# Supplementary material
Source: PubMed Central journal article supplement (PMC3470785)

## **Terminal differentiation and loss of tumorigenicity of human cancers via pluripotency based reprogramming.**

Zhang et. al.

### **SUPPLEMENTAL SECTION:**

#### Supplemental Figure Legends:

Figure 1: Percent frequency and time to iPSCs morphology formation following infection of reprogramming transcription factors as described in main text. Reprogrammed cells were grown on MEF feeder layers (as described in the Materials and Methods) and observed for colony formation characteristic of reprogrammed cells (as in Figure 1Aii). Earliest day of definitive colony formation following reprogramming as visually determined is shown in Figure 1. Colonies were stained with alkaline phosphatase (as shown in Supplemental Figure 3) to ensure that morphologically appearing colonies were reprogrammed. To determine the frequency of reprogramming, cells were harvested at the "earliest day of definitive colony formation following reprogramming as visually determined" as shown above, and stained individually with antibodies for Nanog, Oct4, SSEA4, and Tra-1-81 and with fluorescent conjugated secondary antibodies (FITC, PE, APC, and Cy5.5 - from Abcam: Figure 1). The stained cells were then washed twice in PBS+0.1%BSA, re-suspended in 500ul FACS buffer (PBS+3%BSA). The samples were analyzed using a flow cytometer immediately. Percentage frequency of cells expressing the four markers is shown.

Figure 2: Gene expression analysis of the reprogramming transcription factors based on Affymetrix U133Plus 2.0 arrays comparing parental sarcoma cells to ESCs and MSCs. Error bars show standard deviation. Each analysis was comprised of three replicates (of the indicated samples) and further averaged over the following probe sets (Affymetrix) U133 Plus2.0: per indicated gene: myc 202431\_s\_at; klf4 220266\_s\_at, 221841\_s\_at; sox2 213721\_at, 213722\_at, 214178\_s\_at, 228038\_at; nanog 220184\_at; lin28 219823\_at; oct4=Pou5f1 208286\_x\_at, 214532\_x\_at, 210265\_x\_at, 210905\_x\_at.

Figure 3: (A) Expression of six reprogramming transcription factors in parental and reprogrammed sarcomas via RT-PCR using primers specific for to distinguish between the endogenous or the transgene. As could be seen in the figure, upon reprogramming the transgene is not present in either the parental or the reprogrammed sarcomas. The silencing of the transgene is a well established phenomenon of nuclear reprogramming. Additionally, as could be seen in the figure, some parental cell lines express some of the reprogramming factors (endogeneously) at baseline (as shown in Figure 1), however upon reprogramming ALL reprogrammed sarcoma cell lines express ALL reprogramming factors; and specifically do so via activation of the endogenous versions (as the transgenes are not expressed).

Figure 4: (A) Alkaline Phosphatase staining of ESC/iPSC-like colonies following infection of reprogramming transcription factors as described in main text after the indicated number of days in Supplemental Figure 1. Scale bar=500um. Alkaline Phosphatase (AP) staining was performed on colonies grown on MEFs using the StemTAG™ Alkaline Phosphatase Staining Kit. Scale bar=500uM. (B) Alkaline phosphatase quantification as a function of time following infection with reprogramming transcription factors. Alkaline phosphatase quantification was determined using the StemTAG™ Alkaline Phosphatase Activity Assay Kit (Fluorometric). Specifically, MEF plates onto which infected sarcoma cell lines were plated were grown for the indicated number of days. Total cellular lysates were collected weekly and alkaline phosphatase quantification was performed using the StemTAG™ AP Fluorometric Substrate and fluorescence measured with a fluorescence plate reader at 480 nm/520 nm. Values were compared to a predetermined standardization curve. As controls MEF plates without infected cells were collected at each time point and alkaline phosphatase activity was similarly measured. Data is presented as Relative Fluorescence Units in which the value determined in MEF/sarcoma plates is shown relative to that in the corresponding control MEF plates. “C” represents the baseline value set at 1 of MEF cells determined prior to infection and plating of sarcoma cells. Each data represents the average of two independent experiments (i.e., infections and platings) in which three plates from each experiment were examined. Error bars=standard deviation.

Endogenous specific primers: <sup>1-3</sup>

NANOG<sup>1</sup>: CAGCCCCGATTCTTCCACCAGTCCC; CGGAAGATTCCCAGTCGGGTTCCACC  
SOX2<sup>2</sup>: GGGAAATGGGAGGGGTGCAAAGAGG; TTGCGTGAGTGTGGATGGGATTGGTG  
OCT3/4<sup>2</sup>: GACAGGGGGAGGGGAGGAGCTAGG; CTTCCCTCCAACCAGTTGCCCAAAC  
c-MYC<sup>2</sup>: GCGTCCTGGGAAGGGAGATCCGGAGC; TTGAGGGGCATCGTCGCGGGAGGCTG  
Klf4<sup>2</sup>: TGATTGTAGTGCTTTCTGGCTGGGCTCC; ACGATCGTGGCCCCGAAAAGGACC  
Lin28<sup>3</sup>: AGCCAAGCCACTACATTC; AGATACGTCATTTCGCACA

Transgene specific primers:<sup>4,5</sup>

Oct4<sup>4</sup>: CCTCACTTCACTGCACTGTA; CCTTGAGGTACCAGAGATCT  
SOX2<sup>4</sup>: CCCAGCAGACTTCACATGT; CCTTGAGGTACCAGAGATCT  
Klf4<sup>4</sup>: GATGAACTGACCAGGCACTA; CCTTGAGGTACCAGAGATCT  
Myc<sup>4</sup>: TGCCTCAAATTGGACTTTGG; CGCTCGAGGTTAACGAATT  
Lin28<sup>5</sup>: GCTCTGACTGACCGCGTTAC; CTGCTCCTCGAAACTTCCTG  
NANOG<sup>5</sup>: GCTCTGACTGACCGCGTTAC; TCACACGTCTTCAGGTTGCAT

(B) Expression of Rex via RT-PCR in parental and reprogrammed sarcomas. Primers for REX1<sup>2</sup>:CAGATCCTAAACAGCTCGCAGAAT; GCGTACGCAAATTAAGTCCAGA.

Figure 5: Pictographs of Hematoxylin, Ki67, and vimentin stained xenografts from parental and reprogrammed sarcomas. Specifically, for each xenograft, approximately 10<sup>6</sup> iPS cells were manually harvested, washed and resuspended in a 1.5 ml tube containing 300 µl iPS medium and then injected intramuscularly (tibialis anterior) into NOD SCID Gamma mice (Jackson Labs). Specifically, sarcoma cells and the reprogrammed sarcomas were injected into the left and right anterior tibialis muscle of NOD-SCID-gamma (NSG) mice, respectively, and observed. Eight mice were used for each cell line. The experiment was repeated independently two times. Any visible tumors 4–8 weeks post-transplantation were dissected and fixed overnight with 4% paraformaldehyde/PBS solution. The tissues were then paraffin embedded, sectioned, stained with hematoxylin and eosin, and examined for the presence of tissue representatives of all three germ layers. Scale bar=100µm. No evidence of teratoma formation was observed and no morphological evidence of any non-sarcomatous element could be identified. All NOD-SCID-gamma mice were treated in accordance with IACUC Guidelines and Columbia veterinary policy as previously described<sup>6</sup>. IRB protocol AAAD-1669; PI Matushansky. NOTE: as stated in the

main text, both parental and reprogrammed sarcomas were negative for S100, pankeratin, neurophysin and desmin (data not shown).

Figure 6: Tumors as described in Supplemental Figure 5 were weighed and measured (greatest dimension). Average weights (A) and measurements (B) are shown. Error bars=standard deviation.

Figure 7: Proliferation analysis of parental sarcomas and their reprogrammed counterparts undergoing adipogenic and osteogenic differentiation. Specifically, BOTH parental sarcomas and their reprogrammed counterparts were plated at a density of  $1 \times 10^5$  per 10 cm plate on matrigel. Cells were grown overnight in either the corresponding normal sarcoma cell line medium (please see Materials and Methods) or ESC medium for parental and reprogrammed respectively. Then on "Day 1" cytokines constituting either adipocytic or osteogenic differentiation medium (please see Materials and Methods) were added to the corresponding medium and cultured in differentiation medium from that point on. Cell counting was performed daily using the Countess Cell Counter (Invitrogen). Each cell line was tested concurrently in triplicate. Two independent experiments set up a week apart were performed. Average counts on each subsequent day and standard deviation are shown. "F" and "B" following each cell line in the Figure Legend indicates that the cell line was differentiated into fat (F) or bone (B) respectively. The "R" preceding each cell line in the Figure Legend refers to the reprogrammed counterpart of each sarcoma.

Figure 8: Schedule, inoculation, days of growth, size of greatest dimension, and weight of xenografts from sarcomas and reprogrammed sarcomas following in vitro adipogenic and osteogenic differentiation. Specifically, sarcomas and reprogrammed sarcomas were differentiated as described in either Supplemental Figure 11 or the Main Text - and subsequently injected into NOD SCID Gamma mice as described in Supplemental Figure 9 or the Main Text. Days to tumor formation and sacrifice, length of greatest dimension, and weight of tumors are shown: (A) Before and after differentiation along the osteogenic lineage. (B) Before and after differentiation along the adipogenic lineage. (C) To ensure that tumor formation was indeed eliminated and not delayed; reprogrammed sarcomas were solely injected into a separate cohort of mice and followed for up to four months. Days to tumor formation and sacrifice, length of greatest dimension, and weight of tumors are shown.

Figure 9: Immunofluorescence of CD71 and CD235(GPA) in reprogrammed SW872 cells after 14 and 28 days of erythroid differentiation. Left= goat anti-rabbit Oregon Green 488 to primary marker; middle panel= DAPI; right panel=merge. green circle=CD235a+/DAPI+; blue circle=CD235-/DAPI+; yellow circle=CD235a+/DAPI-. Scale bars=10uM.

Figure 10: Schedule, inoculation, days of growth, size of greatest dimension, and weight of xenografts from reprogrammed sarcomas following in vitro erythroid differentiation as described in the Main Text.

Figure 11: Quantitative RT-PCR of myc RNA in whole cell populations of either the parental or the reprogrammed sarcoma cell lines before (control) and after 21 days of exposure in either adipocytic (fat) or osteogenic (bone) differentiation medium. Values are normalized to GAPDH and each cell line is baselined to the value of "1" of the control of the parental sarcoma cell line. Each measurement was repeated three times. The entire experiment was repeated independently twice as a result of two independent differentiation inductions. The average of six samples is shown. Error bars show standard deviations. Specifically, Quantitative PCR was performed with Platinum SYBR Green qPCR Supermix UDG (Invitrogen) and analyzed with the 7300 real-time PCR system (Applied Biosystems). Primers c-Myc-Human: FOR-CCACAGCAAACCTCCTCACAG, REV-GCAGGATAGTCCTTCCGAGTG; GAPDH-Human: FOR-GGTCGTATTGGGCGCCTGGTCACC, REV-CACACCCATGACGAACATGGGGGC.

Figure 12: (A) Average value of differentially methylated promoter CpG islands ( $p < 0.05$ ) in sarcomas and reprogrammed sarcomas. (B) Average gene expression values (from Affymetrix Arrays) corresponding to differentially methylated promoter CpG islands (from A) in sarcomas and reprogrammed sarcomas for that subset of corresponding genes that show differential expression between sarcomas and reprogrammed sarcomas (please see Main Text for details). Data was analyzed via GeneSpring Software and normalized as described in the Materials and Methods.

Figure 18: Quantitative RT-PCR of 26 of 29 genes (of the 205 gene promoters showing significant changes in CpG methylation) which show significant changes ( $p < 0.05$ , paired T-Test) at the gene expression level via Affymetrix (please see Main Text for details). Primer sets for ACSBG2, FBLIM1, KIAA0141 could not be identified. Quantitative RT-PCR was performed as described in Supplemental Figure 15. Values were secondarily baselined ("1") to those for the parental sarcoma cell line and values relative to that baseline is shown for both sarcomas and their reprogrammed counterparts. Experiments were performed in triplicate. Average values are shown. Error bars=standard deviation. Primer sets used are shown in Supplemental Table 4 (sheet 2).

## Supplemental Table Legends:

### Supplemental Table 1:

Summary of genetic and karyotypic abnormalities in the five cell lines used.

### Supplemental Table 2:

Global DNA-methylation changes in sarcomas and their reprogrammed counterparts using Infinium HumanMethylation27 arrays.

### Supplemental Table 3:

216 CpG islands (corresponding to 205 gene promoters) demonstrating a 15% change in DNA promoter CpG methylation ( $p < 0.05$ , paired T-Test).

### Supplemental Table 4:

29 unique genes (37 Affymetrix IDs) showing significant changes ( $p < 0.05$ , paired T-Test) at the gene expression level of the 205 gene promoters showing significant changes in CpG methylation.

### Supplemental Table 5:

Oncogene list.

### Supplemental Table 6:

Tumor suppressor gene list.

### Supplemental Table 7:

1241 promoters whose degree of methylation was significantly changed by direct reprogramming ( $p < 0.05$ , paired T-Test; no restriction on fold change. In contrast to Supplemental Table 3 which was restricted to a 15% fold change.

### Supplemental Table 8:

Overlap of Supplemental Table 7 and Supplemental Table 6 (oncogene list).

### Supplemental Table 9:

Overlap of Supplemental Table 7 and Supplemental Table 5 (tumor suppressor gene list).

Supplemental Table 10:

Discriminatory 50 gene set<sup>7</sup>, previously used to differentiate between mouse ESCs, mouse embryonic fibroblasts, and reprogrammed fibroblasts.

Supplemental Table 11:

Analysis of variance (ANOVA) identifying a subset of genes discriminating among ESCs, MSCs, fibroblasts), reprogrammed fibroblasts, partially reprogrammed fibroblasts and reprogrammed-sarcomas.

Supplemental Table 12:

Paired T-Test (p 0.05; 1.5 fold change) comparing sarcomas to their reprogrammed counterparts identifying 125 differentially expressed unique genes.

Supplemental Table 13:

Analysis of variance (ANOVA) identifying a subset of genes discriminating between ESCs, MSCs, and fibroblasts.



## REFERENCES (Supplemental Section)

1. Wang Y, Chen J, Hu JL, et al. Reprogramming of mouse and human somatic cells by high-performance engineered factors. *EMBO Rep.* 2011;12:373-378.
2. Takahashi K, Yamanaka S. Induction of pluripotent stem cells from mouse embryonic and adult fibroblast cultures by defined factors. *Cell.* 2006;126:663-676.
3. Narsinh KH, Jia F, Robbins RC, et al. Generation of adult human induced pluripotent stem cells using nonviral minicircle DNA vectors. *Nat Protoc.* 2011;6:78-88.
4. Park IH, Zhao R, West JA, et al. Reprogramming of human somatic cells to pluripotency with defined factors. *Nature.* 2008;451:141-146.
5. Darr H, Benvenisty N. Genetic analysis of the role of the reprogramming gene LIN-28 in human embryonic stem cells. *Stem Cells.* 2009;27:352-362.
6. Mills J, Hricik T, Siddiqi S, et al. Chromatin structure predicts epigenetic therapy responsiveness in sarcoma. *Mol Cancer Ther.* 2011.
7. Mikkelsen TS, Hanna J, Zhang X, et al. Dissecting direct reprogramming through integrative genomic analysis. *Nature.* 2008;454:49-55.

## Supplemental Figure 1:

| Rep-Sarcoma | % Frequency | Time (days) |
|-------------|-------------|-------------|
| SAOS2       | 2           | 25          |
| HOS         | 5           | 27          |
| MG63        | 3           | 42          |
| SW872       | 3           | 26          |
| SKNEP       | 4           | 18          |

Supplemental Figure 2:

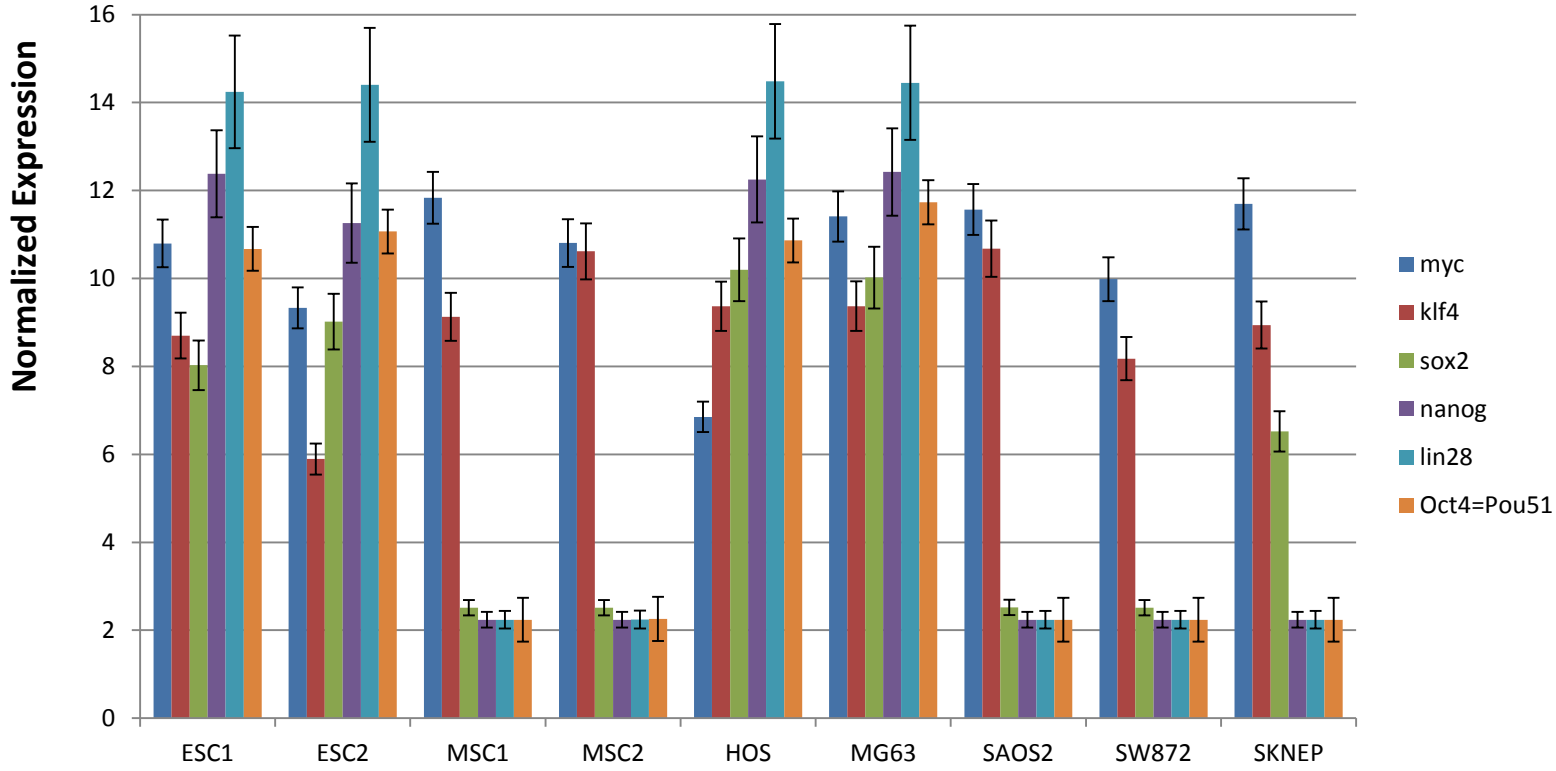

**Supplemental Figure 3:**

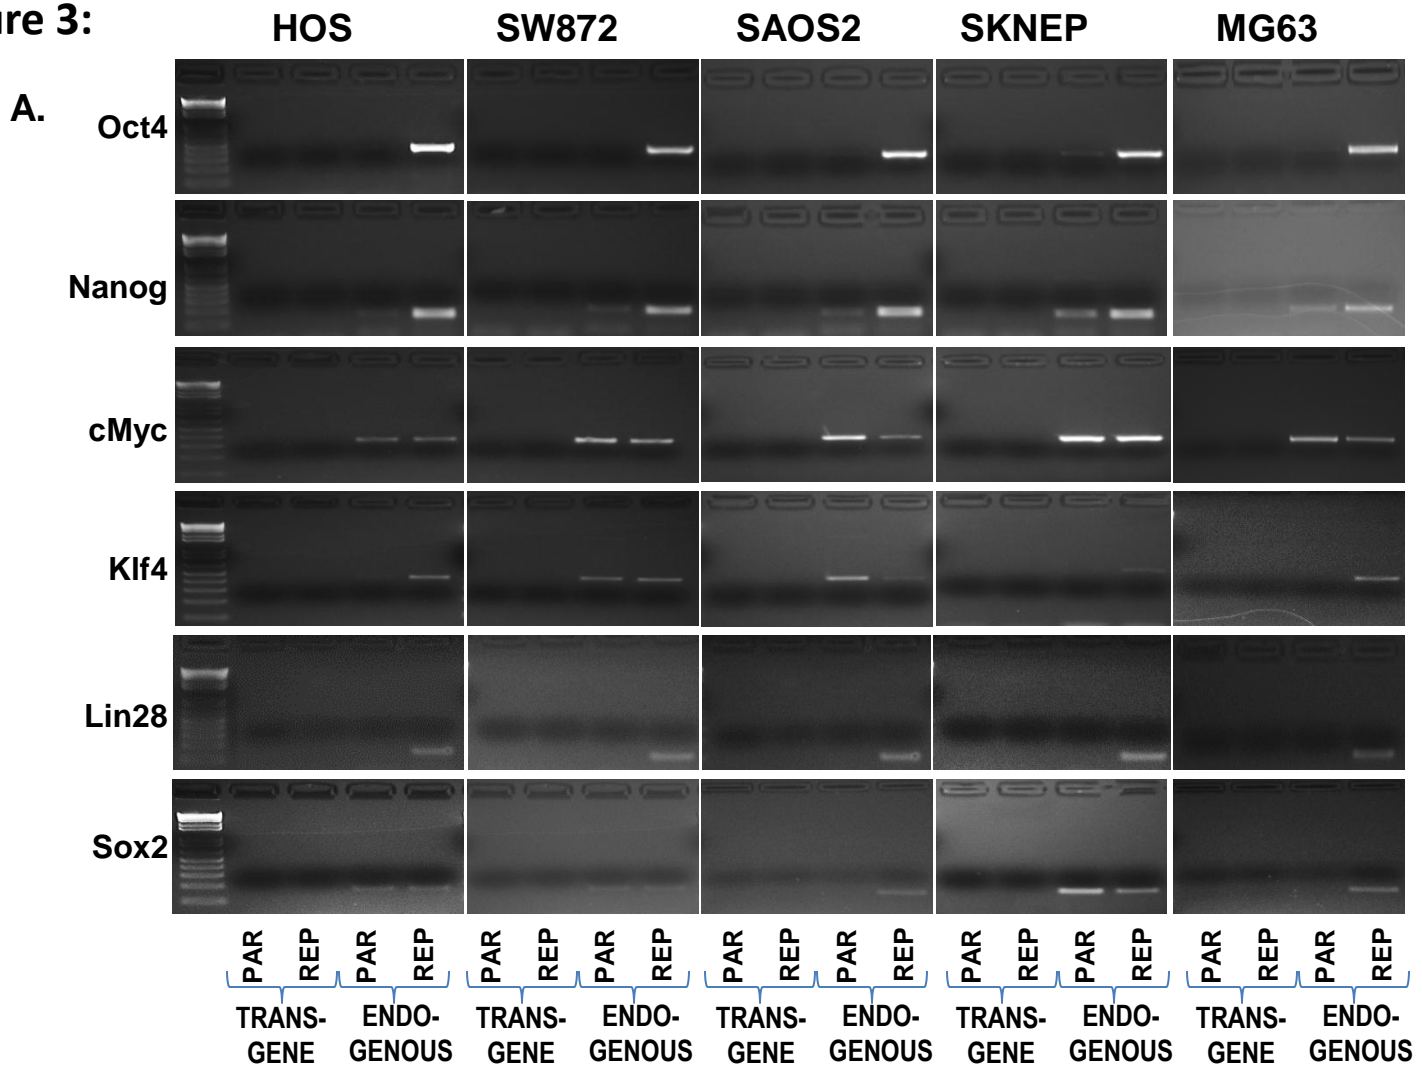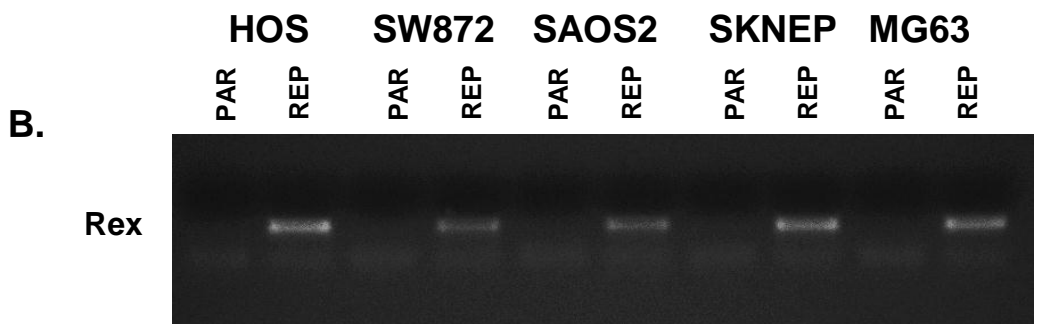

# Supplemental Figure 4:

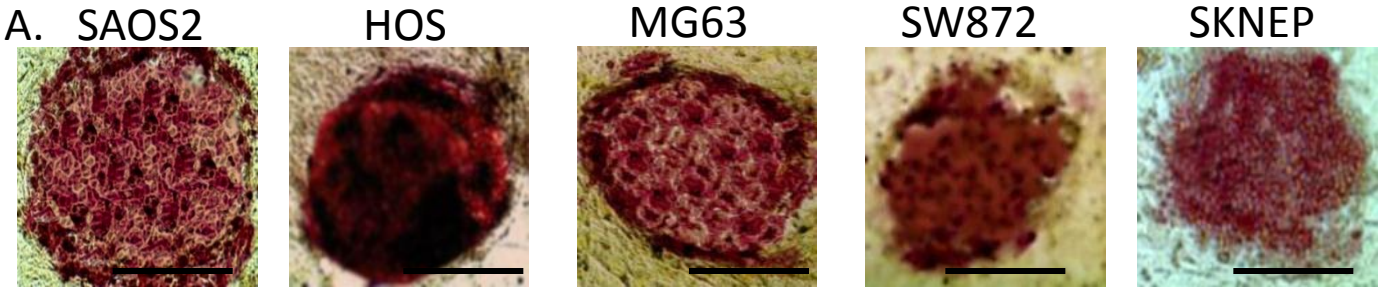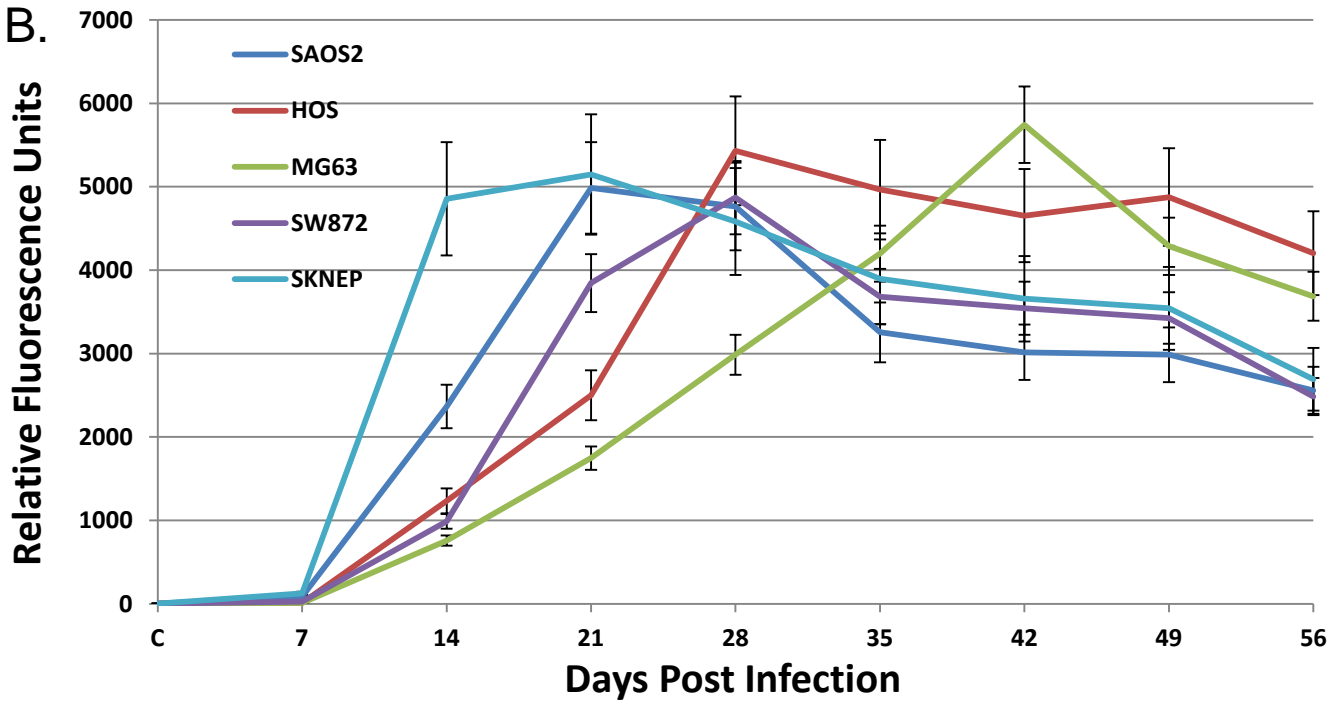

# Supplemental Figure 5:

## PARENTAL

## REPROGRAMMED

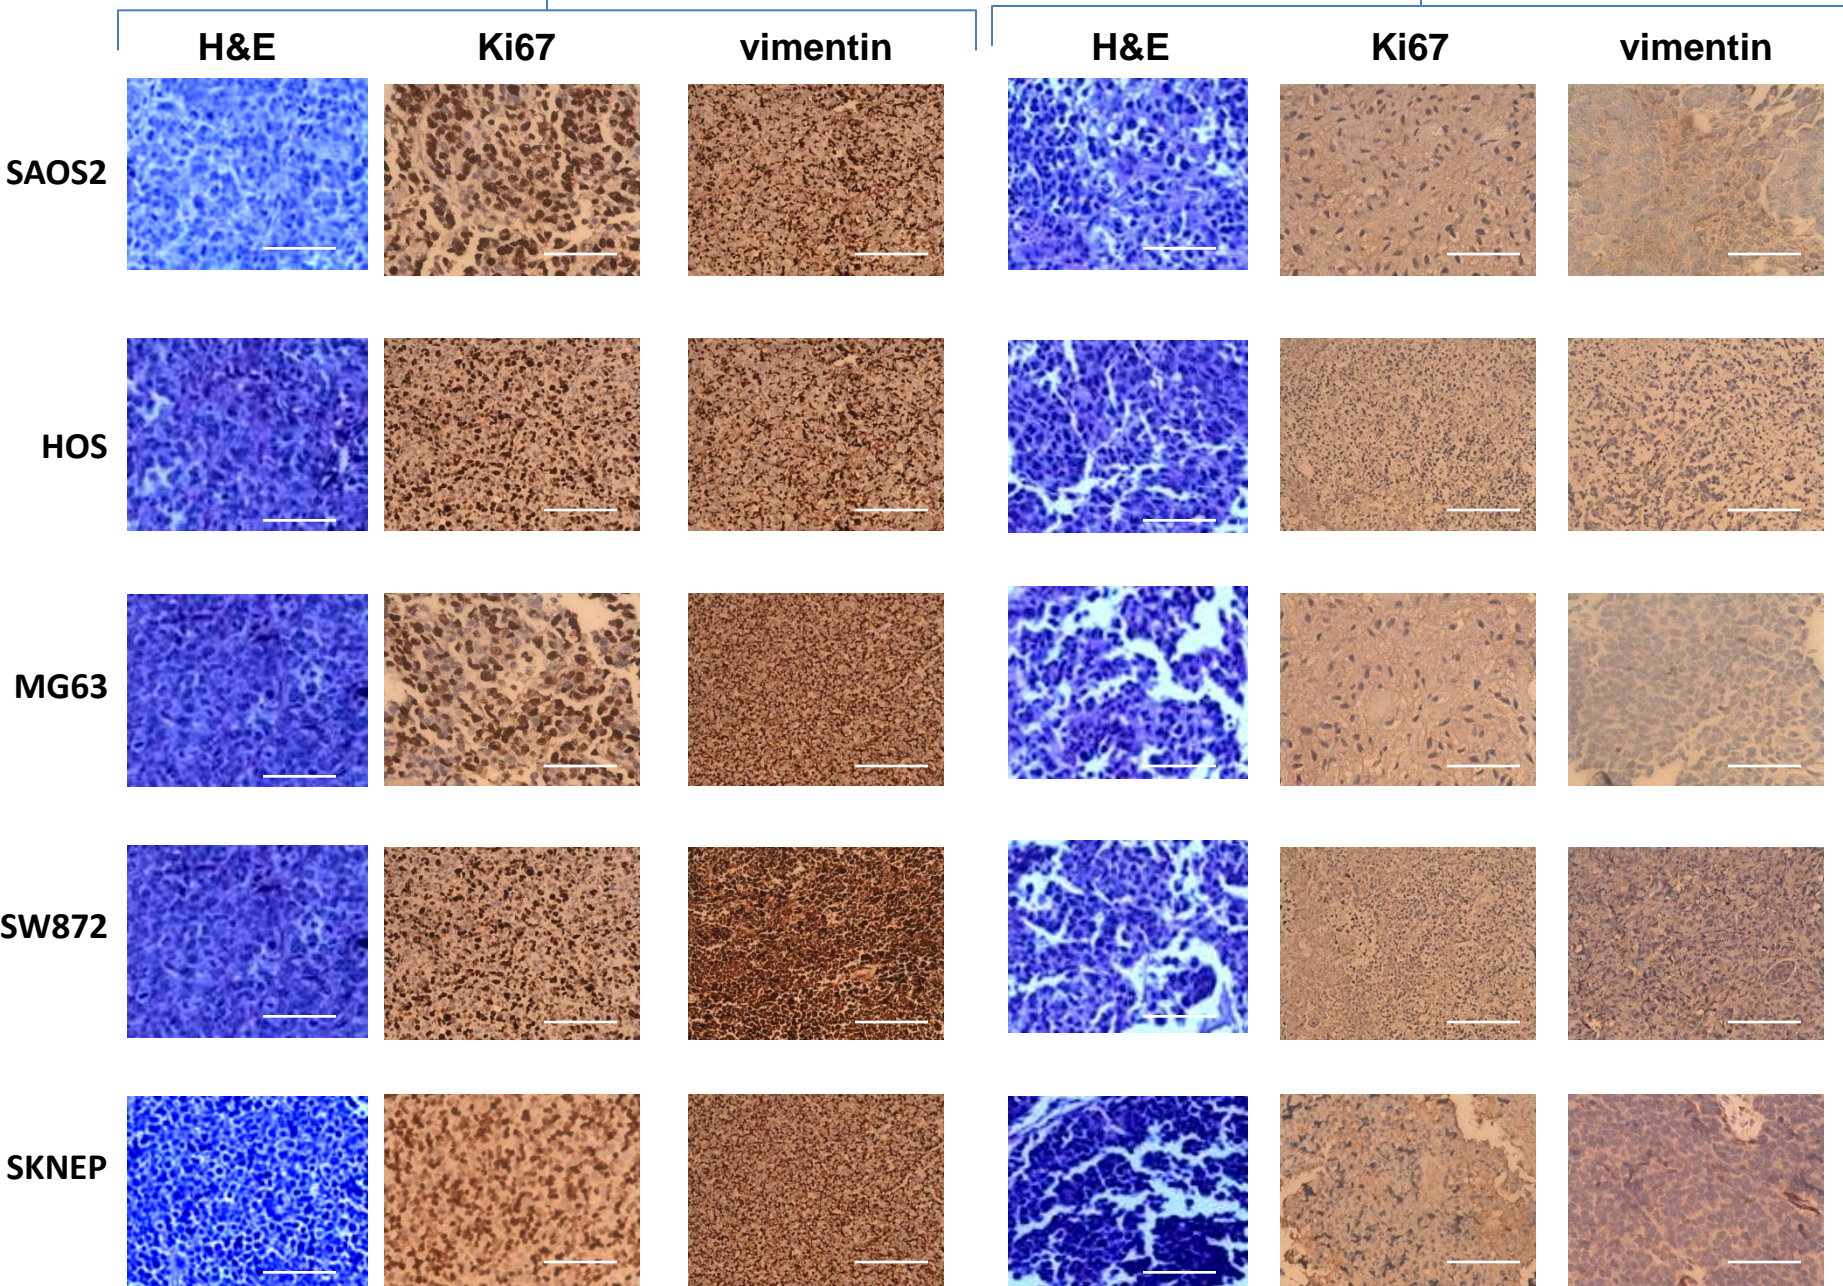

# Supplemental Figure 6:

A.

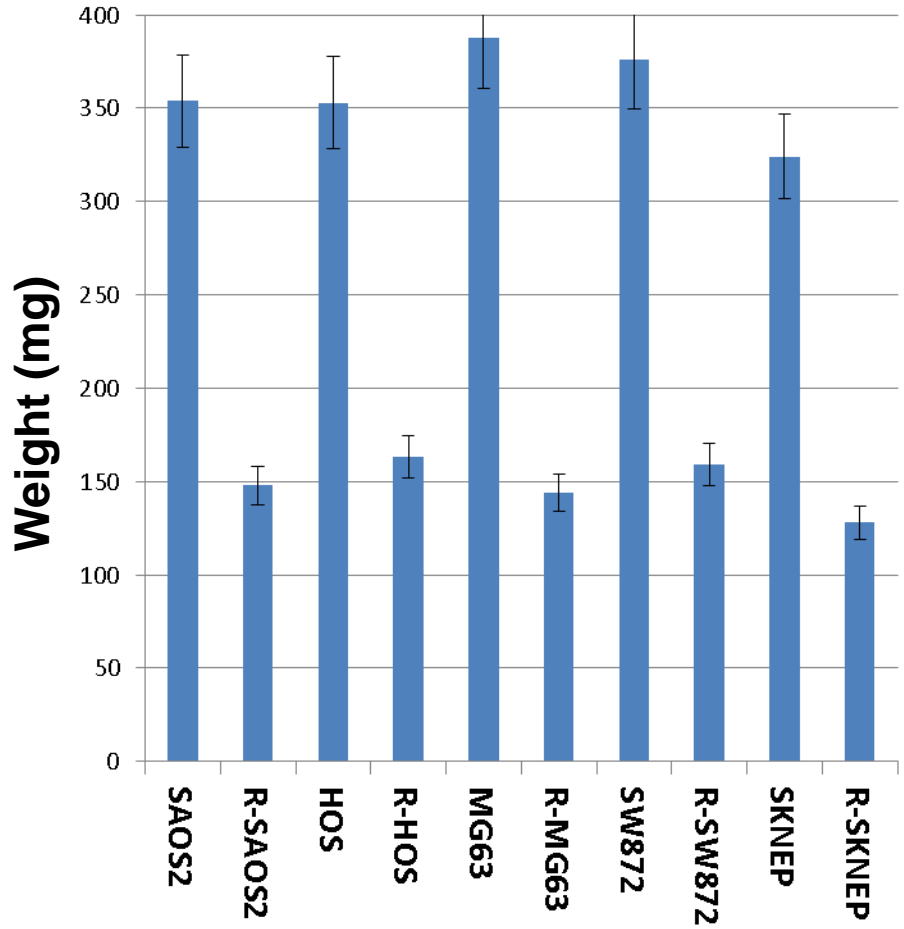

B.

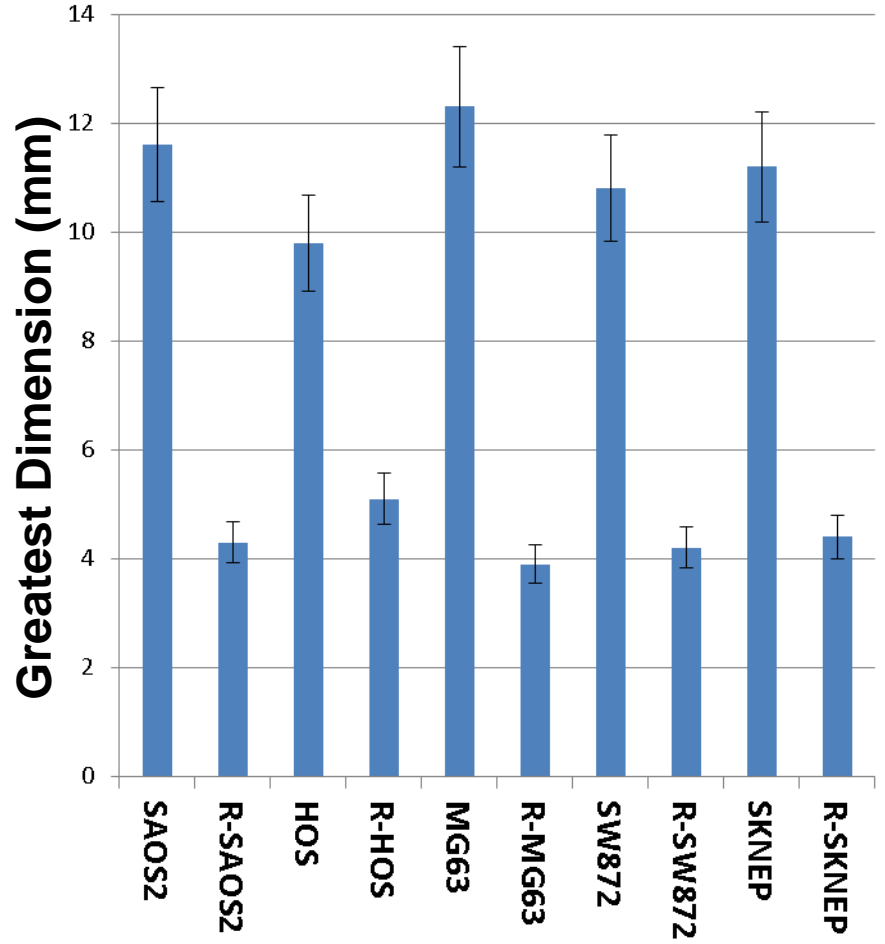





# Supplemental Figure 8:

**A.**

| MOUSE ID | CELL TYPE    | CELL LINE-DIFF 21 |                     | FLANK (L or R) | DAYS TO SAC | Greatest Dimension (mm) | WEIGHT (mg) |
|----------|--------------|-------------------|---------------------|----------------|-------------|-------------------------|-------------|
|          |              | DAYS <b>ODM</b>   | # CELLS INNOCULATED |                |             |                         |             |
| 111710A1 | osteosarcoma | MG63              | one million         | L              | 72          | 11                      | 388         |
| 111710A2 | osteosarcoma | rep-MG63          | one million         | R              | 72          | 0                       | 0           |
| 111710B1 | osteosarcoma | MG63              | one million         | L              | 74          | 10                      | 345         |
| 111710B2 | osteosarcoma | rep-MG63          | one million         | R              | 74          | 0                       | 0           |
| 111710G1 | liposarcoma  | SW872             | one million         | L              | 76          | 12                      | 421         |
| 111710G2 | liposarcoma  | rep-SW872         | one million         | R              | 76          | 0                       | 0           |
| 111710H1 | liposarcoma  | SW872             | one million         | L              | 73          | 11                      | 398         |
| 111710H2 | liposarcoma  | rep-SW872         | one million         | R              | 73          | 0                       | 0           |
| 111710I1 | Ewings       | SKNEP             | one million         | L              | 56          | 13                      | 388         |
| 111710I2 | Ewings       | rep-SKNEP         | one million         | R              | 56          | 0                       | 0           |
| 111710J1 | Ewings       | SKNEP             | one million         | L              | 58          | 12                      | 376         |
| 111710J2 | Ewings       | rep-SKNEP         | one million         | R              | 58          | 0                       | 0           |
| 111710A1 | osteosarcoma | MG63              | two million         | L              | 68          | 11                      | 356         |
| 111710A2 | osteosarcoma | rep-MG63          | two million         | R              | 68          | 0                       | 0           |
| 111710B1 | osteosarcoma | MG63              | two million         | L              | 69          | 13                      | 382         |
| 111710B2 | osteosarcoma | rep-MG63          | two million         | R              | 69          | 0                       | 0           |
| 111710G1 | liposarcoma  | SW872             | two million         | L              | 62          | 11                      | 321         |
| 111710G2 | liposarcoma  | rep-SW872         | two million         | R              | 62          | 0                       | 0           |
| 111710H1 | liposarcoma  | SW872             | two million         | L              | 60          | 10                      | 308         |
| 111710H2 | liposarcoma  | rep-SW872         | two million         | R              | 60          | 0                       | 0           |
| 111710I1 | Ewings       | SKNEP             | two million         | L              | 54          | 11                      | 369         |
| 111710I2 | Ewings       | rep-SKNEP         | two million         | R              | 54          | 0                       | 0           |
| 111710J1 | Ewings       | SKNEP             | two million         | L              | 58          | 12                      | 389         |
| 111710J2 | Ewings       | rep-SKNEP         | two million         | R              | 58          | 0                       | 0           |

**B.**

| MOUSE ID | CELL TYPE    | CELL LINE-DIFF 21 # CELLS |             | FLANK (L or R) | DAYS TO SAC | Greatest Dimension (mm) | WEIGHT (mg) |
|----------|--------------|---------------------------|-------------|----------------|-------------|-------------------------|-------------|
|          |              | DAYS <b>ADM</b>           | INNOCULATED |                |             |                         |             |
| 112110A1 | osteosarcoma | MG63                      | one million | L              | 71          | 12                      | 377         |
| 112110A2 | osteosarcoma | rep-MG63                  | one million | R              | 71          | 0                       | 0           |
| 112110B1 | osteosarcoma | MG63                      | one million | L              | 75          | 11                      | 365         |
| 112110B2 | osteosarcoma | rep-MG63                  | one million | R              | 75          | 0                       | 0           |
| 112110G1 | liposarcoma  | SW872                     | one million | L              | 74          | 11                      | 398         |
| 112110G2 | liposarcoma  | rep-SW872                 | one million | R              | 74          | 0                       | 0           |
| 112110H1 | liposarcoma  | SW872                     | one million | L              | 71          | 12                      | 349         |
| 112110H2 | liposarcoma  | rep-SW872                 | one million | R              | 71          | 0                       | 0           |
| 112110I1 | Ewings       | SKNEP                     | one million | L              | 54          | 13                      | 376         |
| 112110I2 | Ewings       | rep-SKNEP                 | one million | R              | 54          | 0                       | 0           |
| 112110J1 | Ewings       | SKNEP                     | one million | L              | 55          | 10                      | 359         |
| 112110J2 | Ewings       | rep-SKNEP                 | one million | R              | 55          | 0                       | 0           |
| 112110A1 | osteosarcoma | MG63                      | two million | L              | 66          | 12                      | 352         |
| 112110A2 | osteosarcoma | rep-MG63                  | two million | R              | 66          | 0                       | 0           |
| 112110B1 | osteosarcoma | MG63                      | two million | L              | 68          | 11                      | 326         |
| 112110B2 | osteosarcoma | rep-MG63                  | two million | R              | 68          | 0                       | 0           |
| 112110G1 | liposarcoma  | SW872                     | two million | L              | 64          | 12                      | 346         |
| 112110G2 | liposarcoma  | rep-SW872                 | two million | R              | 64          | 0                       | 0           |
| 112110H1 | liposarcoma  | SW872                     | two million | L              | 65          | 11                      | 358         |
| 112110H2 | liposarcoma  | rep-SW872                 | two million | R              | 65          | 0                       | 0           |
| 112110I1 | Ewings       | SKNEP                     | two million | L              | 55          | 12                      | 329         |
| 112110I2 | Ewings       | rep-SKNEP                 | two million | R              | 55          | 0                       | 0           |
| 112110J1 | Ewings       | SKNEP                     | two million | L              | 57          | 11                      | 349         |
| 112110J2 | Ewings       | rep-SKNEP                 | two million | R              | 57          | 0                       | 0           |

**C.**

| MOUSE ID | CELL TYPE    | CELL LINE-DIFF 21 DAYS | Differentiated | # CELLS INNOCULATED | FLANK (L or R) | DAYS TO SAC | Greatest Dimension (mm) | WEIGHT (mg) |
|----------|--------------|------------------------|----------------|---------------------|----------------|-------------|-------------------------|-------------|
|          |              |                        |                |                     |                |             |                         |             |
| 112810A2 | osteosarcoma | rep-MG63               | ADM            | one million         | R              | 125         | 0                       | 0           |
| 112810B1 | osteosarcoma | rep-MG63               | ODM            | one million         | L              | 125         | 0                       | 0           |
| 112810B2 | osteosarcoma | rep-MG63               | ADM            | one million         | R              | 125         | 0                       | 0           |
| 112810G1 | liposarcoma  | rep-SW872              | ODM            | one million         | L              | 125         | 0                       | 0           |
| 112810G2 | liposarcoma  | rep-SW872              | ADM            | one million         | R              | 125         | 0                       | 0           |
| 112810H1 | liposarcoma  | rep-SW872              | ODM            | one million         | L              | 125         | 0                       | 0           |
| 112810H2 | liposarcoma  | rep-SW872              | ADM            | one million         | R              | 125         | 0                       | 0           |
| 112810I1 | Ewings       | rep-SKNEP              | ODM            | one million         | L              | 125         | 0                       | 0           |
| 112810I2 | Ewings       | rep-SKNEP              | ADM            | one million         | R              | 125         | 0                       | 0           |
| 112810J1 | Ewings       | rep-SKNEP              | ODM            | one million         | L              | 125         | 0                       | 0           |
| 112810J2 | Ewings       | rep-SKNEP              | ADM            | one million         | R              | 125         | 0                       | 0           |
| 112810A1 | osteosarcoma | rep-MG63               | ODM            | two million         | L              | 125         | 0                       | 0           |
| 112810A2 | osteosarcoma | rep-MG63               | ADM            | two million         | R              | 125         | 0                       | 0           |
| 112810B1 | osteosarcoma | rep-MG63               | ODM            | two million         | L              | 125         | 0                       | 0           |
| 112810B2 | osteosarcoma | rep-MG63               | ADM            | two million         | R              | 125         | 0                       | 0           |
| 112810G1 | liposarcoma  | rep-SW872              | ODM            | two million         | L              | 125         | 0                       | 0           |
| 112810G2 | liposarcoma  | rep-SW872              | ADM            | two million         | R              | 125         | 0                       | 0           |
| 112810H1 | liposarcoma  | rep-SW872              | ODM            | two million         | L              | 125         | 0                       | 0           |
| 112810H2 | liposarcoma  | rep-SW872              | ADM            | two million         | R              | 125         | 0                       | 0           |
| 112810I1 | Ewings       | rep-SKNEP              | ODM            | two million         | L              | 125         | 0                       | 0           |
| 112810I2 | Ewings       | rep-SKNEP              | ADM            | two million         | R              | 125         | 0                       | 0           |
| 112810J1 | Ewings       | rep-SKNEP              | ODM            | two million         | L              | 125         | 0                       | 0           |
| 112810J2 | Ewings       | rep-SKNEP              | ADM            | two million         | R              | 125         | 0                       | 0           |

## Supplemental Figure 9:

| MOUSE ID | CELL TYPE    | CELL LINE-DIFF |                | # CELLS     |                | DAYS TO SAC | Greatest Dimension (mm) | WEIGHT (mg) |
|----------|--------------|----------------|----------------|-------------|----------------|-------------|-------------------------|-------------|
|          |              | 21 DAYS        | Differentiated | INNOCULATED | FLANK (L or R) |             |                         |             |
| 120110A1 | osteosarcoma | rep-MG63       | erythroid      | one million | L              | 122         | 0                       | 0           |
| 120110A2 | osteosarcoma | rep-MG63       | erythroid      | one million | R              | 122         | 0                       | 0           |
| 120110B1 | liposarcoma  | rep-SW872      | erythroid      | one million | L              | 122         | 0                       | 0           |
| 120110B2 | liposarcoma  | rep-SW872      | erythroid      | one million | R              | 122         | 0                       | 0           |
| 120110G1 | Ewings       | rep-SKNEP      | erythroid      | one million | L              | 122         | 0                       | 0           |
| 120110G2 | Ewings       | rep-SKNEP      | erythroid      | one million | R              | 122         | 0                       | 0           |
| 120110H1 | osteosarcoma | rep-MG63       | erythroid      | two million | L              | 122         | 0                       | 0           |
| 120110H2 | osteosarcoma | rep-MG63       | erythroid      | two million | R              | 122         | 0                       | 0           |
| 120110I1 | liposarcoma  | rep-SW872      | erythroid      | two million | L              | 122         | 0                       | 0           |
| 120110I2 | liposarcoma  | rep-SW872      | erythroid      | two million | R              | 122         | 0                       | 0           |
| 120110J1 | Ewings       | rep-SKNEP      | erythroid      | two million | L              | 122         | 0                       | 0           |
| 120110J2 | Ewings       | rep-SKNEP      | erythroid      | two million | R              | 122         | 0                       | 0           |

Supplemental Figure 10:

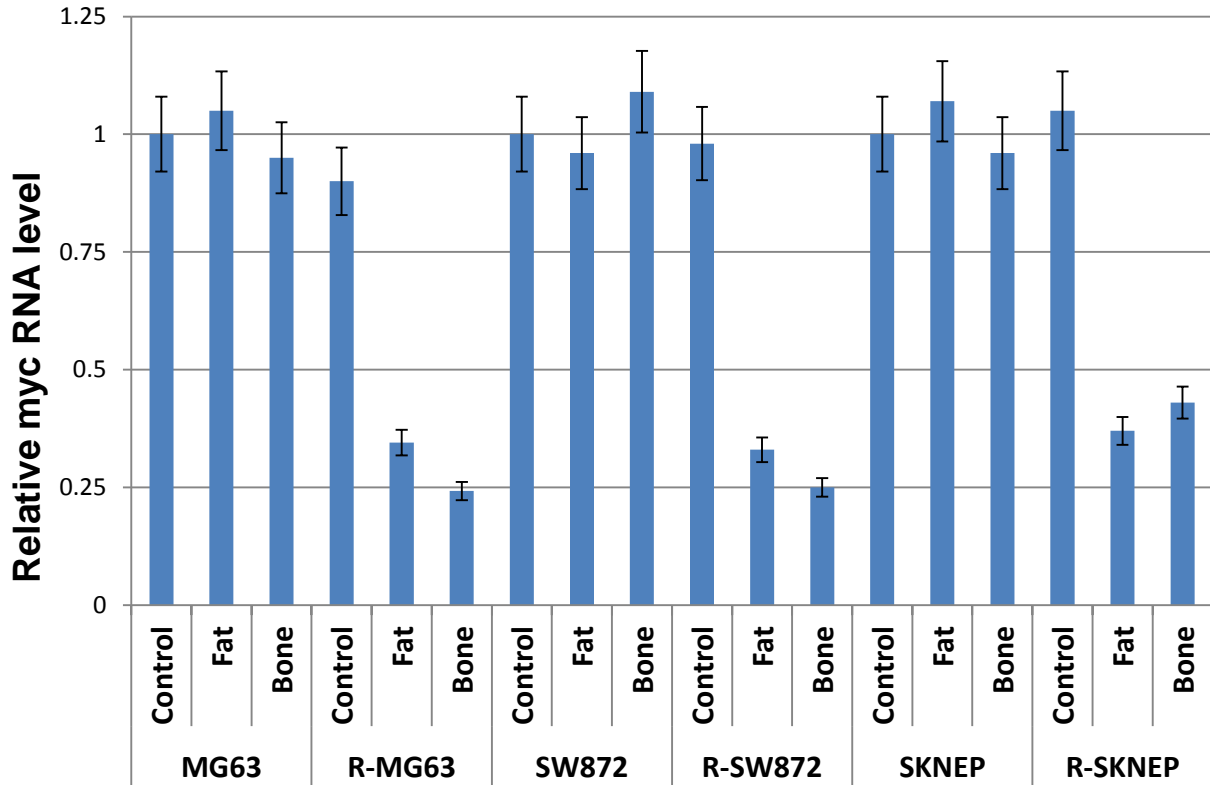

# Supplemental Figure 11:

A.

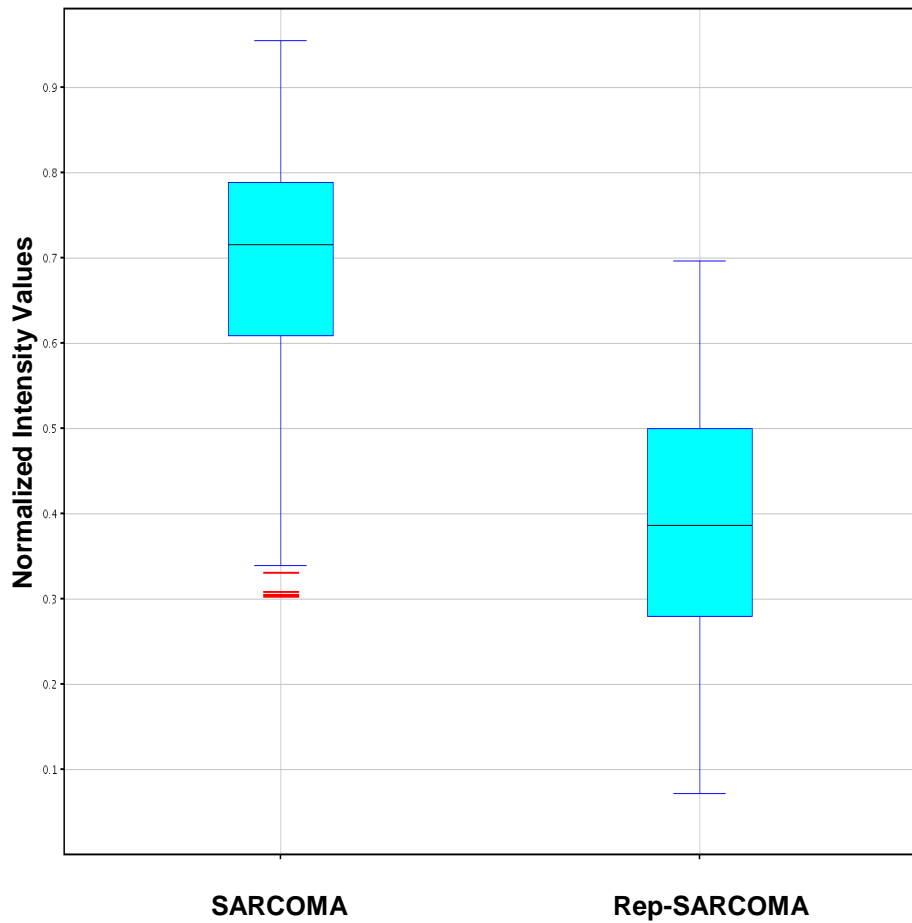

B.

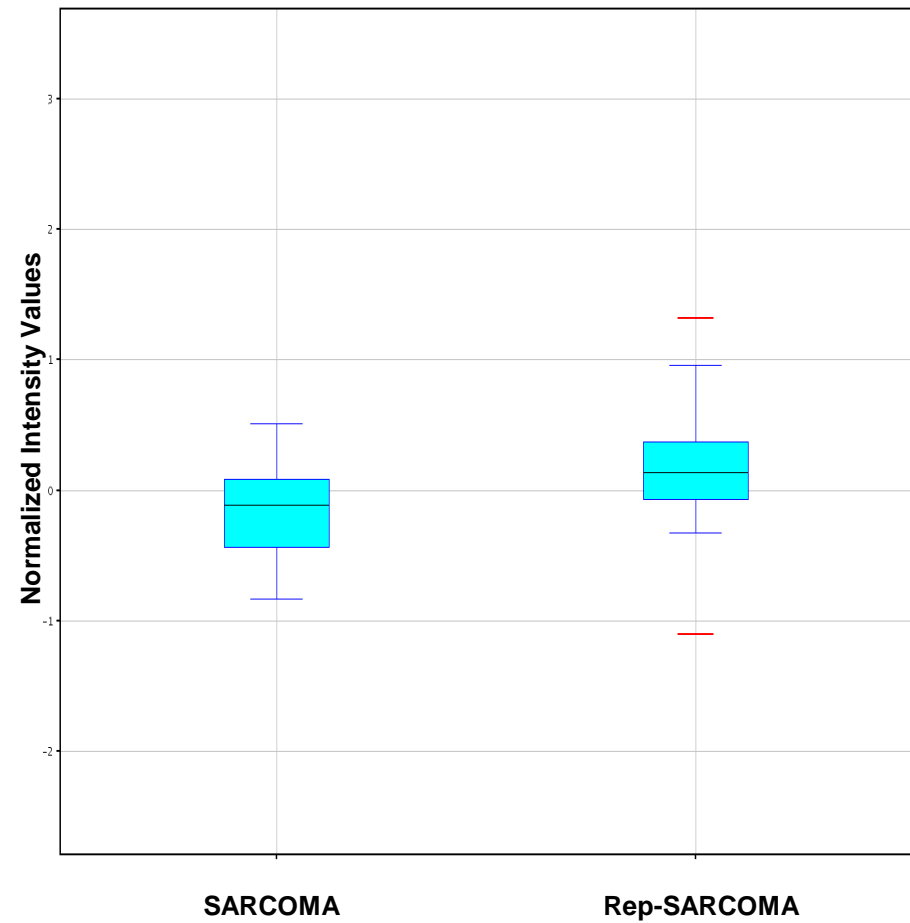

**Supplemental Figure 12:**

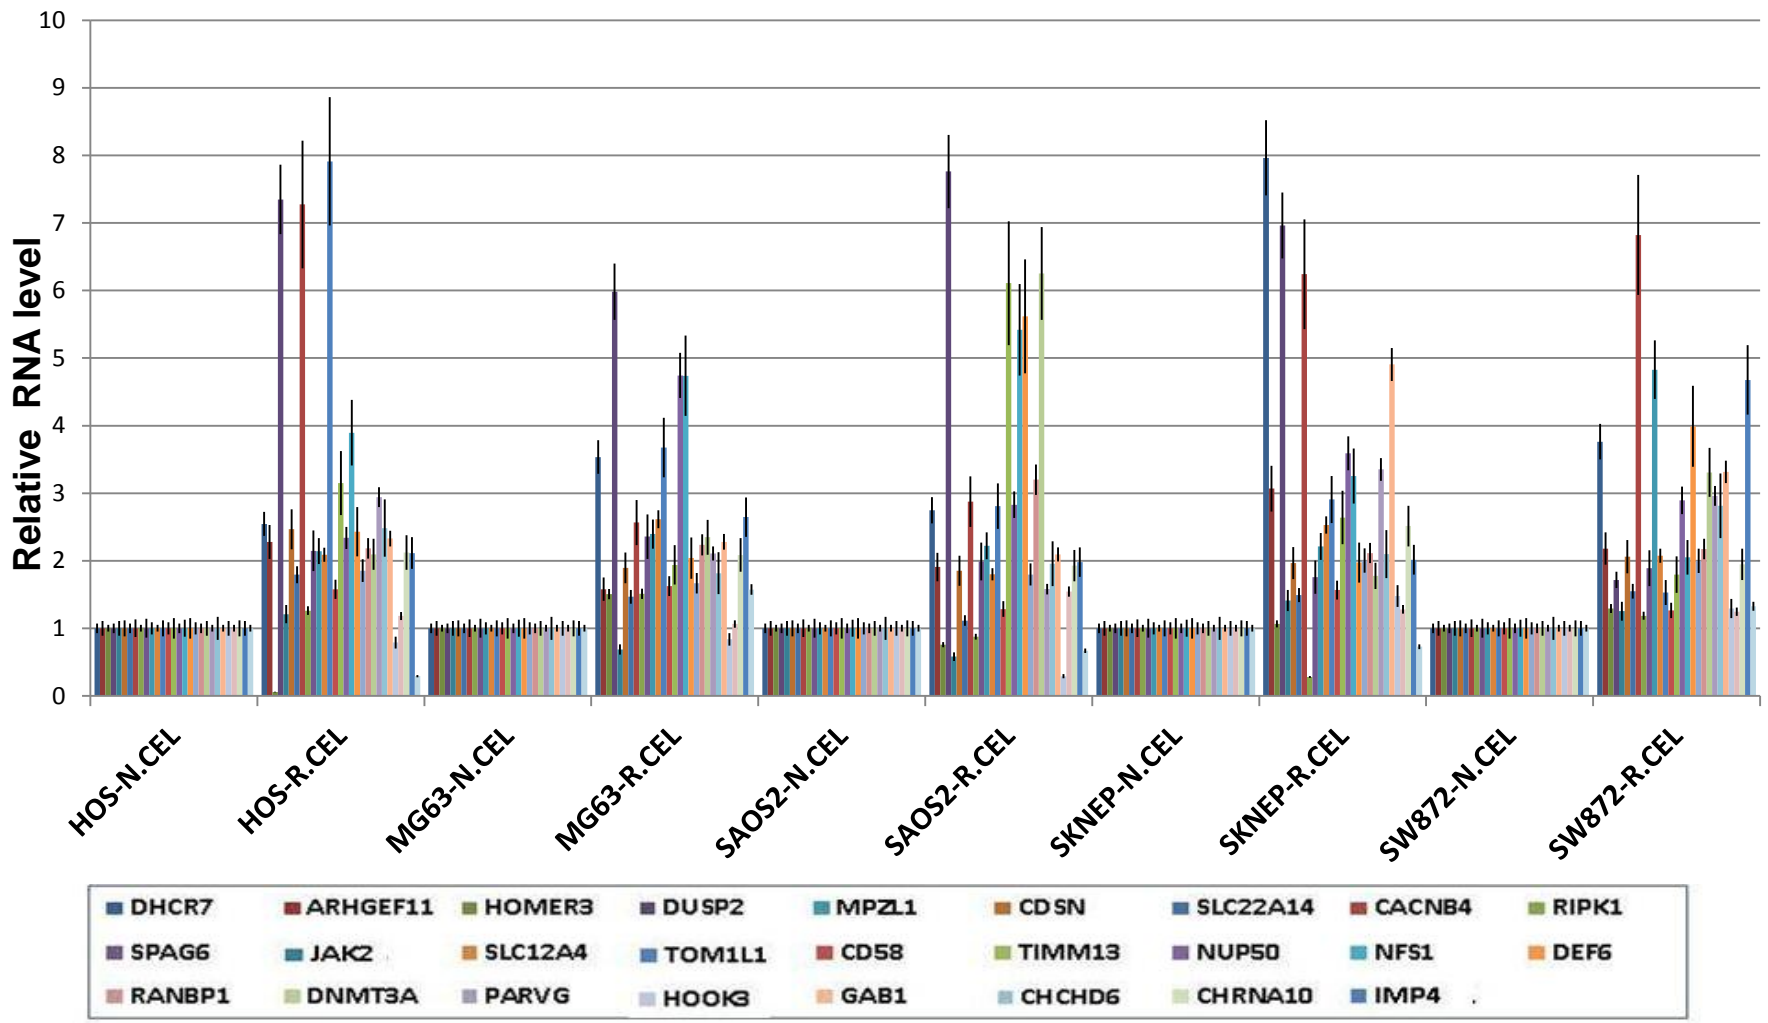

Supplement: NIHMS377161-supplement-1.pdf [file NIHMS377161-supplement-1.pdf]
