# Supplementary material
Source: PubMed Central journal article supplement (PMC3470785)
Supplement: NIHMS377161-supplement-3.pdf [file NIHMS377161-supplement-3.pdf]

| TargetID   | SKNEP-normal | SKNEP-iPS | HOS-normal | HOS-iPS | MG63-normal | MG63-iPS | SAOS2-normal | SAOS2-iPS | SW872-normal | SW872-iPS | SYMBOL          |
|------------|--------------|-----------|------------|---------|-------------|----------|--------------|-----------|--------------|-----------|-----------------|
| cg0000292  | 0.671        | 0.14568   | 0.88085    | 0.89656 | 0.90486     | 0.75195  | 0.09204      | 0.49634   | 0.87077      | 0.66605   | ATP2A1          |
| cg00002426 | 0.89233      | 0.13169   | 0.06073    | 0.05046 | 0.20792     | 0.068    | 0.11038      | 0.09171   | 0.05811      | 0.0527    | SLMAP           |
| cg00003994 | 0.08097      | 0.04858   | 0.39459    | 0.42667 | 0.10265     | 0.06119  | 0.08067      | 0.0737    | 0.40772      | 0.22758   | MEOX2           |
| cg00005847 | 0.83583      | 0.86605   | 0.83171    | 0.83949 | 0.7753      | 0.81435  | 0.80694      | 0.6759    | 0.84058      | 0.81611   | HOXD3           |
| cg00006414 | 0.06616      | 0.06949   | 0.20833    | 0.1337  | 0.09993     | 0.08548  | 0.06428      | 0.06527   | 0.0796       | 0.03993   | ZNF398          |
| cg00007981 | 0.05488      | 0.06985   | 0.0711     | 0.0636  | 0.05217     | 0.06124  | 0.05236      | 0.05864   | 0.04424      | 0.04258   | PANX1           |
| cg00008493 | 0.96155      | 0.96294   | 0.96232    | 0.96116 | 0.95909     | 0.95784  | 0.96251      | 0.96298   | 0.97194      | 0.96202   | COX8C           |
| cg00008713 | 0.03601      | 0.03623   | 0.03829    | 0.03286 | 0.02797     | 0.03298  | 0.03183      | 0.03098   | 0.03127      | 0.03073   | IMPA2           |
| cg00009407 | 0.03312      | 0.03031   | 0.02805    | 0.02529 | 0.02794     | 0.03974  | 0.03053      | 0.02992   | 0.02685      | 0.02998   | TTC8            |
| cg00010193 | 0.43431      | 0.43186   | 0.42276    | 0.48402 | 0.59224     | 0.58369  | 0.41141      | 0.4623    | 0.62837      | 0.66241   | FLJ35816        |
| cg00011459 | 0.86684      | 0.87741   | 0.86002    | 0.87684 | 0.8775      | 0.90369  | 0.86546      | 0.8572    | 0.90473      | 0.86943   | PMM2            |
| cg00012199 | 0.03337      | 0.03364   | 0.03454    | 0.03371 | 0.03182     | 0.04072  | 0.02605      | 0.02514   | 0.02726      | 0.03092   | RNASE4          |
| cg00012386 | 0.0333       | 0.0355    | 0.04084    | 0.03212 | 0.02757     | 0.03315  | 0.03699      | 0.03759   | 0.03767      | 0.03256   | C1orf142        |
| cg00012792 | 0.03294      | 0.03596   | 0.03946    | 0.03707 | 0.02167     | 0.03571  | 0.03512      | 0.03319   | 0.03673      | 0.03715   | TXNDC5          |
| cg00013618 | 0.70419      | 0.68539   | 0.55535    | 0.74247 | 0.85161     | 0.85216  | 0.09187      | 0.17214   | 0.24503      | 0.29297   |                 |
| cg00014085 | 0.03268      | 0.06119   | 0.0386     | 0.0369  | 0.03461     | 0.03866  | 0.03099      | 0.03414   | 0.03617      | 0.03614   | RetSat          |
| cg00014837 | 0.83154      | 0.30632   | 0.81409    | 0.81997 | 0.68426     | 0.87879  | 0.80791      | 0.82019   | 0.82015      | 0.79389   | ACRBP           |
| cg00015770 | 0.23488      | 0.57509   | 0.09513    | 0.37799 | 0.04879     | 0.05076  | 0.09477      | 0.08635   | 0.0677       | 0.05271   | GPR103          |
| cg00016968 | 0.84775      | 0.37728   | 0.4573     | 0.57157 | 0.89457     | 0.59784  | 0.51241      | 0.13931   | 0.44356      | 0.17285   | RHOC            |
| cg00019495 | 0.2221       | 0.21116   | 0.79243    | 0.89257 | 0.81263     | 0.85888  | 0.69676      | 0.6648    | 0.82992      | 0.69966   | HOP             |
| cg00020533 | 0.86975      | 0.56843   | 0.82919    | 0.87496 | 0.81513     | 0.87437  | 0.80097      | 0.37949   | 0.70139      | 0.376     | TULP1           |
| cg00021527 | 0.02165      | 0.02348   | 0.04418    | 0.0376  | 0.02524     | 0.02763  | 0.02689      | 0.02468   | 0.02694      | 0.02483   | TAF15           |
| cg00022606 | 0.04187      | 0.03959   | 0.04307    | 0.04213 | 0.04026     | 0.03713  | 0.04401      | 0.03662   | 0.0351       | 0.02476   | TBC1D20         |
| cg00022866 | 0.65387      | 0.29034   | 0.85274    | 0.8664  | 0.88118     | 0.86693  | 0.81854      | 0.5445    | 0.81343      | 0.78896   | FLJ37970        |
| cg00024396 | 0.07409      | 0.05154   | 0.12285    | 0.34783 | 0.11232     | 0.0729   | 0.06218      | 0.049     | 0.03639      | 0.03732   | ELOVL5          |
| cg00024812 | 0.04219      | 0.0452    | 0.05516    | 0.05273 | 0.04635     | 0.04645  | 0.04567      | 0.04568   | 0.04066      | 0.03713   | CPSF3           |
| cg00025138 | 0.02688      | 0.02861   | 0.02721    | 0.0261  | 0.0265      | 0.02898  | 0.0299       | 0.02532   | 0.02572      | 0.02529   | MAP3K9          |
| cg00025991 | 0.75874      | 0.73831   | 0.66991    | 0.76939 | 0.66465     | 0.65311  | 0.65775      | 0.72633   | 0.48916      | 0.45501   | DIP2C           |
| cg00027083 | 0.03443      | 0.02613   | 0.08041    | 0.0454  | 0.21048     | 0.02287  | 0.04922      | 0.0289    | 0.1065       | 0.02056   | EPB41L3         |
| cg00027674 | 0.07         | 0.07654   | 0.16154    | 0.37263 | 0.64192     | 0.70471  | 0.09288      | 0.06613   | 0.29639      | 0.21272   | RAB38           |
| cg00029826 | 0.16804      | 0.16768   | 0.20812    | 0.15445 | 0.28762     | 0.22704  | 0.15358      | 0.13269   | 0.14621      | 0.21895   | CCNB1IP1        |
| cg00029931 | 0.02577      | 0.02384   | 0.04559    | 0.03637 | 0.03893     | 0.03968  | 0.129        | 0.07113   | 0.02591      | 0.02619   | RPL36A          |
| cg00030047 | 0.92943      | 0.92766   | 0.94219    | 0.92555 | 0.35872     | 0.04138  | 0.59943      | 0.27824   | 0.25828      | 0.04216   | C1orf188        |
| cg00031162 | 0.66716      | 0.63872   | 0.82127    | 0.84366 | 0.74861     | 0.74986  | 0.5546       | 0.51733   | 0.54869      | 0.25993   | TNFSF12-TNFSF13 |
| cg00032227 | 0.02385      | 0.02357   | 0.03135    | 0.02869 | 0.02011     | 0.0239   | 0.0187       | 0.01836   | 0.01996      | 0.01853   | NAT9            |
| cg00032666 | 0.81612      | 0.81803   | 0.71372    | 0.76503 | 0.73859     | 0.77545  | 0.44231      | 0.55386   | 0.84999      | 0.68009   | CXorf6          |
| cg00033516 | 0.04539      | 0.04447   | 0.0497     | 0.04267 | 0.03137     | 0.04911  | 0.04274      | 0.04418   | 0.04323      | 0.03807   | KLF3            |
| cg00033773 | 0.9291       | 0.82697   | 0.83125    | 0.93548 | 0.9608      | 0.81032  | 0.63295      | 0.67703   | 0.93965      | 0.73173   | MORG1           |
| cg00034039 | 0.05857      | 0.06295   | 0.06781    | 0.06254 | 0.04146     | 0.07505  | 0.05745      | 0.05687   | 0.05836      | 0.05701   | C9orf85         |
| cg00035347 | 0.67235      | 0.21415   | 0.61285    | 0.61396 | 0.62031     | 0.26641  | 0.25678      | 0.21019   | 0.55142      | 0.25224   | NT5C2           |

|            |         |         |         |         |         |         |         |         |         |                  |
|------------|---------|---------|---------|---------|---------|---------|---------|---------|---------|------------------|
| cg00035623 | 0.70127 | 0.42573 | 0.14357 | 0.15498 | 0.06706 | 0.06258 | 0.0667  | 0.06694 | 0.05996 | 0.05111 UBE2S    |
| cg00037763 | 0.75283 | 0.62075 | 0.8816  | 0.90242 | 0.88159 | 0.88331 | 0.72712 | 0.87145 | 0.89405 | 0.50846 SETBP1   |
| cg00037940 | 0.8039  | 0.57109 | 0.82811 | 0.84253 | 0.87009 | 0.8558  | 0.83844 | 0.83127 | 0.86564 | 0.85445 PIK3CB   |
| cg00040861 | 0.03781 | 0.04105 | 0.04027 | 0.03928 | 0.05093 | 0.04509 | 0.03569 | 0.02976 | 0.02737 | 0.0978 LSM7      |
| cg00040873 | 0.33219 | 0.10393 | 0.66167 | 0.70929 | 0.80456 | 0.49071 | 0.17219 | 0.06467 | 0.31219 | 0.09825 NDUFB10  |
| cg00041575 | 0.44286 | 0.09401 | 0.78163 | 0.8499  | 0.82706 | 0.59718 | 0.13099 | 0.16489 | 0.22938 | 0.24254 TSPAN32  |
| cg00042156 | 0.84826 | 0.37407 | 0.17813 | 0.15527 | 0.04023 | 0.04338 | 0.49642 | 0.16128 | 0.86413 | 0.50572 MGC16291 |
| cg00043004 | 0.27089 | 0.39332 | 0.2353  | 0.13014 | 0.3581  | 0.44058 | 0.16726 | 0.03722 | 0.09054 | 0.05005 NOXO1    |
| cg00043080 | 0.83913 | 0.78418 | 0.83531 | 0.84538 | 0.81519 | 0.80283 | 0.84331 | 0.85035 | 0.8785  | 0.88021 PLD3     |
| cg00044245 | 0.05016 | 0.05026 | 0.85699 | 0.88396 | 0.05354 | 0.05709 | 0.0623  | 0.05445 | 0.335   | 0.36083 EPHA7    |
| cg00044729 | 0.77155 | 0.40627 | 0.74805 | 0.81277 | 0.52185 | 0.78699 | 0.66199 | 0.35335 | 0.8023  | 0.53633 FLJ25421 |
| cg00047050 | 0.15159 | 0.06267 | 0.06129 | 0.06085 | 0.05434 | 0.05289 | 0.05801 | 0.04715 | 0.11122 | 0.07765 CUL5     |
| cg00047469 | 0.03515 | 0.03714 | 0.03617 | 0.0361  | 0.02795 | 0.03517 | 0.03518 | 0.03559 | 0.03013 | 0.02986 C9orf43  |
| cg00049986 | 0.1757  | 0.1456  | 0.16112 | 0.14814 | 0.19898 | 0.22272 | 0.14857 | 0.12346 | 0.1355  | 0.19997 C14orf10 |
| cg00050312 | 0.02435 | 0.02898 | 0.02921 | 0.03047 | 0.0237  | 0.02878 | 0.02289 | 0.02528 | 0.03142 | 0.02314 PRKCA    |
| cg00051623 | 0.86499 | 0.8587  | 0.80503 | 0.82722 | 0.65591 | 0.78468 | 0.73056 | 0.83819 | 0.83488 | 0.80158 CASP1    |
| cg00051979 | 0.0824  | 0.09696 | 0.09621 | 0.0902  | 0.07843 | 0.07695 | 0.07697 | 0.09436 | 0.06998 | 0.06872 C10orf4  |
| cg00053292 | 0.05029 | 0.05792 | 0.05094 | 0.05425 | 0.05584 | 0.05916 | 0.04369 | 0.04821 | 0.04442 | 0.04319 CCDC44   |
| cg00053647 | 0.08579 | 0.06151 | 0.14101 | 0.25568 | 0.0535  | 0.04924 | 0.06527 | 0.05664 | 0.06331 | 0.04584 C7orf28B |
| cg00054706 | 0.04126 | 0.03856 | 0.04925 | 0.04619 | 0.04712 | 0.04166 | 0.03403 | 0.0341  | 0.04046 | 0.03511 C1D      |
| cg00055233 | 0.88269 | 0.89481 | 0.90531 | 0.89399 | 0.57723 | 0.43436 | 0.89848 | 0.88973 | 0.61613 | 0.59657 RLN1     |
| cg00056767 | 0.53818 | 0.57633 | 0.04183 | 0.03556 | 0.48794 | 0.06839 | 0.0318  | 0.03435 | 0.03177 | 0.02992 FLJ38725 |
| cg00057593 | 0.12226 | 0.13132 | 0.75637 | 0.76581 | 0.5312  | 0.66269 | 0.06951 | 0.05842 | 0.13349 | 0.09317 GML      |
| cg00058938 | 0.17033 | 0.06108 | 0.90033 | 0.90402 | 0.58414 | 0.35635 | 0.10791 | 0.04547 | 0.68388 | 0.57754 TTC9B    |
| cg00059225 | 0.10263 | 0.0728  | 0.58893 | 0.63853 | 0.65879 | 0.10967 | 0.26037 | 0.08224 | 0.33345 | 0.24095 GLRA1    |
| cg00059424 | 0.04138 | 0.03622 | 0.04155 | 0.04932 | 0.05994 | 0.05599 | 0.04985 | 0.04875 | 0.04732 | 0.04897 PES1     |
| cg00059740 | 0.03031 | 0.03145 | 0.03585 | 0.03119 | 0.02599 | 0.03086 | 0.03069 | 0.02874 | 0.03086 | 0.02153 MGC5242  |
| cg00059930 | 0.95968 | 0.95751 | 0.9518  | 0.95807 | 0.96387 | 0.95425 | 0.96203 | 0.95914 | 0.96008 | 0.9621 RB1       |
| cg00060762 | 0.03456 | 0.03652 | 0.03556 | 0.03262 | 0.02847 | 0.04456 | 0.04314 | 0.04397 | 0.03505 | 0.03864 LEO1     |
| cg00060882 | 0.20865 | 0.19424 | 0.16714 | 0.17506 | 0.16685 | 0.17607 | 0.11349 | 0.13329 | 0.13567 | 0.14453 EIF2S3   |
| cg00061059 | 0.15591 | 0.14624 | 0.16653 | 0.14369 | 0.15681 | 0.10896 | 0.12035 | 0.11755 | 0.10419 | 0.10333 GPSN2    |
| cg00061629 | 0.95756 | 0.90067 | 0.96032 | 0.96531 | 0.92916 | 0.95987 | 0.96535 | 0.90201 | 0.96543 | 0.92591 ALX4     |
| cg00062776 | 0.95849 | 0.93818 | 0.96153 | 0.96389 | 0.9696  | 0.9687  | 0.96462 | 0.834   | 0.97571 | 0.96093 TULP2    |
| cg00063144 | 0.8317  | 0.77583 | 0.83378 | 0.83175 | 0.83424 | 0.84136 | 0.54774 | 0.44324 | 0.86402 | 0.8091 KRTHA1    |
| cg00065385 | 0.91466 | 0.9007  | 0.88097 | 0.8986  | 0.86306 | 0.90851 | 0.88454 | 0.87767 | 0.92416 | 0.89226 ACTL7A   |
| cg00065408 | 0.04315 | 0.04629 | 0.04277 | 0.04375 | 0.0328  | 0.03854 | 0.03373 | 0.03703 | 0.03699 | 0.03336 CACNB3   |
| cg00066153 | 0.8928  | 0.89652 | 0.87811 | 0.88842 | 0.8823  | 0.87804 | 0.87506 | 0.89604 | 0.91003 | 0.90714 ACRV1    |
| cg00066816 | 0.05819 | 0.04554 | 0.39618 | 0.25508 | 0.90131 | 0.3727  | 0.25996 | 0.13687 | 0.54603 | 0.03527 IL12B    |
| cg00067471 | 0.12937 | 0.16504 | 0.39932 | 0.36014 | 0.09909 | 0.07163 | 0.07156 | 0.05208 | 0.08805 | 0.05435 ATP5D    |
| cg00069261 | 0.06996 | 0.07567 | 0.07235 | 0.06461 | 0.11729 | 0.05897 | 0.05169 | 0.05967 | 0.03881 | 0.04026 CDR2     |
| cg00071250 | 0.50025 | 0.56341 | 0.8581  | 0.87505 | 0.88858 | 0.86994 | 0.77436 | 0.80096 | 0.83335 | 0.75537 FASLG    |

|            |         |         |         |         |         |         |         |         |         |         |          |
|------------|---------|---------|---------|---------|---------|---------|---------|---------|---------|---------|----------|
| cg00071998 | 0.06397 | 0.06131 | 0.07575 | 0.06353 | 0.07225 | 0.07715 | 0.06706 | 0.0489  | 0.05657 | 0.04741 | MSH5     |
| cg00072216 | 0.03095 | 0.03357 | 0.03435 | 0.03045 | 0.02919 | 0.03151 | 0.0252  | 0.02884 | 0.02166 | 0.02205 | MXD4     |
| cg00073650 | 0.84936 | 0.74191 | 0.81486 | 0.88974 | 0.81878 | 0.74633 | 0.74906 | 0.46404 | 0.68222 | 0.3843  | HSPC176  |
| cg00075967 | 0.05304 | 0.10749 | 0.09748 | 0.08373 | 0.92966 | 0.73921 | 0.85027 | 0.33781 | 0.81181 | 0.86319 | STRA6    |
| cg00076645 | 0.07128 | 0.05855 | 0.06762 | 0.0852  | 0.05536 | 0.04977 | 0.06166 | 0.046   | 0.05785 | 0.06357 | DC-UbP   |
| cg00077457 | 0.76493 | 0.77233 | 0.72252 | 0.74987 | 0.66138 | 0.74096 | 0.80473 | 0.75103 | 0.73611 | 0.71081 | ZNF326   |
| cg00077877 | 0.6463  | 0.05561 | 0.57853 | 0.64798 | 0.7791  | 0.36317 | 0.07083 | 0.06958 | 0.81535 | 0.1115  | DDEF1    |
| cg00078194 | 0.0325  | 0.03762 | 0.02808 | 0.03398 | 0.11818 | 0.05645 | 0.03915 | 0.03533 | 0.03065 | 0.02723 | MDK      |
| cg00078867 | 0.84275 | 0.85588 | 0.84656 | 0.864   | 0.78091 | 0.67392 | 0.42164 | 0.58524 | 0.87582 | 0.8154  | WAS      |
| cg00079056 | 0.85571 | 0.72673 | 0.88793 | 0.90695 | 0.84824 | 0.87977 | 0.87691 | 0.88109 | 0.88705 | 0.80732 | SPINK4   |
| cg00079563 | 0.46885 | 0.53864 | 0.91464 | 0.93371 | 0.50009 | 0.78355 | 0.05681 | 0.02907 | 0.39312 | 0.06165 | ARFGAP3  |
| cg00080012 | 0.02573 | 0.02895 | 0.03239 | 0.02894 | 0.02311 | 0.02728 | 0.02501 | 0.02843 | 0.02232 | 0.01909 | EED      |
| cg00081935 | 0.04185 | 0.03809 | 0.04523 | 0.04492 | 0.05758 | 0.03516 | 0.0434  | 0.04752 | 0.04265 | 0.04446 | TSPAN9   |
| cg00081975 | 0.28577 | 0.02843 | 0.09344 | 0.17744 | 0.54258 | 0.0236  | 0.02368 | 0.02754 | 0.02983 | 0.0228  | ABCC3    |
| cg00083720 | 0.02835 | 0.02511 | 0.03001 | 0.02319 | 0.02618 | 0.03053 | 0.02375 | 0.02567 | 0.01963 | 0.02023 | DSTN     |
| cg00083937 | 0.68757 | 0.45402 | 0.91488 | 0.92129 | 0.92763 | 0.83316 | 0.73083 | 0.55431 | 0.90475 | 0.7762  | MAPK8IP2 |
| cg00084687 | 0.0214  | 0.02713 | 0.03691 | 0.02855 | 0.02198 | 0.02912 | 0.02372 | 0.02462 | 0.02126 | 0.01929 | GATAD1   |
| cg00089071 | 0.02279 | 0.02611 | 0.02323 | 0.02457 | 0.04369 | 0.04608 | 0.0233  | 0.02157 | 0.01896 | 0.02016 | PCGF2    |
| cg00090147 | 0.04445 | 0.05827 | 0.05054 | 0.04483 | 0.92474 | 0.90188 | 0.36215 | 0.05451 | 0.04828 | 0.0368  | GATA4    |
| cg00091693 | 0.73738 | 0.30117 | 0.71556 | 0.77576 | 0.71038 | 0.45264 | 0.20348 | 0.1965  | 0.21253 | 0.2111  | KRT20    |
| cg00093177 | 0.85268 | 0.75484 | 0.82673 | 0.85363 | 0.85025 | 0.78921 | 0.76256 | 0.7609  | 0.8502  | 0.807   | FLJ43826 |
| cg00094319 | 0.8206  | 0.77674 | 0.6254  | 0.72517 | 0.85253 | 0.72094 | 0.67474 | 0.78753 | 0.86128 | 0.86793 | PABPC3   |
| cg00094851 | 0.11153 | 0.0834  | 0.1352  | 0.117   | 0.0655  | 0.07709 | 0.09672 | 0.07417 | 0.1118  | 0.07823 | KIF3C    |
| cg00095526 | 0.75001 | 0.47133 | 0.80578 | 0.85515 | 0.93243 | 0.66727 | 0.51686 | 0.25345 | 0.88133 | 0.85491 | CACNA1S  |
| cg00095674 | 0.10599 | 0.09675 | 0.0971  | 0.08533 | 0.10318 | 0.06862 | 0.07088 | 0.07624 | 0.08656 | 0.09023 | PLEKHO1  |
| cg00096922 | 0.043   | 0.04748 | 0.0912  | 0.06849 | 0.10392 | 0.08192 | 0.04292 | 0.04    | 0.04157 | 0.0344  | DLX5     |
| cg00097536 | 0.0332  | 0.0372  | 0.03766 | 0.03958 | 0.02843 | 0.03252 | 0.03269 | 0.03168 | 0.03177 | 0.03307 | ZFP36L2  |
| cg00098162 | 0.74009 | 0.76052 | 0.73585 | 0.7731  | 0.74065 | 0.76734 | 0.45137 | 0.73729 | 0.76442 | 0.53778 | ANKRD22  |
| cg00098239 | 0.02225 | 0.01949 | 0.02455 | 0.02892 | 0.0224  | 0.02027 | 0.0283  | 0.02892 | 0.01958 | 0.0197  | NTE      |
| cg00099550 | 0.04956 | 0.04924 | 0.04296 | 0.0459  | 0.03556 | 0.03967 | 0.04023 | 0.04023 | 0.04015 | 0.03766 | HNRPF    |
| cg00101227 | 0.8446  | 0.78772 | 0.78099 | 0.77207 | 0.86213 | 0.85581 | 0.59199 | 0.58298 | 0.14374 | 0.35481 | MPZ      |
| cg00103783 | 0.03034 | 0.0286  | 0.02712 | 0.02505 | 0.02258 | 0.02644 | 0.02534 | 0.02716 | 0.0257  | 0.0238  | MPDU1    |
| cg00105253 | 0.06548 | 0.05894 | 0.12232 | 0.10652 | 0.48495 | 0.08034 | 0.07203 | 0.0592  | 0.05821 | 0.04739 | NUDT14   |
| cg00105470 | 0.03779 | 0.03539 | 0.04741 | 0.04522 | 0.0384  | 0.0383  | 0.03673 | 0.02892 | 0.03404 | 0.02768 | C1orf35  |
| cg00107187 | 0.06977 | 0.07249 | 0.55328 | 0.61498 | 0.35684 | 0.07955 | 0.17718 | 0.23249 | 0.26109 | 0.11663 | FLJ42486 |
| cg00107488 | 0.2907  | 0.28573 | 0.2877  | 0.27352 | 0.26667 | 0.26169 | 0.26579 | 0.2479  | 0.28836 | 0.28112 | TXNRD2   |
| cg00107632 | 0.02879 | 0.0309  | 0.02856 | 0.02872 | 0.02393 | 0.02875 | 0.02778 | 0.02572 | 0.0244  | 0.02241 | PGM2     |
| cg00108454 | 0.154   | 0.04807 | 0.29906 | 0.41061 | 0.39574 | 0.33937 | 0.23827 | 0.30651 | 0.29283 | 0.24913 | C1QA     |
| cg00109274 | 0.03099 | 0.02491 | 0.02361 | 0.02274 | 0.0194  | 0.0222  | 0.02416 | 0.02055 | 0.02131 | 0.02066 | DGKH     |
| cg00112517 | 0.1105  | 0.04972 | 0.40181 | 0.35919 | 0.47696 | 0.08688 | 0.08935 | 0.0445  | 0.53097 | 0.06996 | PPP1R1B  |
| cg00113020 | 0.50952 | 0.45523 | 0.75745 | 0.82997 | 0.72836 | 0.82442 | 0.36419 | 0.40123 | 0.17063 | 0.2024  | LILRB4   |

|            |         |         |         |         |         |         |         |         |         |                      |
|------------|---------|---------|---------|---------|---------|---------|---------|---------|---------|----------------------|
| cg00113951 | 0.15869 | 0.14305 | 0.3169  | 0.29999 | 0.19958 | 0.48382 | 0.13367 | 0.14051 | 0.13033 | 0.11449 CABP1        |
| cg00115714 | 0.06201 | 0.06094 | 0.06831 | 0.06674 | 0.07224 | 0.07889 | 0.06197 | 0.0563  | 0.05312 | 0.05532 AMD1         |
| cg00116234 | 0.17403 | 0.09667 | 0.52698 | 0.53617 | 0.15772 | 0.10084 | 0.87758 | 0.09346 | 0.61664 | 0.49202 ADAMTSL1     |
| cg00116838 | 0.06738 | 0.07485 | 0.89964 | 0.90158 | 0.88923 | 0.85263 | 0.47828 | 0.08223 | 0.34287 | 0.26249 FLJ40125     |
| cg00117172 | 0.03671 | 0.03261 | 0.0463  | 0.03933 | 0.04903 | 0.03607 | 0.95853 | 0.94884 | 0.03991 | 0.03216 RUNX3        |
| cg00119079 | 0.17551 | 0.11193 | 0.26125 | 0.28803 | 0.80113 | 0.75478 | 0.66402 | 0.88901 | 0.1002  | 0.04567 LAMP3        |
| cg00121158 | 0.04015 | 0.03933 | 0.03539 | 0.03947 | 0.03272 | 0.04576 | 0.02933 | 0.02969 | 0.02892 | 0.02692 JMJ2C        |
| cg00121640 | 0.09136 | 0.08605 | 0.62629 | 0.66123 | 0.06239 | 0.06831 | 0.07447 | 0.07509 | 0.10651 | 0.1181 ASTN2         |
| cg00121904 | 0.45098 | 0.10563 | 0.21653 | 0.31572 | 0.21532 | 0.10258 | 0.07245 | 0.08323 | 0.10729 | 0.07277 MAOB         |
| cg00123035 | 0.0601  | 0.04965 | 0.04565 | 0.04877 | 0.06053 | 0.0621  | 0.04365 | 0.04295 | 0.06126 | 0.06391 RFX5         |
| cg00126034 | 0.04013 | 0.03385 | 0.25022 | 0.45575 | 0.27884 | 0.82116 | 0.15103 | 0.038   | 0.03765 | 0.03621 WNT3         |
| cg00126657 | 0.33986 | 0.64204 | 0.22694 | 0.22255 | 0.25828 | 0.21429 | 0.08344 | 0.09962 | 0.3459  | 0.33514 SSX6         |
| cg00126698 | 0.74846 | 0.72299 | 0.80993 | 0.85573 | 0.81901 | 0.72018 | 0.24745 | 0.26956 | 0.49383 | 0.48288 BTK          |
| cg00128197 | 0.04042 | 0.03633 | 0.04589 | 0.05331 | 0.04389 | 0.03961 | 0.07896 | 0.02921 | 0.03217 | 0.03513 HADH2        |
| cg00128560 | 0.79581 | 0.68374 | 0.78527 | 0.7995  | 0.73592 | 0.8543  | 0.79849 | 0.81462 | 0.85826 | 0.82103 TIGD7        |
| cg00128654 | 0.04341 | 0.23215 | 0.03815 | 0.04031 | 0.04885 | 0.05025 | 0.03398 | 0.03404 | 0.03563 | 0.03643 C14orf102    |
| cg00128766 | 0.1023  | 0.09525 | 0.15128 | 0.13475 | 0.19636 | 0.13383 | 0.1125  | 0.0987  | 0.10696 | 0.10874 KIAA0494     |
| cg00128877 | 0.09363 | 0.08418 | 0.10136 | 0.08626 | 0.10642 | 0.07183 | 0.07649 | 0.07842 | 0.08644 | 0.06607 MKNK1        |
| cg00129774 | 0.06164 | 0.05046 | 0.09499 | 0.12336 | 0.04896 | 0.04395 | 0.0492  | 0.04766 | 0.0429  | 0.04134 CDK2         |
| cg00131121 | 0.04045 | 0.038   | 0.14232 | 0.18761 | 0.16479 | 0.21752 | 0.06824 | 0.03481 | 0.04591 | 0.03466 POLR2J       |
| cg00131557 | 0.85632 | 0.81478 | 0.80823 | 0.82964 | 0.81398 | 0.80566 | 0.82668 | 0.88831 | 0.87196 | 0.85517 DNAJC15      |
| cg00132141 | 0.46357 | 0.20916 | 0.3209  | 0.41764 | 0.63243 | 0.73403 | 0.2073  | 0.15488 | 0.10792 | 0.21625 CTNNA3       |
| cg00133909 | 0.06281 | 0.05574 | 0.05456 | 0.04683 | 0.03861 | 0.04425 | 0.05658 | 0.05239 | 0.04485 | 0.04752 CD276        |
| cg00134539 | 0.54485 | 0.1728  | 0.89307 | 0.90581 | 0.91723 | 0.92355 | 0.19832 | 0.09511 | 0.86914 | 0.83577 UBASH3A      |
| cg00134787 | 0.15001 | 0.08648 | 0.57018 | 0.6119  | 0.76447 | 0.7886  | 0.13986 | 0.11594 | 0.08788 | 0.10787 MYH1         |
| cg00135056 | 0.35961 | 0.15843 | 0.19111 | 0.34702 | 0.16542 | 0.14872 | 0.13455 | 0.07825 | 0.13277 | 0.07514 C3orf37      |
| cg00135393 | 0.2609  | 0.23157 | 0.33712 | 0.28954 | 0.35872 | 0.26777 | 0.17144 | 0.15292 | 0.21029 | 0.28689 FGG          |
| cg00136105 | 0.03784 | 0.03903 | 0.03825 | 0.0441  | 0.03665 | 0.05922 | 0.04272 | 0.04436 | 0.03758 | 0.03863 GNPTAB       |
| cg00136405 | 0.22733 | 0.16945 | 0.27029 | 0.29713 | 0.38517 | 0.41454 | 0.22943 | 0.21111 | 0.17719 | 0.21318 IL21         |
| cg00136477 | 0.28649 | 0.29628 | 0.47672 | 0.56023 | 0.49071 | 0.71491 | 0.22323 | 0.23556 | 0.3816  | 0.38074 C1QC         |
| cg00136736 | 0.05628 | 0.05619 | 0.06618 | 0.06518 | 0.06726 | 0.07067 | 0.05985 | 0.05677 | 0.05428 | 0.06141 C22orf19     |
| cg00138126 | 0.79588 | 0.30831 | 0.83439 | 0.86573 | 0.743   | 0.34273 | 0.44593 | 0.13443 | 0.86983 | 0.5484 TMEPAI        |
| cg00141162 | 0.05618 | 0.05348 | 0.79614 | 0.85734 | 0.91157 | 0.85906 | 0.89549 | 0.80909 | 0.52415 | 0.55028 HCLS1        |
| cg00141550 | 0.69439 | 0.6195  | 0.58547 | 0.71537 | 0.41692 | 0.56781 | 0.13272 | 0.20026 | 0.41909 | 0.40855 CCNB3        |
| cg00141845 | 0.43115 | 0.22572 | 0.55342 | 0.61517 | 0.65559 | 0.4125  | 0.15771 | 0.32004 | 0.12964 | 0.14272 RP11-311P8.3 |
| cg00143376 | 0.28538 | 0.09204 | 0.74583 | 0.80022 | 0.70168 | 0.80012 | 0.56031 | 0.54626 | 0.88362 | 0.75962 NMUR1        |
| cg00143998 | 0.0534  | 0.05008 | 0.07487 | 0.06585 | 0.05596 | 0.05648 | 0.06518 | 0.04586 | 0.04327 | 0.05154 HIST3H2BB    |
| cg00145118 | 0.71589 | 0.35339 | 0.66914 | 0.78893 | 0.46399 | 0.06419 | 0.36446 | 0.1374  | 0.30687 | 0.07193 GNPDA1       |
| cg00145348 | 0.0539  | 0.05051 | 0.06497 | 0.06218 | 0.04367 | 0.05897 | 0.47112 | 0.38415 | 0.04228 | 0.04184 APEX2        |
| cg00146096 | 0.03078 | 0.03258 | 0.03415 | 0.03337 | 0.0413  | 0.04438 | 0.03304 | 0.03337 | 0.03369 | 0.03394 FANCF        |
| cg00149659 | 0.04463 | 0.04107 | 0.04545 | 0.0406  | 0.06012 | 0.05716 | 0.03913 | 0.03418 | 0.03718 | 0.03303 C3orf10      |

|            |         |         |         |         |         |         |         |         |         |                  |
|------------|---------|---------|---------|---------|---------|---------|---------|---------|---------|------------------|
| cg00149976 | 0.04558 | 0.04335 | 0.03756 | 0.04132 | 0.03258 | 0.03323 | 0.03745 | 0.04193 | 0.03592 | 0.03562 MGLL     |
| cg00151234 | 0.0559  | 0.05089 | 0.09096 | 0.08398 | 0.08112 | 0.06527 | 0.55498 | 0.46632 | 0.06518 | 0.06365 PGK1     |
| cg00151607 | 0.02141 | 0.02466 | 0.02557 | 0.02119 | 0.02307 | 0.03002 | 0.01958 | 0.01893 | 0.02024 | 0.02536 GALNS    |
| cg00152644 | 0.15618 | 0.0529  | 0.49094 | 0.51761 | 0.5805  | 0.5411  | 0.11617 | 0.12756 | 0.05571 | 0.06108 SPRR2E   |
| cg00155167 | 0.04312 | 0.04719 | 0.06474 | 0.05212 | 0.05806 | 0.05902 | 0.06484 | 0.06363 | 0.04661 | 0.0661 VPS13B    |
| cg00155485 | 0.05599 | 0.06638 | 0.0804  | 0.06539 | 0.07724 | 0.06398 | 0.078   | 0.06642 | 0.06512 | 0.06593 THRAP2   |
| cg00155609 | 0.03554 | 0.04572 | 0.09673 | 0.15041 | 0.50382 | 0.53254 | 0.17089 | 0.04387 | 0.03662 | 0.03782 PRDX2    |
| cg00156216 | 0.04587 | 0.05156 | 0.04775 | 0.04048 | 0.03842 | 0.0449  | 0.06188 | 0.06584 | 0.0321  | 0.02499 APLP2    |
| cg00156744 | 0.03294 | 0.02681 | 0.02931 | 0.0311  | 0.02966 | 0.02729 | 0.02163 | 0.02164 | 0.02387 | 0.02283 STK10    |
| cg00158308 | 0.12251 | 0.05083 | 0.85876 | 0.90016 | 0.62183 | 0.42369 | 0.33857 | 0.35005 | 0.0565  | 0.05497 OXGR1    |
| cg00160914 | 0.09599 | 0.09203 | 0.22771 | 0.2358  | 0.24821 | 0.13733 | 0.08871 | 0.06793 | 0.09549 | 0.09303 C1orf183 |
| cg00162401 | 0.03302 | 0.03323 | 0.04957 | 0.04787 | 0.03491 | 0.03588 | 0.05981 | 0.03523 | 0.0319  | 0.02628 GSTA4    |
| cg00162643 | 0.04987 | 0.05494 | 0.05629 | 0.05011 | 0.08559 | 0.08945 | 0.04947 | 0.05395 | 0.03846 | 0.04484 DDX58    |
| cg00164041 | 0.04988 | 0.05303 | 0.05187 | 0.04495 | 0.04916 | 0.05646 | 0.04644 | 0.04484 | 0.04281 | 0.03857 HERC5    |
| cg00164898 | 0.04495 | 0.04055 | 0.14576 | 0.13362 | 0.07581 | 0.03846 | 0.45785 | 0.44232 | 0.05424 | 0.03547 MAPK11   |
| cg00165981 | 0.10128 | 0.08189 | 0.12646 | 0.10086 | 0.14832 | 0.09804 | 0.10392 | 0.08637 | 0.06194 | 0.06429 COL4A3BP |
| cg00167504 | 0.0466  | 0.04435 | 0.04851 | 0.04196 | 0.03417 | 0.04346 | 0.03459 | 0.03723 | 0.0367  | 0.03823 BLVRA    |
| cg00168082 | 0.06499 | 0.07331 | 0.06747 | 0.07109 | 0.09164 | 0.06686 | 0.05201 | 0.04911 | 0.05876 | 0.06181 ABL1     |
| cg00168785 | 0.23131 | 0.08094 | 0.06279 | 0.05447 | 0.08657 | 0.05136 | 0.05141 | 0.04884 | 0.04693 | 0.04601 WDSUB1   |
| cg00168942 | 0.821   | 0.83609 | 0.72442 | 0.77857 | 0.86142 | 0.85289 | 0.69174 | 0.84875 | 0.60605 | 0.46757 CX40.1   |
| cg00169548 | 0.58082 | 0.28988 | 0.26208 | 0.23612 | 0.57381 | 0.3964  | 0.21133 | 0.18905 | 0.19803 | 0.26234 BAZ1A    |
| cg00171126 | 0.04216 | 0.04469 | 0.06039 | 0.04588 | 0.04665 | 0.05063 | 0.04074 | 0.0389  | 0.04177 | 0.03708 WRB      |
| cg00171161 | 0.09479 | 0.06259 | 0.09634 | 0.09374 | 0.09532 | 0.08101 | 0.07887 | 0.0733  | 0.09231 | 0.08134 NUDT9    |
| cg00174500 | 0.38423 | 0.10146 | 0.49624 | 0.74579 | 0.36988 | 0.575   | 0.0368  | 0.02713 | 0.17544 | 0.06724 CMTM5    |
| cg00174901 | 0.04821 | 0.06692 | 0.80269 | 0.8028  | 0.73576 | 0.82127 | 0.23177 | 0.41003 | 0.85451 | 0.69427 PALM     |
| cg00176210 | 0.96392 | 0.94416 | 0.97443 | 0.97422 | 0.98091 | 0.97534 | 0.62643 | 0.17019 | 0.9778  | 0.96765 ANK1     |
| cg00176879 | 0.97449 | 0.94435 | 0.96959 | 0.97467 | 0.97863 | 0.97292 | 0.97097 | 0.96683 | 0.9813  | 0.97633 PTPRA    |
| cg00177013 | 0.10532 | 0.10286 | 0.09492 | 0.10072 | 0.05228 | 0.08076 | 0.08596 | 0.07792 | 0.0865  | 0.08191 ARFRP1   |
| cg00177698 | 0.056   | 0.05776 | 0.05734 | 0.05253 | 0.03629 | 0.05293 | 0.05448 | 0.05542 | 0.04746 | 0.05054 PNPO     |
| cg00177923 | 0.02775 | 0.03628 | 0.03194 | 0.03508 | 0.02986 | 0.0296  | 0.04124 | 0.04755 | 0.02771 | 0.02707 LEPROTL1 |
| cg00178790 | 0.05032 | 0.05007 | 0.04549 | 0.04946 | 0.0447  | 0.05096 | 0.04875 | 0.0426  | 0.04582 | 0.04402 C18orf19 |
| cg00179446 | 0.06244 | 0.07618 | 0.12602 | 0.10486 | 0.10703 | 0.09756 | 0.04839 | 0.07184 | 0.07894 | 0.08533 UPF3B    |
| cg00180012 | 0.04796 | 0.04465 | 0.0501  | 0.05191 | 0.04868 | 0.04976 | 0.03588 | 0.03736 | 0.04102 | 0.03773 LACE1    |
| cg00180631 | 0.66729 | 0.42006 | 0.32055 | 0.28078 | 0.22715 | 0.14222 | 0.29355 | 0.11699 | 0.16579 | 0.09769 MTM1     |
| cg00182461 | 0.08343 | 0.0906  | 0.0901  | 0.08586 | 0.11509 | 0.1032  | 0.07003 | 0.06797 | 0.08787 | 0.08436 PPIL3    |
| cg00183782 | 0.68565 | 0.73956 | 0.63178 | 0.68062 | 0.66461 | 0.67833 | 0.67215 | 0.71976 | 0.66291 | 0.66719 MEF2A    |
| cg00183916 | 0.03683 | 0.03493 | 0.02906 | 0.03017 | 0.03499 | 0.03134 | 0.02651 | 0.03072 | 0.02512 | 0.02597 HS3ST3B1 |
| cg00184884 | 0.02134 | 0.01769 | 0.02469 | 0.01882 | 0.02134 | 0.02114 | 0.01995 | 0.02027 | 0.02054 | 0.01889 SF11     |
| cg00184893 | 0.03433 | 0.03437 | 0.04106 | 0.02838 | 0.04014 | 0.03695 | 0.03136 | 0.03463 | 0.02837 | 0.02694 ALOXE3   |
| cg00185103 | 0.6935  | 0.69177 | 0.71468 | 0.74626 | 0.66372 | 0.62482 | 0.17793 | 0.32864 | 0.82883 | 0.81583 ZNF45    |
| cg00185839 | 0.04203 | 0.04658 | 0.05011 | 0.0482  | 0.03209 | 0.03784 | 0.04146 | 0.04224 | 0.0382  | 0.04182 LRDD     |

|            |         |         |         |         |         |         |         |         |         |         |              |
|------------|---------|---------|---------|---------|---------|---------|---------|---------|---------|---------|--------------|
| cg00186141 | 0.03353 | 0.03135 | 0.06797 | 0.05637 | 0.04178 | 0.03601 | 0.04603 | 0.03104 | 0.02641 | 0.02218 | PODXL        |
| cg00186701 | 0.60471 | 0.39369 | 0.90779 | 0.90993 | 0.92123 | 0.93005 | 0.54641 | 0.49311 | 0.65946 | 0.66681 | TSPYL5       |
| cg00186954 | 0.73368 | 0.40047 | 0.38852 | 0.26822 | 0.64974 | 0.42983 | 0.65077 | 0.24577 | 0.48988 | 0.24898 | ST5          |
| cg00187380 | 0.03379 | 0.03635 | 0.03815 | 0.03493 | 0.93978 | 0.92956 | 0.71201 | 0.03792 | 0.03148 | 0.03395 | HOXC5        |
| cg00187686 | 0.15024 | 0.14535 | 0.47734 | 0.50488 | 0.44149 | 0.42458 | 0.1982  | 0.1775  | 0.14144 | 0.24449 | TCN1         |
| cg00188348 | 0.59723 | 0.53276 | 0.6496  | 0.66744 | 0.6452  | 0.61297 | 0.52644 | 0.54482 | 0.54608 | 0.50548 | BANF1        |
| cg00191052 | 0.29563 | 0.18849 | 0.20803 | 0.17182 | 0.67222 | 0.55277 | 0.33216 | 0.16592 | 0.67268 | 0.25225 | CHST7        |
| cg00194146 | 0.07938 | 0.05012 | 0.1954  | 0.12767 | 0.70693 | 0.89147 | 0.39096 | 0.21837 | 0.04083 | 0.03544 | GFOD1        |
| cg00195561 | 0.86961 | 0.7604  | 0.86384 | 0.88924 | 0.88013 | 0.83749 | 0.32234 | 0.48508 | 0.67103 | 0.34849 | CHRM4        |
| cg00197381 | 0.04713 | 0.05177 | 0.05173 | 0.04404 | 0.03847 | 0.04357 | 0.04219 | 0.04611 | 0.04107 | 0.03914 | FAM53C       |
| cg00197641 | 0.06457 | 0.054   | 0.05828 | 0.05451 | 0.05729 | 0.04867 | 0.05151 | 0.05205 | 0.05178 | 0.04529 | MRPL52       |
| cg00199549 | 0.96333 | 0.78078 | 0.94727 | 0.95304 | 0.95496 | 0.78367 | 0.9643  | 0.95359 | 0.94629 | 0.74247 | MCM5         |
| cg00200063 | 0.03118 | 0.03593 | 0.04082 | 0.04079 | 0.03961 | 0.03407 | 0.02838 | 0.03164 | 0.03163 | 0.03159 | USP32        |
| cg00201234 | 0.92424 | 0.90793 | 0.44406 | 0.59904 | 0.523   | 0.7194  | 0.42349 | 0.23149 | 0.32832 | 0.47355 | FBLN2        |
| cg00202702 | 0.0486  | 0.03381 | 0.02417 | 0.0274  | 0.02773 | 0.03206 | 0.02743 | 0.02437 | 0.02341 | 0.02012 | MGC13040     |
| cg00202711 | 0.51509 | 0.55695 | 0.85957 | 0.89633 | 0.81569 | 0.88626 | 0.62847 | 0.6889  | 0.91829 | 0.92706 | HTR2C        |
| cg00204262 | 0.32322 | 0.30271 | 0.8538  | 0.84689 | 0.89553 | 0.80756 | 0.7741  | 0.19209 | 0.47245 | 0.36124 | ECH1         |
| cg00206052 | 0.05214 | 0.05208 | 0.04914 | 0.05363 | 0.04899 | 0.06201 | 0.05002 | 0.04474 | 0.04419 | 0.04597 | RP11-52910.4 |
| cg00207534 | 0.03616 | 0.03715 | 0.03963 | 0.03316 | 0.0537  | 0.05129 | 0.03382 | 0.03298 | 0.02546 | 0.03509 | KIAA0174     |
| cg00208830 | 0.17248 | 0.13674 | 0.8157  | 0.85569 | 0.89852 | 0.91365 | 0.24776 | 0.43934 | 0.34883 | 0.30926 | LAMC2        |
| cg00208967 | 0.47624 | 0.05182 | 0.87401 | 0.86494 | 0.88695 | 0.07566 | 0.84149 | 0.063   | 0.79074 | 0.3432  | OLFM2        |
| cg00209066 | 0.9019  | 0.79453 | 0.89731 | 0.89223 | 0.90139 | 0.87421 | 0.88739 | 0.85004 | 0.90108 | 0.87101 | BRD1         |
| cg00209951 | 0.09877 | 0.09711 | 0.13913 | 0.11002 | 0.09633 | 0.1085  | 0.10354 | 0.09549 | 0.11627 | 0.1285  | DENND2C      |
| cg00210842 | 0.06832 | 0.05336 | 0.0567  | 0.05744 | 0.04206 | 0.05407 | 0.05319 | 0.04689 | 0.05495 | 0.04375 | APAF1        |
| cg00211661 | 0.18208 | 0.20804 | 0.57649 | 0.49071 | 0.10721 | 0.3506  | 0.08709 | 0.06456 | 0.06332 | 0.06119 | CENTD2       |
| cg00212549 | 0.10234 | 0.1045  | 0.13302 | 0.12233 | 0.14476 | 0.0787  | 0.09933 | 0.07034 | 0.09458 | 0.08031 | SEMA5B       |
| cg00213044 | 0.42918 | 0.28295 | 0.55111 | 0.71336 | 0.61277 | 0.59023 | 0.57619 | 0.32617 | 0.48327 | 0.35477 | KRT6C        |
| cg00213331 | 0.81669 | 0.83071 | 0.82038 | 0.84579 | 0.82578 | 0.85011 | 0.79098 | 0.82628 | 0.83238 | 0.83263 | SIL1         |
| cg00213714 | 0.08413 | 0.0708  | 0.08409 | 0.07831 | 0.06901 | 0.08537 | 0.07823 | 0.07    | 0.05623 | 0.05764 | TRIM32       |
| cg00214346 | 0.03708 | 0.04045 | 0.04369 | 0.03939 | 0.03887 | 0.03766 | 0.02495 | 0.02535 | 0.03318 | 0.03251 | PRKAR1A      |
| cg00214794 | 0.64386 | 0.38625 | 0.6283  | 0.66977 | 0.72154 | 0.64339 | 0.23369 | 0.12835 | 0.497   | 0.37466 | KRT17        |
| cg00214855 | 0.18858 | 0.19055 | 0.23774 | 0.20924 | 0.15691 | 0.15747 | 0.14377 | 0.16041 | 0.14466 | 0.13084 | C6orf79      |
| cg00215066 | 0.93205 | 0.71399 | 0.94398 | 0.94663 | 0.95452 | 0.94808 | 0.93851 | 0.94683 | 0.95123 | 0.93914 | MYO9B        |
| cg00216361 | 0.04857 | 0.04751 | 0.79572 | 0.86704 | 0.03909 | 0.03749 | 0.04926 | 0.03886 | 0.36352 | 0.04074 | GAP43        |
| cg00216758 | 0.07612 | 0.06772 | 0.19513 | 0.11339 | 0.46344 | 0.05702 | 0.1329  | 0.05947 | 0.05142 | 0.05646 | C11orf35     |
| cg00217795 | 0.43781 | 0.33566 | 0.93003 | 0.94894 | 0.8438  | 0.15399 | 0.55381 | 0.86402 | 0.3636  | 0.41849 | DIO2         |
| cg00221494 | 0.62245 | 0.04591 | 0.90177 | 0.81684 | 0.94457 | 0.95314 | 0.54477 | 0.03382 | 0.9574  | 0.96064 | FARP1        |
| cg00223186 | 0.04193 | 0.04398 | 0.05684 | 0.07435 | 0.05557 | 0.04368 | 0.04202 | 0.03171 | 0.04384 | 0.04495 | ACBD6        |
| cg00223950 | 0.05557 | 0.05612 | 0.07086 | 0.05803 | 0.05746 | 0.06094 | 0.06102 | 0.05634 | 0.0582  | 0.05273 | RBAF600      |
| cg00224234 | 0.01977 | 0.02215 | 0.02478 | 0.02291 | 0.01959 | 0.02117 | 0.02053 | 0.02233 | 0.01753 | 0.01808 | RNMTL1       |
| cg00224508 | 0.05907 | 0.05343 | 0.05937 | 0.07316 | 0.06356 | 0.0442  | 0.0484  | 0.04309 | 0.0538  | 0.06375 | CDC42SE1     |

|            |         |         |         |         |         |         |         |         |         |         |           |
|------------|---------|---------|---------|---------|---------|---------|---------|---------|---------|---------|-----------|
| cg00226904 | 0.66219 | 0.16295 | 0.67019 | 0.67538 | 0.55607 | 0.7073  | 0.24943 | 0.14896 | 0.35941 | 0.18696 | SERPINB5  |
| cg00226923 | 0.85074 | 0.29047 | 0.89948 | 0.92608 | 0.95881 | 0.90298 | 0.71512 | 0.34294 | 0.84046 | 0.50901 | FGD2      |
| cg00228799 | 0.04696 | 0.04771 | 0.05718 | 0.04835 | 0.06886 | 0.0555  | 0.05233 | 0.03982 | 0.04086 | 0.0377  | ENDOG     |
| cg00229387 | 0.32379 | 0.15054 | 0.48954 | 0.53237 | 0.06499 | 0.05205 | 0.11618 | 0.0661  | 0.50548 | 0.33555 | TJAP1     |
| cg00230271 | 0.08199 | 0.0711  | 0.08246 | 0.07623 | 0.24909 | 0.10315 | 0.08695 | 0.06312 | 0.07331 | 0.0914  | MGC16169  |
| cg00230368 | 0.04243 | 0.04727 | 0.05104 | 0.04599 | 0.03951 | 0.04206 | 0.04265 | 0.04317 | 0.04151 | 0.0349  | IGF2R     |
| cg00230502 | 0.21144 | 0.10392 | 0.61767 | 0.57218 | 0.42043 | 0.53519 | 0.097   | 0.08652 | 0.07651 | 0.08698 | CCDC60    |
| cg00230685 | 0.06651 | 0.06173 | 0.06201 | 0.05107 | 0.04066 | 0.04665 | 0.34157 | 0.44403 | 0.05343 | 0.05448 | SCML1     |
| cg00231140 | 0.04657 | 0.03535 | 0.03911 | 0.03584 | 0.02964 | 0.03409 | 0.0303  | 0.03107 | 0.03081 | 0.03487 | ACAA2     |
| cg00231644 | 0.26464 | 0.2215  | 0.30597 | 0.49116 | 0.64276 | 0.54997 | 0.26043 | 0.24888 | 0.18166 | 0.1994  | TUBB2A    |
| cg00231920 | 0.04171 | 0.04243 | 0.04194 | 0.0433  | 0.02754 | 0.0371  | 0.03771 | 0.04105 | 0.04364 | 0.04014 | VPS16     |
| cg00233307 | 0.83225 | 0.42135 | 0.91812 | 0.91415 | 0.55107 | 0.07621 | 0.93969 | 0.31984 | 0.25262 | 0.0671  | MAP4K1    |
| cg00234616 | 0.28103 | 0.05471 | 0.88389 | 0.93346 | 0.96477 | 0.90758 | 0.50834 | 0.44911 | 0.93792 | 0.91282 | TLX2      |
| cg00234961 | 0.32407 | 0.04632 | 0.17929 | 0.13052 | 0.36975 | 0.03725 | 0.29114 | 0.04719 | 0.05334 | 0.03844 | ZBED4     |
| cg00236832 | 0.09173 | 0.084   | 0.42642 | 0.37447 | 0.78182 | 0.3779  | 0.79504 | 0.20074 | 0.57111 | 0.36822 | RARA      |
| cg00237010 | 0.85363 | 0.7198  | 0.80733 | 0.82096 | 0.84039 | 0.78485 | 0.78925 | 0.80658 | 0.83575 | 0.56267 | NINJ2     |
| cg00238052 | 0.20568 | 0.20782 | 0.35207 | 0.36817 | 0.28932 | 0.10352 | 0.2389  | 0.19753 | 0.11089 | 0.33507 | TCEAL2    |
| cg00239071 | 0.92596 | 0.78358 | 0.90924 | 0.93729 | 0.95357 | 0.94827 | 0.92256 | 0.89972 | 0.91748 | 0.85627 | C14orf68  |
| cg00239419 | 0.7451  | 0.78701 | 0.86406 | 0.85982 | 0.80774 | 0.83762 | 0.84107 | 0.46001 | 0.90372 | 0.84786 | RPS6KB1   |
| cg00239685 | 0.1199  | 0.08369 | 0.10474 | 0.10054 | 0.10975 | 0.10123 | 0.07305 | 0.06459 | 0.07962 | 0.07203 | GORASP1   |
| cg00240312 | 0.04099 | 0.03286 | 0.9017  | 0.91778 | 0.54418 | 0.95148 | 0.53961 | 0.63413 | 0.58702 | 0.74201 | CDH1      |
| cg00240432 | 0.03307 | 0.03626 | 0.05275 | 0.0375  | 0.35318 | 0.04698 | 0.03389 | 0.03202 | 0.25126 | 0.27777 | TWIST1    |
| cg00240880 | 0.9307  | 0.90754 | 0.9185  | 0.91545 | 0.29629 | 0.08735 | 0.89136 | 0.59649 | 0.80384 | 0.70061 | WISP2     |
| cg00241355 | 0.02911 | 0.0345  | 0.03437 | 0.03216 | 0.0262  | 0.0315  | 0.03086 | 0.02713 | 0.02476 | 0.02811 | GAPDH     |
| cg00242839 | 0.85324 | 0.82495 | 0.65652 | 0.85303 | 0.64581 | 0.58813 | 0.12653 | 0.05558 | 0.09665 | 0.04789 | RBM17     |
| cg00243313 | 0.0276  | 0.02781 | 0.04522 | 0.03828 | 0.35617 | 0.2925  | 0.07781 | 0.09974 | 0.02071 | 0.02142 | IRX4      |
| cg00245878 | 0.67324 | 0.81056 | 0.74148 | 0.80737 | 0.87771 | 0.85126 | 0.8006  | 0.37676 | 0.57957 | 0.58385 | H-pik     |
| cg00247489 | 0.03666 | 0.03803 | 0.04945 | 0.04623 | 0.04454 | 0.03321 | 0.04159 | 0.03243 | 0.05753 | 0.03949 | CR2       |
| cg00250430 | 0.86673 | 0.85378 | 0.33733 | 0.54109 | 0.95677 | 0.95085 | 0.5109  | 0.82897 | 0.26513 | 0.06278 | DMRT2     |
| cg00253200 | 0.03656 | 0.041   | 0.04174 | 0.03808 | 0.03767 | 0.03737 | 0.03602 | 0.03534 | 0.03385 | 0.03138 | C3orf59   |
| cg00256074 | 0.82282 | 0.69791 | 0.85047 | 0.84931 | 0.84592 | 0.8618  | 0.13282 | 0.27128 | 0.88678 | 0.80198 | MYLPF     |
| cg00256166 | 0.04688 | 0.0375  | 0.05083 | 0.05049 | 0.03138 | 0.03737 | 0.04386 | 0.03984 | 0.03761 | 0.03544 | KLHL25    |
| cg00256281 | 0.0286  | 0.02874 | 0.03316 | 0.03003 | 0.02358 | 0.02819 | 0.02582 | 0.0277  | 0.02647 | 0.02751 | PMM1      |
| cg00259755 | 0.45693 | 0.07587 | 0.93885 | 0.94888 | 0.68721 | 0.53395 | 0.94892 | 0.54709 | 0.79993 | 0.82254 | PWWP2     |
| cg00260778 | 0.5708  | 0.21802 | 0.20244 | 0.21234 | 0.25186 | 0.17043 | 0.26807 | 0.24049 | 0.74749 | 0.45271 | C10orf111 |
| cg00261552 | 0.05384 | 0.05202 | 0.0658  | 0.05329 | 0.05279 | 0.05341 | 0.04811 | 0.05797 | 0.04639 | 0.0528  | CREBL2    |
| cg00261781 | 0.7619  | 0.6757  | 0.02387 | 0.02451 | 0.46063 | 0.02214 | 0.02448 | 0.02254 | 0.02266 | 0.02067 | MATN3     |
| cg00262415 | 0.03739 | 0.04055 | 0.05608 | 0.05152 | 0.05268 | 0.03842 | 0.03389 | 0.03468 | 0.04308 | 0.03891 | PUSL1     |
| cg00263723 | 0.03886 | 0.03679 | 0.038   | 0.03617 | 0.03125 | 0.03194 | 0.03098 | 0.03427 | 0.03436 | 0.0245  | NSF       |
| cg00263760 | 0.03433 | 0.03597 | 0.03613 | 0.03586 | 0.09832 | 0.03409 | 0.40875 | 0.47081 | 0.04422 | 0.03202 | VAX1      |
| cg00265415 | 0.02481 | 0.02156 | 0.0238  | 0.02119 | 0.01513 | 0.02014 | 0.02607 | 0.02587 | 0.01764 | 0.01888 | B3GALNT2  |

|            |         |         |         |         |         |         |         |         |         |         |           |
|------------|---------|---------|---------|---------|---------|---------|---------|---------|---------|---------|-----------|
| cg00265490 | 0.09489 | 0.09292 | 0.25319 | 0.2492  | 0.13437 | 0.08902 | 0.12011 | 0.11127 | 0.11054 | 0.09842 | MTDH      |
| cg00268009 | 0.03756 | 0.03081 | 0.04064 | 0.0326  | 0.03636 | 0.03535 | 0.03137 | 0.03014 | 0.02714 | 0.03443 | ADH5      |
| cg00268338 | 0.03532 | 0.03698 | 0.0397  | 0.03829 | 0.04599 | 0.03576 | 0.03622 | 0.03227 | 0.03082 | 0.02922 | HECTD2    |
| cg00269115 | 0.02929 | 0.02799 | 0.0317  | 0.03021 | 0.02431 | 0.0317  | 0.02235 | 0.02443 | 0.02669 | 0.02194 | LOC148898 |
| cg00269932 | 0.93643 | 0.9525  | 0.93374 | 0.95532 | 0.89881 | 0.91311 | 0.81443 | 0.9039  | 0.92069 | 0.90901 | LAIR2     |
| cg00273068 | 0.54268 | 0.07301 | 0.39538 | 0.61543 | 0.89156 | 0.94738 | 0.27898 | 0.08185 | 0.18603 | 0.08484 | EMILIN3   |
| cg00273124 | 0.87792 | 0.87235 | 0.87987 | 0.88987 | 0.89191 | 0.85453 | 0.65973 | 0.47496 | 0.87427 | 0.80911 | NOLA2     |
| cg00274399 | 0.04912 | 0.07566 | 0.08058 | 0.07256 | 0.06239 | 0.0979  | 0.07582 | 0.06964 | 0.05169 | 0.04166 | FGF9      |
| cg00275232 | 0.16498 | 0.03924 | 0.05041 | 0.0353  | 0.12358 | 0.03666 | 0.59577 | 0.77171 | 0.04782 | 0.03244 | ZNF342    |
| cg00276797 | 0.04258 | 0.0439  | 0.05223 | 0.03362 | 0.03459 | 0.04093 | 0.03576 | 0.03632 | 0.03326 | 0.03459 | SLK       |
| cg00278366 | 0.90283 | 0.89029 | 0.90355 | 0.90215 | 0.49701 | 0.41397 | 0.46334 | 0.53537 | 0.38266 | 0.24118 | RAD9B     |
| cg00279797 | 0.41831 | 0.14196 | 0.12616 | 0.11488 | 0.19475 | 0.09343 | 0.30877 | 0.30885 | 0.06006 | 0.05885 | AMMECR1   |
| cg00280814 | 0.8152  | 0.52317 | 0.74667 | 0.82431 | 0.73646 | 0.88053 | 0.8736  | 0.38794 | 0.37791 | 0.22561 | FLJ31568  |
| cg00280894 | 0.04239 | 0.04637 | 0.0969  | 0.18185 | 0.08486 | 0.05517 | 0.03982 | 0.04338 | 0.05573 | 0.08408 | NXF2      |
| cg00282347 | 0.10273 | 0.05389 | 0.64487 | 0.78462 | 0.92878 | 0.87398 | 0.48721 | 0.05665 | 0.52062 | 0.45037 | CHD5      |
| cg00282683 | 0.0301  | 0.03496 | 0.03682 | 0.03203 | 0.02562 | 0.02919 | 0.03045 | 0.03001 | 0.02823 | 0.02885 | UBE3C     |
| cg00283535 | 0.72166 | 0.43499 | 0.70951 | 0.77073 | 0.59007 | 0.72094 | 0.54477 | 0.43    | 0.57882 | 0.36826 | ANXA13    |
| cg00288562 | 0.02533 | 0.03047 | 0.02995 | 0.02646 | 0.02006 | 0.03093 | 0.02266 | 0.02336 | 0.02223 | 0.02088 | TRA2A     |
| cg00290028 | 0.02986 | 0.03249 | 0.04038 | 0.06243 | 0.03812 | 0.02755 | 0.0339  | 0.02739 | 0.02711 | 0.02234 | RFXAP     |
| cg00290506 | 0.05458 | 0.03626 | 0.03158 | 0.02908 | 0.03892 | 0.03286 | 0.05052 | 0.02264 | 0.02875 | 0.03153 | CNIH3     |
| cg00291877 | 0.06851 | 0.05332 | 0.07388 | 0.05935 | 0.07496 | 0.05977 | 0.06154 | 0.06084 | 0.06006 | 0.07493 | SNRPA1    |
| cg00292662 | 0.27918 | 0.11765 | 0.04253 | 0.03615 | 0.02943 | 0.03827 | 0.0376  | 0.03982 | 0.03581 | 0.03459 | LGALS1    |
| cg00292971 | 0.88119 | 0.74313 | 0.77471 | 0.82709 | 0.62029 | 0.70929 | 0.1725  | 0.35589 | 0.73271 | 0.69178 | KIAA0773  |
| cg00293409 | 0.56394 | 0.67569 | 0.43734 | 0.59137 | 0.23223 | 0.56933 | 0.0685  | 0.09195 | 0.06125 | 0.06113 | LRRC33    |
| cg00294382 | 0.64535 | 0.40737 | 0.82611 | 0.86524 | 0.728   | 0.81083 | 0.48329 | 0.7649  | 0.61893 | 0.53804 | IL23A     |
| cg00295206 | 0.05216 | 0.04929 | 0.05281 | 0.04659 | 0.03867 | 0.03989 | 0.03693 | 0.0396  | 0.03804 | 0.03431 | RAB7      |
| cg00295325 | 0.45527 | 0.22767 | 0.66717 | 0.73837 | 0.47428 | 0.51483 | 0.28144 | 0.19329 | 0.14816 | 0.16059 | ABCY11    |
| cg00296685 | 0.06086 | 0.05477 | 0.0561  | 0.05204 | 0.03703 | 0.04644 | 0.05028 | 0.05475 | 0.04565 | 0.05264 | GTF2H4    |
| cg00297584 | 0.05666 | 0.05654 | 0.5471  | 0.70548 | 0.32777 | 0.10147 | 0.1336  | 0.04501 | 0.04861 | 0.04327 | FLJ42957  |
| cg00297600 | 0.0827  | 0.09943 | 0.13876 | 0.11155 | 0.17838 | 0.19078 | 0.58534 | 0.51309 | 0.10197 | 0.16105 | UNC5D     |
| cg00298357 | 0.88644 | 0.58108 | 0.90952 | 0.91207 | 0.94512 | 0.8949  | 0.89744 | 0.87231 | 0.89674 | 0.80694 | IL17B     |
| cg00298951 | 0.25447 | 0.50235 | 0.81318 | 0.88713 | 0.92285 | 0.89344 | 0.85829 | 0.81045 | 0.88633 | 0.86377 | CMKLR1    |
| cg00301864 | 0.01824 | 0.01958 | 0.01742 | 0.01875 | 0.0192  | 0.01664 | 0.01687 | 0.0159  | 0.01481 | 0.0149  | RAB35     |
| cg00302793 | 0.02892 | 0.02952 | 0.02977 | 0.02829 | 0.02154 | 0.03017 | 0.0303  | 0.02778 | 0.0243  | 0.02507 | PPP3CA    |
| cg00303548 | 0.02505 | 0.02931 | 0.03282 | 0.02569 | 0.02329 | 0.03352 | 0.02111 | 0.02447 | 0.03186 | 0.09154 | HS6ST3    |
| cg00304278 | 0.06068 | 0.06302 | 0.08337 | 0.07814 | 0.10388 | 0.07663 | 0.0538  | 0.0488  | 0.05029 | 0.04696 | TLK2      |
| cg00307685 | 0.85275 | 0.58116 | 0.819   | 0.86726 | 0.90587 | 0.8708  | 0.77355 | 0.60755 | 0.618   | 0.58259 | BRDT      |
| cg00308133 | 0.01865 | 0.01908 | 0.03418 | 0.02222 | 0.03619 | 0.01837 | 0.01989 | 0.0144  | 0.01724 | 0.01561 | GAMT      |
| cg00308665 | 0.07495 | 0.07923 | 0.66366 | 0.71599 | 0.39361 | 0.1487  | 0.79286 | 0.26035 | 0.31075 | 0.32726 | HTR2A     |
| cg00309056 | 0.04588 | 0.04834 | 0.06446 | 0.05551 | 0.0486  | 0.04813 | 0.05331 | 0.04694 | 0.04247 | 0.04193 | STARD3NL  |
| cg00309204 | 0.03162 | 0.04002 | 0.03535 | 0.03688 | 0.05699 | 0.0499  | 0.04313 | 0.04107 | 0.03244 | 0.03919 | C17orf61  |



|            |         |         |         |         |         |         |         |         |         |         |          |
|------------|---------|---------|---------|---------|---------|---------|---------|---------|---------|---------|----------|
| cg00311768 | 0.24165 | 0.26923 | 0.3228  | 0.1899  | 0.78327 | 0.42692 | 0.22278 | 0.19448 | 0.5179  | 0.08059 | TSTA3    |
| cg00312919 | 0.03246 | 0.03244 | 0.03651 | 0.0296  | 0.02822 | 0.02737 | 0.0307  | 0.02638 | 0.02572 | 0.02589 | STAR3NL  |
| cg00314943 | 0.80428 | 0.78346 | 0.83405 | 0.87127 | 0.84183 | 0.84058 | 0.83666 | 0.687   | 0.78527 | 0.72048 | ALPPL2   |
| cg00315936 | 0.09081 | 0.19162 | 0.12454 | 0.10281 | 0.25194 | 0.15389 | 0.10442 | 0.09422 | 0.09272 | 0.07863 | SND1     |
| cg00317680 | 0.06074 | 0.05723 | 0.07757 | 0.06871 | 0.04536 | 0.0742  | 0.09202 | 0.08112 | 0.05764 | 0.06248 | MTERFD1  |
| cg00318573 | 0.53332 | 0.60074 | 0.68844 | 0.67418 | 0.79224 | 0.84354 | 0.31674 | 0.04749 | 0.11827 | 0.04001 | CHRNA4   |
| cg00318865 | 0.02774 | 0.03067 | 0.03121 | 0.03085 | 0.02618 | 0.02844 | 0.02828 | 0.031   | 0.0269  | 0.02403 | ACVR1B   |
| cg00319692 | 0.26595 | 0.2998  | 0.68618 | 0.81458 | 0.53384 | 0.82955 | 0.1413  | 0.81932 | 0.27423 | 0.30937 | ATP6V0D2 |
| cg00319761 | 0.02028 | 0.02285 | 0.02083 | 0.01929 | 0.0171  | 0.01864 | 0.01797 | 0.0222  | 0.01851 | 0.0168  | PKMYT1   |
| cg00320243 | 0.03079 | 0.0324  | 0.037   | 0.03347 | 0.02302 | 0.02796 | 0.02783 | 0.02743 | 0.0252  | 0.0229  | RAB3A    |
| cg00321065 | 0.03795 | 0.04336 | 0.05473 | 0.05266 | 0.08298 | 0.04517 | 0.05148 | 0.03652 | 0.04022 | 0.04282 | RLF      |
| cg00321478 | 0.69531 | 0.17633 | 0.86871 | 0.89644 | 0.68094 | 0.5827  | 0.44029 | 0.14446 | 0.8066  | 0.73335 | CRB1     |
| cg00323915 | 0.64619 | 0.17604 | 0.63647 | 0.7759  | 0.5214  | 0.47069 | 0.10346 | 0.09903 | 0.19609 | 0.18834 | GIMAP4   |
| cg00324733 | 0.03606 | 0.04083 | 0.04017 | 0.03455 | 0.04163 | 0.04703 | 0.03465 | 0.04145 | 0.03314 | 0.03762 | NUCB2    |
| cg00325491 | 0.71319 | 0.62197 | 0.46502 | 0.65988 | 0.31411 | 0.45436 | 0.35162 | 0.5783  | 0.11147 | 0.12575 | FN5      |
| cg00327185 | 0.12546 | 0.14174 | 0.14213 | 0.147   | 0.09948 | 0.11738 | 0.11248 | 0.1276  | 0.12136 | 0.12906 | DLAT     |
| cg00327483 | 0.93587 | 0.77548 | 0.94006 | 0.95006 | 0.95774 | 0.94916 | 0.94326 | 0.92788 | 0.92427 | 0.93294 | CASQ1    |
| cg00328227 | 0.91302 | 0.88525 | 0.27941 | 0.30314 | 0.90262 | 0.65529 | 0.51802 | 0.21207 | 0.20871 | 0.03572 | C1orf59  |
| cg00331237 | 0.13544 | 0.05868 | 0.04399 | 0.05173 | 0.08833 | 0.04359 | 0.03759 | 0.04427 | 0.03634 | 0.0368  | CSRP2    |
| cg00331433 | 0.04797 | 0.04864 | 0.06105 | 0.04542 | 0.04885 | 0.04105 | 0.03485 | 0.03859 | 0.03481 | 0.03539 | SYAP1    |
| cg00332153 | 0.94908 | 0.9622  | 0.67057 | 0.76888 | 0.40162 | 0.9525  | 0.07202 | 0.03736 | 0.94609 | 0.94894 | BANK1    |
| cg00332745 | 0.03764 | 0.03988 | 0.0396  | 0.04052 | 0.51078 | 0.03959 | 0.03837 | 0.0416  | 0.02999 | 0.03176 | NOL3     |
| cg00333226 | 0.08703 | 0.06882 | 0.791   | 0.84401 | 0.15735 | 0.05259 | 0.23651 | 0.06172 | 0.3215  | 0.33962 | UNQ739   |
| cg00333528 | 0.79339 | 0.53648 | 0.62771 | 0.83524 | 0.60646 | 0.15824 | 0.24837 | 0.04571 | 0.07797 | 0.06036 | GABRR1   |
| cg00334507 | 0.54095 | 0.49683 | 0.7969  | 0.84111 | 0.72587 | 0.73636 | 0.42818 | 0.1896  | 0.8669  | 0.76723 | MVP      |
| cg00335286 | 0.52226 | 0.25101 | 0.34656 | 0.34256 | 0.52659 | 0.32788 | 0.24291 | 0.24824 | 0.22464 | 0.25323 | MC2R     |
| cg00336605 | 0.11093 | 0.0597  | 0.0664  | 0.07748 | 0.08314 | 0.05415 | 0.0509  | 0.04561 | 0.03976 | 0.03911 | NR1H2    |
| cg00338702 | 0.238   | 0.20241 | 0.34642 | 0.48798 | 0.86174 | 0.79122 | 0.08435 | 0.0627  | 0.27035 | 0.16474 | CHFR     |
| cg00338893 | 0.04135 | 0.04316 | 0.06737 | 0.05518 | 0.06439 | 0.07246 | 0.04227 | 0.04434 | 0.03553 | 0.03159 | MRPS33   |
| cg00340102 | 0.896   | 0.54498 | 0.90306 | 0.91117 | 0.36007 | 0.4096  | 0.51948 | 0.08318 | 0.06768 | 0.09065 | ERGIC3   |
| cg00342530 | 0.2217  | 0.25983 | 0.5118  | 0.6868  | 0.37137 | 0.51056 | 0.50578 | 0.62646 | 0.39415 | 0.17901 | GARNL3   |
| cg00343092 | 0.02456 | 0.02283 | 0.04146 | 0.11212 | 0.02118 | 0.0235  | 0.06159 | 0.05763 | 0.02794 | 0.0253  | BZRP     |
| cg00344358 | 0.92226 | 0.72996 | 0.91137 | 0.91367 | 0.93456 | 0.90518 | 0.91715 | 0.88925 | 0.92711 | 0.91275 | GDF11    |
| cg00344372 | 0.91354 | 0.6763  | 0.8953  | 0.91828 | 0.95417 | 0.84789 | 0.90648 | 0.87281 | 0.90715 | 0.78723 | HGFAC    |
| cg00344709 | 0.55884 | 0.56751 | 0.58595 | 0.66034 | 0.75725 | 0.75215 | 0.49578 | 0.35668 | 0.2963  | 0.3036  | ANKRD21  |
| cg00346145 | 0.12069 | 0.11035 | 0.11959 | 0.09599 | 0.16699 | 0.1554  | 0.1231  | 0.10852 | 0.1022  | 0.12705 | RPL34    |
| cg00347729 | 0.25229 | 0.23747 | 0.42688 | 0.44505 | 0.40268 | 0.23624 | 0.31685 | 0.26879 | 0.20628 | 0.15693 | MMP10    |
| cg00347904 | 0.34393 | 0.10217 | 0.8632  | 0.89665 | 0.96094 | 0.82087 | 0.49674 | 0.58907 | 0.75663 | 0.72855 | SCUBE3   |
| cg00350296 | 0.04802 | 0.23519 | 0.23331 | 0.09712 | 0.92227 | 0.87402 | 0.88494 | 0.39719 | 0.44096 | 0.4931  | CD248    |
| cg00350478 | 0.73407 | 0.56767 | 0.25137 | 0.57726 | 0.73329 | 0.53337 | 0.0646  | 0.11442 | 0.65579 | 0.25548 | FRMD1    |
| cg00350702 | 0.03484 | 0.03958 | 0.0418  | 0.04048 | 0.03725 | 0.04419 | 0.04    | 0.03601 | 0.02829 | 0.0308  | ERGIC3   |

|            |         |         |         |         |         |         |         |         |         |                     |
|------------|---------|---------|---------|---------|---------|---------|---------|---------|---------|---------------------|
| cg00351011 | 0.03767 | 0.03794 | 0.03516 | 0.03645 | 0.02612 | 0.03188 | 0.13445 | 0.03606 | 0.02815 | 0.0317 LASS4        |
| cg00353953 | 0.1553  | 0.13058 | 0.23528 | 0.22731 | 0.36278 | 0.10828 | 0.23383 | 0.25409 | 0.37305 | 0.15363 ZNF384      |
| cg00354258 | 0.78303 | 0.67513 | 0.72043 | 0.81438 | 0.8494  | 0.88333 | 0.72721 | 0.87609 | 0.71794 | 0.85548 ZIM2        |
| cg00354572 | 0.46899 | 0.3371  | 0.23495 | 0.45271 | 0.34328 | 0.50515 | 0.07794 | 0.05948 | 0.07571 | 0.06154 FLJ21963    |
| cg00355802 | 0.05238 | 0.04922 | 0.06478 | 0.05781 | 0.05775 | 0.05355 | 0.06838 | 0.07872 | 0.04178 | 0.0504 DUSP4        |
| cg00359325 | 0.05365 | 0.05036 | 0.06158 | 0.05781 | 0.03835 | 0.04384 | 0.0523  | 0.04836 | 0.04899 | 0.04445 USP4        |
| cg00359973 | 0.05004 | 0.04987 | 0.05892 | 0.05292 | 0.06678 | 0.03467 | 0.26686 | 0.04989 | 0.04211 | 0.03741 RIBC1       |
| cg00363813 | 0.03321 | 0.024   | 0.02617 | 0.02425 | 0.02148 | 0.01943 | 0.11733 | 0.06847 | 0.02236 | 0.01848 HOM-TES-103 |
| cg00364344 | 0.03528 | 0.04068 | 0.04329 | 0.04465 | 0.04036 | 0.06041 | 0.04288 | 0.03631 | 0.03052 | 0.03723 TPP1        |
| cg00364814 | 0.84961 | 0.70662 | 0.76591 | 0.81319 | 0.70606 | 0.8209  | 0.78096 | 0.80741 | 0.79206 | 0.77147 R3HDM2      |
| cg00365193 | 0.03936 | 0.04384 | 0.31213 | 0.3765  | 0.27768 | 0.24363 | 0.29914 | 0.09016 | 0.18322 | 0.12625 NQO2        |
| cg00367281 | 0.40075 | 0.07441 | 0.75422 | 0.78155 | 0.80209 | 0.69195 | 0.48003 | 0.68161 | 0.71659 | 0.27133 CHRNB3      |
| cg00367438 | 0.06077 | 0.08011 | 0.09987 | 0.14608 | 0.14627 | 0.07776 | 0.07405 | 0.07741 | 0.07474 | 0.05994 C7orf21     |
| cg00368022 | 0.04483 | 0.04204 | 0.03988 | 0.03536 | 0.05564 | 0.04642 | 0.04509 | 0.04669 | 0.03867 | 0.03347 FLJ11193    |
| cg00368415 | 0.02214 | 0.02247 | 0.02468 | 0.02039 | 0.01834 | 0.02263 | 0.01989 | 0.0162  | 0.01812 | 0.01781 SNX27       |
| cg00371195 | 0.85075 | 0.72221 | 0.88315 | 0.89705 | 0.85864 | 0.88611 | 0.86965 | 0.61219 | 0.88464 | 0.76775 F2          |
| cg00374717 | 0.85854 | 0.75044 | 0.84108 | 0.85523 | 0.82367 | 0.85292 | 0.84594 | 0.85999 | 0.8779  | 0.8505 ARSG         |
| cg00375964 | 0.08217 | 0.06177 | 0.06616 | 0.06275 | 0.10135 | 0.07212 | 0.04956 | 0.04335 | 0.05793 | 0.05273 ABCE1       |
| cg00376639 | 0.11412 | 0.11737 | 0.11139 | 0.11848 | 0.10742 | 0.12745 | 0.09784 | 0.09245 | 0.09479 | 0.09743 ZNF581      |
| cg00380464 | 0.03853 | 0.0401  | 0.04237 | 0.03846 | 0.03016 | 0.03579 | 0.03872 | 0.03818 | 0.03393 | 0.03245 LTV1        |
| cg00381076 | 0.04683 | 0.03812 | 0.04167 | 0.03993 | 0.02477 | 0.03625 | 0.03268 | 0.03149 | 0.04193 | 0.03178 C18orf54    |
| cg00382515 | 0.02757 | 0.02617 | 0.03235 | 0.02814 | 0.02898 | 0.0302  | 0.02572 | 0.02673 | 0.02378 | 0.02324 MRPL44      |
| cg00382991 | 0.0482  | 0.05858 | 0.05367 | 0.05218 | 0.22714 | 0.05948 | 0.04536 | 0.04673 | 0.24423 | 0.04748 LOC388152   |
| cg00384537 | 0.84551 | 0.76097 | 0.8056  | 0.85822 | 0.79942 | 0.86624 | 0.21824 | 0.20095 | 0.87762 | 0.71848 KRTHA5      |
| cg00386408 | 0.25256 | 0.25756 | 0.32805 | 0.5351  | 0.41929 | 0.47662 | 0.77056 | 0.96971 | 0.71358 | 0.72484 TGFBI       |
| cg00387170 | 0.05466 | 0.05749 | 0.05452 | 0.05374 | 0.06426 | 0.06544 | 0.056   | 0.06184 | 0.04587 | 0.04995 FOXP4       |
| cg00392257 | 0.11054 | 0.04408 | 0.1136  | 0.07715 | 0.06406 | 0.03962 | 0.09371 | 0.06335 | 0.90177 | 0.04647 ISG20L2     |
| cg00393585 | 0.07377 | 0.07875 | 0.06936 | 0.05825 | 0.0576  | 0.06878 | 0.04096 | 0.0451  | 0.06228 | 0.06705 FLJ31659    |
| cg00394658 | 0.92573 | 0.69574 | 0.76524 | 0.83134 | 0.92535 | 0.91261 | 0.90201 | 0.51193 | 0.69072 | 0.47084 PTPRJ       |
| cg00396163 | 0.04949 | 0.04891 | 0.06727 | 0.06062 | 0.06918 | 0.05577 | 0.03973 | 0.03186 | 0.03846 | 0.05095 FLJ37357    |
| cg00396894 | 0.69686 | 0.49651 | 0.38423 | 0.49512 | 0.56729 | 0.56457 | 0.48513 | 0.34611 | 0.21982 | 0.24783 MGC44505    |
| cg00397545 | 0.24626 | 0.25085 | 0.66311 | 0.76923 | 0.76878 | 0.68998 | 0.64445 | 0.65411 | 0.2332  | 0.25939 APOC1       |
| cg00397740 | 0.03881 | 0.03842 | 0.05022 | 0.04881 | 0.03237 | 0.03816 | 0.04792 | 0.03737 | 0.04097 | 0.03955 PPOX        |
| cg00398048 | 0.79624 | 0.48264 | 0.76388 | 0.79296 | 0.50963 | 0.13273 | 0.82208 | 0.42173 | 0.21163 | 0.17642 AGA         |
| cg00399483 | 0.05492 | 0.05158 | 0.68606 | 0.78619 | 0.40614 | 0.52829 | 0.13504 | 0.05808 | 0.40745 | 0.46721 DCC         |
| cg00400028 | 0.72581 | 0.33282 | 0.55434 | 0.51229 | 0.92753 | 0.88486 | 0.90919 | 0.65622 | 0.50105 | 0.31984 ACPL2       |
| cg00400263 | 0.97093 | 0.94862 | 0.9727  | 0.97684 | 0.97408 | 0.9724  | 0.97484 | 0.96669 | 0.97822 | 0.97868 C20orf177   |
| cg00401678 | 0.33117 | 0.25761 | 0.19791 | 0.25938 | 0.18869 | 0.12887 | 0.13016 | 0.14318 | 0.14588 | 0.1119 EMR3         |
| cg00402366 | 0.5361  | 0.64766 | 0.07957 | 0.05843 | 0.06529 | 0.0563  | 0.04242 | 0.035   | 0.05244 | 0.05147 LRRC44      |
| cg00403724 | 0.1241  | 0.13264 | 0.22024 | 0.20845 | 0.29983 | 0.18741 | 0.12447 | 0.17208 | 0.12963 | 0.14532 TNMD        |
| cg00404599 | 0.89483 | 0.61489 | 0.88574 | 0.8882  | 0.94239 | 0.88695 | 0.48056 | 0.59542 | 0.92457 | 0.90889 TSC22D3     |

|            |         |         |         |         |         |         |         |         |         |                   |
|------------|---------|---------|---------|---------|---------|---------|---------|---------|---------|-------------------|
| cg00405070 | 0.15527 | 0.05241 | 0.0597  | 0.05432 | 0.05172 | 0.05341 | 0.05334 | 0.05672 | 0.05091 | 0.05279 C12orf8   |
| cg00405568 | 0.06529 | 0.06396 | 0.06894 | 0.06053 | 0.07928 | 0.07553 | 0.07227 | 0.06453 | 0.06083 | 0.07136 NMT1      |
| cg00405677 | 0.05683 | 0.03742 | 0.28794 | 0.57201 | 0.22572 | 0.05435 | 0.15224 | 0.446   | 0.05821 | 0.0371 HAND1      |
| cg00406188 | 0.24888 | 0.22287 | 0.31764 | 0.42433 | 0.50868 | 0.46927 | 0.21095 | 0.20614 | 0.36755 | 0.30917 LCE2C     |
| cg00406844 | 0.40106 | 0.17399 | 0.44399 | 0.56216 | 0.68779 | 0.75991 | 0.16966 | 0.18332 | 0.56127 | 0.24698 RFPL3     |
| cg00407150 | 0.16434 | 0.0869  | 0.42882 | 0.61681 | 0.91651 | 0.82529 | 0.05297 | 0.11683 | 0.484   | 0.16916 GUP1      |
| cg00410419 | 0.04305 | 0.047   | 0.05306 | 0.04469 | 0.04721 | 0.05306 | 0.03776 | 0.03471 | 0.04248 | 0.03875 COMMD6    |
| cg00410576 | 0.14989 | 0.03605 | 0.14227 | 0.13658 | 0.02766 | 0.02905 | 0.05876 | 0.02996 | 0.03171 | 0.02306 MAPK6     |
| cg00410831 | 0.82526 | 0.80188 | 0.80232 | 0.80906 | 0.75929 | 0.77678 | 0.78606 | 0.80978 | 0.83954 | 0.83489 ZNF45     |
| cg00410895 | 0.82812 | 0.79187 | 0.77187 | 0.7757  | 0.65617 | 0.77006 | 0.64784 | 0.63494 | 0.78371 | 0.75082 CCDC23    |
| cg00410898 | 0.16909 | 0.15766 | 0.21019 | 0.16859 | 0.50123 | 0.44159 | 0.26847 | 0.24909 | 0.1251  | 0.19442 STC1      |
| cg00410921 | 0.24579 | 0.15582 | 0.64016 | 0.69608 | 0.0621  | 0.14531 | 0.31613 | 0.05849 | 0.06489 | 0.22082 CKMT1B    |
| cg00411097 | 0.81388 | 0.32038 | 0.874   | 0.90996 | 0.93345 | 0.55572 | 0.60411 | 0.37746 | 0.91889 | 0.61905 MGC9712   |
| cg00412772 | 0.91897 | 0.90427 | 0.88263 | 0.91164 | 0.93837 | 0.90783 | 0.86836 | 0.91567 | 0.92096 | 0.87295 C19orf33  |
| cg00412805 | 0.42553 | 0.12368 | 0.94294 | 0.94655 | 0.91494 | 0.90664 | 0.94251 | 0.91621 | 0.94425 | 0.92262 KBTBD5    |
| cg00413066 | 0.87587 | 0.64655 | 0.85659 | 0.85946 | 0.75647 | 0.76963 | 0.83882 | 0.85494 | 0.85387 | 0.84417 BCL2L10   |
| cg00415164 | 0.24898 | 0.06264 | 0.05247 | 0.04508 | 0.81441 | 0.8839  | 0.92691 | 0.78622 | 0.9374  | 0.47831 ALX4      |
| cg00415494 | 0.8705  | 0.82874 | 0.71141 | 0.85097 | 0.92268 | 0.91025 | 0.58065 | 0.65754 | 0.92399 | 0.8429 MAGEA2B    |
| cg00415978 | 0.24019 | 0.1495  | 0.14427 | 0.13233 | 0.16853 | 0.14767 | 0.14094 | 0.12547 | 0.86033 | 0.86366 SYNPO2    |
| cg00415993 | 0.79398 | 0.19528 | 0.11952 | 0.14011 | 0.31466 | 0.11727 | 0.11882 | 0.6632  | 0.07942 | 0.06241 F2RL2     |
| cg00417297 | 0.26973 | 0.48066 | 0.04191 | 0.03502 | 0.04068 | 0.04765 | 0.03098 | 0.03556 | 0.03126 | 0.03592 ZNF619    |
| cg00418150 | 0.4142  | 0.39863 | 0.2034  | 0.13932 | 0.91718 | 0.86279 | 0.89689 | 0.85954 | 0.89318 | 0.86096 ALX4      |
| cg00419564 | 0.56046 | 0.35351 | 0.04726 | 0.04428 | 0.05368 | 0.05062 | 0.04069 | 0.06825 | 0.03191 | 0.03631 S100A6    |
| cg00420568 | 0.12104 | 0.10771 | 0.15283 | 0.11781 | 0.33908 | 0.30841 | 0.37921 | 0.11462 | 0.08181 | 0.08432 SHC3      |
| cg00420715 | 0.02844 | 0.03466 | 0.03251 | 0.03106 | 0.02643 | 0.03005 | 0.02933 | 0.02683 | 0.02594 | 0.0282 VPS13B     |
| cg00420929 | 0.42575 | 0.09438 | 0.84123 | 0.84271 | 0.59453 | 0.63308 | 0.48673 | 0.45764 | 0.05366 | 0.03519 PGPEP1    |
| cg00422913 | 0.04537 | 0.04724 | 0.04111 | 0.04066 | 0.03707 | 0.04901 | 0.04179 | 0.04725 | 0.03905 | 0.03956 MGC14376  |
| cg00424946 | 0.03243 | 0.03404 | 0.03375 | 0.03322 | 0.03891 | 0.04127 | 0.02816 | 0.0328  | 0.02477 | 0.02806 SNTB2     |
| cg00425710 | 0.71671 | 0.58722 | 0.74675 | 0.88881 | 0.93969 | 0.91247 | 0.88886 | 0.90526 | 0.9238  | 0.84913 MT1A      |
| cg00425792 | 0.06702 | 0.07061 | 0.09572 | 0.08739 | 0.06569 | 0.07416 | 0.07315 | 0.07202 | 0.06619 | 0.05832 PEX12     |
| cg00426056 | 0.03654 | 0.03457 | 0.03099 | 0.03195 | 0.03162 | 0.03307 | 0.03063 | 0.0333  | 0.02608 | 0.0323 CUTA       |
| cg00426498 | 0.18324 | 0.17208 | 0.1466  | 0.16311 | 0.09381 | 0.14988 | 0.13764 | 0.13752 | 0.14246 | 0.13361 MYO18A    |
| cg00426963 | 0.06176 | 0.05232 | 0.05268 | 0.04885 | 0.08415 | 0.06916 | 0.05082 | 0.04891 | 0.04056 | 0.0444 KIF27      |
| cg00427635 | 0.16756 | 0.08808 | 0.22953 | 0.12053 | 0.26554 | 0.25791 | 0.22872 | 0.18419 | 0.14231 | 0.12747 TBC1D21   |
| cg00429618 | 0.10694 | 0.10058 | 0.08159 | 0.10254 | 0.09586 | 0.17538 | 0.0471  | 0.04902 | 0.08161 | 0.08781 ZNF322B   |
| cg00430287 | 0.89848 | 0.89698 | 0.84655 | 0.86402 | 0.85611 | 0.87342 | 0.87765 | 0.80916 | 0.48227 | 0.69141 FRK       |
| cg00430945 | 0.15277 | 0.06538 | 0.16776 | 0.10792 | 0.10353 | 0.06605 | 0.08536 | 0.07445 | 0.08827 | 0.06097 LIN7B     |
| cg00431050 | 0.06606 | 0.13305 | 0.31614 | 0.27696 | 0.65298 | 0.72151 | 0.18738 | 0.26465 | 0.03712 | 0.03107 ELOVL3    |
| cg00431114 | 0.48869 | 0.07726 | 0.45413 | 0.40258 | 0.25003 | 0.0539  | 0.58559 | 0.05173 | 0.41649 | 0.08816 C20orf121 |
| cg00431549 | 0.80498 | 0.81331 | 0.75734 | 0.77973 | 0.27852 | 0.1388  | 0.70063 | 0.20734 | 0.21203 | 0.21149 MGP       |
| cg00432979 | 0.03222 | 0.03835 | 0.03926 | 0.0404  | 0.03576 | 0.04554 | 0.03861 | 0.03782 | 0.03228 | 0.03455 MRP63     |

|            |         |         |         |         |         |         |         |         |         |         |           |
|------------|---------|---------|---------|---------|---------|---------|---------|---------|---------|---------|-----------|
| cg00433406 | 0.87845 | 0.3518  | 0.86445 | 0.9334  | 0.81167 | 0.59372 | 0.33331 | 0.05485 | 0.89847 | 0.66019 | FLJ32784  |
| cg00434413 | 0.96322 | 0.96291 | 0.92472 | 0.94401 | 0.94427 | 0.96038 | 0.89821 | 0.96466 | 0.96408 | 0.95942 | ARD1A     |
| cg00435408 | 0.07928 | 0.07855 | 0.08737 | 0.06987 | 0.04524 | 0.05813 | 0.08839 | 0.08173 | 0.06693 | 0.06812 | RSPRY1    |
| cg00436282 | 0.20023 | 0.33344 | 0.6903  | 0.80604 | 0.69602 | 0.77091 | 0.37191 | 0.51887 | 0.69017 | 0.73766 | STATH     |
| cg00436301 | 0.03384 | 0.03766 | 0.04254 | 0.05134 | 0.05904 | 0.03451 | 0.02905 | 0.03026 | 0.03477 | 0.02444 | NT5DC1    |
| cg00436603 | 0.61755 | 0.10175 | 0.38344 | 0.49688 | 0.82597 | 0.77292 | 0.06024 | 0.05117 | 0.06485 | 0.0518  | CYP2E1    |
| cg00441136 | 0.93946 | 0.94163 | 0.94481 | 0.9441  | 0.94428 | 0.92924 | 0.93844 | 0.91247 | 0.94831 | 0.73553 | KIF3B     |
| cg00441382 | 0.03071 | 0.03284 | 0.0311  | 0.03006 | 0.02129 | 0.02623 | 0.02731 | 0.02907 | 0.0251  | 0.02465 | STOML1    |
| cg00443307 | 0.53156 | 0.52128 | 0.30911 | 0.45438 | 0.40441 | 0.66716 | 0.19761 | 0.23304 | 0.22294 | 0.21679 | KLRG1     |
| cg00445824 | 0.09901 | 0.08206 | 0.51478 | 0.6273  | 0.97476 | 0.96464 | 0.80697 | 0.89612 | 0.09277 | 0.06915 | ISYNA1    |
| cg00446235 | 0.8116  | 0.93691 | 0.91148 | 0.92298 | 0.93302 | 0.93331 | 0.91325 | 0.92675 | 0.92408 | 0.9279  | F11R      |
| cg00447208 | 0.86974 | 0.72342 | 0.89018 | 0.90192 | 0.90664 | 0.84025 | 0.79841 | 0.23974 | 0.86438 | 0.80041 | TMC8      |
| cg00448720 | 0.73807 | 0.48029 | 0.91814 | 0.92653 | 0.66076 | 0.90666 | 0.65275 | 0.39428 | 0.74627 | 0.71015 | MGC48915  |
| cg00449941 | 0.04288 | 0.03954 | 0.04348 | 0.0473  | 0.036   | 0.03684 | 0.0343  | 0.0398  | 0.03384 | 0.04215 | SPAG5     |
| cg00451635 | 0.68909 | 0.15052 | 0.62663 | 0.64153 | 0.5188  | 0.18942 | 0.2236  | 0.03497 | 0.10249 | 0.0226  | EMP2      |
| cg00453193 | 0.02913 | 0.03272 | 0.49962 | 0.55741 | 0.029   | 0.02968 | 0.02862 | 0.02629 | 0.02881 | 0.02916 | TES       |
| cg00453258 | 0.61129 | 0.46296 | 0.68959 | 0.82378 | 0.81297 | 0.7926  | 0.71927 | 0.76445 | 0.64793 | 0.64803 | FAM26C    |
| cg00459975 | 0.03176 | 0.02609 | 0.0368  | 0.02849 | 0.02804 | 0.02604 | 0.02581 | 0.03181 | 0.03117 | 0.02308 | HMBX1     |
| cg00461841 | 0.61105 | 0.65717 | 0.57631 | 0.60195 | 0.61096 | 0.68938 | 0.61427 | 0.63664 | 0.65019 | 0.67116 | ATF7IP2   |
| cg00462311 | 0.11596 | 0.1128  | 0.12837 | 0.11013 | 0.2509  | 0.17488 | 0.12181 | 0.07393 | 0.09695 | 0.15721 | NFATC4    |
| cg00462994 | 0.27249 | 0.04193 | 0.05627 | 0.26592 | 0.92705 | 0.71033 | 0.41206 | 0.05355 | 0.61661 | 0.15414 | NAGS      |
| cg00463202 | 0.76713 | 0.7051  | 0.90046 | 0.8821  | 0.9389  | 0.88018 | 0.89034 | 0.74502 | 0.90262 | 0.89807 | ADPRHL1   |
| cg00463577 | 0.86106 | 0.90244 | 0.05041 | 0.04475 | 0.03805 | 0.04245 | 0.04515 | 0.03641 | 0.04084 | 0.03378 | C6orf150  |
| cg00463848 | 0.56499 | 0.26738 | 0.42594 | 0.64783 | 0.63088 | 0.59932 | 0.09905 | 0.08321 | 0.14517 | 0.19678 | KRT2A     |
| cg00464269 | 0.02798 | 0.02761 | 0.03157 | 0.0281  | 0.02547 | 0.02823 | 0.02863 | 0.02563 | 0.02255 | 0.02065 | TNFAIP1   |
| cg00465284 | 0.04304 | 0.05182 | 0.19478 | 0.1445  | 0.11568 | 0.3594  | 0.09119 | 0.03678 | 0.11872 | 0.30043 | LRRTM1    |
| cg00465846 | 0.02579 | 0.0284  | 0.03525 | 0.03134 | 0.02657 | 0.02422 | 0.02228 | 0.02266 | 0.02133 | 0.0293  | RNF139    |
| cg00466249 | 0.44479 | 0.07283 | 0.85161 | 0.87962 | 0.7237  | 0.4881  | 0.90324 | 0.89176 | 0.24972 | 0.05475 | MGC15523  |
| cg00466436 | 0.14022 | 0.0874  | 0.12713 | 0.10812 | 0.27728 | 0.44285 | 0.1454  | 0.10152 | 0.08531 | 0.08414 | DEFB126   |
| cg00466492 | 0.34637 | 0.06247 | 0.92752 | 0.95294 | 0.88168 | 0.40158 | 0.47    | 0.28088 | 0.90705 | 0.8355  | CTXN1     |
| cg00466544 | 0.04144 | 0.0444  | 0.03258 | 0.03243 | 0.0445  | 0.04616 | 0.03554 | 0.03885 | 0.03321 | 0.03343 | C14orf101 |
| cg00468146 | 0.04606 | 0.03835 | 0.45215 | 0.45088 | 0.03581 | 0.03831 | 0.03984 | 0.0465  | 0.05491 | 0.04836 | ID4       |
| cg00469635 | 0.0194  | 0.01882 | 0.02204 | 0.02074 | 0.01793 | 0.02168 | 0.02046 | 0.01919 | 0.01707 | 0.01494 | PPME1     |
| cg00471562 | 0.02773 | 0.031   | 0.03295 | 0.02776 | 0.02718 | 0.03019 | 0.02856 | 0.03738 | 0.02705 | 0.02517 | WDR37     |
| cg00472136 | 0.79714 | 0.77876 | 0.83964 | 0.88447 | 0.88654 | 0.84594 | 0.78376 | 0.85027 | 0.83276 | 0.63414 | TAC3      |
| cg00472814 | 0.02792 | 0.02851 | 0.03254 | 0.03002 | 0.02415 | 0.02758 | 0.0195  | 0.02386 | 0.03371 | 0.02411 | ADAMTS1   |
| cg00474004 | 0.27256 | 0.211   | 0.46045 | 0.43872 | 0.12857 | 0.22074 | 0.28827 | 0.23576 | 0.30978 | 0.19116 | IFNA14    |
| cg00474209 | 0.07399 | 0.07796 | 0.09347 | 0.08806 | 0.09993 | 0.07765 | 0.07057 | 0.07359 | 0.07684 | 0.06335 | DLL1      |
| cg00475955 | 0.02744 | 0.02875 | 0.02851 | 0.02907 | 0.02799 | 0.02759 | 0.0213  | 0.02066 | 0.02243 | 0.02472 | C9orf114  |
| cg00476577 | 0.29059 | 0.12102 | 0.05129 | 0.04638 | 0.05249 | 0.04588 | 0.05276 | 0.04577 | 0.1378  | 0.04211 | ZNF217    |
| cg00476580 | 0.03334 | 0.03328 | 0.03034 | 0.0278  | 0.02632 | 0.03152 | 0.02721 | 0.02662 | 0.0255  | 0.02971 | ANP32E    |

|            |         |         |         |         |         |         |         |         |         |                  |
|------------|---------|---------|---------|---------|---------|---------|---------|---------|---------|------------------|
| cg00479269 | 0.06749 | 0.05553 | 0.06442 | 0.07155 | 0.08347 | 0.06062 | 0.05582 | 0.0523  | 0.06041 | 0.05644 C2orf29  |
| cg00480115 | 0.71875 | 0.55671 | 0.82832 | 0.89177 | 0.86357 | 0.86859 | 0.86209 | 0.66799 | 0.68906 | 0.4115 FXYD3     |
| cg00480209 | 0.03548 | 0.03763 | 0.03564 | 0.0373  | 0.02654 | 0.03836 | 0.03274 | 0.03278 | 0.03295 | 0.02992 C17orf48 |
| cg00480356 | 0.15392 | 0.13106 | 0.09646 | 0.12169 | 0.18311 | 0.11881 | 0.15637 | 0.15407 | 0.19698 | 0.18036 HYPK     |
| cg00481227 | 0.09525 | 0.07636 | 0.32099 | 0.33157 | 0.09967 | 0.08409 | 0.15115 | 0.12786 | 0.0601  | 0.0565 CTNBL1    |
| cg00483154 | 0.03114 | 0.02919 | 0.04329 | 0.03501 | 0.04614 | 0.02979 | 0.02911 | 0.02769 | 0.0313  | 0.02505 DDX41    |
| cg00485296 | 0.02274 | 0.02129 | 0.02256 | 0.02037 | 0.981   | 0.94282 | 0.01749 | 0.01844 | 0.61386 | 0.61384 NME3     |
| cg00485380 | 0.04294 | 0.04706 | 0.05263 | 0.04508 | 0.06247 | 0.05328 | 0.05182 | 0.0463  | 0.03884 | 0.04874 CBX3     |
| cg00487159 | 0.04036 | 0.04237 | 0.04225 | 0.03749 | 0.03091 | 0.04246 | 0.03897 | 0.03652 | 0.03471 | 0.03981 SOCS1    |
| cg00488300 | 0.84095 | 0.5     | 0.88522 | 0.93206 | 0.9575  | 0.94979 | 0.70078 | 0.58288 | 0.81768 | 0.61877 TPSP1    |
| cg00488364 | 0.71452 | 0.28071 | 0.65198 | 0.67703 | 0.67714 | 0.77229 | 0.39355 | 0.51067 | 0.57429 | 0.37116 IL13RA2  |
| cg00488718 | 0.04638 | 0.04948 | 0.04656 | 0.04635 | 0.05902 | 0.05528 | 0.04622 | 0.04489 | 0.04343 | 0.05283 MGC33302 |
| cg00489401 | 0.04064 | 0.07365 | 0.71458 | 0.82776 | 0.56018 | 0.94812 | 0.89351 | 0.95354 | 0.93972 | 0.92859 FLT4     |
| cg00491404 | 0.85034 | 0.76609 | 0.87299 | 0.88007 | 0.9     | 0.85004 | 0.50412 | 0.73637 | 0.86113 | 0.64195 EPS8L3   |
| cg00491839 | 0.06769 | 0.07917 | 0.08568 | 0.07653 | 0.05266 | 0.07235 | 0.07485 | 0.07401 | 0.0688  | 0.06511 PPP1R15A |
| cg00493400 | 0.03944 | 0.03667 | 0.04254 | 0.03723 | 0.03509 | 0.04047 | 0.03149 | 0.0306  | 0.03387 | 0.02761 STAT1    |
| cg00495415 | 0.03367 | 0.02995 | 0.04347 | 0.04071 | 0.0395  | 0.03864 | 0.03951 | 0.0317  | 0.02911 | 0.03754 SP1      |
| cg00495442 | 0.05751 | 0.04981 | 0.06468 | 0.0548  | 0.06307 | 0.06578 | 0.0632  | 0.06302 | 0.0382  | 0.04162 KIAA1219 |
| cg00495491 | 0.70167 | 0.68593 | 0.71673 | 0.748   | 0.73904 | 0.73948 | 0.54775 | 0.572   | 0.52923 | 0.48771 ITPR2    |
| cg00496170 | 0.03779 | 0.03358 | 0.03608 | 0.02853 | 0.03553 | 0.03829 | 0.03125 | 0.03557 | 0.03293 | 0.03214 ATP6V1D  |
| cg00497084 | 0.66797 | 0.67631 | 0.61695 | 0.77241 | 0.76031 | 0.82133 | 0.35706 | 0.54663 | 0.59418 | 0.44171 PPEF1    |
| cg00497251 | 0.04703 | 0.04806 | 0.23736 | 0.46231 | 0.50418 | 0.06732 | 0.15906 | 0.04431 | 0.48144 | 0.20697 RNPEPL1  |
| cg00498305 | 0.22562 | 0.07806 | 0.74258 | 0.91854 | 0.73546 | 0.63465 | 0.07674 | 0.05982 | 0.08321 | 0.06474 SLC18A2  |
| cg00498604 | 0.15399 | 0.15829 | 0.18378 | 0.16158 | 0.2412  | 0.16144 | 0.40317 | 0.13168 | 0.12924 | 0.16249 TLL1     |
| cg00499599 | 0.04176 | 0.04126 | 0.04721 | 0.04797 | 0.03323 | 0.03872 | 0.03622 | 0.03638 | 0.03432 | 0.03282 MCM3AP   |
| cg00499822 | 0.14769 | 0.08001 | 0.93274 | 0.93804 | 0.95603 | 0.93067 | 0.79878 | 0.77851 | 0.24973 | 0.26905 CXCL12   |
| cg00500400 | 0.04817 | 0.04287 | 0.06522 | 0.06247 | 0.06228 | 0.07036 | 0.04825 | 0.05337 | 0.06586 | 0.05319 EP300    |
| cg00501366 | 0.46623 | 0.46961 | 0.7482  | 0.85405 | 0.57483 | 0.82887 | 0.32214 | 0.06626 | 0.2173  | 0.25151 ALOX12B  |
| cg00502442 | 0.02813 | 0.02406 | 0.02572 | 0.02871 | 0.02645 | 0.02833 | 0.02286 | 0.02272 | 0.02208 | 0.02133 ZDHHC14  |
| cg00503458 | 0.06664 | 0.07737 | 0.16796 | 0.15927 | 0.12681 | 0.07412 | 0.05299 | 0.04222 | 0.0688  | 0.07728 KIAA0907 |
| cg00503840 | 0.91619 | 0.91953 | 0.92151 | 0.9346  | 0.90584 | 0.90956 | 0.31235 | 0.91518 | 0.8862  | 0.92082 DLX5     |
| cg00504595 | 0.13881 | 0.09783 | 0.47961 | 0.38699 | 0.27616 | 0.16924 | 0.13203 | 0.17554 | 0.13906 | 0.0876 TNFRSF19  |
| cg00509616 | 0.04471 | 0.0241  | 0.11117 | 0.14825 | 0.42367 | 0.26166 | 0.61441 | 0.03482 | 0.05178 | 0.09872 Gcom1    |
| cg00509670 | 0.91973 | 0.53753 | 0.90458 | 0.92839 | 0.9458  | 0.92494 | 0.8439  | 0.67107 | 0.49823 | 0.55533 PAX9     |
| cg00510787 | 0.0748  | 0.06758 | 0.09096 | 0.07855 | 0.07453 | 0.0718  | 0.06012 | 0.06041 | 0.06975 | 0.06545 C6orf96  |
| cg00510956 | 0.88206 | 0.87797 | 0.86182 | 0.88482 | 0.85904 | 0.70368 | 0.84943 | 0.78326 | 0.87057 | 0.85404 KHDRBS1  |
| cg00511475 | 0.30126 | 0.06553 | 0.67313 | 0.84051 | 0.655   | 0.74288 | 0.13951 | 0.07777 | 0.66672 | 0.62046 CDH15    |
| cg00512031 | 0.85381 | 0.67703 | 0.88775 | 0.88206 | 0.86305 | 0.84812 | 0.47796 | 0.76539 | 0.89893 | 0.79388 CYTL1    |
| cg00512279 | 0.03347 | 0.02745 | 0.23132 | 0.18182 | 0.10982 | 0.0224  | 0.06459 | 0.1575  | 0.03633 | 0.01904 SLC18A2  |
| cg00512374 | 0.04618 | 0.04398 | 0.04879 | 0.0451  | 0.58837 | 0.63677 | 0.03627 | 0.03802 | 0.03454 | 0.03316 IGFBP4   |
| cg00513220 | 0.40289 | 0.59339 | 0.20532 | 0.39802 | 0.6634  | 0.79172 | 0.34948 | 0.49845 | 0.68258 | 0.5931 MOSC2     |

|            |         |         |         |         |         |         |         |         |         |         |           |
|------------|---------|---------|---------|---------|---------|---------|---------|---------|---------|---------|-----------|
| cg00513467 | 0.09423 | 0.06678 | 0.07127 | 0.05834 | 0.03154 | 0.04377 | 0.0633  | 0.06514 | 0.04722 | 0.05039 | KLHL9     |
| cg00514407 | 0.04457 | 0.04533 | 0.3343  | 0.44888 | 0.67228 | 0.06632 | 0.37156 | 0.03427 | 0.64275 | 0.04386 | SERPINE2  |
| cg00514895 | 0.03201 | 0.03203 | 0.03992 | 0.03926 | 0.43243 | 0.65651 | 0.0272  | 0.02577 | 0.21407 | 0.03599 | CPZ       |
| cg00515905 | 0.90869 | 0.81312 | 0.92073 | 0.91999 | 0.95148 | 0.91999 | 0.79521 | 0.78258 | 0.9292  | 0.91679 | EPS8L3    |
| cg00516481 | 0.24203 | 0.04435 | 0.45616 | 0.21699 | 0.67413 | 0.54273 | 0.0661  | 0.04606 | 0.04898 | 0.02819 | PDE9A     |
| cg00518911 | 0.39634 | 0.17965 | 0.7037  | 0.76793 | 0.71685 | 0.69547 | 0.65951 | 0.3488  | 0.818   | 0.66926 | HOXA10    |
| cg00518989 | 0.03664 | 0.03411 | 0.04399 | 0.03076 | 0.02921 | 0.03769 | 0.03169 | 0.03172 | 0.03046 | 0.03104 | LIMK2     |
| cg00519208 | 0.79561 | 0.55147 | 0.79441 | 0.82261 | 0.64684 | 0.77715 | 0.85489 | 0.86589 | 0.81337 | 0.67237 | EVI5      |
| cg00519627 | 0.027   | 0.02752 | 0.02916 | 0.02468 | 0.02683 | 0.02453 | 0.02542 | 0.02684 | 0.0262  | 0.02313 | CORO7     |
| cg00520135 | 0.86586 | 0.74021 | 0.72661 | 0.78994 | 0.96519 | 0.9539  | 0.90454 | 0.88249 | 0.96135 | 0.94635 | TPM1      |
| cg00520708 | 0.13655 | 0.10767 | 0.20799 | 0.31667 | 0.43825 | 0.26415 | 0.16111 | 0.13627 | 0.08566 | 0.11282 | FLJ37562  |
| cg00521434 | 0.79635 | 0.54662 | 0.83781 | 0.87468 | 0.89842 | 0.91306 | 0.66042 | 0.86425 | 0.4223  | 0.5488  | GPR61     |
| cg00521598 | 0.07797 | 0.06474 | 0.09924 | 0.08561 | 0.10584 | 0.07891 | 0.08376 | 0.06417 | 0.08052 | 0.07814 | MYCBP     |
| cg00522034 | 0.01873 | 0.02068 | 0.022   | 0.0193  | 0.01636 | 0.01849 | 0.02309 | 0.0244  | 0.01553 | 0.01663 | CBLB      |
| cg00522316 | 0.06521 | 0.05277 | 0.06316 | 0.06991 | 0.09196 | 0.06108 | 0.0487  | 0.05225 | 0.04848 | 0.04274 | KHSRP     |
| cg00524288 | 0.06807 | 0.07182 | 0.04757 | 0.04296 | 0.03904 | 0.04607 | 0.0381  | 0.04494 | 0.0389  | 0.03873 | UPP1      |
| cg00528052 | 0.02603 | 0.02357 | 0.02607 | 0.02683 | 0.02591 | 0.01934 | 0.01802 | 0.01581 | 0.02319 | 0.01769 | JARID1B   |
| cg00528967 | 0.02023 | 0.02482 | 0.02249 | 0.02217 | 0.0187  | 0.024   | 0.01985 | 0.02456 | 0.0235  | 0.01733 | STK24     |
| cg00532335 | 0.41968 | 0.08165 | 0.73723 | 0.79036 | 0.84694 | 0.43827 | 0.78316 | 0.30945 | 0.51973 | 0.27196 | LG11      |
| cg00532890 | 0.04402 | 0.04693 | 0.07178 | 0.05917 | 0.0675  | 0.0591  | 0.05525 | 0.0482  | 0.06057 | 0.05096 | PBX1      |
| cg00534274 | 0.05615 | 0.05243 | 0.07125 | 0.0633  | 0.05494 | 0.05922 | 0.04165 | 0.08981 | 0.05376 | 0.05283 | SLC7A11   |
| cg00534856 | 0.90086 | 0.65966 | 0.95821 | 0.96464 | 0.97698 | 0.91736 | 0.95735 | 0.85594 | 0.9002  | 0.86949 | CGB       |
| cg00536175 | 0.87118 | 0.86253 | 0.86509 | 0.91234 | 0.85853 | 0.79597 | 0.56142 | 0.48254 | 0.45288 | 0.38602 | GATA1     |
| cg00537910 | 0.87964 | 0.86899 | 0.87759 | 0.89671 | 0.91722 | 0.87288 | 0.87945 | 0.86776 | 0.87383 | 0.83965 | ABC6      |
| cg00539322 | 0.61553 | 0.41023 | 0.70544 | 0.76992 | 0.60768 | 0.47926 | 0.68116 | 0.722   | 0.54845 | 0.49932 | SAG       |
| cg00539716 | 0.06558 | 0.06537 | 0.06469 | 0.06753 | 0.04192 | 0.06095 | 0.0627  | 0.06659 | 0.06994 | 0.06885 | HTLF      |
| cg00539955 | 0.81138 | 0.77791 | 0.78199 | 0.77714 | 0.7818  | 0.74166 | 0.74928 | 0.72842 | 0.70917 | 0.6636  | PARVB     |
| cg00540544 | 0.02951 | 0.0277  | 0.02804 | 0.02779 | 0.03545 | 0.05399 | 0.02235 | 0.04365 | 0.02323 | 0.02333 | CSRP1     |
| cg00540769 | 0.38923 | 0.35035 | 0.90961 | 0.92034 | 0.69422 | 0.55127 | 0.67535 | 0.79338 | 0.76497 | 0.7295  | ACOT12    |
| cg00542846 | 0.0525  | 0.05241 | 0.06527 | 0.06295 | 0.11148 | 0.06415 | 0.05648 | 0.05754 | 0.05666 | 0.04412 | APP       |
| cg00544557 | 0.5469  | 0.28979 | 0.90085 | 0.91964 | 0.93229 | 0.81442 | 0.75086 | 0.83679 | 0.87174 | 0.78897 | DSCR10    |
| cg00545573 | 0.10585 | 0.10449 | 0.12863 | 0.12896 | 0.13231 | 0.11979 | 0.11373 | 0.12142 | 0.10827 | 0.10268 | TAOK3     |
| cg00546491 | 0.44196 | 0.45074 | 0.89316 | 0.90765 | 0.49894 | 0.22602 | 0.33537 | 0.09565 | 0.13859 | 0.09563 | PDE1C     |
| cg00546897 | 0.39714 | 0.04213 | 0.91855 | 0.91975 | 0.94237 | 0.86285 | 0.28049 | 0.22867 | 0.04844 | 0.02474 | LOC284837 |
| cg00547018 | 0.52053 | 0.54165 | 0.24251 | 0.25376 | 0.25376 | 0.2028  | 0.26256 | 0.21052 | 0.21141 | 0.26741 | ALG1      |
| cg00547789 | 0.62744 | 0.92792 | 0.08319 | 0.06547 | 0.06807 | 0.06248 | 0.15811 | 0.21263 | 0.92455 | 0.8852  | RAB39B    |
| cg00547829 | 0.04521 | 0.0447  | 0.05634 | 0.05424 | 0.05275 | 0.052   | 0.0412  | 0.04353 | 0.03831 | 0.04081 | TUBD1     |
| cg00548060 | 0.70494 | 0.28521 | 0.7227  | 0.80799 | 0.74331 | 0.8319  | 0.68656 | 0.7672  | 0.80876 | 0.73718 | NPL       |
| cg00548268 | 0.10284 | 0.13725 | 0.9446  | 0.95043 | 0.7504  | 0.72666 | 0.59404 | 0.55881 | 0.12793 | 0.04056 | NPTX2     |
| cg00550617 | 0.34458 | 0.27343 | 0.63067 | 0.72356 | 0.56884 | 0.50239 | 0.15302 | 0.14182 | 0.12043 | 0.14204 | KRTAP9-4  |
| cg00551244 | 0.75348 | 0.44394 | 0.82657 | 0.84831 | 0.87999 | 0.88962 | 0.87359 | 0.87132 | 0.85639 | 0.58961 | C8orf78   |

|            |         |         |         |         |         |         |         |         |         |         |           |
|------------|---------|---------|---------|---------|---------|---------|---------|---------|---------|---------|-----------|
| cg00554173 | 0.762   | 0.34893 | 0.63524 | 0.82788 | 0.82445 | 0.47414 | 0.7114  | 0.82149 | 0.63115 | 0.53359 | ProSAPiP1 |
| cg00554250 | 0.86971 | 0.50994 | 0.80916 | 0.83033 | 0.90127 | 0.87726 | 0.81881 | 0.84947 | 0.9037  | 0.86508 | NR1H3     |
| cg00554682 | 0.05505 | 0.05548 | 0.0572  | 0.05086 | 0.03897 | 0.05304 | 0.0489  | 0.05419 | 0.04593 | 0.04792 | C2orf10   |
| cg00554702 | 0.20519 | 0.22224 | 0.2944  | 0.22564 | 0.31977 | 0.21454 | 0.2217  | 0.18029 | 0.20024 | 0.14264 | CHEK1     |
| cg00556408 | 0.68924 | 0.46005 | 0.82637 | 0.84001 | 0.8808  | 0.8496  | 0.06682 | 0.11601 | 0.85351 | 0.7683  | TMPRSS6   |
| cg00557354 | 0.06587 | 0.04622 | 0.05964 | 0.0434  | 0.07735 | 0.04781 | 0.2428  | 0.04098 | 0.04458 | 0.45804 | ARHGEF7   |
| cg00559473 | 0.0527  | 0.05281 | 0.05469 | 0.05346 | 0.0322  | 0.05159 | 0.04242 | 0.04454 | 0.04319 | 0.04237 | AAAS      |
| cg00560119 | 0.09595 | 0.06908 | 0.24374 | 0.15911 | 0.18224 | 0.05621 | 0.07311 | 0.04956 | 0.09839 | 0.04675 | STXBP1    |
| cg00563229 | 0.16035 | 0.04152 | 0.03723 | 0.0412  | 0.02706 | 0.02784 | 0.88262 | 0.93241 | 0.96976 | 0.95919 | XKR8      |
| cg00563845 | 0.46702 | 0.17675 | 0.2748  | 0.38837 | 0.32184 | 0.25382 | 0.43573 | 0.21614 | 0.30187 | 0.14049 | PXK       |
| cg00563926 | 0.72257 | 0.25159 | 0.88053 | 0.88107 | 0.8424  | 0.8179  | 0.86311 | 0.86374 | 0.89385 | 0.60728 | TGFBR3    |
| cg00563932 | 0.77282 | 0.21063 | 0.87604 | 0.90556 | 0.95064 | 0.70294 | 0.67086 | 0.45418 | 0.85505 | 0.53694 | PTGDS     |
| cg00564163 | 0.13201 | 0.15844 | 0.64389 | 0.651   | 0.61251 | 0.75924 | 0.47855 | 0.52139 | 0.40906 | 0.71702 | STEAP4    |
| cg00565075 | 0.24465 | 0.05768 | 0.06533 | 0.05564 | 0.20719 | 0.07846 | 0.20928 | 0.12943 | 0.15138 | 0.05623 | EIF3S6IP  |
| cg00565688 | 0.40834 | 0.02213 | 0.6788  | 0.70729 | 0.83769 | 0.71191 | 0.82306 | 0.79505 | 0.03619 | 0.02323 | TP73      |
| cg00566759 | 0.07376 | 0.05113 | 0.04921 | 0.03784 | 0.14359 | 0.04862 | 0.04884 | 0.06152 | 0.05892 | 0.08193 | DSC2      |
| cg00567479 | 0.03856 | 0.04207 | 0.0506  | 0.02925 | 0.05823 | 0.06454 | 0.04311 | 0.04006 | 0.04089 | 0.05523 | FARP2     |
| cg00567749 | 0.08798 | 0.07491 | 0.10219 | 0.07263 | 0.08825 | 0.06397 | 0.08339 | 0.0757  | 0.05477 | 0.04989 | CSPG2     |
| cg00568128 | 0.09928 | 0.11151 | 0.10983 | 0.10492 | 0.05637 | 0.10009 | 0.08839 | 0.0942  | 0.09619 | 0.09137 | C10orf118 |
| cg00568792 | 0.08296 | 0.07374 | 0.07688 | 0.07904 | 0.06888 | 0.06534 | 0.06795 | 0.07761 | 0.08049 | 0.07432 | STT3A     |
| cg00569620 | 0.16621 | 0.10736 | 0.07831 | 0.07312 | 0.06919 | 0.06442 | 0.0671  | 0.0638  | 0.06827 | 0.0546  | ABHD10    |
| cg00571634 | 0.24686 | 0.24103 | 0.25051 | 0.23803 | 0.22259 | 0.1945  | 0.19044 | 0.18091 | 0.17388 | 0.22007 | WDR5B     |
| cg00572797 | 0.96337 | 0.9682  | 0.95598 | 0.95844 | 0.96529 | 0.96625 | 0.95511 | 0.95634 | 0.96171 | 0.9617  | RUNX3     |
| cg00573606 | 0.80898 | 0.36832 | 0.7526  | 0.90762 | 0.0403  | 0.10248 | 0.89792 | 0.67993 | 0.91798 | 0.79886 | COL6A3    |
| cg00575744 | 0.48124 | 0.28138 | 0.32449 | 0.3422  | 0.21941 | 0.25765 | 0.04436 | 0.04902 | 0.15363 | 0.04262 | HLA-DMB   |
| cg00576250 | 0.17783 | 0.05869 | 0.79869 | 0.85909 | 0.64121 | 0.61569 | 0.15157 | 0.05205 | 0.06924 | 0.04229 | ZNF663    |
| cg00577167 | 0.15144 | 0.17026 | 0.39873 | 0.544   | 0.60781 | 0.58209 | 0.59562 | 0.73474 | 0.63854 | 0.55881 | ALDOB     |
| cg00577464 | 0.02659 | 0.02751 | 0.06061 | 0.04763 | 0.05708 | 0.07004 | 0.04558 | 0.03318 | 0.1019  | 0.03222 | SHH       |
| cg00578575 | 0.08571 | 0.0578  | 0.13355 | 0.10065 | 0.1537  | 0.0911  | 0.11175 | 0.0922  | 0.08392 | 0.12086 | ZNF596    |
| cg00579393 | 0.6287  | 0.69454 | 0.19545 | 0.15816 | 0.62313 | 0.68987 | 0.27567 | 0.35533 | 0.14615 | 0.1485  | REG1B     |
| cg00579402 | 0.89839 | 0.7544  | 0.79793 | 0.68782 | 0.92338 | 0.89762 | 0.34368 | 0.46588 | 0.78246 | 0.7998  | FUT6      |
| cg00581156 | 0.03369 | 0.03676 | 0.03889 | 0.03132 | 0.0288  | 0.03376 | 0.03014 | 0.03245 | 0.02274 | 0.02443 | HSA9761   |
| cg00582372 | 0.48856 | 0.54421 | 0.53664 | 0.57617 | 0.54884 | 0.59944 | 0.50302 | 0.52867 | 0.55684 | 0.54943 | S100G     |
| cg00582628 | 0.07411 | 0.05547 | 0.08133 | 0.08463 | 0.08097 | 0.07534 | 0.10442 | 0.1183  | 0.0575  | 0.07205 | RGS20     |
| cg00584022 | 0.05518 | 0.04215 | 0.04827 | 0.04669 | 0.08833 | 0.0342  | 0.03748 | 0.04342 | 0.2608  | 0.08592 | KRAS      |
| cg00585790 | 0.83984 | 0.67029 | 0.61932 | 0.7329  | 0.77201 | 0.82364 | 0.72584 | 0.83626 | 0.86038 | 0.84696 | LIMS1     |
| cg00585846 | 0.0555  | 0.05663 | 0.05582 | 0.05044 | 0.05456 | 0.05191 | 0.04602 | 0.05166 | 0.04472 | 0.04205 | NFKBIL1   |
| cg00586909 | 0.15055 | 0.14414 | 0.14286 | 0.14501 | 0.30802 | 0.21251 | 0.14741 | 0.11177 | 0.10468 | 0.12395 | CDKAL1    |
| cg00587613 | 0.58538 | 0.39317 | 0.81766 | 0.87495 | 0.86339 | 0.64938 | 0.82863 | 0.65695 | 0.85924 | 0.42288 | GPR152    |
| cg00592315 | 0.69224 | 0.71702 | 0.49733 | 0.74257 | 0.71251 | 0.79794 | 0.26646 | 0.16795 | 0.4699  | 0.32357 | C14orf152 |
| cg00594118 | 0.06335 | 0.06057 | 0.06242 | 0.06552 | 0.04674 | 0.05519 | 0.04949 | 0.05612 | 0.04824 | 0.05656 | COBRA1    |

|            |         |         |         |         |         |         |         |         |         |                   |
|------------|---------|---------|---------|---------|---------|---------|---------|---------|---------|-------------------|
| cg00594952 | 0.76488 | 0.75339 | 0.89531 | 0.90669 | 0.69466 | 0.65207 | 0.84573 | 0.8748  | 0.3294  | 0.18126 RIMS3     |
| cg00596686 | 0.71529 | 0.79427 | 0.78209 | 0.81595 | 0.80079 | 0.82575 | 0.77163 | 0.86298 | 0.71193 | 0.81389 STS       |
| cg00597076 | 0.96586 | 0.90585 | 0.95843 | 0.97051 | 0.97486 | 0.88808 | 0.95517 | 0.91186 | 0.96584 | 0.69774 MYO1C     |
| cg00598858 | 0.0397  | 0.05184 | 0.04656 | 0.04253 | 0.03018 | 0.03441 | 0.03952 | 0.03841 | 0.03164 | 0.03511 PRKCSH    |
| cg00600110 | 0.76698 | 0.62024 | 0.92044 | 0.95139 | 0.78263 | 0.90232 | 0.78282 | 0.89902 | 0.91544 | 0.93372 FAM9A     |
| cg00600684 | 0.80792 | 0.83863 | 0.79673 | 0.81455 | 0.78205 | 0.81432 | 0.81188 | 0.80479 | 0.82577 | 0.80551 BRWD2     |
| cg00601486 | 0.71423 | 0.57253 | 0.79406 | 0.90114 | 0.89193 | 0.71777 | 0.36713 | 0.16739 | 0.79222 | 0.76073 H1T2      |
| cg00602891 | 0.06664 | 0.06117 | 0.08733 | 0.06974 | 0.07653 | 0.07697 | 0.05903 | 0.05126 | 0.06566 | 0.0616 C17orf62   |
| cg00603172 | 0.92728 | 0.48256 | 0.12525 | 0.2023  | 0.92697 | 0.82264 | 0.91225 | 0.8051  | 0.91537 | 0.09922 BOK       |
| cg00605270 | 0.19251 | 0.03911 | 0.0953  | 0.11156 | 0.27831 | 0.03709 | 0.07501 | 0.04519 | 0.05258 | 0.02681 SMPDL3B   |
| cg00609097 | 0.03637 | 0.03551 | 0.13037 | 0.26013 | 0.03764 | 0.03348 | 0.03209 | 0.02976 | 0.03007 | 0.03027 TESK2     |
| cg00611397 | 0.85166 | 0.77818 | 0.86655 | 0.86913 | 0.83979 | 0.84031 | 0.82555 | 0.83961 | 0.86081 | 0.86209 GTPBP5    |
| cg00612467 | 0.06171 | 0.0664  | 0.06729 | 0.06799 | 0.07469 | 0.06632 | 0.05209 | 0.0415  | 0.05211 | 0.061 HADHSC      |
| cg00613255 | 0.66421 | 0.39834 | 0.46664 | 0.54939 | 0.60181 | 0.84696 | 0.14368 | 0.08295 | 0.16671 | 0.27102 INS       |
| cg00613344 | 0.75054 | 0.57602 | 0.77989 | 0.79894 | 0.81044 | 0.81591 | 0.83538 | 0.61435 | 0.52721 | 0.73178 KIAA1822L |
| cg00614413 | 0.58182 | 0.34919 | 0.61583 | 0.6024  | 0.49598 | 0.55159 | 0.54695 | 0.57819 | 0.6184  | 0.56261 PTPRS     |
| cg00615241 | 0.09211 | 0.08716 | 0.59878 | 0.49463 | 0.25636 | 0.12333 | 0.09108 | 0.05619 | 0.25419 | 0.36644 PRTN3     |
| cg00615377 | 0.06548 | 0.06248 | 0.09676 | 0.06931 | 0.08966 | 0.08067 | 0.04382 | 0.05133 | 0.0853  | 0.0833 RBM9       |
| cg00615915 | 0.19033 | 0.18886 | 0.1562  | 0.1822  | 0.14463 | 0.18432 | 0.16814 | 0.16669 | 0.17524 | 0.14178 SERPINB8  |
| cg00616129 | 0.09576 | 0.05203 | 0.43679 | 0.44662 | 0.48299 | 0.21418 | 0.53256 | 0.38054 | 0.05232 | 0.05129 STYK1     |
| cg00616135 | 0.67398 | 0.739   | 0.68835 | 0.69984 | 0.81236 | 0.88376 | 0.08776 | 0.06709 | 0.54041 | 0.13864 LACTB     |
| cg00616369 | 0.02976 | 0.03203 | 0.03049 | 0.02938 | 0.02862 | 0.02795 | 0.02364 | 0.02773 | 0.02711 | 0.02441 NCL       |
| cg00617305 | 0.16645 | 0.04324 | 0.04083 | 0.03588 | 0.07936 | 0.34007 | 0.03668 | 0.03428 | 0.03525 | 0.03023 TMEM58    |
| cg00618396 | 0.02703 | 0.0342  | 0.04598 | 0.03497 | 0.02593 | 0.03092 | 0.36119 | 0.25354 | 0.02265 | 0.02334 VBP1      |
| cg00619207 | 0.6641  | 0.45186 | 0.74165 | 0.79279 | 0.90021 | 0.87847 | 0.54332 | 0.7082  | 0.82847 | 0.3683 DENND2D    |
| cg00620024 | 0.84732 | 0.83571 | 0.83772 | 0.82713 | 0.81406 | 0.76165 | 0.8312  | 0.67021 | 0.13496 | 0.07632 PPP6C     |
| cg00620223 | 0.066   | 0.06823 | 0.07284 | 0.06452 | 0.05068 | 0.06331 | 0.04973 | 0.05608 | 0.05565 | 0.05403 CENPF     |
| cg00620629 | 0.03499 | 0.03499 | 0.0602  | 0.04748 | 0.07398 | 0.05055 | 0.03796 | 0.03116 | 0.03986 | 0.04737 C6orf113  |
| cg00620857 | 0.85598 | 0.66228 | 0.90759 | 0.90901 | 0.85988 | 0.88478 | 0.89539 | 0.88261 | 0.84478 | 0.86027 ACOT4     |
| cg00622552 | 0.169   | 0.09202 | 0.84735 | 0.90054 | 0.07999 | 0.16253 | 0.47419 | 0.12161 | 0.35645 | 0.06443 ODF3L1    |
| cg00622677 | 0.07497 | 0.06729 | 0.06094 | 0.06156 | 0.07152 | 0.0875  | 0.05927 | 0.0586  | 0.05082 | 0.06808 TSPAN5    |
| cg00623593 | 0.86313 | 0.87545 | 0.88039 | 0.89787 | 0.92304 | 0.8907  | 0.87104 | 0.72356 | 0.89052 | 0.82155 DOCK1     |
| cg00625425 | 0.49588 | 0.21252 | 0.55351 | 0.81654 | 0.82684 | 0.78403 | 0.83243 | 0.82426 | 0.76874 | 0.65824 ANKRD38   |
| cg00625653 | 0.04656 | 0.04916 | 0.28716 | 0.51072 | 0.28273 | 0.69774 | 0.18741 | 0.31428 | 0.0373  | 0.03505 WNT7A     |
| cg00626119 | 0.79428 | 0.6906  | 0.26225 | 0.48427 | 0.63824 | 0.64212 | 0.68932 | 0.66277 | 0.10363 | 0.26204 NTRK1     |
| cg00626466 | 0.26254 | 0.18511 | 0.77529 | 0.84208 | 0.52345 | 0.39896 | 0.10272 | 0.08565 | 0.09044 | 0.07639 GNS       |
| cg00627233 | 0.6471  | 0.70031 | 0.24792 | 0.24855 | 0.39045 | 0.22014 | 0.18262 | 0.16383 | 0.20723 | 0.1896 REG3G      |
| cg00627286 | 0.05585 | 0.07372 | 0.07957 | 0.08437 | 0.07613 | 0.07927 | 0.05615 | 0.05873 | 0.07091 | 0.06029 UGDH      |
| cg00629217 | 0.43077 | 0.28292 | 0.31008 | 0.38129 | 0.87454 | 0.44934 | 0.78277 | 0.64852 | 0.52774 | 0.11353 LNX1      |
| cg00629585 | 0.28004 | 0.17544 | 0.66804 | 0.73138 | 0.58443 | 0.63151 | 0.44287 | 0.38865 | 0.69223 | 0.65401 GF11B     |
| cg00630164 | 0.76809 | 0.04289 | 0.85001 | 0.89331 | 0.94996 | 0.8329  | 0.8872  | 0.19822 | 0.90792 | 0.82597 KCNQ4     |



|            |         |         |         |         |         |         |         |         |         |         |           |
|------------|---------|---------|---------|---------|---------|---------|---------|---------|---------|---------|-----------|
| cg00630249 | 0.04095 | 0.03778 | 0.03968 | 0.03847 | 0.03695 | 0.02971 | 0.03263 | 0.03306 | 0.03407 | 0.02892 | CYB561D1  |
| cg00630583 | 0.02595 | 0.02428 | 0.0239  | 0.02694 | 0.01967 | 0.01881 | 0.02043 | 0.0215  | 0.02194 | 0.02005 | POLE      |
| cg00631230 | 0.02802 | 0.0323  | 0.04622 | 0.03823 | 0.04496 | 0.03632 | 0.03351 | 0.03317 | 0.03122 | 0.03227 | VPS33A    |
| cg00633969 | 0.85335 | 0.875   | 0.88268 | 0.87808 | 0.88957 | 0.8953  | 0.89596 | 0.75506 | 0.89452 | 0.88245 | PARP9     |
| cg00634577 | 0.33082 | 0.31669 | 0.08721 | 0.079   | 0.46639 | 0.25745 | 0.42533 | 0.40137 | 0.23641 | 0.18105 | HIST1H4K  |
| cg00635481 | 0.0269  | 0.02451 | 0.05808 | 0.02959 | 0.04563 | 0.02511 | 0.02417 | 0.02223 | 0.02652 | 0.02077 | ZNF76     |
| cg00636639 | 0.03484 | 0.03902 | 0.04124 | 0.04432 | 0.03083 | 0.03596 | 0.03145 | 0.03304 | 0.02907 | 0.02076 | MRRF      |
| cg00638514 | 0.03296 | 0.04321 | 0.94392 | 0.95709 | 0.7457  | 0.86418 | 0.06519 | 0.02985 | 0.20501 | 0.15807 | OTOP3     |
| cg00642303 | 0.03554 | 0.03235 | 0.03391 | 0.03282 | 0.02542 | 0.03078 | 0.03113 | 0.02593 | 0.02886 | 0.0262  | CENTB2    |
| cg00643392 | 0.85365 | 0.34746 | 0.87028 | 0.87443 | 0.75114 | 0.59951 | 0.43121 | 0.41016 | 0.5596  | 0.17094 | RTBDN     |
| cg00644033 | 0.8759  | 0.76907 | 0.73014 | 0.82069 | 0.90741 | 0.94132 | 0.11968 | 0.07234 | 0.5704  | 0.67855 | MUC3B     |
| cg00645224 | 0.03761 | 0.04055 | 0.04013 | 0.03773 | 0.03611 | 0.04162 | 0.03762 | 0.03424 | 0.03206 | 0.02411 | GTF2IRD2  |
| cg00645579 | 0.93336 | 0.65262 | 0.94412 | 0.95699 | 0.96026 | 0.85663 | 0.95273 | 0.66838 | 0.95531 | 0.92725 | IRF7      |
| cg00645922 | 0.04152 | 0.04244 | 0.04003 | 0.03854 | 0.03509 | 0.03892 | 0.03609 | 0.03638 | 0.02925 | 0.03087 | TMED7     |
| cg00646140 | 0.57896 | 0.41157 | 0.49008 | 0.42396 | 0.43304 | 0.2933  | 0.63345 | 0.4575  | 0.35778 | 0.02652 | ARSD      |
| cg00646492 | 0.25415 | 0.14449 | 0.30461 | 0.27137 | 0.25445 | 0.15393 | 0.16142 | 0.14574 | 0.13713 | 0.13374 | GSTO1     |
| cg00647741 | 0.33203 | 0.18694 | 0.42065 | 0.40889 | 0.22692 | 0.11375 | 0.18006 | 0.16764 | 0.237   | 0.14061 | ZNF274    |
| cg00648153 | 0.05651 | 0.0542  | 0.06366 | 0.06534 | 0.08219 | 0.076   | 0.04745 | 0.04421 | 0.04622 | 0.04659 | SLC17A5   |
| cg00648883 | 0.70723 | 0.71455 | 0.70413 | 0.78752 | 0.66084 | 0.71518 | 0.59491 | 0.75005 | 0.4233  | 0.3874  | LOC196549 |
| cg00650762 | 0.01576 | 0.02172 | 0.01892 | 0.02035 | 0.01876 | 0.01857 | 0.01738 | 0.01798 | 0.0169  | 0.01527 | EPHB2     |
| cg00650876 | 0.02694 | 0.03215 | 0.03018 | 0.02969 | 0.02593 | 0.02894 | 0.02766 | 0.03045 | 0.02068 | 0.02496 | YBX1      |
| cg00651216 | 0.6025  | 0.1714  | 0.42602 | 0.59811 | 0.06291 | 0.0296  | 0.39376 | 0.06564 | 0.30013 | 0.03084 | HSP90AB1  |
| cg00653387 | 0.74677 | 0.50445 | 0.77721 | 0.71757 | 0.30384 | 0.06725 | 0.18822 | 0.05236 | 0.08628 | 0.03237 | PTN       |
| cg00654814 | 0.10866 | 0.13311 | 0.11856 | 0.11457 | 0.17572 | 0.12203 | 0.3592  | 0.10155 | 0.12506 | 0.12541 | MGAT5B    |
| cg00654816 | 0.0346  | 0.05693 | 0.04663 | 0.0371  | 0.04027 | 0.03737 | 0.03395 | 0.03394 | 0.03604 | 0.03249 | ZNF509    |
| cg00655307 | 0.19841 | 0.07469 | 0.6512  | 0.56296 | 0.08562 | 0.04887 | 0.08682 | 0.03397 | 0.08973 | 0.03644 | ESR1      |
| cg00655779 | 0.03544 | 0.04163 | 0.03764 | 0.03582 | 0.02991 | 0.05072 | 0.03557 | 0.03423 | 0.03114 | 0.03181 | CCT7      |
| cg00657095 | 0.19158 | 0.07417 | 0.08544 | 0.07999 | 0.08663 | 0.09465 | 0.08258 | 0.07944 | 0.05893 | 0.05815 | PPARD     |
| cg00657582 | 0.45944 | 0.53442 | 0.24827 | 0.41989 | 0.46838 | 0.08326 | 0.05408 | 0.12785 | 0.06894 | 0.07611 | CHD8      |
| cg00658007 | 0.35566 | 0.05553 | 0.1977  | 0.4879  | 0.22802 | 0.11794 | 0.16227 | 0.1692  | 0.06553 | 0.04754 | C1orf36   |
| cg00658626 | 0.59263 | 0.44368 | 0.07673 | 0.06829 | 0.41885 | 0.73425 | 0.17574 | 0.06896 | 0.5244  | 0.47887 | CCDC63    |
| cg00659129 | 0.84362 | 0.21474 | 0.80953 | 0.81036 | 0.90867 | 0.89384 | 0.57539 | 0.29526 | 0.87289 | 0.26454 | DDEF1     |
| cg00659953 | 0.01768 | 0.02063 | 0.02394 | 0.02151 | 0.01957 | 0.0202  | 0.02137 | 0.02176 | 0.02847 | 0.01557 | C16orf24  |
| cg00660989 | 0.06084 | 0.04732 | 0.06642 | 0.05452 | 0.10962 | 0.06956 | 0.04173 | 0.04185 | 0.2733  | 0.09495 | BTBD5     |
| cg00661202 | 0.02295 | 0.02661 | 0.01984 | 0.02076 | 0.01839 | 0.02285 | 0.01864 | 0.01858 | 0.01796 | 0.01795 | CHCHD4    |
| cg00661485 | 0.85889 | 0.50241 | 0.96202 | 0.9712  | 0.97415 | 0.97345 | 0.84521 | 0.60077 | 0.95833 | 0.96718 | FOXI1     |
| cg00662556 | 0.14736 | 0.25063 | 0.92365 | 0.94644 | 0.6301  | 0.48153 | 0.34713 | 0.54129 | 0.33729 | 0.35431 | GALR1     |
| cg00662775 | 0.21448 | 0.20306 | 0.29772 | 0.23455 | 0.36863 | 0.26326 | 0.2516  | 0.44997 | 0.21757 | 0.20287 | TCEAL4    |
| cg00665395 | 0.04517 | 0.04903 | 0.04508 | 0.04001 | 0.03693 | 0.03802 | 0.04284 | 0.04428 | 0.041   | 0.03633 | TLL4      |
| cg00666446 | 0.10235 | 0.0963  | 0.09881 | 0.09612 | 0.08536 | 0.10195 | 0.12159 | 0.12487 | 0.11017 | 0.10147 | ZNF670    |
| cg00666746 | 0.49539 | 0.0399  | 0.29569 | 0.38419 | 0.44008 | 0.22405 | 0.089   | 0.03012 | 0.0637  | 0.02367 | SYDE1     |

|            |         |         |         |         |         |         |         |         |         |                  |
|------------|---------|---------|---------|---------|---------|---------|---------|---------|---------|------------------|
| cg00668685 | 0.89609 | 0.68247 | 0.89546 | 0.92594 | 0.95251 | 0.88814 | 0.89549 | 0.8372  | 0.90696 | 0.7253 SLC39A5   |
| cg00669623 | 0.05719 | 0.05956 | 0.06691 | 0.06438 | 0.03501 | 0.04714 | 0.04847 | 0.04915 | 0.0494  | 0.04902 CDC2L2   |
| cg00669856 | 0.22325 | 0.21552 | 0.24713 | 0.17024 | 0.27118 | 0.17844 | 0.21835 | 0.17939 | 0.75156 | 0.45217 SPRY1    |
| cg00671161 | 0.02023 | 0.02359 | 0.02373 | 0.02172 | 0.01954 | 0.02463 | 0.02299 | 0.01968 | 0.02207 | 0.01749 ATP7B    |
| cg00672638 | 0.08752 | 0.08789 | 0.08882 | 0.09322 | 0.09627 | 0.09235 | 0.08322 | 0.09415 | 0.08693 | 0.08731 ARHGAP26 |
| cg00673020 | 0.60173 | 0.28807 | 0.83656 | 0.82973 | 0.69751 | 0.09463 | 0.48624 | 0.49534 | 0.8503  | 0.42441 MOSPD1   |
| cg00673191 | 0.64505 | 0.62354 | 0.68829 | 0.77544 | 0.64761 | 0.51133 | 0.64651 | 0.64708 | 0.73474 | 0.73925 DOPEY2   |
| cg00674922 | 0.03871 | 0.03881 | 0.05146 | 0.04472 | 0.03532 | 0.04666 | 0.02876 | 0.02983 | 0.03025 | 0.03083 SATB1    |
| cg00676660 | 0.04156 | 0.03546 | 0.03349 | 0.05451 | 0.20431 | 0.04696 | 0.05507 | 0.05428 | 0.03183 | 0.02917 ADAMTS9  |
| cg00677811 | 0.03897 | 0.04296 | 0.03807 | 0.0377  | 0.04696 | 0.03791 | 0.03885 | 0.0387  | 0.03069 | 0.03176 CCM2     |
| cg00678539 | 0.51639 | 0.6523  | 0.53184 | 0.48934 | 0.47585 | 0.5514  | 0.18025 | 0.16048 | 0.14736 | 0.17797 MNS1     |
| cg00679556 | 0.53003 | 0.22246 | 0.39865 | 0.40959 | 0.67556 | 0.72802 | 0.25251 | 0.18136 | 0.44657 | 0.19224 TRIM31   |
| cg00679738 | 0.02457 | 0.02894 | 0.03305 | 0.03007 | 0.17643 | 0.05308 | 0.03216 | 0.03064 | 0.05003 | 0.02212 FAM89A   |
| cg00682653 | 0.03543 | 0.03392 | 0.02938 | 0.02817 | 0.03008 | 0.03394 | 0.02775 | 0.02988 | 0.0309  | 0.02922 VT1B     |
| cg00684178 | 0.7771  | 0.59982 | 0.74297 | 0.71512 | 0.69826 | 0.7468  | 0.8417  | 0.49457 | 0.61773 | 0.80657 NEU4     |
| cg00685836 | 0.02344 | 0.02524 | 0.10421 | 0.20281 | 0.02408 | 0.0249  | 0.02448 | 0.02094 | 0.06731 | 0.04453 PPFIA2   |
| cg00686022 | 0.87743 | 0.88156 | 0.87905 | 0.90608 | 0.92324 | 0.89764 | 0.86244 | 0.89379 | 0.85362 | 0.76684 C12orf40 |
| cg00686623 | 0.03195 | 0.02949 | 0.03917 | 0.07187 | 0.02913 | 0.03387 | 0.03309 | 0.02927 | 0.02796 | 0.03654 CAPN1    |
| cg00687674 | 0.0801  | 0.10662 | 0.8204  | 0.81484 | 0.70373 | 0.12965 | 0.37625 | 0.10019 | 0.50643 | 0.09604 TMEM84   |
| cg00687686 | 0.04314 | 0.03978 | 0.22465 | 0.46395 | 0.53076 | 0.72332 | 0.12557 | 0.04082 | 0.17549 | 0.38363 NDRG4    |
| cg00688421 | 0.04462 | 0.04729 | 0.0504  | 0.04608 | 0.03636 | 0.04142 | 0.04545 | 0.0455  | 0.0407  | 0.03882 RAP1GDS1 |
| cg00689010 | 0.56812 | 0.36187 | 0.47394 | 0.47943 | 0.10152 | 0.07265 | 0.26893 | 0.09715 | 0.71592 | 0.79788 NCSTN    |
| cg00689014 | 0.80785 | 0.73107 | 0.58028 | 0.81825 | 0.74202 | 0.53888 | 0.47505 | 0.39105 | 0.50265 | 0.07442 GAST     |
| cg00689340 | 0.95516 | 0.95154 | 0.95422 | 0.96389 | 0.91295 | 0.9413  | 0.96347 | 0.9598  | 0.95785 | 0.96173 RTKN     |
| cg00690049 | 0.07163 | 0.07306 | 0.14229 | 0.28155 | 0.15635 | 0.07677 | 0.1069  | 0.07331 | 0.07016 | 0.06348 MAGED2   |
| cg00690280 | 0.08301 | 0.08574 | 0.08895 | 0.0912  | 0.14381 | 0.07203 | 0.08359 | 0.65453 | 0.06068 | 0.05711 WFDC10B  |
| cg00690893 | 0.08135 | 0.09159 | 0.08108 | 0.07683 | 0.07216 | 0.06771 | 0.0536  | 0.04612 | 0.06062 | 0.0562 RAB9A     |
| cg00691625 | 0.75248 | 0.47159 | 0.90498 | 0.90953 | 0.95876 | 0.86973 | 0.75309 | 0.31219 | 0.30407 | 0.15563 NR5A1    |
| cg00691822 | 0.295   | 0.23858 | 0.69914 | 0.74682 | 0.44776 | 0.26033 | 0.50995 | 0.43    | 0.20179 | 0.20455 KLHL13   |
| cg00692549 | 0.11567 | 0.14    | 0.1439  | 0.13554 | 0.16075 | 0.12367 | 0.08328 | 0.10799 | 0.12041 | 0.12583 TARDBP   |
| cg00693307 | 0.77349 | 0.74507 | 0.80391 | 0.80068 | 0.77559 | 0.69789 | 0.6565  | 0.60735 | 0.85495 | 0.84106 UPK2     |
| cg00695416 | 0.04886 | 0.03088 | 0.05317 | 0.03242 | 0.13814 | 0.0418  | 0.02814 | 0.0239  | 0.02966 | 0.02267 CBR1     |
| cg00696900 | 0.03039 | 0.03167 | 0.03015 | 0.02347 | 0.02612 | 0.02957 | 0.02324 | 0.02486 | 0.02685 | 0.02395 MAT2A    |
| cg00698688 | 0.93453 | 0.55582 | 0.93915 | 0.94983 | 0.95204 | 0.84668 | 0.31882 | 0.04372 | 0.9278  | 0.94039 SULT2B1  |
| cg00702231 | 0.68874 | 0.70127 | 0.98254 | 0.9841  | 0.82211 | 0.77047 | 0.76479 | 0.76984 | 0.01856 | 0.01549 PLAGL1   |
| cg00702729 | 0.87966 | 0.7779  | 0.85889 | 0.87789 | 0.87322 | 0.85878 | 0.87982 | 0.87628 | 0.88818 | 0.90046 FLJ10925 |
| cg00704310 | 0.06099 | 0.06315 | 0.06204 | 0.0637  | 0.04981 | 0.04788 | 0.04331 | 0.04114 | 0.04987 | 0.04846 KCTD15   |
| cg00704909 | 0.04146 | 0.03942 | 0.04427 | 0.03748 | 0.0292  | 0.03386 | 0.03284 | 0.03251 | 0.03139 | 0.03574 COPB     |
| cg00705255 | 0.13195 | 0.07271 | 0.20121 | 0.19904 | 0.0856  | 0.11661 | 0.0359  | 0.02259 | 0.06947 | 0.04992 LILRA3   |
| cg00706536 | 0.53252 | 0.35592 | 0.70051 | 0.70219 | 0.63487 | 0.63097 | 0.67952 | 0.34014 | 0.71809 | 0.24746 ATP6V0A1 |
| cg00707317 | 0.03183 | 0.03164 | 0.05843 | 0.07931 | 0.04382 | 0.03471 | 0.05926 | 0.02733 | 0.03529 | 0.03147 NMNAT2   |

|            |         |         |         |         |         |         |         |         |         |         |            |
|------------|---------|---------|---------|---------|---------|---------|---------|---------|---------|---------|------------|
| cg00708598 | 0.45193 | 0.50242 | 0.78907 | 0.7156  | 0.17896 | 0.30939 | 0.48503 | 0.61912 | 0.77783 | 0.84107 | LECT1      |
| cg00708642 | 0.06232 | 0.06772 | 0.06173 | 0.05757 | 0.05296 | 0.0551  | 0.05739 | 0.05431 | 0.04695 | 0.05101 | EIF5       |
| cg00711916 | 0.15239 | 0.15188 | 0.15247 | 0.15386 | 0.19415 | 0.22786 | 0.11083 | 0.13971 | 0.31292 | 0.06065 | CNNM4      |
| cg00712898 | 0.02195 | 0.01928 | 0.02192 | 0.02246 | 0.01484 | 0.01408 | 0.01631 | 0.01562 | 0.01734 | 0.01759 | PRPF38B    |
| cg00714377 | 0.45204 | 0.06044 | 0.15368 | 0.26292 | 0.12014 | 0.32488 | 0.14133 | 0.11662 | 0.06436 | 0.03835 | SLA2       |
| cg00717862 | 0.06266 | 0.06566 | 0.07357 | 0.06486 | 0.05565 | 0.0559  | 0.0705  | 0.06203 | 0.0565  | 0.05104 | DNAJB11    |
| cg00718440 | 0.22769 | 0.52241 | 0.46117 | 0.40063 | 0.46721 | 0.50722 | 0.0274  | 0.02792 | 0.02789 | 0.02757 | CDKN2A     |
| cg00718513 | 0.08491 | 0.08406 | 0.11314 | 0.08942 | 0.10933 | 0.06324 | 0.0617  | 0.07342 | 0.05489 | 0.06197 |            |
| cg00718748 | 0.04577 | 0.04787 | 0.04227 | 0.04077 | 0.03516 | 0.03763 | 0.03665 | 0.03794 | 0.03675 | 0.03267 | ZNF624     |
| cg00720072 | 0.03792 | 0.03683 | 0.03921 | 0.03702 | 0.03049 | 0.03999 | 0.03607 | 0.03695 | 0.03679 | 0.03665 | 5-Mar      |
| cg00720137 | 0.02025 | 0.02443 | 0.9812  | 0.98009 | 0.21569 | 0.1423  | 0.01737 | 0.02024 | 0.27509 | 0.02311 | DYNLRB2    |
| cg00720723 | 0.051   | 0.04362 | 0.05789 | 0.04766 | 0.05496 | 0.06405 | 0.0517  | 0.04525 | 0.05343 | 0.05556 | NOP5/NOP58 |
| cg00722300 | 0.54219 | 0.22286 | 0.55061 | 0.62246 | 0.58631 | 0.71905 | 0.65503 | 0.5265  | 0.69511 | 0.38366 | RLN3       |
| cg00724662 | 0.07412 | 0.07678 | 0.06611 | 0.07538 | 0.05826 | 0.06889 | 0.07025 | 0.07521 | 0.06104 | 0.0661  | NXF1       |
| cg00725143 | 0.52754 | 0.05934 | 0.13418 | 0.12423 | 0.03653 | 0.03198 | 0.03437 | 0.02499 | 0.02635 | 0.02451 | NPEPPS     |
| cg00725635 | 0.08732 | 0.066   | 0.20918 | 0.22348 | 0.14708 | 0.08914 | 0.13951 | 0.06754 | 0.38725 | 0.56755 | B3GALT2    |
| cg00725777 | 0.78723 | 0.35171 | 0.76433 | 0.79462 | 0.64225 | 0.84297 | 0.25757 | 0.566   | 0.79883 | 0.34533 | NGFRAP1    |
| cg00727590 | 0.11685 | 0.02967 | 0.45042 | 0.57046 | 0.65469 | 0.27225 | 0.03257 | 0.02764 | 0.80403 | 0.42672 | PLA2G3     |
| cg00727947 | 0.89283 | 0.78396 | 0.86035 | 0.89219 | 0.88676 | 0.89225 | 0.34797 | 0.08691 | 0.75932 | 0.66874 | LILRA5     |
| cg00728317 | 0.11667 | 0.08498 | 0.29564 | 0.49038 | 0.7445  | 0.83157 | 0.54788 | 0.26616 | 0.10425 | 0.2632  | MT1F       |
| cg00728398 | 0.03742 | 0.02512 | 0.02926 | 0.02361 | 0.02649 | 0.02437 | 0.02325 | 0.02351 | 0.02182 | 0.01969 | C1orf149   |
| cg00728602 | 0.32055 | 0.04609 | 0.03352 | 0.03693 | 0.04713 | 0.04331 | 0.03032 | 0.03153 | 0.02583 | 0.02678 | C6orf27    |
| cg00729275 | 0.60694 | 0.3463  | 0.47804 | 0.67474 | 0.1519  | 0.40252 | 0.10055 | 0.19887 | 0.27712 | 0.26483 | C18orf16   |
| cg00729541 | 0.05915 | 0.03922 | 0.06835 | 0.06425 | 0.02779 | 0.03677 | 0.03035 | 0.03218 | 0.03448 | 0.02973 | FAM73B     |
| cg00729708 | 0.81076 | 0.66596 | 0.85488 | 0.90512 | 0.43068 | 0.43561 | 0.49149 | 0.43328 | 0.70076 | 0.51613 | LASS3      |
| cg00729875 | 0.38122 | 0.34117 | 0.29666 | 0.55028 | 0.08566 | 0.06393 | 0.43194 | 0.03415 | 0.1578  | 0.08517 | PALMD      |
| cg00730260 | 0.90975 | 0.90666 | 0.91205 | 0.91161 | 0.91963 | 0.91535 | 0.8679  | 0.91659 | 0.88707 | 0.86287 | FLJ32894   |
| cg00731459 | 0.02331 | 0.02988 | 0.02848 | 0.02827 | 0.02037 | 0.02639 | 0.02436 | 0.02434 | 0.02456 | 0.02614 | HDAC4      |
| cg00733682 | 0.03563 | 0.03356 | 0.03291 | 0.03701 | 0.0236  | 0.02603 | 0.03057 | 0.02856 | 0.02395 | 0.0228  | ZNF44      |
| cg00734993 | 0.0284  | 0.03356 | 0.0294  | 0.02897 | 0.02945 | 0.03091 | 0.0301  | 0.03216 | 0.02601 | 0.02604 | MTCH1      |
| cg00736326 | 0.05714 | 0.04998 | 0.0668  | 0.05738 | 0.07728 | 0.07616 | 0.04508 | 0.04366 | 0.03556 | 0.0328  | ARPC1A     |
| cg00737514 | 0.0595  | 0.05393 | 0.06205 | 0.04821 | 0.08076 | 0.07211 | 0.05066 | 0.0448  | 0.04863 | 0.0535  | TBC1D1     |
| cg00739120 | 0.41886 | 0.22694 | 0.1391  | 0.10913 | 0.57458 | 0.33536 | 0.50943 | 0.05887 | 0.05941 | 0.2236  | NIFIE14    |
| cg00741717 | 0.3142  | 0.31217 | 0.75621 | 0.80188 | 0.5549  | 0.52818 | 0.4     | 0.23539 | 0.77068 | 0.73961 | TLR8       |
| cg00743372 | 0.03571 | 0.03475 | 0.03961 | 0.0345  | 0.03409 | 0.04562 | 0.02814 | 0.02639 | 0.02979 | 0.02888 | ZNF192     |
| cg00744433 | 0.11002 | 0.13789 | 0.11765 | 0.10944 | 0.48722 | 0.38151 | 0.57438 | 0.29062 | 0.81011 | 0.78254 | CXADR      |
| cg00745543 | 0.7964  | 0.46096 | 0.77111 | 0.88459 | 0.83972 | 0.89022 | 0.26912 | 0.17261 | 0.11834 | 0.3881  | H1T2       |
| cg00745735 | 0.65559 | 0.58644 | 0.67279 | 0.73026 | 0.55655 | 0.45566 | 0.66321 | 0.6837  | 0.48292 | 0.53579 | FLJ14437   |
| cg00746083 | 0.03662 | 0.04128 | 0.04224 | 0.0373  | 0.04363 | 0.04531 | 0.02808 | 0.0308  | 0.03803 | 0.03742 | CHD8       |
| cg00746130 | 0.07202 | 0.07447 | 0.07215 | 0.06257 | 0.13815 | 0.11421 | 0.07315 | 0.08233 | 0.05083 | 0.05144 | BAT5       |
| cg00746981 | 0.07746 | 0.0801  | 0.08722 | 0.08711 | 0.05599 | 0.07653 | 0.06867 | 0.07145 | 0.06916 | 0.06822 | HDGF       |

|            |         |         |         |         |         |         |         |         |         |         |           |
|------------|---------|---------|---------|---------|---------|---------|---------|---------|---------|---------|-----------|
| cg00747849 | 0.03992 | 0.03961 | 0.03961 | 0.03417 | 0.02135 | 0.03696 | 0.03357 | 0.0338  | 0.0453  | 0.02932 | SLC25A1   |
| cg00750606 | 0.17231 | 0.04466 | 0.44548 | 0.55785 | 0.57764 | 0.33261 | 0.04815 | 0.03819 | 0.18685 | 0.09428 | CDA       |
| cg00751288 | 0.0289  | 0.02801 | 0.0281  | 0.02737 | 0.02474 | 0.02708 | 0.02882 | 0.03155 | 0.02417 | 0.02194 | LOC90624  |
| cg00754253 | 0.4976  | 0.45246 | 0.76815 | 0.83082 | 0.84053 | 0.8206  | 0.75525 | 0.83867 | 0.88995 | 0.48905 | HRASLS5   |
| cg00754617 | 0.76155 | 0.26785 | 0.77444 | 0.77106 | 0.79249 | 0.73034 | 0.76451 | 0.80028 | 0.66084 | 0.40629 | SPACA4    |
| cg00755043 | 0.04504 | 0.04807 | 0.87327 | 0.90951 | 0.0717  | 0.05752 | 0.04203 | 0.03825 | 0.04837 | 0.03278 | C9orf121  |
| cg00755709 | 0.79332 | 0.75145 | 0.7179  | 0.74481 | 0.69948 | 0.78271 | 0.70913 | 0.62744 | 0.80624 | 0.7594  | BAAT      |
| cg00756058 | 0.03688 | 0.02029 | 0.0227  | 0.02078 | 0.01894 | 0.02338 | 0.01899 | 0.01701 | 0.01538 | 0.01561 | DZIP1     |
| cg00756887 | 0.70871 | 0.34497 | 0.86231 | 0.84776 | 0.89669 | 0.86379 | 0.81618 | 0.83806 | 0.84404 | 0.52529 | PVRL4     |
| cg00757070 | 0.08724 | 0.08507 | 0.15806 | 0.18268 | 0.56372 | 0.34297 | 0.08371 | 0.07444 | 0.06671 | 0.06955 | UPK2      |
| cg00757952 | 0.52414 | 0.37396 | 0.85991 | 0.8698  | 0.5379  | 0.84918 | 0.63756 | 0.62555 | 0.28768 | 0.10722 | CRYBB1    |
| cg00761755 | 0.03284 | 0.02879 | 0.03174 | 0.03135 | 0.05048 | 0.05342 | 0.02206 | 0.02559 | 0.02084 | 0.02363 | SLC43A2   |
| cg00762512 | 0.03896 | 0.04243 | 0.04399 | 0.03417 | 0.03542 | 0.03977 | 0.03679 | 0.03404 | 0.03302 | 0.03669 | LIAS      |
| cg00763679 | 0.05404 | 0.05241 | 0.0617  | 0.05087 | 0.07067 | 0.0648  | 0.07019 | 0.0518  | 0.05666 | 0.05686 | 2-Sep     |
| cg00763889 | 0.68712 | 0.51071 | 0.80469 | 0.82033 | 0.65581 | 0.80162 | 0.67354 | 0.47252 | 0.82144 | 0.80594 | HRASLS2   |
| cg00766729 | 0.03592 | 0.0324  | 0.31177 | 0.25439 | 0.02746 | 0.03466 | 0.02609 | 0.02799 | 0.02632 | 0.02438 | LOC147808 |
| cg00766889 | 0.03562 | 0.03881 | 0.04021 | 0.03694 | 0.02805 | 0.03972 | 0.03621 | 0.03612 | 0.03535 | 0.03516 | SEPHS1    |
| cg00767581 | 0.95347 | 0.61055 | 0.95495 | 0.95718 | 0.95642 | 0.95966 | 0.95242 | 0.95653 | 0.95826 | 0.95462 | HOXD4     |
| cg00768439 | 0.05217 | 0.05026 | 0.33598 | 0.59342 | 0.29232 | 0.10692 | 0.09534 | 0.04634 | 0.05772 | 0.04157 | NAP1L3    |
| cg00769470 | 0.65593 | 0.55195 | 0.61773 | 0.6497  | 0.54767 | 0.80683 | 0.40454 | 0.18366 | 0.31958 | 0.25039 | DEFB129   |
| cg00769520 | 0.03794 | 0.0328  | 0.03589 | 0.03647 | 0.02876 | 0.03431 | 0.03519 | 0.03439 | 0.03945 | 0.35803 | ST8SIA1   |
| cg00770279 | 0.02925 | 0.03209 | 0.03403 | 0.03596 | 0.02192 | 0.02569 | 0.02623 | 0.02689 | 0.02118 | 0.0201  | CDKN2D    |
| cg00770871 | 0.02039 | 0.02909 | 0.02593 | 0.02257 | 0.02043 | 0.01983 | 0.02226 | 0.02527 | 0.01983 | 0.01924 | TULP3     |
| cg00772000 | 0.56581 | 0.46563 | 0.60727 | 0.68046 | 0.07326 | 0.05524 | 0.07633 | 0.06307 | 0.05774 | 0.04576 | NHLRC1    |
| cg00775197 | 0.09497 | 0.0921  | 0.38502 | 0.48789 | 0.35563 | 0.35551 | 0.06648 | 0.06125 | 0.13972 | 0.02998 | MGC33600  |
| cg00777121 | 0.68055 | 0.87062 | 0.07137 | 0.04871 | 0.5     | 0.04408 | 0.5617  | 0.6593  | 0.89401 | 0.60024 | RASSF1    |
| cg00777555 | 0.03256 | 0.03142 | 0.03325 | 0.03479 | 0.02724 | 0.03042 | 0.03222 | 0.03614 | 0.02783 | 0.02292 | ARF4      |
| cg00778920 | 0.0568  | 0.06179 | 0.07692 | 0.06479 | 0.15333 | 0.07631 | 0.07557 | 0.06138 | 0.06107 | 0.05739 | PRPF19    |
| cg00779924 | 0.80122 | 0.48063 | 0.65322 | 0.80183 | 0.74649 | 0.80982 | 0.43306 | 0.70188 | 0.46649 | 0.7722  | FLJ45983  |
| cg00782174 | 0.06783 | 0.07029 | 0.06985 | 0.07228 | 0.0901  | 0.07516 | 0.0802  | 0.07285 | 0.05746 | 0.05067 | SLC1A5    |
| cg00782854 | 0.04698 | 0.05108 | 0.04537 | 0.04305 | 0.04452 | 0.04579 | 0.03431 | 0.03792 | 0.03476 | 0.03467 | BCL2L1    |
| cg00783759 | 0.0305  | 0.03342 | 0.03015 | 0.02675 | 0.03536 | 0.03413 | 0.0275  | 0.03022 | 0.02546 | 0.0282  | LARP2     |
| cg00784357 | 0.03426 | 0.027   | 0.03663 | 0.0329  | 0.02241 | 0.0274  | 0.02429 | 0.02904 | 0.02424 | 0.02328 | RAC1      |
| cg00791249 | 0.07244 | 0.07465 | 0.08131 | 0.07645 | 0.05538 | 0.07703 | 0.06505 | 0.07095 | 0.07049 | 0.06534 | MGC19604  |
| cg00792687 | 0.05159 | 0.0496  | 0.08891 | 0.0755  | 0.07154 | 0.04533 | 0.06101 | 0.06232 | 0.05891 | 0.04392 | C8orf41   |
| cg00792740 | 0.06998 | 0.06933 | 0.07209 | 0.06639 | 0.05568 | 0.06247 | 0.06557 | 0.0679  | 0.07133 | 0.06453 | UBE3A     |
| cg00792849 | 0.44636 | 0.50383 | 0.58248 | 0.72209 | 0.16052 | 0.11014 | 0.05582 | 0.03773 | 0.04712 | 0.05664 | CX36      |
| cg00793648 | 0.79961 | 0.79964 | 0.8529  | 0.83836 | 0.64032 | 0.77723 | 0.77454 | 0.67324 | 0.66463 | 0.55961 | DDX24     |
| cg00793774 | 0.03214 | 0.02834 | 0.02998 | 0.02705 | 0.0248  | 0.02441 | 0.02517 | 0.03514 | 0.0258  | 0.02237 | TRIM8     |
| cg00795268 | 0.81758 | 0.85157 | 0.84372 | 0.87445 | 0.81175 | 0.85354 | 0.80609 | 0.84537 | 0.81116 | 0.83543 | C11orf55  |
| cg00795812 | 0.08338 | 0.04373 | 0.92598 | 0.9621  | 0.43324 | 0.46158 | 0.54733 | 0.28117 | 0.18795 | 0.0272  | PDCD1     |

|            |         |         |         |         |         |         |         |         |         |                  |
|------------|---------|---------|---------|---------|---------|---------|---------|---------|---------|------------------|
| cg00796728 | 0.24373 | 0.06512 | 0.05006 | 0.03932 | 0.04395 | 0.04316 | 0.0553  | 0.04302 | 0.07405 | 0.02704 FUT4     |
| cg00798206 | 0.05428 | 0.064   | 0.06918 | 0.07257 | 0.06506 | 0.07383 | 0.04889 | 0.04236 | 0.06977 | 0.05569 OXSR1    |
| cg00799727 | 0.3584  | 0.2861  | 0.53959 | 0.59842 | 0.40585 | 0.33409 | 0.21354 | 0.18323 | 0.14532 | 0.18508 MAGEA11  |
| cg00800095 | 0.95846 | 0.95545 | 0.94256 | 0.95782 | 0.93678 | 0.74059 | 0.91848 | 0.94957 | 0.96109 | 0.94485 PNMA3    |
| cg00804048 | 0.07829 | 0.07348 | 0.0876  | 0.07025 | 0.18745 | 0.11768 | 0.10287 | 0.10191 | 0.07223 | 0.09275 EIF5A    |
| cg00804392 | 0.07868 | 0.06982 | 0.84179 | 0.88034 | 0.83663 | 0.83512 | 0.80231 | 0.75179 | 0.86294 | 0.82653 RHOH     |
| cg00806490 | 0.11006 | 0.10535 | 0.61714 | 0.63005 | 0.32938 | 0.62328 | 0.1429  | 0.10547 | 0.09873 | 0.0836 CDH13     |
| cg00807586 | 0.05135 | 0.04663 | 0.78246 | 0.88231 | 0.82888 | 0.86821 | 0.38408 | 0.44612 | 0.06334 | 0.05059 DLEC1    |
| cg00808492 | 0.83109 | 0.61761 | 0.80431 | 0.82515 | 0.73317 | 0.84708 | 0.81654 | 0.86658 | 0.82439 | 0.78887 REG4     |
| cg00810473 | 0.107   | 0.03247 | 0.04417 | 0.04268 | 0.48599 | 0.37897 | 0.02847 | 0.02647 | 0.03879 | 0.02969 SNX22    |
| cg00810495 | 0.10813 | 0.09027 | 0.14608 | 0.13226 | 0.16352 | 0.08849 | 0.0648  | 0.04958 | 0.09128 | 0.09454 BXDC5    |
| cg00811081 | 0.05453 | 0.04691 | 0.07924 | 0.07013 | 0.11947 | 0.08744 | 0.07102 | 0.07937 | 0.07171 | 0.07546 FLJ21908 |
| cg00812502 | 0.01997 | 0.02382 | 0.02377 | 0.02411 | 0.01952 | 0.02083 | 0.02183 | 0.02187 | 0.01731 | 0.01944 DGCR2    |
| cg00814580 | 0.11869 | 0.1056  | 0.15352 | 0.12366 | 0.25627 | 0.18351 | 0.15363 | 0.08656 | 0.06967 | 0.06246 TRAPPC6A |
| cg00815440 | 0.01721 | 0.01757 | 0.01628 | 0.01761 | 0.01243 | 0.01482 | 0.01665 | 0.01899 | 0.01266 | 0.01218 UQCRCF5  |
| cg00815583 | 0.08887 | 0.09339 | 0.14429 | 0.11299 | 0.10478 | 0.09662 | 0.16823 | 0.13883 | 0.08185 | 0.08026 FBXO16   |
| cg00815605 | 0.74462 | 0.5375  | 0.06465 | 0.05842 | 0.41576 | 0.39335 | 0.05917 | 0.07523 | 0.0631  | 0.05222 ACOT2    |
| cg00816620 | 0.15342 | 0.14479 | 0.27771 | 0.38815 | 0.49443 | 0.2962  | 0.17796 | 0.13407 | 0.16837 | 0.1954 C1orf25   |
| cg00818693 | 0.03483 | 0.03768 | 0.03536 | 0.03923 | 0.02305 | 0.03247 | 0.03425 | 0.03542 | 0.03225 | 0.03482 TTC14    |
| cg00818872 | 0.05069 | 0.05127 | 0.13949 | 0.12261 | 0.0717  | 0.05164 | 0.09853 | 0.11883 | 0.06068 | 0.04851 CHRN2    |
| cg00819310 | 0.84711 | 0.76391 | 0.86537 | 0.87026 | 0.90835 | 0.89044 | 0.60705 | 0.85688 | 0.88967 | 0.87955 VANG1    |
| cg00819362 | 0.85736 | 0.8837  | 0.89985 | 0.89823 | 0.90883 | 0.90453 | 0.87881 | 0.8485  | 0.90652 | 0.67125 CLIPR-59 |
| cg00819696 | 0.02331 | 0.02405 | 0.02767 | 0.02732 | 0.02938 | 0.02829 | 0.02574 | 0.0241  | 0.02239 | 0.02573 TIMELESS |
| cg00821764 | 0.02794 | 0.02633 | 0.02952 | 0.03145 | 0.02139 | 0.0211  | 0.02409 | 0.02003 | 0.02609 | 0.02155 UMPS     |
| cg00822607 | 0.06304 | 0.05894 | 0.07271 | 0.06984 | 0.03965 | 0.06167 | 0.05801 | 0.05593 | 0.05802 | 0.05423 ZNF688   |
| cg00823148 | 0.65328 | 0.45293 | 0.60667 | 0.80609 | 0.82277 | 0.77282 | 0.08148 | 0.71665 | 0.49464 | 0.16709 CRYGB    |
| cg00824109 | 0.03664 | 0.03477 | 0.04391 | 0.03871 | 0.03666 | 0.02942 | 0.03623 | 0.03984 | 0.03528 | 0.03633 CHD4     |
| cg00825031 | 0.01907 | 0.01924 | 0.02378 | 0.02234 | 0.0143  | 0.01532 | 0.01976 | 0.01941 | 0.01528 | 0.01505 VPS37A   |
| cg00826384 | 0.0338  | 0.03073 | 0.04497 | 0.03611 | 0.03264 | 0.04197 | 0.03489 | 0.03584 | 0.02859 | 0.02703 PTPRZ1   |
| cg00827369 | 0.03741 | 0.04152 | 0.04525 | 0.04364 | 0.03763 | 0.03882 | 0.04538 | 0.04115 | 0.03471 | 0.02952 WBSR1    |
| cg00828602 | 0.08447 | 0.063   | 0.07727 | 0.07559 | 0.09539 | 0.09066 | 0.09703 | 0.08957 | 0.06651 | 0.05293 WNT5A    |
| cg00830029 | 0.38822 | 0.16705 | 0.69676 | 0.63401 | 0.41285 | 0.7783  | 0.84718 | 0.93491 | 0.95637 | 0.93696 NRIP2    |
| cg00830393 | 0.04855 | 0.04932 | 0.05748 | 0.06986 | 0.07506 | 0.06472 | 0.06825 | 0.06113 | 0.044   | 0.03983 LRIG1    |
| cg00831028 | 0.03809 | 0.04373 | 0.05031 | 0.04883 | 0.03331 | 0.03797 | 0.03936 | 0.04268 | 0.04019 | 0.04426 C2orf43  |
| cg00832517 | 0.11757 | 0.10314 | 0.11389 | 0.10024 | 0.15236 | 0.13537 | 0.07941 | 0.07225 | 0.08183 | 0.10755 C1orf126 |
| cg00832994 | 0.3264  | 0.08077 | 0.79449 | 0.9168  | 0.21561 | 0.04031 | 0.20819 | 0.03302 | 0.40266 | 0.04225 ATPAF1   |
| cg00833393 | 0.04956 | 0.03956 | 0.03221 | 0.02656 | 0.02881 | 0.0287  | 0.02704 | 0.03484 | 0.02994 | 0.02245 CREB3    |
| cg00833777 | 0.8818  | 0.30949 | 0.33445 | 0.48659 | 0.47718 | 0.53081 | 0.16876 | 0.17553 | 0.15918 | 0.17242 ITGAM    |
| cg00834796 | 0.09319 | 0.07228 | 0.08319 | 0.0689  | 0.09866 | 0.06926 | 0.09139 | 0.07558 | 0.07419 | 0.0939 JAKMIP2   |
| cg00834958 | 0.06057 | 0.07369 | 0.07625 | 0.07613 | 0.06176 | 0.0821  | 0.05993 | 0.07174 | 0.0612  | 0.0597 TSC22D4   |
| cg00836605 | 0.02802 | 0.03085 | 0.03982 | 0.03171 | 0.02524 | 0.02366 | 0.02664 | 0.0297  | 0.02781 | 0.02452 JAZF1    |

|            |         |         |         |         |         |         |         |         |         |                   |
|------------|---------|---------|---------|---------|---------|---------|---------|---------|---------|-------------------|
| cg00837103 | 0.07884 | 0.08933 | 0.30889 | 0.39007 | 0.79951 | 0.55446 | 0.55417 | 0.68597 | 0.49953 | 0.38255 COL9A3    |
| cg00838150 | 0.05468 | 0.05003 | 0.05042 | 0.04342 | 0.05855 | 0.05274 | 0.06914 | 0.06619 | 0.0484  | 0.05542 MITF      |
| cg00839584 | 0.18692 | 0.34414 | 0.16815 | 0.46241 | 0.38436 | 0.56256 | 0.31459 | 0.62264 | 0.64225 | 0.34792 IL1A      |
| cg00839802 | 0.06126 | 0.06407 | 0.08042 | 0.06802 | 0.06493 | 0.06197 | 0.0481  | 0.04811 | 0.05973 | 0.0637 MAN1A1     |
| cg00840403 | 0.11365 | 0.10199 | 0.11692 | 0.09275 | 0.22163 | 0.13628 | 0.10946 | 0.08325 | 0.18591 | 0.09923 CHST4     |
| cg00840516 | 0.84347 | 0.46067 | 0.92895 | 0.92273 | 0.95534 | 0.87545 | 0.87787 | 0.70634 | 0.90482 | 0.79548 HYAL2     |
| cg00841581 | 0.03626 | 0.03541 | 0.0374  | 0.03766 | 0.02637 | 0.03359 | 0.03226 | 0.0319  | 0.0301  | 0.03376 STAG1     |
| cg00842351 | 0.20056 | 0.19651 | 0.16157 | 0.13756 | 0.30301 | 0.23944 | 0.14298 | 0.1305  | 0.13522 | 0.14938 TJP2      |
| cg00845900 | 0.93293 | 0.92005 | 0.89516 | 0.91677 | 0.86522 | 0.89684 | 0.90813 | 0.92594 | 0.9394  | 0.91848 CPA4      |
| cg00846036 | 0.17565 | 0.23708 | 0.3108  | 0.40082 | 0.35003 | 0.21321 | 0.66982 | 0.3187  | 0.16387 | 0.1975 DLG2       |
| cg00848394 | 0.04106 | 0.04098 | 0.04514 | 0.04678 | 0.05905 | 0.0567  | 0.03254 | 0.03173 | 0.03956 | 0.0263 WDR51A     |
| cg00848397 | 0.04043 | 0.04744 | 0.0453  | 0.04069 | 0.03853 | 0.03472 | 0.03554 | 0.03587 | 0.03485 | 0.03275 MGC4172   |
| cg00848461 | 0.72502 | 0.19088 | 0.33742 | 0.46356 | 0.51271 | 0.11156 | 0.26318 | 0.14229 | 0.84862 | 0.33793 RAB24     |
| cg00848728 | 0.0193  | 0.01567 | 0.03317 | 0.02653 | 0.36891 | 0.11127 | 0.02191 | 0.01903 | 0.06804 | 0.02114 DAB1      |
| cg00849368 | 0.07114 | 0.06464 | 0.07305 | 0.05807 | 0.06872 | 0.0633  | 0.08309 | 0.05893 | 0.04333 | 0.04711 ARSK      |
| cg00850538 | 0.69486 | 0.33448 | 0.11687 | 0.10007 | 0.78236 | 0.7466  | 0.62023 | 0.18263 | 0.83803 | 0.59728 CRIM1     |
| cg00852964 | 0.52621 | 0.16196 | 0.74818 | 0.76992 | 0.6932  | 0.5593  | 0.22864 | 0.1355  | 0.47208 | 0.2529 VNN1       |
| cg00853068 | 0.30548 | 0.16171 | 0.92808 | 0.9468  | 0.94724 | 0.9478  | 0.75614 | 0.59323 | 0.95279 | 0.93846 FMNL1     |
| cg00854637 | 0.05161 | 0.06119 | 0.05878 | 0.06099 | 0.0431  | 0.04718 | 0.04517 | 0.0461  | 0.04244 | 0.04325 TSNAIP1   |
| cg00854995 | 0.05309 | 0.04749 | 0.0522  | 0.05362 | 0.03982 | 0.04892 | 0.04854 | 0.05057 | 0.049   | 0.05265 SKP1A     |
| cg00856375 | 0.03899 | 0.04191 | 0.04349 | 0.03821 | 0.0422  | 0.03723 | 0.04537 | 0.04573 | 0.05251 | 0.03974 PSMD14    |
| cg00858899 | 0.10565 | 0.10497 | 0.09145 | 0.08564 | 0.13099 | 0.12772 | 0.15314 | 0.11469 | 0.11106 | 0.0981 CCND1      |
| cg00859193 | 0.04091 | 0.04166 | 0.0419  | 0.03929 | 0.03677 | 0.03409 | 0.03561 | 0.0385  | 0.0356  | 0.03203 C13orf12  |
| cg00859655 | 0.8807  | 0.75401 | 0.87921 | 0.89345 | 0.86456 | 0.72205 | 0.67583 | 0.76742 | 0.8125  | 0.78974 CYB5R2    |
| cg00861635 | 0.06025 | 0.05642 | 0.05871 | 0.05515 | 0.04226 | 0.05387 | 0.05003 | 0.05892 | 0.04909 | 0.04168 ZNF200    |
| cg00862041 | 0.50619 | 0.22788 | 0.94781 | 0.95683 | 0.92801 | 0.90376 | 0.73878 | 0.72036 | 0.95242 | 0.96416 GPRASP2   |
| cg00862290 | 0.58985 | 0.7119  | 0.80651 | 0.83578 | 0.79365 | 0.85363 | 0.77082 | 0.67244 | 0.83583 | 0.82108 KCNMB3    |
| cg00862770 | 0.03874 | 0.03501 | 0.03594 | 0.0294  | 0.04698 | 0.03088 | 0.02693 | 0.02991 | 0.02019 | 0.02235 FKBP5     |
| cg00864867 | 0.04876 | 0.04159 | 0.04567 | 0.04125 | 0.04066 | 0.0414  | 0.0369  | 0.03995 | 0.03349 | 0.03683 PAWR      |
| cg00870662 | 0.04082 | 0.03997 | 0.09112 | 0.06724 | 0.06217 | 0.06556 | 0.07635 | 0.06948 | 0.04872 | 0.06143 PARD6G    |
| cg00871453 | 0.04716 | 0.04288 | 0.07191 | 0.06567 | 0.04869 | 0.04471 | 0.03622 | 0.03385 | 0.04074 | 0.0523 WDR67      |
| cg00873037 | 0.04418 | 0.05591 | 0.05772 | 0.0598  | 0.05163 | 0.0483  | 0.08774 | 0.09628 | 0.0441  | 0.04657 NEIL2     |
| cg00873937 | 0.75694 | 0.69975 | 0.08785 | 0.1048  | 0.16045 | 0.0681  | 0.05747 | 0.0464  | 0.0742  | 0.04135 ATOH7     |
| cg00874863 | 0.29512 | 0.38875 | 0.54985 | 0.41857 | 0.60813 | 0.74419 | 0.40738 | 0.4608  | 0.33028 | 0.39377 LHFPL1    |
| cg00875272 | 0.78435 | 0.62228 | 0.80925 | 0.86756 | 0.78496 | 0.8583  | 0.39735 | 0.3075  | 0.40718 | 0.10958 TAL1      |
| cg00876704 | 0.07677 | 0.03087 | 0.03938 | 0.0312  | 0.20774 | 0.02122 | 0.10575 | 0.03211 | 0.498   | 0.09328 PKN1      |
| cg00877887 | 0.09665 | 0.04174 | 0.24456 | 0.11622 | 0.11665 | 0.22837 | 0.07109 | 0.04875 | 0.51286 | 0.60048 LOC405753 |
| cg00877964 | 0.04587 | 0.04671 | 0.04805 | 0.04799 | 0.0355  | 0.04072 | 0.03794 | 0.04298 | 0.04066 | 0.04279 SLC1A4    |
| cg00881086 | 0.05947 | 0.0604  | 0.06673 | 0.05916 | 0.045   | 0.0586  | 0.05624 | 0.05926 | 0.05188 | 0.04998 NPHP3     |
| cg00881370 | 0.93675 | 0.83753 | 0.92285 | 0.9508  | 0.95471 | 0.92237 | 0.61721 | 0.72474 | 0.94609 | 0.85088 LOC55908  |
| cg00882451 | 0.27282 | 0.34826 | 0.86368 | 0.88986 | 0.88846 | 0.91019 | 0.55002 | 0.20434 | 0.70789 | 0.30328 ZP2       |

|            |         |         |         |         |         |         |         |         |         |         |          |
|------------|---------|---------|---------|---------|---------|---------|---------|---------|---------|---------|----------|
| cg00882832 | 0.10964 | 0.10289 | 0.10265 | 0.10223 | 0.1497  | 0.07648 | 0.10182 | 0.08033 | 0.84744 | 0.79009 | SPRY1    |
| cg00884221 | 0.0876  | 0.08509 | 0.08461 | 0.07882 | 0.10926 | 0.10295 | 0.06992 | 0.07634 | 0.06661 | 0.0626  | IGFBP7   |
| cg00884529 | 0.10199 | 0.11702 | 0.10914 | 0.11582 | 0.08516 | 0.09437 | 0.09244 | 0.10876 | 0.10434 | 0.09747 | BZW2     |
| cg00885506 | 0.06645 | 0.06062 | 0.09808 | 0.08831 | 0.10433 | 0.07882 | 0.07701 | 0.07866 | 0.07009 | 0.0669  | WDR31    |
| cg00886554 | 0.0985  | 0.06205 | 0.12794 | 0.25824 | 0.07266 | 0.35335 | 0.04822 | 0.08998 | 0.05164 | 0.04084 | NMU      |
| cg00887101 | 0.12837 | 0.13076 | 0.15102 | 0.13544 | 0.09707 | 0.10292 | 0.10731 | 0.11294 | 0.12629 | 0.10382 | KIAA1698 |
| cg00887547 | 0.05736 | 0.06219 | 0.07708 | 0.06215 | 0.05921 | 0.06589 | 0.06249 | 0.06104 | 0.05598 | 0.05672 | TAOK3    |
| cg00887700 | 0.03302 | 0.03509 | 0.03778 | 0.03491 | 0.03209 | 0.03373 | 0.03191 | 0.03162 | 0.03061 | 0.03154 | EIF2B1   |
| cg00888007 | 0.02519 | 0.03195 | 0.165   | 0.24508 | 0.2792  | 0.30513 | 0.04503 | 0.02842 | 0.02474 | 0.01853 | CCND2    |
| cg00888479 | 0.02983 | 0.0291  | 0.60914 | 0.62321 | 0.63391 | 0.60761 | 0.25811 | 0.46566 | 0.5097  | 0.45976 | SLC24A3  |
| cg00888561 | 0.14076 | 0.04299 | 0.07878 | 0.08168 | 0.04354 | 0.04372 | 0.04647 | 0.03043 | 0.04957 | 0.03158 | WDFY2    |
| cg00890257 | 0.03677 | 0.03603 | 0.33365 | 0.46261 | 0.56115 | 0.47798 | 0.44332 | 0.45687 | 0.05655 | 0.46282 | DEGS2    |
| cg00891278 | 0.77255 | 0.91829 | 0.88808 | 0.91541 | 0.62759 | 0.68123 | 0.27768 | 0.24721 | 0.90532 | 0.88536 | CCDC37   |
| cg00891541 | 0.94333 | 0.94845 | 0.94716 | 0.95264 | 0.95159 | 0.93857 | 0.43063 | 0.85426 | 0.72898 | 0.90497 | SMPD3    |
| cg00892393 | 0.74258 | 0.7932  | 0.59841 | 0.66702 | 0.62808 | 0.78589 | 0.33609 | 0.23447 | 0.80344 | 0.73326 | MGC35212 |
| cg00892798 | 0.02597 | 0.02888 | 0.08647 | 0.04894 | 0.04977 | 0.02607 | 0.03307 | 0.03138 | 0.02819 | 0.02448 | NGFR     |
| cg00893242 | 0.79076 | 0.71831 | 0.04427 | 0.04975 | 0.6729  | 0.40185 | 0.90477 | 0.55422 | 0.03505 | 0.02542 | SND1     |
| cg00893636 | 0.03336 | 0.03196 | 0.03755 | 0.0343  | 0.03738 | 0.03695 | 0.03299 | 0.03274 | 0.03174 | 0.03167 | EPM2AIP1 |
| cg00893987 | 0.04333 | 0.04829 | 0.04852 | 0.04436 | 0.0614  | 0.06012 | 0.04615 | 0.04441 | 0.03401 | 0.03528 | RPL7L1   |
| cg00894577 | 0.3597  | 0.23466 | 0.35575 | 0.31765 | 0.33556 | 0.63481 | 0.39212 | 0.26096 | 0.26854 | 0.29122 | SLC6A14  |
| cg00895324 | 0.1154  | 0.08241 | 0.43314 | 0.67353 | 0.30359 | 0.10006 | 0.07621 | 0.06038 | 0.06989 | 0.06153 | PCP4     |
| cg00896220 | 0.78103 | 0.82575 | 0.68065 | 0.78486 | 0.70554 | 0.73053 | 0.2526  | 0.41032 | 0.65642 | 0.49699 | CCL4L2   |
| cg00897329 | 0.04864 | 0.0467  | 0.06038 | 0.05578 | 0.04447 | 0.05238 | 0.04756 | 0.04174 | 0.0504  | 0.05001 | LACE1    |
| cg00899086 | 0.05747 | 0.05618 | 0.05023 | 0.05415 | 0.07411 | 0.061   | 0.0507  | 0.04483 | 0.04534 | 0.0411  | 11-Sep   |
| cg00899641 | 0.04458 | 0.04602 | 0.05915 | 0.0438  | 0.04515 | 0.04529 | 0.03724 | 0.04105 | 0.04133 | 0.04031 | SF3B1    |
| cg00899659 | 0.83968 | 0.83894 | 0.83733 | 0.85426 | 0.79481 | 0.78903 | 0.81662 | 0.50746 | 0.48302 | 0.12867 | ZNF22    |
| cg00901493 | 0.1433  | 0.05742 | 0.95132 | 0.93849 | 0.42885 | 0.37373 | 0.1102  | 0.06102 | 0.25042 | 0.0462  | YBX2     |
| cg00901652 | 0.05543 | 0.05446 | 0.10169 | 0.08195 | 0.11124 | 0.06892 | 0.07887 | 0.06886 | 0.05613 | 0.08177 | SH2BP1   |
| cg00901683 | 0.02984 | 0.03411 | 0.04017 | 0.03297 | 0.0303  | 0.03305 | 0.02649 | 0.02739 | 0.02702 | 0.0259  | CPSF4    |
| cg00901704 | 0.04509 | 0.04871 | 0.0448  | 0.03856 | 0.04568 | 0.04752 | 0.04309 | 0.04696 | 0.04407 | 0.04904 | SLC25A19 |
| cg00901766 | 0.08099 | 0.07019 | 0.0902  | 0.0787  | 0.09694 | 0.09404 | 0.07659 | 0.06584 | 0.05964 | 0.05795 | MLLT1    |
| cg00902195 | 0.02559 | 0.02475 | 0.02826 | 0.02604 | 0.04269 | 0.02943 | 0.02185 | 0.02579 | 0.03521 | 0.02492 | SYT10    |
| cg00903242 | 0.13273 | 0.12983 | 0.45355 | 0.5874  | 0.42025 | 0.20205 | 0.37513 | 0.33597 | 0.39819 | 0.35274 | CHL1     |
| cg00903375 | 0.03994 | 0.03743 | 0.03998 | 0.03537 | 0.02562 | 0.03171 | 0.03037 | 0.03493 | 0.03082 | 0.03237 | SBDS     |
| cg00904483 | 0.89651 | 0.9198  | 0.67859 | 0.78334 | 0.85566 | 0.88386 | 0.50855 | 0.84061 | 0.90447 | 0.89642 | MGMT     |
| cg00904574 | 0.02477 | 0.03008 | 0.03625 | 0.03553 | 0.0297  | 0.02961 | 0.02601 | 0.03044 | 0.02857 | 0.02549 | PLK3     |
| cg00905170 | 0.03239 | 0.03111 | 0.02963 | 0.02707 | 0.02309 | 0.02727 | 0.02311 | 0.02571 | 0.02029 | 0.02337 | RRS1     |
| cg00906183 | 0.04294 | 0.0433  | 0.04433 | 0.03865 | 0.03108 | 0.03732 | 0.03969 | 0.03697 | 0.03609 | 0.035   | HGS      |
| cg00908551 | 0.08275 | 0.08069 | 0.13427 | 0.14098 | 0.08024 | 0.06494 | 0.08517 | 0.06905 | 0.0833  | 0.0642  | FANCF    |
| cg00910067 | 0.08609 | 0.048   | 0.41393 | 0.46453 | 0.37949 | 0.53134 | 0.4267  | 0.35546 | 0.09785 | 0.04299 | SLC7A10  |
| cg00910168 | 0.88147 | 0.70468 | 0.86744 | 0.86727 | 0.81487 | 0.44087 | 0.78395 | 0.68548 | 0.70599 | 0.3744  | DHX37    |

|            |         |         |         |         |         |         |         |         |         |         |           |
|------------|---------|---------|---------|---------|---------|---------|---------|---------|---------|---------|-----------|
| cg00911351 | 0.73455 | 0.90385 | 0.46451 | 0.47393 | 0.92818 | 0.92277 | 0.92023 | 0.92767 | 0.75909 | 0.67766 | PCDHGB4   |
| cg00911873 | 0.73155 | 0.44862 | 0.75548 | 0.7917  | 0.63255 | 0.72401 | 0.70021 | 0.73285 | 0.77229 | 0.67822 | PRPS1L1   |
| cg00912191 | 0.14735 | 0.1528  | 0.18771 | 0.13258 | 0.2284  | 0.14831 | 0.11523 | 0.08849 | 0.26846 | 0.11111 | DC-UbP    |
| cg00912942 | 0.93742 | 0.58744 | 0.86987 | 0.92654 | 0.92654 | 0.92016 | 0.80421 | 0.13477 | 0.89878 | 0.74986 | C1orf127  |
| cg00915206 | 0.04338 | 0.04167 | 0.04788 | 0.04858 | 0.05023 | 0.04506 | 0.04438 | 0.04293 | 0.03943 | 0.03657 | GAD1      |
| cg00915289 | 0.0345  | 0.03361 | 0.03979 | 0.0379  | 0.0259  | 0.03233 | 0.03057 | 0.02832 | 0.02813 | 0.02264 | CKS1B     |
| cg00916199 | 0.03068 | 0.02854 | 0.03522 | 0.03036 | 0.02429 | 0.028   | 0.02559 | 0.02895 | 0.02932 | 0.02498 | PRO1580   |
| cg00916635 | 0.8311  | 0.78655 | 0.47889 | 0.83988 | 0.76623 | 0.82118 | 0.16575 | 0.7657  | 0.21805 | 0.20322 | PTPN22    |
| cg00917893 | 0.04005 | 0.04488 | 0.03966 | 0.03767 | 0.04982 | 0.04974 | 0.0457  | 0.04739 | 0.03672 | 0.03484 | PDHB      |
| cg00918005 | 0.11866 | 0.07682 | 0.21696 | 0.26951 | 0.36436 | 0.20228 | 0.04658 | 0.04386 | 0.37109 | 0.49528 | REG3G     |
| cg00918794 | 0.06118 | 0.05959 | 0.05598 | 0.06339 | 0.05962 | 0.05308 | 0.06382 | 0.06437 | 0.04936 | 0.05513 | PIIB      |
| cg00919857 | 0.35255 | 0.40771 | 0.8493  | 0.80238 | 0.68418 | 0.60292 | 0.36097 | 0.37457 | 0.4115  | 0.516   | TMOD2     |
| cg00920960 | 0.11383 | 0.10868 | 0.16937 | 0.15436 | 0.16792 | 0.13601 | 0.12006 | 0.13217 | 0.13495 | 0.13149 | BIRC4     |
| cg00922727 | 0.07712 | 0.07312 | 0.1012  | 0.09461 | 0.11258 | 0.08983 | 0.07369 | 0.05785 | 0.08059 | 0.0768  | SESN1     |
| cg00925229 | 0.03493 | 0.03155 | 0.14064 | 0.0487  | 0.03242 | 0.033   | 0.03435 | 0.03197 | 0.03834 | 0.02625 | GPR137    |
| cg00925717 | 0.40625 | 0.14789 | 0.58572 | 0.8044  | 0.16794 | 0.18833 | 0.31074 | 0.04786 | 0.08769 | 0.21375 | SCNN1B    |
| cg00929606 | 0.68102 | 0.35544 | 0.95822 | 0.95639 | 0.95301 | 0.47042 | 0.79815 | 0.28655 | 0.42057 | 0.11871 | ZNF3      |
| cg00929855 | 0.04842 | 0.04681 | 0.04136 | 0.04417 | 0.02834 | 0.04116 | 0.13206 | 0.04219 | 0.03959 | 0.03985 | HSPA1A    |
| cg00930078 | 0.04243 | 0.04469 | 0.04703 | 0.04324 | 0.034   | 0.03745 | 0.0343  | 0.02929 | 0.03569 | 0.0318  | FBXO28    |
| cg00930194 | 0.28027 | 0.10042 | 0.64363 | 0.65002 | 0.68151 | 0.76687 | 0.12722 | 0.11837 | 0.12172 | 0.23689 | PROP1     |
| cg00930873 | 0.04884 | 0.02735 | 0.073   | 0.03401 | 0.83314 | 0.45205 | 0.23316 | 0.10114 | 0.21337 | 0.06629 | ALDH1A2   |
| cg00931491 | 0.72634 | 0.52512 | 0.66999 | 0.7402  | 0.81403 | 0.67344 | 0.47824 | 0.28511 | 0.36732 | 0.3316  | SULT1A2   |
| cg00932276 | 0.1325  | 0.04056 | 0.71047 | 0.77929 | 0.17903 | 0.03136 | 0.57998 | 0.59172 | 0.15913 | 0.42149 | EGFL6     |
| cg00933411 | 0.80073 | 0.58145 | 0.36038 | 0.49251 | 0.58996 | 0.61987 | 0.24289 | 0.16095 | 0.29448 | 0.1902  | DLC1      |
| cg00935364 | 0.90731 | 0.69932 | 0.04331 | 0.04436 | 0.04073 | 0.16539 | 0.12115 | 0.25565 | 0.11538 | 0.0544  | PKP3      |
| cg00935388 | 0.87777 | 0.89721 | 0.87344 | 0.89679 | 0.85986 | 0.86149 | 0.88161 | 0.86674 | 0.90455 | 0.77521 | RNASE8    |
| cg00935430 | 0.05266 | 0.05331 | 0.08331 | 0.07084 | 0.06349 | 0.05954 | 0.04987 | 0.04733 | 0.05394 | 0.0618  | ZNF678    |
| cg00936626 | 0.90387 | 0.623   | 0.8744  | 0.87915 | 0.92189 | 0.89406 | 0.87913 | 0.84146 | 0.91758 | 0.86273 | PIGZ      |
| cg00939965 | 0.65157 | 0.68492 | 0.66045 | 0.68519 | 0.61774 | 0.68003 | 0.51538 | 0.61861 | 0.69681 | 0.68507 | PRRG1     |
| cg00940278 | 0.03419 | 0.03377 | 0.03582 | 0.03352 | 0.02859 | 0.02894 | 0.03377 | 0.0324  | 0.02646 | 0.02832 | GATA6     |
| cg00940891 | 0.02864 | 0.02817 | 0.02546 | 0.02741 | 0.03225 | 0.02973 | 0.02672 | 0.02811 | 0.02628 | 0.02299 | FGFRL1    |
| cg00941229 | 0.04175 | 0.04161 | 0.03173 | 0.02943 | 0.03664 | 0.03752 | 0.02845 | 0.02922 | 0.03448 | 0.04169 | ZA20D1    |
| cg00941549 | 0.78407 | 0.77214 | 0.79692 | 0.85781 | 0.82146 | 0.81513 | 0.31504 | 0.56927 | 0.81102 | 0.70243 | AKAP4     |
| cg00943245 | 0.82367 | 0.75008 | 0.81788 | 0.83698 | 0.87276 | 0.84168 | 0.81513 | 0.80112 | 0.83923 | 0.49516 | PCDHGC5   |
| cg00943909 | 0.42482 | 0.47404 | 0.57935 | 0.62557 | 0.27016 | 0.0622  | 0.65992 | 0.60009 | 0.22657 | 0.1153  | GNAS      |
| cg00943950 | 0.05645 | 0.05309 | 0.05409 | 0.05467 | 0.04831 | 0.04696 | 0.04927 | 0.05065 | 0.04804 | 0.04257 | UBE2B     |
| cg00945507 | 0.18822 | 0.08866 | 0.1057  | 0.13468 | 0.17365 | 0.09424 | 0.12848 | 0.1172  | 0.06831 | 0.07157 | SEC61G    |
| cg00945862 | 0.78661 | 0.65857 | 0.79218 | 0.78196 | 0.87194 | 0.89371 | 0.78264 | 0.90522 | 0.74236 | 0.66718 | SLC4A5    |
| cg00947019 | 0.03202 | 0.03209 | 0.03346 | 0.03156 | 0.02919 | 0.02936 | 0.0282  | 0.02674 | 0.02505 | 0.02521 | H2AFV     |
| cg00947275 | 0.08791 | 0.09042 | 0.13867 | 0.13856 | 0.13396 | 0.11586 | 0.18816 | 0.36011 | 0.09569 | 0.09934 | LAS1L     |
| cg00948500 | 0.19252 | 0.19763 | 0.36202 | 0.24538 | 0.37673 | 0.68694 | 0.19114 | 0.17603 | 0.17817 | 0.16879 | KRTAP20-2 |



|            |         |         |         |         |         |         |         |         |         |                  |
|------------|---------|---------|---------|---------|---------|---------|---------|---------|---------|------------------|
| cg00948524 | 0.73773 | 0.17787 | 0.29352 | 0.55192 | 0.04387 | 0.03335 | 0.07838 | 0.08472 | 0.04141 | 0.03054 RNF135   |
| cg00949442 | 0.53564 | 0.67394 | 0.94409 | 0.95224 | 0.9202  | 0.95902 | 0.19927 | 0.05546 | 0.96715 | 0.96067 ABCA3    |
| cg00949554 | 0.07497 | 0.5299  | 0.11944 | 0.11951 | 0.10128 | 0.15615 | 0.11494 | 0.17361 | 0.10731 | 0.0546 UBE2E3    |
| cg00950418 | 0.03701 | 0.03304 | 0.04714 | 0.03895 | 0.02854 | 0.02994 | 0.03207 | 0.03081 | 0.04635 | 0.03103 SRPK2    |
| cg00950621 | 0.03377 | 0.02755 | 0.02967 | 0.03271 | 0.02363 | 0.02557 | 0.02484 | 0.02829 | 0.02144 | 0.02448 STARD5   |
| cg00951770 | 0.70324 | 0.61385 | 0.79667 | 0.85504 | 0.87835 | 0.81894 | 0.47778 | 0.59996 | 0.57317 | 0.77071 RABGGTA  |
| cg00953256 | 0.43193 | 0.22985 | 0.92385 | 0.91443 | 0.94092 | 0.62007 | 0.66353 | 0.29939 | 0.93553 | 0.78643 CCND1    |
| cg00953277 | 0.03266 | 0.03457 | 0.04097 | 0.03086 | 0.03551 | 0.038   | 0.03175 | 0.03168 | 0.03257 | 0.03239 SFRS2    |
| cg00954003 | 0.02799 | 0.02839 | 0.03004 | 0.03036 | 0.02576 | 0.02649 | 0.02266 | 0.02386 | 0.0226  | 0.02152 TMSB10   |
| cg00954566 | 0.0328  | 0.03309 | 0.04306 | 0.04056 | 0.02579 | 0.02844 | 0.0308  | 0.02881 | 0.02864 | 0.02603 SCD      |
| cg00955230 | 0.06117 | 0.05747 | 0.06709 | 0.05537 | 0.06261 | 0.06305 | 0.06735 | 0.05802 | 0.04532 | 0.04684 RFC2     |
| cg00955451 | 0.84675 | 0.82789 | 0.87663 | 0.8785  | 0.83874 | 0.70057 | 0.08677 | 0.0733  | 0.85392 | 0.81055 APBA2    |
| cg00958517 | 0.03408 | 0.03541 | 0.03439 | 0.02863 | 0.02921 | 0.03849 | 0.03191 | 0.02773 | 0.02433 | 0.02951 ST3GAL2  |
| cg00958560 | 0.74061 | 0.15054 | 0.2989  | 0.24369 | 0.12108 | 0.09309 | 0.07604 | 0.06957 | 0.06735 | 0.06745 FLJ46481 |
| cg00960702 | 0.04868 | 0.04622 | 0.04242 | 0.04193 | 0.03399 | 0.04338 | 0.0389  | 0.03785 | 0.03237 | 0.03429 CCDC9    |
| cg00962459 | 0.84869 | 0.35319 | 0.76567 | 0.77365 | 0.90657 | 0.82741 | 0.25625 | 0.31111 | 0.36502 | 0.28525 PROKR1   |
| cg00962635 | 0.86523 | 0.80842 | 0.72671 | 0.52869 | 0.65124 | 0.48422 | 0.18266 | 0.07458 | 0.52316 | 0.85119 SYTL4    |
| cg00962799 | 0.73724 | 0.74315 | 0.72376 | 0.74855 | 0.71452 | 0.76027 | 0.41194 | 0.47042 | 0.39454 | 0.46371 SSX8     |
| cg00964109 | 0.02928 | 0.03312 | 0.0324  | 0.03025 | 0.02778 | 0.02952 | 0.04687 | 0.04266 | 0.03043 | 0.02665 UBL7     |
| cg00967316 | 0.73094 | 0.34906 | 0.35701 | 0.43273 | 0.6176  | 0.69268 | 0.64543 | 0.64493 | 0.2038  | 0.15484 PPP1R3A  |
| cg00968475 | 0.24437 | 0.66742 | 0.88981 | 0.87558 | 0.07544 | 0.50819 | 0.42097 | 0.48232 | 0.86961 | 0.8533 BHLHB9    |
| cg00968931 | 0.79748 | 0.3511  | 0.65537 | 0.67895 | 0.6896  | 0.60152 | 0.43673 | 0.28526 | 0.31342 | 0.2941 MRPL54    |
| cg00969271 | 0.93211 | 0.83338 | 0.90189 | 0.92824 | 0.95239 | 0.93559 | 0.92641 | 0.91751 | 0.90871 | 0.859 ORM2       |
| cg00969446 | 0.94854 | 0.76241 | 0.89517 | 0.91749 | 0.94729 | 0.93956 | 0.76739 | 0.59404 | 0.80368 | 0.71692 CENTA1   |
| cg00970325 | 0.09807 | 0.06424 | 0.89373 | 0.89986 | 0.88742 | 0.92618 | 0.20487 | 0.06396 | 0.53121 | 0.389 PAQR9      |
| cg00970385 | 0.81905 | 0.80097 | 0.18998 | 0.20756 | 0.7812  | 0.79455 | 0.26115 | 0.11248 | 0.14368 | 0.12274 FLJ38725 |
| cg00971396 | 0.03654 | 0.03664 | 0.04224 | 0.03513 | 0.02658 | 0.02939 | 0.03593 | 0.03757 | 0.03052 | 0.02823 POLR2H   |
| cg00973286 | 0.03066 | 0.03984 | 0.03597 | 0.03349 | 0.02812 | 0.03371 | 0.03344 | 0.03374 | 0.0317  | 0.03399 TNFRSF1A |
| cg00973334 | 0.04367 | 0.04298 | 0.05963 | 0.05113 | 0.06086 | 0.06259 | 0.05062 | 0.04801 | 0.04935 | 0.03658 LASS5    |
| cg00973677 | 0.02236 | 0.02777 | 0.06351 | 0.04432 | 0.03843 | 0.03317 | 0.02494 | 0.02545 | 0.02682 | 0.02402 CHRM2    |
| cg00974864 | 0.6072  | 0.40832 | 0.77939 | 0.84195 | 0.82856 | 0.86544 | 0.38964 | 0.44801 | 0.82902 | 0.271 FCGR3B     |
| cg00976054 | 0.09527 | 0.068   | 0.09337 | 0.12565 | 0.08064 | 0.08223 | 0.07258 | 0.072   | 0.09631 | 0.07902 ATP5H    |
| cg00977690 | 0.167   | 0.17029 | 0.18561 | 0.13755 | 0.14608 | 0.13118 | 0.11681 | 0.11778 | 0.12487 | 0.11362 ZFX      |
| cg00979348 | 0.17442 | 0.07382 | 0.35947 | 0.54937 | 0.12543 | 0.09715 | 0.11321 | 0.05222 | 0.06057 | 0.0451 HPSE      |
| cg00980978 | 0.04308 | 0.06611 | 0.25013 | 0.4047  | 0.74421 | 0.66769 | 0.17361 | 0.11702 | 0.27279 | 0.13047 WFDC2    |
| cg00981643 | 0.65732 | 0.18514 | 0.43663 | 0.39423 | 0.09552 | 0.06905 | 0.17818 | 0.09061 | 0.14829 | 0.034 MECP2      |
| cg00983520 | 0.55068 | 0.20645 | 0.65116 | 0.77374 | 0.81127 | 0.40049 | 0.21725 | 0.17876 | 0.46098 | 0.09106 CPT1B    |
| cg00983899 | 0.69154 | 0.28156 | 0.70764 | 0.77754 | 0.71593 | 0.71304 | 0.53308 | 0.21618 | 0.54817 | 0.57567 CABP2    |
| cg00984602 | 0.1248  | 0.13866 | 0.19018 | 0.1656  | 0.20629 | 0.18547 | 0.14428 | 0.14569 | 0.12203 | 0.13042 SRF      |
| cg00986320 | 0.75318 | 0.83109 | 0.7524  | 0.82478 | 0.80564 | 0.79721 | 0.75344 | 0.78295 | 0.75644 | 0.72176 CYFIP2   |
| cg00987015 | 0.18343 | 0.10092 | 0.73672 | 0.76865 | 0.38857 | 0.17747 | 0.66454 | 0.16282 | 0.06691 | 0.05341 CHRM1    |

|            |         |         |         |         |         |         |         |         |         |                   |
|------------|---------|---------|---------|---------|---------|---------|---------|---------|---------|-------------------|
| cg00987379 | 0.27751 | 0.10289 | 0.14442 | 0.17429 | 0.04148 | 0.03918 | 0.06655 | 0.05389 | 0.07662 | 0.04056 ZNF395    |
| cg00988256 | 0.9008  | 0.8598  | 0.89065 | 0.90603 | 0.91405 | 0.87989 | 0.88701 | 0.57709 | 0.90735 | 0.89238 TSPAN16   |
| cg00995065 | 0.20954 | 0.22282 | 0.42838 | 0.45352 | 0.53079 | 0.54292 | 0.24349 | 0.2264  | 0.22911 | 0.26311 SLCO1B1   |
| cg00995152 | 0.76689 | 0.4203  | 0.73361 | 0.75263 | 0.51335 | 0.39342 | 0.71412 | 0.52643 | 0.33977 | 0.22325 DAB2IP    |
| cg00995327 | 0.07862 | 0.08716 | 0.08932 | 0.0791  | 0.06164 | 0.0663  | 0.08384 | 0.06875 | 0.07659 | 0.06392 CHST2     |
| cg00995520 | 0.1902  | 0.05935 | 0.69751 | 0.86074 | 0.68717 | 0.78836 | 0.08445 | 0.05162 | 0.88088 | 0.82266 KCNA3     |
| cg00997424 | 0.11888 | 0.10054 | 0.14186 | 0.11081 | 0.11542 | 0.11123 | 0.12439 | 0.10022 | 0.10276 | 0.07552 PI4KII    |
| cg01000094 | 0.78574 | 0.73757 | 0.86426 | 0.87911 | 0.7742  | 0.83762 | 0.16155 | 0.16454 | 0.85574 | 0.56121           |
| cg01001286 | 0.44731 | 0.17206 | 0.71424 | 0.82554 | 0.55355 | 0.59986 | 0.76153 | 0.81397 | 0.76271 | 0.39523 IL16      |
| cg01003992 | 0.05894 | 0.05773 | 0.05721 | 0.06576 | 0.05241 | 0.06059 | 0.04549 | 0.0591  | 0.04624 | 0.05318 LOC388152 |
| cg01007201 | 0.82645 | 0.52181 | 0.8991  | 0.92638 | 0.94064 | 0.87593 | 0.82304 | 0.85483 | 0.84979 | 0.779 CLEC4A      |
| cg01009664 | 0.07047 | 0.05929 | 0.90824 | 0.96673 | 0.84325 | 0.63075 | 0.75027 | 0.74898 | 0.94931 | 0.96071 TRH       |
| cg01013324 | 0.05034 | 0.02779 | 0.31489 | 0.35539 | 0.74197 | 0.20877 | 0.38042 | 0.08571 | 0.08135 | 0.03846 EFN3      |
| cg01015871 | 0.21507 | 0.04907 | 0.54344 | 0.74629 | 0.69133 | 0.79926 | 0.30166 | 0.49133 | 0.24949 | 0.05311 MT4       |
| cg01015879 | 0.0474  | 0.05041 | 0.05755 | 0.05902 | 0.0569  | 0.0529  | 0.05833 | 0.05181 | 0.04799 | 0.0495 RDX        |
| cg01017147 | 0.31056 | 0.16723 | 0.35425 | 0.5417  | 0.78911 | 0.42907 | 0.11757 | 0.18594 | 0.25506 | 0.09301 DN3       |
| cg01021485 | 0.01823 | 0.01881 | 0.01833 | 0.01994 | 0.01656 | 0.01724 | 0.01717 | 0.01777 | 0.01519 | 0.01429 CSNK1G1   |
| cg01025762 | 0.10488 | 0.1068  | 0.15818 | 0.1629  | 0.16696 | 0.14176 | 0.10314 | 0.10464 | 0.0977  | 0.08666 DLD       |
| cg01025842 | 0.06201 | 0.05818 | 0.30213 | 0.35101 | 0.08516 | 0.07677 | 0.33601 | 0.08507 | 0.04277 | 0.05312 TRADD     |
| cg01026744 | 0.62522 | 0.61846 | 0.58944 | 0.61913 | 0.63198 | 0.62882 | 0.60606 | 0.61068 | 0.71899 | 0.60347 NAP1L5    |
| cg01027739 | 0.04684 | 0.05102 | 0.1083  | 0.2354  | 0.33271 | 0.30924 | 0.62846 | 0.52541 | 0.04935 | 0.04088 DOLPP1    |
| cg01027805 | 0.06448 | 0.07013 | 0.06655 | 0.06521 | 0.05744 | 0.07488 | 0.07459 | 0.06674 | 0.0626  | 0.06133 ZNF219    |
| cg01029592 | 0.76702 | 0.74126 | 0.49342 | 0.44534 | 0.85954 | 0.79682 | 0.7903  | 0.78081 | 0.79381 | 0.78989 SOX15     |
| cg01031251 | 0.85019 | 0.48503 | 0.85483 | 0.85799 | 0.846   | 0.80399 | 0.73412 | 0.42211 | 0.878   | 0.7578 RPS6KA1    |
| cg01031400 | 0.06564 | 0.02946 | 0.19392 | 0.15165 | 0.95767 | 0.95516 | 0.03637 | 0.03296 | 0.25795 | 0.02177 TNFRSF10D |
| cg01033160 | 0.04677 | 0.046   | 0.06215 | 0.04948 | 0.05124 | 0.04039 | 0.04797 | 0.05093 | 0.07207 | 0.03981 CEBPG     |
| cg01033938 | 0.09857 | 0.08232 | 0.88651 | 0.88689 | 0.88555 | 0.84234 | 0.44668 | 0.66188 | 0.05898 | 0.09734 ADAMTS8   |
| cg01035238 | 0.797   | 0.73883 | 0.73463 | 0.76962 | 0.75266 | 0.74073 | 0.70108 | 0.79383 | 0.77394 | 0.717 TNFAIP6     |
| cg01035422 | 0.82049 | 0.51825 | 0.8627  | 0.88911 | 0.87207 | 0.89798 | 0.81867 | 0.85038 | 0.87805 | 0.85114 PLIN      |
| cg01036012 | 0.89668 | 0.90025 | 0.92416 | 0.94429 | 0.963   | 0.92652 | 0.80818 | 0.79835 | 0.82234 | 0.87896 TUBB8     |
| cg01036148 | 0.03537 | 0.03697 | 0.03184 | 0.03643 | 0.02219 | 0.03293 | 0.02811 | 0.03158 | 0.02834 | 0.03103 RNPEP     |
| cg01036173 | 0.06921 | 0.06712 | 0.04392 | 0.03907 | 0.06548 | 0.09367 | 0.04358 | 0.04224 | 0.03882 | 0.03442 C9orf46   |
| cg01036779 | 0.60924 | 0.30788 | 0.91481 | 0.91391 | 0.84218 | 0.81334 | 0.05589 | 0.343   | 0.15443 | 0.16371 SH2D3A    |
| cg01037108 | 0.04806 | 0.05092 | 0.05212 | 0.04734 | 0.03826 | 0.05298 | 0.04545 | 0.05192 | 0.05392 | 0.04722 HSPA9B    |
| cg01040062 | 0.03754 | 0.04109 | 0.04138 | 0.03909 | 0.02796 | 0.03783 | 0.03771 | 0.03735 | 0.03556 | 0.03451 CY5D2     |
| cg01040759 | 0.04585 | 0.05056 | 0.05811 | 0.05215 | 0.03374 | 0.04992 | 0.05024 | 0.04949 | 0.04726 | 0.04395 ST3GAL5   |
| cg01040850 | 0.89683 | 0.8966  | 0.68361 | 0.76398 | 0.85141 | 0.66189 | 0.21552 | 0.40354 | 0.91099 | 0.77194 MR1       |
| cg01041367 | 0.27036 | 0.06506 | 0.13658 | 0.13038 | 0.09618 | 0.06979 | 0.08217 | 0.0721  | 0.07048 | 0.06722 TMEM70    |
| cg01043330 | 0.09992 | 0.06517 | 0.15228 | 0.17156 | 0.08862 | 0.0749  | 0.07479 | 0.05851 | 0.09451 | 0.15148 RIC3      |
| cg01043831 | 0.85099 | 0.58836 | 0.69574 | 0.79839 | 0.7404  | 0.76422 | 0.62547 | 0.60224 | 0.87883 | 0.65821 PTTG2     |
| cg01044662 | 0.04886 | 0.25354 | 0.35138 | 0.39979 | 0.05242 | 0.04719 | 0.69923 | 0.10911 | 0.04879 | 0.04025 C2orf3    |

|            |         |         |         |         |         |         |         |         |         |                 |
|------------|---------|---------|---------|---------|---------|---------|---------|---------|---------|-----------------|
| cg01044722 | 0.04191 | 0.04735 | 0.03362 | 0.04365 | 0.04662 | 0.04445 | 0.04824 | 0.04543 | 0.0374  | 0.03831 MYH10   |
| cg01045423 | 0.12902 | 0.11634 | 0.15886 | 0.15086 | 0.14148 | 0.16748 | 0.10036 | 0.08769 | 0.12631 | 0.12992 GLMN    |
| cg01046174 | 0.03751 | 0.03152 | 0.03803 | 0.03481 | 0.04216 | 0.04633 | 0.02947 | 0.02915 | 0.03214 | 0.03657 PIP5K3  |
| cg01047414 | 0.42765 | 0.43989 | 0.05247 | 0.04897 | 0.06313 | 0.046   | 0.04334 | 0.05016 | 0.04559 | 0.0375 PHYH     |
| cg01048931 | 0.04252 | 0.04311 | 0.04263 | 0.03717 | 0.04018 | 0.03899 | 0.041   | 0.0459  | 0.03615 | 0.0311 ECOP     |
| cg01049530 | 0.04855 | 0.05331 | 0.22885 | 0.42155 | 0.0556  | 0.04579 | 0.04777 | 0.0373  | 0.41345 | 0.44439 BMP3    |
| cg01050433 | 0.05551 | 0.04806 | 0.06686 | 0.06065 | 0.10044 | 0.07991 | 0.06558 | 0.07051 | 0.09824 | 0.06927 TYRO3   |
| cg01053621 | 0.84307 | 0.89856 | 0.77068 | 0.89654 | 0.93439 | 0.89763 | 0.50326 | 0.53445 | 0.62603 | 0.42227 APOA2   |
| cg01055695 | 0.36708 | 0.24918 | 0.84702 | 0.87218 | 0.87903 | 0.82953 | 0.23719 | 0.32428 | 0.5424  | 0.55156 PAEP    |
| cg01056155 | 0.03921 | 0.03527 | 0.03883 | 0.03686 | 0.02611 | 0.03084 | 0.03287 | 0.03439 | 0.03051 | 0.03181 BTF3    |
| cg01056568 | 0.31097 | 0.13589 | 0.74852 | 0.81134 | 0.70069 | 0.76856 | 0.43218 | 0.44782 | 0.49961 | 0.48735 GLP2R   |
| cg01057962 | 0.0395  | 0.03752 | 0.04215 | 0.03814 | 0.03314 | 0.03903 | 0.0327  | 0.03365 | 0.03248 | 0.02998 BCL6    |
| cg01058368 | 0.75551 | 0.32827 | 0.61746 | 0.8356  | 0.35551 | 0.32899 | 0.44624 | 0.46586 | 0.20926 | 0.11871 CDH10   |
| cg01062029 | 0.16389 | 0.04121 | 0.03532 | 0.03175 | 0.78221 | 0.53201 | 0.07244 | 0.04611 | 0.5966  | 0.20425 ROR2    |
| cg01063524 | 0.11916 | 0.12946 | 0.12268 | 0.11047 | 0.18977 | 0.14547 | 0.15126 | 0.1436  | 0.11534 | 0.16362 NME1    |
| cg01063813 | 0.08164 | 0.08364 | 0.13942 | 0.10787 | 0.42182 | 0.33316 | 0.4813  | 0.51541 | 0.10325 | 0.08582 STAT6   |
| cg01064307 | 0.04939 | 0.05078 | 0.04797 | 0.04695 | 0.03816 | 0.04146 | 0.04811 | 0.04846 | 0.04149 | 0.04153 CD55    |
| cg01064957 | 0.03828 | 0.03692 | 0.04145 | 0.0385  | 0.02017 | 0.04319 | 0.03713 | 0.03805 | 0.03826 | 0.04253 SNX2    |
| cg01065920 | 0.03583 | 0.03408 | 0.03571 | 0.04017 | 0.04212 | 0.04322 | 0.04266 | 0.035   | 0.03584 | 0.03859 NDUFA12 |
| cg01069256 | 0.44192 | 0.06471 | 0.08494 | 0.05763 | 0.11343 | 0.04128 | 0.05078 | 0.05571 | 0.04908 | 0.04783 C8orf70 |
| cg01071811 | 0.62402 | 0.52635 | 0.81494 | 0.83333 | 0.65853 | 0.6652  | 0.55013 | 0.59965 | 0.36344 | 0.39941 L3MBTL  |
| cg01072821 | 0.07821 | 0.05195 | 0.12195 | 0.16218 | 0.06801 | 0.07409 | 0.05223 | 0.05573 | 0.05244 | 0.05834 UNQ9391 |
| cg01074640 | 0.41178 | 0.26228 | 0.61581 | 0.70467 | 0.53382 | 0.62809 | 0.2118  | 0.10022 | 0.31341 | 0.16322 IFNA17  |
| cg01076838 | 0.88056 | 0.89187 | 0.87968 | 0.88893 | 0.91056 | 0.87447 | 0.87651 | 0.8318  | 0.89672 | 0.87695 TMEM86B |
| cg01078276 | 0.02553 | 0.02486 | 0.0332  | 0.03532 | 0.01893 | 0.02912 | 0.41482 | 0.20597 | 0.48088 | 0.02438 PLAU    |
| cg01078434 | 0.65439 | 0.48089 | 0.85561 | 0.89373 | 0.54028 | 0.79265 | 0.05406 | 0.18498 | 0.91067 | 0.47899 MAS1L   |
| cg01078689 | 0.44813 | 0.43087 | 0.73602 | 0.71836 | 0.74768 | 0.68289 | 0.68409 | 0.5603  | 0.78746 | 0.71495 PSG5    |
| cg01078871 | 0.10257 | 0.09171 | 0.09929 | 0.09393 | 0.08423 | 0.09955 | 0.08311 | 0.08353 | 0.08088 | 0.09467 FBXO33  |
| cg01079126 | 0.02436 | 0.02486 | 0.03889 | 0.03337 | 0.14329 | 0.02907 | 0.38659 | 0.17906 | 0.03031 | 0.01522 MTMR1   |
| cg01080862 | 0.03222 | 0.04193 | 0.04419 | 0.04451 | 0.0354  | 0.04054 | 0.10273 | 0.03693 | 0.03963 | 0.03497 IL13RA1 |
| cg01081263 | 0.65129 | 0.53909 | 0.8344  | 0.87505 | 0.90387 | 0.87573 | 0.87229 | 0.8412  | 0.87578 | 0.83092 SCUBE2  |
| cg01082679 | 0.04183 | 0.03609 | 0.0535  | 0.04956 | 0.05644 | 0.04955 | 0.04264 | 0.04165 | 0.03936 | 0.04177 CCNT1   |
| cg01086868 | 0.0637  | 0.06481 | 0.09852 | 0.083   | 0.09413 | 0.09973 | 0.05397 | 0.057   | 0.06562 | 0.06448 AR      |
| cg01086895 | 0.10448 | 0.07159 | 0.22476 | 0.27927 | 0.62506 | 0.51404 | 0.33114 | 0.12342 | 0.08858 | 0.11184 DCHS1   |
| cg01086978 | 0.08103 | 0.07094 | 0.06626 | 0.05911 | 0.05668 | 0.06169 | 0.05669 | 0.06743 | 0.06128 | 0.06542 ARFGEF1 |
| cg01087382 | 0.05743 | 0.04871 | 0.05577 | 0.06239 | 0.05101 | 0.0587  | 0.04941 | 0.04737 | 0.06921 | 0.05321 MAP3K7  |
| cg01087710 | 0.03934 | 0.03717 | 0.04023 | 0.03854 | 0.03531 | 0.0385  | 0.03269 | 0.02933 | 0.03008 | 0.03012 LIN10   |
| cg01090445 | 0.05072 | 0.04977 | 0.05753 | 0.04303 | 0.06543 | 0.06349 | 0.04614 | 0.04147 | 0.04819 | 0.0385 TRAIIP   |
| cg01091448 | 0.04309 | 0.03983 | 0.02806 | 0.03308 | 0.03504 | 0.04363 | 0.03077 | 0.03229 | 0.02745 | 0.02832 AMACR   |
| cg01091565 | 0.918   | 0.86907 | 0.90901 | 0.9175  | 0.93357 | 0.85041 | 0.90912 | 0.87316 | 0.9036  | 0.81014 MESP1   |
| cg01092036 | 0.87798 | 0.87006 | 0.8923  | 0.88678 | 0.78624 | 0.87071 | 0.82712 | 0.85366 | 0.89007 | 0.87909 MMP8    |

|            |         |         |         |         |         |         |         |         |         |                   |
|------------|---------|---------|---------|---------|---------|---------|---------|---------|---------|-------------------|
| cg01092561 | 0.03309 | 0.02872 | 0.03499 | 0.03047 | 0.03429 | 0.02675 | 0.03104 | 0.02963 | 0.02648 | 0.02522 PPP1R3B   |
| cg01095395 | 0.6651  | 0.64599 | 0.64184 | 0.71906 | 0.58528 | 0.73928 | 0.53382 | 0.63577 | 0.68237 | 0.69972 IMPG2     |
| cg01095482 | 0.93098 | 0.82201 | 0.94172 | 0.93797 | 0.93412 | 0.90651 | 0.5186  | 0.16331 | 0.94973 | 0.89881 TIE1      |
| cg01095590 | 0.03299 | 0.03292 | 0.46305 | 0.39497 | 0.27616 | 0.03887 | 0.31941 | 0.34902 | 0.03124 | 0.02289 KIAA0040  |
| cg01097940 | 0.05998 | 0.07122 | 0.08295 | 0.07766 | 0.06372 | 0.05936 | 0.06716 | 0.07143 | 0.06229 | 0.06181 SPSB2     |
| cg01100784 | 0.04177 | 0.03606 | 0.04563 | 0.04089 | 0.03624 | 0.03302 | 0.04532 | 0.03918 | 0.03579 | 0.03015 MAPK8IP3  |
| cg01100796 | 0.12911 | 0.10894 | 0.34626 | 0.37461 | 0.4857  | 0.39569 | 0.27241 | 0.10879 | 0.24259 | 0.1376 CPT2       |
| cg01103730 | 0.85457 | 0.85824 | 0.86821 | 0.86595 | 0.76995 | 0.80417 | 0.85521 | 0.55936 | 0.86746 | 0.76748 IL20      |
| cg01103836 | 0.97078 | 0.96627 | 0.97093 | 0.97227 | 0.97611 | 0.97137 | 0.97356 | 0.9759  | 0.97652 | 0.97884 MYO9B     |
| cg01104423 | 0.04374 | 0.04188 | 0.04793 | 0.04419 | 0.05213 | 0.03839 | 0.03651 | 0.04128 | 0.03234 | 0.03375 EIF2AK1   |
| cg01106788 | 0.8262  | 0.78895 | 0.7917  | 0.82326 | 0.7665  | 0.76577 | 0.81063 | 0.8157  | 0.83377 | 0.79493 KIAA1632  |
| cg01107031 | 0.05427 | 0.05489 | 0.0519  | 0.0524  | 0.06348 | 0.06318 | 0.03927 | 0.03935 | 0.04273 | 0.03669 TGFB1     |
| cg01107741 | 0.03677 | 0.03889 | 0.04835 | 0.04958 | 0.04544 | 0.04212 | 0.02774 | 0.03171 | 0.03091 | 0.03662 CANT1     |
| cg01108476 | 0.94144 | 0.87772 | 0.95014 | 0.94789 | 0.97024 | 0.95042 | 0.95203 | 0.94546 | 0.96264 | 0.89576 TCP11     |
| cg01109219 | 0.64692 | 0.35055 | 0.53154 | 0.64725 | 0.70482 | 0.72867 | 0.54492 | 0.6348  | 0.4653  | 0.3297 RASGRP3    |
| cg01110312 | 0.58183 | 0.27935 | 0.68858 | 0.72449 | 0.75996 | 0.18053 | 0.43037 | 0.22424 | 0.68828 | 0.54457 GTF2H3    |
| cg01110846 | 0.03106 | 0.03279 | 0.03938 | 0.03338 | 0.03046 | 0.02741 | 0.03292 | 0.03422 | 0.02849 | 0.02834 KCTD13    |
| cg01112452 | 0.74626 | 0.82273 | 0.5228  | 0.65004 | 0.41025 | 0.5023  | 0.2667  | 0.10491 | 0.23365 | 0.39466 ZCCHC12   |
| cg01112778 | 0.14084 | 0.08872 | 0.3067  | 0.32845 | 0.5635  | 0.69776 | 0.30235 | 0.46339 | 0.11249 | 0.09959 PPP2R2B   |
| cg01114088 | 0.9235  | 0.61071 | 0.12181 | 0.20691 | 0.90068 | 0.77416 | 0.18094 | 0.06114 | 0.05381 | 0.05281 CYTL1     |
| cg01116966 | 0.02365 | 0.0204  | 0.29405 | 0.19829 | 0.52217 | 0.02171 | 0.08496 | 0.01972 | 0.0424  | 0.01776 TCF7      |
| cg01117627 | 0.04198 | 0.0355  | 0.03982 | 0.03237 | 0.0315  | 0.03876 | 0.03797 | 0.03836 | 0.03481 | 0.03549 CYP46A1   |
| cg01119135 | 0.44196 | 0.11605 | 0.8932  | 0.92706 | 0.79163 | 0.568   | 0.87181 | 0.49743 | 0.50229 | 0.33084 C1orf116  |
| cg01120165 | 0.83448 | 0.14117 | 0.42743 | 0.61983 | 0.95833 | 0.08254 | 0.55824 | 0.07874 | 0.92854 | 0.81658 HDAC10    |
| cg01120307 | 0.87387 | 0.87628 | 0.868   | 0.90043 | 0.91524 | 0.87502 | 0.87334 | 0.89382 | 0.88896 | 0.87378 LOC349236 |
| cg01120308 | 0.88327 | 0.31498 | 0.05793 | 0.06291 | 0.2485  | 0.09885 | 0.05664 | 0.06579 | 0.03622 | 0.04281 PICALM    |
| cg01120761 | 0.81579 | 0.7645  | 0.19976 | 0.22981 | 0.62541 | 0.76899 | 0.15833 | 0.37005 | 0.18492 | 0.15702 CLEC4C    |
| cg01120898 | 0.04022 | 0.03764 | 0.05875 | 0.23233 | 0.17365 | 0.04029 | 0.07154 | 0.0364  | 0.12087 | 0.02736 IL1RAP    |
| cg01124420 | 0.63389 | 0.04687 | 0.29176 | 0.41867 | 0.05266 | 0.07776 | 0.05607 | 0.04951 | 0.05541 | 0.03512 EDAR      |
| cg01124961 | 0.03399 | 0.04137 | 0.0408  | 0.04087 | 0.0255  | 0.03907 | 0.04734 | 0.04415 | 0.03616 | 0.03724 RC74      |
| cg01125463 | 0.13212 | 0.04364 | 0.05036 | 0.04814 | 0.04985 | 0.04357 | 0.04318 | 0.04554 | 0.34432 | 0.14282 PEX6      |
| cg01126560 | 0.90214 | 0.29987 | 0.06774 | 0.06037 | 0.97613 | 0.97615 | 0.05506 | 0.05318 | 0.04117 | 0.04817 C9orf142  |
| cg01127428 | 0.9228  | 0.91908 | 0.92885 | 0.92719 | 0.95241 | 0.93392 | 0.92354 | 0.93    | 0.92896 | 0.94093 SYCP3     |
| cg01128603 | 0.09587 | 0.0779  | 0.11318 | 0.07302 | 0.12745 | 0.09054 | 0.10805 | 0.09689 | 0.08923 | 0.07045 SF3B2     |
| cg01129459 | 0.33377 | 0.07758 | 0.86739 | 0.90414 | 0.91427 | 0.87039 | 0.0723  | 0.04656 | 0.90357 | 0.78403 FLJ46156  |
| cg01129847 | 0.83707 | 0.85196 | 0.76815 | 0.78078 | 0.88706 | 0.86152 | 0.19588 | 0.70892 | 0.23201 | 0.23854 C19orf35  |
| cg01130192 | 0.0404  | 0.03959 | 0.03586 | 0.03608 | 0.14675 | 0.04491 | 0.03417 | 0.03287 | 0.02918 | 0.03183 ACO1      |
| cg01131735 | 0.05775 | 0.03548 | 0.0299  | 0.03291 | 0.03073 | 0.02953 | 0.02925 | 0.03096 | 0.02629 | 0.02902 SC65      |
| cg01134491 | 0.03886 | 0.04014 | 0.04041 | 0.03981 | 0.02671 | 0.0351  | 0.03906 | 0.0392  | 0.03215 | 0.0334 MTHFR      |
| cg01135200 | 0.04916 | 0.05182 | 0.06113 | 0.06696 | 0.04934 | 0.05511 | 0.049   | 0.05329 | 0.05589 | 0.04825 STXPB5    |
| cg01135626 | 0.76428 | 0.22294 | 0.78496 | 0.89685 | 0.76727 | 0.52175 | 0.24734 | 0.75666 | 0.45648 | 0.4651 CDX4       |

|            |         |         |         |         |         |         |         |         |         |                  |
|------------|---------|---------|---------|---------|---------|---------|---------|---------|---------|------------------|
| cg01136458 | 0.37555 | 0.11724 | 0.20745 | 0.15514 | 0.25122 | 0.11707 | 0.21019 | 0.17031 | 0.11138 | 0.13644 CSMD1    |
| cg01137065 | 0.57956 | 0.10667 | 0.21766 | 0.23088 | 0.28261 | 0.05737 | 0.3069  | 0.07164 | 0.09743 | 0.03604 FOXK2    |
| cg01137198 | 0.02798 | 0.02862 | 0.02956 | 0.03044 | 0.02927 | 0.02822 | 0.02964 | 0.02687 | 0.02393 | 0.0242 TA-PP2C   |
| cg01137532 | 0.0337  | 0.03378 | 0.035   | 0.03017 | 0.02537 | 0.02699 | 0.02505 | 0.02628 | 0.0248  | 0.02268 ZNF365   |
| cg01137708 | 0.07369 | 0.04421 | 0.0442  | 0.05025 | 0.05835 | 0.05623 | 0.04673 | 0.04297 | 0.03941 | 0.05338 NFKB1    |
| cg01137737 | 0.0587  | 0.06271 | 0.06224 | 0.05566 | 0.04637 | 0.05527 | 0.05417 | 0.06028 | 0.05377 | 0.05919 MIR16    |
| cg01138020 | 0.61283 | 0.5375  | 0.74358 | 0.90845 | 0.90115 | 0.90283 | 0.70771 | 0.75566 | 0.50564 | 0.13634 MGC29671 |
| cg01139059 | 0.08181 | 0.09079 | 0.08712 | 0.08118 | 0.07178 | 0.08503 | 0.07747 | 0.07932 | 0.08139 | 0.08208 TSN      |
| cg01139966 | 0.08201 | 0.05872 | 0.05671 | 0.04463 | 0.08367 | 0.06949 | 0.0514  | 0.04881 | 0.07741 | 0.06227 GOLPH3L  |
| cg01140782 | 0.03596 | 0.03594 | 0.05039 | 0.04258 | 0.0361  | 0.03461 | 0.20677 | 0.12174 | 0.03069 | 0.02805 FAM58A   |
| cg01141769 | 0.04336 | 0.0465  | 0.09401 | 0.06862 | 0.05812 | 0.04957 | 0.06638 | 0.05492 | 0.03992 | 0.03754 USP25    |
| cg01143454 | 0.0633  | 0.06556 | 0.06038 | 0.05891 | 0.17704 | 0.10125 | 0.07035 | 0.05798 | 0.04645 | 0.0452 C2orf141  |
| cg01144251 | 0.60141 | 0.74188 | 0.39149 | 0.52132 | 0.66072 | 0.61822 | 0.1155  | 0.04486 | 0.48916 | 0.22931 KLK9     |
| cg01144286 | 0.04494 | 0.04125 | 0.50638 | 0.64471 | 0.30165 | 0.23467 | 0.09244 | 0.05961 | 0.04151 | 0.0272 C2orf103  |
| cg01145389 | 0.04327 | 0.04422 | 0.05802 | 0.04906 | 0.04214 | 0.04048 | 0.03347 | 0.03422 | 0.05414 | 0.04372 CDKN2C   |
| cg01145396 | 0.78197 | 0.19127 | 0.77498 | 0.8878  | 0.85452 | 0.83161 | 0.60338 | 0.73836 | 0.09062 | 0.0752 CHRNG     |
| cg01146980 | 0.04076 | 0.03966 | 0.03575 | 0.03954 | 0.04629 | 0.04662 | 0.03176 | 0.03171 | 0.02556 | 0.02783 DNAJA5   |
| cg01148741 | 0.92824 | 0.7161  | 0.87258 | 0.85161 | 0.81159 | 0.17874 | 0.59685 | 0.28222 | 0.63069 | 0.28362 DUSP2    |
| cg01150454 | 0.03035 | 0.02956 | 0.03195 | 0.03258 | 0.03061 | 0.03101 | 0.02184 | 0.02527 | 0.02742 | 0.02649 MRPS5    |
| cg01151686 | 0.02062 | 0.02413 | 0.03217 | 0.02909 | 0.01849 | 0.02187 | 0.02219 | 0.02245 | 0.01904 | 0.02148 LIG3     |
| cg01151699 | 0.05446 | 0.05136 | 0.08555 | 0.07345 | 0.2009  | 0.06177 | 0.06106 | 0.05042 | 0.07737 | 0.05975 CACNG2   |
| cg01152019 | 0.9284  | 0.86283 | 0.82277 | 0.93174 | 0.89085 | 0.90458 | 0.90869 | 0.86398 | 0.91848 | 0.75715 HOXD4    |
| cg01152499 | 0.05628 | 0.06203 | 0.06226 | 0.06678 | 0.05188 | 0.05813 | 0.05837 | 0.0532  | 0.04994 | 0.05386 FAM46C   |
| cg01154193 | 0.0808  | 0.06228 | 0.06866 | 0.06701 | 0.04873 | 0.06191 | 0.06339 | 0.06555 | 0.05329 | 0.05305 IQCC     |
| cg01154537 | 0.08239 | 0.10178 | 0.0837  | 0.07583 | 0.06407 | 0.07033 | 0.06741 | 0.07155 | 0.07327 | 0.0478 C10orf4   |
| cg01154775 | 0.08684 | 0.08747 | 0.15068 | 0.13345 | 0.13111 | 0.08998 | 0.05496 | 0.06295 | 0.06517 | 0.06418 MGC29898 |
| cg01155039 | 0.50291 | 0.20968 | 0.44674 | 0.51385 | 0.71223 | 0.73559 | 0.38155 | 0.07056 | 0.5724  | 0.42062 AMN      |
| cg01160766 | 0.07777 | 0.07077 | 0.09793 | 0.10546 | 0.11685 | 0.09556 | 0.06753 | 0.06899 | 0.07382 | 0.09771 RPL38    |
| cg01161216 | 0.50913 | 0.06144 | 0.07361 | 0.07122 | 0.04733 | 0.04784 | 0.35627 | 0.31677 | 0.05662 | 0.03758 NULP1    |
| cg01161597 | 0.08806 | 0.08665 | 0.10046 | 0.10817 | 0.05224 | 0.0841  | 0.07423 | 0.07712 | 0.08974 | 0.08196 TAF2     |
| cg01161611 | 0.23594 | 0.20229 | 0.40765 | 0.52152 | 0.53161 | 0.71576 | 0.48321 | 0.57422 | 0.38247 | 0.34517 GALNT13  |
| cg01166674 | 0.04478 | 0.04219 | 0.04714 | 0.04579 | 0.04077 | 0.04848 | 0.04003 | 0.04131 | 0.03994 | 0.04088 ABCB8    |
| cg01168201 | 0.03208 | 0.03208 | 0.03809 | 0.03724 | 0.03129 | 0.04068 | 0.05007 | 0.03397 | 0.02775 | 0.03451 HIC1     |
| cg01169610 | 0.87188 | 0.83385 | 0.8479  | 0.88288 | 0.88257 | 0.88629 | 0.66058 | 0.86322 | 0.85975 | 0.87559 INPP4A   |
| cg01169624 | 0.46316 | 0.37154 | 0.51441 | 0.47653 | 0.67933 | 0.78582 | 0.63024 | 0.61242 | 0.5801  | 0.59098 SGCE     |
| cg01169726 | 0.3834  | 0.25325 | 0.20609 | 0.19497 | 0.33218 | 0.04847 | 0.0569  | 0.10511 | 0.38544 | 0.58355 DLX5     |
| cg01169778 | 0.51785 | 0.13494 | 0.90888 | 0.96311 | 0.92835 | 0.94951 | 0.85283 | 0.69027 | 0.97967 | 0.97379 GBGT1    |
| cg01171588 | 0.0185  | 0.01879 | 0.02065 | 0.01846 | 0.04966 | 0.01737 | 0.01457 | 0.01862 | 0.01868 | 0.01583 USP38    |
| cg01171858 | 0.73769 | 0.25385 | 0.76754 | 0.81081 | 0.73737 | 0.80234 | 0.53586 | 0.71412 | 0.80237 | 0.73952 SLC5A2   |
| cg01172484 | 0.04787 | 0.0372  | 0.05729 | 0.06208 | 0.05575 | 0.05172 | 0.06355 | 0.18934 | 0.03574 | 0.04517 MAGEH1   |
| cg01172656 | 0.0343  | 0.02793 | 0.02769 | 0.02463 | 0.02262 | 0.02154 | 0.02161 | 0.02113 | 0.02499 | 0.02219 NRBF2    |

|            |         |         |         |         |         |         |         |         |         |                   |
|------------|---------|---------|---------|---------|---------|---------|---------|---------|---------|-------------------|
| cg01172735 | 0.06817 | 0.06483 | 0.06513 | 0.07173 | 0.07067 | 0.05004 | 0.06136 | 0.05923 | 0.05555 | 0.05305 SESN2     |
| cg01172899 | 0.12292 | 0.09782 | 0.85827 | 0.88034 | 0.8699  | 0.79377 | 0.33085 | 0.06147 | 0.81962 | 0.81058 SLC16A14  |
| cg01172972 | 0.05686 | 0.0521  | 0.05988 | 0.05518 | 0.0407  | 0.05615 | 0.0584  | 0.0584  | 0.05172 | 0.04959 ZFYVE9    |
| cg01173186 | 0.18507 | 0.18179 | 0.41212 | 0.49757 | 0.26858 | 0.18749 | 0.20742 | 0.18948 | 0.41748 | 0.31583 VMP       |
| cg01173291 | 0.03445 | 0.03671 | 0.03788 | 0.03219 | 0.02773 | 0.03146 | 0.03143 | 0.03112 | 0.0276  | 0.02952 ZSCAN2    |
| cg01176271 | 0.03311 | 0.03315 | 0.03176 | 0.03327 | 0.03126 | 0.03753 | 0.03401 | 0.03668 | 0.03263 | 0.02984 SNX1      |
| cg01177524 | 0.04424 | 0.04768 | 0.05136 | 0.0408  | 0.02952 | 0.03752 | 0.03931 | 0.04161 | 0.03172 | 0.04154 NEDD9     |
| cg01177956 | 0.0431  | 0.04439 | 0.06539 | 0.05901 | 0.0552  | 0.05759 | 0.04041 | 0.04471 | 0.03601 | 0.04006 SLC4A2    |
| cg01182585 | 0.0553  | 0.04545 | 0.04284 | 0.03773 | 0.09194 | 0.05222 | 0.05158 | 0.04216 | 0.03188 | 0.03743 C7orf30   |
| cg01182697 | 0.86086 | 0.69349 | 0.85186 | 0.8569  | 0.77694 | 0.80625 | 0.50757 | 0.47839 | 0.87647 | 0.68244 TMEM59    |
| cg01182873 | 0.7736  | 0.40479 | 0.71748 | 0.74691 | 0.73348 | 0.70762 | 0.72655 | 0.76866 | 0.81431 | 0.52747 TAS2R3    |
| cg01183669 | 0.03159 | 0.03218 | 0.03393 | 0.02979 | 0.02825 | 0.02822 | 0.02567 | 0.02847 | 0.02785 | 0.02753 ST7L      |
| cg01184449 | 0.88551 | 0.60471 | 0.89041 | 0.89838 | 0.8053  | 0.63184 | 0.86356 | 0.47079 | 0.61941 | 0.62218 EML4      |
| cg01184522 | 0.02865 | 0.0304  | 0.03018 | 0.02929 | 0.02045 | 0.02585 | 0.07708 | 0.03962 | 0.0403  | 0.03067 ZNF496    |
| cg01185080 | 0.56953 | 0.1706  | 0.06942 | 0.07971 | 0.54043 | 0.20779 | 0.95523 | 0.92681 | 0.95988 | 0.91994 ZNF710    |
| cg01185754 | 0.63092 | 0.08655 | 0.10553 | 0.08427 | 0.74698 | 0.30525 | 0.04307 | 0.05402 | 0.26185 | 0.08821 F3        |
| cg01186777 | 0.04953 | 0.05716 | 0.06384 | 0.0549  | 0.05435 | 0.04648 | 0.05512 | 0.03996 | 0.05025 | 0.03662 TNFSF9    |
| cg01190915 | 0.05748 | 0.04275 | 0.0483  | 0.06649 | 0.02883 | 0.03712 | 0.04176 | 0.03913 | 0.03982 | 0.03786 MT2A      |
| cg01191395 | 0.0308  | 0.03341 | 0.03333 | 0.03257 | 0.02777 | 0.03217 | 0.92282 | 0.54062 | 0.02854 | 0.02429 SAT2      |
| cg01192900 | 0.27815 | 0.16126 | 0.75082 | 0.78744 | 0.64921 | 0.7425  | 0.14952 | 0.1457  | 0.5248  | 0.46902 BTG4      |
| cg01192952 | 0.12013 | 0.0978  | 0.27004 | 0.32435 | 0.31748 | 0.21486 | 0.10624 | 0.07788 | 0.0847  | 0.08302 LGALS14   |
| cg01193293 | 0.3332  | 0.25168 | 0.25313 | 0.38736 | 0.5665  | 0.8296  | 0.04849 | 0.04681 | 0.54798 | 0.27836 SIGLEC7   |
| cg01194444 | 0.95905 | 0.93047 | 0.95635 | 0.9656  | 0.97544 | 0.97199 | 0.96461 | 0.95847 | 0.97234 | 0.96191 MYOG      |
| cg01195014 | 0.38776 | 0.17593 | 0.19648 | 0.17068 | 0.41941 | 0.15347 | 0.24349 | 0.37704 | 0.39782 | 0.34343 MAGED1    |
| cg01195053 | 0.1093  | 0.10898 | 0.09482 | 0.10619 | 0.12014 | 0.08854 | 0.10037 | 0.10237 | 0.06947 | 0.10263 LOC124216 |
| cg01195127 | 0.04616 | 0.04205 | 0.05132 | 0.04732 | 0.03973 | 0.04896 | 0.04172 | 0.04241 | 0.04457 | 0.04214 YIPF4     |
| cg01197831 | 0.81462 | 0.68298 | 0.77572 | 0.82407 | 0.80839 | 0.85182 | 0.78547 | 0.64955 | 0.54939 | 0.42577 FBP2      |
| cg01199721 | 0.04603 | 0.0431  | 0.04078 | 0.04403 | 0.03179 | 0.03704 | 0.03787 | 0.041   | 0.03077 | 0.03022 GCN1L1    |
| cg01200060 | 0.02947 | 0.03125 | 0.56792 | 0.56158 | 0.5259  | 0.49973 | 0.04488 | 0.03408 | 0.03533 | 0.02711 SCRT2     |
| cg01200177 | 0.31819 | 0.07295 | 0.28983 | 0.23211 | 0.29833 | 0.27951 | 0.0601  | 0.04908 | 0.07983 | 0.04483 POLR2D    |
| cg01204271 | 0.03995 | 0.03769 | 0.95102 | 0.98156 | 0.05838 | 0.05119 | 0.04172 | 0.0333  | 0.03669 | 0.03451 YBX2      |
| cg01204439 | 0.2044  | 0.23405 | 0.07851 | 0.0895  | 0.0474  | 0.0763  | 0.08165 | 0.07653 | 0.07479 | 0.079 TPK1        |
| cg01204985 | 0.42256 | 0.08915 | 0.26475 | 0.13421 | 0.46084 | 0.06247 | 0.05175 | 0.05445 | 0.24295 | 0.19126 LILRA4    |
| cg01206472 | 0.02322 | 0.02475 | 0.03362 | 0.02755 | 0.01874 | 0.02011 | 0.01931 | 0.01882 | 0.02299 | 0.02268 TOMM22    |
| cg01206970 | 0.94016 | 0.7479  | 0.96503 | 0.96593 | 0.9667  | 0.9628  | 0.97562 | 0.95482 | 0.97158 | 0.96191 PPFIA3    |
| cg01211097 | 0.79814 | 0.27777 | 0.39613 | 0.49974 | 0.88696 | 0.71508 | 0.65898 | 0.49812 | 0.8188  | 0.46217 USP10     |
| cg01214209 | 0.56252 | 0.56858 | 0.90372 | 0.90807 | 0.92175 | 0.7406  | 0.70318 | 0.21198 | 0.86591 | 0.7298 MANEAL     |
| cg01214321 | 0.03045 | 0.03511 | 0.03508 | 0.0367  | 0.02388 | 0.03287 | 0.04113 | 0.04384 | 0.02423 | 0.02497 DPYSL2    |
| cg01214847 | 0.7667  | 0.37996 | 0.37541 | 0.48434 | 0.41852 | 0.25248 | 0.16077 | 0.12756 | 0.12078 | 0.09633 TMPRSS3   |
| cg01215061 | 0.14616 | 0.11056 | 0.62068 | 0.78099 | 0.6088  | 0.8795  | 0.43905 | 0.09961 | 0.56891 | 0.5419 TGIF2LX    |
| cg01216369 | 0.78345 | 0.81181 | 0.77387 | 0.80496 | 0.66909 | 0.87278 | 0.16505 | 0.30876 | 0.62735 | 0.21187 SPATA16   |

|             |         |         |         |         |         |         |         |         |         |         |           |
|-------------|---------|---------|---------|---------|---------|---------|---------|---------|---------|---------|-----------|
| cg01220033  | 0.04515 | 0.04753 | 0.04491 | 0.0445  | 0.03954 | 0.0392  | 0.03737 | 0.0364  | 0.03506 | 0.03657 | WDR34     |
| cg01221484  | 0.03913 | 0.04715 | 0.04056 | 0.03825 | 0.03061 | 0.03681 | 0.03462 | 0.04113 | 0.03102 | 0.03066 | ZNF584    |
| cg01221637  | 0.03505 | 0.03144 | 0.04002 | 0.02972 | 0.02772 | 0.03126 | 0.02893 | 0.02916 | 0.02829 | 0.02656 | C20orf112 |
| cg01222684  | 0.25657 | 0.18239 | 0.23309 | 0.23506 | 0.19772 | 0.13745 | 0.14039 | 0.13283 | 0.13892 | 0.11266 | TTC1      |
| cg012226811 | 0.1099  | 0.06372 | 0.05717 | 0.05968 | 0.23296 | 0.06269 | 0.06139 | 0.05535 | 0.0837  | 0.07808 | KCNJ8     |
| cg012226883 | 0.03916 | 0.04088 | 0.04358 | 0.03656 | 0.03147 | 0.03485 | 0.03276 | 0.03292 | 0.0275  | 0.03096 | MTHFR     |
| cg012227519 | 0.13628 | 0.12058 | 0.83076 | 0.86575 | 0.91815 | 0.85151 | 0.02707 | 0.31415 | 0.09673 | 0.11451 | SPANXD    |
| cg012227741 | 0.86867 | 0.64554 | 0.30862 | 0.27981 | 0.54054 | 0.4782  | 0.08538 | 0.07576 | 0.07922 | 0.05337 | GIMAP7    |
| cg012228636 | 0.90947 | 0.77983 | 0.50833 | 0.58427 | 0.93299 | 0.8952  | 0.88626 | 0.88664 | 0.41528 | 0.45446 | PTEN      |
| cg012228667 | 0.03973 | 0.03913 | 0.21605 | 0.13994 | 0.25839 | 0.04348 | 0.52221 | 0.45359 | 0.04785 | 0.02418 | GPR101    |
| cg01230160  | 0.0574  | 0.05805 | 0.07079 | 0.068   | 0.05082 | 0.04954 | 0.0532  | 0.04984 | 0.07163 | 0.0461  | DGKD      |
| cg01231779  | 0.04606 | 0.05239 | 0.05196 | 0.04832 | 0.03871 | 0.04702 | 0.04172 | 0.04337 | 0.04516 | 0.04669 | NID2      |
| cg01234063  | 0.05506 | 0.06462 | 0.05925 | 0.06443 | 0.06984 | 0.06163 | 0.06339 | 0.06372 | 0.05134 | 0.04489 | ST3GAL4   |
| cg01234133  | 0.09005 | 0.03141 | 0.25125 | 0.1959  | 0.0289  | 0.03672 | 0.03567 | 0.14269 | 0.9759  | 0.94821 | COL1A1    |
| cg01236137  | 0.11026 | 0.09785 | 0.09171 | 0.08917 | 0.16006 | 0.11126 | 0.08047 | 0.07791 | 0.07537 | 0.06472 | SUB1      |
| cg01237132  | 0.78708 | 0.20731 | 0.65403 | 0.78737 | 0.40612 | 0.19237 | 0.12463 | 0.17414 | 0.19628 | 0.16606 | CST2      |
| cg01240931  | 0.67045 | 0.62923 | 0.16808 | 0.26616 | 0.07845 | 0.06916 | 0.09482 | 0.12861 | 0.33367 | 0.29063 | APC       |
| cg01241375  | 0.05979 | 0.05906 | 0.07073 | 0.06813 | 0.05519 | 0.06263 | 0.05658 | 0.06367 | 0.04628 | 0.04787 | INVS      |
| cg01241836  | 0.0404  | 0.04348 | 0.04448 | 0.04613 | 0.03131 | 0.03988 | 0.50706 | 0.4291  | 0.03932 | 0.04031 | TFE3      |
| cg01242619  | 0.09864 | 0.06433 | 0.16078 | 0.22361 | 0.82615 | 0.82106 | 0.20715 | 0.06676 | 0.8172  | 0.60888 | PLEC1     |
| cg01243790  | 0.77985 | 0.82024 | 0.73585 | 0.76135 | 0.68187 | 0.77558 | 0.81546 | 0.82199 | 0.77249 | 0.75715 | FLJ30294  |
| cg01244871  | 0.04629 | 0.06598 | 0.03507 | 0.0306  | 0.02444 | 0.02584 | 0.03167 | 0.02777 | 0.02655 | 0.0245  | FAM82B    |
| cg01245595  | 0.02645 | 0.02857 | 0.03628 | 0.03611 | 0.02397 | 0.02799 | 0.02338 | 0.02625 | 0.02034 | 0.01886 | LSS       |
| cg01245656  | 0.05347 | 0.03372 | 0.09278 | 0.06574 | 0.04316 | 0.03027 | 0.04489 | 0.02661 | 0.031   | 0.02326 | ASNS      |
| cg01246254  | 0.07721 | 0.08431 | 0.08287 | 0.07017 |         | 0.08285 | 0.07328 | 0.0815  | 0.07358 | 0.06052 | PLEKHA1   |
| cg01246405  | 0.1254  | 0.14188 | 0.14832 | 0.15176 | 0.17915 | 0.15494 | 0.12016 | 0.11991 | 0.12118 | 0.11965 | STIM1     |
| cg01248426  | 0.09429 | 0.24448 | 0.47699 | 0.6993  | 0.63225 | 0.67538 | 0.10837 | 0.73184 | 0.14862 | 0.1632  | ATP6V0D2  |
| cg01249910  | 0.05785 | 0.05442 | 0.06424 | 0.05927 | 0.04355 | 0.0474  | 0.24381 | 0.28413 | 0.04568 | 0.04893 | SAT2      |
| cg01251255  | 0.02487 | 0.02521 | 0.05657 | 0.03132 | 0.02881 | 0.02633 | 0.11058 | 0.10295 | 0.02145 | 0.02085 | NSUN5     |
| cg01252496  | 0.75227 | 0.29774 | 0.81458 | 0.81808 | 0.62482 | 0.42075 | 0.75571 | 0.75423 | 0.31109 | 0.05764 | MDS032    |
| cg01253107  | 0.04212 | 0.04832 | 0.04934 | 0.04321 | 0.07007 | 0.06362 | 0.05374 | 0.03978 | 0.03559 | 0.03431 | STOML2    |
| cg01253545  | 0.0907  | 0.09194 | 0.14103 | 0.10582 | 0.19003 | 0.1466  | 0.14132 | 0.12392 | 0.12647 | 0.10667 | RNF185    |
| cg01254459  | 0.03092 | 0.03505 | 0.03157 | 0.0246  | 0.04441 | 0.03691 | 0.02602 | 0.02295 | 0.03076 | 0.03485 | PSMC6     |
| cg01254505  | 0.18171 | 0.12136 | 0.71812 | 0.79216 | 0.05003 | 0.03737 | 0.69587 | 0.06258 | 0.03111 | 0.02958 | BST2      |
| cg01255349  | 0.06948 | 0.08005 | 0.09225 | 0.09872 | 0.08298 | 0.07178 | 0.07682 | 0.07521 | 0.07721 | 0.07    | PPFIBP1   |
| cg01255591  | 0.75657 | 0.59147 | 0.70258 | 0.83709 | 0.81325 | 0.74208 | 0.15738 | 0.05309 | 0.49135 | 0.56314 | R3HDM1    |
| cg01257202  | 0.0353  | 0.03882 | 0.05463 | 0.0499  | 0.04161 | 0.04656 | 0.07197 | 0.04589 | 0.03372 | 0.0295  | DKC1      |
| cg01259619  | 0.02059 | 0.01903 | 0.02289 | 0.02116 | 0.05174 | 0.0209  | 0.01863 | 0.0193  | 0.06064 | 0.02326 | ITPKB     |
| cg01260219  | 0.45373 | 0.06365 | 0.71715 | 0.79941 | 0.91131 | 0.81743 | 0.73696 | 0.68138 | 0.08342 | 0.04483 | ADAMTS8   |
| cg01261503  | 0.09032 | 0.08261 | 0.10748 | 0.10664 | 0.13554 | 0.08389 | 0.09258 | 0.07132 | 0.07511 | 0.0644  | POLG2     |
| cg01261535  | 0.03011 | 0.02753 | 0.02473 | 0.02671 | 0.02019 | 0.02615 | 0.02609 | 0.02407 | 0.03136 | 0.02579 | N-PAC     |

|            |         |         |         |         |         |         |         |         |         |                   |
|------------|---------|---------|---------|---------|---------|---------|---------|---------|---------|-------------------|
| cg01262913 | 0.48893 | 0.25009 | 0.68569 | 0.70959 | 0.57192 | 0.43494 | 0.56064 | 0.67577 | 0.30912 | 0.40568 DSCR9     |
| cg01263716 | 0.04637 | 0.03273 | 0.03594 | 0.04164 | 0.0383  | 0.04337 | 0.03016 | 0.03649 | 0.02048 | 0.02362 PHLDA2    |
| cg01264826 | 0.04222 | 0.04859 | 0.04975 | 0.04422 | 0.0426  | 0.03914 | 0.03607 | 0.03957 | 0.04103 | 0.03678 CTDSP1    |
| cg01265637 | 0.88841 | 0.88967 | 0.87746 | 0.89565 | 0.90145 | 0.88966 | 0.86482 | 0.85353 | 0.90984 | 0.77974 C20orf141 |
| cg01267315 | 0.04858 | 0.0555  | 0.06308 | 0.0772  | 0.08331 | 0.05487 | 0.04762 | 0.04841 | 0.05174 | 0.05122 C1orf164  |
| cg01269048 | 0.73922 | 0.75716 | 0.72809 | 0.71572 | 0.62574 | 0.74118 | 0.59153 | 0.78251 | 0.72423 | 0.6773 KIAA1244   |
| cg01269795 | 0.37185 | 0.25967 | 0.25375 | 0.43706 | 0.38227 | 0.39172 | 0.33404 | 0.33841 | 0.15536 | 0.1544 BTN3A3     |
| cg01272601 | 0.05179 | 0.06394 | 0.07463 | 0.05509 | 0.07713 | 0.06616 | 0.05135 | 0.03814 | 0.06512 | 0.05148 AAK1      |
| cg01273150 | 0.04969 | 0.05545 | 0.0698  | 0.08068 | 0.07956 | 0.06529 | 0.05697 | 0.06313 | 0.06352 | 0.07895 CORO1C    |
| cg01274324 | 0.95719 | 0.91953 | 0.93436 | 0.94988 | 0.95655 | 0.95155 | 0.36421 | 0.05054 | 0.9106  | 0.90786 C21orf77  |
| cg01274660 | 0.02128 | 0.02102 | 0.0253  | 0.02381 | 0.01853 | 0.0211  | 0.01594 | 0.0251  | 0.92521 | 0.83048 TRIP6     |
| cg01275830 | 0.9215  | 0.91477 | 0.93326 | 0.92489 | 0.92991 | 0.92319 | 0.91191 | 0.91072 | 0.92085 | 0.90662 C10orf95  |
| cg01277844 | 0.04449 | 0.06038 | 0.19365 | 0.16914 | 0.08333 | 0.04824 | 0.10611 | 0.07039 | 0.21164 | 0.05106 PYGO2     |
| cg01278291 | 0.89479 | 0.52834 | 0.91265 | 0.92448 | 0.94365 | 0.91041 | 0.78493 | 0.4339  | 0.74353 | 0.65414 DOK3      |
| cg01278696 | 0.05378 | 0.06478 | 0.05616 | 0.05648 | 0.06619 | 0.06116 | 0.04228 | 0.04425 | 0.04565 | 0.05404 SMARCA5   |
| cg01280080 | 0.5021  | 0.04459 | 0.07141 | 0.05847 | 0.05365 | 0.06064 | 0.28525 | 0.17445 | 0.05375 | 0.03568 ATIC      |
| cg01281797 | 0.0643  | 0.06763 | 0.08536 | 0.09047 | 0.05788 | 0.04263 | 0.05443 | 0.05442 | 0.05651 | 0.0529 LYSMD1     |
| cg01281904 | 0.10614 | 0.35225 | 0.82653 | 0.87345 | 0.8528  | 0.87312 | 0.67806 | 0.77392 | 0.11653 | 0.10349 OPRK1     |
| cg01282074 | 0.09064 | 0.09009 | 0.58106 | 0.73127 | 0.3449  | 0.12459 | 0.15407 | 0.0808  | 0.32866 | 0.13857 NKX2-5    |
| cg01282432 | 0.05079 | 0.05516 | 0.04025 | 0.04926 | 0.05088 | 0.05581 | 0.05197 | 0.06882 | 0.04626 | 0.04758 C14orf101 |
| cg01283289 | 0.80872 | 0.84915 | 0.12531 | 0.18627 | 0.1094  | 0.07258 | 0.04793 | 0.03512 | 0.38045 | 0.29774 FLJ21963  |
| cg01284306 | 0.15526 | 0.11961 | 0.16361 | 0.12805 | 0.23714 | 0.12312 | 0.15721 | 0.12945 | 0.11857 | 0.11137 C21orf91  |
| cg01284619 | 0.10055 | 0.05184 | 0.30158 | 0.40956 | 0.11977 | 0.05522 | 0.17521 | 0.03639 | 0.61599 | 0.39623 HCN2      |
| cg01288067 | 0.0492  | 0.03503 | 0.04226 | 0.0399  | 0.02679 | 0.03341 | 0.03033 | 0.03219 | 0.03707 | 0.03127 MELK      |
| cg01288089 | 0.44207 | 0.22161 | 0.32388 | 0.59159 | 0.49629 | 0.40857 | 0.27774 | 0.20006 | 0.20712 | 0.18147 CXCL10    |
| cg01288598 | 0.05394 | 0.05805 | 0.11283 | 0.27045 | 0.53538 | 0.10276 | 0.15215 | 0.04863 | 0.10614 | 0.05906 CD83      |
| cg01289103 | 0.63549 | 0.25106 | 0.31988 | 0.3589  | 0.27343 | 0.20534 | 0.64984 | 0.64801 | 0.49743 | 0.31193 KA21      |
| cg01291404 | 0.03742 | 0.04101 | 0.4416  | 0.58239 | 0.32733 | 0.31782 | 0.06591 | 0.22877 | 0.03919 | 0.03736 COL2A1    |
| cg01292265 | 0.03751 | 0.0409  | 0.0426  | 0.03797 | 0.05039 | 0.04694 | 0.04327 | 0.03882 | 0.04042 | 0.0327 NOL5A      |
| cg01293143 | 0.81018 | 0.32277 | 0.70186 | 0.8219  | 0.88512 | 0.56397 | 0.53734 | 0.52387 | 0.80784 | 0.41279 TCEA2     |
| cg01293647 | 0.1782  | 0.26511 | 0.59905 | 0.70943 | 0.0433  | 0.0251  | 0.21216 | 0.03416 | 0.02478 | 0.02107 NEUROD2   |
| cg01294695 | 0.59655 | 0.06998 | 0.53663 | 0.57846 | 0.57574 | 0.10276 | 0.30261 | 0.14323 | 0.28395 | 0.08521 MESP1     |
| cg01294702 | 0.79473 | 0.65801 | 0.65516 | 0.64639 | 0.83955 | 0.7985  | 0.58109 | 0.75524 | 0.43691 | 0.21984 FOXJ1     |
| cg01295203 | 0.96879 | 0.97606 | 0.97431 | 0.9708  | 0.53874 | 0.60747 | 0.32203 | 0.793   | 0.1959  | 0.53648 PRDM14    |
| cg01297972 | 0.83532 | 0.87725 | 0.82262 | 0.86108 | 0.70367 | 0.79178 | 0.84094 | 0.84997 | 0.86162 | 0.80034 SDCCAG33  |
| cg01299496 | 0.09912 | 0.06252 | 0.09554 | 0.08975 | 0.11887 | 0.08507 | 0.09098 | 0.07604 | 0.11907 | 0.09636 NOLA3     |
| cg01301664 | 0.04982 | 0.04778 | 0.05268 | 0.04783 | 0.03465 | 0.04075 | 0.04117 | 0.0472  | 0.04888 | 0.03989 FST       |
| cg01302245 | 0.60787 | 0.21667 | 0.74448 | 0.77851 | 0.675   | 0.71024 | 0.51108 | 0.60587 | 0.70732 | 0.5617 P53AIP1    |
| cg01305421 | 0.17238 | 0.14691 | 0.76663 | 0.79615 | 0.72647 | 0.2375  | 0.72933 | 0.43967 | 0.78826 | 0.68488 IGF1      |
| cg01305547 | 0.71009 | 0.58063 | 0.67472 | 0.70013 | 0.63128 | 0.59386 | 0.58023 | 0.65512 | 0.64162 | 0.65313 WHSC1     |
| cg01305625 | 0.54672 | 0.53531 | 0.06711 | 0.06995 | 0.12747 | 0.19171 | 0.05701 | 0.21577 | 0.06672 | 0.04466 PDLIM4    |



|            |         |         |         |         |         |         |         |         |         |                     |
|------------|---------|---------|---------|---------|---------|---------|---------|---------|---------|---------------------|
| cg01306510 | 0.03169 | 0.03155 | 0.0351  | 0.03372 | 0.04049 | 0.03662 | 0.03358 | 0.03278 | 0.0218  | 0.02427 CDKN1A      |
| cg01307730 | 0.88054 | 0.87723 | 0.72423 | 0.87832 | 0.8856  | 0.88542 | 0.30442 | 0.23127 | 0.59298 | 0.67593 HIST1H2AA   |
| cg01308501 | 0.02928 | 0.02955 | 0.02645 | 0.02426 | 0.01884 | 0.02251 | 0.01844 | 0.0212  | 0.02344 | 0.02074 IL12A       |
| cg01308601 | 0.06623 | 0.06985 | 0.07153 | 0.0751  | 0.06023 | 0.06164 | 0.06011 | 0.05028 | 0.05075 | 0.03856 C12orf49    |
| cg01309152 | 0.66135 | 0.30429 | 0.43476 | 0.56722 | 0.68547 | 0.6893  | 0.18739 | 0.30981 | 0.15562 | 0.14955 PCP4        |
| cg01309153 | 0.58842 | 0.48859 | 0.88339 | 0.89013 | 0.92693 | 0.70744 | 0.87322 | 0.75086 | 0.90914 | 0.85969 SURF1       |
| cg01309671 | 0.10974 | 0.06797 | 0.07987 | 0.06966 | 0.10346 | 0.1399  | 0.22555 | 0.07354 | 0.05953 | 0.06238 RP3-473B4.1 |
| cg01311051 | 0.20168 | 0.19466 | 0.19292 | 0.20378 | 0.22551 | 0.17335 | 0.22862 | 0.20199 | 0.17628 | 0.17545 ALDOA       |
| cg01311285 | 0.06    | 0.04734 | 0.07172 | 0.09358 | 0.03311 | 0.04605 | 0.04178 | 0.04799 | 0.04599 | 0.04889 SPATA4      |
| cg01313514 | 0.12724 | 0.04298 | 0.43276 | 0.34469 | 0.13169 | 0.05303 | 0.06007 | 0.04809 | 0.32489 | 0.31752 WNT3A       |
| cg01313949 | 0.87836 | 0.86577 | 0.86478 | 0.85712 | 0.80512 | 0.86463 | 0.88527 | 0.88296 | 0.87507 | 0.84849 LOC202459   |
| cg01313966 | 0.03627 | 0.04039 | 0.04476 | 0.03828 | 0.03408 | 0.03949 | 0.03056 | 0.0357  | 0.03095 | 0.0319 C18orf24     |
| cg01316071 | 0.76318 | 0.42667 | 0.86295 | 0.88285 | 0.70358 | 0.5707  | 0.46473 | 0.78478 | 0.85785 | 0.81644 C14orf139   |
| cg01316516 | 0.03971 | 0.03838 | 0.03683 | 0.03753 | 0.04347 | 0.04455 | 0.03606 | 0.03676 | 0.03237 | 0.03592 LDHA        |
| cg01316789 | 0.0329  | 0.03152 | 0.02734 | 0.02716 | 0.02298 | 0.02345 | 0.0263  | 0.02699 | 0.02262 | 0.0236 RBM12        |
| cg01316819 | 0.03046 | 0.03916 | 0.64029 | 0.74065 | 0.26504 | 0.28172 | 0.03979 | 0.04644 | 0.07164 | 0.0344 PPP1R1A      |
| cg01318557 | 0.60365 | 0.05476 | 0.05604 | 0.05121 | 0.0802  | 0.07326 | 0.04999 | 0.05238 | 0.03819 | 0.03829 LAT2        |
| cg01320040 | 0.043   | 0.04965 | 0.04167 | 0.0481  | 0.0327  | 0.04277 | 0.03775 | 0.0397  | 0.03617 | 0.03657 ZNF295      |
| cg01320361 | 0.04921 | 0.03223 | 0.03141 | 0.03542 | 0.02263 | 0.02798 | 0.02325 | 0.028   | 0.02628 | 0.02732 SEC63       |
| cg01320507 | 0.70686 | 0.74859 | 0.65603 | 0.68311 | 0.64866 | 0.68953 | 0.5917  | 0.64817 | 0.73288 | 0.7348 SPHAR        |
| cg01321151 | 0.78445 | 0.86882 | 0.86668 | 0.88837 | 0.86754 | 0.65261 | 0.85957 | 0.47747 | 0.48898 | 0.32433 AP2A2       |
| cg01322079 | 0.06588 | 0.05172 | 0.09188 | 0.06162 | 0.10265 | 0.06082 | 0.04836 | 0.04334 | 0.07254 | 0.08683 SFT2D1      |
| cg01322134 | 0.043   | 0.03506 | 0.29808 | 0.27038 | 0.08825 | 0.04125 | 0.03714 | 0.08924 | 0.03979 | 0.02844 WNT3A       |
| cg01322897 | 0.02361 | 0.02934 | 0.03137 | 0.02609 | 0.02885 | 0.031   | 0.02495 | 0.02789 | 0.02162 | 0.024 LETMD1        |
| cg01324261 | 0.71341 | 0.51002 | 0.76533 | 0.80597 | 0.67897 | 0.7764  | 0.76423 | 0.69285 | 0.59995 | 0.38093 SCRG1       |
| cg01325515 | 0.71288 | 0.53496 | 0.8698  | 0.91806 | 0.93643 | 0.91243 | 0.35891 | 0.2417  | 0.69108 | 0.68964 CTAG2       |
| cg01328164 | 0.0329  | 0.03623 | 0.02797 | 0.0338  | 0.02165 | 0.02721 | 0.03033 | 0.0302  | 0.02867 | 0.02752 HINT2       |
| cg01331554 | 0.02019 | 0.02288 | 0.02171 | 0.02077 | 0.01983 | 0.01861 | 0.01865 | 0.01847 | 0.01857 | 0.01955 G3BP2       |
| cg01333011 | 0.51009 | 0.5096  | 0.81757 | 0.85638 | 0.79404 | 0.8848  | 0.82987 | 0.72473 | 0.86549 | 0.82561 PTHLH       |
| cg01333131 | 0.12263 | 0.1054  | 0.14215 | 0.13457 | 0.17247 | 0.08381 | 0.12624 | 0.0988  | 0.12177 | 0.1271 CDC42BPB     |
| cg01333619 | 0.04645 | 0.0447  | 0.04402 | 0.03984 | 0.03778 | 0.0419  | 0.04898 | 0.05693 | 0.02453 | 0.02263 VPS26B      |
| cg01333788 | 0.84963 | 0.68775 | 0.78363 | 0.78866 | 0.70043 | 0.61987 | 0.05998 | 0.07731 | 0.74652 | 0.50855 GJB5        |
| cg01334437 | 0.04693 | 0.03914 | 0.04376 | 0.05408 | 0.03918 | 0.04129 | 0.05928 | 0.05577 | 0.03577 | 0.03358 LYPLA1      |
| cg01335367 | 0.10239 | 0.105   | 0.81321 | 0.91677 | 0.83356 | 0.83404 | 0.93281 | 0.89378 | 0.17765 | 0.0924 C12orf34     |
| cg01337047 | 0.17518 | 0.17148 | 0.62127 | 0.75035 | 0.35262 | 0.25811 | 0.22518 | 0.19026 | 0.2099  | 0.20672 DSG1        |
| cg01340005 | 0.03279 | 0.03142 | 0.05475 | 0.05603 | 0.26909 | 0.0753  | 0.03591 | 0.03024 | 0.05484 | 0.03071 SOX2        |
| cg01342792 | 0.74564 | 0.28814 | 0.78344 | 0.81851 | 0.78983 | 0.80889 | 0.79559 | 0.79203 | 0.66823 | 0.63281 FAM71A      |
| cg01343729 | 0.04261 | 0.04196 | 0.0513  | 0.05865 | 0.04542 | 0.04622 | 0.0486  | 0.04099 | 0.03599 | 0.04465 ZNF688      |
| cg01344171 | 0.87683 | 0.77966 | 0.56781 | 0.66748 | 0.75611 | 0.69857 | 0.56978 | 0.53808 | 0.20775 | 0.10741 C6orf206    |
| cg01344452 | 0.13144 | 0.02538 | 0.02984 | 0.02814 | 0.44548 | 0.42739 | 0.01868 | 0.02063 | 0.9817  | 0.97576 DGKE        |
| cg01344518 | 0.84505 | 0.14004 | 0.82889 | 0.86072 | 0.90725 | 0.85311 | 0.80067 | 0.63468 | 0.8876  | 0.78742 RGS11       |

|            |         |         |         |         |         |         |         |         |         |                   |
|------------|---------|---------|---------|---------|---------|---------|---------|---------|---------|-------------------|
| cg01346152 | 0.0645  | 0.06862 | 0.05316 | 0.05173 | 0.21947 | 0.04123 | 0.03353 | 0.04903 | 0.34652 | 0.33041 DHRS3     |
| cg01346589 | 0.04502 | 0.05447 | 0.05536 | 0.04965 | 0.05128 | 0.04668 | 0.04592 | 0.03846 | 0.04578 | 0.04006 RCC2      |
| cg01346718 | 0.38352 | 0.3529  | 0.45144 | 0.44959 | 0.75509 | 0.08728 | 0.68278 | 0.16482 | 0.41914 | 0.06002 CSNK1E    |
| cg01347719 | 0.95803 | 0.95761 | 0.95814 | 0.95415 | 0.96123 | 0.9624  | 0.96109 | 0.96263 | 0.96535 | 0.96627 DQX1      |
| cg01348086 | 0.78399 | 0.50703 | 0.83079 | 0.84891 | 0.75212 | 0.67975 | 0.64956 | 0.75038 | 0.41069 | 0.06685 RGS14     |
| cg01348757 | 0.8233  | 0.55103 | 0.78311 | 0.84363 | 0.78274 | 0.77152 | 0.72573 | 0.73299 | 0.83052 | 0.79441 PLIN      |
| cg01350700 | 0.03402 | 0.03956 | 0.04424 | 0.04472 | 0.0486  | 0.04231 | 0.03082 | 0.03001 | 0.03049 | 0.03592 DCXR      |
| cg01351032 | 0.0829  | 0.04825 | 0.45972 | 0.68515 | 0.03532 | 0.08872 | 0.39595 | 0.03441 | 0.0876  | 0.03626 CIITA     |
| cg01352108 | 0.94012 | 0.5755  | 0.97201 | 0.97338 | 0.97496 | 0.72268 | 0.64426 | 0.09737 | 0.66837 | 0.39953 KCNK4     |
| cg01352882 | 0.04163 | 0.03654 | 0.04832 | 0.03731 | 0.0325  | 0.03196 | 0.03739 | 0.03687 | 0.02971 | 0.03253 STUB1     |
| cg01353347 | 0.037   | 0.03293 | 0.04439 | 0.04383 | 0.03573 | 0.03345 | 0.70176 | 0.64374 | 0.03032 | 0.0329 IRAK1      |
| cg01353448 | 0.88537 | 0.09757 | 0.87232 | 0.89043 | 0.77213 | 0.87977 | 0.31698 | 0.64829 | 0.87463 | 0.77581 C7orf16   |
| cg01354473 | 0.071   | 0.15079 | 0.06452 | 0.04879 | 0.05163 | 0.05924 | 0.06624 | 0.06116 | 0.93919 | 0.92397 HOXA9     |
| cg01355520 | 0.08363 | 0.09196 | 0.10368 | 0.08867 | 0.10836 | 0.10897 | 0.10179 | 0.07738 | 0.07794 | 0.09725 HADHA     |
| cg01355739 | 0.47688 | 0.6033  | 0.9395  | 0.94104 | 0.94583 | 0.92844 | 0.891   | 0.90087 | 0.72383 | 0.813 GNAS        |
| cg01356829 | 0.90222 | 0.78569 | 0.80177 | 0.83574 | 0.86356 | 0.89486 | 0.90306 | 0.62227 | 0.85329 | 0.80256 IL12RB2   |
| cg01357116 | 0.06611 | 0.06282 | 0.10521 | 0.10731 | 0.54352 | 0.10207 | 0.06397 | 0.05941 | 0.06076 | 0.06473 ATOH1     |
| cg01357263 | 0.03155 | 0.03394 | 0.03453 | 0.03392 | 0.03078 | 0.02913 | 0.02833 | 0.02734 | 0.02947 | 0.02851 BCL7A     |
| cg01359534 | 0.73377 | 0.37659 | 0.73986 | 0.80915 | 0.90466 | 0.86362 | 0.68159 | 0.81945 | 0.79225 | 0.40444 AQP10     |
| cg01360325 | 0.0342  | 0.03422 | 0.03229 | 0.03466 | 0.02969 | 0.0326  | 0.03011 | 0.03356 | 0.02796 | 0.02813 TAF5      |
| cg01360768 | 0.02929 | 0.03195 | 0.03161 | 0.02943 | 0.02727 | 0.02968 | 0.02662 | 0.02657 | 0.02509 | 0.02411 TSG101    |
| cg01361446 | 0.80693 | 0.23144 | 0.84705 | 0.86117 | 0.76481 | 0.92989 | 0.17251 | 0.05769 | 0.93714 | 0.74638 IL2RG     |
| cg01361777 | 0.9245  | 0.92349 | 0.91814 | 0.94027 | 0.92817 | 0.89921 | 0.92059 | 0.92883 | 0.93427 | 0.92196 DLG5      |
| cg01362183 | 0.07338 | 0.07681 | 0.07081 | 0.07691 | 0.05394 | 0.06549 | 0.0643  | 0.07589 | 0.07378 | 0.07607 MAP3K7IP2 |
| cg01366407 | 0.0398  | 0.04101 | 0.06534 | 0.08063 | 0.04639 | 0.04824 | 0.03787 | 0.03563 | 0.04408 | 0.03866 FLAD1     |
| cg01366419 | 0.0467  | 0.04544 | 0.29183 | 0.327   | 0.0508  | 0.04997 | 0.04671 | 0.03975 | 0.06271 | 0.0392 WBSCR17    |
| cg01367992 | 0.08515 | 0.06249 | 0.17332 | 0.1802  | 0.14752 | 0.06688 | 0.07718 | 0.06788 | 0.10519 | 0.1493 LY9        |
| cg01369413 | 0.09692 | 0.09529 | 0.48948 | 0.6578  | 0.66931 | 0.5588  | 0.07908 | 0.08312 | 0.48962 | 0.55576 UBQLN3    |
| cg01369850 | 0.22074 | 0.20921 | 0.27722 | 0.26444 | 0.30836 | 0.27954 | 0.1917  | 0.16581 | 0.19583 | 0.18879 ZNF175    |
| cg01369981 | 0.104   | 0.03576 | 0.33519 | 0.6115  | 0.64678 | 0.11573 | 0.80371 | 0.27775 | 0.96732 | 0.56623 CAMKK2    |
| cg01371258 | 0.03631 | 0.04105 | 0.04203 | 0.04113 | 0.02727 | 0.06724 | 0.03289 | 0.02997 | 0.03268 | 0.03134 ZNF184    |
| cg01371477 | 0.08992 | 0.09032 | 0.07028 | 0.06355 | 0.1848  | 0.09851 | 0.08827 | 0.06612 | 0.11081 | 0.12651 ANP32E    |
| cg01372605 | 0.03273 | 0.0359  | 0.04231 | 0.03326 | 0.0362  | 0.04012 | 0.03081 | 0.03755 | 0.0373  | 0.02978 C12orf62  |
| cg01372689 | 0.05196 | 0.0534  | 0.0552  | 0.0619  | 0.04541 | 0.04516 | 0.04309 | 0.04448 | 0.04877 | 0.04898 MRPL12    |
| cg01373706 | 0.02213 | 0.02428 | 0.0229  | 0.02604 | 0.02724 | 0.02479 | 0.01902 | 0.0223  | 0.01755 | 0.01486 TMEM86A   |
| cg01374047 | 0.03919 | 0.03647 | 0.04114 | 0.04064 | 0.03362 | 0.03209 | 0.03768 | 0.03815 | 0.03064 | 0.03327 HCFC1R1   |
| cg01375871 | 0.69495 | 0.20687 | 0.78428 | 0.80947 | 0.57988 | 0.43701 | 0.07983 | 0.05278 | 0.14908 | 0.18653 TPSD1     |
| cg01375994 | 0.10127 | 0.09554 | 0.79052 | 0.84336 | 0.71599 | 0.67721 | 0.61741 | 0.25261 | 0.14362 | 0.08271 MXRA5     |
| cg01376672 | 0.07234 | 0.07515 | 0.06518 | 0.07151 | 0.04607 | 0.05948 | 0.05779 | 0.06397 | 0.05411 | 0.05745 ANAPC5    |
| cg01377755 | 0.75737 | 0.54841 | 0.73814 | 0.77277 | 0.84541 | 0.45246 | 0.44505 | 0.434   | 0.46747 | 0.56208 ACP6      |
| cg01377911 | 0.12422 | 0.32534 | 0.75057 | 0.81533 | 0.65268 | 0.63114 | 0.48663 | 0.40225 | 0.57276 | 0.5444 NTF5       |

|            |         |         |         |         |         |         |         |         |         |                   |
|------------|---------|---------|---------|---------|---------|---------|---------|---------|---------|-------------------|
| cg01381846 | 0.1446  | 0.19437 | 0.17009 | 0.16071 | 0.16536 | 0.16973 | 0.15237 | 0.17918 | 0.88722 | 0.86744 HOXA9     |
| cg01382363 | 0.0417  | 0.03996 | 0.06431 | 0.05255 | 0.04083 | 0.0452  | 0.04814 | 0.04029 | 0.04995 | 0.06022 KIAA0859  |
| cg01385430 | 0.03926 | 0.03688 | 0.03526 | 0.03419 | 0.03827 | 0.03645 | 0.03273 | 0.03251 | 0.04277 | 0.03473 VPS45A    |
| cg01386493 | 0.32301 | 0.06785 | 0.77337 | 0.83979 | 0.50603 | 0.43454 | 0.28277 | 0.09485 | 0.50017 | 0.46705 ADRB3     |
| cg01389761 | 0.28468 | 0.43784 | 0.1358  | 0.1164  | 0.13418 | 0.0658  | 0.20002 | 0.21844 | 0.06639 | 0.06373 TERC      |
| cg01390445 | 0.86319 | 0.85762 | 0.86208 | 0.87095 | 0.84323 | 0.8884  | 0.80273 | 0.86749 | 0.89249 | 0.82229 LIPH      |
| cg01395672 | 0.07539 | 0.08762 | 0.14873 | 0.1136  | 0.10516 | 0.09884 | 0.10271 | 0.08373 | 0.06398 | 0.07407 ZNF207    |
| cg01399317 | 0.9782  | 0.97969 | 0.97537 | 0.98204 | 0.98233 | 0.97417 | 0.97453 | 0.9777  | 0.98692 | 0.98573 FLJ46072  |
| cg01400401 | 0.17451 | 0.18808 | 0.48885 | 0.48024 | 0.42778 | 0.18299 | 0.19118 | 0.15633 | 0.13665 | 0.12948 C19orf30  |
| cg01401337 | 0.02314 | 0.0237  | 0.02181 | 0.02427 | 0.01674 | 0.02066 | 0.01795 | 0.01944 | 0.01847 | 0.01847 PHF2      |
| cg01401376 | 0.04932 | 0.05471 | 0.05344 | 0.05874 | 0.04539 | 0.0531  | 0.04621 | 0.04268 | 0.05672 | 0.04686 EYA4      |
| cg01402045 | 0.07428 | 0.07282 | 0.06955 | 0.05475 | 0.04063 | 0.06255 | 0.06265 | 0.06978 | 0.06016 | 0.06405 FLJ23356  |
| cg01402255 | 0.6189  | 0.26123 | 0.79533 | 0.878   | 0.55976 | 0.70269 | 0.35659 | 0.25592 | 0.86398 | 0.71293 GATAD2B   |
| cg01403114 | 0.1857  | 0.1896  | 0.22571 | 0.15983 | 0.22234 | 0.17284 | 0.1864  | 0.14504 | 0.10524 | 0.20263 PPWD1     |
| cg01404197 | 0.06737 | 0.07657 | 0.07279 | 0.07821 | 0.0526  | 0.06596 | 0.06797 | 0.06918 | 0.06673 | 0.06736 ZW10      |
| cg01404615 | 0.07615 | 0.04929 | 0.30597 | 0.3708  | 0.09891 | 0.06351 | 0.06548 | 0.04666 | 0.13861 | 0.05905 DKK2      |
| cg01405107 | 0.07454 | 0.08073 | 0.05155 | 0.04444 | 0.11195 | 0.08769 | 0.29633 | 0.45316 | 0.71215 | 0.5795 HOXB5      |
| cg01405761 | 0.02831 | 0.02756 | 0.08007 | 0.16597 | 0.02701 | 0.02447 | 0.02766 | 0.01987 | 0.04582 | 0.02018 MGC34646  |
| cg01407244 | 0.40858 | 0.16742 | 0.89671 | 0.89681 | 0.88055 | 0.87257 | 0.26998 | 0.21551 | 0.50231 | 0.33149 TNFRSF10C |
| cg01407341 | 0.89839 | 0.91125 | 0.87216 | 0.8822  | 0.93162 | 0.91587 | 0.56715 | 0.82546 | 0.90235 | 0.87984 SPATA8    |
| cg01407797 | 0.07592 | 0.07664 | 0.07414 | 0.08922 | 0.0817  | 0.07587 | 0.07015 | 0.06925 | 0.06418 | 0.05857 FLJ33814  |
| cg01408383 | 0.03964 | 0.04502 | 0.04927 | 0.04276 | 0.03211 | 0.03316 | 0.28207 | 0.36776 | 0.03511 | 0.03113 PIGA      |
| cg01408558 | 0.78181 | 0.78519 | 0.79762 | 0.80972 | 0.80102 | 0.78304 | 0.77684 | 0.76853 | 0.82369 | 0.61807 PDE4A     |
| cg01409734 | 0.0687  | 0.08451 | 0.09286 | 0.08626 | 0.0887  | 0.09207 | 0.09868 | 0.08561 | 0.08304 | 0.07958 TRAFD1    |
| cg01410472 | 0.03312 | 0.02751 | 0.41139 | 0.42754 | 0.34273 | 0.03374 | 0.02601 | 0.0234  | 0.1757  | 0.02345 CRISPLD1  |
| cg01411954 | 0.03883 | 0.04203 | 0.03719 | 0.03626 | 0.029   | 0.03444 | 0.02981 | 0.03444 | 0.03203 | 0.03171 NVL       |
| cg01412445 | 0.05564 | 0.04953 | 0.05991 | 0.0607  | 0.06474 | 0.05711 | 0.10945 | 0.10416 | 0.053   | 0.05168 BBS4      |
| cg01413314 | 0.02837 | 0.03584 | 0.03305 | 0.02958 | 0.03045 | 0.03077 | 0.02696 | 0.02226 | 0.02214 | 0.02399 IFRD2     |
| cg01413516 | 0.86118 | 0.26371 | 0.79274 | 0.88479 | 0.92566 | 0.94681 | 0.1238  | 0.0708  | 0.5566  | 0.64617 INSL3     |
| cg01414934 | 0.85235 | 0.58198 | 0.59347 | 0.78072 | 0.19471 | 0.11447 | 0.57326 | 0.41579 | 0.87289 | 0.17547 SH3BGR3   |
| cg01416012 | 0.71149 | 0.73761 | 0.67142 | 0.71534 | 0.65721 | 0.68889 | 0.62311 | 0.68524 | 0.67439 | 0.64897 BAZ2B     |
| cg01418124 | 0.13722 | 0.05288 | 0.06095 | 0.05921 | 0.07945 | 0.06876 | 0.16041 | 0.46082 | 0.92438 | 0.89756 ARHGAP24  |
| cg01419479 | 0.01753 | 0.02166 | 0.025   | 0.02491 | 0.01706 | 0.0191  | 0.01835 | 0.01997 | 0.018   | 0.01768 GLUL      |
| cg01419675 | 0.07037 | 0.0701  | 0.07113 | 0.0785  | 0.03753 | 0.06206 | 0.06024 | 0.05639 | 0.06439 | 0.06633 RHOB      |
| cg01419679 | 0.02843 | 0.02516 | 0.02475 | 0.03144 | 0.01964 | 0.02829 | 0.02916 | 0.02754 | 0.02345 | 0.02576 PTTG1IP   |
| cg01419788 | 0.05102 | 0.04994 | 0.05894 | 0.05845 | 0.04237 | 0.04422 | 0.05021 | 0.04965 | 0.04642 | 0.0415 ITPK1      |
| cg01420388 | 0.97147 | 0.80816 | 0.98011 | 0.98496 | 0.98923 | 0.9814  | 0.97829 | 0.90903 | 0.98684 | 0.9825 FBXO2      |
| cg01421985 | 0.7566  | 0.76431 | 0.70666 | 0.74322 | 0.88817 | 0.89302 | 0.88359 | 0.88871 | 0.49372 | 0.50797 OTUD7     |
| cg01422136 | 0.03011 | 0.03052 | 0.03054 | 0.0299  | 0.02439 | 0.02985 | 0.02732 | 0.03118 | 0.0202  | 0.02258 ZCCHC10   |
| cg01422337 | 0.61685 | 0.643   | 0.65954 | 0.72027 | 0.62986 | 0.71714 | 0.65031 | 0.68622 | 0.73127 | 0.75194 CARD8     |
| cg01423840 | 0.901   | 0.87081 | 0.59561 | 0.82034 | 0.89169 | 0.85965 | 0.31004 | 0.33552 | 0.32618 | 0.27369 FATE1     |

|            |         |         |         |         |         |         |         |         |         |                  |
|------------|---------|---------|---------|---------|---------|---------|---------|---------|---------|------------------|
| cg01424107 | 0.0275  | 0.03139 | 0.0342  | 0.03677 | 0.43486 | 0.82251 | 0.07029 | 0.1537  | 0.06442 | 0.2518 CDX2      |
| cg01425405 | 0.05988 | 0.0618  | 0.11491 | 0.1683  | 0.05189 | 0.05611 | 0.05641 | 0.07226 | 0.0492  | 0.05141 DLX3     |
| cg01425670 | 0.03499 | 0.02818 | 0.02839 | 0.02997 | 0.02749 | 0.0266  | 0.02388 | 0.02    | 0.02498 | 0.01951 NEGR1    |
| cg01426743 | 0.76917 | 0.27568 | 0.79022 | 0.81584 | 0.83193 | 0.81384 | 0.81649 | 0.81698 | 0.81636 | 0.74436 FAM20B   |
| cg01427567 | 0.21306 | 0.15911 | 0.23516 | 0.33104 | 0.16019 | 0.16135 | 0.14975 | 0.14657 | 0.15227 | 0.21325 TMC4     |
| cg01428361 | 0.03057 | 0.0301  | 0.03152 | 0.02801 | 0.02839 | 0.03    | 0.02804 | 0.02922 | 0.02547 | 0.02415 RSAD1    |
| cg01428678 | 0.16501 | 0.09028 | 0.0738  | 0.06018 | 0.75485 | 0.78048 | 0.11941 | 0.07762 | 0.09318 | 0.11697 GPHN     |
| cg01429181 | 0.05651 | 0.05545 | 0.08824 | 0.07943 | 0.09159 | 0.06772 | 0.07573 | 0.0623  | 0.07883 | 0.07925 WDR42A   |
| cg01429321 | 0.04692 | 0.04155 | 0.04824 | 0.04255 | 0.02937 | 0.04161 | 0.58409 | 0.04179 | 0.54245 | 0.6665 LOX       |
| cg01429391 | 0.34786 | 0.08523 | 0.15646 | 0.27009 | 0.55041 | 0.11068 | 0.06276 | 0.05505 | 0.06754 | 0.07889 MYH7     |
| cg01429996 | 0.09391 | 0.08569 | 0.10122 | 0.08599 | 0.12568 | 0.08336 | 0.09117 | 0.09658 | 0.07895 | 0.07046 NANS     |
| cg01430430 | 0.87219 | 0.17047 | 0.86767 | 0.87573 | 0.74705 | 0.534   | 0.7109  | 0.46856 | 0.90795 | 0.76208 FLJ37078 |
| cg01430807 | 0.0711  | 0.06047 | 0.10176 | 0.06505 | 0.04395 | 0.05326 | 0.0508  | 0.0519  | 0.04922 | 0.0523 NDUFB8    |
| cg01431114 | 0.09374 | 0.04973 | 0.05972 | 0.0477  | 0.05091 | 0.03757 | 0.07981 | 0.07338 | 0.76653 | 0.73932 PDE10A   |
| cg01432087 | 0.61517 | 0.54921 | 0.424   | 0.39726 | 0.42383 | 0.36027 | 0.27674 | 0.20678 | 0.4818  | 0.44997 FLJ21749 |
| cg01437411 | 0.07842 | 0.15709 | 0.38589 | 0.30837 | 0.0566  | 0.05792 | 0.08436 | 0.04928 | 0.32677 | 0.05507 ATN1     |
| cg01438829 | 0.05074 | 0.04461 | 0.04917 | 0.04032 | 0.03209 | 0.03841 | 0.04205 | 0.03621 | 0.03344 | 0.03238 TMEM97   |
| cg01439669 | 0.02839 | 0.02321 | 0.02179 | 0.02165 | 0.01933 | 0.02127 | 0.01823 | 0.02122 | 0.01598 | 0.01613 ENC1     |
| cg01439983 | 0.05114 | 0.05378 | 0.05902 | 0.04778 | 0.05163 | 0.09351 | 0.035   | 0.03905 | 0.04166 | 0.03851 PEX13    |
| cg01441777 | 0.04786 | 0.04663 | 0.04347 | 0.04308 | 0.04625 | 0.04926 | 0.04447 | 0.04019 | 0.04507 | 0.04794 CSNK1E   |
| cg01442426 | 0.12934 | 0.06866 | 0.47777 | 0.62424 | 0.82691 | 0.86261 | 0.54373 | 0.07212 | 0.58965 | 0.59621 XCR1     |
| cg01442481 | 0.0841  | 0.0846  | 0.09168 | 0.1009  | 0.16171 | 0.12903 | 0.08647 | 0.07144 | 0.06224 | 0.06034 RALY     |
| cg01442799 | 0.04988 | 0.05486 | 0.04741 | 0.04319 | 0.04706 | 0.05081 | 0.05263 | 0.04963 | 0.04161 | 0.04336 YAP1     |
| cg01442833 | 0.07465 | 0.02705 | 0.09617 | 0.03009 | 0.02312 | 0.02377 | 0.03326 | 0.029   | 0.02554 | 0.0239 UNG       |
| cg01443067 | 0.0239  | 0.02638 | 0.03304 | 0.02464 | 0.02068 | 0.02617 | 0.0322  | 0.02791 | 0.03197 | 0.03093 USP8     |
| cg01443452 | 0.91598 | 0.91155 | 0.93096 | 0.9262  | 0.94563 | 0.92672 | 0.88423 | 0.91347 | 0.93367 | 0.92706 GAPDHS   |
| cg01443630 | 0.9253  | 0.88767 | 0.94456 | 0.94104 | 0.46738 | 0.09022 | 0.67702 | 0.28263 | 0.84006 | 0.72607 CLCN7    |
| cg01446393 | 0.75712 | 0.64933 | 0.72692 | 0.7505  | 0.67666 | 0.6594  | 0.60811 | 0.49    | 0.73537 | 0.5049 FAM107A   |
| cg01446692 | 0.69903 | 0.78657 | 0.58084 | 0.83564 | 0.68294 | 0.64126 | 0.14339 | 0.37197 | 0.21012 | 0.08262 CER1     |
| cg01446983 | 0.02162 | 0.0215  | 0.02199 | 0.0229  | 0.01897 | 0.02047 | 0.01882 | 0.02186 | 0.01644 | 0.01735 SPOP     |
| cg01447420 | 0.03337 | 0.03665 | 0.03761 | 0.03563 | 0.02945 | 0.03244 | 0.03743 | 0.03679 | 0.03122 | 0.02813 FEN1     |
| cg01447498 | 0.07591 | 0.06651 | 0.10434 | 0.08653 | 0.11892 | 0.0792  | 0.14579 | 0.12147 | 0.1144  | 0.06592 TSNAX    |
| cg01447817 | 0.77782 | 0.54381 | 0.80989 | 0.87304 | 0.77627 | 0.83983 | 0.09714 | 0.03426 | 0.2404  | 0.23348 AQP12A   |
| cg01449415 | 0.02405 | 0.02934 | 0.02479 | 0.02686 | 0.01911 | 0.02497 | 0.02051 | 0.02574 | 0.02382 | 0.02393 ZNF213   |
| cg01449591 | 0.84415 | 0.86424 | 0.77784 | 0.77531 | 0.61182 | 0.6577  | 0.45852 | 0.57735 | 0.66032 | 0.32772 BIRC1    |
| cg01450842 | 0.80199 | 0.53531 | 0.70797 | 0.84412 | 0.75929 | 0.84216 | 0.82995 | 0.86382 | 0.65506 | 0.64148 SALF     |
| cg01454004 | 0.06484 | 0.06619 | 0.08235 | 0.07812 | 0.08272 | 0.08414 | 0.06603 | 0.06108 | 0.05772 | 0.05685 SLC17A5  |
| cg01454134 | 0.25715 | 0.06325 | 0.52224 | 0.74125 | 0.67461 | 0.50122 | 0.08523 | 0.06281 | 0.05812 | 0.06076 GALP     |
| cg01457080 | 0.02876 | 0.02691 | 0.02741 | 0.029   | 0.03479 | 0.03105 | 0.02834 | 0.02571 | 0.02581 | 0.02907 ANGEL1   |
| cg01457622 | 0.76021 | 0.52389 | 0.82486 | 0.89494 | 0.89103 | 0.83093 | 0.67459 | 0.62113 | 0.86627 | 0.83553 GGT14    |
| cg01457653 | 0.04991 | 0.04632 | 0.07295 | 0.05943 | 0.12781 | 0.1671  | 0.05306 | 0.03993 | 0.03926 | 0.04129 FBXL8    |

|            |         |         |         |         |         |         |         |         |         |         |             |
|------------|---------|---------|---------|---------|---------|---------|---------|---------|---------|---------|-------------|
| cg01459162 | 0.7754  | 0.56316 | 0.84232 | 0.87257 | 0.78555 | 0.64204 | 0.86543 | 0.53218 | 0.6367  | 0.70428 | PADI3       |
| cg01459453 | 0.62373 | 0.4447  | 0.36191 | 0.41775 | 0.45317 | 0.87643 | 0.04843 | 0.06963 | 0.33034 | 0.03865 | SELP        |
| cg01459955 | 0.94978 | 0.86305 | 0.95835 | 0.96304 | 0.97255 | 0.96825 | 0.907   | 0.90705 | 0.96431 | 0.95777 | AHRR        |
| cg01460479 | 0.10859 | 0.05449 | 0.04802 | 0.05297 | 0.04502 | 0.05245 | 0.06245 | 0.16893 | 0.04121 | 0.0457  | ABCB10      |
| cg01461641 | 0.02829 | 0.02888 | 0.02934 | 0.03177 | 0.0275  | 0.02843 | 0.02361 | 0.02466 | 0.02605 | 0.02526 | TMEM63A     |
| cg01462829 | 0.05633 | 0.03156 | 0.97032 | 0.97033 | 0.0388  | 0.02599 | 0.21672 | 0.74175 | 0.18772 | 0.14321 | HS3ST1      |
| cg01462904 | 0.03915 | 0.03817 | 0.04288 | 0.03932 | 0.03835 | 0.04142 | 0.03262 | 0.03247 | 0.0334  | 0.03158 | CCDC12      |
| cg01464985 | 0.69006 | 0.16023 | 0.32409 | 0.33072 | 0.15437 | 0.10909 | 0.22289 | 0.11104 | 0.1158  | 0.07989 | ZNF512      |
| cg01465325 | 0.35009 | 0.0526  | 0.0578  | 0.0576  | 0.09241 | 0.05146 | 0.31192 | 0.05408 | 0.05193 | 0.04471 | ERCC6       |
| cg01465620 | 0.04625 | 0.0465  | 0.05411 | 0.05389 | 0.17561 | 0.06953 | 0.0369  | 0.04129 | 0.05062 | 0.05049 | ACVR2B      |
| cg01465641 | 0.05645 | 0.05486 | 0.06781 | 0.0548  | 0.05954 | 0.0485  | 0.04811 | 0.04695 | 0.04316 | 0.03403 | ITSN1       |
| cg01466020 | 0.04557 | 0.04055 | 0.04284 | 0.04308 | 0.0322  | 0.0321  | 0.03054 | 0.03355 | 0.03317 | 0.02982 | YY1AP1      |
| cg01466075 | 0.04952 | 0.0501  | 0.04857 | 0.04499 | 0.03023 | 0.0394  | 0.04365 | 0.04069 | 0.042   | 0.0409  | SERP1       |
| cg01468621 | 0.04129 | 0.04472 | 0.12582 | 0.06494 | 0.09684 | 0.0375  | 0.04678 | 0.04159 | 0.05831 | 0.03838 | BRSK2       |
| cg01468868 | 0.05036 | 0.05083 | 0.90223 | 0.92524 | 0.04578 | 0.04853 | 0.36095 | 0.25388 | 0.05378 | 0.04925 | LIF         |
| cg01469547 | 0.06602 | 0.06189 | 0.72974 | 0.86944 | 0.86235 | 0.66678 | 0.07625 | 0.06284 | 0.4693  | 0.52768 | OR5P3       |
| cg01470283 | 0.02463 | 0.02528 | 0.02506 | 0.02232 | 0.02167 | 0.02365 | 0.03239 | 0.03202 | 0.02049 | 0.02137 | SCAND1      |
| cg01471384 | 0.02457 | 0.02582 | 0.04701 | 0.02971 | 0.02622 | 0.02504 | 0.03578 | 0.03134 | 0.04888 | 0.02913 | DKK2        |
| cg01471713 | 0.41268 | 0.23299 | 0.05932 | 0.05645 | 0.95328 | 0.9473  | 0.91089 | 0.78207 | 0.94973 | 0.94708 | C1orf115    |
| cg01472101 | 0.33764 | 0.07368 | 0.13655 | 0.16125 | 0.20703 | 0.09457 | 0.07599 | 0.06179 | 0.19229 | 0.06208 | CLEC10A     |
| cg01473816 | 0.82307 | 0.68475 | 0.84266 | 0.86179 | 0.84799 | 0.85401 | 0.82995 | 0.83604 | 0.83911 | 0.84299 | ELF5        |
| cg01474260 | 0.30186 | 0.15644 | 0.19373 | 0.29041 | 0.86074 | 0.89424 | 0.22039 | 0.24154 | 0.09417 | 0.07279 | CESK1       |
| cg01476044 | 0.25554 | 0.2291  | 0.41674 | 0.42965 | 0.4247  | 0.27499 | 0.16028 | 0.14783 | 0.48789 | 0.36892 | MGAM        |
| cg01478450 | 0.04481 | 0.03898 | 0.04048 | 0.04063 | 0.02886 | 0.04166 | 0.03612 | 0.0344  | 0.0329  | 0.04244 | SLC29A3     |
| cg01479232 | 0.56553 | 0.68836 | 0.56128 | 0.70442 | 0.58027 | 0.31336 | 0.24372 | 0.34062 | 0.23946 | 0.23027 | C20orf54    |
| cg01481441 | 0.03689 | 0.03786 | 0.04262 | 0.04021 | 0.03795 | 0.04037 | 0.03276 | 0.02833 | 0.02991 | 0.02931 | KIAA0152    |
| cg01481976 | 0.83683 | 0.8485  | 0.81182 | 0.82671 | 0.819   | 0.81028 | 0.81658 | 0.80808 | 0.85712 | 0.85195 | POLE3       |
| cg01482279 | 0.06052 | 0.05534 | 0.07394 | 0.07285 | 0.0759  | 0.05721 | 0.06422 | 0.05386 | 0.05482 | 0.0554  | ORMDL3      |
| cg01483882 | 0.01835 | 0.02322 | 0.01941 | 0.03121 | 0.02357 | 0.01932 | 0.01378 | 0.01513 | 0.01538 | 0.01381 | TP53INP2    |
| cg01484156 | 0.39242 | 0.34787 | 0.65564 | 0.73778 | 0.42052 | 0.3299  | 0.36789 | 0.26093 | 0.17906 | 0.23489 | NCALD       |
| cg01485645 | 0.1106  | 0.12128 | 0.1087  | 0.11229 | 0.09551 | 0.12212 | 0.10445 | 0.1082  | 0.10046 | 0.10201 | MLLT6       |
| cg01485797 | 0.06154 | 0.06027 | 0.07004 | 0.06352 | 0.05682 | 0.05349 | 0.05754 | 0.05481 | 0.07064 | 0.04915 | RPLP2       |
| cg01485998 | 0.03829 | 0.04129 | 0.04705 | 0.04551 | 0.03271 | 0.04016 | 0.04354 | 0.03684 | 0.03139 | 0.03567 | FLJ12505    |
| cg01488147 | 0.88225 | 0.85728 | 0.78243 | 0.83227 | 0.72381 | 0.79071 | 0.83448 | 0.88102 | 0.83428 | 0.77032 | PEG10       |
| cg01489608 | 0.93045 | 0.93342 | 0.91728 | 0.93439 | 0.94378 | 0.92037 | 0.93146 | 0.92698 | 0.93864 | 0.93372 | LCAT        |
| cg01490535 | 0.09578 | 0.09269 | 0.08411 | 0.07352 | 0.06224 | 0.07176 | 0.09011 | 0.09423 | 0.08128 | 0.06803 | FLJ10661    |
| cg01491225 | 0.02654 | 0.02727 | 0.03292 | 0.02781 | 0.0253  | 0.02855 | 0.02751 | 0.02754 | 0.02211 | 0.02614 | ZCCHC9      |
| cg01491540 | 0.02959 | 0.02755 | 0.03669 | 0.03197 | 0.03123 | 0.0291  | 0.02509 | 0.02771 | 0.02447 | 0.02814 | SSH2        |
| cg01492649 | 0.05588 | 0.0528  | 0.06297 | 0.06261 | 0.04742 | 0.04708 | 0.04543 | 0.0478  | 0.04902 | 0.05383 | FLJ22104    |
| cg01493303 | 0.05325 | 0.05059 | 0.05704 | 0.05153 | 0.05591 | 0.05518 | 0.04196 | 0.03853 | 0.04114 | 0.0421  | GRWD1       |
| cg01493517 | 0.4262  | 0.19587 | 0.23188 | 0.20301 | 0.10481 | 0.06709 | 0.27954 | 0.20423 | 0.13983 | 0.08807 | HOM-TES-103 |

|            |         |         |         |         |         |         |         |         |         |                  |
|------------|---------|---------|---------|---------|---------|---------|---------|---------|---------|------------------|
| cg01494593 | 0.205   | 0.23249 | 0.68244 | 0.77458 | 0.66554 | 0.56517 | 0.47523 | 0.48318 | 0.77286 | 0.50756 ACOXL    |
| cg01494864 | 0.03641 | 0.0455  | 0.03878 | 0.03066 | 0.02521 | 0.03107 | 0.03458 | 0.03046 | 0.03829 | 0.03664 ALG3     |
| cg01495509 | 0.70068 | 0.52551 | 0.66023 | 0.81147 | 0.49703 | 0.56469 | 0.07847 | 0.23565 | 0.44873 | 0.32019 KCNMB1   |
| cg01497501 | 0.0211  | 0.02234 | 0.02213 | 0.02022 | 0.01844 | 0.01817 | 0.0185  | 0.01854 | 0.01521 | 0.01428 ZFAND2A  |
| cg01497527 | 0.96472 | 0.76578 | 0.96875 | 0.96869 | 0.9744  | 0.82981 | 0.96124 | 0.96424 | 0.97534 | 0.96771 ANKDD1A  |
| cg01497576 | 0.78659 | 0.39383 | 0.86651 | 0.89482 | 0.79314 | 0.80018 | 0.8271  | 0.7716  | 0.39393 | 0.3236 SLC24A5   |
| cg01498098 | 0.80627 | 0.7657  | 0.75687 | 0.76447 | 0.74687 | 0.72839 | 0.71745 | 0.75334 | 0.77135 | 0.75993 SACS     |
| cg01500097 | 0.24924 | 0.45773 | 0.6387  | 0.67052 | 0.44697 | 0.37243 | 0.48887 | 0.49889 | 0.40327 | 0.39382 KIAA0274 |
| cg01500140 | 0.85147 | 0.61885 | 0.70678 | 0.70476 | 0.83443 | 0.84757 | 0.37078 | 0.25687 | 0.78178 | 0.64124 LIM2     |
| cg01500421 | 0.05357 | 0.04828 | 0.06137 | 0.05222 | 0.04314 | 0.04791 | 0.05507 | 0.05505 | 0.04943 | 0.04016 HARSL    |
| cg01500567 | 0.03369 | 0.03793 | 0.03724 | 0.0329  | 0.02574 | 0.03172 | 0.03321 | 0.03455 | 0.02787 | 0.02627 CDC5L    |
| cg01505176 | 0.02706 | 0.02373 | 0.03019 | 0.03003 | 0.03906 | 0.03889 | 0.03045 | 0.0325  | 0.01911 | 0.02175 VARS     |
| cg01505590 | 0.02732 | 0.02547 | 0.02827 | 0.02405 | 0.02207 | 0.02532 | 0.02057 | 0.01837 | 0.01784 | 0.01736 PHLDA2   |
| cg01507173 | 0.42148 | 0.15737 | 0.66265 | 0.79371 | 0.73085 | 0.85261 | 0.19153 | 0.18344 | 0.56887 | 0.29521 IL1F5    |
| cg01508386 | 0.03773 | 0.03405 | 0.04778 | 0.04101 | 0.03428 | 0.04209 | 0.03214 | 0.03144 | 0.03271 | 0.03408 SCYL1BP1 |
| cg01510051 | 0.86781 | 0.77059 | 0.65968 | 0.85692 | 0.85224 | 0.84643 | 0.83778 | 0.81952 | 0.37703 | 0.50709 ZNF542   |
| cg01511567 | 0.68783 | 0.39424 | 0.25727 | 0.23278 | 0.38043 | 0.0463  | 0.1484  | 0.10461 | 0.47792 | 0.3318 SSRP1     |
| cg01512854 | 0.81761 | 0.82629 | 0.58778 | 0.75939 | 0.76528 | 0.78413 | 0.47829 | 0.44665 | 0.11515 | 0.08348 PCDHB3   |
| cg01513611 | 0.05849 | 0.05653 | 0.06254 | 0.06235 | 0.10259 | 0.07707 | 0.05832 | 0.05981 | 0.04874 | 0.05219 NDUFA11  |
| cg01513661 | 0.0804  | 0.07152 | 0.09867 | 0.08187 | 0.10377 | 0.10496 | 0.11225 | 0.10491 | 0.11477 | 0.0949 SAPS2     |
| cg01514487 | 0.68429 | 0.16866 | 0.79425 | 0.88075 | 0.66289 | 0.76171 | 0.78405 | 0.78964 | 0.09342 | 0.37727 MYO1A    |
| cg01515426 | 0.02888 | 0.03208 | 0.03843 | 0.03313 | 0.03163 | 0.03523 | 0.03178 | 0.02794 | 0.02764 | 0.02863 ANAPC11  |
| cg01515887 | 0.32789 | 0.09987 | 0.85758 | 0.90477 | 0.74384 | 0.64232 | 0.25306 | 0.10631 | 0.88705 | 0.5604 SAA2      |
| cg01517033 | 0.74955 | 0.50435 | 0.72277 | 0.7454  | 0.6813  | 0.60316 | 0.55698 | 0.4817  | 0.82748 | 0.80217 WFDC3    |
| cg01517728 | 0.19514 | 0.093   | 0.11698 | 0.08168 | 0.14304 | 0.09308 | 0.06386 | 0.06025 | 0.09048 | 0.07833 SOCS6    |
| cg01519742 | 0.02681 | 0.02543 | 0.06554 | 0.05161 | 0.36169 | 0.55613 | 0.19817 | 0.3012  | 0.03393 | 0.04646 JAKMIP1  |
| cg01520924 | 0.75697 | 0.47568 | 0.32728 | 0.46897 | 0.19174 | 0.16842 | 0.9096  | 0.69288 | 0.05912 | 0.04506 HSPA2    |
| cg01521624 | 0.83395 | 0.8609  | 0.35363 | 0.40689 | 0.75738 | 0.81979 | 0.81763 | 0.77447 | 0.81738 | 0.80195 SLC13A3  |
| cg01522194 | 0.04269 | 0.04295 | 0.05806 | 0.05363 | 0.24849 | 0.4717  | 0.06047 | 0.04959 | 0.08804 | 0.04022 KHK      |
| cg01522721 | 0.03451 | 0.03635 | 0.03885 | 0.03548 | 0.02425 | 0.02927 | 0.03111 | 0.03196 | 0.02796 | 0.02547 CDC37    |
| cg01522975 | 0.0376  | 0.03005 | 0.02965 | 0.02999 | 0.03187 | 0.0343  | 0.03021 | 0.02956 | 0.03824 | 0.03697 VPS45A   |
| cg01525376 | 0.80668 | 0.52192 | 0.70909 | 0.73483 | 0.87388 | 0.7511  | 0.22256 | 0.20149 | 0.60465 | 0.17562 LCK      |
| cg01526089 | 0.96425 | 0.76608 | 0.97052 | 0.97909 | 0.98615 | 0.97679 | 0.96132 | 0.91721 | 0.96251 | 0.93589 P2RX1    |
| cg01527212 | 0.02399 | 0.02722 | 0.02862 | 0.02685 | 0.02394 | 0.02319 | 0.02318 | 0.02698 | 0.02052 | 0.02091 TRIAD3   |
| cg01528948 | 0.28104 | 0.32415 | 0.39973 | 0.48291 | 0.43402 | 0.42599 | 0.25679 | 0.23416 | 0.20983 | 0.2649 ADH1B     |
| cg01530101 | 0.62378 | 0.60353 | 0.97974 | 0.9857  | 0.97929 | 0.98851 | 0.97497 | 0.99001 | 0.98577 | 0.9886 KCNQ1DN   |
| cg01531431 | 0.83358 | 0.56602 | 0.93046 | 0.94792 | 0.95711 | 0.94775 | 0.76521 | 0.70581 | 0.94993 | 0.9503 C20orf149 |
| cg01532080 | 0.09092 | 0.06387 | 0.50963 | 0.64766 | 0.54464 | 0.08195 | 0.27116 | 0.09059 | 0.13864 | 0.05317 SSBP4    |
| cg01532103 | 0.03259 | 0.03456 | 0.04691 | 0.0398  | 0.95927 | 0.61768 | 0.04012 | 0.03303 | 0.02962 | 0.02944 BSG      |
| cg01532771 | 0.22436 | 0.09574 | 0.25116 | 0.17573 | 0.12139 | 0.06654 | 0.17134 | 0.09137 | 0.06353 | 0.07457 CLEC4M   |
| cg01533387 | 0.03847 | 0.03922 | 0.04149 | 0.03627 | 0.1109  | 0.03233 | 0.04003 | 0.03653 | 0.03114 | 0.03269 IFI30    |

|            |         |         |         |         |         |         |         |         |         |                  |
|------------|---------|---------|---------|---------|---------|---------|---------|---------|---------|------------------|
| cg01535453 | 0.41357 | 0.60255 | 0.5345  | 0.47089 | 0.18574 | 0.05192 | 0.07189 | 0.11025 | 0.05149 | 0.03826 ACADS    |
| cg01536400 | 0.85422 | 0.85985 | 0.79825 | 0.85676 | 0.704   | 0.593   | 0.72361 | 0.88352 | 0.85626 | 0.85422 NDUFA8   |
| cg01536980 | 0.05067 | 0.04995 | 0.0462  | 0.0465  | 0.0383  | 0.06675 | 0.04424 | 0.044   | 0.0446  | 0.04106 EEF1A1   |
| cg01538982 | 0.03817 | 0.04471 | 0.03992 | 0.03652 | 0.03986 | 0.03914 | 0.03405 | 0.03555 | 0.03157 | 0.03299 CCDC51   |
| cg01539186 | 0.29592 | 0.07858 | 0.13594 | 0.10035 | 0.17567 | 0.11105 | 0.08046 | 0.08721 | 0.1093  | 0.17854 ZNF336   |
| cg01541443 | 0.83999 | 0.79384 | 0.80385 | 0.81387 | 0.79067 | 0.80395 | 0.80034 | 0.68188 | 0.8781  | 0.73169 E11s1    |
| cg01541629 | 0.03185 | 0.0309  | 0.01808 | 0.02193 | 0.0213  | 0.0324  | 0.02733 | 0.02814 | 0.02038 | 0.02566 NSUN2    |
| cg01543654 | 0.06239 | 0.06167 | 0.80545 | 0.82567 | 0.15497 | 0.08999 | 0.85402 | 0.28482 | 0.34302 | 0.51496 PRAC     |
| cg01545079 | 0.60863 | 0.06553 | 0.85579 | 0.75372 | 0.8205  | 0.68633 | 0.85597 | 0.90507 | 0.89887 | 0.86699 CPNE6    |
| cg01545242 | 0.05928 | 0.05397 | 0.05617 | 0.06143 | 0.04852 | 0.05498 | 0.0584  | 0.05324 | 0.03538 | 0.03943 ASF1B    |
| cg01546046 | 0.29635 | 0.31014 | 0.21549 | 0.23266 | 0.16258 | 0.26676 | 0.16902 | 0.24589 | 0.23755 | 0.20516 AP4S1    |
| cg01546430 | 0.16465 | 0.10802 | 0.19693 | 0.16492 | 0.24585 | 0.11128 | 0.30715 | 0.23497 | 0.07605 | 0.07037 ITK      |
| cg01546563 | 0.53214 | 0.06889 | 0.05257 | 0.04749 | 0.94379 | 0.96539 | 0.13324 | 0.06834 | 0.96526 | 0.9545 GATA4     |
| cg01549015 | 0.47163 | 0.4164  | 0.63458 | 0.71559 | 0.83246 | 0.84804 | 0.475   | 0.33756 | 0.68947 | 0.51338 IFNA10   |
| cg01550148 | 0.66364 | 0.0705  | 0.96245 | 0.96646 | 0.93339 | 0.73704 | 0.9645  | 0.9415  | 0.96766 | 0.96187 H2AFY    |
| cg01555431 | 0.06908 | 0.06929 | 0.06526 | 0.05674 | 0.07487 | 0.05784 | 0.05594 | 0.06263 | 0.05472 | 0.05996 AKAP12   |
| cg01556075 | 0.10384 | 0.07129 | 0.23264 | 0.26716 | 0.08286 | 0.14423 | 0.0672  | 0.06495 | 0.05254 | 0.05193 MCEMP1   |
| cg01557297 | 0.02355 | 0.02187 | 0.02777 | 0.02216 | 0.02069 | 0.02204 | 0.02738 | 0.01964 | 0.04689 | 0.01992 SLC22A17 |
| cg01557667 | 0.03199 | 0.02834 | 0.03454 | 0.03197 | 0.02638 | 0.02813 | 0.02681 | 0.03151 | 0.0305  | 0.0283 PACSIN2   |
| cg01557989 | 0.02068 | 0.02629 | 0.15208 | 0.27689 | 0.52792 | 0.38397 | 0.08561 | 0.0332  | 0.03484 | 0.13107 SLC24A3  |
| cg01558777 | 0.54168 | 0.1715  | 0.59176 | 0.85119 | 0.73627 | 0.67254 | 0.18946 | 0.15846 | 0.80548 | 0.52857 C10orf99 |
| cg01560871 | 0.84309 | 0.29121 | 0.88933 | 0.90196 | 0.74639 | 0.62852 | 0.87661 | 0.91006 | 0.80424 | 0.86569 C10orf27 |
| cg01561916 | 0.75603 | 0.86421 | 0.08232 | 0.10435 | 0.63259 | 0.62427 | 0.93734 | 0.92863 | 0.9568  | 0.89942 HAAO     |
| cg01564343 | 0.44321 | 0.30256 | 0.64039 | 0.79835 | 0.29247 | 0.42774 | 0.15345 | 0.26116 | 0.68163 | 0.45235 TREML1   |
| cg01565918 | 0.91448 | 0.85655 | 0.76392 | 0.80648 | 0.88365 | 0.90751 | 0.81225 | 0.3313  | 0.93558 | 0.92544 GNAS     |
| cg01566170 | 0.88762 | 0.50205 | 0.89436 | 0.88786 | 0.85564 | 0.79386 | 0.87644 | 0.74836 | 0.92726 | 0.87813 CAPN2    |
| cg01566404 | 0.91627 | 0.81356 | 0.90254 | 0.90431 | 0.88845 | 0.90024 | 0.88725 | 0.87878 | 0.86259 | 0.8116 ETNK2     |
| cg01567482 | 0.94583 | 0.63814 | 0.94806 | 0.94412 | 0.96249 | 0.78722 | 0.92599 | 0.90998 | 0.94476 | 0.92958 RGS14    |
| cg01568335 | 0.06392 | 0.05163 | 0.09863 | 0.06937 | 0.07624 | 0.06761 | 0.06122 | 0.05099 | 0.06319 | 0.0522 COX5B     |
| cg01568736 | 0.88073 | 0.78626 | 0.8687  | 0.88812 | 0.81808 | 0.86753 | 0.85818 | 0.8266  | 0.8824  | 0.37782 SERPINB7 |
| cg01570086 | 0.06451 | 0.05327 | 0.07078 | 0.06834 | 0.07605 | 0.06124 | 0.10655 | 0.08764 | 0.05593 | 0.05802 ARID3B   |
| cg01570769 | 0.03362 | 0.03265 | 0.03717 | 0.03793 | 0.03148 | 0.03231 | 0.03174 | 0.03015 | 0.02822 | 0.02991 PNR1     |
| cg01570885 | 0.26323 | 0.05167 | 0.24918 | 0.42517 | 0.89853 | 0.87132 | 0.16102 | 0.04258 | 0.46327 | 0.36436 FAM50B   |
| cg01572266 | 0.26184 | 0.08287 | 0.09224 | 0.08948 | 0.1628  | 0.09895 | 0.13632 | 0.11264 | 0.06225 | 0.08007 PTPRG    |
| cg01573562 | 0.07504 | 0.05444 | 0.15118 | 0.16214 | 0.07272 | 0.05728 | 0.07619 | 0.05555 | 0.09816 | 0.03709 RPH3A    |
| cg01578324 | 0.84346 | 0.83906 | 0.92213 | 0.91684 | 0.91339 | 0.80663 | 0.85524 | 0.80873 | 0.90316 | 0.81304 CLIC1    |
| cg01578341 | 0.05114 | 0.04915 | 0.05896 | 0.05075 | 0.04631 | 0.05575 | 0.04906 | 0.04986 | 0.04829 | 0.04868 RKHD3    |
| cg01579216 | 0.72536 | 0.52166 | 0.78556 | 0.78978 | 0.69838 | 0.81309 | 0.49004 | 0.55998 | 0.77242 | 0.61499 NCF2     |
| cg01580044 | 0.64485 | 0.34396 | 0.16449 | 0.15933 | 0.17427 | 0.17535 | 0.17322 | 0.15989 | 0.1997  | 0.17027 PHTF1    |
| cg01580568 | 0.93422 | 0.8728  | 0.76342 | 0.91398 | 0.92897 | 0.88744 | 0.89211 | 0.65961 | 0.90993 | 0.24917 LAMB3    |
| cg01580681 | 0.35324 | 0.0719  | 0.84685 | 0.83305 | 0.84025 | 0.75215 | 0.80366 | 0.7955  | 0.31163 | 0.58308 HAND2    |

|            |         |         |         |         |         |         |         |         |         |                   |
|------------|---------|---------|---------|---------|---------|---------|---------|---------|---------|-------------------|
| cg01580888 | 0.08103 | 0.01739 | 0.01668 | 0.01674 | 0.01879 | 0.01431 | 0.12041 | 0.054   | 0.07567 | 0.0151 RHPN2      |
| cg01581111 | 0.82472 | 0.80665 | 0.67858 | 0.79625 | 0.66831 | 0.81394 | 0.81632 | 0.67101 | 0.85749 | 0.82953 RBM18     |
| cg01584473 | 0.8296  | 0.637   | 0.83665 | 0.86262 | 0.8681  | 0.85775 | 0.45492 | 0.39268 | 0.65823 | 0.49852 MUC17     |
| cg01585703 | 0.06049 | 0.05476 | 0.09889 | 0.07088 | 0.06792 | 0.04927 | 0.0525  | 0.04675 | 0.0563  | 0.05619 FSIP1     |
| cg01585758 | 0.11413 | 0.11375 | 0.11779 | 0.12023 | 0.08576 | 0.10279 | 0.09937 | 0.10875 | 0.11402 | 0.09098 SUMO1     |
| cg01587454 | 0.75955 | 0.8719  | 0.88699 | 0.88438 | 0.88836 | 0.88811 | 0.84111 | 0.9084  | 0.83206 | 0.84026 WDR21C    |
| cg01589580 | 0.30094 | 0.08192 | 0.11526 | 0.14887 | 0.34474 | 0.13204 | 0.07611 | 0.06888 | 0.63335 | 0.24574 CTDTP1    |
| cg01592593 | 0.85815 | 0.86813 | 0.84297 | 0.83053 | 0.88496 | 0.85099 | 0.63842 | 0.71394 | 0.82182 | 0.8532 FGD1       |
| cg01593190 | 0.06049 | 0.04048 | 0.22045 | 0.30025 | 0.27057 | 0.15326 | 0.04819 | 0.05753 | 0.05575 | 0.04514 ADAMTS2   |
| cg01593385 | 0.30225 | 0.3563  | 0.30431 | 0.44742 | 0.27699 | 0.20928 | 0.12517 | 0.12171 | 0.15096 | 0.17686 FGG       |
| cg01593886 | 0.04543 | 0.03571 | 0.09958 | 0.13767 | 0.01843 | 0.03263 | 0.03019 | 0.0421  | 0.85132 | 0.63713 COL1A1    |
| cg01594214 | 0.14972 | 0.1111  | 0.14444 | 0.11953 | 0.08551 | 0.12445 | 0.12217 | 0.10801 | 0.11183 | 0.12059 SMPDL3A   |
| cg01594262 | 0.10173 | 0.05811 | 0.46977 | 0.47314 | 0.05428 | 0.04386 | 0.1436  | 0.39348 | 0.42086 | 0.1789 YIF1B      |
| cg01594915 | 0.06105 | 0.05096 | 0.06638 | 0.05941 | 0.10318 | 0.06129 | 0.06736 | 0.06078 | 0.05934 | 0.06835 HNRPA3    |
| cg01598046 | 0.03657 | 0.03507 | 0.06711 | 0.04588 | 0.03419 | 0.03699 | 0.03337 | 0.03155 | 0.03325 | 0.02592 TRAIIP    |
| cg01598642 | 0.46052 | 0.43296 | 0.82801 | 0.69162 | 0.82402 | 0.85086 | 0.11571 | 0.09655 | 0.53612 | 0.35057 HBG1      |
| cg01599709 | 0.05268 | 0.04237 | 0.04893 | 0.04503 | 0.0396  | 0.03495 | 0.04362 | 0.04183 | 0.03497 | 0.03668 HBEGF     |
| cg01600189 | 0.30726 | 0.289   | 0.34679 | 0.41934 | 0.36579 | 0.45272 | 0.07752 | 0.05059 | 0.04024 | 0.04464 FLJ20444  |
| cg01600782 | 0.04552 | 0.05323 | 0.04746 | 0.04246 | 0.03525 | 0.04221 | 0.03987 | 0.04365 | 0.03787 | 0.03755 CALM2     |
| cg01601573 | 0.88209 | 0.64142 | 0.76627 | 0.75307 | 0.8706  | 0.60751 | 0.74345 | 0.48625 | 0.70801 | 0.10967 GAB1      |
| cg01602416 | 0.06733 | 0.02923 | 0.04154 | 0.04507 | 0.02991 | 0.03931 | 0.0276  | 0.02587 | 0.02726 | 0.02685 GCSH      |
| cg01602430 | 0.05396 | 0.0454  | 0.05994 | 0.05942 | 0.03913 | 0.03881 | 0.04251 | 0.04185 | 0.05635 | 0.03552 WDR36     |
| cg01602596 | 0.7804  | 0.607   | 0.58943 | 0.71819 | 0.92202 | 0.74401 | 0.1841  | 0.19445 | 0.43793 | 0.18238 KRT14     |
| cg01603095 | 0.61578 | 0.26575 | 0.78274 | 0.74532 | 0.47929 | 0.05249 | 0.67797 | 0.44871 | 0.0432  | 0.04216 SLC2A13   |
| cg01605517 | 0.77253 | 0.78753 | 0.7548  | 0.77323 | 0.70374 | 0.79629 | 0.64258 | 0.71554 | 0.75382 | 0.7522 AHCTF1     |
| cg01605783 | 0.48187 | 0.17907 | 0.81645 | 0.85323 | 0.86812 | 0.77617 | 0.51801 | 0.3963  | 0.85561 | 0.49569 LOC284837 |
| cg01605984 | 0.44035 | 0.07217 | 0.07629 | 0.08455 | 0.17511 | 0.04252 | 0.2717  | 0.10286 | 0.71971 | 0.595 SURF5       |
| cg01606998 | 0.07394 | 0.0716  | 0.08635 | 0.06964 | 0.05356 | 0.06151 | 0.05885 | 0.06267 | 0.0543  | 0.05747 PANX2     |
| cg01607495 | 0.31398 | 0.22912 | 0.2476  | 0.2331  | 0.33193 | 0.30591 | 0.32113 | 0.29009 | 0.80179 | 0.54308 BAG4      |
| cg01610240 | 0.05868 | 0.05879 | 0.06942 | 0.06137 | 0.04426 | 0.06101 | 0.05816 | 0.04959 | 0.04772 | 0.056 FBXO28      |
| cg01610488 | 0.27578 | 0.04633 | 0.16815 | 0.31594 | 0.18555 | 0.03208 | 0.58527 | 0.64917 | 0.24701 | 0.37639 TRPA1     |
| cg01611640 | 0.06412 | 0.0616  | 0.07729 | 0.07723 | 0.06622 | 0.0719  | 0.06807 | 0.06168 | 0.05747 | 0.05822 LOC58486  |
| cg01612158 | 0.15403 | 0.12864 | 0.22663 | 0.16758 | 0.25152 | 0.15034 | 0.17464 | 0.18415 | 0.14943 | 0.18424 FCRL4     |
| cg01614759 | 0.90502 | 0.84375 | 0.89751 | 0.90847 | 0.89083 | 0.90621 | 0.88292 | 0.78836 | 0.24624 | 0.29635 ZNF22     |
| cg01615080 | 0.09489 | 0.08422 | 0.09967 | 0.09065 | 0.0774  | 0.09249 | 0.08536 | 0.0796  | 0.09618 | 0.0832 ACYP2      |
| cg01615704 | 0.97252 | 0.9814  | 0.97892 | 0.97642 | 0.98075 | 0.97896 | 0.98152 | 0.98058 | 0.97601 | 0.98503 MALL      |
| cg01617750 | 0.81373 | 0.77651 | 0.94995 | 0.9448  | 0.94986 | 0.94442 | 0.94502 | 0.92349 | 0.95633 | 0.94534 CMTM8     |
| cg01618083 | 0.02042 | 0.02412 | 0.02569 | 0.01977 | 0.0184  | 0.02411 | 0.02083 | 0.02239 | 0.02057 | 0.02169 CRY2      |
| cg01618304 | 0.04077 | 0.04919 | 0.07384 | 0.06447 | 0.07837 | 0.06643 | 0.0644  | 0.05066 | 0.04219 | 0.03842 C11orf54  |
| cg01618660 | 0.92025 | 0.91815 | 0.92019 | 0.91923 | 0.88611 | 0.87372 | 0.9032  | 0.89619 | 0.92388 | 0.92194 TRIM14    |
| cg01618851 | 0.28999 | 0.03743 | 0.06627 | 0.10502 | 0.25902 | 0.21593 | 0.02406 | 0.0376  | 0.30391 | 0.02555 CD209     |



|            |         |         |         |         |         |         |         |         |         |                   |
|------------|---------|---------|---------|---------|---------|---------|---------|---------|---------|-------------------|
| cg01620308 | 0.06417 | 0.06035 | 0.05863 | 0.06101 | 0.09537 | 0.07542 | 0.06789 | 0.06657 | 0.05221 | 0.04882 PRNP      |
| cg01620569 | 0.07254 | 0.04197 | 0.09651 | 0.10896 | 0.08475 | 0.06305 | 0.03914 | 0.03514 | 0.0528  | 0.05369 AK2       |
| cg01620785 | 0.15373 | 0.10941 | 0.16357 | 0.14019 | 0.30018 | 0.10325 | 0.09381 | 0.10946 | 0.11976 | 0.0867 SLC5A6     |
| cg01623187 | 0.76691 | 0.67012 | 0.80471 | 0.81958 | 0.75366 | 0.77658 | 0.50481 | 0.72799 | 0.64905 | 0.63406 FAM112A   |
| cg01623438 | 0.81307 | 0.67741 | 0.86184 | 0.89046 | 0.88364 | 0.77542 | 0.83505 | 0.86083 | 0.80794 | 0.4381 CTSZ       |
| cg01625242 | 0.47046 | 0.28012 | 0.42829 | 0.56991 | 0.75341 | 0.48098 | 0.63769 | 0.33656 | 0.08094 | 0.03076 GRP       |
| cg01626197 | 0.03457 | 0.03824 | 0.0445  | 0.03884 | 0.04147 | 0.04023 | 0.03394 | 0.03368 | 0.03787 | 0.03384 GMPPB     |
| cg01626227 | 0.03397 | 0.03633 | 0.03656 | 0.03247 | 0.02817 | 0.03919 | 0.03033 | 0.03175 | 0.0289  | 0.02864 TRIM4     |
| cg01628253 | 0.03058 | 0.02973 | 0.0259  | 0.02843 | 0.02377 | 0.03398 | 0.02569 | 0.02669 | 0.03061 | 0.03184 HAX1      |
| cg01628803 | 0.36314 | 0.38596 | 0.37657 | 0.36425 | 0.45064 | 0.42045 | 0.45488 | 0.44313 | 0.48096 | 0.40539 KIAA1641  |
| cg01630869 | 0.0296  | 0.03067 | 0.02906 | 0.03267 | 0.02584 | 0.02742 | 0.03062 | 0.03112 | 0.02816 | 0.02188 CDC42EP2  |
| cg01632517 | 0.73752 | 0.75865 | 0.71367 | 0.72472 | 0.68822 | 0.76088 | 0.12412 | 0.08721 | 0.4679  | 0.50941 SSX8      |
| cg01632825 | 0.12393 | 0.04493 | 0.05438 | 0.05541 | 0.16459 | 0.04284 | 0.03899 | 0.0522  | 0.11518 | 0.04459 CLTCL1    |
| cg01634119 | 0.0512  | 0.05764 | 0.06089 | 0.04654 | 0.04517 | 0.03825 | 0.03354 | 0.03362 | 0.04565 | 0.04707 GMPS      |
| cg01635061 | 0.29326 | 0.06438 | 0.65829 | 0.81475 | 0.95312 | 0.92373 | 0.57754 | 0.1634  | 0.83045 | 0.61972 COL11A2   |
| cg01636591 | 0.07024 | 0.09154 | 0.64661 | 0.68945 | 0.12448 | 0.14216 | 0.31791 | 0.08835 | 0.5     | 0.32189 CCL8      |
| cg01637734 | 0.11583 | 0.1096  | 0.15355 | 0.12666 | 0.39311 | 0.26587 | 0.14493 | 0.13602 | 0.12301 | 0.11293 CD5L      |
| cg01638025 | 0.02207 | 0.02237 | 0.02065 | 0.02125 | 0.01851 | 0.01783 | 0.0214  | 0.02427 | 0.01686 | 0.0192 DOCK5      |
| cg01638735 | 0.03604 | 0.03909 | 0.05609 | 0.04706 | 0.0504  | 0.06454 | 0.03496 | 0.03742 | 0.03697 | 0.03049 CDK6      |
| cg01639034 | 0.05128 | 0.05374 | 0.06248 | 0.05936 | 0.05684 | 0.0577  | 0.05859 | 0.11912 | 0.04943 | 0.05342 KIAA0859  |
| cg01639256 | 0.73823 | 0.50589 | 0.90185 | 0.93748 | 0.94739 | 0.75307 | 0.5969  | 0.46869 | 0.79726 | 0.63169 FLJ25084  |
| cg01643284 | 0.03483 | 0.02833 | 0.03058 | 0.03286 | 0.02527 | 0.02875 | 0.02567 | 0.02969 | 0.02409 | 0.02645 DIP13B    |
| cg01643580 | 0.20985 | 0.03545 | 0.93893 | 0.93929 | 0.78432 | 0.82902 | 0.34647 | 0.59233 | 0.51573 | 0.63727 KCNK3     |
| cg01643624 | 0.6144  | 0.32697 | 0.8445  | 0.86214 | 0.87421 | 0.8503  | 0.77769 | 0.42844 | 0.83436 | 0.55669 C11orf16  |
| cg01644850 | 0.04788 | 0.04454 | 0.05832 | 0.0418  | 0.05023 | 0.04415 | 0.0314  | 0.03172 | 0.03246 | 0.03518 ZNF551    |
| cg01646665 | 0.26268 | 0.04274 | 0.1429  | 0.39025 | 0.05972 | 0.03824 | 0.03933 | 0.03456 | 0.09249 | 0.04672 TMEM79    |
| cg01651364 | 0.04238 | 0.0421  | 0.05332 | 0.0465  | 0.0506  | 0.05164 | 0.04948 | 0.04896 | 0.03633 | 0.03584 FLJ23518  |
| cg01651593 | 0.0323  | 0.03523 | 0.03946 | 0.0413  | 0.03957 | 0.03857 | 0.05418 | 0.05289 | 0.02897 | 0.02857 CDC20     |
| cg01651821 | 0.04724 | 0.04388 | 0.06157 | 0.05322 | 0.05419 | 0.06008 | 0.04643 | 0.04026 | 0.04612 | 0.05292 LOC129531 |
| cg01653110 | 0.09321 | 0.07443 | 0.11223 | 0.09211 | 0.09475 | 0.09078 | 0.10507 | 0.08388 | 0.08506 | 0.0886 VAMP4      |
| cg01653445 | 0.03868 | 0.03366 | 0.23867 | 0.07866 | 0.38833 | 0.03762 | 0.03671 | 0.03033 | 0.03951 | 0.03017 BAI2      |
| cg01654582 | 0.05696 | 0.04529 | 0.03543 | 0.03236 | 0.04636 | 0.03338 | 0.02579 | 0.02443 | 0.02556 | 0.02439 AADAT     |
| cg01655123 | 0.03537 | 0.03371 | 0.03321 | 0.03275 | 0.02628 | 0.02504 | 0.02586 | 0.02687 | 0.02778 | 0.02591 PHLDB3    |
| cg01655341 | 0.12057 | 0.11168 | 0.11412 | 0.12866 | 0.15571 | 0.11238 | 0.07183 | 0.0631  | 0.07776 | 0.1023 EXOSC5     |
| cg01655355 | 0.04388 | 0.05115 | 0.30504 | 0.45684 | 0.66434 | 0.09218 | 0.03882 | 0.03953 | 0.04948 | 0.03624 SLC5A5    |
| cg01656216 | 0.64125 | 0.36714 | 0.23121 | 0.20016 | 0.24448 | 0.34305 | 0.23193 | 0.55139 | 0.34441 | 0.19992 ZNF438    |
| cg01656470 | 0.31002 | 0.59773 | 0.83922 | 0.88728 | 0.53166 | 0.51286 | 0.52674 | 0.51139 | 0.28099 | 0.36444 ZIM2      |
| cg01656750 | 0.73065 | 0.7694  | 0.71605 | 0.76781 | 0.82472 | 0.80168 | 0.28043 | 0.44131 | 0.79941 | 0.67127 KATNB1    |
| cg01656853 | 0.85334 | 0.15535 | 0.8333  | 0.84912 | 0.93078 | 0.79701 | 0.40978 | 0.21935 | 0.64643 | 0.4976 FUT2       |
| cg01656955 | 0.11063 | 0.09819 | 0.39854 | 0.34328 | 0.58684 | 0.69648 | 0.46072 | 0.52584 | 0.32311 | 0.53491 NT5C1A    |
| cg01657207 | 0.20234 | 0.1736  | 0.16626 | 0.16456 | 0.24216 | 0.18813 | 0.14132 | 0.10472 | 0.55153 | 0.58588 ZNF35     |

|            |         |         |         |         |         |         |         |         |         |                  |
|------------|---------|---------|---------|---------|---------|---------|---------|---------|---------|------------------|
| cg01657380 | 0.54768 | 0.47847 | 0.8505  | 0.88569 | 0.85951 | 0.84275 | 0.83416 | 0.79962 | 0.87934 | 0.82118 NPFF     |
| cg01657408 | 0.03883 | 0.04774 | 0.04602 | 0.0449  | 0.02898 | 0.03665 | 0.03865 | 0.03342 | 0.03834 | 0.03398 FLJ31951 |
| cg01657694 | 0.03368 | 0.03333 | 0.02868 | 0.03253 | 0.0291  | 0.03169 | 0.02961 | 0.03074 | 0.02765 | 0.02672 KLHL22   |
| cg01658815 | 0.67027 | 0.28505 | 0.77277 | 0.80516 | 0.21316 | 0.15302 | 0.14699 | 0.09808 | 0.79258 | 0.307 ABLIM1     |
| cg01661993 | 0.06216 | 0.06997 | 0.36462 | 0.40904 | 0.06092 | 0.07694 | 0.09944 | 0.09004 | 0.09016 | 0.06831 TTYH1    |
| cg01662650 | 0.82441 | 0.84554 | 0.81756 | 0.84966 | 0.83689 | 0.86356 | 0.40097 | 0.62991 | 0.86896 | 0.86821 YY2      |
| cg01663295 | 0.18835 | 0.1314  | 0.13723 | 0.11388 | 0.2935  | 0.16988 | 0.17623 | 0.10004 | 0.1295  | 0.0789 PACS1     |
| cg01663469 | 0.40094 | 0.38953 | 0.8028  | 0.84817 | 0.07926 | 0.03939 | 0.84255 | 0.52428 | 0.89569 | 0.8858 C3orf15   |
| cg01663570 | 0.03923 | 0.03932 | 0.0463  | 0.0394  | 0.03311 | 0.04366 | 0.03879 | 0.04629 | 0.03823 | 0.03199 DVL3     |
| cg01663968 | 0.88731 | 0.8479  | 0.06988 | 0.04582 | 0.03759 | 0.0356  | 0.58562 | 0.61586 | 0.03534 | 0.03064 CTSZ     |
| cg01664666 | 0.04342 | 0.03826 | 0.52002 | 0.48358 | 0.47548 | 0.05286 | 0.05457 | 0.25737 | 0.09744 | 0.12856 PLD5     |
| cg01665633 | 0.04564 | 0.0431  | 0.04481 | 0.04577 | 0.05742 | 0.05178 | 0.05497 | 0.04869 | 0.05442 | 0.0536 NDNL2     |
| cg01667384 | 0.07291 | 0.03361 | 0.04589 | 0.06038 | 0.03351 | 0.03123 | 0.03234 | 0.03024 | 0.02682 | 0.02502 FLT3LG   |
| cg01667702 | 0.0488  | 0.04248 | 0.05892 | 0.07119 | 0.124   | 0.04811 | 0.05577 | 0.05263 | 0.04175 | 0.0434 TRAPPC1   |
| cg01668126 | 0.85612 | 0.84139 | 0.77469 | 0.85598 | 0.84097 | 0.801   | 0.18582 | 0.18396 | 0.09825 | 0.10679 MSR1     |
| cg01668383 | 0.73972 | 0.71254 | 0.69213 | 0.75219 | 0.78409 | 0.71128 | 0.20022 | 0.14794 | 0.44415 | 0.50527 CSNK1A1L |
| cg01668465 | 0.14841 | 0.14399 | 0.22154 | 0.15711 | 0.28249 | 0.20392 | 0.15556 | 0.11405 | 0.18169 | 0.16257 SCG2     |
| cg01669948 | 0.19852 | 0.05912 | 0.32142 | 0.50966 | 0.69112 | 0.55511 | 0.08444 | 0.08767 | 0.39035 | 0.2925 KCNK16    |
| cg01671575 | 0.81688 | 0.3988  | 0.87454 | 0.91303 | 0.86975 | 0.87197 | 0.83216 | 0.87447 | 0.93378 | 0.85993 PGBD5    |
| cg01671881 | 0.07179 | 0.05935 | 0.12406 | 0.22546 | 0.482   | 0.6434  | 0.04691 | 0.11623 | 0.17893 | 0.13008 C2orf71  |
| cg01673583 | 0.94914 | 0.9552  | 0.9488  | 0.95343 | 0.9369  | 0.93043 | 0.92167 | 0.9483  | 0.94511 | 0.93432 BIRC1    |
| cg01675895 | 0.76878 | 0.60526 | 0.71433 | 0.7707  | 0.61458 | 0.6556  | 0.72315 | 0.74326 | 0.76762 | 0.18661 AFM      |
| cg01677098 | 0.02368 | 0.02697 | 0.02748 | 0.02526 | 0.02206 | 0.02426 | 0.03054 | 0.03115 | 0.02478 | 0.02322 TCEA1    |
| cg01677177 | 0.09233 | 0.09598 | 0.08137 | 0.09144 | 0.06766 | 0.08542 | 0.07107 | 0.08886 | 0.0744  | 0.08541 ZBTB26   |
| cg01678091 | 0.78613 | 0.54641 | 0.58236 | 0.71962 | 0.91345 | 0.88374 | 0.39304 | 0.48443 | 0.89071 | 0.85106 MAGEL2   |
| cg01678321 | 0.23213 | 0.16144 | 0.36067 | 0.62449 | 0.42334 | 0.51099 | 0.20516 | 0.20703 | 0.15742 | 0.13339 SLC36A3  |
| cg01678893 | 0.02808 | 0.02998 | 0.0315  | 0.03174 | 0.02202 | 0.0236  | 0.02642 | 0.02765 | 0.02447 | 0.02434 CALR     |
| cg01679262 | 0.58936 | 0.35341 | 0.54472 | 0.57664 | 0.4562  | 0.37343 | 0.13061 | 0.17793 | 0.21879 | 0.26177 RANBP5   |
| cg01680762 | 0.18925 | 0.1845  | 0.6647  | 0.75622 | 0.874   | 0.78604 | 0.4746  | 0.45283 | 0.08121 | 0.06204 FBXO25   |
| cg01680823 | 0.75657 | 0.34994 | 0.64059 | 0.82234 | 0.83952 | 0.56053 | 0.67554 | 0.2647  | 0.67926 | 0.39944 TCAP     |
| cg01683883 | 0.81975 | 0.52365 | 0.90773 | 0.94088 | 0.97207 | 0.94627 | 0.94819 | 0.88125 | 0.95664 | 0.92038 CMTM2    |
| cg01684579 | 0.5685  | 0.15845 | 0.4041  | 0.52714 | 0.41458 | 0.59325 | 0.45878 | 0.31384 | 0.60901 | 0.30394 HSPC111  |
| cg01684901 | 0.78355 | 0.48402 | 0.78795 | 0.82112 | 0.78862 | 0.48421 | 0.76025 | 0.39557 | 0.62665 | 0.13555 C3orf40  |
| cg01685739 | 0.03334 | 0.03656 | 0.06139 | 0.04977 | 0.05675 | 0.05729 | 0.034   | 0.03208 | 0.02778 | 0.02452 SLC4A2   |
| cg01687051 | 0.0441  | 0.04265 | 0.05385 | 0.04139 | 0.04055 | 0.03539 | 0.0434  | 0.03899 | 0.0393  | 0.04205 LUC7L    |
| cg01687711 | 0.06002 | 0.05404 | 0.055   | 0.05147 | 0.03945 | 0.0525  | 0.04519 | 0.04302 | 0.04243 | 0.04178 CBARA1   |
| cg01692572 | 0.05738 | 0.04277 | 0.07348 | 0.05211 | 0.03421 | 0.0367  | 0.03561 | 0.03869 | 0.04406 | 0.03471 SIAHBP1  |
| cg01692815 | 0.0907  | 0.03109 | 0.03894 | 0.03672 | 0.05301 | 0.03546 | 0.03385 | 0.03664 | 0.20392 | 0.0233 AP3B1     |
| cg01693108 | 0.05177 | 0.04147 | 0.04026 | 0.04211 | 0.04317 | 0.04274 | 0.03395 | 0.04498 | 0.05208 | 0.02989 SRPK1    |
| cg01693157 | 0.03202 | 0.03378 | 0.1623  | 0.31559 | 0.5518  | 0.36794 | 0.02868 | 0.02933 | 0.06213 | 0.0316 TUBA1     |
| cg01693350 | 0.96853 | 0.9699  | 0.97777 | 0.98102 | 0.9749  | 0.97418 | 0.07261 | 0.12082 | 0.97994 | 0.97739 WT1      |

|            |         |         |         |         |         |         |         |         |         |                  |
|------------|---------|---------|---------|---------|---------|---------|---------|---------|---------|------------------|
| cg01697732 | 0.03415 | 0.03247 | 0.10419 | 0.09729 | 0.72942 | 0.66896 | 0.36624 | 0.51617 | 0.91487 | 0.73318 FAM20A   |
| cg01697865 | 0.68871 | 0.0587  | 0.81606 | 0.78475 | 0.82938 | 0.77899 | 0.30008 | 0.37055 | 0.39295 | 0.38962 IL10RA   |
| cg01699584 | 0.02099 | 0.02121 | 0.03882 | 0.02366 | 0.0183  | 0.01981 | 0.0193  | 0.01627 | 0.02414 | 0.01817 KCTD8    |
| cg01703884 | 0.859   | 0.70468 | 0.81891 | 0.8265  | 0.83545 | 0.82502 | 0.64023 | 0.66583 | 0.84716 | 0.7764 FLJ37587  |
| cg01704534 | 0.53134 | 0.16657 | 0.20731 | 0.40511 | 0.52883 | 0.41561 | 0.17098 | 0.1288  | 0.07758 | 0.05575 FLJ20273 |
| cg01705458 | 0.06774 | 0.0672  | 0.05735 | 0.05633 | 0.04178 | 0.05096 | 0.05074 | 0.05345 | 0.05426 | 0.05439 CCDC34   |
| cg01705587 | 0.0269  | 0.02866 | 0.04485 | 0.03239 | 0.74392 | 0.87921 | 0.03431 | 0.03461 | 0.0266  | 0.02817 SV2A     |
| cg01708236 | 0.09362 | 0.06644 | 0.07825 | 0.08439 | 0.06035 | 0.11074 | 0.08744 | 0.08347 | 0.06092 | 0.05611 NFKBIE   |
| cg01708964 | 0.88897 | 0.51948 | 0.92821 | 0.93813 | 0.94997 | 0.93549 | 0.77088 | 0.59727 | 0.8425  | 0.62528 MYL7     |
| cg01712016 | 0.04152 | 0.04052 | 0.04192 | 0.03767 | 0.04188 | 0.03827 | 0.03164 | 0.0293  | 0.03305 | 0.03413 HDAC11   |
| cg01713938 | 0.47346 | 0.50516 | 0.62801 | 0.69799 | 0.82    | 0.73665 | 0.58333 | 0.5741  | 0.48402 | 0.36562 IFNA13   |
| cg01714513 | 0.90639 | 0.89421 | 0.86774 | 0.90509 | 0.83494 | 0.88223 | 0.79988 | 0.82851 | 0.813   | 0.76703 GOLGA8A  |
| cg01714932 | 0.68024 | 0.15584 | 0.47572 | 0.57356 | 0.40502 | 0.54629 | 0.12462 | 0.11745 | 0.46825 | 0.17095 PZP      |
| cg01716061 | 0.42359 | 0.39856 | 0.4638  | 0.42101 | 0.44112 | 0.48048 | 0.07056 | 0.06532 | 0.08949 | 0.06622 CDKN2B   |
| cg01716083 | 0.03828 | 0.04317 | 0.05657 | 0.04092 | 0.0604  | 0.06386 | 0.03177 | 0.03616 | 0.03263 | 0.03159 ZNRD1    |
| cg01717150 | 0.03625 | 0.03998 | 0.43653 | 0.49057 | 0.04239 | 0.03929 | 0.06856 | 0.03556 | 0.04231 | 0.03826 KCNK9    |
| cg01717706 | 0.05359 | 0.04029 | 0.04095 | 0.0409  | 0.03081 | 0.03368 | 0.03712 | 0.03574 | 0.15142 | 0.03096 SOCS1    |
| cg01718139 | 0.76045 | 0.28034 | 0.81212 | 0.85814 | 0.58902 | 0.29641 | 0.26563 | 0.26506 | 0.64609 | 0.47539 UNQ3033  |
| cg01718365 | 0.14741 | 0.09213 | 0.11712 | 0.11221 | 0.11494 | 0.09101 | 0.06233 | 0.05088 | 0.06934 | 0.0717 AOF2      |
| cg01718602 | 0.09904 | 0.08418 | 0.61521 | 0.5325  | 0.10833 | 0.10599 | 0.54972 | 0.43043 | 0.08755 | 0.10206 DACH2    |
| cg01720228 | 0.78231 | 0.54964 | 0.705   | 0.78479 | 0.53731 | 0.72962 | 0.26999 | 0.16373 | 0.58417 | 0.63424 FLJ42461 |
| cg01720520 | 0.35708 | 0.27672 | 0.13414 | 0.17498 | 0.16384 | 0.1291  | 0.12561 | 0.09738 | 0.08738 | 0.07464 LILRB1   |
| cg01722450 | 0.8601  | 0.84698 | 0.76638 | 0.72787 | 0.70604 | 0.76688 | 0.7055  | 0.76687 | 0.16403 | 0.18412 C18orf20 |
| cg01722994 | 0.06494 | 0.0391  | 0.7655  | 0.87657 | 0.60476 | 0.55052 | 0.0679  | 0.04442 | 0.05075 | 0.03119 GRIN2A   |
| cg01723464 | 0.03853 | 0.03891 | 0.04459 | 0.03649 | 0.02993 | 0.03344 | 0.0333  | 0.03744 | 0.03116 | 0.0288 MRFAP1    |
| cg01723747 | 0.12191 | 0.1304  | 0.14832 | 0.12271 | 0.1652  | 0.11459 | 0.1305  | 0.12571 | 0.11321 | 0.12916 C16orf34 |
| cg01724150 | 0.62435 | 0.44981 | 0.5364  | 0.65536 | 0.4358  | 0.2522  | 0.18639 | 0.11783 | 0.17086 | 0.14089 NMNAT3   |
| cg01725199 | 0.0368  | 0.03291 | 0.39582 | 0.60311 | 0.38802 | 0.13028 | 0.12912 | 0.33678 | 0.03445 | 0.02786 GALNT12  |
| cg01726767 | 0.56349 | 0.14753 | 0.32391 | 0.61923 | 0.18188 | 0.6326  | 0.05209 | 0.08319 | 0.10647 | 0.05047 LALBA    |
| cg01726775 | 0.65897 | 0.39305 | 0.10256 | 0.05768 | 0.81108 | 0.57764 | 0.85591 | 0.50674 | 0.06252 | 0.03815 C1RL     |
| cg01727899 | 0.29993 | 0.24656 | 0.3356  | 0.36868 | 0.62705 | 0.56775 | 0.2108  | 0.23494 | 0.12591 | 0.13479 GPATC2   |
| cg01729862 | 0.04453 | 0.04181 | 0.05385 | 0.05201 | 0.0455  | 0.03292 | 0.04508 | 0.04218 | 0.03426 | 0.04497 MRPS34   |
| cg01731341 | 0.91309 | 0.65081 | 0.86899 | 0.9397  | 0.63459 | 0.34816 | 0.05614 | 0.26062 | 0.14642 | 0.31397 FGF6     |
| cg01731685 | 0.15085 | 0.06648 | 0.23834 | 0.22795 | 0.06174 | 0.03707 | 0.0747  | 0.04417 | 0.04812 | 0.03577 IL17R    |
| cg01732037 | 0.80474 | 0.64642 | 0.75556 | 0.81043 | 0.78214 | 0.79856 | 0.78773 | 0.80339 | 0.73064 | 0.75228 TBX19    |
| cg01733599 | 0.57117 | 0.45892 | 0.86802 | 0.87064 | 0.81938 | 0.82607 | 0.66263 | 0.79847 | 0.87988 | 0.87847 LIPC     |
| cg01733783 | 0.03666 | 0.04094 | 0.04841 | 0.04051 | 0.03496 | 0.03657 | 0.03497 | 0.04018 | 0.03649 | 0.03135 HSPA5    |
| cg01734338 | 0.42545 | 0.26323 | 0.77994 | 0.79059 | 0.62332 | 0.59738 | 0.28038 | 0.19913 | 0.31339 | 0.43515 KCNQ1    |
| cg01735903 | 0.0737  | 0.0812  | 0.08206 | 0.07463 | 0.07565 | 0.07921 | 0.09121 | 0.09215 | 0.08063 | 0.07095 POLR3D   |
| cg01737507 | 0.04424 | 0.03829 | 0.03693 | 0.0353  | 0.03917 | 0.03267 | 0.0353  | 0.0348  | 0.02764 | 0.02642 PPIC     |
| cg01737532 | 0.32938 | 0.38344 | 0.41294 | 0.47067 | 0.43566 | 0.51085 | 0.2456  | 0.38348 | 0.22223 | 0.22579 FRG1     |

|            |         |         |         |         |         |         |         |         |         |                      |
|------------|---------|---------|---------|---------|---------|---------|---------|---------|---------|----------------------|
| cg01738359 | 0.07282 | 0.05641 | 0.05346 | 0.05588 | 0.03969 | 0.04677 | 0.04918 | 0.05104 | 0.04807 | 0.0459 RB1           |
| cg01738944 | 0.02592 | 0.02402 | 0.02508 | 0.02635 | 0.03202 | 0.03245 | 0.03183 | 0.03315 | 0.02668 | 0.02712 SLC35E2      |
| cg01739167 | 0.35649 | 0.17576 | 0.81526 | 0.85297 | 0.86881 | 0.77549 | 0.69902 | 0.73281 | 0.80557 | 0.728 CHRNE          |
| cg01739965 | 0.04644 | 0.0473  | 0.09045 | 0.07093 | 0.05034 | 0.05994 | 0.06557 | 0.06967 | 0.06144 | 0.05937 VPS54        |
| cg01743008 | 0.82921 | 0.58201 | 0.58108 | 0.69409 | 0.86173 | 0.86062 | 0.22759 | 0.24327 | 0.03471 | 0.03485 MAGEA2       |
| cg01743370 | 0.29335 | 0.39754 | 0.08761 | 0.2193  | 0.04837 | 0.03895 | 0.04299 | 0.04127 | 0.03935 | 0.03587 GCA          |
| cg01745448 | 0.04874 | 0.04627 | 0.08107 | 0.04319 | 0.02614 | 0.03706 | 0.04047 | 0.04145 | 0.04171 | 0.03836 SCAMP3       |
| cg01745510 | 0.05372 | 0.05392 | 0.05721 | 0.04654 | 0.03863 | 0.04751 | 0.05342 | 0.05014 | 0.04761 | 0.04634 CDKN1B       |
| cg01745657 | 0.17334 | 0.18006 | 0.24023 | 0.18447 | 0.30265 | 0.19513 | 0.16456 | 0.15319 | 0.19062 | 0.18949 PLCXD2       |
| cg01746088 | 0.03225 | 0.03758 | 0.03512 | 0.0366  | 0.02619 | 0.03209 | 0.03466 | 0.03598 | 0.02774 | 0.02938 SFRS7        |
| cg01747191 | 0.85074 | 0.84413 | 0.77494 | 0.84848 | 0.75338 | 0.81543 | 0.75436 | 0.85149 | 0.80788 | 0.79349 C6orf182     |
| cg01747665 | 0.87407 | 0.73461 | 0.87374 | 0.89704 | 0.93734 | 0.81631 | 0.87989 | 0.84066 | 0.90581 | 0.81241 IGFALS       |
| cg01753375 | 0.21553 | 0.26963 | 0.66379 | 0.78456 | 0.2958  | 0.45554 | 0.32268 | 0.20156 | 0.65949 | 0.39366 DCTN1        |
| cg01753595 | 0.03952 | 0.06111 | 0.05543 | 0.04601 | 0.0364  | 0.04069 | 0.03327 | 0.0318  | 0.06976 | 0.03529 COL5A1       |
| cg01753906 | 0.67748 | 0.53882 | 0.5823  | 0.61724 | 0.74367 | 0.68384 | 0.30498 | 0.40121 | 0.45925 | 0.32289              |
| cg01755369 | 0.03397 | 0.03667 | 0.04605 | 0.0402  | 0.02965 | 0.03225 | 0.03036 | 0.0313  | 0.0226  | 0.02404 ILF3         |
| cg01756060 | 0.02687 | 0.02793 | 0.03217 | 0.02765 | 0.02983 | 0.02943 | 0.02386 | 0.02472 | 0.02305 | 0.01876 CDK6         |
| cg01757745 | 0.69205 | 0.5607  | 0.65385 | 0.81746 | 0.93376 | 0.89556 | 0.13303 | 0.0811  | 0.04509 | 0.0374 C10orf93      |
| cg01758870 | 0.96826 | 0.96805 | 0.61652 | 0.61325 | 0.8274  | 0.80596 | 0.50987 | 0.46397 | 0.42144 | 0.41209 MGC72075     |
| cg01761409 | 0.03064 | 0.02932 | 0.19367 | 0.37945 | 0.15376 | 0.35666 | 0.03065 | 0.03288 | 0.02592 | 0.02366 RAB38        |
| cg01762581 | 0.83669 | 0.62483 | 0.82222 | 0.83729 | 0.85041 | 0.82736 | 0.73029 | 0.77767 | 0.8591  | 0.8407 DKK4          |
| cg01765461 | 0.03343 | 0.02598 | 0.05911 | 0.07929 | 0.26688 | 0.35339 | 0.03017 | 0.03886 | 0.03968 | 0.02382 TNFRSF11A    |
| cg01765473 | 0.02071 | 0.02258 | 0.02397 | 0.01827 | 0.01931 | 0.0191  | 0.01806 | 0.01707 | 0.41888 | 0.39501 ATAD1        |
| cg01765641 | 0.86236 | 0.89862 | 0.14893 | 0.13071 | 0.79128 | 0.65181 | 0.37202 | 0.74608 | 0.8808  | 0.81625 TBC1D5       |
| cg01767116 | 0.85981 | 0.73956 | 0.88077 | 0.8834  | 0.91402 | 0.78434 | 0.78089 | 0.63197 | 0.88274 | 0.71876 FBXL22       |
| cg01769037 | 0.13288 | 0.12524 | 0.18612 | 0.18106 | 0.18282 | 0.11363 | 0.11723 | 0.11976 | 0.08101 | 0.088 JARID2         |
| cg01770232 | 0.24656 | 0.07566 | 0.16948 | 0.11251 | 0.24154 | 0.18144 | 0.07235 | 0.08056 | 0.19295 | 0.06097 IL6          |
| cg01770400 | 0.89236 | 0.78522 | 0.90232 | 0.91115 | 0.92169 | 0.91891 | 0.88747 | 0.7603  | 0.91502 | 0.8825 SERPINC1      |
| cg01772980 | 0.11658 | 0.11641 | 0.15147 | 0.14472 | 0.10959 | 0.10149 | 0.12695 | 0.10739 | 0.11236 | 0.1006 SCGB1D1       |
| cg01773061 | 0.04235 | 0.03266 | 0.04132 | 0.04571 | 0.05491 | 0.0385  | 0.03992 | 0.03762 | 0.03504 | 0.04082 LSM10        |
| cg01773854 | 0.07894 | 0.08547 | 0.0899  | 0.08573 | 0.09525 | 0.08793 | 0.07625 | 0.07124 | 0.07268 | 0.07831 IGFBP6       |
| cg01774645 | 0.55249 | 0.36844 | 0.86106 | 0.86787 | 0.90367 | 0.88808 | 0.79118 | 0.8095  | 0.89162 | 0.87486 ARHGAP30     |
| cg01775265 | 0.12405 | 0.07429 | 0.23634 | 0.17667 | 0.45591 | 0.28759 | 0.16278 | 0.0717  | 0.51285 | 0.15479 RP11-49G10.8 |
| cg01775414 | 0.04319 | 0.03921 | 0.04638 | 0.04707 | 0.24038 | 0.23491 | 0.04476 | 0.04157 | 0.04756 | 0.04327 PHF21B       |
| cg01776246 | 0.06227 | 0.0493  | 0.06177 | 0.072   | 0.09732 | 0.06989 | 0.04627 | 0.04464 | 0.05274 | 0.06766 COIL         |
| cg01776396 | 0.53588 | 0.59716 | 0.57094 | 0.59515 | 0.44452 | 0.47107 | 0.36847 | 0.31497 | 0.592   | 0.65562 FANCB        |
| cg01777397 | 0.51516 | 0.10789 | 0.06474 | 0.12635 | 0.55558 | 0.39862 | 0.30916 | 0.05249 | 0.05484 | 0.04314 RSNL2        |
| cg01780107 | 0.04734 | 0.05046 | 0.05296 | 0.04911 | 0.03986 | 0.04047 | 0.04093 | 0.04779 | 0.04963 | 0.04713 DCC1         |
| cg01780482 | 0.03265 | 0.04184 | 0.03494 | 0.03949 | 0.03925 | 0.04348 | 0.04043 | 0.03076 | 0.03421 | 0.03341 EPAS1        |
| cg01781266 | 0.27211 | 0.06655 | 0.04281 | 0.0393  | 0.05027 | 0.04821 | 0.06187 | 0.04613 | 0.03313 | 0.03951 PARVA        |
| cg01782320 | 0.05382 | 0.05243 | 0.05186 | 0.05031 | 0.04926 | 0.04521 | 0.04715 | 0.04711 | 0.04405 | 0.04191 YME1L1       |

|            |         |         |         |         |         |         |         |         |         |         |          |
|------------|---------|---------|---------|---------|---------|---------|---------|---------|---------|---------|----------|
| cg01782486 | 0.90036 | 0.85188 | 0.90848 | 0.90514 | 0.93029 | 0.90835 | 0.8896  | 0.89357 | 0.90408 | 0.89595 | ZBTB7B   |
| cg01782487 | 0.04224 | 0.04273 | 0.06334 | 0.04933 | 0.06211 | 0.05651 | 0.09115 | 0.07166 | 0.04433 | 0.04605 | ERMAP    |
| cg01783386 | 0.07454 | 0.07562 | 0.07814 | 0.06555 | 0.06986 | 0.07138 | 0.06814 | 0.07961 | 0.06651 | 0.05833 | RFT1     |
| cg01784199 | 0.07407 | 0.06261 | 0.11954 | 0.08831 | 0.13255 | 0.08045 | 0.04655 | 0.0454  | 0.09107 | 0.08701 | DNAJB4   |
| cg01785060 | 0.05495 | 0.05618 | 0.0505  | 0.04345 | 0.02277 | 0.02092 | 0.03799 | 0.04221 | 0.04242 | 0.02826 | ZDHC21   |
| cg01785339 | 0.05387 | 0.05941 | 0.07764 | 0.08603 | 0.07473 | 0.06157 | 0.05719 | 0.0533  | 0.0522  | 0.06044 | CNIH4    |
| cg01785568 | 0.77971 | 0.56487 | 0.90001 | 0.92646 | 0.93187 | 0.90121 | 0.84653 | 0.88362 | 0.92941 | 0.86568 | MSX1     |
| cg01787047 | 0.02405 | 0.02559 | 0.02392 | 0.02565 | 0.02045 | 0.02892 | 0.02216 | 0.02403 | 0.02487 | 0.01768 | RAD9A    |
| cg01788438 | 0.03996 | 0.03651 | 0.04246 | 0.04103 | 0.03188 | 0.03458 | 0.03891 | 0.03524 | 0.03422 | 0.03351 | HNRPR    |
| cg01789267 | 0.75875 | 0.58542 | 0.58528 | 0.7797  | 0.66948 | 0.7704  | 0.53793 | 0.68319 | 0.46487 | 0.20306 | SLC28A2  |
| cg01791232 | 0.13816 | 0.13515 | 0.70853 | 0.59277 | 0.65884 | 0.7155  | 0.18711 | 0.14701 | 0.64793 | 0.78562 | KREMEN1  |
| cg01794265 | 0.0495  | 0.03368 | 0.04939 | 0.03548 | 0.36608 | 0.27434 | 0.0699  | 0.03656 | 0.04453 | 0.02523 | FAM105A  |
| cg01794711 | 0.02983 | 0.03638 | 0.04459 | 0.03788 | 0.02856 | 0.04329 | 0.03266 | 0.02752 | 0.0311  | 0.03426 | CNDP2    |
| cg01795122 | 0.02439 | 0.02918 | 0.02574 | 0.02345 | 0.02349 | 0.0208  | 0.02376 | 0.01971 | 0.0224  | 0.01866 | EMP3     |
| cg01795161 | 0.24376 | 0.21781 | 0.31369 | 0.30981 | 0.52098 | 0.32834 | 0.22867 | 0.20681 | 0.20462 | 0.17356 | MCFP     |
| cg01795697 | 0.03705 | 0.04269 | 0.04757 | 0.04654 | 0.03971 | 0.04296 | 0.03926 | 0.03767 | 0.04431 | 0.03787 | DDX5     |
| cg01796223 | 0.37636 | 0.22921 | 0.30499 | 0.26897 | 0.30274 | 0.28026 | 0.22108 | 0.24256 | 0.21256 | 0.17664 | CPA4     |
| cg01796228 | 0.7352  | 0.61865 | 0.81585 | 0.85438 | 0.67406 | 0.77871 | 0.81032 | 0.75362 | 0.56189 | 0.39924 | LIFR     |
| cg01797043 | 0.56356 | 0.27899 | 0.71532 | 0.72322 | 0.65727 | 0.43955 | 0.66575 | 0.27524 | 0.48051 | 0.17084 | RPL3L    |
| cg01797527 | 0.06248 | 0.04644 | 0.17546 | 0.28387 | 0.05179 | 0.0386  | 0.02971 | 0.03156 | 0.09265 | 0.04524 | BMP2     |
| cg01798443 | 0.07962 | 0.09467 | 0.10618 | 0.0889  | 0.15006 | 0.09283 | 0.0708  | 0.07014 | 0.07784 | 0.07394 | RPSA     |
| cg01798589 | 0.38228 | 0.28532 | 0.39033 | 0.33922 | 0.74972 | 0.12887 | 0.09768 | 0.09658 | 0.12556 | 0.07981 | STAC     |
| cg01800843 | 0.05263 | 0.05787 | 0.07378 | 0.06834 | 0.08564 | 0.0709  | 0.07912 | 0.06285 | 0.05583 | 0.04735 | ATM      |
| cg01801174 | 0.0519  | 0.04775 | 0.0627  | 0.06079 | 0.05051 | 0.053   | 0.05707 | 0.05181 | 0.04822 | 0.05478 | UFC1     |
| cg01802635 | 0.07012 | 0.07135 | 0.08986 | 0.07881 | 0.07291 | 0.06729 | 0.06319 | 0.07573 | 0.0562  | 0.05583 | TXNDC5   |
| cg01802653 | 0.08086 | 0.0762  | 0.08172 | 0.08466 | 0.11534 | 0.09807 | 0.07875 | 0.06751 | 0.06135 | 0.09692 | HERC3    |
| cg01803059 | 0.23099 | 0.19836 | 0.23884 | 0.2032  | 0.36115 | 0.26798 | 0.18046 | 0.14651 | 0.23418 | 0.21827 | SMAD1    |
| cg01803238 | 0.07342 | 0.07985 | 0.12217 | 0.13763 | 0.19145 | 0.1315  | 0.1087  | 0.10179 | 0.112   | 0.12118 | BCL2     |
| cg01803810 | 0.02398 | 0.02798 | 0.03073 | 0.02947 | 0.02397 | 0.02604 | 0.02417 | 0.02539 | 0.02443 | 0.02155 | TSEN54   |
| cg01804429 | 0.5909  | 0.40666 | 0.623   | 0.65209 | 0.25465 | 0.10293 | 0.26635 | 0.30113 | 0.33458 | 0.38839 | YTHDC1   |
| cg01804844 | 0.85688 | 0.87676 | 0.75595 | 0.79828 | 0.60712 | 0.72959 | 0.76526 | 0.82079 | 0.83055 | 0.76827 | SDCCAG33 |
| cg01805282 | 0.03873 | 0.08188 | 0.02398 | 0.02235 | 0.03359 | 0.02004 | 0.02568 | 0.01695 | 0.26316 | 0.0663  | EYA4     |
| cg01805540 | 0.02389 | 0.02668 | 0.05557 | 0.03297 | 0.0726  | 0.02588 | 0.05221 | 0.02128 | 0.03241 | 0.01957 | CACNB2   |
| cg01805784 | 0.02938 | 0.02553 | 0.02575 | 0.02355 | 0.02376 | 0.02521 | 0.0242  | 0.02419 | 0.0197  | 0.01992 | PRR7     |
| cg01806808 | 0.0225  | 0.02105 | 0.02297 | 0.02338 | 0.01723 | 0.02057 | 0.01908 | 0.01712 | 0.01828 | 0.01866 | PTK2     |
| cg01806928 | 0.62039 | 0.44452 | 0.81472 | 0.89946 | 0.90395 | 0.86771 | 0.68493 | 0.77282 | 0.83382 | 0.8433  | SYT9     |
| cg01808090 | 0.06347 | 0.05208 | 0.06324 | 0.05898 | 0.05146 | 0.04705 | 0.05022 | 0.05301 | 0.04333 | 0.03778 | NUBP1    |
| cg01808130 | 0.13158 | 0.10889 | 0.17635 | 0.17092 | 0.19443 | 0.14303 | 0.13075 | 0.1343  | 0.07071 | 0.09692 | SLC35B3  |
| cg01808508 | 0.34191 | 0.33812 | 0.39881 | 0.29497 | 0.31848 | 0.43546 | 0.25335 | 0.23914 | 0.19363 | 0.18083 | PSMD6    |
| cg01808706 | 0.02461 | 0.02318 | 0.40103 | 0.47751 | 0.85896 | 0.66311 | 0.0353  | 0.02303 | 0.02969 | 0.02588 | ITPKA    |
| cg01809579 | 0.03408 | 0.03582 | 0.03199 | 0.03326 | 0.03307 | 0.03758 | 0.02797 | 0.03183 | 0.02973 | 0.02769 | HNRPK    |

|            |         |         |         |         |         |         |         |         |         |                   |
|------------|---------|---------|---------|---------|---------|---------|---------|---------|---------|-------------------|
| cg01813334 | 0.06073 | 0.05884 | 0.06892 | 0.06099 | 0.05964 | 0.05193 | 0.06222 | 0.05193 | 0.05804 | 0.05359 EIF3S9    |
| cg01813965 | 0.91401 | 0.84064 | 0.87262 | 0.88803 | 0.94916 | 0.72868 | 0.4239  | 0.4021  | 0.75138 | 0.74632 C16orf50  |
| cg01816336 | 0.02938 | 0.02979 | 0.02626 | 0.02686 | 0.02918 | 0.02295 | 0.03531 | 0.02172 | 0.02807 | 0.01975 MINPP1    |
| cg01817029 | 0.06053 | 0.0594  | 0.06716 | 0.06476 | 0.11718 | 0.13324 | 0.06841 | 0.06097 | 0.08886 | 0.05532 TRHDE     |
| cg01817393 | 0.20612 | 0.20345 | 0.46955 | 0.51893 | 0.31065 | 0.19009 | 0.25713 | 0.22437 | 0.15826 | 0.14735 GNAS      |
| cg01818492 | 0.03692 | 0.0419  | 0.0403  | 0.03612 | 0.02949 | 0.0438  | 0.04373 | 0.04204 | 0.04086 | 0.04436 ENPP1     |
| cg01819572 | 0.04639 | 0.0498  | 0.0734  | 0.1634  | 0.06986 | 0.13224 | 0.05881 | 0.06406 | 0.04209 | 0.04004 IL17RD    |
| cg01819863 | 0.02331 | 0.02351 | 0.02213 | 0.02277 | 0.01657 | 0.0208  | 0.01898 | 0.02002 | 0.02972 | 0.02891 EPC1      |
| cg01820374 | 0.65172 | 0.38783 | 0.82847 | 0.88834 | 0.90619 | 0.85739 | 0.58576 | 0.48494 | 0.91833 | 0.81232 LAG3      |
| cg01820777 | 0.07969 | 0.06634 | 0.71468 | 0.84376 | 0.34446 | 0.04508 | 0.09892 | 0.04558 | 0.70073 | 0.42635 MICAL-L2  |
| cg01824804 | 0.09604 | 0.06165 | 0.07553 | 0.07004 | 0.05611 | 0.06128 | 0.29574 | 0.06447 | 0.48812 | 0.5266 LOX        |
| cg01827098 | 0.91108 | 0.7999  | 0.25996 | 0.4988  | 0.78672 | 0.50033 | 0.06412 | 0.04964 | 0.14897 | 0.25118 GIMAP7    |
| cg01830294 | 0.12147 | 0.05417 | 0.47233 | 0.59261 | 0.57727 | 0.69463 | 0.44918 | 0.46691 | 0.48581 | 0.36728 WNT2      |
| cg01833398 | 0.02602 | 0.02578 | 0.02736 | 0.02419 | 0.02031 | 0.02214 | 0.02311 | 0.02306 | 0.02013 | 0.02378 TARBP2    |
| cg01835489 | 0.83862 | 0.40349 | 0.79672 | 0.75944 | 0.85832 | 0.83574 | 0.83817 | 0.70439 | 0.87015 | 0.74525 KRT8      |
| cg01836044 | 0.04184 | 0.04708 | 0.24085 | 0.46488 | 0.0745  | 0.05411 | 0.0427  | 0.0401  | 0.07267 | 0.03438 PCDH20    |
| cg01837574 | 0.11637 | 0.09053 | 0.1388  | 0.14918 | 0.3097  | 0.05103 | 0.06418 | 0.05247 | 0.054   | 0.05323 TRAPPC1   |
| cg01837689 | 0.03402 | 0.03666 | 0.05132 | 0.04138 | 0.0444  | 0.06434 | 0.04346 | 0.03911 | 0.03656 | 0.04658 P15RS     |
| cg01837719 | 0.05848 | 0.06672 | 0.20114 | 0.19248 | 0.53415 | 0.35186 | 0.0759  | 0.06943 | 0.11807 | 0.29912 FUT9      |
| cg01838317 | 0.05145 | 0.06097 | 0.06129 | 0.07669 | 0.27928 | 0.10282 | 0.0512  | 0.05022 | 0.0616  | 0.0546 GCH1       |
| cg01839464 | 0.03996 | 0.03931 | 0.52911 | 0.64956 | 0.2294  | 0.53945 | 0.10129 | 0.0435  | 0.3248  | 0.48879 DCC       |
| cg01840268 | 0.16435 | 0.15973 | 0.16711 | 0.1476  | 0.26929 | 0.21418 | 0.11064 | 0.11383 | 0.13225 | 0.13374 BTN3A1    |
| cg01843018 | 0.78872 | 0.59249 | 0.6989  | 0.77363 | 0.5983  | 0.72748 | 0.74215 | 0.78122 | 0.80175 | 0.58805 C5        |
| cg01846065 | 0.05516 | 0.04059 | 0.04003 | 0.03844 | 0.03502 | 0.03959 | 0.03859 | 0.03866 | 0.03629 | 0.03422 STAM2     |
| cg01848594 | 0.15315 | 0.15512 | 0.16004 | 0.14374 | 0.28302 | 0.21297 | 0.14489 | 0.14394 | 0.1156  | 0.16006 C16orf61  |
| cg01849789 | 0.07948 | 0.06632 | 0.08632 | 0.08183 | 0.09567 | 0.07519 | 0.08812 | 0.0739  | 0.07827 | 0.07262 ZC3H7B    |
| cg01851208 | 0.36448 | 0.27875 | 0.08933 | 0.18893 | 0.3722  | 0.46958 | 0.04161 | 0.05024 | 0.05036 | 0.03773 C10orf58  |
| cg01851385 | 0.76428 | 0.72574 | 0.82477 | 0.82821 | 0.5057  | 0.45149 | 0.26301 | 0.53925 | 0.09549 | 0.08731 CLCN4     |
| cg01851399 | 0.14751 | 0.06829 | 0.19323 | 0.20448 | 0.51381 | 0.19322 | 0.19257 | 0.11046 | 0.07997 | 0.04437 PKP2      |
| cg01852131 | 0.03643 | 0.0355  | 0.03621 | 0.03632 | 0.02442 | 0.02776 | 0.03503 | 0.03384 | 0.03303 | 0.02822 PPP1R10   |
| cg01852328 | 0.06966 | 0.08368 | 0.06634 | 0.05787 | 0.09268 | 0.07906 | 0.07542 | 0.07878 | 0.05924 | 0.05516 LOC221955 |
| cg01853981 | 0.73913 | 0.54079 | 0.80424 | 0.9065  | 0.89798 | 0.77061 | 0.45515 | 0.09541 | 0.77455 | 0.68274 KRT6IRS   |
| cg01856970 | 0.17606 | 0.03727 | 0.04541 | 0.04866 | 0.48242 | 0.30603 | 0.06278 | 0.02888 | 0.04164 | 0.03376 IL15      |
| cg01856985 | 0.02539 | 0.02732 | 0.02445 | 0.02674 | 0.02028 | 0.0233  | 0.0232  | 0.02405 | 0.02005 | 0.0189 ZNF384     |
| cg01857260 | 0.55386 | 0.13834 | 0.60359 | 0.81718 | 0.75524 | 0.7344  | 0.54632 | 0.69276 | 0.14402 | 0.27304 SCRL      |
| cg01858173 | 0.25807 | 0.08641 | 0.05727 | 0.07418 | 0.02181 | 0.04104 | 0.04084 | 0.03777 | 0.03856 | 0.03545 ROM1      |
| cg01860753 | 0.12222 | 0.10615 | 0.1363  | 0.16212 | 0.10059 | 0.1164  | 0.13533 | 0.09258 | 0.12867 | 0.12807 RASSF5    |
| cg01861509 | 0.65319 | 0.32111 | 0.86501 | 0.86063 | 0.82835 | 0.85132 | 0.83064 | 0.8339  | 0.8547  | 0.56724 SPOCK2    |
| cg01862366 | 0.02687 | 0.03344 | 0.03456 | 0.02937 | 0.03165 | 0.03105 | 0.02709 | 0.026   | 0.0457  | 0.02661 TMEM20    |
| cg01866162 | 0.0196  | 0.02176 | 0.01875 | 0.0194  | 0.01663 | 0.01879 | 0.01557 | 0.01263 | 0.01475 | 0.01481 CTCF      |
| cg01866521 | 0.04907 | 0.05206 | 0.0461  | 0.04583 | 0.03477 | 0.04139 | 0.03785 | 0.04583 | 0.03827 | 0.04092 EHD1      |

|            |         |         |         |         |         |         |         |         |         |                   |
|------------|---------|---------|---------|---------|---------|---------|---------|---------|---------|-------------------|
| cg01868128 | 0.21972 | 0.22445 | 0.20024 | 0.1737  | 0.56151 | 0.30146 | 0.18859 | 0.18614 | 0.23211 | 0.21301 LCE5A     |
| cg01868559 | 0.07722 | 0.03495 | 0.04722 | 0.03816 | 0.03083 | 0.02344 | 0.03928 | 0.03854 | 0.03608 | 0.03121 STRAP     |
| cg01868782 | 0.0564  | 0.05133 | 0.06797 | 0.07954 | 0.13946 | 0.09225 | 0.05078 | 0.04449 | 0.06146 | 0.04685 HEY2      |
| cg01869233 | 0.26652 | 0.04465 | 0.25308 | 0.23252 | 0.56079 | 0.28635 | 0.33929 | 0.06151 | 0.44938 | 0.08946 C20orf75  |
| cg01870826 | 0.05088 | 0.07469 | 0.80892 | 0.87069 | 0.74484 | 0.59132 | 0.08749 | 0.04087 | 0.02475 | 0.02344 LOC389458 |
| cg01871963 | 0.86237 | 0.80768 | 0.87347 | 0.88676 | 0.92268 | 0.90469 | 0.82663 | 0.82557 | 0.86015 | 0.78797 LCN2      |
| cg01871995 | 0.61624 | 0.34249 | 0.72496 | 0.77783 | 0.49722 | 0.63939 | 0.57341 | 0.55421 | 0.60134 | 0.36562 FGL1      |
| cg01872771 | 0.92951 | 0.93907 | 0.89854 | 0.91204 | 0.91298 | 0.94524 | 0.93452 | 0.9305  | 0.92219 | 0.95039 CXorf20   |
| cg01873645 | 0.04911 | 0.04578 | 0.04456 | 0.04076 | 0.05558 | 0.04539 | 0.04207 | 0.03855 | 0.03779 | 0.03478 C9orf85   |
| cg01875775 | 0.04651 | 0.04998 | 0.04504 | 0.04354 | 0.03215 | 0.0473  | 0.052   | 0.04506 | 0.04099 | 0.0425 CHEK2      |
| cg01876612 | 0.05233 | 0.05302 | 0.05542 | 0.05483 | 0.07372 | 0.06394 | 0.05208 | 0.04738 | 0.03908 | 0.04229 ZDHHC7    |
| cg01879488 | 0.04871 | 0.05033 | 0.04277 | 0.05144 | 0.05203 | 0.04357 | 0.04764 | 0.05117 | 0.04281 | 0.03835 CD44      |
| cg01880404 | 0.0347  | 0.03554 | 0.03701 | 0.03753 | 0.02613 | 0.03299 | 0.03623 | 0.0332  | 0.03212 | 0.02939 XRCC1     |
| cg01880569 | 0.17772 | 0.17018 | 0.43747 | 0.61011 | 0.65276 | 0.71683 | 0.29938 | 0.15773 | 0.29863 | 0.14946 CDH13     |
| cg01881255 | 0.02405 | 0.0224  | 0.02156 | 0.02336 | 0.01815 | 0.0206  | 0.02568 | 0.02144 | 0.01794 | 0.01905 SERTAD3   |
| cg01882150 | 0.05032 | 0.05586 | 0.05357 | 0.04496 | 0.03536 | 0.0443  | 0.04704 | 0.04331 | 0.11545 | 0.04647 LRP16     |
| cg01882179 | 0.03309 | 0.03116 | 0.0326  | 0.02931 | 0.02347 | 0.02877 | 0.0291  | 0.0319  | 0.02625 | 0.02447 SOCS2     |
| cg01883521 | 0.04253 | 0.04035 | 0.04277 | 0.04159 | 0.03262 | 0.03657 | 0.03765 | 0.03903 | 0.03763 | 0.03463 HIPK1     |
| cg01883966 | 0.61814 | 0.18058 | 0.8747  | 0.90476 | 0.24836 | 0.27361 | 0.29377 | 0.27639 | 0.92449 | 0.73489 STK19     |
| cg01885202 | 0.03098 | 0.03325 | 0.03217 | 0.03329 | 0.02657 | 0.03249 | 0.51888 | 0.50866 | 0.02627 | 0.02446 CDKL5     |
| cg01885635 | 0.58592 | 0.53807 | 0.47381 | 0.72063 | 0.14387 | 0.07733 | 0.14729 | 0.34855 | 0.06683 | 0.03947 ZNF621    |
| cg01887353 | 0.03135 | 0.03358 | 0.0358  | 0.02836 | 0.02965 | 0.02944 | 0.24079 | 0.34627 | 0.02549 | 0.02982 ZNF41     |
| cg01888166 | 0.84775 | 0.74436 | 0.81038 | 0.83441 | 0.73438 | 0.83613 | 0.78748 | 0.76101 | 0.85295 | 0.8486 PUM2       |
| cg01888411 | 0.0736  | 0.06402 | 0.08172 | 0.07424 | 0.1318  | 0.08213 | 0.28838 | 0.06978 | 0.28384 | 0.32716 ABTB2     |
| cg01888566 | 0.96233 | 0.69303 | 0.9831  | 0.98529 | 0.98476 | 0.97966 | 0.97189 | 0.96618 | 0.98642 | 0.93942 MEST      |
| cg01888601 | 0.58496 | 0.50888 | 0.40662 | 0.39538 | 0.74684 | 0.74076 | 0.75634 | 0.74112 | 0.81665 | 0.45092 AGBL2     |
| cg01889448 | 0.4202  | 0.23597 | 0.75769 | 0.84162 | 0.40937 | 0.38859 | 0.28959 | 0.3759  | 0.5554  | 0.2645 HLA-DQB1   |
| cg01892528 | 0.03702 | 0.03829 | 0.03873 | 0.04033 | 0.02601 | 0.03532 | 0.03667 | 0.03557 | 0.03547 | 0.03341 TTLL1     |
| cg01892689 | 0.7401  | 0.74255 | 0.8033  | 0.79641 | 0.92642 | 0.51604 | 0.53759 | 0.57999 | 0.49221 | 0.57247 PGCP      |
| cg01892727 | 0.32048 | 0.18445 | 0.24669 | 0.33767 | 0.27959 | 0.20475 | 0.22669 | 0.12517 | 0.18022 | 0.1828 CRBN       |
| cg01894895 | 0.80719 | 0.82614 | 0.80481 | 0.80831 | 0.76148 | 0.72214 | 0.42108 | 0.79485 | 0.83101 | 0.80933 ANXA1     |
| cg01895214 | 0.54276 | 0.48121 | 0.64651 | 0.69805 | 0.70974 | 0.66532 | 0.51334 | 0.457   | 0.56131 | 0.52523 LOC654342 |
| cg01897036 | 0.93666 | 0.85736 | 0.7725  | 0.88294 | 0.89408 | 0.78948 | 0.89471 | 0.38956 | 0.12185 | 0.15617 SCTR      |
| cg01899253 | 0.47005 | 0.31232 | 0.67908 | 0.77891 | 0.47811 | 0.75384 | 0.18026 | 0.22821 | 0.89049 | 0.28867 FLT1      |
| cg01900048 | 0.08712 | 0.06201 | 0.09574 | 0.10187 | 0.09554 | 0.06612 | 0.12012 | 0.07068 | 0.22304 | 0.05587 SFT2D3    |
| cg01900364 | 0.88658 | 0.7417  | 0.86219 | 0.88256 | 0.8283  | 0.72392 | 0.85892 | 0.87238 | 0.91869 | 0.85057 CNN1      |
| cg01902747 | 0.14566 | 0.12495 | 0.14484 | 0.12172 | 0.22646 | 0.11328 | 0.1339  | 0.12129 | 0.10234 | 0.10048 CCDC7     |
| cg01906055 | 0.28142 | 0.18244 | 0.40029 | 0.57017 | 0.2657  | 0.20809 | 0.37958 | 0.36342 | 0.18478 | 0.32683 BRN1      |
| cg01906717 | 0.42692 | 0.277   | 0.59234 | 0.73859 | 0.50358 | 0.75427 | 0.4397  | 0.33865 | 0.48973 | 0.33609 IFNA13    |
| cg01907837 | 0.83983 | 0.80382 | 0.6783  | 0.80492 | 0.64621 | 0.35557 | 0.31204 | 0.17467 | 0.74494 | 0.13299 RNF8      |
| cg01909245 | 0.74754 | 0.25382 | 0.86481 | 0.89925 | 0.90138 | 0.89646 | 0.86849 | 0.83975 | 0.89636 | 0.52802 LSP1      |

|            |         |         |         |         |         |         |         |         |         |         |          |
|------------|---------|---------|---------|---------|---------|---------|---------|---------|---------|---------|----------|
| cg01909378 | 0.30255 | 0.26487 | 0.53373 | 0.55068 | 0.53577 | 0.62717 | 0.22324 | 0.21943 | 0.39266 | 0.32318 | ZNF645   |
| cg01909487 | 0.03784 | 0.03662 | 0.03633 | 0.03389 | 0.02281 | 0.03232 | 0.03377 | 0.03479 | 0.02877 | 0.02711 | JUN      |
| cg01909833 | 0.07553 | 0.06536 | 0.0741  | 0.07212 | 0.04248 | 0.05395 | 0.0808  | 0.07934 | 0.05493 | 0.06506 | BRD2     |
| cg01909921 | 0.06787 | 0.07873 | 0.75984 | 0.90122 | 0.84257 | 0.82312 | 0.2129  | 0.0636  | 0.08397 | 0.05372 | GF1B     |
| cg01910452 | 0.03491 | 0.03811 | 0.05001 | 0.05519 | 0.03205 | 0.03318 | 0.42935 | 0.35059 | 0.03144 | 0.02863 | BCAP31   |
| cg01910481 | 0.29029 | 0.10021 | 0.49244 | 0.56016 | 0.22462 | 0.125   | 0.10031 | 0.09318 | 0.83756 | 0.73915 | PLUNC    |
| cg01911082 | 0.02933 | 0.03119 | 0.09755 | 0.09799 | 0.18743 | 0.08701 | 0.0345  | 0.04396 | 0.03446 | 0.03312 | CSMD3    |
| cg01913908 | 0.69455 | 0.71872 | 0.73772 | 0.72716 | 0.81541 | 0.75604 | 0.6288  | 0.72671 | 0.65674 | 0.61588 | ZPLD1    |
| cg01914242 | 0.04065 | 0.03408 | 0.04575 | 0.04094 | 0.9039  | 0.82958 | 0.04974 | 0.04459 | 0.05077 | 0.03366 | ATP2A3   |
| cg01917648 | 0.73726 | 0.75907 | 0.47788 | 0.52373 | 0.71429 | 0.76261 | 0.3545  | 0.13798 | 0.2772  | 0.20579 | SPIC     |
| cg01918706 | 0.02602 | 0.03022 | 0.04043 | 0.03522 | 0.02558 | 0.02629 | 0.02777 | 0.02657 | 0.03075 | 0.02618 | UBE2T    |
| cg01918888 | 0.05212 | 0.04963 | 0.0647  | 0.06235 | 0.05989 | 0.05434 | 0.06038 | 0.05671 | 0.05566 | 0.04936 | RLF      |
| cg01919208 | 0.03868 | 0.03024 | 0.03543 | 0.03418 | 0.027   | 0.0342  | 0.02754 | 0.03363 | 0.03095 | 0.02641 | LAMB2    |
| cg01919488 | 0.05852 | 0.04044 | 0.18324 | 0.48362 | 0.04479 | 0.03553 | 0.08682 | 0.3014  | 0.05517 | 0.03595 | ZNF638   |
| cg01920232 | 0.10473 | 0.05551 | 0.67344 | 0.71544 | 0.28799 | 0.34187 | 0.34544 | 0.29026 | 0.05137 | 0.05071 | RFX4     |
| cg01920829 | 0.1355  | 0.14058 | 0.19381 | 0.27835 | 0.55266 | 0.5814  | 0.14241 | 0.11483 | 0.09899 | 0.09594 | CDK5R2   |
| cg01924619 | 0.0231  | 0.02404 | 0.02381 | 0.02081 | 0.02132 | 0.01859 | 0.02194 | 0.02121 | 0.01716 | 0.01428 | B4GALT5  |
| cg01924993 | 0.02523 | 0.0335  | 0.03494 | 0.03336 | 0.03303 | 0.03316 | 0.03321 | 0.0311  | 0.02209 | 0.02267 | H2AFX    |
| cg01926595 | 0.06655 | 0.05804 | 0.0565  | 0.09127 | 0.07114 | 0.10699 | 0.08385 | 0.08391 | 0.08247 | 0.06878 | PFN1     |
| cg01928902 | 0.04892 | 0.05409 | 0.0425  | 0.04652 | 0.0469  | 0.05059 | 0.04646 | 0.04733 | 0.04798 | 0.04451 | ZFP36L1  |
| cg01929065 | 0.02361 | 0.02346 | 0.02172 | 0.02259 | 0.01959 | 0.02014 | 0.01951 | 0.02062 | 0.01935 | 0.01835 | CD63     |
| cg01929105 | 0.06064 | 0.06905 | 0.07068 | 0.05879 | 0.04855 | 0.05504 | 0.06571 | 0.07162 | 0.0593  | 0.05749 | NMNAT1   |
| cg01930621 | 0.08746 | 0.08544 | 0.07526 | 0.08111 | 0.12339 | 0.09627 | 0.06645 | 0.06713 | 0.06318 | 0.06193 | ZNF649   |
| cg01931893 | 0.557   | 0.11502 | 0.13418 | 0.10398 | 0.21095 | 0.13023 | 0.1247  | 0.09514 | 0.07628 | 0.09983 | TK2      |
| cg01932215 | 0.01802 | 0.02159 | 0.02009 | 0.01801 | 0.01707 | 0.0163  | 0.01662 | 0.01679 | 0.01532 | 0.01531 | MGC4268  |
| cg01932459 | 0.01512 | 0.01384 | 0.01628 | 0.01506 | 0.01312 | 0.01422 | 0.014   | 0.01295 | 0.01326 | 0.01129 | CD164    |
| cg01934790 | 0.03768 | 0.03697 | 0.36146 | 0.46216 | 0.13703 | 0.1023  | 0.04325 | 0.03697 | 0.09106 | 0.03046 | FBXL16   |
| cg01934797 | 0.76138 | 0.82732 | 0.79774 | 0.80011 | 0.74891 | 0.80446 | 0.7379  | 0.78706 | 0.74511 | 0.74908 | GLIS2    |
| cg01936124 | 0.03636 | 0.03695 | 0.03183 | 0.03254 | 0.02328 | 0.02721 | 0.03441 | 0.03555 | 0.0246  | 0.02507 | ETF1     |
| cg01936270 | 0.04277 | 0.06174 | 0.05114 | 0.04275 | 0.03673 | 0.03649 | 0.07056 | 0.03802 | 0.93614 | 0.86115 | CYP1B1   |
| cg01936555 | 0.80721 | 0.80292 | 0.76371 | 0.78979 | 0.66924 | 0.69259 | 0.6375  | 0.50134 | 0.75029 | 0.6512  | SLC17A2  |
| cg01938354 | 0.03405 | 0.03443 | 0.03742 | 0.03038 | 0.03863 | 0.03823 | 0.02973 | 0.02961 | 0.02919 | 0.03542 | KIAA0423 |
| cg01939428 | 0.53927 | 0.09179 | 0.41804 | 0.6843  | 0.0985  | 0.09256 | 0.17949 | 0.0885  | 0.07948 | 0.06174 | UBE3C    |
| cg01939443 | 0.29232 | 0.43538 | 0.31515 | 0.28007 | 0.38839 | 0.4962  | 0.18634 | 0.1239  | 0.17745 | 0.32929 | RGSL1    |
| cg01939479 | 0.07539 | 0.02823 | 0.61593 | 0.71781 | 0.4323  | 0.02464 | 0.02497 | 0.024   | 0.97101 | 0.95497 | KIAA1018 |
| cg01939597 | 0.03662 | 0.0356  | 0.03987 | 0.04238 | 0.03743 | 0.0291  | 0.04278 | 0.03446 | 0.03348 | 0.03003 | ETV6     |
| cg01939681 | 0.03116 | 0.03149 | 0.45034 | 0.49426 | 0.04907 | 0.03223 | 0.03484 | 0.03682 | 0.37745 | 0.37134 | GABRB2   |
| cg01940867 | 0.03899 | 0.03531 | 0.04212 | 0.04035 | 0.02857 | 0.02991 | 0.03439 | 0.0307  | 0.02817 | 0.03235 | TMEM8    |
| cg01940974 | 0.41463 | 0.47294 | 0.46346 | 0.40454 | 0.02761 | 0.03151 | 0.02956 | 0.03018 | 0.02985 | 0.02589 | MTAP     |
| cg01941619 | 0.14983 | 0.15348 | 0.31833 | 0.25084 | 0.24595 | 0.36236 | 0.37132 | 0.47964 | 0.23707 | 0.20068 | MEP1B    |
| cg01942127 | 0.04108 | 0.03593 | 0.74528 | 0.85648 | 0.60798 | 0.49073 | 0.07447 | 0.0662  | 0.54529 | 0.53175 | CACNA1D  |



|            |         |         |         |         |         |         |         |         |         |                  |
|------------|---------|---------|---------|---------|---------|---------|---------|---------|---------|------------------|
| cg01943185 | 0.08849 | 0.05854 | 0.6587  | 0.55464 | 0.19063 | 0.06    | 0.09094 | 0.064   | 0.26625 | 0.13271 NMU      |
| cg01944444 | 0.04997 | 0.05178 | 0.05441 | 0.04624 | 0.05453 | 0.05379 | 0.04571 | 0.04378 | 0.04283 | 0.04239 TUBB     |
| cg01945391 | 0.02795 | 0.03004 | 0.02536 | 0.02514 | 0.02327 | 0.02701 | 0.0281  | 0.0283  | 0.0237  | 0.0212 RPL37     |
| cg01946401 | 0.80547 | 0.78024 | 0.73826 | 0.81614 | 0.38494 | 0.19685 | 0.13155 | 0.67063 | 0.81423 | 0.81255 RUNX2    |
| cg01946574 | 0.06413 | 0.05107 | 0.05338 | 0.05088 | 0.05325 | 0.051   | 0.04393 | 0.05116 | 0.04533 | 0.03981 PTPRM    |
| cg01947224 | 0.05318 | 0.04441 | 0.05989 | 0.06757 | 0.0426  | 0.03622 | 0.02778 | 0.02801 | 0.14945 | 0.02547 ZNF416   |
| cg01951308 | 0.04438 | 0.04087 | 0.03921 | 0.03983 | 0.03972 | 0.04285 | 0.03924 | 0.0364  | 0.03381 | 0.03216 KIF3B    |
| cg01952458 | 0.04536 | 0.03453 | 0.05674 | 0.04578 | 0.03634 | 0.02991 | 0.0349  | 0.04358 | 0.04279 | 0.0288 ATP6V1B2  |
| cg01954353 | 0.03682 | 0.03816 | 0.04111 | 0.04197 | 0.0419  | 0.04709 | 0.04347 | 0.04547 | 0.04137 | 0.04273 MGC7036  |
| cg01956781 | 0.01548 | 0.01718 | 0.01419 | 0.01335 | 0.01478 | 0.01428 | 0.01372 | 0.01397 | 0.01251 | 0.01206 KIAA1838 |
| cg01957330 | 0.0328  | 0.03442 | 0.04026 | 0.04549 | 0.03776 | 0.04433 | 0.04246 | 0.03564 | 0.02752 | 0.02958 SCAP2    |
| cg01958189 | 0.16781 | 0.17915 | 0.16316 | 0.18306 | 0.2582  | 0.22831 | 0.22496 | 0.15689 | 0.13583 | 0.12917 DEFB125  |
| cg01958916 | 0.04733 | 0.04168 | 0.13391 | 0.16036 | 0.61211 | 0.55121 | 0.07844 | 0.07661 | 0.04405 | 0.02129 SEMA6C   |
| cg01959004 | 0.05586 | 0.0495  | 0.05128 | 0.0621  | 0.05693 | 0.05141 | 0.04797 | 0.05249 | 0.03852 | 0.02945 HYOU1    |
| cg01959848 | 0.04609 | 0.05989 | 0.07006 | 0.05242 | 0.07918 | 0.05414 | 0.06282 | 0.05935 | 0.04515 | 0.04058 MED19    |
| cg01961936 | 0.90605 | 0.28162 | 0.87226 | 0.89001 | 0.86388 | 0.89347 | 0.43282 | 0.12805 | 0.8378  | 0.87467 NXF3     |
| cg01962086 | 0.16813 | 0.11059 | 0.16231 | 0.58271 | 0.09093 | 0.09874 | 0.1017  | 0.095   | 0.2185  | 0.10387 TNK2     |
| cg01962826 | 0.25485 | 0.06515 | 0.76138 | 0.78748 | 0.80482 | 0.57878 | 0.0461  | 0.0442  | 0.03805 | 0.03574 GRM4     |
| cg01962969 | 0.05065 | 0.03734 | 0.04227 | 0.04129 | 0.03065 | 0.03958 | 0.03569 | 0.03396 | 0.03109 | 0.0318 CBR1      |
| cg01963696 | 0.7949  | 0.06862 | 0.89878 | 0.88889 | 0.77559 | 0.17313 | 0.88607 | 0.20978 | 0.90245 | 0.78018 ELA2     |
| cg01965939 | 0.07622 | 0.08094 | 0.0604  | 0.07025 | 0.14867 | 0.1514  | 0.20575 | 0.04621 | 0.05978 | 0.04499 SH3TC2   |
| cg01966105 | 0.85615 | 0.60632 | 0.77545 | 0.80502 | 0.88033 | 0.63508 | 0.58866 | 0.63793 | 0.66303 | 0.52024 MGC21830 |
| cg01966465 | 0.0267  | 0.02468 | 0.07364 | 0.06075 | 0.05799 | 0.03174 | 0.02344 | 0.02458 | 0.02471 | 0.0254 RPIB9     |
| cg01968178 | 0.09866 | 0.04639 | 0.16507 | 0.25587 | 0.43436 | 0.21573 | 0.10778 | 0.08557 | 0.0483  | 0.0415 REEP1     |
| cg01968530 | 0.08544 | 0.0875  | 0.09768 | 0.09239 | 0.14663 | 0.14647 | 0.10346 | 0.0942  | 0.09091 | 0.10869 C18orf45 |
| cg01968793 | 0.15621 | 0.04818 | 0.89166 | 0.90717 | 0.50854 | 0.53376 | 0.54188 | 0.47153 | 0.14036 | 0.24053 CNNM1    |
| cg01969748 | 0.02254 | 0.02242 | 0.02456 | 0.02532 | 0.01804 | 0.01983 | 0.01866 | 0.01895 | 0.01935 | 0.01827 GPSM2    |
| cg01970325 | 0.22543 | 0.20888 | 0.15717 | 0.22398 | 0.51426 | 0.18663 | 0.23585 | 0.17614 | 0.08351 | 0.11656 NELF     |
| cg01971122 | 0.30913 | 0.31131 | 0.21922 | 0.30257 | 0.78416 | 0.90417 | 0.11771 | 0.26972 | 0.08076 | 0.35434 CALCA    |
| cg01975392 | 0.04945 | 0.02957 | 0.50563 | 0.78561 | 0.05338 | 0.02657 | 0.38816 | 0.54012 | 0.05245 | 0.02397 LANCL3   |
| cg01979004 | 0.03498 | 0.02928 | 0.0371  | 0.03007 | 0.03149 | 0.03704 | 0.02722 | 0.025   | 0.02936 | 0.03099 MGC24381 |
| cg01980222 | 0.40718 | 0.11561 | 0.20921 | 0.23627 | 0.54276 | 0.44871 | 0.09267 | 0.11214 | 0.12288 | 0.09701 TREM2    |
| cg01980637 | 0.03426 | 0.03265 | 0.03484 | 0.03404 | 0.43814 | 0.2469  | 0.03085 | 0.03022 | 0.02956 | 0.02695 PER1     |
| cg01982455 | 0.05592 | 0.05629 | 0.05041 | 0.04362 | 0.03641 | 0.04475 | 0.0439  | 0.04414 | 0.03604 | 0.03807 RPS14    |
| cg01982597 | 0.81828 | 0.82424 | 0.84607 | 0.86575 | 0.92653 | 0.86014 | 0.80933 | 0.8217  | 0.89689 | 0.56468 PGBD3    |
| cg01982833 | 0.57315 | 0.3327  | 0.68558 | 0.68197 | 0.63291 | 0.48299 | 0.20692 | 0.16896 | 0.13613 | 0.15057 SURB7    |
| cg01985090 | 0.02323 | 0.02345 | 0.02523 | 0.01945 | 0.02083 | 0.02221 | 0.02038 | 0.02021 | 0.0201  | 0.01868 HTF9C    |
| cg01985396 | 0.27419 | 0.38974 | 0.53012 | 0.70203 | 0.95835 | 0.93972 | 0.3834  | 0.13808 | 0.05934 | 0.11497 DAAM2    |
| cg01985852 | 0.05969 | 0.05712 | 0.06401 | 0.05765 | 0.05407 | 0.06749 | 0.05141 | 0.05235 | 0.05404 | 0.04429 RNF166   |
| cg01986577 | 0.44842 | 0.11642 | 0.10792 | 0.15577 | 0.11438 | 0.05416 | 0.16874 | 0.06938 | 0.13486 | 0.04909 ARNTL2   |
| cg01987509 | 0.43141 | 0.71725 | 0.53575 | 0.62818 | 0.41994 | 0.4188  | 0.22265 | 0.14202 | 0.21604 | 0.17049 PGR      |

|            |         |         |         |         |         |         |         |         |         |                   |
|------------|---------|---------|---------|---------|---------|---------|---------|---------|---------|-------------------|
| cg01988129 | 0.94894 | 0.94373 | 0.24506 | 0.60842 | 0.95613 | 0.93147 | 0.83075 | 0.94352 | 0.95214 | 0.95506 ADHFE1    |
| cg01989224 | 0.57844 | 0.40262 | 0.09943 | 0.13201 | 0.65346 | 0.57404 | 0.03795 | 0.03745 | 0.04123 | 0.02719 NDN       |
| cg01990225 | 0.06386 | 0.06567 | 0.08152 | 0.09478 | 0.09115 | 0.07162 | 0.06759 | 0.06074 | 0.06413 | 0.06865 LMAN2L    |
| cg01990304 | 0.03483 | 0.03162 | 0.03512 | 0.03393 | 0.03376 | 0.03266 | 0.03457 | 0.03005 | 0.0248  | 0.02273 OPA3      |
| cg01990334 | 0.04219 | 0.04866 | 0.07128 | 0.06564 | 0.08731 | 0.04966 | 0.08197 | 0.07758 | 0.06344 | 0.05623 FOXJ3     |
| cg01991150 | 0.89683 | 0.61391 | 0.89855 | 0.90156 | 0.90577 | 0.89642 | 0.90121 | 0.89587 | 0.90043 | 0.86964 CHR4      |
| cg01991383 | 0.02549 | 0.02576 | 0.03389 | 0.02793 | 0.02601 | 0.03054 | 0.02842 | 0.02815 | 0.0197  | 0.01937 FOXRED1   |
| cg01992081 | 0.04662 | 0.0445  | 0.04619 | 0.04258 | 0.04247 | 0.05627 | 0.04295 | 0.04158 | 0.04249 | 0.04033 MMD       |
| cg01993411 | 0.08477 | 0.07445 | 0.07235 | 0.07179 | 0.05729 | 0.06522 | 0.0663  | 0.06271 | 0.06457 | 0.06794 C2orf67   |
| cg01993576 | 0.1362  | 0.10704 | 0.26075 | 0.19812 | 0.91431 | 0.88971 | 0.63806 | 0.09115 | 0.67378 | 0.15604 SLC29A1   |
| cg01994328 | 0.02485 | 0.02536 | 0.02193 | 0.0225  | 0.01905 | 0.0236  | 0.02189 | 0.02174 | 0.01853 | 0.01735 MAP3K8    |
| cg01994513 | 0.03464 | 0.03562 | 0.03659 | 0.03562 | 0.03021 | 0.03065 | 0.03063 | 0.03456 | 0.03157 | 0.02802 BLM       |
| cg01994779 | 0.04076 | 0.04681 | 0.04288 | 0.03846 | 0.05672 | 0.04887 | 0.03395 | 0.03526 | 0.0327  | 0.03833 ZNRF1     |
| cg01995513 | 0.0643  | 0.03926 | 0.04336 | 0.03955 | 0.0366  | 0.03492 | 0.0382  | 0.038   | 0.03223 | 0.02836 MPP6      |
| cg01997480 | 0.02794 | 0.02769 | 0.03192 | 0.02794 | 0.02044 | 0.02228 | 0.02813 | 0.02214 | 0.02039 | 0.02048 EIF3S8    |
| cg01997953 | 0.75007 | 0.81905 | 0.71586 | 0.8099  | 0.81557 | 0.85021 | 0.12298 | 0.09339 | 0.82952 | 0.79193 CXorf21   |
| cg01998146 | 0.22031 | 0.47856 | 0.0751  | 0.06766 | 0.09175 | 0.11202 | 0.06366 | 0.06622 | 0.06654 | 0.06781 PSIP1     |
| cg01998682 | 0.04688 | 0.05651 | 0.04611 | 0.05094 | 0.04165 | 0.03286 | 0.04309 | 0.04147 | 0.04188 | 0.03552 ZBTB2     |
| cg01998785 | 0.87299 | 0.75162 | 0.90575 | 0.9198  | 0.95534 | 0.92065 | 0.90422 | 0.92898 | 0.89779 | 0.8338 AYTL1      |
| cg01999333 | 0.22845 | 0.1048  | 0.13498 | 0.12607 | 0.10153 | 0.08025 | 0.10436 | 0.10774 | 0.14807 | 0.07372 CASP14    |
| cg01999523 | 0.07235 | 0.09041 | 0.07502 | 0.07743 | 0.05791 | 0.07424 | 0.04786 | 0.05159 | 0.05806 | 0.05904 CLASP2    |
| cg01999787 | 0.04106 | 0.05575 | 0.06585 | 0.05654 | 0.05883 | 0.07203 | 0.04351 | 0.04474 | 0.05602 | 0.05329 ALG5      |
| cg02000005 | 0.0431  | 0.04577 | 0.51208 | 0.37439 | 0.94104 | 0.9515  | 0.81903 | 0.66752 | 0.9591  | 0.95422 CRIP1     |
| cg02001410 | 0.04564 | 0.03942 | 0.04434 | 0.04416 | 0.03561 | 0.0403  | 0.03673 | 0.03983 | 0.03207 | 0.03275 MAP1B     |
| cg02002676 | 0.80541 | 0.24333 | 0.26573 | 0.36974 | 0.53361 | 0.51996 | 0.47643 | 0.38511 | 0.04094 | 0.02744 APOBEC3B  |
| cg02004156 | 0.07101 | 0.06972 | 0.04582 | 0.04823 | 0.05852 | 0.05934 | 0.0806  | 0.05017 | 0.04691 | 0.05298 TFE3      |
| cg02005336 | 0.03736 | 0.0392  | 0.04411 | 0.03837 | 0.02616 | 0.03104 | 0.03484 | 0.03199 | 0.0321  | 0.03648 FEN1      |
| cg02005375 | 0.04867 | 0.04745 | 0.05515 | 0.0505  | 0.06644 | 0.0593  | 0.04707 | 0.05043 | 0.04532 | 0.04583 DDX18     |
| cg02005755 | 0.85753 | 0.37583 | 0.8427  | 0.86016 | 0.82907 | 0.85198 | 0.78279 | 0.6497  | 0.78451 | 0.8672 SLC13A4    |
| cg02007463 | 0.05069 | 0.05348 | 0.06352 | 0.06306 | 0.06134 | 0.05854 | 0.05674 | 0.05756 | 0.04669 | 0.05006 ITGA7     |
| cg02007844 | 0.05627 | 0.04784 | 0.05421 | 0.05149 | 0.05885 | 0.03629 | 0.04322 | 0.04396 | 0.0427  | 0.04862 KCNJ8     |
| cg02008154 | 0.03817 | 0.03349 | 0.03613 | 0.03456 | 0.02963 | 0.03368 | 0.02868 | 0.03175 | 0.03325 | 0.02806 TBX20     |
| cg02008169 | 0.07447 | 0.0722  | 0.15465 | 0.15329 | 0.14731 | 0.14363 | 0.20719 | 0.1732  | 0.06358 | 0.08015 ZNF267    |
| cg02008416 | 0.88084 | 0.39529 | 0.92817 | 0.93185 | 0.93169 | 0.92776 | 0.7303  | 0.83676 | 0.9047  | 0.92069 TMEM61    |
| cg02008544 | 0.0437  | 0.04481 | 0.04684 | 0.05351 | 0.03496 | 0.04453 | 0.05837 | 0.05376 | 0.03655 | 0.04154 TNFRSF10B |
| cg02009694 | 0.81996 | 0.8157  | 0.83056 | 0.83181 | 0.86411 | 0.84755 | 0.82447 | 0.79438 | 0.84422 | 0.82576 C9orf132  |
| cg02010852 | 0.2665  | 0.14402 | 0.27013 | 0.36031 | 0.40833 | 0.16928 | 0.14616 | 0.13873 | 0.29079 | 0.16735 CRB2      |
| cg02014107 | 0.06358 | 0.05928 | 0.09925 | 0.06819 | 0.12087 | 0.08493 | 0.07854 | 0.07936 | 0.08596 | 0.07226 DLX2      |
| cg02016419 | 0.64785 | 0.80572 | 0.70736 | 0.68493 | 0.38466 | 0.52165 | 0.6147  | 0.47514 | 0.14346 | 0.35018 TEKT3     |
| cg02017041 | 0.11779 | 0.06474 | 0.16977 | 0.16004 | 0.48405 | 0.06808 | 0.07532 | 0.05846 | 0.18212 | 0.22479 SCN1B     |
| cg02017109 | 0.09778 | 0.07938 | 0.61504 | 0.60628 | 0.84173 | 0.82197 | 0.26814 | 0.30306 | 0.3856  | 0.52153 WDR41     |

|            |         |         |         |         |         |         |         |         |         |         |           |
|------------|---------|---------|---------|---------|---------|---------|---------|---------|---------|---------|-----------|
| cg02017155 | 0.18614 | 0.04337 | 0.42049 | 0.40473 | 0.31269 | 0.32041 | 0.08083 | 0.04168 | 0.33606 | 0.03664 | FFAR3     |
| cg02018101 | 0.02526 | 0.02321 | 0.02316 | 0.02431 | 0.02125 | 0.01926 | 0.02063 | 0.0197  | 0.02025 | 0.0191  | SYNE2     |
| cg02019333 | 0.29258 | 0.08117 | 0.64361 | 0.79763 | 0.54746 | 0.5208  | 0.2155  | 0.2005  | 0.25903 | 0.09245 | UPK1B     |
| cg02020018 | 0.75747 | 0.43768 | 0.20927 | 0.40985 | 0.19761 | 0.16741 | 0.15081 | 0.07962 | 0.09331 | 0.08297 | PRRG3     |
| cg02021817 | 0.28612 | 0.13256 | 0.14341 | 0.11685 | 0.16498 | 0.06411 | 0.0767  | 0.05121 | 0.07295 | 0.08328 | RBL2      |
| cg02022375 | 0.71345 | 0.48893 | 0.71557 | 0.78275 | 0.32161 | 0.27454 | 0.2793  | 0.23996 | 0.70542 | 0.57233 | KRTAP1-1  |
| cg02025407 | 0.03119 | 0.02874 | 0.03238 | 0.02898 | 0.02516 | 0.03094 | 0.0261  | 0.02627 | 0.02458 | 0.02298 | C20orf155 |
| cg02026235 | 0.0723  | 0.05503 | 0.48852 | 0.49821 | 0.95508 | 0.93386 | 0.77351 | 0.55573 | 0.66456 | 0.30797 | RHBDL1    |
| cg02027010 | 0.04542 | 0.04394 | 0.0623  | 0.05216 | 0.04068 | 0.04112 | 0.04034 | 0.03648 | 0.03912 | 0.03467 | ALAD      |
| cg02028524 | 0.92793 | 0.91047 | 0.93538 | 0.94259 | 0.90591 | 0.86751 | 0.92561 | 0.87874 | 0.93833 | 0.9006  | ATXN3     |
| cg02029926 | 0.18609 | 0.05857 | 0.07442 | 0.10837 | 0.49721 | 0.46089 | 0.12933 | 0.06795 | 0.53837 | 0.56257 | CXCL1     |
| cg02032115 | 0.06337 | 0.0511  | 0.11213 | 0.42376 | 0.09315 | 0.0528  | 0.06989 | 0.05714 | 0.28965 | 0.05345 | IGSF8     |
| cg02032561 | 0.05288 | 0.05845 | 0.06991 | 0.07201 | 0.06992 | 0.07667 | 0.12836 | 0.09034 | 0.04126 | 0.03926 | ZNF449    |
| cg02033116 | 0.07733 | 0.06744 | 0.08476 | 0.07567 | 0.05262 | 0.05586 | 0.06879 | 0.06067 | 0.06217 | 0.05604 | GPATC1    |
| cg02034222 | 0.88734 | 0.87119 | 0.86197 | 0.88867 | 0.81028 | 0.86092 | 0.87942 | 0.87779 | 0.89676 | 0.85093 | DQX1      |
| cg02037013 | 0.48199 | 0.19661 | 0.78085 | 0.84937 | 0.54833 | 0.51152 | 0.84036 | 0.82839 | 0.56444 | 0.49495 | MC4R      |
| cg02039053 | 0.60629 | 0.59347 | 0.62274 | 0.65236 | 0.50738 | 0.60404 | 0.61799 | 0.65063 | 0.62857 | 0.58596 | ADH1A     |
| cg02039171 | 0.8492  | 0.61102 | 0.90166 | 0.92424 | 0.9595  | 0.94119 | 0.78708 | 0.695   | 0.54164 | 0.26356 | CEBPE     |
| cg02040734 | 0.07501 | 0.06524 | 0.59057 | 0.67423 | 0.17594 | 0.07134 | 0.31382 | 0.08706 | 0.84967 | 0.15172 | C10orf95  |
| cg02043070 | 0.21239 | 0.11303 | 0.02903 | 0.02747 | 0.11708 | 0.04755 | 0.02724 | 0.03189 | 0.02816 | 0.03411 | ADSSL1    |
| cg02043083 | 0.02263 | 0.02008 | 0.02292 | 0.02077 | 0.01715 | 0.02172 | 0.0193  | 0.01777 | 0.0188  | 0.01515 | PCMT1     |
| cg02043477 | 0.69479 | 0.51489 | 0.51076 | 0.76461 | 0.5864  | 0.33936 | 0.41955 | 0.43044 | 0.43515 | 0.29317 | CYP2A6    |
| cg02044161 | 0.86742 | 0.88462 | 0.86978 | 0.87938 | 0.90329 | 0.88072 | 0.82387 | 0.85561 | 0.8992  | 0.87091 | FNDC6     |
| cg02044879 | 0.90417 | 0.5474  | 0.89481 | 0.9076  | 0.92147 | 0.84014 | 0.90326 | 0.44964 | 0.71533 | 0.60487 | PLA2G12B  |
| cg02045085 | 0.02978 | 0.03365 | 0.03032 | 0.02482 | 0.03269 | 0.03593 | 0.0226  | 0.03135 | 0.02613 | 0.02864 | MPP5      |
| cg02046017 | 0.21126 | 0.07342 | 0.27546 | 0.53169 | 0.58265 | 0.66149 | 0.08781 | 0.08296 | 0.0593  | 0.05965 | LOC220070 |
| cg02046340 | 0.21814 | 0.05279 | 0.26855 | 0.21321 | 0.04286 | 0.02945 | 0.03672 | 0.03553 | 0.04363 | 0.02954 | ZNF313    |
| cg02046532 | 0.36334 | 0.20713 | 0.1988  | 0.18686 | 0.22928 | 0.16091 | 0.21532 | 0.15923 | 0.09403 | 0.08887 | DEFB129   |
| cg02047577 | 0.02146 | 0.02228 | 0.0241  | 0.02277 | 0.01975 | 0.01962 | 0.01724 | 0.02213 | 0.01668 | 0.01657 | UCKL1     |
| cg02049180 | 0.86396 | 0.65404 | 0.83752 | 0.84008 | 0.85947 | 0.63682 | 0.81606 | 0.76793 | 0.38146 | 0.48981 | INSRR     |
| cg02053171 | 0.02659 | 0.0311  | 0.03289 | 0.03341 | 0.03514 | 0.03609 | 0.02976 | 0.03408 | 0.02702 | 0.02554 | WBSCR16   |
| cg02055483 | 0.07572 | 0.07664 | 0.4394  | 0.58552 | 0.1894  | 0.09811 | 0.64065 | 0.33682 | 0.11353 | 0.25824 | NPAS4     |
| cg02055963 | 0.05121 | 0.03777 | 0.11529 | 0.07444 | 0.91209 | 0.92665 | 0.30835 | 0.51448 | 0.06762 | 0.08208 | CDX2      |
| cg02056135 | 0.07091 | 0.06259 | 0.07414 | 0.05978 | 0.29959 | 0.07013 | 0.0623  | 0.06507 | 0.06402 | 0.05621 | SP110     |
| cg02057157 | 0.14101 | 0.14432 | 0.1522  | 0.12562 | 0.25598 | 0.20354 | 0.17643 | 0.14416 | 0.12117 | 0.11506 | CNO       |
| cg02058918 | 0.04987 | 0.05262 | 0.06528 | 0.07222 | 0.05788 | 0.07046 | 0.09239 | 0.08342 | 0.09681 | 0.06805 | GABBR2    |
| cg02059813 | 0.95619 | 0.95538 | 0.95728 | 0.95541 | 0.97048 | 0.96509 | 0.95862 | 0.96355 | 0.95958 | 0.97045 | SMARCA3   |
| cg02060618 | 0.62893 | 0.51459 | 0.40762 | 0.64321 | 0.47215 | 0.67722 | 0.09658 | 0.51011 | 0.16093 | 0.43092 | BMP15     |
| cg02060698 | 0.02416 | 0.02882 | 0.02577 | 0.02302 | 0.0196  | 0.02293 | 0.02053 | 0.01977 | 0.01971 | 0.01722 | FOXO3A    |
| cg02060988 | 0.02377 | 0.02611 | 0.02645 | 0.02709 | 0.02571 | 0.02763 | 0.02245 | 0.0264  | 0.02333 | 0.02359 | LASP1     |
| cg02061229 | 0.48573 | 0.25574 | 0.44149 | 0.49991 | 0.57651 | 0.69682 | 0.48614 | 0.67938 | 0.33128 | 0.21482 | MMP10     |

|            |         |         |         |         |         |         |         |         |         |                  |
|------------|---------|---------|---------|---------|---------|---------|---------|---------|---------|------------------|
| cg02062650 | 0.04324 | 0.03317 | 0.1042  | 0.15519 | 0.03865 | 0.03091 | 0.06336 | 0.0357  | 0.32832 | 0.18044 HCFC1R1  |
| cg02064106 | 0.07729 | 0.06203 | 0.09467 | 0.07691 | 0.13571 | 0.07875 | 0.05381 | 0.0549  | 0.57967 | 0.57694 C6orf118 |
| cg02064402 | 0.81856 | 0.50973 | 0.57478 | 0.64548 | 0.72184 | 0.70506 | 0.0426  | 0.04145 | 0.2846  | 0.0893 SLC6A18   |
| cg02065387 | 0.14878 | 0.13762 | 0.18895 | 0.34963 | 0.44875 | 0.309   | 0.14042 | 0.12451 | 0.10836 | 0.11458 GABRA1   |
| cg02065795 | 0.02571 | 0.02968 | 0.03674 | 0.02912 | 0.0274  | 0.02799 | 0.03105 | 0.03172 | 0.12418 | 0.02766 KIAA0101 |
| cg02066681 | 0.66036 | 0.20072 | 0.84685 | 0.90784 | 0.78728 | 0.70733 | 0.87641 | 0.63241 | 0.90962 | 0.86254 COL18A1  |
| cg02066887 | 0.24777 | 0.04316 | 0.04657 | 0.07487 | 0.35121 | 0.05883 | 0.03253 | 0.03133 | 0.04254 | 0.02138 POLD4    |
| cg02067021 | 0.49723 | 0.23075 | 0.84713 | 0.86426 | 0.74787 | 0.48096 | 0.6818  | 0.38346 | 0.93179 | 0.64792 DNAJC5B  |
| cg02068676 | 0.02376 | 0.02578 | 0.02527 | 0.02418 | 0.0206  | 0.02356 | 0.02552 | 0.0233  | 0.02108 | 0.0192 COBRA1    |
| cg02071074 | 0.17376 | 0.07714 | 0.12313 | 0.09868 | 0.22312 | 0.48064 | 0.14977 | 0.1246  | 0.37426 | 0.19186 ATP7B    |
| cg02071305 | 0.10776 | 0.14442 | 0.61903 | 0.68509 | 0.15937 | 0.24491 | 0.23823 | 0.30132 | 0.64682 | 0.5053 VPS18     |
| cg02071439 | 0.03457 | 0.03336 | 0.03711 | 0.03214 | 0.02999 | 0.03288 | 0.03131 | 0.03109 | 0.03111 | 0.09141 FLJ36779 |
| cg02075593 | 0.52479 | 0.3716  | 0.4685  | 0.61754 | 0.51101 | 0.24859 | 0.7564  | 0.61083 | 0.70381 | 0.40582 GSTA3    |
| cg02077702 | 0.77969 | 0.57926 | 0.86088 | 0.87132 | 0.89547 | 0.83352 | 0.8008  | 0.35303 | 0.84326 | 0.63342 ISLR     |
| cg02077793 | 0.15779 | 0.15609 | 0.1545  | 0.13482 | 0.2022  | 0.14861 | 0.17899 | 0.15657 | 0.12151 | 0.11778 CARM1    |
| cg02078356 | 0.08808 | 0.08156 | 0.11507 | 0.12458 | 0.1387  | 0.35483 | 0.07267 | 0.07002 | 0.10379 | 0.09918 TMEM39B  |
| cg02082342 | 0.82303 | 0.36264 | 0.84655 | 0.87948 | 0.8055  | 0.8307  | 0.48051 | 0.75966 | 0.70713 | 0.66211 VSIG2    |
| cg02082571 | 0.85215 | 0.89755 | 0.90781 | 0.91542 | 0.94682 | 0.90693 | 0.88636 | 0.90735 | 0.77868 | 0.90118 CLEC4A   |
| cg02084087 | 0.46854 | 0.13649 | 0.81546 | 0.83745 | 0.82485 | 0.82142 | 0.83407 | 0.72484 | 0.84002 | 0.82826 TNFRSF25 |
| cg02085507 | 0.58021 | 0.42817 | 0.82739 | 0.87282 | 0.81467 | 0.43288 | 0.8857  | 0.55994 | 0.48369 | 0.06959 TRIP10   |
| cg02087637 | 0.29362 | 0.22525 | 0.24916 | 0.42048 | 0.23029 | 0.19298 | 0.19036 | 0.16066 | 0.07452 | 0.07188 PCDHB8   |
| cg02089348 | 0.12438 | 0.03459 | 0.09168 | 0.13084 | 0.05307 | 0.03255 | 0.14982 | 0.04521 | 0.18782 | 0.32262 TMEM129  |
| cg02090283 | 0.02116 | 0.02197 | 0.04121 | 0.03336 | 0.01809 | 0.02232 | 0.10675 | 0.05767 | 0.02311 | 0.01777 CNTNAP3  |
| cg02091100 | 0.07517 | 0.06838 | 0.07928 | 0.22543 | 0.21639 | 0.09385 | 0.08987 | 0.19582 | 0.04528 | 0.05142 GUCA1A   |
| cg02092466 | 0.83825 | 0.85871 | 0.82229 | 0.89102 | 0.92686 | 0.88988 | 0.63143 | 0.29833 | 0.87594 | 0.56721 NTSR2    |
| cg02092706 | 0.03121 | 0.02613 | 0.0231  | 0.02263 | 0.02013 | 0.02408 | 0.02258 | 0.02144 | 0.01983 | 0.01556 MGC12966 |
| cg02094237 | 0.09676 | 0.08819 | 0.14584 | 0.11942 | 0.15265 | 0.08827 | 0.10277 | 0.11985 | 0.09798 | 0.10476 HIST4H4  |
| cg02096520 | 0.82552 | 0.69247 | 0.75735 | 0.8066  | 0.78678 | 0.8208  | 0.42985 | 0.47828 | 0.8064  | 0.52361 FGF16    |
| cg02096633 | 0.04233 | 0.03675 | 0.04668 | 0.04011 | 0.06299 | 0.26452 | 0.03791 | 0.03161 | 0.03932 | 0.03039 UNC13B   |
| cg02096656 | 0.07294 | 0.08261 | 0.15599 | 0.11293 | 0.08638 | 0.12139 | 0.09358 | 0.08862 | 0.0881  | 0.08059 HSPC268  |
| cg02097420 | 0.83925 | 0.8722  | 0.84786 | 0.86191 | 0.68576 | 0.89166 | 0.1183  | 0.10101 | 0.76753 | 0.73878 HRG      |
| cg02097636 | 0.02634 | 0.02699 | 0.03538 | 0.03181 | 0.02721 | 0.02732 | 0.02625 | 0.02292 | 0.02039 | 0.01922 PFAH1B3  |
| cg02099418 | 0.57848 | 0.61569 | 0.73458 | 0.68435 | 0.59285 | 0.67062 | 0.42152 | 0.37524 | 0.46978 | 0.47176 CD28     |
| cg02100629 | 0.89666 | 0.85611 | 0.10719 | 0.09519 | 0.0604  | 0.03402 | 0.0496  | 0.04249 | 0.052   | 0.03421 AMID     |
| cg02100828 | 0.02834 | 0.02948 | 0.02802 | 0.02988 | 0.02166 | 0.029   | 0.02514 | 0.02771 | 0.02391 | 0.02528 PSME4    |
| cg02100848 | 0.86427 | 0.07062 | 0.62826 | 0.64053 | 0.64677 | 0.92092 | 0.63805 | 0.83885 | 0.83964 | 0.70052 C3orf32  |
| cg02101486 | 0.16316 | 0.16348 | 0.50469 | 0.65413 | 0.32853 | 0.27595 | 0.13893 | 0.11    | 0.38611 | 0.41797 DLX5     |
| cg02102644 | 0.03507 | 0.03951 | 0.04107 | 0.04497 | 0.04297 | 0.04372 | 0.03552 | 0.03901 | 0.03379 | 0.03608 AP1GBP1  |
| cg02103294 | 0.03677 | 0.04045 | 0.03836 | 0.03722 | 0.02707 | 0.03526 | 0.03749 | 0.03337 | 0.03563 | 0.03316 SDCBP    |
| cg02104644 | 0.06292 | 0.04429 | 0.23035 | 0.23162 | 0.21297 | 0.05206 | 0.1365  | 0.05625 | 0.04931 | 0.04233 SYT7     |
| cg02105034 | 0.04559 | 0.04826 | 0.0518  | 0.04675 | 0.03288 | 0.04058 | 0.03981 | 0.0449  | 0.04886 | 0.04044 SMG7     |

|            |         |         |         |         |         |         |         |         |         |                   |
|------------|---------|---------|---------|---------|---------|---------|---------|---------|---------|-------------------|
| cg02105377 | 0.02881 | 0.02415 | 0.02423 | 0.02753 | 0.02221 | 0.0279  | 0.02392 | 0.02189 | 0.02038 | 0.02048 MAG11     |
| cg02105856 | 0.10899 | 0.05271 | 0.52983 | 0.65736 | 0.54793 | 0.78481 | 0.05838 | 0.06148 | 0.0747  | 0.07587 PIGR      |
| cg02110963 | 0.76563 | 0.70443 | 0.77553 | 0.86706 | 0.92129 | 0.86143 | 0.59472 | 0.45509 | 0.19996 | 0.09443 MGC40222  |
| cg02111587 | 0.06685 | 0.05965 | 0.10084 | 0.18978 | 0.25396 | 0.4329  | 0.05796 | 0.06855 | 0.1038  | 0.05347 TACR1     |
| cg02113971 | 0.0778  | 0.0763  | 0.09552 | 0.07333 | 0.14013 | 0.11033 | 0.07912 | 0.07535 | 0.08712 | 0.09613 FLJ20859  |
| cg02114786 | 0.03469 | 0.03756 | 0.03522 | 0.03476 | 0.02611 | 0.03034 | 0.03296 | 0.03236 | 0.02938 | 0.03083 PTTG1IP   |
| cg02115041 | 0.07982 | 0.07648 | 0.35891 | 0.40787 | 0.22835 | 0.35379 | 0.0831  | 0.08765 | 0.15796 | 0.1042 NPBWR1     |
| cg02117021 | 0.86497 | 0.88144 | 0.85971 | 0.88168 | 0.77785 | 0.84301 | 0.07949 | 0.08177 | 0.61747 | 0.53901 OR2H1     |
| cg02119229 | 0.18368 | 0.04449 | 0.09211 | 0.07512 | 0.40364 | 0.04828 | 0.10922 | 0.04823 | 0.04539 | 0.03405 BCDO2     |
| cg02119982 | 0.61404 | 0.44517 | 0.66308 | 0.7536  | 0.6894  | 0.70617 | 0.77473 | 0.77648 | 0.84184 | 0.79836 CARD15    |
| cg02121427 | 0.66374 | 0.17304 | 0.53689 | 0.8019  | 0.76041 | 0.56304 | 0.59134 | 0.76377 | 0.44784 | 0.10636 LRRC15    |
| cg02121943 | 0.08733 | 0.08601 | 0.09901 | 0.09924 | 0.0849  | 0.09477 | 0.09351 | 0.08594 | 0.08579 | 0.07631 TBX3      |
| cg02123547 | 0.05178 | 0.04845 | 0.05041 | 0.0501  | 0.05448 | 0.04896 | 0.05079 | 0.08592 | 0.03597 | 0.04424 PIM1      |
| cg02124291 | 0.69231 | 0.72105 | 0.29854 | 0.18807 | 0.16273 | 0.1191  | 0.16605 | 0.14567 | 0.33978 | 0.26674 OR7A5     |
| cg02125271 | 0.22743 | 0.29049 | 0.33417 | 0.34835 | 0.5777  | 0.51004 | 0.33109 | 0.38311 | 0.14255 | 0.13648 SNURF     |
| cg02126424 | 0.91082 | 0.80339 | 0.90123 | 0.9175  | 0.93535 | 0.90205 | 0.89507 | 0.90226 | 0.9134  | 0.89159 CTRL      |
| cg02126638 | 0.02277 | 0.02195 | 0.02638 | 0.02526 | 0.03043 | 0.02881 | 0.02903 | 0.02357 | 0.02784 | 0.02769 LRRC57    |
| cg02126753 | 0.06909 | 0.07733 | 0.4393  | 0.45409 | 0.28434 | 0.69761 | 0.83375 | 0.79868 | 0.56981 | 0.37966 AEBP1     |
| cg02128567 | 0.12822 | 0.03076 | 0.15787 | 0.26933 | 0.04822 | 0.03101 | 0.09335 | 0.08213 | 0.04052 | 0.01928 KCNK5     |
| cg02130905 | 0.69422 | 0.40011 | 0.39719 | 0.44246 | 0.28045 | 0.66932 | 0.05641 | 0.12758 | 0.06899 | 0.05912 STMN4     |
| cg02131399 | 0.0382  | 0.0384  | 0.10835 | 0.06441 | 0.42098 | 0.2271  | 0.03524 | 0.04285 | 0.0289  | 0.0267 LRP1       |
| cg02131853 | 0.50347 | 0.2253  | 0.21898 | 0.28821 | 0.32086 | 0.19042 | 0.50614 | 0.17895 | 0.22455 | 0.16411 FLJ23235  |
| cg02131967 | 0.43394 | 0.02593 | 0.11245 | 0.04716 | 0.92793 | 0.60523 | 0.04196 | 0.0238  | 0.91922 | 0.72473 ACE       |
| cg02131995 | 0.31403 | 0.09247 | 0.87431 | 0.89167 | 0.39742 | 0.36367 | 0.0826  | 0.10138 | 0.40042 | 0.44022 HAMP      |
| cg02132188 | 0.04315 | 0.05175 | 0.14798 | 0.08482 | 0.17127 | 0.08105 | 0.04693 | 0.05367 | 0.06545 | 0.05887 NSBP1     |
| cg02136132 | 0.05642 | 0.12733 | 0.08606 | 0.05049 | 0.05388 | 0.06427 | 0.05885 | 0.0519  | 0.06168 | 0.0456 KCNK13     |
| cg02141570 | 0.61097 | 0.59104 | 0.67539 | 0.69998 | 0.47739 | 0.40008 | 0.59146 | 0.63538 | 0.6263  | 0.37727 LOC348840 |
| cg02141675 | 0.3355  | 0.15542 | 0.45044 | 0.62048 | 0.09021 | 0.04759 | 0.33711 | 0.07546 | 0.35235 | 0.06887 GALNT10   |
| cg02142461 | 0.80972 | 0.68686 | 0.47588 | 0.60666 | 0.78159 | 0.64304 | 0.63231 | 0.46465 | 0.76414 | 0.36683 LYAR      |
| cg02144298 | 0.03494 | 0.02165 | 0.33078 | 0.50264 | 0.45979 | 0.41154 | 0.0541  | 0.01882 | 0.02901 | 0.10516 CEBPA     |
| cg02144933 | 0.3706  | 0.1     | 0.95193 | 0.94213 | 0.68666 | 0.63317 | 0.83829 | 0.85385 | 0.85294 | 0.92115 AOX1      |
| cg02147791 | 0.11299 | 0.1384  | 0.17805 | 0.17471 | 0.16889 | 0.17504 | 0.15261 | 0.10668 | 0.11772 | 0.14338 SAP18     |
| cg02148642 | 0.48122 | 0.06587 | 0.57853 | 0.82797 | 0.44778 | 0.10522 | 0.42846 | 0.11989 | 0.20301 | 0.05568 RGPD5     |
| cg02148711 | 0.05237 | 0.05943 | 0.07996 | 0.06863 | 0.06245 | 0.05444 | 0.58461 | 0.52758 | 0.05732 | 0.05826 ATRX      |
| cg02148834 | 0.96345 | 0.96738 | 0.96044 | 0.96327 | 0.97886 | 0.97605 | 0.92921 | 0.96652 | 0.92705 | 0.97873 TPTE      |
| cg02149446 | 0.2531  | 0.21681 | 0.66035 | 0.78645 | 0.18384 | 0.0984  | 0.11176 | 0.08504 | 0.24018 | 0.07308 C5AR1     |
| cg02150709 | 0.04008 | 0.04304 | 0.04916 | 0.04418 | 0.03982 | 0.049   | 0.06808 | 0.06156 | 0.03634 | 0.03733 PPIH      |
| cg02150910 | 0.14583 | 0.11877 | 0.25427 | 0.14622 | 0.57232 | 0.6637  | 0.47827 | 0.72059 | 0.11073 | 0.15203 GZMH      |
| cg02151301 | 0.38351 | 0.24867 | 0.15862 | 0.16356 | 0.26886 | 0.13855 | 0.1309  | 0.09168 | 0.10397 | 0.08197 HM13      |
| cg02153528 | 0.0437  | 0.04042 | 0.37052 | 0.61307 | 0.23926 | 0.19228 | 0.1524  | 0.26759 | 0.76639 | 0.4697 OBFC2B     |
| cg02153871 | 0.07636 | 0.06866 | 0.07771 | 0.07052 | 0.06885 | 0.05468 | 0.06362 | 0.06628 | 0.05894 | 0.07584 HARSL     |

|            |         |         |         |         |         |         |         |         |         |                  |
|------------|---------|---------|---------|---------|---------|---------|---------|---------|---------|------------------|
| cg02154074 | 0.14404 | 0.03358 | 0.04592 | 0.03919 | 0.21176 | 0.02791 | 0.03262 | 0.02991 | 0.16029 | 0.08706 HTRA2    |
| cg02154186 | 0.04412 | 0.04607 | 0.0565  | 0.05498 | 0.27423 | 0.23294 | 0.10764 | 0.0667  | 0.08767 | 0.0386 PNMA2     |
| cg02154956 | 0.0219  | 0.02351 | 0.02083 | 0.02007 | 0.01794 | 0.02198 | 0.01933 | 0.02062 | 0.01429 | 0.01652 PCCA     |
| cg02157083 | 0.45951 | 0.49715 | 0.72776 | 0.78178 | 0.90018 | 0.86619 | 0.40352 | 0.4089  | 0.86552 | 0.79439 APOA5    |
| cg02157306 | 0.12924 | 0.07271 | 0.19423 | 0.12973 | 0.12763 | 0.09457 | 0.05964 | 0.05821 | 0.05174 | 0.06863 ELMOD2   |
| cg02159896 | 0.03204 | 0.0331  | 0.04253 | 0.04664 | 0.04021 | 0.04592 | 0.03582 | 0.0574  | 0.03036 | 0.04368 MPPE1    |
| cg02160826 | 0.03727 | 0.03886 | 0.04159 | 0.03388 | 0.03674 | 0.03793 | 0.03451 | 0.03335 | 0.03069 | 0.02981 MRPS16   |
| cg02161046 | 0.04329 | 0.04544 | 0.04507 | 0.04443 | 0.03406 | 0.03899 | 0.03967 | 0.03976 | 0.03596 | 0.03708 HIAT1    |
| cg02161900 | 0.45323 | 0.62907 | 0.88883 | 0.91214 | 0.91447 | 0.86107 | 0.90061 | 0.8754  | 0.90937 | 0.8942 IRXL1     |
| cg02162069 | 0.59069 | 0.57419 | 0.90747 | 0.92455 | 0.71737 | 0.93316 | 0.65847 | 0.69467 | 0.70565 | 0.77233 ZIM2     |
| cg02162412 | 0.03009 | 0.03149 | 0.03242 | 0.03576 | 0.02879 | 0.0376  | 0.03424 | 0.03181 | 0.02177 | 0.02031 HMGCR    |
| cg02162950 | 0.02989 | 0.04068 | 0.03906 | 0.03394 | 0.03241 | 0.05193 | 0.03386 | 0.03022 | 0.02649 | 0.02758 KIAA1008 |
| cg02163937 | 0.04894 | 0.05175 | 0.05198 | 0.05018 | 0.05132 | 0.04968 | 0.04899 | 0.04528 | 0.04596 | 0.03838 FAM53B   |
| cg02164046 | 0.05763 | 0.04942 | 0.94593 | 0.95503 | 0.82452 | 0.88692 | 0.2945  | 0.90522 | 0.10554 | 0.04528 SST      |
| cg02164386 | 0.78832 | 0.70667 | 0.8043  | 0.83098 | 0.77813 | 0.75221 | 0.74455 | 0.72856 | 0.83031 | 0.78882 HIGD1B   |
| cg02164442 | 0.62874 | 0.07837 | 0.53497 | 0.59374 | 0.49711 | 0.14106 | 0.04142 | 0.03219 | 0.57094 | 0.47315 ITGAD    |
| cg02165720 | 0.04545 | 0.0485  | 0.038   | 0.03638 | 0.03641 | 0.04067 | 0.42814 | 0.2735  | 0.0393  | 0.03207 NDUFB11  |
| cg02166313 | 0.07786 | 0.0548  | 0.05488 | 0.04817 | 0.07631 | 0.07568 | 0.10069 | 0.05818 | 0.05386 | 0.06641 PAPOLA   |
| cg02166532 | 0.16862 | 0.12669 | 0.14832 | 0.13514 | 0.40798 | 0.15244 | 0.14441 | 0.13167 | 0.22673 | 0.1355 IGF2      |
| cg02168291 | 0.16778 | 0.21463 | 0.50008 | 0.56624 | 0.77521 | 0.6016  | 0.2504  | 0.07154 | 0.49078 | 0.06814 CDH13    |
| cg02169098 | 0.03891 | 0.03735 | 0.05324 | 0.04878 | 0.05078 | 0.05541 | 0.04751 | 0.04016 | 0.0498  | 0.05526 XRCC6    |
| cg02169430 | 0.1241  | 0.11643 | 0.14855 | 0.11013 | 0.22986 | 0.12414 | 0.14944 | 0.1032  | 0.11061 | 0.13503 CHD2     |
| cg02169446 | 0.03135 | 0.03063 | 0.0322  | 0.02675 | 0.0294  | 0.0294  | 0.03185 | 0.03272 | 0.0268  | 0.02672 MYO9A    |
| cg02170525 | 0.58689 | 0.32327 | 0.482   | 0.68083 | 0.6004  | 0.76549 | 0.26325 | 0.08328 | 0.27546 | 0.03409 CD8A     |
| cg02171008 | 0.0343  | 0.03214 | 0.03468 | 0.03047 | 0.03016 | 0.02956 | 0.02989 | 0.02937 | 0.02737 | 0.02523 RPL27A   |
| cg02171545 | 0.52771 | 0.51607 | 0.35442 | 0.65809 | 0.29976 | 0.21656 | 0.16686 | 0.49535 | 0.36355 | 0.38848 SNRPN    |
| cg02173484 | 0.27366 | 0.06623 | 0.71217 | 0.77359 | 0.87523 | 0.82713 | 0.43109 | 0.45321 | 0.83591 | 0.23626 GJA5     |
| cg02175035 | 0.02558 | 0.03085 | 0.03046 | 0.02382 | 0.01986 | 0.02414 | 0.02203 | 0.02244 | 0.02535 | 0.03895 RAB40B   |
| cg02175308 | 0.49097 | 0.10517 | 0.21748 | 0.1711  | 0.91484 | 0.90186 | 0.18816 | 0.12116 | 0.10485 | 0.09625 SORT1    |
| cg02178774 | 0.05147 | 0.05993 | 0.05587 | 0.04964 | 0.03991 | 0.05597 | 0.05201 | 0.04401 | 0.04653 | 0.05186 MEF2B    |
| cg02178898 | 0.0779  | 0.1055  | 0.12319 | 0.10585 | 0.17582 | 0.14096 | 0.06215 | 0.05303 | 0.07643 | 0.07126 MTRF1    |
| cg02181494 | 0.03478 | 0.0284  | 0.03554 | 0.03458 | 0.02445 | 0.03267 | 0.03135 | 0.03354 | 0.03025 | 0.03142 ARSA     |
| cg02181506 | 0.24264 | 0.12174 | 0.22323 | 0.24894 | 0.25333 | 0.07116 | 0.24813 | 0.07104 | 0.11832 | 0.07204 SERPINA1 |
| cg02182354 | 0.11906 | 0.11617 | 0.14559 | 0.15735 | 0.14689 | 0.09742 | 0.12734 | 0.1148  | 0.14647 | 0.10032 NEUROG2  |
| cg02184413 | 0.4584  | 0.22201 | 0.76709 | 0.78388 | 0.57196 | 0.70243 | 0.36374 | 0.15604 | 0.30256 | 0.22303 VNN1     |
| cg02186298 | 0.111   | 0.10655 | 0.11231 | 0.11376 | 0.0812  | 0.09671 | 0.10947 | 0.10655 | 0.10788 | 0.09341 DPF2     |
| cg02186948 | 0.03023 | 0.03931 | 0.04111 | 0.02806 | 0.03394 | 0.03346 | 0.03163 | 0.03318 | 0.0342  | 0.03614 COMMD9   |
| cg02186966 | 0.04651 | 0.05472 | 0.07621 | 0.0608  | 0.06857 | 0.07408 | 0.04663 | 0.04611 | 0.03943 | 0.03928 BET1     |
| cg02187357 | 0.42156 | 0.18769 | 0.8464  | 0.89208 | 0.71107 | 0.84281 | 0.30029 | 0.19937 | 0.10215 | 0.06879 TBC1D22B |
| cg02187914 | 0.0885  | 0.06833 | 0.07226 | 0.06719 | 0.05267 | 0.0519  | 0.05904 | 0.05797 | 0.05011 | 0.06113 ATP6V1C1 |
| cg02189785 | 0.26307 | 0.05825 | 0.78952 | 0.75482 | 0.64053 | 0.69818 | 0.09168 | 0.05823 | 0.63817 | 0.59494 CLIC3    |

|            |         |         |         |         |         |         |         |         |         |                   |
|------------|---------|---------|---------|---------|---------|---------|---------|---------|---------|-------------------|
| cg02192520 | 0.89755 | 0.62934 | 0.80702 | 0.86213 | 0.10341 | 0.09187 | 0.77128 | 0.63917 | 0.87781 | 0.80859 RDH5      |
| cg02192855 | 0.06631 | 0.06039 | 0.07728 | 0.07985 | 0.13089 | 0.12252 | 0.47622 | 0.43943 | 0.72569 | 0.73474 HIST1H2BI |
| cg02192965 | 0.2132  | 0.09248 | 0.85853 | 0.87453 | 0.57842 | 0.5789  | 0.83297 | 0.83139 | 0.10618 | 0.1004 SLC3A1     |
| cg02194211 | 0.70088 | 0.80537 | 0.84146 | 0.85242 | 0.85663 | 0.83187 | 0.84546 | 0.82909 | 0.81505 | 0.77496 FAM3D     |
| cg02194878 | 0.06165 | 0.03785 | 0.36185 | 0.39935 | 0.12111 | 0.05628 | 0.3072  | 0.26005 | 0.04258 | 0.448 EPHA8       |
| cg02196655 | 0.80051 | 0.49079 | 0.19967 | 0.16153 | 0.69369 | 0.39291 | 0.92699 | 0.61915 | 0.66858 | 0.58217 NOL10     |
| cg02196730 | 0.59404 | 0.33274 | 0.14855 | 0.10489 | 0.28813 | 0.03412 | 0.06651 | 0.1394  | 0.03705 | 0.03305 MTHFS     |
| cg02196805 | 0.57727 | 0.35441 | 0.26454 | 0.6598  | 0.58528 | 0.61274 | 0.32033 | 0.48906 | 0.03489 | 0.04689 CSF2      |
| cg02197293 | 0.89002 | 0.89861 | 0.5877  | 0.74288 | 0.84358 | 0.87518 | 0.83043 | 0.853   | 0.92199 | 0.93153 FBXO27    |
| cg02198044 | 0.07652 | 0.07072 | 0.07783 | 0.07421 | 0.07297 | 0.05125 | 0.08688 | 0.08051 | 0.16991 | 0.0722 NEDD4      |
| cg02198582 | 0.87452 | 0.60755 | 0.88982 | 0.90484 | 0.88216 | 0.9094  | 0.82363 | 0.77569 | 0.87085 | 0.8534 TSC2       |
| cg02200132 | 0.03852 | 0.04507 | 0.04573 | 0.03939 | 0.0409  | 0.03371 | 0.0521  | 0.04034 | 0.03785 | 0.04354 EIF4A2    |
| cg02200584 | 0.06884 | 0.06537 | 0.06457 | 0.06276 | 0.07341 | 0.06785 | 0.05757 | 0.05803 | 0.06047 | 0.0708 PDGFC      |
| cg02201963 | 0.02939 | 0.02612 | 0.03022 | 0.02668 | 0.02146 | 0.0276  | 0.02696 | 0.0282  | 0.02241 | 0.02317 TNFSF5IP1 |
| cg02202484 | 0.20389 | 0.23274 | 0.44779 | 0.49809 | 0.67423 | 0.59963 | 0.05912 | 0.06246 | 0.06563 | 0.09209 SPRR4     |
| cg02204046 | 0.0412  | 0.03324 | 0.20053 | 0.29702 | 0.06036 | 0.06465 | 0.07091 | 0.33929 | 0.04309 | 0.02976 MYCN      |
| cg02205739 | 0.04055 | 0.04764 | 0.37328 | 0.35481 | 0.91192 | 0.5271  | 0.11261 | 0.11368 | 0.54638 | 0.33899 PRRX2     |
| cg02205962 | 0.02475 | 0.02601 | 0.03781 | 0.03207 | 0.0215  | 0.02455 | 0.64039 | 0.45608 | 0.02047 | 0.01745 BCAP31    |
| cg02206259 | 0.08792 | 0.08265 | 0.10474 | 0.09988 | 0.11642 | 0.08062 | 0.13678 | 0.12332 | 0.78586 | 0.25169 C1orf198  |
| cg02207610 | 0.08521 | 0.06975 | 0.07404 | 0.07629 | 0.07254 | 0.08764 | 0.06963 | 0.07167 | 0.06696 | 0.06828 PPP1R12C  |
| cg02210123 | 0.11162 | 0.12135 | 0.08134 | 0.06655 | 0.21043 | 0.17968 | 0.11103 | 0.10355 | 0.08052 | 0.14286 RHOJ      |
| cg02210887 | 0.83489 | 0.81999 | 0.73345 | 0.79055 | 0.6148  | 0.77331 | 0.75083 | 0.86779 | 0.51026 | 0.57712 GUCY1A3   |
| cg02212280 | 0.81162 | 0.62056 | 0.81705 | 0.86171 | 0.6318  | 0.77312 | 0.63864 | 0.55729 | 0.82358 | 0.73518 MMP1      |
| cg02212737 | 0.04216 | 0.04028 | 0.05926 | 0.04704 | 0.04902 | 0.04933 | 0.04055 | 0.04511 | 0.04479 | 0.03967 EXOC7     |
| cg02212836 | 0.86474 | 0.90125 | 0.87586 | 0.76604 | 0.37926 | 0.4169  | 0.48354 | 0.19013 | 0.80342 | 0.86151 LY86      |
| cg02213716 | 0.03006 | 0.02717 | 0.03188 | 0.03189 | 0.02086 | 0.02849 | 0.02765 | 0.02456 | 0.02821 | 0.0226 PHGDHL1    |
| cg02214188 | 0.23392 | 0.22181 | 0.33573 | 0.23073 | 0.26279 | 0.33449 | 0.19832 | 0.15621 | 0.20323 | 0.2093 BDH2       |
| cg02215538 | 0.0388  | 0.04127 | 0.04269 | 0.04016 | 0.03201 | 0.0366  | 0.03359 | 0.03275 | 0.14986 | 0.02746 MASK-BP3  |
| cg02216250 | 0.0529  | 0.05084 | 0.12249 | 0.14784 | 0.50027 | 0.54361 | 0.08034 | 0.04161 | 0.5172  | 0.43057 OCLN      |
| cg02217159 | 0.05204 | 0.03189 | 0.13902 | 0.30998 | 0.19923 | 0.55077 | 0.05329 | 0.17719 | 0.05153 | 0.02408 KHDRBS2   |
| cg02217814 | 0.16242 | 0.0887  | 0.13868 | 0.11239 | 0.11329 | 0.07846 | 0.10531 | 0.08733 | 0.06778 | 0.06231 LOC93343  |
| cg02218214 | 0.71176 | 0.5602  | 0.67957 | 0.69838 | 0.58489 | 0.7116  | 0.732   | 0.76721 | 0.70605 | 0.71236 ANGPTL3   |
| cg02218260 | 0.35448 | 0.65305 | 0.69711 | 0.84456 | 0.8558  | 0.83881 | 0.79733 | 0.83189 | 0.88188 | 0.77627 GRM2      |
| cg02218324 | 0.90536 | 0.91496 | 0.92326 | 0.9307  | 0.95662 | 0.9511  | 0.90983 | 0.93812 | 0.9392  | 0.8651 RSHL1      |
| cg02222362 | 0.86597 | 0.94497 | 0.95633 | 0.96476 | 0.95583 | 0.966   | 0.66571 | 0.83401 | 0.10797 | 0.06119 PTPN20B   |
| cg02224164 | 0.8049  | 0.44234 | 0.40625 | 0.58374 | 0.52168 | 0.35118 | 0.11356 | 0.27513 | 0.68556 | 0.52002 ARHGAP9   |
| cg02224920 | 0.04852 | 0.05091 | 0.05645 | 0.05377 | 0.04281 | 0.04485 | 0.05016 | 0.05259 | 0.04964 | 0.04216 B3GALT6   |
| cg02225847 | 0.04814 | 0.09683 | 0.12583 | 0.06272 | 0.04015 | 0.03404 | 0.06384 | 0.07433 | 0.11625 | 0.122 FAM65A      |
| cg02226697 | 0.05042 | 0.02405 | 0.09372 | 0.10506 | 0.06837 | 0.02109 | 0.02828 | 0.02111 | 0.04567 | 0.01837 SQLE      |
| cg02226871 | 0.02109 | 0.02299 | 0.0243  | 0.02707 | 0.02152 | 0.02563 | 0.02056 | 0.02066 | 0.02011 | 0.01981 VPS28     |
| cg02226939 | 0.8248  | 0.13954 | 0.14836 | 0.3807  | 0.10076 | 0.05647 | 0.09733 | 0.05367 | 0.05251 | 0.0502 BLMH       |

|            |         |         |         |         |         |         |         |         |         |                   |
|------------|---------|---------|---------|---------|---------|---------|---------|---------|---------|-------------------|
| cg02227605 | 0.32103 | 0.08147 | 0.08425 | 0.07095 | 0.40442 | 0.13979 | 0.16761 | 0.08022 | 0.07084 | 0.05635 ROPN1L    |
| cg02228185 | 0.57258 | 0.67071 | 0.23959 | 0.37265 | 0.16564 | 0.15486 | 0.15387 | 0.13307 | 0.10693 | 0.11216 ASPA      |
| cg02229516 | 0.04356 | 0.04626 | 0.04369 | 0.04285 | 0.03408 | 0.03785 | 0.04655 | 0.04211 | 0.04453 | 0.0364 TRMT1      |
| cg02229946 | 0.12346 | 0.09974 | 0.58894 | 0.78555 | 0.75291 | 0.82983 | 0.18762 | 0.2059  | 0.83536 | 0.57743 IL1F7     |
| cg02232922 | 0.23031 | 0.13959 | 0.16608 | 0.1951  | 0.17391 | 0.10542 | 0.08325 | 0.1075  | 0.09426 | 0.10653 LOC203427 |
| cg02233558 | 0.08897 | 0.07772 | 0.07337 | 0.07691 | 0.05062 | 0.0644  | 0.07828 | 0.07416 | 0.06877 | 0.06406 SLC12A2   |
| cg02233559 | 0.07681 | 0.04223 | 0.03848 | 0.03692 | 0.0911  | 0.06253 | 0.03293 | 0.03192 | 0.03513 | 0.02942 LOC283537 |
| cg02235880 | 0.08611 | 0.09972 | 0.09503 | 0.09243 | 0.04504 | 0.07478 | 0.07853 | 0.08041 | 0.08556 | 0.08207 FANCF     |
| cg02237119 | 0.50862 | 0.43984 | 0.28863 | 0.4384  | 0.88643 | 0.64939 | 0.25414 | 0.14907 | 0.91968 | 0.50416 WBSR27    |
| cg02237186 | 0.03727 | 0.03998 | 0.05509 | 0.04124 | 0.0315  | 0.03747 | 0.03651 | 0.03948 | 0.03786 | 0.03385 RRM2      |
| cg02238504 | 0.89306 | 0.63932 | 0.47976 | 0.76031 | 0.68628 | 0.85628 | 0.85915 | 0.81067 | 0.20984 | 0.09 ZNF423       |
| cg02238747 | 0.31252 | 0.11551 | 0.26594 | 0.25776 | 0.19628 | 0.10882 | 0.13196 | 0.09731 | 0.08584 | 0.08126 KIAA0690  |
| cg02238826 | 0.04373 | 0.04387 | 0.04269 | 0.04233 | 0.07876 | 0.03292 | 0.06941 | 0.03891 | 0.03744 | 0.03374 B3GNT5    |
| cg02239021 | 0.04731 | 0.05278 | 0.15995 | 0.14626 | 0.0773  | 0.05837 | 0.04565 | 0.04686 | 0.0642  | 0.04559 MRPL37    |
| cg02239082 | 0.02333 | 0.02058 | 0.02624 | 0.02142 | 0.02296 | 0.0219  | 0.01983 | 0.01756 | 0.01777 | 0.01696 PSCD2     |
| cg02240226 | 0.02693 | 0.03006 | 0.03093 | 0.02656 | 0.02495 | 0.02912 | 0.02496 | 0.02467 | 0.02591 | 0.02607 GLB1L     |
| cg02240622 | 0.86642 | 0.83958 | 0.76799 | 0.78644 | 0.91275 | 0.84089 | 0.81705 | 0.6347  | 0.7365  | 0.06944 PLCB2     |
| cg02241259 | 0.83692 | 0.81611 | 0.74763 | 0.7806  | 0.6837  | 0.76014 | 0.78157 | 0.86799 | 0.78302 | 0.78174 IL23R     |
| cg02241586 | 0.08773 | 0.02815 | 0.03449 | 0.03102 | 0.05281 | 0.03029 | 0.02721 | 0.02552 | 0.03285 | 0.02801 PIP5K3    |
| cg02244695 | 0.9191  | 0.78425 | 0.37691 | 0.30741 | 0.93716 | 0.94899 | 0.33802 | 0.46694 | 0.39449 | 0.04768 HCA112    |
| cg02245378 | 0.90389 | 0.80068 | 0.88919 | 0.903   | 0.67532 | 0.6452  | 0.87813 | 0.89002 | 0.0678  | 0.03305 FLJ32447  |
| cg02245418 | 0.80403 | 0.2387  | 0.28799 | 0.40277 | 0.71862 | 0.77785 | 0.83463 | 0.27245 | 0.80584 | 0.45383 ZNF364    |
| cg02246665 | 0.03905 | 0.03067 | 0.03096 | 0.02755 | 0.02504 | 0.02467 | 0.0231  | 0.02576 | 0.0233  | 0.02298 HCFC2     |
| cg02246968 | 0.03197 | 0.02947 | 0.03022 | 0.03052 | 0.02468 | 0.02913 | 0.02768 | 0.03001 | 0.0265  | 0.02517 PHGDHL1   |
| cg02247582 | 0.08812 | 0.05143 | 0.0638  | 0.06085 | 0.06645 | 0.05315 | 0.04261 | 0.04103 | 0.0448  | 0.05019 ZNF512    |
| cg02248486 | 0.06132 | 0.0464  | 0.05157 | 0.04982 | 0.93716 | 0.93153 | 0.40328 | 0.66088 | 0.45564 | 0.42079 HOXA5     |
| cg02248540 | 0.49056 | 0.49113 | 0.05848 | 0.06183 | 0.24922 | 0.44557 | 0.07263 | 0.053   | 0.33065 | 0.40522 HIST1H2AI |
| cg02250594 | 0.05696 | 0.06715 | 0.94108 | 0.94294 | 0.92965 | 0.65471 | 0.07951 | 0.04009 | 0.3728  | 0.19287 ONECUT2   |
| cg02250787 | 0.06901 | 0.0817  | 0.27554 | 0.39303 | 0.1554  | 0.10651 | 0.82766 | 0.68024 | 0.0826  | 0.07545 HTR2A     |
| cg02250992 | 0.01645 | 0.01774 | 0.02031 | 0.01703 | 0.01455 | 0.01538 | 0.01675 | 0.0161  | 0.01196 | 0.01573 SCARB1    |
| cg02251134 | 0.66059 | 0.51081 | 0.64276 | 0.68301 | 0.64133 | 0.68371 | 0.56594 | 0.51009 | 0.6751  | 0.53722 DOCK2     |
| cg02252907 | 0.04662 | 0.04775 | 0.04575 | 0.04595 | 0.05875 | 0.05714 | 0.04068 | 0.0389  | 0.03283 | 0.03431 AP3D1     |
| cg02252918 | 0.02622 | 0.02699 | 0.0252  | 0.02273 | 0.05265 | 0.02116 | 0.02688 | 0.02257 | 0.02367 | 0.02007 ZNF664    |
| cg02254407 | 0.82646 | 0.40254 | 0.90887 | 0.92232 | 0.92955 | 0.91982 | 0.88423 | 0.91222 | 0.91461 | 0.89713 PLEKHB1   |
| cg02254461 | 0.92374 | 0.85748 | 0.89155 | 0.89676 | 0.84526 | 0.78425 | 0.77046 | 0.41227 | 0.90599 | 0.88708 AXUD1     |
| cg02254649 | 0.03523 | 0.03719 | 0.0359  | 0.03682 | 0.03167 | 0.03558 | 0.03281 | 0.0291  | 0.02984 | 0.02835 ENAH      |
| cg02255004 | 0.77873 | 0.72391 | 0.37962 | 0.60201 | 0.88749 | 0.91131 | 0.33563 | 0.55398 | 0.27042 | 0.26249 GDEP      |
| cg02255609 | 0.27862 | 0.06153 | 0.52596 | 0.73739 | 0.50037 | 0.44303 | 0.3729  | 0.46947 | 0.28528 | 0.28567 TTC4      |
| cg02255732 | 0.23893 | 0.22279 | 0.27357 | 0.23515 | 0.38531 | 0.32085 | 0.23478 | 0.27159 | 0.18614 | 0.26085 FLJ46154  |
| cg02257405 | 0.64517 | 0.50013 | 0.88977 | 0.91591 | 0.92188 | 0.89654 | 0.81611 | 0.21287 | 0.87788 | 0.86735 ACSL6     |
| cg02257681 | 0.02317 | 0.03248 | 0.0345  | 0.02861 | 0.05264 | 0.03528 | 0.03481 | 0.02788 | 0.02801 | 0.02291 DDAH2     |



|            |         |         |         |         |         |         |         |         |         |                  |
|------------|---------|---------|---------|---------|---------|---------|---------|---------|---------|------------------|
| cg02259997 | 0.05045 | 0.05783 | 0.05597 | 0.05512 | 0.04479 | 0.04686 | 0.05207 | 0.05288 | 0.05117 | 0.04943 FGF9     |
| cg02260587 | 0.10759 | 0.30378 | 0.59557 | 0.74157 | 0.05545 | 0.15107 | 0.09114 | 0.04623 | 0.0578  | 0.04839 PCDH8B2  |
| cg02261346 | 0.64717 | 0.63248 | 0.86783 | 0.88455 | 0.87571 | 0.87572 | 0.04793 | 0.03088 | 0.38196 | 0.37888 MPPED1   |
| cg02264284 | 0.05967 | 0.05368 | 0.12413 | 0.09535 | 0.12303 | 0.07973 | 0.21896 | 0.06067 | 0.04335 | 0.04 HPRT1       |
| cg02265318 | 0.42635 | 0.62105 | 0.28943 | 0.50768 | 0.85841 | 0.90083 | 0.5079  | 0.68263 | 0.80771 | 0.77126 MOSC1    |
| cg02266731 | 0.69483 | 0.12485 | 0.78028 | 0.87346 | 0.82018 | 0.17996 | 0.79058 | 0.57657 | 0.20816 | 0.0903 CPM       |
| cg02268424 | 0.03836 | 0.03993 | 0.04491 | 0.03998 | 0.05464 | 0.0255  | 0.03235 | 0.03    | 0.02921 | 0.02643 ZNF136   |
| cg02269221 | 0.0294  | 0.02633 | 0.03018 | 0.0272  | 0.02448 | 0.02708 | 0.02727 | 0.02961 | 0.02362 | 0.02233 TRAF4    |
| cg02271621 | 0.0327  | 0.02912 | 0.07774 | 0.15139 | 0.94833 | 0.37201 | 0.02623 | 0.02822 | 0.18947 | 0.03007 DUSP8    |
| cg02273078 | 0.01239 | 0.01235 | 0.01334 | 0.01201 | 0.01255 | 0.01198 | 0.01201 | 0.01288 | 0.01101 | 0.01216 USP14    |
| cg02273392 | 0.08998 | 0.05465 | 0.03421 | 0.0308  | 0.03167 | 0.05353 | 0.22898 | 0.06101 | 0.32495 | 0.12747 SERPINE1 |
| cg02273788 | 0.85991 | 0.60361 | 0.81583 | 0.83825 | 0.81323 | 0.83771 | 0.50114 | 0.77292 | 0.88801 | 0.85228 PLXNB3   |
| cg02274362 | 0.44482 | 0.12683 | 0.55166 | 0.68858 | 0.63522 | 0.94461 | 0.41158 | 0.34    | 0.37964 | 0.2565 PNMA6A    |
| cg02275294 | 0.25395 | 0.11467 | 0.16618 | 0.12691 | 0.84371 | 0.69413 | 0.4588  | 0.13221 | 0.04929 | 0.03043 SOAT1    |
| cg02275359 | 0.86407 | 0.46223 | 0.84417 | 0.84065 | 0.84412 | 0.84003 | 0.81967 | 0.8429  | 0.86489 | 0.85754 ZNF146   |
| cg02275830 | 0.03052 | 0.0326  | 0.03411 | 0.02819 | 0.03216 | 0.03546 | 0.03209 | 0.02871 | 0.02752 | 0.02697 ZADH1    |
| cg02275989 | 0.03288 | 0.02814 | 0.03494 | 0.03552 | 0.02488 | 0.03185 | 0.03125 | 0.02762 | 0.02445 | 0.0241 SMPDL3A   |
| cg02276665 | 0.47361 | 0.2314  | 0.76721 | 0.79355 | 0.89403 | 0.78867 | 0.80182 | 0.78043 | 0.89407 | 0.67298 CTNNA1   |
| cg02276686 | 0.05293 | 0.05081 | 0.04539 | 0.03943 | 0.09412 | 0.06897 | 0.05212 | 0.04979 | 0.04347 | 0.05123 PSMC1    |
| cg02276793 | 0.04879 | 0.04396 | 0.04889 | 0.04347 | 0.03838 | 0.03826 | 0.03135 | 0.03637 | 0.05144 | 0.03753 TLOC1    |
| cg02277509 | 0.04392 | 0.04805 | 0.03375 | 0.0374  | 0.08205 | 0.06633 | 0.04803 | 0.0471  | 0.04897 | 0.05993 TIMM9    |
| cg02278071 | 0.03604 | 0.02751 | 0.04277 | 0.03856 | 0.05405 | 0.0439  | 0.03611 | 0.03549 | 0.04226 | 0.03934 DUSP18   |
| cg02278165 | 0.03528 | 0.03509 | 0.03437 | 0.03277 | 0.03801 | 0.04201 | 0.03212 | 0.02901 | 0.03243 | 0.03067 COX7A2L  |
| cg02279071 | 0.0347  | 0.05631 | 0.03544 | 0.03623 | 0.03808 | 0.04551 | 0.02999 | 0.0342  | 0.02961 | 0.02758 MLH1     |
| cg02280309 | 0.84445 | 0.79603 | 0.8216  | 0.84044 | 0.82768 | 0.54068 | 0.66415 | 0.7966  | 0.55328 | 0.40118 PKLR     |
| cg02282237 | 0.04495 | 0.19203 | 0.49713 | 0.53515 | 0.29051 | 0.36537 | 0.34453 | 0.51696 | 0.15524 | 0.04013 PRKCH    |
| cg02283643 | 0.79881 | 0.30738 | 0.4992  | 0.80178 | 0.64973 | 0.78852 | 0.43385 | 0.16891 | 0.08356 | 0.10812 SULF1    |
| cg02284188 | 0.39534 | 0.30292 | 0.22767 | 0.1613  | 0.42115 | 0.29197 | 0.29131 | 0.28421 | 0.16399 | 0.12092 TRIM49   |
| cg02284889 | 0.03906 | 0.03889 | 0.04324 | 0.04474 | 0.03456 | 0.04239 | 0.04491 | 0.03546 | 0.03567 | 0.03702 PPME1    |
| cg02285477 | 0.03527 | 0.04452 | 0.04191 | 0.03623 | 0.02658 | 0.03577 | 0.03314 | 0.03397 | 0.03124 | 0.03385 MGC9850  |
| cg02286642 | 0.54752 | 0.87456 | 0.68562 | 0.73152 | 0.38226 | 0.59118 | 0.87652 | 0.87777 | 0.09251 | 0.07656 ZNF254   |
| cg02286990 | 0.06035 | 0.05903 | 0.05667 | 0.05555 | 0.06998 | 0.06375 | 0.05063 | 0.04782 | 0.05208 | 0.04795 CCDC28B  |
| cg02288165 | 0.7472  | 0.41154 | 0.24965 | 0.44762 | 0.18157 | 0.1365  | 0.10925 | 0.11207 | 0.06962 | 0.08293 SN       |
| cg02290509 | 0.03814 | 0.03884 | 0.03779 | 0.03964 | 0.02995 | 0.03066 | 0.03211 | 0.03308 | 0.03183 | 0.03461 TBL2     |
| cg02292024 | 0.05407 | 0.05629 | 0.06055 | 0.05304 | 0.04945 | 0.06234 | 0.05526 | 0.05339 | 0.04908 | 0.05251 TIMM10   |
| cg02293044 | 0.08501 | 0.03304 | 0.05491 | 0.0438  | 0.2208  | 0.07113 | 0.54203 | 0.04385 | 0.45011 | 0.02802 GAS2L1   |
| cg02296128 | 0.03587 | 0.0437  | 0.04269 | 0.04079 | 0.03757 | 0.04165 | 0.03179 | 0.03564 | 0.03658 | 0.0332 GTF2F2    |
| cg02298008 | 0.71791 | 0.93791 | 0.16977 | 0.06892 | 0.24442 | 0.5595  | 0.12223 | 0.11075 | 0.9421  | 0.94079 RAB39B   |
| cg02298570 | 0.66066 | 0.37684 | 0.80942 | 0.83916 | 0.48418 | 0.41757 | 0.52171 | 0.33533 | 0.27383 | 0.24756 ZNF555   |
| cg02298612 | 0.90166 | 0.91558 | 0.91329 | 0.92328 | 0.92454 | 0.90997 | 0.91094 | 0.79106 | 0.92607 | 0.55975 CHST6    |
| cg02299279 | 0.0206  | 0.01853 | 0.0209  | 0.01908 | 0.01799 | 0.02059 | 0.02732 | 0.02658 | 0.01956 | 0.01504 UBL7     |

|            |         |         |         |         |         |         |         |         |         |                  |
|------------|---------|---------|---------|---------|---------|---------|---------|---------|---------|------------------|
| cg02299653 | 0.05601 | 0.05158 | 0.04639 | 0.04838 | 0.0495  | 0.04179 | 0.04686 | 0.05786 | 0.039   | 0.03898 LSM5     |
| cg02300906 | 0.04313 | 0.04235 | 0.04735 | 0.03814 | 0.08451 | 0.07829 | 0.05744 | 0.05132 | 0.04106 | 0.04822 FANCF    |
| cg02301754 | 0.87924 | 0.86772 | 0.88517 | 0.89279 | 0.87561 | 0.8551  | 0.88005 | 0.87291 | 0.85164 | 0.84201 TMOD4    |
| cg02301815 | 0.94106 | 0.94125 | 0.92165 | 0.92771 | 0.9065  | 0.91587 | 0.89589 | 0.91068 | 0.92656 | 0.91183 KIAA1267 |
| cg02303361 | 0.04687 | 0.05036 | 0.04696 | 0.04484 | 0.04774 | 0.04349 | 0.0443  | 0.03972 | 0.03452 | 0.03137 AP2S1    |
| cg02304930 | 0.05956 | 0.07314 | 0.06017 | 0.07334 | 0.27117 | 0.07071 | 0.08282 | 0.05997 | 0.0653  | 0.07475 SERTAD4  |
| cg02305261 | 0.26035 | 0.09031 | 0.15614 | 0.27757 | 0.18633 | 0.06246 | 0.19645 | 0.0897  | 0.15911 | 0.0904 KCNG1     |
| cg02305723 | 0.45145 | 0.36938 | 0.87879 | 0.91702 | 0.6883  | 0.77233 | 0.44944 | 0.62688 | 0.27823 | 0.18198 SNRPN    |
| cg02307482 | 0.04781 | 0.04528 | 0.07742 | 0.062   | 0.08936 | 0.04176 | 0.05995 | 0.05339 | 0.06614 | 0.06414 C12orf60 |
| cg02309273 | 0.87156 | 0.60116 | 0.74174 | 0.7219  | 0.06106 | 0.06928 | 0.067   | 0.0614  | 0.68834 | 0.10338 INPP5B   |
| cg02309431 | 0.51037 | 0.42752 | 0.65619 | 0.64555 | 0.90797 | 0.86511 | 0.6588  | 0.77888 | 0.58173 | 0.52359 BPIL3    |
| cg02309594 | 0.62111 | 0.6191  | 0.74789 | 0.76977 | 0.63166 | 0.74637 | 0.61997 | 0.1732  | 0.76391 | 0.76608 HCRTR1   |
| cg02310296 | 0.52895 | 0.17046 | 0.31078 | 0.44251 | 0.24482 | 0.19809 | 0.06387 | 0.06223 | 0.12358 | 0.16904 MMP9     |
| cg02311163 | 0.18797 | 0.27469 | 0.17381 | 0.20352 | 0.49217 | 0.51731 | 0.14593 | 0.15238 | 0.11148 | 0.13109 SEMG2    |
| cg02312170 | 0.0433  | 0.03557 | 0.03454 | 0.0359  | 0.03133 | 0.03841 | 0.03346 | 0.03301 | 0.028   | 0.02778 BRWD2    |
| cg02312751 | 0.04472 | 0.04598 | 0.04887 | 0.05406 | 0.03705 | 0.03779 | 0.04076 | 0.03646 | 0.04791 | 0.03279 TSSC4    |
| cg02314308 | 0.07471 | 0.07042 | 0.2136  | 0.2348  | 0.68939 | 0.44365 | 0.08331 | 0.06694 | 0.63706 | 0.7658 GLT25D2   |
| cg02316718 | 0.02179 | 0.02392 | 0.02451 | 0.02512 | 0.01948 | 0.02121 | 0.01962 | 0.01848 | 0.01846 | 0.01871 UBC      |
| cg02317742 | 0.0416  | 0.03741 | 0.03964 | 0.03802 | 0.04176 | 0.03362 | 0.03698 | 0.03265 | 0.03349 | 0.03908 ATOH8    |
| cg02317907 | 0.69421 | 0.62495 | 0.88456 | 0.8945  | 0.85478 | 0.89409 | 0.89091 | 0.41881 | 0.89316 | 0.87758 DIRAS3   |
| cg02318426 | 0.037   | 0.04138 | 0.04139 | 0.04168 | 0.03484 | 0.04406 | 0.03657 | 0.03298 | 0.03377 | 0.03462 NFKBIA   |
| cg02318535 | 0.80771 | 0.91719 | 0.89974 | 0.91535 | 0.8921  | 0.90757 | 0.91937 | 0.87074 | 0.93056 | 0.73559 PPM1E    |
| cg02320454 | 0.28314 | 0.06322 | 0.07655 | 0.06754 | 0.34593 | 0.48461 | 0.06366 | 0.06213 | 0.05843 | 0.0539 GPR150    |
| cg02321871 | 0.04914 | 0.05712 | 0.06394 | 0.06573 | 0.10016 | 0.08766 | 0.09176 | 0.08151 | 0.0531  | 0.04357 RCBTB1   |
| cg02322621 | 0.04267 | 0.04022 | 0.04319 | 0.04021 | 0.04448 | 0.04933 | 0.03618 | 0.04047 | 0.02932 | 0.03182 ZBTB9    |
| cg02322989 | 0.06166 | 0.06102 | 0.08447 | 0.07681 | 0.1417  | 0.05791 | 0.06713 | 0.05477 | 0.0643  | 0.16895 LRP1B    |
| cg02323334 | 0.02431 | 0.02861 | 0.02433 | 0.02119 | 0.02015 | 0.02063 | 0.02391 | 0.02666 | 0.01569 | 0.01386 PRDM10   |
| cg02324920 | 0.62093 | 0.09694 | 0.87658 | 0.89494 | 0.92741 | 0.82221 | 0.90657 | 0.22962 | 0.86469 | 0.3029 NEURL     |
| cg02326006 | 0.0484  | 0.05067 | 0.07223 | 0.07103 | 0.06655 | 0.0658  | 0.03828 | 0.03287 | 0.05664 | 0.04938 ARHGEF9  |
| cg02326931 | 0.07038 | 0.06271 | 0.07952 | 0.0737  | 0.06886 | 0.07454 | 0.05606 | 0.0559  | 0.06716 | 0.05247 ALG5     |
| cg02327719 | 0.05431 | 0.04021 | 0.09967 | 0.10974 | 0.54897 | 0.04411 | 0.1712  | 0.04436 | 0.8569  | 0.03664 C1orf135 |
| cg02329886 | 0.88712 | 0.703   | 0.87949 | 0.89044 | 0.89617 | 0.88336 | 0.85341 | 0.87802 | 0.88403 | 0.86729 HDC      |
| cg02330106 | 0.23724 | 0.04626 | 0.5728  | 0.59264 | 0.40763 | 0.36628 | 0.73871 | 0.5906  | 0.13408 | 0.03245 MGMT     |
| cg02331561 | 0.04737 | 0.02352 | 0.55565 | 0.51422 | 0.11827 | 0.02014 | 0.07126 | 0.02697 | 0.41397 | 0.22442 ABCA3    |
| cg02332073 | 0.2422  | 0.10381 | 0.56601 | 0.54385 | 0.20886 | 0.11291 | 0.46563 | 0.6348  | 0.07564 | 0.06109 TSGA13   |
| cg02332492 | 0.80765 | 0.74268 | 0.88472 | 0.8895  | 0.92208 | 0.84558 | 0.78136 | 0.67516 | 0.89469 | 0.65495 C8G      |
| cg02332525 | 0.06677 | 0.07668 | 0.82654 | 0.88856 | 0.32209 | 0.06035 | 0.44669 | 0.52079 | 0.39067 | 0.47436 GRM7     |
| cg02332537 | 0.68641 | 0.55628 | 0.79416 | 0.84277 | 0.8846  | 0.8213  | 0.52061 | 0.66034 | 0.82742 | 0.7496 RTP3      |
| cg02334775 | 0.92273 | 0.83847 | 0.89045 | 0.89252 | 0.79116 | 0.6695  | 0.83864 | 0.62878 | 0.84518 | 0.38982 ISG20    |
| cg02335441 | 0.91956 | 0.87282 | 0.22914 | 0.52733 | 0.11133 | 0.08825 | 0.05905 | 0.03865 | 0.86508 | 0.68678 ASTE1    |
| cg02335804 | 0.67499 | 0.62585 | 0.9076  | 0.91038 | 0.82175 | 0.69517 | 0.22973 | 0.37714 | 0.27595 | 0.28839 TCF2     |

|            |         |         |         |         |         |         |         |         |         |                  |
|------------|---------|---------|---------|---------|---------|---------|---------|---------|---------|------------------|
| cg02336128 | 0.05489 | 0.04473 | 0.11421 | 0.07909 | 0.03753 | 0.03058 | 0.03311 | 0.03099 | 0.0311  | 0.02802 DCK      |
| cg02337166 | 0.20089 | 0.08423 | 0.10158 | 0.0834  | 0.13197 | 0.09747 | 0.09674 | 0.09511 | 0.06776 | 0.08684 NR1D1    |
| cg02337447 | 0.64361 | 0.83083 | 0.40973 | 0.56966 | 0.80842 | 0.80398 | 0.46948 | 0.40044 | 0.82896 | 0.7511 SCO1      |
| cg02342494 | 0.0938  | 0.08461 | 0.13806 | 0.1218  | 0.1091  | 0.095   | 0.12118 | 0.12392 | 0.09976 | 0.11012 MGC50559 |
| cg02344078 | 0.04413 | 0.05948 | 0.04812 | 0.05094 | 0.03888 | 0.05073 | 0.04813 | 0.04914 | 0.03722 | 0.03478 STK4     |
| cg02344201 | 0.04877 | 0.04433 | 0.04911 | 0.04654 | 0.03749 | 0.04455 | 0.03973 | 0.04364 | 0.03908 | 0.03598 ELL      |
| cg02344238 | 0.4073  | 0.09249 | 0.37712 | 0.38052 | 0.02733 | 0.03359 | 0.04242 | 0.03207 | 0.03815 | 0.03068 FKSG44   |
| cg02345317 | 0.87928 | 0.84555 | 0.79379 | 0.80315 | 0.78878 | 0.81403 | 0.84646 | 0.63438 | 0.55727 | 0.62736 NLGN3    |
| cg02347114 | 0.5808  | 0.23168 | 0.69121 | 0.73903 | 0.76523 | 0.86853 | 0.50323 | 0.30346 | 0.69321 | 0.5318 LYG2      |
| cg02347487 | 0.04311 | 0.04857 | 0.0773  | 0.05496 | 0.48528 | 0.196   | 0.06746 | 0.22973 | 0.04423 | 0.03523 NALP14   |
| cg02351381 | 0.09853 | 0.07661 | 0.60539 | 0.66856 | 0.81375 | 0.68778 | 0.86372 | 0.52587 | 0.18203 | 0.10667 C12orf34 |
| cg02352653 | 0.0661  | 0.05043 | 0.05571 | 0.05258 | 0.04432 | 0.0456  | 0.0455  | 0.04228 | 0.03683 | 0.03475 SMAD5    |
| cg02357714 | 0.88929 | 0.8001  | 0.87433 | 0.88573 | 0.91815 | 0.86982 | 0.8744  | 0.86989 | 0.90251 | 0.89505 DOK3     |
| cg02357725 | 0.03399 | 0.03578 | 0.03558 | 0.03405 | 0.02418 | 0.03079 | 0.03006 | 0.03648 | 0.03178 | 0.03105 IMP3     |
| cg02358761 | 0.05238 | 0.04989 | 0.16537 | 0.35544 | 0.07486 | 0.0447  | 0.29847 | 0.04323 | 0.04857 | 0.03732 STK17B   |
| cg02358804 | 0.89447 | 0.79324 | 0.87074 | 0.87347 | 0.85018 | 0.88142 | 0.85914 | 0.87632 | 0.91357 | 0.89171 ZNF146   |
| cg02360616 | 0.03373 | 0.03338 | 0.04003 | 0.03874 | 0.03195 | 0.0276  | 0.02833 | 0.02785 | 0.03387 | 0.0312 C1orf24   |
| cg02360776 | 0.06428 | 0.0616  | 0.0889  | 0.08233 | 0.09311 | 0.08152 | 0.07431 | 0.07248 | 0.05959 | 0.06186 ZBTB3    |
| cg02360836 | 0.03639 | 0.03114 | 0.03303 | 0.03029 | 0.02533 | 0.03505 | 0.02803 | 0.02866 | 0.02743 | 0.02673 SMARCD2  |
| cg02361363 | 0.03807 | 0.0428  | 0.03626 | 0.04027 | 0.02528 | 0.03501 | 0.04079 | 0.03769 | 0.03373 | 0.03235 ST3GAL3  |
| cg02361557 | 0.03527 | 0.0354  | 0.05798 | 0.06016 | 0.03357 | 0.03315 | 0.02825 | 0.02595 | 0.03774 | 0.02645 NTNG1    |
| cg02364038 | 0.04372 | 0.04262 | 0.04812 | 0.03987 | 0.07055 | 0.04724 | 0.03817 | 0.02983 | 0.02796 | 0.02591 PTBP1    |
| cg02364642 | 0.16588 | 0.06331 | 0.63475 | 0.67278 | 0.06455 | 0.03659 | 0.265   | 0.09483 | 0.53775 | 0.04287 GEFT     |
| cg02366059 | 0.11521 | 0.11251 | 0.13622 | 0.13273 | 0.15498 | 0.13668 | 0.13337 | 0.12751 | 0.11401 | 0.12649 C18orf45 |
| cg02367472 | 0.05112 | 0.03372 | 0.04697 | 0.04099 | 0.03193 | 0.0425  | 0.04531 | 0.0279  | 0.03463 | 0.03713 SLU7     |
| cg02367951 | 0.30621 | 0.34208 | 0.13538 | 0.16884 | 0.41428 | 0.43384 | 0.40573 | 0.44503 | 0.37669 | 0.4181 HIST1H2AK |
| cg02372712 | 0.20727 | 0.21283 | 0.23634 | 0.23285 | 0.24593 | 0.1838  | 0.18939 | 0.18393 | 0.19577 | 0.19547 ZNF467   |
| cg02374486 | 0.84331 | 0.5382  | 0.83264 | 0.86039 | 0.89854 | 0.87196 | 0.8051  | 0.67393 | 0.84492 | 0.78191 PRF1     |
| cg02376163 | 0.12406 | 0.1135  | 0.12028 | 0.09169 | 0.11355 | 0.10338 | 0.10901 | 0.10194 | 0.08901 | 0.08267 FBXO38   |
| cg02376703 | 0.92914 | 0.9385  | 0.80568 | 0.92326 | 0.55857 | 0.51183 | 0.10913 | 0.0483  | 0.0388  | 0.03098 EPHA1    |
| cg02377083 | 0.90019 | 0.35628 | 0.90322 | 0.91919 | 0.82382 | 0.89545 | 0.90577 | 0.84313 | 0.44751 | 0.27609 CCBP2    |
| cg02381948 | 0.79725 | 0.69361 | 0.58517 | 0.73232 | 0.72644 | 0.81442 | 0.69757 | 0.82888 | 0.81114 | 0.7918 MGMT      |
| cg02382666 | 0.85313 | 0.84785 | 0.61648 | 0.69494 | 0.75131 | 0.78459 | 0.52518 | 0.27781 | 0.88277 | 0.36625 CALD1    |
| cg02385474 | 0.4974  | 0.36824 | 0.83456 | 0.75093 | 0.8668  | 0.83024 | 0.23032 | 0.80847 | 0.81198 | 0.83167 PCNXL2   |
| cg02385791 | 0.08219 | 0.08448 | 0.395   | 0.48418 | 0.37318 | 0.39804 | 0.07082 | 0.07472 | 0.06755 | 0.07452 ZNF570   |
| cg02387613 | 0.03768 | 0.03773 | 0.03493 | 0.03455 | 0.02862 | 0.0367  | 0.03043 | 0.02973 | 0.03166 | 0.03415 TOPBP1   |
| cg02387679 | 0.06154 | 0.05194 | 0.81099 | 0.76507 | 0.76998 | 0.06599 | 0.82743 | 0.05212 | 0.05752 | 0.18577 IQGAP2   |
| cg02387854 | 0.0164  | 0.01756 | 0.01726 | 0.01722 | 0.01523 | 0.01679 | 0.01446 | 0.01717 | 0.01486 | 0.01146 ANAPC11  |
| cg02388150 | 0.58079 | 0.30203 | 0.471   | 0.57311 | 0.3392  | 0.2746  | 0.27736 | 0.13107 | 0.07845 | 0.07334 SFRP1    |
| cg02391387 | 0.03107 | 0.03663 | 0.03789 | 0.03573 | 0.03177 | 0.0392  | 0.0281  | 0.03636 | 0.02704 | 0.02384 IMMP2L   |
| cg02393447 | 0.05418 | 0.05633 | 0.05798 | 0.05673 | 0.05    | 0.05592 | 0.05491 | 0.05642 | 0.05505 | 0.05064 C15orf20 |

|            |         |         |         |         |         |         |         |         |         |                  |
|------------|---------|---------|---------|---------|---------|---------|---------|---------|---------|------------------|
| cg02397514 | 0.02221 | 0.02166 | 0.02813 | 0.02368 | 0.05804 | 0.02122 | 0.01861 | 0.01978 | 0.01874 | 0.02078 HES4     |
| cg02397720 | 0.08415 | 0.08739 | 0.47342 | 0.73229 | 0.73341 | 0.61501 | 0.87556 | 0.54876 | 0.07631 | 0.08619 RAB17    |
| cg02398725 | 0.09173 | 0.09074 | 0.11135 | 0.10941 | 0.10964 | 0.11473 | 0.10674 | 0.10016 | 0.07646 | 0.09048 ZF       |
| cg02399449 | 0.08944 | 0.0909  | 0.16438 | 0.12935 | 0.22249 | 0.19866 | 0.09997 | 0.0887  | 0.09589 | 0.07527 CLDN12   |
| cg02399455 | 0.90045 | 0.91229 | 0.85202 | 0.89215 | 0.82394 | 0.85706 | 0.88588 | 0.92211 | 0.92027 | 0.89421 SRI      |
| cg02400248 | 0.35003 | 0.43011 | 0.4185  | 0.39834 | 0.50213 | 0.38869 | 0.01635 | 0.0149  | 0.014   | 0.015 CDKN2B     |
| cg02401149 | 0.85832 | 0.75295 | 0.88283 | 0.89892 | 0.92626 | 0.89403 | 0.83515 | 0.88718 | 0.90404 | 0.87911 CRYBB3   |
| cg02401978 | 0.80831 | 0.51331 | 0.70708 | 0.74331 | 0.78168 | 0.56573 | 0.46492 | 0.17586 | 0.76527 | 0.49291 FLJ31413 |
| cg02403232 | 0.04367 | 0.04081 | 0.05833 | 0.05649 | 0.06376 | 0.03813 | 0.03862 | 0.04008 | 0.03705 | 0.03084 GOLGA3   |
| cg02404636 | 0.19419 | 0.14307 | 0.40413 | 0.45959 | 0.24508 | 0.13502 | 0.39336 | 0.23754 | 0.15209 | 0.13551 SF11     |
| cg02404843 | 0.02447 | 0.02502 | 0.024   | 0.02354 | 0.02316 | 0.02643 | 0.02193 | 0.02561 | 0.02262 | 0.02169 KIAA1893 |
| cg02407785 | 0.03595 | 0.03829 | 0.05099 | 0.04177 | 0.04922 | 0.06134 | 0.03449 | 0.03004 | 0.0531  | 0.04621 PCDH9    |
| cg02409282 | 0.05551 | 0.06204 | 0.06    | 0.05593 | 0.064   | 0.05484 | 0.04436 | 0.04795 | 0.06495 | 0.05048 ULBP1    |
| cg02409351 | 0.42964 | 0.34768 | 0.49302 | 0.47262 | 0.03302 | 0.03828 | 0.12926 | 0.05289 | 0.03442 | 0.03186 CART1    |
| cg02412050 | 0.06463 | 0.07104 | 0.07232 | 0.16877 | 0.04355 | 0.05023 | 0.06469 | 0.04721 | 0.05935 | 0.05144 MAPK14   |
| cg02413850 | 0.03665 | 0.03166 | 0.3418  | 0.30859 | 0.04751 | 0.02609 | 0.02959 | 0.02747 | 0.05228 | 0.02173 SLC35C2  |
| cg02415431 | 0.5185  | 0.06576 | 0.51191 | 0.74766 | 0.43249 | 0.80503 | 0.49621 | 0.16751 | 0.28895 | 0.04666 IGLL1    |
| cg02416716 | 0.0272  | 0.02645 | 0.13897 | 0.27527 | 0.02806 | 0.02661 | 0.02346 | 0.02559 | 0.02297 | 0.02551 ZNF215   |
| cg02417264 | 0.30201 | 0.04989 | 0.70072 | 0.73145 | 0.32914 | 0.08768 | 0.03988 | 0.04547 | 0.46652 | 0.04282 RAMP3    |
| cg02417408 | 0.74325 | 0.76291 | 0.80604 | 0.80258 | 0.76555 | 0.26156 | 0.77146 | 0.65262 | 0.45965 | 0.06342 PPM1M    |
| cg02420102 | 0.06074 | 0.05278 | 0.06423 | 0.05536 | 0.06521 | 0.05718 | 0.05963 | 0.05156 | 0.04357 | 0.04175 MGC33948 |
| cg02421543 | 0.09505 | 0.09409 | 0.20766 | 0.21652 | 0.2402  | 0.10386 | 0.11073 | 0.07842 | 0.09548 | 0.09702 DR1      |
| cg02422627 | 0.06397 | 0.05924 | 0.06218 | 0.0663  | 0.0393  | 0.06502 | 0.06049 | 0.06258 | 0.05427 | 0.05258 THRAP6   |
| cg02422694 | 0.03937 | 0.04096 | 0.03946 | 0.04044 | 0.20182 | 0.34398 | 0.36053 | 0.19781 | 0.03454 | 0.03803 HOXB4    |
| cg02423618 | 0.3061  | 0.33639 | 0.24552 | 0.30978 | 0.49396 | 0.59865 | 0.03752 | 0.04611 | 0.21024 | 0.12931 SPATA8   |
| cg02425732 | 0.02678 | 0.02352 | 0.03118 | 0.03166 | 0.03598 | 0.03864 | 0.02707 | 0.02729 | 0.01729 | 0.02098 RRPB1    |
| cg02426410 | 0.03893 | 0.04165 | 0.04104 | 0.03859 | 0.0468  | 0.04494 | 0.03794 | 0.03831 | 0.02804 | 0.03327 AASDH    |
| cg02428100 | 0.26023 | 0.06582 | 0.04488 | 0.04762 | 0.04406 | 0.04542 | 0.04611 | 0.0397  | 0.0377  | 0.03698 KEAP1    |
| cg02430692 | 0.09976 | 0.08345 | 0.4725  | 0.62787 | 0.25895 | 0.16299 | 0.08448 | 0.10167 | 0.10268 | 0.08949 PEX5L    |
| cg02431687 | 0.94113 | 0.93153 | 0.9355  | 0.9438  | 0.9497  | 0.93605 | 0.94491 | 0.93848 | 0.41767 | 0.05782 C9orf90  |
| cg02431964 | 0.87625 | 0.50653 | 0.42319 | 0.26481 | 0.83997 | 0.82615 | 0.16478 | 0.09867 | 0.0947  | 0.10265 MARCO    |
| cg02432101 | 0.90561 | 0.67135 | 0.49441 | 0.63308 | 0.89141 | 0.86759 | 0.7111  | 0.5692  | 0.69199 | 0.50782 TCEB3C   |
| cg02433671 | 0.03867 | 0.03349 | 0.09076 | 0.28907 | 0.75931 | 0.93481 | 0.04113 | 0.04611 | 0.02963 | 0.02587 RGL3     |
| cg02433905 | 0.12028 | 0.11579 | 0.19219 | 0.11751 | 0.16915 | 0.1178  | 0.13063 | 0.08602 | 0.10681 | 0.11187 ATP6V1A  |
| cg02435593 | 0.14703 | 0.19276 | 0.18943 | 0.2149  | 0.08134 | 0.11926 | 0.14792 | 0.16465 | 0.12925 | 0.09446 CHMP4B   |
| cg02436686 | 0.55823 | 0.4004  | 0.59611 | 0.63281 | 0.63654 | 0.61522 | 0.45039 | 0.18188 | 0.56323 | 0.45659 GMFG     |
| cg02437376 | 0.03259 | 0.02635 | 0.03292 | 0.03024 | 0.01864 | 0.02988 | 0.02805 | 0.02522 | 0.02843 | 0.02634 VDAC2    |
| cg02440177 | 0.02252 | 0.02349 | 0.96145 | 0.97596 | 0.82947 | 0.96133 | 0.10924 | 0.02111 | 0.02302 | 0.01792 ZNF702   |
| cg02441647 | 0.29294 | 0.20534 | 0.11338 | 0.09564 | 0.15517 | 0.08951 | 0.17974 | 0.1701  | 0.31112 | 0.1857 COL8A1    |
| cg02441831 | 0.04503 | 0.04806 | 0.05775 | 0.05292 | 0.05641 | 0.05606 | 0.05184 | 0.04974 | 0.04671 | 0.04405 SYVN1    |
| cg02442161 | 0.1079  | 0.18931 | 0.45204 | 0.80804 | 0.80537 | 0.44026 | 0.0956  | 0.11799 | 0.07358 | 0.09856 PI3      |

|            |         |         |         |         |         |         |         |         |         |                  |
|------------|---------|---------|---------|---------|---------|---------|---------|---------|---------|------------------|
| cg02443089 | 0.09708 | 0.07366 | 0.05864 | 0.05693 | 0.21371 | 0.13618 | 0.07163 | 0.05843 | 0.08578 | 0.12738 RPS29    |
| cg02447314 | 0.03448 | 0.02343 | 0.02644 | 0.02537 | 0.02202 | 0.02644 | 0.02511 | 0.02154 | 0.02503 | 0.02531 POLI     |
| cg02449608 | 0.80993 | 0.75577 | 0.27663 | 0.4855  | 0.7655  | 0.91314 | 0.90748 | 0.89217 | 0.30736 | 0.24943 C19orf18 |
| cg02449978 | 0.03722 | 0.04071 | 0.0369  | 0.03522 | 0.03146 | 0.03871 | 0.03241 | 0.03362 | 0.03277 | 0.03135 CDC25A   |
| cg02450959 | 0.03493 | 0.03564 | 0.0409  | 0.03775 | 0.03037 | 0.03059 | 0.03554 | 0.04508 | 0.02777 | 0.03724 THAP1    |
| cg02451362 | 0.02023 | 0.0213  | 0.02098 | 0.02087 | 0.01825 | 0.02107 | 0.01765 | 0.01993 | 0.01808 | 0.01771 MAFG     |
| cg02451670 | 0.21692 | 0.17152 | 0.25304 | 0.23529 | 0.24681 | 0.17349 | 0.19719 | 0.17319 | 0.16797 | 0.15742 DTL      |
| cg02452985 | 0.02786 | 0.02736 | 0.02528 | 0.02381 | 0.04085 | 0.02227 | 0.01918 | 0.02231 | 0.05553 | 0.01961 BCL11B   |
| cg02453591 | 0.04967 | 0.04869 | 0.05998 | 0.04648 | 0.06073 | 0.07107 | 0.04992 | 0.04175 | 0.05759 | 0.05969 FARSLB   |
| cg02453653 | 0.05046 | 0.04477 | 0.04694 | 0.05347 | 0.04001 | 0.04443 | 0.03984 | 0.04062 | 0.03584 | 0.02803 KIAA1698 |
| cg02456292 | 0.38289 | 0.15661 | 0.54186 | 0.5438  | 0.80232 | 0.30497 | 0.43213 | 0.11306 | 0.47858 | 0.06119 FLJ90805 |
| cg02457752 | 0.69633 | 0.83414 | 0.73866 | 0.81914 | 0.76866 | 0.78352 | 0.45967 | 0.47502 | 0.15137 | 0.06352 CDR1     |
| cg02460120 | 0.04081 | 0.04017 | 0.04882 | 0.03967 | 0.05272 | 0.04695 | 0.02632 | 0.034   | 0.04312 | 0.04308 USP15    |
| cg02460349 | 0.03114 | 0.03789 | 0.06016 | 0.30078 | 0.0438  | 0.04856 | 0.03879 | 0.03985 | 0.02634 | 0.03555 RRPB1    |
| cg02470959 | 0.08793 | 0.09005 | 0.09873 | 0.102   | 0.05904 | 0.08267 | 0.06844 | 0.07679 | 0.07105 | 0.06287 SFRS8    |
| cg02471507 | 0.79955 | 0.64913 | 0.36481 | 0.44197 | 0.52158 | 0.58241 | 0.0239  | 0.03737 | 0.03526 | 0.02115 CHMP4C   |
| cg02473123 | 0.91329 | 0.57566 | 0.82407 | 0.90781 | 0.92699 | 0.90581 | 0.86624 | 0.79741 | 0.91705 | 0.90553 CD7      |
| cg02475653 | 0.49739 | 0.41868 | 0.36107 | 0.2749  | 0.47052 | 0.50471 | 0.25057 | 0.16145 | 0.51954 | 0.34838 KIAA0703 |
| cg02477931 | 0.79712 | 0.35098 | 0.47197 | 0.5208  | 0.83329 | 0.84064 | 0.70126 | 0.25963 | 0.04797 | 0.04527 C11orf39 |
| cg02479196 | 0.02673 | 0.02699 | 0.02914 | 0.02561 | 0.02523 | 0.027   | 0.02597 | 0.02703 | 0.02224 | 0.01993 7-Mar    |
| cg02479575 | 0.03121 | 0.03762 | 0.06112 | 0.08127 | 0.02888 | 0.03294 | 0.03192 | 0.02745 | 0.02759 | 0.02376 C19orf30 |
| cg02480835 | 0.0489  | 0.04751 | 0.06075 | 0.03969 | 0.05986 | 0.05485 | 0.05529 | 0.04644 | 0.03629 | 0.04357 NUPL2    |
| cg02486845 | 0.03894 | 0.03968 | 0.0412  | 0.03705 | 0.02555 | 0.04106 | 0.03372 | 0.04052 | 0.04216 | 0.03177 C6orf166 |
| cg02488871 | 0.60062 | 0.5002  | 0.7389  | 0.86701 | 0.78109 | 0.66577 | 0.5227  | 0.63812 | 0.61585 | 0.55836 VIL1     |
| cg02489552 | 0.15539 | 0.07566 | 0.67427 | 0.7518  | 0.46251 | 0.49504 | 0.4591  | 0.58392 | 0.26207 | 0.1889 FLJ40365  |
| cg02490034 | 0.90858 | 0.7611  | 0.89901 | 0.91857 | 0.89879 | 0.88221 | 0.91474 | 0.91898 | 0.92677 | 0.92252 MEST     |
| cg02491012 | 0.04976 | 0.05643 | 0.04951 | 0.05047 | 0.03405 | 0.04272 | 0.03845 | 0.04252 | 0.04393 | 0.04845 SPIN1    |
| cg02491878 | 0.34765 | 0.57114 | 0.85807 | 0.88434 | 0.62443 | 0.61468 | 0.32969 | 0.1278  | 0.04635 | 0.06356 ATP6V0A4 |
| cg02492740 | 0.07152 | 0.06024 | 0.10553 | 0.07595 | 0.07887 | 0.0728  | 0.07378 | 0.06868 | 0.06995 | 0.06753 UBQLN2   |
| cg02493771 | 0.03544 | 0.06583 | 0.05532 | 0.04815 | 0.04327 | 0.34593 | 0.03196 | 0.0323  | 0.04162 | 0.0289 KRTAP13-2 |
| cg02494117 | 0.09748 | 0.09747 | 0.05921 | 0.06147 | 0.04389 | 0.06137 | 0.06469 | 0.05701 | 0.0484  | 0.05766 DNM1     |
| cg02496295 | 0.02139 | 0.0216  | 0.02311 | 0.02379 | 0.02176 | 0.02121 | 0.02212 | 0.01974 | 0.02085 | 0.02458 ADD1     |
| cg02497175 | 0.05559 | 0.05557 | 0.05099 | 0.04732 | 0.0441  | 0.05714 | 0.05666 | 0.05575 | 0.04622 | 0.04876 NLK      |
| cg02497428 | 0.91984 | 0.90999 | 0.921   | 0.92143 | 0.94936 | 0.91508 | 0.90527 | 0.87336 | 0.94125 | 0.93137 IGSF6    |
| cg02497700 | 0.3842  | 0.37493 | 0.09236 | 0.0971  | 0.87519 | 0.60633 | 0.12237 | 0.09202 | 0.48688 | 0.24295 ZNF238   |
| cg02497758 | 0.02883 | 0.02723 | 0.53902 | 0.62642 | 0.26421 | 0.16625 | 0.02663 | 0.03052 | 0.45989 | 0.51203 MAFB     |
| cg02498063 | 0.87027 | 0.85312 | 0.86196 | 0.85803 | 0.81204 | 0.84091 | 0.46048 | 0.66052 | 0.721   | 0.86055 CCDC60   |
| cg02499249 | 0.14258 | 0.13922 | 0.15142 | 0.12952 | 0.23654 | 0.22613 | 0.12516 | 0.09374 | 0.1248  | 0.12659 RARB     |
| cg02500392 | 0.24545 | 0.36271 | 0.78177 | 0.77102 | 0.70598 | 0.68005 | 0.2044  | 0.4072  | 0.15436 | 0.19027 PBOV1    |
| cg02501779 | 0.05022 | 0.04928 | 0.86697 | 0.87619 | 0.07834 | 0.08942 | 0.08922 | 0.13736 | 0.19763 | 0.55765 CBLN4    |
| cg02501984 | 0.02399 | 0.02486 | 0.02449 | 0.02048 | 0.01889 | 0.02106 | 0.02121 | 0.02189 | 0.01881 | 0.01897 POLE     |

|            |         |         |         |         |         |         |         |         |         |                   |
|------------|---------|---------|---------|---------|---------|---------|---------|---------|---------|-------------------|
| cg02502132 | 0.02816 | 0.03138 | 0.03368 | 0.03282 | 0.02812 | 0.03088 | 0.02846 | 0.02596 | 0.02513 | 0.0281 LRP8       |
| cg02503850 | 0.03493 | 0.02932 | 0.51835 | 0.44942 | 0.02837 | 0.02422 | 0.4281  | 0.03329 | 0.05461 | 0.01776 ADAMTS14  |
| cg02503970 | 0.03806 | 0.04082 | 0.03848 | 0.04096 | 0.03461 | 0.03608 | 0.03733 | 0.03491 | 0.0338  | 0.03324 ST3GAL1   |
| cg02504280 | 0.83164 | 0.68488 | 0.7622  | 0.77456 | 0.78229 | 0.8119  | 0.44454 | 0.45966 | 0.88182 | 0.86286 MAGEA12   |
| cg02504465 | 0.01938 | 0.02161 | 0.02608 | 0.02297 | 0.02267 | 0.02377 | 0.01942 | 0.01727 | 0.01926 | 0.01623 SNX3      |
| cg02505409 | 0.0385  | 0.03202 | 0.03508 | 0.04076 | 0.10461 | 0.02699 | 0.03638 | 0.03673 | 0.03092 | 0.0277 ANGPTL4    |
| cg02505689 | 0.03304 | 0.03674 | 0.03548 | 0.0322  | 0.03679 | 0.03935 | 0.0349  | 0.04036 | 0.02933 | 0.0323 DBF4B      |
| cg02506426 | 0.07697 | 0.07689 | 0.07685 | 0.08664 | 0.09475 | 0.06654 | 0.07492 | 0.07557 | 0.07417 | 0.06487 AQP11     |
| cg02506728 | 0.03521 | 0.03172 | 0.04146 | 0.0387  | 0.02563 | 0.03171 | 0.03058 | 0.02962 | 0.0259  | 0.02754 PPP1R3D   |
| cg02506908 | 0.89552 | 0.60836 | 0.0804  | 0.1121  | 0.1504  | 0.06191 | 0.06706 | 0.1187  | 0.07651 | 0.18576 HPD       |
| cg02507175 | 0.04095 | 0.04639 | 0.0439  | 0.04029 | 0.02831 | 0.03772 | 0.03852 | 0.04361 | 0.03492 | 0.03822 PKNOX1    |
| cg02507952 | 0.19856 | 0.06534 | 0.12478 | 0.13909 | 0.15421 | 0.05935 | 0.07154 | 0.07399 | 0.07629 | 0.17644 KIAA0125  |
| cg02508567 | 0.03187 | 0.03549 | 0.03292 | 0.0327  | 0.1049  | 0.0374  | 0.61231 | 0.03377 | 0.19447 | 0.06312 TCF7L1    |
| cg02510853 | 0.04703 | 0.04354 | 0.89867 | 0.92098 | 0.92843 | 0.55028 | 0.8938  | 0.73854 | 0.91098 | 0.80372 PKMYT1    |
| cg02511532 | 0.04467 | 0.04568 | 0.05704 | 0.04702 | 0.02732 | 0.02992 | 0.03168 | 0.03408 | 0.03414 | 0.04567 TAF2      |
| cg02512226 | 0.53266 | 0.42061 | 0.57817 | 0.56248 | 0.81066 | 0.38424 | 0.48016 | 0.44293 | 0.43663 | 0.83059 ARMC4     |
| cg02512860 | 0.92399 | 0.90369 | 0.91808 | 0.92019 | 0.89778 | 0.86584 | 0.91462 | 0.88022 | 0.93121 | 0.91899 CLDN15    |
| cg02513045 | 0.03409 | 0.04714 | 0.04416 | 0.03948 | 0.03502 | 0.03833 | 0.03257 | 0.03543 | 0.03583 | 0.03301 C21orf2   |
| cg02515422 | 0.08004 | 0.07911 | 0.09587 | 0.08396 | 0.12714 | 0.12259 | 0.09937 | 0.07422 | 0.06289 | 0.07462 TLR4      |
| cg02515725 | 0.05661 | 0.0617  | 0.22801 | 0.24464 | 0.06459 | 0.0529  | 0.05668 | 0.04431 | 0.05817 | 0.04316 PDLIM3    |
| cg02516189 | 0.77388 | 0.43331 | 0.85223 | 0.87839 | 0.89991 | 0.72872 | 0.79687 | 0.67238 | 0.67657 | 0.24374 CARD9     |
| cg02516388 | 0.0207  | 0.02699 | 0.02695 | 0.02206 | 0.02196 | 0.02745 | 0.0243  | 0.02742 | 0.01864 | 0.02116 FLJ20920  |
| cg02517489 | 0.05412 | 0.04297 | 0.04806 | 0.04103 | 0.03816 | 0.04114 | 0.038   | 0.04186 | 0.04842 | 0.03777 UBE3A     |
| cg02518339 | 0.69706 | 0.57355 | 0.25928 | 0.2433  | 0.34118 | 0.25117 | 0.29903 | 0.33995 | 0.2119  | 0.20113 CYSLTR1   |
| cg02518671 | 0.05322 | 0.05514 | 0.05561 | 0.05554 | 0.04265 | 0.05133 | 0.04904 | 0.05779 | 0.05314 | 0.05215 SIRT6     |
| cg02519218 | 0.61821 | 0.0776  | 0.89505 | 0.90814 | 0.73158 | 0.07665 | 0.90417 | 0.12605 | 0.90627 | 0.09407 CHFR      |
| cg02519806 | 0.18245 | 0.06906 | 0.06478 | 0.05528 | 0.09517 | 0.07268 | 0.05264 | 0.05404 | 0.9281  | 0.92926 SYNPO2    |
| cg02523400 | 0.87137 | 0.83154 | 0.88439 | 0.90282 | 0.88994 | 0.88473 | 0.8792  | 0.89165 | 0.8995  | 0.8835 SERPIND1   |
| cg02523617 | 0.1568  | 0.13743 | 0.18197 | 0.14221 | 0.22835 | 0.26443 | 0.17589 | 0.16441 | 0.16681 | 0.13509 HIP2      |
| cg02525396 | 0.11219 | 0.11322 | 0.1155  | 0.11673 | 0.09078 | 0.09754 | 0.10062 | 0.09327 | 0.09714 | 0.10098 TOMM40L   |
| cg02525756 | 0.30432 | 0.09286 | 0.14551 | 0.5412  | 0.70394 | 0.70769 | 0.77099 | 0.6952  | 0.18622 | 0.04672 RAB42     |
| cg02527529 | 0.02053 | 0.02139 | 0.01999 | 0.02107 | 0.01797 | 0.0178  | 0.01737 | 0.01783 | 0.01673 | 0.01674 C17orf53  |
| cg02528468 | 0.04368 | 0.04543 | 0.05071 | 0.04229 | 0.03404 | 0.0443  | 0.03869 | 0.03964 | 0.04655 | 0.03462 ATP11B    |
| cg02532648 | 0.02008 | 0.02374 | 0.02326 | 0.02148 | 0.01888 | 0.02326 | 0.02028 | 0.01876 | 0.01824 | 0.01653 BTG3      |
| cg02533173 | 0.37474 | 0.12509 | 0.48798 | 0.41553 | 0.08731 | 0.10501 | 0.41048 | 0.11421 | 0.27955 | 0.22465 BRD4      |
| cg02533993 | 0.04382 | 0.03828 | 0.03657 | 0.03738 | 0.04713 | 0.0339  | 0.02952 | 0.02899 | 0.17898 | 0.02995 WDR4      |
| cg02536286 | 0.03129 | 0.03697 | 0.03623 | 0.03205 | 0.03631 | 0.02851 | 0.09495 | 0.03288 | 0.03016 | 0.02766 TFAP2C    |
| cg02537023 | 0.57653 | 0.33258 | 0.76137 | 0.84543 | 0.91623 | 0.89986 | 0.87708 | 0.79358 | 0.74837 | 0.55331 NCF1      |
| cg02537838 | 0.85729 | 0.48375 | 0.84481 | 0.86571 | 0.90834 | 0.84257 | 0.51957 | 0.36197 | 0.86399 | 0.69131 C20orf151 |
| cg02537909 | 0.03098 | 0.03217 | 0.03462 | 0.02825 | 0.02037 | 0.02852 | 0.03662 | 0.03301 | 0.03799 | 0.02208 COBLL1    |
| cg02539714 | 0.0257  | 0.0277  | 0.03009 | 0.02802 | 0.27514 | 0.06454 | 0.07533 | 0.02637 | 0.0301  | 0.02353 RHOF      |

|            |         |         |         |         |         |         |         |         |         |         |           |
|------------|---------|---------|---------|---------|---------|---------|---------|---------|---------|---------|-----------|
| cg02540157 | 0.79121 | 0.77959 | 0.75296 | 0.84837 | 0.87032 | 0.83597 | 0.8192  | 0.79368 | 0.84032 | 0.78407 | MGC2463   |
| cg02543879 | 0.03867 | 0.02598 | 0.02642 | 0.02723 | 0.0198  | 0.02587 | 0.02321 | 0.02591 | 0.02342 | 0.02213 | VPS36     |
| cg02545106 | 0.17205 | 0.09508 | 0.1706  | 0.15212 | 0.14116 | 0.09841 | 0.17412 | 0.15069 | 0.07531 | 0.08729 | KM-HN-1   |
| cg02545192 | 0.15423 | 0.02621 | 0.91312 | 0.90735 | 0.77668 | 0.43824 | 0.50032 | 0.72788 | 0.3321  | 0.08825 | TERT      |
| cg02546521 | 0.02687 | 0.03069 | 0.03039 | 0.02579 | 0.02333 | 0.02704 | 0.02528 | 0.02696 | 0.02758 | 0.02116 | ULK1      |
| cg02547138 | 0.02775 | 0.03407 | 0.02734 | 0.02601 | 0.02237 | 0.02844 | 0.02497 | 0.02662 | 0.02556 | 0.02302 | RCE1      |
| cg02547439 | 0.04937 | 0.0564  | 0.05912 | 0.05536 | 0.05926 | 0.06616 | 0.05573 | 0.06131 | 0.04526 | 0.04268 | ELMO2     |
| cg02548238 | 0.06887 | 0.04591 | 0.04836 | 0.04145 | 0.03939 | 0.03632 | 0.06499 | 0.0366  | 0.40801 | 0.42665 | LOX       |
| cg02549418 | 0.73373 | 0.70114 | 0.39892 | 0.31242 | 0.64847 | 0.67653 | 0.41531 | 0.50854 | 0.72766 | 0.62892 | MBNL3     |
| cg02549424 | 0.27298 | 0.2395  | 0.29644 | 0.35381 | 0.60838 | 0.69395 | 0.31941 | 0.34927 | 0.40262 | 0.22748 | AIFL      |
| cg02549910 | 0.03424 | 0.03812 | 0.03638 | 0.03375 | 0.03292 | 0.03365 | 0.03197 | 0.03818 | 0.03353 | 0.03767 | FLJ13946  |
| cg02550200 | 0.02357 | 0.01935 | 0.02317 | 0.02111 | 0.01762 | 0.01964 | 0.01755 | 0.0237  | 0.01541 | 0.0141  | DERL2     |
| cg02550358 | 0.05176 | 0.05525 | 0.05675 | 0.04905 | 0.09476 | 0.07046 | 0.0596  | 0.05952 | 0.04323 | 0.05678 | PIGL      |
| cg02551396 | 0.07198 | 0.06876 | 0.0444  | 0.03309 | 0.02948 | 0.04019 | 0.0385  | 0.05908 | 0.03693 | 0.03942 | JPH2      |
| cg02552572 | 0.39752 | 0.19715 | 0.70794 | 0.78861 | 0.84351 | 0.82793 | 0.70757 | 0.77139 | 0.4562  | 0.40413 | MT4       |
| cg02552945 | 0.71712 | 0.39913 | 0.69648 | 0.74675 | 0.5694  | 0.61188 | 0.5928  | 0.71347 | 0.5314  | 0.20323 | C5        |
| cg02553486 | 0.16952 | 0.20572 | 0.48397 | 0.3407  | 0.61737 | 0.46329 | 0.35004 | 0.55698 | 0.85913 | 0.54913 | CORIN     |
| cg02554564 | 0.25505 | 0.1458  | 0.65433 | 0.82962 | 0.63534 | 0.30978 | 0.53301 | 0.59352 | 0.12893 | 0.15671 | NTF3      |
| cg02554810 | 0.04177 | 0.03985 | 0.03669 | 0.03794 | 0.02795 | 0.03061 | 0.02976 | 0.03223 | 0.02828 | 0.02807 | SNX15     |
| cg02555579 | 0.77041 | 0.39149 | 0.69259 | 0.73491 | 0.74937 | 0.67782 | 0.69284 | 0.48166 | 0.787   | 0.47343 | SLC25A18  |
| cg02556718 | 0.05521 | 0.05367 | 0.05996 | 0.0563  | 0.05326 | 0.05012 | 0.05606 | 0.05295 | 0.04017 | 0.04837 | SEZ6L2    |
| cg02558133 | 0.02863 | 0.02334 | 0.02653 | 0.02716 | 0.02311 | 0.02816 | 0.0203  | 0.02213 | 0.02023 | 0.02369 | PKN2      |
| cg02564061 | 0.14716 | 0.26275 | 0.80299 | 0.8345  | 0.84368 | 0.73674 | 0.81033 | 0.74526 | 0.76484 | 0.4873  | C12orf25  |
| cg02564523 | 0.45773 | 0.03667 | 0.93251 | 0.93705 | 0.90282 | 0.13208 | 0.7305  | 0.03563 | 0.41051 | 0.16107 | C7orf19   |
| cg02564733 | 0.10413 | 0.06069 | 0.26932 | 0.15715 | 0.56943 | 0.40718 | 0.71763 | 0.4705  | 0.38142 | 0.49853 | ADAMTS15  |
| cg02566518 | 0.06925 | 0.063   | 0.0745  | 0.06535 | 0.09423 | 0.04544 | 0.05212 | 0.04997 | 0.04434 | 0.05099 | FUT11     |
| cg02567144 | 0.03016 | 0.03246 | 0.03508 | 0.03398 | 0.02118 | 0.0287  | 0.02619 | 0.02859 | 0.03282 | 0.02164 | EFHC1     |
| cg02569086 | 0.03174 | 0.03028 | 0.03362 | 0.02981 | 0.02765 | 0.03082 | 0.03184 | 0.03169 | 0.03154 | 0.02727 | ITPR2     |
| cg02569333 | 0.03944 | 0.03628 | 0.04264 | 0.03756 | 0.02828 | 0.03685 | 0.03777 | 0.03663 | 0.02872 | 0.02882 | SGK3      |
| cg02569613 | 0.10112 | 0.08232 | 0.63368 | 0.66204 | 0.0585  | 0.07054 | 0.52838 | 0.14244 | 0.09943 | 0.0642  | C10orf72  |
| cg02571905 | 0.03404 | 0.03065 | 0.04396 | 0.04674 | 0.02761 | 0.03037 | 0.02982 | 0.02762 | 0.0277  | 0.03092 | TMEM107   |
| cg02575859 | 0.06603 | 0.06752 | 0.12289 | 0.12143 | 0.1035  | 0.09286 | 0.05259 | 0.06212 | 0.058   | 0.06127 | RPS4X     |
| cg02577849 | 0.10858 | 0.097   | 0.11375 | 0.0945  | 0.09594 | 0.08925 | 0.09839 | 0.08958 | 0.07613 | 0.07934 | ADAMTS6   |
| cg02579133 | 0.62257 | 0.40088 | 0.43009 | 0.21202 | 0.12225 | 0.07948 | 0.11976 | 0.0765  | 0.08276 | 0.06191 | KRTAP10-8 |
| cg02579736 | 0.09774 | 0.11052 | 0.0775  | 0.07375 | 0.23089 | 0.10626 | 0.05864 | 0.05047 | 0.07603 | 0.06564 | FANCD2    |
| cg02580195 | 0.05677 | 0.06112 | 0.0562  | 0.06126 | 0.03297 | 0.0468  | 0.04377 | 0.04244 | 0.04731 | 0.04094 | RABL2A    |
| cg02580606 | 0.77042 | 0.68552 | 0.83626 | 0.86471 | 0.82786 | 0.827   | 0.09695 | 0.06612 | 0.82101 | 0.69555 | KRTHA3B   |
| cg02581667 | 0.03947 | 0.03977 | 0.0568  | 0.04485 | 0.0375  | 0.03602 | 0.03103 | 0.03977 | 0.03155 | 0.03591 | ECH1      |
| cg02582608 | 0.03992 | 0.03997 | 0.03855 | 0.03713 | 0.03264 | 0.02945 | 0.05031 | 0.04322 | 0.27342 | 0.25757 | ALCAM     |
| cg02582754 | 0.90765 | 0.67839 | 0.90573 | 0.90969 | 0.87261 | 0.9082  | 0.92249 | 0.73635 | 0.92801 | 0.92465 | MAS1      |
| cg02583151 | 0.0667  | 0.07597 | 0.06944 | 0.06961 | 0.05526 | 0.06771 | 0.06156 | 0.06226 | 0.05462 | 0.05356 | SIX1      |

|            |         |         |         |         |         |         |         |         |         |                  |
|------------|---------|---------|---------|---------|---------|---------|---------|---------|---------|------------------|
| cg02584520 | 0.03231 | 0.04044 | 0.04103 | 0.0383  | 0.02852 | 0.03065 | 0.03854 | 0.03444 | 0.0325  | 0.03649 STAU2    |
| cg02586730 | 0.34898 | 0.28142 | 0.35577 | 0.2417  | 0.04274 | 0.05188 | 0.22322 | 0.22265 | 0.43819 | 0.55133 EFEMP2   |
| cg02588309 | 0.33341 | 0.06831 | 0.63722 | 0.80866 | 0.15484 | 0.09884 | 0.06681 | 0.04971 | 0.07437 | 0.1025 OSRF      |
| cg02589695 | 0.65155 | 0.65198 | 0.25962 | 0.28114 | 0.77819 | 0.47012 | 0.10465 | 0.18155 | 0.04072 | 0.03281 RASSF5   |
| cg02590345 | 0.05234 | 0.05296 | 0.34718 | 0.55175 | 0.07094 | 0.04436 | 0.11179 | 0.17505 | 0.60926 | 0.64472 PRG-3    |
| cg02592124 | 0.07102 | 0.04033 | 0.04715 | 0.05202 | 0.04296 | 0.03511 | 0.03471 | 0.03387 | 0.03629 | 0.03417 SUMO1    |
| cg02593766 | 0.3749  | 0.16631 | 0.62252 | 0.65863 | 0.82685 | 0.89399 | 0.16688 | 0.12648 | 0.87347 | 0.59722 EPN3     |
| cg02595219 | 0.03069 | 0.05993 | 0.08094 | 0.09188 | 0.60701 | 0.68852 | 0.1272  | 0.10308 | 0.93096 | 0.90295 KCNE3    |
| cg02595263 | 0.0351  | 0.03659 | 0.04076 | 0.03581 | 0.02318 | 0.02773 | 0.03026 | 0.03414 | 0.0295  | 0.02657 MRPS28   |
| cg02597128 | 0.13937 | 0.10606 | 0.32244 | 0.54834 | 0.3166  | 0.45386 | 0.29327 | 0.36138 | 0.42717 | 0.39507 CXorf41  |
| cg02597269 | 0.05297 | 0.05302 | 0.04417 | 0.04221 | 0.05773 | 0.06875 | 0.03867 | 0.04574 | 0.03373 | 0.05658 MON1B    |
| cg02599225 | 0.03824 | 0.02896 | 0.03325 | 0.02941 | 0.02621 | 0.02738 | 0.02447 | 0.02772 | 0.0281  | 0.02482 C10orf57 |
| cg02599464 | 0.85311 | 0.80105 | 0.36686 | 0.34123 | 0.06666 | 0.05977 | 0.76499 | 0.87743 | 0.43434 | 0.49209 HIST1H4I |
| cg02600394 | 0.9206  | 0.72669 | 0.91655 | 0.93102 | 0.90865 | 0.60125 | 0.90548 | 0.09383 | 0.91893 | 0.84436 TXK      |
| cg02600430 | 0.04064 | 0.042   | 0.05002 | 0.04317 | 0.47991 | 0.35809 | 0.35269 | 0.38262 | 0.05041 | 0.03136 ZIC5     |
| cg02600515 | 0.05356 | 0.05449 | 0.05892 | 0.05547 | 0.04392 | 0.05566 | 0.05342 | 0.05033 | 0.04454 | 0.04273 ZBTB3    |
| cg02601403 | 0.52454 | 0.32062 | 0.42664 | 0.53664 | 0.49161 | 0.55299 | 0.21034 | 0.24509 | 0.3062  | 0.25752 TBC1D3C  |
| cg02602411 | 0.32415 | 0.07651 | 0.76862 | 0.78666 | 0.87129 | 0.82054 | 0.0711  | 0.82126 | 0.06974 | 0.37663 PPP3R2   |
| cg02602864 | 0.05187 | 0.06787 | 0.0985  | 0.08285 | 0.1138  | 0.07403 | 0.04917 | 0.0464  | 0.05594 | 0.07685 MAP2K6   |
| cg02603366 | 0.02319 | 0.0222  | 0.02438 | 0.02117 | 0.01924 | 0.02354 | 0.01909 | 0.02159 | 0.01824 | 0.01977 RPS21    |
| cg02603784 | 0.79247 | 0.73277 | 0.82262 | 0.84789 | 0.75672 | 0.83898 | 0.79055 | 0.84268 | 0.86214 | 0.84252 TMEM113  |
| cg02604290 | 0.36998 | 0.06492 | 0.44533 | 0.59311 | 0.32606 | 0.52919 | 0.10645 | 0.07958 | 0.23623 | 0.05256 CYP24A1  |
| cg02605634 | 0.13012 | 0.06608 | 0.2272  | 0.21395 | 0.24249 | 0.06157 | 0.11034 | 0.08258 | 0.15805 | 0.05498 WFDC10A  |
| cg02608019 | 0.73971 | 0.78312 | 0.04656 | 0.0437  | 0.06184 | 0.03204 | 0.05814 | 0.03852 | 0.06777 | 0.03573 SYK      |
| cg02608292 | 0.06368 | 0.06969 | 0.06935 | 0.0674  | 0.0515  | 0.0595  | 0.07249 | 0.063   | 0.05726 | 0.06641 RPL28    |
| cg02609749 | 0.06901 | 0.05603 | 0.10404 | 0.12903 | 0.06992 | 0.05872 | 0.13173 | 0.05645 | 0.39263 | 0.12548 ZNF276   |
| cg02609880 | 0.43571 | 0.47896 | 0.8408  | 0.86199 | 0.64599 | 0.70346 | 0.21212 | 0.10564 | 0.86819 | 0.70917 BCAN     |
| cg02611282 | 0.28082 | 0.10739 | 0.64517 | 0.65996 | 0.20108 | 0.12854 | 0.48079 | 0.2791  | 0.31279 | 0.13818 CREB5    |
| cg02611419 | 0.13063 | 0.12085 | 0.21141 | 0.22854 | 0.41257 | 0.48585 | 0.11459 | 0.11629 | 0.40582 | 0.18309 KCNK17   |
| cg02611863 | 0.59551 | 0.51423 | 0.80463 | 0.83621 | 0.5441  | 0.62121 | 0.52489 | 0.55341 | 0.31575 | 0.31074 L3MBTL   |
| cg02612026 | 0.04612 | 0.04209 | 0.05452 | 0.05038 | 0.04983 | 0.04127 | 0.03233 | 0.03308 | 0.04432 | 0.03228 CASP9    |
| cg02613386 | 0.47933 | 0.47299 | 0.93256 | 0.93929 | 0.92693 | 0.93827 | 0.77953 | 0.60451 | 0.35185 | 0.0781 FBXO39    |
| cg02613803 | 0.42072 | 0.39955 | 0.89571 | 0.89158 | 0.90361 | 0.88284 | 0.29072 | 0.08067 | 0.69543 | 0.64736 TMPRSS2  |
| cg02614187 | 0.08751 | 0.10007 | 0.12684 | 0.11985 | 0.09836 | 0.09013 | 0.08799 | 0.07755 | 0.10148 | 0.09976 TRIM45   |
| cg02614818 | 0.83017 | 0.66568 | 0.8848  | 0.88964 | 0.75136 | 0.77978 | 0.60169 | 0.44048 | 0.73376 | 0.64467 ABCC6    |
| cg02615157 | 0.04287 | 0.04635 | 0.09392 | 0.07859 | 0.20768 | 0.09981 | 0.04738 | 0.0422  | 0.16224 | 0.09992 PIN1     |
| cg02616808 | 0.02735 | 0.03335 | 0.02879 | 0.03616 | 0.11415 | 0.20688 | 0.10924 | 0.04004 | 0.02266 | 0.02482 UNC5A    |
| cg02617361 | 0.0222  | 0.02276 | 0.02453 | 0.02242 | 0.0211  | 0.02094 | 0.01899 | 0.03327 | 0.01816 | 0.0183 FNTA      |
| cg02620013 | 0.29995 | 0.37394 | 0.64643 | 0.61173 | 0.21239 | 0.10901 | 0.06027 | 0.04747 | 0.50785 | 0.52056 MLNR     |
| cg02620228 | 0.24106 | 0.19867 | 0.21515 | 0.20935 | 0.21797 | 0.16641 | 0.09653 | 0.10722 | 0.15498 | 0.16327 RAB9A    |
| cg02620470 | 0.03186 | 0.03296 | 0.03453 | 0.03291 | 0.02776 | 0.03222 | 0.0335  | 0.03083 | 0.02975 | 0.02956 EXT2     |



|            |         |         |         |         |         |         |         |         |         |         |           |
|------------|---------|---------|---------|---------|---------|---------|---------|---------|---------|---------|-----------|
| cg02620769 | 0.03179 | 0.0303  | 0.87656 | 0.90558 | 0.05713 | 0.04069 | 0.13658 | 0.03964 | 0.94323 | 0.94709 | CCDC65    |
| cg02622316 | 0.07239 | 0.03429 | 0.03677 | 0.03392 | 0.29105 | 0.17462 | 0.07058 | 0.08536 | 0.04121 | 0.02794 | ZNF96     |
| cg02624129 | 0.18745 | 0.21564 | 0.13589 | 0.14234 | 0.09834 | 0.08403 | 0.03117 | 0.03017 | 0.06998 | 0.12033 | SNX19     |
| cg02624705 | 0.03352 | 0.02738 | 0.32118 | 0.70763 | 0.71866 | 0.51216 | 0.14773 | 0.06323 | 0.43462 | 0.8499  | DCC       |
| cg02626929 | 0.87884 | 0.5283  | 0.82651 | 0.76727 | 0.78208 | 0.29814 | 0.15751 | 0.06198 | 0.85573 | 0.0668  | PAQR4     |
| cg02626977 | 0.03346 | 0.04011 | 0.03101 | 0.03154 | 0.03461 | 0.04434 | 0.02785 | 0.02829 | 0.03102 | 0.03007 | CDKN3     |
| cg02628202 | 0.07586 | 0.06749 | 0.05117 | 0.05149 | 0.11239 | 0.09446 | 0.06747 | 0.06382 | 0.05867 | 0.06807 | LGMN      |
| cg02628930 | 0.01894 | 0.01758 | 0.01915 | 0.02067 | 0.01919 | 0.01961 | 0.0181  | 0.02028 | 0.01573 | 0.01882 | KLHL8     |
| cg02629257 | 0.89651 | 0.76723 | 0.91289 | 0.92357 | 0.78863 | 0.85283 | 0.88224 | 0.89671 | 0.91886 | 0.88498 | EPPB9     |
| cg02629312 | 0.82245 | 0.29903 | 0.83372 | 0.87176 | 0.75764 | 0.74519 | 0.74338 | 0.56897 | 0.85452 | 0.20434 | C7orf9    |
| cg02629761 | 0.11561 | 0.07474 | 0.06664 | 0.06783 | 0.05319 | 0.06395 | 0.05691 | 0.05841 | 0.05246 | 0.04885 | PTPN21    |
| cg02630105 | 0.07803 | 0.07938 | 0.08768 | 0.08381 | 0.06299 | 0.07682 | 0.08575 | 0.08392 | 0.07781 | 0.07159 | PRKCD     |
| cg02630122 | 0.05782 | 0.06279 | 0.06219 | 0.06452 | 0.04707 | 0.05061 | 0.05198 | 0.05023 | 0.05602 | 0.04598 | HTF9C     |
| cg02630207 | 0.87336 | 0.70902 | 0.54314 | 0.60621 | 0.82561 | 0.85047 | 0.81356 | 0.7486  | 0.32193 | 0.35085 | FLJ10379  |
| cg02630694 | 0.13523 | 0.09043 | 0.11442 | 0.08735 | 0.21018 | 0.11205 | 0.14381 | 0.08971 | 0.15728 | 0.10564 | C10orf7   |
| cg02630888 | 0.90117 | 0.89755 | 0.76164 | 0.91978 | 0.5861  | 0.44734 | 0.07702 | 0.26034 | 0.92639 | 0.86421 | FBXL5     |
| cg02631622 | 0.0361  | 0.04215 | 0.04036 | 0.04063 | 0.03499 | 0.03769 | 0.03069 | 0.03917 | 0.03671 | 0.02777 | SIAH1     |
| cg02631906 | 0.26873 | 0.08901 | 0.11431 | 0.10547 | 0.14356 | 0.08567 | 0.06726 | 0.05467 | 0.08754 | 0.08593 | PRDX1     |
| cg02631957 | 0.03798 | 0.032   | 0.03447 | 0.0267  | 0.01908 | 0.02575 | 0.02954 | 0.02894 | 0.0216  | 0.02656 | CSNK1G3   |
| cg02632166 | 0.02504 | 0.02555 | 0.03289 | 0.03131 | 0.02086 | 0.02646 | 0.02536 | 0.02631 | 0.02827 | 0.02222 | ITM2B     |
| cg02633817 | 0.84122 | 0.59721 | 0.78575 | 0.88973 | 0.88749 | 0.85307 | 0.49264 | 0.30141 | 0.29295 | 0.22426 | FXSD3     |
| cg02633838 | 0.08301 | 0.071   | 0.10074 | 0.09468 | 0.14885 | 0.09884 | 0.08993 | 0.07245 | 0.08414 | 0.07656 | MRPS5     |
| cg02635407 | 0.78547 | 0.70392 | 0.80781 | 0.82421 | 0.88395 | 0.74726 | 0.69265 | 0.71187 | 0.80188 | 0.593   | SH3TC1    |
| cg02635865 | 0.03321 | 0.04498 | 0.0372  | 0.03079 | 0.02544 | 0.03247 | 0.0438  | 0.03426 | 0.02806 | 0.03341 | RAB22A    |
| cg02639007 | 0.06757 | 0.05831 | 0.06821 | 0.08739 | 0.11625 | 0.08181 | 0.06855 | 0.07001 | 0.06028 | 0.06776 | CCDC41    |
| cg02640558 | 0.02941 | 0.0295  | 0.03032 | 0.02668 | 0.02506 | 0.02573 | 0.02536 | 0.0271  | 0.02445 | 0.0235  | PPP3CC    |
| cg02641095 | 0.09665 | 0.07724 | 0.14923 | 0.18276 | 0.10643 | 0.06654 | 0.06011 | 0.07766 | 0.04217 | 0.03809 | LSM11     |
| cg02641560 | 0.04319 | 0.03927 | 0.0598  | 0.07462 | 0.04872 | 0.0408  | 0.03782 | 0.03431 | 0.03327 | 0.03449 | DSCR1L2   |
| cg02641676 | 0.7084  | 0.29659 | 0.15628 | 0.1755  | 0.32156 | 0.25074 | 0.66407 | 0.26224 | 0.61577 | 0.32709 | SLC20A2   |
| cg02643667 | 0.91576 | 0.59252 | 0.86683 | 0.90141 | 0.94212 | 0.90983 | 0.49637 | 0.40472 | 0.90071 | 0.73701 | TFF1      |
| cg02644301 | 0.02972 | 0.02888 | 0.02961 | 0.02709 | 0.02118 | 0.02689 | 0.02648 | 0.02743 | 0.01885 | 0.01801 | GPSN2     |
| cg02646854 | 0.0385  | 0.04373 | 0.04843 | 0.04152 | 0.04111 | 0.04652 | 0.04356 | 0.05206 | 0.03327 | 0.03447 | C11orf2   |
| cg02647265 | 0.66982 | 0.36358 | 0.36474 | 0.5304  | 0.44596 | 0.35492 | 0.22174 | 0.1933  | 0.70225 | 0.57457 | FLJ22471  |
| cg02647545 | 0.04208 | 0.03657 | 0.09739 | 0.07747 | 0.11246 | 0.04195 | 0.05384 | 0.03059 | 0.06614 | 0.02984 | FLJ90652  |
| cg02648999 | 0.05812 | 0.03843 | 0.04924 | 0.04192 | 0.04437 | 0.04196 | 0.11269 | 0.03232 | 0.04045 | 0.03929 | TGFBRAP1  |
| cg02649337 | 0.86309 | 0.54107 | 0.86095 | 0.92198 | 0.94158 | 0.89629 | 0.27451 | 0.37921 | 0.61342 | 0.64401 | MAGEA9    |
| cg02649608 | 0.05699 | 0.05435 | 0.05504 | 0.04979 | 0.03884 | 0.05416 | 0.48772 | 0.40958 | 0.0484  | 0.04782 | ZBTB33    |
| cg02654291 | 0.68264 | 0.75086 | 0.56849 | 0.55332 | 0.40788 | 0.12607 | 0.37128 | 0.24053 | 0.43937 | 0.24615 | C9orf64   |
| cg02655204 | 0.57476 | 0.5653  | 0.61423 | 0.6681  | 0.67794 | 0.65854 | 0.55438 | 0.5437  | 0.54834 | 0.52373 | RB1       |
| cg02655623 | 0.72206 | 0.73844 | 0.7114  | 0.71979 | 0.64067 | 0.66762 | 0.63303 | 0.66767 | 0.70194 | 0.65387 | HSA277841 |
| cg02656594 | 0.45767 | 0.09409 | 0.19932 | 0.26632 | 0.45495 | 0.46953 | 0.28093 | 0.09761 | 0.05933 | 0.06895 | IL21R     |

|            |         |         |         |         |         |         |         |         |         |                   |
|------------|---------|---------|---------|---------|---------|---------|---------|---------|---------|-------------------|
| cg02657360 | 0.43715 | 0.44313 | 0.85751 | 0.92242 | 0.55776 | 0.13922 | 0.31097 | 0.23673 | 0.34203 | 0.23342 H19       |
| cg02657438 | 0.51918 | 0.38375 | 0.84569 | 0.86979 | 0.65183 | 0.60413 | 0.25351 | 0.73069 | 0.34782 | 0.49171 STON2     |
| cg02657721 | 0.06551 | 0.0558  | 0.19656 | 0.42797 | 0.13802 | 0.24861 | 0.52903 | 0.127   | 0.06296 | 0.04858 SEMA3B    |
| cg02658214 | 0.64329 | 0.29905 | 0.72356 | 0.77778 | 0.85171 | 0.80781 | 0.61923 | 0.68679 | 0.58412 | 0.53293 SDR-O     |
| cg02658251 | 0.62279 | 0.37605 | 0.87912 | 0.88372 | 0.92332 | 0.78125 | 0.07572 | 0.0509  | 0.31186 | 0.15588 DEFB4     |
| cg02659086 | 0.04448 | 0.04894 | 0.04168 | 0.04256 | 0.04744 | 0.04378 | 0.04387 | 0.05125 | 0.03972 | 0.03423 GSTP1     |
| cg02659232 | 0.13463 | 0.14171 | 0.21742 | 0.15088 | 0.31961 | 0.19413 | 0.18294 | 0.19468 | 0.13471 | 0.11831 PUS3      |
| cg02661879 | 0.15976 | 0.02605 | 0.03262 | 0.02428 | 0.02296 | 0.02796 | 0.02512 | 0.01969 | 0.02074 | 0.02032 FLNC      |
| cg02664205 | 0.42187 | 0.31804 | 0.87606 | 0.89275 | 0.89635 | 0.88768 | 0.87808 | 0.8989  | 0.83672 | 0.89631 PDE7B     |
| cg02665570 | 0.03049 | 0.02879 | 0.03405 | 0.02951 | 0.01951 | 0.03002 | 0.02696 | 0.02835 | 0.0249  | 0.02683 LYPLAL1   |
| cg02668581 | 0.02128 | 0.02693 | 0.02941 | 0.02764 | 0.02247 | 0.02719 | 0.02344 | 0.02152 | 0.02541 | 0.02254 DSU       |
| cg02668729 | 0.02403 | 0.02295 | 0.02741 | 0.02366 | 0.02132 | 0.02449 | 0.02521 | 0.02253 | 0.02701 | 0.01875 CTPS      |
| cg02668984 | 0.05156 | 0.05139 | 0.28402 | 0.43925 | 0.18849 | 0.0584  | 0.06171 | 0.06566 | 0.04764 | 0.04998 PDK2      |
| cg02671171 | 0.62878 | 0.61637 | 0.76397 | 0.80631 | 0.79365 | 0.813   | 0.64508 | 0.58843 | 0.72429 | 0.21089 RPH3AL    |
| cg02671806 | 0.04569 | 0.04556 | 0.04796 | 0.04409 | 0.03116 | 0.03579 | 0.03385 | 0.03601 | 0.03592 | 0.03736 CLPX      |
| cg02672220 | 0.87616 | 0.80094 | 0.17633 | 0.09043 | 0.95069 | 0.93639 | 0.12099 | 0.21795 | 0.09191 | 0.04679 SIM2      |
| cg02672493 | 0.22723 | 0.12252 | 0.05081 | 0.05231 | 0.71993 | 0.63577 | 0.04509 | 0.07092 | 0.95496 | 0.95307 TMEM22    |
| cg02674804 | 0.93531 | 0.92872 | 0.9288  | 0.93646 | 0.94024 | 0.93165 | 0.86955 | 0.78417 | 0.94293 | 0.9324 REEP6      |
| cg02675652 | 0.75722 | 0.58378 | 0.84288 | 0.77296 | 0.41284 | 0.37079 | 0.62621 | 0.4565  | 0.11136 | 0.06204 C12orf22  |
| cg02675896 | 0.05876 | 0.05552 | 0.05939 | 0.05563 | 0.04702 | 0.04634 | 0.05193 | 0.05131 | 0.04085 | 0.04128 LOC90355  |
| cg02676865 | 0.24925 | 0.06329 | 0.06341 | 0.06    | 0.07361 | 0.05363 | 0.06279 | 0.05435 | 0.0503  | 0.04217 UBTD1     |
| cg02677802 | 0.58039 | 0.57526 | 0.62495 | 0.65694 | 0.69245 | 0.72853 | 0.55243 | 0.5705  | 0.54883 | 0.4925 ITPR2      |
| cg02678356 | 0.06534 | 0.05877 | 0.10664 | 0.06603 | 0.09351 | 0.06509 | 0.30568 | 0.217   | 0.06375 | 0.06235 ZXDA      |
| cg02679745 | 0.90152 | 0.56783 | 0.87387 | 0.88194 | 0.93308 | 0.78538 | 0.66306 | 0.35099 | 0.86057 | 0.70332 FUT7      |
| cg02681442 | 0.05055 | 0.04842 | 0.92404 | 0.93251 | 0.24741 | 0.37146 | 0.24975 | 0.2263  | 0.06893 | 0.06337 FOXG1B    |
| cg02682905 | 0.78884 | 0.69901 | 0.64602 | 0.71231 | 0.69077 | 0.7636  | 0.29078 | 0.30398 | 0.6159  | 0.80932 FLJ38288  |
| cg02683985 | 0.0479  | 0.04421 | 0.04727 | 0.04483 | 0.04116 | 0.04419 | 0.38644 | 0.33688 | 0.03908 | 0.0396 PDGFA      |
| cg02686662 | 0.53013 | 0.53064 | 0.91364 | 0.91603 | 0.94127 | 0.91531 | 0.91072 | 0.89491 | 0.90496 | 0.89903 PPAP2C    |
| cg02686769 | 0.03231 | 0.03611 | 0.06897 | 0.0386  | 0.04413 | 0.03561 | 0.03698 | 0.03042 | 0.03571 | 0.03131 TCP11L2   |
| cg02688643 | 0.83291 | 0.45247 | 0.83321 | 0.85557 | 0.80564 | 0.82889 | 0.78724 | 0.81595 | 0.87579 | 0.71838 MGST2     |
| cg02689825 | 0.05492 | 0.05241 | 0.06331 | 0.06111 | 0.08614 | 0.09223 | 0.07249 | 0.06891 | 0.0348  | 0.04912 PCNA      |
| cg02690554 | 0.25608 | 0.13337 | 0.70124 | 0.70797 | 0.33553 | 0.16634 | 0.17389 | 0.20114 | 0.75412 | 0.66829 CITED1    |
| cg02691091 | 0.89433 | 0.89242 | 0.89925 | 0.90826 | 0.88311 | 0.89868 | 0.89607 | 0.88742 | 0.89938 | 0.88418 SP2       |
| cg02692952 | 0.08067 | 0.08135 | 0.08891 | 0.07036 | 0.07157 | 0.07512 | 0.06893 | 0.0706  | 0.06497 | 0.07615 TRAF6     |
| cg02693857 | 0.04973 | 0.04416 | 0.04442 | 0.04203 | 0.0357  | 0.04751 | 0.04341 | 0.04344 | 0.04155 | 0.03966 MXD3      |
| cg02694395 | 0.83728 | 0.84499 | 0.80609 | 0.83675 | 0.81141 | 0.83547 | 0.71617 | 0.66718 | 0.57624 | 0.56767 FMO4      |
| cg02699167 | 0.03445 | 0.03654 | 0.03288 | 0.03542 | 0.02956 | 0.03348 | 0.02684 | 0.02925 | 0.0295  | 0.02834 FBXL2     |
| cg02699645 | 0.02414 | 0.02632 | 0.02534 | 0.02166 | 0.0208  | 0.02456 | 0.02295 | 0.02287 | 0.02509 | 0.02258 UBE2G2    |
| cg02701137 | 0.5798  | 0.39784 | 0.75168 | 0.83643 | 0.85724 | 0.85459 | 0.46866 | 0.5716  | 0.54403 | 0.51779 DLGAP4    |
| cg02702510 | 0.11928 | 0.12247 | 0.12665 | 0.13404 | 0.1452  | 0.10422 | 0.10313 | 0.10672 | 0.09543 | 0.08946 8-Mar     |
| cg02704907 | 0.70482 | 0.21413 | 0.64606 | 0.76021 | 0.57096 | 0.30563 | 0.76056 | 0.25536 | 0.2165  | 0.24885 HIST1H2BK |

|            |         |         |         |         |         |         |         |         |         |         |            |
|------------|---------|---------|---------|---------|---------|---------|---------|---------|---------|---------|------------|
| cg02705666 | 0.06176 | 0.0472  | 0.06405 | 0.06123 | 0.07816 | 0.073   | 0.03837 | 0.03747 | 0.06514 | 0.05703 | GTF2B      |
| cg02706575 | 0.20585 | 0.16215 | 0.57992 | 0.6707  | 0.72235 | 0.78337 | 0.14735 | 0.72765 | 0.74502 | 0.50243 | CCL13      |
| cg02706881 | 0.76507 | 0.32839 | 0.9365  | 0.92913 | 0.9565  | 0.89619 | 0.92198 | 0.82352 | 0.93908 | 0.89495 | C21orf123  |
| cg02709261 | 0.04344 | 0.03609 | 0.04068 | 0.03556 | 0.02897 | 0.02833 | 0.03018 | 0.03385 | 0.03323 | 0.03068 | TOR3A      |
| cg02710105 | 0.02732 | 0.03068 | 0.02399 | 0.02732 | 0.02709 | 0.02859 | 0.02442 | 0.02278 | 0.026   | 0.02125 | MAP4K3     |
| cg02710161 | 0.67252 | 0.64371 | 0.66922 | 0.72904 | 0.60281 | 0.76435 | 0.68182 | 0.74307 | 0.74643 | 0.66648 | TFDP2      |
| cg02712165 | 0.93382 | 0.65409 | 0.93527 | 0.94516 | 0.95252 | 0.93912 | 0.93116 | 0.87556 | 0.94952 | 0.92358 | C17orf76   |
| cg02712845 | 0.0456  | 0.04989 | 0.06382 | 0.04807 | 0.06225 | 0.06694 | 0.06662 | 0.04928 | 0.03518 | 0.03517 | DPAGT1     |
| cg02712878 | 0.83428 | 0.72675 | 0.4083  | 0.46881 | 0.4016  | 0.10172 | 0.31212 | 0.27    | 0.86731 | 0.54773 | FAIM       |
| cg02713563 | 0.2003  | 0.09346 | 0.18512 | 0.15664 | 0.20321 | 0.09008 | 0.11556 | 0.09618 | 0.07051 | 0.05302 | TRAPPC6A   |
| cg02715115 | 0.08611 | 0.08248 | 0.10534 | 0.12312 | 0.27792 | 0.08442 | 0.05595 | 0.05883 | 0.08198 | 0.08235 | LOC90826   |
| cg02715140 | 0.02498 | 0.02968 | 0.02407 | 0.02372 | 0.0225  | 0.025   | 0.0221  | 0.02723 | 0.02303 | 0.02086 | CFL1       |
| cg02717046 | 0.45112 | 0.1338  | 0.1665  | 0.20903 | 0.12844 | 0.06365 | 0.11503 | 0.10236 | 0.76778 | 0.53362 | GPR133     |
| cg02717570 | 0.04932 | 0.05235 | 0.05341 | 0.04236 | 0.03762 | 0.04554 | 0.05291 | 0.04251 | 0.05151 | 0.04823 | ANKRD13B   |
| cg02717866 | 0.8623  | 0.42681 | 0.81815 | 0.92333 | 0.89223 | 0.91117 | 0.74406 | 0.48158 | 0.76549 | 0.54081 | FLJ32771   |
| cg02718531 | 0.03219 | 0.03284 | 0.03797 | 0.03934 | 0.03702 | 0.0316  | 0.03236 | 0.02529 | 0.03372 | 0.03047 | LOC114984  |
| cg02718563 | 0.39412 | 0.41779 | 0.43929 | 0.45873 | 0.38162 | 0.41053 | 0.49093 | 0.59939 | 0.38914 | 0.36563 | SLC25A5    |
| cg02718725 | 0.11485 | 0.07785 | 0.0851  | 0.08993 | 0.08759 | 0.10488 | 0.05748 | 0.05972 | 0.07445 | 0.08065 | CNN3       |
| cg02719245 | 0.14738 | 0.14923 | 0.13031 | 0.1066  | 0.196   | 0.18363 | 0.15115 | 0.12863 | 0.12323 | 0.14154 | DICER1     |
| cg02719634 | 0.7941  | 0.52873 | 0.854   | 0.89563 | 0.86109 | 0.85109 | 0.68136 | 0.28791 | 0.91222 | 0.86013 | SLC22A18AS |
| cg02720618 | 0.03511 | 0.03634 | 0.17576 | 0.43297 | 0.75065 | 0.74053 | 0.09708 | 0.02671 | 0.06874 | 0.3062  | ESR1       |
| cg02721374 | 0.07919 | 0.07596 | 0.20245 | 0.20294 | 0.3474  | 0.46072 | 0.09207 | 0.08127 | 0.07    | 0.08451 | OR1D2      |
| cg02723372 | 0.90021 | 0.89342 | 0.91617 | 0.90059 | 0.9344  | 0.88651 | 0.89568 | 0.89831 | 0.90324 | 0.8131  | RUNX3      |
| cg02723533 | 0.74234 | 0.25337 | 0.98031 | 0.98004 | 0.97484 | 0.89555 | 0.95725 | 0.96742 | 0.98248 | 0.97831 | CCND1      |
| cg02724472 | 0.08658 | 0.08162 | 0.13495 | 0.1029  | 0.48505 | 0.41645 | 0.09429 | 0.07348 | 0.38962 | 0.28207 | LRRC17     |
| cg02725014 | 0.05    | 0.062   | 0.06377 | 0.05588 | 0.04414 | 0.04764 | 0.05297 | 0.05375 | 0.05506 | 0.06018 | HOMER1     |
| cg02725692 | 0.20784 | 0.15298 | 0.524   | 0.64609 | 0.41438 | 0.33997 | 0.20813 | 0.07596 | 0.50069 | 0.08351 | PORCN      |
| cg02727285 | 0.17715 | 0.06021 | 0.74619 | 0.81853 | 0.45244 | 0.55501 | 0.11769 | 0.04316 | 0.14972 | 0.17318 | RELB       |
| cg02727423 | 0.20681 | 0.20252 | 0.89714 | 0.92996 | 0.55318 | 0.58332 | 0.8323  | 0.37768 | 0.90074 | 0.34268 | EML1       |
| cg02729303 | 0.80721 | 0.66826 | 0.64876 | 0.77483 | 0.80841 | 0.10421 | 0.59185 | 0.45854 | 0.28184 | 0.12525 | FLJ20152   |
| cg02729352 | 0.05316 | 0.04882 | 0.0644  | 0.05508 | 0.67855 | 0.50632 | 0.04457 | 0.03902 | 0.03815 | 0.03941 | ZNF432     |
| cg02729506 | 0.04585 | 0.04778 | 0.04905 | 0.04253 | 0.04365 | 0.04305 | 0.03357 | 0.03769 | 0.03777 | 0.03873 | HSPG2      |
| cg02732134 | 0.88317 | 0.79207 | 0.89836 | 0.90748 | 0.89212 | 0.90996 | 0.89483 | 0.85469 | 0.9169  | 0.91451 | DNMBP      |
| cg02732509 | 0.7607  | 0.09252 | 0.8659  | 0.86039 | 0.9165  | 0.49468 | 0.343   | 0.08222 | 0.15908 | 0.10993 | CTDSP2     |
| cg02733650 | 0.06962 | 0.04765 | 0.05031 | 0.0486  | 0.07173 | 0.06148 | 0.06839 | 0.05136 | 0.05021 | 0.05637 | XTP3TPA    |
| cg02735071 | 0.04347 | 0.04559 | 0.05329 | 0.04753 | 0.02521 | 0.03763 | 0.0339  | 0.03445 | 0.04282 | 0.0409  | EIF3S3     |
| cg02735133 | 0.02959 | 0.02803 | 0.03056 | 0.02831 | 0.02266 | 0.02902 | 0.02719 | 0.0284  | 0.0244  | 0.02255 | DCTN5      |
| cg02735486 | 0.62406 | 0.35761 | 0.90777 | 0.93447 | 0.90896 | 0.89606 | 0.53881 | 0.87003 | 0.78661 | 0.7012  | ANK2       |
| cg02737335 | 0.75888 | 0.71378 | 0.8788  | 0.85462 | 0.86605 | 0.83501 | 0.62525 | 0.3073  | 0.52772 | 0.7115  | ARHGEF16   |
| cg02738086 | 0.90808 | 0.79831 | 0.85138 | 0.88273 | 0.86896 | 0.8811  | 0.8907  | 0.83175 | 0.88843 | 0.82706 | POLR3H     |
| cg02738763 | 0.02353 | 0.02242 | 0.02815 | 0.02344 | 0.02085 | 0.02473 | 0.01899 | 0.02501 | 0.01933 | 0.02361 | TARSL2     |

|            |         |         |         |         |         |         |         |         |         |         |           |
|------------|---------|---------|---------|---------|---------|---------|---------|---------|---------|---------|-----------|
| cg02740128 | 0.09    | 0.08762 | 0.08463 | 0.08135 | 0.06239 | 0.08119 | 0.0819  | 0.07956 | 0.08567 | 0.07703 | DLG4      |
| cg02740947 | 0.09609 | 0.03675 | 0.14485 | 0.47354 | 0.06381 | 0.03549 | 0.29257 | 0.04947 | 0.27482 | 0.03809 | RAD51L3   |
| cg02741177 | 0.43066 | 0.4145  | 0.40775 | 0.45518 | 0.50984 | 0.62218 | 0.28915 | 0.25021 | 0.30932 | 0.20039 | PROL1     |
| cg02741249 | 0.04557 | 0.03857 | 0.0554  | 0.08684 | 0.07695 | 0.04233 | 0.04181 | 0.03999 | 0.03684 | 0.03447 | GGA2      |
| cg02741744 | 0.04441 | 0.03913 | 0.05952 | 0.05788 | 0.07827 | 0.05673 | 0.05621 | 0.05492 | 0.05659 | 0.04841 | ACTR6     |
| cg02742971 | 0.03434 | 0.03553 | 0.06935 | 0.1401  | 0.72647 | 0.71288 | 0.03373 | 0.02595 | 0.07264 | 0.03989 | OSR1      |
| cg02744459 | 0.0605  | 0.05809 | 0.08081 | 0.0638  | 0.07295 | 0.05045 | 0.06307 | 0.05961 | 0.05411 | 0.07071 | RECQL     |
| cg02748427 | 0.06385 | 0.06494 | 0.10428 | 0.08254 | 0.06473 | 0.08679 | 0.05795 | 0.05596 | 0.06457 | 0.07064 | GLMN      |
| cg02748539 | 0.03376 | 0.03198 | 0.50414 | 0.67267 | 0.45799 | 0.43363 | 0.43729 | 0.36565 | 0.08287 | 0.03753 | SLC9A3    |
| cg02749825 | 0.0342  | 0.03451 | 0.03663 | 0.03155 | 0.02585 | 0.02965 | 0.03045 | 0.03373 | 0.02642 | 0.02658 | COMTD1    |
| cg02750754 | 0.0479  | 0.04806 | 0.05702 | 0.0448  | 0.03651 | 0.03906 | 0.05446 | 0.04741 | 0.04531 | 0.04515 | MGC4093   |
| cg02751839 | 0.86596 | 0.86535 | 0.84875 | 0.88318 | 0.86388 | 0.82665 | 0.86285 | 0.79063 | 0.84359 | 0.7119  | GPR37L1   |
| cg02755455 | 0.83012 | 0.44375 | 0.7863  | 0.82754 | 0.7813  | 0.77375 | 0.8114  | 0.77939 | 0.81425 | 0.67914 | JAK1      |
| cg02755525 | 0.02313 | 0.02568 | 0.02506 | 0.02387 | 0.02045 | 0.02172 | 0.01967 | 0.02503 | 0.02152 | 0.01657 | NETO2     |
| cg02756614 | 0.0762  | 0.06609 | 0.06675 | 0.07181 | 0.07532 | 0.07875 | 0.06718 | 0.06282 | 0.05765 | 0.05702 | FER1L3    |
| cg02756698 | 0.79502 | 0.72222 | 0.75897 | 0.79832 | 0.80077 | 0.82071 | 0.18608 | 0.07445 | 0.35522 | 0.54343 | KRT12     |
| cg02756845 | 0.10174 | 0.07498 | 0.6137  | 0.83346 | 0.79873 | 0.64204 | 0.46638 | 0.90624 | 0.0906  | 0.0896  | MAPK8IP2  |
| cg02757432 | 0.09216 | 0.05238 | 0.95178 | 0.96209 | 0.48577 | 0.23852 | 0.25785 | 0.05509 | 0.06982 | 0.04771 | GPR26     |
| cg02760007 | 0.04901 | 0.05503 | 0.0576  | 0.05244 | 0.07468 | 0.06873 | 0.05544 | 0.0597  | 0.04189 | 0.03619 | SRF       |
| cg02762689 | 0.81583 | 0.47307 | 0.85058 | 0.8551  | 0.83874 | 0.81423 | 0.83671 | 0.82361 | 0.8661  | 0.79567 | GUCA1B    |
| cg02763671 | 0.89206 | 0.51663 | 0.87383 | 0.88314 | 0.8097  | 0.32314 | 0.83584 | 0.63365 | 0.90139 | 0.88744 | RANBP1    |
| cg02764611 | 0.03985 | 0.04163 | 0.03633 | 0.04037 | 0.03569 | 0.03546 | 0.0388  | 0.03244 | 0.02757 | 0.02846 | MGC19604  |
| cg02764897 | 0.11601 | 0.18544 | 0.18547 | 0.14368 | 0.41857 | 0.73681 | 0.10785 | 0.09355 | 0.10701 | 0.1233  | KRTAP13-1 |
| cg02765045 | 0.01992 | 0.02064 | 0.02045 | 0.01734 | 0.01589 | 0.01837 | 0.0175  | 0.01526 | 0.01673 | 0.0167  | PCBP2     |
| cg02765328 | 0.0362  | 0.03388 | 0.29524 | 0.07873 | 0.14039 | 0.06492 | 0.33543 | 0.07187 | 0.08862 | 0.02606 | CND2      |
| cg02765820 | 0.24415 | 0.08471 | 0.54876 | 0.65731 | 0.78474 | 0.7147  | 0.77222 | 0.21384 | 0.20178 | 0.05085 | C3orf22   |
| cg02770814 | 0.03676 | 0.03433 | 0.03675 | 0.03563 | 0.02727 | 0.03347 | 0.02909 | 0.03153 | 0.03179 | 0.03184 | C5orf5    |
| cg02772367 | 0.0553  | 0.04336 | 0.06714 | 0.08051 | 0.10023 | 0.0728  | 0.03698 | 0.02839 | 0.03114 | 0.02339 | NUP160    |
| cg02774160 | 0.81259 | 0.73759 | 0.86911 | 0.86869 | 0.90105 | 0.71818 | 0.39438 | 0.04467 | 0.71511 | 0.83347 | GGT1      |
| cg02774439 | 0.0775  | 0.06769 | 0.05031 | 0.05792 | 0.07675 | 0.0598  | 0.04681 | 0.04285 | 0.15799 | 0.05227 | HAND2     |
| cg02774486 | 0.91214 | 0.91357 | 0.89851 | 0.89962 | 0.93164 | 0.90694 | 0.8784  | 0.85426 | 0.91052 | 0.88992 | H2-ALPHA  |
| cg02774963 | 0.86178 | 0.85114 | 0.75    | 0.83813 | 0.80118 | 0.80054 | 0.66332 | 0.85484 | 0.75142 | 0.73644 | KEL       |
| cg02775617 | 0.20859 | 0.25573 | 0.24446 | 0.211   | 0.24018 | 0.21778 | 0.22472 | 0.23257 | 0.20241 | 0.22055 | ARHGAP12  |
| cg02776251 | 0.05711 | 0.05448 | 0.04944 | 0.05441 | 0.03589 | 0.05199 | 0.05117 | 0.05168 | 0.05216 | 0.04429 | USP15     |
| cg02780295 | 0.0513  | 0.04707 | 0.04874 | 0.04856 | 0.03867 | 0.03899 | 0.04781 | 0.04898 | 0.03885 | 0.04089 | PCDHGC3   |
| cg02780849 | 0.62989 | 0.35398 | 0.82884 | 0.83687 | 0.67812 | 0.8107  | 0.65928 | 0.72128 | 0.62619 | 0.26861 | GNG4      |
| cg02780988 | 0.82443 | 0.68479 | 0.7824  | 0.82305 | 0.81552 | 0.80112 | 0.16725 | 0.12899 | 0.81451 | 0.5635  | KRTHA6    |
| cg02782630 | 0.1107  | 0.12805 | 0.18777 | 0.13909 | 0.114   | 0.09302 | 0.05464 | 0.07812 | 0.10101 | 0.0526  | FLJ13614  |
| cg02784848 | 0.05372 | 0.06236 | 0.07538 | 0.07933 | 0.07248 | 0.05496 | 0.04112 | 0.04139 | 0.05036 | 0.04224 | FLJ22688  |
| cg02784874 | 0.59965 | 0.45335 | 0.48557 | 0.5559  | 0.67559 | 0.57379 | 0.10173 | 0.05669 | 0.43147 | 0.32729 | KRT9      |
| cg02786019 | 0.1031  | 0.06302 | 0.40774 | 0.74358 | 0.20772 | 0.11419 | 0.10845 | 0.10815 | 0.05075 | 0.03271 | TRPV6     |

|            |         |         |         |         |         |         |         |         |         |         |          |
|------------|---------|---------|---------|---------|---------|---------|---------|---------|---------|---------|----------|
| cg02786378 | 0.66107 | 0.44958 | 0.67464 | 0.71769 | 0.49012 | 0.68457 | 0.55377 | 0.54861 | 0.70082 | 0.35167 | SLC7A2   |
| cg02787991 | 0.02986 | 0.02842 | 0.56127 | 0.55572 | 0.55993 | 0.47856 | 0.50192 | 0.03792 | 0.02573 | 0.02553 | SECTM1   |
| cg02788090 | 0.03919 | 0.03657 | 0.04965 | 0.04686 | 0.05437 | 0.03777 | 0.0273  | 0.03194 | 0.03467 | 0.02938 | SOX9     |
| cg02788102 | 0.05859 | 0.06251 | 0.06721 | 0.05888 | 0.05344 | 0.05668 | 0.05255 | 0.05538 | 0.05624 | 0.0619  | IGSF4    |
| cg02789485 | 0.55243 | 0.80316 | 0.77658 | 0.81544 | 0.56823 | 0.64386 | 0.11233 | 0.38245 | 0.36692 | 0.25931 | MGC39497 |
| cg02790471 | 0.82483 | 0.57855 | 0.80879 | 0.84054 | 0.65319 | 0.85432 | 0.76493 | 0.4441  | 0.83963 | 0.80262 | SCML4    |
| cg02792677 | 0.05234 | 0.04732 | 0.04919 | 0.04961 | 0.04756 | 0.0333  | 0.04706 | 0.0388  | 0.03274 | 0.03446 | MRPL4    |
| cg02793099 | 0.41845 | 0.42658 | 0.91088 | 0.92123 | 0.63227 | 0.36328 | 0.77512 | 0.86737 | 0.61442 | 0.62067 | ZIM2     |
| cg02794695 | 0.8733  | 0.8699  | 0.87929 | 0.90451 | 0.9331  | 0.89654 | 0.89673 | 0.86765 | 0.91124 | 0.80215 | SLA      |
| cg02795624 | 0.03802 | 0.04288 | 0.04219 | 0.03702 | 0.04629 | 0.03826 | 0.03596 | 0.04554 | 0.0308  | 0.03493 | MIZF     |
| cg02797569 | 0.50229 | 0.12097 | 0.10172 | 0.09492 | 0.12708 | 0.09795 | 0.07047 | 0.06725 | 0.09648 | 0.06777 | PCOLCE   |
| cg02798801 | 0.11248 | 0.10756 | 0.17097 | 0.12325 | 0.19865 | 0.11381 | 0.0956  | 0.08455 | 0.24256 | 0.09022 | G10      |
| cg02799466 | 0.87717 | 0.49598 | 0.79896 | 0.87821 | 0.86063 | 0.80944 | 0.66638 | 0.74456 | 0.87865 | 0.85727 | FLJ20701 |
| cg02800334 | 0.4857  | 0.34514 | 0.66519 | 0.68622 | 0.6703  | 0.78819 | 0.71465 | 0.58948 | 0.36304 | 0.25623 | ANXA13   |
| cg02801485 | 0.0544  | 0.03569 | 0.04264 | 0.03637 | 0.04761 | 0.04095 | 0.04079 | 0.04322 | 0.04078 | 0.03647 | ALS2CR2  |
| cg02801598 | 0.0456  | 0.0446  | 0.06367 | 0.06546 | 0.08191 | 0.06645 | 0.04837 | 0.04539 | 0.02949 | 0.0449  | PDP2     |
| cg02802055 | 0.04811 | 0.05432 | 0.07017 | 0.09226 | 0.20708 | 0.05732 | 0.04646 | 0.0443  | 0.05479 | 0.04053 | USP20    |
| cg02803836 | 0.9218  | 0.90619 | 0.21319 | 0.27554 | 0.85549 | 0.93364 | 0.33999 | 0.57859 | 0.6737  | 0.5002  | MGMT     |
| cg02804166 | 0.03557 | 0.03953 | 0.07665 | 0.06369 | 0.06    | 0.04853 | 0.30108 | 0.08183 | 0.03017 | 0.0271  | PHF6     |
| cg02805028 | 0.43557 | 0.5204  | 0.82771 | 0.86524 | 0.57795 | 0.25686 | 0.63286 | 0.46839 | 0.54658 | 0.53019 | MGC18079 |
| cg02806093 | 0.07078 | 0.06626 | 0.06901 | 0.05923 | 0.11443 | 0.08571 | 0.05042 | 0.05069 | 0.05274 | 0.08893 | RAB2B    |
| cg02806658 | 0.03684 | 0.03618 | 0.05207 | 0.04302 | 0.04714 | 0.04082 | 0.03398 | 0.03882 | 0.03567 | 0.03936 | C12orf48 |
| cg02806777 | 0.90226 | 0.9414  | 0.94589 | 0.95155 | 0.94369 | 0.93765 | 0.76665 | 0.37642 | 0.95759 | 0.95826 | PGLYRP1  |
| cg02807450 | 0.14237 | 0.13479 | 0.18648 | 0.17714 | 0.24749 | 0.143   | 0.19552 | 0.1493  | 0.12452 | 0.12084 | MTMR2    |
| cg02807948 | 0.29347 | 0.43528 | 0.56405 | 0.85393 | 0.28493 | 0.47365 | 0.32208 | 0.04357 | 0.37489 | 0.24336 | IGF2     |
| cg02809263 | 0.0697  | 0.07766 | 0.07003 | 0.06528 | 0.04786 | 0.0585  | 0.0652  | 0.06653 | 0.05711 | 0.05653 | LRRC40   |
| cg02810134 | 0.84858 | 0.67322 | 0.91877 | 0.92112 | 0.95086 | 0.92605 | 0.90742 | 0.89939 | 0.79729 | 0.56661 | TNNC2    |
| cg02810773 | 0.02455 | 0.02637 | 0.02589 | 0.02479 | 0.0206  | 0.0238  | 0.02176 | 0.02134 | 0.01984 | 0.01898 | ITPA     |
| cg02811755 | 0.03585 | 0.03228 | 0.03638 | 0.03727 | 0.03685 | 0.03549 | 0.03166 | 0.02792 | 0.03313 | 0.02808 | AKAP10   |
| cg02812142 | 0.11942 | 0.15659 | 0.51688 | 0.48015 | 0.57465 | 0.16604 | 0.11079 | 0.12168 | 0.11456 | 0.09631 | ACMSD    |
| cg02813021 | 0.05417 | 0.04551 | 0.0486  | 0.04943 | 0.05653 | 0.04228 | 0.0933  | 0.06285 | 0.04872 | 0.04131 | ZMYND11  |
| cg02813121 | 0.12917 | 0.08421 | 0.29725 | 0.47185 | 0.83449 | 0.87728 | 0.07822 | 0.06275 | 0.38282 | 0.06445 | S100A12  |
| cg02813863 | 0.67607 | 0.51828 | 0.89591 | 0.9003  | 0.30849 | 0.38017 | 0.46802 | 0.43925 | 0.90439 | 0.31739 | APOLD1   |
| cg02815516 | 0.76546 | 0.53559 | 0.86953 | 0.86603 | 0.91135 | 0.67875 | 0.8543  | 0.68271 | 0.88067 | 0.61879 | ANKRD25  |
| cg02818322 | 0.05592 | 0.07507 | 0.69046 | 0.723   | 0.6455  | 0.83862 | 0.27895 | 0.36522 | 0.06136 | 0.2366  | MAGEC3   |
| cg02822723 | 0.03974 | 0.03616 | 0.03804 | 0.03561 | 0.03254 | 0.02979 | 0.03806 | 0.03595 | 0.03433 | 0.03045 | TRIP13   |
| cg02823866 | 0.3554  | 0.11604 | 0.06438 | 0.05681 | 0.12373 | 0.11561 | 0.07061 | 0.05963 | 0.04311 | 0.04644 | CD274    |
| cg02825709 | 0.80416 | 0.80917 | 0.75206 | 0.79893 | 0.81633 | 0.83716 | 0.62581 | 0.44765 | 0.80813 | 0.23077 | ZNF75A   |
| cg02827112 | 0.06723 | 0.04629 | 0.25408 | 0.11249 | 0.09827 | 0.3675  | 0.07616 | 0.04025 | 0.06374 | 0.04421 | SMARCAD1 |
| cg02827328 | 0.16289 | 0.02638 | 0.03365 | 0.02652 | 0.02485 | 0.02595 | 0.02384 | 0.02583 | 0.03485 | 0.01944 | TRIM14   |
| cg02828104 | 0.64107 | 0.77421 | 0.79969 | 0.82176 | 0.7924  | 0.54759 | 0.82398 | 0.49838 | 0.42251 | 0.38573 | Kua      |

|            |         |         |         |         |         |         |         |         |         |         |           |
|------------|---------|---------|---------|---------|---------|---------|---------|---------|---------|---------|-----------|
| cg02829654 | 0.60956 | 0.29969 | 0.2755  | 0.47892 | 0.11978 | 0.07985 | 0.14842 | 0.13432 | 0.06284 | 0.06229 | LYST      |
| cg02830467 | 0.69154 | 0.7162  | 0.58136 | 0.62857 | 0.55667 | 0.704   | 0.28351 | 0.15663 | 0.58883 | 0.55097 | MYCT1     |
| cg02831294 | 0.67911 | 0.24918 | 0.86667 | 0.86114 | 0.87542 | 0.69249 | 0.19336 | 0.11781 | 0.87692 | 0.77851 | CALML3    |
| cg02831393 | 0.04149 | 0.03909 | 0.03567 | 0.03696 | 0.04335 | 0.04694 | 0.04355 | 0.0367  | 0.03126 | 0.02868 | PAFAH1B2  |
| cg02831604 | 0.04374 | 0.03539 | 0.04636 | 0.04584 | 0.39519 | 0.42264 | 0.04566 | 0.03863 | 0.43788 | 0.36363 | ISL2      |
| cg02832245 | 0.04726 | 0.05784 | 0.06357 | 0.05269 | 0.064   | 0.04295 | 0.05529 | 0.05203 | 0.05343 | 0.0578  | EXOSC9    |
| cg02833180 | 0.39274 | 0.47877 | 0.50033 | 0.45127 | 0.54673 | 0.78167 | 0.68879 | 0.84746 | 0.27191 | 0.1474  | PLCL1     |
| cg02833725 | 0.09554 | 0.05583 | 0.10941 | 0.09863 | 0.14031 | 0.04104 | 0.10804 | 0.05471 | 0.92512 | 0.04987 | ISG20L2   |
| cg02836529 | 0.06405 | 0.0654  | 0.82685 | 0.84844 | 0.23205 | 0.42712 | 0.1892  | 0.15739 | 0.10411 | 0.07437 | NEUROD1   |
| cg02838492 | 0.9252  | 0.91712 | 0.93897 | 0.94154 | 0.96218 | 0.93829 | 0.93932 | 0.84235 | 0.94978 | 0.93456 | KIF12     |
| cg02838877 | 0.50632 | 0.34542 | 0.38693 | 0.38707 | 0.5975  | 0.31218 | 0.6048  | 0.21661 | 0.30031 | 0.2055  | MBNL2     |
| cg02840794 | 0.16047 | 0.04492 | 0.03492 | 0.03345 | 0.02437 | 0.03173 | 0.02911 | 0.02991 | 0.04603 | 0.02371 | HPS6      |
| cg02841886 | 0.02554 | 0.02784 | 0.02782 | 0.02368 | 0.019   | 0.02091 | 0.02294 | 0.02283 | 0.01819 | 0.01762 | RFX1      |
| cg02841933 | 0.02431 | 0.02875 | 0.02752 | 0.02486 | 0.02076 | 0.03033 | 0.02318 | 0.02351 | 0.01955 | 0.01707 | NRF1      |
| cg02844051 | 0.5905  | 0.46812 | 0.84593 | 0.87546 | 0.86258 | 0.83299 | 0.30892 | 0.14021 | 0.90871 | 0.69041 | ZD52F10   |
| cg02844545 | 0.92046 | 0.92707 | 0.92585 | 0.93279 | 0.90929 | 0.77102 | 0.55074 | 0.55851 | 0.93947 | 0.92733 | GCM2      |
| cg02844629 | 0.04059 | 0.04782 | 0.05428 | 0.05107 | 0.02875 | 0.05139 | 0.0671  | 0.05807 | 0.03822 | 0.03345 | ARV1      |
| cg02845923 | 0.77231 | 0.67448 | 0.73549 | 0.66775 | 0.78195 | 0.84463 | 0.79317 | 0.78722 | 0.81637 | 0.8345  | C12orf26  |
| cg02847216 | 0.33299 | 0.52478 | 0.88668 | 0.90336 | 0.93132 | 0.89824 | 0.69981 | 0.51913 | 0.86604 | 0.6646  | CTAGE1    |
| cg02847500 | 0.02913 | 0.03281 | 0.96742 | 0.97353 | 0.21307 | 0.54243 | 0.67463 | 0.66688 | 0.04364 | 0.03209 | SOX3      |
| cg02848777 | 0.03553 | 0.03988 | 0.042   | 0.03817 | 0.03388 | 0.03636 | 0.03689 | 0.03423 | 0.03461 | 0.03212 | TLL2      |
| cg02849695 | 0.88685 | 0.88766 | 0.94155 | 0.9545  | 0.8333  | 0.68643 | 0.74457 | 0.83474 | 0.95905 | 0.95673 | CCDC19    |
| cg02850329 | 0.06027 | 0.06319 | 0.11176 | 0.11163 | 0.06961 | 0.06657 | 0.05887 | 0.05556 | 0.05974 | 0.0438  | DSCR1L2   |
| cg02850821 | 0.03464 | 0.03382 | 0.03058 | 0.03379 | 0.02088 | 0.03086 | 0.02818 | 0.02823 | 0.03339 | 0.02963 | KRAS      |
| cg02854090 | 0.71663 | 0.7227  | 0.5931  | 0.75204 | 0.63679 | 0.74042 | 0.26316 | 0.09376 | 0.4323  | 0.47493 | HIST1H2AA |
| cg02854288 | 0.06234 | 0.05579 | 0.22061 | 0.10521 | 0.06334 | 0.04688 | 0.08431 | 0.05062 | 0.37777 | 0.08821 | FHIT      |
| cg02855426 | 0.53752 | 0.10512 | 0.44555 | 0.51081 | 0.38612 | 0.38368 | 0.10135 | 0.12457 | 0.52358 | 0.20332 | CPA5      |
| cg02856727 | 0.53831 | 0.30067 | 0.63262 | 0.67474 | 0.51402 | 0.67145 | 0.47525 | 0.30312 | 0.53339 | 0.62338 | GH2       |
| cg02859934 | 0.26938 | 0.38736 | 0.23778 | 0.15525 | 0.71373 | 0.8388  | 0.40659 | 0.38341 | 0.89252 | 0.89587 | NAGPA     |
| cg02860342 | 0.07739 | 0.05401 | 0.66672 | 0.83882 | 0.55021 | 0.65186 | 0.20254 | 0.11054 | 0.53514 | 0.41333 | HCN4      |
| cg02860543 | 0.11813 | 0.11515 | 0.13264 | 0.10949 | 0.18515 | 0.27816 | 0.15909 | 0.15185 | 0.09732 | 0.10844 | IGF2BP3   |
| cg02861781 | 0.0289  | 0.03328 | 0.48684 | 0.48613 | 0.13212 | 0.03168 | 0.74734 | 0.11145 | 0.9452  | 0.80693 | GJB2      |
| cg02862153 | 0.05871 | 0.06518 | 0.06091 | 0.05927 | 0.03962 | 0.05143 | 0.0564  | 0.05129 | 0.05707 | 0.05817 | CUTL1     |
| cg02862362 | 0.82514 | 0.64502 | 0.82123 | 0.83355 | 0.74577 | 0.6359  | 0.8531  | 0.6394  | 0.84315 | 0.83172 | ARG1      |
| cg02862835 | 0.06973 | 0.06699 | 0.0715  | 0.07273 | 0.04955 | 0.0699  | 0.0628  | 0.07505 | 0.06857 | 0.06605 | MMAB      |
| cg02863237 | 0.02009 | 0.02138 | 0.02372 | 0.02507 | 0.01544 | 0.02281 | 0.02135 | 0.02106 | 0.02157 | 0.01984 | RBM17     |
| cg02863842 | 0.0281  | 0.02656 | 0.03029 | 0.02379 | 0.0215  | 0.0253  | 0.02247 | 0.02508 | 0.02574 | 0.01916 | PVRL2     |
| cg02863947 | 0.86145 | 0.83617 | 0.85385 | 0.87736 | 0.87874 | 0.88724 | 0.85805 | 0.84896 | 0.79122 | 0.8491  | NR1I2     |
| cg02865818 | 0.02585 | 0.02282 | 0.02064 | 0.02059 | 0.01783 | 0.02029 | 0.02014 | 0.02151 | 0.02164 | 0.01738 | WWC1      |
| cg02867079 | 0.3454  | 0.29657 | 0.67561 | 0.78506 | 0.97129 | 0.95472 | 0.79418 | 0.36799 | 0.46264 | 0.5953  | KIAA1822  |
| cg02868123 | 0.29207 | 0.16213 | 0.12984 | 0.09376 | 0.37435 | 0.57354 | 0.05218 | 0.08334 | 0.24669 | 0.04685 | REGL      |

|            |         |         |         |         |         |         |         |         |         |                   |
|------------|---------|---------|---------|---------|---------|---------|---------|---------|---------|-------------------|
| cg02868306 | 0.06548 | 0.07838 | 0.06749 | 0.06646 | 0.05361 | 0.07138 | 0.07652 | 0.06751 | 0.07175 | 0.06783 RAB11B    |
| cg02868338 | 0.04047 | 0.03304 | 0.04087 | 0.04082 | 0.0332  | 0.02702 | 0.03791 | 0.0354  | 0.06009 | 0.02644 EXOSC4    |
| cg02870945 | 0.24986 | 0.04002 | 0.22917 | 0.39881 | 0.25937 | 0.52704 | 0.33635 | 0.13725 | 0.05468 | 0.02933 REEP1     |
| cg02873524 | 0.03221 | 0.03637 | 0.03695 | 0.03539 | 0.04871 | 0.03371 | 0.05683 | 0.04055 | 0.03229 | 0.02871 PAPP      |
| cg02874605 | 0.05822 | 0.04888 | 0.08947 | 0.0665  | 0.0784  | 0.06704 | 0.06928 | 0.07379 | 0.13388 | 0.05638 DEPDC4    |
| cg02875297 | 0.47841 | 0.56963 | 0.80067 | 0.82511 | 0.78083 | 0.82252 | 0.85135 | 0.85141 | 0.88912 | 0.66213 RLN2      |
| cg02875404 | 0.83276 | 0.84111 | 0.85393 | 0.8877  | 0.89769 | 0.89066 | 0.70198 | 0.74729 | 0.60498 | 0.51774 VN1R1     |
| cg02876062 | 0.2733  | 0.07882 | 0.76965 | 0.73686 | 0.80643 | 0.87146 | 0.06317 | 0.04781 | 0.72937 | 0.33452 FAM107B   |
| cg02878987 | 0.05832 | 0.06575 | 0.06632 | 0.06463 | 0.0524  | 0.0636  | 0.06219 | 0.06253 | 0.05834 | 0.05785 C1orf58   |
| cg02879662 | 0.03613 | 0.03129 | 0.96228 | 0.97779 | 0.9117  | 0.95295 | 0.10808 | 0.0395  | 0.11197 | 0.04143 HIF3A     |
| cg02880176 | 0.10484 | 0.08752 | 0.10654 | 0.10678 | 0.16642 | 0.12108 | 0.09462 | 0.09199 | 0.07166 | 0.08842 LOC201164 |
| cg02880679 | 0.80975 | 0.82044 | 0.82415 | 0.84838 | 0.74333 | 0.80644 | 0.79836 | 0.82346 | 0.85319 | 0.81594 MBTD1     |
| cg02882813 | 0.55404 | 0.31518 | 0.66709 | 0.83171 | 0.52362 | 0.51324 | 0.25647 | 0.41215 | 0.20179 | 0.21484 CST5      |
| cg02883161 | 0.11117 | 0.089   | 0.20822 | 0.18153 | 0.36244 | 0.30979 | 0.20166 | 0.20638 | 0.45155 | 0.42306 MSI1      |
| cg02883230 | 0.30126 | 0.13913 | 0.58089 | 0.53529 | 0.21014 | 0.14038 | 0.24864 | 0.21499 | 0.39374 | 0.19864 PARP6     |
| cg02883621 | 0.87483 | 0.77275 | 0.8731  | 0.8953  | 0.92822 | 0.89261 | 0.86179 | 0.86945 | 0.87643 | 0.83211 S100P     |
| cg02885771 | 0.80936 | 0.86464 | 0.82177 | 0.84359 | 0.71144 | 0.43317 | 0.86376 | 0.8545  | 0.2075  | 0.17467 LTV1      |
| cg02886284 | 0.04071 | 0.05089 | 0.04258 | 0.03895 | 0.03762 | 0.03904 | 0.03368 | 0.03125 | 0.03266 | 0.04214 CPE       |
| cg02887841 | 0.96631 | 0.96504 | 0.95374 | 0.96974 | 0.96318 | 0.97222 | 0.10834 | 0.22508 | 0.03464 | 0.08138 TBX1      |
| cg02888247 | 0.17738 | 0.14327 | 0.25649 | 0.26537 | 0.30943 | 0.19485 | 0.13642 | 0.11275 | 0.21677 | 0.22786 C6orf62   |
| cg02889982 | 0.44596 | 0.51572 | 0.45303 | 0.44958 | 0.47934 | 0.49459 | 0.49254 | 0.55418 | 0.46717 | 0.48073 M-RIP     |
| cg02890926 | 0.062   | 0.02453 | 0.02871 | 0.02562 | 0.01882 | 0.02607 | 0.02341 | 0.02011 | 0.02165 | 0.02334 TMEM53    |
| cg02899723 | 0.91707 | 0.89332 | 0.94237 | 0.95075 | 0.90179 | 0.95134 | 0.93316 | 0.94318 | 0.95269 | 0.74797 DDX4      |
| cg02899772 | 0.04954 | 0.04396 | 0.62093 | 0.68397 | 0.09236 | 0.67652 | 0.20037 | 0.041   | 0.04209 | 0.03282 EFCBP2    |
| cg02900980 | 0.03149 | 0.03292 | 0.03089 | 0.03136 | 0.03186 | 0.02992 | 0.03168 | 0.03083 | 0.02364 | 0.02011 FOXP1     |
| cg02901122 | 0.02838 | 0.03247 | 0.03594 | 0.03183 | 0.02944 | 0.03828 | 0.02842 | 0.02683 | 0.02562 | 0.03187 P15RS     |
| cg02901159 | 0.03435 | 0.03555 | 0.0465  | 0.03827 | 0.0394  | 0.03899 | 0.03955 | 0.03756 | 0.0302  | 0.02806 CLNS1A    |
| cg02901679 | 0.54716 | 0.63844 | 0.77696 | 0.81168 | 0.70333 | 0.83277 | 0.70912 | 0.16587 | 0.82479 | 0.7687 IL10       |
| cg02902770 | 0.89026 | 0.6331  | 0.83226 | 0.87164 | 0.7254  | 0.87627 | 0.32873 | 0.29342 | 0.83748 | 0.48111 RARRES2   |
| cg02903525 | 0.85808 | 0.75327 | 0.81116 | 0.83916 | 0.88163 | 0.76979 | 0.79097 | 0.75177 | 0.64914 | 0.76539 C5AR1     |
| cg02904235 | 0.04312 | 0.04352 | 0.03646 | 0.03176 | 0.04558 | 0.05137 | 0.03825 | 0.03582 | 0.03744 | 0.04074 RPS6KA5   |
| cg02904365 | 0.04226 | 0.04121 | 0.04135 | 0.0382  | 0.03463 | 0.03543 | 0.03376 | 0.03481 | 0.03627 | 0.03563 DNAJC11   |
| cg02905245 | 0.12868 | 0.25388 | 0.08636 | 0.08464 | 0.0797  | 0.15565 | 0.07843 | 0.11403 | 0.0844  | 0.0763 URB        |
| cg02905881 | 0.05044 | 0.04203 | 0.17542 | 0.08747 | 0.14501 | 0.05309 | 0.14841 | 0.0351  | 0.03549 | 0.03484 MSH6      |
| cg02906238 | 0.07801 | 0.06337 | 0.15457 | 0.34714 | 0.39146 | 0.05699 | 0.14185 | 0.07185 | 0.119   | 0.05889 TFCP2L1   |
| cg02906939 | 0.88726 | 0.92123 | 0.86836 | 0.88351 | 0.84658 | 0.86415 | 0.83149 | 0.81102 | 0.85214 | 0.86076 HNMT      |
| cg02907300 | 0.03991 | 0.03668 | 0.0422  | 0.04049 | 0.03534 | 0.03531 | 0.02813 | 0.02235 | 0.03534 | 0.03437 TCEB3     |
| cg02909042 | 0.0275  | 0.03145 | 0.02831 | 0.03121 | 0.02698 | 0.02974 | 0.02759 | 0.02802 | 0.02442 | 0.02456 C14orf32  |
| cg02909790 | 0.07703 | 0.08677 | 0.09019 | 0.0902  | 0.1151  | 0.0961  | 0.37907 | 0.38199 | 0.91365 | 0.90772 HIST1H3G  |
| cg02910574 | 0.50607 | 0.08196 | 0.59351 | 0.69017 | 0.95174 | 0.92514 | 0.77367 | 0.17766 | 0.95017 | 0.78027 PCOLN3    |
| cg02912041 | 0.73488 | 0.71899 | 0.69463 | 0.75804 | 0.70377 | 0.75316 | 0.44101 | 0.32638 | 0.74011 | 0.70283 UNQ846    |

|            |         |         |         |         |         |         |         |         |         |                   |
|------------|---------|---------|---------|---------|---------|---------|---------|---------|---------|-------------------|
| cg02913089 | 0.03313 | 0.02623 | 0.0291  | 0.02769 | 0.07978 | 0.02477 | 0.07591 | 0.02984 | 0.02793 | 0.02174 PDE8A     |
| cg02913364 | 0.05141 | 0.04801 | 0.05182 | 0.04704 | 0.0373  | 0.03715 | 0.03914 | 0.0438  | 0.0441  | 0.0384 UBE2J2     |
| cg02914379 | 0.28814 | 0.23884 | 0.0474  | 0.04872 | 0.91913 | 0.89489 | 0.0371  | 0.03104 | 0.31312 | 0.24953 MDF1      |
| cg02914419 | 0.04545 | 0.03813 | 0.04199 | 0.04348 | 0.02215 | 0.04193 | 0.57772 | 0.13585 | 0.03399 | 0.03446 ASNA1     |
| cg02915261 | 0.03968 | 0.0296  | 0.8915  | 0.96117 | 0.25339 | 0.05251 | 0.24306 | 0.07099 | 0.02349 | 0.02199 LSR       |
| cg02915544 | 0.5871  | 0.71345 | 0.25671 | 0.21993 | 0.41173 | 0.61376 | 0.26659 | 0.35652 | 0.16589 | 0.18238 PSMAL     |
| cg02915837 | 0.07475 | 0.06914 | 0.08311 | 0.07425 | 0.04807 | 0.05868 | 0.06743 | 0.07404 | 0.07118 | 0.0569 TEAD4      |
| cg02916816 | 0.11183 | 0.0562  | 0.58103 | 0.6716  | 0.49791 | 0.15925 | 0.34677 | 0.38434 | 0.04484 | 0.04277 JPH4      |
| cg02917064 | 0.75284 | 0.18774 | 0.40041 | 0.4986  | 0.66451 | 0.6425  | 0.11877 | 0.05633 | 0.07179 | 0.03795 SMARCD3   |
| cg02917381 | 0.04382 | 0.03813 | 0.04422 | 0.03541 | 0.04548 | 0.04887 | 0.04539 | 0.0407  | 0.0447  | 0.0552 MEIS2      |
| cg02917772 | 0.08792 | 0.08667 | 0.0963  | 0.08056 | 0.07288 | 0.07979 | 0.06445 | 0.05967 | 0.07266 | 0.06907 CTH       |
| cg02917972 | 0.0266  | 0.02777 | 0.03001 | 0.03356 | 0.02824 | 0.03162 | 0.02338 | 0.03112 | 0.02788 | 0.02402 ZCCHC11   |
| cg02918483 | 0.04943 | 0.04091 | 0.05043 | 0.0406  | 0.04067 | 0.05465 | 0.04005 | 0.04566 | 0.03612 | 0.03368 FLJ13614  |
| cg02919422 | 0.842   | 0.77621 | 0.09344 | 0.10569 | 0.60157 | 0.59457 | 0.85531 | 0.92523 | 0.14507 | 0.03434 SOX17     |
| cg02920216 | 0.2983  | 0.21584 | 0.6508  | 0.72389 | 0.7167  | 0.54416 | 0.41926 | 0.53633 | 0.33034 | 0.25379 CHODL     |
| cg02921068 | 0.02471 | 0.02604 | 0.03488 | 0.03597 | 0.0376  | 0.03776 | 0.02436 | 0.03224 | 0.02208 | 0.01956 LSM8      |
| cg02921257 | 0.29114 | 0.33228 | 0.86779 | 0.88542 | 0.86284 | 0.83829 | 0.24683 | 0.09973 | 0.40121 | 0.08815 CMYA1     |
| cg02922563 | 0.05615 | 0.06437 | 0.06298 | 0.07491 | 0.05643 | 0.04846 | 0.05469 | 0.04308 | 0.04844 | 0.0374 TREX1      |
| cg02924961 | 0.08554 | 0.08832 | 0.12051 | 0.09156 | 0.27739 | 0.16064 | 0.07842 | 0.06139 | 0.07066 | 0.08067 HIST1H2BC |
| cg02927346 | 0.0459  | 0.04381 | 0.09756 | 0.07369 | 0.40852 | 0.18048 | 0.16941 | 0.05066 | 0.27426 | 0.26108 RASL10B   |
| cg02929869 | 0.02737 | 0.02434 | 0.03087 | 0.02416 | 0.0222  | 0.02261 | 0.02143 | 0.02385 | 0.02261 | 0.02073 PFN2      |
| cg02930996 | 0.10624 | 0.06096 | 0.83592 | 0.84661 | 0.82526 | 0.80775 | 0.62875 | 0.33468 | 0.07047 | 0.05969 B4GALT6   |
| cg02932167 | 0.88273 | 0.71122 | 0.94842 | 0.94475 | 0.96409 | 0.939   | 0.93164 | 0.88925 | 0.95977 | 0.94364 ECEL1     |
| cg02932669 | 0.93285 | 0.92739 | 0.6342  | 0.72271 | 0.81977 | 0.93735 | 0.77222 | 0.52914 | 0.84794 | 0.78671 VGCNL1    |
| cg02932689 | 0.22091 | 0.08197 | 0.17645 | 0.2753  | 0.06547 | 0.05357 | 0.09479 | 0.07441 | 0.43191 | 0.05263 MAP1LC3B  |
| cg02936263 | 0.56066 | 0.24532 | 0.57824 | 0.54533 | 0.54159 | 0.48706 | 0.33985 | 0.6092  | 0.7736  | 0.67675 CCL7      |
| cg02936468 | 0.03664 | 0.03859 | 0.04082 | 0.04149 | 0.03482 | 0.03698 | 0.03652 | 0.03522 | 0.03514 | 0.03197 C9orf41   |
| cg02936740 | 0.57975 | 0.56342 | 0.5871  | 0.59615 | 0.46825 | 0.41618 | 0.3415  | 0.19523 | 0.37586 | 0.14853 TMPRSS11F |
| cg02936872 | 0.02982 | 0.03327 | 0.03306 | 0.02887 | 0.02836 | 0.02664 | 0.02518 | 0.02238 | 0.02173 | 0.01941 CTSL2     |
| cg02937060 | 0.07616 | 0.07363 | 0.07909 | 0.06385 | 0.06834 | 0.0691  | 0.06588 | 0.05871 | 0.06683 | 0.06665 ANP32E    |
| cg02937102 | 0.88442 | 0.90202 | 0.88204 | 0.88992 | 0.86984 | 0.89923 | 0.78174 | 0.90472 | 0.88861 | 0.86496 SCML4     |
| cg02937479 | 0.08903 | 0.08295 | 0.08002 | 0.07946 | 0.10267 | 0.10003 | 0.08588 | 0.08946 | 0.06289 | 0.07175 FKBPL     |
| cg02938601 | 0.39369 | 0.08535 | 0.87349 | 0.88257 | 0.73812 | 0.62284 | 0.27404 | 0.12356 | 0.27154 | 0.15136 TNFRSF10C |
| cg02939139 | 0.22063 | 0.07515 | 0.81299 | 0.82216 | 0.80079 | 0.74477 | 0.52306 | 0.3374  | 0.28905 | 0.26685 RASAL1    |
| cg02940164 | 0.19995 | 0.04515 | 0.17688 | 0.09758 | 0.42052 | 0.03435 | 0.09123 | 0.03327 | 0.07585 | 0.02676 FRAG1     |
| cg02941816 | 0.06728 | 0.04337 | 0.49766 | 0.55773 | 0.06348 | 0.03654 | 0.13363 | 0.07428 | 0.04788 | 0.04199 MGMT      |
| cg02942159 | 0.06603 | 0.0404  | 0.04425 | 0.04216 | 0.03322 | 0.03151 | 0.04382 | 0.0369  | 0.03029 | 0.02668 RPS6      |
| cg02943497 | 0.08384 | 0.08854 | 0.08844 | 0.08591 | 0.0506  | 0.08778 | 0.08232 | 0.07268 | 0.09    | 0.07341 PARP4     |
| cg02944057 | 0.04886 | 0.04676 | 0.05168 | 0.04614 | 0.04032 | 0.04386 | 0.04125 | 0.03894 | 0.04002 | 0.03482 NUDT3     |
| cg02945019 | 0.15827 | 0.15841 | 0.23195 | 0.21703 | 0.27632 | 0.16384 | 0.20421 | 0.16695 | 0.16825 | 0.18788 CD84      |
| cg02945646 | 0.45415 | 0.20151 | 0.33599 | 0.54609 | 0.3681  | 0.49578 | 0.51226 | 0.18126 | 0.36658 | 0.06078 AP1G2     |



|            |         |         |         |         |         |         |         |         |         |         |               |
|------------|---------|---------|---------|---------|---------|---------|---------|---------|---------|---------|---------------|
| cg02946570 | 0.75673 | 0.55399 | 0.68891 | 0.81258 | 0.5537  | 0.69363 | 0.62938 | 0.27008 | 0.26498 | 0.22043 | FLJ21820      |
| cg02946754 | 0.04947 | 0.04727 | 0.04517 | 0.04679 | 0.04267 | 0.04505 | 0.04091 | 0.04336 | 0.03827 | 0.04148 | NHLRC2        |
| cg02946850 | 0.87973 | 0.82224 | 0.52288 | 0.71217 | 0.18335 | 0.5122  | 0.05916 | 0.05999 | 0.09413 | 0.0407  | GRM8          |
| cg02947222 | 0.02976 | 0.02713 | 0.0305  | 0.03095 | 0.02523 | 0.02999 | 0.02268 | 0.02859 | 0.02494 | 0.026   | PHLDA1        |
| cg02947253 | 0.4415  | 0.38794 | 0.92164 | 0.9337  | 0.94249 | 0.93361 | 0.74428 | 0.69381 | 0.91905 | 0.89245 | ADORA3        |
| cg02947354 | 0.57022 | 0.32337 | 0.49482 | 0.72062 | 0.69193 | 0.74136 | 0.66845 | 0.7701  | 0.56818 | 0.52982 | LOC129530     |
| cg02949544 | 0.08615 | 0.08029 | 0.07382 | 0.06018 | 0.21429 | 0.12171 | 0.13696 | 0.09761 | 0.08588 | 0.10178 | MYST2         |
| cg02951021 | 0.12881 | 0.13823 | 0.14221 | 0.14279 | 0.0862  | 0.10063 | 0.09707 | 0.09406 | 0.09898 | 0.07064 | DNCL1         |
| cg02953306 | 0.17719 | 0.05026 | 0.06562 | 0.05899 | 0.13371 | 0.14126 | 0.08766 | 0.06968 | 0.11271 | 0.14469 | CHRNA2        |
| cg02955504 | 0.79228 | 0.64732 | 0.66506 | 0.71987 | 0.59627 | 0.2829  | 0.65184 | 0.73501 | 0.73993 | 0.61084 | TXNL4A        |
| cg02955988 | 0.77717 | 0.77911 | 0.36691 | 0.3946  | 0.7827  | 0.77472 | 0.59981 | 0.50807 | 0.72846 | 0.62187 | FLJ21106      |
| cg02956093 | 0.10045 | 0.10978 | 0.12443 | 0.1136  | 0.07278 | 0.08339 | 0.09649 | 0.10564 | 0.0886  | 0.08198 | AKT1          |
| cg02956481 | 0.0461  | 0.04772 | 0.05208 | 0.0542  | 0.03991 | 0.04267 | 0.0453  | 0.03976 | 0.03757 | 0.03114 | LOC148137     |
| cg02957086 | 0.11314 | 0.06991 | 0.08275 | 0.07242 | 0.07123 | 0.05929 | 0.09276 | 0.0677  | 0.15478 | 0.06113 | AXIN2         |
| cg02959669 | 0.04293 | 0.04159 | 0.09297 | 0.11632 | 0.11158 | 0.04649 | 0.03583 | 0.03716 | 0.04068 | 0.03445 | ZNF256        |
| cg02961200 | 0.50378 | 0.20417 | 0.08898 | 0.09414 | 0.04783 | 0.04522 | 0.06229 | 0.08416 | 0.03682 | 0.03124 | DKFZp451M2119 |
| cg02962299 | 0.02203 | 0.02467 | 0.02494 | 0.02229 | 0.02053 | 0.02017 | 0.01891 | 0.02184 | 0.01604 | 0.0167  | KIN           |
| cg02962602 | 0.21517 | 0.04107 | 0.0474  | 0.05578 | 0.03376 | 0.04106 | 0.04231 | 0.03844 | 0.03825 | 0.03984 | CCDC57        |
| cg02963198 | 0.02576 | 0.02416 | 0.02769 | 0.02406 | 0.02057 | 0.02174 | 0.01755 | 0.01663 | 0.02006 | 0.01843 | NOTCH2NL      |
| cg02964385 | 0.86424 | 0.55843 | 0.43299 | 0.52143 | 0.56762 | 0.48743 | 0.16706 | 0.3659  | 0.84194 | 0.44544 | STK38         |
| cg02964389 | 0.037   | 0.04074 | 0.04682 | 0.04468 | 0.03818 | 0.04636 | 0.03347 | 0.03536 | 0.03307 | 0.03811 | PSMD9         |
| cg02965078 | 0.36318 | 0.08036 | 0.33057 | 0.53051 | 0.85001 | 0.50807 | 0.52131 | 0.43506 | 0.38299 | 0.44009 | GPR44         |
| cg02966329 | 0.05555 | 0.05418 | 0.09273 | 0.07801 | 0.07923 | 0.06694 | 0.05563 | 0.05263 | 0.04278 | 0.04716 | TTK           |
| cg02966851 | 0.66326 | 0.33958 | 0.47936 | 0.38771 | 0.38843 | 0.41264 | 0.54941 | 0.33582 | 0.79706 | 0.34651 | C6orf149      |
| cg02968557 | 0.90771 | 0.79489 | 0.92745 | 0.93804 | 0.93565 | 0.88532 | 0.911   | 0.80801 | 0.93371 | 0.88475 | HSPB9         |
| cg02972551 | 0.05822 | 0.06666 | 0.49811 | 0.58288 | 0.06748 | 0.0561  | 0.05127 | 0.06245 | 0.05436 | 0.05448 | JMJD1A        |
| cg02973263 | 0.07236 | 0.06505 | 0.06937 | 0.06616 | 0.05585 | 0.06254 | 0.05683 | 0.05287 | 0.05887 | 0.05522 | PRKCI         |
| cg02973416 | 0.05939 | 0.09932 | 0.04236 | 0.03659 | 0.04392 | 0.0422  | 0.03841 | 0.03908 | 0.03547 | 0.03585 | SLC25A22      |
| cg02973883 | 0.7634  | 0.81966 | 0.84583 | 0.86286 | 0.6883  | 0.76097 | 0.78249 | 0.8352  | 0.8368  | 0.75644 | WDR21A        |
| cg02973971 | 0.04657 | 0.04877 | 0.0597  | 0.05527 | 0.05636 | 0.05629 | 0.31662 | 0.29672 | 0.04687 | 0.03981 | CXorf40B      |
| cg02975142 | 0.04867 | 0.05042 | 0.04485 | 0.0471  | 0.04094 | 0.04466 | 0.03777 | 0.03934 | 0.03804 | 0.03691 | FLCN          |
| cg02975259 | 0.02401 | 0.01795 | 0.01938 | 0.0216  | 0.01737 | 0.02398 | 0.01943 | 0.018   | 0.01636 | 0.01511 | NCK1          |
| cg02976090 | 0.06401 | 0.06114 | 0.07342 | 0.06874 | 0.06174 | 0.06122 | 0.0583  | 0.05012 | 0.0545  | 0.05191 | NPAL3         |
| cg02976574 | 0.87814 | 0.89014 | 0.89385 | 0.90421 | 0.88412 | 0.91985 | 0.91286 | 0.89374 | 0.91198 | 0.90167 | FNDC3B        |
| cg02976617 | 0.04822 | 0.04889 | 0.35081 | 0.36205 | 0.03484 | 0.04264 | 0.04261 | 0.04107 | 0.04122 | 0.04101 | NUDT12        |
| cg02978542 | 0.02622 | 0.02731 | 0.02737 | 0.02478 | 0.02092 | 0.02794 | 0.023   | 0.01998 | 0.02091 | 0.01944 | MTHFR         |
| cg02978737 | 0.7191  | 0.32804 | 0.8558  | 0.89123 | 0.54852 | 0.4184  | 0.08983 | 0.20616 | 0.1936  | 0.1033  | PVALB         |
| cg02981703 | 0.91391 | 0.89161 | 0.86677 | 0.88551 | 0.84881 | 0.87807 | 0.64695 | 0.87493 | 0.8865  | 0.81119 | CA6           |
| cg02981853 | 0.90479 | 0.50205 | 0.92203 | 0.91872 | 0.79483 | 0.68203 | 0.64383 | 0.87648 | 0.91812 | 0.69384 | ARHGEF18      |
| cg02982690 | 0.03857 | 0.04484 | 0.29126 | 0.34503 | 0.03311 | 0.03252 | 0.0598  | 0.05193 | 0.05904 | 0.03026 | BHLHB5        |
| cg02982734 | 0.74972 | 0.67761 | 0.4083  | 0.44753 | 0.55271 | 0.46212 | 0.30752 | 0.40111 | 0.54132 | 0.66434 | MAGEL2        |

|            |         |         |         |         |         |         |         |         |         |         |           |
|------------|---------|---------|---------|---------|---------|---------|---------|---------|---------|---------|-----------|
| cg02983451 | 0.7296  | 0.73932 | 0.82909 | 0.81122 | 0.92984 | 0.9296  | 0.31741 | 0.11815 | 0.07087 | 0.06493 | KLF11     |
| cg02987051 | 0.03851 | 0.03892 | 0.05572 | 0.04937 | 0.0464  | 0.05458 | 0.0497  | 0.04109 | 0.03594 | 0.04165 | IER3IP1   |
| cg02987163 | 0.04734 | 0.04536 | 0.046   | 0.04777 | 0.04022 | 0.04419 | 0.0426  | 0.04561 | 0.03827 | 0.042   | DUSP14    |
| cg02988947 | 0.79537 | 0.09908 | 0.91411 | 0.92453 | 0.94752 | 0.91154 | 0.91211 | 0.91208 | 0.31807 | 0.27295 | LIMD2     |
| cg02989257 | 0.90646 | 0.7934  | 0.45849 | 0.13777 | 0.04548 | 0.03772 | 0.9     | 0.35588 | 0.91516 | 0.60649 | COL16A1   |
| cg02989940 | 0.69507 | 0.64804 | 0.37042 | 0.66007 | 0.54082 | 0.85265 | 0.38733 | 0.16014 | 0.04619 | 0.04733 | ERAF      |
| cg02990033 | 0.57041 | 0.31095 | 0.57157 | 0.52396 | 0.24286 | 0.42763 | 0.06001 | 0.05608 | 0.19362 | 0.05975 | GFRA4     |
| cg02990567 | 0.02553 | 0.03289 | 0.04162 | 0.03017 | 0.01895 | 0.02019 | 0.02568 | 0.02845 | 0.02254 | 0.02854 | RGL2      |
| cg02990612 | 0.46917 | 0.22996 | 0.74429 | 0.78948 | 0.56975 | 0.78919 | 0.45262 | 0.36179 | 0.77833 | 0.76872 | GATA4     |
| cg02992596 | 0.77064 | 0.89805 | 0.52422 | 0.81932 | 0.79643 | 0.90534 | 0.09399 | 0.04562 | 0.3976  | 0.19092 | MGC27016  |
| cg02992632 | 0.04473 | 0.04967 | 0.34883 | 0.55563 | 0.06176 | 0.04273 | 0.49914 | 0.15156 | 0.11266 | 0.03939 | FGF12     |
| cg02992647 | 0.43381 | 0.38626 | 0.85973 | 0.86001 | 0.86647 | 0.86541 | 0.49629 | 0.37259 | 0.88636 | 0.83059 | DDX52     |
| cg02992767 | 0.72895 | 0.52177 | 0.56563 | 0.60944 | 0.64416 | 0.72923 | 0.32637 | 0.48927 | 0.57143 | 0.61978 | CD40LG    |
| cg02994216 | 0.02583 | 0.02794 | 0.0294  | 0.02486 | 0.02528 | 0.02656 | 0.02263 | 0.02407 | 0.02309 | 0.02349 | RALB      |
| cg02994956 | 0.04603 | 0.0344  | 0.9729  | 0.97522 | 0.81031 | 0.78233 | 0.14807 | 0.06932 | 0.04486 | 0.03231 | NEFH      |
| cg02994974 | 0.04643 | 0.02946 | 0.45943 | 0.50064 | 0.08231 | 0.0662  | 0.06668 | 0.49405 | 0.53368 | 0.60643 | SPON1     |
| cg02995130 | 0.02852 | 0.03283 | 0.03361 | 0.03199 | 0.03297 | 0.03046 | 0.03351 | 0.03061 | 0.02813 | 0.02996 | RSN       |
| cg02995295 | 0.0454  | 0.04219 | 0.0971  | 0.08808 | 0.22683 | 0.04257 | 0.0401  | 0.04063 | 0.04567 | 0.0274  | FLJ30707  |
| cg02995853 | 0.03617 | 0.0436  | 0.04034 | 0.03749 | 0.02641 | 0.03671 | 0.03314 | 0.03523 | 0.03478 | 0.03238 | APBB3     |
| cg02998425 | 0.06235 | 0.0514  | 0.13567 | 0.15377 | 0.60297 | 0.48572 | 0.05257 | 0.04938 | 0.05513 | 0.07585 | ADAM21    |
| cg03000603 | 0.10893 | 0.08625 | 0.11861 | 0.09605 | 0.14856 | 0.11271 | 0.11328 | 0.09116 | 0.07393 | 0.07756 | DHX34     |
| cg03000846 | 0.36995 | 0.03302 | 0.58678 | 0.71936 | 0.9811  | 0.96603 | 0.95594 | 0.60132 | 0.98063 | 0.95777 | RAC3      |
| cg03001305 | 0.89569 | 0.4243  | 0.8984  | 0.90856 | 0.82341 | 0.6744  | 0.90155 | 0.35226 | 0.72089 | 0.22146 | STAT5A    |
| cg03001647 | 0.08852 | 0.08231 | 0.11511 | 0.09003 | 0.13688 | 0.07654 | 0.09847 | 0.07869 | 0.09212 | 0.09178 | MPZL1     |
| cg03002480 | 0.04046 | 0.04125 | 0.04536 | 0.03763 | 0.04116 | 0.04501 | 0.04894 | 0.03718 | 0.04677 | 0.0462  | UBR1      |
| cg03003060 | 0.05151 | 0.04142 | 0.03209 | 0.03002 | 0.06419 | 0.03098 | 0.34528 | 0.454   | 0.02643 | 0.02433 | GPM6B     |
| cg03003256 | 0.7445  | 0.57163 | 0.73836 | 0.73376 | 0.65071 | 0.2615  | 0.74788 | 0.19484 | 0.74914 | 0.45252 | C6orf78   |
| cg03003745 | 0.5592  | 0.26278 | 0.45173 | 0.80892 | 0.8202  | 0.62764 | 0.31278 | 0.04387 | 0.54891 | 0.20773 | UNQ473    |
| cg03005055 | 0.10717 | 0.06961 | 0.05236 | 0.04126 | 0.07228 | 0.07193 | 0.14623 | 0.0669  | 0.06002 | 0.05809 | HSPA2     |
| cg03005261 | 0.54244 | 0.1169  | 0.11287 | 0.07874 | 0.38959 | 0.20958 | 0.04637 | 0.05869 | 0.67494 | 0.52463 | FLJ20647  |
| cg03007010 | 0.07949 | 0.07774 | 0.10281 | 0.10844 | 0.06839 | 0.06877 | 0.07374 | 0.07074 | 0.05302 | 0.05066 | SNX26     |
| cg03007571 | 0.0784  | 0.09019 | 0.08022 | 0.06903 | 0.16575 | 0.11499 | 0.0659  | 0.05179 | 0.05389 | 0.05621 | HIST1H2BD |
| cg03011500 | 0.06876 | 0.06628 | 0.05883 | 0.04996 | 0.07555 | 0.0672  | 0.05943 | 0.04671 | 0.06965 | 0.06258 | CGN       |
| cg03012280 | 0.82298 | 0.62662 | 0.82864 | 0.84969 | 0.69486 | 0.83919 | 0.81576 | 0.83056 | 0.27376 | 0.25493 | ZFYVE19   |
| cg03013422 | 0.13211 | 0.05091 | 0.06595 | 0.06699 | 0.24156 | 0.02574 | 0.16277 | 0.03969 | 0.0446  | 0.02365 | AACS      |
| cg03014628 | 0.02789 | 0.02703 | 0.06184 | 0.12266 | 0.27364 | 0.25938 | 0.03037 | 0.02368 | 0.0258  | 0.02063 | RAB3C     |
| cg03014680 | 0.79531 | 0.66923 | 0.75999 | 0.79608 | 0.72009 | 0.77485 | 0.35312 | 0.2002  | 0.53725 | 0.52417 | CLEC12A   |
| cg03014957 | 0.26768 | 0.30232 | 0.14238 | 0.17039 | 0.15089 | 0.13688 | 0.11146 | 0.12328 | 0.11338 | 0.10084 | DEFB118   |
| cg03016571 | 0.78378 | 0.81919 | 0.79209 | 0.80768 | 0.7653  | 0.77849 | 0.74924 | 0.77576 | 0.79453 | 0.73249 | C17orf73  |
| cg03017264 | 0.78264 | 0.57459 | 0.71136 | 0.7944  | 0.76132 | 0.65607 | 0.5029  | 0.74814 | 0.75608 | 0.72664 | NFAM1     |
| cg03017475 | 0.21566 | 0.23685 | 0.38025 | 0.32212 | 0.38348 | 0.3352  | 0.23578 | 0.22767 | 0.22508 | 0.18545 | TAS2R38   |

|            |         |         |         |         |         |         |         |         |         |                  |
|------------|---------|---------|---------|---------|---------|---------|---------|---------|---------|------------------|
| cg03017653 | 0.27674 | 0.14358 | 0.52131 | 0.61346 | 0.54185 | 0.21241 | 0.33369 | 0.28799 | 0.5839  | 0.15185 TTC13    |
| cg03017946 | 0.25024 | 0.19805 | 0.51099 | 0.60038 | 0.48323 | 0.56492 | 0.25858 | 0.30999 | 0.41404 | 0.31294 NPFFR2   |
| cg03019000 | 0.85898 | 0.63664 | 0.83988 | 0.84706 | 0.78444 | 0.83772 | 0.85764 | 0.7448  | 0.86566 | 0.83918 TEX264   |
| cg03020271 | 0.13378 | 0.1303  | 0.13746 | 0.129   | 0.09215 | 0.1236  | 0.11051 | 0.10311 | 0.12163 | 0.1273 M6PRBP1   |
| cg03020597 | 0.06179 | 0.06006 | 0.15699 | 0.34686 | 0.16352 | 0.08027 | 0.05118 | 0.04423 | 0.05699 | 0.05168 SLITRK2  |
| cg03020951 | 0.86573 | 0.64581 | 0.04513 | 0.04102 | 0.84805 | 0.61939 | 0.89625 | 0.82983 | 0.61812 | 0.47395 HMGA1    |
| cg03021690 | 0.87928 | 0.7621  | 0.89049 | 0.8962  | 0.86476 | 0.84584 | 0.87352 | 0.87198 | 0.86697 | 0.68368 TNFAIP2  |
| cg03021892 | 0.75516 | 0.29421 | 0.64321 | 0.75222 | 0.71332 | 0.77305 | 0.40508 | 0.21443 | 0.2151  | 0.51105 SLC38A5  |
| cg03022541 | 0.57345 | 0.30434 | 0.65339 | 0.81875 | 0.58836 | 0.37308 | 0.17729 | 0.14043 | 0.08717 | 0.09147 DNAJB8   |
| cg03024246 | 0.85536 | 0.85089 | 0.78227 | 0.84059 | 0.71578 | 0.86513 | 0.81847 | 0.81875 | 0.88389 | 0.88247 JRKL     |
| cg03025569 | 0.84494 | 0.8475  | 0.84048 | 0.852   | 0.69105 | 0.72518 | 0.78913 | 0.81365 | 0.86593 | 0.80216 TRIM16   |
| cg03026462 | 0.02172 | 0.02794 | 0.02577 | 0.02428 | 0.04903 | 0.02151 | 0.02355 | 0.02138 | 0.03333 | 0.0202 FOXA1     |
| cg03027037 | 0.06357 | 0.04851 | 0.06706 | 0.06222 | 0.21025 | 0.06085 | 0.05842 | 0.04571 | 0.04615 | 0.03225 NAPB     |
| cg03028472 | 0.67586 | 0.73207 | 0.0488  | 0.04504 | 0.06924 | 0.4489  | 0.04696 | 0.0404  | 0.90771 | 0.88007 RERG     |
| cg03029060 | 0.04565 | 0.04727 | 0.0439  | 0.04799 | 0.03157 | 0.04739 | 0.04257 | 0.04791 | 0.04179 | 0.04058 ZNF184   |
| cg03029145 | 0.03246 | 0.03556 | 0.04691 | 0.04714 | 0.03757 | 0.04763 | 0.04242 | 0.03993 | 0.03049 | 0.03633 SMAD2    |
| cg03029616 | 0.33314 | 0.24771 | 0.80985 | 0.83328 | 0.81672 | 0.79628 | 0.08608 | 0.09317 | 0.80169 | 0.80771 KRTAP6-1 |
| cg03030757 | 0.03992 | 0.04591 | 0.05606 | 0.04572 | 0.10069 | 0.03824 | 0.04974 | 0.05305 | 0.14799 | 0.03176 FANCE    |
| cg03032025 | 0.39508 | 0.63062 | 0.34578 | 0.51905 | 0.29423 | 0.32516 | 0.20298 | 0.48315 | 0.17637 | 0.17094 CPEB4    |
| cg03033367 | 0.5553  | 0.53882 | 0.34268 | 0.49686 | 0.69395 | 0.76951 | 0.53722 | 0.62457 | 0.88798 | 0.90709 CSAG2    |
| cg03035419 | 0.01687 | 0.01985 | 0.01847 | 0.0185  | 0.01429 | 0.01809 | 0.01662 | 0.01808 | 0.0155  | 0.01323 RPS21    |
| cg03036064 | 0.03387 | 0.03795 | 0.03651 | 0.03471 | 0.02549 | 0.03302 | 0.03122 | 0.03531 | 0.03095 | 0.03077 UCK2     |
| cg03037266 | 0.20081 | 0.20129 | 0.25317 | 0.27623 | 0.33425 | 0.18131 | 0.12702 | 0.1283  | 0.143   | 0.14656 GLRA2    |
| cg03037331 | 0.0299  | 0.03198 | 0.03153 | 0.02853 | 0.02858 | 0.0263  | 0.02567 | 0.03002 | 0.02383 | 0.0303 DEGS1     |
| cg03038003 | 0.044   | 0.04606 | 0.20322 | 0.33072 | 0.0725  | 0.08171 | 0.03559 | 0.03154 | 0.04508 | 0.06422 C1orf165 |
| cg03038672 | 0.5991  | 0.58675 | 0.8695  | 0.89106 | 0.82129 | 0.84586 | 0.76029 | 0.84646 | 0.77396 | 0.81247 CLDN9    |
| cg03039172 | 0.04505 | 0.05149 | 0.06485 | 0.05862 | 0.08271 | 0.04601 | 0.04413 | 0.0492  | 0.06866 | 0.04388 SIX5     |
| cg03041841 | 0.19781 | 0.05485 | 0.05504 | 0.04559 | 0.74347 | 0.11603 | 0.05732 | 0.05408 | 0.0465  | 0.03817 C9orf75  |
| cg03042149 | 0.02323 | 0.02474 | 0.02782 | 0.02364 | 0.02292 | 0.02008 | 0.02044 | 0.02247 | 0.02094 | 0.0195 PDE8A     |
| cg03044435 | 0.48642 | 0.28271 | 0.62587 | 0.69029 | 0.50646 | 0.43466 | 0.31686 | 0.39101 | 0.60896 | 0.54931 FLJ35816 |
| cg03046445 | 0.05887 | 0.04651 | 0.06077 | 0.06376 | 0.06192 | 0.05034 | 0.04572 | 0.04816 | 0.04862 | 0.03724 BHLHB3   |
| cg03047098 | 0.05238 | 0.04439 | 0.05083 | 0.04376 | 0.06704 | 0.06146 | 0.04643 | 0.04629 | 0.03394 | 0.03743 AP1G1    |
| cg03048535 | 0.03268 | 0.03395 | 0.04481 | 0.05775 | 0.02689 | 0.03344 | 0.03228 | 0.02876 | 0.03066 | 0.03435 FOXN4    |
| cg03050522 | 0.07139 | 0.06348 | 0.16264 | 0.15815 | 0.07698 | 0.06453 | 0.11518 | 0.06132 | 0.10316 | 0.04636 ARHGEF1  |
| cg03050748 | 0.07452 | 0.07169 | 0.06861 | 0.08114 | 0.06236 | 0.07539 | 0.06189 | 0.06534 | 0.06255 | 0.05593 GHR      |
| cg03054162 | 0.0482  | 0.05924 | 0.0715  | 0.05818 | 0.0561  | 0.06613 | 0.04564 | 0.04449 | 0.04882 | 0.04918 PCYOX1   |
| cg03054529 | 0.87686 | 0.58928 | 0.37329 | 0.40499 | 0.73202 | 0.6363  | 0.6833  | 0.31953 | 0.8345  | 0.25634 SCRNI    |
| cg03055440 | 0.64363 | 0.66591 | 0.54452 | 0.51624 | 0.58932 | 0.6222  | 0.61747 | 0.73223 | 0.49991 | 0.45987 MS4A6A   |
| cg03055492 | 0.03259 | 0.03956 | 0.03232 | 0.0322  | 0.03138 | 0.03292 | 0.03088 | 0.02481 | 0.03133 | 0.03118 UGP2     |
| cg03056007 | 0.04637 | 0.03746 | 0.18428 | 0.17019 | 0.09344 | 0.02868 | 0.05316 | 0.03805 | 0.03421 | 0.02577 FBXO25   |
| cg03057808 | 0.02983 | 0.03307 | 0.06001 | 0.06909 | 0.0288  | 0.03366 | 0.53208 | 0.50812 | 0.0415  | 0.03163 FLJ10178 |

|            |         |         |         |         |         |         |         |         |         |                   |
|------------|---------|---------|---------|---------|---------|---------|---------|---------|---------|-------------------|
| cg03059018 | 0.1198  | 0.1124  | 0.07236 | 0.05749 | 0.18053 | 0.12185 | 0.10089 | 0.08228 | 0.35037 | 0.11976 SIX4      |
| cg03059528 | 0.04248 | 0.04566 | 0.05511 | 0.04947 | 0.03075 | 0.04686 | 0.04044 | 0.04651 | 0.0449  | 0.04425 RNF146    |
| cg03060925 | 0.06033 | 0.06372 | 0.06513 | 0.0627  | 0.04725 | 0.06136 | 0.05888 | 0.0547  | 0.05232 | 0.04828 FLJ41131  |
| cg03062665 | 0.02768 | 0.03046 | 0.02934 | 0.02726 | 0.03015 | 0.03039 | 0.02509 | 0.02812 | 0.02338 | 0.0227 CALM1      |
| cg03063797 | 0.0802  | 0.08898 | 0.06275 | 0.05562 | 0.13565 | 0.10886 | 0.16652 | 0.08006 | 0.06607 | 0.08503 SAV1      |
| cg03064067 | 0.83405 | 0.44403 | 0.89312 | 0.88357 | 0.2249  | 0.1048  | 0.16697 | 0.08377 | 0.09138 | 0.09699 SLC6A15   |
| cg03064241 | 0.02683 | 0.02635 | 0.03181 | 0.03235 | 0.02115 | 0.0234  | 0.02535 | 0.02866 | 0.02382 | 0.02377 RNF34     |
| cg03064400 | 0.07267 | 0.06707 | 0.06394 | 0.07203 | 0.06806 | 0.07232 | 0.06266 | 0.06642 | 0.05056 | 0.04298 U2AF1L3   |
| cg03065202 | 0.06477 | 0.04379 | 0.30408 | 0.59015 | 0.8789  | 0.92485 | 0.72769 | 0.17141 | 0.54957 | 0.07745 MGC17330  |
| cg03065661 | 0.04258 | 0.04442 | 0.0464  | 0.03981 | 0.0371  | 0.04618 | 0.042   | 0.04261 | 0.03709 | 0.03692 CRSP6     |
| cg03066138 | 0.02665 | 0.02874 | 0.02862 | 0.02441 | 0.02085 | 0.0237  | 0.02257 | 0.02293 | 0.02274 | 0.01973 RPLP2     |
| cg03067226 | 0.22215 | 0.09232 | 0.36053 | 0.42809 | 0.04673 | 0.03257 | 0.08062 | 0.04115 | 0.15056 | 0.07078 TP11      |
| cg03070194 | 0.02412 | 0.0226  | 0.54368 | 0.67588 | 0.02249 | 0.03094 | 0.13014 | 0.04162 | 0.02444 | 0.02293 GSTM2     |
| cg03070588 | 0.0476  | 0.04484 | 0.06498 | 0.04988 | 0.05276 | 0.05857 | 0.04871 | 0.05103 | 0.04861 | 0.04931 USP30     |
| cg03072102 | 0.07194 | 0.05956 | 0.10941 | 0.07366 | 0.0731  | 0.05427 | 0.10515 | 0.10727 | 0.06063 | 0.07132 LRR1Q2    |
| cg03072378 | 0.04757 | 0.03595 | 0.07851 | 0.10572 | 0.06015 | 0.03306 | 0.03467 | 0.03558 | 0.07589 | 0.04265 DLX4      |
| cg03073814 | 0.04732 | 0.03939 | 0.04503 | 0.04097 | 0.09481 | 0.06597 | 0.05391 | 0.05038 | 0.03951 | 0.04767 TTC19     |
| cg03075662 | 0.4563  | 0.46876 | 0.7049  | 0.77484 | 0.68251 | 0.83726 | 0.61934 | 0.63695 | 0.40077 | 0.29211 PLSCR2    |
| cg03076324 | 0.02702 | 0.02885 | 0.03028 | 0.0297  | 0.02379 | 0.0247  | 0.02513 | 0.02689 | 0.02385 | 0.02242 DNAJC1    |
| cg03076871 | 0.0621  | 0.06829 | 0.05455 | 0.05007 | 0.06859 | 0.0712  | 0.07526 | 0.10699 | 0.06252 | 0.04653 STX16     |
| cg03077062 | 0.02538 | 0.03081 | 0.02805 | 0.02787 | 0.11404 | 0.02891 | 0.0251  | 0.02555 | 0.02427 | 0.0262 SFXN5      |
| cg03077492 | 0.48978 | 0.43165 | 0.85264 | 0.87483 | 0.80575 | 0.83279 | 0.85714 | 0.76085 | 0.86775 | 0.79191 CCL28     |
| cg03077836 | 0.02871 | 0.02735 | 0.03202 | 0.02682 | 0.0219  | 0.02565 | 0.33515 | 0.02713 | 0.02402 | 0.02231 DDEF2     |
| cg03079549 | 0.01909 | 0.01816 | 0.02105 | 0.01879 | 0.01604 | 0.01984 | 0.02172 | 0.01811 | 0.0249  | 0.02267 PLDN      |
| cg03079681 | 0.47626 | 0.471   | 0.49127 | 0.4579  | 0.47324 | 0.4566  | 0.04532 | 0.04078 | 0.03806 | 0.03592 CDKN2A    |
| cg03080344 | 0.19185 | 0.10818 | 0.05396 | 0.04961 | 0.03467 | 0.03446 | 0.07518 | 0.0416  | 0.03672 | 0.03524 METTL2B   |
| cg03080985 | 0.27398 | 0.09019 | 0.16154 | 0.09747 | 0.09402 | 0.07625 | 0.06034 | 0.05632 | 0.05489 | 0.05203 SH3BGR2   |
| cg03081134 | 0.067   | 0.06268 | 0.06553 | 0.06648 | 0.02438 | 0.04291 | 0.07055 | 0.06365 | 0.0499  | 0.04712 RECK      |
| cg03082060 | 0.49323 | 0.54235 | 0.3017  | 0.23542 | 0.39966 | 0.17421 | 0.27306 | 0.24011 | 0.62559 | 0.26111 LGALS8    |
| cg03085312 | 0.05436 | 0.07537 | 0.58606 | 0.77634 | 0.87966 | 0.84936 | 0.84381 | 0.56949 | 0.71481 | 0.59597 RARA      |
| cg03085377 | 0.89123 | 0.89089 | 0.87879 | 0.87077 | 0.87679 | 0.88638 | 0.86658 | 0.89771 | 0.882   | 0.8869 RB1        |
| cg03085637 | 0.02499 | 0.02704 | 0.02456 | 0.02389 | 0.02768 | 0.02776 | 0.01863 | 0.02011 | 0.02577 | 0.03035 PEX11B    |
| cg03086563 | 0.05605 | 0.05619 | 0.03101 | 0.03397 | 0.075   | 0.06493 | 0.04033 | 0.03723 | 0.06151 | 0.07149 HIST2H2AC |
| cg03086857 | 0.36598 | 0.19417 | 0.35713 | 0.51848 | 0.46357 | 0.92774 | 0.06647 | 0.24335 | 0.03738 | 0.03433 EDNRB     |
| cg03087937 | 0.86992 | 0.76471 | 0.75209 | 0.84909 | 0.80214 | 0.85208 | 0.55488 | 0.70099 | 0.28291 | 0.0703 MUC15      |
| cg03091512 | 0.04765 | 0.04085 | 0.04755 | 0.06059 | 0.03631 | 0.04493 | 0.03794 | 0.03912 | 0.03849 | 0.03854 RHBDD1    |
| cg03096975 | 0.03295 | 0.03013 | 0.08082 | 0.03432 | 0.02944 | 0.02666 | 0.02841 | 0.03234 | 0.02778 | 0.02547 EML2      |
| cg03097995 | 0.91431 | 0.73805 | 0.86034 | 0.91824 | 0.63662 | 0.65186 | 0.06568 | 0.0687  | 0.44239 | 0.12579 TNNI3     |
| cg03098361 | 0.02728 | 0.03131 | 0.04768 | 0.03599 | 0.10354 | 0.03191 | 0.02867 | 0.02821 | 0.02678 | 0.02027 RFC2      |
| cg03098643 | 0.12123 | 0.10956 | 0.1182  | 0.11834 | 0.0814  | 0.09493 | 0.09451 | 0.08302 | 0.0906  | 0.09852 FAT       |
| cg03098721 | 0.42179 | 0.2832  | 0.32791 | 0.35884 | 0.70614 | 0.43946 | 0.08369 | 0.07357 | 0.69561 | 0.53595 TLL7      |

|            |         |         |         |         |         |         |         |         |         |                  |
|------------|---------|---------|---------|---------|---------|---------|---------|---------|---------|------------------|
| cg03099492 | 0.05981 | 0.05832 | 0.50708 | 0.24683 | 0.09425 | 0.06285 | 0.1855  | 0.0614  | 0.06229 | 0.05349 CYP26A1  |
| cg03099771 | 0.69759 | 0.63642 | 0.70549 | 0.87278 | 0.66531 | 0.62576 | 0.05759 | 0.04584 | 0.0917  | 0.05015 PRSS16   |
| cg03100040 | 0.19213 | 0.19562 | 0.40234 | 0.40425 | 0.38286 | 0.42781 | 0.20757 | 0.19158 | 0.13474 | 0.16606 ZNF345   |
| cg03100146 | 0.13118 | 0.12485 | 0.11988 | 0.12085 | 0.08676 | 0.1083  | 0.11302 | 0.12565 | 0.10557 | 0.11323 SH3BGR13 |
| cg03100196 | 0.06072 | 0.03785 | 0.03872 | 0.037   | 0.03074 | 0.03496 | 0.03407 | 0.03246 | 0.03196 | 0.02869 ZYX      |
| cg03100752 | 0.51727 | 0.13863 | 0.86825 | 0.86998 | 0.93138 | 0.73898 | 0.87867 | 0.89411 | 0.74864 | 0.81286 ASNA1    |
| cg03101664 | 0.10909 | 0.06664 | 0.36223 | 0.45422 | 0.19549 | 0.44603 | 0.09749 | 0.07567 | 0.22347 | 0.07166 SNX15    |
| cg03102516 | 0.66879 | 0.29808 | 0.58955 | 0.7065  | 0.59463 | 0.62716 | 0.64166 | 0.60389 | 0.50694 | 0.42839 LINC1    |
| cg03103192 | 0.70054 | 0.80339 | 0.85232 | 0.84552 | 0.92091 | 0.88585 | 0.65479 | 0.51764 | 0.42846 | 0.06434 SPATA18  |
| cg03104936 | 0.71854 | 0.36454 | 0.86384 | 0.88954 | 0.70115 | 0.84247 | 0.80029 | 0.69105 | 0.86995 | 0.82406 GRB10    |
| cg03107405 | 0.02103 | 0.02319 | 0.03234 | 0.02866 | 0.01866 | 0.02229 | 0.01677 | 0.02138 | 0.01771 | 0.01802 TSSC1    |
| cg03108701 | 0.08247 | 0.07251 | 0.11196 | 0.09412 | 0.08108 | 0.10823 | 0.07727 | 0.07182 | 0.07086 | 0.06572 C6orf167 |
| cg03109047 | 0.05574 | 0.05379 | 0.25911 | 0.29231 | 0.28599 | 0.05346 | 0.08151 | 0.05494 | 0.05517 | 0.04776 GRIN1    |
| cg03109066 | 0.03161 | 0.0304  | 0.03206 | 0.02601 | 0.03146 | 0.0317  | 0.02617 | 0.02754 | 0.02274 | 0.03136 C4orf16  |
| cg03109316 | 0.35298 | 0.196   | 0.54939 | 0.61601 | 0.54652 | 0.46868 | 0.08427 | 0.07705 | 0.30521 | 0.09938 ZNF80    |
| cg03109701 | 0.15816 | 0.13263 | 0.15232 | 0.15778 | 0.76775 | 0.55341 | 0.12571 | 0.12294 | 0.78093 | 0.61024 TMEM118  |
| cg03112433 | 0.8069  | 0.08854 | 0.62407 | 0.75015 | 0.6116  | 0.16547 | 0.67229 | 0.08716 | 0.78523 | 0.08484 PFTK1    |
| cg03112782 | 0.06881 | 0.06112 | 0.06911 | 0.06201 | 0.05693 | 0.05519 | 0.05333 | 0.05842 | 0.1252  | 0.04667 C1orf149 |
| cg03112869 | 0.79583 | 0.84431 | 0.71706 | 0.83006 | 0.81916 | 0.83502 | 0.68074 | 0.58955 | 0.53071 | 0.26766 FBXW12   |
| cg03113824 | 0.89807 | 0.62114 | 0.87454 | 0.87837 | 0.92523 | 0.89346 | 0.83797 | 0.82196 | 0.63153 | 0.64233 FLJ32926 |
| cg03114244 | 0.03233 | 0.03331 | 0.03985 | 0.03587 | 0.03043 | 0.0443  | 0.03776 | 0.03652 | 0.0341  | 0.03307 FEN1     |
| cg03115649 | 0.02504 | 0.025   | 0.03111 | 0.02797 | 0.02586 | 0.02406 | 0.02487 | 0.0203  | 0.02194 | 0.02407 TOR1AIP1 |
| cg03115746 | 0.76288 | 0.72743 | 0.74168 | 0.78834 | 0.73289 | 0.75713 | 0.73428 | 0.71421 | 0.76728 | 0.68398 WHSC1    |
| cg03115886 | 0.58674 | 0.63285 | 0.75106 | 0.78794 | 0.71393 | 0.7162  | 0.7353  | 0.72866 | 0.78894 | 0.74406 PTPRA    |
| cg03116238 | 0.03228 | 0.06425 | 0.59745 | 0.70331 | 0.17729 | 0.09625 | 0.15612 | 0.02722 | 0.32642 | 0.09635 GNG8     |
| cg03116740 | 0.62719 | 0.07726 | 0.14977 | 0.32247 | 0.09378 | 0.06381 | 0.15437 | 0.1054  | 0.73439 | 0.44413 TSPAN4   |
| cg03117949 | 0.15159 | 0.2685  | 0.60008 | 0.56883 | 0.42618 | 0.29914 | 0.4019  | 0.30118 | 0.13832 | 0.09312 USP16    |
| cg03118854 | 0.44648 | 0.08506 | 0.77071 | 0.85462 | 0.92807 | 0.84594 | 0.31744 | 0.38449 | 0.86512 | 0.45588 PNPLA5   |
| cg03122511 | 0.08952 | 0.09677 | 0.17374 | 0.15234 | 0.16832 | 0.13566 | 0.22189 | 0.26197 | 0.13112 | 0.11472 NKAP     |
| cg03125090 | 0.07937 | 0.04987 | 0.09166 | 0.07428 | 0.0824  | 0.06143 | 0.06073 | 0.04406 | 0.07302 | 0.06399 ARPC5    |
| cg03126490 | 0.03227 | 0.03881 | 0.0413  | 0.0361  | 0.03434 | 0.03951 | 0.03433 | 0.03301 | 0.0306  | 0.02879 SPATA13  |
| cg03127334 | 0.12781 | 0.09879 | 0.19293 | 0.14751 | 0.18899 | 0.1025  | 0.13114 | 0.09223 | 0.1023  | 0.09745 ERG      |
| cg03127543 | 0.20899 | 0.19489 | 0.32997 | 0.31672 | 0.32913 | 0.22998 | 0.22521 | 0.20317 | 0.23197 | 0.24535 NXF5     |
| cg03128832 | 0.79536 | 0.21703 | 0.76697 | 0.81243 | 0.62071 | 0.59809 | 0.54855 | 0.37628 | 0.54484 | 0.33742 APOL5    |
| cg03129910 | 0.05265 | 0.04679 | 0.05905 | 0.04629 | 0.05235 | 0.06792 | 0.04011 | 0.04325 | 0.03975 | 0.03694 SRP72    |
| cg03131527 | 0.73743 | 0.2281  | 0.75013 | 0.76798 | 0.69083 | 0.6647  | 0.66536 | 0.70977 | 0.6113  | 0.4401 BDH       |
| cg03132911 | 0.0274  | 0.02215 | 0.03779 | 0.03356 | 0.02953 | 0.02526 | 0.0222  | 0.02508 | 0.02255 | 0.01772 IQGAP2   |
| cg03133269 | 0.05857 | 0.04087 | 0.10572 | 0.23786 | 0.42077 | 0.21983 | 0.06127 | 0.05033 | 0.34244 | 0.05351 WNT4     |
| cg03135127 | 0.05487 | 0.05659 | 0.04916 | 0.06097 | 0.03771 | 0.0475  | 0.06753 | 0.05446 | 0.04089 | 0.04063 TRMT1    |
| cg03135598 | 0.02866 | 0.02682 | 0.0281  | 0.02809 | 0.02374 | 0.02694 | 0.02673 | 0.02409 | 0.02282 | 0.01814 SEPW1    |
| cg03136712 | 0.94388 | 0.91085 | 0.95676 | 0.95355 | 0.96242 | 0.95965 | 0.94387 | 0.9524  | 0.95495 | 0.95377 DND1     |

|            |         |         |         |         |         |         |         |         |         |                   |
|------------|---------|---------|---------|---------|---------|---------|---------|---------|---------|-------------------|
| cg03138091 | 0.57554 | 0.07353 | 0.02819 | 0.02402 | 0.0298  | 0.02267 | 0.02551 | 0.02355 | 0.0214  | 0.01913 OSMR      |
| cg03138405 | 0.04471 | 0.05071 | 0.05808 | 0.05627 | 0.04364 | 0.03504 | 0.04501 | 0.04275 | 0.03529 | 0.02925 GLT25D1   |
| cg03138668 | 0.0505  | 0.04979 | 0.44828 | 0.43872 | 0.12693 | 0.05579 | 0.03811 | 0.05849 | 0.03877 | 0.03313 SLC17A7   |
| cg03139057 | 0.03672 | 0.03011 | 0.23682 | 0.44238 | 0.65459 | 0.39871 | 0.03305 | 0.02862 | 0.08528 | 0.02266 DLL3      |
| cg03139377 | 0.61602 | 0.38385 | 0.85235 | 0.85065 | 0.6939  | 0.49103 | 0.71936 | 0.74396 | 0.37217 | 0.04786 SLC6A12   |
| cg03140096 | 0.041   | 0.04114 | 0.03647 | 0.03524 | 0.02472 | 0.02888 | 0.03346 | 0.03179 | 0.02638 | 0.02588 FARSLA    |
| cg03140978 | 0.873   | 0.64615 | 0.86472 | 0.86137 | 0.87354 | 0.87915 | 0.87759 | 0.88714 | 0.88501 | 0.88614 C1orf201  |
| cg03142203 | 0.84148 | 0.87738 | 0.83303 | 0.85186 | 0.85406 | 0.85553 | 0.86413 | 0.8667  | 0.86333 | 0.8445 GPR64      |
| cg03143333 | 0.88421 | 0.87786 | 0.83143 | 0.86225 | 0.75544 | 0.78634 | 0.65056 | 0.86337 | 0.86928 | 0.82362 CCDC11    |
| cg03143365 | 0.07728 | 0.05869 | 0.43345 | 0.39494 | 0.05786 | 0.13879 | 0.0689  | 0.06582 | 0.05299 | 0.04452 MAN2B1    |
| cg03143849 | 0.75293 | 0.39471 | 0.29807 | 0.39632 | 0.66768 | 0.53382 | 0.44074 | 0.45879 | 0.69851 | 0.37907 CDKN1C    |
| cg03144206 | 0.05325 | 0.05443 | 0.05673 | 0.05139 | 0.04237 | 0.04596 | 0.04562 | 0.04074 | 0.04929 | 0.04578 ACTN4     |
| cg03144357 | 0.86902 | 0.70127 | 0.89254 | 0.69661 | 0.73039 | 0.86673 | 0.69274 | 0.66574 | 0.89756 | 0.9009 LRRC14     |
| cg03146158 | 0.05664 | 0.05631 | 0.11262 | 0.12965 | 0.05151 | 0.04678 | 0.07432 | 0.06119 | 0.03743 | 0.05036 MYO1E     |
| cg03147542 | 0.07012 | 0.03405 | 0.0428  | 0.04009 | 0.05355 | 0.0516  | 0.03885 | 0.03873 | 0.02812 | 0.0268 CBLL1      |
| cg03147990 | 0.23383 | 0.08163 | 0.23121 | 0.28879 | 0.24086 | 0.28823 | 0.25731 | 0.10503 | 0.07159 | 0.08551 ZNF585B   |
| cg03148461 | 0.15312 | 0.22588 | 0.18225 | 0.14495 | 0.14564 | 0.14554 | 0.10418 | 0.10609 | 0.09666 | 0.09304 BRAF      |
| cg03149130 | 0.05978 | 0.04294 | 0.17962 | 0.14318 | 0.15822 | 0.08171 | 0.06368 | 0.06086 | 0.24235 | 0.2339 DIRAS2     |
| cg03152385 | 0.5299  | 0.25657 | 0.31759 | 0.32828 | 0.54007 | 0.45591 | 0.71221 | 0.51158 | 0.23082 | 0.10655 RRN3      |
| cg03152785 | 0.03619 | 0.03146 | 0.04597 | 0.04172 | 0.03563 | 0.03167 | 0.03399 | 0.03856 | 0.03189 | 0.0317 KCNC4      |
| cg03154500 | 0.0509  | 0.04494 | 0.06838 | 0.07662 | 0.07746 | 0.16257 | 0.03364 | 0.0494  | 0.03984 | 0.04506 LOC133957 |
| cg03154513 | 0.02623 | 0.03285 | 0.03127 | 0.03082 | 0.02636 | 0.02782 | 0.02962 | 0.02462 | 0.02553 | 0.02649 ID1       |
| cg03155724 | 0.07537 | 0.07338 | 0.10027 | 0.30559 | 0.08205 | 0.07467 | 0.07282 | 0.07948 | 0.07439 | 0.07221 C10orf104 |
| cg03156547 | 0.84513 | 0.39323 | 0.38948 | 0.42862 | 0.87089 | 0.1454  | 0.38198 | 0.08991 | 0.90165 | 0.81346 CDH24     |
| cg03157149 | 0.01728 | 0.01708 | 0.0191  | 0.01992 | 0.01667 | 0.01817 | 0.0165  | 0.01659 | 0.01567 | 0.01494 GDI2      |
| cg03157806 | 0.04402 | 0.04598 | 0.0473  | 0.04064 | 0.03796 | 0.04022 | 0.50286 | 0.48119 | 0.04094 | 0.03926 FAM11A    |
| cg03158400 | 0.21224 | 0.14702 | 0.76157 | 0.86596 | 0.57049 | 0.75829 | 0.27292 | 0.31056 | 0.83402 | 0.81087 FAM3B     |
| cg03159329 | 0.03658 | 0.03425 | 0.04247 | 0.03688 | 0.02823 | 0.03274 | 0.03427 | 0.03255 | 0.03537 | 0.02831 STK39     |
| cg03159785 | 0.02739 | 0.02822 | 0.02681 | 0.02415 | 0.02075 | 0.02313 | 0.02373 | 0.02177 | 0.02496 | 0.02296 SKIL      |
| cg03159836 | 0.07519 | 0.07607 | 0.07937 | 0.06946 | 0.06418 | 0.05281 | 0.04351 | 0.05271 | 0.05861 | 0.05833 ZFX       |
| cg03160135 | 0.08474 | 0.06147 | 0.11023 | 0.0978  | 0.15588 | 0.07644 | 0.27697 | 0.08272 | 0.10431 | 0.04996 VGLL2     |
| cg03160309 | 0.14062 | 0.07849 | 0.10501 | 0.22676 | 0.08083 | 0.07353 | 0.08176 | 0.08411 | 0.09485 | 0.07993 PTGS2     |
| cg03160508 | 0.58456 | 0.43205 | 0.58345 | 0.74555 | 0.8577  | 0.6367  | 0.92204 | 0.46845 | 0.92696 | 0.74042 RHOD      |
| cg03160637 | 0.0599  | 0.05367 | 0.25215 | 0.10195 | 0.35041 | 0.06161 | 0.21168 | 0.05384 | 0.10836 | 0.17862 DDB1      |
| cg03160740 | 0.1977  | 0.06491 | 0.5286  | 0.51265 | 0.57381 | 0.29661 | 0.05835 | 0.05038 | 0.07475 | 0.04297 VIPR1     |
| cg03160815 | 0.20468 | 0.02751 | 0.67062 | 0.59988 | 0.97259 | 0.94473 | 0.88925 | 0.72826 | 0.28654 | 0.08117 NPB       |
| cg03161112 | 0.05754 | 0.03835 | 0.04783 | 0.04338 | 0.02702 | 0.0362  | 0.03684 | 0.03479 | 0.03352 | 0.03458 ZNF24     |
| cg03161453 | 0.13478 | 0.22428 | 0.93239 | 0.9233  | 0.90957 | 0.92815 | 0.51477 | 0.60234 | 0.92786 | 0.91503 BCOR      |
| cg03161839 | 0.05056 | 0.05631 | 0.0556  | 0.05137 | 0.0374  | 0.05178 | 0.04927 | 0.0459  | 0.05498 | 0.04817 ARHGEF1   |
| cg03163246 | 0.79591 | 0.74263 | 0.72022 | 0.77898 | 0.69196 | 0.73107 | 0.73278 | 0.32897 | 0.68156 | 0.49778 PPBPL2    |
| cg03164831 | 0.11338 | 0.12131 | 0.09886 | 0.08768 | 0.07015 | 0.08868 | 0.45109 | 0.52494 | 0.09623 | 0.08187 BRWD3     |

|            |         |         |         |         |         |         |         |         |         |                  |
|------------|---------|---------|---------|---------|---------|---------|---------|---------|---------|------------------|
| cg03165378 | 0.2899  | 0.14344 | 0.2092  | 0.22108 | 0.81253 | 0.63474 | 0.11306 | 0.12103 | 0.56979 | 0.33868 S100A9   |
| cg03165700 | 0.04866 | 0.05058 | 0.07453 | 0.05516 | 0.0726  | 0.06034 | 0.06452 | 0.06013 | 0.04738 | 0.0361 ATM       |
| cg03166779 | 0.04792 | 0.04314 | 0.05084 | 0.04526 | 0.04714 | 0.05617 | 0.04764 | 0.04997 | 0.03966 | 0.04653 ETV1     |
| cg03167275 | 0.04992 | 0.04634 | 0.08687 | 0.07563 | 0.33254 | 0.03833 | 0.055   | 0.04185 | 0.10416 | 0.0381 CXADR     |
| cg03167339 | 0.0326  | 0.02723 | 0.03595 | 0.03185 | 0.01724 | 0.02408 | 0.02097 | 0.02049 | 0.0234  | 0.02094 MICAL-L2 |
| cg03167763 | 0.4741  | 0.08152 | 0.88072 | 0.83654 | 0.92169 | 0.91233 | 0.06948 | 0.06    | 0.11728 | 0.0587 UBXD3     |
| cg03167883 | 0.45701 | 0.25734 | 0.08144 | 0.07744 | 0.07073 | 0.08278 | 0.09774 | 0.11926 | 0.07091 | 0.08025 FLJ46365 |
| cg03168296 | 0.23625 | 0.04605 | 0.05023 | 0.0462  | 0.03739 | 0.03131 | 0.03973 | 0.03917 | 0.23058 | 0.03655 NOXA1    |
| cg03168582 | 0.03575 | 0.0329  | 0.76172 | 0.90026 | 0.06303 | 0.0253  | 0.04197 | 0.0285  | 0.05015 | 0.02675 DMRT1    |
| cg03169180 | 0.57331 | 0.32654 | 0.90181 | 0.90005 | 0.94568 | 0.53121 | 0.58129 | 0.48395 | 0.92291 | 0.83607 NLGN2    |
| cg03169527 | 0.06182 | 0.04131 | 0.04763 | 0.0403  | 0.04741 | 0.04555 | 0.03135 | 0.03042 | 0.04438 | 0.03398 C3orf31  |
| cg03169715 | 0.03527 | 0.04006 | 0.05152 | 0.04116 | 0.03125 | 0.03814 | 0.03803 | 0.03541 | 0.0369  | 0.09747 HAS3     |
| cg03171924 | 0.93355 | 0.76245 | 0.92339 | 0.92805 | 0.96814 | 0.84714 | 0.93971 | 0.93903 | 0.95656 | 0.88944 RUNX3    |
| cg03172991 | 0.6981  | 0.33985 | 0.79257 | 0.80786 | 0.8423  | 0.65349 | 0.74325 | 0.48055 | 0.81705 | 0.48822 NFIX     |
| cg03173722 | 0.2443  | 0.20575 | 0.48039 | 0.59274 | 0.57374 | 0.3133  | 0.18411 | 0.16014 | 0.20355 | 0.16243 RUFY3    |
| cg03176585 | 0.0431  | 0.03752 | 0.04938 | 0.0449  | 0.04142 | 0.03229 | 0.04023 | 0.03961 | 0.03362 | 0.04019 MRPS35   |
| cg03177025 | 0.15298 | 0.1966  | 0.11967 | 0.1586  | 0.18176 | 0.11336 | 0.10775 | 0.14205 | 0.12859 | 0.23615 RBKS     |
| cg03177084 | 0.04035 | 0.04003 | 0.04575 | 0.04487 | 0.03451 | 0.0398  | 0.03885 | 0.04092 | 0.03655 | 0.03607 PSME3    |
| cg03179866 | 0.69435 | 0.70787 | 0.7314  | 0.76741 | 0.6376  | 0.65818 | 0.63212 | 0.67755 | 0.66813 | 0.67472 MMP12    |
| cg03184439 | 0.07304 | 0.05864 | 0.06317 | 0.05277 | 0.04214 | 0.05182 | 0.0604  | 0.05373 | 0.05259 | 0.05529 ICT1     |
| cg03184964 | 0.3502  | 0.30993 | 0.29938 | 0.36368 | 0.13656 | 0.08288 | 0.33182 | 0.34723 | 0.33404 | 0.32007 SMARCC2  |
| cg03188118 | 0.43046 | 0.34342 | 0.60883 | 0.63083 | 0.49813 | 0.3136  | 0.47026 | 0.40536 | 0.36489 | 0.43264 RGS6     |
| cg03190825 | 0.10712 | 0.06107 | 0.21632 | 0.20826 | 0.03497 | 0.05548 | 0.07304 | 0.05877 | 0.06528 | 0.04988 CYP4F11  |
| cg03192551 | 0.48256 | 0.08821 | 0.22099 | 0.33716 | 0.05479 | 0.02936 | 0.5462  | 0.09798 | 0.7769  | 0.61316 CGI-69   |
| cg03192737 | 0.49263 | 0.46139 | 0.39327 | 0.49464 | 0.40115 | 0.64794 | 0.24459 | 0.22378 | 0.21849 | 0.17531 OSTN     |
| cg03196745 | 0.04478 | 0.04152 | 0.05625 | 0.04798 | 0.04512 | 0.04903 | 0.04711 | 0.04938 | 0.04215 | 0.04027 NIFUN    |
| cg03197524 | 0.07456 | 0.06349 | 0.05592 | 0.04559 | 0.06259 | 0.05319 | 0.06212 | 0.05718 | 0.0596  | 0.05256 TNIP1    |
| cg03198372 | 0.52471 | 0.10627 | 0.54207 | 0.72662 | 0.40054 | 0.06616 | 0.18054 | 0.26005 | 0.39776 | 0.23475 KREMEN1  |
| cg03199651 | 0.08135 | 0.06528 | 0.06037 | 0.07031 | 0.15551 | 0.07547 | 0.06478 | 0.05915 | 0.56997 | 0.07474 MSX1     |
| cg03201604 | 0.03382 | 0.03292 | 0.03648 | 0.03434 | 0.60034 | 0.86722 | 0.92339 | 0.94463 | 0.43549 | 0.11137 AS AHL   |
| cg03202897 | 0.1124  | 0.03809 | 0.49832 | 0.52897 | 0.97719 | 0.97085 | 0.43868 | 0.03141 | 0.5437  | 0.48414 FAM50B   |
| cg03205208 | 0.07547 | 0.07675 | 0.08254 | 0.08038 | 0.09036 | 0.08675 | 0.08424 | 0.08241 | 0.09636 | 0.06263 KIN      |
| cg03208093 | 0.03895 | 0.03945 | 0.04382 | 0.03808 | 0.03689 | 0.0332  | 0.03489 | 0.03132 | 0.03833 | 0.02452 ZNF248   |
| cg03209127 | 0.03763 | 0.03519 | 0.03616 | 0.03393 | 0.02556 | 0.02978 | 0.03183 | 0.02971 | 0.02631 | 0.02865 B3GALNT2 |
| cg03212129 | 0.03948 | 0.03929 | 0.03366 | 0.04086 | 0.03874 | 0.03671 | 0.02148 | 0.01942 | 0.02752 | 0.0296 MGC13096  |
| cg03213216 | 0.03736 | 0.03633 | 0.87757 | 0.87171 | 0.89914 | 0.76069 | 0.39266 | 0.04759 | 0.29691 | 0.29923 FLJ40125 |
| cg03214212 | 0.08076 | 0.05964 | 0.06605 | 0.05846 | 0.04793 | 0.05369 | 0.04882 | 0.06032 | 0.06066 | 0.05623 TSPAN13  |
| cg03214697 | 0.57662 | 0.6395  | 0.41558 | 0.3672  | 0.15832 | 0.09088 | 0.4941  | 0.08164 | 0.59482 | 0.58292 SEC14L4  |
| cg03217102 | 0.10603 | 0.10484 | 0.1082  | 0.10977 | 0.06693 | 0.08707 | 0.0962  | 0.09454 | 0.0927  | 0.08241 LEMD3    |
| cg03217964 | 0.03873 | 0.03555 | 0.04505 | 0.0411  | 0.0453  | 0.05183 | 0.03331 | 0.0367  | 0.03902 | 0.03442 ZFP1     |
| cg03218019 | 0.02933 | 0.03825 | 0.03162 | 0.03112 | 0.03702 | 0.0413  | 0.03007 | 0.02318 | 0.03273 | 0.03501 DDOST    |

|            |         |         |         |         |         |         |         |         |         |         |           |
|------------|---------|---------|---------|---------|---------|---------|---------|---------|---------|---------|-----------|
| cg03218374 | 0.16751 | 0.10941 | 0.21981 | 0.22661 | 0.41556 | 0.66441 | 0.28644 | 0.16632 | 0.11171 | 0.12178 | ANGPT4    |
| cg03218909 | 0.16758 | 0.21002 | 0.21139 | 0.21266 | 0.1562  | 0.14142 | 0.16266 | 0.14992 | 0.14671 | 0.14337 | HAPLN2    |
| cg03221436 | 0.80243 | 0.53562 | 0.6556  | 0.77062 | 0.60311 | 0.52279 | 0.4362  | 0.54782 | 0.8599  | 0.82966 | JM11      |
| cg03221619 | 0.13437 | 0.05392 | 0.26594 | 0.26205 | 0.24917 | 0.28615 | 0.07585 | 0.05209 | 0.16328 | 0.0747  | FCER2     |
| cg03221676 | 0.0243  | 0.02543 | 0.02745 | 0.02386 | 0.02013 | 0.02157 | 0.02342 | 0.02279 | 0.02392 | 0.01995 | ZCCHC6    |
| cg03221776 | 0.43249 | 0.11348 | 0.63173 | 0.5825  | 0.90223 | 0.62999 | 0.0363  | 0.03475 | 0.03792 | 0.03315 | MFSD3     |
| cg03221914 | 0.49378 | 0.04928 | 0.29902 | 0.35456 | 0.76164 | 0.06128 | 0.90077 | 0.89706 | 0.90283 | 0.87391 | HIST1H2AJ |
| cg03222066 | 0.24465 | 0.05734 | 0.56468 | 0.67363 | 0.87652 | 0.83524 | 0.83714 | 0.71852 | 0.47169 | 0.56038 | ABCG4     |
| cg03223878 | 0.05955 | 0.04087 | 0.04993 | 0.04185 | 0.04101 | 0.04814 | 0.03401 | 0.03266 | 0.03455 | 0.03541 | BHLHB2    |
| cg03224418 | 0.5051  | 0.19634 | 0.81666 | 0.88921 | 0.93182 | 0.82731 | 0.88253 | 0.62236 | 0.93649 | 0.86673 | SAMD10    |
| cg03225779 | 0.1545  | 0.13183 | 0.23934 | 0.21392 | 0.47715 | 0.47949 | 0.20539 | 0.1698  | 0.15639 | 0.13924 | COL27A1   |
| cg03227078 | 0.09441 | 0.09324 | 0.15823 | 0.14702 | 0.15707 | 0.11915 | 0.11193 | 0.09398 | 0.0628  | 0.07523 | ZNF221    |
| cg03229887 | 0.03993 | 0.03972 | 0.04646 | 0.04721 | 0.03373 | 0.04376 | 0.03616 | 0.03199 | 0.03632 | 0.03302 | EIF2B3    |
| cg03231024 | 0.04394 | 0.04854 | 0.04843 | 0.05047 | 0.07611 | 0.04418 | 0.04379 | 0.04627 | 0.0376  | 0.04175 | EFNA1     |
| cg03234661 | 0.85294 | 0.84966 | 0.87633 | 0.87798 | 0.78245 | 0.8041  | 0.79244 | 0.84166 | 0.85924 | 0.80917 | SLC10A1   |
| cg03237153 | 0.13722 | 0.03737 | 0.87743 | 0.90647 | 0.88166 | 0.53438 | 0.86743 | 0.82746 | 0.68006 | 0.58274 | PPAP2C    |
| cg03238797 | 0.03521 | 0.02797 | 0.72367 | 0.73463 | 0.0491  | 0.03048 | 0.07045 | 0.03248 | 0.13216 | 0.06301 | ADAMTS18  |
| cg03240509 | 0.09954 | 0.06009 | 0.80681 | 0.80448 | 0.56014 | 0.474   | 0.28137 | 0.29174 | 0.20723 | 0.15666 | KCNA6     |
| cg03240745 | 0.84895 | 0.83944 | 0.84993 | 0.87319 | 0.89244 | 0.87343 | 0.84528 | 0.84569 | 0.86347 | 0.85339 | EGFL4     |
| cg03241282 | 0.29962 | 0.32692 | 0.41431 | 0.41065 | 0.27287 | 0.24107 | 0.37729 | 0.48712 | 0.11118 | 0.20749 | LOC348840 |
| cg03242666 | 0.26134 | 0.21188 | 0.71411 | 0.79331 | 0.38971 | 0.1564  | 0.74069 | 0.70284 | 0.80238 | 0.7711  | PMP22     |
| cg03242880 | 0.87333 | 0.87831 | 0.87196 | 0.88538 | 0.89011 | 0.86819 | 0.75287 | 0.8466  | 0.86918 | 0.86982 | BTG4      |
| cg03243506 | 0.88436 | 0.76946 | 0.86631 | 0.89247 | 0.92999 | 0.86526 | 0.59387 | 0.84813 | 0.87487 | 0.82028 | TMC2      |
| cg03243700 | 0.02396 | 0.03306 | 0.02529 | 0.02389 | 0.0233  | 0.03029 | 0.02399 | 0.02483 | 0.01928 | 0.02004 | WDR5      |
| cg03243895 | 0.0251  | 0.02817 | 0.02565 | 0.02425 | 0.0205  | 0.02469 | 0.02352 | 0.02748 | 0.02327 | 0.02087 | SPTAN1    |
| cg03243946 | 0.08371 | 0.07626 | 0.08349 | 0.08302 | 0.07385 | 0.06996 | 0.0699  | 0.07452 | 0.07724 | 0.07698 | LDHB      |
| cg03245641 | 0.13055 | 0.08099 | 0.54429 | 0.56695 | 0.71497 | 0.52751 | 0.78436 | 0.5833  | 0.7256  | 0.48298 | GPHA2     |
| cg03245962 | 0.05265 | 0.05164 | 0.05297 | 0.05059 | 0.04172 | 0.04677 | 0.0385  | 0.03866 | 0.04205 | 0.04276 | XRN1      |
| cg03247626 | 0.13211 | 0.12753 | 0.15239 | 0.15338 | 0.17045 | 0.13198 | 0.11264 | 0.10982 | 0.13088 | 0.14486 | HINT3     |
| cg03251079 | 0.03179 | 0.03789 | 0.03311 | 0.03495 | 0.0247  | 0.02659 | 0.03092 | 0.03036 | 0.0265  | 0.02981 | HMGA2     |
| cg03251249 | 0.03421 | 0.03479 | 0.0354  | 0.03108 | 0.02481 | 0.03162 | 0.03482 | 0.03049 | 0.02685 | 0.02809 | SIRT1     |
| cg03251655 | 0.82038 | 0.61904 | 0.09838 | 0.09473 | 0.06847 | 0.06499 | 0.06055 | 0.05174 | 0.05789 | 0.04906 | FLJ10260  |
| cg03251857 | 0.57196 | 0.15153 | 0.84085 | 0.8137  | 0.90242 | 0.85677 | 0.7841  | 0.55235 | 0.64028 | 0.60407 | PPAPDC3   |
| cg03256955 | 0.76823 | 0.2898  | 0.07183 | 0.05841 | 0.10367 | 0.07555 | 0.04736 | 0.0489  | 0.05248 | 0.05771 | TGFBR2    |
| cg03257423 | 0.31046 | 0.18505 | 0.06064 | 0.05709 | 0.05395 | 0.05758 | 0.04266 | 0.04192 | 0.04532 | 0.03867 | ZNF228    |
| cg03258472 | 0.8778  | 0.87831 | 0.88637 | 0.88775 | 0.74405 | 0.84841 | 0.86067 | 0.61931 | 0.90271 | 0.84552 | CRB3      |
| cg03259469 | 0.08941 | 0.21713 | 0.08219 | 0.064   | 0.07001 | 0.07777 | 0.07038 | 0.06738 | 0.88846 | 0.812   | SVIL      |
| cg03260744 | 0.90762 | 0.83537 | 0.84545 | 0.86384 | 0.71633 | 0.80113 | 0.85255 | 0.73993 | 0.89365 | 0.86513 | TEKT2     |
| cg03261004 | 0.0213  | 0.02259 | 0.01749 | 0.02086 | 0.01962 | 0.02191 | 0.02135 | 0.02122 | 0.02306 | 0.01636 | MAN1B1    |
| cg03262773 | 0.16445 | 0.1173  | 0.74144 | 0.69125 | 0.16905 | 0.1808  | 0.2842  | 0.09814 | 0.20719 | 0.12163 | RAD54L    |
| cg03262918 | 0.0431  | 0.03854 | 0.046   | 0.03903 | 0.03507 | 0.03832 | 0.0391  | 0.04175 | 0.0359  | 0.03521 | BBX       |



|            |         |         |         |         |         |         |         |         |         |                  |
|------------|---------|---------|---------|---------|---------|---------|---------|---------|---------|------------------|
| cg03264209 | 0.82722 | 0.52005 | 0.87632 | 0.8996  | 0.96204 | 0.84035 | 0.8908  | 0.83723 | 0.78424 | 0.85195 CREBBP   |
| cg03264414 | 0.24481 | 0.07105 | 0.87641 | 0.88126 | 0.74762 | 0.61727 | 0.06794 | 0.06466 | 0.14603 | 0.17148 PAEP     |
| cg03266453 | 0.15114 | 0.08246 | 0.78229 | 0.80206 | 0.63975 | 0.79904 | 0.7512  | 0.78233 | 0.6173  | 0.61846 EN1      |
| cg03266904 | 0.0266  | 0.02612 | 0.04121 | 0.03074 | 0.02786 | 0.03435 | 0.02322 | 0.02164 | 0.01978 | 0.01755 CNOT4    |
| cg03270167 | 0.03823 | 0.0638  | 0.44341 | 0.44026 | 0.07703 | 0.04984 | 0.68535 | 0.50383 | 0.04788 | 0.03411 RAMP1    |
| cg03270204 | 0.9074  | 0.87041 | 0.93466 | 0.94186 | 0.93633 | 0.88941 | 0.93071 | 0.87681 | 0.95421 | 0.84021 DDR1     |
| cg03270376 | 0.05144 | 0.05261 | 0.0521  | 0.04987 | 0.03555 | 0.04406 | 0.04332 | 0.04713 | 0.0457  | 0.04201 STK36    |
| cg03271651 | 0.07608 | 0.06734 | 0.06677 | 0.04737 | 0.0975  | 0.06687 | 0.05826 | 0.05335 | 0.08938 | 0.08498 POGZ     |
| cg03271907 | 0.92567 | 0.94047 | 0.67866 | 0.84219 | 0.89686 | 0.92885 | 0.42217 | 0.89733 | 0.90528 | 0.92803 MGMT     |
| cg03272031 | 0.03178 | 0.03461 | 0.03805 | 0.03322 | 0.02929 | 0.02818 | 0.02961 | 0.02998 | 0.02613 | 0.03066 LOH12CR1 |
| cg03273615 | 0.31052 | 0.15711 | 0.2978  | 0.29781 | 0.21626 | 0.13269 | 0.13109 | 0.13522 | 0.11181 | 0.13475 FLJ11016 |
| cg03274654 | 0.0386  | 0.04251 | 0.04381 | 0.04224 | 0.04853 | 0.068   | 0.06803 | 0.06088 | 0.03161 | 0.03657 KPNA3    |
| cg03274876 | 0.11596 | 0.11076 | 0.0919  | 0.0829  | 0.13344 | 0.11161 | 0.05704 | 0.05632 | 0.07759 | 0.09448 FLJ20534 |
| cg03275186 | 0.0465  | 0.04668 | 0.0517  | 0.04428 | 0.05808 | 0.04237 | 0.04667 | 0.03825 | 0.0522  | 0.0424 COPS8     |
| cg03276813 | 0.02062 | 0.01855 | 0.01992 | 0.01856 | 0.01441 | 0.01638 | 0.01735 | 0.01577 | 0.01997 | 0.01531 SSFA2    |
| cg03277051 | 0.06357 | 0.05777 | 0.04578 | 0.04562 | 0.04288 | 0.04557 | 0.06322 | 0.06133 | 0.04805 | 0.04163 COL8A1   |
| cg03277112 | 0.1547  | 0.05253 | 0.07171 | 0.07008 | 0.07005 | 0.07274 | 0.05181 | 0.04771 | 0.05242 | 0.05252 CRSP3    |
| cg03278643 | 0.6487  | 0.53619 | 0.31167 | 0.39448 | 0.95622 | 0.94302 | 0.93139 | 0.8328  | 0.93597 | 0.70661 EVC2     |
| cg03278960 | 0.03726 | 0.03414 | 0.03942 | 0.03735 | 0.02677 | 0.02692 | 0.03721 | 0.03212 | 0.02714 | 0.0303 C16orf57  |
| cg03279443 | 0.06282 | 0.07022 | 0.06182 | 0.06073 | 0.05973 | 0.05451 | 0.05687 | 0.05352 | 0.05528 | 0.05164 VDAC2    |
| cg03283421 | 0.56211 | 0.17286 | 0.70732 | 0.82555 | 0.71369 | 0.28215 | 0.64177 | 0.17848 | 0.86731 | 0.56599 CUZD1    |
| cg03283569 | 0.10093 | 0.05188 | 0.08185 | 0.05905 | 0.05895 | 0.04745 | 0.17921 | 0.06283 | 0.05129 | 0.0536 RABEPK    |
| cg03283694 | 0.11961 | 0.1085  | 0.26405 | 0.26689 | 0.33985 | 0.11699 | 0.09431 | 0.0917  | 0.11494 | 0.16326 SIGLEC11 |
| cg03283842 | 0.89573 | 0.33107 | 0.07094 | 0.05837 | 0.15698 | 0.06496 | 0.06348 | 0.05731 | 0.0897  | 0.04707 FKBP7    |
| cg03285457 | 0.03681 | 0.04479 | 0.22377 | 0.56421 | 0.86745 | 0.84228 | 0.86139 | 0.8662  | 0.15419 | 0.1498 LBX1      |
| cg03286783 | 0.07152 | 0.07558 | 0.07253 | 0.0724  | 0.0442  | 0.06171 | 0.05877 | 0.05912 | 0.06705 | 0.06002 CASC4    |
| cg03287877 | 0.79067 | 0.69254 | 0.80375 | 0.80051 | 0.73581 | 0.82746 | 0.2271  | 0.46647 | 0.86871 | 0.84397 DCAKD    |
| cg03289369 | 0.04758 | 0.0434  | 0.05743 | 0.04065 | 0.0556  | 0.05406 | 0.03521 | 0.04117 | 0.03677 | 0.02979 AASDH    |
| cg03289872 | 0.02847 | 0.03549 | 0.86536 | 0.91274 | 0.41756 | 0.24556 | 0.02789 | 0.02557 | 0.02629 | 0.02729 ZNF667   |
| cg03290040 | 0.03076 | 0.03053 | 0.03234 | 0.03117 | 0.91965 | 0.95222 | 0.03633 | 0.0407  | 0.03789 | 0.02613 C22orf16 |
| cg03291145 | 0.29313 | 0.1995  | 0.51854 | 0.66821 | 0.83933 | 0.84898 | 0.40669 | 0.39785 | 0.17008 | 0.30716 ARSF     |
| cg03292149 | 0.93052 | 0.92191 | 0.90798 | 0.92546 | 0.91172 | 0.91128 | 0.90431 | 0.77621 | 0.93999 | 0.77546 CBLC     |
| cg03292388 | 0.02746 | 0.03279 | 0.05092 | 0.04037 | 0.70808 | 0.90411 | 0.02697 | 0.02261 | 0.25457 | 0.09623 CPZ      |
| cg03293770 | 0.04466 | 0.04717 | 0.05197 | 0.04943 | 0.05158 | 0.05252 | 0.04666 | 0.04422 | 0.03926 | 0.04406 FLJ20487 |
| cg03293882 | 0.12783 | 0.13014 | 0.13892 | 0.11696 | 0.43338 | 0.31586 | 0.08241 | 0.07602 | 0.08099 | 0.06815 ZNF614   |
| cg03294491 | 0.86741 | 0.70042 | 0.82494 | 0.81962 | 0.81865 | 0.71851 | 0.83525 | 0.41687 | 0.59492 | 0.12479 SMAD2    |
| cg03294557 | 0.20506 | 0.25949 | 0.38027 | 0.36342 | 0.29124 | 0.24556 | 0.19204 | 0.1716  | 0.17482 | 0.16753 SERPINB4 |
| cg03294619 | 0.03618 | 0.02712 | 0.93452 | 0.97054 | 0.59518 | 0.4842  | 0.42224 | 0.55445 | 0.73432 | 0.67435 NKX2-5   |
| cg03296929 | 0.23825 | 0.18383 | 0.36561 | 0.412   | 0.20305 | 0.21648 | 0.31228 | 0.25313 | 0.18467 | 0.19221 IBSP     |
| cg03297731 | 0.69233 | 0.10427 | 0.29667 | 0.29579 | 0.39547 | 0.27074 | 0.28905 | 0.1589  | 0.17691 | 0.0843 GDPD3     |
| cg03298413 | 0.04909 | 0.05345 | 0.05308 | 0.05421 | 0.09807 | 0.10316 | 0.06994 | 0.05639 | 0.03782 | 0.04389 CREBL1   |

|            |         |         |         |         |         |         |         |         |         |         |          |
|------------|---------|---------|---------|---------|---------|---------|---------|---------|---------|---------|----------|
| cg03301801 | 0.87228 | 0.53332 | 0.81545 | 0.84963 | 0.87467 | 0.89652 | 0.81383 | 0.868   | 0.85993 | 0.62862 | FNDC7    |
| cg03302287 | 0.03471 | 0.03772 | 0.03921 | 0.03514 | 0.16216 | 0.03719 | 0.03606 | 0.04242 | 0.02574 | 0.02715 | PKP2     |
| cg03305230 | 0.05279 | 0.05307 | 0.05428 | 0.05546 | 0.08968 | 0.08425 | 0.0585  | 0.06209 | 0.05047 | 0.05631 | RA11     |
| cg03308985 | 0.04629 | 0.03755 | 0.04496 | 0.03666 | 0.034   | 0.03578 | 0.03098 | 0.03768 | 0.03494 | 0.02695 | DGCR6L   |
| cg03309050 | 0.04559 | 0.04412 | 0.05325 | 0.04821 | 0.1812  | 0.03848 | 0.03975 | 0.04407 | 0.03975 | 0.03878 | ZNF688   |
| cg03309721 | 0.03682 | 0.04074 | 0.03539 | 0.03781 | 0.02816 | 0.03505 | 0.03521 | 0.03695 | 0.03063 | 0.03043 | PLEKHJ1  |
| cg03309967 | 0.25902 | 0.39987 | 0.2926  | 0.48803 | 0.70153 | 0.48362 | 0.07414 | 0.07183 | 0.1944  | 0.21855 | PSENEEN  |
| cg03310453 | 0.02827 | 0.02421 | 0.02627 | 0.02551 | 0.021   | 0.02106 | 0.02389 | 0.02152 | 0.02034 | 0.01834 | PPP1CC   |
| cg03310469 | 0.04346 | 0.02239 | 0.02363 | 0.02599 | 0.01767 | 0.01971 | 0.01974 | 0.01717 | 0.01722 | 0.01435 | SIX2     |
| cg03311036 | 0.03652 | 0.04051 | 0.04577 | 0.04418 | 0.03202 | 0.04556 | 0.04198 | 0.04528 | 0.02829 | 0.03373 | CASP2    |
| cg03311899 | 0.94734 | 0.89258 | 0.93195 | 0.93176 | 0.9174  | 0.91505 | 0.85954 | 0.90815 | 0.94536 | 0.89587 | GPR109A  |
| cg03312124 | 0.03128 | 0.0325  | 0.04136 | 0.04206 | 0.02916 | 0.03104 | 0.02786 | 0.03332 | 0.02552 | 0.02822 | RFFL     |
| cg03312426 | 0.05233 | 0.04317 | 0.05288 | 0.05557 | 0.05709 | 0.05269 | 0.0294  | 0.02758 | 0.02933 | 0.03615 | RRAS     |
| cg03312532 | 0.85924 | 0.8131  | 0.85022 | 0.86358 | 0.89398 | 0.81503 | 0.83882 | 0.84127 | 0.84322 | 0.78454 | C1orf42  |
| cg03312792 | 0.64798 | 0.57366 | 0.69064 | 0.83361 | 0.7795  | 0.87127 | 0.12177 | 0.36329 | 0.20905 | 0.07163 | SEMG2    |
| cg03316864 | 0.73478 | 0.33984 | 0.61194 | 0.63809 | 0.45952 | 0.49709 | 0.03545 | 0.03288 | 0.41151 | 0.28755 | B3GNT3   |
| cg03317245 | 0.6468  | 0.33288 | 0.86359 | 0.86959 | 0.88981 | 0.85725 | 0.32743 | 0.30831 | 0.66514 | 0.56749 | P2RX5    |
| cg03320844 | 0.55522 | 0.62057 | 0.64148 | 0.64321 | 0.48732 | 0.5318  | 0.55881 | 0.62466 | 0.83101 | 0.7799  | GJA1     |
| cg03322129 | 0.03586 | 0.03484 | 0.03888 | 0.03454 | 0.02185 | 0.03098 | 0.03468 | 0.03402 | 0.03587 | 0.03099 | UBE2J2   |
| cg03322749 | 0.05641 | 0.05475 | 0.05486 | 0.05608 | 0.03989 | 0.05112 | 0.04715 | 0.05017 | 0.04868 | 0.0475  | MRRF     |
| cg03327494 | 0.89455 | 0.43082 | 0.88828 | 0.89426 | 0.92705 | 0.89695 | 0.84638 | 0.86745 | 0.7438  | 0.32925 | ZDHC19   |
| cg03328750 | 0.04363 | 0.03973 | 0.04135 | 0.03987 | 0.0386  | 0.03572 | 0.03675 | 0.03603 | 0.0383  | 0.03619 | ARHGAP26 |
| cg03328804 | 0.06207 | 0.06735 | 0.10143 | 0.08564 | 0.07503 | 0.09275 | 0.09383 | 0.0813  | 0.08041 | 0.06672 | UVRAG    |
| cg03329165 | 0.10499 | 0.05723 | 0.37398 | 0.53885 | 0.07997 | 0.09579 | 0.18162 | 0.0522  | 0.0608  | 0.04381 | CD200    |
| cg03329572 | 0.69816 | 0.37253 | 0.76877 | 0.81386 | 0.51151 | 0.48545 | 0.39867 | 0.4842  | 0.36833 | 0.34352 | FCRL5    |
| cg03330058 | 0.2001  | 0.19605 | 0.74884 | 0.84181 | 0.76001 | 0.55613 | 0.41344 | 0.06119 | 0.70132 | 0.55597 | ABTB1    |
| cg03330516 | 0.0546  | 0.06195 | 0.80694 | 0.77305 | 0.77429 | 0.74776 | 0.2873  | 0.15071 | 0.25323 | 0.26694 | SRMS     |
| cg03330678 | 0.04719 | 0.04558 | 0.05494 | 0.04177 | 0.03875 | 0.0368  | 0.04253 | 0.0393  | 0.04162 | 0.04333 | 9-Sep    |
| cg03332113 | 0.05847 | 0.05518 | 0.13727 | 0.12798 | 0.05921 | 0.05958 | 0.05279 | 0.03914 | 0.03216 | 0.03326 | RAI14    |
| cg03332271 | 0.88648 | 0.71411 | 0.87299 | 0.93884 | 0.91904 | 0.61793 | 0.8711  | 0.91796 | 0.74099 | 0.26677 | MST1R    |
| cg03332970 | 0.04332 | 0.04206 | 0.05312 | 0.06069 | 0.6672  | 0.51127 | 0.0687  | 0.06244 | 0.24834 | 0.03471 | ESAM     |
| cg03334529 | 0.48151 | 0.5051  | 0.12152 | 0.25872 | 0.81912 | 0.84171 | 0.06699 | 0.06566 | 0.06186 | 0.05895 | ZNF663   |
| cg03336167 | 0.95608 | 0.55261 | 0.97223 | 0.97534 | 0.93372 | 0.96008 | 0.9454  | 0.97529 | 0.97494 | 0.97539 | SLC22A18 |
| cg03338064 | 0.74465 | 0.79105 | 0.68467 | 0.75223 | 0.66791 | 0.73742 | 0.72828 | 0.76607 | 0.82805 | 0.80723 | KIF2     |
| cg03338189 | 0.08378 | 0.06209 | 0.0537  | 0.05276 | 0.04643 | 0.05216 | 0.05125 | 0.05688 | 0.05194 | 0.04645 | C2orf4   |
| cg03338959 | 0.17139 | 0.10605 | 0.15502 | 0.18629 | 0.22324 | 0.11163 | 0.13289 | 0.059   | 0.05899 | 0.04769 | PBEF1    |
| cg03340261 | 0.03439 | 0.03976 | 0.04051 | 0.03914 | 0.035   | 0.03884 | 0.03172 | 0.03717 | 0.03371 | 0.03309 | HBS1L    |
| cg03340878 | 0.61968 | 0.31266 | 0.71281 | 0.82192 | 0.36013 | 0.42661 | 0.73293 | 0.58096 | 0.19925 | 0.17779 | OR2B6    |
| cg03343942 | 0.47807 | 0.06935 | 0.44144 | 0.49767 | 0.3123  | 0.53891 | 0.19995 | 0.53616 | 0.35138 | 0.10342 | SLC39A5  |
| cg03347966 | 0.03668 | 0.03989 | 0.04147 | 0.04065 | 0.04119 | 0.04254 | 0.03388 | 0.03702 | 0.0395  | 0.03793 | FBXL6    |
| cg03349251 | 0.7707  | 0.61505 | 0.68908 | 0.74249 | 0.81012 | 0.66874 | 0.74504 | 0.79308 | 0.83297 | 0.78278 | MAK      |

|            |         |         |         |         |         |         |         |         |         |                  |
|------------|---------|---------|---------|---------|---------|---------|---------|---------|---------|------------------|
| cg03349935 | 0.90307 | 0.66475 | 0.89325 | 0.90973 | 0.69232 | 0.89636 | 0.87723 | 0.85597 | 0.90965 | 0.8788 RASL12    |
| cg03349953 | 0.68388 | 0.82056 | 0.72859 | 0.72709 | 0.40693 | 0.71118 | 0.1292  | 0.11432 | 0.07803 | 0.07783 PCDHB5   |
| cg03352153 | 0.88466 | 0.90909 | 0.81829 | 0.84949 | 0.69707 | 0.83564 | 0.4869  | 0.53575 | 0.09399 | 0.09618 GLULD1   |
| cg03354519 | 0.12173 | 0.04679 | 0.05354 | 0.051   | 0.04183 | 0.04386 | 0.04413 | 0.04323 | 0.04832 | 0.05343 ANXA5    |
| cg03354772 | 0.08722 | 0.05382 | 0.50083 | 0.76618 | 0.90086 | 0.86583 | 0.05409 | 0.05339 | 0.23765 | 0.21456 C10orf93 |
| cg03355298 | 0.02125 | 0.02329 | 0.0225  | 0.02447 | 0.02438 | 0.02771 | 0.02339 | 0.0232  | 0.02443 | 0.02404 B2M      |
| cg03355526 | 0.41375 | 0.70354 | 0.82853 | 0.92824 | 0.74651 | 0.64879 | 0.41988 | 0.03833 | 0.13866 | 0.06314 ZNF454   |
| cg03359285 | 0.04509 | 0.03633 | 0.05212 | 0.05076 | 0.0556  | 0.04836 | 0.05498 | 0.0462  | 0.0388  | 0.04448 TOP2A    |
| cg03359508 | 0.03885 | 0.04268 | 0.04365 | 0.03999 | 0.02585 | 0.03917 | 0.04044 | 0.04068 | 0.03531 | 0.02792 ANXA11   |
| cg03361068 | 0.02969 | 0.02783 | 0.02628 | 0.02748 | 0.031   | 0.03061 | 0.02492 | 0.0273  | 0.02171 | 0.02503 TRIM9    |
| cg03362494 | 0.7681  | 0.7913  | 0.67577 | 0.76092 | 0.79729 | 0.81883 | 0.60099 | 0.6093  | 0.63516 | 0.44439 ZDHC19   |
| cg03363175 | 0.02997 | 0.03338 | 0.03465 | 0.03414 | 0.02808 | 0.02747 | 0.03516 | 0.03507 | 0.02618 | 0.0256 NLE1      |
| cg03363283 | 0.76226 | 0.79158 | 0.6404  | 0.72815 | 0.60554 | 0.74945 | 0.68444 | 0.72835 | 0.71649 | 0.59852 TAS2R9   |
| cg03364504 | 0.92206 | 0.86599 | 0.05464 | 0.05852 | 0.93309 | 0.8759  | 0.8951  | 0.88952 | 0.87097 | 0.1609 FLJ36116  |
| cg03364781 | 0.85292 | 0.67281 | 0.6724  | 0.71871 | 0.73432 | 0.8372  | 0.81966 | 0.86388 | 0.45757 | 0.12777 ALPK1    |
| cg03365354 | 0.0282  | 0.03164 | 0.03467 | 0.0323  | 0.2584  | 0.03155 | 0.02943 | 0.03029 | 0.0254  | 0.02371 MCAM     |
| cg03365432 | 0.06053 | 0.06726 | 0.06624 | 0.08131 | 0.04225 | 0.06058 | 0.05828 | 0.06082 | 0.06746 | 0.04487 FGFR10P  |
| cg03365437 | 0.20651 | 0.08104 | 0.24669 | 0.22162 | 0.58575 | 0.74648 | 0.62332 | 0.77557 | 0.15752 | 0.2735 ALDH1A2   |
| cg03366382 | 0.55305 | 0.53483 | 0.18745 | 0.23831 | 0.92361 | 0.71809 | 0.11923 | 0.0895  | 0.46724 | 0.32003 INS      |
| cg03366677 | 0.02076 | 0.0187  | 0.01614 | 0.01652 | 0.01568 | 0.01913 | 0.01688 | 0.01747 | 0.01319 | 0.01495 C14orf4  |
| cg03366896 | 0.02522 | 0.02431 | 0.02734 | 0.02864 | 0.0156  | 0.02251 | 0.0212  | 0.0225  | 0.01829 | 0.01941 ECHS1    |
| cg03367667 | 0.03011 | 0.03232 | 0.04084 | 0.03457 | 0.02826 | 0.03035 | 0.02608 | 0.02502 | 0.02534 | 0.02326 STOML2   |
| cg03368758 | 0.79569 | 0.43328 | 0.57291 | 0.60172 | 0.50054 | 0.38802 | 0.24715 | 0.25902 | 0.11662 | 0.11504 LDB2     |
| cg03369671 | 0.03029 | 0.0331  | 0.03201 | 0.03144 | 0.02268 | 0.02939 | 0.02693 | 0.02814 | 0.02417 | 0.02712 ARMC9    |
| cg03370542 | 0.13761 | 0.13271 | 0.20929 | 0.17704 | 0.23977 | 0.19245 | 0.16385 | 0.13423 | 0.15408 | 0.2089 ATG4C     |
| cg03371205 | 0.05459 | 0.05461 | 0.04526 | 0.04738 | 0.03552 | 0.04175 | 0.04539 | 0.04445 | 0.04045 | 0.03984 LYPLA2   |
| cg03371306 | 0.05112 | 0.04525 | 0.04652 | 0.04131 | 0.05178 | 0.0455  | 0.0435  | 0.03672 | 0.03683 | 0.04132 FBXW7    |
| cg03373080 | 0.04375 | 0.04655 | 0.05105 | 0.04509 | 0.02961 | 0.03783 | 0.03814 | 0.0425  | 0.03521 | 0.03936 C10orf42 |
| cg03373442 | 0.0246  | 0.02583 | 0.02767 | 0.02783 | 0.02204 | 0.02875 | 0.02317 | 0.024   | 0.02421 | 0.01819 HSPH1    |
| cg03373857 | 0.02901 | 0.02622 | 0.02812 | 0.02421 | 0.01888 | 0.03252 | 0.02386 | 0.02463 | 0.02231 | 0.02072 WBSCR16  |
| cg03375002 | 0.73108 | 0.39289 | 0.70173 | 0.75913 | 0.67098 | 0.73132 | 0.6221  | 0.65672 | 0.2835  | 0.24823 LAT2     |
| cg03375833 | 0.7949  | 0.49039 | 0.7392  | 0.79725 | 0.66145 | 0.57955 | 0.18954 | 0.53318 | 0.4589  | 0.20335 TTLL3    |
| cg03377682 | 0.07592 | 0.10265 | 0.07055 | 0.07646 | 0.05798 | 0.06715 | 0.06939 | 0.06288 | 0.06952 | 0.07943 PDIA3    |
| cg03379131 | 0.03674 | 0.05004 | 0.04891 | 0.04206 | 0.03171 | 0.03204 | 0.04224 | 0.03634 | 0.03421 | 0.03186 ADAM15   |
| cg03380645 | 0.83704 | 0.59181 | 0.87156 | 0.83981 | 0.86928 | 0.84553 | 0.84595 | 0.6891  | 0.9193  | 0.51179 SFTPB    |
| cg03380773 | 0.07614 | 0.02594 | 0.07692 | 0.06744 | 0.14872 | 0.06123 | 0.06483 | 0.03833 | 0.02863 | 0.03116 FLJ25169 |
| cg03381111 | 0.60025 | 0.67508 | 0.5017  | 0.6362  | 0.18537 | 0.18102 | 0.48543 | 0.53181 | 0.67307 | 0.22754 PWCR1    |
| cg03382304 | 0.05859 | 0.05038 | 0.05479 | 0.05427 | 0.08998 | 0.0481  | 0.15299 | 0.05176 | 0.06721 | 0.04558 JAM2     |
| cg03382346 | 0.74874 | 0.6151  | 0.44266 | 0.35572 | 0.64654 | 0.72676 | 0.77203 | 0.82795 | 0.79843 | 0.75403 ZNF611   |
| cg03382564 | 0.04301 | 0.04518 | 0.04477 | 0.04062 | 0.03535 | 0.03642 | 0.03296 | 0.03341 | 0.03734 | 0.03263 FLJ25476 |
| cg03382797 | 0.81663 | 0.78849 | 0.78526 | 0.81356 | 0.70973 | 0.78638 | 0.67064 | 0.62141 | 0.80586 | 0.7902 C9orf98   |

|            |         |         |         |         |         |         |         |         |         |         |           |
|------------|---------|---------|---------|---------|---------|---------|---------|---------|---------|---------|-----------|
| cg03383661 | 0.05097 | 0.0535  | 0.05696 | 0.05071 | 0.03652 | 0.03977 | 0.0426  | 0.04494 | 0.04608 | 0.0404  | TBC       |
| cg03384938 | 0.03134 | 0.02983 | 0.03276 | 0.03096 | 0.03103 | 0.03972 | 0.02862 | 0.02402 | 0.02772 | 0.0258  | CXXC4     |
| cg03386140 | 0.04679 | 0.04971 | 0.05489 | 0.05081 | 0.05501 | 0.04298 | 0.04259 | 0.03755 | 0.03908 | 0.03834 | ANGEL2    |
| cg03386373 | 0.48003 | 0.09827 | 0.50785 | 0.5634  | 0.53843 | 0.56309 | 0.10805 | 0.09984 | 0.30622 | 0.20909 | SPATA3    |
| cg03386722 | 0.04998 | 0.05538 | 0.04764 | 0.04766 | 0.03051 | 0.04287 | 0.04239 | 0.04712 | 0.04075 | 0.03693 | FASN      |
| cg03386869 | 0.92361 | 0.76889 | 0.09232 | 0.06057 | 0.05777 | 0.1422  | 0.87683 | 0.87535 | 0.95929 | 0.89452 | ITGBL1    |
| cg03386903 | 0.6998  | 0.16637 | 0.90502 | 0.91259 | 0.92851 | 0.90832 | 0.89428 | 0.80945 | 0.905   | 0.91363 | KCNAB3    |
| cg03387497 | 0.56946 | 0.33902 | 0.67891 | 0.71752 | 0.71868 | 0.80332 | 0.77512 | 0.81671 | 0.63867 | 0.46186 | C20orf179 |
| cg03387723 | 0.93917 | 0.77062 | 0.94266 | 0.92847 | 0.95451 | 0.71116 | 0.13375 | 0.37051 | 0.91388 | 0.16332 | SCMH1     |
| cg03388193 | 0.85731 | 0.75542 | 0.68786 | 0.69446 | 0.70574 | 0.83824 | 0.10302 | 0.07939 | 0.86873 | 0.82114 | HPSE2     |
| cg03389111 | 0.09346 | 0.09092 | 0.15153 | 0.12633 | 0.14585 | 0.09249 | 0.09435 | 0.07106 | 0.09672 | 0.09927 | HRB2      |
| cg03389133 | 0.76526 | 0.41357 | 0.68338 | 0.89397 | 0.74788 | 0.69049 | 0.2513  | 0.04379 | 0.10882 | 0.04036 | SSTR3     |
| cg03389164 | 0.87659 | 0.87755 | 0.9185  | 0.92397 | 0.79755 | 0.87326 | 0.8959  | 0.90264 | 0.92399 | 0.87233 | ASB2      |
| cg03390211 | 0.03154 | 0.02698 | 0.5868  | 0.64399 | 0.86303 | 0.96997 | 0.02872 | 0.04157 | 0.02374 | 0.03969 | PDIA2     |
| cg03391040 | 0.02827 | 0.03026 | 0.09041 | 0.03257 | 0.02238 | 0.02504 | 0.02627 | 0.02829 | 0.02379 | 0.02418 | ZNF420    |
| cg03391568 | 0.61444 | 0.10452 | 0.1579  | 0.31197 | 0.49066 | 0.81678 | 0.06623 | 0.28981 | 0.30223 | 0.24844 | PTHR1     |
| cg03392046 | 0.12274 | 0.11265 | 0.13957 | 0.12378 | 0.10206 | 0.12614 | 0.11344 | 0.12769 | 0.1272  | 0.11762 | CCDC75    |
| cg03395546 | 0.36106 | 0.34387 | 0.30545 | 0.33728 | 0.35524 | 0.33787 | 0.21814 | 0.21505 | 0.27993 | 0.25981 | ADCK4     |
| cg03395898 | 0.19686 | 0.12565 | 0.27599 | 0.36626 | 0.39335 | 0.16042 | 0.19126 | 0.13697 | 0.49906 | 0.12697 | TGFB3     |
| cg03396229 | 0.04784 | 0.03303 | 0.14172 | 0.16632 | 0.37662 | 0.40435 | 0.03845 | 0.07139 | 0.03959 | 0.02405 | COL22A1   |
| cg03399459 | 0.74305 | 0.26993 | 0.84233 | 0.80229 | 0.91866 | 0.80828 | 0.40726 | 0.20504 | 0.87027 | 0.47574 | ANXA8     |
| cg03399971 | 0.88477 | 0.88021 | 0.85887 | 0.87305 | 0.83858 | 0.85563 | 0.88376 | 0.73666 | 0.87109 | 0.85842 | INHBC     |
| cg03400060 | 0.91995 | 0.84211 | 0.02979 | 0.03006 | 0.9594  | 0.92813 | 0.92805 | 0.70725 | 0.3591  | 0.54765 | BHMT2     |
| cg03401114 | 0.58931 | 0.66134 | 0.85182 | 0.8736  | 0.83331 | 0.85601 | 0.76157 | 0.80633 | 0.88161 | 0.85619 | BMP8B     |
| cg03402775 | 0.05054 | 0.0564  | 0.05907 | 0.05733 | 0.04308 | 0.0488  | 0.05146 | 0.05268 | 0.0428  | 0.04815 | DZIP3     |
| cg03402876 | 0.02252 | 0.02434 | 0.026   | 0.02789 | 0.01865 | 0.01802 | 0.04759 | 0.01733 | 0.02022 | 0.0162  | KCNF1     |
| cg03403539 | 0.04434 | 0.04419 | 0.04805 | 0.04379 | 0.05193 | 0.05588 | 0.04752 | 0.05039 | 0.03656 | 0.0326  | NUPL2     |
| cg03404502 | 0.78176 | 0.58402 | 0.74204 | 0.78588 | 0.71648 | 0.7199  | 0.75861 | 0.80444 | 0.65285 | 0.6447  | GPR18     |
| cg03405173 | 0.05708 | 0.05817 | 0.06515 | 0.06689 | 0.05258 | 0.05542 | 0.06998 | 0.05303 | 0.05207 | 0.04991 | ZNF441    |
| cg03406535 | 0.7947  | 0.18343 | 0.36105 | 0.48788 | 0.5118  | 0.58782 | 0.35423 | 0.29982 | 0.36051 | 0.07009 | RBP7      |
| cg03409548 | 0.73083 | 0.24027 | 0.0952  | 0.09338 | 0.07262 | 0.07521 | 0.0799  | 0.07921 | 0.0777  | 0.07457 | MOBK2C    |
| cg03410718 | 0.89838 | 0.88878 | 0.91387 | 0.91005 | 0.92411 | 0.91002 | 0.9254  | 0.91785 | 0.92194 | 0.90658 | FLJ45684  |
| cg03411288 | 0.03855 | 0.04043 | 0.04257 | 0.03846 | 0.03591 | 0.03857 | 0.04337 | 0.03992 | 0.03121 | 0.0297  | C10orf47  |
| cg03414321 | 0.17716 | 0.09224 | 0.54005 | 0.80395 | 0.46478 | 0.224   | 0.18883 | 0.08689 | 0.51946 | 0.43618 | HCK       |
| cg03415518 | 0.35972 | 0.45697 | 0.57143 | 0.71732 | 0.6875  | 0.74972 | 0.44114 | 0.46845 | 0.57244 | 0.51234 | NCRMS     |
| cg03417317 | 0.0526  | 0.05485 | 0.08121 | 0.08963 | 0.0644  | 0.0506  | 0.04432 | 0.03825 | 0.04063 | 0.036   | C10orf77  |
| cg03417466 | 0.66224 | 0.1897  | 0.28493 | 0.22035 | 0.57959 | 0.7251  | 0.23678 | 0.25827 | 0.20672 | 0.15876 | TYR       |
| cg03418289 | 0.02126 | 0.02216 | 0.02145 | 0.01851 | 0.01644 | 0.02409 | 0.01748 | 0.01943 | 0.01722 | 0.01818 | LIX1L     |
| cg03421300 | 0.94039 | 0.93614 | 0.93049 | 0.93968 | 0.94572 | 0.93675 | 0.94043 | 0.92955 | 0.95166 | 0.92549 | SFN       |
| cg03421687 | 0.02395 | 0.02126 | 0.04234 | 0.02928 | 0.96582 | 0.96785 | 0.29303 | 0.41227 | 0.35835 | 0.3352  | ZMYND10   |
| cg03422350 | 0.81052 | 0.06615 | 0.90904 | 0.89369 | 0.83687 | 0.65058 | 0.87483 | 0.284   | 0.82899 | 0.56197 | MOCS1     |

|            |         |         |         |         |         |         |         |         |         |                  |
|------------|---------|---------|---------|---------|---------|---------|---------|---------|---------|------------------|
| cg03423524 | 0.02956 | 0.0301  | 0.03059 | 0.02927 | 0.02685 | 0.02666 | 0.02544 | 0.02449 | 0.02481 | 0.02404 FOSL1    |
| cg03424436 | 0.12914 | 0.06837 | 0.08228 | 0.0791  | 0.08433 | 0.06801 | 0.1118  | 0.05827 | 0.06967 | 0.04479 CEP250   |
| cg03425110 | 0.02533 | 0.02521 | 0.87461 | 0.90556 | 0.5479  | 0.54226 | 0.02591 | 0.01913 | 0.02497 | 0.01969 NEUROG3  |
| cg03426225 | 0.2115  | 0.13309 | 0.7779  | 0.86945 | 0.85701 | 0.85562 | 0.70954 | 0.45852 | 0.85811 | 0.63017 FAM38B   |
| cg03427564 | 0.03904 | 0.03808 | 0.0515  | 0.04753 | 0.04716 | 0.04061 | 0.0413  | 0.04353 | 0.05497 | 0.0397 EP300     |
| cg03427831 | 0.12453 | 0.07686 | 0.13505 | 0.13466 | 0.41512 | 0.59133 | 0.09363 | 0.07788 | 0.10353 | 0.09672 MTHFR    |
| cg03428000 | 0.05154 | 0.04643 | 0.0485  | 0.04508 | 0.03375 | 0.03882 | 0.04031 | 0.04275 | 0.04052 | 0.04694 HSMPP8   |
| cg03429034 | 0.04998 | 0.05061 | 0.0454  | 0.04394 | 0.04302 | 0.05208 | 0.03384 | 0.03727 | 0.02989 | 0.02816 ZKSCAN1  |
| cg03429582 | 0.03102 | 0.02944 | 0.02771 | 0.02758 | 0.03052 | 0.02841 | 0.02736 | 0.02936 | 0.02548 | 0.02495 RBM4     |
| cg03430067 | 0.12548 | 0.11821 | 0.11758 | 0.12817 | 0.10155 | 0.08299 | 0.09663 | 0.09773 | 0.08641 | 0.08847 MGC11271 |
| cg03430998 | 0.36822 | 0.60394 | 0.7145  | 0.75709 | 0.54726 | 0.66198 | 0.5996  | 0.4152  | 0.72939 | 0.6825 TLR1      |
| cg03431064 | 0.04615 | 0.05391 | 0.05756 | 0.05418 | 0.03824 | 0.0475  | 0.04714 | 0.04831 | 0.04729 | 0.05104 TUBB2C   |
| cg03437318 | 0.14042 | 0.04444 | 0.28305 | 0.3612  | 0.42437 | 0.38777 | 0.40802 | 0.22346 | 0.04829 | 0.0346 ERBB3     |
| cg03438515 | 0.04815 | 0.05819 | 0.10517 | 0.27848 | 0.04286 | 0.04874 | 0.04499 | 0.04304 | 0.04642 | 0.04127 SRGAP3   |
| cg03438904 | 0.03725 | 0.03519 | 0.03288 | 0.03222 | 0.02978 | 0.02985 | 0.03329 | 0.03055 | 0.02846 | 0.0247 LRCH3     |
| cg03439703 | 0.78961 | 0.24161 | 0.38341 | 0.49903 | 0.94497 | 0.82848 | 0.36902 | 0.34057 | 0.51723 | 0.26281 PDE3B    |
| cg03439805 | 0.0768  | 0.07584 | 0.0969  | 0.09345 | 0.10349 | 0.09806 | 0.11308 | 0.08945 | 0.07447 | 0.08944 CORO1C   |
| cg03440267 | 0.31661 | 0.03388 | 0.03793 | 0.14033 | 0.03798 | 0.04253 | 0.02937 | 0.07037 | 0.18758 | 0.02395 F13A1    |
| cg03440846 | 0.07346 | 0.08802 | 0.11675 | 0.32696 | 0.64218 | 0.63113 | 0.07952 | 0.08666 | 0.14565 | 0.05393 ACSS2    |
| cg03442064 | 0.19968 | 0.19965 | 0.19715 | 0.19531 | 0.12249 | 0.16412 | 0.18013 | 0.17988 | 0.19404 | 0.18102 FOXP4    |
| cg03443922 | 0.04278 | 0.04265 | 0.0495  | 0.04788 | 0.02253 | 0.03978 | 0.03404 | 0.03762 | 0.0387  | 0.042 CBLL1      |
| cg03445474 | 0.04104 | 0.03839 | 0.04666 | 0.03977 | 0.04428 | 0.04103 | 0.04434 | 0.04066 | 0.032   | 0.04335 GPIAP1   |
| cg03445896 | 0.78985 | 0.79746 | 0.62999 | 0.64096 | 0.547   | 0.50022 | 0.34503 | 0.45086 | 0.16333 | 0.16559 GPR23    |
| cg03446863 | 0.08063 | 0.08443 | 0.07856 | 0.08216 | 0.05003 | 0.07778 | 0.06602 | 0.07659 | 0.07009 | 0.06941 TFEB     |
| cg03447931 | 0.03103 | 0.0352  | 0.05021 | 0.03574 | 0.25634 | 0.20843 | 0.02755 | 0.02874 | 0.02552 | 0.02608 BMP6     |
| cg03451296 | 0.02042 | 0.02107 | 0.02324 | 0.02207 | 0.01931 | 0.01949 | 0.01838 | 0.0187  | 0.01749 | 0.01773 CRIP2    |
| cg03453449 | 0.8729  | 0.64191 | 0.87933 | 0.88688 | 0.88261 | 0.87335 | 0.87189 | 0.86002 | 0.88273 | 0.75977 USP44    |
| cg03454353 | 0.08753 | 0.1024  | 0.13788 | 0.20956 | 0.25826 | 0.29724 | 0.22452 | 0.06971 | 0.05538 | 0.05285 ZFP37    |
| cg03455024 | 0.87834 | 0.86898 | 0.86805 | 0.89772 | 0.91774 | 0.92684 | 0.85714 | 0.87174 | 0.92235 | 0.84581 SLC12A3  |
| cg03455458 | 0.04012 | 0.03731 | 0.05124 | 0.03588 | 0.06035 | 0.30054 | 0.03719 | 0.0385  | 0.03411 | 0.02906 FLJ12505 |
| cg03455762 | 0.18177 | 0.27539 | 0.73768 | 0.85282 | 0.69931 | 0.7685  | 0.57973 | 0.11513 | 0.39736 | 0.46324 XPNPEP2  |
| cg03455874 | 0.0448  | 0.04722 | 0.04891 | 0.04808 | 0.04582 | 0.04526 | 0.04807 | 0.04855 | 0.04119 | 0.03829 BRI3BP   |
| cg03458191 | 0.37602 | 0.15625 | 0.86017 | 0.8967  | 0.6721  | 0.66821 | 0.30754 | 0.1737  | 0.89442 | 0.63688 SAA1     |
| cg03459809 | 0.4392  | 0.09275 | 0.22605 | 0.41191 | 0.86282 | 0.54572 | 0.67405 | 0.28164 | 0.54412 | 0.26333 EPHX1    |
| cg03460527 | 0.32697 | 0.13227 | 0.04355 | 0.03824 | 0.06778 | 0.03881 | 0.12697 | 0.05876 | 0.05897 | 0.03354 F3       |
| cg03460682 | 0.43777 | 0.26269 | 0.34528 | 0.33312 | 0.31714 | 0.30896 | 0.63355 | 0.06058 | 0.05087 | 0.05063 CYP27A1  |
| cg03461495 | 0.03338 | 0.0406  | 0.03828 | 0.03475 | 0.03497 | 0.03387 | 0.03342 | 0.02879 | 0.02956 | 0.03044 ATG9A    |
| cg03462055 | 0.03114 | 0.03664 | 0.03724 | 0.03273 | 0.04991 | 0.03271 | 0.03205 | 0.03035 | 0.03014 | 0.02326 TUBB2B   |
| cg03464416 | 0.07192 | 0.06557 | 0.12134 | 0.11448 | 0.08597 | 0.07642 | 0.41831 | 0.28035 | 0.05467 | 0.06028 RPL10    |
| cg03464655 | 0.93624 | 0.92678 | 0.87536 | 0.82952 | 0.87419 | 0.93294 | 0.52644 | 0.47033 | 0.10545 | 0.06812 FLJ39822 |
| cg03464689 | 0.05744 | 0.05719 | 0.06152 | 0.05392 | 0.04593 | 0.05514 | 0.04421 | 0.0523  | 0.0503  | 0.04955 NFKB1    |

|            |         |         |         |         |         |         |         |         |         |                   |
|------------|---------|---------|---------|---------|---------|---------|---------|---------|---------|-------------------|
| cg03465320 | 0.62248 | 0.24519 | 0.66917 | 0.64927 | 0.73075 | 0.79996 | 0.43276 | 0.21554 | 0.22471 | 0.1592 TAP1       |
| cg03465847 | 0.01848 | 0.01985 | 0.02011 | 0.02029 | 0.0142  | 0.01805 | 0.01139 | 0.01364 | 0.01398 | 0.01326 CRSP2     |
| cg03468463 | 0.78042 | 0.65382 | 0.74521 | 0.82378 | 0.45772 | 0.71    | 0.15791 | 0.12857 | 0.1393  | 0.15402 SERPINB12 |
| cg03469054 | 0.04779 | 0.0597  | 0.91365 | 0.94268 | 0.55026 | 0.50758 | 0.06835 | 0.05745 | 0.19828 | 0.06255 KIAA1944  |
| cg03469082 | 0.09886 | 0.0772  | 0.11994 | 0.10646 | 0.07867 | 0.05668 | 0.06136 | 0.06454 | 0.06733 | 0.06796 GABRG1    |
| cg03469158 | 0.54289 | 0.57297 | 0.77713 | 0.8044  | 0.65387 | 0.75789 | 0.68002 | 0.73765 | 0.78269 | 0.7489 MMP8       |
| cg03473294 | 0.03594 | 0.03708 | 0.06049 | 0.06945 | 0.02997 | 0.02924 | 0.03269 | 0.03435 | 0.03232 | 0.02912 TASP1     |
| cg03473518 | 0.44432 | 0.25155 | 0.88469 | 0.92537 | 0.95844 | 0.91841 | 0.86195 | 0.76771 | 0.89224 | 0.7031 GJB6       |
| cg03474731 | 0.07211 | 0.04535 | 0.13266 | 0.12348 | 0.25897 | 0.08939 | 0.22448 | 0.09953 | 0.0876  | 0.04254 CHEK1     |
| cg03475172 | 0.22042 | 0.53568 | 0.84655 | 0.84365 | 0.67346 | 0.39572 | 0.29572 | 0.18543 | 0.35335 | 0.23125 USP6NL    |
| cg03475420 | 0.03059 | 0.034   | 0.02806 | 0.03062 | 0.02854 | 0.03152 | 0.03118 | 0.03029 | 0.02978 | 0.02829 RTN4R     |
| cg03476195 | 0.47531 | 0.49485 | 0.72433 | 0.763   | 0.63626 | 0.69568 | 0.40175 | 0.41449 | 0.34539 | 0.32818 ANK2      |
| cg03476370 | 0.08685 | 0.07817 | 0.08586 | 0.09469 | 0.11944 | 0.08348 | 0.08677 | 0.07048 | 0.06198 | 0.05886 NDUFC2    |
| cg03478689 | 0.03078 | 0.03373 | 0.03251 | 0.0358  | 0.02589 | 0.02958 | 0.0314  | 0.0258  | 0.1557  | 0.29184 EDIL3     |
| cg03479797 | 0.05634 | 0.06663 | 0.06955 | 0.06217 | 0.08773 | 0.09495 | 0.06259 | 0.05655 | 0.05078 | 0.05721 CREBL1    |
| cg03479974 | 0.0491  | 0.04778 | 0.0465  | 0.04588 | 0.0354  | 0.04671 | 0.04747 | 0.05057 | 0.04327 | 0.05068 FBXO18    |
| cg03482087 | 0.07896 | 0.07655 | 0.06973 | 0.06528 | 0.0776  | 0.07765 | 0.05227 | 0.06568 | 0.06094 | 0.06565 MGC33302  |
| cg03483626 | 0.15485 | 0.07006 | 0.70238 | 0.82039 | 0.64529 | 0.64943 | 0.08285 | 0.05832 | 0.86549 | 0.80522 KCNA3     |
| cg03483654 | 0.96731 | 0.96625 | 0.96721 | 0.97435 | 0.96373 | 0.9614  | 0.95918 | 0.93216 | 0.97684 | 0.97326 DAK       |
| cg03484533 | 0.02448 | 0.02425 | 0.03579 | 0.06689 | 0.24692 | 0.15961 | 0.06129 | 0.02303 | 0.35869 | 0.20736 FABP3     |
| cg03486540 | 0.07971 | 0.08698 | 0.12038 | 0.09286 | 0.11337 | 0.09366 | 0.09098 | 0.08328 | 0.0611  | 0.07034 ZNF224    |
| cg03490115 | 0.06538 | 0.06114 | 0.08456 | 0.0662  | 0.0914  | 0.06796 | 0.04661 | 0.05135 | 0.06492 | 0.05649 ZNHIT4    |
| cg03490200 | 0.87634 | 0.90267 | 0.87196 | 0.87742 | 0.9064  | 0.88159 | 0.86755 | 0.87322 | 0.89982 | 0.87256 A2ML1     |
| cg03491181 | 0.08346 | 0.06653 | 0.07867 | 0.06299 | 0.09457 | 0.10018 | 0.05334 | 0.04767 | 0.05854 | 0.07121 FKBP3     |
| cg03491478 | 0.3016  | 0.41983 | 0.47917 | 0.59878 | 0.47255 | 0.5047  | 0.23369 | 0.10867 | 0.29277 | 0.11178 MAPK8IP1  |
| cg03493069 | 0.06764 | 0.04431 | 0.05754 | 0.05439 | 0.06334 | 0.04678 | 0.04389 | 0.036   | 0.0439  | 0.03847 PSCD1     |
| cg03494005 | 0.02976 | 0.027   | 0.03265 | 0.03504 | 0.02871 | 0.03253 | 0.02429 | 0.03001 | 0.02501 | 0.02216 FBXO24    |
| cg03495868 | 0.05074 | 0.04808 | 0.05127 | 0.05228 | 0.03583 | 0.04633 | 0.0415  | 0.04667 | 0.04811 | 0.04342 PTGFR     |
| cg03496289 | 0.09476 | 0.08744 | 0.11454 | 0.13285 | 0.06289 | 0.05908 | 0.08204 | 0.08472 | 0.09897 | 0.06647 CDKN2D    |
| cg03496978 | 0.15938 | 0.16497 | 0.15679 | 0.16601 | 0.16262 | 0.16653 | 0.16784 | 0.13722 | 0.16163 | 0.15452 FBXO28    |
| cg03498559 | 0.56924 | 0.67733 | 0.6577  | 0.64871 | 0.55916 | 0.59682 | 0.6408  | 0.58747 | 0.58375 | 0.60616 UGT2B4    |
| cg03499052 | 0.17912 | 0.04502 | 0.04411 | 0.03946 | 0.03266 | 0.03999 | 0.03523 | 0.03798 | 0.0394  | 0.03206 LOC92689  |
| cg03503295 | 0.25675 | 0.39741 | 0.82534 | 0.90726 | 0.9189  | 0.81496 | 0.85408 | 0.43773 | 0.50471 | 0.63437 DNAH5     |
| cg03503905 | 0.0207  | 0.02419 | 0.01972 | 0.0205  | 0.01962 | 0.01766 | 0.01861 | 0.01924 | 0.01637 | 0.01653 TAF4      |
| cg03504078 | 0.74552 | 0.75317 | 0.61621 | 0.69799 | 0.69737 | 0.74891 | 0.32175 | 0.28242 | 0.23671 | 0.35701 PCDH3     |
| cg03504701 | 0.81071 | 0.15628 | 0.82384 | 0.81201 | 0.84684 | 0.82641 | 0.43778 | 0.4345  | 0.21776 | 0.08017 CDH18     |
| cg03506489 | 0.07462 | 0.04641 | 0.63038 | 0.80252 | 0.14767 | 0.15212 | 0.07726 | 0.04751 | 0.28911 | 0.39943 KCNA4     |
| cg03506684 | 0.07068 | 0.03736 | 0.04181 | 0.03786 | 0.03653 | 0.03805 | 0.0324  | 0.03141 | 0.03106 | 0.03245 GYG2      |
| cg03506799 | 0.04978 | 0.0343  | 0.08904 | 0.05417 | 0.03157 | 0.02718 | 0.04716 | 0.02686 | 0.03705 | 0.02169 CHSY1     |
| cg03509024 | 0.02857 | 0.02691 | 0.03146 | 0.02653 | 0.05472 | 0.02786 | 0.02913 | 0.02464 | 0.02397 | 0.02319 VHL       |
| cg03510310 | 0.80345 | 0.58356 | 0.87674 | 0.86629 | 0.90695 | 0.87822 | 0.61668 | 0.7815  | 0.87556 | 0.83682 HRASLS2   |

|            |         |         |         |         |         |         |         |         |         |         |           |
|------------|---------|---------|---------|---------|---------|---------|---------|---------|---------|---------|-----------|
| cg03513163 | 0.1342  | 0.10253 | 0.6939  | 0.69968 | 0.37013 | 0.28822 | 0.14182 | 0.12603 | 0.09902 | 0.12954 | PCDHB1    |
| cg03513363 | 0.20397 | 0.07617 | 0.48186 | 0.54942 | 0.67847 | 0.43932 | 0.1817  | 0.10671 | 0.09372 | 0.0697  | DUSP15    |
| cg03515901 | 0.16364 | 0.15575 | 0.47662 | 0.62043 | 0.64333 | 0.78891 | 0.48454 | 0.16145 | 0.42978 | 0.74276 | TGIF2LY   |
| cg03517000 | 0.85235 | 0.49198 | 0.79929 | 0.84205 | 0.71119 | 0.77616 | 0.81294 | 0.85345 | 0.76271 | 0.44396 | GSTA2     |
| cg03518503 | 0.04427 | 0.04488 | 0.0553  | 0.04348 | 0.05267 | 0.03937 | 0.05103 | 0.04416 | 0.04232 | 0.04052 | PLEKHH3   |
| cg03519303 | 0.02657 | 0.02688 | 0.02944 | 0.02966 | 0.02411 | 0.0271  | 0.02293 | 0.02363 | 0.02365 | 0.024   | CCRN4L    |
| cg03520136 | 0.82232 | 0.86032 | 0.81054 | 0.84315 | 0.6855  | 0.81331 | 0.66523 | 0.83239 | 0.27792 | 0.30282 | UPP2      |
| cg03521113 | 0.71793 | 0.14643 | 0.59967 | 0.7658  | 0.81699 | 0.71505 | 0.55679 | 0.11491 | 0.14266 | 0.09503 | LRMP      |
| cg03521347 | 0.03343 | 0.03444 | 0.03318 | 0.03086 | 0.03206 | 0.03589 | 0.03916 | 0.03433 | 0.0281  | 0.024   | NUDCD3    |
| cg03521600 | 0.05973 | 0.05353 | 0.08261 | 0.0798  | 0.03527 | 0.03594 | 0.04385 | 0.04549 | 0.05895 | 0.06836 | MTBP      |
| cg03522063 | 0.05719 | 0.05828 | 0.06904 | 0.07825 | 0.06179 | 0.06241 | 0.05795 | 0.05684 | 0.16031 | 0.07469 | EMX2      |
| cg03522216 | 0.03015 | 0.03004 | 0.02437 | 0.02406 | 0.02639 | 0.02626 | 0.02475 | 0.0266  | 0.02096 | 0.02147 | GOLPH3    |
| cg03522403 | 0.04422 | 0.04823 | 0.04331 | 0.04334 | 0.03561 | 0.03842 | 0.03929 | 0.03552 | 0.03407 | 0.03545 | STAU      |
| cg03522910 | 0.67852 | 0.0472  | 0.48663 | 0.46485 | 0.40838 | 0.10206 | 0.14834 | 0.1063  | 0.04069 | 0.02722 | B4GALT3   |
| cg03524308 | 0.10908 | 0.04316 | 0.69609 | 0.79107 | 0.41227 | 0.45476 | 0.04248 | 0.04577 | 0.03336 | 0.03344 | ZNF585A   |
| cg03524627 | 0.03421 | 0.02986 | 0.04241 | 0.06541 | 0.02919 | 0.03194 | 0.02949 | 0.02961 | 0.02639 | 0.02485 | CDC25B    |
| cg03528946 | 0.06999 | 0.04993 | 0.05008 | 0.05307 | 0.80529 | 0.04721 | 0.04344 | 0.04347 | 0.3291  | 0.0438  | SHB       |
| cg03529436 | 0.03906 | 0.03905 | 0.04099 | 0.04654 | 0.42577 | 0.39686 | 0.06303 | 0.03954 | 0.03143 | 0.03776 | ORF1-FL49 |
| cg03530967 | 0.07552 | 0.07855 | 0.08742 | 0.0692  | 0.14961 | 0.10311 | 0.0837  | 0.09448 | 0.09645 | 0.09973 | ITGAV     |
| cg03531512 | 0.07269 | 0.06938 | 0.07833 | 0.09447 | 0.0836  | 0.07569 | 0.07547 | 0.06189 | 0.0624  | 0.0713  | TFIP11    |
| cg03532005 | 0.03915 | 0.03763 | 0.04446 | 0.03775 | 0.03286 | 0.03391 | 0.03695 | 0.04264 | 0.03609 | 0.03679 | PSPH      |
| cg03532114 | 0.0355  | 0.03923 | 0.03835 | 0.03995 | 0.02869 | 0.03804 | 0.03615 | 0.03173 | 0.03344 | 0.03249 | COMMD1    |
| cg03532879 | 0.70222 | 0.55968 | 0.88364 | 0.88752 | 0.88225 | 0.88437 | 0.82077 | 0.59728 | 0.69591 | 0.64722 | SMAF1     |
| cg03532957 | 0.04972 | 0.05649 | 0.05438 | 0.04868 | 0.03763 | 0.05626 | 0.04847 | 0.04958 | 0.04427 | 0.05406 | CHSY1     |
| cg03533058 | 0.89587 | 0.60822 | 0.90439 | 0.91577 | 0.44632 | 0.70622 | 0.55638 | 0.86719 | 0.55444 | 0.31879 | NR4A1     |
| cg03533811 | 0.88735 | 0.87958 | 0.95897 | 0.96281 | 0.96476 | 0.95966 | 0.96007 | 0.95607 | 0.94263 | 0.95323 | HISPPD2A  |
| cg03533858 | 0.52222 | 0.5785  | 0.59453 | 0.84178 | 0.83738 | 0.83251 | 0.86416 | 0.52833 | 0.89037 | 0.84515 | MORN1     |
| cg03534410 | 0.85505 | 0.75985 | 0.79235 | 0.90019 | 0.93952 | 0.84762 | 0.69792 | 0.73307 | 0.7918  | 0.04245 | TMEM40    |
| cg03535648 | 0.81148 | 0.84014 | 0.66564 | 0.74845 | 0.68126 | 0.74657 | 0.73112 | 0.76445 | 0.76684 | 0.75191 | PMCH      |
| cg03536003 | 0.63762 | 0.54326 | 0.57634 | 0.6182  | 0.52342 | 0.55527 | 0.55787 | 0.61957 | 0.58497 | 0.5677  | TMPRSS11D |
| cg03536787 | 0.0336  | 0.0322  | 0.03161 | 0.03144 | 0.02523 | 0.02876 | 0.02845 | 0.0279  | 0.02774 | 0.02885 | NSD1      |
| cg03538345 | 0.16438 | 0.13619 | 0.12269 | 0.11467 | 0.07233 | 0.05233 | 0.04295 | 0.05647 | 0.15993 | 0.09745 | MTMR3     |
| cg03538436 | 0.04629 | 0.05142 | 0.96224 | 0.9659  | 0.45973 | 0.94687 | 0.04891 | 0.04798 | 0.0517  | 0.03408 | NOS1      |
| cg03539474 | 0.05292 | 0.05107 | 0.06658 | 0.06201 | 0.06922 | 0.0702  | 0.05504 | 0.07105 | 0.07221 | 0.0797  | SLC25A12  |
| cg03543403 | 0.01841 | 0.01879 | 0.02161 | 0.01774 | 0.01595 | 0.01841 | 0.02162 | 0.01885 | 0.01707 | 0.02245 | DIABLO    |
| cg03543593 | 0.21965 | 0.0589  | 0.12218 | 0.12174 | 0.18089 | 0.10809 | 0.07659 | 0.06507 | 0.13833 | 0.14789 | TNXB      |
| cg03544320 | 0.04413 | 0.03019 | 0.97593 | 0.98598 | 0.24416 | 0.29618 | 0.60838 | 0.68074 | 0.01947 | 0.02033 | CRMP1     |
| cg03544379 | 0.26568 | 0.04683 | 0.30632 | 0.3436  | 0.52738 | 0.43364 | 0.05488 | 0.04924 | 0.49737 | 0.42047 | OR7C2     |
| cg03544525 | 0.03818 | 0.04401 | 0.73675 | 0.7496  | 0.39274 | 0.03502 | 0.03171 | 0.03693 | 0.03792 | 0.03083 | PFKFB2    |
| cg03545635 | 0.82629 | 0.75963 | 0.83707 | 0.86121 | 0.81507 | 0.75968 | 0.78632 | 0.83553 | 0.8754  | 0.82145 | CHST12    |
| cg03547797 | 0.84497 | 0.79865 | 0.28631 | 0.28153 | 0.23096 | 0.39938 | 0.10433 | 0.1283  | 0.64958 | 0.51268 | GAS2      |

|            |         |         |         |         |         |         |         |         |         |         |          |
|------------|---------|---------|---------|---------|---------|---------|---------|---------|---------|---------|----------|
| cg03547924 | 0.8713  | 0.43709 | 0.93308 | 0.93681 | 0.90801 | 0.82035 | 0.87017 | 0.06792 | 0.7797  | 0.61953 | GDF5     |
| cg03548857 | 0.10975 | 0.13742 | 0.848   | 0.83075 | 0.68033 | 0.67352 | 0.08961 | 0.07415 | 0.85961 | 0.85656 | FFAR2    |
| cg03549127 | 0.23438 | 0.39449 | 0.1341  | 0.16694 | 0.0805  | 0.06803 | 0.08159 | 0.07824 | 0.05872 | 0.06379 | GCA      |
| cg03549571 | 0.02693 | 0.02723 | 0.92858 | 0.82615 | 0.95526 | 0.96386 | 0.2102  | 0.04295 | 0.32994 | 0.07773 | DHH      |
| cg03550002 | 0.05465 | 0.04864 | 0.05974 | 0.03999 | 0.04465 | 0.04791 | 0.0579  | 0.0499  | 0.03982 | 0.03574 | ARSK     |
| cg03550508 | 0.03026 | 0.03234 | 0.03514 | 0.02804 | 0.02182 | 0.03051 | 0.02466 | 0.02969 | 0.0245  | 0.03293 | SNRPD3   |
| cg03552103 | 0.75317 | 0.07298 | 0.05473 | 0.04846 | 0.13932 | 0.04368 | 0.80939 | 0.39769 | 0.94299 | 0.82912 | 10-Sep   |
| cg03552688 | 0.65816 | 0.36669 | 0.80137 | 0.76572 | 0.84963 | 0.88202 | 0.83566 | 0.88124 | 0.87437 | 0.62759 | BPESC1   |
| cg03554552 | 0.20458 | 0.02533 | 0.03609 | 0.04125 | 0.64352 | 0.86711 | 0.54141 | 0.55001 | 0.9656  | 0.95029 | PPP1R13L |
| cg03554914 | 0.05354 | 0.05421 | 0.05968 | 0.05045 | 0.07165 | 0.04664 | 0.05354 | 0.05028 | 0.04369 | 0.04842 | MASTL    |
| cg03555203 | 0.94942 | 0.94481 | 0.94373 | 0.94458 | 0.96449 | 0.94581 | 0.77731 | 0.83856 | 0.8983  | 0.89432 | ZNF537   |
| cg03555909 | 0.01925 | 0.01885 | 0.02489 | 0.0185  | 0.01786 | 0.0171  | 0.01714 | 0.01962 | 0.01565 | 0.01431 | TMEM109  |
| cg03556497 | 0.05552 | 0.0644  | 0.22709 | 0.34382 | 0.05905 | 0.06875 | 0.05999 | 0.05401 | 0.05297 | 0.05763 | SLC32A1  |
| cg03557698 | 0.93679 | 0.59052 | 0.9518  | 0.9688  | 0.97156 | 0.9745  | 0.96256 | 0.61692 | 0.96629 | 0.79424 | C1orf177 |
| cg03557733 | 0.04049 | 0.04181 | 0.15919 | 0.17957 | 0.94753 | 0.88851 | 0.07305 | 0.04357 | 0.92093 | 0.88762 | MPP2     |
| cg03558299 | 0.04479 | 0.03666 | 0.04583 | 0.05315 | 0.0247  | 0.0276  | 0.0363  | 0.03477 | 0.02585 | 0.02028 | CSE1L    |
| cg03558807 | 0.92663 | 0.92911 | 0.92867 | 0.93257 | 0.9481  | 0.89626 | 0.93946 | 0.92746 | 0.94007 | 0.92507 | TIGA1    |
| cg03560090 | 0.27005 | 0.0325  | 0.0385  | 0.03296 | 0.02476 | 0.03054 | 0.02874 | 0.03076 | 0.02784 | 0.02821 | MGC10433 |
| cg03560597 | 0.03223 | 0.03179 | 0.04086 | 0.03666 | 0.03807 | 0.04424 | 0.03106 | 0.0312  | 0.03293 | 0.03296 | DUSP18   |
| cg03561565 | 0.14795 | 0.12497 | 0.63421 | 0.67342 | 0.57062 | 0.52843 | 0.18249 | 0.15996 | 0.5158  | 0.57333 | KCNS2    |
| cg03562120 | 0.81828 | 0.65536 | 0.7686  | 0.76968 | 0.79082 | 0.74468 | 0.36623 | 0.15079 | 0.83191 | 0.67357 | WISP2    |
| cg03563403 | 0.03036 | 0.02956 | 0.02565 | 0.02534 | 0.03059 | 0.02671 | 0.02319 | 0.02824 | 0.02196 | 0.01774 | FANCG    |
| cg03564506 | 0.09747 | 0.04798 | 0.16227 | 0.05361 | 0.05496 | 0.04688 | 0.04165 | 0.03979 | 0.03541 | 0.03389 | TRRAP    |
| cg03565081 | 0.06661 | 0.06199 | 0.10919 | 0.19329 | 0.12913 | 0.06813 | 0.08182 | 0.05202 | 0.06774 | 0.06656 | C14orf93 |
| cg03565323 | 0.11221 | 0.06027 | 0.83246 | 0.87007 | 0.19376 | 0.09017 | 0.10019 | 0.20135 | 0.05437 | 0.04513 | ZNF287   |
| cg03565782 | 0.02441 | 0.02435 | 0.02229 | 0.02538 | 0.02189 | 0.02338 | 0.02209 | 0.02153 | 0.01999 | 0.0201  | IER5     |
| cg03567830 | 0.02431 | 0.02069 | 0.6599  | 0.77256 | 0.94611 | 0.9127  | 0.2483  | 0.3838  | 0.90281 | 0.9073  | NTSR1    |
| cg03568064 | 0.20439 | 0.03827 | 0.68923 | 0.79138 | 0.91951 | 0.9391  | 0.44564 | 0.25713 | 0.1322  | 0.49543 | MAPK8IP1 |
| cg03568718 | 0.89826 | 0.42932 | 0.91602 | 0.95188 | 0.95292 | 0.92457 | 0.51714 | 0.38039 | 0.16433 | 0.41621 | TP73     |
| cg03569412 | 0.90249 | 0.62976 | 0.90384 | 0.89888 | 0.88503 | 0.53066 | 0.9021  | 0.79345 | 0.93261 | 0.63194 | MBD3     |
| cg03569637 | 0.76935 | 0.63571 | 0.87406 | 0.89016 | 0.87409 | 0.86655 | 0.19775 | 0.68937 | 0.87978 | 0.78315 | FAM113B  |
| cg03570766 | 0.89204 | 0.71253 | 0.93236 | 0.93958 | 0.87532 | 0.90902 | 0.82946 | 0.90236 | 0.90622 | 0.82234 | CATSPER1 |
| cg03570976 | 0.03228 | 0.02858 | 0.03231 | 0.02958 | 0.03484 | 0.03542 | 0.0302  | 0.03344 | 0.02809 | 0.02972 | CES2     |
| cg03572913 | 0.07298 | 0.05622 | 0.07346 | 0.07892 | 0.09027 | 0.06564 | 0.08294 | 0.06229 | 0.06055 | 0.04676 | C20orf52 |
| cg03573747 | 0.83754 | 0.64176 | 0.70107 | 0.70971 | 0.79923 | 0.75379 | 0.16991 | 0.10166 | 0.55673 | 0.38057 | ADIPOQ   |
| cg03574115 | 0.84717 | 0.55001 | 0.76388 | 0.78824 | 0.71361 | 0.68521 | 0.65338 | 0.66438 | 0.79791 | 0.77513 | WDR65    |
| cg03574571 | 0.9061  | 0.89031 | 0.87656 | 0.91319 | 0.93919 | 0.89558 | 0.26168 | 0.37639 | 0.91994 | 0.85717 | CD22     |
| cg03575468 | 0.0749  | 0.05623 | 0.07433 | 0.06332 | 0.07791 | 0.19676 | 0.04473 | 0.03701 | 0.04778 | 0.05007 | PDHA1    |
| cg03578041 | 0.69336 | 0.13137 | 0.20581 | 0.25181 | 0.53873 | 0.4534  | 0.70466 | 0.52537 | 0.86629 | 0.2731  | LARP6    |
| cg03580247 | 0.78541 | 0.17608 | 0.85133 | 0.87998 | 0.84973 | 0.75917 | 0.13336 | 0.07134 | 0.52113 | 0.18584 | SLC4A1   |
| cg03580351 | 0.03422 | 0.03568 | 0.05015 | 0.04076 | 0.03728 | 0.03892 | 0.03749 | 0.03132 | 0.02981 | 0.03122 | FLJ40869 |



|            |         |         |         |         |         |         |         |         |         |                  |
|------------|---------|---------|---------|---------|---------|---------|---------|---------|---------|------------------|
| cg03580876 | 0.01855 | 0.01749 | 0.02388 | 0.01905 | 0.02151 | 0.01869 | 0.01788 | 0.01896 | 0.02079 | 0.0165 TRMU      |
| cg03582451 | 0.71772 | 0.76839 | 0.74472 | 0.76362 | 0.7715  | 0.78411 | 0.73392 | 0.73765 | 0.81331 | 0.77729 LOC81691 |
| cg03583857 | 0.70437 | 0.32293 | 0.90935 | 0.92388 | 0.93049 | 0.90747 | 0.0742  | 0.07515 | 0.90353 | 0.6616 CD34      |
| cg03584220 | 0.7582  | 0.28209 | 0.79769 | 0.83327 | 0.71824 | 0.65527 | 0.69139 | 0.51778 | 0.49424 | 0.2599 XCL2      |
| cg03584646 | 0.82135 | 0.82123 | 0.79083 | 0.80779 | 0.77033 | 0.81515 | 0.7238  | 0.84025 | 0.80642 | 0.77095 TBC1D8   |
| cg03586029 | 0.05208 | 0.04876 | 0.04826 | 0.04451 | 0.05969 | 0.05852 | 0.04771 | 0.04745 | 0.04505 | 0.06363 MGC33302 |
| cg03586879 | 0.03463 | 0.03909 | 0.20592 | 0.18878 | 0.03325 | 0.03528 | 0.02791 | 0.03375 | 0.03679 | 0.03348 A2BP1    |
| cg03588357 | 0.41937 | 0.29646 | 0.6728  | 0.74565 | 0.95902 | 0.90475 | 0.34986 | 0.20382 | 0.36889 | 0.06792 GPR68    |
| cg03589001 | 0.79106 | 0.56403 | 0.8785  | 0.90048 | 0.92288 | 0.88067 | 0.87325 | 0.87593 | 0.90144 | 0.57623 MORF4L1  |
| cg03591238 | 0.11086 | 0.06906 | 0.10191 | 0.13164 | 0.09339 | 0.0882  | 0.07075 | 0.06654 | 0.17623 | 0.08022 ZNHIT2   |
| cg03591594 | 0.06346 | 0.06069 | 0.04322 | 0.03892 | 0.04933 | 0.04088 | 0.03919 | 0.03588 | 0.03333 | 0.03027 VLDLR    |
| cg03592161 | 0.02182 | 0.02432 | 0.02518 | 0.02219 | 0.01886 | 0.02096 | 0.02243 | 0.02239 | 0.01915 | 0.01635 C1orf48  |
| cg03593419 | 0.03483 | 0.02598 | 0.21823 | 0.22439 | 0.50527 | 0.42303 | 0.02588 | 0.02641 | 0.02657 | 0.02626 GABRA4   |
| cg03594044 | 0.03166 | 0.03296 | 0.03565 | 0.03456 | 0.02803 | 0.0329  | 0.03471 | 0.03392 | 0.02991 | 0.02782 FUT10    |
| cg03595428 | 0.06298 | 0.06238 | 0.10223 | 0.08286 | 0.0862  | 0.08934 | 0.48624 | 0.56722 | 0.04772 | 0.04516 MTCP1    |
| cg03597525 | 0.27581 | 0.09717 | 0.61993 | 0.65481 | 0.28528 | 0.27003 | 0.09597 | 0.09845 | 0.11377 | 0.09203 SIGLEC10 |
| cg03599338 | 0.70853 | 0.32978 | 0.80022 | 0.84958 | 0.61482 | 0.05702 | 0.67999 | 0.57908 | 0.66466 | 0.04642 SUSD2    |
| cg03600318 | 0.07193 | 0.044   | 0.05309 | 0.0621  | 0.07202 | 0.04931 | 0.04459 | 0.04615 | 0.04846 | 0.04566 SFTPD    |
| cg03600687 | 0.02568 | 0.02696 | 0.02708 | 0.02181 | 0.06136 | 0.02605 | 0.07975 | 0.02153 | 0.02552 | 0.02339 BOK      |
| cg03602500 | 0.10995 | 0.07785 | 0.42169 | 0.53992 | 0.10843 | 0.0759  | 0.06563 | 0.06274 | 0.05933 | 0.09939 FLJ00060 |
| cg03604278 | 0.28133 | 0.12232 | 0.7318  | 0.80314 | 0.63416 | 0.73627 | 0.25668 | 0.13795 | 0.29403 | 0.32854 CIDEA    |
| cg03605339 | 0.03144 | 0.03653 | 0.04067 | 0.03386 | 0.02901 | 0.03448 | 0.03433 | 0.02864 | 0.03417 | 0.02947 ARMC7    |
| cg03605761 | 0.71228 | 0.77163 | 0.8428  | 0.86643 | 0.28765 | 0.08902 | 0.14891 | 0.2527  | 0.26359 | 0.24304 RNF126   |
| cg03606258 | 0.6907  | 0.70752 | 0.69422 | 0.74587 | 0.87096 | 0.8857  | 0.94408 | 0.95217 | 0.49898 | 0.52491 GNAS     |
| cg03608167 | 0.02901 | 0.02654 | 0.0322  | 0.03144 | 0.04555 | 0.02838 | 0.03384 | 0.0365  | 0.3433  | 0.31943 CXCR4    |
| cg03608577 | 0.21085 | 0.08271 | 0.50431 | 0.6544  | 0.49628 | 0.48172 | 0.05984 | 0.07027 | 0.2333  | 0.1437 OR12D3    |
| cg03608974 | 0.30062 | 0.06221 | 0.10747 | 0.06996 | 0.67775 | 0.17579 | 0.51522 | 0.0946  | 0.6654  | 0.2685 ZAK       |
| cg03609102 | 0.28596 | 0.08249 | 0.27246 | 0.41749 | 0.87091 | 0.78939 | 0.03825 | 0.02412 | 0.17632 | 0.03153 MUC5B    |
| cg03611555 | 0.02374 | 0.02249 | 0.02131 | 0.0197  | 0.01875 | 0.0218  | 0.02068 | 0.01796 | 0.01914 | 0.02035 SLC25A21 |
| cg03614513 | 0.05843 | 0.05309 | 0.04796 | 0.05355 | 0.16305 | 0.04759 | 0.05738 | 0.04769 | 0.10275 | 0.04563 TSPAN2   |
| cg03614664 | 0.04457 | 0.03535 | 0.03623 | 0.0372  | 0.03675 | 0.07322 | 0.0374  | 0.03365 | 0.03005 | 0.02582 RBX1     |
| cg03616357 | 0.0675  | 0.04235 | 0.59281 | 0.61779 | 0.04665 | 0.04828 | 0.03349 | 0.04011 | 0.03958 | 0.03514 FLJ21159 |
| cg03617367 | 0.02703 | 0.02881 | 0.02677 | 0.02526 | 0.03255 | 0.03186 | 0.02386 | 0.03006 | 0.02395 | 0.02709 C14orf43 |
| cg03617456 | 0.85405 | 0.28656 | 0.58245 | 0.53679 | 0.52194 | 0.19628 | 0.34299 | 0.2946  | 0.51195 | 0.21103 EXOSC10  |
| cg03619472 | 0.13459 | 0.10627 | 0.15119 | 0.10244 | 0.09042 | 0.05594 | 0.11302 | 0.1097  | 0.36406 | 0.09256 NUDT21   |
| cg03620376 | 0.04423 | 0.05106 | 0.29824 | 0.1379  | 0.17467 | 0.05188 | 0.47216 | 0.20719 | 0.04991 | 0.04129 CDC42EP5 |
| cg03621001 | 0.95937 | 0.8536  | 0.94581 | 0.96125 | 0.96988 | 0.97    | 0.96727 | 0.95767 | 0.967   | 0.97073 RAB8A    |
| cg03621406 | 0.19422 | 0.1992  | 0.19055 | 0.20581 | 0.16415 | 0.15129 | 0.21796 | 0.17121 | 0.14053 | 0.16087 FBXL12   |
| cg03622431 | 0.82885 | 0.81422 | 0.8388  | 0.88218 | 0.86455 | 0.87354 | 0.85818 | 0.88578 | 0.79514 | 0.85091 DNASE2B  |
| cg03622689 | 0.04341 | 0.04865 | 0.05119 | 0.05436 | 0.04219 | 0.04154 | 0.03969 | 0.03761 | 0.04031 | 0.03472 C21orf67 |
| cg03623878 | 0.10856 | 0.03121 | 0.10637 | 0.20701 | 0.61926 | 0.38202 | 0.07753 | 0.03011 | 0.20066 | 0.12901 MCF2L    |

|            |         |         |         |         |         |         |         |         |         |         |           |
|------------|---------|---------|---------|---------|---------|---------|---------|---------|---------|---------|-----------|
| cg03625911 | 0.63186 | 0.42664 | 0.80334 | 0.8572  | 0.71267 | 0.57347 | 0.5274  | 0.30062 | 0.78242 | 0.4285  | CHI3L1    |
| cg03626672 | 0.0835  | 0.0891  | 0.48579 | 0.48488 | 0.13807 | 0.12274 | 0.07726 | 0.06418 | 0.48077 | 0.16387 | CMKOR1    |
| cg03627896 | 0.13075 | 0.04202 | 0.0423  | 0.03345 | 0.03023 | 0.03932 | 0.04055 | 0.03207 | 0.03675 | 0.03243 | LOC283932 |
| cg03630088 | 0.08852 | 0.0556  | 0.70646 | 0.89818 | 0.84342 | 0.68576 | 0.52272 | 0.53286 | 0.53548 | 0.04349 | CPXM2     |
| cg03630344 | 0.04748 | 0.12706 | 0.12419 | 0.0644  | 0.07595 | 0.06532 | 0.03114 | 0.03009 | 0.03985 | 0.03797 | VAMP3     |
| cg03631076 | 0.04396 | 0.04077 | 0.0397  | 0.03635 | 0.04268 | 0.04729 | 0.03736 | 0.03746 | 0.03236 | 0.03385 | BANP      |
| cg03633120 | 0.05858 | 0.03877 | 0.04275 | 0.04476 | 0.10364 | 0.02911 | 0.04739 | 0.03892 | 0.2962  | 0.11986 | NDUFA7    |
| cg03634234 | 0.06447 | 0.04775 | 0.57671 | 0.52047 | 0.09721 | 0.04997 | 0.06391 | 0.0611  | 0.28196 | 0.19304 | MLL3      |
| cg03634982 | 0.80719 | 0.85521 | 0.79875 | 0.8208  | 0.77161 | 0.84911 | 0.49785 | 0.44986 | 0.64597 | 0.59306 | MS4A4A    |
| cg03634997 | 0.04806 | 0.04578 | 0.07267 | 0.05935 | 0.02976 | 0.06314 | 0.05201 | 0.0376  | 0.03556 | 0.04013 | GAS8      |
| cg03636183 | 0.96176 | 0.96096 | 0.55293 | 0.66501 | 0.47212 | 0.19489 | 0.11525 | 0.09639 | 0.95079 | 0.9438  | F2RL3     |
| cg03640148 | 0.05999 | 0.05834 | 0.06258 | 0.05637 | 0.09496 | 0.06825 | 0.04726 | 0.03968 | 0.0532  | 0.04267 | WDR6      |
| cg03640568 | 0.03475 | 0.0212  | 0.0285  | 0.02848 | 0.02657 | 0.02922 | 0.02825 | 0.02559 | 0.02918 | 0.03077 | DDX17     |
| cg03640944 | 0.83414 | 0.70134 | 0.83705 | 0.87397 | 0.79084 | 0.58268 | 0.81702 | 0.68805 | 0.84429 | 0.80474 | KIAA1754  |
| cg03641225 | 0.25045 | 0.43639 | 0.49359 | 0.54166 | 0.49067 | 0.11191 | 0.17488 | 0.17391 | 0.25619 | 0.07922 | DIRAS3    |
| cg03642357 | 0.03993 | 0.03691 | 0.32011 | 0.54696 | 0.24188 | 0.0972  | 0.42061 | 0.09399 | 0.09903 | 0.09568 | ADRBK2    |
| cg03642518 | 0.86265 | 0.77938 | 0.70821 | 0.89971 | 0.71755 | 0.90852 | 0.8754  | 0.49905 | 0.34281 | 0.06261 | PNOC      |
| cg03643709 | 0.1017  | 0.09624 | 0.09434 | 0.09327 | 0.10808 | 0.15353 | 0.14864 | 0.11981 | 0.14206 | 0.16313 | VPS18     |
| cg03644378 | 0.03187 | 0.03196 | 0.02878 | 0.02634 | 0.02676 | 0.02891 | 0.03313 | 0.03294 | 0.02772 | 0.20732 | CYB5D1    |
| cg03648823 | 0.03979 | 0.04539 | 0.04803 | 0.04435 | 0.05046 | 0.04482 | 0.05043 | 0.04477 | 0.04001 | 0.04088 | ZNF643    |
| cg03649060 | 0.74342 | 0.85799 | 0.86198 | 0.85944 | 0.91765 | 0.87585 | 0.80136 | 0.7103  | 0.87737 | 0.83105 | ELOF1     |
| cg03651573 | 0.08038 | 0.06518 | 0.09432 | 0.0999  | 0.07056 | 0.05741 | 0.05533 | 0.05947 | 0.05903 | 0.06497 | TRIM28    |
| cg03652343 | 0.07875 | 0.04173 | 0.05339 | 0.0618  | 0.04834 | 0.04174 | 0.0313  | 0.0284  | 0.03361 | 0.0278  | HERC4     |
| cg03657766 | 0.04501 | 0.0346  | 0.0445  | 0.04248 | 0.09215 | 0.05117 | 0.05388 | 0.04476 | 0.06355 | 0.04563 | DLX2      |
| cg03658471 | 0.06885 | 0.06927 | 0.06493 | 0.06249 | 0.04312 | 0.05293 | 0.0606  | 0.05557 | 0.05549 | 0.05887 | TMEM23    |
| cg03658707 | 0.82897 | 0.64771 | 0.84405 | 0.85397 | 0.8844  | 0.81962 | 0.80158 | 0.77946 | 0.85889 | 0.81339 | ASIP      |
| cg03660451 | 0.75387 | 0.79702 | 0.68143 | 0.76047 | 0.76396 | 0.74688 | 0.70052 | 0.49287 | 0.80835 | 0.74186 | RECQL5    |
| cg03662459 | 0.8503  | 0.6231  | 0.86596 | 0.86201 | 0.89356 | 0.42274 | 0.84142 | 0.58997 | 0.87051 | 0.83305 | IL11RA    |
| cg03663215 | 0.04313 | 0.03232 | 0.17346 | 0.19653 | 0.19158 | 0.03969 | 0.05229 | 0.04013 | 0.14122 | 0.15574 | ADCY2     |
| cg03663715 | 0.04631 | 0.03809 | 0.2159  | 0.18126 | 0.14528 | 0.03601 | 0.03498 | 0.03425 | 0.57213 | 0.31111 | FOXO1     |
| cg03664139 | 0.0285  | 0.02037 | 0.02814 | 0.02537 | 0.01925 | 0.01883 | 0.01815 | 0.01728 | 0.01571 | 0.01889 | ASCC3     |
| cg03664800 | 0.04404 | 0.04713 | 0.05027 | 0.04279 | 0.03797 | 0.03579 | 0.04811 | 0.05715 | 0.03395 | 0.04022 | LOXL2     |
| cg03664992 | 0.1151  | 0.06086 | 0.09156 | 0.05565 | 0.53998 | 0.05398 | 0.30645 | 0.05979 | 0.05738 | 0.05212 | BMP8A     |
| cg03665457 | 0.55196 | 0.67488 | 0.28021 | 0.2802  | 0.05722 | 0.04702 | 0.04142 | 0.04186 | 0.03858 | 0.03253 | LOC158160 |
| cg03665605 | 0.93733 | 0.86477 | 0.89105 | 0.91312 | 0.79349 | 0.81853 | 0.38781 | 0.16708 | 0.46598 | 0.39359 | ATP5J2    |
| cg03665785 | 0.62621 | 0.26128 | 0.66439 | 0.7686  | 0.32344 | 0.1148  | 0.29173 | 0.20665 | 0.12137 | 0.07707 | HS747E2A  |
| cg03667047 | 0.93214 | 0.91657 | 0.91688 | 0.91602 | 0.91605 | 0.90382 | 0.89642 | 0.93125 | 0.929   | 0.9248  | KL        |
| cg03667091 | 0.03384 | 0.039   | 0.03292 | 0.03517 | 0.02349 | 0.0339  | 0.02837 | 0.02443 | 0.02712 | 0.02902 | ACTL6A    |
| cg03668539 | 0.82673 | 0.86972 | 0.89954 | 0.8999  | 0.89468 | 0.74661 | 0.84671 | 0.73335 | 0.79971 | 0.91011 | PEX11G    |
| cg03670238 | 0.73028 | 0.06359 | 0.89201 | 0.91139 | 0.93252 | 0.72905 | 0.68908 | 0.4418  | 0.91984 | 0.72403 | WISP1     |
| cg03672021 | 0.05716 | 0.06193 | 0.06723 | 0.07041 | 0.04908 | 0.0664  | 0.33596 | 0.24271 | 0.05629 | 0.04399 | FLNA      |

|            |         |         |         |         |         |         |         |         |         |                  |
|------------|---------|---------|---------|---------|---------|---------|---------|---------|---------|------------------|
| cg03673470 | 0.43197 | 0.53789 | 0.75105 | 0.80692 | 0.44625 | 0.45362 | 0.72328 | 0.70284 | 0.27821 | 0.15786 ZP4      |
| cg03673687 | 0.029   | 0.03024 | 0.03269 | 0.03097 | 0.02503 | 0.02798 | 0.02701 | 0.02646 | 0.02306 | 0.02539 EML1     |
| cg03679305 | 0.16921 | 0.19487 | 0.72864 | 0.55768 | 0.332   | 0.42174 | 0.38903 | 0.16393 | 0.70438 | 0.6204 SLC2A5    |
| cg03679581 | 0.87339 | 0.88809 | 0.91056 | 0.89743 | 0.6096  | 0.49892 | 0.88616 | 0.89395 | 0.63591 | 0.59939 RLN2     |
| cg03679734 | 0.05729 | 0.04241 | 0.44133 | 0.51581 | 0.04441 | 0.04645 | 0.17879 | 0.04419 | 0.05903 | 0.04881 CKMT1B   |
| cg03680758 | 0.03012 | 0.0316  | 0.02998 | 0.02814 | 0.02621 | 0.03138 | 0.02754 | 0.03032 | 0.02549 | 0.02363 SLC2A4RG |
| cg03681481 | 0.04113 | 0.03249 | 0.49232 | 0.6058  | 0.16024 | 0.04266 | 0.21992 | 0.05563 | 0.4194  | 0.28071 OVOL1    |
| cg03682712 | 0.02746 | 0.02842 | 0.02752 | 0.02485 | 0.01945 | 0.01868 | 0.65753 | 0.02522 | 0.95788 | 0.89022 LOXL1    |
| cg03682823 | 0.45212 | 0.38428 | 0.40324 | 0.43137 | 0.95659 | 0.94708 | 0.50374 | 0.51418 | 0.48252 | 0.53512 SGCE     |
| cg03684977 | 0.84302 | 0.6868  | 0.91673 | 0.92572 | 0.95131 | 0.85097 | 0.89701 | 0.73031 | 0.91489 | 0.89313 GRB7     |
| cg03686067 | 0.85877 | 0.8853  | 0.8089  | 0.86564 | 0.79899 | 0.84309 | 0.83306 | 0.85851 | 0.81822 | 0.79344 C18orf14 |
| cg03688818 | 0.0363  | 0.02836 | 0.03002 | 0.02478 | 0.32382 | 0.02455 | 0.02701 | 0.02444 | 0.03145 | 0.02014 APEH     |
| cg03690162 | 0.0834  | 0.07968 | 0.08048 | 0.08803 | 0.10428 | 0.08423 | 0.0735  | 0.07673 | 0.07559 | 0.06889 BAG3     |
| cg03691812 | 0.04252 | 0.03562 | 0.10547 | 0.10087 | 0.06737 | 0.0352  | 0.06326 | 0.03537 | 0.15588 | 0.03692 CORO1A   |
| cg03693099 | 0.84538 | 0.75212 | 0.84467 | 0.86407 | 0.88963 | 0.82726 | 0.83382 | 0.84164 | 0.85815 | 0.83795 CEL      |
| cg03693601 | 0.02356 | 0.02731 | 0.02685 | 0.02247 | 0.01691 | 0.01943 | 0.01986 | 0.01817 | 0.02141 | 0.01666 SHCBP1   |
| cg03694261 | 0.02682 | 0.03123 | 0.02847 | 0.02377 | 0.03947 | 0.03288 | 0.02977 | 0.03109 | 0.0251  | 0.02134 FLJ23554 |
| cg03695693 | 0.23797 | 0.13029 | 0.22037 | 0.26133 | 0.44675 | 0.60884 | 0.10732 | 0.09595 | 0.11202 | 0.08855 ITGB1BP3 |
| cg03697316 | 0.02148 | 0.02294 | 0.0225  | 0.02429 | 0.01586 | 0.0195  | 0.02    | 0.01784 | 0.01638 | 0.01558 LZTR1    |
| cg03698393 | 0.05147 | 0.03684 | 0.03523 | 0.03268 | 0.33946 | 0.2517  | 0.49604 | 0.09576 | 0.02573 | 0.02542 HAPLN3   |
| cg03699566 | 0.79416 | 0.58216 | 0.84439 | 0.8472  | 0.85077 | 0.58646 | 0.27563 | 0.24081 | 0.58916 | 0.70558 FOLR1    |
| cg03699904 | 0.39996 | 0.43068 | 0.32247 | 0.30796 | 0.33306 | 0.25378 | 0.80043 | 0.67481 | 0.78445 | 0.73376 SLC2A2   |
| cg03700218 | 0.02923 | 0.0308  | 0.02798 | 0.02247 | 0.01848 | 0.02462 | 0.02432 | 0.02515 | 0.0243  | 0.02318 NUBP2    |
| cg03700308 | 0.04998 | 0.04705 | 0.0542  | 0.04707 | 0.03878 | 0.03676 | 0.03457 | 0.04106 | 0.03119 | 0.03066 MOCS3    |
| cg03700462 | 0.05458 | 0.03467 | 0.03647 | 0.03243 | 0.01924 | 0.03224 | 0.03342 | 0.03112 | 0.02933 | 0.02775 HOXA1    |
| cg03701222 | 0.0414  | 0.03805 | 0.03748 | 0.03603 | 0.02855 | 0.03279 | 0.03325 | 0.03063 | 0.03219 | 0.02953 RAB40C   |
| cg03702236 | 0.14546 | 0.06858 | 0.0362  | 0.0389  | 0.02646 | 0.04134 | 0.04394 | 0.04449 | 0.78099 | 0.60438 SEMA5A   |
| cg03703325 | 0.02865 | 0.02973 | 0.03065 | 0.02575 | 0.02496 | 0.02621 | 0.0233  | 0.02361 | 0.02538 | 0.0261 HEMK1     |
| cg03704024 | 0.6464  | 0.51164 | 0.69727 | 0.71365 | 0.64651 | 0.71826 | 0.75722 | 0.7816  | 0.76272 | 0.7192 TMCC1     |
| cg03704031 | 0.90673 | 0.8734  | 0.06473 | 0.07598 | 0.13915 | 0.29729 | 0.23663 | 0.09234 | 0.8991  | 0.73262 INGX     |
| cg03704393 | 0.91352 | 0.6852  | 0.85817 | 0.85477 | 0.70522 | 0.79895 | 0.90404 | 0.8967  | 0.93004 | 0.92758 ZNF169   |
| cg03704653 | 0.84592 | 0.86415 | 0.84347 | 0.87016 | 0.90932 | 0.89687 | 0.72386 | 0.81505 | 0.86071 | 0.87637 FAM9A    |
| cg03705396 | 0.4065  | 0.04128 | 0.25508 | 0.24594 | 0.65356 | 0.49823 | 0.09769 | 0.02708 | 0.07785 | 0.02637 MAP6D1   |
| cg03707950 | 0.75065 | 0.67504 | 0.73564 | 0.79005 | 0.73768 | 0.78057 | 0.73718 | 0.71028 | 0.772   | 0.72004 MFAP3    |
| cg03708463 | 0.0378  | 0.04032 | 0.03982 | 0.03868 | 0.02817 | 0.0316  | 0.03134 | 0.03382 | 0.03235 | 0.02946 RNASEH1  |
| cg03712038 | 0.02314 | 0.02123 | 0.10572 | 0.04328 | 0.03818 | 0.0212  | 0.01914 | 0.0212  | 0.01756 | 0.01719 ZNF160   |
| cg03712237 | 0.80631 | 0.7727  | 0.77845 | 0.81916 | 0.76273 | 0.79495 | 0.20049 | 0.37226 | 0.2967  | 0.32025 SSX2     |
| cg03712239 | 0.07285 | 0.06541 | 0.07802 | 0.07161 | 0.07309 | 0.08822 | 0.06845 | 0.05662 | 0.05978 | 0.06057 ZNF25    |
| cg03712708 | 0.04748 | 0.05367 | 0.0454  | 0.04626 | 0.03991 | 0.04359 | 0.03699 | 0.04152 | 0.03926 | 0.03833 CKS2     |
| cg03712843 | 0.85135 | 0.77704 | 0.81616 | 0.80805 | 0.81768 | 0.78871 | 0.80198 | 0.81816 | 0.80427 | 0.70413 STOML3   |
| cg03713346 | 0.02905 | 0.02589 | 0.02538 | 0.02455 | 0.02209 | 0.02058 | 0.02551 | 0.02497 | 0.02198 | 0.02242 CPNE2    |

|            |         |         |         |         |         |         |         |         |         |         |             |
|------------|---------|---------|---------|---------|---------|---------|---------|---------|---------|---------|-------------|
| cg03714397 | 0.79645 | 0.6951  | 0.6252  | 0.69187 | 0.64582 | 0.7612  | 0.63411 | 0.81738 | 0.61454 | 0.57091 | SEC63D1     |
| cg03714916 | 0.17022 | 0.06292 | 0.34933 | 0.30301 | 0.08717 | 0.05505 | 0.31808 | 0.10375 | 0.04709 | 0.04163 | CDKN1A      |
| cg03716937 | 0.80702 | 0.82604 | 0.7241  | 0.75976 | 0.79748 | 0.635   | 0.39103 | 0.35052 | 0.35364 | 0.26194 | ADAM2       |
| cg03716942 | 0.03385 | 0.03549 | 0.03418 | 0.03315 | 0.03317 | 0.0384  | 0.02771 | 0.03778 | 0.03566 | 0.02521 | GNB1        |
| cg03716999 | 0.04745 | 0.02637 | 0.02754 | 0.02964 | 0.97218 | 0.97101 | 0.90473 | 0.88002 | 0.97072 | 0.96837 | FLJ46380    |
| cg03717979 | 0.03635 | 0.03245 | 0.03805 | 0.03794 | 0.03812 | 0.03471 | 0.03318 | 0.03527 | 0.0323  | 0.02969 | MSX1        |
| cg03718026 | 0.2175  | 0.07402 | 0.10317 | 0.11314 | 0.0961  | 0.05393 | 0.1223  | 0.09866 | 0.12014 | 0.06331 | RPS20       |
| cg03718539 | 0.30639 | 0.03068 | 0.31464 | 0.164   | 0.95447 | 0.47146 | 0.13326 | 0.0212  | 0.26655 | 0.05853 | ETNK2       |
| cg03718677 | 0.88502 | 0.87638 | 0.89103 | 0.91031 | 0.82304 | 0.84027 | 0.88467 | 0.85957 | 0.85975 | 0.79778 | TMOD4       |
| cg03721967 | 0.90015 | 0.80807 | 0.84101 | 0.90796 | 0.92485 | 0.89864 | 0.67518 | 0.58981 | 0.90185 | 0.89078 | GRTP1       |
| cg03723845 | 0.83416 | 0.84572 | 0.76242 | 0.84462 | 0.77473 | 0.8567  | 0.65617 | 0.7665  | 0.55082 | 0.54905 | BTNL8       |
| cg03724445 | 0.04083 | 0.04351 | 0.04901 | 0.04225 | 0.03921 | 0.04167 | 0.04154 | 0.04512 | 0.04218 | 0.03446 | PRKRA       |
| cg03724463 | 0.26932 | 0.04594 | 0.85531 | 0.87612 | 0.5277  | 0.53722 | 0.4245  | 0.24528 | 0.15293 | 0.03714 | CCK         |
| cg03724882 | 0.10746 | 0.06034 | 0.04941 | 0.05046 | 0.04618 | 0.06547 | 0.04179 | 0.04356 | 0.04415 | 0.04788 | CDKN3       |
| cg03727165 | 0.45758 | 0.60523 | 0.61699 | 0.53649 | 0.58598 | 0.64344 | 0.47899 | 0.46798 | 0.60889 | 0.525   | C8orf4      |
| cg03729431 | 0.028   | 0.02635 | 0.03867 | 0.10719 | 0.04046 | 0.03102 | 0.02554 | 0.02409 | 0.06713 | 0.02196 | ADORA2B     |
| cg03731616 | 0.11701 | 0.06556 | 0.33798 | 0.48763 | 0.85    | 0.5403  | 0.29599 | 0.08613 | 0.50399 | 0.14169 | MYLK        |
| cg03731898 | 0.13819 | 0.72759 | 0.55387 | 0.63731 | 0.75922 | 0.82337 | 0.10738 | 0.09677 | 0.40866 | 0.36617 | CPO         |
| cg03732056 | 0.32464 | 0.12103 | 0.4774  | 0.56986 | 0.36502 | 0.36812 | 0.3203  | 0.20122 | 0.16788 | 0.1007  | DOK2        |
| cg03732295 | 0.11065 | 0.11577 | 0.14745 | 0.11942 | 0.13672 | 0.11422 | 0.18676 | 0.16327 | 0.10189 | 0.11424 | IMPAD1      |
| cg03732545 | 0.40223 | 0.37258 | 0.60729 | 0.55031 | 0.46867 | 0.66722 | 0.0756  | 0.06701 | 0.2158  | 0.42004 | CNTN2       |
| cg03733371 | 0.19084 | 0.14435 | 0.61678 | 0.63594 | 0.67632 | 0.10858 | 0.36461 | 0.27818 | 0.40787 | 0.13743 | LIPH        |
| cg03734660 | 0.02286 | 0.02325 | 0.02472 | 0.02344 | 0.03121 | 0.02138 | 0.02598 | 0.0218  | 0.0193  | 0.02065 | CRABP2      |
| cg03734783 | 0.66906 | 0.55846 | 0.85911 | 0.87643 | 0.87972 | 0.86321 | 0.79981 | 0.58099 | 0.88227 | 0.87806 | ACCN3       |
| cg03734874 | 0.15385 | 0.07153 | 0.61541 | 0.62559 | 0.35402 | 0.62883 | 0.31336 | 0.07483 | 0.10742 | 0.03827 | FLJ42486    |
| cg03735049 | 0.04211 | 0.03448 | 0.06481 | 0.06961 | 0.0498  | 0.0605  | 0.028   | 0.02845 | 0.04731 | 0.0532  | RP1-112K5.2 |
| cg03737135 | 0.07196 | 0.06721 | 0.068   | 0.05909 | 0.07817 | 0.06321 | 0.06274 | 0.05696 | 0.0599  | 0.04972 | HSPA14      |
| cg03738331 | 0.03456 | 0.0344  | 0.04116 | 0.03667 | 0.02794 | 0.029   | 0.03336 | 0.0315  | 0.02957 | 0.0316  | HD          |
| cg03738959 | 0.02588 | 0.03118 | 0.0364  | 0.02762 | 0.02689 | 0.02927 | 0.02133 | 0.02453 | 0.02358 | 0.02026 | MCART1      |
| cg03740216 | 0.09141 | 0.11605 | 0.60601 | 0.67951 | 0.81081 | 0.51891 | 0.341   | 0.21375 | 0.30106 | 0.18017 | ICAM4       |
| cg03740984 | 0.0623  | 0.06036 | 0.0525  | 0.05284 | 0.04667 | 0.04658 | 0.05654 | 0.05098 | 0.04331 | 0.04651 | SLC35E1     |
| cg03741352 | 0.14358 | 0.08889 | 0.39286 | 0.50337 | 0.53527 | 0.43074 | 0.104   | 0.14595 | 0.06448 | 0.0516  | LCE3C       |
| cg03742003 | 0.05144 | 0.05371 | 0.06481 | 0.06115 | 0.05224 | 0.05371 | 0.05182 | 0.0625  | 0.05069 | 0.05457 | SLIT2       |
| cg03742214 | 0.03655 | 0.03363 | 0.03898 | 0.03267 | 0.02845 | 0.03376 | 0.03426 | 0.03002 | 0.02798 | 0.02493 | CRY1        |
| cg03742272 | 0.22978 | 0.10975 | 0.28565 | 0.44298 | 0.7213  | 0.6627  | 0.04804 | 0.04777 | 0.0485  | 0.05622 | ALOX12B     |
| cg03743584 | 0.12266 | 0.02533 | 0.65659 | 0.95664 | 0.96813 | 0.77436 | 0.14178 | 0.0194  | 0.02553 | 0.02096 | PRAP1       |
| cg03746685 | 0.11756 | 0.11144 | 0.1294  | 0.11462 | 0.17912 | 0.12469 | 0.14138 | 0.12822 | 0.10113 | 0.10664 | TMEM126B    |
| cg03747695 | 0.13312 | 0.11681 | 0.12743 | 0.12512 | 0.14203 | 0.1224  | 0.12029 | 0.12613 | 0.08531 | 0.07832 | ZNF227      |
| cg03750407 | 0.072   | 0.06339 | 0.05759 | 0.05391 | 0.0622  | 0.06533 | 0.06026 | 0.06106 | 0.05835 | 0.04939 | RAD9A       |
| cg03750606 | 0.11143 | 0.08652 | 0.49022 | 0.57297 | 0.1868  | 0.14282 | 0.0878  | 0.08399 | 0.20224 | 0.2317  | ESRRG       |
| cg03751414 | 0.0394  | 0.05509 | 0.07504 | 0.07728 | 0.08978 | 0.07249 | 0.04227 | 0.0463  | 0.03801 | 0.03866 | AP1S1       |

|            |         |         |         |         |         |         |         |         |         |                  |
|------------|---------|---------|---------|---------|---------|---------|---------|---------|---------|------------------|
| cg03751799 | 0.0987  | 0.05668 | 0.08478 | 0.0919  | 0.07314 | 0.05551 | 0.04705 | 0.04486 | 0.04564 | 0.05742 SRPRB    |
| cg03751813 | 0.19521 | 0.04108 | 0.88529 | 0.90868 | 0.49108 | 0.25897 | 0.03569 | 0.03455 | 0.03348 | 0.03239 ZNF585B  |
| cg03752087 | 0.27401 | 0.127   | 0.49847 | 0.57781 | 0.39862 | 0.3902  | 0.80195 | 0.84558 | 0.37234 | 0.28673 CASP14   |
| cg03752628 | 0.0566  | 0.05211 | 0.09119 | 0.04269 | 0.15594 | 0.0306  | 0.09976 | 0.04602 | 0.31813 | 0.20201 PTGFRN   |
| cg03752689 | 0.38821 | 0.27112 | 0.1088  | 0.07768 | 0.0809  | 0.05775 | 0.07005 | 0.05442 | 0.0641  | 0.07122 C1orf74  |
| cg03752885 | 0.63718 | 0.20406 | 0.11464 | 0.10354 | 0.1721  | 0.17621 | 0.12648 | 0.34511 | 0.28885 | 0.11034 DAPK3    |
| cg03754063 | 0.8862  | 0.88265 | 0.88521 | 0.8874  | 0.91331 | 0.9164  | 0.868   | 0.8784  | 0.88203 | 0.85014 KEAP1    |
| cg03755123 | 0.10376 | 0.06669 | 0.85301 | 0.83312 | 0.44001 | 0.12361 | 0.14106 | 0.61028 | 0.11558 | 0.05899 UTF1     |
| cg03756121 | 0.05045 | 0.05578 | 0.05415 | 0.04846 | 0.03456 | 0.04746 | 0.04602 | 0.05027 | 0.04741 | 0.04641 ARFIP2   |
| cg03759077 | 0.04105 | 0.03726 | 0.03821 | 0.03985 | 0.03152 | 0.03486 | 0.04319 | 0.03802 | 0.03751 | 0.03247 ARL6IP6  |
| cg03760483 | 0.94707 | 0.93009 | 0.95546 | 0.95942 | 0.96566 | 0.95759 | 0.94636 | 0.95598 | 0.96041 | 0.95363 ALOX12   |
| cg03760705 | 0.08059 | 0.07498 | 0.10326 | 0.11033 | 0.17242 | 0.13497 | 0.11753 | 0.11685 | 0.09769 | 0.09891 RNF185   |
| cg03761560 | 0.02375 | 0.02805 | 0.02856 | 0.02801 | 0.02081 | 0.02267 | 0.02915 | 0.02509 | 0.02188 | 0.02621 DNAJB12  |
| cg03762535 | 0.3585  | 0.24232 | 0.63771 | 0.70456 | 0.62845 | 0.69513 | 0.65277 | 0.72443 | 0.45375 | 0.39223 HAO2     |
| cg03763616 | 0.5155  | 0.0748  | 0.60686 | 0.65336 | 0.64115 | 0.41924 | 0.09913 | 0.06148 | 0.6354  | 0.76268 SPIB     |
| cg03764161 | 0.08799 | 0.03808 | 0.06406 | 0.04582 | 0.05235 | 0.04973 | 0.04469 | 0.04159 | 0.03749 | 0.03903 FAM111A  |
| cg03764352 | 0.05231 | 0.04071 | 0.03879 | 0.04265 | 0.03225 | 0.03254 | 0.03503 | 0.03478 | 0.03104 | 0.02549 ETNK1    |
| cg03764506 | 0.03877 | 0.03826 | 0.03874 | 0.03137 | 0.0333  | 0.03708 | 0.03384 | 0.03831 | 0.03568 | 0.029 ESRRA      |
| cg03764585 | 0.55596 | 0.31803 | 0.32725 | 0.42145 | 0.51226 | 0.41542 | 0.13467 | 0.07497 | 0.14433 | 0.03123 FMOD     |
| cg03766965 | 0.81013 | 0.71936 | 0.78088 | 0.80353 | 0.73583 | 0.82524 | 0.79663 | 0.48945 | 0.86491 | 0.81495 SRCAP    |
| cg03766998 | 0.11388 | 0.06906 | 0.15595 | 0.13245 | 0.17196 | 0.07584 | 0.08829 | 0.12157 | 0.06879 | 0.09819 AFG3L2   |
| cg03770147 | 0.03187 | 0.03093 | 0.02604 | 0.02769 | 0.02365 | 0.02836 | 0.02105 | 0.02202 | 0.02361 | 0.01863 KLF7     |
| cg03770548 | 0.7264  | 0.13516 | 0.37847 | 0.45525 | 0.80291 | 0.11908 | 0.28372 | 0.07877 | 0.89147 | 0.8771 CDH24     |
| cg03771255 | 0.05432 | 0.05058 | 0.05394 | 0.055   | 0.05895 | 0.06384 | 0.03553 | 0.03522 | 0.04361 | 0.06225 RPS3A    |
| cg03773789 | 0.10127 | 0.04918 | 0.14756 | 0.20139 | 0.09189 | 0.03939 | 0.10711 | 0.04696 | 0.05196 | 0.04848 GLI4     |
| cg03774732 | 0.02754 | 0.10104 | 0.02917 | 0.02787 | 0.02841 | 0.02308 | 0.02915 | 0.02241 | 0.01991 | 0.02112 PAF1     |
| cg03775123 | 0.56148 | 0.42141 | 0.61271 | 0.7418  | 0.66055 | 0.60859 | 0.50424 | 0.62301 | 0.50081 | 0.37516 ANKDD1A  |
| cg03775246 | 0.71669 | 0.49913 | 0.75569 | 0.78857 | 0.62683 | 0.62493 | 0.68562 | 0.55767 | 0.78792 | 0.54172 C5orf13  |
| cg03775422 | 0.05137 | 0.03828 | 0.18869 | 0.39655 | 0.08294 | 0.04262 | 0.04276 | 0.0363  | 0.03931 | 0.02592 MGC33530 |
| cg03776060 | 0.30762 | 0.03755 | 0.2365  | 0.26301 | 0.52711 | 0.0703  | 0.37989 | 0.30477 | 0.04213 | 0.02713 C9orf58  |
| cg03776464 | 0.03272 | 0.03493 | 0.21622 | 0.27251 | 0.0292  | 0.03704 | 0.03214 | 0.02864 | 0.03843 | 0.02755 EPHA4    |
| cg03776551 | 0.11451 | 0.04145 | 0.04359 | 0.04827 | 0.17223 | 0.04443 | 0.03615 | 0.0398  | 0.03292 | 0.03869 ZNF396   |
| cg03776850 | 0.89716 | 0.71361 | 0.94086 | 0.95124 | 0.94951 | 0.90696 | 0.33754 | 0.08892 | 0.66057 | 0.61366 TPSD1    |
| cg03777405 | 0.05192 | 0.05446 | 0.04874 | 0.04621 | 0.06171 | 0.0585  | 0.04988 | 0.05407 | 0.03992 | 0.05458 NFE2L1   |
| cg03777459 | 0.05691 | 0.04506 | 0.39877 | 0.63314 | 0.80082 | 0.76724 | 0.06189 | 0.048   | 0.10536 | 0.07351 GATA5    |
| cg03780486 | 0.43971 | 0.16306 | 0.23875 | 0.17181 | 0.40394 | 0.63373 | 0.354   | 0.48928 | 0.40844 | 0.31061 OR6A2    |
| cg03780733 | 0.25766 | 0.17076 | 0.29352 | 0.24378 | 0.23775 | 0.15485 | 0.25308 | 0.39297 | 0.14779 | 0.14834 PCDHB7   |
| cg03782453 | 0.93423 | 0.94687 | 0.95284 | 0.95233 | 0.98002 | 0.97878 | 0.42239 | 0.07637 | 0.98088 | 0.97629 FLJ90575 |
| cg03782727 | 0.75245 | 0.45697 | 0.62957 | 0.81098 | 0.86173 | 0.88989 | 0.17795 | 0.10139 | 0.60715 | 0.25663 FFAR1    |
| cg03785807 | 0.45205 | 0.11009 | 0.06969 | 0.0686  | 0.07713 | 0.08297 | 0.09212 | 0.08784 | 0.06116 | 0.05887 GBE1     |
| cg03786772 | 0.08622 | 0.08954 | 0.14386 | 0.10865 | 0.22052 | 0.10994 | 0.07481 | 0.07689 | 0.23153 | 0.19479 C6orf166 |

|            |         |         |         |         |         |         |         |         |         |                   |
|------------|---------|---------|---------|---------|---------|---------|---------|---------|---------|-------------------|
| cg03787486 | 0.05712 | 0.05808 | 0.05995 | 0.05342 | 0.08035 | 0.07874 | 0.05302 | 0.03977 | 0.10865 | 0.05543 ADH5      |
| cg03788666 | 0.07688 | 0.0748  | 0.09082 | 0.07765 | 0.15078 | 0.08855 | 0.1121  | 0.08779 | 0.13276 | 0.12326 MFAP1     |
| cg03789934 | 0.10535 | 0.09839 | 0.12894 | 0.13446 | 0.11968 | 0.10832 | 0.07958 | 0.08555 | 0.09421 | 0.0718 NALP11     |
| cg03790207 | 0.03446 | 0.03262 | 0.0722  | 0.05162 | 0.04211 | 0.0308  | 0.03178 | 0.03302 | 0.02794 | 0.02612 PEX6      |
| cg03790787 | 0.10079 | 0.0639  | 0.12935 | 0.12763 | 0.18626 | 0.09537 | 0.1201  | 0.11892 | 0.08228 | 0.13266 FLJ22639  |
| cg03791917 | 0.57145 | 0.18525 | 0.7647  | 0.89696 | 0.46119 | 0.51459 | 0.12342 | 0.10666 | 0.13528 | 0.25284 BTK       |
| cg03792199 | 0.03333 | 0.03041 | 0.05718 | 0.06099 | 0.03389 | 0.04135 | 0.03837 | 0.03773 | 0.02478 | 0.03062 HIBADH    |
| cg03792653 | 0.5491  | 0.04035 | 0.11027 | 0.06888 | 0.28673 | 0.13286 | 0.09303 | 0.07385 | 0.03549 | 0.04063 C2orf77   |
| cg03793131 | 0.04385 | 0.04082 | 0.04168 | 0.04621 | 0.04242 | 0.04696 | 0.06481 | 0.0588  | 0.03896 | 0.03588 ELOVL1    |
| cg03793778 | 0.5382  | 0.2506  | 0.40795 | 0.43426 | 0.56157 | 0.6188  | 0.52124 | 0.43033 | 0.51478 | 0.45282 LGALS7    |
| cg03794550 | 0.03511 | 0.03405 | 0.06106 | 0.05179 | 0.07631 | 0.05414 | 0.04366 | 0.03353 | 0.04497 | 0.03204 FANCF     |
| cg03799530 | 0.04375 | 0.0396  | 0.16861 | 0.32805 | 0.09135 | 0.05422 | 0.07064 | 0.04666 | 0.04396 | 0.0463 LNK        |
| cg03801144 | 0.03838 | 0.03839 | 0.03858 | 0.03665 | 0.03187 | 0.03586 | 0.03617 | 0.03493 | 0.03705 | 0.03429 PPP6C     |
| cg03801286 | 0.585   | 0.52407 | 0.8846  | 0.89604 | 0.91138 | 0.89951 | 0.89769 | 0.89687 | 0.5655  | 0.7206 KCNE1      |
| cg03802191 | 0.86111 | 0.69697 | 0.84323 | 0.86058 | 0.87924 | 0.39579 | 0.79482 | 0.57907 | 0.64698 | 0.19382 TARBP1    |
| cg03802231 | 0.07122 | 0.06854 | 0.07522 | 0.06305 | 0.03292 | 0.04927 | 0.06203 | 0.08048 | 0.06098 | 0.05229 FNTA      |
| cg03803009 | 0.71637 | 0.44657 | 0.14815 | 0.15882 | 0.37156 | 0.3396  | 0.04379 | 0.04081 | 0.05589 | 0.04886 GPR142    |
| cg03803589 | 0.04595 | 0.04511 | 0.04376 | 0.03683 | 0.04417 | 0.05139 | 0.03907 | 0.04359 | 0.03389 | 0.04155 STYX      |
| cg03804500 | 0.77419 | 0.60749 | 0.86894 | 0.91392 | 0.93359 | 0.91032 | 0.88769 | 0.51415 | 0.91858 | 0.75419 SSNA1     |
| cg03804568 | 0.03178 | 0.03277 | 0.03497 | 0.03277 | 0.02521 | 0.03196 | 0.02787 | 0.03053 | 0.03322 | 0.02956 CBX7      |
| cg03804985 | 0.06257 | 0.07245 | 0.07852 | 0.07164 | 0.07    | 0.06823 | 0.06418 | 0.05143 | 0.05929 | 0.05999 SLC2A8    |
| cg03805364 | 0.03096 | 0.03445 | 0.03275 | 0.03175 | 0.02366 | 0.02724 | 0.02692 | 0.02783 | 0.02617 | 0.02809 PAFAH1B2  |
| cg03805442 | 0.37493 | 0.44242 | 0.83499 | 0.85988 | 0.86498 | 0.8568  | 0.87562 | 0.84608 | 0.46342 | 0.46321 ACCN1     |
| cg03805684 | 0.06703 | 0.05209 | 0.06439 | 0.0745  | 0.05762 | 0.04666 | 0.06117 | 0.06744 | 0.22254 | 0.04044 C11orf10  |
| cg03807235 | 0.37687 | 0.07433 | 0.47609 | 0.85858 | 0.427   | 0.27087 | 0.0964  | 0.03707 | 0.18228 | 0.06917 PEX7      |
| cg03807314 | 0.04832 | 0.04648 | 0.0419  | 0.03634 | 0.03144 | 0.0415  | 0.03441 | 0.04053 | 0.04201 | 0.0382 MAP3K8     |
| cg03808835 | 0.1038  | 0.11557 | 0.16324 | 0.10416 | 0.22318 | 0.1168  | 0.12222 | 0.07828 | 0.09212 | 0.09861 PCDH15    |
| cg03809891 | 0.03822 | 0.03121 | 0.04236 | 0.04112 | 0.02733 | 0.02602 | 0.03624 | 0.03461 | 0.02708 | 0.02333 ZNF442    |
| cg03811411 | 0.14973 | 0.0614  | 0.76636 | 0.88238 | 0.91375 | 0.75808 | 0.82146 | 0.42145 | 0.31788 | 0.33916 SGCD      |
| cg03811478 | 0.11161 | 0.05648 | 0.55003 | 0.51333 | 0.32337 | 0.45414 | 0.26903 | 0.25183 | 0.14429 | 0.0584 SOX14      |
| cg03812067 | 0.0363  | 0.04288 | 0.04221 | 0.04572 | 0.02636 | 0.03478 | 0.03397 | 0.03656 | 0.03992 | 0.03872 SERINC3   |
| cg03812679 | 0.08414 | 0.07436 | 0.16294 | 0.12653 | 0.10726 | 0.05475 | 0.05605 | 0.05722 | 0.07587 | 0.04274 CSF3      |
| cg03813215 | 0.08097 | 0.07749 | 0.08303 | 0.079   | 0.08796 | 0.06834 | 0.06383 | 0.06484 | 0.07045 | 0.06768 BCL2      |
| cg03813905 | 0.04981 | 0.05131 | 0.06533 | 0.05631 | 0.03256 | 0.04112 | 0.03429 | 0.04058 | 0.04542 | 0.06903 NDUFB9    |
| cg03814826 | 0.04013 | 0.03986 | 0.04577 | 0.04843 | 0.04163 | 0.04074 | 0.04119 | 0.03938 | 0.03631 | 0.031 YWHAH       |
| cg03815350 | 0.53663 | 0.52127 | 0.8729  | 0.87089 | 0.90041 | 0.82258 | 0.8237  | 0.65208 | 0.7203  | 0.67577 ESPL1     |
| cg03817621 | 0.35511 | 0.29783 | 0.66867 | 0.71667 | 0.58143 | 0.72648 | 0.32083 | 0.28473 | 0.2725  | 0.23748 ACF       |
| cg03818682 | 0.43417 | 0.3496  | 0.38133 | 0.49639 | 0.57605 | 0.55954 | 0.14681 | 0.0771  | 0.25643 | 0.31656 MUC5AC    |
| cg03819692 | 0.08984 | 0.03353 | 0.66146 | 0.89835 | 0.51076 | 0.87985 | 0.03047 | 0.02783 | 0.0446  | 0.03976 FLJ36701  |
| cg03820909 | 0.01798 | 0.01531 | 0.02129 | 0.01676 | 0.05293 | 0.01695 | 0.01252 | 0.01251 | 0.01288 | 0.01592 C10orf137 |
| cg03821311 | 0.66655 | 0.4909  | 0.72204 | 0.74692 | 0.45883 | 0.64097 | 0.7788  | 0.49812 | 0.72772 | 0.62119 HIST1H1B  |

|            |         |         |         |         |         |         |         |         |         |                   |
|------------|---------|---------|---------|---------|---------|---------|---------|---------|---------|-------------------|
| cg03822011 | 0.03275 | 0.03927 | 0.04537 | 0.04132 | 0.04957 | 0.05626 | 0.0404  | 0.0383  | 0.04262 | 0.03532 FANCF     |
| cg03822159 | 0.8985  | 0.90675 | 0.87688 | 0.8885  | 0.85849 | 0.89746 | 0.8789  | 0.88556 | 0.89246 | 0.90073 SETD8     |
| cg03825921 | 0.18935 | 0.15948 | 0.20674 | 0.22027 | 0.18175 | 0.15506 | 0.29524 | 0.21807 | 0.14807 | 0.13881 RAB4A     |
| cg03826976 | 0.0432  | 0.02561 | 0.45633 | 0.43095 | 0.96483 | 0.95249 | 0.84931 | 0.95661 | 0.96719 | 0.9581 CYB5R2     |
| cg03830408 | 0.05145 | 0.05358 | 0.07888 | 0.08201 | 0.09589 | 0.07455 | 0.08394 | 0.07153 | 0.05976 | 0.03541 DCPS      |
| cg03833068 | 0.07393 | 0.06117 | 0.07004 | 0.05698 | 0.03875 | 0.08278 | 0.05296 | 0.04841 | 0.05026 | 0.04958 HIST1H2BN |
| cg03833566 | 0.0487  | 0.04991 | 0.05477 | 0.04383 | 0.06227 | 0.04941 | 0.08232 | 0.04262 | 0.04807 | 0.03948 C3orf54   |
| cg03833774 | 0.82665 | 0.76919 | 0.82393 | 0.85166 | 0.83641 | 0.83889 | 0.36048 | 0.49834 | 0.75632 | 0.80222 ZCCHC5    |
| cg03835158 | 0.86299 | 0.86061 | 0.83115 | 0.84706 | 0.84012 | 0.87063 | 0.80358 | 0.79157 | 0.87931 | 0.86424 PCMTD1    |
| cg03835292 | 0.82094 | 0.83722 | 0.7843  | 0.78678 | 0.73333 | 0.80795 | 0.75612 | 0.6678  | 0.78143 | 0.76964 LGALS2    |
| cg03835296 | 0.44159 | 0.11333 | 0.30697 | 0.38723 | 0.4308  | 0.75429 | 0.06481 | 0.05461 | 0.0888  | 0.0423 SLC17A1    |
| cg03835332 | 0.07325 | 0.07129 | 0.07519 | 0.07064 | 0.10698 | 0.06899 | 0.15659 | 0.05551 | 0.07409 | 0.05884 ELL3      |
| cg03837750 | 0.22288 | 0.29475 | 0.27943 | 0.2198  | 0.28288 | 0.21443 | 0.12247 | 0.10591 | 0.19745 | 0.19289 LRRC44    |
| cg03839341 | 0.01966 | 0.02269 | 0.02211 | 0.02122 | 0.01699 | 0.01824 | 0.01724 | 0.01679 | 0.01906 | 0.02088 RAB10     |
| cg03839972 | 0.09562 | 0.08133 | 0.09949 | 0.08418 | 0.12257 | 0.096   | 0.0829  | 0.07077 | 0.07832 | 0.09213 DGUOK     |
| cg03840259 | 0.78958 | 0.23182 | 0.7301  | 0.8045  | 0.49762 | 0.46425 | 0.29388 | 0.23383 | 0.20841 | 0.16441 GRAP2     |
| cg03841029 | 0.06247 | 0.0591  | 0.11788 | 0.08699 | 0.13746 | 0.10886 | 0.0753  | 0.05482 | 0.06367 | 0.0933 MBD1       |
| cg03842617 | 0.58905 | 0.46156 | 0.78435 | 0.89599 | 0.91662 | 0.91349 | 0.28699 | 0.09832 | 0.65758 | 0.46121 NOS3      |
| cg03843852 | 0.05046 | 0.0293  | 0.03302 | 0.02774 | 0.02018 | 0.02645 | 0.0255  | 0.02731 | 0.02522 | 0.02276 PIGB      |
| cg03843951 | 0.48657 | 0.07912 | 0.4297  | 0.53707 | 0.36867 | 0.10648 | 0.14443 | 0.10265 | 0.62505 | 0.08584 DDC       |
| cg03843978 | 0.709   | 0.69971 | 0.9053  | 0.90557 | 0.78278 | 0.76395 | 0.76835 | 0.86792 | 0.62974 | 0.60869 MSX1      |
| cg03845435 | 0.82212 | 0.81408 | 0.81991 | 0.83577 | 0.77181 | 0.81054 | 0.80478 | 0.82843 | 0.82021 | 0.80585 C1orf162  |
| cg03846288 | 0.0582  | 0.05442 | 0.06095 | 0.05374 | 0.08736 | 0.0523  | 0.07723 | 0.0656  | 0.05388 | 0.07247 RNF111    |
| cg03846767 | 0.84355 | 0.38816 | 0.90222 | 0.93748 | 0.91933 | 0.94409 | 0.12914 | 0.08427 | 0.14369 | 0.07627 TP73      |
| cg03847636 | 0.07304 | 0.07391 | 0.08085 | 0.06835 | 0.11133 | 0.08459 | 0.06212 | 0.05863 | 0.04701 | 0.05437 GRPEL1    |
| cg03848145 | 0.06402 | 0.05517 | 0.07994 | 0.06089 | 0.35127 | 0.05627 | 0.05101 | 0.05227 | 0.07653 | 0.05453 C1orf52   |
| cg03848555 | 0.02297 | 0.02297 | 0.02071 | 0.0199  | 0.01911 | 0.02137 | 0.01807 | 0.01974 | 0.01739 | 0.01591 C9orf40   |
| cg03848675 | 0.0845  | 0.05768 | 0.79818 | 0.76624 | 0.5625  | 0.3973  | 0.72633 | 0.54637 | 0.79801 | 0.45309 FOXF2     |
| cg03849074 | 0.07037 | 0.06994 | 0.06385 | 0.06234 | 0.10956 | 0.09686 | 0.06003 | 0.05186 | 0.05423 | 0.05075 ZNF306    |
| cg03851112 | 0.09528 | 0.05025 | 0.13405 | 0.06967 | 0.06329 | 0.04311 | 0.06764 | 0.05078 | 0.25051 | 0.19466 BBS1      |
| cg03852144 | 0.85806 | 0.82833 | 0.07766 | 0.06701 | 0.06162 | 0.0801  | 0.07164 | 0.06384 | 0.04257 | 0.0472 GLRX       |
| cg03852570 | 0.05775 | 0.06777 | 0.07411 | 0.06559 | 0.50105 | 0.10921 | 0.73333 | 0.06671 | 0.07598 | 0.04801 C10orf33  |
| cg03853151 | 0.02681 | 0.02977 | 0.03397 | 0.02799 | 0.02709 | 0.02571 | 0.02636 | 0.02466 | 0.02473 | 0.02473 OAT       |
| cg03853987 | 0.33196 | 0.1029  | 0.22762 | 0.1778  | 0.14246 | 0.10827 | 0.10244 | 0.07538 | 0.21235 | 0.10903 CHST10    |
| cg03854071 | 0.9564  | 0.87527 | 0.94311 | 0.92518 | 0.9636  | 0.79518 | 0.91788 | 0.9336  | 0.9626  | 0.92581 NDUFA13   |
| cg03855656 | 0.81955 | 0.4779  | 0.88739 | 0.88707 | 0.76993 | 0.49606 | 0.08872 | 0.08512 | 0.64147 | 0.47393 SERHL     |
| cg03856450 | 0.03097 | 0.03162 | 0.03473 | 0.03587 | 0.04581 | 0.02849 | 0.02254 | 0.02716 | 0.03179 | 0.02815 SFXN5     |
| cg03856723 | 0.0464  | 0.05174 | 0.29988 | 0.39753 | 0.18055 | 0.04932 | 0.26009 | 0.05075 | 0.07466 | 0.04519 PRKACA    |
| cg03856786 | 0.12536 | 0.04383 | 0.0676  | 0.04722 | 0.15644 | 0.03779 | 0.04427 | 0.03542 | 0.03846 | 0.03046 ZNF497    |
| cg03856801 | 0.89386 | 0.8786  | 0.91998 | 0.93161 | 0.93582 | 0.92289 | 0.91182 | 0.91173 | 0.93777 | 0.84922 APOA1     |
| cg03859282 | 0.1188  | 0.08605 | 0.11653 | 0.11008 | 0.17765 | 0.2785  | 0.09427 | 0.10595 | 0.16913 | 0.09879 ANKS3     |

|            |         |         |         |         |         |         |         |         |         |                  |
|------------|---------|---------|---------|---------|---------|---------|---------|---------|---------|------------------|
| cg03860051 | 0.04508 | 0.03967 | 0.03921 | 0.03419 | 0.03579 | 0.03726 | 0.03487 | 0.03493 | 0.03489 | 0.0306 ACADSB    |
| cg03860400 | 0.16482 | 0.29516 | 0.35847 | 0.53101 | 0.48155 | 0.45443 | 0.1499  | 0.20328 | 0.0987  | 0.2029 BTBD10    |
| cg03860466 | 0.03855 | 0.03797 | 0.04793 | 0.06617 | 0.3809  | 0.44499 | 0.05127 | 0.0357  | 0.03237 | 0.02927 PRDX2    |
| cg03860768 | 0.34143 | 0.06254 | 0.86641 | 0.88931 | 0.88525 | 0.8661  | 0.70327 | 0.58029 | 0.57654 | 0.57972 BLK      |
| cg03860890 | 0.56664 | 0.40335 | 0.54109 | 0.55013 | 0.80977 | 0.79888 | 0.11341 | 0.0449  | 0.43985 | 0.22522 EGFR     |
| cg03861428 | 0.02485 | 0.02441 | 0.0261  | 0.02553 | 0.01967 | 0.02519 | 0.02058 | 0.01919 | 0.01767 | 0.02003 SDHB     |
| cg03862540 | 0.03803 | 0.03686 | 0.03126 | 0.03798 | 0.0317  | 0.03521 | 0.03327 | 0.04203 | 0.02954 | 0.03112 PPP4R1   |
| cg03862760 | 0.2622  | 0.35462 | 0.26647 | 0.25756 | 0.34347 | 0.31932 | 0.02984 | 0.02144 | 0.03922 | 0.06767 MGC10911 |
| cg03863149 | 0.03423 | 0.0389  | 0.04816 | 0.04199 | 0.03656 | 0.04434 | 0.02598 | 0.02378 | 0.03936 | 0.03348 ZNF644   |
| cg03863549 | 0.03319 | 0.03349 | 0.03178 | 0.03126 | 0.02593 | 0.02893 | 0.02821 | 0.03095 | 0.02728 | 0.02267 NOL6     |
| cg03866607 | 0.55455 | 0.56215 | 0.81982 | 0.83492 | 0.85369 | 0.81144 | 0.62508 | 0.73616 | 0.54241 | 0.44079 TBX4     |
| cg03870261 | 0.43253 | 0.06524 | 0.8685  | 0.92624 | 0.622   | 0.19891 | 0.89099 | 0.52913 | 0.3905  | 0.13641 TIMM13   |
| cg03870862 | 0.69306 | 0.37753 | 0.289   | 0.41417 | 0.48985 | 0.51787 | 0.65581 | 0.65169 | 0.71486 | 0.33883 ZC3H3    |
| cg03872267 | 0.04047 | 0.04173 | 0.04769 | 0.04608 | 0.04588 | 0.04372 | 0.04796 | 0.05067 | 0.0387  | 0.04434 MRPL46   |
| cg03872376 | 0.11975 | 0.1357  | 0.74486 | 0.83633 | 0.15775 | 0.39859 | 0.72402 | 0.33882 | 0.09018 | 0.14188 ZP4      |
| cg03873930 | 0.83765 | 0.744   | 0.88023 | 0.8821  | 0.82371 | 0.80962 | 0.83978 | 0.73785 | 0.90304 | 0.65146 ARFRP1   |
| cg03874127 | 0.8589  | 0.70084 | 0.87298 | 0.89077 | 0.86133 | 0.56191 | 0.87362 | 0.74865 | 0.8917  | 0.74709 ARMC2    |
| cg03874199 | 0.94491 | 0.94234 | 0.9404  | 0.9433  | 0.92603 | 0.95306 | 0.93781 | 0.93583 | 0.73465 | 0.60646 HOXD12   |
| cg03874886 | 0.02816 | 0.02378 | 0.02898 | 0.02593 | 0.0254  | 0.02403 | 0.02372 | 0.02485 | 0.04031 | 0.0224 FLJ14397  |
| cg03875195 | 0.08258 | 0.07249 | 0.12294 | 0.09919 | 0.56847 | 0.4177  | 0.25532 | 0.07878 | 0.06927 | 0.07058 SLC30A3  |
| cg03875678 | 0.09783 | 0.10769 | 0.11934 | 0.12665 | 0.19282 | 0.15465 | 0.09264 | 0.15517 | 0.09261 | 0.11046 GZMB     |
| cg03876618 | 0.06046 | 0.04622 | 0.05216 | 0.04745 | 0.04263 | 0.03863 | 0.04478 | 0.0401  | 0.04059 | 0.04057 IGFBP7   |
| cg03876622 | 0.15584 | 0.14137 | 0.22334 | 0.18869 | 0.27585 | 0.13267 | 0.13235 | 0.15183 | 0.13352 | 0.16631 CSDA     |
| cg03877802 | 0.05163 | 0.04557 | 0.13202 | 0.14057 | 0.03804 | 0.03804 | 0.06585 | 0.04442 | 0.05166 | 0.03571 PPP5C    |
| cg03878377 | 0.02834 | 0.02177 | 0.02873 | 0.02426 | 0.02978 | 0.02955 | 0.02954 | 0.03115 | 0.02631 | 0.03143 C15orf15 |
| cg03879294 | 0.06013 | 0.06281 | 0.05668 | 0.06263 | 0.04916 | 0.06208 | 0.0475  | 0.05523 | 0.05541 | 0.0509 SFRS9     |
| cg03879730 | 0.62679 | 0.4939  | 0.79729 | 0.86942 | 0.4309  | 0.36375 | 0.71394 | 0.22327 | 0.1914  | 0.0909 PSMD4     |
| cg03879902 | 0.04031 | 0.0453  | 0.19303 | 0.16976 | 0.20832 | 0.18805 | 0.04099 | 0.05631 | 0.04112 | 0.03279 GIPR     |
| cg03882305 | 0.9494  | 0.85148 | 0.96294 | 0.96521 | 0.95397 | 0.9357  | 0.83839 | 0.88647 | 0.9699  | 0.96911 TRIM50C  |
| cg03883348 | 0.30364 | 0.05063 | 0.89773 | 0.93771 | 0.90842 | 0.89596 | 0.07927 | 0.03437 | 0.31655 | 0.25468 KLC3     |
| cg03883519 | 0.04163 | 0.03753 | 0.03951 | 0.03938 | 0.02981 | 0.04062 | 0.03458 | 0.03615 | 0.03801 | 0.03662 MGC33302 |
| cg03884783 | 0.04654 | 0.04345 | 0.05912 | 0.05197 | 0.4554  | 0.40958 | 0.04118 | 0.03987 | 0.0331  | 0.03332 ZNF569   |
| cg03885639 | 0.80889 | 0.80153 | 0.68835 | 0.78222 | 0.83586 | 0.11143 | 0.05966 | 0.16933 | 0.40173 | 0.54295 PANX3    |
| cg03886110 | 0.90273 | 0.90374 | 0.92726 | 0.92881 | 0.95761 | 0.90723 | 0.89287 | 0.88862 | 0.9368  | 0.92324 PECAM1   |
| cg03886898 | 0.75393 | 0.53564 | 0.80519 | 0.84142 | 0.76858 | 0.63398 | 0.47707 | 0.65913 | 0.8413  | 0.76335 DIO1     |
| cg03887534 | 0.04868 | 0.05516 | 0.05812 | 0.04418 | 0.07184 | 0.04388 | 0.04642 | 0.044   | 0.05013 | 0.04738 BCL2L13  |
| cg03887787 | 0.89116 | 0.55867 | 0.89886 | 0.90454 | 0.91996 | 0.86146 | 0.87971 | 0.78926 | 0.91532 | 0.65162 CTSW     |
| cg03889226 | 0.09416 | 0.06116 | 0.77064 | 0.82529 | 0.61393 | 0.51494 | 0.29051 | 0.34677 | 0.09807 | 0.25178 OLIG3    |
| cg03890877 | 0.03023 | 0.03243 | 0.03595 | 0.02983 | 0.04943 | 0.03675 | 0.02404 | 0.02561 | 0.02841 | 0.02759 PTK9L    |
| cg03891191 | 0.40803 | 0.29881 | 0.2564  | 0.33894 | 0.54434 | 0.50177 | 0.1744  | 0.11945 | 0.13693 | 0.14693 PRAMEF2  |
| cg03891319 | 0.60558 | 0.21001 | 0.17866 | 0.14004 | 0.12206 | 0.03584 | 0.24083 | 0.11338 | 0.39213 | 0.02777 ACY1     |



|            |         |         |         |         |         |         |         |         |         |                   |
|------------|---------|---------|---------|---------|---------|---------|---------|---------|---------|-------------------|
| cg03894103 | 0.74078 | 0.33815 | 0.66361 | 0.70723 | 0.35551 | 0.34475 | 0.62838 | 0.51473 | 0.59431 | 0.34477 PREPL     |
| cg03897136 | 0.45696 | 0.66303 | 0.51165 | 0.81294 | 0.04091 | 0.0323  | 0.06583 | 0.18371 | 0.03244 | 0.02832 HOOK1     |
| cg03898365 | 0.11052 | 0.10618 | 0.17706 | 0.1454  | 0.2512  | 0.13139 | 0.15982 | 0.15713 | 0.1034  | 0.1158 OR10A4     |
| cg03900104 | 0.05456 | 0.0475  | 0.05172 | 0.05183 | 0.05622 | 0.05132 | 0.05328 | 0.04834 | 0.03973 | 0.04374 PPP1R13L  |
| cg03900284 | 0.91128 | 0.86937 | 0.92223 | 0.93493 | 0.94516 | 0.90805 | 0.90501 | 0.80283 | 0.9478  | 0.88962 P518      |
| cg03900542 | 0.06963 | 0.06582 | 0.05555 | 0.06334 | 0.06677 | 0.05866 | 0.06328 | 0.05226 | 0.04611 | 0.04356 DEDD2     |
| cg03902905 | 0.72278 | 0.60684 | 0.70816 | 0.75453 | 0.75696 | 0.70227 | 0.58121 | 0.62717 | 0.64673 | 0.61428 SLC3A1    |
| cg03905094 | 0.04455 | 0.05127 | 0.06537 | 0.05356 | 0.05244 | 0.04157 | 0.04755 | 0.04076 | 0.03937 | 0.03156 DEPDC1B   |
| cg03905144 | 0.73477 | 0.31466 | 0.80426 | 0.84277 | 0.61186 | 0.6434  | 0.76331 | 0.53178 | 0.83259 | 0.6476 MPDZ       |
| cg03907174 | 0.88754 | 0.88905 | 0.9058  | 0.90547 | 0.89147 | 0.65285 | 0.93383 | 0.90109 | 0.82873 | 0.21004 RCN3      |
| cg03907363 | 0.65924 | 0.18879 | 0.51394 | 0.59661 | 0.42941 | 0.4234  | 0.24422 | 0.14144 | 0.15789 | 0.124 KLK1        |
| cg03907454 | 0.26696 | 0.07983 | 0.23541 | 0.33034 | 0.08947 | 0.07045 | 0.08632 | 0.06075 | 0.28045 | 0.06323 KIF2C     |
| cg03908676 | 0.80728 | 0.7534  | 0.66273 | 0.71852 | 0.616   | 0.71254 | 0.57321 | 0.16492 | 0.57496 | 0.2402 XLKD1      |
| cg03909500 | 0.03561 | 0.03297 | 0.87213 | 0.90374 | 0.10822 | 0.04521 | 0.07596 | 0.04558 | 0.02482 | 0.02534 RLN3R1    |
| cg03910901 | 0.0572  | 0.04438 | 0.09964 | 0.09703 | 0.07291 | 0.05419 | 0.0468  | 0.03716 | 0.05305 | 0.02857 COPS6     |
| cg03912013 | 0.05354 | 0.0621  | 0.06074 | 0.06383 | 0.05852 | 0.06282 | 0.05593 | 0.04854 | 0.04703 | 0.04625 SACM1L    |
| cg03913271 | 0.08408 | 0.07775 | 0.0853  | 0.10045 | 0.06187 | 0.0861  | 0.07952 | 0.07864 | 0.08643 | 0.11592 MICAL-L1  |
| cg03914397 | 0.11526 | 0.09201 | 0.2972  | 0.33416 | 0.40948 | 0.36205 | 0.09092 | 0.09883 | 0.07089 | 0.05597 NMUR2     |
| cg03914452 | 0.75609 | 0.3902  | 0.61881 | 0.68091 | 0.61991 | 0.63152 | 0.69768 | 0.68956 | 0.73976 | 0.48438 PRR8      |
| cg03916421 | 0.42547 | 0.07195 | 0.13175 | 0.10263 | 0.33551 | 0.07702 | 0.07516 | 0.0655  | 0.10186 | 0.07422 LOC132321 |
| cg03916787 | 0.12683 | 0.11836 | 0.12859 | 0.11347 | 0.11797 | 0.12082 | 0.11124 | 0.10418 | 0.11035 | 0.11013 RPL35     |
| cg03918304 | 0.88726 | 0.89159 | 0.85365 | 0.8756  | 0.82587 | 0.85021 | 0.66799 | 0.761   | 0.86606 | 0.82722 HOXD10    |
| cg03919644 | 0.02891 | 0.0336  | 0.03381 | 0.03371 | 0.02179 | 0.02914 | 0.03375 | 0.03387 | 0.02772 | 0.02907 LRRIQ2    |
| cg03919781 | 0.09191 | 0.09144 | 0.12641 | 0.09878 | 0.12849 | 0.09829 | 0.16995 | 0.18122 | 0.07598 | 0.10006 EFHA2     |
| cg03920233 | 0.06932 | 0.03319 | 0.18649 | 0.11432 | 0.07725 | 0.0495  | 0.05101 | 0.02922 | 0.03029 | 0.02415 DOC2A     |
| cg03922337 | 0.13558 | 0.07394 | 0.1126  | 0.12505 | 0.04073 | 0.06433 | 0.06533 | 0.05364 | 0.113   | 0.05732 RRAS2     |
| cg03923277 | 0.54377 | 0.49974 | 0.49718 | 0.52331 | 0.52112 | 0.47849 | 0.35121 | 0.41523 | 0.3137  | 0.29197 TDG       |
| cg03923464 | 0.07971 | 0.07684 | 0.09079 | 0.09274 | 0.0848  | 0.07078 | 0.07239 | 0.06848 | 0.08578 | 0.06043 ABCB9     |
| cg03923934 | 0.19411 | 0.06189 | 0.41389 | 0.46791 | 0.20485 | 0.54177 | 0.06928 | 0.05406 | 0.11165 | 0.05204 OPCML     |
| cg03924115 | 0.87026 | 0.73356 | 0.86629 | 0.87748 | 0.90876 | 0.86115 | 0.83044 | 0.79988 | 0.86565 | 0.83512 P518      |
| cg03925809 | 0.02195 | 0.02467 | 0.02312 | 0.02802 | 0.02663 | 0.03125 | 0.02249 | 0.02047 | 0.01836 | 0.01811 GTF2F1    |
| cg03928182 | 0.13969 | 0.2836  | 0.55272 | 0.65051 | 0.13035 | 0.08285 | 0.09493 | 0.06064 | 0.08171 | 0.05671 PTPRR     |
| cg03929796 | 0.62955 | 0.38503 | 0.85313 | 0.82638 | 0.94997 | 0.6352  | 0.94603 | 0.30366 | 0.37098 | 0.10428 ALAS1     |
| cg03930357 | 0.03385 | 0.03495 | 0.03754 | 0.03664 | 0.03911 | 0.04166 | 0.0377  | 0.03499 | 0.03597 | 0.03212 MBTPS1    |
| cg03930474 | 0.04188 | 0.04529 | 0.05549 | 0.05484 | 0.06295 | 0.0365  | 0.04354 | 0.04625 | 0.04822 | 0.04233 ING4      |
| cg03930970 | 0.93072 | 0.84777 | 0.92937 | 0.93251 | 0.94719 | 0.89787 | 0.92335 | 0.91382 | 0.94502 | 0.89731 ZDHHC4    |
| cg03931808 | 0.94631 | 0.91287 | 0.93871 | 0.94065 | 0.89004 | 0.93575 | 0.89969 | 0.83057 | 0.70391 | 0.72708 RLN3      |
| cg03933322 | 0.09544 | 0.0654  | 0.06424 | 0.06026 | 0.04394 | 0.19326 | 0.06225 | 0.0574  | 0.05668 | 0.05682 CSAD      |
| cg03934354 | 0.86401 | 0.88058 | 0.83622 | 0.87031 | 0.89908 | 0.86852 | 0.86929 | 0.8715  | 0.87749 | 0.81761 C1QTNF3   |
| cg03936963 | 0.1157  | 0.04464 | 0.05669 | 0.04739 | 0.05714 | 0.03311 | 0.50342 | 0.42256 | 0.05688 | 0.13599 TMEM29    |
| cg03938043 | 0.16892 | 0.15391 | 0.19956 | 0.13111 | 0.25431 | 0.16691 | 0.12596 | 0.09596 | 0.12867 | 0.13931 DTL       |

|            |         |         |         |         |         |         |         |         |         |                  |
|------------|---------|---------|---------|---------|---------|---------|---------|---------|---------|------------------|
| cg03939485 | 0.06113 | 0.06241 | 0.05845 | 0.06234 | 0.04199 | 0.04038 | 0.05642 | 0.05891 | 0.04669 | 0.04795 RGL2     |
| cg03939688 | 0.03771 | 0.04161 | 0.04671 | 0.03856 | 0.04177 | 0.03958 | 0.03819 | 0.03624 | 0.03102 | 0.02804 KLF4     |
| cg03940103 | 0.29943 | 0.30191 | 0.1634  | 0.14948 | 0.05608 | 0.06004 | 0.0767  | 0.05386 | 0.05892 | 0.05148 CYP2S1   |
| cg03940966 | 0.67041 | 0.46957 | 0.04256 | 0.04132 | 0.03639 | 0.03495 | 0.45996 | 0.54865 | 0.03414 | 0.02909 THEM4    |
| cg03941108 | 0.05676 | 0.04022 | 0.19902 | 0.44472 | 0.38213 | 0.30635 | 0.04089 | 0.04672 | 0.04284 | 0.03228 C1QB     |
| cg03942271 | 0.05481 | 0.04744 | 0.06347 | 0.05594 | 0.06121 | 0.04557 | 0.04964 | 0.05315 | 0.03493 | 0.03577 AUH      |
| cg03942436 | 0.03527 | 0.03431 | 0.03337 | 0.03547 | 0.02565 | 0.02616 | 0.02913 | 0.02805 | 0.02446 | 0.02857 ZNF688   |
| cg03943081 | 0.06241 | 0.03809 | 0.69968 | 0.80967 | 0.31534 | 0.04559 | 0.16374 | 0.34341 | 0.12496 | 0.30952 TCERG1L  |
| cg03943509 | 0.89228 | 0.84785 | 0.85101 | 0.87019 | 0.81263 | 0.76137 | 0.82984 | 0.76709 | 0.87882 | 0.86944 PYGM     |
| cg03944089 | 0.15728 | 0.09865 | 0.13095 | 0.11763 | 0.21212 | 0.10996 | 0.49097 | 0.07961 | 0.1065  | 0.10701 SGK      |
| cg03945021 | 0.08003 | 0.05382 | 0.36917 | 0.61382 | 0.73539 | 0.0503  | 0.04704 | 0.04646 | 0.06711 | 0.04206 FLJ45256 |
| cg03945800 | 0.15753 | 0.054   | 0.03804 | 0.04221 | 0.09117 | 0.05109 | 0.04082 | 0.03842 | 0.07817 | 0.16513 ADCY9    |
| cg03947362 | 0.03575 | 0.04068 | 0.04272 | 0.03595 | 0.03702 | 0.04056 | 0.0351  | 0.03521 | 0.0359  | 0.03478 FLJ37953 |
| cg03950009 | 0.03646 | 0.0431  | 0.04317 | 0.05046 | 0.04938 | 0.04609 | 0.04409 | 0.04704 | 0.03166 | 0.03462 STX17    |
| cg03950654 | 0.03935 | 0.03216 | 0.04247 | 0.03895 | 0.04217 | 0.02725 | 0.03011 | 0.02405 | 0.04487 | 0.02721 ARR2     |
| cg03950669 | 0.0255  | 0.02653 | 0.02827 | 0.02529 | 0.02489 | 0.0256  | 0.02668 | 0.02903 | 0.0201  | 0.01902 TIMM8B   |
| cg03952109 | 0.35702 | 0.22555 | 0.59889 | 0.68644 | 0.59384 | 0.439   | 0.55125 | 0.53222 | 0.37276 | 0.33465 C5orf21  |
| cg03954150 | 0.03343 | 0.03468 | 0.03662 | 0.03601 | 0.03193 | 0.02937 | 0.02963 | 0.03278 | 0.02996 | 0.03219 FBXO15   |
| cg03954173 | 0.05975 | 0.05749 | 0.08503 | 0.06974 | 0.05044 | 0.05442 | 0.06892 | 0.05533 | 0.05385 | 0.05717 CD97     |
| cg03954587 | 0.12478 | 0.11709 | 0.13844 | 0.1112  | 0.24892 | 0.20531 | 0.1642  | 0.1455  | 0.11265 | 0.13956 UBB      |
| cg03954858 | 0.12906 | 0.04086 | 0.13484 | 0.4067  | 0.14218 | 0.2092  | 0.04331 | 0.06525 | 0.08036 | 0.04763 FAM83F   |
| cg03955296 | 0.04831 | 0.0496  | 0.05502 | 0.04536 | 0.03224 | 0.04182 | 0.04957 | 0.04849 | 0.04402 | 0.0443 ETV3      |
| cg03956267 | 0.02998 | 0.03506 | 0.03481 | 0.03143 | 0.03561 | 0.03495 | 0.03463 | 0.03212 | 0.02878 | 0.02896 FLJ20297 |
| cg03956628 | 0.14966 | 0.13766 | 0.11119 | 0.08999 | 0.1572  | 0.10114 | 0.07026 | 0.07583 | 0.32365 | 0.08888 MLH1     |
| cg03957435 | 0.62341 | 0.41139 | 0.54607 | 0.71936 | 0.697   | 0.77614 | 0.36418 | 0.61661 | 0.39202 | 0.68652 ZNF157   |
| cg03958344 | 0.01966 | 0.02723 | 0.027   | 0.02321 | 0.02279 | 0.02183 | 0.02335 | 0.02205 | 0.0168  | 0.01625 CNP      |
| cg03958426 | 0.15498 | 0.14861 | 0.3523  | 0.37606 | 0.41784 | 0.14858 | 0.20153 | 0.13705 | 0.17204 | 0.13429 MAPKAPK2 |
| cg03958979 | 0.04712 | 0.03916 | 0.9729  | 0.97126 | 0.51473 | 0.57903 | 0.06204 | 0.04316 | 0.26296 | 0.48728 NR2E1    |
| cg03959079 | 0.44668 | 0.1651  | 0.12619 | 0.16101 | 0.72851 | 0.84549 | 0.23808 | 0.09037 | 0.07732 | 0.06946 TAB3     |
| cg03959219 | 0.05672 | 0.05949 | 0.05915 | 0.06297 | 0.04732 | 0.0611  | 0.04608 | 0.04955 | 0.04906 | 0.05053 TSPYL4   |
| cg03960217 | 0.04589 | 0.04577 | 0.09354 | 0.13622 | 0.14889 | 0.22469 | 0.04403 | 0.03803 | 0.0451  | 0.03921 LCE2C    |
| cg03961189 | 0.02257 | 0.02059 | 0.02838 | 0.02465 | 0.02591 | 0.02255 | 0.02532 | 0.01956 | 0.01602 | 0.02396 SH2BP1   |
| cg03962522 | 0.11823 | 0.02772 | 0.80096 | 0.93572 | 0.76172 | 0.91092 | 0.1125  | 0.04153 | 0.88394 | 0.78992 SLC5A1   |
| cg03963198 | 0.05144 | 0.03088 | 0.56148 | 0.62374 | 0.90756 | 0.7817  | 0.09347 | 0.06515 | 0.21242 | 0.02695 IRX4     |
| cg03963654 | 0.80821 | 0.11176 | 0.87988 | 0.88418 | 0.8346  | 0.41491 | 0.83885 | 0.29142 | 0.8949  | 0.08917 SCOC     |
| cg03964111 | 0.75892 | 0.32761 | 0.18731 | 0.53964 | 0.55681 | 0.81814 | 0.07642 | 0.052   | 0.28563 | 0.28675 LR8      |
| cg03966406 | 0.04982 | 0.05224 | 0.0514  | 0.04862 | 0.03507 | 0.04222 | 0.04698 | 0.04167 | 0.0437  | 0.04628 ITPR2    |
| cg03966541 | 0.0212  | 0.02555 | 0.02422 | 0.02349 | 0.01716 | 0.02099 | 0.02102 | 0.02115 | 0.01925 | 0.01679 PGGT1B   |
| cg03969797 | 0.61296 | 0.59746 | 0.29553 | 0.33392 | 0.16917 | 0.17547 | 0.07707 | 0.05835 | 0.47651 | 0.5427 MKRN3     |
| cg03969906 | 0.15057 | 0.1492  | 0.17157 | 0.16861 | 0.1709  | 0.16881 | 0.11681 | 0.16097 | 0.10437 | 0.12595 HIST1H4A |
| cg03969997 | 0.02704 | 0.03378 | 0.03708 | 0.03037 | 0.03411 | 0.03597 | 0.02915 | 0.03323 | 0.02589 | 0.02373 WBSR27   |

|            |         |         |         |         |         |         |         |         |         |         |           |
|------------|---------|---------|---------|---------|---------|---------|---------|---------|---------|---------|-----------|
| cg03970351 | 0.02642 | 0.02889 | 0.02868 | 0.02451 | 0.02919 | 0.02925 | 0.02081 | 0.02416 | 0.01974 | 0.02184 | TERF2     |
| cg03970609 | 0.44749 | 0.70666 | 0.67038 | 0.66616 | 0.59115 | 0.61141 | 0.56679 | 0.53952 | 0.67683 | 0.68574 | MUC7      |
| cg03972838 | 0.87917 | 0.57463 | 0.7169  | 0.83323 | 0.4128  | 0.28278 | 0.49264 | 0.12543 | 0.2174  | 0.26952 | FLJ20232  |
| cg03973663 | 0.70758 | 0.40258 | 0.40836 | 0.70318 | 0.85758 | 0.84123 | 0.77242 | 0.51043 | 0.90394 | 0.83979 | LYN       |
| cg03975345 | 0.03137 | 0.02932 | 0.03517 | 0.03049 | 0.02513 | 0.02558 | 0.02661 | 0.02978 | 0.01981 | 0.01962 | MGC34713  |
| cg03975694 | 0.06274 | 0.06248 | 0.93563 | 0.94356 | 0.6305  | 0.66304 | 0.04298 | 0.05245 | 0.06753 | 0.25494 | ZNF540    |
| cg03976567 | 0.0511  | 0.05154 | 0.06845 | 0.06112 | 0.05789 | 0.05027 | 0.04675 | 0.04306 | 0.04462 | 0.05449 | C6orf199  |
| cg03977657 | 0.81392 | 0.59737 | 0.81182 | 0.87911 | 0.91309 | 0.88585 | 0.85628 | 0.44993 | 0.87389 | 0.81762 | LAMB3     |
| cg03977782 | 0.04245 | 0.04157 | 0.26607 | 0.392   | 0.19145 | 0.0367  | 0.31371 | 0.24164 | 0.09629 | 0.02802 | SIDT1     |
| cg03979162 | 0.06402 | 0.06558 | 0.07658 | 0.15496 | 0.09011 | 0.07478 | 0.05504 | 0.05051 | 0.0635  | 0.05968 | BCAS3     |
| cg03980304 | 0.12184 | 0.06163 | 0.05591 | 0.05406 | 0.04063 | 0.03889 | 0.04697 | 0.05315 | 0.04168 | 0.04625 | IL4R      |
| cg03984733 | 0.03005 | 0.03159 | 0.03563 | 0.03666 | 0.03017 | 0.02341 | 0.03241 | 0.0323  | 0.02667 | 0.02057 | HDHD3     |
| cg03985136 | 0.45161 | 0.27186 | 0.57133 | 0.58399 | 0.07536 | 0.03648 | 0.09089 | 0.05287 | 0.12005 | 0.28022 | ULBP2     |
| cg03985657 | 0.02473 | 0.02293 | 0.04904 | 0.04179 | 0.02369 | 0.02415 | 0.0198  | 0.02006 | 0.0256  | 0.02477 | C1orf2    |
| cg03986640 | 0.67013 | 0.52666 | 0.62134 | 0.8556  | 0.66269 | 0.42927 | 0.40509 | 0.71306 | 0.12709 | 0.07534 | MIP       |
| cg03986968 | 0.07086 | 0.05596 | 0.06513 | 0.06668 | 0.07217 | 0.08038 | 0.07344 | 0.07051 | 0.09224 | 0.08777 | AVEN      |
| cg03989322 | 0.07459 | 0.02801 | 0.03227 | 0.0365  | 0.05359 | 0.03408 | 0.03378 | 0.03168 | 0.02665 | 0.0223  | SLC30A5   |
| cg03989569 | 0.03659 | 0.03439 | 0.04019 | 0.0353  | 0.03107 | 0.0377  | 0.03084 | 0.02745 | 0.03211 | 0.03002 | MEF2D     |
| cg03990551 | 0.02846 | 0.02821 | 0.0309  | 0.03348 | 0.02462 | 0.02729 | 0.02836 | 0.02501 | 0.02405 | 0.02665 | BBS7      |
| cg03991326 | 0.26212 | 0.22238 | 0.28988 | 0.26314 | 0.2358  | 0.21721 | 0.26771 | 0.23787 | 0.20493 | 0.23728 | RPL7      |
| cg03991512 | 0.62626 | 0.21181 | 0.82623 | 0.82918 | 0.90206 | 0.76739 | 0.81076 | 0.45062 | 0.09332 | 0.04943 | LDHD      |
| cg03992069 | 0.03912 | 0.03988 | 0.04953 | 0.05034 | 0.04291 | 0.03085 | 0.28109 | 0.28497 | 0.03457 | 0.03806 | ZMYM3     |
| cg03992230 | 0.05162 | 0.05158 | 0.05937 | 0.05149 | 0.0464  | 0.04634 | 0.04948 | 0.05684 | 0.0462  | 0.04978 | HNRPH1    |
| cg03993463 | 0.16438 | 0.4205  | 0.88485 | 0.91029 | 0.91186 | 0.91854 | 0.87755 | 0.86158 | 0.51971 | 0.42995 | KCNJ15    |
| cg03994908 | 0.03124 | 0.03364 | 0.0425  | 0.04244 | 0.02377 | 0.0287  | 0.02743 | 0.02271 | 0.02787 | 0.02603 | RNASEH1   |
| cg03996465 | 0.03108 | 0.04484 | 0.0438  | 0.04454 | 0.05181 | 0.05384 | 0.0433  | 0.04367 | 0.02899 | 0.03789 | SUGT1     |
| cg03996793 | 0.19248 | 0.19626 | 0.49411 | 0.35851 | 0.27178 | 0.23848 | 0.17728 | 0.15993 | 0.15798 | 0.1483  | C19orf30  |
| cg03996822 | 0.83479 | 0.63372 | 0.81302 | 0.8367  | 0.6951  | 0.81778 | 0.69367 | 0.56391 | 0.83609 | 0.45439 | RASSF6    |
| cg03998173 | 0.52484 | 0.90727 | 0.06294 | 0.04452 | 0.12596 | 0.20825 | 0.2163  | 0.32972 | 0.03322 | 0.03219 | RHEB      |
| cg03998348 | 0.21358 | 0.15219 | 0.85206 | 0.87199 | 0.53786 | 0.63446 | 0.18202 | 0.15921 | 0.42315 | 0.20556 | TMCO5     |
| cg03999420 | 0.04611 | 0.05554 | 0.05841 | 0.05152 | 0.04926 | 0.0541  | 0.05134 | 0.04673 | 0.03999 | 0.0385  | MYCBP2    |
| cg04000821 | 0.10856 | 0.07483 | 0.13771 | 0.25036 | 0.06151 | 0.0732  | 0.09096 | 0.13792 | 0.07889 | 0.0811  | LAIR2     |
| cg04001333 | 0.92691 | 0.94813 | 0.81804 | 0.93874 | 0.91211 | 0.92681 | 0.19781 | 0.04857 | 0.95821 | 0.92504 | C14orf58  |
| cg04001668 | 0.91655 | 0.62261 | 0.92068 | 0.94736 | 0.97094 | 0.95551 | 0.93331 | 0.91883 | 0.96639 | 0.91017 | GPR56     |
| cg04001802 | 0.18403 | 0.21001 | 0.59022 | 0.71288 | 0.75279 | 0.49975 | 0.14621 | 0.12547 | 0.78576 | 0.57287 | THEDC1    |
| cg04001842 | 0.06166 | 0.03803 | 0.43402 | 0.41123 | 0.20246 | 0.18561 | 0.03573 | 0.02917 | 0.35376 | 0.07725 | LOC405753 |
| cg04004861 | 0.05532 | 0.05383 | 0.06215 | 0.04906 | 0.04504 | 0.0496  | 0.04729 | 0.05203 | 0.04768 | 0.04943 | STAU2     |
| cg04005032 | 0.04187 | 0.04882 | 0.04694 | 0.05839 | 0.04028 | 0.04334 | 0.03636 | 0.0427  | 0.03965 | 0.03729 | OSBPL10   |
| cg04005701 | 0.05656 | 0.07375 | 0.05375 | 0.04946 | 0.03939 | 0.04329 | 0.04294 | 0.04309 | 0.04193 | 0.03845 | SMYD4     |
| cg04005707 | 0.08396 | 0.04189 | 0.91192 | 0.95427 | 0.51353 | 0.60436 | 0.36149 | 0.45672 | 0.47999 | 0.42876 | FLJ21511  |
| cg04005725 | 0.03827 | 0.03234 | 0.0334  | 0.03134 | 0.06831 | 0.17122 | 0.02574 | 0.02783 | 0.0301  | 0.02574 | KLHDC8B   |

|            |         |         |         |         |         |         |         |         |         |                  |
|------------|---------|---------|---------|---------|---------|---------|---------|---------|---------|------------------|
| cg04006554 | 0.01981 | 0.02334 | 0.05957 | 0.17134 | 0.03071 | 0.02243 | 0.02236 | 0.01714 | 0.06222 | 0.02445 ENPP5    |
| cg04007936 | 0.90783 | 0.83174 | 0.91473 | 0.93022 | 0.93873 | 0.92623 | 0.92086 | 0.90052 | 0.88704 | 0.92063 CARHSP1  |
| cg04008455 | 0.20629 | 0.10701 | 0.25625 | 0.52475 | 0.92258 | 0.52555 | 0.23049 | 0.15602 | 0.8676  | 0.55094 MAN2C1   |
| cg04008843 | 0.16837 | 0.12471 | 0.72891 | 0.75856 | 0.5342  | 0.52803 | 0.38587 | 0.47852 | 0.16626 | 0.15115 TTR      |
| cg04008901 | 0.03999 | 0.0461  | 0.03969 | 0.04205 | 0.04293 | 0.035   | 0.03461 | 0.03199 | 0.13857 | 0.03159 CACNA2D1 |
| cg04008913 | 0.12296 | 0.0928  | 0.75915 | 0.79785 | 0.14137 | 0.09752 | 0.30416 | 0.12256 | 0.35404 | 0.06747 SNRK     |
| cg04009666 | 0.05775 | 0.06641 | 0.071   | 0.07292 | 0.09375 | 0.06753 | 0.0442  | 0.03749 | 0.04516 | 0.05731 POLG2    |
| cg04010530 | 0.03514 | 0.03243 | 0.04741 | 0.04899 | 0.04111 | 0.03501 | 0.03552 | 0.03144 | 0.03213 | 0.02555 NR4A2    |
| cg04011402 | 0.69002 | 0.70468 | 0.69793 | 0.68751 | 0.68745 | 0.69723 | 0.63894 | 0.68959 | 0.67127 | 0.62488 FIS      |
| cg04011872 | 0.03117 | 0.035   | 0.03667 | 0.04289 | 0.02978 | 0.03042 | 0.03262 | 0.02919 | 0.03361 | 0.02794 MRPL23   |
| cg04014889 | 0.50706 | 0.48935 | 0.6038  | 0.7104  | 0.82733 | 0.82876 | 0.33091 | 0.48975 | 0.42148 | 0.48186 MAGEL2   |
| cg04016326 | 0.10703 | 0.10634 | 0.79509 | 0.81343 | 0.69159 | 0.92038 | 0.51324 | 0.85304 | 0.84775 | 0.84729 GRIN2B   |
| cg04017769 | 0.01964 | 0.02397 | 0.02333 | 0.02138 | 0.0197  | 0.01942 | 0.02073 | 0.02261 | 0.01727 | 0.01924 TACC1    |
| cg04019407 | 0.87395 | 0.59588 | 0.90879 | 0.90957 | 0.86563 | 0.86033 | 0.75534 | 0.49787 | 0.90453 | 0.61863 GIP      |
| cg04020816 | 0.02189 | 0.02405 | 0.02494 | 0.02388 | 0.01196 | 0.02183 | 0.02068 | 0.02138 | 0.0204  | 0.01731 MAN2A1   |
| cg04021421 | 0.86231 | 0.84386 | 0.85345 | 0.85331 | 0.81631 | 0.84251 | 0.86687 | 0.76974 | 0.88422 | 0.87345 FANCC    |
| cg04025590 | 0.0392  | 0.03619 | 0.04327 | 0.04097 | 0.03915 | 0.03967 | 0.03149 | 0.03683 | 0.03421 | 0.03349 CCDC21   |
| cg04025889 | 0.03784 | 0.03496 | 0.03679 | 0.03299 | 0.0275  | 0.02984 | 0.02769 | 0.02861 | 0.02637 | 0.02505 AHCY     |
| cg04026012 | 0.10741 | 0.11115 | 0.17386 | 0.13977 | 0.21398 | 0.15537 | 0.11089 | 0.09195 | 0.08867 | 0.08503 SYNCRIP  |
| cg04028573 | 0.02807 | 0.03062 | 0.03922 | 0.03192 | 0.0413  | 0.03795 | 0.0321  | 0.02483 | 0.02903 | 0.02612 POMZP3   |
| cg04030848 | 0.3525  | 0.06579 | 0.63175 | 0.70321 | 0.4986  | 0.09652 | 0.15425 | 0.05355 | 0.40622 | 0.0513 GAL3ST1   |
| cg04032226 | 0.04996 | 0.03154 | 0.22641 | 0.45402 | 0.95883 | 0.97225 | 0.96726 | 0.79266 | 0.97818 | 0.9732 NAGS      |
| cg04032566 | 0.86752 | 0.89189 | 0.8091  | 0.88184 | 0.86068 | 0.89499 | 0.78705 | 0.81151 | 0.89831 | 0.87298 NSUN3    |
| cg04032871 | 0.03222 | 0.03202 | 0.02865 | 0.029   | 0.02994 | 0.03376 | 0.02839 | 0.02886 | 0.02551 | 0.02326 QPCTL    |
| cg04033650 | 0.03209 | 0.03491 | 0.04431 | 0.03895 | 0.04648 | 0.04497 | 0.28191 | 0.12518 | 0.02579 | 0.02912 NSUN5    |
| cg04033774 | 0.92806 | 0.93488 | 0.9056  | 0.91646 | 0.95272 | 0.94051 | 0.91834 | 0.91433 | 0.93247 | 0.91908 GPSM2    |
| cg04034767 | 0.05128 | 0.04229 | 0.17461 | 0.07095 | 0.5243  | 0.26351 | 0.07878 | 0.06274 | 0.23547 | 0.07874 GRASP    |
| cg04036714 | 0.02541 | 0.02456 | 0.02827 | 0.02736 | 0.02589 | 0.02693 | 0.02099 | 0.02172 | 0.02032 | 0.0176 NAPE-PLD  |
| cg04036898 | 0.2554  | 0.11131 | 0.20718 | 0.27846 | 0.11117 | 0.03981 | 0.15016 | 0.19214 | 0.21505 | 0.10951 POMGNT1  |
| cg04037228 | 0.11536 | 0.07964 | 0.14014 | 0.15865 | 0.0874  | 0.06724 | 0.29411 | 0.4606  | 0.55818 | 0.27198 LIMD1    |
| cg04037732 | 0.29324 | 0.05238 | 0.95013 | 0.95253 | 0.73161 | 0.68666 | 0.29408 | 0.16517 | 0.24068 | 0.03996 NLGN3    |
| cg04037952 | 0.95727 | 0.94706 | 0.9473  | 0.95739 | 0.95548 | 0.95365 | 0.88967 | 0.6976  | 0.56048 | 0.92597 GPR148   |
| cg04038932 | 0.10139 | 0.12626 | 0.29372 | 0.51446 | 0.86018 | 0.83471 | 0.07202 | 0.08948 | 0.71208 | 0.53826 FLJ46082 |
| cg04039225 | 0.67877 | 0.68657 | 0.68923 | 0.71823 | 0.6373  | 0.66358 | 0.22742 | 0.30401 | 0.21822 | 0.25147 SAMD7    |
| cg04039397 | 0.62448 | 0.35115 | 0.70247 | 0.78134 | 0.6878  | 0.33829 | 0.74695 | 0.39099 | 0.21332 | 0.19311 CD96     |
| cg04041960 | 0.03566 | 0.03391 | 0.03182 | 0.03109 | 0.7009  | 0.56622 | 0.56832 | 0.60794 | 0.97397 | 0.97251 RGS10    |
| cg04042106 | 0.0486  | 0.03369 | 0.03719 | 0.0294  | 0.04154 | 0.03235 | 0.03167 | 0.03215 | 0.16154 | 0.02638 MUS81    |
| cg04044561 | 0.02793 | 0.02948 | 0.02976 | 0.02904 | 0.02375 | 0.02498 | 0.02608 | 0.02557 | 0.02531 | 0.02501 POP7     |
| cg04044684 | 0.77536 | 0.82262 | 0.64072 | 0.71487 | 0.63839 | 0.62336 | 0.727   | 0.61191 | 0.3801  | 0.40948 CHFR     |
| cg04047710 | 0.03283 | 0.0335  | 0.03385 | 0.03162 | 0.02274 | 0.03406 | 0.03119 | 0.03358 | 0.02978 | 0.02667 C21orf66 |
| cg04048218 | 0.04906 | 0.04989 | 0.05108 | 0.04827 | 0.03913 | 0.0492  | 0.04732 | 0.04431 | 0.04344 | 0.04646 PPIH     |

|            |         |         |         |         |         |         |         |         |         |                  |
|------------|---------|---------|---------|---------|---------|---------|---------|---------|---------|------------------|
| cg04048249 | 0.72712 | 0.32869 | 0.33458 | 0.45458 | 0.75419 | 0.55954 | 0.38221 | 0.38064 | 0.4155  | 0.27309 APOC3    |
| cg04048259 | 0.0568  | 0.02363 | 0.96897 | 0.9785  | 0.97533 | 0.81145 | 0.45905 | 0.08162 | 0.03099 | 0.01727 EDN3     |
| cg04049033 | 0.87301 | 0.86425 | 0.85846 | 0.86433 | 0.90594 | 0.78472 | 0.81689 | 0.83892 | 0.86289 | 0.77999 RILP     |
| cg04049800 | 0.02698 | 0.02917 | 0.02973 | 0.03038 | 0.02271 | 0.02498 | 0.02899 | 0.03005 | 0.02396 | 0.0216 C1orf57   |
| cg04051458 | 0.04315 | 0.0447  | 0.04586 | 0.04331 | 0.0412  | 0.03949 | 0.04057 | 0.03994 | 0.04477 | 0.04044 THBS1    |
| cg04052038 | 0.68365 | 0.74067 | 0.62646 | 0.58133 | 0.65978 | 0.76833 | 0.19126 | 0.1251  | 0.77199 | 0.61948 CLDN8    |
| cg04053638 | 0.03749 | 0.04549 | 0.04342 | 0.03721 | 0.0336  | 0.04056 | 0.02737 | 0.03502 | 0.03815 | 0.03302 SUCLG1   |
| cg04055049 | 0.07203 | 0.0361  | 0.13405 | 0.08632 | 0.34355 | 0.25021 | 0.11421 | 0.04285 | 0.0361  | 0.0282 GPR153    |
| cg04056179 | 0.06099 | 0.04452 | 0.08149 | 0.06448 | 0.10207 | 0.06925 | 0.05764 | 0.04773 | 0.06581 | 0.07843 PREI3    |
| cg04057053 | 0.03099 | 0.02633 | 0.03026 | 0.03007 | 0.02695 | 0.02771 | 0.02695 | 0.02759 | 0.02722 | 0.02784 WNT2B    |
| cg04057106 | 0.85906 | 0.87177 | 0.85821 | 0.87211 | 0.81731 | 0.8504  | 0.85876 | 0.87126 | 0.87712 | 0.88893 C9orf48  |
| cg04057485 | 0.96669 | 0.96082 | 0.96316 | 0.96525 | 0.94443 | 0.93799 | 0.95789 | 0.90146 | 0.96938 | 0.94826 PTGIR    |
| cg04057858 | 0.09906 | 0.0713  | 0.0615  | 0.09569 | 0.07792 | 0.25021 | 0.07238 | 0.07275 | 0.05562 | 0.0644 UNQ9391   |
| cg04058169 | 0.72937 | 0.37749 | 0.7236  | 0.7072  | 0.44936 | 0.43491 | 0.20968 | 0.3201  | 0.81743 | 0.74668 BUB3     |
| cg04058675 | 0.74383 | 0.70679 | 0.6449  | 0.69803 | 0.62128 | 0.74453 | 0.50296 | 0.63353 | 0.7545  | 0.7407 HUWE1     |
| cg04059714 | 0.05206 | 0.05227 | 0.06515 | 0.06176 | 0.06731 | 0.06736 | 0.0616  | 0.05552 | 0.05509 | 0.04913 C12orf38 |
| cg04059863 | 0.86727 | 0.84662 | 0.79364 | 0.84119 | 0.84561 | 0.88227 | 0.87992 | 0.88046 | 0.61727 | 0.51039 ILDR1    |
| cg04060163 | 0.77968 | 0.16468 | 0.23832 | 0.27625 | 0.24454 | 0.08122 | 0.05511 | 0.14528 | 0.23605 | 0.04295 SEC14L1  |
| cg04060275 | 0.03926 | 0.03799 | 0.03949 | 0.0384  | 0.0456  | 0.03238 | 0.03988 | 0.04083 | 0.03706 | 0.02951 DUSP1    |
| cg04062391 | 0.08124 | 0.07429 | 0.60243 | 0.73822 | 0.66799 | 0.62577 | 0.15304 | 0.08375 | 0.11268 | 0.2806 ZNF560    |
| cg04062907 | 0.04601 | 0.04598 | 0.05856 | 0.06217 | 0.08528 | 0.06043 | 0.04793 | 0.05363 | 0.04683 | 0.04553 ANAPC7   |
| cg04063348 | 0.66784 | 0.22606 | 0.32926 | 0.35346 | 0.49881 | 0.39782 | 0.19397 | 0.33577 | 0.26583 | 0.2462 IL17F     |
| cg04065065 | 0.12398 | 0.10446 | 0.13427 | 0.12123 | 0.13333 | 0.16224 | 0.13033 | 0.11968 | 0.11628 | 0.10492 PIGO     |
| cg04066242 | 0.05028 | 0.04317 | 0.04866 | 0.04473 | 0.03613 | 0.03828 | 0.04427 | 0.04136 | 0.03357 | 0.03746 BFAR     |
| cg04070847 | 0.23139 | 0.54844 | 0.71159 | 0.7549  | 0.58341 | 0.53749 | 0.57632 | 0.56939 | 0.26689 | 0.16516 CD200R1  |
| cg04072323 | 0.03453 | 0.03818 | 0.68289 | 0.71914 | 0.2993  | 0.58576 | 0.04293 | 0.03589 | 0.07544 | 0.06935 SKIP     |
| cg04076481 | 0.13476 | 0.12921 | 0.12521 | 0.12565 | 0.10945 | 0.09537 | 0.13342 | 0.11617 | 0.09229 | 0.076 FLJ12949   |
| cg04078251 | 0.04406 | 0.04576 | 0.04904 | 0.04122 | 0.03364 | 0.04317 | 0.04215 | 0.04126 | 0.04555 | 0.04011 KIF22    |
| cg04078896 | 0.28325 | 0.04888 | 0.07157 | 0.06996 | 0.15597 | 0.03223 | 0.04455 | 0.05061 | 0.4313  | 0.32587 ZGPAT    |
| cg04080057 | 0.79976 | 0.33747 | 0.54705 | 0.59393 | 0.92379 | 0.88125 | 0.15848 | 0.09382 | 0.87528 | 0.82179 CACNG6   |
| cg04081402 | 0.94023 | 0.74837 | 0.9262  | 0.93806 | 0.93385 | 0.92674 | 0.9285  | 0.91795 | 0.92937 | 0.88432 TCN2     |
| cg04082985 | 0.05691 | 0.04363 | 0.04542 | 0.04252 | 0.04298 | 0.05018 | 0.0383  | 0.04399 | 0.05081 | 0.04612 LASS2    |
| cg04084157 | 0.04747 | 0.04738 | 0.04411 | 0.04022 | 0.54465 | 0.46094 | 0.14249 | 0.06163 | 0.04152 | 0.04384 VGF      |
| cg04084172 | 0.03894 | 0.03525 | 0.045   | 0.04102 | 0.03851 | 0.03319 | 0.03873 | 0.03424 | 0.06302 | 0.0249 CCNG1     |
| cg04086012 | 0.69786 | 0.85742 | 0.41184 | 0.59322 | 0.82718 | 0.87114 | 0.55178 | 0.87445 | 0.05869 | 0.07813 FLJ36180 |
| cg04086834 | 0.86941 | 0.88198 | 0.71859 | 0.81867 | 0.85376 | 0.82815 | 0.78166 | 0.49529 | 0.45963 | 0.51555 SMAP1    |
| cg04087608 | 0.68761 | 0.36781 | 0.79971 | 0.83094 | 0.83869 | 0.86778 | 0.76832 | 0.84651 | 0.81898 | 0.77173 HSD3B2   |
| cg04088433 | 0.47318 | 0.27854 | 0.64578 | 0.47662 | 0.38506 | 0.34096 | 0.53338 | 0.25268 | 0.46498 | 0.33774 DCN      |
| cg04088650 | 0.05439 | 0.0441  | 0.04655 | 0.04277 | 0.03595 | 0.04249 | 0.03807 | 0.03991 | 0.03782 | 0.03431 UCHL3    |
| cg04089739 | 0.5084  | 0.55368 | 0.55403 | 0.72049 | 0.46073 | 0.86443 | 0.16259 | 0.11318 | 0.39823 | 0.50822 C3       |
| cg04091078 | 0.72689 | 0.62705 | 0.72767 | 0.74028 | 0.67554 | 0.23824 | 0.47469 | 0.49805 | 0.08989 | 0.08198 SLCO1C1  |

|            |         |         |         |         |         |         |         |         |         |                  |
|------------|---------|---------|---------|---------|---------|---------|---------|---------|---------|------------------|
| cg04094160 | 0.05591 | 0.06176 | 0.05815 | 0.04985 | 0.05642 | 0.07986 | 0.04897 | 0.05497 | 0.04527 | 0.04175 ZBTB5    |
| cg04095468 | 0.11506 | 0.11938 | 0.12364 | 0.11208 | 0.14531 | 0.1132  | 0.09791 | 0.10833 | 0.07143 | 0.07968 SECISBP2 |
| cg04096365 | 0.04678 | 0.03563 | 0.05935 | 0.04832 | 0.09408 | 0.03487 | 0.03067 | 0.03175 | 0.03681 | 0.03108 IFI30    |
| cg04096767 | 0.94862 | 0.84335 | 0.95688 | 0.96644 | 0.96254 | 0.95931 | 0.23556 | 0.05622 | 0.64172 | 0.60684 WT1      |
| cg04098585 | 0.52976 | 0.29266 | 0.43491 | 0.66003 | 0.72411 | 0.56095 | 0.38868 | 0.42903 | 0.15844 | 0.10488 CD28     |
| cg04099420 | 0.75342 | 0.36679 | 0.79166 | 0.78244 | 0.62857 | 0.17846 | 0.76974 | 0.3617  | 0.77368 | 0.28729 RIPK1    |
| cg04099673 | 0.03426 | 0.03723 | 0.06198 | 0.04925 | 0.05749 | 0.05662 | 0.04595 | 0.04361 | 0.03599 | 0.04796 WDR7     |
| cg04101379 | 0.29893 | 0.16942 | 0.04664 | 0.04662 | 0.05237 | 0.06102 | 0.04142 | 0.03204 | 0.02541 | 0.0259 DZIP1     |
| cg04103317 | 0.54928 | 0.08502 | 0.74217 | 0.90942 | 0.80328 | 0.55478 | 0.44999 | 0.20341 | 0.86776 | 0.58858 SPINK4   |
| cg04103514 | 0.39854 | 0.13775 | 0.27137 | 0.29838 | 0.24556 | 0.10641 | 0.13474 | 0.14141 | 0.40538 | 0.12052 EMR2     |
| cg04106190 | 0.68519 | 0.39925 | 0.80161 | 0.81688 | 0.74267 | 0.78973 | 0.5401  | 0.5088  | 0.12754 | 0.07716 WNT16    |
| cg04106641 | 0.08699 | 0.08986 | 0.12693 | 0.08526 | 0.10971 | 0.09115 | 0.10035 | 0.07645 | 0.08675 | 0.09537 ORC4L    |
| cg04106785 | 0.93913 | 0.93865 | 0.88679 | 0.89153 | 0.91662 | 0.89804 | 0.91268 | 0.6503  | 0.56099 | 0.16979 CDK5R1   |
| cg04107037 | 0.05064 | 0.04896 | 0.08314 | 0.11066 | 0.10904 | 0.05749 | 0.05545 | 0.04818 | 0.0628  | 0.04884 ATOH1    |
| cg04108240 | 0.88462 | 0.83826 | 0.8937  | 0.85421 | 0.74994 | 0.81312 | 0.86464 | 0.71459 | 0.92275 | 0.8652 TRA2A     |
| cg04108502 | 0.03204 | 0.02885 | 0.02998 | 0.02889 | 0.02316 | 0.03082 | 0.0268  | 0.02777 | 0.02538 | 0.02686 CDK2     |
| cg04109220 | 0.06163 | 0.06156 | 0.07059 | 0.20513 | 0.15758 | 0.11805 | 0.0654  | 0.06059 | 0.04543 | 0.04424 SPAG8    |
| cg04109382 | 0.7341  | 0.37261 | 0.89992 | 0.90226 | 0.92891 | 0.89747 | 0.8784  | 0.8943  | 0.7832  | 0.67915 C20orf10 |
| cg04111761 | 0.28209 | 0.21441 | 0.58938 | 0.73004 | 0.34593 | 0.42974 | 0.18667 | 0.08095 | 0.13122 | 0.11349 CCR3     |
| cg04112019 | 0.17022 | 0.18669 | 0.29911 | 0.35427 | 0.19638 | 0.1668  | 0.21799 | 0.28414 | 0.17767 | 0.16232 IGF2AS   |
| cg04112431 | 0.04955 | 0.05101 | 0.04722 | 0.04968 | 0.03975 | 0.04539 | 0.04018 | 0.04845 | 0.04183 | 0.04579 PWP1     |
| cg04113075 | 0.75829 | 0.89989 | 0.06384 | 0.05823 | 0.04212 | 0.05417 | 0.05541 | 0.11804 | 0.05729 | 0.04654 RAB32    |
| cg04114315 | 0.08454 | 0.04721 | 0.12547 | 0.10885 | 0.10243 | 0.05547 | 0.07729 | 0.05788 | 0.2235  | 0.04919 CKAP5    |
| cg04115602 | 0.55644 | 0.36289 | 0.57021 | 0.61849 | 0.57186 | 0.62986 | 0.54509 | 0.4552  | 0.49613 | 0.24747 CGB8     |
| cg04117029 | 0.62505 | 0.08766 | 0.24155 | 0.34105 | 0.31478 | 0.28237 | 0.17889 | 0.08978 | 0.88329 | 0.8631 UROS      |
| cg04117338 | 0.13807 | 0.4149  | 0.07448 | 0.06368 | 0.06965 | 0.07182 | 0.06652 | 0.05767 | 0.05378 | 0.0636 CRADD     |
| cg04118154 | 0.02981 | 0.03393 | 0.03011 | 0.03537 | 0.03015 | 0.02994 | 0.02731 | 0.0298  | 0.02778 | 0.02398 TMEM53   |
| cg04118884 | 0.029   | 0.02857 | 0.03264 | 0.02569 | 0.02324 | 0.02762 | 0.02487 | 0.02662 | 0.02109 | 0.02319 CHPF     |
| cg04119538 | 0.03874 | 0.04611 | 0.04544 | 0.04006 | 0.029   | 0.03664 | 0.03675 | 0.03723 | 0.03644 | 0.03859 TOP1     |
| cg04121771 | 0.26084 | 0.25553 | 0.52643 | 0.62892 | 0.11739 | 0.0987  | 0.09743 | 0.12576 | 0.31688 | 0.13352 TM4SF4   |
| cg04121983 | 0.06316 | 0.05702 | 0.06014 | 0.05433 | 0.0499  | 0.04594 | 0.04522 | 0.04996 | 0.04828 | 0.05312 CASKIN2  |
| cg04123409 | 0.85143 | 0.36497 | 0.58672 | 0.56649 | 0.14867 | 0.25276 | 0.39739 | 0.08274 | 0.36272 | 0.51386 SDS      |
| cg04123507 | 0.92405 | 0.59241 | 0.91292 | 0.92523 | 0.90949 | 0.89509 | 0.89847 | 0.89814 | 0.1249  | 0.05537 KRTHB6   |
| cg04125208 | 0.09575 | 0.24787 | 0.05605 | 0.04384 | 0.03373 | 0.03555 | 0.04014 | 0.06062 | 0.037   | 0.02926 CD44     |
| cg04126335 | 0.80452 | 0.79296 | 0.83989 | 0.86394 | 0.73119 | 0.79958 | 0.81167 | 0.7834  | 0.79972 | 0.77576 ITGA10   |
| cg04126427 | 0.09491 | 0.09111 | 0.113   | 0.08713 | 0.101   | 0.09105 | 0.09682 | 0.08987 | 0.08672 | 0.08642 EIF3S10  |
| cg04126816 | 0.03619 | 0.03742 | 0.03654 | 0.03564 | 0.02793 | 0.03261 | 0.03307 | 0.0269  | 0.02854 | 0.02656 HSU79303 |
| cg04126866 | 0.78237 | 0.51713 | 0.85729 | 0.89615 | 0.90223 | 0.91642 | 0.73999 | 0.54659 | 0.34757 | 0.41415 C10orf99 |
| cg04127255 | 0.598   | 0.70391 | 0.8888  | 0.89873 | 0.90741 | 0.88241 | 0.85732 | 0.82659 | 0.90434 | 0.8987 PSG2      |
| cg04127303 | 0.05236 | 0.0434  | 0.06458 | 0.0539  | 0.06618 | 0.0656  | 0.03723 | 0.03177 | 0.05729 | 0.05765 ZZZ3     |
| cg04128563 | 0.03839 | 0.0359  | 0.03189 | 0.03641 | 0.04384 | 0.03397 | 0.03042 | 0.03152 | 0.03989 | 0.05346 AMD1     |

|            |         |         |         |         |         |         |         |         |         |         |           |
|------------|---------|---------|---------|---------|---------|---------|---------|---------|---------|---------|-----------|
| cg04132607 | 0.66704 | 0.08175 | 0.77597 | 0.92122 | 0.96522 | 0.93071 | 0.07056 | 0.08849 | 0.38782 | 0.18767 | GATA5     |
| cg04133652 | 0.06015 | 0.02841 | 0.08132 | 0.0509  | 0.47474 | 0.24408 | 0.36707 | 0.33195 | 0.02694 | 0.02432 | MLLT6     |
| cg04134624 | 0.02467 | 0.02796 | 0.02662 | 0.02498 | 0.02318 | 0.02262 | 0.02492 | 0.02329 | 0.02525 | 0.02248 | CBX6      |
| cg04134859 | 0.0243  | 0.02234 | 0.02584 | 0.02097 | 0.01472 | 0.02331 | 0.02106 | 0.01861 | 0.02355 | 0.0185  | WBCSCR22  |
| cg04135543 | 0.06143 | 0.07136 | 0.06454 | 0.06813 | 0.45479 | 0.53108 | 0.05886 | 0.06243 | 0.0598  | 0.06163 | ORF1-FL49 |
| cg04136480 | 0.04445 | 0.04767 | 0.0486  | 0.04439 | 0.05595 | 0.05638 | 0.04237 | 0.0466  | 0.03717 | 0.03488 | BAT1      |
| cg04137037 | 0.02731 | 0.02918 | 0.02868 | 0.02894 | 0.02213 | 0.02579 | 0.02428 | 0.02231 | 0.02429 | 0.02688 | TEF       |
| cg04137116 | 0.02593 | 0.03152 | 0.03331 | 0.02984 | 0.01868 | 0.02548 | 0.02923 | 0.02898 | 0.02733 | 0.02695 | CRI2      |
| cg04137128 | 0.04854 | 0.04214 | 0.05334 | 0.0458  | 0.05827 | 0.05645 | 0.11109 | 0.08057 | 0.0384  | 0.05745 | SIN3A     |
| cg04138756 | 0.07978 | 0.05316 | 0.13678 | 0.15646 | 0.48738 | 0.45391 | 0.05703 | 0.0719  | 0.31756 | 0.05418 | SPRR3     |
| cg04140754 | 0.37377 | 0.34157 | 0.50661 | 0.50328 | 0.40227 | 0.43249 | 0.38562 | 0.37696 | 0.3863  | 0.31357 | ATP6V0A2  |
| cg04141379 | 0.01837 | 0.01697 | 0.12156 | 0.23694 | 0.0122  | 0.01695 | 0.01341 | 0.01353 | 0.01537 | 0.01455 | SPATA6    |
| cg04143809 | 0.81618 | 0.8375  | 0.75511 | 0.81245 | 0.70085 | 0.79241 | 0.62814 | 0.73929 | 0.17937 | 0.33063 | FLJ39822  |
| cg04144768 | 0.26682 | 0.09377 | 0.60311 | 0.62156 | 0.69998 | 0.70375 | 0.21045 | 0.13125 | 0.23007 | 0.33428 | DDC       |
| cg04144788 | 0.04006 | 0.04546 | 0.93496 | 0.93862 | 0.20633 | 0.1928  | 0.9209  | 0.93603 | 0.92408 | 0.93548 | OXCT2     |
| cg04145477 | 0.02729 | 0.02318 | 0.0274  | 0.02927 | 0.02741 | 0.03056 | 0.02308 | 0.02299 | 0.0259  | 0.02726 | QRSL1     |
| cg04148458 | 0.97671 | 0.96288 | 0.03427 | 0.02783 | 0.06264 | 0.02598 | 0.02845 | 0.02465 | 0.09188 | 0.02435 | FAIM      |
| cg04149472 | 0.84846 | 0.83614 | 0.83687 | 0.84645 | 0.84885 | 0.85256 | 0.77038 | 0.77479 | 0.85242 | 0.81681 | NAT1      |
| cg04151683 | 0.56226 | 0.59664 | 0.13475 | 0.12939 | 0.44846 | 0.48088 | 0.29125 | 0.64071 | 0.08719 | 0.08359 | LRRN6C    |
| cg04154812 | 0.19013 | 0.19551 | 0.17317 | 0.17088 | 0.1052  | 0.1353  | 0.12906 | 0.13805 | 0.15706 | 0.15089 | CALCOCO2  |
| cg04155026 | 0.06305 | 0.06291 | 0.23987 | 0.26087 | 0.12768 | 0.07151 | 0.10851 | 0.05312 | 0.05623 | 0.04668 | TSNAXIP1  |
| cg04155793 | 0.07525 | 0.05945 | 0.09137 | 0.25213 | 0.60521 | 0.45567 | 0.21598 | 0.42333 | 0.05616 | 0.05702 | CDK10     |
| cg04156850 | 0.07368 | 0.09543 | 0.22768 | 0.13157 | 0.25501 | 0.07489 | 0.24502 | 0.1523  | 0.06512 | 0.06106 | GRB2      |
| cg04164824 | 0.75188 | 0.58233 | 0.73359 | 0.80236 | 0.72278 | 0.56915 | 0.1707  | 0.09631 | 0.59896 | 0.39589 | SIGLEC9   |
| cg04166304 | 0.1769  | 0.0824  | 0.02639 | 0.0627  | 0.03662 | 0.02908 | 0.02621 | 0.02193 | 0.26304 | 0.57085 | C14orf106 |
| cg04167054 | 0.06369 | 0.06202 | 0.06375 | 0.0636  | 0.0528  | 0.05156 | 0.04838 | 0.03721 | 0.04562 | 0.05063 | ATP2C1    |
| cg04167867 | 0.82326 | 0.60321 | 0.86369 | 0.79925 | 0.91505 | 0.90988 | 0.68224 | 0.59441 | 0.14126 | 0.06091 | MORC1     |
| cg04169469 | 0.02769 | 0.03363 | 0.03482 | 0.03622 | 0.02892 | 0.02845 | 0.02498 | 0.02825 | 0.026   | 0.02594 | ODC1      |
| cg04171565 | 0.04917 | 0.05932 | 0.05575 | 0.0536  | 0.05277 | 0.07248 | 0.04082 | 0.04392 | 0.03628 | 0.04088 | FLJ22624  |
| cg04172043 | 0.02163 | 0.02321 | 0.02638 | 0.02498 | 0.02154 | 0.02556 | 0.03129 | 0.03284 | 0.01706 | 0.019   | RELA      |
| cg04172348 | 0.07631 | 0.04396 | 0.16005 | 0.25945 | 0.25537 | 0.08394 | 0.64192 | 0.79503 | 0.03741 | 0.03927 | SYN2      |
| cg04176254 | 0.94037 | 0.92916 | 0.94055 | 0.94575 | 0.95078 | 0.9374  | 0.93542 | 0.94108 | 0.9507  | 0.94641 | AGRP      |
| cg04177705 | 0.03446 | 0.03172 | 0.0355  | 0.03155 | 0.03777 | 0.04459 | 0.04867 | 0.04225 | 0.03033 | 0.02913 | C3orf38   |
| cg04180460 | 0.03806 | 0.03738 | 0.03631 | 0.0376  | 0.02619 | 0.03211 | 0.02813 | 0.03129 | 0.03159 | 0.03094 | CTNNB1    |
| cg04180868 | 0.02915 | 0.03071 | 0.2361  | 0.41069 | 0.73626 | 0.58617 | 0.03346 | 0.03071 | 0.95369 | 0.9647  | PRTFDC1   |
| cg04180953 | 0.04967 | 0.04771 | 0.83772 | 0.87692 | 0.2503  | 0.52901 | 0.28464 | 0.28763 | 0.04196 | 0.04568 | DSC1      |
| cg04182865 | 0.57164 | 0.3871  | 0.63713 | 0.69758 | 0.67581 | 0.75327 | 0.53105 | 0.45021 | 0.70249 | 0.34554 | RNF14     |
| cg04183425 | 0.67952 | 0.51511 | 0.81233 | 0.80215 | 0.7725  | 0.57662 | 0.81398 | 0.2839  | 0.83484 | 0.77709 | ASF1A     |
| cg04183933 | 0.04278 | 0.04621 | 0.06202 | 0.04913 | 0.05618 | 0.05864 | 0.04817 | 0.0452  | 0.0524  | 0.04298 | HSPE1     |
| cg04184278 | 0.44037 | 0.17157 | 0.68752 | 0.77927 | 0.65354 | 0.83628 | 0.24838 | 0.16066 | 0.19129 | 0.30996 | GYS2      |
| cg04185037 | 0.02612 | 0.03494 | 0.04191 | 0.0314  | 0.03399 | 0.03016 | 0.02974 | 0.02962 | 0.03374 | 0.02939 | VIL2      |

|            |         |         |         |         |         |         |         |         |         |                  |
|------------|---------|---------|---------|---------|---------|---------|---------|---------|---------|------------------|
| cg04185861 | 0.02881 | 0.02466 | 0.02206 | 0.02302 | 0.0189  | 0.02351 | 0.02165 | 0.02076 | 0.0218  | 0.01741 IL6R     |
| cg04185893 | 0.02829 | 0.03228 | 0.03207 | 0.02756 | 0.02236 | 0.02684 | 0.02209 | 0.02204 | 0.02419 | 0.0238 PTBP2     |
| cg04187545 | 0.06038 | 0.05487 | 0.07433 | 0.05476 | 0.05317 | 0.05494 | 0.09888 | 0.08378 | 0.04931 | 0.05027 RPS20    |
| cg04189838 | 0.12099 | 0.09158 | 0.83693 | 0.86271 | 0.84899 | 0.83319 | 0.66703 | 0.47225 | 0.10992 | 0.08721 CYP2C19  |
| cg04195127 | 0.56748 | 0.04218 | 0.08434 | 0.06923 | 0.07931 | 0.06667 | 0.05145 | 0.04104 | 0.16525 | 0.11189 WFDC1    |
| cg04195527 | 0.07745 | 0.07517 | 0.09564 | 0.08423 | 0.10685 | 0.10328 | 0.10443 | 0.08923 | 0.07426 | 0.07132 INSIG2   |
| cg04197051 | 0.03307 | 0.02796 | 0.03522 | 0.03321 | 0.02929 | 0.03611 | 0.03013 | 0.02615 | 0.03114 | 0.02786 PIGM     |
| cg04197135 | 0.04118 | 0.03942 | 0.04703 | 0.0395  | 0.03673 | 0.03961 | 0.03656 | 0.03852 | 0.03624 | 0.03655 MGC11102 |
| cg04197195 | 0.03009 | 0.03333 | 0.03428 | 0.03552 | 0.02745 | 0.0327  | 0.02991 | 0.02837 | 0.03214 | 0.02458 CCDC71   |
| cg04198824 | 0.05176 | 0.07613 | 0.08235 | 0.07436 | 0.098   | 0.109   | 0.06198 | 0.05088 | 0.06608 | 0.06228 USPL1    |
| cg04200192 | 0.56288 | 0.19481 | 0.49483 | 0.64948 | 0.6164  | 0.84129 | 0.07282 | 0.11755 | 0.57925 | 0.50764 HTR3D    |
| cg04200765 | 0.031   | 0.0269  | 0.03229 | 0.03017 | 0.02346 | 0.03005 | 0.03295 | 0.03338 | 0.02304 | 0.02546 SDFR1    |
| cg04201347 | 0.65847 | 0.5125  | 0.32838 | 0.36232 | 0.42957 | 0.44267 | 0.09256 | 0.09726 | 0.08265 | 0.07016 PRRG2    |
| cg04201526 | 0.78905 | 0.82319 | 0.81701 | 0.83289 | 0.84291 | 0.91959 | 0.29794 | 0.42798 | 0.32277 | 0.27387 CRISP1   |
| cg04206644 | 0.02536 | 0.02771 | 0.03034 | 0.02943 | 0.02682 | 0.02961 | 0.02944 | 0.02996 | 0.02553 | 0.02224 DDX26    |
| cg04208151 | 0.02739 | 0.02573 | 0.02688 | 0.02503 | 0.0207  | 0.02552 | 0.02354 | 0.02116 | 0.02178 | 0.0209 DDX20     |
| cg04209631 | 0.03756 | 0.04102 | 0.04653 | 0.03863 | 0.04641 | 0.04341 | 0.04335 | 0.03917 | 0.03323 | 0.03103 C11orf54 |
| cg04211745 | 0.03406 | 0.0371  | 0.04446 | 0.03889 | 0.02587 | 0.03124 | 0.03514 | 0.03698 | 0.03305 | 0.02823 BTG1     |
| cg04211807 | 0.8261  | 0.59547 | 0.62875 | 0.8838  | 0.87191 | 0.87302 | 0.42936 | 0.49739 | 0.52287 | 0.31652 ZCCHC13  |
| cg04211818 | 0.02111 | 0.01863 | 0.02172 | 0.01916 | 0.01436 | 0.01914 | 0.02067 | 0.01753 | 0.02054 | 0.0188 BTBD12    |
| cg04215480 | 0.05128 | 0.05751 | 0.08966 | 0.10063 | 0.12546 | 0.05057 | 0.0455  | 0.05146 | 0.04602 | 0.04319 ZNF573   |
| cg04216597 | 0.04705 | 0.04699 | 0.50642 | 0.51422 | 0.24587 | 0.06203 | 0.46758 | 0.09826 | 0.3301  | 0.42853 CACNA1G  |
| cg04217178 | 0.06297 | 0.04035 | 0.04194 | 0.03819 | 0.02966 | 0.03497 | 0.02934 | 0.03493 | 0.03255 | 0.02624 ITM2B    |
| cg04217218 | 0.91795 | 0.24967 | 0.92295 | 0.92717 | 0.92301 | 0.81176 | 0.90996 | 0.90708 | 0.92549 | 0.88003 ZDHC21   |
| cg04219321 | 0.10049 | 0.0809  | 0.38226 | 0.53944 | 0.88983 | 0.84585 | 0.32241 | 0.27976 | 0.83039 | 0.65856 HLF      |
| cg04220579 | 0.38708 | 0.03453 | 0.6854  | 0.64318 | 0.05554 | 0.02906 | 0.74794 | 0.66208 | 0.05728 | 0.02552 C7orf20  |
| cg04222374 | 0.03218 | 0.0386  | 0.03297 | 0.02949 | 0.03277 | 0.0307  | 0.51976 | 0.47727 | 0.03251 | 0.0278 CXorf40A  |
| cg04223442 | 0.07003 | 0.05879 | 0.06646 | 0.06665 | 0.06332 | 0.04495 | 0.04543 | 0.05047 | 0.06593 | 0.04639 NCOR1    |
| cg04223844 | 0.04225 | 0.04706 | 0.04927 | 0.04709 | 0.03505 | 0.04049 | 0.04006 | 0.05149 | 0.03641 | 0.03556 IKBKB    |
| cg04223956 | 0.8633  | 0.25595 | 0.7247  | 0.71823 | 0.80985 | 0.25005 | 0.83171 | 0.66018 | 0.8437  | 0.28334 NEK7     |
| cg04224968 | 0.06773 | 0.05997 | 0.0758  | 0.06842 | 0.08935 | 0.08539 | 0.0721  | 0.05786 | 0.04735 | 0.05102 C19orf36 |
| cg04228042 | 0.87397 | 0.80827 | 0.86283 | 0.86988 | 0.82985 | 0.88412 | 0.83711 | 0.85234 | 0.86497 | 0.85439 ART4     |
| cg04228553 | 0.02472 | 0.02296 | 0.02374 | 0.02156 | 0.0198  | 0.02321 | 0.02066 | 0.01908 | 0.01858 | 0.01611 CAPN7    |
| cg04228573 | 0.08094 | 0.07364 | 0.13254 | 0.11825 | 0.14105 | 0.10114 | 0.06308 | 0.05793 | 0.07483 | 0.09181 MAP2K6   |
| cg04228628 | 0.02203 | 0.01909 | 0.02592 | 0.02493 | 0.01684 | 0.01829 | 0.02269 | 0.02081 | 0.01847 | 0.01645 TNKS     |
| cg04229238 | 0.06043 | 0.07082 | 0.07691 | 0.0784  | 0.07304 | 0.06441 | 0.12588 | 0.12985 | 0.0598  | 0.06383 RB1CC1   |
| cg04230060 | 0.95062 | 0.65109 | 0.94351 | 0.94816 | 0.96525 | 0.94833 | 0.86866 | 0.50836 | 0.9518  | 0.75573 SUSD1    |
| cg04230869 | 0.05361 | 0.05645 | 0.05598 | 0.06191 | 0.04327 | 0.05854 | 0.05239 | 0.05818 | 0.04823 | 0.0485 RRM2B     |
| cg04232649 | 0.04476 | 0.0372  | 0.04433 | 0.04142 | 0.03384 | 0.04174 | 0.04062 | 0.03582 | 0.03192 | 0.02823 CCNG1    |
| cg04233664 | 0.02493 | 0.02176 | 0.02751 | 0.02337 | 0.01663 | 0.02113 | 0.02385 | 0.02256 | 0.01906 | 0.01435 CTBP2    |
| cg04235146 | 0.04853 | 0.06205 | 0.05391 | 0.04497 | 0.36613 | 0.04023 | 0.05215 | 0.04415 | 0.03939 | 0.0377 ATP2A2    |



|            |         |         |         |         |         |         |         |         |         |                  |
|------------|---------|---------|---------|---------|---------|---------|---------|---------|---------|------------------|
| cg04237003 | 0.85037 | 0.84283 | 0.41784 | 0.46757 | 0.89717 | 0.86467 | 0.79921 | 0.81369 | 0.87157 | 0.7628 C11orf9   |
| cg04237663 | 0.04594 | 0.04841 | 0.67196 | 0.61929 | 0.16823 | 0.04249 | 0.04438 | 0.03893 | 0.08562 | 0.04617 KCNV1    |
| cg04238548 | 0.03819 | 0.04279 | 0.04137 | 0.04417 | 0.03264 | 0.03501 | 0.50377 | 0.40207 | 0.03972 | 0.03218 FLJ20298 |
| cg04240200 | 0.08156 | 0.05868 | 0.21049 | 0.23737 | 0.27847 | 0.1132  | 0.0686  | 0.057   | 0.08995 | 0.04963 ATRN     |
| cg04241572 | 0.04537 | 0.0482  | 0.04657 | 0.04481 | 0.03323 | 0.0405  | 0.49386 | 0.43317 | 0.03298 | 0.03749 HADH2    |
| cg04244987 | 0.07628 | 0.06312 | 0.19498 | 0.14025 | 0.44588 | 0.48586 | 0.0922  | 0.05066 | 0.06327 | 0.07941 NCKIPSD  |
| cg04245402 | 0.9128  | 0.2197  | 0.7025  | 0.66154 | 0.9483  | 0.91313 | 0.62988 | 0.05854 | 0.9658  | 0.68204 C19orf21 |
| cg04249030 | 0.02615 | 0.02489 | 0.02755 | 0.02272 | 0.02237 | 0.02108 | 0.0234  | 0.02421 | 0.02134 | 0.02137 COX5A    |
| cg04249586 | 0.07379 | 0.06699 | 0.06351 | 0.0579  | 0.05364 | 0.06382 | 0.0596  | 0.06424 | 0.06235 | 0.06418 ELOVL6   |
| cg04251363 | 0.03889 | 0.04306 | 0.04167 | 0.03839 | 0.03373 | 0.03609 | 0.05556 | 0.055   | 0.03672 | 0.03698 ST3GAL6  |
| cg04251662 | 0.04253 | 0.03379 | 0.0341  | 0.02891 | 0.02885 | 0.03446 | 0.02769 | 0.0258  | 0.02881 | 0.03111 ITPR1    |
| cg04254119 | 0.56455 | 0.84762 | 0.83987 | 0.89434 | 0.86651 | 0.77576 | 0.66482 | 0.44475 | 0.62353 | 0.44904 AKAP3    |
| cg04254916 | 0.89211 | 0.65888 | 0.87686 | 0.89556 | 0.91971 | 0.91049 | 0.91543 | 0.86837 | 0.10381 | 0.17459 KRT5     |
| cg04255048 | 0.03578 | 0.03889 | 0.04345 | 0.044   | 0.03274 | 0.04059 | 0.02761 | 0.02917 | 0.03595 | 0.02727 KIF9     |
| cg04256470 | 0.93537 | 0.82603 | 0.92634 | 0.92339 | 0.94529 | 0.88433 | 0.64749 | 0.5475  | 0.94659 | 0.9535 CORT      |
| cg04259560 | 0.41418 | 0.11865 | 0.45164 | 0.48883 | 0.68692 | 0.51245 | 0.27979 | 0.119   | 0.24732 | 0.02991 FLJ35773 |
| cg04261665 | 0.04843 | 0.04789 | 0.06228 | 0.0603  | 0.06023 | 0.06432 | 0.06951 | 0.06202 | 0.04753 | 0.05541 C12orf52 |
| cg04262565 | 0.03773 | 0.04006 | 0.04101 | 0.03543 | 0.04557 | 0.03409 | 0.03003 | 0.03057 | 0.04097 | 0.03643 DUSP7    |
| cg04263186 | 0.49779 | 0.51377 | 0.73631 | 0.80682 | 0.42349 | 0.06852 | 0.03312 | 0.02664 | 0.06361 | 0.0552 TACR3     |
| cg04265576 | 0.04336 | 0.07321 | 0.14159 | 0.3286  | 0.95568 | 0.9478  | 0.11909 | 0.0725  | 0.95322 | 0.94086 HOXA6    |
| cg04267184 | 0.87406 | 0.87345 | 0.85807 | 0.86635 | 0.86174 | 0.84026 | 0.8584  | 0.8465  | 0.89283 | 0.86428 GNRH2    |
| cg04268405 | 0.88738 | 0.88814 | 0.89442 | 0.90076 | 0.89356 | 0.90018 | 0.89073 | 0.8569  | 0.89801 | 0.86708 CHST3    |
| cg04269351 | 0.89672 | 0.88516 | 0.89688 | 0.90873 | 0.79132 | 0.84113 | 0.76799 | 0.71479 | 0.91412 | 0.81373 VT11B    |
| cg04270025 | 0.07103 | 0.05851 | 0.07159 | 0.12052 | 0.07346 | 0.06723 | 0.07276 | 0.06178 | 0.05198 | 0.07102 PCDHB11  |
| cg04270274 | 0.07197 | 0.07558 | 0.07108 | 0.07313 | 0.06052 | 0.07799 | 0.06059 | 0.06519 | 0.07354 | 0.05469 CNOT1    |
| cg04270788 | 0.03168 | 0.03636 | 0.0334  | 0.03315 | 0.02049 | 0.02854 | 0.02893 | 0.03022 | 0.03267 | 0.03147 GTF2B    |
| cg04270799 | 0.16939 | 0.05411 | 0.16684 | 0.1023  | 0.95713 | 0.94813 | 0.58955 | 0.35313 | 0.73744 | 0.50958 KIF5A    |
| cg04270835 | 0.08567 | 0.0535  | 0.18141 | 0.13416 | 0.21425 | 0.10354 | 0.07579 | 0.07134 | 0.08163 | 0.0829 SLC17A6   |
| cg04272086 | 0.02119 | 0.02152 | 0.87373 | 0.91681 | 0.46368 | 0.62415 | 0.31592 | 0.06109 | 0.0683  | 0.0196 DCC       |
| cg04273431 | 0.14399 | 0.08272 | 0.17635 | 0.17517 | 0.7256  | 0.32273 | 0.1532  | 0.07761 | 0.86315 | 0.56064 PRR3     |
| cg04273556 | 0.14935 | 0.17337 | 0.156   | 0.1461  | 0.09293 | 0.13018 | 0.13601 | 0.13465 | 0.15065 | 0.13932 PIGO     |
| cg04274487 | 0.04398 | 0.03595 | 0.03211 | 0.03142 | 0.02438 | 0.02669 | 0.02727 | 0.0294  | 0.02764 | 0.02343 RAB31    |
| cg04275881 | 0.65948 | 0.59795 | 0.79276 | 0.88524 | 0.91473 | 0.88922 | 0.76832 | 0.82988 | 0.61588 | 0.48485 SLAMF8   |
| cg04275985 | 0.0365  | 0.04377 | 0.04506 | 0.04192 | 0.03106 | 0.03249 | 0.03615 | 0.03699 | 0.02981 | 0.03698 PRUNE    |
| cg04276232 | 0.50682 | 0.4401  | 0.57113 | 0.68713 | 0.66275 | 0.63141 | 0.57305 | 0.5985  | 0.56698 | 0.43443 UGT2B4   |
| cg04278702 | 0.03405 | 0.02558 | 0.1717  | 0.20982 | 0.23475 | 0.42398 | 0.03758 | 0.03697 | 0.10239 | 0.02875 HTR1E    |
| cg04278905 | 0.91776 | 0.90361 | 0.89997 | 0.90558 | 0.9264  | 0.89298 | 0.91253 | 0.9037  | 0.92028 | 0.8827 GCN5L2    |
| cg04280119 | 0.04111 | 0.04528 | 0.0598  | 0.07058 | 0.05779 | 0.05923 | 0.04415 | 0.04199 | 0.03771 | 0.03419 TAF6     |
| cg04280397 | 0.0705  | 0.05253 | 0.14935 | 0.14551 | 0.05355 | 0.0491  | 0.05632 | 0.04314 | 0.13687 | 0.06005 PLA2G6   |
| cg04280480 | 0.02316 | 0.0253  | 0.02246 | 0.02424 | 0.01992 | 0.02197 | 0.0233  | 0.02047 | 0.02084 | 0.02039 PPARA    |
| cg04280758 | 0.0362  | 0.04045 | 0.05141 | 0.04155 | 0.04492 | 0.04275 | 0.04229 | 0.03676 | 0.03392 | 0.03361 MAML2    |

|            |         |         |         |         |         |         |         |         |         |         |           |
|------------|---------|---------|---------|---------|---------|---------|---------|---------|---------|---------|-----------|
| cg04281204 | 0.49139 | 0.21393 | 0.61043 | 0.68211 | 0.57422 | 0.62906 | 0.58485 | 0.42567 | 0.68952 | 0.64543 | DCLRE1A   |
| cg04281268 | 0.02744 | 0.02833 | 0.02405 | 0.02188 | 0.01919 | 0.02259 | 0.01995 | 0.02279 | 0.01943 | 0.01957 | HSP90AA1  |
| cg04282422 | 0.85764 | 0.89142 | 0.89683 | 0.91256 | 0.82809 | 0.91432 | 0.91928 | 0.94454 | 0.82621 | 0.33771 | PAGE1     |
| cg04282622 | 0.45855 | 0.17618 | 0.39085 | 0.37559 | 0.44648 | 0.53753 | 0.39113 | 0.26132 | 0.2231  | 0.27258 | FAM71C    |
| cg04283377 | 0.04199 | 0.05829 | 0.04263 | 0.03802 | 0.04821 | 0.05183 | 0.13201 | 0.03535 | 0.04689 | 0.04046 | ARAF      |
| cg04283392 | 0.79137 | 0.55577 | 0.53946 | 0.59858 | 0.54645 | 0.38462 | 0.27475 | 0.55353 | 0.33995 | 0.07002 | LRRC33    |
| cg04283938 | 0.07151 | 0.03112 | 0.41466 | 0.76951 | 0.86755 | 0.69985 | 0.12826 | 0.16416 | 0.5861  | 0.42917 | 3-Sep     |
| cg04284814 | 0.05672 | 0.0482  | 0.05907 | 0.05989 | 0.04645 | 0.041   | 0.05255 | 0.04572 | 0.05173 | 0.05126 | C5orf16   |
| cg04286043 | 0.05489 | 0.03933 | 0.09418 | 0.07501 | 0.0576  | 0.04418 | 0.05154 | 0.04142 | 0.08077 | 0.03211 | C6orf69   |
| cg04286933 | 0.66276 | 0.14588 | 0.83427 | 0.84196 | 0.92631 | 0.80507 | 0.78674 | 0.58595 | 0.86795 | 0.18046 | APOBEC3G  |
| cg04287191 | 0.05309 | 0.03865 | 0.46796 | 0.70177 | 0.70749 | 0.31199 | 0.38596 | 0.04049 | 0.04694 | 0.03345 | RENBP     |
| cg04289385 | 0.93584 | 0.75903 | 0.93664 | 0.93061 | 0.94346 | 0.49921 | 0.92257 | 0.89458 | 0.93861 | 0.82553 | ETV7      |
| cg04290964 | 0.8346  | 0.69745 | 0.80745 | 0.84654 | 0.84343 | 0.81045 | 0.79879 | 0.83786 | 0.78246 | 0.70374 | CLN5      |
| cg04291079 | 0.94054 | 0.94547 | 0.95204 | 0.95105 | 0.96062 | 0.95489 | 0.94768 | 0.94163 | 0.95669 | 0.94611 | MEG3      |
| cg04293726 | 0.03335 | 0.02942 | 0.03549 | 0.03098 | 0.03041 | 0.02834 | 0.02908 | 0.02896 | 0.03025 | 0.02747 | YIPF5     |
| cg04296434 | 0.06129 | 0.0638  | 0.06853 | 0.05622 | 0.05388 | 0.04902 | 0.05179 | 0.05792 | 0.04703 | 0.0446  | Kua       |
| cg04297093 | 0.50639 | 0.80876 | 0.77402 | 0.83871 | 0.72515 | 0.87923 | 0.2068  | 0.37681 | 0.26369 | 0.18195 | KRTAP19-3 |
| cg04297329 | 0.06348 | 0.06459 | 0.13703 | 0.11571 | 0.15499 | 0.08509 | 0.07612 | 0.07461 | 0.08829 | 0.09345 | NAP1L2    |
| cg04298323 | 0.42447 | 0.14289 | 0.61019 | 0.69724 | 0.65696 | 0.68719 | 0.57073 | 0.65106 | 0.42141 | 0.41793 | PDE6C     |
| cg04300115 | 0.88036 | 0.6299  | 0.87843 | 0.90196 | 0.92522 | 0.89474 | 0.86956 | 0.8653  | 0.89079 | 0.90167 | PRIC285   |
| cg04301375 | 0.88048 | 0.87366 | 0.38679 | 0.62946 | 0.90757 | 0.85427 | 0.87995 | 0.86181 | 0.84219 | 0.8584  | ZNF558    |
| cg04301614 | 0.77491 | 0.79444 | 0.80364 | 0.80735 | 0.82858 | 0.76502 | 0.7498  | 0.78702 | 0.79897 | 0.79197 | FLJ11017  |
| cg04303269 | 0.05532 | 0.05931 | 0.063   | 0.05607 | 0.06563 | 0.054   | 0.05378 | 0.05205 | 0.04593 | 0.0475  | CEP57     |
| cg04303901 | 0.36054 | 0.20117 | 0.16224 | 0.14077 | 0.39057 | 0.36372 | 0.14027 | 0.12777 | 0.10247 | 0.11199 | NCRMS     |
| cg04304130 | 0.46137 | 0.64315 | 0.87969 | 0.90057 | 0.91999 | 0.87855 | 0.88775 | 0.89281 | 0.8955  | 0.83744 | HERV-FRD  |
| cg04304927 | 0.02929 | 0.02571 | 0.03167 | 0.03301 | 0.03078 | 0.02451 | 0.0191  | 0.01766 | 0.02329 | 0.02005 | SLC39A8   |
| cg04305134 | 0.0302  | 0.0306  | 0.02906 | 0.03073 | 0.02536 | 0.02947 | 0.02992 | 0.03187 | 0.03105 | 0.02497 | ANXA7     |
| cg04305913 | 0.86623 | 0.74209 | 0.86494 | 0.87252 | 0.87414 | 0.85062 | 0.86858 | 0.86408 | 0.85781 | 0.57867 | GPSM1     |
| cg04310489 | 0.01994 | 0.02241 | 0.02108 | 0.02012 | 0.01599 | 0.01891 | 0.0169  | 0.01864 | 0.01788 | 0.01608 | AHCYL1    |
| cg04310824 | 0.03209 | 0.02683 | 0.03383 | 0.03336 | 0.03925 | 0.0217  | 0.01817 | 0.02193 | 0.02251 | 0.02214 | SCP2      |
| cg04311606 | 0.02644 | 0.02583 | 0.02934 | 0.02879 | 0.01864 | 0.02282 | 0.02127 | 0.02553 | 0.02017 | 0.02003 | ZNF136    |
| cg04311964 | 0.53525 | 0.17253 | 0.68683 | 0.8884  | 0.91917 | 0.86349 | 0.2075  | 0.1609  | 0.65883 | 0.46609 | LYPD2     |
| cg04312209 | 0.1742  | 0.12991 | 0.09709 | 0.07692 | 0.15308 | 0.1256  | 0.11472 | 0.08311 | 0.07643 | 0.08774 | IL7R      |
| cg04313552 | 0.10311 | 0.10511 | 0.14028 | 0.12827 | 0.13709 | 0.11865 | 0.10005 | 0.09064 | 0.10916 | 0.11352 | KIAA2013  |
| cg04314463 | 0.03477 | 0.03555 | 0.04724 | 0.04542 | 0.04394 | 0.03272 | 0.03056 | 0.02739 | 0.07544 | 0.05562 | PNKP      |
| cg04315264 | 0.04534 | 0.0475  | 0.04369 | 0.04303 | 0.03183 | 0.03829 | 0.03573 | 0.03712 | 0.03813 | 0.03837 | RPL10A    |
| cg04315771 | 0.87448 | 0.79053 | 0.87971 | 0.89871 | 0.45971 | 0.81462 | 0.54801 | 0.35661 | 0.8673  | 0.07281 | IL4I1     |
| cg04316754 | 0.08678 | 0.08451 | 0.16686 | 0.19412 | 0.13386 | 0.08218 | 0.10921 | 0.06844 | 0.05843 | 0.05694 | MMP24     |
| cg04316770 | 0.04919 | 0.04467 | 0.0553  | 0.05146 | 0.05553 | 0.0514  | 0.05132 | 0.05239 | 0.06348 | 0.05847 | RUTBC3    |
| cg04317031 | 0.11027 | 0.11569 | 0.13153 | 0.14023 | 0.17976 | 0.11286 | 0.10431 | 0.0988  | 0.10379 | 0.08035 | FAM73B    |
| cg04317366 | 0.06742 | 0.06368 | 0.06002 | 0.05379 | 0.09684 | 0.06523 | 0.07321 | 0.0656  | 0.05281 | 0.04718 | PRPF8     |

|            |         |         |         |         |         |         |         |         |         |                   |
|------------|---------|---------|---------|---------|---------|---------|---------|---------|---------|-------------------|
| cg04317399 | 0.10369 | 0.07768 | 0.08836 | 0.08541 | 0.06228 | 0.06968 | 0.07058 | 0.07232 | 0.06984 | 0.06372 HOXA4     |
| cg04317543 | 0.02807 | 0.02666 | 0.05102 | 0.04572 | 0.02979 | 0.02991 | 0.03001 | 0.02291 | 0.02714 | 0.02792 LMNA      |
| cg04317940 | 0.03519 | 0.03717 | 0.02813 | 0.02786 | 0.03488 | 0.03135 | 0.02805 | 0.02825 | 0.02513 | 0.0228 PMS2       |
| cg04319097 | 0.7735  | 0.79115 | 0.72962 | 0.76892 | 0.61269 | 0.65328 | 0.6971  | 0.62689 | 0.73612 | 0.65499 ZFP161    |
| cg04322134 | 0.075   | 0.05936 | 0.06704 | 0.05373 | 0.06944 | 0.06668 | 0.06195 | 0.05511 | 0.04316 | 0.04232 NUDT2     |
| cg04322344 | 0.03564 | 0.03422 | 0.03496 | 0.0332  | 0.03185 | 0.03349 | 0.02805 | 0.02958 | 0.03045 | 0.03123 MRPL3     |
| cg04322978 | 0.03521 | 0.03443 | 0.08662 | 0.09051 | 0.03217 | 0.03119 | 0.02683 | 0.02768 | 0.02493 | 0.03177 ETFB      |
| cg04323187 | 0.02991 | 0.03059 | 0.03954 | 0.03448 | 0.03409 | 0.03286 | 0.03847 | 0.04532 | 0.03325 | 0.02991 CCDC24    |
| cg04323365 | 0.89384 | 0.90498 | 0.81789 | 0.83564 | 0.82395 | 0.84563 | 0.82273 | 0.70628 | 0.24039 | 0.27245 GJB1      |
| cg04324308 | 0.0353  | 0.03049 | 0.11673 | 0.09658 | 0.05939 | 0.03271 | 0.1673  | 0.39569 | 0.18406 | 0.07879 COL4A3    |
| cg04325632 | 0.42544 | 0.1052  | 0.08923 | 0.12112 | 0.0623  | 0.0614  | 0.06635 | 0.04933 | 0.05094 | 0.04303 ADRA2C    |
| cg04326040 | 0.06553 | 0.06514 | 0.07066 | 0.06592 | 0.15702 | 0.08239 | 0.08736 | 0.07316 | 0.06005 | 0.06749 VPS53     |
| cg04329069 | 0.02644 | 0.02096 | 0.0236  | 0.02051 | 0.01943 | 0.02127 | 0.022   | 0.02038 | 0.01815 | 0.01536 AP1B1     |
| cg04329382 | 0.84071 | 0.76706 | 0.05407 | 0.04642 | 0.05969 | 0.04966 | 0.07296 | 0.06046 | 0.1618  | 0.06876 FLJ27365  |
| cg04329454 | 0.52546 | 0.59528 | 0.98005 | 0.97771 | 0.98292 | 0.97702 | 0.97557 | 0.9708  | 0.98412 | 0.98115 FLJ43752  |
| cg04330084 | 0.15898 | 0.13199 | 0.17845 | 0.14784 | 0.31355 | 0.22146 | 0.15501 | 0.16208 | 0.1199  | 0.09837 FLJ35834  |
| cg04330449 | 0.0787  | 0.04693 | 0.83302 | 0.91797 | 0.61824 | 0.64512 | 0.1083  | 0.04824 | 0.11775 | 0.04663 NEUROG1   |
| cg04333463 | 0.07708 | 0.0751  | 0.06046 | 0.05977 | 0.05336 | 0.05379 | 0.06346 | 0.05766 | 0.05162 | 0.06105 ASPH      |
| cg04335339 | 0.14818 | 0.13176 | 0.18102 | 0.18906 | 0.11952 | 0.15823 | 0.14706 | 0.13702 | 0.15236 | 0.12095 ATRNL1    |
| cg04336379 | 0.11345 | 0.1029  | 0.65425 | 0.63519 | 0.34268 | 0.21042 | 0.15051 | 0.13736 | 0.08244 | 0.09414 LOC389458 |
| cg04336572 | 0.87216 | 0.86315 | 0.73483 | 0.75337 | 0.81337 | 0.81563 | 0.33101 | 0.46875 | 0.80928 | 0.40846 ATP1B4    |
| cg04337944 | 0.032   | 0.04251 | 0.03972 | 0.03165 | 0.05941 | 0.02571 | 0.87099 | 0.06257 | 0.87264 | 0.05291 FBLN1     |
| cg04338788 | 0.86104 | 0.8898  | 0.87351 | 0.87895 | 0.79085 | 0.82232 | 0.89091 | 0.89656 | 0.87191 | 0.86182 SEMA3G    |
| cg04339860 | 0.12555 | 0.11028 | 0.12025 | 0.13754 | 0.19568 | 0.13284 | 0.13553 | 0.13378 | 0.10251 | 0.11256 WWP2      |
| cg04340502 | 0.2466  | 0.10817 | 0.34495 | 0.37429 | 0.68694 | 0.1867  | 0.0691  | 0.13364 | 0.22882 | 0.07057 GSTA3     |
| cg04341084 | 0.03314 | 0.03725 | 0.04117 | 0.0369  | 0.03944 | 0.03031 | 0.06127 | 0.09652 | 0.02935 | 0.0297 TPD52      |
| cg04341806 | 0.89727 | 0.86598 | 0.82136 | 0.83382 | 0.72042 | 0.80521 | 0.71418 | 0.82848 | 0.88718 | 0.85395 LCP1      |
| cg04344347 | 0.02127 | 0.01999 | 0.02397 | 0.0214  | 0.01314 | 0.0191  | 0.01625 | 0.01676 | 0.01753 | 0.016 ADI1        |
| cg04344997 | 0.08039 | 0.0766  | 0.10799 | 0.10072 | 0.09402 | 0.09449 | 0.55548 | 0.64843 | 0.06375 | 0.05901 EMD       |
| cg04345475 | 0.88976 | 0.8794  | 0.8604  | 0.87071 | 0.83279 | 0.8458  | 0.86457 | 0.89033 | 0.90723 | 0.88248 FXC1      |
| cg04345908 | 0.58009 | 0.57958 | 0.6462  | 0.64022 | 0.60362 | 0.75042 | 0.26874 | 0.26015 | 0.35241 | 0.33828 HLA-DQB2  |
| cg04347447 | 0.80677 | 0.5712  | 0.87554 | 0.8296  | 0.9046  | 0.79459 | 0.63986 | 0.56153 | 0.59219 | 0.35991 CACNA2D2  |
| cg04348872 | 0.92523 | 0.85826 | 0.91019 | 0.93228 | 0.93203 | 0.82445 | 0.91705 | 0.88791 | 0.93016 | 0.92272 ADCY3     |
| cg04349311 | 0.05168 | 0.04972 | 0.06202 | 0.05878 | 0.05933 | 0.05556 | 0.04253 | 0.03765 | 0.04811 | 0.04899 TXNDC12   |
| cg04349727 | 0.42559 | 0.31532 | 0.17612 | 0.23078 | 0.29921 | 0.75599 | 0.09282 | 0.07501 | 0.10468 | 0.08376 KLK5      |
| cg04350610 | 0.04133 | 0.04046 | 0.03829 | 0.0334  | 0.03304 | 0.03382 | 0.03138 | 0.03253 | 0.02957 | 0.03038 BTAF1     |
| cg04350646 | 0.04315 | 0.03934 | 0.04119 | 0.04108 | 0.047   | 0.04879 | 0.04693 | 0.05061 | 0.0306  | 0.03228 PSMA2     |
| cg04351979 | 0.01984 | 0.02134 | 0.02559 | 0.02382 | 0.43532 | 0.01889 | 0.01967 | 0.01707 | 0.02271 | 0.01453 CTXN1     |
| cg04353483 | 0.2908  | 0.24791 | 0.74553 | 0.77141 | 0.63447 | 0.71337 | 0.80284 | 0.67941 | 0.52242 | 0.10761 CCKAR     |
| cg04353769 | 0.06364 | 0.06254 | 0.12505 | 0.0995  | 0.81149 | 0.82626 | 0.0748  | 0.10313 | 0.05928 | 0.05967 MS4A6A    |
| cg04355435 | 0.84218 | 0.36028 | 0.91007 | 0.92767 | 0.8429  | 0.89579 | 0.06405 | 0.06568 | 0.61571 | 0.17345 TMEM125   |

|            |         |         |         |         |         |         |         |         |         |                   |
|------------|---------|---------|---------|---------|---------|---------|---------|---------|---------|-------------------|
| cg04356968 | 0.85762 | 0.82279 | 0.87179 | 0.86872 | 0.69103 | 0.80328 | 0.72319 | 0.82785 | 0.72493 | 0.81679 BGLAP     |
| cg04359302 | 0.78651 | 0.75211 | 0.7796  | 0.77897 | 0.75136 | 0.78471 | 0.77113 | 0.80257 | 0.81186 | 0.79006 MRPL47    |
| cg04361527 | 0.0339  | 0.03465 | 0.06033 | 0.05132 | 0.03211 | 0.03573 | 0.02654 | 0.02442 | 0.03547 | 0.0314 PMVK       |
| cg04362655 | 0.05195 | 0.0516  | 0.05432 | 0.05087 | 0.04918 | 0.04574 | 0.04678 | 0.05062 | 0.04915 | 0.04459 GLRX5     |
| cg04365980 | 0.23173 | 0.16786 | 0.20618 | 0.24465 | 0.2531  | 0.19268 | 0.16645 | 0.14621 | 0.15369 | 0.16125 CLEC3A    |
| cg04366367 | 0.96034 | 0.93366 | 0.94846 | 0.95573 | 0.96998 | 0.95448 | 0.95807 | 0.90965 | 0.96394 | 0.95668 GPS1      |
| cg04367351 | 0.0552  | 0.04528 | 0.18795 | 0.26819 | 0.59525 | 0.51487 | 0.56978 | 0.87289 | 0.44463 | 0.61903 PLA2R1    |
| cg04368716 | 0.03462 | 0.02666 | 0.02661 | 0.02291 | 0.03713 | 0.02323 | 0.02277 | 0.02368 | 0.02768 | 0.02109 C14orf153 |
| cg04368877 | 0.93701 | 0.91897 | 0.95862 | 0.95264 | 0.96347 | 0.95405 | 0.95399 | 0.94366 | 0.95999 | 0.96099 FBXL19    |
| cg04368919 | 0.06972 | 0.05    | 0.14921 | 0.49741 | 0.19001 | 0.08025 | 0.19174 | 0.04475 | 0.05708 | 0.05936 EFN1      |
| cg04369341 | 0.04273 | 0.04533 | 0.06341 | 0.05578 | 0.91215 | 0.55086 | 0.42559 | 0.04269 | 0.03999 | 0.03982 C20orf100 |
| cg04371779 | 0.02375 | 0.02245 | 0.02814 | 0.02217 | 0.01793 | 0.02247 | 0.02088 | 0.02114 | 0.01833 | 0.02055 C14orf118 |
| cg04375036 | 0.29862 | 0.15932 | 0.22365 | 0.13471 | 0.67765 | 0.09758 | 0.83069 | 0.52075 | 0.28574 | 0.07636 PPP1CC    |
| cg04375683 | 0.08051 | 0.0783  | 0.22938 | 0.18477 | 0.44019 | 0.07068 | 0.55288 | 0.06144 | 0.05656 | 0.05887 PPP2R1A   |
| cg04376312 | 0.88904 | 0.89271 | 0.48575 | 0.81729 | 0.52203 | 0.55979 | 0.07864 | 0.32877 | 0.70667 | 0.67687 MYLK      |
| cg04376617 | 0.15522 | 0.16001 | 0.23709 | 0.21786 | 0.31582 | 0.23208 | 0.23548 | 0.1783  | 0.1899  | 0.23033 ATP5A1    |
| cg04377282 | 0.57991 | 0.39823 | 0.65166 | 0.7841  | 0.80447 | 0.67325 | 0.41334 | 0.49989 | 0.09701 | 0.23623 NODAL     |
| cg04378886 | 0.90672 | 0.92087 | 0.36074 | 0.62597 | 0.02853 | 0.03924 | 0.20548 | 0.05911 | 0.14555 | 0.05072 RCN3      |
| cg04380513 | 0.05885 | 0.04616 | 0.62628 | 0.69089 | 0.05992 | 0.04628 | 0.04807 | 0.04388 | 0.04784 | 0.06396 ST8SIA4   |
| cg04380669 | 0.07635 | 0.08398 | 0.09956 | 0.08209 | 0.15066 | 0.10425 | 0.10972 | 0.09757 | 0.08075 | 0.09748 NME1      |
| cg04382920 | 0.97079 | 0.96829 | 0.96954 | 0.9713  | 0.97388 | 0.96959 | 0.97306 | 0.96819 | 0.97154 | 0.97152 SLC25A31  |
| cg04383012 | 0.03623 | 0.03383 | 0.03379 | 0.03321 | 0.02534 | 0.02794 | 0.0283  | 0.02902 | 0.02417 | 0.02461 PSMD1     |
| cg04383274 | 0.06134 | 0.06348 | 0.0799  | 0.07486 | 0.08128 | 0.07733 | 0.06867 | 0.06169 | 0.06435 | 0.05585 C21orf55  |
| cg04384208 | 0.08711 | 0.18637 | 0.15306 | 0.17079 | 0.07605 | 0.05931 | 0.04434 | 0.03648 | 0.24657 | 0.09708 FCGR3A    |
| cg04384398 | 0.2198  | 0.08229 | 0.11227 | 0.09343 | 0.12833 | 0.11463 | 0.23662 | 0.09739 | 0.12799 | 0.12927 PMM1      |
| cg04385519 | 0.89653 | 0.90975 | 0.89362 | 0.90799 | 0.90394 | 0.91148 | 0.89088 | 0.89363 | 0.87426 | 0.84443 ADCY9     |
| cg04386405 | 0.03863 | 0.03799 | 0.51721 | 0.5035  | 0.70594 | 0.70032 | 0.33737 | 0.08141 | 0.0548  | 0.03196 ZNF83     |
| cg04387658 | 0.84522 | 0.68408 | 0.67091 | 0.80755 | 0.87381 | 0.89911 | 0.79765 | 0.46748 | 0.87073 | 0.81613 CD86      |
| cg04388983 | 0.27202 | 0.51559 | 0.55381 | 0.78606 | 0.80162 | 0.91708 | 0.38769 | 0.09765 | 0.47995 | 0.59693 P2RY2     |
| cg04389838 | 0.57409 | 0.80708 | 0.80675 | 0.88061 | 0.53577 | 0.33804 | 0.29545 | 0.1454  | 0.05718 | 0.03977 ZNF501    |
| cg04391111 | 0.49852 | 0.06542 | 0.9247  | 0.93011 | 0.9786  | 0.95982 | 0.14862 | 0.17146 | 0.02638 | 0.02326 TP73      |
| cg04391540 | 0.62848 | 0.32122 | 0.69554 | 0.74773 | 0.87117 | 0.43671 | 0.55495 | 0.0941  | 0.67048 | 0.52199 ZNF541    |
| cg04391736 | 0.02416 | 0.02331 | 0.02488 | 0.01864 | 0.0215  | 0.02794 | 0.01954 | 0.0197  | 0.01961 | 0.0163 NIP7       |
| cg04393897 | 0.05381 | 0.05217 | 0.07528 | 0.0778  | 0.06296 | 0.0624  | 0.06908 | 0.05198 | 0.06625 | 0.06616 BAT2D1    |
| cg04394101 | 0.51309 | 0.48385 | 0.47697 | 0.52358 | 0.45931 | 0.46621 | 0.41934 | 0.55846 | 0.40516 | 0.38342 CYBB      |
| cg04394102 | 0.26442 | 0.22255 | 0.2086  | 0.21106 | 0.47817 | 0.34282 | 0.16914 | 0.19829 | 0.1166  | 0.14137 DDT       |
| cg04394967 | 0.08685 | 0.07407 | 0.48335 | 0.53377 | 0.13395 | 0.08085 | 0.07466 | 0.07648 | 0.45898 | 0.20131 RDH12     |
| cg04396791 | 0.03517 | 0.03432 | 0.07447 | 0.15033 | 0.097   | 0.21761 | 0.0299  | 0.03034 | 0.02824 | 0.02579 SHANK2    |
| cg04397441 | 0.03493 | 0.03361 | 0.04389 | 0.04545 | 0.03877 | 0.03938 | 0.08801 | 0.1864  | 0.03082 | 0.03029 OGT       |
| cg04398275 | 0.81553 | 0.80884 | 0.79068 | 0.82474 | 0.73243 | 0.77825 | 0.75032 | 0.78788 | 0.78165 | 0.78281 SBNO1     |
| cg04398282 | 0.75625 | 0.79339 | 0.72197 | 0.76899 | 0.65827 | 0.73061 | 0.7578  | 0.79573 | 0.78185 | 0.8124 BRDG1      |

|            |         |         |         |         |         |         |         |         |         |         |            |
|------------|---------|---------|---------|---------|---------|---------|---------|---------|---------|---------|------------|
| cg04398978 | 0.36701 | 0.60939 | 0.87162 | 0.88551 | 0.88775 | 0.53454 | 0.60192 | 0.58282 | 0.90406 | 0.78847 | CBX4       |
| cg04400030 | 0.05111 | 0.033   | 0.0753  | 0.05289 | 0.06352 | 0.0356  | 0.04409 | 0.04309 | 0.03402 | 0.04193 | SNX1       |
| cg04401436 | 0.04393 | 0.03771 | 0.05344 | 0.04504 | 0.04329 | 0.03767 | 0.03867 | 0.03795 | 0.03775 | 0.02546 | FLJ90709   |
| cg04402021 | 0.03623 | 0.02696 | 0.0316  | 0.03371 | 0.02576 | 0.02404 | 0.02369 | 0.02222 | 0.02177 | 0.02306 | POLR2E     |
| cg04402875 | 0.0408  | 0.03741 | 0.05735 | 0.0452  | 0.04646 | 0.03152 | 0.04389 | 0.04957 | 0.03374 | 0.02935 | RET        |
| cg04404982 | 0.80707 | 0.79074 | 0.81203 | 0.83342 | 0.80054 | 0.83596 | 0.77435 | 0.61067 | 0.85001 | 0.82278 | ITGAL      |
| cg04405541 | 0.82087 | 0.85704 | 0.83548 | 0.87947 | 0.91454 | 0.87008 | 0.46672 | 0.45551 | 0.86259 | 0.64793 | C20orf114  |
| cg04409427 | 0.58762 | 0.46409 | 0.80134 | 0.8579  | 0.71245 | 0.86728 | 0.79067 | 0.88544 | 0.32116 | 0.46474 | KCNE2      |
| cg04409945 | 0.03161 | 0.03965 | 0.0398  | 0.03972 | 0.03302 | 0.03045 | 0.03387 | 0.03244 | 0.02822 | 0.03108 | PSMB3      |
| cg04410834 | 0.02907 | 0.03317 | 0.04108 | 0.02959 | 0.0593  | 0.12797 | 0.03429 | 0.03162 | 0.03251 | 0.02484 | ABCG4      |
| cg04410862 | 0.04313 | 0.04168 | 0.0393  | 0.04128 | 0.03565 | 0.04502 | 0.03661 | 0.04355 | 0.03817 | 0.04129 | E2F7       |
| cg04411625 | 0.02705 | 0.0284  | 0.44616 | 0.34447 | 0.89465 | 0.91507 | 0.60617 | 0.27973 | 0.93456 | 0.93022 | CRIP1      |
| cg04413148 | 0.91056 | 0.8986  | 0.9058  | 0.92224 | 0.90705 | 0.87309 | 0.89775 | 0.90798 | 0.90851 | 0.8832  | CTRL       |
| cg04413397 | 0.02689 | 0.02302 | 0.02884 | 0.02613 | 0.02223 | 0.02571 | 0.0207  | 0.02069 | 0.0247  | 0.02044 | NMNAT1     |
| cg04413986 | 0.04319 | 0.05146 | 0.07234 | 0.06111 | 0.08321 | 0.06544 | 0.06408 | 0.05918 | 0.05436 | 0.06715 | NACA       |
| cg04415689 | 0.90684 | 0.79214 | 0.88553 | 0.90293 | 0.91047 | 0.82167 | 0.58412 | 0.51888 | 0.91466 | 0.84495 | TMEM16G    |
| cg04416752 | 0.05361 | 0.05248 | 0.05181 | 0.04858 | 0.04489 | 0.05496 | 0.04693 | 0.04819 | 0.05178 | 0.04303 | ST6GALNAC4 |
| cg04418492 | 0.87303 | 0.93495 | 0.63678 | 0.68638 | 0.5434  | 0.58594 | 0.05146 | 0.01985 | 0.11803 | 0.05016 | CYP7B1     |
| cg04418752 | 0.04135 | 0.04067 | 0.04256 | 0.04027 | 0.02571 | 0.03641 | 0.0333  | 0.03757 | 0.03575 | 0.03682 | PAICS      |
| cg04418771 | 0.06272 | 0.06115 | 0.05792 | 0.06971 | 0.07608 | 0.07439 | 0.05667 | 0.04984 | 0.05067 | 0.04644 | COPS4      |
| cg04419707 | 0.03991 | 0.04234 | 0.05042 | 0.05721 | 0.05941 | 0.05286 | 0.0524  | 0.04018 | 0.06272 | 0.05455 | RPL3       |
| cg04420907 | 0.05163 | 0.03209 | 0.10554 | 0.43871 | 0.95082 | 0.90994 | 0.03744 | 0.03202 | 0.05236 | 0.02932 | WDRPUH     |
| cg04422896 | 0.04312 | 0.03947 | 0.05449 | 0.05032 | 0.04856 | 0.05173 | 0.04824 | 0.04145 | 0.0426  | 0.03722 | C12orf43   |
| cg04424621 | 0.12443 | 0.09164 | 0.10942 | 0.10128 | 0.31824 | 0.17132 | 0.09286 | 0.05493 | 0.07527 | 0.09464 | HIST1H2BJ  |
| cg04425624 | 0.88417 | 0.3458  | 0.95241 | 0.94527 | 0.79621 | 0.6192  | 0.64205 | 0.47727 | 0.70297 | 0.21687 | TNF        |
| cg04428453 | 0.71122 | 0.22266 | 0.76987 | 0.86954 | 0.72916 | 0.45589 | 0.17298 | 0.15792 | 0.89973 | 0.77809 | FLJ20581   |
| cg04428853 | 0.03181 | 0.03158 | 0.03214 | 0.0292  | 0.02726 | 0.02769 | 0.02421 | 0.02532 | 0.02418 | 0.02476 | TMEM110    |
| cg04429140 | 0.03847 | 0.03616 | 0.04346 | 0.04645 | 0.04885 | 0.04246 | 0.03778 | 0.03864 | 0.03333 | 0.03682 | AARSD1     |
| cg04430204 | 0.67963 | 0.78605 | 0.79172 | 0.82183 | 0.78487 | 0.77672 | 0.63466 | 0.60587 | 0.81972 | 0.51097 | RNF25      |
| cg04431054 | 0.7317  | 0.44178 | 0.82754 | 0.83223 | 0.4604  | 0.31933 | 0.61027 | 0.13739 | 0.08535 | 0.06847 | LOC133619  |
| cg04431133 | 0.1123  | 0.06055 | 0.07019 | 0.05519 | 0.09508 | 0.06876 | 0.05116 | 0.05553 | 0.05808 | 0.06818 | RPL36AL    |
| cg04431776 | 0.81294 | 0.67376 | 0.67768 | 0.82347 | 0.73434 | 0.56959 | 0.24559 | 0.29793 | 0.57357 | 0.43284 | GAGE2      |
| cg04432009 | 0.36096 | 0.3701  | 0.61465 | 0.75358 | 0.77113 | 0.78088 | 0.54186 | 0.69387 | 0.09326 | 0.07229 | LYL1       |
| cg04433306 | 0.08476 | 0.06111 | 0.09443 | 0.10471 | 0.07117 | 0.07838 | 0.05297 | 0.04742 | 0.05287 | 0.04683 | UBE2H      |
| cg04434339 | 0.03681 | 0.02614 | 0.02717 | 0.02611 | 0.05402 | 0.02579 | 0.02451 | 0.02451 | 0.03266 | 0.02074 | ST6GAL2    |
| cg04435377 | 0.91062 | 0.61533 | 0.93399 | 0.94796 | 0.94433 | 0.93779 | 0.58506 | 0.55238 | 0.9413  | 0.66033 | FLJ31568   |
| cg04435420 | 0.10073 | 0.0417  | 0.15434 | 0.36598 | 0.02374 | 0.0259  | 0.03673 | 0.02406 | 0.15197 | 0.16254 | SGCD       |
| cg04436474 | 0.0631  | 0.06623 | 0.06285 | 0.0666  | 0.04421 | 0.05522 | 0.06822 | 0.06293 | 0.05949 | 0.06334 | RBM6       |
| cg04437590 | 0.09282 | 0.08986 | 0.11474 | 0.104   | 0.16509 | 0.14573 | 0.09431 | 0.09335 | 0.0822  | 0.07698 | NDUFA5     |
| cg04438497 | 0.35579 | 0.07878 | 0.59231 | 0.6225  | 0.65425 | 0.60213 | 0.42515 | 0.12587 | 0.06957 | 0.05614 | MTL5       |
| cg04439215 | 0.61556 | 0.10125 | 0.69724 | 0.73382 | 0.69673 | 0.15377 | 0.75035 | 0.0934  | 0.84819 | 0.23205 | KCTD4      |

|            |         |         |         |         |         |         |         |         |         |         |            |
|------------|---------|---------|---------|---------|---------|---------|---------|---------|---------|---------|------------|
| cg04443324 | 0.33695 | 0.68617 | 0.79404 | 0.86892 | 0.81834 | 0.88941 | 0.25936 | 0.07945 | 0.48645 | 0.51939 | FAT2       |
| cg04444006 | 0.0578  | 0.05781 | 0.06799 | 0.06401 | 0.07211 | 0.06312 | 0.07068 | 0.07266 | 0.05458 | 0.0606  | ZNF289     |
| cg04444771 | 0.05185 | 0.08685 | 0.41658 | 0.46365 | 0.38428 | 0.53376 | 0.7229  | 0.36792 | 0.3638  | 0.05679 | C10orf10   |
| cg04446579 | 0.28996 | 0.09748 | 0.62788 | 0.57684 | 0.51371 | 0.35989 | 0.12235 | 0.24736 | 0.08364 | 0.10617 | ANKRD45    |
| cg04447123 | 0.03377 | 0.03749 | 0.0401  | 0.0361  | 0.03476 | 0.03262 | 0.04173 | 0.04241 | 0.0301  | 0.02782 | RHOBTB2    |
| cg04447890 | 0.14199 | 0.14718 | 0.14701 | 0.14924 | 0.16821 | 0.14568 | 0.1466  | 0.13398 | 0.15812 | 0.13892 | GPR177     |
| cg04448487 | 0.07359 | 0.06418 | 0.23571 | 0.45444 | 0.61697 | 0.53285 | 0.07609 | 0.0566  | 0.05702 | 0.04042 | GDAP1L1    |
| cg04450876 | 0.87668 | 0.89233 | 0.85229 | 0.859   | 0.87695 | 0.83776 | 0.14082 | 0.10264 | 0.60282 | 0.48889 | FAM112B    |
| cg04451770 | 0.91944 | 0.33513 | 0.64882 | 0.73985 | 0.8018  | 0.24364 | 0.0776  | 0.05882 | 0.49538 | 0.36665 | ENTPD1     |
| cg04451988 | 0.03227 | 0.03854 | 0.03743 | 0.03033 | 0.03177 | 0.03176 | 0.03162 | 0.03421 | 0.03084 | 0.02754 | C10orf38   |
| cg04452095 | 0.06924 | 0.06695 | 0.07111 | 0.06566 | 0.03839 | 0.06314 | 0.06418 | 0.06692 | 0.0658  | 0.05875 | 9-Sep      |
| cg04452713 | 0.09681 | 0.17799 | 0.10101 | 0.09856 | 0.15765 | 0.1265  | 0.47357 | 0.06188 | 0.06094 | 0.0742  | DST        |
| cg04453065 | 0.02635 | 0.0301  | 0.03586 | 0.03129 | 0.03152 | 0.03052 | 0.01987 | 0.01981 | 0.02873 | 0.02801 | CYR61      |
| cg04454050 | 0.39473 | 0.17408 | 0.66458 | 0.81225 | 0.48596 | 0.81797 | 0.28446 | 0.30972 | 0.79642 | 0.52366 | TREML1     |
| cg04454259 | 0.04088 | 0.04222 | 0.04572 | 0.04212 | 0.02744 | 0.03576 | 0.0345  | 0.0386  | 0.04138 | 0.0339  | CBR3       |
| cg04454391 | 0.02857 | 0.02822 | 0.02724 | 0.03041 | 0.02303 | 0.02434 | 0.02019 | 0.0259  | 0.02214 | 0.02181 | NDUFAB1    |
| cg04454951 | 0.0759  | 0.06803 | 0.52876 | 0.50561 | 0.23924 | 0.0996  | 0.09277 | 0.07915 | 0.06868 | 0.12771 | UNQ739     |
| cg04455064 | 0.05137 | 0.0479  | 0.04989 | 0.04185 | 0.04183 | 0.04024 | 0.05783 | 0.04942 | 0.03961 | 0.04634 | TUFM       |
| cg04455759 | 0.87257 | 0.81885 | 0.80636 | 0.83201 | 0.83959 | 0.86976 | 0.74063 | 0.80649 | 0.83823 | 0.8513  | SDHD       |
| cg04455999 | 0.04784 | 0.05144 | 0.05473 | 0.05457 | 0.48974 | 0.41871 | 0.36414 | 0.55335 | 0.04559 | 0.04672 | FAM70A     |
| cg04456238 | 0.93285 | 0.91759 | 0.9271  | 0.93824 | 0.92886 | 0.91217 | 0.16806 | 0.18929 | 0.64795 | 0.92821 | WT1        |
| cg04457051 | 0.73077 | 0.2891  | 0.16063 | 0.23577 | 0.68448 | 0.20515 | 0.61478 | 0.11032 | 0.65363 | 0.08983 | SCOC       |
| cg04457481 | 0.77597 | 0.7682  | 0.55565 | 0.64717 | 0.71327 | 0.63655 | 0.73835 | 0.87629 | 0.41173 | 0.34057 | GNAS       |
| cg04457794 | 0.63847 | 0.40906 | 0.86877 | 0.89261 | 0.90205 | 0.86342 | 0.24186 | 0.07725 | 0.87307 | 0.67643 | CTSE       |
| cg04457979 | 0.52217 | 0.43016 | 0.95848 | 0.96296 | 0.90113 | 0.96492 | 0.95391 | 0.94818 | 0.96826 | 0.9289  | KCNQ1DN    |
| cg04458139 | 0.04368 | 0.04222 | 0.04126 | 0.03953 | 0.03374 | 0.03593 | 0.04259 | 0.04066 | 0.03416 | 0.03895 | OTUD6B     |
| cg04458548 | 0.39119 | 0.2308  | 0.63763 | 0.61316 | 0.17319 | 0.18061 | 0.10588 | 0.08566 | 0.08358 | 0.07871 | FETUB      |
| cg04459030 | 0.35707 | 0.05442 | 0.43045 | 0.55862 | 0.45289 | 0.3473  | 0.79543 | 0.26479 | 0.43816 | 0.23712 | GHRH       |
| cg04460372 | 0.38048 | 0.06145 | 0.19763 | 0.25512 | 0.05767 | 0.03505 | 0.06345 | 0.03421 | 0.05899 | 0.02992 | ST6GALNAC6 |
| cg04461705 | 0.10599 | 0.11982 | 0.11838 | 0.10671 | 0.06589 | 0.10076 | 0.10081 | 0.11148 | 0.10121 | 0.08884 | PFN4       |
| cg04461802 | 0.54684 | 0.38811 | 0.04528 | 0.03641 | 0.50923 | 0.06119 | 0.25943 | 0.24715 | 0.06811 | 0.03891 | GPR126     |
| cg04462209 | 0.02099 | 0.02149 | 0.02533 | 0.02479 | 0.02171 | 0.02001 | 0.01901 | 0.0191  | 0.01855 | 0.01961 | KLHL12     |
| cg04463638 | 0.58754 | 0.08696 | 0.88777 | 0.90003 | 0.91404 | 0.87093 | 0.86298 | 0.74683 | 0.88891 | 0.88956 | CLDN5      |
| cg04464446 | 0.82775 | 0.34827 | 0.84834 | 0.87892 | 0.91835 | 0.87052 | 0.89318 | 0.84681 | 0.90509 | 0.75317 | GAL        |
| cg04464465 | 0.02773 | 0.03213 | 0.03113 | 0.03335 | 0.03075 | 0.02881 | 0.02699 | 0.03052 | 0.02899 | 0.02604 | CDK2AP1    |
| cg04464559 | 0.02291 | 0.02626 | 0.03253 | 0.03323 | 0.02467 | 0.02666 | 0.02457 | 0.02039 | 0.0261  | 0.02198 | PDSS2      |
| cg04466253 | 0.02993 | 0.02851 | 0.02554 | 0.02632 | 0.01963 | 0.0249  | 0.02424 | 0.02525 | 0.02199 | 0.02427 | ACBD5      |
| cg04466273 | 0.02811 | 0.03427 | 0.03449 | 0.03028 | 0.02579 | 0.02892 | 0.02611 | 0.02874 | 0.02499 | 0.02477 | TBK1       |
| cg04466870 | 0.04926 | 0.04938 | 0.05072 | 0.04983 | 0.03858 | 0.04694 | 0.0464  | 0.04649 | 0.04124 | 0.0395  | SFXN4      |
| cg04467034 | 0.03003 | 0.02974 | 0.03463 | 0.03144 | 0.02595 | 0.02811 | 0.02419 | 0.0241  | 0.02659 | 0.02521 | ANKRD10    |
| cg04469303 | 0.02935 | 0.03249 | 0.0378  | 0.03267 | 0.02764 | 0.02837 | 0.02739 | 0.02975 | 0.02409 | 0.021   | PRDM15     |

|            |         |         |         |         |         |         |         |         |         |                      |
|------------|---------|---------|---------|---------|---------|---------|---------|---------|---------|----------------------|
| cg04469686 | 0.3076  | 0.4481  | 0.20601 | 0.23157 | 0.19407 | 0.05743 | 0.0573  | 0.0549  | 0.05807 | 0.04425 HSD17B7      |
| cg04471507 | 0.95532 | 0.94012 | 0.9538  | 0.95459 | 0.9617  | 0.94951 | 0.95548 | 0.36111 | 0.9572  | 0.75771 STMN1        |
| cg04473030 | 0.8835  | 0.76368 | 0.33722 | 0.50846 | 0.82636 | 0.83991 | 0.38566 | 0.37508 | 0.78788 | 0.75852 MGMT         |
| cg04473302 | 0.05123 | 0.05497 | 0.65779 | 0.76583 | 0.83568 | 0.89633 | 0.07928 | 0.0779  | 0.79817 | 0.88042 SLC26A4      |
| cg04474832 | 0.31119 | 0.09837 | 0.71455 | 0.70054 | 0.14046 | 0.04987 | 0.23898 | 0.13574 | 0.3589  | 0.11205 ABHD14A      |
| cg04478795 | 0.2539  | 0.05759 | 0.09551 | 0.13592 | 0.12578 | 0.10715 | 0.1153  | 0.0362  | 0.19328 | 0.03489 SMO          |
| cg04480914 | 0.02108 | 0.02005 | 0.02442 | 0.02201 | 0.01737 | 0.01895 | 0.01858 | 0.01807 | 0.01518 | 0.01445 PPP2R5B      |
| cg04481779 | 0.87949 | 0.74328 | 0.86436 | 0.87474 | 0.86162 | 0.81967 | 0.75938 | 0.85447 | 0.86714 | 0.85507 IL20RA       |
| cg04482110 | 0.06082 | 0.04941 | 0.04868 | 0.04415 | 0.35977 | 0.09978 | 0.06245 | 0.49233 | 0.04233 | 0.04046 TMEM106A     |
| cg04483623 | 0.03518 | 0.03437 | 0.03608 | 0.03263 | 0.04091 | 0.03992 | 0.03565 | 0.0396  | 0.03394 | 0.03663 C2orf19      |
| cg04483754 | 0.73427 | 0.58787 | 0.82321 | 0.85057 | 0.89982 | 0.86329 | 0.47151 | 0.65602 | 0.82442 | 0.83761 NOS2A        |
| cg04484789 | 0.70899 | 0.69434 | 0.76405 | 0.84654 | 0.64843 | 0.66816 | 0.26163 | 0.46255 | 0.54411 | 0.4794 KRT25B        |
| cg04485075 | 0.04123 | 0.03962 | 0.05087 | 0.04387 | 0.04609 | 0.04432 | 0.03032 | 0.03206 | 0.03734 | 0.03263 NOC2L        |
| cg04485603 | 0.79212 | 0.80922 | 0.73031 | 0.80023 | 0.619   | 0.75241 | 0.80335 | 0.81607 | 0.8322  | 0.84012 CLOCK        |
| cg04486568 | 0.037   | 0.03733 | 0.03732 | 0.03975 | 0.03449 | 0.0306  | 0.02946 | 0.0297  | 0.02801 | 0.02639 ETS2         |
| cg04488521 | 0.03762 | 0.03265 | 0.26406 | 0.42386 | 0.19466 | 0.05508 | 0.1683  | 0.08336 | 0.03434 | 0.02484 ZNF354C      |
| cg04488527 | 0.57472 | 0.85217 | 0.9603  | 0.95934 | 0.9691  | 0.96145 | 0.93634 | 0.9562  | 0.96508 | 0.95484 RP11-450P7.3 |
| cg04488758 | 0.88456 | 0.12815 | 0.94563 | 0.94149 | 0.9573  | 0.83862 | 0.92648 | 0.83988 | 0.93414 | 0.19871 USP44        |
| cg04490516 | 0.11428 | 0.06893 | 0.13817 | 0.13679 | 0.14926 | 0.0578  | 0.08593 | 0.07265 | 0.0636  | 0.07094 GBL          |
| cg04490714 | 0.02886 | 0.03005 | 0.77177 | 0.83721 | 0.45437 | 0.497   | 0.16678 | 0.69919 | 0.0622  | 0.03866 SLC6A2       |
| cg04491089 | 0.5864  | 0.18964 | 0.22238 | 0.14983 | 0.16364 | 0.09816 | 0.35571 | 0.10534 | 0.46631 | 0.08052 MBTPS1       |
| cg04491443 | 0.04017 | 0.04018 | 0.37659 | 0.4632  | 0.93081 | 0.93558 | 0.18978 | 0.03572 | 0.25185 | 0.0342 PDILT         |
| cg04493740 | 0.04276 | 0.04804 | 0.07856 | 0.06218 | 0.08245 | 0.05471 | 0.21105 | 0.21043 | 0.05323 | 0.0499 SLC25A14      |
| cg04495969 | 0.03705 | 0.04651 | 0.04686 | 0.04354 | 0.03895 | 0.03711 | 0.03535 | 0.03392 | 0.03465 | 0.05918 FBXO11       |
| cg04496615 | 0.01739 | 0.01951 | 0.01819 | 0.01694 | 0.01657 | 0.01706 | 0.01416 | 0.01596 | 0.01411 | 0.01343 PPP3R1       |
| cg04497885 | 0.02924 | 0.02972 | 0.03133 | 0.03205 | 0.01892 | 0.02494 | 0.02366 | 0.02742 | 0.02299 | 0.02085 GSK3A        |
| cg04498032 | 0.09666 | 0.0649  | 0.05703 | 0.06238 | 0.05141 | 0.0577  | 0.06548 | 0.05935 | 0.07329 | 0.05965 CLK2         |
| cg04498511 | 0.88089 | 0.83391 | 0.83544 | 0.85423 | 0.86654 | 0.46422 | 0.8503  | 0.87507 | 0.86946 | 0.7003 ZC3H11A       |
| cg04498679 | 0.39274 | 0.15644 | 0.72718 | 0.80465 | 0.18778 | 0.40678 | 0.10095 | 0.2638  | 0.28875 | 0.04335 C2           |
| cg04498739 | 0.56762 | 0.52033 | 0.19302 | 0.15004 | 0.37889 | 0.10616 | 0.0791  | 0.06043 | 0.07767 | 0.06527 PDK4         |
| cg04499325 | 0.05653 | 0.05609 | 0.22221 | 0.07746 | 0.52086 | 0.16261 | 0.05585 | 0.0576  | 0.07941 | 0.18562 EPDR1        |
| cg04499381 | 0.82396 | 0.66037 | 0.81423 | 0.86617 | 0.94124 | 0.92765 | 0.38783 | 0.5228  | 0.59881 | 0.74661 CXorf9       |
| cg04502814 | 0.12334 | 0.39678 | 0.55595 | 0.81151 | 0.50096 | 0.58271 | 0.22194 | 0.18563 | 0.31752 | 0.20055 SEPP1        |
| cg04504095 | 0.02197 | 0.0206  | 0.01973 | 0.01932 | 0.01858 | 0.02117 | 0.01821 | 0.02234 | 0.01486 | 0.01793 FOXC1        |
| cg04505023 | 0.04671 | 0.04459 | 0.06936 | 0.04966 | 0.05088 | 0.04532 | 0.04853 | 0.04506 | 0.04513 | 0.04399 SPRR1A       |
| cg04506546 | 0.01779 | 0.02019 | 0.01765 | 0.01829 | 0.01606 | 0.0186  | 0.01766 | 0.01899 | 0.01485 | 0.01358 SLC35C2      |
| cg04506628 | 0.06707 | 0.0511  | 0.06144 | 0.06773 | 0.03396 | 0.10047 | 0.06913 | 0.06726 | 0.03573 | 0.03849 SNRPC        |
| cg04507972 | 0.04325 | 0.04321 | 0.04241 | 0.03823 | 0.03378 | 0.03362 | 0.0254  | 0.02682 | 0.03121 | 0.0316 CRSP2         |
| cg04508286 | 0.29035 | 0.39091 | 0.03701 | 0.03465 | 0.02817 | 0.03221 | 0.03235 | 0.03343 | 0.02457 | 0.0266 7-Sep         |
| cg04508649 | 0.86369 | 0.86569 | 0.82987 | 0.82897 | 0.76355 | 0.81324 | 0.87482 | 0.87464 | 0.84327 | 0.822 ANGPTL7        |
| cg04510262 | 0.0277  | 0.03374 | 0.02896 | 0.03418 | 0.03875 | 0.05686 | 0.02893 | 0.03456 | 0.0288  | 0.02851 PTPN2        |

|            |         |         |         |         |         |         |         |         |         |                   |
|------------|---------|---------|---------|---------|---------|---------|---------|---------|---------|-------------------|
| cg04511195 | 0.95605 | 0.95104 | 0.94763 | 0.9516  | 0.94039 | 0.94118 | 0.95505 | 0.96126 | 0.96217 | 0.96404 FZR1      |
| cg04511534 | 0.81557 | 0.79857 | 0.82704 | 0.8449  | 0.9109  | 0.83917 | 0.65282 | 0.62749 | 0.78847 | 0.61981 GGT6      |
| cg04513422 | 0.77161 | 0.41278 | 0.03691 | 0.03728 | 0.27937 | 0.15565 | 0.03156 | 0.05278 | 0.03934 | 0.03451 LOC283487 |
| cg04513669 | 0.0607  | 0.07277 | 0.26675 | 0.38761 | 0.14306 | 0.05164 | 0.07989 | 0.04998 | 0.06068 | 0.04675 SH3GLB1   |
| cg04513728 | 0.07963 | 0.07513 | 0.10889 | 0.07919 | 0.24948 | 0.18381 | 0.07053 | 0.04877 | 0.05206 | 0.07086 PPP1R10   |
| cg04514469 | 0.30365 | 0.30203 | 0.85468 | 0.86141 | 0.89613 | 0.84758 | 0.42159 | 0.47918 | 0.07145 | 0.06888 C14orf49  |
| cg04514981 | 0.05859 | 0.06397 | 0.06584 | 0.05935 | 0.07013 | 0.08723 | 0.07023 | 0.06013 | 0.05778 | 0.06626 C18orf37  |
| cg04515001 | 0.29808 | 0.16053 | 0.89412 | 0.91988 | 0.21362 | 0.18562 | 0.80253 | 0.92039 | 0.9398  | 0.93736 DCDC2     |
| cg04515567 | 0.83995 | 0.81549 | 0.8581  | 0.85348 | 0.85671 | 0.83162 | 0.84468 | 0.84864 | 0.85707 | 0.83958 FOXH1     |
| cg04515986 | 0.19853 | 0.10014 | 0.14704 | 0.10784 | 0.11794 | 0.20577 | 0.06461 | 0.06068 | 0.08046 | 0.07471 FTHL17    |
| cg04517429 | 0.91537 | 0.78794 | 0.82397 | 0.81688 | 0.61352 | 0.43202 | 0.5832  | 0.16756 | 0.88328 | 0.8195 DCHS2      |
| cg04518106 | 0.02824 | 0.03156 | 0.0357  | 0.03262 | 0.02559 | 0.03701 | 0.02956 | 0.03465 | 0.02526 | 0.02479 RPL26     |
| cg04518155 | 0.06534 | 0.03598 | 0.1198  | 0.10502 | 0.15737 | 0.03198 | 0.08416 | 0.02187 | 0.02897 | 0.02593 FLJ20534  |
| cg04518808 | 0.04779 | 0.05254 | 0.27834 | 0.5704  | 0.0794  | 0.07008 | 0.05456 | 0.05109 | 0.48678 | 0.26509 PRKCG     |
| cg04520084 | 0.03373 | 0.03585 | 0.04092 | 0.04832 | 0.03378 | 0.03955 | 0.03123 | 0.03003 | 0.0328  | 0.03373 CCNC      |
| cg04520391 | 0.40475 | 0.46528 | 0.4256  | 0.45085 | 0.27273 | 0.16899 | 0.12067 | 0.08226 | 0.30159 | 0.17121 PRB2      |
| cg04523589 | 0.93135 | 0.93024 | 0.82017 | 0.92222 | 0.91052 | 0.90389 | 0.56632 | 0.54635 | 0.90334 | 0.80826 CAMP      |
| cg04525496 | 0.03805 | 0.04757 | 0.05009 | 0.04667 | 0.03012 | 0.03791 | 0.04427 | 0.03779 | 0.05001 | 0.04391 CSPG2     |
| cg04525773 | 0.07025 | 0.1001  | 0.09208 | 0.09267 | 0.06887 | 0.08124 | 0.05593 | 0.06751 | 0.07429 | 0.06455 DBF4      |
| cg04527363 | 0.08375 | 0.0731  | 0.44532 | 0.59323 | 0.09062 | 0.07086 | 0.3252  | 0.52106 | 0.25259 | 0.12481 GRM7      |
| cg04527918 | 0.08246 | 0.03061 | 0.75435 | 0.86484 | 0.86776 | 0.74609 | 0.75988 | 0.45447 | 0.95613 | 0.93337 UCN       |
| cg04527989 | 0.73736 | 0.69011 | 0.69562 | 0.73403 | 0.64828 | 0.70734 | 0.70925 | 0.70227 | 0.81178 | 0.76891 PTCDD2    |
| cg04528819 | 0.11847 | 0.051   | 0.2325  | 0.09964 | 0.29972 | 0.08104 | 0.43526 | 0.04209 | 0.06112 | 0.03765 KLF14     |
| cg04529955 | 0.05197 | 0.0461  | 0.05986 | 0.05321 | 0.07324 | 0.05628 | 0.03702 | 0.03783 | 0.04419 | 0.05566 C4orf13   |
| cg04531254 | 0.04276 | 0.0476  | 0.04605 | 0.04372 | 0.03973 | 0.03568 | 0.04334 | 0.04446 | 0.0425  | 0.04225 MGC17839  |
| cg04531710 | 0.0236  | 0.02137 | 0.0198  | 0.02041 | 0.01749 | 0.0171  | 0.01804 | 0.01754 | 0.01449 | 0.01718 EIF4G1    |
| cg04532229 | 0.05441 | 0.04311 | 0.16101 | 0.22687 | 0.08123 | 0.09516 | 0.05097 | 0.03324 | 0.04726 | 0.03743 SLC9A2    |
| cg04532952 | 0.05144 | 0.05454 | 0.92969 | 0.96761 | 0.96504 | 0.96    | 0.76644 | 0.82088 | 0.13532 | 0.04904 CA4       |
| cg04533291 | 0.9398  | 0.84701 | 0.93843 | 0.94581 | 0.94359 | 0.93605 | 0.949   | 0.87393 | 0.94609 | 0.94064 WDR39     |
| cg04533591 | 0.06075 | 0.04649 | 0.05592 | 0.05059 | 0.04562 | 0.04401 | 0.48693 | 0.45008 | 0.04033 | 0.03897 RPL39     |
| cg04534765 | 0.04443 | 0.03248 | 0.96636 | 0.96932 | 0.18912 | 0.03293 | 0.49557 | 0.38425 | 0.07694 | 0.49297 GALR1     |
| cg04536575 | 0.64574 | 0.14882 | 0.86066 | 0.8901  | 0.35241 | 0.34753 | 0.54335 | 0.79094 | 0.4481  | 0.7077 C14orf50   |
| cg04536922 | 0.20034 | 0.10186 | 0.11221 | 0.10167 | 0.22059 | 0.1104  | 0.09312 | 0.08687 | 0.08397 | 0.10459 FAM13A1   |
| cg04536998 | 0.03098 | 0.03842 | 0.04377 | 0.03938 | 0.02487 | 0.02689 | 0.03663 | 0.0409  | 0.03547 | 0.0337 FLJ11305   |
| cg04541078 | 0.03663 | 0.03324 | 0.04818 | 0.05263 | 0.03305 | 0.03658 | 0.05557 | 0.03476 | 0.03853 | 0.02952 ARCN1     |
| cg04541293 | 0.10302 | 0.05122 | 0.82534 | 0.88568 | 0.27174 | 0.41854 | 0.07248 | 0.08731 | 0.15278 | 0.31845 PTPRT     |
| cg04541607 | 0.71492 | 0.63295 | 0.87639 | 0.88196 | 0.94376 | 0.89233 | 0.81417 | 0.80028 | 0.89923 | 0.58308 CRYBB1    |
| cg04542415 | 0.02892 | 0.02764 | 0.04149 | 0.03965 | 0.0453  | 0.0261  | 0.03172 | 0.0279  | 0.02974 | 0.01902 ZFP64     |
| cg04542938 | 0.0413  | 0.04642 | 0.04682 | 0.04309 | 0.10124 | 0.042   | 0.03517 | 0.03935 | 0.03738 | 0.03303 ATXN1     |
| cg04543012 | 0.05767 | 0.05611 | 0.08761 | 0.06084 | 0.4272  | 0.475   | 0.21677 | 0.04876 | 0.04167 | 0.04218 TFCEP2    |
| cg04544154 | 0.67668 | 0.14071 | 0.10011 | 0.14207 | 0.71189 | 0.04618 | 0.78715 | 0.71548 | 0.95121 | 0.96051 ELF4      |



|            |         |         |         |         |         |         |         |         |         |                  |
|------------|---------|---------|---------|---------|---------|---------|---------|---------|---------|------------------|
| cg04544498 | 0.15065 | 0.15552 | 0.22785 | 0.19072 | 0.24649 | 0.19833 | 0.2089  | 0.35513 | 0.16237 | 0.16182 MAGEE1   |
| cg04545159 | 0.70504 | 0.70665 | 0.65668 | 0.69851 | 0.64508 | 0.73469 | 0.76358 | 0.77717 | 0.72635 | 0.72675 FIGF     |
| cg04545516 | 0.21235 | 0.20502 | 0.22673 | 0.17495 | 0.49911 | 0.2807  | 0.18022 | 0.15765 | 0.10762 | 0.12633 SEMG1    |
| cg04545708 | 0.37476 | 0.14816 | 0.41884 | 0.31864 | 0.14679 | 0.09653 | 0.08952 | 0.08359 | 0.08293 | 0.05398 C11orf1  |
| cg04548378 | 0.07846 | 0.0836  | 0.09279 | 0.09501 | 0.09753 | 0.11655 | 0.09039 | 0.08117 | 0.06812 | 0.07536 CDKN1C   |
| cg04548841 | 0.05965 | 0.06841 | 0.06352 | 0.06084 | 0.05    | 0.05798 | 0.05944 | 0.05785 | 0.05868 | 0.04779 CNIH4    |
| cg04549333 | 0.96215 | 0.95719 | 0.95715 | 0.93759 | 0.96168 | 0.95757 | 0.95572 | 0.95843 | 0.96557 | 0.90389 ALX4     |
| cg04551655 | 0.71955 | 0.70258 | 0.70444 | 0.70824 | 0.68558 | 0.71181 | 0.70945 | 0.74894 | 0.72003 | 0.72207 FLJ13646 |
| cg04551925 | 0.87437 | 0.59057 | 0.88572 | 0.89223 | 0.92843 | 0.90641 | 0.87232 | 0.88471 | 0.89828 | 0.64455 AQP1     |
| cg04553232 | 0.14387 | 0.15308 | 0.16553 | 0.20101 | 0.33721 | 0.23114 | 0.07361 | 0.09816 | 0.67154 | 0.11074 KAL1     |
| cg04553559 | 0.05281 | 0.05943 | 0.0579  | 0.05284 | 0.07078 | 0.05406 | 0.06117 | 0.06555 | 0.61452 | 0.10383 ZNF703   |
| cg04555771 | 0.45826 | 0.50712 | 0.43372 | 0.51193 | 0.30877 | 0.12965 | 0.34213 | 0.07878 | 0.08694 | 0.06008 CACNA2D2 |
| cg04555836 | 0.07974 | 0.08371 | 0.08646 | 0.09012 | 0.05985 | 0.07605 | 0.07926 | 0.07891 | 0.08475 | 0.07195 MYO6     |
| cg04556854 | 0.09823 | 0.10467 | 0.11984 | 0.09286 | 0.11472 | 0.08655 | 0.09692 | 0.08233 | 0.08411 | 0.1095 FLJ35630  |
| cg04557383 | 0.932   | 0.93128 | 0.96963 | 0.96281 | 0.97898 | 0.97287 | 0.94659 | 0.95322 | 0.97257 | 0.97411 MT1H     |
| cg04557868 | 0.17042 | 0.0927  | 0.17764 | 0.14275 | 0.18546 | 0.11751 | 0.10059 | 0.08039 | 0.10228 | 0.09357 REL      |
| cg04558553 | 0.31853 | 0.35094 | 0.58665 | 0.63978 | 0.51909 | 0.55595 | 0.58494 | 0.58674 | 0.3878  | 0.24611 UGT2B7   |
| cg04558861 | 0.02833 | 0.03314 | 0.03501 | 0.0333  | 0.02564 | 0.0292  | 0.0252  | 0.02792 | 0.02512 | 0.02188 F25965   |
| cg04559909 | 0.83135 | 0.88424 | 0.84343 | 0.85751 | 0.79843 | 0.85626 | 0.86005 | 0.85037 | 0.89914 | 0.90959 CXCL5    |
| cg04561804 | 0.59392 | 0.85846 | 0.67195 | 0.75644 | 0.8058  | 0.81075 | 0.84668 | 0.63807 | 0.10244 | 0.07554 TLOC1    |
| cg04562739 | 0.02307 | 0.02176 | 0.02276 | 0.02041 | 0.02147 | 0.02642 | 0.02018 | 0.02333 | 0.01733 | 0.01567 PCNA     |
| cg04563996 | 0.31198 | 0.31741 | 0.55513 | 0.60651 | 0.57714 | 0.53316 | 0.66538 | 0.49689 | 0.48224 | 0.28409 SPATA12  |
| cg04564030 | 0.2497  | 0.13994 | 0.84339 | 0.86844 | 0.53191 | 0.5754  | 0.30481 | 0.10483 | 0.1523  | 0.1003 CDH7      |
| cg04564646 | 0.02214 | 0.02459 | 0.02528 | 0.02232 | 0.01658 | 0.01961 | 0.02313 | 0.02076 | 0.01848 | 0.01985 MOV10    |
| cg04565661 | 0.03272 | 0.03661 | 0.04055 | 0.03694 | 0.04863 | 0.03389 | 0.03186 | 0.03143 | 0.03272 | 0.02731 SEMA5B   |
| cg04567009 | 0.2432  | 0.07402 | 0.30405 | 0.35395 | 0.08942 | 0.24104 | 0.05141 | 0.05761 | 0.25508 | 0.1053 FCGR3B    |
| cg04567315 | 0.80933 | 0.55843 | 0.69687 | 0.82773 | 0.48801 | 0.14846 | 0.49683 | 0.18016 | 0.11051 | 0.13116 CLUL1    |
| cg04568580 | 0.42925 | 0.44067 | 0.38966 | 0.42093 | 0.40385 | 0.40284 | 0.35754 | 0.38855 | 0.35481 | 0.31578 PRKRIR   |
| cg04569233 | 0.40327 | 0.16338 | 0.57684 | 0.7717  | 0.55227 | 0.74133 | 0.15874 | 0.16204 | 0.53735 | 0.23944 CX3CR1   |
| cg04569804 | 0.72847 | 0.51667 | 0.84595 | 0.86214 | 0.87171 | 0.8494  | 0.86624 | 0.81829 | 0.84302 | 0.66287 CSF1R    |
| cg04570669 | 0.6273  | 0.54318 | 0.43753 | 0.55707 | 0.45955 | 0.66902 | 0.20581 | 0.23989 | 0.19455 | 0.15925 APIN     |
| cg04572898 | 0.04709 | 0.03945 | 0.04874 | 0.054   | 0.05306 | 0.04617 | 0.05519 | 0.05812 | 0.04169 | 0.0499 ISG20L1   |
| cg04574442 | 0.07266 | 0.03577 | 0.04785 | 0.04101 | 0.05994 | 0.04113 | 0.04295 | 0.03261 | 0.03374 | 0.02732 ALG8     |
| cg04574507 | 0.11237 | 0.12211 | 0.29022 | 0.32431 | 0.1698  | 0.29663 | 0.14724 | 0.13553 | 0.1415  | 0.1442 CD1B      |
| cg04574723 | 0.67114 | 0.54098 | 0.69616 | 0.84642 | 0.49901 | 0.49114 | 0.34758 | 0.0821  | 0.49642 | 0.79026 P2RY4    |
| cg04575343 | 0.03012 | 0.02629 | 0.02968 | 0.02818 | 0.20123 | 0.028   | 0.02708 | 0.0225  | 0.02775 | 0.0217 SLC2A13   |
| cg04576021 | 0.83615 | 0.61132 | 0.82682 | 0.83648 | 0.9002  | 0.8908  | 0.78693 | 0.81115 | 0.87276 | 0.78857 HLA-DOB  |
| cg04576203 | 0.13224 | 0.05115 | 0.05189 | 0.0473  | 0.04629 | 0.0472  | 0.04216 | 0.03612 | 0.08424 | 0.04231 AUP1     |
| cg04576855 | 0.02342 | 0.02748 | 0.02841 | 0.0243  | 0.02142 | 0.02554 | 0.02125 | 0.01949 | 0.0219  | 0.03251 SERTAD2  |
| cg04577715 | 0.90092 | 0.91068 | 0.83519 | 0.85782 | 0.88785 | 0.90728 | 0.86663 | 0.8458  | 0.85761 | 0.84188 SPINK1   |
| cg04578090 | 0.44732 | 0.27058 | 0.3603  | 0.29776 | 0.60735 | 0.71748 | 0.76337 | 0.68282 | 0.85016 | 0.50942 PROCA1   |

|            |         |         |         |         |         |         |         |         |         |         |          |
|------------|---------|---------|---------|---------|---------|---------|---------|---------|---------|---------|----------|
| cg04581377 | 0.07865 | 0.05009 | 0.05685 | 0.05373 | 0.06399 | 0.04494 | 0.05172 | 0.04018 | 0.03775 | 0.02884 | SLC35F2  |
| cg04582295 | 0.6766  | 0.61092 | 0.80236 | 0.84983 | 0.86588 | 0.77939 | 0.50872 | 0.75776 | 0.39567 | 0.33991 | SGCA     |
| cg04582843 | 0.03976 | 0.04113 | 0.04594 | 0.03897 | 0.02115 | 0.03025 | 0.03585 | 0.03704 | 0.03732 | 0.02984 | VAV2     |
| cg04582938 | 0.86327 | 0.62124 | 0.63264 | 0.55225 | 0.71513 | 0.42211 | 0.32388 | 0.08785 | 0.69791 | 0.40335 | UAP1L1   |
| cg04583874 | 0.15075 | 0.13172 | 0.68064 | 0.68343 | 0.56173 | 0.64844 | 0.50153 | 0.70694 | 0.34744 | 0.35319 | LY6H     |
| cg04584523 | 0.81422 | 0.56536 | 0.8374  | 0.89545 | 0.91323 | 0.89523 | 0.74375 | 0.54429 | 0.58789 | 0.49551 | ELA3B    |
| cg04585992 | 0.05033 | 0.05239 | 0.04853 | 0.04125 | 0.03911 | 0.05166 | 0.03425 | 0.0405  | 0.03623 | 0.04564 | TRAPPC6B |
| cg04586023 | 0.82088 | 0.6822  | 0.7163  | 0.76696 | 0.8763  | 0.44533 | 0.52855 | 0.4661  | 0.86607 | 0.79785 | HDAC10   |
| cg04586563 | 0.8991  | 0.91406 | 0.89276 | 0.90951 | 0.88356 | 0.90085 | 0.83809 | 0.90581 | 0.90734 | 0.91296 | DIP2C    |
| cg04587829 | 0.27679 | 0.17531 | 0.93627 | 0.93048 | 0.82289 | 0.90307 | 0.71185 | 0.72851 | 0.51009 | 0.48293 | FN3K     |
| cg04587910 | 0.28462 | 0.10828 | 0.47637 | 0.53037 | 0.09128 | 0.12451 | 0.08804 | 0.07377 | 0.08839 | 0.08969 | XLF      |
| cg04588079 | 0.02348 | 0.01829 | 0.02949 | 0.02866 | 0.03049 | 0.01723 | 0.01634 | 0.02218 | 0.02614 | 0.01639 | HEBP1    |
| cg04589904 | 0.04606 | 0.04887 | 0.44319 | 0.45928 | 0.58803 | 0.50894 | 0.25308 | 0.07856 | 0.94671 | 0.9339  | ADRB1    |
| cg04589975 | 0.02552 | 0.0274  | 0.03063 | 0.02788 | 0.02537 | 0.02461 | 0.02094 | 0.02273 | 0.0208  | 0.01741 | FLJ20558 |
| cg04590931 | 0.01565 | 0.01527 | 0.01723 | 0.01755 | 0.0172  | 0.01347 | 0.01267 | 0.01552 | 0.01474 | 0.01149 | PHF15    |
| cg04590978 | 0.07069 | 0.04873 | 0.24087 | 0.17994 | 0.59974 | 0.1382  | 0.0668  | 0.04986 | 0.04639 | 0.04149 | CCNJ     |
| cg04592706 | 0.87785 | 0.77686 | 0.85513 | 0.87813 | 0.74747 | 0.83388 | 0.57378 | 0.57834 | 0.85488 | 0.5952  | ABCA4    |
| cg04595021 | 0.89951 | 0.89921 | 0.86724 | 0.88263 | 0.83416 | 0.88215 | 0.8937  | 0.91165 | 0.88336 | 0.88045 | C21orf86 |
| cg04595372 | 0.36984 | 0.71796 | 0.95854 | 0.96564 | 0.74688 | 0.69153 | 0.38137 | 0.44105 | 0.0633  | 0.02437 | CRISP2   |
| cg04595835 | 0.08663 | 0.07788 | 0.09892 | 0.08665 | 0.13333 | 0.09703 | 0.0854  | 0.08606 | 0.08071 | 0.06964 | WDFY3    |
| cg04597449 | 0.53365 | 0.10704 | 0.29511 | 0.2521  | 0.86628 | 0.89641 | 0.19699 | 0.18643 | 0.35159 | 0.24812 | GPR150   |
| cg04598121 | 0.32064 | 0.44518 | 0.72784 | 0.8437  | 0.40204 | 0.35598 | 0.11695 | 0.05991 | 0.11044 | 0.04268 | PENK     |
| cg04598744 | 0.02541 | 0.02714 | 0.03238 | 0.0304  | 0.02318 | 0.03784 | 0.01947 | 0.02188 | 0.01972 | 0.02207 | LMBRD1   |
| cg04599297 | 0.12059 | 0.11879 | 0.43769 | 0.78663 | 0.21088 | 0.55322 | 0.12215 | 0.09708 | 0.38282 | 0.33497 | GAD2     |
| cg04600076 | 0.03603 | 0.03738 | 0.04141 | 0.03483 | 0.02316 | 0.03424 | 0.03038 | 0.0365  | 0.036   | 0.03112 | FAM60A   |
| cg04600406 | 0.03198 | 0.03562 | 0.03559 | 0.03409 | 0.02976 | 0.03159 | 0.03135 | 0.03458 | 0.02946 | 0.02841 | UQCR     |
| cg04600618 | 0.95553 | 0.96184 | 0.41571 | 0.46529 | 0.94222 | 0.94415 | 0.51656 | 0.45665 | 0.02716 | 0.02125 | C6orf206 |
| cg04601137 | 0.45024 | 0.17811 | 0.86464 | 0.87573 | 0.37688 | 0.46109 | 0.55656 | 0.30536 | 0.5592  | 0.60252 | ADAMTSL5 |
| cg04603031 | 0.04503 | 0.3273  | 0.19299 | 0.13372 | 0.37029 | 0.12041 | 0.07068 | 0.06803 | 0.05783 | 0.06163 | CHRNA3   |
| cg04603184 | 0.06386 | 0.06089 | 0.09273 | 0.09293 | 0.10903 | 0.0635  | 0.05731 | 0.08107 | 0.05511 | 0.05151 | RNF182   |
| cg04605667 | 0.70258 | 0.75568 | 0.1376  | 0.13105 | 0.15857 | 0.12568 | 0.13737 | 0.10803 | 0.13164 | 0.10872 | SIAH2    |
| cg04609640 | 0.72742 | 0.26754 | 0.52741 | 0.68272 | 0.51342 | 0.34064 | 0.40021 | 0.2082  | 0.32476 | 0.13127 | VMD2L2   |
| cg04609859 | 0.04066 | 0.04168 | 0.03577 | 0.0346  | 0.22169 | 0.2895  | 0.33501 | 0.16895 | 0.03017 | 0.03521 | HOXB4    |
| cg04612566 | 0.085   | 0.0883  | 0.09409 | 0.09651 | 0.87615 | 0.87719 | 0.10623 | 0.07035 | 0.2769  | 0.08007 | C8orf31  |
| cg04613080 | 0.19172 | 0.0606  | 0.09195 | 0.0775  | 0.24081 | 0.38144 | 0.04046 | 0.0537  | 0.0457  | 0.0544  | CNGA2    |
| cg04613791 | 0.05493 | 0.05032 | 0.05955 | 0.04919 | 0.04725 | 0.04654 | 0.0439  | 0.04305 | 0.04917 | 0.0531  | FKBP1A   |
| cg04614339 | 0.44952 | 0.41511 | 0.37283 | 0.30631 | 0.38907 | 0.46979 | 0.13631 | 0.11687 | 0.12206 | 0.12542 | CFHR4    |
| cg04614380 | 0.01997 | 0.02113 | 0.02127 | 0.02078 | 0.02192 | 0.02051 | 0.0198  | 0.01844 | 0.01779 | 0.01623 | SEMA3F   |
| cg04616566 | 0.81826 | 0.70656 | 0.87858 | 0.88858 | 0.83184 | 0.8466  | 0.77392 | 0.53505 | 0.8894  | 0.32037 | THSD4    |
| cg04616963 | 0.25514 | 0.13083 | 0.49878 | 0.66407 | 0.3406  | 0.16711 | 0.21979 | 0.16958 | 0.15025 | 0.15634 | XCL1     |
| cg04618528 | 0.88916 | 0.75406 | 0.88033 | 0.89729 | 0.93203 | 0.88358 | 0.15048 | 0.08221 | 0.84881 | 0.69528 | KRTHA6   |

|            |         |         |         |         |         |         |         |         |         |                   |
|------------|---------|---------|---------|---------|---------|---------|---------|---------|---------|-------------------|
| cg04618607 | 0.03832 | 0.03666 | 0.03757 | 0.03903 | 0.02886 | 0.03233 | 0.02952 | 0.03133 | 0.02918 | 0.0301 SQLE       |
| cg04619381 | 0.06957 | 0.04272 | 0.25354 | 0.36801 | 0.67123 | 0.5658  | 0.28846 | 0.2436  | 0.93879 | 0.92809 LOC222171 |
| cg04619854 | 0.35559 | 0.13624 | 0.49155 | 0.62969 | 0.47245 | 0.31491 | 0.35299 | 0.17121 | 0.10794 | 0.11024 UBXD4     |
| cg04619859 | 0.01864 | 0.01918 | 0.0284  | 0.02714 | 0.03125 | 0.02624 | 0.01655 | 0.01838 | 0.01753 | 0.01414 MGC5242   |
| cg04621255 | 0.02152 | 0.02538 | 0.03678 | 0.02381 | 0.79293 | 0.21603 | 0.02826 | 0.02102 | 0.04683 | 0.01704 ENDOG     |
| cg04622802 | 0.1989  | 0.04794 | 0.32204 | 0.58762 | 0.41804 | 0.27795 | 0.26959 | 0.05076 | 0.93256 | 0.7935 LOC387758  |
| cg04623168 | 0.02735 | 0.02775 | 0.02911 | 0.02672 | 0.02533 | 0.02599 | 0.03002 | 0.02815 | 0.02294 | 0.02268 C12orf30  |
| cg04623837 | 0.50604 | 0.50941 | 0.92745 | 0.93836 | 0.90041 | 0.89609 | 0.94106 | 0.9516  | 0.95263 | 0.95069 HCG9      |
| cg04623955 | 0.06468 | 0.3149  | 0.64974 | 0.74183 | 0.60887 | 0.86323 | 0.41466 | 0.51335 | 0.09366 | 0.06135 DIO3      |
| cg04624659 | 0.37318 | 0.56034 | 0.86707 | 0.90398 | 0.72815 | 0.45269 | 0.92886 | 0.93214 | 0.09553 | 0.04601 SPAG17    |
| cg04626574 | 0.04057 | 0.03686 | 0.03737 | 0.03402 | 0.02316 | 0.03477 | 0.04035 | 0.03817 | 0.03447 | 0.0364 LOC402055  |
| cg04627663 | 0.77062 | 0.53146 | 0.7296  | 0.74613 | 0.6848  | 0.70652 | 0.20692 | 0.15007 | 0.5304  | 0.14502 ADIPOQ    |
| cg04628008 | 0.03966 | 0.04473 | 0.04998 | 0.05268 | 0.05072 | 0.0377  | 0.06354 | 0.0795  | 0.02765 | 0.03049 ZBTB16    |
| cg04629204 | 0.36896 | 0.0577  | 0.49383 | 0.69172 | 0.53022 | 0.24335 | 0.56776 | 0.33883 | 0.40098 | 0.34237 EXTL1     |
| cg04629269 | 0.03034 | 0.02551 | 0.02898 | 0.0291  | 0.02284 | 0.02451 | 0.02687 | 0.02445 | 0.03799 | 0.03082 Magmas    |
| cg04631202 | 0.56035 | 0.07127 | 0.13785 | 0.19078 | 0.72472 | 0.06855 | 0.06437 | 0.06176 | 0.07995 | 0.06818 MAN1C1    |
| cg04632671 | 0.04522 | 0.14909 | 0.04003 | 0.03898 | 0.06285 | 0.04132 | 0.03551 | 0.03139 | 0.58131 | 0.64974 PPARG     |
| cg04632683 | 0.83326 | 0.72707 | 0.85176 | 0.85397 | 0.71951 | 0.88163 | 0.86196 | 0.86895 | 0.87853 | 0.80904 TFPT      |
| cg04633384 | 0.05306 | 0.05914 | 0.11124 | 0.23245 | 0.21064 | 0.05935 | 0.05607 | 0.05545 | 0.0488  | 0.04449 C18orf1   |
| cg04633513 | 0.04924 | 0.04929 | 0.15446 | 0.13989 | 0.16529 | 0.59602 | 0.07346 | 0.05036 | 0.05523 | 0.04193 AVPR1B    |
| cg04636194 | 0.86079 | 0.62532 | 0.78793 | 0.83818 | 0.87621 | 0.82099 | 0.56581 | 0.53941 | 0.46782 | 0.48108 PAGE4     |
| cg04636557 | 0.62897 | 0.26448 | 0.23382 | 0.28501 | 0.42845 | 0.64786 | 0.0716  | 0.06703 | 0.3062  | 0.33174 C1orf124  |
| cg04637372 | 0.51083 | 0.19045 | 0.92531 | 0.92878 | 0.93265 | 0.91251 | 0.787   | 0.07903 | 0.93361 | 0.68217 FLJ32784  |
| cg04640886 | 0.04243 | 0.04595 | 0.23799 | 0.25443 | 0.05273 | 0.03679 | 0.03409 | 0.04007 | 0.04163 | 0.03596 C19orf30  |
| cg04640913 | 0.12585 | 0.06426 | 0.48774 | 0.59882 | 0.14311 | 0.11132 | 0.0478  | 0.05775 | 0.07486 | 0.04911 CDH22     |
| cg04644624 | 0.14403 | 0.15581 | 0.20785 | 0.2148  | 0.25741 | 0.16553 | 0.18015 | 0.18482 | 0.17876 | 0.15989 TBC1D10A  |
| cg04645049 | 0.08201 | 0.08685 | 0.08276 | 0.07319 | 0.09697 | 0.1102  | 0.12925 | 0.12603 | 0.07513 | 0.07857 ARL6IP5   |
| cg04645174 | 0.50973 | 0.77514 | 0.67796 | 0.75962 | 0.6424  | 0.72853 | 0.19828 | 0.16777 | 0.17823 | 0.14729 OR7A17    |
| cg04645342 | 0.56492 | 0.08791 | 0.08248 | 0.08104 | 0.08749 | 0.06765 | 0.05017 | 0.04704 | 0.07361 | 0.06173 NEGR1     |
| cg04645843 | 0.19468 | 0.1012  | 0.23039 | 0.24024 | 0.30907 | 0.12108 | 0.24888 | 0.32572 | 0.11809 | 0.07789 DPCR1     |
| cg04648087 | 0.10592 | 0.14213 | 0.11776 | 0.10381 | 0.15742 | 0.11762 | 0.12551 | 0.11583 | 0.08779 | 0.07482 TSC1      |
| cg04648440 | 0.10164 | 0.10183 | 0.10218 | 0.10573 | 0.08048 | 0.12825 | 0.07458 | 0.07933 | 0.08704 | 0.07714 BRD3      |
| cg04650786 | 0.1516  | 0.04009 | 0.07726 | 0.10436 | 0.04348 | 0.03541 | 0.04879 | 0.03314 | 0.03682 | 0.03711 OSTM1     |
| cg04653021 | 0.16173 | 0.1356  | 0.17783 | 0.21021 | 0.21625 | 0.16068 | 0.14367 | 0.16573 | 0.36307 | 0.15896 DIRC2     |
| cg04653308 | 0.54875 | 0.27804 | 0.65748 | 0.70548 | 0.62218 | 0.37838 | 0.51574 | 0.42758 | 0.82052 | 0.33908 PPP2R4    |
| cg04655481 | 0.89545 | 0.84793 | 0.87284 | 0.88999 | 0.88791 | 0.76099 | 0.87196 | 0.84573 | 0.91164 | 0.89241 GPR21     |
| cg04658354 | 0.07164 | 0.05708 | 0.1049  | 0.08299 | 0.09735 | 0.09595 | 0.08081 | 0.07795 | 0.06385 | 0.07683 BRCA1     |
| cg04659622 | 0.89118 | 0.8567  | 0.82177 | 0.86418 | 0.82667 | 0.87831 | 0.40823 | 0.19494 | 0.14612 | 0.17754 PNPLA4    |
| cg04660234 | 0.0576  | 0.05276 | 0.0794  | 0.0593  | 0.04708 | 0.04583 | 0.04776 | 0.04271 | 0.05213 | 0.04173 WDR32     |
| cg04660410 | 0.02478 | 0.03794 | 0.03564 | 0.03147 | 0.04443 | 0.03401 | 0.04723 | 0.03186 | 0.02602 | 0.02694 VILL      |
| cg04660617 | 0.04883 | 0.03965 | 0.08008 | 0.09151 | 0.05098 | 0.03972 | 0.05559 | 0.04203 | 0.0428  | 0.0392 RABL2B     |

|            |         |         |         |         |         |         |         |         |         |                  |
|------------|---------|---------|---------|---------|---------|---------|---------|---------|---------|------------------|
| cg04660698 | 0.03129 | 0.03128 | 0.02885 | 0.03096 | 0.02506 | 0.03026 | 0.03029 | 0.02859 | 0.03058 | 0.02229 C16orf53 |
| cg04662451 | 0.05277 | 0.05013 | 0.05557 | 0.04827 | 0.05197 | 0.05286 | 0.04672 | 0.04815 | 0.05628 | 0.0508 RAD51     |
| cg04662594 | 0.52144 | 0.2294  | 0.2593  | 0.4583  | 0.5113  | 0.83585 | 0.24515 | 0.11031 | 0.29171 | 0.06324 EPB49    |
| cg04663194 | 0.87062 | 0.6034  | 0.76556 | 0.82507 | 0.93436 | 0.68496 | 0.85328 | 0.21886 | 0.94047 | 0.71602 ACTN3    |
| cg04663487 | 0.12789 | 0.13482 | 0.24713 | 0.13291 | 0.33841 | 0.23259 | 0.16292 | 0.21766 | 0.19585 | 0.09474 TFEC     |
| cg04667458 | 0.03606 | 0.03747 | 0.05154 | 0.0551  | 0.05629 | 0.04134 | 0.03225 | 0.02613 | 0.04572 | 0.04269 C1orf128 |
| cg04668164 | 0.06486 | 0.06228 | 0.08146 | 0.07941 | 0.0828  | 0.08525 | 0.0829  | 0.08233 | 0.08116 | 0.07558 SMAP1L   |
| cg04672450 | 0.02855 | 0.02997 | 0.03582 | 0.0365  | 0.16877 | 0.02326 | 0.0246  | 0.02654 | 0.02807 | 0.02014 SAMD11   |
| cg04675937 | 0.43457 | 0.43723 | 0.4391  | 0.44464 | 0.45302 | 0.43554 | 0.92756 | 0.93098 | 0.9401  | 0.94479 CDKN2B   |
| cg04676561 | 0.03583 | 0.03733 | 0.04393 | 0.03451 | 0.03132 | 0.04607 | 0.03605 | 0.03826 | 0.03487 | 0.03465 HIST1H18 |
| cg04677163 | 0.07133 | 0.07778 | 0.08789 | 0.08266 | 0.09083 | 0.08284 | 0.07062 | 0.07545 | 0.05723 | 0.06249 CAV1     |
| cg04677227 | 0.09471 | 0.05866 | 0.04778 | 0.04402 | 0.79891 | 0.83557 | 0.04993 | 0.05368 | 0.04639 | 0.04034 LOXL4    |
| cg04678793 | 0.0377  | 0.0277  | 0.06049 | 0.04766 | 0.05506 | 0.02386 | 0.04979 | 0.08561 | 0.03646 | 0.03686 LY6E     |
| cg04680304 | 0.03133 | 0.03218 | 0.03821 | 0.03492 | 0.03592 | 0.03621 | 0.02915 | 0.03077 | 0.02614 | 0.02996 RRM1     |
| cg04681849 | 0.05512 | 0.05956 | 0.06763 | 0.06634 | 0.07483 | 0.06231 | 0.10539 | 0.0883  | 0.09238 | 0.0583 PDGFRL    |
| cg04682845 | 0.07669 | 0.0539  | 0.22709 | 0.47476 | 0.54765 | 0.43119 | 0.29166 | 0.15609 | 0.09592 | 0.0975 TMEM42    |
| cg04683119 | 0.25513 | 0.09507 | 0.18132 | 0.20946 | 0.19052 | 0.09749 | 0.08747 | 0.05858 | 0.06924 | 0.0801 GUF1      |
| cg04683240 | 0.0492  | 0.04733 | 0.05849 | 0.05931 | 0.03848 | 0.03701 | 0.03795 | 0.03287 | 0.03921 | 0.04096 HLX1     |
| cg04684516 | 0.02968 | 0.02951 | 0.03181 | 0.02982 | 0.0213  | 0.02614 | 0.0261  | 0.02516 | 0.0283  | 0.02192 SNCAIP   |
| cg04686412 | 0.07836 | 0.0775  | 0.11006 | 0.1076  | 0.08249 | 0.06777 | 0.06857 | 0.06856 | 0.07414 | 0.08408 PSD2     |
| cg04688368 | 0.06405 | 0.08417 | 0.07758 | 0.07967 | 0.07376 | 0.0698  | 0.07548 | 0.06339 | 0.08008 | 0.05347 KCNMA1   |
| cg04689061 | 0.24615 | 0.17298 | 0.48519 | 0.49181 | 0.63422 | 0.73386 | 0.20542 | 0.16433 | 0.27692 | 0.23696 PKIA     |
| cg04690289 | 0.02463 | 0.02762 | 0.02748 | 0.02601 | 0.02621 | 0.02655 | 0.02195 | 0.02502 | 0.02457 | 0.02289 EXOSC7   |
| cg04691375 | 0.14922 | 0.14195 | 0.17843 | 0.1789  | 0.22376 | 0.2056  | 0.14201 | 0.11536 | 0.14966 | 0.15504 LRRC42   |
| cg04691540 | 0.04669 | 0.04959 | 0.05678 | 0.04757 | 0.04681 | 0.04797 | 0.05028 | 0.04338 | 0.05032 | 0.04287 ABL2     |
| cg04691961 | 0.80904 | 0.82237 | 0.70159 | 0.72834 | 0.75903 | 0.79964 | 0.76931 | 0.80283 | 0.73713 | 0.70572 C3orf57  |
| cg04697119 | 0.06811 | 0.06194 | 0.11955 | 0.08761 | 0.09417 | 0.04978 | 0.05997 | 0.06201 | 0.06344 | 0.05869 IGSF8    |
| cg04697562 | 0.86075 | 0.86431 | 0.86988 | 0.87621 | 0.88552 | 0.85719 | 0.88383 | 0.88011 | 0.8434  | 0.48216 GPC2     |
| cg04697849 | 0.80812 | 0.7913  | 0.83224 | 0.85517 | 0.79923 | 0.7931  | 0.7685  | 0.81986 | 0.82136 | 0.78741 UTX      |
| cg04698187 | 0.36967 | 0.29681 | 0.41524 | 0.47936 | 0.24429 | 0.03999 | 0.05465 | 0.06644 | 0.06813 | 0.03684 LRRN5    |
| cg04700814 | 0.82172 | 0.76604 | 0.82709 | 0.84891 | 0.80078 | 0.52121 | 0.59786 | 0.68748 | 0.56183 | 0.27173 HEXIM1   |
| cg04700925 | 0.14647 | 0.03689 | 0.04904 | 0.04693 | 0.04819 | 0.02983 | 0.03525 | 0.03077 | 0.03821 | 0.02867 KIAA0922 |
| cg04702045 | 0.02904 | 0.03189 | 0.03319 | 0.03426 | 0.02896 | 0.02818 | 0.11592 | 0.06191 | 0.02794 | 0.02864 OPHN1    |
| cg04702490 | 0.0549  | 0.0439  | 0.08284 | 0.10225 | 0.04167 | 0.04175 | 0.08618 | 0.05265 | 0.04419 | 0.03249 GALNT2   |
| cg04703844 | 0.0419  | 0.04197 | 0.04428 | 0.03814 | 0.02851 | 0.034   | 0.03589 | 0.03773 | 0.04075 | 0.03241 RDH10    |
| cg04705866 | 0.4384  | 0.16372 | 0.76555 | 0.79471 | 0.74877 | 0.80418 | 0.64521 | 0.43925 | 0.81697 | 0.61881 GZMK     |
| cg04706338 | 0.67356 | 0.57361 | 0.87534 | 0.87909 | 0.87711 | 0.84423 | 0.492   | 0.39404 | 0.86283 | 0.86759 VTN      |
| cg04710641 | 0.89547 | 0.88851 | 0.88836 | 0.8903  | 0.89246 | 0.88145 | 0.89125 | 0.89358 | 0.89582 | 0.90647 RDBP     |
| cg04710918 | 0.06967 | 0.04962 | 0.2943  | 0.25875 | 0.17045 | 0.05478 | 0.10835 | 0.04124 | 0.04891 | 0.0309 GSS       |
| cg04711050 | 0.0277  | 0.02558 | 0.04504 | 0.06122 | 0.09667 | 0.02481 | 0.02558 | 0.02126 | 0.04152 | 0.01674 SLC1A1   |
| cg04711324 | 0.68216 | 0.52129 | 0.74575 | 0.83925 | 0.65243 | 0.87294 | 0.36234 | 0.87845 | 0.31258 | 0.20005 RIT2     |

|            |         |         |         |         |         |         |         |         |         |         |           |
|------------|---------|---------|---------|---------|---------|---------|---------|---------|---------|---------|-----------|
| cg04712018 | 0.06048 | 0.04952 | 0.05013 | 0.06652 | 0.059   | 0.03556 | 0.03526 | 0.0378  | 0.04671 | 0.04254 | ATG16L1   |
| cg04712892 | 0.87519 | 0.86803 | 0.88062 | 0.88213 | 0.85348 | 0.89068 | 0.54645 | 0.39232 | 0.76739 | 0.86807 | NRAP      |
| cg04713352 | 0.44831 | 0.43504 | 0.19    | 0.43064 | 0.15217 | 0.28475 | 0.10111 | 0.06677 | 0.29675 | 0.2583  | ATP4A     |
| cg04713521 | 0.03163 | 0.0319  | 0.04742 | 0.04052 | 0.21792 | 0.03187 | 0.04281 | 0.02753 | 0.97493 | 0.97799 | PRRX2     |
| cg04715462 |         |         |         |         |         |         |         |         |         |         | H19       |
| cg04716261 | 0.08729 | 0.0888  | 0.10767 | 0.09909 | 0.11088 | 0.10075 | 0.0784  | 0.08095 | 0.07069 | 0.05593 | ARPM2     |
| cg04717045 | 0.49337 | 0.23094 | 0.86707 | 0.88498 | 0.78622 | 0.52845 | 0.74325 | 0.53334 | 0.88774 | 0.68505 | CCND1     |
| cg04718306 | 0.05492 | 0.06343 | 0.07168 | 0.06497 | 0.05754 | 0.06348 | 0.05759 | 0.04603 | 0.06081 | 0.05769 | GADD45A   |
| cg04718342 | 0.05945 | 0.04674 | 0.05767 | 0.05616 | 0.09064 | 0.0608  | 0.0734  | 0.06042 | 0.04914 | 0.05931 | CLPX      |
| cg04718414 | 0.05543 | 0.03369 | 0.09884 | 0.05443 | 0.03036 | 0.03257 | 0.03387 | 0.02457 | 0.02892 | 0.0233  | CDC16     |
| cg04719491 | 0.05261 | 0.04604 | 0.05109 | 0.04159 | 0.24015 | 0.28671 | 0.03864 | 0.03266 | 0.04675 | 0.03381 | HAS2      |
| cg04719766 | 0.81691 | 0.75747 | 0.72599 | 0.84159 | 0.75816 | 0.79505 | 0.3754  | 0.14874 | 0.4898  | 0.55118 | KCNQ1     |
| cg04720330 | 0.18898 | 0.04151 | 0.05457 | 0.04316 | 0.05578 | 0.06681 | 0.4498  | 0.08709 | 0.14905 | 0.03898 | PHLDA2    |
| cg04720358 | 0.97186 | 0.95471 | 0.97459 | 0.97459 | 0.97821 | 0.97417 | 0.91466 | 0.96227 | 0.97796 | 0.97805 | RCV1      |
| cg04721098 | 0.10287 | 0.08219 | 0.17554 | 0.22112 | 0.08178 | 0.06526 | 0.10061 | 0.07535 | 0.08547 | 0.07431 | CACNG3    |
| cg04721883 | 0.0417  | 0.03775 | 0.29979 | 0.23555 | 0.07472 | 0.04551 | 0.68612 | 0.68954 | 0.03661 | 0.0337  | ESX1      |
| cg04722168 | 0.03638 | 0.03186 | 0.04045 | 0.03617 | 0.03536 | 0.03732 | 0.02795 | 0.03065 | 0.03848 | 0.03075 | PAFAH2    |
| cg04725234 | 0.0348  | 0.03968 | 0.05022 | 0.04562 | 0.04309 | 0.03942 | 0.04078 | 0.04149 | 0.03525 | 0.03231 | TMEM38B   |
| cg04726200 | 0.96235 | 0.96119 | 0.96173 | 0.96732 | 0.97261 | 0.96596 | 0.96812 | 0.96016 | 0.967   | 0.97033 | SLC22A18  |
| cg04726446 | 0.45169 | 0.45633 | 0.4091  | 0.65032 | 0.92476 | 0.87653 | 0.32187 | 0.39337 | 0.33551 | 0.35287 | MGC16372  |
| cg04727522 | 0.55008 | 0.06644 | 0.94097 | 0.94752 | 0.92085 | 0.87129 | 0.57091 | 0.35614 | 0.95146 | 0.61595 | C18orf22  |
| cg04730731 | 0.04184 | 0.04001 | 0.04006 | 0.03849 | 0.03124 | 0.03273 | 0.03864 | 0.03571 | 0.03338 | 0.02981 | GEMIN5    |
| cg04731091 | 0.06062 | 0.05928 | 0.05897 | 0.05205 | 0.04772 | 0.05858 | 0.05063 | 0.05112 | 0.05081 | 0.04906 | WDR37     |
| cg04731384 | 0.88877 | 0.54171 | 0.80011 | 0.90003 | 0.9311  | 0.87914 | 0.72365 | 0.52405 | 0.61599 | 0.52801 | MGC3101   |
| cg04732193 | 0.84828 | 0.82874 | 0.78521 | 0.6023  | 0.38759 | 0.74581 | 0.54151 | 0.11037 | 0.81107 | 0.54445 | HSD11B1   |
| cg04733302 | 0.08865 | 0.07073 | 0.21725 | 0.52864 | 0.64627 | 0.56751 | 0.09264 | 0.06052 | 0.06878 | 0.06428 | TTC18     |
| cg04733388 | 0.05246 | 0.05734 | 0.06146 | 0.04878 | 0.06034 | 0.04048 | 0.04022 | 0.04442 | 0.05657 | 0.04908 | UBE1DC1   |
| cg04733989 | 0.01768 | 0.01593 | 0.02076 | 0.02022 | 0.01932 | 0.01415 | 0.01747 | 0.01504 | 0.01944 | 0.02288 | NAGA      |
| cg04735237 | 0.79548 | 0.53812 | 0.81928 | 0.87216 | 0.73468 | 0.4588  | 0.57427 | 0.5102  | 0.83945 | 0.77108 | TIMM17B   |
| cg04735745 | 0.03116 | 0.02662 | 0.03265 | 0.0305  | 0.02725 | 0.02432 | 0.02651 | 0.02554 | 0.02321 | 0.01826 | ZBED3     |
| cg04736140 | 0.05327 | 0.0334  | 0.10353 | 0.15712 | 0.10213 | 0.1734  | 0.04166 | 0.03011 | 0.03968 | 0.16774 | GPR161    |
| cg04737046 | 0.43057 | 0.15963 | 0.43196 | 0.51197 | 0.76715 | 0.58187 | 0.42235 | 0.39152 | 0.5961  | 0.51537 | ABCB4     |
| cg04737319 | 0.03666 | 0.02971 | 0.05662 | 0.04286 | 0.05129 | 0.06226 | 0.04177 | 0.03995 | 0.02379 | 0.02767 | HARS2     |
| cg04737405 | 0.43596 | 0.50819 | 0.58317 | 0.65764 | 0.35075 | 0.40173 | 0.10059 | 0.07426 | 0.61408 | 0.52365 | OR12D2    |
| cg04738091 | 0.60401 | 0.03285 | 0.15878 | 0.15976 | 0.97174 | 0.7791  | 0.28944 | 0.03181 | 0.45727 | 0.43596 | PTEN      |
| cg04739149 | 0.8341  | 0.8333  | 0.84207 | 0.83341 | 0.85868 | 0.8336  | 0.81015 | 0.81745 | 0.84365 | 0.83826 | DOC1      |
| cg04739485 | 0.81986 | 0.82271 | 0.86789 | 0.8615  | 0.84609 | 0.85225 | 0.8311  | 0.84306 | 0.86546 | 0.85339 | MLXIP     |
| cg04739570 | 0.0679  | 0.06866 | 0.82002 | 0.85757 | 0.22863 | 0.0544  | 0.08915 | 0.05669 | 0.08913 | 0.05965 | PODXL2    |
| cg04740359 | 0.27261 | 0.19633 | 0.28755 | 0.43356 | 0.58882 | 0.80629 | 0.78349 | 0.71946 | 0.26233 | 0.549   | NTF3      |
| cg04741133 | 0.04649 | 0.04488 | 0.05068 | 0.04365 | 0.0561  | 0.04311 | 0.03281 | 0.0382  | 0.03457 | 0.03279 | LOC153684 |
| cg04741636 | 0.36912 | 0.20388 | 0.11644 | 0.10003 | 0.06898 | 0.16073 | 0.09876 | 0.08253 | 0.08721 | 0.07877 | DTX3L     |

|            |         |         |         |         |         |         |         |         |         |         |           |
|------------|---------|---------|---------|---------|---------|---------|---------|---------|---------|---------|-----------|
| cg04741821 | 0.043   | 0.04344 | 0.05399 | 0.04087 | 0.0459  | 0.03598 | 0.0317  | 0.03025 | 0.03696 | 0.03492 | TXNDC13   |
| cg04743063 | 0.06421 | 0.06986 | 0.07711 | 0.07302 | 0.07405 | 0.08297 | 0.06146 | 0.06766 | 0.072   | 0.07304 | RTCD1     |
| cg04743650 | 0.36785 | 0.2285  | 0.36802 | 0.45112 | 0.63233 | 0.3674  | 0.66958 | 0.15145 | 0.25772 | 0.27434 | VCAM1     |
| cg04743872 | 0.63679 | 0.12862 | 0.40106 | 0.67753 | 0.05134 | 0.06366 | 0.04552 | 0.04513 | 0.08675 | 0.05208 | FLJ20701  |
| cg04744379 | 0.65018 | 0.13303 | 0.27254 | 0.69083 | 0.50423 | 0.64648 | 0.10486 | 0.09551 | 0.15089 | 0.06654 | KLK15     |
| cg04745698 | 0.02552 | 0.02754 | 0.02554 | 0.02466 | 0.02324 | 0.02608 | 0.02713 | 0.02434 | 0.02123 | 0.0182  | UPF2      |
| cg04745805 | 0.46209 | 0.45028 | 0.11285 | 0.08709 | 0.35279 | 0.2463  | 0.21521 | 0.09915 | 0.23526 | 0.08168 | STAT5B    |
| cg04747322 | 0.22739 | 0.29578 | 0.36446 | 0.31131 | 0.14992 | 0.06535 | 0.09249 | 0.05555 | 0.13699 | 0.2435  | SNCAIP    |
| cg04747510 | 0.08927 | 0.06484 | 0.22186 | 0.21135 | 0.19536 | 0.15481 | 0.21053 | 0.19147 | 0.1332  | 0.04338 | MICA      |
| cg04747619 | 0.11434 | 0.10658 | 0.17214 | 0.14131 | 0.18771 | 0.08663 | 0.18678 | 0.18    | 0.0976  | 0.11025 | DEFA5     |
| cg04747863 | 0.02886 | 0.0311  | 0.03053 | 0.02918 | 0.03294 | 0.03373 | 0.02777 | 0.03177 | 0.02461 | 0.0242  | PRPSAP2   |
| cg04748010 | 0.77127 | 0.49217 | 0.70265 | 0.82374 | 0.38198 | 0.39006 | 0.20699 | 0.46527 | 0.14477 | 0.25741 | POU6F2    |
| cg04748704 | 0.13386 | 0.10391 | 0.32419 | 0.24935 | 0.24298 | 0.35947 | 0.15244 | 0.11401 | 0.23155 | 0.18075 | CHRM2     |
| cg04749104 | 0.75774 | 0.55431 | 0.05024 | 0.04121 | 0.03794 | 0.03803 | 0.03937 | 0.04765 | 0.03457 | 0.03347 | STEAP3    |
| cg04749372 | 0.28056 | 0.22349 | 0.85937 | 0.86664 | 0.84306 | 0.74915 | 0.84276 | 0.54535 | 0.5142  | 0.40197 | INMT      |
| cg04752565 | 0.12461 | 0.10192 | 0.13934 | 0.12978 | 0.16968 | 0.11626 | 0.12967 | 0.12252 | 0.123   | 0.11354 | LOC57228  |
| cg04754011 | 0.31593 | 0.06199 | 0.29331 | 0.49678 | 0.73245 | 0.60645 | 0.49843 | 0.31921 | 0.10016 | 0.05131 | GPR44     |
| cg04755031 | 0.07989 | 0.05198 | 0.34633 | 0.31292 | 0.60363 | 0.44165 | 0.04502 | 0.04382 | 0.04614 | 0.04174 | PNPLA5    |
| cg04755662 | 0.89613 | 0.78394 | 0.86819 | 0.86229 | 0.86917 | 0.79231 | 0.50309 | 0.11131 | 0.42678 | 0.33276 | AR        |
| cg04755933 | 0.24431 | 0.04663 | 0.05694 | 0.05019 | 0.05714 | 0.04285 | 0.03465 | 0.03296 | 0.06385 | 0.03529 | AUP1      |
| cg04756629 | 0.08865 | 0.05965 | 0.4105  | 0.5498  | 0.23325 | 0.06909 | 0.0742  | 0.05927 | 0.47086 | 0.18694 | LOC400696 |
| cg04757093 | 0.74962 | 0.58791 | 0.77909 | 0.80043 | 0.85022 | 0.62215 | 0.83232 | 0.69911 | 0.58078 | 0.447   | RUNX3     |
| cg04757243 | 0.86088 | 0.65584 | 0.89267 | 0.90421 | 0.93252 | 0.89296 | 0.88411 | 0.8806  | 0.90177 | 0.829   | C3orf36   |
| cg04757428 | 0.0285  | 0.02792 | 0.02734 | 0.02458 | 0.01997 | 0.02317 | 0.03402 | 0.02433 | 0.02069 | 0.0206  | STMN3     |
| cg04759439 | 0.05214 | 0.05658 | 0.06264 | 0.05865 | 0.06361 | 0.08398 | 0.08619 | 0.07578 | 0.06959 | 0.06134 | CAST1     |
| cg04759756 | 0.908   | 0.84718 | 0.88457 | 0.91146 | 0.94585 | 0.92427 | 0.90271 | 0.92168 | 0.86252 | 0.85205 | SLA2      |
| cg04761824 | 0.88404 | 0.85184 | 0.86806 | 0.88339 | 0.84307 | 0.89209 | 0.71782 | 0.656   | 0.7525  | 0.73962 | 1-Dec     |
| cg04762213 | 0.12575 | 0.11177 | 0.1259  | 0.13293 | 0.08143 | 0.09418 | 0.12184 | 0.14369 | 0.0494  | 0.05705 | BAT2      |
| cg04762346 | 0.02672 | 0.02229 | 0.02949 | 0.02598 | 0.02063 | 0.02075 | 0.02296 | 0.02188 | 0.02009 | 0.01827 | EDG5      |
| cg04763192 | 0.02729 | 0.02423 | 0.13152 | 0.10712 | 0.15201 | 0.0274  | 0.02435 | 0.07177 | 0.03485 | 0.02214 | C1orf88   |
| cg04764624 | 0.49521 | 0.26799 | 0.92201 | 0.92246 | 0.9387  | 0.87891 | 0.62302 | 0.29257 | 0.91204 | 0.49494 | RAB11FIP4 |
| cg04765277 | 0.83443 | 0.53335 | 0.66319 | 0.8636  | 0.93165 | 0.87321 | 0.2341  | 0.19416 | 0.90515 | 0.8688  | FLJ45983  |
| cg04765422 | 0.06462 | 0.07373 | 0.06848 | 0.08117 | 0.11451 | 0.08442 | 0.05784 | 0.0461  | 0.05903 | 0.05041 | RAD18     |
| cg04765675 | 0.1004  | 0.10941 | 0.09838 | 0.07801 | 0.09385 | 0.06972 | 0.04739 | 0.0682  | 0.06282 | 0.05853 | CXorf15   |
| cg04765929 | 0.03409 | 0.03905 | 0.03594 | 0.04769 | 0.35829 | 0.0347  | 0.0341  | 0.03296 | 0.02706 | 0.02612 | TNFAIP8L1 |
| cg04770504 | 0.07129 | 0.03014 | 0.03288 | 0.03054 | 0.03576 | 0.02664 | 0.03072 | 0.03094 | 0.0298  | 0.0218  | DFNA5     |
| cg04774694 | 0.74775 | 0.70658 | 0.77744 | 0.798   | 0.81334 | 0.7633  | 0.63332 | 0.6326  | 0.58701 | 0.64614 | DPEP2     |
| cg04775502 | 0.12034 | 0.11999 | 0.2068  | 0.17543 | 0.52964 | 0.84957 | 0.13186 | 0.11987 | 0.28747 | 0.10293 | C6orf114  |
| cg04779191 | 0.04966 | 0.05081 | 0.04744 | 0.05354 | 0.06962 | 0.06043 | 0.05201 | 0.04263 | 0.03444 | 0.0425  | CIRH1A    |
| cg04780126 | 0.03307 | 0.0373  | 0.03419 | 0.03097 | 0.03719 | 0.03557 | 0.0345  | 0.03546 | 0.02699 | 0.02762 | POLA2     |
| cg04780454 | 0.70662 | 0.34914 | 0.66417 | 0.79082 | 0.42312 | 0.69496 | 0.28739 | 0.35329 | 0.31264 | 0.17896 | SERPINF2  |

|            |         |         |         |         |         |         |         |         |         |                   |
|------------|---------|---------|---------|---------|---------|---------|---------|---------|---------|-------------------|
| cg04780629 | 0.06265 | 0.06233 | 0.07249 | 0.06104 | 0.09177 | 0.0668  | 0.06297 | 0.06003 | 0.06346 | 0.05618 RNF43     |
| cg04783231 | 0.35216 | 0.68868 | 0.37345 | 0.332   | 0.4405  | 0.46422 | 0.29783 | 0.28011 | 0.10983 | 0.18519 ZFP28     |
| cg04784315 | 0.86037 | 0.83562 | 0.84867 | 0.84587 | 0.80608 | 0.84998 | 0.82937 | 0.82257 | 0.82874 | 0.8475 GPR21      |
| cg04784672 | 0.03531 | 0.03404 | 0.92193 | 0.94216 | 0.12264 | 0.03557 | 0.12296 | 0.02932 | 0.0491  | 0.03714 LRFN5     |
| cg04785227 | 0.04433 | 0.03594 | 0.06212 | 0.04779 | 0.06912 | 0.04808 | 0.04707 | 0.05068 | 0.05728 | 0.06646 CHRNA7    |
| cg04785461 | 0.02098 | 0.03016 | 0.02433 | 0.0251  | 0.01945 | 0.02214 | 0.02377 | 0.02204 | 0.02229 | 0.01791 DCLRE1C   |
| cg04786857 | 0.93869 | 0.97354 | 0.96866 | 0.97071 | 0.93142 | 0.96952 | 0.97826 | 0.97171 | 0.97426 | 0.96971 SPDY1     |
| cg04788442 | 0.62836 | 0.40583 | 0.4742  | 0.51148 | 0.4046  | 0.25736 | 0.52302 | 0.26595 | 0.30623 | 0.31874 PRG4      |
| cg04790129 | 0.51774 | 0.59271 | 0.76439 | 0.82881 | 0.8786  | 0.78821 | 0.8167  | 0.56548 | 0.62312 | 0.60489 ITGB2     |
| cg04790829 | 0.02697 | 0.03103 | 0.03007 | 0.02829 | 0.02303 | 0.02394 | 0.02421 | 0.02639 | 0.02298 | 0.02181 LRRC54    |
| cg04790874 | 0.91924 | 0.82218 | 0.68927 | 0.74454 | 0.91873 | 0.85181 | 0.52625 | 0.1371  | 0.22552 | 0.03956 CD79A     |
| cg04790936 | 0.02576 | 0.02569 | 0.02516 | 0.02372 | 0.52835 | 0.87254 | 0.07058 | 0.02322 | 0.02164 | 0.02305 SH3BP1    |
| cg04794268 | 0.25411 | 0.15799 | 0.42588 | 0.44293 | 0.06603 | 0.04451 | 0.74515 | 0.37711 | 0.31701 | 0.05496 CYHR1     |
| cg04794505 | 0.03643 | 0.04832 | 0.03905 | 0.04186 | 0.03984 | 0.03582 | 0.03592 | 0.03664 | 0.0342  | 0.03161 PBX3      |
| cg04794887 | 0.0431  | 0.0432  | 0.04535 | 0.04055 | 0.03111 | 0.03984 | 0.0396  | 0.03872 | 0.03679 | 0.03818 LETM1     |
| cg04794901 | 0.03526 | 0.03727 | 0.03926 | 0.03601 | 0.03596 | 0.03404 | 0.03046 | 0.02938 | 0.03609 | 0.02932 TCP1      |
| cg04796162 | 0.03227 | 0.03476 | 0.14288 | 0.09938 | 0.45688 | 0.12135 | 0.08704 | 0.04115 | 0.96788 | 0.93973 IGFBP3    |
| cg04797323 | 0.71208 | 0.7074  | 0.04005 | 0.04577 | 0.70748 | 0.7137  | 0.92023 | 0.87596 | 0.97337 | 0.97312 SOCS2     |
| cg04797496 | 0.69675 | 0.29264 | 0.27909 | 0.41833 | 0.66957 | 0.47738 | 0.07276 | 0.22387 | 0.07166 | 0.1107 PCDH12     |
| cg04798095 | 0.02733 | 0.02834 | 0.02683 | 0.02747 | 0.02206 | 0.02541 | 0.03093 | 0.02865 | 0.02588 | 0.02025 LAMA5     |
| cg04798158 | 0.04726 | 0.05077 | 0.03782 | 0.0335  | 0.06464 | 0.04644 | 0.0348  | 0.04105 | 0.03739 | 0.04628 C14orf111 |
| cg04798796 | 0.03286 | 0.02899 | 0.03388 | 0.02752 | 0.02309 | 0.03268 | 0.02531 | 0.02203 | 0.02925 | 0.02799 GLUD1     |
| cg04799664 | 0.50273 | 0.12586 | 0.62439 | 0.73674 | 0.55004 | 0.20611 | 0.46661 | 0.33276 | 0.38487 | 0.16151 NOD27     |
| cg04801003 | 0.03761 | 0.03429 | 0.03472 | 0.03671 | 0.02597 | 0.03193 | 0.03047 | 0.03273 | 0.02737 | 0.02781 ANTXR1    |
| cg04802221 | 0.85487 | 0.51023 | 0.84072 | 0.88258 | 0.86114 | 0.84632 | 0.72695 | 0.13733 | 0.42288 | 0.46073 LOC283849 |
| cg04802801 | 0.04831 | 0.05119 | 0.04816 | 0.04369 | 0.03673 | 0.04427 | 0.04839 | 0.04264 | 0.04219 | 0.04281 PPP1R11   |
| cg04803153 | 0.58597 | 0.34906 | 0.50324 | 0.74044 | 0.36074 | 0.33055 | 0.17219 | 0.14265 | 0.30035 | 0.19267 MGC62100  |
| cg04805109 | 0.05451 | 0.05426 | 0.05356 | 0.05322 | 0.04866 | 0.04806 | 0.05013 | 0.04598 | 0.04514 | 0.04378 CSPG5     |
| cg04806409 | 0.8216  | 0.28148 | 0.28702 | 0.51091 | 0.87707 | 0.04082 | 0.19121 | 0.04646 | 0.50966 | 0.3849 TFF3       |
| cg04807655 | 0.04093 | 0.03861 | 0.04429 | 0.04304 | 0.05211 | 0.03918 | 0.05389 | 0.18921 | 0.39898 | 0.39376 TIAM1     |
| cg04808672 | 0.0393  | 0.03529 | 0.03832 | 0.03707 | 0.02525 | 0.03255 | 0.03483 | 0.02831 | 0.03339 | 0.02626 SMURF2    |
| cg04809136 | 0.03408 | 0.05112 | 0.59202 | 0.63697 | 0.32829 | 0.1223  | 0.32684 | 0.04983 | 0.02758 | 0.02559 SF3B14    |
| cg04809787 | 0.13916 | 0.04479 | 0.0346  | 0.03124 | 0.49016 | 0.43101 | 0.74497 | 0.22339 | 0.0343  | 0.02583 CHRNB1    |
| cg04810997 | 0.17195 | 0.12216 | 0.36646 | 0.38359 | 0.59431 | 0.74017 | 0.08655 | 0.07939 | 0.07794 | 0.07246 TAS2R60   |
| cg04811526 | 0.0471  | 0.04966 | 0.05433 | 0.05446 | 0.03739 | 0.04111 | 0.04902 | 0.05109 | 0.04455 | 0.04367 TIMM44    |
| cg04815626 | 0.05944 | 0.06431 | 0.06126 | 0.07024 | 0.06561 | 0.06909 | 0.08793 | 0.09445 | 0.05627 | 0.06122 MSRA      |
| cg04816348 | 0.95377 | 0.93599 | 0.95907 | 0.96489 | 0.85311 | 0.88398 | 0.17797 | 0.12976 | 0.10306 | 0.2302 CLEC4G     |
| cg04818845 | 0.06745 | 0.0683  | 0.86049 | 0.86715 | 0.15934 | 0.05799 | 0.09062 | 0.05638 | 0.06571 | 0.05498 PLEKHG5   |
| cg04819539 | 0.79024 | 0.79355 | 0.78333 | 0.81372 | 0.74893 | 0.73654 | 0.78753 | 0.6587  | 0.78649 | 0.79013 METTL1    |
| cg04820387 | 0.07197 | 0.06341 | 0.0835  | 0.0917  | 0.16601 | 0.09338 | 0.09936 | 0.1094  | 0.07902 | 0.06549 PCMTD2    |
| cg04824341 | 0.03436 | 0.0323  | 0.03952 | 0.04459 | 0.04494 | 0.04326 | 0.04574 | 0.03859 | 0.03316 | 0.03762 CHCHD8    |

|            |         |         |         |         |         |         |         |         |         |         |           |
|------------|---------|---------|---------|---------|---------|---------|---------|---------|---------|---------|-----------|
| cg04824716 | 0.53242 | 0.43762 | 0.63888 | 0.66677 | 0.49195 | 0.07376 | 0.52313 | 0.10849 | 0.16477 | 0.0652  | CCHCR1    |
| cg04825431 | 0.70484 | 0.87928 | 0.66979 | 0.70351 | 0.83273 | 0.6399  | 0.85708 | 0.88253 | 0.91123 | 0.88236 | ZNF239    |
| cg04826422 | 0.02833 | 0.02979 | 0.03141 | 0.02606 | 0.02224 | 0.02777 | 0.02332 | 0.02415 | 0.02366 | 0.02416 | LOC129285 |
| cg04826883 | 0.07501 | 0.04818 | 0.05917 | 0.05845 | 0.04541 | 0.0473  | 0.0938  | 0.05689 | 0.35942 | 0.20184 | CA12      |
| cg04828792 | 0.57739 | 0.25627 | 0.8551  | 0.85371 | 0.69676 | 0.83119 | 0.34431 | 0.18913 | 0.8807  | 0.5927  | MX2       |
| cg04828892 | 0.03235 | 0.03272 | 0.03719 | 0.03852 | 0.03207 | 0.03009 | 0.02437 | 0.02336 | 0.02912 | 0.02748 | PPM1J     |
| cg04833050 | 0.8932  | 0.88434 | 0.8999  | 0.90462 | 0.92894 | 0.88996 | 0.89901 | 0.89904 | 0.87263 | 0.74759 | LHFPL2    |
| cg04833152 | 0.06221 | 0.06816 | 0.09056 | 0.06584 | 0.05878 | 0.05601 | 0.12015 | 0.09934 | 0.05332 | 0.06921 | PURG      |
| cg04833845 | 0.83976 | 0.22487 | 0.83478 | 0.84859 | 0.81242 | 0.75648 | 0.73628 | 0.73441 | 0.83326 | 0.41885 | KCNN4     |
| cg04834572 | 0.92763 | 0.92055 | 0.90876 | 0.92774 | 0.9097  | 0.64849 | 0.92028 | 0.81266 | 0.67    | 0.70098 | DUSP13    |
| cg04835638 | 0.80423 | 0.76419 | 0.78099 | 0.77294 | 0.73327 | 0.78427 | 0.7015  | 0.78377 | 0.79873 | 0.72749 | FHIT      |
| cg04836038 | 0.04196 | 0.04162 | 0.04581 | 0.04968 | 0.05919 | 0.45698 | 0.03957 | 0.04208 | 0.06157 | 0.03606 | DOCK9     |
| cg04836428 | 0.07038 | 0.07315 | 0.08491 | 0.08372 | 0.07046 | 0.07493 | 0.08151 | 0.06393 | 0.07463 | 0.07615 | DTNA      |
| cg04836786 | 0.03001 | 0.02759 | 0.02606 | 0.02541 | 0.0224  | 0.02382 | 0.02046 | 0.02222 | 0.01985 | 0.01751 | SMARCA3   |
| cg04837071 | 0.95142 | 0.80349 | 0.93676 | 0.93375 | 0.964   | 0.94586 | 0.50103 | 0.08478 | 0.85381 | 0.84511 | NOXA1     |
| cg04837322 | 0.08111 | 0.05435 | 0.06444 | 0.05316 | 0.12072 | 0.05841 | 0.05665 | 0.05323 | 0.0466  | 0.04611 | ROD1      |
| cg04837898 | 0.16583 | 0.17878 | 0.22901 | 0.20702 | 0.26542 | 0.26579 | 0.20082 | 0.18176 | 0.14951 | 0.18405 | SACM1L    |
| cg04837997 | 0.10407 | 0.05276 | 0.05714 | 0.05414 | 0.05501 | 0.04613 | 0.05178 | 0.04021 | 0.04292 | 0.04232 | AP3S2     |
| cg04838107 | 0.1526  | 0.10207 | 0.08153 | 0.07005 | 0.13447 | 0.10569 | 0.16111 | 0.11942 | 0.08693 | 0.10467 | ARF6      |
| cg04845063 | 0.23494 | 0.22427 | 0.24608 | 0.23375 | 0.33442 | 0.30801 | 0.25471 | 0.22257 | 0.19064 | 0.29131 | FAM13A1   |
| cg04845144 | 0.02701 | 0.02818 | 0.02923 | 0.03169 | 0.04387 | 0.02586 | 0.02816 | 0.02777 | 0.02435 | 0.02093 | RTN2      |
| cg04845579 | 0.84114 | 0.41439 | 0.3675  | 0.8131  | 0.90109 | 0.71956 | 0.81066 | 0.46732 | 0.07638 | 0.07886 | SULF1     |
| cg04845628 | 0.28683 | 0.10085 | 0.08767 | 0.10296 | 0.08755 | 0.06859 | 0.12639 | 0.11807 | 0.08844 | 0.07109 | MINA      |
| cg04848046 | 0.85495 | 0.77936 | 0.87032 | 0.88542 | 0.81358 | 0.6656  | 0.50835 | 0.34898 | 0.90752 | 0.83331 | FNDC3B    |
| cg04848452 | 0.67527 | 0.56627 | 0.41727 | 0.52548 | 0.30203 | 0.09263 | 0.13932 | 0.12568 | 0.09768 | 0.06444 | EIF1B     |
| cg04849025 | 0.05067 | 0.04654 | 0.1145  | 0.05621 | 0.05977 | 0.04418 | 0.04694 | 0.04449 | 0.07035 | 0.0339  | YIPF2     |
| cg04853151 | 0.09529 | 0.10344 | 0.10703 | 0.09416 | 0.05654 | 0.0824  | 0.08967 | 0.09571 | 0.08739 | 0.09922 | C1orf83   |
| cg04853383 | 0.02404 | 0.02781 | 0.03263 | 0.02328 | 0.0194  | 0.02506 | 0.0232  | 0.02414 | 0.02472 | 0.02424 | C12orf49  |
| cg04853958 | 0.05122 | 0.06375 | 0.05683 | 0.05649 | 0.05111 | 0.05108 | 0.04898 | 0.0487  | 0.0472  | 0.04526 | NAP1L4    |
| cg04856043 | 0.23752 | 0.05359 | 0.09293 | 0.08154 | 0.19866 | 0.04734 | 0.07406 | 0.07997 | 0.04213 | 0.03235 | HS1BP3    |
| cg04856203 | 0.04331 | 0.04609 | 0.05355 | 0.0415  | 0.03515 | 0.03277 | 0.03916 | 0.04419 | 0.03688 | 0.02918 | DMXL1     |
| cg04856685 | 0.05394 | 0.05751 | 0.05721 | 0.0625  | 0.08237 | 0.08058 | 0.04051 | 0.0439  | 0.04844 | 0.05766 | MAP4      |
| cg04856689 | 0.05176 | 0.06048 | 0.04711 | 0.04936 | 0.10292 | 0.09511 | 0.07954 | 0.05598 | 0.04313 | 0.04305 | CRHR1     |
| cg04856858 | 0.48163 | 0.06352 | 0.18649 | 0.17633 | 0.41342 | 0.38159 | 0.02249 | 0.02351 | 0.57882 | 0.5156  | CENTG2    |
| cg04861271 | 0.96027 | 0.96184 | 0.95052 | 0.95864 | 0.956   | 0.88851 | 0.96824 | 0.91954 | 0.96721 | 0.95672 | PABPN1    |
| cg04862249 | 0.06309 | 0.03712 | 0.88639 | 0.92551 | 0.4061  | 0.54144 | 0.06022 | 0.05513 | 0.168   | 0.03473 | ZFP3      |
| cg04863713 | 0.16017 | 0.05957 | 0.1102  | 0.11242 | 0.05551 | 0.04724 | 0.08934 | 0.15592 | 0.08497 | 0.04708 | TSRC1     |
| cg04865575 | 0.0276  | 0.02779 | 0.03125 | 0.0249  | 0.02406 | 0.02651 | 0.02684 | 0.02723 | 0.02257 | 0.02167 | YME1L1    |
| cg04868764 | 0.42557 | 0.36289 | 0.85371 | 0.87293 | 0.92753 | 0.93405 | 0.58843 | 0.59831 | 0.9334  | 0.93805 | SPINT1    |
| cg04870470 | 0.20049 | 0.15951 | 0.22692 | 0.16672 | 0.4098  | 0.31397 | 0.11692 | 0.0994  | 0.16667 | 0.26669 | EXTL2     |
| cg04871004 | 0.01853 | 0.02016 | 0.02109 | 0.01912 | 0.01851 | 0.01898 | 0.01897 | 0.01772 | 0.01574 | 0.01379 | ZNF337    |



|            |         |         |         |         |         |         |         |         |         |         |          |
|------------|---------|---------|---------|---------|---------|---------|---------|---------|---------|---------|----------|
| cg04872051 | 0.04096 | 0.0423  | 0.03485 | 0.02947 | 0.052   | 0.71967 | 0.59152 | 0.57243 | 0.03448 | 0.02652 | CHST7    |
| cg04872689 | 0.88711 | 0.34115 | 0.90564 | 0.90293 | 0.92212 | 0.7948  | 0.8665  | 0.85461 | 0.89084 | 0.70313 | PLEK     |
| cg04875162 | 0.06276 | 0.05465 | 0.85732 | 0.87883 | 0.07912 | 0.07371 | 0.05893 | 0.05222 | 0.16355 | 0.39691 | PABPC5   |
| cg04875709 | 0.02661 | 0.02904 | 0.02703 | 0.0264  | 0.01998 | 0.02107 | 0.02657 | 0.0278  | 0.02223 | 0.0206  | CDKN1B   |
| cg04876451 | 0.02995 | 0.02837 | 0.03392 | 0.02775 | 0.02843 | 0.03727 | 0.02513 | 0.02595 | 0.02468 | 0.02428 | PET112L  |
| cg04878152 | 0.08157 | 0.05662 | 0.06863 | 0.07243 | 0.09123 | 0.05487 | 0.10027 | 0.072   | 0.07482 | 0.05363 | AGTR1    |
| cg04878727 | 0.09556 | 0.10159 | 0.10945 | 0.16333 | 0.15901 | 0.1439  | 0.1847  | 0.17721 | 0.0666  | 0.08072 | ZNF306   |
| cg04878842 | 0.09852 | 0.09572 | 0.09682 | 0.0837  | 0.1666  | 0.12735 | 0.11351 | 0.1057  | 0.08027 | 0.07253 | ERCC2    |
| cg04879235 | 0.73865 | 0.60837 | 0.81937 | 0.86661 | 0.91557 | 0.87992 | 0.66214 | 0.71455 | 0.45418 | 0.47357 | PPY      |
| cg04879696 | 0.04053 | 0.04463 | 0.04211 | 0.03866 | 0.03472 | 0.03972 | 0.03927 | 0.03788 | 0.03344 | 0.0394  | SPG7     |
| cg04880063 | 0.04088 | 0.03693 | 0.55148 | 0.72283 | 0.44841 | 0.31861 | 0.07642 | 0.02965 | 0.05948 | 0.32753 | SFXN3    |
| cg04880762 | 0.03726 | 0.03882 | 0.04556 | 0.04578 | 0.03481 | 0.03856 | 0.03942 | 0.03702 | 0.03245 | 0.02947 | VAMP1    |
| cg04881903 | 0.89356 | 0.6233  | 0.89527 | 0.8972  | 0.45964 | 0.59093 | 0.87185 | 0.85463 | 0.83233 | 0.50198 | CAPG     |
| cg04882759 | 0.92665 | 0.85097 | 0.90056 | 0.93206 | 0.88706 | 0.9006  | 0.832   | 0.89077 | 0.54856 | 0.68919 | MYOCD    |
| cg04882894 | 0.32448 | 0.04485 | 0.22122 | 0.38524 | 0.06171 | 0.04601 | 0.05733 | 0.05012 | 0.04497 | 0.03894 | IGSF1    |
| cg04883450 | 0.2213  | 0.07536 | 0.04926 | 0.05552 | 0.03991 | 0.04685 | 0.04949 | 0.05087 | 0.04963 | 0.05296 | HSA9761  |
| cg04884122 | 0.0495  | 0.04891 | 0.04629 | 0.05056 | 0.05941 | 0.05391 | 0.03976 | 0.03781 | 0.03776 | 0.04857 | PSMB5    |
| cg04884732 | 0.05267 | 0.05247 | 0.05127 | 0.03772 | 0.07859 | 0.05348 | 0.05465 | 0.0509  | 0.05387 | 0.05625 | MTERFD2  |
| cg04884908 | 0.07783 | 0.07623 | 0.10397 | 0.09145 | 0.10604 | 0.06503 | 0.07036 | 0.07337 | 0.09765 | 0.06111 | CYP26B1  |
| cg04886198 | 0.11864 | 0.12133 | 0.12476 | 0.11889 | 0.12705 | 0.1283  | 0.13667 | 0.12743 | 0.11572 | 0.12347 | ALG3     |
| cg04887278 | 0.13889 | 0.0866  | 0.16795 | 0.33372 | 0.19844 | 0.37663 | 0.0938  | 0.04045 | 0.2057  | 0.04417 | RWDD2    |
| cg04891836 | 0.80779 | 0.54716 | 0.7399  | 0.81379 | 0.81613 | 0.54548 | 0.34358 | 0.09829 | 0.70534 | 0.57824 | TNFSF14  |
| cg04893087 | 0.10664 | 0.10642 | 0.16159 | 0.11982 | 0.18149 | 0.15814 | 0.09662 | 0.09815 | 0.10739 | 0.11949 | PPARGC1A |
| cg04893119 | 0.1953  | 0.25676 | 0.34032 | 0.46347 | 0.16816 | 0.09093 | 0.25742 | 0.20785 | 0.15731 | 0.31192 | PI15     |
| cg04894993 | 0.03573 | 0.04044 | 0.05149 | 0.04707 | 0.05292 | 0.05331 | 0.03984 | 0.03482 | 0.03383 | 0.03073 | KIAA0265 |
| cg04897683 | 0.06523 | 0.47514 | 0.5606  | 0.58271 | 0.20214 | 0.42974 | 0.0659  | 0.05234 | 0.0517  | 0.03305 | NEUROG1  |
| cg04898443 | 0.05291 | 0.04745 | 0.05121 | 0.05066 | 0.04148 | 0.0509  | 0.04985 | 0.04686 | 0.04605 | 0.045   | HDLBP    |
| cg04898512 | 0.78791 | 0.70128 | 0.86269 | 0.82662 | 0.92833 | 0.87679 | 0.85527 | 0.88766 | 0.90042 | 0.8679  | KLF2     |
| cg04898797 | 0.42808 | 0.06422 | 0.63599 | 0.71726 | 0.70512 | 0.85223 | 0.79145 | 0.4992  | 0.28361 | 0.15528 | MAP4K2   |
| cg04900486 | 0.66084 | 0.12285 | 0.0859  | 0.1657  | 0.20213 | 0.05976 | 0.07269 | 0.04606 | 0.06769 | 0.06786 | RFX5     |
| cg04901273 | 0.4195  | 0.43288 | 0.45483 | 0.49971 | 0.47266 | 0.53831 | 0.26918 | 0.26937 | 0.3691  | 0.33351 | TBC1D3   |
| cg04902405 | 0.83342 | 0.85166 | 0.76917 | 0.7807  | 0.75436 | 0.74481 | 0.81306 | 0.8286  | 0.69649 | 0.65396 | ZC3H11A  |
| cg04905829 | 0.08364 | 0.07149 | 0.11243 | 0.20372 | 0.28431 | 0.09884 | 0.23293 | 0.12849 | 0.07758 | 0.08114 | CYP27B1  |
| cg04906538 | 0.35034 | 0.35685 | 0.60166 | 0.62349 | 0.5738  | 0.6628  | 0.23159 | 0.2505  | 0.43175 | 0.30303 | AMELX    |
| cg04907257 | 0.07055 | 0.1356  | 0.89886 | 0.94982 | 0.96605 | 0.96062 | 0.61517 | 0.61548 | 0.88668 | 0.93327 | ADCY2    |
| cg04907664 | 0.05766 | 0.07179 | 0.08755 | 0.08943 | 0.0811  | 0.06932 | 0.39582 | 0.39375 | 0.07059 | 0.06326 | EFNB1    |
| cg04910299 | 0.03149 | 0.03208 | 0.02939 | 0.02525 | 0.03234 | 0.04548 | 0.03796 | 0.03521 | 0.0319  | 0.02402 | MLL      |
| cg04912050 | 0.02934 | 0.03029 | 0.32501 | 0.37895 | 0.02826 | 0.0305  | 0.12943 | 0.03237 | 0.0312  | 0.0267  | IDUA     |
| cg04912278 | 0.04588 | 0.04372 | 0.044   | 0.04182 | 0.0292  | 0.03593 | 0.04956 | 0.04446 | 0.03177 | 0.03474 | MRPL4    |
| cg04914105 | 0.09969 | 0.06954 | 0.21242 | 0.20409 | 0.31112 | 0.05951 | 0.07636 | 0.06715 | 0.38917 | 0.05343 | PTPN9    |
| cg04914305 | 0.04795 | 0.04803 | 0.04917 | 0.0477  | 0.03549 | 0.04305 | 0.0469  | 0.0452  | 0.04233 | 0.04325 | MRPL34   |

|            |         |         |         |         |         |         |         |         |         |                  |
|------------|---------|---------|---------|---------|---------|---------|---------|---------|---------|------------------|
| cg04915182 | 0.12386 | 0.11308 | 0.1589  | 0.15076 | 0.23726 | 0.09461 | 0.11793 | 0.09563 | 0.2019  | 0.15479 RASGEF1C |
| cg04915566 | 0.62602 | 0.60683 | 0.09842 | 0.10152 | 0.30261 | 0.10717 | 0.08287 | 0.11843 | 0.09343 | 0.07015 RUNX1    |
| cg04916200 | 0.02394 | 0.02874 | 0.028   | 0.02745 | 0.02565 | 0.02468 | 0.02299 | 0.02303 | 0.02286 | 0.02174 RIC8B    |
| cg04916311 | 0.06612 | 0.06624 | 0.09597 | 0.07795 | 0.07269 | 0.06641 | 0.06063 | 0.06352 | 0.05707 | 0.05751 PQLC3    |
| cg04916911 | 0.21672 | 0.17063 | 0.22967 | 0.25751 | 0.26443 | 0.0848  | 0.093   | 0.06235 | 0.0626  | 0.07307 NTS      |
| cg04916980 | 0.62005 | 0.46249 | 0.59659 | 0.6547  | 0.58644 | 0.53728 | 0.58573 | 0.63345 | 0.65085 | 0.51986 PCBD1    |
| cg04920616 | 0.76255 | 0.77139 | 0.81721 | 0.83629 | 0.74487 | 0.82781 | 0.57353 | 0.70736 | 0.83271 | 0.77874 FOXP3    |
| cg04920951 | 0.02712 | 0.02471 | 0.02423 | 0.02406 | 0.02321 | 0.02553 | 0.02637 | 0.02655 | 0.01961 | 0.0223 GSTP1     |
| cg04922020 | 0.21066 | 0.08361 | 0.2101  | 0.41407 | 0.11114 | 0.08782 | 0.07547 | 0.07433 | 0.059   | 0.06008 CXX1     |
| cg04922810 | 0.07613 | 0.06001 | 0.46361 | 0.5066  | 0.39202 | 0.41573 | 0.47656 | 0.77168 | 0.09136 | 0.38526 CRHR2    |
| cg04922833 |         | 0.06536 | 0.06179 |         |         | 0.06272 | 0.05551 | 0.05709 | 0.05582 | 0.05616 ZNF503   |
| cg04924696 | 0.04226 | 0.04358 | 0.04212 | 0.04066 | 0.03234 | 0.03825 | 0.52987 | 0.51027 | 0.03098 | 0.03699 FLJ25444 |
| cg04925864 | 0.05987 | 0.02711 | 0.41778 | 0.25018 | 0.0764  | 0.02412 | 0.23792 | 0.02256 | 0.17178 | 0.02574 FAM65A   |
| cg04926244 | 0.88564 | 0.91473 | 0.87101 | 0.90275 | 0.88247 | 0.91891 | 0.86761 | 0.85508 | 0.81432 | 0.7754 FLJ32894  |
| cg04927982 | 0.04503 | 0.0433  | 0.04895 | 0.04515 | 0.03706 | 0.03815 | 0.01911 | 0.02352 | 0.02844 | 0.03554 SMCX     |
| cg04929736 | 0.13508 | 0.04841 | 0.05084 | 0.04793 | 0.0365  | 0.04664 | 0.05125 | 0.05558 | 0.04409 | 0.04177 CLU      |
| cg04929865 | 0.73392 | 0.68868 | 0.11281 | 0.07995 | 0.06145 | 0.0641  | 0.15505 | 0.10236 | 0.09051 | 0.18724 BGN      |
| cg04936062 | 0.0293  | 0.03207 | 0.03862 | 0.03843 | 0.04116 | 0.03905 | 0.03025 | 0.029   | 0.0334  | 0.03057 THRAP3   |
| cg04936930 | 0.20716 | 0.06526 | 0.05744 | 0.08406 | 0.04504 | 0.03428 | 0.03656 | 0.04016 | 0.2521  | 0.10072 PTS      |
| cg04940435 | 0.14611 | 0.03904 | 0.79866 | 0.74619 | 0.39204 | 0.19006 | 0.64678 | 0.35855 | 0.4505  | 0.28924 DNTTIP1  |
| cg04940515 | 0.04395 | 0.04272 | 0.04563 | 0.04427 | 0.05349 | 0.05322 | 0.02866 | 0.02513 | 0.04363 | 0.04529 RABGGB   |
| cg04941721 | 0.5062  | 0.17911 | 0.49428 | 0.55198 | 0.0496  | 0.03658 | 0.0939  | 0.1957  | 0.06511 | 0.03233 EREG     |
| cg04943986 | 0.03935 | 0.04527 | 0.04328 | 0.04072 | 0.02726 | 0.0431  | 0.03843 | 0.06409 | 0.0345  | 0.03297 NR2F2    |
| cg04944936 | 0.03308 | 0.03773 | 0.03389 | 0.03348 | 0.02864 | 0.03444 | 0.53385 | 0.55451 | 0.02617 | 0.02665 CXorf17  |
| cg04945541 | 0.51244 | 0.43118 | 0.33715 | 0.47198 | 0.87383 | 0.73438 | 0.71192 | 0.81666 | 0.83774 | 0.50047 FMNL1    |
| cg04946535 | 0.03922 | 0.03306 | 0.03444 | 0.03145 | 0.0269  | 0.03082 | 0.0317  | 0.03111 | 0.03091 | 0.02874 CFL1     |
| cg04946916 | 0.94899 | 0.94713 | 0.95141 | 0.9633  | 0.97702 | 0.96387 | 0.96894 | 0.96624 | 0.95934 | 0.92889 HUS1B    |
| cg04947157 | 0.81948 | 0.17136 | 0.89143 | 0.92098 | 0.92519 | 0.87373 | 0.63999 | 0.23311 | 0.91161 | 0.85894 TMC6     |
| cg04947578 | 0.05237 | 0.0508  | 0.04836 | 0.04626 | 0.0404  | 0.04503 | 0.04569 | 0.04646 | 0.04426 | 0.04333 C19orf10 |
| cg04947838 | 0.06823 | 0.08064 | 0.11101 | 0.08564 | 0.12188 | 0.07507 | 0.08832 | 0.08639 | 0.06906 | 0.09744 ARFGEF1  |
| cg04949741 | 0.12764 | 0.1241  | 0.09891 | 0.09481 | 0.24156 | 0.1446  | 0.1449  | 0.14195 | 0.134   | 0.13955 EFEMP2   |
| cg04950711 | 0.92925 | 0.95101 | 0.9382  | 0.9593  | 0.96299 | 0.96621 | 0.58203 | 0.62012 | 0.02631 | 0.02292 MAGEA10  |
| cg04950789 | 0.05027 | 0.05432 | 0.06854 | 0.06448 | 0.05826 | 0.04785 | 0.05294 | 0.0427  | 0.0721  | 0.04523 E2F5     |
| cg04951204 | 0.04145 | 0.04589 | 0.04933 | 0.04466 | 0.04764 | 0.04382 | 0.03759 | 0.03999 | 0.05824 | 0.04037 PPP1R9A  |
| cg04953015 | 0.59776 | 0.05208 | 0.74983 | 0.881   | 0.68882 | 0.44218 | 0.07138 | 0.05639 | 0.78274 | 0.69096 CHRNA2   |
| cg04956382 | 0.22797 | 0.1358  | 0.49093 | 0.58006 | 0.37638 | 0.26564 | 0.54242 | 0.28905 | 0.11329 | 0.09167 MYOT     |
| cg04956511 | 0.97732 | 0.96587 | 0.97659 | 0.97858 | 0.97981 | 0.98237 | 0.98178 | 0.98037 | 0.98379 | 0.9822 PTPN6     |
| cg04956790 | 0.19419 | 0.19346 | 0.23385 | 0.22621 | 0.18038 | 0.17153 | 0.15061 | 0.17074 | 0.19245 | 0.21239 CAND1    |
| cg04958389 | 0.07527 | 0.06831 | 0.82209 | 0.85308 | 0.91906 | 0.86271 | 0.06229 | 0.07271 | 0.34556 | 0.3098 PRSS2     |
| cg04958703 | 0.06063 | 0.06118 | 0.07714 | 0.11454 | 0.13804 | 0.07238 | 0.06907 | 0.06209 | 0.17596 | 0.14989 SLC25A11 |
| cg04959788 | 0.03114 | 0.03181 | 0.05592 | 0.15619 | 0.60919 | 0.88425 | 0.02432 | 0.03191 | 0.05747 | 0.04875 PTCH2    |

|            |         |         |         |         |         |         |         |         |         |         |           |
|------------|---------|---------|---------|---------|---------|---------|---------|---------|---------|---------|-----------|
| cg04959837 | 0.19859 | 0.08339 | 0.09922 | 0.07864 | 0.08557 | 0.0573  | 0.08545 | 0.0587  | 0.08133 | 0.05199 | PLSCR4    |
| cg04960271 | 0.03568 | 0.03356 | 0.03808 | 0.03031 | 0.02496 | 0.02955 | 0.03065 | 0.0306  | 0.02654 | 0.02658 | PARP1     |
| cg04960652 | 0.05734 | 0.04967 | 0.05186 | 0.04122 | 0.04591 | 0.04526 | 0.05021 | 0.04807 | 0.04344 | 0.04472 | BNIP1     |
| cg04960951 | 0.04772 | 0.04702 | 0.04202 | 0.04985 | 0.03992 | 0.04862 | 0.03746 | 0.036   | 0.03275 | 0.03391 | SUV420H2  |
| cg04961553 | 0.25482 | 0.03435 | 0.06156 | 0.28449 | 0.92734 | 0.93888 | 0.03162 | 0.03058 | 0.91752 | 0.7324  | OCIAD2    |
| cg04962134 | 0.30777 | 0.2647  | 0.18714 | 0.2808  | 0.45068 | 0.43745 | 0.24438 | 0.18796 | 0.04085 | 0.03653 | TRIM51    |
| cg04963951 | 0.48658 | 0.72633 | 0.88157 | 0.88311 | 0.90497 | 0.92593 | 0.83572 | 0.92613 | 0.88129 | 0.74706 | FTMT      |
| cg04964702 | 0.08406 | 0.08333 | 0.11758 | 0.09547 | 0.11817 | 0.10947 | 0.1165  | 0.10562 | 0.07167 | 0.05733 | CBL       |
| cg04967538 | 0.95102 | 0.92242 | 0.05786 | 0.05411 | 0.05279 | 0.04656 | 0.12731 | 0.03452 | 0.05671 | 0.03474 | CXorf42   |
| cg04968426 | 0.5749  | 0.19103 | 0.85338 | 0.86842 | 0.87755 | 0.95397 | 0.39367 | 0.69113 | 0.80172 | 0.83687 | PPP1R14D  |
| cg04968473 | 0.36007 | 0.24492 | 0.50252 | 0.73168 | 0.63231 | 0.7907  | 0.17743 | 0.46382 | 0.09447 | 0.1484  | CYP1A2    |
| cg04969808 | 0.07261 | 0.07086 | 0.15675 | 0.27898 | 0.06573 | 0.05884 | 0.09831 | 0.08725 | 0.07232 | 0.05265 | WNT7A     |
| cg04969878 | 0.82618 | 0.73299 | 0.36882 | 0.52146 | 0.49525 | 0.34356 | 0.30103 | 0.17812 | 0.41886 | 0.22871 | TMEM19    |
| cg04970117 | 0.03557 | 0.02957 | 0.32535 | 0.39618 | 0.05296 | 0.03527 | 0.20267 | 0.0487  | 0.07468 | 0.0262  | SLC6A20   |
| cg04970352 | 0.53966 | 0.54328 | 0.04717 | 0.04048 | 0.96726 | 0.96152 | 0.9639  | 0.96463 | 0.97526 | 0.95897 | ALX4      |
| cg04970994 | 0.88595 | 0.90146 | 0.91005 | 0.91485 | 0.94045 | 0.92008 | 0.90188 | 0.84291 | 0.92731 | 0.9078  | ZNF142    |
| cg04972545 | 0.10894 | 0.09544 | 0.07312 | 0.0601  | 0.07118 | 0.06485 | 0.07503 | 0.05762 | 0.0468  | 0.05276 | RFX3      |
| cg04972979 | 0.71281 | 0.40798 | 0.75754 | 0.82165 | 0.76454 | 0.7741  | 0.14184 | 0.07062 | 0.42822 | 0.04757 | C2orf54   |
| cg04975920 | 0.78662 | 0.52398 | 0.66646 | 0.70814 | 0.66998 | 0.59243 | 0.71113 | 0.73466 | 0.79787 | 0.58945 | SPAN1     |
| cg04979725 | 0.04415 | 0.03665 | 0.03256 | 0.03057 | 0.02726 | 0.02493 | 0.02668 | 0.02828 | 0.03142 | 0.02528 | UNKL      |
| cg04979933 | 0.68975 | 0.54005 | 0.62992 | 0.77617 | 0.61055 | 0.79987 | 0.55838 | 0.84718 | 0.38443 | 0.2927  | INSL5     |
| cg04981414 | 0.04223 | 0.0568  | 0.04709 | 0.0462  | 0.63239 | 0.57828 | 0.04861 | 0.03337 | 0.04312 | 0.04047 | POMT1     |
| cg04981492 | 0.05332 | 0.05037 | 0.04915 | 0.05055 | 0.03623 | 0.03464 | 0.0685  | 0.0443  | 0.04239 | 0.03533 | SYDE1     |
| cg04982748 | 0.0766  | 0.08848 | 0.08034 | 0.08031 | 0.05638 | 0.07142 | 0.06731 | 0.0681  | 0.06525 | 0.06559 | HELB      |
| cg04983977 | 0.86893 | 0.86761 | 0.87324 | 0.88516 | 0.89945 | 0.86565 | 0.87865 | 0.86845 | 0.87277 | 0.88418 | GPR25     |
| cg04984200 | 0.02853 | 0.0279  | 0.03061 | 0.03132 | 0.02609 | 0.02534 | 0.02497 | 0.02464 | 0.02425 | 0.02119 | CTSD      |
| cg04984513 | 0.34371 | 0.23369 | 0.18725 | 0.14559 | 0.31465 | 0.59119 | 0.31297 | 0.12588 | 0.10636 | 0.11198 | BRI3BP    |
| cg04985144 | 0.87235 | 0.6872  | 0.87271 | 0.86692 | 0.91562 | 0.86013 | 0.85063 | 0.73266 | 0.64109 | 0.6233  | SPTBN2    |
| cg04985146 | 0.02623 | 0.02823 | 0.03148 | 0.03275 | 0.02345 | 0.02568 | 0.02642 | 0.02555 | 0.02456 | 0.02288 | MRPL12    |
| cg04987894 | 0.77958 | 0.73595 | 0.43716 | 0.48946 | 0.43892 | 0.42188 | 0.83718 | 0.89257 | 0.59456 | 0.59324 | GSTM5     |
| cg04988423 | 0.02982 | 0.0296  | 0.02841 | 0.02637 | 0.07162 | 0.02623 | 0.02727 | 0.02815 | 0.02496 | 0.0282  | ALX4      |
| cg04988978 | 0.17895 | 0.06399 | 0.05679 | 0.06619 | 0.04432 | 0.05334 | 0.03563 | 0.03044 | 0.0416  | 0.03661 | MPO       |
| cg04991214 | 0.89162 | 0.42152 | 0.92982 | 0.92973 | 0.86827 | 0.41098 | 0.89418 | 0.50407 | 0.92849 | 0.82215 | PFDN2     |
| cg04991337 | 0.07394 | 0.08176 | 0.07221 | 0.07354 | 0.05791 | 0.06655 | 0.06667 | 0.06396 | 0.0646  | 0.06737 | MCCC1     |
| cg04992673 | 0.68945 | 0.33787 | 0.86233 | 0.8903  | 0.80879 | 0.85002 | 0.08494 | 0.06462 | 0.81687 | 0.41897 | LOC253012 |
| cg04993257 | 0.86517 | 0.49371 | 0.56711 | 0.66216 | 0.80453 | 0.84528 | 0.50796 | 0.52215 | 0.11876 | 0.0655  | PLAC2     |
| cg04994456 | 0.89153 | 0.70933 | 0.88662 | 0.90643 | 0.89307 | 0.77019 | 0.90584 | 0.7278  | 0.91319 | 0.89246 | RNF186    |
| cg04995095 | 0.08092 | 0.05556 | 0.08272 | 0.0833  | 0.0959  | 0.06027 | 0.04191 | 0.04725 | 0.05346 | 0.05294 | CD300E    |
| cg04995717 | 0.67929 | 0.28316 | 0.77258 | 0.7944  | 0.63488 | 0.75469 | 0.75266 | 0.5869  | 0.83312 | 0.71087 | TEK       |
| cg04996020 | 0.41749 | 0.36021 | 0.3635  | 0.50462 | 0.39807 | 0.55907 | 0.1826  | 0.30811 | 0.12407 | 0.10724 | SLC26A3   |
| cg04997967 | 0.16147 | 0.14703 | 0.70319 | 0.72728 | 0.73691 | 0.67076 | 0.62715 | 0.5223  | 0.92938 | 0.93766 | KCNIP2    |

|            |         |         |         |         |         |         |         |         |         |                   |
|------------|---------|---------|---------|---------|---------|---------|---------|---------|---------|-------------------|
| cg04998282 | 0.04263 | 0.04745 | 0.05207 | 0.05381 | 0.05094 | 0.05088 | 0.04195 | 0.04688 | 0.04407 | 0.04488 NOL11     |
| cg04999036 | 0.55108 | 0.45357 | 0.05554 | 0.04584 | 0.0618  | 0.04465 | 0.05921 | 0.07591 | 0.05015 | 0.05347 GANC      |
| cg04999691 | 0.82786 | 0.53832 | 0.89533 | 0.90541 | 0.22734 | 0.29462 | 0.34427 | 0.08081 | 0.74845 | 0.2371 C7orf29    |
| cg05000446 | 0.73574 | 0.59662 | 0.70003 | 0.69531 | 0.57274 | 0.68435 | 0.72536 | 0.47162 | 0.15935 | 0.12729 MGC41945  |
| cg05001145 | 0.03547 | 0.02267 | 0.16319 | 0.15347 | 0.02822 | 0.01971 | 0.02039 | 0.02113 | 0.01682 | 0.0202 ELL2       |
| cg05004940 | 0.07605 | 0.07447 | 0.29411 | 0.38433 | 0.38688 | 0.34173 | 0.07528 | 0.06081 | 0.04431 | 0.04014 C20orf195 |
| cg05008406 | 0.02623 | 0.02372 | 0.02417 | 0.02513 | 0.017   | 0.02444 | 0.02199 | 0.02043 | 0.02176 | 0.01874 B4GALT4   |
| cg05009249 | 0.03537 | 0.03362 | 0.03856 | 0.04189 | 0.03225 | 0.03196 | 0.02717 | 0.03164 | 0.0345  | 0.02941 ATAD3A    |
| cg05010058 | 0.04942 | 0.063   | 0.0591  | 0.05201 | 0.05796 | 0.05173 | 0.0375  | 0.04845 | 0.0479  | 0.05011 CEP68     |
| cg05010623 | 0.08639 | 0.03462 | 0.35725 | 0.55212 | 0.19266 | 0.2824  | 0.07464 | 0.04124 | 0.05287 | 0.02321 ACVR1C    |
| cg05010967 | 0.6931  | 0.19793 | 0.79686 | 0.84439 | 0.5476  | 0.85511 | 0.45519 | 0.13873 | 0.34832 | 0.31186 SPATS1    |
| cg05011018 | 0.82926 | 0.78141 | 0.8534  | 0.84506 | 0.80451 | 0.69816 | 0.79958 | 0.8086  | 0.81489 | 0.70094 TRIM16    |
| cg05011232 | 0.03559 | 0.03821 | 0.03817 | 0.0335  | 0.03638 | 0.03724 | 0.0331  | 0.03239 | 0.03185 | 0.0324 ETV4       |
| cg05012785 | 0.05362 | 0.05695 | 0.06228 | 0.04825 | 0.04326 | 0.04954 | 0.06271 | 0.04989 | 0.04598 | 0.04742 U2AF1L2   |
| cg05013695 | 0.02457 | 0.02452 | 0.02595 | 0.02501 | 0.11578 | 0.08581 | 0.02027 | 0.02317 | 0.11326 | 0.01822 FRAT1     |
| cg05016508 | 0.96911 | 0.96456 | 0.97339 | 0.97498 | 0.96544 | 0.96545 | 0.9719  | 0.96696 | 0.98223 | 0.98007 FLRT1     |
| cg05016953 | 0.03258 | 0.03248 | 0.92944 | 0.94145 | 0.06671 | 0.05605 | 0.05522 | 0.02936 | 0.03999 | 0.02272 SLC6A4    |
| cg05018361 | 0.06591 | 0.05903 | 0.0583  | 0.06666 | 0.07123 | 0.07034 | 0.07093 | 0.05198 | 0.05883 | 0.04773 NSUN6     |
| cg05019001 | 0.04192 | 0.03921 | 0.05216 | 0.04801 | 0.30846 | 0.04026 | 0.34357 | 0.44492 | 0.05516 | 0.03924 AR        |
| cg05019152 | 0.03132 | 0.03369 | 0.03009 | 0.03142 | 0.03609 | 0.03277 | 0.03268 | 0.03549 | 0.03273 | 0.03441 FAM82C    |
| cg05019661 | 0.05942 | 0.0489  | 0.05343 | 0.05304 | 0.05201 | 0.05184 | 0.05661 | 0.05498 | 0.04156 | 0.04926 ADK       |
| cg05020203 | 0.65323 | 0.50774 | 0.67434 | 0.72008 | 0.80595 | 0.7808  | 0.42102 | 0.44015 | 0.51913 | 0.46805 FLJ41327  |
| cg05022306 | 0.04334 | 0.04952 | 0.05513 | 0.05842 | 0.05908 | 0.04792 | 0.10457 | 0.56382 | 0.04441 | 0.04214 HOXC8     |
| cg05023116 | 0.37644 | 0.4813  | 0.76232 | 0.78519 | 0.79775 | 0.8375  | 0.80597 | 0.91327 | 0.33617 | 0.57405 NALP5     |
| cg05023540 | 0.57374 | 0.52064 | 0.634   | 0.68134 | 0.60571 | 0.62099 | 0.41594 | 0.47356 | 0.45555 | 0.35888 TCL6      |
| cg05023691 | 0.70436 | 0.31699 | 0.67015 | 0.71866 | 0.63592 | 0.27716 | 0.54345 | 0.31545 | 0.57978 | 0.37046 RGS13     |
| cg05024638 | 0.02708 | 0.0355  | 0.0284  | 0.02845 | 0.02464 | 0.02413 | 0.0325  | 0.02792 | 0.02959 | 0.02859 POLG      |
| cg05026033 | 0.06937 | 0.07355 | 0.08584 | 0.08351 | 0.10911 | 0.08487 | 0.11786 | 0.11529 | 0.06687 | 0.06973 ELP3      |
| cg05026186 | 0.11591 | 0.19316 | 0.8367  | 0.87208 | 0.61203 | 0.56096 | 0.0739  | 0.0692  | 0.12088 | 0.05816 ABLIM3    |
| cg05027081 | 0.02218 | 0.02086 | 0.02417 | 0.02452 | 0.01895 | 0.021   | 0.0165  | 0.01687 | 0.02329 | 0.01949 CDC7      |
| cg05028306 | 0.11639 | 0.09888 | 0.11428 | 0.11696 | 0.08967 | 0.11159 | 0.09188 | 0.09082 | 0.09086 | 0.08079 LAP3      |
| cg05028467 | 0.07181 | 0.06261 | 0.05647 | 0.0805  | 0.79727 | 0.70823 | 0.06137 | 0.04369 | 0.07169 | 0.08165 SNCB      |
| cg05029288 | 0.029   | 0.03065 | 0.03648 | 0.02743 | 0.02454 | 0.03017 | 0.02605 | 0.02774 | 0.02483 | 0.02738 UGDH      |
| cg05032550 | 0.02267 | 0.02187 | 0.02332 | 0.02245 | 0.02038 | 0.02378 | 0.01806 | 0.01908 | 0.01821 | 0.01551 C14orf2   |
| cg05032943 | 0.05397 | 0.052   | 0.10793 | 0.08593 | 0.06118 | 0.05692 | 0.03541 | 0.03631 | 0.04911 | 0.0495 SFRS4      |
| cg05037688 | 0.76789 | 0.59406 | 0.07586 | 0.17685 | 0.36559 | 0.24383 | 0.03836 | 0.04019 | 0.12714 | 0.13645 EGFL7     |
| cg05038053 | 0.03274 | 0.02803 | 0.0306  | 0.0314  | 0.0252  | 0.02328 | 0.02487 | 0.0269  | 0.02691 | 0.02186 ACP2      |
| cg05038121 | 0.2284  | 0.17199 | 0.19467 | 0.19133 | 0.24954 | 0.17752 | 0.22736 | 0.1869  | 0.17722 | 0.16285 FAH       |
| cg05038209 | 0.04616 | 0.04871 | 0.04163 | 0.04307 | 0.04382 | 0.04085 | 0.04073 | 0.04181 | 0.03741 | 0.03659 MAP1LC3B  |
| cg05038977 | 0.07587 | 0.0818  | 0.07873 | 0.0793  | 0.05382 | 0.06829 | 0.0776  | 0.06922 | 0.07222 | 0.07416 EIF4A1    |
| cg05039054 | 0.21109 | 0.19331 | 0.22504 | 0.21008 | 0.23422 | 0.16595 | 0.25179 | 0.15986 | 0.14375 | 0.14155 DMD       |

|            |         |         |         |         |         |         |         |         |         |                  |
|------------|---------|---------|---------|---------|---------|---------|---------|---------|---------|------------------|
| cg05040360 | 0.28531 | 0.53633 | 0.41352 | 0.54208 | 0.45538 | 0.49643 | 0.40878 | 0.40263 | 0.19847 | 0.12337 MS4A6E   |
| cg05040429 | 0.04414 | 0.04047 | 0.09711 | 0.47912 | 0.4498  | 0.18435 | 0.03029 | 0.03033 | 0.04829 | 0.03978 SAMD12   |
| cg05040447 | 0.02278 | 0.02039 | 0.0252  | 0.02345 | 0.01841 | 0.02105 | 0.01918 | 0.01722 | 0.01808 | 0.0161 QP-C      |
| cg05044994 | 0.71725 | 0.72879 | 0.74341 | 0.72352 | 0.7825  | 0.77697 | 0.72834 | 0.71789 | 0.74979 | 0.73114 FLJ42393 |
| cg05045383 | 0.0341  | 0.03441 | 0.03769 | 0.03519 | 0.03928 | 0.03286 | 0.03205 | 0.03158 | 0.02867 | 0.02239 RAE1     |
| cg05045528 | 0.0581  | 0.06606 | 0.09166 | 0.0777  | 0.07956 | 0.06137 | 0.04785 | 0.04306 | 0.14423 | 0.05392 GPR107   |
| cg05045781 | 0.20786 | 0.06289 | 0.18269 | 0.09912 | 0.3373  | 0.09572 | 0.24147 | 0.04664 | 0.08471 | 0.07061 FHL3     |
| cg05046097 | 0.64604 | 0.65403 | 0.85638 | 0.85096 | 0.8897  | 0.81918 | 0.8191  | 0.63515 | 0.85343 | 0.79201 SNCG     |
| cg05047411 | 0.60915 | 0.50152 | 0.81312 | 0.83687 | 0.196   | 0.40784 | 0.06007 | 0.03827 | 0.0987  | 0.05448 MAGEA8   |
| cg05050341 | 0.79452 | 0.66004 | 0.84316 | 0.84196 | 0.83085 | 0.74798 | 0.79887 | 0.79859 | 0.84192 | 0.68915 ENG      |
| cg05051316 | 0.02978 | 0.02149 | 0.01994 | 0.02048 | 0.01947 | 0.01849 | 0.01655 | 0.01936 | 0.01681 | 0.01459 TMED1    |
| cg05052633 | 0.07728 | 0.04386 | 0.58046 | 0.73014 | 0.90611 | 0.95457 | 0.07116 | 0.04403 | 0.14708 | 0.35185 CENTA2   |
| cg05055150 | 0.66739 | 0.64809 | 0.59348 | 0.81573 | 0.45382 | 0.30946 | 0.04851 | 0.04344 | 0.52883 | 0.44186 MAG      |
| cg05055720 | 0.03439 | 0.03605 | 0.03165 | 0.03623 | 0.03204 | 0.03851 | 0.03212 | 0.02768 | 0.0286  | 0.03007 RHOA     |
| cg05056120 | 0.05997 | 0.06941 | 0.08104 | 0.09163 | 0.1277  | 0.06282 | 0.06212 | 0.05842 | 0.12264 | 0.06283 EBF      |
| cg05057057 | 0.05642 | 0.05222 | 0.07072 | 0.29227 | 0.04188 | 0.0573  | 0.04979 | 0.08292 | 0.04602 | 0.03935 DDX56    |
| cg05058973 | 0.48355 | 0.24877 | 0.37925 | 0.30554 | 0.45391 | 0.45481 | 0.21933 | 0.18229 | 0.14219 | 0.17715 GHRHR    |
| cg05059825 | 0.05097 | 0.04501 | 0.06377 | 0.05408 | 0.0634  | 0.0637  | 0.0587  | 0.05033 | 0.04011 | 0.03858 TTC9C    |
| cg05060602 | 0.06873 | 0.07507 | 0.05662 | 0.06091 | 0.0626  | 0.05956 | 0.03721 | 0.03538 | 0.40569 | 0.09789 DCTD     |
| cg05060662 | 0.05793 | 0.06708 | 0.06146 | 0.0555  | 0.05601 | 0.03355 | 0.08778 | 0.12137 | 0.05647 | 0.05651 HIST4H4  |
| cg05062178 | 0.04758 | 0.05416 | 0.051   | 0.05246 | 0.12418 | 0.0402  | 0.0391  | 0.03625 | 0.03839 | 0.04051 ITGB5    |
| cg05063104 | 0.4482  | 0.60537 | 0.87287 | 0.87687 | 0.39282 | 0.35417 | 0.27137 | 0.12101 | 0.59316 | 0.58476 SLC5A8   |
| cg05064181 | 0.86153 | 0.80019 | 0.788   | 0.82165 | 0.79293 | 0.65893 | 0.59078 | 0.42522 | 0.88694 | 0.54283 ABLIM1   |
| cg05064352 | 0.08346 | 0.08132 | 0.17369 | 0.32941 | 0.16749 | 0.09899 | 0.11066 | 0.10213 | 0.1107  | 0.11765 PHF21B   |
| cg05064673 | 0.03651 | 0.04009 | 0.08207 | 0.16985 | 0.41906 | 0.28702 | 0.02622 | 0.02318 | 0.02801 | 0.02528 PTPRU    |
| cg05065037 | 0.17532 | 0.06362 | 0.11718 | 0.21567 | 0.20153 | 0.0588  | 0.08348 | 0.04675 | 0.13312 | 0.04379 ZCCHC6   |
| cg05065690 | 0.06145 | 0.06658 | 0.06485 | 0.06618 | 0.04425 | 0.05665 | 0.05962 | 0.05837 | 0.05213 | 0.05391 DDX23    |
| cg05067286 | 0.202   | 0.07252 | 0.92409 | 0.92773 | 0.71473 | 0.89194 | 0.91746 | 0.7556  | 0.24425 | 0.14004 TMEM45B  |
| cg05067973 | 0.93009 | 0.90645 | 0.93645 | 0.92948 | 0.91645 | 0.90276 | 0.919   | 0.92969 | 0.9405  | 0.92465 TRIB3    |
| cg05069385 | 0.0331  | 0.0368  | 0.04484 | 0.03818 | 0.0456  | 0.05306 | 0.03373 | 0.03894 | 0.02826 | 0.02952 FKBPL    |
| cg05070690 | 0.97552 | 0.97566 | 0.97455 | 0.97373 | 0.97678 | 0.97546 | 0.97057 | 0.96651 | 0.97561 | 0.97834 MOV10L1  |
| cg05071677 | 0.42439 | 0.30364 | 0.74958 | 0.76198 | 0.64602 | 0.71088 | 0.05486 | 0.05624 | 0.58918 | 0.44672 OR2V2    |
| cg05072008 | 0.85895 | 0.82992 | 0.85483 | 0.88757 | 0.8187  | 0.80443 | 0.82032 | 0.84575 | 0.28357 | 0.29145 FIGL1    |
| cg05072951 | 0.03624 | 0.03334 | 0.04146 | 0.03168 | 0.02981 | 0.03152 | 0.03708 | 0.02953 | 0.02927 | 0.03178 CAPN1    |
| cg05073035 | 0.24095 | 0.29059 | 0.89953 | 0.89284 | 0.03294 | 0.02807 | 0.02733 | 0.02652 | 0.9078  | 0.90134 ZIC1     |
| cg05073845 | 0.0321  | 0.02719 | 0.02863 | 0.02761 | 0.07714 | 0.02461 | 0.02303 | 0.0233  | 0.02004 | 0.02096 FOXO1A   |
| cg05076631 | 0.15286 | 0.10207 | 0.12443 | 0.14496 | 0.05348 | 0.0757  | 0.08601 | 0.07826 | 0.0789  | 0.08172 PGF      |
| cg05078019 | 0.24384 | 0.03775 | 0.56321 | 0.58119 | 0.88036 | 0.53845 | 0.08741 | 0.0477  | 0.28944 | 0.27857 PDE6B    |
| cg05079045 | 0.02767 | 0.02905 | 0.0386  | 0.03702 | 0.02448 | 0.04553 | 0.02974 | 0.02541 | 0.02952 | 0.02026 APBB1    |
| cg05079794 | 0.0616  | 0.05315 | 0.06831 | 0.06666 | 0.06331 | 0.07927 | 0.05071 | 0.04987 | 0.06536 | 0.04529 IMPDH1   |
| cg05086873 | 0.02512 | 0.02851 | 0.03529 | 0.03271 | 0.03007 | 0.02819 | 0.02751 | 0.02948 | 0.02292 | 0.02712 RIC8A    |

|            |         |         |         |         |         |         |         |         |         |                  |
|------------|---------|---------|---------|---------|---------|---------|---------|---------|---------|------------------|
| cg05086993 | 0.05633 | 0.05748 | 0.06675 | 0.06564 | 0.06121 | 0.05859 | 0.05071 | 0.04955 | 0.06445 | 0.05537 NOL9     |
| cg05087948 | 0.04173 | 0.03834 | 0.63654 | 0.84905 | 0.25296 | 0.39305 | 0.04483 | 0.03973 | 0.03688 | 0.03257 CTSF     |
| cg05088386 | 0.75026 | 0.78032 | 0.70128 | 0.74228 | 0.64043 | 0.69874 | 0.75535 | 0.80496 | 0.75932 | 0.70179 ELF2     |
| cg05088512 | 0.13012 | 0.13157 | 0.16065 | 0.13886 | 0.21646 | 0.14859 | 0.09274 | 0.06126 | 0.09693 | 0.11859 DKKL1    |
| cg05089059 | 0.03125 | 0.03473 | 0.0429  | 0.03452 | 0.0277  | 0.03473 | 0.02789 | 0.02762 | 0.02499 | 0.0216 IMPDH1    |
| cg05089968 | 0.67939 | 0.28271 | 0.72283 | 0.79191 | 0.68323 | 0.67717 | 0.71895 | 0.56978 | 0.78942 | 0.54086 MGC35308 |
| cg05090725 | 0.02444 | 0.02589 | 0.029   | 0.03153 | 0.02713 | 0.0259  | 0.02736 | 0.02352 | 0.02095 | 0.02213 RAB39    |
| cg05091653 | 0.50501 | 0.6961  | 0.15501 | 0.12523 | 0.19764 | 0.15591 | 0.16624 | 0.19699 | 0.1392  | 0.14548 SP100    |
| cg05093686 | 0.83453 | 0.82617 | 0.09305 | 0.08379 | 0.08742 | 0.0877  | 0.11682 | 0.07848 | 0.34597 | 0.27184 MAB21L1  |
| cg05094216 | 0.46753 | 0.36635 | 0.63029 | 0.60751 | 0.57687 | 0.37521 | 0.6234  | 0.39943 | 0.30769 | 0.29507 P2RY12   |
| cg05095674 | 0.03161 | 0.03165 | 0.03241 | 0.03198 | 0.02613 | 0.02607 | 0.02848 | 0.02474 | 0.02705 | 0.02658 GTF2H2   |
| cg05098471 | 0.02948 | 0.03692 | 0.03663 | 0.03568 | 0.03394 | 0.04201 | 0.02978 | 0.02902 | 0.03028 | 0.02592 MEIS1    |
| cg05098732 | 0.12108 | 0.05344 | 0.73625 | 0.77079 | 0.93036 | 0.65756 | 0.05724 | 0.07389 | 0.14123 | 0.09817 FOXA3    |
| cg05101920 | 0.08253 | 0.06408 | 0.06875 | 0.06941 | 0.36093 | 0.34524 | 0.14599 | 0.07978 | 0.08385 | 0.05962 KCNJ10   |
| cg05102817 | 0.79674 | 0.73218 | 0.75325 | 0.79346 | 0.66262 | 0.75584 | 0.77362 | 0.63396 | 0.83057 | 0.79191 RBM18    |
| cg05103623 | 0.42059 | 0.13382 | 0.22913 | 0.34865 | 0.27278 | 0.16614 | 0.34708 | 0.14627 | 0.1587  | 0.15782 TAGAP    |
| cg05104081 | 0.83329 | 0.8677  | 0.89346 | 0.90448 | 0.91501 | 0.89368 | 0.89705 | 0.87975 | 0.90279 | 0.89077 KIAA0802 |
| cg05105069 | 0.45373 | 0.12616 | 0.6005  | 0.69687 | 0.4398  | 0.20398 | 0.11477 | 0.11549 | 0.47067 | 0.28813 TCEAL7   |
| cg05105913 | 0.43588 | 0.26921 | 0.74857 | 0.84126 | 0.65077 | 0.45611 | 0.70115 | 0.41155 | 0.88586 | 0.44764 XYLT2    |
| cg05106502 | 0.85326 | 0.50203 | 0.76951 | 0.88031 | 0.93452 | 0.90723 | 0.41236 | 0.34421 | 0.89969 | 0.75935 SCAP1    |
| cg05107152 | 0.0628  | 0.06654 | 0.07751 | 0.07113 | 0.18185 | 0.12372 | 0.08134 | 0.08428 | 0.04414 | 0.04011 KLC4     |
| cg05109049 | 0.18077 | 0.17117 | 0.39374 | 0.54024 | 0.29538 | 0.20727 | 0.67348 | 0.59246 | 0.18555 | 0.209 EVI2B      |
| cg05111036 | 0.08064 | 0.08374 | 0.08423 | 0.08743 | 0.14113 | 0.09703 | 0.08521 | 0.06485 | 0.07773 | 0.07424 HIGD1A   |
| cg05111110 | 0.86811 | 0.53155 | 0.9505  | 0.95497 | 0.96629 | 0.80144 | 0.95551 | 0.93092 | 0.96401 | 0.7878 LRFN4     |
| cg05111829 | 0.02692 | 0.03337 | 0.03175 | 0.0332  | 0.03104 | 0.02685 | 0.02629 | 0.0301  | 0.02923 | 0.0224 SUPV3L1   |
| cg05112299 | 0.28068 | 0.24382 | 0.21502 | 0.28607 | 0.2632  | 0.338   | 0.05069 | 0.05339 | 0.1616  | 0.15079 OR7A17   |
| cg05112986 | 0.18725 | 0.08288 | 0.0869  | 0.10052 | 0.71437 | 0.77085 | 0.86027 | 0.86822 | 0.05666 | 0.06213 SUPT3H   |
| cg05113558 | 0.85947 | 0.46001 | 0.93533 | 0.93961 | 0.94477 | 0.85544 | 0.90293 | 0.85794 | 0.94228 | 0.68846 FOXH1    |
| cg05113908 | 0.15432 | 0.14637 | 0.13281 | 0.06838 | 0.48761 | 0.2727  | 0.07638 | 0.08934 | 0.12077 | 0.09166 GYG2     |
| cg05114625 | 0.03292 | 0.03493 | 0.03711 | 0.027   | 0.03945 | 0.03698 | 0.02886 | 0.03127 | 0.03021 | 0.03803 CDC27    |
| cg05116896 | 0.04235 | 0.04392 | 0.03987 | 0.03774 | 0.03924 | 0.04144 | 0.04003 | 0.03779 | 0.03573 | 0.03713 CD2BP2   |
| cg05119218 | 0.85185 | 0.75424 | 0.71264 | 0.7147  | 0.7866  | 0.83746 | 0.83095 | 0.84962 | 0.88439 | 0.83065 HK3      |
| cg05119831 | 0.04487 | 0.05086 | 0.08002 | 0.06296 | 0.06364 | 0.06239 | 0.03567 | 0.04231 | 0.03702 | 0.0303 PTPRN2    |
| cg05120641 | 0.02268 | 0.02497 | 0.02379 | 0.02776 | 0.02166 | 0.02391 | 0.02241 | 0.02466 | 0.02626 | 0.02574 CHAC1    |
| cg05120715 | 0.04    | 0.04308 | 0.04696 | 0.0436  | 0.0261  | 0.04093 | 0.04084 | 0.04104 | 0.03841 | 0.03599 UGCG     |
| cg05122605 | 0.04168 | 0.04327 | 0.04335 | 0.03995 | 0.03149 | 0.03882 | 0.04141 | 0.04458 | 0.03987 | 0.03771 MAEA     |
| cg05125838 | 0.84249 | 0.74047 | 0.15171 | 0.55353 | 0.13136 | 0.55547 | 0.03355 | 0.42402 | 0.02942 | 0.03432 UCN2     |
| cg05126264 | 0.66969 | 0.75416 | 0.77184 | 0.87131 | 0.94793 | 0.95383 | 0.48085 | 0.55862 | 0.81339 | 0.67992 IFNB1    |
| cg05127380 | 0.06212 | 0.05779 | 0.06789 | 0.06496 | 0.07269 | 0.07624 | 0.06829 | 0.05948 | 0.05457 | 0.0536 STIP1     |
| cg05127924 | 0.87581 | 0.86832 | 0.87717 | 0.86277 | 0.87156 | 0.86573 | 0.8427  | 0.84925 | 0.87719 | 0.85432 FBXW10   |
| cg05129930 | 0.02993 | 0.03182 | 0.031   | 0.0329  | 0.02859 | 0.02801 | 0.02538 | 0.02446 | 0.02446 | 0.02156 PFKL     |

|            |         |         |         |         |         |         |         |         |         |         |           |
|------------|---------|---------|---------|---------|---------|---------|---------|---------|---------|---------|-----------|
| cg05130485 | 0.77242 | 0.66193 | 0.20272 | 0.14458 | 0.50908 | 0.17855 | 0.47964 | 0.24957 | 0.14539 | 0.15705 | CASP8     |
| cg05131524 | 0.19889 | 0.10838 | 0.17215 | 0.18413 | 0.15494 | 0.12618 | 0.10341 | 0.08392 | 0.11831 | 0.08624 | ADAM22    |
| cg05131835 | 0.59973 | 0.56493 | 0.56599 | 0.65166 | 0.76304 | 0.69455 | 0.46444 | 0.42807 | 0.51994 | 0.40871 | GH2       |
| cg05134796 | 0.26423 | 0.22021 | 0.31129 | 0.30836 | 0.35332 | 0.22873 | 0.24536 | 0.23726 | 0.77616 | 0.41699 | HNRPD     |
| cg05135156 | 0.81477 | 0.19401 | 0.15604 | 0.16402 | 0.49559 | 0.21576 | 0.29684 | 0.04597 | 0.16325 | 0.21668 | C1orf21   |
| cg05135288 | 0.27905 | 0.27133 | 0.8996  | 0.8981  | 0.87472 | 0.35467 | 0.82353 | 0.58114 | 0.89129 | 0.36737 | RHOT2     |
| cg05139924 | 0.05327 | 0.04582 | 0.04444 | 0.04191 | 0.0396  | 0.03748 | 0.03846 | 0.03698 | 0.03174 | 0.0341  | LZTR1     |
| cg05140736 | 0.90916 | 0.88583 | 0.90099 | 0.89919 | 0.91734 | 0.82838 | 0.89338 | 0.89367 | 0.8384  | 0.87679 | SGSH      |
| cg05141400 | 0.70503 | 0.48221 | 0.6714  | 0.6712  | 0.60871 | 0.75549 | 0.05692 | 0.05049 | 0.32907 | 0.31965 | MAGEB4    |
| cg05141870 | 0.03957 | 0.03814 | 0.06045 | 0.04833 | 0.03833 | 0.04247 | 0.04798 | 0.03899 | 0.03196 | 0.03633 | CCDC55    |
| cg05142115 | 0.04089 | 0.03579 | 0.03918 | 0.04447 | 0.0406  | 0.04635 | 0.03602 | 0.03685 | 0.02933 | 0.03156 | C7orf24   |
| cg05142373 | 0.06778 | 0.0613  | 0.0611  | 0.06191 | 0.0834  | 0.05789 | 0.0723  | 0.06363 | 0.0667  | 0.05717 | FZD1      |
| cg05142576 | 0.05361 | 0.0519  | 0.06264 | 0.04491 | 0.1009  | 0.08496 | 0.04523 | 0.03596 | 0.03772 | 0.04179 | HIST1H2AH |
| cg05144089 | 0.04935 | 0.04535 | 0.05477 | 0.0481  | 0.03912 | 0.03698 | 0.07285 | 0.05691 | 0.03748 | 0.03593 | TOMM20    |
| cg05146205 | 0.03741 | 0.03777 | 0.04978 | 0.04919 | 0.56028 | 0.06125 | 0.04925 | 0.04505 | 0.03595 | 0.0283  | CUTL1     |
| cg05146762 | 0.0628  | 0.06046 | 0.05409 | 0.05663 | 0.04165 | 0.05112 | 0.05332 | 0.05654 | 0.05509 | 0.05536 | GTF2IRD1  |
| cg05149586 | 0.65544 | 0.23976 | 0.15058 | 0.15792 | 0.1138  | 0.12515 | 0.1156  | 0.14834 | 0.13961 | 0.11429 | SDSL      |
| cg05150177 | 0.05421 | 0.05535 | 0.13986 | 0.11974 | 0.08069 | 0.05459 | 0.049   | 0.04027 | 0.06296 | 0.07309 | SYT11     |
| cg05152459 | 0.06339 | 0.05686 | 0.87603 | 0.91708 | 0.19772 | 0.82963 | 0.7773  | 0.41428 | 0.0616  | 0.06129 | MAGEE2    |
| cg05154390 | 0.08283 | 0.03703 | 0.04145 | 0.05382 | 0.03702 | 0.03032 | 0.03215 | 0.03072 | 0.04641 | 0.02854 | MRPS15    |
| cg05155595 | 0.47704 | 0.22783 | 0.79441 | 0.81313 | 0.74912 | 0.73688 | 0.747   | 0.77842 | 0.82119 | 0.54244 | ANXA4     |
| cg05156613 | 0.95676 | 0.88642 | 0.95903 | 0.95441 | 0.95941 | 0.9499  | 0.95786 | 0.95518 | 0.9517  | 0.93074 | ACTL7B    |
| cg05157725 | 0.83262 | 0.6399  | 0.66219 | 0.7143  | 0.92339 | 0.91453 | 0.73938 | 0.92055 | 0.12215 | 0.10433 | COL21A1   |
| cg05158538 | 0.37846 | 0.27095 | 0.26968 | 0.36737 | 0.37815 | 0.33276 | 0.19389 | 0.17306 | 0.18945 | 0.20875 | PPARGC1A  |
| cg05158615 | 0.12029 | 0.05303 | 0.26474 | 0.25464 | 0.56318 | 0.41739 | 0.17696 | 0.07471 | 0.37426 | 0.78565 | NPY       |
| cg05159188 | 0.44504 | 0.59532 | 0.88982 | 0.88733 | 0.78721 | 0.85609 | 0.55675 | 0.66776 | 0.2306  | 0.18722 | HIST1H4F  |
| cg05159732 | 0.84956 | 0.81937 | 0.88574 | 0.89551 | 0.91091 | 0.86879 | 0.52346 | 0.44665 | 0.89628 | 0.55657 | HCRT      |
| cg05160935 | 0.0415  | 0.04159 | 0.05961 | 0.05382 | 0.01948 | 0.03287 | 0.03338 | 0.03599 | 0.04401 | 0.05638 | THRAP6    |
| cg05161795 | 0.24605 | 0.19601 | 0.74435 | 0.69628 | 0.58066 | 0.38947 | 0.24573 | 0.13916 | 0.84652 | 0.35908 | ZDHHC3    |
| cg05163057 | 0.09494 | 0.07121 | 0.10571 | 0.125   | 0.1291  | 0.06396 | 0.0975  | 0.08229 | 0.05761 | 0.04667 | LSM7      |
| cg05163071 | 0.31616 | 0.25542 | 0.7141  | 0.77035 | 0.5972  | 0.58719 | 0.2825  | 0.24354 | 0.23634 | 0.23589 | RETNLB    |
| cg05163206 | 0.57851 | 0.52042 | 0.69905 | 0.72681 | 0.49739 | 0.52337 | 0.22034 | 0.19871 | 0.71175 | 0.70624 | FLJ20130  |
| cg05163348 | 0.19939 | 0.1845  | 0.47097 | 0.64038 | 0.24386 | 0.22628 | 0.17943 | 0.1856  | 0.19018 | 0.16427 | RPP30     |
| cg05163588 | 0.04935 | 0.05547 | 0.06136 | 0.05532 | 0.05218 | 0.05853 | 0.04683 | 0.05914 | 0.04128 | 0.03517 | LIMK1     |
| cg05164185 | 0.06596 | 0.07289 | 0.06676 | 0.05669 | 0.17966 | 0.07057 | 0.10884 | 0.10086 | 0.06804 | 0.07189 | CNND1     |
| cg05164634 | 0.88585 | 0.66235 | 0.62665 | 0.84473 | 0.86133 | 0.67832 | 0.03544 | 0.09002 | 0.03779 | 0.03255 | WNT10B    |
| cg05165580 | 0.04305 | 0.04437 | 0.04899 | 0.04452 | 0.05051 | 0.04935 | 0.04102 | 0.0387  | 0.03329 | 0.03655 | ADAT1     |
| cg05168404 | 0.43509 | 0.0942  | 0.34332 | 0.34949 | 0.511   | 0.32655 | 0.26139 | 0.08989 | 0.26429 | 0.06116 | SLC29A4   |
| cg05170326 | 0.02399 | 0.02406 | 0.0244  | 0.02521 | 0.02169 | 0.02118 | 0.02342 | 0.02557 | 0.02254 | 0.02101 | OACT5     |
| cg05171367 | 0.09045 | 0.07699 | 0.07558 | 0.07615 | 0.05551 | 0.06926 | 0.07856 | 0.07089 | 0.07311 | 0.07966 | HIP1      |
| cg05173789 | 0.03382 | 0.0374  | 0.03859 | 0.0326  | 0.02967 | 0.03119 | 0.03572 | 0.03155 | 0.03182 | 0.03087 | RPLP0     |

|            |         |         |         |         |         |         |         |         |         |                  |
|------------|---------|---------|---------|---------|---------|---------|---------|---------|---------|------------------|
| cg05174079 | 0.8115  | 0.71102 | 0.69322 | 0.74307 | 0.92648 | 0.91753 | 0.61169 | 0.69874 | 0.50647 | 0.54247 MGC42630 |
| cg05179880 | 0.04147 | 0.04186 | 0.05872 | 0.05949 | 0.06301 | 0.05723 | 0.07015 | 0.05984 | 0.04497 | 0.05639 PDCD7    |
| cg05180295 | 0.07256 | 0.0664  | 0.06858 | 0.06433 | 0.08991 | 0.06776 | 0.05656 | 0.05287 | 0.06892 | 0.04829 DAP3     |
| cg05181279 | 0.8643  | 0.42973 | 0.90126 | 0.91862 | 0.89224 | 0.89592 | 0.87495 | 0.79626 | 0.89988 | 0.31557 RIG      |
| cg05181565 | 0.02096 | 0.02395 | 0.02576 | 0.02132 | 0.02485 | 0.0243  | 0.01901 | 0.02319 | 0.02014 | 0.02087 SSU72    |
| cg05184394 | 0.40281 | 0.35973 | 0.81413 | 0.85229 | 0.84689 | 0.86615 | 0.37315 | 0.15705 | 0.70763 | 0.6495 FLJ38377  |
| cg05185584 | 0.40986 | 0.1877  | 0.76907 | 0.76844 | 0.67096 | 0.6843  | 0.72384 | 0.75534 | 0.78174 | 0.78048 KCNJ11   |
| cg05186188 | 0.83575 | 0.77503 | 0.79721 | 0.81685 | 0.78801 | 0.82147 | 0.73793 | 0.11012 | 0.84182 | 0.72663 AQP8     |
| cg05187322 | 0.88595 | 0.58333 | 0.87075 | 0.91167 | 0.91865 | 0.91072 | 0.67026 | 0.6958  | 0.89571 | 0.8633 CARD14    |
| cg05189291 | 0.0502  | 0.03835 | 0.05436 | 0.04357 | 0.03801 | 0.03809 | 0.0501  | 0.03389 | 0.02671 | 0.02737 ICF45    |
| cg05190718 | 0.667   | 0.10782 | 0.66596 | 0.8265  | 0.37069 | 0.56887 | 0.58706 | 0.21273 | 0.07069 | 0.05432 CASQ2    |
| cg05191071 | 0.3749  | 0.06201 | 0.07488 | 0.06507 | 0.04889 | 0.04345 | 0.13475 | 0.07211 | 0.05329 | 0.04328 MRPS21   |
| cg05191792 | 0.02449 | 0.02483 | 0.02067 | 0.02243 | 0.03813 | 0.02673 | 0.01966 | 0.02281 | 0.01776 | 0.019 WRNIP1     |
| cg05193832 | 0.64253 | 0.40283 | 0.67799 | 0.76459 | 0.67889 | 0.77114 | 0.28247 | 0.3716  | 0.58698 | 0.49712 KCNJ1    |
| cg05194726 | 0.64887 | 0.06425 | 0.45375 | 0.34953 | 0.55117 | 0.37657 | 0.79308 | 0.21457 | 0.54294 | 0.66941 NRIP2    |
| cg05197908 | 0.03909 | 0.03761 | 0.04229 | 0.03669 | 0.03423 | 0.03625 | 0.03953 | 0.03428 | 0.03248 | 0.03064 CHERP    |
| cg05200311 | 0.02362 | 0.02936 | 0.02875 | 0.02464 | 0.0228  | 0.02576 | 0.024   | 0.02542 | 0.02394 | 0.02291 DEK      |
| cg05200606 | 0.05985 | 0.05802 | 0.06499 | 0.06173 | 0.04006 | 0.05718 | 0.05097 | 0.05525 | 0.05427 | 0.04725 CCND1    |
| cg05200628 | 0.47438 | 0.40964 | 0.68834 | 0.68598 | 0.63964 | 0.78926 | 0.22021 | 0.20528 | 0.76737 | 0.60144 CD48     |
| cg05203877 | 0.04676 | 0.04762 | 0.05968 | 0.04674 | 0.14392 | 0.31752 | 0.08378 | 0.04253 | 0.04365 | 0.03666 SLC8A3   |
| cg05205664 | 0.05693 | 0.05203 | 0.05221 | 0.05    | 0.04462 | 0.04943 | 0.31116 | 0.05311 | 0.0447  | 0.03815 UCP2     |
| cg05206587 | 0.75078 | 0.77047 | 0.53863 | 0.67078 | 0.77036 | 0.83115 | 0.11818 | 0.17827 | 0.14407 | 0.13212 GLRA2    |
| cg05206661 | 0.75128 | 0.58806 | 0.5275  | 0.51203 | 0.63813 | 0.44911 | 0.26956 | 0.09861 | 0.7293  | 0.64504 FLJ33534 |
| cg05208153 | 0.86066 | 0.32445 | 0.7193  | 0.74194 | 0.9432  | 0.89126 | 0.89521 | 0.66547 | 0.89806 | 0.89847 C9orf24  |
| cg05208878 | 0.05041 | 0.03978 | 0.04653 | 0.04097 | 0.0296  | 0.0341  | 0.03888 | 0.03428 | 0.03062 | 0.03154 PRAME    |
| cg05209463 | 0.02735 | 0.02785 | 0.03842 | 0.03875 | 0.02187 | 0.02448 | 0.0318  | 0.02396 | 0.13813 | 0.02362 TETTRAN  |
| cg05209917 | 0.60811 | 0.34029 | 0.46818 | 0.60147 | 0.73773 | 0.59024 | 0.79692 | 0.23297 | 0.39782 | 0.53866 CNTN6    |
| cg05210526 | 0.0533  | 0.02983 | 0.03418 | 0.03527 | 0.03145 | 0.02786 | 0.02797 | 0.02639 | 0.02497 | 0.02486 PGM1     |
| cg05213296 | 0.06715 | 0.07259 | 0.10083 | 0.07802 | 0.67102 | 0.62057 | 0.05559 | 0.064   | 0.07056 | 0.07679 BXDC1    |
| cg05215575 | 0.37001 | 0.44722 | 0.4111  | 0.72933 | 0.54673 | 0.31    | 0.56292 | 0.16648 | 0.0788  | 0.04563 FLJ25410 |
| cg05216141 | 0.66461 | 0.59142 | 0.56943 | 0.69615 | 0.09264 | 0.02642 | 0.18643 | 0.23826 | 0.04025 | 0.01989 ETV7     |
| cg05217755 | 0.04257 | 0.03354 | 0.03509 | 0.03559 | 0.02665 | 0.03456 | 0.03023 | 0.02922 | 0.03218 | 0.03058 ERF      |
| cg05218490 | 0.09188 | 0.10193 | 0.10215 | 0.09208 | 0.06837 | 0.08694 | 0.09102 | 0.08688 | 0.099   | 0.07568 ORC4L    |
| cg05219900 | 0.03982 | 0.03435 | 0.03364 | 0.02994 | 0.02057 | 0.0275  | 0.03208 | 0.03092 | 0.02621 | 0.0288 CREB3     |
| cg05221167 | 0.36758 | 0.49129 | 0.90217 | 0.90978 | 0.66405 | 0.54715 | 0.52867 | 0.83693 | 0.55166 | 0.61035 ZNF560   |
| cg05221264 | 0.83348 | 0.7147  | 0.87604 | 0.90135 | 0.91395 | 0.92463 | 0.91894 | 0.92615 | 0.54689 | 0.66623 ELA2A    |
| cg05222924 | 0.88549 | 0.94354 | 0.95146 | 0.94895 | 0.163   | 0.78152 | 0.03922 | 0.03972 | 0.20423 | 0.04789 WT1      |
| cg05225390 | 0.02318 | 0.02208 | 0.02928 | 0.02455 | 0.01764 | 0.02215 | 0.02264 | 0.02354 | 0.02273 | 0.0191 ZW10      |
| cg05225996 | 0.04111 | 0.04096 | 0.04283 | 0.04222 | 0.03024 | 0.04231 | 0.03896 | 0.03515 | 0.03734 | 0.0354 ZNF205    |
| cg05226008 | 0.49903 | 0.71434 | 0.57633 | 0.53776 | 0.64213 | 0.60963 | 0.5548  | 0.32258 | 0.13436 | 0.14423 DLC1     |
| cg05227963 | 0.07716 | 0.05834 | 0.08811 | 0.08343 | 0.04819 | 0.05026 | 0.05681 | 0.05266 | 0.04954 | 0.05069 RFC5     |



|            |         |         |         |         |         |         |         |         |         |         |           |
|------------|---------|---------|---------|---------|---------|---------|---------|---------|---------|---------|-----------|
| cg05228408 | 0.13771 | 0.07508 | 0.29355 | 0.41751 | 0.63547 | 0.34458 | 0.36085 | 0.12218 | 0.05943 | 0.03877 | CLCN6     |
| cg05229898 | 0.03718 | 0.03065 | 0.05282 | 0.04634 | 0.03936 | 0.02721 | 0.04786 | 0.02863 | 0.04883 | 0.02637 | EGR1      |
| cg05232067 | 0.04632 | 0.04784 | 0.05129 | 0.05031 | 0.03724 | 0.05561 | 0.06107 | 0.06297 | 0.04312 | 0.04707 | BNIP3L    |
| cg05232889 | 0.37336 | 0.7203  | 0.24057 | 0.19832 | 0.30377 | 0.21267 | 0.16637 | 0.14434 | 0.1497  | 0.10848 | FOXP2     |
| cg05236037 | 0.04869 | 0.05088 | 0.05641 | 0.04907 | 0.05122 | 0.04835 | 0.05312 | 0.05029 | 0.03688 | 0.03914 | ZNF202    |
| cg05236474 | 0.04297 | 0.04341 | 0.03661 | 0.04132 | 0.02919 | 0.03655 | 0.03916 | 0.0423  | 0.03806 | 0.03212 | C17orf59  |
| cg05237543 | 0.0642  | 0.06514 | 0.10181 | 0.09934 | 0.09239 | 0.08033 | 0.10599 | 0.09181 | 0.06934 | 0.07596 | MTDH      |
| cg05238794 | 0.08226 | 0.05602 | 0.06528 | 0.07705 | 0.04024 | 0.04277 | 0.27192 | 0.04695 | 0.03615 | 0.03939 | GK        |
| cg05241571 | 0.37048 | 0.03184 | 0.12713 | 0.16336 | 0.12016 | 0.04158 | 0.0388  | 0.03481 | 0.24675 | 0.04394 | UNQ467    |
| cg05242523 | 0.93922 | 0.92273 | 0.92818 | 0.93415 | 0.919   | 0.92202 | 0.5362  | 0.6511  | 0.80337 | 0.73046 | KLK14     |
| cg05242945 | 0.04284 | 0.04593 | 0.0453  | 0.04146 | 0.08008 | 0.04898 | 0.03651 | 0.03212 | 0.04206 | 0.03883 | RPSA      |
| cg05243804 | 0.08467 | 0.06013 | 0.21142 | 0.21058 | 0.04996 | 0.04666 | 0.05247 | 0.03451 | 0.03349 | 0.03614 | FECH      |
| cg05243815 | 0.02262 | 0.02533 | 0.02896 | 0.0262  | 0.02135 | 0.02206 | 0.02247 | 0.02053 | 0.02262 | 0.02055 | STRAP     |
| cg05243874 | 0.0399  | 0.04225 | 0.03898 | 0.03563 | 0.16076 | 0.05957 | 0.04436 | 0.03361 | 0.16959 | 0.03105 | LOC388152 |
| cg05243909 | 0.06563 | 0.06954 | 0.07383 | 0.06676 | 0.04518 | 0.05939 | 0.06464 | 0.05976 | 0.05991 | 0.05486 | NTHL1     |
| cg05244766 | 0.88763 | 0.81941 | 0.91273 | 0.92067 | 0.80143 | 0.80832 | 0.81267 | 0.29838 | 0.30751 | 0.07257 | GSTP1     |
| cg05245515 | 0.12651 | 0.1237  | 0.20034 | 0.43079 | 0.28092 | 0.11166 | 0.05399 | 0.12738 | 0.11719 | 0.08251 | SLC39A2   |
| cg05245861 | 0.05847 | 0.05657 | 0.30288 | 0.62683 | 0.07241 | 0.43866 | 0.05061 | 0.05166 | 0.06402 | 0.06048 | C18orf34  |
| cg05246522 | 0.83036 | 0.36684 | 0.65602 | 0.7574  | 0.67016 | 0.31681 | 0.14624 | 0.17198 | 0.09644 | 0.10299 | KSR1      |
| cg05248470 | 0.43143 | 0.17898 | 0.54124 | 0.6548  | 0.1924  | 0.13369 | 0.08885 | 0.08904 | 0.08723 | 0.1731  | LILRB2    |
| cg05248781 | 0.48668 | 0.42998 | 0.61171 | 0.7173  | 0.93009 | 0.8762  | 0.485   | 0.3826  | 0.04771 | 0.03872 | LCE5A     |
| cg05249393 | 0.09813 | 0.0843  | 0.09022 | 0.08316 | 0.11682 | 0.09424 | 0.09264 | 0.08506 | 0.12742 | 0.06771 | LDLR      |
| cg05250458 | 0.13328 | 0.20392 | 0.42388 | 0.65021 | 0.35842 | 0.16436 | 0.2627  | 0.09258 | 0.09911 | 0.05955 | ZNF177    |
| cg05250673 | 0.03285 | 0.03338 | 0.0374  | 0.037   | 0.02998 | 0.03915 | 0.03525 | 0.03705 | 0.0281  | 0.02935 | IPMK      |
| cg05251000 | 0.05532 | 0.04842 | 0.35685 | 0.30282 | 0.06149 | 0.03595 | 0.04008 | 0.03365 | 0.06764 | 0.04247 | FREQ      |
| cg05252264 | 0.17614 | 0.15553 | 0.37447 | 0.3171  | 0.64144 | 0.69063 | 0.12758 | 0.11435 | 0.12256 | 0.14816 | FCAR      |
| cg05253159 | 0.77604 | 0.53197 | 0.82519 | 0.85244 | 0.85696 | 0.76761 | 0.63996 | 0.60088 | 0.54423 | 0.53536 | APS       |
| cg05253327 | 0.78074 | 0.26036 | 0.76517 | 0.80421 | 0.67559 | 0.68863 | 0.75665 | 0.80461 | 0.54917 | 0.5217  | B3GNT1    |
| cg05254049 | 0.09812 | 0.04204 | 0.93951 | 0.93126 | 0.95244 | 0.85622 | 0.70387 | 0.62128 | 0.07529 | 0.03002 | SYN1      |
| cg05254747 | 0.9106  | 0.88761 | 0.82781 | 0.91968 | 0.88587 | 0.87815 | 0.65554 | 0.85809 | 0.9241  | 0.90643 | SLC39A14  |
| cg05256043 | 0.11231 | 0.14273 | 0.4209  | 0.35846 | 0.51682 | 0.14891 | 0.18079 | 0.08992 | 0.39363 | 0.3463  | DCT       |
| cg05257479 | 0.02833 | 0.02791 | 0.03238 | 0.02914 | 0.02463 | 0.03016 | 0.02939 | 0.02913 | 0.02619 | 0.02505 | WARS2     |
| cg05257610 | 0.2611  | 0.24704 | 0.2448  | 0.24892 | 0.36762 | 0.26621 | 0.20771 | 0.18886 | 0.25921 | 0.25027 | PRO1853   |
| cg05259765 | 0.90443 | 0.82994 | 0.89632 | 0.8921  | 0.81891 | 0.89838 | 0.87893 | 0.88767 | 0.87784 | 0.86805 | PSCD4     |
| cg05260966 | 0.23732 | 0.04229 | 0.76919 | 0.69881 | 0.60825 | 0.44785 | 0.7511  | 0.70275 | 0.80733 | 0.53465 | TIMP3     |
| cg05261289 | 0.03632 | 0.03656 | 0.03438 | 0.03814 | 0.02583 | 0.03329 | 0.02868 | 0.03021 | 0.02912 | 0.02854 | STARD7    |
| cg05261299 | 0.91978 | 0.78858 | 0.93581 | 0.93478 | 0.84277 | 0.87128 | 0.90671 | 0.90481 | 0.85247 | 0.80281 | NR4A1     |
| cg05261824 | 0.76974 | 0.31147 | 0.78247 | 0.85258 | 0.53209 | 0.80826 | 0.25775 | 0.30574 | 0.65731 | 0.6596  | ZNF165    |
| cg05262335 | 0.45497 | 0.12737 | 0.66632 | 0.79038 | 0.64284 | 0.43056 | 0.64751 | 0.59179 | 0.6646  | 0.29501 | TAGAP     |
| cg05263682 | 0.06217 | 0.05807 | 0.08611 | 0.07901 | 0.0933  | 0.08046 | 0.06788 | 0.05022 | 0.04772 | 0.05642 | RNGTT     |
| cg05266460 | 0.78416 | 0.77872 | 0.78585 | 0.79051 | 0.79953 | 0.78637 | 0.74895 | 0.56917 | 0.80455 | 0.74544 | Rgr       |

|            |         |         |         |         |         |         |         |         |         |                   |
|------------|---------|---------|---------|---------|---------|---------|---------|---------|---------|-------------------|
| cg05266781 | 0.03546 | 0.03668 | 0.41048 | 0.59723 | 0.02901 | 0.02961 | 0.03483 | 0.0323  | 0.03    | 0.03208 IRX5      |
| cg05270634 | 0.12062 | 0.05307 | 0.70913 | 0.86514 | 0.96406 | 0.96062 | 0.94989 | 0.0764  | 0.93332 | 0.91717 RND2      |
| cg05275231 | 0.10928 | 0.09984 | 0.15041 | 0.14219 | 0.15747 | 0.13563 | 0.14416 | 0.13332 | 0.12609 | 0.13747 SLC25A32  |
| cg05275605 | 0.74514 | 0.57461 | 0.92133 | 0.90433 | 0.93037 | 0.91004 | 0.61796 | 0.75527 | 0.92231 | 0.90667 C21orf123 |
| cg05275752 | 0.91158 | 0.86522 | 0.36215 | 0.6328  | 0.88594 | 0.57687 | 0.34824 | 0.06113 | 0.0395  | 0.04014 GALM      |
| cg05276137 | 0.08452 | 0.03732 | 0.16257 | 0.06446 | 0.06219 | 0.03139 | 0.34585 | 0.037   | 0.12897 | 0.03253 SLC2A4RG  |
| cg05279707 | 0.06329 | 0.05375 | 0.06012 | 0.06344 | 0.05152 | 0.05266 | 0.04992 | 0.04997 | 0.04018 | 0.03867 ADNP      |
| cg05279864 | 0.09353 | 0.08311 | 0.13938 | 0.16659 | 0.48865 | 0.78315 | 0.3046  | 0.29904 | 0.39889 | 0.10101 ABCB4     |
| cg05280555 | 0.05162 | 0.0479  | 0.04663 | 0.04118 | 0.06836 | 0.06555 | 0.03661 | 0.03013 | 0.03906 | 0.04141 CNOT10    |
| cg05284582 | 0.03447 | 0.03382 | 0.03215 | 0.03586 | 0.94949 | 0.91251 | 0.91884 | 0.8899  | 0.02714 | 0.02707 DNAJC18   |
| cg05284724 | 0.05537 | 0.04553 | 0.04529 | 0.04703 | 0.03693 | 0.04598 | 0.03811 | 0.04158 | 0.03901 | 0.03802 FLJ12571  |
| cg05286874 | 0.02366 | 0.02185 | 0.18209 | 0.39394 | 0.07656 | 0.0228  | 0.31638 | 0.02139 | 0.01589 | 0.01412 ABCA1     |
| cg05287690 | 0.14013 | 0.14328 | 0.14092 | 0.14833 | 0.10475 | 0.12545 | 0.1362  | 0.13268 | 0.13939 | 0.11224 FBXW7     |
| cg05288569 | 0.02352 | 0.02563 | 0.02436 | 0.02945 | 0.02203 | 0.0291  | 0.02553 | 0.02523 | 0.02136 | 0.02547 KLHL11    |
| cg05288803 | 0.02554 | 0.028   | 0.02431 | 0.02851 | 0.02425 | 0.02595 | 0.05192 | 0.02482 | 0.02062 | 0.02258 TIMP3     |
| cg05289701 | 0.05938 | 0.06634 | 0.06962 | 0.06368 | 0.03568 | 0.05729 | 0.05461 | 0.05745 | 0.05557 | 0.05822 C12orf11  |
| cg05290904 | 0.05351 | 0.05423 | 0.08411 | 0.06507 | 0.06688 | 0.056   | 0.04819 | 0.04136 | 0.0581  | 0.06221 RBBP5     |
| cg05291178 | 0.86717 | 0.77656 | 0.88311 | 0.88464 | 0.85185 | 0.82261 | 0.87401 | 0.87727 | 0.8872  | 0.88908 C3orf24   |
| cg05292376 | 0.8362  | 0.51024 | 0.67432 | 0.77866 | 0.83829 | 0.36008 | 0.48767 | 0.35256 | 0.83424 | 0.83231 AATK      |
| cg05293216 | 0.87146 | 0.86881 | 0.88094 | 0.89349 | 0.77813 | 0.79531 | 0.52491 | 0.16796 | 0.51689 | 0.29859 FANCG     |
| cg05293407 | 0.04645 | 0.05101 | 0.04884 | 0.04973 | 0.04497 | 0.05369 | 0.04922 | 0.04867 | 0.04684 | 0.04422 RFP       |
| cg05294095 | 0.07298 | 0.03028 | 0.03179 | 0.03438 | 0.02717 | 0.0276  | 0.02846 | 0.02566 | 0.02479 | 0.02106 PSMD8     |
| cg05294243 | 0.38299 | 0.29525 | 0.21887 | 0.19458 | 0.35877 | 0.54151 | 0.12226 | 0.13604 | 0.37941 | 0.17643 KLK13     |
| cg05294455 | 0.54121 | 0.31666 | 0.86163 | 0.92189 | 0.90484 | 0.90927 | 0.83842 | 0.85158 | 0.41254 | 0.25096 MYL4      |
| cg05300132 | 0.88147 | 0.8853  | 0.90925 | 0.93187 | 0.81141 | 0.83132 | 0.87059 | 0.88699 | 0.90256 | 0.85767 EXDL2     |
| cg05301102 | 0.05352 | 0.05665 | 0.0861  | 0.07629 | 0.07875 | 0.06496 | 0.05009 | 0.04196 | 0.05102 | 0.04845 STX6      |
| cg05301852 | 0.46825 | 0.3445  | 0.55726 | 0.65699 | 0.48361 | 0.5345  | 0.18724 | 0.21663 | 0.52034 | 0.24741 FABP1     |
| cg05303448 | 0.12851 | 0.12176 | 0.57227 | 0.55829 | 0.33121 | 0.19087 | 0.33011 | 0.16001 | 0.18765 | 0.19492 AACS      |
| cg05306006 | 0.02825 | 0.03684 | 0.0331  | 0.03017 | 0.0257  | 0.02772 | 0.0259  | 0.02789 | 0.03115 | 0.02845 RPE       |
| cg05306176 | 0.11636 | 0.11041 | 0.15096 | 0.12687 | 0.08738 | 0.11702 | 0.09951 | 0.12252 | 0.10326 | 0.09409 FVT1      |
| cg05306735 | 0.07462 | 0.07972 | 0.13461 | 0.10525 | 0.15888 | 0.15185 | 0.09935 | 0.07976 | 0.05829 | 0.06552 ZNF273    |
| cg05307923 | 0.03375 | 0.03759 | 0.46517 | 0.47152 | 0.28215 | 0.51164 | 0.14745 | 0.38136 | 0.0391  | 0.02684 ADARB2    |
| cg05308484 | 0.03451 | 0.03469 | 0.03744 | 0.03704 | 0.13896 | 0.0271  | 0.03403 | 0.03332 | 0.03132 | 0.03022 C12orf5   |
| cg05308617 | 0.08791 | 0.07415 | 0.07815 | 0.07345 | 0.05752 | 0.07003 | 0.06609 | 0.05307 | 0.0612  | 0.06695 ARMC8     |
| cg05310071 | 0.06244 | 0.07138 | 0.09811 | 0.07915 | 0.21858 | 0.12338 | 0.09862 | 0.08449 | 0.05782 | 0.07647 PIGL      |
| cg05311623 | 0.06579 | 0.06536 | 0.06712 | 0.07147 | 0.05075 | 0.05175 | 0.05586 | 0.05697 | 0.05596 | 0.05656 ANXA5     |
| cg05313261 | 0.09883 | 0.10054 | 0.11366 | 0.111   | 0.12945 | 0.09588 | 0.11434 | 0.09699 | 0.09027 | 0.0972 MAPK3      |
| cg05316065 | 0.1041  | 0.09961 | 0.73384 | 0.8528  | 0.27417 | 0.18078 | 0.51164 | 0.46502 | 0.53849 | 0.07251 MLZE      |
| cg05318777 | 0.44497 | 0.16989 | 0.24581 | 0.26345 | 0.44106 | 0.26225 | 0.20756 | 0.141   | 0.18227 | 0.19759 BBS7      |
| cg05321960 | 0.09554 | 0.09842 | 0.19232 | 0.18208 | 0.13193 | 0.10371 | 0.08836 | 0.07075 | 0.10782 | 0.10818 KIAA0907  |
| cg05322019 | 0.29407 | 0.1988  | 0.51751 | 0.79868 | 0.54147 | 0.53194 | 0.48083 | 0.52144 | 0.82295 | 0.65431 SEMA4G    |

|            |         |         |         |         |         |         |         |         |         |                   |
|------------|---------|---------|---------|---------|---------|---------|---------|---------|---------|-------------------|
| cg05322222 | 0.20975 | 0.24957 | 0.53643 | 0.57971 | 0.23995 | 0.41042 | 0.09638 | 0.05928 | 0.59183 | 0.55908 MGC33486  |
| cg05323436 | 0.03832 | 0.04044 | 0.04577 | 0.03956 | 0.05336 | 0.05088 | 0.03314 | 0.0294  | 0.03937 | 0.03369 LAMB2     |
| cg05325699 | 0.04695 | 0.04054 | 0.06415 | 0.07728 | 0.04806 | 0.06875 | 0.045   | 0.04082 | 0.05638 | 0.0425 HAP1       |
| cg05327750 | 0.03091 | 0.03309 | 0.04782 | 0.04219 | 0.02675 | 0.03589 | 0.18302 | 0.04538 | 0.03258 | 0.02998 FLJ11016  |
| cg05330360 | 0.59398 | 0.43197 | 0.8167  | 0.89368 | 0.81236 | 0.69868 | 0.86855 | 0.87421 | 0.82259 | 0.71416 ZBPB2     |
| cg05331214 | 0.34133 | 0.57397 | 0.51808 | 0.44476 | 0.61028 | 0.57964 | 0.37437 | 0.31489 | 0.3413  | 0.29168 SCN7A     |
| cg05333568 | 0.06502 | 0.03054 | 0.3722  | 0.52369 | 0.43529 | 0.53911 | 0.26875 | 0.05555 | 0.12313 | 0.25969 C1orf65   |
| cg05334239 | 0.07665 | 0.05868 | 0.06358 | 0.08219 | 0.08978 | 0.07172 | 0.07811 | 0.07919 | 0.0857  | 0.09596 CCDC32    |
| cg05334253 | 0.02875 | 0.031   | 0.03254 | 0.03229 | 0.0273  | 0.03461 | 0.02876 | 0.03255 | 0.03182 | 0.03366 NDEL1     |
| cg05335315 | 0.20524 | 0.0604  | 0.87492 | 0.87573 | 0.90973 | 0.89815 | 0.78005 | 0.1511  | 0.89751 | 0.80696 JAG2      |
| cg05337441 | 0.07131 | 0.05976 | 0.1136  | 0.13527 | 0.11362 | 0.06436 | 0.03904 | 0.04118 | 0.05144 | 0.03698 APOB      |
| cg05337966 | 0.02451 | 0.02269 | 0.02604 | 0.02454 | 0.02053 | 0.02644 | 0.02882 | 0.02746 | 0.01663 | 0.01609 C13orf1   |
| cg05338155 | 0.11029 | 0.03461 | 0.03941 | 0.03605 | 0.01851 | 0.0323  | 0.03095 | 0.03027 | 0.03107 | 0.03212 IFIT5     |
| cg05338167 | 0.89075 | 0.87556 | 0.88659 | 0.89516 | 0.91236 | 0.88845 | 0.90133 | 0.82596 | 0.90476 | 0.61736 CALML4    |
| cg05339305 | 0.02477 | 0.02829 | 0.03723 | 0.03696 | 0.01758 | 0.0281  | 0.05499 | 0.02944 | 0.03643 | 0.02296 DIPA      |
| cg05339472 | 0.03385 | 0.03459 | 0.03789 | 0.03583 | 0.02601 | 0.02744 | 0.02197 | 0.02675 | 0.0368  | 0.03226 EIF1AX    |
| cg05341115 | 0.77829 | 0.74287 | 0.7007  | 0.71676 | 0.57715 | 0.67396 | 0.66837 | 0.33106 | 0.56567 | 0.51309 HYAL4     |
| cg05341670 | 0.02781 | 0.0307  | 0.02904 | 0.02943 | 0.02724 | 0.03003 | 0.02639 | 0.02966 | 0.02903 | 0.02687 C1orf83   |
| cg05341878 | 0.10143 | 0.09234 | 0.68691 | 0.77592 | 0.18219 | 0.1046  | 0.54455 | 0.66715 | 0.11399 | 0.12063 RIMS2     |
| cg05342835 | 0.85813 | 0.49236 | 0.60441 | 0.81984 | 0.65474 | 0.62733 | 0.49342 | 0.47765 | 0.66758 | 0.87199 SYNC1     |
| cg05343453 | 0.8481  | 0.84314 | 0.80646 | 0.81184 | 0.74153 | 0.78255 | 0.81212 | 0.82207 | 0.72882 | 0.78323 LOC136263 |
| cg05345286 | 0.04476 | 0.04391 | 0.84519 | 0.90143 | 0.95399 | 0.91335 | 0.06173 | 0.04446 | 0.40041 | 0.34387 MDF1      |
| cg05346140 | 0.92576 | 0.90004 | 0.93131 | 0.92373 | 0.94447 | 0.91143 | 0.92339 | 0.91808 | 0.9227  | 0.92537 HSPB9     |
| cg05346899 | 0.0539  | 0.05276 | 0.06421 | 0.05345 | 0.05196 | 0.03893 | 0.05097 | 0.04336 | 0.03661 | 0.03873 LASS4     |
| cg05347567 | 0.06747 | 0.06779 | 0.07985 | 0.10247 | 0.09894 | 0.06235 | 0.06275 | 0.06492 | 0.05962 | 0.04929 ZC3H10    |
| cg05348123 | 0.55308 | 0.23393 | 0.67084 | 0.60286 | 0.76312 | 0.78794 | 0.69079 | 0.60618 | 0.6795  | 0.30661 SCRG1     |
| cg05348272 | 0.02562 | 0.02643 | 0.02734 | 0.03098 | 0.02811 | 0.02528 | 0.02309 | 0.02769 | 0.02144 | 0.02121 TBCD      |
| cg05348870 | 0.8371  | 0.83161 | 0.75893 | 0.83922 | 0.82144 | 0.86233 | 0.38497 | 0.09922 | 0.86168 | 0.75642 TNFSF14   |
| cg05350879 | 0.77395 | 0.61234 | 0.80158 | 0.81686 | 0.73382 | 0.77348 | 0.81346 | 0.78759 | 0.82601 | 0.15641 SPARCL1   |
| cg05352541 | 0.02593 | 0.02477 | 0.02607 | 0.02525 | 0.01991 | 0.02131 | 0.02433 | 0.02362 | 0.02253 | 0.02084 PITPNB    |
| cg05352668 | 0.78374 | 0.50474 | 0.53932 | 0.80051 | 0.48359 | 0.87625 | 0.773   | 0.6792  | 0.41509 | 0.16384 C1orf127  |
| cg05354432 | 0.04796 | 0.0369  | 0.04212 | 0.04925 | 0.05733 | 0.05701 | 0.03852 | 0.03542 | 0.04656 | 0.04199 LEF1      |
| cg05357320 | 0.04649 | 0.0388  | 0.06534 | 0.04717 | 0.03528 | 0.03692 | 0.05052 | 0.0435  | 0.03559 | 0.04211 ZNF317    |
| cg05358291 | 0.12509 | 0.11467 | 0.14719 | 0.1241  | 0.1134  | 0.1394  | 0.12077 | 0.10184 | 0.45329 | 0.17319 CYP4F2    |
| cg05358404 | 0.13844 | 0.02445 | 0.63423 | 0.88577 | 0.10792 | 0.02246 | 0.28249 | 0.18082 | 0.3349  | 0.29627 RTEL1     |
| cg05360220 | 0.19432 | 0.09425 | 0.14101 | 0.32314 | 0.12351 | 0.0729  | 0.08539 | 0.05473 | 0.05515 | 0.04978 TNFRSF14  |
| cg05360265 | 0.05353 | 0.04895 | 0.07465 | 0.06667 | 0.05305 | 0.07434 | 0.05616 | 0.05016 | 0.06861 | 0.07103 STXBP5    |
| cg05361373 | 0.19558 | 0.07389 | 0.20385 | 0.26783 | 0.95086 | 0.81935 | 0.92522 | 0.93481 | 0.07416 | 0.05365 PYCARD    |
| cg05361811 | 0.0619  | 0.06886 | 0.07001 | 0.06081 | 0.04424 | 0.06105 | 0.05494 | 0.0577  | 0.06418 | 0.05501 UTP20     |
| cg05362516 | 0.03626 | 0.03738 | 0.24932 | 0.38919 | 0.02526 | 0.03366 | 0.03616 | 0.0379  | 0.03098 | 0.03141 IRX5      |
| cg05362669 | 0.05804 | 0.05347 | 0.06189 | 0.06048 | 0.04251 | 0.05049 | 0.04693 | 0.04903 | 0.05498 | 0.05932 PTPRG     |

|            |         |         |         |         |         |         |         |         |         |         |           |
|------------|---------|---------|---------|---------|---------|---------|---------|---------|---------|---------|-----------|
| cg05364569 | 0.69064 | 0.63222 | 0.62971 | 0.74716 | 0.7657  | 0.72159 | 0.16549 | 0.15963 | 0.7881  | 0.6559  | FLJ45202  |
| cg05365525 | 0.04415 | 0.04736 | 0.05572 | 0.06051 | 0.03002 | 0.02801 | 0.03235 | 0.03718 | 0.0475  | 0.06048 | DEPDC6    |
| cg05365670 | 0.83095 | 0.12541 | 0.92565 | 0.9332  | 0.64554 | 0.31809 | 0.84518 | 0.74766 | 0.17807 | 0.28864 | AYTL2     |
| cg05365729 | 0.40008 | 0.07695 | 0.11945 | 0.15302 | 0.39397 | 0.23911 | 0.3321  | 0.15245 | 0.45859 | 0.04762 | LOXL2     |
| cg05366401 | 0.02343 | 0.02717 | 0.02606 | 0.02676 | 0.02542 | 0.0283  | 0.02159 | 0.02291 | 0.02266 | 0.02332 | TM9SF1    |
| cg05367858 | 0.03255 | 0.03115 | 0.04288 | 0.04175 | 0.04468 | 0.03912 | 0.03418 | 0.03262 | 0.03201 | 0.03048 | RNF141    |
| cg05368089 | 0.03384 | 0.0335  | 0.04161 | 0.0417  | 0.04192 | 0.04809 | 0.04179 | 0.03813 | 0.04159 | 0.03819 | PFDN5     |
| cg05368341 | 0.03052 | 0.03079 | 0.05655 | 0.08214 | 0.05751 | 0.05698 | 0.03998 | 0.04216 | 0.04749 | 0.03311 | SYT6      |
| cg05368762 | 0.01852 | 0.02064 | 0.02488 | 0.02362 | 0.01837 | 0.02144 | 0.02152 | 0.0208  | 0.02041 | 0.0219  | TEGT      |
| cg05368942 | 0.04544 | 0.04347 | 0.04774 | 0.05076 | 0.03334 | 0.03841 | 0.03379 | 0.03687 | 0.03547 | 0.04068 | RBM15     |
| cg05369142 | 0.02207 | 0.02095 | 0.02639 | 0.02411 | 0.07253 | 0.01801 | 0.02056 | 0.01851 | 0.02004 | 0.01696 | ALS2CL    |
| cg05369166 | 0.07559 | 0.04071 | 0.36817 | 0.75958 | 0.62544 | 0.29889 | 0.09793 | 0.04852 | 0.06633 | 0.04139 | NFASC     |
| cg05372736 | 0.63648 | 0.56368 | 0.58991 | 0.61603 | 0.65268 | 0.61654 | 0.31525 | 0.34619 | 0.39211 | 0.32986 | PRAMEF1   |
| cg05373276 | 0.01745 | 0.02037 | 0.02844 | 0.02417 | 0.03689 | 0.03805 | 0.01944 | 0.01958 | 0.0162  | 0.01655 | C7orf28B  |
| cg05373457 | 0.89223 | 0.92234 | 0.91771 | 0.93119 | 0.75472 | 0.91838 | 0.67819 | 0.9161  | 0.67848 | 0.5353  | KCNS2     |
| cg05373692 | 0.12071 | 0.11425 | 0.67283 | 0.59363 | 0.27122 | 0.3908  | 0.08753 | 0.12399 | 0.13696 | 0.16481 | ZDHHC15   |
| cg05375800 | 0.05497 | 0.05337 | 0.07067 | 0.05389 | 0.04061 | 0.04281 | 0.04809 | 0.04366 | 0.06143 | 0.03653 | WDR31     |
| cg05376895 | 0.19487 | 0.10852 | 0.8167  | 0.85585 | 0.88244 | 0.80363 | 0.27107 | 0.3774  | 0.84908 | 0.68074 | PNMA3     |
| cg05376954 | 0.13251 | 0.13136 | 0.18054 | 0.178   | 0.21402 | 0.17379 | 0.35673 | 0.11093 | 0.38972 | 0.13    | FPR1      |
| cg05379350 | 0.41543 | 0.17273 | 0.28138 | 0.43259 | 0.09089 | 0.05309 | 0.15362 | 0.11951 | 0.54181 | 0.05046 | GIT1      |
| cg05380570 | 0.04708 | 0.0586  | 0.05173 | 0.04982 | 0.07077 | 0.05195 | 0.04514 | 0.04466 | 0.05407 | 0.04112 | ARHGEF10L |
| cg05380910 | 0.71536 | 0.69995 | 0.55068 | 0.63083 | 0.53265 | 0.59375 | 0.46943 | 0.49302 | 0.63347 | 0.61098 | STOML3    |
| cg05380982 | 0.06347 | 0.05537 | 0.11435 | 0.09178 | 0.49675 | 0.49088 | 0.4411  | 0.60196 | 0.18473 | 0.06199 | KCNJ6     |
| cg05382123 | 0.04995 | 0.02823 | 0.9468  | 0.95242 | 0.74694 | 0.89359 | 0.21817 | 0.20483 | 0.60634 | 0.61369 | CSMD2     |
| cg05382565 | 0.04198 | 0.04036 | 0.04138 | 0.03899 | 0.03832 | 0.03308 | 0.04736 | 0.03776 | 0.03739 | 0.03171 | TIGD6     |
| cg05382730 | 0.02997 | 0.03252 | 0.03167 | 0.02896 | 0.02752 | 0.02369 | 0.02599 | 0.02592 | 0.02303 | 0.02479 | EMG1      |
| cg05384917 | 0.92323 | 0.89653 | 0.90789 | 0.92695 | 0.93465 | 0.92115 | 0.48806 | 0.5869  | 0.93226 | 0.89984 | GPR109B   |
| cg05385377 | 0.19941 | 0.05381 | 0.04249 | 0.04481 | 0.51004 | 0.51027 | 0.2013  | 0.10823 | 0.05876 | 0.03143 | TMEM51    |
| cg05386606 | 0.92514 | 0.66343 | 0.78042 | 0.84241 | 0.71021 | 0.56793 | 0.17061 | 0.04476 | 0.06142 | 0.02952 | BCL7B     |
| cg05388361 | 0.02616 | 0.03261 | 0.03496 | 0.03211 | 0.02705 | 0.03017 | 0.03133 | 0.03181 | 0.02409 | 0.0244  | STAT2     |
| cg05389024 | 0.33012 | 0.31153 | 0.30044 | 0.2525  | 0.29726 | 0.26078 | 0.29463 | 0.2495  | 0.23651 | 0.25369 | KBTBD10   |
| cg05389183 | 0.12151 | 0.08688 | 0.10255 | 0.08191 | 0.0927  | 0.06805 | 0.08584 | 0.06943 | 0.05054 | 0.06159 | PPIC      |
| cg05389335 | 0.1339  | 0.10275 | 0.58202 | 0.58311 | 0.08879 | 0.06278 | 0.26971 | 0.06041 | 0.07021 | 0.06119 | TACR3     |
| cg05390437 | 0.0393  | 0.04485 | 0.04172 | 0.04334 | 0.03664 | 0.03732 | 0.03578 | 0.03464 | 0.03497 | 0.03022 | WDR45L    |
| cg05392265 | 0.6065  | 0.59805 | 0.58509 | 0.53874 | 0.61033 | 0.59825 | 0.36718 | 0.31291 | 0.92532 | 0.93541 | DIRAS3    |
| cg05393484 | 0.65762 | 0.43617 | 0.67258 | 0.7099  | 0.3485  | 0.48542 | 0.42371 | 0.53389 | 0.53021 | 0.24523 | OR6A2     |
| cg05394497 | 0.03003 | 0.02829 | 0.03291 | 0.02916 | 0.02229 | 0.02743 | 0.02555 | 0.02556 | 0.02558 | 0.0255  | FLJ13984  |
| cg05395196 | 0.03307 | 0.03986 | 0.03686 | 0.03427 | 0.02451 | 0.0353  | 0.02555 | 0.02618 | 0.03061 | 0.03157 | HSF2      |
| cg05395995 | 0.11395 | 0.06198 | 0.06675 | 0.05823 | 0.06591 | 0.08056 | 0.44914 | 0.56108 | 0.05657 | 0.04457 | LOC221143 |
| cg05396987 | 0.08367 | 0.03906 | 0.12372 | 0.36545 | 0.10629 | 0.03719 | 0.11318 | 0.12132 | 0.05184 | 0.02814 | FLJ30834  |
| cg05397738 | 0.90581 | 0.80719 | 0.48465 | 0.37462 | 0.92725 | 0.09823 | 0.5416  | 0.65041 | 0.91511 | 0.80805 | PGRMC1    |

|            |         |         |         |         |         |         |         |         |         |                   |
|------------|---------|---------|---------|---------|---------|---------|---------|---------|---------|-------------------|
| cg05399360 | 0.02984 | 0.03583 | 0.03535 | 0.03461 | 0.20607 | 0.04754 | 0.0406  | 0.03657 | 0.02665 | 0.02568 MICB      |
| cg05399553 | 0.06648 | 0.06198 | 0.06412 | 0.06523 | 0.11385 | 0.12215 | 0.08198 | 0.07758 | 0.04171 | 0.04213 SNRPB     |
| cg05399697 | 0.47795 | 0.52064 | 0.42007 | 0.39009 | 0.45842 | 0.55279 | 0.41871 | 0.52466 | 0.43265 | 0.45895 LOC400986 |
| cg05399707 | 0.04348 | 0.03561 | 0.03757 | 0.03828 | 0.0428  | 0.04549 | 0.03929 | 0.03882 | 0.03348 | 0.02773 TRIP10    |
| cg05401645 | 0.01375 | 0.01513 | 0.01822 | 0.01598 | 0.01385 | 0.01485 | 0.0124  | 0.01405 | 0.01266 | 0.0112 LOC162427  |
| cg05402265 | 0.04292 | 0.04351 | 0.05224 | 0.05668 | 0.06748 | 0.07246 | 0.04939 | 0.05446 | 0.03249 | 0.04162 ICK       |
| cg05403071 | 0.03225 | 0.0305  | 0.51746 | 0.44978 | 0.03464 | 0.04433 | 0.03143 | 0.03881 | 0.02224 | 0.02218 SNAI1     |
| cg05404787 | 0.89473 | 0.79802 | 0.92316 | 0.93423 | 0.93938 | 0.8828  | 0.8616  | 0.81994 | 0.92824 | 0.78186 FLJ25102  |
| cg05406101 | 0.88304 | 0.30481 | 0.90186 | 0.90336 | 0.87718 | 0.55947 | 0.87986 | 0.86171 | 0.7545  | 0.82349 C21orf6   |
| cg05409038 | 0.05117 | 0.05024 | 0.05235 | 0.04885 | 0.03609 | 0.04684 | 0.04701 | 0.04885 | 0.0406  | 0.04608 TEX261    |
| cg05409601 | 0.0478  | 0.04598 | 0.05513 | 0.04831 | 0.06549 | 0.05441 | 0.04551 | 0.04118 | 0.04176 | 0.03817 CCNG2     |
| cg05411032 | 0.03365 | 0.0372  | 0.03615 | 0.03912 | 0.02945 | 0.02787 | 0.03248 | 0.03464 | 0.03341 | 0.02635 CLPTM1    |
| cg05412136 | 0.05355 | 0.05628 | 0.0526  | 0.05388 | 0.02361 | 0.03236 | 0.0592  | 0.05022 | 0.03951 | 0.04179 CLTA      |
| cg05412531 | 0.85849 | 0.56523 | 0.84277 | 0.86632 | 0.8821  | 0.91462 | 0.91198 | 0.91141 | 0.91023 | 0.83698 C8orf78   |
| cg05413282 | 0.83182 | 0.84045 | 0.86381 | 0.88932 | 0.45931 | 0.83996 | 0.80497 | 0.84499 | 0.7129  | 0.62878 PRSS3     |
| cg05414225 | 0.05165 | 0.05601 | 0.0649  | 0.06118 | 0.04372 | 0.05593 | 0.05332 | 0.05243 | 0.1072  | 0.04934 C9orf6    |
| cg05414338 | 0.04511 | 0.05625 | 0.35559 | 0.36863 | 0.0923  | 0.07942 | 0.51031 | 0.70473 | 0.03963 | 0.03901 HIST1H3F  |
| cg05417615 | 0.03473 | 0.03292 | 0.04326 | 0.04428 | 0.08889 | 0.06461 | 0.03592 | 0.02874 | 0.03684 | 0.04518 C4orf13   |
| cg05417950 | 0.30707 | 0.17284 | 0.16784 | 0.1405  | 0.23073 | 0.14793 | 0.29861 | 0.14205 | 0.1502  | 0.19708 SPATA5    |
| cg05417985 | 0.02426 | 0.01991 | 0.01751 | 0.01686 | 0.01256 | 0.01561 | 0.01795 | 0.01513 | 0.01755 | 0.01501 ENPP1     |
| cg05418129 | 0.58797 | 0.34661 | 0.62298 | 0.70005 | 0.54873 | 0.54228 | 0.50365 | 0.26218 | 0.71252 | 0.58273 C9orf26   |
| cg05418487 | 0.06128 | 0.22365 | 0.67366 | 0.74021 | 0.78795 | 0.37295 | 0.39624 | 0.35336 | 0.38868 | 0.41689 KCNQ1     |
| cg05419984 | 0.69845 | 0.33848 | 0.49741 | 0.5212  | 0.68678 | 0.52519 | 0.47842 | 0.44403 | 0.55737 | 0.21686 PIGX      |
| cg05420896 | 0.11832 | 0.13987 | 0.73009 | 0.83593 | 0.25257 | 0.49581 | 0.38416 | 0.14323 | 0.15849 | 0.18093 DCC       |
| cg05421555 | 0.03095 | 0.03518 | 0.03535 | 0.03462 | 0.02218 | 0.02823 | 0.02782 | 0.02945 | 0.02298 | 0.02738 AKAP13    |
| cg05421673 | 0.06581 | 0.05988 | 0.05838 | 0.05866 | 0.30776 | 0.05683 | 0.05739 | 0.06553 | 0.06521 | 0.04872 NOG       |
| cg05421688 | 0.0449  | 0.04074 | 0.82785 | 0.88117 | 0.65449 | 0.48884 | 0.27765 | 0.59211 | 0.19017 | 0.36829 C1orf76   |
| cg05421946 | 0.02111 | 0.02477 | 0.02633 | 0.02674 | 0.02636 | 0.02807 | 0.03124 | 0.03335 | 0.02301 | 0.0225 ABHD6      |
| cg05422352 | 0.18626 | 0.04711 | 0.28512 | 0.29764 | 0.09356 | 0.21131 | 0.05833 | 0.04467 | 0.08938 | 0.0569 COPS7B     |
| cg05423257 | 0.72286 | 0.51847 | 0.90863 | 0.94211 | 0.95651 | 0.93207 | 0.92652 | 0.69628 | 0.86437 | 0.8153 ALPI       |
| cg05428978 | 0.0288  | 0.02926 | 0.0342  | 0.03032 | 0.02441 | 0.02799 | 0.02641 | 0.02584 | 0.02685 | 0.0224 CDCA7      |
| cg05429895 | 0.25244 | 0.11813 | 0.11379 | 0.09901 | 0.25291 | 0.10691 | 0.1245  | 0.13535 | 0.22224 | 0.18348 TLR4      |
| cg05432118 | 0.03805 | 0.04232 | 0.03912 | 0.04175 | 0.03484 | 0.04009 | 0.04221 | 0.03793 | 0.03783 | 0.0366 PRKAB1     |
| cg05433460 | 0.83302 | 0.59751 | 0.85107 | 0.87884 | 0.75959 | 0.83837 | 0.82512 | 0.8373  | 0.87054 | 0.83995 ZNF408    |
| cg05434957 | 0.02592 | 0.02705 | 0.02606 | 0.02569 | 0.03538 | 0.02271 | 0.02848 | 0.02433 | 0.03727 | 0.02092 ICA1      |
| cg05435853 | 0.04662 | 0.03898 | 0.05194 | 0.05121 | 0.0429  | 0.04201 | 0.05429 | 0.04657 | 0.04109 | 0.04482 RNF41     |
| cg05436231 | 0.4452  | 0.04561 | 0.96778 | 0.9701  | 0.97054 | 0.96846 | 0.97328 | 0.96482 | 0.9658  | 0.96891 CD164L2   |
| cg05436658 | 0.03256 | 0.03296 | 0.80242 | 0.9313  | 0.14752 | 0.03408 | 0.46852 | 0.85477 | 0.03524 | 0.0309 PRKCB1     |
| cg05437059 | 0.88092 | 0.90814 | 0.87923 | 0.87363 | 0.91552 | 0.89857 | 0.51878 | 0.84519 | 0.88224 | 0.8741 KCNE1L     |
| cg05439318 | 0.03133 | 0.02611 | 0.03309 | 0.02711 | 0.03094 | 0.03101 | 0.0255  | 0.02644 | 0.02196 | 0.02696 CYB5-M    |
| cg05439368 | 0.58463 | 0.57963 | 0.85846 | 0.86103 | 0.8921  | 0.85862 | 0.52982 | 0.78863 | 0.84276 | 0.64074 RNF36     |

|             |         |         |         |         |         |         |         |         |         |                   |
|-------------|---------|---------|---------|---------|---------|---------|---------|---------|---------|-------------------|
| cg054440218 | 0.04043 | 0.03741 | 0.05603 | 0.04714 | 0.03433 | 0.03305 | 0.03204 | 0.0355  | 0.03735 | 0.03444 C8orf36   |
| cg054440289 | 0.26822 | 0.33321 | 0.5756  | 0.69373 | 0.83593 | 0.74492 | 0.22366 | 0.21774 | 0.1431  | 0.2463 IVL        |
| cg054441133 | 0.91987 | 0.58644 | 0.94246 | 0.95369 | 0.95181 | 0.94179 | 0.61032 | 0.42082 | 0.9469  | 0.96057 GDF2      |
| cg054442902 | 0.16448 | 0.04287 | 0.08024 | 0.09221 | 0.60077 | 0.53096 | 0.23792 | 0.08803 | 0.03451 | 0.04084 P2RXL1    |
| cg054443740 | 0.20494 | 0.04259 | 0.60004 | 0.70537 | 0.38913 | 0.57229 | 0.0361  | 0.05959 | 0.34228 | 0.12554 CSEN      |
| cg054444024 | 0.91813 | 0.81743 | 0.77441 | 0.89753 | 0.89758 | 0.90431 | 0.31594 | 0.11533 | 0.45699 | 0.44395 FUT6      |
| cg054445326 | 0.93394 | 0.74607 | 0.07551 | 0.1371  | 0.72235 | 0.71935 | 0.0632  | 0.23015 | 0.08833 | 0.05521 TM4SF19   |
| cg054446471 | 0.86977 | 0.61251 | 0.95077 | 0.94387 | 0.94534 | 0.91245 | 0.94534 | 0.90782 | 0.95352 | 0.91645 HDAC11    |
| cg054449414 | 0.06871 | 0.05829 | 0.06305 | 0.05664 | 0.06365 | 0.05918 | 0.89912 | 0.89109 | 0.06256 | 0.04576 ABCA11    |
| cg054449607 | 0.46889 | 0.41238 | 0.06995 | 0.06584 | 0.04957 | 0.04244 | 0.07814 | 0.06359 | 0.06259 | 0.04139 C6orf51   |
| cg05450995  | 0.07312 | 0.06825 | 0.06516 | 0.06419 | 0.06366 | 0.06261 | 0.05871 | 0.05516 | 0.051   | 0.05499 BCL7A     |
| cg05451974  | 0.02008 | 0.02115 | 0.02239 | 0.01988 | 0.01682 | 0.01923 | 0.0182  | 0.01765 | 0.01799 | 0.01614 C20orf35  |
| cg054544446 | 0.63654 | 0.85891 | 0.84644 | 0.75198 | 0.0859  | 0.06152 | 0.82796 | 0.47204 | 0.32114 | 0.32882 BMS1L     |
| cg05457411  | 0.04815 | 0.04699 | 0.04154 | 0.04057 | 0.06592 | 0.04926 | 0.04483 | 0.03993 | 0.04259 | 0.04087 DDX19A    |
| cg05459203  | 0.10205 | 0.04793 | 0.05746 | 0.04861 | 0.0562  | 0.04841 | 0.0598  | 0.04758 | 0.03545 | 0.04341 NUDCD3    |
| cg05461276  | 0.69674 | 0.1255  | 0.82913 | 0.86841 | 0.8134  | 0.78004 | 0.54901 | 0.42323 | 0.66649 | 0.38408 PDZD3     |
| cg05461841  | 0.1915  | 0.08536 | 0.83945 | 0.90973 | 0.92354 | 0.86919 | 0.03671 | 0.0421  | 0.478   | 0.07028 LOC124220 |
| cg05462826  | 0.05126 | 0.04858 | 0.05045 | 0.05285 | 0.03187 | 0.0386  | 0.03908 | 0.04127 | 0.04196 | 0.04407 ABI2      |
| cg05463705  | 0.03182 | 0.03261 | 0.03653 | 0.03182 | 0.02855 | 0.03099 | 0.02999 | 0.03176 | 0.03157 | 0.02429 ZNF143    |
| cg05465755  | 0.01983 | 0.02022 | 0.02224 | 0.01966 | 0.01462 | 0.0189  | 0.01709 | 0.01751 | 0.01679 | 0.01618 CKS2      |
| cg05467106  | 0.05357 | 0.03998 | 0.04126 | 0.05004 | 0.03234 | 0.03482 | 0.03168 | 0.03925 | 0.03196 | 0.03398 ZNF689    |
| cg05467167  | 0.06038 | 0.05521 | 0.06406 | 0.04858 | 0.08949 | 0.06894 | 0.06868 | 0.06745 | 0.05206 | 0.06466 GOSR2     |
| cg05467458  | 0.76369 | 0.44454 | 0.71809 | 0.8031  | 0.80315 | 0.77113 | 0.46191 | 0.38225 | 0.79984 | 0.61801 SLC7A9    |
| cg05467918  | 0.41695 | 0.4255  | 0.41619 | 0.43588 | 0.42607 | 0.43584 | 0.04358 | 0.03503 | 0.03751 | 0.04324 ACADM     |
| cg05468303  | 0.11452 | 0.15779 | 0.04796 | 0.13139 | 0.83342 | 0.57229 | 0.29383 | 0.04294 | 0.58114 | 0.45846 DGCR6     |
| cg05469695  | 0.60394 | 0.04723 | 0.03164 | 0.0289  | 0.38278 | 0.04533 | 0.02128 | 0.02261 | 0.34965 | 0.02066 CDC42EP3  |
| cg05471297  | 0.398   | 0.05645 | 0.29023 | 0.44223 | 0.27706 | 0.06306 | 0.09872 | 0.06073 | 0.04342 | 0.04108 RYR1      |
| cg05471521  | 0.29202 | 0.09238 | 0.11613 | 0.19712 | 0.22146 | 0.08851 | 0.12304 | 0.10336 | 0.30282 | 0.15843 STK6      |
| cg05471775  | 0.07959 | 0.08386 | 0.08929 | 0.09619 | 0.1975  | 0.14894 | 0.06057 | 0.05967 | 0.04533 | 0.05561 HIST1H4B  |
| cg05472874  | 0.02024 | 0.02137 | 0.10274 | 0.54959 | 0.6203  | 0.53317 | 0.62497 | 0.56807 | 0.01959 | 0.02021 SULT4A1   |
| cg05473175  | 0.04826 | 0.13988 | 0.42977 | 0.35454 | 0.12385 | 0.33574 | 0.06152 | 0.0647  | 0.0416  | 0.04015 IGSF4C    |
| cg05473677  | 0.88977 | 0.85724 | 0.90042 | 0.90221 | 0.90279 | 0.88833 | 0.84439 | 0.87947 | 0.8927  | 0.82453 OSTalpha  |
| cg05473871  | 0.08315 | 0.06701 | 0.07216 | 0.09004 | 0.52007 | 0.46859 | 0.09635 | 0.07307 | 0.05743 | 0.04293 ADAMTSL5  |
| cg05475028  | 0.04665 | 0.0445  | 0.06134 | 0.06424 | 0.04795 | 0.04555 | 0.0341  | 0.04169 | 0.04209 | 0.03822 FAM44A    |
| cg05475277  | 0.94852 | 0.81523 | 0.9634  | 0.95841 | 0.97352 | 0.57971 | 0.95979 | 0.95441 | 0.07308 | 0.03638 FLJ23322  |
| cg05475904  | 0.9377  | 0.9394  | 0.92962 | 0.93473 | 0.93354 | 0.93311 | 0.96025 | 0.93996 | 0.94288 | 0.93058 BCL10     |
| cg05477024  | 0.63355 | 0.25455 | 0.79937 | 0.85847 | 0.84104 | 0.71224 | 0.24867 | 0.21721 | 0.10359 | 0.08951 KIAA1804  |
| cg05477027  | 0.03037 | 0.03623 | 0.03462 | 0.03208 | 0.02209 | 0.02748 | 0.02791 | 0.02593 | 0.02909 | 0.02682 DMWD      |
| cg05480532  | 0.73603 | 0.67243 | 0.71231 | 0.75974 | 0.78846 | 0.69624 | 0.6011  | 0.60055 | 0.61775 | 0.63017 TMPRSS11A |
| cg05482722  | 0.89846 | 0.90012 | 0.84962 | 0.86827 | 0.84713 | 0.85464 | 0.84952 | 0.87263 | 0.88633 | 0.86641 UTP14C    |
| cg05483509  | 0.3982  | 0.11483 | 0.91608 | 0.9003  | 0.85668 | 0.74863 | 0.84074 | 0.04622 | 0.70165 | 0.60888 ATP6VOC   |

|            |         |         |         |         |         |         |         |         |         |         |                |
|------------|---------|---------|---------|---------|---------|---------|---------|---------|---------|---------|----------------|
| cg05484458 | 0.83745 | 0.47652 | 0.85018 | 0.8484  | 0.89778 | 0.8233  | 0.78038 | 0.80241 | 0.83998 | 0.55726 | GNB3           |
| cg05484920 | 0.04959 | 0.05935 | 0.05199 | 0.04844 | 0.03492 | 0.04654 | 0.0512  | 0.04928 | 0.04702 | 0.04753 | SNRP70         |
| cg05485060 | 0.13349 | 0.31892 | 0.7502  | 0.76259 | 0.55049 | 0.57662 | 0.36642 | 0.18131 | 0.11299 | 0.10261 | CTNNAL1        |
| cg05485062 | 0.83515 | 0.05827 | 0.77198 | 0.87458 | 0.4158  | 0.08434 | 0.31954 | 0.06184 | 0.46587 | 0.06819 | SERPINA12      |
| cg05486551 | 0.16243 | 0.17069 | 0.18915 | 0.1829  | 0.30059 | 0.26774 | 0.1977  | 0.20148 | 0.14112 | 0.14622 | FLJ25067       |
| cg05488632 | 0.93873 | 0.9523  | 0.94295 | 0.94965 | 0.96404 | 0.94737 | 0.94885 | 0.94203 | 0.95098 | 0.95171 | ABHD9          |
| cg05492113 | 0.32209 | 0.056   | 0.57367 | 0.79991 | 0.51818 | 0.83167 | 0.78852 | 0.79988 | 0.35801 | 0.2304  | TUB            |
| cg05492270 | 0.06714 | 0.05859 | 0.09821 | 0.07266 | 0.1114  | 0.09782 | 0.10187 | 0.08131 | 0.07087 | 0.07085 | RNF121         |
| cg05492503 | 0.02373 | 0.02561 | 0.0269  | 0.0243  | 0.02055 | 0.02651 | 0.02473 | 0.02484 | 0.02369 | 0.0229  | EPN2           |
| cg05492605 | 0.02866 | 0.02672 | 0.03847 | 0.04055 | 0.02934 | 0.03358 | 0.02541 | 0.02457 | 0.02861 | 0.0227  | PPP1R8         |
| cg05492845 | 0.02863 | 0.02661 | 0.04658 | 0.05087 | 0.03367 | 0.04558 | 0.03422 | 0.02949 | 0.0247  | 0.01857 | VEGFB          |
| cg05494069 | 0.0433  | 0.03912 | 0.05627 | 0.04804 | 0.068   | 0.04413 | 0.03614 | 0.03503 | 0.04993 | 0.0372  | PRKAA2         |
| cg05494459 | 0.06701 | 0.06176 | 0.06701 | 0.06326 | 0.05085 | 0.05571 | 0.30625 | 0.21914 | 0.05617 | 0.05937 | FTSJ1          |
| cg05497107 | 0.03225 | 0.03136 | 0.02931 | 0.02766 | 0.02484 | 0.02495 | 0.02615 | 0.02507 | 0.02992 | 0.0235  | RUFY1          |
| cg05497616 | 0.02817 | 0.02646 | 0.02901 | 0.02876 | 0.24305 | 0.02254 | 0.02568 | 0.02527 | 0.02207 | 0.01983 | CAMK4          |
| cg05498681 | 0.90723 | 0.80743 | 0.84829 | 0.89972 | 0.86474 | 0.87495 | 0.77321 | 0.72326 | 0.56989 | 0.81004 | SRC            |
| cg05499853 | 0.04539 | 0.04067 | 0.0481  | 0.04236 | 0.03745 | 0.04371 | 0.04791 | 0.04263 | 0.0385  | 0.03341 | C1orf97        |
| cg05500015 | 0.04126 | 0.04192 | 0.19251 | 0.72488 | 0.06381 | 0.04131 | 0.04737 | 0.03862 | 0.31633 | 0.41632 | NAALAD2        |
| cg05500074 | 0.8574  | 0.77271 | 0.7235  | 0.80009 | 0.76058 | 0.86234 | 0.46178 | 0.40986 | 0.88255 | 0.78167 | TSKS           |
| cg05501276 | 0.0301  | 0.03162 | 0.0305  | 0.031   | 0.02426 | 0.04921 | 0.02554 | 0.02753 | 0.0252  | 0.02349 | TRA2A          |
| cg05501357 | 0.61305 | 0.56841 | 0.61179 | 0.64614 | 0.51327 | 0.56961 | 0.51569 | 0.53143 | 0.63452 | 0.50514 | HIPK3          |
| cg05501584 | 0.10114 | 0.07794 | 0.63317 | 0.78634 | 0.83834 | 0.8537  | 0.11571 | 0.09168 | 0.06905 | 0.06627 | ST8SIA2        |
| cg05501658 | 0.0225  | 0.02693 | 0.02649 | 0.02539 | 0.01798 | 0.02291 | 0.02338 | 0.02272 | 0.02353 | 0.02233 | E2F4           |
| cg05501682 | 0.29652 | 0.14992 | 0.08205 | 0.08446 | 0.04359 | 0.06609 | 0.06244 | 0.07799 | 0.06949 | 0.06117 | DKFZp686i15217 |
| cg05501721 | 0.02511 | 0.02258 | 0.03025 | 0.02504 | 0.02063 | 0.02555 | 0.02085 | 0.02052 | 0.02177 | 0.01788 | CRTC1          |
| cg05503412 | 0.03216 | 0.03417 | 0.03435 | 0.03419 | 0.03394 | 0.03907 | 0.02873 | 0.03097 | 0.02899 | 0.02486 | C4orf14        |
| cg05507459 | 0.27892 | 0.23251 | 0.15235 | 0.26538 | 0.27606 | 0.25813 | 0.17148 | 0.22984 | 0.08307 | 0.06034 | C9orf121       |
| cg05507894 | 0.03007 | 0.02371 | 0.02501 | 0.02284 | 0.02627 | 0.02523 | 0.01906 | 0.02011 | 0.02195 | 0.01909 | LOC201895      |
| cg05508048 | 0.02906 | 0.03228 | 0.03233 | 0.03711 | 0.0318  | 0.03661 | 0.03167 | 0.03215 | 0.0326  | 0.03382 | DDX26          |
| cg05508067 | 0.88706 | 0.85236 | 0.36204 | 0.79648 | 0.82531 | 0.8378  | 0.16142 | 0.07922 | 0.09134 | 0.05743 | PNPLA4         |
| cg05508084 | 0.08869 | 0.07733 | 0.84223 | 0.85675 | 0.80304 | 0.64754 | 0.06175 | 0.06195 | 0.08324 | 0.07213 | ZNF667         |
| cg05508558 | 0.19423 | 0.05497 | 0.2162  | 0.1293  | 0.14334 | 0.06318 | 0.0916  | 0.04673 | 0.79904 | 0.36155 | CR2            |
| cg05510041 | 0.05327 | 0.05669 | 0.05427 | 0.05376 | 0.04242 | 0.05223 | 0.05321 | 0.05371 | 0.04991 | 0.04785 | VCL            |
| cg05511517 | 0.053   | 0.06133 | 0.295   | 0.33324 | 0.20298 | 0.03466 | 0.19525 | 0.06768 | 0.10457 | 0.05325 | NOTCH2         |
| cg05511685 | 0.41313 | 0.24002 | 0.78626 | 0.80014 | 0.6946  | 0.78352 | 0.62881 | 0.62352 | 0.81226 | 0.69089 | RGS9           |
| cg05511752 | 0.04649 | 0.04902 | 0.05714 | 0.05169 | 0.03851 | 0.05137 | 0.11962 | 0.09851 | 0.04705 | 0.03948 | MED12          |
| cg05512099 | 0.79072 | 0.69426 | 0.62475 | 0.73966 | 0.77086 | 0.54733 | 0.73801 | 0.25397 | 0.83106 | 0.24039 | PLEKHF1        |
| cg05512756 | 0.0835  | 0.05475 | 0.06231 | 0.10374 | 0.21319 | 0.65617 | 0.06698 | 0.06564 | 0.04091 | 0.02706 | UGT3A1         |
| cg05516537 | 0.14887 | 0.07702 | 0.07854 | 0.08247 | 0.11709 | 0.08775 | 0.11295 | 0.06049 | 0.09539 | 0.10867 | TFDP1          |
| cg05516832 | 0.04681 | 0.04066 | 0.04492 | 0.04729 | 0.0408  | 0.04335 | 0.04231 | 0.04113 | 0.0385  | 0.03754 | SGTA           |
| cg05517572 | 0.66039 | 0.61174 | 0.2239  | 0.53309 | 0.91198 | 0.83479 | 0.79044 | 0.55216 | 0.06713 | 0.03258 | STAP2          |

|            |         |         |         |         |         |         |         |         |         |         |              |
|------------|---------|---------|---------|---------|---------|---------|---------|---------|---------|---------|--------------|
| cg05517711 | 0.45002 | 0.28671 | 0.50788 | 0.75178 | 0.75985 | 0.12178 | 0.40146 | 0.12633 | 0.44311 | 0.09326 | ST6GALNAC6   |
| cg05518543 | 0.07341 | 0.05787 | 0.06955 | 0.06511 | 0.10552 | 0.07274 | 0.06176 | 0.05608 | 0.05272 | 0.04736 | MAEA         |
| cg05520656 | 0.10273 | 0.59069 | 0.64077 | 0.71986 | 0.46757 | 0.11357 | 0.92374 | 0.92355 | 0.05387 | 0.04895 | ZNF681       |
| cg05521696 | 0.58183 | 0.64829 | 0.56726 | 0.66414 | 0.6523  | 0.7557  | 0.30579 | 0.57798 | 0.43762 | 0.24618 | SLC2A14      |
| cg05522288 | 0.04801 | 0.04674 | 0.06568 | 0.04921 | 0.06584 | 0.07226 | 0.04802 | 0.04727 | 0.04379 | 0.03429 | LSM8         |
| cg05522383 | 0.03654 | 0.11479 | 0.04993 | 0.04637 | 0.21696 | 0.03704 | 0.03924 | 0.03746 | 0.26835 | 0.42193 | PITX2        |
| cg05523047 | 0.0309  | 0.02945 | 0.03385 | 0.0217  | 0.26534 | 0.02413 | 0.02967 | 0.0233  | 0.02151 | 0.01547 | VLDLR        |
| cg05523085 | 0.03765 | 0.03023 | 0.49421 | 0.42491 | 0.36192 | 0.23174 | 0.42321 | 0.05557 | 0.71081 | 0.36269 | MYO5A        |
| cg05523254 | 0.02086 | 0.02456 | 0.02376 | 0.02075 | 0.01819 | 0.02166 | 0.02084 | 0.02173 | 0.018   | 0.01736 | MFN2         |
| cg05526376 | 0.02822 | 0.03872 | 0.06601 | 0.03545 | 0.05254 | 0.06596 | 0.03096 | 0.03843 | 0.03406 | 0.02526 | LMTK2        |
| cg05528918 | 0.81727 | 0.82226 | 0.81237 | 0.83422 | 0.75537 | 0.78849 | 0.78771 | 0.74358 | 0.82033 | 0.78626 | ZFP161       |
| cg05529097 | 0.07611 | 0.08067 | 0.07865 | 0.07663 | 0.09916 | 0.09521 | 0.10242 | 0.08835 | 0.071   | 0.08712 | FXR2         |
| cg05531055 | 0.05523 | 0.05774 | 0.06136 | 0.05568 | 0.04814 | 0.05815 | 0.05201 | 0.05265 | 0.04533 | 0.05712 | TOM1         |
| cg05532892 | 0.04501 | 0.0469  | 0.07094 | 0.05274 | 0.12267 | 0.06247 | 0.04953 | 0.04581 | 0.03986 | 0.04086 | PSMA1        |
| cg05535113 | 0.17355 | 0.18098 | 0.71739 | 0.74104 | 0.3414  | 0.18069 | 0.22359 | 0.15743 | 0.11773 | 0.13459 | CHST4        |
| cg05538387 | 0.03478 | 0.03458 | 0.04403 | 0.03213 | 0.03639 | 0.03117 | 0.03413 | 0.03675 | 0.03122 | 0.034   | RP11-52910.4 |
| cg05538432 | 0.66924 | 0.39335 | 0.55784 | 0.64148 | 0.3089  | 0.50846 | 0.39541 | 0.43505 | 0.26343 | 0.24859 | C1S          |
| cg05546038 | 0.92486 | 0.92578 | 0.93591 | 0.94513 | 0.94802 | 0.92374 | 0.93907 | 0.92987 | 0.81202 | 0.76012 | NOL3         |
| cg05546044 | 0.86007 | 0.24743 | 0.33166 | 0.42082 | 0.88141 | 0.16087 | 0.73483 | 0.16002 | 0.17968 | 0.14213 | MAPK1        |
| cg05546383 | 0.85931 | 0.88165 | 0.86809 | 0.86717 | 0.82068 | 0.84854 | 0.88034 | 0.89087 | 0.88671 | 0.83671 | OTUD4        |
| cg05547500 | 0.84265 | 0.87795 | 0.88373 | 0.88925 | 0.89569 | 0.88236 | 0.75237 | 0.87853 | 0.88548 | 0.86573 | TXNDC2       |
| cg05547993 | 0.04162 | 0.03663 | 0.04166 | 0.04305 | 0.05893 | 0.06021 | 0.03203 | 0.03246 | 0.02917 | 0.03674 | VAC14        |
| cg05552534 | 0.05617 | 0.04884 | 0.06211 | 0.06932 | 0.06895 | 0.04492 | 0.09135 | 0.07127 | 0.0564  | 0.03936 | ABCBC10      |
| cg05554718 | 0.27806 | 0.55108 | 0.17316 | 0.16142 | 0.23126 | 0.17703 | 0.51641 | 0.57663 | 0.24429 | 0.10026 | HIST1H1D     |
| cg05554936 | 0.02732 | 0.02889 | 0.71548 | 0.96183 | 0.61042 | 0.94605 | 0.25528 | 0.03059 | 0.02022 | 0.01934 | RAB3D        |
| cg05556020 | 0.48327 | 0.42359 | 0.89967 | 0.90633 | 0.77274 | 0.66626 | 0.69562 | 0.6086  | 0.68681 | 0.8493  | REN          |
| cg05556202 | 0.89021 | 0.88246 | 0.52348 | 0.87284 | 0.93353 | 0.90303 | 0.40353 | 0.82741 | 0.31438 | 0.11188 | TM4SF19      |
| cg05556210 | 0.04262 | 0.05251 | 0.04065 | 0.04076 | 0.03245 | 0.03925 | 0.04286 | 0.04339 | 0.04077 | 0.0319  | ATBF1        |
| cg05556717 | 0.73313 | 0.3065  | 0.89205 | 0.90697 | 0.91496 | 0.80219 | 0.86228 | 0.67206 | 0.90413 | 0.44696 | CCL26        |
| cg05558390 | 0.10763 | 0.06128 | 0.49237 | 0.57312 | 0.20284 | 0.25299 | 0.54371 | 0.48984 | 0.52413 | 0.55487 | GNAS         |
| cg05559445 | 0.92962 | 0.77919 | 0.92934 | 0.94074 | 0.94183 | 0.89228 | 0.91557 | 0.77687 | 0.89284 | 0.64969 | CDKN1C       |
| cg05562327 | 0.06907 | 0.06547 | 0.10022 | 0.0887  | 0.05664 | 0.08239 | 0.08171 | 0.07461 | 0.0771  | 0.07137 | CPEB2        |
| cg05562817 | 0.06615 | 0.05431 | 0.31786 | 0.47409 | 0.06857 | 0.04515 | 0.05699 | 0.05314 | 0.04444 | 0.04543 | MGC33839     |
| cg05564251 | 0.92026 | 0.93522 | 0.91601 | 0.93146 | 0.93883 | 0.93141 | 0.91086 | 0.88934 | 0.9216  | 0.80574 | SP140        |
| cg05564266 | 0.86984 | 0.29199 | 0.79597 | 0.8787  | 0.80397 | 0.65045 | 0.85331 | 0.67786 | 0.80907 | 0.5693  | C6orf204     |
| cg05564657 | 0.84963 | 0.7742  | 0.9242  | 0.943   | 0.96304 | 0.89696 | 0.89249 | 0.92201 | 0.84705 | 0.72069 | AADAC        |
| cg05565537 | 0.89123 | 0.42687 | 0.90457 | 0.9171  | 0.88969 | 0.87295 | 0.78289 | 0.8889  | 0.65862 | 0.78523 | GALNT6       |
| cg05566397 | 0.03718 | 0.03792 | 0.05186 | 0.04781 | 0.06667 | 0.07093 | 0.03623 | 0.03562 | 0.0294  | 0.02998 | MLL5         |
| cg05566965 | 0.02838 | 0.03044 | 0.03222 | 0.03183 | 0.0543  | 0.02981 | 0.02997 | 0.03118 | 0.04191 | 0.02758 | BID          |
| cg05568762 | 0.02604 | 0.02689 | 0.03558 | 0.03243 | 0.02261 | 0.02892 | 0.02486 | 0.02608 | 0.02371 | 0.02448 | MLR1         |
| cg05569220 | 0.39514 | 0.3821  | 0.75257 | 0.86541 | 0.88403 | 0.41355 | 0.42078 | 0.1538  | 0.72994 | 0.42004 | FLJ44861     |



|            |         |         |         |         |         |         |         |         |         |                   |
|------------|---------|---------|---------|---------|---------|---------|---------|---------|---------|-------------------|
| cg05570980 | 0.79256 | 0.70346 | 0.1103  | 0.10636 | 0.53098 | 0.37983 | 0.38265 | 0.1189  | 0.096   | 0.07381 C3orf52   |
| cg05573563 | 0.6768  | 0.71255 | 0.37813 | 0.29873 | 0.53601 | 0.43639 | 0.62839 | 0.60301 | 0.75895 | 0.69235 OFD1      |
| cg05575043 | 0.03938 | 0.04558 | 0.06406 | 0.05349 | 0.06835 | 0.06229 | 0.04004 | 0.03649 | 0.03537 | 0.03492 ZNF394    |
| cg05576974 | 0.0264  | 0.02521 | 0.03169 | 0.02716 | 0.02503 | 0.03134 | 0.02749 | 0.02759 | 0.02564 | 0.02147 UCHL5     |
| cg05577173 | 0.07239 | 0.05704 | 0.06511 | 0.0625  | 0.05176 | 0.05205 | 0.0572  | 0.05582 | 0.04885 | 0.04149 PAPD4     |
| cg05585544 | 0.80784 | 0.55726 | 0.83633 | 0.85578 | 0.74838 | 0.79087 | 0.75821 | 0.76702 | 0.83506 | 0.70025 C1QTNF4   |
| cg05587158 | 0.26068 | 0.06098 | 0.36435 | 0.38224 | 0.32459 | 0.35788 | 0.05749 | 0.08248 | 0.35592 | 0.32268 ARR3      |
| cg05587474 | 0.10459 | 0.03552 | 0.03994 | 0.03635 | 0.03301 | 0.03985 | 0.03065 | 0.02946 | 0.03277 | 0.03492 MOV10     |
| cg05587736 | 0.74781 | 0.75796 | 0.7537  | 0.78166 | 0.78665 | 0.83183 | 0.72004 | 0.76524 | 0.79404 | 0.76229 NUP93     |
| cg05588972 | 0.21344 | 0.06555 | 0.09305 | 0.09531 | 0.03995 | 0.0391  | 0.10278 | 0.05011 | 0.09584 | 0.0354 C1orf89    |
| cg05589246 | 0.05363 | 0.06324 | 0.25776 | 0.43183 | 0.4135  | 0.44542 | 0.25042 | 0.07168 | 0.18624 | 0.39435 HOXC12    |
| cg05590257 | 0.03127 | 0.03114 | 0.0326  | 0.02856 | 0.0383  | 0.03883 | 0.03232 | 0.02833 | 0.02653 | 0.02785 LOC201164 |
| cg05590294 | 0.47441 | 0.57879 | 0.73662 | 0.78558 | 0.62027 | 0.7224  | 0.20921 | 0.24479 | 0.62556 | 0.51 CD69         |
| cg05590567 | 0.04876 | 0.05101 | 0.04817 | 0.04583 | 0.03779 | 0.04211 | 0.04362 | 0.04112 | 0.11348 | 0.03709 METTL2B   |
| cg05590982 | 0.43862 | 0.36436 | 0.61334 | 0.77035 | 0.04794 | 0.0481  | 0.1749  | 0.09336 | 0.04761 | 0.0788 P8         |
| cg05592398 | 0.05871 | 0.06957 | 0.38457 | 0.42548 | 0.67887 | 0.63052 | 0.76043 | 0.10155 | 0.53299 | 0.45984 LIMK1     |
| cg05592434 | 0.21975 | 0.20972 | 0.14986 | 0.161   | 0.12653 | 0.22001 | 0.24503 | 0.29445 | 0.1774  | 0.19265 RPS13     |
| cg05592527 | 0.94312 | 0.87546 | 0.03611 | 0.03815 | 0.02667 | 0.03698 | 0.02786 | 0.02288 | 0.02755 | 0.02312 ARMCX6    |
| cg05593300 | 0.14667 | 0.14013 | 0.21252 | 0.24181 | 0.31529 | 0.16763 | 0.22613 | 0.20249 | 0.54964 | 0.40057 PRRX1     |
| cg05593325 | 0.10482 | 0.07036 | 0.70868 | 0.88439 | 0.80242 | 0.65215 | 0.88324 | 0.827   | 0.52633 | 0.19595 GALNT12   |
| cg05593479 | 0.072   | 0.07929 | 0.07643 | 0.05976 | 0.11467 | 0.09263 | 0.07027 | 0.06841 | 0.08609 | 0.07142 TIGD1     |
| cg05593780 | 0.02829 | 0.02962 | 0.03232 | 0.029   | 0.03813 | 0.03739 | 0.03414 | 0.03465 | 0.03945 | 0.04553 PHF5A     |
| cg05594230 | 0.69707 | 0.6887  | 0.05439 | 0.05837 | 0.08146 | 0.05142 | 0.30315 | 0.58632 | 0.84998 | 0.43665 INGX      |
| cg05595345 | 0.02453 | 0.01977 | 0.03865 | 0.02185 | 0.01517 | 0.01813 | 0.01873 | 0.02095 | 0.01977 | 0.01722 ARRD4     |
| cg05596294 | 0.12134 | 0.49875 | 0.69523 | 0.84567 | 0.51642 | 0.13158 | 0.15713 | 0.16073 | 0.3404  | 0.59127 LPPR4     |
| cg05596756 | 0.89083 | 0.9078  | 0.90429 | 0.90776 | 0.91101 | 0.90356 | 0.1982  | 0.84814 | 0.89901 | 0.83999 FAM113B   |
| cg05598246 | 0.77878 | 0.79486 | 0.76624 | 0.82071 | 0.75884 | 0.75983 | 0.39263 | 0.29973 | 0.74944 | 0.5768 MOG        |
| cg05600174 | 0.12827 | 0.10415 | 0.12689 | 0.1163  | 0.28599 | 0.17072 | 0.10023 | 0.08822 | 0.07363 | 0.07932 C9orf95   |
| cg05600717 | 0.56805 | 0.14929 | 0.91291 | 0.8703  | 0.9118  | 0.67171 | 0.3282  | 0.13846 | 0.73427 | 0.41697 FLJ13639  |
| cg05602212 | 0.06711 | 0.06107 | 0.06088 | 0.05668 | 0.04318 | 0.05349 | 0.05234 | 0.05553 | 0.05529 | 0.06064 ZFYVE16   |
| cg05602615 | 0.02637 | 0.02616 | 0.02437 | 0.02169 | 0.0239  | 0.02899 | 0.02322 | 0.02443 | 0.02155 | 0.02079 SETD3     |
| cg05603623 | 0.04221 | 0.04007 | 0.0455  | 0.05126 | 0.02992 | 0.02723 | 0.04832 | 0.03987 | 0.0365  | 0.03287 TIMM44    |
| cg05604720 | 0.06132 | 0.06295 | 0.0672  | 0.06573 | 0.04195 | 0.04623 | 0.06252 | 0.05404 | 0.05212 | 0.0631 RIPK2      |
| cg05606799 | 0.78432 | 0.57406 | 0.07442 | 0.07197 | 0.48278 | 0.5093  | 0.05215 | 0.05201 | 0.08932 | 0.05235 KISS1     |
| cg05607127 | 0.04805 | 0.0444  | 0.04531 | 0.04883 | 0.05281 | 0.03996 | 0.03841 | 0.0387  | 0.06407 | 0.03636 KCNG3     |
| cg05607401 | 0.61259 | 0.53932 | 0.71874 | 0.75581 | 0.74506 | 0.71941 | 0.47012 | 0.42126 | 0.33166 | 0.2943 GMFG       |
| cg05607472 | 0.02824 | 0.02763 | 0.02913 | 0.02293 | 0.02438 | 0.0246  | 0.02567 | 0.02195 | 0.02254 | 0.02106 CSNK1A1   |
| cg05608188 | 0.05548 | 0.04666 | 0.0811  | 0.05572 | 0.07783 | 0.07195 | 0.04482 | 0.05492 | 0.03543 | 0.03275 FLJ13576  |
| cg05610148 | 0.03882 | 0.03921 | 0.04451 | 0.04474 | 0.03577 | 0.03983 | 0.04183 | 0.03648 | 0.03789 | 0.03883 C1orf93   |
| cg05610379 | 0.0247  | 0.02617 | 0.02695 | 0.02533 | 0.02112 | 0.02309 | 0.0211  | 0.0229  | 0.02136 | 0.01862 C10orf86  |
| cg05612904 | 0.03677 | 0.03431 | 0.04761 | 0.03812 | 0.03642 | 0.03684 | 0.03156 | 0.0365  | 0.04401 | 0.03415 DPH5      |

|            |         |         |         |         |         |         |         |         |         |                   |
|------------|---------|---------|---------|---------|---------|---------|---------|---------|---------|-------------------|
| cg05615150 | 0.77821 | 0.73495 | 0.61796 | 0.75891 | 0.69791 | 0.32944 | 0.77947 | 0.76317 | 0.48741 | 0.40579 ARPP-21   |
| cg05615487 | 0.47914 | 0.27173 | 0.13103 | 0.1783  | 0.13066 | 0.338   | 0.24245 | 0.08125 | 0.07666 | 0.05859 ACR       |
| cg05619712 | 0.65399 | 0.58894 | 0.59787 | 0.60772 | 0.64934 | 0.64834 | 0.56696 | 0.43905 | 0.32136 | 0.27273 CRYGC     |
| cg05621401 | 0.04188 | 0.04128 | 0.8443  | 0.81358 | 0.18505 | 0.14891 | 0.04278 | 0.04729 | 0.04461 | 0.03571 RET       |
| cg05621759 | 0.86266 | 0.71532 | 0.45688 | 0.57141 | 0.89336 | 0.86871 | 0.74714 | 0.88183 | 0.49699 | 0.22802 H-pIk     |
| cg05624196 | 0.72475 | 0.72967 | 0.71197 | 0.7389  | 0.658   | 0.67519 | 0.737   | 0.72398 | 0.28137 | 0.24317 APOD      |
| cg05624932 | 0.05451 | 0.05537 | 0.35108 | 0.54527 | 0.1255  | 0.05719 | 0.07022 | 0.05822 | 0.09959 | 0.05599 CRISPLD1  |
| cg05626013 | 0.17153 | 0.1541  | 0.3544  | 0.5509  | 0.28755 | 0.15991 | 0.32693 | 0.16723 | 0.14776 | 0.14833 LRRTM3    |
| cg05627103 | 0.14387 | 0.04386 | 0.91435 | 0.92959 | 0.33089 | 0.06321 | 0.07361 | 0.0424  | 0.06766 | 0.03196 KIAA1984  |
| cg05628549 | 0.95919 | 0.95569 | 0.03395 | 0.03622 | 0.02984 | 0.03838 | 0.09985 | 0.13373 | 0.03262 | 0.02989 PRKCDBP   |
| cg05633152 | 0.64131 | 0.35183 | 0.72436 | 0.86899 | 0.61722 | 0.92667 | 0.23565 | 0.45236 | 0.05786 | 0.0364 SLC10A1    |
| cg05636175 | 0.1776  | 0.07995 | 0.92274 | 0.91341 | 0.78044 | 0.85798 | 0.4671  | 0.09367 | 0.35947 | 0.39022 TNFRSF10C |
| cg05637351 | 0.05304 | 0.0349  | 0.11497 | 0.29974 | 0.05097 | 0.08649 | 0.07085 | 0.06878 | 0.07862 | 0.0484 CDH7       |
| cg05637892 | 0.05453 | 0.05914 | 0.0765  | 0.06111 | 0.05533 | 0.05973 | 0.04853 | 0.05264 | 0.0487  | 0.0504 SCFD1      |
| cg05641882 | 0.03364 | 0.03457 | 0.0339  | 0.03473 | 0.03586 | 0.03716 | 0.03211 | 0.03105 | 0.02926 | 0.03459 CXCL3     |
| cg05641961 | 0.02913 | 0.02392 | 0.02647 | 0.03104 | 0.02106 | 0.02649 | 0.02686 | 0.02549 | 0.0282  | 0.02772 CIB1      |
| cg05642698 | 0.03447 | 0.03937 | 0.03732 | 0.04134 | 0.03018 | 0.0656  | 0.03682 | 0.02944 | 0.03217 | 0.03503 SEC63     |
| cg05646865 | 0.83675 | 0.57766 | 0.91475 | 0.92011 | 0.93424 | 0.90864 | 0.91411 | 0.85569 | 0.92912 | 0.69836 FLJ23878  |
| cg05647526 | 0.05235 | 0.04627 | 0.05899 | 0.05689 | 0.06648 | 0.07375 | 0.04152 | 0.04388 | 0.04332 | 0.0428 CALU       |
| cg05647859 | 0.45315 | 0.10512 | 0.65152 | 0.69944 | 0.17169 | 0.10913 | 0.13936 | 0.10676 | 0.13943 | 0.13667 LIN7A     |
| cg05649009 | 0.68753 | 0.31674 | 0.71042 | 0.79795 | 0.52637 | 0.67932 | 0.15602 | 0.51828 | 0.53617 | 0.20647 CHRNA1    |
| cg05650171 | 0.61895 | 0.10488 | 0.87328 | 0.90379 | 0.39675 | 0.08766 | 0.68714 | 0.13364 | 0.72923 | 0.679 PFDN2       |
| cg05650565 | 0.03106 | 0.02662 | 0.03193 | 0.02917 | 0.02081 | 0.02689 | 0.02482 | 0.02457 | 0.02394 | 0.02388 UBXD2     |
| cg05650764 | 0.03435 | 0.03244 | 0.03504 | 0.03121 | 0.02375 | 0.03136 | 0.03707 | 0.03016 | 0.03319 | 0.02829 SAPS3     |
| cg05654163 | 0.66783 | 0.64055 | 0.84697 | 0.87728 | 0.76449 | 0.81388 | 0.62632 | 0.83744 | 0.87604 | 0.73606 SLC39A2   |
| cg05654164 | 0.92561 | 0.761   | 0.94028 | 0.93832 | 0.04144 | 0.03345 | 0.74384 | 0.17068 | 0.07581 | 0.03274 C1orf52   |
| cg05655041 | 0.66809 | 0.70659 | 0.6675  | 0.70332 | 0.65484 | 0.70025 | 0.36762 | 0.4759  | 0.78836 | 0.70278 ASB11     |
| cg05655556 | 0.16552 | 0.03789 | 0.51799 | 0.59462 | 0.03871 | 0.02837 | 0.03701 | 0.0376  | 0.04166 | 0.03448 PSMD2     |
| cg05656180 | 0.49445 | 0.1802  | 0.88442 | 0.88285 | 0.83489 | 0.83583 | 0.6509  | 0.43604 | 0.55795 | 0.58771 KCNQ1DN   |
| cg05656364 | 0.86871 | 0.76159 | 0.88903 | 0.89048 | 0.91918 | 0.83459 | 0.80447 | 0.54731 | 0.82646 | 0.27193 VAMP8     |
| cg05657090 | 0.92023 | 0.74643 | 0.93491 | 0.93223 | 0.88091 | 0.48789 | 0.84622 | 0.65883 | 0.94261 | 0.81899 RNASEH2A  |
| cg05657520 | 0.85234 | 0.5484  | 0.80629 | 0.86251 | 0.86952 | 0.86814 | 0.56389 | 0.42853 | 0.57221 | 0.48596 OPTC      |
| cg05658858 | 0.02682 | 0.02431 | 0.02451 | 0.02721 | 0.0213  | 0.02455 | 0.02057 | 0.02416 | 0.02287 | 0.01693 TUBGCP2   |
| cg05659526 | 0.92585 | 0.91837 | 0.90621 | 0.91803 | 0.9239  | 0.92096 | 0.898   | 0.9289  | 0.91971 | 0.90956 FCER1G    |
| cg05659947 | 0.70953 | 0.12245 | 0.5818  | 0.5375  | 0.88828 | 0.64523 | 0.47693 | 0.15066 | 0.49496 | 0.3521 C4BPB      |
| cg05660795 | 0.39805 | 0.28827 | 0.53646 | 0.59412 | 0.8264  | 0.68082 | 0.90769 | 0.46851 | 0.81196 | 0.60634 IGFBP1    |
| cg05661333 | 0.0357  | 0.04032 | 0.04002 | 0.03711 | 0.04201 | 0.04558 | 0.09252 | 0.03442 | 0.03075 | 0.02687 GABBR1    |
| cg05661838 | 0.44131 | 0.34232 | 0.78987 | 0.70422 | 0.8201  | 0.89652 | 0.05414 | 0.6258  | 0.03877 | 0.23285 MOS       |
| cg05662500 | 0.56609 | 0.10391 | 0.15743 | 0.145   | 0.0591  | 0.0494  | 0.06905 | 0.04885 | 0.24643 | 0.04082 GPD1L     |
| cg05663262 | 0.79164 | 0.59571 | 0.80771 | 0.80754 | 0.74682 | 0.25454 | 0.40304 | 0.54749 | 0.80852 | 0.33704 HY1       |
| cg05664072 | 0.10749 | 0.13221 | 0.38356 | 0.35195 | 0.72084 | 0.57775 | 0.13013 | 0.05799 | 0.33033 | 0.25023 PER2      |

|            |         |         |         |         |         |         |         |         |         |         |               |
|------------|---------|---------|---------|---------|---------|---------|---------|---------|---------|---------|---------------|
| cg05666713 | 0.69555 | 0.34475 | 0.8749  | 0.88919 | 0.78164 | 0.8238  | 0.7556  | 0.53672 | 0.6622  | 0.07708 | DKFZp434B1231 |
| cg05668720 | 0.02601 | 0.03154 | 0.03661 | 0.03282 | 0.02743 | 0.03314 | 0.02672 | 0.02734 | 0.02743 | 0.03013 | TUBE1         |
| cg05668853 | 0.05462 | 0.06031 | 0.04977 | 0.04805 | 0.03752 | 0.04518 | 0.05711 | 0.08335 | 0.0426  | 0.04473 | RAB34         |
| cg05669100 | 0.06626 | 0.06003 | 0.08009 | 0.06746 | 0.08016 | 0.06816 | 0.06269 | 0.07307 | 0.06828 | 0.07302 | FAM103A1      |
| cg05669210 | 0.06905 | 0.07058 | 0.11107 | 0.13224 | 0.13739 | 0.15587 | 0.08565 | 0.07756 | 0.06856 | 0.05232 | SLC12A9       |
| cg05669980 | 0.03401 | 0.03313 | 0.03491 | 0.03011 | 0.02753 | 0.03226 | 0.02529 | 0.02814 | 0.02837 | 0.03232 | ARNT          |
| cg05670275 | 0.0353  | 0.03466 | 0.04044 | 0.03601 | 0.03402 | 0.03311 | 0.03387 | 0.03299 | 0.02857 | 0.03029 | FBXO36        |
| cg05670348 | 0.02993 | 0.02925 | 0.52602 | 0.50285 | 0.02233 | 0.02746 | 0.02521 | 0.03016 | 0.02806 | 0.02374 | LARGE         |
| cg05670408 | 0.05699 | 0.05488 | 0.09685 | 0.08335 | 0.17676 | 0.26432 | 0.05873 | 0.04716 | 0.084   | 0.04897 | MAN1C1        |
| cg05670596 | 0.20875 | 0.05657 | 0.41059 | 0.64754 | 0.9251  | 0.87805 | 0.07121 | 0.17163 | 0.82143 | 0.4613  | CCRL2         |
| cg05671018 | 0.91904 | 0.90832 | 0.88933 | 0.90678 | 0.93129 | 0.81034 | 0.88254 | 0.73612 | 0.89818 | 0.84004 | LYSMD2        |
| cg05671350 | 0.31602 | 0.32665 | 0.86144 | 0.75978 | 0.61415 | 0.56751 | 0.15115 | 0.07466 | 0.36334 | 0.2785  | P4HA3         |
| cg05672265 | 0.02567 | 0.03035 | 0.0299  | 0.03252 | 0.02461 | 0.02723 | 0.02598 | 0.02817 | 0.02713 | 0.02737 | SLC20A1       |
| cg05673087 | 0.04914 | 0.05343 | 0.0507  | 0.05148 | 0.03568 | 0.04445 | 0.13373 | 0.02777 | 0.03405 | 0.03672 | FAM51A1       |
| cg05674036 | 0.09447 | 0.12744 | 0.2105  | 0.35992 | 0.58686 | 0.24267 | 0.07724 | 0.07707 | 0.07936 | 0.07346 | OR3A3         |
| cg05674199 | 0.39235 | 0.11728 | 0.36246 | 0.38393 | 0.12003 | 0.06039 | 0.56429 | 0.33016 | 0.48242 | 0.04767 | AHCY          |
| cg05674444 | 0.2971  | 0.31301 | 0.18425 | 0.1161  | 0.21399 | 0.26849 | 0.19646 | 0.10561 | 0.10011 | 0.09172 | C21orf99      |
| cg05674944 | 0.10583 | 0.03093 | 0.66597 | 0.69994 | 0.57067 | 0.22511 | 0.09122 | 0.03349 | 0.95082 | 0.89097 | SLC30A2       |
| cg05675373 | 0.09596 | 0.02788 | 0.97741 | 0.97903 | 0.98088 | 0.97288 | 0.69839 | 0.80688 | 0.9804  | 0.98106 | KCNC4         |
| cg05676042 | 0.03776 | 0.02936 | 0.04395 | 0.04046 | 0.06001 | 0.04192 | 0.04004 | 0.03694 | 0.03257 | 0.03222 | PPME1         |
| cg05677402 | 0.0201  | 0.01915 | 0.03011 | 0.02347 | 0.02059 | 0.02102 | 0.02188 | 0.02138 | 0.01955 | 0.01542 | UBE2L6        |
| cg05678175 | 0.04023 | 0.03874 | 0.04484 | 0.04514 | 0.05099 | 0.04233 | 0.04371 | 0.03756 | 0.0362  | 0.03183 | TRIM28        |
| cg05678938 | 0.0324  | 0.03704 | 0.0433  | 0.04117 | 0.03389 | 0.03837 | 0.03005 | 0.03189 | 0.03191 | 0.03015 | USP13         |
| cg05679521 | 0.07022 | 0.06565 | 0.06892 | 0.05992 | 0.13162 | 0.10127 | 0.06632 | 0.06732 | 0.06868 | 0.07196 | MAP2K3        |
| cg05679613 | 0.7563  | 0.7505  | 0.73331 | 0.74301 | 0.63715 | 0.73802 | 0.72239 | 0.74526 | 0.77767 | 0.70187 | MEPE          |
| cg05680424 | 0.04775 | 0.05951 | 0.09856 | 0.07365 | 0.07808 | 0.09223 | 0.05759 | 0.05262 | 0.04656 | 0.04551 | BPGM          |
| cg05681757 | 0.17172 | 0.07772 | 0.4033  | 0.2146  | 0.74032 | 0.10301 | 0.38107 | 0.35812 | 0.14126 | 0.14366 | FGD4          |
| cg05684015 | 0.03119 | 0.0355  | 0.04028 | 0.03489 | 0.0335  | 0.03398 | 0.02708 | 0.02262 | 0.03566 | 0.03211 | DR1           |
| cg05684195 | 0.53481 | 0.21474 | 0.75909 | 0.85518 | 0.88838 | 0.57227 | 0.233   | 0.40132 | 0.33457 | 0.38689 | CIDEA         |
| cg05684891 | 0.04114 | 0.03507 | 0.063   | 0.06137 | 0.20877 | 0.05033 | 0.03654 | 0.0302  | 0.63203 | 0.66305 | DAB2IP        |
| cg05688084 | 0.04079 | 0.03717 | 0.04978 | 0.05131 | 0.08415 | 0.04107 | 0.02872 | 0.02573 | 0.04054 | 0.04518 | KIAA0090      |
| cg05689121 | 0.04305 | 0.05776 | 0.04898 | 0.04845 | 0.04011 | 0.04314 | 0.04722 | 0.05049 | 0.03702 | 0.043   | TNRC6A        |
| cg05695927 | 0.05738 | 0.04986 | 0.0366  | 0.03971 | 0.02489 | 0.02855 | 0.02728 | 0.02944 | 0.05914 | 0.08925 | SPATA5L1      |
| cg05696092 | 0.43003 | 0.18007 | 0.89952 | 0.92221 | 0.65201 | 0.6571  | 0.09229 | 0.04597 | 0.18308 | 0.37229 | NOSIP         |
| cg05697231 | 0.06103 | 0.05928 | 0.06708 | 0.0586  | 0.04395 | 0.0591  | 0.0653  | 0.06767 | 0.05239 | 0.06018 | PML           |
| cg05697249 | 0.2953  | 0.04481 | 0.80012 | 0.84381 | 0.87746 | 0.77134 | 0.79702 | 0.71553 | 0.61167 | 0.03911 | C11orf52      |
| cg05697976 | 0.27844 | 0.57815 | 0.71748 | 0.75962 | 0.7645  | 0.53048 | 0.51573 | 0.70619 | 0.45264 | 0.1964  | MLSTD1        |
| cg05698069 | 0.30243 | 0.11801 | 0.69225 | 0.73863 | 0.91914 | 0.87278 | 0.44196 | 0.08439 | 0.32903 | 0.24535 | PDLIM2        |
| cg05698090 | 0.3648  | 0.26576 | 0.19044 | 0.30429 | 0.08988 | 0.06654 | 0.08539 | 0.12092 | 0.74847 | 0.09342 | CERK          |
| cg05699592 | 0.14271 | 0.04858 | 0.05319 | 0.05117 | 0.04902 | 0.05644 | 0.03975 | 0.04271 | 0.04307 | 0.04035 | PRKAR2A       |
| cg05699806 | 0.13032 | 0.10344 | 0.1475  | 0.17747 | 0.16827 | 0.1023  | 0.08026 | 0.07787 | 0.107   | 0.08272 | ARSF          |

|            |         |         |         |         |         |         |         |         |         |                   |
|------------|---------|---------|---------|---------|---------|---------|---------|---------|---------|-------------------|
| cg05700681 | 0.68444 | 0.10481 | 0.66024 | 0.61857 | 0.90406 | 0.87669 | 0.70317 | 0.49176 | 0.53168 | 0.55543 CCL22     |
| cg05701114 | 0.14681 | 0.16182 | 0.12357 | 0.15249 | 0.08969 | 0.14197 | 0.19284 | 0.24664 | 0.11338 | 0.11293 DLEU1     |
| cg05702633 | 0.03925 | 0.0406  | 0.03367 | 0.02928 | 0.03664 | 0.04368 | 0.03453 | 0.03167 | 0.03726 | 0.03482 PPP1R15B  |
| cg05702737 | 0.05261 | 0.04542 | 0.46044 | 0.51945 | 0.49744 | 0.43525 | 0.90774 | 0.8811  | 0.1142  | 0.15139 WNT10A    |
| cg05702774 | 0.58281 | 0.27273 | 0.51172 | 0.6464  | 0.51502 | 0.48404 | 0.5168  | 0.43756 | 0.44327 | 0.37143 SUCNR1    |
| cg05702952 | 0.02674 | 0.02249 | 0.02466 | 0.02415 | 0.01791 | 0.02457 | 0.02202 | 0.02592 | 0.01816 | 0.01738 PDK1      |
| cg05705366 | 0.03851 | 0.04297 | 0.0413  | 0.04009 | 0.03175 | 0.03854 | 0.03832 | 0.03716 | 0.04115 | 0.03129 SNAG1     |
| cg05705583 | 0.69473 | 0.56322 | 0.95366 | 0.94617 | 0.87358 | 0.78569 | 0.72338 | 0.79248 | 0.05313 | 0.05381 CAMLG     |
| cg05706061 | 0.31733 | 0.09756 | 0.45849 | 0.45563 | 0.38436 | 0.25851 | 0.49143 | 0.10623 | 0.08785 | 0.06652 SLC31A2   |
| cg05709923 | 0.05453 | 0.05341 | 0.05235 | 0.04431 | 0.03539 | 0.04743 | 0.04828 | 0.04811 | 0.04609 | 0.04078 SAMM50    |
| cg05711886 | 0.5314  | 0.5348  | 0.92615 | 0.94836 | 0.95308 | 0.94947 | 0.43878 | 0.84629 | 0.91219 | 0.83379 MEG3      |
| cg05714219 | 0.03843 | 0.03945 | 0.0403  | 0.03448 | 0.04647 | 0.04044 | 0.04327 | 0.039   | 0.03052 | 0.03279 GALNT14   |
| cg05714479 | 0.15676 | 0.03486 | 0.0266  | 0.02659 | 0.01918 | 0.0273  | 0.2581  | 0.22937 | 0.01876 | 0.01864 LATS2     |
| cg05714729 | 0.84886 | 0.43281 | 0.78052 | 0.83677 | 0.76338 | 0.79355 | 0.78192 | 0.65564 | 0.84174 | 0.64108 GALNT1    |
| cg05715287 | 0.07487 | 0.07539 | 0.09923 | 0.07588 | 0.07876 | 0.07838 | 0.06191 | 0.06474 | 0.07038 | 0.07372 CDC40     |
| cg05715649 | 0.46241 | 0.13933 | 0.82971 | 0.86932 | 0.87514 | 0.45529 | 0.59597 | 0.2165  | 0.49573 | 0.50668 SYT2      |
| cg05717160 | 0.04036 | 0.04587 | 0.04376 | 0.03654 | 0.03351 | 0.03428 | 0.03616 | 0.03872 | 0.03564 | 0.03622 USMG5     |
| cg05718253 | 0.9485  | 0.93907 | 0.95368 | 0.95978 | 0.97275 | 0.9481  | 0.89248 | 0.90108 | 0.93956 | 0.91798 LOC55908  |
| cg05718625 | 0.08667 | 0.06859 | 0.07219 | 0.07001 | 0.09775 | 0.0775  | 0.0894  | 0.07745 | 0.07361 | 0.10476 TMEM85    |
| cg05719902 | 0.6783  | 0.55709 | 0.71391 | 0.82454 | 0.96244 | 0.95189 | 0.64957 | 0.56084 | 0.73169 | 0.71026 LOC136306 |
| cg05720937 | 0.02634 | 0.03037 | 0.03188 | 0.03143 | 0.02542 | 0.02629 | 0.02101 | 0.02508 | 0.02015 | 0.01931 ACTR1B    |
| cg05721199 | 0.66715 | 0.6287  | 0.68037 | 0.68148 | 0.59932 | 0.69889 | 0.28502 | 0.29586 | 0.39604 | 0.40677 SAMD7     |
| cg05722552 | 0.07774 | 0.06335 | 0.07575 | 0.05997 | 0.08611 | 0.04447 | 0.06669 | 0.05349 | 0.05984 | 0.06155 NLGN1     |
| cg05722906 | 0.07529 | 0.10774 | 0.09804 | 0.06704 | 0.04534 | 0.045   | 0.04908 | 0.04473 | 0.08088 | 0.03979 CYP4F12   |
| cg05722918 | 0.04392 | 0.02474 | 0.89591 | 0.81581 | 0.57707 | 0.75802 | 0.03952 | 0.03691 | 0.02377 | 0.02062 SLC5A8    |
| cg05723825 | 0.08186 | 0.07662 | 0.16131 | 0.20496 | 0.24942 | 0.46861 | 0.07111 | 0.07127 | 0.48612 | 0.62684 TEKT4     |
| cg05724065 | 0.70174 | 0.35049 | 0.48537 | 0.30456 | 0.03482 | 0.03644 | 0.13416 | 0.03512 | 0.37238 | 0.23362 PHKG1     |
| cg05725452 | 0.02583 | 0.02872 | 0.02621 | 0.02738 | 0.02575 | 0.02534 | 0.02281 | 0.02476 | 0.02476 | 0.02451 SDF2L1    |
| cg05726109 | 0.94476 | 0.91436 | 0.95286 | 0.94797 | 0.96555 | 0.95513 | 0.94655 | 0.95334 | 0.95834 | 0.9565 GP1BB      |
| cg05727959 | 0.03024 | 0.03077 | 0.0312  | 0.0306  | 0.02591 | 0.02922 | 0.02749 | 0.03096 | 0.02422 | 0.02449 C12orf48  |
| cg05728656 | 0.03644 | 0.03346 | 0.03431 | 0.0347  | 0.03174 | 0.03518 | 0.0292  | 0.03068 | 0.02866 | 0.0247 C6orf47    |
| cg05729093 | 0.08713 | 0.08255 | 0.0805  | 0.07705 | 0.06265 | 0.05614 | 0.07655 | 0.08311 | 0.05648 | 0.06009 IL4R      |
| cg05730092 | 0.48803 | 0.46287 | 0.92301 | 0.92568 | 0.79139 | 0.72348 | 0.85833 | 0.63211 | 0.82013 | 0.8724 KIAA1446   |
| cg05731779 | 0.52194 | 0.24182 | 0.75595 | 0.82987 | 0.83417 | 0.87928 | 0.62452 | 0.87145 | 0.48454 | 0.3722 MGC13034   |
| cg05732130 | 0.08355 | 0.05132 | 0.06024 | 0.04595 | 0.05095 | 0.02882 | 0.0432  | 0.03848 | 0.03176 | 0.04003 FLJ13912  |
| cg05732530 | 0.18363 | 0.02377 | 0.11393 | 0.08089 | 0.03484 | 0.02241 | 0.02429 | 0.0189  | 0.01977 | 0.01839 DUSP2     |
| cg05739825 | 0.04616 | 0.04333 | 0.05263 | 0.04864 | 0.03711 | 0.03843 | 0.04101 | 0.0374  | 0.06007 | 0.03298 EI24      |
| cg05740244 | 0.88869 | 0.83192 | 0.8625  | 0.87853 | 0.71086 | 0.82376 | 0.83962 | 0.5616  | 0.38792 | 0.26892 LDHC      |
| cg05741384 | 0.03649 | 0.03939 | 0.0389  | 0.03752 | 0.02582 | 0.03062 | 0.03542 | 0.03456 | 0.03698 | 0.02557 ODC1      |
| cg05742308 | 0.06253 | 0.06376 | 0.11814 | 0.07908 | 0.15782 | 0.1253  | 0.10263 | 0.075   | 0.06655 | 0.06415 SEMA3A    |
| cg05743054 | 0.02377 | 0.02356 | 0.02697 | 0.02273 | 0.01526 | 0.02029 | 0.02131 | 0.02032 | 0.0229  | 0.02102 MLF1      |

|            |         |         |         |         |         |         |         |         |         |                   |
|------------|---------|---------|---------|---------|---------|---------|---------|---------|---------|-------------------|
| cg05744229 | 0.68729 | 0.48766 | 0.64432 | 0.71177 | 0.63876 | 0.64298 | 0.43803 | 0.29247 | 0.2819  | 0.2156 MYH7       |
| cg05745457 | 0.83816 | 0.83161 | 0.82739 | 0.84155 | 0.86787 | 0.8581  | 0.79463 | 0.82663 | 0.82147 | 0.84078 TKTL2     |
| cg05745851 | 0.03274 | 0.03578 | 0.04702 | 0.03908 | 0.4911  | 0.60938 | 0.38788 | 0.08245 | 0.03582 | 0.02937 CCDC62    |
| cg05747424 | 0.04098 | 0.03992 | 0.04023 | 0.0359  | 0.0276  | 0.03835 | 0.03548 | 0.0374  | 0.03085 | 0.03168 C14orf150 |
| cg05749161 | 0.02818 | 0.02044 | 0.54539 | 0.55111 | 0.33462 | 0.02248 | 0.01673 | 0.01948 | 0.01798 | 0.0159 RASA4      |
| cg05749577 | 0.02397 | 0.02642 | 0.02164 | 0.02267 | 0.01922 | 0.0211  | 0.02185 | 0.02396 | 0.02047 | 0.0181 KIF23      |
| cg05749792 | 0.83849 | 0.53119 | 0.71529 | 0.761   | 0.47409 | 0.49384 | 0.28685 | 0.18625 | 0.83505 | 0.78569 DGAT2L6   |
| cg05750321 | 0.91211 | 0.85891 | 0.91533 | 0.91464 | 0.90338 | 0.9166  | 0.88529 | 0.90926 | 0.92633 | 0.91279 CGNL1     |
| cg05751148 | 0.78665 | 0.75976 | 0.6403  | 0.67171 | 0.95878 | 0.85722 | 0.68512 | 0.71655 | 0.90346 | 0.7453 PTPRCAP    |
| cg05751159 | 0.59999 | 0.51976 | 0.05929 | 0.02965 | 0.02679 | 0.03124 | 0.02517 | 0.02843 | 0.02551 | 0.02196 TSGA14    |
| cg05751979 | 0.04707 | 0.04823 | 0.06677 | 0.0441  | 0.10165 | 0.04257 | 0.04954 | 0.04197 | 0.04437 | 0.04088 TCEB1     |
| cg05754589 | 0.06341 | 0.05481 | 0.08427 | 0.07977 | 0.09204 | 0.0905  | 0.0858  | 0.07014 | 0.06807 | 0.06816 CBX5      |
| cg05754631 | 0.08642 | 0.07733 | 0.09175 | 0.08747 | 0.0914  | 0.08546 | 0.06728 | 0.06462 | 0.07367 | 0.07409 GAB1      |
| cg05755354 | 0.17589 | 0.73318 | 0.88522 | 0.89718 | 0.90973 | 0.88274 | 0.8417  | 0.78581 | 0.89447 | 0.81738 FRMD4A    |
| cg05755779 | 0.53231 | 0.4188  | 0.83653 | 0.88979 | 0.91906 | 0.91764 | 0.90117 | 0.76342 | 0.6656  | 0.55717 COLEC10   |
| cg05755837 | 0.07027 | 0.05901 | 0.0725  | 0.06822 | 0.06611 | 0.07038 | 0.04906 | 0.05905 | 0.05182 | 0.05119 PMPCB     |
| cg05759269 | 0.05692 | 0.0546  | 0.05166 | 0.0481  | 0.06063 | 0.05864 | 0.06038 | 0.05696 | 0.03419 | 0.04169 CDKN1A    |
| cg05761032 | 0.03774 | 0.04005 | 0.03808 | 0.03871 | 0.02811 | 0.04222 | 0.03528 | 0.03828 | 0.03263 | 0.03841 CCPG1     |
| cg05761971 | 0.3913  | 0.38021 | 0.69572 | 0.73984 | 0.45485 | 0.53351 | 0.66814 | 0.73635 | 0.16874 | 0.22951 FAM82A    |
| cg05764061 | 0.12409 | 0.13769 | 0.10969 | 0.10086 | 0.13399 | 0.1296  | 0.08939 | 0.08607 | 0.11075 | 0.11002 PPM1B     |
| cg05764376 | 0.04206 | 0.02743 | 0.03318 | 0.03011 | 0.02288 | 0.02441 | 0.02418 | 0.03005 | 0.02714 | 0.02417 THAP10    |
| cg05764607 | 0.03821 | 0.03811 | 0.04027 | 0.03099 | 0.03206 | 0.04298 | 0.03086 | 0.028   | 0.0304  | 0.0313 PHF22      |
| cg05766425 | 0.07752 | 0.06481 | 0.08334 | 0.07951 | 0.05086 | 0.05849 | 0.0599  | 0.05882 | 0.05886 | 0.06262 CROP      |
| cg05766474 | 0.46994 | 0.04894 | 0.44932 | 0.62061 | 0.92261 | 0.91287 | 0.03846 | 0.03931 | 0.41743 | 0.20099 CCL16     |
| cg05767404 | 0.73174 | 0.49388 | 0.70074 | 0.72878 | 0.55827 | 0.80735 | 0.16632 | 0.14999 | 0.13315 | 0.2961 C1orf150   |
| cg05768141 | 0.06843 | 0.0583  | 0.14017 | 0.13092 | 0.42925 | 0.5153  | 0.10975 | 0.54953 | 0.35075 | 0.06315 KCNJ10    |
| cg05769161 | 0.06836 | 0.05115 | 0.72031 | 0.72618 | 0.25937 | 0.08063 | 0.06794 | 0.09226 | 0.06805 | 0.05279 B4GALNT3  |
| cg05769169 | 0.03391 | 0.03276 | 0.0467  | 0.04563 | 0.05474 | 0.03494 | 0.02763 | 0.02622 | 0.12507 | 0.1593 EGLN3      |
| cg05772663 | 0.49806 | 0.41153 | 0.82961 | 0.85716 | 0.7493  | 0.56392 | 0.46744 | 0.54158 | 0.87657 | 0.89207 HTR2C     |
| cg05773628 | 0.84754 | 0.67224 | 0.16437 | 0.1369  | 0.41981 | 0.158   | 0.208   | 0.23072 | 0.39151 | 0.13792 NCKAP1    |
| cg05774801 | 0.23223 | 0.3654  | 0.87353 | 0.89939 | 0.13773 | 0.56219 | 0.4683  | 0.05638 | 0.88045 | 0.84346 SFRP2     |
| cg05776763 | 0.06112 | 0.06393 | 0.06875 | 0.06661 | 0.05412 | 0.0644  | 0.06071 | 0.05966 | 0.06104 | 0.05781 DLST      |
| cg05777319 | 0.04569 | 0.04434 | 0.05246 | 0.05102 | 0.04264 | 0.03109 | 0.0724  | 0.07338 | 0.04208 | 0.0522 ARL6       |
| cg05778847 | 0.196   | 0.10073 | 0.28716 | 0.33705 | 0.7921  | 0.77324 | 0.13478 | 0.09492 | 0.38912 | 0.13691 PPP1R14A  |
| cg05779068 | 0.28089 | 0.12759 | 0.39197 | 0.56158 | 0.25497 | 0.2244  | 0.14049 | 0.1878  | 0.10725 | 0.12384 OR2W1     |
| cg05779272 | 0.82807 | 0.77101 | 0.83053 | 0.80188 | 0.89127 | 0.6797  | 0.80711 | 0.7031  | 0.64772 | 0.32549 B4GALT1   |
| cg05780311 | 0.10273 | 0.03021 | 0.03059 | 0.02319 | 0.02068 | 0.02364 | 0.02371 | 0.02339 | 0.0221  | 0.02341 STAT5B    |
| cg05780616 | 0.04307 | 0.04515 | 0.04632 | 0.04156 | 0.03002 | 0.03658 | 0.03742 | 0.03339 | 0.03741 | 0.03482 SNRPF     |
| cg05781767 | 0.71307 | 0.26797 | 0.80233 | 0.8317  | 0.7631  | 0.68487 | 0.83949 | 0.82363 | 0.20345 | 0.43467 PODXL2    |
| cg05782292 | 0.6417  | 0.61063 | 0.65032 | 0.75155 | 0.9031  | 0.77503 | 0.04171 | 0.04604 | 0.9051  | 0.87978 SCT       |
| cg05782445 | 0.18046 | 0.09579 | 0.35236 | 0.23234 | 0.71493 | 0.76724 | 0.21704 | 0.22563 | 0.83119 | 0.70344 KCNK3     |

|            |         |         |         |         |         |         |         |         |         |                  |
|------------|---------|---------|---------|---------|---------|---------|---------|---------|---------|------------------|
| cg05782975 | 0.0453  | 0.04909 | 0.07085 | 0.05464 | 0.05582 | 0.05619 | 0.56851 | 0.51558 | 0.04275 | 0.0449 NGFRAP1   |
| cg05786601 | 0.23493 | 0.23474 | 0.2185  | 0.20607 | 0.19093 | 0.18037 | 0.30322 | 0.23791 | 0.18829 | 0.19639 AR       |
| cg05786809 | 0.03672 | 0.03356 | 0.08068 | 0.07064 | 0.57293 | 0.46537 | 0.03309 | 0.03424 | 0.03616 | 0.03279 CKB      |
| cg05788437 | 0.02594 | 0.0278  | 0.02659 | 0.02538 | 0.02333 | 0.02497 | 0.02514 | 0.02601 | 0.02449 | 0.02394 FYTDD1   |
| cg05788526 | 0.07541 | 0.07304 | 0.0928  | 0.07981 | 0.13851 | 0.10839 | 0.08553 | 0.07329 | 0.06696 | 0.0726 MTMR2     |
| cg05788638 | 0.52306 | 0.45312 | 0.58264 | 0.65826 | 0.89523 | 0.86854 | 0.49065 | 0.49479 | 0.15401 | 0.0489 SERPINA10 |
| cg05790038 | 0.90232 | 0.54707 | 0.81042 | 0.88498 | 0.45712 | 0.37689 | 0.09487 | 0.0771  | 0.66113 | 0.05214 TRPV3    |
| cg05790999 | 0.02474 | 0.02638 | 0.02603 | 0.02344 | 0.01715 | 0.02266 | 0.02084 | 0.0196  | 0.01898 | 0.0195 HS1BP3    |
| cg05793077 | 0.07965 | 0.05478 | 0.06534 | 0.0652  | 0.0397  | 0.04485 | 0.04229 | 0.05627 | 0.0411  | 0.03987 GSN      |
| cg05795157 | 0.04196 | 0.03978 | 0.03105 | 0.03487 | 0.04263 | 0.04504 | 0.02882 | 0.02743 | 0.04677 | 0.04043 PIAS3    |
| cg05795313 | 0.11777 | 0.09132 | 0.08732 | 0.06967 | 0.1223  | 0.07377 | 0.08016 | 0.06942 | 0.07688 | 0.06299 ZNF641   |
| cg05797656 | 0.05062 | 0.04094 | 0.0427  | 0.04441 | 0.02951 | 0.03671 | 0.03905 | 0.04118 | 0.03378 | 0.03664 DDX42    |
| cg05798712 | 0.74979 | 0.68906 | 0.4954  | 0.27279 | 0.53502 | 0.45236 | 0.23757 | 0.13444 | 0.23889 | 0.21054 FABP7    |
| cg05798972 | 0.06489 | 0.06438 | 0.10702 | 0.10101 | 0.08276 | 0.0647  | 0.06107 | 0.06369 | 0.05806 | 0.06225 PPARBP   |
| cg05799317 | 0.8514  | 0.86352 | 0.81768 | 0.82789 | 0.78409 | 0.83546 | 0.82979 | 0.86073 | 0.57484 | 0.5648 C6orf118  |
| cg05800321 | 0.75586 | 0.2619  | 0.69143 | 0.7827  | 0.94721 | 0.91747 | 0.06778 | 0.05248 | 0.64336 | 0.21014 LY6D     |
| cg05801573 | 0.04054 | 0.03644 | 0.89667 | 0.88984 | 0.07353 | 0.04475 | 0.17703 | 0.05686 | 0.47159 | 0.28294 SLITRK4  |
| cg05801648 | 0.67286 | 0.65641 | 0.10705 | 0.11504 | 0.14423 | 0.09936 | 0.09256 | 0.08396 | 0.37406 | 0.56677 SYK      |
| cg05806233 | 0.03479 | 0.03751 | 0.065   | 0.05168 | 0.07404 | 0.04599 | 0.03517 | 0.03866 | 0.03446 | 0.02828 GNAI1    |
| cg05807444 | 0.94452 | 0.67192 | 0.18858 | 0.11038 | 0.97022 | 0.92843 | 0.60152 | 0.56669 | 0.45543 | 0.02454 VPS28    |
| cg05807768 | 0.04422 | 0.0424  | 0.04498 | 0.04247 | 0.03404 | 0.04094 | 0.04133 | 0.04001 | 0.03723 | 0.03629 ST7L     |
| cg05807991 | 0.71022 | 0.94169 | 0.22944 | 0.22811 | 0.15409 | 0.09817 | 0.06784 | 0.06077 | 0.25773 | 0.26552 TRAM1L1  |
| cg05810550 | 0.62699 | 0.18937 | 0.3372  | 0.39922 | 0.0864  | 0.11517 | 0.09093 | 0.09152 | 0.08121 | 0.06029 DEFB106A |
| cg05812599 | 0.75143 | 0.59235 | 0.77171 | 0.81265 | 0.74662 | 0.82322 | 0.74779 | 0.81765 | 0.43217 | 0.4208 CLPB      |
| cg05813084 | 0.04412 | 0.04225 | 0.08088 | 0.07534 | 0.04248 | 0.04627 | 0.03834 | 0.03766 | 0.0416  | 0.03993 EFNA3    |
| cg05813234 | 0.12027 | 0.13865 | 0.20931 | 0.16716 | 0.22569 | 0.1581  | 0.12082 | 0.28575 | 0.13037 | 0.13086 RPS6KA6  |
| cg05815893 | 0.05432 | 0.06266 | 0.06696 | 0.06425 | 0.08809 | 0.08075 | 0.05244 | 0.05509 | 0.04576 | 0.06315 C17orf80 |
| cg05815906 | 0.12513 | 0.12124 | 0.12996 | 0.11981 | 0.17406 | 0.15681 | 0.09635 | 0.0848  | 0.10113 | 0.12044 RAB33B   |
| cg05817232 | 0.12722 | 0.12165 | 0.15676 | 0.13355 | 0.15656 | 0.11096 | 0.1295  | 0.10802 | 0.1019  | 0.10197 MARK4    |
| cg05819268 | 0.90602 | 0.87197 | 0.94319 | 0.94283 | 0.94148 | 0.95447 | 0.94432 | 0.96676 | 0.94374 | 0.95276 CACNG1   |
| cg05820087 | 0.75477 | 0.23115 | 0.59347 | 0.46208 | 0.50041 | 0.59588 | 0.09305 | 0.11826 | 0.499   | 0.2478 ATP13A4   |
| cg05822100 | 0.06897 | 0.07127 | 0.13346 | 0.08082 | 0.0599  | 0.05582 | 0.10903 | 0.11386 | 0.05118 | 0.04156 CDH6     |
| cg05822532 | 0.02761 | 0.03327 | 0.96416 | 0.97588 | 0.97851 | 0.98003 | 0.97171 | 0.53591 | 0.57084 | 0.15624 ELN      |
| cg05823029 | 0.58192 | 0.1383  | 0.66181 | 0.84858 | 0.92952 | 0.74895 | 0.25202 | 0.38231 | 0.51105 | 0.57356 ATP4B    |
| cg05824215 | 0.79134 | 0.63398 | 0.72061 | 0.83231 | 0.71709 | 0.60211 | 0.21421 | 0.22977 | 0.17863 | 0.10754 CCR6     |
| cg05824432 | 0.97233 | 0.96998 | 0.02142 | 0.01946 | 0.01601 | 0.01843 | 0.01851 | 0.02175 | 0.01901 | 0.01518 DCI      |
| cg05824484 | 0.02734 | 0.02591 | 0.03938 | 0.03557 | 0.02361 | 0.02704 | 0.03051 | 0.02811 | 0.03175 | 0.02706 IL17R    |
| cg05824762 | 0.07281 | 0.05188 | 0.08515 | 0.07026 | 0.05665 | 0.0495  | 0.04458 | 0.042   | 0.14517 | 0.03965 ZYG11BL  |
| cg05825950 | 0.13596 | 0.09328 | 0.39928 | 0.35737 | 0.34811 | 0.19018 | 0.11545 | 0.09965 | 0.1574  | 0.47495 CR1      |
| cg05826823 | 0.93549 | 0.9099  | 0.94004 | 0.94105 | 0.96002 | 0.84974 | 0.84132 | 0.76723 | 0.93788 | 0.88696 CIZ1     |
| cg05828624 | 0.22591 | 0.3     | 0.27359 | 0.37329 | 0.35091 | 0.39988 | 0.15957 | 0.12565 | 0.13268 | 0.13693 REG1A    |

|            |         |         |         |         |         |         |         |         |         |         |          |
|------------|---------|---------|---------|---------|---------|---------|---------|---------|---------|---------|----------|
| cg05829479 | 0.67825 | 0.46755 | 0.1998  | 0.17259 | 0.74621 | 0.65154 | 0.50195 | 0.48894 | 0.13351 | 0.11742 | C6orf141 |
| cg05830416 | 0.0599  | 0.05472 | 0.09938 | 0.07812 | 0.04261 | 0.05788 | 0.05446 | 0.0505  | 0.0504  | 0.04857 | C9orf100 |
| cg05832051 | 0.05548 | 0.0548  | 0.06083 | 0.05427 | 0.36036 | 0.42608 | 0.0954  | 0.04254 | 0.93607 | 0.93209 | MYADM    |
| cg05832487 | 0.04447 | 0.04599 | 0.26976 | 0.29638 | 0.25607 | 0.04695 | 0.09532 | 0.04563 | 0.06193 | 0.03914 | FLJ13909 |
| cg05835416 | 0.36816 | 0.3999  | 0.71481 | 0.70429 | 0.61808 | 0.40862 | 0.56724 | 0.34331 | 0.30249 | 0.27528 | CYP2C18  |
| cg05836145 | 0.09607 | 0.09103 | 0.38831 | 0.4277  | 0.8976  | 0.73181 | 0.10775 | 0.08369 | 0.08969 | 0.06779 | SP8      |
| cg05837075 | 0.03528 | 0.0329  | 0.03341 | 0.02927 | 0.02811 | 0.0322  | 0.02689 | 0.0252  | 0.02436 | 0.0268  | ERO1L    |
| cg05839235 | 0.07899 | 0.03531 | 0.51375 | 0.46713 | 0.11618 | 0.03675 | 0.10502 | 0.18508 | 0.25832 | 0.2681  | NPR3     |
| cg05840031 | 0.04879 | 0.04066 | 0.03512 | 0.03852 | 0.04464 | 0.02854 | 0.05168 | 0.04926 | 0.13917 | 0.02735 | PAX6     |
| cg05840553 | 0.0319  | 0.0342  | 0.03001 | 0.03098 | 0.03138 | 0.0271  | 0.03751 | 0.026   | 0.15315 | 0.02419 | LRSAM1   |
| cg05843340 | 0.13752 | 0.01937 | 0.46271 | 0.55121 | 0.02259 | 0.01708 | 0.01673 | 0.0158  | 0.01402 | 0.01273 | KENAE    |
| cg05843800 | 0.04984 | 0.04458 | 0.05986 | 0.05621 | 0.0468  | 0.05236 | 0.03564 | 0.03193 | 0.03562 | 0.04021 | SUMF1    |
| cg05844583 | 0.04471 | 0.03661 | 0.36446 | 0.50547 | 0.05126 | 0.04607 | 0.04037 | 0.03709 | 0.04332 | 0.04007 | SLC19A3  |
| cg05845178 | 0.02315 | 0.02465 | 0.02038 | 0.02156 | 0.05277 | 0.02295 | 0.0182  | 0.01914 | 0.01685 | 0.01607 | IL17RC   |
| cg05845357 | 0.03478 | 0.03278 | 0.04237 | 0.04049 | 0.04075 | 0.04742 | 0.0417  | 0.03924 | 0.04174 | 0.04821 | PGEA1    |
| cg05845503 | 0.02824 | 0.02981 | 0.03096 | 0.02632 | 0.03027 | 0.03399 | 0.02627 | 0.02453 | 0.01873 | 0.02083 | GRHPR    |
| cg05846716 | 0.04085 | 0.04347 | 0.29285 | 0.38556 | 0.11146 | 0.07813 | 0.08805 | 0.04937 | 0.04663 | 0.03861 | PCSK2    |
| cg05847038 | 0.21563 | 0.1705  | 0.38331 | 0.4296  | 0.30681 | 0.19851 | 0.30435 | 0.24717 | 0.12542 | 0.17504 | ADAM7    |
| cg05847778 | 0.0318  | 0.03309 | 0.0587  | 0.09076 | 0.03554 | 0.03935 | 0.03701 | 0.03392 | 0.03628 | 0.0377  | BBS5     |
| cg05851042 | 0.92142 | 0.85731 | 0.91061 | 0.91648 | 0.9137  | 0.91947 | 0.90579 | 0.84133 | 0.93574 | 0.89082 | ATP9A    |
| cg05851163 | 0.04544 | 0.04684 | 0.04991 | 0.04731 | 0.03921 | 0.0443  | 0.04534 | 0.04185 | 0.04916 | 0.04373 | C18orf4  |
| cg05852416 | 0.03392 | 0.03661 | 0.03489 | 0.03577 | 0.04074 | 0.04192 | 0.02904 | 0.03036 | 0.03073 | 0.03394 | NFKBIA   |
| cg05855071 | 0.06379 | 0.0631  | 0.08762 | 0.0801  | 0.119   | 0.08589 | 0.091   | 0.07511 | 0.11008 | 0.09115 | C15orf29 |
| cg05856884 | 0.67817 | 0.38302 | 0.73069 | 0.76256 | 0.70039 | 0.79528 | 0.5697  | 0.51881 | 0.67769 | 0.60013 | SMPX     |
| cg05856931 | 0.06921 | 0.0524  | 0.11646 | 0.28769 | 0.19017 | 0.09473 | 0.04363 | 0.048   | 0.04512 | 0.0515  | MSI2     |
| cg05857825 | 0.06727 | 0.06638 | 0.0762  | 0.07143 | 0.12675 | 0.082   | 0.05656 | 0.05673 | 0.04433 | 0.04908 | MAPRE1   |
| cg05859264 | 0.76549 | 0.54281 | 0.74604 | 0.86253 | 0.77246 | 0.82122 | 0.73899 | 0.64423 | 0.8651  | 0.65521 | MAPK13   |
| cg05859842 | 0.40505 | 0.4618  | 0.48816 | 0.64078 | 0.49612 | 0.32075 | 0.16661 | 0.13925 | 0.12518 | 0.13873 | FRMPD2   |
| cg05860890 | 0.06524 | 0.0535  | 0.64502 | 0.68706 | 0.19658 | 0.06677 | 0.05468 | 0.04768 | 0.11309 | 0.06242 | KCNV1    |
| cg05861567 | 0.10925 | 0.12106 | 0.68005 | 0.83155 | 0.62251 | 0.81926 | 0.42612 | 0.38529 | 0.33674 | 0.24532 | MLC1     |
| cg05861661 | 0.07788 | 0.07306 | 0.08223 | 0.0685  | 0.09239 | 0.10252 | 0.09116 | 0.09275 | 0.11215 | 0.10346 | FAM98B   |
| cg05862431 | 0.04983 | 0.05347 | 0.08622 | 0.17944 | 0.07339 | 0.0521  | 0.10274 | 0.07092 | 0.06295 | 0.07119 | MGC13125 |
| cg05863612 | 0.76186 | 0.79939 | 0.73981 | 0.78351 | 0.67016 | 0.80473 | 0.75501 | 0.79911 | 0.79238 | 0.78517 | DNMBP    |
| cg05868316 | 0.02119 | 0.0207  | 0.31095 | 0.47822 | 0.0155  | 0.01419 | 0.02249 | 0.02057 | 0.0151  | 0.0164  | FBXW9    |
| cg05868799 | 0.17207 | 0.119   | 0.13834 | 0.16262 | 0.16811 | 0.28478 | 0.09671 | 0.07939 | 0.91908 | 0.90826 | NCOA2    |
| cg05869585 | 0.92596 | 0.8382  | 0.92598 | 0.94162 | 0.92927 | 0.91925 | 0.92162 | 0.68317 | 0.9416  | 0.93084 | PMM2     |
| cg05869964 | 0.82655 | 0.84758 | 0.85684 | 0.86181 | 0.86168 | 0.85679 | 0.80872 | 0.85012 | 0.87966 | 0.85927 | C5orf13  |
| cg05871136 | 0.25774 | 0.05801 | 0.41266 | 0.57715 | 0.2741  | 0.31221 | 0.17903 | 0.08177 | 0.06891 | 0.04042 | UNC5B    |
| cg05871607 | 0.05178 | 0.05457 | 0.05634 | 0.04723 | 0.03449 | 0.04228 | 0.05246 | 0.05958 | 0.04735 | 0.04631 | RPA2     |
| cg05872485 | 0.04563 | 0.0525  | 0.05595 | 0.04942 | 0.04663 | 0.05329 | 0.05364 | 0.04972 | 0.11971 | 0.0444  | PTGES3   |
| cg05873268 | 0.74655 | 0.55477 | 0.90146 | 0.91289 | 0.85136 | 0.68834 | 0.19327 | 0.07561 | 0.29822 | 0.43805 | TPSAB1   |

|            |         |         |         |         |         |         |         |         |         |                   |
|------------|---------|---------|---------|---------|---------|---------|---------|---------|---------|-------------------|
| cg05874450 | 0.24768 | 0.0883  | 0.03809 | 0.03878 | 0.09728 | 0.03692 | 0.03374 | 0.03482 | 0.03882 | 0.03316 POPDC3    |
| cg05874478 | 0.23246 | 0.23606 | 0.16929 | 0.18067 | 0.15076 | 0.2002  | 0.1088  | 0.12579 | 0.19832 | 0.17372 PSME2     |
| cg05876083 | 0.03005 | 0.03354 | 0.03512 | 0.03445 | 0.0262  | 0.03174 | 0.03148 | 0.03261 | 0.02775 | 0.02615 NUDT16L1  |
| cg05876094 | 0.06129 | 0.0642  | 0.06515 | 0.05513 | 0.04636 | 0.05313 | 0.04997 | 0.05401 | 0.05128 | 0.04883 CACYBP    |
| cg05876918 | 0.13284 | 0.06395 | 0.07607 | 0.06469 | 0.07506 | 0.06263 | 0.05449 | 0.05402 | 0.07744 | 0.0589 PIP5K2C    |
| cg05877109 | 0.26913 | 0.21818 | 0.21794 | 0.21366 | 0.23194 | 0.22385 | 0.19807 | 0.20369 | 0.19333 | 0.21691 BCL2L2    |
| cg05879334 | 0.01994 | 0.02222 | 0.02513 | 0.02299 | 0.01769 | 0.02368 | 0.0189  | 0.01659 | 0.01919 | 0.01499 ACAT2     |
| cg05879919 | 0.03935 | 0.04333 | 0.1476  | 0.10471 | 0.03438 | 0.03885 | 0.03201 | 0.03369 | 0.03248 | 0.03433 ANKRD9    |
| cg05881135 | 0.11069 | 0.0413  | 0.03604 | 0.03476 | 0.04629 | 0.02725 | 0.03008 | 0.03163 | 0.06834 | 0.03645 DMN       |
| cg05881762 | 0.83917 | 0.24127 | 0.61408 | 0.76711 | 0.20514 | 0.11191 | 0.50542 | 0.16109 | 0.14562 | 0.14525 UBE3A     |
| cg05882522 | 0.05026 | 0.05078 | 0.04756 | 0.0443  | 0.33645 | 0.42719 | 0.03935 | 0.04234 | 0.03976 | 0.03827 EHD3      |
| cg05882691 | 0.18335 | 0.19037 | 0.19669 | 0.17891 | 0.15943 | 0.24123 | 0.15616 | 0.13041 | 0.149   | 0.17231 HIST1H3H  |
| cg05885123 | 0.39652 | 0.42558 | 0.5876  | 0.84063 | 0.44157 | 0.38336 | 0.22409 | 0.03012 | 0.20669 | 0.01992 CRIP3     |
| cg05885720 | 0.75124 | 0.30131 | 0.73625 | 0.83451 | 0.2535  | 0.11793 | 0.78687 | 0.43671 | 0.60474 | 0.19639 EMP1      |
| cg05886367 | 0.08884 | 0.05094 | 0.14048 | 0.31613 | 0.13377 | 0.07183 | 0.05575 | 0.05697 | 0.07475 | 0.05299 BTNL9     |
| cg05886626 | 0.11146 | 0.09005 | 0.12286 | 0.11933 | 0.2602  | 0.11955 | 0.13437 | 0.11043 | 0.65456 | 0.74292 THBS1     |
| cg05887405 | 0.82402 | 0.74696 | 0.78377 | 0.84683 | 0.79824 | 0.7817  | 0.74625 | 0.45844 | 0.85141 | 0.76062 OKL38     |
| cg05889321 | 0.20392 | 0.18508 | 0.20484 | 0.1919  | 0.11108 | 0.14646 | 0.15688 | 0.17436 | 0.18009 | 0.15368 ALDH18A1  |
| cg05890019 | 0.04014 | 0.02753 | 0.03473 | 0.02767 | 0.10051 | 0.028   | 0.02578 | 0.02479 | 0.07133 | 0.02019 WDFY3     |
| cg05890484 | 0.85754 | 0.65851 | 0.94186 | 0.9591  | 0.94302 | 0.95916 | 0.93002 | 0.94065 | 0.90217 | 0.81843 BHMT      |
| cg05890578 | 0.06294 | 0.0665  | 0.06194 | 0.06381 | 0.0643  | 0.06518 | 0.06066 | 0.05827 | 0.06588 | 0.05913 PRKCE     |
| cg05894797 | 0.2368  | 0.0746  | 0.13287 | 0.14287 | 0.09561 | 0.05276 | 0.09967 | 0.0771  | 0.08472 | 0.04622 PSEN2     |
| cg05895453 | 0.70639 | 0.43021 | 0.70254 | 0.65492 | 0.83444 | 0.64506 | 0.19854 | 0.12554 | 0.37233 | 0.45201 KBTBD7    |
| cg05896682 | 0.10766 | 0.09127 | 0.81304 | 0.79641 | 0.27066 | 0.16766 | 0.12103 | 0.17112 | 0.08164 | 0.09249 GALR1     |
| cg05897048 | 0.88452 | 0.62839 | 0.05348 | 0.05124 | 0.14807 | 0.04152 | 0.45656 | 0.44146 | 0.04631 | 0.03632 HRASLS3   |
| cg05898102 | 0.13609 | 0.05927 | 0.1164  | 0.21861 | 0.1001  | 0.04848 | 0.09571 | 0.06164 | 0.04617 | 0.04166 PCDHB10   |
| cg05898356 | 0.03937 | 0.04234 | 0.04002 | 0.03827 | 0.0232  | 0.03763 | 0.03216 | 0.02958 | 0.0317  | 0.02838 ARHGAP11A |
| cg05898524 | 0.53375 | 0.20494 | 0.3433  | 0.36914 | 0.18246 | 0.07989 | 0.11453 | 0.08257 | 0.44831 | 0.11366 LMNA      |
| cg05899618 | 0.0496  | 0.04872 | 0.61977 | 0.61269 | 0.31423 | 0.14184 | 0.07367 | 0.04183 | 0.14624 | 0.25674 GDF7      |
| cg05902852 | 0.03873 | 0.02999 | 0.67946 | 0.81073 | 0.0321  | 0.02975 | 0.04858 | 0.03694 | 0.08124 | 0.04337 MAGI2     |
| cg05903609 | 0.09348 | 0.09001 | 0.09427 | 0.08857 | 0.10513 | 0.09822 | 0.10772 | 0.09344 | 0.09913 | 0.1122 PRPF8      |
| cg05903630 | 0.06357 | 0.06645 | 0.06033 | 0.06489 | 0.05556 | 0.05577 | 0.05785 | 0.05828 | 0.04981 | 0.04902 MRPS27    |
| cg05905876 | 0.02688 | 0.02769 | 0.03237 | 0.02991 | 0.0308  | 0.02886 | 0.04303 | 0.03223 | 0.02532 | 0.02523 SEC11L1   |
| cg05906362 | 0.0344  | 0.03368 | 0.06575 | 0.06281 | 0.3878  | 0.06532 | 0.76721 | 0.18494 | 0.31986 | 0.03929 ARHGAP4   |
| cg05908775 | 0.04311 | 0.04799 | 0.05113 | 0.0482  | 0.04447 | 0.04863 | 0.03783 | 0.0387  | 0.03084 | 0.03371 ZNF211    |
| cg05909475 | 0.04463 | 0.04481 | 0.20942 | 0.08318 | 0.0832  | 0.05259 | 0.05249 | 0.05288 | 0.03962 | 0.03921 ETV3      |
| cg05910970 | 0.80819 | 0.73635 | 0.72034 | 0.75121 | 0.83132 | 0.80591 | 0.68627 | 0.72336 | 0.69035 | 0.64592 CYP2A6    |
| cg05911610 | 0.04871 | 0.04193 | 0.0469  | 0.04603 | 0.03604 | 0.03594 | 0.03201 | 0.03044 | 0.03935 | 0.03456 MRPL3     |
| cg05912121 | 0.82769 | 0.35323 | 0.8911  | 0.87725 | 0.69645 | 0.49096 | 0.16847 | 0.13011 | 0.68124 | 0.52552 TH        |
| cg05915281 | 0.0302  | 0.02912 | 0.02833 | 0.02744 | 0.02157 | 0.0267  | 0.02316 | 0.025   | 0.02353 | 0.02362 IRF1      |
| cg05916196 | 0.77731 | 0.52436 | 0.78929 | 0.77801 | 0.77336 | 0.73735 | 0.67809 | 0.58014 | 0.80828 | 0.71149 IL19      |



|            |         |         |         |         |         |         |         |         |         |         |          |
|------------|---------|---------|---------|---------|---------|---------|---------|---------|---------|---------|----------|
| cg05916783 | 0.04334 | 0.04185 | 0.04175 | 0.03996 | 0.03373 | 0.03891 | 0.03641 | 0.0373  | 0.03588 | 0.03264 | GAN      |
| cg05917963 | 0.11578 | 0.12401 | 0.13366 | 0.15164 | 0.33842 | 0.30948 | 0.10655 | 0.10322 | 0.16969 | 0.14217 | CHUK     |
| cg05919661 | 0.03158 | 0.03605 | 0.04007 | 0.04115 | 0.03841 | 0.03862 | 0.03706 | 0.03025 | 0.03548 | 0.03481 | LMBR1L   |
| cg05920090 | 0.04359 | 0.04483 | 0.04487 | 0.04266 | 0.02401 | 0.03528 | 0.09421 | 0.03679 | 0.03996 | 0.03417 | HSPA1A   |
| cg05920720 | 0.65362 | 0.64365 | 0.45991 | 0.41886 | 0.57938 | 0.61389 | 0.39278 | 0.62825 | 0.6212  | 0.64044 | MBNL3    |
| cg05921207 | 0.63276 | 0.46737 | 0.86115 | 0.87951 | 0.30163 | 0.75789 | 0.06603 | 0.13087 | 0.81375 | 0.82506 | CHRD1    |
| cg05921324 | 0.69567 | 0.30874 | 0.54478 | 0.69229 | 0.91792 | 0.86247 | 0.13969 | 0.29992 | 0.45728 | 0.3851  | APOA4    |
| cg05921581 | 0.86719 | 0.58838 | 0.86377 | 0.89064 | 0.87017 | 0.61748 | 0.82086 | 0.83312 | 0.38936 | 0.35811 | KRT1B    |
| cg05921699 | 0.859   | 0.54899 | 0.75008 | 0.8475  | 0.81048 | 0.73537 | 0.29431 | 0.14749 | 0.66438 | 0.47207 | CD79A    |
| cg05922057 | 0.19613 | 0.04067 | 0.07487 | 0.06139 | 0.0642  | 0.04204 | 0.0826  | 0.0389  | 0.12387 | 0.03424 | ZZEF1    |
| cg05922591 | 0.85211 | 0.73527 | 0.82886 | 0.83961 | 0.90606 | 0.87471 | 0.4522  | 0.43291 | 0.69795 | 0.67686 | LILRB4   |
| cg05922972 | 0.02773 | 0.0325  | 0.02911 | 0.03047 | 0.0283  | 0.03049 | 0.03131 | 0.03011 | 0.02915 | 0.02541 | TSPAN3   |
| cg05923056 | 0.04008 | 0.0426  | 0.04144 | 0.03808 | 0.04064 | 0.03987 | 0.03488 | 0.046   | 0.03828 | 0.03559 | CHES1    |
| cg05923103 | 0.03047 | 0.03008 | 0.03391 | 0.03029 | 0.03314 | 0.02716 | 0.02974 | 0.03205 | 0.02574 | 0.02686 | RNF11    |
| cg05924191 | 0.62824 | 0.1774  | 0.46271 | 0.50244 | 0.59107 | 0.54935 | 0.38448 | 0.33837 | 0.53549 | 0.58393 | FLJ20582 |
| cg05924583 | 0.77644 | 0.55303 | 0.67785 | 0.82466 | 0.87511 | 0.8425  | 0.18371 | 0.26334 | 0.34426 | 0.07438 | TP73     |
| cg05927017 | 0.47209 | 0.04932 | 0.34889 | 0.48109 | 0.11552 | 0.05682 | 0.39769 | 0.44916 | 0.35128 | 0.44272 | BCL2     |
| cg05927159 | 0.05195 | 0.04148 | 0.06261 | 0.05136 | 0.04514 | 0.04149 | 0.07072 | 0.03023 | 0.04351 | 0.03017 | WDR1     |
| cg05932408 | 0.18368 | 0.16916 | 0.39185 | 0.52722 | 0.67659 | 0.75717 | 0.41591 | 0.05472 | 0.15098 | 0.35215 | PTGIS    |
| cg05932936 | 0.07647 | 0.07711 | 0.11398 | 0.09397 | 0.12016 | 0.06667 | 0.0686  | 0.06107 | 0.04507 | 0.05125 | SERINC3  |
| cg05934874 | 0.05715 | 0.04465 | 0.06244 | 0.06377 | 0.09403 | 0.07728 | 0.06029 | 0.0508  | 0.06266 | 0.06735 | VPS4B    |
| cg05935584 | 0.02272 | 0.02919 | 0.04728 | 0.04752 | 0.02526 | 0.03024 | 0.54619 | 0.51859 | 0.02685 | 0.02309 | HMGB3    |
| cg05936800 | 0.65335 | 0.68372 | 0.65213 | 0.68117 | 0.61088 | 0.71085 | 0.65003 | 0.6355  | 0.69758 | 0.71053 | TNFSF18  |
| cg05937182 | 0.02853 | 0.03392 | 0.03893 | 0.03412 | 0.02797 | 0.03994 | 0.02713 | 0.02765 | 0.02524 | 0.02088 | ST7      |
| cg05937237 | 0.8261  | 0.80002 | 0.8348  | 0.85783 | 0.89153 | 0.84375 | 0.83105 | 0.84978 | 0.82932 | 0.85521 | MGC11257 |
| cg05937453 | 0.04567 | 0.04549 | 0.62886 | 0.60071 | 0.18542 | 0.07485 | 0.04267 | 0.10026 | 0.04786 | 0.0279  | SFRP5    |
| cg05938285 | 0.0497  | 0.04632 | 0.04513 | 0.04581 | 0.03286 | 0.03799 | 0.04358 | 0.04129 | 0.03752 | 0.0303  | PIGZ     |
| cg05938725 | 0.02919 | 0.03132 | 0.03402 | 0.03299 | 0.07849 | 0.03476 | 0.02925 | 0.02925 | 0.02953 | 0.02729 | NUAK2    |
| cg05940463 | 0.05001 | 0.05393 | 0.05369 | 0.04957 | 0.04423 | 0.04835 | 0.0439  | 0.04684 | 0.04567 | 0.04563 | C1orf86  |
| cg05940536 | 0.07428 | 0.06555 | 0.1116  | 0.0888  | 0.19509 | 0.1773  | 0.08899 | 0.0886  | 0.08891 | 0.08843 | ACVR1B   |
| cg05941634 | 0.11931 | 0.08541 | 0.1316  | 0.11271 | 0.17841 | 0.09241 | 0.1199  | 0.09083 | 0.09108 | 0.08003 | CNNM3    |
| cg05942574 | 0.07313 | 0.08381 | 0.51578 | 0.7201  | 0.74677 | 0.84178 | 0.75826 | 0.69666 | 0.07716 | 0.0787  | CACNA1G  |
| cg05942970 | 0.93945 | 0.88861 | 0.91616 | 0.92732 | 0.95658 | 0.94689 | 0.60895 | 0.47108 | 0.58005 | 0.42962 | C10orf39 |
| cg05944800 | 0.07652 | 0.05724 | 0.08968 | 0.08458 | 0.11141 | 0.08949 | 0.07446 | 0.07424 | 0.06954 | 0.06867 | INSIG2   |
| cg05945622 | 0.02997 | 0.03418 | 0.02963 | 0.0292  | 0.02541 | 0.02994 | 0.02697 | 0.02681 | 0.02396 | 0.02824 | YIF1A    |
| cg05946081 | 0.04158 | 0.03589 | 0.04171 | 0.03688 | 0.0387  | 0.03508 | 0.03272 | 0.03104 | 0.03351 | 0.02826 | RBMXL1   |
| cg05947740 | 0.68854 | 0.21907 | 0.73899 | 0.82201 | 0.86437 | 0.82524 | 0.65218 | 0.27052 | 0.55062 | 0.50151 | PHYHIP   |
| cg05948654 | 0.27655 | 0.32074 | 0.60864 | 0.67227 | 0.47209 | 0.58425 | 0.25258 | 0.41071 | 0.37016 | 0.35415 | SLC17A2  |
| cg05949173 | 0.14131 | 0.13111 | 0.45901 | 0.63125 | 0.5653  | 0.73481 | 0.19469 | 0.16767 | 0.18982 | 0.3054  | IL1F10   |
| cg05949660 | 0.09272 | 0.07509 | 0.62416 | 0.77415 | 0.45053 | 0.20424 | 0.69553 | 0.72507 | 0.91534 | 0.74532 | MICAL1   |
| cg05950276 | 0.79701 | 0.78887 | 0.7361  | 0.7618  | 0.69399 | 0.68739 | 0.7497  | 0.78827 | 0.8138  | 0.83523 | TMTC4    |

|            |         |         |         |         |         |         |         |         |         |                   |
|------------|---------|---------|---------|---------|---------|---------|---------|---------|---------|-------------------|
| cg05951646 | 0.07953 | 0.05505 | 0.2094  | 0.32254 | 0.51693 | 0.25534 | 0.06225 | 0.04882 | 0.04406 | 0.03749 RYK       |
| cg05951993 | 0.03389 | 0.03468 | 0.03248 | 0.03272 | 0.02295 | 0.03322 | 0.03423 | 0.03338 | 0.02699 | 0.02931 GYS1      |
| cg05953243 | 0.62907 | 0.52584 | 0.35556 | 0.48506 | 0.42324 | 0.22215 | 0.57921 | 0.56998 | 0.16366 | 0.14666 SLC5A12   |
| cg05953394 | 0.06378 | 0.05034 | 0.11406 | 0.08546 | 0.06559 | 0.07026 | 0.05744 | 0.05532 | 0.05599 | 0.0409 PRKAG2     |
| cg05955224 | 0.11697 | 0.10841 | 0.12864 | 0.14012 | 0.12156 | 0.11424 | 0.1226  | 0.11254 | 0.08474 | 0.08071 CR12      |
| cg05955301 | 0.61519 | 0.27413 | 0.83203 | 0.84747 | 0.6815  | 0.65123 | 0.78229 | 0.49379 | 0.39847 | 0.24088 PRELP     |
| cg05957518 | 0.03188 | 0.03401 | 0.03196 | 0.03367 | 0.02649 | 0.03255 | 0.02732 | 0.02619 | 0.02779 | 0.02782 PSMA3     |
| cg05958352 | 0.85478 | 0.84976 | 0.85723 | 0.85816 | 0.87272 | 0.85144 | 0.26145 | 0.33937 | 0.55218 | 0.43786 RNASE1    |
| cg05958582 | 0.79604 | 0.3062  | 0.73597 | 0.7803  | 0.65102 | 0.62886 | 0.0564  | 0.05024 | 0.05747 | 0.0598 PKD2L1     |
| cg05958659 | 0.17514 | 0.0593  | 0.07216 | 0.06431 | 0.06723 | 0.056   | 0.06547 | 0.05824 | 0.04999 | 0.04462 UNQ1912   |
| cg05959392 | 0.0911  | 0.05287 | 0.07144 | 0.06702 | 0.06432 | 0.0541  | 0.06107 | 0.05924 | 0.04098 | 0.0466 C10orf32   |
| cg05959508 | 0.80096 | 0.49669 | 0.8314  | 0.88235 | 0.79647 | 0.91816 | 0.03693 | 0.10126 | 0.88638 | 0.65153 TRAF3IP3  |
| cg05960024 | 0.8299  | 0.25183 | 0.67486 | 0.63448 | 0.63166 | 0.77725 | 0.33411 | 0.34778 | 0.85814 | 0.84336 CLOCK     |
| cg05960806 | 0.05184 | 0.05945 | 0.05032 | 0.05042 | 0.04886 | 0.05064 | 0.05136 | 0.05099 | 0.04145 | 0.04834 CLNS1A    |
| cg05961212 | 0.84949 | 0.55808 | 0.24537 | 0.31454 | 0.80899 | 0.71926 | 0.1605  | 0.07664 | 0.09427 | 0.08902 ADPRH     |
| cg05961595 | 0.02093 | 0.02409 | 0.02592 | 0.0248  | 0.0189  | 0.02432 | 0.17041 | 0.13699 | 0.01843 | 0.01828 APEX2     |
| cg05961827 | 0.89008 | 0.88255 | 0.88923 | 0.90766 | 0.8614  | 0.87913 | 0.82111 | 0.86551 | 0.88332 | 0.61346 UGT1A7    |
| cg05964373 | 0.06133 | 0.04858 | 0.05181 | 0.04932 | 0.13235 | 0.0448  | 0.05507 | 0.04821 | 0.06418 | 0.05153 TEX9      |
| cg05965188 | 0.75884 | 0.7865  | 0.7365  | 0.72517 | 0.70741 | 0.72582 | 0.72303 | 0.75799 | 0.77526 | 0.74711 KIAA0179  |
| cg05965402 | 0.08725 | 0.07498 | 0.1071  | 0.10788 | 0.10218 | 0.06249 | 0.05786 | 0.05203 | 0.07475 | 0.04768 PI4K2B    |
| cg05968233 | 0.47237 | 0.72848 | 0.73813 | 0.66418 | 0.54938 | 0.35397 | 0.63034 | 0.09778 | 0.16084 | 0.11125 ALKBH7    |
| cg05969697 | 0.04394 | 0.04401 | 0.4051  | 0.65371 | 0.04556 | 0.04423 | 0.03838 | 0.03971 | 0.0327  | 0.03185 BICD2     |
| cg05970437 | 0.04821 | 0.05485 | 0.05576 | 0.05157 | 0.04426 | 0.05217 | 0.05426 | 0.04936 | 0.03982 | 0.04081 KLF16     |
| cg05970790 | 0.03943 | 0.04816 | 0.04475 | 0.04393 | 0.04908 | 0.03703 | 0.064   | 0.03453 | 0.17884 | 0.43263 NFATC1    |
| cg05973262 | 0.77137 | 0.78343 | 0.62536 | 0.8371  | 0.88415 | 0.86173 | 0.11018 | 0.32873 | 0.54516 | 0.40705 NOTCH4    |
| cg05976074 | 0.59034 | 0.20396 | 0.7538  | 0.77928 | 0.76864 | 0.89826 | 0.57284 | 0.43695 | 0.56967 | 0.68749 SLC7A10   |
| cg05976325 | 0.91276 | 0.90049 | 0.90192 | 0.90236 | 0.90764 | 0.89383 | 0.91437 | 0.90405 | 0.88669 | 0.88214 LOC284912 |
| cg05978187 | 0.03645 | 0.04046 | 0.032   | 0.02965 | 0.03283 | 0.03273 | 0.03504 | 0.03182 | 0.02996 | 0.03089 ERH       |
| cg05982504 | 0.70959 | 0.07677 | 0.88436 | 0.91299 | 0.95034 | 0.91813 | 0.83839 | 0.76956 | 0.88182 | 0.62029 IGFALS    |
| cg05983247 | 0.01968 | 0.01951 | 0.01846 | 0.02006 | 0.01695 | 0.01769 | 0.01669 | 0.0173  | 0.01558 | 0.01583 SLTM      |
| cg05985767 | 0.59714 | 0.08713 | 0.88982 | 0.90127 | 0.92857 | 0.88886 | 0.67255 | 0.71907 | 0.80364 | 0.85667 ANPEP     |
| cg05986149 | 0.11197 | 0.12464 | 0.15843 | 0.14249 | 0.17232 | 0.13889 | 0.08119 | 0.09096 | 0.1055  | 0.11973 BRIP1     |
| cg05988645 | 0.08207 | 0.06418 | 0.43284 | 0.42303 | 0.08335 | 0.20327 | 0.38987 | 0.05245 | 0.0746  | 0.06365 MGC2654   |
| cg05989054 | 0.93752 | 0.81598 | 0.9018  | 0.91115 | 0.9216  | 0.90454 | 0.8569  | 0.52103 | 0.94633 | 0.90862 GAMT      |
| cg05989429 | 0.03014 | 0.02846 | 0.03842 | 0.0317  | 0.77295 | 0.39511 | 0.02589 | 0.02403 | 0.85843 | 0.07903 ABCA7     |
| cg05990214 | 0.07885 | 0.05458 | 0.05297 | 0.04531 | 0.04289 | 0.07474 | 0.05353 | 0.04866 | 0.04526 | 0.04881 SPHK2     |
| cg05992340 | 0.80151 | 0.76968 | 0.81972 | 0.83035 | 0.75025 | 0.82987 | 0.80595 | 0.85093 | 0.67158 | 0.81158 PDE4D     |
| cg05995267 | 0.06896 | 0.09257 | 0.07869 | 0.08379 | 0.06286 | 0.06455 | 0.07531 | 0.06229 | 0.06322 | 0.06196 PRRT2     |
| cg05996042 | 0.6462  | 0.63371 | 0.74875 | 0.77493 | 0.34785 | 0.22196 | 0.14008 | 0.61449 | 0.60413 | 0.64218 RUNX2     |
| cg05996238 | 0.87294 | 0.55145 | 0.76385 | 0.87395 | 0.9338  | 0.88878 | 0.39168 | 0.46239 | 0.88183 | 0.53139 PAGE2     |
| cg05997860 | 0.13186 | 0.07667 | 0.08976 | 0.0926  | 0.24462 | 0.43741 | 0.08447 | 0.06942 | 0.07799 | 0.07704 ADAM21    |

|            |         |         |         |         |         |         |         |         |         |                  |
|------------|---------|---------|---------|---------|---------|---------|---------|---------|---------|------------------|
| cg05998244 | 0.59403 | 0.53193 | 0.66028 | 0.72625 | 0.64    | 0.71054 | 0.6743  | 0.75932 | 0.72952 | 0.69616 LONRF2   |
| cg05998426 | 0.83846 | 0.05606 | 0.02387 | 0.02901 | 0.04008 | 0.03997 | 0.0353  | 0.03078 | 0.02798 | 0.02614 RIN1     |
| cg05998983 | 0.56301 | 0.27767 | 0.66986 | 0.73813 | 0.56093 | 0.73292 | 0.70568 | 0.73387 | 0.72033 | 0.55453 OIT3     |
| cg06000781 | 0.80591 | 0.80313 | 0.706   | 0.74741 | 0.70275 | 0.78327 | 0.83753 | 0.85099 | 0.81176 | 0.81041 BST1     |
| cg06001166 | 0.91744 | 0.82256 | 0.91871 | 0.92203 | 0.95131 | 0.92364 | 0.84884 | 0.82237 | 0.91225 | 0.90055 RPL3L    |
| cg06003187 | 0.74631 | 0.53969 | 0.84676 | 0.9119  | 0.36226 | 0.60987 | 0.42579 | 0.09488 | 0.90441 | 0.81486 GUCA2A   |
| cg06005396 | 0.19071 | 0.0523  | 0.26606 | 0.47035 | 0.2771  | 0.24327 | 0.16315 | 0.26724 | 0.06081 | 0.12054 HCN2     |
| cg06005644 | 0.02693 | 0.03059 | 0.02925 | 0.02873 | 0.02165 | 0.02572 | 0.02579 | 0.02393 | 0.02402 | 0.02247 UBE2D2   |
| cg06006444 | 0.36921 | 0.05191 | 0.06811 | 0.06318 | 0.09812 | 0.06535 | 0.04931 | 0.04606 | 0.04705 | 0.06079 UBE2D3   |
| cg06007645 | 0.50896 | 0.26173 | 0.43454 | 0.70399 | 0.61725 | 0.60953 | 0.38679 | 0.2924  | 0.3277  | 0.10023 C1orf175 |
| cg06011292 | 0.04454 | 0.04045 | 0.03813 | 0.03765 | 0.03919 | 0.04541 | 0.04282 | 0.04219 | 0.02974 | 0.03693 MYH10    |
| cg06015218 | 0.05586 | 0.05741 | 0.52171 | 0.75502 | 0.58411 | 0.48203 | 0.06533 | 0.04796 | 0.05032 | 0.0597 GRM1      |
| cg06018072 | 0.07303 | 0.07509 | 0.08296 | 0.06441 | 0.06487 | 0.06612 | 0.07524 | 0.07405 | 0.06971 | 0.07186 CLN6     |
| cg06020352 | 0.15112 | 0.11126 | 0.78921 | 0.83572 | 0.84389 | 0.82917 | 0.11116 | 0.09984 | 0.83345 | 0.87858 IRF8     |
| cg06021171 | 0.35468 | 0.34601 | 0.54634 | 0.59553 | 0.48573 | 0.54867 | 0.24185 | 0.20465 | 0.26693 | 0.31622 SPOCK3   |
| cg06022562 | 0.92545 | 0.89195 | 0.89307 | 0.90765 | 0.87755 | 0.89964 | 0.91971 | 0.92792 | 0.92902 | 0.8959 FLJ13841  |
| cg06023257 | 0.13892 | 0.03194 | 0.34896 | 0.33582 | 0.05426 | 0.0866  | 0.32738 | 0.32341 | 0.02694 | 0.02355 GAB2     |
| cg06025017 | 0.36115 | 0.2625  | 0.21315 | 0.30997 | 0.15377 | 0.52356 | 0.12342 | 0.16184 | 0.12157 | 0.10401 RGSL2    |
| cg06026755 | 0.82576 | 0.71672 | 0.86696 | 0.8688  | 0.77944 | 0.85299 | 0.76677 | 0.77859 | 0.83014 | 0.65411 CEP27    |
| cg06027949 | 0.06239 | 0.06839 | 0.16866 | 0.14298 | 0.08934 | 0.08994 | 0.18914 | 0.13655 | 0.05365 | 0.07619 SNX16    |
| cg06029655 | 0.85645 | 0.35752 | 0.87665 | 0.90243 | 0.91423 | 0.91483 | 0.89353 | 0.83355 | 0.92502 | 0.86499 SBP1     |
| cg06030619 | 0.03882 | 0.03988 | 0.07117 | 0.08542 | 0.12695 | 0.1626  | 0.04347 | 0.03807 | 0.03654 | 0.02581 CORO1A   |
| cg06034822 | 0.20501 | 0.15688 | 0.18733 | 0.17458 | 0.16076 | 0.12935 | 0.16516 | 0.14405 | 0.16503 | 0.16269 USF1     |
| cg06037693 | 0.86883 | 0.87915 | 0.87086 | 0.88723 | 0.87971 | 0.53883 | 0.12151 | 0.85991 | 0.89118 | 0.87878 RUNX3    |
| cg06038049 | 0.01454 | 0.01338 | 0.02012 | 0.02006 | 0.01384 | 0.0147  | 0.01388 | 0.01279 | 0.01759 | 0.01457 CPSF3L   |
| cg06038133 | 0.78791 | 0.57568 | 0.97314 | 0.97487 | 0.97703 | 0.97734 | 0.97852 | 0.97798 | 0.98003 | 0.97873 CORO6    |
| cg06039392 | 0.78132 | 0.19601 | 0.77381 | 0.79665 | 0.82254 | 0.81333 | 0.78391 | 0.84139 | 0.42333 | 0.4341 MTNR1A    |
| cg06039624 | 0.03375 | 0.04039 | 0.0379  | 0.03568 | 0.02614 | 0.03434 | 0.03181 | 0.03239 | 0.02749 | 0.02722 MGC16943 |
| cg06041240 | 0.8736  | 0.8571  | 0.82876 | 0.85988 | 0.86079 | 0.85874 | 0.563   | 0.85536 | 0.86219 | 0.86047 NXT2     |
| cg06041363 | 0.62652 | 0.24963 | 0.38581 | 0.46187 | 0.25533 | 0.15988 | 0.48925 | 0.27515 | 0.15852 | 0.15589 FLJ20699 |
| cg06042828 | 0.79173 | 0.7499  | 0.82023 | 0.83306 | 0.70335 | 0.57822 | 0.8178  | 0.8222  | 0.85806 | 0.80966 DDX28    |
| cg06043042 | 0.05101 | 0.03793 | 0.48451 | 0.70659 | 0.07961 | 0.07605 | 0.05786 | 0.04038 | 0.0364  | 0.03028 NEUROG3  |
| cg06043114 | 0.1294  | 0.05593 | 0.05578 | 0.04271 | 0.06391 | 0.07582 | 0.03474 | 0.03782 | 0.05096 | 0.03543 TSPAN2   |
| cg06043190 | 0.04704 | 0.05733 | 0.04387 | 0.0359  | 0.05353 | 0.05467 | 0.03815 | 0.0389  | 0.04469 | 0.0435 EML4      |
| cg06044117 | 0.02929 | 0.03506 | 0.03729 | 0.03737 | 0.0367  | 0.0373  | 0.03747 | 0.03329 | 0.02787 | 0.03078 CEP57    |
| cg06044899 | 0.59058 | 0.57789 | 0.53103 | 0.55241 | 0.49957 | 0.54739 | 0.60345 | 0.60001 | 0.65151 | 0.63977 TMSL3    |
| cg06044900 | 0.04453 | 0.04592 | 0.0445  | 0.04678 | 0.0454  | 0.03958 | 0.03921 | 0.04164 | 0.03586 | 0.03586 GNAS     |
| cg06048156 | 0.03261 | 0.03167 | 0.02923 | 0.03184 | 0.02968 | 0.03022 | 0.03116 | 0.03142 | 0.02743 | 0.02622 ITGB3    |
| cg06048973 | 0.70271 | 0.47308 | 0.93206 | 0.93191 | 0.91821 | 0.9086  | 0.87043 | 0.70565 | 0.86376 | 0.75535 ACTC     |
| cg06049972 | 0.06279 | 0.04681 | 0.06041 | 0.07877 | 0.37426 | 0.05664 | 0.04441 | 0.0405  | 0.08296 | 0.0443 UQCRC1    |
| cg06051311 | 0.83475 | 0.3312  | 0.66203 | 0.82427 | 0.72179 | 0.73482 | 0.42836 | 0.24188 | 0.76093 | 0.4348 TRIM15    |

|            |         |         |         |         |         |         |         |         |         |         |           |
|------------|---------|---------|---------|---------|---------|---------|---------|---------|---------|---------|-----------|
| cg06051662 | 0.66938 | 0.21379 | 0.74184 | 0.79541 | 0.44782 | 0.38104 | 0.10549 | 0.10548 | 0.2587  | 0.38789 | PDZD4     |
| cg06055013 | 0.09657 | 0.04363 | 0.06581 | 0.05014 | 0.4916  | 0.36805 | 0.04302 | 0.0419  | 0.18911 | 0.38952 | ATRNL1    |
| cg06057707 | 0.97054 | 0.90321 | 0.92886 | 0.9647  | 0.97731 | 0.97201 | 0.48427 | 0.60515 | 0.0355  | 0.01535 | XAGE2     |
| cg06058319 | 0.08187 | 0.07529 | 0.08245 | 0.08265 | 0.06576 | 0.07178 | 0.06856 | 0.07481 | 0.0759  | 0.07112 | PPFIBP1   |
| cg06058597 | 0.02915 | 0.03293 | 0.03149 | 0.02995 | 0.02333 | 0.02753 | 0.0264  | 0.02562 | 0.02622 | 0.02522 | NOL10     |
| cg06059810 | 0.83206 | 0.82734 | 0.81832 | 0.81846 | 0.73362 | 0.78065 | 0.26733 | 0.1517  | 0.84812 | 0.81099 | RUFY3     |
| cg06060661 | 0.10343 | 0.21529 | 0.21625 | 0.19268 | 0.15071 | 0.24612 | 0.08769 | 0.12592 | 0.09908 | 0.19313 | MAGEA11   |
| cg06061892 | 0.02715 | 0.0252  | 0.03645 | 0.04103 | 0.04109 | 0.03852 | 0.03241 | 0.02914 | 0.02286 | 0.02104 | SNX5      |
| cg06062132 | 0.09501 | 0.0899  | 0.11706 | 0.09383 | 0.113   | 0.09299 | 0.09092 | 0.09402 | 0.08774 | 0.08879 | SENP6     |
| cg06063714 | 0.08912 | 0.06072 | 0.80606 | 0.81649 | 0.43414 | 0.38594 | 0.39783 | 0.51847 | 0.49229 | 0.43739 | GABRD     |
| cg06063729 | 0.07466 | 0.07918 | 0.07531 | 0.06637 | 0.05173 | 0.05636 | 0.06087 | 0.05816 | 0.04863 | 0.05378 | RASSF1    |
| cg06066303 | 0.23609 | 0.15057 | 0.68595 | 0.86546 | 0.56149 | 0.41124 | 0.62688 | 0.2184  | 0.56688 | 0.46095 | MS4A5     |
| cg06066711 | 0.03592 | 0.03661 | 0.0415  | 0.03418 | 0.03201 | 0.03337 | 0.03124 | 0.03679 | 0.03338 | 0.03286 | KLHL21    |
| cg06069187 | 0.21081 | 0.19882 | 0.2439  | 0.19312 | 0.29396 | 0.23102 | 0.24053 | 0.23847 | 0.15585 | 0.20315 | SARM1     |
| cg06069731 | 0.04201 | 0.03726 | 0.08246 | 0.0936  | 0.05167 | 0.03782 | 0.1326  | 0.13881 | 0.11087 | 0.08967 | HIST1H2BB |
| cg06071083 | 0.02622 | 0.02792 | 0.02971 | 0.0263  | 0.02717 | 0.02798 | 0.02615 | 0.02738 | 0.02034 | 0.01969 | SLC12A4   |
| cg06073471 | 0.05307 | 0.04959 | 0.04677 | 0.04983 | 0.03812 | 0.0362  | 0.06249 | 0.06129 | 0.03902 | 0.03667 | FAM55C    |
| cg06074920 | 0.77882 | 0.81134 | 0.8826  | 0.90163 | 0.87046 | 0.75305 | 0.17936 | 0.10366 | 0.82083 | 0.51336 | KRTHA4    |
| cg06076054 | 0.04345 | 0.047   | 0.04525 | 0.0409  | 0.04647 | 0.04789 | 0.03738 | 0.04219 | 0.0369  | 0.03723 | C21orf91  |
| cg06077733 | 0.01887 | 0.0196  | 0.0194  | 0.01829 | 0.01713 | 0.01952 | 0.01748 | 0.01626 | 0.01724 | 0.01831 | UBE2D1    |
| cg06084117 | 0.80757 | 0.67262 | 0.8096  | 0.8916  | 0.84769 | 0.8325  | 0.83001 | 0.87216 | 0.80961 | 0.28572 | PLXNA4B   |
| cg06084557 | 0.09526 | 0.09564 | 0.08763 | 0.07483 | 0.20234 | 0.12983 | 0.09035 | 0.08633 | 0.11879 | 0.11314 | BTBD7     |
| cg06084735 | 0.02878 | 0.03138 | 0.04652 | 0.03929 | 0.02614 | 0.03177 | 0.03172 | 0.02463 | 0.02771 | 0.03657 | ENY2      |
| cg06087537 | 0.04437 | 0.03984 | 0.04813 | 0.04066 | 0.01989 | 0.01936 | 0.04038 | 0.0428  | 0.02728 | 0.03784 | RNF38     |
| cg06088032 | 0.04061 | 0.04035 | 0.08415 | 0.05757 | 0.96085 | 0.96086 | 0.45812 | 0.55369 | 0.49955 | 0.47782 | ZMYND10   |
| cg06088314 | 0.91912 | 0.854   | 0.91139 | 0.9183  | 0.93457 | 0.90735 | 0.90749 | 0.85794 | 0.90946 | 0.90377 | CLK1      |
| cg06090351 | 0.07185 | 0.07562 | 0.08245 | 0.07369 | 0.05986 | 0.07277 | 0.10413 | 0.09228 | 0.06637 | 0.06541 | ADSS      |
| cg06090421 | 0.0408  | 0.04659 | 0.04866 | 0.04802 | 0.06126 | 0.05384 | 0.03668 | 0.03922 | 0.03695 | 0.04487 | PPM1D     |
| cg06090630 | 0.02234 | 0.02144 | 0.02188 | 0.02185 | 0.01882 | 0.01646 | 0.01711 | 0.0174  | 0.01591 | 0.01635 | TCEB2     |
| cg06090864 | 0.89455 | 0.72477 | 0.83082 | 0.93486 | 0.92378 | 0.92335 | 0.31015 | 0.37604 | 0.93562 | 0.75654 | FFAR1     |
| cg06092815 | 0.08184 | 0.06877 | 0.90122 | 0.91586 | 0.5934  | 0.63544 | 0.32905 | 0.50614 | 0.32945 | 0.39084 | SKIP      |
| cg06093279 | 0.0613  | 0.06723 | 0.07444 | 0.06593 | 0.15797 | 0.06431 | 0.08368 | 0.07315 | 0.05994 | 0.06859 | MTUS1     |
| cg06094150 | 0.32944 | 0.05755 | 0.83094 | 0.89833 | 0.9445  | 0.91666 | 0.64593 | 0.29696 | 0.53503 | 0.36674 | MT1B      |
| cg06094757 | 0.7106  | 0.72047 | 0.63509 | 0.69249 | 0.6215  | 0.71422 | 0.64903 | 0.66617 | 0.67843 | 0.55809 | KLRC4     |
| cg06095560 | 0.08023 | 0.07867 | 0.10079 | 0.09841 | 0.13071 | 0.09205 | 0.09243 | 0.07149 | 0.05607 | 0.06759 | SAE1      |
| cg06096336 | 0.26705 | 0.70779 | 0.86562 | 0.86546 | 0.82973 | 0.78748 | 0.8531  | 0.84697 | 0.8545  | 0.84202 | HTR2B     |
| cg06098051 | 0.82431 | 0.81825 | 0.75332 | 0.79647 | 0.74612 | 0.80675 | 0.77406 | 0.81276 | 0.80634 | 0.77622 | LOC400986 |
| cg06100291 | 0.05317 | 0.05545 | 0.06726 | 0.06072 | 0.09009 | 0.07299 | 0.05967 | 0.05075 | 0.07509 | 0.07076 | CLSPN     |
| cg06100324 | 0.92359 | 0.7304  | 0.90163 | 0.92395 | 0.94034 | 0.91361 | 0.4357  | 0.26743 | 0.90771 | 0.85817 | MSLN      |
| cg06100991 | 0.0576  | 0.0307  | 0.03362 | 0.02897 | 0.02912 | 0.03822 | 0.03181 | 0.0266  | 0.02654 | 0.03113 | ELOVL6    |
| cg06101212 | 0.33362 | 0.29626 | 0.8465  | 0.88529 | 0.97977 | 0.95141 | 0.83202 | 0.88669 | 0.30187 | 0.28543 | CLDN3     |

|            |         |         |         |         |         |         |         |         |         |         |           |
|------------|---------|---------|---------|---------|---------|---------|---------|---------|---------|---------|-----------|
| cg06101225 | 0.04152 | 0.03813 | 0.04796 | 0.0435  | 0.03728 | 0.0489  | 0.04158 | 0.03938 | 0.03386 | 0.03793 | STIL      |
| cg06101324 | 0.06195 | 0.06214 | 0.07423 | 0.07581 | 0.06114 | 0.05712 | 0.05059 | 0.05618 | 0.06336 | 0.05692 | SPRR1A    |
| cg06105085 | 0.08889 | 0.08737 | 0.09486 | 0.08178 | 0.07743 | 0.07484 | 0.07766 | 0.07648 | 0.08349 | 0.06665 | C10orf104 |
| cg06106793 | 0.03836 | 0.04279 | 0.05176 | 0.04353 | 0.0355  | 0.04054 | 0.04389 | 0.03451 | 0.03745 | 0.03861 | PRCC      |
| cg06109724 | 0.05549 | 0.05523 | 0.06295 | 0.05466 | 0.04771 | 0.05727 | 0.04569 | 0.05757 | 0.05603 | 0.05664 | NUDT5     |
| cg06110365 | 0.05232 | 0.05133 | 0.05172 | 0.05373 | 0.05188 | 0.05016 | 0.06092 | 0.06342 | 0.05202 | 0.05255 | TLL12     |
| cg06110728 | 0.05229 | 0.04463 | 0.91366 | 0.93317 | 0.10829 | 0.08105 | 0.33048 | 0.07581 | 0.13456 | 0.06972 | NELL2     |
| cg06111305 | 0.03067 | 0.03618 | 0.03286 | 0.03844 | 0.03411 | 0.04079 | 0.02678 | 0.03207 | 0.02578 | 0.03031 | RAP2A     |
| cg06111454 | 0.04194 | 0.04482 | 0.04606 | 0.03961 | 0.06138 | 0.04447 | 0.03465 | 0.03211 | 0.03594 | 0.03971 | NFATC4    |
| cg06112415 | 0.61787 | 0.09228 | 0.83714 | 0.80184 | 0.77658 | 0.71341 | 0.35127 | 0.13073 | 0.41828 | 0.0833  | CGREF1    |
| cg06114765 | 0.03857 | 0.04111 | 0.043   | 0.04316 | 0.0209  | 0.03402 | 0.03557 | 0.03841 | 0.03261 | 0.03548 | USP25     |
| cg06117855 | 0.85662 | 0.1396  | 0.53881 | 0.74091 | 0.1056  | 0.08307 | 0.79849 | 0.40956 | 0.05685 | 0.03984 | CLEC3B    |
| cg06118312 | 0.21446 | 0.07902 | 0.42393 | 0.34808 | 0.24772 | 0.29607 | 0.19693 | 0.09097 | 0.25852 | 0.14828 | GZMA      |
| cg06119575 | 0.85261 | 0.80761 | 0.80358 | 0.83117 | 0.74582 | 0.82549 | 0.82211 | 0.83748 | 0.86396 | 0.81737 | TAL2      |
| cg06121469 | 0.78401 | 0.15199 | 0.35226 | 0.35593 | 0.05035 | 0.03055 | 0.05046 | 0.03009 | 0.07735 | 0.03488 | KIAA1840  |
| cg06122080 | 0.10787 | 0.10666 | 0.11456 | 0.10571 | 0.16708 | 0.14787 | 0.0942  | 0.09677 | 0.0855  | 0.10051 | OXSM      |
| cg06123346 | 0.12139 | 0.07163 | 0.10462 | 0.09124 | 0.08313 | 0.08309 | 0.07084 | 0.05211 | 0.07164 | 0.05441 | ATP4A     |
| cg06126510 | 0.58843 | 0.59487 | 0.27294 | 0.25903 | 0.40058 | 0.51013 | 0.41071 | 0.30461 | 0.23194 | 0.11762 | PMCHL1    |
| cg06130787 | 0.61009 | 0.26492 | 0.08239 | 0.09241 | 0.88409 | 0.50828 | 0.05407 | 0.18706 | 0.04475 | 0.03552 | KLK10     |
| cg06131859 | 0.79822 | 0.69023 | 0.55904 | 0.75702 | 0.635   | 0.62494 | 0.42772 | 0.42528 | 0.53219 | 0.32363 | KYNU      |
| cg06131936 | 0.38948 | 0.10802 | 0.18226 | 0.31003 | 0.22305 | 0.10129 | 0.18492 | 0.13264 | 0.06341 | 0.06508 | OSBPL5    |
| cg06132324 | 0.04305 | 0.04241 | 0.04353 | 0.04749 | 0.05208 | 0.04294 | 0.03983 | 0.04629 | 0.0315  | 0.0317  | POLH      |
| cg06132342 | 0.67961 | 0.20423 | 0.67062 | 0.84202 | 0.84967 | 0.80987 | 0.81746 | 0.76784 | 0.38194 | 0.24564 | KRTHB5    |
| cg06132694 | 0.04402 | 0.05366 | 0.06202 | 0.05075 | 0.09054 | 0.06048 | 0.06445 | 0.05267 | 0.0491  | 0.05346 | NDST3     |
| cg06134936 | 0.05681 | 0.05056 | 0.05297 | 0.05416 | 0.0448  | 0.04552 | 0.04384 | 0.04735 | 0.04677 | 0.04294 | HERC4     |
| cg06134964 | 0.45429 | 0.10378 | 0.58801 | 0.68228 | 0.50809 | 0.17971 | 0.41464 | 0.48959 | 0.36454 | 0.07699 | ITIH1     |
| cg06138027 | 0.05392 | 0.06267 | 0.05749 | 0.04562 | 0.11734 | 0.07679 | 0.05707 | 0.04522 | 0.04367 | 0.04127 | HNRPK     |
| cg06139836 | 0.04429 | 0.04619 | 0.11044 | 0.07611 | 0.04818 | 0.0407  | 0.20203 | 0.5416  | 0.04562 | 0.0382  | EBF3      |
| cg06140118 | 0.0211  | 0.01643 | 0.02518 | 0.02714 | 0.07628 | 0.01761 | 0.01687 | 0.01564 | 0.017   | 0.01338 | DUS2L     |
| cg06141025 | 0.43075 | 0.3003  | 0.68631 | 0.77413 | 0.46382 | 0.43075 | 0.18401 | 0.14234 | 0.30802 | 0.31493 | GYS2      |
| cg06141123 | 0.06151 | 0.054   | 0.06735 | 0.06225 | 0.0621  | 0.07595 | 0.07543 | 0.05999 | 0.06259 | 0.04406 | NFE2L2    |
| cg06142324 | 0.81905 | 0.49292 | 0.81828 | 0.84383 | 0.70256 | 0.78421 | 0.18138 | 0.1065  | 0.85341 | 0.56272 | FLJ25530  |
| cg06143901 | 0.72316 | 0.27685 | 0.77487 | 0.80843 | 0.82936 | 0.81259 | 0.75937 | 0.80502 | 0.55487 | 0.31785 | TCF15     |
| cg06144905 | 0.09136 | 0.08389 | 0.61806 | 0.6478  | 0.38472 | 0.11972 | 0.30087 | 0.0864  | 0.59956 | 0.07827 | PIPOX     |
| cg06145308 | 0.04622 | 0.05375 | 0.05693 | 0.04797 | 0.04618 | 0.05671 | 0.04554 | 0.04655 | 0.04227 | 0.03941 | CNOT4     |
| cg06145357 | 0.65244 | 0.24992 | 0.80651 | 0.76981 | 0.82942 | 0.93399 | 0.10512 | 0.06335 | 0.07911 | 0.03469 | MAGEA8    |
| cg06146910 | 0.01693 | 0.02551 | 0.02302 | 0.02102 | 0.02182 | 0.0265  | 0.01454 | 0.01244 | 0.01519 | 0.01634 | KBTBD6    |
| cg06147863 | 0.65795 | 0.10121 | 0.88678 | 0.9111  | 0.88438 | 0.60185 | 0.83161 | 0.28848 | 0.53555 | 0.45279 | SPI1      |
| cg06148175 | 0.42955 | 0.40288 | 0.29811 | 0.2842  | 0.19779 | 0.06801 | 0.09798 | 0.09683 | 0.05461 | 0.05321 | ACY3      |
| cg06148264 | 0.82842 | 0.83307 | 0.53157 | 0.53168 | 0.66667 | 0.14175 | 0.80427 | 0.35117 | 0.49537 | 0.29615 | SERPINB1  |
| cg06150468 | 0.04815 | 0.04177 | 0.19627 | 0.28792 | 0.08439 | 0.03944 | 0.06501 | 0.04869 | 0.07208 | 0.03458 | SNFT      |

|            |         |         |         |         |         |         |         |         |         |                   |
|------------|---------|---------|---------|---------|---------|---------|---------|---------|---------|-------------------|
| cg06150803 | 0.25487 | 0.26114 | 0.25694 | 0.30339 | 0.28697 | 0.19482 | 0.39869 | 0.33183 | 0.28274 | 0.24388 TNFRSF19  |
| cg06151165 | 0.06505 | 0.04385 | 0.90981 | 0.92496 | 0.13856 | 0.06292 | 0.1308  | 0.10893 | 0.86017 | 0.89358 VSX1      |
| cg06151964 | 0.8865  | 0.87472 | 0.84491 | 0.87851 | 0.93641 | 0.90139 | 0.41584 | 0.52724 | 0.87047 | 0.81469 HPN       |
| cg06154570 | 0.58999 | 0.24947 | 0.26827 | 0.28599 | 0.4896  | 0.14093 | 0.64235 | 0.21997 | 0.89242 | 0.74955 HEYL      |
| cg06154597 | 0.40798 | 0.23328 | 0.56124 | 0.6681  | 0.27685 | 0.26686 | 0.40991 | 0.14688 | 0.8821  | 0.35449 MGC4618   |
| cg06156376 | 0.11397 | 0.05711 | 0.04993 | 0.04795 | 0.06124 | 0.05114 | 0.04674 | 0.04999 | 0.04952 | 0.04334 SHOX2     |
| cg06161738 | 0.02236 | 0.02938 | 0.03553 | 0.02864 | 0.02463 | 0.02918 | 0.01858 | 0.02118 | 0.02052 | 0.02135 GALNT11   |
| cg06161930 | 0.36039 | 0.21963 | 0.46309 | 0.5236  | 0.20511 | 0.06173 | 0.35026 | 0.3089  | 0.30233 | 0.27135 LOC126208 |
| cg06162003 | 0.03829 | 0.03847 | 0.0375  | 0.03568 | 0.03272 | 0.03164 | 0.03266 | 0.03391 | 0.03182 | 0.03069 CBX2      |
| cg06162422 | 0.04399 | 0.05152 | 0.07852 | 0.08763 | 0.09314 | 0.07217 | 0.54225 | 0.39892 | 0.05646 | 0.04777 GLA       |
| cg06165395 | 0.39649 | 0.30888 | 0.89102 | 0.89096 | 0.84945 | 0.83974 | 0.18618 | 0.08151 | 0.87624 | 0.86911 GRIK3     |
| cg06166767 | 0.60876 | 0.56987 | 0.8114  | 0.81549 | 0.65329 | 0.78627 | 0.11117 | 0.14652 | 0.81503 | 0.81202 SFRP1     |
| cg06166863 | 0.04077 | 0.03773 | 0.03626 | 0.03779 | 0.03816 | 0.0398  | 0.03078 | 0.02795 | 0.03046 | 0.03244 PNN       |
| cg06168050 | 0.07352 | 0.07879 | 0.08173 | 0.07712 | 0.04755 | 0.06789 | 0.07182 | 0.0686  | 0.06516 | 0.06071 ZNF207    |
| cg06168324 | 0.03173 | 0.03044 | 0.03594 | 0.02985 | 0.03271 | 0.04142 | 0.03439 | 0.03415 | 0.0347  | 0.0349 RBMS1      |
| cg06168449 | 0.13166 | 0.10037 | 0.15272 | 0.16818 | 0.22322 | 0.14348 | 0.15209 | 0.14401 | 0.10256 | 0.09745 DPF1      |
| cg06171242 | 0.04737 | 0.04741 | 0.05748 | 0.04914 | 0.04978 | 0.04767 | 0.04003 | 0.03864 | 0.03759 | 0.03696 TTRAP     |
| cg06171787 | 0.27397 | 0.07742 | 0.15937 | 0.15508 | 0.22806 | 0.10177 | 0.33651 | 0.12902 | 0.07048 | 0.05047 MRPL16    |
| cg06172871 | 0.81736 | 0.54435 | 0.83252 | 0.85391 | 0.77868 | 0.79707 | 0.77472 | 0.82065 | 0.56835 | 0.63333 HP        |
| cg06173079 | 0.05599 | 0.06781 | 0.07152 | 0.31594 | 0.37086 | 0.06491 | 0.05914 | 0.05842 | 0.05713 | 0.05536 DGCR6     |
| cg06175025 | 0.03025 | 0.02859 | 0.03318 | 0.02748 | 0.02741 | 0.03628 | 0.02698 | 0.03602 | 0.02775 | 0.026 SPTLC2      |
| cg06177698 | 0.74161 | 0.36227 | 0.58167 | 0.60756 | 0.51445 | 0.16204 | 0.44515 | 0.27829 | 0.73928 | 0.73002 GABRQ     |
| cg06177968 | 0.04041 | 0.05321 | 0.04606 | 0.04611 | 0.02699 | 0.04739 | 0.04193 | 0.04977 | 0.04348 | 0.04586 WDR55     |
| cg06178072 | 0.91795 | 0.91379 | 0.9304  | 0.92866 | 0.92928 | 0.92522 | 0.90615 | 0.89994 | 0.93563 | 0.92288 HSPC176   |
| cg06179485 | 0.44058 | 0.17062 | 0.55617 | 0.54047 | 0.47079 | 0.31326 | 0.25509 | 0.48271 | 0.05878 | 0.05996 TMEM54    |
| cg06183267 | 0.13257 | 0.08036 | 0.84872 | 0.88219 | 0.88402 | 0.8951  | 0.75744 | 0.89049 | 0.89258 | 0.31781 AFF3      |
| cg06185738 | 0.05313 | 0.04528 | 0.19784 | 0.34561 | 0.0665  | 0.05151 | 0.04664 | 0.04433 | 0.04513 | 0.04388 SLC17A6   |
| cg06186808 | 0.88986 | 0.86011 | 0.88171 | 0.89317 | 0.92108 | 0.88255 | 0.83922 | 0.76786 | 0.88376 | 0.86702 LOC161247 |
| cg06186861 | 0.09773 | 0.10432 | 0.81184 | 0.87079 | 0.13004 | 0.088   | 0.08981 | 0.06837 | 0.07491 | 0.07471 ZNF501    |
| cg06186973 | 0.03105 | 0.03312 | 0.03469 | 0.03154 | 0.03316 | 0.03026 | 0.03129 | 0.03032 | 0.02691 | 0.02919 YWHAG     |
| cg06187947 | 0.04434 | 0.03821 | 0.0382  | 0.03431 | 0.02563 | 0.03512 | 0.03539 | 0.0341  | 0.03601 | 0.03345 GULP1     |
| cg06188683 | 0.02843 | 0.02923 | 0.02857 | 0.02534 | 0.02624 | 0.02586 | 0.03063 | 0.03033 | 0.02562 | 0.02521 ANP32A    |
| cg06189133 | 0.94615 | 0.54046 | 0.94668 | 0.94718 | 0.96048 | 0.71814 | 0.10284 | 0.06302 | 0.72513 | 0.71077 INSL3     |
| cg06189265 | 0.06549 | 0.07676 | 0.09279 | 0.08082 | 0.06303 | 0.0864  | 0.08297 | 0.06834 | 0.06803 | 0.07574 ZBTB37    |
| cg06189653 | 0.08342 | 0.06922 | 0.69695 | 0.8077  | 0.66249 | 0.11462 | 0.32228 | 0.1346  | 0.87615 | 0.46058 PRR7      |
| cg06190053 | 0.02758 | 0.02599 | 0.51626 | 0.5772  | 0.29851 | 0.37659 | 0.04495 | 0.10374 | 0.10028 | 0.19089 PGM5      |
| cg06190732 | 0.45416 | 0.24252 | 0.72221 | 0.7508  | 0.58035 | 0.6142  | 0.72704 | 0.32699 | 0.59591 | 0.35373 SERPINA3  |
| cg06191076 | 0.5943  | 0.58074 | 0.57072 | 0.49954 | 0.57152 | 0.59347 | 0.32282 | 0.28563 | 0.92537 | 0.9303 DIRAS3     |
| cg06191203 | 0.02729 | 0.02762 | 0.03172 | 0.03152 | 0.02908 | 0.0292  | 0.03449 | 0.03496 | 0.02666 | 0.02859 RIF1      |
| cg06191990 | 0.13307 | 0.14273 | 0.14134 | 0.13263 | 0.08864 | 0.12423 | 0.1264  | 0.12558 | 0.128   | 0.12781 TSFM      |
| cg06192619 | 0.89248 | 0.83897 | 0.8841  | 0.8916  | 0.79078 | 0.69479 | 0.83943 | 0.84979 | 0.31142 | 0.2331 SLC1A6     |

|            |         |         |         |         |         |         |         |         |         |         |            |
|------------|---------|---------|---------|---------|---------|---------|---------|---------|---------|---------|------------|
| cg06192753 | 0.24449 | 0.14742 | 0.19492 | 0.36092 | 0.09889 | 0.07635 | 0.12404 | 0.12936 | 0.09746 | 0.09667 | GADD45GIP1 |
| cg06193382 | 0.04562 | 0.04636 | 0.04592 | 0.0459  | 0.03817 | 0.03979 | 0.04047 | 0.04325 | 0.04538 | 0.03657 | FAM54A     |
| cg06193397 | 0.35962 | 0.18615 | 0.42006 | 0.58949 | 0.14549 | 0.09603 | 0.10509 | 0.10593 | 0.16558 | 0.14854 | ENPP2      |
| cg06194186 | 0.17964 | 0.5689  | 0.59374 | 0.63625 | 0.69065 | 0.72459 | 0.15399 | 0.13388 | 0.17752 | 0.15363 | CPO        |
| cg06194808 | 0.95346 | 0.49785 | 0.95329 | 0.95151 | 0.9605  | 0.94779 | 0.93927 | 0.55845 | 0.97006 | 0.95894 | MGC9712    |
| cg06196379 | 0.42632 | 0.06436 | 0.20755 | 0.41708 | 0.12951 | 0.09103 | 0.15242 | 0.06448 | 0.0925  | 0.04655 | TREM1      |
| cg06197006 | 0.03039 | 0.02734 | 0.03069 | 0.03259 | 0.02537 | 0.0292  | 0.02655 | 0.02425 | 0.02114 | 0.02365 | CRK        |
| cg06197492 | 0.77219 | 0.04425 | 0.87114 | 0.89169 | 0.89006 | 0.87751 | 0.88768 | 0.74361 | 0.88804 | 0.82535 | H19        |
| cg06200013 | 0.03274 | 0.03571 | 0.03849 | 0.03199 | 0.12238 | 0.07312 | 0.53057 | 0.47958 | 0.03106 | 0.03441 | ATP1B2     |
| cg06200339 | 0.88949 | 0.42699 | 0.90396 | 0.9335  | 0.9647  | 0.92051 | 0.88039 | 0.87558 | 0.81354 | 0.93999 | SOX30      |
| cg06200697 | 0.18622 | 0.30068 | 0.53637 | 0.74923 | 0.15642 | 0.0806  | 0.08778 | 0.08433 | 0.73858 | 0.62422 | CTNND1     |
| cg06201642 | 0.04684 | 0.05221 | 0.0526  | 0.0565  | 0.071   | 0.0488  | 0.0413  | 0.04061 | 0.52876 | 0.48248 | ST6GALNAC5 |
| cg06202984 | 0.04099 | 0.03814 | 0.05061 | 0.04337 | 0.03846 | 0.03754 | 0.04352 | 0.04028 | 0.03924 | 0.03198 | FANCC      |
| cg06204948 | 0.8997  | 0.88091 | 0.89633 | 0.90204 | 0.92048 | 0.88753 | 0.72798 | 0.89431 | 0.67    | 0.84949 | MARK2      |
| cg06206626 | 0.55943 | 0.55542 | 0.57777 | 0.61329 | 0.95397 | 0.86428 | 0.47178 | 0.19244 | 0.66974 | 0.59437 | ASPHD2     |
| cg06206628 | 0.6591  | 0.70071 | 0.75443 | 0.7422  | 0.84517 | 0.87212 | 0.62147 | 0.45095 | 0.85555 | 0.85306 | FRMPD2     |
| cg06207460 | 0.12901 | 0.10421 | 0.08534 | 0.07799 | 0.09496 | 0.17412 | 0.03057 | 0.02898 | 0.03224 | 0.02479 | AK3        |
| cg06207804 | 0.53546 | 0.50434 | 0.50122 | 0.56557 | 0.61664 | 0.82762 | 0.75279 | 0.84238 | 0.85225 | 0.84751 | ARTN       |
| cg06208111 | 0.80566 | 0.4697  | 0.62311 | 0.66835 | 0.69433 | 0.7405  | 0.31996 | 0.23668 | 0.3997  | 0.36336 | ITM2A      |
| cg06210526 | 0.87936 | 0.17398 | 0.81094 | 0.85639 | 0.78158 | 0.66621 | 0.08403 | 0.08251 | 0.34108 | 0.27898 | CYP2F1     |
| cg06211616 | 0.04825 | 0.05564 | 0.07357 | 0.22244 | 0.08725 | 0.05108 | 0.04524 | 0.04994 | 0.05021 | 0.04457 | SLC22A18   |
| cg06211871 | 0.06005 | 0.05846 | 0.1314  | 0.07912 | 0.10575 | 0.09076 | 0.09141 | 0.07769 | 0.07388 | 0.06566 | ZNF684     |
| cg06212607 | 0.02879 | 0.04082 | 0.04206 | 0.03724 | 0.02737 | 0.03314 | 0.05162 | 0.03793 | 0.03441 | 0.03122 | GGPS1      |
| cg06213287 | 0.22699 | 0.20123 | 0.35703 | 0.36611 | 0.24471 | 0.1851  | 0.22375 | 0.19253 | 0.29101 | 0.19541 | LIX1       |
| cg06213598 | 0.72279 | 0.7311  | 0.66079 | 0.51381 | 0.65631 | 0.41675 | 0.33265 | 0.22375 | 0.51223 | 0.70166 | ABCA9      |
| cg06214007 | 0.6697  | 0.37916 | 0.23409 | 0.35523 | 0.73301 | 0.70495 | 0.56312 | 0.31764 | 0.3978  | 0.15638 | GBP6       |
| cg06214729 | 0.05485 | 0.05384 | 0.06572 | 0.05981 | 0.57952 | 0.53141 | 0.048   | 0.05211 | 0.04823 | 0.04022 | RENT1      |
| cg06215939 | 0.34335 | 0.36051 | 0.36969 | 0.36137 | 0.2924  | 0.40431 | 0.46073 | 0.44837 | 0.3989  | 0.35177 | MAPK8IP3   |
| cg06216677 | 0.04954 | 0.03543 | 0.12364 | 0.07326 | 0.02571 | 0.02183 | 0.06483 | 0.03116 | 0.02167 | 0.02504 | TESK1      |
| cg06218044 | 0.03057 | 0.03063 | 0.03255 | 0.03251 | 0.02216 | 0.03217 | 0.03044 | 0.03256 | 0.02851 | 0.03055 | PREP       |
| cg06220208 | 0.81552 | 0.79146 | 0.64782 | 0.69675 | 0.66048 | 0.72903 | 0.53843 | 0.58194 | 0.91468 | 0.84261 | FLJ20444   |
| cg06220235 | 0.0998  | 0.03868 | 0.06587 | 0.0596  | 0.21864 | 0.03211 | 0.03933 | 0.03266 | 0.98445 | 0.33006 | SOCS1      |
| cg06220521 | 0.04341 | 0.02355 | 0.03073 | 0.02654 | 0.02027 | 0.02958 | 0.0231  | 0.02347 | 0.01922 | 0.01956 | ITR        |
| cg06220755 | 0.58666 | 0.58847 | 0.3314  | 0.51801 | 0.89436 | 0.8567  | 0.19112 | 0.26821 | 0.43454 | 0.58437 | RAI2       |
| cg06220958 | 0.06768 | 0.06361 | 0.66663 | 0.68892 | 0.31197 | 0.45559 | 0.07627 | 0.07178 | 0.04698 | 0.05696 | MYH2       |
| cg06221259 | 0.37934 | 0.21944 | 0.50765 | 0.43367 | 0.72049 | 0.26945 | 0.35828 | 0.21307 | 0.08274 | 0.06442 | REEP2      |
| cg06222120 | 0.08798 | 0.07301 | 0.07871 | 0.06381 | 0.08012 | 0.08782 | 0.08142 | 0.06409 | 0.07496 | 0.06677 | TRNT1      |
| cg06222800 | 0.70256 | 0.77346 | 0.76007 | 0.81452 | 0.58123 | 0.68008 | 0.54715 | 0.49782 | 0.24123 | 0.25385 | KRTAP21-1  |
| cg06222851 | 0.0401  | 0.04174 | 0.06823 | 0.07125 | 0.22152 | 0.29109 | 0.04279 | 0.04099 | 0.03431 | 0.03464 | OGDHL      |
| cg06224510 | 0.29944 | 0.23974 | 0.21119 | 0.28149 | 0.26199 | 0.20806 | 0.2487  | 0.18292 | 0.22517 | 0.20609 | ITI2H      |
| cg06225581 | 0.06251 | 0.05131 | 0.06249 | 0.05824 | 0.04839 | 0.05808 | 0.05581 | 0.04906 | 0.04763 | 0.04576 | ZMAT2      |

|            |         |         |         |         |         |         |         |         |         |                  |
|------------|---------|---------|---------|---------|---------|---------|---------|---------|---------|------------------|
| cg06226384 | 0.04335 | 0.04113 | 0.05656 | 0.05876 | 0.05645 | 0.05291 | 0.0311  | 0.05075 | 0.03374 | 0.0355 CACNG5    |
| cg06229674 | 0.91068 | 0.67869 | 0.89129 | 0.91    | 0.93159 | 0.91945 | 0.8808  | 0.33625 | 0.91426 | 0.4615 ARP10     |
| cg06230736 | 0.03981 | 0.04504 | 0.07853 | 0.05545 | 0.44392 | 0.04137 | 0.09464 | 0.04649 | 0.04585 | 0.03081 GATA3    |
| cg06233473 | 0.13574 | 0.10929 | 0.11288 | 0.09577 | 0.09315 | 0.10043 | 0.09575 | 0.0909  | 0.28832 | 0.09579 KPNA5    |
| cg06233503 | 0.1591  | 0.06268 | 0.17404 | 0.16416 | 0.09128 | 0.05805 | 0.2423  | 0.08981 | 0.0746  | 0.05013 KCNQ1    |
| cg06233985 | 0.28016 | 0.40236 | 0.64365 | 0.66844 | 0.57047 | 0.59106 | 0.38214 | 0.30417 | 0.29366 | 0.2976 HBB       |
| cg06235429 | 0.88066 | 0.86384 | 0.87475 | 0.87466 | 0.885   | 0.85223 | 0.80779 | 0.84678 | 0.88206 | 0.81397 NDUFV1   |
| cg06235991 | 0.04669 | 0.04429 | 0.07218 | 0.06618 | 0.10555 | 0.09329 | 0.06429 | 0.06605 | 0.07897 | 0.07657 L3MBTL2  |
| cg06236061 | 0.19532 | 0.10816 | 0.25594 | 0.41383 | 0.23651 | 0.14557 | 0.15081 | 0.10278 | 0.75415 | 0.09432 GLTP     |
| cg06236276 | 0.25619 | 0.13108 | 0.41624 | 0.48821 | 0.62168 | 0.9202  | 0.06879 | 0.16982 | 0.59371 | 0.60361 SLC22A2  |
| cg06236748 | 0.07599 | 0.07267 | 0.07476 | 0.07126 | 0.04453 | 0.0516  | 0.06263 | 0.05731 | 0.06715 | 0.05715 INPPL1   |
| cg06237414 | 0.03931 | 0.04144 | 0.03894 | 0.03762 | 0.02061 | 0.03415 | 0.03705 | 0.03506 | 0.0386  | 0.03119 MTX1     |
| cg06238491 | 0.72553 | 0.65262 | 0.51046 | 0.56639 | 0.67668 | 0.60322 | 0.30493 | 0.30213 | 0.43739 | 0.39385 LAIR1    |
| cg06240124 | 0.04148 | 0.03979 | 0.04026 | 0.0375  | 0.03288 | 0.03312 | 0.03557 | 0.03512 | 0.03153 | 0.02993 PLK1     |
| cg06240542 | 0.05132 | 0.05564 | 0.05905 | 0.04855 | 0.03879 | 0.0474  | 0.04715 | 0.04581 | 0.04485 | 0.04759 CYBASC3  |
| cg06240849 | 0.04331 | 0.04452 | 0.04362 | 0.04684 | 0.03422 | 0.04934 | 0.03831 | 0.03529 | 0.0394  | 0.03944 KIAA0494 |
| cg06241300 | 0.37118 | 0.3057  | 0.80891 | 0.83903 | 0.71069 | 0.54955 | 0.71032 | 0.21992 | 0.75165 | 0.42318 APOM     |
| cg06242000 | 0.11752 | 0.09371 | 0.11582 | 0.10987 | 0.15714 | 0.12761 | 0.1088  | 0.07218 | 0.20622 | 0.18824 MGC2408  |
| cg06242827 | 0.03128 | 0.02877 | 0.04746 | 0.03533 | 0.02883 | 0.03681 | 0.03152 | 0.03812 | 0.03056 | 0.03515 WWP1     |
| cg06243393 | 0.79209 | 0.80849 | 0.88549 | 0.87154 | 0.81468 | 0.82914 | 0.84107 | 0.77391 | 0.88803 | 0.83087 TXNDC2   |
| cg06243556 | 0.06245 | 0.05355 | 0.58769 | 0.55607 | 0.27387 | 0.4109  | 0.04801 | 0.04949 | 0.04511 | 0.0437 ZNF447    |
| cg06244417 | 0.60799 | 0.05405 | 0.626   | 0.60921 | 0.75234 | 0.5526  | 0.06658 | 0.06927 | 0.28612 | 0.24218 FCN1     |
| cg06244634 | 0.77253 | 0.67939 | 0.6482  | 0.70812 | 0.62477 | 0.66888 | 0.71808 | 0.7479  | 0.73735 | 0.70824 TAS2R4   |
| cg06244906 | 0.25179 | 0.30962 | 0.18228 | 0.18496 | 0.13166 | 0.33554 | 0.08884 | 0.25125 | 0.39481 | 0.39344 ZIM2     |
| cg06245154 | 0.03991 | 0.03833 | 0.05435 | 0.04087 | 0.0376  | 0.04869 | 0.04118 | 0.03932 | 0.03373 | 0.03329 ERCC2    |
| cg06247172 | 0.02444 | 0.02722 | 0.02614 | 0.03335 | 0.02512 | 0.02755 | 0.02455 | 0.02457 | 0.0248  | 0.01582 C6orf1   |
| cg06248182 | 0.06534 | 0.06893 | 0.13387 | 0.12801 | 0.11664 | 0.08223 | 0.09644 | 0.08298 | 0.06506 | 0.07173 ERAL1    |
| cg06250108 | 0.45314 | 0.43178 | 0.10085 | 0.12776 | 0.11981 | 0.0483  | 0.05039 | 0.04759 | 0.06939 | 0.04505 LOC92691 |
| cg06251129 | 0.06288 | 0.06195 | 0.14026 | 0.12621 | 0.13521 | 0.07755 | 0.05523 | 0.0453  | 0.08408 | 0.07614 SSR2     |
| cg06251489 | 0.06745 | 0.06484 | 0.07123 | 0.06213 | 0.08127 | 0.08433 | 0.04609 | 0.05244 | 0.05182 | 0.06092 STIM2    |
| cg06252382 | 0.05657 | 0.03353 | 0.11911 | 0.36864 | 0.88723 | 0.86802 | 0.05286 | 0.03397 | 0.0319  | 0.02546 SLC31A2  |
| cg06252849 | 0.11314 | 0.08825 | 0.11817 | 0.3431  | 0.14256 | 0.11302 | 0.11621 | 0.10786 | 0.06346 | 0.06296 AGGF1    |
| cg06253072 | 0.48812 | 0.11501 | 0.53246 | 0.6273  | 0.26223 | 0.17499 | 0.1927  | 0.13422 | 0.215   | 0.10068 C6orf125 |
| cg06253734 | 0.04358 | 0.04141 | 0.04088 | 0.04129 | 0.03446 | 0.04085 | 0.03986 | 0.03974 | 0.0345  | 0.03352 ADAM10   |
| cg06254453 | 0.05207 | 0.05309 | 0.26177 | 0.24907 | 0.06539 | 0.06916 | 0.4261  | 0.54223 | 0.04763 | 0.03594 HIST1H3F |
| cg06255227 | 0.44253 | 0.42647 | 0.5666  | 0.63762 | 0.3349  | 0.10137 | 0.64945 | 0.59593 | 0.41049 | 0.31362 NPBWR2   |
| cg06255524 | 0.04963 | 0.05775 | 0.0603  | 0.04653 | 0.05771 | 0.06372 | 0.0519  | 0.0487  | 0.03257 | 0.03418 DNAJC3   |
| cg06256735 | 0.42167 | 0.44867 | 0.28743 | 0.41348 | 0.17565 | 0.07394 | 0.26666 | 0.07558 | 0.09192 | 0.084 MFAP5      |
| cg06258834 | 0.08314 | 0.07225 | 0.53891 | 0.57977 | 0.20425 | 0.49436 | 0.29602 | 0.40648 | 0.06453 | 0.04956 KLK7     |
| cg06259570 | 0.76532 | 0.43809 | 0.84459 | 0.87283 | 0.80954 | 0.8336  | 0.53817 | 0.52145 | 0.64488 | 0.53864 MMP27    |
| cg06263495 | 0.41799 | 0.4499  | 0.95381 | 0.96442 | 0.44597 | 0.5705  | 0.60748 | 0.72709 | 0.55526 | 0.10029 ASCL2    |



|            |         |         |         |         |         |         |         |         |         |                  |
|------------|---------|---------|---------|---------|---------|---------|---------|---------|---------|------------------|
| cg06263943 | 0.86386 | 0.76607 | 0.87161 | 0.88291 | 0.90698 | 0.81624 | 0.85945 | 0.84714 | 0.68711 | 0.80297 CACNA1H  |
| cg06264060 | 0.90109 | 0.81435 | 0.88637 | 0.9093  | 0.85712 | 0.8244  | 0.81778 | 0.7292  | 0.85788 | 0.66392 GPR24    |
| cg06268694 | 0.5324  | 0.03658 | 0.27369 | 0.07966 | 0.56556 | 0.54701 | 0.1753  | 0.22128 | 0.98156 | 0.98503 CELSR1   |
| cg06269001 | 0.02245 | 0.02086 | 0.02066 | 0.02135 | 0.01937 | 0.02184 | 0.01959 | 0.02067 | 0.01431 | 0.01361 ENTPD6   |
| cg06269753 | 0.11647 | 0.13116 | 0.25656 | 0.3133  | 0.1255  | 0.10078 | 0.12545 | 0.11175 | 0.12083 | 0.12676 MSC      |
| cg06270401 | 0.62217 | 0.41561 | 0.73351 | 0.73035 | 0.77886 | 0.74527 | 0.2258  | 0.11161 | 0.05651 | 0.0474 DYRK4     |
| cg06273569 | 0.0398  | 0.04338 | 0.04212 | 0.04082 | 0.03827 | 0.03788 | 0.03849 | 0.04036 | 0.03947 | 0.03898 PMS2L3   |
| cg06273903 | 0.04449 | 0.03181 | 0.0756  | 0.06199 | 0.0316  | 0.02504 | 0.04361 | 0.03004 | 0.02689 | 0.02591 UBE2A    |
| cg06274159 | 0.90064 | 0.92893 | 0.93285 | 0.94916 | 0.9597  | 0.9617  | 0.95353 | 0.95678 | 0.15209 | 0.16311 ZFP42    |
| cg06275635 | 0.16396 | 0.07652 | 0.08585 | 0.07553 | 0.61    | 0.45274 | 0.05235 | 0.04623 | 0.16799 | 0.08387 PGLYRP3  |
| cg06276114 | 0.0467  | 0.05262 | 0.05331 | 0.04528 | 0.04867 | 0.05916 | 0.05275 | 0.04894 | 0.07507 | 0.05025 BIRC2    |
| cg06276653 | 0.19125 | 0.05699 | 0.34682 | 0.43788 | 0.78106 | 0.64171 | 0.04705 | 0.04613 | 0.05362 | 0.05098 C8ORFK32 |
| cg06277277 | 0.68234 | 0.56344 | 0.8081  | 0.77119 | 0.9125  | 0.88209 | 0.75367 | 0.4906  | 0.5559  | 0.43156 NR1I3    |
| cg06277481 | 0.03098 | 0.03    | 0.03994 | 0.07886 | 0.02516 | 0.02612 | 0.03336 | 0.02816 | 0.0271  | 0.02398 ANKRD47  |
| cg06277657 | 0.63219 | 0.55544 | 0.68517 | 0.56646 | 0.85454 | 0.95117 | 0.35162 | 0.06476 | 0.86731 | 0.88395 DGKI     |
| cg06277838 | 0.04765 | 0.05146 | 0.0501  | 0.04207 | 0.04324 | 0.04107 | 0.56203 | 0.49618 | 0.501   | 0.37252 SLC16A2  |
| cg06279414 | 0.03909 | 0.04633 | 0.02979 | 0.0298  | 0.04871 | 0.0486  | 0.03717 | 0.03763 | 0.03249 | 0.0416 TRIP11    |
| cg06281719 | 0.15871 | 0.12898 | 0.19558 | 0.15918 | 0.28834 | 0.22779 | 0.0799  | 0.06819 | 0.0914  | 0.09524 GMNN     |
| cg06281795 | 0.03216 | 0.03126 | 0.0692  | 0.08153 | 0.05955 | 0.03213 | 0.03683 | 0.03517 | 0.02812 | 0.03231 CALB1    |
| cg06282059 | 0.76391 | 0.77741 | 0.75814 | 0.79455 | 0.64827 | 0.69231 | 0.79315 | 0.78299 | 0.80798 | 0.72356 UBE2E1   |
| cg06282240 | 0.02049 | 0.02262 | 0.02465 | 0.02446 | 0.01967 | 0.02634 | 0.02289 | 0.0227  | 0.01913 | 0.01824 CENPJ    |
| cg06284244 | 0.06988 | 0.04425 | 0.20133 | 0.41657 | 0.16982 | 0.03917 | 0.04834 | 0.04294 | 0.04282 | 0.02751 YES1     |
| cg06284322 | 0.09363 | 0.09313 | 0.11601 | 0.1067  | 0.18891 | 0.21215 | 0.07965 | 0.07852 | 0.08422 | 0.08226 TAF7     |
| cg06285340 | 0.56114 | 0.10963 | 0.93899 | 0.93186 | 0.93573 | 0.91559 | 0.62577 | 0.27433 | 0.91258 | 0.6095 CYP11A1   |
| cg06285486 | 0.07834 | 0.07742 | 0.08393 | 0.0787  | 0.05262 | 0.06699 | 0.0723  | 0.0677  | 0.07031 | 0.07518 SART1    |
| cg06286028 | 0.10427 | 0.11026 | 0.15554 | 0.14256 | 0.08291 | 0.0996  | 0.10248 | 0.09449 | 0.09949 | 0.0763 HPS6      |
| cg06288351 | 0.40901 | 0.08472 | 0.61985 | 0.75286 | 0.90158 | 0.8308  | 0.34792 | 0.10987 | 0.83313 | 0.75883 KCNS1    |
| cg06288632 | 0.95513 | 0.94442 | 0.94622 | 0.95079 | 0.96124 | 0.94311 | 0.95336 | 0.93856 | 0.94823 | 0.92381 PREB     |
| cg06289589 | 0.07821 | 0.05426 | 0.08092 | 0.0928  | 0.10867 | 0.05797 | 0.05615 | 0.0538  | 0.05953 | 0.03527 ANKRD5   |
| cg06290096 | 0.77129 | 0.46303 | 0.43844 | 0.41342 | 0.70029 | 0.64504 | 0.76519 | 0.64915 | 0.6643  | 0.54483 PHLDB1   |
| cg06290168 | 0.06165 | 0.02507 | 0.0289  |         |         | 0.02605 | 0.02041 | 0.02339 | 0.02367 | 0.02263 C12orf24 |
| cg06291334 | 0.3797  | 0.08608 | 0.5159  | 0.65601 | 0.49898 | 0.27476 | 0.1003  | 0.09266 | 0.08252 | 0.13121 SPOP     |
| cg06291595 | 0.05026 | 0.05184 | 0.04593 | 0.04518 | 0.06205 | 0.0664  | 0.05547 | 0.06101 | 0.04799 | 0.05058 NPC2     |
| cg06291867 | 0.11083 | 0.03407 | 0.15069 | 0.10741 | 0.58413 | 0.59128 | 0.1261  | 0.35698 | 0.9692  | 0.81994 HTR7     |
| cg06292277 | 0.13536 | 0.08718 | 0.08464 | 0.06721 | 0.12002 | 0.09289 | 0.05594 | 0.05353 | 0.06206 | 0.07672 CLCN3    |
| cg06293195 | 0.79536 | 0.75484 | 0.74837 | 0.79044 | 0.80098 | 0.73504 | 0.63113 | 0.63162 | 0.70957 | 0.66235 TXN2     |
| cg06295404 | 0.06477 | 0.07198 | 0.0692  | 0.06664 | 0.08128 | 0.05453 | 0.07739 | 0.0671  | 0.06748 | 0.06595 SOCS1    |
| cg06295856 | 0.12652 | 0.03127 | 0.45257 | 0.59963 | 0.8837  | 0.85703 | 0.65905 | 0.40584 | 0.26458 | 0.58166 CALCA    |
| cg06296021 | 0.04352 | 0.04294 | 0.05039 | 0.04433 | 0.0363  | 0.04108 | 0.0399  | 0.04551 | 0.03936 | 0.04319 CDKL3    |
| cg06297145 | 0.31308 | 0.12812 | 0.48015 | 0.54101 | 0.09263 | 0.07501 | 0.12613 | 0.04822 | 0.19752 | 0.21949 NFXL1    |
| cg06302803 | 0.03814 | 0.03566 | 0.04175 | 0.03084 | 0.03185 | 0.03452 | 0.04138 | 0.03818 | 0.03699 | 0.03495 MATR3    |

|            |         |         |         |         |         |         |         |         |         |                   |
|------------|---------|---------|---------|---------|---------|---------|---------|---------|---------|-------------------|
| cg06303238 | 0.47648 | 0.641   | 0.97768 | 0.9823  | 0.98493 | 0.98588 | 0.98592 | 0.98496 | 0.98568 | 0.98655 SALL4     |
| cg06305312 | 0.04858 | 0.05275 | 0.05029 | 0.04748 | 0.04189 | 0.04798 | 0.04823 | 0.04033 | 0.04617 | 0.04295 PQLC2     |
| cg06305609 | 0.77219 | 0.27616 | 0.93469 | 0.95257 | 0.94796 | 0.9253  | 0.52944 | 0.53041 | 0.31801 | 0.27765 BCNP1     |
| cg06306751 | 0.25413 | 0.19465 | 0.40257 | 0.51378 | 0.49749 | 0.26646 | 0.27875 | 0.28201 | 0.17463 | 0.17827 F8        |
| cg06307169 | 0.12179 | 0.11159 | 0.11336 | 0.11091 | 0.09965 | 0.12395 | 0.0981  | 0.1134  | 0.09005 | 0.10553 CASC3     |
| cg06307422 | 0.02325 | 0.02325 | 0.02594 | 0.02471 | 0.01789 | 0.02618 | 0.02072 | 0.02467 | 0.02235 | 0.02253 RNF111    |
| cg06307601 | 0.04016 | 0.04311 | 0.14868 | 0.18072 | 0.24519 | 0.04902 | 0.05829 | 0.03028 | 0.04305 | 0.04385 FAM49B    |
| cg06308323 | 0.82473 | 0.52175 | 0.87301 | 0.90431 | 0.7922  | 0.66738 | 0.78469 | 0.72308 | 0.84412 | 0.63047 C9orf25   |
| cg06310489 | 0.90977 | 0.8716  | 0.91597 | 0.92498 | 0.92941 | 0.92232 | 0.67532 | 0.69303 | 0.82241 | 0.78614 SSX2      |
| cg06310844 | 0.27354 | 0.3013  | 0.24089 | 0.25137 | 0.23511 | 0.29976 | 0.20382 | 0.21025 | 0.20212 | 0.1896 PDCD5      |
| cg06311778 | 0.05705 | 0.09959 | 0.02646 | 0.02525 | 0.01854 | 0.0204  | 0.01804 | 0.02955 | 0.02062 | 0.0165 TENC1      |
| cg06312477 | 0.82107 | 0.8306  | 0.84378 | 0.85202 | 0.8825  | 0.84745 | 0.84346 | 0.79794 | 0.4699  | 0.46953 MPN2      |
| cg06313930 | 0.30299 | 0.18328 | 0.15193 | 0.13896 | 0.4533  | 0.38214 | 0.11301 | 0.05769 | 0.79975 | 0.3144 MAGEA5     |
| cg06317209 | 0.27938 | 0.13305 | 0.70271 | 0.79938 | 0.6961  | 0.54021 | 0.78904 | 0.201   | 0.80723 | 0.52301 AVIL      |
| cg06318164 | 0.05581 | 0.04916 | 0.05102 | 0.04596 | 0.05598 | 0.05254 | 0.03939 | 0.03766 | 0.04635 | 0.03597 TMEM15    |
| cg06318853 | 0.42185 | 0.39392 | 0.55649 | 0.57857 | 0.49367 | 0.36781 | 0.52231 | 0.56537 | 0.39605 | 0.35935 INPP4B    |
| cg06319346 | 0.70935 | 0.52898 | 0.80376 | 0.87075 | 0.70701 | 0.65443 | 0.53935 | 0.59977 | 0.39186 | 0.46264 CHRFBAM7A |
| cg06319579 | 0.30725 | 0.06191 | 0.54685 | 0.64681 | 0.03969 | 0.03212 | 0.05194 | 0.05505 | 0.03736 | 0.03174 C17orf44  |
| cg06320982 | 0.1284  | 0.0847  | 0.14146 | 0.2085  | 0.06062 | 0.05254 | 0.10588 | 0.06403 | 0.07224 | 0.06153 FLJ10815  |
| cg06321883 | 0.70409 | 0.06069 | 0.17379 | 0.20148 | 0.6358  | 0.69499 | 0.80852 | 0.77028 | 0.07577 | 0.0387 COL19A1    |
| cg06323290 | 0.59912 | 0.67377 | 0.90149 | 0.91933 | 0.90891 | 0.88231 | 0.40519 | 0.10869 | 0.8954  | 0.81639 HK1       |
| cg06323427 | 0.06399 | 0.0732  | 0.06994 | 0.06617 | 0.04518 | 0.0482  | 0.04813 | 0.0462  | 0.05898 | 0.05405 PDCD10    |
| cg06324048 | 0.58339 | 0.43365 | 0.51131 | 0.62236 | 0.62685 | 0.62568 | 0.52925 | 0.43826 | 0.1817  | 0.20937 GNAS      |
| cg06324094 | 0.10837 | 0.07926 | 0.08661 | 0.07199 | 0.12396 | 0.09403 | 0.0956  | 0.06892 | 0.15919 | 0.12432 JTB       |
| cg06324671 | 0.64686 | 0.80148 | 0.84364 | 0.86108 | 0.8865  | 0.88183 | 0.36327 | 0.33322 | 0.56282 | 0.49727 KRTAP19-7 |
| cg06325346 | 0.43754 | 0.3405  | 0.37185 | 0.38539 | 0.42006 | 0.41577 | 0.31329 | 0.29356 | 0.31412 | 0.30107 VN1R2     |
| cg06325687 | 0.89066 | 0.81254 | 0.91847 | 0.94747 | 0.70636 | 0.74179 | 0.55988 | 0.63911 | 0.94369 | 0.6898 OPN1MW     |
| cg06327515 | 0.11311 | 0.06094 | 0.41858 | 0.56291 | 0.15092 | 0.17745 | 0.62864 | 0.19289 | 0.04756 | 0.04488 PCDHB14   |
| cg06330324 | 0.02977 | 0.0306  | 0.03714 | 0.03617 | 0.04025 | 0.04188 | 0.03157 | 0.02985 | 0.03488 | 0.03038 SLC35E4   |
| cg06330621 | 0.55906 | 0.54999 | 0.43422 | 0.42855 | 0.67916 | 0.51194 | 0.38067 | 0.34731 | 0.71984 | 0.52027 ZCCHC14   |
| cg06331674 | 0.04557 | 0.04462 | 0.07045 | 0.05066 | 0.0635  | 0.05869 | 0.04728 | 0.04573 | 0.03541 | 0.03721 KIAA0241  |
| cg06333435 | 0.02237 | 0.02783 | 0.02369 | 0.02466 | 0.02055 | 0.02352 | 0.03094 | 0.0277  | 0.01915 | 0.02293 POLR3D    |
| cg06334093 | 0.04513 | 0.04233 | 0.04943 | 0.04761 | 0.0389  | 0.05476 | 0.03944 | 0.04365 | 0.04413 | 0.04642 CCDC28A   |
| cg06334284 | 0.02782 | 0.02587 | 0.0282  | 0.02786 | 0.0218  | 0.024   | 0.02043 | 0.02246 | 0.02148 | 0.02037 PPAP2B    |
| cg06334496 | 0.03806 | 0.03959 | 0.04595 | 0.04338 | 0.0354  | 0.0367  | 0.04241 | 0.0293  | 0.03671 | 0.03665 TMEM70    |
| cg06335814 | 0.07055 | 0.05331 | 0.06261 | 0.04629 | 0.1103  | 0.04596 | 0.03784 | 0.03928 | 0.07265 | 0.32916 FAM59A    |
| cg06335889 | 0.12914 | 0.04003 | 0.22664 | 0.26185 | 0.03491 | 0.03869 | 0.04326 | 0.04236 | 0.03224 | 0.03349 CBFA2T2   |
| cg06336792 | 0.03279 | 0.03423 | 0.07027 | 0.03867 | 0.02042 | 0.03013 | 0.03119 | 0.03011 | 0.0274  | 0.02398 CREM      |
| cg06337239 | 0.15551 | 0.16245 | 0.17145 | 0.15736 | 0.25823 | 0.23534 | 0.14193 | 0.15465 | 0.11738 | 0.12577 DDX58     |
| cg06338119 | 0.28971 | 0.05662 | 0.11976 | 0.08292 | 0.25053 | 0.0624  | 0.18071 | 0.0524  | 0.38979 | 0.46001 RGAG1     |
| cg06339657 | 0.47463 | 0.67546 | 0.86094 | 0.84327 | 0.72945 | 0.73587 | 0.59037 | 0.51667 | 0.58328 | 0.50272 PDE8B     |

|            |         |         |         |         |         |         |         |         |         |         |           |
|------------|---------|---------|---------|---------|---------|---------|---------|---------|---------|---------|-----------|
| cg06339706 | 0.89284 | 0.81459 | 0.62553 | 0.77854 | 0.61616 | 0.6851  | 0.69743 | 0.12866 | 0.06985 | 0.10747 | PLEKHA4   |
| cg06340713 | 0.79136 | 0.55187 | 0.7174  | 0.76796 | 0.70343 | 0.76166 | 0.70654 | 0.73262 | 0.78465 | 0.72542 | CHM       |
| cg06341721 | 0.21566 | 0.07012 | 0.67935 | 0.7042  | 0.83419 | 0.25399 | 0.10481 | 0.0744  | 0.26343 | 0.44035 | DAZAP1    |
| cg06344807 | 0.03095 | 0.03383 | 0.0331  | 0.02989 | 0.39785 | 0.02941 | 0.02876 | 0.02689 | 0.02963 | 0.02628 | SLC9A3R1  |
| cg06346081 | 0.94563 | 0.93375 | 0.95029 | 0.9555  | 0.94996 | 0.94856 | 0.40623 | 0.73633 | 0.47044 | 0.36647 | ZMYND12   |
| cg06347928 | 0.0479  | 0.04378 | 0.04206 | 0.04205 | 0.04098 | 0.04257 | 0.03958 | 0.03837 | 0.03686 | 0.03487 | IFIH1     |
| cg06347996 | 0.06916 | 0.05979 | 0.07031 | 0.0654  | 0.05331 | 0.0645  | 0.05338 | 0.05985 | 0.05353 | 0.05372 | DPYD      |
| cg06349174 | 0.34895 | 0.12554 | 0.20067 | 0.18522 | 0.03604 | 0.03295 | 0.02689 | 0.04154 | 0.03433 | 0.02502 | STIM1     |
| cg06350107 | 0.69445 | 0.72958 | 0.54071 | 0.31749 | 0.14719 | 0.36051 | 0.28249 | 0.55514 | 0.35031 | 0.26998 | OTC       |
| cg06350796 | 0.09016 | 0.05032 | 0.4212  | 0.69901 | 0.32456 | 0.41203 | 0.32791 | 0.38725 | 0.17643 | 0.11749 | CXorf41   |
| cg06351503 | 0.63388 | 0.57098 | 0.85681 | 0.88736 | 0.88633 | 0.89097 | 0.68456 | 0.85434 | 0.73244 | 0.6229  | RDBP      |
| cg06352750 | 0.6755  | 0.41545 | 0.06041 | 0.04958 | 0.07647 | 0.1084  | 0.63044 | 0.61848 | 0.63344 | 0.6133  | SDPR      |
| cg06353318 | 0.09354 | 0.07612 | 0.43635 | 0.54823 | 0.1073  | 0.09568 | 0.15201 | 0.05964 | 0.07324 | 0.05782 | OTOP2     |
| cg06353345 | 0.08956 | 0.33497 | 0.47888 | 0.51124 | 0.29427 | 0.11634 | 0.1277  | 0.08814 | 0.09987 | 0.11403 | OR51B4    |
| cg06353720 | 0.19287 | 0.38661 | 0.12869 | 0.14077 | 0.2513  | 0.14034 | 0.14245 | 0.11001 | 0.11603 | 0.13211 | IFIT3     |
| cg06353948 | 0.89642 | 0.90699 | 0.91517 | 0.9142  | 0.87821 | 0.84224 | 0.89716 | 0.90695 | 0.84524 | 0.73749 | SETX      |
| cg06356454 | 0.90622 | 0.656   | 0.9216  | 0.94221 | 0.94738 | 0.93083 | 0.38307 | 0.34523 | 0.69318 | 0.44177 | AQP12A    |
| cg06357925 | 0.05454 | 0.04079 | 0.53792 | 0.55161 | 0.08476 | 0.03004 | 0.03479 | 0.035   | 0.70107 | 0.67602 | PTPRO     |
| cg06358566 | 0.04177 | 0.04525 | 0.04412 | 0.04383 | 0.03437 | 0.04437 | 0.04076 | 0.04114 | 0.03786 | 0.03536 | RPIA      |
| cg06361108 | 0.03586 | 0.01955 | 0.02785 | 0.07422 | 0.24689 | 0.02248 | 0.02078 | 0.01738 | 0.01506 | 0.01236 | CCNF      |
| cg06362985 | 0.40651 | 0.29947 | 0.50994 | 0.37493 | 0.40191 | 0.46443 | 0.47075 | 0.3274  | 0.73505 | 0.46889 | RAB3IP    |
| cg06363129 | 0.22975 | 0.27722 | 0.77085 | 0.84932 | 0.62493 | 0.29442 | 0.74568 | 0.28823 | 0.33938 | 0.22228 | SOSTDC1   |
| cg06363801 | 0.03014 | 0.0294  | 0.03318 | 0.03369 | 0.02699 | 0.02971 | 0.35173 | 0.45546 | 0.02111 | 0.02231 | MOSPD1    |
| cg06366981 | 0.12466 | 0.07959 | 0.3317  | 0.66537 | 0.36928 | 0.04259 | 0.29851 | 0.2115  | 0.037   | 0.04885 | HPGD      |
| cg06367117 | 0.30246 | 0.10848 | 0.82062 | 0.84759 | 0.94667 | 0.06684 | 0.05628 | 0.03452 | 0.69989 | 0.2741  | ALDOC     |
| cg06369854 | 0.05932 | 0.03867 | 0.44127 | 0.46752 | 0.18089 | 0.30155 | 0.28524 | 0.31102 | 0.55691 | 0.48823 | VDR       |
| cg06374075 | 0.21198 | 0.07495 | 0.21642 | 0.19716 | 0.38848 | 0.3143  | 0.48627 | 0.06535 | 0.38612 | 0.35731 | ADAM11    |
| cg06376129 | 0.04629 | 0.03983 | 0.04182 | 0.04446 | 0.03971 | 0.03218 | 0.03734 | 0.03571 | 0.03716 | 0.03638 | RIPK5     |
| cg06377278 | 0.0162  | 0.01555 | 0.02076 | 0.01857 | 0.04912 | 0.01538 | 0.98359 | 0.9834  | 0.07894 | 0.01483 | RUNX3     |
| cg06378107 | 0.54983 | 0.61782 | 0.834   | 0.86896 | 0.56156 | 0.65964 | 0.80608 | 0.82181 | 0.85018 | 0.73299 | AD031     |
| cg06378357 | 0.06288 | 0.05747 | 0.06613 | 0.0574  | 0.05582 | 0.05202 | 0.05498 | 0.06279 | 0.05248 | 0.04873 | U1SNRNPBP |
| cg06378617 | 0.66961 | 0.79182 | 0.79458 | 0.81019 | 0.76139 | 0.7743  | 0.15115 | 0.06666 | 0.78804 | 0.47125 | KRT23     |
| cg06378976 | 0.12442 | 0.3332  | 0.53144 | 0.7975  | 0.74201 | 0.80904 | 0.06353 | 0.07186 | 0.09624 | 0.06423 | TFEB      |
| cg06379754 | 0.03891 | 0.03321 | 0.04389 | 0.05205 | 0.02713 | 0.02588 | 0.0279  | 0.02637 | 0.3312  | 0.22817 | CACNA2D1  |
| cg06380007 | 0.02576 | 0.02849 | 0.02871 | 0.02919 | 0.02374 | 0.02575 | 0.0277  | 0.02269 | 0.02437 | 0.02607 | INOC1     |
| cg06381133 | 0.0457  | 0.03979 | 0.05054 | 0.05023 | 0.03957 | 0.0562  | 0.0345  | 0.04148 | 0.13294 | 0.03429 | FRS3      |
| cg06382459 | 0.04459 | 0.04717 | 0.04808 | 0.04576 | 0.05201 | 0.04836 | 0.041   | 0.04347 | 0.0502  | 0.048   | SKI       |
| cg06382698 | 0.20584 | 0.16714 | 0.19262 | 0.18607 | 0.26809 | 0.16902 | 0.13736 | 0.13776 | 0.14209 | 0.15711 | ASB3      |
| cg06383088 | 0.04428 | 0.04344 | 0.05276 | 0.05343 | 0.04451 | 0.04016 | 0.04212 | 0.04375 | 0.03945 | 0.0366  | XPA       |
| cg06384026 | 0.03114 | 0.0321  | 0.09926 | 0.03529 | 0.02819 | 0.02888 | 0.03311 | 0.03342 | 0.03058 | 0.02301 | PPFIA1    |
| cg06384053 | 0.34595 | 0.25659 | 0.2334  | 0.20275 | 0.33313 | 0.36532 | 0.25431 | 0.25249 | 0.34614 | 0.16637 | FLJ20010  |

|            |         |         |         |         |         |         |         |         |         |                   |
|------------|---------|---------|---------|---------|---------|---------|---------|---------|---------|-------------------|
| cg06384463 | 0.04214 | 0.03245 | 0.51002 | 0.80876 | 0.12455 | 0.04126 | 0.02696 | 0.0328  | 0.07373 | 0.04988 BARHL2    |
| cg06384491 | 0.298   | 0.52433 | 0.86576 | 0.8885  | 0.91757 | 0.8542  | 0.56765 | 0.67481 | 0.88037 | 0.8368 SPIN2      |
| cg06385087 | 0.91631 | 0.7487  | 0.11075 | 0.10018 | 0.02095 | 0.0245  | 0.56357 | 0.52296 | 0.27157 | 0.06539 CTSZ      |
| cg06386517 | 0.02718 | 0.02475 | 0.02502 | 0.02281 | 0.02415 | 0.02537 | 0.02335 | 0.02196 | 0.02085 | 0.02042 GRB10     |
| cg06386533 | 0.07331 | 0.03911 | 0.0389  | 0.0418  | 0.02949 | 0.02822 | 0.02604 | 0.02598 | 0.02443 | 0.02444 SOCS5     |
| cg06388544 | 0.76283 | 0.77684 | 0.85263 | 0.86877 | 0.70277 | 0.69805 | 0.59434 | 0.46127 | 0.82199 | 0.76795 RHD       |
| cg06391468 | 0.05397 | 0.0517  | 0.04747 | 0.04451 | 0.03313 | 0.03816 | 0.03694 | 0.03977 | 0.03246 | 0.03649 SOX9      |
| cg06391660 | 0.82203 | 0.75265 | 0.88928 | 0.89926 | 0.9073  | 0.88522 | 0.8209  | 0.79062 | 0.87859 | 0.83998 DCTN1     |
| cg06392096 | 0.25946 | 0.25562 | 0.13503 | 0.13671 | 0.07544 | 0.06455 | 0.06444 | 0.06369 | 0.0733  | 0.06296 LILRA5    |
| cg06392241 | 0.1067  | 0.06839 | 0.36016 | 0.58394 | 0.88222 | 0.28966 | 0.12187 | 0.07643 | 0.0548  | 0.05036 NUDT4     |
| cg06392426 | 0.08742 | 0.08553 | 0.10237 | 0.11228 | 0.0992  | 0.06005 | 0.09921 | 0.09337 | 0.52908 | 0.12323 FLJ12949  |
| cg06392589 | 0.82326 | 0.77215 | 0.79535 | 0.81473 | 0.82083 | 0.61347 | 0.7873  | 0.84951 | 0.83742 | 0.79162 FNDC6     |
| cg06393290 | 0.04824 | 0.0396  | 0.24742 | 0.32186 | 0.58684 | 0.39954 | 0.09652 | 0.06355 | 0.03711 | 0.02949 FGFR1     |
| cg06394229 | 0.91359 | 0.86624 | 0.88939 | 0.9244  | 0.93925 | 0.87879 | 0.88059 | 0.73772 | 0.87462 | 0.64388 LGALS4    |
| cg06394897 | 0.06709 | 0.06282 | 0.09128 | 0.07918 | 0.07777 | 0.07805 | 0.05209 | 0.04563 | 0.07144 | 0.06673 AK2       |
| cg06397510 | 0.04076 | 0.03303 | 0.02638 | 0.02412 | 0.05935 | 0.10741 | 0.02466 | 0.02126 | 0.17374 | 0.14611 PTP4A2    |
| cg06397837 | 0.0455  | 0.04506 | 0.08591 | 0.08693 | 0.18821 | 0.05937 | 0.06243 | 0.04584 | 0.03148 | 0.03935 HOXA13    |
| cg06398181 | 0.70161 | 0.42891 | 0.67354 | 0.73325 | 0.65508 | 0.44547 | 0.65866 | 0.42327 | 0.78203 | 0.60586 ZNF236    |
| cg06399881 | 0.60326 | 0.44752 | 0.60045 | 0.68598 | 0.54341 | 0.68297 | 0.69604 | 0.61684 | 0.35704 | 0.23747 TMPRSS11B |
| cg06403126 | 0.02596 | 0.03072 | 0.03    | 0.03008 | 0.02374 | 0.02737 | 0.02989 | 0.02988 | 0.02492 | 0.02574 PPP2R2A   |
| cg06403553 | 0.71214 | 0.84879 | 0.83132 | 0.9053  | 0.73799 | 0.86571 | 0.10995 | 0.0919  | 0.06229 | 0.05648 PGK2      |
| cg06405090 | 0.14705 | 0.15713 | 0.15263 | 0.15213 | 0.1357  | 0.14531 | 0.1501  | 0.13945 | 0.15254 | 0.15732 TTLL12    |
| cg06405206 | 0.38633 | 0.11624 | 0.51173 | 0.57054 | 0.88542 | 0.60012 | 0.34855 | 0.15401 | 0.89247 | 0.83191 NXPH3     |
| cg06407137 | 0.6514  | 0.12128 | 0.89172 | 0.90901 | 0.90574 | 0.88089 | 0.11801 | 0.19261 | 0.90914 | 0.87297 CD300LB   |
| cg06409153 | 0.89404 | 0.85621 | 0.67784 | 0.74214 | 0.49907 | 0.60172 | 0.33353 | 0.1224  | 0.31675 | 0.10175 ABCA5     |
| cg06414605 | 0.05781 | 0.05319 | 0.05117 | 0.05839 | 0.04191 | 0.04637 | 0.18644 | 0.05128 | 0.04943 | 0.04568 HES1      |
| cg06415153 | 0.45362 | 0.18765 | 0.72704 | 0.84362 | 0.31043 | 0.38855 | 0.16477 | 0.45732 | 0.87965 | 0.82088 PITPNM2   |
| cg06416685 | 0.06952 | 0.06976 | 0.11382 | 0.11199 | 0.13014 | 0.10135 | 0.11575 | 0.32531 | 0.07723 | 0.0929 TSPAN6     |
| cg06417225 | 0.22955 | 0.07664 | 0.21924 | 0.1291  | 0.11033 | 0.0956  | 0.10063 | 0.10335 | 0.10333 | 0.08295 PEBP1     |
| cg06417705 | 0.02986 | 0.0282  | 0.02965 | 0.03284 | 0.0217  | 0.02706 | 0.02707 | 0.02926 | 0.02344 | 0.02465 ETAA16    |
| cg06417962 | 0.21536 | 0.16087 | 0.55799 | 0.71147 | 0.28962 | 0.28879 | 0.48397 | 0.17842 | 0.25811 | 0.1719 RNH1       |
| cg06418184 | 0.07486 | 0.08272 | 0.08988 | 0.07407 | 0.12656 | 0.11338 | 0.07475 | 0.06305 | 0.0489  | 0.06535 DCTN3     |
| cg06418219 | 0.05615 | 0.05323 | 0.08945 | 0.09976 | 0.07217 | 0.03851 | 0.03822 | 0.03341 | 0.05377 | 0.04782 SHC1      |
| cg06418878 | 0.03492 | 0.03206 | 0.03349 | 0.03178 | 0.03191 | 0.03288 | 0.03093 | 0.03483 | 0.02984 | 0.031 MGC13125    |
| cg06419771 | 0.04504 | 0.04797 | 0.04515 | 0.04789 | 0.03861 | 0.04036 | 0.04537 | 0.03985 | 0.04903 | 0.04328 EHD4      |
| cg06420088 | 0.1341  | 0.08391 | 0.09247 | 0.09848 | 0.06822 | 0.09426 | 0.0814  | 0.08486 | 0.08749 | 0.08107 MUC1      |
| cg06421707 | 0.02131 | 0.02411 | 0.02726 | 0.02009 | 0.02324 | 0.02038 | 0.02168 | 0.01792 | 0.01757 | 0.01682 PYGB      |
| cg06421800 | 0.47751 | 0.5     | 0.42302 | 0.44831 | 0.40848 | 0.40245 | 0.88901 | 0.89773 | 0.89394 | 0.89394 CDKN2B    |
| cg06422693 | 0.02668 | 0.02823 | 0.02655 | 0.02516 | 0.02066 | 0.02323 | 0.02191 | 0.02463 | 0.02217 | 0.02192 OCIAD1    |
| cg06422910 | 0.03954 | 0.05196 | 0.06667 | 0.07494 | 0.06758 | 0.04462 | 0.05903 | 0.03443 | 0.04609 | 0.02565 COPG2     |
| cg06423920 | 0.04291 | 0.0441  | 0.39139 | 0.45085 | 0.0613  | 0.0581  | 0.06209 | 0.03842 | 0.04688 | 0.04 ZNF312       |

|            |         |         |         |         |         |         |         |         |         |         |           |
|------------|---------|---------|---------|---------|---------|---------|---------|---------|---------|---------|-----------|
| cg06424894 | 0.35544 | 0.06153 | 0.17563 | 0.12799 | 0.49147 | 0.72336 | 0.31597 | 0.07486 | 0.06657 | 0.04426 | SORD      |
| cg06425515 | 0.55203 | 0.39921 | 0.60735 | 0.64864 | 0.51947 | 0.35087 | 0.46893 | 0.43807 | 0.32146 | 0.32641 | ADH7      |
| cg06425556 | 0.04764 | 0.05614 | 0.05706 | 0.05999 | 0.04285 | 0.04716 | 0.04864 | 0.04716 | 0.04609 | 0.04677 | NCOA6     |
| cg06425868 | 0.52677 | 0.08134 | 0.50617 | 0.51689 | 0.05504 | 0.03162 | 0.7076  | 0.24423 | 0.19509 | 0.02512 | C20orf161 |
| cg06426831 | 0.82066 | 0.50211 | 0.15313 | 0.11605 | 0.09614 | 0.05256 | 0.12398 | 0.1066  | 0.25096 | 0.04401 | SLC35A3   |
| cg06428055 | 0.02668 | 0.02911 | 0.03489 | 0.02961 | 0.01585 | 0.02575 | 0.61163 | 0.55412 | 0.84168 | 0.03092 | ELF4      |
| cg06428195 | 0.0415  | 0.03831 | 0.04933 | 0.03792 | 0.04274 | 0.03915 | 0.03625 | 0.03515 | 0.03597 | 0.03155 | GOT1      |
| cg06429195 | 0.90228 | 0.89783 | 0.89301 | 0.89705 | 0.93175 | 0.90789 | 0.87916 | 0.90295 | 0.86975 | 0.88658 | DAZL      |
| cg06432655 | 0.49586 | 0.54569 | 0.92975 | 0.91828 | 0.95392 | 0.93745 | 0.30841 | 0.04802 | 0.04362 | 0.03172 | CLIPR-59  |
| cg06433658 | 0.06206 | 0.18383 | 0.05838 | 0.08104 | 0.07803 | 0.03642 | 0.02976 | 0.04784 | 0.03891 | 0.03366 | FAM63A    |
| cg06433995 | 0.03003 | 0.02632 | 0.02819 | 0.02779 | 0.01995 | 0.02342 | 0.02098 | 0.02133 | 0.02123 | 0.02116 | NOL7      |
| cg06434428 | 0.84535 | 0.85667 | 0.83555 | 0.88179 | 0.87326 | 0.87255 | 0.11196 | 0.84771 | 0.73316 | 0.51063 | HAPLN1    |
| cg06434451 | 0.69654 | 0.88302 | 0.87878 | 0.90536 | 0.91318 | 0.63681 | 0.83987 | 0.76485 | 0.68287 | 0.31416 | MARCKSL1  |
| cg06434470 | 0.57825 | 0.14063 | 0.57012 | 0.65844 | 0.65828 | 0.76491 | 0.16183 | 0.47128 | 0.40093 | 0.3839  | DPP6      |
| cg06435786 | 0.87338 | 0.85126 | 0.86934 | 0.88777 | 0.91704 | 0.878   | 0.88896 | 0.86136 | 0.89499 | 0.77808 | INPP4A    |
| cg06436504 | 0.88564 | 0.8969  | 0.88802 | 0.90146 | 0.89984 | 0.89468 | 0.8705  | 0.81537 | 0.76937 | 0.71413 | DOC1      |
| cg06437004 | 0.04132 | 0.04042 | 0.04226 | 0.04048 | 0.03243 | 0.03642 | 0.03832 | 0.03462 | 0.03428 | 0.03615 | LDHB      |
| cg06437862 | 0.93627 | 0.92597 | 0.57017 | 0.85919 | 0.7765  | 0.76763 | 0.08186 | 0.08094 | 0.25323 | 0.19586 | TUBA2     |
| cg06438300 | 0.10336 | 0.09044 | 0.14241 | 0.11686 | 0.17976 | 0.1152  | 0.09623 | 0.06113 | 0.0936  | 0.12095 | FAM19A2   |
| cg06438404 | 0.03403 | 0.03647 | 0.03625 | 0.03185 | 0.02618 | 0.02665 | 0.02871 | 0.03134 | 0.02966 | 0.03022 | COX4NB    |
| cg06440646 | 0.04496 | 0.0456  | 0.04818 | 0.04666 | 0.04179 | 0.05124 | 0.036   | 0.0343  | 0.03652 | 0.04788 | SMAD1     |
| cg06444558 | 0.04451 | 0.05212 | 0.06054 | 0.06248 | 0.05038 | 0.04238 | 0.10334 | 0.09922 | 0.04437 | 0.05722 | PBK       |
| cg06444781 | 0.9194  | 0.55528 | 0.91321 | 0.93182 | 0.91019 | 0.81424 | 0.86105 | 0.88378 | 0.90026 | 0.87816 | TCF1      |
| cg06445611 | 0.87374 | 0.85846 | 0.87126 | 0.8894  | 0.88095 | 0.83361 | 0.87406 | 0.87334 | 0.89713 | 0.86531 | GABRR2    |
| cg06449653 | 0.02151 | 0.02486 | 0.02669 | 0.02323 | 0.02569 | 0.02547 | 0.02223 | 0.0189  | 0.02443 | 0.0214  | HNRPR     |
| cg06452064 | 0.04672 | 0.0438  | 0.04333 | 0.04287 | 0.03616 | 0.04808 | 0.04343 | 0.0446  | 0.03914 | 0.03867 | TRA2A     |
| cg06452647 | 0.06233 | 0.0626  | 0.06763 | 0.06021 | 0.06509 | 0.06676 | 0.06898 | 0.06667 | 0.05805 | 0.06025 | MCRS1     |
| cg06453691 | 0.8296  | 0.81616 | 0.73787 | 0.77479 | 0.76278 | 0.79249 | 0.77552 | 0.82387 | 0.80183 | 0.80407 | FLJ32206  |
| cg06454084 | 0.80578 | 0.82377 | 0.82308 | 0.83114 | 0.78074 | 0.80798 | 0.69231 | 0.82101 | 0.84577 | 0.82924 | MGC15476  |
| cg06454226 | 0.21112 | 0.134   | 0.22335 | 0.25127 | 0.33408 | 0.48525 | 0.13375 | 0.19384 | 0.12663 | 0.19034 | METTL4    |
| cg06456031 | 0.79237 | 0.70219 | 0.32263 | 0.50445 | 0.27227 | 0.16407 | 0.08937 | 0.14298 | 0.09548 | 0.07158 | FLJ11000  |
| cg06456512 | 0.07512 | 0.08271 | 0.07895 | 0.07212 | 0.049   | 0.07023 | 0.0675  | 0.06798 | 0.06833 | 0.05881 | ANP32A    |
| cg06457357 | 0.12108 | 0.07724 | 0.3442  | 0.36928 | 0.10011 | 0.07757 | 0.09907 | 0.48672 | 0.04947 | 0.04735 | KLF8      |
| cg06458239 | 0.12994 | 0.12019 | 0.14504 | 0.1389  | 0.21401 | 0.1248  | 0.12262 | 0.10061 | 0.08856 | 0.09589 | ZNF549    |
| cg06459066 | 0.03704 | 0.03853 | 0.05262 | 0.06221 | 0.04147 | 0.0376  | 0.06052 | 0.04692 | 0.0397  | 0.03309 | MTHFD1    |
| cg06459327 | 0.11731 | 0.06034 | 0.07954 | 0.07446 | 0.13113 | 0.10617 | 0.10871 | 0.08587 | 0.1345  | 0.13383 | NOLA3     |
| cg06459378 | 0.86017 | 0.3345  | 0.72518 | 0.83125 | 0.75141 | 0.81417 | 0.22864 | 0.08737 | 0.35854 | 0.28975 | CYP3A7    |
| cg06461769 | 0.01777 | 0.01854 | 0.01806 | 0.01915 | 0.01511 | 0.01769 | 0.01851 | 0.01796 | 0.01598 | 0.01459 | TWSG1     |
| cg06461848 | 0.64245 | 0.29909 | 0.36945 | 0.36275 | 0.35402 | 0.51185 | 0.32173 | 0.29877 | 0.24791 | 0.25992 | WDR64     |
| cg06462291 | 0.73356 | 0.5138  | 0.05183 | 0.04025 | 0.03867 | 0.04004 | 0.03913 | 0.04355 | 0.03879 | 0.05216 | NT5DC3    |
| cg06462703 | 0.95252 | 0.9519  | 0.93727 | 0.94765 | 0.96145 | 0.954   | 0.95339 | 0.95294 | 0.95845 | 0.95821 | CHFR      |

|            |         |         |         |         |         |         |         |         |         |         |               |
|------------|---------|---------|---------|---------|---------|---------|---------|---------|---------|---------|---------------|
| cg06463913 | 0.02755 | 0.02534 | 0.02985 | 0.02749 | 0.0235  | 0.02673 | 0.02375 | 0.02862 | 0.02325 | 0.02053 | BET1L         |
| cg06465021 | 0.07795 | 0.05321 | 0.05757 | 0.05544 | 0.05001 | 0.04786 | 0.05461 | 0.05435 | 0.0548  | 0.05107 | SLC12A2       |
| cg06465194 | 0.68444 | 0.07515 | 0.62809 | 0.59601 | 0.58676 | 0.28131 | 0.34879 | 0.45868 | 0.34671 | 0.24877 | GRIK4         |
| cg06465926 | 0.06631 | 0.07002 | 0.06089 | 0.0639  | 0.04338 | 0.06724 | 0.06304 | 0.0571  | 0.06138 | 0.05888 | PPP2R3A       |
| cg06466479 | 0.8425  | 0.84945 | 0.89758 | 0.89886 | 0.8411  | 0.61704 | 0.86285 | 0.77618 | 0.91701 | 0.91119 | RAD1          |
| cg06466797 | 0.05596 | 0.04486 | 0.05262 | 0.04636 | 0.04532 | 0.04271 | 0.04768 | 0.03833 | 0.04296 | 0.03474 | FLJ22313      |
| cg06468695 | 0.80944 | 0.66813 | 0.89385 | 0.8984  | 0.92319 | 0.86334 | 0.6284  | 0.77506 | 0.48755 | 0.23675 | CCDC42        |
| cg06469542 | 0.89255 | 0.29326 | 0.94911 | 0.95965 | 0.78311 | 0.46655 | 0.38645 | 0.22    | 0.59976 | 0.11599 | THSD3         |
| cg06470471 | 0.79952 | 0.39757 | 0.76155 | 0.80296 | 0.58998 | 0.72032 | 0.63851 | 0.69189 | 0.79595 | 0.66497 | LRTM1         |
| cg06470552 | 0.03617 | 0.03313 | 0.03426 | 0.03107 | 0.03142 | 0.0333  | 0.03502 | 0.03978 | 0.03382 | 0.03148 | CSPG6         |
| cg06470943 | 0.0639  | 0.05304 | 0.20358 | 0.23822 | 0.05334 | 0.04053 | 0.06178 | 0.04408 | 0.04227 | 0.0333  | SMAP1L        |
| cg06471905 | 0.80675 | 0.19317 | 0.69844 | 0.77215 | 0.90047 | 0.75194 | 0.23048 | 0.13895 | 0.6325  | 0.39289 | ADAM11        |
| cg06473539 | 0.057   | 0.06402 | 0.07111 | 0.05523 | 0.09966 | 0.05886 | 0.05962 | 0.05299 | 0.05707 | 0.05422 | NOS1AP        |
| cg06475327 | 0.7203  | 0.58263 | 0.86317 | 0.9007  | 0.94437 | 0.92101 | 0.40035 | 0.91147 | 0.72783 | 0.74665 | CEACAM8       |
| cg06476337 | 0.21712 | 0.16795 | 0.21248 | 0.18508 | 0.27741 | 0.2398  | 0.17477 | 0.16617 | 0.1446  | 0.14346 | NDUFS4        |
| cg06476606 | 0.14958 | 0.12416 | 0.11549 | 0.09109 | 0.1241  | 0.0869  | 0.08867 | 0.07958 | 0.08659 | 0.08769 | IFIT2         |
| cg06479216 | 0.37529 | 0.25808 | 0.36077 | 0.38018 | 0.19337 | 0.21656 | 0.32522 | 0.30095 | 0.25516 | 0.2553  | IFNA16        |
| cg06479426 | 0.0314  | 0.03311 | 0.03043 | 0.03177 | 0.03897 | 0.0351  | 0.04301 | 0.08617 | 0.09111 | 0.02403 | SLCO4A1       |
| cg06479512 | 0.90944 | 0.83752 | 0.91511 | 0.92233 | 0.90224 | 0.90538 | 0.84402 | 0.8366  | 0.91333 | 0.64687 | PNLDC1        |
| cg06481786 | 0.09826 | 0.08928 | 0.42806 | 0.47224 | 0.17045 | 0.09944 | 0.15969 | 0.09713 | 0.09627 | 0.08591 | RAD52B        |
| cg06484397 | 0.04228 | 0.03218 | 0.08016 | 0.05714 | 0.45993 | 0.38947 | 0.03671 | 0.03985 | 0.04349 | 0.02703 | C9orf19       |
| cg06487986 | 0.03528 | 0.0316  | 0.02891 | 0.02868 | 0.02862 | 0.02676 | 0.02506 | 0.02485 | 0.02643 | 0.02546 | PER3          |
| cg06488505 | 0.67657 | 0.24338 | 0.61156 | 0.71835 | 0.63376 | 0.58458 | 0.70915 | 0.60143 | 0.7965  | 0.65779 | DKFZp667M2411 |
| cg06488678 | 0.76645 | 0.65357 | 0.65013 | 0.75468 | 0.68532 | 0.56333 | 0.77722 | 0.15885 | 0.58278 | 0.34471 | TMPRSS9       |
| cg06489008 | 0.81874 | 0.57948 | 0.53964 | 0.79147 | 0.66578 | 0.78774 | 0.33447 | 0.26655 | 0.74406 | 0.60917 | CST11         |
| cg06489418 | 0.09454 | 0.08776 | 0.08499 | 0.07532 | 0.07386 | 0.08378 | 0.52687 | 0.49511 | 0.07309 | 0.08169 | FTSJ1         |
| cg06489804 | 0.04771 | 0.04021 | 0.47681 | 0.62115 | 0.02952 | 0.0363  | 0.03429 | 0.03822 | 0.02993 | 0.03299 | FBXW9         |
| cg06490162 | 0.03662 | 0.0379  | 0.21384 | 0.05356 | 0.02867 | 0.03301 | 0.03316 | 0.03392 | 0.0294  | 0.02923 | C16orf63      |
| cg06490951 | 0.94211 | 0.93009 | 0.93704 | 0.94184 | 0.95913 | 0.95635 | 0.88649 | 0.9297  | 0.93608 | 0.93199 | CETN1         |
| cg06490988 | 0.63355 | 0.65188 | 0.96896 | 0.97395 | 0.94698 | 0.91891 | 0.6284  | 0.6493  | 0.97375 | 0.97511 | GATA2         |
| cg06491116 | 0.89123 | 0.88145 | 0.74627 | 0.75597 | 0.37184 | 0.30772 | 0.63515 | 0.14264 | 0.07935 | 0.04614 | LOC196264     |
| cg06491924 | 0.04395 | 0.03725 | 0.07099 | 0.18979 | 0.064   | 0.05773 | 0.03204 | 0.03551 | 0.03155 | 0.03255 | ZNF613        |
| cg06492206 | 0.03119 | 0.03108 | 0.04035 | 0.03309 | 0.02353 | 0.02706 | 0.02931 | 0.02841 | 0.03212 | 0.03255 | SLC19A2       |
| cg06493080 | 0.06026 | 0.05699 | 0.06061 | 0.06731 | 0.09015 | 0.07037 | 0.06904 | 0.07564 | 0.06144 | 0.05545 | HOXB7         |
| cg06493386 | 0.26839 | 0.04918 | 0.36247 | 0.50302 | 0.22101 | 0.0392  | 0.40171 | 0.51142 | 0.17329 | 0.51049 | TRPA1         |
| cg06493930 | 0.83899 | 0.70695 | 0.19737 | 0.21549 | 0.36482 | 0.19413 | 0.18435 | 0.15216 | 0.49282 | 0.35301 | GAS2          |
| cg06493994 | 0.04556 | 0.07845 | 0.57963 | 0.73602 | 0.05079 | 0.03932 | 0.12634 | 0.12072 | 0.10507 | 0.04285 | SCGN          |
| cg06494770 | 0.54416 | 0.59408 | 0.52043 | 0.5987  | 0.63027 | 0.54277 | 0.53198 | 0.3309  | 0.26309 | 0.23779 | KLHL13        |
| cg06494782 | 0.66416 | 0.54692 | 0.56397 | 0.5423  | 0.81513 | 0.64819 | 0.31695 | 0.4984  | 0.08693 | 0.08724 | K6IRS2        |
| cg06495347 | 0.74797 | 0.68652 | 0.19523 | 0.15631 | 0.098   | 0.08325 | 0.42481 | 0.52551 | 0.08915 | 0.08534 | SUOX          |
| cg06495803 | 0.14247 | 0.12277 | 0.39802 | 0.5129  | 0.44657 | 0.25255 | 0.29731 | 0.42595 | 0.23843 | 0.17746 | TNFRSF7       |

|            |         |         |         |         |         |         |         |         |         |         |            |
|------------|---------|---------|---------|---------|---------|---------|---------|---------|---------|---------|------------|
| cg06495924 | 0.04032 | 0.0399  | 0.06293 | 0.05357 | 0.03202 | 0.03583 | 0.03279 | 0.03656 | 0.04009 | 0.03477 | CYC1       |
| cg06496078 | 0.03768 | 0.03956 | 0.03686 | 0.03694 | 0.02614 | 0.03486 | 0.03027 | 0.03442 | 0.02789 | 0.0264  | C12orf23   |
| cg06496654 | 0.57685 | 0.64009 | 0.60306 | 0.6813  | 0.63386 | 0.78664 | 0.47506 | 0.6024  | 0.26485 | 0.2435  | TAS2R7     |
| cg06497752 | 0.20964 | 0.02042 | 0.38957 | 0.40382 | 0.63003 | 0.93466 | 0.02133 | 0.02208 | 0.23065 | 0.08345 | COL9A3     |
| cg06497795 | 0.07753 | 0.0523  | 0.05792 | 0.05791 | 0.05337 | 0.05802 | 0.04973 | 0.05047 | 0.05097 | 0.04668 | ZC3H10     |
| cg06498267 | 0.0298  | 0.0304  | 0.86205 | 0.90952 | 0.34389 | 0.03578 | 0.05492 | 0.05742 | 0.40492 | 0.55725 | HCN1       |
| cg06499565 | 0.06001 | 0.0496  | 0.08463 | 0.07657 | 0.0768  | 0.05357 | 0.11713 | 0.09344 | 0.03804 | 0.03668 | NDRG3      |
| cg06499652 | 0.07331 | 0.07529 | 0.07632 | 0.06964 | 0.12017 | 0.22173 | 0.13306 | 0.06978 | 0.05659 | 0.07173 | ARNTL      |
| cg06500079 | 0.11401 | 0.04509 | 0.59643 | 0.84352 | 0.11084 | 0.04539 | 0.881   | 0.20403 | 0.03849 | 0.05957 | VPS53      |
| cg06500476 | 0.45041 | 0.53883 | 0.59198 | 0.67349 | 0.63396 | 0.72233 | 0.49339 | 0.77716 | 0.30554 | 0.65645 | FLJ11017   |
| cg06501070 | 0.11315 | 0.14852 | 0.80371 | 0.81464 | 0.55901 | 0.80787 | 0.16083 | 0.42728 | 0.17898 | 0.10573 | EDG7       |
| cg06501084 | 0.58517 | 0.45481 | 0.57985 | 0.65071 | 0.49406 | 0.53182 | 0.27745 | 0.24954 | 0.22619 | 0.26256 | KCNH5      |
| cg06501790 | 0.39609 | 0.06255 | 0.29291 | 0.33413 | 0.54954 | 0.36598 | 0.07355 | 0.10989 | 0.14332 | 0.0716  | SLC34A1    |
| cg06502510 | 0.05771 | 0.06315 | 0.06785 | 0.07886 | 0.06625 | 0.08485 | 0.05998 | 0.05734 | 0.05028 | 0.05313 | ITSN1      |
| cg06502868 | 0.03696 | 0.02319 | 0.02502 | 0.02904 | 0.02455 | 0.0266  | 0.02369 | 0.02411 | 0.02305 | 0.02226 | H3F3B      |
| cg06504820 | 0.56762 | 0.15807 | 0.88883 | 0.90581 | 0.74179 | 0.82921 | 0.21246 | 0.58012 | 0.47537 | 0.18063 | DLK1       |
| cg06505666 | 0.02883 | 0.02932 | 0.03168 | 0.02283 | 0.02636 | 0.02863 | 0.02592 | 0.02877 | 0.02665 | 0.02562 | FLJ40629   |
| cg06506156 | 0.02901 | 0.03291 | 0.06012 | 0.04935 | 0.0355  | 0.03944 | 0.02827 | 0.03    | 0.03334 | 0.03601 | TSSC1      |
| cg06506864 | 0.78952 | 0.6153  | 0.79526 | 0.83904 | 0.80372 | 0.81572 | 0.13253 | 0.12588 | 0.08999 | 0.30526 | GPR154     |
| cg06507244 | 0.85344 | 0.84193 | 0.83283 | 0.86488 | 0.78356 | 0.86259 | 0.83353 | 0.85566 | 0.87563 | 0.86307 | DHX32      |
| cg06507645 | 0.06483 | 0.07493 | 0.10695 | 0.10124 | 0.12724 | 0.12487 | 0.11422 | 0.11217 | 0.08097 | 0.08636 | SUGT1      |
| cg06508445 | 0.04555 | 0.0402  | 0.04667 | 0.03683 | 0.03166 | 0.03725 | 0.7331  | 0.03247 | 0.581   | 0.59721 | LOX        |
| cg06508934 | 0.02795 | 0.02781 | 0.03815 | 0.03006 | 0.0242  | 0.02744 | 0.02502 | 0.02456 | 0.0263  | 0.02487 | TIMP2      |
| cg06509239 | 0.33666 | 0.08684 | 0.51802 | 0.55619 | 0.78741 | 0.80014 | 0.14503 | 0.07052 | 0.86871 | 0.76143 | OSR1       |
| cg06509940 | 0.75846 | 0.29804 | 0.82486 | 0.87316 | 0.81396 | 0.88781 | 0.48387 | 0.40308 | 0.39382 | 0.34514 | CD80       |
| cg06510830 | 0.02336 | 0.02368 | 0.04233 | 0.02647 | 0.03185 | 0.02867 | 0.02389 | 0.02291 | 0.0241  | 0.02221 | C21orf45   |
| cg06513075 | 0.04601 | 0.04244 | 0.05977 | 0.05123 | 0.09517 | 0.04217 | 0.05995 | 0.04851 | 0.04275 | 0.05579 | NAT10      |
| cg06516124 | 0.90168 | 0.909   | 0.88189 | 0.91489 | 0.83355 | 0.86185 | 0.06265 | 0.0855  | 0.38216 | 0.27994 | WT1        |
| cg06516650 | 0.03421 | 0.03867 | 0.03909 | 0.0389  | 0.03761 | 0.04279 | 0.04063 | 0.03205 | 0.02773 | 0.03027 | RAB30      |
| cg06517798 | 0.73462 | 0.7966  | 0.70653 | 0.68306 | 0.91031 | 0.87479 | 0.83388 | 0.83314 | 0.63147 | 0.62921 | ATP1A4     |
| cg06518271 | 0.71825 | 0.83549 | 0.79591 | 0.83629 | 0.71311 | 0.80609 | 0.64159 | 0.8362  | 0.40949 | 0.47731 | ADH6       |
| cg06518779 | 0.03056 | 0.0405  | 0.03471 | 0.03293 | 0.03239 | 0.04402 | 0.02495 | 0.02713 | 0.01927 | 0.02098 | KDELCL1    |
| cg06521280 | 0.23148 | 0.17011 | 0.11574 | 0.20799 | 0.03674 | 0.04684 | 0.22    | 0.06728 | 0.05158 | 0.04133 | PLAU       |
| cg06521761 | 0.61072 | 0.65332 | 0.70745 | 0.70933 | 0.61568 | 0.67357 | 0.75402 | 0.81798 | 0.76473 | 0.64926 | LRP2BP     |
| cg06521852 | 0.10978 | 0.04873 | 0.09009 | 0.1527  | 0.37948 | 0.05102 | 0.10926 | 0.04812 | 0.06944 | 0.0547  | HRIHFB2122 |
| cg06522719 | 0.5174  | 0.5131  | 0.43611 | 0.52021 | 0.42728 | 0.37882 | 0.26061 | 0.27842 | 0.51788 | 0.44791 | VSIG1      |
| cg06526829 | 0.08701 | 0.10804 | 0.50477 | 0.48535 | 0.69983 | 0.72739 | 0.23874 | 0.06255 | 0.04999 | 0.03943 | KCND1      |
| cg06528936 | 0.02156 | 0.02375 | 0.02248 | 0.02513 | 0.01551 | 0.02156 | 0.01972 | 0.02296 | 0.01991 | 0.02249 | GNL2       |
| cg06529761 | 0.8968  | 0.6437  | 0.89986 | 0.90097 | 0.93326 | 0.8303  | 0.88989 | 0.84587 | 0.56821 | 0.53468 | DNASE1     |
| cg06530118 | 0.0336  | 0.02626 | 0.03365 | 0.03361 | 0.02578 | 0.03587 | 0.03516 | 0.03056 | 0.03127 | 0.02774 | CLN3       |
| cg06531741 | 0.06746 | 0.0524  | 0.65933 | 0.83264 | 0.1885  | 0.08905 | 0.06379 | 0.08374 | 0.24198 | 0.03651 | HTR3B      |

|            |         |         |         |         |         |         |         |         |         |                   |
|------------|---------|---------|---------|---------|---------|---------|---------|---------|---------|-------------------|
| cg06532147 | 0.85235 | 0.87006 | 0.84134 | 0.87077 | 0.90072 | 0.85753 | 0.72814 | 0.85913 | 0.86518 | 0.84662 H2AFB3    |
| cg06532176 | 0.03409 | 0.03205 | 0.04064 | 0.03597 | 0.17376 | 0.03869 | 0.03223 | 0.03241 | 0.03685 | 0.031 WWOX        |
| cg06532493 | 0.0535  | 0.05015 | 0.05068 | 0.0497  | 0.04385 | 0.04921 | 0.03815 | 0.04854 | 0.04649 | 0.04128 C10orf70  |
| cg06533629 | 0.06163 | 0.073   | 0.1014  | 0.09162 | 0.13865 | 0.11266 | 0.06586 | 0.06817 | 0.09173 | 0.05424 KLF14     |
| cg06534172 | 0.04956 | 0.04109 | 0.05334 | 0.05316 | 0.02951 | 0.02865 | 0.03965 | 0.03119 | 0.03182 | 0.0291 DDX39      |
| cg06534422 | 0.0408  | 0.0407  | 0.04346 | 0.03628 | 0.02597 | 0.03132 | 0.03438 | 0.02958 | 0.03471 | 0.02714 MIF       |
| cg06536578 | 0.77693 | 0.17043 | 0.63664 | 0.77033 | 0.71014 | 0.55423 | 0.7245  | 0.29221 | 0.14456 | 0.13642 JPH4      |
| cg06537230 | 0.09284 | 0.08929 | 0.1704  | 0.08466 | 0.10791 | 0.06811 | 0.07461 | 0.07752 | 0.23057 | 0.35983 DLX5      |
| cg06537829 | 0.0519  | 0.05987 | 0.09727 | 0.08444 | 0.09825 | 0.07797 | 0.06184 | 0.05595 | 0.04794 | 0.05077 UBB       |
| cg06538003 | 0.07103 | 0.07794 | 0.07341 | 0.06538 | 0.05706 | 0.0712  | 0.06942 | 0.06975 | 0.05365 | 0.06261 C2orf13   |
| cg06539449 | 0.1432  | 0.14741 | 0.90202 | 0.91182 | 0.83983 | 0.64852 | 0.72583 | 0.50873 | 0.91224 | 0.8339 CCND1      |
| cg06539804 | 0.07418 | 0.04179 | 0.54864 | 0.52987 | 0.16531 | 0.13312 | 0.16635 | 0.04462 | 0.03001 | 0.03988 CPXM      |
| cg06540105 | 0.03715 | 0.03714 | 0.30606 | 0.3613  | 0.24087 | 0.29517 | 0.04131 | 0.03512 | 0.03639 | 0.02873 CCDC74A   |
| cg06540636 | 0.0635  | 0.0524  | 0.0508  | 0.04338 | 0.0452  | 0.04971 | 0.04599 | 0.05792 | 0.04324 | 0.04181 PLAUR     |
| cg06540715 | 0.12646 | 0.11214 | 0.14156 | 0.13467 | 0.21805 | 0.15139 | 0.12071 | 0.08652 | 0.10644 | 0.09267 ANKRD10   |
| cg06540941 | 0.13375 | 0.13047 | 0.14659 | 0.12427 | 0.15763 | 0.13636 | 0.13691 | 0.11753 | 0.14577 | 0.11719 VAMP4     |
| cg06541857 | 0.26545 | 0.09172 | 0.51723 | 0.60268 | 0.09037 | 0.05987 | 0.20543 | 0.09091 | 0.17131 | 0.09188 CEP63     |
| cg06542614 | 0.75662 | 0.59392 | 0.86272 | 0.86407 | 0.77833 | 0.78981 | 0.81367 | 0.57785 | 0.85029 | 0.80104 PDLIM1    |
| cg06543018 | 0.05316 | 0.07412 | 0.31674 | 0.14894 | 0.59858 | 0.55758 | 0.24385 | 0.06039 | 0.61771 | 0.21786 RBP1      |
| cg06543761 | 0.02399 | 0.02646 | 0.02732 | 0.02679 | 0.0206  | 0.02429 | 0.02298 | 0.02256 | 0.01999 | 0.01914 PPM2C     |
| cg06544198 | 0.0451  | 0.04337 | 0.05363 | 0.05177 | 0.02985 | 0.02892 | 0.03299 | 0.03291 | 0.02864 | 0.03027 TMEM14C   |
| cg06545504 | 0.46587 | 0.52447 | 0.49452 | 0.53409 | 0.65888 | 0.76464 | 0.18265 | 0.13899 | 0.35062 | 0.20302 HTN1      |
| cg06545845 | 0.04736 | 0.04948 | 0.07069 | 0.16734 | 0.03956 | 0.03721 | 0.05175 | 0.03915 | 0.04818 | 0.04293 ARL8A     |
| cg06546607 | 0.34555 | 0.09926 | 0.47138 | 0.54311 | 0.4346  | 0.17816 | 0.30667 | 0.28834 | 0.04121 | 0.03025 PEPD      |
| cg06547766 | 0.58285 | 0.48612 | 0.2673  | 0.27351 | 0.69245 | 0.72424 | 0.34689 | 0.41005 | 0.73824 | 0.55627 LPP       |
| cg06548519 | 0.81904 | 0.80563 | 0.76775 | 0.83194 | 0.80635 | 0.78856 | 0.63486 | 0.79085 | 0.8033  | 0.69543 LYZL6     |
| cg06550629 | 0.92074 | 0.61753 | 0.59109 | 0.65155 | 0.65201 | 0.7344  | 0.29571 | 0.45271 | 0.90541 | 0.93003 GPR133    |
| cg06552037 | 0.02384 | 0.02139 | 0.02538 | 0.0211  | 0.01944 | 0.02266 | 0.02144 | 0.02193 | 0.0226  | 0.01771 INHA      |
| cg06552050 | 0.03044 | 0.03303 | 0.04    | 0.02901 | 0.02294 | 0.03012 | 0.02487 | 0.02784 | 0.02565 | 0.02614 CSDA      |
| cg06554069 | 0.22071 | 0.20333 | 0.24293 | 0.21203 | 0.17141 | 0.19473 | 0.20846 | 0.21403 | 0.20076 | 0.19311 SAFB2     |
| cg06554542 | 0.03003 | 0.02928 | 0.03415 | 0.03012 | 0.01928 | 0.02566 | 0.03017 | 0.02495 | 0.02547 | 0.02534 GNPTAB    |
| cg06554928 | 0.06753 | 0.06674 | 0.06966 | 0.05968 | 0.04449 | 0.05929 | 0.06714 | 0.05727 | 0.06261 | 0.05703 PFN1      |
| cg06557358 | 0.02313 | 0.02317 | 0.03843 | 0.03262 | 0.04123 | 0.02962 | 0.03965 | 0.02272 | 0.03199 | 0.05747 LOC124842 |
| cg06557606 | 0.06564 | 0.08079 | 0.08165 | 0.09711 | 0.07229 | 0.07656 | 0.11849 | 0.1305  | 0.05723 | 0.06521 ATP6V1H   |
| cg06563300 | 0.83999 | 0.37029 | 0.84063 | 0.86362 | 0.76698 | 0.84816 | 0.3639  | 0.52786 | 0.55898 | 0.30427 SLC17A8   |
| cg06564900 | 0.09442 | 0.09422 | 0.11457 | 0.07954 | 0.11737 | 0.10198 | 0.13392 | 0.11021 | 0.12682 | 0.11079 FIGN      |
| cg06565684 | 0.09256 | 0.08442 | 0.09596 | 0.09541 | 0.10455 | 0.09478 | 0.05872 | 0.04955 | 0.08886 | 0.07876 EXTL2     |
| cg06566994 | 0.87202 | 0.7484  | 0.73538 | 0.77782 | 0.88408 | 0.88503 | 0.6368  | 0.52565 | 0.90828 | 0.83382 ZNF167    |
| cg06567342 | 0.09927 | 0.10384 | 0.18489 | 0.11342 | 0.19217 | 0.13256 | 0.10284 | 0.07456 | 0.11363 | 0.13596 ZNF265    |
| cg06567423 | 0.05713 | 0.06335 | 0.08319 | 0.06653 | 0.07366 | 0.07172 | 0.06934 | 0.07246 | 0.04119 | 0.02825 STT3A     |
| cg06570843 | 0.54686 | 0.36594 | 0.63188 | 0.70602 | 0.60841 | 0.63851 | 0.65611 | 0.7     | 0.55122 | 0.38042 FABP2     |



|            |         |         |         |         |         |         |         |         |         |         |           |
|------------|---------|---------|---------|---------|---------|---------|---------|---------|---------|---------|-----------|
| cg06572160 | 0.10544 | 0.02761 | 0.87836 | 0.90128 | 0.83121 | 0.78172 | 0.65081 | 0.6054  | 0.57099 | 0.58236 | KCNC3     |
| cg06572974 | 0.89802 | 0.86799 | 0.8333  | 0.89521 | 0.79609 | 0.72526 | 0.81672 | 0.78851 | 0.8999  | 0.53704 | CHD2      |
| cg06575572 | 0.76149 | 0.30024 | 0.81018 | 0.75481 | 0.74577 | 0.47469 | 0.59218 | 0.56149 | 0.14777 | 0.04897 | C22orf8   |
| cg06577005 | 0.63383 | 0.50232 | 0.47872 | 0.64092 | 0.28013 | 0.19713 | 0.42192 | 0.16597 | 0.23436 | 0.04227 | DHDDS     |
| cg06577463 | 0.04334 | 0.0436  | 0.04551 | 0.04252 | 0.03677 | 0.03638 | 0.04362 | 0.04369 | 0.04022 | 0.03457 | DDX48     |
| cg06577658 | 0.04637 | 0.04576 | 0.04695 | 0.04561 | 0.04607 | 0.0498  | 0.04217 | 0.03842 | 0.03508 | 0.03174 | DMWD      |
| cg06577725 | 0.7339  | 0.7487  | 0.48154 | 0.65188 | 0.15271 | 0.18857 | 0.11637 | 0.09355 | 0.11794 | 0.14753 | SPATA16   |
| cg06580318 | 0.08715 | 0.0612  | 0.07827 | 0.06594 | 0.05628 | 0.05058 | 0.06742 | 0.04907 | 0.05816 | 0.04543 | SPBC25    |
| cg06583518 | 0.06784 | 0.06751 | 0.34226 | 0.24077 | 0.10764 | 0.09891 | 0.0664  | 0.0584  | 0.03971 | 0.04073 | ZNF571    |
| cg06584407 | 0.81859 | 0.83546 | 0.86972 | 0.88327 | 0.91003 | 0.84688 | 0.86545 | 0.83815 | 0.85477 | 0.59538 | NPPA      |
| cg06585027 | 0.02958 | 0.03321 | 0.03246 | 0.02838 | 0.03039 | 0.03041 | 0.02441 | 0.02424 | 0.02838 | 0.02885 | PIK4CB    |
| cg06585108 | 0.93954 | 0.48978 | 0.91572 | 0.92462 | 0.96748 | 0.92068 | 0.64845 | 0.4841  | 0.64846 | 0.48533 | C10orf92  |
| cg06585690 | 0.36145 | 0.36922 | 0.36511 | 0.29935 | 0.39453 | 0.48731 | 0.28836 | 0.2983  | 0.27309 | 0.27217 | PROL1     |
| cg06585893 | 0.89514 | 0.84894 | 0.89566 | 0.93637 | 0.93229 | 0.92495 | 0.92111 | 0.90818 | 0.28179 | 0.4221  | CAPN9     |
| cg06586599 | 0.03677 | 0.03452 | 0.03651 | 0.0379  | 0.02632 | 0.02796 | 0.03441 | 0.03162 | 0.02668 | 0.02848 | MCOLN1    |
| cg06587969 | 0.03097 | 0.03223 | 0.03238 | 0.0291  | 0.03141 | 0.03042 | 0.04026 | 0.03511 | 0.02771 | 0.02846 | WDR79     |
| cg06588247 | 0.0339  | 0.03449 | 0.03195 | 0.0303  | 0.0272  | 0.02684 | 0.02882 | 0.02652 | 0.02598 | 0.02823 | TRAF3     |
| cg06589885 | 0.90445 | 0.37698 | 0.87145 | 0.8984  | 0.85093 | 0.59742 | 0.41324 | 0.27871 | 0.58036 | 0.70782 | HFE2      |
| cg06590533 | 0.03848 | 0.03902 | 0.0473  | 0.03861 | 0.0257  | 0.03258 | 0.0354  | 0.03042 | 0.03128 | 0.02744 | C20orf108 |
| cg06590610 | 0.87214 | 0.67543 | 0.8372  | 0.91382 | 0.94031 | 0.94682 | 0.35171 | 0.19421 | 0.7138  | 0.27573 | ZNFN1A1   |
| cg06590711 | 0.10981 | 0.79249 | 0.20216 | 0.13092 | 0.21486 | 0.75081 | 0.06145 | 0.05766 | 0.10532 | 0.08817 | CPXCR1    |
| cg06593568 | 0.0392  | 0.04186 | 0.05737 | 0.04726 | 0.03596 | 0.04237 | 0.04036 | 0.03484 | 0.04338 | 0.04385 | C1orf48   |
| cg06594008 | 0.76079 | 0.15131 | 0.65064 | 0.6892  | 0.73882 | 0.64887 | 0.68931 | 0.25012 | 0.85237 | 0.5577  | MKL1      |
| cg06595693 | 0.4303  | 0.44692 | 0.58091 | 0.69233 | 0.75253 | 0.60809 | 0.21291 | 0.09229 | 0.17532 | 0.08345 | DISP2     |
| cg06597095 | 0.74675 | 0.75836 | 0.80301 | 0.82028 | 0.78077 | 0.73841 | 0.7335  | 0.70313 | 0.82765 | 0.75748 | FLJ21657  |
| cg06597861 | 0.04289 | 0.04397 | 0.0451  | 0.0434  | 0.03612 | 0.03755 | 0.06292 | 0.06717 | 0.03719 | 0.03704 | LY6E      |
| cg06598256 | 0.94021 | 0.87362 | 0.9361  | 0.94276 | 0.94064 | 0.93544 | 0.93202 | 0.92167 | 0.9519  | 0.93853 | DNAJC4    |
| cg06598631 | 0.03868 | 0.03515 | 0.04341 | 0.03977 | 0.04093 | 0.03962 | 0.03998 | 0.03888 | 0.04071 | 0.03826 | ORC3L     |
| cg06600412 | 0.03765 | 0.03406 | 0.0271  | 0.02476 | 0.02647 | 0.03132 | 0.01959 | 0.02039 | 0.0204  | 0.02345 | MLF1IP    |
| cg06600447 | 0.03626 | 0.04299 | 0.04201 | 0.03935 | 0.03267 | 0.03889 | 0.03919 | 0.03794 | 0.03553 | 0.03556 | MGC2749   |
| cg06601473 | 0.55136 | 0.36294 | 0.85242 | 0.87916 | 0.7291  | 0.90173 | 0.80273 | 0.81715 | 0.89845 | 0.81972 | MGC34830  |
| cg06602857 | 0.04601 | 0.03976 | 0.12748 | 0.04707 | 0.20893 | 0.04281 | 0.05685 | 0.0492  | 0.02939 | 0.03301 | FOXF1     |
| cg06605933 | 0.87702 | 0.86593 | 0.8087  | 0.84838 | 0.95204 | 0.7542  | 0.05919 | 0.07526 | 0.04374 | 0.05063 | BOLA1     |
| cg06606198 | 0.02811 | 0.02519 | 0.02845 | 0.02687 | 0.02149 | 0.02582 | 0.02471 | 0.02518 | 0.02229 | 0.02172 | DDX55     |
| cg06607866 | 0.24484 | 0.06954 | 0.35041 | 0.30486 | 0.14569 | 0.04413 | 0.09086 | 0.07531 | 0.04856 | 0.03679 | AIP       |
| cg06609049 | 0.19429 | 0.14246 | 0.25531 | 0.38035 | 0.28932 | 0.24718 | 0.1771  | 0.12277 | 0.09864 | 0.11775 | THOP1     |
| cg06609475 | 0.0598  | 0.056   | 0.0476  | 0.05301 | 0.3788  | 0.33631 | 0.06102 | 0.05656 | 0.3314  | 0.04346 | NDUFS6    |
| cg06611310 | 0.05057 | 0.05286 | 0.05082 | 0.04658 | 0.05434 | 0.05513 | 0.04508 | 0.03886 | 0.0464  | 0.0473  | LOC129285 |
| cg06611744 | 0.28488 | 0.12232 | 0.50845 | 0.26399 | 0.58888 | 0.11159 | 0.17135 | 0.11266 | 0.46607 | 0.07794 | RASL11A   |
| cg06612452 | 0.08064 | 0.075   | 0.11149 | 0.1123  | 0.09262 | 0.07709 | 0.07476 | 0.06857 | 0.08382 | 0.07229 | PINK1     |
| cg06613840 | 0.26093 | 0.14533 | 0.24353 | 0.30005 | 0.2997  | 0.3275  | 0.81418 | 0.96841 | 0.13577 | 0.08258 | GPX1      |

|            |         |         |         |         |         |         |         |         |         |                  |
|------------|---------|---------|---------|---------|---------|---------|---------|---------|---------|------------------|
| cg06614002 | 0.95748 | 0.62304 | 0.78    | 0.88205 | 0.96414 | 0.90496 | 0.70689 | 0.7992  | 0.79345 | 0.57342 SOX10    |
| cg06615154 | 0.78268 | 0.19808 | 0.88284 | 0.90994 | 0.85977 | 0.75273 | 0.2413  | 0.23361 | 0.42673 | 0.11093 S100A3   |
| cg06615667 | 0.02931 | 0.03154 | 0.03564 | 0.03349 | 0.0269  | 0.02697 | 0.02582 | 0.02822 | 0.02573 | 0.03379 GPR107   |
| cg06615861 | 0.03593 | 0.04157 | 0.04963 | 0.04345 | 0.02945 | 0.03398 | 0.03287 | 0.02757 | 0.03034 | 0.02941 KIF1B    |
| cg06616147 | 0.08594 | 0.08903 | 0.08717 | 0.09505 | 0.17455 | 0.13142 | 0.07595 | 0.0638  | 0.05348 | 0.0573 ICK       |
| cg06616245 | 0.10338 | 0.12212 | 0.16166 | 0.1438  | 0.36392 | 0.15361 | 0.10935 | 0.09853 | 0.11262 | 0.11891 GLI1     |
| cg06617418 | 0.31819 | 0.07271 | 0.09304 | 0.10104 | 0.17834 | 0.07877 | 0.13122 | 0.05686 | 0.09044 | 0.07642 RGAG1    |
| cg06618866 | 0.43931 | 0.07934 | 0.72952 | 0.90541 | 0.56984 | 0.86958 | 0.42004 | 0.39805 | 0.34892 | 0.06458 TLR2     |
| cg06619076 | 0.06321 | 0.05841 | 0.05759 | 0.05998 | 0.03995 | 0.05595 | 0.04895 | 0.05129 | 0.04746 | 0.04492 ASPH     |
| cg06619299 | 0.90341 | 0.89223 | 0.7687  | 0.85868 | 0.87592 | 0.91112 | 0.239   | 0.27352 | 0.88053 | 0.81919 GMCL1L   |
| cg06620254 | 0.15453 | 0.06721 | 0.13316 | 0.1477  | 0.19003 | 0.07037 | 0.33927 | 0.34531 | 0.06827 | 0.06002 NONO     |
| cg06621126 | 0.03031 | 0.03177 | 0.60399 | 0.69599 | 0.90733 | 0.92384 | 0.94107 | 0.88594 | 0.19179 | 0.13825 HSF4     |
| cg06621358 | 0.07996 | 0.32932 | 0.63548 | 0.58323 | 0.42013 | 0.07418 | 0.12785 | 0.079   | 0.07259 | 0.06938 CELSR3   |
| cg06622725 | 0.02086 | 0.02122 | 0.01868 | 0.02115 | 0.02432 | 0.02357 | 0.02005 | 0.01999 | 0.01763 | 0.01865 PEX16    |
| cg06623268 | 0.03541 | 0.0372  | 0.03478 | 0.03633 | 0.07229 | 0.0308  | 0.07927 | 0.06221 | 0.04206 | 0.0289 TOE1      |
| cg06624832 | 0.02719 | 0.03012 | 0.03158 | 0.02787 | 0.02758 | 0.0308  | 0.02742 | 0.03111 | 0.02524 | 0.02276 NAT9     |
| cg06625414 | 0.02513 | 0.02304 | 0.04699 | 0.05933 | 0.12961 | 0.02554 | 0.02532 | 0.02412 | 0.02313 | 0.01965 SLC4A3   |
| cg06625767 | 0.87922 | 0.55709 | 0.83548 | 0.89396 | 0.93147 | 0.87178 | 0.75114 | 0.76035 | 0.86911 | 0.50693 F12      |
| cg06625811 | 0.08332 | 0.05457 | 0.1356  | 0.08256 | 0.12987 | 0.07072 | 0.0699  | 0.05314 | 0.07704 | 0.06015 KIFAP3   |
| cg06626655 | 0.08193 | 0.1706  | 0.12621 | 0.40998 | 0.06832 | 0.0539  | 0.05666 | 0.05004 | 0.03395 | 0.03663 RSPO1    |
| cg06627364 | 0.20801 | 0.05602 | 0.04892 | 0.04528 | 0.03457 | 0.03967 | 0.03995 | 0.0421  | 0.03932 | 0.03935 MGC4677  |
| cg06628693 | 0.07274 | 0.06515 | 0.10049 | 0.07822 | 0.09929 | 0.10297 | 0.04919 | 0.04593 | 0.08307 | 0.07974 PRKACB   |
| cg06630241 | 0.61378 | 0.38484 | 0.34411 | 0.42446 | 0.68517 | 0.75504 | 0.6465  | 0.65833 | 0.71384 | 0.54889 SOCS2    |
| cg06630567 | 0.55888 | 0.16239 | 0.9396  | 0.95857 | 0.28278 | 0.68367 | 0.9287  | 0.76769 | 0.70791 | 0.81238 AMBP     |
| cg06630737 | 0.38794 | 0.14863 | 0.27919 | 0.45478 | 0.61794 | 0.58045 | 0.14635 | 0.04707 | 0.05273 | 0.03886 C1orf187 |
| cg06632528 | 0.03359 | 0.03376 | 0.03409 | 0.03856 | 0.10367 | 0.03439 | 0.03979 | 0.03141 | 0.03495 | 0.0257 NUDT22    |
| cg06634267 | 0.06152 | 0.05202 | 0.07313 | 0.06399 | 0.05489 | 0.05787 | 0.04936 | 0.06025 | 0.04309 | 0.0484 C6orf151  |
| cg06636246 | 0.10526 | 0.10082 | 0.11118 | 0.10179 | 0.08772 | 0.07515 | 0.08564 | 0.09823 | 0.07852 | 0.09085 MLR2     |
| cg06636463 | 0.11171 | 0.05186 | 0.09825 | 0.06073 | 0.02946 | 0.03856 | 0.07339 | 0.05197 | 0.06025 | 0.04676 DDX1     |
| cg06637774 | 0.97268 | 0.97396 | 0.96346 | 0.97201 | 0.96542 | 0.9721  | 0.47641 | 0.78981 | 0.97942 | 0.97834 P2RY6    |
| cg06637893 | 0.69351 | 0.65403 | 0.49076 | 0.52012 | 0.5922  | 0.48004 | 0.32266 | 0.23797 | 0.09299 | 0.03065 C16orf48 |
| cg06638012 | 0.69939 | 0.23757 | 0.66659 | 0.65981 | 0.28373 | 0.14071 | 0.39724 | 0.05087 | 0.05277 | 0.03537 AFF4     |
| cg06638433 | 0.04283 | 0.04704 | 0.04971 | 0.0408  | 0.14747 | 0.04471 | 0.07273 | 0.28854 | 0.04319 | 0.04456 IGF2BP1  |
| cg06638451 | 0.3348  | 0.11163 | 0.92311 | 0.93349 | 0.1839  | 0.08202 | 0.85436 | 0.19164 | 0.94383 | 0.75545 FAM107A  |
| cg06638966 | 0.66972 | 0.08115 | 0.49978 | 0.72931 | 0.43565 | 0.54078 | 0.89423 | 0.72524 | 0.07878 | 0.05103 COL19A1  |
| cg06639544 | 0.18344 | 0.08738 | 0.09872 | 0.11762 | 0.08559 | 0.26105 | 0.07104 | 0.06507 | 0.09249 | 0.05443 OR7A5    |
| cg06640279 | 0.37478 | 0.08501 | 0.29212 | 0.33988 | 0.24277 | 0.31836 | 0.1734  | 0.07698 | 0.62434 | 0.23568 FAIM3    |
| cg06641366 | 0.88455 | 0.8854  | 0.86433 | 0.87317 | 0.84031 | 0.86961 | 0.88234 | 0.83487 | 0.87405 | 0.86302 LRRC8C   |
| cg06641503 | 0.7805  | 0.56259 | 0.61585 | 0.74811 | 0.5912  | 0.71784 | 0.7811  | 0.6847  | 0.78089 | 0.49431 ARIH2    |
| cg06642617 | 0.02047 | 0.02374 | 0.02284 | 0.01984 | 0.01765 | 0.01889 | 0.01712 | 0.0194  | 0.01809 | 0.0168 CCT7      |
| cg06643227 | 0.56515 | 0.39805 | 0.86831 | 0.88222 | 0.90085 | 0.88722 | 0.86255 | 0.86279 | 0.85875 | 0.851 C9orf84    |

|            |         |         |         |         |         |         |         |         |         |         |           |
|------------|---------|---------|---------|---------|---------|---------|---------|---------|---------|---------|-----------|
| cg06645778 | 0.10164 | 0.09314 | 0.09822 | 0.06766 | 0.2745  | 0.10193 | 0.08702 | 0.05204 | 0.08809 | 0.0717  | HSPC159   |
| cg06646021 | 0.93762 | 0.73047 | 0.94423 | 0.9507  | 0.96405 | 0.75169 | 0.57522 | 0.27562 | 0.95306 | 0.87912 | RAB4A     |
| cg06648029 | 0.8816  | 0.89759 | 0.90244 | 0.88915 | 0.91562 | 0.90199 | 0.90309 | 0.89169 | 0.90125 | 0.89503 | NR1I2     |
| cg06649520 | 0.03191 | 0.02487 | 0.0381  | 0.03448 | 0.11549 | 0.02841 | 0.02198 | 0.02216 | 0.0263  | 0.02939 | ARFIP1    |
| cg06650260 | 0.77861 | 0.55185 | 0.90626 | 0.90397 | 0.91448 | 0.89593 | 0.74884 | 0.65546 | 0.88831 | 0.48403 | NR0B2     |
| cg06650786 | 0.53841 | 0.32983 | 0.59471 | 0.72097 | 0.87437 | 0.85595 | 0.72068 | 0.34909 | 0.6072  | 0.37934 | NOTCH3    |
| cg06653796 | 0.80973 | 0.54399 | 0.89289 | 0.92102 | 0.87262 | 0.69799 | 0.82473 | 0.71403 | 0.92795 | 0.8342  | LIME1     |
| cg06654134 | 0.06467 | 0.08555 | 0.06817 | 0.05441 | 0.08231 | 0.07697 | 0.0534  | 0.05129 | 0.06812 | 0.06792 | PIGF      |
| cg06654447 | 0.03112 | 0.03118 | 0.04213 | 0.03609 | 0.02049 | 0.03232 | 0.02888 | 0.0294  | 0.0373  | 0.02565 | MGC14141  |
| cg06655089 | 0.01333 | 0.01465 | 0.01653 | 0.01621 | 0.00973 | 0.014   | 0.01288 | 0.01114 | 0.01213 | 0.01325 | IMPDH2    |
| cg06655100 | 0.24366 | 0.27451 | 0.50252 | 0.81177 | 0.75745 | 0.87146 | 0.19976 | 0.37686 | 0.04677 | 0.36862 | KLF8      |
| cg06655504 | 0.07216 | 0.06261 | 0.08736 | 0.07556 | 0.0961  | 0.07606 | 0.04619 | 0.04874 | 0.05478 | 0.06491 | GDPD1     |
| cg06656924 | 0.54908 | 0.30114 | 0.73536 | 0.79432 | 0.50577 | 0.44271 | 0.44564 | 0.24457 | 0.49823 | 0.17246 | ZNF76     |
| cg06657741 | 0.04843 | 0.05664 | 0.08948 | 0.07988 | 0.06633 | 0.06829 | 0.08516 | 0.2154  | 0.03695 | 0.03534 | SLC9A6    |
| cg06659073 | 0.08555 | 0.06765 | 0.13645 | 0.14697 | 0.13926 | 0.10415 | 0.09778 | 0.11528 | 0.0976  | 0.06824 | SERAC1    |
| cg06659128 | 0.04673 | 0.04691 | 0.04471 | 0.04542 | 0.14736 | 0.04233 | 0.04478 | 0.04024 | 0.03592 | 0.04027 | TMLHE     |
| cg06661765 | 0.035   | 0.03035 | 0.03476 | 0.032   | 0.03052 | 0.03661 | 0.03365 | 0.03529 | 0.02968 | 0.02745 | NFIX      |
| cg06661994 | 0.18061 | 0.05291 | 0.62401 | 0.79101 | 0.7153  | 0.16394 | 0.69427 | 0.13227 | 0.18357 | 0.03333 | C20orf195 |
| cg06665322 | 0.76751 | 0.29041 | 0.81653 | 0.83273 | 0.715   | 0.16712 | 0.78067 | 0.46539 | 0.76449 | 0.21929 | GPA33     |
| cg06665799 | 0.05576 | 0.05241 | 0.04975 | 0.04993 | 0.04046 | 0.04954 | 0.05153 | 0.04807 | 0.04567 | 0.04815 | TMED9     |
| cg06665941 | 0.02627 | 0.02512 | 0.03085 | 0.02563 | 0.03086 | 0.01845 | 0.01907 | 0.02049 | 0.02145 | 0.01955 | IFNAR2    |
| cg06665984 | 0.0498  | 0.04968 | 0.04847 | 0.04168 | 0.05451 | 0.05707 | 0.04729 | 0.04484 | 0.03801 | 0.04413 | TRIP11    |
| cg06666486 | 0.08841 | 0.09471 | 0.10235 | 0.09352 | 0.19285 | 0.10029 | 0.08737 | 0.10665 | 0.06779 | 0.07632 | EIF2AK1   |
| cg06667091 | 0.63886 | 0.676   | 0.5883  | 0.65224 | 0.57505 | 0.64833 | 0.70573 | 0.73452 | 0.71259 | 0.69042 | CCNC      |
| cg06667406 | 0.84663 | 0.82008 | 0.77559 | 0.81093 | 0.73085 | 0.74122 | 0.82491 | 0.76879 | 0.84211 | 0.83029 | AASS      |
| cg06668073 | 0.16148 | 0.08157 | 0.08272 | 0.14111 | 0.49116 | 0.32237 | 0.05816 | 0.07875 | 0.05221 | 0.04393 | C20orf42  |
| cg06668300 | 0.0425  | 0.22991 | 0.24683 | 0.29851 | 0.11827 | 0.05509 | 0.22802 | 0.25042 | 0.03069 | 0.02898 | MAL       |
| cg06672652 | 0.03908 | 0.0408  | 0.03339 | 0.03743 | 0.03334 | 0.0411  | 0.03463 | 0.03382 | 0.03265 | 0.03741 | SNRPE     |
| cg06673956 | 0.4926  | 0.42688 | 0.71492 | 0.73051 | 0.6413  | 0.57766 | 0.45624 | 0.37671 | 0.64747 | 0.50208 | GPR116    |
| cg06675341 | 0.05411 | 0.04441 | 0.05187 | 0.05162 | 0.04601 | 0.04889 | 0.04288 | 0.03941 | 0.05248 | 0.03291 | PRMT3     |
| cg06675478 | 0.04734 | 0.05275 | 0.63721 | 0.65295 | 0.22804 | 0.13596 | 0.35222 | 0.06858 | 0.33287 | 0.12724 | SOX1      |
| cg06675496 | 0.08122 | 0.10126 | 0.09751 | 0.09189 | 0.15402 | 0.09401 | 0.06952 | 0.05823 | 0.09767 | 0.06936 | ITSN2     |
| cg06677140 | 0.03205 | 0.03455 | 0.03169 | 0.03246 | 0.03453 | 0.03405 | 0.02822 | 0.0322  | 0.02471 | 0.02581 | MSX1      |
| cg06677660 | 0.03936 | 0.03886 | 0.03574 | 0.03634 | 0.02906 | 0.03714 | 0.02768 | 0.0316  | 0.02855 | 0.02516 | DBP       |
| cg06679221 | 0.04832 | 0.06346 | 0.05776 | 0.04543 | 0.10672 | 0.06242 | 0.03685 | 0.0353  | 0.04053 | 0.03474 | THUMPD3   |
| cg06682185 | 0.76969 | 0.4645  | 0.82981 | 0.7802  | 0.86965 | 0.81529 | 0.5046  | 0.28029 | 0.12697 | 0.09467 | SERPINB5  |
| cg06682978 | 0.02039 | 0.01949 | 0.02361 | 0.02348 | 0.02155 | 0.0195  | 0.01636 | 0.01564 | 0.01524 | 0.01466 | CAP2      |
| cg06684910 | 0.02816 | 0.02884 | 0.02837 | 0.02452 | 0.02197 | 0.02382 | 0.02636 | 0.02939 | 0.02578 | 0.02589 | POLR3E    |
| cg06687562 | 0.1059  | 0.09616 | 0.13826 | 0.12831 | 0.15995 | 0.10527 | 0.07957 | 0.06993 | 0.09813 | 0.10314 | ACTL8     |
| cg06688396 | 0.09222 | 0.10641 | 0.09485 | 0.08113 | 0.13216 | 0.04448 | 0.06611 | 0.04911 | 0.06978 | 0.04709 | TMEM55A   |
| cg06688848 | 0.03714 | 0.03737 | 0.03935 | 0.03502 | 0.02853 | 0.03251 | 0.03496 | 0.03621 | 0.03157 | 0.02848 | RSPRY1    |

|            |         |         |         |         |         |         |         |         |         |                  |
|------------|---------|---------|---------|---------|---------|---------|---------|---------|---------|------------------|
| cg06689536 | 0.0306  | 0.03098 | 0.02982 | 0.03343 | 0.02051 | 0.02766 | 0.02983 | 0.03116 | 0.02728 | 0.02719 CCNF     |
| cg06690548 | 0.05425 | 0.04854 | 0.04762 | 0.05487 | 0.07342 | 0.05761 | 0.03758 | 0.27878 | 0.09715 | 0.06266 SLC7A11  |
| cg06690633 | 0.05039 | 0.05203 | 0.05605 | 0.0585  | 0.1116  | 0.04586 | 0.06774 | 0.04945 | 0.06743 | 0.0416 RAB15     |
| cg06691299 | 0.05178 | 0.05264 | 0.03963 | 0.04172 | 0.04024 | 0.04778 | 0.02747 | 0.0281  | 0.03853 | 0.03632 PCTK1    |
| cg06692050 | 0.93474 | 0.91927 | 0.91547 | 0.92454 | 0.94591 | 0.9239  | 0.90379 | 0.60339 | 0.91368 | 0.90425 SFRP5    |
| cg06692957 | 0.0493  | 0.04448 | 0.03889 | 0.03702 | 0.06743 | 0.05142 | 0.04774 | 0.03248 | 0.05179 | 0.02981 GNAQ     |
| cg06695761 | 0.62964 | 0.53166 | 0.63103 | 0.62448 | 0.94514 | 0.92287 | 0.68943 | 0.69769 | 0.63617 | 0.6597 PEG10     |
| cg06697251 | 0.65552 | 0.77332 | 0.81495 | 0.83943 | 0.74387 | 0.77535 | 0.08348 | 0.30725 |         | 0.7699 TUBB4     |
| cg06698742 | 0.04273 | 0.03726 | 0.04941 | 0.04207 | 0.06942 | 0.05153 | 0.04192 | 0.03884 | 0.03562 | 0.03331 TMEM126A |
| cg06699365 | 0.02967 | 0.03361 | 0.03531 | 0.02764 | 0.02712 | 0.03583 | 0.03109 | 0.02991 | 0.02728 | 0.02225 OSBP     |
| cg06700265 | 0.02179 | 0.02532 | 0.02329 | 0.0221  | 0.01892 | 0.02084 | 0.02105 | 0.02067 | 0.01919 | 0.01765 DUSP16   |
| cg06700462 | 0.02957 | 0.03131 | 0.03092 | 0.02802 | 0.01999 | 0.02636 | 0.3668  | 0.4146  | 0.03343 | 0.01771 PHKA2    |
| cg06701500 | 0.40161 | 0.13767 | 0.1319  | 0.15893 | 0.18992 | 0.07251 | 0.07238 | 0.05688 | 0.33401 | 0.06844 YWHAQ    |
| cg06707338 | 0.02042 | 0.01997 | 0.02274 | 0.02066 | 0.02082 | 0.02344 | 0.01866 | 0.01921 | 0.01988 | 0.01788 EEF1B2   |
| cg06707886 | 0.02639 | 0.02694 | 0.03186 | 0.02734 | 0.01959 | 0.02569 | 0.02448 | 0.02507 | 0.02376 | 0.01867 C7orf20  |
| cg06708560 | 0.1661  | 0.08311 | 0.15927 | 0.24214 | 0.29302 | 0.17467 | 0.07781 | 0.06809 | 0.05903 | 0.07061 DNAJC7   |
| cg06710522 | 0.02965 | 0.03315 | 0.03313 | 0.03034 | 0.02291 | 0.02792 | 0.02655 | 0.02933 | 0.02512 | 0.02252 MRPL10   |
| cg06710648 | 0.59329 | 0.44753 | 0.9019  | 0.89731 | 0.91438 | 0.62367 | 0.43567 | 0.46738 | 0.64066 | 0.60169 DAB1     |
| cg06711560 | 0.887   | 0.82585 | 0.90587 | 0.91016 | 0.90728 | 0.83804 | 0.88651 | 0.85746 | 0.89784 | 0.84228 MAMDC4   |
| cg06712026 | 0.08531 | 0.063   | 0.07993 | 0.07496 | 0.10155 | 0.12052 | 0.08285 | 0.06497 | 0.07336 | 0.06161 CSTF2T   |
| cg06713098 | 0.02946 | 0.02948 | 0.41126 | 0.50729 | 0.03899 | 0.02474 | 0.09037 | 0.03017 | 0.80239 | 0.92135 IGFBP3   |
| cg06714705 | 0.36982 | 0.13512 | 0.69486 | 0.87757 | 0.88533 | 0.06063 | 0.64896 | 0.22888 | 0.86124 | 0.50616 OLFML1   |
| cg06716436 | 0.05267 | 0.03072 | 0.0384  | 0.03276 | 0.02372 | 0.02521 | 0.03278 | 0.03252 | 0.02773 | 0.02269 EDG5     |
| cg06717104 | 0.02471 | 0.0267  | 0.02136 | 0.02417 | 0.01958 | 0.02336 | 0.02163 | 0.02322 | 0.02334 | 0.02133 TIMM23   |
| cg06717231 | 0.03276 | 0.03142 | 0.03178 | 0.03419 | 0.02868 | 0.0249  | 0.02921 | 0.02757 | 0.02262 | 0.02045 ZNF559   |
| cg06718696 | 0.0396  | 0.04314 | 0.04862 | 0.05027 | 0.041   | 0.04903 | 0.03445 | 0.03476 | 0.03476 | 0.03439 DDX48    |
| cg06719391 | 0.06242 | 0.05203 | 0.04684 | 0.0429  | 0.03337 | 0.12123 | 0.03873 | 0.04207 | 0.05156 | 0.04433 KCNQ1    |
| cg06720424 | 0.02117 | 0.02142 | 0.02347 | 0.02248 | 0.0193  | 0.02043 | 0.01847 | 0.01748 | 0.0173  | 0.01717 RAP80    |
| cg06720660 | 0.69479 | 0.41698 | 0.15863 | 0.13753 | 0.35034 | 0.42051 | 0.08942 | 0.08473 | 0.53263 | 0.5261 RNASE6    |
| cg06720956 | 0.04104 | 0.04304 | 0.10017 | 0.06167 | 0.3233  | 0.34901 | 0.06313 | 0.05601 | 0.04208 | 0.05548 ONECUT1  |
| cg06722216 | 0.02361 | 0.02756 | 0.03953 | 0.03095 | 0.06825 | 0.03258 | 0.02281 | 0.02482 | 0.03657 | 0.02665 NOL4     |
| cg06722633 | 0.03914 | 0.04187 | 0.76723 | 0.71461 | 0.37739 | 0.058   | 0.20002 | 0.10733 | 0.07888 | 0.04447 GRIK3    |
| cg06722792 | 0.04562 | 0.0506  | 0.09902 | 0.05759 | 0.39702 | 0.43104 | 0.07248 | 0.08147 | 0.04455 | 0.04497 PDE9A    |
| cg06723357 | 0.6994  | 0.69729 | 0.72336 | 0.74544 | 0.57604 | 0.68603 | 0.692   | 0.75518 | 0.68396 | 0.58726 CUEDC1   |
| cg06725035 | 0.07253 | 0.08454 | 0.09773 | 0.109   | 0.19006 | 0.10029 | 0.07284 | 0.07929 | 0.07209 | 0.07324 PRMT2    |
| cg06725760 | 0.04107 | 0.04241 | 0.04054 | 0.0425  | 0.03232 | 0.04087 | 0.03135 | 0.03243 | 0.03659 | 0.03569 WDR37    |
| cg06726207 | 0.05593 | 0.05229 | 0.05508 | 0.05097 | 0.04707 | 0.05288 | 0.0492  | 0.0511  | 0.08354 | 0.04165 SIX4     |
| cg06728335 | 0.03434 | 0.03171 | 0.03203 | 0.03077 | 0.02325 | 0.02727 | 0.02795 | 0.02738 | 0.02604 | 0.02612 RNPS1    |
| cg06730286 | 0.78855 | 0.79845 | 0.78852 | 0.7981  | 0.72453 | 0.83047 | 0.75834 | 0.78135 | 0.82059 | 0.75986 IFT140   |
| cg06730468 | 0.10826 | 0.10883 | 0.1154  | 0.09619 | 0.06441 | 0.09097 | 0.09101 | 0.09807 | 0.10054 | 0.09073 FLJ10922 |
| cg06731484 | 0.05827 | 0.04456 | 0.05406 | 0.04733 | 0.06574 | 0.06032 | 0.05833 | 0.04918 | 0.06082 | 0.05785 IVD      |

|            |         |         |         |         |         |         |         |         |         |                   |
|------------|---------|---------|---------|---------|---------|---------|---------|---------|---------|-------------------|
| cg06731599 | 0.07487 | 0.04885 | 0.14175 | 0.10754 | 0.05184 | 0.04159 | 0.60461 | 0.57062 | 0.05358 | 0.03828 ATP6AP2   |
| cg06734812 | 0.4102  | 0.1897  | 0.25396 | 0.24063 | 0.49596 | 0.43646 | 0.34908 | 0.33833 | 0.16336 | 0.15319 BRUNOL5   |
| cg06734828 | 0.03034 | 0.02997 | 0.0317  | 0.02918 | 0.02619 | 0.02641 | 0.02629 | 0.02809 | 0.14914 | 0.02567 KIAA0251  |
| cg06734962 | 0.0377  | 0.03466 | 0.04327 | 0.03558 | 0.02852 | 0.03469 | 0.03334 | 0.03986 | 0.03296 | 0.02991 CEBPD     |
| cg06736444 | 0.12294 | 0.04601 | 0.54208 | 0.59789 | 0.49932 | 0.03311 | 0.89302 | 0.47553 | 0.11019 | 0.16869 SRRM2     |
| cg06738602 | 0.10524 | 0.08874 | 0.47262 | 0.49906 | 0.12151 | 0.76009 | 0.67075 | 0.29121 | 0.2584  | 0.08625 PTGER2    |
| cg06740897 | 0.85756 | 0.76987 | 0.21723 | 0.25969 | 0.16348 | 0.08206 | 0.09724 | 0.11385 | 0.06844 | 0.07272 NFE2L1    |
| cg06742978 | 0.03823 | 0.04246 | 0.0544  | 0.05653 | 0.24784 | 0.03312 | 0.03107 | 0.03151 | 0.16093 | 0.0613 ACCN2      |
| cg06743811 | 0.43619 | 0.39355 | 0.27086 | 0.4066  | 0.87211 | 0.81813 | 0.23607 | 0.21783 | 0.48099 | 0.36739 NDN       |
| cg06744574 | 0.03022 | 0.02962 | 0.69157 | 0.74339 | 0.75829 | 0.91092 | 0.04525 | 0.02775 | 0.07026 | 0.03753 C1orf165  |
| cg06745740 | 0.16903 | 0.1715  | 0.75696 | 0.76408 | 0.23967 | 0.14903 | 0.61028 | 0.30438 | 0.23921 | 0.22642 HGF       |
| cg06746101 | 0.02705 | 0.0289  | 0.03068 | 0.02665 | 0.02202 | 0.02744 | 0.02792 | 0.02794 | 0.0224  | 0.0217 TMED3      |
| cg06746171 | 0.07333 | 0.06155 | 0.661   | 0.78632 | 0.46043 | 0.0686  | 0.49473 | 0.06461 | 0.81231 | 0.24527 ATOX1     |
| cg06747888 | 0.47507 | 0.24542 | 0.63448 | 0.77155 | 0.78209 | 0.77    | 0.80719 | 0.78308 | 0.8623  | 0.75987 TBR1      |
| cg06748315 | 0.79025 | 0.83207 | 0.79398 | 0.80521 | 0.70673 | 0.79739 | 0.46014 | 0.45932 | 0.63853 | 0.52965 KRTAP19-3 |
| cg06750167 | 0.37147 | 0.18724 | 0.46965 | 0.6904  | 0.26533 | 0.21923 | 0.13947 | 0.07648 | 0.70688 | 0.64227 TESC      |
| cg06751597 | 0.18931 | 0.17114 | 0.18686 | 0.18616 | 0.27739 | 0.20874 | 0.22759 | 0.20725 | 0.2338  | 0.26702 SNAP23    |
| cg06752594 | 0.01937 | 0.02274 | 0.02294 | 0.02687 | 0.01698 | 0.01906 | 0.01822 | 0.02039 | 0.02332 | 0.0166 PSRC1      |
| cg06754047 | 0.05237 | 0.05789 | 0.07567 | 0.10446 | 0.05489 | 0.05738 | 0.05148 | 0.04363 | 0.05085 | 0.05424 SMYD5     |
| cg06755819 | 0.4003  | 0.37024 | 0.32807 | 0.35467 | 0.3393  | 0.32258 | 0.36993 | 0.39237 | 0.39078 | 0.40325 RCN1      |
| cg06757810 | 0.76837 | 0.78594 | 0.38677 | 0.53173 | 0.76386 | 0.77312 | 0.71812 | 0.7884  | 0.50875 | 0.49138 CNGB3     |
| cg06758848 | 0.08872 | 0.04651 | 0.02296 | 0.02288 | 0.0747  | 0.03194 | 0.50278 | 0.39355 | 0.44594 | 0.04348 FLNA      |
| cg06759215 | 0.02685 | 0.02823 | 0.02726 | 0.02786 | 0.01809 | 0.02399 | 0.02451 | 0.02173 | 0.02731 | 0.02578 DBF4B     |
| cg06759890 | 0.82952 | 0.84837 | 0.86218 | 0.8591  | 0.88973 | 0.86486 | 0.84103 | 0.84038 | 0.69755 | 0.64451 LHFPL2    |
| cg06760035 | 0.03108 | 0.02748 | 0.02516 | 0.0276  | 0.17886 | 0.07533 | 0.36726 | 0.06946 | 0.01952 | 0.02009 HOXB4     |
| cg06762858 | 0.9104  | 0.86728 | 0.91601 | 0.92018 | 0.95516 | 0.90104 | 0.89714 | 0.80483 | 0.92118 | 0.85241 PILRA     |
| cg06763078 | 0.03563 | 0.03595 | 0.03624 | 0.03387 | 0.03643 | 0.03244 | 0.0333  | 0.03448 | 0.03324 | 0.02938 KCNC1     |
| cg06765434 | 0.04751 | 0.04873 | 0.05699 | 0.0488  | 0.04873 | 0.05589 | 0.0534  | 0.05207 | 0.0478  | 0.04932 TXNL1     |
| cg06765514 | 0.04561 | 0.06373 | 0.84882 | 0.85397 | 0.76637 | 0.75296 | 0.37084 | 0.29956 | 0.14038 | 0.21168 PIP5KL1   |
| cg06765947 | 0.83428 | 0.65242 | 0.81469 | 0.74094 | 0.91499 | 0.89376 | 0.82161 | 0.76515 | 0.51359 | 0.4806 UROC1      |
| cg06766367 | 0.21872 | 0.10618 | 0.57474 | 0.64206 | 0.07063 | 0.05255 | 0.29132 | 0.08924 | 0.0548  | 0.04653 CBFB      |
| cg06768707 | 0.70942 | 0.78276 | 0.65206 | 0.75289 | 0.43213 | 0.48935 | 0.57688 | 0.46789 | 0.0735  | 0.07166 PCDHB8    |
| cg06771126 | 0.33976 | 0.23077 | 0.76954 | 0.84001 | 0.77057 | 0.78336 | 0.77443 | 0.49761 | 0.41802 | 0.39383 HOP       |
| cg06772202 | 0.8507  | 0.31083 | 0.54072 | 0.6165  | 0.72575 | 0.77177 | 0.7716  | 0.66839 | 0.8729  | 0.69608 STYXL1    |
| cg06776256 | 0.18789 | 0.09594 | 0.09692 | 0.11037 | 0.43723 | 0.1489  | 0.70273 | 0.35232 | 0.26024 | 0.07727 GPRC5A    |
| cg06777274 | 0.05668 | 0.0484  | 0.0626  | 0.05353 | 0.05927 | 0.0559  | 0.05232 | 0.04447 | 0.05701 | 0.08867 ME2       |
| cg06777581 | 0.09199 | 0.10148 | 0.08343 | 0.07822 | 0.11771 | 0.12604 | 0.11291 | 0.10792 | 0.07104 | 0.07337 RNF8      |
| cg06777715 | 0.03924 | 0.03671 | 0.03544 | 0.02981 | 0.02974 | 0.04148 | 0.03571 | 0.02927 | 0.02054 | 0.02467 ATG10     |
| cg06778853 | 0.67907 | 0.59243 | 0.89882 | 0.89829 | 0.55636 | 0.65845 | 0.88699 | 0.65374 | 0.14852 | 0.13867 PHF13     |
| cg06779945 | 0.02435 | 0.02866 | 0.02776 | 0.02536 | 0.0223  | 0.02369 | 0.02352 | 0.02216 | 0.02253 | 0.02251 TNFAIP3   |
| cg06780358 | 0.03721 | 0.03847 | 0.03551 | 0.03445 | 0.0367  | 0.03703 | 0.03305 | 0.04249 | 0.0291  | 0.03356 PTPRJ     |

|            |         |         |         |         |         |         |         |         |         |                  |
|------------|---------|---------|---------|---------|---------|---------|---------|---------|---------|------------------|
| cg06781209 | 0.0529  | 0.03399 | 0.14645 | 0.17686 | 0.61249 | 0.53414 | 0.24615 | 0.03292 | 0.60966 | 0.59992 FADS2    |
| cg06782692 | 0.06019 | 0.06599 | 0.06201 | 0.05423 | 0.05362 | 0.06204 | 0.05469 | 0.05707 | 0.05443 | 0.04847 STK32C   |
| cg06782849 | 0.15834 | 0.05326 | 0.05264 | 0.05016 | 0.0368  | 0.04284 | 0.04614 | 0.04099 | 0.047   | 0.03993 NPHP3    |
| cg06783668 | 0.89205 | 0.77646 | 0.10485 | 0.09161 | 0.11809 | 0.09918 | 0.07819 | 0.06314 | 0.0679  | 0.06688 FLJ12056 |
| cg06784339 | 0.06617 | 0.07375 | 0.07438 | 0.06882 | 0.0393  | 0.06985 | 0.06731 | 0.07799 | 0.06082 | 0.05545 MKRN1    |
| cg06784466 | 0.16951 | 0.15576 | 0.19281 | 0.15156 | 0.19324 | 0.15006 | 0.29915 | 0.11606 | 0.42604 | 0.15394 FPRL2    |
| cg06785429 | 0.83651 | 0.534   | 0.81851 | 0.77499 | 0.84061 | 0.63572 | 0.54417 | 0.57193 | 0.59661 | 0.48412 DCUN1D1  |
| cg06785822 | 0.85717 | 0.8499  | 0.77309 | 0.78921 | 0.79495 | 0.7814  | 0.77817 | 0.79652 | 0.83605 | 0.85704 FLJ25102 |
| cg06786424 | 0.04263 | 0.04355 | 0.0387  | 0.03491 | 0.06395 | 0.06192 | 0.0506  | 0.05036 | 0.04091 | 0.03985 PRPF4B   |
| cg06790275 | 0.04304 | 0.04667 | 0.04528 | 0.04724 | 0.02878 | 0.03553 | 0.03814 | 0.03852 | 0.03547 | 0.0369 PIAS1     |
| cg06790324 | 0.02901 | 0.02954 | 0.03008 | 0.03626 | 0.02057 | 0.02632 | 0.02264 | 0.02633 | 0.02771 | 0.02287 GRB10    |
| cg06790862 | 0.82509 | 0.68109 | 0.65749 | 0.67453 | 0.73444 | 0.72856 | 0.77401 | 0.75537 | 0.48476 | 0.34892 MPPE2    |
| cg06791102 | 0.42352 | 0.03173 | 0.87947 | 0.97554 | 0.97768 | 0.97742 | 0.93446 | 0.96754 | 0.98093 | 0.97904 ARHGAP4  |
| cg06791867 | 0.90801 | 0.30584 | 0.93033 | 0.94633 | 0.93783 | 0.85532 | 0.90989 | 0.88811 | 0.93264 | 0.5542 TSPAN18   |
| cg06792598 | 0.05426 | 0.05552 | 0.05988 | 0.06538 | 0.04193 | 0.05547 | 0.05089 | 0.05949 | 0.05472 | 0.05693 CD55     |
| cg06792911 | 0.02774 | 0.02904 | 0.04968 | 0.05758 | 0.04465 | 0.04245 | 0.05121 | 0.04373 | 0.03327 | 0.02677 SLC2A1   |
| cg06793062 | 0.06208 | 0.0467  | 0.1167  | 0.20897 | 0.43646 | 0.44216 | 0.04876 | 0.18139 | 0.05713 | 0.04563 CNTNAP4  |
| cg06796611 | 0.6808  | 0.10665 | 0.7256  | 0.79445 | 0.75304 | 0.79486 | 0.78266 | 0.72335 | 0.77608 | 0.51343 IL24     |
| cg06797533 | 0.86704 | 0.95965 | 0.04801 | 0.04352 | 0.09344 | 0.03419 | 0.63245 | 0.95543 | 0.0378  | 0.03277 ADFP     |
| cg06798189 | 0.664   | 0.44163 | 0.61452 | 0.67908 | 0.49534 | 0.55295 | 0.69973 | 0.7193  | 0.67263 | 0.60614 SLC4A7   |
| cg06799664 | 0.79086 | 0.72495 | 0.75679 | 0.86529 | 0.84884 | 0.91434 | 0.41693 | 0.40537 | 0.76845 | 0.89469 DNAHL1   |
| cg06800962 | 0.72363 | 0.4541  | 0.32376 | 0.27287 | 0.50748 | 0.37909 | 0.77888 | 0.12317 | 0.78197 | 0.48959 TM4SF1   |
| cg06803184 | 0.03964 | 0.04056 | 0.04851 | 0.04317 | 0.03432 | 0.03979 | 0.05711 | 0.04807 | 0.03301 | 0.03131 FH       |
| cg06803253 | 0.89152 | 0.54874 | 0.90324 | 0.91507 | 0.9288  | 0.88432 | 0.82772 | 0.83448 | 0.8876  | 0.79241 GNAT1    |
| cg06804431 | 0.04064 | 0.04151 | 0.04085 | 0.03354 | 0.04796 | 0.04249 | 0.02719 | 0.03003 | 0.03887 | 0.04644 PEX11B   |
| cg06804711 | 0.03388 | 0.03919 | 0.03475 | 0.03275 | 0.02467 | 0.03201 | 0.02921 | 0.02967 | 0.02819 | 0.02946 MALT1    |
| cg06806080 | 0.93403 | 0.93111 | 0.93647 | 0.9331  | 0.95033 | 0.93188 | 0.93219 | 0.93597 | 0.93581 | 0.93656 CD47     |
| cg06806711 | 0.06888 | 0.06452 | 0.14165 | 0.08827 | 0.5808  | 0.33159 | 0.09413 | 0.0786  | 0.06261 | 0.06284 MS4A1    |
| cg06807379 | 0.04869 | 0.05056 | 0.04338 | 0.05856 | 0.07192 | 0.05863 | 0.04344 | 0.03451 | 0.03287 | 0.03126 DAPK3    |
| cg06807579 | 0.03528 | 0.03757 | 0.03907 | 0.03717 | 0.02712 | 0.03745 | 0.03565 | 0.03344 | 0.03102 | 0.03129 RPL29    |
| cg06807989 | 0.60863 | 0.27969 | 0.06243 | 0.05852 | 0.06285 | 0.0553  | 0.05296 | 0.05543 | 0.05459 | 0.05465 C3orf52  |
| cg06808983 | 0.03465 | 0.03857 | 0.03349 | 0.03741 | 0.04179 | 0.04028 | 0.04084 | 0.03273 | 0.03089 | 0.03039 G6PC3    |
| cg06809565 | 0.03856 | 0.03688 | 0.05017 | 0.04864 | 0.04177 | 0.04714 | 0.52474 | 0.45246 | 0.03009 | 0.0275 CXorf12   |
| cg06810461 | 0.89146 | 0.85207 | 0.87281 | 0.89522 | 0.9132  | 0.87994 | 0.80818 | 0.83988 | 0.87572 | 0.64563 AGRP     |
| cg06810647 | 0.06657 | 0.29896 | 0.05364 | 0.0484  | 0.11208 | 0.04578 | 0.51145 | 0.28709 | 0.46669 | 0.61504 CRAMP1L  |
| cg06811800 | 0.61652 | 0.11896 | 0.7038  | 0.87862 | 0.79788 | 0.80812 | 0.09706 | 0.16793 | 0.56044 | 0.50599 ATP4B    |
| cg06812033 | 0.06309 | 0.0616  | 0.07449 | 0.07035 | 0.05406 | 0.04601 | 0.05222 | 0.05525 | 0.08003 | 0.04897 NKD1     |
| cg06812844 | 0.89634 | 0.85205 | 0.52626 | 0.64717 | 0.13004 | 0.08185 | 0.07727 | 0.06791 | 0.38417 | 0.46788 TRPM2    |
| cg06812977 | 0.87366 | 0.90212 | 0.89597 | 0.91406 | 0.07919 | 0.05025 | 0.06218 | 0.04757 | 0.71354 | 0.90067 C10orf59 |
| cg06813842 | 0.31839 | 0.11888 | 0.36354 | 0.40821 | 0.44142 | 0.4322  | 0.26991 | 0.16007 | 0.28811 | 0.17967 STRC     |
| cg06815666 | 0.12401 | 0.12015 | 0.15777 | 0.21506 | 0.17569 | 0.15522 | 0.11716 | 0.09775 | 0.25993 | 0.09665 PRPF31   |

|            |         |         |         |         |         |         |         |         |         |                  |
|------------|---------|---------|---------|---------|---------|---------|---------|---------|---------|------------------|
| cg06815817 | 0.07494 | 0.08041 | 0.17593 | 0.2058  | 0.14341 | 0.13829 | 0.07857 | 0.06437 | 0.07136 | 0.05832 ZNF212   |
| cg06816063 | 0.02944 | 0.03062 | 0.03158 | 0.02724 | 0.02301 | 0.02494 | 0.02546 | 0.02614 | 0.02157 | 0.02536 RAB8A    |
| cg06816106 | 0.28608 | 0.11971 | 0.67293 | 0.78973 | 0.07906 | 0.05386 | 0.9133  | 0.89042 | 0.0555  | 0.03836 SPDY1    |
| cg06816161 | 0.03229 | 0.03356 | 0.0473  | 0.03479 | 0.03473 | 0.04027 | 0.03003 | 0.02907 | 0.02685 | 0.02725 EZH2     |
| cg06817264 | 0.10835 | 0.05962 | 0.92918 | 0.96396 | 0.87894 | 0.84468 | 0.38778 | 0.04784 | 0.12353 | 0.04493 CTSF     |
| cg06817269 | 0.61738 | 0.4854  | 0.83601 | 0.86145 | 0.81558 | 0.8519  | 0.49473 | 0.23248 | 0.64702 | 0.57092 GCNT3    |
| cg06817917 | 0.05494 | 0.05977 | 0.05233 | 0.04846 | 0.04088 | 0.04634 | 0.05067 | 0.05186 | 0.04681 | 0.04334 BMPR1A   |
| cg06818415 | 0.0748  | 0.04452 | 0.07874 | 0.07893 | 0.06653 | 0.05748 | 0.05088 | 0.04552 | 0.04035 | 0.03277 PHF1     |
| cg06818473 | 0.16175 | 0.16592 | 0.41122 | 0.52103 | 0.54931 | 0.5754  | 0.20719 | 0.14232 | 0.34231 | 0.36464 RAB40B   |
| cg06818777 | 0.13657 | 0.08229 | 0.38474 | 0.5187  | 0.89354 | 0.85412 | 0.48326 | 0.14309 | 0.86509 | 0.84367 CHAD     |
| cg06819200 | 0.01413 | 0.01431 | 0.01748 | 0.01382 | 0.23401 | 0.01552 | 0.60306 | 0.68645 | 0.01661 | 0.01012 ECE1     |
| cg06821120 | 0.88809 | 0.69355 | 0.89349 | 0.9212  | 0.38426 | 0.12784 | 0.90101 | 0.50521 | 0.36022 | 0.24594 RASSF1   |
| cg06821274 | 0.04995 | 0.03261 | 0.08977 | 0.07178 | 0.04703 | 0.03419 | 0.03238 | 0.03001 | 0.04295 | 0.03763 SSR2     |
| cg06821993 | 0.14182 | 0.03585 | 0.42595 | 0.66728 | 0.18697 | 0.03526 | 0.04328 | 0.06763 | 0.39332 | 0.47393 CSMD3    |
| cg06822229 | 0.04837 | 0.05451 | 0.06206 | 0.07114 | 0.06929 | 0.05772 | 0.48595 | 0.67271 | 0.05915 | 0.04629 ACSL4    |
| cg06822995 | 0.30225 | 0.40277 | 0.34437 | 0.56066 | 0.65738 | 0.6156  | 0.15285 | 0.10664 | 0.67816 | 0.63437 CAMK4    |
| cg06823263 | 0.05721 | 0.06081 | 0.06744 | 0.0702  | 0.09291 | 0.0644  | 0.067   | 0.05991 | 0.06264 | 0.05783 USF1     |
| cg06824727 | 0.08373 | 0.06084 | 0.33474 | 0.29531 | 0.05875 | 0.05934 | 0.05279 | 0.0465  | 0.05384 | 0.06304 DHRS1    |
| cg06825142 | 0.31277 | 0.04143 | 0.82706 | 0.9395  | 0.96485 | 0.94226 | 0.77141 | 0.92363 | 0.87481 | 0.75239 DRD4     |
| cg06825166 | 0.76932 | 0.55367 | 0.56604 | 0.6691  | 0.84959 | 0.86774 | 0.03685 | 0.04965 | 0.41437 | 0.04424 TMEM10   |
| cg06827038 | 0.43632 | 0.19072 | 0.72694 | 0.81671 | 0.86713 | 0.81417 | 0.60602 | 0.39246 | 0.48522 | 0.33478 WFIKKN2  |
| cg06827976 | 0.81318 | 0.33448 | 0.81827 | 0.84665 | 0.82857 | 0.83284 | 0.77424 | 0.79923 | 0.80957 | 0.66028 FGR      |
| cg06830426 | 0.08714 | 0.07957 | 0.07486 | 0.08242 | 0.06483 | 0.0809  | 0.07899 | 0.07639 | 0.06777 | 0.06641 RPS5     |
| cg06831658 | 0.04778 | 0.0461  | 0.0557  | 0.05111 | 0.04831 | 0.05256 | 0.04643 | 0.04486 | 0.05517 | 0.04859 SOCS2    |
| cg06832039 | 0.77603 | 0.79733 | 0.79103 | 0.83778 | 0.78662 | 0.85939 | 0.69577 | 0.71418 | 0.7776  | 0.73014 FLJ42291 |
| cg06832950 | 0.85338 | 0.34808 | 0.89262 | 0.89577 | 0.85245 | 0.84482 | 0.87599 | 0.85233 | 0.66943 | 0.78765 SPG3A    |
| cg06833562 | 0.04947 | 0.05168 | 0.0577  | 0.05082 | 0.06119 | 0.06194 | 0.03306 | 0.03456 | 0.05078 | 0.0434 C1orf181  |
| cg06834261 | 0.10166 | 0.08398 | 0.13965 | 0.09392 | 0.24066 | 0.09986 | 0.11493 | 0.07557 | 0.09438 | 0.11168 WDR12    |
| cg06834875 | 0.72381 | 0.45442 | 0.85663 | 0.8511  | 0.9427  | 0.93362 | 0.89329 | 0.66625 | 0.46981 | 0.41134 KIAA1822 |
| cg06834983 | 0.93384 | 0.92582 | 0.93257 | 0.93878 | 0.92829 | 0.86082 | 0.75749 | 0.78427 | 0.86004 | 0.87254 SSX7     |
| cg06836338 | 0.0457  | 0.03637 | 0.04775 | 0.04227 | 0.06182 | 0.14821 | 0.03399 | 0.03532 | 0.06506 | 0.07635 C1orf39  |
| cg06836736 | 0.84088 | 0.62662 | 0.03987 | 0.04393 | 0.03062 | 0.03866 | 0.03414 | 0.03561 | 0.63777 | 0.5073 ME1       |
| cg06836772 | 0.0792  | 0.0994  | 0.07044 | 0.06438 | 0.08064 | 0.06445 | 0.22796 | 0.07846 | 0.46363 | 0.40613 PRKAA2   |
| cg06836849 | 0.66316 | 0.23675 | 0.71909 | 0.78373 | 0.16135 | 0.56467 | 0.11639 | 0.47435 | 0.1737  | 0.28779 SLC17A8  |
| cg06837731 | 0.04808 | 0.04539 | 0.05319 | 0.04707 | 0.03771 | 0.04522 | 0.05087 | 0.04523 | 0.04398 | 0.04076 SPFH1    |
| cg06838394 | 0.1134  | 0.08496 | 0.08773 | 0.08469 | 0.06416 | 0.07381 | 0.08318 | 0.07241 | 0.07821 | 0.07231 ARFGEF2  |
| cg06839953 | 0.03086 | 0.02977 | 0.04259 | 0.038   | 0.04595 | 0.03802 | 0.02565 | 0.02557 | 0.02899 | 0.03004 C1orf160 |
| cg06840042 | 0.02358 | 0.02345 | 0.02893 | 0.02307 | 0.02409 | 0.02725 | 0.02175 | 0.02086 | 0.02265 | 0.02064 MKRN2    |
| cg06840226 | 0.02634 | 0.02958 | 0.02614 | 0.02543 | 0.02162 | 0.02278 | 0.02335 | 0.02232 | 0.02252 | 0.02129 GPC1     |
| cg06840239 | 0.03583 | 0.03358 | 0.04128 | 0.03897 | 0.03477 | 0.03515 | 0.03145 | 0.03241 | 0.03241 | 0.02973 TAF6L    |
| cg06840801 | 0.4336  | 0.15434 | 0.62756 | 0.68888 | 0.71442 | 0.64949 | 0.34665 | 0.73903 | 0.59231 | 0.18954 CHRNB3   |

|            |         |         |         |         |         |         |         |         |         |         |          |
|------------|---------|---------|---------|---------|---------|---------|---------|---------|---------|---------|----------|
| cg06848073 | 0.61864 | 0.12464 | 0.45226 | 0.64041 | 0.43588 | 0.23054 | 0.2613  | 0.13497 | 0.25222 | 0.08358 | FBXO44   |
| cg06848288 | 0.03639 | 0.04492 | 0.05413 | 0.05147 | 0.04672 | 0.04742 | 0.04255 | 0.03902 | 0.03924 | 0.03731 | PHIP     |
| cg06849227 | 0.94335 | 0.85555 | 0.941   | 0.94309 | 0.94181 | 0.94642 | 0.75399 | 0.65302 | 0.93806 | 0.95043 | KCNH6    |
| cg06849477 | 0.23537 | 0.10839 | 0.4846  | 0.57231 | 0.75388 | 0.60946 | 0.52752 | 0.12952 | 0.34195 | 0.30662 | PRR5     |
| cg06850526 | 0.55256 | 0.05281 | 0.92062 | 0.93206 | 0.83436 | 0.4674  | 0.94863 | 0.93709 | 0.3427  | 0.06079 | MGC15523 |
| cg06851207 | 0.63408 | 0.24384 | 0.70597 | 0.83254 | 0.7948  | 0.83633 | 0.3292  | 0.11902 | 0.32856 | 0.09902 | FLJ10781 |
| cg06852652 | 0.8407  | 0.51503 | 0.70726 | 0.77845 | 0.5341  | 0.71667 | 0.48619 | 0.16391 | 0.46942 | 0.34576 | CYP2C18  |
| cg06852744 | 0.90733 | 0.862   | 0.90693 | 0.91193 | 0.92331 | 0.91237 | 0.89761 | 0.86494 | 0.9146  | 0.79657 | AEBP1    |
| cg06855803 | 0.82029 | 0.18544 | 0.91496 | 0.92876 | 0.93558 | 0.77976 | 0.76976 | 0.46113 | 0.77488 | 0.11643 | ICAM3    |
| cg06856528 | 0.03235 | 0.03391 | 0.0489  | 0.15879 | 0.35224 | 0.38417 | 0.13403 | 0.14985 | 0.08448 | 0.03107 | TMEFF2   |
| cg06859828 | 0.93465 | 0.82045 | 0.89067 | 0.89688 | 0.87632 | 0.90069 | 0.91201 | 0.92679 | 0.86544 | 0.868   | TNFRSF25 |
| cg06862062 | 0.03518 | 0.0374  | 0.03526 | 0.03534 | 0.02893 | 0.02892 | 0.0244  | 0.02666 | 0.02887 | 0.02523 | ACOX3    |
| cg06862644 | 0.39423 | 0.19932 | 0.54586 | 0.70538 | 0.90521 | 0.8866  | 0.21351 | 0.23137 | 0.47567 | 0.57066 | SPATA22  |
| cg06864275 | 0.03239 | 0.03297 | 0.02737 | 0.02881 | 0.03179 | 0.03484 | 0.02919 | 0.0268  | 0.0243  | 0.02285 | KIAA0963 |
| cg06866657 | 0.05486 | 0.04835 | 0.08102 | 0.12474 | 0.07494 | 0.04905 | 0.04995 | 0.04803 | 0.05335 | 0.04437 | LHX6     |
| cg06866862 | 0.12037 | 0.09164 | 0.08687 | 0.08841 | 0.08471 | 0.08733 | 0.06154 | 0.06451 | 0.07398 | 0.08626 | ZNF512   |
| cg06868758 | 0.55642 | 0.40306 | 0.43406 | 0.50265 | 0.62674 | 0.48365 | 0.42819 | 0.35146 | 0.35387 | 0.45031 | NDUFS1   |
| cg06869899 | 0.03505 | 0.0341  | 0.04109 | 0.04234 | 0.0446  | 0.04025 | 0.0294  | 0.03072 | 0.03546 | 0.03152 | RBKS     |
| cg06871974 | 0.79104 | 0.49166 | 0.94987 | 0.95324 | 0.96754 | 0.94985 | 0.80283 | 0.83598 | 0.75722 | 0.62948 | TNS3     |
| cg06872331 | 0.49928 | 0.49092 | 0.0647  | 0.06224 | 0.04225 | 0.05079 | 0.0488  | 0.06487 | 0.57471 | 0.09765 | STEAP3   |
| cg06872381 | 0.66946 | 0.56829 | 0.59632 | 0.71069 | 0.62132 | 0.79116 | 0.3411  | 0.33648 | 0.28296 | 0.20996 | DPPA3    |
| cg06873352 | 0.24516 | 0.18532 | 0.08705 | 0.07209 | 0.14578 | 0.08367 | 0.06801 | 0.06978 | 0.05366 | 0.05423 | LYK5     |
| cg06874144 | 0.8525  | 0.84164 | 0.84863 | 0.85516 | 0.80636 | 0.67083 | 0.85314 | 0.76098 | 0.83627 | 0.51666 | CAB39    |
| cg06878726 | 0.04082 | 0.04641 | 0.04817 | 0.04563 | 0.04304 | 0.05346 | 0.04199 | 0.03934 | 0.03561 | 0.03541 | RBM19    |
| cg06880557 | 0.08607 | 0.03366 | 0.03582 | 0.03014 | 0.02726 | 0.03532 | 0.02731 | 0.02563 | 0.02753 | 0.02758 | LOC93081 |
| cg06882877 | 0.83627 | 0.60007 | 0.86378 | 0.87938 | 0.90154 | 0.68594 | 0.77031 | 0.41974 | 0.86179 | 0.58537 | PAQR6    |
| cg06882926 | 0.20625 | 0.2145  | 0.22848 | 0.16355 | 0.36257 | 0.21189 | 0.25213 | 0.21768 | 0.20405 | 0.27953 | OR1G1    |
| cg06883149 | 0.10191 | 0.05003 | 0.05744 | 0.05327 | 0.05255 | 0.05669 | 0.04244 | 0.04491 | 0.03868 | 0.03997 | C18orf24 |
| cg06885524 | 0.027   | 0.02487 | 0.02505 | 0.02293 | 0.01928 | 0.01922 | 0.02003 | 0.02363 | 0.02112 | 0.01926 | CYBRD1   |
| cg06885782 | 0.12045 | 0.15507 | 0.84141 | 0.91134 | 0.92807 | 0.74699 | 0.87536 | 0.44099 | 0.69382 | 0.32181 | KCNQ4    |
| cg06886022 | 0.05762 | 0.05972 | 0.05705 | 0.06194 | 0.05124 | 0.04351 | 0.05783 | 0.05554 | 0.04547 | 0.04961 | C9orf75  |
| cg06887167 | 0.03304 | 0.02583 | 0.03319 | 0.04884 | 0.02897 | 0.02275 | 0.02148 | 0.0224  | 0.02974 | 0.02071 | CIT      |
| cg06887170 | 0.09993 | 0.085   | 0.07695 | 0.06842 | 0.20086 | 0.13098 | 0.08542 | 0.08799 | 0.07422 | 0.09514 | FAM14A   |
| cg06887414 | 0.0466  | 0.04333 | 0.04254 | 0.04087 | 0.03104 | 0.03777 | 0.04047 | 0.04103 | 0.03806 | 0.03582 | RPN1     |
| cg06887663 | 0.06885 | 0.06623 | 0.05845 | 0.0619  | 0.06097 | 0.06739 | 0.05674 | 0.05989 | 0.06005 | 0.06545 | SNAPC1   |
| cg06890553 | 0.09204 | 0.08969 | 0.47149 | 0.58868 | 0.2538  | 0.11556 | 0.10222 | 0.10523 | 0.0704  | 0.07973 | ZNF223   |
| cg06892726 | 0.28094 | 0.49377 | 0.14549 | 0.13127 | 0.29931 | 0.18392 | 0.10737 | 0.09772 | 0.08842 | 0.10661 | HFE      |
| cg06893980 | 0.02821 | 0.02955 | 0.04157 | 0.03664 | 0.02875 | 0.03474 | 0.02651 | 0.02576 | 0.02554 | 0.02652 | PSMB1    |
| cg06894381 | 0.04331 | 0.04172 | 0.03909 | 0.03655 | 0.03168 | 0.03747 | 0.03775 | 0.03872 | 0.03225 | 0.03292 | SLC35D1  |
| cg06894812 | 0.0465  | 0.04534 | 0.04764 | 0.04408 | 0.05224 | 0.04533 | 0.05455 | 0.03789 | 0.05366 | 0.04538 | MCC      |
| cg06896207 | 0.07401 | 0.08156 | 0.16068 | 0.15458 | 0.90622 | 0.80335 | 0.94337 | 0.82848 | 0.37692 | 0.06736 | MOBK12A  |



|            |         |         |         |         |         |         |         |         |         |                   |
|------------|---------|---------|---------|---------|---------|---------|---------|---------|---------|-------------------|
| cg06898923 | 0.08919 | 0.07102 | 0.10478 | 0.0787  | 0.0837  | 0.06808 | 0.07716 | 0.07012 | 0.0716  | 0.05716 RAB18     |
| cg06899329 | 0.83617 | 0.54566 | 0.83524 | 0.87794 | 0.75182 | 0.45464 | 0.92338 | 0.60561 | 0.93586 | 0.77484 TSSK6     |
| cg06899582 | 0.04383 | 0.03754 | 0.05531 | 0.06029 | 0.04029 | 0.04986 | 0.13966 | 0.37699 | 0.04112 | 0.03744 SUHW3     |
| cg06899802 | 0.02987 | 0.02646 | 0.0241  | 0.02379 | 0.02119 | 0.02334 | 0.02063 | 0.02574 | 0.02175 | 0.02058 CSNK1A1   |
| cg06899808 | 0.82375 | 0.62731 | 0.59048 | 0.71419 | 0.84961 | 0.85636 | 0.29901 | 0.28779 | 0.04356 | 0.04435 MAGEA6    |
| cg06899976 | 0.08926 | 0.05015 | 0.49766 | 0.57723 | 0.3723  | 0.27804 | 0.05472 | 0.10926 | 0.0572  | 0.05323 PCDHB1    |
| cg06900776 | 0.04967 | 0.02501 | 0.02515 | 0.02148 | 0.01609 | 0.02076 | 0.06565 | 0.02697 | 0.02174 | 0.02123 ARMCX3    |
| cg06901392 | 0.02713 | 0.02574 | 0.03146 | 0.02881 | 0.02345 | 0.02698 | 0.0267  | 0.02619 | 0.02703 | 0.0268 HSPH1      |
| cg06904813 | 0.95827 | 0.70279 | 0.87603 | 0.85649 | 0.88372 | 0.7764  | 0.43254 | 0.38705 | 0.49929 | 0.37713 PNMA6A    |
| cg06905514 | 0.03034 | 0.02666 | 0.36486 | 0.1499  | 0.02655 | 0.02977 | 0.03683 | 0.0392  | 0.05841 | 0.04017 CAMK2B    |
| cg06905862 | 0.05819 | 0.05392 | 0.07542 | 0.07099 | 0.06922 | 0.08723 | 0.0711  | 0.06227 | 0.05051 | 0.0548 TPP1       |
| cg06906435 | 0.7871  | 0.40556 | 0.12653 | 0.16532 | 0.57461 | 0.79054 | 0.08014 | 0.07345 | 0.08225 | 0.20091 FLJ25773  |
| cg06907544 | 0.80254 | 0.7053  | 0.80758 | 0.81081 | 0.83216 | 0.72564 | 0.76001 | 0.65432 | 0.75199 | 0.57147 FLJ35785  |
| cg06908474 | 0.02292 | 0.02038 | 0.02533 | 0.02399 | 0.01637 | 0.01981 | 0.01985 | 0.01976 | 0.01685 | 0.01733 CAT       |
| cg06908778 | 0.07205 | 0.03823 | 0.92919 | 0.95257 | 0.40784 | 0.62383 | 0.6672  | 0.73474 | 0.95079 | 0.92632 SPAG6     |
| cg06910048 | 0.03365 | 0.0387  | 0.04206 | 0.03916 | 0.02872 | 0.03499 | 0.03364 | 0.03223 | 0.03308 | 0.03213 FLJ10726  |
| cg06910100 | 0.85872 | 0.82439 | 0.89123 | 0.91367 | 0.81994 | 0.65221 | 0.46052 | 0.46069 | 0.58272 | 0.71127 USHBP1    |
| cg06911084 | 0.05028 | 0.04647 | 0.32061 | 0.41391 | 0.19266 | 0.44621 | 0.04155 | 0.03769 | 0.2937  | 0.48719 DLX5      |
| cg06911113 | 0.54142 | 0.46266 | 0.81306 | 0.89618 | 0.94538 | 0.83664 | 0.10566 | 0.05171 | 0.0552  | 0.02307 UBXD3     |
| cg06912252 | 0.03808 | 0.03769 | 0.04043 | 0.03909 | 0.03487 | 0.04322 | 0.03611 | 0.04068 | 0.75279 | 0.75723 C9orf125  |
| cg06913228 | 0.02435 | 0.02489 | 0.02097 | 0.02436 | 0.02098 | 0.02258 | 0.02186 | 0.02252 | 0.01906 | 0.01841 UBE2J1    |
| cg06914598 | 0.60393 | 0.50226 | 0.77916 | 0.74446 | 0.74683 | 0.77227 | 0.61666 | 0.55196 | 0.69325 | 0.64968 RBAK      |
| cg06915165 | 0.04965 | 0.03508 | 0.04715 | 0.04692 | 0.03583 | 0.03778 | 0.04442 | 0.03933 | 0.03886 | 0.03844 GABARAPL1 |
| cg06917325 | 0.62669 | 0.15249 | 0.31529 | 0.71002 | 0.72573 | 0.85609 | 0.10419 | 0.13718 | 0.0581  | 0.04704 SLC22A8   |
| cg06918467 | 0.0524  | 0.0418  | 0.57728 | 0.84516 | 0.24468 | 0.36161 | 0.10869 | 0.05575 | 0.17763 | 0.04941 OLIG3     |
| cg06919067 | 0.81897 | 0.84179 | 0.82565 | 0.81995 | 0.83112 | 0.83773 | 0.81672 | 0.82424 | 0.85121 | 0.82777 NSMCE1    |
| cg06919203 | 0.34526 | 0.18997 | 0.63999 | 0.71703 | 0.59537 | 0.47172 | 0.13606 | 0.05157 | 0.45522 | 0.45835 GFRA4     |
| cg06919956 | 0.05419 | 0.05667 | 0.07898 | 0.05767 | 0.05179 | 0.05258 | 0.0499  | 0.05134 | 0.05287 | 0.0444 C9orf111   |
| cg06921282 | 0.05195 | 0.04902 | 0.44647 | 0.52558 | 0.82464 | 0.20421 | 0.63843 | 0.11535 | 0.16833 | 0.05965 LRRC56    |
| cg06922130 | 0.05118 | 0.05178 | 0.06203 | 0.06505 | 0.05955 | 0.06114 | 0.0495  | 0.05566 | 0.0515  | 0.05246 KIF2C     |
| cg06926735 | 0.06028 | 0.04637 | 0.12584 | 0.11567 | 0.05741 | 0.03893 | 0.04861 | 0.04398 | 0.07268 | 0.02932 UBE2V1    |
| cg06927864 | 0.24918 | 0.15744 | 0.67598 | 0.69197 | 0.28245 | 0.16189 | 0.1211  | 0.10184 | 0.37933 | 0.3422 IL1RAPL1   |
| cg06930095 | 0.05786 | 0.05459 | 0.05777 | 0.05492 | 0.0367  | 0.04878 | 0.04597 | 0.04651 | 0.04854 | 0.04744 SEC11L1   |
| cg06933072 | 0.83826 | 0.84589 | 0.79385 | 0.82925 | 0.77701 | 0.85474 | 0.80186 | 0.83618 | 0.84256 | 0.55271 SAC       |
| cg06933965 | 0.05672 | 0.08921 | 0.7235  | 0.63741 | 0.572   | 0.51288 | 0.94237 | 0.91295 | 0.25928 | 0.16652 CMKLR1    |
| cg06937608 | 0.05529 | 0.04144 | 0.29429 | 0.30494 | 0.23531 | 0.07223 | 0.1085  | 0.41447 | 0.04082 | 0.03413 AGC1      |
| cg06938406 | 0.1123  | 0.08846 | 0.13011 | 0.12708 | 0.17381 | 0.1171  | 0.09492 | 0.07907 | 0.09577 | 0.11723 COX6A1    |
| cg06938878 | 0.91229 | 0.67043 | 0.738   | 0.77397 | 0.84302 | 0.90391 | 0.82145 | 0.72159 | 0.59707 | 0.15145 CALCB     |
| cg06940107 | 0.79145 | 0.80716 | 0.54576 | 0.75676 | 0.35218 | 0.15455 | 0.12669 | 0.29317 | 0.16811 | 0.11331 C21orf100 |
| cg06940574 | 0.90694 | 0.89775 | 0.8988  | 0.90831 | 0.91392 | 0.90389 | 0.9     | 0.9108  | 0.92664 | 0.91147 MGC40168  |
| cg06940792 | 0.08758 | 0.03751 | 0.92649 | 0.95073 | 0.45435 | 0.02723 | 0.42992 | 0.03531 | 0.27362 | 0.31263 MEGF10    |

|            |         |         |         |         |         |         |         |         |         |         |             |
|------------|---------|---------|---------|---------|---------|---------|---------|---------|---------|---------|-------------|
| cg06941093 | 0.84479 | 0.58355 | 0.13857 | 0.14639 | 0.70184 | 0.16501 | 0.14926 | 0.56402 | 0.85159 | 0.1618  | GLIS1       |
| cg06942110 | 0.79631 | 0.50708 | 0.94446 | 0.91989 | 0.95484 | 0.8519  | 0.88821 | 0.52442 | 0.93469 | 0.89191 | INT1        |
| cg06942445 | 0.02903 | 0.03029 | 0.07879 | 0.12721 | 0.13244 | 0.08251 | 0.03197 | 0.02947 | 0.0299  | 0.03016 | TRO         |
| cg06942536 | 0.69694 | 0.58215 | 0.51113 | 0.52866 | 0.55515 | 0.32174 | 0.25509 | 0.522   | 0.57388 | 0.52232 | ASB9        |
| cg06943865 | 0.83992 | 0.89333 | 0.86868 | 0.90744 | 0.93427 | 0.90809 | 0.8764  | 0.9082  | 0.7191  | 0.7456  | PEG10       |
| cg06944050 | 0.03825 | 0.03496 | 0.04807 | 0.04204 | 0.08013 | 0.03897 | 0.49482 | 0.15296 | 0.03218 | 0.03477 | LONRF3      |
| cg06945625 | 0.52185 | 0.3053  | 0.10573 | 0.09138 | 0.10269 | 0.10801 | 0.09065 | 0.08561 | 0.05785 | 0.05071 | SERPINB6    |
| cg06946880 | 0.85484 | 0.86666 | 0.85299 | 0.86133 | 0.75185 | 0.64844 | 0.87879 | 0.7088  | 0.89285 | 0.61827 | ATP6V1B1    |
| cg06948294 | 0.03782 | 0.03408 | 0.44304 | 0.40397 | 0.06557 | 0.23062 | 0.02658 | 0.0351  | 0.04666 | 0.03068 | STXBP6      |
| cg06948408 | 0.19795 | 0.09876 | 0.35701 | 0.46416 | 0.34534 | 0.40241 | 0.17359 | 0.1508  | 0.67765 | 0.15941 | TMEM125     |
| cg06948937 | 0.88416 | 0.88036 | 0.8789  | 0.88427 | 0.90994 | 0.82399 | 0.86914 | 0.76128 | 0.9028  | 0.6728  | PCTK3       |
| cg06949789 | 0.02757 | 0.02313 | 0.02771 | 0.02406 | 0.02583 | 0.02491 | 0.02059 | 0.0201  | 0.02245 | 0.02047 | RPL15       |
| cg06950730 | 0.81488 | 0.71921 | 0.21    | 0.12438 | 0.884   | 0.83054 | 0.44624 | 0.64886 | 0.84195 | 0.80198 | TAGLN       |
| cg06952117 | 0.02932 | 0.03112 | 0.03263 | 0.02989 | 0.02921 | 0.03272 | 0.02807 | 0.02585 | 0.0248  | 0.02503 | NAB1        |
| cg06952236 | 0.12281 | 0.03808 | 0.0969  | 0.06705 | 0.30198 | 0.1157  | 0.05443 | 0.04353 | 0.0647  | 0.04443 | RASGRP1     |
| cg06952310 | 0.06436 | 0.03952 | 0.19499 | 0.16954 | 0.33077 | 0.18804 | 0.06827 | 0.04602 | 0.04269 | 0.02941 | CSPG3       |
| cg06953304 | 0.14947 | 0.12885 | 0.16619 | 0.13309 | 0.26377 | 0.19493 | 0.12262 | 0.08449 | 0.13572 | 0.15051 | NKTR        |
| cg06953768 | 0.17371 | 0.16659 | 0.19602 | 0.20105 | 0.24153 | 0.13557 | 0.18317 | 0.16892 | 0.17051 | 0.15679 | FLJ37562    |
| cg06953995 | 0.03601 | 0.03826 | 0.0371  | 0.03645 | 0.03794 | 0.03273 | 0.02984 | 0.03447 | 0.0364  | 0.03544 | PALM2-AKAP2 |
| cg06954481 | 0.03457 | 0.03734 | 0.03968 | 0.02847 | 0.03727 | 0.03309 | 0.05763 | 0.03316 | 0.0512  | 0.03941 | GBX2        |
| cg06956273 | 0.49769 | 0.46305 | 0.8296  | 0.86562 | 0.88198 | 0.79757 | 0.81025 | 0.83204 | 0.87159 | 0.86034 | GNAT2       |
| cg06956646 | 0.1279  | 0.05206 | 0.0344  | 0.02876 | 0.0727  | 0.04308 | 0.0331  | 0.02925 | 0.05247 | 0.03842 | SOS2        |
| cg06957329 | 0.03686 | 0.0372  | 0.03539 | 0.03168 | 0.03469 | 0.0398  | 0.02896 | 0.03387 | 0.02995 | 0.03321 | MRPS23      |
| cg06958034 | 0.03475 | 0.03636 | 0.03186 | 0.03656 | 0.03147 | 0.03318 | 0.0293  | 0.02859 | 0.02867 | 0.02932 | AOF2        |
| cg06958211 | 0.87631 | 0.6566  | 0.87766 | 0.87472 | 0.77974 | 0.83623 | 0.77232 | 0.82379 | 0.84273 | 0.78182 | PAK6        |
| cg06958537 | 0.1942  | 0.09235 | 0.08016 | 0.1063  | 0.7763  | 0.4882  | 0.40883 | 0.3218  | 0.53352 | 0.26535 | ETS2        |
| cg06958829 | 0.10824 | 0.04924 | 0.59463 | 0.78485 | 0.93952 | 0.89812 | 0.50246 | 0.20443 | 0.95822 | 0.94121 | CHAD        |
| cg06959635 | 0.11403 | 0.63735 | 0.21874 | 0.34419 | 0.54799 | 0.12992 | 0.12399 | 0.11086 | 0.07287 | 0.06798 | MCF2        |
| cg06960698 | 0.16518 | 0.167   | 0.46977 | 0.5619  | 0.27526 | 0.20556 | 0.18122 | 0.14215 | 0.13058 | 0.13332 | FGF14       |
| cg06963844 | 0.04944 | 0.03985 | 0.04894 | 0.04724 | 0.5161  | 0.45327 | 0.04291 | 0.03854 | 0.07885 | 0.0406  | FBXO6       |
| cg06971096 | 0.08341 | 0.08298 | 0.08722 | 0.07115 | 0.16785 | 0.11639 | 0.06612 | 0.05259 | 0.08273 | 0.08016 | PTPRN       |
| cg06973652 | 0.67327 | 0.21122 | 0.83951 | 0.8579  | 0.80304 | 0.86456 | 0.85302 | 0.87182 | 0.79665 | 0.88371 | BRCA1       |
| cg06973760 | 0.03249 | 0.03622 | 0.03752 | 0.0434  | 0.0328  | 0.03344 | 0.19802 | 0.02999 | 0.03111 | 0.03229 | NFATC1      |
| cg06974755 | 0.04234 | 0.04692 | 0.89961 | 0.92709 | 0.83654 | 0.22955 | 0.59316 | 0.04101 | 0.6684  | 0.17955 | RALGDS      |
| cg06975499 | 0.06449 | 0.05919 | 0.06646 | 0.06635 | 0.06334 | 0.06288 | 0.0695  | 0.06161 | 0.05331 | 0.05725 | EZH1        |
| cg06975739 | 0.13935 | 0.13817 | 0.16734 | 0.16236 | 0.12926 | 0.10111 | 0.20767 | 0.1804  | 0.0868  | 0.11888 | TAPBP       |
| cg06976977 | 0.13846 | 0.07576 | 0.08275 | 0.06629 | 0.09452 | 0.07465 | 0.05723 | 0.05947 | 0.05818 | 0.05962 | FLJ38991    |
| cg06979034 | 0.26021 | 0.03616 | 0.13761 | 0.08194 | 0.13746 | 0.03927 | 0.21446 | 0.18228 | 0.18606 | 0.17397 | ARHGEF5     |
| cg06980053 | 0.88847 | 0.86038 | 0.84862 | 0.88663 | 0.73161 | 0.11537 | 0.87733 | 0.70099 | 0.83904 | 0.50283 | RASSF1      |
| cg06980380 | 0.7216  | 0.53567 | 0.88542 | 0.86697 | 0.20371 | 0.03822 | 0.13185 | 0.08471 | 0.08067 | 0.03626 | DTNB        |
| cg06980460 | 0.60439 | 0.11279 | 0.66288 | 0.70432 | 0.56352 | 0.54997 | 0.78655 | 0.79138 | 0.79582 | 0.81183 | FOLH1       |

|            |         |         |         |         |         |         |         |         |         |                   |
|------------|---------|---------|---------|---------|---------|---------|---------|---------|---------|-------------------|
| cg06981182 | 0.89524 | 0.90775 | 0.90005 | 0.91203 | 0.08006 | 0.04257 | 0.05231 | 0.04503 | 0.90375 | 0.88346 C10orf59  |
| cg06981910 | 0.82301 | 0.59032 | 0.74528 | 0.79726 | 0.69825 | 0.52535 | 0.79019 | 0.73426 | 0.84974 | 0.72616 LOC136263 |
| cg06983551 | 0.13324 | 0.13014 | 0.13296 | 0.16485 | 0.05565 | 0.09239 | 0.10955 | 0.13361 | 0.18314 | 0.13593 BUB1      |
| cg06985415 | 0.81862 | 0.50578 | 0.66088 | 0.77411 | 0.96162 | 0.9421  | 0.10066 | 0.03106 | 0.04463 | 0.03485 C10orf39  |
| cg06987504 | 0.08957 | 0.08711 | 0.14901 | 0.13969 | 0.16186 | 0.1029  | 0.05428 | 0.04945 | 0.08525 | 0.12615 EIF3S6    |
| cg06990298 | 0.03627 | 0.04301 | 0.04806 | 0.05077 | 0.02779 | 0.03131 | 0.07094 | 0.04655 | 0.03008 | 0.02861 RASD1     |
| cg06990379 | 0.02622 | 0.02366 | 0.02741 | 0.02465 | 0.02185 | 0.02187 | 0.0198  | 0.01843 | 0.02199 | 0.01973 DPYD      |
| cg06992027 | 0.0447  | 0.04704 | 0.04337 | 0.0436  | 0.03005 | 0.04073 | 0.0365  | 0.03843 | 0.0334  | 0.03367 TAGLN2    |
| cg06993413 | 0.13199 | 0.05168 | 0.09428 | 0.08174 | 0.06184 | 0.02407 | 0.03662 | 0.02509 | 0.09115 | 0.02699 DPP8      |
| cg06994747 | 0.07381 | 0.07636 | 0.1393  | 0.10716 | 0.04667 | 0.07368 | 0.07522 | 0.0787  | 0.0751  | 0.06853 ADAMTS10  |
| cg06994793 | 0.03523 | 0.02981 | 0.03648 | 0.02943 | 0.02603 | 0.03087 | 0.02596 | 0.02482 | 0.0243  | 0.02798 PRO1580   |
| cg06995715 | 0.08883 | 0.04431 | 0.97952 | 0.98509 | 0.99027 | 0.98294 | 0.97691 | 0.93782 | 0.24298 | 0.10502 FOXL1     |
| cg06999776 | 0.07845 | 0.08461 | 0.09625 | 0.09043 | 0.09611 | 0.11128 | 0.07785 | 0.06304 | 0.08629 | 0.07569 SEMA4F    |
| cg07000551 | 0.0315  | 0.02981 | 0.03091 | 0.02927 | 0.02016 | 0.02788 | 0.02482 | 0.02568 | 0.02296 | 0.02469 BMF       |
| cg07000785 | 0.0699  | 0.08366 | 0.07466 | 0.07543 | 0.05359 | 0.06815 | 0.06681 | 0.07492 | 0.06265 | 0.0653 GADD45A    |
| cg07000831 | 0.03183 | 0.0338  | 0.03916 | 0.03418 | 0.03237 | 0.04059 | 0.04826 | 0.04461 | 0.03021 | 0.02785 SETDB2    |
| cg07003563 | 0.07253 | 0.0671  | 0.08614 | 0.08334 | 0.09132 | 0.0861  | 0.06507 | 0.05702 | 0.09395 | 0.07092 CAPZA1    |
| cg07004820 | 0.04301 | 0.04257 | 0.19629 | 0.19675 | 0.05187 | 0.04517 | 0.04158 | 0.04838 | 0.04437 | 0.03846 TGFA      |
| cg07005513 | 0.09932 | 0.09631 | 0.0931  | 0.0936  | 0.49233 | 0.53897 | 0.08611 | 0.09148 | 0.59796 | 0.58831 FADS2     |
| cg07005767 | 0.73811 | 0.695   | 0.87046 | 0.91421 | 0.90247 | 0.75331 | 0.41594 | 0.3429  | 0.11605 | 0.05664 ABRA      |
| cg07006042 | 0.02902 | 0.0308  | 0.02946 | 0.03308 | 0.01796 | 0.02762 | 0.02392 | 0.02759 | 0.02575 | 0.02298 ATP1B3    |
| cg07006526 | 0.02317 | 0.02551 | 0.02408 | 0.02615 | 0.02    | 0.02296 | 0.02274 | 0.02491 | 0.02128 | 0.01882 SMTN      |
| cg07007400 | 0.62182 | 0.338   | 0.86425 | 0.85686 | 0.8701  | 0.86456 | 0.42362 | 0.31458 | 0.85054 | 0.86682 KRT7      |
| cg07008350 | 0.89105 | 0.76757 | 0.9169  | 0.92493 | 0.95152 | 0.92768 | 0.85513 | 0.79987 | 0.84071 | 0.79768 TCEB3C    |
| cg07008386 | 0.05851 | 0.09138 | 0.37629 | 0.28882 | 0.06316 | 0.05697 | 0.08175 | 0.06461 | 0.22483 | 0.12227 PLCB1     |
| cg07009002 | 0.15582 | 0.09828 | 0.11888 | 0.13019 | 0.16288 | 0.14416 | 0.07251 | 0.07991 | 0.1236  | 0.16209 MB        |
| cg07011110 | 0.79648 | 0.39812 | 0.85854 | 0.87911 | 0.86703 | 0.8226  | 0.83471 | 0.84582 | 0.79015 | 0.27306 BTN1A1    |
| cg07011445 | 0.02366 | 0.02304 | 0.02918 | 0.02265 | 0.01962 | 0.02277 | 0.02384 | 0.02143 | 0.01912 | 0.02185 C10orf86  |
| cg07013734 | 0.05686 | 0.05745 | 0.62755 | 0.61005 | 0.14334 | 0.11336 | 0.09465 | 0.13111 | 0.05916 | 0.10944 TRPC6     |
| cg07014174 | 0.27268 | 0.14476 | 0.16753 | 0.16368 | 0.25009 | 0.19963 | 0.08473 | 0.07112 | 0.11167 | 0.07635 KRTAP11-1 |
| cg07015079 | 0.09403 | 0.046   | 0.50409 | 0.52674 | 0.47817 | 0.29528 | 0.16624 | 0.05175 | 0.57267 | 0.47481 ANKRD35   |
| cg07015629 | 0.04357 | 0.03478 | 0.14803 | 0.21521 | 0.03307 | 0.0298  | 0.05998 | 0.0703  | 0.18899 | 0.08591 ERBB4     |
| cg07016325 | 0.02693 | 0.02751 | 0.01892 | 0.02092 | 0.02413 | 0.02948 | 0.02598 | 0.02399 | 0.02144 | 0.02668 PAPOLA    |
| cg07017374 | 0.03802 | 0.05539 | 0.05689 | 0.05965 | 0.52368 | 0.45139 | 0.06073 | 0.05048 | 0.04073 | 0.03763 FLT3      |
| cg07017477 | 0.49667 | 0.11887 | 0.09032 | 0.08754 | 0.03987 | 0.06443 | 0.31587 | 0.26435 | 0.05448 | 0.05122 THEM4     |
| cg07017706 | 0.7483  | 0.52209 | 0.66134 | 0.77802 | 0.8261  | 0.82109 | 0.15235 | 0.35906 | 0.19358 | 0.04522 K6IRS3    |
| cg07018708 | 0.83839 | 0.83185 | 0.79853 | 0.81594 | 0.69598 | 0.76942 | 0.81655 | 0.78451 | 0.83159 | 0.80937 HYMAI     |
| cg07020407 | 0.03116 | 0.02954 | 0.02791 | 0.02645 | 0.02325 | 0.0285  | 0.01941 | 0.02222 | 0.02299 | 0.02156 PDCD6     |
| cg07020962 | 0.04605 | 0.04862 | 0.04924 | 0.04904 | 0.05909 | 0.0816  | 0.03923 | 0.04962 | 0.04045 | 0.06207 MAPRE2    |
| cg07022477 | 0.08339 | 0.06817 | 0.3927  | 0.47708 | 0.31548 | 0.21894 | 0.07533 | 0.07331 | 0.56348 | 0.16665 HIF3A     |
| cg07022885 | 0.03515 | 0.03807 | 0.03573 | 0.03856 | 0.03272 | 0.03711 | 0.03468 | 0.03526 | 0.0296  | 0.03168 FLJ32675  |

|            |         |         |         |         |         |         |         |         |         |         |          |
|------------|---------|---------|---------|---------|---------|---------|---------|---------|---------|---------|----------|
| cg07026910 | 0.80025 | 0.67037 | 0.83552 | 0.8671  | 0.82159 | 0.80455 | 0.78821 | 0.81078 | 0.83043 | 0.58425 | INPP5D   |
| cg07027075 | 0.15949 | 0.12115 | 0.13774 | 0.10357 | 0.30465 | 0.17084 | 0.11468 | 0.09569 | 0.15097 | 0.18848 | RPL9     |
| cg07027513 | 0.07958 | 0.06082 | 0.87881 | 0.88463 | 0.85316 | 0.84691 | 0.75197 | 0.30365 | 0.06182 | 0.07141 | B4GALT6  |
| cg07027685 | 0.11394 | 0.10903 | 0.11352 | 0.12243 | 0.13526 | 0.10448 | 0.11062 | 0.1175  | 0.08561 | 0.07442 | IARS     |
| cg07028533 | 0.04015 | 0.0384  | 0.85599 | 0.91973 | 0.40811 | 0.04204 | 0.17631 | 0.29568 | 0.27802 | 0.3685  | CNTNAP2  |
| cg07028869 | 0.43437 | 0.19462 | 0.40958 | 0.50127 | 0.89524 | 0.75932 | 0.70409 | 0.26225 | 0.12175 | 0.11626 | FLJ13236 |
| cg07029998 | 0.08918 | 0.07036 | 0.11603 | 0.11075 | 0.19614 | 0.09292 | 0.07624 | 0.0537  | 0.085   | 0.08149 | FRAP1    |
| cg07031532 | 0.04835 | 0.04657 | 0.05279 | 0.07717 | 0.03946 | 0.07791 | 0.03798 | 0.04697 | 0.04196 | 0.0404  | OAZ2     |
| cg07031996 | 0.07013 | 0.02838 | 0.07376 | 0.15455 | 0.04772 | 0.03792 | 0.1225  | 0.07113 | 0.03398 | 0.03262 | MTF1     |
| cg07033083 | 0.24707 | 0.06647 | 0.12978 | 0.15189 | 0.09855 | 0.11209 | 0.25448 | 0.19077 | 0.33141 | 0.15059 | NSUN5C   |
| cg07034269 | 0.08007 | 0.0701  | 0.09706 | 0.0862  | 0.07983 | 0.07364 | 0.06575 | 0.07373 | 0.08456 | 0.07084 | UGCGL1   |
| cg07034561 | 0.24739 | 0.05955 | 0.11728 | 0.25836 | 0.2838  | 0.2206  | 0.07886 | 0.07682 | 0.04968 | 0.0472  | TSGA2    |
| cg07035740 | 0.03511 | 0.03425 | 0.10797 | 0.10827 | 0.29959 | 0.5306  | 0.14238 | 0.35038 | 0.06954 | 0.35432 | SNCB     |
| cg07036530 | 0.1362  | 0.1164  | 0.71969 | 0.8614  | 0.65643 | 0.68704 | 0.13275 | 0.11501 | 0.10585 | 0.08706 | GPR26    |
| cg07036775 | 0.0407  | 0.04033 | 0.04186 | 0.03337 | 0.03356 | 0.03755 | 0.03146 | 0.03323 | 0.03669 | 0.03188 | POLR3GL  |
| cg07038400 | 0.46771 | 0.08666 | 0.82294 | 0.85805 | 0.22815 | 0.05309 | 0.12489 | 0.05106 | 0.38125 | 0.05228 | PPP2R3A  |
| cg07038617 | 0.03716 | 0.04252 | 0.04273 | 0.03979 | 0.03202 | 0.04371 | 0.03696 | 0.03892 | 0.03342 | 0.03513 | ABCF2    |
| cg07038887 | 0.03858 | 0.04171 | 0.04484 | 0.05345 | 0.03874 | 0.03324 | 0.0335  | 0.02932 | 0.03223 | 0.03217 | BLMH     |
| cg07039113 | 0.27744 | 0.1296  | 0.23119 | 0.26665 | 0.91444 | 0.84959 | 0.05267 | 0.05821 | 0.56898 | 0.26251 | S100A9   |
| cg07039362 | 0.75716 | 0.81951 | 0.16149 | 0.15993 | 0.43969 | 0.16598 | 0.43853 | 0.17057 | 0.26166 | 0.3807  | CES7     |
| cg07042144 | 0.82013 | 0.66499 | 0.81537 | 0.86953 | 0.83133 | 0.81988 | 0.07153 | 0.04815 | 0.46427 | 0.32981 | NALP12   |
| cg07043494 | 0.69036 | 0.67714 | 0.70198 | 0.70949 | 0.66927 | 0.67181 | 0.71958 | 0.76793 | 0.75158 | 0.69444 | HRH1     |
| cg07044282 | 0.75113 | 0.5836  | 0.67198 | 0.66577 | 0.61464 | 0.64265 | 0.6737  | 0.36357 | 0.7117  | 0.69417 | ANGPTL1  |
| cg07047653 | 0.8312  | 0.80732 | 0.86814 | 0.88461 | 0.89358 | 0.87227 | 0.59897 | 0.79376 | 0.85804 | 0.75899 | AQP2     |
| cg07048066 | 0.07075 | 0.06995 | 0.06748 | 0.06783 | 0.0607  | 0.06564 | 0.07937 | 0.07119 | 0.2169  | 0.07754 | C5orf5   |
| cg07048351 | 0.01462 | 0.01657 | 0.01702 | 0.01448 | 0.01113 | 0.01424 | 0.01358 | 0.01168 | 0.01204 | 0.01309 | SERP1    |
| cg07049929 | 0.10517 | 0.11003 | 0.10107 | 0.11065 | 0.09555 | 0.10697 | 0.10563 | 0.09879 | 0.10048 | 0.09638 | ABCD4    |
| cg07050831 | 0.08838 | 0.08959 | 0.08292 | 0.09196 | 0.05456 | 0.08329 | 0.07621 | 0.08303 | 0.07507 | 0.0738  | HSPC268  |
| cg07051140 | 0.03088 | 0.02881 | 0.03189 | 0.03264 | 0.02465 | 0.02619 | 0.02493 | 0.02687 | 0.02472 | 0.02344 | MGC15875 |
| cg07051960 | 0.77728 | 0.50202 | 0.72728 | 0.77773 | 0.81383 | 0.74753 | 0.13502 | 0.05364 | 0.32047 | 0.32403 | ATP1A3   |
| cg07052087 | 0.03215 | 0.03604 | 0.03298 | 0.03153 | 0.02839 | 0.03135 | 0.03117 | 0.03262 | 0.03141 | 0.02742 | TP1      |
| cg07052387 | 0.04733 | 0.04859 | 0.04612 | 0.04564 | 0.04778 | 0.0473  | 0.05333 | 0.05135 | 0.04689 | 0.04135 | HIF1A    |
| cg07052880 | 0.87877 | 0.71967 | 0.85519 | 0.86875 | 0.88252 | 0.87117 | 0.85695 | 0.88306 | 0.88177 | 0.79922 | ATP6V1B1 |
| cg07053469 | 0.03197 | 0.03329 | 0.03582 | 0.03866 | 0.08099 | 0.03287 | 0.03402 | 0.03207 | 0.02666 | 0.02501 | EID-3    |
| cg07054095 | 0.03485 | 0.04117 | 0.04241 | 0.03915 | 0.0348  | 0.03409 | 0.03014 | 0.02888 | 0.0307  | 0.02975 | ZNF549   |
| cg07054526 | 0.85428 | 0.80783 | 0.81146 | 0.83732 | 0.77534 | 0.79098 | 0.78949 | 0.80727 | 0.86562 | 0.75495 | BRCA1    |
| cg07054641 | 0.90357 | 0.88407 | 0.89208 | 0.82451 | 0.69419 | 0.66836 | 0.88634 | 0.85475 | 0.92624 | 0.9182  | WDR52    |
| cg07054788 | 0.02768 | 0.02368 | 0.03289 | 0.03129 | 0.0256  | 0.03392 | 0.02558 | 0.02548 | 0.02766 | 0.0231  | RPL5     |
| cg07056057 | 0.84582 | 0.55378 | 0.86601 | 0.89754 | 0.89925 | 0.86616 | 0.48142 | 0.48711 | 0.86878 | 0.38365 | DYNLL2   |
| cg07057831 | 0.06973 | 0.03274 | 0.12532 | 0.19119 | 0.05257 | 0.02582 | 0.03778 | 0.0284  | 0.6112  | 0.05365 | EPIM     |
| cg07059052 | 0.21403 | 0.17444 | 0.58257 | 0.52831 | 0.11257 | 0.03238 | 0.16976 | 0.31722 | 0.9128  | 0.72045 | TCEB2    |

|            |         |         |         |         |         |         |         |         |         |         |         |
|------------|---------|---------|---------|---------|---------|---------|---------|---------|---------|---------|---------|
| cg07059360 | 0.11897 | 0.09049 | 0.27562 | 0.45867 | 0.16819 | 0.15367 | 0.13419 | 0.12047 | 0.06886 | 0.05619 | POLR3D  |
| cg07059403 | 0.04088 | 0.04813 | 0.04667 | 0.03849 | 0.03602 | 0.03592 | 0.0394  | 0.03885 | 0.03521 | 0.03204 | TCTE3   |
| cg07059875 | 0.30836 | 0.12613 | 0.59677 | 0.62649 | 0.33183 | 0.30296 | 0.33157 | 0.18542 | 0.17491 | 0.13813 | TACSTD1 |
| cg07060572 | 0.06502 | 0.05758 | 0.06365 | 0.07794 | 0.06889 | 0.05517 | 0.05307 | 0.04862 | 0.04777 | 0.04094 | MAML2   |
| cg07061145 | 0.66529 | 0.48865 | 0.74607 | 0.7558  | 0.77221 | 0.78041 | 0.6604  | 0.59093 | 0.76482 | 0.7751  | DNAJA4  |
| cg07061913 | 0.04825 | 0.04892 | 0.05473 | 0.05194 | 0.05497 | 0.04747 | 0.05275 | 0.04522 | 0.04917 | 0.04967 | DNAJC9  |
| cg07063745 | 0.12349 | 0.12057 | 0.12161 | 0.10046 | 0.17172 | 0.16395 | 0.09742 | 0.08153 | 0.11129 | 0.11666 | LANCL1  |
| cg07064406 | 0.86563 | 0.82205 | 0.873   | 0.89413 | 0.90731 | 0.88907 | 0.83501 | 0.86463 | 0.88282 | 0.86643 | YWHAB   |
| cg07065941 | 0.07856 | 0.07975 | 0.07581 | 0.08408 | 0.06888 | 0.06106 | 0.06294 | 0.06898 | 0.06974 | 0.07084 | KLF10   |
| cg07066326 | 0.12326 | 0.05756 | 0.3061  | 0.25623 | 0.64002 | 0.34909 | 0.21124 | 0.08431 | 0.31631 | 0.29509 | CHID1   |
| cg07067241 | 0.11784 | 0.08636 | 0.16589 | 0.11148 | 0.28718 | 0.07004 | 0.06123 | 0.06681 | 0.10471 | 0.07152 | TRPC1   |
| cg07068616 | 0.04526 | 0.04888 | 0.04779 | 0.04657 | 0.03887 | 0.04454 | 0.0416  | 0.04235 | 0.04042 | 0.04371 | ORC5L   |
| cg07068998 | 0.18978 | 0.06762 | 0.10128 | 0.17715 | 0.04368 | 0.05298 | 0.09796 | 0.04841 | 0.05002 | 0.04494 | NRAS    |
| cg07070694 | 0.10899 | 0.11259 | 0.11763 | 0.10786 | 0.05722 | 0.10834 | 0.09836 | 0.0916  | 0.09885 | 0.09573 | ZFYVE1  |
| cg07070934 | 0.08112 | 0.05599 | 0.20284 | 0.16868 | 0.33023 | 0.34238 | 0.05571 | 0.04944 | 0.06775 | 0.0657  | GJA4    |
| cg07070940 | 0.05814 | 0.05329 | 0.06698 | 0.05637 | 0.05299 | 0.05197 | 0.03702 | 0.0393  | 0.04553 | 0.04161 | HDHD1A  |
| cg07071881 | 0.04008 | 0.03844 | 0.04822 | 0.04237 | 0.03742 | 0.04622 | 0.04211 | 0.04405 | 0.04046 | 0.04248 | FBXO7   |
| cg07072140 | 0.03624 | 0.03703 | 0.04217 | 0.03924 | 0.03269 | 0.03604 | 0.03319 | 0.03177 | 0.03316 | 0.02707 | NANP    |
| cg07072643 | 0.65655 | 0.51585 | 0.51691 | 0.625   | 0.4663  | 0.57478 | 0.22596 | 0.10596 | 0.37678 | 0.15278 | EMR3    |
| cg07073964 | 0.89508 | 0.56467 | 0.80569 | 0.8831  | 0.77127 | 0.83663 | 0.56119 | 0.19232 | 0.52104 | 0.23018 | PRSSL1  |
| cg07074571 | 0.47486 | 0.36471 | 0.27708 | 0.46532 | 0.25546 | 0.18381 | 0.20697 | 0.26332 | 0.26421 | 0.2064  | AGPAT4  |
| cg07075930 | 0.03255 | 0.03033 | 0.03182 | 0.03129 | 0.04336 | 0.02912 | 0.02888 | 0.02731 | 0.03063 | 0.02382 | PTPRM   |
| cg07076342 | 0.09128 | 0.09136 | 0.10184 | 0.0852  | 0.16765 | 0.13138 | 0.09307 | 0.10451 | 0.06197 | 0.06869 | MEA1    |
| cg07077459 | 0.6323  | 0.66187 | 0.98355 | 0.98789 | 0.7824  | 0.75973 | 0.75425 | 0.76419 | 0.01872 | 0.0171  | PLAGL1  |
| cg07078114 | 0.53103 | 0.12335 | 0.92104 | 0.93588 | 0.88428 | 0.90945 | 0.6089  | 0.45932 | 0.93626 | 0.90794 | FAM69B  |
| cg07080007 | 0.05235 | 0.05736 | 0.06651 | 0.06333 | 0.05874 | 0.06509 | 0.06074 | 0.05465 | 0.04793 | 0.05383 | RPL27   |
| cg07080358 | 0.04834 | 0.0371  | 0.03695 | 0.03507 | 0.03409 | 0.03496 | 0.0327  | 0.03061 | 0.02805 | 0.02818 | C2orf32 |
| cg07080946 | 0.76657 | 0.5599  | 0.76987 | 0.7642  | 0.63959 | 0.51375 | 0.76434 | 0.78914 | 0.21734 | 0.16029 | LUC7L   |
| cg07081888 | 0.88104 | 0.89604 | 0.82018 | 0.83592 | 0.86674 | 0.90028 | 0.53248 | 0.60938 | 0.92252 | 0.90417 | NALP4   |
| cg07082331 | 0.07063 | 0.03557 | 0.05519 | 0.0612  | 0.20463 | 0.05379 | 0.05411 | 0.03674 | 0.05342 | 0.04738 | BMP8B   |
| cg07084161 | 0.0585  | 0.06366 | 0.07132 | 0.06056 | 0.04517 | 0.0634  | 0.05957 | 0.064   | 0.05307 | 0.05896 | NBN     |
| cg07084163 | 0.47693 | 0.45368 | 0.60561 | 0.68336 | 0.4496  | 0.53419 | 0.4453  | 0.4118  | 0.22397 | 0.28238 | UGT3A2  |
| cg07084709 | 0.93726 | 0.53373 | 0.94157 | 0.94373 | 0.94603 | 0.81257 | 0.92441 | 0.91776 | 0.94684 | 0.81367 | Gcom1   |
| cg07084746 | 0.83943 | 0.85289 | 0.83846 | 0.85631 | 0.863   | 0.85144 | 0.83827 | 0.81257 | 0.85247 | 0.83205 | C3orf27 |
| cg07085271 | 0.11301 | 0.08944 | 0.71586 | 0.7953  | 0.77278 | 0.64708 | 0.67312 | 0.83646 | 0.85047 | 0.85076 | MMP24   |
| cg07086380 | 0.88289 | 0.7719  | 0.79537 | 0.84353 | 0.8816  | 0.76658 | 0.75679 | 0.71215 | 0.8952  | 0.61145 | TNFAIP8 |
| cg07086898 | 0.03332 | 0.03235 | 0.03614 | 0.03157 | 0.03094 | 0.03014 | 0.03234 | 0.03273 | 0.02841 | 0.0311  | USMG5   |
| cg07090813 | 0.26612 | 0.05825 | 0.08542 | 0.10934 | 0.07171 | 0.04867 | 0.1569  | 0.05741 | 0.66743 | 0.59995 | PHGDH   |
| cg07091552 | 0.84308 | 0.71715 | 0.86761 | 0.87422 | 0.87707 | 0.85048 | 0.83948 | 0.83733 | 0.8548  | 0.80362 | UCP3    |
| cg07091958 | 0.0458  | 0.0419  | 0.04024 | 0.04282 | 0.04147 | 0.04342 | 0.04963 | 0.04373 | 0.05454 | 0.04636 | RTF1    |
| cg07092725 | 0.8038  | 0.4825  | 0.7576  | 0.82115 | 0.73797 | 0.67184 | 0.15674 | 0.15921 | 0.1706  | 0.20705 | KCNH5   |

|            |         |         |         |         |         |         |         |         |         |                   |
|------------|---------|---------|---------|---------|---------|---------|---------|---------|---------|-------------------|
| cg07093046 | 0.02006 | 0.02058 | 0.02615 | 0.02018 | 0.01853 | 0.01973 | 0.02282 | 0.0277  | 0.01598 | 0.01625 MTR       |
| cg07093661 | 0.79827 | 0.55152 | 0.84156 | 0.86737 | 0.82122 | 0.76294 | 0.8509  | 0.85259 | 0.73068 | 0.64672 DHDH      |
| cg07097098 | 0.17514 | 0.10483 | 0.13749 | 0.11546 | 0.18741 | 0.11927 | 0.10341 | 0.08286 | 0.0805  | 0.08462 PTPRH     |
| cg07098866 | 0.03356 | 0.03164 | 0.03647 | 0.02914 | 0.11922 | 0.03353 | 0.03551 | 0.03343 | 0.03035 | 0.03352 MEGF11    |
| cg07099407 | 0.29843 | 0.1788  | 0.21478 | 0.30632 | 0.08081 | 0.03659 | 0.11948 | 0.04866 | 0.1604  | 0.03079 KLC4      |
| cg07099627 | 0.03117 | 0.03454 | 0.03342 | 0.0322  | 0.02219 | 0.02613 | 0.02635 | 0.02538 | 0.02115 | 0.02016 LPPR2     |
| cg07102705 | 0.04289 | 0.0255  | 0.64567 | 0.68164 | 0.09766 | 0.05273 | 0.20197 | 0.07797 | 0.11697 | 0.03389 HTR4      |
| cg07103493 | 0.13025 | 0.0362  | 0.94148 | 0.95966 | 0.04951 | 0.02706 | 0.0814  | 0.03835 | 0.1695  | 0.03645 SLC27A6   |
| cg07103819 | 0.02508 | 0.03212 | 0.03442 | 0.03523 | 0.04101 | 0.03641 | 0.02808 | 0.02266 | 0.02841 | 0.02932 DGAT1     |
| cg07104706 | 0.04959 | 0.05008 | 0.81658 | 0.91479 | 0.15099 | 0.11161 | 0.0541  | 0.04702 | 0.16353 | 0.1206 SLITRK1    |
| cg07105440 | 0.04332 | 0.03179 | 0.1604  | 0.43356 | 0.18786 | 0.03073 | 0.07202 | 0.04627 | 0.03814 | 0.02292 CISH      |
| cg07107453 | 0.50735 | 0.24356 | 0.25803 | 0.29779 | 0.35097 | 0.39444 | 0.19297 | 0.07977 | 0.29425 | 0.12251 IFI44     |
| cg07109287 | 0.0351  | 0.03862 | 0.04139 | 0.03644 | 0.05109 | 0.02945 | 0.03019 | 0.02244 | 0.02955 | 0.02574 LHX2      |
| cg07109670 | 0.04477 | 0.05341 | 0.06578 | 0.06265 | 0.05183 | 0.04104 | 0.04959 | 0.04081 | 0.04335 | 0.053 WDR67       |
| cg07109801 | 0.53648 | 0.399   | 0.76595 | 0.85638 | 0.89869 | 0.62552 | 0.20446 | 0.15076 | 0.30457 | 0.21641 C3orf60   |
| cg07112154 | 0.08052 | 0.08277 | 0.09668 | 0.09641 | 0.83738 | 0.69686 | 0.07733 | 0.08444 | 0.74941 | 0.67697 MPP2      |
| cg07112210 | 0.30933 | 0.05897 | 0.53056 | 0.48808 | 0.77918 | 0.48969 | 0.47871 | 0.25508 | 0.85073 | 0.72164 MGAT5B    |
| cg07113600 | 0.0452  | 0.05159 | 0.04556 | 0.04557 | 0.04234 | 0.0578  | 0.04351 | 0.03638 | 0.04235 | 0.03988 KLF12     |
| cg07114024 | 0.03204 | 0.02999 | 0.03548 | 0.03062 | 0.02786 | 0.03196 | 0.02869 | 0.03209 | 0.03116 | 0.03016 BAHD1     |
| cg07114894 | 0.07582 | 0.06984 | 0.0707  | 0.0775  | 0.13724 | 0.08918 | 0.06684 | 0.06024 | 0.05366 | 0.0587 ZNF23      |
| cg07115304 | 0.047   | 0.04308 | 0.03912 | 0.03921 | 0.03142 | 0.04002 | 0.03473 | 0.0393  | 0.03955 | 0.0298 TRIB3      |
| cg07115558 | 0.12094 | 0.12839 | 0.15972 | 0.12868 | 0.20586 | 0.13364 | 0.13106 | 0.13385 | 0.1322  | 0.13409 TLE2      |
| cg07115820 | 0.1214  | 0.03624 | 0.4452  | 0.49054 | 0.58791 | 0.24699 | 0.26503 | 0.07854 | 0.19122 | 0.03417 EPX       |
| cg07117700 | 0.55457 | 0.52007 | 0.85632 | 0.87959 | 0.80474 | 0.86526 | 0.57088 | 0.55782 | 0.91247 | 0.86884 PSMC5     |
| cg07118243 | 0.03986 | 0.03699 | 0.03914 | 0.0335  | 0.03021 | 0.02874 | 0.03139 | 0.03381 | 0.0315  | 0.02957 CCDC41    |
| cg07118638 | 0.05371 | 0.05098 | 0.06387 | 0.06332 | 0.05591 | 0.04589 | 0.08435 | 0.08118 | 0.04615 | 0.05467 THEX1     |
| cg07122126 | 0.03318 | 0.03311 | 0.033   | 0.03241 | 0.03178 | 0.03423 | 0.03012 | 0.02715 | 0.02495 | 0.02489 ZNF8      |
| cg07122495 | 0.04449 | 0.04578 | 0.03859 | 0.03185 | 0.032   | 0.03919 | 0.0229  | 0.02653 | 0.02401 | 0.02754 MLF1IP    |
| cg07123069 | 0.03481 | 0.04131 | 0.04808 | 0.04117 | 0.02808 | 0.03649 | 0.05847 | 0.05704 | 0.22014 | 0.03808 HOXC11    |
| cg07123548 | 0.5831  | 0.14502 | 0.59159 | 0.81154 | 0.72228 | 0.85115 | 0.59461 | 0.41942 | 0.43933 | 0.16577 HIPK4     |
| cg07125009 | 0.03548 | 0.03361 | 0.03272 | 0.03065 | 0.02485 | 0.02783 | 0.03328 | 0.03145 | 0.02622 | 0.02819 ZNF689    |
| cg07125123 | 0.08964 | 0.0921  | 0.12055 | 0.12977 | 0.10876 | 0.10018 | 0.12127 | 0.10298 | 0.10001 | 0.10078 RRM2B     |
| cg07125166 | 0.85285 | 0.53037 | 0.77125 | 0.8678  | 0.88499 | 0.87633 | 0.52892 | 0.79635 | 0.34075 | 0.29719 FBXW12    |
| cg07125991 | 0.01989 | 0.02016 | 0.02106 | 0.02022 | 0.01667 | 0.01873 | 0.01782 | 0.01892 | 0.01665 | 0.01789 LOC196463 |
| cg07126559 | 0.78986 | 0.80774 | 0.79954 | 0.85796 | 0.40018 | 0.3913  | 0.07759 | 0.07675 | 0.07923 | 0.14692 SGCG      |
| cg07126839 | 0.035   | 0.02126 | 0.0225  | 0.01983 | 0.01543 | 0.01913 | 0.01867 | 0.01973 | 0.01821 | 0.01881 FAM100B   |
| cg07127225 | 0.05599 | 0.05463 | 0.14672 | 0.06039 | 0.46002 | 0.59589 | 0.07516 | 0.03943 | 0.4959  | 0.29242 FCGRT     |
| cg07127957 | 0.82937 | 0.83506 | 0.85263 | 0.86739 | 0.84792 | 0.86004 | 0.80692 | 0.76565 | 0.53318 | 0.33822 SYNPO2L   |
| cg07128330 | 0.03737 | 0.03956 | 0.05326 | 0.05374 | 0.0519  | 0.03358 | 0.04721 | 0.04604 | 0.04245 | 0.04124 MDS028    |
| cg07129274 | 0.0463  | 0.04235 | 0.13625 | 0.13783 | 0.03585 | 0.06995 | 0.03227 | 0.0297  | 0.03976 | 0.02962 HIST1H2AL |
| cg07131544 | 0.84076 | 0.5318  | 0.68147 | 0.78675 | 0.45261 | 0.65743 | 0.24338 | 0.27064 | 0.56379 | 0.63591 NCR2      |

|            |         |         |         |         |         |         |         |         |         |         |          |
|------------|---------|---------|---------|---------|---------|---------|---------|---------|---------|---------|----------|
| cg07132517 | 0.02392 | 0.02399 | 0.0243  | 0.0273  | 0.02128 | 0.0212  | 0.02108 | 0.0237  | 0.01981 | 0.0177  | POLR2L   |
| cg07133445 | 0.0481  | 0.04385 | 0.05216 | 0.05084 | 0.04374 | 0.04893 | 0.0472  | 0.04873 | 0.04499 | 0.03924 | SOLH     |
| cg07136161 | 0.19837 | 0.18687 | 0.32775 | 0.23303 | 0.62438 | 0.72297 | 0.29032 | 0.42876 | 0.16847 | 0.20588 | CYLC2    |
| cg07136254 | 0.50457 | 0.16798 | 0.73754 | 0.84006 | 0.56668 | 0.56578 | 0.34647 | 0.25177 | 0.49623 | 0.28995 | HFE2     |
| cg07136421 | 0.89728 | 0.89504 | 0.88064 | 0.9032  | 0.90215 | 0.89762 | 0.87544 | 0.88882 | 0.89651 | 0.82245 | GPR89A   |
| cg07137581 | 0.02872 | 0.03363 | 0.03819 | 0.03538 | 0.03003 | 0.03219 | 0.06023 | 0.2482  | 0.0314  | 0.02802 | FLJ39827 |
| cg07138512 | 0.11531 | 0.21481 | 0.73906 | 0.75956 | 0.92662 | 0.94879 | 0.65261 | 0.48426 | 0.49108 | 0.33177 | RAP1GA1  |
| cg07139440 | 0.54505 | 0.07795 | 0.22955 | 0.43135 | 0.0645  | 0.05224 | 0.0549  | 0.06062 | 0.14903 | 0.05465 | MLLT11   |
| cg07141002 | 0.5483  | 0.28047 | 0.26936 | 0.37134 | 0.93535 | 0.91119 | 0.35402 | 0.39133 | 0.1009  | 0.07486 | H1FO     |
| cg07142319 | 0.45389 | 0.04674 | 0.66569 | 0.85266 | 0.74292 | 0.6452  | 0.05102 | 0.04358 | 0.8921  | 0.64116 | PLA2G2D  |
| cg07143898 | 0.04508 | 0.03313 | 0.14761 | 0.13752 | 0.40742 | 0.48755 | 0.03576 | 0.04501 | 0.04457 | 0.03751 | SLIT1    |
| cg07146718 | 0.64176 | 0.66657 | 0.32498 | 0.21994 | 0.44744 | 0.38881 | 0.17984 | 0.13534 | 0.18279 | 0.18466 | FGF13    |
| cg07147350 | 0.65894 | 0.48274 | 0.49229 | 0.52748 | 0.13526 | 0.4974  | 0.43207 | 0.38431 | 0.32085 | 0.34493 | FMR1     |
| cg07148914 | 0.04198 | 0.04074 | 0.0657  | 0.10061 | 0.08923 | 0.03452 | 0.03835 | 0.03487 | 0.0441  | 0.06446 | GGTL3    |
| cg07149772 | 0.06877 | 0.06173 | 0.0935  | 0.08667 | 0.07256 | 0.067   | 0.10425 | 0.1144  | 0.06484 | 0.07682 | KCTD9    |
| cg07150830 | 0.92629 | 0.79687 | 0.91941 | 0.94864 | 0.79262 | 0.66208 | 0.56395 | 0.33626 | 0.94176 | 0.90899 | NOS2A    |
| cg07152925 | 0.21789 | 0.58899 | 0.69609 | 0.79003 | 0.45531 | 0.70787 | 0.09508 | 0.12143 | 0.46157 | 0.31633 | S100B    |
| cg07153965 | 0.79531 | 0.78014 | 0.73975 | 0.74856 | 0.72637 | 0.74469 | 0.73358 | 0.75273 | 0.83282 | 0.82188 | ACRV1    |
| cg07154408 | 0.21152 | 0.19544 | 0.23494 | 0.21027 | 0.32198 | 0.2147  | 0.16575 | 0.20629 | 0.18049 | 0.20389 | PDE5A    |
| cg07155664 | 0.04371 | 0.03971 | 0.04292 | 0.03491 | 0.03474 | 0.03645 | 0.03949 | 0.04008 | 0.0345  | 0.03407 | RPS14    |
| cg07156669 | 0.88957 | 0.87228 | 0.79524 | 0.80531 | 0.73339 | 0.66359 | 0.73518 | 0.46926 | 0.39764 | 0.09333 | CPD      |
| cg07158339 | 0.23638 | 0.09136 | 0.5571  | 0.61621 | 0.28437 | 0.4142  | 0.06004 | 0.08812 | 0.05618 | 0.0451  | FXN      |
| cg07159490 | 0.02681 | 0.02874 | 0.04416 | 0.03758 | 0.40894 | 0.06075 | 0.04277 | 0.03369 | 0.05226 | 0.02289 | NXP4     |
| cg07160163 | 0.35705 | 0.1063  | 0.14256 | 0.3194  | 0.15745 | 0.027   | 0.13445 | 0.03902 | 0.0283  | 0.01822 | SYK      |
| cg07163603 | 0.54697 | 0.4471  | 0.44961 | 0.47701 | 0.56197 | 0.52689 | 0.41028 | 0.43312 | 0.48935 | 0.40402 | HLA-A    |
| cg07165793 | 0.0508  | 0.05406 | 0.0581  | 0.05461 | 0.04819 | 0.05086 | 0.05468 | 0.05346 | 0.04019 | 0.04913 | AP1GBP1  |
| cg07168556 | 0.89809 | 0.79555 | 0.71046 | 0.84151 | 0.83867 | 0.77885 | 0.50586 | 0.17134 | 0.90577 | 0.87303 | WFIKKN2  |
| cg07172256 | 0.04706 | 0.04278 | 0.04189 | 0.04004 | 0.05898 | 0.03278 | 0.06771 | 0.03495 | 0.63684 | 0.64815 | ERBB2IP  |
| cg07172280 | 0.13603 | 0.03698 | 0.0321  | 0.03822 | 0.71291 | 0.03174 | 0.14844 | 0.03792 | 0.29319 | 0.03055 | DPP7     |
| cg07173760 | 0.15611 | 0.08703 | 0.47747 | 0.66226 | 0.19659 | 0.31918 | 0.08861 | 0.08855 | 0.17745 | 0.06284 | CLC      |
| cg07175007 | 0.92213 | 0.87381 | 0.89452 | 0.90036 | 0.94104 | 0.87954 | 0.90399 | 0.89144 | 0.69464 | 0.56579 | UHMK1    |
| cg07175883 | 0.0231  | 0.02571 | 0.0286  | 0.02551 | 0.02098 | 0.02851 | 0.02433 | 0.02283 | 0.02387 | 0.0217  | HOXD13   |
| cg07177300 | 0.06882 | 0.06831 | 0.06358 | 0.06092 | 0.04276 | 0.04131 | 0.05539 | 0.04076 | 0.04312 | 0.03873 | FRMPD4   |
| cg07177755 | 0.02654 | 0.03596 | 0.04083 | 0.03187 | 0.03554 | 0.0478  | 0.02608 | 0.03109 | 0.02098 | 0.02111 | ERCC5    |
| cg07177852 | 0.66077 | 0.72898 | 0.30763 | 0.34886 | 0.23744 | 0.40524 | 0.03592 | 0.056   | 0.61595 | 0.49994 | CCDC68   |
| cg07179770 | 0.0536  | 0.05197 | 0.04483 | 0.04125 | 0.04777 | 0.05943 | 0.04568 | 0.04819 | 0.04369 | 0.04327 | C16orf44 |
| cg07180649 | 0.60905 | 0.41337 | 0.38672 | 0.50063 | 0.65363 | 0.27893 | 0.57897 | 0.36096 | 0.57396 | 0.33381 | WNT4     |
| cg07181349 | 0.03041 | 0.03099 | 0.05202 | 0.02742 | 0.05906 | 0.05424 | 0.03531 | 0.03637 | 0.90482 | 0.92773 | KIT      |
| cg07181881 | 0.09616 | 0.08447 | 0.11527 | 0.09774 | 0.36233 | 0.10167 | 0.12798 | 0.09287 | 0.62884 | 0.25616 | KLHL23   |
| cg07184439 | 0.0311  | 0.03553 | 0.02752 | 0.02197 | 0.02955 | 0.03222 | 0.02533 | 0.02541 | 0.02254 | 0.02648 | MGAT2    |
| cg07185695 | 0.46676 | 0.24353 | 0.80557 | 0.88433 | 0.89928 | 0.88857 | 0.6821  | 0.82805 | 0.41783 | 0.24258 | MOSC1    |

|            |         |         |         |         |         |         |         |         |         |                  |
|------------|---------|---------|---------|---------|---------|---------|---------|---------|---------|------------------|
| cg07186138 | 0.42294 | 0.48184 | 0.04888 | 0.04238 | 0.06374 | 0.06947 | 0.04139 | 0.36413 | 0.04101 | 0.04348 APOBEC3C |
| cg07186707 | 0.06182 | 0.06192 | 0.05617 | 0.05823 | 0.05246 | 0.05917 | 0.06371 | 0.04965 | 0.0407  | 0.04315 PAK4     |
| cg07189381 | 0.39702 | 0.16184 | 0.61455 | 0.67901 | 0.47123 | 0.62371 | 0.14539 | 0.38077 | 0.16707 | 0.12326 TNNT1    |
| cg07190485 | 0.68491 | 0.7011  | 0.75506 | 0.88912 | 0.02611 | 0.03212 | 0.02796 | 0.02566 | 0.02785 | 0.0233 STOM      |
| cg07190917 | 0.05443 | 0.05329 | 0.05753 | 0.05988 | 0.04299 | 0.04179 | 0.05368 | 0.06329 | 0.04271 | 0.04125 STX4A    |
| cg07191600 | 0.19421 | 0.03125 | 0.09163 | 0.09493 | 0.02059 | 0.02459 | 0.02532 | 0.02011 | 0.01803 | 0.01762 TRERF1   |
| cg07192857 | 0.05054 | 0.05815 | 0.05209 | 0.05017 | 0.03693 | 0.0507  | 0.04696 | 0.05106 | 0.05011 | 0.05032 HSPA1B   |
| cg07193504 | 0.84512 | 0.41962 | 0.50145 | 0.8559  | 0.44918 | 0.31871 | 0.20607 | 0.3138  | 0.11859 | 0.05019 SRP9     |
| cg07195282 | 0.04254 | 0.04323 | 0.13968 | 0.07906 | 0.21864 | 0.30226 | 0.04075 | 0.044   | 0.03568 | 0.03179 ZNF563   |
| cg07195577 | 0.04214 | 0.04174 | 0.04333 | 0.04017 | 0.03232 | 0.03235 | 0.03973 | 0.03843 | 0.05431 | 0.02729 TLCD1    |
| cg07195622 | 0.05777 | 0.05801 | 0.06541 | 0.05516 | 0.0456  | 0.05124 | 0.05458 | 0.04995 | 0.0477  | 0.04792 SRRM2    |
| cg07196761 | 0.90287 | 0.72106 | 0.88745 | 0.7874  | 0.92222 | 0.85283 | 0.88138 | 0.84223 | 0.92042 | 0.71544 WDR71    |
| cg07197059 | 0.05635 | 0.12028 | 0.54839 | 0.6446  | 0.24053 | 0.03922 | 0.06224 | 0.04129 | 0.28941 | 0.32478 EFS      |
| cg07197823 | 0.04728 | 0.04493 | 0.0634  | 0.05741 | 0.0473  | 0.0472  | 0.04929 | 0.04741 | 0.04448 | 0.04784 INHBB    |
| cg07200280 | 0.14376 | 0.41704 | 0.08162 | 0.07287 | 0.18255 | 0.09001 | 0.07961 | 0.06813 | 0.85651 | 0.74294 RAFTLIN  |
| cg07200897 | 0.07674 | 0.05362 | 0.06432 | 0.0579  | 0.06135 | 0.04656 | 0.04332 | 0.03765 | 0.05691 | 0.05896 HSPBAP1  |
| cg07204803 | 0.66874 | 0.68862 | 0.65397 | 0.68398 | 0.6678  | 0.70144 | 0.62031 | 0.63932 | 0.70473 | 0.69938 ARL13B   |
| cg07207789 | 0.85766 | 0.34895 | 0.91039 | 0.91403 | 0.89418 | 0.86572 | 0.88498 | 0.71145 | 0.90929 | 0.85631 CRISPLD2 |
| cg07207937 | 0.05807 | 0.06339 | 0.05462 | 0.05581 | 0.09385 | 0.07576 | 0.05429 | 0.05328 | 0.0507  | 0.03625 MRPL1    |
| cg07209631 | 0.07235 | 0.06259 | 0.0658  | 0.06621 | 0.04646 | 0.05593 | 0.063   | 0.06498 | 0.05553 | 0.05652 PPM1K    |
| cg07210490 | 0.06162 | 0.0465  | 0.34287 | 0.43461 | 0.06788 | 0.04875 | 0.06581 | 0.03609 | 0.51935 | 0.05047 SMARCD1  |
| cg07211259 | 0.72574 | 0.52842 | 0.07747 | 0.06663 | 0.15064 | 0.23164 | 0.05642 | 0.28483 | 0.04957 | 0.05518 PDCD1LG2 |
| cg07212894 | 0.03282 | 0.03137 | 0.09695 | 0.32448 | 0.58309 | 0.74233 | 0.02776 | 0.03208 | 0.03271 | 0.02733 SLC38A3  |
| cg07214572 | 0.03247 | 0.03043 | 0.67738 | 0.85929 | 0.44009 | 0.38178 | 0.18172 | 0.11275 | 0.05333 | 0.03566 LHX9     |
| cg07215749 | 0.06398 | 0.03713 | 0.03564 | 0.03628 | 0.04959 | 0.02956 | 0.03142 | 0.03126 | 0.03342 | 0.0262 SOCS2     |
| cg07218192 | 0.044   | 0.04801 | 0.04    | 0.03927 | 0.03389 | 0.04062 | 0.03325 | 0.0388  | 0.03662 | 0.04757 MPP5     |
| cg07218880 | 0.16404 | 0.37231 | 0.11087 | 0.10008 | 0.13664 | 0.15366 | 0.09686 | 0.13067 | 0.09959 | 0.08754 UPF3A    |
| cg07220442 | 0.05114 | 0.043   | 0.05221 | 0.04855 | 0.05999 | 0.05314 | 0.04889 | 0.04207 | 0.04151 | 0.04926 NUP107   |
| cg07220939 | 0.49517 | 0.36217 | 0.83616 | 0.84737 | 0.59962 | 0.74705 | 0.0432  | 0.03266 | 0.19523 | 0.25413 SLC22A12 |
| cg07221454 | 0.83009 | 0.43092 | 0.91808 | 0.91858 | 0.93466 | 0.90007 | 0.91346 | 0.45152 | 0.93857 | 0.89819 MS4A10   |
| cg07223164 | 0.09661 | 0.09647 | 0.10332 | 0.09222 | 0.08804 | 0.11244 | 0.09754 | 0.07901 | 0.08885 | 0.10255 DC2      |
| cg07230446 | 0.06786 | 0.05297 | 0.0849  | 0.17121 | 0.08873 | 0.07107 | 0.05407 | 0.04751 | 0.05087 | 0.05893 TNRC15   |
| cg07231132 | 0.15258 | 0.03896 | 0.03812 | 0.0465  | 0.13082 | 0.03503 | 0.0358  | 0.03656 | 0.50977 | 0.4095 TMEM92    |
| cg07232688 | 0.714   | 0.59292 | 0.67142 | 0.71754 | 0.60654 | 0.65604 | 0.78173 | 0.76356 | 0.72779 | 0.5237 LRRC39    |
| cg07233761 | 0.03058 | 0.02871 | 0.0321  | 0.03251 | 0.02556 | 0.0293  | 0.02787 | 0.0278  | 0.02611 | 0.02211 ESM1     |
| cg07236190 | 0.89701 | 0.77688 | 0.80517 | 0.87276 | 0.50629 | 0.28642 | 0.81197 | 0.73268 | 0.63872 | 0.71553 AMDHD1   |
| cg07236358 | 0.04718 | 0.05173 | 0.04585 | 0.04507 | 0.03219 | 0.03909 | 0.04503 | 0.04477 | 0.04048 | 0.04139 POP5     |
| cg07236381 | 0.03977 | 0.03602 | 0.03594 | 0.04065 | 0.03095 | 0.03836 | 0.03837 | 0.03547 | 0.03302 | 0.02445 AFF4     |
| cg07236769 | 0.3465  | 0.17174 | 0.35451 | 0.57173 | 0.17702 | 0.44338 | 0.22433 | 0.22119 | 0.11116 | 0.11482 IFNW1    |
| cg07236943 | 0.08217 | 0.09244 | 0.17283 | 0.11634 | 0.2818  | 0.15491 | 0.08999 | 0.08704 | 0.13186 | 0.0882 PEG10     |
| cg07237830 | 0.80978 | 0.2337  | 0.83112 | 0.8969  | 0.81387 | 0.55726 | 0.71188 | 0.50811 | 0.89221 | 0.51394 BSCL2    |



|            |         |         |         |         |         |         |         |         |         |         |          |
|------------|---------|---------|---------|---------|---------|---------|---------|---------|---------|---------|----------|
| cg07237939 | 0.05384 | 0.02756 | 0.068   | 0.13347 | 0.042   | 0.02938 | 0.06168 | 0.10124 | 0.43842 | 0.02379 | SLC22A3  |
| cg07238167 | 0.04666 | 0.04047 | 0.04304 | 0.04353 | 0.03565 | 0.03295 | 0.02645 | 0.03462 | 0.03427 | 0.03543 | EIF2S3   |
| cg07239938 | 0.13063 | 0.06094 | 0.69643 | 0.91964 | 0.42411 | 0.5451  | 0.31695 | 0.07554 | 0.11853 | 0.40455 | ELA2     |
| cg07240721 | 0.04981 | 0.04982 | 0.05409 | 0.05687 | 0.03843 | 0.04396 | 0.04703 | 0.03967 | 0.04307 | 0.03864 | HINT3    |
| cg07241568 | 0.05043 | 0.0443  | 0.52644 | 0.56739 | 0.39123 | 0.23101 | 0.36916 | 0.38599 | 0.04347 | 0.02913 | ABO      |
| cg07242375 | 0.0565  | 0.05177 | 0.1085  | 0.34239 | 0.03772 | 0.0497  | 0.16602 | 0.08505 | 0.04974 | 0.04813 | LMO6     |
| cg07242414 | 0.04052 | 0.04249 | 0.1823  | 0.24399 | 0.25677 | 0.08245 | 0.05965 | 0.03568 | 0.07625 | 0.04549 | BMP1     |
| cg07242565 | 0.04633 | 0.0588  | 0.05832 | 0.05489 | 0.03623 | 0.05521 | 0.05337 | 0.04831 | 0.051   | 0.04904 | NR2F6    |
| cg07243519 | 0.03384 | 0.03282 | 0.05051 | 0.04245 | 0.04152 | 0.04402 | 0.03977 | 0.03424 | 0.03746 | 0.03852 | UFM1     |
| cg07243932 | 0.0331  | 0.02324 | 0.0406  | 0.04614 | 0.02701 | 0.02423 | 0.02294 | 0.02217 | 0.05276 | 0.0206  | SLC30A4  |
| cg07246225 | 0.09645 | 0.07894 | 0.12617 | 0.12394 | 0.19448 | 0.12709 | 0.11606 | 0.10639 | 0.10913 | 0.10013 | ZFHx1B   |
| cg07248043 | 0.03362 | 0.02994 | 0.03465 | 0.0356  | 0.02626 | 0.02937 | 0.0303  | 0.02797 | 0.02943 | 0.02516 | OSBPL11  |
| cg07248310 | 0.27449 | 0.6008  | 0.85565 | 0.89084 | 0.07846 | 0.0693  | 0.08386 | 0.13516 | 0.03787 | 0.03324 | HOOK1    |
| cg07248407 | 0.03495 | 0.03145 | 0.03819 | 0.03602 | 0.02508 | 0.0307  | 0.03454 | 0.03319 | 0.02709 | 0.02439 | DNM2     |
| cg07249409 | 0.02247 | 0.02459 | 0.02449 | 0.02462 | 0.02064 | 0.02216 | 0.02022 | 0.02158 | 0.02006 | 0.01697 | C1orf123 |
| cg07251788 | 0.86522 | 0.35799 | 0.85578 | 0.82278 | 0.8309  | 0.79377 | 0.62885 | 0.40916 | 0.05172 | 0.04165 | CLTCL1   |
| cg07251857 | 0.87155 | 0.82457 | 0.80387 | 0.82256 | 0.94619 | 0.91957 | 0.80281 | 0.9036  | 0.89196 | 0.84915 | ALPK3    |
| cg07253191 | 0.35693 | 0.13432 | 0.41771 | 0.45434 | 0.34337 | 0.11496 | 0.22234 | 0.16072 | 0.23919 | 0.15148 | PDHX     |
| cg07256847 | 0.41761 | 0.11153 | 0.20594 | 0.40126 | 0.33827 | 0.14107 | 0.1146  | 0.12282 | 0.12724 | 0.12868 | TCP10    |
| cg07258507 | 0.2494  | 0.08035 | 0.0815  | 0.15617 | 0.10194 | 0.09365 | 0.04476 | 0.05781 | 0.05529 | 0.05358 | IL17E    |
| cg07259382 | 0.84558 | 0.68936 | 0.82699 | 0.87376 | 0.84507 | 0.70691 | 0.35627 | 0.4626  | 0.0817  | 0.11153 | 1-Mar    |
| cg07260017 | 0.61807 | 0.37408 | 0.45622 | 0.64532 | 0.18061 | 0.06405 | 0.04871 | 0.18064 | 0.04692 | 0.0626  | CSF1R    |
| cg07260592 | 0.42773 | 0.56461 | 0.94775 | 0.95054 | 0.49381 | 0.43197 | 0.28438 | 0.54474 | 0.04445 | 0.02597 | LPA      |
| cg07263984 | 0.02581 | 0.02846 | 0.02794 | 0.02404 | 0.02313 | 0.02541 | 0.02478 | 0.02531 | 0.02323 | 0.02142 | AP3S1    |
| cg07264679 | 0.48121 | 0.54801 | 0.81673 | 0.82804 | 0.67027 | 0.42201 | 0.81975 | 0.81361 | 0.07319 | 0.22792 | CD163    |
| cg07265300 | 0.0644  | 0.059   | 0.06227 | 0.06346 | 0.06603 | 0.06472 | 0.05162 | 0.04946 | 0.05699 | 0.05934 | PFN4     |
| cg07265310 | 0.56135 | 0.19313 | 0.90512 | 0.90498 | 0.50483 | 0.59231 | 0.16668 | 0.05955 | 0.64504 | 0.34459 | K5B      |
| cg07265622 | 0.06996 | 0.07321 | 0.07615 | 0.07468 | 0.05835 | 0.09684 | 0.07435 | 0.06589 | 0.07312 | 0.07247 | MED31    |
| cg07267296 | 0.04335 | 0.05339 | 0.04445 | 0.04048 | 0.02548 | 0.04481 | 0.0411  | 0.0426  | 0.03977 | 0.0357  | HMBOX1   |
| cg07269146 | 0.69417 | 0.27241 | 0.64725 | 0.77079 | 0.66388 | 0.77109 | 0.19248 | 0.20721 | 0.73094 | 0.52272 | CCL21    |
| cg07270175 | 0.21861 | 0.08641 | 0.29362 | 0.21538 | 0.10919 | 0.07826 | 0.09195 | 0.06636 | 0.08724 | 0.06942 | NOC3L    |
| cg07271264 | 0.0745  | 0.09133 | 0.82881 | 0.86494 | 0.41357 | 0.90459 | 0.2265  | 0.24727 | 0.28212 | 0.06319 | MYOD1    |
| cg07271268 | 0.0309  | 0.02823 | 0.03384 | 0.03119 | 0.06973 | 0.02834 | 0.02619 | 0.02833 | 0.02658 | 0.02401 | JARID1A  |
| cg07273415 | 0.07215 | 0.04244 | 0.04443 | 0.04488 | 0.38351 | 0.24168 | 0.0403  | 0.03653 | 0.04094 | 0.0326  | CYBASC3  |
| cg07274506 | 0.02837 | 0.02917 | 0.02843 | 0.03414 | 0.02518 | 0.02754 | 0.02317 | 0.02678 | 0.02327 | 0.02312 | NOL9     |
| cg07276902 | 0.05227 | 0.05516 | 0.05425 | 0.0572  | 0.04721 | 0.05502 | 0.03987 | 0.03781 | 0.04152 | 0.04747 | SNRPG    |
| cg07278207 | 0.03909 | 0.04022 | 0.0487  | 0.03591 | 0.06514 | 0.05681 | 0.04151 | 0.03877 | 0.03465 | 0.03953 | DCDC1    |
| cg07278624 | 0.13851 | 0.13366 | 0.13469 | 0.13609 | 0.12717 | 0.12743 | 0.1291  | 0.11428 | 0.11522 | 0.116   | TCP11L2  |
| cg07281640 | 0.03185 | 0.03028 | 0.04591 | 0.03454 | 0.09621 | 0.03721 | 0.0349  | 0.02687 | 0.03151 | 0.02423 | C9orf6   |
| cg07281688 | 0.04243 | 0.02726 | 0.03624 | 0.03103 | 0.02048 | 0.02336 | 0.02399 | 0.02286 | 0.02067 | 0.01751 | PTGES3   |
| cg07284407 | 0.56736 | 0.57615 | 0.65689 | 0.75783 | 0.58786 | 0.45698 | 0.43455 | 0.25705 | 0.40147 | 0.40666 | GNAS     |

|            |         |         |         |         |         |         |         |         |         |                  |
|------------|---------|---------|---------|---------|---------|---------|---------|---------|---------|------------------|
| cg07284558 | 0.8741  | 0.85608 | 0.86695 | 0.90434 | 0.72006 | 0.49077 | 0.40703 | 0.149   | 0.75116 | 0.73289 STK32C   |
| cg07285167 | 0.82508 | 0.31703 | 0.70407 | 0.84947 | 0.80936 | 0.59835 | 0.41354 | 0.09305 | 0.29958 | 0.24666 CSF3R    |
| cg07285276 | 0.87535 | 0.56848 | 0.87415 | 0.895   | 0.86234 | 0.8813  | 0.86766 | 0.83239 | 0.90603 | 0.7993 RAPGEF1   |
| cg07285838 | 0.13553 | 0.10357 | 0.04828 | 0.05001 | 0.07011 | 0.05168 | 0.04289 | 0.04525 | 0.05347 | 0.04069 FLJ21106 |
| cg07285953 | 0.90302 | 0.74771 | 0.84495 | 0.85141 | 0.87699 | 0.90946 | 0.88635 | 0.87217 | 0.91822 | 0.8825 CRYBA1    |
| cg07288394 | 0.10298 | 0.09888 | 0.1208  | 0.24741 | 0.11571 | 0.0921  | 0.13174 | 0.11802 | 0.07244 | 0.06159 C19orf12 |
| cg07288587 | 0.04041 | 0.03724 | 0.03621 | 0.03624 | 0.03026 | 0.03854 | 0.03932 | 0.03663 | 0.03582 | 0.03526 CSNK1G1  |
| cg07289581 | 0.0348  | 0.04178 | 0.04272 | 0.04461 | 0.03768 | 0.03643 | 0.03484 | 0.04035 | 0.04744 | 0.038 MRPS35     |
| cg07290273 | 0.06877 | 0.0389  | 0.03782 | 0.03634 | 0.03325 | 0.03513 | 0.0331  | 0.03282 | 0.03574 | 0.02834 TMEM17   |
| cg07290435 | 0.33635 | 0.25538 | 0.24149 | 0.31833 | 0.26978 | 0.27537 | 0.28487 | 0.27966 | 0.23568 | 0.2381 CDH10     |
| cg07291563 | 0.04061 | 0.03891 | 0.05052 | 0.04612 | 0.15671 | 0.03666 | 0.0358  | 0.03012 | 0.03521 | 0.02745 GRWD1    |
| cg07292816 | 0.7942  | 0.66237 | 0.75697 | 0.76917 | 0.72882 | 0.75559 | 0.64897 | 0.81152 | 0.60864 | 0.4917 EFCAB3    |
| cg07293947 | 0.07968 | 0.05392 | 0.38771 | 0.38617 | 0.10905 | 0.30418 | 0.06853 | 0.04786 | 0.07134 | 0.04029 SFXN1    |
| cg07294541 | 0.81191 | 0.04108 | 0.33548 | 0.35297 | 0.93136 | 0.07922 | 0.88414 | 0.03157 | 0.89056 | 0.28529 DEF6     |
| cg07294734 | 0.3033  | 0.04988 | 0.08371 | 0.0676  | 0.27057 | 0.28554 | 0.18679 | 0.06041 | 0.14689 | 0.26553 ATP5D    |
| cg07294774 | 0.16554 | 0.1615  | 0.7365  | 0.74591 | 0.2722  | 0.1841  | 0.18861 | 0.23584 | 0.1518  | 0.1657 DIO2      |
| cg07294870 | 0.06116 | 0.05655 | 0.0619  | 0.06172 | 0.06148 | 0.06722 | 0.0549  | 0.0651  | 0.04135 | 0.04591 PIGT     |
| cg07295034 | 0.03459 | 0.03913 | 0.0369  | 0.0356  | 0.02854 | 0.0329  | 0.02868 | 0.03693 | 0.03121 | 0.03568 SMG1     |
| cg07295092 | 0.03746 | 0.05003 | 0.0429  | 0.0472  | 0.04172 | 0.04448 | 0.03617 | 0.04196 | 0.03218 | 0.03351 FPGS     |
| cg07295678 | 0.03535 | 0.02962 | 0.24047 | 0.05924 | 0.23766 | 0.0377  | 0.04987 | 0.0595  | 0.06158 | 0.02278 DPYSL4   |
| cg07296772 | 0.90993 | 0.86796 | 0.91853 | 0.93172 | 0.93442 | 0.83744 | 0.89469 | 0.67396 | 0.92712 | 0.90589 CHMP4A   |
| cg07297178 | 0.77029 | 0.52772 | 0.18653 | 0.21929 | 0.16199 | 0.08041 | 0.06705 | 0.07776 | 0.06848 | 0.06205 CEACAM7  |
| cg07297906 | 0.04243 | 0.03461 | 0.85802 | 0.9539  | 0.15022 | 0.03707 | 0.37481 | 0.1301  | 0.04659 | 0.02121 GPC3     |
| cg07299462 | 0.02242 | 0.02274 | 0.02667 | 0.02815 | 0.02447 | 0.02645 | 0.03748 | 0.03566 | 0.02152 | 0.02119 MED8     |
| cg07300408 | 0.43594 | 0.23576 | 0.62767 | 0.70013 | 0.4705  | 0.44751 | 0.19753 | 0.17203 | 0.72665 | 0.64604 RNASE11  |
| cg07301004 | 0.05198 | 0.04595 | 0.05133 | 0.0519  | 0.05681 | 0.04889 | 0.05084 | 0.04739 | 0.0522  | 0.05361 ARPC3    |
| cg07301822 | 0.03791 | 0.04108 | 0.03994 | 0.03784 | 0.03469 | 0.04433 | 0.03127 | 0.03141 | 0.05307 | 0.03869 SEC24D   |
| cg07306197 | 0.03491 | 0.03765 | 0.03757 | 0.03826 | 0.04769 | 0.02761 | 0.03107 | 0.0301  | 0.02957 | 0.02373 ZNF266   |
| cg07307078 | 0.295   | 0.06126 | 0.05061 | 0.05487 | 0.05223 | 0.05356 | 0.83583 | 0.89476 | 0.93387 | 0.89685 TUBB6    |
| cg07308943 | 0.05022 | 0.03683 | 0.05425 | 0.05042 | 0.07541 | 0.02816 | 0.03176 | 0.03102 | 0.04153 | 0.02598 FLJ20628 |
| cg07309102 | 0.02547 | 0.02509 | 0.02807 | 0.02527 | 0.02351 | 0.02401 | 0.02004 | 0.02149 | 0.02027 | 0.02015 KLF4     |
| cg07309361 | 0.02932 | 0.03105 | 0.03069 | 0.03073 | 0.02642 | 0.03039 | 0.03047 | 0.02747 | 0.02601 | 0.02525 PCBP4    |
| cg07309374 | 0.03848 | 0.03591 | 0.04916 | 0.05053 | 0.03897 | 0.04579 | 0.03488 | 0.02776 | 0.03544 | 0.03121 PDIA5    |
| cg07310661 | 0.09061 | 0.10474 | 0.22605 | 0.18016 | 0.10864 | 0.14888 | 0.1042  | 0.09933 | 0.11704 | 0.13205 CUL3     |
| cg07310951 | 0.54281 | 0.15466 | 0.36289 | 0.40683 | 0.24796 | 0.12086 | 0.21239 | 0.16104 | 0.68734 | 0.58913 ZIM2     |
| cg07311845 | 0.0767  | 0.09614 | 0.13034 | 0.11775 |         | 0.10635 | 0.06394 | 0.05219 | 0.05551 | 0.05857 TMLHE    |
| cg07312445 | 0.08221 | 0.03859 | 0.29636 | 0.43188 | 0.05878 | 0.05431 | 0.02783 | 0.02833 | 0.03031 | 0.02951 FLJ14001 |
| cg07313155 | 0.31462 | 0.07414 | 0.11102 | 0.19927 | 0.62053 | 0.05294 | 0.0458  | 0.04075 | 0.09126 | 0.02918 THRA     |
| cg07314337 | 0.02712 | 0.02787 | 0.02755 | 0.02579 | 0.02522 | 0.02574 | 0.02421 | 0.02473 | 0.02458 | 0.02276 ARL6IP6  |
| cg07314414 | 0.11097 | 0.12434 | 0.12337 | 0.13308 | 0.10687 | 0.12849 | 0.12382 | 0.10994 | 0.11129 | 0.10243 SAP130   |
| cg07314549 | 0.07587 | 0.03721 | 0.04092 | 0.04648 | 0.02817 | 0.03522 | 0.03993 | 0.03869 | 0.03671 | 0.03951 MGC16943 |

|            |         |         |         |         |         |         |         |         |         |                  |
|------------|---------|---------|---------|---------|---------|---------|---------|---------|---------|------------------|
| cg07314984 | 0.07606 | 0.08342 | 0.09919 | 0.08299 | 0.08298 | 0.07319 | 0.07606 | 0.06906 | 0.07589 | 0.06396 PHKA2    |
| cg07315298 | 0.88032 | 0.86564 | 0.88636 | 0.91727 | 0.86248 | 0.85317 | 0.83723 | 0.85298 | 0.87638 | 0.88595 FOXD4L4  |
| cg07315445 | 0.03775 | 0.04119 | 0.04009 | 0.03465 | 0.03228 | 0.03599 | 0.03833 | 0.04138 | 0.03339 | 0.03001 MYL6     |
| cg07318658 | 0.06338 | 0.06213 | 0.08287 | 0.07437 | 0.04994 | 0.06192 | 0.0564  | 0.04862 | 0.05433 | 0.05211 MTMR4    |
| cg07321605 | 0.747   | 0.78811 | 0.80406 | 0.78698 | 0.66868 | 0.73011 | 0.68606 | 0.70934 | 0.86566 | 0.86352 NSF      |
| cg07322981 | 0.03845 | 0.03456 | 0.03628 | 0.03563 | 0.02783 | 0.03228 | 0.03652 | 0.03301 | 0.03156 | 0.03394 RNF103   |
| cg07326074 | 0.02462 | 0.03046 | 0.02658 | 0.02662 | 0.06397 | 0.02808 | 0.02238 | 0.02242 | 0.02107 | 0.02157 FLJ13909 |
| cg07326586 | 0.1641  | 0.08942 | 0.16357 | 0.20753 | 0.29257 | 0.15101 | 0.07244 | 0.10508 | 0.06714 | 0.06502 UBD      |
| cg07327328 | 0.06718 | 0.059   | 0.0633  | 0.05209 | 0.05688 | 0.05594 | 0.0616  | 0.05103 | 0.04768 | 0.04154 CEP250   |
| cg07327347 | 0.2778  | 0.08388 | 0.17962 | 0.30922 | 0.10679 | 0.07707 | 0.25046 | 0.06    | 0.04136 | 0.04351 AQP8     |
| cg07327468 | 0.86306 | 0.72525 | 0.09762 | 0.07358 | 0.81465 | 0.06106 | 0.0467  | 0.0487  | 0.85355 | 0.78579 EYA4     |
| cg07328495 | 0.05333 | 0.06842 | 0.09456 | 0.08311 | 0.10101 | 0.09332 | 0.09323 | 0.08873 | 0.05688 | 0.06494 SMC2L1   |
| cg07328579 | 0.61516 | 0.23658 | 0.06045 | 0.04672 | 0.0603  | 0.05391 | 0.05325 | 0.04804 | 0.33984 | 0.23133 GLT8D2   |
| cg07330329 | 0.21647 | 0.08967 | 0.16938 | 0.09807 | 0.19122 | 0.1024  | 0.15634 | 0.10797 | 0.10074 | 0.10029 TRIM48   |
| cg07330718 | 0.02742 | 0.03672 | 0.03577 | 0.03104 | 0.03742 | 0.03538 | 0.03271 | 0.03562 | 0.02884 | 0.02093 HYOU1    |
| cg07331725 | 0.91257 | 0.73426 | 0.91103 | 0.92092 | 0.92864 | 0.8908  | 0.67479 | 0.58526 | 0.54788 | 0.89688 SERPINB5 |
| cg07331806 | 0.48471 | 0.02312 | 0.51549 | 0.66309 | 0.71142 | 0.93044 | 0.47158 | 0.14863 | 0.38862 | 0.18719 AIFL     |
| cg07334912 | 0.18974 | 0.03805 | 0.03987 | 0.04134 | 0.05493 | 0.04673 | 0.08369 | 0.04293 | 0.18169 | 0.03135 HARS2    |
| cg07336230 | 0.37276 | 0.04586 | 0.023   | 0.0254  | 0.02827 | 0.02979 | 0.02092 | 0.02287 | 0.38734 | 0.26029 KIF6     |
| cg07337598 | 0.65804 | 0.38613 | 0.7704  | 0.80557 | 0.8     | 0.67975 | 0.76318 | 0.73016 | 0.77984 | 0.63474 ANXA9    |
| cg07338205 | 0.41302 | 0.16196 | 0.46932 | 0.56649 | 0.37145 | 0.20221 | 0.25696 | 0.21065 | 0.19535 | 0.22529 G6PC2    |
| cg07339138 | 0.83076 | 0.51156 | 0.86603 | 0.87208 | 0.23092 | 0.3603  | 0.76597 | 0.76283 | 0.86421 | 0.84897 CCDC13   |
| cg07339327 | 0.16277 | 0.24216 | 0.95182 | 0.96536 | 0.94433 | 0.90192 | 0.831   | 0.30454 | 0.95746 | 0.95957 CCND1    |
| cg07341907 | 0.04066 | 0.04278 | 0.04549 | 0.04173 | 0.03858 | 0.04389 | 0.03826 | 0.0357  | 0.03199 | 0.02976 UNC13B   |
| cg07342016 | 0.03963 | 0.03227 | 0.94589 | 0.95435 | 0.83115 | 0.93398 | 0.78993 | 0.7026  | 0.97215 | 0.96776 RAB33A   |
| cg07342545 | 0.04358 | 0.04357 | 0.04536 | 0.04525 | 0.03997 | 0.0395  | 0.03592 | 0.03774 | 0.04257 | 0.03297 FOSL2    |
| cg07342901 | 0.74265 | 0.19002 | 0.82848 | 0.88425 | 0.74945 | 0.74131 | 0.85589 | 0.80074 | 0.91069 | 0.78357 H19      |
| cg07346310 | 0.14114 | 0.13181 | 0.18465 | 0.20482 | 0.65054 | 0.53312 | 0.58299 | 0.08827 | 0.79251 | 0.57847 RBM24    |
| cg07347137 | 0.04016 | 0.03537 | 0.04183 | 0.03948 | 0.03063 | 0.04468 | 0.03478 | 0.03515 | 0.03577 | 0.03259 ZCCHC11  |
| cg07347645 | 0.84208 | 0.84108 | 0.81688 | 0.85617 | 0.80039 | 0.81069 | 0.77538 | 0.84248 | 0.85722 | 0.8415 SYCP2     |
| cg07347725 | 0.09162 | 0.10625 | 0.1262  | 0.14327 | 0.11508 | 0.09664 | 0.09818 | 0.08369 | 0.08598 | 0.08603 C9orf18  |
| cg07348311 | 0.14572 | 0.04594 | 0.07589 | 0.08916 | 0.04967 | 0.04797 | 0.05474 | 0.04398 | 0.04179 | 0.04153 IFIH1    |
| cg07349094 | 0.3212  | 0.09534 | 0.8879  | 0.8855  | 0.89229 | 0.93432 | 0.91942 | 0.93334 | 0.92754 | 0.90775 AFF3     |
| cg07351267 | 0.8049  | 0.59469 | 0.87247 | 0.88167 | 0.91323 | 0.58037 | 0.64901 | 0.52062 | 0.8784  | 0.74692 LRP3     |
| cg07352586 | 0.04183 | 0.03101 | 0.03527 | 0.03668 | 0.03504 | 0.03334 | 0.02935 | 0.02503 | 0.03157 | 0.02862 KIAA1919 |
| cg07352600 | 0.55816 | 0.10452 | 0.40497 | 0.58123 | 0.26114 | 0.05818 | 0.08959 | 0.03866 | 0.08574 | 0.03823 LIN10    |
| cg07354209 | 0.41062 | 0.27544 | 0.26623 | 0.23765 | 0.32151 | 0.24729 | 0.2913  | 0.26738 | 0.24298 | 0.26328 FAP      |
| cg07354440 | 0.0552  | 0.06025 | 0.91687 | 0.92037 | 0.17954 | 0.04643 | 0.8633  | 0.78481 | 0.10888 | 0.04876 NDUFS2   |
| cg07355551 | 0.05785 | 0.05762 | 0.05702 | 0.05194 | 0.04269 | 0.05324 | 0.05602 | 0.05347 | 0.05237 | 0.05447 ZNF343   |
| cg07356189 | 0.9412  | 0.94142 | 0.9203  | 0.92972 | 0.92611 | 0.93737 | 0.95514 | 0.94809 | 0.96157 | 0.96128 CXorf2   |
| cg07356753 | 0.03684 | 0.04262 | 0.04223 | 0.02723 | 0.03156 | 0.03485 | 0.03781 | 0.03731 | 0.02455 | 0.02404 GBE1     |

|            |         |         |         |         |         |         |         |         |         |                   |
|------------|---------|---------|---------|---------|---------|---------|---------|---------|---------|-------------------|
| cg07356771 | 0.60525 | 0.55749 | 0.09824 | 0.04047 | 0.10907 | 0.02979 | 0.10581 | 0.03099 | 0.93348 | 0.72933 CHDH      |
| cg07357256 | 0.02772 | 0.02562 | 0.03405 | 0.02702 | 0.03375 | 0.0342  | 0.02913 | 0.03027 | 0.02305 | 0.023 MRPS26      |
| cg07359545 | 0.95118 | 0.92929 | 0.95412 | 0.95517 | 0.97228 | 0.96865 | 0.95625 | 0.95438 | 0.73006 | 0.73708 GP1BB     |
| cg07360076 | 0.35085 | 0.03501 | 0.93255 | 0.97058 | 0.93724 | 0.17395 | 0.12398 | 0.03055 | 0.13177 | 0.03977 FGFR3     |
| cg07360692 | 0.81219 | 0.3898  | 0.40986 | 0.62528 | 0.90827 | 0.73849 | 0.8545  | 0.57173 | 0.91085 | 0.8997 FLJ20032   |
| cg07361385 | 0.83721 | 0.87718 | 0.84859 | 0.89793 | 0.90641 | 0.89484 | 0.07182 | 0.04988 | 0.87767 | 0.75198 AHSG      |
| cg07363637 | 0.77159 | 0.60041 | 0.91045 | 0.91234 | 0.94234 | 0.92524 | 0.88766 | 0.77912 | 0.92794 | 0.8404 SLC44A4    |
| cg07364638 | 0.02272 | 0.01879 | 0.01813 | 0.01919 | 0.02141 | 0.0241  | 0.02372 | 0.0232  | 0.01822 | 0.0252 NGRN       |
| cg07364841 | 0.85027 | 0.46788 | 0.87831 | 0.89189 | 0.85652 | 0.864   | 0.8764  | 0.87363 | 0.87811 | 0.76914 HGFAC     |
| cg07366967 | 0.84144 | 0.76944 | 0.8487  | 0.87429 | 0.71955 | 0.7701  | 0.81248 | 0.81016 | 0.83607 | 0.77958 EXDL2     |
| cg07369274 | 0.79874 | 0.16263 | 0.7893  | 0.82323 | 0.73828 | 0.14239 | 0.69396 | 0.28082 | 0.55488 | 0.09341 DNASE1L3  |
| cg07371290 | 0.03743 | 0.03526 | 0.07301 | 0.11062 | 0.29306 | 0.07976 | 0.05507 | 0.03455 | 0.41411 | 0.29357 HDAC5     |
| cg07371530 | 0.41097 | 0.08151 | 0.91805 | 0.9295  | 0.96728 | 0.76521 | 0.69717 | 0.78376 | 0.92801 | 0.93058 RPUSD1    |
| cg07373172 | 0.45683 | 0.46308 | 0.58245 | 0.69615 | 0.53138 | 0.57988 | 0.41757 | 0.18327 | 0.1127  | 0.13396 IFNA21    |
| cg07374145 | 0.0191  | 0.01598 | 0.01622 | 0.01802 | 0.01528 | 0.01377 | 0.01494 | 0.01556 | 0.01423 | 0.01202 ARRC2C    |
| cg07374632 | 0.02773 | 0.02917 | 0.06297 | 0.06484 | 0.07314 | 0.29077 | 0.5185  | 0.51257 | 0.02579 | 0.02679 PCSK1N    |
| cg07374637 | 0.54596 | 0.30888 | 0.65548 | 0.72321 | 0.75408 | 0.83966 | 0.1201  | 0.08782 | 0.14566 | 0.08754 KRTAP19-5 |
| cg07374928 | 0.80223 | 0.79141 | 0.73281 | 0.76801 | 0.65392 | 0.76986 | 0.70666 | 0.74743 | 0.80968 | 0.80849 FLJ21103  |
| cg07376029 | 0.35633 | 0.25608 | 0.25247 | 0.19692 | 0.31546 | 0.25647 | 0.18399 | 0.29252 | 0.17622 | 0.16487 GC        |
| cg07376232 | 0.59093 | 0.0544  | 0.11895 | 0.07032 | 0.31242 | 0.32399 | 0.07199 | 0.06152 | 0.06913 | 0.0525 AMICA1     |
| cg07376535 | 0.30662 | 0.33939 | 0.73886 | 0.79309 | 0.20307 | 0.71398 | 0.29044 | 0.25552 | 0.09455 | 0.051 ADCYAP1     |
| cg07378350 | 0.73018 | 0.15664 | 0.87975 | 0.90728 | 0.72601 | 0.33953 | 0.5428  | 0.13671 | 0.46314 | 0.29284 GDF5      |
| cg07379574 | 0.34376 | 0.38604 | 0.94015 | 0.93487 | 0.77862 | 0.68509 | 0.20792 | 0.06839 | 0.14484 | 0.31348 C19orf4   |
| cg07380416 | 0.92148 | 0.45438 | 0.92076 | 0.93406 | 0.95469 | 0.93169 | 0.90556 | 0.85685 | 0.9392  | 0.89658 CD6       |
| cg07380496 | 0.02721 | 0.02443 | 0.02603 | 0.02587 | 0.02435 | 0.02052 | 0.02531 | 0.02168 | 0.02286 | 0.01889 MAP1B     |
| cg07380959 | 0.08309 | 0.04923 | 0.0606  | 0.05266 | 0.12815 | 0.05272 | 0.06586 | 0.06046 | 0.08691 | 0.03539 TFPI2     |
| cg07383972 | 0.04415 | 0.05577 | 0.08158 | 0.06801 | 0.07264 | 0.07607 | 0.04129 | 0.04199 | 0.03304 | 0.0325 NUP205     |
| cg07384961 | 0.89606 | 0.11112 | 0.97028 | 0.97035 | 0.97932 | 0.94724 | 0.95299 | 0.85903 | 0.95601 | 0.86569 CLDN6     |
| cg07387199 | 0.03986 | 0.0395  | 0.04074 | 0.03812 | 0.02917 | 0.03525 | 0.0373  | 0.03982 | 0.03462 | 0.0309 DDX5       |
| cg07387450 | 0.02503 | 0.02384 | 0.0279  | 0.02418 | 0.02473 | 0.02697 | 0.02196 | 0.02094 | 0.02585 | 0.01853 TMED5     |
| cg07388493 | 0.90629 | 0.59023 | 0.73    | 0.88409 | 0.5156  | 0.07038 | 0.09781 | 0.2238  | 0.60322 | 0.53447 NDUFS5    |
| cg07389922 | 0.05856 | 0.03326 | 0.04189 | 0.04432 | 0.03471 | 0.04329 | 0.03656 | 0.03073 | 0.2497  | 0.05412 C17orf81  |
| cg07393322 | 0.24391 | 0.06055 | 0.14508 | 0.08499 | 0.44063 | 0.12466 | 0.39796 | 0.19906 | 0.63219 | 0.38233 A4GALT    |
| cg07395788 | 0.04254 | 0.04437 | 0.0485  | 0.04577 | 0.03636 | 0.03909 | 0.03988 | 0.03817 | 0.03231 | 0.04294 PDSS2     |
| cg07398350 | 0.06774 | 0.07188 | 0.07042 | 0.06862 | 0.04072 | 0.04448 | 0.0597  | 0.05749 | 0.04916 | 0.05253 C16orf57  |
| cg07398429 | 0.67726 | 0.66544 | 0.63953 | 0.68052 | 0.63598 | 0.73183 | 0.05967 | 0.11753 | 0.33466 | 0.30647 MAGEB4    |
| cg07399355 | 0.08707 | 0.0583  | 0.28563 | 0.37035 | 0.06086 | 0.04597 | 0.11739 | 0.06175 | 0.04679 | 0.04055 MUC1      |
| cg07401901 | 0.03306 | 0.03505 | 0.03383 | 0.0374  | 0.02408 | 0.03563 | 0.02947 | 0.03215 | 0.02846 | 0.02995 DAAM1     |
| cg07403255 | 0.43477 | 0.24559 | 0.7912  | 0.8035  | 0.85128 | 0.82859 | 0.7675  | 0.81553 | 0.79794 | 0.7377 PAX8       |
| cg07403350 | 0.67675 | 0.1678  | 0.57731 | 0.66542 | 0.7027  | 0.6874  | 0.51006 | 0.57847 | 0.72444 | 0.69442 LIG4      |
| cg07404418 | 0.05688 | 0.06871 | 0.08887 | 0.10012 | 0.15644 | 0.12855 | 0.06695 | 0.06418 | 0.05587 | 0.05495 ALKBH4    |

|            |         |         |         |         |         |         |         |         |         |                   |
|------------|---------|---------|---------|---------|---------|---------|---------|---------|---------|-------------------|
| cg07404485 | 0.38114 | 0.51193 | 0.83826 | 0.81845 | 0.8809  | 0.87815 | 0.67792 | 0.81274 | 0.31588 | 0.2636 PON1       |
| cg07405796 | 0.71876 | 0.43896 | 0.60511 | 0.80802 | 0.57674 | 0.87044 | 0.07508 | 0.09554 | 0.21433 | 0.05844 TRIM40    |
| cg07408456 | 0.87381 | 0.573   | 0.50967 | 0.76777 | 0.6889  | 0.6     | 0.11482 | 0.13398 | 0.39689 | 0.34651 PGLYRP2   |
| cg07408740 | 0.0865  | 0.07793 | 0.406   | 0.31315 | 0.50818 | 0.46055 | 0.1311  | 0.1054  | 0.46159 | 0.26289 OGDH      |
| cg07409200 | 0.31771 | 0.1041  | 0.44271 | 0.62431 | 0.58605 | 0.49651 | 0.52733 | 0.61147 | 0.10999 | 0.13246 FLJ40919  |
| cg07410075 | 0.04482 | 0.0521  | 0.04635 | 0.04698 | 0.03286 | 0.03909 | 0.03572 | 0.04152 | 0.03757 | 0.03495 CCDC6     |
| cg07411229 | 0.06801 | 0.06116 | 0.09296 | 0.08165 | 0.07804 | 0.06656 | 0.07356 | 0.0587  | 0.05437 | 0.06407 LOC128153 |
| cg07412254 | 0.84805 | 0.63741 | 0.88262 | 0.90955 | 0.92132 | 0.88194 | 0.87749 | 0.50797 | 0.90535 | 0.65422 FLJ14816  |
| cg07413497 | 0.05643 | 0.05896 | 0.05602 | 0.05596 | 0.04921 | 0.04732 | 0.04315 | 0.04377 | 0.04469 | 0.0439 C6orf57    |
| cg07414384 | 0.1327  | 0.11028 | 0.1341  | 0.13564 | 0.20227 | 0.16684 | 0.10435 | 0.10623 | 0.11762 | 0.14621 BAZ1A     |
| cg07421682 | 0.89485 | 0.63291 | 0.90695 | 0.92685 | 0.91074 | 0.72481 | 0.19943 | 0.09402 | 0.7668  | 0.61684 PCSK6     |
| cg07422345 | 0.03179 | 0.03514 | 0.0732  | 0.03688 | 0.03435 | 0.02921 | 0.10854 | 0.0522  | 0.07611 | 0.03798 CEBPA     |
| cg07423149 | 0.7716  | 0.52635 | 0.70469 | 0.86246 | 0.67811 | 0.15554 | 0.83793 | 0.10282 | 0.43976 | 0.09755 CHI3L1    |
| cg07423906 | 0.0352  | 0.04668 | 0.04181 | 0.03269 | 0.03124 | 0.03718 | 0.03177 | 0.03454 | 0.03183 | 0.03515 C17orf56  |
| cg07424155 | 0.03279 | 0.03768 | 0.03739 | 0.03578 | 0.03633 | 0.03845 | 0.02867 | 0.03313 | 0.02844 | 0.02461 CAPZA2    |
| cg07425555 | 0.79534 | 0.63773 | 0.57495 | 0.65923 | 0.71307 | 0.48754 | 0.03336 | 0.14097 | 0.04483 | 0.04343 FLJ23447  |
| cg07426848 | 0.74339 | 0.30819 | 0.07867 | 0.1941  | 0.0998  | 0.14951 | 0.06414 | 0.09058 | 0.0607  | 0.05107 S100A3    |
| cg07426960 | 0.23827 | 0.21589 | 0.79447 | 0.82242 | 0.31575 | 0.10367 | 0.36193 | 0.14783 | 0.63191 | 0.37057 CCND1     |
| cg07427065 | 0.76363 | 0.75232 | 0.56029 | 0.58316 | 0.73117 | 0.55471 | 0.80554 | 0.73128 | 0.90463 | 0.75234 MEST      |
| cg07428089 | 0.02231 | 0.0232  | 0.02473 | 0.02187 | 0.53614 | 0.54427 | 0.01779 | 0.01778 | 0.02149 | 0.01919 ATP5G3    |
| cg07428182 | 0.04181 | 0.04527 | 0.05451 | 0.05385 | 0.12367 | 0.39603 | 0.49594 | 0.35762 | 0.17607 | 0.04343 PLXNA3    |
| cg07430605 | 0.0378  | 0.03845 | 0.03695 | 0.0362  | 0.02801 | 0.03546 | 0.03618 | 0.03192 | 0.03489 | 0.03736 BRD8      |
| cg07432969 | 0.80696 | 0.49564 | 0.92169 | 0.93263 | 0.95611 | 0.92789 | 0.88407 | 0.89871 | 0.8836  | 0.80667 GPR35     |
| cg07433344 | 0.02379 | 0.0256  | 0.50018 | 0.58969 | 0.97516 | 0.97281 | 0.22764 | 0.02716 | 0.97494 | 0.92631 HSD17B8   |
| cg07433453 | 0.87652 | 0.81035 | 0.82631 | 0.89061 | 0.91776 | 0.86922 | 0.89209 | 0.86847 | 0.90616 | 0.87696 GPR146    |
| cg07434278 | 0.89894 | 0.35553 | 0.85808 | 0.88078 | 0.93696 | 0.89853 | 0.67226 | 0.60559 | 0.89463 | 0.64028 CYP21A2   |
| cg07434382 | 0.66108 | 0.42292 | 0.58846 | 0.74847 | 0.81569 | 0.8099  | 0.69271 | 0.69432 | 0.51512 | 0.41844 LOC348174 |
| cg07435592 | 0.10795 | 0.09253 | 0.10189 | 0.08416 | 0.07371 | 0.06991 | 0.11776 | 0.12327 | 0.08598 | 0.07853 DCBLD2    |
| cg07436807 | 0.87123 | 0.86787 | 0.87303 | 0.89673 | 0.4232  | 0.68525 | 0.10335 | 0.19439 | 0.63633 | 0.62132 ACTA2     |
| cg07437033 | 0.04503 | 0.04486 | 0.04425 | 0.04305 | 0.03016 | 0.04082 | 0.04207 | 0.04034 | 0.03611 | 0.03554 ZBTB17    |
| cg07440387 | 0.05309 | 0.04919 | 0.05037 | 0.04367 | 0.04025 | 0.04566 | 0.04603 | 0.04977 | 0.03967 | 0.03292 SFRS6     |
| cg07440414 | 0.04954 | 0.04754 | 0.05981 | 0.04415 | 0.54748 | 0.5002  | 0.04171 | 0.03802 | 0.08207 | 0.04384 TCF7      |
| cg07440877 | 0.76704 | 0.63608 | 0.90996 | 0.93731 | 0.95002 | 0.90623 | 0.19823 | 0.06202 | 0.41473 | 0.06529 FLJ46358  |
| cg07441143 | 0.47541 | 0.06441 | 0.33886 | 0.45547 | 0.46998 | 0.39611 | 0.11313 | 0.18142 | 0.06457 | 0.03537 SLURP1    |
| cg07441272 | 0.04828 | 0.04486 | 0.04908 | 0.0436  | 0.42419 | 0.49808 | 0.53228 | 0.58403 | 0.03717 | 0.03337 RPL39L    |
| cg07442479 | 0.10649 | 0.06533 | 0.08127 | 0.07156 | 0.36635 | 0.2601  | 0.0654  | 0.08329 | 0.33371 | 0.19009 GDNF      |
| cg07443748 | 0.21101 | 0.30345 | 0.05936 | 0.07057 | 0.59641 | 0.39784 | 0.05428 | 0.04835 | 0.04266 | 0.04262 CESK1     |
| cg07443954 | 0.04565 | 0.03992 | 0.04762 | 0.04607 | 0.13506 | 0.03257 | 0.03309 | 0.03401 | 0.0338  | 0.03558 CA11      |
| cg07444907 | 0.0539  | 0.0501  | 0.06874 | 0.04924 | 0.04192 | 0.05137 | 0.05958 | 0.05357 | 0.03874 | 0.03352 UBLCP1    |
| cg07446572 | 0.25473 | 0.2946  | 0.75808 | 0.84927 | 0.51298 | 0.25984 | 0.39477 | 0.23925 | 0.93012 | 0.8388 CDCA3      |
| cg07446846 | 0.93971 | 0.80757 | 0.63721 | 0.82148 | 0.95362 | 0.91683 | 0.78637 | 0.60548 | 0.94252 | 0.47923 SLC6A8    |

|            |         |         |         |         |         |         |         |         |         |                   |
|------------|---------|---------|---------|---------|---------|---------|---------|---------|---------|-------------------|
| cg07447773 | 0.77915 | 0.36929 | 0.90401 | 0.92945 | 0.93207 | 0.93278 | 0.82099 | 0.81128 | 0.93402 | 0.91779 AKR7A3    |
| cg07447922 | 0.06279 | 0.06448 | 0.54253 | 0.72529 | 0.2556  | 0.08735 | 0.06837 | 0.0652  | 0.05913 | 0.04448 EPHA10    |
| cg07448460 | 0.04971 | 0.04793 | 0.04888 | 0.03834 | 0.0499  | 0.03837 | 0.04237 | 0.03613 | 0.07134 | 0.03956 GGH       |
| cg07448499 | 0.27352 | 0.30789 | 0.48806 | 0.59978 | 0.37577 | 0.31014 | 0.16532 | 0.09147 | 0.08562 | 0.06717 CTSH      |
| cg07448856 | 0.02218 | 0.02742 | 0.03578 | 0.0313  | 0.02602 | 0.02579 | 0.03898 | 0.03543 | 0.03477 | 0.02767 ZNF670    |
| cg07452799 | 0.03358 | 0.03698 | 0.03005 | 0.03048 | 0.02349 | 0.03038 | 0.02851 | 0.0286  | 0.02587 | 0.0312 PARD3      |
| cg07453618 | 0.02361 | 0.02399 | 0.02445 | 0.0238  | 0.02089 | 0.02314 | 0.01881 | 0.02185 | 0.02054 | 0.02018 FAM79A    |
| cg07453748 | 0.79113 | 0.80142 | 0.62529 | 0.62814 | 0.72815 | 0.78226 | 0.55302 | 0.79538 | 0.70609 | 0.53099 MGMT      |
| cg07454215 | 0.03307 | 0.03443 | 0.03337 | 0.03193 | 0.0367  | 0.04124 | 0.02601 | 0.02951 | 0.02635 | 0.02704 DCP1A     |
| cg07455279 | 0.58741 | 0.26007 | 0.54992 | 0.64475 | 0.36121 | 0.61171 | 0.09096 | 0.06787 | 0.1074  | 0.04474 NDUFA3    |
| cg07455975 | 0.06778 | 0.03725 | 0.03715 | 0.0393  | 0.02981 | 0.03287 | 0.08578 | 0.03135 | 0.02898 | 0.02692 PTD004    |
| cg07456201 | 0.27386 | 0.24576 | 0.28907 | 0.2654  | 0.36578 | 0.16517 | 0.19329 | 0.18734 | 0.17555 | 0.1918 UMOD       |
| cg07456645 | 0.05103 | 0.0512  | 0.33829 | 0.43743 | 0.03947 | 0.04197 | 0.05263 | 0.04198 | 0.06439 | 0.0521 C19orf30   |
| cg07457944 | 0.03055 | 0.03542 | 0.03814 | 0.03023 | 0.02497 | 0.03127 | 0.02933 | 0.02889 | 0.03104 | 0.03143 SOCS6     |
| cg07459264 | 0.07353 | 0.08254 | 0.08569 | 0.07627 | 0.05455 | 0.05997 | 0.06221 | 0.06751 | 0.06231 | 0.06021 NECAP2    |
| cg07459489 | 0.45172 | 0.68342 | 0.46889 | 0.66788 | 0.83525 | 0.89984 | 0.83877 | 0.71161 | 0.52879 | 0.31582 SLC30A8   |
| cg07460665 | 0.23426 | 0.18368 | 0.12583 | 0.24155 | 0.18567 | 0.10746 | 0.18006 | 0.19418 | 0.10596 | 0.09847 CALCOCO2  |
| cg07461318 | 0.61592 | 0.5919  | 0.3318  | 0.36047 | 0.20324 | 0.37293 | 0.03796 | 0.03855 | 0.85603 | 0.55858 NTN4      |
| cg07461582 | 0.03981 | 0.04062 | 0.04024 | 0.03687 | 0.03095 | 0.03665 | 0.03509 | 0.03432 | 0.03199 | 0.03182 RINT-1    |
| cg07463059 | 0.10934 | 0.09541 | 0.15871 | 0.15371 | 0.16485 | 0.14364 | 0.12814 | 0.12924 | 0.10795 | 0.11829 IFI16     |
| cg07465480 | 0.06268 | 0.06148 | 0.07247 | 0.06331 | 0.23322 | 0.04426 | 0.05165 | 0.05191 | 0.09684 | 0.04592 TPMT      |
| cg07465609 | 0.77864 | 0.78859 | 0.39828 | 0.49291 | 0.56459 | 0.69795 | 0.26195 | 0.20823 | 0.30204 | 0.24632 EGFL11    |
| cg07465864 | 0.15548 | 0.11535 | 0.29602 | 0.3942  | 0.08546 | 0.07496 | 0.37572 | 0.42338 | 0.07839 | 0.086 YTHDC2      |
| cg07466531 | 0.03939 | 0.0285  | 0.04803 | 0.04625 | 0.04652 | 0.03496 | 0.04242 | 0.03405 | 0.06252 | 0.04444 SRP14     |
| cg07469792 | 0.0193  | 0.01953 | 0.02489 | 0.02433 | 0.02021 | 0.01927 | 0.01929 | 0.022   | 0.01726 | 0.01739 RASSF8    |
| cg07471052 | 0.95611 | 0.95346 | 0.94521 | 0.94654 | 0.94564 | 0.95028 | 0.95735 | 0.9549  | 0.96022 | 0.94396 CDK3      |
| cg07472159 | 0.73147 | 0.69405 | 0.66648 | 0.6819  | 0.61528 | 0.66423 | 0.68435 | 0.70956 | 0.69989 | 0.66248 COL10A1   |
| cg07473175 | 0.23199 | 0.0472  | 0.0542  | 0.04744 | 0.04186 | 0.04829 | 0.04464 | 0.05025 | 0.8647  | 0.263 AMIGO2      |
| cg07473550 | 0.02026 | 0.01933 | 0.02703 | 0.02292 | 0.01952 | 0.02493 | 0.1038  | 0.027   | 0.01918 | 0.02334 TSC22D3   |
| cg07474356 | 0.03661 | 0.04509 | 0.13779 | 0.39411 | 0.04023 | 0.06531 | 0.05546 | 0.04033 | 0.07466 | 0.04437 PCDH11X   |
| cg07475247 | 0.03266 | 0.0329  | 0.04407 | 0.03818 | 0.04186 | 0.04284 | 0.03203 | 0.03044 | 0.03306 | 0.02583 PMPCB     |
| cg07475743 | 0.60429 | 0.60244 | 0.74245 | 0.81452 | 0.71874 | 0.82747 | 0.56403 | 0.56548 | 0.48092 | 0.49907 OTOP1     |
| cg07476030 | 0.76052 | 0.601   | 0.18096 | 0.18686 | 0.68905 | 0.50897 | 0.5735  | 0.49552 | 0.75249 | 0.73208 RTN4IP1   |
| cg07477160 | 0.03148 | 0.03321 | 0.03609 | 0.03345 | 0.02679 | 0.02923 | 0.0262  | 0.02755 | 0.02813 | 0.02535 NDRG1     |
| cg07478100 | 0.05207 | 0.03891 | 0.03827 | 0.03403 | 0.02673 | 0.03349 | 0.03224 | 0.03321 | 0.02938 | 0.0324 DERL2      |
| cg07478122 | 0.50732 | 0.59223 | 0.54152 | 0.55677 | 0.38067 | 0.11847 | 0.39297 | 0.41532 | 0.76597 | 0.77176 HBII-13   |
| cg07478208 | 0.68223 | 0.29338 | 0.54986 | 0.86309 | 0.16952 | 0.39239 | 0.1869  | 0.15971 | 0.4408  | 0.55611 MEIS3     |
| cg07479491 | 0.07924 | 0.07065 | 0.11331 | 0.10548 | 0.13202 | 0.0927  | 0.0866  | 0.09099 | 0.05639 | 0.0857 BMP6       |
| cg07480567 | 0.19616 | 0.03491 | 0.03061 | 0.02565 | 0.04944 | 0.03355 | 0.02577 | 0.02454 | 0.02769 | 0.02337 HS3ST3A1  |
| cg07482936 | 0.09638 | 0.06406 | 0.09785 | 0.05871 | 0.0576  | 0.05069 | 0.59329 | 0.58778 | 0.44659 | 0.11527 LOC388407 |
| cg07483064 | 0.02028 | 0.02644 | 0.02952 | 0.03175 | 0.02725 | 0.03209 | 0.02481 | 0.02443 | 0.02628 | 0.02232 ENO1      |

|            |         |         |         |         |         |         |         |         |         |         |           |
|------------|---------|---------|---------|---------|---------|---------|---------|---------|---------|---------|-----------|
| cg07484450 | 0.56516 | 0.52071 | 0.31213 | 0.57055 | 0.51591 | 0.31022 | 0.39469 | 0.80731 | 0.58142 | 0.76262 | MGC39681  |
| cg07484827 | 0.69066 | 0.1326  | 0.81659 | 0.79907 | 0.66426 | 0.24714 | 0.61038 | 0.10378 | 0.84681 | 0.54454 | CHRNA10   |
| cg07485588 | 0.71387 | 0.46443 | 0.81402 | 0.83016 | 0.65117 | 0.633   | 0.58078 | 0.62041 | 0.75852 | 0.77669 | FOXD4L4   |
| cg07485777 | 0.89751 | 0.89071 | 0.89446 | 0.90662 | 0.9134  | 0.90365 | 0.88365 | 0.8806  | 0.89496 | 0.84776 | TRIM60    |
| cg07487535 | 0.07166 | 0.07408 | 0.08022 | 0.06437 | 0.08268 | 0.06082 | 0.08561 | 0.07161 | 0.22069 | 0.07128 | DHCR7     |
| cg07489003 | 0.92594 | 0.89669 | 0.92813 | 0.92668 | 0.86211 | 0.50935 | 0.63278 | 0.60439 | 0.92543 | 0.86644 | XK        |
| cg07489134 | 0.03294 | 0.03396 | 0.03923 | 0.03534 | 0.02904 | 0.03157 | 0.03131 | 0.03335 | 0.03984 | 0.02884 | HELLS     |
| cg07490776 | 0.01935 | 0.02201 | 0.25996 | 0.32473 | 0.10529 | 0.03487 | 0.02027 | 0.02623 | 0.02359 | 0.01949 | AP3M2     |
| cg07494047 | 0.02661 | 0.02677 | 0.02903 | 0.02659 | 0.02137 | 0.02703 | 0.02281 | 0.02184 | 0.02157 | 0.02274 | ZNF304    |
| cg07494248 | 0.027   | 0.03152 | 0.05119 | 0.04521 | 0.05247 | 0.04803 | 0.05126 | 0.03524 | 0.04893 | 0.04218 | HSPD1     |
| cg07494518 | 0.03009 | 0.03059 | 0.03705 | 0.03197 | 0.18359 | 0.19701 | 0.02635 | 0.02597 | 0.02695 | 0.02743 | SNF1LK    |
| cg07495664 | 0.04337 | 0.17007 | 0.05899 | 0.05853 | 0.1525  | 0.03041 | 0.02221 | 0.03776 | 0.02492 | 0.02299 | FAM63A    |
| cg07496861 | 0.03177 | 0.02919 | 0.03367 | 0.0298  | 0.0278  | 0.02435 | 0.02692 | 0.02397 | 0.02508 | 0.02286 | LOC151194 |
| cg07496902 | 0.75898 | 0.78727 | 0.77491 | 0.81229 | 0.6746  | 0.76748 | 0.69711 | 0.72643 | 0.82502 | 0.80339 | ASB14     |
| cg07498421 | 0.24534 | 0.59082 | 0.13398 | 0.12496 | 0.11627 | 0.12845 | 0.11541 | 0.10589 | 0.11012 | 0.11137 | CRADD     |
| cg07498879 | 0.90437 | 0.55445 | 0.95682 | 0.94503 | 0.94906 | 0.93788 | 0.45684 | 0.13784 | 0.951   | 0.87821 | OSM       |
| cg07499072 | 0.07873 | 0.04693 | 0.05407 | 0.04712 | 0.04193 | 0.03645 | 0.03788 | 0.03561 | 0.06632 | 0.27521 | FST       |
| cg07499372 | 0.84469 | 0.83183 | 0.89205 | 0.91258 | 0.88617 | 0.86296 | 0.79949 | 0.8556  | 0.85618 | 0.92314 | USP29     |
| cg07499806 | 0.56369 | 0.25463 | 0.27481 | 0.31244 | 0.72564 | 0.78571 | 0.34878 | 0.18432 | 0.84306 | 0.81169 | ZSCAN5    |
| cg07501965 | 0.40389 | 0.42491 | 0.07871 | 0.08272 | 0.21231 | 0.29081 | 0.18098 | 0.07464 | 0.26875 | 0.14025 | CHRFAM7A  |
| cg07503829 | 0.04931 | 0.05629 | 0.0637  | 0.06068 | 0.05701 | 0.05042 | 0.05808 | 0.06222 | 0.05223 | 0.04891 | SIRT3     |
| cg07504718 | 0.64571 | 0.55437 | 0.62749 | 0.62972 | 0.60886 | 0.6013  | 0.50186 | 0.33612 | 0.65484 | 0.46585 | MMP21     |
| cg07504780 | 0.04504 | 0.03601 | 0.04278 | 0.03987 | 0.03112 | 0.0383  | 0.0336  | 0.03573 | 0.03959 | 0.03733 | PSMB9     |
| cg07505695 | 0.05599 | 0.05086 | 0.0636  | 0.05259 | 0.09131 | 0.05872 | 0.06921 | 0.0637  | 0.05587 | 0.0609  | SPG21     |
| cg07506795 | 0.55769 | 0.55668 | 0.86618 | 0.92054 | 0.22709 | 0.49298 | 0.13233 | 0.0569  | 0.39009 | 0.40483 | ZNF19     |
| cg07507271 | 0.02257 | 0.02357 | 0.02246 | 0.02392 | 0.01653 | 0.02203 | 0.02319 | 0.02007 | 0.01828 | 0.01882 | CTBP1     |
| cg07509155 | 0.83277 | 0.25501 | 0.87088 | 0.88094 | 0.90394 | 0.73744 | 0.7636  | 0.82598 | 0.91416 | 0.88118 | IL28RA    |
| cg07510052 | 0.13927 | 0.12789 | 0.12774 | 0.17056 | 0.07094 | 0.09939 | 0.0452  | 0.03701 | 0.09782 | 0.07152 | HIGD2A    |
| cg07510080 | 0.11989 | 0.11222 | 0.1365  | 0.11485 | 0.16818 | 0.13295 | 0.12702 | 0.10879 | 0.09325 | 0.10767 | HIF1AN    |
| cg07512345 | 0.86543 | 0.72416 | 0.90218 | 0.90837 | 0.90755 | 0.91309 | 0.85063 | 0.84605 | 0.48911 | 0.39778 | TNP2      |
| cg07512517 | 0.76629 | 0.61448 | 0.59633 | 0.73434 | 0.54574 | 0.24001 | 0.6529  | 0.70226 | 0.78482 | 0.33048 |           |
| cg07514381 | 0.88406 | 0.76579 | 0.85235 | 0.87771 | 0.89959 | 0.86564 | 0.36645 | 0.56031 | 0.85782 | 0.83812 | LRRC2     |
| cg07515662 | 0.04688 | 0.04845 | 0.04841 | 0.04559 | 0.03922 | 0.04358 | 0.03832 | 0.04114 | 0.04131 | 0.03883 | RPS26     |
| cg07516225 | 0.06439 | 0.0667  | 0.08194 | 0.082   | 0.05334 | 0.05245 | 0.0936  | 0.09557 | 0.05103 | 0.057   | C8orf41   |
| cg07518362 | 0.02332 | 0.02204 | 0.02367 | 0.02007 | 0.01495 | 0.02053 | 0.02147 | 0.02007 | 0.0196  | 0.01967 | NOTCH2    |
| cg07519011 | 0.07656 | 0.0839  | 0.07923 | 0.07275 | 0.0589  | 0.07811 | 0.06966 | 0.06945 | 0.0675  | 0.06834 | TBC1D4    |
| cg07520158 | 0.03805 | 0.03845 | 0.04078 | 0.03803 | 0.02314 | 0.03355 | 0.02917 | 0.03314 | 0.03419 | 0.02927 | KIAA0241  |
| cg07520161 | 0.03452 | 0.03219 | 0.03025 | 0.02894 | 0.01874 | 0.03217 | 0.02859 | 0.03103 | 0.02876 | 0.03217 | TMTC3     |
| cg07525077 | 0.12009 | 0.106   | 0.19866 | 0.18085 | 0.16324 | 0.13135 | 0.07435 | 0.07735 | 0.10555 | 0.1359  | RNASE3    |
| cg07525445 | 0.03749 | 0.04332 | 0.03777 | 0.04006 | 0.59805 | 0.68853 | 0.02935 | 0.03617 | 0.0306  | 0.03574 | TPM1      |
| cg07526021 | 0.02864 | 0.02688 | 0.02748 | 0.02604 | 0.02173 | 0.02949 | 0.02529 | 0.02405 | 0.02245 | 0.02445 | DHFR      |

|            |         |         |         |         |         |         |         |         |         |         |          |
|------------|---------|---------|---------|---------|---------|---------|---------|---------|---------|---------|----------|
| cg07526069 | 0.02976 | 0.03061 | 0.0313  | 0.03174 | 0.02203 | 0.02772 | 0.02438 | 0.02579 | 0.02664 | 0.02248 | GOT1     |
| cg07526675 | 0.39051 | 0.55359 | 0.86661 | 0.85877 | 0.51897 | 0.42458 | 0.53202 | 0.44443 | 0.37106 | 0.27069 | PCSK1N   |
| cg07531356 | 0.79498 | 0.67458 | 0.85477 | 0.87873 | 0.75583 | 0.87775 | 0.73108 | 0.84471 | 0.76878 | 0.82624 | INSL6    |
| cg07533148 | 0.0247  | 0.02252 | 0.05662 | 0.02392 | 0.61068 | 0.61573 | 0.0833  | 0.02773 | 0.02432 | 0.02191 | TRIM58   |
| cg07533529 | 0.10078 | 0.10087 | 0.08797 | 0.08455 | 0.06911 | 0.08778 | 0.08251 | 0.08346 | 0.29142 | 0.0961  | EML3     |
| cg07534467 | 0.05898 | 0.06768 | 0.07989 | 0.08285 | 0.15113 | 0.11209 | 0.0686  | 0.06122 | 0.06856 | 0.08457 | ZNF16    |
| cg07535475 | 0.05576 | 0.06016 | 0.05448 | 0.05579 | 0.03887 | 0.0416  | 0.05332 | 0.05538 | 0.05202 | 0.0429  | SEC61B   |
| cg07535879 | 0.05009 | 0.04607 | 0.05937 | 0.05995 | 0.07341 | 0.04545 | 0.04524 | 0.04213 | 0.04675 | 0.04508 | MTRF1L   |
| cg07536847 | 0.02859 | 0.0309  | 0.96408 | 0.96338 | 0.96309 | 0.90365 | 0.94267 | 0.92809 | 0.52806 | 0.43568 | PAX7     |
| cg07536920 | 0.03516 | 0.02967 | 0.04558 | 0.05057 | 0.03082 | 0.03065 | 0.03029 | 0.0361  | 0.03697 | 0.02425 | RORB     |
| cg07537523 | 0.15184 | 0.043   | 0.05891 | 0.06211 | 0.06045 | 0.04257 | 0.05213 | 0.04847 | 0.54876 | 0.38541 | BCAT1    |
| cg07540118 | 0.04654 | 0.04841 | 0.0512  | 0.04699 | 0.04444 | 0.04162 | 0.04792 | 0.04615 | 0.04504 | 0.04036 | ADAM19   |
| cg07543883 | 0.89449 | 0.58133 | 0.74904 | 0.89925 | 0.89162 | 0.71093 | 0.72947 | 0.77873 | 0.49199 | 0.19524 | ANGPTL6  |
| cg07545232 | 0.62438 | 0.31094 | 0.60499 | 0.85863 | 0.92639 | 0.90149 | 0.07952 | 0.06374 | 0.02478 | 0.0259  | MAGEA3   |
| cg07545925 | 0.15704 | 0.14621 | 0.16153 | 0.19077 | 0.4582  | 0.71399 | 0.10907 | 0.09738 | 0.23872 | 0.21832 | CD3G     |
| cg07546360 | 0.84831 | 0.6039  | 0.08153 | 0.15135 | 0.02739 | 0.03994 | 0.18099 | 0.24586 | 0.88577 | 0.4464  | FLJ27365 |
| cg07548313 | 0.24799 | 0.17271 | 0.64589 | 0.64593 | 0.47667 | 0.49489 | 0.31364 | 0.19409 | 0.19695 | 0.21072 | CD1C     |
| cg07549194 | 0.83124 | 0.17237 | 0.68727 | 0.65546 | 0.60638 | 0.63311 | 0.42162 | 0.43722 | 0.07248 | 0.04244 | TIP39    |
| cg07549630 | 0.02689 | 0.01762 | 0.02813 | 0.02583 | 0.01563 | 0.01892 | 0.01602 | 0.01949 | 0.01764 | 0.01793 | NEDD1    |
| cg07549715 | 0.67484 | 0.36185 | 0.84174 | 0.85941 | 0.77233 | 0.56895 | 0.81778 | 0.70834 | 0.88424 | 0.63041 | GNRH2    |
| cg07550267 | 0.03477 | 0.03554 | 0.04461 | 0.03885 | 0.03735 | 0.0382  | 0.03393 | 0.02961 | 0.03347 | 0.03537 | RPS8     |
| cg07550278 | 0.05403 | 0.05824 | 0.06053 | 0.04791 | 0.05832 | 0.04594 | 0.04469 | 0.04279 | 0.03518 | 0.04436 | C10orf4  |
| cg07550362 | 0.06985 | 0.0491  | 0.47951 | 0.42554 | 0.05717 | 0.0478  | 0.23816 | 0.26494 | 0.59964 | 0.64737 | TAC1     |
| cg07551659 | 0.59494 | 0.16489 | 0.52023 | 0.49674 | 0.53658 | 0.10574 | 0.31486 | 0.0788  | 0.08383 | 0.03166 | CGNL1    |
| cg07554030 | 0.16347 | 0.09716 | 0.24662 | 0.25859 | 0.20419 | 0.10817 | 0.21083 | 0.11518 | 0.10942 | 0.0955  | NAGLU    |
| cg07557424 | 0.10432 | 0.09256 | 0.09453 | 0.0839  | 0.158   | 0.10711 | 0.09744 | 0.09011 | 0.08044 | 0.06089 | C9orf23  |
| cg07558006 | 0.77129 | 0.54272 | 0.78113 | 0.77608 | 0.65923 | 0.8033  | 0.72611 | 0.42126 | 0.74842 | 0.63685 | TAAR8    |
| cg07558455 | 0.05585 | 0.03329 | 0.67227 | 0.90715 | 0.16522 | 0.08746 | 0.53178 | 0.5822  | 0.63438 | 0.8954  | ANKRD38  |
| cg07559730 | 0.04264 | 0.05195 | 0.79676 | 0.89995 | 0.09208 | 0.35318 | 0.04124 | 0.04332 | 0.04643 | 0.03072 | ZNF702   |
| cg07560096 | 0.48242 | 0.13849 | 0.65984 | 0.83633 | 0.28464 | 0.08847 | 0.4464  | 0.57255 | 0.90972 | 0.87398 | ME3      |
| cg07561400 | 0.05412 | 0.04631 | 0.051   | 0.04569 | 0.03876 | 0.04723 | 0.03595 | 0.03969 | 0.03182 | 0.03662 | ZC3HAV1  |
| cg07561588 | 0.02747 | 0.02707 | 0.03153 | 0.02855 | 0.02269 | 0.02284 | 0.02137 | 0.02259 | 0.02323 | 0.02774 | RNF139   |
| cg07566050 | 0.88316 | 0.87147 | 0.86768 | 0.86181 | 0.88655 | 0.84715 | 0.80788 | 0.76873 | 0.86807 | 0.78225 | PEA15    |
| cg07567107 | 0.02122 | 0.021   | 0.02219 | 0.02111 | 0.01679 | 0.01791 | 0.01741 | 0.01722 | 0.01521 | 0.01682 | ABC1     |
| cg07569069 | 0.04594 | 0.04321 | 0.04396 | 0.04942 | 0.03181 | 0.0399  | 0.04211 | 0.04268 | 0.03555 | 0.03433 | FLJ35119 |
| cg07569756 | 0.0374  | 0.03312 | 0.03171 | 0.03809 | 0.03342 | 0.03371 | 0.03275 | 0.0369  | 0.0321  | 0.03257 | LRRCS9   |
| cg07570142 | 0.27395 | 0.05818 | 0.04138 | 0.04046 | 0.12805 | 0.04176 | 0.27721 | 0.04064 | 0.04238 | 0.03321 | MOXD1    |
| cg07570421 | 0.07843 | 0.08344 | 0.09369 | 0.10911 | 0.09833 | 0.08807 | 0.07636 | 0.08214 | 0.07097 | 0.07737 | PTER     |
| cg07571117 | 0.0216  | 0.02658 | 0.03321 | 0.02427 | 0.02285 | 0.02384 | 0.02062 | 0.02058 | 0.02287 | 0.02196 | FAM98A   |
| cg07572341 | 0.06339 | 0.03286 | 0.33201 | 0.34789 | 0.75662 | 0.8599  | 0.44424 | 0.51896 | 0.05084 | 0.02729 | FOXA2    |
| cg07572435 | 0.78777 | 0.24204 | 0.91059 | 0.90727 | 0.8586  | 0.86194 | 0.22405 | 0.05016 | 0.78232 | 0.64526 | LY6D     |



|            |         |         |         |         |         |         |         |         |         |                   |
|------------|---------|---------|---------|---------|---------|---------|---------|---------|---------|-------------------|
| cg07576541 | 0.88572 | 0.82962 | 0.90538 | 0.89149 | 0.56484 | 0.61746 | 0.88719 | 0.86986 | 0.47947 | 0.13365 SNAPAP    |
| cg07577263 | 0.05381 | 0.09966 | 0.11838 | 0.09946 | 0.15046 | 0.09947 | 0.05754 | 0.05682 | 0.05259 | 0.04582 NUP205    |
| cg07579404 | 0.29785 | 0.10706 | 0.20776 | 0.35157 | 0.07094 | 0.09086 | 0.08498 | 0.08904 | 0.09495 | 0.0775 RAET1L     |
| cg07580475 | 0.86497 | 0.8398  | 0.88135 | 0.87682 | 0.85786 | 0.83531 | 0.87146 | 0.85217 | 0.88052 | 0.83212 SEMA3B    |
| cg07580827 | 0.7068  | 0.57948 | 0.78351 | 0.83507 | 0.55078 | 0.81668 | 0.66715 | 0.79294 | 0.69884 | 0.52614 LOC120379 |
| cg07581365 | 0.05307 | 0.04687 | 0.06452 | 0.09735 | 0.20812 | 0.04195 | 0.0459  | 0.0386  | 0.04101 | 0.04373 CBX8      |
| cg07581973 | 0.02501 | 0.02704 | 0.02863 | 0.02622 | 0.01913 | 0.0307  | 0.56391 | 0.63227 | 0.01989 | 0.02334 PRDX4     |
| cg07584959 | 0.08117 | 0.0735  | 0.07412 | 0.07778 | 0.09492 | 0.0819  | 0.06817 | 0.05051 | 0.0513  | 0.04583 THRAP5    |
| cg07586911 | 0.68859 | 0.57842 | 0.87425 | 0.87658 | 0.88073 | 0.87756 | 0.85758 | 0.8874  | 0.8937  | 0.89812 NYD-SP18  |
| cg07588113 | 0.02326 | 0.02668 | 0.02741 | 0.02814 | 0.0219  | 0.02759 | 0.02258 | 0.01897 | 0.02202 | 0.02056 FLJ21062  |
| cg07588664 | 0.14339 | 0.13023 | 0.23451 | 0.20701 | 0.26249 | 0.20662 | 0.22693 | 0.16619 | 0.18873 | 0.19837 PPHLN1    |
| cg07588779 | 0.13301 | 0.1003  | 0.48954 | 0.57247 | 0.16447 | 0.10721 | 0.11586 | 0.10548 | 0.11135 | 0.08328 BAD       |
| cg07589355 | 0.12387 | 0.16561 | 0.16401 | 0.16916 | 0.2306  | 0.15462 | 0.15768 | 0.14663 | 0.15223 | 0.15677 RBMS2     |
| cg07590705 | 0.06162 | 0.03488 | 0.03625 | 0.03932 | 0.03257 | 0.03128 | 0.02735 | 0.02965 | 0.03425 | 0.0296 CHCHD3     |
| cg07592353 | 0.33287 | 0.23981 | 0.68347 | 0.66423 | 0.84321 | 0.84307 | 0.52226 | 0.49263 | 0.23291 | 0.22099 GABRA6    |
| cg07594478 | 0.0468  | 0.04342 | 0.046   | 0.04095 | 0.03647 | 0.04217 | 0.05892 | 0.05507 | 0.03843 | 0.0392 ARIH1      |
| cg07594933 | 0.85912 | 0.84091 | 0.82765 | 0.84554 | 0.87013 | 0.81277 | 0.81151 | 0.83251 | 0.85373 | 0.82158 CCDC77    |
| cg07595113 | 0.06172 | 0.05121 | 0.06055 | 0.05596 | 0.0386  | 0.06002 | 0.05861 | 0.05628 | 0.04766 | 0.04887 MYBL1     |
| cg07595943 | 0.92912 | 0.96333 | 0.9657  | 0.97328 | 0.97091 | 0.88515 | 0.60322 | 0.32608 | 0.85147 | 0.82907 LOC161931 |
| cg07596401 | 0.76156 | 0.69044 | 0.62875 | 0.72789 | 0.67095 | 0.40446 | 0.409   | 0.30619 | 0.21717 | 0.13016 LHPP      |
| cg07596494 | 0.02842 | 0.02926 | 0.04334 | 0.03093 | 0.07143 | 0.03062 | 0.03202 | 0.02995 | 0.11422 | 0.02455 KIF3C     |
| cg07597871 | 0.05334 | 0.0546  | 0.05333 | 0.05373 | 0.05191 | 0.04645 | 0.04375 | 0.04668 | 0.0491  | 0.04394 RAP1A     |
| cg07597976 | 0.79708 | 0.24183 | 0.57747 | 0.61928 | 0.51242 | 0.4131  | 0.20579 | 0.35605 | 0.17368 | 0.05673 CD19      |
| cg07598199 | 0.2533  | 0.22473 | 0.5767  | 0.56482 | 0.27371 | 0.21423 | 0.33855 | 0.32877 | 0.1556  | 0.21741 MYO22     |
| cg07599644 | 0.38566 | 0.25137 | 0.77566 | 0.80285 | 0.61472 | 0.38595 | 0.71039 | 0.65339 | 0.80341 | 0.60738 MGC34830  |
| cg07601320 | 0.87789 | 0.85911 | 0.18019 | 0.07439 | 0.66109 | 0.64525 | 0.08792 | 0.08103 | 0.64035 | 0.34934 SLC38A4   |
| cg07602026 | 0.02552 | 0.02364 | 0.02492 | 0.02434 | 0.0176  | 0.02592 | 0.02233 | 0.02181 | 0.02181 | 0.02314 PSME1     |
| cg07602200 | 0.56538 | 0.28198 | 0.51274 | 0.67198 | 0.07121 | 0.05703 | 0.06772 | 0.05648 | 0.04254 | 0.04746 P2RX7     |
| cg07603484 | 0.91176 | 0.89311 | 0.91827 | 0.92155 | 0.91402 | 0.88057 | 0.89626 | 0.80275 | 0.92007 | 0.81959 IL411     |
| cg07605143 | 0.77639 | 0.75739 | 0.77677 | 0.76872 | 0.76412 | 0.80327 | 0.7801  | 0.7814  | 0.80059 | 0.7687 EMP3       |
| cg07607462 | 0.04914 | 0.04358 | 0.04564 | 0.04391 | 0.04358 | 0.04739 | 0.05109 | 0.0541  | 0.07307 | 0.05904 UBR1      |
| cg07607921 | 0.22469 | 0.06747 | 0.12227 | 0.08846 | 0.07894 | 0.17038 | 0.14096 | 0.0517  | 0.13442 | 0.04738 ZZEF1     |
| cg07608333 | 0.2044  | 0.11606 | 0.16038 | 0.16164 | 0.19206 | 0.07111 | 0.13977 | 0.12109 | 0.09121 | 0.10121 CD209     |
| cg07611177 | 0.05969 | 0.04611 | 0.11375 | 0.24668 | 0.07115 | 0.05239 | 0.0568  | 0.05212 | 0.06186 | 0.03714 LOC91137  |
| cg07611334 | 0.05413 | 0.05905 | 0.06437 | 0.05758 | 0.04306 | 0.04571 | 0.04454 | 0.05239 | 0.0537  | 0.056 C2orf98     |
| cg07611925 | 0.62204 | 0.57869 | 0.71226 | 0.7963  | 0.82819 | 0.83176 | 0.83091 | 0.68216 | 0.73062 | 0.70242 KCNE2     |
| cg07612655 | 0.39902 | 0.37192 | 0.94752 | 0.94738 | 0.97077 | 0.90936 | 0.81722 | 0.62013 | 0.95878 | 0.73824 PTGIS     |
| cg07613153 | 0.33705 | 0.14637 | 0.19409 | 0.24364 | 0.45963 | 0.42095 | 0.15378 | 0.13209 | 0.45767 | 0.39371 TDRD9     |
| cg07613278 | 0.22849 | 0.19289 | 0.27191 | 0.21187 | 0.2972  | 0.22781 | 0.28492 | 0.25109 | 0.206   | 0.23505 API5      |
| cg07614786 | 0.85353 | 0.63342 | 0.87732 | 0.88675 | 0.83994 | 0.85859 | 0.89969 | 0.89179 | 0.89486 | 0.89163 TLL3      |
| cg07617246 | 0.84122 | 0.48186 | 0.84749 | 0.87019 | 0.8984  | 0.8396  | 0.87489 | 0.63974 | 0.86618 | 0.83741 NOPE      |

|            |         |         |         |         |         |         |         |         |         |         |              |
|------------|---------|---------|---------|---------|---------|---------|---------|---------|---------|---------|--------------|
| cg07617560 | 0.03479 | 0.03906 | 0.03559 | 0.03685 | 0.02829 | 0.03126 | 0.03112 | 0.02927 | 0.03082 | 0.03111 | DNAJA3       |
| cg07618900 | 0.24916 | 0.16718 | 0.41862 | 0.44551 | 0.35075 | 0.48403 | 0.14277 | 0.11272 | 0.22349 | 0.16218 | MGC13168     |
| cg07619076 | 0.14069 | 0.1218  | 0.14465 | 0.12881 | 0.22161 | 0.16003 | 0.20334 | 0.14258 | 0.11167 | 0.10924 | LANCL2       |
| cg07621042 | 0.9737  | 0.97603 | 0.96384 | 0.96914 | 0.97094 | 0.97396 | 0.9494  | 0.97234 | 0.95828 | 0.97363 | CXorf55      |
| cg07621046 | 0.85218 | 0.90441 | 0.94782 | 0.95144 | 0.97768 | 0.96704 | 0.56131 | 0.15952 | 0.96431 | 0.95972 | C10orf82     |
| cg07621456 | 0.8427  | 0.43569 | 0.84805 | 0.87284 | 0.87721 | 0.86593 | 0.53566 | 0.30707 | 0.846   | 0.55454 | CCDC48       |
| cg07623294 | 0.08682 | 0.04874 | 0.68369 | 0.70141 | 0.40577 | 0.35643 | 0.05395 | 0.05145 | 0.04507 | 0.04535 | ELAVL2       |
| cg07625840 | 0.28625 | 0.07428 | 0.04951 | 0.04785 | 0.04919 | 0.04937 | 0.26363 | 0.04723 | 0.06346 | 0.04911 | PRSS12       |
| cg07628086 | 0.01891 | 0.02143 | 0.04162 | 0.03786 | 0.02335 | 0.02462 | 0.02276 | 0.02137 | 0.01627 | 0.02404 | AP2B1        |
| cg07629017 | 0.05638 | 0.22189 | 0.23748 | 0.26003 | 0.05447 | 0.21002 | 0.12283 | 0.08741 | 0.32453 | 0.58961 | NPBWR1       |
| cg07633499 | 0.13663 | 0.13616 | 0.11807 | 0.10573 | 0.1544  | 0.10849 | 0.11182 | 0.11756 | 0.10583 | 0.10745 | UFD1L        |
| cg07634191 | 0.42699 | 0.10139 | 0.33296 | 0.55695 | 0.59511 | 0.35154 | 0.24164 | 0.10253 | 0.77683 | 0.48936 | SCARA5       |
| cg07634204 | 0.08902 | 0.0957  | 0.06582 | 0.07704 | 0.12762 | 0.08452 | 0.08155 | 0.05718 | 0.08723 | 0.09116 | VPS72        |
| cg07634706 | 0.87906 | 0.73179 | 0.81831 | 0.88579 | 0.85493 | 0.86041 | 0.62589 | 0.57907 | 0.89032 | 0.86802 | CCL17        |
| cg07636178 | 0.04409 | 0.05178 | 0.44733 | 0.57765 | 0.08579 | 0.09062 | 0.91157 | 0.92207 | 0.03943 | 0.03634 | HIST1H3C     |
| cg07637239 | 0.37122 | 0.31271 | 0.18969 | 0.21948 | 0.07793 | 0.07841 | 0.05142 | 0.04294 | 0.04236 | 0.04476 | KCNK18       |
| cg07638871 | 0.0544  | 0.04768 | 0.04609 | 0.04322 | 0.03363 | 0.038   | 0.03853 | 0.04178 | 0.03078 | 0.03173 | DKFZP7811119 |
| cg07638935 | 0.04451 | 0.04138 | 0.03671 | 0.02972 | 0.02115 | 0.03087 | 0.04834 | 0.02982 | 0.35313 | 0.02651 | KAZALD1      |
| cg07638938 | 0.89746 | 0.91089 | 0.79987 | 0.83117 | 0.77532 | 0.79511 | 0.6361  | 0.79287 | 0.79282 | 0.78664 | MGMT         |
| cg07639198 | 0.21805 | 0.47398 | 0.38016 | 0.4979  | 0.48276 | 0.67451 | 0.17846 | 0.13653 | 0.45144 | 0.43295 | AKR1C1       |
| cg07639720 | 0.05855 | 0.06367 | 0.05635 | 0.05278 | 0.04514 | 0.05246 | 0.18189 | 0.16444 | 0.05291 | 0.05128 | BNC1         |
| cg07639959 | 0.03774 | 0.04496 | 0.04962 | 0.04814 | 0.04204 | 0.04587 | 0.06277 | 0.05922 | 0.03946 | 0.03831 | EXO1         |
| cg07640473 | 0.03934 | 0.03593 | 0.96709 | 0.97122 | 0.11731 | 0.11554 | 0.94329 | 0.8724  | 0.95109 | 0.94027 | SEMA3F       |
| cg07640820 | 0.05384 | 0.09042 | 0.07943 | 0.06849 | 0.06663 | 0.06713 | 0.04898 | 0.19066 | 0.04261 | 0.03061 | MULK         |
| cg07641524 | 0.35565 | 0.09574 | 0.09415 | 0.09338 | 0.09688 | 0.07316 | 0.06291 | 0.05999 | 0.08625 | 0.06817 | MSRB3        |
| cg07642638 | 0.06572 | 0.05189 | 0.60073 | 0.55219 | 0.66145 | 0.41061 | 0.84538 | 0.74122 | 0.04754 | 0.04848 | CHGB         |
| cg07643942 | 0.79675 | 0.42152 | 0.15938 | 0.1419  | 0.21348 | 0.45391 | 0.08886 | 0.11021 | 0.0837  | 0.09326 | LACRT        |
| cg07644368 | 0.18294 | 0.35176 | 0.83765 | 0.8765  | 0.81722 | 0.87443 | 0.35223 | 0.21123 | 0.83205 | 0.78871 | CDO1         |
| cg07651242 | 0.45887 | 0.13738 | 0.22742 | 0.27155 | 0.28122 | 0.49195 | 0.05459 | 0.18742 | 0.23943 | 0.0348  | ADCY1        |
| cg07651857 | 0.07617 | 0.07674 | 0.07519 | 0.07344 | 0.07102 | 0.074   | 0.05691 | 0.06342 | 0.0584  | 0.05492 | RNF4         |
| cg07651914 | 0.85154 | 0.79609 | 0.8449  | 0.86877 | 0.88258 | 0.7985  | 0.84509 | 0.79741 | 0.86063 | 0.85527 | CLDN15       |
| cg07652213 | 0.04379 | 0.04531 | 0.05064 | 0.04589 | 0.02788 | 0.03568 | 0.047   | 0.04023 | 0.03571 | 0.0391  | MSH6         |
| cg07652553 | 0.02762 | 0.02761 | 0.03734 | 0.0422  | 0.03731 | 0.03369 | 0.0197  | 0.02415 | 0.02744 | 0.02654 | ZCCHC17      |
| cg07654843 | 0.81623 | 0.56472 | 0.13208 | 0.10946 | 0.70363 | 0.75204 | 0.46352 | 0.54747 | 0.70332 | 0.63991 | MYO18B       |
| cg07654896 | 0.94104 | 0.94298 | 0.95044 | 0.96165 | 0.87459 | 0.90928 | 0.70285 | 0.93439 | 0.95939 | 0.95444 | RGN          |
| cg07654934 | 0.87539 | 0.87703 | 0.50262 | 0.624   | 0.90122 | 0.8938  | 0.87405 | 0.8867  | 0.88379 | 0.88697 | LXN          |
| cg07655627 | 0.07799 | 0.06599 | 0.41765 | 0.46747 | 0.07202 | 0.06862 | 0.08283 | 0.07458 | 0.185   | 0.07361 | NUDT12       |
| cg07656304 | 0.17394 | 0.12279 | 0.17951 | 0.15024 | 0.2803  | 0.13344 | 0.11801 | 0.09044 | 0.13963 | 0.1544  | NAP1L1       |
| cg07656362 | 0.03543 | 0.03599 | 0.04244 | 0.04061 | 0.03556 | 0.03642 | 0.02887 | 0.02721 | 0.03661 | 0.03522 | C10orf91     |
| cg07656391 | 0.09488 | 0.10832 | 0.12775 | 0.11988 | 0.14033 | 0.11503 | 0.10309 | 0.08924 | 0.10019 | 0.12123 | LOC84661     |
| cg07657236 | 0.09715 | 0.05634 | 0.49441 | 0.61585 | 0.06959 | 0.06732 | 0.10182 | 0.0607  | 0.11526 | 0.07687 | KCNH8        |

|            |         |         |         |         |         |         |         |         |         |         |           |
|------------|---------|---------|---------|---------|---------|---------|---------|---------|---------|---------|-----------|
| cg07657776 | 0.80934 | 0.48531 | 0.79036 | 0.81264 | 0.29363 | 0.4663  | 0.67819 | 0.69966 | 0.80372 | 0.42128 | UBE3B     |
| cg07658590 | 0.77755 | 0.22475 | 0.87363 | 0.87601 | 0.84947 | 0.36633 | 0.41769 | 0.38868 | 0.57395 | 0.39519 | SLC19A1   |
| cg07658718 | 0.05425 | 0.05805 | 0.07133 | 0.06884 | 0.32596 | 0.05089 | 0.04493 | 0.05943 | 0.08285 | 0.03949 | CDK5R1    |
| cg07660236 | 0.10563 | 0.05176 | 0.06507 | 0.052   | 0.44351 | 0.36748 | 0.15871 | 0.17751 | 0.54474 | 0.38421 | ZNF96     |
| cg07663789 | 0.04684 | 0.04036 | 0.13872 | 0.11297 | 0.12271 | 0.12459 | 0.0369  | 0.03264 | 0.03329 | 0.06902 | NPR3      |
| cg07664027 | 0.87569 | 0.87808 | 0.87933 | 0.87399 | 0.87042 | 0.58544 | 0.87292 | 0.86197 | 0.88543 | 0.61764 | RPL13A    |
| cg07664183 | 0.72104 | 0.26948 | 0.74161 | 0.84719 | 0.1012  | 0.04745 | 0.71765 | 0.67455 | 0.23771 | 0.06842 | FAM29A    |
| cg07664856 | 0.20415 | 0.11423 | 0.20025 | 0.18206 | 0.47264 | 0.18301 | 0.60094 | 0.10505 | 0.13631 | 0.11438 | CNTN6     |
| cg07665060 | 0.67011 | 0.86363 | 0.90219 | 0.90863 | 0.95812 | 0.92878 | 0.89701 | 0.90958 | 0.77548 | 0.80592 | C19orf33  |
| cg07666065 | 0.25005 | 0.24811 | 0.12641 | 0.08784 | 0.17748 | 0.12646 | 0.07284 | 0.05978 | 0.05646 | 0.06408 | PON2      |
| cg07667595 | 0.03772 | 0.0417  | 0.03795 | 0.04145 | 0.03473 | 0.03782 | 0.04129 | 0.03753 | 0.03035 | 0.02646 | ZNF576    |
| cg07668036 | 0.04167 | 0.04896 | 0.05201 | 0.04172 | 0.0455  | 0.04739 | 0.04106 | 0.03889 | 0.04583 | 0.04484 | PSMD4     |
| cg07671208 | 0.79588 | 0.70447 | 0.81662 | 0.84902 | 0.93197 | 0.83559 | 0.71438 | 0.55007 | 0.76546 | 0.68341 | BTN2A1    |
| cg07671603 | 0.03203 | 0.03472 | 0.06314 | 0.049   | 0.04887 | 0.03913 | 0.03098 | 0.03392 | 0.02615 | 0.02852 | C7orf13   |
| cg07671949 | 0.30138 | 0.21776 | 0.7943  | 0.83398 | 0.72416 | 0.55257 | 0.40964 | 0.09946 | 0.6641  | 0.8486  | ESR1      |
| cg07671976 | 0.14512 | 0.02355 | 0.9538  | 0.95931 | 0.81619 | 0.60145 | 0.37078 | 0.03695 | 0.95992 | 0.90022 | TNFRSF18  |
| cg07672479 | 0.02715 | 0.03025 | 0.02459 | 0.02674 | 0.02947 | 0.02997 | 0.02267 | 0.02389 | 0.02284 | 0.02427 | DYNC1H1   |
| cg07673945 | 0.03431 | 0.03543 | 0.0403  | 0.04242 | 0.02838 | 0.03388 | 0.03395 | 0.03223 | 0.02831 | 0.02719 | GART      |
| cg07674153 | 0.08984 | 0.06481 | 0.29605 | 0.31009 | 0.13015 | 0.09478 | 0.0996  | 0.08493 | 0.0821  | 0.28274 | TSHR      |
| cg07675169 | 0.49509 | 0.28601 | 0.69904 | 0.76142 | 0.71505 | 0.83429 | 0.20881 | 0.21962 | 0.62766 | 0.59731 | C20orf58  |
| cg07675682 | 0.87504 | 0.81628 | 0.80021 | 0.80862 | 0.86918 | 0.73065 | 0.84152 | 0.79186 | 0.8471  | 0.75645 | SGSH      |
| cg07676849 | 0.17791 | 0.13137 | 0.45227 | 0.57982 | 0.67779 | 0.72992 | 0.67637 | 0.3721  | 0.19054 | 0.12787 | FOLR3     |
| cg07677850 | 0.75376 | 0.7468  | 0.74937 | 0.7648  | 0.65015 | 0.65234 | 0.6897  | 0.69775 | 0.76292 | 0.61737 | ADORA2B   |
| cg07678643 | 0.06667 | 0.06159 | 0.09256 | 0.06434 | 0.0561  | 0.05991 | 0.05328 | 0.05646 | 0.06676 | 0.0489  | LOC113444 |
| cg07679836 | 0.43581 | 0.49865 | 0.45041 | 0.53411 | 0.19937 | 0.11539 | 0.15113 | 0.23648 | 0.31287 | 0.30039 | BAK1      |
| cg07681084 | 0.03276 | 0.03137 | 0.03516 | 0.03068 | 0.02406 | 0.03361 | 0.02636 | 0.02831 | 0.02602 | 0.02334 | LMBR1     |
| cg07684150 | 0.02899 | 0.0246  | 0.03285 | 0.02801 | 0.02601 | 0.02762 | 0.02752 | 0.02307 | 0.0237  | 0.02483 | IQWD1     |
| cg07684353 | 0.05604 | 0.06216 | 0.05984 | 0.05327 | 0.04064 | 0.05612 | 0.05136 | 0.05214 | 0.05509 | 0.05116 | MYO1E     |
| cg07684796 | 0.05697 | 0.06333 | 0.03436 | 0.03516 | 0.02498 | 0.03292 | 0.03046 | 0.03468 | 0.05908 | 0.02907 | DKK1      |
| cg07684809 | 0.49889 | 0.40941 | 0.74893 | 0.81314 | 0.37925 | 0.40064 | 0.10511 | 0.06619 | 0.83476 | 0.64211 | MGC26856  |
| cg07685034 | 0.41702 | 0.31127 | 0.4295  | 0.58588 | 0.5163  | 0.6807  | 0.11484 | 0.4949  | 0.54766 | 0.31059 | PCBP3     |
| cg07685221 | 0.03654 | 0.03538 | 0.10921 | 0.03726 | 0.028   | 0.03199 | 0.04106 | 0.03294 | 0.0348  | 0.03291 | QTRT1     |
| cg07685786 | 0.8891  | 0.69638 | 0.76121 | 0.87661 | 0.93568 | 0.91569 | 0.53239 | 0.49746 | 0.55523 | 0.51848 | S100B     |
| cg07685869 | 0.27112 | 0.17443 | 0.27922 | 0.31382 | 0.36221 | 0.1048  | 0.42543 | 0.20242 | 0.19201 | 0.1373  | KIFC3     |
| cg07686479 | 0.07292 | 0.04224 | 0.45554 | 0.41918 | 0.9551  | 0.70275 | 0.05159 | 0.43455 | 0.11019 | 0.04239 | LMX1A     |
| cg07688234 | 0.7619  | 0.18059 | 0.7186  | 0.63187 | 0.65298 | 0.60719 | 0.51847 | 0.41583 | 0.37377 | 0.59283 | PFC       |
| cg07688613 | 0.33068 | 0.08869 | 0.29865 | 0.24231 | 0.09106 | 0.03651 | 0.05103 | 0.04043 | 0.05759 | 0.04091 | C1orf60   |
| cg07688933 | 0.05007 | 0.05923 | 0.06246 | 0.05925 | 0.04027 | 0.05163 | 0.05401 | 0.05459 | 0.05276 | 0.05931 | FLJ20512  |
| cg07689731 | 0.35408 | 0.36399 | 0.65269 | 0.66682 | 0.62924 | 0.5709  | 0.61439 | 0.40977 | 0.71463 | 0.47583 | SDC3      |
| cg07689821 | 0.05264 | 0.04894 | 0.06038 | 0.06018 | 0.12216 | 0.0989  | 0.0678  | 0.06377 | 0.03302 | 0.04515 | DAXX      |
| cg07690018 | 0.03895 | 0.04411 | 0.07152 | 0.04146 | 0.55569 | 0.03765 | 0.21538 | 0.32163 | 0.91537 | 0.77414 | CPNE7     |

|            |         |         |         |         |         |         |         |         |         |                   |
|------------|---------|---------|---------|---------|---------|---------|---------|---------|---------|-------------------|
| cg07693270 | 0.26652 | 0.04582 | 0.09354 | 0.12461 | 0.71276 | 0.60397 | 0.77808 | 0.93524 | 0.04517 | 0.03222 RPL39L    |
| cg07694025 | 0.41946 | 0.21371 | 0.80278 | 0.78876 | 0.28986 | 0.29164 | 0.78923 | 0.0885  | 0.786   | 0.65326 SFRP2     |
| cg07695590 | 0.04277 | 0.05195 | 0.04834 | 0.03702 | 0.0607  | 0.04281 | 0.03371 | 0.02802 | 0.04407 | 0.03692 CEBPZ     |
| cg07696033 | 0.28546 | 0.31548 | 0.59071 | 0.50687 | 0.84025 | 0.91093 | 0.90045 | 0.90651 | 0.91835 | 0.87821 ALX4      |
| cg07697078 | 0.05691 | 0.05678 | 0.05307 | 0.05411 | 0.05583 | 0.05787 | 0.0588  | 0.05087 | 0.04809 | 0.05319 PFDN1     |
| cg07697569 | 0.03706 | 0.03725 | 0.0343  | 0.04063 | 0.03275 | 0.04078 | 0.03331 | 0.03604 | 0.03137 | 0.02631 H2AFX     |
| cg07699362 | 0.14708 | 0.03766 | 0.26156 | 0.47915 | 0.71673 | 0.94718 | 0.38282 | 0.04535 | 0.90091 | 0.8897 GPX3       |
| cg07699440 | 0.02383 | 0.02463 | 0.02383 | 0.02122 | 0.02143 | 0.01826 | 0.01861 | 0.02185 | 0.01801 | 0.01836 FAH       |
| cg07703337 | 0.7938  | 0.60061 | 0.13415 | 0.24341 | 0.58703 | 0.2611  | 0.78263 | 0.79369 | 0.60211 | 0.54581 ZNF610    |
| cg07703401 | 0.06828 | 0.04165 | 0.96173 | 0.9643  | 0.77712 | 0.60272 | 0.93576 | 0.96147 | 0.06248 | 0.03044 HBQ1      |
| cg07704144 | 0.06079 | 0.04079 | 0.05317 | 0.04328 | 0.18982 | 0.04888 | 0.08163 | 0.07059 | 0.03767 | 0.03157 SNPH      |
| cg07705835 | 0.5641  | 0.62997 | 0.27872 | 0.34412 | 0.20734 | 0.12225 | 0.46564 | 0.57055 | 0.07027 | 0.07797 IL17RC    |
| cg07705908 | 0.75463 | 0.3255  | 0.812   | 0.87799 | 0.89085 | 0.7387  | 0.33349 | 0.48942 | 0.46005 | 0.20036 SPDEF     |
| cg07706067 | 0.03575 | 0.03711 | 0.04402 | 0.03756 | 0.05595 | 0.06057 | 0.04068 | 0.03969 | 0.03054 | 0.03534 DHRS7B    |
| cg07706362 | 0.05744 | 0.21049 | 0.18689 | 0.23773 | 0.0647  | 0.11476 | 0.47434 | 0.41997 | 0.03238 | 0.02315 ZNF91     |
| cg07707227 | 0.05758 | 0.03813 | 0.04327 | 0.05748 | 0.03998 | 0.03903 | 0.02847 | 0.03703 | 0.0882  | 0.05597 FLJ37927  |
| cg07707498 | 0.08594 | 0.07084 | 0.09918 | 0.10316 | 0.06921 | 0.06253 | 0.09428 | 0.07623 | 0.05908 | 0.06974 LOC388272 |
| cg07708788 | 0.03031 | 0.02748 | 0.74667 | 0.82497 | 0.56337 | 0.48462 | 0.68683 | 0.12642 | 0.07096 | 0.01912 SLCO2A1   |
| cg07710481 | 0.0643  | 0.07624 | 0.11154 | 0.10285 | 0.13908 | 0.12331 | 0.08102 | 0.06499 | 0.09253 | 0.05123 SLITRK5   |
| cg07711097 | 0.22368 | 0.0556  | 0.77135 | 0.77541 | 0.65541 | 0.61848 | 0.16735 | 0.09175 | 0.12306 | 0.12683 GML       |
| cg07711515 | 0.71227 | 0.39149 | 0.86666 | 0.89327 | 0.73534 | 0.68325 | 0.35974 | 0.42775 | 0.78022 | 0.76607 BAG1      |
| cg07713361 | 0.71431 | 0.35756 | 0.30517 | 0.62824 | 0.69012 | 0.82324 | 0.17631 | 0.3194  | 0.20131 | 0.17355 APOL1     |
| cg07713493 | 0.7653  | 0.64989 | 0.75852 | 0.70341 | 0.7     | 0.49813 | 0.58839 | 0.2095  | 0.78513 | 0.51451 PCTK3     |
| cg07714374 | 0.17601 | 0.19415 | 0.22561 | 0.20935 | 0.27418 | 0.26712 | 0.19465 | 0.19713 | 0.32637 | 0.25834 TCF4      |
| cg07714534 | 0.05902 | 0.06144 | 0.07792 | 0.05985 | 0.06967 | 0.0665  | 0.05315 | 0.05345 | 0.05763 | 0.04711 FLJ25416  |
| cg07715201 | 0.36737 | 0.0352  | 0.08543 | 0.05211 | 0.1436  | 0.03479 | 0.03732 | 0.03928 | 0.52855 | 0.42897 GDNF      |
| cg07715387 | 0.03568 | 0.03952 | 0.04319 | 0.04152 | 0.02493 | 0.03638 | 0.03516 | 0.03173 | 0.03877 | 0.03389 SLC1A4    |
| cg07715894 | 0.04233 | 0.03722 | 0.03889 | 0.03284 | 0.03025 | 0.02975 | 0.03503 | 0.03366 | 0.03278 | 0.02807 MGC24665  |
| cg07717632 | 0.92061 | 0.71953 | 0.05573 | 0.05797 | 0.92617 | 0.84157 | 0.86722 | 0.87462 | 0.92902 | 0.78567 FLJ20245  |
| cg07719512 | 0.57581 | 0.40846 | 0.71639 | 0.65636 | 0.83462 | 0.88024 | 0.52898 | 0.57611 | 0.74597 | 0.32001 SLC11A1   |
| cg07719737 | 0.03894 | 0.04351 | 0.04056 | 0.0424  | 0.04616 | 0.04117 | 0.07196 | 0.06683 | 0.02911 | 0.02563 MANBAL    |
| cg07728874 | 0.88193 | 0.82072 | 0.86004 | 0.88558 | 0.92216 | 0.90314 | 0.55199 | 0.87176 | 0.74    | 0.73745 CD3D      |
| cg07730301 | 0.87344 | 0.80933 | 0.0474  | 0.04935 | 0.02634 | 0.03711 | 0.03644 | 0.04537 | 0.03271 | 0.02917 ALDH3B1   |
| cg07730329 | 0.8814  | 0.69728 | 0.6559  | 0.85658 | 0.89721 | 0.86095 | 0.87129 | 0.88555 | 0.88339 | 0.83954 PCDHGA12  |
| cg07731916 | 0.25176 | 0.24542 | 0.19807 | 0.20713 | 0.28736 | 0.22262 | 0.16166 | 0.13037 | 0.14855 | 0.21211 IRF2      |
| cg07732037 | 0.85953 | 0.88332 | 0.81359 | 0.85792 | 0.7734  | 0.81341 | 0.80578 | 0.84224 | 0.85383 | 0.82732 MPHOSPH9  |
| cg07732644 | 0.61308 | 0.63359 | 0.51664 | 0.67032 | 0.67381 | 0.71919 | 0.22917 | 0.17406 | 0.77042 | 0.67059 ASPA      |
| cg07733031 | 0.05654 | 0.04914 | 0.06097 | 0.05571 | 0.03824 | 0.04024 | 0.04509 | 0.04422 | 0.06484 | 0.04877 SGTB      |
| cg07736705 | 0.03727 | 0.04535 | 0.04689 | 0.03763 | 0.04266 | 0.04267 | 0.03801 | 0.03749 | 0.0364  | 0.03459 POM121    |
| cg07737781 | 0.09471 | 0.07863 | 0.46155 | 0.67716 | 0.57979 | 0.71824 | 0.0709  | 0.05825 | 0.08277 | 0.06175 WBSR14    |
| cg07739803 | 0.02769 | 0.02636 | 0.03473 | 0.03016 | 0.02401 | 0.02735 | 0.02671 | 0.02552 | 0.02636 | 0.02583 SLC30A7   |

|            |         |         |         |         |         |         |         |         |         |         |           |
|------------|---------|---------|---------|---------|---------|---------|---------|---------|---------|---------|-----------|
| cg07740640 | 0.97169 | 0.88656 | 0.97453 | 0.97321 | 0.97839 | 0.97571 | 0.97633 | 0.96668 | 0.97529 | 0.97587 | BHLHB8    |
| cg07740989 | 0.04825 | 0.04279 | 0.05102 | 0.049   | 0.03067 | 0.03829 | 0.04185 | 0.32912 | 0.03762 | 0.03495 | EEF1A1    |
| cg07744166 | 0.04042 | 0.05169 | 0.05876 | 0.05391 | 0.05083 | 0.07153 | 0.06653 | 0.35927 | 0.04776 | 0.04418 | WASF3     |
| cg07745434 | 0.1164  | 0.09296 | 0.20135 | 0.17249 | 0.5286  | 0.44965 | 0.34206 | 0.11611 | 0.09285 | 0.09555 | CHST13    |
| cg07745725 | 0.1509  | 0.16529 | 0.81725 | 0.83042 | 0.89176 | 0.8679  | 0.2478  | 0.17004 | 0.34789 | 0.40562 | PSG3      |
| cg07746918 | 0.04555 | 0.04548 | 0.04947 | 0.04897 | 0.03077 | 0.03727 | 0.03795 | 0.04597 | 0.05059 | 0.03927 | SREBF2    |
| cg07747299 | 0.07813 | 0.06805 | 0.06528 | 0.07319 | 0.05206 | 0.05943 | 0.05004 | 0.04385 | 0.10675 | 0.04974 | C21orf56  |
| cg07747336 | 0.22938 | 0.14141 | 0.24948 | 0.24647 | 0.53264 | 0.37068 | 0.13843 | 0.15206 | 0.5987  | 0.44159 | C11orf38  |
| cg07747970 | 0.04037 | 0.035   | 0.03153 | 0.02962 | 0.03986 | 0.04353 | 0.06128 | 0.04357 | 0.02309 | 0.0218  | LHX1      |
| cg07748017 | 0.0567  | 0.03689 | 0.04543 | 0.03924 | 0.27863 | 0.03171 | 0.03187 | 0.03589 | 0.05774 | 0.03497 | PEX5      |
| cg07748540 | 0.09281 | 0.05252 | 0.06589 | 0.05886 | 0.11223 | 0.05515 | 0.04665 | 0.03995 | 0.12207 | 0.27597 | PDGFD     |
| cg07749074 | 0.31512 | 0.43777 | 0.43819 | 0.57893 | 0.66087 | 0.62837 | 0.10928 | 0.11589 | 0.10679 | 0.15463 | HRG       |
| cg07749808 | 0.02811 | 0.02827 | 0.03318 | 0.0251  | 0.04393 | 0.04637 | 0.02254 | 0.02715 | 0.02074 | 0.01905 | SYT17     |
| cg07750111 | 0.04688 | 0.05451 | 0.0516  | 0.05072 | 0.04907 | 0.05801 | 0.04069 | 0.04689 | 0.04085 | 0.04211 | HIST1H1C  |
| cg07752420 | 0.42097 | 0.44822 | 0.43428 | 0.44675 | 0.45158 | 0.41144 | 0.90136 | 0.91446 | 0.90073 | 0.93323 | CDKN2A    |
| cg07753583 | 0.07587 | 0.05115 | 0.06506 | 0.05053 | 0.94657 | 0.89311 | 0.89727 | 0.89051 | 0.89473 | 0.82007 | LRRC61    |
| cg07753644 | 0.65209 | 0.2846  | 0.8723  | 0.87648 | 0.8936  | 0.5321  | 0.9     | 0.73032 | 0.92162 | 0.79993 | P2RY11    |
| cg07755653 | 0.4537  | 0.31761 | 0.07022 | 0.10086 | 0.51315 | 0.48051 | 0.0555  | 0.02903 | 0.11686 | 0.02806 | STX11     |
| cg07757386 | 0.05185 | 0.05278 | 0.04591 | 0.03738 | 0.06886 | 0.06561 | 0.04536 | 0.04195 | 0.04359 | 0.05168 | RAGE      |
| cg07758574 | 0.23056 | 0.2468  | 0.23236 | 0.4151  | 0.2621  | 0.2837  | 0.18755 | 0.18957 | 0.07195 | 0.07708 | C3orf62   |
| cg07758904 | 0.3422  | 0.08443 | 0.85233 | 0.95741 | 0.96401 | 0.95917 | 0.64485 | 0.93707 | 0.04593 | 0.02141 | TSCOT     |
| cg07759587 | 0.6976  | 0.73284 | 0.73766 | 0.72256 | 0.68756 | 0.75907 | 0.51239 | 0.78444 | 0.74721 | 0.7737  | TLR8      |
| cg07761912 | 0.05176 | 0.04856 | 0.068   | 0.05598 | 0.05831 | 0.05439 | 0.05608 | 0.0472  | 0.0528  | 0.05339 | TOR1AIP2  |
| cg07763768 | 0.8453  | 0.84139 | 0.81729 | 0.83629 | 0.53975 | 0.33509 | 0.82696 | 0.8644  | 0.82982 | 0.80959 | C9orf45   |
| cg07764959 | 0.04126 | 0.04243 | 0.0539  | 0.05056 | 0.06198 | 0.05471 | 0.05656 | 0.0507  | 0.04176 | 0.03218 | SLC43A1   |
| cg07766315 | 0.04517 | 0.038   | 0.17512 | 0.26377 | 0.07369 | 0.03316 | 0.06978 | 0.12334 | 0.48079 | 0.26539 | LOC400451 |
| cg07766612 | 0.03746 | 0.03129 | 0.63506 | 0.733   | 0.93063 | 0.96588 | 0.02785 | 0.07309 | 0.47969 | 0.77081 | SLC30A2   |
| cg07770222 | 0.16797 | 0.17278 | 0.27551 | 0.27165 | 0.47565 | 0.57724 | 0.20194 | 0.15881 | 0.20325 | 0.23598 | C8orf31   |
| cg07772309 | 0.01504 | 0.01824 | 0.01518 | 0.01468 | 0.01349 | 0.01542 | 0.015   | 0.01619 | 0.01285 | 0.00888 | NELF      |
| cg07773116 | 0.13905 | 0.39523 | 0.70199 | 0.74304 | 0.42805 | 0.54572 | 0.05827 | 0.42062 | 0.03016 | 0.02382 | GDF10     |
| cg07773642 | 0.04915 | 0.04664 | 0.05392 | 0.04886 | 0.05199 | 0.06233 | 0.04512 | 0.04153 | 0.03958 | 0.03514 | PSMD7     |
| cg07774025 | 0.12239 | 0.41578 | 0.13253 | 0.14371 | 0.06884 | 0.0521  | 0.05304 | 0.05197 | 0.05417 | 0.06175 | HSD17B7   |
| cg07774222 | 0.02918 | 0.03118 | 0.0307  | 0.02413 | 0.03745 | 0.04204 | 0.0315  | 0.02769 | 0.02838 | 0.0309  | MED6      |
| cg07775501 | 0.02997 | 0.03128 | 0.06257 | 0.03583 | 0.02337 | 0.02723 | 0.12936 | 0.02467 | 0.02306 | 0.0231  | JOSD2     |
| cg07775675 | 0.05702 | 0.05098 | 0.05162 | 0.07203 | 0.09464 | 0.05531 | 0.03417 | 0.05394 | 0.04989 | 0.04249 | SPHK1     |
| cg07777378 | 0.03656 | 0.03806 | 0.03737 | 0.03535 | 0.04019 | 0.03649 | 0.03786 | 0.03408 | 0.03761 | 0.03542 | GRN       |
| cg07778029 | 0.02956 | 0.02468 | 0.02698 | 0.02233 | 0.024   | 0.02516 | 0.02048 | 0.02264 | 0.94533 | 0.92689 | HOXA9     |
| cg07778080 | 0.02065 | 0.01987 | 0.02278 | 0.02638 | 0.02073 | 0.02334 | 0.02058 | 0.02168 | 0.01844 | 0.02056 | NPC1      |
| cg07780118 | 0.05764 | 0.06479 | 0.06839 | 0.05927 | 0.09921 | 0.05181 | 0.12626 | 0.06318 | 0.09325 | 0.06227 | AR        |
| cg07780979 | 0.9463  | 0.76818 | 0.94654 | 0.95443 | 0.96987 | 0.9364  | 0.8747  | 0.94541 | 0.93187 | 0.91403 | AHRR      |
| cg07782113 | 0.01787 | 0.02344 | 0.02246 | 0.02318 | 0.01282 | 0.01722 | 0.01607 | 0.01965 | 0.01544 | 0.01353 | HIVEP1    |

|            |         |         |         |         |         |         |         |         |         |         |           |
|------------|---------|---------|---------|---------|---------|---------|---------|---------|---------|---------|-----------|
| cg07785936 | 0.88503 | 0.78826 | 0.35042 | 0.45498 | 0.80906 | 0.74564 | 0.54866 | 0.43914 | 0.67937 | 0.46848 | GPR39     |
| cg07786760 | 0.05999 | 0.04786 | 0.08515 | 0.07591 | 0.17306 | 0.06338 | 0.05251 | 0.0352  | 0.05588 | 0.04603 | DCHS2     |
| cg07788138 | 0.03211 | 0.03594 | 0.04058 | 0.03573 | 0.03368 | 0.03491 | 0.0324  | 0.0336  | 0.03224 | 0.02525 | DOCK4     |
| cg07789083 | 0.03419 | 0.03734 | 0.04925 | 0.0375  | 0.04844 | 0.03317 | 0.04457 | 0.03317 | 0.03266 | 0.02906 | GPRC5C    |
| cg07789552 | 0.0773  | 0.08223 | 0.08301 | 0.08399 | 0.05191 | 0.08023 | 0.07132 | 0.06435 | 0.06596 | 0.07671 | STK40     |
| cg07789904 | 0.04237 | 0.03622 | 0.1467  | 0.10843 | 0.17714 | 0.03966 | 0.06844 | 0.02938 | 0.03928 | 0.03374 | MAD2L2    |
| cg07790638 | 0.78565 | 0.66942 | 0.75614 | 0.8031  | 0.70423 | 0.75474 | 0.75466 | 0.78559 | 0.80302 | 0.75377 | LOC91431  |
| cg07791997 | 0.09516 | 0.0888  | 0.09658 | 0.09939 | 0.05853 | 0.08047 | 0.08335 | 0.08152 | 0.07848 | 0.07583 | PPME1     |
| cg07792737 | 0.88783 | 0.51578 | 0.89372 | 0.93309 | 0.95776 | 0.89987 | 0.7953  | 0.70043 | 0.80452 | 0.68182 | NPIP      |
| cg07799434 | 0.04886 | 0.05894 | 0.06182 | 0.0549  | 0.0437  | 0.04163 | 0.05728 | 0.05531 | 0.04206 | 0.04537 | MGC2803   |
| cg07799947 | 0.29758 | 0.30682 | 0.30625 | 0.30103 | 0.25833 | 0.27368 | 0.30717 | 0.28589 | 0.29105 | 0.282   | NPAS2     |
| cg07800320 | 0.42857 | 0.41867 | 0.2026  | 0.12633 | 0.14037 | 0.40662 | 0.34119 | 0.41375 | 0.03737 | 0.03257 | ALDH1L1   |
| cg07803864 | 0.6922  | 0.64601 | 0.63263 | 0.69563 | 0.57039 | 0.70778 | 0.62427 | 0.7266  | 0.73025 | 0.6657  | TUBAL3    |
| cg07804122 | 0.04209 | 0.04246 | 0.03788 | 0.03944 | 0.02853 | 0.03545 | 0.03491 | 0.04065 | 0.03477 | 0.03188 | TXN       |
| cg07804582 | 0.68616 | 0.54036 | 0.22613 | 0.27891 | 0.73199 | 0.79438 | 0.09567 | 0.09752 | 0.2646  | 0.09475 | MGC33367  |
| cg07805833 | 0.88501 | 0.90568 | 0.8799  | 0.88942 | 0.72819 | 0.84373 | 0.8732  | 0.86062 | 0.91996 | 0.91467 | POLR1C    |
| cg07806164 | 0.04695 | 0.05273 | 0.04713 | 0.0479  | 0.03988 | 0.04681 | 0.03846 | 0.04105 | 0.0377  | 0.03924 | UBE2E2    |
| cg07807709 | 0.07031 | 0.07563 | 0.08516 | 0.08821 | 0.06124 | 0.07403 | 0.06931 | 0.07902 | 0.06576 | 0.06712 | HIST2H2AB |
| cg07807817 | 0.10709 | 0.08773 | 0.1586  | 0.13212 | 0.18635 | 0.11258 | 0.10004 | 0.08086 | 0.17385 | 0.09281 | C14orf44  |
| cg07808960 | 0.02432 | 0.02851 | 0.02635 | 0.02301 | 0.02268 | 0.02668 | 0.0218  | 0.02052 | 0.02019 | 0.02162 | RBM6      |
| cg07810156 | 0.87903 | 0.78078 | 0.86705 | 0.90047 | 0.82926 | 0.7478  | 0.34319 | 0.51129 | 0.73608 | 0.75857 | PDZK1IP1  |
| cg07810967 | 0.8692  | 0.8088  | 0.88375 | 0.88641 | 0.89287 | 0.90466 | 0.78065 | 0.7572  | 0.89374 | 0.872   | IL13      |
| cg07811498 | 0.30972 | 0.15036 | 0.39914 | 0.46342 | 0.08348 | 0.06227 | 0.28448 | 0.09246 | 0.06903 | 0.05331 | LOC91689  |
| cg07811750 | 0.02736 | 0.02732 | 0.23456 | 0.36188 | 0.22491 | 0.02841 | 0.02937 | 0.02796 | 0.02543 | 0.02284 | CAMTA2    |
| cg07815386 | 0.03785 | 0.03434 | 0.03705 | 0.03146 | 0.02869 | 0.02963 | 0.03023 | 0.03114 | 0.02936 | 0.03021 | RNF149    |
| cg07816074 | 0.93757 | 0.93328 | 0.93832 | 0.94488 | 0.95339 | 0.94795 | 0.65143 | 0.6428  | 0.71174 | 0.57543 | SH3TC1    |
| cg07816439 | 0.62851 | 0.14125 | 0.82736 | 0.78953 | 0.57118 | 0.5557  | 0.45179 | 0.10212 | 0.60557 | 0.40462 | C1QTNF2   |
| cg07816442 | 0.03615 | 0.0391  | 0.04038 | 0.03749 | 0.03159 | 0.03176 | 0.03405 | 0.03565 | 0.03018 | 0.02846 | CD3EAP    |
| cg07817698 | 0.09849 | 0.0943  | 0.09061 | 0.07942 | 0.1697  | 0.13731 | 0.09249 | 0.08814 | 0.06925 | 0.09858 | DHODH     |
| cg07817783 | 0.03577 | 0.03321 | 0.05327 | 0.0355  | 0.04077 | 0.03604 | 0.03293 | 0.03567 | 0.03057 | 0.02226 | DAP       |
| cg07818646 | 0.02884 | 0.03038 | 0.03878 | 0.03449 | 0.03921 | 0.04441 | 0.03529 | 0.03216 | 0.03172 | 0.03055 | FLJ11712  |
| cg07819926 | 0.03588 | 0.03354 | 0.05195 | 0.04007 | 0.03708 | 0.0427  | 0.02927 | 0.03107 | 0.02682 | 0.02624 | HSPC268   |
| cg07820214 | 0.03803 | 0.03324 | 0.03282 | 0.03702 | 0.02312 | 0.03194 | 0.04924 | 0.02518 | 0.02432 | 0.02509 | RUVBL1    |
| cg07823492 | 0.9106  | 0.71616 | 0.96765 | 0.97393 | 0.97038 | 0.96895 | 0.80149 | 0.91901 | 0.97052 | 0.94448 | HOXB1     |
| cg07823755 | 0.91501 | 0.77965 | 0.91349 | 0.93771 | 0.87629 | 0.91188 | 0.73215 | 0.88056 | 0.92003 | 0.90757 | UGT1A1    |
| cg07823935 | 0.03539 | 0.03344 | 0.03692 | 0.03377 | 0.02735 | 0.03201 | 0.028   | 0.03289 | 0.03231 | 0.02957 | NCKAP1    |
| cg07824317 | 0.14298 | 0.08739 | 0.13224 | 0.19543 | 0.09543 | 0.08778 | 0.10824 | 0.11819 | 0.07373 | 0.0636  | RPGR      |
| cg07824742 | 0.95046 | 0.3787  | 0.96968 | 0.97913 | 0.97496 | 0.97129 | 0.10987 | 0.02064 | 0.56463 | 0.49085 | DBH       |
| cg07826255 | 0.10447 | 0.14963 | 0.1447  | 0.22569 | 0.14706 | 0.2065  | 0.09188 | 0.17242 | 0.06559 | 0.06195 | SGCA      |
| cg07827038 | 0.03408 | 0.04047 | 0.0439  | 0.03534 | 0.03469 | 0.04173 | 0.03499 | 0.03751 | 0.03423 | 0.02851 | MRP63     |
| cg07829804 | 0.78098 | 0.75725 | 0.69962 | 0.78293 | 0.47341 | 0.4529  | 0.22653 | 0.52292 | 0.46255 | 0.31084 | OLR1      |

|            |         |         |         |         |         |         |         |         |         |         |           |
|------------|---------|---------|---------|---------|---------|---------|---------|---------|---------|---------|-----------|
| cg07829809 | 0.67163 | 0.52291 | 0.67269 | 0.6971  | 0.6178  | 0.64612 | 0.65176 | 0.67992 | 0.72395 | 0.65058 | METAP1    |
| cg07830847 | 0.6763  | 0.06867 | 0.61363 | 0.84927 | 0.81934 | 0.85662 | 0.09249 | 0.06447 | 0.31045 | 0.08354 | KCNA10    |
| cg07832674 | 0.80999 | 0.60046 | 0.81676 | 0.8636  | 0.83131 | 0.82923 | 0.79753 | 0.73202 | 0.0939  | 0.11624 | IL17RE    |
| cg07833035 | 0.02448 | 0.02353 | 0.02458 | 0.02803 | 0.01839 | 0.02312 | 0.02247 | 0.02139 | 0.02047 | 0.01861 | RPS23     |
| cg07833382 | 0.11225 | 0.10944 | 0.1289  | 0.11489 | 0.17003 | 0.14961 | 0.09789 | 0.07929 | 0.08179 | 0.12755 | SCPEP1    |
| cg07836370 | 0.03908 | 0.04767 | 0.09065 | 0.31502 | 0.09663 | 0.03365 | 0.04307 | 0.03236 | 0.03461 | 0.03466 | GLTP      |
| cg07837085 | 0.18815 | 0.16074 | 0.54188 | 0.58585 | 0.34044 | 0.14831 | 0.16039 | 0.14022 | 0.13253 | 0.14312 | SLAMF7    |
| cg07837262 | 0.08996 | 0.03017 | 0.03353 | 0.03056 | 0.0301  | 0.02564 | 0.03125 | 0.038   | 0.02764 | 0.02655 | SLC39A14  |
| cg07841014 | 0.37926 | 0.6693  | 0.32613 | 0.41729 | 0.65628 | 0.88463 | 0.10241 | 0.08856 | 0.37461 | 0.33017 | REG1B     |
| cg07842062 | 0.4841  | 0.63176 | 0.40087 | 0.42504 | 0.44885 | 0.42361 | 0.15237 | 0.15796 | 0.89992 | 0.70533 | MEFV      |
| cg07842593 | 0.04001 | 0.03892 | 0.04107 | 0.03622 | 0.02797 | 0.03669 | 0.0323  | 0.03369 | 0.03391 | 0.0351  | SEPHS2    |
| cg07843027 | 0.08039 | 0.08559 | 0.08922 | 0.07195 | 0.11224 | 0.11464 | 0.05973 | 0.05982 | 0.06159 | 0.08361 | LOC124491 |
| cg07844021 | 0.06133 | 0.05645 | 0.07574 | 0.07176 | 0.11177 | 0.09469 | 0.04962 | 0.04349 | 0.06378 | 0.06858 | COIL      |
| cg07844572 | 0.03595 | 0.03189 | 0.05502 | 0.07979 | 0.04605 | 0.03453 | 0.03158 | 0.03001 | 0.0345  | 0.03146 | FTSJ3     |
| cg07845390 | 0.05474 | 0.04746 | 0.54593 | 0.73948 | 0.07003 | 0.0471  | 0.04632 | 0.04455 | 0.05772 | 0.05022 | KCNT2     |
| cg07845392 | 0.13522 | 0.06472 | 0.75879 | 0.78749 | 0.96074 | 0.3478  | 0.7728  | 0.35137 | 0.38434 | 0.41616 | SLC25A10  |
| cg07845566 | 0.02187 | 0.0234  | 0.03431 | 0.0705  | 0.04421 | 0.02011 | 0.03037 | 0.02297 | 0.01529 | 0.01576 | B3GAT1    |
| cg07846167 | 0.85125 | 0.29638 | 0.85162 | 0.8411  | 0.96501 | 0.74145 | 0.74816 | 0.47592 | 0.74719 | 0.35737 | FBLIM1    |
| cg07846220 | 0.02946 | 0.23961 | 0.02249 | 0.02287 | 0.02352 | 0.02662 | 0.2299  | 0.48994 | 0.02184 | 0.02527 | LAMA1     |
| cg07847428 | 0.03382 | 0.02943 | 0.02844 | 0.03161 | 0.02101 | 0.02088 | 0.02863 | 0.02455 | 0.02072 | 0.01931 | 2-Mar     |
| cg07849904 | 0.0678  | 0.07197 | 0.06468 | 0.06325 | 0.05139 | 0.06973 | 0.07076 | 0.06642 | 0.06313 | 0.06422 | MN1       |
| cg07850221 | 0.87321 | 0.88429 | 0.88292 | 0.89023 | 0.90663 | 0.88761 | 0.88945 | 0.87055 | 0.89576 | 0.89445 | PSENN     |
| cg07850604 | 0.03252 | 0.03414 | 0.03683 | 0.03521 | 0.13848 | 0.0327  | 0.03141 | 0.1319  | 0.02727 | 0.02905 | INSM2     |
| cg07851192 | 0.88331 | 0.76491 | 0.95645 | 0.9625  | 0.76926 | 0.95109 | 0.90877 | 0.58069 | 0.88345 | 0.97952 | KCNG2     |
| cg07851243 | 0.03543 | 0.03345 | 0.03506 | 0.03324 | 0.0289  | 0.02859 | 0.02745 | 0.02621 | 0.0302  | 0.03063 | MXRA7     |
| cg07851278 | 0.03893 | 0.04427 | 0.04409 | 0.03714 | 0.04125 | 0.04497 | 0.03978 | 0.0388  | 0.03072 | 0.03718 | RIOK3     |
| cg07854244 | 0.03724 | 0.03745 | 0.03976 | 0.03271 | 0.0268  | 0.03671 | 0.03302 | 0.03829 | 0.03231 | 0.03081 | IHPK2     |
| cg07855056 | 0.09026 | 0.08267 | 0.19512 | 0.16708 | 0.15638 | 0.10514 | 0.10761 | 0.10403 | 0.08328 | 0.10112 | CCDC55    |
| cg07857181 | 0.03454 | 0.04152 | 0.03766 | 0.03225 | 0.0426  | 0.03918 | 0.03538 | 0.03635 | 0.03303 | 0.033   | POLH      |
| cg07858745 | 0.05093 | 0.05418 | 0.05705 | 0.05431 | 0.04327 | 0.0519  | 0.04447 | 0.0437  | 0.04391 | 0.0413  | GTF2I     |
| cg07861564 | 0.31927 | 0.06191 | 0.03873 | 0.03316 | 0.03016 | 0.03582 | 0.03069 | 0.03635 | 0.04522 | 0.02755 | HSPB8     |
| cg07862358 | 0.0327  | 0.03369 | 0.03527 | 0.03022 | 0.02739 | 0.0335  | 0.03296 | 0.0365  | 0.02662 | 0.02765 | MYO10     |
| cg07864189 | 0.03399 | 0.0437  | 0.04132 | 0.03997 | 0.03016 | 0.03529 | 0.03665 | 0.03386 | 0.03004 | 0.02937 | NADSYN1   |
| cg07864297 | 0.57973 | 0.32592 | 0.59605 | 0.57768 | 0.20462 | 0.12305 | 0.07642 | 0.06909 | 0.33707 | 0.18427 | ESRRB     |
| cg07864632 | 0.05267 | 0.0443  | 0.0559  | 0.06079 | 0.06149 | 0.0422  | 0.03726 | 0.03151 | 0.04541 | 0.03703 | TRIP12    |
| cg07865790 | 0.03536 | 0.02981 | 0.0319  | 0.0305  | 0.02475 | 0.03134 | 0.03248 | 0.02794 | 0.02862 | 0.02286 | IKIP      |
| cg07867360 | 0.11697 | 0.2517  | 0.8762  | 0.91589 | 0.69007 | 0.86765 | 0.07876 | 0.07774 | 0.40444 | 0.35411 | PPP2R2C   |
| cg07868688 | 0.05723 | 0.06022 | 0.05353 | 0.05345 | 0.04358 | 0.05295 | 0.0538  | 0.05619 | 0.05159 | 0.05025 | ORC3L     |
| cg07871503 | 0.56464 | 0.51042 | 0.92729 | 0.93659 | 0.72664 | 0.68248 | 0.85506 | 0.92349 | 0.20701 | 0.35979 | RASGEF1A  |
| cg07872652 | 0.04865 | 0.0509  | 0.04623 | 0.04168 | 0.45071 | 0.0951  | 0.04459 | 0.04907 | 0.0438  | 0.03566 | CNIH2     |
| cg07873128 | 0.92819 | 0.76758 | 0.90359 | 0.92992 | 0.88832 | 0.90436 | 0.92547 | 0.92192 | 0.7912  | 0.89078 | OSBPL5    |

|            |         |         |         |         |         |         |         |         |         |         |           |
|------------|---------|---------|---------|---------|---------|---------|---------|---------|---------|---------|-----------|
| cg07873488 | 0.86892 | 0.6985  | 0.80872 | 0.88064 | 0.68573 | 0.5399  | 0.19633 | 0.15941 | 0.84703 | 0.54744 | MUC17     |
| cg07874155 | 0.02322 | 0.02252 | 0.03008 | 0.02697 | 0.01919 | 0.01779 | 0.02376 | 0.01815 | 0.01945 | 0.01904 | CTNNA1    |
| cg07874284 | 0.07924 | 0.07656 | 0.09141 | 0.10596 | 0.08273 | 0.06434 | 0.15974 | 0.50063 | 0.06072 | 0.05502 | PRPS2     |
| cg07874520 | 0.84057 | 0.7668  | 0.8574  | 0.88477 | 0.75248 | 0.83436 | 0.71497 | 0.70545 | 0.78992 | 0.76788 | THEM5     |
| cg07876586 | 0.03835 | 0.04164 | 0.03812 | 0.04318 | 0.03239 | 0.03442 | 0.56547 | 0.64118 | 0.03004 | 0.03452 | PGRMC1    |
| cg07879727 | 0.03466 | 0.03442 | 0.21567 | 0.48572 | 0.28288 | 0.2784  | 0.42186 | 0.47579 | 0.30077 | 0.35585 | WNT3      |
| cg07879977 | 0.04358 | 0.02874 | 0.23078 | 0.45634 | 0.32466 | 0.29577 | 0.02772 | 0.02982 | 0.03478 | 0.02301 | OR1F1     |
| cg07880061 | 0.03921 | 0.03755 | 0.03906 | 0.03561 | 0.07701 | 0.03599 | 0.03486 | 0.03489 | 0.03721 | 0.03345 | PX19      |
| cg07880715 | 0.92559 | 0.9263  | 0.88946 | 0.88928 | 0.90496 | 0.8933  | 0.93251 | 0.92403 | 0.935   | 0.95215 | RB1       |
| cg07880854 | 0.44391 | 0.22139 | 0.39679 | 0.5154  | 0.92091 | 0.9185  | 0.80048 | 0.41751 | 0.64674 | 0.0595  | FLJ37440  |
| cg07881407 | 0.37697 | 0.37248 | 0.17427 | 0.21297 | 0.44479 | 0.41242 | 0.06639 | 0.06916 | 0.42337 | 0.30517 | CCL14     |
| cg07882535 | 0.639   | 0.28014 | 0.79259 | 0.85399 | 0.86969 | 0.8438  | 0.44098 | 0.18975 | 0.78616 | 0.43787 | TRPM5     |
| cg07882831 | 0.02443 | 0.02359 | 0.31021 | 0.254   | 0.06137 | 0.02449 | 0.08738 | 0.02031 | 0.17277 | 0.02677 | TTYH2     |
| cg07883333 | 0.9577  | 0.95727 | 0.95815 | 0.95756 | 0.97014 | 0.96481 | 0.95649 | 0.95693 | 0.9643  | 0.96699 | F11R      |
| cg07884019 | 0.10366 | 0.0677  | 0.5728  | 0.71394 | 0.21415 | 0.20565 | 0.20239 | 0.05797 | 0.36365 | 0.24071 | HMP19     |
| cg07884474 | 0.0383  | 0.03466 | 0.03919 | 0.03534 | 0.04578 | 0.04398 | 0.03316 | 0.03495 | 0.02617 | 0.02485 | VPS16     |
| cg07886712 | 0.16204 | 0.1205  | 0.11133 | 0.11342 | 0.16467 | 0.09477 | 0.10451 | 0.10363 | 0.1143  | 0.09777 | RHBDD3    |
| cg07888040 | 0.78266 | 0.63386 | 0.86828 | 0.8699  | 0.8313  | 0.85561 | 0.64711 | 0.80698 | 0.10528 | 0.30922 | GLDN      |
| cg07888234 | 0.26792 | 0.31889 | 0.93695 | 0.78808 | 0.12805 | 0.06754 | 0.20538 | 0.05862 | 0.75511 | 0.06344 | TNFRSF11A |
| cg07889201 | 0.36974 | 0.18659 | 0.14933 | 0.2116  | 0.05665 | 0.06466 | 0.11185 | 0.07561 | 0.11073 | 0.03999 | ZNF343    |
| cg07890954 | 0.91694 | 0.78777 | 0.82927 | 0.84952 | 0.95372 | 0.78442 | 0.89434 | 0.49145 | 0.94234 | 0.90245 | NR2E3     |
| cg07892051 | 0.56663 | 0.30135 | 0.7944  | 0.84658 | 0.61734 | 0.32962 | 0.66915 | 0.79503 | 0.57172 | 0.2903  | AKAP3     |
| cg07894162 | 0.04924 | 0.05228 | 0.04577 | 0.04149 | 0.03381 | 0.04657 | 0.04005 | 0.04513 | 0.03585 | 0.03799 | TUG1      |
| cg07894717 | 0.9403  | 0.73674 | 0.92408 | 0.93663 | 0.86957 | 0.53195 | 0.91203 | 0.69507 | 0.60713 | 0.50677 | CORT      |
| cg07895149 | 0.02665 | 0.05055 | 0.25692 | 0.60251 | 0.98397 | 0.97392 | 0.97708 | 0.97136 | 0.03184 | 0.02124 | FAM26B    |
| cg07896225 | 0.02332 | 0.02688 | 0.03136 | 0.02164 | 0.02052 | 0.0207  | 0.02248 | 0.02143 | 0.03211 | 0.01794 | BCL7C     |
| cg07897193 | 0.02091 | 0.02543 | 0.02358 | 0.02097 | 0.01826 | 0.02519 | 0.02178 | 0.02116 | 0.02013 | 0.02311 | SOCS5     |
| cg07897414 | 0.07475 | 0.09166 | 0.16949 | 0.1256  | 0.16329 | 0.07923 | 0.07399 | 0.09401 | 0.10276 | 0.07836 | KLHL4     |
| cg07897701 | 0.84381 | 0.36279 | 0.59751 | 0.88928 | 0.83072 | 0.78249 | 0.03133 | 0.03561 | 0.20643 | 0.0765  | ABP1      |
| cg07897837 | 0.02399 | 0.02401 | 0.02808 | 0.02374 | 0.02283 | 0.02433 | 0.03299 | 0.03188 | 0.02175 | 0.02335 | C1orf131  |
| cg07899016 | 0.89909 | 0.88487 | 0.50467 | 0.6254  | 0.68791 | 0.7223  | 0.48838 | 0.23981 | 0.0977  | 0.04978 | PCDHB12   |
| cg07899425 | 0.02671 | 0.02579 | 0.0345  | 0.02758 | 0.02388 | 0.0253  | 0.02923 | 0.04175 | 0.02742 | 0.02974 | GSR       |
| cg07900766 | 0.82345 | 0.85917 | 0.08492 | 0.18625 | 0.10148 | 0.06729 | 0.04957 | 0.04338 | 0.05697 | 0.05376 | SPAG16    |
| cg07903860 | 0.05438 | 0.04227 | 0.04169 | 0.03841 | 0.03049 | 0.03851 | 0.04143 | 0.03733 | 0.0388  | 0.03671 | DCLRE1C   |
| cg07903918 | 0.07066 | 0.05081 | 0.93459 | 0.95979 | 0.62316 | 0.43624 | 0.68574 | 0.64201 | 0.6371  | 0.59488 | GABBR2    |
| cg07905963 | 0.28627 | 0.05498 | 0.07653 | 0.08286 | 0.11713 | 0.13148 | 0.04486 | 0.04065 | 0.09447 | 0.03715 | CYP2A13   |
| cg07906495 | 0.05159 | 0.03552 | 0.03352 | 0.03473 | 0.02477 | 0.03173 | 0.03048 | 0.03376 | 0.02846 | 0.02578 | KIAA1333  |
| cg07906724 | 0.49918 | 0.14817 | 0.22925 | 0.23578 | 0.64925 | 0.26372 | 0.50078 | 0.70039 | 0.41603 | 0.19095 | CHRNA6    |
| cg07908874 | 0.89649 | 0.68756 | 0.88464 | 0.88275 | 0.91195 | 0.85639 | 0.87711 | 0.88411 | 0.89461 | 0.87952 | TUBGCP2   |
| cg07909265 | 0.04979 | 0.04389 | 0.04843 | 0.04209 | 0.0479  | 0.04418 | 0.04411 | 0.04878 | 0.04218 | 0.0411  | ITGAV     |
| cg07909422 | 0.06931 | 0.07071 | 0.07332 | 0.07152 | 0.05266 | 0.0581  | 0.05129 | 0.05249 | 0.04199 | 0.05073 | SIRT5     |



|            |         |         |         |         |         |         |         |         |         |         |               |
|------------|---------|---------|---------|---------|---------|---------|---------|---------|---------|---------|---------------|
| cg07909527 | 0.01841 | 0.01994 | 0.02076 | 0.05061 | 0.0155  | 0.01533 | 0.01665 | 0.01664 | 0.0157  | 0.01377 | NUBP2         |
| cg07911663 | 0.86748 | 0.24619 | 0.56607 | 0.75521 | 0.7456  | 0.18553 | 0.51516 | 0.35182 | 0.20119 | 0.02202 | RP13-360B22.2 |
| cg07911673 | 0.82756 | 0.69996 | 0.86695 | 0.86493 | 0.87874 | 0.83365 | 0.81617 | 0.83775 | 0.87286 | 0.74906 | SLC25A35      |
| cg07912181 | 0.02126 | 0.02503 | 0.02599 | 0.09707 | 0.02063 | 0.02193 | 0.02695 | 0.02235 | 0.01693 | 0.01872 | HSD17B12      |
| cg07914866 | 0.91586 | 0.92935 | 0.12424 | 0.12092 | 0.51695 | 0.36164 | 0.47789 | 0.55891 | 0.06986 | 0.05353 | IRAK3         |
| cg07914959 | 0.02758 | 0.03237 | 0.02867 | 0.02776 | 0.03444 | 0.02741 | 0.0261  | 0.02717 | 0.02605 | 0.02195 | BACH2         |
| cg07915282 | 0.16664 | 0.12    | 0.13384 | 0.13165 | 0.24772 | 0.11208 | 0.07632 | 0.09427 | 0.09511 | 0.09588 | RASSF3        |
| cg07915343 | 0.86504 | 0.87822 | 0.87107 | 0.8756  | 0.84594 | 0.82405 | 0.71017 | 0.83692 | 0.80856 | 0.84571 | LDHAL6A       |
| cg07915542 | 0.1551  | 0.06502 | 0.21542 | 0.2374  | 0.06635 | 0.04915 | 0.06603 | 0.05618 | 0.44491 | 0.31463 | IDH1          |
| cg07917796 | 0.0482  | 0.05376 | 0.08415 | 0.06379 | 0.03765 | 0.04272 | 0.09251 | 0.0451  | 0.03885 | 0.04031 | DIAPH2        |
| cg07918509 | 0.90588 | 0.73964 | 0.49693 | 0.6372  | 0.60322 | 0.63037 | 0.2034  | 0.35342 | 0.63069 | 0.28029 | ICAM2         |
| cg07919162 | 0.04311 | 0.04541 | 0.04611 | 0.04593 | 0.03836 | 0.03967 | 0.039   | 0.04204 | 0.03849 | 0.03184 | SF4           |
| cg07922606 | 0.96157 | 0.96545 | 0.95146 | 0.9643  | 0.46362 | 0.561   | 0.96981 | 0.96371 | 0.97113 | 0.96526 | HIST1H3E      |
| cg07924575 | 0.37196 | 0.09363 | 0.68858 | 0.79477 | 0.29867 | 0.16031 | 0.31066 | 0.27633 | 0.71585 | 0.79142 | HPS4          |
| cg07924819 | 0.03797 | 0.04287 | 0.0533  | 0.04872 | 0.03693 | 0.04587 | 0.03793 | 0.0404  | 0.04094 | 0.04677 | ATF6          |
| cg07925687 | 0.05466 | 0.05944 | 0.06085 | 0.05746 | 0.05799 | 0.04534 | 0.04856 | 0.04734 | 0.04788 | 0.05204 | RABL3         |
| cg07926025 | 0.44461 | 0.63984 | 0.70972 | 0.76843 | 0.94096 | 0.79195 | 0.39626 | 0.31467 | 0.36459 | 0.33206 | CER1          |
| cg07927484 | 0.03538 | 0.02818 | 0.03244 | 0.02893 | 0.02498 | 0.02686 | 0.03182 | 0.0317  | 0.03088 | 0.02515 | NS4ATP2       |
| cg07928641 | 0.03083 | 0.03179 | 0.04075 | 0.03607 | 0.03318 | 0.03176 | 0.03193 | 0.02658 | 0.02792 | 0.02609 | LAMC1         |
| cg07928695 | 0.06934 | 0.0618  | 0.06613 | 0.0742  | 0.11194 | 0.07499 | 0.06102 | 0.05721 | 0.05282 | 0.04034 | BLOC1S3       |
| cg07929310 | 0.04081 | 0.04022 | 0.05599 | 0.04977 | 0.04679 | 0.03752 | 0.04063 | 0.04616 | 0.03376 | 0.02507 | KIAA0513      |
| cg07930578 | 0.89754 | 0.68213 | 0.89892 | 0.91166 | 0.84869 | 0.86346 | 0.7666  | 0.78004 | 0.88952 | 0.48521 | LTK           |
| cg07933176 | 0.06833 | 0.05598 | 0.05139 | 0.09211 | 0.09775 | 0.05587 | 0.04414 | 0.05173 | 0.05455 | 0.05135 | MGC3265       |
| cg07933197 | 0.80562 | 0.7967  | 0.80214 | 0.81084 | 0.70452 | 0.78661 | 0.7518  | 0.80387 | 0.84792 | 0.77346 | LTBP4         |
| cg07933199 | 0.03809 | 0.0356  | 0.03825 | 0.04168 | 0.0279  | 0.03474 | 0.03633 | 0.03501 | 0.03151 | 0.03148 | C3orf59       |
| cg07934026 | 0.05396 | 0.04256 | 0.0556  | 0.04839 | 0.04991 | 0.05064 | 0.93993 | 0.94488 | 0.03508 | 0.03241 | ABCA11        |
| cg07935151 | 0.0486  | 0.05158 | 0.05255 | 0.04869 | 0.05245 | 0.06491 | 0.05916 | 0.05755 | 0.04055 | 0.04169 | LSM2          |
| cg07935264 | 0.15676 | 0.11024 | 0.32748 | 0.61668 | 0.24526 | 0.14647 | 0.56505 | 0.26565 | 0.13447 | 0.1299  | IL1B          |
| cg07935568 | 0.31565 | 0.04988 | 0.23054 | 0.27537 | 0.4379  | 0.52591 | 0.0621  | 0.04976 | 0.61909 | 0.55683 | MLNR          |
| cg07936037 | 0.01949 | 0.01731 | 0.02431 | 0.0202  | 0.01581 | 0.02051 | 0.01579 | 0.01666 | 0.01497 | 0.01564 | SSR1          |
| cg07937272 | 0.87101 | 0.56321 | 0.47729 | 0.54609 | 0.96184 | 0.87179 | 0.89268 | 0.61538 | 0.96007 | 0.80718 | PARP12        |
| cg07940485 | 0.02614 | 0.02641 | 0.02646 | 0.0261  | 0.05192 | 0.02787 | 0.02546 | 0.02179 | 0.02543 | 0.01933 | SLC16A10      |
| cg07940804 | 0.37583 | 0.55014 | 0.21131 | 0.31114 | 0.19249 | 0.77641 | 0.06031 | 0.38139 | 0.07929 | 0.06945 | ACTRT1        |
| cg07942995 | 0.6699  | 0.49297 | 0.526   | 0.57741 | 0.61319 | 0.70341 | 0.66907 | 0.77206 | 0.73458 | 0.65455 | ZSCAN1        |
| cg07944287 | 0.03998 | 0.0394  | 0.04241 | 0.03751 | 0.03726 | 0.035   | 0.0356  | 0.0358  | 0.03189 | 0.02826 | RFX2          |
| cg07944811 | 0.80604 | 0.68866 | 0.92709 | 0.934   | 0.94917 | 0.92539 | 0.8911  | 0.6178  | 0.92019 | 0.84131 | GCK           |
| cg07945480 | 0.03275 | 0.03748 | 0.03558 | 0.02976 | 0.026   | 0.03456 | 0.02888 | 0.03746 | 0.02859 | 0.02882 | GRK4          |
| cg07947016 | 0.09771 | 0.0403  | 0.06625 | 0.07033 | 0.05713 | 0.04357 | 0.0387  | 0.03828 | 0.11068 | 0.03754 | KLK2          |
| cg07947930 | 0.3462  | 0.08386 | 0.60652 | 0.65452 | 0.34731 | 0.5195  | 0.20194 | 0.09045 | 0.33903 | 0.44547 | PRELP         |
| cg07948245 | 0.04161 | 0.04859 | 0.04444 | 0.0452  | 0.05169 | 0.05531 | 0.03479 | 0.03454 | 0.03694 | 0.04117 | ARHGAP5       |
| cg07948472 | 0.54861 | 0.68509 | 0.67393 | 0.70476 | 0.67432 | 0.73447 | 0.64715 | 0.67417 | 0.65255 | 0.52121 | SPATA9        |

|            |         |         |         |         |         |         |         |         |         |                  |
|------------|---------|---------|---------|---------|---------|---------|---------|---------|---------|------------------|
| cg07950803 | 0.21637 | 0.05602 | 0.57932 | 0.7634  | 0.06609 | 0.0533  | 0.06442 | 0.05836 | 0.18627 | 0.15065 CD1A     |
| cg07952391 | 0.35965 | 0.10823 | 0.04614 | 0.03938 | 0.09491 | 0.05813 | 0.45808 | 0.61827 | 0.64874 | 0.64063 FLJ10916 |
| cg07952773 | 0.04061 | 0.03528 | 0.04446 | 0.04173 | 0.04004 | 0.04346 | 0.03905 | 0.03286 | 0.03559 | 0.03179 ADPRHL2  |
| cg07955356 | 0.05801 | 0.05389 | 0.06877 | 0.05735 | 0.04212 | 0.03966 | 0.05833 | 0.05482 | 0.04229 | 0.04017 DNASE2   |
| cg07955828 | 0.03481 | 0.0352  | 0.03773 | 0.03635 | 0.03538 | 0.03624 | 0.03682 | 0.03475 | 0.02706 | 0.0281 DHX35     |
| cg07955887 | 0.85583 | 0.79085 | 0.88509 | 0.88848 | 0.92913 | 0.88606 | 0.86773 | 0.86203 | 0.89573 | 0.85568 KIAA0802 |
| cg07957491 | 0.85136 | 0.38782 | 0.86869 | 0.9051  | 0.94154 | 0.5341  | 0.8876  | 0.61472 | 0.30425 | 0.25657 UCK1     |
| cg07958192 | 0.71338 | 0.65537 | 0.68015 | 0.71813 | 0.6184  | 0.67036 | 0.6772  | 0.70113 | 0.72367 | 0.39414 TIGD2    |
| cg07959477 | 0.79678 | 0.31392 | 0.51745 | 0.71187 | 0.4389  | 0.27998 | 0.20896 | 0.7095  | 0.68459 | 0.2221 CLEC1A    |
| cg07959896 | 0.22805 | 0.03958 | 0.03726 | 0.03245 | 0.04154 | 0.03561 | 0.03053 | 0.02997 | 0.03319 | 0.03393 GEMIN6   |
| cg07960846 | 0.05291 | 0.061   | 0.06271 | 0.06512 | 0.06752 | 0.07525 | 0.07214 | 0.05447 | 0.04775 | 0.04963 STK11    |
| cg07962043 | 0.05942 | 0.05674 | 0.05877 | 0.04913 | 0.04222 | 0.04702 | 0.04678 | 0.05173 | 0.04422 | 0.04383 HSPA5BP1 |
| cg07962051 | 0.08525 | 0.0859  | 0.12293 | 0.11509 | 0.11833 | 0.07704 | 0.16895 | 0.15258 | 0.0732  | 0.08895 TNKS     |
| cg07962315 | 0.25882 | 0.1196  | 0.17857 | 0.19087 | 0.2613  | 0.51715 | 0.09567 | 0.14198 | 0.19174 | 0.08483 C9orf95  |
| cg07964133 | 0.13189 | 0.11472 | 0.11064 | 0.12358 | 0.1875  | 0.13543 | 0.12129 | 0.1172  | 0.10223 | 0.0971 HNRPD     |
| cg07964538 | 0.02854 | 0.0296  | 0.03748 | 0.03177 | 0.04003 | 0.04224 | 0.02768 | 0.03382 | 0.02408 | 0.02612 CAV1     |
| cg07964539 | 0.12543 | 0.10883 | 0.14103 | 0.1432  | 0.2547  | 0.18736 | 0.15625 | 0.14513 | 0.08258 | 0.09996 TRFP     |
| cg07965714 | 0.03168 | 0.03305 | 0.03755 | 0.03442 | 0.0274  | 0.03588 | 0.03659 | 0.02755 | 0.03046 | 0.0241 XPA       |
| cg07965823 | 0.28963 | 0.05075 | 0.73864 | 0.8969  | 0.4465  | 0.29089 | 0.5889  | 0.59469 | 0.13498 | 0.04551 THSD3    |
| cg07965839 | 0.05002 | 0.05218 | 0.05005 | 0.04507 | 0.04741 | 0.04338 | 0.0436  | 0.04029 | 0.04178 | 0.04097 ZA20D3   |
| cg07967308 | 0.7569  | 0.50369 | 0.45705 | 0.57594 | 0.55403 | 0.55248 | 0.22698 | 0.17672 | 0.41996 | 0.36534 ACP5     |
| cg07967643 | 0.0376  | 0.04208 | 0.04007 | 0.03665 | 0.03423 | 0.03992 | 0.03091 | 0.03844 | 0.03224 | 0.03074 FRS3     |
| cg07970007 | 0.84844 | 0.8832  | 0.72825 | 0.69461 | 0.77603 | 0.62492 | 0.61397 | 0.75613 | 0.44733 | 0.42349 GBP1     |
| cg07971188 | 0.92746 | 0.82791 | 0.91513 | 0.93369 | 0.90469 | 0.90452 | 0.15081 | 0.16433 | 0.93274 | 0.93345 HCP5     |
| cg07973246 | 0.36271 | 0.0464  | 0.03996 | 0.04024 | 0.03796 | 0.03196 | 0.02613 | 0.02636 | 0.03227 | 0.03359 SRGAP1   |
| cg07973390 | 0.09898 | 0.08353 | 0.06713 | 0.06357 | 0.07931 | 0.07072 | 0.06112 | 0.04726 | 0.05518 | 0.05149 CARF     |
| cg07973395 | 0.0911  | 0.05369 | 0.05858 | 0.05768 | 0.18784 | 0.25437 | 0.04322 | 0.04711 | 0.0479  | 0.04524 BLM      |
| cg07973461 | 0.30646 | 0.36822 | 0.4478  | 0.62252 | 0.82376 | 0.70157 | 0.20275 | 0.25602 | 0.357   | 0.27293 BAGE     |
| cg07973967 | 0.54724 | 0.42611 | 0.93354 | 0.94429 | 0.92359 | 0.94498 | 0.8221  | 0.57989 | 0.95067 | 0.92885 CD79B    |
| cg07974125 | 0.02741 | 0.02741 | 0.02664 | 0.02894 | 0.02544 | 0.02575 | 0.02526 | 0.024   | 0.02661 | 0.01984 C4orf14  |
| cg07974303 | 0.41471 | 0.13986 | 0.20401 | 0.19658 | 0.44495 | 0.43923 | 0.25281 | 0.21859 | 0.11332 | 0.15529 DEFA6    |
| cg07974891 | 0.6521  | 0.30201 | 0.47734 | 0.58846 | 0.56355 | 0.64836 | 0.65262 | 0.27135 | 0.70242 | 0.54943 ITGB1BP1 |
| cg07975063 | 0.20162 | 0.05448 | 0.05697 | 0.05521 | 0.03996 | 0.05028 | 0.0431  | 0.04786 | 0.04794 | 0.05222 ZNF512   |
| cg07975813 | 0.03206 | 0.03709 | 0.03281 | 0.04043 | 0.03041 | 0.03455 | 0.03344 | 0.03245 | 0.03234 | 0.02914 USP5     |
| cg07977490 | 0.92031 | 0.52253 | 0.91649 | 0.92208 | 0.93697 | 0.89718 | 0.91818 | 0.88369 | 0.9258  | 0.91703 C16orf45 |
| cg07979357 | 0.11924 | 0.05455 | 0.40921 | 0.46544 | 0.51336 | 0.23542 | 0.4595  | 0.21274 | 0.25044 | 0.07316 IL27RA   |
| cg07979577 | 0.03298 | 0.03938 | 0.04146 | 0.03385 | 0.02786 | 0.03024 | 0.03016 | 0.02976 | 0.02991 | 0.02676 PPP2R5A  |
| cg07979752 | 0.26313 | 0.11353 | 0.12279 | 0.09846 | 0.14671 | 0.09517 | 0.09692 | 0.08541 | 0.33988 | 0.0707 CUL5      |
| cg07980015 | 0.88648 | 0.53849 | 0.83503 | 0.84542 | 0.74275 | 0.78656 | 0.83503 | 0.81837 | 0.89826 | 0.85493 TMTC4    |
| cg07980518 | 0.05141 | 0.05309 | 0.49247 | 0.49149 | 0.68204 | 0.41832 | 0.24066 | 0.07008 | 0.39424 | 0.39185 RNF152   |
| cg07980804 | 0.04643 | 0.04057 | 0.05457 | 0.05786 | 0.05911 | 0.06575 | 0.0461  | 0.04862 | 0.04557 | 0.04773 WDR7     |

|            |         |         |         |         |         |         |         |         |         |                   |
|------------|---------|---------|---------|---------|---------|---------|---------|---------|---------|-------------------|
| cg07980988 | 0.55922 | 0.42579 | 0.37935 | 0.46258 | 0.33525 | 0.40984 | 0.16107 | 0.19661 | 0.2657  | 0.43029 SH2D1A    |
| cg07981495 | 0.45716 | 0.65468 | 0.74614 | 0.78855 | 0.71061 | 0.79169 | 0.64689 | 0.53985 | 0.52111 | 0.47274 CGA       |
| cg07981588 | 0.13632 | 0.08137 | 0.09423 | 0.10282 | 0.13127 | 0.0718  | 0.10472 | 0.10721 | 0.06857 | 0.05602 YWHAZ     |
| cg07981910 | 0.02072 | 0.02396 | 0.02218 | 0.02191 | 0.02113 | 0.02081 | 0.01772 | 0.01893 | 0.5675  | 0.54027 DAB2IP    |
| cg07985359 | 0.08686 | 0.09512 | 0.09845 | 0.09366 | 0.06602 | 0.0914  | 0.08741 | 0.0933  | 0.10539 | 0.0875 EVI5L      |
| cg07986525 | 0.0444  | 0.03246 | 0.06902 | 0.05681 | 0.16652 | 0.05883 | 0.29783 | 0.0599  | 0.32159 | 0.0529 NFE2L3     |
| cg07986773 | 0.74044 | 0.11563 | 0.08057 | 0.09818 | 0.78152 | 0.12649 | 0.92011 | 0.26694 | 0.92942 | 0.74531 NUP50     |
| cg07989514 | 0.02912 | 0.02989 | 0.02948 | 0.02867 | 0.02385 | 0.02902 | 0.02301 | 0.02667 | 0.02363 | 0.02504 C14orf4   |
| cg07990489 | 0.04253 | 0.04132 | 0.04995 | 0.04211 | 0.03822 | 0.04837 | 0.0426  | 0.04337 | 0.04208 | 0.03925 NUP35     |
| cg07990939 | 0.03315 | 0.03419 | 0.03771 | 0.03272 | 0.03089 | 0.03231 | 0.0332  | 0.02916 | 0.02791 | 0.02561 TMTC3     |
| cg07991621 | 0.10683 | 0.10633 | 0.43618 | 0.34493 | 0.76579 | 0.66061 | 0.79132 | 0.75424 | 0.85979 | 0.85308 SH3BP2    |
| cg07992625 | 0.07825 | 0.06102 | 0.08768 | 0.08294 | 0.0959  | 0.08548 | 0.08345 | 0.06347 | 0.0663  | 0.06349 ATF7      |
| cg07997737 | 0.68474 | 0.50567 | 0.43856 | 0.57841 | 0.16304 | 0.09419 | 0.09119 | 0.08745 | 0.62077 | 0.25729 NRTN      |
| cg08001895 | 0.05104 | 0.05129 | 0.87366 | 0.92021 | 0.0847  | 0.07967 | 0.05692 | 0.06246 | 0.13065 | 0.11734 EPHA7     |
| cg08002996 | 0.0381  | 0.04472 | 0.06864 | 0.06704 | 0.09598 | 0.06421 | 0.05556 | 0.05479 | 0.05258 | 0.04713 SOCS2     |
| cg08003150 | 0.03113 | 0.03064 | 0.10056 | 0.31031 | 0.15915 | 0.11187 | 0.03852 | 0.0799  | 0.0269  | 0.02054 KCNQ2     |
| cg08003742 | 0.07827 | 0.03785 | 0.15444 | 0.20477 | 0.35568 | 0.4334  | 0.19909 | 0.06194 | 0.41375 | 0.29668 CXCL3     |
| cg08005849 | 0.42861 | 0.24875 | 0.86017 | 0.8827  | 0.13238 | 0.11294 | 0.82049 | 0.85146 | 0.27957 | 0.26869 HGF       |
| cg08007665 | 0.55033 | 0.10973 | 0.34171 | 0.66759 | 0.69209 | 0.82796 | 0.15371 | 0.25489 | 0.21193 | 0.08037 KCNQ1     |
| cg08008233 | 0.66723 | 0.59645 | 0.32305 | 0.37474 | 0.6524  | 0.69925 | 0.27601 | 0.461   | 0.24226 | 0.2155 TCEB3C     |
| cg08008403 | 0.08084 | 0.07135 | 0.85026 | 0.86385 | 0.58933 | 0.49896 | 0.73775 | 0.86911 | 0.83158 | 0.81622 LHX9      |
| cg08008562 | 0.04124 | 0.05464 | 0.08031 | 0.07484 | 0.05129 | 0.04432 | 0.03933 | 0.04097 | 0.04871 | 0.0443 UBE2Q1     |
| cg08009328 | 0.21178 | 0.2109  | 0.24141 | 0.20736 | 0.30167 | 0.26614 | 0.16399 | 0.13519 | 0.14243 | 0.19054 HIST1H2BF |
| cg08009622 | 0.05809 | 0.02897 | 0.70428 | 0.72485 | 0.51525 | 0.67351 | 0.58906 | 0.22071 | 0.96865 | 0.9626 COL12A1    |
| cg08009711 | 0.77695 | 0.71246 | 0.80467 | 0.84038 | 0.82016 | 0.82616 | 0.8101  | 0.80341 | 0.62663 | 0.46903 C21orf25  |
| cg08009831 | 0.04417 | 0.04733 | 0.04567 | 0.04087 | 0.04904 | 0.08648 | 0.03386 | 0.04042 | 0.03923 | 0.03821 LOC201895 |
| cg08011170 | 0.03571 | 0.03531 | 0.03617 | 0.03688 | 0.03518 | 0.03962 | 0.03525 | 0.03522 | 0.02868 | 0.02891 ELAC2     |
| cg08011328 | 0.04479 | 0.04043 | 0.0438  | 0.04462 | 0.04267 | 0.04085 | 0.03885 | 0.03645 | 0.03572 | 0.03366 BYSL      |
| cg08012287 | 0.8329  | 0.2147  | 0.56412 | 0.68478 | 0.44913 | 0.43015 | 0.46964 | 0.07373 | 0.32188 | 0.27765 ACTN3     |
| cg08012454 | 0.04508 | 0.04726 | 0.04036 | 0.03756 | 0.03496 | 0.03624 | 0.03808 | 0.04061 | 0.03415 | 0.02698 KIF5B     |
| cg08013810 | 0.53464 | 0.39588 | 0.91419 | 0.91752 | 0.61822 | 0.69163 | 0.56049 | 0.48486 | 0.49802 | 0.4675 PHF20      |
| cg08015253 | 0.05467 | 0.05622 | 0.06452 | 0.06117 | 0.0497  | 0.05369 | 0.04838 | 0.04833 | 0.04982 | 0.04172 MOCOS     |
| cg08015496 | 0.61215 | 0.16847 | 0.2177  | 0.1421  | 0.2654  | 0.09058 | 0.16068 | 0.11476 | 0.8439  | 0.67773 COPA      |
| cg08016363 | 0.13618 | 0.1305  | 0.17395 | 0.1215  | 0.35294 | 0.24565 | 0.15887 | 0.16023 | 0.2382  | 0.19081 TMEM11    |
| cg08016383 | 0.03852 | 0.0402  | 0.05927 | 0.04591 | 0.03466 | 0.03774 | 0.14954 | 0.11077 | 0.03728 | 0.03484 ADAMTS17  |
| cg08017606 | 0.14699 | 0.12366 | 0.11637 | 0.11522 | 0.15026 | 0.12667 | 0.12485 | 0.13097 | 0.29584 | 0.22174 SH3RF2    |
| cg08020051 | 0.03394 | 0.04364 | 0.05259 | 0.04508 | 0.03425 | 0.03498 | 0.03774 | 0.03164 | 0.04454 | 0.0499 GPAA1      |
| cg08020381 | 0.03358 | 0.03648 | 0.03325 | 0.03623 | 0.03205 | 0.03125 | 0.02873 | 0.02974 | 0.02557 | 0.03003 IDI1      |
| cg08020808 | 0.1384  | 0.14061 | 0.1694  | 0.14852 | 0.30802 | 0.1835  | 0.1177  | 0.11398 | 0.13898 | 0.1534 CMA1       |
| cg08021299 | 0.2953  | 0.36173 | 0.26519 | 0.23266 | 0.49944 | 0.79275 | 0.08365 | 0.1428  | 0.1602  | 0.18724 HEPH      |
| cg08022502 | 0.0619  | 0.04539 | 0.06521 | 0.08624 | 0.21731 | 0.05323 | 0.04517 | 0.05376 | 0.04453 | 0.03743 UNC45A    |

|            |         |         |         |         |         |         |         |         |         |         |          |
|------------|---------|---------|---------|---------|---------|---------|---------|---------|---------|---------|----------|
| cg08023692 | 0.73603 | 0.76454 | 0.6371  | 0.66535 | 0.67114 | 0.68332 | 0.61724 | 0.68566 | 0.63875 | 0.66892 | TFDP3    |
| cg08023751 | 0.94484 | 0.53502 | 0.93425 | 0.93243 | 0.93115 | 0.88861 | 0.9017  | 0.69453 | 0.94124 | 0.93028 | MERTK    |
| cg08024766 | 0.07814 | 0.07774 | 0.08125 | 0.08188 | 0.05748 | 0.05402 | 0.05095 | 0.05292 | 0.05679 | 0.05913 | PSCD1    |
| cg08025786 | 0.82422 | 0.32039 | 0.87586 | 0.88784 | 0.88135 | 0.8589  | 0.77578 | 0.79516 | 0.86046 | 0.71552 | CLK3     |
| cg08026144 | 0.08566 | 0.0958  | 0.08076 | 0.08894 | 0.09054 | 0.09111 | 0.074   | 0.08214 | 0.07607 | 0.06529 | PCSK5    |
| cg08027001 | 0.03364 | 0.0326  | 0.13934 | 0.19575 | 0.06535 | 0.0299  | 0.03512 | 0.03082 | 0.03646 | 0.03117 | SLC30A4  |
| cg08027745 | 0.04954 | 0.0415  | 0.07038 | 0.06122 | 0.06652 | 0.04955 | 0.04761 | 0.04434 | 0.03351 | 0.03745 | SFRS3    |
| cg08028004 | 0.23585 | 0.31177 | 0.25642 | 0.26839 | 0.21773 | 0.26942 | 0.26604 | 0.26301 | 0.25867 | 0.22645 | RANBP2   |
| cg08029608 | 0.28488 | 0.16462 | 0.59428 | 0.51098 | 0.46279 | 0.41477 | 0.25286 | 0.34194 | 0.10788 | 0.22287 | TLR7     |
| cg08030082 | 0.7723  | 0.4383  | 0.9657  | 0.97784 | 0.9608  | 0.95705 | 0.94027 | 0.86118 | 0.97542 | 0.93269 | POMC     |
| cg08032971 | 0.84132 | 0.50009 | 0.82798 | 0.87482 | 0.91837 | 0.51293 | 0.88608 | 0.41215 | 0.8776  | 0.80663 | DMBX1    |
| cg08034216 | 0.04968 | 0.05175 | 0.04486 | 0.04666 | 0.04956 | 0.04383 | 0.04629 | 0.04144 | 0.03703 | 0.03837 | IDE      |
| cg08034397 | 0.03252 | 0.03749 | 0.03849 | 0.04008 | 0.04247 | 0.04339 | 0.03208 | 0.02962 | 0.03201 | 0.03007 | TMEM16K  |
| cg08035082 | 0.86085 | 0.36501 | 0.82031 | 0.83908 | 0.69958 | 0.84044 | 0.81661 | 0.81562 | 0.78409 | 0.73916 | AMPD3    |
| cg08035942 | 0.04899 | 0.05033 | 0.0473  | 0.05399 | 0.03493 | 0.04709 | 0.05168 | 0.04882 | 0.04368 | 0.05093 | ZADH2    |
| cg08039281 | 0.0427  | 0.04481 | 0.04624 | 0.044   | 0.0358  | 0.04979 | 0.03752 | 0.0383  | 0.04033 | 0.04281 | PSMA6    |
| cg08040428 | 0.07297 | 0.06868 | 0.082   | 0.08718 | 0.05713 | 0.05628 | 0.07364 | 0.07508 | 0.06761 | 0.06017 | PSD3     |
| cg08040471 | 0.43957 | 0.05916 | 0.90831 | 0.92549 | 0.92379 | 0.90476 | 0.91971 | 0.74424 | 0.9208  | 0.86338 | C17orf62 |
| cg08041019 | 0.13669 | 0.13572 | 0.17778 | 0.17768 | 0.13024 | 0.17335 | 0.19353 | 0.18073 | 0.18091 | 0.16025 | ATXN2    |
| cg08044694 | 0.05817 | 0.05283 | 0.81473 | 0.61231 | 0.06048 | 0.04943 | 0.3741  | 0.0588  | 0.80048 | 0.539   | BRD4     |
| cg08045570 | 0.02387 | 0.02364 | 0.04253 | 0.0806  | 0.12227 | 0.06964 | 0.03116 | 0.03322 | 0.01767 | 0.01618 | FOXF2    |
| cg08045757 | 0.84269 | 0.84008 | 0.84736 | 0.85551 | 0.88121 | 0.84624 | 0.84162 | 0.85065 | 0.85297 | 0.86424 | HDAC7A   |
| cg08046471 | 0.76497 | 0.78643 | 0.77372 | 0.80125 | 0.77354 | 0.73429 | 0.72812 | 0.7787  | 0.83619 | 0.78731 | CXCL11   |
| cg08047457 | 0.90946 | 0.90101 | 0.04159 | 0.02737 | 0.5053  | 0.03432 | 0.58811 | 0.69548 | 0.94338 | 0.96478 | RASSF1   |
| cg08047907 | 0.04154 | 0.03729 | 0.50667 | 0.54378 | 0.78061 | 0.68915 | 0.04404 | 0.03356 | 0.04279 | 0.03868 | C1orf114 |
| cg08048656 | 0.04342 | 0.04278 | 0.04093 | 0.0435  | 0.03217 | 0.04346 | 0.03897 | 0.04392 | 0.03856 | 0.04072 | SMARCE1  |
| cg08049198 | 0.0463  | 0.053   | 0.05128 | 0.053   | 0.05229 | 0.06052 | 0.05068 | 0.04974 | 0.04309 | 0.03374 | AGPAT1   |
| cg08052882 | 0.08417 | 0.05998 | 0.05114 | 0.05181 | 0.06241 | 0.05414 | 0.05487 | 0.05678 | 0.05505 | 0.04238 | NNT      |
| cg08054038 | 0.31658 | 0.25691 | 0.58853 | 0.55652 | 0.35391 | 0.40189 | 0.28484 | 0.26786 | 0.25911 | 0.21662 | PVRL2    |
| cg08056146 | 0.02912 | 0.02613 | 0.02977 | 0.02856 | 0.05197 | 0.02961 | 0.04751 | 0.11882 | 0.0515  | 0.021   | SOX7     |
| cg08056903 | 0.07399 | 0.05678 | 0.04091 | 0.03727 | 0.67211 | 0.84925 | 0.07174 | 0.05364 | 0.05095 | 0.05968 | GPHN     |
| cg08057475 | 0.79783 | 0.86785 | 0.77467 | 0.82621 | 0.82924 | 0.84192 | 0.8005  | 0.80775 | 0.80378 | 0.81991 | C15orf21 |
| cg08062469 | 0.03738 | 0.03165 | 0.04593 | 0.03529 | 0.03756 | 0.04197 | 0.0364  | 0.03361 | 0.02947 | 0.03299 | SPAG5    |
| cg08063013 | 0.02552 | 0.02741 | 0.03186 | 0.0246  | 0.02676 | 0.02636 | 0.02512 | 0.02366 | 0.02517 | 0.02542 | COX8A    |
| cg08063724 | 0.02686 | 0.02294 | 0.03169 | 0.03286 | 0.037   | 0.02268 | 0.03287 | 0.02281 | 0.02919 | 0.0205  | MYCL1    |
| cg08064891 | 0.05309 | 0.04652 | 0.09539 | 0.08703 | 0.0642  | 0.04098 | 0.05141 | 0.03435 | 0.26949 | 0.0317  | PTOV1    |
| cg08067268 | 0.34328 | 0.16477 | 0.20499 | 0.18499 | 0.35082 | 0.20042 | 0.17928 | 0.12644 | 0.18651 | 0.17783 | HADHB    |
| cg08067365 | 0.03712 | 0.04119 | 0.05458 | 0.046   | 0.04517 | 0.04148 | 0.03541 | 0.03765 | 0.03917 | 0.03305 | G1P2     |
| cg08069899 | 0.06232 | 0.06011 | 0.07701 | 0.0656  | 0.1424  | 0.324   | 0.06457 | 0.08973 | 0.0663  | 0.04876 | CNND2    |
| cg08072716 | 0.8048  | 0.47147 | 0.8669  | 0.85979 | 0.82647 | 0.80913 | 0.81174 | 0.62436 | 0.86368 | 0.76854 | GPR62    |
| cg08074477 | 0.85114 | 0.42799 | 0.85918 | 0.86366 | 0.93546 | 0.47437 | 0.7538  | 0.46978 | 0.87013 | 0.57587 | TNS4     |

|            |         |         |         |         |         |         |         |         |         |         |              |
|------------|---------|---------|---------|---------|---------|---------|---------|---------|---------|---------|--------------|
| cg08076508 | 0.06193 | 0.06292 | 0.0593  | 0.05669 | 0.04421 | 0.0582  | 0.2671  | 0.39132 | 0.05725 | 0.05599 | PHF8         |
| cg08077345 | 0.8515  | 0.76922 | 0.86791 | 0.87418 | 0.47456 | 0.50639 | 0.81296 | 0.36647 | 0.88266 | 0.66783 | PLEKHA4      |
| cg08077673 | 0.96642 | 0.95159 | 0.95385 | 0.96371 | 0.96597 | 0.96381 | 0.9616  | 0.96747 | 0.9611  | 0.96834 | MEST         |
| cg08079693 | 0.03609 | 0.03347 | 0.03769 | 0.03726 | 0.02705 | 0.03345 | 0.03184 | 0.03225 | 0.03226 | 0.02733 | CHD6         |
| cg08080029 | 0.04592 | 0.04693 | 0.21468 | 0.41305 | 0.18694 | 0.04361 | 0.04978 | 0.03614 | 0.03914 | 0.03792 | CHD5         |
| cg08081036 | 0.06952 | 0.08044 | 0.07935 | 0.07778 | 0.05463 | 0.0711  | 0.06891 | 0.07531 | 0.07075 | 0.06376 | ANXA2        |
| cg08081407 | 0.14084 | 0.13909 | 0.13928 | 0.1296  | 0.16225 | 0.136   | 0.16055 | 0.15031 | 0.12345 | 0.13175 | ARF4         |
| cg08081725 | 0.28974 | 0.11963 | 0.16952 | 0.18107 | 0.14861 | 0.05778 | 0.10578 | 0.06647 | 0.07575 | 0.06226 | NDE1         |
| cg08082692 | 0.84055 | 0.8323  | 0.78125 | 0.84233 | 0.84035 | 0.82939 | 0.21699 | 0.45008 | 0.85807 | 0.84426 | GALNAC4S-6ST |
| cg08083689 | 0.04478 | 0.04733 | 0.0504  | 0.04405 | 0.03403 | 0.04642 | 0.04868 | 0.04897 | 0.04161 | 0.04147 | ACOX3        |
| cg08084415 | 0.06781 | 0.05208 | 0.11018 | 0.08373 | 0.04701 | 0.04614 | 0.04954 | 0.04772 | 0.05585 | 0.04845 | ZNF507       |
| cg08085165 | 0.81195 | 0.55026 | 0.73995 | 0.72645 | 0.64576 | 0.7294  | 0.72504 | 0.73435 | 0.78133 | 0.69488 | NUP37        |
| cg08085267 | 0.10158 | 0.0946  | 0.34988 | 0.30073 | 0.31757 | 0.13996 | 0.14739 | 0.11814 | 0.81428 | 0.71866 | C17orf57     |
| cg08088390 | 0.1455  | 0.07051 | 0.10753 | 0.12978 | 0.25832 | 0.13777 | 0.13179 | 0.10089 | 0.18282 | 0.12621 | DEFB125      |
| cg08088989 | 0.74289 | 0.54724 | 0.78483 | 0.82202 | 0.18228 | 0.13911 | 0.12165 | 0.10796 | 0.10579 | 0.09835 | SUHW1        |
| cg08089301 | 0.02913 | 0.02979 | 0.03356 | 0.03172 | 0.52771 | 0.55443 | 0.59391 | 0.2237  | 0.03013 | 0.02953 | HOXB4        |
| cg08090396 | 0.03674 | 0.03489 | 0.04024 | 0.04023 | 0.03789 | 0.04599 | 0.02776 | 0.02939 | 0.03261 | 0.02831 | NEK4         |
| cg08090640 | 0.82636 | 0.87788 | 0.71944 | 0.85584 | 0.73522 | 0.71399 | 0.83221 | 0.87689 | 0.79154 | 0.36752 | IFI35        |
| cg08090772 | 0.67651 | 0.88497 | 0.05838 | 0.27652 | 0.1849  | 0.10965 | 0.21656 | 0.61262 | 0.72073 | 0.61614 | ADHFE1       |
| cg08093211 | 0.03693 | 0.03693 | 0.06006 | 0.0466  | 0.04273 | 0.04407 | 0.14755 | 0.04499 | 0.0398  | 0.04473 | CSTF2        |
| cg08093278 | 0.02263 | 0.02444 | 0.02263 | 0.0189  | 0.02392 | 0.02109 | 0.01895 | 0.02118 | 0.02445 | 0.01859 | RANBP3       |
| cg08093398 | 0.63558 | 0.68236 | 0.68942 | 0.73295 | 0.58188 | 0.79285 | 0.71599 | 0.74935 | 0.77202 | 0.62571 | PSF1         |
| cg08095532 | 0.90437 | 0.88235 | 0.88814 | 0.9027  | 0.92032 | 0.90414 | 0.88912 | 0.88486 | 0.90114 | 0.89488 | PSMA4        |
| cg08096010 | 0.87139 | 0.46789 | 0.88245 | 0.90256 | 0.8399  | 0.78966 | 0.8733  | 0.82074 | 0.88998 | 0.78139 | SAG          |
| cg08096038 | 0.82127 | 0.67502 | 0.74666 | 0.7865  | 0.72081 | 0.80301 | 0.8119  | 0.82421 | 0.82444 | 0.79624 | C6orf111     |
| cg08096946 | 0.03081 | 0.03276 | 0.03189 | 0.02884 | 0.02409 | 0.02617 | 0.0268  | 0.02828 | 0.02682 | 0.02567 | DIRC2        |
| cg08097657 | 0.96948 | 0.97019 | 0.97603 | 0.97307 | 0.97433 | 0.97552 | 0.97615 | 0.96044 | 0.97767 | 0.97714 | SEMA3B       |
| cg08097755 | 0.04179 | 0.04476 | 0.15402 | 0.2508  | 0.21027 | 0.32181 | 0.0856  | 0.03688 | 0.03924 | 0.02665 | VGF          |
| cg08097882 | 0.03239 | 0.03529 | 0.05288 | 0.04837 | 0.32617 | 0.19079 | 0.03923 | 0.03238 | 0.05796 | 0.23467 | POU4F1       |
| cg08097973 | 0.91055 | 0.70816 | 0.90517 | 0.90442 | 0.81712 | 0.9023  | 0.90606 | 0.9022  | 0.77497 | 0.68605 | NUMA1        |
| cg08099701 | 0.33971 | 0.8542  | 0.57104 | 0.60857 | 0.47076 | 0.56541 | 0.31014 | 0.2908  | 0.24772 | 0.21097 | GABRA5       |
| cg08100497 | 0.0668  | 0.05683 | 0.06809 | 0.06278 | 0.05144 | 0.05504 | 0.05931 | 0.0532  | 0.06081 | 0.04857 | NRG2         |
| cg08101172 | 0.54104 | 0.54722 | 0.06259 | 0.06064 | 0.03773 | 0.03249 | 0.04998 | 0.05375 | 0.04468 | 0.04916 | PSIP1        |
| cg08101264 | 0.6824  | 0.81825 | 0.93047 | 0.92381 | 0.17776 | 0.04069 | 0.90994 | 0.632   | 0.79068 | 0.13736 | ACOT8        |
| cg08102619 | 0.04825 | 0.04868 | 0.05126 | 0.04991 | 0.03752 | 0.04532 | 0.04682 | 0.04628 | 0.04261 | 0.04241 | TIAL1        |
| cg08103676 | 0.06622 | 0.06264 | 0.06179 | 0.06229 | 0.09196 | 0.05509 | 0.05903 | 0.06223 | 0.05563 | 0.0435  | 6-Mar        |
| cg08104838 | 0.79571 | 0.33168 | 0.87205 | 0.90551 | 0.91068 | 0.89911 | 0.79349 | 0.77028 | 0.83915 | 0.70922 | SDHA         |
| cg08107272 | 0.05256 | 0.05676 | 0.79362 | 0.86844 | 0.05194 | 0.04882 | 0.04195 | 0.05262 | 0.24693 | 0.48878 | CTNNA2       |
| cg08107767 | 0.02701 | 0.02743 | 0.03211 | 0.02646 | 0.02557 | 0.02931 | 0.04455 | 0.02547 | 0.02356 | 0.01764 | MRPS17       |
| cg08108311 | 0.03841 | 0.02853 | 0.03296 | 0.02912 | 0.62451 | 0.59693 | 0.02575 | 0.0461  | 0.02393 | 0.02479 | WNK4         |
| cg08108641 | 0.60293 | 0.4766  | 0.9211  | 0.93549 | 0.72442 | 0.83621 | 0.76949 | 0.83133 | 0.92085 | 0.88749 | NTNG2        |

|            |         |         |         |         |         |         |         |         |         |                  |
|------------|---------|---------|---------|---------|---------|---------|---------|---------|---------|------------------|
| cg08108953 | 0.1485  | 0.12079 | 0.21193 | 0.21248 | 0.3737  | 0.33062 | 0.20782 | 0.59622 | 0.12381 | 0.09116 WFDC13   |
| cg08109646 | 0.1232  | 0.09008 | 0.63777 | 0.7111  | 0.62096 | 0.40373 | 0.29415 | 0.08342 | 0.25862 | 0.08501 ZNF683   |
| cg08109815 | 0.33664 | 0.3017  | 0.90866 | 0.89881 | 0.9185  | 0.90173 | 0.85966 | 0.87557 | 0.20356 | 0.43783 NMBR     |
| cg08110559 | 0.09298 | 0.10592 | 0.15346 | 0.12435 | 0.14282 | 0.09894 | 0.18632 | 0.16013 | 0.10746 | 0.11646 KCTD9    |
| cg08113203 | 0.38232 | 0.50428 | 0.47307 | 0.62941 | 0.59589 | 0.58369 | 0.24836 | 0.21154 | 0.19837 | 0.22323 SMR3B    |
| cg08113913 | 0.02788 | 0.02442 | 0.18804 | 0.19238 | 0.19036 | 0.18018 | 0.03405 | 0.02579 | 0.02229 | 0.02057 CCDC74B  |
| cg08115510 | 0.0365  | 0.03686 | 0.03369 | 0.03446 | 0.01978 | 0.03724 | 0.03393 | 0.02862 | 0.0283  | 0.0321 AMOTL2    |
| cg08116137 | 0.18355 | 0.09294 | 0.3045  | 0.3578  | 0.22828 | 0.219   | 0.24674 | 0.29203 | 0.10433 | 0.08922 NAT8     |
| cg08118311 | 0.0312  | 0.03069 | 0.95686 | 0.97394 | 0.11894 | 0.11178 | 0.02409 | 0.02741 | 0.33057 | 0.12094 SALL3    |
| cg08120190 | 0.03561 | 0.0341  | 0.04027 | 0.03147 | 0.02974 | 0.03542 | 0.03246 | 0.03228 | 0.02716 | 0.02958 C7orf36  |
| cg08121954 | 0.76426 | 0.74013 | 0.7463  | 0.80044 | 0.65331 | 0.7605  | 0.78653 | 0.8339  | 0.73829 | 0.73521 TDO2     |
| cg08122545 | 0.04287 | 0.04086 | 0.06664 | 0.09271 | 0.06583 | 0.04727 | 0.15444 | 0.238   | 0.05211 | 0.03928 HES4     |
| cg08123074 | 0.10862 | 0.11279 | 0.20266 | 0.19913 | 0.20898 | 0.11884 | 0.09234 | 0.07483 | 0.126   | 0.10418 PHACTR4  |
| cg08124030 | 0.85659 | 0.8717  | 0.125   | 0.09702 | 0.09474 | 0.08517 | 0.86348 | 0.56893 | 0.88054 | 0.84171 TM4SF1   |
| cg08124399 | 0.90205 | 0.9291  | 0.93491 | 0.92972 | 0.94023 | 0.94304 | 0.9344  | 0.94547 | 0.41361 | 0.34065 DDX43    |
| cg08124722 | 0.83013 | 0.87693 | 0.8293  | 0.84384 | 0.87753 | 0.87741 | 0.57982 | 0.87367 | 0.88187 | 0.87155 CCL7     |
| cg08126211 | 0.15131 | 0.17455 | 0.82136 | 0.82615 | 0.18205 | 0.06757 | 0.7642  | 0.75882 | 0.87055 | 0.69246 KAAG1    |
| cg08128768 | 0.96097 | 0.03678 | 0.04601 | 0.04901 | 0.11544 | 0.03256 | 0.33729 | 0.52115 | 0.97716 | 0.95437 DAB2IP   |
| cg08130265 | 0.24904 | 0.13924 | 0.7831  | 0.82962 | 0.76654 | 0.71269 | 0.71275 | 0.30708 | 0.83581 | 0.21487 C15orf5  |
| cg08132711 | 0.82538 | 0.43521 | 0.67107 | 0.71067 | 0.67554 | 0.70052 | 0.22703 | 0.14706 | 0.21974 | 0.08799 KSP37    |
| cg08132767 | 0.04549 | 0.05807 | 0.06033 | 0.05173 | 0.04832 | 0.04672 | 0.05186 | 0.04785 | 0.04622 | 0.04711 ARL1     |
| cg08132931 | 0.03913 | 0.04214 | 0.45748 | 0.5493  | 0.05092 | 0.03557 | 0.03729 | 0.03864 | 0.03306 | 0.03879 ADD2     |
| cg08136806 | 0.2654  | 0.16759 | 0.27225 | 0.32832 | 0.22491 | 0.18684 | 0.22132 | 0.15817 | 0.46962 | 0.2511 KRT6E     |
| cg08136893 | 0.0559  | 0.05457 | 0.05691 | 0.0567  | 0.04931 | 0.04991 | 0.05974 | 0.05474 | 0.04573 | 0.04902 C7orf11  |
| cg08137040 | 0.45509 | 0.5927  | 0.81082 | 0.8192  | 0.3717  | 0.1483  | 0.61851 | 0.29268 | 0.08876 | 0.082 LOC168850  |
| cg08137716 | 0.9463  | 0.74657 | 0.93633 | 0.94822 | 0.93353 | 0.92977 | 0.88164 | 0.70251 | 0.94603 | 0.89778 TTLL6    |
| cg08139833 | 0.02318 | 0.02199 | 0.01923 | 0.01894 | 0.02411 | 0.02528 | 0.02347 | 0.01936 | 0.01742 | 0.01757 NDUFS8   |
| cg08141463 | 0.85241 | 0.76379 | 0.81806 | 0.87501 | 0.86984 | 0.8817  | 0.80885 | 0.79762 | 0.7891  | 0.83985 PLA1A    |
| cg08141806 | 0.04617 | 0.04531 | 0.1432  | 0.12111 | 0.0705  | 0.03997 | 0.06269 | 0.04473 | 0.03916 | 0.04148 FBXO21   |
| cg08141873 | 0.1544  | 0.05362 | 0.58942 | 0.67208 | 0.19752 | 0.19801 | 0.04948 | 0.0652  | 0.40167 | 0.13565 HRAS     |
| cg08141989 | 0.79473 | 0.75945 | 0.80451 | 0.8641  | 0.93041 | 0.87326 | 0.50271 | 0.28604 | 0.68656 | 0.54728 ASGR1    |
| cg08142684 | 0.05771 | 0.05908 | 0.07026 | 0.06623 | 0.08545 | 0.06654 | 0.05723 | 0.05129 | 0.08065 | 0.06291 TCP1     |
| cg08145177 | 0.24251 | 0.10873 | 0.85874 | 0.92252 | 0.95656 | 0.91763 | 0.11305 | 0.06221 | 0.92881 | 0.80682 ABHD8    |
| cg08145590 | 0.42379 | 0.57386 | 0.95708 | 0.95951 | 0.07758 | 0.0432  | 0.94589 | 0.86839 | 0.97205 | 0.96974 C3orf15  |
| cg08145625 | 0.36691 | 0.73278 | 0.11924 | 0.12183 | 0.18641 | 0.07773 | 0.06561 | 0.06352 | 0.0925  | 0.09726 TRAM1L1  |
| cg08146221 | 0.22735 | 0.07552 | 0.07782 | 0.07631 | 0.04775 | 0.06521 | 0.08462 | 0.06101 | 0.05764 | 0.05749 PTMS     |
| cg08147886 | 0.03205 | 0.02765 | 0.02933 | 0.02462 | 0.02328 | 0.02517 | 0.02633 | 0.02376 | 0.02617 | 0.02416 ACSL3    |
| cg08149333 | 0.02419 | 0.02554 | 0.03443 | 0.02914 | 0.02019 | 0.02158 | 0.02267 | 0.02385 | 0.02526 | 0.02412 SLC25A24 |
| cg08151281 | 0.047   | 0.04915 | 0.04914 | 0.04281 | 0.03879 | 0.03987 | 0.03599 | 0.0435  | 0.03601 | 0.0387 BRP44     |
| cg08151470 | 0.6199  | 0.47185 | 0.1989  | 0.21067 | 0.66008 | 0.39909 | 0.25126 | 0.23739 | 0.18172 | 0.18359 UBE4B    |
| cg08156349 | 0.0349  | 0.04253 | 0.03494 | 0.042   | 0.02864 | 0.03307 | 0.02969 | 0.03396 | 0.034   | 0.03094 MEF2D    |

|            |         |         |         |         |         |         |         |         |         |                   |
|------------|---------|---------|---------|---------|---------|---------|---------|---------|---------|-------------------|
| cg08157292 | 0.75825 | 0.15092 | 0.41927 | 0.56896 | 0.50658 | 0.17538 | 0.69758 | 0.23245 | 0.81968 | 0.25365 PPP1R7    |
| cg08157579 | 0.06734 | 0.0563  | 0.06218 | 0.05913 | 0.1426  | 0.44475 | 0.06699 | 0.04994 | 0.06743 | 0.05324 SERHL2    |
| cg08157638 | 0.83645 | 0.68165 | 0.79778 | 0.81233 | 0.78331 | 0.8222  | 0.25051 | 0.59417 | 0.82127 | 0.80259 VANG1     |
| cg08158289 | 0.59262 | 0.16222 | 0.59321 | 0.63462 | 0.387   | 0.10045 | 0.81922 | 0.62262 | 0.8984  | 0.57113 KIAA0141  |
| cg08158331 | 0.24347 | 0.07938 | 0.28395 | 0.41727 | 0.0418  | 0.05014 | 0.0579  | 0.05189 | 0.05819 | 0.04804 LOC284948 |
| cg08158570 | 0.03669 | 0.03726 | 0.03687 | 0.02788 | 0.02795 | 0.03007 | 0.02978 | 0.02944 | 0.02479 | 0.02896 ZNF503    |
| cg08158860 | 0.10142 | 0.08873 | 0.06481 | 0.04951 | 0.17114 | 0.13095 | 0.09112 | 0.08173 | 0.06313 | 0.10189 RAD51L1   |
| cg08159444 | 0.1643  | 0.06402 | 0.13307 | 0.24242 | 0.12723 | 0.08296 | 0.04118 | 0.04554 | 0.12494 | 0.04298 PNMA5     |
| cg08162572 | 0.02626 | 0.02036 | 0.02198 | 0.02048 | 0.02146 | 0.02135 | 0.01926 | 0.02225 | 0.01883 | 0.01521 CSE1L     |
| cg08162780 | 0.53502 | 0.25139 | 0.17742 | 0.20856 | 0.141   | 0.03014 | 0.04006 | 0.04171 | 0.54694 | 0.60689 GDF15     |
| cg08163803 | 0.12214 | 0.13048 | 0.17968 | 0.12883 | 0.20341 | 0.15794 | 0.13116 | 0.13018 | 0.11413 | 0.10479 EFHA1     |
| cg08164315 | 0.0448  | 0.04039 | 0.03806 | 0.033   | 0.04208 | 0.04466 | 0.03787 | 0.0373  | 0.03117 | 0.0296 PTGER4     |
| cg08164900 | 0.01779 | 0.02004 | 0.01978 | 0.01899 | 0.01903 | 0.01583 | 0.01813 | 0.01693 | 0.0166  | 0.01618 PDZD8     |
| cg08166982 | 0.05649 | 0.06009 | 0.06843 | 0.05816 | 0.0477  | 0.05573 | 0.04353 | 0.04258 | 0.05268 | 0.05387 CSDE1     |
| cg08169325 | 0.03986 | 0.05287 | 0.40612 | 0.48716 | 0.2301  | 0.05549 | 0.03593 | 0.03504 | 0.02828 | 0.02652 EPIM      |
| cg08170622 | 0.03378 | 0.03984 | 0.03236 | 0.0371  | 0.04029 | 0.04404 | 0.03666 | 0.03399 | 0.03227 | 0.02942 CCND1     |
| cg08172935 | 0.03088 | 0.03099 | 0.03159 | 0.03531 | 0.02677 | 0.0341  | 0.02776 | 0.02683 | 0.02681 | 0.03228 AMZ2      |
| cg08173535 | 0.06442 | 0.06379 | 0.06743 | 0.0605  | 0.06921 | 0.07597 | 0.05127 | 0.05558 | 0.05719 | 0.05501 NR6A1     |
| cg08174003 | 0.06956 | 0.1116  | 0.35796 | 0.42059 | 0.051   | 0.09377 | 0.04081 | 0.04813 | 0.03871 | 0.0498 ZNF600     |
| cg08176609 | 0.0373  | 0.03135 | 0.03522 | 0.02934 | 0.02398 | 0.02418 | 0.02591 | 0.02606 | 0.02371 | 0.02686 POMGNT1   |
| cg08176694 | 0.87173 | 0.82201 | 0.9123  | 0.90114 | 0.93048 | 0.671   | 0.81305 | 0.81919 | 0.92093 | 0.89102 PITPNM2   |
| cg08177017 | 0.06755 | 0.06461 | 0.08356 | 0.11518 | 0.05266 | 0.0624  | 0.05897 | 0.05069 | 0.06465 | 0.05979 C10orf6   |
| cg08177445 | 0.71413 | 0.48836 | 0.31038 | 0.21943 | 0.50249 | 0.62196 | 0.14337 | 0.15859 | 0.1529  | 0.16834 FATE1     |
| cg08179530 | 0.02235 | 0.02062 | 0.0338  | 0.02949 | 0.03429 | 0.03785 | 0.0205  | 0.02273 | 0.02292 | 0.026 CDKN1A      |
| cg08179907 | 0.07126 | 0.07248 | 0.12446 | 0.09248 | 0.05027 | 0.06782 | 0.06474 | 0.07135 | 0.06912 | 0.07091 RAB39     |
| cg08183114 | 0.07012 | 0.08071 | 0.11866 | 0.13235 | 0.12584 | 0.08887 | 0.08547 | 0.05925 | 0.05965 | 0.04289 PBX2      |
| cg08185241 | 0.50386 | 0.65085 | 0.03025 | 0.03351 | 0.56862 | 0.56349 | 0.03393 | 0.0294  | 0.02529 | 0.02554 G0S2      |
| cg08185661 | 0.08106 | 0.07655 | 0.63974 | 0.70773 | 0.12142 | 0.04179 | 0.46782 | 0.5821  | 0.08895 | 0.02793 SYT9      |
| cg08186124 | 0.0459  | 0.05213 | 0.05913 | 0.0502  | 0.05213 | 0.04919 | 0.04299 | 0.03904 | 0.04199 | 0.03811 LZTFL1    |
| cg08186362 | 0.02196 | 0.02381 | 0.60323 | 0.63649 | 0.48166 | 0.54508 | 0.55402 | 0.59296 | 0.23149 | 0.08645 HRH3      |
| cg08190044 | 0.05325 | 0.05397 | 0.04625 | 0.04591 | 0.06149 | 0.07393 | 0.04421 | 0.05072 | 0.07666 | 0.06994 ATP8B2    |
| cg08190291 | 0.03364 | 0.0411  | 0.03438 | 0.03993 | 0.02899 | 0.0293  | 0.03061 | 0.02771 | 0.05505 | 0.03106 ADAMTS5   |
| cg08191854 | 0.077   | 0.10577 | 0.13972 | 0.18513 | 0.21502 | 0.1772  | 0.04405 | 0.04496 | 0.05339 | 0.04508 TRPM2     |
| cg08191915 | 0.75406 | 0.42178 | 0.57251 | 0.79578 | 0.2013  | 0.20107 | 0.07126 | 0.14837 | 0.0919  | 0.2379 PANX3      |
| cg08195505 | 0.05923 | 0.06965 | 0.06857 | 0.07237 | 0.06568 | 0.05716 | 0.0637  | 0.0664  | 0.0526  | 0.05873 ETV5      |
| cg08197122 | 0.22635 | 0.05547 | 0.03707 | 0.03346 | 0.03461 | 0.04136 | 0.04472 | 0.03771 | 0.04284 | 0.03165 DCC1      |
| cg08197201 | 0.02754 | 0.03032 | 0.02999 | 0.02857 | 0.02193 | 0.02755 | 0.02759 | 0.02691 | 0.02177 | 0.02251 RAB6IP2   |
| cg08198102 | 0.46205 | 0.12073 | 0.06796 | 0.0714  | 0.07536 | 0.0603  | 0.06636 | 0.06043 | 0.07028 | 0.04631 PTPLA     |
| cg08198370 | 0.0315  | 0.02801 | 0.03614 | 0.03127 | 0.02427 | 0.02722 | 0.02529 | 0.02625 | 0.02709 | 0.02711 MRPS15    |
| cg08198480 | 0.12915 | 0.1024  | 0.09574 | 0.10377 | 0.20008 | 0.13165 | 0.1413  | 0.12425 | 0.0835  | 0.09552 FLJ34047  |
| cg08201421 | 0.82784 | 0.49547 | 0.88701 | 0.87076 | 0.91991 | 0.8368  | 0.86599 | 0.69287 | 0.8717  | 0.62123 TNNC2     |

|            |         |         |         |         |         |         |         |         |         |                  |
|------------|---------|---------|---------|---------|---------|---------|---------|---------|---------|------------------|
| cg08203715 | 0.05571 | 0.05002 | 0.04839 | 0.04594 | 0.12093 | 0.03441 | 0.10785 | 0.053   | 0.11466 | 0.02892 ST3GAL4  |
| cg08205655 | 0.0839  | 0.08065 | 0.10417 | 0.08413 | 0.13541 | 0.08108 | 0.08478 | 0.07061 | 0.06646 | 0.08631 USP18    |
| cg08205865 | 0.39875 | 0.11243 | 0.43314 | 0.54485 | 0.40111 | 0.29731 | 0.46375 | 0.47147 | 0.44854 | 0.1408 SAC       |
| cg08207256 | 0.11573 | 0.09177 | 0.16742 | 0.18958 | 0.13551 | 0.13406 | 0.16149 | 0.14262 | 0.11948 | 0.10292 DNM2     |
| cg08209133 | 0.28637 | 0.28029 | 0.07921 | 0.07219 | 0.55806 | 0.65361 | 0.261   | 0.06771 | 0.1739  | 0.24031 SLC10A4  |
| cg08209724 | 0.10689 | 0.09864 | 0.15597 | 0.17306 | 0.11085 | 0.1156  | 0.12858 | 0.11517 | 0.09086 | 0.09515 ZNF207   |
| cg08210616 | 0.10578 | 0.07776 | 0.69801 | 0.63534 | 0.26017 | 0.36741 | 0.07655 | 0.06558 | 0.0632  | 0.05693 ZNF502   |
| cg08211091 | 0.07198 | 0.07354 | 0.06213 | 0.07114 | 0.56801 | 0.06309 | 0.07866 | 0.06378 | 0.06269 | 0.05816 FLJ37478 |
| cg08211967 | 0.03793 | 0.03998 | 0.03931 | 0.0351  | 0.0313  | 0.04056 | 0.03317 | 0.03444 | 0.03259 | 0.0315 AKAP13    |
| cg08212685 | 0.08773 | 0.08193 | 0.10884 | 0.09155 | 0.07159 | 0.08311 | 0.07972 | 0.09705 | 0.11951 | 0.10532 ATG10    |
| cg08214029 | 0.06133 | 0.0554  | 0.05423 | 0.06701 | 0.05255 | 0.06752 | 0.04457 | 0.04589 | 0.03779 | 0.04147 CCL18    |
| cg08214328 | 0.09371 | 0.08375 | 0.08118 | 0.07867 | 0.06835 | 0.07623 | 0.13238 | 0.05748 | 0.05809 | 0.06365 CTPS2    |
| cg08214957 | 0.72333 | 0.85469 | 0.82888 | 0.84349 | 0.78104 | 0.77201 | 0.54726 | 0.62054 | 0.31337 | 0.22407 CDR1     |
| cg08216720 | 0.06564 | 0.07234 | 0.07552 | 0.06974 | 0.05967 | 0.06496 | 0.06542 | 0.06251 | 0.05404 | 0.05882 SLC31A1  |
| cg08216792 | 0.05247 | 0.04846 | 0.07095 | 0.05471 | 0.06813 | 0.07732 | 0.0518  | 0.03765 | 0.05076 | 0.05091 LIG4     |
| cg08216808 | 0.37279 | 0.16811 | 0.28616 | 0.47825 | 0.06639 | 0.06393 | 0.13205 | 0.07668 | 0.06736 | 0.05221 ARPC2    |
| cg08220793 | 0.03112 | 0.0289  | 0.03021 | 0.02519 | 0.02601 | 0.02745 | 0.02466 | 0.02362 | 0.02135 | 0.02183 TSEN2    |
| cg08221207 | 0.10812 | 0.02902 | 0.37544 | 0.77602 | 0.41379 | 0.03146 | 0.08796 | 0.03342 | 0.19886 | 0.02464 FEZ1     |
| cg08222185 | 0.0382  | 0.03443 | 0.04453 | 0.04666 | 0.0275  | 0.03431 | 0.03264 | 0.03217 | 0.02816 | 0.03232 ADARB1   |
| cg08222514 | 0.16571 | 0.14846 | 0.18463 | 0.15351 | 0.18444 | 0.17631 | 0.14744 | 0.13128 | 0.13261 | 0.14663 SENP6    |
| cg08222662 | 0.27053 | 0.13564 | 0.14913 | 0.11405 | 0.16881 | 0.14109 | 0.08851 | 0.08337 | 0.08095 | 0.06863 ZC3HAV1  |
| cg08223235 | 0.78111 | 0.83789 | 0.86128 | 0.87477 | 0.86278 | 0.84808 | 0.87831 | 0.80273 | 0.72824 | 0.63537 BCL2     |
| cg08223748 | 0.02288 | 0.02746 | 0.02855 | 0.02818 | 0.02264 | 0.02561 | 0.02338 | 0.02215 | 0.02276 | 0.04332 MEF2C    |
| cg08228917 | 0.04317 | 0.05786 | 0.04851 | 0.04644 | 0.03875 | 0.06222 | 0.04196 | 0.04345 | 0.03807 | 0.03368 LHFP     |
| cg08229627 | 0.03868 | 0.03233 | 0.04294 | 0.03747 | 0.03198 | 0.03757 | 0.03801 | 0.03267 | 0.03113 | 0.03145 NPHP1    |
| cg08229694 | 0.03039 | 0.04141 | 0.04403 | 0.03669 | 0.03824 | 0.04207 | 0.03046 | 0.03207 | 0.03397 | 0.03378 IMMT     |
| cg08233088 | 0.07698 | 0.06234 | 0.08949 | 0.05989 | 0.08201 | 0.08104 | 0.09184 | 0.06967 | 0.06677 | 0.05793 C15orf15 |
| cg08233173 | 0.09081 | 0.09414 | 0.09206 | 0.0933  | 0.05959 | 0.06645 | 0.08115 | 0.07438 | 0.07629 | 0.07175 ATP6V0E  |
| cg08235271 | 0.09134 | 0.19479 | 0.11243 | 0.09616 | 0.16012 | 0.106   | 0.06385 | 0.05008 | 0.10441 | 0.08103 LPHN2    |
| cg08241785 | 0.376   | 0.10397 | 0.10965 | 0.08444 | 0.14972 | 0.09495 | 0.09361 | 0.18111 | 0.04687 | 0.05887 F2RL2    |
| cg08242020 | 0.04807 | 0.05248 | 0.05458 | 0.06158 | 0.06635 | 0.06215 | 0.04622 | 0.0529  | 0.03795 | 0.04388 RTN3     |
| cg08242323 | 0.05242 | 0.04183 | 0.05784 | 0.049   | 0.05095 | 0.04503 | 0.04783 | 0.04862 | 0.08361 | 0.04441 POLR2D   |
| cg08242493 | 0.03679 | 0.03839 | 0.0365  | 0.04121 | 0.03071 | 0.03653 | 0.03358 | 0.03226 | 0.0308  | 0.03076 MGEA5    |
| cg08244028 | 0.69094 | 0.18198 | 0.45267 | 0.70224 | 0.85587 | 0.76066 | 0.59054 | 0.10569 | 0.61243 | 0.1159 MSH3      |
| cg08244522 | 0.03263 | 0.03505 | 0.0352  | 0.03382 | 0.0308  | 0.03394 | 0.0409  | 0.0571  | 0.68025 | 0.70606 THBD     |
| cg08245487 | 0.89423 | 0.78698 | 0.87833 | 0.8691  | 0.80299 | 0.92549 | 0.8736  | 0.84605 | 0.86878 | 0.48482 GSG1     |
| cg08245789 | 0.95241 | 0.93212 | 0.93941 | 0.95128 | 0.95024 | 0.95109 | 0.91385 | 0.8886  | 0.94936 | 0.8962 FLJ25421  |
| cg08247612 | 0.79307 | 0.3373  | 0.86967 | 0.90921 | 0.89557 | 0.57829 | 0.89041 | 0.47778 | 0.91791 | 0.86704 NHLH1    |
| cg08248532 | 0.08009 | 0.08581 | 0.07277 | 0.07917 | 0.06798 | 0.06796 | 0.37219 | 0.35648 | 0.05912 | 0.05625 PRDX4    |
| cg08250444 | 0.02738 | 0.02617 | 0.03877 | 0.04047 | 0.11045 | 0.04553 | 0.02448 | 0.01982 | 0.02906 | 0.02561 EFNA1    |
| cg08251036 | 0.89739 | 0.9     | 0.8777  | 0.88416 | 0.87443 | 0.88874 | 0.88364 | 0.88514 | 0.90283 | 0.8914 MGAT5     |



|            |         |         |         |         |         |         |         |         |         |                  |
|------------|---------|---------|---------|---------|---------|---------|---------|---------|---------|------------------|
| cg08251399 | 0.80546 | 0.64997 | 0.88002 | 0.85382 | 0.93126 | 0.90146 | 0.66008 | 0.4126  | 0.88762 | 0.76881 EHD3     |
| cg08253405 | 0.64003 | 0.13318 | 0.75225 | 0.75897 | 0.7437  | 0.37793 | 0.69618 | 0.38151 | 0.78856 | 0.18269 C1orf62  |
| cg08254089 | 0.17048 | 0.06157 | 0.437   | 0.60878 | 0.72013 | 0.50063 | 0.09319 | 0.14235 | 0.64754 | 0.4329 BPI       |
| cg08254263 | 0.88031 | 0.85987 | 0.80338 | 0.83228 | 0.8079  | 0.83479 | 0.52036 | 0.85463 | 0.85225 | 0.81867 GDPD2    |
| cg08256027 | 0.17173 | 0.18058 | 0.19876 | 0.17908 | 0.20289 | 0.20685 | 0.15878 | 0.16334 | 0.17884 | 0.18871 HYMAI    |
| cg08256260 | 0.02735 | 0.02846 | 0.02736 | 0.03382 | 0.02727 | 0.03005 | 0.02466 | 0.02827 | 0.02441 | 0.02305 KCTD13   |
| cg08256691 | 0.89174 | 0.77927 | 0.83409 | 0.83337 | 0.88019 | 0.47058 | 0.8453  | 0.71357 | 0.89325 | 0.53096 RIT1     |
| cg08256781 | 0.86674 | 0.04752 | 0.80209 | 0.84946 | 0.83612 | 0.45627 | 0.53353 | 0.10558 | 0.84163 | 0.18512 ACSBG2   |
| cg08258650 | 0.03221 | 0.03261 | 0.82915 | 0.77473 | 0.72061 | 0.79148 | 0.84334 | 0.17963 | 0.07659 | 0.02947 SLC1A2   |
| cg08259617 | 0.03732 | 0.04434 | 0.03894 | 0.03722 | 0.03474 | 0.03644 | 0.03422 | 0.03269 | 0.02984 | 0.02934 GADD45B  |
| cg08260891 | 0.47828 | 0.18062 | 0.70576 | 0.84673 | 0.94051 | 0.68088 | 0.39665 | 0.09124 | 0.51104 | 0.10562 PPGB     |
| cg08260959 | 0.511   | 0.60564 | 0.89579 | 0.91333 | 0.80857 | 0.89836 | 0.37941 | 0.60621 | 0.2105  | 0.24035 HIST1H4F |
| cg08261094 | 0.10337 | 0.10207 | 0.29755 | 0.33994 | 0.54727 | 0.25888 | 0.09205 | 0.08323 | 0.14491 | 0.30769 SFRP4    |
| cg08261177 | 0.04654 | 0.04192 | 0.04721 | 0.04292 | 0.03931 | 0.04606 | 0.04215 | 0.03641 | 0.0369  | 0.03489 ALDH16A1 |
| cg08261666 | 0.02658 | 0.02786 | 0.03041 | 0.03274 | 0.02257 | 0.03222 | 0.03425 | 0.03662 | 0.02604 | 0.02393 VAMP2    |
| cg08261841 | 0.85759 | 0.88066 | 0.85081 | 0.88521 | 0.84096 | 0.84325 | 0.78657 | 0.85517 | 0.90298 | 0.42151 FLJ90586 |
| cg08262933 | 0.03589 | 0.04167 | 0.06315 | 0.05526 | 0.04507 | 0.04921 | 0.0775  | 0.03959 | 0.04408 | 0.04586 MORF4L2  |
| cg08263357 | 0.65068 | 0.67584 | 0.9788  | 0.98    | 0.97875 | 0.93598 | 0.81048 | 0.747   | 0.88054 | 0.58769 PLAGL1   |
| cg08263647 | 0.84701 | 0.83103 | 0.85081 | 0.88738 | 0.85106 | 0.87525 | 0.87049 | 0.85928 | 0.86629 | 0.8299 LXN       |
| cg08265265 | 0.04777 | 0.04964 | 0.04363 | 0.04491 | 0.05895 | 0.06421 | 0.04032 | 0.03419 | 0.03755 | 0.03243 SLC39A3  |
| cg08268099 | 0.95709 | 0.74204 | 0.55761 | 0.76367 | 0.95562 | 0.94282 | 0.05993 | 0.04215 | 0.05309 | 0.03899 OLFM1    |
| cg08268266 | 0.09704 | 0.08432 | 0.09693 | 0.0929  | 0.06827 | 0.05719 | 0.0884  | 0.08309 | 0.0656  | 0.07642 LITAF    |
| cg08269321 | 0.04274 | 0.04295 | 0.06962 | 0.04527 | 0.13614 | 0.18188 | 0.06146 | 0.04535 | 0.04055 | 0.04 RPRML       |
| cg08270477 | 0.02186 | 0.02155 | 0.02322 | 0.02098 | 0.03043 | 0.0267  | 0.02166 | 0.01906 | 0.01722 | 0.02056 C17orf45 |
| cg08271519 | 0.08494 | 0.0818  | 0.07719 | 0.06673 | 0.05948 | 0.06129 | 0.06826 | 0.06293 | 0.20193 | 0.16963 TM9SF2   |
| cg08274234 | 0.08931 | 0.11339 | 0.10136 | 0.11298 | 0.19048 | 0.12398 | 0.17921 | 0.1263  | 0.09794 | 0.07265 SEMA3E   |
| cg08274552 | 0.81623 | 0.45052 | 0.83055 | 0.82344 | 0.78453 | 0.69975 | 0.82981 | 0.78123 | 0.81217 | 0.75335 SLC4A3   |
| cg08278554 | 0.89911 | 0.92586 | 0.16948 | 0.1937  | 0.11279 | 0.09052 | 0.08334 | 0.07915 | 0.85036 | 0.83125 C15orf48 |
| cg08283293 | 0.03661 | 0.0427  | 0.04434 | 0.04181 | 0.03157 | 0.03738 | 0.03701 | 0.04204 | 0.03728 | 0.03275 RNF44    |
| cg08284151 | 0.21113 | 0.12429 | 0.49497 | 0.65754 | 0.37116 | 0.39838 | 0.19611 | 0.26279 | 0.0539  | 0.03918 DPPA3    |
| cg08284180 | 0.02099 | 0.02321 | 0.02666 | 0.02221 | 0.02017 | 0.02135 | 0.02569 | 0.02244 | 0.02024 | 0.02054 WDR42A   |
| cg08284598 | 0.72358 | 0.49703 | 0.9307  | 0.93761 | 0.95819 | 0.87785 | 0.81576 | 0.65094 | 0.80685 | 0.62868 SLC4A11  |
| cg08285151 | 0.72807 | 0.67554 | 0.42523 | 0.72445 | 0.40886 | 0.27046 | 0.1868  | 0.15974 | 0.18495 | 0.1646 HDAC9     |
| cg08286169 | 0.03564 | 0.03408 | 0.04077 | 0.03824 | 0.03141 | 0.03593 | 0.03466 | 0.03296 | 0.03572 | 0.03059 PEX3     |
| cg08287471 | 0.1217  | 0.12634 | 0.1323  | 0.11287 | 0.13478 | 0.13215 | 0.11698 | 0.11369 | 0.10916 | 0.1088 NEK6      |
| cg08289932 | 0.04088 | 0.04608 | 0.04343 | 0.04315 | 0.03454 | 0.03577 | 0.04007 | 0.03761 | 0.03529 | 0.03828 SHB      |
| cg08290212 | 0.0363  | 0.0346  | 0.04751 | 0.03885 | 0.04111 | 0.043   | 0.03623 | 0.04194 | 0.03439 | 0.02707 GNG3     |
| cg08290628 | 0.79319 | 0.59575 | 0.52578 | 0.76114 | 0.15839 | 0.19885 | 0.48577 | 0.6444  | 0.19484 | 0.2932 CORO2B    |
| cg08291000 | 0.47933 | 0.3861  | 0.47009 | 0.46192 | 0.9277  | 0.92241 | 0.54795 | 0.56698 | 0.49549 | 0.57038 PEG10    |
| cg08291098 | 0.05582 | 0.05331 | 0.34775 | 0.43891 | 0.63798 | 0.45234 | 0.23929 | 0.34122 | 0.16291 | 0.24539 STMN3    |
| cg08291539 | 0.02924 | 0.02735 | 0.02446 | 0.0275  | 0.02713 | 0.02529 | 0.03103 | 0.03023 | 0.02679 | 0.02745 DENND4A  |

|            |         |         |         |         |         |         |         |         |         |         |           |
|------------|---------|---------|---------|---------|---------|---------|---------|---------|---------|---------|-----------|
| cg08292050 | 0.90151 | 0.42479 | 0.93098 | 0.9268  | 0.88301 | 0.89992 | 0.57108 | 0.16822 | 0.92372 | 0.73629 | SOCS4     |
| cg08292112 | 0.03846 | 0.03893 | 0.0387  | 0.03535 | 0.05908 | 0.04632 | 0.03197 | 0.02807 | 0.03221 | 0.03101 | HIP2      |
| cg08293367 | 0.05231 | 0.04862 | 0.05323 | 0.05615 | 0.04418 | 0.04641 | 0.04315 | 0.03787 | 0.04505 | 0.03622 | YPEL1     |
| cg08293760 | 0.03118 | 0.03531 | 0.03845 | 0.0381  | 0.02655 | 0.03195 | 0.02905 | 0.02643 | 0.0254  | 0.02933 | RAB3GAP2  |
| cg08296824 | 0.04212 | 0.04579 | 0.05301 | 0.05047 | 0.03614 | 0.04631 | 0.05342 | 0.04902 | 0.04603 | 0.03707 | OSBPL3    |
| cg08299045 | 0.01883 | 0.02156 | 0.02692 | 0.02131 | 0.01851 | 0.02275 | 0.02158 | 0.02002 | 0.01759 | 0.01919 | MRPL55    |
| cg08300622 | 0.06339 | 0.06043 | 0.05008 | 0.04966 | 0.05179 | 0.04709 | 0.51141 | 0.1508  | 0.04485 | 0.04054 | SCML2     |
| cg08300860 | 0.90334 | 0.05717 | 0.14033 | 0.1331  | 0.93466 | 0.27386 | 0.03567 | 0.0536  | 0.37412 | 0.37951 | LDB3      |
| cg08301503 | 0.39498 | 0.43671 | 0.88717 | 0.87    | 0.87643 | 0.84955 | 0.80006 | 0.83574 | 0.86433 | 0.835   | FLJ43752  |
| cg08302713 | 0.06123 | 0.06823 | 0.06642 | 0.05904 | 0.0435  | 0.0501  | 0.06106 | 0.06398 | 0.05946 | 0.06127 | GCLC      |
| cg08303146 | 0.04593 | 0.03013 | 0.74066 | 0.70106 | 0.34046 | 0.02126 | 0.48375 | 0.33438 | 0.09149 | 0.02206 | KCNQ1     |
| cg08304608 | 0.89114 | 0.7076  | 0.91149 | 0.90843 | 0.95838 | 0.58968 | 0.89574 | 0.91963 | 0.90596 | 0.75448 | TUBB1     |
| cg08305742 | 0.04485 | 0.05327 | 0.05897 | 0.06427 | 0.03493 | 0.04855 | 0.04365 | 0.03773 | 0.0499  | 0.04924 | LOC51315  |
| cg08307039 | 0.07021 | 0.06776 | 0.06508 | 0.06332 | 0.0609  | 0.07477 | 0.05801 | 0.05557 | 0.0502  | 0.04382 | TRIM23    |
| cg08307092 | 0.0593  | 0.05792 | 0.06386 | 0.05211 | 0.12673 | 0.07748 | 0.03965 | 0.04511 | 0.03628 | 0.03942 | HIST1H3D  |
| cg08307580 | 0.73646 | 0.72607 | 0.06443 | 0.05971 | 0.10374 | 0.08739 | 0.04382 | 0.0446  | 0.04171 | 0.04031 | ZNF193    |
| cg08307816 | 0.07278 | 0.03908 | 0.93988 | 0.95186 | 0.26313 | 0.09295 | 0.30096 | 0.49849 | 0.33135 | 0.57013 | DEGS2     |
| cg08307963 | 0.13145 | 0.03969 | 0.5464  | 0.59352 | 0.63226 | 0.55842 | 0.12948 | 0.21723 | 0.87572 | 0.27325 | GJA5      |
| cg08308257 | 0.06788 | 0.07544 | 0.06585 | 0.06639 | 0.11954 | 0.07391 | 0.07114 | 0.06784 | 0.06052 | 0.06464 | SMNDC1    |
| cg08308286 | 0.02009 | 0.02555 | 0.02937 | 0.0235  | 0.02613 | 0.02983 | 0.0194  | 0.02427 | 0.02089 | 0.02156 | ET        |
| cg08308510 | 0.87244 | 0.7865  | 0.85458 | 0.87827 | 0.84907 | 0.8915  | 0.86476 | 0.81743 | 0.80014 | 0.84823 | C20orf173 |
| cg08312191 | 0.04859 | 0.05542 | 0.05353 | 0.05025 | 0.04321 | 0.04717 | 0.04619 | 0.04155 | 0.0429  | 0.04551 | SNRPG     |
| cg08313788 | 0.02277 | 0.02584 | 0.02323 | 0.02589 | 0.01891 | 0.01782 | 0.01791 | 0.02238 | 0.01838 | 0.01929 | ROD1      |
| cg08314660 | 0.95253 | 0.64317 | 0.07946 | 0.09674 | 0.89133 | 0.61126 | 0.91737 | 0.74769 | 0.93838 | 0.16787 | PKP3      |
| cg08315187 | 0.11681 | 0.05627 | 0.08705 | 0.09073 | 0.08374 | 0.06973 | 0.06583 | 0.05343 | 0.06454 | 0.05254 | PERP      |
| cg08315277 | 0.945   | 0.91184 | 0.84444 | 0.9407  | 0.95698 | 0.95557 | 0.9413  | 0.93842 | 0.95435 | 0.9385  | PKDREJ    |
| cg08315770 | 0.12228 | 0.0541  | 0.92013 | 0.94096 | 0.94627 | 0.9431  | 0.58927 | 0.78535 | 0.2809  | 0.04571 | KCNK17    |
| cg08317263 | 0.08846 | 0.24441 | 0.1497  | 0.26596 | 0.84249 | 0.90113 | 0.46534 | 0.38575 | 0.07108 | 0.03168 | CCDC69    |
| cg08319238 | 0.06767 | 0.27364 | 0.21457 | 0.08535 | 0.54431 | 0.41363 | 0.21947 | 0.10389 | 0.06168 | 0.0569  | BCAM      |
| cg08319404 | 0.88869 | 0.73609 | 0.6006  | 0.64018 | 0.85277 | 0.82329 | 0.81823 | 0.0911  | 0.9111  | 0.87854 | THRB      |
| cg08319991 | 0.03788 | 0.03909 | 0.03457 | 0.03355 | 0.23985 | 0.23379 | 0.03501 | 0.0326  | 0.04184 | 0.10237 | UCHL1     |
| cg08321272 | 0.02567 | 0.02414 | 0.02189 | 0.01937 | 0.02597 | 0.02514 | 0.0195  | 0.0186  | 0.01791 | 0.01893 | SLC30A9   |
| cg08321330 | 0.72629 | 0.53393 | 0.89242 | 0.92352 | 0.82771 | 0.69403 | 0.18048 | 0.06589 | 0.2803  | 0.42683 | TPSB2     |
| cg08321346 | 0.02723 | 0.01996 | 0.53518 | 0.61817 | 0.80265 | 0.74943 | 0.57436 | 0.42815 | 0.96584 | 0.95835 | ANKMY1    |
| cg08324796 | 0.21649 | 0.1891  | 0.14289 | 0.12175 | 0.31729 | 0.16485 | 0.09609 | 0.09199 | 0.13291 | 0.13992 | GPKOW     |
| cg08328671 | 0.0892  | 0.048   | 0.05071 | 0.04344 | 0.04991 | 0.05758 | 0.03427 | 0.04239 | 0.03795 | 0.04385 | BDKRB2    |
| cg08331313 | 0.03833 | 0.04668 | 0.03493 | 0.03194 | 0.02901 | 0.02751 | 0.03023 | 0.07868 | 0.03073 | 0.03048 | SPARC     |
| cg08331840 | 0.79925 | 0.77332 | 0.78497 | 0.81717 | 0.70142 | 0.8035  | 0.69862 | 0.73538 | 0.59507 | 0.47075 | FKSG2     |
| cg08331960 | 0.62076 | 0.24605 | 0.83367 | 0.71458 | 0.68829 | 0.54609 | 0.62395 | 0.65182 | 0.43065 | 0.23276 | SLC9A3R2  |
| cg08332212 | 0.74534 | 0.36008 | 0.83114 | 0.89293 | 0.81097 | 0.82819 | 0.59732 | 0.649   | 0.71955 | 0.82352 | MLN       |
| cg08332868 | 0.02817 | 0.02685 | 0.03518 | 0.02745 | 0.02764 | 0.03204 | 0.02867 | 0.03113 | 0.02822 | 0.02494 | RBM19     |

|            |         |         |         |         |         |         |         |         |         |         |          |
|------------|---------|---------|---------|---------|---------|---------|---------|---------|---------|---------|----------|
| cg08335125 | 0.72894 | 0.79853 | 0.78461 | 0.81706 | 0.8448  | 0.78967 | 0.79012 | 0.78324 | 0.81139 | 0.80551 | PGBD3    |
| cg08338368 | 0.56878 | 0.16443 | 0.75601 | 0.78211 | 0.70302 | 0.81515 | 0.83272 | 0.85392 | 0.76614 | 0.69118 | IL26     |
| cg08339208 | 0.02163 | 0.02187 | 0.02545 | 0.02385 | 0.01616 | 0.02196 | 0.02096 | 0.01996 | 0.0187  | 0.01798 | SIKE     |
| cg08341667 | 0.27264 | 0.1897  | 0.17037 | 0.14637 | 0.30873 | 0.25415 | 0.19263 | 0.23926 | 0.13665 | 0.13804 | ZNF488   |
| cg08341874 | 0.04852 | 0.04418 | 0.79403 | 0.80268 | 0.8347  | 0.58568 | 0.78416 | 0.54321 | 0.3509  | 0.36293 | VMO1     |
| cg08341924 | 0.53103 | 0.15411 | 0.79624 | 0.83945 | 0.78295 | 0.84736 | 0.33572 | 0.46275 | 0.33618 | 0.1689  | TGM1     |
| cg08341978 | 0.03793 | 0.03741 | 0.0506  | 0.04987 | 0.03644 | 0.04464 | 0.03369 | 0.03329 | 0.03878 | 0.03334 | RERE     |
| cg08342270 | 0.13249 | 0.14008 | 0.14673 | 0.13959 | 0.05599 | 0.11929 | 0.12265 | 0.11118 | 0.11626 | 0.12076 | TLE3     |
| cg08343834 | 0.09785 | 0.081   | 0.69031 | 0.72008 | 0.50783 | 0.16424 | 0.7389  | 0.35911 | 0.56602 | 0.19659 | PMP22    |
| cg08343943 | 0.0677  | 0.07637 | 0.09775 | 0.07653 | 0.05416 | 0.06156 | 0.06621 | 0.06236 | 0.05607 | 0.05739 | ALDH9A1  |
| cg08346269 | 0.06299 | 0.06824 | 0.07376 | 0.06819 | 0.04907 | 0.05645 | 0.06879 | 0.07435 | 0.06326 | 0.05809 | BLOC1S1  |
| cg08347423 | 0.03626 | 0.03574 | 0.05492 | 0.03897 | 0.04625 | 0.04212 | 0.04224 | 0.04358 | 0.03508 | 0.02997 | INVS     |
| cg08347960 | 0.29287 | 0.27897 | 0.33709 | 0.27621 | 0.32129 | 0.30556 | 0.35438 | 0.30974 | 0.27575 | 0.30554 | SCN2A2   |
| cg08348496 | 0.0635  | 0.02589 | 0.02781 | 0.0333  | 0.39764 | 0.32272 | 0.64664 | 0.38493 | 0.12992 | 0.0253  | HAPLN3   |
| cg08348900 | 0.17899 | 0.14762 | 0.39196 | 0.22404 | 0.41821 | 0.22518 | 0.16269 | 0.15357 | 0.22115 | 0.15128 | VIP      |
| cg08348962 | 0.10718 | 0.09698 | 0.12679 | 0.1207  | 0.1822  | 0.09689 | 0.1127  | 0.0978  | 0.11923 | 0.10885 | C1orf32  |
| cg08349573 | 0.02368 | 0.02671 | 0.0308  | 0.02927 | 0.04724 | 0.02381 | 0.02519 | 0.02321 | 0.02416 | 0.02319 | C1QTNF1  |
| cg08349806 | 0.61515 | 0.91872 | 0.52965 | 0.59874 | 0.57213 | 0.60274 | 0.58164 | 0.64676 | 0.60407 | 0.64616 | FLJ39599 |
| cg08350173 | 0.0293  | 0.03003 | 0.02911 | 0.02894 | 0.02521 | 0.02802 | 0.02941 | 0.0297  | 0.02765 | 0.0276  | B2M      |
| cg08351105 | 0.04414 | 0.04364 | 0.04846 | 0.04116 | 0.04523 | 0.04291 | 0.03656 | 0.03027 | 0.03545 | 0.03682 | FOSL2    |
| cg08351143 | 0.02799 | 0.03245 | 0.03391 | 0.03497 | 0.02822 | 0.03555 | 0.02895 | 0.02545 | 0.02355 | 0.02367 | UBE2R2   |
| cg08351331 | 0.50165 | 0.14873 | 0.36832 | 0.65128 | 0.81742 | 0.81485 | 0.15814 | 0.60305 | 0.45302 | 0.37736 | LBP      |
| cg08353062 | 0.04056 | 0.03666 | 0.04227 | 0.03393 | 0.03629 | 0.04302 | 0.03498 | 0.03622 | 0.03244 | 0.03131 | UGDH     |
| cg08353146 | 0.0618  | 0.06391 | 0.11838 | 0.10358 | 0.05164 | 0.05502 | 0.06219 | 0.06583 | 0.05039 | 0.04897 | TMCC2    |
| cg08355340 | 0.03391 | 0.02492 | 0.038   | 0.0342  | 0.02732 | 0.02481 | 0.02606 | 0.02208 | 0.02518 | 0.02318 | MPHOSPH6 |
| cg08355944 | 0.0684  | 0.05016 | 0.04023 | 0.04614 | 0.04534 | 0.04204 | 0.037   | 0.03845 | 0.04777 | 0.03988 | SLC37A3  |
| cg08356693 | 0.11917 | 0.12089 | 0.42019 | 0.4532  | 0.31631 | 0.25018 | 0.15259 | 0.16283 | 0.23196 | 0.28537 | ITLN1    |
| cg08358671 | 0.04607 | 0.03936 | 0.04863 | 0.04939 | 0.03837 | 0.03555 | 0.0323  | 0.03823 | 0.03858 | 0.03935 | IVNS1ABP |
| cg08359956 | 0.84509 | 0.83923 | 0.35464 | 0.41846 | 0.86553 | 0.85461 | 0.30404 | 0.06167 | 0.42077 | 0.46294 | LR8      |
| cg08360728 | 0.25221 | 0.22014 | 0.26323 | 0.26942 | 0.24239 | 0.2252  | 0.20161 | 0.17384 | 0.22097 | 0.23275 | GPATC3   |
| cg08361238 | 0.22494 | 0.06867 | 0.24492 | 0.17711 | 0.51531 | 0.09635 | 0.35636 | 0.08957 | 0.359   | 0.12949 | PTGFRN   |
| cg08364102 | 0.11271 | 0.11155 | 0.10335 | 0.15748 | 0.06667 | 0.22089 | 0.08485 | 0.05803 | 0.31551 | 0.3745  | OSBPL2   |
| cg08365982 | 0.84086 | 0.274   | 0.92388 | 0.93688 | 0.87552 | 0.90428 | 0.78266 | 0.87583 | 0.92502 | 0.9231  | CAV3     |
| cg08366126 | 0.04685 | 0.04418 | 0.07666 | 0.05858 | 0.14704 | 0.05373 | 0.04295 | 0.04171 | 0.03735 | 0.0356  | FUCA1    |
| cg08367026 | 0.03511 | 0.03562 | 0.0421  | 0.05659 | 0.03231 | 0.03283 | 0.03898 | 0.03498 | 0.03469 | 0.02908 | C12orf47 |
| cg08367223 | 0.78602 | 0.58581 | 0.8043  | 0.83377 | 0.5784  | 0.18336 | 0.75458 | 0.80311 | 0.87579 | 0.80726 | SNRPA    |
| cg08367703 | 0.02608 | 0.03186 | 0.02366 | 0.02226 | 0.02049 | 0.02437 | 0.02464 | 0.02106 | 0.02618 | 0.01763 | SDCCAG3  |
| cg08367838 | 0.15708 | 0.12031 | 0.15626 | 0.14759 | 0.16044 | 0.10695 | 0.14673 | 0.12874 | 0.12658 | 0.14535 | YIPF5    |
| cg08368934 | 0.79258 | 0.45513 | 0.81932 | 0.87491 | 0.9107  | 0.85521 | 0.5743  | 0.18178 | 0.03982 | 0.22434 | GPR97    |
| cg08369065 | 0.03958 | 0.04109 | 0.04069 | 0.03782 | 0.69763 | 0.94725 | 0.23641 | 0.17064 | 0.03117 | 0.02821 | GATA4    |
| cg08370996 | 0.03964 | 0.04316 | 0.04051 | 0.04332 | 0.03424 | 0.04024 | 0.0378  | 0.05867 | 0.03635 | 0.03687 | NR2F2    |

|            |         |         |         |         |         |         |         |         |         |                  |
|------------|---------|---------|---------|---------|---------|---------|---------|---------|---------|------------------|
| cg08372326 | 0.0825  | 0.02893 | 0.03103 | 0.03761 | 0.0275  | 0.02924 | 0.02526 | 0.02428 | 0.01998 | 0.01844 HABP4    |
| cg08373610 | 0.09301 | 0.05823 | 0.11106 | 0.16538 | 0.11579 | 0.09598 | 0.05797 | 0.08235 | 0.07484 | 0.08572 C2orf11  |
| cg08374799 | 0.76216 | 0.29837 | 0.80627 | 0.86632 | 0.8248  | 0.791   | 0.76099 | 0.78062 | 0.66667 | 0.4566 ITGB7     |
| cg08375941 | 0.53496 | 0.40713 | 0.6086  | 0.69516 | 0.57648 | 0.65369 | 0.43428 | 0.37659 | 0.4122  | 0.17945 GPR15    |
| cg08376864 | 0.1076  | 0.10143 | 0.13656 | 0.10536 | 0.26298 | 0.08156 | 0.1314  | 0.35058 | 0.08047 | 0.08532 HRASLS   |
| cg08377000 | 0.80495 | 0.83441 | 0.74065 | 0.81399 | 0.72526 | 0.78868 | 0.77477 | 0.82661 | 0.85018 | 0.7956 TIGD2     |
| cg08379517 | 0.86589 | 0.58926 | 0.84383 | 0.87157 | 0.82985 | 0.83831 | 0.79712 | 0.77585 | 0.88842 | 0.71405 LRRC25   |
| cg08380205 | 0.15562 | 0.11845 | 0.84553 | 0.87011 | 0.5249  | 0.63961 | 0.19805 | 0.13915 | 0.21714 | 0.11912 SPSB4    |
| cg08380539 | 0.07021 | 0.08729 | 0.07334 | 0.07396 | 0.08077 | 0.06459 | 0.05026 | 0.04508 | 0.06141 | 0.05574 CTBS     |
| cg08383063 | 0.1195  | 0.05081 | 0.06779 | 0.06829 | 0.04618 | 0.05102 | 0.04869 | 0.04163 | 0.04052 | 0.03786 RB1      |
| cg08383315 | 0.05751 | 0.03355 | 0.83716 | 0.9501  | 0.35757 | 0.59161 | 0.1978  | 0.09042 | 0.04541 | 0.02433 RIC3     |
| cg08385610 | 0.9378  | 0.8854  | 0.93497 | 0.93991 | 0.94486 | 0.94369 | 0.90417 | 0.9063  | 0.93258 | 0.91093 LZTS1    |
| cg08388746 | 0.21449 | 0.21134 | 0.27953 | 0.2656  | 0.227   | 0.24847 | 0.17553 | 0.2091  | 0.23378 | 0.23702 C1orf83  |
| cg08390021 | 0.02414 | 0.0257  | 0.02742 | 0.02566 | 0.02481 | 0.02034 | 0.02169 | 0.01875 | 0.02897 | 0.01666 C1orf54  |
| cg08390209 | 0.40078 | 0.41317 | 0.43303 | 0.41494 | 0.44252 | 0.45202 | 0.88498 | 0.89838 | 0.92235 | 0.90882 CDKN2B   |
| cg08390254 | 0.24407 | 0.10039 | 0.59638 | 0.7729  | 0.70355 | 0.85571 | 0.34287 | 0.26721 | 0.12017 | 0.09957 ATP1A2   |
| cg08392591 | 0.09544 | 0.08761 | 0.0917  | 0.08623 | 0.14858 | 0.09993 | 0.07939 | 0.06366 | 0.06296 | 0.08561 ANKRD11  |
| cg08393006 | 0.07474 | 0.06651 | 0.07457 | 0.07362 | 0.04621 | 0.04554 | 0.06089 | 0.06513 | 0.05733 | 0.05565 SFRS14   |
| cg08393541 | 0.02965 | 0.03642 | 0.03923 | 0.03672 | 0.03201 | 0.03266 | 0.02566 | 0.02437 | 0.03167 | 0.02728 NUDC     |
| cg08394377 | 0.82431 | 0.75539 | 0.86974 | 0.87143 | 0.88627 | 0.81167 | 0.83786 | 0.61136 | 0.88096 | 0.74964 RIMS3    |
| cg08395365 | 0.17998 | 0.14682 | 0.14221 | 0.14816 | 0.1143  | 0.14342 | 0.16794 | 0.16272 | 0.15858 | 0.14317 MCCC1    |
| cg08395706 | 0.03554 | 0.03945 | 0.04399 | 0.03521 | 0.03367 | 0.0313  | 0.035   | 0.03528 | 0.02544 | 0.02557 ZNF646   |
| cg08395899 | 0.10681 | 0.1073  | 0.10218 | 0.10602 | 0.10152 | 0.11327 | 0.10321 | 0.10925 | 0.09262 | 0.09755 UPF2     |
| cg08397758 | 0.04884 | 0.05337 | 0.05219 | 0.04366 | 0.66838 | 0.24372 | 0.86469 | 0.13641 | 0.04688 | 0.04896 C10orf33 |
| cg08398233 | 0.05088 | 0.04448 | 0.05369 | 0.06014 | 0.0372  | 0.04431 | 0.36701 | 0.43137 | 0.22597 | 0.14546 CAMK2N1  |
| cg08399444 | 0.85691 | 0.80927 | 0.74895 | 0.76796 | 0.77843 | 0.88063 | 0.83486 | 0.82277 | 0.84492 | 0.2941 GSG1      |
| cg08400019 | 0.06755 | 0.06012 | 0.06891 | 0.05402 | 0.06906 | 0.05684 | 0.06551 | 0.06233 | 0.064   | 0.05088 NSUN6    |
| cg08400120 | 0.04463 | 0.03974 | 0.05427 | 0.04338 | 0.0313  | 0.03939 | 0.03926 | 0.03475 | 0.03988 | 0.03678 PRKCI    |
| cg08402568 | 0.94579 | 0.77474 | 0.94734 | 0.95257 | 0.97164 | 0.95722 | 0.94551 | 0.48996 | 0.95766 | 0.38508 MGC34647 |
| cg08403419 | 0.82121 | 0.60611 | 0.86179 | 0.83219 | 0.89946 | 0.08835 | 0.8168  | 0.6201  | 0.55472 | 0.05472 RLN3R2   |
| cg08404225 | 0.72871 | 0.28982 | 0.24993 | 0.27093 | 0.28646 | 0.38537 | 0.59948 | 0.66128 | 0.125   | 0.14027 IL5RA    |
| cg08404227 | 0.03338 | 0.03339 | 0.18371 | 0.18051 | 0.03048 | 0.02978 | 0.16355 | 0.14323 | 0.04726 | 0.15761 SLCO3A1  |
| cg08408988 | 0.03918 | 0.04243 | 0.03819 | 0.03321 | 0.02605 | 0.03353 | 0.03645 | 0.04132 | 0.03226 | 0.03452 KCTD10   |
| cg08409225 | 0.16756 | 0.1385  | 0.37247 | 0.62231 | 0.13404 | 0.18305 | 0.30199 | 0.07214 | 0.05607 | 0.05524 OBFC2B   |
| cg08411049 | 0.91515 | 0.8778  | 0.91502 | 0.91696 | 0.05714 | 0.06227 | 0.21127 | 0.30127 | 0.67303 | 0.4694 SERPINB5  |
| cg08411435 | 0.19809 | 0.06924 | 0.44075 | 0.52343 | 0.34683 | 0.1206  | 0.17539 | 0.1007  | 0.04975 | 0.03875 PPP1R1B  |
| cg08412305 | 0.02115 | 0.02555 | 0.02548 | 0.02214 | 0.01828 | 0.02324 | 0.02363 | 0.02386 | 0.02104 | 0.02289 BRP44    |
| cg08413153 | 0.12356 | 0.13598 | 0.12553 | 0.12809 | 0.14432 | 0.12494 | 0.1085  | 0.13286 | 0.11295 | 0.10283 SNX11    |
| cg08413366 | 0.04658 | 0.04501 | 0.03638 | 0.04776 | 0.04495 | 0.04409 | 0.04712 | 0.04472 | 0.0629  | 0.03719 PPP3CB   |
| cg08413469 | 0.03997 | 0.04652 | 0.05135 | 0.04591 | 0.04014 | 0.04564 | 0.03589 | 0.02996 | 0.04053 | 0.03875 DEPDC1   |
| cg08416046 | 0.04975 | 0.04963 | 0.93128 | 0.94642 | 0.76049 | 0.8287  | 0.42988 | 0.28265 | 0.06683 | 0.05476 IRS4     |

|            |         |         |         |         |         |         |         |         |         |                  |
|------------|---------|---------|---------|---------|---------|---------|---------|---------|---------|------------------|
| cg08417687 | 0.05271 | 0.04449 | 0.06973 | 0.06659 | 0.05702 | 0.06055 | 0.04711 | 0.04944 | 0.05184 | 0.05301 SNX3     |
| cg08418111 | 0.69905 | 0.45955 | 0.86618 | 0.84751 | 0.68933 | 0.47866 | 0.72585 | 0.56857 | 0.43654 | 0.31621 LDHC     |
| cg08418332 | 0.7418  | 0.15024 | 0.5151  | 0.78519 | 0.94921 | 0.80522 | 0.52599 | 0.22119 | 0.72425 | 0.21553 CCL19    |
| cg08418747 | 0.02229 | 0.02836 | 0.02646 | 0.02543 | 0.02143 | 0.02222 | 0.02488 | 0.0233  | 0.02587 | 0.01955 PMS2L5   |
| cg08418978 | 0.8541  | 0.85464 | 0.81767 | 0.84992 | 0.73388 | 0.79608 | 0.11683 | 0.08468 | 0.58718 | 0.47507 CLDN10   |
| cg08419026 | 0.04038 | 0.04352 | 0.05248 | 0.04316 | 0.07428 | 0.04362 | 0.04019 | 0.04145 | 0.13365 | 0.04466 SLCO5A1  |
| cg08420085 | 0.02213 | 0.02716 | 0.02474 | 0.0235  | 0.02058 | 0.02777 | 0.02465 | 0.02692 | 0.02332 | 0.02184 ZDHHC24  |
| cg08420900 | 0.89244 | 0.61122 | 0.856   | 0.89419 | 0.86459 | 0.87201 | 0.36337 | 0.32081 | 0.49523 | 0.4579 LW-1      |
| cg08422599 | 0.03776 | 0.03588 | 0.25229 | 0.07348 | 0.50688 | 0.68097 | 0.18773 | 0.03394 | 0.04897 | 0.03348 KCNIP1   |
| cg08424423 | 0.67757 | 0.2616  | 0.94954 | 0.96148 | 0.95249 | 0.93528 | 0.93314 | 0.66799 | 0.94501 | 0.83713 CDSN     |
| cg08424427 | 0.05363 | 0.03787 | 0.05266 | 0.06066 | 0.03277 | 0.05591 | 0.05632 | 0.04912 | 0.04489 | 0.04536 GNB2L1   |
| cg08426384 | 0.06235 | 0.05762 | 0.06178 | 0.06804 | 0.03641 | 0.0501  | 0.04387 | 0.04985 | 0.05665 | 0.05262 ADCK1    |
| cg08427977 | 0.61063 | 0.13007 | 0.39856 | 0.56418 | 0.54231 | 0.35758 | 0.36917 | 0.10597 | 0.36374 | 0.35099 C10orf72 |
| cg08428707 | 0.04262 | 0.04385 | 0.04268 | 0.0423  | 0.04664 | 0.04968 | 0.03843 | 0.03752 | 0.03226 | 0.02898 CHMP4B   |
| cg08430598 | 0.63346 | 0.60782 | 0.91574 | 0.93864 | 0.927   | 0.8953  | 0.06067 | 0.03496 | 0.45761 | 0.14853 CST1     |
| cg08431931 | 0.86955 | 0.90611 | 0.94633 | 0.96341 | 0.31968 | 0.25756 | 0.306   | 0.17015 | 0.11932 | 0.11771 MGC26816 |
| cg08432727 | 0.02665 | 0.02587 | 0.93967 | 0.95819 | 0.03725 | 0.02582 | 0.45739 | 0.59974 | 0.52289 | 0.46329 SOX11    |
| cg08433095 | 0.86268 | 0.76408 | 0.88156 | 0.89933 | 0.90241 | 0.8924  | 0.86781 | 0.85436 | 0.89702 | 0.80241 DYX1C1   |
| cg08433538 | 0.08681 | 0.06396 | 0.10389 | 0.15446 | 0.07959 | 0.07586 | 0.07553 | 0.05225 | 0.06487 | 0.0573 RALGPS1   |
| cg08434152 | 0.03855 | 0.04254 | 0.04409 | 0.04007 | 0.03771 | 0.04044 | 0.03668 | 0.03114 | 0.03369 | 0.03394 MOBK1B   |
| cg08434234 | 0.03467 | 0.0389  | 0.07201 | 0.06842 | 0.18034 | 0.84573 | 0.12982 | 0.12598 | 0.05475 | 0.21232 DGKI     |
| cg08434396 | 0.06989 | 0.06692 | 0.09332 | 0.0934  | 0.08765 | 0.0831  | 0.22923 | 0.08502 | 0.06055 | 0.05823 FMR1     |
| cg08434547 | 0.14993 | 0.0543  | 0.39995 | 0.48172 | 0.35157 | 0.03849 | 0.03106 | 0.02484 | 0.03358 | 0.02714 GCN5L2   |
| cg08439468 | 0.04425 | 0.04119 | 0.04139 | 0.03608 | 0.03625 | 0.03399 | 0.03894 | 0.04111 | 0.03736 | 0.02978 BICD2    |
| cg08440125 | 0.05048 | 0.04593 | 0.0448  | 0.0448  | 0.03076 | 0.04574 | 0.04197 | 0.0425  | 0.04136 | 0.03772 HIBADH   |
| cg08440425 | 0.02999 | 0.03012 | 0.03534 | 0.03185 | 0.03679 | 0.03136 | 0.02761 | 0.03161 | 0.07179 | 0.02284 LRRC51   |
| cg08441170 | 0.11011 | 0.04959 | 0.83082 | 0.97237 | 0.22989 | 0.05675 | 0.08853 | 0.04431 | 0.0955  | 0.16032 MYO3A    |
| cg08441546 | 0.45814 | 0.16571 | 0.17346 | 0.1946  | 0.04485 | 0.05431 | 0.2552  | 0.17144 | 0.06584 | 0.05127 DREV1    |
| cg08441806 | 0.08309 | 0.04009 | 0.56074 | 0.62459 | 0.41293 | 0.12354 | 0.15787 | 0.12472 | 0.42362 | 0.78792 NKX6-2   |
| cg08443351 | 0.0312  | 0.03245 | 0.03434 | 0.03799 | 0.03099 | 0.03615 | 0.03832 | 0.03362 | 0.02929 | 0.02626 ARHGAP19 |
| cg08445039 | 0.85573 | 0.70801 | 0.03578 | 0.03487 | 0.02828 | 0.03391 | 0.03403 | 0.04204 | 0.03498 | 0.03151 FKBP9    |
| cg08446111 | 0.75893 | 0.18478 | 0.35331 | 0.3873  | 0.51304 | 0.22985 | 0.39854 | 0.3342  | 0.48529 | 0.14461 ABCC11   |
| cg08448040 | 0.04331 | 0.04813 | 0.049   | 0.04248 | 0.03243 | 0.03299 | 0.04061 | 0.03897 | 0.03479 | 0.03443 HDAC11   |
| cg08448751 | 0.69595 | 0.60233 | 0.78018 | 0.87637 | 0.88804 | 0.87325 | 0.35789 | 0.54945 | 0.33524 | 0.50998 SEMA3G   |
| cg08450168 | 0.92682 | 0.85822 | 0.88668 | 0.90935 | 0.92159 | 0.91168 | 0.92174 | 0.91688 | 0.93073 | 0.90743 RAB42    |
| cg08450982 | 0.04766 | 0.03196 | 0.44632 | 0.5717  | 0.02222 | 0.02364 | 0.02594 | 0.02615 | 0.04064 | 0.01994 NUMBL    |
| cg08451957 | 0.84665 | 0.77649 | 0.88323 | 0.91236 | 0.89238 | 0.88282 | 0.79717 | 0.81584 | 0.78479 | 0.815 FOXD4L1    |
| cg08452348 | 0.88766 | 0.88516 | 0.87342 | 0.86973 | 0.86418 | 0.90421 | 0.87354 | 0.89215 | 0.89907 | 0.88667 CATSPER3 |
| cg08453021 | 0.05359 | 0.05236 | 0.05899 | 0.04861 | 0.32956 | 0.04362 | 0.06289 | 0.04569 | 0.07838 | 0.04176 ELMO1    |
| cg08453096 | 0.78598 | 0.46441 | 0.66287 | 0.71039 | 0.70957 | 0.32994 | 0.42697 | 0.22211 | 0.17068 | 0.10352 ABCG5    |
| cg08453968 | 0.02992 | 0.035   | 0.03708 | 0.03617 | 0.03152 | 0.03307 | 0.02843 | 0.03413 | 0.03198 | 0.0324 NXT1      |

|            |         |         |         |         |         |         |         |         |         |         |          |
|------------|---------|---------|---------|---------|---------|---------|---------|---------|---------|---------|----------|
| cg08455548 | 0.09525 | 0.11339 | 0.25083 | 0.38343 | 0.14142 | 0.22857 | 0.12688 | 0.13268 | 0.18357 | 0.15996 | PCDH11Y  |
| cg08458170 | 0.92157 | 0.92172 | 0.9116  | 0.91852 | 0.9107  | 0.91151 | 0.17393 | 0.87651 | 0.65839 | 0.75913 | ZNF537   |
| cg08458487 | 0.47172 | 0.29992 | 0.84645 | 0.7842  | 0.89817 | 0.87936 | 0.0659  | 0.06137 | 0.05391 | 0.0644  | SFTPD    |
| cg08459368 | 0.39835 | 0.40532 | 0.76061 | 0.86391 | 0.37724 | 0.50708 | 0.24822 | 0.05422 | 0.2502  | 0.22999 | SCGB2A1  |
| cg08460026 | 0.71497 | 0.50262 | 0.69952 | 0.84865 | 0.67942 | 0.61606 | 0.48897 | 0.72897 | 0.18144 | 0.21912 | CTLA4    |
| cg08460435 | 0.89109 | 0.9474  | 0.12457 | 0.14798 | 0.55676 | 0.32343 | 0.08809 | 0.07284 | 0.09076 | 0.0894  | C1orf59  |
| cg08461397 | 0.13072 | 0.09233 | 0.31987 | 0.29111 | 0.19742 | 0.10128 | 0.1005  | 0.06862 | 0.08925 | 0.06229 | SNTB2    |
| cg08462247 | 0.05032 | 0.0475  | 0.05423 | 0.05219 | 0.04303 | 0.04433 | 0.08294 | 0.05065 | 0.04937 | 0.03949 | MYEOV2   |
| cg08462292 | 0.03942 | 0.04029 | 0.05004 | 0.04151 | 0.04326 | 0.03942 | 0.0267  | 0.02062 | 0.03815 | 0.04384 | PTBP2    |
| cg08463061 | 0.08549 | 0.08385 | 0.11148 | 0.10786 | 0.13463 | 0.11155 | 0.13197 | 0.10063 | 0.09945 | 0.09198 | RND3     |
| cg08463485 | 0.56453 | 0.43821 | 0.63854 | 0.82601 | 0.72264 | 0.89899 | 0.80515 | 0.87115 | 0.3664  | 0.32429 | ILDR1    |
| cg08465510 | 0.10328 | 0.10154 | 0.08026 | 0.07616 | 0.07931 | 0.05993 | 0.16279 | 0.0617  | 0.06414 | 0.06061 | SLC26A11 |
| cg08465774 | 0.79502 | 0.68094 | 0.64649 | 0.62946 | 0.57995 | 0.5154  | 0.62083 | 0.60808 | 0.51758 | 0.23479 | INDO     |
| cg08465862 | 0.04796 | 0.0445  | 0.05496 | 0.06379 | 0.06146 | 0.05038 | 0.04561 | 0.04616 | 0.86899 | 0.29226 | PFKP     |
| cg08466074 | 0.10934 | 0.11704 | 0.13718 | 0.09317 | 0.2091  | 0.20681 | 0.15619 | 0.17075 | 0.11613 | 0.1276  | SMAP     |
| cg08466883 | 0.04053 | 0.04827 | 0.04993 | 0.04303 | 0.03241 | 0.04483 | 0.04427 | 0.04285 | 0.03954 | 0.04551 | KCTD3    |
| cg08468689 | 0.0483  | 0.04536 | 0.83218 | 0.8715  | 0.15239 | 0.06232 | 0.04764 | 0.04011 | 0.03488 | 0.03534 | LGP1     |
| cg08469834 | 0.1115  | 0.11835 | 0.16132 | 0.12877 | 0.27649 | 0.12772 | 0.13969 | 0.11818 | 0.11342 | 0.09247 | CASP4    |
| cg08471713 | 0.21398 | 0.26824 | 0.93306 | 0.9423  | 0.92334 | 0.93841 | 0.91592 | 0.46328 | 0.94603 | 0.94741 | MEOX1    |
| cg08472583 | 0.54227 | 0.43176 | 0.55794 | 0.57659 | 0.55189 | 0.51134 | 0.56507 | 0.45244 | 0.54172 | 0.43061 | RCP9     |
| cg08473533 | 0.06155 | 0.03453 | 0.03408 | 0.04056 | 0.0285  | 0.03178 | 0.03443 | 0.03579 | 0.05608 | 0.02671 | MGC24381 |
| cg08474603 | 0.38266 | 0.36125 | 0.74168 | 0.78483 | 0.65554 | 0.61719 | 0.16678 | 0.20374 | 0.36485 | 0.33656 | CRP      |
| cg08475088 | 0.69094 | 0.46838 | 0.4645  | 0.44794 | 0.37506 | 0.38763 | 0.0408  | 0.04554 | 0.12888 | 0.05478 | NALP9    |
| cg08475827 | 0.16544 | 0.09594 | 0.12258 | 0.11779 | 0.11484 | 0.08789 | 0.10144 | 0.08749 | 0.10359 | 0.07404 | RIF1     |
| cg08477744 | 0.9061  | 0.82392 | 0.12952 | 0.68531 | 0.03991 | 0.51149 | 0.05581 | 0.77057 | 0.03797 | 0.20777 | MFAP2    |
| cg08478189 | 0.03271 | 0.03662 | 0.03535 | 0.03428 | 0.03538 | 0.03512 | 0.03271 | 0.03595 | 0.03153 | 0.0334  | KLF7     |
| cg08480367 | 0.85781 | 0.53295 | 0.66257 | 0.84929 | 0.62969 | 0.32285 | 0.60463 | 0.41813 | 0.63578 | 0.534   | SRPX     |
| cg08487038 | 0.06088 | 0.05281 | 0.04528 | 0.04365 | 0.04183 | 0.06491 | 0.03814 | 0.03752 | 0.0349  | 0.02795 | UHRF2    |
| cg08487374 | 0.03857 | 0.03977 | 0.04034 | 0.04246 | 0.04325 | 0.04058 | 0.04021 | 0.03971 | 0.03145 | 0.03644 | TSC22D4  |
| cg08489623 | 0.30041 | 0.27863 | 0.42158 | 0.36668 | 0.34464 | 0.46715 | 0.2683  | 0.20783 | 0.17244 | 0.12224 | FLJ44060 |
| cg08490173 | 0.04884 | 0.0479  | 0.05339 | 0.05842 | 0.04749 | 0.04281 | 0.04368 | 0.04304 | 0.04605 | 0.0436  | FEM1C    |
| cg08491025 | 0.02562 | 0.02796 | 0.03736 | 0.02931 | 0.02292 | 0.02683 | 0.02282 | 0.02527 | 0.02717 | 0.02316 | SLC16A1  |
| cg08491125 | 0.12585 | 0.06926 | 0.0643  | 0.08337 | 0.054   | 0.05774 | 0.06784 | 0.19087 | 0.05996 | 0.05296 | ISG20    |
| cg08491964 | 0.13636 | 0.13839 | 0.13152 | 0.13187 | 0.08569 | 0.12995 | 0.11455 | 0.11471 | 0.31103 | 0.10488 | TCF4     |
| cg08492707 | 0.04232 | 0.048   | 0.05474 | 0.04658 | 0.06009 | 0.04093 | 0.03754 | 0.03893 | 0.03903 | 0.03013 | IFNAR1   |
| cg08493463 | 0.79036 | 0.37828 | 0.47339 | 0.6192  | 0.47817 | 0.50637 | 0.49797 | 0.21038 | 0.34903 | 0.41733 | ENPP6    |
| cg08494812 | 0.04296 | 0.04894 | 0.05984 | 0.0741  | 0.04714 | 0.03424 | 0.04244 | 0.04436 | 0.04134 | 0.03516 | TAF1B    |
| cg08495878 | 0.44309 | 0.09277 | 0.80284 | 0.9075  | 0.90738 | 0.91226 | 0.37436 | 0.19084 | 0.64447 | 0.04676 | SERPINA4 |
| cg08496601 | 0.03925 | 0.03619 | 0.03525 | 0.03404 | 0.33122 | 0.53409 | 0.50679 | 0.4242  | 0.02863 | 0.0247  | EBP      |
| cg08496998 | 0.86216 | 0.87967 | 0.86102 | 0.88338 | 0.82447 | 0.88537 | 0.86063 | 0.85723 | 0.88353 | 0.76937 | TRIAD3   |
| cg08497766 | 0.05371 | 0.0435  | 0.04632 | 0.04569 | 0.0563  | 0.04732 | 0.05033 | 0.0384  | 0.04406 | 0.03855 | IL15RA   |

|            |         |         |         |         |         |         |         |         |         |         |           |
|------------|---------|---------|---------|---------|---------|---------|---------|---------|---------|---------|-----------|
| cg08500346 | 0.09396 | 0.06865 | 0.14657 | 0.17224 | 0.40962 | 0.32352 | 0.07288 | 0.06049 | 0.10031 | 0.06009 | CTSH      |
| cg08504049 | 0.10239 | 0.11187 | 0.10734 | 0.1128  | 0.08433 | 0.0992  | 0.08666 | 0.09523 | 0.09758 | 0.0951  | ZNF264    |
| cg08504583 | 0.90933 | 0.90337 | 0.21734 | 0.26323 | 0.86042 | 0.79341 | 0.26218 | 0.86701 | 0.78655 | 0.67706 | FLJ30046  |
| cg08504905 | 0.02429 | 0.02614 | 0.03002 | 0.03012 | 0.01766 | 0.02411 | 0.02235 | 0.02468 | 0.02358 | 0.02069 | LENG1     |
| cg08505473 | 0.03332 | 0.02299 | 0.18672 | 0.22505 | 0.02958 | 0.02287 | 0.02532 | 0.01855 | 0.03126 | 0.02073 | PRIMA1    |
| cg08507270 | 0.75876 | 0.8032  | 0.62008 | 0.72789 | 0.49685 | 0.80285 | 0.52384 | 0.7046  | 0.53156 | 0.33387 | TAS2R8    |
| cg08508325 | 0.0648  | 0.04104 | 0.48722 | 0.56547 | 0.04194 | 0.03987 | 0.21319 | 0.05141 | 0.24673 | 0.02667 | CARS      |
| cg08509737 | 0.88355 | 0.78108 | 0.88434 | 0.88257 | 0.79127 | 0.84128 | 0.89242 | 0.8536  | 0.90874 | 0.88074 | ATG7      |
| cg08510456 | 0.35927 | 0.26637 | 0.77952 | 0.81157 | 0.72812 | 0.29182 | 0.6254  | 0.32409 | 0.8213  | 0.29773 | BSN       |
| cg08512940 | 0.085   | 0.04318 | 0.0535  | 0.03995 | 0.04841 | 0.03452 | 0.03851 | 0.0398  | 0.03761 | 0.03518 | PRPF40B   |
| cg08513100 | 0.04995 | 0.04942 | 0.04912 | 0.05567 | 0.04926 | 0.03805 | 0.03974 | 0.04373 | 0.04033 | 0.04396 | UBE2B     |
| cg08514736 | 0.0361  | 0.03475 | 0.0359  | 0.03311 | 0.029   | 0.03238 | 0.03472 | 0.02942 | 0.02713 | 0.02774 | UNG2      |
| cg08516400 | 0.38918 | 0.74918 | 0.38169 | 0.36089 | 0.33269 | 0.48815 | 0.11449 | 0.13236 | 0.78053 | 0.61568 | C14orf166 |
| cg08519865 | 0.05185 | 0.05055 | 0.05803 | 0.0559  | 0.06489 | 0.04998 | 0.06427 | 0.05031 | 0.06306 | 0.04651 | CRSP9     |
| cg08519905 | 0.36289 | 0.07141 | 0.72079 | 0.52775 | 0.66983 | 0.63349 | 0.80948 | 0.70469 | 0.34373 | 0.05071 | CD9       |
| cg08521225 | 0.61531 | 0.49498 | 0.80693 | 0.83631 | 0.76453 | 0.69538 | 0.65157 | 0.50606 | 0.3605  | 0.16909 | TTR       |
| cg08524221 | 0.07462 | 0.07439 | 0.07415 | 0.07707 | 0.05715 | 0.06871 | 0.06662 | 0.07032 | 0.07527 | 0.06636 | ET        |
| cg08524525 | 0.03037 | 0.03351 | 0.02942 | 0.02787 | 0.02317 | 0.02884 | 0.02533 | 0.02272 | 0.02229 | 0.02896 | FLJ35630  |
| cg08525145 | 0.54544 | 0.31088 | 0.60711 | 0.66719 | 0.73171 | 0.1155  | 0.37893 | 0.29895 | 0.53849 | 0.09073 | RLN3R2    |
| cg08525207 | 0.04201 | 0.04589 | 0.05617 | 0.04966 | 0.04092 | 0.03923 | 0.04192 | 0.03758 | 0.03332 | 0.0385  | RPS7      |
| cg08525481 | 0.02441 | 0.02561 | 0.02373 | 0.02397 | 0.02252 | 0.02262 | 0.0245  | 0.02202 | 0.02358 | 0.01722 | OGFR      |
| cg08526867 | 0.05094 | 0.04666 | 0.05538 | 0.04599 | 0.04298 | 0.04309 | 0.04666 | 0.04834 | 0.03441 | 0.03829 | COX7C     |
| cg08527127 | 0.22399 | 0.07711 | 0.35408 | 0.32627 | 0.42261 | 0.35025 | 0.07448 | 0.05623 | 0.12383 | 0.43911 | C1orf94   |
| cg08528984 | 0.02062 | 0.01896 | 0.12147 | 0.11326 | 0.054   | 0.03155 | 0.14905 | 0.19687 | 0.01689 | 0.01856 | PRDM16    |
| cg08529259 | 0.06108 | 0.039   | 0.04179 | 0.03722 | 0.30917 | 0.03989 | 0.04115 | 0.03687 | 0.0646  | 0.02801 | GCSH      |
| cg08529529 | 0.86053 | 0.33559 | 0.83868 | 0.85359 | 0.77757 | 0.78272 | 0.84626 | 0.86825 | 0.85115 | 0.70505 | ALOX5AP   |
| cg08529852 | 0.95719 | 0.95023 | 0.9568  | 0.96079 | 0.96608 | 0.95947 | 0.85087 | 0.5146  | 0.96402 | 0.95227 | EGFL7     |
| cg08530414 | 0.48152 | 0.18906 | 0.09583 | 0.0943  | 0.02888 | 0.03368 | 0.03474 | 0.0641  | 0.03264 | 0.03605 | CD44      |
| cg08531821 | 0.02804 | 0.03115 | 0.05897 | 0.05813 | 0.03477 | 0.0287  | 0.02786 | 0.03205 | 0.02634 | 0.026   | C9orf156  |
| cg08532057 | 0.34526 | 0.68446 | 0.74197 | 0.7619  | 0.1141  | 0.06614 | 0.14856 | 0.17844 | 0.09383 | 0.27327 | NUPL1     |
| cg08535091 | 0.02095 | 0.02277 | 0.02275 | 0.02214 | 0.01707 | 0.01835 | 0.01618 | 0.0187  | 0.018   | 0.01537 | LOC283932 |
| cg08535373 | 0.09857 | 0.07992 | 0.45875 | 0.50614 | 0.25913 | 0.29063 | 0.08323 | 0.0654  | 0.0633  | 0.27582 | SLC32A1   |
| cg08536841 | 0.0962  | 0.07553 | 0.12292 | 0.09929 | 0.59422 | 0.71458 | 0.06123 | 0.05181 | 0.05259 | 0.06148 | IZUMO1    |
| cg08537652 | 0.04257 | 0.04583 | 0.04634 | 0.04298 | 0.04062 | 0.04788 | 0.04145 | 0.03859 | 0.04469 | 0.04052 | PRDM16    |
| cg08538752 | 0.56506 | 0.59273 | 0.34506 | 0.34538 | 0.62461 | 0.56852 | 0.60224 | 0.52767 | 0.50195 | 0.62927 | TPTE      |
| cg08539093 | 0.77349 | 0.52102 | 0.84903 | 0.88023 | 0.91261 | 0.87365 | 0.44528 | 0.4311  | 0.50049 | 0.51744 | OBP2B     |
| cg08539991 | 0.72273 | 0.51059 | 0.86376 | 0.92297 | 0.94636 | 0.77221 | 0.10916 | 0.11081 | 0.94142 | 0.31674 | ZBTB32    |
| cg08541219 | 0.03288 | 0.03844 | 0.03808 | 0.03025 | 0.0277  | 0.03273 | 0.03136 | 0.03022 | 0.0255  | 0.02726 | PAPSS1    |
| cg08548086 | 0.06267 | 0.04415 | 0.05367 | 0.0538  | 0.04872 | 0.05675 | 0.04659 | 0.04057 | 0.03495 | 0.03967 | HEXB      |
| cg08548888 | 0.09402 | 0.09426 | 0.225   | 0.19269 | 0.1479  | 0.45504 | 0.25037 | 0.09561 | 0.3234  | 0.07808 | MYD88     |
| cg08550026 | 0.12111 | 0.06355 | 0.06789 | 0.05988 | 0.05286 | 0.05714 | 0.04987 | 0.0581  | 0.05224 | 0.05169 | NAV2      |

|            |         |         |         |         |         |         |         |         |         |                   |
|------------|---------|---------|---------|---------|---------|---------|---------|---------|---------|-------------------|
| cg08550724 | 0.7713  | 0.6603  | 0.75361 | 0.7913  | 0.74943 | 0.79252 | 0.82196 | 0.76646 | 0.8008  | 0.81678 C6orf182  |
| cg08551088 | 0.07883 | 0.07434 | 0.06887 | 0.06846 | 0.0579  | 0.0667  | 0.0625  | 0.07075 | 0.07227 | 0.05846 C10orf119 |
| cg08551633 | 0.08785 | 0.09499 | 0.56787 | 0.60277 | 0.5827  | 0.59025 | 0.52459 | 0.31384 | 0.55374 | 0.50769 CEACAM8   |
| cg08551857 | 0.04435 | 0.03324 | 0.0419  | 0.03586 | 0.02865 | 0.03951 | 0.0382  | 0.03842 | 0.03329 | 0.03116 PAG1      |
| cg08552121 | 0.04679 | 0.04769 | 0.05568 | 0.05737 | 0.03153 | 0.0321  | 0.02833 | 0.03597 | 0.03373 | 0.03365 TMEM14B   |
| cg08552254 | 0.14848 | 0.15007 | 0.24143 | 0.19425 | 0.24088 | 0.19905 | 0.27176 | 0.2621  | 0.18728 | 0.17886 JMJD2A    |
| cg08552999 | 0.17033 | 0.07539 | 0.09901 | 0.08543 | 0.0875  | 0.08089 | 0.05803 | 0.05333 | 0.07495 | 0.07119 ZNF644    |
| cg08553339 | 0.0295  | 0.02839 | 0.02836 | 0.027   | 0.02452 | 0.02432 | 0.02819 | 0.03036 | 0.0215  | 0.02352 CRSP7     |
| cg08554114 | 0.79326 | 0.35765 | 0.75768 | 0.78966 | 0.75967 | 0.75013 | 0.80767 | 0.8223  | 0.60445 | 0.36918 ERO1L     |
| cg08554462 | 0.07935 | 0.07766 | 0.08369 | 0.09156 | 0.08611 | 0.07795 | 0.07479 | 0.07104 | 0.08004 | 0.07263 BCL2      |
| cg08555612 | 0.19839 | 0.04251 | 0.41327 | 0.56044 | 0.26343 | 0.04552 | 0.09363 | 0.04694 | 0.1202  | 0.13119 PROK2     |
| cg08555657 | 0.2067  | 0.12078 | 0.48634 | 0.48358 | 0.54978 | 0.50889 | 0.1826  | 0.17252 | 0.11259 | 0.11211 SPRR2E    |
| cg08555772 | 0.05364 | 0.05603 | 0.04847 | 0.05697 | 0.03896 | 0.04979 | 0.05422 | 0.05049 | 0.08163 | 0.07892 ARMC4     |
| cg08555924 | 0.78922 | 0.80291 | 0.74759 | 0.77576 | 0.69896 | 0.73884 | 0.70802 | 0.78488 | 0.80614 | 0.75021 DSG3      |
| cg08557686 | 0.12731 | 0.0945  | 0.12057 | 0.13048 | 0.09046 | 0.10811 | 0.124   | 0.10667 | 0.11831 | 0.06677 RTN4R     |
| cg08558340 | 0.06274 | 0.0577  | 0.36933 | 0.59323 | 0.06323 | 0.05916 | 0.37758 | 0.20599 | 0.04016 | 0.03443 ARS2      |
| cg08558873 | 0.05313 | 0.02762 | 0.44313 | 0.57891 | 0.03548 | 0.02915 | 0.02492 | 0.02651 | 0.02344 | 0.0286 ZNF214     |
| cg08559914 | 0.61167 | 0.38122 | 0.62801 | 0.68054 | 0.57715 | 0.73331 | 0.38476 | 0.54312 | 0.625   | 0.70925 ACE2      |
| cg08560942 | 0.02915 | 0.03156 | 0.04664 | 0.03783 | 0.61397 | 0.06048 | 0.02885 | 0.03076 | 0.02774 | 0.02436 ACHE      |
| cg08563994 | 0.02177 | 0.02734 | 0.0262  | 0.02614 | 0.02591 | 0.03014 | 0.02199 | 0.0208  | 0.0211  | 0.02069 IHPK1     |
| cg08567916 | 0.02568 | 0.02513 | 0.02938 | 0.02447 | 0.02306 | 0.0248  | 0.02303 | 0.02606 | 0.01941 | 0.01734 SPRYD3    |
| cg08568512 | 0.02354 | 0.02324 | 0.02419 | 0.02445 | 0.01912 | 0.02114 | 0.01826 | 0.01802 | 0.01707 | 0.01922 FHOD3     |
| cg08568987 | 0.03396 | 0.03346 | 0.0383  | 0.0299  | 0.02724 | 0.03079 | 0.02533 | 0.02571 | 0.02848 | 0.02746 U2AF2     |
| cg08569678 | 0.12847 | 0.07578 | 0.0629  | 0.07183 | 0.04477 | 0.04338 | 0.05041 | 0.05977 | 0.05278 | 0.05903 LY6K      |
| cg08570275 | 0.02956 | 0.04152 | 0.03403 | 0.02732 | 0.13058 | 0.02871 | 0.02675 | 0.02845 | 0.02934 | 0.02459 P2RY1     |
| cg08570521 | 0.06045 | 0.06061 | 0.0768  | 0.05777 | 0.05112 | 0.05166 | 0.0446  | 0.04877 | 0.0712  | 0.05148 TLL1      |
| cg08571203 | 0.02555 | 0.02646 | 0.03845 | 0.03355 | 0.04296 | 0.02265 | 0.02895 | 0.02536 | 0.0244  | 0.02246 FOXJ2     |
| cg08572611 | 0.04156 | 0.03087 | 0.69492 | 0.79237 | 0.21896 | 0.26439 | 0.09473 | 0.15826 | 0.03171 | 0.02234 ACTL6B    |
| cg08573687 | 0.89641 | 0.53663 | 0.96206 | 0.97021 | 0.89503 | 0.80013 | 0.13482 | 0.10564 | 0.71961 | 0.49291 TH        |
| cg08573893 | 0.06188 | 0.05202 | 0.17594 | 0.12313 | 0.07501 | 0.06425 | 0.05103 | 0.05313 | 0.06094 | 0.06782 C8orf32   |
| cg08574156 | 0.03681 | 0.03917 | 0.03816 | 0.03914 | 0.03394 | 0.038   | 0.04464 | 0.04072 | 0.04403 | 0.03454 CAMK2N2   |
| cg08575537 | 0.45609 | 0.4883  | 0.98013 | 0.97934 | 0.98248 | 0.96674 | 0.47316 | 0.18269 | 0.78851 | 0.76921 EPO       |
| cg08575950 | 0.72697 | 0.21183 | 0.72473 | 0.77422 | 0.72514 | 0.79495 | 0.69087 | 0.62587 | 0.71483 | 0.72333 FLJ14503  |
| cg08576197 | 0.03576 | 0.03286 | 0.03459 | 0.03094 | 0.02916 | 0.03499 | 0.03214 | 0.03344 | 0.03436 | 0.03876 CCDC57    |
| cg08578023 | 0.67927 | 0.56016 | 0.46222 | 0.5039  | 0.39382 | 0.25405 | 0.57326 | 0.25684 | 0.40189 | 0.25201 CTSS      |
| cg08578305 | 0.03964 | 0.04374 | 0.04122 | 0.03626 | 0.03454 | 0.03832 | 0.0396  | 0.03957 | 0.03571 | 0.03008 KRAS      |
| cg08578641 | 0.25315 | 0.07089 | 0.05089 | 0.05133 | 0.06047 | 0.05547 | 0.04317 | 0.04491 | 0.03866 | 0.03444 DNAI1     |
| cg08578734 | 0.39315 | 0.30847 | 0.84116 | 0.87133 | 0.4341  | 0.31237 | 0.79837 | 0.84053 | 0.13188 | 0.10412 GRIA1     |
| cg08579995 | 0.78985 | 0.43486 | 0.62454 | 0.6897  | 0.7894  | 0.63467 | 0.68453 | 0.47708 | 0.69448 | 0.8073 FLJ46230   |
| cg08583049 | 0.02331 | 0.02107 | 0.32096 | 0.41148 | 0.05602 | 0.0202  | 0.24812 | 0.88603 | 0.02136 | 0.01794 FOXB1     |
| cg08584430 | 0.02659 | 0.02942 | 0.03124 | 0.02878 | 0.03005 | 0.03401 | 0.01972 | 0.02405 | 0.02262 | 0.02583 IHPK1     |



|            |         |         |         |         |         |         |         |         |         |         |          |
|------------|---------|---------|---------|---------|---------|---------|---------|---------|---------|---------|----------|
| cg08585897 | 0.23857 | 0.06    | 0.16837 | 0.25606 | 0.23152 | 0.24724 | 0.24153 | 0.1617  | 0.32934 | 0.33054 | TERF2IP  |
| cg08586737 | 0.87795 | 0.73216 | 0.68272 | 0.6967  | 0.69925 | 0.68118 | 0.51882 | 0.26995 | 0.52972 | 0.39809 | GCC1     |
| cg08587542 | 0.07805 | 0.0553  | 0.05895 | 0.0694  | 0.0313  | 0.03984 | 0.05186 | 0.04286 | 0.15559 | 0.04099 | KIAA0141 |
| cg08587820 | 0.05839 | 0.04766 | 0.04589 | 0.05199 | 0.06695 | 0.0608  | 0.0414  | 0.03557 | 0.04241 | 0.04511 | BHLHB2   |
| cg08587864 | 0.58527 | 0.30823 | 0.42691 | 0.4638  | 0.65256 | 0.57656 | 0.08729 | 0.09483 | 0.24738 | 0.21254 | PIGC     |
| cg08590939 | 0.06664 | 0.03005 | 0.03232 | 0.02992 | 0.02721 | 0.03305 | 0.02681 | 0.02543 | 0.03197 | 0.02433 | OXCT1    |
| cg08591489 | 0.10282 | 0.12179 | 0.17891 | 0.14549 | 0.15897 | 0.14918 | 0.10237 | 0.09815 | 0.10677 | 0.12987 | CXorf56  |
| cg08592230 | 0.02635 | 0.02994 | 0.03576 | 0.03337 | 0.03213 | 0.03722 | 0.02878 | 0.03058 | 0.02628 | 0.0266  | GPSM3    |
| cg08592761 | 0.03869 | 0.03877 | 0.04226 | 0.04098 | 0.03449 | 0.04087 | 0.03907 | 0.04072 | 0.03351 | 0.03674 | LARP6    |
| cg08594695 | 0.81765 | 0.24761 | 0.67224 | 0.78787 | 0.75884 | 0.83067 | 0.14156 | 0.5388  | 0.33869 | 0.10608 | AQP4     |
| cg08595011 | 0.07013 | 0.06869 | 0.07278 | 0.06862 | 0.04474 | 0.0652  | 0.07461 | 0.06931 | 0.06233 | 0.06272 | C3orf39  |
| cg08596000 | 0.63141 | 0.19706 | 0.09052 | 0.11905 | 0.26228 | 0.04754 | 0.08348 | 0.08262 | 0.0879  | 0.04219 | PDGFD    |
| cg08596544 | 0.04866 | 0.05121 | 0.05251 | 0.04387 | 0.05228 | 0.0576  | 0.03854 | 0.03902 | 0.04758 | 0.04837 | SLC33A1  |
| cg08596642 | 0.05859 | 0.03889 | 0.06897 | 0.22688 | 0.07331 | 0.03917 | 0.03573 | 0.03677 | 0.04966 | 0.03028 | DHX9     |
| cg08598221 | 0.88536 | 0.71838 | 0.7949  | 0.68182 | 0.96857 | 0.94469 | 0.85835 | 0.80254 | 0.85706 | 0.69918 | SNTB1    |
| cg08602689 | 0.02581 | 0.03287 | 0.02772 | 0.02728 | 0.02329 | 0.03832 | 0.02413 | 0.02234 | 0.02083 | 0.02567 | KDELCL1  |
| cg08603768 | 0.38771 | 0.1381  | 0.35589 | 0.49304 | 0.50666 | 0.66184 | 0.33855 | 0.17812 | 0.2303  | 0.08955 | WNT8A    |
| cg08604885 | 0.03853 | 0.03954 | 0.06091 | 0.05037 | 0.06239 | 0.04983 | 0.04191 | 0.03414 | 0.03709 | 0.02781 | TRIM4    |
| cg08605641 | 0.04123 | 0.03995 | 0.04856 | 0.04012 | 0.03954 | 0.0391  | 0.03932 | 0.04117 | 0.03594 | 0.03855 | PLEKHF2  |
| cg08606356 | 0.08097 | 0.08159 | 0.07099 | 0.07742 | 0.06588 | 0.07144 | 0.0793  | 0.07009 | 0.07355 | 0.07368 | CD44     |
| cg08607082 | 0.35356 | 0.06349 | 0.09211 | 0.10808 | 0.52682 | 0.30576 | 0.46559 | 0.09881 | 0.02445 | 0.02602 | ICAM1    |
| cg08607500 | 0.06788 | 0.06837 | 0.12195 | 0.09928 | 0.08482 | 0.07348 | 0.08246 | 0.07245 | 0.08491 | 0.09733 | CBWD1    |
| cg08608800 | 0.0345  | 0.04104 | 0.05174 | 0.05071 | 0.04636 | 0.05849 | 0.05725 | 0.04187 | 0.02852 | 0.03109 | KIAA0853 |
| cg08610361 | 0.0464  | 0.04153 | 0.04098 | 0.03837 | 0.03132 | 0.0369  | 0.0369  | 0.03071 | 0.02994 | 0.0284  | E2F7     |
| cg08611205 | 0.81949 | 0.84006 | 0.82165 | 0.83142 | 0.76583 | 0.80295 | 0.84175 | 0.84782 | 0.86295 | 0.8353  | LSM3     |
| cg08611714 | 0.38734 | 0.15487 | 0.49607 | 0.56451 | 0.86725 | 0.84768 | 0.05323 | 0.06146 | 0.4275  | 0.08416 | KRTHA2   |
| cg08612037 | 0.05652 | 0.05016 | 0.05924 | 0.05424 | 0.04708 | 0.05163 | 0.05175 | 0.05636 | 0.05465 | 0.04808 | BTBD11   |
| cg08612601 | 0.03119 | 0.03362 | 0.03203 | 0.03207 | 0.02122 | 0.02309 | 0.03056 | 0.02741 | 0.02446 | 0.02716 | ZBTB12   |
| cg08612871 | 0.70298 | 0.22466 | 0.41492 | 0.41107 | 0.65004 | 0.6595  | 0.09427 | 0.10422 | 0.12668 | 0.48791 | GJB5     |
| cg08613513 | 0.04248 | 0.04298 | 0.04868 | 0.04711 | 0.0453  | 0.04467 | 0.03524 | 0.03422 | 0.04024 | 0.03912 | ORC1L    |
| cg08614201 | 0.88015 | 0.4597  | 0.9094  | 0.92786 | 0.88553 | 0.87092 | 0.92025 | 0.8974  | 0.87655 | 0.74649 | CD160    |
| cg08614481 | 0.20047 | 0.08548 | 0.89917 | 0.88261 | 0.87131 | 0.83544 | 0.1211  | 0.09539 | 0.06789 | 0.05362 | HTR1B    |
| cg08614528 | 0.05634 | 0.05602 | 0.40335 | 0.47553 | 0.28656 | 0.35529 | 0.11727 | 0.05382 | 0.09048 | 0.03799 | CRELD1   |
| cg08615333 | 0.84882 | 0.71956 | 0.87897 | 0.88202 | 0.82223 | 0.79768 | 0.71859 | 0.338   | 0.88046 | 0.85337 | TGFB3    |
| cg08617916 | 0.03973 | 0.04318 | 0.04012 | 0.04463 | 0.02971 | 0.03941 | 0.03598 | 0.03771 | 0.03812 | 0.0358  | RASSF5   |
| cg08618113 | 0.07359 | 0.07345 | 0.07582 | 0.06346 | 0.05689 | 0.05579 | 0.06033 | 0.05989 | 0.06663 | 0.05522 | CHP      |
| cg08620270 | 0.02961 | 0.02997 | 0.03112 | 0.02514 | 0.02922 | 0.02667 | 0.02404 | 0.0253  | 0.02429 | 0.01887 | NUP153   |
| cg08620470 | 0.87927 | 0.91349 | 0.90789 | 0.91922 | 0.87675 | 0.90668 | 0.90587 | 0.8834  | 0.90875 | 0.89138 | SLC25A16 |
| cg08623383 | 0.52464 | 0.21992 | 0.3857  | 0.34954 | 0.82205 | 0.77127 | 0.46074 | 0.22546 | 0.39098 | 0.3024  | C1orf38  |
| cg08623787 | 0.27292 | 0.17833 | 0.45173 | 0.79106 | 0.81456 | 0.58824 | 0.431   | 0.42795 | 0.11418 | 0.07291 | RXRG     |
| cg08623947 | 0.05105 | 0.03263 | 0.59361 | 0.65202 | 0.2703  | 0.54151 | 0.08975 | 0.04764 | 0.50532 | 0.45727 | HCK      |

|            |         |         |         |         |         |         |         |         |         |         |           |
|------------|---------|---------|---------|---------|---------|---------|---------|---------|---------|---------|-----------|
| cg08624068 | 0.8246  | 0.68424 | 0.76701 | 0.82885 | 0.77436 | 0.75835 | 0.79277 | 0.75887 | 0.82015 | 0.77048 | STARD6    |
| cg08624249 | 0.84297 | 0.67401 | 0.86179 | 0.86316 | 0.86928 | 0.85684 | 0.77228 | 0.77357 | 0.8767  | 0.85005 | KIAA0889  |
| cg08625022 | 0.06418 | 0.05681 | 0.05862 | 0.05747 | 0.09806 | 0.08316 | 0.06646 | 0.05636 | 0.0462  | 0.04298 | OSTF1     |
| cg08625335 | 0.03229 | 0.03575 | 0.02968 | 0.03166 | 0.03197 | 0.03697 | 0.03449 | 0.03284 | 0.02916 | 0.03109 | RPS29     |
| cg08626653 | 0.90507 | 0.81264 | 0.91787 | 0.93773 | 0.9598  | 0.88254 | 0.9023  | 0.77813 | 0.92308 | 0.69452 | FLJ37538  |
| cg08626943 | 0.04778 | 0.04255 | 0.04685 | 0.04362 | 0.02995 | 0.04224 | 0.04478 | 0.04109 | 0.03909 | 0.04006 | IPO7      |
| cg08629913 | 0.02414 | 0.02841 | 0.02938 | 0.03007 | 0.02708 | 0.02769 | 0.02762 | 0.02962 | 0.02948 | 0.02281 | IGFBP6    |
| cg08631151 | 0.03656 | 0.03779 | 0.05977 | 0.0843  | 0.04539 | 0.03457 | 0.03159 | 0.02838 | 0.12311 | 0.39932 | RPRML     |
| cg08631437 | 0.19439 | 0.20649 | 0.17551 | 0.21512 | 0.1404  | 0.16698 | 0.13258 | 0.16506 | 0.19593 | 0.16949 |           |
| cg08632701 | 0.81371 | 0.77956 | 0.85195 | 0.87481 | 0.81731 | 0.86643 | 0.85779 | 0.88556 | 0.49259 | 0.24401 | SETD4     |
| cg08633154 | 0.02288 | 0.02231 | 0.02636 | 0.02279 | 0.01696 | 0.02081 | 0.02009 | 0.02051 | 0.02054 | 0.01597 | PCGF5     |
| cg08634024 | 0.07536 | 0.07703 | 0.37171 | 0.51308 | 0.80016 | 0.85845 | 0.06829 | 0.06318 | 0.15996 | 0.04308 | OR2F1     |
| cg08634464 | 0.07165 | 0.07498 | 0.29074 | 0.28989 | 0.37646 | 0.34382 | 0.31893 | 0.28711 | 0.27832 | 0.28275 | LOC126295 |
| cg08634539 | 0.04686 | 0.0466  | 0.04277 | 0.03948 | 0.03567 | 0.04685 | 0.03866 | 0.0386  | 0.03634 | 0.03619 | DHRS7     |
| cg08635242 | 0.0771  | 0.09019 | 0.08061 | 0.07722 | 0.05244 | 0.06495 | 0.06595 | 0.07389 | 0.07158 | 0.05722 | CPD       |
| cg08635249 | 0.02979 | 0.03665 | 0.03346 | 0.03504 | 0.03668 | 0.04314 | 0.02939 | 0.0294  | 0.02819 | 0.02302 | RBM28     |
| cg08636224 | 0.81932 | 0.87819 | 0.88637 | 0.90028 | 0.84466 | 0.87485 | 0.86966 | 0.85979 | 0.8838  | 0.6735  | FKBP5     |
| cg08637669 | 0.69508 | 0.68913 | 0.63697 | 0.66438 | 0.59326 | 0.67545 | 0.61966 | 0.65353 | 0.68552 | 0.68839 | C9orf102  |
| cg08638395 | 0.0287  | 0.02729 | 0.03253 | 0.02986 | 0.02255 | 0.02944 | 0.02642 | 0.02814 | 0.02569 | 0.0269  | XPR1      |
| cg08640498 | 0.52976 | 0.36516 | 0.74745 | 0.88887 | 0.40558 | 0.18274 | 0.52314 | 0.13575 | 0.2682  | 0.17849 | INHBC     |
| cg08642068 | 0.81048 | 0.80056 | 0.8639  | 0.8868  | 0.83433 | 0.86367 | 0.83941 | 0.65248 | 0.77858 | 0.6846  | SPAG4L    |
| cg08643928 | 0.02193 | 0.02306 | 0.03161 | 0.02737 | 0.02355 | 0.02172 | 0.01894 | 0.02146 | 0.02065 | 0.02133 | RALGPS2   |
| cg08646988 | 0.01771 | 0.01971 | 0.02232 | 0.01712 | 0.0127  | 0.01586 | 0.01572 | 0.015   | 0.0144  | 0.01432 | GFPT1     |
| cg08647446 | 0.42139 | 0.18615 | 0.70987 | 0.76304 | 0.28687 | 0.3477  | 0.30599 | 0.22741 | 0.26937 | 0.1114  | RASSF6    |
| cg08647727 | 0.16517 | 0.0588  | 0.09225 | 0.11599 | 0.05325 | 0.06278 | 0.05418 | 0.06871 | 0.06857 | 0.05622 | MGC50559  |
| cg08649013 | 0.09686 | 0.08512 | 0.19608 | 0.49131 | 0.29747 | 0.25824 | 0.05145 | 0.09469 | 0.2985  | 0.15636 | SLC2A9    |
| cg08651674 | 0.0543  | 0.05488 | 0.05892 | 0.05356 | 0.02726 | 0.0327  | 0.04469 | 0.04394 | 0.05775 | 0.04209 | RREB1     |
| cg08652404 | 0.04123 | 0.04434 | 0.04207 | 0.03856 | 0.03617 | 0.04209 | 0.03563 | 0.03019 | 0.03577 | 0.03316 | ZNF394    |
| cg08653874 | 0.04335 | 0.04128 | 0.03539 | 0.03098 | 0.05772 | 0.07089 | 0.04295 | 0.04446 | 0.03706 | 0.05501 | SFRS5     |
| cg08654334 | 0.64091 | 0.6736  | 0.57296 | 0.70535 | 0.55988 | 0.65854 | 0.57143 | 0.60953 | 0.22542 | 0.28753 | DIRC1     |
| cg08654655 | 0.07419 | 0.04621 | 0.4662  | 0.6411  | 0.107   | 0.04888 | 0.04338 | 0.03274 | 0.05074 | 0.23131 | IGSF4B    |
| cg08655844 | 0.62443 | 0.3599  | 0.40207 | 0.37187 | 0.25403 | 0.07642 | 0.11322 | 0.13413 | 0.30577 | 0.04542 | ECOP      |
| cg08656294 | 0.03547 | 0.03189 | 0.02944 | 0.03175 | 0.03152 | 0.03263 | 0.03418 | 0.02986 | 0.02609 | 0.0303  | CD68      |
| cg08657449 | 0.47716 | 0.26067 | 0.78642 | 0.8152  | 0.73445 | 0.86492 | 0.70905 | 0.79697 | 0.81279 | 0.57033 | TM7SF4    |
| cg08658594 | 0.85221 | 0.67969 | 0.79091 | 0.81888 | 0.68103 | 0.83878 | 0.80519 | 0.81233 | 0.84633 | 0.80157 | TAS2R13   |
| cg08659539 | 0.88589 | 0.87084 | 0.90031 | 0.88568 | 0.84013 | 0.86771 | 0.85899 | 0.8884  | 0.84112 | 0.80725 | ZFYVE19   |
| cg08659707 | 0.77988 | 0.73269 | 0.76631 | 0.80189 | 0.74104 | 0.78922 | 0.71359 | 0.71791 | 0.80918 | 0.74768 | PUM2      |
| cg08660285 | 0.1659  | 0.15828 | 0.17416 | 0.15269 | 0.15851 | 0.17069 | 0.111   | 0.1054  | 0.15029 | 0.18706 | WDR78     |
| cg08661003 | 0.88087 | 0.56271 | 0.91487 | 0.91869 | 0.8909  | 0.89234 | 0.91218 | 0.91083 | 0.91645 | 0.90705 | C20orf116 |
| cg08661227 | 0.01512 | 0.01823 | 0.02284 | 0.02508 | 0.01542 | 0.01738 | 0.01642 | 0.01543 | 0.01679 | 0.01478 | TAGLN2    |
| cg08661290 | 0.05365 | 0.04778 | 0.07607 | 0.06386 | 0.06793 | 0.06133 | 0.04292 | 0.04068 | 0.06306 | 0.04689 | PHF13     |

|            |         |         |         |         |         |         |         |         |         |                    |
|------------|---------|---------|---------|---------|---------|---------|---------|---------|---------|--------------------|
| cg08662074 | 0.14694 | 0.14612 | 0.20626 | 0.17183 | 0.37978 | 0.21261 | 0.40438 | 0.2396  | 0.15796 | 0.11706 PAPP       |
| cg08663969 | 0.87276 | 0.86436 | 0.81999 | 0.85998 | 0.75944 | 0.86063 | 0.5579  | 0.73152 | 0.87023 | 0.8517 ABCG1       |
| cg08665772 | 0.09709 | 0.07749 | 0.40916 | 0.58934 | 0.28943 | 0.08828 | 0.14121 | 0.19432 | 0.15109 | 0.39334 KCNJ9      |
| cg08666623 | 0.0619  | 0.04612 | 0.53551 | 0.51336 | 0.93345 | 0.83579 | 0.53706 | 0.10315 | 0.30885 | 0.03464 ST6GALNAC2 |
| cg08667721 | 0.14874 | 0.13797 | 0.15952 | 0.17735 | 0.09745 | 0.10688 | 0.15505 | 0.13308 | 0.1361  | 0.1311 RAB11B      |
| cg08668790 | 0.51414 | 0.53937 | 0.81037 | 0.83568 | 0.8433  | 0.80821 | 0.94422 | 0.94276 | 0.95603 | 0.95504 ZNF154     |
| cg08670517 | 0.19696 | 0.44134 | 0.14182 | 0.09127 | 0.46682 | 0.51344 | 0.15865 | 0.08493 | 0.0705  | 0.06704 UBQLN1     |
| cg08670691 | 0.53648 | 0.11776 | 0.43837 | 0.64024 | 0.52463 | 0.55463 | 0.14841 | 0.09879 | 0.11685 | 0.1074 CCDC27      |
| cg08673615 | 0.04341 | 0.04839 | 0.04465 | 0.04729 | 0.03221 | 0.04286 | 0.04537 | 0.03982 | 0.04214 | 0.03735 HMGCL      |
| cg08674093 | 0.07345 | 0.06686 | 0.06911 | 0.06547 | 0.05763 | 0.06585 | 0.06372 | 0.06841 | 0.05879 | 0.06079 DCUN1D1    |
| cg08675585 | 0.57247 | 0.57083 | 0.5561  | 0.58001 | 0.6198  | 0.69518 | 0.2089  | 0.22538 | 0.74417 | 0.60219 C14orf166B |
| cg08675664 | 0.05944 | 0.0651  | 0.05894 | 0.05876 | 0.04276 | 0.05466 | 0.06628 | 0.05629 | 0.06342 | 0.05663 ALDH7A1    |
| cg08678755 | 0.8032  | 0.62467 | 0.58904 | 0.68634 | 0.62945 | 0.76375 | 0.30719 | 0.34313 | 0.15212 | 0.12276 ENPP3      |
| cg08679985 | 0.85855 | 0.23222 | 0.87422 | 0.88816 | 0.62213 | 0.70563 | 0.38337 | 0.16306 | 0.8357  | 0.77136 KLF17      |
| cg08680085 | 0.03663 | 0.03263 | 0.04057 | 0.0383  | 0.05378 | 0.03418 | 0.53275 | 0.51238 | 0.03789 | 0.03078 MASK       |
| cg08680102 | 0.02087 | 0.02377 | 0.02488 | 0.02334 | 0.01962 | 0.0223  | 0.02044 | 0.02779 | 0.02244 | 0.02003 GRPEL2     |
| cg08680731 | 0.06657 | 0.065   | 0.09718 | 0.09232 | 0.12542 | 0.10578 | 0.09742 | 0.0753  | 0.0626  | 0.07446 VPS41      |
| cg08682341 | 0.12055 | 0.13448 | 0.14749 | 0.08941 | 0.1598  | 0.10023 | 0.11644 | 0.11477 | 0.11677 | 0.08838 INPP5A     |
| cg08684473 | 0.75997 | 0.55629 | 0.65249 | 0.75479 | 0.35928 | 0.29257 | 0.03851 | 0.10282 | 0.04407 | 0.05608 LILRB5     |
| cg08687163 | 0.90878 | 0.70131 | 0.92119 | 0.92144 | 0.94993 | 0.94016 | 0.91136 | 0.92743 | 0.93287 | 0.90021 MST1R      |
| cg08687825 | 0.21235 | 0.17152 | 0.05178 | 0.04858 | 0.8663  | 0.57362 | 0.04963 | 0.05143 | 0.04761 | 0.03771 PRSS35     |
| cg08687901 | 0.09497 | 0.09429 | 0.06835 | 0.03848 | 0.08473 | 0.05864 | 0.054   | 0.12731 | 0.05927 | 0.05504 HIST1H4E   |
| cg08687958 | 0.05743 | 0.03317 | 0.07431 | 0.03939 | 0.28046 | 0.0297  | 0.05992 | 0.02893 | 0.02747 | 0.02193 PDZD8      |
| cg08690031 | 0.06484 | 0.0646  | 0.078   | 0.06108 | 0.07812 | 0.05687 | 0.04604 | 0.05229 | 0.06888 | 0.06086 CDCA7      |
| cg08690721 | 0.03965 | 0.04511 | 0.09532 | 0.14776 | 0.06214 | 0.04924 | 0.09278 | 0.05451 | 0.04737 | 0.04116 C11orf17   |
| cg08693206 | 0.03365 | 0.03403 | 0.04008 | 0.03394 | 0.03031 | 0.03275 | 0.02991 | 0.03161 | 0.02749 | 0.02639 AP1B1      |
| cg08693325 | 0.41965 | 0.59613 | 0.43656 | 0.64418 | 0.77966 | 0.86422 | 0.37936 | 0.74791 | 0.28776 | 0.2346 LUZP4       |
| cg08694544 | 0.05227 | 0.03164 | 0.94191 | 0.94284 | 0.34911 | 0.18825 | 0.05951 | 0.02606 | 0.03454 | 0.02146 RTBDN      |
| cg08695223 | 0.02552 | 0.02675 | 0.02633 | 0.02934 | 0.02071 | 0.02404 | 0.56704 | 0.36888 | 0.023   | 0.01912 SLC9A6     |
| cg08695830 | 0.24699 | 0.05539 | 0.19706 | 0.12917 | 0.03992 | 0.03613 | 0.04958 | 0.04103 | 0.03291 | 0.03024 CYLN2      |
| cg08696192 | 0.8596  | 0.83773 | 0.85745 | 0.88169 | 0.90953 | 0.86611 | 0.86878 | 0.86448 | 0.86751 | 0.83808 TNS4       |
| cg08696890 | 0.03244 | 0.03867 | 0.03555 | 0.03195 | 0.06521 | 0.02883 | 0.02973 | 0.02941 | 0.02835 | 0.0273 CPNE2       |
| cg08697242 | 0.83033 | 0.82055 | 0.84973 | 0.88125 | 0.7712  | 0.79307 | 0.80427 | 0.7901  | 0.78248 | 0.75463 CA14       |
| cg08697285 | 0.09979 | 0.10134 | 0.10354 | 0.11307 | 0.08014 | 0.09959 | 0.08355 | 0.07352 | 0.07924 | 0.07992 MYCBP2     |
| cg08697665 | 0.49055 | 0.20493 | 0.70792 | 0.73123 | 0.92864 | 0.90529 | 0.78324 | 0.77416 | 0.69569 | 0.4859 RARRES1     |
| cg08699435 | 0.11774 | 0.04269 | 0.42785 | 0.45486 | 0.20997 | 0.12115 | 0.18632 | 0.03989 | 0.09041 | 0.03537 NAT5       |
| cg08700306 | 0.08374 | 0.05112 | 0.11502 | 0.04045 | 0.03238 | 0.03294 | 0.0646  | 0.10344 | 0.86755 | 0.46336 LRP3       |
| cg08700651 | 0.2404  | 0.13072 | 0.56231 | 0.66181 | 0.6873  | 0.59998 | 0.87762 | 0.68697 | 0.92439 | 0.91556 IL28RA     |
| cg08701609 | 0.05105 | 0.05341 | 0.05395 | 0.05448 | 0.03822 | 0.046   | 0.0426  | 0.04524 | 0.04647 | 0.03613 DONSON     |
| cg08703595 | 0.05863 | 0.05711 | 0.05686 | 0.05603 | 0.08245 | 0.06684 | 0.07522 | 0.05738 | 0.04192 | 0.05258 FLJ22313   |
| cg08703971 | 0.05263 | 0.0457  | 0.08199 | 0.06825 | 0.0474  | 0.06442 | 0.05034 | 0.0497  | 0.05395 | 0.04676 SGPP1      |

|            |         |         |         |         |         |         |         |         |         |                  |
|------------|---------|---------|---------|---------|---------|---------|---------|---------|---------|------------------|
| cg08704509 | 0.08678 | 0.06533 | 0.08496 | 0.20858 | 0.16272 | 0.05396 | 0.11608 | 0.07259 | 0.05016 | 0.03557 GRAMD3   |
| cg08704606 | 0.6673  | 0.54228 | 0.67172 | 0.74786 | 0.58117 | 0.71652 | 0.43859 | 0.71597 | 0.74864 | 0.71364 MRC1     |
| cg08704884 | 0.04625 | 0.04617 | 0.06013 | 0.05445 | 0.03429 | 0.05729 | 0.04963 | 0.0539  | 0.04326 | 0.04073 UBE2M    |
| cg08705994 | 0.97092 | 0.97041 | 0.95121 | 0.95736 | 0.92709 | 0.93834 | 0.95372 | 0.95914 | 0.96338 | 0.96015 RUNX3    |
| cg08706258 | 0.02434 | 0.02186 | 0.02086 | 0.0159  | 0.02167 | 0.02142 | 0.01866 | 0.02343 | 0.01938 | 0.01928 WSB1     |
| cg08707063 | 0.10696 | 0.09638 | 0.13527 | 0.1108  | 0.11846 | 0.12415 | 0.09316 | 0.08647 | 0.10682 | 0.12616 FUBP1    |
| cg08707078 | 0.74066 | 0.66223 | 0.23629 | 0.25093 | 0.46548 | 0.60596 | 0.10302 | 0.08884 | 0.5778  | 0.22172 MGC72075 |
| cg08707819 | 0.31542 | 0.29272 | 0.28114 | 0.2819  | 0.36877 | 0.3685  | 0.29026 | 0.28352 | 0.24081 | 0.28998 RCOR1    |
| cg08708323 | 0.04886 | 0.0453  | 0.04815 | 0.04689 | 0.04691 | 0.03485 | 0.04398 | 0.04363 | 0.03246 | 0.03487 C16orf34 |
| cg08709276 | 0.84581 | 0.87131 | 0.88424 | 0.89407 | 0.89157 | 0.85617 | 0.65752 | 0.86313 | 0.73418 | 0.83696 APOBEC2  |
| cg08709385 | 0.93776 | 0.72357 | 0.94049 | 0.94774 | 0.931   | 0.92656 | 0.90534 | 0.90352 | 0.92952 | 0.93592          |
| cg08711674 | 0.35432 | 0.20474 | 0.6172  | 0.7764  | 0.88618 | 0.74758 | 0.56818 | 0.3749  | 0.90092 | 0.77224 AKT1S1   |
| cg08711724 | 0.05239 | 0.06083 | 0.06245 | 0.05106 | 0.0599  | 0.05873 | 0.05503 | 0.04944 | 0.03899 | 0.05278 NOC3L    |
| cg08713365 | 0.06904 | 0.06695 | 0.03922 | 0.03979 | 0.13624 | 0.05872 | 0.06249 | 0.04611 | 0.03373 | 0.02894 C20orf98 |
| cg08715135 | 0.02386 | 0.03196 | 0.02987 | 0.02845 | 0.01976 | 0.02098 | 0.02472 | 0.02305 | 0.02148 | 0.0207 TRIB1     |
| cg08715837 | 0.10693 | 0.064   | 0.22293 | 0.06984 | 0.89384 | 0.96561 | 0.64753 | 0.6658  | 0.063   | 0.04663 TUBA8    |
| cg08717396 | 0.05036 | 0.05468 | 0.05528 | 0.05531 | 0.04752 | 0.06258 | 0.04943 | 0.05086 | 0.04936 | 0.0522 HIST1H2AG |
| cg08718071 | 0.05319 | 0.04813 | 0.06233 | 0.05367 | 0.0408  | 0.04452 | 0.05454 | 0.05265 | 0.06561 | 0.05681 HDCC3    |
| cg08719081 | 0.90787 | 0.78233 | 0.90344 | 0.93269 | 0.94902 | 0.93386 | 0.87814 | 0.88608 | 0.91638 | 0.86717 ALX3     |
| cg08719486 | 0.13885 | 0.10669 | 0.65281 | 0.68744 | 0.61971 | 0.57016 | 0.53348 | 0.43739 | 0.77797 | 0.76627 DAPK1    |
| cg08721347 | 0.03493 | 0.03592 | 0.04644 | 0.03687 | 0.03941 | 0.0374  | 0.02743 | 0.02538 | 0.03337 | 0.04013 ALG14    |
| cg08722104 | 0.0358  | 0.03105 | 0.03695 | 0.02959 | 0.05592 | 0.04855 | 0.0561  | 0.04081 | 0.02964 | 0.03258 PSMC3    |
| cg08722122 | 0.96447 | 0.73238 | 0.93321 | 0.95868 | 0.96215 | 0.95021 | 0.41057 | 0.56169 | 0.9654  | 0.94778 FGFR1    |
| cg08722720 | 0.08407 | 0.05313 | 0.0657  | 0.05526 | 0.05849 | 0.05029 | 0.07214 | 0.04851 | 0.06088 | 0.06127 AVEN     |
| cg08723608 | 0.76668 | 0.70787 | 0.8899  | 0.89936 | 0.92518 | 0.87879 | 0.86626 | 0.71323 | 0.8328  | 0.8776 FLJ37538  |
| cg08724474 | 0.06249 | 0.04664 | 0.04658 | 0.03976 | 0.03385 | 0.03833 | 0.04285 | 0.04576 | 0.05518 | 0.03776 SLC36A1  |
| cg08724517 | 0.57153 | 0.23424 | 0.30913 | 0.27579 | 0.18301 | 0.14766 | 0.08797 | 0.07665 | 0.10104 | 0.14203 FLJ21159 |
| cg08724563 | 0.04966 | 0.05614 | 0.10356 | 0.21537 | 0.04674 | 0.05811 | 0.0521  | 0.05458 | 0.05284 | 0.04858 RAX      |
| cg08724636 | 0.02406 | 0.02766 | 0.02931 | 0.02635 | 0.0248  | 0.02424 | 0.02955 | 0.02646 | 0.02015 | 0.0204 RALA      |
| cg08725962 | 0.01926 | 0.02086 | 0.6367  | 0.61083 | 0.76907 | 0.94037 | 0.01948 | 0.01719 | 0.03109 | 0.01505 ARL10    |
| cg08727202 | 0.79325 | 0.53366 | 0.65548 | 0.6502  | 0.95794 | 0.79485 | 0.73859 | 0.44804 | 0.90857 | 0.57049 MPST     |
| cg08728865 | 0.55983 | 0.55734 | 0.74901 | 0.83625 | 0.87955 | 0.88423 | 0.09917 | 0.49649 | 0.47846 | 0.42045 NALP7    |
| cg08729012 | 0.13152 | 0.132   | 0.13658 | 0.13062 | 0.24724 | 0.15922 | 0.11519 | 0.09659 | 0.11973 | 0.1284 CMTM6     |
| cg08731300 | 0.03754 | 0.03872 | 0.0519  | 0.0556  | 0.03635 | 0.03459 | 0.03227 | 0.03134 | 0.03251 | 0.02759 FZD8     |
| cg08733315 | 0.02586 | 0.02779 | 0.02709 | 0.02384 | 0.01872 | 0.02065 | 0.02274 | 0.02344 | 0.02162 | 0.023 BMF        |
| cg08733774 | 0.39913 | 0.09063 | 0.47148 | 0.22364 | 0.0607  | 0.04346 | 0.19318 | 0.06056 | 0.08906 | 0.0572 RANBP2    |
| cg08735298 | 0.03574 | 0.04913 | 0.05657 | 0.04743 | 0.04596 | 0.0468  | 0.04267 | 0.04225 | 0.04025 | 0.04336 C1orf122 |
| cg08736146 | 0.03007 | 0.02931 | 0.03388 | 0.02839 | 0.03207 | 0.03411 | 0.0329  | 0.03574 | 0.02724 | 0.02796 MRPL10   |
| cg08737421 | 0.04458 | 0.04896 | 0.04172 | 0.0351  | 0.05543 | 0.05425 | 0.04305 | 0.03929 | 0.03465 | 0.04376 MAX      |
| cg08738040 | 0.02414 | 0.02787 | 0.02513 | 0.02389 | 0.03263 | 0.02778 | 0.02597 | 0.02602 | 0.01655 | 0.01727 TNRC5    |
| cg08738269 | 0.03794 | 0.04266 | 0.25196 | 0.48021 | 0.04709 | 0.04438 | 0.03888 | 0.03936 | 0.02767 | 0.03244 ZFPM1    |

|            |         |         |         |         |         |         |         |         |         |                  |
|------------|---------|---------|---------|---------|---------|---------|---------|---------|---------|------------------|
| cg08739282 | 0.54575 | 0.21172 | 0.12316 | 0.11519 | 0.07701 | 0.06357 | 0.05907 | 0.04043 | 0.34063 | 0.31603 DHX15    |
| cg08742106 | 0.72938 | 0.58688 | 0.77698 | 0.85794 | 0.85472 | 0.76574 | 0.48641 | 0.50748 | 0.61917 | 0.61965 USP6     |
| cg08743392 | 0.06294 | 0.05968 | 0.10549 | 0.14695 | 0.06504 | 0.16985 | 0.04229 | 0.05119 | 0.32398 | 0.06848 GSS      |
| cg08744726 | 0.06293 | 0.06033 | 0.12528 | 0.18459 | 0.599   | 0.7353  | 0.1144  | 0.06257 | 0.10864 | 0.06201 FLJ12700 |
| cg08744769 | 0.03747 | 0.04748 | 0.04622 | 0.0444  | 0.03498 | 0.03357 | 0.02985 | 0.03204 | 0.03023 | 0.03135 MXD1     |
| cg08747377 | 0.05698 | 0.06032 | 0.41325 | 0.4595  | 0.50609 | 0.38796 | 0.2     | 0.31101 | 0.04176 | 0.03995 CDH13    |
| cg08747889 | 0.03038 | 0.03137 | 0.07575 | 0.06125 | 0.05464 | 0.0413  | 0.03109 | 0.03031 | 0.07932 | 0.02057 PTK7     |
| cg08748415 | 0.10194 | 0.08275 | 0.1954  | 0.37609 | 0.0859  | 0.06492 | 0.10038 | 0.09369 | 0.10868 | 0.08865 CLIC5    |
| cg08749122 | 0.04878 | 0.04396 | 0.04823 | 0.04091 | 0.047   | 0.04853 | 0.04144 | 0.04051 | 0.04752 | 0.04359 TARSL1   |
| cg08749917 | 0.87802 | 0.62702 | 0.80224 | 0.88972 | 0.95289 | 0.93102 | 0.06426 | 0.05111 | 0.44573 | 0.37258 RTP1     |
| cg08750326 | 0.32123 | 0.15555 | 0.22574 | 0.2502  | 0.26023 | 0.24068 | 0.11957 | 0.11704 | 0.16064 | 0.171 ODZ1       |
| cg08752459 | 0.36006 | 0.33072 | 0.27067 | 0.25182 | 0.28582 | 0.20657 | 0.45174 | 0.24699 | 0.23603 | 0.23459 CLEC2B   |
| cg08753553 | 0.82155 | 0.68851 | 0.75615 | 0.75867 | 0.84491 | 0.79413 | 0.58721 | 0.55629 | 0.51788 | 0.49653 DEFB106A |
| cg08755040 | 0.22356 | 0.07044 | 0.09506 | 0.10311 | 0.07449 | 0.0723  | 0.14504 | 0.0667  | 0.08588 | 0.08064 QSCN6    |
| cg08757531 | 0.02139 | 0.0239  | 0.02603 | 0.02188 | 0.0332  | 0.01681 | 0.02225 | 0.02334 | 0.02217 | 0.02249 FAM103A1 |
| cg08758850 | 0.07236 | 0.09094 | 0.14473 | 0.14819 | 0.07412 | 0.1335  | 0.07199 | 0.07347 | 0.10161 | 0.1739 NR6A1     |
| cg08759036 | 0.40767 | 0.39621 | 0.24975 | 0.24628 | 0.26921 | 0.22099 | 0.26768 | 0.22028 | 0.19433 | 0.19331 OCRL     |
| cg08759274 | 0.10276 | 0.10551 | 0.1123  | 0.11474 | 0.05793 | 0.08995 | 0.08792 | 0.08438 | 0.08197 | 0.08201 PHF5A    |
| cg08761447 | 0.0902  | 0.09959 | 0.1483  | 0.14558 | 0.17733 | 0.07345 | 0.09596 | 0.12046 | 0.1145  | 0.12352 PARP11   |
| cg08762247 | 0.20806 | 0.23761 | 0.16733 | 0.22372 | 0.26563 | 0.14664 | 0.12511 | 0.11896 | 0.11027 | 0.15885 TMEM100  |
| cg08763351 | 0.09625 | 0.07921 | 0.17946 | 0.15683 | 0.62744 | 0.58686 | 0.07681 | 0.05938 | 0.20914 | 0.11027 SPRR4    |
| cg08763433 | 0.02769 | 0.01809 | 0.019   | 0.01775 | 0.01627 | 0.01788 | 0.01759 | 0.01635 | 0.01441 | 0.01255 SMG5     |
| cg08764758 | 0.04436 | 0.03723 | 0.07993 | 0.06529 | 0.05271 | 0.04353 | 0.04761 | 0.04969 | 0.0376  | 0.0444 FLJ34922  |
| cg08766149 | 0.11599 | 0.03991 | 0.72859 | 0.75616 | 0.93214 | 0.88947 | 0.7146  | 0.82865 | 0.49761 | 0.03296 GZMB     |
| cg08766742 | 0.03246 | 0.03827 | 0.03981 | 0.03892 | 0.04252 | 0.0434  | 0.03052 | 0.02786 | 0.03369 | 0.03353 SLC25A19 |
| cg08768421 | 0.03517 | 0.02552 | 0.66546 | 0.86238 | 0.28439 | 0.61605 | 0.14779 | 0.03423 | 0.02546 | 0.01907 GDA      |
| cg08769044 | 0.93634 | 0.91575 | 0.93014 | 0.93606 | 0.92904 | 0.93863 | 0.89246 | 0.91749 | 0.84806 | 0.86239 SSX3     |
| cg08770869 | 0.05348 | 0.03707 | 0.06906 | 0.13627 | 0.03042 | 0.0387  | 0.0345  | 0.03476 | 0.02981 | 0.02977 CDC25B   |
| cg08771429 | 0.05465 | 0.07336 | 0.12689 | 0.08434 | 0.18761 | 0.13305 | 0.07042 | 0.06965 | 0.05692 | 0.04358 KRIT1    |
| cg08771731 | 0.04628 | 0.03572 | 0.03059 | 0.0333  | 0.03381 | 0.04795 | 0.04761 | 0.04521 | 0.03263 | 0.03246 BASP1    |
| cg08772206 | 0.81052 | 0.20789 | 0.87046 | 0.90019 | 0.76743 | 0.90778 | 0.59474 | 0.81447 | 0.92655 | 0.88721 SH2D4B   |
| cg08773844 | 0.02884 | 0.03374 | 0.03489 | 0.02866 | 0.02613 | 0.03099 | 0.02803 | 0.03753 | 0.02419 | 0.02749 CCDC25   |
| cg08775230 | 0.47586 | 0.08792 | 0.74268 | 0.80915 | 0.77072 | 0.45453 | 0.59357 | 0.74212 | 0.12544 | 0.07367 C11orf52 |
| cg08775774 | 0.08943 | 0.0853  | 0.1372  | 0.16432 | 0.45797 | 0.56044 | 0.27311 | 0.1174  | 0.07371 | 0.07256 CCDC62   |
| cg08775793 | 0.85807 | 0.86172 | 0.86485 | 0.87422 | 0.90679 | 0.86623 | 0.86436 | 0.86386 | 0.89936 | 0.87732 APOL1    |
| cg08778586 | 0.03185 | 0.03382 | 0.04192 | 0.03582 | 0.02665 | 0.04137 | 0.02492 | 0.02725 | 0.02763 | 0.02283 ZCCHC17  |
| cg08779777 | 0.06872 | 0.07838 | 0.17347 | 0.23585 | 0.70763 | 0.68531 | 0.50183 | 0.75424 | 0.12518 | 0.11138 PIK3CG   |
| cg08780378 | 0.03019 | 0.03058 | 0.02892 | 0.03024 | 0.02864 | 0.03009 | 0.0319  | 0.03205 | 0.03516 | 0.03255 EIF3S1   |
| cg08781448 | 0.01949 | 0.02008 | 0.02309 | 0.0202  | 0.02575 | 0.02394 | 0.01736 | 0.01865 | 0.01609 | 0.01572 GALNS    |
| cg08782122 | 0.79349 | 0.76656 | 0.92796 | 0.94388 | 0.95601 | 0.92938 | 0.73709 | 0.81146 | 0.74265 | 0.75764 FLJ42291 |
| cg08783491 | 0.02698 | 0.02931 | 0.03033 | 0.02979 | 0.02259 | 0.03147 | 0.02692 | 0.03872 | 0.03006 | 0.02388 STX16    |

|            |         |         |         |         |         |         |         |         |         |                   |
|------------|---------|---------|---------|---------|---------|---------|---------|---------|---------|-------------------|
| cg08784110 | 0.29664 | 0.12382 | 0.57228 | 0.75882 | 0.43832 | 0.75076 | 0.153   | 0.15568 | 0.18134 | 0.1405 MAS1       |
| cg08785133 | 0.03123 | 0.03277 | 0.03254 | 0.03537 | 0.0338  | 0.0286  | 0.47976 | 0.4288  | 0.0236  | 0.0293 PORCN      |
| cg08785155 | 0.08268 | 0.03771 | 0.04246 | 0.03251 | 0.24899 | 0.04838 | 0.03057 | 0.03118 | 0.03458 | 0.031 ATP1B1      |
| cg08785215 | 0.08837 | 0.03654 | 0.03653 | 0.04453 | 0.03432 | 0.03226 | 0.04047 | 0.03813 | 0.02726 | 0.0308 FLNB       |
| cg08785534 | 0.12767 | 0.07795 | 0.08595 | 0.09768 | 0.49484 | 0.6484  | 0.30344 | 0.08429 | 0.09418 | 0.06483 GAL       |
| cg08785922 | 0.04949 | 0.05426 | 0.05599 | 0.05264 | 0.03879 | 0.04534 | 0.03552 | 0.04537 | 0.07179 | 0.04562 NXN       |
| cg08786003 | 0.12676 | 0.1146  | 0.21302 | 0.22392 | 0.35498 | 0.45113 | 0.15911 | 0.16186 | 0.15324 | 0.1607 FCRL3      |
| cg08788717 | 0.04535 | 0.03056 | 0.03201 | 0.032   | 0.6402  | 0.69858 | 0.03869 | 0.09519 | 0.41333 | 0.08584 STK33     |
| cg08789630 | 0.84747 | 0.77611 | 0.7928  | 0.80581 | 0.70898 | 0.81603 | 0.77205 | 0.81517 | 0.76386 | 0.70225 MYST4     |
| cg08789908 | 0.07567 | 0.07066 | 0.12179 | 0.1509  | 0.37974 | 0.49104 | 0.06824 | 0.06841 | 0.06737 | 0.06796 HSD11B2   |
| cg08790491 | 0.06682 | 0.05945 | 0.052   | 0.05191 | 0.07982 | 0.0868  | 0.05931 | 0.05847 | 0.0547  | 0.05983 ARID4A    |
| cg08790550 | 0.95293 | 0.95385 | 0.93354 | 0.94699 | 0.94206 | 0.94836 | 0.92762 | 0.93415 | 0.90921 | 0.95663 LOC112714 |
| cg08792314 | 0.04178 | 0.0381  | 0.18077 | 0.05573 | 0.05166 | 0.05107 | 0.48053 | 0.40886 | 0.13279 | 0.04028 COASY     |
| cg08793459 | 0.03676 | 0.03017 | 0.04472 | 0.03656 | 0.02983 | 0.036   | 0.02848 | 0.03026 | 0.02899 | 0.02819 PTRH2     |
| cg08794192 | 0.02942 | 0.02996 | 0.03151 | 0.02551 | 0.02519 | 0.02634 | 0.0255  | 0.02456 | 0.02513 | 0.02032 SPATA2    |
| cg08794763 | 0.86707 | 0.7092  | 0.75075 | 0.46677 | 0.86304 | 0.30616 | 0.72752 | 0.4847  | 0.87793 | 0.76699 TLE6      |
| cg08797106 | 0.17459 | 0.16349 | 0.45373 | 0.45106 | 0.16664 | 0.18475 | 0.34582 | 0.36179 | 0.25093 | 0.21398 HIST1H3A  |
| cg08797194 | 0.04746 | 0.04432 | 0.0493  | 0.0406  | 0.4533  | 0.06142 | 0.03852 | 0.03496 | 0.01882 | 0.0165 UGCGL2     |
| cg08797471 | 0.0975  | 0.11357 | 0.10688 | 0.103   | 0.06344 | 0.09546 | 0.09139 | 0.09964 | 0.09002 | 0.09757 DAPK1     |
| cg08798116 | 0.01524 | 0.01589 | 0.17654 | 0.04386 | 0.0285  | 0.01485 | 0.57031 | 0.5424  | 0.01167 | 0.01437 GPC4      |
| cg08798523 | 0.03483 | 0.03902 | 0.03411 | 0.03644 | 0.02943 | 0.03605 | 0.0329  | 0.03015 | 0.02794 | 0.02882 MTMR6     |
| cg08799191 | 0.07506 | 0.06219 | 0.08384 | 0.09349 | 0.09814 | 0.07596 | 0.136   | 0.06214 | 0.06542 | 0.08765 FLJ22222  |
| cg08800033 | 0.0607  | 0.08544 | 0.12366 | 0.11712 | 0.13232 | 0.1009  | 0.08069 | 0.06414 | 0.04647 | 0.04836 CETN2     |
| cg08801329 | 0.03245 | 0.03525 | 0.03658 | 0.03661 | 0.02715 | 0.03534 | 0.02995 | 0.02738 | 0.03047 | 0.02856 NAT5      |
| cg08801754 | 0.74366 | 0.71243 | 0.76585 | 0.77759 | 0.6781  | 0.65028 | 0.62491 | 0.66981 | 0.73441 | 0.71014 ZCCHC10   |
| cg08802167 | 0.03428 | 0.03592 | 0.03552 | 0.0331  | 0.0285  | 0.03046 | 0.0284  | 0.03355 | 0.02898 | 0.02548 NPC2      |
| cg08803129 | 0.02853 | 0.02706 | 0.03107 | 0.02825 | 0.03214 | 0.02965 | 0.02504 | 0.02214 | 0.02489 | 0.02523 SLC39A6   |
| cg08803144 | 0.0405  | 0.03948 | 0.04694 | 0.03554 | 0.03399 | 0.04237 | 0.035   | 0.03596 | 0.03514 | 0.03581 ATIC      |
| cg08804892 | 0.4792  | 0.29744 | 0.769   | 0.79311 | 0.73587 | 0.7466  | 0.78438 | 0.72682 | 0.81517 | 0.5281 TRAK1      |
| cg08805338 | 0.05052 | 0.04749 | 0.05011 | 0.04978 | 0.03772 | 0.03654 | 0.04325 | 0.04393 | 0.14868 | 0.0382 PPP3CB     |
| cg08806153 | 0.03088 | 0.02844 | 0.04068 | 0.08092 | 0.03032 | 0.03168 | 0.06012 | 0.03081 | 0.03027 | 0.02371 HOXD11    |
| cg08807541 | 0.1038  | 0.09489 | 0.18241 | 0.14254 | 0.26011 | 0.12555 | 0.13971 | 0.13635 | 0.1559  | 0.14294 FLJ10292  |
| cg08810065 | 0.09756 | 0.04003 | 0.04373 | 0.0358  | 0.0388  | 0.0428  | 0.03127 | 0.03184 | 0.03338 | 0.0422 KIAA1333   |
| cg08810582 | 0.47893 | 0.23106 | 0.62965 | 0.68118 | 0.23735 | 0.09305 | 0.31311 | 0.17544 | 0.25121 | 0.06215 SLC35E3   |
| cg08810779 | 0.07075 | 0.0799  | 0.07093 | 0.06421 | 0.05269 | 0.07448 | 0.06908 | 0.06807 | 0.06537 | 0.06832 DHX16     |
| cg08811349 | 0.02621 | 0.0258  | 0.02635 | 0.02704 | 0.02152 | 0.02154 | 0.01845 | 0.02131 | 0.02229 | 0.02457 ZHX1      |
| cg08812504 | 0.04266 | 0.03995 | 0.04348 | 0.0423  | 0.03193 | 0.03689 | 0.03142 | 0.03801 | 0.03855 | 0.03331 QSCN6     |
| cg08812936 | 0.18908 | 0.24543 | 0.7108  | 0.64098 | 0.24574 | 0.24157 | 0.51362 | 0.43572 | 0.12526 | 0.12828 KCNMB2    |
| cg08813236 | 0.03177 | 0.03218 | 0.0316  | 0.03348 | 0.02381 | 0.02852 | 0.02715 | 0.03092 | 0.03051 | 0.02413 PIGF      |
| cg08815403 | 0.53622 | 0.42662 | 0.56706 | 0.7216  | 0.66341 | 0.3583  | 0.52905 | 0.27999 | 0.05717 | 0.08982 HSD17B13  |
| cg08815652 | 0.07115 | 0.07332 | 0.08663 | 0.08356 | 0.05324 | 0.05852 | 0.05602 | 0.05748 | 0.05577 | 0.05581 UACA      |

|            |         |         |         |         |         |         |         |         |         |                        |
|------------|---------|---------|---------|---------|---------|---------|---------|---------|---------|------------------------|
| cg08816023 | 0.83084 | 0.65858 | 0.79637 | 0.79599 | 0.90392 | 0.11544 | 0.1783  | 0.09553 | 0.81767 | 0.07071 FGF1           |
| cg08816248 | 0.08034 | 0.07529 | 0.06214 | 0.05297 | 0.09933 | 0.09764 | 0.07123 | 0.06658 | 0.06477 | 0.08208 SYNJ2BP        |
| cg08817120 | 0.04122 | 0.16329 | 0.08855 | 0.07773 | 0.05001 | 0.05143 | 0.02975 | 0.03263 | 0.04508 | 0.03027 DKFZP686A01247 |
| cg08817171 | 0.02562 | 0.03074 | 0.02421 | 0.02735 | 0.02033 | 0.0228  | 0.02199 | 0.02444 | 0.02214 | 0.02637 KIF23          |
| cg08818385 | 0.49873 | 0.46425 | 0.7534  | 0.72568 | 0.62239 | 0.88234 | 0.77079 | 0.5461  | 0.56298 | 0.47158 FAHD2A         |
| cg08818784 | 0.02926 | 0.02511 | 0.90144 | 0.96657 | 0.24921 | 0.60544 | 0.36522 | 0.20744 | 0.08628 | 0.07244 KLK10          |
| cg08818984 | 0.83198 | 0.18241 | 0.79328 | 0.81153 | 0.81123 | 0.23366 | 0.78929 | 0.35898 | 0.15112 | 0.15736 NR3C1          |
| cg08819884 | 0.06735 | 0.05899 | 0.11022 | 0.10275 | 0.11939 | 0.06543 | 0.06544 | 0.03833 | 0.0503  | 0.03994 TRNT1          |
| cg08820801 | 0.05589 | 0.03495 | 0.0354  | 0.03909 | 0.02043 | 0.03313 | 0.03338 | 0.06028 | 0.04359 | 0.0319 FBXO17          |
| cg08820821 | 0.08383 | 0.063   | 0.08265 | 0.07057 | 0.07313 | 0.07474 | 0.03821 | 0.0416  | 0.0579  | 0.04314 SNRP70         |
| cg08821669 | 0.07039 | 0.07875 | 0.07038 | 0.06844 | 0.04684 | 0.05634 | 0.04625 | 0.04207 | 0.07658 | 0.06218 COX6A1         |
| cg08822227 | 0.05104 | 0.05379 | 0.39883 | 0.29079 | 0.80102 | 0.73758 | 0.83631 | 0.93438 | 0.95972 | 0.8338 SH3BP2          |
| cg08823182 | 0.79018 | 0.54732 | 0.86337 | 0.85771 | 0.71221 | 0.75426 | 0.79602 | 0.79603 | 0.786   | 0.52055 S100A5         |
| cg08825571 | 0.02734 | 0.03112 | 0.03272 | 0.03014 | 0.02319 | 0.02452 | 0.02749 | 0.02541 | 0.02701 | 0.02626 MAF1           |
| cg08826839 | 0.61778 | 0.45954 | 0.19238 | 0.15402 | 0.28068 | 0.21482 | 0.22634 | 0.20327 | 0.19598 | 0.20712 FAP            |
| cg08826863 | 0.07576 | 0.07345 | 0.07394 | 0.07244 | 0.116   | 0.10348 | 0.07187 | 0.07235 | 0.04686 | 0.05429 VEGF           |
| cg08827391 | 0.03967 | 0.03998 | 0.03638 | 0.03346 | 0.04466 | 0.039   | 0.04598 | 0.03528 | 0.03533 | 0.03037 GDI2           |
| cg08828036 | 0.59533 | 0.62529 | 0.78304 | 0.84699 | 0.82695 | 0.72709 | 0.67515 | 0.64627 | 0.71218 | 0.76944 ATP10A         |
| cg08831348 | 0.21015 | 0.21664 | 0.2206  | 0.19335 | 0.74043 | 0.34682 | 0.29133 | 0.23175 | 0.14357 | 0.11997 EML2           |
| cg08831522 | 0.61423 | 0.74519 | 0.34972 | 0.37058 | 0.58362 | 0.71222 | 0.67299 | 0.67143 | 0.39948 | 0.28929 ATP10A         |
| cg08831594 | 0.05113 | 0.04661 | 0.25085 | 0.30082 | 0.8772  | 0.06175 | 0.04493 | 0.05071 | 0.12804 | 0.03971 TSPAN15        |
| cg08831701 | 0.0371  | 0.04389 | 0.0386  | 0.03241 | 0.02355 | 0.03492 | 0.03848 | 0.04149 | 0.0343  | 0.03535 HELZ           |
| cg08831744 | 0.03857 | 0.04245 | 0.2829  | 0.3417  | 0.87588 | 0.84168 | 0.22736 | 0.04084 | 0.82096 | 0.63457 IGFBP3         |
| cg08832227 | 0.12872 | 0.03809 | 0.95469 | 0.95055 | 0.96152 | 0.93008 | 0.74237 | 0.94114 | 0.05218 | 0.0347 KCNA1           |
| cg08833432 | 0.24512 | 0.11443 | 0.40246 | 0.30964 | 0.3803  | 0.11968 | 0.23748 | 0.15111 | 0.78389 | 0.3914 PSMA7           |
| cg08834018 | 0.7628  | 0.10656 | 0.2816  | 0.60697 | 0.45217 | 0.07103 | 0.07869 | 0.0582  | 0.08767 | 0.06724 PRODH          |
| cg08835688 | 0.94728 | 0.81269 | 0.90077 | 0.933   | 0.97705 | 0.97039 | 0.91791 | 0.95689 | 0.97972 | 0.97729 GRB10          |
| cg08836024 | 0.85816 | 0.77624 | 0.42442 | 0.42172 | 0.66954 | 0.55338 | 0.64666 | 0.56109 | 0.76563 | 0.79006 RARSL          |
| cg08837884 | 0.78001 | 0.68017 | 0.47718 | 0.51799 | 0.60123 | 0.74765 | 0.15003 | 0.14294 | 0.8419  | 0.80798 LRG1           |
| cg08839620 | 0.03445 | 0.03369 | 0.04009 | 0.03886 | 0.0427  | 0.03977 | 0.03765 | 0.0389  | 0.0298  | 0.02858 POLD3          |
| cg08840010 | 0.71276 | 0.66642 | 0.71691 | 0.73647 | 0.64263 | 0.51801 | 0.74255 | 0.73583 | 0.56758 | 0.55063 TNFRSF9        |
| cg08843314 | 0.89547 | 0.89854 | 0.8538  | 0.87669 | 0.85151 | 0.88665 | 0.34928 | 0.4781  | 0.89178 | 0.88009 CXCR3          |
| cg08843492 | 0.5135  | 0.28312 | 0.14857 | 0.14861 | 0.14592 | 0.09581 | 0.2011  | 0.11218 | 0.16902 | 0.21626 IFITM2         |
| cg08846002 | 0.13862 | 0.13112 | 0.24733 | 0.21246 | 0.24898 | 0.18425 | 0.13706 | 0.14599 | 0.12027 | 0.09589 ZNF75          |
| cg08847038 | 0.08366 | 0.06165 | 0.08516 | 0.07556 | 0.08305 | 0.09067 | 0.07878 | 0.07159 | 0.06153 | 0.06983 C10orf63       |
| cg08847533 | 0.46026 | 0.59203 | 0.02983 | 0.03157 | 0.03509 | 0.03592 | 0.26926 | 0.3998  | 0.06188 | 0.04502 NEK9           |
| cg08847636 | 0.02806 | 0.02947 | 0.07577 | 0.03517 | 0.22145 | 0.14639 | 0.0256  | 0.02942 | 0.03387 | 0.02362 ZNF442         |
| cg08849126 | 0.05167 | 0.0507  | 0.04867 | 0.04795 | 0.02632 | 0.03963 | 0.04037 | 0.03954 | 0.03902 | 0.03873 GPRC5A         |
| cg08849574 | 0.14734 | 0.41252 | 0.44995 | 0.38161 | 0.62965 | 0.62957 | 0.05759 | 0.06137 | 0.10559 | 0.06412 ZNF134         |
| cg08851943 | 0.03771 | 0.03719 | 0.0368  | 0.03882 | 0.02963 | 0.03346 | 0.03155 | 0.03648 | 0.03113 | 0.03186 C6orf64        |
| cg08853659 | 0.03415 | 0.03712 | 0.03516 | 0.037   | 0.03167 | 0.02867 | 0.03189 | 0.02545 | 0.02924 | 0.02749 CLSTN2         |

|            |         |         |         |         |         |         |         |         |         |         |               |
|------------|---------|---------|---------|---------|---------|---------|---------|---------|---------|---------|---------------|
| cg08858521 | 0.86998 | 0.31016 | 0.65526 | 0.75739 | 0.95561 | 0.78482 | 0.57424 | 0.53284 | 0.94339 | 0.60795 | WFIKKN1       |
| cg08859675 | 0.87948 | 0.88354 | 0.88753 | 0.90081 | 0.91512 | 0.87996 | 0.91147 | 0.8423  | 0.88799 | 0.88566 | PDE4A         |
| cg08859916 | 0.07613 | 0.05947 | 0.07039 | 0.0547  | 0.06593 | 0.05212 | 0.0706  | 0.05095 | 0.06432 | 0.04775 | PTEN          |
| cg08860143 | 0.24996 | 0.1106  | 0.25881 | 0.45371 | 0.28352 | 0.13601 | 0.21758 | 0.259   | 0.09265 | 0.07907 | MYLPF         |
| cg08860710 | 0.06887 | 0.07333 | 0.06831 | 0.06584 | 0.04682 | 0.06633 | 0.08522 | 0.064   | 0.05821 | 0.05059 | CDV3          |
| cg08861115 | 0.54534 | 0.42645 | 0.78865 | 0.85987 | 0.67377 | 0.6019  | 0.05188 | 0.0585  | 0.06881 | 0.04562 | IL1F9         |
| cg08865050 | 0.06414 | 0.12806 | 0.06346 | 0.06057 | 0.04536 | 0.03137 | 0.03636 | 0.03586 | 0.04031 | 0.0303  | DDX12         |
| cg08866753 | 0.02669 | 0.03004 | 0.03409 | 0.03117 | 0.02243 | 0.02999 | 0.03065 | 0.02658 | 0.0294  | 0.02515 | PABPC4        |
| cg08871016 | 0.15442 | 0.04656 | 0.05461 | 0.05091 | 0.02818 | 0.03212 | 0.03827 | 0.02903 | 0.03137 | 0.02791 | HSF2BP        |
| cg08871189 | 0.05436 | 0.05133 | 0.06857 | 0.05563 | 0.04192 | 0.04657 | 0.04689 | 0.0464  | 0.0516  | 0.04377 | COMMD9        |
| cg08871917 | 0.06456 | 0.07408 | 0.0803  | 0.08692 | 0.11035 | 0.10773 | 0.06085 | 0.06342 | 0.0624  | 0.05058 | GATAD1        |
| cg08872483 | 0.122   | 0.05555 | 0.09816 | 0.06673 | 0.09731 | 0.21981 | 0.06938 | 0.05518 | 0.07002 | 0.03727 | C9orf10       |
| cg08872493 | 0.29708 | 0.12088 | 0.17648 | 0.1428  | 0.21422 | 0.14684 | 0.13807 | 0.09669 | 0.14837 | 0.16213 | HTR1D         |
| cg08872550 | 0.06641 | 0.0668  | 0.17094 | 0.14309 | 0.14438 | 0.06031 | 0.14897 | 0.10051 | 0.55747 | 0.10634 | CA2           |
| cg08872742 | 0.71919 | 0.30483 | 0.73839 | 0.75483 | 0.16277 | 0.13099 | 0.8165  | 0.41722 | 0.11618 | 0.08419 | CDH5          |
| cg08875535 | 0.04459 | 0.04273 | 0.04727 | 0.04835 | 0.03346 | 0.04033 | 0.04523 | 0.04326 | 0.04256 | 0.03356 | MAP4K4        |
| cg08876470 | 0.03665 | 0.04049 | 0.0455  | 0.03995 | 0.06583 | 0.03066 | 0.03629 | 0.03113 | 0.03397 | 0.02938 | GCDH          |
| cg08876591 | 0.05145 | 0.05051 | 0.08247 | 0.06242 | 0.06951 | 0.04279 | 0.04678 | 0.04825 | 0.05184 | 0.04047 | ADAM22        |
| cg08876665 | 0.0822  | 0.02893 | 0.03413 | 0.02783 | 0.02905 | 0.02596 | 0.02752 | 0.02728 | 0.03413 | 0.02387 | LTB4DH        |
| cg08876932 | 0.03207 | 0.02071 | 0.96803 | 0.9721  | 0.8672  | 0.96224 | 0.51601 | 0.52686 | 0.20119 | 0.24614 | PHOX2A        |
| cg08878304 | 0.04802 | 0.04936 | 0.05679 | 0.05262 | 0.03443 | 0.04982 | 0.04913 | 0.04679 | 0.04537 | 0.04663 | FBX07         |
| cg08878323 | 0.14336 | 0.12121 | 0.50558 | 0.53016 | 0.48049 | 0.32882 | 0.09667 | 0.09806 | 0.40812 | 0.33262 | DLX5          |
| cg08878352 | 0.07554 | 0.07123 | 0.07318 | 0.07402 | 0.11157 | 0.11751 | 0.05218 | 0.04836 | 0.04808 | 0.04504 | PPP1R11       |
| cg08878744 | 0.04619 | 0.03878 | 0.07612 | 0.04721 | 0.13957 | 0.19962 | 0.03758 | 0.03585 | 0.04543 | 0.04041 | LCE1B         |
| cg08880153 | 0.86777 | 0.75406 | 0.85128 | 0.87715 | 0.90195 | 0.89092 | 0.70956 | 0.84586 | 0.86897 | 0.43787 | MAP1A         |
| cg08881067 | 0.03677 | 0.03099 | 0.03369 | 0.03685 | 0.04095 | 0.04047 | 0.03088 | 0.02926 | 0.02319 | 0.01919 | GFM2          |
| cg08881519 | 0.065   | 0.05765 | 0.0563  | 0.05917 | 0.05218 | 0.05382 | 0.06068 | 0.05961 | 0.05408 | 0.05246 | DKFZP586D0919 |
| cg08884343 | 0.69486 | 0.74658 | 0.83625 | 0.84678 | 0.79184 | 0.78837 | 0.38678 | 0.36664 | 0.80617 | 0.71648 | FOXP3         |
| cg08886154 | 0.09117 | 0.09147 | 0.27037 | 0.37425 | 0.30206 | 0.10245 | 0.05406 | 0.05939 | 0.04902 | 0.04034 | PAX4          |
| cg08887137 | 0.03562 | 0.03895 | 0.03603 | 0.04019 | 0.02918 | 0.03363 | 0.0364  | 0.04015 | 0.0324  | 0.03042 | DCTN6         |
| cg08887581 | 0.81808 | 0.89255 | 0.92663 | 0.93899 | 0.78891 | 0.73425 | 0.84023 | 0.70109 | 0.40243 | 0.33319 | C1orf64       |
| cg08888956 | 0.65156 | 0.60116 | 0.66809 | 0.63236 | 0.89046 | 0.60809 | 0.44713 | 0.40035 | 0.06487 | 0.05406 | NTS           |
| cg08890043 | 0.04258 | 0.03739 | 0.04371 | 0.03909 | 0.0281  | 0.03886 | 0.03909 | 0.03813 | 0.03696 | 0.03532 | CHKB          |
| cg08891270 | 0.03252 | 0.03021 | 0.03074 | 0.03144 | 0.02356 | 0.02444 | 0.02962 | 0.02799 | 0.02294 | 0.02068 | MDS032        |
| cg08893585 | 0.05687 | 0.05652 | 0.07788 | 0.11619 | 0.0484  | 0.05175 | 0.0723  | 0.05393 | 0.04493 | 0.03902 | BARX2         |
| cg08894534 | 0.0602  | 0.06402 | 0.06656 | 0.05901 | 0.05748 | 0.05645 | 0.05881 | 0.05701 | 0.05188 | 0.0491  | FLJ40869      |
| cg08896053 | 0.04772 | 0.05855 | 0.61112 | 0.59826 | 0.09691 | 0.33226 | 0.07014 | 0.09855 | 0.04638 | 0.04298 | SNTG1         |
| cg08896629 | 0.04087 | 0.04246 | 0.04653 | 0.04752 | 0.03336 | 0.03871 | 0.04481 | 0.04619 | 0.03277 | 0.03888 | TYK2          |
| cg08896945 | 0.05971 | 0.05086 | 0.45415 | 0.49542 | 0.0915  | 0.53393 | 0.05067 | 0.0474  | 0.31919 | 0.47657 | CALCB         |
| cg08897388 | 0.37644 | 0.03941 | 0.09751 | 0.07853 | 0.04404 | 0.03957 | 0.50675 | 0.03297 | 0.03777 | 0.03734 | LAMA4         |
| cg08899626 | 0.12628 | 0.15643 | 0.20557 | 0.21634 | 0.20103 | 0.17157 | 0.36407 | 0.1889  | 0.12147 | 0.12104 | LDB2          |



|            |         |         |         |         |         |         |         |         |         |                   |
|------------|---------|---------|---------|---------|---------|---------|---------|---------|---------|-------------------|
| cg08899632 | 0.03113 | 0.03048 | 0.03278 | 0.02923 | 0.03687 | 0.02646 | 0.02931 | 0.03193 | 0.02346 | 0.01935 ZFP64     |
| cg08900043 | 0.02029 | 0.02268 | 0.01765 | 0.01681 | 0.01717 | 0.0188  | 0.01432 | 0.01849 | 0.03782 | 0.0118 HOXC10     |
| cg08901867 | 0.77076 | 0.2655  | 0.75238 | 0.78698 | 0.74512 | 0.75827 | 0.17675 | 0.18423 | 0.78835 | 0.58508 TTLL6     |
| cg08902132 | 0.0445  | 0.03593 | 0.03836 | 0.03696 | 0.0337  | 0.03381 | 0.03452 | 0.04207 | 0.0224  | 0.02714 ETF1      |
| cg08902818 | 0.60605 | 0.84875 | 0.15922 | 0.3854  | 0.06278 | 0.04881 | 0.07549 | 0.04925 | 0.06884 | 0.04405 XK        |
| cg08905118 | 0.06973 | 0.06477 | 0.04361 | 0.04051 | 0.06157 | 0.06317 | 0.22974 | 0.15482 | 0.04623 | 0.04851 RP2       |
| cg08906015 | 0.76839 | 0.56235 | 0.75365 | 0.84998 | 0.80306 | 0.80654 | 0.57496 | 0.79471 | 0.7932  | 0.50509 MGC15476  |
| cg08907850 | 0.03081 | 0.03218 | 0.02882 | 0.03065 | 0.02423 | 0.02852 | 0.02831 | 0.02795 | 0.02599 | 0.02336 IDI1      |
| cg08908355 | 0.09388 | 0.09245 | 0.07527 | 0.06643 | 0.11514 | 0.09569 | 0.06891 | 0.06942 | 0.09221 | 0.10997 HIST2H2AC |
| cg08909157 | 0.14924 | 0.1247  | 0.35816 | 0.15329 | 0.15746 | 0.16637 | 0.17262 | 0.16269 | 0.88934 | 0.87143 C9orf66   |
| cg08911391 | 0.06268 | 0.05112 | 0.55489 | 0.57314 | 0.21109 | 0.21375 | 0.18843 | 0.06196 | 0.09871 | 0.04892 DDOST     |
| cg08912400 | 0.41107 | 0.03238 | 0.43799 | 0.5171  | 0.33934 | 0.30884 | 0.13358 | 0.0311  | 0.0306  | 0.15652 CHRNA4    |
| cg08914623 | 0.46293 | 0.06794 | 0.02034 | 0.02076 | 0.94115 | 0.94743 | 0.96896 | 0.95871 | 0.97239 | 0.91768 ALX4      |
| cg08914916 | 0.0255  | 0.02574 | 0.02817 | 0.02474 | 0.02325 | 0.02567 | 0.02085 | 0.02443 | 0.01799 | 0.01831 MRPS12    |
| cg08917718 | 0.11123 | 0.0751  | 0.0713  | 0.0928  | 0.1478  | 0.05269 | 0.05356 | 0.05301 | 0.06114 | 0.04333 PCBP4     |
| cg08918431 | 0.02791 | 0.02827 | 0.02978 | 0.03106 | 0.02489 | 0.02451 | 0.02793 | 0.02729 | 0.02618 | 0.02244 MASK-BP3  |
| cg08918749 | 0.04218 | 0.04745 | 0.07062 | 0.07246 | 0.23384 | 0.04153 | 0.06262 | 0.05334 | 0.05341 | 0.03505 LPL       |
| cg08920071 | 0.70693 | 0.6099  | 0.66081 | 0.74571 | 0.56421 | 0.7573  | 0.68857 | 0.79327 | 0.73024 | 0.70649 IGSF2     |
| cg08923060 | 0.03791 | 0.03702 | 0.06148 | 0.08191 | 0.04578 | 0.03007 | 0.03276 | 0.03003 | 0.24685 | 0.03714 TRIAP1    |
| cg08923109 | 0.85357 | 0.83419 | 0.79543 | 0.84603 | 0.74723 | 0.81887 | 0.79837 | 0.83327 | 0.83892 | 0.82301 PAN3      |
| cg08923379 | 0.02145 | 0.0226  | 0.0247  | 0.01891 | 0.01975 | 0.01988 | 0.0187  | 0.01832 | 0.01651 | 0.01839 ODF2      |
| cg08923450 | 0.06263 | 0.05915 | 0.06678 | 0.06322 | 0.16333 | 0.07087 | 0.04976 | 0.05726 | 0.05064 | 0.05132 HEY2      |
| cg08924430 | 0.65176 | 0.14842 | 0.12457 | 0.18019 | 0.38343 | 0.21652 | 0.46996 | 0.13136 | 0.93243 | 0.93564 FLJ20032  |
| cg08927489 | 0.02978 | 0.0309  | 0.0294  | 0.02552 | 0.02884 | 0.03361 | 0.02415 | 0.02214 | 0.03462 | 0.03075 ZNF687    |
| cg08927738 | 0.69073 | 0.61875 | 0.17433 | 0.17107 | 0.34825 | 0.78126 | 0.30393 | 0.28072 | 0.31965 | 0.11715 BCAS1     |
| cg08928646 | 0.09329 | 0.08805 | 0.10102 | 0.08719 | 0.14688 | 0.12489 | 0.07575 | 0.07566 | 0.09091 | 0.0564 UBE1L2     |
| cg08929103 | 0.8922  | 0.78893 | 0.85945 | 0.87935 | 0.65827 | 0.63436 | 0.07436 | 0.06144 | 0.49395 | 0.2658 CRHR1      |
| cg08932320 | 0.02451 | 0.02907 | 0.02978 | 0.02477 | 0.0258  | 0.03029 | 0.02257 | 0.02633 | 0.02223 | 0.0234 GMDS       |
| cg08933517 | 0.70736 | 0.33746 | 0.79037 | 0.82074 | 0.49097 | 0.45791 | 0.1997  | 0.17752 | 0.80093 | 0.72027 TDRD9     |
| cg08934427 | 0.67831 | 0.68632 | 0.88225 | 0.87502 | 0.7463  | 0.85233 | 0.87309 | 0.87753 | 0.88473 | 0.71903 SLC22A14  |
| cg08934443 | 0.10519 | 0.09947 | 0.06261 | 0.05754 | 0.13268 | 0.11699 | 0.08843 | 0.06734 | 0.1109  | 0.12247 HIST2H2AB |
| cg08935003 | 0.10788 | 0.18547 | 0.11766 | 0.10891 | 0.11774 | 0.09673 | 0.11815 | 0.10007 | 0.07386 | 0.07285 MS4A6E    |
| cg08935243 | 0.04227 | 0.04022 | 0.04604 | 0.04077 | 0.03273 | 0.02898 | 0.03735 | 0.03562 | 0.02775 | 0.02703 CETN3     |
| cg08935301 | 0.86555 | 0.86928 | 0.77661 | 0.82883 | 0.21462 | 0.0729  | 0.25943 | 0.29079 | 0.06289 | 0.04083 LMCD1     |
| cg08936952 | 0.88171 | 0.82438 | 0.88295 | 0.90225 | 0.89745 | 0.89067 | 0.83509 | 0.81716 | 0.89275 | 0.84882 MGC48595  |
| cg08942800 | 0.38885 | 0.65075 | 0.90693 | 0.93102 | 0.80073 | 0.78193 | 0.29238 | 0.22652 | 0.05466 | 0.04961 CRISP2    |
| cg08942875 | 0.2931  | 0.0351  | 0.19983 | 0.41825 | 0.85885 | 0.77608 | 0.06885 | 0.02856 | 0.60092 | 0.57724 OCIAD2    |
| cg08946117 | 0.47649 | 0.32288 | 0.34274 | 0.49716 | 0.6389  | 0.60724 | 0.23869 | 0.29638 | 0.2085  | 0.34649 MGC50273  |
| cg08946332 | 0.95342 | 0.95351 | 0.95092 | 0.95602 | 0.96041 | 0.95521 | 0.95875 | 0.94311 | 0.96495 | 0.94086 ALOX12    |
| cg08946989 | 0.02414 | 0.02539 | 0.03004 | 0.02915 | 0.01972 | 0.02435 | 0.01998 | 0.02023 | 0.01582 | 0.01657 TBC1D7    |
| cg08947964 | 0.09112 | 0.06975 | 0.26961 | 0.31295 | 0.32282 | 0.34439 | 0.10819 | 0.10507 | 0.07414 | 0.06776 CX62      |

|            |         |         |         |         |         |         |         |         |         |         |          |
|------------|---------|---------|---------|---------|---------|---------|---------|---------|---------|---------|----------|
| cg08948050 | 0.91407 | 0.90767 | 0.89673 | 0.92679 | 0.94477 | 0.89224 | 0.9214  | 0.81387 | 0.91888 | 0.86966 | SLC35A4  |
| cg08949296 | 0.03884 | 0.04252 | 0.05336 | 0.06027 | 0.05527 | 0.03734 | 0.05157 | 0.03764 | 0.12616 | 0.04257 | JPH1     |
| cg08950375 | 0.67951 | 0.44349 | 0.73862 | 0.78922 | 0.61425 | 0.68941 | 0.71504 | 0.76725 | 0.72217 | 0.54927 | COL6A3   |
| cg08952029 | 0.46241 | 0.09445 | 0.887   | 0.91765 | 0.92848 | 0.91332 | 0.34871 | 0.36302 | 0.15106 | 0.26835 | CHRD2    |
| cg08954856 | 0.05279 | 0.05275 | 0.37618 | 0.406   | 0.20012 | 0.05291 | 0.1306  | 0.05173 | 0.0701  | 0.05699 | BIK      |
| cg08955609 | 0.07326 | 0.06264 | 0.15641 | 0.18465 | 0.18226 | 0.05792 | 0.20286 | 0.04464 | 0.08534 | 0.06669 | APOE     |
| cg08956138 | 0.10116 | 0.07915 | 0.28228 | 0.21573 | 0.36049 | 0.49722 | 0.08397 | 0.07541 | 0.07692 | 0.04715 | CD3E     |
| cg08958015 | 0.03733 | 0.0356  | 0.77774 | 0.88719 | 0.07971 | 0.06058 | 0.12445 | 0.04989 | 0.72363 | 0.45359 | CCDC65   |
| cg08958913 | 0.37384 | 0.51514 | 0.35813 | 0.37516 | 0.27171 | 0.18173 | 0.20746 | 0.19664 | 0.18012 | 0.13895 | LGALS14  |
| cg08959992 | 0.0667  | 0.0622  | 0.07525 | 0.05999 | 0.03205 | 0.05936 | 0.05428 | 0.05451 | 0.05575 | 0.05613 | PCBP2    |
| cg08961832 | 0.34981 | 0.18062 | 0.9175  | 0.94935 | 0.83333 | 0.54741 | 0.8697  | 0.92438 | 0.85913 | 0.23649 | NALP6    |
| cg08965143 | 0.48165 | 0.64055 | 0.58338 | 0.61757 | 0.89222 | 0.89081 | 0.24644 | 0.08595 | 0.89352 | 0.90989 | TP53I3   |
| cg08965235 | 0.10755 | 0.36256 | 0.48945 | 0.45865 | 0.41944 | 0.10868 | 0.69606 | 0.05315 | 0.19244 | 0.04451 | LTBP3    |
| cg08965324 | 0.29764 | 0.31907 | 0.28819 | 0.2249  | 0.32813 | 0.33385 | 0.27461 | 0.25052 | 0.22815 | 0.24626 | LTA4H    |
| cg08965337 | 0.06621 | 0.06726 | 0.12892 | 0.11328 | 0.11485 | 0.08145 | 0.39013 | 0.44001 | 0.09236 | 0.0858  | RAP2C    |
| cg08965527 | 0.06243 | 0.04309 | 0.04608 | 0.04285 | 0.0673  | 0.04912 | 0.04113 | 0.03877 | 0.03598 | 0.03326 | LRRC50   |
| cg08966023 | 0.08886 | 0.09078 | 0.08116 | 0.07835 | 0.06858 | 0.07062 | 0.07399 | 0.0775  | 0.06778 | 0.07284 | PPP1R3D  |
| cg08966293 | 0.14485 | 0.08997 | 0.25268 | 0.19712 | 0.13327 | 0.06329 | 0.13615 | 0.07904 | 0.14028 | 0.0723  | MAPK3    |
| cg08970446 | 0.94074 | 0.73931 | 0.95236 | 0.96015 | 0.9616  | 0.91679 | 0.82912 | 0.71112 | 0.95302 | 0.92702 | SLC1A7   |
| cg08970694 | 0.1414  | 0.12839 | 0.68337 | 0.67278 | 0.64908 | 0.70988 | 0.16847 | 0.12469 | 0.23411 | 0.13623 | HBE1     |
| cg08972170 | 0.83427 | 0.85913 | 0.81277 | 0.83317 | 0.78053 | 0.81216 | 0.77332 | 0.80133 | 0.81359 | 0.84171 | ELIs1    |
| cg08974656 | 0.01983 | 0.01942 | 0.02359 | 0.02093 | 0.01858 | 0.01821 | 0.0154  | 0.01757 | 0.0186  | 0.01523 | TMEM127  |
| cg08977028 | 0.85878 | 0.59006 | 0.63473 | 0.70942 | 0.87381 | 0.89071 | 0.23505 | 0.26882 | 0.03628 | 0.04014 | CSAG1    |
| cg08977371 | 0.05555 | 0.05307 | 0.39052 | 0.42631 | 0.92155 | 0.88147 | 0.36281 | 0.06529 | 0.04714 | 0.04718 | CDH13    |
| cg08980578 | 0.07127 | 0.13245 | 0.4355  | 0.49005 | 0.09023 | 0.06033 | 0.07901 | 0.06306 | 0.42154 | 0.59057 | KCNK6    |
| cg08981777 | 0.12158 | 0.10745 | 0.20445 | 0.34196 | 0.54235 | 0.13285 | 0.1115  | 0.1004  | 0.0768  | 0.0816  | ELSPBP1  |
| cg08983259 | 0.86107 | 0.81457 | 0.82011 | 0.85659 | 0.79973 | 0.84447 | 0.85898 | 0.89223 | 0.83756 | 0.84553 | INSL5    |
| cg08983760 | 0.62697 | 0.61628 | 0.60008 | 0.62119 | 0.53408 | 0.52559 | 0.40532 | 0.42496 | 0.42272 | 0.40832 | EDNRB    |
| cg08983975 | 0.04013 | 0.04111 | 0.04017 | 0.03842 | 0.03103 | 0.03495 | 0.03948 | 0.03361 | 0.03748 | 0.03005 | TCOF1    |
| cg08986416 | 0.05996 | 0.05797 | 0.06758 | 0.06317 | 0.04258 | 0.05362 | 0.04813 | 0.0479  | 0.05274 | 0.05312 | DMXL2    |
| cg08987989 | 0.82561 | 0.73618 | 0.60438 | 0.63549 | 0.4336  | 0.3365  | 0.81513 | 0.41454 | 0.5917  | 0.61718 | PGGT1B   |
| cg08990057 | 0.03716 | 0.04377 | 0.0604  | 0.05931 | 0.04576 | 0.05284 | 0.0514  | 0.04126 | 0.04627 | 0.05004 | PLS3     |
| cg08992050 | 0.02882 | 0.02482 | 0.03117 | 0.02982 | 0.02232 | 0.03172 | 0.03055 | 0.02934 | 0.02658 | 0.0281  | IRAK4    |
| cg08993172 | 0.23296 | 0.07636 | 0.09055 | 0.07346 | 0.74752 | 0.85591 | 0.88041 | 0.51138 | 0.92474 | 0.76508 | ALX4     |
| cg08993267 | 0.08833 | 0.08644 | 0.13496 | 0.11279 | 0.1384  | 0.12387 | 0.13399 | 0.10514 | 0.08938 | 0.10644 | BRCA1    |
| cg08993557 | 0.61895 | 0.55294 | 0.54771 | 0.62401 | 0.22021 | 0.14388 | 0.5021  | 0.4709  | 0.78397 | 0.76247 | HBII-437 |
| cg08995424 | 0.03693 | 0.0434  | 0.84718 | 0.8933  | 0.11714 | 0.14376 | 0.14475 | 0.03857 | 0.89806 | 0.89698 | ATP5G2   |
| cg08996413 | 0.29732 | 0.07341 | 0.61615 | 0.73371 | 0.5994  | 0.53254 | 0.61139 | 0.20288 | 0.50351 | 0.16327 | SLA      |
| cg08996502 | 0.07198 | 0.0592  | 0.09665 | 0.07245 | 0.06034 | 0.04972 | 0.05771 | 0.04631 | 0.07088 | 0.05191 | SCRIB    |
| cg08996521 | 0.03814 | 0.04877 | 0.57362 | 0.62765 | 0.53984 | 0.40095 | 0.48742 | 0.2469  | 0.05588 | 0.03628 | CISH     |
| cg08996748 | 0.40121 | 0.17845 | 0.56077 | 0.59945 | 0.70728 | 0.15232 | 0.22275 | 0.03983 | 0.03538 | 0.02208 | DISP2    |

|            |         |         |         |         |         |         |         |         |         |         |                |
|------------|---------|---------|---------|---------|---------|---------|---------|---------|---------|---------|----------------|
| cg08996986 | 0.86313 | 0.71776 | 0.89363 | 0.89419 | 0.8255  | 0.90996 | 0.07697 | 0.06239 | 0.07324 | 0.13009 | EPS8L1         |
| cg08997253 | 0.05377 | 0.03069 | 0.3061  | 0.49756 | 0.04502 | 0.20105 | 0.05584 | 0.31744 | 0.04211 | 0.03108 | GRIN3A         |
| cg08998501 | 0.12152 | 0.08368 | 0.16453 | 0.10098 | 0.13423 | 0.12149 | 0.06686 | 0.07609 | 0.08304 | 0.06407 | ZNF615         |
| cg08998967 | 0.392   | 0.41676 | 0.04882 | 0.04205 | 0.0347  | 0.03971 | 0.0384  | 0.03988 | 0.04038 | 0.0397  | SLC25A13       |
| cg08999352 | 0.51856 | 0.16899 | 0.68253 | 0.79754 | 0.94696 | 0.50426 | 0.65116 | 0.12495 | 0.72063 | 0.37444 | CDK9           |
| cg08999486 | 0.03652 | 0.03011 | 0.03097 | 0.06594 | 0.04836 | 0.04231 | 0.0293  | 0.03444 | 0.03918 | 0.04017 | CDC42BPB       |
| cg08999895 | 0.86255 | 0.40594 | 0.80055 | 0.86573 | 0.68531 | 0.38779 | 0.75183 | 0.49524 | 0.52546 | 0.54382 | SLC22A18AS     |
| cg09000112 | 0.08435 | 0.05025 | 0.05769 | 0.06058 | 0.08576 | 0.04245 | 0.0494  | 0.04698 | 0.03819 | 0.03994 | EFNA5          |
| cg09000510 | 0.04192 | 0.04042 | 0.04407 | 0.04165 | 0.02836 | 0.03124 | 0.03376 | 0.03714 | 0.03471 | 0.03298 | TESK1          |
| cg09001777 | 0.89848 | 0.61749 | 0.82356 | 0.88457 | 0.93961 | 0.81951 | 0.56985 | 0.49292 | 0.86756 | 0.54223 | FUT3           |
| cg09001953 | 0.17254 | 0.12411 | 0.45564 | 0.50055 | 0.23367 | 0.19125 | 0.36954 | 0.21437 | 0.74366 | 0.54996 | FLJ11200       |
| cg09002165 | 0.02106 | 0.01998 | 0.02172 | 0.01924 | 0.02578 | 0.02161 | 0.01956 | 0.01823 | 0.01608 | 0.02118 | SLC25A29       |
| cg09002774 | 0.05942 | 0.05829 | 0.0664  | 0.06761 | 0.04564 | 0.06525 | 0.0666  | 0.06287 | 0.06293 | 0.06033 | SLC35B1        |
| cg09003876 | 0.0174  | 0.02148 | 0.02534 | 0.02057 | 0.01384 | 0.01767 | 0.01869 | 0.01847 | 0.01672 | 0.01958 | C18orf21       |
| cg09006267 | 0.03001 | 0.02854 | 0.03164 | 0.03125 | 0.02506 | 0.02943 | 0.02605 | 0.02607 | 0.02893 | 0.02654 | ACAT1          |
| cg09008187 | 0.03057 | 0.02879 | 0.04804 | 0.03656 | 0.02572 | 0.02968 | 0.03438 | 0.02791 | 0.02627 | 0.02149 | SLC25A35       |
| cg09009042 | 0.04484 | 0.04359 | 0.0657  | 0.06533 | 0.04001 | 0.05169 | 0.03909 | 0.03711 | 0.04058 | 0.04315 | PPP1R8         |
| cg09009111 | 0.03743 | 0.03196 | 0.09353 | 0.19767 | 0.24697 | 0.03249 | 0.02834 | 0.03842 | 0.03105 | 0.03015 | EMILIN2        |
| cg09009259 | 0.14147 | 0.08131 | 0.4495  | 0.55855 | 0.19103 | 0.11499 | 0.4728  | 0.40139 | 0.05207 | 0.04124 | MUM1           |
| cg09009380 | 0.06377 | 0.05982 | 0.96569 | 0.97101 | 0.97877 | 0.97374 | 0.97147 | 0.96594 | 0.97664 | 0.97261 | PKP1           |
| cg09010998 | 0.05513 | 0.05863 | 0.05935 | 0.05691 | 0.05662 | 0.05785 | 0.05606 | 0.05524 | 0.05518 | 0.04303 | TCF8           |
| cg09011597 | 0.15729 | 0.07534 | 0.28345 | 0.41114 | 0.08081 | 0.12802 | 0.07531 | 0.07897 | 0.06453 | 0.05805 | PA2G4          |
| cg09013626 | 0.07931 | 0.07117 | 0.09499 | 0.08527 | 0.10832 | 0.06346 | 0.0778  | 0.071   | 0.07425 | 0.05782 | RYBP           |
| cg09014354 | 0.08502 | 0.08717 | 0.7009  | 0.76395 | 0.51855 | 0.41471 | 0.09957 | 0.10143 | 0.1161  | 0.08749 | NEUROD4        |
| cg09015232 | 0.54156 | 0.58997 | 0.33314 | 0.59127 | 0.67285 | 0.83955 | 0.17267 | 0.18767 | 0.32726 | 0.26967 | SLC12A5        |
| cg09017174 | 0.17446 | 0.10297 | 0.66861 | 0.70241 | 0.10121 | 0.22251 | 0.09543 | 0.09433 | 0.12599 | 0.1102  | SLC1A2         |
| cg09018040 | 0.76734 | 0.80108 | 0.73116 | 0.76729 | 0.69797 | 0.78139 | 0.34034 | 0.39529 | 0.80111 | 0.7405  | VCX            |
| cg09018810 | 0.02614 | 0.03029 | 0.03205 | 0.03036 | 0.02706 | 0.02496 | 0.46497 | 0.40428 | 0.01907 | 0.01758 | IDS            |
| cg09018824 | 0.76899 | 0.166   | 0.83106 | 0.81851 | 0.86479 | 0.73586 | 0.81049 | 0.54014 | 0.82752 | 0.06067 | DKFZP686A01247 |
| cg09018862 | 0.74744 | 0.73537 | 0.84328 | 0.84474 | 0.89489 | 0.85894 | 0.51782 | 0.40042 | 0.41648 | 0.42699 | SBP1           |
| cg09019938 | 0.0454  | 0.04075 | 0.14556 | 0.10845 | 0.03394 | 0.03365 | 0.0456  | 0.03878 | 0.05241 | 0.03553 | PRKG1          |
| cg09020461 | 0.02884 | 0.02832 | 0.02989 | 0.02837 | 0.02259 | 0.02639 | 0.02889 | 0.02328 | 0.02534 | 0.02431 | TP53BP1        |
| cg09022808 | 0.15013 | 0.06826 | 0.43527 | 0.49307 | 0.53269 | 0.10496 | 0.07991 | 0.07149 | 0.12902 | 0.06772 | GAL3ST1        |
| cg09022993 | 0.34212 | 0.34072 | 0.08821 | 0.0548  | 0.66984 | 0.85171 | 0.04695 | 0.04995 | 0.04182 | 0.08163 | SPATA18        |
| cg09025324 | 0.29309 | 0.1376  | 0.05582 | 0.05542 | 0.81015 | 0.06311 | 0.38887 | 0.04196 | 0.95596 | 0.94756 | SART2          |
| cg09027725 | 0.58899 | 0.15388 | 0.52399 | 0.82829 | 0.57016 | 0.83812 | 0.33646 | 0.33314 | 0.19393 | 0.21164 | COX4I2         |
| cg09030119 | 0.56964 | 0.2736  | 0.82936 | 0.90044 | 0.30322 | 0.41269 | 0.13534 | 0.07625 | 0.11467 | 0.04243 | ZNF285         |
| cg09033997 | 0.65626 | 0.15439 | 0.8481  | 0.84306 | 0.81239 | 0.80628 | 0.46015 | 0.62857 | 0.26265 | 0.15222 | CCR9           |
| cg09034836 | 0.91806 | 0.83186 | 0.9217  | 0.93423 | 0.95625 | 0.92518 | 0.86834 | 0.89708 | 0.90599 | 0.86595 |                |
| cg09034896 | 0.87986 | 0.70529 | 0.86238 | 0.88238 | 0.9424  | 0.9049  | 0.48305 | 0.52534 | 0.21291 | 0.53012 | GRK1           |
| cg09037813 | 0.95426 | 0.05198 | 0.48915 | 0.52756 | 0.97807 | 0.85114 | 0.97318 | 0.11547 | 0.97393 | 0.11875 | LRRFIP1        |

|            |         |         |         |         |         |         |         |         |         |         |           |
|------------|---------|---------|---------|---------|---------|---------|---------|---------|---------|---------|-----------|
| cg09037858 | 0.04659 | 0.05197 | 0.04748 | 0.05398 | 0.03154 | 0.05122 | 0.07422 | 0.06837 | 0.04759 | 0.04622 | POLR3D    |
| cg09038676 | 0.0367  | 0.03988 | 0.03899 | 0.03623 | 0.03376 | 0.03182 | 0.03324 | 0.02917 | 0.03774 | 0.02898 | GSTP1     |
| cg09038885 | 0.04394 | 0.04306 | 0.29014 | 0.3863  | 0.1252  | 0.036   | 0.29575 | 0.15501 | 0.06525 | 0.03742 | ADRA1B    |
| cg09038914 | 0.83184 | 0.77757 | 0.8566  | 0.90368 | 0.91646 | 0.88829 | 0.88582 | 0.56601 | 0.89906 | 0.74065 | GFAP      |
| cg09039163 | 0.83129 | 0.26178 | 0.68462 | 0.7777  | 0.83884 | 0.3268  | 0.79419 | 0.72953 | 0.50654 | 0.50434 | LOC339768 |
| cg09039698 | 0.03473 | 0.03796 | 0.03519 | 0.03447 | 0.03097 | 0.02788 | 0.03118 | 0.03139 | 0.02703 | 0.02591 | FLJ90652  |
| cg09040752 | 0.4426  | 0.35997 | 0.70384 | 0.73186 | 0.80157 | 0.51709 | 0.39013 | 0.17644 | 0.39094 | 0.56017 | AOC3      |
| cg09044738 | 0.69604 | 0.45247 | 0.67275 | 0.62332 | 0.84422 | 0.82606 | 0.29832 | 0.42094 | 0.83502 | 0.8154  | FAM12A    |
| cg09044743 | 0.21095 | 0.04909 | 0.12335 | 0.17999 | 0.11363 | 0.04604 | 0.03871 | 0.0421  | 0.05866 | 0.04382 | PANK4     |
| cg09045681 | 0.11679 | 0.04411 | 0.081   | 0.05959 | 0.10946 | 0.08172 | 0.04607 | 0.04717 | 0.67031 | 0.03113 | TCF19     |
| cg09047884 | 0.17553 | 0.06614 | 0.15156 | 0.20699 | 0.10962 | 0.06255 | 0.06779 | 0.05615 | 0.08064 | 0.08077 | TTLL1     |
| cg09049660 | 0.35987 | 0.10997 | 0.07655 | 0.06434 | 0.23348 | 0.09125 | 0.066   | 0.06614 | 0.20836 | 0.05488 | PANK2     |
| cg09052983 | 0.09787 | 0.04883 | 0.04847 | 0.04595 | 0.19141 | 0.03897 | 0.04377 | 0.04917 | 0.04877 | 0.03669 | RAB27B    |
| cg09053680 | 0.02726 | 0.0272  | 0.97938 | 0.97859 | 0.64552 | 0.30739 | 0.8189  | 0.61618 | 0.10592 | 0.09433 | UTF1      |
| cg09054876 | 0.24564 | 0.13753 | 0.18772 | 0.17903 | 0.21872 | 0.18319 | 0.15847 | 0.14779 | 0.08114 | 0.09021 | PECI      |
| cg09056317 | 0.28659 | 0.15217 | 0.44603 | 0.44481 | 0.85865 | 0.60866 | 0.14133 | 0.07069 | 0.58117 | 0.28745 | POLR2I    |
| cg09057265 | 0.03655 | 0.03614 | 0.0335  | 0.03349 | 0.0341  | 0.03165 | 0.03256 | 0.03288 | 0.03038 | 0.03193 | FBXO3     |
| cg09058381 | 0.0614  | 0.05082 | 0.05539 | 0.04519 | 0.0733  | 0.06443 | 0.03675 | 0.04718 | 0.09549 | 0.05032 | EAF1      |
| cg09058542 | 0.81515 | 0.43075 | 0.73853 | 0.78899 | 0.67285 | 0.82477 | 0.80027 | 0.41727 | 0.22346 | 0.27346 | TSHB      |
| cg09059181 | 0.04063 | 0.04289 | 0.04194 | 0.04237 | 0.03057 | 0.04122 | 0.04051 | 0.03823 | 0.03638 | 0.04037 | NOLC1     |
| cg09059548 | 0.05588 | 0.04565 | 0.08305 | 0.07002 | 0.08654 | 0.05258 | 0.05924 | 0.06291 | 0.06304 | 0.07358 | PHC1      |
| cg09059635 | 0.87635 | 0.56366 | 0.92463 | 0.92443 | 0.92606 | 0.89709 | 0.31649 | 0.46326 | 0.93718 | 0.92339 | NTNG2     |
| cg09059945 | 0.9311  | 0.94742 | 0.91965 | 0.94369 | 0.94314 | 0.93643 | 0.91733 | 0.96111 | 0.96113 | 0.94982 | MEST      |
| cg09060849 | 0.06671 | 0.07312 | 0.0769  | 0.07601 | 0.11344 | 0.05978 | 0.07648 | 0.07278 | 0.07462 | 0.06901 | GGA2      |
| cg09060914 | 0.80113 | 0.80787 | 0.76377 | 0.78256 | 0.58866 | 0.57515 | 0.65494 | 0.47163 | 0.77518 | 0.7471  | SELP      |
| cg09061733 | 0.86063 | 0.81735 | 0.82284 | 0.84507 | 0.82343 | 0.64185 | 0.41799 | 0.10727 | 0.88506 | 0.8227  | SERPING1  |
| cg09065135 | 0.05791 | 0.03836 | 0.03286 | 0.03275 | 0.03297 | 0.03566 | 0.03444 | 0.03546 | 0.032   | 0.03099 | ZA20D1    |
| cg09065199 | 0.03703 | 0.03808 | 0.04221 | 0.03368 | 0.04321 | 0.03777 | 0.03278 | 0.02907 | 0.03576 | 0.02969 | ASXL1     |
| cg09067967 | 0.04184 | 0.04653 | 0.23586 | 0.25093 | 0.0493  | 0.06256 | 0.19614 | 0.17109 | 0.258   | 0.28423 | UGDH      |
| cg09068198 | 0.07419 | 0.08289 | 0.07354 | 0.07142 | 0.06465 | 0.07018 | 0.07239 | 0.06463 | 0.06346 | 0.06491 | RAB1A     |
| cg09068492 | 0.15721 | 0.06587 | 0.57744 | 0.61789 | 0.81742 | 0.90242 | 0.58284 | 0.48594 | 0.35704 | 0.5957  | CALCA     |
| cg09068528 | 0.0526  | 0.05105 | 0.17044 | 0.15879 | 0.06588 | 0.06016 | 0.05177 | 0.04818 | 0.26384 | 0.37397 | ACADL     |
| cg09068993 | 0.08006 | 0.08509 | 0.08618 | 0.07    | 0.06579 | 0.06603 | 0.05719 | 0.07599 | 0.05315 | 0.06086 | C10orf4   |
| cg09069593 | 0.41395 | 0.4293  | 0.28973 | 0.49057 | 0.23072 | 0.27808 | 0.31579 | 0.10132 | 0.13182 | 0.04655 | GPR114    |
| cg09070492 | 0.03647 | 0.03898 | 0.03921 | 0.03917 | 0.03176 | 0.03111 | 0.03962 | 0.04017 | 0.04358 | 0.02997 | COX15     |
| cg09072120 | 0.04395 | 0.02798 | 0.07738 | 0.05097 | 0.56187 | 0.44011 | 0.04176 | 0.03008 | 0.96054 | 0.90923 | PRTFDC1   |
| cg09076012 | 0.109   | 0.10852 | 0.12206 | 0.13594 | 0.08524 | 0.18191 | 0.09101 | 0.08948 | 0.10525 | 0.1094  | NOV       |
| cg09076077 | 0.90401 | 0.7594  | 0.86999 | 0.92061 | 0.79793 | 0.64499 | 0.84325 | 0.8966  | 0.4236  | 0.49041 | FLJ33860  |
| cg09076123 | 0.45605 | 0.31011 | 0.63501 | 0.61853 | 0.82515 | 0.78477 | 0.52894 | 0.42012 | 0.81231 | 0.63798 | NCF2      |
| cg09076584 | 0.89518 | 0.87836 | 0.88374 | 0.89991 | 0.96451 | 0.91474 | 0.92042 | 0.90322 | 0.9508  | 0.85477 | FLJ25006  |
| cg09079275 | 0.0553  | 0.05534 | 0.04823 | 0.05109 | 0.07524 | 0.04247 | 0.0443  | 0.04719 | 0.06583 | 0.04349 | ADAM19    |

|            |         |         |         |         |         |         |         |         |         |                   |
|------------|---------|---------|---------|---------|---------|---------|---------|---------|---------|-------------------|
| cg09079593 | 0.06341 | 0.05541 | 0.09282 | 0.08668 | 0.48373 | 0.43125 | 0.0897  | 0.06399 | 0.06624 | 0.05103 TRIM7     |
| cg09080746 | 0.04078 | 0.03843 | 0.10303 | 0.08675 | 0.0722  | 0.05368 | 0.05946 | 0.04883 | 0.04733 | 0.04277 PTHB1     |
| cg09081544 | 0.70826 | 0.20239 | 0.66642 | 0.83971 | 0.70278 | 0.5537  | 0.77829 | 0.64985 | 0.87495 | 0.1851 MUC13      |
| cg09082287 | 0.2757  | 0.11257 | 0.15931 | 0.30444 | 0.16288 | 0.11087 | 0.08482 | 0.1179  | 0.17968 | 0.16099 DNAJC6    |
| cg09082921 | 0.30415 | 0.16731 | 0.21566 | 0.18858 | 0.27046 | 0.22061 | 0.45644 | 0.55794 | 0.12837 | 0.12916 UNQ3045   |
| cg09083627 | 0.01701 | 0.02051 | 0.03108 | 0.02477 | 0.04109 | 0.02571 | 0.01897 | 0.02221 | 0.23877 | 0.52523 SLITRK5   |
| cg09084200 | 0.37683 | 0.12602 | 0.28309 | 0.35043 | 0.09405 | 0.0798  | 0.13636 | 0.11131 | 0.05112 | 0.08837 hCAP-D3   |
| cg09085198 | 0.02737 | 0.0321  | 0.05772 | 0.10712 | 0.02355 | 0.02484 | 0.02409 | 0.03532 | 0.02808 | 0.02432 ANKRD29   |
| cg09085639 | 0.0435  | 0.04147 | 0.04691 | 0.04473 | 0.04071 | 0.04411 | 0.0389  | 0.04144 | 0.04493 | 0.04229 MRPL12    |
| cg09086179 | 0.12676 | 0.13157 | 0.24095 | 0.19301 | 0.20506 | 0.17395 | 0.10889 | 0.13567 | 0.15096 | 0.16141 NSBP1     |
| cg09086761 | 0.02966 | 0.02678 | 0.03116 | 0.02835 | 0.11433 | 0.05018 | 0.02614 | 0.02507 | 0.33996 | 0.0323 MTA2       |
| cg09087901 | 0.3495  | 0.26344 | 0.44087 | 0.53197 | 0.5783  | 0.32184 | 0.20471 | 0.18967 | 0.22418 | 0.26003 PLG       |
| cg09087966 | 0.0331  | 0.03554 | 0.0304  | 0.03143 | 0.02736 | 0.03513 | 0.02638 | 0.02754 | 0.02607 | 0.02131 CCNG2     |
| cg09088193 | 0.83655 | 0.84293 | 0.79728 | 0.80383 | 0.72103 | 0.81503 | 0.38283 | 0.13842 | 0.84593 | 0.76727 KA35      |
| cg09088508 | 0.16959 | 0.03513 | 0.07714 | 0.04988 | 0.90525 | 0.5072  | 0.5122  | 0.03999 | 0.36647 | 0.03731 RHOF      |
| cg09088576 | 0.82804 | 0.64251 | 0.91017 | 0.92585 | 0.9344  | 0.90991 | 0.63564 | 0.3546  | 0.91185 | 0.78193 CSF3R     |
| cg09088577 | 0.85425 | 0.84568 | 0.8144  | 0.85186 | 0.71397 | 0.77932 | 0.85983 | 0.88168 | 0.86534 | 0.59987 OTUD4     |
| cg09088834 | 0.03056 | 0.03418 | 0.0801  | 0.0702  | 0.26529 | 0.03315 | 0.20069 | 0.04979 | 0.37228 | 0.02389 KIAA0980  |
| cg09089053 | 0.51713 | 0.34276 | 0.55169 | 0.63987 | 0.20611 | 0.37163 | 0.05694 | 0.03437 | 0.44671 | 0.48364 FLJ13265  |
| cg09092161 | 0.02536 | 0.03604 | 0.03604 | 0.03272 | 0.0368  | 0.03503 | 0.02821 | 0.02813 | 0.0263  | 0.02407 AK1       |
| cg09094355 | 0.1165  | 0.10347 | 0.42985 | 0.29451 | 0.23259 | 0.18246 | 0.26058 | 0.26845 | 0.45301 | 0.19648 PRKX      |
| cg09095562 | 0.79974 | 0.46044 | 0.91752 | 0.92067 | 0.85266 | 0.5596  | 0.72085 | 0.46762 | 0.51885 | 0.4394 GTF3C5     |
| cg09096031 | 0.53063 | 0.32903 | 0.39468 | 0.52649 | 0.1394  | 0.07314 | 0.07787 | 0.162   | 0.13399 | 0.07133 C2orf11   |
| cg09096383 | 0.55936 | 0.45236 | 0.49333 | 0.60486 | 0.55331 | 0.65651 | 0.26864 | 0.25466 | 0.28515 | 0.2122 CSN1S1     |
| cg09096950 | 0.47341 | 0.6605  | 0.8857  | 0.89154 | 0.4058  | 0.22359 | 0.34738 | 0.40091 | 0.28097 | 0.14373 UBE4A     |
| cg09099022 | 0.80759 | 0.75299 | 0.92499 | 0.92667 | 0.8859  | 0.91662 | 0.91682 | 0.9314  | 0.90941 | 0.90947 LRRC8B    |
| cg09099177 | 0.87031 | 0.72986 | 0.87428 | 0.87074 | 0.84769 | 0.85202 | 0.86203 | 0.86182 | 0.87895 | 0.87087 CALML4    |
| cg09099744 | 0.45253 | 0.49067 | 0.50036 | 0.44577 | 0.43762 | 0.48617 | 0.96136 | 0.96155 | 0.96868 | 0.96814 CDKN2A    |
| cg09102409 | 0.07255 | 0.08292 | 0.14691 | 0.10094 | 0.02906 | 0.03963 | 0.07037 | 0.05248 | 0.09489 | 0.11568 NDRG1     |
| cg09102714 | 0.1554  | 0.09435 | 0.0999  | 0.11841 | 0.17916 | 0.12188 | 0.10809 | 0.08022 | 0.06824 | 0.07866 AARS      |
| cg09103232 | 0.02743 | 0.02903 | 0.03393 | 0.02592 | 0.26412 | 0.02837 | 0.02807 | 0.02662 | 0.02388 | 0.02493 SLC2A4    |
| cg09106817 | 0.06248 | 0.06471 | 0.07321 | 0.08313 | 0.08193 | 0.06164 | 0.04492 | 0.04908 | 0.05921 | 0.05982 MAP3K7IP2 |
| cg09106999 | 0.83337 | 0.63998 | 0.84615 | 0.85115 | 0.83087 | 0.46348 | 0.59895 | 0.50705 | 0.87437 | 0.61344 CDK2      |
| cg09107232 | 0.07094 | 0.07947 | 0.07332 | 0.07078 | 0.05633 | 0.07537 | 0.07693 | 0.07006 | 0.07109 | 0.06768 MYNN      |
| cg09107315 | 0.90007 | 0.90815 | 0.82703 | 0.93029 | 0.96127 | 0.93861 | 0.91223 | 0.91269 | 0.83443 | 0.58284 GIPC2     |
| cg09109450 | 0.06897 | 0.07366 | 0.07215 | 0.06692 | 0.04838 | 0.06363 | 0.06126 | 0.0692  | 0.06212 | 0.06122 FLJ21820  |
| cg09109996 | 0.12886 | 0.12982 | 0.1612  | 0.14379 | 0.21873 | 0.17304 | 0.21401 | 0.17395 | 0.10683 | 0.07828 LOH11CR2A |
| cg09111484 | 0.84493 | 0.72309 | 0.72167 | 0.81273 | 0.67352 | 0.81519 | 0.78235 | 0.77387 | 0.50246 | 0.42064 FLJ90579  |
| cg09111917 | 0.33508 | 0.14299 | 0.74953 | 0.7782  | 0.68194 | 0.72442 | 0.64673 | 0.55132 | 0.48807 | 0.23491 TGM4      |
| cg09112782 | 0.20189 | 0.1947  | 0.25326 | 0.27552 | 0.18781 | 0.23085 | 0.22031 | 0.2589  | 0.22347 | 0.18552 UPF3A     |
| cg09113530 | 0.89739 | 0.87897 | 0.87059 | 0.90691 | 0.93829 | 0.89905 | 0.91257 | 0.89626 | 0.9118  | 0.89598 MALL      |

|            |         |         |         |         |         |         |         |         |         |                  |
|------------|---------|---------|---------|---------|---------|---------|---------|---------|---------|------------------|
| cg09113613 | 0.03899 | 0.04261 | 0.04255 | 0.03705 | 0.02756 | 0.03844 | 0.0398  | 0.03853 | 0.04116 | 0.03517 KIAA1219 |
| cg09114441 | 0.03057 | 0.02735 | 0.04104 | 0.02752 | 0.02693 | 0.02359 | 0.06253 | 0.02382 | 0.02466 | 0.02193 ZNF546   |
| cg09114799 | 0.14646 | 0.11786 | 0.27898 | 0.29515 | 0.0714  | 0.07544 | 0.09567 | 0.10231 | 0.07563 | 0.08796 RAPGEF3  |
| cg09118625 | 0.76032 | 0.87286 | 0.92012 | 0.9285  | 0.90934 | 0.92352 | 0.84701 | 0.93829 | 0.89909 | 0.92467 DIRAS3   |
| cg09119665 | 0.03519 | 0.03498 | 0.02345 | 0.02564 | 0.04114 | 0.03465 | 0.0318  | 0.03718 | 0.02576 | 0.02906 PNMA1    |
| cg09119967 | 0.16313 | 0.10009 | 0.66461 | 0.80822 | 0.73851 | 0.59023 | 0.67732 | 0.6677  | 0.72685 | 0.59311 C2orf103 |
| cg09120035 | 0.16554 | 0.15155 | 0.82585 | 0.86394 | 0.75171 | 0.68697 | 0.04384 | 0.03932 | 0.11822 | 0.04262 CYP11B1  |
| cg09121849 | 0.02346 | 0.03075 | 0.02525 | 0.02567 | 0.02459 | 0.02697 | 0.02654 | 0.02528 | 0.01983 | 0.0209 SLC7A1    |
| cg09123444 | 0.02896 | 0.03082 | 0.03582 | 0.0346  | 0.02679 | 0.03213 | 0.02332 | 0.02676 | 0.02448 | 0.02394 MGC13170 |
| cg09126273 | 0.05831 | 0.05926 | 0.10811 | 0.07218 | 0.04562 | 0.05354 | 0.11519 | 0.05092 | 0.81905 | 0.7848 PTPRO     |
| cg09128050 | 0.05454 | 0.03977 | 0.0393  | 0.03001 | 0.02757 | 0.03402 | 0.03622 | 0.04035 | 0.29909 | 0.28746 SAMHD1   |
| cg09130402 | 0.05267 | 0.05047 | 0.0936  | 0.07549 | 0.05529 | 0.06086 | 0.04814 | 0.04537 | 0.04172 | 0.04972 TXNL1    |
| cg09131135 | 0.05562 | 0.05972 | 0.05536 | 0.05673 | 0.03989 | 0.05554 | 0.0494  | 0.04821 | 0.04772 | 0.04624 SUPT7L   |
| cg09133026 | 0.44774 | 0.36586 | 0.92579 | 0.92238 | 0.92588 | 0.90567 | 0.61173 | 0.82541 | 0.90594 | 0.8419 RPS6KL1   |
| cg09134003 | 0.07678 | 0.04887 | 0.05104 | 0.05045 | 0.16882 | 0.03014 | 0.03621 | 0.03751 | 0.05133 | 0.03055 NEUROG2  |
| cg09134726 | 0.92363 | 0.80622 | 0.72044 | 0.73894 | 0.853   | 0.51041 | 0.79307 | 0.38987 | 0.41277 | 0.11636 PRTN3    |
| cg09134747 | 0.19032 | 0.16536 | 0.14001 | 0.16394 | 0.12833 | 0.21604 | 0.15905 | 0.12215 | 0.14761 | 0.16876 ATP2C1   |
| cg09137696 | 0.33094 | 0.23291 | 0.40488 | 0.65272 | 0.93216 | 0.94154 | 0.72082 | 0.85546 | 0.92494 | 0.91992 MT1A     |
| cg09138627 | 0.03445 | 0.03403 | 0.03351 | 0.03182 | 0.03088 | 0.03722 | 0.02754 | 0.03057 | 0.03093 | 0.02952 TNRC15   |
| cg09142399 | 0.76211 | 0.65988 | 0.63675 | 0.66284 | 0.75204 | 0.61628 | 0.52734 | 0.43181 | 0.87659 | 0.85828 CRYZ     |
| cg09143576 | 0.02213 | 0.02296 | 0.0284  | 0.02347 | 0.0218  | 0.02458 | 0.01941 | 0.01841 | 0.02375 | 0.02028 HKR3     |
| cg09143663 | 0.44746 | 0.28367 | 0.91638 | 0.91514 | 0.94911 | 0.89886 | 0.64649 | 0.06107 | 0.58905 | 0.23725 BACH1    |
| cg09144196 | 0.05809 | 0.06058 | 0.06485 | 0.06413 | 0.04659 | 0.0525  | 0.08077 | 0.0682  | 0.04928 | 0.04779 RBM34    |
| cg09144422 | 0.06482 | 0.02835 | 0.10697 | 0.22815 | 0.21183 | 0.39946 | 0.06707 | 0.02457 | 0.04198 | 0.03838 DUS2L    |
| cg09144786 | 0.02609 | 0.02354 | 0.03662 | 0.03014 | 0.02993 | 0.02794 | 0.16652 | 0.4199  | 0.02647 | 0.02557 WDR44    |
| cg09146695 | 0.0605  | 0.06654 | 0.0625  | 0.07244 | 0.08294 | 0.07152 | 0.06068 | 0.06426 | 0.06376 | 0.07353 LEF1     |
| cg09147213 | 0.31208 | 0.11555 | 0.10261 | 0.08858 | 0.10907 | 0.0844  | 0.07644 | 0.07734 | 0.0685  | 0.06495 HOMER1   |
| cg09147222 | 0.0714  | 0.07982 | 0.88259 | 0.89996 | 0.09436 | 0.20737 | 0.0687  | 0.05495 | 0.0709  | 0.08316 CPNE4    |
| cg09147827 | 0.53587 | 0.33177 | 0.25203 | 0.3916  | 0.38214 | 0.44656 | 0.19334 | 0.19319 | 0.24334 | 0.46824 SERPINA6 |
| cg09149294 | 0.02361 | 0.02392 | 0.02938 | 0.02359 | 0.01629 | 0.02084 | 0.02031 | 0.02486 | 0.02018 | 0.02258 ARRDCA4  |
| cg09150117 | 0.06231 | 0.07479 | 0.11508 | 0.10302 | 0.22609 | 0.13955 | 0.06449 | 0.064   | 0.07599 | 0.07261 DLX5     |
| cg09150232 | 0.84181 | 0.88395 | 0.83991 | 0.89074 | 0.6982  | 0.79697 | 0.818   | 0.83127 | 0.87257 | 0.86642 GRB10    |
| cg09151429 | 0.04689 | 0.04323 | 0.06177 | 0.05377 | 0.03805 | 0.03747 | 0.05125 | 0.04756 | 0.03548 | 0.03266 LPHN1    |
| cg09152089 | 0.68857 | 0.41538 | 0.10228 | 0.28192 | 0.03248 | 0.03575 | 0.03283 | 0.04049 | 0.09733 | 0.05342 IL22RA1  |
| cg09155001 | 0.71104 | 0.55786 | 0.83554 | 0.888   | 0.92562 | 0.60658 | 0.69804 | 0.79858 | 0.61752 | 0.59151 FAM26C   |
| cg09155025 | 0.94229 | 0.85361 | 0.94976 | 0.93881 | 0.96363 | 0.94121 | 0.90293 | 0.82474 | 0.94939 | 0.86308 SLC39A4  |
| cg09155852 | 0.05248 | 0.03996 | 0.05228 | 0.05003 | 0.04211 | 0.04123 | 0.03394 | 0.03491 | 0.03443 | 0.03603 MAPKAP1  |
| cg09155905 | 0.20241 | 0.09168 | 0.16917 | 0.20323 | 0.16268 | 0.23748 | 0.14165 | 0.08205 | 0.07028 | 0.06358 FNDC8    |
| cg09156233 | 0.0299  | 0.02446 | 0.0319  | 0.0493  | 0.05168 | 0.02062 | 0.01998 | 0.0214  | 0.10822 | 0.07575 BMPR1B   |
| cg09158314 | 0.30614 | 0.23454 | 0.15944 | 0.2388  | 0.10099 | 0.09135 | 0.65448 | 0.38419 | 0.07488 | 0.06411 TNFSF13B |
| cg09158909 | 0.04734 | 0.0486  | 0.05898 | 0.05207 | 0.02863 | 0.03979 | 0.04029 | 0.04477 | 0.046   | 0.04248 C2orf29  |

|            |         |         |         |         |         |         |         |         |         |         |          |
|------------|---------|---------|---------|---------|---------|---------|---------|---------|---------|---------|----------|
| cg09160477 | 0.54774 | 0.03644 | 0.97024 | 0.96612 | 0.96633 | 0.94226 | 0.47265 | 0.12281 | 0.02092 | 0.01902 | SUSD3    |
| cg09161592 | 0.03149 | 0.03559 | 0.03739 | 0.02858 | 0.02875 | 0.0302  | 0.02827 | 0.0312  | 0.02871 | 0.02243 | PANK1    |
| cg09163021 | 0.84812 | 0.54832 | 0.74452 | 0.82738 | 0.91901 | 0.82811 | 0.80122 | 0.77211 | 0.85911 | 0.7411  | RAPS     |
| cg09163317 | 0.04877 | 0.04227 | 0.06961 | 0.06061 | 0.07911 | 0.06757 | 0.04596 | 0.03567 | 0.05607 | 0.06971 | GALGT    |
| cg09163442 | 0.0969  | 0.0629  | 0.08541 | 0.07889 | 0.14633 | 0.08115 | 0.08934 | 0.08077 | 0.04545 | 0.0599  | SEC61G   |
| cg09164559 | 0.10565 | 0.09987 | 0.10934 | 0.09781 | 0.12988 | 0.09839 | 0.09739 | 0.09184 | 0.09286 | 0.07541 | KIAA1279 |
| cg09169283 | 0.06878 | 0.04794 | 0.2162  | 0.4256  | 0.16024 | 0.04283 | 0.11994 | 0.30855 | 0.04419 | 0.03719 | GRIN2C   |
| cg09169633 | 0.89978 | 0.88227 | 0.87984 | 0.88867 | 0.88645 | 0.87861 | 0.85865 | 0.87519 | 0.89317 | 0.86675 | MAN2A2   |
| cg09171381 | 0.05447 | 0.07246 | 0.05748 | 0.05114 | 0.03977 | 0.04193 | 0.04321 | 0.03652 | 0.05778 | 0.04412 | NMD3     |
| cg09172980 | 0.68735 | 0.23361 | 0.45931 | 0.46433 | 0.2688  | 0.19508 | 0.25762 | 0.14441 | 0.35947 | 0.2554  | NAT8     |
| cg09173897 | 0.21961 | 0.19885 | 0.71273 | 0.76444 | 0.54404 | 0.47383 | 0.67925 | 0.45954 | 0.71395 | 0.66112 | KIAA1622 |
| cg09174741 | 0.88896 | 0.8665  | 0.89092 | 0.90567 | 0.90116 | 0.86726 | 0.73954 | 0.75793 | 0.79625 | 0.80361 | THSD1    |
| cg09175724 | 0.0265  | 0.02597 | 0.02987 | 0.02947 | 0.02295 | 0.02824 | 0.02496 | 0.02611 | 0.02473 | 0.02154 | CDC42EP2 |
| cg09176853 | 0.04401 | 0.04236 | 0.04602 | 0.04672 | 0.04292 | 0.04577 | 0.53945 | 0.45356 | 0.04201 | 0.0375  | MLLT7    |
| cg09176995 | 0.03827 | 0.03573 | 0.04167 | 0.04191 | 0.03301 | 0.03534 | 0.03914 | 0.03537 | 0.03159 | 0.03714 | SLC30A5  |
| cg09179743 | 0.68448 | 0.57381 | 0.36837 | 0.55005 | 0.49202 | 0.26585 | 0.45531 | 0.76417 | 0.33333 | 0.24412 | IFNK     |
| cg09179845 | 0.44076 | 0.17655 | 0.36649 | 0.28624 | 0.75671 | 0.82867 | 0.39029 | 0.39486 | 0.56701 | 0.4551  | C7       |
| cg09180926 | 0.03054 | 0.03429 | 0.04102 | 0.03343 | 0.03761 | 0.03397 | 0.03889 | 0.03123 | 0.03118 | 0.02793 | PRC1     |
| cg09182986 | 0.04352 | 0.05329 | 0.04358 | 0.04685 | 0.0353  | 0.05062 | 0.04719 | 0.04245 | 0.03726 | 0.04149 | CAP1     |
| cg09185773 | 0.05334 | 0.07371 | 0.06734 | 0.07703 | 0.08902 | 0.06625 | 0.25019 | 0.23934 | 0.23844 | 0.06243 | WASF3    |
| cg09186006 | 0.05239 | 0.03074 | 0.63447 | 0.63932 | 0.09229 | 0.20581 | 0.43827 | 0.43782 | 0.04617 | 0.16981 | SLC16A12 |
| cg09186685 | 0.05335 | 0.04709 | 0.04997 | 0.0412  | 0.03612 | 0.03791 | 0.04077 | 0.03871 | 0.03556 | 0.03717 | EEF2K    |
| cg09188980 | 0.09834 | 0.03331 | 0.35676 | 0.47044 | 0.40044 | 0.87006 | 0.19059 | 0.0426  | 0.09178 | 0.03612 | CALCA    |
| cg09189322 | 0.03208 | 0.03774 | 0.03403 | 0.03236 | 0.02834 | 0.0336  | 0.03177 | 0.03605 | 0.03076 | 0.03039 | TCERG1   |
| cg09189428 | 0.02356 | 0.02725 | 0.02761 | 0.02717 | 0.05438 | 0.02318 | 0.51283 | 0.27332 | 0.02792 | 0.02506 | ZNF278   |
| cg09190408 | 0.86194 | 0.8879  | 0.9029  | 0.88909 | 0.85346 | 0.87354 | 0.86208 | 0.8731  | 0.88153 | 0.87671 | TBC1D10C |
| cg09191232 | 0.8145  | 0.83081 | 0.80914 | 0.79983 | 0.83431 | 0.80031 | 0.8196  | 0.81662 | 0.85058 | 0.78785 | PAPSS1   |
| cg09191327 | 0.03654 | 0.04287 | 0.47999 | 0.64961 | 0.11464 | 0.04138 | 0.0368  | 0.03648 | 0.03609 | 0.0352  | PRDM12   |
| cg09191626 | 0.0387  | 0.0415  | 0.72378 | 0.84021 | 0.42335 | 0.45614 | 0.2154  | 0.0907  | 0.86096 | 0.82535 | SPON1    |
| cg09192760 | 0.04992 | 0.05261 | 0.05161 | 0.04469 | 0.05679 | 0.05834 | 0.03879 | 0.03309 | 0.03324 | 0.03565 | NDUFA3   |
| cg09194436 | 0.0329  | 0.03193 | 0.03307 | 0.0261  | 0.04028 | 0.04201 | 0.03266 | 0.0283  | 0.02719 | 0.03388 | ALDH6A1  |
| cg09194650 | 0.03184 | 0.03514 | 0.03495 | 0.03943 | 0.02552 | 0.03145 | 0.03205 | 0.03336 | 0.03002 | 0.02483 | TCHP     |
| cg09195271 | 0.9066  | 0.56746 | 0.89926 | 0.89664 | 0.90062 | 0.87502 | 0.9015  | 0.37436 | 0.93048 | 0.76597 | RNF186   |
| cg09196942 | 0.50186 | 0.39715 | 0.33866 | 0.46249 | 0.64172 | 0.50566 | 0.20664 | 0.10101 | 0.1995  | 0.28569 | PRAMEF1  |
| cg09196959 | 0.53969 | 0.39293 | 0.54233 | 0.60098 | 0.41778 | 0.43727 | 0.1235  | 0.08323 | 0.26128 | 0.08787 | TRIM40   |
| cg09197965 | 0.03941 | 0.0413  | 0.03953 | 0.04062 | 0.03221 | 0.03733 | 0.03617 | 0.03789 | 0.03638 | 0.03222 | TUBA1    |
| cg09198463 | 0.03515 | 0.02981 | 0.03136 | 0.03069 | 0.02548 | 0.03061 | 0.02786 | 0.02892 | 0.02579 | 0.02844 | ARL6IP2  |
| cg09199317 | 0.20374 | 0.0442  | 0.11023 | 0.12764 | 0.07632 | 0.03741 | 0.03608 | 0.0376  | 0.03028 | 0.03011 | FRAT2    |
| cg09201327 | 0.17931 | 0.10905 | 0.13896 | 0.14653 | 0.46158 | 0.17618 | 0.14588 | 0.12509 | 0.13106 | 0.13785 | TNC      |
| cg09201719 | 0.93432 | 0.64599 | 0.91946 | 0.95858 | 0.9525  | 0.4484  | 0.91973 | 0.12025 | 0.94643 | 0.91467 | CYP17A1  |
| cg09202373 | 0.24292 | 0.06597 | 0.43674 | 0.54865 | 0.34404 | 0.26951 | 0.62283 | 0.4081  | 0.78903 | 0.5073  | DNASE1L1 |

|            |         |         |         |         |         |         |         |         |         |                  |
|------------|---------|---------|---------|---------|---------|---------|---------|---------|---------|------------------|
| cg09203961 | 0.022   | 0.02519 | 0.02658 | 0.02413 | 0.02223 | 0.03169 | 0.02254 | 0.02144 | 0.02266 | 0.02147 HMGB1    |
| cg09204187 | 0.07684 | 0.03665 | 0.05576 | 0.05768 | 0.03334 | 0.03227 | 0.12423 | 0.0533  | 0.88935 | 0.72296 FLJ14346 |
| cg09205751 | 0.82539 | 0.50778 | 0.86694 | 0.95437 | 0.81681 | 0.63994 | 0.90681 | 0.33167 | 0.70071 | 0.40047 NALP6    |
| cg09207718 | 0.36646 | 0.11391 | 0.28643 | 0.43656 | 0.70091 | 0.51399 | 0.09376 | 0.11588 | 0.43905 | 0.35791 CYP1A2   |
| cg09208010 | 0.04751 | 0.062   | 0.04973 | 0.04854 | 0.05253 | 0.04787 | 0.03913 | 0.11886 | 0.04077 | 0.03405 MMP14    |
| cg09209002 | 0.05113 | 0.05749 | 0.06649 | 0.05912 | 0.10113 | 0.08975 | 0.05036 | 0.05781 | 0.05773 | 0.03763 SAS10    |
| cg09210315 | 0.83958 | 0.66391 | 0.86458 | 0.85642 | 0.84945 | 0.4298  | 0.06187 | 0.06264 | 0.6037  | 0.3825 SLCO4A1   |
| cg09212058 | 0.83464 | 0.67966 | 0.82956 | 0.85767 | 0.78011 | 0.79498 | 0.81026 | 0.73384 | 0.84841 | 0.70737 PRKD3    |
| cg09212468 | 0.30864 | 0.12586 | 0.34788 | 0.26067 | 0.41956 | 0.31497 | 0.16645 | 0.15806 | 0.41579 | 0.2502 C16orf50  |
| cg09214254 | 0.57583 | 0.55653 | 0.90835 | 0.93023 | 0.56183 | 0.81269 | 0.65814 | 0.70788 | 0.05005 | 0.08686 SMOC2    |
| cg09214551 | 0.4574  | 0.54176 | 0.44884 | 0.44316 | 0.29645 | 0.3158  | 0.15924 | 0.16829 | 0.56678 | 0.49383 DCAKD    |
| cg09214920 | 0.05863 | 0.05568 | 0.06815 | 0.06177 | 0.03681 | 0.04561 | 0.04741 | 0.04064 | 0.05625 | 0.04811 SLC25A24 |
| cg09215553 | 0.03819 | 0.04284 | 0.06418 | 0.05867 | 0.0588  | 0.05042 | 0.04746 | 0.044   | 0.04497 | 0.04217 SHMT2    |
| cg09217923 | 0.83086 | 0.84642 | 0.79176 | 0.82567 | 0.79615 | 0.81295 | 0.57241 | 0.5596  | 0.81879 | 0.65439 TAAR2    |
| cg09218130 | 0.06331 | 0.06461 | 0.06092 | 0.06192 | 0.04496 | 0.05478 | 0.05571 | 0.0541  | 0.05467 | 0.05436 PUS1     |
| cg09220361 | 0.06632 | 0.05987 | 0.52292 | 0.78319 | 0.1719  | 0.06567 | 0.16779 | 0.0668  | 0.09166 | 0.37518 GABRG2   |
| cg09221326 | 0.03222 | 0.03162 | 0.03789 | 0.0354  | 0.03503 | 0.03828 | 0.02607 | 0.02711 | 0.03181 | 0.03421 DYNLT1   |
| cg09222115 | 0.82529 | 0.75064 | 0.87322 | 0.88471 | 0.90959 | 0.91466 | 0.51818 | 0.39031 | 0.88502 | 0.86028 OTOS     |
| cg09222791 | 0.96286 | 0.96789 | 0.96715 | 0.96656 | 0.95783 | 0.96342 | 0.96884 | 0.97132 | 0.97503 | 0.96938 FLJ35894 |
| cg09223071 | 0.03904 | 0.03729 | 0.03636 | 0.03552 | 0.0319  | 0.03723 | 0.02854 | 0.02825 | 0.0304  | 0.03117 SUPT7L   |
| cg09224952 | 0.66195 | 0.62651 | 0.66684 | 0.6594  | 0.56822 | 0.62883 | 0.54419 | 0.5996  | 0.66595 | 0.67639 KCTD6    |
| cg09225321 | 0.0528  | 0.04767 | 0.31361 | 0.40488 | 0.04563 | 0.05789 | 0.06332 | 0.04295 | 0.0487  | 0.04752 OTOP2    |
| cg09226684 | 0.31899 | 0.12933 | 0.58483 | 0.81722 | 0.34468 | 0.4017  | 0.20888 | 0.2937  | 0.16822 | 0.35178 KLK10    |
| cg09227136 | 0.02102 | 0.02153 | 0.02684 | 0.02808 | 0.01832 | 0.02072 | 0.01804 | 0.01864 | 0.01906 | 0.02041 GOLGA1   |
| cg09227563 | 0.02336 | 0.03068 | 0.16513 | 0.10319 | 0.18083 | 0.0321  | 0.399   | 0.16077 | 0.14974 | 0.05086 CDC42EP5 |
| cg09229231 | 0.03985 | 0.04005 | 0.05146 | 0.04254 | 0.03169 | 0.03579 | 0.04216 | 0.03269 | 0.95349 | 0.94554 DHRS3    |
| cg09229912 | 0.05811 | 0.02824 | 0.26616 | 0.34372 | 0.13973 | 0.02397 | 0.03594 | 0.02975 | 0.03126 | 0.02525 CUTL2    |
| cg09229960 | 0.02486 | 0.02553 | 0.03573 | 0.04015 | 0.03106 | 0.02765 | 0.67439 | 0.62441 | 0.01908 | 0.02009 EMD      |
| cg09230173 | 0.10069 | 0.02628 | 0.43422 | 0.51621 | 0.25072 | 0.02666 | 0.03109 | 0.01872 | 0.26786 | 0.27665 PGM5     |
| cg09230646 | 0.85686 | 0.87297 | 0.85739 | 0.87083 | 0.73863 | 0.81035 | 0.86234 | 0.85283 | 0.86664 | 0.64601 FLJ20718 |
| cg09230732 | 0.06384 | 0.05209 | 0.06199 | 0.0564  | 0.07127 | 0.0508  | 0.05583 | 0.05739 | 0.03976 | 0.0414 SKIV2L2   |
| cg09231514 | 0.21365 | 0.07279 | 0.30014 | 0.55587 | 0.64    | 0.9024  | 0.29616 | 0.07332 | 0.0268  | 0.0263 QIL1      |
| cg09234474 | 0.06791 | 0.06827 | 0.0743  | 0.07046 | 0.05523 | 0.07309 | 0.06204 | 0.06258 | 0.0633  | 0.05665 DUSP14   |
| cg09234859 | 0.04768 | 0.05099 | 0.04211 | 0.04714 | 0.03452 | 0.04412 | 0.05061 | 0.04287 | 0.03468 | 0.02971 KLHL7    |
| cg09234872 | 0.06841 | 0.0775  | 0.06977 | 0.07303 | 0.06061 | 0.06938 | 0.06722 | 0.07695 | 0.06616 | 0.07429 TRAF7    |
| cg09237521 | 0.94479 | 0.92662 | 0.89366 | 0.91874 | 0.86818 | 0.92382 | 0.89975 | 0.92031 | 0.92616 | 0.90656 IFITM2   |
| cg09238598 | 0.04644 | 0.04319 | 0.03935 | 0.03761 | 0.02821 | 0.03497 | 0.03094 | 0.0359  | 0.0317  | 0.0294 ANKH      |
| cg09238677 | 0.18326 | 0.19093 | 0.25367 | 0.2411  | 0.38937 | 0.16207 | 0.27518 | 0.27199 | 0.22496 | 0.21919 C3AR1    |
| cg09239756 | 0.05841 | 0.05829 | 0.07166 | 0.05982 | 0.06366 | 0.06832 | 0.06953 | 0.05698 | 0.06234 | 0.06129 CKAP4    |
| cg09242541 | 0.83417 | 0.52711 | 0.77764 | 0.87079 | 0.44167 | 0.32102 | 0.83013 | 0.52176 | 0.65385 | 0.46407 APITD1   |
| cg09242772 | 0.02944 | 0.02703 | 0.03159 | 0.02726 | 0.0246  | 0.02708 | 0.02629 | 0.02535 | 0.02531 | 0.02177 CTDP1    |



|            |         |         |         |         |         |         |         |         |         |         |          |
|------------|---------|---------|---------|---------|---------|---------|---------|---------|---------|---------|----------|
| cg09243021 | 0.95528 | 0.94189 | 0.94904 | 0.95534 | 0.74823 | 0.52056 | 0.86015 | 0.4933  | 0.3006  | 0.06836 | CASP2    |
| cg09243900 | 0.90708 | 0.71835 | 0.87111 | 0.88824 | 0.91973 | 0.90266 | 0.88633 | 0.90367 | 0.8993  | 0.87436 | RAB25    |
| cg09244244 | 0.23438 | 0.16658 | 0.17139 | 0.14874 | 0.15478 | 0.09274 | 0.13717 | 0.1171  | 0.07653 | 0.0798  | KIAA0372 |
| cg09245073 | 0.57839 | 0.09675 | 0.85366 | 0.8626  | 0.76322 | 0.58979 | 0.584   | 0.1328  | 0.12436 | 0.26771 | ASGR1    |
| cg09245378 | 0.03453 | 0.03247 | 0.04139 | 0.03864 | 0.03169 | 0.03745 | 0.03621 | 0.03403 | 0.03504 | 0.03111 | KIAA0157 |
| cg09250703 | 0.06553 | 0.0432  | 0.8766  | 0.78726 | 0.2863  | 0.35458 | 0.11329 | 0.04281 | 0.05121 | 0.04451 | PIR      |
| cg09251995 | 0.02733 | 0.02622 | 0.02677 | 0.0292  | 0.02289 | 0.02639 | 0.02283 | 0.02418 | 0.0206  | 0.01883 | JUND     |
| cg09252204 | 0.04065 | 0.0378  | 0.04163 | 0.04877 | 0.04303 | 0.14309 | 0.61818 | 0.5523  | 0.19111 | 0.05041 | CNKSR2   |
| cg09253125 | 0.03161 | 0.03335 | 0.03813 | 0.03177 | 0.02813 | 0.03053 | 0.03147 | 0.03213 | 0.03145 | 0.02771 | IQCD     |
| cg09254939 | 0.0411  | 0.0343  | 0.53631 | 0.85057 | 0.20957 | 0.04215 | 0.42127 | 0.42123 | 0.09495 | 0.04631 | KLK10    |
| cg09255666 | 0.02523 | 0.02382 | 0.02847 | 0.02787 | 0.02285 | 0.01938 | 0.02327 | 0.01923 | 0.02239 | 0.02418 | ZNF281   |
| cg09256683 | 0.10565 | 0.07805 | 0.13086 | 0.14082 | 0.25956 | 0.34228 | 0.09955 | 0.09986 | 0.0824  | 0.08901 | CCL14    |
| cg09257092 | 0.08243 | 0.05111 | 0.32724 | 0.27703 | 0.09184 | 0.23772 | 0.04343 | 0.04334 | 0.03629 | 0.03277 | ITPR2    |
| cg09258965 | 0.83956 | 0.85216 | 0.79377 | 0.79642 | 0.71453 | 0.72162 | 0.73336 | 0.58997 | 0.77405 | 0.79737 | TBC1D7   |
| cg09259332 | 0.04221 | 0.03959 | 0.04004 | 0.04142 | 0.03194 | 0.04158 | 0.04271 | 0.03947 | 0.03432 | 0.03558 | EEA1     |
| cg09259772 | 0.71016 | 0.63587 | 0.89304 | 0.90496 | 0.12607 | 0.04331 | 0.06803 | 0.04244 | 0.06716 | 0.03993 | ARL4     |
| cg09260089 | 0.05027 | 0.03399 | 0.28933 | 0.49581 | 0.38342 | 0.22904 | 0.04901 | 0.04255 | 0.10917 | 0.28477 | NKX6-2   |
| cg09260441 | 0.14904 | 0.06379 | 0.39011 | 0.40526 | 0.53764 | 0.30611 | 0.31954 | 0.07187 | 0.27956 | 0.51309 | DOK5     |
| cg09260564 | 0.03392 | 0.03807 | 0.03328 | 0.03365 | 0.02902 | 0.03677 | 0.03377 | 0.03887 | 0.02876 | 0.03377 | VAPA     |
| cg09260830 | 0.08426 | 0.08171 | 0.53375 | 0.72855 | 0.90105 | 0.89642 | 0.5156  | 0.62593 | 0.58373 | 0.62446 | GNA14    |
| cg09261015 | 0.05442 | 0.03864 | 0.20239 | 0.12885 | 0.09683 | 0.04266 | 0.43199 | 0.60101 | 0.03536 | 0.03195 | ESX1     |
| cg09261262 | 0.40008 | 0.13957 | 0.88028 | 0.91023 | 0.40545 | 0.38214 | 0.25072 | 0.59292 | 0.27087 | 0.16888 | OPN4     |
| cg09262269 | 0.21542 | 0.06903 | 0.04712 | 0.04101 | 0.03911 | 0.04072 | 0.06279 | 0.04404 | 0.4985  | 0.38246 | LOX      |
| cg09263755 | 0.04424 | 0.03387 | 0.07041 | 0.07201 | 0.0587  | 0.0423  | 0.04538 | 0.03924 | 0.04638 | 0.04835 | CCT6B    |
| cg09264112 | 0.026   | 0.0259  | 0.13341 | 0.1233  | 0.10484 | 0.38944 | 0.02241 | 0.02598 | 0.02312 | 0.0236  | GCHFR    |
| cg09266433 | 0.03526 | 0.03515 | 0.04036 | 0.03346 | 0.07244 | 0.0378  | 0.04004 | 0.03567 | 0.09595 | 0.03476 | OSBPL6   |
| cg09266965 | 0.12358 | 0.11196 | 0.11322 | 0.10412 | 0.098   | 0.09389 | 0.10761 | 0.11519 | 0.10017 | 0.14704 | TRIM52   |
| cg09272256 | 0.2813  | 0.23294 | 0.50838 | 0.67329 | 0.28294 | 0.19562 | 0.26339 | 0.20046 | 0.20817 | 0.20176 | AKR1C4   |
| cg09272869 | 0.04989 | 0.03573 | 0.04927 | 0.04528 | 0.02773 | 0.04048 | 0.03995 | 0.03952 | 0.03575 | 0.02905 | FEM1B    |
| cg09273772 | 0.0897  | 0.09828 | 0.11775 | 0.11544 | 0.15625 | 0.1146  | 0.12558 | 0.11138 | 0.08721 | 0.10578 | TOP2A    |
| cg09275137 | 0.06767 | 0.07017 | 0.07808 | 0.08776 | 0.09098 | 0.07507 | 0.39551 | 0.36932 | 0.04729 | 0.05304 | CXorf12  |
| cg09276355 | 0.02113 | 0.02579 | 0.0252  | 0.02546 | 0.01973 | 0.0259  | 0.02731 | 0.02866 | 0.01795 | 0.02102 | C13orf1  |
| cg09276363 | 0.4131  | 0.0522  | 0.90164 | 0.91046 | 0.94776 | 0.90117 | 0.82999 | 0.57626 | 0.33662 | 0.33306 | KCND3    |
| cg09276451 | 0.53657 | 0.30326 | 0.54249 | 0.54758 | 0.50538 | 0.36429 | 0.11989 | 0.25598 | 0.44309 | 0.0332  | SLITL2   |
| cg09276883 | 0.68469 | 0.3308  | 0.21441 | 0.20926 | 0.23181 | 0.43328 | 0.16416 | 0.10202 | 0.29868 | 0.11522 | HHAT     |
| cg09276978 | 0.53925 | 0.59934 | 0.75954 | 0.82391 | 0.61764 | 0.61641 | 0.10056 | 0.09841 | 0.68061 | 0.76936 | DLGAP4   |
| cg09277365 | 0.09759 | 0.07826 | 0.11943 | 0.13061 | 0.06026 | 0.07517 | 0.07071 | 0.06532 | 0.06871 | 0.05259 | FLJ97079 |
| cg09277575 | 0.16793 | 0.2377  | 0.37609 | 0.50087 | 0.51464 | 0.7457  | 0.44052 | 0.30553 | 0.47539 | 0.44311 | AKR1D1   |
| cg09279263 | 0.17339 | 0.19909 | 0.17637 | 0.17929 | 0.29575 | 0.17943 | 0.13677 | 0.15033 | 0.16671 | 0.15943 | TADA3L   |
| cg09280976 | 0.63274 | 0.52977 | 0.6256  | 0.66359 | 0.8352  | 0.82798 | 0.11049 | 0.0975  | 0.80956 | 0.30953 | MEG3     |
| cg09282338 | 0.0387  | 0.04032 | 0.05714 | 0.04649 | 0.06383 | 0.06264 | 0.03644 | 0.0395  | 0.02951 | 0.02365 | NXT1     |

|            |         |         |         |         |         |         |         |         |         |                   |
|------------|---------|---------|---------|---------|---------|---------|---------|---------|---------|-------------------|
| cg09282744 | 0.0277  | 0.02694 | 0.02453 | 0.0257  | 0.01862 | 0.01944 | 0.01937 | 0.01944 | 0.01898 | 0.01808 NOLA2     |
| cg09283007 | 0.89568 | 0.92349 | 0.90797 | 0.93036 | 0.93321 | 0.94154 | 0.629   | 0.68447 | 0.80611 | 0.82185 FAM47B    |
| cg09283635 | 0.01755 | 0.02144 | 0.02465 | 0.01985 | 0.01585 | 0.02205 | 0.0178  | 0.01806 | 0.01782 | 0.0141 LOC168850  |
| cg09286787 | 0.91676 | 0.9258  | 0.90146 | 0.91979 | 0.82035 | 0.9148  | 0.76233 | 0.79355 | 0.83397 | 0.83864 LOC284361 |
| cg09288658 | 0.02275 | 0.02267 | 0.02917 | 0.02508 | 0.02124 | 0.02722 | 0.26074 | 0.022   | 0.02418 | 0.02135 ZAK       |
| cg09290866 | 0.69014 | 0.43694 | 0.79729 | 0.86548 | 0.85227 | 0.64514 | 0.85099 | 0.3939  | 0.88546 | 0.63349 IL15RA    |
| cg09291628 | 0.02905 | 0.02716 | 0.02817 | 0.02859 | 0.02261 | 0.0287  | 0.02377 | 0.02211 | 0.02333 | 0.01981 FBXL3     |
| cg09294589 | 0.23873 | 0.09397 | 0.09512 | 0.08699 | 0.22675 | 0.09328 | 0.05829 | 0.05495 | 0.07642 | 0.07782 CRTAP     |
| cg09296044 | 0.04442 | 0.032   | 0.03462 | 0.03254 | 0.04875 | 0.03856 | 0.04079 | 0.04436 | 0.03903 | 0.04307 CCNDBP1   |
| cg09296212 | 0.86121 | 0.8486  | 0.85127 | 0.8579  | 0.90134 | 0.84767 | 0.86262 | 0.864   | 0.29428 | 0.07001 C9orf90   |
| cg09297361 | 0.05046 | 0.04676 | 0.12735 | 0.09816 | 0.39675 | 0.52338 | 0.06047 | 0.04894 | 0.03969 | 0.0455 SNX22      |
| cg09298289 | 0.04313 | 0.03223 | 0.03531 | 0.03137 | 0.0299  | 0.03518 | 0.029   | 0.03179 | 0.0257  | 0.02114 CENPH     |
| cg09298484 | 0.35097 | 0.18457 | 0.43456 | 0.49981 | 0.46537 | 0.36027 | 0.46558 | 0.379   | 0.58454 | 0.49538 TSGA10    |
| cg09298623 | 0.52584 | 0.52474 | 0.67413 | 0.65367 | 0.44975 | 0.43284 | 0.40887 | 0.39626 | 0.52717 | 0.52836 ROPN1     |
| cg09299307 | 0.08081 | 0.06451 | 0.06578 | 0.0553  | 0.04631 | 0.05035 | 0.06042 | 0.04807 | 0.04075 | 0.0435 CCNH       |
| cg09299381 | 0.03537 | 0.04121 | 0.04361 | 0.04786 | 0.03383 | 0.03264 | 0.03822 | 0.04041 | 0.04452 | 0.04085 DNAL4     |
| cg09299388 | 0.59945 | 0.80682 | 0.80062 | 0.87033 | 0.70332 | 0.88658 | 0.0708  | 0.07453 | 0.06258 | 0.05583 PGK2      |
| cg09300114 | 0.70607 | 0.64266 | 0.42386 | 0.41257 | 0.74242 | 0.73506 | 0.86525 | 0.65748 | 0.87549 | 0.6069 SLC16A5    |
| cg09303043 | 0.03227 | 0.02906 | 0.0304  | 0.02781 | 0.03856 | 0.03536 | 0.03018 | 0.03121 | 0.02619 | 0.02329 ALDH3A2   |
| cg09303642 | 0.87886 | 0.44352 | 0.90442 | 0.90682 | 0.92977 | 0.88766 | 0.90626 | 0.89452 | 0.92257 | 0.64335 NFE2      |
| cg09304040 | 0.05721 | 0.0672  | 0.05971 | 0.05541 | 0.04451 | 0.05159 | 0.05668 | 0.05486 | 0.05112 | 0.04826 CDK2      |
| cg09304624 | 0.48775 | 0.48896 | 0.44777 | 0.61835 | 0.44395 | 0.18547 | 0.63867 | 0.24961 | 0.32284 | 0.35946 PI15      |
| cg09305224 | 0.88697 | 0.56604 | 0.80107 | 0.87464 | 0.95036 | 0.81045 | 0.60624 | 0.33232 | 0.80055 | 0.46835 FUT7      |
| cg09305478 | 0.04952 | 0.05468 | 0.18404 | 0.19452 | 0.19017 | 0.18977 | 0.27939 | 0.27841 | 0.19661 | 0.19255 MGC15416  |
| cg09305770 | 0.09119 | 0.08684 | 0.40958 | 0.37809 | 0.23389 | 0.18542 | 0.40866 | 0.39447 | 0.0826  | 0.17078 HIST1H3A  |
| cg09306186 | 0.02501 | 0.02563 | 0.0235  | 0.02102 | 0.01847 | 0.02057 | 0.02049 | 0.01839 | 0.01775 | 0.01779 ATBF1     |
| cg09306577 | 0.04536 | 0.03727 | 0.0484  | 0.13382 | 0.02632 | 0.03678 | 0.04168 | 0.03623 | 0.03624 | 0.02945 MFN2      |
| cg09306675 | 0.07579 | 0.06916 | 0.17625 | 0.2225  | 0.05573 | 0.05714 | 0.06844 | 0.06063 | 0.06588 | 0.05657 EYA2      |
| cg09307264 | 0.09717 | 0.14784 | 0.11267 | 0.09545 | 0.05302 | 0.06176 | 0.06296 | 0.05481 | 0.31751 | 0.06715 INCA1     |
| cg09307279 | 0.02273 | 0.02486 | 0.02188 | 0.02312 | 0.01837 | 0.02329 | 0.01938 | 0.02039 | 0.01709 | 0.01831 GLT8D1    |
| cg09309269 | 0.06779 | 0.14242 | 0.14076 | 0.11503 | 0.13106 | 0.07801 | 0.10297 | 0.08347 | 0.05816 | 0.05014 PSMD11    |
| cg09310112 | 0.06134 | 0.04647 | 0.06549 | 0.0572  | 0.37573 | 0.1741  | 0.05075 | 0.04686 | 0.13935 | 0.04016 JMJD2B    |
| cg09311052 | 0.01499 | 0.01426 | 0.0168  | 0.01561 | 0.01249 | 0.01283 | 0.01428 | 0.01161 | 0.01281 | 0.01178 UBE2Q1    |
| cg09312149 | 0.12771 | 0.12195 | 0.69765 | 0.66783 | 0.10995 | 0.09122 | 0.63307 | 0.19962 | 0.11099 | 0.08284 TRIM36    |
| cg09313439 | 0.03865 | 0.04262 | 0.0436  | 0.04252 | 0.04032 | 0.03593 | 0.03542 | 0.03487 | 0.03477 | 0.03261 CDH2      |
| cg09313705 | 0.54583 | 0.64776 | 0.13887 | 0.14979 | 0.43064 | 0.17368 | 0.20747 | 0.21403 | 0.16453 | 0.16396 HOXB2     |
| cg09314766 | 0.89411 | 0.91382 | 0.87434 | 0.91123 | 0.92484 | 0.92773 | 0.45201 | 0.34216 | 0.27012 | 0.46418 ADAM2     |
| cg09321965 | 0.75464 | 0.18878 | 0.73422 | 0.77495 | 0.75883 | 0.18588 | 0.74006 | 0.71422 | 0.76314 | 0.73885 NEK7      |
| cg09322949 | 0.11675 | 0.12329 | 0.1419  | 0.1283  | 0.29454 | 0.17633 | 0.13049 | 0.16613 | 0.22392 | 0.15011 TRFP      |
| cg09324116 | 0.03762 | 0.04522 | 0.05112 | 0.03858 | 0.03329 | 0.03989 | 0.19737 | 0.03474 | 0.03553 | 0.02728 FAM51A1   |
| cg09325101 | 0.13358 | 0.07903 | 0.62984 | 0.70811 | 0.72845 | 0.82434 | 0.18112 | 0.10674 | 0.15588 | 0.21789 OSTbeta   |

|            |         |         |         |         |         |         |         |         |         |                   |
|------------|---------|---------|---------|---------|---------|---------|---------|---------|---------|-------------------|
| cg09325711 | 0.05499 | 0.04738 | 0.06482 | 0.05742 | 0.06265 | 0.06718 | 0.07976 | 0.05778 | 0.04282 | 0.06725 RALA      |
| cg09326546 | 0.03483 | 0.03129 | 0.03895 | 0.03253 | 0.04032 | 0.03763 | 0.03086 | 0.02463 | 0.02566 | 0.03313 RAF1      |
| cg09326702 | 0.85061 | 0.61005 | 0.89803 | 0.91523 | 0.93847 | 0.89196 | 0.84552 | 0.82951 | 0.90768 | 0.85 SLC22A11     |
| cg09327628 | 0.03904 | 0.04057 | 0.0451  | 0.03981 | 0.03678 | 0.04096 | 0.04037 | 0.03378 | 0.03493 | 0.03614 MARCKSL1  |
| cg09328024 | 0.89763 | 0.44624 | 0.82617 | 0.85482 | 0.91002 | 0.81267 | 0.83243 | 0.53205 | 0.34628 | 0.06846 DYRK3     |
| cg09329225 | 0.39026 | 0.37956 | 0.36104 | 0.39093 | 0.40061 | 0.43515 | 0.28841 | 0.25309 | 0.72946 | 0.54131 C14orf108 |
| cg09329496 | 0.02674 | 0.03174 | 0.02771 | 0.02613 | 0.02298 | 0.02611 | 0.02456 | 0.02563 | 0.02502 | 0.02241 NARG1     |
| cg09330643 | 0.03295 | 0.03    | 0.03047 | 0.02703 | 0.02561 | 0.0245  | 0.0251  | 0.02693 | 0.02347 | 0.023 LRRC20      |
| cg09331011 | 0.03864 | 0.03897 | 0.03863 | 0.03662 | 0.04498 | 0.03556 | 0.03896 | 0.03597 | 0.04    | 0.03029 GNAL      |
| cg09332592 | 0.03753 | 0.04173 | 0.04831 | 0.04017 | 0.03094 | 0.03675 | 0.03351 | 0.03782 | 0.03693 | 0.03301 STXBP1    |
| cg09338170 | 0.0787  | 0.07989 | 0.12015 | 0.11285 | 0.15298 | 0.11196 | 0.05292 | 0.05208 | 0.09052 | 0.1029 SLC35A3    |
| cg09339301 | 0.0239  | 0.02434 | 0.02298 | 0.02404 | 0.0177  | 0.02144 | 0.02141 | 0.02043 | 0.01983 | 0.02133 QKI       |
| cg09339527 | 0.09984 | 0.02543 | 0.41819 | 0.42882 | 0.35795 | 0.40032 | 0.82066 | 0.964   | 0.02516 | 0.02197 ZFP2      |
| cg09340639 | 0.11654 | 0.10297 | 0.1718  | 0.17164 | 0.23903 | 0.1091  | 0.15428 | 0.12677 | 0.14018 | 0.14124 FCRL1     |
| cg09343150 | 0.87502 | 0.86511 | 0.84283 | 0.84479 | 0.79579 | 0.8164  | 0.74879 | 0.44329 | 0.87306 | 0.8692 MEN1       |
| cg09343544 | 0.05411 | 0.04421 | 0.06807 | 0.07995 | 0.05665 | 0.03882 | 0.04873 | 0.04291 | 0.04455 | 0.04012 DGCR14    |
| cg09345431 | 0.09528 | 0.02807 | 0.02558 | 0.02627 | 0.0253  | 0.02928 | 0.02698 | 0.02627 | 0.02181 | 0.02222 ARFGEF2   |
| cg09347151 | 0.31139 | 0.06855 | 0.60242 | 0.40075 | 0.23795 | 0.08332 | 0.55288 | 0.41196 | 0.06605 | 0.04553 MGC39606  |
| cg09350141 | 0.11951 | 0.04975 | 0.13969 | 0.07153 | 0.1468  | 0.04135 | 0.32564 | 0.04507 | 0.23565 | 0.03375 PPM1F     |
| cg09350274 | 0.09564 | 0.0639  | 0.72916 | 0.91944 | 0.65417 | 0.76831 | 0.12892 | 0.29842 | 0.581   | 0.49305 GFRA3     |
| cg09351449 | 0.02948 | 0.0253  | 0.02836 | 0.02747 | 0.02658 | 0.02854 | 0.04192 | 0.04088 | 0.02195 | 0.01952 C20orf172 |
| cg09351859 | 0.08201 | 0.07842 | 0.07579 | 0.07798 | 0.06509 | 0.067   | 0.07337 | 0.07815 | 0.06889 | 0.05801 PARP8     |
| cg09351894 | 0.03715 | 0.02945 | 0.03463 | 0.03483 | 0.02463 | 0.03622 | 0.0304  | 0.02991 | 0.02917 | 0.02932 CREM      |
| cg09352789 | 0.32547 | 0.12858 | 0.21017 | 0.16803 | 0.08261 | 0.05989 | 0.08589 | 0.07539 | 0.1602  | 0.20039 XPNPEP1   |
| cg09354267 | 0.37651 | 0.30247 | 0.46928 | 0.43437 | 0.10166 | 0.0569  | 0.15623 | 0.06904 | 0.09495 | 0.33413 ATG5      |
| cg09354331 | 0.889   | 0.30961 | 0.9193  | 0.9323  | 0.93522 | 0.75144 | 0.90774 | 0.8791  | 0.92374 | 0.8912 RAI17      |
| cg09357097 | 0.0597  | 0.0616  | 0.05526 | 0.0666  | 0.04047 | 0.05296 | 0.06104 | 0.05858 | 0.05928 | 0.04822 HOXB7     |
| cg09358725 | 0.85328 | 0.85423 | 0.77136 | 0.8265  | 0.89165 | 0.89495 | 0.80897 | 0.84935 | 0.897   | 0.73808 LMO2      |
| cg09360083 | 0.65237 | 0.61786 | 0.64626 | 0.70772 | 0.58845 | 0.64314 | 0.54552 | 0.56789 | 0.76097 | 0.75294 THYN1     |
| cg09360654 | 0.11091 | 0.06561 | 0.08038 | 0.09524 | 0.20229 | 0.08675 | 0.26705 | 0.08231 | 0.07507 | 0.07937 MUTYH     |
| cg09370442 | 0.05838 | 0.05193 | 0.0556  | 0.05973 | 0.04697 | 0.05734 | 0.0507  | 0.05306 | 0.05339 | 0.05234 CHP       |
| cg09371142 | 0.10869 | 0.10783 | 0.10706 | 0.11702 | 0.10536 | 0.09624 | 0.10852 | 0.10187 | 0.07637 | 0.09747 DCUN1D3   |
| cg09374949 | 0.11901 | 0.06963 | 0.5015  | 0.56174 | 0.97555 | 0.95936 | 0.89055 | 0.93375 | 0.08562 | 0.06339 ISYNA1    |
| cg09375488 | 0.71511 | 0.67229 | 0.62236 | 0.65854 | 0.42131 | 0.41773 | 0.63333 | 0.67168 | 0.69667 | 0.52073 ASB4      |
| cg09377486 | 0.72292 | 0.68143 | 0.51461 | 0.62655 | 0.6002  | 0.70429 | 0.72208 | 0.78274 | 0.44348 | 0.55172 BIRC8     |
| cg09377899 | 0.03517 | 0.03828 | 0.03617 | 0.04059 | 0.02863 | 0.0292  | 0.03383 | 0.03618 | 0.03215 | 0.03088 DDX11     |
| cg09378691 | 0.03394 | 0.0341  | 0.03552 | 0.0326  | 0.0234  | 0.02657 | 0.02864 | 0.03199 | 0.02837 | 0.02789 ZNF335    |
| cg09378940 | 0.08377 | 0.04599 | 0.2621  | 0.35707 | 0.03667 | 0.0497  | 0.04816 | 0.04653 | 0.03804 | 0.04217 LACTB2    |
| cg09381003 | 0.37131 | 0.05818 | 0.10184 | 0.13632 | 0.51645 | 0.44917 | 0.08425 | 0.05376 | 0.12346 | 0.05732 SHKBP1    |
| cg09381701 | 0.03435 | 0.03128 | 0.039   | 0.03376 | 0.0271  | 0.02937 | 0.03221 | 0.03371 | 0.02952 | 0.03147 SASH1     |
| cg09382492 | 0.16692 | 0.11258 | 0.6217  | 0.83153 | 0.82544 | 0.69399 | 0.47854 | 0.25283 | 0.63511 | 0.53322 AANAT     |

|            |         |         |         |         |         |         |         |         |         |                  |
|------------|---------|---------|---------|---------|---------|---------|---------|---------|---------|------------------|
| cg09382850 | 0.07927 | 0.07151 | 0.11606 | 0.11255 | 0.17358 | 0.09979 | 0.07445 | 0.07517 | 0.07492 | 0.05961 SYPL1    |
| cg09383789 | 0.03737 | 0.03538 | 0.04327 | 0.03881 | 0.04311 | 0.06219 | 0.03744 | 0.03998 | 0.05266 | 0.03963 C1orf159 |
| cg09384159 | 0.03126 | 0.03587 | 0.03181 | 0.03199 | 0.03061 | 0.03046 | 0.02671 | 0.03194 | 0.02895 | 0.02815 TUBE1    |
| cg09386615 | 0.56711 | 0.57865 | 0.64196 | 0.64601 | 0.55357 | 0.55948 | 0.60629 | 0.58729 | 0.69637 | 0.68536 GLIS3    |
| cg09390792 | 0.7023  | 0.30629 | 0.858   | 0.89962 | 0.87517 | 0.85712 | 0.85437 | 0.81265 | 0.87621 | 0.77367 TSPAN18  |
| cg09390902 | 0.03296 | 0.03132 | 0.03456 | 0.033   | 0.02814 | 0.02915 | 0.07166 | 0.0965  | 0.02638 | 0.02645 NSUN5C   |
| cg09390932 | 0.78613 | 0.62195 | 0.74382 | 0.79442 | 0.60289 | 0.62153 | 0.80586 | 0.72459 | 0.77471 | 0.78505 B3GNT1   |
| cg09391966 | 0.02421 | 0.02554 | 0.02322 | 0.02496 | 0.01785 | 0.02444 | 0.02063 | 0.02233 | 0.01909 | 0.02 GIT2        |
| cg09394600 | 0.88585 | 0.87526 | 0.87707 | 0.89464 | 0.82464 | 0.85832 | 0.86806 | 0.86024 | 0.87131 | 0.88259 RABEP1   |
| cg09395732 | 0.35141 | 0.05425 | 0.89982 | 0.92602 | 0.95787 | 0.77891 | 0.22737 | 0.10201 | 0.47489 | 0.35586 SLC6A11  |
| cg09395833 | 0.09471 | 0.08886 | 0.11042 | 0.11932 | 0.08627 | 0.0777  | 0.09877 | 0.09099 | 0.07692 | 0.08534 ILVBL    |
| cg09396217 | 0.78075 | 0.32063 | 0.33491 | 0.45611 | 0.36411 | 0.12439 | 0.2934  | 0.08111 | 0.53578 | 0.12793 ANGPT1   |
| cg09398185 | 0.21487 | 0.09978 | 0.09701 | 0.07519 | 0.11691 | 0.08908 | 0.09411 | 0.07431 | 0.08494 | 0.07143 IFIT2    |
| cg09399047 | 0.03949 | 0.04105 | 0.0412  | 0.03537 | 0.04296 | 0.0396  | 0.03325 | 0.03642 | 0.03397 | 0.02834 DALRD3   |
| cg09400966 | 0.03368 | 0.03133 | 0.0338  | 0.03573 | 0.11048 | 0.02946 | 0.03728 | 0.037   | 0.02824 | 0.02737 PROS1    |
| cg09404256 | 0.06004 | 0.07073 | 0.05226 | 0.07609 | 0.06249 | 0.07006 | 0.04439 | 0.04528 | 0.05743 | 0.05326 USF2     |
| cg09404334 | 0.06365 | 0.08621 | 0.08813 | 0.07841 | 0.07691 | 0.06927 | 0.06171 | 0.05935 | 0.0602  | 0.06084 SNX14    |
| cg09404633 | 0.17655 | 0.13346 | 0.1465  | 0.33172 | 0.60114 | 0.64704 | 0.68379 | 0.44645 | 0.89162 | 0.83141 LMOD1    |
| cg09405083 | 0.07259 | 0.07765 | 0.06121 | 0.05199 | 0.62029 | 0.59186 | 0.70189 | 0.058   | 0.07188 | 0.05963 C1orf26  |
| cg09405612 | 0.04096 | 0.04791 | 0.04339 | 0.04893 | 0.06356 | 0.04715 | 0.06838 | 0.04781 | 0.03526 | 0.04223 GLI3     |
| cg09406238 | 0.06678 | 0.07464 | 0.85107 | 0.84802 | 0.64633 | 0.46867 | 0.42163 | 0.26909 | 0.43029 | 0.34008 MTMR8    |
| cg09407859 | 0.62909 | 0.47396 | 0.82885 | 0.87163 | 0.51253 | 0.42815 | 0.74485 | 0.71276 | 0.70041 | 0.66498 FLJ21736 |
| cg09408780 | 0.73601 | 0.74531 | 0.7082  | 0.74373 | 0.64834 | 0.60265 | 0.69854 | 0.74739 | 0.66629 | 0.67863 SFTPG    |
| cg09409398 | 0.04121 | 0.04031 | 0.03413 | 0.03382 | 0.03905 | 0.04747 | 0.03469 | 0.03824 | 0.04504 | 0.03963 SF3B4    |
| cg09410845 | 0.04065 | 0.04388 | 0.04246 | 0.05025 | 0.0411  | 0.0487  | 0.03864 | 0.04033 | 0.04375 | 0.04043 BMPR2    |
| cg09411212 | 0.71268 | 0.5107  | 0.69183 | 0.79326 | 0.88228 | 0.89055 | 0.83583 | 0.89876 | 0.8187  | 0.71402 POPDC2   |
| cg09411366 | 0.23801 | 0.24494 | 0.25096 | 0.24903 | 0.52536 | 0.44549 | 0.23298 | 0.22805 | 0.24453 | 0.19901 PEPD     |
| cg09412715 | 0.05103 | 0.04172 | 0.05261 | 0.05474 | 0.06501 | 0.05087 | 0.02734 | 0.03221 | 0.04807 | 0.04545 HELB     |
| cg09412782 | 0.86387 | 0.87897 | 0.8548  | 0.87575 | 0.86336 | 0.85432 | 0.81231 | 0.8013  | 0.83087 | 0.82287 C15orf48 |
| cg09413557 | 0.49411 | 0.46859 | 0.0269  | 0.02358 | 0.02551 | 0.02713 | 0.02416 | 0.03154 | 0.02389 | 0.02437 S100A6   |
| cg09414535 | 0.17286 | 0.224   | 0.8259  | 0.85005 | 0.7303  | 0.6971  | 0.67096 | 0.29222 | 0.82911 | 0.75926 GRIP1    |
| cg09416313 | 0.0764  | 0.07921 | 0.80573 | 0.92697 | 0.3734  | 0.55166 | 0.06166 | 0.10564 | 0.12842 | 0.09748 MATK     |
| cg09416501 | 0.05667 | 0.05404 | 0.06491 | 0.05275 | 0.04355 | 0.04356 | 0.05347 | 0.03117 | 0.05123 | 0.04697 TOB2     |
| cg09418283 | 0.02661 | 0.03    | 0.03448 | 0.02805 | 0.01747 | 0.02468 | 0.02893 | 0.02641 | 0.02143 | 0.02075 PAWR     |
| cg09418321 | 0.10588 | 0.05774 | 0.16169 | 0.20046 | 0.62968 | 0.76531 | 0.06726 | 0.06482 | 0.05082 | 0.05107 DYRK4    |
| cg09419116 | 0.03788 | 0.0415  | 0.04515 | 0.04414 | 0.05839 | 0.06485 | 0.04238 | 0.04032 | 0.03835 | 0.04552 SEC11L3  |
| cg09419670 | 0.06304 | 0.05915 | 0.23802 | 0.22317 | 0.50584 | 0.37704 | 0.31539 | 0.05536 | 0.1146  | 0.04678 PSMD5    |
| cg09419900 | 0.88769 | 0.86253 | 0.87419 | 0.88822 | 0.85146 | 0.81948 | 0.54157 | 0.43969 | 0.22405 | 0.10123 C10orf89 |
| cg09420988 | 0.03059 | 0.02954 | 0.03131 | 0.02541 | 0.02287 | 0.02594 | 0.02109 | 0.02524 | 0.02048 | 0.02188 MRPS30   |
| cg09421020 | 0.0869  | 0.10356 | 0.10031 | 0.10592 | 0.08562 | 0.0749  | 0.09354 | 0.09602 | 0.07501 | 0.0797 MEF2B     |
| cg09421562 | 0.40709 | 0.26864 | 0.2942  | 0.39901 | 0.21377 | 0.73107 | 0.28772 | 0.17855 | 0.1942  | 0.1212 MPO       |

|            |         |         |         |         |         |         |         |         |         |                  |
|------------|---------|---------|---------|---------|---------|---------|---------|---------|---------|------------------|
| cg09422355 | 0.0905  | 0.04564 | 0.74468 | 0.90595 | 0.86834 | 0.86976 | 0.04088 | 0.04191 | 0.6746  | 0.37902 CABP5    |
| cg09423836 | 0.16053 | 0.03936 | 0.27362 | 0.31161 | 0.04993 | 0.03882 | 0.06682 | 0.0361  | 0.06137 | 0.02355 NUP54    |
| cg09424308 | 0.2469  | 0.06808 | 0.11598 | 0.06864 | 0.44314 | 0.22878 | 0.34178 | 0.05808 | 0.38184 | 0.04108 FLJ90575 |
| cg09424896 | 0.31577 | 0.16615 | 0.69697 | 0.73715 | 0.28216 | 0.29772 | 0.18768 | 0.06316 | 0.41904 | 0.09196 CIB3     |
| cg09424925 | 0.12701 | 0.11773 | 0.08612 | 0.07689 | 0.16256 | 0.14844 | 0.10846 | 0.10644 | 0.09188 | 0.10784 RAD51L1  |
| cg09425215 | 0.1973  | 0.163   | 0.19582 | 0.17272 | 0.2334  | 0.193   | 0.23635 | 0.15544 | 0.17262 | 0.22389 CHD2     |
| cg09425228 | 0.79678 | 0.76291 | 0.82968 | 0.86273 | 0.81175 | 0.85037 | 0.12725 | 0.09142 | 0.84882 | 0.77396 CCL20    |
| cg09425611 | 0.09705 | 0.08233 | 0.10333 | 0.11255 | 0.09736 | 0.11376 | 0.11402 | 0.07334 | 0.13136 | 0.21635 CES1     |
| cg09425898 | 0.90874 | 0.74885 | 0.92761 | 0.92294 | 0.64971 | 0.52748 | 0.87574 | 0.60054 | 0.92864 | 0.88977 PRNT     |
| cg09426307 | 0.07306 | 0.05334 | 0.2814  | 0.44755 | 0.30857 | 0.36568 | 0.04816 | 0.04614 | 0.13206 | 0.30137 SEC14L3  |
| cg09427311 | 0.83773 | 0.35689 | 0.88967 | 0.88824 | 0.21714 | 0.10928 | 0.76548 | 0.25389 | 0.88737 | 0.43067 ANGPLT2  |
| cg09429111 | 0.08303 | 0.04305 | 0.06021 | 0.04604 | 0.05937 | 0.03172 | 0.04208 | 0.03628 | 0.03369 | 0.02791 PTPDC1   |
| cg09429153 | 0.03753 | 0.03633 | 0.0406  | 0.03327 | 0.02687 | 0.03644 | 0.03174 | 0.0322  | 0.03198 | 0.03186 PBX3     |
| cg09429185 | 0.09406 | 0.04793 | 0.09627 | 0.0646  | 0.20241 | 0.22566 | 0.04667 | 0.04199 | 0.05785 | 0.04339 ZNF286   |
| cg09430689 | 0.01909 | 0.02151 | 0.02031 | 0.0187  | 0.01781 | 0.01904 | 0.01731 | 0.01794 | 0.01572 | 0.01593 C14orf1  |
| cg09431062 | 0.02265 | 0.02157 | 0.02169 | 0.01888 | 0.0201  | 0.01826 | 0.01588 | 0.02007 | 0.0264  | 0.02321 SH3GLB2  |
| cg09432154 | 0.63522 | 0.22424 | 0.15725 | 0.17142 | 0.16376 | 0.11076 | 0.1457  | 0.2787  | 0.14746 | 0.12163 GPR87    |
| cg09432376 | 0.78647 | 0.81617 | 0.22388 | 0.398   | 0.65014 | 0.60498 | 0.12959 | 0.56783 | 0.09292 | 0.09244 APOL6    |
| cg09433780 | 0.09053 | 0.09681 | 0.09995 | 0.09545 | 0.08181 | 0.08396 | 0.0887  | 0.08555 | 0.08399 | 0.08445 APPL     |
| cg09434995 | 0.79518 | 0.48127 | 0.80023 | 0.82605 | 0.88207 | 0.81383 | 0.82586 | 0.76656 | 0.82328 | 0.66835 SRCRB4D  |
| cg09435090 | 0.13025 | 0.11206 | 0.17004 | 0.1517  | 0.14378 | 0.12731 | 0.09227 | 0.07877 | 0.0923  | 0.08551 QDPR     |
| cg09437522 | 0.5168  | 0.29616 | 0.93846 | 0.94956 | 0.82122 | 0.70235 | 0.20953 | 0.27355 | 0.81048 | 0.92919 GNAS     |
| cg09438266 | 0.02132 | 0.02536 | 0.01972 | 0.02079 | 0.02028 | 0.0178  | 0.01901 | 0.02053 | 0.01679 | 0.01351 MGC13138 |
| cg09439093 | 0.03271 | 0.03687 | 0.03677 | 0.04013 | 0.03582 | 0.04057 | 0.02846 | 0.03422 | 0.02609 | 0.02556 PEI1     |
| cg09440243 | 0.25502 | 0.21569 | 0.20727 | 0.13972 | 0.31893 | 0.66667 | 0.16714 | 0.16026 | 0.08876 | 0.10104 PTPRD    |
| cg09440289 | 0.05737 | 0.03282 | 0.05797 | 0.04316 | 0.03356 | 0.03604 | 0.06289 | 0.02697 | 0.60572 | 0.58836 PTPRO    |
| cg09440340 | 0.65339 | 0.49205 | 0.84226 | 0.86666 | 0.386   | 0.2222  | 0.47162 | 0.29281 | 0.31695 | 0.26279 C1orf161 |
| cg09441152 | 0.04231 | 0.04799 | 0.09208 | 0.10207 | 0.38655 | 0.03922 | 0.0611  | 0.05396 | 0.04793 | 0.04101 PQLC1    |
| cg09445097 | 0.03674 | 0.04574 | 0.0465  | 0.0454  | 0.04012 | 0.04576 | 0.0341  | 0.03291 | 0.03295 | 0.03142 ZNF79    |
| cg09446127 | 0.05581 | 0.06913 | 0.07211 | 0.07361 | 0.10328 | 0.06901 | 0.05692 | 0.05651 | 0.05434 | 0.04758 UBADC1   |
| cg09447105 | 0.80957 | 0.66787 | 0.83833 | 0.89384 | 0.70815 | 0.89755 | 0.31534 | 0.77273 | 0.08654 | 0.14807 PDE6H    |
| cg09448875 | 0.50508 | 0.25872 | 0.76483 | 0.81138 | 0.68253 | 0.54312 | 0.70395 | 0.6786  | 0.43353 | 0.16195 ABCC2    |
| cg09448880 | 0.10219 | 0.07006 | 0.2591  | 0.38623 | 0.62403 | 0.6278  | 0.05343 | 0.05563 | 0.06377 | 0.0597 PGLYRP3   |
| cg09449490 | 0.12604 | 0.13193 | 0.12987 | 0.12219 | 0.21433 | 0.17002 | 0.13483 | 0.12632 | 0.12576 | 0.13323 ROCK1    |
| cg09450020 | 0.01813 | 0.0228  | 0.05009 | 0.02297 | 0.05684 | 0.07021 | 0.02313 | 0.01767 | 0.08825 | 0.09184 STEAP2   |
| cg09450238 | 0.08221 | 0.04438 | 0.05406 | 0.05634 | 0.83519 | 0.2783  | 0.64845 | 0.1202  | 0.89125 | 0.16262 BTBD6    |
| cg09451092 | 0.66477 | 0.62582 | 0.81768 | 0.86143 | 0.90672 | 0.72719 | 0.85294 | 0.82951 | 0.6878  | 0.81862 CCDC19   |
| cg09453312 | 0.67118 | 0.16147 | 0.42423 | 0.47229 | 0.57235 | 0.75541 | 0.61211 | 0.70247 | 0.10804 | 0.12027 ITK      |
| cg09453737 | 0.06321 | 0.0456  | 0.05654 | 0.04348 | 0.24786 | 0.10022 | 0.04771 | 0.0488  | 0.11478 | 0.04061 ZNF84    |
| cg09454892 | 0.31426 | 0.16106 | 0.75748 | 0.56631 | 0.55482 | 0.20718 | 0.44237 | 0.10565 | 0.4555  | 0.16718 SAMD8    |
| cg09455096 | 0.03955 | 0.04247 | 0.04405 | 0.0359  | 0.02798 | 0.03776 | 0.03931 | 0.04361 | 0.03029 | 0.03965 XPO1     |

|            |         |         |         |         |         |         |         |         |         |         |          |
|------------|---------|---------|---------|---------|---------|---------|---------|---------|---------|---------|----------|
| cg09456329 | 0.02958 | 0.03212 | 0.03255 | 0.03356 | 0.0328  | 0.04042 | 0.03138 | 0.03005 | 0.02237 | 0.02724 | MGC39581 |
| cg09456939 | 0.04345 | 0.04052 | 0.05674 | 0.04708 | 0.04684 | 0.05238 | 0.03418 | 0.03371 | 0.04235 | 0.04568 | CASZ1    |
| cg09457245 | 0.78577 | 0.79055 | 0.54974 | 0.75122 | 0.7659  | 0.74354 | 0.19717 | 0.70867 | 0.39082 | 0.17085 | ZNF385   |
| cg09458170 | 0.02458 | 0.0285  | 0.03399 | 0.02767 | 0.02003 | 0.02545 | 0.03018 | 0.02564 | 0.02647 | 0.02942 | ATXN3    |
| cg09458237 | 0.64135 | 0.0871  | 0.63716 | 0.76809 | 0.7988  | 0.4883  | 0.09931 | 0.15538 | 0.21488 | 0.26607 | HSPA12B  |
| cg09458394 | 0.07186 | 0.05836 | 0.07328 | 0.06431 | 0.0852  | 0.0948  | 0.0447  | 0.04219 | 0.07461 | 0.06716 | RABGGTB  |
| cg09459044 | 0.04656 | 0.04978 | 0.04778 | 0.04377 | 0.03343 | 0.07151 | 0.05529 | 0.05192 | 0.04849 | 0.04858 | PPA2     |
| cg09459188 | 0.02325 | 0.02741 | 0.02461 | 0.02503 | 0.01855 | 0.0224  | 0.01735 | 0.01848 | 0.01947 | 0.0192  | MFSD1    |
| cg09461185 | 0.05222 | 0.04391 | 0.0673  | 0.07444 | 0.04735 | 0.0457  | 0.05283 | 0.04564 | 0.09882 | 0.06155 | PTGS2    |
| cg09462575 | 0.17028 | 0.15066 | 0.17993 | 0.27577 | 0.16133 | 0.14713 | 0.13737 | 0.15904 | 0.11314 | 0.12143 | PI3      |
| cg09462576 | 0.21021 | 0.16043 | 0.28501 | 0.17439 | 0.88964 | 0.83061 | 0.17376 | 0.19058 | 0.30294 | 0.23255 | MRPL55   |
| cg09462587 | 0.04049 | 0.04203 | 0.03962 | 0.03728 | 0.05468 | 0.04656 | 0.0541  | 0.05657 | 0.0411  | 0.04007 | MGC11102 |
| cg09462826 | 0.0476  | 0.04746 | 0.04729 | 0.05321 | 0.0954  | 0.05626 | 0.05673 | 0.04943 | 0.1084  | 0.04344 | FADS1    |
| cg09464487 | 0.1293  | 0.02616 | 0.02589 | 0.02116 | 0.14474 | 0.02917 | 0.01869 | 0.01688 | 0.19845 | 0.05619 | ACTR6    |
| cg09467501 | 0.12904 | 0.04106 | 0.09891 | 0.35164 | 0.92763 | 0.92857 | 0.93802 | 0.9047  | 0.93935 | 0.93834 | PYY      |
| cg09469394 | 0.04542 | 0.04161 | 0.04993 | 0.04131 | 0.0756  | 0.07673 | 0.03683 | 0.03128 | 0.04625 | 0.03249 | PEX13    |
| cg09470640 | 0.11483 | 0.04716 | 0.0807  | 0.06899 | 0.07377 | 0.33101 | 0.09182 | 0.06047 | 0.62129 | 0.61157 | PTPRO    |
| cg09472203 | 0.04084 | 0.03736 | 0.04725 | 0.04517 | 0.03454 | 0.03845 | 0.03726 | 0.04333 | 0.03847 | 0.03817 | AP3B2    |
| cg09472953 | 0.032   | 0.09189 | 0.03403 | 0.03237 | 0.02352 | 0.03332 | 0.02707 | 0.02703 | 0.03018 | 0.02865 | EPM2A    |
| cg09473585 | 0.8191  | 0.74971 | 0.70331 | 0.73686 | 0.67731 | 0.7905  | 0.6693  | 0.67706 | 0.8483  | 0.80511 | C3orf14  |
| cg09475324 | 0.03668 | 0.03408 | 0.0525  | 0.04008 | 0.02931 | 0.03777 | 0.03279 | 0.03271 | 0.1062  | 0.02698 | HYPE     |
| cg09475757 | 0.1685  | 0.1767  | 0.14362 | 0.11986 | 0.0708  | 0.1099  | 0.12803 | 0.11099 | 0.1319  | 0.14517 | NEIL3    |
| cg09476523 | 0.03402 | 0.02908 | 0.03421 | 0.03182 | 0.02624 | 0.02951 | 0.03655 | 0.03667 | 0.02406 | 0.02674 | RHOBTB2  |
| cg09478045 | 0.09709 | 0.09659 | 0.09314 | 0.08074 | 0.06019 | 0.08433 | 0.0816  | 0.07897 | 0.07548 | 0.07953 | EIF4B    |
| cg09478478 | 0.43489 | 0.16376 | 0.3139  | 0.23308 | 0.44783 | 0.31316 | 0.25731 | 0.19298 | 0.55523 | 0.51737 | CD1E     |
| cg09478597 | 0.02255 | 0.02214 | 0.02711 | 0.02442 | 0.02224 | 0.02128 | 0.02701 | 0.03223 | 0.01745 | 0.01946 | SPFH2    |
| cg09479015 | 0.04507 | 0.03618 | 0.15731 | 0.18383 | 0.30411 | 0.06378 | 0.07235 | 0.0679  | 0.04139 | 0.03453 | KIRREL2  |
| cg09479906 | 0.03118 | 0.03217 | 0.03458 | 0.03379 | 0.0249  | 0.02904 | 0.03118 | 0.03021 | 0.02807 | 0.02732 | C10orf88 |
| cg09480162 | 0.109   | 0.06904 | 0.08104 | 0.06949 | 0.07508 | 0.08173 | 0.05953 | 0.04636 | 0.04842 | 0.04607 | FLJ22624 |
| cg09480837 | 0.27162 | 0.08578 | 0.86452 | 0.87859 | 0.88402 | 0.828   | 0.86581 | 0.81999 | 0.33205 | 0.16525 | PLCE1    |
| cg09485593 | 0.84227 | 0.87262 | 0.82424 | 0.86608 | 0.88195 | 0.88389 | 0.85012 | 0.86254 | 0.88239 | 0.8371  | XYLT1    |
| cg09486093 | 0.27677 | 0.09244 | 0.0924  | 0.09401 | 0.35271 | 0.2583  | 0.05397 | 0.04462 | 0.07823 | 0.03835 | HSD17B4  |
| cg09486567 | 0.0337  | 0.04024 | 0.12098 | 0.14571 | 0.55499 | 0.47345 | 0.03964 | 0.04616 | 0.03007 | 0.02539 | OVOL2    |
| cg09491779 | 0.28989 | 0.19287 | 0.22334 | 0.18135 | 0.29277 | 0.2438  | 0.21587 | 0.1727  | 0.15255 | 0.1533  | C9orf82  |
| cg09492887 | 0.09058 | 0.05185 | 0.74037 | 0.8711  | 0.87665 | 0.87519 | 0.2219  | 0.0828  | 0.40173 | 0.64954 | SLC26A5  |
| cg09494188 | 0.86889 | 0.60793 | 0.88347 | 0.89442 | 0.91789 | 0.87788 | 0.89287 | 0.86095 | 0.88419 | 0.63747 | SCGB1A1  |
| cg09494546 | 0.65084 | 0.30409 | 0.65555 | 0.72678 | 0.20588 | 0.13533 | 0.43834 | 0.2733  | 0.68321 | 0.45959 | SLC16A4  |
| cg09495351 | 0.44597 | 0.22968 | 0.2779  | 0.26538 | 0.24658 | 0.1355  | 0.11303 | 0.0939  | 0.07649 | 0.1     | WIRE     |
| cg09495977 | 0.91726 | 0.90663 | 0.0399  | 0.04617 | 0.80315 | 0.9142  | 0.79255 | 0.88078 | 0.04633 | 0.02716 | HTRA3    |
| cg09496393 | 0.02954 | 0.03304 | 0.03618 | 0.03344 | 0.03196 | 0.03601 | 0.02511 | 0.02481 | 0.02965 | 0.03436 | KPNA5    |
| cg09497789 | 0.16536 | 0.19184 | 0.46354 | 0.38605 | 0.15271 | 0.195   | 0.57249 | 0.76215 | 0.10358 | 0.08025 | SPAG17   |

|            |         |         |         |         |         |         |         |         |         |                   |
|------------|---------|---------|---------|---------|---------|---------|---------|---------|---------|-------------------|
| cg09498007 | 0.10352 | 0.08821 | 0.15895 | 0.20367 | 0.30777 | 0.24181 | 0.10661 | 0.07757 | 0.10052 | 0.1061 CREG2      |
| cg09498106 | 0.03761 | 0.03333 | 0.13225 | 0.065   | 0.03069 | 0.02946 | 0.03271 | 0.03225 | 0.02833 | 0.02555 RENT1     |
| cg09498379 | 0.01537 | 0.01444 | 0.01452 | 0.01384 | 0.0136  | 0.01604 | 0.01482 | 0.01573 | 0.0116  | 0.01089 NEDD4     |
| cg09499698 | 0.07438 | 0.06333 | 0.07699 | 0.0751  | 0.10254 | 0.10976 | 0.05851 | 0.05616 | 0.06447 | 0.05262 CENPC1    |
| cg09499849 | 0.24116 | 0.3144  | 0.104   | 0.06892 | 0.13939 | 0.18731 | 0.0821  | 0.07476 | 0.0752  | 0.1161 ACVR1      |
| cg09500672 | 0.06848 | 0.04893 | 0.05435 | 0.04997 | 0.04595 | 0.0356  | 0.03972 | 0.03598 | 0.04281 | 0.03048 MGC52057  |
| cg09501516 | 0.0631  | 0.05942 | 0.09874 | 0.11197 | 0.13585 | 0.0769  | 0.45828 | 0.35313 | 0.31027 | 0.23012 RGS4      |
| cg09503780 | 0.03749 | 0.03779 | 0.03831 | 0.03852 | 0.0428  | 0.04192 | 0.03877 | 0.04141 | 0.03957 | 0.03588 GORASP2   |
| cg09503974 | 0.43805 | 0.40114 | 0.39043 | 0.4718  | 0.91794 | 0.88544 | 0.56134 | 0.6471  | 0.35732 | 0.34246 RARRES1   |
| cg09503975 | 0.02774 | 0.0302  | 0.0427  | 0.03796 | 0.02241 | 0.02678 | 0.02598 | 0.02628 | 0.02303 | 0.02458 SF1       |
| cg09504196 | 0.02989 | 0.03124 | 0.04404 | 0.0348  | 0.03084 | 0.03612 | 0.02831 | 0.02518 | 0.02664 | 0.02687 ZNF398    |
| cg09504352 | 0.01668 | 0.01951 | 0.02096 | 0.01743 | 0.0141  | 0.01799 | 0.01749 | 0.01661 | 0.0155  | 0.01704 CDK4      |
| cg09507928 | 0.0189  | 0.02043 | 0.0201  | 0.01654 | 0.01554 | 0.01413 | 0.01945 | 0.01923 | 0.01319 | 0.01483 IK        |
| cg09508556 | 0.86502 | 0.4784  | 0.91474 | 0.93418 | 0.95972 | 0.89693 | 0.35618 | 0.58725 | 0.79887 | 0.49314 PSORS1C2  |
| cg09509576 | 0.05349 | 0.05933 | 0.05465 | 0.05256 | 0.04063 | 0.04984 | 0.05627 | 0.05118 | 0.05417 | 0.04872 GRB2      |
| cg09509673 | 0.71548 | 0.23957 | 0.89851 | 0.90668 | 0.89609 | 0.86227 | 0.89593 | 0.81305 | 0.91941 | 0.9056 CCR10      |
| cg09509863 | 0.1495  | 0.1198  | 0.1233  | 0.21015 | 0.11964 | 0.13    | 0.10379 | 0.08139 | 0.10433 | 0.10899 CUL3      |
| cg09511421 | 0.1135  | 0.09593 | 0.29231 | 0.25094 | 0.35997 | 0.11337 | 0.12882 | 0.09375 | 0.10505 | 0.14917 NDST4     |
| cg09513026 | 0.85093 | 0.80028 | 0.8364  | 0.86317 | 0.88355 | 0.84285 | 0.85421 | 0.58458 | 0.8641  | 0.78378 WNT8A     |
| cg09514038 | 0.58515 | 0.55981 | 0.73139 | 0.77185 | 0.78239 | 0.81153 | 0.60215 | 0.53852 | 0.84367 | 0.72932 TMC5      |
| cg09514188 | 0.03947 | 0.04057 | 0.04465 | 0.03349 | 0.05376 | 0.04598 | 0.04485 | 0.04167 | 0.0361  | 0.03806 TOB1      |
| cg09514589 | 0.04826 | 0.04979 | 0.04984 | 0.04997 | 0.03661 | 0.04326 | 0.04392 | 0.04905 | 0.04146 | 0.04574 ETFA      |
| cg09515778 | 0.02749 | 0.0266  | 0.04998 | 0.04467 | 0.04207 | 0.04595 | 0.02912 | 0.02229 | 0.0256  | 0.02244 CDK5      |
| cg09515805 | 0.03608 | 0.03998 | 0.04197 | 0.04576 | 0.03854 | 0.03912 | 0.03694 | 0.04056 | 0.0346  | 0.03597 PGM2L1    |
| cg09516965 | 0.03783 | 0.03063 | 0.98381 | 0.98589 | 0.96806 | 0.97978 | 0.38185 | 0.5834  | 0.0399  | 0.02849 PTGDR     |
| cg09517019 | 0.13829 | 0.16261 | 0.29455 | 0.3069  | 0.31739 | 0.17526 | 0.19885 | 0.15507 | 0.14178 | 0.11679 ARHGEF6   |
| cg09518735 | 0.12174 | 0.05272 | 0.03628 | 0.03499 | 0.03921 | 0.03528 | 0.0365  | 0.0339  | 0.02783 | 0.02893 C10orf119 |
| cg09519758 | 0.7447  | 0.35284 | 0.76167 | 0.77017 | 0.57243 | 0.69059 | 0.5044  | 0.67035 | 0.83257 | 0.75857 C9orf68   |
| cg09522147 | 0.79603 | 0.65958 | 0.93708 | 0.94094 | 0.9595  | 0.94708 | 0.79234 | 0.82536 | 0.93628 | 0.941 KRT7        |
| cg09523691 | 0.20006 | 0.19598 | 0.14258 | 0.12907 | 0.28529 | 0.10518 | 0.13311 | 0.10124 | 0.84296 | 0.09767 ATG12     |
| cg09526693 | 0.56945 | 0.51185 | 0.74606 | 0.77458 | 0.67606 | 0.68894 | 0.73141 | 0.70723 | 0.78452 | 0.36115 IL2       |
| cg09527021 | 0.03945 | 0.04143 | 0.03811 | 0.03983 | 0.03289 | 0.03672 | 0.03309 | 0.0336  | 0.03745 | 0.03312 TADA1L    |
| cg09527362 | 0.87396 | 0.75924 | 0.0362  | 0.0401  | 0.03957 | 0.03856 | 0.04878 | 0.0569  | 0.03876 | 0.03175 C6orf150  |
| cg09528351 | 0.66319 | 0.62023 | 0.92148 | 0.9005  | 0.72337 | 0.70444 | 0.76581 | 0.80809 | 0.93624 | 0.87237 PIK3R5    |
| cg09529667 | 0.02816 | 0.02902 | 0.02681 | 0.03045 | 0.01897 | 0.03122 | 0.02791 | 0.02656 | 0.1885  | 0.02579 SSBP4     |
| cg09530763 | 0.48754 | 0.10114 | 0.4712  | 0.52661 | 0.07323 | 0.06007 | 0.28103 | 0.09552 | 0.0519  | 0.04218 RNF26     |
| cg09531892 | 0.07684 | 0.06984 | 0.08866 | 0.07369 | 0.07064 | 0.06857 | 0.07216 | 0.06915 | 0.06759 | 0.06529 LRP12     |
| cg09532664 | 0.26794 | 0.26299 | 0.83806 | 0.84169 | 0.75221 | 0.80871 | 0.25768 | 0.23385 | 0.22972 | 0.42495 TAS2R1    |
| cg09533063 | 0.5186  | 0.17723 | 0.5397  | 0.68946 | 0.21234 | 0.10575 | 0.40357 | 0.55968 | 0.34829 | 0.07369 ALDH8A1   |
| cg09533293 | 0.07319 | 0.07096 | 0.0765  | 0.06365 | 0.06247 | 0.0605  | 0.08858 | 0.08026 | 0.06586 | 0.07305 ANXA2     |
| cg09535168 | 0.03972 | 0.04081 | 0.04798 | 0.04147 | 0.03245 | 0.03669 | 0.03537 | 0.03475 | 0.03152 | 0.03515 SF4       |

|            |         |         |         |         |         |         |         |         |         |         |          |
|------------|---------|---------|---------|---------|---------|---------|---------|---------|---------|---------|----------|
| cg09536738 | 0.14411 | 0.12387 | 0.16481 | 0.13456 | 0.25012 | 0.16238 | 0.1452  | 0.10802 | 0.14652 | 0.1268  | EFHD1    |
| cg09537031 | 0.58505 | 0.64194 | 0.04497 | 0.04084 | 0.03132 | 0.03054 | 0.34303 | 0.31027 | 0.33097 | 0.34081 | SH2D4A   |
| cg09538287 | 0.26905 | 0.36147 | 0.15768 | 0.13656 | 0.33546 | 0.13377 | 0.14214 | 0.11638 | 0.12141 | 0.12172 | CTNNA3   |
| cg09538582 | 0.90231 | 0.91683 | 0.88684 | 0.88957 | 0.85756 | 0.89199 | 0.83706 | 0.58504 | 0.57416 | 0.41405 | KRTHA5   |
| cg09539271 | 0.02758 | 0.02746 | 0.0487  | 0.03838 | 0.0254  | 0.02822 | 0.02763 | 0.02664 | 0.02896 | 0.02467 | PTHB1    |
| cg09539408 | 0.03863 | 0.04494 | 0.04279 | 0.03427 | 0.03361 | 0.03258 | 0.03159 | 0.03333 | 0.03536 | 0.0355  | STRN3    |
| cg09539438 | 0.03796 | 0.04405 | 0.26995 | 0.25173 | 0.08252 | 0.05373 | 0.0372  | 0.03462 | 0.05012 | 0.03488 | NTRK2    |
| cg09539538 | 0.85748 | 0.65311 | 0.58788 | 0.66571 | 0.85006 | 0.6382  | 0.15963 | 0.64965 | 0.50689 | 0.22281 | C2orf42  |
| cg09541248 | 0.44053 | 0.05036 | 0.50133 | 0.44569 | 0.58033 | 0.30147 | 0.65488 | 0.42957 | 0.17233 | 0.03667 | MYO1A    |
| cg09541468 | 0.02465 | 0.02509 | 0.02355 | 0.02391 | 0.02925 | 0.0239  | 0.02632 | 0.02412 | 0.02187 | 0.01854 | CORO1B   |
| cg09542111 | 0.03829 | 0.03501 | 0.08812 | 0.10382 | 0.15163 | 0.03632 | 0.04226 | 0.18111 | 0.22539 | 0.1841  | GRIK1    |
| cg09542291 | 0.08842 | 0.0568  | 0.6133  | 0.61659 | 0.88284 | 0.88267 | 0.11821 | 0.04908 | 0.07584 | 0.04487 | SMCP     |
| cg09542745 | 0.05286 | 0.0595  | 0.09298 | 0.19265 | 0.35983 | 0.06001 | 0.0603  | 0.0591  | 0.07049 | 0.05475 | SFRP5    |
| cg09543783 | 0.82318 | 0.67123 | 0.92001 | 0.92913 | 0.92    | 0.83877 | 0.88317 | 0.21323 | 0.92525 | 0.87079 | FKRP     |
| cg09543792 | 0.03944 | 0.04448 | 0.04346 | 0.04062 | 0.03915 | 0.04107 | 0.04032 | 0.04163 | 0.54987 | 0.67753 | SLC16A13 |
| cg09544918 | 0.03703 | 0.03941 | 0.0523  | 0.04511 | 0.03727 | 0.04462 | 0.04357 | 0.03426 | 0.03037 | 0.02868 | CDON     |
| cg09545860 | 0.03023 | 0.02731 | 0.02824 | 0.02397 | 0.04447 | 0.02643 | 0.02445 | 0.02692 | 0.03196 | 0.02662 | NS4ATP2  |
| cg09546307 | 0.7174  | 0.60126 | 0.72701 | 0.83669 | 0.79468 | 0.81858 | 0.12649 | 0.10259 | 0.0791  | 0.0792  | CLEC4D   |
| cg09546332 | 0.02044 | 0.02894 | 0.02493 | 0.02914 | 0.02067 | 0.0309  | 0.02696 | 0.02575 | 0.02411 | 0.0229  | PARP4    |
| cg09546345 | 0.05191 | 0.04545 | 0.05303 | 0.04451 | 0.05848 | 0.05412 | 0.03864 | 0.04379 | 0.04332 | 0.04281 | DHRS1    |
| cg09547190 | 0.88411 | 0.52808 | 0.69589 | 0.7248  | 0.84842 | 0.43593 | 0.78241 | 0.45295 | 0.32273 | 0.04904 | C9orf89  |
| cg09547224 | 0.08981 | 0.04129 | 0.6609  | 0.88276 | 0.46216 | 0.60856 | 0.09722 | 0.04046 | 0.58457 | 0.6302  | SLC5A1   |
| cg09547777 | 0.90374 | 0.6279  | 0.91267 | 0.9327  | 0.96501 | 0.89458 | 0.88135 | 0.73595 | 0.94035 | 0.90185 | CASQ1    |
| cg09548084 | 0.92629 | 0.91102 | 0.20033 | 0.53662 | 0.37473 | 0.31194 | 0.59544 | 0.20945 | 0.22517 | 0.33041 | SLC35B3  |
| cg09548179 | 0.03497 | 0.03137 | 0.03775 | 0.03138 | 0.02558 | 0.02864 | 0.03172 | 0.03442 | 0.02948 | 0.02668 | AMDHD2   |
| cg09549827 | 0.11072 | 0.0438  | 0.06186 | 0.04673 | 0.7573  | 0.57774 | 0.14596 | 0.03791 | 0.05935 | 0.03135 | ESPN     |
| cg09551147 | 0.03581 | 0.0232  | 0.56886 | 0.60444 | 0.03181 | 0.02924 | 0.05326 | 0.02444 | 0.05763 | 0.02787 | SORCS3   |
| cg09551916 | 0.17632 | 0.09362 | 0.32137 | 0.44895 | 0.3239  | 0.43804 | 0.06578 | 0.15727 | 0.09265 | 0.0696  | CFHR2    |
| cg09553358 | 0.06144 | 0.05202 | 0.86131 | 0.89883 | 0.84915 | 0.57578 | 0.1706  | 0.06981 | 0.63401 | 0.29738 | BM88     |
| cg09553448 | 0.26404 | 0.12135 | 0.33193 | 0.43688 | 0.24406 | 0.27145 | 0.31055 | 0.11749 | 0.34028 | 0.26853 | NUP214   |
| cg09554443 | 0.83791 | 0.60332 | 0.83762 | 0.90091 | 0.87598 | 0.85369 | 0.84009 | 0.88513 | 0.84934 | 0.81966 | CD3Z     |
| cg09555217 | 0.09772 | 0.11758 | 0.11678 | 0.11164 | 0.20687 | 0.16976 | 0.14242 | 0.11113 | 0.09572 | 0.12707 | SMAP     |
| cg09555679 | 0.6416  | 0.7076  | 0.70591 | 0.73714 | 0.58762 | 0.70031 | 0.44211 | 0.49023 | 0.67756 | 0.69323 | CCNB3    |
| cg09555879 | 0.89926 | 0.61448 | 0.55357 | 0.62372 | 0.8763  | 0.8802  | 0.0318  | 0.03175 | 0.89708 | 0.82359 | GRIK5    |
| cg09556292 | 0.04794 | 0.04766 | 0.04683 | 0.04568 | 0.04107 | 0.04636 | 0.04329 | 0.04377 | 0.04466 | 0.03667 | RCOR1    |
| cg09558502 | 0.10038 | 0.07079 | 0.07185 | 0.07052 | 0.17289 | 0.07154 | 0.06199 | 0.07001 | 0.07182 | 0.07145 | OVGP1    |
| cg09558850 | 0.63078 | 0.22414 | 0.57277 | 0.69749 | 0.78277 | 0.52017 | 0.82814 | 0.87455 | 0.89607 | 0.88448 | TFPI2    |
| cg09559551 | 0.62466 | 0.66164 | 0.67279 | 0.74223 | 0.61844 | 0.70272 | 0.60995 | 0.63876 | 0.71816 | 0.65488 | RSC1A1   |
| cg09560912 | 0.05143 | 0.05794 | 0.06132 | 0.05817 | 0.06847 | 0.06095 | 0.05472 | 0.06073 | 0.03849 | 0.03921 | NCOA3    |
| cg09562455 | 0.05423 | 0.05836 | 0.89354 | 0.90196 | 0.06411 | 0.05358 | 0.07215 | 0.4053  | 0.04813 | 0.0308  | NROB1    |
| cg09563216 | 0.82468 | 0.83358 | 0.86635 | 0.88617 | 0.826   | 0.83305 | 0.85799 | 0.88133 | 0.85448 | 0.8347  | C1orf51  |



|            |         |         |         |         |         |         |         |         |         |         |           |
|------------|---------|---------|---------|---------|---------|---------|---------|---------|---------|---------|-----------|
| cg09564133 | 0.06994 | 0.07547 | 0.07156 | 0.07381 | 0.04731 | 0.06678 | 0.05701 | 0.06696 | 0.05898 | 0.05842 | MXD3      |
| cg09565688 | 0.72151 | 0.7304  | 0.60736 | 0.63353 | 0.56454 | 0.65314 | 0.52551 | 0.56704 | 0.54225 | 0.49626 | CLEC12B   |
| cg09571369 | 0.80139 | 0.54048 | 0.7792  | 0.79781 | 0.63186 | 0.82338 | 0.83653 | 0.84838 | 0.69685 | 0.61116 | P2RY14    |
| cg09572106 | 0.02438 | 0.02708 | 0.0275  | 0.02381 | 0.06402 | 0.02897 | 0.02905 | 0.02637 | 0.02464 | 0.02066 | PDLIM7    |
| cg09572685 | 0.81695 | 0.81422 | 0.79596 | 0.82357 | 0.63799 | 0.77303 | 0.80896 | 0.81803 | 0.8124  | 0.74216 | MKS1      |
| cg09573435 | 0.04276 | 0.04161 | 0.04321 | 0.04102 | 0.07887 | 0.03475 | 0.03696 | 0.03905 | 0.26312 | 0.07394 | SEMA6A    |
| cg09573795 | 0.88552 | 0.84244 | 0.8847  | 0.89198 | 0.86048 | 0.87369 | 0.87468 | 0.90461 | 0.89628 | 0.91676 | MSX1      |
| cg09576882 | 0.14367 | 0.11248 | 0.11307 | 0.10899 | 0.06651 | 0.08532 | 0.09057 | 0.09709 | 0.09653 | 0.08538 | POLS      |
| cg09577651 | 0.65793 | 0.50518 | 0.82591 | 0.81653 | 0.32062 | 0.83003 | 0.16148 | 0.18507 | 0.12633 | 0.06559 | SIRPB1    |
| cg09580336 | 0.61451 | 0.14867 | 0.82557 | 0.83344 | 0.80012 | 0.80616 | 0.79441 | 0.72994 | 0.54216 | 0.40877 | ATP1A1    |
| cg09581098 | 0.055   | 0.06128 | 0.06597 | 0.06568 | 0.0644  | 0.04991 | 0.19914 | 0.3662  | 0.04474 | 0.05105 | 6-Sep     |
| cg09582042 | 0.91726 | 0.42539 | 0.78498 | 0.79034 | 0.33187 | 0.07293 | 0.09646 | 0.03689 | 0.27495 | 0.04106 | ITR       |
| cg09583599 | 0.73202 | 0.71369 | 0.76729 | 0.70733 | 0.86729 | 0.87236 | 0.7391  | 0.58175 | 0.80332 | 0.60385 | SKIV2L    |
| cg09584711 | 0.26823 | 0.07287 | 0.14289 | 0.12049 | 0.68234 | 0.79312 | 0.09263 | 0.1069  | 0.25431 | 0.06111 | HPR       |
| cg09585781 | 0.43955 | 0.09413 | 0.41491 | 0.52516 | 0.61023 | 0.34084 | 0.25569 | 0.12205 | 0.33552 | 0.10299 | CSH2      |
| cg09585834 | 0.04658 | 0.04905 | 0.05307 | 0.04053 | 0.0328  | 0.03707 | 0.04458 | 0.04277 | 0.04944 | 0.05186 | ANKS3     |
| cg09587549 | 0.25875 | 0.04686 | 0.17346 | 0.31096 | 0.96533 | 0.95316 | 0.9422  | 0.90381 | 0.03653 | 0.03643 | PYCARD    |
| cg09588210 | 0.20658 | 0.20569 | 0.23725 | 0.22695 | 0.28725 | 0.18238 | 0.17576 | 0.18357 | 0.32292 | 0.19768 | FLJ39739  |
| cg09588653 | 0.17572 | 0.09729 | 0.64747 | 0.65799 | 0.748   | 0.75116 | 0.26968 | 0.18389 | 0.28348 | 0.12067 | SLC6A7    |
| cg09591663 | 0.06205 | 0.06401 | 0.11789 | 0.08013 | 0.12086 | 0.09088 | 0.06698 | 0.05662 | 0.07127 | 0.05999 | C6orf66   |
| cg09593286 | 0.81148 | 0.79399 | 0.43159 | 0.37513 | 0.10074 | 0.07281 | 0.45484 | 0.09847 | 0.06145 | 0.05072 | SQRDL     |
| cg09593402 | 0.04949 | 0.04193 | 0.04264 | 0.04232 | 0.05365 | 0.03446 | 0.03533 | 0.03419 | 0.02701 | 0.02465 | LNPEP     |
| cg09594067 | 0.03128 | 0.03593 | 0.03519 | 0.03221 | 0.03387 | 0.04034 | 0.02848 | 0.02925 | 0.02654 | 0.02468 | EXOSC6    |
| cg09594841 | 0.03868 | 0.04187 | 0.04539 | 0.04673 | 0.04617 | 0.03905 | 0.03668 | 0.03853 | 0.0328  | 0.03433 | LIG1      |
| cg09595479 | 0.78688 | 0.72253 | 0.95836 | 0.95725 | 0.96166 | 0.95971 | 0.88537 | 0.92036 | 0.96168 | 0.96948 | PRPH      |
| cg09597465 | 0.03941 | 0.05108 | 0.0486  | 0.04221 | 0.03741 | 0.04198 | 0.04101 | 0.04081 | 0.0457  | 0.03798 | SLC15A4   |
| cg09597496 | 0.047   | 0.04456 | 0.04654 | 0.04624 | 0.04081 | 0.04622 | 0.03868 | 0.04115 | 0.03783 | 0.03776 | NISCH     |
| cg09598225 | 0.0655  | 0.07282 | 0.07321 | 0.07389 | 0.04599 | 0.06421 | 0.06824 | 0.06404 | 0.0648  | 0.06679 | GNAS      |
| cg09599653 | 0.83081 | 0.79914 | 0.75847 | 0.80174 | 0.7322  | 0.77498 | 0.68158 | 0.73467 | 0.84367 | 0.61985 | ARL11     |
| cg09600437 | 0.05698 | 0.06722 | 0.06878 | 0.06613 | 0.07405 | 0.0577  | 0.0487  | 0.04798 | 0.05637 | 0.04733 | REL       |
| cg09600520 | 0.71548 | 0.63795 | 0.76252 | 0.818   | 0.75371 | 0.75391 | 0.78423 | 0.53225 | 0.72264 | 0.53293 | CDYL      |
| cg09600829 | 0.08506 | 0.07652 | 0.09181 | 0.07908 | 0.10572 | 0.08233 | 0.09566 | 0.07501 | 0.05863 | 0.06559 | C9orf100S |
| cg09601629 | 0.04079 | 0.03899 | 0.31199 | 0.32839 | 0.41082 | 0.43421 | 0.06935 | 0.11662 | 0.05392 | 0.03702 | FLJ40365  |
| cg09604203 | 0.03366 | 0.02967 | 0.03315 | 0.03196 | 0.04217 | 0.02898 | 0.02755 | 0.03273 | 0.04643 | 0.02103 | MYBL2     |
| cg09604428 | 0.49378 | 0.35587 | 0.53535 | 0.50722 | 0.37178 | 0.16133 | 0.60097 | 0.58726 | 0.69444 | 0.79781 | PB1       |
| cg09606564 | 0.09281 | 0.11052 | 0.67894 | 0.4168  | 0.50207 | 0.3531  | 0.79983 | 0.09918 | 0.44252 | 0.50108 | MFAP4     |
| cg09607232 | 0.9051  | 0.5597  | 0.8522  | 0.87726 | 0.46458 | 0.6119  | 0.41167 | 0.37953 | 0.87105 | 0.90931 | MAGEA9    |
| cg09607282 | 0.14973 | 0.1594  | 0.22009 | 0.14464 | 0.12395 | 0.1395  | 0.13457 | 0.13316 | 0.11884 | 0.11587 | RTN2      |
| cg09610963 | 0.78719 | 0.72797 | 0.8937  | 0.89658 | 0.90811 | 0.86641 | 0.72132 | 0.67574 | 0.87535 | 0.32526 | LRRC37A   |
| cg09614401 | 0.97056 | 0.97821 | 0.97702 | 0.97762 | 0.976   | 0.97578 | 0.87624 | 0.97442 | 0.98104 | 0.98443 | ADRA1D    |
| cg09615786 | 0.04585 | 0.0467  | 0.04599 | 0.03994 | 0.04298 | 0.03912 | 0.0598  | 0.06356 | 0.04336 | 0.04068 | DCBLD2    |

|            |         |         |         |         |         |         |         |         |         |                  |
|------------|---------|---------|---------|---------|---------|---------|---------|---------|---------|------------------|
| cg09615982 | 0.04255 | 0.03458 | 0.04125 | 0.03707 | 0.03602 | 0.03459 | 0.03774 | 0.0423  | 0.0298  | 0.03207 E4F1     |
| cg09616556 | 0.80881 | 0.85126 | 0.76392 | 0.79809 | 0.59981 | 0.37306 | 0.60017 | 0.48742 | 0.61271 | 0.37889 AMN      |
| cg09617747 | 0.05304 | 0.05426 | 0.05095 | 0.05336 | 0.06649 | 0.05709 | 0.04789 | 0.04859 | 0.04395 | 0.03924 NOB1P    |
| cg09617773 | 0.27247 | 0.2731  | 0.40191 | 0.48705 | 0.3851  | 0.6175  | 0.30336 | 0.43113 | 0.26665 | 0.23205 IMPG1    |
| cg09618028 | 0.06148 | 0.06622 | 0.05849 | 0.05953 | 0.05707 | 0.06739 | 0.0453  | 0.0573  | 0.05581 | 0.0607 COX11     |
| cg09618387 | 0.83285 | 0.60599 | 0.82603 | 0.86471 | 0.81681 | 0.83122 | 0.72025 | 0.3893  | 0.87172 | 0.13301 TSKS     |
| cg09618682 | 0.06014 | 0.06619 | 0.09711 | 0.06093 | 0.13286 | 0.05709 | 0.05433 | 0.05511 | 0.06376 | 0.05858 SEC22L2  |
| cg09619146 | 0.33244 | 0.07341 | 0.83647 | 0.90174 | 0.74804 | 0.68129 | 0.42187 | 0.39091 | 0.40317 | 0.04742 CPXM2    |
| cg09619786 | 0.037   | 0.02856 | 0.09553 | 0.08698 | 0.92856 | 0.78547 | 0.45785 | 0.30849 | 0.73959 | 0.49805 RPP25    |
| cg09620798 | 0.12016 | 0.10028 | 0.09774 | 0.10008 | 0.16708 | 0.13267 | 0.16172 | 0.13851 | 0.08855 | 0.09892 UBE1C    |
| cg09622447 | 0.10282 | 0.11585 | 0.09771 | 0.09556 | 0.20942 | 0.09027 | 0.09037 | 0.07884 | 0.10111 | 0.07772 CBS      |
| cg09622957 | 0.08121 | 0.04559 | 0.07043 | 0.08457 | 0.05169 | 0.04302 | 0.06022 | 0.13128 | 0.05542 | 0.0362 TSRC1     |
| cg09624565 | 0.70729 | 0.61915 | 0.83409 | 0.87649 | 0.89413 | 0.8535  | 0.25978 | 0.10537 | 0.86987 | 0.61913 NCF4     |
| cg09625066 | 0.93304 | 0.90522 | 0.92313 | 0.93555 | 0.9553  | 0.91241 | 0.6769  | 0.68554 | 0.94154 | 0.90994 RGN      |
| cg09626634 | 0.86094 | 0.81931 | 0.11554 | 0.32405 | 0.15866 | 0.68811 | 0.07183 | 0.79447 | 0.48155 | 0.40013 EBI2     |
| cg09626984 | 0.45677 | 0.04447 | 0.0464  | 0.04527 | 0.66108 | 0.87997 | 0.35811 | 0.07597 | 0.88881 | 0.88816 GATA4    |
| cg09628199 | 0.03214 | 0.03481 | 0.09619 | 0.47165 | 0.04145 | 0.02489 | 0.041   | 0.03395 | 0.04206 | 0.02886 TSNARE1  |
| cg09628601 | 0.08142 | 0.07561 | 0.44118 | 0.76539 | 0.29995 | 0.25694 | 0.07845 | 0.06852 | 0.05733 | 0.0562 NPAS1     |
| cg09628707 | 0.19434 | 0.04656 | 0.84004 | 0.86235 | 0.90341 | 0.84931 | 0.7986  | 0.49241 | 0.47183 | 0.53092 KCNS1    |
| cg09630404 | 0.45337 | 0.44773 | 0.18293 | 0.32844 | 0.19778 | 0.10473 | 0.59938 | 0.14894 | 0.55741 | 0.26571 STAR     |
| cg09630437 | 0.13812 | 0.05305 | 0.27158 | 0.14612 | 0.15693 | 0.05116 | 0.10103 | 0.12292 | 0.27405 | 0.20059 SLC39A3  |
| cg09632136 | 0.5878  | 0.71286 | 0.14617 | 0.11565 | 0.16759 | 0.14228 | 0.13129 | 0.18609 | 0.07777 | 0.09746 NNMT     |
| cg09632416 | 0.03252 | 0.03203 | 0.03967 | 0.03429 | 0.02066 | 0.03216 | 0.02524 | 0.0281  | 0.02958 | 0.03037 TMEM16K  |
| cg09632585 | 0.89695 | 0.87801 | 0.89856 | 0.89297 | 0.9085  | 0.89394 | 0.89255 | 0.8636  | 0.91861 | 0.79001 FLJ10246 |
| cg09633588 | 0.03666 | 0.03767 | 0.04183 | 0.03804 | 0.03341 | 0.03911 | 0.02772 | 0.03696 | 0.03206 | 0.03667 C1orf174 |
| cg09634469 | 0.78934 | 0.80244 | 0.81909 | 0.79305 | 0.75798 | 0.80617 | 0.79154 | 0.80526 | 0.81526 | 0.79192 SERPIND1 |
| cg09634802 | 0.02439 | 0.02949 | 0.03176 | 0.03197 | 0.02581 | 0.02579 | 0.02766 | 0.02905 | 0.02202 | 0.02176 THRA     |
| cg09635067 | 0.16504 | 0.05352 | 0.07303 | 0.06579 | 0.10365 | 0.03734 | 0.04291 | 0.03871 | 0.05775 | 0.03231 RAB7L1   |
| cg09636671 | 0.06454 | 0.03415 | 0.04028 | 0.0358  | 0.39591 | 0.30097 | 0.13422 | 0.02793 | 0.04626 | 0.0301 LMOD1     |
| cg09637363 | 0.05355 | 0.05095 | 0.8622  | 0.83694 | 0.85186 | 0.48511 | 0.74983 | 0.83674 | 0.87136 | 0.83338 CCND1    |
| cg09638834 | 0.62948 | 0.78625 | 0.93535 | 0.93659 | 0.72118 | 0.47938 | 0.56083 | 0.479   | 0.49384 | 0.71274 RAET1L   |
| cg09640202 | 0.33362 | 0.04971 | 0.49341 | 0.56519 | 0.2058  | 0.05074 | 0.84169 | 0.13032 | 0.91243 | 0.46231 IMP4     |
| cg09643186 | 0.91275 | 0.9123  | 0.92541 | 0.93193 | 0.89477 | 0.91454 | 0.91987 | 0.92038 | 0.91017 | 0.91303 GPX2     |
| cg09643313 | 0.09413 | 0.10154 | 0.11945 | 0.10636 | 0.08412 | 0.07295 | 0.09905 | 0.07591 | 0.14123 | 0.08615 PPP1R9A  |
| cg09643544 | 0.07506 | 0.08061 | 0.83198 | 0.90364 | 0.44353 | 0.45336 | 0.19441 | 0.13336 | 0.06622 | 0.0607 ZNF177    |
| cg09644722 | 0.87368 | 0.49631 | 0.74472 | 0.95212 | 0.95612 | 0.94296 | 0.9456  | 0.94733 | 0.94979 | 0.94412 RNF190   |
| cg09645888 | 0.83768 | 0.60592 | 0.93492 | 0.93756 | 0.89287 | 0.93222 | 0.45283 | 0.54656 | 0.87287 | 0.89907 ME3      |
| cg09646392 | 0.66734 | 0.28909 | 0.37757 | 0.52553 | 0.56416 | 0.50362 | 0.50391 | 0.3585  | 0.32734 | 0.50666 TNFSF13B |
| cg09648228 | 0.04615 | 0.04483 | 0.04573 | 0.04236 | 0.05469 | 0.04507 | 0.03006 | 0.03346 | 0.03817 | 0.05542 HNRPC    |
| cg09648233 | 0.02973 | 0.03025 | 0.03846 | 0.04993 | 0.03151 | 0.02963 | 0.03033 | 0.02878 | 0.02707 | 0.02151 ALKBH4   |
| cg09649610 | 0.56497 | 0.14084 | 0.94873 | 0.94873 | 0.93882 | 0.95039 | 0.87582 | 0.58396 | 0.15718 | 0.15567 GNG4     |

|            |         |         |         |         |         |         |         |         |         |                  |
|------------|---------|---------|---------|---------|---------|---------|---------|---------|---------|------------------|
| cg09650667 | 0.02215 | 0.02297 | 0.02336 | 0.02577 | 0.01791 | 0.01986 | 0.01993 | 0.01956 | 0.02023 | 0.01779 COPB2    |
| cg09650985 | 0.02848 | 0.03179 | 0.02728 | 0.03002 | 0.02132 | 0.02663 | 0.02894 | 0.02757 | 0.0233  | 0.02233 SHKBP1   |
| cg09655559 | 0.04735 | 0.04333 | 0.0416  | 0.03689 | 0.03836 | 0.03753 | 0.03374 | 0.03989 | 0.03029 | 0.03472 TPD5L2L  |
| cg09656405 | 0.02885 | 0.02629 | 0.02912 | 0.0275  | 0.02328 | 0.02686 | 0.03088 | 0.02989 | 0.02307 | 0.0261 RPLP1     |
| cg09656934 | 0.92695 | 0.83753 | 0.75811 | 0.7434  | 0.90077 | 0.88293 | 0.65099 | 0.59377 | 0.19394 | 0.06867 TDRD5    |
| cg09657265 | 0.03269 | 0.02905 | 0.03296 | 0.02783 | 0.02141 | 0.02257 | 0.01719 | 0.01957 | 0.02369 | 0.02264 SMPDL3A  |
| cg09657311 | 0.82453 | 0.66284 | 0.84421 | 0.86099 | 0.74626 | 0.81224 | 0.79994 | 0.73332 | 0.84816 | 0.84166 MGC15912 |
| cg09657538 | 0.19767 | 0.1521  | 0.11383 | 0.12864 | 0.12866 | 0.13975 | 0.10908 | 0.11967 | 0.12905 | 0.10088 PIGY     |
| cg09658342 | 0.05285 | 0.05928 | 0.06363 | 0.05922 | 0.06962 | 0.06571 | 0.0518  | 0.04607 | 0.04873 | 0.04775 TIA1     |
| cg09658438 | 0.07108 | 0.0722  | 0.06809 | 0.06643 | 0.05176 | 0.06549 | 0.06303 | 0.06667 | 0.0661  | 0.06321 CS       |
| cg09659887 | 0.05017 | 0.05139 | 0.05508 | 0.05294 | 0.05392 | 0.05627 | 0.05981 | 0.04924 | 0.05064 | 0.04665 IPO7     |
| cg09660171 | 0.04516 | 0.04624 | 0.07319 | 0.04412 | 0.20208 | 0.04101 | 0.04689 | 0.04183 | 0.06468 | 0.05933 LMX1B    |
| cg09662150 | 0.03243 | 0.03632 | 0.03141 | 0.03037 | 0.03016 | 0.03237 | 0.0374  | 0.03792 | 0.02833 | 0.02515 TM2D2    |
| cg09663323 | 0.94105 | 0.93111 | 0.92738 | 0.93674 | 0.96263 | 0.95762 | 0.94077 | 0.94698 | 0.83515 | 0.7924 LOC112714 |
| cg09664442 | 0.01766 | 0.01866 | 0.01993 | 0.01845 | 0.01849 | 0.01707 | 0.43728 | 0.44648 | 0.01472 | 0.01705 ERICH1   |
| cg09665351 | 0.20386 | 0.19111 | 0.17843 | 0.1622  | 0.54136 | 0.55845 | 0.73367 | 0.38326 | 0.48661 | 0.14419 APXL     |
| cg09665592 | 0.046   | 0.04527 | 0.04555 | 0.04692 | 0.03957 | 0.04506 | 0.03794 | 0.03675 | 0.0381  | 0.03212 DPM2     |
| cg09666654 | 0.05488 | 0.04783 | 0.05314 | 0.04868 | 0.03831 | 0.0388  | 0.04116 | 0.04177 | 0.04646 | 0.04512 MYO1B    |
| cg09667122 | 0.07963 | 0.0812  | 0.10726 | 0.09825 | 0.12893 | 0.10328 | 0.08487 | 0.08134 | 0.06414 | 0.05666 GTF2IRD2 |
| cg09667226 | 0.0291  | 0.02954 | 0.0313  | 0.02875 | 0.02843 | 0.03874 | 0.02903 | 0.0207  | 0.02644 | 0.02665 KLF5     |
| cg09667582 | 0.6215  | 0.0738  | 0.40213 | 0.43306 | 0.67878 | 0.08805 | 0.15672 | 0.14204 | 0.0842  | 0.07212 UBE2Q2   |
| cg09669099 | 0.10845 | 0.10266 | 0.10824 | 0.09892 | 0.13801 | 0.11197 | 0.08727 | 0.09266 | 0.06676 | 0.08135 TERF2    |
| cg09671005 | 0.03256 | 0.02791 | 0.0279  | 0.02671 | 0.02026 | 0.02614 | 0.02532 | 0.02508 | 0.02159 | 0.01986 LOC90355 |
| cg09671611 | 0.81774 | 0.54282 | 0.79663 | 0.84494 | 0.79599 | 0.78198 | 0.73933 | 0.67586 | 0.66959 | 0.56384 GPR114   |
| cg09674215 | 0.27867 | 0.22192 | 0.83319 | 0.8552  | 0.904   | 0.88147 | 0.48326 | 0.18697 | 0.74449 | 0.84337 TWIST1   |
| cg09674867 | 0.83893 | 0.68244 | 0.88565 | 0.91187 | 0.95489 | 0.85373 | 0.85332 | 0.80253 | 0.82341 | 0.30415 C11orf16 |
| cg09675889 | 0.0442  | 0.04718 | 0.0575  | 0.04907 | 0.02109 | 0.03311 | 0.04251 | 0.03927 | 0.03856 | 0.03756 C19orf22 |
| cg09676390 | 0.87186 | 0.61783 | 0.74287 | 0.58529 | 0.87127 | 0.83428 | 0.86701 | 0.69193 | 0.90125 | 0.5666 ADARB1    |
| cg09676788 | 0.32489 | 0.47843 | 0.23131 | 0.22176 | 0.68598 | 0.27972 | 0.17998 | 0.11747 | 0.133   | 0.11264 RNF128   |
| cg09678228 | 0.04517 | 0.06622 | 0.0425  | 0.0369  | 0.02738 | 0.0351  | 0.03645 | 0.04637 | 0.06075 | 0.04612 TMEM117  |
| cg09682183 | 0.46168 | 0.21752 | 0.66262 | 0.65414 | 0.44842 | 0.12775 | 0.1055  | 0.08523 | 0.09677 | 0.20284 UNC93A   |
| cg09685104 | 0.01887 | 0.01879 | 0.02316 | 0.02553 | 0.02015 | 0.02414 | 0.01869 | 0.02575 | 0.01779 | 0.01755 C18orf19 |
| cg09685568 | 0.04094 | 0.04085 | 0.04875 | 0.04561 | 0.33657 | 0.03202 | 0.03663 | 0.03359 | 0.03833 | 0.03059 HIRA     |
| cg09685747 | 0.06529 | 0.06222 | 0.05679 | 0.05383 | 0.07589 | 0.05781 | 0.05864 | 0.05142 | 0.20473 | 0.0458 PNPT1     |
| cg09686308 | 0.50206 | 0.28615 | 0.8557  | 0.85218 | 0.86167 | 0.8167  | 0.73016 | 0.34462 | 0.60856 | 0.40692 CIB3     |
| cg09686635 | 0.08094 | 0.0867  | 0.13423 | 0.13404 | 0.13679 | 0.17451 | 0.14533 | 0.13607 | 0.13702 | 0.11624 C1orf107 |
| cg09688546 | 0.03296 | 0.02678 | 0.02879 | 0.02299 | 0.22477 | 0.02327 | 0.02345 | 0.02315 | 0.03402 | 0.02307 GLRB     |
| cg09688763 | 0.06879 | 0.06379 | 0.06646 | 0.07062 | 0.07675 | 0.0588  | 0.05774 | 0.0431  | 0.04484 | 0.05492 ZDHHC6   |
| cg09691574 | 0.74725 | 0.52327 | 0.85802 | 0.87766 | 0.90202 | 0.89029 | 0.27622 | 0.15292 | 0.89302 | 0.76419 MRGPRX4  |
| cg09693433 | 0.04511 | 0.04403 | 0.04864 | 0.04262 | 0.03218 | 0.03909 | 0.03804 | 0.04035 | 0.04356 | 0.03971 CDKL3    |
| cg09694403 | 0.03256 | 0.03796 | 0.02945 | 0.02731 | 0.0393  | 0.03958 | 0.03418 | 0.03251 | 0.02695 | 0.03601 DHRS7    |

|            |         |         |         |         |         |         |         |         |         |                   |
|------------|---------|---------|---------|---------|---------|---------|---------|---------|---------|-------------------|
| cg09697386 | 0.10398 | 0.07906 | 0.07642 | 0.07359 | 0.23034 | 0.13106 | 0.07771 | 0.08485 | 0.06768 | 0.06883 KIF27     |
| cg09697795 | 0.29282 | 0.09773 | 0.32426 | 0.40726 | 0.23908 | 0.59633 | 0.36266 | 0.40097 | 0.13559 | 0.05247 SCRL      |
| cg09699159 | 0.7712  | 0.15045 | 0.85911 | 0.8785  | 0.83194 | 0.84699 | 0.70277 | 0.79478 | 0.86426 | 0.67255 PRDM11    |
| cg09701102 | 0.89155 | 0.77386 | 0.8945  | 0.9394  | 0.89844 | 0.90197 | 0.66278 | 0.85438 | 0.81126 | 0.66776 NDUFV1    |
| cg09702010 | 0.16557 | 0.08787 | 0.13031 | 0.14213 | 0.21231 | 0.13048 | 0.07651 | 0.06273 | 0.06853 | 0.07498 KLK11     |
| cg09704415 | 0.43218 | 0.11144 | 0.63852 | 0.80374 | 0.67545 | 0.70687 | 0.33519 | 0.15594 | 0.06582 | 0.04515 SPATA6    |
| cg09705062 | 0.881   | 0.80112 | 0.87143 | 0.883   | 0.88697 | 0.87181 | 0.87506 | 0.79708 | 0.89545 | 0.72769 SLC22A11  |
| cg09706243 | 0.10386 | 0.04225 | 0.18143 | 0.24894 | 0.03469 | 0.03387 | 0.33086 | 0.23918 | 0.74611 | 0.41054 POLD4     |
| cg09712066 | 0.77863 | 0.83668 | 0.81315 | 0.85902 | 0.37723 | 0.2839  | 0.36407 | 0.22539 | 0.49887 | 0.25253 PART1     |
| cg09712527 | 0.25345 | 0.02791 | 0.0355  | 0.02474 | 0.09049 | 0.03149 | 0.01982 | 0.01961 | 0.02672 | 0.01701 KBTBD7    |
| cg09712606 | 0.03415 | 0.03512 | 0.03279 | 0.03321 | 0.02581 | 0.03406 | 0.02742 | 0.02734 | 0.02705 | 0.02627 IRF3      |
| cg09715672 | 0.23567 | 0.06073 | 0.91861 | 0.93326 | 0.01942 | 0.02725 | 0.8873  | 0.80766 | 0.93779 | 0.75951 C10orf116 |
| cg09717545 | 0.1651  | 0.09672 | 0.12348 | 0.13505 | 0.63062 | 0.7985  | 0.10926 | 0.08502 | 0.09773 | 0.07664 KISS1R    |
| cg09721047 | 0.87301 | 0.78667 | 0.85393 | 0.87509 | 0.8222  | 0.8521  | 0.72712 | 0.57996 | 0.87469 | 0.53943 ARHGAP25  |
| cg09721427 | 0.54658 | 0.12122 | 0.14784 | 0.20695 | 0.70729 | 0.23223 | 0.58766 | 0.15739 | 0.92173 | 0.84571 HEX       |
| cg09721659 | 0.57641 | 0.71053 | 0.86653 | 0.8566  | 0.31699 | 0.56259 | 0.89502 | 0.79992 | 0.87627 | 0.83503 TSHR      |
| cg09722397 | 0.04293 | 0.04766 | 0.06065 | 0.05399 | 0.05134 | 0.03622 | 0.04193 | 0.03762 | 0.05806 | 0.0355 GRIN2C     |
| cg09722555 | 0.48033 | 0.16558 | 0.76073 | 0.91504 | 0.94709 | 0.91571 | 0.55238 | 0.78649 | 0.2461  | 0.25457 CCL27     |
| cg09725013 | 0.02714 | 0.03056 | 0.02791 | 0.02754 | 0.0223  | 0.02636 | 0.02456 | 0.02582 | 0.02379 | 0.02779 GTF3C1    |
| cg09726469 | 0.0383  | 0.04316 | 0.04319 | 0.04151 | 0.02677 | 0.03259 | 0.0408  | 0.03659 | 0.03123 | 0.03422 MCL1      |
| cg09729918 | 0.04039 | 0.03992 | 0.04382 | 0.0406  | 0.03406 | 0.03853 | 0.04039 | 0.04081 | 0.0354  | 0.03163 SLC25A25  |
| cg09730017 | 0.04053 | 0.03877 | 0.04473 | 0.03821 | 0.03023 | 0.03322 | 0.03257 | 0.03675 | 0.03147 | 0.02781 HMBS      |
| cg09730349 | 0.17278 | 0.14969 | 0.31195 | 0.1799  | 0.74938 | 0.7458  | 0.18402 | 0.16236 | 0.47415 | 0.32036 C14orf143 |
| cg09730361 | 0.04827 | 0.03668 | 0.04614 | 0.04054 | 0.03223 | 0.03171 | 0.04018 | 0.04407 | 0.03428 | 0.03677 MLLT3     |
| cg09730836 | 0.04591 | 0.04002 | 0.04244 | 0.04022 | 0.0351  | 0.03773 | 0.04441 | 0.04134 | 0.03345 | 0.03063 TIGA1     |
| cg09735598 | 0.13545 | 0.13393 | 0.19656 | 0.16105 | 0.19863 | 0.16071 | 0.14882 | 0.12084 | 0.16042 | 0.16378 RGL1      |
| cg09735905 | 0.02795 | 0.02596 | 0.03383 | 0.03139 | 0.02724 | 0.02549 | 0.02312 | 0.0269  | 0.0297  | 0.02533 HHLA3     |
| cg09736162 | 0.02073 | 0.02146 | 0.36042 | 0.50277 | 0.35256 | 0.02141 | 0.02266 | 0.01956 | 0.0206  | 0.01883 CELSR3    |
| cg09736922 | 0.87515 | 0.41375 | 0.91821 | 0.91112 | 0.93818 | 0.87997 | 0.59931 | 0.1697  | 0.84587 | 0.20697 THPO      |
| cg09737668 | 0.75451 | 0.29234 | 0.78557 | 0.87801 | 0.73056 | 0.48935 | 0.30808 | 0.06999 | 0.12768 | 0.03632 SLAMF9    |
| cg09738100 | 0.03193 | 0.02826 | 0.03087 | 0.02656 | 0.0254  | 0.03215 | 0.02723 | 0.02511 | 0.02766 | 0.03043 MRPS9     |
| cg09739907 | 0.03985 | 0.04093 | 0.04394 | 0.04626 | 0.0367  | 0.0434  | 0.03986 | 0.03371 | 0.03924 | 0.03279 NAPE-PLD  |
| cg09744051 | 0.89299 | 0.87028 | 0.53902 | 0.59047 | 0.91967 | 0.86288 | 0.79177 | 0.83678 | 0.90234 | 0.76306 A4GALT    |
| cg09745307 | 0.21556 | 0.24652 | 0.72945 | 0.60831 | 0.54632 | 0.70968 | 0.58668 | 0.59525 | 0.20767 | 0.11461 AGXT2     |
| cg09747578 | 0.04135 | 0.03883 | 0.04028 | 0.03768 | 0.03718 | 0.04073 | 0.03675 | 0.03694 | 0.03577 | 0.03446 LRRC41    |
| cg09747829 | 0.13376 | 0.13504 | 0.19499 | 0.17928 | 0.23825 | 0.17105 | 0.11537 | 0.09308 | 0.13105 | 0.17808 BAI3      |
| cg09748960 | 0.21147 | 0.1151  | 0.66416 | 0.7284  | 0.3571  | 0.19145 | 0.14185 | 0.17116 | 0.3497  | 0.24044 BTNL2     |
| cg09748975 | 0.97682 | 0.97916 | 0.97593 | 0.97623 | 0.97071 | 0.97239 | 0.97907 | 0.97905 | 0.98035 | 0.98186 MSX1      |
| cg09750083 | 0.11178 | 0.10217 | 0.14749 | 0.11577 | 0.13177 | 0.12883 | 0.09509 | 0.07908 | 0.10234 | 0.09275 ETAA16    |
| cg09750183 | 0.85359 | 0.71417 | 0.93328 | 0.94712 | 0.95535 | 0.94773 | 0.52469 | 0.50397 | 0.80529 | 0.86535 PGA5      |
| cg09750385 | 0.13536 | 0.07975 | 0.50326 | 0.71676 | 0.22853 | 0.11954 | 0.43834 | 0.11203 | 0.09221 | 0.08292 GUCY1A3   |

|            |         |         |         |         |         |         |         |         |         |                   |
|------------|---------|---------|---------|---------|---------|---------|---------|---------|---------|-------------------|
| cg09752703 | 0.06487 | 0.0584  | 0.08153 | 0.07007 | 0.22395 | 0.07557 | 0.06099 | 0.0473  | 0.04655 | 0.05452 BCL2      |
| cg09754413 | 0.04893 | 0.06738 | 0.0642  | 0.05848 | 0.06588 | 0.05609 | 0.06295 | 0.10779 | 0.213   | 0.04882 RNF182    |
| cg09755102 | 0.09595 | 0.08755 | 0.07994 | 0.08155 | 0.06594 | 0.07777 | 0.08788 | 0.08626 | 0.07257 | 0.06684 YARS      |
| cg09757107 | 0.04565 | 0.04624 | 0.04482 | 0.04358 | 0.03622 | 0.04507 | 0.04552 | 0.04634 | 0.04213 | 0.03859 CDC42EP4  |
| cg09757277 | 0.15839 | 0.14725 | 0.2253  | 0.23677 | 0.23466 | 0.15177 | 0.14619 | 0.13465 | 0.10104 | 0.09597 ZNF222    |
| cg09759260 | 0.04641 | 0.04104 | 0.05361 | 0.0569  | 0.03389 | 0.04342 | 0.04399 | 0.03709 | 0.03185 | 0.03532 ITGA2     |
| cg09761310 | 0.54915 | 0.12013 | 0.03654 | 0.03707 | 0.02841 | 0.0301  | 0.03591 | 0.03522 | 0.03618 | 0.0269 EPS8       |
| cg09765256 | 0.04359 | 0.03857 | 0.04107 | 0.03971 | 0.03338 | 0.03567 | 0.03936 | 0.0375  | 0.03094 | 0.03274 ZNF668    |
| cg09766383 | 0.05572 | 0.05624 | 0.06606 | 0.0539  | 0.15633 | 0.044   | 0.05824 | 0.05021 | 0.06222 | 0.04711 GPR63     |
| cg09768051 | 0.7125  | 0.74706 | 0.48074 | 0.54154 | 0.55623 | 0.70934 | 0.59363 | 0.64662 | 0.37599 | 0.37989 LRRC7     |
| cg09768944 | 0.0382  | 0.037   | 0.0389  | 0.03919 | 0.02694 | 0.03961 | 0.03871 | 0.03778 | 0.0424  | 0.03457 PDCL      |
| cg09769679 | 0.04938 | 0.05544 | 0.06956 | 0.07338 | 0.06127 | 0.05834 | 0.05452 | 0.0474  | 0.05183 | 0.04285 NUFIP1    |
| cg09770154 | 0.02367 | 0.02259 | 0.02797 | 0.02389 | 0.02352 | 0.02108 | 0.02186 | 0.02409 | 0.02056 | 0.01929 MXI1      |
| cg09770323 | 0.05338 | 0.05819 | 0.05974 | 0.06094 | 0.05835 | 0.05904 | 0.0513  | 0.04412 | 0.04983 | 0.04293 RIS1      |
| cg09772154 | 0.10111 | 0.06408 | 0.50638 | 0.80937 | 0.08418 | 0.06687 | 0.07182 | 0.05955 | 0.06074 | 0.06785 FGFR2     |
| cg09772827 | 0.10733 | 0.11995 | 0.13726 | 0.12143 | 0.15022 | 0.11149 | 0.13525 | 0.11269 | 0.32333 | 0.09623 PRCP      |
| cg09773756 | 0.05489 | 0.06028 | 0.0512  | 0.05296 | 0.21813 | 0.055   | 0.04913 | 0.05453 | 0.04328 | 0.0455 MMS19L     |
| cg09775312 | 0.06199 | 0.0375  | 0.03967 | 0.03332 | 0.03124 | 0.0317  | 0.0326  | 0.03303 | 0.03061 | 0.03185 PPP1R3C   |
| cg09778422 | 0.88739 | 0.52966 | 0.07738 | 0.08273 | 0.03135 | 0.04495 | 0.19206 | 0.28761 | 0.04249 | 0.03991 MSN       |
| cg09778734 | 0.89035 | 0.87982 | 0.89646 | 0.90288 | 0.86792 | 0.84016 | 0.86512 | 0.88863 | 0.89524 | 0.87781 FLJ40142  |
| cg09779091 | 0.83536 | 0.8538  | 0.87919 | 0.86326 | 0.80903 | 0.88193 | 0.88119 | 0.84992 | 0.89486 | 0.85185 OTUD4     |
| cg09781054 | 0.08693 | 0.07284 | 0.099   | 0.08196 | 0.14432 | 0.11359 | 0.09941 | 0.09453 | 0.05988 | 0.06421 ZSWIM1    |
| cg09781594 | 0.6355  | 0.81068 | 0.63823 | 0.58809 | 0.74142 | 0.77566 | 0.16268 | 0.09183 | 0.15552 | 0.16154 LOC339789 |
| cg09783309 | 0.0262  | 0.03069 | 0.03359 | 0.02715 | 0.02938 | 0.03218 | 0.03199 | 0.02733 | 0.03125 | 0.03585 DNAL4     |
| cg09784259 | 0.68875 | 0.36605 | 0.65787 | 0.7099  | 0.58436 | 0.74885 | 0.46865 | 0.36349 | 0.22227 | 0.19071 SELE      |
| cg09785172 | 0.03417 | 0.03423 | 0.03496 | 0.03404 | 0.02987 | 0.03016 | 0.03068 | 0.03162 | 0.02736 | 0.02631 WFS1      |
| cg09786221 | 0.97503 | 0.97726 | 0.02069 | 0.01698 | 0.74727 | 0.62837 | 0.02195 | 0.04065 | 0.98266 | 0.97869 MYL9      |
| cg09786257 | 0.35308 | 0.15652 | 0.88374 | 0.91738 | 0.92136 | 0.91017 | 0.78012 | 0.06566 | 0.18458 | 0.08218 PCSK1     |
| cg09787254 | 0.02918 | 0.02669 | 0.05441 | 0.02613 | 0.09535 | 0.02174 | 0.03698 | 0.02156 | 0.05202 | 0.01699 FA2H      |
| cg09787394 | 0.06574 | 0.06203 | 0.08296 | 0.09583 | 0.30475 | 0.05747 | 0.06087 | 0.06098 | 0.06154 | 0.05569 LIPT1     |
| cg09788239 | 0.05142 | 0.05093 | 0.04994 | 0.05239 | 0.04346 | 0.04168 | 0.04596 | 0.04039 | 0.04624 | 0.04095 PCQAP     |
| cg09788866 | 0.12042 | 0.07578 | 0.21882 | 0.09398 | 0.18332 | 0.07642 | 0.07456 | 0.07399 | 0.09093 | 0.07489 ERCC3     |
| cg09791681 | 0.07295 | 0.08014 | 0.07698 | 0.08006 | 0.09457 | 0.0892  | 0.06245 | 0.05893 | 0.073   | 0.06654 TMCO3     |
| cg09793001 | 0.04116 | 0.04653 | 0.04549 | 0.04151 | 0.06087 | 0.04728 | 0.0325  | 0.0361  | 0.03977 | 0.03641 TOP2B     |
| cg09793197 | 0.67178 | 0.59439 | 0.73015 | 0.73668 | 0.7487  | 0.71848 | 0.71408 | 0.58798 | 0.75457 | 0.73711 ROPN1     |
| cg09793796 | 0.82116 | 0.67663 | 0.84295 | 0.8809  | 0.81985 | 0.65887 | 0.81079 | 0.76297 | 0.83491 | 0.82525 JTV1      |
| cg09793866 | 0.92462 | 0.84496 | 0.87194 | 0.89344 | 0.92544 | 0.63387 | 0.41047 | 0.29256 | 0.52556 | 0.28834 STAR      |
| cg09794131 | 0.0936  | 0.07758 | 0.80269 | 0.84009 | 0.14483 | 0.42165 | 0.1404  | 0.07022 | 0.05342 | 0.05472 HYDIN     |
| cg09799156 | 0.92256 | 0.85612 | 0.91987 | 0.92992 | 0.93366 | 0.92038 | 0.91787 | 0.88007 | 0.92966 | 0.87107 VMD2L2    |
| cg09799714 | 0.69158 | 0.54609 | 0.87183 | 0.90085 | 0.50185 | 0.68535 | 0.38647 | 0.1604  | 0.75146 | 0.68658 PDZD3     |
| cg09799873 | 0.13959 | 0.08145 | 0.27775 | 0.25526 | 0.12947 | 0.05578 | 0.16267 | 0.09661 | 0.28335 | 0.22676 NDUFA7    |

|            |         |         |         |         |         |         |         |         |         |         |           |
|------------|---------|---------|---------|---------|---------|---------|---------|---------|---------|---------|-----------|
| cg09800519 | 0.03726 | 0.04448 | 0.03928 | 0.03534 | 0.03071 | 0.03471 | 0.03816 | 0.03365 | 0.03093 | 0.03471 | RXRA      |
| cg09801065 | 0.12408 | 0.08629 | 0.17981 | 0.11148 | 0.44253 | 0.43248 | 0.10411 | 0.07688 | 0.08204 | 0.09555 | FAT2      |
| cg09801842 | 0.02142 | 0.02445 | 0.02063 | 0.02287 | 0.01675 | 0.0201  | 0.02023 | 0.02053 | 0.01508 | 0.01652 | SFXN1     |
| cg09805010 | 0.04737 | 0.04137 | 0.04264 | 0.0415  | 0.05354 | 0.04613 | 0.0294  | 0.02864 | 0.03504 | 0.02798 | THRБ      |
| cg09806934 | 0.02579 | 0.02856 | 0.02634 | 0.02504 | 0.02004 | 0.02326 | 0.02492 | 0.02486 | 0.02435 | 0.01965 | CPT1A     |
| cg09809242 | 0.03401 | 0.04319 | 0.04641 | 0.04354 | 0.05335 | 0.05131 | 0.05199 | 0.043   | 0.04495 | 0.04507 | MKI67IP   |
| cg09809672 | 0.9024  | 0.75143 | 0.22677 | 0.48118 | 0.91646 | 0.89474 | 0.09213 | 0.07968 | 0.88124 | 0.57023 | EDARADD   |
| cg09809950 | 0.03056 | 0.02534 | 0.03185 | 0.0276  | 0.02965 | 0.02836 | 0.0249  | 0.02273 | 0.02501 | 0.02263 | MRPL39    |
| cg09811393 | 0.94036 | 0.7061  | 0.96537 | 0.96474 | 0.97635 | 0.96198 | 0.97073 | 0.95919 | 0.96582 | 0.96588 | SEMA3B    |
| cg09812049 | 0.05221 | 0.02396 | 0.05284 | 0.09632 | 0.03138 | 0.0222  | 0.02058 | 0.01927 | 0.02912 | 0.01873 | WIRE      |
| cg09813840 | 0.77203 | 0.42835 | 0.83017 | 0.85375 | 0.86116 | 0.81185 | 0.24738 | 0.69254 | 0.85864 | 0.61478 | SELPLG    |
| cg09814877 | 0.92495 | 0.78505 | 0.87213 | 0.92433 | 0.96202 | 0.94016 | 0.66393 | 0.58996 | 0.93213 | 0.77389 | ACPT      |
| cg09816180 | 0.69835 | 0.79756 | 0.58442 | 0.51954 | 0.61514 | 0.77383 | 0.1896  | 0.59152 | 0.33826 | 0.3707  | GC        |
| cg09816471 | 0.72776 | 0.70756 | 0.96753 | 0.9691  | 0.91659 | 0.4808  | 0.0579  | 0.03331 | 0.0304  | 0.02727 | SNN       |
| cg09816912 | 0.04642 | 0.05268 | 0.06137 | 0.05101 | 0.0492  | 0.05184 | 0.04713 | 0.04425 | 0.05469 | 0.04754 | MARCKS    |
| cg09817114 | 0.05324 | 0.05308 | 0.05121 | 0.05241 | 0.03916 | 0.04463 | 0.04641 | 0.04792 | 0.04307 | 0.04585 | WDR53     |
| cg09818732 | 0.02981 | 0.02945 | 0.39262 | 0.44584 | 0.10564 | 0.04326 | 0.0497  | 0.02822 | 0.67453 | 0.61914 | FLJ20489  |
| cg09819033 | 0.0399  | 0.0357  | 0.04037 | 0.03878 | 0.03779 | 0.0331  | 0.03359 | 0.04126 | 0.03566 | 0.03276 | CREBL2    |
| cg09819495 | 0.03694 | 0.04084 | 0.04666 | 0.04004 | 0.03049 | 0.03384 | 0.03989 | 0.03772 | 0.03386 | 0.03424 | SNRPE     |
| cg09822001 | 0.04847 | 0.05055 | 0.06497 | 0.07495 | 0.05904 | 0.0539  | 0.05626 | 0.04163 | 0.0506  | 0.05165 | APOA1BP   |
| cg09822907 | 0.05054 | 0.05466 | 0.04331 | 0.04364 | 0.0729  | 0.05835 | 0.06152 | 0.06027 | 0.0489  | 0.05891 | EME1      |
| cg09825414 | 0.24721 | 0.72009 | 0.92205 | 0.93576 | 0.93204 | 0.87005 | 0.91087 | 0.8553  | 0.91927 | 0.89417 | TCOF1     |
| cg09826784 | 0.03486 | 0.03878 | 0.03959 | 0.03582 | 0.05004 | 0.03032 | 0.03269 | 0.03064 | 0.03788 | 0.02993 | DGCR6L    |
| cg09827833 | 0.69026 | 0.18318 | 0.73134 | 0.82636 | 0.46932 | 0.43861 | 0.48429 | 0.46668 | 0.53732 | 0.23451 | TEK       |
| cg09828634 | 0.23675 | 0.16013 | 0.38856 | 0.52411 | 0.56567 | 0.82029 | 0.18417 | 0.14899 | 0.25341 | 0.41441 | KRTAP19-2 |
| cg09829176 | 0.54332 | 0.39966 | 0.70254 | 0.8762  | 0.8162  | 0.75515 | 0.60938 | 0.54083 | 0.4745  | 0.31646 | PPARA     |
| cg09829319 | 0.56449 | 0.40916 | 0.89766 | 0.91656 | 0.56767 | 0.5043  | 0.41233 | 0.53017 | 0.67423 | 0.60797 | GCM2      |
| cg09830278 | 0.74393 | 0.76792 | 0.73352 | 0.76559 | 0.67464 | 0.70649 | 0.73143 | 0.74351 | 0.75956 | 0.7678  | SHOC2     |
| cg09830866 | 0.03527 | 0.02377 | 0.94218 | 0.92973 | 0.86903 | 0.41177 | 0.33431 | 0.10897 | 0.41088 | 0.04756 | C16orf24  |
| cg09831311 | 0.04703 | 0.0471  | 0.0485  | 0.04746 | 0.0439  | 0.04946 | 0.04458 | 0.04411 | 0.04674 | 0.03592 | COX4NB    |
| cg09831553 | 0.37529 | 0.03358 | 0.04723 | 0.03408 | 0.29939 | 0.17239 | 0.89542 | 0.12538 | 0.65878 | 0.47288 | LAMA5     |
| cg09834162 | 0.10323 | 0.0312  | 0.0368  | 0.0354  | 0.03091 | 0.03676 | 0.0332  | 0.03473 | 0.02982 | 0.03148 | DNAJB9    |
| cg09834205 | 0.03066 | 0.02823 | 0.04528 | 0.04049 | 0.0292  | 0.0354  | 0.03071 | 0.02866 | 0.03044 | 0.03201 | LRP11     |
| cg09835085 | 0.07234 | 0.03291 | 0.10685 | 0.14198 | 0.10833 | 0.06432 | 0.41871 | 0.03385 | 0.04332 | 0.04029 | KCNE4     |
| cg09835543 | 0.04393 | 0.02887 | 0.10673 | 0.05161 | 0.15117 | 0.03653 | 0.08997 | 0.03063 | 0.0495  | 0.02456 | DIRAS2    |
| cg09837169 | 0.59962 | 0.30907 | 0.86847 | 0.86947 | 0.85653 | 0.76973 | 0.85934 | 0.88028 | 0.89098 | 0.81014 | TIAM2     |
| cg09837361 | 0.19568 | 0.08721 | 0.47017 | 0.52187 | 0.29116 | 0.12886 | 0.41419 | 0.27125 | 0.39524 | 0.28717 | GMEB1     |
| cg09837648 | 0.9351  | 0.92184 | 0.93601 | 0.93068 | 0.95256 | 0.9332  | 0.90987 | 0.80864 | 0.92091 | 0.7874  | PLXNB1    |
| cg09837803 | 0.64894 | 0.22576 | 0.69985 | 0.82467 | 0.86722 | 0.82573 | 0.68584 | 0.78343 | 0.62348 | 0.35748 | IL16      |
| cg09837943 | 0.49828 | 0.5099  | 0.18318 | 0.28231 | 0.17958 | 0.29027 | 0.1035  | 0.14835 | 0.33688 | 0.24469 | ZIM2      |
| cg09837977 | 0.88408 | 0.83083 | 0.81188 | 0.83888 | 0.6321  | 0.33638 | 0.86322 | 0.14753 | 0.43758 | 0.36153 | LRRN3     |

|            |         |         |         |         |         |         |         |         |         |                   |
|------------|---------|---------|---------|---------|---------|---------|---------|---------|---------|-------------------|
| cg09839960 | 0.43545 | 0.45238 | 0.49367 | 0.57619 | 0.86414 | 0.89244 | 0.45108 | 0.2285  | 0.40346 | 0.39448 HBII-438B |
| cg09840989 | 0.72638 | 0.71947 | 0.53261 | 0.61467 | 0.52994 | 0.67235 | 0.36405 | 0.52777 | 0.25617 | 0.27958 ACTRT1    |
| cg09841009 | 0.41722 | 0.39439 | 0.79018 | 0.88646 | 0.65331 | 0.74377 | 0.49371 | 0.50003 | 0.52492 | 0.39564 GYP A     |
| cg09842540 | 0.03099 | 0.03275 | 0.03217 | 0.02977 | 0.02327 | 0.02709 | 0.02412 | 0.02222 | 0.02397 | 0.02336 TBC1D17   |
| cg09845785 | 0.09726 | 0.07803 | 0.1455  | 0.0971  | 0.30672 | 0.109   | 0.51507 | 0.12494 | 0.11299 | 0.11436 PDE1A     |
| cg09845946 | 0.03292 | 0.02917 | 0.03087 | 0.03193 | 0.02572 | 0.02986 | 0.02608 | 0.02619 | 0.02575 | 0.02623 AB12      |
| cg09846458 | 0.05833 | 0.06091 | 0.06989 | 0.06656 | 0.04976 | 0.04642 | 0.05246 | 0.05092 | 0.05031 | 0.0505 ISOC2      |
| cg09847234 | 0.17464 | 0.14089 | 0.19156 | 0.17888 | 0.15638 | 0.1208  | 0.12921 | 0.12227 | 0.13922 | 0.14149 NCK1      |
| cg09847584 | 0.90443 | 0.65583 | 0.42065 | 0.54904 | 0.78086 | 0.84442 | 0.1537  | 0.14581 | 0.13358 | 0.12591 RIMBP2    |
| cg09848074 | 0.31921 | 0.10851 | 0.57466 | 0.73287 | 0.55039 | 0.70211 | 0.43339 | 0.66456 | 0.54915 | 0.61262 FLJ44186  |
| cg09848198 | 0.03735 | 0.04271 | 0.03835 | 0.03526 | 0.02661 | 0.03314 | 0.03469 | 0.03287 | 0.03158 | 0.03114 EEA1      |
| cg09848420 | 0.04984 | 0.04837 | 0.05061 | 0.04419 | 0.03768 | 0.04293 | 0.03923 | 0.04988 | 0.04169 | 0.03697 ZCSL2     |
| cg09851465 | 0.91114 | 0.6477  | 0.83583 | 0.89976 | 0.83943 | 0.89634 | 0.68371 | 0.91804 | 0.8727  | 0.80689 C1orf87   |
| cg09852871 | 0.73246 | 0.27899 | 0.85325 | 0.90339 | 0.79664 | 0.49898 | 0.75238 | 0.56315 | 0.83889 | 0.91295 WDR24     |
| cg09855435 | 0.77783 | 0.79273 | 0.76842 | 0.75093 | 0.75945 | 0.69861 | 0.70397 | 0.72312 | 0.71012 | 0.71974 IL22RA2   |
| cg09863066 | 0.16397 | 0.04427 | 0.33537 | 0.46813 | 0.04115 | 0.03892 | 0.03365 | 0.03696 | 0.03783 | 0.03289 PVALB     |
| cg09863772 | 0.33611 | 0.10161 | 0.68607 | 0.74777 | 0.34789 | 0.652   | 0.353   | 0.35152 | 0.3789  | 0.30808 LPIN1     |
| cg09864712 | 0.97935 | 0.93197 | 0.97585 | 0.97599 | 0.98193 | 0.95315 | 0.96946 | 0.95412 | 0.97936 | 0.8714 RHBDL1     |
| cg09864990 | 0.86645 | 0.66452 | 0.831   | 0.90363 | 0.94927 | 0.87826 | 0.05094 | 0.11211 | 0.17408 | 0.30131 GATA5     |
| cg09866173 | 0.02832 | 0.02564 | 0.02696 | 0.02293 | 0.02456 | 0.02644 | 0.02304 | 0.02341 | 0.02108 | 0.02201 HIST2H4   |
| cg09867157 | 0.02193 | 0.03022 | 0.02642 | 0.02545 | 0.03053 | 0.03027 | 0.02432 | 0.02058 | 0.13778 | 0.02884 BAT3      |
| cg09867835 | 0.1383  | 0.14515 | 0.31234 | 0.38915 | 0.21379 | 0.13782 | 0.11691 | 0.12083 | 0.14634 | 0.12485 GLP1R     |
| cg09868035 | 0.77    | 0.55975 | 0.85381 | 0.87015 | 0.91907 | 0.84666 | 0.86441 | 0.84167 | 0.64346 | 0.64288 C20orf135 |
| cg09868597 | 0.07386 | 0.06926 | 0.07694 | 0.07234 | 0.05936 | 0.06855 | 0.07518 | 0.06717 | 0.0712  | 0.06656 YTHDC2    |
| cg09868882 | 0.82804 | 0.79752 | 0.32247 | 0.52105 | 0.32465 | 0.38754 | 0.10981 | 0.11328 | 0.09092 | 0.08484 GRM8      |
| cg09869042 | 0.03025 | 0.03111 | 0.03701 | 0.0331  | 0.03102 | 0.03327 | 0.03355 | 0.03032 | 0.03623 | 0.03292 C22orf18  |
| cg09869791 | 0.05752 | 0.06003 | 0.06431 | 0.05601 | 0.05472 | 0.05431 | 0.04419 | 0.03987 | 0.04768 | 0.04835 ABCD3     |
| cg09869858 | 0.89835 | 0.88448 | 0.89962 | 0.91384 | 0.92222 | 0.9026  | 0.89364 | 0.85312 | 0.90282 | 0.80296 P11       |
| cg09870606 | 0.1107  | 0.0863  | 0.13086 | 0.12881 | 0.13845 | 0.11147 | 0.09169 | 0.07076 | 0.08547 | 0.0744 GLG1       |
| cg09871043 | 0.86326 | 0.50919 | 0.20572 | 0.17449 | 0.17442 | 0.22619 | 0.06725 | 0.08146 | 0.0678  | 0.05781 PKHD1     |
| cg09871315 | 0.12051 | 0.07171 | 0.46451 | 0.49662 | 0.96851 | 0.95781 | 0.96225 | 0.7732  | 0.97526 | 0.96362 HOXA2     |
| cg09872233 | 0.03814 | 0.03543 | 0.68959 | 0.7898  | 0.57167 | 0.39629 | 0.04599 | 0.04569 | 0.78056 | 0.76131 ALOX15    |
| cg09872616 | 0.94751 | 0.96184 | 0.96245 | 0.96546 | 0.97251 | 0.95076 | 0.96076 | 0.96346 | 0.95953 | 0.96353 MEST      |
| cg09872934 | 0.04708 | 0.05131 | 0.07165 | 0.06327 | 0.06821 | 0.06548 | 0.05156 | 0.04133 | 0.05424 | 0.04737 SGK       |
| cg09873258 | 0.14688 | 0.09899 | 0.90092 | 0.93924 | 0.69811 | 0.88651 | 0.34879 | 0.73944 | 0.19573 | 0.19249 DLK1      |
| cg09873510 | 0.70411 | 0.71721 | 0.7073  | 0.70623 | 0.67947 | 0.71067 | 0.71776 | 0.71398 | 0.83217 | 0.57352 NLN       |
| cg09874127 | 0.53035 | 0.15702 | 0.17906 | 0.17675 | 0.07743 | 0.08037 | 0.10847 | 0.05952 | 0.05723 | 0.05772 UBE1L     |
| cg09874600 | 0.0698  | 0.05685 | 0.08786 | 0.08668 | 0.11329 | 0.06729 | 0.53604 | 0.49592 | 0.05652 | 0.06103 TRIP4     |
| cg09874752 | 0.03203 | 0.03933 | 0.23991 | 0.11534 | 0.3808  | 0.41328 | 0.03405 | 0.03236 | 0.31559 | 0.04122 SFRP5     |
| cg09874776 | 0.08093 | 0.06783 | 0.12167 | 0.15788 | 0.29384 | 0.2804  | 0.09313 | 0.71509 | 0.12341 | 0.05625 WFDC13    |
| cg09875273 | 0.04871 | 0.04703 | 0.39365 | 0.6059  | 0.06323 | 0.05719 | 0.061   | 0.05178 | 0.05175 | 0.05016 ERBB2     |

|            |         |         |         |         |         |         |         |         |         |                   |
|------------|---------|---------|---------|---------|---------|---------|---------|---------|---------|-------------------|
| cg09877136 | 0.03141 | 0.03086 | 0.03165 | 0.0289  | 0.02785 | 0.02943 | 0.02744 | 0.0252  | 0.02775 | 0.02733 GMFB      |
| cg09878269 | 0.80237 | 0.68942 | 0.87396 | 0.88315 | 0.92765 | 0.84987 | 0.84327 | 0.78898 | 0.8687  | 0.782 PROZ        |
| cg09879099 | 0.04351 | 0.04501 | 0.04805 | 0.04395 | 0.04469 | 0.04341 | 0.04304 | 0.04045 | 0.03448 | 0.0401 ONECUT2    |
| cg09879797 | 0.51061 | 0.32145 | 0.60278 | 0.60026 | 0.64567 | 0.50555 | 0.48298 | 0.24362 | 0.94897 | 0.88433 WSB2      |
| cg09879869 | 0.30576 | 0.30052 | 0.32172 | 0.29887 | 0.49002 | 0.36744 | 0.32586 | 0.27676 | 0.5956  | 0.48622 C14orf108 |
| cg09881855 | 0.04981 | 0.05288 | 0.05625 | 0.05071 | 0.08504 | 0.04934 | 0.05025 | 0.06188 | 0.04157 | 0.04999 SNAI2     |
| cg09881917 | 0.10093 | 0.07853 | 0.08734 | 0.08649 | 0.16333 | 0.11339 | 0.10107 | 0.08461 | 0.07034 | 0.07591 FUK       |
| cg09882647 | 0.30236 | 0.08485 | 0.4769  | 0.54247 | 0.54843 | 0.19751 | 0.49215 | 0.12406 | 0.33044 | 0.09292 C20orf35  |
| cg09884077 | 0.05427 | 0.05014 | 0.04217 | 0.04333 | 0.02862 | 0.03904 | 0.04118 | 0.04099 | 0.03866 | 0.03343 NIPA1     |
| cg09885086 | 0.06724 | 0.04183 | 0.0342  | 0.03478 | 0.03401 | 0.04095 | 0.02848 | 0.03559 | 0.03461 | 0.02917 GCNT1     |
| cg09885409 | 0.03817 | 0.03594 | 0.03627 | 0.03607 | 0.0286  | 0.03046 | 0.03417 | 0.04017 | 0.03584 | 0.03288 IFNAR1    |
| cg09885951 | 0.0328  | 0.03831 | 0.03813 | 0.03553 | 0.03205 | 0.03398 | 0.03656 | 0.03158 | 0.02944 | 0.02318 CENPF     |
| cg09886641 | 0.92223 | 0.86627 | 0.8787  | 0.92579 | 0.97182 | 0.96992 | 0.90686 | 0.93384 | 0.53025 | 0.633 SPESP1      |
| cg09888137 | 0.04267 | 0.04921 | 0.04356 | 0.03967 | 0.03891 | 0.03962 | 0.04286 | 0.03894 | 0.03657 | 0.03084 ACTR1A    |
| cg09889850 | 0.07225 | 0.0821  | 0.05503 | 0.05975 | 0.08005 | 0.07907 | 0.05414 | 0.0565  | 0.05754 | 0.06309 C14orf11  |
| cg09890046 | 0.0245  | 0.02705 | 0.0288  | 0.02637 | 0.02083 | 0.02323 | 0.02732 | 0.02208 | 0.02217 | 0.01944 QPCTL     |
| cg09890200 | 0.02875 | 0.02945 | 0.03317 | 0.02858 | 0.02842 | 0.03358 | 0.03045 | 0.02817 | 0.02456 | 0.02594 PRKRA     |
| cg09891106 | 0.03427 | 0.03907 | 0.03431 | 0.03852 | 0.03379 | 0.03304 | 0.02929 | 0.02898 | 0.0283  | 0.02857 TP53INP2  |
| cg09891761 | 0.19741 | 0.04351 | 0.17157 | 0.0805  | 0.25673 | 0.04303 | 0.05079 | 0.0455  | 0.51931 | 0.40757 F5        |
| cg09892131 | 0.05346 | 0.06134 | 0.05724 | 0.05298 | 0.04791 | 0.05616 | 0.05424 | 0.05669 | 0.05779 | 0.05805 ZBTB9     |
| cg09892203 | 0.01635 | 0.01916 | 0.0236  | 0.02104 | 0.02216 | 0.0177  | 0.01839 | 0.01802 | 0.01625 | 0.01419 CACNG4    |
| cg09892390 | 0.03256 | 0.03538 | 0.03361 | 0.03187 | 0.02632 | 0.02865 | 0.025   | 0.02598 | 0.02598 | 0.0265 ARHGAP21   |
| cg09893068 | 0.85953 | 0.72286 | 0.82901 | 0.82264 | 0.78312 | 0.78835 | 0.81336 | 0.76226 | 0.65857 | 0.8253 CCDC17     |
| cg09893305 | 0.88264 | 0.90715 | 0.89323 | 0.87398 | 0.72278 | 0.88915 | 0.10045 | 0.86582 | 0.90835 | 0.79035 HAPLN1    |
| cg09896445 | 0.05315 | 0.05706 | 0.08418 | 0.06861 | 0.07188 | 0.07254 | 0.04471 | 0.03882 | 0.05766 | 0.03187 GPC5      |
| cg09898548 | 0.78917 | 0.77037 | 0.80054 | 0.85207 | 0.62477 | 0.80592 | 0.77441 | 0.77665 | 0.85043 | 0.7539 C20orf86   |
| cg09901733 | 0.79932 | 0.67265 | 0.86502 | 0.86762 | 0.76848 | 0.7666  | 0.82841 | 0.79411 | 0.87138 | 0.84968 RPA1      |
| cg09902130 | 0.94174 | 0.13972 | 0.957   | 0.9671  | 0.96489 | 0.95753 | 0.96031 | 0.77133 | 0.96367 | 0.94089 CD6       |
| cg09903430 | 0.05994 | 0.06485 | 0.07008 | 0.074   | 0.0869  | 0.05069 | 0.08635 | 0.08403 | 0.06922 | 0.05135 ST3GAL3   |
| cg09904573 | 0.05831 | 0.06211 | 0.06832 | 0.06469 | 0.05252 | 0.08784 | 0.07458 | 0.07504 | 0.05516 | 0.0522 RNF122     |
| cg09906309 | 0.10237 | 0.08014 | 0.0877  | 0.07737 | 0.12006 | 0.1127  | 0.09265 | 0.07201 | 0.05959 | 0.07776 C11orf46  |
| cg09906458 | 0.82387 | 0.50541 | 0.4104  | 0.54275 | 0.5826  | 0.56676 | 0.28652 | 0.23822 | 0.7281  | 0.4419 PRND       |
| cg09906488 | 0.02423 | 0.02407 | 0.52992 | 0.41193 | 0.34976 | 0.02606 | 0.12899 | 0.02033 | 0.02674 | 0.01972 CAMK1D    |
| cg09907395 | 0.03484 | 0.03694 | 0.05721 | 0.03397 | 0.03024 | 0.04517 | 0.0409  | 0.0377  | 0.03381 | 0.03149 KIAA1618  |
| cg09910464 | 0.04013 | 0.04408 | 0.04505 | 0.03994 | 0.02889 | 0.03792 | 0.03571 | 0.03727 | 0.03616 | 0.03623 MGC40579  |
| cg09911342 | 0.78091 | 0.75421 | 0.77657 | 0.75021 | 0.81213 | 0.82128 | 0.38834 | 0.45135 | 0.47237 | 0.43857 ASZ1      |
| cg09911755 | 0.52424 | 0.40047 | 0.59168 | 0.58611 | 0.10293 | 0.06432 | 0.35788 | 0.06265 | 0.06775 | 0.056 OSBPL7      |
| cg09914304 | 0.86963 | 0.3103  | 0.85825 | 0.91333 | 0.96013 | 0.90634 | 0.83415 | 0.91687 | 0.87671 | 0.81573 PRF1      |
| cg09914444 | 0.25096 | 0.07987 | 0.33213 | 0.37147 | 0.35077 | 0.14282 | 0.34236 | 0.12325 | 0.14455 | 0.1302 DMBX1      |
| cg09914773 | 0.47843 | 0.07134 | 0.81767 | 0.79454 | 0.78204 | 0.81612 | 0.09244 | 0.04933 | 0.5167  | 0.58304 CYP3A4    |
| cg09915099 | 0.2042  | 0.13405 | 0.55113 | 0.5999  | 0.3068  | 0.07187 | 0.10082 | 0.04686 | 0.07241 | 0.03385 AGPAT6    |



|            |         |         |         |         |         |         |         |         |         |                  |
|------------|---------|---------|---------|---------|---------|---------|---------|---------|---------|------------------|
| cg09916572 | 0.14506 | 0.10468 | 0.70414 | 0.69584 | 0.13057 | 0.17727 | 0.05467 | 0.04366 | 0.0367  | 0.03861 ZP3      |
| cg09916853 | 0.1607  | 0.13457 | 0.39989 | 0.48736 | 0.18238 | 0.39034 | 0.20624 | 0.1465  | 0.44545 | 0.2798 TSPAN33   |
| cg09917461 | 0.77399 | 0.49636 | 0.73973 | 0.80465 | 0.73544 | 0.83573 | 0.28851 | 0.20689 | 0.18316 | 0.05326 CSAG1    |
| cg09918512 | 0.88899 | 0.90266 | 0.86138 | 0.89327 | 0.86468 | 0.89335 | 0.86784 | 0.87784 | 0.90444 | 0.90295 CWF19L2  |
| cg09918674 | 0.70249 | 0.4417  | 0.77646 | 0.77196 | 0.82064 | 0.44635 | 0.78946 | 0.5155  | 0.81079 | 0.1136 TNFAIP8L1 |
| cg09920145 | 0.04156 | 0.0368  | 0.03589 | 0.03532 | 0.08698 | 0.03553 | 0.05757 | 0.04816 | 0.03847 | 0.03629 TMF1     |
| cg09920632 | 0.05687 | 0.05179 | 0.05395 | 0.05433 | 0.03543 | 0.04705 | 0.25114 | 0.09198 | 0.04762 | 0.04497 PHF8     |
| cg09922115 | 0.05122 | 0.04664 | 0.05189 | 0.04684 | 0.03372 | 0.0454  | 0.04604 | 0.0395  | 0.03838 | 0.03801 GIT2     |
| cg09923671 | 0.74975 | 0.67908 | 0.62725 | 0.74337 | 0.91186 | 0.82892 | 0.17705 | 0.17745 | 0.46451 | 0.33468 GATA5    |
| cg09923855 | 0.02499 | 0.02486 | 0.0308  | 0.02936 | 0.02153 | 0.02065 | 0.60468 | 0.6251  | 0.01843 | 0.01514 HTATSF1  |
| cg09924998 | 0.5505  | 0.21347 | 0.68623 | 0.70299 | 0.4119  | 0.06231 | 0.1167  | 0.08695 | 0.12135 | 0.22994 VPS33A   |
| cg09926889 | 0.026   | 0.02654 | 0.02466 | 0.02732 | 0.02059 | 0.02505 | 0.02132 | 0.02811 | 0.02145 | 0.02029 RNF34    |
| cg09926892 | 0.04058 | 0.03796 | 0.04143 | 0.0392  | 0.03724 | 0.04281 | 0.04004 | 0.03595 | 0.03124 | 0.03136 RNPC2    |
| cg09928375 | 0.07317 | 0.06705 | 0.0553  | 0.05784 | 0.07266 | 0.05016 | 0.42361 | 0.4562  | 0.08867 | 0.04388 OTUD5    |
| cg09929564 | 0.10018 | 0.11675 | 0.09902 | 0.08558 | 0.19733 | 0.14957 | 0.09414 | 0.08508 | 0.14227 | 0.15985 ILF2     |
| cg09929612 | 0.02974 | 0.03288 | 0.0356  | 0.03172 | 0.02508 | 0.036   | 0.0294  | 0.0297  | 0.02988 | 0.02716 ATP5J2   |
| cg09930017 | 0.08171 | 0.0777  | 0.12018 | 0.10637 | 0.18247 | 0.11767 | 0.11396 | 0.09899 | 0.09556 | 0.10071 UBC      |
| cg09930410 | 0.05358 | 0.02781 | 0.16202 | 0.13532 | 0.04775 | 0.0294  | 0.12521 | 0.01943 | 0.04973 | 0.03121 GALE     |
| cg09931793 | 0.88674 | 0.79768 | 0.8632  | 0.89536 | 0.86665 | 0.88009 | 0.8009  | 0.86781 | 0.86532 | 0.66653 OR2K2    |
| cg09932694 | 0.11984 | 0.09329 | 0.16133 | 0.14384 | 0.23343 | 0.11301 | 0.1027  | 0.08693 | 0.09491 | 0.10466 ATAD3A   |
| cg09935228 | 0.91356 | 0.78381 | 0.84332 | 0.85825 | 0.76138 | 0.89066 | 0.81289 | 0.87247 | 0.75517 | 0.58222          |
| cg09935540 | 0.08002 | 0.07331 | 0.10779 | 0.18399 | 0.34762 | 0.10912 | 0.28175 | 0.08183 | 0.49001 | 0.09929 DNAH3    |
| cg09936561 | 0.17175 | 0.19386 | 0.90206 | 0.94388 | 0.35841 | 0.3323  | 0.19871 | 0.09997 | 0.04971 | 0.05159 DRD5     |
| cg09936762 | 0.79997 | 0.20261 | 0.84185 | 0.87762 | 0.80853 | 0.81447 | 0.86191 | 0.86559 | 0.88403 | 0.86829 RAI17    |
| cg09936839 | 0.54567 | 0.09901 | 0.10796 | 0.11506 | 0.08051 | 0.07181 | 0.0739  | 0.06941 | 0.07468 | 0.042 SIRT6      |
| cg09937039 | 0.54812 | 0.07026 | 0.91492 | 0.92587 | 0.39458 | 0.08375 | 0.53798 | 0.20207 | 0.44826 | 0.40012 BATF     |
| cg09938079 | 0.03901 | 0.04042 | 0.04748 | 0.05009 | 0.04122 | 0.04361 | 0.04045 | 0.03627 | 0.0315  | 0.03778 RHOG     |
| cg09938681 | 0.0269  | 0.02947 | 0.03447 | 0.02874 | 0.02439 | 0.02699 | 0.03053 | 0.02848 | 0.02594 | 0.02629 ZNF688   |
| cg09938768 | 0.04992 | 0.04741 | 0.06345 | 0.05761 | 0.0532  | 0.05061 | 0.06037 | 0.04916 | 0.04782 | 0.0362 EPHB3     |
| cg09941381 | 0.03265 | 0.03574 | 0.04114 | 0.03096 | 0.07906 | 0.18578 | 0.02725 | 0.0308  | 0.06195 | 0.02978 PLEKHK1  |
| cg09944147 | 0.02612 | 0.02503 | 0.02925 | 0.02481 | 0.02266 | 0.02255 | 0.01935 | 0.02259 | 0.02036 | 0.02003 COL27A1  |
| cg09944526 | 0.66119 | 0.34092 | 0.40704 | 0.35727 | 0.64007 | 0.63407 | 0.44194 | 0.43773 | 0.81371 | 0.47448 EXOC6    |
| cg09945801 | 0.38514 | 0.11583 | 0.86891 | 0.85239 | 0.80627 | 0.91338 | 0.74221 | 0.1017  | 0.9174  | 0.90106 WRN      |
| cg09947274 | 0.65216 | 0.46276 | 0.46633 | 0.69741 | 0.62777 | 0.39826 | 0.11278 | 0.13132 | 0.52486 | 0.16052 CAD      |
| cg09948350 | 0.68277 | 0.51943 | 0.82405 | 0.893   | 0.81569 | 0.86416 | 0.42096 | 0.42633 | 0.78942 | 0.77323 FLJ25084 |
| cg09949775 | 0.1002  | 0.04336 | 0.97421 | 0.98122 | 0.983   | 0.95946 | 0.40351 | 0.11162 | 0.33584 | 0.35938 COMP     |
| cg09950034 | 0.04624 | 0.04999 | 0.07204 | 0.06346 | 0.03489 | 0.04884 | 0.30024 | 0.41222 | 0.04035 | 0.03405 BIRC4    |
| cg09950370 | 0.87955 | 0.60654 | 0.81003 | 0.85161 | 0.87356 | 0.86669 | 0.79754 | 0.76987 | 0.88722 | 0.78941 GFRA2    |
| cg09952204 | 0.04223 | 0.02998 | 0.03127 | 0.0317  | 0.01953 | 0.02391 | 0.25422 | 0.02254 | 0.05804 | 0.04394 RASGRF2  |
| cg09952620 | 0.12616 | 0.10245 | 0.14714 | 0.12239 | 0.0939  | 0.06721 | 0.14087 | 0.09844 | 0.08366 | 0.09676 HSPC023  |
| cg09953122 | 0.90643 | 0.90972 | 0.84531 | 0.88044 | 0.81709 | 0.87528 | 0.7737  | 0.90915 | 0.77952 | 0.90457 CST8     |

|            |         |         |         |         |         |         |         |         |         |                  |
|------------|---------|---------|---------|---------|---------|---------|---------|---------|---------|------------------|
| cg09954385 | 0.84867 | 0.72124 | 0.96234 | 0.96316 | 0.95944 | 0.9551  | 0.40046 | 0.46019 | 0.96426 | 0.96097 ARHGAP8  |
| cg09955730 | 0.10351 | 0.08405 | 0.17813 | 0.14449 | 0.17692 | 0.10696 | 0.08371 | 0.06308 | 0.11896 | 0.11367 TMED5    |
| cg09958090 | 0.02976 | 0.031   | 0.0346  | 0.03291 | 0.03379 | 0.03409 | 0.02807 | 0.02862 | 0.02974 | 0.03045 KLHL22   |
| cg09961373 | 0.04486 | 0.02975 | 0.04557 | 0.05996 | 0.02922 | 0.03012 | 0.02635 | 0.02357 | 0.02288 | 0.02046 WIPI2    |
| cg09963123 | 0.79964 | 0.67717 | 0.61788 | 0.80063 | 0.15623 | 0.08631 | 0.63668 | 0.3519  | 0.85132 | 0.73973 KLF3     |
| cg09964005 | 0.0225  | 0.02282 | 0.02624 | 0.02339 | 0.02202 | 0.02427 | 0.02228 | 0.02311 | 0.02026 | 0.02144 GTPBP1   |
| cg09964921 | 0.71321 | 0.68988 | 0.78498 | 0.77936 | 0.74594 | 0.80218 | 0.81343 | 0.85677 | 0.8499  | 0.85383 KCNE1    |
| cg09965258 | 0.0809  | 0.08126 | 0.06961 | 0.05469 | 0.02392 | 0.03061 | 0.06573 | 0.05087 | 0.04407 | 0.04146 NFIB     |
| cg09966445 | 0.88913 | 0.8996  | 0.89407 | 0.90767 | 0.91704 | 0.89003 | 0.8222  | 0.88781 | 0.90583 | 0.85243 AMPH     |
| cg09967877 | 0.0356  | 0.03308 | 0.80254 | 0.87809 | 0.97062 | 0.97512 | 0.97543 | 0.92213 | 0.06846 | 0.02755 SYT12    |
| cg09970396 | 0.06049 | 0.0606  | 0.08721 | 0.07322 | 0.06725 | 0.05963 | 0.06913 | 0.07031 | 0.06765 | 0.05985 C12orf35 |
| cg09970593 | 0.42865 | 0.33034 | 0.82539 | 0.84855 | 0.8275  | 0.84858 | 0.19337 | 0.08214 | 0.10083 | 0.09945 OPRD1    |
| cg09971646 | 0.10917 | 0.08042 | 0.84877 | 0.86126 | 0.5885  | 0.7694  | 0.50585 | 0.48762 | 0.44051 | 0.4685 DLK1      |
| cg09971811 | 0.89614 | 0.51184 | 0.91075 | 0.92974 | 0.13543 | 0.05281 | 0.30838 | 0.04216 | 0.52414 | 0.56941 CST7     |
| cg09972884 | 0.04401 | 0.05307 | 0.0611  | 0.05513 | 0.03701 | 0.04088 | 0.05883 | 0.06757 | 0.04067 | 0.0496 RRN3      |
| cg09976774 | 0.04514 | 0.04024 | 0.03725 | 0.04059 | 0.02949 | 0.03805 | 0.03297 | 0.04008 | 0.03917 | 0.03625 FOXM1    |
| cg09978128 | 0.02515 | 0.02788 | 0.02679 | 0.02473 | 0.0207  | 0.02498 | 0.02234 | 0.02621 | 0.01879 | 0.01911 NDEL1    |
| cg09979256 | 0.05256 | 0.04598 | 0.05764 | 0.06746 | 0.05799 | 0.05105 | 0.04039 | 0.03645 | 0.0845  | 0.16018 RSP03    |
| cg09980522 | 0.3207  | 0.35903 | 0.56648 | 0.51871 | 0.49683 | 0.29092 | 0.3793  | 0.3073  | 0.29862 | 0.2666 GRIA4     |
| cg09980622 | 0.62918 | 0.59412 | 0.48237 | 0.57833 | 0.30541 | 0.02401 | 0.16635 | 0.01603 | 0.02633 | 0.02236 BOLA1    |
| cg09983885 | 0.11976 | 0.05136 | 0.14348 | 0.13263 | 0.76358 | 0.4174  | 0.22928 | 0.06495 | 0.06197 | 0.04815 TRIM21   |
| cg09984370 | 0.0811  | 0.06355 | 0.37067 | 0.30203 | 0.33283 | 0.43017 | 0.05326 | 0.05991 | 0.06823 | 0.05774 ZNF567   |
| cg09985279 | 0.47985 | 0.0497  | 0.82215 | 0.91849 | 0.93426 | 0.90955 | 0.66088 | 0.53764 | 0.32328 | 0.5288 MT1G      |
| cg09985635 | 0.09557 | 0.05625 | 0.07612 | 0.06525 | 0.06543 | 0.05349 | 0.07394 | 0.05925 | 0.07508 | 0.04394 PCDH1    |
| cg09986574 | 0.7653  | 0.73598 | 0.75145 | 0.7837  | 0.69882 | 0.72122 | 0.71271 | 0.7535  | 0.73071 | 0.74406 GTF3C4   |
| cg09988116 | 0.91112 | 0.66528 | 0.91815 | 0.92846 | 0.92924 | 0.92131 | 0.18566 | 0.11482 | 0.92861 | 0.72722 MGC52423 |
| cg09989134 | 0.02624 | 0.02635 | 0.03042 | 0.02899 | 0.02674 | 0.0332  | 0.02627 | 0.02918 | 0.02419 | 0.02405 C12orf44 |
| cg09989883 | 0.05501 | 0.05322 | 0.04871 | 0.04932 | 0.0381  | 0.04317 | 0.03568 | 0.03542 | 0.03514 | 0.04248 MRPS22   |
| cg09990086 | 0.87189 | 0.86178 | 0.86271 | 0.87916 | 0.86064 | 0.87809 | 0.8381  | 0.81168 | 0.88869 | 0.85516 TACC1    |
| cg09991975 | 0.03203 | 0.02995 | 0.03824 | 0.03867 | 0.02695 | 0.03147 | 0.03532 | 0.0348  | 0.02989 | 0.03202 JOSD1    |
| cg09995854 | 0.7809  | 0.66065 | 0.67131 | 0.81526 | 0.7542  | 0.82774 | 0.17495 | 0.14626 | 0.21164 | 0.57172 IL1F8    |
| cg09996240 | 0.94483 | 0.93803 | 0.94879 | 0.95684 | 0.94484 | 0.94683 | 0.96514 | 0.95588 | 0.96407 | 0.95442 HMG20B   |
| cg09997082 | 0.55163 | 0.437   | 0.77157 | 0.80274 | 0.63957 | 0.72862 | 0.36596 | 0.31442 | 0.60612 | 0.73863 GIPR     |
| cg09997760 | 0.04532 | 0.03869 | 0.0528  | 0.04163 | 0.03996 | 0.03706 | 0.03245 | 0.03237 | 0.03444 | 0.03288 GNB4     |
| cg09998229 | 0.26959 | 0.03823 | 0.03955 | 0.03922 | 0.03125 | 0.04266 | 0.03756 | 0.0381  | 0.03549 | 0.03329 TBXA2R   |
| cg09998519 | 0.06522 | 0.04104 | 0.05122 | 0.04564 | 0.05019 | 0.03713 | 0.0585  | 0.05659 | 0.03562 | 0.0363 HNRPU     |
| cg09998591 | 0.5852  | 0.53678 | 0.86294 | 0.87069 | 0.89664 | 0.83834 | 0.63877 | 0.82323 | 0.85606 | 0.84175 KCNQ1DN  |
| cg10000775 | 0.14056 | 0.06877 | 0.05466 | 0.05519 | 0.10836 | 0.132   | 0.05539 | 0.05828 | 0.0571  | 0.06083 PDLIM3   |
| cg10001720 | 0.82088 | 0.64165 | 0.88381 | 0.89681 | 0.84615 | 0.76448 | 0.88127 | 0.69053 | 0.8682  | 0.73751 LAPTM5   |
| cg10002103 | 0.04419 | 0.03933 | 0.05801 | 0.05161 | 0.05666 | 0.06204 | 0.05748 | 0.0517  | 0.04183 | 0.05003 SLC38A2  |
| cg10002561 | 0.02966 | 0.03016 | 0.03195 | 0.03306 | 0.0219  | 0.02645 | 0.02638 | 0.02718 | 0.02447 | 0.02502 CCNA2    |

|            |         |         |         |         |         |         |         |         |         |                   |
|------------|---------|---------|---------|---------|---------|---------|---------|---------|---------|-------------------|
| cg10002977 | 0.14738 | 0.10137 | 0.08991 | 0.10012 | 0.06095 | 0.05647 | 0.08503 | 0.04789 | 0.19479 | 0.04479 SOD2      |
| cg10003443 | 0.37265 | 0.51063 | 0.46709 | 0.58025 | 0.46006 | 0.76609 | 0.22926 | 0.16855 | 0.10989 | 0.07545 FOXA2     |
| cg10005894 | 0.06808 | 0.06428 | 0.09093 | 0.08359 | 0.06804 | 0.07014 | 0.05976 | 0.1196  | 0.0682  | 0.06795 ST6GAL1   |
| cg10006582 | 0.05051 | 0.03872 | 0.1843  | 0.22157 | 0.08579 | 0.03414 | 0.06296 | 0.03302 | 0.03711 | 0.03562 BBS5      |
| cg10007262 | 0.03807 | 0.03382 | 0.21677 | 0.47605 | 0.10456 | 0.0388  | 0.08355 | 0.03298 | 0.04856 | 0.0267 RELN       |
| cg10007692 | 0.0594  | 0.05481 | 0.06169 | 0.06174 | 0.04665 | 0.05948 | 0.0575  | 0.05565 | 0.04355 | 0.03572 GPSN2     |
| cg10009003 | 0.13465 | 0.12843 | 0.20654 | 0.16266 | 0.17498 | 0.14041 | 0.27599 | 0.23241 | 0.11576 | 0.13375 UBQLN2    |
| cg10009830 | 0.11083 | 0.03221 | 0.32994 | 0.44594 | 0.0867  | 0.01891 | 0.57277 | 0.54979 | 0.01877 | 0.01556 FLJ14503  |
| cg10011232 | 0.09929 | 0.07754 | 0.19822 | 0.15382 | 0.31307 | 0.08142 | 0.09083 | 0.06871 | 0.06625 | 0.06326 FKBP8     |
| cg10011623 | 0.56155 | 0.38442 | 0.42134 | 0.42729 | 0.77241 | 0.57193 | 0.54521 | 0.35824 | 0.93323 | 0.91216 GNAS      |
| cg10014190 | 0.02938 | 0.02902 | 0.03149 | 0.02955 | 0.02508 | 0.03024 | 0.02668 | 0.02603 | 0.02557 | 0.02086 KIAA0690  |
| cg10014293 | 0.19185 | 0.05594 | 0.76761 | 0.86527 | 0.88743 | 0.85973 | 0.60183 | 0.27199 | 0.15874 | 0.18242 MT1H      |
| cg10016608 | 0.66125 | 0.25714 | 0.76273 | 0.86626 | 0.45078 | 0.73808 | 0.66274 | 0.36046 | 0.65516 | 0.37792 GAS2L2    |
| cg10018778 | 0.02891 | 0.03256 | 0.07067 | 0.17694 | 0.04232 | 0.03893 | 0.0309  | 0.02394 | 0.02664 | 0.03221 TSPAN31   |
| cg10019507 | 0.40284 | 0.21597 | 0.79765 | 0.86429 | 0.70216 | 0.95428 | 0.74621 | 0.89838 | 0.81994 | 0.79932 SSTR4     |
| cg10021735 | 0.05232 | 0.05131 | 0.05034 | 0.05246 | 0.05622 | 0.04071 | 0.04391 | 0.04428 | 0.05063 | 0.05364 FARP2     |
| cg10025443 | 0.75331 | 0.65073 | 0.0714  | 0.10911 | 0.07412 | 0.06129 | 0.34854 | 0.46704 | 0.68931 | 0.63629 SYK       |
| cg10025865 | 0.5585  | 0.47176 | 0.34337 | 0.32247 | 0.46496 | 0.44404 | 0.06078 | 0.0876  | 0.3513  | 0.09356 SERPINA6  |
| cg10027114 | 0.03327 | 0.02927 | 0.04804 | 0.03689 | 0.03902 | 0.03352 | 0.03326 | 0.03617 | 0.03048 | 0.03315 C12orf58  |
| cg10028071 | 0.05289 | 0.05264 | 0.06296 | 0.05259 | 0.06427 | 0.04929 | 0.05308 | 0.05037 | 0.04544 | 0.0414 COMMD3     |
| cg10029076 | 0.04518 | 0.04185 | 0.04761 | 0.04479 | 0.07869 | 0.05488 | 0.04003 | 0.03283 | 0.04904 | 0.04377 ARMET     |
| cg10029411 | 0.39521 | 0.21995 | 0.39067 | 0.46317 | 0.62878 | 0.53712 | 0.37301 | 0.38247 | 0.4986  | 0.40088 FAM10A4   |
| cg10031456 | 0.67141 | 0.68702 | 0.63732 | 0.68499 | 0.62678 | 0.65592 | 0.66828 | 0.67892 | 0.67923 | 0.50154 RASGRP3   |
| cg10031651 | 0.84226 | 0.75362 | 0.87187 | 0.88337 | 0.79474 | 0.84024 | 0.69424 | 0.50817 | 0.87826 | 0.87216 LRRC2     |
| cg10035272 | 0.76253 | 0.72996 | 0.80875 | 0.83393 | 0.58035 | 0.57066 | 0.7307  | 0.85737 | 0.83138 | 0.81792 C6orf55   |
| cg10035303 | 0.15781 | 0.18034 | 0.17926 | 0.16009 | 0.21747 | 0.12185 | 0.12739 | 0.11411 | 0.10381 | 0.11004 TRPC4AP   |
| cg10035922 | 0.44472 | 0.47098 | 0.15653 | 0.25517 | 0.0472  | 0.0493  | 0.04774 | 0.04429 | 0.04802 | 0.04736 C1orf102  |
| cg10036895 | 0.78093 | 0.81531 | 0.75115 | 0.79626 | 0.65251 | 0.77119 | 0.71983 | 0.81778 | 0.7878  | 0.82307 MGMT      |
| cg10037005 | 0.79686 | 0.81734 | 0.35447 | 0.46683 | 0.78141 | 0.80416 | 0.39685 | 0.43814 | 0.84199 | 0.48919 CD37      |
| cg10037068 | 0.76882 | 0.31132 | 0.90475 | 0.92241 | 0.96149 | 0.9225  | 0.91132 | 0.87413 | 0.92896 | 0.75939 WASPIP    |
| cg10038087 | 0.04807 | 0.04417 | 0.04452 | 0.04723 | 0.04097 | 0.04829 | 0.04161 | 0.05251 | 0.05514 | 0.05045 TLL2      |
| cg10038259 | 0.0358  | 0.03538 | 0.03524 | 0.03634 | 0.03034 | 0.03864 | 0.03129 | 0.03418 | 0.03216 | 0.02808 HNRPAB    |
| cg10039928 | 0.39722 | 0.30063 | 0.87984 | 0.90084 | 0.79177 | 0.71005 | 0.74017 | 0.91115 | 0.89176 | 0.75886 MATN2     |
| cg10040059 | 0.09276 | 0.07669 | 0.12265 | 0.09632 | 0.09701 | 0.08918 | 0.1194  | 0.12279 | 0.08038 | 0.08428 ZNF691    |
| cg10042178 | 0.05215 | 0.05304 | 0.05328 | 0.04929 | 0.03995 | 0.04506 | 0.04632 | 0.05039 | 0.04217 | 0.0424 LMO4       |
| cg10043101 | 0.03378 | 0.03088 | 0.07999 | 0.08063 | 0.0315  | 0.03122 | 0.47645 | 0.44413 | 0.02927 | 0.02593 ATP1B2    |
| cg10044101 | 0.42605 | 0.48765 | 0.79518 | 0.79224 | 0.63553 | 0.21893 | 0.56144 | 0.18725 | 0.15959 | 0.10712 VNN2      |
| cg10045881 | 0.15148 | 0.05427 | 0.60959 | 0.77359 | 0.73986 | 0.67172 | 0.60583 | 0.7005  | 0.73876 | 0.41664 CHI3L2    |
| cg10046620 | 0.07176 | 0.04841 | 0.05893 | 0.05244 | 0.36514 | 0.08868 | 0.10872 | 0.0571  | 0.9313  | 0.90467 HIST1H2AI |
| cg10046892 | 0.73314 | 0.11057 | 0.71449 | 0.77821 | 0.72474 | 0.31151 | 0.4913  | 0.19322 | 0.1571  | 0.06164 PAQR6     |
| cg10049535 | 0.21216 | 0.18341 | 0.19185 | 0.18408 | 0.33521 | 0.25721 | 0.19785 | 0.19807 | 0.15341 | 0.17864 SLC7A6    |

|            |         |         |         |         |         |         |         |         |         |         |          |
|------------|---------|---------|---------|---------|---------|---------|---------|---------|---------|---------|----------|
| cg10049968 | 0.034   | 0.03827 | 0.04003 | 0.04008 | 0.02385 | 0.03389 | 0.03042 | 0.02742 | 0.02879 | 0.03095 | C9orf25  |
| cg10051054 | 0.71712 | 0.25315 | 0.73945 | 0.82843 | 0.54775 | 0.77244 | 0.06272 | 0.1083  | 0.27708 | 0.05591 | CCDC27   |
| cg10052190 | 0.04918 | 0.04935 | 0.04852 | 0.04784 | 0.26297 | 0.30838 | 0.0426  | 0.059   | 0.04403 | 0.04233 | C16orf52 |
| cg10052840 | 0.32263 | 0.32501 | 0.22081 | 0.4379  | 0.02181 | 0.0402  | 0.08714 | 0.08868 | 0.20822 | 0.27122 | SEMA6B   |
| cg10053203 | 0.06635 | 0.06113 | 0.06473 | 0.05833 | 0.04965 | 0.05705 | 0.0631  | 0.0515  | 0.05468 | 0.0551  | NIT1     |
| cg10054127 | 0.02321 | 0.02283 | 0.02389 | 0.0237  | 0.01965 | 0.02    | 0.01841 | 0.01898 | 0.01911 | 0.01778 | APBA2BP  |
| cg10054857 | 0.79584 | 0.74444 | 0.66635 | 0.69373 | 0.50923 | 0.72997 | 0.56801 | 0.6272  | 0.107   | 0.16235 | C18orf20 |
| cg10055471 | 0.94883 | 0.81127 | 0.96251 | 0.96854 | 0.96809 | 0.96679 | 0.73509 | 0.37921 | 0.96113 | 0.86505 | NR0B2    |
| cg10056627 | 0.73938 | 0.82186 | 0.68297 | 0.82582 | 0.66569 | 0.51134 | 0.97427 | 0.96913 | 0.66231 | 0.72384 | GNMT     |
| cg10057065 | 0.52246 | 0.30435 | 0.6401  | 0.6684  | 0.62321 | 0.41082 | 0.39905 | 0.14563 | 0.35708 | 0.05867 | C1orf104 |
| cg10057218 | 0.86538 | 0.51912 | 0.78629 | 0.88822 | 0.72765 | 0.50927 | 0.6952  | 0.61835 | 0.4127  | 0.24024 | GSDML    |
| cg10057295 | 0.90096 | 0.80819 | 0.12404 | 0.14114 | 0.18447 | 0.0538  | 0.1203  | 0.27473 | 0.08755 | 0.04507 | STK24    |
| cg10058540 | 0.05853 | 0.05685 | 0.07418 | 0.06916 | 0.07008 | 0.06388 | 0.05249 | 0.04388 | 0.05861 | 0.05376 | DCTN2    |
| cg10059104 | 0.93518 | 0.89601 | 0.93902 | 0.94651 | 0.95741 | 0.94413 | 0.93935 | 0.89608 | 0.94429 | 0.94733 | FLJ36046 |
| cg10059959 | 0.35761 | 0.10537 | 0.47721 | 0.56174 | 0.74324 | 0.88966 | 0.07377 | 0.27905 | 0.02986 | 0.02714 | PAX5     |
| cg10061117 | 0.09316 | 0.02404 | 0.26164 | 0.19494 | 0.58533 | 0.30564 | 0.0223  | 0.02621 | 0.1308  | 0.05152 | SORL1    |
| cg10061138 | 0.71248 | 0.51805 | 0.90789 | 0.91376 | 0.96336 | 0.82045 | 0.79349 | 0.73783 | 0.65787 | 0.7622  | STAB1    |
| cg10061247 | 0.03937 | 0.03728 | 0.04508 | 0.03835 | 0.03007 | 0.03105 | 0.03355 | 0.0298  | 0.03308 | 0.02652 | TMEM115  |
| cg10061496 | 0.02022 | 0.02504 | 0.02032 | 0.02004 | 0.0223  | 0.02164 | 0.01666 | 0.01717 | 0.01655 | 0.01715 | HDAC11   |
| cg10062065 | 0.89034 | 0.58862 | 0.89683 | 0.91346 | 0.90533 | 0.86742 | 0.90677 | 0.90896 | 0.92055 | 0.90984 | APEG1    |
| cg10062803 | 0.66378 | 0.13969 | 0.57657 | 0.53698 | 0.60707 | 0.54261 | 0.43571 | 0.21017 | 0.14372 | 0.16027 | FABP4    |
| cg10063179 | 0.16723 | 0.07784 | 0.08666 | 0.35878 | 0.2399  | 0.51365 | 0.64823 | 0.93555 | 0.05227 | 0.04405 | MTNR1A   |
| cg10064162 | 0.88684 | 0.35355 | 0.84363 | 0.84369 | 0.77606 | 0.46569 | 0.75779 | 0.21681 | 0.92827 | 0.65514 | LAMB1    |
| cg10065130 | 0.03239 | 0.03846 | 0.03827 | 0.03606 | 0.03978 | 0.03495 | 0.03133 | 0.03594 | 0.02959 | 0.02967 | COG5     |
| cg10065416 | 0.03935 | 0.03247 | 0.28638 | 0.33555 | 0.15419 | 0.02685 | 0.16778 | 0.03699 | 0.3584  | 0.25555 | MPP3     |
| cg10065825 | 0.03706 | 0.04553 | 0.09235 | 0.07945 | 0.04281 | 0.04942 | 0.0414  | 0.04386 | 0.90641 | 0.91119 | CDH11    |
| cg10066332 | 0.04569 | 0.03931 | 0.03686 | 0.0424  | 0.06708 | 0.0699  | 0.03708 | 0.0423  | 0.03687 | 0.04449 | PPP1R13B |
| cg10069638 | 0.03733 | 0.04031 | 0.05285 | 0.04635 | 0.04602 | 0.04666 | 0.03582 | 0.03108 | 0.04117 | 0.038   | NFIA     |
| cg10071275 | 0.13396 | 0.10016 | 0.67159 | 0.6933  | 0.83592 | 0.82977 | 0.81622 | 0.11463 | 0.24559 | 0.09036 | MYT1     |
| cg10072995 | 0.07618 | 0.06236 | 0.04124 | 0.04442 | 0.04155 | 0.03649 | 0.03529 | 0.03097 | 0.02603 | 0.02834 | NINJ1    |
| cg10073042 | 0.59501 | 0.39296 | 0.55852 | 0.70182 | 0.83112 | 0.76857 | 0.30523 | 0.2999  | 0.66775 | 0.327   |          |
| cg10073091 | 0.12164 | 0.05533 | 0.05342 | 0.05603 | 0.05418 | 0.04695 | 0.05745 | 0.05334 | 0.81167 | 0.2185  | DHCR24   |
| cg10073723 | 0.02793 | 0.02978 | 0.03487 | 0.03151 | 0.02335 | 0.02759 | 0.03106 | 0.02911 | 0.02982 | 0.02233 | BMPER    |
| cg10073875 | 0.03492 | 0.04104 | 0.03659 | 0.03008 | 0.02674 | 0.03138 | 0.02902 | 0.03301 | 0.02814 | 0.02897 | GEMIN7   |
| cg10074409 | 0.85115 | 0.89913 | 0.88026 | 0.84467 | 0.87571 | 0.86991 | 0.35709 | 0.25652 | 0.85865 | 0.80778 | IRF6     |
| cg10074513 | 0.02485 | 0.03172 | 0.03097 | 0.03222 | 0.02852 | 0.02893 | 0.02296 | 0.02437 | 0.02556 | 0.02514 | FAM79A   |
| cg10074949 | 0.04945 | 0.0459  | 0.06087 | 0.05344 | 0.05442 | 0.0585  | 0.06514 | 0.06466 | 0.05264 | 0.05337 | MAPK6    |
| cg10075436 | 0.03268 | 0.02825 | 0.03139 | 0.03219 | 0.02278 | 0.03203 | 0.0241  | 0.02553 | 0.02411 | 0.0252  | ZNF42    |
| cg10076009 | 0.07777 | 0.07512 | 0.1073  | 0.08811 | 0.08648 | 0.07653 | 0.52675 | 0.52857 | 0.08162 | 0.07016 | SMARCA1  |
| cg10078415 | 0.12972 | 0.13291 | 0.42897 | 0.66765 | 0.15358 | 0.09386 | 0.17652 | 0.11605 | 0.09681 | 0.1046  | ACSM3    |
| cg10078829 | 0.06655 | 0.04417 | 0.42545 | 0.49428 | 0.28062 | 0.44554 | 0.09409 | 0.04336 | 0.04186 | 0.03491 | KLK4     |

|            |         |         |         |         |         |         |         |         |         |         |           |
|------------|---------|---------|---------|---------|---------|---------|---------|---------|---------|---------|-----------|
| cg10080004 | 0.06416 | 0.03002 | 0.30732 | 0.17879 | 0.12773 | 0.02938 | 0.18123 | 0.3537  | 0.37321 | 0.02538 | SYT5      |
| cg10081899 | 0.04899 | 0.03802 | 0.03942 | 0.04165 | 0.03567 | 0.0403  | 0.03999 | 0.04277 | 0.03302 | 0.02629 | PPM1F     |
| cg10082841 | 0.07647 | 0.05067 | 0.85191 | 0.88268 | 0.89571 | 0.828   | 0.79726 | 0.51253 | 0.88448 | 0.64094 | PIP5KL1   |
| cg10082991 | 0.05916 | 0.04985 | 0.05392 | 0.05175 | 0.04128 | 0.04706 | 0.04632 | 0.04898 | 0.04549 | 0.04618 | RNF44     |
| cg10083236 | 0.02889 | 0.0406  | 0.0357  | 0.03318 | 0.03028 | 0.03159 | 0.02295 | 0.02339 | 0.028   | 0.02966 | FAM98A    |
| cg10084993 | 0.20472 | 0.09437 | 0.38003 | 0.28861 | 0.81542 | 0.6434  | 0.40772 | 0.27109 | 0.86215 | 0.27961 | SLC9A3R2  |
| cg10087081 | 0.69559 | 0.3368  | 0.67934 | 0.75952 | 0.59082 | 0.7234  | 0.53944 | 0.52609 | 0.73707 | 0.56657 | KIAA0355  |
| cg10087399 | 0.08191 | 0.06794 | 0.08652 | 0.08336 | 0.81082 | 0.42247 | 0.0654  | 0.06459 | 0.0774  | 0.07989 | SORT1     |
| cg10088985 | 0.13698 | 0.05226 | 0.93358 | 0.93702 | 0.57687 | 0.8259  | 0.56504 | 0.53041 | 0.10524 | 0.08442 | CXCL5     |
| cg10089145 | 0.50048 | 0.36994 | 0.88354 | 0.8318  | 0.98221 | 0.96713 | 0.82262 | 0.62109 | 0.05303 | 0.05093 | ST14      |
| cg10089324 | 0.12478 | 0.12173 | 0.12565 | 0.11469 | 0.08305 | 0.10239 | 0.11315 | 0.12419 | 0.10475 | 0.11914 | EPS15     |
| cg10090585 | 0.03457 | 0.04464 | 0.05499 | 0.06031 | 0.04822 | 0.05098 | 0.04995 | 0.03407 | 0.04057 | 0.04269 | COVA1     |
| cg10091705 | 0.03603 | 0.03531 | 0.05268 | 0.04697 | 0.03511 | 0.04394 | 0.03549 | 0.03277 | 0.03434 | 0.03243 | PPP1R12B  |
| cg10092957 | 0.03758 | 0.03416 | 0.36794 | 0.52935 | 0.35219 | 0.0512  | 0.09521 | 0.03059 | 0.08475 | 0.03663 | LOC342897 |
| cg10094277 | 0.6466  | 0.48704 | 0.61236 | 0.69041 | 0.54451 | 0.66728 | 0.62408 | 0.71918 | 0.5037  | 0.20144 | KERA      |
| cg10094443 | 0.34586 | 0.23052 | 0.05429 | 0.04625 | 0.05594 | 0.0541  | 0.03847 | 0.05084 | 0.07523 | 0.04451 | UGDH      |
| cg10095719 | 0.03945 | 0.0379  | 0.04056 | 0.04241 | 0.03736 | 0.03688 | 0.03839 | 0.03879 | 0.03653 | 0.03836 | NRP1      |
| cg10098216 | 0.05766 | 0.05174 | 0.07136 | 0.0487  | 0.05812 | 0.0469  | 0.05907 | 0.05445 | 0.04989 | 0.05187 | NDUFB8    |
| cg10098541 | 0.42128 | 0.27535 | 0.5623  | 0.57004 | 0.46529 | 0.30774 | 0.45562 | 0.2582  | 0.06893 | 0.05479 | PDIA5     |
| cg10098888 | 0.07848 | 0.03723 | 0.68376 | 0.92806 | 0.62406 | 0.44633 | 0.31976 | 0.30562 | 0.93635 | 0.6113  | IRS1      |
| cg10099900 | 0.70342 | 0.40722 | 0.65095 | 0.72019 | 0.80542 | 0.83848 | 0.28857 | 0.09266 | 0.54755 | 0.53107 | PSMF1     |
| cg10100220 | 0.86313 | 0.81359 | 0.78584 | 0.81291 | 0.76561 | 0.78562 | 0.76302 | 0.82365 | 0.82635 | 0.84568 | LNX2      |
| cg10103111 | 0.03983 | 0.03884 | 0.04636 | 0.04704 | 0.03309 | 0.05214 | 0.03562 | 0.03062 | 0.02945 | 0.03203 | OPA3      |
| cg10104451 | 0.06165 | 0.07093 | 0.14348 | 0.15224 | 0.05446 | 0.05855 | 0.04896 | 0.05817 | 0.106   | 0.10275 | ARC       |
| cg10106284 | 0.79119 | 0.15842 | 0.37697 | 0.56153 | 0.19032 | 0.10863 | 0.75245 | 0.15298 | 0.29001 | 0.51419 | FAM49A    |
| cg10106388 | 0.10465 | 0.04253 | 0.273   | 0.32275 | 0.17468 | 0.39096 | 0.0693  | 0.04779 | 0.29225 | 0.22955 | CD244     |
| cg10107186 | 0.0645  | 0.06633 | 0.07259 | 0.09959 | 0.10114 | 0.09898 | 0.09069 | 0.06874 | 0.07801 | 0.06323 | PFDN5     |
| cg10107671 | 0.97219 | 0.97523 | 0.9731  | 0.97472 | 0.97215 | 0.97189 | 0.979   | 0.94256 | 0.98322 | 0.98142 | FLJ45684  |
| cg10107725 | 0.77261 | 0.77412 | 0.79519 | 0.80568 | 0.83731 | 0.77826 | 0.71654 | 0.77768 | 0.77736 | 0.74859 | LY75      |
| cg10108208 | 0.74331 | 0.7631  | 0.7496  | 0.77149 | 0.76602 | 0.59771 | 0.77183 | 0.76525 | 0.78112 | 0.62992 | GPATC1    |
| cg10114327 | 0.40175 | 0.57267 | 0.15339 | 0.37153 | 0.09726 | 0.03834 | 0.52691 | 0.05704 | 0.21856 | 0.04555 | GPR103    |
| cg10115873 | 0.8193  | 0.59854 | 0.76364 | 0.7954  | 0.7735  | 0.44415 | 0.70524 | 0.7657  | 0.79266 | 0.72483 | DNAJB7    |
| cg10117369 | 0.46729 | 0.04659 | 0.80089 | 0.84019 | 0.60876 | 0.39943 | 0.48686 | 0.09947 | 0.66021 | 0.11956 | LAX1      |
| cg10124201 | 0.56029 | 0.80646 | 0.77182 | 0.83073 | 0.74738 | 0.83897 | 0.41911 | 0.40305 | 0.81723 | 0.79736 | BOLL      |
| cg10124491 | 0.03995 | 0.04534 | 0.03926 | 0.03376 | 0.05736 | 0.05111 | 0.04252 | 0.03593 | 0.05567 | 0.0414  | MGC29891  |
| cg10125119 | 0.10889 | 0.10055 | 0.13885 | 0.14696 | 0.14192 | 0.13037 | 0.10599 | 0.10176 | 0.13291 | 0.13453 | CSDE1     |
| cg10125195 | 0.7883  | 0.72133 | 0.16803 | 0.20934 | 0.32484 | 0.61793 | 0.0702  | 0.08689 | 0.0741  | 0.06147 | LACRT     |
| cg10126874 | 0.0207  | 0.02225 | 0.01949 | 0.02226 | 0.02035 | 0.02336 | 0.01662 | 0.02129 | 0.01813 | 0.01699 | CRY1      |
| cg10126923 | 0.70498 | 0.5498  | 0.38422 | 0.41664 | 0.91253 | 0.93506 | 0.11816 | 0.03794 | 0.78713 | 0.71981 | NKG7      |
| cg10127415 | 0.05511 | 0.05112 | 0.28281 | 0.37244 | 0.0981  | 0.076   | 0.0307  | 0.0386  | 0.06297 | 0.04501 | MAGEB6    |
| cg10128164 | 0.12436 | 0.08678 | 0.52637 | 0.74353 | 0.18713 | 0.15059 | 0.08582 | 0.06314 | 0.08888 | 0.09228 | COCH      |

|            |         |         |         |         |         |         |         |         |         |                   |
|------------|---------|---------|---------|---------|---------|---------|---------|---------|---------|-------------------|
| cg10128868 | 0.04131 | 0.04132 | 0.0439  | 0.03975 | 0.02489 | 0.03377 | 0.04049 | 0.04082 | 0.03353 | 0.03603 PDIA4     |
| cg10129493 | 0.74813 | 0.49823 | 0.55876 | 0.68856 | 0.86684 | 0.7676  | 0.07855 | 0.05604 | 0.46221 | 0.41311 CD33      |
| cg10130071 | 0.84822 | 0.85455 | 0.80188 | 0.83272 | 0.74109 | 0.80302 | 0.82309 | 0.83606 | 0.85782 | 0.78781 GALNT1    |
| cg10133777 | 0.18835 | 0.11182 | 0.44655 | 0.51997 | 0.58986 | 0.66292 | 0.11803 | 0.10907 | 0.68136 | 0.54268 ZD52F10   |
| cg10134939 | 0.90341 | 0.87628 | 0.89155 | 0.90783 | 0.94319 | 0.90782 | 0.90185 | 0.86444 | 0.82044 | 0.63009 FLJ13391  |
| cg10135708 | 0.62252 | 0.33269 | 0.3459  | 0.64612 | 0.42015 | 0.33255 | 0.16552 | 0.30309 | 0.18164 | 0.1919 UCN2       |
| cg10135717 | 0.12917 | 0.08166 | 0.29914 | 0.5099  | 0.42653 | 0.46547 | 0.1197  | 0.4521  | 0.07478 | 0.07449 ADAMTS17  |
| cg10137010 | 0.83759 | 0.29386 | 0.77393 | 0.86885 | 0.91264 | 0.77949 | 0.38846 | 0.0886  | 0.25027 | 0.03117 TRPV3     |
| cg10137155 | 0.05529 | 0.04352 | 0.05884 | 0.04902 | 0.06303 | 0.06521 | 0.07826 | 0.05759 | 0.04591 | 0.04322 KBTBD8    |
| cg10139614 | 0.06195 | 0.03251 | 0.03077 | 0.02863 | 0.02373 | 0.0314  | 0.02627 | 0.02748 | 0.02583 | 0.02228 APRT      |
| cg10139846 | 0.1189  | 0.03478 | 0.04057 | 0.04352 | 0.06897 | 0.03509 | 0.02752 | 0.0223  | 0.03271 | 0.02619 INADL     |
| cg10140638 | 0.03227 | 0.03039 | 0.12947 | 0.08442 | 0.15274 | 0.05911 | 0.02445 | 0.02573 | 0.02704 | 0.02657 PTPRN     |
| cg10141022 | 0.02979 | 0.03582 | 0.0559  | 0.04972 | 0.03706 | 0.05162 | 0.02985 | 0.03215 | 0.02574 | 0.02255 BRAF      |
| cg10141715 | 0.46338 | 0.4445  | 0.93423 | 0.93059 | 0.36241 | 0.40602 | 0.08317 | 0.39573 | 0.14689 | 0.24744 SLC5A8    |
| cg10143146 | 0.42743 | 0.56292 | 0.65297 | 0.67456 | 0.65148 | 0.62496 | 0.51544 | 0.29806 | 0.09898 | 0.05057 COL11A2   |
| cg10145369 | 0.02266 | 0.02874 | 0.02398 | 0.02416 | 0.02625 | 0.02709 | 0.02432 | 0.02209 | 0.02128 | 0.02042 DAD1      |
| cg10145725 | 0.73277 | 0.74181 | 0.65097 | 0.70951 | 0.61921 | 0.70481 | 0.67619 | 0.69947 | 0.7093  | 0.71693 KLRA1     |
| cg10145926 | 0.49035 | 0.0705  | 0.738   | 0.81691 | 0.65223 | 0.75695 | 0.16369 | 0.13103 | 0.80339 | 0.69315 C14orf139 |
| cg10146929 | 0.61405 | 0.75612 | 0.19917 | 0.56096 | 0.52321 | 0.72984 | 0.80475 | 0.80648 | 0.29508 | 0.29652 HIST1H1A  |
| cg10148280 | 0.4542  | 0.15419 | 0.44703 | 0.52458 | 0.52227 | 0.43256 | 0.44934 | 0.10571 | 0.30988 | 0.14051 HPS3      |
| cg10148841 | 0.883   | 0.51231 | 0.87977 | 0.89691 | 0.61772 | 0.8625  | 0.88477 | 0.89075 | 0.90698 | 0.88297 ROBO4     |
| cg10149329 | 0.07149 | 0.06404 | 0.07367 | 0.06679 | 0.06569 | 0.06143 | 0.05223 | 0.05214 | 0.05433 | 0.05904 MGC33302  |
| cg10149836 | 0.14237 | 0.05616 | 0.70448 | 0.86938 | 0.84046 | 0.82592 | 0.79226 | 0.54192 | 0.88339 | 0.77207 RAB11FIP4 |
| cg10150530 | 0.85124 | 0.72694 | 0.84578 | 0.86872 | 0.86627 | 0.89454 | 0.84669 | 0.84583 | 0.8741  | 0.83193 LRMP      |
| cg10150813 | 0.89299 | 0.68827 | 0.84753 | 0.78307 | 0.88653 | 0.84938 | 0.32401 | 0.40035 | 0.90967 | 0.88039 KIAA0746  |
| cg10154655 | 0.08049 | 0.05205 | 0.07457 | 0.05109 | 0.04584 | 0.04221 | 0.04549 | 0.042   | 0.0448  | 0.03949 PNPO      |
| cg10154926 | 0.0299  | 0.02821 | 0.03567 | 0.03207 | 0.03989 | 0.033   | 0.03314 | 0.02814 | 0.02501 | 0.02464 HAP1      |
| cg10157098 | 0.891   | 0.88362 | 0.89447 | 0.90693 | 0.92499 | 0.89829 | 0.88905 | 0.89067 | 0.7622  | 0.75315 NYD-SP18  |
| cg10158080 | 0.05832 | 0.05141 | 0.06516 | 0.05492 | 0.04435 | 0.04288 | 0.04919 | 0.04568 | 0.05846 | 0.05246 SOX5      |
| cg10158181 | 0.02943 | 0.02748 | 0.03344 | 0.0295  | 0.02882 | 0.02316 | 0.02384 | 0.02396 | 0.02402 | 0.0177 GRK4       |
| cg10158711 | 0.02752 | 0.02386 | 0.02742 | 0.02535 | 0.02349 | 0.02434 | 0.02155 | 0.02076 | 0.01731 | 0.01934 PDIA4     |
| cg10159529 | 0.72944 | 0.21014 | 0.16016 | 0.31922 | 0.75968 | 0.86043 | 0.45293 | 0.60957 | 0.30341 | 0.29845 IL5RA     |
| cg10160407 | 0.02535 | 0.0192  | 0.01951 | 0.01967 | 0.17046 | 0.0183  | 0.02239 | 0.01999 | 0.0417  | 0.01529 PDGFRL    |
| cg10161121 | 0.40943 | 0.43906 | 0.85535 | 0.87044 | 0.74367 | 0.8852  | 0.81697 | 0.57629 | 0.59823 | 0.1277 FASLG      |
| cg10162464 | 0.12801 | 0.11502 | 0.09502 | 0.0942  | 0.07437 | 0.08891 | 0.1081  | 0.10799 | 0.10123 | 0.11476 ZNF282    |
| cg10163825 | 0.38841 | 0.14116 | 0.78412 | 0.94356 | 0.75472 | 0.60056 | 0.43087 | 0.16988 | 0.51698 | 0.62131 C16orf25  |
| cg10164137 | 0.03442 | 0.03696 | 0.04782 | 0.04722 | 0.04269 | 0.04877 | 0.03747 | 0.04049 | 0.03425 | 0.04011 DVL1      |
| cg10164640 | 0.03355 | 0.03647 | 0.03638 | 0.03588 | 0.07697 | 0.05264 | 0.02947 | 0.04531 | 0.03099 | 0.03084 GLOXD1    |
| cg10164686 | 0.04664 | 0.04542 | 0.04761 | 0.04591 | 0.03345 | 0.04181 | 0.0401  | 0.04161 | 0.04277 | 0.03659 SERPINB6  |
| cg10165198 | 0.03521 | 0.03384 | 0.03673 | 0.03444 | 0.03044 | 0.0355  | 0.03114 | 0.03193 | 0.02814 | 0.02631 PCCB      |
| cg10166697 | 0.09898 | 0.09735 | 0.13708 | 0.1362  | 0.22391 | 0.16628 | 0.1118  | 0.08994 | 0.13525 | 0.07462 SLC25A13  |

|            |         |         |         |         |         |         |         |         |         |         |           |
|------------|---------|---------|---------|---------|---------|---------|---------|---------|---------|---------|-----------|
| cg10167296 | 0.04664 | 0.03514 | 0.25572 | 0.47153 | 0.71045 | 0.89265 | 0.88404 | 0.65673 | 0.031   | 0.02586 | RASSF5    |
| cg10168628 | 0.60665 | 0.4965  | 0.59769 | 0.65226 | 0.68108 | 0.56549 | 0.59473 | 0.59379 | 0.52297 | 0.47362 | WBSCR19   |
| cg10169812 | 0.875   | 0.86223 | 0.80913 | 0.83259 | 0.79179 | 0.86455 | 0.86614 | 0.89795 | 0.9041  | 0.86922 | CD38      |
| cg10171125 | 0.17037 | 0.06176 | 0.17641 | 0.29707 | 0.10255 | 0.05662 | 0.10722 | 0.07925 | 0.20471 | 0.05295 | SCARA5    |
| cg10172318 | 0.04691 | 0.03554 | 0.04786 | 0.03437 | 0.05067 | 0.04365 | 0.14831 | 0.08132 | 0.0725  | 0.03381 | DRAP1     |
| cg10173075 | 0.85947 | 0.77594 | 0.85267 | 0.86322 | 0.88353 | 0.84042 | 0.78431 | 0.79763 | 0.69324 | 0.80145 | RLBP1     |
| cg10173675 | 0.92268 | 0.90714 | 0.88123 | 0.88932 | 0.95265 | 0.93269 | 0.89724 | 0.75672 | 0.93771 | 0.9065  | RAB17     |
| cg10173723 | 0.87185 | 0.61236 | 0.84449 | 0.84454 | 0.84779 | 0.50627 | 0.09774 | 0.09637 | 0.85521 | 0.84199 | KRT25C    |
| cg10174687 | 0.05534 | 0.04655 | 0.05349 | 0.04576 | 0.08121 | 0.05929 | 0.06342 | 0.05606 | 0.06621 | 0.07158 | FAM98B    |
| cg10174864 | 0.1376  | 0.13763 | 0.17887 | 0.14231 | 0.1235  | 0.14378 | 0.13732 | 0.11995 | 0.13802 | 0.12871 | FANCL     |
| cg10175795 | 0.04205 | 0.04625 | 0.60614 | 0.57978 | 0.46655 | 0.3399  | 0.4904  | 0.50405 | 0.12854 | 0.03988 | TCERG1L   |
| cg10177528 | 0.87252 | 0.82286 | 0.86225 | 0.8767  | 0.89116 | 0.71097 | 0.82581 | 0.82847 | 0.87374 | 0.53422 | TRAF5     |
| cg10179196 | 0.11234 | 0.11219 | 0.61135 | 0.53839 | 0.57282 | 0.25821 | 0.72317 | 0.26522 | 0.28638 | 0.22619 | CXCL14    |
| cg10179684 | 0.03605 | 0.04123 | 0.04041 | 0.03581 | 0.03242 | 0.0337  | 0.03385 | 0.0339  | 0.02746 | 0.03165 | STARD7    |
| cg10180697 | 0.76964 | 0.78322 | 0.72497 | 0.78236 | 0.68888 | 0.7926  | 0.73793 | 0.74841 | 0.83954 | 0.84467 | MSH3      |
| cg10182321 | 0.0414  | 0.0433  | 0.04592 | 0.04451 | 0.2363  | 0.04136 | 0.04458 | 0.0338  | 0.04194 | 0.03257 | STK32B    |
| cg10183248 | 0.03074 | 0.02724 | 0.06569 | 0.03979 | 0.03506 | 0.02617 | 0.04516 | 0.04284 | 0.05126 | 0.02898 | UBTF      |
| cg10184881 | 0.02856 | 0.03641 | 0.03815 | 0.04049 | 0.03386 | 0.02856 | 0.05221 | 0.0258  | 0.02839 | 0.02771 | PTP4A2    |
| cg10184886 | 0.10562 | 0.09536 | 0.26417 | 0.24955 | 0.23451 | 0.15127 | 0.16302 | 0.10468 | 0.16574 | 0.16008 | PLA2G6    |
| cg10185638 | 0.02263 | 0.02326 | 0.02613 | 0.02466 | 0.02332 | 0.02539 | 0.02163 | 0.02199 | 0.02487 | 0.02461 | ATG9A     |
| cg10186308 | 0.03213 | 0.03466 | 0.04109 | 0.03897 | 0.03834 | 0.0411  | 0.03485 | 0.03275 | 0.03505 | 0.03408 | CALCOCO1  |
| cg10186456 | 0.91556 | 0.80563 | 0.92302 | 0.91337 | 0.87013 | 0.69837 | 0.91176 | 0.89979 | 0.75011 | 0.85134 | MGC52282  |
| cg10187559 | 0.12649 | 0.11103 | 0.56154 | 0.4336  | 0.17437 | 0.13555 | 0.12064 | 0.08769 | 0.19633 | 0.19103 | TTYH1     |
| cg10187932 | 0.08408 | 0.10384 | 0.12956 | 0.11681 | 0.18044 | 0.08294 | 0.11322 | 0.126   | 0.11217 | 0.11472 | PARP11    |
| cg10188131 | 0.03169 | 0.03299 | 0.03732 | 0.03267 | 0.04649 | 0.03607 | 0.02716 | 0.02963 | 0.02733 | 0.02379 | RPL12     |
| cg10189695 | 0.04307 | 0.20397 | 0.94332 | 0.94806 | 0.04848 | 0.03432 | 0.40771 | 0.48156 | 0.04575 | 0.02561 | GPR78     |
| cg10189763 | 0.26285 | 0.64509 | 0.35733 | 0.38358 | 0.60886 | 0.54595 | 0.17216 | 0.13804 | 0.1442  | 0.15059 | MUC7      |
| cg10190509 | 0.33028 | 0.36547 | 0.39492 | 0.66574 | 0.64788 | 0.80592 | 0.09417 | 0.08325 | 0.39815 | 0.07973 | CCL16     |
| cg10193817 | 0.03593 | 0.03923 | 0.03898 | 0.03165 | 0.03023 | 0.03603 | 0.03576 | 0.03322 | 0.03085 | 0.02834 | IGSF4     |
| cg10194829 | 0.10028 | 0.0958  | 0.47199 | 0.62622 | 0.36646 | 0.39253 | 0.59907 | 0.2214  | 0.35154 | 0.38232 | FGF17     |
| cg10196289 | 0.02678 | 0.02613 | 0.02533 | 0.02655 | 0.01939 | 0.02539 | 0.02432 | 0.02334 | 0.02414 | 0.02159 | NSMAF     |
| cg10198837 | 0.89459 | 0.84716 | 0.77379 | 0.82352 | 0.87426 | 0.8929  | 0.36063 | 0.32746 | 0.71598 | 0.89319 | CD8B1     |
| cg10198932 | 0.44342 | 0.12462 | 0.61698 | 0.68533 | 0.55658 | 0.7339  | 0.25496 | 0.14214 | 0.54227 | 0.23594 | C21orf129 |
| cg10200408 | 0.03447 | 0.03593 | 0.04236 | 0.04028 | 0.03486 | 0.04156 | 0.03678 | 0.0374  | 0.02956 | 0.0323  | ASB8      |
| cg10201668 | 0.72469 | 0.31551 | 0.61351 | 0.74145 | 0.80497 | 0.87663 | 0.22588 | 0.09525 | 0.83254 | 0.62115 | NIP       |
| cg10202457 | 0.12947 | 0.12791 | 0.19004 | 0.23881 | 0.27234 | 0.29139 | 0.12996 | 0.10978 | 0.15834 | 0.14113 | NMNAT2    |
| cg10203483 | 0.87557 | 0.36177 | 0.914   | 0.92576 | 0.38745 | 0.05167 | 0.58966 | 0.43904 | 0.68257 | 0.49124 | LOC284948 |
| cg10203523 | 0.03609 | 0.03872 | 0.03436 | 0.03324 | 0.03038 | 0.03376 | 0.03024 | 0.03452 | 0.032   | 0.03062 | MRFAP1L1  |
| cg10207745 | 0.08127 | 0.08568 | 0.14119 | 0.14825 | 0.30968 | 0.76685 | 0.32327 | 0.84064 | 0.08165 | 0.09348 | C12orf36  |
| cg10207787 | 0.89312 | 0.89902 | 0.90277 | 0.90262 | 0.92992 | 0.89028 | 0.85893 | 0.89038 | 0.88132 | 0.87961 | PPP2R2A   |
| cg10207917 | 0.59917 | 0.47999 | 0.46541 | 0.53771 | 0.55109 | 0.58703 | 0.3994  | 0.38771 | 0.46632 | 0.47741 | GH1       |

|            |         |         |         |         |         |         |         |         |         |         |           |
|------------|---------|---------|---------|---------|---------|---------|---------|---------|---------|---------|-----------|
| cg10210238 | 0.38946 | 0.42165 | 0.44899 | 0.4849  | 0.44923 | 0.46694 | 0.97343 | 0.94615 | 0.97822 | 0.97999 | CDKN2B    |
| cg10211252 | 0.05104 | 0.04551 | 0.07062 | 0.06172 | 0.13101 | 0.04299 | 0.0725  | 0.05753 | 0.05044 | 0.04303 | ZNF488    |
| cg10211788 | 0.02791 | 0.03353 | 0.03394 | 0.02796 | 0.02157 | 0.02067 | 0.02978 | 0.0298  | 0.02152 | 0.02133 | BRD2      |
| cg10211877 | 0.02234 | 0.0202  | 0.02506 | 0.02428 | 0.02927 | 0.02936 | 0.02044 | 0.01853 | 0.01907 | 0.01723 | PDRG1     |
| cg10212621 | 0.74344 | 0.29436 | 0.66944 | 0.83132 | 0.66832 | 0.61028 | 0.54318 | 0.37467 | 0.39412 | 0.09899 | HMGCS2    |
| cg10213812 | 0.85269 | 0.11045 | 0.79234 | 0.88738 | 0.93776 | 0.91203 | 0.8947  | 0.9032  | 0.75616 | 0.68972 | FOXN1     |
| cg10213821 | 0.10989 | 0.10568 | 0.1496  | 0.16015 | 0.20479 | 0.14115 | 0.11554 | 0.09815 | 0.13903 | 0.07695 | G10       |
| cg10214058 | 0.06519 | 0.06163 | 0.05948 | 0.05609 | 0.05568 | 0.06069 | 0.06195 | 0.05874 | 0.0584  | 0.05755 | CNOT8     |
| cg10215079 | 0.85991 | 0.74051 | 0.86105 | 0.8728  | 0.88912 | 0.78274 | 0.75253 | 0.72837 | 0.80806 | 0.76895 | TAC3      |
| cg10215570 | 0.05354 | 0.0589  | 0.07377 | 0.05974 | 0.07448 | 0.05779 | 0.04846 | 0.04847 | 0.04287 | 0.05312 | LOC84661  |
| cg10215884 | 0.06366 | 0.04649 | 0.07514 | 0.13286 | 0.39957 | 0.45368 | 0.04561 | 0.05307 | 0.07141 | 0.03493 | MGC33214  |
| cg10216105 | 0.04857 | 0.04622 | 0.05334 | 0.05143 | 0.04594 | 0.05825 | 0.06351 | 0.05062 | 0.04702 | 0.04389 | TTL       |
| cg10217445 | 0.39214 | 0.31597 | 0.35794 | 0.4423  | 0.75689 | 0.64535 | 0.32341 | 0.38786 | 0.11764 | 0.0552  | OLIG2     |
| cg10217449 | 0.0836  | 0.07244 | 0.08154 | 0.06597 | 0.15317 | 0.08655 | 0.06299 | 0.05747 | 0.06264 | 0.05846 | GNPDA2    |
| cg10218426 | 0.03021 | 0.03242 | 0.03867 | 0.04185 | 0.03342 | 0.0419  | 0.03275 | 0.03072 | 0.02895 | 0.02843 | CKAP2     |
| cg10218646 | 0.12351 | 0.07095 | 0.07032 | 0.0654  | 0.04301 | 0.05506 | 0.08307 | 0.08471 | 0.0586  | 0.05912 | ZBTB11    |
| cg10218959 | 0.04187 | 0.06006 | 0.04975 | 0.04875 | 0.03947 | 0.04956 | 0.04129 | 0.04501 | 0.04097 | 0.04202 | PTGES2    |
| cg10219037 | 0.20986 | 0.04657 | 0.17135 | 0.12878 | 0.06836 | 0.0562  | 0.06351 | 0.03704 | 0.0451  | 0.04218 | C11orf1   |
| cg10220156 | 0.02686 | 0.02822 | 0.0278  | 0.02959 | 0.02442 | 0.02789 | 0.02827 | 0.02734 | 0.02457 | 0.02389 | KIF13B    |
| cg10221501 | 0.8756  | 0.5254  | 0.92237 | 0.91124 | 0.92593 | 0.86762 | 0.88494 | 0.89633 | 0.9221  | 0.91076 | CMTM1     |
| cg10221736 | 0.9037  | 0.80442 | 0.90738 | 0.9111  | 0.90818 | 0.88424 | 0.89366 | 0.81269 | 0.90015 | 0.89687 | TICAM1    |
| cg10222534 | 0.89711 | 0.89276 | 0.90386 | 0.90756 | 0.78002 | 0.37176 | 0.8674  | 0.69711 | 0.77702 | 0.9041  | KCNJ14    |
| cg10222574 | 0.03636 | 0.03562 | 0.03577 | 0.03679 | 0.02757 | 0.0302  | 0.03212 | 0.03441 | 0.03037 | 0.02934 | RAB11FIP2 |
| cg10224037 | 0.03738 | 0.0393  | 0.03592 | 0.03147 | 0.02189 | 0.02168 | 0.02423 | 0.02264 | 0.02387 | 0.02261 | ZNF354A   |
| cg10225525 | 0.51161 | 0.6496  | 0.82263 | 0.84817 | 0.60588 | 0.75167 | 0.69202 | 0.7271  | 0.79172 | 0.4312  | FUT8      |
| cg10226546 | 0.38074 | 0.11897 | 0.91174 | 0.91533 | 0.91421 | 0.82908 | 0.91047 | 0.90632 | 0.92735 | 0.87307 | NFATC2    |
| cg10226744 | 0.02372 | 0.02609 | 0.03014 | 0.02677 | 0.03678 | 0.02322 | 0.02567 | 0.02505 | 0.0606  | 0.02407 | ATXN10    |
| cg10227191 | 0.25263 | 0.03035 | 0.032   | 0.02887 | 0.48285 | 0.48574 | 0.33188 | 0.02904 | 0.02589 | 0.0226  | KRT18     |
| cg10227731 | 0.05229 | 0.06504 | 0.07325 | 0.0583  | 0.07139 | 0.0785  | 0.05062 | 0.04163 | 0.05083 | 0.05498 | ZNF16     |
| cg10234776 | 0.12184 | 0.05895 | 0.11427 | 0.0656  | 0.0458  | 0.03908 | 0.03714 | 0.03438 | 0.03915 | 0.02991 | NRBF2     |
| cg10234985 | 0.886   | 0.88692 | 0.74807 | 0.84806 | 0.94304 | 0.89482 | 0.86127 | 0.59367 | 0.63687 | 0.68581 | IZUMO1    |
| cg10235741 | 0.8412  | 0.85286 | 0.8268  | 0.84038 | 0.75826 | 0.78469 | 0.75393 | 0.4145  | 0.59882 | 0.44801 | DNASE1L3  |
| cg10235817 | 0.04637 | 0.02696 | 0.91924 | 0.96424 | 0.51418 | 0.13992 | 0.10642 | 0.07418 | 0.48743 | 0.54125 | ADRA2C    |
| cg10236239 | 0.84659 | 0.68849 | 0.8146  | 0.83262 | 0.80474 | 0.81704 | 0.81598 | 0.15153 | 0.78132 | 0.76089 | SULT1C2   |
| cg10237469 | 0.27192 | 0.13796 | 0.39921 | 0.38334 | 0.10747 | 0.3152  | 0.13392 | 0.1231  | 0.14509 | 0.10899 | CEACAM4   |
| cg10237911 | 0.16971 | 0.15052 | 0.14238 | 0.15454 | 0.1462  | 0.20896 | 0.18576 | 0.16468 | 0.1068  | 0.12528 | ANKRA2    |
| cg10238171 | 0.38227 | 0.2496  | 0.70082 | 0.74651 | 0.33384 | 0.40227 | 0.32848 | 0.52355 | 0.51929 | 0.41272 | BDKRB1    |
| cg10238818 | 0.03602 | 0.03899 | 0.92144 | 0.92449 | 0.06646 | 0.16085 | 0.03177 | 0.08941 | 0.1909  | 0.24341 | CYYR1     |
| cg10239941 | 0.03579 | 0.03035 | 0.04003 | 0.03476 | 0.01845 | 0.02999 | 0.02928 | 0.02751 | 0.03388 | 0.02875 | MPV17     |
| cg10240083 | 0.65129 | 0.4761  | 0.75666 | 0.77642 | 0.76006 | 0.80616 | 0.72305 | 0.76884 | 0.39188 | 0.17346 | LOC92017  |
| cg10240853 | 0.11698 | 0.10853 | 0.47723 | 0.45541 | 0.04652 | 0.03297 | 0.17344 | 0.04719 | 0.04336 | 0.03873 | MOSPD3    |



|            |         |         |         |         |         |         |         |         |         |                   |
|------------|---------|---------|---------|---------|---------|---------|---------|---------|---------|-------------------|
| cg10241097 | 0.12404 | 0.08481 | 0.65741 | 0.86325 | 0.8654  | 0.66002 | 0.07025 | 0.31202 | 0.72851 | 0.49098 UBL4B     |
| cg10242476 | 0.79933 | 0.77887 | 0.71549 | 0.81507 | 0.77362 | 0.74533 | 0.14626 | 0.28011 | 0.68249 | 0.51363 TDGF1     |
| cg10244047 | 0.03707 | 0.03674 | 0.05125 | 0.05071 | 0.04307 | 0.04871 | 0.03607 | 0.03073 | 0.05299 | 0.03247 BA13      |
| cg10245048 | 0.13312 | 0.04883 | 0.54015 | 0.59017 | 0.2436  | 0.29052 | 0.05    | 0.05584 | 0.44003 | 0.04218 TNFRSF10A |
| cg10246296 | 0.56986 | 0.15858 | 0.82429 | 0.85226 | 0.14316 | 0.19867 | 0.08043 | 0.15729 | 0.0726  | 0.08035 CLCN4     |
| cg10246520 | 0.85042 | 0.78574 | 0.1615  | 0.26903 | 0.58966 | 0.81227 | 0.09553 | 0.27202 | 0.07982 | 0.72733 OLFM4     |
| cg10247252 | 0.0543  | 0.04142 | 0.46033 | 0.63096 | 0.33626 | 0.35657 | 0.06658 | 0.04365 | 0.0476  | 0.03609 GALR2     |
| cg10247268 | 0.02577 | 0.02999 | 0.03301 | 0.02923 | 0.01657 | 0.03482 | 0.03275 | 0.02893 | 0.02414 | 0.02008 PFKP      |
| cg10248727 | 0.79762 | 0.22491 | 0.84587 | 0.87306 | 0.86349 | 0.796   | 0.2288  | 0.20133 | 0.47443 | 0.59734 LCN1      |
| cg10248733 | 0.05413 | 0.05663 | 0.07021 | 0.06992 | 0.06456 | 0.06126 | 0.05867 | 0.05773 | 0.05832 | 0.05488 CALR3     |
| cg10249734 | 0.65974 | 0.42433 | 0.79093 | 0.75947 | 0.89864 | 0.71123 | 0.90704 | 0.46116 | 0.45108 | 0.14984 SECTM1    |
| cg10250107 | 0.03437 | 0.03625 | 0.03017 | 0.02903 | 0.03205 | 0.0411  | 0.04074 | 0.04061 | 0.03942 | 0.03777 LOC389199 |
| cg10252059 | 0.04539 | 0.03829 | 0.05039 | 0.05832 | 0.03357 | 0.03609 | 0.03659 | 0.03864 | 0.03809 | 0.033 CYP20A1     |
| cg10253484 | 0.02835 | 0.02516 | 0.03433 | 0.03243 | 0.02659 | 0.02596 | 0.04016 | 0.02778 | 0.02157 | 0.02418 SCAMP2    |
| cg10256052 | 0.0195  | 0.02433 | 0.02388 | 0.02455 | 0.02078 | 0.0304  | 0.02162 | 0.02363 | 0.01879 | 0.01622 CPSF4     |
| cg10257049 | 0.84509 | 0.43563 | 0.87282 | 0.88979 | 0.80445 | 0.81466 | 0.83061 | 0.7741  | 0.0654  | 0.05535 C5orf4    |
| cg10261191 | 0.19279 | 0.19268 | 0.82418 | 0.86099 | 0.81047 | 0.77821 | 0.75699 | 0.68218 | 0.89883 | 0.19983 MGC39545  |
| cg10261589 | 0.49098 | 0.10091 | 0.09552 | 0.09543 | 0.13963 | 0.13526 | 0.10137 | 0.09942 | 0.09833 | 0.12226 LOC133308 |
| cg10262425 | 0.0764  | 0.07843 | 0.07806 | 0.08577 | 0.06991 | 0.0515  | 0.05508 | 0.06887 | 0.05429 | 0.04729 PGLS      |
| cg10264187 | 0.03807 | 0.03151 | 0.03519 | 0.02795 | 0.02911 | 0.03222 | 0.02665 | 0.03133 | 0.02734 | 0.02591 SLC39A13  |
| cg10265786 | 0.023   | 0.02924 | 0.02459 | 0.01772 | 0.02051 | 0.02228 | 0.01945 | 0.02101 | 0.01735 | 0.01899 DOM3Z     |
| cg10266068 | 0.07116 | 0.06698 | 0.08007 | 0.07604 | 0.16149 | 0.34861 | 0.07042 | 0.05858 | 0.05671 | 0.04917 PGPEP1    |
| cg10266188 | 0.05044 | 0.0397  | 0.0568  | 0.05335 | 0.03933 | 0.03804 | 0.04546 | 0.03799 | 0.0501  | 0.02641 TXLNA     |
| cg10266490 | 0.45945 | 0.09539 | 0.88736 | 0.89652 | 0.6319  | 0.38709 | 0.7615  | 0.30024 | 0.73706 | 0.59736 ACOT11    |
| cg10269439 | 0.29702 | 0.30654 | 0.65948 | 0.72876 | 0.43354 | 0.34559 | 0.2687  | 0.16981 | 0.3931  | 0.33635 IL1F7     |
| cg10271717 | 0.08184 | 0.07404 | 0.08624 | 0.09971 | 0.0511  | 0.06099 | 0.06653 | 0.06635 | 0.07056 | 0.06839 C20orf14  |
| cg10272885 | 0.03516 | 0.0326  | 0.03384 | 0.03283 | 0.03329 | 0.02773 | 0.03103 | 0.03046 | 0.0305  | 0.02677 SNAPAP    |
| cg10273210 | 0.37272 | 0.46077 | 0.03566 | 0.03247 | 0.29284 | 0.06868 | 0.10189 | 0.03963 | 0.80597 | 0.51657 TRIM59    |
| cg10274502 | 0.06796 | 0.0611  | 0.09353 | 0.07537 | 0.08921 | 0.08854 | 0.05701 | 0.04939 | 0.06775 | 0.05891 SPEN      |
| cg10274830 | 0.07977 | 0.083   | 0.11518 | 0.09223 | 0.11634 | 0.09237 | 0.0699  | 0.06278 | 0.0951  | 0.08853 C6orf96   |
| cg10274908 | 0.03331 | 0.03326 | 0.59237 | 0.59009 | 0.30053 | 0.0436  | 0.0245  | 0.02592 | 0.02173 | 0.02073 RASA4     |
| cg10275770 | 0.30795 | 0.06753 | 0.15741 | 0.28466 | 0.80055 | 0.61773 | 0.13065 | 0.08896 | 0.17015 | 0.04273 ICAM2     |
| cg10276549 | 0.92261 | 0.54385 | 0.84419 | 0.92438 | 0.95076 | 0.42786 | 0.44551 | 0.24499 | 0.90284 | 0.55643 GABRE     |
| cg10276576 | 0.02967 | 0.0276  | 0.02807 | 0.02869 | 0.02895 | 0.0297  | 0.03042 | 0.03028 | 0.0249  | 0.02294 C11orf24  |
| cg10277146 | 0.04869 | 0.06539 | 0.05206 | 0.05329 | 0.05643 | 0.05869 | 0.04408 | 0.04445 | 0.04283 | 0.04472 SPAST     |
| cg10277195 | 0.39467 | 0.06756 | 0.03938 | 0.06529 | 0.03038 | 0.03663 | 0.03196 | 0.03004 | 0.02702 | 0.02564 MDC1      |
| cg10277781 | 0.03256 | 0.02892 | 0.02811 | 0.0282  | 0.02293 | 0.02675 | 0.02762 | 0.02563 | 0.02283 | 0.02399 CNIH      |
| cg10279685 | 0.03339 | 0.03901 | 0.04492 | 0.04473 | 0.02977 | 0.03723 | 0.039   | 0.0373  | 0.03155 | 0.03268 NPHP1     |
| cg10280342 | 0.74508 | 0.21482 | 0.90616 | 0.92022 | 0.93445 | 0.45993 | 0.90963 | 0.62588 | 0.72322 | 0.0665 PSPN       |
| cg10281002 | 0.8283  | 0.52068 | 0.67826 | 0.80762 | 0.60518 | 0.82032 | 0.20691 | 0.25276 | 0.57912 | 0.30202 TBX5      |
| cg10281478 | 0.28275 | 0.29097 | 0.8029  | 0.87    | 0.67944 | 0.43237 | 0.28956 | 0.26154 | 0.28878 | 0.28093 DYNC111   |

|            |         |         |         |         |         |         |         |         |         |                  |
|------------|---------|---------|---------|---------|---------|---------|---------|---------|---------|------------------|
| cg10281770 | 0.55375 | 0.24652 | 0.78478 | 0.80199 | 0.79974 | 0.70444 | 0.457   | 0.421   | 0.80693 | 0.45387 WDR45L   |
| cg10282491 | 0.24564 | 0.04787 | 0.8857  | 0.89909 | 0.82696 | 0.86823 | 0.88755 | 0.4131  | 0.62335 | 0.80826 CLDN9    |
| cg10283277 | 0.11422 | 0.12525 | 0.20713 | 0.20109 | 0.23092 | 0.13109 | 0.12019 | 0.09499 | 0.26746 | 0.08579 SNF1LK2  |
| cg10287137 | 0.96848 | 0.94394 | 0.92982 | 0.95549 | 0.9776  | 0.97668 | 0.96561 | 0.96455 | 0.97993 | 0.97687 P2RY2    |
| cg10289190 | 0.03468 | 0.03336 | 0.03507 | 0.03169 | 0.02578 | 0.03177 | 0.03372 | 0.03205 | 0.02936 | 0.02864 GRHPR    |
| cg10289912 | 0.05373 | 0.05454 | 0.05563 | 0.04938 | 0.03596 | 0.04619 | 0.05109 | 0.04624 | 0.04556 | 0.04644 ZNRF2    |
| cg10290730 | 0.86407 | 0.54055 | 0.81926 | 0.83681 | 0.82192 | 0.84091 | 0.22046 | 0.25491 | 0.56833 | 0.42737 ATP2B3   |
| cg10293925 | 0.03741 | 0.04234 | 0.04531 | 0.04114 | 0.03991 | 0.03317 | 0.05788 | 0.04358 | 0.02979 | 0.02563 AMPH     |
| cg10294200 | 0.05109 | 0.03964 | 0.05253 | 0.05892 | 0.06083 | 0.04735 | 0.04881 | 0.05437 | 0.04702 | 0.04426 C12orf30 |
| cg10294797 | 0.03024 | 0.02813 | 0.02771 | 0.02714 | 0.04215 | 0.02925 | 0.04991 | 0.02362 | 0.02415 | 0.0252 MAP3K9    |
| cg10294836 | 0.08015 | 0.08155 | 0.58714 | 0.71015 | 0.8954  | 0.89059 | 0.88529 | 0.60535 | 0.23439 | 0.22067 DYRK1B   |
| cg10296238 | 0.10936 | 0.11403 | 0.12349 | 0.14486 | 0.16893 | 0.1009  | 0.11351 | 0.10239 | 0.1147  | 0.3496 C21orf56  |
| cg10298205 | 0.93859 | 0.73424 | 0.95385 | 0.96197 | 0.97552 | 0.9074  | 0.95861 | 0.86391 | 0.96625 | 0.93462 NAPRT1   |
| cg10298815 | 0.02851 | 0.02575 | 0.78044 | 0.89832 | 0.77522 | 0.94845 | 0.1212  | 0.35147 | 0.35108 | 0.3054 GPR88     |
| cg10299667 | 0.02713 | 0.02572 | 0.0238  | 0.0274  | 0.02252 | 0.0251  | 0.02039 | 0.02162 | 0.02215 | 0.02225 SLC25A10 |
| cg10300154 | 0.76247 | 0.17666 | 0.25348 | 0.40154 | 0.30029 | 0.28319 | 0.48218 | 0.30907 | 0.84941 | 0.57997 MGC5297  |
| cg10300684 | 0.06123 | 0.0575  | 0.86524 | 0.81708 | 0.13782 | 0.07647 | 0.2087  | 0.33086 | 0.08097 | 0.05234 FOXG1B   |
| cg10301967 | 0.03669 | 0.04091 | 0.03754 | 0.03867 | 0.03124 | 0.03245 | 0.03359 | 0.03606 | 0.03454 | 0.03118 RPS18    |
| cg10301990 | 0.2836  | 0.13555 | 0.29153 | 0.30341 | 0.18367 | 0.17677 | 0.24409 | 0.08369 | 0.1955  | 0.18144 UBXD6    |
| cg10302026 | 0.03459 | 0.0357  | 0.03648 | 0.03385 | 0.02439 | 0.02977 | 0.02644 | 0.03061 | 0.02864 | 0.02526 STRN4    |
| cg10303487 | 0.0211  | 0.03775 | 0.97819 | 0.97559 | 0.23009 | 0.03548 | 0.34349 | 0.58905 | 0.27388 | 0.51535 DPYS     |
| cg10303842 | 0.33696 | 0.24858 | 0.322   | 0.37504 | 0.25798 | 0.1423  | 0.35783 | 0.37838 | 0.10431 | 0.09756 CDH12    |
| cg10305797 | 0.13678 | 0.03255 | 0.09029 | 0.12114 | 0.11384 | 0.24797 | 0.04458 | 0.04202 | 0.04568 | 0.0333 UNQ467    |
| cg10307548 | 0.67021 | 0.42002 | 0.81008 | 0.88674 | 0.88311 | 0.89535 | 0.68332 | 0.51166 | 0.33724 | 0.24948 SOD3     |
| cg10309835 | 0.08326 | 0.08092 | 0.08049 | 0.08334 | 0.08088 | 0.07741 | 0.07337 | 0.07576 | 0.062   | 0.06191 KDELR1   |
| cg10313093 | 0.03146 | 0.03413 | 0.03451 | 0.03497 | 0.02113 | 0.03188 | 0.02508 | 0.02708 | 0.02741 | 0.02749 TPARG    |
| cg10313633 | 0.89042 | 0.29024 | 0.95071 | 0.95575 | 0.92898 | 0.85373 | 0.65841 | 0.54017 | 0.94748 | 0.80406 TP5311   |
| cg10313673 | 0.05887 | 0.04013 | 0.78515 | 0.89917 | 0.97525 | 0.96253 | 0.19215 | 0.03963 | 0.28197 | 0.35864 CILP2    |
| cg10313675 | 0.31271 | 0.33825 | 0.02234 | 0.02145 | 0.01884 | 0.02127 | 0.02172 | 0.02141 | 0.02059 | 0.01783 C1orf74  |
| cg10314752 | 0.06015 | 0.05812 | 0.07057 | 0.07363 | 0.05322 | 0.05808 | 0.05414 | 0.0544  | 0.05402 | 0.04808 KIAA1622 |
| cg10315128 | 0.02467 | 0.02891 | 0.03012 | 0.03415 | 0.01977 | 0.02867 | 0.02728 | 0.02921 | 0.02545 | 0.02617 SMAD4    |
| cg10315334 | 0.86175 | 0.6416  | 0.86367 | 0.88739 | 0.92584 | 0.70432 | 0.81316 | 0.87394 | 0.38437 | 0.36462 CCL5     |
| cg10316381 | 0.04535 | 0.04416 | 0.04899 | 0.0413  | 0.07541 | 0.04061 | 0.04893 | 0.04002 | 0.03386 | 0.03443 SNX10    |
| cg10316635 | 0.03785 | 0.03433 | 0.07371 | 0.05464 | 0.0466  | 0.02967 | 0.03041 | 0.02894 | 0.03984 | 0.02368 INADL    |
| cg10316764 | 0.75922 | 0.68892 | 0.73858 | 0.77651 | 0.73885 | 0.77058 | 0.48238 | 0.38202 | 0.79604 | 0.74331 TAOK2    |
| cg10318258 | 0.24814 | 0.08796 | 0.13211 | 0.15509 | 0.29172 | 0.15245 | 0.07769 | 0.07089 | 0.09661 | 0.09453 RIPK3    |
| cg10318351 | 0.06582 | 0.05693 | 0.06769 | 0.06447 | 0.04867 | 0.05457 | 0.05566 | 0.05608 | 0.04539 | 0.0471 GNL3L     |
| cg10318443 | 0.02862 | 0.02863 | 0.02927 | 0.03077 | 0.02687 | 0.03142 | 0.02739 | 0.02822 | 0.02303 | 0.02241 RNMTL1   |
| cg10319505 | 0.0442  | 0.08279 | 0.03462 | 0.03033 | 0.84022 | 0.92497 | 0.84393 | 0.47051 | 0.83371 | 0.93788 RASEF    |
| cg10321196 | 0.86898 | 0.6781  | 0.47263 | 0.46434 | 0.72271 | 0.08956 | 0.29235 | 0.46556 | 0.82172 | 0.04609 SLC25A5  |
| cg10321208 | 0.07252 | 0.0707  | 0.10678 | 0.08566 | 0.17573 | 0.0892  | 0.05755 | 0.05097 | 0.08242 | 0.08332 CPT2     |

|            |         |         |         |         |         |         |         |         |         |                   |
|------------|---------|---------|---------|---------|---------|---------|---------|---------|---------|-------------------|
| cg10321723 | 0.59603 | 0.36162 | 0.89279 | 0.93784 | 0.93645 | 0.91587 | 0.92181 | 0.9092  | 0.93431 | 0.83459 PDZK1     |
| cg10322308 | 0.02951 | 0.02891 | 0.03656 | 0.0298  | 0.03233 | 0.02792 | 0.02002 | 0.02192 | 0.03155 | 0.02554 PARS2     |
| cg10322876 | 0.85616 | 0.38578 | 0.52674 | 0.59343 | 0.86484 | 0.81423 | 0.11301 | 0.08699 | 0.32337 | 0.22186 CYP2B6    |
| cg10324224 | 0.78117 | 0.2708  | 0.86135 | 0.87052 | 0.85038 | 0.84144 | 0.77528 | 0.78415 | 0.88778 | 0.73562 TTC13     |
| cg10326447 | 0.03132 | 0.03551 | 0.03068 | 0.03061 | 0.02615 | 0.02599 | 0.03036 | 0.02768 | 0.02665 | 0.02234 NRGN      |
| cg10328462 | 0.02659 | 0.02413 | 0.02715 | 0.02508 | 0.02355 | 0.01963 | 0.02961 | 0.02837 | 0.02329 | 0.02387 GRPEL2    |
| cg10328573 | 0.62614 | 0.34623 | 0.71483 | 0.7303  | 0.86544 | 0.55671 | 0.09331 | 0.0749  | 0.25755 | 0.04726 KRT9      |
| cg10329418 | 0.73344 | 0.51872 | 0.84993 | 0.90994 | 0.75759 | 0.89513 | 0.81165 | 0.89442 | 0.06145 | 0.03227 PON3      |
| cg10331038 | 0.32158 | 0.10199 | 0.18617 | 0.15995 | 0.29602 | 0.19875 | 0.35511 | 0.38769 | 0.19271 | 0.09228 TNR       |
| cg10331048 | 0.06276 | 0.05775 | 0.05923 | 0.0527  | 0.26904 | 0.18001 | 0.05267 | 0.04859 | 0.3142  | 0.04993 MRPL11    |
| cg10331779 | 0.05806 | 0.05485 | 0.76751 | 0.78358 | 0.67432 | 0.51528 | 0.10672 | 0.09911 | 0.20028 | 0.07791 CTNND2    |
| cg10332700 | 0.02677 | 0.02857 | 0.9604  | 0.96908 | 0.18959 | 0.05349 | 0.02079 | 0.02393 | 0.02162 | 0.02069 ZNF415    |
| cg10333959 | 0.83733 | 0.88635 | 0.68452 | 0.81021 | 0.78681 | 0.83868 | 0.4556  | 0.40224 | 0.75758 | 0.84542 MGMT      |
| cg10334385 | 0.22333 | 0.08859 | 0.10948 | 0.09128 | 0.20339 | 0.24314 | 0.0725  | 0.05033 | 0.09811 | 0.06174 FLJ25143  |
| cg10334928 | 0.84293 | 0.89223 | 0.87747 | 0.8881  | 0.79101 | 0.83041 | 0.60298 | 0.8695  | 0.86992 | 0.83049 STON2     |
| cg10335112 | 0.31587 | 0.17943 | 0.24338 | 0.28855 | 0.04128 | 0.03935 | 0.03973 | 0.04255 | 0.03501 | 0.03125 ODF3      |
| cg10335931 | 0.85097 | 0.48867 | 0.88615 | 0.8934  | 0.9248  | 0.8821  | 0.87639 | 0.56736 | 0.79365 | 0.73877 MYBPC3    |
| cg10337772 | 0.04024 | 0.04675 | 0.03912 | 0.04237 | 0.03901 | 0.04003 | 0.0343  | 0.03465 | 0.03925 | 0.03761 KIAA1143  |
| cg10337819 | 0.88758 | 0.61331 | 0.87567 | 0.8885  | 0.87777 | 0.85491 | 0.84763 | 0.87104 | 0.87761 | 0.87813 LTB4R2    |
| cg10338338 | 0.13894 | 0.1513  | 0.1351  | 0.16652 | 0.50314 | 0.22821 | 0.14063 | 0.13353 | 0.14192 | 0.1288 SLC2A3     |
| cg10339201 | 0.88994 | 0.9017  | 0.78741 | 0.83746 | 0.82527 | 0.85531 | 0.25414 | 0.24751 | 0.88003 | 0.88018 F9        |
| cg10342590 | 0.93524 | 0.87601 | 0.92201 | 0.93443 | 0.916   | 0.91162 | 0.908   | 0.89834 | 0.93807 | 0.94031 MRPL49    |
| cg10343901 | 0.03316 | 0.04032 | 0.02971 | 0.0315  | 0.02682 | 0.02871 | 0.0294  | 0.02868 | 0.0286  | 0.02569 RAB6A     |
| cg10345936 | 0.1344  | 0.07166 | 0.1281  | 0.15272 | 0.34297 | 0.48526 | 0.08372 | 0.10807 | 0.06783 | 0.06328 SLC36A2   |
| cg10346242 | 0.04958 | 0.05062 | 0.07762 | 0.05981 | 0.08621 | 0.06347 | 0.05618 | 0.05694 | 0.06121 | 0.05575 ARF3      |
| cg10347418 | 0.8892  | 0.8654  | 0.86877 | 0.8868  | 0.90727 | 0.8862  | 0.88654 | 0.86765 | 0.89321 | 0.75656 ZNF436    |
| cg10347998 | 0.02673 | 0.03036 | 0.02987 | 0.02808 | 0.01669 | 0.02364 | 0.0228  | 0.02104 | 0.02327 | 0.02598 GSK3B     |
| cg10348643 | 0.0515  | 0.04607 | 0.05851 | 0.05546 | 0.05349 | 0.04422 | 0.08056 | 0.07046 | 0.04979 | 0.04137 C1orf198  |
| cg10348863 | 0.05088 | 0.05736 | 0.04511 | 0.04396 | 0.0412  | 0.0423  | 0.03474 | 0.03644 | 0.03201 | 0.03627 ING2      |
| cg10349665 | 0.82888 | 0.83569 | 0.73159 | 0.75461 | 0.81547 | 0.8208  | 0.53188 | 0.64065 | 0.88891 | 0.85415 NSDHL     |
| cg10353436 | 0.03668 | 0.03882 | 0.038   | 0.03558 | 0.02658 | 0.02894 | 0.02956 | 0.02987 | 0.03168 | 0.0299 EIF4A1     |
| cg10353870 | 0.02583 | 0.03174 | 0.02681 | 0.02358 | 0.02601 | 0.02789 | 0.02716 | 0.0275  | 0.02938 | 0.02785 BIN1      |
| cg10356060 | 0.0438  | 0.03106 | 0.04229 | 0.03648 | 0.96704 | 0.96892 | 0.95609 | 0.95996 | 0.02831 | 0.03106 DNAJC18   |
| cg10356463 | 0.83932 | 0.65258 | 0.83696 | 0.87363 | 0.76665 | 0.80388 | 0.69466 | 0.76046 | 0.85569 | 0.80664 ITIH1     |
| cg10358212 | 0.67433 | 0.4255  | 0.61005 | 0.84787 | 0.78225 | 0.78232 | 0.81804 | 0.82747 | 0.84437 | 0.85385 ASCIZ     |
| cg10361696 | 0.07275 | 0.07789 | 0.11491 | 0.07844 | 0.05863 | 0.07189 | 0.08018 | 0.07906 | 0.06436 | 0.07088 FAM109A   |
| cg10362426 | 0.10014 | 0.10805 | 0.10271 | 0.10329 | 0.09275 | 0.09536 | 0.08229 | 0.07673 | 0.09419 | 0.08849 C1orf83   |
| cg10362475 | 0.05238 | 0.04659 | 0.23418 | 0.37434 | 0.81878 | 0.84546 | 0.20679 | 0.35983 | 0.05638 | 0.04286 SHANK2    |
| cg10362591 | 0.05958 | 0.04494 | 0.42008 | 0.47557 | 0.19949 | 0.12678 | 0.1046  | 0.47316 | 0.08536 | 0.17162 SLC6A2    |
| cg10364182 | 0.08613 | 0.07544 | 0.10582 | 0.05903 | 0.1527  | 0.08118 | 0.09922 | 0.09239 | 0.06761 | 0.09892 LOC119710 |
| cg10364513 | 0.02978 | 0.03033 | 0.21516 | 0.43787 | 0.10054 | 0.14287 | 0.25286 | 0.53376 | 0.05091 | 0.02854 RXRG      |

|            |         |         |         |         |         |         |         |         |         |         |          |
|------------|---------|---------|---------|---------|---------|---------|---------|---------|---------|---------|----------|
| cg10365880 | 0.85351 | 0.69173 | 0.69335 | 0.72455 | 0.36588 | 0.65799 | 0.05436 | 0.05226 | 0.05132 | 0.0456  | PKD2L1   |
| cg10367730 | 0.07001 | 0.07547 | 0.07103 | 0.07234 | 0.06867 | 0.07615 | 0.07025 | 0.06811 | 0.06504 | 0.0724  | PRDX3    |
| cg10368842 | 0.40213 | 0.17889 | 0.51813 | 0.52279 | 0.19332 | 0.47849 | 0.19363 | 0.17711 | 0.2541  | 0.0957  | C10orf81 |
| cg10368981 | 0.02657 | 0.02645 | 0.03062 | 0.02929 | 0.02639 | 0.02952 | 0.03897 | 0.03743 | 0.02368 | 0.02275 | DPYSL2   |
| cg10370591 | 0.77692 | 0.76496 | 0.7018  | 0.73043 | 0.61435 | 0.75637 | 0.21125 | 0.26369 | 0.11458 | 0.26967 | TPO      |
| cg10371914 | 0.2692  | 0.2867  | 0.31075 | 0.28277 | 0.5463  | 0.49324 | 0.34586 | 0.441   | 0.31054 | 0.33645 | C8orf34  |
| cg10373645 | 0.05938 | 0.06449 | 0.06442 | 0.06028 | 0.06699 | 0.07487 | 0.05094 | 0.04728 | 0.04994 | 0.05762 | DUSP11   |
| cg10375110 | 0.88745 | 0.64192 | 0.88916 | 0.89601 | 0.29286 | 0.11129 | 0.25445 | 0.12256 | 0.91491 | 0.41096 | CHRNA9   |
| cg10375802 | 0.05881 | 0.0662  | 0.06567 | 0.06427 | 0.05505 | 0.0521  | 0.07882 | 0.0704  | 0.06427 | 0.05681 | C1orf57  |
| cg10376763 | 0.84486 | 0.7526  | 0.85842 | 0.8878  | 0.85805 | 0.86008 | 0.87765 | 0.85978 | 0.87795 | 0.80181 | TNP1     |
| cg10377211 | 0.05748 | 0.06113 | 0.05402 | 0.05999 | 0.04786 | 0.05475 | 0.06024 | 0.05104 | 0.05409 | 0.05071 | SMBP     |
| cg10377274 | 0.40865 | 0.49285 | 0.50987 | 0.62573 | 0.72212 | 0.62613 | 0.32949 | 0.704   | 0.37801 | 0.46875 | PATE     |
| cg10377451 | 0.02512 | 0.02489 | 0.02383 | 0.02182 | 0.01969 | 0.02279 | 0.01932 | 0.02045 | 0.01876 | 0.01865 | RAB33B   |
| cg10377764 | 0.19678 | 0.11937 | 0.06003 | 0.05943 | 0.03615 | 0.05254 | 0.03841 | 0.03752 | 0.04028 | 0.03462 | RAD52    |
| cg10379112 | 0.04458 | 0.04782 | 0.05002 | 0.03897 | 0.02998 | 0.03354 | 0.03771 | 0.0432  | 0.0319  | 0.04228 | LOC57146 |
| cg10379687 | 0.0614  | 0.04875 | 0.37308 | 0.49215 | 0.42167 | 0.54207 | 0.07551 | 0.07031 | 0.37126 | 0.17196 | SPINLW1  |
| cg10383428 | 0.34305 | 0.1405  | 0.66236 | 0.75831 | 0.58545 | 0.61107 | 0.1442  | 0.16256 | 0.31247 | 0.27246 | CNAP1    |
| cg10383839 | 0.01555 | 0.01679 | 0.02316 | 0.01561 | 0.02398 | 0.01564 | 0.0171  | 0.01486 | 0.01614 | 0.01271 | LAPTM4A  |
| cg10384134 | 0.06748 | 0.06994 | 0.07764 | 0.06452 | 0.0943  | 0.08257 | 0.06485 | 0.05441 | 0.05278 | 0.05399 | RPS9     |
| cg10387416 | 0.03564 | 0.04215 | 0.03693 | 0.03635 | 0.03052 | 0.03118 | 0.03375 | 0.03533 | 0.03181 | 0.03113 | TATDN2   |
| cg10387901 | 0.03555 | 0.03629 | 0.0372  | 0.03763 | 0.02596 | 0.03531 | 0.03304 | 0.03707 | 0.03324 | 0.0359  | MRPS25   |
| cg10390922 | 0.06697 | 0.06649 | 0.08238 | 0.08407 | 0.12312 | 0.08343 | 0.0521  | 0.05254 | 0.09755 | 0.12389 | BCAS3    |
| cg10391629 | 0.06394 | 0.05721 | 0.0805  | 0.0654  | 0.04993 | 0.06979 | 0.04887 | 0.04753 | 0.05256 | 0.04641 | AKAP11   |
| cg10392768 | 0.03143 | 0.03001 | 0.03641 | 0.03356 | 0.02255 | 0.02595 | 0.0278  | 0.02318 | 0.03034 | 0.02254 | ALOXE3   |
| cg10394139 | 0.05106 | 0.05025 | 0.09901 | 0.08682 | 0.06165 | 0.06982 | 0.08109 | 0.06938 | 0.05851 | 0.05583 | CRLF3    |
| cg10394385 | 0.12036 | 0.11799 | 0.27056 | 0.55788 | 0.08108 | 0.10162 | 0.10478 | 0.11044 | 0.10209 | 0.10234 | ERBB2    |
| cg10396357 | 0.03488 | 0.03471 | 0.02912 | 0.03068 | 0.02594 | 0.02363 | 0.03076 | 0.02747 | 0.03747 | 0.02777 | TFAP4    |
| cg10396470 | 0.05272 | 0.05024 | 0.0684  | 0.05761 | 0.0671  | 0.05998 | 0.04566 | 0.0412  | 0.05667 | 0.05408 | NUP107   |
| cg10398682 | 0.07368 | 0.06653 | 0.05899 | 0.05469 | 0.05793 | 0.06612 | 0.34635 | 0.08988 | 0.05732 | 0.04527 | BNC1     |
| cg10398950 | 0.07036 | 0.0538  | 0.10198 | 0.0587  | 0.10283 | 0.04668 | 0.05907 | 0.04634 | 0.08127 | 0.04378 | CRKRS    |
| cg10399228 | 0.52905 | 0.55484 | 0.46407 | 0.69657 | 0.28431 | 0.19599 | 0.34104 | 0.23169 | 0.1691  | 0.20472 | RAG1     |
| cg10399369 | 0.02511 | 0.02226 | 0.02436 | 0.02584 | 0.0226  | 0.02334 | 0.02206 | 0.02173 | 0.0197  | 0.0193  | CABC1    |
| cg10401088 | 0.62758 | 0.5339  | 0.36013 | 0.24957 | 0.31215 | 0.49254 | 0.14984 | 0.26029 | 0.2525  | 0.21803 | LUM      |
| cg10401803 | 0.03068 | 0.03419 | 0.03798 | 0.03905 | 0.02795 | 0.02902 | 0.55081 | 0.50518 | 0.03049 | 0.03093 | TAF1     |
| cg10402626 | 0.04035 | 0.04232 | 0.04615 | 0.03667 | 0.03469 | 0.04416 | 0.04476 | 0.04575 | 0.03525 | 0.03387 | RPS5     |
| cg10403260 | 0.03091 | 0.03068 | 0.03261 | 0.02834 | 0.02954 | 0.02826 | 0.03076 | 0.02587 | 0.02825 | 0.02497 | PHF21A   |
| cg10404950 | 0.07964 | 0.08521 | 0.09873 | 0.10493 | 0.10495 | 0.09433 | 0.09092 | 0.08476 | 0.075   | 0.06956 | ALKBH8   |
| cg10408410 | 0.62031 | 0.44449 | 0.77629 | 0.85008 | 0.88763 | 0.83846 | 0.72315 | 0.84418 | 0.81553 | 0.74393 | RLBP1    |
| cg10409560 | 0.85582 | 0.30402 | 0.26749 | 0.72369 | 0.82322 | 0.1471  | 0.10456 | 0.1402  | 0.1202  | 0.09209 | FLJ23657 |
| cg10409680 | 0.13029 | 0.11716 | 0.09875 | 0.10363 | 0.04744 | 0.04896 | 0.03644 | 0.04491 | 0.21021 | 0.29328 | HLA-C    |
| cg10409799 | 0.04397 | 0.04477 | 0.0996  | 0.07979 | 0.04687 | 0.05378 | 0.03509 | 0.03197 | 0.05181 | 0.04609 | ADAR     |

|            |         |         |         |         |         |         |         |         |         |         |            |
|------------|---------|---------|---------|---------|---------|---------|---------|---------|---------|---------|------------|
| cg10412312 | 0.27623 | 0.20556 | 0.66546 | 0.7164  | 0.4252  | 0.54179 | 0.36252 | 0.5553  | 0.45082 | 0.37623 | FLJ36004   |
| cg10413342 | 0.02934 | 0.03478 | 0.02699 | 0.02955 | 0.02677 | 0.03166 | 0.03092 | 0.0309  | 0.02743 | 0.02153 | MRPL21     |
| cg10414058 | 0.87259 | 0.55009 | 0.83681 | 0.91868 | 0.91758 | 0.85771 | 0.53954 | 0.34966 | 0.90273 | 0.41456 | HDAC3      |
| cg10414946 | 0.09624 | 0.08889 | 0.13814 | 0.11285 | 0.21622 | 0.12067 | 0.12858 | 0.10546 | 0.07539 | 0.08673 | MS4A2      |
| cg10415235 | 0.03639 | 0.03791 | 0.04171 | 0.03899 | 0.03201 | 0.03824 | 0.03288 | 0.0364  | 0.02797 | 0.02777 | COX8A      |
| cg10417559 | 0.88313 | 0.57866 | 0.86002 | 0.88668 | 0.90335 | 0.75428 | 0.8282  | 0.76564 | 0.89257 | 0.84347 | LMO6       |
| cg10421192 | 0.51786 | 0.33224 | 0.89552 | 0.90641 | 0.88223 | 0.87592 | 0.5079  | 0.8064  | 0.91844 | 0.86391 | CTAGE1     |
| cg10421561 | 0.02982 | 0.03435 | 0.04057 | 0.03903 | 0.02901 | 0.04207 | 0.03347 | 0.03433 | 0.02913 | 0.02926 | ANP32B     |
| cg10423227 | 0.04514 | 0.05102 | 0.05318 | 0.04783 | 0.0511  | 0.04226 | 0.03904 | 0.04012 | 0.04049 | 0.04455 | AFTIPHILIN |
| cg10423830 | 0.06078 | 0.05997 | 0.06667 | 0.06558 | 0.07441 | 0.07266 | 0.05779 | 0.06904 | 0.07388 | 0.08124 | PGEA1      |
| cg10423860 | 0.47513 | 0.05846 | 0.20996 | 0.34185 | 0.0632  | 0.31599 | 0.04687 | 0.05939 | 0.0396  | 0.10997 | CST5       |
| cg10426652 | 0.05572 | 0.0467  | 0.06138 | 0.04704 | 0.08611 | 0.06016 | 0.04924 | 0.03215 | 0.05623 | 0.06017 | WDR75      |
| cg10429262 | 0.07843 | 0.08098 | 0.11465 | 0.10878 | 0.12059 | 0.1157  | 0.06836 | 0.06031 | 0.08862 | 0.09863 | GPR157     |
| cg10430690 | 0.84725 | 0.69068 | 0.83855 | 0.88027 | 0.83233 | 0.86395 | 0.86535 | 0.88073 | 0.87185 | 0.37907 | KALRN      |
| cg10431340 | 0.66357 | 0.52859 | 0.38327 | 0.52871 | 0.36016 | 0.44547 | 0.30714 | 0.35384 | 0.43034 | 0.27141 | MPZ        |
| cg10432177 | 0.03898 | 0.03885 | 0.04233 | 0.03699 | 0.03233 | 0.03289 | 0.04316 | 0.03213 | 0.02996 | 0.02809 | BIK        |
| cg10432620 | 0.06409 | 0.0354  | 0.46264 | 0.41383 | 0.12826 | 0.1597  | 0.35103 | 0.03836 | 0.12235 | 0.03971 | FA2H       |
| cg10432859 | 0.7051  | 0.50174 | 0.56124 | 0.73872 | 0.54505 | 0.79121 | 0.14268 | 0.12563 | 0.40239 | 0.66454 | UGT1A7     |
| cg10435003 | 0.02976 | 0.02942 | 0.03104 | 0.0262  | 0.04566 | 0.04541 | 0.03257 | 0.02938 | 0.02545 | 0.02744 | MSH5       |
| cg10441365 | 0.04508 | 0.03369 | 0.05002 | 0.04335 | 0.03362 | 0.03712 | 0.03552 | 0.03375 | 0.0292  | 0.03109 | SAR1B      |
| cg10442358 | 0.05823 | 0.07128 | 0.09764 | 0.08414 | 0.11285 | 0.11712 | 0.06801 | 0.06421 | 0.05499 | 0.05622 | HRBL       |
| cg10444350 | 0.03758 | 0.03493 | 0.03457 | 0.03372 | 0.03132 | 0.03331 | 0.02983 | 0.02995 | 0.02644 | 0.02336 | SFRS1      |
| cg10446968 | 0.0362  | 0.03816 | 0.03691 | 0.03558 | 0.03343 | 0.03477 | 0.0337  | 0.03702 | 0.03249 | 0.03205 | SLC25A12   |
| cg10447080 | 0.25171 | 0.31455 | 0.29919 | 0.33543 | 0.21813 | 0.32886 | 0.23429 | 0.14802 | 0.13778 | 0.11923 | FILIP1     |
| cg10448528 | 0.02889 | 0.03507 | 0.03933 | 0.03512 | 0.02692 | 0.03081 | 0.03261 | 0.02997 | 0.02091 | 0.02528 | ZNF202     |
| cg10449070 | 0.06803 | 0.02259 | 0.02927 | 0.03162 | 0.05449 | 0.02607 | 0.02319 | 0.02232 | 0.94777 | 0.89555 | ALDH2      |
| cg10450322 | 0.06247 | 0.06816 | 0.07186 | 0.07029 | 0.07157 | 0.06114 | 0.0498  | 0.05419 | 0.05403 | 0.06998 | CDKN2C     |
| cg10451401 | 0.04041 | 0.0418  | 0.04657 | 0.03957 | 0.03024 | 0.03357 | 0.03445 | 0.03567 | 0.03391 | 0.02863 | RAC1       |
| cg10451565 | 0.77589 | 0.41311 | 0.79741 | 0.81489 | 0.71646 | 0.75812 | 0.80133 | 0.73511 | 0.69118 | 0.71146 | GPR77      |
| cg10452522 | 0.06352 | 0.06224 | 0.06694 | 0.05833 | 0.04915 | 0.05275 | 0.05301 | 0.04851 | 0.05047 | 0.05354 | LSM14A     |
| cg10453040 | 0.09681 | 0.10541 | 0.09816 | 0.09814 | 0.09514 | 0.08893 | 0.12049 | 0.12422 | 0.08843 | 0.08563 | TMEM68     |
| cg10453365 | 0.53358 | 0.08704 | 0.93449 | 0.94165 | 0.84949 | 0.88213 | 0.0535  | 0.03217 | 0.1001  | 0.09226 | RHCG       |
| cg10453758 | 0.59859 | 0.23976 | 0.23475 | 0.2373  | 0.2887  | 0.14906 | 0.20529 | 0.20291 | 0.42308 | 0.2602  | ACAD11     |
| cg10454268 | 0.05931 | 0.06416 | 0.07033 | 0.06663 | 0.04619 | 0.06138 | 0.05294 | 0.05676 | 0.05904 | 0.05229 | STX3A      |
| cg10455133 | 0.02786 | 0.02996 | 0.02479 | 0.02909 | 0.02072 | 0.03049 | 0.1892  | 0.05888 | 0.02332 | 0.02554 | ARAF       |
| cg10455676 | 0.04518 | 0.04883 | 0.04107 | 0.03967 | 0.04255 | 0.04488 | 0.03983 | 0.03806 | 0.0429  | 0.04675 | MTIF2      |
| cg10457247 | 0.82361 | 0.85606 | 0.73358 | 0.83732 | 0.26638 | 0.41735 | 0.22099 | 0.13816 | 0.05062 | 0.04016 | PRDM14     |
| cg10457895 | 0.05829 | 0.05768 | 0.06936 | 0.05889 | 0.05298 | 0.04661 | 0.04968 | 0.04742 | 0.05936 | 0.05202 | RSRC1      |
| cg10458581 | 0.03194 | 0.03011 | 0.02886 | 0.02853 | 0.02292 | 0.02423 | 0.02577 | 0.0226  | 0.02301 | 0.02435 | QP-C       |
| cg10458876 | 0.08178 | 0.0889  | 0.08916 | 0.0869  | 0.06015 | 0.07401 | 0.08318 | 0.08445 | 0.09052 | 0.08651 | PSKH1      |
| cg10459515 | 0.01867 | 0.02335 | 0.02601 | 0.02039 | 0.02017 | 0.02154 | 0.0171  | 0.01825 | 0.01819 | 0.01758 | BCLAF1     |

|            |         |         |         |         |         |         |         |         |         |         |          |
|------------|---------|---------|---------|---------|---------|---------|---------|---------|---------|---------|----------|
| cg10464585 | 0.19624 | 0.18748 | 0.2641  | 0.27845 | 0.4     | 0.18396 | 0.15228 | 0.13002 | 0.21111 | 0.22109 | CNOT2    |
| cg10464775 | 0.79564 | 0.73491 | 0.80494 | 0.8318  | 0.76585 | 0.75445 | 0.62812 | 0.43205 | 0.8205  | 0.82018 | LAMP1    |
| cg10465696 | 0.84779 | 0.57395 | 0.51329 | 0.7058  | 0.79921 | 0.81513 | 0.80463 | 0.85632 | 0.88877 | 0.85289 | ROBO4    |
| cg10466917 | 0.13216 | 0.14476 | 0.29491 | 0.26833 | 0.3142  | 0.23281 | 0.14614 | 0.14235 | 0.10369 | 0.10069 | TRY1     |
| cg10467022 | 0.22057 | 0.05746 | 0.43416 | 0.49668 | 0.80542 | 0.83458 | 0.36184 | 0.42663 | 0.06478 | 0.04484 | CALCA    |
| cg10467098 | 0.6937  | 0.30971 | 0.09557 | 0.1702  | 0.30162 | 0.10885 | 0.19604 | 0.1152  | 0.86961 | 0.45188 | Bles03   |
| cg10467681 | 0.04421 | 0.04863 | 0.04627 | 0.04365 | 0.04543 | 0.03703 | 0.04564 | 0.04394 | 0.04573 | 0.03536 | ANAPC2   |
| cg10468369 | 0.68487 | 0.75823 | 0.40252 | 0.40207 | 0.21007 | 0.60419 | 0.03837 | 0.0318  | 0.035   | 0.02582 | DDX19B   |
| cg10468702 | 0.90594 | 0.50338 | 0.92681 | 0.9205  | 0.94453 | 0.84143 | 0.74214 | 0.31468 | 0.94148 | 0.82343 | PTGER1   |
| cg10473004 | 0.03056 | 0.03431 | 0.03606 | 0.03689 | 0.03128 | 0.03027 | 0.03246 | 0.03239 | 0.02638 | 0.03073 | CPNE3    |
| cg10474368 | 0.01901 | 0.02343 | 0.02363 | 0.0206  | 0.0198  | 0.0237  | 0.02051 | 0.01874 | 0.0163  | 0.01381 | SPCS2    |
| cg10475433 | 0.07092 | 0.0566  | 0.08222 | 0.07641 | 0.07219 | 0.05559 | 0.04665 | 0.04384 | 0.05023 | 0.04643 | FLJ11171 |
| cg10477754 | 0.1231  | 0.10215 | 0.10785 | 0.0999  | 0.18769 | 0.10192 | 0.09768 | 0.1011  | 0.10257 | 0.1083  | PPRC1    |
| cg10478221 | 0.79589 | 0.29644 | 0.81684 | 0.83219 | 0.86563 | 0.65962 | 0.77383 | 0.76118 | 0.83388 | 0.74679 | WFIKKN1  |
| cg10479325 | 0.03441 | 0.03961 | 0.03611 | 0.03799 | 0.0331  | 0.03614 | 0.03286 | 0.0305  | 0.02825 | 0.03296 | MGC33302 |
| cg10479672 | 0.06921 | 0.05112 | 0.10137 | 0.17525 | 0.2107  | 0.05214 | 0.03968 | 0.05281 | 0.05475 | 0.05496 | IL1F8    |
| cg10480741 | 0.03228 | 0.0328  | 0.03437 | 0.02926 | 0.033   | 0.02911 | 0.02983 | 0.0297  | 0.02357 | 0.02328 | PPP5C    |
| cg10481417 | 0.02526 | 0.02601 | 0.02998 | 0.02347 | 0.20394 | 0.0212  | 0.02894 | 0.04563 | 0.02177 | 0.01957 | CYP1A1   |
| cg10481740 | 0.06559 | 0.05628 | 0.06271 | 0.06574 | 0.05499 | 0.04628 | 0.06152 | 0.05273 | 0.04724 | 0.0417  | LETM1    |
| cg10482024 | 0.17855 | 0.05147 | 0.11925 | 0.09012 | 0.06489 | 0.04968 | 0.05248 | 0.04976 | 0.45562 | 0.32361 | AK3L1    |
| cg10482750 | 0.02696 | 0.0314  | 0.02692 | 0.02985 | 0.0205  | 0.02141 | 0.02457 | 0.02699 | 0.02439 | 0.02398 | NRD1     |
| cg10484450 | 0.03015 | 0.03007 | 0.02532 | 0.023   | 0.03368 | 0.02936 | 0.02704 | 0.02756 | 0.02284 | 0.02954 | FLJ33387 |
| cg10484485 | 0.0274  | 0.02655 | 0.02874 | 0.0288  | 0.02088 | 0.02452 | 0.02681 | 0.02459 | 0.02137 | 0.0205  | KIAA0922 |
| cg10484958 | 0.07239 | 0.11929 | 0.47806 | 0.45689 | 0.55172 | 0.2268  | 0.09266 | 0.10382 | 0.06594 | 0.07064 | PCDH8    |
| cg10485472 | 0.03134 | 0.03986 | 0.04925 | 0.04264 | 0.03391 | 0.03625 | 0.0552  | 0.05596 | 0.03439 | 0.04184 | TMEM68   |
| cg10485724 | 0.04168 | 0.03815 | 0.04342 | 0.04063 | 0.04232 | 0.04119 | 0.04076 | 0.03778 | 0.03254 | 0.03134 | PMS2     |
| cg10486998 | 0.07037 | 0.05465 | 0.91427 | 0.93189 | 0.06836 | 0.05461 | 0.49918 | 0.91178 | 0.04782 | 0.04989 | GALR1    |
| cg10487127 | 0.02995 | 0.02595 | 0.03984 | 0.04385 | 0.04254 | 0.03768 | 0.02264 | 0.02012 | 0.02008 | 0.01662 | ATXN1    |
| cg10488141 | 0.01856 | 0.02106 | 0.02    | 0.02282 | 0.02002 | 0.01826 | 0.01748 | 0.01873 | 0.01835 | 0.01466 | SUFU     |
| cg10488185 | 0.03868 | 0.0386  | 0.04367 | 0.04541 | 0.03594 | 0.04135 | 0.03428 | 0.03555 | 0.03712 | 0.03569 | MLL5     |
| cg10488476 | 0.04565 | 0.03633 | 0.03443 | 0.03024 | 0.02713 | 0.02843 | 0.0314  | 0.0324  | 0.02673 | 0.02902 | ITGA3    |
| cg10488637 | 0.04434 | 0.05123 | 0.10011 | 0.04327 | 0.03894 | 0.04284 | 0.04769 | 0.04401 | 0.03535 | 0.04074 | ZNF180   |
| cg10490064 | 0.4503  | 0.09779 | 0.18099 | 0.16301 | 0.72716 | 0.78314 | 0.41236 | 0.40604 | 0.0844  | 0.09466 | CRYBB2   |
| cg10490196 | 0.02641 | 0.03003 | 0.02981 | 0.02976 | 0.02407 | 0.02179 | 0.0235  | 0.02624 | 0.02474 | 0.02214 | TPCN2    |
| cg10491648 | 0.07432 | 0.05232 | 0.07536 | 0.10059 | 0.04435 | 0.04312 | 0.05212 | 0.04191 | 0.05462 | 0.04167 | WDR54    |
| cg10493166 | 0.07339 | 0.04388 | 0.22634 | 0.24348 | 0.57019 | 0.26778 | 0.0644  | 0.04269 | 0.05736 | 0.04199 | PTGS1    |
| cg10493739 | 0.07658 | 0.08319 | 0.07972 | 0.0737  | 0.05431 | 0.07103 | 0.0743  | 0.07124 | 0.07813 | 0.05917 | TMEM38B  |
| cg10494770 | 0.53603 | 0.08951 | 0.48891 | 0.60382 | 0.51253 | 0.4474  | 0.4621  | 0.47671 | 0.36808 | 0.31772 | IGLL1    |
| cg10494773 | 0.12237 | 0.11934 | 0.11842 | 0.11411 | 0.17014 | 0.14154 | 0.10848 | 0.10868 | 0.11226 | 0.12477 | SRP54    |
| cg10497569 | 0.03571 | 0.03332 | 0.03648 | 0.03517 | 0.02799 | 0.03038 | 0.03138 | 0.03109 | 0.0306  | 0.0313  | RAB23    |
| cg10498097 | 0.85655 | 0.67593 | 0.67498 | 0.77826 | 0.85969 | 0.86786 | 0.75072 | 0.63674 | 0.72837 | 0.84535 | MGC50811 |

|            |         |         |         |         |         |         |         |         |         |         |              |
|------------|---------|---------|---------|---------|---------|---------|---------|---------|---------|---------|--------------|
| cg10498963 | 0.03518 | 0.03865 | 0.03565 | 0.03097 | 0.02549 | 0.02934 | 0.03046 | 0.02975 | 0.03461 | 0.03244 | GALK1        |
| cg10500167 | 0.68482 | 0.45573 | 0.85272 | 0.88799 | 0.92383 | 0.89849 | 0.54526 | 0.54075 | 0.62163 | 0.60326 | ATP2B2       |
| cg10500283 | 0.12352 | 0.11554 | 0.76028 | 0.84097 | 0.72998 | 0.65276 | 0.83028 | 0.6845  | 0.83253 | 0.69471 | UTS2         |
| cg10500716 | 0.8052  | 0.5065  | 0.52671 | 0.59223 | 0.78222 | 0.80082 | 0.59041 | 0.60162 | 0.81607 | 0.77705 | WDR77        |
| cg10500909 | 0.18447 | 0.10844 | 0.22109 | 0.25423 | 0.2332  | 0.43008 | 0.07338 | 0.04353 | 0.08712 | 0.07326 | CYP11B2      |
| cg10501065 | 0.07179 | 0.07362 | 0.21931 | 0.17794 | 0.16718 | 0.08026 | 0.10225 | 0.08094 | 0.05971 | 0.06442 | IGF2AS       |
| cg10501128 | 0.02898 | 0.03444 | 0.03504 | 0.02942 | 0.24249 | 0.03477 | 0.04272 | 0.02799 | 0.05101 | 0.0243  | FLT1         |
| cg10501629 | 0.84892 | 0.8614  | 0.75829 | 0.8182  | 0.80552 | 0.81605 | 0.76799 | 0.81918 | 0.82255 | 0.7808  | ATP2B1       |
| cg10503138 | 0.26517 | 0.10875 | 0.23381 | 0.32511 | 0.6071  | 0.79024 | 0.82028 | 0.78616 | 0.14756 | 0.2446  | CNTN4        |
| cg10503232 | 0.91696 | 0.82712 | 0.92783 | 0.93987 | 0.88317 | 0.94105 | 0.65834 | 0.6047  | 0.9427  | 0.92641 | KCNQ1DN      |
| cg10503234 | 0.0768  | 0.03224 | 0.04154 | 0.03129 | 0.22043 | 0.03364 | 0.02703 | 0.02899 | 0.03598 | 0.02169 | FSTL3        |
| cg10506212 | 0.02845 | 0.0316  | 0.03394 | 0.03119 | 0.02513 | 0.03077 | 0.02494 | 0.02909 | 0.02806 | 0.02556 | GGCX         |
| cg10506318 | 0.62997 | 0.34504 | 0.39568 | 0.5247  | 0.61501 | 0.66491 | 0.69805 | 0.67446 | 0.69448 | 0.19584 | mimitin      |
| cg10507231 | 0.90663 | 0.89648 | 0.87804 | 0.8924  | 0.90644 | 0.90555 | 0.89261 | 0.91737 | 0.90351 | 0.8988  | PIK3C2B      |
| cg10507961 | 0.2341  | 0.03511 | 0.03177 | 0.03429 | 0.02962 | 0.02891 | 0.02771 | 0.02725 | 0.0285  | 0.03022 | MGC34732     |
| cg10515956 | 0.2874  | 0.1421  | 0.08765 | 0.07145 | 0.31518 | 0.14839 | 0.08351 | 0.04919 | 0.06767 | 0.05526 | MCOLN3       |
| cg10516359 | 0.7049  | 0.06719 | 0.93998 | 0.96411 | 0.52646 | 0.06366 | 0.71426 | 0.74362 | 0.71905 | 0.76356 | SLC35C1      |
| cg10516886 | 0.46131 | 0.2371  | 0.26043 | 0.24162 | 0.23035 | 0.45321 | 0.18217 | 0.17102 | 0.23474 | 0.20248 | CD53         |
| cg10517312 | 0.27009 | 0.14429 | 0.39854 | 0.54797 | 0.48247 | 0.30154 | 0.24597 | 0.43439 | 0.14096 | 0.11942 | RNF36        |
| cg10519140 | 0.05835 | 0.05657 | 0.06899 | 0.05758 | 0.93669 | 0.81883 | 0.17965 | 0.05725 | 0.0477  | 0.04591 | SLC29A1      |
| cg10520594 | 0.03323 | 0.03746 | 0.04033 | 0.03107 | 0.03844 | 0.03486 | 0.05505 | 0.03202 | 0.05986 | 0.03367 | NT5C         |
| cg10520887 | 0.05893 | 0.05994 | 0.07317 | 0.0769  | 0.07467 | 0.06166 | 0.05379 | 0.04303 | 0.09385 | 0.07265 | UNC5C        |
| cg10521267 | 0.06766 | 0.05631 | 0.08982 | 0.07795 | 0.09768 | 0.08223 | 0.0806  | 0.07835 | 0.06469 | 0.06493 | ZNF684       |
| cg10521852 | 0.84835 | 0.07596 | 0.91636 | 0.92941 | 0.9392  | 0.91846 | 0.10463 | 0.11475 | 0.21652 | 0.09556 | EDG4         |
| cg10523019 | 0.82191 | 0.88341 | 0.91246 | 0.91486 | 0.11947 | 0.02788 | 0.03396 | 0.02891 | 0.02599 | 0.02229 | RHBDD1       |
| cg10523494 | 0.3546  | 0.17088 | 0.33172 | 0.36182 | 0.68909 | 0.66635 | 0.11909 | 0.14571 | 0.32702 | 0.20258 | CD300LB      |
| cg10523671 | 0.76499 | 0.73981 | 0.81328 | 0.83729 | 0.84145 | 0.40516 | 0.85481 | 0.25448 | 0.82734 | 0.7935  | SLC15A2      |
| cg10523820 | 0.16141 | 0.02847 | 0.62449 | 0.67456 | 0.91524 | 0.77438 | 0.0993  | 0.03998 | 0.03165 | 0.02158 | ZDHC24       |
| cg10524192 | 0.02122 | 0.02227 | 0.02832 | 0.02375 | 0.01818 | 0.02223 | 0.02208 | 0.01963 | 0.01822 | 0.01573 | OPRS1        |
| cg10524983 | 0.13747 | 0.12188 | 0.11687 | 0.11162 | 0.18866 | 0.07703 | 0.09021 | 0.10397 | 0.10892 | 0.09962 | GYG1         |
| cg10525372 | 0.87541 | 0.79998 | 0.87832 | 0.87767 | 0.9295  | 0.87325 | 0.84467 | 0.84512 | 0.86984 | 0.8198  | WISP3        |
| cg10525488 | 0.5302  | 0.22472 | 0.45394 | 0.44448 | 0.57617 | 0.1609  | 0.17576 | 0.16662 | 0.23677 | 0.15058 | FLJ39370     |
| cg10526232 | 0.09783 | 0.09227 | 0.0814  | 0.10533 | 0.10088 | 0.08551 | 0.08269 | 0.07811 | 0.08431 | 0.07799 | ZNF688       |
| cg10526888 | 0.08969 | 0.09974 | 0.17597 | 0.13041 | 0.1533  | 0.12864 | 0.33043 | 0.12495 | 0.10939 | 0.11603 | DKFZp564K142 |
| cg10527457 | 0.03039 | 0.03477 | 0.03459 | 0.03092 | 0.02418 | 0.02845 | 0.0281  | 0.02488 | 0.02728 | 0.02661 | ECT2         |
| cg10528989 | 0.21696 | 0.09078 | 0.81925 | 0.81883 | 0.10952 | 0.10837 | 0.18171 | 0.34785 | 0.81409 | 0.50691 | BDKRB1       |
| cg10530281 | 0.0522  | 0.04927 | 0.06745 | 0.05595 | 0.06337 | 0.08484 | 0.05895 | 0.05803 | 0.0535  | 0.04873 | TBX3         |
| cg10530713 | 0.8726  | 0.55001 | 0.89979 | 0.93019 | 0.94659 | 0.91115 | 0.64693 | 0.6887  | 0.73757 | 0.71464 | GAGE4        |
| cg10530733 | 0.12049 | 0.05657 | 0.11676 | 0.26713 | 0.03787 | 0.03355 | 0.0625  | 0.169   | 0.05013 | 0.03889 | GPR173       |
| cg10531372 | 0.80241 | 0.78518 | 0.78206 | 0.82449 | 0.80869 | 0.78475 | 0.78663 | 0.8085  | 0.70904 | 0.73253 | FAM71A       |
| cg10533434 | 0.71607 | 0.5111  | 0.63989 | 0.67732 | 0.55641 | 0.37091 | 0.16727 | 0.15704 | 0.2206  | 0.24852 | SERPINB3     |

|            |         |         |         |         |         |         |         |         |         |                   |
|------------|---------|---------|---------|---------|---------|---------|---------|---------|---------|-------------------|
| cg10533739 | 0.04544 | 0.0436  | 0.0453  | 0.04276 | 0.03969 | 0.04137 | 0.03807 | 0.0387  | 0.0489  | 0.03343 RAP2B     |
| cg10534672 | 0.12787 | 0.06884 | 0.22344 | 0.33536 | 0.05744 | 0.05425 | 0.25256 | 0.05342 | 0.05006 | 0.04114 C1QTNF2   |
| cg10536534 | 0.08193 | 0.08502 | 0.12691 | 0.10319 | 0.10742 | 0.10305 | 0.32748 | 0.47157 | 0.1051  | 0.08516 MCTS1     |
| cg10536625 | 0.80844 | 0.75201 | 0.80413 | 0.81729 | 0.84403 | 0.76455 | 0.77808 | 0.7683  | 0.8114  | 0.73938 IFT140    |
| cg10536916 | 0.77096 | 0.74681 | 0.66581 | 0.6915  | 0.89307 | 0.81436 | 0.66142 | 0.60449 | 0.77661 | 0.51234 HIST1H4L  |
| cg10537079 | 0.77811 | 0.49285 | 0.72766 | 0.77999 | 0.7663  | 0.46762 | 0.46549 | 0.20924 | 0.85155 | 0.44326 OTC       |
| cg10537269 | 0.24673 | 0.22655 | 0.22279 | 0.14563 | 0.42297 | 0.26747 | 0.23781 | 0.22618 | 0.22084 | 0.27087 TIMM9     |
| cg10539418 | 0.0369  | 0.03333 | 0.03392 | 0.0329  | 0.02691 | 0.02668 | 0.11367 | 0.04208 | 0.0276  | 0.02856 CCND1     |
| cg10539507 | 0.07295 | 0.07155 | 0.07107 | 0.07062 | 0.08555 | 0.09865 | 0.06948 | 0.07906 | 0.06512 | 0.05851 NKX6-1    |
| cg10539712 | 0.04419 | 0.04484 | 0.04742 | 0.04615 | 0.06325 | 0.04214 | 0.05931 | 0.06812 | 0.03369 | 0.02772 LYN       |
| cg10539808 | 0.56625 | 0.24552 | 0.7869  | 0.90812 | 0.7242  | 0.9059  | 0.19702 | 0.56771 | 0.80223 | 0.26769 KCTD1     |
| cg10541755 | 0.04987 | 0.05081 | 0.05839 | 0.04563 | 0.04043 | 0.03943 | 0.0385  | 0.03616 | 0.04227 | 0.03705 EIF5A2    |
| cg10541994 | 0.02308 | 0.02352 | 0.02336 | 0.0185  | 0.02173 | 0.01936 | 0.0186  | 0.02059 | 0.01824 | 0.01793 TMEM30A   |
| cg10544564 | 0.04885 | 0.04907 | 0.10383 | 0.1343  | 0.21945 | 0.08833 | 0.07149 | 0.06134 | 0.06388 | 0.07939 IGSF4B    |
| cg10545682 | 0.06503 | 0.03584 | 0.03191 | 0.02837 | 0.0325  | 0.03113 | 0.03149 | 0.02628 | 0.02903 | 0.02619 TUFT1     |
| cg10546523 | 0.04126 | 0.0372  | 0.04191 | 0.03916 | 0.05166 | 0.05048 | 0.03351 | 0.02737 | 0.03482 | 0.02925 SEMA3B    |
| cg10548277 | 0.05455 | 0.04782 | 0.0434  | 0.04971 | 0.04294 | 0.04244 | 0.06229 | 0.07078 | 0.04139 | 0.0348 MED8       |
| cg10548978 | 0.76739 | 0.11905 | 0.88944 | 0.90947 | 0.9221  | 0.8927  | 0.59262 | 0.90536 | 0.87887 | 0.84114 C1orf27   |
| cg10549188 | 0.07876 | 0.08234 | 0.06433 | 0.0507  | 0.10459 | 0.08069 | 0.06479 | 0.05794 | 0.08196 | 0.08832 ANP32E    |
| cg10549973 | 0.96242 | 0.96468 | 0.96428 | 0.96632 | 0.90459 | 0.62186 | 0.90514 | 0.75715 | 0.50245 | 0.04514 UNQ9438   |
| cg10551759 | 0.0297  | 0.03604 | 0.0366  | 0.03408 | 0.03769 | 0.04753 | 0.03335 | 0.03699 | 0.02617 | 0.0223 FAM3C      |
| cg10552385 | 0.01781 | 0.01877 | 0.0223  | 0.01897 | 0.01761 | 0.02102 | 0.0173  | 0.0141  | 0.0148  | 0.01568 RB1       |
| cg10553028 | 0.06082 | 0.05629 | 0.05964 | 0.06042 | 0.07746 | 0.05937 | 0.04435 | 0.04352 | 0.04545 | 0.04585 CMTM8     |
| cg10556064 | 0.94171 | 0.95224 | 0.94585 | 0.95305 | 0.95004 | 0.94228 | 0.38151 | 0.77802 | 0.69617 | 0.80386 SMPD3     |
| cg10557828 | 0.42406 | 0.11675 | 0.15321 | 0.13661 | 0.14191 | 0.08121 | 0.09805 | 0.07488 | 0.10529 | 0.1258 PLOD2      |
| cg10559803 | 0.858   | 0.67664 | 0.64265 | 0.70621 | 0.85901 | 0.52095 | 0.75189 | 0.26559 | 0.44299 | 0.27809 RALGPS2   |
| cg10560038 | 0.94523 | 0.70045 | 0.86747 | 0.93882 | 0.91372 | 0.92062 | 0.21509 | 0.09429 | 0.87201 | 0.65446 CMTM5     |
| cg10560144 | 0.07674 | 0.06597 | 0.09749 | 0.08501 | 0.081   | 0.10744 | 0.62305 | 0.55442 | 0.07806 | 0.0813 PGK1       |
| cg10561472 | 0.04702 | 0.04802 | 0.04877 | 0.04806 | 0.06145 | 0.05212 | 0.04392 | 0.03808 | 0.03549 | 0.03392 ZBTB7A    |
| cg10562586 | 0.61969 | 0.11638 | 0.74067 | 0.78907 | 0.26134 | 0.13646 | 0.57332 | 0.23995 | 0.72381 | 0.68216 MAP2      |
| cg10563284 | 0.05338 | 0.03939 | 0.05374 | 0.06266 | 0.07135 | 0.04127 | 0.04348 | 0.03847 | 0.05475 | 0.04218 PAK6      |
| cg10564498 | 0.69213 | 0.13933 | 0.18813 | 0.18249 | 0.45902 | 0.2616  | 0.08402 | 0.07558 | 0.1417  | 0.10562 AXL       |
| cg10566677 | 0.06271 | 0.066   | 0.0659  | 0.0673  | 0.04239 | 0.05875 | 0.05864 | 0.06282 | 0.05647 | 0.0516 GLMN       |
| cg10568796 | 0.82885 | 0.81211 | 0.80494 | 0.82549 | 0.83263 | 0.79131 | 0.75854 | 0.77213 | 0.77849 | 0.73444 PIK4CA    |
| cg10568944 | 0.09467 | 0.08981 | 0.07616 | 0.06943 | 0.06173 | 0.08804 | 0.06144 | 0.0709  | 0.0702  | 0.08754 MUT       |
| cg10569414 | 0.87962 | 0.38797 | 0.91509 | 0.90449 | 0.95676 | 0.9044  | 0.84734 | 0.723   | 0.9051  | 0.39954 C21orf121 |
| cg10569616 | 0.73672 | 0.73396 | 0.61263 | 0.67935 | 0.53216 | 0.64636 | 0.73621 | 0.73176 | 0.72761 | 0.71737 POT1      |
| cg10570177 | 0.21552 | 0.06676 | 0.07954 | 0.08928 | 0.13409 | 0.23091 | 0.09478 | 0.05069 | 0.05165 | 0.05051 C9orf7    |
| cg10573763 | 0.02316 | 0.02219 | 0.02387 | 0.02741 | 0.01684 | 0.01977 | 0.02201 | 0.02269 | 0.01886 | 0.02117 COPE      |
| cg10574499 | 0.06459 | 0.06279 | 0.79969 | 0.73107 | 0.86963 | 0.56624 | 0.85251 | 0.29399 | 0.79009 | 0.34923 UNQ2446   |
| cg10575414 | 0.0496  | 0.04942 | 0.12021 | 0.31549 | 0.07142 | 0.05277 | 0.04977 | 0.04295 | 0.03931 | 0.04141 RTDR1     |



|            |         |         |         |         |         |         |         |         |         |                  |
|------------|---------|---------|---------|---------|---------|---------|---------|---------|---------|------------------|
| cg10575735 | 0.45284 | 0.59153 | 0.45413 | 0.57609 | 0.2674  | 0.43731 | 0.08397 | 0.11849 | 0.14273 | 0.54759 SSX4     |
| cg10575841 | 0.03341 | 0.03269 | 0.02921 | 0.02761 | 0.02622 | 0.02244 | 0.02741 | 0.02682 | 0.02171 | 0.01969 TMED7    |
| cg10576828 | 0.80257 | 0.83192 | 0.58508 | 0.54764 | 0.74328 | 0.8047  | 0.73095 | 0.80922 | 0.63256 | 0.65699 LRRC7    |
| cg10578779 | 0.05864 | 0.05851 | 0.08735 | 0.07355 | 0.07712 | 0.06195 | 0.0952  | 0.06427 | 0.06837 | 0.06986 ZBTB37   |
| cg10579246 | 0.59756 | 0.48271 | 0.37857 | 0.53304 | 0.66627 | 0.70955 | 0.5348  | 0.40111 | 0.76618 | 0.56858 MGC15763 |
| cg10581256 | 0.03072 | 0.03072 | 0.03277 | 0.0305  | 0.04257 | 0.02771 | 0.02561 | 0.02829 | 0.02357 | 0.02298 ZNF11B   |
| cg10583097 | 0.03163 | 0.03096 | 0.03134 | 0.02737 | 0.02711 | 0.02951 | 0.0262  | 0.02501 | 0.029   | 0.02554 RBM15B   |
| cg10583382 | 0.04228 | 0.04955 | 0.05868 | 0.03697 | 0.08337 | 0.06874 | 0.04793 | 0.04817 | 0.03685 | 0.04471 IMMP1L   |
| cg10583632 | 0.02857 | 0.02888 | 0.02891 | 0.02537 | 0.04503 | 0.04117 | 0.02965 | 0.02854 | 0.02862 | 0.02801 ZNF624   |
| cg10584819 | 0.92058 | 0.70289 | 0.88608 | 0.909   | 0.63407 | 0.42902 | 0.89936 | 0.85017 | 0.93331 | 0.75545 HPRT1    |
| cg10585462 | 0.6245  | 0.66762 | 0.44966 | 0.51365 | 0.60015 | 0.67005 | 0.27217 | 0.22756 | 0.24197 | 0.18625 C4orf7   |
| cg10585962 | 0.35422 | 0.0357  | 0.17178 | 0.20675 | 0.58398 | 0.59281 | 0.12508 | 0.08149 | 0.26262 | 0.13323 MOGAT2   |
| cg10586599 | 0.04787 | 0.04605 | 0.06175 | 0.05143 | 0.05653 | 0.05798 | 0.04215 | 0.0412  | 0.05065 | 0.04699 ORC1L    |
| cg10586756 | 0.79559 | 0.81834 | 0.79199 | 0.82602 | 0.87829 | 0.87314 | 0.76112 | 0.78653 | 0.84866 | 0.79396 NUP93    |
| cg10588377 | 0.04523 | 0.0395  | 0.05653 | 0.04076 | 0.03572 | 0.0321  | 0.04769 | 0.031   | 0.03206 | 0.03176 HTRA1    |
| cg10590292 | 0.89277 | 0.90497 | 0.87124 | 0.90404 | 0.91204 | 0.90552 | 0.87428 | 0.89067 | 0.8214  | 0.70367 BIN2     |
| cg10591174 | 0.72295 | 0.45063 | 0.65155 | 0.76363 | 0.56107 | 0.48691 | 0.14127 | 0.10783 | 0.65766 | 0.27629 MYL2     |
| cg10591659 | 0.48865 | 0.1722  | 0.90968 | 0.9423  | 0.9562  | 0.89167 | 0.53417 | 0.28789 | 0.92349 | 0.46638 NYX      |
| cg10593493 | 0.05744 | 0.05164 | 0.04959 | 0.05805 | 0.04271 | 0.0507  | 0.04977 | 0.05432 | 0.0477  | 0.04155 HOXC6    |
| cg10594105 | 0.07877 | 0.07782 | 0.40231 | 0.43005 | 0.10007 | 0.07504 | 0.13278 | 0.07165 | 0.06467 | 0.05714 C19orf37 |
| cg10599444 | 0.03733 | 0.04271 | 0.0437  | 0.04488 | 0.03451 | 0.03123 | 0.03158 | 0.09822 | 0.02767 | 0.02895 MMP14    |
| cg10601002 | 0.03605 | 0.03515 | 0.03441 | 0.03423 | 0.02973 | 0.02967 | 0.02884 | 0.02943 | 0.0325  | 0.02945 NOC4L    |
| cg10601168 | 0.04272 | 0.04751 | 0.05224 | 0.05281 | 0.04515 | 0.04622 | 0.03464 | 0.03217 | 0.03823 | 0.03794 CNKSR3   |
| cg10601939 | 0.0267  | 0.02689 | 0.03286 | 0.0262  | 0.02517 | 0.02599 | 0.02358 | 0.0236  | 0.02243 | 0.02143 ARL5B    |
| cg10602543 | 0.72753 | 0.23778 | 0.52207 | 0.66906 | 0.66162 | 0.68918 | 0.73296 | 0.51806 | 0.58465 | 0.37724 H19      |
| cg10604168 | 0.23478 | 0.08504 | 0.49713 | 0.55999 | 0.16754 | 0.42158 | 0.75824 | 0.65927 | 0.19815 | 0.04165 RASL12   |
| cg10604333 | 0.5373  | 0.51039 | 0.85493 | 0.81274 | 0.0695  | 0.05605 | 0.21569 | 0.35506 | 0.22996 | 0.19833 ZNF222   |
| cg10604646 | 0.82638 | 0.78418 | 0.78301 | 0.82681 | 0.82721 | 0.74238 | 0.79086 | 0.76172 | 0.77009 | 0.75975 RGS5     |
| cg10604703 | 0.05836 | 0.06398 | 0.08116 | 0.07385 | 0.07715 | 0.07574 | 0.05393 | 0.05415 | 0.05645 | 0.04894 WDR5     |
| cg10605520 | 0.03006 | 0.03038 | 0.46685 | 0.59107 | 0.08501 | 0.02707 | 0.02889 | 0.0282  | 0.0402  | 0.02121 HRH3     |
| cg10608333 | 0.03309 | 0.03764 | 0.03226 | 0.03137 | 0.02157 | 0.03616 | 0.30015 | 0.29231 | 0.02561 | 0.028 HIST1H4K   |
| cg10608341 | 0.61203 | 0.18864 | 0.71179 | 0.76397 | 0.49529 | 0.61955 | 0.39171 | 0.66876 | 0.57374 | 0.2831 HESX1     |
| cg10609615 | 0.062   | 0.06291 | 0.06729 | 0.05783 | 0.05241 | 0.04839 | 0.06326 | 0.05688 | 0.0751  | 0.06571 TRAP1    |
| cg10612997 | 0.55887 | 0.58745 | 0.71525 | 0.75369 | 0.55925 | 0.56147 | 0.20611 | 0.17722 | 0.15311 | 0.27473 GREB1    |
| cg10613381 | 0.80118 | 0.54023 | 0.87168 | 0.88693 | 0.92428 | 0.8781  | 0.85877 | 0.76138 | 0.89874 | 0.79649 UPB1     |
| cg10613440 | 0.02299 | 0.02799 | 0.03018 | 0.02638 | 0.01816 | 0.02498 | 0.02408 | 0.0242  | 0.02063 | 0.02012 SUCLA2   |
| cg10615091 | 0.04093 | 0.03957 | 0.04835 | 0.03637 | 0.0401  | 0.03872 | 0.04006 | 0.03796 | 0.04475 | 0.05023 FAM13C1  |
| cg10617171 | 0.03494 | 0.03117 | 0.08443 | 0.05708 | 0.32296 | 0.03688 | 0.09483 | 0.03638 | 0.03003 | 0.028 SCN1B      |
| cg10618882 | 0.86458 | 0.75563 | 0.8282  | 0.86393 | 0.86919 | 0.82172 | 0.80759 | 0.66944 | 0.88724 | 0.62401 LRRC25   |
| cg10620457 | 0.62531 | 0.49973 | 0.33801 | 0.32358 | 0.71726 | 0.79599 | 0.46703 | 0.18251 | 0.40611 | 0.25899 C8B      |
| cg10624445 | 0.49233 | 0.26292 | 0.29686 | 0.33111 | 0.75227 | 0.59398 | 0.26858 | 0.09271 | 0.68611 | 0.3969 CNGB1     |

|            |         |         |         |         |         |         |         |         |         |         |           |
|------------|---------|---------|---------|---------|---------|---------|---------|---------|---------|---------|-----------|
| cg10624583 | 0.0341  | 0.03483 | 0.08525 | 0.07816 | 0.26309 | 0.22994 | 0.03272 | 0.04129 | 0.04063 | 0.03668 | TENC1     |
| cg10624768 | 0.06102 | 0.06162 | 0.06384 | 0.05882 | 0.07338 | 0.0622  | 0.09832 | 0.06018 | 0.04896 | 0.0437  | DNAJA1    |
| cg10627136 | 0.09412 | 0.08755 | 0.09772 | 0.08698 | 0.07015 | 0.0906  | 0.08532 | 0.0856  | 0.08293 | 0.08896 | HINT1     |
| cg10628098 | 0.03976 | 0.0405  | 0.04955 | 0.04504 | 0.05202 | 0.03311 | 0.03711 | 0.03831 | 0.03746 | 0.02962 | SCYL1     |
| cg10631471 | 0.48365 | 0.19827 | 0.24616 | 0.29827 | 0.22751 | 0.18142 | 0.3186  | 0.23679 | 0.38931 | 0.14371 | ABCC11    |
| cg10633491 | 0.04011 | 0.04107 | 0.04249 | 0.04659 | 0.05145 | 0.0534  | 0.04233 | 0.03453 | 0.03272 | 0.03137 | ZBTB7A    |
| cg10634115 | 0.66585 | 0.35554 | 0.81715 | 0.82688 | 0.86669 | 0.82822 | 0.79425 | 0.2902  | 0.61669 | 0.75629 | UTS2R     |
| cg10634217 | 0.03536 | 0.03529 | 0.03848 | 0.03451 | 0.03252 | 0.03286 | 0.03325 | 0.02951 | 0.03348 | 0.03018 | MRPL18    |
| cg10634358 | 0.83587 | 0.83101 | 0.76451 | 0.79143 | 0.76316 | 0.79187 | 0.49278 | 0.57718 | 0.85381 | 0.85531 | NSDHL     |
| cg10634424 | 0.57721 | 0.47366 | 0.55    | 0.62374 | 0.57364 | 0.62971 | 0.66857 | 0.66757 | 0.29459 | 0.24379 | LUM       |
| cg10634551 | 0.13189 | 0.17469 | 0.5576  | 0.49843 | 0.2083  | 0.19798 | 0.23301 | 0.10315 | 0.13097 | 0.11022 | KCNMB2    |
| cg10635061 | 0.73688 | 0.11336 | 0.0479  | 0.04744 | 0.91009 | 0.34587 | 0.63887 | 0.05682 | 0.04821 | 0.04486 | FHL2      |
| cg10636246 | 0.33333 | 0.15314 | 0.45098 | 0.3107  | 0.62685 | 0.07446 | 0.11477 | 0.19254 | 0.5567  | 0.08046 | AIM2      |
| cg10637955 | 0.43451 | 0.19463 | 0.31334 | 0.5677  | 0.58646 | 0.74249 | 0.30191 | 0.13944 | 0.58481 | 0.47059 | BZW1      |
| cg10639440 | 0.07188 | 0.06305 | 0.07962 | 0.07941 | 0.07451 | 0.06597 | 0.06299 | 0.07194 | 0.06748 | 0.05188 | SCRN1     |
| cg10640379 | 0.0671  | 0.05678 | 0.08162 | 0.05401 | 0.06881 | 0.05636 | 0.04925 | 0.05149 | 0.04708 | 0.0545  | LARP2     |
| cg10642330 | 0.92783 | 0.93499 | 0.89025 | 0.9304  | 0.86734 | 0.9369  | 0.82256 | 0.86436 | 0.95104 | 0.95063 | NNAT      |
| cg10643489 | 0.31747 | 0.05964 | 0.0833  | 0.10872 | 0.07459 | 0.06401 | 0.06102 | 0.05772 | 0.33449 | 0.17227 | RQCD1     |
| cg10644361 | 0.04009 | 0.04291 | 0.04695 | 0.04694 | 0.03199 | 0.03271 | 0.032   | 0.03693 | 0.02726 | 0.03069 | MIPOL1    |
| cg10644878 | 0.33215 | 0.30628 | 0.32623 | 0.35696 | 0.27373 | 0.31957 | 0.38657 | 0.42417 | 0.2915  | 0.24088 | LYPLA1    |
| cg10645113 | 0.95767 | 0.57305 | 0.95404 | 0.95617 | 0.96585 | 0.94449 | 0.94598 | 0.95022 | 0.95755 | 0.94914 | LOC349236 |
| cg10645943 | 0.03598 | 0.03544 | 0.04274 | 0.03887 | 0.04025 | 0.04967 | 0.03739 | 0.03699 | 0.03391 | 0.03836 | STRA13    |
| cg10646402 | 0.03053 | 0.02505 | 0.4053  | 0.43795 | 0.03244 | 0.01971 | 0.0409  | 0.02336 | 0.7194  | 0.71903 | PTPRO     |
| cg10647513 | 0.10912 | 0.06012 | 0.74034 | 0.84734 | 0.64655 | 0.78354 | 0.06406 | 0.18429 | 0.06866 | 0.04022 | HBA1      |
| cg10648113 | 0.91157 | 0.90914 | 0.82701 | 0.8579  | 0.87701 | 0.84099 | 0.85746 | 0.85787 | 0.69017 | 0.85515 | SULT1B1   |
| cg10648908 | 0.04178 | 0.04548 | 0.04483 | 0.0436  | 0.02922 | 0.03792 | 0.03708 | 0.03632 | 0.04039 | 0.0389  | ARFGAP3   |
| cg10652277 | 0.07397 | 0.06047 | 0.07046 | 0.05789 | 0.10723 | 0.06894 | 0.04207 | 0.03777 | 0.05009 | 0.05394 | SLC30A9   |
| cg10654016 | 0.04804 | 0.05261 | 0.09145 | 0.07996 | 0.12192 | 0.08825 | 0.05897 | 0.05013 | 0.08037 | 0.08291 | C12orf31  |
| cg10660136 | 0.02146 | 0.02071 | 0.02261 | 0.02104 | 0.01706 | 0.02216 | 0.01809 | 0.01958 | 0.01806 | 0.01877 | MGC43122  |
| cg10660256 | 0.92007 | 0.58235 | 0.95479 | 0.95636 | 0.92968 | 0.95314 | 0.8622  | 0.72904 | 0.78525 | 0.70401 | BHMT      |
| cg10661591 | 0.07948 | 0.08108 | 0.09619 | 0.08333 | 0.07385 | 0.05359 | 0.15487 | 0.1129  | 0.06753 | 0.08692 | TFG       |
| cg10662787 | 0.82809 | 0.32474 | 0.05924 | 0.0622  | 0.04899 | 0.04214 | 0.05245 | 0.05257 | 0.04612 | 0.04509 | LGTN      |
| cg10663017 | 0.07439 | 0.07657 | 0.71372 | 0.76872 | 0.10703 | 0.09024 | 0.08548 | 0.08497 | 0.08774 | 0.0864  | DUSP23    |
| cg10663973 | 0.05081 | 0.06303 | 0.05929 | 0.04614 | 0.05864 | 0.06067 | 0.04856 | 0.04709 | 0.04523 | 0.04609 | MRFAP1    |
| cg10664272 | 0.93372 | 0.92748 | 0.94093 | 0.94012 | 0.91356 | 0.6371  | 0.9378  | 0.93422 | 0.94223 | 0.93115 | CAPG      |
| cg10665018 | 0.11509 | 0.08795 | 0.10712 | 0.10953 | 0.07192 | 0.0898  | 0.09192 | 0.09707 | 0.08495 | 0.07704 | ZNF688    |
| cg10667970 | 0.52976 | 0.15919 | 0.18773 | 0.12068 | 0.81785 | 0.44085 | 0.65584 | 0.29558 | 0.85377 | 0.23784 | FBXO6     |
| cg10669058 | 0.24374 | 0.17925 | 0.63572 | 0.60651 | 0.89911 | 0.85218 | 0.49484 | 0.56685 | 0.83617 | 0.65876 | CILP2     |
| cg10670077 | 0.52239 | 0.10081 | 0.87782 | 0.8996  | 0.73729 | 0.84151 | 0.50414 | 0.20551 | 0.96586 | 0.93739 | INSR      |
| cg10671066 | 0.11613 | 0.13938 | 0.25646 | 0.22148 | 0.22475 | 0.11636 | 0.19259 | 0.12645 | 0.17121 | 0.13296 | SLAMF6    |
| cg10671802 | 0.03565 | 0.02801 | 0.17119 | 0.07777 | 0.15461 | 0.02708 | 0.03844 | 0.02835 | 0.41744 | 0.02537 | MGC23280  |

|            |         |         |         |         |         |         |         |         |         |                  |
|------------|---------|---------|---------|---------|---------|---------|---------|---------|---------|------------------|
| cg10673431 | 0.95434 | 0.95494 | 0.9646  | 0.96499 | 0.95892 | 0.95591 | 0.95483 | 0.95514 | 0.94698 | 0.94915 S100A11  |
| cg10673984 | 0.01661 | 0.0184  | 0.01926 | 0.01839 | 0.01492 | 0.01709 | 0.01289 | 0.01487 | 0.01256 | 0.01463 PPM1D    |
| cg10674793 | 0.56414 | 0.07128 | 0.15282 | 0.21488 | 0.31641 | 0.04675 | 0.11044 | 0.04808 | 0.06401 | 0.0407 DVL3      |
| cg10676060 | 0.14672 | 0.08689 | 0.13935 | 0.11295 | 0.08351 | 0.08196 | 0.79161 | 0.53907 | 0.09216 | 0.2465 DDX31     |
| cg10677144 | 0.92247 | 0.90835 | 0.89248 | 0.90523 | 0.83878 | 0.87787 | 0.31814 | 0.80041 | 0.91285 | 0.88585 MYOM1    |
| cg10677787 | 0.50072 | 0.4915  | 0.26833 | 0.42396 | 0.03449 | 0.04164 | 0.05686 | 0.04098 | 0.03675 | 0.03406 DHRS4L2  |
| cg10681065 | 0.87724 | 0.81142 | 0.94132 | 0.94937 | 0.959   | 0.92806 | 0.80358 | 0.41955 | 0.94253 | 0.93504 TFR2     |
| cg10681137 | 0.97314 | 0.97228 | 0.96625 | 0.96712 | 0.96545 | 0.96845 | 0.96631 | 0.96133 | 0.9716  | 0.97655 ATPBD3   |
| cg10681725 | 0.05942 | 0.0582  | 0.05553 | 0.05371 | 0.04683 | 0.05305 | 0.05616 | 0.05415 | 0.03888 | 0.04058 RPS23    |
| cg10682057 | 0.02981 | 0.02776 | 0.0369  | 0.02895 | 0.67842 | 0.67662 | 0.97083 | 0.97193 | 0.04133 | 0.02199 AS AHL   |
| cg10683939 | 0.8394  | 0.4086  | 0.34096 | 0.53181 | 0.37423 | 0.36749 | 0.80173 | 0.81591 | 0.12838 | 0.12424 C16orf47 |
| cg10685945 | 0.05651 | 0.05005 | 0.22812 | 0.12516 | 0.64279 | 0.29715 | 0.13331 | 0.04325 | 0.53601 | 0.15524 HMFN0839 |
| cg10686044 | 0.03371 | 0.02465 | 0.02765 | 0.02538 | 0.03608 | 0.0403  | 0.02496 | 0.02787 | 0.02934 | 0.03207 SEL1L    |
| cg10688941 | 0.04369 | 0.05099 | 0.06119 | 0.05239 | 0.05358 | 0.04725 | 0.04384 | 0.03787 | 0.04522 | 0.0391 ASCC3L1   |
| cg10688991 | 0.02341 | 0.02321 | 0.11159 | 0.29684 | 0.05121 | 0.02233 | 0.02293 | 0.02236 | 0.01954 | 0.01762 DLX3     |
| cg10689889 | 0.03117 | 0.03078 | 0.03366 | 0.03265 | 0.04904 | 0.04191 | 0.02805 | 0.03058 | 0.02425 | 0.02628 MAF      |
| cg10691006 | 0.07325 | 0.05773 | 0.05519 | 0.053   | 0.03888 | 0.04219 | 0.04548 | 0.04948 | 0.04288 | 0.04468 MCM2     |
| cg10691259 | 0.06307 | 0.0623  | 0.12462 | 0.14086 | 0.11233 | 0.07733 | 0.04899 | 0.0475  | 0.08268 | 0.10111 TRSPAP1  |
| cg10691387 | 0.46403 | 0.0947  | 0.30812 | 0.33206 | 0.42913 | 0.19359 | 0.06146 | 0.06344 | 0.13601 | 0.39484 IQCF2    |
| cg10692870 | 0.13308 | 0.04704 | 0.05206 | 0.03802 | 0.03802 | 0.04824 | 0.04548 | 0.08259 | 0.40805 | 0.52134 FN1      |
| cg10693071 | 0.17699 | 0.11372 | 0.61784 | 0.58642 | 0.22491 | 0.10687 | 0.56285 | 0.18261 | 0.09612 | 0.09671 TRIM36   |
| cg10694152 | 0.0917  | 0.07051 | 0.4405  | 0.27802 | 0.57257 | 0.52046 | 0.15153 | 0.15395 | 0.3053  | 0.05831 SLC15A1  |
| cg10694914 | 0.87321 | 0.85723 | 0.85301 | 0.87458 | 0.87656 | 0.83587 | 0.81887 | 0.85331 | 0.87283 | 0.79512 POU2AF1  |
| cg10694959 | 0.03526 | 0.03138 | 0.04625 | 0.04834 | 0.04142 | 0.04412 | 0.03399 | 0.02979 | 0.03571 | 0.03414 KPNA6    |
| cg10698222 | 0.03441 | 0.04752 | 0.04422 | 0.04481 | 0.04478 | 0.05598 | 0.03734 | 0.03611 | 0.03242 | 0.03168 FLJ10925 |
| cg10698549 | 0.0349  | 0.03411 | 0.03852 | 0.03665 | 0.03715 | 0.03699 | 0.04271 | 0.04058 | 0.03467 | 0.03339 SRRM1    |
| cg10703331 | 0.05648 | 0.08349 | 0.14661 | 0.10904 | 0.1117  | 0.11017 | 0.06333 | 0.06895 | 0.07384 | 0.05177 TRIM24   |
| cg10704545 | 0.77167 | 0.7842  | 0.70017 | 0.73618 | 0.70821 | 0.77599 | 0.75438 | 0.78532 | 0.73783 | 0.72135 GLRX2    |
| cg10704923 | 0.92865 | 0.92571 | 0.91635 | 0.93518 | 0.8489  | 0.87353 | 0.94649 | 0.94938 | 0.95423 | 0.93598 HIST1H1T |
| cg10705251 | 0.75021 | 0.73533 | 0.89179 | 0.90048 | 0.91266 | 0.90058 | 0.87372 | 0.55189 | 0.90539 | 0.79387 ZNF683   |
| cg10705800 | 0.43632 | 0.31814 | 0.68652 | 0.68632 | 0.37922 | 0.31985 | 0.63664 | 0.29444 | 0.44951 | 0.16248 CITED4   |
| cg10705951 | 0.0288  | 0.02981 | 0.02728 | 0.02981 | 0.02187 | 0.02733 | 0.02667 | 0.02462 | 0.02191 | 0.02586 TAOK2    |
| cg10707300 | 0.05094 | 0.04691 | 0.05699 | 0.05442 | 0.03885 | 0.04173 | 0.04661 | 0.04676 | 0.03941 | 0.03796 ZNF653   |
| cg10707565 | 0.7206  | 0.72267 | 0.74659 | 0.79922 | 0.72004 | 0.78109 | 0.72995 | 0.78464 | 0.73718 | 0.70592 CUBN     |
| cg10708675 | 0.07497 | 0.06935 | 0.06871 | 0.0708  | 0.10524 | 0.10644 | 0.06745 | 0.06722 | 0.05588 | 0.0514 NQO1      |
| cg10708793 | 0.15547 | 0.30518 | 0.6413  | 0.81732 | 0.12238 | 0.03693 | 0.17889 | 0.5653  | 0.04151 | 0.02876 LGP2     |
| cg10708828 | 0.03564 | 0.04093 | 0.04281 | 0.03999 | 0.03327 | 0.03763 | 0.0318  | 0.03554 | 0.03291 | 0.02542 NFIL3    |
| cg10708905 | 0.05952 | 0.05916 | 0.06568 | 0.0606  | 0.0527  | 0.05843 | 0.05494 | 0.05342 | 0.0581  | 0.04988 LRIG3    |
| cg10709021 | 0.18191 | 0.13066 | 0.56205 | 0.49095 | 0.77073 | 0.69843 | 0.18679 | 0.04331 | 0.71297 | 0.50241 WRN      |
| cg10710439 | 0.81531 | 0.62224 | 0.14675 | 0.23734 | 0.43724 | 0.34132 | 0.48098 | 0.49408 | 0.1611  | 0.06264 FLJ37549 |
| cg10712623 | 0.16653 | 0.1706  | 0.17747 | 0.1548  | 0.15181 | 0.14074 | 0.13297 | 0.12582 | 0.16407 | 0.14882 RARB     |

|            |         |         |         |         |         |         |         |         |         |         |          |
|------------|---------|---------|---------|---------|---------|---------|---------|---------|---------|---------|----------|
| cg10713320 | 0.05141 | 0.05417 | 0.05726 | 0.0544  | 0.03295 | 0.05158 | 0.05569 | 0.05335 | 0.04418 | 0.05756 | CLDND1   |
| cg10714284 | 0.3066  | 0.05553 | 0.06096 | 0.06119 | 0.03174 | 0.03939 | 0.06012 | 0.04837 | 0.0339  | 0.03504 | HLA-DMB  |
| cg10715231 | 0.91393 | 0.89722 | 0.92473 | 0.92123 | 0.91993 | 0.91517 | 0.90264 | 0.8911  | 0.91752 | 0.9157  | SOX30    |
| cg10716163 | 0.0629  | 0.05498 | 0.09477 | 0.09143 | 0.09824 | 0.05326 | 0.05158 | 0.04497 | 0.10243 | 0.0481  | MUM1     |
| cg10716607 | 0.10764 | 0.10104 | 0.10612 | 0.08162 | 0.17396 | 0.165   | 0.11164 | 0.104   | 0.08762 | 0.08209 | TOPORS   |
| cg10719920 | 0.91131 | 0.64056 | 0.93982 | 0.94724 | 0.9524  | 0.92334 | 0.90484 | 0.84397 | 0.95036 | 0.82442 | C21orf93 |
| cg10720654 | 0.27436 | 0.39512 | 0.42246 | 0.56472 | 0.44573 | 0.27277 | 0.3795  | 0.4655  | 0.43465 | 0.40025 |          |
| cg10722799 | 0.08201 | 0.05161 | 0.59483 | 0.78111 | 0.45126 | 0.59917 | 0.25852 | 0.46764 | 0.60139 | 0.59643 | CLIC6    |
| cg10723020 | 0.05639 | 0.04319 | 0.03614 | 0.03883 | 0.03985 | 0.03808 | 0.07882 | 0.03909 | 0.03855 | 0.03162 | CREB1    |
| cg10725344 | 0.84953 | 0.7322  | 0.59362 | 0.68112 | 0.21393 | 0.1777  | 0.78183 | 0.76479 | 0.36224 | 0.33664 | UNQ1940  |
| cg10726357 | 0.3368  | 0.22001 | 0.85508 | 0.87863 | 0.82558 | 0.8673  | 0.85469 | 0.8595  | 0.74875 | 0.78953 | TSCOT    |
| cg10728503 | 0.7588  | 0.77665 | 0.76937 | 0.77743 | 0.67683 | 0.74867 | 0.75398 | 0.79485 | 0.7829  | 0.72944 | MKS1     |
| cg10729531 | 0.0389  | 0.03498 | 0.03613 | 0.03329 | 0.0275  | 0.03073 | 0.0323  | 0.03269 | 0.03207 | 0.02972 | TCFL5    |
| cg10730174 | 0.03905 | 0.04595 | 0.03855 | 0.04308 | 0.04452 | 0.05961 | 0.03543 | 0.03666 | 0.12694 | 0.04563 | PRRX1    |
| cg10730712 | 0.04337 | 0.04184 | 0.24888 | 0.50265 | 0.34305 | 0.30846 | 0.08789 | 0.84996 | 0.25192 | 0.1142  | COL23A1  |
| cg10731022 | 0.4043  | 0.02938 | 0.86461 | 0.90142 | 0.04021 | 0.02376 | 0.86784 | 0.5909  | 0.03409 | 0.02361 | EIF4EBP3 |
| cg10731149 | 0.06394 | 0.06165 | 0.07586 | 0.06489 | 0.06173 | 0.06719 | 0.06743 | 0.13491 | 0.05937 | 0.06007 | CYBRD1   |
| cg10732834 | 0.7474  | 0.71175 | 0.7068  | 0.73885 | 0.66909 | 0.68444 | 0.67492 | 0.73405 | 0.74571 | 0.71429 | KIAA1632 |
| cg10734665 | 0.90469 | 0.91189 | 0.63275 | 0.83453 | 0.57369 | 0.09189 | 0.21086 | 0.19875 | 0.79973 | 0.50782 | ATP10A   |
| cg10735116 | 0.02395 | 0.02303 | 0.02874 | 0.02308 | 0.0237  | 0.02238 | 0.02164 | 0.02332 | 0.0214  | 0.02427 | GPR89A   |
| cg10735607 | 0.94668 | 0.91441 | 0.7082  | 0.77986 | 0.74699 | 0.1548  | 0.55147 | 0.0484  | 0.47779 | 0.38783 | TMEM109  |
| cg10737521 | 0.943   | 0.72883 | 0.95963 | 0.95922 | 0.61667 | 0.05237 | 0.94328 | 0.70904 | 0.76453 | 0.38624 | KIAA0676 |
| cg10737625 | 0.06357 | 0.06773 | 0.06441 | 0.06281 | 0.04588 | 0.05505 | 0.06047 | 0.05558 | 0.05944 | 0.06435 | THAP6    |
| cg10740670 | 0.05297 | 0.03838 | 0.03625 | 0.03694 | 0.04362 | 0.05816 | 0.04137 | 0.04127 | 0.04334 | 0.04304 | FNTB     |
| cg10740965 | 0.02741 | 0.03845 | 0.04031 | 0.03072 | 0.02132 | 0.02644 | 0.02939 | 0.033   | 0.34721 | 0.03032 | CTNNBIP1 |
| cg10741369 | 0.13744 | 0.09975 | 0.42632 | 0.4121  | 0.38996 | 0.14041 | 0.37477 | 0.13873 | 0.13937 | 0.11162 | TRIM7    |
| cg10741760 | 0.30375 | 0.1145  | 0.62612 | 0.72622 | 0.88986 | 0.62073 | 0.11886 | 0.05013 | 0.19793 | 0.06856 | HTR6     |
| cg10742225 | 0.74658 | 0.44355 | 0.71016 | 0.70231 | 0.72747 | 0.78721 | 0.30517 | 0.3762  | 0.70622 | 0.38924 | KRT13    |
| cg10742801 | 0.11698 | 0.07587 | 0.74449 | 0.75983 | 0.80365 | 0.63892 | 0.1032  | 0.05777 | 0.48405 | 0.45876 | PRAP1    |
| cg10743104 | 0.6191  | 0.50313 | 0.1011  | 0.29073 | 0.03775 | 0.03623 | 0.04461 | 0.03592 | 0.03425 | 0.02719 | PDPN     |
| cg10746737 | 0.49436 | 0.15257 | 0.76307 | 0.82152 | 0.51194 | 0.42215 | 0.06515 | 0.06902 | 0.59654 | 0.36831 | HLA-DRB5 |
| cg10748867 | 0.51346 | 0.51114 | 0.70327 | 0.73266 | 0.62881 | 0.68603 | 0.45449 | 0.39764 | 0.76812 | 0.71548 | C1orf33  |
| cg10749011 | 0.03015 | 0.03024 | 0.0324  | 0.02729 | 0.02833 | 0.02749 | 0.02602 | 0.0281  | 0.02525 | 0.02391 | ITGA6    |
| cg10749413 | 0.03201 | 0.02958 | 0.03445 | 0.03115 | 0.81105 | 0.09237 | 0.02532 | 0.02557 | 0.81261 | 0.03286 | ABCA7    |
| cg10751811 | 0.12875 | 0.1054  | 0.1931  | 0.1537  | 0.18172 | 0.1506  | 0.38545 | 0.19478 | 0.12231 | 0.13269 | CYP4Z1   |
| cg10752753 | 0.18828 | 0.08241 | 0.14536 | 0.1721  | 0.17832 | 0.108   | 0.1886  | 0.08258 | 0.06841 | 0.05147 | SLC45A2  |
| cg10753073 | 0.82297 | 0.75922 | 0.81774 | 0.85632 | 0.68747 | 0.82917 | 0.84736 | 0.90443 | 0.8371  | 0.72961 | UBE2U    |
| cg10753582 | 0.04357 | 0.05283 | 0.04996 | 0.04984 | 0.03063 | 0.04834 | 0.04165 | 0.04323 | 0.04266 | 0.04504 | KIFAP3   |
| cg10756887 | 0.09381 | 0.06334 | 0.85835 | 0.87454 | 0.90163 | 0.85809 | 0.81996 | 0.74174 | 0.8478  | 0.29902 | C22orf15 |
| cg10757144 | 0.71867 | 0.13882 | 0.40642 | 0.59977 | 0.61289 | 0.53128 | 0.7086  | 0.64242 | 0.36288 | 0.11618 | PCDHB15  |
| cg10758292 | 0.14119 | 0.07856 | 0.16702 | 0.19422 | 0.13737 | 0.20861 | 0.56918 | 0.18218 | 0.05028 | 0.07566 | DEFA1    |

|            |         |         |         |         |         |         |         |         |         |         |          |
|------------|---------|---------|---------|---------|---------|---------|---------|---------|---------|---------|----------|
| cg10762132 | 0.02229 | 0.02155 | 0.0258  | 0.02211 | 0.0197  | 0.02148 | 0.02192 | 0.02021 | 0.01876 | 0.0189  | SLC20A1  |
| cg10762615 | 0.68171 | 0.55427 | 0.70174 | 0.70418 | 0.66007 | 0.86653 | 0.73502 | 0.70799 | 0.61384 | 0.54026 | FBXW10   |
| cg10763059 | 0.12446 | 0.08527 | 0.1832  | 0.30075 | 0.77628 | 0.34566 | 0.11101 | 0.08534 | 0.08441 | 0.05263 | PTPN12   |
| cg10763288 | 0.74325 | 0.06788 | 0.14365 | 0.14174 | 0.87267 | 0.57934 | 0.86032 | 0.44752 | 0.46759 | 0.22712 | DHCR7    |
| cg10764357 | 0.03537 | 0.03396 | 0.03253 | 0.03255 | 0.02392 | 0.02936 | 0.03149 | 0.02985 | 0.52547 | 0.49354 | BCAT1    |
| cg10766289 | 0.67228 | 0.6116  | 0.74077 | 0.77986 | 0.44232 | 0.41649 | 0.31735 | 0.48725 | 0.20939 | 0.16441 | KRT1     |
| cg10769011 | 0.87749 | 0.45132 | 0.87357 | 0.92334 | 0.9279  | 0.86228 | 0.85668 | 0.69574 | 0.86217 | 0.86999 | FOXN1    |
| cg10770524 | 0.19272 | 0.18858 | 0.27758 | 0.29254 | 0.23408 | 0.16626 | 0.24343 | 0.21839 | 0.37525 | 0.24702 | SMA3     |
| cg10770529 | 0.04346 | 0.03054 | 0.02926 | 0.02712 | 0.04206 | 0.03192 | 0.02421 | 0.02527 | 0.0255  | 0.02698 | ZNF274   |
| cg10771262 | 0.16002 | 0.39263 | 0.9219  | 0.93087 | 0.03355 | 0.07636 | 0.82671 | 0.19737 | 0.86708 | 0.2668  | TCF21    |
| cg10773309 | 0.09337 | 0.09125 | 0.12694 | 0.12756 | 0.10501 | 0.10972 | 0.11794 | 0.1033  | 0.10795 | 0.10918 | BAI2     |
| cg10773869 | 0.03092 | 0.03238 | 0.02769 | 0.03    | 0.028   | 0.02844 | 0.02392 | 0.02557 | 0.02679 | 0.02785 | GMCL1    |
| cg10774155 | 0.02118 | 0.02437 | 0.02599 | 0.02286 | 0.02375 | 0.03017 | 0.03021 | 0.02123 | 0.02    | 0.01724 | VKORC1L1 |
| cg10774440 | 0.73575 | 0.43068 | 0.79018 | 0.84712 | 0.80965 | 0.77379 | 0.78179 | 0.78837 | 0.83434 | 0.65454 | LEFTY1   |
| cg10775273 | 0.18203 | 0.01612 | 0.98176 | 0.98288 | 0.98416 | 0.98147 | 0.74101 | 0.63169 | 0.10416 | 0.01196 | CRYBA2   |
| cg10777851 | 0.18495 | 0.08313 | 0.24852 | 0.32804 | 0.15501 | 0.06735 | 0.08947 | 0.07641 | 0.08326 | 0.06687 | CD200    |
| cg10778415 | 0.05712 | 0.06743 | 0.09854 | 0.08073 | 0.20482 | 0.15757 | 0.07782 | 0.06195 | 0.0532  | 0.0483  | RSAFD1   |
| cg10778619 | 0.03343 | 0.03823 | 0.06804 | 0.0744  | 0.09682 | 0.04221 | 0.17688 | 0.0339  | 0.05087 | 0.05048 | KCNMB4   |
| cg10779183 | 0.35249 | 0.04005 | 0.3635  | 0.34919 | 0.3409  | 0.3247  | 0.41104 | 0.21385 | 0.43838 | 0.24175 | ELA3A    |
| cg10780112 | 0.07166 | 0.0728  | 0.07776 | 0.05902 | 0.04532 | 0.06205 | 0.07169 | 0.06465 | 0.06394 | 0.0626  | HEBP2    |
| cg10783042 | 0.16446 | 0.15979 | 0.1243  | 0.1059  | 0.19612 | 0.13191 | 0.21912 | 0.24063 | 0.12074 | 0.1416  | HDAC6    |
| cg10784030 | 0.90794 | 0.38492 | 0.80952 | 0.80369 | 0.06977 | 0.06588 | 0.06535 | 0.05522 | 0.8242  | 0.05869 | INPP5B   |
| cg10784067 | 0.06194 | 0.05183 | 0.09258 | 0.05788 | 0.07232 | 0.09605 | 0.05916 | 0.05213 | 0.04281 | 0.04854 | ERCC4    |
| cg10784090 | 0.83843 | 0.50512 | 0.80363 | 0.88296 | 0.74361 | 0.67768 | 0.48382 | 0.82627 | 0.05998 | 0.23808 | CLDN18   |
| cg10784341 | 0.10623 | 0.10175 | 0.77048 | 0.84123 | 0.8418  | 0.76775 | 0.11333 | 0.07974 | 0.82747 | 0.43198 | PHACTR2  |
| cg10784785 | 0.10233 | 0.07474 | 0.08133 | 0.07216 | 0.15219 | 0.08861 | 0.07082 | 0.06804 | 0.0797  | 0.05296 | SIAH1    |
| cg10784813 | 0.77969 | 0.04276 | 0.16011 | 0.35208 | 0.86647 | 0.29332 | 0.13781 | 0.03541 | 0.96074 | 0.22018 | SOCS1    |
| cg10784821 | 0.80902 | 0.54122 | 0.87996 | 0.87541 | 0.80734 | 0.83365 | 0.83287 | 0.85679 | 0.8627  | 0.77032 | COQ6     |
| cg10786622 | 0.05166 | 0.05515 | 0.05849 | 0.04837 | 0.04176 | 0.05126 | 0.04511 | 0.04772 | 0.05201 | 0.04936 | NUP153   |
| cg10786880 | 0.0195  | 0.02132 | 0.02117 | 0.01926 | 0.01666 | 0.01757 | 0.0182  | 0.01841 | 0.01725 | 0.01309 | PRKAA1   |
| cg10787197 | 0.61943 | 0.73419 | 0.83768 | 0.88635 | 0.92449 | 0.89725 | 0.31174 | 0.23449 | 0.75723 | 0.56241 | C6orf105 |
| cg10789261 | 0.71228 | 0.60811 | 0.73771 | 0.74414 | 0.70167 | 0.71779 | 0.70047 | 0.70854 | 0.78192 | 0.55781 | LARP5    |
| cg10791260 | 0.29852 | 0.08366 | 0.36995 | 0.52795 | 0.20635 | 0.06786 | 0.27662 | 0.08728 | 0.1095  | 0.04493 | TNFSF15  |
| cg10791955 | 0.02882 | 0.03029 | 0.03016 | 0.02829 | 0.03208 | 0.02511 | 0.02787 | 0.0268  | 0.02725 | 0.02236 | C6orf75  |
| cg10792326 | 0.09354 | 0.09515 | 0.08964 | 0.08065 | 0.06199 | 0.07493 | 0.08152 | 0.09479 | 0.07554 | 0.06887 | DNCL1    |
| cg10795646 | 0.10248 | 0.06684 | 0.48444 | 0.51937 | 0.40686 | 0.07138 | 0.09997 | 0.05963 | 0.09296 | 0.07167 | S100A10  |
| cg10796979 | 0.03274 | 0.02549 | 0.02873 | 0.02604 | 0.01704 | 0.03459 | 0.02424 | 0.02489 | 0.02583 | 0.02414 | LMBRD1   |
| cg10797195 | 0.06529 | 0.07125 | 0.08027 | 0.07366 | 0.0806  | 0.0683  | 0.14476 | 0.083   | 0.08201 | 0.05967 | TOE1     |
| cg10797910 | 0.04205 | 0.02622 | 0.02779 | 0.02937 | 0.02107 | 0.0267  | 0.02348 | 0.0232  | 0.02434 | 0.01772 | SNF1LK2  |
| cg10798171 | 0.32326 | 0.2697  | 0.76285 | 0.86943 | 0.84307 | 0.84759 | 0.51597 | 0.38538 | 0.77356 | 0.71262 | ICA1     |
| cg10801213 | 0.03428 | 0.03142 | 0.09007 | 0.08888 | 0.06444 | 0.05473 | 0.03939 | 0.04034 | 0.04147 | 0.03497 | SLC7A3   |

|            |         |         |         |         |         |         |         |         |         |         |           |
|------------|---------|---------|---------|---------|---------|---------|---------|---------|---------|---------|-----------|
| cg10801369 | 0.89168 | 0.89594 | 0.80857 | 0.83943 | 0.81823 | 0.67429 | 0.41263 | 0.28228 | 0.90902 | 0.76699 | RFFL      |
| cg10805447 | 0.03739 | 0.04419 | 0.03609 | 0.03985 | 0.03131 | 0.03796 | 0.03442 | 0.03552 | 0.03132 | 0.03292 | ZNF297B   |
| cg10805667 | 0.03163 | 0.03492 | 0.0348  | 0.0386  | 0.03346 | 0.03233 | 0.02936 | 0.02588 | 0.02696 | 0.02462 | FLJ20625  |
| cg10805676 | 0.92425 | 0.88865 | 0.91543 | 0.9277  | 0.94939 | 0.88005 | 0.91712 | 0.89105 | 0.93165 | 0.90731 | MRPL28    |
| cg10806140 | 0.04755 | 0.04401 | 0.06953 | 0.05343 | 0.0356  | 0.03872 | 0.03963 | 0.04127 | 0.10368 | 0.0369  | SFRP4     |
| cg10807560 | 0.08531 | 0.07366 | 0.84847 | 0.8745  | 0.86326 | 0.85372 | 0.85896 | 0.85221 | 0.81912 | 0.82251 | SLC8A1    |
| cg10809441 | 0.03578 | 0.04034 | 0.04244 | 0.03586 | 0.02883 | 0.03669 | 0.03717 | 0.03704 | 0.03384 | 0.03318 | DHX8      |
| cg10810921 | 0.01755 | 0.01875 | 0.02351 | 0.02039 | 0.01847 | 0.01561 | 0.01575 | 0.08453 | 0.01447 | 0.01273 | CRLF1     |
| cg10812811 | 0.03175 | 0.03703 | 0.03755 | 0.03625 | 0.13846 | 0.05807 | 0.03163 | 0.03062 | 0.02791 | 0.02478 | C20orf112 |
| cg10814135 | 0.04163 | 0.04121 | 0.04583 | 0.04288 | 0.05331 | 0.05219 | 0.04321 | 0.042   | 0.03925 | 0.04062 | ASPSCR1   |
| cg10818284 | 0.0516  | 0.04347 | 0.03687 | 0.03318 | 0.04133 | 0.04555 | 0.477   | 0.14815 | 0.02904 | 0.03484 | SYP       |
| cg10818781 | 0.65532 | 0.13636 | 0.62317 | 0.59902 | 0.40451 | 0.16978 | 0.70709 | 0.50522 | 0.8376  | 0.63389 | PHB2      |
| cg10819446 | 0.04698 | 0.03073 | 0.09241 | 0.06273 | 0.13776 | 0.03123 | 0.05771 | 0.03093 | 0.0441  | 0.0236  | PARD6A    |
| cg10821722 | 0.65345 | 0.70268 | 0.9339  | 0.9401  | 0.94578 | 0.76167 | 0.93008 | 0.86893 | 0.95286 | 0.87354 | MAP4K2    |
| cg10822116 | 0.23302 | 0.18636 | 0.21645 | 0.21738 | 0.15858 | 0.0989  | 0.20299 | 0.1822  | 0.15767 | 0.16274 | TLN1      |
| cg10822172 | 0.63147 | 0.17353 | 0.27627 | 0.26701 | 0.1875  | 0.12533 | 0.13449 | 0.11062 | 0.14641 | 0.14387 | CREB5     |
| cg10823157 | 0.04421 | 0.03713 | 0.05975 | 0.06183 | 0.07007 | 0.06969 | 0.04005 | 0.03221 | 0.04369 | 0.05531 | ATP9B     |
| cg10823546 | 0.06441 | 0.06348 | 0.06006 | 0.0564  | 0.05243 | 0.05362 | 0.04883 | 0.04207 | 0.04839 | 0.04359 | MAK10     |
| cg10823926 | 0.03248 | 0.03345 | 0.05999 | 0.08274 | 0.02853 | 0.03512 | 0.02467 | 0.02413 | 0.02762 | 0.03233 | ANKRD35   |
| cg10829134 | 0.02698 | 0.02752 | 0.02633 | 0.02638 | 0.02429 | 0.02486 | 0.02545 | 0.02288 | 0.01877 | 0.02139 | ZA20D3    |
| cg10829427 | 0.04674 | 0.0445  | 0.04275 | 0.04254 | 0.03944 | 0.03815 | 0.03351 | 0.03543 | 0.04025 | 0.03582 | RPUSD3    |
| cg10830758 | 0.04611 | 0.04956 | 0.04999 | 0.055   | 0.02922 | 0.04022 | 0.04201 | 0.04111 | 0.04425 | 0.04098 | C10orf4   |
| cg10832166 | 0.53478 | 0.59821 | 0.53314 | 0.66913 | 0.3689  | 0.1989  | 0.46489 | 0.45262 | 0.70058 | 0.66412 | PWCR1     |
| cg10832945 | 0.39225 | 0.25123 | 0.338   | 0.50888 | 0.57788 | 0.70412 | 0.1258  | 0.10297 | 0.2279  | 0.15589 | FLJ45964  |
| cg10833014 | 0.02826 | 0.03397 | 0.03131 | 0.02798 | 0.05426 | 0.03059 | 0.0258  | 0.02694 | 0.02766 | 0.02579 | HSP90AA1  |
| cg10833091 | 0.03727 | 0.05845 | 0.06309 | 0.06258 | 0.10356 | 0.07728 | 0.04349 | 0.04809 | 0.04794 | 0.0408  | C7orf23   |
| cg10833576 | 0.03558 | 0.03599 | 0.03492 | 0.03797 | 0.031   | 0.03898 | 0.03616 | 0.03648 | 0.02761 | 0.02505 | ANKRA2    |
| cg10834439 | 0.03439 | 0.03463 | 0.04607 | 0.03542 | 0.02715 | 0.03747 | 0.0342  | 0.03442 | 0.02915 | 0.03203 | ZNHIT4    |
| cg10834677 | 0.4887  | 0.30221 | 0.75851 | 0.80183 | 0.7858  | 0.80215 | 0.34613 | 0.60627 | 0.78569 | 0.5831  | FAM19A3   |
| cg10835876 | 0.78796 | 0.71069 | 0.71074 | 0.77764 | 0.72491 | 0.76576 | 0.73553 | 0.77048 | 0.78407 | 0.76466 | DPT       |
| cg10837843 | 0.04948 | 0.05173 | 0.05027 | 0.04263 | 0.34501 | 0.05527 | 0.04891 | 0.05251 | 0.86302 | 0.47359 | DUSP1     |
| cg10839521 | 0.04148 | 0.04477 | 0.07009 | 0.06668 | 0.38685 | 0.40828 | 0.05983 | 0.03807 | 0.04095 | 0.03434 | FLJ32786  |
| cg10839723 | 0.13086 | 0.15098 | 0.11364 | 0.11517 | 0.10129 | 0.10152 | 0.10396 | 0.38058 | 0.10816 | 0.09104 | TBL1X     |
| cg10839997 | 0.24652 | 0.14887 | 0.02866 | 0.02368 | 0.0415  | 0.03611 | 0.27513 | 0.31346 | 0.08581 | 0.02461 | B3GNT6    |
| cg10840135 | 0.5274  | 0.38054 | 0.51185 | 0.60336 | 0.57255 | 0.50937 | 0.68494 | 0.50316 | 0.27889 | 0.50544 | CYP2D6    |
| cg10840864 | 0.63932 | 0.67708 | 0.85048 | 0.86726 | 0.81028 | 0.84047 | 0.57568 | 0.56287 | 0.88146 | 0.85511 | PSMC5     |
| cg10841258 | 0.14979 | 0.14858 | 0.20325 | 0.23103 | 0.17575 | 0.09171 | 0.10912 | 0.11938 | 0.13629 | 0.15034 | CTTNBP2NL |
| cg10844844 | 0.12117 | 0.05074 | 0.22873 | 0.28704 | 0.2581  | 0.11993 | 0.06421 | 0.04999 | 0.13485 | 0.10087 | KCNK5     |
| cg10845200 | 0.01833 | 0.02005 | 0.12208 | 0.15705 | 0.01723 | 0.0164  | 0.01824 | 0.01729 | 0.01666 | 0.0173  | DRD1IP    |
| cg10846410 | 0.66018 | 0.53687 | 0.75364 | 0.7928  | 0.54925 | 0.61885 | 0.63941 | 0.68214 | 0.70805 | 0.62761 | HSPA2     |
| cg10846922 | 0.80804 | 0.64952 | 0.73208 | 0.76119 | 0.80325 | 0.7164  | 0.81698 | 0.82164 | 0.35424 | 0.40016 | RAB9P1    |

|            |         |         |         |         |         |         |         |         |         |                  |
|------------|---------|---------|---------|---------|---------|---------|---------|---------|---------|------------------|
| cg10847798 | 0.08666 | 0.08639 | 0.08249 | 0.09052 | 0.04615 | 0.07438 | 0.0759  | 0.07545 | 0.07906 | 0.07435 LAMC1    |
| cg10848367 | 0.07487 | 0.07394 | 0.09637 | 0.06974 | 0.13697 | 0.06799 | 0.07406 | 0.06762 | 0.06416 | 0.14284 SCGB1D2  |
| cg10849854 | 0.80906 | 0.48711 | 0.70424 | 0.74068 | 0.7152  | 0.7337  | 0.20636 | 0.12549 | 0.20903 | 0.16408 GREB1    |
| cg10850119 | 0.1003  | 0.04018 | 0.0317  | 0.03251 | 0.02706 | 0.03502 | 0.0352  | 0.03076 | 0.0291  | 0.02299 FBXO4    |
| cg10850580 | 0.04614 | 0.05292 | 0.06695 | 0.06549 | 0.07376 | 0.05408 | 0.03228 | 0.03113 | 0.04691 | 0.04933 RBAF600  |
| cg10851775 | 0.75428 | 0.73867 | 0.67882 | 0.72027 | 0.68614 | 0.65841 | 0.69379 | 0.72465 | 0.75229 | 0.70261 SLC26A7  |
| cg10853416 | 0.80027 | 0.73181 | 0.79336 | 0.81174 | 0.55454 | 0.40525 | 0.0773  | 0.07168 | 0.56459 | 0.495 MS4A7      |
| cg10857345 | 0.32053 | 0.24657 | 0.64308 | 0.84561 | 0.88125 | 0.75129 | 0.12894 | 0.1268  | 0.82751 | 0.31512 TEX13B   |
| cg10857774 | 0.81721 | 0.4972  | 0.25335 | 0.42878 | 0.09314 | 0.05921 | 0.04469 | 0.5226  | 0.0676  | 0.03791 DMPK     |
| cg10857807 | 0.01434 | 0.01658 | 0.01719 | 0.01665 | 0.01445 | 0.01541 | 0.01364 | 0.01302 | 0.01147 | 0.01103 MAD1L1   |
| cg10861017 | 0.10164 | 0.09344 | 0.14117 | 0.11568 | 0.09225 | 0.08938 | 0.08782 | 0.08342 | 0.0825  | 0.07026 ZNF420   |
| cg10861599 | 0.37444 | 0.42508 | 0.81095 | 0.82505 | 0.79857 | 0.84575 | 0.80199 | 0.80316 | 0.82931 | 0.8135 TNFSF4    |
| cg10861751 | 0.8473  | 0.85357 | 0.82832 | 0.85651 | 0.83203 | 0.45423 | 0.81952 | 0.59733 | 0.27535 | 0.13601 RGS1     |
| cg10862535 | 0.66583 | 0.60555 | 0.89495 | 0.91759 | 0.92417 | 0.92939 | 0.63669 | 0.52302 | 0.69439 | 0.60721 PGLYRP1  |
| cg10862587 | 0.15413 | 0.23866 | 0.08664 | 0.09101 | 0.06962 | 0.04081 | 0.04552 | 0.04123 | 0.06313 | 0.03923 GLB1L    |
| cg10862848 | 0.93292 | 0.93053 | 0.92803 | 0.93704 | 0.91991 | 0.89375 | 0.9384  | 0.94006 | 0.94328 | 0.90958 GNMT     |
| cg10863038 | 0.02894 | 0.02856 | 0.02873 | 0.02623 | 0.02387 | 0.02298 | 0.02466 | 0.02368 | 0.02455 | 0.02202 OBFC2A   |
| cg10864286 | 0.10535 | 0.05181 | 0.05393 | 0.0589  | 0.04326 | 0.04379 | 0.04594 | 0.27523 | 0.04238 | 0.03565 CXorf22  |
| cg10864501 | 0.0786  | 0.08588 | 0.12779 | 0.10857 | 0.17647 | 0.14701 | 0.13309 | 0.12602 | 0.13562 | 0.16395 POLDIP3  |
| cg10864941 | 0.74836 | 0.73758 | 0.80516 | 0.85951 | 0.70031 | 0.81446 | 0.38083 | 0.13426 | 0.12418 | 0.12739 LYZL4    |
| cg10865119 | 0.1721  | 0.0747  | 0.19336 | 0.25504 | 0.14448 | 0.09484 | 0.19199 | 0.10796 | 0.28632 | 0.07462 C6orf208 |
| cg10866709 | 0.05657 | 0.0551  | 0.047   | 0.0539  | 0.48275 | 0.6208  | 0.09162 | 0.15692 | 0.04366 | 0.04439 GATA4    |
| cg10869069 | 0.1156  | 0.09797 | 0.08485 | 0.08672 | 0.06976 | 0.0794  | 0.08673 | 0.08216 | 0.07861 | 0.07402 ASCC3    |
| cg10869376 | 0.04114 | 0.04452 | 0.05212 | 0.04008 | 0.03974 | 0.05503 | 0.03821 | 0.03429 | 0.03232 | 0.03855 MRPS31   |
| cg10871523 | 0.0423  | 0.03797 | 0.04247 | 0.03854 | 0.05142 | 0.05762 | 0.03792 | 0.03542 | 0.03116 | 0.03334 FLJ30655 |
| cg10872209 | 0.26997 | 0.05878 | 0.28057 | 0.37736 | 0.16846 | 0.08146 | 0.58747 | 0.08933 | 0.38327 | 0.07403 ARL3     |
| cg10872212 | 0.04381 | 0.05065 | 0.08347 | 0.04509 | 0.42666 | 0.5668  | 0.05122 | 0.03432 | 0.03219 | 0.02894 KLHDC8B  |
| cg10872447 | 0.02165 | 0.02823 | 0.02531 | 0.02492 | 0.02334 | 0.0292  | 0.02171 | 0.01859 | 0.01702 | 0.01993 GTF2F2   |
| cg10874403 | 0.5125  | 0.31894 | 0.56502 | 0.69731 | 0.53454 | 0.67146 | 0.46063 | 0.58461 | 0.45932 | 0.45552 POU1F1   |
| cg10876928 | 0.19296 | 0.05685 | 0.11044 | 0.17159 | 0.09883 | 0.03727 | 0.18903 | 0.04641 | 0.25994 | 0.03308 SDC4     |
| cg10878307 | 0.80845 | 0.538   | 0.64002 | 0.573   | 0.91998 | 0.77865 | 0.67512 | 0.1889  | 0.85829 | 0.74062 ATAD4    |
| cg10878896 | 0.03058 | 0.03071 | 0.06404 | 0.10923 | 0.03501 | 0.03839 | 0.04729 | 0.03361 | 0.03663 | 0.03079 CS       |
| cg10878998 | 0.1174  | 0.04871 | 0.15883 | 0.18756 | 0.7913  | 0.85412 | 0.06149 | 0.03171 | 0.11543 | 0.03249 CYB5A    |
| cg10880863 | 0.06951 | 0.07315 | 0.08679 | 0.06688 | 0.04761 | 0.06764 | 0.06324 | 0.07357 | 0.06195 | 0.07132 SEC8L1   |
| cg10881306 | 0.07964 | 0.0803  | 0.06571 | 0.06169 | 0.0476  | 0.05649 | 0.0453  | 0.05082 | 0.0537  | 0.04294 CRIM1    |
| cg10882227 | 0.26424 | 0.23406 | 0.28358 | 0.46168 | 0.21311 | 0.11881 | 0.31873 | 0.20012 | 0.08099 | 0.07564 APLP2    |
| cg10883303 | 0.03634 | 0.03139 | 0.04491 | 0.04237 | 0.6936  | 0.65554 | 0.02955 | 0.03247 | 0.06625 | 0.10662 HOXA13   |
| cg10883352 | 0.30645 | 0.75109 | 0.86666 | 0.92718 | 0.37583 | 0.8806  | 0.34336 | 0.85901 | 0.52244 | 0.38359          |
| cg10883621 | 0.54821 | 0.4091  | 0.46997 | 0.63236 | 0.84207 | 0.84413 | 0.28867 | 0.29296 | 0.32294 | 0.29406 MGC16372 |
| cg10885338 | 0.92736 | 0.90864 | 0.90144 | 0.94772 | 0.96472 | 0.92282 | 0.87754 | 0.54392 | 0.93455 | 0.93308 ECRG4    |
| cg10885645 | 0.03115 | 0.03724 | 0.03826 | 0.03317 | 0.60193 | 0.1874  | 0.02839 | 0.02913 | 0.03649 | 0.03125 CLSTN3   |

|            |         |         |         |         |         |         |         |         |         |         |          |
|------------|---------|---------|---------|---------|---------|---------|---------|---------|---------|---------|----------|
| cg10887021 | 0.10914 | 0.08548 | 0.41721 | 0.47963 | 0.12646 | 0.26989 | 0.12283 | 0.08097 | 0.08883 | 0.08578 | PCDHB2   |
| cg10887392 | 0.03283 | 0.04027 | 0.03816 | 0.03197 | 0.02933 | 0.02443 | 0.06994 | 0.03412 | 0.02436 | 0.0255  | CTDSP1   |
| cg10889070 | 0.12138 | 0.05416 | 0.21357 | 0.12251 | 0.41769 | 0.41955 | 0.0966  | 0.09195 | 0.08944 | 0.06875 | RNPS1    |
| cg10889792 | 0.42991 | 0.27011 | 0.40346 | 0.43035 | 0.87965 | 0.67853 | 0.0625  | 0.0338  | 0.11032 | 0.15167 | KRTAP5-9 |
| cg10891025 | 0.02856 | 0.03513 | 0.03566 | 0.02855 | 0.02371 | 0.02969 | 0.03231 | 0.03637 | 0.03945 | 0.03157 | EIF3S1   |
| cg10891157 | 0.04774 | 0.04675 | 0.04312 | 0.04188 | 0.04082 | 0.042   | 0.04423 | 0.03953 | 0.04145 | 0.03795 | CRTAP    |
| cg10891879 | 0.07617 | 0.07675 | 0.06456 | 0.08226 | 0.06913 | 0.04858 | 0.05437 | 0.09067 | 0.04933 | 0.05082 | CASZ1    |
| cg10892866 | 0.02896 | 0.0291  | 0.03167 | 0.03072 | 0.02147 | 0.02353 | 0.02223 | 0.023   | 0.02263 | 0.02017 | PYGO2    |
| cg10893007 | 0.04726 | 0.04628 | 0.07995 | 0.06887 | 0.0947  | 0.06148 | 0.07544 | 0.05695 | 0.05454 | 0.0663  | NBR2     |
| cg10893437 | 0.15683 | 0.19094 | 0.25963 | 0.20666 | 0.12176 | 0.1201  | 0.32373 | 0.12386 | 0.08943 | 0.07394 | C13orf8  |
| cg10894102 | 0.04178 | 0.04951 | 0.05257 | 0.05414 | 0.06428 | 0.04074 | 0.05563 | 0.05078 | 0.04893 | 0.04582 | CLIC4    |
| cg10894453 | 0.06196 | 0.06847 | 0.77629 | 0.83187 | 0.89028 | 0.88199 | 0.49455 | 0.83514 | 0.15154 | 0.04328 | ITM2A    |
| cg10894512 | 0.69121 | 0.68909 | 0.83735 | 0.85088 | 0.24152 | 0.3648  | 0.10422 | 0.18421 | 0.6302  | 0.58621 | ACTA2    |
| cg10895130 | 0.75694 | 0.70817 | 0.85632 | 0.87097 | 0.80107 | 0.8303  | 0.84662 | 0.77132 | 0.7968  | 0.82975 | BNIP1    |
| cg10895543 | 0.44253 | 0.47515 | 0.42889 | 0.42691 | 0.42421 | 0.38736 | 0.89633 | 0.90588 | 0.93905 | 0.92903 | CDKN2A   |
| cg10896774 | 0.03754 | 0.03802 | 0.05496 | 0.04452 | 0.03829 | 0.05288 | 0.03367 | 0.03769 | 0.03103 | 0.03721 | C7orf34  |
| cg10896886 | 0.05902 | 0.04374 | 0.0682  | 0.06837 | 0.06284 | 0.06113 | 0.03886 | 0.0344  | 0.03505 | 0.02543 | ACTR3B   |
| cg10897648 | 0.08864 | 0.03902 | 0.04183 | 0.04516 | 0.02888 | 0.0305  | 0.02698 | 0.03128 | 0.02995 | 0.02807 | MALT1    |
| cg10900550 | 0.0932  | 0.07664 | 0.24583 | 0.274   | 0.18455 | 0.24776 | 0.06469 | 0.0664  | 0.2365  | 0.22975 | TDRD7    |
| cg10904672 | 0.79333 | 0.70802 | 0.81398 | 0.86044 | 0.68187 | 0.77599 | 0.49625 | 0.49277 | 0.34844 | 0.29834 | FCGR1A   |
| cg10905613 | 0.04471 | 0.04811 | 0.05452 | 0.05322 | 0.03782 | 0.03733 | 0.03544 | 0.03769 | 0.04338 | 0.03824 | GPS2     |
| cg10905918 | 0.0852  | 0.09248 | 0.09917 | 0.10167 | 0.10624 | 0.09571 | 0.09499 | 0.08593 | 0.08292 | 0.0821  | RPS24    |
| cg10906135 | 0.81917 | 0.81278 | 0.81565 | 0.83    | 0.76033 | 0.80005 | 0.81502 | 0.82569 | 0.85396 | 0.84327 | GLTSCR1  |
| cg10906552 | 0.03622 | 0.0369  | 0.04159 | 0.03673 | 0.03438 | 0.03106 | 0.03237 | 0.03651 | 0.03565 | 0.03389 | IL1RAP   |
| cg10906663 | 0.6362  | 0.49365 | 0.66188 | 0.7369  | 0.70692 | 0.69969 | 0.21928 | 0.44626 | 0.43748 | 0.2972  | PHEX     |
| cg10907112 | 0.18856 | 0.28704 | 0.22926 | 0.19473 | 0.37649 | 0.62912 | 0.12542 | 0.16541 | 0.12793 | 0.18834 | POF1B    |
| cg10908369 | 0.03287 | 0.03195 | 0.04079 | 0.033   | 0.03033 | 0.0305  | 0.02984 | 0.031   | 0.0281  | 0.02679 | C2orf32  |
| cg10909324 | 0.04956 | 0.05331 | 0.051   | 0.0463  | 0.0489  | 0.05147 | 0.04574 | 0.04578 | 0.04085 | 0.04069 | EHMT2    |
| cg10910525 | 0.68888 | 0.44169 | 0.5585  | 0.68056 | 0.43444 | 0.48415 | 0.49354 | 0.48163 | 0.06642 | 0.03059 | HRC      |
| cg10910775 | 0.53522 | 0.42591 | 0.50559 | 0.56636 | 0.49611 | 0.4756  | 0.235   | 0.23766 | 0.23855 | 0.21913 | CDC27    |
| cg10911660 | 0.05329 | 0.05164 | 0.85956 | 0.92327 | 0.1824  | 0.06807 | 0.05052 | 0.05219 | 0.04433 | 0.03562 | ZNF585A  |
| cg10911877 | 0.06905 | 0.04901 | 0.06022 | 0.05448 | 0.05117 | 0.04339 | 0.04846 | 0.04799 | 0.05357 | 0.0445  | PAFAH1B1 |
| cg10912077 | 0.04677 | 0.05223 | 0.05073 | 0.04631 | 0.03519 | 0.04372 | 0.04818 | 0.04982 | 0.04477 | 0.04389 | LMO4     |
| cg10912268 | 0.05282 | 0.05376 | 0.05843 | 0.05385 | 0.03911 | 0.04592 | 0.04503 | 0.05129 | 0.03714 | 0.04578 | SPTLC1   |
| cg10913563 | 0.04588 | 0.04609 | 0.05265 | 0.04607 | 0.044   | 0.03614 | 0.04178 | 0.03888 | 0.04008 | 0.0363  | C8orf55  |
| cg10917602 | 0.80737 | 0.39026 | 0.7081  | 0.68782 | 0.80131 | 0.74933 | 0.80511 | 0.7907  | 0.88774 | 0.82745 | HSD3B7   |
| cg10917619 | 0.0657  | 0.10289 | 0.1508  | 0.14835 | 0.19611 | 0.11755 | 0.15199 | 0.25117 | 0.11378 | 0.09226 | NRXN1    |
| cg10918202 | 0.10742 | 0.06714 | 0.13398 | 0.41172 | 0.52666 | 0.65036 | 0.06684 | 0.04386 | 0.20486 | 0.08243 | BAALC    |
| cg10918419 | 0.03483 | 0.03256 | 0.06682 | 0.05575 | 0.10394 | 0.0314  | 0.05518 | 0.04088 | 0.04089 | 0.02846 | C8orf55  |
| cg10918927 | 0.02482 | 0.02364 | 0.02645 | 0.02406 | 0.02407 | 0.02227 | 0.0253  | 0.02636 | 0.02133 | 0.02089 | HOXC4    |
| cg10919204 | 0.85498 | 0.6504  | 0.85416 | 0.88615 | 0.82348 | 0.84606 | 0.08564 | 0.07374 | 0.64299 | 0.56887 | CDH6     |



|            |         |         |         |         |         |         |         |         |         |         |           |
|------------|---------|---------|---------|---------|---------|---------|---------|---------|---------|---------|-----------|
| cg10919329 | 0.02847 | 0.03436 | 0.03391 | 0.0337  | 0.0309  | 0.03538 | 0.02591 | 0.02856 | 0.02602 | 0.02811 | SLC35A1   |
| cg10920302 | 0.03497 | 0.03647 | 0.03319 | 0.03274 | 0.03259 | 0.04262 | 0.0263  | 0.02548 | 0.02852 | 0.0289  | LARS2     |
| cg10920427 | 0.04336 | 0.04543 | 0.05997 | 0.05891 | 0.04698 | 0.055   | 0.04216 | 0.0405  | 0.04622 | 0.04412 | BXDC1     |
| cg10920765 | 0.24618 | 0.22785 | 0.61132 | 0.51897 | 0.51055 | 0.34939 | 0.30074 | 0.2611  | 0.22695 | 0.40932 | HBG2      |
| cg10920957 | 0.0641  | 0.0451  | 0.78347 | 0.71561 | 0.66932 | 0.57128 | 0.64805 | 0.70659 | 0.03671 | 0.34649 | JPH3      |
| cg10922163 | 0.06978 | 0.07488 | 0.0749  | 0.07115 | 0.07064 | 0.054   | 0.04951 | 0.05058 | 0.05654 | 0.06345 | C9orf23   |
| cg10922280 | 0.56345 | 0.18911 | 0.6417  | 0.79571 | 0.78609 | 0.79573 | 0.46097 | 0.39535 | 0.25506 | 0.20528 | DPEP2     |
| cg10922622 | 0.04244 | 0.02977 | 0.03705 | 0.03475 | 0.03053 | 0.03118 | 0.02808 | 0.02805 | 0.02961 | 0.02502 | FSD1NL    |
| cg10923408 | 0.74661 | 0.60978 | 0.72812 | 0.82664 | 0.51202 | 0.20885 | 0.45475 | 0.19766 | 0.7966  | 0.6749  | MGC40178  |
| cg10925082 | 0.09942 | 0.10323 | 0.17198 | 0.22302 | 0.78503 | 0.60879 | 0.65877 | 0.70791 | 0.76431 | 0.58683 | ARHGDI8   |
| cg10926623 | 0.04075 | 0.04468 | 0.04711 | 0.04998 | 0.0335  | 0.04251 | 0.03428 | 0.03454 | 0.05008 | 0.03727 | L1CAM     |
| cg10927536 | 0.03148 | 0.03545 | 0.03421 | 0.03235 | 0.03139 | 0.03802 | 0.03616 | 0.03254 | 0.03375 | 0.0318  | LOC402055 |
| cg10929387 | 0.80323 | 0.58133 | 0.86188 | 0.89212 | 0.85839 | 0.81871 | 0.6902  | 0.54105 | 0.62626 | 0.39517 | ITIH4     |
| cg10934032 | 0.3698  | 0.13239 | 0.15584 | 0.13837 | 0.22154 | 0.1451  | 0.10207 | 0.09048 | 0.39991 | 0.10519 | RNASE6    |
| cg10935064 | 0.96459 | 0.96545 | 0.95846 | 0.95954 | 0.96228 | 0.95998 | 0.96637 | 0.96146 | 0.96965 | 0.96925 | SYCP3     |
| cg10935550 | 0.02767 | 0.02682 | 0.02988 | 0.02651 | 0.02313 | 0.02449 | 0.0237  | 0.02233 | 0.02143 | 0.01873 | BTG2      |
| cg10935709 | 0.03395 | 0.03514 | 0.0495  | 0.04125 | 0.03471 | 0.03705 | 0.03399 | 0.03197 | 0.02694 | 0.02937 | CBWD1     |
| cg10935723 | 0.12805 | 0.12304 | 0.43659 | 0.52476 | 0.77914 | 0.786   | 0.22556 | 0.12247 | 0.69868 | 0.57453 | KCNK10    |
| cg10936230 | 0.33919 | 0.1161  | 0.18363 | 0.16743 | 0.19412 | 0.10597 | 0.16621 | 0.12342 | 0.21345 | 0.10532 | RAB27A    |
| cg10936763 | 0.0472  | 0.04388 | 0.05054 | 0.04876 | 0.04603 | 0.04759 | 0.0404  | 0.04559 | 0.04166 | 0.03971 | CDKN1A    |
| cg10938286 | 0.80181 | 0.89408 | 0.88835 | 0.92216 | 0.90465 | 0.91113 | 0.21094 | 0.09573 | 0.39828 | 0.37263 | CST2      |
| cg10938446 | 0.84027 | 0.84754 | 0.85745 | 0.8726  | 0.85357 | 0.86087 | 0.74122 | 0.80491 | 0.85564 | 0.86004 | IL1RN     |
| cg10938486 | 0.24279 | 0.34875 | 0.42644 | 0.59263 | 0.25556 | 0.10786 | 0.10595 | 0.09109 | 0.47861 | 0.49225 | FLJ20581  |
| cg10940099 | 0.0356  | 0.03686 | 0.03607 | 0.03566 | 0.02734 | 0.03054 | 0.0288  | 0.02789 | 0.02969 | 0.02746 | CD164     |
| cg10940418 | 0.18588 | 0.12785 | 0.541   | 0.79319 | 0.35064 | 0.11784 | 0.19815 | 0.07759 | 0.86589 | 0.76928 | SLC39A7   |
| cg10942056 | 0.2125  | 0.16241 | 0.80427 | 0.88442 | 0.68887 | 0.07765 | 0.24347 | 0.06271 | 0.91107 | 0.67805 | DISP1     |
| cg10943191 | 0.08572 | 0.03713 | 0.69405 | 0.92105 | 0.80114 | 0.81072 | 0.33065 | 0.04725 | 0.19344 | 0.03184 | TMEM52    |
| cg10944783 | 0.02928 | 0.03052 | 0.03881 | 0.0289  | 0.02786 | 0.03272 | 0.03498 | 0.02722 | 0.03695 | 0.0257  | TBPIP     |
| cg10946435 | 0.05897 | 0.05501 | 0.60729 | 0.68618 | 0.37327 | 0.14307 | 0.05152 | 0.04288 | 0.0547  | 0.04146 | KCNN3     |
| cg10947146 | 0.02611 | 0.02624 | 0.02723 | 0.02515 | 0.21285 | 0.02769 | 0.87276 | 0.9689  | 0.02162 | 0.0215  | XKR6      |
| cg10948777 | 0.02046 | 0.02602 | 0.02514 | 0.02203 | 0.01678 | 0.01892 | 0.01793 | 0.01887 | 0.0224  | 0.01763 | DNM2      |
| cg10948883 | 0.02431 | 0.02162 | 0.02095 | 0.02038 | 0.02263 | 0.0232  | 0.02287 | 0.02207 | 0.01871 | 0.01965 | DDX41     |
| cg10949322 | 0.04084 | 0.04252 | 0.04223 | 0.03964 | 0.03659 | 0.03229 | 0.03366 | 0.03606 | 0.03214 | 0.03162 | CUL2      |
| cg10950297 | 0.03809 | 0.04554 | 0.06225 | 0.06082 | 0.05307 | 0.04794 | 0.48547 | 0.4408  | 0.04412 | 0.04677 | EFNB1     |
| cg10951619 | 0.29319 | 0.21493 | 0.26392 | 0.1074  | 0.44418 | 0.19598 | 0.18469 | 0.1104  | 0.2773  | 0.31398 | FAM5C     |
| cg10954182 | 0.43173 | 0.18274 | 0.66744 | 0.65652 | 0.40554 | 0.28616 | 0.42874 | 0.19787 | 0.10397 | 0.04268 | NFYB      |
| cg10957151 | 0.32162 | 0.10775 | 0.14023 | 0.11326 | 0.8074  | 0.45583 | 0.13084 | 0.0809  | 0.09716 | 0.07764 | HOXD9     |
| cg10957200 | 0.04373 | 0.03361 | 0.03853 | 0.0343  | 0.02672 | 0.03365 | 0.03521 | 0.03102 | 0.02197 | 0.02702 | HSPA14    |
| cg10957584 | 0.02796 | 0.02679 | 0.03487 | 0.03545 | 0.02984 | 0.03017 | 0.03266 | 0.02617 | 0.02397 | 0.0303  | FAM86A    |
| cg10957680 | 0.06073 | 0.04939 | 0.08892 | 0.07585 | 0.07535 | 0.07593 | 0.05108 | 0.04616 | 0.05701 | 0.06384 | G1P3      |
| cg10958402 | 0.05513 | 0.05694 | 0.06647 | 0.05465 | 0.05332 | 0.05537 | 0.04629 | 0.04419 | 0.05172 | 0.05658 | RNF7      |

|            |         |         |         |         |         |         |         |         |         |                   |
|------------|---------|---------|---------|---------|---------|---------|---------|---------|---------|-------------------|
| cg10959933 | 0.14076 | 0.12394 | 0.14035 | 0.13079 | 0.23823 | 0.09267 | 0.24266 | 0.07806 | 0.14131 | 0.0914 C15orf39   |
| cg10960626 | 0.66559 | 0.5     | 0.70207 | 0.74879 | 0.65827 | 0.82025 | 0.74202 | 0.52494 | 0.67488 | 0.70672 C8orf45   |
| cg10960946 | 0.02249 | 0.02004 | 0.02195 | 0.02058 | 0.01709 | 0.01689 | 0.01872 | 0.01967 | 0.01645 | 0.01368 UBE2I     |
| cg10962407 | 0.03325 | 0.0254  | 0.06499 | 0.04171 | 0.02479 | 0.03352 | 0.01773 | 0.02163 | 0.02482 | 0.01455 ALS2CR15  |
| cg10964421 | 0.07006 | 0.08252 | 0.08873 | 0.0787  | 0.58391 | 0.63272 | 0.10008 | 0.10445 | 0.083   | 0.07667 TNFRSF10D |
| cg10965432 | 0.02664 | 0.03101 | 0.02776 | 0.02914 | 0.01945 | 0.0235  | 0.0241  | 0.02453 | 0.02063 | 0.0246 FTS        |
| cg10965489 | 0.83559 | 0.84036 | 0.76237 | 0.81387 | 0.82597 | 0.91649 | 0.84221 | 0.85604 | 0.89778 | 0.86597 MAK       |
| cg10966500 | 0.03515 | 0.03512 | 0.03662 | 0.03262 | 0.0331  | 0.03533 | 0.03374 | 0.03683 | 0.03142 | 0.03088 TCHP      |
| cg10967280 | 0.94664 | 0.92545 | 0.93355 | 0.9476  | 0.95382 | 0.94035 | 0.95164 | 0.95923 | 0.95094 | 0.93632 C12orf12  |
| cg10968649 | 0.02838 | 0.03027 | 0.03607 | 0.03237 | 0.03761 | 0.0371  | 0.0455  | 0.04015 | 0.02865 | 0.02921 JMJD2A    |
| cg10968815 | 0.28113 | 0.09437 | 0.47605 | 0.59613 | 0.4201  | 0.53508 | 0.34482 | 0.45242 | 0.23024 | 0.18645 BPIL1     |
| cg10970251 | 0.21681 | 0.12958 | 0.03986 | 0.03884 | 0.03175 | 0.03771 | 0.04183 | 0.04834 | 0.03113 | 0.02802 SLC25A22  |
| cg10970409 | 0.11386 | 0.07329 | 0.76514 | 0.7273  | 0.8224  | 0.78772 | 0.42876 | 0.55656 | 0.39254 | 0.51592 VIPR1     |
| cg10971269 | 0.02691 | 0.028   | 0.02727 | 0.02651 | 0.02801 | 0.02798 | 0.02532 | 0.02661 | 0.02077 | 0.0241 TMEM106B   |
| cg10971346 | 0.04269 | 0.03781 | 0.05154 | 0.04981 | 0.04091 | 0.04426 | 0.04062 | 0.04001 | 0.04706 | 0.03703 PIGV      |
| cg10971750 | 0.03155 | 0.03083 | 0.03796 | 0.03041 | 0.02774 | 0.03313 | 0.02994 | 0.03156 | 0.02858 | 0.02372 VRK1      |
| cg10971790 | 0.02637 | 0.02272 | 0.35525 | 0.36229 | 0.11183 | 0.02931 | 0.0217  | 0.02214 | 0.0215  | 0.02118 FLJ22688  |
| cg10972353 | 0.03153 | 0.03392 | 0.02947 | 0.02965 | 0.02989 | 0.03286 | 0.029   | 0.02516 | 0.02084 | 0.02403 SCD5      |
| cg10972821 | 0.05634 | 0.06173 | 0.05059 | 0.05485 | 0.04554 | 0.04647 | 0.03907 | 0.04394 | 0.05352 | 0.04596 AKAP1     |
| cg10976172 | 0.07761 | 0.08613 | 0.82074 | 0.82276 | 0.05679 | 0.06972 | 0.12536 | 0.09756 | 0.07082 | 0.0685 FLJ32130   |
| cg10976673 | 0.03885 | 0.04003 | 0.04687 | 0.04239 | 0.08085 | 0.04185 | 0.03258 | 0.03354 | 0.04027 | 0.04104 CCRN4L    |
| cg10977115 | 0.69177 | 0.2273  | 0.75817 | 0.83585 | 0.42495 | 0.51356 | 0.72023 | 0.75717 | 0.65123 | 0.58792 CRTAM     |
| cg10978346 | 0.44241 | 0.38185 | 0.57027 | 0.60097 | 0.38316 | 0.42238 | 0.584   | 0.61119 | 0.46541 | 0.33989 INPP4B    |
| cg10978355 | 0.9478  | 0.81757 | 0.77297 | 0.8516  | 0.93982 | 0.90355 | 0.9526  | 0.96262 | 0.86692 | 0.90829 CKMT2     |
| cg10978402 | 0.02986 | 0.02743 | 0.03081 | 0.02588 | 0.0267  | 0.0247  | 0.02578 | 0.03012 | 0.02057 | 0.02517 IQGAP1    |
| cg10979891 | 0.16424 | 0.34035 | 0.31531 | 0.40252 | 0.89863 | 0.64283 | 0.08997 | 0.07538 | 0.08261 | 0.07076 SMOC1     |
| cg10981541 | 0.07299 | 0.06506 | 0.0685  | 0.06443 | 0.04709 | 0.05794 | 0.05745 | 0.06086 | 0.05845 | 0.05037 FAM57A    |
| cg10982775 | 0.04068 | 0.04537 | 0.04143 | 0.04346 | 0.03801 | 0.04481 | 0.03954 | 0.0435  | 0.03462 | 0.03402 PLEKHA8   |
| cg10983208 | 0.34902 | 0.38065 | 0.88004 | 0.8199  | 0.92308 | 0.91232 | 0.92136 | 0.62961 | 0.89025 | 0.91239 SPOCK2    |
| cg10983720 | 0.0499  | 0.05378 | 0.05412 | 0.05668 | 0.04779 | 0.05035 | 0.04655 | 0.04901 | 0.04626 | 0.03982 LRIG2     |
| cg10984852 | 0.13123 | 0.10915 | 0.12383 | 0.1069  | 0.13695 | 0.13031 | 0.1447  | 0.12306 | 0.10085 | 0.09291 ECHS1     |
| cg10985320 | 0.85303 | 0.68951 | 0.77379 | 0.83614 | 0.79286 | 0.85618 | 0.8     | 0.74488 | 0.87034 | 0.88935 JRKL      |
| cg10985987 | 0.04192 | 0.03459 | 0.03733 | 0.03582 | 0.02462 | 0.03039 | 0.03313 | 0.03242 | 0.02662 | 0.02279 CDIPT     |
| cg10986043 | 0.60015 | 0.29544 | 0.47182 | 0.51028 | 0.85857 | 0.75092 | 0.73631 | 0.58783 | 0.52666 | 0.06896 TCAP      |
| cg10987882 | 0.31847 | 0.31503 | 0.34749 | 0.34724 | 0.35376 | 0.38597 | 0.35364 | 0.3964  | 0.30541 | 0.26564 RNF24     |
| cg10988561 | 0.24819 | 0.06623 | 0.09288 | 0.20379 | 0.07959 | 0.11566 | 0.07485 | 0.04722 | 0.15636 | 0.05719 PDCD6     |
| cg10989326 | 0.48101 | 0.26368 | 0.62371 | 0.73211 | 0.53622 | 0.39282 | 0.34615 | 0.72904 | 0.15286 | 0.18309 EVI5      |
| cg10989517 | 0.13941 | 0.06792 | 0.11255 | 0.11265 | 0.08614 | 0.37682 | 0.14374 | 0.06965 | 0.09153 | 0.05044 SERGEF    |
| cg10990993 | 0.13992 | 0.15113 | 0.11233 | 0.09069 | 0.16796 | 0.11842 | 0.08034 | 0.08605 | 0.46419 | 0.09837 MLH1      |
| cg10994126 | 0.1297  | 0.15303 | 0.14862 | 0.14575 | 0.14269 | 0.34233 | 0.31625 | 0.15861 | 0.08555 | 0.08908 PAPP2A    |
| cg10994379 | 0.17284 | 0.15963 | 0.18691 | 0.21839 | 0.50293 | 0.39819 | 0.17435 | 0.22771 | 0.12108 | 0.13668 CAPSL     |

|            |         |         |         |         |         |         |         |         |         |                     |
|------------|---------|---------|---------|---------|---------|---------|---------|---------|---------|---------------------|
| cg10994430 | 0.32041 | 0.0524  | 0.14153 | 0.09307 | 0.40882 | 0.04199 | 0.04784 | 0.03966 | 0.20596 | 0.04015 PALM2-AKAP2 |
| cg10994858 | 0.05806 | 0.05608 | 0.07109 | 0.05967 | 0.0527  | 0.06554 | 0.05993 | 0.05681 | 0.05332 | 0.04881 MINPP1      |
| cg10995359 | 0.02682 | 0.02782 | 0.03027 | 0.02597 | 0.02053 | 0.02501 | 0.02291 | 0.02517 | 0.03017 | 0.02591 LYCAT       |
| cg10995380 | 0.11954 | 0.08495 | 0.27651 | 0.18264 | 0.22206 | 0.31959 | 0.52071 | 0.4147  | 0.06371 | 0.0768 TGFBI1       |
| cg10995925 | 0.64006 | 0.24855 | 0.77157 | 0.83942 | 0.61355 | 0.70241 | 0.49152 | 0.49412 | 0.83744 | 0.5468 LTA          |
| cg10996143 | 0.0906  | 0.08857 | 0.10657 | 0.12991 | 0.15001 | 0.1189  | 0.13965 | 0.11773 | 0.08036 | 0.07683 FKBP1A      |
| cg10997248 | 0.48176 | 0.17775 | 0.69255 | 0.69048 | 0.70773 | 0.65597 | 0.5901  | 0.26923 | 0.58757 | 0.37065 FXD2        |
| cg10999429 | 0.30111 | 0.06754 | 0.12353 | 0.23264 | 0.28166 | 0.36552 | 0.03714 | 0.04835 | 0.35089 | 0.25668 ACVRL1      |
| cg11000221 | 0.08183 | 0.0682  | 0.09192 | 0.08097 | 0.10155 | 0.07236 | 0.06283 | 0.05963 | 0.07422 | 0.06729 DHX40       |
| cg11003133 | 0.41943 | 0.17601 | 0.74088 | 0.79007 | 0.76335 | 0.88895 | 0.56147 | 0.5774  | 0.86864 | 0.66477 AIM2        |
| cg11004890 | 0.19111 | 0.06991 | 0.93176 | 0.93154 | 0.8629  | 0.73437 | 0.68863 | 0.09326 | 0.9107  | 0.7912 SLC4A11      |
| cg11005091 | 0.05957 | 0.05969 | 0.09314 | 0.06456 | 0.09706 | 0.06172 | 0.08259 | 0.066   | 0.06157 | 0.06885 HNRPA1      |
| cg11005826 | 0.10577 | 0.09641 | 0.92542 | 0.95548 | 0.85008 | 0.73476 | 0.13785 | 0.0953  | 0.09512 | 0.08634 IGF2AS      |
| cg11007123 | 0.03929 | 0.04648 | 0.03882 | 0.03799 | 0.03566 | 0.03927 | 0.0345  | 0.03809 | 0.03356 | 0.03536 SPTAN1      |
| cg11007423 | 0.1033  | 0.07622 | 0.09804 | 0.10575 | 0.10168 | 0.09175 | 0.10952 | 0.09246 | 0.12204 | 0.12359 SPPL2A      |
| cg11008571 | 0.75723 | 0.48082 | 0.71405 | 0.73765 | 0.6777  | 0.64223 | 0.73077 | 0.65247 | 0.75135 | 0.70877 CGO18       |
| cg11008866 | 0.35635 | 0.23295 | 0.52154 | 0.56037 | 0.25555 | 0.35892 | 0.37845 | 0.2413  | 0.37419 | 0.35768 CASR        |
| cg11009596 | 0.02693 | 0.02505 | 0.02647 | 0.02635 | 0.0221  | 0.0254  | 0.02928 | 0.03126 | 0.02689 | 0.02323 AURKB       |
| cg11009736 | 0.43014 | 0.09687 | 0.16786 | 0.12016 | 0.25808 | 0.3694  | 0.1325  | 0.10214 | 0.09566 | 0.11411 MARCO       |
| cg11010122 | 0.13344 | 0.04376 | 0.04348 | 0.05175 | 0.06253 | 0.04726 | 0.03907 | 0.03402 | 0.03371 | 0.04131 DNAJB14     |
| cg11011602 | 0.05143 | 0.03178 | 0.03694 | 0.04162 | 0.02515 | 0.02868 | 0.03004 | 0.03098 | 0.02668 | 0.02404 RPL7A       |
| cg11011938 | 0.03857 | 0.03782 | 0.0453  | 0.03721 | 0.04194 | 0.03217 | 0.05124 | 0.03116 | 0.14076 | 0.04485 SEMA5A      |
| cg11012046 | 0.05478 | 0.06122 | 0.6693  | 0.71572 | 0.31205 | 0.23369 | 0.09317 | 0.0817  | 0.59746 | 0.43569 LOC89944    |
| cg11015241 | 0.65179 | 0.92118 | 0.52387 | 0.60862 | 0.8136  | 0.89779 | 0.88441 | 0.83867 | 0.52741 | 0.16494 ATP10A      |
| cg11016563 | 0.08275 | 0.07073 | 0.57451 | 0.57585 | 0.1315  | 0.36523 | 0.09537 | 0.08454 | 0.13478 | 0.06939 TRPC6       |
| cg11016745 | 0.0699  | 0.06713 | 0.0602  | 0.07272 | 0.04412 | 0.05393 | 0.34611 | 0.3197  | 0.04448 | 0.0463 FLJ25444     |
| cg11017269 | 0.02877 | 0.02636 | 0.035   | 0.0238  | 0.02412 | 0.02339 | 0.02578 | 0.02352 | 0.02373 | 0.02297 RHOBTB3     |
| cg11018904 | 0.13409 | 0.11376 | 0.14014 | 0.09958 | 0.28123 | 0.1967  | 0.16829 | 0.12796 | 0.06807 | 0.09251 C20orf28    |
| cg11021744 | 0.07319 | 0.06594 | 0.11365 | 0.1081  | 0.11361 | 0.07935 | 0.06719 | 0.11677 | 0.05369 | 0.05788 SLC6A1      |
| cg11023442 | 0.02823 | 0.03117 | 0.02952 | 0.02712 | 0.02557 | 0.0269  | 0.03275 | 0.02825 | 0.02523 | 0.02744 SKIP        |
| cg11024597 | 0.88305 | 0.88482 | 0.87097 | 0.90125 | 0.89331 | 0.87368 | 0.83772 | 0.898   | 0.88982 | 0.84052 ECRG4       |
| cg11025793 | 0.18969 | 0.17542 | 0.19643 | 0.18576 | 0.16015 | 0.10749 | 0.17948 | 0.16959 | 0.15461 | 0.15444 STX10       |
| cg11027330 | 0.37731 | 0.14987 | 0.67674 | 0.67099 | 0.82877 | 0.30344 | 0.8146  | 0.672   | 0.33281 | 0.067 METRN         |
| cg11027570 | 0.08976 | 0.09925 | 0.11003 | 0.09838 | 0.31799 | 0.29754 | 0.08952 | 0.07106 | 0.80727 | 0.6897 RBP1         |
| cg11029501 | 0.02046 | 0.02212 | 0.02487 | 0.02144 | 0.0172  | 0.01687 | 0.02586 | 0.02407 | 0.01832 | 0.01537 TARBP1      |
| cg11032157 | 0.85158 | 0.85261 | 0.81573 | 0.85213 | 0.8371  | 0.77887 | 0.83617 | 0.84096 | 0.83452 | 0.8271 TAS2R50      |
| cg11033833 | 0.04061 | 0.04869 | 0.61333 | 0.56248 | 0.63966 | 0.37282 | 0.19823 | 0.11185 | 0.03801 | 0.03275 GPR101      |
| cg11034784 | 0.02674 | 0.03244 | 0.02715 | 0.0246  | 0.0194  | 0.02693 | 0.02634 | 0.02157 | 0.02616 | 0.02395 MTERFD2     |
| cg11034861 | 0.13575 | 0.11855 | 0.13257 | 0.12417 | 0.15951 | 0.17487 | 0.14212 | 0.12246 | 0.10037 | 0.12148 FBXL8       |
| cg11035216 | 0.02826 | 0.02352 | 0.01996 | 0.02206 | 0.02061 | 0.0255  | 0.01949 | 0.02071 | 0.01667 | 0.0186 RASSF1       |
| cg11037148 | 0.31314 | 0.30238 | 0.05986 | 0.07279 | 0.42525 | 0.23867 | 0.3932  | 0.36668 | 0.22225 | 0.17182 HIST1H4J    |

|            |         |         |         |         |         |         |         |         |         |                   |
|------------|---------|---------|---------|---------|---------|---------|---------|---------|---------|-------------------|
| cg11037424 | 0.03653 | 0.03768 | 0.04063 | 0.03448 | 0.02141 | 0.02784 | 0.03469 | 0.02957 | 0.02974 | 0.02606 C20orf14  |
| cg11037772 | 0.05889 | 0.03808 | 0.29152 | 0.30863 | 0.29109 | 0.24741 | 0.41175 | 0.43429 | 0.23135 | 0.18813 POLR3C    |
| cg11037787 | 0.70821 | 0.66383 | 0.81976 | 0.85007 | 0.89499 | 0.77811 | 0.16017 | 0.07766 | 0.84055 | 0.52296 PLA2G2A   |
| cg11037818 | 0.10277 | 0.09132 | 0.18016 | 0.27295 | 0.30242 | 0.09163 | 0.62675 | 0.09082 | 0.75327 | 0.18106 C1orf132  |
| cg11038081 | 0.67578 | 0.1856  | 0.61785 | 0.63563 | 0.57375 | 0.39352 | 0.68053 | 0.45715 | 0.48288 | 0.3912 ZNF235     |
| cg11038843 | 0.14715 | 0.11116 | 0.21919 | 0.13343 | 0.75704 | 0.68351 | 0.11172 | 0.11718 | 0.13757 | 0.22113 B3GAT1    |
| cg11039072 | 0.03822 | 0.03945 | 0.04379 | 0.04153 | 0.03631 | 0.03826 | 0.03943 | 0.04351 | 0.04752 | 0.05004 FLJ20582  |
| cg11041457 | 0.17896 | 0.1683  | 0.18748 | 0.17496 | 0.33487 | 0.18949 | 0.15389 | 0.11978 | 0.17729 | 0.15269 GNL3      |
| cg11041966 | 0.02752 | 0.02492 | 0.03346 | 0.0327  | 0.02361 | 0.03878 | 0.02594 | 0.02652 | 0.02232 | 0.01761 RBM28     |
| cg11042320 | 0.09002 | 0.06114 | 0.08924 | 0.05545 | 0.45778 | 0.06798 | 0.22837 | 0.05665 | 0.14872 | 0.04854 PDGFRB    |
| cg11042454 | 0.02463 | 0.02395 | 0.02662 | 0.02615 | 0.02036 | 0.02616 | 0.02611 | 0.02713 | 0.0214  | 0.01986 TUBB2C    |
| cg11043092 | 0.89959 | 0.83253 | 0.89733 | 0.9044  | 0.8898  | 0.89777 |         | 0.87764 | 0.91955 | 0.88245 MCPH1     |
| cg11044163 | 0.04775 | 0.04893 | 0.07802 | 0.08397 | 0.10114 | 0.06945 | 0.06495 | 0.05474 | 0.04507 | 0.04809 CPVL      |
| cg11044263 | 0.03092 | 0.03067 | 0.03079 | 0.03009 | 0.0244  | 0.02866 | 0.03082 | 0.02963 | 0.02475 | 0.02997 TMEM65    |
| cg11044823 | 0.05785 | 0.05689 | 0.05883 | 0.05955 | 0.05118 | 0.05583 | 0.05554 | 0.05704 | 0.05816 | 0.05543 PPWD1     |
| cg11047295 | 0.03677 | 0.03556 | 0.03941 | 0.03785 | 0.03205 | 0.04156 | 0.0325  | 0.03353 | 0.03366 | 0.03027 HMGB1     |
| cg11049298 | 0.07048 | 0.06818 | 0.06286 | 0.07434 | 0.04671 | 0.05421 | 0.06901 | 0.06139 | 0.04231 | 0.05288 HNRPA0    |
| cg11049305 | 0.05017 | 0.05415 | 0.1206  | 0.12357 | 0.08046 | 0.41806 | 0.04192 | 0.04509 | 0.04878 | 0.05436 KIAA1166  |
| cg11050116 | 0.03297 | 0.03154 | 0.0299  | 0.0297  | 0.02738 | 0.02547 | 0.03404 | 0.03333 | 0.02154 | 0.02457 PCM1      |
| cg11050527 | 0.05304 | 0.05011 | 0.05409 | 0.04357 | 0.03212 | 0.05114 | 0.04522 | 0.04699 | 0.0453  | 0.04725 ATP6V1H   |
| cg11051139 | 0.86279 | 0.51679 | 0.09388 | 0.32837 | 0.39933 | 0.32661 | 0.10223 | 0.64473 | 0.06031 | 0.14031 LOC144501 |
| cg11051158 | 0.10733 | 0.61077 | 0.18227 | 0.20334 | 0.07134 | 0.06301 | 0.67146 | 0.12584 | 0.0673  | 0.04915 C2orf3    |
| cg11051843 | 0.04598 | 0.04027 | 0.05026 | 0.0445  | 0.04503 | 0.04419 | 0.03854 | 0.03251 | 0.03974 | 0.03182 SEMA3C    |
| cg11052068 | 0.08134 | 0.08467 | 0.13187 | 0.09272 | 0.10157 | 0.09621 | 0.08126 | 0.06864 | 0.08106 | 0.09662 CDC40     |
| cg11052143 | 0.92728 | 0.92658 | 0.83146 | 0.70702 | 0.91403 | 0.91959 | 0.73545 | 0.91344 | 0.07343 | 0.0281 ALS2CR11   |
| cg11053574 | 0.02598 | 0.02715 | 0.28781 | 0.57897 | 0.02357 | 0.02427 | 0.02236 | 0.02707 | 0.0247  | 0.02117 NT5C3L    |
| cg11053740 | 0.05102 | 0.05555 | 0.05586 | 0.0495  | 0.08729 | 0.0726  | 0.04568 | 0.04211 | 0.0466  | 0.07874 RAB2B     |
| cg11054882 | 0.0736  | 0.07753 | 0.07248 | 0.07551 | 0.04328 | 0.07137 | 0.06444 | 0.0652  | 0.07769 | 0.0777 TRAPPC4    |
| cg11054936 | 0.89825 | 0.50417 | 0.90377 | 0.91556 | 0.93069 | 0.87613 | 0.87996 | 0.71599 | 0.56425 | 0.31799 GJB2      |
| cg11056832 | 0.03204 | 0.04097 | 0.03295 | 0.03332 | 0.02626 | 0.03162 | 0.02866 | 0.02731 | 0.03254 | 0.02941 PKN3      |
| cg11057497 | 0.04652 | 0.04092 | 0.03368 | 0.03496 | 0.04246 | 0.04327 | 0.02789 | 0.03161 | 0.02457 | 0.02199 HMGCS1    |
| cg11058696 | 0.04283 | 0.04174 | 0.0679  | 0.05267 | 0.06541 | 0.07001 | 0.05357 | 0.05054 | 0.03341 | 0.03399 SNRPB2    |
| cg11058932 | 0.83386 | 0.72577 | 0.75979 | 0.82536 | 0.75429 | 0.74515 | 0.7456  | 0.64939 | 0.69731 | 0.50038 TSGA13    |
| cg11059341 | 0.77623 | 0.57813 | 0.64519 | 0.64718 | 0.39804 | 0.44658 | 0.76851 | 0.5924  | 0.14063 | 0.17841 MYL1      |
| cg11059483 | 0.42814 | 0.6111  | 0.55496 | 0.63488 | 0.42399 | 0.31648 | 0.27015 | 0.15437 | 0.44511 | 0.06204 ESR2      |
| cg11061603 | 0.03165 | 0.02763 | 0.03049 | 0.03344 | 0.03117 | 0.03285 | 0.02881 | 0.02764 | 0.05308 | 0.02455 RPS10     |
| cg11061975 | 0.7038  | 0.14376 | 0.84217 | 0.74299 | 0.83403 | 0.84613 | 0.08187 | 0.06736 | 0.68542 | 0.58278 SIRPB2    |
| cg11062095 | 0.12015 | 0.09968 | 0.19281 | 0.175   | 0.16697 | 0.10201 | 0.26949 | 0.13823 | 0.24085 | 0.11498 C5orf15   |
| cg11063110 | 0.84438 | 0.47223 | 0.84422 | 0.86553 | 0.74655 | 0.57155 | 0.17626 | 0.09428 | 0.7466  | 0.23328 CPA5      |
| cg11063988 | 0.02164 | 0.02107 | 0.0194  | 0.0192  | 0.01584 | 0.01753 | 0.01596 | 0.01686 | 0.01518 | 0.01353 SIX5      |
| cg11064206 | 0.02367 | 0.02666 | 0.03221 | 0.02964 | 0.02477 | 0.0275  | 0.02564 | 0.02564 | 0.02607 | 0.02316 ABCB9     |

|            |         |         |         |         |         |         |         |         |         |                  |
|------------|---------|---------|---------|---------|---------|---------|---------|---------|---------|------------------|
| cg11064558 | 0.02427 | 0.02998 | 0.03007 | 0.02728 | 0.0226  | 0.02294 | 0.02339 | 0.02474 | 0.02063 | 0.02178 ZNF295   |
| cg11064797 | 0.04935 | 0.05374 | 0.05151 | 0.05403 | 0.02856 | 0.053   | 0.05085 | 0.04695 | 0.04486 | 0.04555 C5orf16  |
| cg11065385 | 0.04523 | 0.03488 | 0.83231 | 0.82078 | 0.38821 | 0.20273 | 0.11921 | 0.03836 | 0.0409  | 0.03242 B4GALNT3 |
| cg11065518 | 0.05692 | 0.0623  | 0.06372 | 0.06808 | 0.08087 | 0.07761 | 0.05381 | 0.05547 | 0.06428 | 0.0692 MDH1B     |
| cg11065693 | 0.0504  | 0.04862 | 0.04433 | 0.04485 | 0.04496 | 0.05296 | 0.044   | 0.04426 | 0.03588 | 0.04838 ISGF3G   |
| cg11068096 | 0.63985 | 0.45155 | 0.45018 | 0.51846 | 0.63755 | 0.72555 | 0.29172 | 0.36543 | 0.46803 | 0.35709 KRT14    |
| cg11070419 | 0.16682 | 0.11799 | 0.35427 | 0.48062 | 0.4527  | 0.24433 | 0.23285 | 0.11895 | 0.14734 | 0.13979 C4BPA    |
| cg11070941 | 0.04288 | 0.03827 | 0.05471 | 0.0458  | 0.04217 | 0.04018 | 0.03654 | 0.03269 | 0.03868 | 0.03418 STX11    |
| cg11072113 | 0.88554 | 0.46371 | 0.92068 | 0.90945 | 0.95454 | 0.90635 | 0.90634 | 0.88841 | 0.92727 | 0.84707 VWCE     |
| cg11074362 | 0.60155 | 0.71466 | 0.6296  | 0.67223 | 0.67852 | 0.73503 | 0.62488 | 0.66545 | 0.73202 | 0.66217 DENND4C  |
| cg11074746 | 0.04321 | 0.04052 | 0.04307 | 0.03825 | 0.04482 | 0.03518 | 0.03317 | 0.03289 | 0.02993 | 0.03218 C2orf4   |
| cg11075556 | 0.7692  | 0.81326 | 0.6539  | 0.77274 | 0.53166 | 0.76729 | 0.77325 | 0.79216 | 0.75662 | 0.77773 ANKRD7   |
| cg11075745 | 0.85743 | 0.56411 | 0.74448 | 0.87407 | 0.93559 | 0.65713 | 0.7349  | 0.66282 | 0.8384  | 0.35064 CLDN19   |
| cg11077161 | 0.64235 | 0.70885 | 0.70913 | 0.75598 | 0.56074 | 0.42232 | 0.49808 | 0.47196 | 0.6718  | 0.62857 SIPA1L1  |
| cg11078738 | 0.04794 | 0.04662 | 0.0524  | 0.04206 | 0.04214 | 0.05837 | 0.04377 | 0.04253 | 0.04288 | 0.04375 ANTXR1   |
| cg11079619 | 0.75452 | 0.50306 | 0.763   | 0.81184 | 0.47101 | 0.55893 | 0.20725 | 0.2338  | 0.61474 | 0.43413 INHBA    |
| cg11080718 | 0.05519 | 0.06346 | 0.05275 | 0.05601 | 0.04519 | 0.07373 | 0.04161 | 0.03147 | 0.03569 | 0.02961 HIGD1A   |
| cg11081833 | 0.78052 | 0.30209 | 0.75579 | 0.77943 | 0.76253 | 0.73868 | 0.35886 | 0.18101 | 0.399   | 0.35136 LGALS2   |
| cg11082575 | 0.04435 | 0.04475 | 0.04472 | 0.04733 | 0.03437 | 0.03893 | 0.04127 | 0.03827 | 0.04015 | 0.03563 FAM60A   |
| cg11084020 | 0.02526 | 0.02529 | 0.04224 | 0.03776 | 0.02236 | 0.02449 | 0.02088 | 0.02388 | 0.02257 | 0.0229 TAX1BP1   |
| cg11084035 | 0.02632 | 0.02578 | 0.02905 | 0.0295  | 0.0234  | 0.02818 | 0.02863 | 0.02577 | 0.02455 | 0.02262 GANAB    |
| cg11084611 | 0.73537 | 0.71164 | 0.79819 | 0.88714 | 0.93217 | 0.92358 | 0.46281 | 0.53289 | 0.59661 | 0.67032 C2orf27  |
| cg11086066 | 0.29891 | 0.42138 | 0.87476 | 0.89786 | 0.95086 | 0.92624 | 0.94023 | 0.92382 | 0.93736 | 0.93519 NFATC2   |
| cg11086568 | 0.02792 | 0.02711 | 0.03092 | 0.02653 | 0.02304 | 0.02552 | 0.02662 | 0.03043 | 0.31617 | 0.02144 WDR53    |
| cg11091262 | 0.74931 | 0.63653 | 0.54982 | 0.72973 | 0.39216 | 0.81664 | 0.11925 | 0.21185 | 0.09438 | 0.07292 GALNTL5  |
| cg11093356 | 0.03261 | 0.03097 | 0.03161 | 0.02647 | 0.02977 | 0.03177 | 0.02814 | 0.03097 | 0.02671 | 0.02837 DDX19A   |
| cg11094938 | 0.92413 | 0.90552 | 0.91596 | 0.92676 | 0.89804 | 0.91141 | 0.62885 | 0.62559 | 0.92797 | 0.88998 ATP2A1   |
| cg11095315 | 0.82209 | 0.81869 | 0.77557 | 0.81253 | 0.75622 | 0.78012 | 0.81752 | 0.84355 | 0.83269 | 0.79484 PABPN1   |
| cg11096640 | 0.02895 | 0.03106 | 0.02979 | 0.02165 | 0.0281  | 0.02727 | 0.0296  | 0.02366 | 0.03503 | 0.02239 ACTR3B   |
| cg11096837 | 0.04993 | 0.03517 | 0.04227 | 0.04574 | 0.03192 | 0.03003 | 0.02975 | 0.03114 | 0.0361  | 0.02714 CGI-96   |
| cg11096993 | 0.20049 | 0.06243 | 0.44635 | 0.48865 | 0.26692 | 0.07322 | 0.15776 | 0.0554  | 0.25592 | 0.0404 ACY3      |
| cg11098259 | 0.74105 | 0.46782 | 0.75492 | 0.81236 | 0.78428 | 0.74516 | 0.31423 | 0.76377 | 0.22133 | 0.44491 AQP9     |
| cg11099291 | 0.05251 | 0.05374 | 0.06005 | 0.0524  | 0.04411 | 0.04834 | 0.05153 | 0.05267 | 0.04454 | 0.04701 MGC14376 |
| cg11099899 | 0.73352 | 0.70907 | 0.76641 | 0.77852 | 0.87506 | 0.84927 | 0.67458 | 0.79732 | 0.83739 | 0.74265 CLDN14   |
| cg11100802 | 0.02423 | 0.02153 | 0.02383 | 0.02439 | 0.01986 | 0.02137 | 0.02006 | 0.0247  | 0.02428 | 0.02045 TRIM52   |
| cg11102782 | 0.65382 | 0.08376 | 0.89795 | 0.93106 | 0.97271 | 0.95337 | 0.96829 | 0.95022 | 0.53261 | 0.42099 ISYNA1   |
| cg11102794 | 0.09121 | 0.08966 | 0.12642 | 0.1274  | 0.13873 | 0.11778 | 0.10618 | 0.11708 | 0.19547 | 0.10501 LMO1     |
| cg11104347 | 0.03469 | 0.03392 | 0.8711  | 0.91894 | 0.0849  | 0.04088 | 0.02821 | 0.03183 | 0.02864 | 0.02801 DUSP23   |
| cg11105610 | 0.80416 | 0.68854 | 0.85857 | 0.85675 | 0.8204  | 0.16166 | 0.86389 | 0.22864 | 0.87286 | 0.75919 LGALS3BP |
| cg11107205 | 0.05199 | 0.04585 | 0.04334 | 0.0441  | 0.04754 | 0.04923 | 0.03771 | 0.04239 | 0.03797 | 0.03544 RCL1     |
| cg11108432 | 0.04177 | 0.04082 | 0.04881 | 0.03597 | 0.03027 | 0.03154 | 0.04492 | 0.04207 | 0.03003 | 0.02772 PINX1    |

|            |         |         |         |         |         |         |         |         |         |                  |
|------------|---------|---------|---------|---------|---------|---------|---------|---------|---------|------------------|
| cg11108890 | 0.6935  | 0.91646 | 0.11253 | 0.06561 | 0.46926 | 0.54883 | 0.50434 | 0.56402 | 0.0763  | 0.04512 VAMP5    |
| cg11109684 | 0.01947 | 0.0269  | 0.02545 | 0.02637 | 0.01928 | 0.02163 | 0.0175  | 0.01734 | 0.01809 | 0.01689 RAB10    |
| cg11110686 | 0.70308 | 0.69937 | 0.9309  | 0.94726 | 0.96668 | 0.96066 | 0.66589 | 0.68369 | 0.37814 | 0.31759 MAGEC1   |
| cg11113534 | 0.09439 | 0.06961 | 0.13888 | 0.1688  | 0.35504 | 0.61425 | 0.08245 | 0.15934 | 0.79645 | 0.55019 C20orf70 |
| cg11114344 | 0.08185 | 0.05597 | 0.06044 | 0.04979 | 0.16293 | 0.10561 | 0.0835  | 0.07132 | 0.05033 | 0.06091 C17orf45 |
| cg11115427 | 0.55992 | 0.22852 | 0.39217 | 0.34878 | 0.41304 | 0.0768  | 0.28756 | 0.15064 | 0.78179 | 0.3312 PHYH      |
| cg11115702 | 0.08332 | 0.04151 | 0.09551 | 0.11602 | 0.08014 | 0.2405  | 0.05792 | 0.04508 | 0.09851 | 0.30098 SPIN1    |
| cg11116142 | 0.01839 | 0.0254  | 0.0248  | 0.02353 | 0.01903 | 0.02836 | 0.01992 | 0.01892 | 0.02229 | 0.01828 CRBN     |
| cg11116440 | 0.05934 | 0.05134 | 0.07655 | 0.05985 | 0.047   | 0.0479  | 0.05019 | 0.04785 | 0.0568  | 0.04363 C9orf74  |
| cg11117707 | 0.0267  | 0.03087 | 0.03231 | 0.03324 | 0.03691 | 0.0253  | 0.02814 | 0.02558 | 0.07379 | 0.02913 SLC16A6  |
| cg11118665 | 0.03051 | 0.03026 | 0.03292 | 0.02539 | 0.02991 | 0.03135 | 0.02634 | 0.03121 | 0.02178 | 0.02294 TCFL5    |
| cg11119131 | 0.07378 | 0.07236 | 0.06687 | 0.05793 | 0.06304 | 0.06525 | 0.05669 | 0.05515 | 0.06452 | 0.06486 FLJ20364 |
| cg11119596 | 0.598   | 0.16284 | 0.59743 | 0.64362 | 0.71278 | 0.22546 | 0.26669 | 0.18216 | 0.272   | 0.09899 CD96     |
| cg11119884 | 0.34496 | 0.33279 | 0.36583 | 0.25971 | 0.34701 | 0.3024  | 0.24332 | 0.41251 | 0.20819 | 0.20934 SEC63D1  |
| cg11120551 | 0.43804 | 0.19941 | 0.47472 | 0.53281 | 0.36565 | 0.29535 | 0.32493 | 0.14231 | 0.28156 | 0.24857 CHD1L    |
| cg11122968 | 0.23929 | 0.30402 | 0.22597 | 0.21754 | 0.27749 | 0.20403 | 0.19448 | 0.17383 | 0.17305 | 0.21138 CD33     |
| cg11126134 | 0.97063 | 0.79515 | 0.21472 | 0.43474 | 0.07027 | 0.03307 | 0.03702 | 0.02796 | 0.68343 | 0.34211 FLJ14834 |
| cg11126313 | 0.70398 | 0.68572 | 0.70973 | 0.76196 | 0.66212 | 0.71483 | 0.61413 | 0.31499 | 0.79251 | 0.49588 CCR3     |
| cg11128808 | 0.91038 | 0.62986 | 0.93145 | 0.94825 | 0.95091 | 0.93001 | 0.08828 | 0.05685 | 0.93204 | 0.91372 CACNG6   |
| cg11129291 | 0.04962 | 0.04705 | 0.08456 | 0.05463 | 0.06222 | 0.05045 | 0.04879 | 0.04915 | 0.04738 | 0.04421 DARS     |
| cg11130441 | 0.41319 | 0.223   | 0.74241 | 0.81388 | 0.62627 | 0.75828 | 0.17845 | 0.57508 | 0.66318 | 0.30976 MGC34824 |
| cg11132751 | 0.80691 | 0.7609  | 0.82398 | 0.84763 | 0.8891  | 0.87971 | 0.77272 | 0.60296 | 0.63527 | 0.5743 LOC340602 |
| cg11134443 | 0.75117 | 0.78851 | 0.58222 | 0.42163 | 0.60808 | 0.64814 | 0.67523 | 0.52777 | 0.40794 | 0.39508 KYNU     |
| cg11136251 | 0.05244 | 0.05329 | 0.05016 | 0.04922 | 0.05519 | 0.05695 | 0.05397 | 0.05266 | 0.0386  | 0.05314 ZWILCH   |
| cg11136562 | 0.8376  | 0.84681 | 0.13959 | 0.23338 | 0.57581 | 0.54331 | 0.69549 | 0.65964 | 0.06986 | 0.07305 CENTD3   |
| cg11139878 | 0.12215 | 0.07079 | 0.15122 | 0.12556 | 0.16632 | 0.08765 | 0.1567  | 0.11066 | 0.07881 | 0.07964 CD5L     |
| cg11140307 | 0.03105 | 0.03085 | 0.03473 | 0.03034 | 0.0606  | 0.02552 | 0.02218 | 0.02798 | 0.02475 | 0.0213 CMTM4     |
| cg11140785 | 0.03524 | 0.03628 | 0.03866 | 0.03809 | 0.028   | 0.02892 | 0.02638 | 0.0299  | 0.02637 | 0.02314 ZNF264   |
| cg11141013 | 0.02752 | 0.02423 | 0.02877 | 0.02682 | 0.01949 | 0.02442 | 0.02472 | 0.02232 | 0.02172 | 0.01974 ZNF688   |
| cg11141561 | 0.02574 | 0.02326 | 0.02529 | 0.02292 | 0.02125 | 0.02066 | 0.02363 | 0.01977 | 0.02475 | 0.02215 CAMLG    |
| cg11142466 | 0.04778 | 0.04476 | 0.05049 | 0.04142 | 0.0317  | 0.03637 | 0.03986 | 0.03712 | 0.04227 | 0.03651 LOC51315 |
| cg11147193 | 0.89167 | 0.71551 | 0.72651 | 0.79272 | 0.5871  | 0.19393 | 0.66374 | 0.20518 | 0.92688 | 0.86966 HPCAL1   |
| cg11147886 | 0.76953 | 0.75265 | 0.32047 | 0.32162 | 0.61486 | 0.6862  | 0.70739 | 0.6881  | 0.21088 | 0.28777 NFAT5    |
| cg11148307 | 0.89139 | 0.87087 | 0.88668 | 0.89271 | 0.891   | 0.88546 | 0.76984 | 0.86757 | 0.90019 | 0.84551 C10orf92 |
| cg11149033 | 0.04282 | 0.05211 | 0.05751 | 0.04774 | 0.03572 | 0.03994 | 0.04594 | 0.04276 | 0.04008 | 0.04228 TFAM     |
| cg11151665 | 0.29521 | 0.23798 | 0.85283 | 0.86491 | 0.81154 | 0.81704 | 0.77604 | 0.68179 | 0.79578 | 0.81336 PSG6     |
| cg11151811 | 0.02896 | 0.03458 | 0.03213 | 0.03346 | 0.02589 | 0.02805 | 0.02725 | 0.02884 | 0.02641 | 0.02073 PRKAG1   |
| cg11151820 | 0.05963 | 0.04657 | 0.04214 | 0.0343  | 0.03697 | 0.04037 | 0.04074 | 0.03437 | 0.03021 | 0.03102 CCT5     |
| cg11152574 | 0.72827 | 0.70744 | 0.74315 | 0.75728 | 0.64272 | 0.75419 | 0.57121 | 0.56143 | 0.77622 | 0.77245 ACSL5    |
| cg11154542 | 0.65554 | 0.90281 | 0.49469 | 0.73977 | 0.42144 | 0.27421 | 0.23507 | 0.2119  | 0.09435 | 0.04784 CTSL     |
| cg11154798 | 0.05096 | 0.04555 | 0.04767 | 0.04182 | 0.04088 | 0.05958 | 0.04362 | 0.03944 | 0.03693 | 0.03203 RAI14    |

|            |         |         |         |         |         |         |         |         |         |                   |
|------------|---------|---------|---------|---------|---------|---------|---------|---------|---------|-------------------|
| cg11154879 | 0.83772 | 0.79828 | 0.78674 | 0.81421 | 0.86642 | 0.81028 | 0.43986 | 0.5072  | 0.65298 | 0.60959 C20orf151 |
| cg11155265 | 0.43995 | 0.5024  | 0.58493 | 0.58424 | 0.72382 | 0.78275 | 0.63627 | 0.53087 | 0.58211 | 0.45681 DDEF1     |
| cg11157872 | 0.03892 | 0.03593 | 0.04627 | 0.04724 | 0.04676 | 0.04749 | 0.04814 | 0.05179 | 0.04244 | 0.04202 FLJ11021  |
| cg11158374 | 0.69318 | 0.3418  | 0.62709 | 0.7454  | 0.62604 | 0.46514 | 0.10938 | 0.08716 | 0.38185 | 0.3294 TFF2       |
| cg11158430 | 0.70089 | 0.73352 | 0.70759 | 0.72652 | 0.66543 | 0.76078 | 0.34278 | 0.72789 | 0.55668 | 0.53345 UTS2D     |
| cg11158440 | 0.06846 | 0.06766 | 0.05904 | 0.07055 | 0.04162 | 0.04367 | 0.06923 | 0.07005 | 0.05699 | 0.05191 STX10     |
| cg11158729 | 0.13348 | 0.04247 | 0.23577 | 0.42797 | 0.49164 | 0.06547 | 0.13938 | 0.02494 | 0.03518 | 0.02155 CNM4      |
| cg11158760 | 0.08866 | 0.09815 | 0.08304 | 0.08467 | 0.0986  | 0.11379 | 0.11196 | 0.11398 | 0.07754 | 0.07843 FHIT      |
| cg11159299 | 0.70021 | 0.67125 | 0.63491 | 0.65701 | 0.7145  | 0.76037 | 0.55087 | 0.48811 | 0.57018 | 0.30575 GZMM      |
| cg11159727 | 0.33301 | 0.41821 | 0.22868 | 0.17074 | 0.25547 | 0.24605 | 0.16468 | 0.16209 | 0.11309 | 0.13002 MTERF     |
| cg11160386 | 0.03065 | 0.02511 | 0.03861 | 0.03074 | 0.03288 | 0.03065 | 0.02658 | 0.02485 | 0.02674 | 0.02962 MDM1      |
| cg11160820 | 0.05821 | 0.05324 | 0.06866 | 0.0619  | 0.0453  | 0.04876 | 0.05477 | 0.05135 | 0.04587 | 0.05059 CD58      |
| cg11161417 | 0.60718 | 0.2922  | 0.08445 | 0.11689 | 0.09202 | 0.13914 | 0.04946 | 0.06444 | 0.0852  | 0.11398 SPACA3    |
| cg11161873 | 0.80024 | 0.76202 | 0.7106  | 0.76437 | 0.69393 | 0.51738 | 0.58311 | 0.53595 | 0.50217 | 0.29047 FLJ39575  |
| cg11164347 | 0.17032 | 0.15237 | 0.21143 | 0.18033 | 0.26716 | 0.21209 | 0.18691 | 0.14244 | 0.19603 | 0.17659 TRAPPC3   |
| cg11164400 | 0.83583 | 0.12256 | 0.13326 | 0.14843 | 0.76613 | 0.18562 | 0.68077 | 0.20005 | 0.63608 | 0.60432 PPP1R9A   |
| cg11166252 | 0.02895 | 0.03136 | 0.02918 | 0.02796 | 0.02503 | 0.03429 | 0.03549 | 0.02995 | 0.02278 | 0.02599 AHR       |
| cg11166823 | 0.04999 | 0.03197 | 0.03541 | 0.02885 | 0.02426 | 0.02444 | 0.0393  | 0.02705 | 0.02948 | 0.02369 AGPAT3    |
| cg11166999 | 0.59563 | 0.78685 | 0.71756 | 0.80087 | 0.61006 | 0.73656 | 0.49124 | 0.45548 | 0.70781 | 0.70588 HBII-436  |
| cg11170179 | 0.06187 | 0.05201 | 0.27077 | 0.27999 | 0.30876 | 0.47459 | 0.0736  | 0.04856 | 0.46878 | 0.33748 KLK10     |
| cg11170796 | 0.75982 | 0.83425 | 0.83459 | 0.83025 | 0.85233 | 0.63324 | 0.82542 | 0.6129  | 0.86109 | 0.82875 TCF3      |
| cg11171719 | 0.02959 | 0.02861 | 0.02788 | 0.02691 | 0.02173 | 0.0256  | 0.02508 | 0.02625 | 0.02615 | 0.02321 CTDSPL    |
| cg11172196 | 0.05218 | 0.02855 | 0.0308  | 0.03018 | 0.02394 | 0.02847 | 0.02491 | 0.02938 | 0.0235  | 0.02889 TMEM65    |
| cg11172299 | 0.02487 | 0.02242 | 0.02737 | 0.02179 | 0.01769 | 0.02201 | 0.02276 | 0.0214  | 0.01824 | 0.01742 C14orf130 |
| cg11172423 | 0.90913 | 0.8617  | 0.88517 | 0.91944 | 0.91414 | 0.91628 | 0.73777 | 0.89652 | 0.8994  | 0.84284 CLDN19    |
| cg11173246 | 0.31168 | 0.04631 | 0.07963 | 0.10291 | 0.06546 | 0.03822 | 0.32687 | 0.18376 | 0.52896 | 0.17806 TSPAN4    |
| cg11174654 | 0.04058 | 0.02337 | 0.05402 | 0.18154 | 0.02683 | 0.02037 | 0.08442 | 0.04644 | 0.01822 | 0.02011 GLUD2     |
| cg11175310 | 0.03905 | 0.04209 | 0.03958 | 0.03807 | 0.03088 | 0.03236 | 0.03478 | 0.03819 | 0.03194 | 0.03048 RSU1      |
| cg11175476 | 0.19007 | 0.17013 | 0.23323 | 0.21942 | 0.27294 | 0.20658 | 0.19575 | 0.22433 | 0.19006 | 0.18732 LRP6      |
| cg11175477 | 0.11696 | 0.02898 | 0.04428 | 0.03372 | 0.02759 | 0.03028 | 0.03173 | 0.02963 | 0.02674 | 0.02884 RAD9B     |
| cg11176095 | 0.16076 | 0.17172 | 0.05421 | 0.03935 | 0.20245 | 0.36262 | 0.29694 | 0.44366 | 0.06037 | 0.04202 GPR126    |
| cg11177404 | 0.67185 | 0.34819 | 0.9241  | 0.93533 | 0.73896 | 0.85501 | 0.93174 | 0.82566 | 0.63696 | 0.5618 CGB2       |
| cg11177450 | 0.18457 | 0.11031 | 0.19359 | 0.33527 | 0.17767 | 0.05265 | 0.2027  | 0.06416 | 0.05456 | 0.05711 SENP5     |
| cg11177693 | 0.82507 | 0.53163 | 0.90069 | 0.91416 | 0.88086 | 0.50873 | 0.89547 | 0.77156 | 0.92698 | 0.53999 ZNF513    |
| cg11177955 | 0.03748 | 0.0302  | 0.03895 | 0.03864 | 0.03407 | 0.03181 | 0.02995 | 0.02752 | 0.02593 | 0.03212 C1orf58   |
| cg11178136 | 0.78169 | 0.80063 | 0.79433 | 0.83054 | 0.63728 | 0.77709 | 0.49526 | 0.74175 | 0.82915 | 0.74708 KIAA0652  |
| cg11178443 | 0.02817 | 0.02626 | 0.02972 | 0.0284  | 0.03129 | 0.0257  | 0.02683 | 0.02751 | 0.02281 | 0.02294 RANGRF    |
| cg11179184 | 0.85249 | 0.83441 | 0.80182 | 0.80903 | 0.84931 | 0.85438 | 0.85394 | 0.83732 | 0.83321 | 0.8149 C8orf76    |
| cg11181795 | 0.93245 | 0.90775 | 0.92791 | 0.94078 | 0.94704 | 0.93814 | 0.91831 | 0.92986 | 0.95182 | 0.95178 GPS2      |
| cg11184091 | 0.03211 | 0.03563 | 0.03829 | 0.0385  | 0.03312 | 0.03684 | 0.02586 | 0.02977 | 0.02993 | 0.02687 DOLPP1    |
| cg11185452 | 0.05775 | 0.05878 | 0.04536 | 0.0379  | 0.09264 | 0.07298 | 0.05312 | 0.04961 | 0.04602 | 0.08152 ERH       |

|            |         |         |         |         |         |         |         |         |         |                  |
|------------|---------|---------|---------|---------|---------|---------|---------|---------|---------|------------------|
| cg11185569 | 0.03899 | 0.0372  | 0.0369  | 0.0394  | 0.17726 | 0.03098 | 0.04811 | 0.03695 | 0.04302 | 0.02853 CHN2     |
| cg11187508 | 0.07087 | 0.06498 | 0.07745 | 0.06107 | 0.08331 | 0.06276 | 0.0597  | 0.05639 | 0.05069 | 0.06135 CWF19L1  |
| cg11189434 | 0.04776 | 0.03898 | 0.06169 | 0.05409 | 0.04955 | 0.05048 | 0.02907 | 0.02538 | 0.04775 | 0.05617 RPL5     |
| cg11189837 | 0.06639 | 0.04501 | 0.08829 | 0.06756 | 0.32953 | 0.35024 | 0.06982 | 0.04846 | 0.09375 | 0.05534 ADAMTS1  |
| cg11191210 | 0.04585 | 0.04371 | 0.77002 | 0.88029 | 0.09683 | 0.04634 | 0.05281 | 0.04713 | 0.04328 | 0.03708 VGLL2    |
| cg11191337 | 0.73277 | 0.61883 | 0.45538 | 0.59424 | 0.66464 | 0.71502 | 0.69501 | 0.51049 | 0.65737 | 0.51305 PLTP     |
| cg11192270 | 0.05265 | 0.05836 | 0.13071 | 0.35794 | 0.16201 | 0.05352 | 0.06421 | 0.05432 | 0.16838 | 0.0501 ATP13A2   |
| cg11193041 | 0.03906 | 0.04528 | 0.04209 | 0.03712 | 0.05249 | 0.07143 | 0.04752 | 0.04144 | 0.04682 | 0.05685 GSTZ1    |
| cg11194725 | 0.04359 | 0.03827 | 0.04469 | 0.04282 | 0.05376 | 0.05061 | 0.05091 | 0.05713 | 0.03934 | 0.04476 CBX1     |
| cg11195002 | 0.0412  | 0.03439 | 0.26786 | 0.1755  | 0.9056  | 0.91896 | 0.29869 | 0.02815 | 0.18749 | 0.02738 ICAM5    |
| cg11195662 | 0.06488 | 0.0604  | 0.06371 | 0.07219 | 0.27889 | 0.11648 | 0.05326 | 0.0598  | 0.09915 | 0.05149 C9orf65  |
| cg11196870 | 0.07405 | 0.08084 | 0.0805  | 0.07382 | 0.06009 | 0.06936 | 0.06839 | 0.06598 | 0.07039 | 0.06232 SLD5     |
| cg11197066 | 0.02835 | 0.03347 | 0.03143 | 0.02698 | 0.02829 | 0.03204 | 0.02254 | 0.02457 | 0.02527 | 0.02522 PGAP1    |
| cg11199399 | 0.08583 | 0.08364 | 0.09031 | 0.08623 | 0.06576 | 0.0829  | 0.07945 | 0.07829 | 0.07201 | 0.07579 LTBP1    |
| cg11200929 | 0.03558 | 0.0296  | 0.52943 | 0.61329 | 0.40651 | 0.27389 | 0.48915 | 0.46054 | 0.91955 | 0.84497 CRABP1   |
| cg11201229 | 0.84896 | 0.81646 | 0.8251  | 0.8584  | 0.59213 | 0.79849 | 0.77202 | 0.81841 | 0.85548 | 0.78634 PIK3C2A  |
| cg11201288 | 0.76562 | 0.52557 | 0.78378 | 0.78175 | 0.74013 | 0.77762 | 0.75341 | 0.70644 | 0.80402 | 0.75752 SFRS11   |
| cg11201532 | 0.90732 | 0.77801 | 0.91356 | 0.92481 | 0.8667  | 0.71203 | 0.91459 | 0.61164 | 0.90064 | 0.86059 MFNG     |
| cg11203041 | 0.74373 | 0.7203  | 0.48029 | 0.50216 | 0.63426 | 0.63146 | 0.68428 | 0.40604 | 0.53927 | 0.34936 MGST1    |
| cg11204562 | 0.85429 | 0.88109 | 0.81806 | 0.86946 | 0.69259 | 0.63082 | 0.44436 | 0.3673  | 0.10449 | 0.06393 C10orf81 |
| cg11206634 | 0.9017  | 0.86404 | 0.86682 | 0.88333 | 0.87398 | 0.83566 | 0.8553  | 0.83732 | 0.89581 | 0.41785 SFT2D3   |
| cg11206667 | 0.03681 | 0.041   | 0.04286 | 0.04083 | 0.03734 | 0.04729 | 0.03274 | 0.03396 | 0.04188 | 0.03366 FBXO36   |
| cg11206763 | 0.03051 | 0.03422 | 0.02961 | 0.02893 | 0.02473 | 0.02917 | 0.02642 | 0.02863 | 0.02751 | 0.0256 FAM62A    |
| cg11207379 | 0.03868 | 0.03426 | 0.04812 | 0.03963 | 0.03257 | 0.03895 | 0.03896 | 0.03368 | 0.03115 | 0.03075 TDG      |
| cg11207564 | 0.11443 | 0.11894 | 0.07327 | 0.08214 | 0.07925 | 0.17971 | 0.0443  | 0.03787 | 0.14965 | 0.08974 CCL3L3   |
| cg11208235 | 0.05092 | 0.04155 | 0.05319 | 0.04693 | 0.0517  | 0.046   | 0.0334  | 0.03176 | 0.0391  | 0.03603 BCAR3    |
| cg11208483 | 0.14808 | 0.07333 | 0.51434 | 0.498   | 0.30043 | 0.45686 | 0.30453 | 0.27558 | 0.19878 | 0.08043 SOX21    |
| cg11208880 | 0.02613 | 0.02225 | 0.02485 | 0.02442 | 0.01943 | 0.02251 | 0.01717 | 0.01711 | 0.01931 | 0.02039 LRRC8D   |
| cg11212312 | 0.70415 | 0.23895 | 0.83072 | 0.87681 | 0.83158 | 0.87609 | 0.52709 | 0.44192 | 0.50615 | 0.38192 IL3      |
| cg11212609 | 0.06169 | 0.06087 | 0.06572 | 0.06155 | 0.04531 | 0.05116 | 0.05479 | 0.05431 | 0.04759 | 0.05501 DULLARD  |
| cg11213150 | 0.50968 | 0.09378 | 0.53729 | 0.49134 | 0.14316 | 0.04722 | 0.5788  | 0.41624 | 0.5467  | 0.5507 ANGPTL2   |
| cg11214889 | 0.89837 | 0.89904 | 0.84979 | 0.92054 | 0.7541  | 0.86546 | 0.8874  | 0.46818 | 0.04651 | 0.03717 CLUL1    |
| cg11216616 | 0.09319 | 0.07786 | 0.1215  | 0.11738 | 0.1718  | 0.11203 | 0.08737 | 0.06944 | 0.10525 | 0.10458 RAB35    |
| cg11219178 | 0.85182 | 0.33962 | 0.8435  | 0.85303 | 0.84763 | 0.76508 | 0.76082 | 0.59643 | 0.86499 | 0.24872 OSBPL5   |
| cg11220060 | 0.66249 | 0.37135 | 0.4177  | 0.37585 | 0.11713 | 0.03799 | 0.04617 | 0.05605 | 0.09256 | 0.03842 KLF1     |
| cg11220635 | 0.07403 | 0.07887 | 0.07575 | 0.0588  | 0.0768  | 0.06583 | 0.05555 | 0.05749 | 0.06429 | 0.0767 RDH11     |
| cg11221132 | 0.60399 | 0.54126 | 0.80088 | 0.84101 | 0.67377 | 0.7371  | 0.82987 | 0.75021 | 0.69932 | 0.66352 CYP2D7P1 |
| cg11221265 | 0.04182 | 0.04107 | 0.05206 | 0.04249 | 0.03078 | 0.03109 | 0.04405 | 0.03762 | 0.03864 | 0.03487 SDHC     |
| cg11221508 | 0.04244 | 0.04112 | 0.09555 | 0.07151 | 0.05542 | 0.0572  | 0.0536  | 0.05464 | 0.04016 | 0.05559 CCT6B    |
| cg11221513 | 0.05051 | 0.04026 | 0.08229 | 0.12059 | 0.16939 | 0.03565 | 0.07006 | 0.04465 | 0.13948 | 0.04198 C22orf9  |
| cg11222041 | 0.04047 | 0.03811 | 0.0496  | 0.03858 | 0.0484  | 0.04031 | 0.04041 | 0.03777 | 0.03542 | 0.03351 TOR1A    |



|            |         |         |         |         |         |         |         |         |         |                  |
|------------|---------|---------|---------|---------|---------|---------|---------|---------|---------|------------------|
| cg11223252 | 0.44341 | 0.15018 | 0.15699 | 0.13708 | 0.09056 | 0.08201 | 0.06427 | 0.06358 | 0.07288 | 0.10132 RNF103   |
| cg11223864 | 0.06241 | 0.06438 | 0.06511 | 0.0589  | 0.05875 | 0.05773 | 0.05116 | 0.05139 | 0.04892 | 0.05023 GNB2     |
| cg11225410 | 0.54888 | 0.53199 | 0.03628 | 0.06705 | 0.45331 | 0.49217 | 0.42479 | 0.44651 | 0.89699 | 0.71657 SOCS2    |
| cg11225935 | 0.02703 | 0.02708 | 0.02873 | 0.03333 | 0.02012 | 0.03104 | 0.02652 | 0.0264  | 0.02604 | 0.02536 JARID1A  |
| cg11226328 | 0.29452 | 0.06596 | 0.31881 | 0.329   | 0.31169 | 0.03309 | 0.09163 | 0.03445 | 0.25892 | 0.0212 EPB41     |
| cg11227541 | 0.06222 | 0.06359 | 0.08672 | 0.07626 | 0.077   | 0.08387 | 0.04715 | 0.04281 | 0.07134 | 0.06498 GNG5     |
| cg11228872 | 0.02684 | 0.02746 | 0.03271 | 0.0287  | 0.01886 | 0.02234 | 0.02577 | 0.02415 | 0.02224 | 0.02109 CALR     |
| cg11231018 | 0.8     | 0.79985 | 0.75714 | 0.81673 | 0.63831 | 0.80944 | 0.75712 | 0.8349  | 0.77582 | 0.78873 LIPF     |
| cg11233153 | 0.02352 | 0.02166 | 0.03098 | 0.02744 | 0.02379 | 0.02598 | 0.51418 | 0.13524 | 0.01791 | 0.0166 SLC10A3   |
| cg11233228 | 0.07437 | 0.07959 | 0.07158 | 0.0669  | 0.05212 | 0.06898 | 0.07089 | 0.06455 | 0.05894 | 0.06071 CDC26    |
| cg11233384 | 0.51236 | 0.29486 | 0.44955 | 0.67432 | 0.57054 | 0.51158 | 0.40483 | 0.553   | 0.42775 | 0.3839 AKR7A3    |
| cg11234457 | 0.80474 | 0.93828 | 0.84094 | 0.89055 | 0.8199  | 0.8761  | 0.80985 | 0.94176 | 0.74193 | 0.7594 FTMT      |
| cg11235426 | 0.05313 | 0.0499  | 0.47922 | 0.42761 | 0.56042 | 0.54884 | 0.4709  | 0.60161 | 0.03105 | 0.03258 DUSP22   |
| cg11235871 | 0.03307 | 0.03611 | 0.03782 | 0.03398 | 0.02493 | 0.03271 | 0.03294 | 0.03269 | 0.02648 | 0.03186 QARS     |
| cg11236244 | 0.74017 | 0.52846 | 0.5941  | 0.56128 | 0.60728 | 0.63316 | 0.34545 | 0.44961 | 0.7536  | 0.71791 MAGEA12  |
| cg11237115 | 0.0454  | 0.05129 | 0.04559 | 0.04869 | 0.04033 | 0.03387 | 0.04379 | 0.04052 | 0.03658 | 0.03334 KLHL24   |
| cg11237738 | 0.76796 | 0.77531 | 0.77512 | 0.77523 | 0.59261 | 0.49899 | 0.67737 | 0.47764 | 0.82057 | 0.55319 C4orf6   |
| cg11237817 | 0.14256 | 0.22945 | 0.31166 | 0.39958 | 0.79972 | 0.72404 | 0.04877 | 0.04302 | 0.19912 | 0.30283 KIR3DL3  |
| cg11237883 | 0.03183 | 0.03189 | 0.03287 | 0.03496 | 0.03432 | 0.03949 | 0.02979 | 0.03053 | 0.02471 | 0.02854 MDH2     |
| cg11238505 | 0.02158 | 0.02459 | 0.03637 | 0.03155 | 0.02884 | 0.02891 | 0.02137 | 0.02129 | 0.02323 | 0.02291 CYHR1    |
| cg11241627 | 0.04334 | 0.0561  | 0.83333 | 0.87754 | 0.73416 | 0.8759  | 0.86405 | 0.87806 | 0.79833 | 0.46086 FERD3L   |
| cg11243196 | 0.04985 | 0.04553 | 0.04996 | 0.05119 | 0.05349 | 0.05236 | 0.05633 | 0.04002 | 0.03962 | 0.03101 ADAMTS3  |
| cg11245384 | 0.51806 | 0.09858 | 0.51151 | 0.5678  | 0.78767 | 0.85657 | 0.07422 | 0.04995 | 0.4682  | 0.13922 PDYN     |
| cg11246695 | 0.02501 | 0.02537 | 0.02414 | 0.02185 | 0.02202 | 0.02721 | 0.01908 | 0.01847 | 0.02161 | 0.02284 PIAS3    |
| cg11248413 | 0.02969 | 0.03164 | 0.34384 | 0.45373 | 0.40414 | 0.54353 | 0.02659 | 0.02223 | 0.1002  | 0.37331 NEUROG1  |
| cg11248491 | 0.32582 | 0.06602 | 0.50988 | 0.61507 | 0.22743 | 0.04049 | 0.04788 | 0.03808 | 0.03825 | 0.0291 PSCD3     |
| cg11249120 | 0.71608 | 0.70346 | 0.62315 | 0.69951 | 0.62801 | 0.64181 | 0.43174 | 0.2474  | 0.63407 | 0.47157 SAMD3    |
| cg11249173 | 0.34288 | 0.31212 | 0.71914 | 0.72594 | 0.78154 | 0.76212 | 0.73729 | 0.70043 | 0.68369 | 0.45362 HERV-FRD |
| cg11250058 | 0.05232 | 0.04502 | 0.05968 | 0.04801 | 0.0465  | 0.05192 | 0.04748 | 0.05311 | 0.0539  | 0.04637 RAPH1    |
| cg11250247 | 0.06668 | 0.06581 | 0.08935 | 0.16032 | 0.11644 | 0.06916 | 0.06672 | 0.05703 | 0.07161 | 0.06472 TBP      |
| cg11251086 | 0.0553  | 0.07609 | 0.07053 | 0.0644  | 0.07047 | 0.06296 | 0.04848 | 0.05186 | 0.04677 | 0.05543 DUSP11   |
| cg11251498 | 0.25118 | 0.13948 | 0.19608 | 0.22233 | 0.23074 | 0.12478 | 0.18825 | 0.20187 | 0.11214 | 0.14432 INDOL1   |
| cg11251858 | 0.66665 | 0.60875 | 0.7705  | 0.87226 | 0.12623 | 0.24926 | 0.06612 | 0.02717 | 0.04602 | 0.02859 ESR1     |
| cg11251877 | 0.81143 | 0.54263 | 0.66649 | 0.77588 | 0.72719 | 0.71844 | 0.76061 | 0.48633 | 0.82277 | 0.74294 C6orf54  |
| cg11254522 | 0.92367 | 0.71644 | 0.92395 | 0.94036 | 0.9638  | 0.90404 | 0.89911 | 0.90751 | 0.93059 | 0.86793 FGR      |
| cg11255163 | 0.03211 | 0.02785 | 0.88507 | 0.93447 | 0.43954 | 0.55267 | 0.47407 | 0.51155 | 0.28048 | 0.40455 CDH1     |
| cg11255230 | 0.0427  | 0.04774 | 0.05117 | 0.04951 | 0.03802 | 0.05455 | 0.04804 | 0.04233 | 0.06472 | 0.04354 BCL2     |
| cg11256279 | 0.03097 | 0.03101 | 0.03464 | 0.02901 | 0.01932 | 0.03453 | 0.02886 | 0.02819 | 0.02644 | 0.02665 C7orf23  |
| cg11256445 | 0.89184 | 0.83811 | 0.89101 | 0.89512 | 0.6639  | 0.84576 | 0.90239 | 0.89078 | 0.90325 | 0.90264 HCLS1    |
| cg11258532 | 0.88659 | 0.50689 | 0.76698 | 0.82565 | 0.90071 | 0.84989 | 0.80785 | 0.45772 | 0.87095 | 0.51287 CA7      |
| cg11260422 | 0.03996 | 0.03703 | 0.04754 | 0.0416  | 0.04614 | 0.0344  | 0.03486 | 0.03189 | 0.03191 | 0.02849 FOXA1    |

|            |         |         |         |         |         |         |         |         |         |                       |
|------------|---------|---------|---------|---------|---------|---------|---------|---------|---------|-----------------------|
| cg11260848 | 0.50078 | 0.4644  | 0.6685  | 0.61394 | 0.89827 | 0.86424 | 0.88962 | 0.8598  | 0.86043 | 0.86295 ALX4          |
| cg11261264 | 0.85631 | 0.62101 | 0.85332 | 0.86962 | 0.83575 | 0.80474 | 0.81743 | 0.76819 | 0.88682 | 0.6616 PTPRH          |
| cg11262815 | 0.03757 | 0.03597 | 0.07446 | 0.03663 | 0.04083 | 0.32156 | 0.02897 | 0.03366 | 0.02879 | 0.02798 CACNA1G       |
| cg11262874 | 0.192   | 0.24186 | 0.5012  | 0.4981  | 0.2698  | 0.34676 | 0.49133 | 0.53088 | 0.14886 | 0.17608 ZNF681        |
| cg11263296 | 0.70525 | 0.28407 | 0.92799 | 0.9385  | 0.90908 | 0.81138 | 0.76546 | 0.69695 | 0.92109 | 0.92012 CCDC64        |
| cg11263497 | 0.51587 | 0.58735 | 0.11684 | 0.10886 | 0.06858 | 0.0519  | 0.06137 | 0.05057 | 0.05669 | 0.04458 WDR35         |
| cg11263584 | 0.08716 | 0.0356  | 0.0397  | 0.12923 | 0.03062 | 0.03117 | 0.0375  | 0.02942 | 0.0306  | 0.02681 ICT1          |
| cg11264817 | 0.02191 | 0.02557 | 0.02373 | 0.02381 | 0.02254 | 0.02203 | 0.02132 | 0.02177 | 0.02036 | 0.01792 KIF1C         |
| cg11265916 | 0.04453 | 0.04078 | 0.05332 | 0.07489 | 0.06472 | 0.04463 | 0.04713 | 0.03811 | 0.04583 | 0.03107 MAPK1         |
| cg11265941 | 0.28946 | 0.23955 | 0.63989 | 0.78408 | 0.84535 | 0.84609 | 0.06124 | 0.19221 | 0.07211 | 0.05279 SNRPN         |
| cg11266874 | 0.05275 | 0.05518 | 0.0685  | 0.05307 | 0.05796 | 0.05769 | 0.09006 | 0.09356 | 0.05468 | 0.05498 ARL13B        |
| cg11267879 | 0.81152 | 0.57905 | 0.18833 | 0.20592 | 0.29509 | 0.21473 | 0.1384  | 0.12396 | 0.128   | 0.1059 CYP2F1         |
| cg11269533 | 0.0585  | 0.06291 | 0.41683 | 0.56164 | 0.45471 | 0.61625 | 0.09789 | 0.06792 | 0.06176 | 0.25117 FEV           |
| cg11270633 | 0.19801 | 0.07213 | 0.14195 | 0.1526  | 0.28158 | 0.2718  | 0.08189 | 0.076   | 0.29994 | 0.15347 IL28B         |
| cg11271605 | 0.05156 | 0.03924 | 0.30217 | 0.30185 | 0.14926 | 0.07418 | 0.12177 | 0.4738  | 0.09471 | 0.19005 STEAP4        |
| cg11272332 | 0.0409  | 0.04235 | 0.39093 | 0.672   | 0.0413  | 0.04098 | 0.38863 | 0.4506  | 0.03801 | 0.03133 ZDHC1         |
| cg11274211 | 0.05    | 0.04473 | 0.04581 | 0.04239 | 0.05657 | 0.0573  | 0.03434 | 0.03058 | 0.0384  | 0.03377 C9orf42       |
| cg11275139 | 0.05591 | 0.05535 | 0.06215 | 0.05879 | 0.04672 | 0.05063 | 0.05097 | 0.05993 | 0.04575 | 0.04598 SAV1          |
| cg11276198 | 0.02237 | 0.02302 | 0.02329 | 0.02142 | 0.01817 | 0.02167 | 0.02212 | 0.02231 | 0.01943 | 0.01861 KRAS          |
| cg11276280 | 0.06094 | 0.06139 | 0.06363 | 0.05981 | 0.0617  | 0.06507 | 0.05112 | 0.04944 | 0.04534 | 0.04223 TBCC          |
| cg11277126 | 0.776   | 0.54868 | 0.12695 | 0.32964 | 0.3497  | 0.0744  | 0.0351  | 0.0911  | 0.02892 | 0.02623 TRPC4AP       |
| cg11277230 | 0.3112  | 0.075   | 0.3074  | 0.4479  | 0.45686 | 0.17834 | 0.10691 | 0.06783 | 0.66174 | 0.06593 MGC26744      |
| cg11278262 | 0.04841 | 0.04419 | 0.14572 | 0.1134  | 0.87041 | 0.64249 | 0.03992 | 0.03591 | 0.0572  | 0.06124 KRTCAP2       |
| cg11279021 | 0.2371  | 0.043   | 0.0752  | 0.05548 | 0.06591 | 0.05182 | 0.08981 | 0.04189 | 0.04252 | 0.0414 ETV1           |
| cg11283860 | 0.88616 | 0.82729 | 0.90231 | 0.896   | 0.88865 | 0.90118 | 0.90217 | 0.91071 | 0.89926 | 0.91249 SLC45A1       |
| cg11285003 | 0.0616  | 0.04316 | 0.88002 | 0.92094 | 0.15451 | 0.03995 | 0.05211 | 0.04442 | 0.15353 | 0.29251 HCN1          |
| cg11285843 | 0.42085 | 0.21556 | 0.32016 | 0.30183 | 0.19334 | 0.17782 | 0.20083 | 0.08167 | 0.34996 | 0.24201 TMEM41A       |
| cg11286122 | 0.84161 | 0.59517 | 0.82597 | 0.84646 | 0.67773 | 0.80774 | 0.79197 | 0.75386 | 0.86247 | 0.83074 PHLDB1        |
| cg11286163 | 0.03459 | 0.033   | 0.03612 | 0.03488 | 0.02035 | 0.02675 | 0.02798 | 0.03134 | 0.03083 | 0.02969 PSMA5         |
| cg11286618 | 0.04651 | 0.04152 | 0.04865 | 0.04567 | 0.03266 | 0.04451 | 0.0449  | 0.0433  | 0.03998 | 0.03813 WBP1          |
| cg11289251 | 0.02018 | 0.01919 | 0.01935 | 0.02284 | 0.03381 | 0.02081 | 0.01785 | 0.01721 | 0.01636 | 0.0155 DUS2L          |
| cg11290225 | 0.21146 | 0.06388 | 0.16466 | 0.13725 | 0.88082 | 0.70866 | 0.11956 | 0.25423 | 0.30235 | 0.05162 KIFC2         |
| cg11291009 | 0.03302 | 0.03796 | 0.04009 | 0.03907 | 0.03499 | 0.04371 | 0.07638 | 0.05951 | 0.03284 | 0.03161 ARHGEF9       |
| cg11291200 | 0.94374 | 0.93127 | 0.86643 | 0.76582 | 0.96835 | 0.95333 | 0.23211 | 0.02649 | 0.89457 | 0.86962 MAGEB2        |
| cg11295113 | 0.57645 | 0.3372  | 0.67987 | 0.73706 | 0.65692 | 0.59847 | 0.39241 | 0.59343 | 0.31472 | 0.32131 FOLR2         |
| cg11295902 | 0.05442 | 0.05285 | 0.0587  | 0.06835 | 0.06736 | 0.06087 | 0.06338 | 0.06611 | 0.03899 | 0.04421 SF1           |
| cg11296363 | 0.0413  | 0.04158 | 0.04956 | 0.05264 | 0.04149 | 0.05335 | 0.03122 | 0.0328  | 0.03644 | 0.04123 FTSJ3         |
| cg11296937 | 0.2412  | 0.22081 | 0.25491 | 0.2631  | 0.21968 | 0.20365 | 0.28616 | 0.21235 | 0.22455 | 0.1579 HSPC152        |
| cg11297236 | 0.09809 | 0.08388 | 0.10761 | 0.13626 | 0.2282  | 0.55099 | 0.09148 | 0.09007 | 0.09217 | 0.07782 PDILT         |
| cg11298412 | 0.03591 | 0.0416  | 0.04525 | 0.03968 | 0.03147 | 0.03639 | 0.04298 | 0.03348 | 0.03918 | 0.03803 DKFZP564O0823 |
| cg11298616 | 0.03553 | 0.04641 | 0.04816 | 0.04817 | 0.04725 | 0.05203 | 0.04182 | 0.04581 | 0.04317 | 0.04189 CKAP2         |

|            |         |         |         |         |         |         |         |         |         |         |           |
|------------|---------|---------|---------|---------|---------|---------|---------|---------|---------|---------|-----------|
| cg11299964 | 0.06513 | 0.06695 | 0.05695 | 0.05346 | 0.05881 | 0.04867 | 0.04232 | 0.0398  | 0.0435  | 0.03892 | MAPKAP1   |
| cg11300809 | 0.85321 | 0.50333 | 0.7815  | 0.87364 | 0.89878 | 0.86366 | 0.81896 | 0.67944 | 0.86931 | 0.82545 | SGPP2     |
| cg11301598 | 0.13971 | 0.0427  | 0.17759 | 0.37381 | 0.09899 | 0.03307 | 0.06778 | 0.03793 | 0.04262 | 0.03329 | OASL      |
| cg11303670 | 0.04613 | 0.0477  | 0.10826 | 0.10102 | 0.05738 | 0.05831 | 0.07416 | 0.04592 | 0.05302 | 0.04334 | TSPAN33   |
| cg11303749 | 0.03678 | 0.04156 | 0.04768 | 0.03608 | 0.04302 | 0.04518 | 0.03957 | 0.03517 | 0.02952 | 0.02896 | HIST1H4B  |
| cg11304234 | 0.69502 | 0.45989 | 0.68699 | 0.73684 | 0.1541  | 0.18248 | 0.48922 | 0.72996 | 0.84208 | 0.69262 | IL18      |
| cg11304524 | 0.89267 | 0.74736 | 0.87859 | 0.89875 | 0.82609 | 0.85447 | 0.90182 | 0.90318 | 0.89705 | 0.88192 | TSSK4     |
| cg11304734 | 0.3172  | 0.19518 | 0.67708 | 0.83625 | 0.38273 | 0.28718 | 0.31586 | 0.12776 | 0.25539 | 0.20712 | PRAF1     |
| cg11308639 | 0.68797 | 0.62541 | 0.68932 | 0.73879 | 0.51874 | 0.73848 | 0.2876  | 0.41927 | 0.5535  | 0.48071 | BMP10     |
| cg11308840 | 0.14077 | 0.24719 | 0.22613 | 0.43125 | 0.30841 | 0.11578 | 0.13901 | 0.05181 | 0.14208 | 0.08937 | LOC401498 |
| cg11310496 | 0.91845 | 0.84512 | 0.88422 | 0.89883 | 0.88321 | 0.88679 | 0.57063 | 0.52741 | 0.90834 | 0.92265 | PNLIPRP2  |
| cg11310692 | 0.03294 | 0.03581 | 0.035   | 0.03651 | 0.03415 | 0.03575 | 0.03227 | 0.03124 | 0.03786 | 0.03531 | PEX7      |
| cg11311499 | 0.07331 | 0.05531 | 0.0596  | 0.06715 | 0.08788 | 0.04938 | 0.05581 | 0.06345 | 0.05078 | 0.04863 | MSH2      |
| cg11312566 | 0.03318 | 0.0349  | 0.03753 | 0.03163 | 0.02971 | 0.03032 | 0.02484 | 0.0294  | 0.02972 | 0.02745 | SLC2A8    |
| cg11313124 | 0.04697 | 0.04509 | 0.04988 | 0.04376 | 0.03966 | 0.03583 | 0.03134 | 0.03502 | 0.03894 | 0.0375  | WIG1      |
| cg11313997 | 0.04079 | 0.02547 | 0.03751 | 0.04169 | 0.02779 | 0.02511 | 0.03224 | 0.02212 | 0.03019 | 0.02147 | B4GALT7   |
| cg11314271 | 0.81961 | 0.45828 | 0.80659 | 0.80571 | 0.67453 | 0.75291 | 0.75758 | 0.4049  | 0.4237  | 0.42543 | RGPD5     |
| cg11314292 | 0.16764 | 0.0722  | 0.16622 | 0.14576 | 0.2989  | 0.27428 | 0.10524 | 0.07343 | 0.0782  |         | RNF125    |
| cg11314684 | 0.1812  | 0.06713 | 0.14288 | 0.1163  | 0.16572 | 0.14298 | 0.36335 | 0.58307 | 0.67    | 0.58034 | AKT3      |
| cg11316784 | 0.2411  | 0.02881 | 0.38335 | 0.42442 | 0.02649 | 0.02534 | 0.02761 | 0.02789 | 0.21391 | 0.09778 | NSD1      |
| cg11318251 | 0.72082 | 0.14943 | 0.76974 | 0.80035 | 0.73086 | 0.76577 | 0.70051 | 0.70235 | 0.78538 | 0.66464 | BAALC     |
| cg11319389 | 0.05325 | 0.05431 | 0.14658 | 0.06823 | 0.90593 | 0.82538 | 0.53644 | 0.06639 | 0.06154 | 0.05038 | C20orf100 |
| cg11320084 | 0.85754 | 0.79964 | 0.86137 | 0.88136 | 0.8775  | 0.59709 | 0.51825 | 0.45161 | 0.44027 | 0.19731 | RNF2      |
| cg11320143 | 0.04501 | 0.04567 | 0.05982 | 0.04579 | 0.05072 | 0.05453 | 0.03003 | 0.03199 | 0.04151 | 0.05186 | WDR3      |
| cg11321895 | 0.0469  | 0.05133 | 0.04809 | 0.0447  | 0.04647 | 0.04239 | 0.04418 | 0.03779 | 0.0412  | 0.0475  | PLAG1     |
| cg11323198 | 0.0482  | 0.04644 | 0.80071 | 0.92321 | 0.07349 | 0.04907 | 0.445   | 0.46905 | 0.09419 | 0.08601 | CDH8      |
| cg11323230 | 0.03092 | 0.03061 | 0.03183 | 0.0298  | 0.024   | 0.02364 | 0.02479 | 0.02886 | 0.02368 | 0.02176 | AMFR      |
| cg11323731 | 0.08246 | 0.09183 | 0.08955 | 0.08282 | 0.06855 | 0.08775 | 0.07248 | 0.07911 | 0.08212 | 0.07291 | AKR1A1    |
| cg11324740 | 0.03701 | 0.03764 | 0.03879 | 0.04409 | 0.05203 | 0.04623 | 0.05124 | 0.05103 | 0.0545  | 0.05157 | OIP5      |
| cg11325578 | 0.88077 | 0.92194 | 0.92608 | 0.91748 | 0.82501 | 0.90502 | 0.87931 | 0.93767 | 0.15379 | 0.44958 | GPR143    |
| cg11326613 | 0.23012 | 0.10692 | 0.27027 | 0.38565 | 0.3999  | 0.37568 | 0.13027 | 0.1256  | 0.09829 | 0.08752 | MGC31967  |
| cg11326640 | 0.03644 | 0.04125 | 0.04333 | 0.03349 | 0.04788 | 0.0406  | 0.03282 | 0.04192 | 0.0274  | 0.02704 | STAU      |
| cg11328149 | 0.62244 | 0.45724 | 0.66108 | 0.71808 | 0.78733 | 0.85582 | 0.69326 | 0.76553 | 0.52021 | 0.05239 | LY6G6C    |
| cg11328541 | 0.15539 | 0.09836 | 0.14224 | 0.13631 | 0.15041 | 0.07678 | 0.11463 | 0.09147 | 0.21135 | 0.12242 | OR7C1     |
| cg11328875 | 0.04845 | 0.04514 | 0.03432 | 0.03179 | 0.05202 | 0.05081 | 0.03076 | 0.03245 | 0.03048 | 0.04133 | PPIL5     |
| cg11329235 | 0.02575 | 0.02857 | 0.02729 | 0.02929 | 0.02254 | 0.0265  | 0.02608 | 0.02754 | 0.02278 | 0.02219 | SRRM1     |
| cg11330108 | 0.13721 | 0.12159 | 0.24981 | 0.28154 | 0.18601 | 0.16215 | 0.15849 | 0.13157 | 0.12258 | 0.17957 | BCL2      |
| cg11331769 | 0.65101 | 0.41999 | 0.45757 | 0.47398 | 0.44786 | 0.43377 | 0.50298 | 0.64016 | 0.7918  | 0.46403 | TAZ       |
| cg11332950 | 0.03949 | 0.04586 | 0.0488  | 0.04236 | 0.04101 | 0.0417  | 0.0367  | 0.03584 | 0.03707 | 0.04009 | AHSA2     |
| cg11332994 | 0.40021 | 0.30931 | 0.51488 | 0.55047 | 0.58778 | 0.44618 | 0.48362 | 0.42031 | 0.24923 | 0.24971 | SMN2      |
| cg11334469 | 0.0767  | 0.04617 | 0.07812 | 0.07187 | 0.1469  | 0.1     | 0.09467 | 0.05415 | 0.04558 | 0.04608 | GTF2I     |

|            |         |         |         |         |         |         |         |         |         |         |           |
|------------|---------|---------|---------|---------|---------|---------|---------|---------|---------|---------|-----------|
| cg11336428 | 0.06706 | 0.07573 | 0.07503 | 0.06956 | 0.05222 | 0.064   | 0.05958 | 0.06936 | 0.06089 | 0.05631 | TEX2      |
| cg11337525 | 0.03336 | 0.04057 | 0.04305 | 0.03989 | 0.37117 | 0.0289  | 0.03482 | 0.02941 | 0.03022 | 0.02885 | APOC1     |
| cg11337780 | 0.36893 | 0.26869 | 0.34846 | 0.41713 | 0.30484 | 0.15971 | 0.66746 | 0.53879 | 0.72736 | 0.7931  | ZNF439    |
| cg11340260 | 0.87615 | 0.49634 | 0.88151 | 0.91719 | 0.94522 | 0.68097 | 0.78272 | 0.46219 | 0.08683 | 0.05752 | GP1BA     |
| cg11341028 | 0.46991 | 0.21907 | 0.65178 | 0.81777 | 0.43031 | 0.2529  | 0.29106 | 0.55779 | 0.84675 | 0.5581  | KBTBD4    |
| cg11341528 | 0.03456 | 0.0385  | 0.03337 | 0.03052 | 0.02394 | 0.03011 | 0.0563  | 0.03327 | 0.02809 | 0.03512 | NBLA04196 |
| cg11344614 | 0.80259 | 0.80314 | 0.77624 | 0.81106 | 0.74495 | 0.80357 | 0.45526 | 0.60334 | 0.58736 | 0.49597 | JAM2      |
| cg11345438 | 0.57329 | 0.56561 | 0.58448 | 0.59405 | 0.61037 | 0.62367 | 0.54897 | 0.55428 | 0.61748 | 0.58494 | KIAA2013  |
| cg11346450 | 0.76382 | 0.61049 | 0.65067 | 0.75077 | 0.80449 | 0.85793 | 0.12298 | 0.15106 | 0.788   | 0.52483 | UGT1A3    |
| cg11353032 | 0.04906 | 0.04979 | 0.04722 | 0.04291 | 0.04347 | 0.03812 | 0.02642 | 0.04303 | 0.0372  | 0.03595 | U2AF1L2   |
| cg11354906 | 0.07552 | 0.06134 | 0.7698  | 0.83223 | 0.28588 | 0.06771 | 0.08743 | 0.04594 | 0.61892 | 0.53692 | SFRP2     |
| cg11356290 | 0.05624 | 0.04689 | 0.05805 | 0.05114 | 0.08626 | 0.05378 | 0.03624 | 0.03578 | 0.04085 | 0.04913 | AZI2      |
| cg11356705 | 0.02832 | 0.03505 | 0.03314 | 0.03117 | 0.02913 | 0.03396 | 0.02803 | 0.02894 | 0.02678 | 0.02316 | NUP54     |
| cg11360149 | 0.79304 | 0.67288 | 0.91501 | 0.92046 | 0.93205 | 0.93867 | 0.14653 | 0.09079 | 0.92752 | 0.93293 | OR2V2     |
| cg11360718 | 0.82089 | 0.49229 | 0.85971 | 0.71882 | 0.53761 | 0.56504 | 0.87119 | 0.85759 | 0.70021 | 0.63654 | TM9SF4    |
| cg11360768 | 0.3726  | 0.02042 | 0.06461 | 0.02351 | 0.43707 | 0.45322 | 0.49095 | 0.55042 | 0.01707 | 0.01583 | WHSC1L1   |
| cg11366015 | 0.02392 | 0.02586 | 0.02604 | 0.02478 | 0.02606 | 0.0252  | 0.02279 | 0.02112 | 0.01775 | 0.0174  | C2orf27   |
| cg11368509 | 0.05091 | 0.03708 | 0.06865 | 0.09022 | 0.06367 | 0.08512 | 0.07419 | 0.0418  | 0.07981 | 0.05941 | SUV420H2  |
| cg11368578 | 0.0641  | 0.05917 | 0.05864 | 0.05808 | 0.04204 | 0.15699 | 0.05574 | 0.06969 | 0.05599 | 0.05026 | CDK5      |
| cg11368643 | 0.63219 | 0.54972 | 0.63055 | 0.72593 | 0.65386 | 0.57018 | 0.54183 | 0.52214 | 0.079   | 0.06115 | PCDHB15   |
| cg11368791 | 0.03668 | 0.04024 | 0.04323 | 0.04013 | 0.03157 | 0.02858 | 0.03914 | 0.03829 | 0.03332 | 0.0311  | PFDN6     |
| cg11368946 | 0.1257  | 0.05969 | 0.16223 | 0.09292 | 0.07456 | 0.05362 | 0.09312 | 0.04786 | 0.77732 | 0.38408 | GCAT      |
| cg11371160 | 0.02894 | 0.0286  | 0.03468 | 0.03432 | 0.02852 | 0.02814 | 0.43292 | 0.50803 | 0.02387 | 0.02323 | UBL4A     |
| cg11371394 | 0.20014 | 0.08171 | 0.06174 | 0.05921 | 0.07679 | 0.09026 | 0.2079  | 0.0642  | 0.06063 | 0.04971 | TGFBRAP1  |
| cg11371791 | 0.04671 | 0.0472  | 0.04816 | 0.04609 | 0.0415  | 0.04296 | 0.04102 | 0.04292 | 0.04106 | 0.03216 | FAM18B2   |
| cg11372696 | 0.0372  | 0.03151 | 0.03808 | 0.03774 | 0.02765 | 0.04112 | 0.03754 | 0.03452 | 0.02977 | 0.03155 | POLR2G    |
| cg11372831 | 0.08332 | 0.07843 | 0.0773  | 0.0757  | 0.06886 | 0.08614 | 0.07705 | 0.07456 | 0.07573 | 0.06635 | PPAT      |
| cg11373429 | 0.12192 | 0.12106 | 0.12317 | 0.12854 | 0.50508 | 0.56621 | 0.12631 | 0.11204 | 0.10087 | 0.08696 | ICAM5     |
| cg11373746 | 0.09783 | 0.07552 | 0.14414 | 0.11527 | 0.11098 | 0.08415 | 0.10412 | 0.08706 | 0.08426 | 0.10009 | ALDH9A1   |
| cg11375079 | 0.05852 | 0.05577 | 0.06337 | 0.06448 | 0.05003 | 0.04867 | 0.05115 | 0.05026 | 0.04698 | 0.05003 | GLRX5     |
| cg11375102 | 0.63259 | 0.69026 | 0.06998 | 0.06767 | 0.75982 | 0.61922 | 0.77418 | 0.80928 | 0.05522 | 0.05332 | C16orf30  |
| cg11375475 | 0.0384  | 0.03516 | 0.035   | 0.03498 | 0.02935 | 0.03194 | 0.034   | 0.03482 | 0.0311  | 0.0327  | BBC3      |
| cg11375622 | 0.06379 | 0.06114 | 0.11644 | 0.08793 | 0.22621 | 0.11582 | 0.05722 | 0.05812 | 0.09711 | 0.09248 | BOP1      |
| cg11376198 | 0.96715 | 0.97893 | 0.97978 | 0.97938 | 0.98276 | 0.98246 | 0.97044 | 0.98114 | 0.98521 | 0.98604 | AFAR3     |
| cg11377136 | 0.65986 | 0.93789 | 0.96635 | 0.97405 | 0.97528 | 0.97154 | 0.79851 | 0.95868 | 0.77827 | 0.86668 | PKDREJ    |
| cg11378044 | 0.72053 | 0.62774 | 0.62868 | 0.69826 | 0.64706 | 0.63457 | 0.51318 | 0.44675 | 0.67031 | 0.73648 | SPAG4L    |
| cg11378052 | 0.58221 | 0.4106  | 0.71521 | 0.80646 | 0.66277 | 0.74863 | 0.69521 | 0.41364 | 0.4554  | 0.21024 | MGC48595  |
| cg11378484 | 0.53291 | 0.09055 | 0.18862 | 0.28377 | 0.54921 | 0.16644 | 0.4094  | 0.08497 | 0.41122 | 0.03621 | NIF3L1BP1 |
| cg11378686 | 0.08488 | 0.08438 | 0.07118 | 0.19311 | 0.07962 | 0.06464 | 0.05736 | 0.06865 | 0.07567 | 0.04145 | ZNF318    |
| cg11378840 | 0.01877 | 0.02509 | 0.02364 | 0.02168 | 0.01974 | 0.02236 | 0.02155 | 0.01769 | 0.01881 | 0.02087 | HHEX      |
| cg11380128 | 0.40976 | 0.25435 | 0.73101 | 0.86521 | 0.53491 | 0.84405 | 0.44475 | 0.36203 | 0.52064 | 0.52124 | PRLH      |

|            |         |         |         |         |         |         |         |         |         |                  |
|------------|---------|---------|---------|---------|---------|---------|---------|---------|---------|------------------|
| cg11380624 | 0.08098 | 0.06806 | 0.06813 | 0.06455 | 0.05105 | 0.06088 | 0.77601 | 0.3961  | 0.05366 | 0.05299 DNAJC14  |
| cg11384427 | 0.88098 | 0.75327 | 0.88985 | 0.88426 | 0.90591 | 0.88807 | 0.86926 | 0.81606 | 0.88169 | 0.80988 TNFRSF7  |
| cg11385473 | 0.11126 | 0.09493 | 0.18423 | 0.08994 | 0.27746 | 0.12626 | 0.11735 | 0.09528 | 0.4618  | 0.2003 IMMP1L    |
| cg11386709 | 0.83904 | 0.85472 | 0.4705  | 0.44675 | 0.75758 | 0.78399 | 0.80904 | 0.85126 | 0.80541 | 0.81801 EPB41L2  |
| cg11386746 | 0.20104 | 0.1122  | 0.76178 | 0.72701 | 0.87748 | 0.71017 | 0.74254 | 0.53038 | 0.40985 | 0.1185 CDH15     |
| cg11387131 | 0.05731 | 0.0607  | 0.17604 | 0.19709 | 0.48379 | 0.40113 | 0.09717 | 0.07576 | 0.15671 | 0.07254 KCNJ5    |
| cg11387519 | 0.06998 | 0.08891 | 0.10796 | 0.09132 | 0.13162 | 0.07331 | 0.08205 | 0.0625  | 0.07948 | 0.08309 MRPL53   |
| cg11388238 | 0.14924 | 0.09092 | 0.18234 | 0.20502 | 0.06941 | 0.04404 | 0.05635 | 0.05286 | 0.34244 | 0.17996 KCTD18   |
| cg11389172 | 0.0263  | 0.02736 | 0.06945 | 0.1957  | 0.03867 | 0.02105 | 0.02547 | 0.02386 | 0.02082 | 0.01854 SLC18A3  |
| cg11390468 | 0.12864 | 0.09991 | 0.09001 | 0.06343 | 0.07011 | 0.06066 | 0.06549 | 0.06779 | 0.06366 | 0.0562 IFT57     |
| cg11391732 | 0.83289 | 0.82187 | 0.81992 | 0.85082 | 0.6764  | 0.69434 | 0.07671 | 0.07508 | 0.58194 | 0.7061 HSPB3     |
| cg11392765 | 0.06884 | 0.05834 | 0.12493 | 0.11192 | 0.10954 | 0.08243 | 0.05167 | 0.04495 | 0.06388 | 0.06403 BAPX1    |
| cg11393453 | 0.03731 | 0.03164 | 0.03729 | 0.03385 | 0.03827 | 0.03413 | 0.02721 | 0.02795 | 0.03183 | 0.02765 FAM59A   |
| cg11393848 | 0.18758 | 0.04423 | 0.044   | 0.05905 | 0.0269  | 0.0414  | 0.03209 | 0.02854 | 0.02993 | 0.02637 C1QC     |
| cg11394644 | 0.07847 | 0.07026 | 0.10489 | 0.0788  | 0.09515 | 0.05785 | 0.06363 | 0.0595  | 0.06445 | 0.08178 C1orf80  |
| cg11394785 | 0.83063 | 0.31847 | 0.87927 | 0.89724 | 0.89891 | 0.58086 | 0.71144 | 0.69184 | 0.88993 | 0.81907 LTC4S    |
| cg11395610 | 0.06736 | 0.06157 | 0.13284 | 0.12089 | 0.10648 | 0.08258 | 0.04919 | 0.04739 | 0.05967 | 0.04984 RAB28    |
| cg11395917 | 0.03825 | 0.04034 | 0.04785 | 0.04616 | 0.03605 | 0.04161 | 0.04184 | 0.04513 | 0.03847 | 0.03499 PLEKHB2  |
| cg11395975 | 0.04043 | 0.03416 | 0.08199 | 0.0475  | 0.07016 | 0.02852 | 0.05045 | 0.03519 | 0.05059 | 0.02893 GBL      |
| cg11396509 | 0.06864 | 0.0498  | 0.08521 | 0.08353 | 0.0399  | 0.03482 | 0.03308 | 0.03251 | 0.03654 | 0.03008 SIRT2    |
| cg11397854 | 0.0373  | 0.10529 | 0.04261 | 0.04171 | 0.03909 | 0.04442 | 0.85965 | 0.45207 | 0.03375 | 0.02898 IQSEC1   |
| cg11398517 | 0.8928  | 0.71544 | 0.75978 | 0.89983 | 0.08867 | 0.27414 | 0.10686 | 0.27571 | 0.17798 | 0.11097 FAM112A  |
| cg11398680 | 0.05645 | 0.04953 | 0.08092 | 0.05758 | 0.04847 | 0.05067 | 0.05462 | 0.04579 | 0.04377 | 0.0463 PTK2      |
| cg11399100 | 0.05457 | 0.05744 | 0.16345 | 0.20286 | 0.90345 | 0.71193 | 0.22131 | 0.07708 | 0.29038 | 0.08998 C19orf4  |
| cg11399527 | 0.03584 | 0.033   | 0.03619 | 0.04044 | 0.03171 | 0.03659 | 0.03275 | 0.03473 | 0.02938 | 0.02989 PDP2     |
| cg11399590 | 0.0416  | 0.03609 | 0.04226 | 0.0383  | 0.03743 | 0.03903 | 0.03599 | 0.03424 | 0.03533 | 0.03603 C20orf67 |
| cg11399891 | 0.066   | 0.08184 | 0.07086 | 0.06783 | 0.04647 | 0.05676 | 0.05823 | 0.05784 | 0.05907 | 0.05974 ZNF444   |
| cg11400333 | 0.04988 | 0.04316 | 0.22417 | 0.35353 | 0.05414 | 0.03568 | 0.04907 | 0.03873 | 0.04067 | 0.0367 MGC33486  |
| cg11402505 | 0.62002 | 0.42278 | 0.36931 | 0.53253 | 0.59293 | 0.15322 | 0.30949 | 0.12214 | 0.48675 | 0.21044 FBXO27   |
| cg11403598 | 0.65745 | 0.29483 | 0.59392 | 0.59974 | 0.6449  | 0.4496  | 0.448   | 0.20686 | 0.70206 | 0.60492 COG8     |
| cg11405695 | 0.8952  | 0.47656 | 0.86937 | 0.88478 | 0.83909 | 0.87221 | 0.14249 | 0.0845  | 0.78503 | 0.69623 ATAD3C   |
| cg11406340 | 0.75645 | 0.53708 | 0.75998 | 0.80211 | 0.648   | 0.7606  | 0.70177 | 0.74942 | 0.78912 | 0.24037 IDI2     |
| cg11406695 | 0.04052 | 0.03903 | 0.04261 | 0.04905 | 0.05278 | 0.05691 | 0.04735 | 0.04764 | 0.0307  | 0.02977 C6orf125 |
| cg11407345 | 0.20241 | 0.20796 | 0.21458 | 0.2054  | 0.1322  | 0.17196 | 0.19704 | 0.19559 | 0.18254 | 0.18132 C21orf58 |
| cg11408517 | 0.04007 | 0.03507 | 0.04607 | 0.0495  | 0.04235 | 0.0468  | 0.0413  | 0.03025 | 0.04125 | 0.03424 LATS1    |
| cg11411707 | 0.04533 | 0.04307 | 0.04798 | 0.04172 | 0.03632 | 0.03659 | 0.05688 | 0.04559 | 0.03631 | 0.03684 MGC29891 |
| cg11412582 | 0.47461 | 0.53373 | 0.43547 | 0.44679 | 0.50577 | 0.54717 | 0.45826 | 0.43371 | 0.03572 | 0.03765 HERC2    |
| cg11414046 | 0.03534 | 0.03532 | 0.05018 | 0.04513 | 0.0405  | 0.04846 | 0.03133 | 0.03513 | 0.03072 | 0.02836 BRAF     |
| cg11414151 | 0.34092 | 0.16522 | 0.26379 | 0.37704 | 0.63616 | 0.56901 | 0.17531 | 0.08738 | 0.15389 | 0.12975 ACSL1    |
| cg11415932 | 0.04385 | 0.04436 | 0.0437  | 0.04274 | 0.0313  | 0.03957 | 0.03939 | 0.03871 | 0.03594 | 0.03338 POLB     |
| cg11416386 | 0.04006 | 0.0401  | 0.04053 | 0.04238 | 0.03408 | 0.03711 | 0.03629 | 0.034   | 0.21008 | 0.10722 DPY19L3  |

|            |         |         |         |         |         |         |         |         |         |                   |
|------------|---------|---------|---------|---------|---------|---------|---------|---------|---------|-------------------|
| cg11418559 | 0.95074 | 0.57681 | 0.63735 | 0.79958 | 0.96428 | 0.93679 | 0.58132 | 0.41956 | 0.95514 | 0.94062 ZNF593    |
| cg11419863 | 0.05377 | 0.06322 | 0.06068 | 0.07856 | 0.10302 | 0.06018 | 0.07038 | 0.0642  | 0.05146 | 0.0411 FAU        |
| cg11422541 | 0.04012 | 0.03979 | 0.04842 | 0.05273 | 0.04402 | 0.04446 | 0.0492  | 0.04713 | 0.04318 | 0.045 ADCY6       |
| cg11423990 | 0.03874 | 0.03976 | 0.03482 | 0.03901 | 0.02703 | 0.03078 | 0.03163 | 0.03225 | 0.03245 | 0.03729 TXN2      |
| cg11426590 | 0.03607 | 0.03071 | 0.03979 | 0.04125 | 0.0346  | 0.03191 | 0.03399 | 0.02768 | 0.0307  | 0.02895 TRIM62    |
| cg11428724 | 0.02665 | 0.02955 | 0.58484 | 0.81407 | 0.59774 | 0.62497 | 0.14052 | 0.03639 | 0.0701  | 0.06962 PAX7      |
| cg11429632 | 0.0693  | 0.07717 | 0.09287 | 0.06712 | 0.09375 | 0.0631  | 0.05705 | 0.04601 | 0.0837  | 0.04634 RAB14     |
| cg11429658 | 0.86276 | 0.77195 | 0.86233 | 0.86399 | 0.66389 | 0.53865 | 0.66475 | 0.83529 | 0.6216  | 0.6193 ABCC13     |
| cg11431126 | 0.19954 | 0.12196 | 0.15693 | 0.14866 | 0.12777 | 0.0697  | 0.25532 | 0.11398 | 0.0674  | 0.05585 RHOU      |
| cg11432797 | 0.88125 | 0.62289 | 0.81172 | 0.90251 | 0.85738 | 0.82201 | 0.49996 | 0.81212 | 0.7605  | 0.36492 SPN       |
| cg11434468 | 0.0259  | 0.02778 | 0.02734 | 0.02505 | 0.02755 | 0.02706 | 0.05999 | 0.68356 | 0.02036 | 0.02204 XKR6      |
| cg11435943 | 0.55072 | 0.41185 | 0.5684  | 0.69062 | 0.24341 | 0.1307  | 0.07791 | 0.06302 | 0.05932 | 0.08376 SERPINB12 |
| cg11438428 | 0.04365 | 0.04521 | 0.79503 | 0.87552 | 0.42433 | 0.52557 | 0.06118 | 0.03774 | 0.07892 | 0.06552 PTF1A     |
| cg11438755 | 0.04626 | 0.0466  | 0.0536  | 0.04662 | 0.04622 | 0.04482 | 0.04222 | 0.04494 | 0.03411 | 0.03668 TMEM20    |
| cg11442050 | 0.04124 | 0.03667 | 0.0481  | 0.05167 | 0.04585 | 0.04815 | 0.0457  | 0.0416  | 0.04501 | 0.04952 EIF4ENIF1 |
| cg11442717 | 0.1335  | 0.03714 | 0.04717 | 0.03633 | 0.51401 | 0.35406 | 0.23391 | 0.04338 | 0.04797 | 0.03694 PHF10     |
| cg11443787 | 0.08999 | 0.07529 | 0.09438 | 0.07906 | 0.14314 | 0.09787 | 0.09381 | 0.07325 | 0.08469 | 0.06942 MLLT10    |
| cg11449935 | 0.03423 | 0.03707 | 0.02866 | 0.03125 | 0.02288 | 0.02663 | 0.0417  | 0.04048 | 0.02934 | 0.02742 TGIF2     |
| cg11450001 | 0.03179 | 0.03128 | 0.03286 | 0.03259 | 0.02413 | 0.0288  | 0.02886 | 0.02906 | 0.02522 | 0.02315 GABARAPL1 |
| cg11450827 | 0.83112 | 0.43786 | 0.8218  | 0.82882 | 0.80081 | 0.7955  | 0.77991 | 0.78253 | 0.83991 | 0.8 CLDN5         |
| cg11451801 | 0.16439 | 0.0664  | 0.05809 | 0.06149 | 0.04642 | 0.03268 | 0.03035 | 0.04149 | 0.02755 | 0.02384 PSMB10    |
| cg11452221 | 0.13345 | 0.09677 | 0.80347 | 0.79928 | 0.67562 | 0.68231 | 0.75665 | 0.10552 | 0.87412 | 0.47853 GEFT      |
| cg11452360 | 0.053   | 0.05471 | 0.1309  | 0.18643 | 0.1716  | 0.04929 | 0.05634 | 0.04696 | 0.0604  | 0.04935 C1orf93   |
| cg11453347 | 0.04159 | 0.04286 | 0.04087 | 0.03522 | 0.0263  | 0.03527 | 0.04004 | 0.03541 | 0.03557 | 0.03783 BCCIP     |
| cg11454415 | 0.05214 | 0.05499 | 0.05259 | 0.05121 | 0.03443 | 0.0441  | 0.04209 | 0.05417 | 0.03997 | 0.04794 TOMM34    |
| cg11455040 | 0.10225 | 0.04963 | 0.09339 | 0.08707 | 0.12938 | 0.05302 | 0.04961 | 0.04338 | 0.17833 | 0.04578 SLC45A3   |
| cg11456838 | 0.77228 | 0.35064 | 0.72028 | 0.85935 | 0.79102 | 0.82788 | 0.36732 | 0.51243 | 0.86129 | 0.77765 LOC202459 |
| cg11458642 | 0.04342 | 0.0415  | 0.03902 | 0.03693 | 0.02874 | 0.03467 | 0.03217 | 0.03554 | 0.03527 | 0.03628 ATR       |
| cg11458974 | 0.78545 | 0.71544 | 0.86709 | 0.8523  | 0.80609 | 0.63783 | 0.55231 | 0.35762 | 0.86727 | 0.32901 HMOX1     |
| cg11459714 | 0.07029 | 0.07584 | 0.52832 | 0.60919 | 0.2384  | 0.6464  | 0.12539 | 0.08666 | 0.06882 | 0.0675 KLK10      |
| cg11459822 | 0.05544 | 0.05085 | 0.07057 | 0.05922 | 0.04984 | 0.06889 | 0.05432 | 0.05165 | 0.04561 | 0.05922 TADA1L    |
| cg11460029 | 0.05284 | 0.05028 | 0.10254 | 0.08719 | 0.40093 | 0.11752 | 0.07645 | 0.0504  | 0.04947 | 0.03878 EFNB3     |
| cg11460364 | 0.71301 | 0.80113 | 0.77102 | 0.82616 | 0.72315 | 0.77332 | 0.61362 | 0.38039 | 0.54058 | 0.32243 DPP4      |
| cg11462533 | 0.08037 | 0.06835 | 0.42693 | 0.64445 | 0.82175 | 0.52986 | 0.36405 | 0.4174  | 0.45512 | 0.42883 HPCAL4    |
| cg11462865 | 0.87476 | 0.93689 | 0.96799 | 0.95981 | 0.97663 | 0.95835 | 0.08938 | 0.03255 | 0.94983 | 0.96118 KRT19     |
| cg11465163 | 0.5497  | 0.58441 | 0.53328 | 0.52597 | 0.66764 | 0.56527 | 0.32843 | 0.24965 | 0.9009  | 0.89101 DIRAS3    |
| cg11465372 | 0.69373 | 0.57745 | 0.8175  | 0.87789 | 0.63825 | 0.86045 | 0.13524 | 0.10606 | 0.18456 | 0.37587 KRT2B     |
| cg11465971 | 0.04778 | 0.05138 | 0.14439 | 0.18696 | 0.41235 | 0.07089 | 0.05671 | 0.05056 | 0.05162 | 0.05209 GSH2      |
| cg11466485 | 0.86782 | 0.85331 | 0.85245 | 0.88939 | 0.78567 | 0.84151 | 0.75045 | 0.88029 | 0.87833 | 0.6971 SARDH      |
| cg11466837 | 0.67961 | 0.16238 | 0.26334 | 0.37259 | 0.67172 | 0.87236 | 0.39163 | 0.08763 | 0.16658 | 0.15154 TRIM29    |
| cg11466908 | 0.04329 | 0.0487  | 0.05238 | 0.04572 | 0.04745 | 0.04076 | 0.04278 | 0.03845 | 0.0339  | 0.03533 AUH       |

|            |         |         |         |         |         |         |         |         |         |                   |
|------------|---------|---------|---------|---------|---------|---------|---------|---------|---------|-------------------|
| cg11467738 | 0.05198 | 0.05266 | 0.05442 | 0.0563  | 0.04933 | 0.0675  | 0.0483  | 0.04176 | 0.0529  | 0.04103 ARPC1B    |
| cg11468462 | 0.0312  | 0.02692 | 0.0321  | 0.03101 | 0.03036 | 0.03305 | 0.03549 | 0.03081 | 0.02959 | 0.02937 NXPH4     |
| cg11468711 | 0.02174 | 0.02337 | 0.02536 | 0.02286 | 0.05696 | 0.01675 | 0.02316 | 0.02203 | 0.01944 | 0.01997 ZNF710    |
| cg11469137 | 0.47813 | 0.07874 | 0.57756 | 0.68894 | 0.06565 | 0.04177 | 0.24953 | 0.06426 | 0.05337 | 0.03796 PLOD1     |
| cg11469321 | 0.15244 | 0.0698  | 0.08967 | 0.08755 | 0.31496 | 0.07235 | 0.06197 | 0.05953 | 0.05866 | 0.06651 BDH2      |
| cg11469778 | 0.7252  | 0.48152 | 0.8315  | 0.78915 | 0.76993 | 0.77313 | 0.02751 | 0.027   | 0.19495 | 0.56885 ARHGEF4   |
| cg11471401 | 0.73807 | 0.49083 | 0.74792 | 0.7761  | 0.85513 | 0.76405 | 0.13027 | 0.12517 | 0.14019 | 0.11065 KRT6A     |
| cg11471666 | 0.03327 | 0.03352 | 0.03643 | 0.03458 | 0.02612 | 0.03082 | 0.02806 | 0.02817 | 0.02667 | 0.02427 EIF4B     |
| cg11472424 | 0.26454 | 0.40535 | 0.63065 | 0.71134 | 0.23037 | 0.44485 | 0.26859 | 0.08399 | 0.05454 | 0.03333 PFKFB1    |
| cg11473104 | 0.39244 | 0.41199 | 0.45422 | 0.46311 | 0.45023 | 0.48686 | 0.43815 | 0.41561 | 0.39882 | 0.36904 NUDT15    |
| cg11474075 | 0.05787 | 0.05687 | 0.06246 | 0.05017 | 0.07214 | 0.07235 | 0.05361 | 0.05285 | 0.05298 | 0.06141 TTC5      |
| cg11474811 | 0.08191 | 0.06829 | 0.26961 | 0.48208 | 0.80956 | 0.85354 | 0.08597 | 0.17152 | 0.18693 | 0.21717 TRPM5     |
| cg11475332 | 0.02654 | 0.02477 | 0.03039 | 0.03783 | 0.48277 | 0.03997 | 0.02515 | 0.02006 | 0.02248 | 0.01828 SDC1      |
| cg11476211 | 0.05964 | 0.02709 | 0.02798 | 0.03065 | 0.02356 | 0.02504 | 0.02403 | 0.02344 | 0.02106 | 0.0191 PRKCE      |
| cg11476254 | 0.87376 | 0.88634 | 0.87359 | 0.88549 | 0.81546 | 0.83752 | 0.88935 | 0.89273 | 0.88221 | 0.88998 LOC197322 |
| cg11479591 | 0.05202 | 0.03546 | 0.04035 | 0.03975 | 0.03658 | 0.03644 | 0.21292 | 0.10408 | 0.03328 | 0.02388 MECP2     |
| cg11479877 | 0.60635 | 0.29242 | 0.75321 | 0.75577 | 0.81217 | 0.77437 | 0.26201 | 0.30102 | 0.64938 | 0.43442 B3GALT5   |
| cg11480873 | 0.03976 | 0.03607 | 0.04444 | 0.0456  | 0.03825 | 0.03647 | 0.03715 | 0.0315  | 0.03547 | 0.0397 RAB7L1     |
| cg11481351 | 0.82603 | 0.77994 | 0.84597 | 0.87152 | 0.90152 | 0.89112 | 0.8578  | 0.86888 | 0.81803 | 0.5956 FNDC7      |
| cg11481490 | 0.05117 | 0.04908 | 0.05971 |         |         | 0.04791 | 0.04208 | 0.03934 | 0.03827 | 0.03676 FLJ41131  |
| cg11481720 | 0.05312 | 0.06325 | 0.06972 | 0.06891 | 0.03735 | 0.03835 | 0.06076 | 0.06269 | 0.04605 | 0.04466 FLJ90396  |
| cg11481793 | 0.11085 | 0.0885  | 0.14027 | 0.12871 | 0.17738 | 0.12174 | 0.07222 | 0.06915 | 0.10066 | 0.11964 FLJ25476  |
| cg11483915 | 0.77709 | 0.62381 | 0.23355 | 0.16607 | 0.54416 | 0.56121 | 0.09033 | 0.06269 | 0.32628 | 0.50557 SLC40A1   |
| cg11484288 | 0.02798 | 0.03415 | 0.03386 | 0.02966 | 0.03011 | 0.03399 | 0.02776 | 0.02844 | 0.02578 | 0.02472 PTPN23    |
| cg11484576 | 0.35235 | 0.05621 | 0.70663 | 0.79991 | 0.09022 | 0.19276 | 0.64423 | 0.51407 | 0.57742 | 0.53836 LGALS12   |
| cg11484872 | 0.61535 | 0.59918 | 0.72743 | 0.78861 | 0.69194 | 0.74055 | 0.48749 | 0.66328 | 0.70533 | 0.18977 TNF       |
| cg11485602 | 0.0316  | 0.03063 | 0.03302 | 0.03237 | 0.02262 | 0.02687 | 0.03067 | 0.03441 | 0.02663 | 0.02571 PDHB      |
| cg11487705 | 0.10043 | 0.04217 | 0.0433  | 0.03873 | 0.05691 | 0.03893 | 0.03629 | 0.03217 | 0.12815 | 0.02979 OXCT1     |
| cg11487967 | 0.73929 | 0.56513 | 0.8511  | 0.88033 | 0.94876 | 0.8209  | 0.7584  | 0.79352 | 0.73508 | 0.60511 FLJ41327  |
| cg11489580 | 0.0698  | 0.07105 | 0.07778 | 0.06794 | 0.06359 | 0.06707 | 0.05983 | 0.05787 | 0.05704 | 0.05117 G3BP2     |
| cg11490446 | 0.10575 | 0.14063 | 0.49171 | 0.48846 | 0.18507 | 0.04503 | 0.04029 | 0.04329 | 0.03686 | 0.03705 PSEN1     |
| cg11492040 | 0.78694 | 0.02649 | 0.66038 | 0.91622 | 0.686   | 0.60611 | 0.75457 | 0.30911 | 0.63844 | 0.56103 H19       |
| cg11492403 | 0.94075 | 0.91576 | 0.94837 | 0.9434  | 0.92337 | 0.9256  | 0.74047 | 0.67748 | 0.95735 | 0.87937 AARSD1    |
| cg11492856 | 0.80764 | 0.76372 | 0.78906 | 0.82727 | 0.74142 | 0.67219 | 0.83352 | 0.84482 | 0.84855 | 0.80161 CAPN7     |
| cg11494656 | 0.45033 | 0.30701 | 0.50249 | 0.45636 | 0.75764 | 0.12674 | 0.09119 | 0.10394 | 0.53783 | 0.7373 ARR3       |
| cg11494699 | 0.78853 | 0.85289 | 0.72718 | 0.86905 | 0.4404  | 0.65134 | 0.51472 | 0.48911 | 0.14936 | 0.20438 RAG1      |
| cg11498156 | 0.63199 | 0.42238 | 0.68098 | 0.76294 | 0.55341 | 0.18237 | 0.17487 | 0.2666  | 0.27678 | 0.15377 TLX1      |
| cg11498188 | 0.10495 | 0.06644 | 0.14189 | 0.12313 | 0.12681 | 0.06508 | 0.05006 | 0.04731 | 0.25814 | 0.04582 HECA      |
| cg11498740 | 0.05781 | 0.05847 | 0.05819 | 0.0469  | 0.06421 | 0.0562  | 0.05056 | 0.0556  | 0.54072 | 0.61054 MOAP1     |
| cg11500727 | 0.67589 | 0.1336  | 0.93737 | 0.94325 | 0.94067 | 0.88023 | 0.06818 | 0.04708 | 0.21543 | 0.02868 CNFN      |
| cg11500797 | 0.35853 | 0.11532 | 0.74895 | 0.87239 | 0.43959 | 0.60493 | 0.08034 | 0.09732 | 0.82492 | 0.913 DLX5        |

|            |         |         |         |         |         |         |         |         |         |                  |
|------------|---------|---------|---------|---------|---------|---------|---------|---------|---------|------------------|
| cg11502800 | 0.03493 | 0.04161 | 0.04241 | 0.04084 | 0.03379 | 0.03771 | 0.03264 | 0.04148 | 0.03738 | 0.02961 ZNF565   |
| cg11503011 | 0.19612 | 0.13961 | 0.16989 | 0.13426 | 0.18531 | 0.1166  | 0.18953 | 0.15662 | 0.10453 | 0.1047 EBF       |
| cg11503744 | 0.05881 | 0.06549 | 0.05816 | 0.04807 | 0.0432  | 0.05726 | 0.05602 | 0.05815 | 0.05129 | 0.04831 RUSC1    |
| cg11504646 | 0.72905 | 0.38397 | 0.67377 | 0.807   | 0.80978 | 0.70241 | 0.1693  | 0.13145 | 0.24591 | 0.44255 RTP1     |
| cg11504739 | 0.69784 | 0.10181 | 0.80354 | 0.85734 | 0.87143 | 0.84154 | 0.83165 | 0.63378 | 0.75984 | 0.42764 SCGB1A1  |
| cg11504740 | 0.702   | 0.38733 | 0.8017  | 0.87242 | 0.2227  | 0.06632 | 0.34071 | 0.06707 | 0.10581 | 0.04565 GPR152   |
| cg11504897 | 0.13951 | 0.15296 | 0.17407 | 0.164   | 0.12096 | 0.13666 | 0.11623 | 0.13582 | 0.11113 | 0.12107 NRN1     |
| cg11505048 | 0.844   | 0.85896 | 0.79691 | 0.82714 | 0.77707 | 0.83593 | 0.80464 | 0.84306 | 0.82982 | 0.80824 APOBEC4  |
| cg11505080 | 0.44608 | 0.06471 | 0.35385 | 0.39501 | 0.44    | 0.04707 | 0.33591 | 0.31904 | 0.20858 | 0.41736 GPR173   |
| cg11505565 | 0.85946 | 0.86945 | 0.84527 | 0.85003 | 0.79352 | 0.86329 | 0.86369 | 0.83877 | 0.87533 | 0.83358 RPS6KB1  |
| cg11507178 | 0.16818 | 0.15669 | 0.16896 | 0.16156 | 0.09169 | 0.13285 | 0.13695 | 0.14791 | 0.16825 | 0.14102 BCL9L    |
| cg11510269 | 0.0556  | 0.05129 | 0.07361 | 0.06839 | 0.07177 | 0.07373 | 0.06309 | 0.06271 | 0.06587 | 0.05696 FLJ11021 |
| cg11510839 | 0.04233 | 0.03975 | 0.59986 | 0.70721 | 0.05925 | 0.05806 | 0.06577 | 0.0527  | 0.05404 | 0.05941 OCA2     |
| cg11511443 | 0.20946 | 0.12041 | 0.75652 | 0.81265 | 0.72075 | 0.78395 | 0.75738 | 0.54013 | 0.7826  | 0.66324 LMO3     |
| cg11512771 | 0.88256 | 0.87766 | 0.90339 | 0.915   | 0.91772 | 0.88999 | 0.89402 | 0.81149 | 0.90389 | 0.86911 ECM1     |
| cg11513856 | 0.35107 | 0.36805 | 0.24057 | 0.25941 | 0.19526 | 0.30654 | 0.63676 | 0.64282 | 0.10122 | 0.1096 RABL5     |
| cg11516377 | 0.49549 | 0.4168  | 0.89487 | 0.86416 | 0.75726 | 0.61222 | 0.53552 | 0.21017 | 0.93358 | 0.76078 DPH1     |
| cg11516606 | 0.0458  | 0.05101 | 0.15988 | 0.12655 | 0.06351 | 0.04827 | 0.05052 | 0.04751 | 0.04668 | 0.03736 TDRD7    |
| cg11518240 | 0.89963 | 0.89831 | 0.8806  | 0.87494 | 0.83221 | 0.91457 | 0.863   | 0.8727  | 0.88528 | 0.86322 FKBP4    |
| cg11519508 | 0.03695 | 0.03918 | 0.04787 | 0.03828 | 0.04352 | 0.04513 | 0.04291 | 0.04901 | 0.03854 | 0.04945 TP53     |
| cg11520395 | 0.60131 | 0.40979 | 0.63262 | 0.60917 | 0.53017 | 0.50079 | 0.44429 | 0.17079 | 0.63903 | 0.56732 JMJD4    |
| cg11521325 | 0.27993 | 0.2117  | 0.15534 | 0.27042 | 0.23652 | 0.11059 | 0.10333 | 0.07174 | 0.08656 | 0.05592 FLJ32926 |
| cg11521965 | 0.85361 | 0.59996 | 0.74346 | 0.89945 | 0.23296 | 0.06817 | 0.21528 | 0.06484 | 0.26077 | 0.24902 PTN      |
| cg11523020 | 0.59619 | 0.59689 | 0.84528 | 0.86298 | 0.76511 | 0.83578 | 0.5879  | 0.44685 | 0.89974 | 0.84435 UPK3A    |
| cg11524446 | 0.88915 | 0.86251 | 0.64631 | 0.82325 | 0.86406 | 0.88671 | 0.19183 | 0.04665 | 0.05667 | 0.04441 C1orf94  |
| cg11525285 | 0.06559 | 0.04299 | 0.84829 | 0.89951 | 0.48298 | 0.30356 | 0.07025 | 0.03725 | 0.86835 | 0.7597 CHX10     |
| cg11526405 | 0.05226 | 0.06709 | 0.07252 | 0.06063 | 0.07535 | 0.08297 | 0.05509 | 0.04968 | 0.04832 | 0.0499 SH3GLB2   |
| cg11527279 | 0.06323 | 0.10379 | 0.20346 | 0.26012 | 0.07042 | 0.05419 | 0.08049 | 0.06026 | 0.06022 | 0.04375 TTLL11   |
| cg11528101 | 0.01649 | 0.02171 | 0.02196 | 0.02065 | 0.01985 | 0.01888 | 0.01838 | 0.02018 | 0.0183  | 0.01778 MRPS24   |
| cg11528666 | 0.07108 | 0.05936 | 0.0552  | 0.05241 | 0.17937 | 0.07133 | 0.05228 | 0.05219 | 0.05104 | 0.05517 FLJ21106 |
| cg11529128 | 0.03214 | 0.03365 | 0.20242 | 0.09786 | 0.26664 | 0.21369 | 0.03694 | 0.02615 | 0.04609 | 0.02439 LHFPL5   |
| cg11529250 | 0.66065 | 0.3274  | 0.46286 | 0.62666 | 0.33837 | 0.30429 | 0.14417 | 0.06621 | 0.80763 | 0.72782 UPK3A    |
| cg11530960 | 0.19064 | 0.08672 | 0.50588 | 0.50009 | 0.61154 | 0.66156 | 0.40239 | 0.46921 | 0.17067 | 0.08076 DMRT2    |
| cg11532513 | 0.81964 | 0.70892 | 0.84319 | 0.86114 | 0.79283 | 0.8529  | 0.78576 | 0.81658 | 0.73382 | 0.72756 LRTM1    |
| cg11536940 | 0.93647 | 0.59853 | 0.075   | 0.13245 | 0.21496 | 0.26345 | 0.08961 | 0.26865 | 0.90831 | 0.44138 PGCP     |
| cg11538128 | 0.03343 | 0.03494 | 0.24438 | 0.30368 | 0.1456  | 0.20386 | 0.09476 | 0.03231 | 0.02371 | 0.02408 ZNF354C  |
| cg11539173 | 0.03107 | 0.02988 | 0.02671 | 0.029   | 0.0269  | 0.02909 | 0.02923 | 0.02687 | 0.02419 | 0.02316 GNB1L    |
| cg11540692 | 0.55748 | 0.3623  | 0.03984 | 0.03964 | 0.04133 | 0.03717 | 0.8674  | 0.36008 | 0.23139 | 0.36645 SIM1     |
| cg11540997 | 0.81556 | 0.51728 | 0.61405 | 0.75447 | 0.81292 | 0.79144 | 0.3015  | 0.2448  | 0.66097 | 0.37392 DUOX2    |
| cg11541187 | 0.0363  | 0.03597 | 0.052   | 0.04714 | 0.0398  | 0.04066 | 0.0321  | 0.03193 | 0.03227 | 0.04394 SESN1    |
| cg11542231 | 0.03986 | 0.03351 | 0.07313 | 0.08357 | 0.05441 | 0.05143 | 0.03374 | 0.03103 | 0.04287 | 0.03745 RPA2     |



|            |         |         |         |         |         |         |         |         |         |         |           |
|------------|---------|---------|---------|---------|---------|---------|---------|---------|---------|---------|-----------|
| cg11546621 | 0.77427 | 0.61791 | 0.80251 | 0.77878 | 0.84374 | 0.79468 | 0.7965  | 0.73072 | 0.63457 | 0.42401 | PTGDS     |
| cg11547724 | 0.80964 | 0.18609 | 0.77971 | 0.81693 | 0.82405 | 0.74196 | 0.71099 | 0.48087 | 0.75298 | 0.19741 | HPX       |
| cg11550426 | 0.02726 | 0.02808 | 0.03608 | 0.02955 | 0.0218  | 0.02935 | 0.02574 | 0.02627 | 0.02646 | 0.02379 | SDCBP     |
| cg11552293 | 0.74669 | 0.37465 | 0.63452 | 0.70423 | 0.58564 | 0.51576 | 0.24379 | 0.17869 | 0.39576 | 0.40474 | COL4A6    |
| cg11553177 | 0.01933 | 0.02167 | 0.02681 | 0.02681 | 0.01997 | 0.02004 | 0.02268 | 0.02046 | 0.01783 | 0.01758 | SDF2      |
| cg11554507 | 0.85082 | 0.43147 | 0.24435 | 0.40742 | 0.39779 | 0.42973 | 0.18133 | 0.15715 | 0.27288 | 0.11235 | NEUROD6   |
| cg11554605 | 0.76136 | 0.7154  | 0.82228 | 0.85407 | 0.77456 | 0.8     | 0.80871 | 0.79544 | 0.87014 | 0.79244 | ASB4      |
| cg11554937 | 0.9121  | 0.82667 | 0.91922 | 0.92888 | 0.93766 | 0.42484 | 0.9074  | 0.40212 | 0.92983 | 0.88745 | HSD17B3   |
| cg11558474 | 0.18538 | 0.15081 | 0.13356 | 0.13925 | 0.37025 | 0.22344 | 0.16037 | 0.15653 | 0.13642 | 0.13696 | TMEM2     |
| cg11560403 | 0.94695 | 0.94633 | 0.94874 | 0.95362 | 0.95967 | 0.94814 | 0.93781 | 0.95065 | 0.94828 | 0.93829 | TMEM81    |
| cg11560645 | 0.10455 | 0.05212 | 0.23734 | 0.29331 | 0.10905 | 0.10076 | 0.0463  | 0.06708 | 0.04671 | 0.04449 |           |
| cg11563860 | 0.45611 | 0.32971 | 0.13334 | 0.13968 | 0.12386 | 0.06081 | 0.37786 | 0.24232 | 0.11554 | 0.06576 | CNTN4     |
| cg11564268 | 0.03829 | 0.0365  | 0.04134 | 0.03976 | 0.28397 | 0.38018 | 0.03289 | 0.0355  | 0.02507 | 0.02732 | NOB1P     |
| cg11564670 | 0.69844 | 0.55651 | 0.73715 | 0.71258 | 0.69517 | 0.83158 | 0.55393 | 0.23697 | 0.86693 | 0.58677 | MC2R      |
| cg11565248 | 0.03153 | 0.02762 | 0.02739 | 0.02795 | 0.02314 | 0.02377 | 0.52089 | 0.487   | 0.02583 | 0.02328 | RPS6KA3   |
| cg11566199 | 0.87789 | 0.80935 | 0.90528 | 0.91195 | 0.94298 | 0.90987 | 0.88023 | 0.8922  | 0.90228 | 0.88878 | GALNT6    |
| cg11566244 | 0.17812 | 0.18819 | 0.1925  | 0.1887  | 0.20404 | 0.17773 | 0.30796 | 0.17278 | 0.22007 | 0.16625 | GSTP1     |
| cg11566939 | 0.06182 | 0.07737 | 0.06521 | 0.06712 | 0.05331 | 0.0666  | 0.05532 | 0.05887 | 0.05779 | 0.0544  | DULLARD   |
| cg11572744 | 0.056   | 0.0619  | 0.06777 | 0.06133 | 0.05962 | 0.05352 | 0.05275 | 0.04986 | 0.10047 | 0.29666 | DPYSL3    |
| cg11574612 | 0.05251 | 0.05398 | 0.05505 | 0.04761 | 0.05528 | 0.05922 | 0.04603 | 0.05196 | 0.04098 | 0.04407 | CYP39A1   |
| cg11574758 | 0.05939 | 0.04833 | 0.05193 | 0.06878 | 0.03855 | 0.04604 | 0.04546 | 0.04122 | 0.04773 | 0.03868 | C20orf19  |
| cg11577097 | 0.11243 | 0.08628 | 0.16556 | 0.28602 | 0.2744  | 0.20526 | 0.151   | 0.23865 | 0.0956  | 0.09627 | AQP9      |
| cg11579069 | 0.08419 | 0.08122 | 0.09562 | 0.08693 | 0.05623 | 0.07106 | 0.07446 | 0.07201 | 0.07286 | 0.07816 | MYB       |
| cg11582100 | 0.06573 | 0.07229 | 0.074   | 0.06422 | 0.06886 | 0.05571 | 0.05487 | 0.06142 | 0.05874 | 0.05498 | GAD1      |
| cg11584111 | 0.05128 | 0.0503  | 0.06176 | 0.07085 | 0.0428  | 0.0412  | 0.04989 | 0.04692 | 0.06475 | 0.03632 | PIGC      |
| cg11584690 | 0.3107  | 0.2799  | 0.88473 | 0.91246 | 0.92676 | 0.83886 | 0.46109 | 0.17985 | 0.90083 | 0.83703 | ZNF574    |
| cg11584936 | 0.63028 | 0.43064 | 0.74026 | 0.84954 | 0.72234 | 0.81473 | 0.79838 | 0.76908 | 0.63762 | 0.52232 | BNIP1     |
| cg11585425 | 0.03987 | 0.03698 | 0.04002 | 0.03571 | 0.03113 | 0.02961 | 0.02923 | 0.03018 | 0.0258  | 0.02409 | ACTR2     |
| cg11590700 | 0.08584 | 0.09425 | 0.08856 | 0.087   | 0.08963 | 0.09407 | 0.08028 | 0.09377 | 0.37932 | 0.29381 | MDS1      |
| cg11591325 | 0.03631 | 0.02847 | 0.04533 | 0.05316 | 0.92173 | 0.89394 | 0.02661 | 0.04753 | 0.02538 | 0.01913 | F2R       |
| cg11592951 | 0.01466 | 0.01454 | 0.01503 | 0.01212 | 0.0127  | 0.01571 | 0.01175 | 0.01217 | 0.01069 | 0.01225 | ARS2      |
| cg11593656 | 0.19698 | 0.23714 | 0.22476 | 0.22564 | 0.26379 | 0.28063 | 0.21401 | 0.18384 | 0.24373 | 0.23945 | COMMD6    |
| cg11594131 | 0.06766 | 0.06869 | 0.07154 | 0.06946 | 0.04358 | 0.06113 | 0.06097 | 0.06851 | 0.05769 | 0.06121 | XPO1      |
| cg11594137 | 0.5261  | 0.53266 | 0.396   | 0.54817 | 0.63536 | 0.50221 | 0.16908 | 0.06707 | 0.49488 | 0.47773 | EDG3      |
| cg11594228 | 0.90741 | 0.56766 | 0.58716 | 0.60508 | 0.71633 | 0.42439 | 0.70222 | 0.42492 | 0.90176 | 0.57693 | RANBP1    |
| cg11594415 | 0.03584 | 0.03088 | 0.0426  | 0.03564 | 0.02865 | 0.03468 | 0.03186 | 0.03023 | 0.02907 | 0.03167 | BAT2D1    |
| cg11595245 | 0.04393 | 0.04396 | 0.04353 | 0.03656 | 0.04954 | 0.05069 | 0.04415 | 0.04097 | 0.03413 | 0.03852 | HELLS     |
| cg11595749 | 0.03297 | 0.03433 | 0.03446 | 0.03001 | 0.02414 | 0.029   | 0.03032 | 0.02964 | 0.02723 | 0.0281  | ATP5E     |
| cg11595794 | 0.07123 | 0.06833 | 0.04585 | 0.04365 | 0.04743 | 0.04729 | 0.03226 | 0.02944 | 0.03444 | 0.0386  | ANKRD37   |
| cg11598929 | 0.27964 | 0.30564 | 0.36358 | 0.36932 | 0.35994 | 0.27205 | 0.36263 | 0.52098 | 0.22286 | 0.23219 | FLJ31204  |
| cg11599505 | 0.18679 | 0.10825 | 0.9488  | 0.95596 | 0.9283  | 0.93803 | 0.90441 | 0.89262 | 0.96137 | 0.95738 | C20orf102 |

|            |         |         |         |         |         |         |         |         |         |                   |
|------------|---------|---------|---------|---------|---------|---------|---------|---------|---------|-------------------|
| cg11600161 | 0.89073 | 0.62309 | 0.85573 | 0.91057 | 0.95759 | 0.68879 | 0.86845 | 0.89558 | 0.60738 | 0.52167 TBC1D10C  |
| cg11601662 | 0.04812 | 0.04665 | 0.06735 | 0.05383 | 0.05758 | 0.06303 | 0.06752 | 0.04549 | 0.03491 | 0.05019 FKBP14    |
| cg11603096 | 0.03678 | 0.04177 | 0.04759 | 0.04694 | 0.03665 | 0.04431 | 0.04077 | 0.03716 | 0.03631 | 0.04098 EIF3S7    |
| cg11608114 | 0.07451 | 0.07039 | 0.10169 | 0.08231 | 0.12264 | 0.06292 | 0.0896  | 0.07381 | 0.08385 | 0.08957 LOC338799 |
| cg11608424 | 0.26611 | 0.05835 | 0.86766 | 0.8794  | 0.68556 | 0.45545 | 0.10599 | 0.06569 | 0.38053 | 0.04704 LOC253012 |
| cg11609154 | 0.04061 | 0.04701 | 0.09051 | 0.07286 | 0.08522 | 0.06882 | 0.03603 | 0.03925 | 0.02841 | 0.0275 HSPC268    |
| cg11609344 | 0.07203 | 0.06584 | 0.07126 | 0.06874 | 0.08722 | 0.08214 | 0.08472 | 0.0738  | 0.05154 | 0.05973 YKT6      |
| cg11609366 | 0.03979 | 0.03972 | 0.05639 | 0.06013 | 0.07417 | 0.08797 | 0.03972 | 0.03482 | 0.04324 | 0.04074 RPL8      |
| cg11609760 | 0.07464 | 0.07892 | 0.07759 | 0.08075 | 0.05203 | 0.07363 | 0.33112 | 0.41677 | 0.06723 | 0.06624 FGD1      |
| cg11611600 | 0.04051 | 0.04007 | 0.19667 | 0.38595 | 0.04095 | 0.03273 | 0.05386 | 0.04052 | 0.11572 | 0.21336 ADAMTSL3  |
| cg11611854 | 0.04431 | 0.04622 | 0.05307 | 0.05144 | 0.04575 | 0.05108 | 0.04107 | 0.04485 | 0.05013 | 0.04193 RPL17     |
| cg11612291 | 0.05704 | 0.05397 | 0.05912 | 0.04721 | 0.06074 | 0.058   | 0.04594 | 0.04454 | 0.69262 | 0.71072 ZNF35     |
| cg11612345 | 0.11492 | 0.07307 | 0.29832 | 0.59094 | 0.63687 | 0.78262 | 0.33017 | 0.13196 | 0.05541 | 0.05273 SMOG2     |
| cg11613875 | 0.0706  | 0.05235 | 0.07562 | 0.0674  | 0.12312 | 0.08842 | 0.06014 | 0.05751 | 0.04202 | 0.03825 C9orf72   |
| cg11614809 | 0.29022 | 0.51693 | 0.80051 | 0.83879 | 0.27663 | 0.16531 | 0.55075 | 0.08119 | 0.14129 | 0.12797 NDP       |
| cg11617144 | 0.98095 | 0.98119 | 0.9732  | 0.98048 | 0.97995 | 0.96412 | 0.97704 | 0.9768  | 0.97857 | 0.98044 GPT       |
| cg11618577 | 0.93012 | 0.92802 | 0.9495  | 0.95604 | 0.96515 | 0.94741 | 0.95413 | 0.92307 | 0.94123 | 0.82682 KRTCAP3   |
| cg11619390 | 0.61425 | 0.53257 | 0.40249 | 0.58214 | 0.63524 | 0.66454 | 0.44286 | 0.396   | 0.06003 | 0.04872 ZBTB8     |
| cg11620807 | 0.02697 | 0.02548 | 0.02749 | 0.02616 | 0.02202 | 0.02484 | 0.02284 | 0.02272 | 0.02295 | 0.02248 IRS1      |
| cg11620873 | 0.04129 | 0.04452 | 0.04766 | 0.05001 | 0.03293 | 0.03894 | 0.03753 | 0.04134 | 0.04603 | 0.03569 CD9       |
| cg11625178 | 0.03178 | 0.03113 | 0.05632 | 0.05954 | 0.02854 | 0.03016 | 0.02906 | 0.02575 | 0.02295 | 0.02101 TMPO      |
| cg11625451 | 0.03628 | 0.03485 | 0.03373 | 0.03683 | 0.02921 | 0.03641 | 0.02958 | 0.03386 | 0.04067 | 0.02632 GAN       |
| cg11625946 | 0.04031 | 0.04024 | 0.04336 | 0.04549 | 0.03166 | 0.03386 | 0.03806 | 0.03639 | 0.03345 | 0.03268 LRIG3     |
| cg11626656 | 0.07073 | 0.06206 | 0.123   | 0.10728 | 0.11981 | 0.08523 | 0.11763 | 0.08195 | 0.09527 | 0.0958 RND3       |
| cg11626791 | 0.03755 | 0.04413 | 0.04305 | 0.03907 | 0.03457 | 0.03656 | 0.03787 | 0.04026 | 0.0378  | 0.03382 TLK1      |
| cg11628026 | 0.93742 | 0.9333  | 0.92845 | 0.93997 | 0.95031 | 0.94659 | 0.92724 | 0.93916 | 0.94625 | 0.92881 ACTL7A    |
| cg11628034 | 0.04258 | 0.05009 | 0.04446 | 0.04678 | 0.03504 | 0.04845 | 0.04376 | 0.04804 | 0.047   | 0.04203 RPS16     |
| cg11628282 | 0.04823 | 0.03606 | 0.04135 | 0.04136 | 0.03159 | 0.03493 | 0.0308  | 0.02798 | 0.03613 | 0.03103 MFN1      |
| cg11628487 | 0.41354 | 0.09773 | 0.2845  | 0.38129 | 0.10994 | 0.05627 | 0.27941 | 0.09241 | 0.05899 | 0.0457 SET        |
| cg11630242 | 0.92014 | 0.89427 | 0.81632 | 0.85606 | 0.42644 | 0.33987 | 0.91826 | 0.87883 | 0.4263  | 0.07858 AKAP10    |
| cg11630392 | 0.70719 | 0.74833 | 0.69807 | 0.70642 | 0.65636 | 0.75849 | 0.74438 | 0.81421 | 0.72975 | 0.68191 GPR171    |
| cg11631275 | 0.83386 | 0.85029 | 0.84698 | 0.83989 | 0.6859  | 0.79566 | 0.83289 | 0.86122 | 0.85285 | 0.86419 SDAD1     |
| cg11631518 | 0.04262 | 0.04794 | 0.91536 | 0.93034 | 0.31182 | 0.10516 | 0.04994 | 0.04321 | 0.04936 | 0.05057 KCNC2     |
| cg11632617 | 0.22055 | 0.13509 | 0.18042 | 0.16767 | 0.18209 | 0.08854 | 0.08538 | 0.08897 | 0.12829 | 0.09305 PPCDC     |
| cg11634198 | 0.08692 | 0.14683 | 0.67176 | 0.81495 | 0.14647 | 0.21601 | 0.22852 | 0.06459 | 0.05882 | 0.04095 NEUROD2   |
| cg11635563 | 0.80579 | 0.79194 | 0.75471 | 0.76965 | 0.73372 | 0.70957 | 0.79911 | 0.82916 | 0.80491 | 0.78299 PIG38     |
| cg11638200 | 0.0596  | 0.04842 | 0.04588 | 0.0426  | 0.06394 | 0.03698 | 0.0768  | 0.05373 | 0.04515 | 0.03761 PRKCQ     |
| cg11638880 | 0.03479 | 0.03883 | 0.03902 | 0.03893 | 0.03324 | 0.04127 | 0.03488 | 0.03075 | 0.03399 | 0.03276 SFT2D1    |
| cg11639397 | 0.01587 | 0.01657 | 0.01883 | 0.01703 | 0.01267 | 0.01811 | 0.01564 | 0.01667 | 0.01577 | 0.01296 VASP      |
| cg11639651 | 0.7144  | 0.74985 | 0.779   | 0.81044 | 0.71888 | 0.82261 | 0.26155 | 0.15578 | 0.78024 | 0.72981 HKDC1     |
| cg11640565 | 0.83492 | 0.7151  | 0.83734 | 0.86287 | 0.87401 | 0.68556 | 0.8276  | 0.81629 | 0.80525 | 0.52547 STS       |

|            |         |         |         |         |         |         |         |         |         |         |           |
|------------|---------|---------|---------|---------|---------|---------|---------|---------|---------|---------|-----------|
| cg11644586 | 0.92405 | 0.35424 | 0.45658 | 0.48591 | 0.85598 | 0.74458 | 0.23723 | 0.06219 | 0.74012 | 0.38203 | FLJ10786  |
| cg11646704 | 0.05115 | 0.04725 | 0.05653 | 0.04728 | 0.06306 | 0.05692 | 0.03852 | 0.03772 | 0.11084 | 0.05371 | IPO4      |
| cg11646757 | 0.03212 | 0.03687 | 0.05064 | 0.0387  | 0.04385 | 0.04137 | 0.02933 | 0.03142 | 0.02805 | 0.02824 | HIG2      |
| cg11646887 | 0.04766 | 0.05576 | 0.04369 | 0.04323 | 0.03203 | 0.03506 | 0.04727 | 0.03962 | 0.03567 | 0.03244 | SCRN2     |
| cg11647681 | 0.8989  | 0.86551 | 0.73906 | 0.87038 | 0.93266 | 0.88018 | 0.90456 | 0.91978 | 0.90892 | 0.90002 | PCDHGA12  |
| cg11648289 | 0.03409 | 0.03068 | 0.10149 | 0.08519 | 0.71145 | 0.38993 | 0.03698 | 0.03099 | 0.02844 | 0.02319 | EN2       |
| cg11648471 | 0.08073 | 0.07064 | 0.08978 | 0.07836 | 0.06831 | 0.06652 | 0.18856 | 0.32208 | 0.06208 | 0.05131 | MOSPD2    |
| cg11648996 | 0.78335 | 0.88455 | 0.88106 | 0.91856 | 0.90916 | 0.92727 | 0.62222 | 0.82142 | 0.6026  | 0.5687  | FAM47B    |
| cg11649001 | 0.04034 | 0.04257 | 0.03607 | 0.03309 | 0.03912 | 0.04444 | 0.03806 | 0.04293 | 0.0288  | 0.03022 | KIAA0082  |
| cg11649654 | 0.06331 | 0.06332 | 0.06429 | 0.066   | 0.05712 | 0.05859 | 0.05847 | 0.04899 | 0.04074 | 0.05671 | ERCC8     |
| cg11649825 | 0.062   | 0.05692 | 0.06538 | 0.05853 | 0.05196 | 0.05694 | 0.09477 | 0.08232 | 0.05594 | 0.04461 | C2orf4    |
| cg11649846 | 0.85144 | 0.84809 | 0.75108 | 0.8018  | 0.57285 | 0.72105 | 0.81998 | 0.8207  | 0.83923 | 0.87475 | LOC346673 |
| cg11651717 | 0.03247 | 0.02629 | 0.02931 | 0.02576 | 0.0272  | 0.02587 | 0.02348 | 0.02555 | 0.02226 | 0.02158 | ABCA5     |
| cg11653266 | 0.03336 | 0.03479 | 0.03467 | 0.03268 | 0.02719 | 0.03219 | 0.02855 | 0.03094 | 0.0273  | 0.02695 | MRPL38    |
| cg11653271 | 0.02658 | 0.03084 | 0.03073 | 0.02953 | 0.02231 | 0.02945 | 0.02726 | 0.02247 | 0.02491 | 0.02027 | POLR3K    |
| cg11653466 | 0.80285 | 0.63571 | 0.74471 | 0.77634 | 0.72688 | 0.62239 | 0.76945 | 0.25015 | 0.64175 | 0.69087 | FLJ43582  |
| cg11653500 | 0.04261 | 0.03831 | 0.03883 | 0.03451 | 0.0235  | 0.03814 | 0.03431 | 0.03946 | 0.03757 | 0.0302  | SPRY2     |
| cg11653709 | 0.42063 | 0.45948 | 0.40649 | 0.45507 | 0.42817 | 0.40256 | 0.72621 | 0.75995 | 0.78994 | 0.78701 | CDKN2A    |
| cg11653858 | 0.88594 | 0.82554 | 0.72259 | 0.77707 | 0.92949 | 0.90515 | 0.50254 | 0.37573 | 0.49171 | 0.14021 | SLC13A2   |
| cg11653864 | 0.05817 | 0.05776 | 0.04199 | 0.0362  | 0.04947 | 0.04817 | 0.29399 | 0.24983 | 0.04552 | 0.0378  | ELK1      |
| cg11654333 | 0.04962 | 0.0419  | 0.05333 | 0.05593 | 0.04013 | 0.04069 | 0.04288 | 0.03966 | 0.04845 | 0.0397  | DCK       |
| cg11654620 | 0.04285 | 0.02729 | 0.03925 | 0.03063 | 0.02953 | 0.02339 | 0.04044 | 0.16353 | 0.05005 | 0.02505 | ECGF1     |
| cg11654737 | 0.10495 | 0.10409 | 0.17557 | 0.13687 | 0.15129 | 0.15369 | 0.10512 | 0.09964 | 0.09247 | 0.09906 | BCKDHB    |
| cg11655418 | 0.05665 | 0.05692 | 0.07029 | 0.06582 | 0.08044 | 0.07573 | 0.05928 | 0.07001 | 0.04565 | 0.04573 | RPS10     |
| cg11655691 | 0.06084 | 0.0472  | 0.0554  | 0.04963 | 0.07818 | 0.05829 | 0.06223 | 0.04869 | 0.05272 | 0.04142 | CBARA1    |
| cg11656547 | 0.09457 | 0.05855 | 0.05824 | 0.05218 | 0.63129 | 0.80542 | 0.82897 | 0.4634  | 0.08181 | 0.04768 | MAMDC2    |
| cg11657615 | 0.12399 | 0.14508 | 0.44538 | 0.54265 | 0.03941 | 0.04255 | 0.2737  | 0.07877 | 0.06427 | 0.04585 | ZDHC1     |
| cg11657808 | 0.0375  | 0.04312 | 0.65687 | 0.74939 | 0.05281 | 0.04398 | 0.07814 | 0.05535 | 0.04315 | 0.18792 | RYR2      |
| cg11659747 | 0.2407  | 0.16423 | 0.15365 | 0.15365 | 0.09424 | 0.12299 | 0.12722 | 0.13631 | 0.13922 | 0.13434 | SCARB2    |
| cg11661234 | 0.07299 | 0.07455 | 0.10869 | 0.10124 | 0.094   | 0.09845 | 0.35231 | 0.27626 | 0.07404 | 0.07911 | RNF12     |
| cg11662098 | 0.0376  | 0.03977 | 0.03849 | 0.0353  | 0.02929 | 0.03561 | 0.03198 | 0.03569 | 0.03212 | 0.03045 | GOPC      |
| cg11664825 | 0.07912 | 0.09279 | 0.11025 | 0.16879 | 0.19791 | 0.08972 | 0.08173 | 0.08145 | 0.08471 | 0.08181 | XKRX      |
| cg11665562 | 0.04461 | 0.03245 | 0.03825 | 0.03216 | 0.11145 | 0.03664 | 0.03993 | 0.02972 | 0.03615 | 0.03579 | PSMC1     |
| cg11665588 | 0.05821 | 0.07396 | 0.06176 | 0.05922 | 0.08561 | 0.05027 | 0.05272 | 0.05308 | 0.06507 | 0.05366 | SESN3     |
| cg11666924 | 0.28423 | 0.06652 | 0.15669 | 0.13248 | 0.07076 | 0.04316 | 0.06166 | 0.05259 | 0.09185 | 0.06693 | STXBP3    |
| cg11667117 | 0.78215 | 0.8424  | 0.81585 | 0.82156 | 0.8178  | 0.84187 | 0.80828 | 0.63422 | 0.71991 | 0.45488 | CA5A      |
| cg11667754 | 0.32617 | 0.04822 | 0.94489 | 0.95356 | 0.952   | 0.93859 | 0.64639 | 0.37866 | 0.95518 | 0.90762 | CDH1      |
| cg11668512 | 0.91771 | 0.88892 | 0.90733 | 0.92239 | 0.92753 | 0.91329 | 0.89473 | 0.89666 | 0.91793 | 0.90443 | ZHX3      |
| cg11668844 | 0.57531 | 0.05036 | 0.46174 | 0.73001 | 0.91777 | 0.48333 | 0.15027 | 0.07083 | 0.507   | 0.27917 | MCF2L     |
| cg11668923 | 0.04469 | 0.05078 | 0.05348 | 0.05175 | 0.04311 | 0.04848 | 0.04036 | 0.03824 | 0.05436 | 0.03834 | ADAM12    |
| cg11670211 | 0.74518 | 0.56915 | 0.11238 | 0.15485 | 0.11282 | 0.10028 | 0.2003  | 0.79112 | 0.07832 | 0.04837 | NOX4      |

|            |         |         |         |         |         |         |         |         |         |                  |
|------------|---------|---------|---------|---------|---------|---------|---------|---------|---------|------------------|
| cg11672225 | 0.0828  | 0.09286 | 0.10992 | 0.09198 | 0.15994 | 0.12805 | 0.11637 | 0.10026 | 0.09267 | 0.0888 RNF185    |
| cg11673092 | 0.84022 | 0.84253 | 0.44071 | 0.5494  | 0.48033 | 0.8852  | 0.3743  | 0.36933 | 0.81523 | 0.48652 ARMC3    |
| cg11673803 | 0.46574 | 0.48239 | 0.41004 | 0.46704 | 0.36924 | 0.37506 | 0.47901 | 0.51894 | 0.09489 | 0.01881 GLUD1    |
| cg11673969 | 0.0436  | 0.0546  | 0.05009 | 0.05071 | 0.04187 | 0.05943 | 0.04688 | 0.04986 | 0.04849 | 0.04346 EPHB4    |
| cg11674404 | 0.10227 | 0.08344 | 0.06721 | 0.10888 | 0.09175 | 0.08141 | 0.04777 | 0.03978 | 0.0747  | 0.07409 WDR17    |
| cg11675413 | 0.9469  | 0.94337 | 0.94878 | 0.95067 | 0.96017 | 0.95374 | 0.92452 | 0.95454 | 0.9459  | 0.95382 RNF113B  |
| cg11676109 | 0.02871 | 0.0317  | 0.03609 | 0.03144 | 0.02335 | 0.03108 | 0.02779 | 0.02675 | 0.0234  | 0.02481 MIZF     |
| cg11676599 | 0.05894 | 0.06223 | 0.05544 | 0.05703 | 0.04698 | 0.05445 | 0.05225 | 0.05399 | 0.05031 | 0.0503 PLEKHA1   |
| cg11677722 | 0.03374 | 0.02913 | 0.03278 | 0.03526 | 0.03741 | 0.03387 | 0.02934 | 0.03066 | 0.02244 | 0.02343 PAF1     |
| cg11678767 | 0.10906 | 0.1243  | 0.67881 | 0.726   | 0.53816 | 0.14627 | 0.11661 | 0.12064 | 0.13702 | 0.14001 COL4A6   |
| cg11679069 | 0.66594 | 0.3831  | 0.63677 | 0.63212 | 0.72407 | 0.72194 | 0.5742  | 0.47696 | 0.63953 | 0.26221 DNAJC15  |
| cg11680158 | 0.08551 | 0.08754 | 0.08064 | 0.07964 | 0.05857 | 0.07549 | 0.06931 | 0.07309 | 0.06487 | 0.06445 C9orf52  |
| cg11680236 | 0.04099 | 0.03916 | 0.03767 | 0.03981 | 0.0352  | 0.03688 | 0.03158 | 0.03769 | 0.03467 | 0.03282 NME6     |
| cg11680741 | 0.62917 | 0.64636 | 0.61209 | 0.64064 | 0.53277 | 0.6078  | 0.49852 | 0.5819  | 0.56279 | 0.52251 MYH8     |
| cg11681073 | 0.03383 | 0.03661 | 0.04968 | 0.03837 | 0.03491 | 0.04503 | 0.03257 | 0.03138 | 0.02749 | 0.02887 CUL1     |
| cg11681617 | 0.1597  | 0.05039 | 0.08091 | 0.08842 | 0.30529 | 0.06766 | 0.13932 | 0.07118 | 0.25185 | 0.03498 GAB3     |
| cg11682508 | 0.88268 | 0.35446 | 0.79855 | 0.83377 | 0.88172 | 0.54499 | 0.07734 | 0.0616  | 0.17319 | 0.24912 FLJ30313 |
| cg11688219 | 0.19286 | 0.06946 | 0.08465 | 0.08109 | 0.20253 | 0.23843 | 0.04848 | 0.04511 | 0.06278 | 0.05091 THAP3    |
| cg11688469 | 0.84125 | 0.67114 | 0.82383 | 0.83104 | 0.86215 | 0.83929 | 0.77166 | 0.54746 | 0.83386 | 0.60992 TNNI1    |
| cg11688990 | 0.71545 | 0.46688 | 0.79171 | 0.83282 | 0.82957 | 0.88893 | 0.8575  | 0.18435 | 0.92282 | 0.83709 CEP76    |
| cg11691938 | 0.09936 | 0.05015 | 0.04886 | 0.03932 | 0.05547 | 0.04876 | 0.03814 | 0.02955 | 0.05022 | 0.05083 FLJ33167 |
| cg11692021 | 0.5221  | 0.38551 | 0.80426 | 0.86622 | 0.74714 | 0.69392 | 0.79737 | 0.69096 | 0.62554 | 0.38538 GNB3     |
| cg11692477 | 0.3535  | 0.13133 | 0.05779 | 0.03754 | 0.05883 | 0.03343 | 0.03599 | 0.02726 | 0.03768 | 0.03562 SLC40A1  |
| cg11693019 | 0.56058 | 0.45969 | 0.85386 | 0.86795 | 0.89297 | 0.86282 | 0.8276  | 0.79106 | 0.67039 | 0.78876 AKR1B10  |
| cg11694641 | 0.0423  | 0.04558 | 0.04594 | 0.03946 | 0.03204 | 0.04053 | 0.03986 | 0.0385  | 0.03843 | 0.03961 SLC25A3  |
| cg11695266 | 0.12294 | 0.07047 | 0.14019 | 0.22328 | 0.10691 | 0.28497 | 0.17182 | 0.03209 | 0.22649 | 0.10284 DNAJB6   |
| cg11695358 | 0.83131 | 0.7431  | 0.82022 | 0.84206 | 0.32153 | 0.41657 | 0.63409 | 0.49196 | 0.4854  | 0.39916 MAPK15   |
| cg11695601 | 0.0614  | 0.05969 | 0.06946 | 0.06017 | 0.13178 | 0.07854 | 0.06799 | 0.06653 | 0.06506 | 0.06468 CHN1     |
| cg11695684 | 0.89333 | 0.375   | 0.89136 | 0.89962 | 0.93594 | 0.90603 | 0.87607 | 0.51205 | 0.89905 | 0.86414 CHRND    |
| cg11696575 | 0.02695 | 0.02836 | 0.03966 | 0.03143 | 0.03392 | 0.04158 | 0.02823 | 0.02915 | 0.02755 | 0.02227 ING3     |
| cg11697652 | 0.05199 | 0.05775 | 0.15806 | 0.16687 | 0.1022  | 0.05897 | 0.06163 | 0.06889 | 0.06006 | 0.07369 ATF7IP   |
| cg11698653 | 0.46138 | 0.54927 | 0.64318 | 0.68806 | 0.54094 | 0.61074 | 0.65424 | 0.70692 | 0.66648 | 0.44346 ASB5     |
| cg11698762 | 0.09277 | 0.08568 | 0.10002 | 0.09694 | 0.28146 | 0.07435 | 0.08244 | 0.08847 | 0.07759 | 0.07344 WDR54    |
| cg11700429 | 0.0199  | 0.01968 | 0.02379 | 0.02122 | 0.0197  | 0.02043 | 0.01916 | 0.01994 | 0.01799 | 0.0173 ANAPC1    |
| cg11700584 | 0.07983 | 0.06142 | 0.04071 | 0.03281 | 0.13123 | 0.07412 | 0.03904 | 0.03965 | 0.04786 | 0.07461 RPL36AL  |
| cg11701148 | 0.43081 | 0.32334 | 0.23206 | 0.23277 | 0.4933  | 0.43442 | 0.25    | 0.20885 | 0.24901 | 0.30114 MYOM2    |
| cg11703011 | 0.04493 | 0.0492  | 0.04617 | 0.04653 | 0.02968 | 0.04073 | 0.03742 | 0.0368  | 0.04427 | 0.04025 SERPINE2 |
| cg11705439 | 0.03452 | 0.0408  | 0.04092 | 0.0416  | 0.03068 | 0.03114 | 0.0342  | 0.0335  | 0.02755 | 0.02808 PRKCSH   |
| cg11706111 | 0.20914 | 0.12207 | 0.78414 | 0.84144 | 0.18587 | 0.60015 | 0.10658 | 0.06621 | 0.30529 | 0.08022 ZNF19    |
| cg11706163 | 0.17667 | 0.17951 | 0.70551 | 0.73307 | 0.66145 | 0.76821 | 0.17863 | 0.14691 | 0.20985 | 0.10963 C9       |
| cg11706746 | 0.11895 | 0.02795 | 0.03037 | 0.03073 | 0.01832 | 0.02215 | 0.02355 | 0.02241 | 0.02133 | 0.01726 B3GAT3   |

|            |         |         |         |         |         |         |         |         |         |         |          |
|------------|---------|---------|---------|---------|---------|---------|---------|---------|---------|---------|----------|
| cg11706911 | 0.48176 | 0.13752 | 0.2584  | 0.36704 | 0.27244 | 0.21299 | 0.12332 | 0.25872 | 0.08346 | 0.0868  | AGMAT    |
| cg11710000 | 0.03946 | 0.0427  | 0.04782 | 0.05262 | 0.1513  | 0.11636 | 0.05435 | 0.05396 | 0.03197 | 0.03246 | FZD3     |
| cg11710560 | 0.90165 | 0.80389 | 0.89871 | 0.91065 | 0.91909 | 0.84693 | 0.06883 | 0.0541  | 0.21719 | 0.12407 | KRTAP9-3 |
| cg11710969 | 0.79484 | 0.84476 | 0.41258 | 0.42221 | 0.59469 | 0.55837 | 0.48184 | 0.3037  | 0.62223 | 0.4833  | ARMC3    |
| cg11712199 | 0.23447 | 0.22473 | 0.5697  | 0.67653 | 0.51536 | 0.53397 | 0.57925 | 0.65321 | 0.36177 | 0.40613 | TAIP-2   |
| cg11713008 | 0.03288 | 0.03723 | 0.0514  | 0.0447  | 0.04571 | 0.04215 | 0.04688 | 0.04522 | 0.03807 | 0.0468  | HRSP12   |
| cg11713029 | 0.02283 | 0.02701 | 0.09799 | 0.15369 | 0.02354 | 0.02598 | 0.0291  | 0.02281 | 0.02263 | 0.02311 | DLNB14   |
| cg11713336 | 0.08014 | 0.03579 | 0.08315 | 0.11995 | 0.21319 | 0.09652 | 0.05636 | 0.03831 | 0.03827 | 0.02761 | UBE2D2   |
| cg11714014 | 0.22898 | 0.0498  | 0.83516 | 0.76674 | 0.24113 | 0.65986 | 0.47044 | 0.5254  | 0.93471 | 0.87478 | GABRQ    |
| cg11714502 | 0.45824 | 0.50458 | 0.29223 | 0.32428 | 0.42304 | 0.08169 | 0.24162 | 0.107   | 0.16228 | 0.03405 | AK1      |
| cg11715903 | 0.02793 | 0.02908 | 0.02263 | 0.01994 | 0.02745 | 0.02555 | 0.0196  | 0.02224 | 0.01957 | 0.02121 | PLEKHC1  |
| cg11715966 | 0.82027 | 0.44496 | 0.85061 | 0.86526 | 0.89102 | 0.70125 | 0.87515 | 0.84476 | 0.88097 | 0.59904 | CCDC8    |
| cg11715999 | 0.0402  | 0.04575 | 0.04089 | 0.04009 | 0.04588 | 0.04354 | 0.04418 | 0.04408 | 0.04185 | 0.03612 | ATP5G1   |
| cg11716026 | 0.70231 | 0.81645 | 0.82926 | 0.83689 | 0.74337 | 0.76347 | 0.72206 | 0.74368 | 0.84915 | 0.84792 | H19      |
| cg11717557 | 0.03237 | 0.03614 | 0.04705 | 0.03613 | 0.02922 | 0.03482 | 0.031   | 0.03426 | 0.0497  | 0.02803 | AP4B1    |
| cg11718090 | 0.05521 | 0.06192 | 0.29728 | 0.33764 | 0.21265 | 0.03477 | 0.20523 | 0.06192 | 0.11408 | 0.05404 | NOTCH2NL |
| cg11718315 | 0.06693 | 0.05718 | 0.06112 | 0.07623 | 0.09234 | 0.07536 | 0.08872 | 0.07411 | 0.06995 | 0.06844 | PARP16   |
| cg11719157 | 0.08751 | 0.06991 | 0.55083 | 0.66856 | 0.36394 | 0.06755 | 0.12269 | 0.07123 | 0.0776  | 0.06126 | PITPNA   |
| cg11719283 | 0.82322 | 0.70695 | 0.82584 | 0.89865 | 0.86533 | 0.89229 | 0.4728  | 0.49906 | 0.55453 | 0.52331 | ZNF574   |
| cg11719297 | 0.10055 | 0.07098 | 0.28566 | 0.11871 | 0.62295 | 0.67749 | 0.47981 | 0.60519 | 0.56025 | 0.54972 | RIPK4    |
| cg11719412 | 0.02028 | 0.02344 | 0.0245  | 0.02387 | 0.02034 | 0.01868 | 0.01794 | 0.02064 | 0.01839 | 0.02095 | NDUFB9   |
| cg11719452 | 0.03387 | 0.04229 | 0.04603 | 0.04089 | 0.02837 | 0.04931 | 0.04224 | 0.03267 | 0.03004 | 0.02926 | BCDIN3   |
| cg11719784 | 0.53459 | 0.43073 | 0.73899 | 0.74522 | 0.81632 | 0.68071 | 0.41982 | 0.16529 | 0.76899 | 0.42883 | ADORA1   |
| cg11720778 | 0.8342  | 0.86255 | 0.83759 | 0.84567 | 0.87825 | 0.87291 | 0.83109 | 0.85975 | 0.87835 | 0.86212 | TIGD7    |
| cg11721194 | 0.15973 | 0.16581 | 0.23564 | 0.2288  | 0.14504 | 0.15875 | 0.18811 | 0.15529 | 0.14796 | 0.14842 | SLAMF7   |
| cg11722531 | 0.03462 | 0.03714 | 0.39711 | 0.47376 | 0.55525 | 0.48944 | 0.06223 | 0.04156 | 0.08396 | 0.03163 | APC2     |
| cg11722639 | 0.0299  | 0.02427 | 0.03178 | 0.03511 | 0.0332  | 0.03359 | 0.02835 | 0.03564 | 0.02783 | 0.02905 | OBFC2B   |
| cg11724134 | 0.28768 | 0.02754 | 0.2386  | 0.46498 | 0.47085 | 0.32978 | 0.06162 | 0.02023 | 0.16512 | 0.02386 | RNF39    |
| cg11724759 | 0.40154 | 0.31474 | 0.48036 | 0.59767 | 0.6417  | 0.79545 | 0.48184 | 0.16153 | 0.32941 | 0.29483 | RPE65    |
| cg11726593 | 0.78772 | 0.59409 | 0.32035 | 0.5494  | 0.10498 | 0.2446  | 0.24035 | 0.08296 | 0.39578 | 0.19145 | IMPA1    |
| cg11727029 | 0.05394 | 0.0453  | 0.05645 | 0.05733 | 0.07257 | 0.05335 | 0.05587 | 0.05386 | 0.04558 | 0.05553 | UNC45A   |
| cg11730100 | 0.07907 | 0.05911 | 0.08384 | 0.08402 | 0.08268 | 0.07358 | 0.07095 | 0.06176 | 0.05873 | 0.05009 | FEN1     |
| cg11730691 | 0.11298 | 0.04852 | 0.04941 | 0.04866 | 0.03659 | 0.04715 | 0.05169 | 0.0435  | 0.04098 | 0.03837 | NOD9     |
| cg11730961 | 0.09104 | 0.08887 | 0.09319 | 0.08835 | 0.06356 | 0.07826 | 0.07437 | 0.07875 | 0.07894 | 0.07777 | SFPQ     |
| cg11732619 | 0.04837 | 0.03655 | 0.03555 | 0.03291 | 0.02652 | 0.02743 | 0.02906 | 0.0269  | 0.02781 | 0.02946 | SLIT3    |
| cg11733245 | 0.8138  | 0.84178 | 0.84211 | 0.85917 | 0.77503 | 0.83571 | 0.56765 | 0.7595  | 0.83957 | 0.83561 | IL2RA    |
| cg11735358 | 0.02175 | 0.02404 | 0.02267 | 0.02635 | 0.01742 | 0.01849 | 0.02068 | 0.02372 | 0.01864 | 0.01997 | ATP5F1   |
| cg11735605 | 0.03556 | 0.044   | 0.06334 | 0.04945 | 0.06307 | 0.04691 | 0.0495  | 0.04323 | 0.057   | 0.05481 | ZNFN1A2  |
| cg11736869 | 0.12984 | 0.14967 | 0.14161 | 0.14322 | 0.12438 | 0.12926 | 0.11124 | 0.11354 | 0.11463 | 0.14103 | FLJ32312 |
| cg11738011 | 0.02835 | 0.03275 | 0.03527 | 0.03498 | 0.03131 | 0.0282  | 0.02539 | 0.02497 | 0.02878 | 0.02492 | PUS1     |
| cg11738543 | 0.6008  | 0.6335  | 0.05084 | 0.04369 | 0.44185 | 0.47492 | 0.6727  | 0.79992 | 0.90582 | 0.89619 | SOCS2    |

|            |         |         |         |         |         |         |         |         |         |                  |
|------------|---------|---------|---------|---------|---------|---------|---------|---------|---------|------------------|
| cg11739626 | 0.84307 | 0.44632 | 0.84074 | 0.90548 | 0.93034 | 0.67938 | 0.68844 | 0.63159 | 0.91463 | 0.82064 AKT1S1   |
| cg11743470 | 0.69239 | 0.61039 | 0.6478  | 0.69357 | 0.34462 | 0.24474 | 0.62649 | 0.48358 | 0.65673 | 0.2023 GCNT4     |
| cg11743795 | 0.05077 | 0.04582 | 0.04076 | 0.04315 | 0.05378 | 0.04704 | 0.05497 | 0.05067 | 0.0309  | 0.03129 SLMAP    |
| cg11744351 | 0.02349 | 0.03181 | 0.02771 | 0.02483 | 0.02235 | 0.02719 | 0.0228  | 0.02148 | 0.01976 | 0.02388 UBL3     |
| cg11745019 | 0.10977 | 0.40882 | 0.12481 | 0.1013  | 0.10907 | 0.10302 | 0.06849 | 0.06414 | 0.09894 | 0.12385 ANGPT1   |
| cg11747499 | 0.06519 | 0.06358 | 0.77473 | 0.77528 | 0.402   | 0.10546 | 0.58215 | 0.60475 | 0.08333 | 0.07536 SSH1     |
| cg11747771 | 0.0421  | 0.04205 | 0.30981 | 0.33053 | 0.03309 | 0.04273 | 0.0497  | 0.03639 | 0.04688 | 0.03255 GLDC     |
| cg11748006 | 0.05758 | 0.05734 | 0.0665  | 0.0593  | 0.04604 | 0.05662 | 0.05552 | 0.06338 | 0.05412 | 0.05278 CAPNS1   |
| cg11750183 | 0.07772 | 0.06846 | 0.07134 | 0.06068 | 0.13494 | 0.12078 | 0.07685 | 0.07984 | 0.05761 | 0.04803 C9orf40  |
| cg11750883 | 0.07579 | 0.04206 | 0.14953 | 0.20759 | 0.85188 | 0.60293 | 0.04741 | 0.03996 | 0.08429 | 0.09706 C1orf42  |
| cg11752275 | 0.57851 | 0.53633 | 0.85053 | 0.88484 | 0.83673 | 0.84512 | 0.74655 | 0.49931 | 0.85504 | 0.60545 GNLY     |
| cg11754095 | 0.29511 | 0.5216  | 0.133   | 0.11269 | 0.2357  | 0.18778 | 0.10144 | 0.08405 | 0.11447 | 0.19983 CTSO     |
| cg11754206 | 0.17465 | 0.17138 | 0.76757 | 0.74737 | 0.15744 | 0.06132 | 0.13534 | 0.0921  | 0.06577 | 0.05137 KCN2     |
| cg11754343 | 0.04549 | 0.04605 | 0.04331 | 0.04162 | 0.04953 | 0.04791 | 0.05139 | 0.05033 | 0.07395 | 0.05122 NUP88    |
| cg11754676 | 0.02583 | 0.02943 | 0.02804 | 0.02743 | 0.34431 | 0.52204 | 0.02838 | 0.03257 | 0.02344 | 0.02305 ZNF10    |
| cg11756837 | 0.05493 | 0.05391 | 0.06356 | 0.07234 | 0.07579 | 0.07379 | 0.06107 | 0.0648  | 0.05124 | 0.05299 PRKAB1   |
| cg11757293 | 0.32916 | 0.25635 | 0.36359 | 0.39651 | 0.95769 | 0.86509 | 0.35145 | 0.34871 | 0.52613 | 0.5019 KIFC2     |
| cg11759378 | 0.79639 | 0.81615 | 0.63308 | 0.69335 | 0.80661 | 0.84344 | 0.63653 | 0.79736 | 0.53451 | 0.3134 DPPA2     |
| cg11761535 | 0.63568 | 0.1733  | 0.63742 | 0.64205 | 0.47091 | 0.08665 | 0.75136 | 0.27354 | 0.89728 | 0.61639 TM4SF18  |
| cg11762346 | 0.75989 | 0.34334 | 0.85321 | 0.87815 | 0.73703 | 0.82598 | 0.10274 | 0.07068 | 0.8953  | 0.86851 HKDC1    |
| cg11762629 | 0.04739 | 0.04316 | 0.05115 | 0.04891 | 0.04421 | 0.04875 | 0.04837 | 0.03477 | 0.04462 | 0.04434 CTDSP2   |
| cg11763112 | 0.03152 | 0.03553 | 0.04193 | 0.0447  | 0.04141 | 0.04231 | 0.03303 | 0.03524 | 0.02809 | 0.03324 C6orf84  |
| cg11764747 | 0.05353 | 0.05479 | 0.073   | 0.0778  | 0.0622  | 0.06505 | 0.0701  | 0.05833 | 0.05814 | 0.05664 EFNB1    |
| cg11765205 | 0.5194  | 0.12259 | 0.85291 | 0.88324 | 0.8832  | 0.82342 | 0.8191  | 0.19683 | 0.81837 | 0.51927 ARL11    |
| cg11766698 | 0.1024  | 0.08172 | 0.10538 | 0.09961 | 0.11869 | 0.09306 | 0.10944 | 0.08489 | 0.08223 | 0.07782 UQCRC2   |
| cg11767711 | 0.88876 | 0.42132 | 0.87053 | 0.90362 | 0.76717 | 0.60876 | 0.76637 | 0.62682 | 0.88778 | 0.8525 APLP1     |
| cg11768416 | 0.96583 | 0.97123 | 0.96863 | 0.97426 | 0.9797  | 0.97243 | 0.97208 | 0.97479 | 0.95092 | 0.9352 C12orf12  |
| cg11768886 | 0.05226 | 0.04529 | 0.05364 | 0.0524  | 0.09783 | 0.12213 | 0.04729 | 0.04823 | 0.03893 | 0.03598 STK32B   |
| cg11769360 | 0.63911 | 0.56854 | 0.77744 | 0.78911 | 0.78402 | 0.82935 | 0.7645  | 0.8001  | 0.85808 | 0.8197 LRAP      |
| cg11772764 | 0.02651 | 0.02652 | 0.02851 | 0.02745 | 0.02303 | 0.02179 | 0.03127 | 0.02213 | 0.01927 | 0.01978 TSGA2    |
| cg11777321 | 0.0944  | 0.28435 | 0.83693 | 0.86053 | 0.45353 | 0.89068 | 0.02825 | 0.03627 | 0.03365 | 0.02985 TEF      |
| cg11778001 | 0.84774 | 0.67864 | 0.44471 | 0.6046  | 0.101   | 0.05314 | 0.25846 | 0.14979 | 0.38691 | 0.1617 NAB1      |
| cg11780382 | 0.04493 | 0.05353 | 0.06957 | 0.07156 | 0.11041 | 0.0689  | 0.03931 | 0.03927 | 0.03521 | 0.03643 C6orf62  |
| cg11780934 | 0.04094 | 0.0427  | 0.06556 | 0.05625 | 0.04329 | 0.038   | 0.05553 | 0.04582 | 0.06626 | 0.03918 ANKRD13B |
| cg11781389 | 0.07767 | 0.09295 | 0.23698 | 0.54012 | 0.44813 | 0.28796 | 0.69149 | 0.80361 | 0.04428 | 0.04023 LOC89944 |
| cg11783451 | 0.03601 | 0.03332 | 0.04141 | 0.03282 | 0.02522 | 0.03019 | 0.03301 | 0.03299 | 0.03211 | 0.02926 LOC90693 |
| cg11783497 | 0.89968 | 0.78766 | 0.77299 | 0.91266 | 0.51757 | 0.32646 | 0.28002 | 0.11556 | 0.56515 | 0.801 IL1RN      |
| cg11784281 | 0.65284 | 0.67846 | 0.79728 | 0.86128 | 0.89001 | 0.85148 | 0.65841 | 0.54761 | 0.84844 | 0.59739 MGC35154 |
| cg11784785 | 0.06932 | 0.06299 | 0.16931 | 0.22247 | 0.08162 | 0.08243 | 0.08957 | 0.06571 | 0.15595 | 0.06426 SLC6A5   |
| cg11786750 | 0.04691 | 0.0443  | 0.04403 | 0.04054 | 0.03787 | 0.04842 | 0.04228 | 0.04222 | 0.04007 | 0.03799 DYNC1L11 |
| cg11787522 | 0.06127 | 0.12612 | 0.11984 | 0.06443 | 0.89403 | 0.48036 | 0.77023 | 0.18513 | 0.79907 | 0.53116 STRA6    |

|            |         |         |         |         |         |         |         |         |         |         |          |
|------------|---------|---------|---------|---------|---------|---------|---------|---------|---------|---------|----------|
| cg11787828 | 0.08521 | 0.08851 | 0.05381 | 0.06464 | 0.0296  | 0.02434 | 0.02335 | 0.02446 | 0.03157 | 0.03726 | C6orf66  |
| cg11787839 | 0.06992 | 0.07002 | 0.09844 | 0.21415 | 0.10357 | 0.06283 | 0.07964 | 0.15762 | 0.05821 | 0.05637 | IQCG     |
| cg11790217 | 0.0452  | 0.04133 | 0.04607 | 0.03678 | 0.04141 | 0.05017 | 0.05792 | 0.03965 | 0.03534 | 0.03988 | PIAS1    |
| cg11792483 | 0.03306 | 0.03072 | 0.04465 | 0.04153 | 0.08355 | 0.03058 | 0.03226 | 0.02813 | 0.02937 | 0.02888 | ASPHD2   |
| cg11792664 | 0.03297 | 0.0358  | 0.03456 | 0.03502 | 0.02926 | 0.02769 | 0.03094 | 0.03148 | 0.03263 | 0.02689 | UQCR     |
| cg11793332 | 0.15283 | 0.20438 | 0.32949 | 0.33576 | 0.48563 | 0.52488 | 0.76235 | 0.65263 | 0.45596 | 0.3298  | ELF1     |
| cg11793380 | 0.75073 | 0.57902 | 0.7958  | 0.84709 | 0.81774 | 0.36502 | 0.70791 | 0.46016 | 0.54721 | 0.29159 | C1QTNF6  |
| cg11794728 | 0.04168 | 0.05252 | 0.05154 | 0.06874 | 0.05779 | 0.06191 | 0.03347 | 0.03558 | 0.04677 | 0.045   | KLF12    |
| cg11795262 | 0.89356 | 0.78239 | 0.89805 | 0.89974 | 0.73455 | 0.68812 | 0.89206 | 0.88326 | 0.76907 | 0.71669 | GATAD2A  |
| cg11797883 | 0.02195 | 0.02499 | 0.02307 | 0.0226  | 0.02397 | 0.02268 | 0.01894 | 0.01888 | 0.02198 | 0.01723 | ARPC5L   |
| cg11797994 | 0.24368 | 0.25302 | 0.50027 | 0.53225 | 0.37766 | 0.46242 | 0.42698 | 0.36114 | 0.2938  | 0.26395 | ALX4     |
| cg11799561 | 0.63146 | 0.68101 | 0.58932 | 0.7062  | 0.5746  | 0.65165 | 0.57897 | 0.47932 | 0.39141 | 0.36921 | SMR3A    |
| cg11800672 | 0.84881 | 0.77172 | 0.82564 | 0.82218 | 0.87111 | 0.82241 | 0.77467 | 0.71953 | 0.84649 | 0.83256 | SLC39A4  |
| cg11801011 | 0.82401 | 0.86945 | 0.3813  | 0.46598 | 0.59312 | 0.61516 | 0.05931 | 0.05326 | 0.36871 | 0.32385 | SHANK1   |
| cg11801374 | 0.70762 | 0.2379  | 0.59808 | 0.7467  | 0.71639 | 0.65885 | 0.08273 | 0.18666 | 0.36034 | 0.59906 | C2orf160 |
| cg11802013 | 0.44844 | 0.3852  | 0.87361 | 0.89268 | 0.95851 | 0.6068  | 0.83595 | 0.54146 | 0.90555 | 0.69155 | CNND1    |
| cg11802692 | 0.07027 | 0.06646 | 0.0709  | 0.06515 | 0.0587  | 0.06695 | 0.06096 | 0.0618  | 0.05356 | 0.05041 | FKBP14   |
| cg11804789 | 0.6739  | 0.44001 | 0.56441 | 0.60116 | 0.39154 | 0.4168  | 0.10796 | 0.1842  | 0.08926 | 0.05552 | CST7     |
| cg11806389 | 0.04029 | 0.04622 | 0.04823 | 0.04365 | 0.03538 | 0.03969 | 0.04674 | 0.04352 | 0.04519 | 0.03651 | ZNF446   |
| cg11806565 | 0.07143 | 0.05416 | 0.10625 | 0.08972 | 0.05433 | 0.05249 | 0.55543 | 0.51932 | 0.05264 | 0.04668 | PHKA1    |
| cg11806749 | 0.05645 | 0.05079 | 0.05445 | 0.05182 | 0.95494 | 0.94492 | 0.93722 | 0.92323 | 0.05126 | 0.05008 | SUPT3H   |
| cg11808544 | 0.66771 | 0.49654 | 0.33749 | 0.47599 | 0.68024 | 0.71489 | 0.46093 | 0.50828 | 0.33892 | 0.30155 | FKBP9L   |
| cg11808757 | 0.2605  | 0.10493 | 0.26155 | 0.23273 | 0.23086 | 0.07603 | 0.43852 | 0.35106 | 0.48318 | 0.14763 | TUBGCP6  |
| cg11808874 | 0.60989 | 0.31612 | 0.81188 | 0.82574 | 0.89154 | 0.654   | 0.51484 | 0.52317 | 0.60823 | 0.42386 | FLJ14668 |
| cg11809085 | 0.79206 | 0.49177 | 0.69519 | 0.79651 | 0.63188 | 0.68833 | 0.73204 | 0.66127 | 0.62405 | 0.61903 | TNFSF15  |
| cg11809091 | 0.39544 | 0.23511 | 0.60225 | 0.68806 | 0.57548 | 0.40152 | 0.20905 | 0.19238 | 0.14832 | 0.13321 | PCDHB7   |
| cg11810837 | 0.04637 | 0.04316 | 0.06119 | 0.04966 | 0.03952 | 0.05322 | 0.28708 | 0.54    | 0.04014 | 0.04375 | ARMCX5   |
| cg11811840 | 0.86297 | 0.60962 | 0.68262 | 0.75425 | 0.81057 | 0.73655 | 0.14784 | 0.11174 | 0.84529 | 0.8414  | UGT1A1   |
| cg11812202 | 0.26804 | 0.27022 | 0.634   | 0.71521 | 0.68236 | 0.7958  | 0.14966 | 0.13265 | 0.28999 | 0.20732 | PNLIP    |
| cg11812218 | 0.05474 | 0.03509 | 0.81271 | 0.94719 | 0.72271 | 0.7043  | 0.3565  | 0.24987 | 0.32958 | 0.04104 | GHSR     |
| cg11814446 | 0.06515 | 0.06527 | 0.0931  | 0.0636  | 0.09523 | 0.05957 | 0.0524  | 0.04782 | 0.05508 | 0.06918 | LEMD3    |
| cg11815363 | 0.02539 | 0.02058 | 0.02806 | 0.02316 | 0.11994 | 0.02204 | 0.45717 | 0.68279 | 0.06058 | 0.02152 | KCNK1    |
| cg11816577 | 0.12727 | 0.09392 | 0.19001 | 0.27867 | 0.29248 | 0.08764 | 0.14062 | 0.08934 | 0.14798 | 0.06948 | YWHAE    |
| cg11819013 | 0.03588 | 0.03776 | 0.04079 | 0.03746 | 0.0453  | 0.04286 | 0.02705 | 0.0248  | 0.03189 | 0.02879 | IMPDH2   |
| cg11819429 | 0.09378 | 0.09141 | 0.08588 | 0.08325 | 0.10499 | 0.08794 | 0.07166 | 0.06354 | 0.08372 | 0.09262 | ACIN1    |
| cg11819637 | 0.45717 | 0.23293 | 0.67774 | 0.76332 | 0.7863  | 0.79841 | 0.24823 | 0.21295 | 0.45607 | 0.158   | THPO     |
| cg11820497 | 0.03023 | 0.02951 | 0.03204 | 0.03351 | 0.02221 | 0.03383 | 0.03315 | 0.0248  | 0.02859 | 0.02666 | ATG4D    |
| cg11820734 | 0.05583 | 0.05437 | 0.05536 | 0.055   | 0.0511  | 0.05412 | 0.04568 | 0.04877 | 0.04814 | 0.05453 | MRPL35   |
| cg11821147 | 0.04213 | 0.02228 | 0.03057 | 0.02687 | 0.02438 | 0.02859 | 0.01986 | 0.01939 | 0.02255 | 0.02293 | THAP2    |
| cg11821536 | 0.02819 | 0.02671 | 0.02478 | 0.02503 | 0.02504 | 0.02991 | 0.02408 | 0.02417 | 0.02125 | 0.02464 | TTC8     |
| cg11821702 | 0.66622 | 0.7799  | 0.79712 | 0.83977 | 0.76957 | 0.72684 | 0.8026  | 0.81367 | 0.63659 | 0.60079 | MLANA    |

|            |         |         |         |         |         |         |         |         |         |                       |
|------------|---------|---------|---------|---------|---------|---------|---------|---------|---------|-----------------------|
| cg11822659 | 0.08684 | 0.06616 | 0.43226 | 0.54812 | 0.06089 | 0.06239 | 0.09229 | 0.07236 | 0.08228 | 0.28651 DOK5          |
| cg11822772 | 0.35695 | 0.37056 | 0.34879 | 0.41502 | 0.35646 | 0.36819 | 0.28551 | 0.29221 | 0.32218 | 0.36194 SUHW3         |
| cg11822932 | 0.87054 | 0.76121 | 0.85841 | 0.88306 | 0.86683 | 0.87854 | 0.84315 | 0.85874 | 0.88363 | 0.85244 LMO2          |
| cg11822964 | 0.86721 | 0.84519 | 0.83878 | 0.85227 | 0.81172 | 0.85384 | 0.81891 | 0.68074 | 0.88488 | 0.81041 PTGIR         |
| cg11823654 | 0.0318  | 0.03196 | 0.03948 | 0.03316 | 0.03803 | 0.03787 | 0.03711 | 0.03625 | 0.03077 | 0.03767 C15orf20      |
| cg11824111 | 0.15617 | 0.09835 | 0.2064  | 0.54193 | 0.14665 | 0.1253  | 0.17696 | 0.08308 | 0.06017 | 0.05717 DKC1          |
| cg11825652 | 0.57767 | 0.49689 | 0.42524 | 0.41761 | 0.57654 | 0.12013 | 0.2931  | 0.22888 | 0.76825 | 0.33628 CAV2          |
| cg11826116 | 0.06197 | 0.0698  | 0.07296 | 0.06783 | 0.04556 | 0.05671 | 0.05793 | 0.06407 | 0.06386 | 0.05812 ATF4          |
| cg11826486 | 0.62702 | 0.66801 | 0.58071 | 0.59579 | 0.53022 | 0.59354 | 0.37894 | 0.51337 | 0.33049 | 0.27334 TMSL3         |
| cg11827101 | 0.88631 | 0.89088 | 0.81073 | 0.84072 | 0.93723 | 0.91133 | 0.46835 | 0.46776 | 0.38092 | 0.54292 LOC339789     |
| cg11827595 | 0.11321 | 0.06924 | 0.12003 | 0.09795 | 0.10845 | 0.09583 | 0.08929 | 0.05447 | 0.06523 | 0.05691 C3orf10       |
| cg11828089 | 0.38791 | 0.58169 | 0.73213 | 0.78753 | 0.92111 | 0.91405 | 0.42439 | 0.27066 | 0.08441 | 0.31314 CALN1         |
| cg11828669 | 0.04527 | 0.04447 | 0.04956 | 0.04368 | 0.03133 | 0.03885 | 0.03923 | 0.03913 | 0.04079 | 0.03673 ZBTB25        |
| cg11830061 | 0.75788 | 0.87607 | 0.90995 | 0.91753 | 0.80217 | 0.82804 | 0.86768 | 0.50048 | 0.74974 | 0.59939 INSL6         |
| cg11832543 | 0.92332 | 0.75871 | 0.90257 | 0.92771 | 0.90584 | 0.71675 | 0.89069 | 0.92855 | 0.93608 | 0.84472 C1orf49       |
| cg11832722 | 0.06212 | 0.08046 | 0.94488 | 0.95551 | 0.62084 | 0.90703 | 0.175   | 0.62892 | 0.15735 | 0.42246 DSC3          |
| cg11832727 | 0.04487 | 0.0494  | 0.05911 | 0.05208 | 0.05526 | 0.04938 | 0.04464 | 0.05005 | 0.04845 | 0.04368 RERE          |
| cg11833861 | 0.11633 | 0.13548 | 0.38774 | 0.31921 | 0.61022 | 0.31609 | 0.21703 | 0.14624 | 0.2728  | 0.15038 TMEM98        |
| cg11834681 | 0.8802  | 0.85815 | 0.75761 | 0.84354 | 0.81321 | 0.72132 | 0.3875  | 0.45701 | 0.5283  | 0.51803 CYP2A13       |
| cg11835197 | 0.63418 | 0.44502 | 0.63175 | 0.76718 | 0.73676 | 0.84804 | 0.72708 | 0.72737 | 0.92449 | 0.74257 TFAP2E        |
| cg11835355 | 0.82322 | 0.6742  | 0.82052 | 0.86605 | 0.85428 | 0.8923  | 0.81703 | 0.87553 | 0.83457 | 0.52653 APOL3         |
| cg11837864 | 0.04245 | 0.03598 | 0.03765 | 0.0365  | 0.06842 | 0.03409 | 0.02934 | 0.02897 | 0.0338  | 0.03329 C2orf17       |
| cg11839979 | 0.03852 | 0.04827 | 0.04935 | 0.0424  | 0.03651 | 0.04384 | 0.46628 | 0.44549 | 0.04091 | 0.03595 RP13-360B22.2 |
| cg11840168 | 0.03619 | 0.03982 | 0.04194 | 0.03987 | 0.02942 | 0.03788 | 0.03427 | 0.03659 | 0.03077 | 0.03286 RBBP8         |
| cg11840540 | 0.0389  | 0.03726 | 0.05814 | 0.10778 | 0.19505 | 0.28506 | 0.02939 | 0.02638 | 0.94045 | 0.82569 FXYD5         |
| cg11841758 | 0.05502 | 0.05175 | 0.05746 | 0.05144 | 0.04326 | 0.05518 | 0.04671 | 0.05043 | 0.04821 | 0.04789 MAGOH         |
| cg11843304 | 0.38344 | 0.46917 | 0.66864 | 0.75351 | 0.72041 | 0.85439 | 0.10178 | 0.83342 | 0.10392 | 0.09638 PTPRO         |
| cg11843691 | 0.09996 | 0.06406 | 0.07324 | 0.06182 | 0.10913 | 0.07072 | 0.04686 | 0.042   | 0.05835 | 0.07434 TBC1D9        |
| cg11843760 | 0.03313 | 0.03662 | 0.03331 | 0.03374 | 0.03015 | 0.0339  | 0.02945 | 0.02807 | 0.03093 | 0.02653 DFFA          |
| cg11844110 | 0.07062 | 0.0774  | 0.07158 | 0.06711 | 0.04317 | 0.0682  | 0.06479 | 0.06956 | 0.06091 | 0.05818 C1orf132      |
| cg11845202 | 0.85224 | 0.84609 | 0.88594 | 0.89036 | 0.91456 | 0.87817 | 0.77943 | 0.65312 | 0.88128 | 0.86602 K5B           |
| cg11846236 | 0.03419 | 0.03233 | 0.03408 | 0.0769  | 0.8943  | 0.93147 | 0.03463 | 0.04639 | 0.94872 | 0.95278 COL7A1        |
| cg11846543 | 0.05021 | 0.06273 | 0.05748 | 0.04694 | 0.04845 | 0.04713 | 0.05555 | 0.05571 | 0.05337 | 0.05611 KIF1B         |
| cg11846956 | 0.04769 | 0.04818 | 0.93476 | 0.95411 | 0.48266 | 0.65827 | 0.53715 | 0.53529 | 0.34765 | 0.3054 KLK10          |
| cg11846968 | 0.20545 | 0.1039  | 0.40357 | 0.57725 | 0.52465 | 0.57492 | 0.08252 | 0.09891 | 0.57103 | 0.31123 PLUNC         |
| cg11847459 | 0.02822 | 0.02655 | 0.03142 | 0.02445 | 0.02611 | 0.02639 | 0.02464 | 0.02653 | 0.02298 | 0.02178 MBIP          |
| cg11847808 | 0.17334 | 0.08142 | 0.90103 | 0.91277 | 0.56762 | 0.64653 | 0.07766 | 0.07072 | 0.25811 | 0.4496 EPHA8          |
| cg11847949 | 0.84377 | 0.54112 | 0.72555 | 0.80951 | 0.90109 | 0.82935 | 0.65883 | 0.50351 | 0.76351 | 0.54793 CYP21A2       |
| cg11848539 | 0.03436 | 0.03242 | 0.03521 | 0.03071 | 0.04021 | 0.04217 | 0.02609 | 0.0289  | 0.02335 | 0.02365 TNFRSF21      |
| cg11849692 | 0.86895 | 0.80669 | 0.921   | 0.91816 | 0.91728 | 0.91482 | 0.88817 | 0.79841 | 0.92635 | 0.9175 LDB1           |
| cg11850311 | 0.03504 | 0.03971 | 0.05659 | 0.05556 | 0.04051 | 0.04347 | 0.03593 | 0.02734 | 0.03057 | 0.02822 ID1           |



|            |         |         |         |         |         |         |         |         |         |                      |
|------------|---------|---------|---------|---------|---------|---------|---------|---------|---------|----------------------|
| cg11851098 | 0.86128 | 0.8673  | 0.86115 | 0.88738 | 0.86037 | 0.85834 | 0.84432 | 0.4851  | 0.87574 | 0.85251 MGC26816     |
| cg11852073 | 0.93504 | 0.92142 | 0.95348 | 0.95271 | 0.95359 | 0.94153 | 0.93957 | 0.94627 | 0.92726 | 0.94166 C1orf56      |
| cg11852814 | 0.05629 | 0.05689 | 0.05291 | 0.0551  | 0.03355 | 0.05063 | 0.04614 | 0.0415  | 0.05566 | 0.05348 PLCXD2       |
| cg11854007 | 0.06487 | 0.07248 | 0.08213 | 0.08941 | 0.1885  | 0.29129 | 0.06209 | 0.05044 | 0.05102 | 0.04576 RP11-49G10.8 |
| cg11854877 | 0.02942 | 0.0231  | 0.03305 | 0.02665 | 0.02943 | 0.0256  | 0.66853 | 0.66902 | 0.01881 | 0.05311 F8A1         |
| cg11856093 | 0.08102 | 0.08249 | 0.08428 | 0.08777 | 0.07239 | 0.06853 | 0.06531 | 0.05926 | 0.0751  | 0.06773 ARID1A       |
| cg11856697 | 0.84391 | 0.81375 | 0.83871 | 0.87717 | 0.80626 | 0.84286 | 0.56998 | 0.85711 | 0.84921 | 0.81567 DNAI2        |
| cg11856918 | 0.03127 | 0.03026 | 0.03238 | 0.02955 | 0.02629 | 0.0313  | 0.03141 | 0.03434 | 0.02326 | 0.02701 ATP6V1B2     |
| cg11857445 | 0.04947 | 0.0503  | 0.47501 | 0.50533 | 0.07174 | 0.05877 | 0.03415 | 0.03264 | 0.08612 | 0.0295 AATF          |
| cg11858029 | 0.30295 | 0.14262 | 0.6771  | 0.75591 | 0.49293 | 0.56604 | 0.43583 | 0.28277 | 0.38359 | 0.29942 UBIAD1       |
| cg11860203 | 0.168   | 0.05163 | 0.1363  | 0.20614 | 0.03683 | 0.03901 | 0.0575  | 0.0353  | 0.04315 | 0.03128 CCL2         |
| cg11861730 | 0.0643  | 0.05119 | 0.05232 | 0.04146 | 0.04718 | 0.05006 | 0.05521 | 0.06188 | 0.03461 | 0.03822 ETS1         |
| cg11864993 | 0.67084 | 0.5388  | 0.54206 | 0.60724 | 0.45266 | 0.4588  | 0.5847  | 0.57336 | 0.0962  | 0.16243 PCDHB16      |
| cg11867686 | 0.05456 | 0.05603 | 0.05524 | 0.05216 | 0.04745 | 0.06117 | 0.06125 | 0.0537  | 0.05581 | 0.04866 PPP1CA       |
| cg11868029 | 0.04058 | 0.04332 | 0.04036 | 0.0419  | 0.03545 | 0.03913 | 0.03852 | 0.04196 | 0.03532 | 0.03723 CTSC         |
| cg11868900 | 0.28649 | 0.44853 | 0.54809 | 0.70252 | 0.4752  | 0.10091 | 0.37758 | 0.03649 | 0.8968  | 0.78185 EFCAB1       |
| cg11869721 | 0.03844 | 0.03784 | 0.03522 | 0.03789 | 0.03167 | 0.03355 | 0.03369 | 0.03389 | 0.03106 | 0.03045 DREV1        |
| cg11871280 | 0.64495 | 0.71359 | 0.79957 | 0.85996 | 0.3105  | 0.40318 | 0.20522 | 0.34696 | 0.11996 | 0.09374 SLC16A7      |
| cg11871549 | 0.04365 | 0.04628 | 0.2438  | 0.0649  | 0.09491 | 0.04768 | 0.53761 | 0.46757 | 0.15375 | 0.04369 ZCCHC12      |
| cg11873854 | 0.3215  | 0.18795 | 0.15056 | 0.24932 | 0.1926  | 0.44311 | 0.05812 | 0.06147 | 0.05688 | 0.03949 LCN6         |
| cg11874272 | 0.42697 | 0.23509 | 0.30967 | 0.28654 | 0.35739 | 0.20026 | 0.44043 | 0.18565 | 0.3261  | 0.24614 CD86         |
| cg11876012 | 0.92092 | 0.59547 | 0.90739 | 0.90863 | 0.92454 | 0.91355 | 0.9134  | 0.92268 | 0.93362 | 0.91483 C16orf33     |
| cg11876919 | 0.04713 | 0.04005 | 0.10205 | 0.19872 | 0.07282 | 0.03843 | 0.05641 | 0.04536 | 0.04496 | 0.03274 HMG20A       |
| cg11877382 | 0.07941 | 0.07461 | 0.62846 | 0.72918 | 0.19852 | 0.31794 | 0.31194 | 0.40452 | 0.10726 | 0.10126 GLT1D1       |
| cg11879188 | 0.96462 | 0.95575 | 0.96059 | 0.96971 | 0.97293 | 0.97058 | 0.34687 | 0.33034 | 0.94827 | 0.72865 ABO          |
| cg11879480 | 0.0923  | 0.10281 | 0.13912 | 0.11385 | 0.17966 | 0.13179 | 0.12417 | 0.1128  | 0.09429 | 0.09084 SLC36A4      |
| cg11879514 | 0.1094  | 0.09125 | 0.13451 | 0.11749 | 0.17146 | 0.12043 | 0.10899 | 0.07462 | 0.09464 | 0.11555 SLC16A6      |
| cg11879577 | 0.23963 | 0.10187 | 0.25654 | 0.28389 | 0.26644 | 0.07304 | 0.23886 | 0.17398 | 0.82831 | 0.09669 ARL6IP       |
| cg11880010 | 0.12178 | 0.10412 | 0.86598 | 0.85386 | 0.61482 | 0.77682 | 0.81312 | 0.16018 | 0.16294 | 0.18953 KIAA0367     |
| cg11880211 | 0.85543 | 0.85583 | 0.85713 | 0.85411 | 0.88502 | 0.85375 | 0.83992 | 0.73182 | 0.85667 | 0.86052 CSH1         |
| cg11880892 | 0.04313 | 0.04719 | 0.04915 | 0.05142 | 0.03452 | 0.04084 | 0.0458  | 0.04459 | 0.04548 | 0.04597 PPA1         |
| cg11882252 | 0.07913 | 0.07345 | 0.07506 | 0.06427 | 0.06165 | 0.07755 | 0.24285 | 0.51485 | 0.48498 | 0.56761 LOC134147    |
| cg11884243 | 0.83303 | 0.2346  | 0.54197 | 0.7204  | 0.94605 | 0.91418 | 0.26543 | 0.10987 | 0.08807 | 0.04504 FCN2         |
| cg11884546 | 0.55935 | 0.06053 | 0.0789  | 0.12712 | 0.10136 | 0.05645 | 0.05233 | 0.05419 | 0.06332 | 0.04893 ITGAX        |
| cg11884656 | 0.07588 | 0.07051 | 0.08564 | 0.08015 | 0.05424 | 0.06524 | 0.06775 | 0.06787 | 0.06541 | 0.06129 MAK3         |
| cg11884699 | 0.65003 | 0.65587 | 0.60228 | 0.734   | 0.5505  | 0.57624 | 0.22249 | 0.18807 | 0.20975 | 0.225 OR2A4          |
| cg11884792 | 0.04445 | 0.04434 | 0.0481  | 0.04367 | 0.04363 | 0.05152 | 0.0435  | 0.04423 | 0.04682 | 0.04421 OBFC2A       |
| cg11885098 | 0.18917 | 0.04416 | 0.21992 | 0.31275 | 0.82932 | 0.37517 | 0.13213 | 0.09036 | 0.2691  | 0.37769 EFNA2        |
| cg11887234 | 0.11365 | 0.10691 | 0.1474  | 0.14129 | 0.19552 | 0.162   | 0.14869 | 0.12103 | 0.12628 | 0.13444 SMUG1        |
| cg11890956 | 0.03336 | 0.03529 | 0.03541 | 0.03321 | 0.03557 | 0.03806 | 0.0386  | 0.03118 | 0.02831 | 0.02703 DSCR2        |
| cg11891504 | 0.06156 | 0.05049 | 0.05313 | 0.05039 | 0.08211 | 0.06109 | 0.0366  | 0.03302 | 0.0422  | 0.05285 C14orf94     |

|            |         |         |         |         |         |         |         |         |         |         |                |
|------------|---------|---------|---------|---------|---------|---------|---------|---------|---------|---------|----------------|
| cg11891583 | 0.52585 | 0.51801 | 0.42473 | 0.48676 | 0.39911 | 0.42027 | 0.53889 | 0.54737 | 0.09845 | 0.01563 | GLUD2          |
| cg11893236 | 0.03424 | 0.03502 | 0.03778 | 0.03834 | 0.03275 | 0.04189 | 0.03394 | 0.03678 | 0.03603 | 0.03039 | PRMT7          |
| cg11893323 | 0.07102 | 0.10622 | 0.09366 | 0.09181 | 0.07946 | 0.06405 | 0.05801 | 0.05743 | 0.06092 | 0.05341 | C9orf74        |
| cg11896271 | 0.04773 | 0.05216 | 0.50774 | 0.49905 | 0.51262 | 0.12248 | 0.205   | 0.04872 | 0.22671 | 0.03614 | PANX2          |
| cg11896345 | 0.02842 | 0.02614 | 0.03289 | 0.02812 | 0.02462 | 0.02824 | 0.02446 | 0.02817 | 0.02748 | 0.03055 | SLC43A2        |
| cg11896923 | 0.10109 | 0.05358 | 0.06052 | 0.06167 | 0.81645 | 0.77872 | 0.5784  | 0.47766 | 0.28782 | 0.20453 | PNMT           |
| cg11897314 | 0.05117 | 0.0503  | 0.04045 | 0.04326 | 0.03433 | 0.04354 | 0.04094 | 0.03626 | 0.20112 | 0.24728 | LOC51334       |
| cg11898695 | 0.88972 | 0.75171 | 0.87479 | 0.91447 | 0.75142 | 0.48409 | 0.86484 | 0.79358 | 0.78629 | 0.79358 | PTCRA          |
| cg11899895 | 0.05376 | 0.05821 | 0.10545 | 0.0892  | 0.06922 | 0.06537 | 0.06223 | 0.06291 | 0.04371 | 0.04526 | TAX1BP1        |
| cg11901954 | 0.07177 | 0.08372 | 0.11984 | 0.08294 | 0.11313 | 0.09078 | 0.10035 | 0.06402 | 0.07997 | 0.07037 | C1orf73        |
| cg11902458 | 0.05549 | 0.05576 | 0.65838 | 0.76013 | 0.09766 | 0.05363 | 0.08644 | 0.05904 | 0.04661 | 0.04293 | KCNN3          |
| cg11903057 | 0.09539 | 0.08374 | 0.79955 | 0.88661 | 0.72527 | 0.80504 | 0.7508  | 0.75281 | 0.88306 | 0.83462 | RHOH           |
| cg11903096 | 0.122   | 0.10139 | 0.09124 | 0.08675 | 0.16976 | 0.13691 | 0.46448 | 0.48909 | 0.09568 | 0.12208 | PPP2R5C        |
| cg11903151 | 0.05439 | 0.05451 | 0.10899 | 0.12129 | 0.15645 | 0.10583 | 0.12004 | 0.0448  | 0.05236 | 0.04158 | LOC388152      |
| cg11903880 | 0.74198 | 0.31935 | 0.68231 | 0.76345 | 0.64849 | 0.64296 | 0.76    | 0.68951 | 0.58946 | 0.71405 | GSTM4          |
| cg11904887 | 0.06174 | 0.05384 | 0.15915 | 0.30513 | 0.05506 | 0.0503  | 0.04408 | 0.04467 | 0.05105 | 0.04577 | C1orf166       |
| cg11905488 | 0.69937 | 0.63155 | 0.66726 | 0.78203 | 0.58778 | 0.67566 | 0.20433 | 0.1758  | 0.16312 | 0.15135 | CLEC12A        |
| cg11905589 | 0.1271  | 0.10391 | 0.1344  | 0.12454 | 0.14467 | 0.10249 | 0.12203 | 0.11633 | 0.09296 | 0.11395 | PAIP2          |
| cg11905617 | 0.06294 | 0.05666 | 0.07906 | 0.07387 | 0.06454 | 0.07128 | 0.07211 | 0.06545 | 0.06272 | 0.06187 | KLHL20         |
| cg11906718 | 0.2101  | 0.21829 | 0.21255 | 0.20858 | 0.17042 | 0.19123 | 0.19843 | 0.19466 | 0.20431 | 0.18908 | RNF19          |
| cg11908570 | 0.07602 | 0.04225 | 0.15487 | 0.36765 | 0.13935 | 0.0778  | 0.0385  | 0.03233 | 0.03765 | 0.03094 | KIAA0040       |
| cg11909310 | 0.06273 | 0.07744 | 0.11007 | 0.0875  | 0.14145 | 0.14187 | 0.08253 | 0.07248 | 0.0585  | 0.06302 | DKFZP686A10121 |
| cg11909865 | 0.06087 | 0.05726 | 0.09079 | 0.05869 | 0.07389 | 0.07394 | 0.07041 | 0.06058 | 0.04753 | 0.04392 | LOC120379      |
| cg11911418 | 0.9328  | 0.93348 | 0.87506 | 0.90757 | 0.84074 | 0.84592 | 0.88668 | 0.89514 | 0.90337 | 0.89966 | ELAC1          |
| cg11911951 | 0.71569 | 0.26784 | 0.81389 | 0.86717 | 0.85976 | 0.79966 | 0.70475 | 0.41781 | 0.79633 | 0.71955 | C16orf28       |
| cg11912049 | 0.02659 | 0.03148 | 0.02945 | 0.02664 | 0.03824 | 0.02619 | 0.02392 | 0.02699 | 0.02495 | 0.02003 | AQP6           |
| cg11913104 | 0.03013 | 0.03171 | 0.03352 | 0.03452 | 0.02231 | 0.02562 | 0.03472 | 0.03057 | 0.0263  | 0.02559 | RAD23A         |
| cg11913615 | 0.23931 | 0.13834 | 0.1945  | 0.22759 | 0.27237 | 0.16348 | 0.13686 | 0.13358 | 0.1641  | 0.14333 | KCNG4          |
| cg11916186 | 0.03471 | 0.03404 | 0.04296 | 0.03282 | 0.02689 | 0.03038 | 0.03045 | 0.02971 | 0.03189 | 0.03245 | THRAP3         |
| cg11916609 | 0.21986 | 0.25    | 0.34795 | 0.26466 | 0.35994 | 0.20684 | 0.15922 | 0.13082 | 0.40041 | 0.2169  | IL1RL1         |
| cg11917694 | 0.21597 | 0.05805 | 0.06226 | 0.05223 | 0.0578  | 0.04253 | 0.0706  | 0.04551 | 0.04865 | 0.03922 | STAMBPL1       |
| cg11919271 | 0.72053 | 0.73625 | 0.68363 | 0.75739 | 0.62324 | 0.80841 | 0.77273 | 0.80585 | 0.71376 | 0.71314 | P2RY12         |
| cg11919694 | 0.25585 | 0.14624 | 0.06926 | 0.08023 | 0.23154 | 0.10439 | 0.0379  | 0.04315 | 0.07407 | 0.04707 | TBC1D10B       |
| cg11920519 | 0.879   | 0.75252 | 0.91143 | 0.9155  | 0.89636 | 0.91455 | 0.80035 | 0.68929 | 0.70645 | 0.67507 | MAP1LC3A       |
| cg11921829 | 0.25589 | 0.21889 | 0.34242 | 0.2948  | 0.30737 | 0.23164 | 0.2858  | 0.23609 | 0.30931 | 0.26164 | FCRL2          |
| cg11928198 | 0.33839 | 0.25135 | 0.84565 | 0.87957 | 0.70375 | 0.49626 | 0.72411 | 0.50914 | 0.58005 | 0.31039 | SCN11          |
| cg11928366 | 0.03734 | 0.03627 | 0.03719 | 0.03586 | 0.02757 | 0.03264 | 0.02895 | 0.03381 | 0.02859 | 0.02976 | NDUFB7         |
| cg11928635 | 0.17378 | 0.05131 | 0.07385 | 0.10331 | 0.04983 | 0.04401 | 0.044   | 0.03925 | 0.03146 | 0.0278  | ZNF318         |
| cg11930592 | 0.02739 | 0.03131 | 0.02945 | 0.03183 | 0.0283  | 0.02657 | 0.02659 | 0.02657 | 0.02357 | 0.02155 | MSX1           |
| cg11932564 | 0.02879 | 0.02799 | 0.45966 | 0.52421 | 0.94949 | 0.52777 | 0.51666 | 0.08312 | 0.12594 | 0.03495 | TNFRSF13C      |
| cg11933267 | 0.20619 | 0.05017 | 0.21264 | 0.38582 | 0.19975 | 0.38723 | 0.04015 | 0.03639 | 0.15103 | 0.04973 | PLA2G2F        |

|            |         |         |         |         |         |         |         |         |         |                   |
|------------|---------|---------|---------|---------|---------|---------|---------|---------|---------|-------------------|
| cg11933375 | 0.07244 | 0.05613 | 0.07717 | 0.06494 | 0.04097 | 0.03861 | 0.05812 | 0.05394 | 0.04689 | 0.04315 FLJ10815  |
| cg11934695 | 0.03469 | 0.03162 | 0.07833 | 0.07177 | 0.08321 | 0.02991 | 0.03016 | 0.03342 | 0.02926 | 0.04212 ADRA1D    |
| cg11935147 | 0.68399 | 0.66076 | 0.48233 | 0.51397 | 0.42362 | 0.49927 | 0.49215 | 0.58231 | 0.66246 | 0.65908 PDE4DIP   |
| cg11935638 | 0.67043 | 0.11865 | 0.60797 | 0.49976 | 0.52257 | 0.30584 | 0.46352 | 0.10386 | 0.09562 | 0.05827 EHHADH    |
| cg11939047 | 0.02531 | 0.02014 | 0.02141 | 0.02359 | 0.02376 | 0.02964 | 0.02604 | 0.02344 | 0.01985 | 0.02025 NARG2     |
| cg11939071 | 0.02618 | 0.02617 | 0.61868 | 0.64965 | 0.6901  | 0.6714  | 0.16273 | 0.03649 | 0.57601 | 0.51366 DTX1      |
| cg11939496 | 0.71181 | 0.54601 | 0.69318 | 0.82165 | 0.83262 | 0.8727  | 0.11313 | 0.09344 | 0.10351 | 0.12488 CD244     |
| cg11943820 | 0.89202 | 0.88861 | 0.88164 | 0.9067  | 0.84987 | 0.79266 | 0.86855 | 0.80499 | 0.89717 | 0.72408 KIAA1754  |
| cg11944101 | 0.8419  | 0.86137 | 0.70191 | 0.77253 | 0.7536  | 0.8381  | 0.36837 | 0.55355 | 0.48189 | 0.69621 CD40LG    |
| cg11944393 | 0.05076 | 0.04668 | 0.04749 | 0.04279 | 0.0338  | 0.04026 | 0.04101 | 0.04112 | 0.03707 | 0.03659 CSPG6     |
| cg11946165 | 0.8674  | 0.84585 | 0.58263 | 0.82442 | 0.74676 | 0.86249 | 0.85188 | 0.87759 | 0.82373 | 0.81518 CTSK      |
| cg11946503 | 0.86093 | 0.85485 | 0.85501 | 0.87941 | 0.90927 | 0.91951 | 0.78708 | 0.87523 | 0.41557 | 0.56989 NEUROG1   |
| cg11946769 | 0.02993 | 0.02257 | 0.02356 | 0.02499 | 0.03159 | 0.02918 | 0.02094 | 0.02016 | 0.02076 | 0.02319 NME6      |
| cg11947493 | 0.10649 | 0.04716 | 0.3083  | 0.21468 | 0.96639 | 0.96157 | 0.04598 | 0.04368 | 0.38424 | 0.03694 TNFRSF10D |
| cg11948328 | 0.07639 | 0.07745 | 0.08388 | 0.10576 | 0.05336 | 0.07101 | 0.09875 | 0.10615 | 0.05878 | 0.05568 HSD17B12  |
| cg11951066 | 0.61673 | 0.87493 | 0.92274 | 0.9142  | 0.89344 | 0.88222 | 0.92937 | 0.91941 | 0.92903 | 0.91993 FLJ14768  |
| cg11951446 | 0.14312 | 0.13532 | 0.12029 | 0.11279 | 0.12889 | 0.10059 | 0.09421 | 0.09318 | 0.11328 | 0.12356 COX17     |
| cg11952714 | 0.30171 | 0.16038 | 0.36017 | 0.3736  | 0.28312 | 0.14427 | 0.08189 | 0.05833 | 0.14824 | 0.12056 SNX7      |
| cg11953334 | 0.0868  | 0.06718 | 0.63081 | 0.56566 | 0.4379  | 0.29739 | 0.20494 | 0.1188  | 0.18142 | 0.05176 GRIN2D    |
| cg11953824 | 0.28523 | 0.28127 | 0.49802 | 0.68351 | 0.31195 | 0.20771 | 0.49205 | 0.37245 | 0.53275 | 0.4747 IKBKAP     |
| cg11953868 | 0.06084 | 0.05189 | 0.06663 | 0.0703  | 0.04996 | 0.05611 | 0.04103 | 0.04764 | 0.04717 | 0.04339 WFDC10A   |
| cg11956146 | 0.06589 | 0.05563 | 0.07165 | 0.07595 | 0.62695 | 0.63585 | 0.06298 | 0.06161 | 0.05639 | 0.06797 CABYR     |
| cg11957040 | 0.02493 | 0.02979 | 0.02483 | 0.02635 | 0.01765 | 0.02564 | 0.01998 | 0.01799 | 0.01701 | 0.01696 PPP2R1A   |
| cg11957880 | 0.02245 | 0.02367 | 0.02525 | 0.02586 | 0.01845 | 0.02251 | 0.02275 | 0.02374 | 0.01794 | 0.02166 UBE2N     |
| cg11957986 | 0.8444  | 0.79396 | 0.85642 | 0.85161 | 0.78956 | 0.79425 | 0.64381 | 0.57617 | 0.86027 | 0.86006 PGA5      |
| cg11959435 | 0.18615 | 0.17825 | 0.425   | 0.62356 | 0.3779  | 0.40262 | 0.37261 | 0.34862 | 0.2657  | 0.13358 IFNA1     |
| cg11959821 | 0.03531 | 0.0395  | 0.03693 | 0.03998 | 0.06297 | 0.04328 | 0.04609 | 0.03722 | 0.02646 | 0.03313 TBRG4     |
| cg11960393 | 0.0902  | 0.07368 | 0.06829 | 0.06519 | 0.06298 | 0.06006 | 0.65982 | 0.06711 | 0.50948 | 0.52645 LOX       |
| cg11961618 | 0.27601 | 0.06239 | 0.05108 | 0.0692  | 0.38359 | 0.0539  | 0.04838 | 0.06244 | 0.0442  | 0.04347 PHLDA2    |
| cg11964474 | 0.80436 | 0.7387  | 0.77889 | 0.79743 | 0.82032 | 0.81398 | 0.79954 | 0.81959 | 0.79883 | 0.82952 BRCA1     |
| cg11964613 | 0.82735 | 0.59187 | 0.17531 | 0.16967 | 0.83573 | 0.82913 | 0.11085 | 0.12194 | 0.4602  | 0.44935 ARSE      |
| cg11965370 | 0.0392  | 0.0451  | 0.94314 | 0.94569 | 0.04113 | 0.25803 | 0.95881 | 0.90558 | 0.41548 | 0.26529 HNT       |
| cg11970301 | 0.0581  | 0.05729 | 0.06665 | 0.05828 | 0.05271 | 0.04389 | 0.05767 | 0.05043 | 0.08801 | 0.04975 PPP4C     |
| cg11970458 | 0.27545 | 0.24035 | 0.30427 | 0.33593 | 0.67667 | 0.41878 | 0.67704 | 0.64678 | 0.22677 | 0.21563 PYCARD    |
| cg11973052 | 0.02524 | 0.02473 | 0.023   | 0.02222 | 0.0188  | 0.01963 | 0.02133 | 0.02197 | 0.02128 | 0.01602 SOCS1     |
| cg11973688 | 0.02803 | 0.02971 | 0.02883 | 0.03042 | 0.02474 | 0.02758 | 0.02514 | 0.02748 | 0.02282 | 0.02579 FPGS      |
| cg11976048 | 0.02859 | 0.02669 | 0.02979 | 0.02758 | 0.02111 | 0.02746 | 0.0272  | 0.02898 | 0.0231  | 0.0228 MGC4172    |
| cg11976166 | 0.1527  | 0.15431 | 0.20079 | 0.17279 | 0.44837 | 0.25373 | 0.15469 | 0.11233 | 0.1419  | 0.16236 TGFB2     |
| cg11976616 | 0.19653 | 0.16904 | 0.57375 | 0.47735 | 0.67734 | 0.75498 | 0.27107 | 0.15034 | 0.34669 | 0.19368 C6        |
| cg11976790 | 0.21387 | 0.22376 | 0.44366 | 0.48744 | 0.41298 | 0.3407  | 0.25978 | 0.18821 | 0.45883 | 0.28342 DMBT1     |
| cg11977634 | 0.04339 | 0.04164 | 0.04367 | 0.04045 | 0.04697 | 0.04453 | 0.03924 | 0.03788 | 0.03627 | 0.03403 DDR1      |

|            |         |         |         |         |         |         |         |         |         |                  |
|------------|---------|---------|---------|---------|---------|---------|---------|---------|---------|------------------|
| cg11979312 | 0.67123 | 0.45774 | 0.76734 | 0.84457 | 0.65044 | 0.19743 | 0.77891 | 0.62581 | 0.83663 | 0.54738 TNFSF10  |
| cg11979382 | 0.03524 | 0.03244 | 0.03529 | 0.03263 | 0.02842 | 0.03884 | 0.03175 | 0.03206 | 0.0273  | 0.025 BCDIN3     |
| cg11979959 | 0.04641 | 0.04631 | 0.05392 | 0.04959 | 0.27588 | 0.21397 | 0.32106 | 0.05141 | 0.0496  | 0.03962 SULF2    |
| cg11980188 | 0.04965 | 0.04749 | 0.04802 | 0.04812 | 0.10314 | 0.07198 | 0.04678 | 0.05457 | 0.03906 | 0.05044 CYP2R1   |
| cg11980435 | 0.34845 | 0.11136 | 0.18894 | 0.14907 | 0.17134 | 0.1121  | 0.1286  | 0.10105 | 0.0905  | 0.09696 BBC3     |
| cg11981599 | 0.37855 | 0.42207 | 0.04438 | 0.0409  | 0.71477 | 0.91391 | 0.26566 | 0.14323 | 0.94408 | 0.91212 GATA4    |
| cg11981631 | 0.04007 | 0.04599 | 0.27335 | 0.46366 | 0.72156 | 0.86694 | 0.0437  | 0.03918 | 0.43778 | 0.44107 ABCC8    |
| cg11983245 | 0.84004 | 0.4367  | 0.88081 | 0.89322 | 0.20214 | 0.36443 | 0.20361 | 0.07202 | 0.85649 | 0.37698 KRT15    |
| cg11984608 | 0.8694  | 0.49602 | 0.43163 | 0.47295 | 0.88024 | 0.1604  | 0.80503 | 0.2359  | 0.87394 | 0.48488 CLDN16   |
| cg11985856 | 0.06515 | 0.05394 | 0.06337 | 0.058   | 0.11195 | 0.05068 | 0.05404 | 0.0452  | 0.04939 | 0.04756 SAR1A    |
| cg11990309 | 0.04866 | 0.05195 | 0.28061 | 0.26632 | 0.40989 | 0.39306 | 0.07776 | 0.22222 | 0.25765 | 0.26952 HTR1E    |
| cg11991627 | 0.04307 | 0.04354 | 0.05432 | 0.03952 | 0.07776 | 0.06991 | 0.06505 | 0.04838 | 0.03281 | 0.03212 C20orf96 |
| cg11991859 | 0.04335 | 0.04337 | 0.04283 | 0.03834 | 0.04497 | 0.0504  | 0.03765 | 0.03592 | 0.04122 | 0.0422 NPAS3     |
| cg11993300 | 0.01994 | 0.01621 | 0.01909 | 0.01557 | 0.01495 | 0.01607 | 0.01669 | 0.01436 | 0.01535 | 0.01235 NDST2    |
| cg11993754 | 0.03526 | 0.04055 | 0.05728 | 0.0455  | 0.04592 | 0.03342 | 0.03611 | 0.03523 | 0.0383  | 0.03028 ERBB2    |
| cg11995303 | 0.05288 | 0.03307 | 0.04744 | 0.03173 | 0.03216 | 0.03319 | 0.0329  | 0.03063 | 0.02679 | 0.02381 DCUN1D5  |
| cg11995732 | 0.03022 | 0.0285  | 0.03205 | 0.02727 | 0.02628 | 0.0288  | 0.02237 | 0.02677 | 0.02762 | 0.02453 MGC3731  |
| cg11997899 | 0.1697  | 0.17496 | 0.27223 | 0.20521 | 0.27789 | 0.35546 | 0.18659 | 0.17516 | 0.20525 | 0.16758 DLX5     |
| cg11998307 | 0.90549 | 0.88492 | 0.91324 | 0.92455 | 0.95025 | 0.92547 | 0.90706 | 0.90942 | 0.92904 | 0.80628 SCARF1   |
| cg11999384 | 0.03952 | 0.04097 | 0.04029 | 0.04434 | 0.04595 | 0.0426  | 0.04387 | 0.03979 | 0.04288 | 0.04042 GRN      |
| cg12000587 | 0.07684 | 0.03964 | 0.16888 | 0.17565 | 0.04716 | 0.03766 | 0.10956 | 0.06563 | 0.04225 | 0.0347 C17orf79  |
| cg12001148 | 0.06911 | 0.04782 | 0.25428 | 0.16588 | 0.93025 | 0.8832  | 0.17255 | 0.05923 | 0.37614 | 0.13311 FLJ33790 |
| cg12002314 | 0.03279 | 0.03593 | 0.04313 | 0.0386  | 0.02463 | 0.03281 | 0.03102 | 0.03347 | 0.02994 | 0.02955 CHRAC1   |
| cg12003230 | 0.87525 | 0.85289 | 0.89401 | 0.88402 | 0.92731 | 0.86714 | 0.8547  | 0.87441 | 0.87715 | 0.86863 C21orf84 |
| cg12004206 | 0.03942 | 0.04271 | 0.0443  | 0.04157 | 0.03276 | 0.05112 | 0.03816 | 0.04205 | 0.03514 | 0.03534 BTBD14A  |
| cg12004730 | 0.03874 | 0.03422 | 0.0364  | 0.03249 | 0.02704 | 0.03368 | 0.03247 | 0.0368  | 0.0303  | 0.03198 TAX1BP3  |
| cg12005098 | 0.03585 | 0.02281 | 0.67813 | 0.65438 | 0.05961 | 0.0314  | 0.12805 | 0.08249 | 0.34016 | 0.30275 SLC16A12 |
| cg12005703 | 0.05226 | 0.04954 | 0.05749 | 0.05329 | 0.08537 | 0.07137 | 0.04535 | 0.03344 | 0.05104 | 0.04986 HEMK1    |
| cg12006284 | 0.86069 | 0.91266 | 0.90087 | 0.91336 | 0.87698 | 0.87387 | 0.38996 | 0.8969  | 0.90788 | 0.88988 WT1      |
| cg12008118 | 0.74087 | 0.64182 | 0.58874 | 0.54538 | 0.93793 | 0.79966 | 0.12104 | 0.35747 | 0.91498 | 0.583 LDB3       |
| cg12010995 | 0.66678 | 0.692   | 0.61044 | 0.64206 | 0.64795 | 0.73791 | 0.50836 | 0.54865 | 0.70517 | 0.64583 CYP7A1   |
| cg12011267 | 0.15482 | 0.05239 | 0.68544 | 0.67541 | 0.28595 | 0.32671 | 0.24398 | 0.07813 | 0.80387 | 0.71792 PPP1R13B |
| cg12012699 | 0.02859 | 0.03095 | 0.03684 | 0.0328  | 0.03072 | 0.03235 | 0.02696 | 0.02904 | 0.04127 | 0.02582 DYM      |
| cg12013321 | 0.28043 | 0.14411 | 0.62523 | 0.55753 | 0.19871 | 0.10774 | 0.18602 | 0.08328 | 0.04518 | 0.0479 GCLC      |
| cg12014368 | 0.68487 | 0.64763 | 0.62081 | 0.63708 | 0.57207 | 0.61931 | 0.63423 | 0.67917 | 0.6931  | 0.61652 MRAP     |
| cg12014417 | 0.72413 | 0.18678 | 0.79238 | 0.79301 | 0.61885 | 0.58124 | 0.51458 | 0.42945 | 0.36711 | 0.26864 GPR109A  |
| cg12017007 | 0.03912 | 0.04656 | 0.04985 | 0.04318 | 0.03003 | 0.03525 | 0.03762 | 0.03428 | 0.03442 | 0.03142 PHF12    |
| cg12018696 | 0.0625  | 0.0555  | 0.06765 | 0.05716 | 0.04764 | 0.0557  | 0.06359 | 0.05227 | 0.05251 | 0.06819 SFRS10   |
| cg12019109 | 0.47838 | 0.1352  | 0.72383 | 0.81749 | 0.58267 | 0.12806 | 0.13939 | 0.07928 | 0.35699 | 0.08536 AZGP1    |
| cg12020639 | 0.0349  | 0.03044 | 0.03633 | 0.03556 | 0.02255 | 0.0263  | 0.02549 | 0.02821 | 0.02628 | 0.02792 AHCYL1   |
| cg12022621 | 0.577   | 0.07992 | 0.16054 | 0.2351  | 0.47976 | 0.08203 | 0.06175 | 0.07078 | 0.38794 | 0.05909 LAX1     |

|            |         |         |         |         |         |         |         |         |         |         |          |
|------------|---------|---------|---------|---------|---------|---------|---------|---------|---------|---------|----------|
| cg12024292 | 0.05529 | 0.03784 | 0.84642 | 0.8974  | 0.07645 | 0.04234 | 0.03832 | 0.03949 | 0.28974 | 0.25212 | ASTN2    |
| cg12024906 | 0.04019 | 0.03321 | 0.94321 | 0.91649 | 0.40514 | 0.53145 | 0.03057 | 0.03482 | 0.02638 | 0.02402 | HKR1     |
| cg12025941 | 0.07652 | 0.06658 | 0.33897 | 0.36768 | 0.10676 | 0.09032 | 0.11936 | 0.08823 | 0.06135 | 0.06845 | RFX4     |
| cg12026394 | 0.03521 | 0.03404 | 0.03714 | 0.03556 | 0.04058 | 0.03733 | 0.03368 | 0.034   | 0.03259 | 0.02907 | ANP32B   |
| cg12026956 | 0.64981 | 0.18544 | 0.04067 | 0.04834 | 0.03884 | 0.03418 | 0.03885 | 0.0409  | 0.03555 | 0.02898 | TNPO1    |
| cg12029639 | 0.79774 | 0.76234 | 0.14732 | 0.12879 | 0.17467 | 0.16491 | 0.22906 | 0.11936 | 0.49726 | 0.27226 | MAB21L1  |
| cg12032009 | 0.0853  | 0.06836 | 0.07129 | 0.07053 | 0.04873 | 0.05723 | 0.05249 | 0.05813 | 0.22772 | 0.05533 | VPS13C   |
| cg12032049 | 0.62769 | 0.53645 | 0.44058 | 0.4399  | 0.75166 | 0.56467 | 0.36808 | 0.49736 | 0.13305 | 0.11073 | LPO      |
| cg12032116 | 0.07557 | 0.05456 | 0.08143 | 0.07058 | 0.05909 | 0.0614  | 0.08606 | 0.07811 | 0.05531 | 0.05422 | DMXL1    |
| cg12032620 | 0.03483 | 0.02677 | 0.0323  | 0.03355 | 0.0415  | 0.03218 | 0.04186 | 0.03747 | 0.05193 | 0.04567 | TP53BP1  |
| cg12034229 | 0.02641 | 0.02524 | 0.02463 | 0.02524 | 0.02311 | 0.02587 | 0.02455 | 0.02469 | 0.02095 | 0.01827 | HUS1     |
| cg12038710 | 0.62516 | 0.31872 | 0.85799 | 0.86    | 0.90298 | 0.86196 | 0.85101 | 0.85046 | 0.86854 | 0.82059 | CDH17    |
| cg12040555 | 0.92839 | 0.91456 | 0.40796 | 0.48191 | 0.9491  | 0.90347 | 0.44438 | 0.86128 | 0.88676 | 0.89722 | MGMT     |
| cg12041387 | 0.77507 | 0.5625  | 0.57086 | 0.74542 | 0.4866  | 0.38373 | 0.14987 | 0.7992  | 0.24708 | 0.13326 | DLX5     |
| cg12042396 | 0.09677 | 0.10107 | 0.11288 | 0.09486 | 0.17953 | 0.11055 | 0.1173  | 0.09109 | 0.1145  | 0.09927 | MAP1D    |
| cg12042678 | 0.02138 | 0.02098 | 0.02484 | 0.0208  | 0.01785 | 0.02467 | 0.02153 | 0.02318 | 0.01646 | 0.0178  | SUV39H2  |
| cg12043807 | 0.02204 | 0.02527 | 0.02691 | 0.02364 | 0.02615 | 0.02506 | 0.02346 | 0.02211 | 0.02096 | 0.02232 | ZNF367   |
| cg12044210 | 0.93668 | 0.94605 | 0.94699 | 0.9529  | 0.92635 | 0.92602 | 0.58577 | 0.60366 | 0.9436  | 0.93327 | APBA2    |
| cg12044689 | 0.89932 | 0.8144  | 0.86393 | 0.89076 | 0.8073  | 0.87186 | 0.86464 | 0.8784  | 0.90249 | 0.87898 | HIATL1   |
| cg12044889 | 0.0375  | 0.04035 | 0.05577 | 0.0586  | 0.05442 | 0.04504 | 0.03739 | 0.0382  | 0.03117 | 0.03208 | NQO2     |
| cg12045002 | 0.1057  | 0.04159 | 0.66201 | 0.72377 | 0.96324 | 0.84118 | 0.88616 | 0.20137 | 0.07306 | 0.02852 | DPYSL5   |
| cg12045676 | 0.0819  | 0.07885 | 0.07832 | 0.08256 | 0.07659 | 0.08411 | 0.07175 | 0.08198 | 0.17561 | 0.07594 | CRTC1    |
| cg12045829 | 0.85784 | 0.55805 | 0.84375 | 0.84241 | 0.71154 | 0.73859 | 0.72824 | 0.43506 | 0.7778  | 0.52726 | TNFSF12  |
| cg12051359 | 0.02521 | 0.02898 | 0.03721 | 0.03144 | 0.02608 | 0.02177 | 0.02299 | 0.0268  | 0.02561 | 0.02253 | DEPDC6   |
| cg12052258 | 0.04305 | 0.04127 | 0.03238 | 0.03343 | 0.04464 | 0.04034 | 0.03439 | 0.03115 | 0.04279 | 0.04522 | S100A11  |
| cg12052765 | 0.07952 | 0.05686 | 0.657   | 0.83608 | 0.5215  | 0.45734 | 0.08165 | 0.30914 | 0.09161 | 0.04597 | CHAT     |
| cg12053284 | 0.06203 | 0.04213 | 0.09401 | 0.07134 | 0.40518 | 0.3121  | 0.05956 | 0.04247 | 0.04924 | 0.0655  | SYT4     |
| cg12054080 | 0.06028 | 0.05604 | 0.07057 | 0.06335 | 0.07203 | 0.04812 | 0.04846 | 0.04625 | 0.05184 | 0.04626 | RAB3GAP2 |
| cg12054421 | 0.05244 | 0.04796 | 0.06054 | 0.05525 | 0.05537 | 0.05996 | 0.05318 | 0.05124 | 0.05722 | 0.04797 | PASK     |
| cg12056618 | 0.02898 | 0.03103 | 0.03796 | 0.02436 | 0.02065 | 0.02112 | 0.02076 | 0.02381 | 0.31095 | 0.02096 | KLF13    |
| cg12058490 | 0.75954 | 0.81956 | 0.61106 | 0.72852 | 0.47743 | 0.65609 | 0.33482 | 0.23126 | 0.36637 | 0.44115 | A2M      |
| cg12059012 | 0.02586 | 0.0256  | 0.03428 | 0.02715 | 0.02728 | 0.02937 | 0.02737 | 0.01963 | 0.02331 | 0.02054 | ABHD5    |
| cg12061127 | 0.06413 | 0.05322 | 0.5233  | 0.57068 | 0.3872  | 0.51333 | 0.13774 | 0.11935 | 0.37052 | 0.39344 | WFDC9    |
| cg12061236 | 0.80988 | 0.4189  | 0.88978 | 0.8981  | 0.92217 | 0.89474 | 0.88571 | 0.6351  | 0.91515 | 0.82031 | AKAP12   |
| cg12062464 | 0.02086 | 0.02068 | 0.0297  | 0.01987 | 0.01636 | 0.02005 | 0.01646 | 0.01801 | 0.0186  | 0.01664 | PCAF     |
| cg12062492 | 0.35742 | 0.36017 | 0.32283 | 0.36066 | 0.06343 | 0.08771 | 0.16245 | 0.16685 | 0.13231 | 0.07439 | DHRS4    |
| cg12062995 | 0.20321 | 0.08387 | 0.35149 | 0.25881 | 0.19742 | 0.08794 | 0.08329 | 0.05664 | 0.07452 | 0.06375 | RFC1     |
| cg12063359 | 0.03166 | 0.02432 | 0.04756 | 0.37224 | 0.45244 | 0.64809 | 0.04729 | 0.02134 | 0.02738 | 0.02002 | KCNK15   |
| cg12064213 | 0.33451 | 0.05795 | 0.07922 | 0.04942 | 0.66416 | 0.59797 | 0.76523 | 0.64227 | 0.54365 | 0.02982 | WWC3     |
| cg12064626 | 0.02995 | 0.02954 | 0.04208 | 0.03558 | 0.03066 | 0.03481 | 0.02656 | 0.02607 | 0.02515 | 0.02554 | SH3BGR   |
| cg12064929 | 0.36001 | 0.21855 | 0.26471 | 0.23898 | 0.50361 | 0.34766 | 0.24058 | 0.18462 | 0.21331 | 0.18392 | MGC16186 |

|            |         |         |         |         |         |         |         |         |         |                  |
|------------|---------|---------|---------|---------|---------|---------|---------|---------|---------|------------------|
| cg12066181 | 0.05701 | 0.0555  | 0.04929 | 0.0531  | 0.0439  | 0.04542 | 0.0394  | 0.03898 | 0.04146 | 0.03562 DNMT3A   |
| cg12067261 | 0.37107 | 0.15297 | 0.88129 | 0.87387 | 0.70332 | 0.80943 | 0.49601 | 0.86664 | 0.52736 | 0.49523 INSL4    |
| cg12067287 | 0.7813  | 0.32756 | 0.62924 | 0.74397 | 0.63649 | 0.20204 | 0.76673 | 0.4491  | 0.17372 | 0.18676 MYOM1    |
| cg12069042 | 0.88848 | 0.86386 | 0.64093 | 0.83439 | 0.48785 | 0.29129 | 0.73924 | 0.7267  | 0.9086  | 0.63699 PLXNB1   |
| cg12069309 | 0.04561 | 0.03313 | 0.63351 | 0.71538 | 0.93769 | 0.95135 | 0.96064 | 0.80325 | 0.45832 | 0.3698 SEMA3B    |
| cg12071073 | 0.86811 | 0.6434  | 0.78831 | 0.64654 | 0.85524 | 0.85249 | 0.75974 | 0.84913 | 0.85976 | 0.66534 CCDC70   |
| cg12071544 | 0.05715 | 0.05517 | 0.05972 | 0.04836 | 0.03184 | 0.04392 | 0.05021 | 0.04724 | 0.03819 | 0.03472 SLITL2   |
| cg12072001 | 0.52184 | 0.13358 | 0.75852 | 0.79635 | 0.84308 | 0.77283 | 0.80786 | 0.67145 | 0.84647 | 0.84087 SPON2    |
| cg12072803 | 0.06936 | 0.05041 | 0.06785 | 0.05915 | 0.07261 | 0.06499 | 0.04698 | 0.04733 | 0.04738 | 0.03303 JMJ2B    |
| cg12072973 | 0.03236 | 0.03193 | 0.02597 | 0.03043 | 0.61256 | 0.06046 | 0.02103 | 0.02306 | 0.55797 | 0.02784 PLEKHO1  |
| cg12073537 | 0.04861 | 0.04858 | 0.04567 | 0.0489  | 0.03844 | 0.04344 | 0.04293 | 0.04737 | 0.04092 | 0.04488 TUBA6    |
| cg12073594 | 0.23417 | 0.04879 | 0.52087 | 0.57577 | 0.53119 | 0.45077 | 0.32323 | 0.42519 | 0.41398 | 0.3681 ARFGAP1   |
| cg12073779 | 0.7373  | 0.68485 | 0.62411 | 0.75054 | 0.36868 | 0.37349 | 0.14315 | 0.30338 | 0.54008 | 0.52767 CRYGD    |
| cg12073949 | 0.04238 | 0.0388  | 0.04512 | 0.04417 | 0.04212 | 0.03428 | 0.02948 | 0.03001 | 0.03383 | 0.03037 raptor   |
| cg12076344 | 0.03337 | 0.03711 | 0.03598 | 0.03437 | 0.04551 | 0.03648 | 0.03489 | 0.03216 | 0.03171 | 0.0282 SLC27A4   |
| cg12078929 | 0.66659 | 0.58825 | 0.97929 | 0.98454 | 0.9546  | 0.88193 | 0.5226  | 0.55309 | 0.98634 | 0.98491 SERHL    |
| cg12079362 | 0.07824 | 0.07794 | 0.11466 | 0.28163 | 0.10086 | 0.08003 | 0.1369  | 0.13129 | 0.09458 | 0.08151 ATP6V0B  |
| cg12080675 | 0.92306 | 0.64306 | 0.95618 | 0.95206 | 0.32042 | 0.05415 | 0.9404  | 0.47621 | 0.5333  | 0.18401 KIAA0676 |
| cg12080812 | 0.93545 | 0.80359 | 0.92621 | 0.94654 | 0.94248 | 0.92247 | 0.91125 | 0.91527 | 0.95548 | 0.88823 FAM89B   |
| cg12081743 | 0.42515 | 0.11531 | 0.16206 | 0.29706 | 0.20064 | 0.13602 | 0.134   | 0.11032 | 0.08902 | 0.09151 HDAC9    |
| cg12082129 | 0.08482 | 0.05223 | 0.09114 | 0.1204  | 0.04034 | 0.04893 | 0.04742 | 0.04658 | 0.05506 | 0.05177 PCSK7    |
| cg12082568 | 0.05099 | 0.05536 | 0.06056 | 0.05439 | 0.03836 | 0.04376 | 0.04168 | 0.03737 | 0.04759 | 0.04561 CITED2   |
| cg12082615 | 0.04559 | 0.04178 | 0.04087 | 0.03485 | 0.03901 | 0.04087 | 0.03332 | 0.03383 | 0.04107 | 0.04152 SETDB1   |
| cg12085044 | 0.17549 | 0.15858 | 0.19329 | 0.16586 | 0.27588 | 0.26693 | 0.19434 | 0.16538 | 0.18209 | 0.16879 APPBP1   |
| cg12085225 | 0.03098 | 0.03052 | 0.02532 | 0.02617 | 0.02837 | 0.02925 | 0.02402 | 0.02308 | 0.02338 | 0.02195 SETX     |
| cg12085660 | 0.08695 | 0.08486 | 0.57089 | 0.57955 | 0.07662 | 0.07637 | 0.07376 | 0.07808 | 0.07268 | 0.0773 C19orf37  |
| cg12086773 | 0.0384  | 0.03728 | 0.05595 | 0.05163 | 0.03979 | 0.04534 | 0.04422 | 0.036   | 0.03887 | 0.03977 C2orf25  |
| cg12087643 | 0.06758 | 0.0554  | 0.06712 | 0.04841 | 0.14711 | 0.18838 | 0.1379  | 0.04016 | 0.63632 | 0.55929 GFRA1    |
| cg12089169 | 0.87398 | 0.88992 | 0.85712 | 0.87056 | 0.75117 | 0.86672 | 0.85894 | 0.85905 | 0.87337 | 0.86634 PRR4     |
| cg12089439 | 0.08031 | 0.07985 | 0.09378 | 0.09211 | 0.08098 | 0.06684 | 0.12311 | 0.10632 | 0.06903 | 0.0843 TUSC3     |
| cg12089698 | 0.52806 | 0.51536 | 0.79512 | 0.86579 | 0.91619 | 0.86844 | 0.54976 | 0.63094 | 0.67262 | 0.41455 SPATC1   |
| cg12090242 | 0.15148 | 0.11994 | 0.14666 | 0.1334  | 0.17712 | 0.12135 | 0.13787 | 0.1138  | 0.13006 | 0.23117 ATP6V1E1 |
| cg12090388 | 0.05688 | 0.05955 | 0.06096 | 0.06198 | 0.04227 | 0.05845 | 0.06232 | 0.06164 | 0.04962 | 0.05941 RPL11    |
| cg12091331 | 0.08705 | 0.09311 | 0.08816 | 0.07303 | 0.09208 | 0.10536 | 0.1611  | 0.11944 | 0.05977 | 0.07229 PLAT     |
| cg12091944 | 0.23975 | 0.14363 | 0.42443 | 0.3736  | 0.28153 | 0.20886 | 0.15632 | 0.15976 | 0.21883 | 0.16091 BARD1    |
| cg12095167 | 0.43036 | 0.16366 | 0.23322 | 0.22276 | 0.16969 | 0.14323 | 0.18013 | 0.15331 | 0.20873 | 0.1474 RAB2      |
| cg12095491 | 0.70723 | 0.40969 | 0.77352 | 0.80193 | 0.80229 | 0.84842 | 0.76029 | 0.8068  | 0.87003 | 0.86403 CAST     |
| cg12097239 | 0.08251 | 0.07112 | 0.08959 | 0.07875 | 0.09927 | 0.09968 | 0.06214 | 0.06161 | 0.0697  | 0.08124 ARL8B    |
| cg12099032 | 0.9231  | 0.96312 | 0.93239 | 0.95338 | 0.93013 | 0.94318 | 0.91333 | 0.95182 | 0.63008 | 0.61688 TXNDC3   |
| cg12099051 | 0.28826 | 0.23559 | 0.05903 | 0.05048 | 0.04614 | 0.05497 | 0.08106 | 0.07036 | 0.25842 | 0.2741 SAMHD1    |
| cg12099357 | 0.04202 | 0.03375 | 0.09164 | 0.1014  | 0.0484  | 0.04087 | 0.026   | 0.0273  | 0.0317  | 0.02868 FAM76A   |

|            |         |         |         |         |         |         |         |         |         |                  |
|------------|---------|---------|---------|---------|---------|---------|---------|---------|---------|------------------|
| cg12100077 | 0.03614 | 0.03581 | 0.03901 | 0.0367  | 0.02968 | 0.0416  | 0.0362  | 0.03461 | 0.03201 | 0.03185 KLHL7    |
| cg12100791 | 0.7064  | 0.80535 | 0.88054 | 0.89417 | 0.95447 | 0.91989 | 0.78557 | 0.83066 | 0.59537 | 0.40988 PYCARD   |
| cg12104707 | 0.12322 | 0.06663 | 0.13561 | 0.08785 | 0.16637 | 0.0515  | 0.06869 | 0.05996 | 0.0516  | 0.04425 ZNF426   |
| cg12105450 | 0.36395 | 0.23049 | 0.51655 | 0.67551 | 0.24527 | 0.16398 | 0.20588 | 0.46158 | 0.72301 | 0.24886 CASP10   |
| cg12106731 | 0.04714 | 0.04688 | 0.05373 | 0.0528  | 0.03888 | 0.04666 | 0.04115 | 0.04622 | 0.0341  | 0.03679 NCDN     |
| cg12106945 | 0.03253 | 0.03046 | 0.0303  | 0.02848 | 0.02451 | 0.03228 | 0.02666 | 0.02788 | 0.02691 | 0.02601 COL13A1  |
| cg12107692 | 0.04942 | 0.05497 | 0.0548  | 0.04538 | 0.05465 | 0.04742 | 0.03376 | 0.03416 | 0.03911 | 0.03434 BCL2L2   |
| cg12108912 | 0.84875 | 0.82    | 0.80422 | 0.82386 | 0.78096 | 0.7977  | 0.7853  | 0.84249 | 0.53203 | 0.18213 MGC10993 |
| cg12109455 | 0.04792 | 0.04548 | 0.06823 | 0.05735 | 0.0995  | 0.04317 | 0.04008 | 0.04647 | 0.04546 | 0.04031 DPYSL4   |
| cg12110626 | 0.11638 | 0.10975 | 0.14785 | 0.1294  | 0.18519 | 0.19236 | 0.13396 | 0.12614 | 0.1158  | 0.17254 FAM18B2  |
| cg12111697 | 0.03408 | 0.03508 | 0.03215 | 0.03356 | 0.03242 | 0.04002 | 0.02991 | 0.02879 | 0.02574 | 0.02245 ZNF555   |
| cg12111714 | 0.90135 | 0.8879  | 0.87866 | 0.89776 | 0.89916 | 0.86075 | 0.86547 | 0.89105 | 0.73851 | 0.87637 ATP8A2   |
| cg12112929 | 0.0483  | 0.04831 | 0.07802 | 0.07825 | 0.12409 | 0.05935 | 0.04206 | 0.03569 | 0.05266 | 0.04021 GPR3     |
| cg12113075 | 0.03138 | 0.03264 | 0.0353  | 0.03345 | 0.02749 | 0.03466 | 0.03397 | 0.03162 | 0.03065 | 0.02832 WDFY2    |
| cg12113132 | 0.87604 | 0.68405 | 0.75534 | 0.87433 | 0.90833 | 0.62877 | 0.68281 | 0.7204  | 0.55746 | 0.68364 CCNDBP1  |
| cg12113819 | 0.91033 | 0.53187 | 0.72288 | 0.81381 | 0.89687 | 0.7602  | 0.80374 | 0.58782 | 0.9239  | 0.77696 THRAP2   |
| cg12113932 | 0.03275 | 0.03521 | 0.04259 | 0.0425  | 0.0507  | 0.05165 | 0.04909 | 0.03911 | 0.03155 | 0.02588 C2orf18  |
| cg12114524 | 0.77446 | 0.4088  | 0.58207 | 0.81053 | 0.85389 | 0.82229 | 0.3598  | 0.31791 | 0.1144  | 0.04815 TNNI1    |
| cg12116020 | 0.04198 | 0.04312 | 0.0541  | 0.05945 | 0.03589 | 0.04258 | 0.04448 | 0.04271 | 0.04155 | 0.03268 PRKACA   |
| cg12118011 | 0.04126 | 0.03666 | 0.05203 | 0.04462 | 0.04096 | 0.04083 | 0.03899 | 0.03175 | 0.03741 | 0.03646 SOAT1    |
| cg12118437 | 0.65043 | 0.62465 | 0.599   | 0.64788 | 0.659   | 0.68267 | 0.68778 | 0.60095 | 0.58382 | 0.6076 REXO4     |
| cg12118465 | 0.03772 | 0.03417 | 0.13771 | 0.26472 | 0.17718 | 0.10357 | 0.06832 | 0.03865 | 0.14455 | 0.03837 EFHD1    |
| cg12119029 | 0.05239 | 0.03475 | 0.08798 | 0.16056 | 0.53213 | 0.51231 | 0.32259 | 0.44656 | 0.03515 | 0.02761 CDK10    |
| cg12120741 | 0.76946 | 0.72395 | 0.74735 | 0.83806 | 0.78178 | 0.84609 | 0.60646 | 0.65699 | 0.40923 | 0.31951 EDNRB    |
| cg12124478 | 0.06756 | 0.0612  | 0.07904 | 0.10904 | 0.06112 | 0.06898 | 0.07398 | 0.05839 | 0.0666  | 0.06673 IQGAP3   |
| cg12124516 | 0.04641 | 0.04186 | 0.05981 | 0.05184 | 0.04067 | 0.05842 | 0.05515 | 0.04767 | 0.04239 | 0.05638 MCM6     |
| cg12125117 | 0.8932  | 0.34081 | 0.89467 | 0.92681 | 0.95284 | 0.9104  | 0.58162 | 0.15254 | 0.02801 | 0.16858 GPR97    |
| cg12125691 | 0.041   | 0.04261 | 0.04665 | 0.04209 | 0.04037 | 0.03865 | 0.04119 | 0.03968 | 0.03674 | 0.03008 COX6C    |
| cg12126248 | 0.0971  | 0.08447 | 0.13611 | 0.10944 | 0.18102 | 0.1364  | 0.10247 | 0.10013 | 0.0776  | 0.07878 NDUFA5   |
| cg12126786 | 0.02273 | 0.01885 | 0.0203  | 0.02203 | 0.01575 | 0.01997 | 0.01732 | 0.01727 | 0.01666 | 0.01552 SCAMP1   |
| cg12127282 | 0.91027 | 0.87472 | 0.90676 | 0.92098 | 0.92602 | 0.91577 | 0.90634 | 0.8992  | 0.87072 | 0.86233 HOXD4    |
| cg12128017 | 0.06998 | 0.03832 | 0.76033 | 0.94985 | 0.44365 | 0.61844 | 0.04378 | 0.0348  | 0.25343 | 0.04751 EPHA10   |
| cg12128839 | 0.05505 | 0.04189 | 0.0479  | 0.04267 | 0.8629  | 0.84361 | 0.13737 | 0.3034  | 0.22963 | 0.3638 HOXA5     |
| cg12128876 | 0.0344  | 0.03633 | 0.0315  | 0.03546 | 0.03034 | 0.03559 | 0.03508 | 0.02967 | 0.0301  | 0.0306 NCOA3     |
| cg12130692 | 0.1201  | 0.3468  | 0.11218 | 0.09576 | 0.09164 | 0.10553 | 0.07574 | 0.07491 | 0.09203 | 0.09749 EPM2A    |
| cg12133004 | 0.59165 | 0.60111 | 0.41283 | 0.49118 | 0.54079 | 0.36032 | 0.12874 | 0.11343 | 0.11455 | 0.10951 C12orf54 |
| cg12133444 | 0.10632 | 0.10524 | 0.22036 | 0.19144 | 0.17378 | 0.09133 | 0.1114  | 0.086   | 0.10169 | 0.09633 KCTD3    |
| cg12135976 | 0.10569 | 0.0583  | 0.8093  | 0.83628 | 0.22665 | 0.30535 | 0.42041 | 0.39827 | 0.28547 | 0.29251 SLC5A8   |
| cg12137206 | 0.06882 | 0.07345 | 0.06941 | 0.06521 | 0.06197 | 0.06504 | 0.05777 | 0.0586  | 0.05208 | 0.05578 GPAM     |
| cg12144803 | 0.87461 | 0.82993 | 0.87352 | 0.87779 | 0.89267 | 0.86736 | 0.85785 | 0.86617 | 0.52965 | 0.61082 KALRN    |
| cg12145907 | 0.25183 | 0.099   | 0.79879 | 0.7945  | 0.7929  | 0.79704 | 0.7763  | 0.80477 | 0.80143 | 0.7777 PCDHGC4   |

|            |         |         |         |         |         |         |         |         |         |         |          |
|------------|---------|---------|---------|---------|---------|---------|---------|---------|---------|---------|----------|
| cg12146151 | 0.5431  | 0.53289 | 0.74141 | 0.80652 | 0.60216 | 0.41001 | 0.74667 | 0.42426 | 0.3206  | 0.12588 | ITGB4    |
| cg12148581 | 0.1201  | 0.11235 | 0.12493 | 0.11541 | 0.23558 | 0.16658 | 0.08794 | 0.07172 | 0.0749  | 0.09772 | RPL14    |
| cg12148919 | 0.04734 | 0.05521 | 0.05067 | 0.04804 | 0.03558 | 0.04571 | 0.04742 | 0.04786 | 0.04319 | 0.04795 | PTPRK    |
| cg12149391 | 0.13289 | 0.04987 | 0.05285 | 0.05619 | 0.91046 | 0.91979 | 0.89602 | 0.79116 | 0.47172 | 0.35348 | DLG1     |
| cg12150066 | 0.04244 | 0.04216 | 0.06806 | 0.06928 | 0.03259 | 0.04324 | 0.04531 | 0.03685 | 0.14246 | 0.03695 | GNB1     |
| cg12150401 | 0.74957 | 0.39858 | 0.21238 | 0.14405 | 0.33439 | 0.20554 | 0.14735 | 0.12868 | 0.17276 | 0.07476 | TAS2R16  |
| cg12152256 | 0.02983 | 0.0312  | 0.0272  | 0.026   | 0.02071 | 0.02856 | 0.02459 | 0.0241  | 0.02241 | 0.02315 | ZNF410   |
| cg12153542 | 0.05436 | 0.04037 | 0.36367 | 0.39462 | 0.49087 | 0.7905  | 0.09633 | 0.03457 | 0.04469 | 0.0315  | REM1     |
| cg12154803 | 0.04138 | 0.04694 | 0.05789 | 0.04381 | 0.04345 | 0.03991 | 0.03684 | 0.04004 | 0.0413  | 0.03428 | CCDC34   |
| cg12157010 | 0.03475 | 0.04698 | 0.0446  | 0.04398 | 0.03645 | 0.04175 | 0.03323 | 0.03425 | 0.03729 | 0.03657 | RASSF3   |
| cg12158019 | 0.05345 | 0.04642 | 0.85717 | 0.87741 | 0.84797 | 0.89532 | 0.86694 | 0.88861 | 0.84716 | 0.82384 | OXCT2    |
| cg12163132 | 0.5247  | 0.41753 | 0.43856 | 0.55251 | 0.86886 | 0.78871 | 0.41069 | 0.64367 | 0.87063 | 0.84327 | TBX2     |
| cg12163490 | 0.0287  | 0.02543 | 0.05701 | 0.11339 | 0.03866 | 0.02731 | 0.02317 | 0.02667 | 0.96941 | 0.97194 | CDH11    |
| cg12164282 | 0.03634 | 0.03284 | 0.04535 | 0.04168 | 0.02107 | 0.03127 | 0.60197 | 0.71472 | 0.03029 | 0.03708 | PXDN     |
| cg12167239 | 0.02645 | 0.03293 | 0.03821 | 0.20659 | 0.19166 | 0.03832 | 0.07853 | 0.02051 | 0.42204 | 0.20599 | SLC25A1  |
| cg12167564 | 0.42521 | 0.11904 | 0.28847 | 0.51894 | 0.07208 | 0.06266 | 0.15629 | 0.09933 | 0.07554 | 0.05968 | LYST     |
| cg12168164 | 0.03249 | 0.03355 | 0.02939 | 0.02566 | 0.03003 | 0.0336  | 0.02834 | 0.0248  | 0.02347 | 0.02217 | TARS     |
| cg12172720 | 0.68974 | 0.2568  | 0.70097 | 0.73471 | 0.50605 | 0.48133 | 0.23233 | 0.24687 | 0.69745 | 0.44768 | SYNPO    |
| cg12177001 | 0.81722 | 0.4459  | 0.79287 | 0.85664 | 0.86254 | 0.70767 | 0.78285 | 0.46095 | 0.85621 | 0.15216 | IFI27    |
| cg12177023 | 0.03017 | 0.03039 | 0.03152 | 0.03353 | 0.02773 | 0.031   | 0.02643 | 0.03384 | 0.03476 | 0.02922 | UBE3A    |
| cg12177677 | 0.84727 | 0.80522 | 0.76049 | 0.80884 | 0.7749  | 0.81163 | 0.7625  | 0.81458 | 0.47211 | 0.42764 | PSCDBP   |
| cg12177743 | 0.95665 | 0.95294 | 0.12797 | 0.16981 | 0.0659  | 0.06219 | 0.0526  | 0.05343 | 0.06168 | 0.05533 | TTC12    |
| cg12179044 | 0.0262  | 0.02932 | 0.03788 | 0.02648 | 0.02866 | 0.02663 | 0.02622 | 0.02461 | 0.02593 | 0.02867 | GCN1L1   |
| cg12179176 | 0.06249 | 0.08909 | 0.12345 | 0.05912 | 0.04691 | 0.05735 | 0.20532 | 0.18427 | 0.05129 | 0.03862 | SNX19    |
| cg12180123 | 0.03537 | 0.02361 | 0.07865 | 0.37436 | 0.0293  | 0.02859 | 0.02    | 0.02073 | 0.03017 | 0.01635 | PAPOLG   |
| cg12181621 | 0.09052 | 0.08318 | 0.08381 | 0.07383 | 0.05981 | 0.11525 | 0.06173 | 0.05674 | 0.09087 | 0.05713 | HIST1H3I |
| cg12182525 | 0.75663 | 0.75277 | 0.82616 | 0.85867 | 0.66684 | 0.7988  | 0.85005 | 0.87095 | 0.84445 | 0.67288 | ASB5     |
| cg12185908 | 0.06329 | 0.05767 | 0.07299 | 0.05611 | 0.07113 | 0.08622 | 0.05183 | 0.04015 | 0.04999 | 0.0599  | SGOL1    |
| cg12186917 | 0.41562 | 0.22127 | 0.33597 | 0.36533 | 0.60442 | 0.65901 | 0.2924  | 0.33693 | 0.74127 | 0.66234 | CRYZL1   |
| cg12187213 | 0.03362 | 0.0396  | 0.03622 | 0.03617 | 0.02699 | 0.03536 | 0.03163 | 0.03328 | 0.0312  | 0.03196 | ADAMTS9  |
| cg12187567 | 0.03955 | 0.04298 | 0.04492 | 0.03975 | 0.03281 | 0.03114 | 0.03708 | 0.03939 | 0.02889 | 0.03304 | CCNE2    |
| cg12188416 | 0.8551  | 0.82054 | 0.80361 | 0.83815 | 0.46709 | 0.66888 | 0.7282  | 0.6811  | 0.12998 | 0.30248 | TP73L    |
| cg12188482 | 0.03005 | 0.02775 | 0.02939 | 0.02443 | 0.03102 | 0.02917 | 0.02791 | 0.02891 | 0.02296 | 0.02492 | CYB5D2   |
| cg12188538 | 0.03131 | 0.0318  | 0.03078 | 0.03642 | 0.02521 | 0.03003 | 0.0309  | 0.03328 | 0.03508 | 0.03437 | FLJ20232 |
| cg12188560 | 0.04319 | 0.03959 | 0.87428 | 0.90208 | 0.93477 | 0.92269 | 0.62409 | 0.31437 | 0.87824 | 0.57468 | CNTFR    |
| cg12188860 | 0.0543  | 0.03728 | 0.95366 | 0.95423 | 0.26221 | 0.04883 | 0.72552 | 0.70541 | 0.40069 | 0.03064 | TOP1MT   |
| cg12189880 | 0.03831 | 0.02896 | 0.04091 | 0.03746 | 0.06053 | 0.02762 | 0.03287 | 0.03383 | 0.03316 | 0.0287  | RHOV     |
| cg12194493 | 0.02443 | 0.03078 | 0.02933 | 0.02627 | 0.02914 | 0.02517 | 0.02531 | 0.02609 | 0.02128 | 0.02544 | PIGG     |
| cg12195135 | 0.0864  | 0.05376 | 0.18871 | 0.16107 | 0.28335 | 0.04991 | 0.45256 | 0.06585 | 0.09403 | 0.06108 | ZNF584   |
| cg12195695 | 0.04766 | 0.04685 | 0.09563 | 0.1007  | 0.12091 | 0.04094 | 0.11295 | 0.04633 | 0.05147 | 0.04139 | ARMC7    |
| cg12197254 | 0.05298 | 0.05684 | 0.05234 | 0.05083 | 0.03523 | 0.04654 | 0.04123 | 0.04978 | 0.04155 | 0.0428  | C16orf9  |



|            |         |         |         |         |         |         |         |         |         |         |          |
|------------|---------|---------|---------|---------|---------|---------|---------|---------|---------|---------|----------|
| cg12200412 | 0.0699  | 0.07966 | 0.10024 | 0.08494 | 0.06827 | 0.07189 | 0.06637 | 0.07361 | 0.06967 | 0.08101 | CD1E     |
| cg12201164 | 0.02359 | 0.02441 | 0.02476 | 0.02559 | 0.02378 | 0.02688 | 0.02216 | 0.02479 | 0.01747 | 0.01661 | C20orf3  |
| cg12202913 | 0.86919 | 0.83565 | 0.84727 | 0.86896 | 0.90693 | 0.85078 | 0.83318 | 0.82248 | 0.89587 | 0.87121 | MGC2803  |
| cg12203852 | 0.02761 | 0.03602 | 0.03231 | 0.03135 | 0.02306 | 0.02996 | 0.02623 | 0.02878 | 0.02738 | 0.02381 | ARID4A   |
| cg12204574 | 0.02713 | 0.03109 | 0.07939 | 0.3268  | 0.02581 | 0.02471 | 0.4461  | 0.50827 | 0.02825 | 0.02187 | GABRE    |
| cg12204727 | 0.22226 | 0.12971 | 0.18769 | 0.22712 | 0.0862  | 0.07701 | 0.13848 | 0.13138 | 0.07117 | 0.07437 | COMMMD4  |
| cg12205047 | 0.03962 | 0.04361 | 0.055   | 0.04664 | 0.05116 | 0.0379  | 0.06179 | 0.04141 | 0.04798 | 0.03713 | IGSF3    |
| cg12205230 | 0.18244 | 0.14638 | 0.19893 | 0.26053 | 0.30699 | 0.11056 | 0.08644 | 0.10578 | 0.10624 | 0.1146  | TPM3     |
| cg12205591 | 0.36241 | 0.05479 | 0.74217 | 0.70862 | 0.91138 | 0.80069 | 0.56373 | 0.48546 | 0.48399 | 0.42844 | CRYAA    |
| cg12206093 | 0.0244  | 0.0251  | 0.02724 | 0.02761 | 0.02804 | 0.02424 | 0.02856 | 0.02622 | 0.02187 | 0.0212  | FKSG44   |
| cg12207371 | 0.11278 | 0.08908 | 0.77903 | 0.83975 | 0.32687 | 0.70448 | 0.70182 | 0.53268 | 0.1177  | 0.12127 | CD163    |
| cg12213457 | 0.78203 | 0.45457 | 0.14502 | 0.11204 | 0.34688 | 0.10362 | 0.23868 | 0.10532 | 0.28589 | 0.08811 | CHPT1    |
| cg12213910 | 0.69145 | 0.83561 | 0.79746 | 0.83807 | 0.84958 | 0.86137 | 0.81678 | 0.86328 | 0.81817 | 0.76245 | RAET1E   |
| cg12215675 | 0.84483 | 0.85227 | 0.93115 | 0.92804 | 0.94639 | 0.93337 | 0.55945 | 0.72733 | 0.75755 | 0.92658 | TLL2     |
| cg12216205 | 0.85832 | 0.8278  | 0.81734 | 0.82882 | 0.75746 | 0.80834 | 0.83601 | 0.83077 | 0.84699 | 0.82247 | C6orf111 |
| cg12218747 | 0.81865 | 0.75066 | 0.8099  | 0.83394 | 0.86839 | 0.79305 | 0.77692 | 0.83107 | 0.61459 | 0.23695 | SETD4    |
| cg12219753 | 0.02399 | 0.02421 | 0.02678 | 0.02354 | 0.01987 | 0.02162 | 0.02079 | 0.02191 | 0.02016 | 0.02123 | C18orf10 |
| cg12219915 | 0.03796 | 0.04352 | 0.06273 | 0.06456 | 0.05297 | 0.05144 | 0.49326 | 0.30395 | 0.02923 | 0.02668 | FAM50A   |
| cg12220493 | 0.03288 | 0.03605 | 0.03783 | 0.03073 | 0.0742  | 0.0329  | 0.03513 | 0.03481 | 0.06515 | 0.03188 | TITF1    |
| cg12224394 | 0.03757 | 0.04391 | 0.03932 | 0.03769 | 0.03259 | 0.03837 | 0.03835 | 0.03775 | 0.03358 | 0.03224 | AAMP     |
| cg12227762 | 0.11008 | 0.04735 | 0.04277 | 0.03836 | 0.05253 | 0.05514 | 0.03641 | 0.04257 | 0.03772 | 0.04418 | GNPNAT1  |
| cg12228229 | 0.33491 | 0.2548  | 0.89783 | 0.91627 | 0.85595 | 0.47798 | 0.88961 | 0.73837 | 0.7032  | 0.53578 | DLG4     |
| cg12228611 | 0.08781 | 0.09133 | 0.11401 | 0.10627 | 0.05905 | 0.07743 | 0.07344 | 0.07913 | 0.07475 | 0.07353 | PPIL2    |
| cg12228707 | 0.03291 | 0.03076 | 0.03415 | 0.03157 | 0.02761 | 0.03375 | 0.02746 | 0.02929 | 0.26197 | 0.02696 | ADM      |
| cg12229172 | 0.9392  | 0.925   | 0.04221 | 0.03575 | 0.05194 | 0.04054 | 0.06472 | 0.03908 | 0.04608 | 0.03102 | MGST2    |
| cg12229387 | 0.66043 | 0.35009 | 0.73118 | 0.77328 | 0.61902 | 0.57722 | 0.29992 | 0.22433 | 0.76154 | 0.25723 | GAST     |
| cg12230010 | 0.08142 | 0.0561  | 0.0716  | 0.0724  | 0.04461 | 0.0482  | 0.05199 | 0.04926 | 0.05483 | 0.04807 | EIF4EBP2 |
| cg12232274 | 0.03145 | 0.02719 | 0.3842  | 0.39769 | 0.18999 | 0.14823 | 0.03756 | 0.02794 | 0.06234 | 0.02533 | LRP11    |
| cg12232463 | 0.18147 | 0.5269  | 0.47721 | 0.67772 | 0.63712 | 0.603   | 0.15581 | 0.70445 | 0.5347  | 0.34841 | LONRF2   |
| cg12234947 | 0.70607 | 0.27736 | 0.81625 | 0.85761 | 0.88216 | 0.55965 | 0.73616 | 0.45241 | 0.84588 | 0.4656  | GNAT2    |
| cg12236045 | 0.16168 | 0.12173 | 0.24385 | 0.29666 | 0.20244 | 0.13994 | 0.13954 | 0.13527 | 0.14561 | 0.1609  | LRRTM3   |
| cg12237269 | 0.54817 | 0.36654 | 0.85117 | 0.87724 | 0.84452 | 0.83305 | 0.12963 | 0.75672 | 0.30051 | 0.17568 | SLN      |
| cg12237946 | 0.1561  | 0.11842 | 0.13286 | 0.12273 | 0.18076 | 0.15542 | 0.13121 | 0.12776 | 0.17047 | 0.16131 | PGBD4    |
| cg12238343 | 0.03546 | 0.03038 | 0.89762 | 0.89649 | 0.13644 | 0.23282 | 0.05207 | 0.2082  | 0.02535 | 0.02225 | RLN3R1   |
| cg12239750 | 0.01408 | 0.01897 | 0.01979 | 0.01616 | 0.01289 | 0.01615 | 0.01342 | 0.01573 | 0.01559 | 0.01425 | ALDH18A1 |
| cg12240237 | 0.82926 | 0.69873 | 0.80226 | 0.82151 | 0.79968 | 0.79518 | 0.79509 | 0.78661 | 0.83019 | 0.52882 | WBSCR23  |
| cg12240824 | 0.0904  | 0.08931 | 0.09103 | 0.08747 | 0.07349 | 0.07564 | 0.07676 | 0.08356 | 0.07157 | 0.07407 | ZNF271   |
| cg12241125 | 0.05296 | 0.04868 | 0.11405 | 0.07105 | 0.11872 | 0.07659 | 0.07307 | 0.06576 | 0.06176 | 0.04152 | WBSCR1   |
| cg12241297 | 0.11246 | 0.09634 | 0.10866 | 0.1194  | 0.07085 | 0.0784  | 0.09798 | 0.08322 | 0.06158 | 0.06165 | HNRPA0   |
| cg12242338 | 0.23593 | 0.0632  | 0.62772 | 0.79349 | 0.4469  | 0.28122 | 0.06411 | 0.08313 | 0.05137 | 0.05889 | TRIM42   |
| cg12243255 | 0.02264 | 0.02272 | 0.02654 | 0.01979 | 0.02254 | 0.02152 | 0.01627 | 0.01753 | 0.01769 | 0.01688 | AXUD1    |

|            |         |         |         |         |         |         |         |         |         |                    |
|------------|---------|---------|---------|---------|---------|---------|---------|---------|---------|--------------------|
| cg12243271 | 0.7303  | 0.7264  | 0.69121 | 0.72622 | 0.60842 | 0.71127 | 0.46249 | 0.5716  | 0.59369 | 0.61176 CFI        |
| cg12245996 | 0.12657 | 0.09206 | 0.10116 | 0.08607 | 0.17751 | 0.16142 | 0.10538 | 0.08227 | 0.07647 | 0.07836 PRKCQ      |
| cg12246527 | 0.03013 | 0.02963 | 0.03798 | 0.03203 | 0.03077 | 0.02893 | 0.03209 | 0.02891 | 0.03196 | 0.03237 MAP2K5     |
| cg12247247 | 0.09401 | 0.08421 | 0.13314 | 0.11    | 0.14011 | 0.13103 | 0.13572 | 0.1238  | 0.08485 | 0.11123 RPL23      |
| cg12249575 | 0.03726 | 0.03742 | 0.03893 | 0.04457 | 0.04961 | 0.03397 | 0.0283  | 0.02549 | 0.34206 | 0.03338 TITF1      |
| cg12251508 | 0.06438 | 0.0668  | 0.05759 | 0.04759 | 0.06314 | 0.06243 | 0.36904 | 0.32256 | 0.04362 | 0.05638 RBM3       |
| cg12251804 | 0.03072 | 0.03888 | 0.78737 | 0.75559 | 0.42753 | 0.52212 | 0.03233 | 0.02846 | 0.02737 | 0.02526 C10orf125  |
| cg12254515 | 0.03464 | 0.03334 | 0.04529 | 0.03625 | 0.04038 | 0.03581 | 0.02961 | 0.02615 | 0.03151 | 0.03567 DERL1      |
| cg12255284 | 0.60348 | 0.54666 | 0.61521 | 0.65356 | 0.5902  | 0.65043 | 0.61287 | 0.65569 | 0.68849 | 0.64895 C8orf45    |
| cg12256080 | 0.04557 | 0.05364 | 0.05234 | 0.04797 | 0.0514  | 0.05894 | 0.04412 | 0.04172 | 0.04156 | 0.04136 ABT1       |
| cg12256228 | 0.03993 | 0.03802 | 0.04214 | 0.04631 | 0.11085 | 0.04569 | 0.03832 | 0.03478 | 0.03331 | 0.03428 RING1      |
| cg12259256 | 0.04631 | 0.04835 | 0.04576 | 0.04461 | 0.07382 | 0.0622  | 0.05564 | 0.05035 | 0.04692 | 0.05209 TMEM101    |
| cg12259537 | 0.47484 | 0.29447 | 0.86511 | 0.86725 | 0.73731 | 0.66484 | 0.20112 | 0.38838 | 0.66582 | 0.88662 ZNF606     |
| cg12261786 | 0.70582 | 0.4172  | 0.82157 | 0.85177 | 0.28705 | 0.41013 | 0.73712 | 0.65697 | 0.8704  | 0.81183 C10orf116  |
| cg12262564 | 0.03128 | 0.03118 | 0.03213 | 0.03326 | 0.06448 | 0.02807 | 0.02843 | 0.02576 | 0.02256 | 0.02497 IQGAP3     |
| cg12263485 | 0.06988 | 0.05863 | 0.09077 | 0.07177 | 0.1167  | 0.07871 | 0.08325 | 0.07392 | 0.06791 | 0.08174 CBX5       |
| cg12264551 | 0.02595 | 0.02733 | 0.03548 | 0.03312 | 0.02945 | 0.03231 | 0.02912 | 0.03109 | 0.02851 | 0.02575 LOC283377  |
| cg12265604 | 0.08276 | 0.06694 | 0.18303 | 0.16142 | 0.1455  | 0.09451 | 0.08839 | 0.06786 | 0.89502 | 0.26626 HAS3       |
| cg12265829 | 0.06096 | 0.03834 | 0.899   | 0.9252  | 0.74465 | 0.89107 | 0.55011 | 0.47791 | 0.94761 | 0.8989 ADCY4       |
| cg12266024 | 0.03469 | 0.03059 | 0.03787 | 0.02973 | 0.03649 | 0.03814 | 0.03229 | 0.03275 | 0.02418 | 0.02778 DRCTNBNB1A |
| cg12266049 | 0.15251 | 0.15077 | 0.95846 | 0.96423 | 0.95996 | 0.91036 | 0.93682 | 0.72513 | 0.96405 | 0.95271 CCND1      |
| cg12266551 | 0.02922 | 0.03422 | 0.03372 | 0.03433 | 0.02793 | 0.03108 | 0.03083 | 0.02998 | 0.02366 | 0.02673 TOMM40     |
| cg12268344 | 0.8045  | 0.41022 | 0.88599 | 0.86826 | 0.89566 | 0.87008 | 0.8386  | 0.87029 | 0.62345 | 0.55888 PRM1       |
| cg12269343 | 0.07229 | 0.05918 | 0.05945 | 0.05664 | 0.11486 | 0.10668 | 0.07174 | 0.06147 | 0.06728 | 0.08242 SEL1L      |
| cg12270520 | 0.04858 | 0.03166 | 0.04102 | 0.04032 | 0.03415 | 0.03599 | 0.02596 | 0.02562 | 0.02547 | 0.02985 ZNF517     |
| cg12271587 | 0.69129 | 0.81375 | 0.82176 | 0.82861 | 0.74927 | 0.77055 | 0.84264 | 0.67553 | 0.81147 | 0.79516 TTF1       |
| cg12271671 | 0.11122 | 0.0746  | 0.49836 | 0.66556 | 0.1813  | 0.14738 | 0.41884 | 0.59792 | 0.36681 | 0.28077 FGL2       |
| cg12274479 | 0.81648 | 0.70521 | 0.78976 | 0.8071  | 0.7241  | 0.64414 | 0.80571 | 0.69661 | 0.80551 | 0.68662 HSPG2      |
| cg12274567 | 0.8495  | 0.86839 | 0.8094  | 0.83267 | 0.84133 | 0.70021 | 0.5533  | 0.58045 | 0.86293 | 0.80955 SH2D1B     |
| cg12275348 | 0.48855 | 0.10301 | 0.05101 | 0.05945 | 0.62252 | 0.3657  | 0.20202 | 0.1807  | 0.73462 | 0.14838 SOCS2      |
| cg12276904 | 0.02264 | 0.02654 | 0.02579 | 0.03005 | 0.01595 | 0.02341 | 0.02276 | 0.02422 | 0.02145 | 0.02219 H1FX       |
| cg12277666 | 0.05887 | 0.03682 | 0.94137 | 0.95352 | 0.27827 | 0.25493 | 0.38897 | 0.41949 | 0.31392 | 0.23157 TDRD5      |
| cg12278770 | 0.61997 | 0.70641 | 0.73095 | 0.78385 | 0.17584 | 0.20409 | 0.56541 | 0.3263  | 0.5198  | 0.09259 C1orf90    |
| cg12279128 | 0.05957 | 0.05645 | 0.05663 | 0.05259 | 0.23907 | 0.61686 | 0.05418 | 0.05452 | 0.05738 | 0.06195 C22orf16   |
| cg12280407 | 0.02418 | 0.03089 | 0.02981 | 0.02931 | 0.02331 | 0.025   | 0.02727 | 0.02785 | 0.02884 | 0.02322 KCTD12     |
| cg12281657 | 0.59609 | 0.44154 | 0.90665 | 0.92102 | 0.48245 | 0.4057  | 0.67153 | 0.89976 | 0.33975 | 0.42528 C14orf50   |
| cg12285118 | 0.45609 | 0.32738 | 0.75146 | 0.75721 | 0.6921  | 0.7318  | 0.15931 | 0.11479 | 0.80905 | 0.66173 FAM107B    |
| cg12286890 | 0.36128 | 0.22512 | 0.69418 | 0.75084 | 0.77756 | 0.75046 | 0.22855 | 0.27778 | 0.19423 | 0.19486 XCL2       |
| cg12287813 | 0.04398 | 0.0444  | 0.05    | 0.04595 | 0.03466 | 0.04296 | 0.03935 | 0.04379 | 0.0414  | 0.04319 GCC2       |
| cg12288365 | 0.01628 | 0.02191 | 0.02118 | 0.01577 | 0.01789 | 0.01708 | 0.01581 | 0.01698 | 0.01655 | 0.01336 KCTD7      |
| cg12288726 | 0.863   | 0.77541 | 0.85656 | 0.86742 | 0.84956 | 0.84929 | 0.86393 | 0.84799 | 0.67411 | 0.66096 ARF5       |

|            |         |         |         |         |         |         |         |         |         |                  |
|------------|---------|---------|---------|---------|---------|---------|---------|---------|---------|------------------|
| cg12288842 | 0.10109 | 0.05283 | 0.05184 | 0.05011 | 0.04663 | 0.05758 | 0.05827 | 0.05809 | 0.06298 | 0.05821 ATPBD4   |
| cg12289045 | 0.48355 | 0.24847 | 0.42711 | 0.41906 | 0.31682 | 0.33993 | 0.06917 | 0.06429 | 0.27113 | 0.26055 SYT3     |
| cg12290002 | 0.02716 | 0.02547 | 0.0269  | 0.02619 | 0.02198 | 0.02372 | 0.02357 | 0.0257  | 0.02216 | 0.02356 FBXO5    |
| cg12291552 | 0.01641 | 0.02327 | 0.01905 | 0.01691 | 0.01244 | 0.01692 | 0.01274 | 0.01329 | 0.01507 | 0.01272 GOLPH4   |
| cg12292686 | 0.05214 | 0.04887 | 0.04932 | 0.05345 | 0.04554 | 0.04638 | 0.04539 | 0.04573 | 0.05289 | 0.04393 PAOX     |
| cg12293634 | 0.0245  | 0.0247  | 0.02815 | 0.02715 | 0.02597 | 0.0247  | 0.02461 | 0.02046 | 0.01929 | 0.02059 RNF149   |
| cg12294121 | 0.14704 | 0.07943 | 0.89496 | 0.92477 | 0.34698 | 0.50244 | 0.17954 | 0.32776 | 0.39313 | 0.37379 GABRB1   |
| cg12297221 | 0.031   | 0.03262 | 0.14864 | 0.16414 | 0.03692 | 0.03286 | 0.05562 | 0.02955 | 0.02581 | 0.02555 ART5     |
| cg12300353 | 0.03912 | 0.02446 | 0.97547 | 0.98096 | 0.11511 | 0.02979 | 0.02406 | 0.05479 | 0.06006 | 0.03612 KCTD8    |
| cg12302621 | 0.86875 | 0.44794 | 0.86095 | 0.84735 | 0.87769 | 0.92143 | 0.68442 | 0.50991 | 0.59825 | 0.676 SLC28A1    |
| cg12304441 | 0.04227 | 0.03902 | 0.04229 | 0.03731 | 0.03107 | 0.04134 | 0.03098 | 0.03215 | 0.03287 | 0.03466 USP15    |
| cg12308275 | 0.82125 | 0.84935 | 0.88002 | 0.87049 | 0.8291  | 0.82931 | 0.79723 | 0.82204 | 0.73141 | 0.51536 TGM5     |
| cg12311132 | 0.45096 | 0.08983 | 0.4813  | 0.46431 | 0.3373  | 0.09406 | 0.45496 | 0.17797 | 0.40661 | 0.21824 RCN1     |
| cg12312863 | 0.08232 | 0.06509 | 0.49235 | 0.61224 | 0.5806  | 0.44656 | 0.13563 | 0.0893  | 0.65093 | 0.50278 AMDHD2   |
| cg12313568 | 0.07862 | 0.07115 | 0.0751  | 0.06173 | 0.06322 | 0.05641 | 0.06204 | 0.05641 | 0.06404 | 0.05212 ATXN2    |
| cg12314510 | 0.04356 | 0.04367 | 0.03991 | 0.04036 | 0.04432 | 0.04035 | 0.03657 | 0.03784 | 0.04026 | 0.04136 DYNLL2   |
| cg12315302 | 0.08145 | 0.06609 | 0.07773 | 0.08632 | 0.2402  | 0.2049  | 0.89092 | 0.90693 | 0.04054 | 0.07449 HIST1H4D |
| cg12315311 | 0.19362 | 0.06885 | 0.14102 | 0.17793 | 0.11109 | 0.07027 | 0.04794 | 0.05063 | 0.20194 | 0.09933 UNQ3033  |
| cg12315959 | 0.8257  | 0.81977 | 0.78846 | 0.83017 | 0.78122 | 0.79904 | 0.78242 | 0.61756 | 0.67889 | 0.6416 DNAJC12   |
| cg12315997 | 0.09473 | 0.09684 | 0.09936 | 0.08471 | 0.26134 | 0.14303 | 0.08657 | 0.07493 | 0.11463 | 0.13131 RPL9     |
| cg12316147 | 0.05073 | 0.0458  | 0.0528  | 0.04838 | 0.03132 | 0.03309 | 0.04761 | 0.05003 | 0.03928 | 0.03718 GBA2     |
| cg12317456 | 0.35821 | 0.05511 | 0.04153 | 0.04174 | 0.02781 | 0.03381 | 0.04183 | 0.03746 | 0.62975 | 0.0965 MMP2      |
| cg12317676 | 0.04006 | 0.03708 | 0.03367 | 0.03836 | 0.02912 | 0.03937 | 0.0372  | 0.03499 | 0.02998 | 0.03217 CARM1    |
| cg12318316 | 0.06515 | 0.06037 | 0.14815 | 0.1103  | 0.15268 | 0.10143 | 0.05675 | 0.06054 | 0.06104 | 0.04551 NDUFB2   |
| cg12319004 | 0.78732 | 0.79002 | 0.78344 | 0.80161 | 0.64912 | 0.53961 | 0.70854 | 0.65099 | 0.44515 | 0.5069 LEFTY1    |
| cg12320306 | 0.03579 | 0.04338 | 0.046   | 0.04048 | 0.03172 | 0.0374  | 0.03586 | 0.04243 | 0.44594 | 0.3676 ADM       |
| cg12320676 | 0.08013 | 0.08369 | 0.15319 | 0.14527 | 0.10567 | 0.07699 | 0.0956  | 0.09504 | 0.07975 | 0.06987 E2F6     |
| cg12322132 | 0.06221 | 0.03506 | 0.39922 | 0.47208 | 0.14375 | 0.29722 | 0.04159 | 0.04724 | 0.03093 | 0.03184 IGF2AS   |
| cg12323894 | 0.04464 | 0.04057 | 0.05424 | 0.04595 | 0.02789 | 0.03519 | 0.03975 | 0.03603 | 0.04181 | 0.03326 DBI      |
| cg12324144 | 0.74619 | 0.32922 | 0.81323 | 0.8523  | 0.34494 | 0.09728 | 0.2377  | 0.22336 | 0.13368 | 0.0942 LRRC34    |
| cg12324629 | 0.78996 | 0.51956 | 0.7827  | 0.91046 | 0.94163 | 0.89041 | 0.72174 | 0.51378 | 0.91347 | 0.87609 ULK2     |
| cg12324831 | 0.09648 | 0.06315 | 0.07937 | 0.06634 | 0.05589 | 0.06648 | 0.07809 | 0.06008 | 0.04568 | 0.04609 VBP1     |
| cg12330929 | 0.72666 | 0.76256 | 0.82155 | 0.86785 | 0.63947 | 0.80894 | 0.876   | 0.89352 | 0.78357 | 0.80829 USP9X    |
| cg12331389 | 0.07163 | 0.0327  | 0.45123 | 0.52281 | 0.31168 | 0.40564 | 0.06555 | 0.02194 | 0.15164 | 0.02833 RBP4     |
| cg12331980 | 0.72024 | 0.72736 | 0.68511 | 0.73316 | 0.64837 | 0.75444 | 0.50127 | 0.73038 | 0.70789 | 0.63438 FLJ39502 |
| cg12332316 | 0.91108 | 0.66749 | 0.8111  | 0.88498 | 0.9171  | 0.92182 | 0.74138 | 0.91395 | 0.89268 | 0.82236 F12      |
| cg12333095 | 0.02485 | 0.03075 | 0.02871 | 0.02453 | 0.02435 | 0.03114 | 0.02893 | 0.0275  | 0.02585 | 0.02207 ANKRD13  |
| cg12334759 | 0.74166 | 0.78073 | 0.54497 | 0.82421 | 0.69243 | 0.63271 | 0.19963 | 0.09108 | 0.76389 | 0.31438 C19orf19 |
| cg12335708 | 0.46776 | 0.46876 | 0.73286 | 0.88446 | 0.82687 | 0.62809 | 0.77716 | 0.65396 | 0.58579 | 0.45255 DPP4     |
| cg12336540 | 0.52238 | 0.21364 | 0.67938 | 0.7749  | 0.78336 | 0.8208  | 0.59757 | 0.22462 | 0.79247 | 0.58305 RCSDB1   |
| cg12336877 | 0.0312  | 0.03145 | 0.03097 | 0.02782 | 0.02477 | 0.02613 | 0.02647 | 0.03072 | 0.02556 | 0.02337 MAN1B1   |

|            |         |         |         |         |         |         |         |         |         |         |           |
|------------|---------|---------|---------|---------|---------|---------|---------|---------|---------|---------|-----------|
| cg12337114 | 0.91015 | 0.80585 | 0.84894 | 0.87309 | 0.8611  | 0.84617 | 0.8991  | 0.9109  | 0.90419 | 0.89614 | TAS2R3    |
| cg12339029 | 0.71529 | 0.09659 | 0.75707 | 0.78485 | 0.35053 | 0.34239 | 0.8536  | 0.44748 | 0.10172 | 0.1228  | MYL1      |
| cg12339802 | 0.04945 | 0.04733 | 0.0603  | 0.05526 | 0.06478 | 0.05557 | 0.23811 | 0.09826 | 0.04642 | 0.04258 | C1orf109  |
| cg12340144 | 0.14213 | 0.04913 | 0.06292 | 0.07305 | 0.07139 | 0.05484 | 0.07323 | 0.06601 | 0.05407 | 0.04133 | XYLB      |
| cg12341414 | 0.04788 | 0.04383 | 0.06429 | 0.05269 | 0.05392 | 0.05085 | 0.0357  | 0.03608 | 0.0418  | 0.0427  | REPS1     |
| cg12343082 | 0.68762 | 0.75365 | 0.79384 | 0.90649 | 0.91246 | 0.83066 | 0.66176 | 0.44376 | 0.79861 | 0.42248 | CA5A      |
| cg12343638 | 0.80388 | 0.79395 | 0.16863 | 0.28545 | 0.42288 | 0.66177 | 0.36435 | 0.39836 | 0.10567 | 0.09528 | PCDHB12   |
| cg12343777 | 0.6724  | 0.25797 | 0.53658 | 0.70105 | 0.52799 | 0.59085 | 0.04571 | 0.05141 | 0.63744 | 0.38858 | ALOX15B   |
| cg12344605 | 0.04771 | 0.03792 | 0.0401  | 0.03946 | 0.05085 | 0.02974 | 0.03081 | 0.03062 | 0.03595 | 0.02624 | MAP2K4    |
| cg12345724 | 0.09193 | 0.02775 | 0.31029 | 0.15765 | 0.03338 | 0.02598 | 0.05716 | 0.03029 | 0.03401 | 0.02495 | CDCA4     |
| cg12346515 | 0.0374  | 0.03686 | 0.04477 | 0.03666 | 0.02733 | 0.03544 | 0.03429 | 0.03893 | 0.03446 | 0.03723 | AMACR     |
| cg12346881 | 0.8554  | 0.77514 | 0.21031 | 0.24024 | 0.36601 | 0.48975 | 0.61798 | 0.54428 | 0.75788 | 0.86604 | ZNF300    |
| cg12347740 | 0.91344 | 0.60972 | 0.89617 | 0.91946 | 0.92386 | 0.89629 | 0.89491 | 0.86519 | 0.92356 | 0.81309 | MGC34647  |
| cg12348970 | 0.14376 | 0.35176 | 0.30983 | 0.52993 | 0.74969 | 0.49099 | 0.1312  | 0.11253 | 0.59303 | 0.39453 | SLC24A2   |
| cg12351042 | 0.84012 | 0.43096 | 0.72995 | 0.84372 | 0.79669 | 0.74306 | 0.779   | 0.80126 | 0.29524 | 0.0871  | OR2B2     |
| cg12351433 | 0.87759 | 0.61186 | 0.53216 | 0.52325 | 0.48698 | 0.64738 | 0.14868 | 0.31908 | 0.20678 | 0.30165 | LHCGR     |
| cg12352006 | 0.04881 | 0.04809 | 0.04626 | 0.04661 | 0.06277 | 0.06287 | 0.06231 | 0.04732 | 0.05336 | 0.04296 | ZMAT5     |
| cg12353516 | 0.04007 | 0.03872 | 0.04062 | 0.04263 | 0.02724 | 0.04053 | 0.03603 | 0.03529 | 0.03626 | 0.0335  | MAPK7     |
| cg12354377 | 0.87302 | 0.62335 | 0.87772 | 0.87791 | 0.81737 | 0.6099  | 0.87731 | 0.65081 | 0.87989 | 0.84297 | ANK3      |
| cg12356261 | 0.14252 | 0.04965 | 0.45085 | 0.45238 | 0.85321 | 0.3695  | 0.80179 | 0.25332 | 0.37285 | 0.15149 | NES       |
| cg12359315 | 0.18566 | 0.11581 | 0.51995 | 0.73436 | 0.29487 | 0.40152 | 0.44729 | 0.57716 | 0.31181 | 0.22987 | SLC6A20   |
| cg12360373 | 0.04219 | 0.0423  | 0.04049 | 0.0387  | 0.02982 | 0.03645 | 0.03499 | 0.03334 | 0.02923 | 0.03298 | ATXN2L    |
| cg12360736 | 0.82324 | 0.79898 | 0.17602 | 0.15368 | 0.1927  | 0.10473 | 0.31222 | 0.12344 | 0.57683 | 0.55661 | MBNL1     |
| cg12360886 | 0.90115 | 0.79886 | 0.85665 | 0.86386 | 0.82284 | 0.86727 | 0.84373 | 0.88198 | 0.89459 | 0.86677 | GSDML     |
| cg12361925 | 0.08335 | 0.05109 | 0.0613  | 0.05793 | 0.13825 | 0.04874 | 0.04618 | 0.0469  | 0.05204 | 0.06764 | C2orf17   |
| cg12365667 | 0.31988 | 0.13689 | 0.32504 | 0.23684 | 0.35668 | 0.39391 | 0.22611 | 0.15939 | 0.14152 | 0.07763 | HLA-DPB1  |
| cg12368241 | 0.78747 | 0.27776 | 0.71227 | 0.78865 | 0.47296 | 0.21604 | 0.77572 | 0.50464 | 0.80953 | 0.80791 | PHF3      |
| cg12370791 | 0.01878 | 0.02137 | 0.01976 | 0.01881 | 0.02428 | 0.02116 | 0.02258 | 0.02064 | 0.01539 | 0.0177  | HOXB9     |
| cg12370884 | 0.05128 | 0.04627 | 0.05956 | 0.05558 | 0.08155 | 0.05817 | 0.05098 | 0.05416 | 0.05698 | 0.04825 | PAICS     |
| cg12371177 | 0.92325 | 0.91899 | 0.92333 | 0.92238 | 0.93618 | 0.93238 | 0.9292  | 0.93332 | 0.92653 | 0.91107 | PLEKHG6   |
| cg12373072 | 0.11815 | 0.12073 | 0.11136 | 0.11541 | 0.10417 | 0.10137 | 0.09809 | 0.08755 | 0.10366 | 0.10252 | OSBPL11   |
| cg12373771 | 0.66382 | 0.32965 | 0.4568  | 0.4107  | 0.32889 | 0.03443 | 0.43372 | 0.57056 | 0.05049 | 0.0437  | CECR6     |
| cg12374431 | 0.04628 | 0.04466 | 0.93287 | 0.95358 | 0.97375 | 0.94146 | 0.68421 | 0.51794 | 0.77797 | 0.534   | VAX2      |
| cg12374577 | 0.16891 | 0.21922 | 0.75193 | 0.73082 | 0.7274  | 0.77677 | 0.68761 | 0.76301 | 0.26911 | 0.3969  | UGT2A3    |
| cg12374721 | 0.0592  | 0.06344 | 0.9391  | 0.93556 | 0.92322 | 0.93551 | 0.79939 | 0.7302  | 0.94168 | 0.93095 | PRAC      |
| cg12376277 | 0.06848 | 0.06837 | 0.09194 | 0.07952 | 0.09276 | 0.07181 | 0.07317 | 0.06847 | 0.07302 | 0.06901 | TUG1      |
| cg12376406 | 0.05733 | 0.05649 | 0.06619 | 0.0546  | 0.09327 | 0.06131 | 0.0475  | 0.03981 | 0.04801 | 0.08246 | FAM12B    |
| cg12377712 | 0.03147 | 0.02803 | 0.03813 | 0.03379 | 0.03803 | 0.02982 | 0.03662 | 0.0347  | 0.03036 | 0.02552 | ATP6V1G1  |
| cg12378831 | 0.03785 | 0.04149 | 0.05858 | 0.0537  | 0.05039 | 0.05806 | 0.05424 | 0.03712 | 0.03784 | 0.03767 | KIAA0853  |
| cg12379145 | 0.85554 | 0.89025 | 0.84291 | 0.87735 | 0.81489 | 0.61041 | 0.84035 | 0.84568 | 0.87018 | 0.85196 | PRDM2     |
| cg12379775 | 0.25086 | 0.02635 | 0.50702 | 0.55775 | 0.89961 | 0.71657 | 0.34559 | 0.05568 | 0.03917 | 0.02138 | LOC284739 |

|            |         |         |         |         |         |         |         |         |         |                  |
|------------|---------|---------|---------|---------|---------|---------|---------|---------|---------|------------------|
| cg12380764 | 0.1215  | 0.05356 | 0.15992 | 0.25259 | 0.16652 | 0.09185 | 0.08377 | 0.09869 | 0.27517 | 0.07001 IL19     |
| cg12380854 | 0.77617 | 0.79005 | 0.79544 | 0.81238 | 0.67678 | 0.53642 | 0.72276 | 0.78913 | 0.80371 | 0.77435 LRRC46   |
| cg12382902 | 0.02152 | 0.02152 | 0.04314 | 0.02831 | 0.43052 | 0.40411 | 0.04769 | 0.03755 | 0.03539 | 0.01836 CCND2    |
| cg12382941 | 0.09639 | 0.03717 | 0.0454  | 0.03972 | 0.11381 | 0.03762 | 0.17688 | 0.03704 | 0.18098 | 0.02612 SYTL4    |
| cg12384303 | 0.6664  | 0.67188 | 0.55102 | 0.56971 | 0.54297 | 0.56194 | 0.28409 | 0.4107  | 0.71342 | 0.57999 VGLL1    |
| cg12385425 | 0.12796 | 0.08879 | 0.12263 | 0.11248 | 0.09746 | 0.08942 | 0.07632 | 0.07269 | 0.08327 | 0.07948 TMEM17   |
| cg12385643 | 0.89637 | 0.86283 | 0.87828 | 0.89105 | 0.89386 | 0.87305 | 0.71313 | 0.77413 | 0.88437 | 0.08781 UGT1A6   |
| cg12387247 | 0.27781 | 0.26073 | 0.8158  | 0.88547 | 0.36708 | 0.27861 | 0.05746 | 0.03693 | 0.04337 | 0.11205 FCER2    |
| cg12388309 | 0.04168 | 0.03762 | 0.52227 | 0.65696 | 0.07425 | 0.038   | 0.07675 | 0.03226 | 0.03363 | 0.02686 PAK7     |
| cg12390946 | 0.04416 | 0.05417 | 0.03796 | 0.03563 | 0.04278 | 0.04445 | 0.04058 | 0.04305 | 0.04236 | 0.03591 INPP5A   |
| cg12391048 | 0.95103 | 0.93309 | 0.95509 | 0.94844 | 0.9636  | 0.94279 | 0.95107 | 0.93656 | 0.96037 | 0.95743 PRSS27   |
| cg12391174 | 0.03409 | 0.03574 | 0.06386 | 0.05409 | 0.05229 | 0.04143 | 0.04172 | 0.03382 | 0.73722 | 0.70422 FLJ20489 |
| cg12391783 | 0.82385 | 0.80252 | 0.85839 | 0.87223 | 0.87695 | 0.86107 | 0.79325 | 0.8306  | 0.83018 | 0.76261 NSMCE1   |
| cg12391921 | 0.80233 | 0.70385 | 0.80917 | 0.85559 | 0.86951 | 0.5649  | 0.29991 | 0.34435 | 0.18805 | 0.40975 ITGB1BP2 |
| cg12392669 | 0.04789 | 0.05762 | 0.05273 | 0.05458 | 0.03728 | 0.05168 | 0.04902 | 0.05119 | 0.04827 | 0.04816 CHCHD2   |
| cg12393697 | 0.04252 | 0.03884 | 0.0445  | 0.04118 | 0.04486 | 0.04525 | 0.04029 | 0.04195 | 0.03749 | 0.03713 KIAA1946 |
| cg12397274 | 0.16469 | 0.11126 | 0.63085 | 0.80627 | 0.45    | 0.46152 | 0.25288 | 0.5806  | 0.05606 | 0.09214 TINAG    |
| cg12398332 | 0.11578 | 0.07875 | 0.08618 | 0.08198 | 0.104   | 0.0717  | 0.07245 | 0.0626  | 0.05406 | 0.05581 GPRC5B   |
| cg12398397 | 0.0774  | 0.07927 | 0.08598 | 0.07754 | 0.14532 | 0.1181  | 0.06725 | 0.0658  | 0.07708 | 0.08691 FALZ     |
| cg12400041 | 0.82794 | 0.65302 | 0.58832 | 0.66921 | 0.77595 | 0.57322 | 0.35331 | 0.13541 | 0.89813 | 0.86437 DST      |
| cg12400881 | 0.0745  | 0.02834 | 0.91062 | 0.82641 | 0.93402 | 0.91857 | 0.13263 | 0.08221 | 0.48399 | 0.18883 PPL      |
| cg12402251 | 0.03472 | 0.02288 | 0.22081 | 0.57307 | 0.05159 | 0.03063 | 0.03413 | 0.35799 | 0.03518 | 0.01994 CALB1    |
| cg12402495 | 0.02092 | 0.02083 | 0.01973 | 0.01932 | 0.01689 | 0.01634 | 0.01808 | 0.01791 | 0.01574 | 0.01592 C1orf43  |
| cg12403575 | 0.05369 | 0.05492 | 0.0552  | 0.04319 | 0.07306 | 0.08025 | 0.06671 | 0.05692 | 0.04235 | 0.04014 TRADD    |
| cg12405833 | 0.07552 | 0.07416 | 0.08338 | 0.07438 | 0.06054 | 0.05281 | 0.07815 | 0.06702 | 0.05542 | 0.06125 RUNC2A   |
| cg12406417 | 0.0631  | 0.05313 | 0.08212 | 0.0884  | 0.06171 | 0.06447 | 0.07547 | 0.05455 | 0.04253 | 0.04523 BCR      |
| cg12406460 | 0.03813 | 0.03974 | 0.03086 | 0.03204 | 0.04295 | 0.0461  | 0.04258 | 0.04124 | 0.03045 | 0.02778 ATP5L    |
| cg12406559 | 0.29582 | 0.10062 | 0.13278 | 0.10085 | 0.20134 | 0.11724 | 0.11213 | 0.11678 | 0.09897 | 0.11245 ZNF532   |
| cg12408911 | 0.77789 | 0.55397 | 0.61612 | 0.51482 | 0.74049 | 0.43655 | 0.76345 | 0.44989 | 0.49989 | 0.41716 SLC7A5   |
| cg12411068 | 0.02961 | 0.03306 | 0.03106 | 0.02959 | 0.02746 | 0.0278  | 0.02743 | 0.02607 | 0.02066 | 0.0207 SMARCA4   |
| cg12412075 | 0.01734 | 0.01865 | 0.94675 | 0.96149 | 0.06076 | 0.03811 | 0.01486 | 0.01666 | 0.97873 | 0.8469 LIN7B     |
| cg12413566 | 0.54685 | 0.4712  | 0.51153 | 0.85938 | 0.8876  | 0.87932 | 0.91868 | 0.80852 | 0.91709 | 0.88253 CMYA1    |
| cg12417299 | 0.03669 | 0.03254 | 0.04632 | 0.03753 | 0.03789 | 0.03447 | 0.02846 | 0.02885 | 0.02984 | 0.02832 NEK4     |
| cg12417466 | 0.76455 | 0.8224  | 0.61788 | 0.79384 | 0.6843  | 0.4253  | 0.76795 | 0.77479 | 0.5476  | 0.48089 ARPP-21  |
| cg12419067 | 0.07097 | 0.03975 | 0.05811 | 0.05604 | 0.04839 | 0.10854 | 0.07242 | 0.04376 | 0.05889 | 0.0397 CRELD1    |
| cg12420104 | 0.055   | 0.05054 | 0.4406  | 0.56122 | 0.67371 | 0.85658 | 0.24547 | 0.07487 | 0.41573 | 0.37364 DMRT3    |
| cg12421458 | 0.03673 | 0.03868 | 0.03986 | 0.03743 | 0.03372 | 0.02788 | 0.03308 | 0.0309  | 0.03015 | 0.03254 HDGF     |
| cg12422450 | 0.06023 | 0.05593 | 0.69357 | 0.76801 | 0.65964 | 0.06354 | 0.05989 | 0.06119 | 0.05245 | 0.0585 CHGA      |
| cg12422683 | 0.05408 | 0.03819 | 0.03767 | 0.03293 | 0.0462  | 0.03483 | 0.03806 | 0.03524 | 0.02781 | 0.03266 MICAL2   |
| cg12422968 | 0.03427 | 0.03624 | 0.03259 | 0.03139 | 0.03111 | 0.03047 | 0.02943 | 0.0315  | 0.02818 | 0.03155 GCH1     |
| cg12424817 | 0.04803 | 0.05539 | 0.04942 | 0.04444 | 0.03511 | 0.03905 | 0.04359 | 0.03832 | 0.0421  | 0.03754 LAPTM4B  |

|            |         |         |         |         |         |         |         |         |         |         |          |
|------------|---------|---------|---------|---------|---------|---------|---------|---------|---------|---------|----------|
| cg12424907 | 0.91696 | 0.8418  | 0.84638 | 0.89618 | 0.83004 | 0.90756 | 0.87559 | 0.83438 | 0.90953 | 0.89381 | TAS2R49  |
| cg12425673 | 0.03859 | 0.04454 | 0.04162 | 0.04125 | 0.03966 | 0.03268 | 0.04023 | 0.03504 | 0.04186 | 0.03458 | WNK1     |
| cg12426141 | 0.05228 | 0.04319 | 0.04898 | 0.03834 | 0.03458 | 0.05561 | 0.05497 | 0.04901 | 0.04316 | 0.05373 | TCF12    |
| cg12428416 | 0.82788 | 0.47444 | 0.80221 | 0.84902 | 0.87498 | 0.61348 | 0.68154 | 0.54542 | 0.82182 | 0.64124 | GJA3     |
| cg12428447 | 0.38004 | 0.20006 | 0.38911 | 0.44107 | 0.61227 | 0.22525 | 0.19006 | 0.31035 | 0.32425 | 0.14885 | SLC22A6  |
| cg12428604 | 0.02973 | 0.03213 | 0.04067 | 0.03284 | 0.04613 | 0.02938 | 0.03432 | 0.03076 | 0.03665 | 0.02892 | TMEM60   |
| cg12430845 | 0.0499  | 0.0387  | 0.04149 | 0.03082 | 0.03479 | 0.04334 | 0.02771 | 0.0287  | 0.02682 | 0.02675 | NIPBL    |
| cg12431196 | 0.04401 | 0.04528 | 0.05851 | 0.04158 | 0.03848 | 0.07164 | 0.11528 | 0.05566 | 0.04295 | 0.03314 | MAGEE1   |
| cg12431401 | 0.58511 | 0.3292  | 0.48076 | 0.69232 | 0.69806 | 0.70872 | 0.51506 | 0.24401 | 0.4579  | 0.61229 | FLJ45909 |
| cg12431699 | 0.03365 | 0.03044 | 0.0363  | 0.0348  | 0.02303 | 0.04148 | 0.03108 | 0.02807 | 0.03023 | 0.03348 | CDK5RAP1 |
| cg12432709 | 0.61442 | 0.48835 | 0.7287  | 0.79725 | 0.74565 | 0.75623 | 0.76386 | 0.16834 | 0.40691 | 0.29807 | CCDC68   |
| cg12433691 | 0.0496  | 0.04454 | 0.042   | 0.04593 | 0.10262 | 0.04391 | 0.04106 | 0.05567 | 0.04071 | 0.03203 | GCC2     |
| cg12434258 | 0.02803 | 0.02948 | 0.04079 | 0.02979 | 0.01709 | 0.02079 | 0.02922 | 0.0283  | 0.01874 | 0.02068 | FLJ90396 |
| cg12434587 | 0.03523 | 0.0245  | 0.95719 | 0.96932 | 0.07452 | 0.02194 | 0.13718 | 0.40249 | 0.02182 | 0.0226  | MGMT     |
| cg12434779 | 0.04293 | 0.04256 | 0.04182 | 0.04404 | 0.03299 | 0.03939 | 0.55059 | 0.49617 | 0.03538 | 0.03283 | ARHGAP6  |
| cg12435359 | 0.02113 | 0.02356 | 0.02374 | 0.02349 | 0.01899 | 0.02229 | 0.02032 | 0.0229  | 0.01881 | 0.01761 | BTBD1    |
| cg12435611 | 0.0594  | 0.05905 | 0.08004 | 0.07896 | 0.07829 | 0.08848 | 0.04848 | 0.0492  | 0.05709 | 0.06647 | BRIP1    |
| cg12435758 | 0.02735 | 0.02305 | 0.04572 | 0.04069 | 0.03606 | 0.02808 | 0.02094 | 0.02014 | 0.02175 | 0.02002 | LGJ2     |
| cg12435792 | 0.13111 | 0.05061 | 0.83903 | 0.81138 | 0.80329 | 0.67655 | 0.11765 | 0.05154 | 0.34506 | 0.4883  | PDE6B    |
| cg12437239 | 0.06047 | 0.03068 | 0.03054 | 0.02995 | 0.02419 | 0.02736 | 0.02796 | 0.0317  | 0.02769 | 0.02745 | GOLPH4   |
| cg12437481 | 0.32619 | 0.07574 | 0.91189 | 0.92622 | 0.80106 | 0.42186 | 0.50775 | 0.47323 | 0.84782 | 0.22476 | MRPL28   |
| cg12438034 | 0.1409  | 0.05055 | 0.68986 | 0.79421 | 0.14447 | 0.0412  | 0.0941  | 0.06493 | 0.05138 | 0.04113 | MAGEF1   |
| cg12438037 | 0.13975 | 0.07744 | 0.13534 | 0.12086 | 0.10125 | 0.06629 | 0.23028 | 0.11828 | 0.88776 | 0.52105 | C9orf116 |
| cg12438666 | 0.10405 | 0.10757 | 0.13277 | 0.10609 | 0.1788  | 0.14408 | 0.12159 | 0.09881 | 0.12119 | 0.13854 | C2orf15  |
| cg12439773 | 0.48258 | 0.12669 | 0.57096 | 0.58817 | 0.61219 | 0.62057 | 0.42234 | 0.13461 | 0.43248 | 0.36927 | SLC22A6  |
| cg12439899 | 0.04458 | 0.05056 | 0.06683 | 0.05794 | 0.04298 | 0.02503 | 0.37028 | 0.43527 | 0.02787 | 0.0335  | TFAP2A   |
| cg12441928 | 0.07228 | 0.05497 | 0.10929 | 0.166   | 0.48386 | 0.7465  | 0.04499 | 0.04838 | 0.06945 | 0.0435  | CCR1     |
| cg12441964 | 0.9501  | 0.73472 | 0.94397 | 0.95779 | 0.9531  | 0.9466  | 0.93913 | 0.94604 | 0.95784 | 0.95193 | FLJ35894 |
| cg12444340 | 0.04477 | 0.04905 | 0.04291 | 0.04158 | 0.06351 | 0.05725 | 0.04108 | 0.03474 | 0.03751 | 0.03751 | RBM5     |
| cg12445208 | 0.80785 | 0.78009 | 0.73687 | 0.85377 | 0.7018  | 0.5816  | 0.72894 | 0.61009 | 0.60562 | 0.59371 | ZNF583   |
| cg12446644 | 0.0596  | 0.05879 | 0.0665  | 0.05949 | 0.05758 | 0.06367 | 0.05685 | 0.06586 | 0.04808 | 0.05375 | LASP1    |
| cg12447832 | 0.25063 | 0.12082 | 0.34197 | 0.31956 | 0.13426 | 0.11697 | 0.54493 | 0.33202 | 0.40753 | 0.39701 | TTC15    |
| cg12448933 | 0.06261 | 0.35516 | 0.89767 | 0.93666 | 0.16002 | 0.04509 | 0.0801  | 0.15275 | 0.34922 | 0.55104 | RAB37    |
| cg12448934 | 0.0319  | 0.03919 | 0.04385 | 0.03712 | 0.76604 | 0.40948 | 0.03204 | 0.02977 | 0.02976 | 0.02616 | CLSTN3   |
| cg12449183 | 0.60972 | 0.21051 | 0.78064 | 0.84155 | 0.6893  | 0.28311 | 0.57948 | 0.24609 | 0.79884 | 0.1969  | ERAS     |
| cg12452010 | 0.06859 | 0.07695 | 0.07125 | 0.06774 | 0.05369 | 0.05861 | 0.05566 | 0.06188 | 0.05887 | 0.05486 | C10orf22 |
| cg12452675 | 0.02845 | 0.02681 | 0.0273  | 0.02601 | 0.02107 | 0.02435 | 0.02304 | 0.02616 | 0.02104 | 0.02231 | ACOX1    |
| cg12452946 | 0.13247 | 0.13311 | 0.15538 | 0.14561 | 0.16064 | 0.17306 | 0.12081 | 0.11171 | 0.12183 | 0.15663 | MGC33302 |
| cg12453288 | 0.39939 | 0.21383 | 0.12137 | 0.11051 | 0.49298 | 0.20646 | 0.07469 | 0.06648 | 0.07305 | 0.06528 | FLJ25143 |
| cg12453778 | 0.0487  | 0.05285 | 0.05251 | 0.05054 | 0.05388 | 0.05268 | 0.04856 | 0.03841 | 0.05187 | 0.04331 | COMMD1   |
| cg12454167 | 0.34023 | 0.17877 | 0.25049 | 0.22336 | 0.30324 | 0.15682 | 0.2045  | 0.18015 | 0.14412 | 0.14779 | KNG1     |

|            |         |         |         |         |         |         |         |         |         |                   |
|------------|---------|---------|---------|---------|---------|---------|---------|---------|---------|-------------------|
| cg12454725 | 0.02766 | 0.02448 | 0.0248  | 0.0221  | 0.01876 | 0.02033 | 0.01987 | 0.023   | 0.02868 | 0.02059 SYT17     |
| cg12455187 | 0.54462 | 0.24365 | 0.19069 | 0.32631 | 0.59072 | 0.72028 | 0.20213 | 0.21091 | 0.75523 | 0.24492 CCL5      |
| cg12455562 | 0.68828 | 0.6692  | 0.65183 | 0.66854 | 0.68018 | 0.65732 | 0.69767 | 0.67657 | 0.73822 | 0.66948 BTN2A3    |
| cg12456510 | 0.49064 | 0.05498 | 0.2306  | 0.49387 | 0.29021 | 0.1072  | 0.03907 | 0.04005 | 0.10861 | 0.15883 TFF2      |
| cg12457773 | 0.07029 | 0.06543 | 0.60891 | 0.61029 | 0.52936 | 0.4659  | 0.21282 | 0.32296 | 0.3397  | 0.32008 VMP       |
| cg12459502 | 0.8627  | 0.88653 | 0.86077 | 0.90071 | 0.85563 | 0.40556 | 0.6483  | 0.23071 | 0.89065 | 0.85804 BCL2      |
| cg12460105 | 0.03785 | 0.04001 | 0.04288 | 0.03942 | 0.03589 | 0.03885 | 0.03588 | 0.03759 | 0.03337 | 0.0285 RAD17      |
| cg12460359 | 0.61308 | 0.42279 | 0.59425 | 0.69741 | 0.58453 | 0.75507 | 0.63419 | 0.73247 | 0.36063 | 0.25895 KLRK1     |
| cg12460541 | 0.15487 | 0.14302 | 0.14086 | 0.14932 | 0.15732 | 0.11923 | 0.1506  | 0.14914 | 0.17435 | 0.16744 ITPKA     |
| cg12461141 | 0.74633 | 0.71441 | 0.70163 | 0.71547 | 0.62508 | 0.57621 | 0.64272 | 0.56518 | 0.79212 | 0.41934 TRIM22    |
| cg12463550 | 0.02269 | 0.02863 | 0.02469 | 0.02308 | 0.02458 | 0.02456 | 0.02279 | 0.0231  | 0.02219 | 0.01778 RCP9      |
| cg12465398 | 0.06682 | 0.06102 | 0.07452 | 0.06982 | 0.11733 | 0.08023 | 0.06689 | 0.06797 | 0.07019 | 0.07848 PPIL3     |
| cg12466095 | 0.63809 | 0.61864 | 0.61406 | 0.65772 | 0.53269 | 0.58766 | 0.5957  | 0.61584 | 0.63752 | 0.55666 C14orf103 |
| cg12467090 | 0.68988 | 0.75882 | 0.87762 | 0.90502 | 0.90354 | 0.88755 | 0.82889 | 0.78409 | 0.8272  | 0.79104 PIK3C2B   |
| cg12467191 | 0.07654 | 0.12156 | 0.4397  | 0.54754 | 0.14191 | 0.05279 | 0.10595 | 0.07232 | 0.09524 | 0.07478 CSK       |
| cg12467864 | 0.02107 | 0.02115 | 0.02267 | 0.01964 | 0.02068 | 0.02021 | 0.022   | 0.02033 | 0.01563 | 0.01711 PRC1      |
| cg12468056 | 0.04039 | 0.04066 | 0.0377  | 0.03995 | 0.03164 | 0.03899 | 0.03987 | 0.05021 | 0.0331  | 0.03368 MYST3     |
| cg12468189 | 0.86281 | 0.65852 | 0.55485 | 0.72582 | 0.79945 | 0.40972 | 0.36229 | 0.18011 | 0.78456 | 0.43886 STK23     |
| cg12471156 | 0.02911 | 0.02642 | 0.02977 | 0.02794 | 0.02369 | 0.02537 | 0.02586 | 0.0234  | 0.02158 | 0.02119 RBM16     |
| cg12473775 | 0.76797 | 0.73339 | 0.7141  | 0.785   | 0.22534 | 0.08473 | 0.8548  | 0.77384 | 0.80234 | 0.62503 RHOD      |
| cg12476968 | 0.14935 | 0.10104 | 0.20529 | 0.2103  | 0.25791 | 0.21444 | 0.41176 | 0.39661 | 0.6213  | 0.47823 SLC12A6   |
| cg12477012 | 0.04655 | 0.04581 | 0.04873 | 0.04702 | 0.04549 | 0.04528 | 0.0398  | 0.03837 | 0.03712 | 0.0391 NASP       |
| cg12477119 | 0.08621 | 0.08507 | 0.14847 | 0.14434 | 0.10258 | 0.10173 | 0.10167 | 0.09611 | 0.08235 | 0.09239 CRKRS     |
| cg12478185 | 0.56342 | 0.64718 | 0.29719 | 0.31639 | 0.71505 | 0.66471 | 0.33165 | 0.24761 | 0.64834 | 0.52736 SCO1      |
| cg12478809 | 0.66123 | 0.80283 | 0.29747 | 0.6261  | 0.04786 | 0.0492  | 0.09656 | 0.12372 | 0.09207 | 0.03701 COX5A     |
| cg12478978 | 0.06452 | 0.06365 | 0.07042 | 0.05933 | 0.04285 | 0.05635 | 0.06644 | 0.06198 | 0.05895 | 0.05619 FLOT1     |
| cg12480658 | 0.10583 | 0.1209  | 0.10405 | 0.105   | 0.09392 | 0.09162 | 0.1133  | 0.10388 | 0.09822 | 0.09463 ATF2      |
| cg12483860 | 0.03821 | 0.04181 | 0.04211 | 0.03618 | 0.02407 | 0.03224 | 0.03231 | 0.0343  | 0.0339  | 0.03335 TNIP1     |
| cg12484193 | 0.04974 | 0.04844 | 0.06116 | 0.04983 | 0.06726 | 0.07469 | 0.07311 | 0.05181 | 0.05999 | 0.0573 DUSP19     |
| cg12485020 | 0.28114 | 0.2266  | 0.94141 | 0.94478 | 0.05315 | 0.05405 | 0.04808 | 0.04645 | 0.14777 | 0.11493 CHRDL1    |
| cg12485992 | 0.75481 | 0.57192 | 0.75075 | 0.84682 | 0.82953 | 0.64779 | 0.53525 | 0.10379 | 0.81939 | 0.60414 SPATA22   |
| cg12489819 | 0.0458  | 0.04773 | 0.09201 | 0.08166 | 0.04997 | 0.05406 | 0.03524 | 0.03307 | 0.04706 | 0.04895 FDPS      |
| cg12489960 | 0.73489 | 0.87196 | 0.81366 | 0.87679 | 0.85891 | 0.49533 | 0.43401 | 0.16328 | 0.72125 | 0.69195 SGCB      |
| cg12491368 | 0.68427 | 0.67456 | 0.79586 | 0.87101 | 0.87943 | 0.83034 | 0.66148 | 0.85116 | 0.25929 | 0.06618 LOC196549 |
| cg12491659 | 0.4484  | 0.76867 | 0.75414 | 0.84157 | 0.54439 | 0.12451 | 0.13357 | 0.09603 | 0.65116 | 0.51905 FLJ33641  |
| cg12491710 | 0.93709 | 0.93841 | 0.90582 | 0.93731 | 0.93849 | 0.93608 | 0.83926 | 0.90277 | 0.9356  | 0.92979 LIM2      |
| cg12493160 | 0.83036 | 0.90059 | 0.75043 | 0.88874 | 0.89132 | 0.87064 | 0.67156 | 0.87716 | 0.68034 | 0.36538 PRKACG    |
| cg12493906 | 0.16418 | 0.1495  | 0.14669 | 0.11203 | 0.67726 | 0.58622 | 0.0776  | 0.06861 | 0.04872 | 0.06034 MMP26     |
| cg12497298 | 0.03153 | 0.03344 | 0.03736 | 0.03481 | 0.03124 | 0.03617 | 0.03319 | 0.03002 | 0.03055 | 0.02897 C1orf166  |
| cg12497564 | 0.19152 | 0.02526 | 0.26035 | 0.16745 | 0.59974 | 0.51023 | 0.0751  | 0.01827 | 0.72198 | 0.49019 RBP1      |
| cg12497692 | 0.91201 | 0.75816 | 0.93049 | 0.93027 | 0.9348  | 0.93834 | 0.81769 | 0.71448 | 0.95519 | 0.9521 ZBTB32     |

|            |         |         |         |         |         |         |         |         |         |                  |
|------------|---------|---------|---------|---------|---------|---------|---------|---------|---------|------------------|
| cg12497851 | 0.05824 | 0.04904 | 0.11483 | 0.06795 | 0.04592 | 0.04925 | 0.0511  | 0.0452  | 0.05766 | 0.04816 TBC1D14  |
| cg12499211 | 0.0575  | 0.06319 | 0.46898 | 0.76703 | 0.879   | 0.32608 | 0.34937 | 0.23082 | 0.02917 | 0.02667 SH2D2A   |
| cg12501949 | 0.35318 | 0.21094 | 0.53016 | 0.56722 | 0.45133 | 0.58286 | 0.30437 | 0.51325 | 0.36762 | 0.27472 FLJ39502 |
| cg12503243 | 0.19023 | 0.17109 | 0.18924 | 0.15216 | 0.2334  | 0.2497  | 0.1518  | 0.13825 | 0.16218 | 0.19287 PRPF39   |
| cg12504957 | 0.03394 | 0.02938 | 0.03572 | 0.03207 | 0.02827 | 0.02972 | 0.02863 | 0.02751 | 0.02779 | 0.02568 MDM2     |
| cg12506373 | 0.03766 | 0.03603 | 0.03951 | 0.03541 | 0.02871 | 0.03435 | 0.03617 | 0.0402  | 0.0338  | 0.03607 CAD      |
| cg12506971 | 0.06007 | 0.05908 | 0.04613 | 0.04779 | 0.04391 | 0.05301 | 0.03574 | 0.03939 | 0.03609 | 0.04215 AADAT    |
| cg12507125 | 0.04562 | 0.03995 | 0.04298 | 0.03479 | 0.0328  | 0.03433 | 0.03012 | 0.03148 | 0.03795 | 0.03497 WWTR1    |
| cg12508214 | 0.02694 | 0.0332  | 0.02604 | 0.02703 | 0.01911 | 0.02662 | 0.0267  | 0.0253  | 0.02309 | 0.02295 FBXO32   |
| cg12508624 | 0.02916 | 0.02728 | 0.93509 | 0.93435 | 0.69605 | 0.5878  | 0.43005 | 0.71055 | 0.91141 | 0.89247 THY1     |
| cg12510502 | 0.92563 | 0.71818 | 0.92806 | 0.92359 | 0.90534 | 0.91099 | 0.92707 | 0.91852 | 0.94033 | 0.9337 SLC22A18  |
| cg12510755 | 0.53819 | 0.51195 | 0.51875 | 0.54704 | 0.54475 | 0.55594 | 0.59239 | 0.60787 | 0.442   | 0.59265 EIF3S5   |
| cg12513308 | 0.49187 | 0.56544 | 0.05293 | 0.04725 | 0.03887 | 0.0415  | 0.04514 | 0.04175 | 0.04295 | 0.04287 KCLF     |
| cg12513379 | 0.10097 | 0.06985 | 0.08842 | 0.08778 | 0.06612 | 0.04269 | 0.08007 | 0.0773  | 0.06056 | 0.05333 OR10H2   |
| cg12513481 | 0.85739 | 0.10934 | 0.8888  | 0.8747  | 0.58327 | 0.93447 | 0.76749 | 0.87971 | 0.73372 | 0.62227 SCAP1    |
| cg12514506 | 0.83863 | 0.69514 | 0.76064 | 0.84115 | 0.8682  | 0.86232 | 0.85756 | 0.86276 | 0.8864  | 0.8548 OSBPL5    |
| cg12514620 | 0.04345 | 0.03808 | 0.2577  | 0.29113 | 0.06167 | 0.05276 | 0.04203 | 0.03726 | 0.0354  | 0.03556 SSBP3    |
| cg12515371 | 0.92334 | 0.8176  | 0.92072 | 0.92828 | 0.95382 | 0.88424 | 0.89122 | 0.8595  | 0.94008 | 0.90547 PPP1R16A |
| cg12515638 | 0.03702 | 0.02629 | 0.17188 | 0.29662 | 0.49807 | 0.54322 | 0.0882  | 0.02896 | 0.18266 | 0.03009 SFRP4    |
| cg12517167 | 0.04326 | 0.04431 | 0.05496 | 0.05315 | 0.04059 | 0.04701 | 0.55533 | 0.58742 | 0.03667 | 0.03705 RBMX     |
| cg12517944 | 0.95143 | 0.94646 | 0.9539  | 0.95883 | 0.96404 | 0.94691 | 0.9399  | 0.93523 | 0.85106 | 0.93322 AMAC1    |
| cg12520111 | 0.04114 | 0.03719 | 0.04171 | 0.03287 | 0.03246 | 0.03249 | 0.03305 | 0.03065 | 0.03121 | 0.02258 PPIA     |
| cg12526025 | 0.04405 | 0.04927 | 0.13187 | 0.14372 | 0.04573 | 0.05689 | 0.04572 | 0.04475 | 0.04159 | 0.05065 LARGE    |
| cg12529228 | 0.90447 | 0.39987 | 0.84448 | 0.77085 | 0.95318 | 0.85664 | 0.89802 | 0.87773 | 0.9032  | 0.79138 NHLH1    |
| cg12529801 | 0.20169 | 0.08757 | 0.03191 | 0.03195 | 0.04948 | 0.03097 | 0.10813 | 0.02763 | 0.02546 | 0.02441 PRO0149  |
| cg12530021 | 0.14872 | 0.03284 | 0.11859 | 0.20642 | 0.07292 | 0.04681 | 0.02782 | 0.02501 | 0.32633 | 0.12514 SIGLEC12 |
| cg12530080 | 0.69272 | 0.5307  | 0.1169  | 0.13174 | 0.60388 | 0.58725 | 0.38012 | 0.37819 | 0.0869  | 0.09027 PMCHL1   |
| cg12530270 | 0.91666 | 0.81375 | 0.87942 | 0.85793 | 0.92364 | 0.92188 | 0.91497 | 0.90236 | 0.92021 | 0.85335 DCST1    |
| cg12531003 | 0.03332 | 0.03858 | 0.03813 | 0.04241 | 0.02667 | 0.03761 | 0.03241 | 0.02909 | 0.03246 | 0.02412 ZNF580   |
| cg12531542 | 0.68522 | 0.30706 | 0.83261 | 0.86463 | 0.89081 | 0.85533 | 0.75269 | 0.50569 | 0.87601 | 0.81278 MOGAT2   |
| cg12532169 | 0.49267 | 0.49082 | 0.60863 | 0.82491 | 0.76047 | 0.68173 | 0.43758 | 0.59616 | 0.03366 | 0.03526 NDN      |
| cg12532477 | 0.86147 | 0.56803 | 0.82942 | 0.74561 | 0.90237 | 0.87472 | 0.80654 | 0.76897 | 0.87618 | 0.79077 CHST6    |
| cg12532500 | 0.0791  | 0.07283 | 0.08378 | 0.06986 | 0.08157 | 0.09775 | 0.06415 | 0.05898 | 0.07089 | 0.06341 STARD13  |
| cg12532667 | 0.64093 | 0.74978 | 0.58404 | 0.67083 | 0.54489 | 0.62378 | 0.46483 | 0.51281 | 0.20277 | 0.23853 EMCN     |
| cg12533010 | 0.07842 | 0.07792 | 0.05332 | 0.05079 | 0.12443 | 0.12412 | 0.08804 | 0.0733  | 0.06621 | 0.08077 PSMA3    |
| cg12533335 | 0.08683 | 0.06657 | 0.08449 | 0.07519 | 0.08565 | 0.09275 | 0.08241 | 0.05827 | 0.05329 | 0.06361 TAF1C    |
| cg12534466 | 0.06096 | 0.05632 | 0.06072 | 0.0575  | 0.08171 | 0.07557 | 0.04867 | 0.04372 | 0.04982 | 0.04233 FLJ20551 |
| cg12535715 | 0.94322 | 0.94653 | 0.49388 | 0.65986 | 0.95006 | 0.94178 | 0.89961 | 0.89309 | 0.9474  | 0.93636 HTRA4    |
| cg12536534 | 0.06339 | 0.06855 | 0.07557 | 0.06527 | 0.05448 | 0.05446 | 0.36516 | 0.44588 | 0.05828 | 0.04826 G6PD     |
| cg12537796 | 0.87845 | 0.73564 | 0.88863 | 0.90126 | 0.33636 | 0.38812 | 0.13031 | 0.51892 | 0.05566 | 0.04597          |
| cg12539975 | 0.05579 | 0.0611  | 0.52509 | 0.65057 | 0.36644 | 0.4246  | 0.0666  | 0.07172 | 0.35034 | 0.32646 PRDM12   |



|            |         |         |         |         |         |         |         |         |         |         |           |
|------------|---------|---------|---------|---------|---------|---------|---------|---------|---------|---------|-----------|
| cg12541591 | 0.08148 | 0.06687 | 0.06936 | 0.06697 | 0.05778 | 0.07524 | 0.06764 | 0.06351 | 0.06592 | 0.05826 | TGFBR2    |
| cg12542281 | 0.09606 | 0.13121 | 0.14676 | 0.12817 | 0.16667 | 0.18449 | 0.12035 | 0.09106 | 0.11016 | 0.14068 | PFAAP5    |
| cg12542604 | 0.14719 | 0.13037 | 0.14255 | 0.14856 | 0.0778  | 0.22128 | 0.16813 | 0.16056 | 0.07325 | 0.07845 | ANKS1A    |
| cg12543649 | 0.0335  | 0.03604 | 0.05734 | 0.05084 | 0.07931 | 0.03688 | 0.03758 | 0.03441 | 0.05822 | 0.0345  | THBS3     |
| cg12547930 | 0.10984 | 0.13038 | 0.20478 | 0.17535 | 0.26378 | 0.12699 | 0.14983 | 0.12433 | 0.40587 | 0.38633 | WFDC6     |
| cg12548064 | 0.03464 | 0.03526 | 0.0418  | 0.03517 | 0.03003 | 0.03336 | 0.0372  | 0.03279 | 0.03324 | 0.03345 | ANKRD46   |
| cg12548454 | 0.05789 | 0.05332 | 0.05421 | 0.04119 | 0.05538 | 0.05281 | 0.0521  | 0.03676 | 0.03912 | 0.03762 | PSAT1     |
| cg12549513 | 0.02868 | 0.02235 | 0.2863  | 0.29447 | 0.02049 | 0.01921 | 0.13809 | 0.14308 | 0.02201 | 0.01792 | BEX2      |
| cg12552392 | 0.58119 | 0.3338  | 0.60394 | 0.62598 | 0.34643 | 0.10513 | 0.40605 | 0.1806  | 0.82727 | 0.37466 | NFS1      |
| cg12554476 | 0.16612 | 0.10402 | 0.77563 | 0.79175 | 0.72339 | 0.56318 | 0.09883 | 0.08722 | 0.23994 | 0.22199 | GP2       |
| cg12554573 | 0.72254 | 0.45161 | 0.67373 | 0.74438 | 0.07112 | 0.05143 | 0.78783 | 0.75879 | 0.04534 | 0.17598 | PARP3     |
| cg12554819 | 0.03352 | 0.03654 | 0.03769 | 0.03415 | 0.0302  | 0.03238 | 0.0311  | 0.03003 | 0.02947 | 0.0308  | REV1L     |
| cg12554857 | 0.86956 | 0.83205 | 0.86339 | 0.88731 | 0.71147 | 0.82553 | 0.78216 | 0.83623 | 0.7698  | 0.13274 | PGDS      |
| cg12555334 | 0.16867 | 0.07569 | 0.0738  | 0.07602 | 0.07871 | 0.06402 | 0.08349 | 0.07227 | 0.25414 | 0.07849 | PSPH      |
| cg12555907 | 0.94837 | 0.84435 | 0.95011 | 0.96181 | 0.96572 | 0.95472 | 0.84751 | 0.93669 | 0.96398 | 0.94101 | MBP       |
| cg12556134 | 0.09068 | 0.10252 | 0.08309 | 0.07905 | 0.87767 | 0.77389 | 0.19407 | 0.17978 | 0.10067 | 0.09382 | TGIF2     |
| cg12556325 | 0.86379 | 0.47345 | 0.74888 | 0.8035  | 0.65735 | 0.71741 | 0.38171 | 0.28538 | 0.73985 | 0.26884 | C7orf29   |
| cg12556991 | 0.03328 | 0.0373  | 0.03889 | 0.03886 | 0.04452 | 0.04675 | 0.0294  | 0.03272 | 0.03317 | 0.03649 | RPL27     |
| cg12558519 | 0.04057 | 0.03848 | 0.04741 | 0.0345  | 0.02626 | 0.08825 | 0.02989 | 0.03702 | 0.02859 | 0.02648 | KLHL26    |
| cg12558957 | 0.06602 | 0.0504  | 0.0446  | 0.05442 | 0.04214 | 0.04404 | 0.06265 | 0.0594  | 0.04306 | 0.03466 | TOMM20    |
| cg12559031 | 0.03392 | 0.03209 | 0.06942 | 0.05732 | 0.04228 | 0.02926 | 0.0337  | 0.02889 | 0.12769 | 0.04086 | DLX4      |
| cg12561748 | 0.0354  | 0.04171 | 0.04073 | 0.032   | 0.0547  | 0.05378 | 0.03187 | 0.03191 | 0.03152 | 0.02752 | ZNF307    |
| cg12562500 | 0.04661 | 0.03453 | 0.04017 | 0.03497 | 0.0281  | 0.03437 | 0.03157 | 0.03597 | 0.03016 | 0.02933 | CLPP      |
| cg12563178 | 0.02928 | 0.03247 | 0.05455 | 0.06921 | 0.03854 | 0.02617 | 0.02451 | 0.02599 | 0.82566 | 0.95111 | PLXDC2    |
| cg12563480 | 0.06785 | 0.04811 | 0.0753  | 0.08739 | 0.07427 | 0.04835 | 0.04674 | 0.0468  | 0.03918 | 0.03725 | SNX11     |
| cg12564453 | 0.96152 | 0.90518 | 0.96098 | 0.9697  | 0.97527 | 0.94055 | 0.95454 | 0.47385 | 0.81428 | 0.72367 | CETP      |
| cg12564962 | 0.92028 | 0.92573 | 0.92351 | 0.919   | 0.93538 | 0.9166  | 0.91145 | 0.92107 | 0.9278  | 0.90774 | DSCR6     |
| cg12566415 | 0.88013 | 0.7605  | 0.86343 | 0.86519 | 0.91234 | 0.85547 | 0.86756 | 0.85721 | 0.88463 | 0.86107 | LHB       |
| cg12567315 | 0.04446 | 0.03923 | 0.0817  | 0.06394 | 0.11385 | 0.19794 | 0.08775 | 0.03858 | 0.07696 | 0.03013 | TSPAN13   |
| cg12568776 | 0.02234 | 0.02009 | 0.02178 | 0.02525 | 0.02273 | 0.0232  | 0.0213  | 0.02413 | 0.0195  | 0.02543 | EPB41L4B  |
| cg12569173 | 0.06431 | 0.05097 | 0.06751 | 0.06092 | 0.31577 | 0.04622 | 0.05203 | 0.04746 | 0.11332 | 0.04195 | FAM104A   |
| cg12569516 | 0.04331 | 0.04707 | 0.05123 | 0.04741 | 0.03327 | 0.04372 | 0.04008 | 0.03945 | 0.04204 | 0.05001 | TRPS1     |
| cg12570787 | 0.0702  | 0.05716 | 0.04223 | 0.05695 | 0.04128 | 0.09608 | 0.03209 | 0.03325 | 0.0515  | 0.04762 | LOC133957 |
| cg12571423 | 0.95018 | 0.94669 | 0.86281 | 0.81047 | 0.72145 | 0.44221 | 0.90689 | 0.91649 | 0.60971 | 0.42327 | CCNA1     |
| cg12572011 | 0.02096 | 0.02023 | 0.0246  | 0.02026 | 0.02355 | 0.02264 | 0.0191  | 0.02213 | 0.01977 | 0.02093 | UBE3A     |
| cg12572278 | 0.2079  | 0.07415 | 0.10016 | 0.11057 | 0.1462  | 0.04191 | 0.37911 | 0.06071 | 0.48659 | 0.08939 | OAF       |
| cg12572545 | 0.05166 | 0.05001 | 0.05176 | 0.0455  | 0.04904 | 0.04983 | 0.03305 | 0.03427 | 0.04061 | 0.05868 | SC4MOL    |
| cg12572827 | 0.83134 | 0.85501 | 0.80523 | 0.81944 | 0.78599 | 0.85427 | 0.59582 | 0.83268 | 0.63543 | 0.37839 | PDE6H     |
| cg12572939 | 0.05088 | 0.01783 | 0.02672 | 0.03947 | 0.46468 | 0.01814 | 0.63652 | 0.62237 | 0.01572 | 0.01527 | F8A1      |
| cg12573766 | 0.04599 | 0.05126 | 0.04917 | 0.04587 | 0.0636  | 0.05242 | 0.0481  | 0.04376 | 0.03855 | 0.03534 | RPS3      |
| cg12575181 | 0.86624 | 0.73848 | 0.89763 | 0.9162  | 0.86311 | 0.86764 | 0.88799 | 0.86817 | 0.89539 | 0.87212 | PIGH      |

|            |         |         |         |         |         |         |         |         |         |                    |
|------------|---------|---------|---------|---------|---------|---------|---------|---------|---------|--------------------|
| cg12575751 | 0.02564 | 0.02354 | 0.02745 | 0.0224  | 0.0246  | 0.02565 | 0.02235 | 0.02286 | 0.01763 | 0.02225 NUCB2      |
| cg12576145 | 0.03175 | 0.03782 | 0.04333 | 0.04271 | 0.03456 | 0.03805 | 0.339   | 0.20427 | 0.03177 | 0.03668 AMMECR1    |
| cg12576700 | 0.04345 | 0.04862 | 0.0518  | 0.04947 | 0.04543 | 0.04284 | 0.03252 | 0.02908 | 0.03228 | 0.03747 CDK5RAP2   |
| cg12576844 | 0.77587 | 0.82724 | 0.77653 | 0.79711 | 0.77814 | 0.7928  | 0.76925 | 0.78091 | 0.83222 | 0.7819 LEAP-2      |
| cg12577610 | 0.02975 | 0.03585 | 0.04193 | 0.03917 | 0.03922 | 0.04543 | 0.02586 | 0.02397 | 0.03019 | 0.03085 SMARCD2    |
| cg12578166 | 0.05575 | 0.04173 | 0.75073 | 0.89622 | 0.94293 | 0.88259 | 0.56366 | 0.52718 | 0.0882  | 0.03897 KCNQ1      |
| cg12578480 | 0.08704 | 0.09043 | 0.10082 | 0.09098 | 0.09489 | 0.08356 | 0.08033 | 0.08007 | 0.08173 | 0.07855 MSRB2      |
| cg12581035 | 0.02579 | 0.02946 | 0.02776 | 0.02663 | 0.02497 | 0.02563 | 0.02496 | 0.02613 | 0.02537 | 0.02175 PHC1       |
| cg12582008 | 0.71301 | 0.71478 | 0.46107 | 0.67248 | 0.58249 | 0.76972 | 0.31817 | 0.38778 | 0.32442 | 0.53022 OLFM4      |
| cg12582366 | 0.08014 | 0.07308 | 0.82591 | 0.75558 | 0.08849 | 0.05976 | 0.08794 | 0.1037  | 0.06015 | 0.05817 FLJ32130   |
| cg12582959 | 0.0646  | 0.04607 | 0.46835 | 0.33525 | 0.6096  | 0.06214 | 0.16957 | 0.04587 | 0.4878  | 0.41458 HSU79303   |
| cg12582965 | 0.91666 | 0.95112 | 0.93759 | 0.95229 | 0.9472  | 0.94284 | 0.92528 | 0.94519 | 0.94777 | 0.92166 ATP10A     |
| cg12583908 | 0.12556 | 0.08519 | 0.12618 | 0.12772 | 0.10503 | 0.07114 | 0.10798 | 0.06819 | 0.13747 | 0.05822 RFC4       |
| cg12584034 | 0.09446 | 0.09764 | 0.09996 | 0.10257 | 0.09938 | 0.10926 | 0.11535 | 0.09781 | 0.09938 | 0.08742 RPL21      |
| cg12584718 | 0.40053 | 0.20618 | 0.83974 | 0.84468 | 0.86827 | 0.65436 | 0.44404 | 0.30481 | 0.84423 | 0.62595 BCDIN3     |
| cg12584889 | 0.59484 | 0.39918 | 0.8196  | 0.85355 | 0.82605 | 0.73527 | 0.10512 | 0.06634 | 0.09593 | 0.08859 NXF3       |
| cg12585282 | 0.11772 | 0.11743 | 0.11513 | 0.11138 | 0.06321 | 0.09933 | 0.09165 | 0.11319 | 0.09874 | 0.08698 PABPC4     |
| cg12585943 | 0.02959 | 0.02929 | 0.09813 | 0.06751 | 0.67278 | 0.02971 | 0.58261 | 0.15787 | 0.02642 | 0.02092 PPT2       |
| cg12586262 | 0.0892  | 0.07675 | 0.10472 | 0.07913 | 0.07049 | 0.07867 | 0.06997 | 0.07022 | 0.05775 | 0.06174 ZNF160     |
| cg12588299 | 0.69998 | 0.25436 | 0.52855 | 0.65075 | 0.54205 | 0.7193  | 0.13226 | 0.13135 | 0.49829 | 0.20622 GPR31      |
| cg12588301 | 0.60323 | 0.20747 | 0.52589 | 0.6958  | 0.8494  | 0.36003 | 0.46483 | 0.33609 | 0.50747 | 0.4055 C1orf42     |
| cg12588476 | 0.03212 | 0.04099 | 0.0569  | 0.04594 | 0.07552 | 0.06499 | 0.03564 | 0.03942 | 0.02938 | 0.02568 ZNF38      |
| cg12589433 | 0.03668 | 0.03947 | 0.04513 | 0.04796 | 0.07036 | 0.04218 | 0.09309 | 0.39572 | 0.31212 | 0.31857 AR         |
| cg12591323 | 0.90915 | 0.83301 | 0.90233 | 0.93036 | 0.90896 | 0.92079 | 0.91369 | 0.83886 | 0.90498 | 0.8875 SMARCAL1    |
| cg12592463 | 0.03943 | 0.03975 | 0.03993 | 0.04327 | 0.0347  | 0.03646 | 0.03287 | 0.03518 | 0.0293  | 0.03025 C1orf63    |
| cg12592716 | 0.0352  | 0.0418  | 0.08761 | 0.05599 | 0.5754  | 0.54122 | 0.48149 | 0.04655 | 0.04896 | 0.04585 CUL1       |
| cg12592779 | 0.18088 | 0.08589 | 0.11359 | 0.0981  | 0.3524  | 0.14244 | 0.11556 | 0.09229 | 0.10655 | 0.06703 ZNF12      |
| cg12593411 | 0.91067 | 0.66542 | 0.87012 | 0.93138 | 0.9427  | 0.89791 | 0.77972 | 0.47003 | 0.62039 | 0.36987 ANGPTL6    |
| cg12594641 | 0.0267  | 0.02636 | 0.02592 | 0.02624 | 0.05595 | 0.02322 | 0.02424 | 0.02436 | 0.02181 | 0.01963 MGC52057   |
| cg12598178 | 0.96271 | 0.93498 | 0.95704 | 0.95107 | 0.96968 | 0.96536 | 0.55662 | 0.3566  | 0.94752 | 0.93188 UTS2R      |
| cg12598198 | 0.90157 | 0.90551 | 0.89788 | 0.89991 | 0.9286  | 0.90088 | 0.89041 | 0.68026 | 0.89052 | 0.87331 HSPB2      |
| cg12598364 | 0.02873 | 0.02988 | 0.04743 | 0.04016 | 0.03376 | 0.04057 | 0.03916 | 0.03369 | 0.04081 | 0.03719 GCAT       |
| cg12598575 | 0.02103 | 0.01907 | 0.02143 | 0.018   | 0.01436 | 0.02031 | 0.01711 | 0.01765 | 0.01687 | 0.01733 FAM44B     |
| cg12599000 | 0.53125 | 0.51004 | 0.7432  | 0.8105  | 0.60962 | 0.45006 | 0.59569 | 0.70128 | 0.70192 | 0.60714 ZNF322B    |
| cg12600197 | 0.84461 | 0.43328 | 0.86059 | 0.85527 | 0.92243 | 0.84954 | 0.87797 | 0.80416 | 0.53828 | 0.456 NEIL1        |
| cg12601757 | 0.04599 | 0.05017 | 0.58209 | 0.77679 | 0.07968 | 0.04755 | 0.03756 | 0.03452 | 0.04706 | 0.04913 ST6GALNAC3 |
| cg12601987 | 0.04614 | 0.04378 | 0.05043 | 0.04748 | 0.03605 | 0.04587 | 0.07336 | 0.05607 | 0.04113 | 0.04113 RASD1      |
| cg12603043 | 0.02959 | 0.03038 | 0.03033 | 0.02877 | 0.02311 | 0.02624 | 0.02678 | 0.0225  | 0.02082 | 0.02027 EHD2       |
| cg12603560 | 0.14911 | 0.13436 | 0.17323 | 0.14786 | 0.24637 | 0.19961 | 0.16582 | 0.20586 | 0.11736 | 0.12379 TNKS1BP1   |
| cg12604192 | 0.19122 | 0.14009 | 0.14298 | 0.14919 | 0.31567 | 0.47233 | 0.09097 | 0.07921 | 0.09402 | 0.09246 KCNA10     |
| cg12605747 | 0.5465  | 0.25075 | 0.25969 | 0.20833 | 0.37419 | 0.22093 | 0.20151 | 0.17921 | 0.18412 | 0.22558 RPL4       |

|            |         |         |         |         |         |         |         |         |         |         |           |
|------------|---------|---------|---------|---------|---------|---------|---------|---------|---------|---------|-----------|
| cg12609467 | 0.06265 | 0.06677 | 0.06187 | 0.0603  | 0.06006 | 0.05204 | 0.04472 | 0.0512  | 0.07226 | 0.05047 | DAG1      |
| cg12610070 | 0.11591 | 0.09419 | 0.43266 | 0.55926 | 0.96048 | 0.84728 | 0.02971 | 0.0448  | 0.93256 | 0.28727 | TSPAN15   |
| cg12610744 | 0.79016 | 0.53012 | 0.75476 | 0.77137 | 0.75732 | 0.73015 | 0.43663 | 0.42821 | 0.74464 | 0.71199 | KRT4      |
| cg12611860 | 0.76972 | 0.7838  | 0.76442 | 0.80644 | 0.63995 | 0.70588 | 0.72623 | 0.72701 | 0.79994 | 0.67493 | PIK3C2A   |
| cg12612336 | 0.02509 | 0.02491 | 0.02613 | 0.02776 | 0.02308 | 0.02572 | 0.02234 | 0.02242 | 0.0204  | 0.02327 | PRPSAP1   |
| cg12613344 | 0.90061 | 0.76596 | 0.89564 | 0.91282 | 0.90507 | 0.9019  | 0.88048 | 0.89015 | 0.90789 | 0.89593 | NR1H3     |
| cg12613383 | 0.10471 | 0.09746 | 0.86226 | 0.90944 | 0.75351 | 0.8004  | 0.0902  | 0.14397 | 0.09247 | 0.28937 | PLD5      |
| cg12614105 | 0.12508 | 0.0475  | 0.76084 | 0.80327 | 0.27484 | 0.5688  | 0.51816 | 0.38954 | 0.39511 | 0.33742 | NPY       |
| cg12616277 | 0.08218 | 0.08105 | 0.11098 | 0.09008 | 0.49967 | 0.57682 | 0.13298 | 0.07119 | 0.06867 | 0.06842 | FAM62C    |
| cg12616487 | 0.68794 | 0.57212 | 0.34226 | 0.42178 | 0.53403 | 0.31469 | 0.54783 | 0.52855 | 0.82806 | 0.35809 | EML3      |
| cg12618251 | 0.07093 | 0.07852 | 0.07897 | 0.06823 | 0.04813 | 0.06664 | 0.06908 | 0.07426 | 0.06683 | 0.05277 | FZD7      |
| cg12619162 | 0.32945 | 0.3047  | 0.28884 | 0.52571 | 0.52648 | 0.54442 | 0.12772 | 0.09229 | 0.05757 | 0.03362 | FXYP4     |
| cg12619509 | 0.26681 | 0.18978 | 0.47338 | 0.35937 | 0.96018 | 0.92408 | 0.95947 | 0.93204 | 0.95729 | 0.95799 | DNASE1L2  |
| cg12620111 | 0.03635 | 0.03835 | 0.04344 | 0.03273 | 0.02972 | 0.03709 | 0.03897 | 0.03232 | 0.03201 | 0.03328 | ZNF70     |
| cg12620499 | 0.04699 | 0.04889 | 0.04403 | 0.04145 | 0.05604 | 0.04887 | 0.04469 | 0.04628 | 0.03746 | 0.0328  | DSU       |
| cg12621514 | 0.11421 | 0.10457 | 0.1098  | 0.10758 | 0.27948 | 0.10446 | 0.13379 | 0.12193 | 0.10155 | 0.10451 | DKK1      |
| cg12622273 | 0.8812  | 0.88054 | 0.60122 | 0.78453 | 0.90809 | 0.91484 | 0.72469 | 0.54614 | 0.91492 | 0.87949 | LG14      |
| cg12622986 | 0.07406 | 0.24543 | 0.69758 | 0.86335 | 0.07765 | 0.08813 | 0.27486 | 0.05735 | 0.11771 | 0.05168 | BARHL1    |
| cg12623088 | 0.77481 | 0.44612 | 0.0641  | 0.0458  | 0.19186 | 0.05897 | 0.26188 | 0.16715 | 0.19561 | 0.08631 | MGC4562   |
| cg12624523 | 0.83125 | 0.75494 | 0.78303 | 0.80503 | 0.61509 | 0.7582  | 0.75316 | 0.81516 | 0.42957 | 0.30628 | GPLD1     |
| cg12624641 | 0.17757 | 0.16981 | 0.28943 | 0.19423 | 0.57892 | 0.51499 | 0.2129  | 0.17892 | 0.52852 | 0.30823 | C14orf143 |
| cg12626085 | 0.02941 | 0.02938 | 0.03064 | 0.03336 | 0.03977 | 0.04432 | 0.03319 | 0.02794 | 0.03423 | 0.029   | UEV3      |
| cg12626411 | 0.58884 | 0.48458 | 0.52392 | 0.57196 | 0.40583 | 0.48481 | 0.27335 | 0.27307 | 0.25554 | 0.18374 | PRG4      |
| cg12627583 | 0.41262 | 0.2861  | 0.93515 | 0.92852 | 0.65206 | 0.90631 | 0.91572 | 0.89609 | 0.80685 | 0.92415 | AOX1      |
| cg12628062 | 0.0289  | 0.02767 | 0.03427 | 0.0317  | 0.02574 | 0.0287  | 0.02697 | 0.02961 | 0.02317 | 0.02635 | TBPIP     |
| cg12628956 | 0.76408 | 0.93703 | 0.07197 | 0.0479  | 0.02904 | 0.03015 | 0.03697 | 0.04078 | 0.02819 | 0.02483 | LOC317671 |
| cg12629083 | 0.03904 | 0.03218 | 0.0393  | 0.04084 | 0.03842 | 0.03759 | 0.03444 | 0.03625 | 0.03135 | 0.02572 | SENP1     |
| cg12629244 | 0.82018 | 0.88822 | 0.871   | 0.89763 | 0.90921 | 0.88324 | 0.89219 | 0.89118 | 0.89315 | 0.85703 | FAM20B    |
| cg12629325 | 0.0473  | 0.037   | 0.19762 | 0.08425 | 0.1664  | 0.0843  | 0.16887 | 0.28542 | 0.04737 | 0.03461 | PCDHAC1   |
| cg12629515 | 0.09662 | 0.09656 | 0.11217 | 0.09525 | 0.1125  | 0.15536 | 0.68616 | 0.08056 | 0.0808  | 0.08866 | HIST1H2BO |
| cg12631737 | 0.09713 | 0.0681  | 0.06992 | 0.06566 | 0.04708 | 0.06764 | 0.06402 | 0.06041 | 0.05993 | 0.0636  | FUT4      |
| cg12635664 | 0.03814 | 0.039   | 0.03997 | 0.03913 | 0.02365 | 0.03459 | 0.03611 | 0.03417 | 0.03043 | 0.02884 | SAR1A     |
| cg12638745 | 0.17846 | 0.14676 | 0.61781 | 0.73998 | 0.73226 | 0.79441 | 0.60962 | 0.4065  | 0.81456 | 0.39462 | C21orf13  |
| cg12639234 | 0.34511 | 0.25682 | 0.46801 | 0.60709 | 0.22469 | 0.38916 | 0.4495  | 0.3133  | 0.08862 | 0.1215  | NAT2      |
| cg12640109 | 0.5084  | 0.24304 | 0.52093 | 0.47276 | 0.5195  | 0.34554 | 0.06266 | 0.05561 | 0.07908 | 0.05402 | ASRGL1    |
| cg12641660 | 0.0584  | 0.04837 | 0.06801 | 0.05948 | 0.06195 | 0.04935 | 0.04585 | 0.04341 | 0.06847 | 0.04898 | TTF2      |
| cg12643449 | 0.54038 | 0.27042 | 0.71146 | 0.75929 | 0.64923 | 0.6383  | 0.75728 | 0.70423 | 0.75413 | 0.74415 | IFRD1     |
| cg12643877 | 0.71775 | 0.71333 | 0.71718 | 0.74975 | 0.72547 | 0.74934 | 0.62731 | 0.58905 | 0.60306 | 0.59999 | ARHGAP27  |
| cg12644353 | 0.07816 | 0.09275 | 0.09087 | 0.08969 | 0.07514 | 0.07973 | 0.10069 | 0.08825 | 0.08793 | 0.09347 | ACTR3     |
| cg12645220 | 0.04386 | 0.02824 | 0.5392  | 0.52046 | 0.32128 | 0.26285 | 0.05107 | 0.02811 | 0.05325 | 0.02313 | PAK7      |
| cg12645567 | 0.02372 | 0.02651 | 0.02494 | 0.02647 | 0.01804 | 0.02531 | 0.02412 | 0.02422 | 0.02396 | 0.02699 | TFAP4     |

|            |         |         |         |         |         |         |         |         |         |                   |
|------------|---------|---------|---------|---------|---------|---------|---------|---------|---------|-------------------|
| cg12645742 | 0.04988 | 0.04016 | 0.04683 | 0.04513 | 0.0347  | 0.04606 | 0.04408 | 0.0414  | 0.03683 | 0.03949 SMAD6     |
| cg12646585 | 0.05454 | 0.0621  | 0.08747 | 0.08056 | 0.05597 | 0.05602 | 0.04088 | 0.05089 | 0.16934 | 0.06721 C8orf32   |
| cg12647320 | 0.79396 | 0.62645 | 0.75054 | 0.84442 | 0.70288 | 0.66521 | 0.64979 | 0.25197 | 0.76838 | 0.45447 POGZ      |
| cg12647587 | 0.11762 | 0.12097 | 0.79381 | 0.85823 | 0.7965  | 0.89138 | 0.81592 | 0.88037 | 0.443   | 0.52692 C10orf129 |
| cg12647643 | 0.06049 | 0.06084 | 0.06791 | 0.05639 | 0.09972 | 0.08375 | 0.05739 | 0.05819 | 0.05113 | 0.07001 PTPN13    |
| cg12648263 | 0.04404 | 0.03085 | 0.02344 | 0.02083 | 0.0253  | 0.0257  | 0.02387 | 0.01999 | 0.02797 | 0.02275 PIGH      |
| cg12648583 | 0.09742 | 0.08751 | 0.07196 | 0.0579  | 0.0667  | 0.05321 | 0.05033 | 0.04899 | 0.05446 | 0.07069 FBXO8     |
| cg12650011 | 0.07023 | 0.03455 | 0.04455 | 0.04891 | 0.03247 | 0.04065 | 0.02878 | 0.03645 | 0.2012  | 0.19484 TSPAN12   |
| cg12650635 | 0.7523  | 0.43898 | 0.77489 | 0.88233 | 0.36928 | 0.13578 | 0.46048 | 0.45256 | 0.47885 | 0.40988 AQP2      |
| cg12650780 | 0.05926 | 0.06092 | 0.15618 | 0.08616 | 0.1438  | 0.07085 | 0.12    | 0.05815 | 0.4307  | 0.31306 SH3BGRL   |
| cg12650926 | 0.05799 | 0.03992 | 0.04337 | 0.03218 | 0.02814 | 0.03898 | 0.04737 | 0.04302 | 0.04127 | 0.03497 ITPR3     |
| cg12651014 | 0.07312 | 0.06604 | 0.07559 | 0.06288 | 0.06361 | 0.0582  | 0.07068 | 0.06129 | 0.05482 | 0.0494 CCDC7      |
| cg12653105 | 0.04519 | 0.04285 | 0.04603 | 0.04357 | 0.03119 | 0.04001 | 0.4554  | 0.07528 | 0.03528 | 0.03586 PLP2      |
| cg12654845 | 0.83656 | 0.49915 | 0.78457 | 0.75869 | 0.79657 | 0.59655 | 0.17531 | 0.10423 | 0.86507 | 0.54267 CLDN2     |
| cg12657853 | 0.02513 | 0.02758 | 0.03377 | 0.03151 | 0.02057 | 0.02964 | 0.02744 | 0.02807 | 0.03161 | 0.02958 HSF2      |
| cg12658552 | 0.5946  | 0.44128 | 0.73419 | 0.77296 | 0.67863 | 0.68508 | 0.7181  | 0.7177  | 0.76678 | 0.74536 SFRS2IP   |
| cg12658982 | 0.02474 | 0.02374 | 0.03199 | 0.03205 | 0.10405 | 0.22911 | 0.04773 | 0.02669 | 0.89276 | 0.82917 LOC222171 |
| cg12661229 | 0.03846 | 0.04012 | 0.04477 | 0.04027 | 0.0367  | 0.03654 | 0.03318 | 0.0325  | 0.03094 | 0.03359 C3orf54   |
| cg12661964 | 0.88924 | 0.90384 | 0.87474 | 0.86505 | 0.88266 | 0.88154 | 0.89377 | 0.87917 | 0.90405 | 0.87327 IFI35     |
| cg12662162 | 0.08602 | 0.08538 | 0.09363 | 0.0873  | 0.08761 | 0.08718 | 0.08416 | 0.07635 | 0.07779 | 0.07654 C6orf106  |
| cg12663253 | 0.86827 | 0.87609 | 0.86142 | 0.87024 | 0.86818 | 0.88131 | 0.85806 | 0.88375 | 0.89846 | 0.89265 PIK3R1    |
| cg12667808 | 0.03442 | 0.02872 | 0.03841 | 0.03153 | 0.04702 | 0.03087 | 0.03477 | 0.028   | 0.15949 | 0.09512 KIAA0082  |
| cg12671744 | 0.46657 | 0.10642 | 0.538   | 0.5676  | 0.8442  | 0.91136 | 0.04988 | 0.03991 | 0.08796 | 0.05222 FAAH      |
| cg12674192 | 0.03776 | 0.03062 | 0.03738 | 0.03303 | 0.02796 | 0.03436 | 0.05244 | 0.04786 | 0.02725 | 0.02924 RBM13     |
| cg12675800 | 0.04344 | 0.04948 | 0.04727 | 0.0418  | 0.0569  | 0.05332 | 0.03281 | 0.03408 | 0.03576 | 0.0422 TRAPPC6B   |
| cg12676081 | 0.1153  | 0.09684 | 0.1383  | 0.11118 | 0.16732 | 0.08817 | 0.11918 | 0.09424 | 0.0673  | 0.08453 RIOK2     |
| cg12680071 | 0.10982 | 0.04522 | 0.041   | 0.04468 | 0.03657 | 0.04294 | 0.03698 | 0.03803 | 0.03191 | 0.03595 COX6B1    |
| cg12680609 | 0.34449 | 0.11156 | 0.87644 | 0.94315 | 0.47287 | 0.54342 | 0.29235 | 0.3192  | 0.56606 | 0.43683 ZFP41     |
| cg12681402 | 0.09042 | 0.09032 | 0.3405  | 0.54081 | 0.28294 | 0.13935 | 0.14025 | 0.113   | 0.12385 | 0.10945 RPH3A     |
| cg12682367 | 0.16323 | 0.14218 | 0.46403 | 0.59994 | 0.30269 | 0.4614  | 0.06725 | 0.04571 | 0.0479  | 0.04341 FLJ46358  |
| cg12683641 | 0.64476 | 0.54957 | 0.8888  | 0.92227 | 0.69341 | 0.9104  | 0.64483 | 0.58846 | 0.55413 | 0.5102 KLK14      |
| cg12683929 | 0.10402 | 0.0966  | 0.79407 | 0.75277 | 0.28721 | 0.16327 | 0.49356 | 0.35615 | 0.39092 | 0.26547 BLOC1S1   |
| cg12684360 | 0.0429  | 0.04613 | 0.05943 | 0.04936 | 0.04887 | 0.06904 | 0.07206 | 0.07357 | 0.04423 | 0.0369 KPNA3      |
| cg12685200 | 0.0302  | 0.02876 | 0.02247 | 0.02261 | 0.02242 | 0.02403 | 0.02161 | 0.02091 | 0.01786 | 0.0201 LGMN       |
| cg12685753 | 0.0872  | 0.06588 | 0.81544 | 0.86555 | 0.21698 | 0.57157 | 0.12769 | 0.08627 | 0.09324 | 0.10886 TEKT1     |
| cg12686016 | 0.14119 | 0.05745 | 0.04975 | 0.04527 | 0.08141 | 0.07393 | 0.06484 | 0.05784 | 0.0422  | 0.04294 HOXA1     |
| cg12686915 | 0.12115 | 0.09077 | 0.14112 | 0.12831 | 0.09315 | 0.09037 | 0.07611 | 0.07243 | 0.10402 | 0.11275 EIF3S3    |
| cg12687215 | 0.02663 | 0.03005 | 0.03278 | 0.03201 | 0.18632 | 0.02826 | 0.4828  | 0.36896 | 0.02419 | 0.02043 FAM50A    |
| cg12687463 | 0.20076 | 0.08707 | 0.30867 | 0.42927 | 0.31335 | 0.46669 | 0.07157 | 0.13439 | 0.07014 | 0.05922 CFHR1     |
| cg12687922 | 0.03648 | 0.03768 | 0.04134 | 0.03774 | 0.03009 | 0.03479 | 0.03398 | 0.03902 | 0.03568 | 0.03162 PPM1J     |
| cg12687990 | 0.06539 | 0.03532 | 0.05987 | 0.03711 | 0.06303 | 0.02968 | 0.03133 | 0.09003 | 0.07002 | 0.05448           |

|            |         |         |         |         |         |         |         |         |         |         |              |
|------------|---------|---------|---------|---------|---------|---------|---------|---------|---------|---------|--------------|
| cg12688043 | 0.07623 | 0.05761 | 0.05554 | 0.0609  | 0.08268 | 0.08279 | 0.04686 | 0.04541 | 0.0609  | 0.05035 | MAP4         |
| cg12688215 | 0.01859 | 0.01939 | 0.01898 | 0.01823 | 0.01798 | 0.01933 | 0.01471 | 0.01889 | 0.01435 | 0.01606 | KTI12        |
| cg12688670 | 0.28227 | 0.42291 | 0.45558 | 0.43596 | 0.05273 | 0.05005 | 0.44236 | 0.17259 | 0.29467 | 0.14338 | KIF22        |
| cg12689375 | 0.2703  | 0.03822 | 0.0351  | 0.03172 | 0.03112 | 0.03404 | 0.04107 | 0.03142 | 0.03107 | 0.03493 | DDX3X        |
| cg12689475 | 0.03678 | 0.03341 | 0.0549  | 0.05774 | 0.05611 | 0.18808 | 0.04128 | 0.02951 | 0.29534 | 0.0393  | RPUSD1       |
| cg12691219 | 0.10029 | 0.0835  | 0.14336 | 0.12174 | 0.11727 | 0.08795 | 0.22868 | 0.15146 | 0.09405 | 0.09147 | ARMCX3       |
| cg12691366 | 0.01797 | 0.01975 | 0.02004 | 0.0179  | 0.01847 | 0.01733 | 0.0169  | 0.01671 | 0.01596 | 0.01354 | HSPC159      |
| cg12693135 | 0.02281 | 0.02141 | 0.02598 | 0.02141 | 0.01808 | 0.02484 | 0.0167  | 0.02041 | 0.01986 | 0.01702 | HGS          |
| cg12693634 | 0.14913 | 0.13279 | 0.1315  | 0.14126 | 0.14534 | 0.13231 | 0.11361 | 0.1123  | 0.10641 | 0.13359 | TMEM23       |
| cg12694555 | 0.79595 | 0.76945 | 0.7399  | 0.83943 | 0.64081 | 0.72971 | 0.72327 | 0.63562 | 0.79043 | 0.73344 | KBTBD10      |
| cg12694870 | 0.8786  | 0.68785 | 0.82659 | 0.86924 | 0.84116 | 0.15211 | 0.51438 | 0.46263 | 0.88227 | 0.67477 | HPD          |
| cg12696750 | 0.16135 | 0.18015 | 0.68075 | 0.64713 | 0.16975 | 0.09038 | 0.16464 | 0.0944  | 0.07437 | 0.06987 | DNAL1        |
| cg12697789 | 0.49391 | 0.26136 | 0.18307 | 0.15132 | 0.10098 | 0.08787 | 0.10838 | 0.12781 | 0.10771 | 0.16455 | TLR3         |
| cg12699145 | 0.0348  | 0.02889 | 0.07987 | 0.2099  | 0.02349 | 0.02195 | 0.17324 | 0.37245 | 0.61035 | 0.03769 | TMC7         |
| cg12699371 | 0.05788 | 0.04031 | 0.78481 | 0.92723 | 0.34501 | 0.29607 | 0.1878  | 0.17289 | 0.0414  | 0.05255 | GALR1        |
| cg12701101 | 0.04208 | 0.0455  | 0.04664 | 0.04493 | 0.06396 | 0.04639 | 0.04042 | 0.03886 | 0.0389  | 0.0387  | DKFZp434N062 |
| cg12701576 | 0.04222 | 0.039   | 0.05417 | 0.05181 | 0.05112 | 0.04197 | 0.06071 | 0.04577 | 0.03753 | 0.04665 | PEX19        |
| cg12703269 | 0.75923 | 0.52169 | 0.79295 | 0.84498 | 0.87766 | 0.85541 | 0.77904 | 0.69638 | 0.67102 | 0.6492  | PSTPIP1      |
| cg12706983 | 0.07972 | 0.33251 | 0.09098 | 0.06923 | 0.21783 | 0.13336 | 0.95755 | 0.95271 | 0.1177  | 0.06515 | ZNF435       |
| cg12707233 | 0.04821 | 0.04616 | 0.15269 | 0.08676 | 0.16545 | 0.48627 | 0.40543 | 0.40174 | 0.03748 | 0.03985 | WNK3         |
| cg12707353 | 0.68806 | 0.49539 | 0.62948 | 0.67078 | 0.58632 | 0.53108 | 0.50172 | 0.52912 | 0.73423 | 0.64117 | FLJ35725     |
| cg12709412 | 0.05274 | 0.04894 | 0.06499 | 0.05808 | 0.07187 | 0.05668 | 0.052   | 0.04875 | 0.0505  | 0.0533  | C18orf8      |
| cg12711530 | 0.7536  | 0.39757 | 0.73374 | 0.76541 | 0.65764 | 0.70366 | 0.38334 | 0.37573 | 0.7619  | 0.17385 | BMP10        |
| cg12711814 | 0.04622 | 0.03397 | 0.039   | 0.033   | 0.03048 | 0.03213 | 0.04148 | 0.05198 | 0.0293  | 0.02947 | ENO1         |
| cg12712746 | 0.03924 | 0.0375  | 0.04057 | 0.03662 | 0.03326 | 0.03715 | 0.04142 | 0.03853 | 0.03367 | 0.03896 | SAMM50       |
| cg12716838 | 0.66403 | 0.41481 | 0.65554 | 0.64731 | 0.67008 | 0.48129 | 0.02523 | 0.02522 | 0.03046 | 0.03353 | B3GALT3      |
| cg12717203 | 0.06819 | 0.05712 | 0.0594  | 0.05745 | 0.07553 | 0.07039 | 0.18209 | 0.11785 | 0.41077 | 0.40485 | FLJ90036     |
| cg12717594 | 0.03198 | 0.02819 | 0.03251 | 0.02613 | 0.09224 | 0.01887 | 0.02401 | 0.02824 | 0.02272 | 0.02214 | RECK         |
| cg12717668 | 0.07749 | 0.07528 | 0.09703 | 0.08042 | 0.07377 | 0.07179 | 0.07718 | 0.08396 | 0.07326 | 0.0666  | ZNF655       |
| cg12718440 | 0.86029 | 0.67476 | 0.21368 | 0.23265 | 0.43974 | 0.50039 | 0.23726 | 0.15606 | 0.06815 | 0.0541  | C10orf83     |
| cg12718562 | 0.19995 | 0.03875 | 0.72323 | 0.68568 | 0.82182 | 0.67391 | 0.27672 | 0.30852 | 0.4215  | 0.26592 | TBC1D21      |
| cg12719235 | 0.09772 | 0.095   | 0.10499 | 0.0938  | 0.04804 | 0.07849 | 0.08229 | 0.08802 | 0.06828 | 0.08217 | POLR2E       |
| cg12721546 | 0.02242 | 0.02752 | 0.02531 | 0.02566 | 0.0238  | 0.02614 | 0.02235 | 0.02104 | 0.02203 | 0.01982 | BCLAF1       |
| cg12722998 | 0.05356 | 0.05093 | 0.05409 | 0.05648 | 0.04636 | 0.05331 | 0.04772 | 0.04777 | 0.0448  | 0.03818 | FLJ11305     |
| cg12723191 | 0.76321 | 0.58328 | 0.75261 | 0.77541 | 0.71809 | 0.77366 | 0.75941 | 0.71363 | 0.76488 | 0.40198 | PDC          |
| cg12723809 | 0.08676 | 0.05609 | 0.05608 | 0.06238 | 0.05033 | 0.0492  | 0.04765 | 0.04032 | 0.04008 | 0.04844 | MGC26744     |
| cg12724357 | 0.05861 | 0.0377  | 0.08875 | 0.0551  | 0.28651 | 0.1788  | 0.16929 | 0.03702 | 0.04285 | 0.02844 | SYT12        |
| cg12724466 | 0.48207 | 0.47692 | 0.53719 | 0.56167 | 0.54869 | 0.5667  | 0.32994 | 0.40387 | 0.63373 | 0.60338 | ASB11        |
| cg12724827 | 0.81812 | 0.82227 | 0.7253  | 0.76258 | 0.65693 | 0.78837 | 0.39683 | 0.51223 | 0.80327 | 0.76033 | FSHPRH1      |
| cg12726576 | 0.70463 | 0.55513 | 0.81916 | 0.85943 | 0.8044  | 0.73417 | 0.52191 | 0.44368 | 0.60416 | 0.54836 | CTGLF1       |
| cg12727374 | 0.0309  | 0.02724 | 0.0303  | 0.03375 | 0.44525 | 0.54507 | 0.02315 | 0.02793 | 0.04316 | 0.02388 | MAP6D1       |

|            |         |         |         |         |         |         |         |         |         |                   |
|------------|---------|---------|---------|---------|---------|---------|---------|---------|---------|-------------------|
| cg12727795 | 0.73503 | 0.10104 | 0.04883 | 0.04758 | 0.78062 | 0.61639 | 0.26089 | 0.06425 | 0.04045 | 0.05384 PDGFRB    |
| cg12728032 | 0.48285 | 0.34883 | 0.47358 | 0.58891 | 0.65229 | 0.61355 | 0.56331 | 0.54175 | 0.5     | 0.31198 ELF5      |
| cg12728629 | 0.71859 | 0.25236 | 0.57313 | 0.72483 | 0.8872  | 0.92704 | 0.0776  | 0.20705 | 0.05874 | 0.05035 MAGEA2    |
| cg12729048 | 0.11292 | 0.04826 | 0.03156 | 0.02641 | 0.02539 | 0.02561 | 0.02868 | 0.02465 | 0.03364 | 0.02319 TUFT1     |
| cg12729059 | 0.02746 | 0.02908 | 0.03108 | 0.03047 | 0.03027 | 0.02861 | 0.02442 | 0.02209 | 0.02477 | 0.02281 IFNGR1    |
| cg12730381 | 0.20616 | 0.20142 | 0.18707 | 0.19436 | 0.10052 | 0.15045 | 0.17158 | 0.17881 | 0.15478 | 0.17246 YWHAG     |
| cg12730424 | 0.0591  | 0.05786 | 0.05459 | 0.05116 | 0.10304 | 0.07601 | 0.05388 | 0.05178 | 0.05293 | 0.05687 BTBD7     |
| cg12731488 | 0.64717 | 0.58083 | 0.55402 | 0.64772 | 0.69721 | 0.73127 | 0.48203 | 0.43229 | 0.44846 | 0.60067 SYTL5     |
| cg12732155 | 0.45459 | 0.10033 | 0.93911 | 0.93477 | 0.95629 | 0.93775 | 0.93205 | 0.46699 | 0.92276 | 0.91838 LAPTM5    |
| cg12732953 | 0.18152 | 0.21683 | 0.5442  | 0.56706 | 0.5865  | 0.65149 | 0.39956 | 0.52114 | 0.12029 | 0.10888 FMR1NB    |
| cg12733079 | 0.05402 | 0.05545 | 0.06464 | 0.05048 | 0.05548 | 0.07249 | 0.0524  | 0.05257 | 0.04863 | 0.03911 ZNF277    |
| cg12733430 | 0.04579 | 0.04052 | 0.06654 | 0.04712 | 0.06801 | 0.05172 | 0.05022 | 0.04587 | 0.04873 | 0.05506 KLHL8     |
| cg12736438 | 0.04792 | 0.05034 | 0.0576  | 0.05599 | 0.06509 | 0.06593 | 0.05174 | 0.03627 | 0.04139 | 0.0332 RAB20      |
| cg12737574 | 0.12431 | 0.04703 | 0.07205 | 0.06984 | 0.04453 | 0.05646 | 0.06573 | 0.05217 | 0.05797 | 0.06383 PDIA3     |
| cg12737801 | 0.05757 | 0.05188 | 0.06265 | 0.05476 | 0.05842 | 0.04831 | 0.08403 | 0.0924  | 0.04998 | 0.05197 TCEA1     |
| cg12738007 | 0.02273 | 0.02731 | 0.02612 | 0.02438 | 0.02286 | 0.02364 | 0.02626 | 0.0244  | 0.01864 | 0.01885 MRPL16    |
| cg12738197 | 0.04673 | 0.03905 | 0.3287  | 0.34388 | 0.40443 | 0.37241 | 0.03776 | 0.03077 | 0.02988 | 0.03555 ZNF572    |
| cg12739034 | 0.03585 | 0.03606 | 0.45272 | 0.49956 | 0.11475 | 0.0327  | 0.04637 | 0.03879 | 0.39873 | 0.45281 PTGER3    |
| cg12739647 | 0.02513 | 0.02948 | 0.02909 | 0.02943 | 0.02104 | 0.02389 | 0.02282 | 0.02607 | 0.02489 | 0.02307 SFT2D2    |
| cg12741420 | 0.03949 | 0.03209 | 0.32408 | 0.41105 | 0.30873 | 0.68732 | 0.0511  | 0.04595 | 0.05653 | 0.02645 IRF4      |
| cg12741488 | 0.04744 | 0.04171 | 0.10771 | 0.1144  | 0.04878 | 0.04067 | 0.05767 | 0.03703 | 0.04617 | 0.04144 LOC114984 |
| cg12743398 | 0.62674 | 0.43715 | 0.60629 | 0.74247 | 0.7802  | 0.63936 | 0.36117 | 0.13302 | 0.7736  | 0.44053 SULT1A2   |
| cg12743894 | 0.01601 | 0.01801 | 0.0225  | 0.01802 | 0.01667 | 0.01927 | 0.01585 | 0.01428 | 0.01757 | 0.01502 C11orf46  |
| cg12744185 | 0.04911 | 0.04988 | 0.04684 | 0.0531  | 0.03777 | 0.04333 | 0.03914 | 0.04486 | 0.04673 | 0.04177 PCTP      |
| cg12745769 | 0.05109 | 0.04948 | 0.06673 | 0.04151 | 0.04107 | 0.04064 | 0.89435 | 0.87403 | 0.04403 | 0.03231 LOC115648 |
| cg12748258 | 0.0269  | 0.02623 | 0.53843 | 0.6094  | 0.61033 | 0.62388 | 0.02606 | 0.02811 | 0.02829 | 0.02164 HR        |
| cg12748926 | 0.02821 | 0.02881 | 0.02518 | 0.03082 | 0.02402 | 0.02871 | 0.02782 | 0.02452 | 0.02332 | 0.02497 FLJ36888  |
| cg12753358 | 0.17245 | 0.08555 | 0.12933 | 0.19941 | 0.09194 | 0.06899 | 0.0676  | 0.05133 | 0.07514 | 0.05174 EFNB1     |
| cg12753858 | 0.80719 | 0.30135 | 0.8049  | 0.86767 | 0.7071  | 0.77992 | 0.32028 | 0.29729 | 0.79253 | 0.63553 NUT       |
| cg12754733 | 0.02478 | 0.03386 | 0.03279 | 0.02915 | 0.02125 | 0.0343  | 0.03131 | 0.0284  | 0.02859 | 0.02422 FLJ35119  |
| cg12754854 | 0.80046 | 0.40632 | 0.79549 | 0.82629 | 0.67289 | 0.81701 | 0.76567 | 0.59472 | 0.69114 | 0.64797 PHYHD1    |
| cg12757143 | 0.17279 | 0.08425 | 0.55964 | 0.83663 | 0.24435 | 0.23798 | 0.64234 | 0.31909 | 0.56097 | 0.45523 C9orf112  |
| cg12757684 | 0.63423 | 0.64826 | 0.97673 | 0.97925 | 0.72227 | 0.72198 | 0.69324 | 0.70599 | 0.02758 | 0.02189 PLAGL1    |
| cg12758687 | 0.36918 | 0.51591 | 0.68452 | 0.72334 | 0.50899 | 0.35483 | 0.34527 | 0.44399 | 0.23968 | 0.21931 DRD2      |
| cg12759554 | 0.56189 | 0.55053 | 0.52467 | 0.49961 | 0.53026 | 0.52619 | 0.4947  | 0.48082 | 0.60093 | 0.53774 NAP1L5    |
| cg12762680 | 0.16761 | 0.18655 | 0.14948 | 0.24572 | 0.14564 | 0.05605 | 0.09102 | 0.09548 | 0.05652 | 0.05557 PSMB9     |
| cg12762799 | 0.44035 | 0.31354 | 0.70142 | 0.77627 | 0.52872 | 0.68744 | 0.71115 | 0.64969 | 0.78998 | 0.51668 CLEC4E    |
| cg12763546 | 0.80529 | 0.77075 | 0.8738  | 0.88462 | 0.79341 | 0.83223 | 0.74914 | 0.73425 | 0.57988 | 0.44644 ZNF232    |
| cg12766348 | 0.03422 | 0.03622 | 0.0686  | 0.05237 | 0.0496  | 0.06218 | 0.06641 | 0.057   | 0.04058 | 0.04625 CLK4      |
| cg12768605 | 0.11078 | 0.05364 | 0.91961 | 0.93754 | 0.70453 | 0.78722 | 0.88826 | 0.93731 | 0.94062 | 0.94082 LYPD5     |
| cg12770741 | 0.89029 | 0.87752 | 0.94662 | 0.95054 | 0.95444 | 0.80174 | 0.94704 | 0.86884 | 0.96018 | 0.93545 NXN       |

|            |         |         |         |         |         |         |         |         |         |         |          |
|------------|---------|---------|---------|---------|---------|---------|---------|---------|---------|---------|----------|
| cg12771281 | 0.02217 | 0.02315 | 0.01893 | 0.01946 | 0.01959 | 0.01976 | 0.01709 | 0.01897 | 0.01914 | 0.01872 | SLC38A6  |
| cg12774845 | 0.17391 | 0.2071  | 0.33635 | 0.37982 | 0.08845 | 0.0847  | 0.07264 | 0.07208 | 0.08618 | 0.06764 | ENTPD5   |
| cg12775479 | 0.85241 | 0.85482 | 0.81141 | 0.84207 | 0.83924 | 0.86071 | 0.84785 | 0.87259 | 0.80119 | 0.60032 | IGSF10   |
| cg12775613 | 0.84128 | 0.8323  | 0.75474 | 0.78556 | 0.71408 | 0.78532 | 0.70766 | 0.73349 | 0.80081 | 0.81167 | HTR1F    |
| cg12776163 | 0.03779 | 0.04273 | 0.04008 | 0.03586 | 0.03814 | 0.0438  | 0.04875 | 0.04613 | 0.02832 | 0.03295 | 7-Sep    |
| cg12780286 | 0.05643 | 0.05406 | 0.05958 | 0.05889 | 0.04248 | 0.04146 | 0.04016 | 0.04259 | 0.04675 | 0.04036 | EAF2     |
| cg12780322 | 0.0508  | 0.05392 | 0.05346 | 0.04814 | 0.03842 | 0.04569 | 0.04817 | 0.04837 | 0.04436 | 0.04597 | SRP72    |
| cg12781218 | 0.05087 | 0.05178 | 0.04712 | 0.04628 | 0.05067 | 0.05165 | 0.05124 | 0.04974 | 0.04303 | 0.0443  | C7orf31  |
| cg12781395 | 0.10522 | 0.11335 | 0.09555 | 0.08132 | 0.13027 | 0.14901 | 0.11105 | 0.08658 | 0.08817 | 0.12233 | SNW1     |
| cg12781568 | 0.86776 | 0.81107 | 0.84649 | 0.87436 | 0.70982 | 0.80011 | 0.44537 | 0.54073 | 0.72717 | 0.58668 | WT1      |
| cg12782180 | 0.71169 | 0.53468 | 0.96723 | 0.96801 | 0.96933 | 0.96452 | 0.94568 | 0.96342 | 0.96707 | 0.97006 | LEP      |
| cg12783573 | 0.04738 | 0.04603 | 0.06565 | 0.0604  | 0.0551  | 0.06628 | 0.04391 | 0.04321 | 0.04912 | 0.0499  | C6orf113 |
| cg12783640 | 0.02668 | 0.03552 | 0.028   | 0.02769 | 0.02267 | 0.02469 | 0.02769 | 0.0253  | 0.02485 | 0.02327 | ABCC5    |
| cg12783776 | 0.1686  | 0.0938  | 0.86669 | 0.87978 | 0.78571 | 0.80134 | 0.52237 | 0.30455 | 0.70873 | 0.53967 | SERPING1 |
| cg12784172 | 0.89481 | 0.85673 | 0.90195 | 0.90821 | 0.934   | 0.90219 | 0.89813 | 0.90783 | 0.90714 | 0.91801 | ZNF690   |
| cg12785087 | 0.03122 | 0.03452 | 0.02857 | 0.0267  | 0.03939 | 0.03033 | 0.02062 | 0.02587 | 0.02188 | 0.02349 | FLJ13848 |
| cg12785675 | 0.05548 | 0.06131 | 0.05144 | 0.05397 | 0.03707 | 0.05131 | 0.04719 | 0.04928 | 0.04574 | 0.0422  | ARMC2    |
| cg12785689 | 0.06694 | 0.05775 | 0.08607 | 0.06191 | 0.08847 | 0.06053 | 0.06505 | 0.05695 | 0.05034 | 0.05422 | ITGB4BP  |
| cg12787624 | 0.02876 | 0.02834 | 0.02857 | 0.03184 | 0.03004 | 0.02928 | 0.02731 | 0.02697 | 0.02508 | 0.02339 | LIMA1    |
| cg12788061 | 0.02545 | 0.02553 | 0.02825 | 0.02885 | 0.1184  | 0.0281  | 0.02759 | 0.0252  | 0.02771 | 0.02183 | TIGD3    |
| cg12788313 | 0.92476 | 0.91731 | 0.93057 | 0.92845 | 0.95589 | 0.66149 | 0.88327 | 0.88089 | 0.91988 | 0.59201 | MST1     |
| cg12788467 | 0.87934 | 0.87038 | 0.84987 | 0.86907 | 0.86127 | 0.8669  | 0.44311 | 0.80172 | 0.20731 | 0.10983 | TCF2     |
| cg12788471 | 0.02071 | 0.02058 | 0.02472 | 0.02305 | 0.02394 | 0.01763 | 0.01915 | 0.02067 | 0.01504 | 0.01713 | ARPC5L   |
| cg12789833 | 0.28588 | 0.18694 | 0.30985 | 0.24616 | 0.20461 | 0.16435 | 0.25148 | 0.29312 | 0.1811  | 0.17751 | FBXO22   |
| cg12790134 | 0.03967 | 0.04366 | 0.04634 | 0.04463 | 0.12232 | 0.03464 | 0.03308 | 0.03902 | 0.05328 | 0.0333  | VCPIP1   |
| cg12791465 | 0.64552 | 0.62159 | 0.65409 | 0.68229 | 0.7306  | 0.70928 | 0.58273 | 0.61912 | 0.58728 | 0.56902 | HHLA1    |
| cg12791554 | 0.84547 | 0.84835 | 0.72012 | 0.7442  | 0.68038 | 0.79563 | 0.77575 | 0.65729 | 0.76076 | 0.78241 | TAS2R49  |
| cg12792011 | 0.03341 | 0.03553 | 0.04023 | 0.03198 | 0.03256 | 0.34805 | 0.02623 | 0.02902 | 0.02584 | 0.08411 | ZNF329   |
| cg12792157 | 0.02478 | 0.02698 | 0.02512 | 0.02465 | 0.0216  | 0.02352 | 0.02415 | 0.02265 | 0.02006 | 0.02036 | MYCBP    |
| cg12792366 | 0.05475 | 0.05194 | 0.04928 | 0.04153 | 0.0566  | 0.04955 | 0.03549 | 0.03476 | 0.03551 | 0.0385  | LRRFIP2  |
| cg12792367 | 0.59647 | 0.18132 | 0.49835 | 0.64727 | 0.38313 | 0.47805 | 0.18967 | 0.20523 | 0.47418 | 0.30008 | TFR2     |
| cg12793610 | 0.42837 | 0.49085 | 0.842   | 0.84944 | 0.53975 | 0.58149 | 0.60933 | 0.07378 | 0.39504 | 0.46861 | TRIM2    |
| cg12795208 | 0.84444 | 0.31813 | 0.86928 | 0.89312 | 0.90784 | 0.90102 | 0.89413 | 0.77943 | 0.63556 | 0.56135 | KRT6B    |
| cg12796229 | 0.03528 | 0.03871 | 0.04159 | 0.03908 | 0.02989 | 0.03697 | 0.03991 | 0.03924 | 0.03125 | 0.03617 | C18orf43 |
| cg12797788 | 0.03653 | 0.04035 | 0.04084 | 0.03708 | 0.03209 | 0.0289  | 0.03451 | 0.0338  | 0.02787 | 0.02622 | NUTF2    |
| cg12799265 | 0.11028 | 0.10521 | 0.15946 | 0.14103 | 0.19626 | 0.14183 | 0.22545 | 0.18491 | 0.12067 | 0.12449 | C1orf50  |
| cg12799835 | 0.21709 | 0.18942 | 0.26564 | 0.23139 | 0.1011  | 0.08853 | 0.38271 | 0.14421 | 0.07151 | 0.06139 | FLJ31204 |
| cg12799895 | 0.02869 | 0.02484 | 0.42982 | 0.5662  | 0.20374 | 0.02414 | 0.20024 | 0.09239 | 0.01891 | 0.01975 | NPTX2    |
| cg12800028 | 0.19983 | 0.05594 | 0.79778 | 0.87175 | 0.15368 | 0.31211 | 0.29691 | 0.42245 | 0.07747 | 0.04313 | GPR6     |
| cg12800145 | 0.75347 | 0.70606 | 0.77947 | 0.7696  | 0.7407  | 0.78472 | 0.71542 | 0.74907 | 0.70124 | 0.67153 | GPRC5D   |
| cg12802819 | 0.07162 | 0.06172 | 0.08717 | 0.06592 | 0.08197 | 0.08025 | 0.08321 | 0.0687  | 0.05568 | 0.05179 | PUS3     |

|            |         |         |         |         |         |         |         |         |         |                  |
|------------|---------|---------|---------|---------|---------|---------|---------|---------|---------|------------------|
| cg12803724 | 0.03796 | 0.03819 | 0.05261 | 0.0464  | 0.03432 | 0.04392 | 0.0432  | 0.0385  | 0.03566 | 0.03831 C8orf70  |
| cg12804976 | 0.034   | 0.04006 | 0.0388  | 0.03734 | 0.02025 | 0.03221 | 0.02468 | 0.03055 | 0.03231 | 0.03139 NDUFA10  |
| cg12806381 | 0.15849 | 0.06902 | 0.0673  | 0.05357 | 0.09003 | 0.04733 | 0.06217 | 0.0581  | 0.04326 | 0.04222 PIGV     |
| cg12806521 | 0.04401 | 0.03982 | 0.05195 | 0.04621 | 0.03099 | 0.03788 | 0.14827 | 0.04675 | 0.03227 | 0.03298 NOL1     |
| cg12808992 | 0.05653 | 0.06126 | 0.06565 | 0.0616  | 0.05106 | 0.05149 | 0.05447 | 0.05087 | 0.05311 | 0.0476 ULBP2     |
| cg12809314 | 0.09586 | 0.09505 | 0.114   | 0.10272 | 0.18432 | 0.12145 | 0.09598 | 0.07364 | 0.08932 | 0.09675 ZNF445   |
| cg12810190 | 0.0271  | 0.0298  | 0.02926 | 0.02978 | 0.02412 | 0.02688 | 0.0267  | 0.02156 | 0.0244  | 0.02188 CSAD     |
| cg12810837 | 0.3082  | 0.24859 | 0.69181 | 0.74655 | 0.60857 | 0.69689 | 0.20019 | 0.48018 | 0.6677  | 0.48823 CLEC2D   |
| cg12811135 | 0.79609 | 0.87095 | 0.71926 | 0.87444 | 0.89138 | 0.89191 | 0.11329 | 0.11309 | 0.60554 | 0.69447 FLJ25369 |
| cg12813792 | 0.84324 | 0.72029 | 0.90124 | 0.91173 | 0.8365  | 0.85418 | 0.85398 | 0.86138 | 0.9065  | 0.86224 C20orf85 |
| cg12813797 | 0.76642 | 0.71643 | 0.77748 | 0.80192 | 0.73573 | 0.78649 | 0.63315 | 0.65151 | 0.7864  | 0.51284 TAAR6    |
| cg12813922 | 0.02478 | 0.02615 | 0.02544 | 0.02468 | 0.01867 | 0.03012 | 0.02679 | 0.02721 | 0.02126 | 0.02067 RAB3GAP1 |
| cg12814525 | 0.04464 | 0.03292 | 0.03116 | 0.02762 | 0.03512 | 0.03171 | 0.02513 | 0.02611 | 0.02688 | 0.02485 MDC1     |
| cg12815142 | 0.83033 | 0.65062 | 0.05446 | 0.05735 | 0.08467 | 0.08244 | 0.19369 | 0.81014 | 0.79575 | 0.60328 SPAG7    |
| cg12815841 | 0.08188 | 0.05221 | 0.55531 | 0.48802 | 0.23378 | 0.0467  | 0.46904 | 0.06409 | 0.3092  | 0.04321 LHPP     |
| cg12815916 | 0.95373 | 0.95356 | 0.95155 | 0.94689 | 0.9528  | 0.95134 | 0.94836 | 0.93602 | 0.9555  | 0.89137 PTPN18   |
| cg12818699 | 0.81785 | 0.69324 | 0.85561 | 0.8754  | 0.81483 | 0.86874 | 0.83736 | 0.8539  | 0.82494 | 0.56026 C6orf32  |
| cg12819826 | 0.92245 | 0.93606 | 0.92232 | 0.92782 | 0.71592 | 0.62994 | 0.90781 | 0.88006 | 0.30705 | 0.39555 PPAN     |
| cg12820481 | 0.08101 | 0.04412 | 0.05917 | 0.06553 | 0.04637 | 0.04109 | 0.03385 | 0.03558 | 0.04483 | 0.04228 NEK2     |
| cg12820608 | 0.06186 | 0.07148 | 0.10152 | 0.08458 | 0.0377  | 0.04337 | 0.0487  | 0.06296 | 0.04036 | 0.0377 RARG      |
| cg12821045 | 0.03835 | 0.04118 | 0.05159 | 0.04811 | 0.05444 | 0.03657 | 0.03125 | 0.03396 | 0.02952 | 0.03484 ZNF573   |
| cg12821724 | 0.79227 | 0.24119 | 0.82216 | 0.8728  | 0.85882 | 0.76286 | 0.73433 | 0.69605 | 0.52157 | 0.45084 SLC23A2  |
| cg12823748 | 0.04463 | 0.05316 | 0.05623 | 0.04744 | 0.02952 | 0.0539  | 0.05117 | 0.0435  | 0.04769 | 0.04185 USP15    |
| cg12825252 | 0.0256  | 0.02504 | 0.02324 | 0.0229  | 0.01919 | 0.02134 | 0.02019 | 0.01877 | 0.02048 | 0.01977 FLJ14397 |
| cg12827188 | 0.50335 | 0.52918 | 0.6358  | 0.68536 | 0.20143 | 0.68155 | 0.12026 | 0.30767 | 0.12045 | 0.27569 FGA      |
| cg12827555 | 0.07735 | 0.05866 | 0.67448 | 0.73811 | 0.22094 | 0.36461 | 0.11318 | 0.10989 | 0.1671  | 0.06791 CHX10    |
| cg12830694 | 0.89808 | 0.87917 | 0.908   | 0.89339 | 0.90838 | 0.90538 | 0.8909  | 0.88248 | 0.91642 | 0.88451 PPP1R14A |
| cg12830829 | 0.03819 | 0.04026 | 0.03974 | 0.03582 | 0.03213 | 0.03593 | 0.03285 | 0.03631 | 0.03039 | 0.03698 TXNDC    |
| cg12832565 | 0.82454 | 0.81957 | 0.88865 | 0.89997 | 0.90893 | 0.82728 | 0.49473 | 0.65846 | 0.86244 | 0.10374 CD160    |
| cg12832649 | 0.03783 | 0.03138 | 0.07151 | 0.36053 | 0.0185  | 0.0278  | 0.02769 | 0.02629 | 0.18526 | 0.05662 SPOCK    |
| cg12833011 | 0.66692 | 0.8389  | 0.86602 | 0.86801 | 0.89143 | 0.65442 | 0.84293 | 0.61164 | 0.86769 | 0.75299 KCNIP1   |
| cg12833508 | 0.06855 | 0.06975 | 0.10088 | 0.07942 | 0.06271 | 0.07622 | 0.07827 | 0.06779 | 0.24615 | 0.17945 AP1S3    |
| cg12833720 | 0.09199 | 0.10685 | 0.09877 | 0.1152  | 0.11136 | 0.08065 | 0.08859 | 0.07606 | 0.06961 | 0.07855 BCL3     |
| cg12835684 | 0.0992  | 0.07267 | 0.30698 | 0.41725 | 0.03508 | 0.05342 | 0.05364 | 0.0519  | 0.0623  | 0.04706 MFSD5    |
| cg12836610 | 0.10755 | 0.08367 | 0.09295 | 0.09473 | 0.17481 | 0.11087 | 0.12761 | 0.10599 | 0.08859 | 0.1059 MTCH2     |
| cg12836863 | 0.91065 | 0.90572 | 0.89118 | 0.90365 | 0.89959 | 0.85299 | 0.42117 | 0.41988 | 0.89742 | 0.90699 BRCA2    |
| cg12838902 | 0.5784  | 0.57242 | 0.50855 | 0.54612 | 0.59662 | 0.47151 | 0.52168 | 0.56207 | 0.50239 | 0.52123 SLC29A4  |
| cg12839593 | 0.04828 | 0.04858 | 0.03752 | 0.03584 | 0.04293 | 0.04754 | 0.03909 | 0.03768 | 0.03759 | 0.04059 SIX1     |
| cg12840719 | 0.46488 | 0.46464 | 0.44945 | 0.50594 | 0.44577 | 0.4504  | 0.49548 | 0.81506 | 0.85258 | 0.87659 CDKN2A   |
| cg12841020 | 0.67182 | 0.15222 | 0.34049 | 0.5274  | 0.4857  | 0.47217 | 0.08017 | 0.05811 | 0.04466 | 0.03453 PGF      |
| cg12842316 | 0.12705 | 0.10255 | 0.78578 | 0.83463 | 0.52084 | 0.51855 | 0.3409  | 0.47573 | 0.20017 | 0.46475 SLITRK4  |



|            |         |         |         |         |         |         |         |         |         |                  |
|------------|---------|---------|---------|---------|---------|---------|---------|---------|---------|------------------|
| cg12844497 | 0.0624  | 0.05755 | 0.05534 | 0.05069 | 0.05474 | 0.05764 | 0.06138 | 0.05886 | 0.04625 | 0.05563 AURKB    |
| cg12845249 | 0.03925 | 0.04246 | 0.03673 | 0.03897 | 0.03216 | 0.03417 | 0.04148 | 0.03407 | 0.03135 | 0.03202 THAP11   |
| cg12845808 | 0.91596 | 0.57809 | 0.9024  | 0.92618 | 0.92781 | 0.81828 | 0.80748 | 0.70784 | 0.90358 | 0.64255 PCDH12   |
| cg12846567 | 0.8616  | 0.87768 | 0.85575 | 0.86875 | 0.80628 | 0.80536 | 0.82151 | 0.86863 | 0.89407 | 0.87614 ZNF556   |
| cg12846938 | 0.11707 | 0.1042  | 0.10226 | 0.11393 | 0.08648 | 0.0833  | 0.09412 | 0.11058 | 0.08041 | 0.08496 GPSN2    |
| cg12847373 | 0.02482 | 0.03012 | 0.53727 | 0.52359 | 0.05735 | 0.02683 | 0.03916 | 0.02583 | 0.0499  | 0.02399 EDNRB    |
| cg12848131 | 0.02817 | 0.02574 | 0.0283  | 0.02174 | 0.02297 | 0.02665 | 0.0201  | 0.02129 | 0.02442 | 0.0197 KLF5      |
| cg12850636 | 0.71343 | 0.36629 | 0.8219  | 0.82329 | 0.41843 | 0.74297 | 0.12193 | 0.0697  | 0.83014 | 0.67238 TJP3     |
| cg12853521 | 0.14115 | 0.07173 | 0.15938 | 0.21794 | 0.41476 | 0.09936 | 0.36579 | 0.11477 | 0.09965 | 0.08198 MC5R     |
| cg12854483 | 0.87883 | 0.30936 | 0.26135 | 0.64565 | 0.92752 | 0.75202 | 0.16571 | 0.1111  | 0.26591 | 0.12248 CNN1     |
| cg12855851 | 0.83208 | 0.82951 | 0.72993 | 0.83599 | 0.9014  | 0.8871  | 0.60056 | 0.50909 | 0.57893 | 0.37902 PGC      |
| cg12855988 | 0.31878 | 0.30997 | 0.27978 | 0.32336 | 0.23066 | 0.30912 | 0.19123 | 0.18021 | 0.29009 | 0.24435 RPS12    |
| cg12856392 | 0.67268 | 0.55201 | 0.47044 | 0.50579 | 0.30882 | 0.21024 | 0.42176 | 0.32695 | 0.33012 | 0.45443 ZNF588   |
| cg12857957 | 0.02483 | 0.02483 | 0.03268 | 0.03327 | 0.02532 | 0.02968 | 0.02324 | 0.02333 | 0.02291 | 0.02491 LZTFL1   |
| cg12858075 | 0.03073 | 0.03305 | 0.03846 | 0.04717 | 0.02366 | 0.0317  | 0.03083 | 0.03029 | 0.03014 | 0.02846 E2F6     |
| cg12858460 | 0.05416 | 0.05867 | 0.087   | 0.05802 | 0.27934 | 0.0557  | 0.05818 | 0.0556  | 0.12538 | 0.23883 EOMES    |
| cg12858514 | 0.94366 | 0.74832 | 0.94706 | 0.94857 | 0.96292 | 0.87714 | 0.95449 | 0.82143 | 0.95635 | 0.89769 PADI3    |
| cg12862537 | 0.93558 | 0.94456 | 0.93502 | 0.93827 | 0.94095 | 0.93933 | 0.87989 | 0.902   | 0.94323 | 0.95032 NNAT     |
| cg12864235 | 0.20034 | 0.40106 | 0.83717 | 0.86986 | 0.14849 | 0.17205 | 0.76248 | 0.81678 | 0.19086 | 0.16483 CDH9     |
| cg12864581 | 0.7234  | 0.843   | 0.60092 | 0.65903 | 0.93323 | 0.91012 | 0.38443 | 0.38332 | 0.06874 | 0.04639 FAM77C   |
| cg12864853 | 0.04551 | 0.06774 | 0.05307 | 0.04668 | 0.0374  | 0.03523 | 0.04185 | 0.03621 | 0.06298 | 0.03967 TPBG     |
| cg12864903 | 0.82899 | 0.70249 | 0.72266 | 0.75172 | 0.75722 | 0.79619 | 0.74448 | 0.81708 | 0.82843 | 0.71814 FLJ46247 |
| cg12865837 | 0.78901 | 0.43961 | 0.1487  | 0.1384  | 0.23442 | 0.12484 | 0.75759 | 0.26466 | 0.77853 | 0.7516 SIM1      |
| cg12866859 | 0.84904 | 0.6994  | 0.87894 | 0.89086 | 0.79624 | 0.63227 | 0.76195 | 0.59509 | 0.34119 | 0.08434 HEXIM1   |
| cg12867068 | 0.0408  | 0.03843 | 0.03622 | 0.02681 | 0.05723 | 0.04541 | 0.02985 | 0.03234 | 0.03123 | 0.04379 CDKL1    |
| cg12867448 | 0.82581 | 0.53616 | 0.84737 | 0.86234 | 0.87909 | 0.81787 | 0.66162 | 0.59899 | 0.84444 | 0.66751 ODF2     |
| cg12869058 | 0.81448 | 0.2219  | 0.17519 | 0.68398 | 0.87914 | 0.84212 | 0.04634 | 0.24691 | 0.06396 | 0.04341 ABCA4    |
| cg12869240 | 0.68843 | 0.55482 | 0.73253 | 0.8075  | 0.7379  | 0.78007 | 0.52749 | 0.77592 | 0.79974 | 0.80858 DHX32    |
| cg12870705 | 0.05482 | 0.06771 | 0.05965 | 0.05659 | 0.0561  | 0.05301 | 0.04824 | 0.05861 | 0.05912 | 0.04693 NRP1     |
| cg12871124 | 0.02186 | 0.02014 | 0.0233  | 0.02294 | 0.01906 | 0.02241 | 0.01831 | 0.01927 | 0.0172  | 0.01473 STARD4   |
| cg12872238 | 0.77841 | 0.23791 | 0.72934 | 0.84836 | 0.55572 | 0.74364 | 0.33425 | 0.48389 | 0.14509 | 0.08506 TRPC5    |
| cg12873941 | 0.06849 | 0.05587 | 0.06167 | 0.06275 | 0.11035 | 0.07905 | 0.06835 | 0.05768 | 0.06178 | 0.05662 MOAP1    |
| cg12874092 | 0.02239 | 0.02197 | 0.0253  | 0.02903 | 0.02065 | 0.01845 | 0.02145 | 0.02214 | 0.01931 | 0.01782 VIM      |
| cg12875426 | 0.84492 | 0.85747 | 0.78274 | 0.83466 | 0.78965 | 0.7786  | 0.80199 | 0.8318  | 0.43698 | 0.39826 DYM      |
| cg12876594 | 0.90947 | 0.85226 | 0.51134 | 0.63214 | 0.06949 | 0.08347 | 0.91016 | 0.93325 | 0.09649 | 0.0842 NPR2      |
| cg12878228 | 0.06241 | 0.05557 | 0.47323 | 0.61567 | 0.70387 | 0.41368 | 0.05179 | 0.04994 | 0.06056 | 0.04919 PRSS1    |
| cg12879297 | 0.03412 | 0.03771 | 0.03309 | 0.03247 | 0.0297  | 0.03243 | 0.02951 | 0.03287 | 0.02927 | 0.02827 C16orf46 |
| cg12879425 | 0.79183 | 0.62295 | 0.73784 | 0.78935 | 0.35128 | 0.78232 | 0.45905 | 0.54764 | 0.56789 | 0.42143 BRDG1    |
| cg12880200 | 0.0507  | 0.05243 | 0.06497 | 0.06265 | 0.04693 | 0.04531 | 0.04387 | 0.05039 | 0.04436 | 0.04928 LSM10    |
| cg12880658 | 0.02825 | 0.03145 | 0.81987 | 0.9076  | 0.43317 | 0.33807 | 0.05404 | 0.0596  | 0.73475 | 0.64025 CDO1     |
| cg12883767 | 0.84426 | 0.7892  | 0.93687 | 0.95159 | 0.96328 | 0.94948 | 0.93185 | 0.92915 | 0.94235 | 0.95457 SLC26A10 |

|            |         |         |         |         |         |         |         |         |         |                  |
|------------|---------|---------|---------|---------|---------|---------|---------|---------|---------|------------------|
| cg12884406 | 0.51889 | 0.45865 | 0.29229 | 0.22511 | 0.21975 | 0.40312 | 0.41799 | 0.61253 | 0.3921  | 0.15601 COL11A1  |
| cg12885244 | 0.06025 | 0.06479 | 0.06328 | 0.05518 | 0.04148 | 0.06578 | 0.05396 | 0.05075 | 0.05075 | 0.05702 LOC51315 |
| cg12888039 | 0.02456 | 0.02797 | 0.0285  | 0.03199 | 0.0223  | 0.02543 | 0.02568 | 0.02828 | 0.0223  | 0.02236 ADIPOR1  |
| cg12888113 | 0.9604  | 0.96171 | 0.95737 | 0.96397 | 0.97108 | 0.95985 | 0.94705 | 0.94766 | 0.96256 | 0.96239 MASP2    |
| cg12888961 | 0.03377 | 0.02836 | 0.02954 | 0.0304  | 0.02639 | 0.03534 | 0.03046 | 0.03281 | 0.03022 | 0.02777 PCTK2    |
| cg12891678 | 0.06333 | 0.06159 | 0.13312 | 0.07071 | 0.07942 | 0.15807 | 0.05782 | 0.05938 | 0.05436 | 0.04941 SPRR2D   |
| cg12893143 | 0.03149 | 0.03321 | 0.08663 | 0.04142 | 0.0407  | 0.0289  | 0.27255 | 0.02908 | 0.04078 | 0.03174 UNC5A    |
| cg12894126 | 0.19693 | 0.09587 | 0.53932 | 0.56346 | 0.29769 | 0.23473 | 0.28024 | 0.08491 | 0.49691 | 0.31563 UCK1     |
| cg12894629 | 0.83695 | 0.30288 | 0.80922 | 0.86541 | 0.7163  | 0.65135 | 0.78429 | 0.64215 | 0.70726 | 0.57126 OSTalpha |
| cg12894984 | 0.84492 | 0.59444 | 0.85218 | 0.87592 | 0.92135 | 0.64213 | 0.85134 | 0.66848 | 0.86986 | 0.8031 PNMT      |
| cg12897370 | 0.05544 | 0.0512  | 0.06101 | 0.04885 | 0.03645 | 0.04019 | 0.0382  | 0.04254 | 0.03732 | 0.03243 RBM16    |
| cg12897458 | 0.85824 | 0.86008 | 0.86539 | 0.85976 | 0.84265 | 0.82392 | 0.85068 | 0.85546 | 0.89221 | 0.87975 PDF      |
| cg12900467 | 0.18619 | 0.03159 | 0.03075 | 0.02977 | 0.02313 | 0.03058 | 0.0272  | 0.02526 | 0.02298 | 0.02285 LATS2    |
| cg12900739 | 0.04361 | 0.04348 | 0.04533 | 0.04584 | 0.03415 | 0.04357 | 0.05074 | 0.03462 | 0.03723 | 0.03495 RRAGB    |
| cg12901064 | 0.61471 | 0.10182 | 0.15365 | 0.19709 | 0.43808 | 0.08978 | 0.137   | 0.07236 | 0.44102 | 0.06245 CXorf26  |
| cg12902039 | 0.05696 | 0.053   | 0.85277 | 0.88899 | 0.41262 | 0.48327 | 0.89093 | 0.88312 | 0.04311 | 0.03884 OCA2     |
| cg12902719 | 0.03499 | 0.03329 | 0.03754 | 0.03504 | 0.03868 | 0.03785 | 0.03074 | 0.03215 | 0.03718 | 0.03481 LIMD1    |
| cg12903171 | 0.45784 | 0.451   | 0.40106 | 0.40569 | 0.73723 | 0.69124 | 0.47155 | 0.52387 | 0.93075 | 0.89446 GRB10    |
| cg12906740 | 0.04087 | 0.04082 | 0.04254 | 0.04448 | 0.03153 | 0.04253 | 0.03794 | 0.03958 | 0.03475 | 0.03861 NUDT15   |
| cg12907644 | 0.25029 | 0.17802 | 0.31734 | 0.5411  | 0.32463 | 0.19938 | 0.16898 | 0.15175 | 0.14893 | 0.15626 SAA2     |
| cg12909005 | 0.03808 | 0.03715 | 0.03528 | 0.0369  | 0.03651 | 0.03731 | 0.03409 | 0.0326  | 0.02974 | 0.0308 ZNRD1     |
| cg12910797 | 0.8781  | 0.60168 | 0.1269  | 0.09234 | 0.25027 | 0.11616 | 0.86653 | 0.87209 | 0.90057 | 0.8864 HOXB3     |
| cg12911791 | 0.55982 | 0.45322 | 0.55206 | 0.56952 | 0.70543 | 0.67117 | 0.27305 | 0.07147 | 0.55768 | 0.51322 CSHL1    |
| cg12914014 | 0.8171  | 0.37433 | 0.86934 | 0.8737  | 0.78299 | 0.63818 | 0.86896 | 0.83767 | 0.70143 | 0.48571 USP7     |
| cg12914062 | 0.04881 | 0.04745 | 0.06397 | 0.04953 | 0.07619 | 0.05119 | 0.04129 | 0.04765 | 0.04154 | 0.03426 EXOC1    |
| cg12914362 | 0.02982 | 0.03786 | 0.03704 | 0.05038 | 0.02154 | 0.02559 | 0.02788 | 0.02848 | 0.02789 | 0.05766 FZD8     |
| cg12914657 | 0.10559 | 0.05594 | 0.22586 | 0.13745 | 0.24625 | 0.40352 | 0.05042 | 0.04281 | 0.05866 | 0.04418 GIMAP1   |
| cg12916723 | 0.9165  | 0.85635 | 0.8489  | 0.91809 | 0.92663 | 0.88716 | 0.61853 | 0.43151 | 0.92016 | 0.88022 NKG7     |
| cg12917695 | 0.0233  | 0.02633 | 0.03089 | 0.02792 | 0.0264  | 0.02697 | 0.01864 | 0.02259 | 0.01828 | 0.01831 HSPC268  |
| cg12919379 | 0.05633 | 0.0497  | 0.85483 | 0.88008 | 0.18612 | 0.40886 | 0.44157 | 0.43932 | 0.03499 | 0.03126 PNCK     |
| cg12920798 | 0.06028 | 0.05866 | 0.05816 | 0.05706 | 0.05752 | 0.05648 | 0.03627 | 0.03427 | 0.03995 | 0.03791 MGC4093  |
| cg12924262 | 0.5208  | 0.10307 | 0.1659  | 0.13007 | 0.17507 | 0.11079 | 0.15061 | 0.12616 | 0.09411 | 0.08183 CHPT1    |
| cg12924408 | 0.03723 | 0.03767 | 0.03741 | 0.03623 | 0.03097 | 0.03379 | 0.03185 | 0.02866 | 0.03575 | 0.03025 RABL4    |
| cg12925542 | 0.48906 | 0.53346 | 0.45148 | 0.45535 | 0.53037 | 0.55784 | 0.38822 | 0.53899 | 0.35685 | 0.31934 WDR49    |
| cg12927153 | 0.0542  | 0.02787 | 0.35594 | 0.47145 | 0.8366  | 0.74083 | 0.08873 | 0.07405 | 0.16016 | 0.11468 PTGS1    |
| cg12927617 | 0.7827  | 0.382   | 0.75561 | 0.83138 | 0.35825 | 0.2332  | 0.53819 | 0.19049 | 0.7645  | 0.27001 ORM1     |
| cg12927772 | 0.48403 | 0.53447 | 0.33286 | 0.3764  | 0.05249 | 0.06389 | 0.07483 | 0.10957 | 0.07272 | 0.07363 C9orf64  |
| cg12928668 | 0.04228 | 0.04498 | 0.07911 | 0.04397 | 0.29427 | 0.0419  | 0.04146 | 0.04081 | 0.43145 | 0.59767 SEMA6A   |
| cg12930602 | 0.05261 | 0.05905 | 0.05661 | 0.04389 | 0.08772 | 0.06109 | 0.06886 | 0.06278 | 0.05097 | 0.04758 DIPA     |
| cg12930920 | 0.04727 | 0.05388 | 0.04192 | 0.04782 | 0.04268 | 0.06073 | 0.04394 | 0.04505 | 0.03758 | 0.03853 KIAA1008 |
| cg12932195 | 0.91644 | 0.55303 | 0.92278 | 0.92968 | 0.94015 | 0.91677 | 0.92394 | 0.91971 | 0.92969 | 0.93925 ALG12    |

|            |         |         |         |         |         |         |         |         |         |                  |
|------------|---------|---------|---------|---------|---------|---------|---------|---------|---------|------------------|
| cg12936220 | 0.75077 | 0.40229 | 0.65775 | 0.81941 | 0.50967 | 0.55294 | 0.3021  | 0.40441 | 0.06069 | 0.0332 RPL26L1   |
| cg12936747 | 0.50589 | 0.5049  | 0.69102 | 0.68252 | 0.11709 | 0.05227 | 0.5909  | 0.37659 | 0.08537 | 0.04457 RBP4     |
| cg12937434 | 0.72154 | 0.32    | 0.76924 | 0.77049 | 0.74339 | 0.77751 | 0.77047 | 0.59545 | 0.81272 | 0.76133 BZRAP1   |
| cg12937807 | 0.03892 | 0.04024 | 0.06667 | 0.05309 | 0.05286 | 0.04125 | 0.04839 | 0.04828 | 0.04069 | 0.03498 LPHN1    |
| cg12938998 | 0.05013 | 0.0504  | 0.11252 | 0.13672 | 0.1479  | 0.07289 | 0.11242 | 0.04574 | 0.04358 | 0.0396 GAB3      |
| cg12939527 | 0.08462 | 0.07703 | 0.07508 | 0.08538 | 0.14816 | 0.08801 | 0.06472 | 0.06435 | 0.07109 | 0.06764 TNIP2    |
| cg12939547 | 0.8854  | 0.89841 | 0.88887 | 0.90365 | 0.8803  | 0.85006 | 0.88034 | 0.86555 | 0.90321 | 0.8609 C6orf27   |
| cg12940073 | 0.29436 | 0.34078 | 0.69778 | 0.70973 | 0.48762 | 0.49944 | 0.59728 | 0.53445 | 0.63479 | 0.58448 ABCC12   |
| cg12940430 | 0.05856 | 0.06391 | 0.06145 | 0.05727 | 0.07494 | 0.08124 | 0.05147 | 0.05962 | 0.04698 | 0.05492 SRF      |
| cg12941369 | 0.2916  | 0.1277  | 0.41345 | 0.37967 | 0.55656 | 0.50659 | 0.1696  | 0.11412 | 0.16254 | 0.49592 PDCD6IP  |
| cg12941931 | 0.61315 | 0.11033 | 0.36654 | 0.62999 | 0.69334 | 0.73377 | 0.70801 | 0.40219 | 0.14843 | 0.09327 SEMA6B   |
| cg12943082 | 0.8512  | 0.47978 | 0.94381 | 0.94891 | 0.93941 | 0.9189  | 0.92445 | 0.89343 | 0.8946  | 0.6888 CCL26     |
| cg12946225 | 0.04778 | 0.03213 | 0.0751  | 0.16878 | 0.04296 | 0.0325  | 0.02525 | 0.02407 | 0.02239 | 0.02107 HMG20B   |
| cg12946690 | 0.20546 | 0.19482 | 0.20528 | 0.20513 | 0.16767 | 0.22091 | 0.22386 | 0.24544 | 0.21667 | 0.22973 SMG6     |
| cg12949760 | 0.5579  | 0.05849 | 0.63312 | 0.77327 | 0.32126 | 0.51384 | 0.10316 | 0.08497 | 0.287   | 0.05424 KCNQ1    |
| cg12949975 | 0.39111 | 0.11462 | 0.92473 | 0.96308 | 0.92384 | 0.96732 | 0.38731 | 0.3737  | 0.88503 | 0.9467 GDF7      |
| cg12951282 | 0.45124 | 0.15546 | 0.51081 | 0.61805 | 0.52708 | 0.61539 | 0.08119 | 0.07236 | 0.31853 | 0.07767 ASGR2    |
| cg12952132 | 0.51693 | 0.07216 | 0.11988 | 0.18296 | 0.60379 | 0.38102 | 0.04008 | 0.03447 | 0.04355 | 0.04422 NCR1     |
| cg12952136 | 0.07812 | 0.04583 | 0.04544 | 0.0615  | 0.03796 | 0.0548  | 0.04274 | 0.04343 | 0.0406  | 0.03411 GRSF1    |
| cg12953249 | 0.89983 | 0.62246 | 0.89792 | 0.91781 | 0.90365 | 0.90964 | 0.86211 | 0.65739 | 0.91588 | 0.91791 CRB2     |
| cg12954718 | 0.28091 | 0.10843 | 0.24384 | 0.33462 | 0.17167 | 0.21321 | 0.08782 | 0.10685 | 0.16484 | 0.08169 USP6     |
| cg12955127 | 0.32544 | 0.10124 | 0.36299 | 0.20238 | 0.55539 | 0.26937 | 0.30934 | 0.11095 | 0.842   | 0.77295 ATP5F1   |
| cg12955583 | 0.01969 | 0.01787 | 0.02396 | 0.01971 | 0.01823 | 0.02138 | 0.01606 | 0.01821 | 0.02678 | 0.01515 KNDC1    |
| cg12958778 | 0.38999 | 0.0624  | 0.48255 | 0.65433 | 0.94579 | 0.79015 | 0.87795 | 0.44529 | 0.90884 | 0.7007 TBC1D14   |
| cg12958813 | 0.79929 | 0.83934 | 0.71721 | 0.78476 | 0.6768  | 0.80607 | 0.73413 | 0.83227 | 0.15535 | 0.16437 ATP6V1G3 |
| cg12958836 | 0.04489 | 0.0494  | 0.06032 | 0.06814 | 0.10318 | 0.04216 | 0.05317 | 0.05653 | 0.05098 | 0.05098 FOXJ2    |
| cg12960248 | 0.07437 | 0.07147 | 0.08582 | 0.07404 | 0.1404  | 0.12962 | 0.06962 | 0.0657  | 0.06045 | 0.07017 MGC11335 |
| cg12962021 | 0.1415  | 0.10218 | 0.10607 | 0.08939 | 0.19837 | 0.0688  | 0.14267 | 0.06651 | 0.06908 | 0.06107 LIN9     |
| cg12962778 | 0.92001 | 0.90035 | 0.9063  | 0.9123  | 0.86114 | 0.91427 | 0.6421  | 0.85807 | 0.92188 | 0.88125 ZNF385   |
| cg12963312 | 0.02111 | 0.02425 | 0.02252 | 0.0223  | 0.01751 | 0.02037 | 0.01999 | 0.01788 | 0.01845 | 0.01703 TRAM2    |
| cg12965512 | 0.74511 | 0.74547 | 0.19544 | 0.16697 | 0.54184 | 0.68591 | 0.19629 | 0.18501 | 0.21055 | 0.16841 TSPAN8   |
| cg12966875 | 0.10592 | 0.05337 | 0.10014 | 0.31844 | 0.06594 | 0.0672  | 0.05386 | 0.07096 | 0.04453 | 0.03819 SLPI     |
| cg12967560 | 0.91844 | 0.9185  | 0.91891 | 0.91857 | 0.9409  | 0.65004 | 0.76345 | 0.4862  | 0.93436 | 0.92376 LYSDM4   |
| cg12968903 | 0.80748 | 0.74562 | 0.46401 | 0.76544 | 0.68163 | 0.7494  | 0.81735 | 0.80639 | 0.86566 | 0.16808 FLJ32028 |
| cg12969407 | 0.1048  | 0.11411 | 0.172   | 0.12398 | 0.17437 | 0.12576 | 0.1159  | 0.10205 | 0.11904 | 0.12476 NCOA7    |
| cg12969595 | 0.02677 | 0.02813 | 0.05272 | 0.04151 | 0.14584 | 0.06859 | 0.0273  | 0.0315  | 0.07804 | 0.02369 TMEM98   |
| cg12970008 | 0.05518 | 0.05329 | 0.05084 | 0.05044 | 0.03175 | 0.04317 | 0.04115 | 0.04966 | 0.05552 | 0.04057 OSBPL5   |
| cg12970081 | 0.76464 | 0.77881 | 0.37442 | 0.37853 | 0.50359 | 0.33557 | 0.31416 | 0.14101 | 0.47747 | 0.51476 GPR32    |
| cg12970084 | 0.70446 | 0.42664 | 0.47416 | 0.60267 | 0.94115 | 0.54888 | 0.5018  | 0.47675 | 0.57447 | 0.28435 ELF3     |
| cg12970724 | 0.18208 | 0.19119 | 0.36769 | 0.37642 | 0.67771 | 0.67715 | 0.19572 | 0.21547 | 0.18436 | 0.16073 CRLF1    |
| cg12971338 | 0.03771 | 0.04281 | 0.04948 | 0.04103 | 0.03017 | 0.03855 | 0.03614 | 0.04338 | 0.0314  | 0.03438 TRAF4    |

|            |         |         |         |         |         |         |         |         |         |                    |
|------------|---------|---------|---------|---------|---------|---------|---------|---------|---------|--------------------|
| cg12971694 | 0.73125 | 0.48559 | 0.35867 | 0.56057 | 0.88192 | 0.79744 | 0.28143 | 0.06897 | 0.57307 | 0.26011 CD72       |
| cg12971958 | 0.04773 | 0.04341 | 0.05381 | 0.06241 | 0.13545 | 0.05029 | 0.03318 | 0.03282 | 0.04468 | 0.03638 PDCD6IP    |
| cg12973651 | 0.59696 | 0.10032 | 0.9116  | 0.91507 | 0.91479 | 0.80057 | 0.09531 | 0.03801 | 0.3072  | 0.11702 CNFN       |
| cg12975220 | 0.02783 | 0.03014 | 0.03414 | 0.03037 | 0.03297 | 0.0309  | 0.02806 | 0.01901 | 0.0287  | 0.02697 MEIS1      |
| cg12977318 | 0.02945 | 0.03459 | 0.03091 | 0.02832 | 0.02366 | 0.02952 | 0.0331  | 0.03253 | 0.02851 | 0.02118 VPS26B     |
| cg12978308 | 0.87605 | 0.42327 | 0.94705 | 0.95444 | 0.96611 | 0.95367 | 0.93256 | 0.89095 | 0.47529 | 0.42907 NEIL1      |
| cg12979743 | 0.05716 | 0.06142 | 0.05037 | 0.05538 | 0.04447 | 0.05486 | 0.04711 | 0.05549 | 0.05298 | 0.04534 NDUFB5     |
| cg12981137 | 0.03141 | 0.01957 | 0.88443 | 0.97825 | 0.09053 | 0.0186  | 0.04962 | 0.21042 | 0.03323 | 0.01512 MGMT       |
| cg12983442 | 0.06983 | 0.05966 | 0.0795  | 0.07597 | 0.08772 | 0.07524 | 0.05847 | 0.05375 | 0.05357 | 0.05751 ZNF552     |
| cg12984356 | 0.05529 | 0.06232 | 0.09319 | 0.08754 | 0.08098 | 0.05931 | 0.07562 | 0.0643  | 0.4527  | 0.05727 MAN2A2     |
| cg12985164 | 0.05227 | 0.04989 | 0.05223 | 0.04758 | 0.04836 | 0.0557  | 0.04126 | 0.04023 | 0.03705 | 0.0401 TSEN2       |
| cg12985418 | 0.04283 | 0.04768 | 0.04727 | 0.04424 | 0.04266 | 0.05197 | 0.04391 | 0.03812 | 0.04964 | 0.04434 MIB1       |
| cg12986021 | 0.47993 | 0.54429 | 0.53545 | 0.45064 | 0.45357 | 0.54767 | 0.50894 | 0.241   | 0.77993 | 0.75446 DIRAS3     |
| cg12989642 | 0.04266 | 0.03813 | 0.04357 | 0.03639 | 0.04355 | 0.04273 | 0.03925 | 0.04145 | 0.03107 | 0.02892 PURB       |
| cg12989650 | 0.78682 | 0.71185 | 0.74645 | 0.8436  | 0.72212 | 0.77665 | 0.41878 | 0.38867 | 0.66351 | 0.42947 ARHGEF15   |
| cg12990410 | 0.48376 | 0.21226 | 0.32075 | 0.45627 | 0.46163 | 0.28231 | 0.20439 | 0.20335 | 0.12764 | 0.15042 PCDHB4     |
| cg12991341 | 0.86832 | 0.86371 | 0.81294 | 0.84129 | 0.9257  | 0.83099 | 0.54827 | 0.7283  | 0.74143 | 0.82267 TMEM74     |
| cg12991365 | 0.29643 | 0.10483 | 0.81797 | 0.82979 | 0.72377 | 0.36304 | 0.1595  | 0.09201 | 0.31767 | 0.20347 CHDH       |
| cg12992720 | 0.12022 | 0.08686 | 0.86428 | 0.87782 | 0.93966 | 0.95667 | 0.94286 | 0.93748 | 0.95844 | 0.93096 EDG4       |
| cg12994003 | 0.05497 | 0.05917 | 0.08612 | 0.07845 | 0.11233 | 0.06405 | 0.05359 | 0.04983 | 0.04825 | 0.04888 LBR        |
| cg12995941 | 0.4532  | 0.46098 | 0.27417 | 0.39282 | 0.49569 | 0.6441  | 0.26133 | 0.13815 | 0.18228 | 0.14736 INSRR      |
| cg12997958 | 0.0594  | 0.05311 | 0.05212 | 0.05365 | 0.08035 | 0.073   | 0.0639  | 0.05545 | 0.05267 | 0.05704 FLII       |
| cg12998491 | 0.01783 | 0.01662 | 0.06869 | 0.0265  | 0.24566 | 0.35233 | 0.01884 | 0.01411 | 0.01567 | 0.01111 FAM78A     |
| cg12998614 | 0.72917 | 0.08523 | 0.61409 | 0.62754 | 0.93879 | 0.60123 | 0.47013 | 0.06982 | 0.70851 | 0.48181 KISS1R     |
| cg12999103 | 0.04923 | 0.04719 | 0.06707 | 0.06384 | 0.0616  | 0.05539 | 0.04232 | 0.04878 | 0.05825 | 0.04284 ATP13A2    |
| cg12999109 | 0.9099  | 0.8935  | 0.85048 | 0.91659 | 0.84229 | 0.75899 | 0.43225 | 0.78804 | 0.90007 | 0.84722 ASAH3      |
| cg13002506 | 0.42578 | 0.16902 | 0.25062 | 0.17106 | 0.30429 | 0.21983 | 0.22619 | 0.21437 | 0.19738 | 0.17158 GDPD4      |
| cg13002939 | 0.03404 | 0.03046 | 0.03409 | 0.03048 | 0.06996 | 0.36258 | 0.02774 | 0.02586 | 0.02754 | 0.02355 PDGFRA     |
| cg13003163 | 0.65663 | 0.59817 | 0.77577 | 0.8775  | 0.87507 | 0.87714 | 0.459   | 0.4388  | 0.37114 | 0.41654 ANP32D     |
| cg13005002 | 0.16219 | 0.08924 | 0.24449 | 0.34571 | 0.36825 | 0.3495  | 0.10946 | 0.09931 | 0.34623 | 0.30102 RFPL3      |
| cg13006591 | 0.56289 | 0.16812 | 0.87996 | 0.89645 | 0.76459 | 0.72433 | 0.86866 | 0.8053  | 0.8315  | 0.50127 TLR6       |
| cg13007988 | 0.75029 | 0.73566 | 0.65881 | 0.7042  | 0.63932 | 0.70305 | 0.63617 | 0.65245 | 0.71237 | 0.71861 MLL2       |
| cg13014406 | 0.0417  | 0.04308 | 0.04379 | 0.04108 | 0.03307 | 0.03668 | 0.02781 | 0.03236 | 0.04581 | 0.03028 RER1       |
| cg13015534 | 0.58982 | 0.17351 | 0.78437 | 0.80489 | 0.6986  | 0.60943 | 0.53215 | 0.50695 | 0.80163 | 0.10528 ST6GALNAC1 |
| cg13017345 | 0.87291 | 0.7192  | 0.86196 | 0.88827 | 0.88223 | 0.8439  | 0.87623 | 0.6731  | 0.89749 | 0.85223 MXI1       |
| cg13018903 | 0.6172  | 0.30173 | 0.85532 | 0.84425 | 0.78551 | 0.59558 | 0.18316 | 0.3905  | 0.86287 | 0.65347 FLJ25530   |
| cg13019092 | 0.63845 | 0.31858 | 0.82142 | 0.87937 | 0.88973 | 0.75188 | 0.83016 | 0.75895 | 0.89212 | 0.60115 PDZK1      |
| cg13021192 | 0.97688 | 0.97489 | 0.04566 | 0.04078 | 0.04288 | 0.0471  | 0.77922 | 0.78398 | 0.03775 | 0.03447 CTSZ       |
| cg13021384 | 0.05028 | 0.02846 | 0.20186 | 0.12288 | 0.55028 | 0.51233 | 0.2323  | 0.63574 | 0.14249 | 0.02124 SLC27A2    |
| cg13021725 | 0.04331 | 0.03602 | 0.19162 | 0.25742 | 0.2124  | 0.08899 | 0.21875 | 0.0942  | 0.0408  | 0.02216 C2orf172   |
| cg13022129 | 0.95291 | 0.92115 | 0.94498 | 0.95007 | 0.94642 | 0.94285 | 0.95448 | 0.95829 | 0.959   | 0.95215 PHYHD1     |

|            |         |         |         |         |         |         |         |         |         |                  |
|------------|---------|---------|---------|---------|---------|---------|---------|---------|---------|------------------|
| cg13022174 | 0.07009 | 0.05562 | 0.04265 | 0.04235 | 0.02831 | 0.0365  | 0.04073 | 0.03975 | 0.03753 | 0.03446 SS18     |
| cg13026483 | 0.05121 | 0.05993 | 0.06862 | 0.06104 | 0.04441 | 0.03897 | 0.06272 | 0.05618 | 0.04376 | 0.04381 FLJ20422 |
| cg13030582 | 0.02819 | 0.03635 | 0.31293 | 0.04135 | 0.23665 | 0.09679 | 0.79988 | 0.02923 | 0.48048 | 0.34517 MFAP4    |
| cg13031432 | 0.03578 | 0.03862 | 0.04021 | 0.03054 | 0.03978 | 0.22632 | 0.03532 | 0.0349  | 0.04813 | 0.02481 NDRG4    |
| cg13031679 | 0.058   | 0.0657  | 0.05774 | 0.05799 | 0.05413 | 0.04691 | 0.05357 | 0.05284 | 0.04445 | 0.05256 FLJ10560 |
| cg13033054 | 0.82478 | 0.65748 | 0.47054 | 0.49987 | 0.5064  | 0.45082 | 0.22014 | 0.32483 | 0.65988 | 0.64604 C21orf77 |
| cg13033853 | 0.05633 | 0.05757 | 0.05365 | 0.04817 | 0.05723 | 0.05372 | 0.04469 | 0.04655 | 0.03958 | 0.04036 FIBCD1   |
| cg13035743 | 0.8901  | 0.90897 | 0.92783 | 0.93257 | 0.87765 | 0.90799 | 0.67161 | 0.21046 | 0.96098 | 0.94894 PRRT1    |
| cg13037275 | 0.34209 | 0.47573 | 0.35892 | 0.45566 | 0.23048 | 0.31758 | 0.18312 | 0.12582 | 0.42979 | 0.42058 SESN3    |
| cg13038560 | 0.89474 | 0.7635  | 0.17503 | 0.22936 | 0.31491 | 0.45031 | 0.26658 | 0.26147 | 0.87285 | 0.82708 FLJ22555 |
| cg13041032 | 0.83214 | 0.84311 | 0.85648 | 0.87276 | 0.73726 | 0.81417 | 0.77749 | 0.80223 | 0.85419 | 0.85269 MMP13    |
| cg13042288 | 0.89676 | 0.84802 | 0.89707 | 0.89389 | 0.91031 | 0.90071 | 0.86896 | 0.79325 | 0.90174 | 0.87287 ANPEP    |
| cg13042487 | 0.0363  | 0.03671 | 0.13241 | 0.04189 | 0.03069 | 0.02659 | 0.0517  | 0.05086 | 0.05199 | 0.0289 XRCC3     |
| cg13043509 | 0.40444 | 0.15157 | 0.49968 | 0.3685  | 0.47807 | 0.45663 | 0.02977 | 0.03583 | 0.03115 | 0.04045 GIMAP5   |
| cg13043862 | 0.07641 | 0.07314 | 0.15977 | 0.09107 | 0.12121 | 0.07383 | 0.09959 | 0.08414 | 0.07708 | 0.10588 EYA1     |
| cg13044136 | 0.23992 | 0.2278  | 0.08387 | 0.07371 | 0.36887 | 0.09109 | 0.16869 | 0.10482 | 0.41504 | 0.24576 AES      |
| cg13044223 | 0.05924 | 0.05868 | 0.05875 | 0.06106 | 0.06613 | 0.06743 | 0.0602  | 0.05354 | 0.05455 | 0.05718 RPS8     |
| cg13044277 | 0.24785 | 0.22992 | 0.26222 | 0.22925 | 0.29345 | 0.23315 | 0.36569 | 0.31043 | 0.17597 | 0.28303 NRG4     |
| cg13045611 | 0.07924 | 0.06709 | 0.12402 | 0.13355 | 0.09967 | 0.06663 | 0.08037 | 0.07329 | 0.0613  | 0.06564 SDF2     |
| cg13047596 | 0.9609  | 0.94012 | 0.9663  | 0.96953 | 0.96979 | 0.96948 | 0.96919 | 0.96886 | 0.96964 | 0.96928 UNQ830   |
| cg13047892 | 0.03803 | 0.04269 | 0.7297  | 0.69432 | 0.06148 | 0.04099 | 0.25193 | 0.1243  | 0.08405 | 0.04304 MEOX2    |
| cg13051968 | 0.01909 | 0.01862 | 0.02967 | 0.26751 | 0.02325 | 0.01575 | 0.01754 | 0.01885 | 0.01628 | 0.01514 RNF144   |
| cg13052755 | 0.90042 | 0.90423 | 0.85232 | 0.86657 | 0.94517 | 0.94411 | 0.90355 | 0.90603 | 0.89346 | 0.85676 PVT1     |
| cg13053396 | 0.83137 | 0.3835  | 0.85016 | 0.88331 | 0.90761 | 0.86827 | 0.41634 | 0.17217 | 0.87756 | 0.83258 C1S      |
| cg13053608 | 0.53834 | 0.15087 | 0.82524 | 0.90323 | 0.96129 | 0.79805 | 0.71745 | 0.52918 | 0.61048 | 0.4171 LGP1      |
| cg13055001 | 0.64535 | 0.25766 | 0.62654 | 0.69404 | 0.32465 | 0.18517 | 0.06151 | 0.05352 | 0.26329 | 0.14175 PPP1CA   |
| cg13055278 | 0.24531 | 0.31774 | 0.49195 | 0.50003 | 0.05749 | 0.06194 | 0.05998 | 0.06127 | 0.07349 | 0.06573 ID2      |
| cg13056210 | 0.65471 | 0.68705 | 0.69399 | 0.75289 | 0.59937 | 0.51715 | 0.65428 | 0.72502 | 0.25833 | 0.21042 MXRA5    |
| cg13056269 | 0.03444 | 0.03293 | 0.0364  | 0.03037 | 0.03963 | 0.03553 | 0.03147 | 0.02868 | 0.04412 | 0.02765 MCM6     |
| cg13057368 | 0.03329 | 0.03518 | 0.04464 | 0.03339 | 0.05175 | 0.04735 | 0.03958 | 0.0362  | 0.03621 | 0.03423 SSB      |
| cg13057891 | 0.03566 | 0.03659 | 0.03544 | 0.03413 | 0.02871 | 0.04205 | 0.03372 | 0.02556 | 0.02163 | 0.02315 ERCC5    |
| cg13058581 | 0.05773 | 0.06907 | 0.0513  | 0.05002 | 0.0575  | 0.04663 | 0.07666 | 0.08603 | 0.03248 | 0.03179 PRDM10   |
| cg13059335 | 0.79233 | 0.75213 | 0.65665 | 0.75222 | 0.53779 | 0.79358 | 0.23849 | 0.27929 | 0.28962 | 0.14858 ADAMDEC1 |
| cg13059782 | 0.10789 | 0.06662 | 0.34203 | 0.3424  | 0.2166  | 0.06234 | 0.42672 | 0.55369 | 0.39433 | 0.33693 CNTNAP3  |
| cg13060154 | 0.91372 | 0.21399 | 0.07435 | 0.07597 | 0.19516 | 0.03994 | 0.34707 | 0.32514 | 0.95704 | 0.9246 DAB2IP    |
| cg13060405 | 0.07214 | 0.07185 | 0.08518 | 0.07575 | 0.05205 | 0.06686 | 0.06485 | 0.06296 | 0.0924  | 0.06805 MYO18A   |
| cg13060646 | 0.53177 | 0.94997 | 0.02141 | 0.0201  | 0.01411 | 0.01629 | 0.34745 | 0.72897 | 0.01336 | 0.01403 ADFP     |
| cg13060997 | 0.81085 | 0.83605 | 0.08146 | 0.12503 | 0.04007 | 0.04415 | 0.11222 | 0.04117 | 0.06237 | 0.03256 CCNA1    |
| cg13062935 | 0.11756 | 0.066   | 0.73644 | 0.80962 | 0.72077 | 0.86754 | 0.7524  | 0.7153  | 0.48826 | 0.3267 MRGPRX2   |
| cg13064571 | 0.66712 | 0.32543 | 0.40017 | 0.64961 | 0.55466 | 0.22784 | 0.24207 | 0.26245 | 0.53002 | 0.24265 C8orf44  |
| cg13064881 | 0.06775 | 0.0539  | 0.07161 | 0.06004 | 0.04512 | 0.05188 | 0.06065 | 0.05351 | 0.05853 | 0.05155 CDC16    |

|            |         |         |         |         |         |         |         |         |         |                  |
|------------|---------|---------|---------|---------|---------|---------|---------|---------|---------|------------------|
| cg13066542 | 0.03435 | 0.02942 | 0.02779 | 0.02724 | 0.03769 | 0.03836 | 0.02596 | 0.03025 | 0.02507 | 0.02468 RFK      |
| cg13066963 | 0.54368 | 0.26798 | 0.61745 | 0.80579 | 0.96071 | 0.93744 | 0.47116 | 0.30944 | 0.89901 | 0.61535 ESPN     |
| cg13067215 | 0.19762 | 0.3396  | 0.24385 | 0.54419 | 0.71676 | 0.92868 | 0.08824 | 0.05233 | 0.36384 | 0.07939 CGI-38   |
| cg13073894 | 0.04729 | 0.03959 | 0.09414 | 0.05092 | 0.4629  | 0.44323 | 0.03812 | 0.03624 | 0.04265 | 0.03841 ZNF566   |
| cg13074965 | 0.89244 | 0.80517 | 0.88742 | 0.89647 | 0.92474 | 0.90117 | 0.88342 | 0.68911 | 0.91044 | 0.82666 MGC15912 |
| cg13077930 | 0.66235 | 0.45618 | 0.61007 | 0.62536 | 0.55012 | 0.61977 | 0.61555 | 0.6661  | 0.63915 | 0.24475 ALB      |
| cg13078388 | 0.1     | 0.0984  | 0.10326 | 0.10988 | 0.11478 | 0.09637 | 0.08098 | 0.08981 | 0.0896  | 0.0739 CIRBP     |
| cg13079099 | 0.03232 | 0.03031 | 0.03738 | 0.03235 | 0.18345 | 0.02488 | 0.24997 | 0.03031 | 0.03015 | 0.02622 LENG9    |
| cg13080465 | 0.12586 | 0.04224 | 0.42585 | 0.44646 | 0.10357 | 0.03752 | 0.08203 | 0.04192 | 0.29178 | 0.03603 MANSC1   |
| cg13081704 | 0.56397 | 0.29069 | 0.97599 | 0.97327 | 0.97394 | 0.97301 | 0.93111 | 0.88714 | 0.98093 | 0.97493 KCNQ1DN  |
| cg13082192 | 0.06244 | 0.05991 | 0.90565 | 0.93885 | 0.38581 | 0.55919 | 0.58453 | 0.61373 | 0.12101 | 0.0686 IRS4      |
| cg13083810 | 0.86288 | 0.64184 | 0.86519 | 0.8636  | 0.921   | 0.87838 | 0.87282 | 0.7578  | 0.68877 | 0.65576 POU5F1   |
| cg13084335 | 0.42424 | 0.13632 | 0.12581 | 0.1192  | 0.06156 | 0.0675  | 0.05153 | 0.06772 | 0.02995 | 0.02947 CRYAB    |
| cg13084429 | 0.18833 | 0.10709 | 0.78034 | 0.86804 | 0.4788  | 0.08325 | 0.16201 | 0.07317 | 0.91566 | 0.774 VWA2       |
| cg13084525 | 0.08747 | 0.10176 | 0.60602 | 0.72491 | 0.73188 | 0.15808 | 0.76377 | 0.27672 | 0.19795 | 0.09711 EHF      |
| cg13084909 | 0.02903 | 0.02911 | 0.03301 | 0.03028 | 0.02529 | 0.03282 | 0.0299  | 0.02808 | 0.02566 | 0.0234 RNF26     |
| cg13085976 | 0.57719 | 0.65048 | 0.7932  | 0.82373 | 0.91565 | 0.77438 | 0.8692  | 0.81721 | 0.88032 | 0.828 FLJ20245   |
| cg13086467 | 0.88875 | 0.74438 | 0.79387 | 0.83418 | 0.93739 | 0.88838 | 0.6316  | 0.77686 | 0.91829 | 0.70943 MORG1    |
| cg13086586 | 0.39749 | 0.45837 | 0.44087 | 0.42499 | 0.26661 | 0.37499 | 0.35563 | 0.39396 | 0.43937 | 0.35262 PPAT     |
| cg13088755 | 0.81696 | 0.81248 | 0.26122 | 0.59398 | 0.45794 | 0.51712 | 0.29893 | 0.45221 | 0.14619 | 0.15455 P2RY10   |
| cg13097407 | 0.43938 | 0.38194 | 0.59177 | 0.83535 | 0.28698 | 0.49456 | 0.38464 | 0.09029 | 0.23684 | 0.03478 CRIP3    |
| cg13097816 | 0.68295 | 0.19346 | 0.37111 | 0.56339 | 0.67458 | 0.32004 | 0.79182 | 0.38548 | 0.08917 | 0.03115 GPR35    |
| cg13098382 | 0.03874 | 0.03957 | 0.06018 | 0.05152 | 0.03001 | 0.03722 | 0.03078 | 0.02925 | 0.02956 | 0.02877 RNF38    |
| cg13098960 | 0.2622  | 0.10265 | 0.07763 | 0.09472 | 0.72548 | 0.36521 | 0.77971 | 0.52951 | 0.71112 | 0.6485 SOX15     |
| cg13099330 | 0.91623 | 0.75696 | 0.95132 | 0.94274 | 0.97208 | 0.93764 | 0.94896 | 0.52074 | 0.96227 | 0.94831 RBP1     |
| cg13102585 | 0.22905 | 0.05154 | 0.59323 | 0.56495 | 0.76227 | 0.71198 | 0.31695 | 0.05582 | 0.08273 | 0.05671 RPIP8    |
| cg13105904 | 0.43593 | 0.04782 | 0.45161 | 0.58981 | 0.06175 | 0.0404  | 0.48979 | 0.0831  | 0.95338 | 0.65224 KIAA0323 |
| cg13107169 | 0.88308 | 0.8975  | 0.90127 | 0.89075 | 0.92556 | 0.90076 | 0.87559 | 0.88597 | 0.90061 | 0.88986 N4BP2    |
| cg13108181 | 0.11202 | 0.03844 | 0.04602 | 0.03218 | 0.33004 | 0.62625 | 0.03431 | 0.03109 | 0.032   | 0.02317 ZNF141   |
| cg13108328 | 0.07652 | 0.11944 | 0.12511 | 0.13077 | 0.18021 | 0.07943 | 0.13256 | 0.12456 | 0.10045 | 0.11007 PLEKHA5  |
| cg13109289 | 0.78227 | 0.80378 | 0.77435 | 0.79449 | 0.71953 | 0.80333 | 0.77913 | 0.62571 | 0.84773 | 0.82 C1GALT1     |
| cg13112336 | 0.07137 | 0.07061 | 0.07589 | 0.06276 | 0.05583 | 0.06647 | 0.07755 | 0.07265 | 0.06522 | 0.0664 MCMDC1    |
| cg13112511 | 0.80938 | 0.81624 | 0.75014 | 0.77713 | 0.73372 | 0.64659 | 0.69457 | 0.80938 | 0.85025 | 0.7656 PDE4D     |
| cg13113656 | 0.03122 | 0.03237 | 0.03953 | 0.03475 | 0.02467 | 0.02995 | 0.02866 | 0.02684 | 0.02879 | 0.0286 CLTC      |
| cg13114389 | 0.03868 | 0.04414 | 0.04081 | 0.03824 | 0.03019 | 0.03982 | 0.03786 | 0.04025 | 0.03193 | 0.03229 ENTPD7   |
| cg13117105 | 0.03993 | 0.04132 | 0.11081 | 0.09083 | 0.10735 | 0.03159 | 0.11067 | 0.04076 | 0.03612 | 0.02614 PAQR5    |
| cg13118748 | 0.04205 | 0.03481 | 0.04411 | 0.04328 | 0.03353 | 0.0363  | 0.03743 | 0.03414 | 0.03286 | 0.0382 C6orf136  |
| cg13118849 | 0.50224 | 0.52927 | 0.5622  | 0.80891 | 0.61047 | 0.62241 | 0.4645  | 0.50993 | 0.6972  | 0.65438 CSPG3    |
| cg13119609 | 0.76432 | 0.73837 | 0.74464 | 0.81685 | 0.71731 | 0.6818  | 0.65035 | 0.551   | 0.76409 | 0.70852 APOC2    |
| cg13120519 | 0.05711 | 0.06146 | 0.0606  | 0.05051 | 0.04232 | 0.05022 | 0.04615 | 0.04657 | 0.05219 | 0.04356 ALKBH7   |
| cg13120814 | 0.25663 | 0.13146 | 0.25358 | 0.22014 | 0.25976 | 0.2489  | 0.11954 | 0.13271 | 0.10536 | 0.10777 FLJ11000 |

|            |         |         |         |         |         |         |         |         |         |                   |
|------------|---------|---------|---------|---------|---------|---------|---------|---------|---------|-------------------|
| cg13121699 | 0.21282 | 0.06053 | 0.22009 | 0.13674 | 0.03763 | 0.03773 | 0.05585 | 0.03347 | 0.04312 | 0.03084 C2orf10   |
| cg13125510 | 0.12278 | 0.23165 | 0.83491 | 0.87032 | 0.1034  | 0.34985 | 0.68307 | 0.78059 | 0.30198 | 0.45825 C11orf44  |
| cg13125997 | 0.94458 | 0.93583 | 0.93272 | 0.93932 | 0.95481 | 0.96091 | 0.93999 | 0.94496 | 0.9507  | 0.94275 PKD1      |
| cg13126790 | 0.27699 | 0.39131 | 0.33641 | 0.5009  | 0.94708 | 0.84183 | 0.80154 | 0.74192 | 0.42973 | 0.27105 FLJ27255  |
| cg13127386 | 0.07755 | 0.04231 | 0.03551 | 0.03666 | 0.02956 | 0.03434 | 0.04082 | 0.03576 | 0.03118 | 0.0296 SLC4A8     |
| cg13128531 | 0.10965 | 0.09637 | 0.18197 | 0.13467 | 0.16152 | 0.1299  | 0.29891 | 0.10124 | 0.12031 | 0.10542 ZBTB33    |
| cg13129046 | 0.34126 | 0.06628 | 0.31935 | 0.49108 | 0.23241 | 0.21727 | 0.08042 | 0.1509  | 0.05175 | 0.04737 C10orf35  |
| cg13131015 | 0.39964 | 0.26214 | 0.42349 | 0.59103 | 0.33367 | 0.39129 | 0.11846 | 0.25612 | 0.13358 | 0.13912 GUCY2C    |
| cg13132204 | 0.02873 | 0.02544 | 0.03492 | 0.0337  | 0.03529 | 0.03111 | 0.02492 | 0.02201 | 0.02837 | 0.02311 ELMOD2    |
| cg13133148 | 0.02832 | 0.02913 | 0.03551 | 0.02987 | 0.47417 | 0.48199 | 0.05136 | 0.02529 | 0.02333 | 0.02291 SNAPC5    |
| cg13133883 | 0.06284 | 0.046   | 0.08587 | 0.08856 | 0.05786 | 0.06453 | 0.04392 | 0.04054 | 0.04651 | 0.03657 RGR       |
| cg13134662 | 0.05599 | 0.05384 | 0.06438 | 0.05493 | 0.033   | 0.05078 | 0.05943 | 0.05236 | 0.04991 | 0.0492 VAV2       |
| cg13135121 | 0.88993 | 0.86712 | 0.91    | 0.92298 | 0.87051 | 0.89502 | 0.89819 | 0.90975 | 0.89982 | 0.88246 HSPA2     |
| cg13135127 | 0.03298 | 0.03116 | 0.03736 | 0.03311 | 0.0328  | 0.02552 | 0.0325  | 0.02969 | 0.03569 | 0.02114 ASH1L     |
| cg13135180 | 0.04158 | 0.04231 | 0.03781 | 0.04368 | 0.03191 | 0.03243 | 0.03989 | 0.0364  | 0.03479 | 0.03348 RPP21     |
| cg13138279 | 0.85906 | 0.67053 | 0.81633 | 0.79968 | 0.82251 | 0.88253 | 0.8533  | 0.77548 | 0.87771 | 0.78968 CRYBA1    |
| cg13139843 | 0.17202 | 0.13657 | 0.2642  | 0.23985 | 0.35905 | 0.23381 | 0.1429  | 0.13428 | 0.12714 | 0.1349 KRTAP19-1  |
| cg13140267 | 0.05539 | 0.03994 | 0.25165 | 0.47819 | 0.06376 | 0.03539 | 0.52097 | 0.09081 | 0.07513 | 0.02968 ASCC3L1   |
| cg13140464 | 0.89741 | 0.67173 | 0.89022 | 0.90389 | 0.92937 | 0.91966 | 0.87993 | 0.78148 | 0.91768 | 0.91425 AP3B2     |
| cg13140740 | 0.14368 | 0.17128 | 0.13862 | 0.17288 | 0.0731  | 0.12545 | 0.15487 | 0.18843 | 0.15513 | 0.10586 ARL4      |
| cg13143729 | 0.40665 | 0.33185 | 0.53627 | 0.67859 | 0.44688 | 0.46828 | 0.38916 | 0.35601 | 0.37213 | 0.42613 GYPE      |
| cg13144004 | 0.03288 | 0.03227 | 0.03191 | 0.03541 | 0.02196 | 0.03006 | 0.02387 | 0.02428 | 0.02688 | 0.02853 UMPS      |
| cg13144783 | 0.58159 | 0.45715 | 0.74452 | 0.7788  | 0.74325 | 0.75451 | 0.65357 | 0.25149 | 0.77744 | 0.58167 CCR1      |
| cg13145013 | 0.92713 | 0.78158 | 0.89141 | 0.93999 | 0.93941 | 0.91768 | 0.91007 | 0.87557 | 0.93402 | 0.66339 H19       |
| cg13145440 | 0.08015 | 0.04544 | 0.04622 | 0.04666 | 0.04307 | 0.04284 | 0.0377  | 0.04308 | 0.0389  | 0.03955 LOC81558  |
| cg13145458 | 0.03114 | 0.02986 | 0.03127 | 0.03528 | 0.03545 | 0.03619 | 0.02807 | 0.03293 | 0.03738 | 0.03154 RNF185    |
| cg13149307 | 0.04313 | 0.04305 | 0.06806 | 0.08751 | 0.24196 | 0.03604 | 0.03647 | 0.03959 | 0.0853  | 0.04379 PLXDC2    |
| cg13149996 | 0.75148 | 0.70725 | 0.70727 | 0.73208 | 0.60256 | 0.74411 | 0.78944 | 0.79664 | 0.76581 | 0.74828 EIF4G3    |
| cg13150441 | 0.07678 | 0.08009 | 0.0877  | 0.07713 | 0.07057 | 0.06184 | 0.07495 | 0.06194 | 0.06227 | 0.06646 RNF40     |
| cg13150596 | 0.04149 | 0.03624 | 0.05746 | 0.08602 | 0.02807 | 0.02902 | 0.03491 | 0.02953 | 0.26059 | 0.02496 GIPC1     |
| cg13150977 | 0.03738 | 0.03947 | 0.42625 | 0.47412 | 0.15006 | 0.14807 | 0.09774 | 0.09362 | 0.0355  | 0.03194 FLJ43276  |
| cg13151102 | 0.04125 | 0.03461 | 0.04941 | 0.0483  | 0.39917 | 0.04421 | 0.04392 | 0.04236 | 0.04961 | 0.05102 KCNJ4     |
| cg13152535 | 0.15575 | 0.14097 | 0.57415 | 0.721   | 0.16511 | 0.14034 | 0.16027 | 0.09619 | 0.36354 | 0.12709 CLEC11A   |
| cg13153865 | 0.05996 | 0.05434 | 0.05304 | 0.05686 | 0.05973 | 0.04592 | 0.05068 | 0.05213 | 0.09877 | 0.03931 C8orf1    |
| cg13155059 | 0.03769 | 0.03118 | 0.03367 | 0.03305 | 0.03529 | 0.04839 | 0.02707 | 0.0358  | 0.0304  | 0.02179 CAPZA2    |
| cg13156121 | 0.87864 | 0.71547 | 0.78535 | 0.87561 | 0.9152  | 0.83996 | 0.70419 | 0.65349 | 0.88081 | 0.74369 TEPP      |
| cg13156411 | 0.8881  | 0.64799 | 0.84482 | 0.87425 | 0.90525 | 0.85944 | 0.57936 | 0.76331 | 0.89062 | 0.74477 PTHR1     |
| cg13158571 | 0.05825 | 0.04686 | 0.23098 | 0.27443 | 0.19083 | 0.27848 | 0.68787 | 0.37169 | 0.06546 | 0.0414 CYP4X1     |
| cg13159566 | 0.23715 | 0.05952 | 0.15517 | 0.20956 | 0.04273 | 0.03778 | 0.08565 | 0.03189 | 0.0336  | 0.02434 CCDC59    |
| cg13160888 | 0.04503 | 0.03799 | 0.04005 | 0.03604 | 0.04591 | 0.03248 | 0.03628 | 0.03446 | 0.03311 | 0.03038 NIPSNAP3B |
| cg13162577 | 0.84445 | 0.703   | 0.66548 | 0.82043 | 0.86936 | 0.88905 | 0.81227 | 0.88406 | 0.8795  | 0.79842 C11orf42  |

|            |         |         |         |         |         |         |         |         |         |                 |
|------------|---------|---------|---------|---------|---------|---------|---------|---------|---------|-----------------|
| cg13162810 | 0.18102 | 0.05083 | 0.07811 | 0.15274 | 0.31201 | 0.05725 | 0.09445 | 0.06869 | 0.04544 | 0.03658 PREI3   |
| cg13163729 | 0.39443 | 0.40151 | 0.44114 | 0.55395 | 0.14533 | 0.29784 | 0.05938 | 0.04641 | 0.08582 | 0.46022 SIX3    |
| cg13164309 | 0.54629 | 0.32932 | 0.38506 | 0.51912 | 0.74216 | 0.58499 | 0.09616 | 0.05514 | 0.33703 | 0.21117 CDA     |
| cg13164537 | 0.86645 | 0.77938 | 0.93919 | 0.95001 | 0.94927 | 0.94945 | 0.70831 | 0.0592  | 0.96062 | 0.95142 CD226   |
| cg13168374 | 0.46983 | 0.20644 | 0.76237 | 0.79337 | 0.72939 | 0.75078 | 0.75936 | 0.80943 | 0.82581 | 0.71014 CPLX4   |
| cg13168683 | 0.06141 | 0.07013 | 0.06429 | 0.0687  | 0.08396 | 0.06765 | 0.05629 | 0.06224 | 0.05483 | 0.05412 JAKMIP1 |
| cg13168820 | 0.02884 | 0.02924 | 0.37063 | 0.47657 | 0.27944 | 0.42447 | 0.08192 | 0.03377 | 0.04449 | 0.30643 PTPRT   |
| cg13169373 | 0.03348 | 0.02888 | 0.03591 | 0.03082 | 0.02919 | 0.03711 | 0.02773 | 0.03278 | 0.02783 | 0.02354 APP     |
| cg13170032 | 0.14391 | 0.13281 | 0.398   | 0.57402 | 0.53263 | 0.65267 | 0.14524 | 0.16924 | 0.7324  | 0.68716 HLX1    |
| cg13173909 | 0.02171 | 0.02467 | 0.02594 | 0.02441 | 0.01798 | 0.02542 | 0.01967 | 0.02199 | 0.01956 | 0.0198 UGCGL1   |
| cg13174077 | 0.87377 | 0.8252  | 0.85783 | 0.88204 | 0.87    | 0.85842 | 0.38738 | 0.5334  | 0.87268 | 0.85408 CUL4B   |
| cg13174197 | 0.19876 | 0.1701  | 0.19051 | 0.18851 | 0.31218 | 0.19914 | 0.15725 | 0.12259 | 0.17107 | 0.16278 GNL3    |
| cg13176285 | 0.03836 | 0.04574 | 0.0547  | 0.05    | 0.0578  | 0.0687  | 0.04295 | 0.04265 | 0.04692 | 0.04062 C13orf8 |
| cg13176979 | 0.74229 | 0.60633 | 0.45341 | 0.54648 | 0.89367 | 0.80014 | 0.33886 | 0.16328 | 0.32275 | 0.30764 HMG3    |
| cg13179915 | 0.90901 | 0.54934 | 0.88208 | 0.91477 | 0.95342 | 0.79265 | 0.88888 | 0.8641  | 0.92074 | 0.72049 KCNK7   |
| cg13179983 | 0.03445 | 0.03782 | 0.03428 | 0.03401 | 0.03493 | 0.0267  | 0.034   | 0.03884 | 0.02968 | 0.02489 PIK3R2  |
| cg13180098 | 0.25808 | 0.18146 | 0.34154 | 0.52439 | 0.49867 | 0.65199 | 0.29873 | 0.20126 | 0.21632 | 0.05052 RHO     |
| cg13180809 | 0.07626 | 0.08854 | 0.10406 | 0.26082 | 0.03571 | 0.06593 | 0.06912 | 0.07126 | 0.06479 | 0.06129 HPS1    |
| cg13181019 | 0.83867 | 0.72849 | 0.84767 | 0.84218 | 0.81946 | 0.82728 | 0.31505 | 0.21151 | 0.08612 | 0.08891 MPP7    |
| cg13181284 | 0.55296 | 0.35845 | 0.67742 | 0.7545  | 0.81629 | 0.81296 | 0.74124 | 0.46304 | 0.44875 | 0.50754 KRT6B   |
| cg13183496 | 0.05622 | 0.05254 | 0.08392 | 0.0787  | 0.08381 | 0.07066 | 0.16924 | 0.2401  | 0.0599  | 0.04779 CXorf17 |
| cg13183539 | 0.92001 | 0.93235 | 0.92183 | 0.92507 | 0.92908 | 0.91143 | 0.92259 | 0.9295  | 0.93539 | 0.92961 FZR1    |
| cg13184442 | 0.06776 | 0.0762  | 0.07399 | 0.06986 | 0.04193 | 0.12021 | 0.0778  | 0.06786 | 0.05495 | 0.05318 CDC5L   |
| cg13184872 | 0.07045 | 0.06539 | 0.06902 | 0.0724  | 0.05156 | 0.05875 | 0.05533 | 0.0548  | 0.05924 | 0.0521 ADPN     |
| cg13185177 | 0.84602 | 0.19136 | 0.83115 | 0.8462  | 0.7033  | 0.63206 | 0.82331 | 0.68543 | 0.8696  | 0.54422 GP5     |
| cg13185308 | 0.78895 | 0.63286 | 0.87534 | 0.88642 | 0.71961 | 0.88313 | 0.49988 | 0.49321 | 0.48501 | 0.41558 ABCC8   |
| cg13188385 | 0.0423  | 0.04033 | 0.04817 | 0.09691 | 0.04182 | 0.04221 | 0.03559 | 0.03442 | 0.03415 | 0.03108 SRGAP3  |
| cg13191049 | 0.06491 | 0.04469 | 0.17562 | 0.39406 | 0.10991 | 0.05213 | 0.03955 | 0.05081 | 0.04579 | 0.04303 DMN     |
| cg13191808 | 0.02471 | 0.02593 | 0.95731 | 0.93784 | 0.96208 | 0.95619 | 0.05653 | 0.0309  | 0.03822 | 0.02279 PCSK9   |
| cg13192155 | 0.81124 | 0.82962 | 0.84772 | 0.89233 | 0.76856 | 0.84874 | 0.8501  | 0.89711 | 0.83574 | 0.85005 ERAS    |
| cg13199589 | 0.0886  | 0.0539  | 0.11689 | 0.0998  | 0.48052 | 0.08978 | 0.05806 | 0.06671 | 0.09457 | 0.0403 FAM80A   |
| cg13199822 | 0.04624 | 0.04919 | 0.04747 | 0.04115 | 0.03241 | 0.04344 | 0.03422 | 0.03161 | 0.03691 | 0.03595 ATP6V1A |
| cg13201322 | 0.79175 | 0.81653 | 0.69903 | 0.74726 | 0.81325 | 0.79232 | 0.07118 | 0.09381 | 0.60696 | 0.2274 MAGEB1   |
| cg13202751 | 0.06574 | 0.10354 | 0.5203  | 0.66444 | 0.45994 | 0.4973  | 0.16137 | 0.12528 | 0.07568 | 0.39312 SLC6A3  |
| cg13204181 | 0.84428 | 0.49516 | 0.86275 | 0.86442 | 0.85139 | 0.68159 | 0.48647 | 0.38786 | 0.87616 | 0.8209 GH1      |
| cg13205516 | 0.04377 | 0.05078 | 0.04831 | 0.04336 | 0.03515 | 0.04469 | 0.0416  | 0.04286 | 0.03717 | 0.03411 GBAS    |
| cg13206017 | 0.14977 | 0.16414 | 0.64356 | 0.70946 | 0.49193 | 0.33947 | 0.29747 | 0.23578 | 0.47444 | 0.53167 SST     |
| cg13208492 | 0.024   | 0.02335 | 0.02224 | 0.01956 | 0.02198 | 0.02002 | 0.01836 | 0.02393 | 0.02028 | 0.01968 TSN     |
| cg13208732 | 0.01489 | 0.01933 | 0.02085 | 0.02128 | 0.01206 | 0.01786 | 0.02043 | 0.01959 | 0.01557 | 0.01494 PLAG1   |
| cg13210512 | 0.06424 | 0.06468 | 0.06393 | 0.0635  | 0.04338 | 0.05279 | 0.05589 | 0.05602 | 0.05884 | 0.05581 SPATA2  |
| cg13210534 | 0.3487  | 0.29219 | 0.26848 | 0.44055 | 0.48891 | 0.5056  | 0.14747 | 0.1981  | 0.26141 | 0.1738 HSPB2    |



|            |         |         |         |         |         |         |         |         |         |                   |
|------------|---------|---------|---------|---------|---------|---------|---------|---------|---------|-------------------|
| cg13214349 | 0.02126 | 0.02307 | 0.02616 | 0.02629 | 0.02455 | 0.02843 | 0.02109 | 0.01893 | 0.01909 | 0.01668 HBP1      |
| cg13214422 | 0.83682 | 0.68008 | 0.85126 | 0.87093 | 0.87581 | 0.83039 | 0.8195  | 0.76432 | 0.85857 | 0.78653 MYOZ3     |
| cg13216057 | 0.0634  | 0.04003 | 0.04171 | 0.03492 | 0.03113 | 0.03781 | 0.03735 | 0.04013 | 0.9517  | 0.95707 DKK3      |
| cg13216088 | 0.03519 | 0.04283 | 0.04057 | 0.02968 | 0.04702 | 0.04279 | 0.03532 | 0.03007 | 0.03856 | 0.04202 PSMD1     |
| cg13216303 | 0.04354 | 0.0349  | 0.07797 | 0.17275 | 0.03555 | 0.02936 | 0.02889 | 0.02655 | 0.34369 | 0.03064 ILF2      |
| cg13216351 | 0.05138 | 0.05052 | 0.05634 | 0.05353 | 0.0636  | 0.06409 | 0.04672 | 0.057   | 0.03723 | 0.037 MOCS3       |
| cg13217373 | 0.61073 | 0.22114 | 0.70356 | 0.58924 | 0.44065 | 0.35259 | 0.80101 | 0.734   | 0.41908 | 0.19789 RPS6KA2   |
| cg13218435 | 0.07829 | 0.06605 | 0.07015 | 0.06509 | 0.07399 | 0.06364 | 0.04294 | 0.04293 | 0.05473 | 0.05915 PET112L   |
| cg13218906 | 0.05895 | 0.05103 | 0.0887  | 0.06925 | 0.05475 | 0.05265 | 0.05243 | 0.05504 | 0.03742 | 0.0383 PCMTD2     |
| cg13219107 | 0.04977 | 0.04758 | 0.06313 | 0.05638 | 0.05293 | 0.03818 | 0.04731 | 0.04949 | 0.05142 | 0.04151 LRBA      |
| cg13221588 | 0.04433 | 0.03871 | 0.05954 | 0.04773 | 0.05306 | 0.04697 | 0.04398 | 0.0369  | 0.04205 | 0.03995 TTF2      |
| cg13221796 | 0.8769  | 0.64435 | 0.86893 | 0.8709  | 0.83142 | 0.78777 | 0.61871 | 0.45422 | 0.9135  | 0.39596 RB1       |
| cg13222081 | 0.12316 | 0.09866 | 0.15238 | 0.12743 | 0.14608 | 0.11792 | 0.07728 | 0.06939 | 0.09066 | 0.11836 MRPL52    |
| cg13224710 | 0.8077  | 0.82196 | 0.82469 | 0.85029 | 0.88422 | 0.84264 | 0.59265 | 0.7343  | 0.84279 | 0.75432 TGIF      |
| cg13225039 | 0.07917 | 0.06578 | 0.29051 | 0.174   | 0.04773 | 0.05319 | 0.44149 | 0.16365 | 0.39191 | 0.0658 TACC3      |
| cg13226172 | 0.04801 | 0.04429 | 0.0953  | 0.1245  | 0.06086 | 0.05302 | 0.05647 | 0.04137 | 0.03685 | 0.0286 CNTFR      |
| cg13226591 | 0.71877 | 0.70524 | 0.6747  | 0.81608 | 0.8095  | 0.6398  | 0.23621 | 0.5048  | 0.09598 | 0.08145 MAGEB18   |
| cg13228642 | 0.53772 | 0.20952 | 0.0994  | 0.13159 | 0.3138  | 0.32045 | 0.28717 | 0.25946 | 0.07215 | 0.07354 IER5      |
| cg13230197 | 0.72108 | 0.77728 | 0.21685 | 0.43848 | 0.12621 | 0.08897 | 0.60681 | 0.7398  | 0.08069 | 0.34382 CSPG4     |
| cg13230584 | 0.41381 | 0.44951 | 0.05768 | 0.0541  | 0.04994 | 0.05387 | 0.03991 | 0.03884 | 0.04194 | 0.03236 GSTK1     |
| cg13232900 | 0.05545 | 0.05954 | 0.05437 | 0.05645 | 0.06623 | 0.06647 | 0.04552 | 0.04741 | 0.04133 | 0.04007 ADAT1     |
| cg13233799 | 0.02032 | 0.02135 | 0.02726 | 0.02261 | 0.01735 | 0.02462 | 0.02537 | 0.02286 | 0.01845 | 0.0234 PTPRF      |
| cg13234643 | 0.03971 | 0.03183 | 0.03928 | 0.03643 | 0.04063 | 0.03945 | 0.03584 | 0.03054 | 0.03384 | 0.02457 CTSL2     |
| cg13234848 | 0.17752 | 0.20434 | 0.25333 | 0.23995 | 0.28945 | 0.2435  | 0.19399 | 0.1945  | 0.19013 | 0.18038 AUTS2     |
| cg13234863 | 0.0834  | 0.0614  | 0.88887 | 0.93714 | 0.58449 | 0.47341 | 0.22356 | 0.53887 | 0.52757 | 0.86412 KIAA1944  |
| cg13235447 | 0.26762 | 0.2354  | 0.30612 | 0.24345 | 0.09959 | 0.14356 | 0.28066 | 0.20955 | 0.18225 | 0.19947 IFNA2     |
| cg13236107 | 0.81851 | 0.13395 | 0.81419 | 0.84438 | 0.78678 | 0.19811 | 0.67099 | 0.38036 | 0.8489  | 0.19127 C20orf152 |
| cg13236637 | 0.04185 | 0.0402  | 0.0595  | 0.06014 | 0.04389 | 0.03849 | 0.04431 | 0.05188 | 0.04578 | 0.04115 SURB7     |
| cg13236854 | 0.03111 | 0.02881 | 0.03102 | 0.02807 | 0.02993 | 0.02886 | 0.0273  | 0.02866 | 0.01974 | 0.02127 NAPA      |
| cg13237829 | 0.0508  | 0.05276 | 0.0602  | 0.07142 | 0.04204 | 0.0554  | 0.04988 | 0.05241 | 0.03655 | 0.04055 GPSN2     |
| cg13237906 | 0.03049 | 0.03125 | 0.02979 | 0.02608 | 0.02394 | 0.02389 | 0.02437 | 0.02489 | 0.02209 | 0.02326 SLC26A2   |
| cg13240311 | 0.0551  | 0.05291 | 0.04933 | 0.04474 | 0.04922 | 0.05112 | 0.0772  | 0.05218 | 0.03498 | 0.04949 PKIG      |
| cg13240332 | 0.03712 | 0.03465 | 0.04932 | 0.03533 | 0.04233 | 0.0405  | 0.04    | 0.03404 | 0.03529 | 0.03613 ARPC2     |
| cg13240598 | 0.0375  | 0.03449 | 0.04117 | 0.03611 | 0.03403 | 0.0314  | 0.03277 | 0.02888 | 0.05043 | 0.03021 FLVCR     |
| cg13240639 | 0.03662 | 0.04171 | 0.04347 | 0.04412 | 0.02774 | 0.03774 | 0.03833 | 0.03651 | 0.04193 | 0.04054 ZMAT5     |
| cg13243219 | 0.10625 | 0.0989  | 0.10766 | 0.09863 | 0.30272 | 0.0791  | 0.09219 | 0.071   | 0.08599 | 0.09086 MDS1      |
| cg13243377 | 0.08211 | 0.0871  | 0.11072 | 0.08255 | 0.07231 | 0.07827 | 0.06881 | 0.07249 | 0.08271 | 0.07043 VPS37A    |
| cg13244707 | 0.06301 | 0.05243 | 0.06111 | 0.06323 | 0.10597 | 0.04589 | 0.0541  | 0.04842 | 0.03943 | 0.0505 UQCRC2     |
| cg13245912 | 0.02184 | 0.02572 | 0.02314 | 0.02221 | 0.01885 | 0.02023 | 0.02208 | 0.01943 | 0.01849 | 0.01945 RTN3      |
| cg13246269 | 0.53738 | 0.4609  | 0.37769 | 0.45892 | 0.56062 | 0.53874 | 0.31292 | 0.27059 | 0.24448 | 0.13176 AQP7      |
| cg13246592 | 0.23391 | 0.16288 | 0.76268 | 0.78657 | 0.55064 | 0.54321 | 0.14086 | 0.11973 | 0.45843 | 0.34545 P2RX5     |

|            |         |         |         |         |         |         |         |         |         |         |           |
|------------|---------|---------|---------|---------|---------|---------|---------|---------|---------|---------|-----------|
| cg13246654 | 0.06876 | 0.03678 | 0.03712 | 0.03426 | 0.03441 | 0.03539 | 0.03065 | 0.03049 | 0.03169 | 0.02931 | CAMK2D    |
| cg13247990 | 0.81236 | 0.72445 | 0.86203 | 0.88756 | 0.9175  | 0.88718 | 0.8336  | 0.84664 | 0.85179 | 0.75683 | MLCK      |
| cg13249256 | 0.94215 | 0.94398 | 0.94262 | 0.94274 | 0.95952 | 0.95254 | 0.94582 | 0.9548  | 0.89506 | 0.89273 | MAEL      |
| cg13250711 | 0.14779 | 0.13831 | 0.13803 | 0.11087 | 0.23906 | 0.18967 | 0.17946 | 0.13265 | 0.1011  | 0.1344  | ARNTL     |
| cg13253729 | 0.91228 | 0.90845 | 0.90696 | 0.9311  | 0.91192 | 0.88617 | 0.88868 | 0.89886 | 0.83199 | 0.89435 | Rgr       |
| cg13255096 | 0.04657 | 0.03431 | 0.06171 | 0.04412 | 0.04588 | 0.03873 | 0.04132 | 0.07689 | 0.03759 | 0.03297 | MAP3K5    |
| cg13255190 | 0.31465 | 0.33082 | 0.38713 | 0.42345 | 0.49655 | 0.5778  | 0.1488  | 0.27257 | 0.118   | 0.10594 | GALNT8    |
| cg13255629 | 0.8229  | 0.42182 | 0.85221 | 0.88015 | 0.42863 | 0.86973 | 0.86084 | 0.84567 | 0.37678 | 0.06309 | MEPE      |
| cg13257485 | 0.22076 | 0.2209  | 0.65631 | 0.60366 | 0.20149 | 0.11532 | 0.07466 | 0.09028 | 0.13058 | 0.12773 | NXT2      |
| cg13258606 | 0.02975 | 0.02954 | 0.03568 | 0.03469 | 0.02376 | 0.02616 | 0.0271  | 0.02753 | 0.02845 | 0.02168 | FDX1      |
| cg13258700 | 0.12456 | 0.09358 | 0.10196 | 0.17731 | 0.12748 | 0.0656  | 0.16282 | 0.05132 | 0.48327 | 0.23223 | C7orf13   |
| cg13259290 | 0.32254 | 0.24223 | 0.88138 | 0.87765 | 0.94162 | 0.65843 | 0.82981 | 0.81793 | 0.90504 | 0.5894  | CSF2      |
| cg13260333 | 0.13875 | 0.06942 | 0.08858 | 0.09386 | 0.18008 | 0.13339 | 0.35972 | 0.08954 | 0.06667 | 0.06256 | C6orf108  |
| cg13260633 | 0.0504  | 0.04846 | 0.03265 | 0.03505 | 0.03633 | 0.04571 | 0.02714 | 0.02934 | 0.02648 | 0.03124 | CBR4      |
| cg13262687 | 0.08981 | 0.09288 | 0.60984 | 0.77978 | 0.23069 | 0.37823 | 0.15095 | 0.1069  | 0.10422 | 0.09661 | POU4F2    |
| cg13262752 | 0.06305 | 0.077   | 0.07995 | 0.08013 | 0.08752 | 0.07495 | 0.05235 | 0.0319  | 0.05214 | 0.06535 | YIPF1     |
| cg13263114 | 0.08798 | 0.0835  | 0.13991 | 0.15461 | 0.22023 | 0.10165 | 0.09533 | 0.10078 | 0.19156 | 0.10986 | ERBB2     |
| cg13263483 | 0.03771 | 0.03594 | 0.08458 | 0.12218 | 0.47878 | 0.10691 | 0.03431 | 0.03192 | 0.04566 | 0.03125 | GJB3      |
| cg13264208 | 0.03921 | 0.04796 | 0.04367 | 0.03957 | 0.03344 | 0.04184 | 0.0399  | 0.03969 | 0.03589 | 0.03805 | SEC61A1   |
| cg13264741 | 0.03875 | 0.04421 | 0.13802 | 0.20536 | 0.05254 | 0.0395  | 0.03986 | 0.04246 | 0.09377 | 0.04306 | GRIN2B    |
| cg13265003 | 0.66224 | 0.32549 | 0.75945 | 0.85018 | 0.71958 | 0.77205 | 0.24448 | 0.08561 | 0.86475 | 0.70601 | SLC37A1   |
| cg13265789 | 0.06384 | 0.04102 | 0.06286 | 0.04786 | 0.55602 | 0.43085 | 0.03767 | 0.03585 | 0.18986 | 0.04052 | UNC5C     |
| cg13266292 | 0.12661 | 0.07264 | 0.1217  | 0.19166 | 0.28425 | 0.25764 | 0.17133 | 0.05822 | 0.20784 | 0.3058  | RPS15     |
| cg13266631 | 0.08383 | 0.08938 | 0.67968 | 0.65885 | 0.14625 | 0.07779 | 0.15544 | 0.14667 | 0.12513 | 0.38916 | NEFL      |
| cg13269407 | 0.04724 | 0.04766 | 0.04106 | 0.04425 | 0.03438 | 0.03962 | 0.04191 | 0.04356 | 0.03585 | 0.03545 | FLJ10945  |
| cg13269964 | 0.92434 | 0.9215  | 0.9319  | 0.92671 | 0.94673 | 0.92936 | 0.92753 | 0.90208 | 0.93641 | 0.91542 | CD300LG   |
| cg13270853 | 0.93813 | 0.92608 | 0.93548 | 0.94466 | 0.93834 | 0.8964  | 0.94739 | 0.94005 | 0.94888 | 0.96131 | CHFR      |
| cg13271076 | 0.045   | 0.04327 | 0.04622 | 0.04188 | 0.03029 | 0.03688 | 0.04044 | 0.03831 | 0.03575 | 0.03395 | PRMT2     |
| cg13271951 | 0.92079 | 0.55455 | 0.93665 | 0.94107 | 0.94179 | 0.8226  | 0.66583 | 0.16277 | 0.92948 | 0.85983 | FAM57B    |
| cg13271963 | 0.95029 | 0.93413 | 0.94619 | 0.94939 | 0.9497  | 0.93834 | 0.93525 | 0.94046 | 0.95051 | 0.94938 | ANKRD2    |
| cg13272258 | 0.02879 | 0.0339  | 0.0401  | 0.03289 | 0.02778 | 0.03555 | 0.02909 | 0.03119 | 0.02626 | 0.02633 | USP2      |
| cg13272327 | 0.03635 | 0.0427  | 0.04599 | 0.03884 | 0.02511 | 0.0328  | 0.03047 | 0.03652 | 0.03333 | 0.03529 | ARMC8     |
| cg13273136 | 0.74137 | 0.40635 | 0.87288 | 0.87715 | 0.82178 | 0.85713 | 0.43702 | 0.20234 | 0.80978 | 0.8032  | PSD4      |
| cg13274254 | 0.03354 | 0.04063 | 0.0403  | 0.03124 | 0.04575 | 0.03747 | 0.03173 | 0.03167 | 0.03576 | 0.03248 | GULP1     |
| cg13274713 | 0.02223 | 0.0327  | 0.02017 | 0.01987 | 0.01564 | 0.01983 | 0.01715 | 0.01844 | 0.02822 | 0.01751 | TBX2      |
| cg13277160 | 0.03578 | 0.04024 | 0.04037 | 0.03233 | 0.29653 | 0.26598 | 0.03402 | 0.03839 | 0.02972 | 0.02744 | LOC151194 |
| cg13277179 | 0.13236 | 0.05319 | 0.48394 | 0.35196 | 0.03781 | 0.03435 | 0.10121 | 0.04487 | 0.04438 | 0.03581 | PHKG2     |
| cg13277385 | 0.06589 | 0.04302 | 0.09524 | 0.07756 | 0.11321 | 0.04118 | 0.04834 | 0.04083 | 0.03936 | 0.03373 | DECR1     |
| cg13277716 | 0.03466 | 0.03519 | 0.03838 | 0.0347  | 0.46736 | 0.12444 | 0.1918  | 0.1987  | 0.02523 | 0.02362 | KAL1      |
| cg13277939 | 0.7722  | 0.38226 | 0.48289 | 0.57139 | 0.3519  | 0.22107 | 0.51904 | 0.38694 | 0.79044 | 0.22646 | CTAGE5    |
| cg13278334 | 0.06828 | 0.05908 | 0.06747 | 0.06707 | 0.03661 | 0.05496 | 0.05413 | 0.05907 | 0.04737 | 0.05139 | FLJ20643  |

|            |         |         |         |         |         |         |         |         |         |                       |
|------------|---------|---------|---------|---------|---------|---------|---------|---------|---------|-----------------------|
| cg13279585 | 0.1586  | 0.13091 | 0.1928  | 0.15313 | 0.17664 | 0.14528 | 0.10924 | 0.09514 | 0.11181 | 0.10566               |
| cg13281719 | 0.0319  | 0.03096 | 0.02925 | 0.02877 | 0.0322  | 0.03758 | 0.02995 | 0.02582 | 0.02688 | 0.03178 ATG16L1       |
| cg13281868 | 0.76508 | 0.81403 | 0.72719 | 0.80494 | 0.65591 | 0.74828 | 0.5872  | 0.64904 | 0.44967 | 0.21662 C6orf142      |
| cg13282594 | 0.76456 | 0.60454 | 0.70336 | 0.79327 | 0.24586 | 0.68241 | 0.23598 | 0.7741  | 0.7321  | 0.77256 BGLAP         |
| cg13282837 | 0.96941 | 0.96917 | 0.97352 | 0.97439 | 0.971   | 0.95795 | 0.07162 | 0.29594 | 0.04509 | 0.38274 TCL1A         |
| cg13282951 | 0.12891 | 0.13669 | 0.13325 | 0.12374 | 0.0915  | 0.11438 | 0.1109  | 0.10133 | 0.12103 | 0.10115 UHRF1         |
| cg13283751 | 0.10304 | 0.05945 | 0.15268 | 0.18105 | 0.15758 | 0.09842 | 0.04761 | 0.04349 | 0.04258 | 0.0475 GPX5           |
| cg13283942 | 0.03065 | 0.026   | 0.03681 | 0.029   | 0.02693 | 0.02798 | 0.0241  | 0.02002 | 0.02758 | 0.03076 C1orf77       |
| cg13284426 | 0.67213 | 0.33936 | 0.53681 | 0.59721 | 0.82492 | 0.6827  | 0.62422 | 0.26545 | 0.80871 | 0.72491 RAB24         |
| cg13285447 | 0.03199 | 0.03475 | 0.03805 | 0.0366  | 0.03343 | 0.03273 | 0.03307 | 0.02896 | 0.02709 | 0.02679 NUMBL         |
| cg13286902 | 0.03921 | 0.0372  | 0.03697 | 0.04641 | 0.02609 | 0.04644 | 0.3316  | 0.50231 | 0.03211 | 0.03722 CXorf34       |
| cg13287780 | 0.81793 | 0.79343 | 0.78403 | 0.83295 | 0.80741 | 0.82024 | 0.82644 | 0.76456 | 0.87905 | 0.82528 WRB           |
| cg13288195 | 0.91014 | 0.70128 | 0.89721 | 0.90861 | 0.80338 | 0.83146 | 0.84359 | 0.81942 | 0.9073  | 0.89575 FBXL22        |
| cg13289321 | 0.86811 | 0.58767 | 0.88198 | 0.8782  | 0.90546 | 0.87372 | 0.78563 | 0.45202 | 0.72992 | 0.80954 ASB10         |
| cg13289561 | 0.04007 | 0.04369 | 0.04686 | 0.04343 | 0.03099 | 0.03773 | 0.04019 | 0.04038 | 0.03783 | 0.02792 DKFZP586D0919 |
| cg13293721 | 0.07436 | 0.10583 | 0.07536 | 0.06998 | 0.08022 | 0.07575 | 0.05803 | 0.04947 | 0.05859 | 0.05691 RPIA          |
| cg13294439 | 0.03115 | 0.03792 | 0.04401 | 0.03773 | 0.05113 | 0.03907 | 0.03683 | 0.0357  | 0.03504 | 0.03288 TA-PP2C       |
| cg13294509 | 0.08832 | 0.08715 | 0.09823 | 0.09081 | 0.17008 | 0.10437 | 0.08136 | 0.07498 | 0.08009 | 0.08914 GLE1L         |
| cg13294594 | 0.0313  | 0.02739 | 0.34402 | 0.51329 | 0.03469 | 0.02138 | 0.02453 | 0.02761 | 0.02275 | 0.01958 MAST1         |
| cg13296371 | 0.66007 | 0.16321 | 0.24172 | 0.2738  | 0.22136 | 0.14694 | 0.14792 | 0.11908 | 0.10728 | 0.10332 TMEM128       |
| cg13296563 | 0.04072 | 0.04381 | 0.04964 | 0.04576 | 0.04739 | 0.05233 | 0.04693 | 0.04567 | 0.04144 | 0.0439 RPL6           |
| cg13297249 | 0.78542 | 0.47731 | 0.80401 | 0.84545 | 0.57532 | 0.69929 | 0.22545 | 0.26651 | 0.61824 | 0.48363 FLJ38379      |
| cg13297865 | 0.0503  | 0.02109 | 0.04454 | 0.03732 | 0.27511 | 0.03185 | 0.02861 | 0.02054 | 0.0318  | 0.01521 ELOVL4        |
| cg13297960 | 0.91914 | 0.91714 | 0.83474 | 0.88046 | 0.9103  | 0.91464 | 0.80992 | 0.9008  | 0.65745 | 0.63686 NCAM2         |
| cg13298382 | 0.03105 | 0.03553 | 0.03968 | 0.04463 | 0.03284 | 0.03136 | 0.03432 | 0.03213 | 0.03392 | 0.02555 NIT1          |
| cg13299148 | 0.44652 | 0.24919 | 0.0379  | 0.05768 | 0.02401 | 0.02414 | 0.41257 | 0.02798 | 0.48226 | 0.24311 COL16A1       |
| cg13300756 | 0.09806 | 0.13253 | 0.8392  | 0.92201 | 0.90129 | 0.91361 | 0.91385 | 0.75806 | 0.87746 | 0.80846 HAS1          |
| cg13301003 | 0.8595  | 0.85179 | 0.84885 | 0.84633 | 0.77224 | 0.83929 | 0.08238 | 0.12882 | 0.7116  | 0.80279 WT1           |
| cg13301014 | 0.4776  | 0.09494 | 0.71075 | 0.84057 | 0.89819 | 0.75885 | 0.04084 | 0.07837 | 0.06405 | 0.03905 SPINT2        |
| cg13301933 | 0.03523 | 0.02897 | 0.03513 | 0.03379 | 0.0359  | 0.02825 | 0.03329 | 0.03102 | 0.02817 | 0.02723 RORA          |
| cg13302154 | 0.1548  | 0.16412 | 0.62064 | 0.5738  | 0.33755 | 0.21181 | 0.63541 | 0.18664 | 0.2062  | 0.17165 MGP           |
| cg13302823 | 0.36561 | 0.47317 | 0.92676 | 0.89182 | 0.75414 | 0.91683 | 0.50826 | 0.49539 | 0.20714 | 0.47293 SCRT1         |
| cg13303256 | 0.03908 | 0.0451  | 0.04015 | 0.0404  | 0.0308  | 0.03597 | 0.03549 | 0.03486 | 0.0334  | 0.02928 PHF1          |
| cg13306164 | 0.01993 | 0.01927 | 0.16558 | 0.36803 | 0.0152  | 0.02186 | 0.02182 | 0.01869 | 0.01929 | 0.0187 HPCA           |
| cg13306784 | 0.0711  | 0.08157 | 0.11559 | 0.11744 | 0.09099 | 0.13021 | 0.0813  | 0.07901 | 0.07811 | 0.07198 INPP5E        |
| cg13307384 | 0.7835  | 0.22773 | 0.93296 | 0.92635 | 0.92367 | 0.51124 | 0.74486 | 0.17987 | 0.41474 | 0.40847 PRPF40B       |
| cg13309018 | 0.04572 | 0.04656 | 0.04874 | 0.04368 | 0.0359  | 0.03745 | 0.03804 | 0.0399  | 0.03744 | 0.03688 DNM1          |
| cg13310628 | 0.02791 | 0.02613 | 0.05751 | 0.04302 | 0.08021 | 0.02485 | 0.0601  | 0.02511 | 0.0282  | 0.02211 SOLH          |
| cg13310671 | 0.01996 | 0.0211  | 0.01891 | 0.02034 | 0.01659 | 0.01795 | 0.01666 | 0.018   | 0.01565 | 0.01385 ZNF313        |
| cg13311440 | 0.32769 | 0.04855 | 0.60619 | 0.5922  | 0.44998 | 0.48675 | 0.04866 | 0.04637 | 0.06595 | 0.06248 CD48          |
| cg13313036 | 0.02117 | 0.02066 | 0.02126 | 0.01875 | 0.33504 | 0.40403 | 0.01903 | 0.01986 | 0.01735 | 0.01524 SLC29A2       |

|            |         |         |         |         |         |         |         |         |         |                       |
|------------|---------|---------|---------|---------|---------|---------|---------|---------|---------|-----------------------|
| cg13314167 | 0.88039 | 0.8827  | 0.87729 | 0.90528 | 0.85624 | 0.89562 | 0.8782  | 0.90376 | 0.90611 | 0.90756 C9orf84       |
| cg13315147 | 0.95971 | 0.59243 | 0.95206 | 0.95822 | 0.95475 | 0.95669 | 0.12954 | 0.15101 | 0.03673 | 0.02311 CYP2E1        |
| cg13315690 | 0.62893 | 0.20038 | 0.23313 | 0.15513 | 0.93563 | 0.87736 | 0.37159 | 0.07749 | 0.19109 | 0.03362 OVCA2         |
| cg13316191 | 0.03841 | 0.04082 | 0.05733 | 0.04745 | 0.03446 | 0.03747 | 0.11184 | 0.04402 | 0.02715 | 0.02576 CDCA7L        |
| cg13316424 | 0.84714 | 0.84272 | 0.84596 | 0.8617  | 0.8621  | 0.84359 | 0.84439 | 0.80234 | 0.8444  | 0.847 CIZ1            |
| cg13319139 | 0.16264 | 0.14678 | 0.1502  | 0.14409 | 0.20905 | 0.15496 | 0.15624 | 0.12273 | 0.12543 | 0.12955 ST3GAL2       |
| cg13319175 | 0.84737 | 0.80461 | 0.87415 | 0.87472 | 0.78931 | 0.8613  | 0.86378 | 0.88827 | 0.88451 | 0.86096 CAPZB         |
| cg13319664 | 0.05126 | 0.04714 | 0.04304 | 0.04359 | 0.032   | 0.03702 | 0.04009 | 0.03609 | 0.03885 | 0.03757 C21orf55      |
| cg13320626 | 0.06688 | 0.06414 | 0.7526  | 0.79799 | 0.07982 | 0.06524 | 0.08239 | 0.07348 | 0.06786 | 0.04645 ST8SIA4       |
| cg13320683 | 0.4005  | 0.37192 | 0.93996 | 0.94479 | 0.95267 | 0.92728 | 0.87366 | 0.45405 | 0.945   | 0.79169 RHOBTB1       |
| cg13322449 | 0.72265 | 0.68834 | 0.45549 | 0.48463 | 0.36465 | 0.59295 | 0.10888 | 0.12287 | 0.11196 | 0.10178 CEACAM3       |
| cg13323474 | 0.06384 | 0.06556 | 0.25161 | 0.54257 | 0.82313 | 0.68745 | 0.08195 | 0.06129 | 0.0579  | 0.06643 TTC18         |
| cg13323752 | 0.38936 | 0.18328 | 0.54665 | 0.62186 | 0.6156  | 0.68417 | 0.42991 | 0.46013 | 0.03133 | 0.01822 SLC2A14       |
| cg13325261 | 0.02693 | 0.02614 | 0.02901 | 0.02778 | 0.0201  | 0.0244  | 0.02576 | 0.02336 | 0.02384 | 0.02343 ARNTL2        |
| cg13325529 | 0.10746 | 0.06798 | 0.31242 | 0.38203 | 0.04626 | 0.04439 | 0.06743 | 0.07184 | 0.0543  | 0.04799 TMEM107       |
| cg13325666 | 0.03512 | 0.03868 | 0.04135 | 0.0349  | 0.02396 | 0.03011 | 0.03028 | 0.03006 | 0.02819 | 0.02422 MLLT4         |
| cg13326338 | 0.93449 | 0.91369 | 0.93546 | 0.94142 | 0.96128 | 0.94588 | 0.94072 | 0.92523 | 0.94511 | 0.8456 SIL1           |
| cg13328485 | 0.71801 | 0.7483  | 0.64973 | 0.74778 | 0.60106 | 0.69419 | 0.6188  | 0.67685 | 0.73199 | 0.69535 ZNF650        |
| cg13332088 | 0.03389 | 0.03492 | 0.03984 | 0.03118 | 0.02968 | 0.03212 | 0.03124 | 0.03222 | 0.03306 | 0.02604 C14orf80      |
| cg13332130 | 0.04675 | 0.03893 | 0.04183 | 0.04205 | 0.03688 | 0.04352 | 0.03747 | 0.03498 | 0.03595 | 0.0286 RAB4B          |
| cg13332925 | 0.07594 | 0.02668 | 0.0278  | 0.02552 | 0.02566 | 0.02788 | 0.0235  | 0.02623 | 0.02555 | 0.02326 DKFZp451M2119 |
| cg13333141 | 0.01896 | 0.01834 | 0.02481 | 0.02093 | 0.01843 | 0.01966 | 0.02011 | 0.01957 | 0.01735 | 0.016 BTG1            |
| cg13334054 | 0.73739 | 0.74417 | 0.73796 | 0.79675 | 0.74585 | 0.81334 | 0.62136 | 0.77812 | 0.77895 | 0.76147 ZNF80         |
| cg13334277 | 0.56105 | 0.5613  | 0.54882 | 0.59987 | 0.64182 | 0.66579 | 0.60161 | 0.48253 | 0.45132 | 0.44922 SPACA1        |
| cg13334990 | 0.12871 | 0.12911 | 0.18693 | 0.2216  | 0.17739 | 0.12917 | 0.19257 | 0.16917 | 0.15312 | 0.12339 ENO2          |
| cg13335112 | 0.69809 | 0.40233 | 0.84416 | 0.85613 | 0.87543 | 0.85005 | 0.86486 | 0.85057 | 0.80457 | 0.61492 C14orf29      |
| cg13336167 | 0.05197 | 0.03825 | 0.04579 | 0.04142 | 0.04552 | 0.03805 | 0.03574 | 0.03753 | 0.02849 | 0.03423 ZNF579        |
| cg13337662 | 0.76685 | 0.32025 | 0.78733 | 0.84547 | 0.85797 | 0.85252 | 0.11705 | 0.08906 | 0.15626 | 0.44368 ATP12A        |
| cg13337865 | 0.05681 | 0.04894 | 0.21313 | 0.46772 | 0.15285 | 0.26662 | 0.04005 | 0.17616 | 0.05166 | 0.03209 TEKT1         |
| cg13338132 | 0.67501 | 0.68771 | 0.83358 | 0.89598 | 0.8603  | 0.80826 | 0.72538 | 0.53347 | 0.08614 | 0.20867 FAM71C        |
| cg13340269 | 0.3558  | 0.10353 | 0.82928 | 0.84941 | 0.51719 | 0.38407 | 0.13968 | 0.09653 | 0.50482 | 0.39894 TMEM35        |
| cg13342120 | 0.05896 | 0.05223 | 0.05787 | 0.05673 | 0.04309 | 0.05236 | 0.05137 | 0.05869 | 0.05513 | 0.04735 TRAFD1        |
| cg13342558 | 0.28551 | 0.15961 | 0.29759 | 0.29652 | 0.35634 | 0.28106 | 0.16576 | 0.11777 | 0.29634 | 0.17859 TECTB         |
| cg13342625 | 0.0223  | 0.02314 | 0.02837 | 0.02584 | 0.02251 | 0.02482 | 0.03558 | 0.02976 | 0.02751 | 0.02486 EBNA1BP2      |
| cg13343486 | 0.03615 | 0.03134 | 0.51435 | 0.50031 | 0.06171 | 0.02986 | 0.2391  | 0.2145  | 0.03094 | 0.02369 KLK10         |
| cg13344740 | 0.15497 | 0.14362 | 0.1729  | 0.16087 | 0.16573 | 0.12976 | 0.13546 | 0.14629 | 0.2816  | 0.20609 DLX5          |
| cg13346032 | 0.05941 | 0.06605 | 0.06708 | 0.06598 | 0.06137 | 0.05841 | 0.0632  | 0.05739 | 0.071   | 0.06496 TBC1D22A      |
| cg13346411 | 0.11907 | 0.0488  | 0.71755 | 0.82705 | 0.37731 | 0.07422 | 0.05917 | 0.05624 | 0.51467 | 0.4345 CCKBR          |
| cg13347296 | 0.03323 | 0.03301 | 0.02896 | 0.02445 | 0.03199 | 0.02846 | 0.03203 | 0.03461 | 0.03022 | 0.02198 PFDN4         |
| cg13348944 | 0.55632 | 0.08356 | 0.24657 | 0.42435 | 0.81232 | 0.76425 | 0.0817  | 0.07532 | 0.15798 | 0.14745 SCN2B         |
| cg13349425 | 0.18833 | 0.0454  | 0.69706 | 0.78099 | 0.44314 | 0.56249 | 0.69569 | 0.79251 | 0.15393 | 0.0794 C5orf20        |

|            |         |         |         |         |         |         |         |         |         |                       |
|------------|---------|---------|---------|---------|---------|---------|---------|---------|---------|-----------------------|
| cg13350481 | 0.04946 | 0.04195 | 0.05493 | 0.05182 | 0.05154 | 0.06351 | 0.04042 | 0.03844 | 0.0386  | 0.03963 ENDOGL1       |
| cg13350783 | 0.86825 | 0.68095 | 0.81595 | 0.87061 | 0.92976 | 0.91044 | 0.09799 | 0.06813 | 0.83868 | 0.65708 KRT13         |
| cg13351161 | 0.94931 | 0.49285 | 0.92334 | 0.94092 | 0.93112 | 0.35748 | 0.69279 | 0.13108 | 0.94232 | 0.84011 SCARA3        |
| cg13351406 | 0.82519 | 0.18088 | 0.79456 | 0.82978 | 0.76778 | 0.54822 | 0.85023 | 0.41247 | 0.46668 | 0.28452 LOC284912     |
| cg13351583 | 0.11563 | 0.10328 | 0.08455 | 0.07367 | 0.64799 | 0.57739 | 0.46345 | 0.2771  | 0.06601 | 0.05978 SHC3          |
| cg13351698 | 0.06059 | 0.05725 | 0.06053 | 0.05786 | 0.06433 | 0.06426 | 0.06628 | 0.06431 | 0.05052 | 0.04636 CBX3          |
| cg13352306 | 0.88789 | 0.89107 | 0.87154 | 0.88943 | 0.89481 | 0.87777 | 0.87831 | 0.88189 | 0.89397 | 0.89588 ROM1          |
| cg13352495 | 0.05362 | 0.04552 | 0.0551  | 0.05348 | 0.0531  | 0.04012 | 0.04063 | 0.04121 | 0.04601 | 0.04265 UNG2          |
| cg13353683 | 0.04199 | 0.03942 | 0.03743 | 0.03853 | 0.03675 | 0.03527 | 0.04089 | 0.04794 | 0.03682 | 0.03436 PTRF          |
| cg13354523 | 0.72659 | 0.61798 | 0.64197 | 0.73692 | 0.46321 | 0.1763  | 0.19307 | 0.38021 | 0.63515 | 0.50765 CLEC1A        |
| cg13358084 | 0.58042 | 0.59423 | 0.59124 | 0.58137 | 0.57883 | 0.55568 | 0.45035 | 0.48601 | 0.5578  | 0.5481 RPL13          |
| cg13359415 | 0.02412 | 0.02389 | 0.02518 | 0.01729 | 0.0351  | 0.01905 | 0.0153  | 0.01759 | 0.02298 | 0.01702 LGI2          |
| cg13360150 | 0.07705 | 0.07712 | 0.09299 | 0.07173 | 0.09648 | 0.11219 | 0.07889 | 0.07479 | 0.07114 | 0.07614 LIN7C         |
| cg13360404 | 0.02401 | 0.02363 | 0.02497 | 0.02555 | 0.02719 | 0.02876 | 0.02166 | 0.02692 | 0.02437 | 0.01869 KIAA0265      |
| cg13362403 | 0.05434 | 0.05778 | 0.05352 | 0.05178 | 0.06018 | 0.05803 | 0.06203 | 0.05479 | 0.04469 | 0.05288 UBE2Z         |
| cg13364756 | 0.78944 | 0.10377 | 0.74036 | 0.84441 | 0.77637 | 0.8274  | 0.1235  | 0.0917  | 0.70152 | 0.55756 CYP3A43       |
| cg13365022 | 0.12702 | 0.12357 | 0.3849  | 0.48546 | 0.26487 | 0.17171 | 0.26966 | 0.13866 | 0.18323 | 0.21935 MC4R          |
| cg13365761 | 0.07751 | 0.07383 | 0.39457 | 0.63278 | 0.11052 | 0.07912 | 0.10747 | 0.13618 | 0.07142 | 0.07545 SCNN1G        |
| cg13368786 | 0.37796 | 0.24001 | 0.7174  | 0.69663 | 0.39241 | 0.21461 | 0.38757 | 0.31275 | 0.62532 | 0.42526 ACSS2         |
| cg13369981 | 0.03734 | 0.05078 | 0.05877 | 0.06184 | 0.07251 | 0.08109 | 0.05823 | 0.04448 | 0.04213 | 0.03548 BCDIN3        |
| cg13370916 | 0.69487 | 0.0633  | 0.07012 | 0.06814 | 0.0388  | 0.04438 | 0.07703 | 0.05606 | 0.03964 | 0.0442 STARD8         |
| cg13372488 | 0.1186  | 0.18274 | 0.61391 | 0.65778 | 0.143   | 0.10752 | 0.12799 | 0.10097 | 0.11697 | 0.13918 KCNT2         |
| cg13376158 | 0.08961 | 0.03269 | 0.03609 | 0.03429 | 0.02723 | 0.02738 | 0.03027 | 0.0277  | 0.02392 | 0.02521 NT5C          |
| cg13378388 | 0.04269 | 0.04877 | 0.038   | 0.03733 | 0.02803 | 0.03233 | 0.03302 | 0.03308 | 0.03595 | 0.03842 VEGFC         |
| cg13379236 | 0.78237 | 0.31239 | 0.81313 | 0.82383 | 0.4769  | 0.16833 | 0.72558 | 0.10714 | 0.06402 | 0.08282 EGF           |
| cg13379763 | 0.38074 | 0.17231 | 0.82864 | 0.86661 | 0.91797 | 0.8849  | 0.33828 | 0.11337 | 0.81869 | 0.68468 DKFZp434O0527 |
| cg13379871 | 0.02681 | 0.03065 | 0.03315 | 0.02783 | 0.02683 | 0.02574 | 0.02512 | 0.02571 | 0.02399 | 0.02323 PCGF4         |
| cg13382694 | 0.85852 | 0.61054 | 0.9107  | 0.907   | 0.71813 | 0.61748 | 0.78005 | 0.59125 | 0.41432 | 0.13936 ZNF652        |
| cg13382714 | 0.03803 | 0.03573 | 0.0382  | 0.03654 | 0.0379  | 0.03666 | 0.03312 | 0.03657 | 0.03418 | 0.03167 AP4S1         |
| cg13383490 | 0.05444 | 0.04695 | 0.06091 | 0.04599 | 0.0712  | 0.06165 | 0.05488 | 0.04953 | 0.0517  | 0.04842 TSG101        |
| cg13383491 | 0.19359 | 0.23985 | 0.30113 | 0.24285 | 0.28458 | 0.27657 | 0.21728 | 0.22145 | 0.1686  | 0.13406 GPR85         |
| cg13383572 | 0.88354 | 0.88908 | 0.87475 | 0.88525 | 0.88981 | 0.88607 | 0.89335 | 0.87902 | 0.89322 | 0.87255 PRH1          |
| cg13384396 | 0.17295 | 0.21811 | 0.29196 | 0.27651 | 0.50234 | 0.46478 | 0.20821 | 0.28979 | 0.1068  | 0.06713 ADCY5         |
| cg13384498 | 0.85677 | 0.7732  | 0.86131 | 0.89753 | 0.89064 | 0.85079 | 0.68488 | 0.86165 | 0.82897 | 0.83712 CRYGB         |
| cg13386234 | 0.03002 | 0.03237 | 0.03003 | 0.03271 | 0.02687 | 0.02744 | 0.02855 | 0.02975 | 0.02736 | 0.02987 DAD1          |
| cg13386884 | 0.8973  | 0.08746 | 0.87859 | 0.90113 | 0.89663 | 0.35507 | 0.866   | 0.69884 | 0.89554 | 0.73043 PTDSS2        |
| cg13387232 | 0.90765 | 0.89192 | 0.89817 | 0.90557 | 0.85562 | 0.86868 | 0.89757 | 0.90502 | 0.89724 | 0.88893 FLJ34443      |
| cg13391235 | 0.84053 | 0.49323 | 0.83907 | 0.87105 | 0.72904 | 0.79629 | 0.80535 | 0.81323 | 0.68401 | 0.39343 MGC22001      |
| cg13391638 | 0.77377 | 0.20983 | 0.59072 | 0.74093 | 0.25248 | 0.10053 | 0.19558 | 0.09589 | 0.07251 | 0.04779 FLJ13576      |
| cg13393195 | 0.03043 | 0.03015 | 0.03134 | 0.03198 | 0.01813 | 0.03185 | 0.02824 | 0.03099 | 0.02502 | 0.0268 IQCD           |
| cg13396068 | 0.80137 | 0.13475 | 0.1475  | 0.13242 | 0.22649 | 0.33097 | 0.09521 | 0.08858 | 0.07729 | 0.18134 DCD           |

|            |         |         |         |         |         |         |         |         |         |                 |
|------------|---------|---------|---------|---------|---------|---------|---------|---------|---------|-----------------|
| cg13396213 | 0.05488 | 0.0501  | 0.28262 | 0.35492 | 0.05743 | 0.05518 | 0.0545  | 0.04827 | 0.03723 | 0.04114 ZNF575  |
| cg13397365 | 0.02803 | 0.02967 | 0.03151 | 0.0293  | 0.03842 | 0.03823 | 0.02463 | 0.03476 | 0.01926 | 0.02049 MEA1    |
| cg13397379 | 0.7351  | 0.37867 | 0.58134 | 0.75704 | 0.36482 | 0.46369 | 0.06666 | 0.05607 | 0.39939 | 0.36719 OR2C3   |
| cg13398291 | 0.04177 | 0.03434 | 0.05588 | 0.04008 | 0.30009 | 0.06362 | 0.10366 | 0.05175 | 0.02509 | 0.02717 SFRP1   |
| cg13398993 | 0.06488 | 0.08414 | 0.08493 | 0.08048 | 0.08707 | 0.06614 | 0.08866 | 0.09627 | 0.05881 | 0.05687 ARMC1   |
| cg13401339 | 0.10883 | 0.04965 | 0.15268 | 0.20647 | 0.95358 | 0.93799 | 0.92356 | 0.7547  | 0.04814 | 0.13277 FKBP1B  |
| cg13401681 | 0.11615 | 0.10971 | 0.11824 | 0.12062 | 0.12547 | 0.07531 | 0.05975 | 0.06319 | 0.09905 | 0.08105 GRPR    |
| cg13401831 | 0.10046 | 0.05271 | 0.10123 | 0.05939 | 0.58165 | 0.6784  | 0.59081 | 0.59565 | 0.0524  | 0.0433 TUBA8    |
| cg13401987 | 0.02316 | 0.02364 | 0.0202  | 0.02193 | 0.01856 | 0.01896 | 0.01894 | 0.02074 | 0.01723 | 0.01771 APH1B   |
| cg13404558 | 0.06166 | 0.03823 | 0.0446  | 0.03788 | 0.02926 | 0.03416 | 0.03747 | 0.03911 | 0.03742 | 0.03003 PANK3   |
| cg13405161 | 0.03629 | 0.03434 | 0.0506  | 0.0465  | 0.03388 | 0.03279 | 0.0323  | 0.03279 | 0.03743 | 0.03415 EIF2C2  |
| cg13406768 | 0.81763 | 0.74985 | 0.57644 | 0.59979 | 0.69397 | 0.66806 | 0.8096  | 0.7872  | 0.79447 | 0.73773 C2orf33 |
| cg13406950 | 0.84753 | 0.83678 | 0.46036 | 0.48767 | 0.39397 | 0.24587 | 0.31936 | 0.28423 | 0.07432 | 0.06575 GBP1    |
| cg13407883 | 0.78897 | 0.67299 | 0.47218 | 0.66755 | 0.76019 | 0.47213 | 0.05449 | 0.04563 | 0.86232 | 0.66253 SIGLEC9 |
| cg13409216 | 0.03266 | 0.03284 | 0.03376 | 0.03744 | 0.02686 | 0.03386 | 0.03032 | 0.02998 | 0.02435 | 0.02326 SUPV3L1 |
| cg13410437 | 0.22444 | 0.0699  | 0.81021 | 0.87292 | 0.75771 | 0.81618 | 0.12175 | 0.34203 | 0.1228  | 0.39635 OR5P2   |
| cg13412063 | 0.02975 | 0.0366  | 0.03184 | 0.03205 | 0.03115 | 0.03352 | 0.02985 | 0.03149 | 0.03186 | 0.02653 SOS1    |
| cg13412615 | 0.68957 | 0.35379 | 0.64314 | 0.70375 | 0.84799 | 0.82549 | 0.58784 | 0.61642 | 0.55164 | 0.38792 KCNK4   |
| cg13414044 | 0.028   | 0.03026 | 0.02589 | 0.02586 | 0.01871 | 0.02568 | 0.0209  | 0.02446 | 0.022   | 0.02145 RNF170  |
| cg13415207 | 0.0261  | 0.02851 | 0.02505 | 0.02796 | 0.02029 | 0.02715 | 0.02321 | 0.02253 | 0.0194  | 0.02142 PMAIP1  |
| cg13415434 | 0.03792 | 0.04055 | 0.03749 | 0.04019 | 0.02258 | 0.03664 | 0.03689 | 0.03448 | 0.03978 | 0.0442 WDR6     |
| cg13415850 | 0.3593  | 0.04804 | 0.26377 | 0.18599 | 0.06475 | 0.04454 | 0.09634 | 0.06338 | 0.80958 | 0.26104 C2orf7  |
| cg13417824 | 0.0249  | 0.02385 | 0.03313 | 0.02685 | 0.02282 | 0.0246  | 0.02782 | 0.02276 | 0.0257  | 0.0225 RPP38    |
| cg13420923 | 0.02604 | 0.02863 | 0.02938 | 0.03142 | 0.02139 | 0.02353 | 0.02628 | 0.02344 | 0.02536 | 0.02363 NHLRC2  |
| cg13421924 | 0.0537  | 0.06533 | 0.04856 | 0.04833 | 0.09193 | 0.0808  | 0.07092 | 0.06125 | 0.04631 | 0.03814 SC5DL   |
| cg13423076 | 0.04122 | 0.04813 | 0.06369 | 0.05699 | 0.06274 | 0.07329 | 0.05933 | 0.04846 | 0.04053 | 0.05199 CXXC1   |
| cg13423394 | 0.07315 | 0.06565 | 0.09339 | 0.08287 | 0.07944 | 0.07641 | 0.08202 | 0.08633 | 0.07573 | 0.07042 ABHD6   |
| cg13424229 | 0.33347 | 0.12354 | 0.83086 | 0.88334 | 0.88525 | 0.89114 | 0.5278  | 0.4815  | 0.69421 | 0.28796 CPA3    |
| cg13424446 | 0.832   | 0.72011 | 0.72025 | 0.81527 | 0.91499 | 0.8961  | 0.65884 | 0.59924 | 0.51858 | 0.58809 GGTLA4  |
| cg13425637 | 0.03514 | 0.03693 | 0.03038 | 0.02738 | 0.04832 | 0.03922 | 0.03085 | 0.03    | 0.02832 | 0.03316 PRKCH   |
| cg13426503 | 0.02845 | 0.03271 | 0.02943 | 0.03253 | 0.02248 | 0.03094 | 0.02771 | 0.02636 | 0.02622 | 0.02413 RBL2    |
| cg13427055 | 0.0296  | 0.0274  | 0.02685 | 0.02745 | 0.02337 | 0.03168 | 0.02478 | 0.02339 | 0.01759 | 0.02233 HERC5   |
| cg13430425 | 0.02594 | 0.02814 | 0.03604 | 0.03145 | 0.02932 | 0.0359  | 0.03048 | 0.03164 | 0.03384 | 0.03974 ADSL    |
| cg13430851 | 0.13045 | 0.11774 | 0.14416 | 0.11094 | 0.16218 | 0.11016 | 0.16523 | 0.12909 | 0.11748 | 0.11086 C10orf7 |
| cg13431205 | 0.91994 | 0.92524 | 0.8759  | 0.88971 | 0.87453 | 0.85307 | 0.92021 | 0.92535 | 0.93043 | 0.93773 RB1     |
| cg13433272 | 0.03029 | 0.03828 | 0.03467 | 0.04129 | 0.03427 | 0.0426  | 0.03638 | 0.03173 | 0.03275 | 0.03152 CDK8    |
| cg13434203 | 0.37484 | 0.28542 | 0.8557  | 0.84939 | 0.8993  | 0.86603 | 0.73024 | 0.54028 | 0.8034  | 0.80155 PSG3    |
| cg13434842 | 0.81311 | 0.94167 | 0.91094 | 0.94072 | 0.86483 | 0.95298 | 0.25782 | 0.6996  | 0.95364 | 0.95166 GATA4   |
| cg13434852 | 0.87982 | 0.90413 | 0.87848 | 0.89282 | 0.91084 | 0.8965  | 0.87954 | 0.88615 | 0.89476 | 0.88657 DOCK1   |
| cg13435189 | 0.88876 | 0.88571 | 0.87893 | 0.88694 | 0.87907 | 0.88773 | 0.8768  | 0.77775 | 0.89305 | 0.90919 CWF19L2 |
| cg13435381 | 0.0905  | 0.06484 | 0.10944 | 0.08866 | 0.57806 | 0.3842  | 0.17746 | 0.50694 | 0.09706 | 0.05341 LGR5    |

|            |         |         |         |         |         |         |         |         |         |                   |
|------------|---------|---------|---------|---------|---------|---------|---------|---------|---------|-------------------|
| cg13435792 | 0.75475 | 0.71962 | 0.82186 | 0.83482 | 0.82151 | 0.86596 | 0.79297 | 0.83993 | 0.83664 | 0.76445 C12orf46  |
| cg13436343 | 0.02213 | 0.02133 | 0.02753 | 0.02317 | 0.01909 | 0.02578 | 0.01826 | 0.01904 | 0.01996 | 0.01449 PUM1      |
| cg13436799 | 0.05214 | 0.04705 | 0.22527 | 0.0879  | 0.08212 | 0.07229 | 0.11439 | 0.05308 | 0.06234 | 0.05914 LRP2      |
| cg13436996 | 0.64611 | 0.58268 | 0.65858 | 0.69638 | 0.59332 | 0.66027 | 0.64806 | 0.66538 | 0.4886  | 0.38694 UGT2B11   |
| cg13437593 | 0.06358 | 0.05289 | 0.08118 | 0.07452 | 0.0962  | 0.09002 | 0.07213 | 0.07319 | 0.05439 | 0.07584 THRAP4    |
| cg13438543 | 0.05211 | 0.04877 | 0.0492  | 0.05458 | 0.03467 | 0.04773 | 0.05057 | 0.04482 | 0.04652 | 0.05119 TBCA      |
| cg13438673 | 0.03091 | 0.03124 | 0.03371 | 0.03248 | 0.02558 | 0.03117 | 0.03089 | 0.02702 | 0.0254  | 0.02657 ZNF526    |
| cg13438834 | 0.05657 | 0.02826 | 0.0611  | 0.04685 | 0.1021  | 0.02593 | 0.03937 | 0.02828 | 0.3368  | 0.10622 C22orf8   |
| cg13438944 | 0.04034 | 0.04411 | 0.03758 | 0.03322 | 0.06521 | 0.06078 | 0.06651 | 0.06551 | 0.03408 | 0.04888 MGC16028  |
| cg13439299 | 0.90531 | 0.63933 | 0.85063 | 0.85685 | 0.86722 | 0.88238 | 0.85718 | 0.68184 | 0.876   | 0.84912 DNAJC5G   |
| cg13439730 | 0.89366 | 0.5422  | 0.82795 | 0.86286 | 0.92751 | 0.75478 | 0.67866 | 0.83438 | 0.8901  | 0.47516 PRSS8     |
| cg13442811 | 0.59774 | 0.60157 | 0.57364 | 0.64883 | 0.57066 | 0.6106  | 0.55601 | 0.63169 | 0.50709 | 0.49388 KIAA1128  |
| cg13445249 | 0.18092 | 0.15587 | 0.68223 | 0.69728 | 0.27601 | 0.33712 | 0.25344 | 0.20221 | 0.18267 | 0.22499 DSG4      |
| cg13445358 | 0.54536 | 0.10581 | 0.69987 | 0.68255 | 0.28048 | 0.15666 | 0.45208 | 0.17938 | 0.10443 | 0.10663 ESPL1     |
| cg13446199 | 0.78604 | 0.35074 | 0.5056  | 0.71114 | 0.91919 | 0.92317 | 0.90181 | 0.59158 | 0.90821 | 0.89017 PSCA      |
| cg13446235 | 0.04691 | 0.04816 | 0.0547  | 0.044   | 0.02942 | 0.05039 | 0.03335 | 0.03409 | 0.04481 | 0.04387 AFG3L1    |
| cg13446622 | 0.65232 | 0.31309 | 0.79435 | 0.85645 | 0.81052 | 0.79539 | 0.66117 | 0.58969 | 0.41792 | 0.35686 SDR-O     |
| cg13446852 | 0.02379 | 0.02741 | 0.02615 | 0.02636 | 0.02706 | 0.03089 | 0.0231  | 0.02518 | 0.02532 | 0.0243 LEPR       |
| cg13447818 | 0.79746 | 0.78702 | 0.59841 | 0.78822 | 0.35683 | 0.63564 | 0.78807 | 0.88124 | 0.34925 | 0.07457 FLG       |
| cg13448401 | 0.02495 | 0.02752 | 0.02457 | 0.02342 | 0.0179  | 0.01959 | 0.02099 | 0.0217  | 0.01849 | 0.01664 VPS35     |
| cg13448625 | 0.81672 | 0.5834  | 0.82849 | 0.82283 | 0.80452 | 0.81919 | 0.76668 | 0.78768 | 0.82316 | 0.77323 COL17A1   |
| cg13449372 | 0.50496 | 0.36235 | 0.91528 | 0.91511 | 0.30014 | 0.48846 | 0.82719 | 0.7023  | 0.91049 | 0.71272 MRPL43    |
| cg13449778 | 0.04453 | 0.02785 | 0.30297 | 0.21811 | 0.26509 | 0.0751  | 0.12168 | 0.12991 | 0.20398 | 0.08119 C1orf76   |
| cg13450057 | 0.88134 | 0.87004 | 0.82288 | 0.86383 | 0.6773  | 0.81086 | 0.84076 | 0.84847 | 0.84851 | 0.83543 POLN      |
| cg13451483 | 0.06162 | 0.03436 | 0.04525 | 0.04102 | 0.04606 | 0.05047 | 0.03889 | 0.0342  | 0.02566 | 0.02341 MGC39581  |
| cg13453139 | 0.76716 | 0.50519 | 0.87978 | 0.8836  | 0.90622 | 0.87261 | 0.71028 | 0.81633 | 0.86785 | 0.60059 PIK3R5    |
| cg13454184 | 0.05292 | 0.0507  | 0.04655 | 0.04714 | 0.06539 | 0.06537 | 0.04237 | 0.04271 | 0.05485 | 0.05529 TARSL1    |
| cg13455369 | 0.06039 | 0.06167 | 0.1089  | 0.09438 | 0.08075 | 0.07145 | 0.04404 | 0.0447  | 0.0477  | 0.05829 FAM44A    |
| cg13456653 | 0.03696 | 0.04395 | 0.05558 | 0.05123 | 0.04623 | 0.05581 | 0.03941 | 0.03583 | 0.03827 | 0.03362 DNAJB6    |
| cg13459560 | 0.69248 | 0.49683 | 0.54302 | 0.62338 | 0.53254 | 0.68756 | 0.47842 | 0.56773 | 0.42212 | 0.5163 CSN3       |
| cg13460409 | 0.9395  | 0.7582  | 0.85888 | 0.87934 | 0.849   | 0.91071 | 0.81101 | 0.54432 | 0.93153 | 0.92593 DSCR6     |
| cg13461509 | 0.45889 | 0.42266 | 0.13422 | 0.27566 | 0.03994 | 0.03597 | 0.07957 | 0.25793 | 0.89638 | 0.81002 ECHDC2    |
| cg13461600 | 0.06461 | 0.05638 | 0.12062 | 0.11118 | 0.03727 | 0.04196 | 0.05442 | 0.04189 | 0.04421 | 0.04007 ABCF3     |
| cg13461622 | 0.69253 | 0.55828 | 0.60994 | 0.74672 | 0.49949 | 0.27113 | 0.13357 | 0.25753 | 0.54178 | 0.48075 RUNX3     |
| cg13462129 | 0.86771 | 0.83656 | 0.79243 | 0.86896 | 0.59063 | 0.81708 | 0.09671 | 0.68554 | 0.89116 | 0.89463 DLX5      |
| cg13462160 | 0.31297 | 0.34719 | 0.32076 | 0.33364 | 0.2799  | 0.30026 | 0.33177 | 0.35087 | 0.35643 | 0.34769 ATF4      |
| cg13463167 | 0.79482 | 0.81893 | 0.72096 | 0.74983 | 0.72447 | 0.80148 | 0.73206 | 0.8274  | 0.7572  | 0.73947 FLJ20054  |
| cg13463367 | 0.11302 | 0.12868 | 0.18674 | 0.14607 | 0.25945 | 0.20192 | 0.13146 | 0.11427 | 0.09121 | 0.09456 PSMC2     |
| cg13464062 | 0.04339 | 0.04537 | 0.05025 | 0.04437 | 0.03977 | 0.04223 | 0.05181 | 0.04237 | 0.04016 | 0.03997 RP9       |
| cg13466487 | 0.90847 | 0.88738 | 0.89855 | 0.90696 | 0.92515 | 0.86517 | 0.89415 | 0.87834 | 0.91816 | 0.90998 LOC134147 |
| cg13467649 | 0.03639 | 0.04516 | 0.05046 | 0.0406  | 0.03824 | 0.03454 | 0.0482  | 0.04924 | 0.0258  | 0.03905 CCDC25    |

|            |         |         |         |         |         |         |         |         |         |                  |
|------------|---------|---------|---------|---------|---------|---------|---------|---------|---------|------------------|
| cg13467814 | 0.08159 | 0.07344 | 0.09163 | 0.08463 | 0.1169  | 0.07719 | 0.06646 | 0.05674 | 0.07514 | 0.07223 C2orf30  |
| cg13468685 | 0.79556 | 0.65464 | 0.77696 | 0.7753  | 0.73214 | 0.81112 | 0.75433 | 0.84146 | 0.78013 | 0.81841 PLEK     |
| cg13469311 | 0.03184 | 0.03607 | 0.03802 | 0.03449 | 0.03262 | 0.03997 | 0.0375  | 0.03174 | 0.0289  | 0.03073 PGRMC2   |
| cg13470920 | 0.04353 | 0.10781 | 0.92579 | 0.94297 | 0.94906 | 0.91472 | 0.20094 | 0.08809 | 0.95445 | 0.9216 VAV1      |
| cg13471990 | 0.67227 | 0.26799 | 0.38061 | 0.72427 | 0.50141 | 0.42837 | 0.10152 | 0.10667 | 0.11941 | 0.09269 ENTPD1   |
| cg13473336 | 0.63303 | 0.29269 | 0.57461 | 0.66216 | 0.60048 | 0.47285 | 0.55674 | 0.18724 | 0.30061 | 0.32356 SLC5A2   |
| cg13473383 | 0.22682 | 0.07251 | 0.40785 | 0.39381 | 0.27698 | 0.04869 | 0.23777 | 0.08015 | 0.07691 | 0.03425 ZDHHC5   |
| cg13474734 | 0.90934 | 0.87236 | 0.25205 | 0.45954 | 0.94558 | 0.89734 | 0.07205 | 0.28835 | 0.7436  | 0.4596 FLJ43339  |
| cg13474750 | 0.92693 | 0.93135 | 0.93042 | 0.92848 | 0.95543 | 0.92642 | 0.91728 | 0.9102  | 0.94397 | 0.91862 SH3BP1   |
| cg13477510 | 0.87537 | 0.59814 | 0.86625 | 0.87249 | 0.80099 | 0.83653 | 0.85351 | 0.76542 | 0.8659  | 0.82791 5-Sep    |
| cg13479669 | 0.39932 | 0.47997 | 0.44349 | 0.45227 | 0.41012 | 0.43581 | 0.03753 | 0.03681 | 0.03115 | 0.02964 CDKN2A   |
| cg13481359 | 0.17758 | 0.06057 | 0.77809 | 0.87966 | 0.56918 | 0.57867 | 0.57162 | 0.58975 | 0.15598 | 0.07293 EGR4     |
| cg13482233 | 0.13316 | 0.07235 | 0.18074 | 0.18763 | 0.40031 | 0.5277  | 0.07589 | 0.29466 | 0.07979 | 0.05544 HEPH     |
| cg13482485 | 0.07444 | 0.06966 | 0.07034 | 0.07105 | 0.0547  | 0.0577  | 0.07458 | 0.07943 | 0.06396 | 0.06328 SNX7     |
| cg13486556 | 0.39292 | 0.25134 | 0.20137 | 0.27512 | 0.58897 | 0.6115  | 0.0642  | 0.0684  | 0.60168 | 0.03528 TMOD2    |
| cg13488201 | 0.64137 | 0.89072 | 0.60427 | 0.6856  | 0.63087 | 0.57658 | 0.03483 | 0.04397 | 0.9474  | 0.94785 ADAM12   |
| cg13488557 | 0.07759 | 0.07094 | 0.09768 | 0.10955 | 0.11757 | 0.08678 | 0.07002 | 0.05594 | 0.07548 | 0.08182 C1orf63  |
| cg13490635 | 0.05701 | 0.05248 | 0.05075 | 0.0501  | 0.04032 | 0.05093 | 0.08708 | 0.06985 | 0.04166 | 0.04415 RBPMS    |
| cg13490971 | 0.51503 | 0.10989 | 0.23594 | 0.18447 | 0.08148 | 0.05002 | 0.17396 | 0.0529  | 0.08063 | 0.11043 NDFIP1   |
| cg13492227 | 0.09966 | 0.06925 | 0.17965 | 0.22142 | 0.88649 | 0.80486 | 0.76805 | 0.34621 | 0.83456 | 0.79023 FGF11    |
| cg13492340 | 0.05662 | 0.05244 | 0.22974 | 0.28473 | 0.20889 | 0.06763 | 0.06583 | 0.04532 | 0.05159 | 0.03405 ITGA8    |
| cg13493001 | 0.73821 | 0.39545 | 0.7151  | 0.85312 | 0.75666 | 0.66011 | 0.40281 | 0.62811 | 0.52085 | 0.43267 LCN12    |
| cg13493559 | 0.03406 | 0.03272 | 0.03764 | 0.0349  | 0.03092 | 0.03035 | 0.03264 | 0.03466 | 0.02388 | 0.02666 PLCB3    |
| cg13494498 | 0.03222 | 0.03211 | 0.09319 | 0.06116 | 0.04225 | 0.03072 | 0.03843 | 0.03633 | 0.03995 | 0.02288 TUBB3    |
| cg13496066 | 0.75471 | 0.77767 | 0.75701 | 0.78884 | 0.56417 | 0.7362  | 0.70451 | 0.78022 | 0.7943  | 0.74672 CHST5    |
| cg13496736 | 0.19118 | 0.02191 | 0.91246 | 0.96718 | 0.8564  | 0.8048  | 0.36082 | 0.09257 | 0.90828 | 0.95452 OVOL1    |
| cg13496838 | 0.18751 | 0.60084 | 0.79045 | 0.83547 | 0.83815 | 0.81168 | 0.44128 | 0.43605 | 0.64207 | 0.58111 PAX3     |
| cg13500388 | 0.73534 | 0.64643 | 0.84084 | 0.85536 | 0.41986 | 0.25268 | 0.6844  | 0.33836 | 0.86391 | 0.77659 CFBF     |
| cg13500819 | 0.90565 | 0.91421 | 0.89044 | 0.8841  | 0.92125 | 0.90566 | 0.88321 | 0.88313 | 0.91433 | 0.90328 PACAP    |
| cg13501117 | 0.05571 | 0.05859 | 0.04854 | 0.05262 | 0.04134 | 0.04799 | 0.04996 | 0.04697 | 0.04905 | 0.04164 WDR8     |
| cg13501507 | 0.0427  | 0.03333 | 0.08913 | 0.05639 | 0.04003 | 0.03417 | 0.03361 | 0.03406 | 0.02978 | 0.02835 DMXL2    |
| cg13501999 | 0.03529 | 0.03776 | 0.03551 | 0.03573 | 0.03132 | 0.04098 | 0.0365  | 0.03714 | 0.03089 | 0.02996 CACNB1   |
| cg13502356 | 0.03575 | 0.03621 | 0.0399  | 0.03789 | 0.03873 | 0.03318 | 0.03528 | 0.03506 | 0.03224 | 0.03189 ZMPSTE24 |
| cg13504059 | 0.89087 | 0.58214 | 0.87957 | 0.87308 | 0.89976 | 0.56968 | 0.30984 | 0.09978 | 0.59342 | 0.51583 CCR7     |
| cg13506226 | 0.72665 | 0.72644 | 0.6619  | 0.68119 | 0.73201 | 0.63285 | 0.73959 | 0.73865 | 0.73284 | 0.72676 P2RY5    |
| cg13507326 | 0.9109  | 0.9125  | 0.92362 | 0.93001 | 0.87138 | 0.87888 | 0.89965 | 0.91157 | 0.9154  | 0.87907 FLJ25976 |
| cg13507429 | 0.81093 | 0.63839 | 0.33238 | 0.52687 | 0.1201  | 0.05254 | 0.22672 | 0.08823 | 0.10319 | 0.04396 KLHDC7A  |
| cg13507893 | 0.24676 | 0.24567 | 0.72132 | 0.78535 | 0.62974 | 0.64907 | 0.54361 | 0.47365 | 0.46266 | 0.57164 SLC5A4   |
| cg13509147 | 0.20741 | 0.06417 | 0.48482 | 0.52587 | 0.68339 | 0.29251 | 0.32202 | 0.10939 | 0.11988 | 0.20262 CREB3L3  |
| cg13510262 | 0.10539 | 0.1071  | 0.10497 | 0.10259 | 0.05855 | 0.08463 | 0.09003 | 0.09084 | 0.08843 | 0.09489 SP1      |
| cg13510327 | 0.03112 | 0.03074 | 0.03483 | 0.0356  | 0.04635 | 0.04964 | 0.03568 | 0.03514 | 0.02554 | 0.0278 NEU1      |



|            |         |         |         |         |         |         |         |         |         |                       |
|------------|---------|---------|---------|---------|---------|---------|---------|---------|---------|-----------------------|
| cg13510363 | 0.03542 | 0.03755 | 0.03274 | 0.03573 | 0.02391 | 0.04248 | 0.03524 | 0.03277 | 0.02894 | 0.02615 ANKS1A        |
| cg13514050 | 0.03512 | 0.0318  | 0.14349 | 0.31525 | 0.07444 | 0.13564 | 0.02711 | 0.02737 | 0.03358 | 0.02711 GGTL3         |
| cg13514129 | 0.04928 | 0.05029 | 0.07493 | 0.16113 | 0.05435 | 0.05181 | 0.05741 | 0.05141 | 0.05023 | 0.04901 MACF1         |
| cg13515605 | 0.05788 | 0.05005 | 0.09803 | 0.06523 | 0.07861 | 0.046   | 0.04574 | 0.03692 | 0.27873 | 0.04783 CMTM6         |
| cg13515674 | 0.0396  | 0.03914 | 0.03118 | 0.03298 | 0.02169 | 0.02777 | 0.02616 | 0.02536 | 0.02385 | 0.02842 HMGB2         |
| cg13516796 | 0.05664 | 0.05644 | 0.06005 | 0.05286 | 0.04722 | 0.03915 | 0.05112 | 0.04359 | 0.06454 | 0.05931 ALG1          |
| cg13517305 | 0.03369 | 0.03447 | 0.03838 | 0.05634 | 0.03227 | 0.02726 | 0.02767 | 0.02678 | 0.02695 | 0.02967 CHCHD6        |
| cg13517968 | 0.9047  | 0.91254 | 0.9166  | 0.9127  | 0.92894 | 0.91601 | 0.83607 | 0.90837 | 0.92592 | 0.72791 UPK1A         |
| cg13518195 | 0.88772 | 0.93536 | 0.03549 | 0.02952 | 0.02138 | 0.02487 | 0.02307 | 0.02112 | 0.02171 | 0.0205 NUDT16         |
| cg13518327 | 0.44643 | 0.08261 | 0.08896 | 0.06995 | 0.10957 | 0.09962 | 0.07098 | 0.06586 | 0.06825 | 0.06773 THR3          |
| cg13519373 | 0.0718  | 0.0458  | 0.07718 | 0.13569 | 0.09262 | 0.06139 | 0.04989 | 0.04146 | 0.05034 | 0.04776 IL8RA         |
| cg13520327 | 0.46461 | 0.34774 | 0.48266 | 0.38308 | 0.7964  | 0.46046 | 0.47077 | 0.35912 | 0.76532 | 0.6476 KCNH6          |
| cg13520715 | 0.8491  | 0.67027 | 0.85691 | 0.87653 | 0.90509 | 0.87156 | 0.66487 | 0.62822 | 0.87916 | 0.78566 C21orf129     |
| cg13521229 | 0.60684 | 0.79459 | 0.8874  | 0.92782 | 0.94375 | 0.82307 | 0.85602 | 0.70293 | 0.92845 | 0.88576 JOSD2         |
| cg13523386 | 0.22085 | 0.22817 | 0.61191 | 0.57748 | 0.47054 | 0.7022  | 0.36469 | 0.26106 | 0.24812 | 0.16708 AMBN          |
| cg13523557 | 0.19097 | 0.06301 | 0.77839 | 0.78934 | 0.95462 | 0.92099 | 0.69961 | 0.61675 | 0.79922 | 0.6474 ADCY1          |
| cg13525683 | 0.89997 | 0.89732 | 0.80703 | 0.82352 | 0.81768 | 0.84974 | 0.85671 | 0.86031 | 0.88759 | 0.84951 TIAF1         |
| cg13526007 | 0.06932 | 0.07256 | 0.80511 | 0.80268 | 0.25723 | 0.08325 | 0.07827 | 0.06841 | 0.09803 | 0.07423 LRFN5         |
| cg13526689 | 0.05217 | 0.05421 | 0.05655 | 0.04873 | 0.05202 | 0.04423 | 0.0461  | 0.04601 | 0.04485 | 0.04721 DLST          |
| cg13530039 | 0.2226  | 0.0591  | 0.1656  | 0.34884 | 0.07588 | 0.0517  | 0.06343 | 0.05447 | 0.05688 | 0.04596 CHR1          |
| cg13530946 | 0.56988 | 0.54505 | 0.76493 | 0.78693 | 0.62853 | 0.59596 | 0.77303 | 0.76391 | 0.27493 | 0.25622 IARS2         |
| cg13531460 | 0.86274 | 0.85553 | 0.8602  | 0.88359 | 0.92389 | 0.88803 | 0.55269 | 0.42452 | 0.89983 | 0.7214 GPR55          |
| cg13531842 | 0.04932 | 0.03812 | 0.14909 | 0.06703 | 0.18085 | 0.02841 | 0.02909 | 0.03014 | 0.06883 | 0.0253 ZNF37A         |
| cg13535217 | 0.85083 | 0.81687 | 0.84045 | 0.84694 | 0.88305 | 0.75481 | 0.8313  | 0.85076 | 0.85439 | 0.84085 DKFZp43411020 |
| cg13536448 | 0.04116 | 0.03042 | 0.03927 | 0.03301 | 0.02115 | 0.03119 | 0.03396 | 0.04905 | 0.02925 | 0.02869 HIST2H2AA     |
| cg13539030 | 0.04319 | 0.02814 | 0.02589 | 0.02486 | 0.02836 | 0.02309 | 0.02303 | 0.02558 | 0.02669 | 0.02185 ARL4C         |
| cg13540795 | 0.03946 | 0.03193 | 0.08042 | 0.09336 | 0.43778 | 0.22523 | 0.0218  | 0.02831 | 0.02091 | 0.02926 ZNF432        |
| cg13543096 | 0.96237 | 0.9573  | 0.95102 | 0.95794 | 0.96327 | 0.96264 | 0.95303 | 0.94957 | 0.96643 | 0.9666 GDPD3          |
| cg13546796 | 0.51377 | 0.52502 | 0.5462  | 0.64074 | 0.53759 | 0.5992  | 0.49352 | 0.53568 | 0.56935 | 0.51556 CSN3          |
| cg13547237 | 0.52507 | 0.24726 | 0.15497 | 0.17474 | 0.23422 | 0.12551 | 0.15701 | 0.12089 | 0.64409 | 0.42289 Bles03        |
| cg13547299 | 0.03054 | 0.03257 | 0.03903 | 0.0343  | 0.02888 | 0.02836 | 0.03115 | 0.03184 | 0.02813 | 0.02783 TOLLIP        |
| cg13547644 | 0.28764 | 0.10952 | 0.96209 | 0.96589 | 0.97267 | 0.96779 | 0.95761 | 0.95786 | 0.96078 | 0.87268 ACTA1         |
| cg13548361 | 0.03547 | 0.03331 | 0.67329 | 0.6971  | 0.52022 | 0.57085 | 0.08005 | 0.05566 | 0.30593 | 0.07765 PSD           |
| cg13549845 | 0.214   | 0.13646 | 0.75866 | 0.84792 | 0.24601 | 0.15341 | 0.14427 | 0.1494  | 0.13319 | 0.13026 GRID2         |
| cg13550608 | 0.83878 | 0.4886  | 0.603   | 0.74986 | 0.76984 | 0.7227  | 0.92315 | 0.80769 | 0.49823 | 0.35329 SEMA3B        |
| cg13550877 | 0.82247 | 0.70857 | 0.85646 | 0.88085 | 0.68374 | 0.80731 | 0.82548 | 0.85584 | 0.84594 | 0.7801 C14orf148      |
| cg13551243 | 0.03492 | 0.04188 | 0.04134 | 0.04398 | 0.04261 | 0.05017 | 0.03429 | 0.03726 | 0.03464 | 0.03442 ZNF7          |
| cg13552650 | 0.11612 | 0.11878 | 0.14834 | 0.12484 | 0.11874 | 0.10462 | 0.09304 | 0.08945 | 0.09848 | 0.09063 MORC3         |
| cg13552869 | 0.59427 | 0.07307 | 0.83535 | 0.8559  | 0.89721 | 0.8288  | 0.26827 | 0.04001 | 0.86863 | 0.53704 SEZ6L2        |
| cg13553204 | 0.69822 | 0.34004 | 0.84036 | 0.83768 | 0.81641 | 0.76487 | 0.76477 | 0.41525 | 0.82565 | 0.73038 CNKSR1        |
| cg13553455 | 0.31657 | 0.14448 | 0.45166 | 0.59938 | 0.27664 | 0.24434 | 0.18756 | 0.1173  | 0.18578 | 0.11306 COL17A1       |

|            |         |         |         |         |         |         |         |         |         |         |               |
|------------|---------|---------|---------|---------|---------|---------|---------|---------|---------|---------|---------------|
| cg13553498 | 0.76844 | 0.79237 | 0.74928 | 0.73779 | 0.69734 | 0.80084 | 0.77442 | 0.75292 | 0.74933 | 0.77937 | CLEC2D        |
| cg13554114 | 0.03947 | 0.04573 | 0.04244 | 0.04756 | 0.03838 | 0.04228 | 0.04752 | 0.04553 | 0.04479 | 0.04175 | TERF1         |
| cg13555543 | 0.02643 | 0.02769 | 0.02852 | 0.02402 | 0.02039 | 0.02787 | 0.02633 | 0.023   | 0.02351 | 0.02619 | MAX           |
| cg13555884 | 0.90561 | 0.88769 | 0.92386 | 0.92993 | 0.93593 | 0.92145 | 0.88132 | 0.83623 | 0.92789 | 0.92625 | CTGLF1        |
| cg13557178 | 0.02517 | 0.02594 | 0.02459 | 0.02427 | 0.0221  | 0.02447 | 0.0205  | 0.02191 | 0.02109 | 0.01873 | EFHA1         |
| cg13559495 | 0.06015 | 0.04862 | 0.06768 | 0.05779 | 0.06172 | 0.06214 | 0.0334  | 0.03615 | 0.06037 | 0.06067 | ALG14         |
| cg13560436 | 0.60823 | 0.16345 | 0.093   | 0.18563 | 0.64193 | 0.57993 | 0.10464 | 0.07463 | 0.16156 | 0.18477 | DKFZP78111119 |
| cg13560548 | 0.80025 | 0.92918 | 0.93597 | 0.93466 | 0.9552  | 0.8277  | 0.91687 | 0.94153 | 0.76067 | 0.9164  | C3orf24       |
| cg13562542 | 0.03262 | 0.0342  | 0.15599 | 0.0315  | 0.08147 | 0.02989 | 0.35161 | 0.37997 | 0.05414 | 0.02878 | GPR27         |
| cg13562911 | 0.03176 | 0.03483 | 0.04392 | 0.04872 | 0.07223 | 0.03237 | 0.03882 | 0.05112 | 0.02964 | 0.03212 | ELOVL2        |
| cg13563405 | 0.03666 | 0.03673 | 0.04739 | 0.04311 | 0.05258 | 0.03799 | 0.06695 | 0.05252 | 0.02965 | 0.03955 | ASAH1         |
| cg13564075 | 0.02312 | 0.024   | 0.03654 | 0.03612 | 0.02734 | 0.02465 | 0.02599 | 0.02388 | 0.01967 | 0.01961 | PHF12         |
| cg13564468 | 0.09101 | 0.07985 | 0.15634 | 0.12811 | 0.21237 | 0.10518 | 0.07991 | 0.07741 | 0.09158 | 0.07864 | C6orf192      |
| cg13564595 | 0.02728 | 0.02372 | 0.02594 | 0.02486 | 0.02616 | 0.0314  | 0.02252 | 0.02586 | 0.02074 | 0.02238 | GRPEL1        |
| cg13565157 | 0.09365 | 0.07527 | 0.35001 | 0.52011 | 0.38931 | 0.54699 | 0.08872 | 0.08481 | 0.08924 | 0.09673 | PDE1B         |
| cg13565215 | 0.53159 | 0.63343 | 0.2803  | 0.2885  | 0.50792 | 0.47474 | 0.10035 | 0.10249 | 0.0907  | 0.06733 | DSCAML1       |
| cg13565723 | 0.0754  | 0.09343 | 0.13976 | 0.09826 | 0.15058 | 0.09786 | 0.07397 | 0.07005 | 0.09174 | 0.10084 | FLJ32312      |
| cg13571802 | 0.36958 | 0.22671 | 0.61227 | 0.67548 | 0.53837 | 0.52806 | 0.39829 | 0.70315 | 0.40926 | 0.38999 | TGM4          |
| cg13572545 | 0.0808  | 0.0796  | 0.1029  | 0.09129 | 0.08362 | 0.07442 | 0.06659 | 0.06875 | 0.11165 | 0.072   | FBXO30        |
| cg13573276 | 0.04705 | 0.02889 | 0.25045 | 0.30878 | 0.31343 | 0.24676 | 0.16076 | 0.03346 | 0.04044 | 0.0292  | RDHE2         |
| cg13574590 | 0.0399  | 0.03933 | 0.08895 | 0.16664 | 0.21634 | 0.92715 | 0.04166 | 0.0535  | 0.04494 | 0.04223 | CCND2         |
| cg13575604 | 0.05062 | 0.04396 | 0.05056 | 0.04158 | 0.03708 | 0.04138 | 0.03924 | 0.04159 | 0.03904 | 0.03269 | TCP11L1       |
| cg13576061 | 0.04217 | 0.04873 | 0.04263 | 0.04455 | 0.04663 | 0.04424 | 0.03888 | 0.03406 | 0.03093 | 0.02988 | IL6ST         |
| cg13576290 | 0.77565 | 0.56853 | 0.82522 | 0.85192 | 0.90925 | 0.86553 | 0.24324 | 0.3264  | 0.88065 | 0.67314 | LOC165186     |
| cg13576739 | 0.05648 | 0.06409 | 0.06047 | 0.06081 | 0.04439 | 0.0465  | 0.05771 | 0.05737 | 0.04681 | 0.04448 | PFDN6         |
| cg13577076 | 0.25752 | 0.10698 | 0.94815 | 0.95808 | 0.936   | 0.95694 | 0.42402 | 0.44107 | 0.63319 | 0.58163 | PRKAR1B       |
| cg13577407 | 0.05239 | 0.04936 | 0.04153 | 0.03713 | 0.04612 | 0.04448 | 0.0408  | 0.03489 | 0.03511 | 0.04008 | FLNB          |
| cg13578400 | 0.04726 | 0.049   | 0.04778 | 0.04729 | 0.03867 | 0.04693 | 0.04238 | 0.04375 | 0.04049 | 0.04196 | RCD-8         |
| cg13578652 | 0.60005 | 0.36683 | 0.63769 | 0.74215 | 0.57661 | 0.85928 | 0.07994 | 0.10736 | 0.8369  | 0.75735 | UBASH3A       |
| cg13580728 | 0.71788 | 0.71002 | 0.64609 | 0.72133 | 0.64509 | 0.72121 | 0.68143 | 0.71553 | 0.76027 | 0.75479 | OGN           |
| cg13581475 | 0.03626 | 0.03748 | 0.02995 | 0.03308 | 0.03305 | 0.03151 | 0.02888 | 0.03041 | 0.02675 | 0.02904 | MTHFD1        |
| cg13581941 | 0.02273 | 0.02091 | 0.02263 | 0.02235 | 0.01842 | 0.02309 | 0.02285 | 0.0219  | 0.01712 | 0.0162  | CDC23         |
| cg13585240 | 0.83538 | 0.54154 | 0.7823  | 0.81087 | 0.67811 | 0.5047  | 0.75737 | 0.70692 | 0.51293 | 0.35688 | ARIH2         |
| cg13587552 | 0.82226 | 0.60153 | 0.56689 | 0.81949 | 0.71811 | 0.43147 | 0.71396 | 0.60996 | 0.58556 | 0.46737 | SCNN1D        |
| cg13587740 | 0.85614 | 0.77313 | 0.02783 | 0.02198 | 0.01878 | 0.02223 | 0.02387 | 0.02624 | 0.01991 | 0.022   | HEXA          |
| cg13588354 | 0.06303 | 0.20419 | 0.08938 | 0.10237 | 0.10218 | 0.07086 | 0.07078 | 0.06933 | 0.26387 | 0.17224 | MC3R          |
| cg13588645 | 0.01891 | 0.02226 | 0.02382 | 0.02195 | 0.01629 | 0.0168  | 0.01824 | 0.01733 | 0.01578 | 0.01929 | R3HDM1        |
| cg13588835 | 0.61317 | 0.38241 | 0.75892 | 0.79475 | 0.8656  | 0.69057 | 0.46623 | 0.17203 | 0.33782 | 0.27573 | LGALS7        |
| cg13589108 | 0.04433 | 0.03053 | 0.20262 | 0.08498 | 0.24198 | 0.25024 | 0.03916 | 0.02786 | 0.03859 | 0.0274  | FAM5B         |
| cg13590277 | 0.6149  | 0.26734 | 0.1181  | 0.17202 | 0.03338 | 0.11264 | 0.05537 | 0.04236 | 0.03052 | 0.0781  | SYNPO         |
| cg13591701 | 0.19426 | 0.18252 | 0.19624 | 0.18536 | 0.46464 | 0.47485 | 0.25079 | 0.34525 | 0.66789 | 0.43314 | FAM20A        |

|            |         |         |         |         |         |         |         |         |         |         |          |
|------------|---------|---------|---------|---------|---------|---------|---------|---------|---------|---------|----------|
| cg13592003 | 0.01427 | 0.01696 | 0.0188  | 0.01779 | 0.01711 | 0.02052 | 0.01525 | 0.01459 | 0.01304 | 0.01794 | ZNF250   |
| cg13592155 | 0.18564 | 0.17519 | 0.2356  | 0.23428 | 0.26344 | 0.15598 | 0.21707 | 0.21839 | 0.18906 | 0.20408 | MRPL51   |
| cg13593287 | 0.89302 | 0.51991 | 0.06608 | 0.05784 | 0.25569 | 0.12673 | 0.05193 | 0.09428 | 0.04755 | 0.0561  | SPTB     |
| cg13594711 | 0.86915 | 0.15435 | 0.88484 | 0.89738 | 0.88766 | 0.8914  | 0.84145 | 0.76077 | 0.91324 | 0.87917 | SRCRB4D  |
| cg13597949 | 0.03703 | 0.03589 | 0.04122 | 0.04034 | 0.0421  | 0.03229 | 0.03863 | 0.03634 | 0.06917 | 0.0274  | CKAP1    |
| cg13599007 | 0.79968 | 0.80853 | 0.79936 | 0.81713 | 0.80527 | 0.82942 | 0.76595 | 0.80234 | 0.84333 | 0.78412 | FABP6    |
| cg13599025 | 0.04275 | 0.04315 | 0.0647  | 0.0587  | 0.06011 | 0.06108 | 0.02822 | 0.02898 | 0.05537 | 0.04582 | CDC7     |
| cg13599477 | 0.16873 | 0.09384 | 0.09254 | 0.06809 | 0.11572 | 0.07035 | 0.88292 | 0.77671 | 0.91012 | 0.63258 | NET1     |
| cg13601079 | 0.76712 | 0.75807 | 0.76951 | 0.81309 | 0.68607 | 0.76953 | 0.23886 | 0.40015 | 0.32082 | 0.3207  | SSX3     |
| cg13603099 | 0.05805 | 0.0977  | 0.05095 | 0.04815 | 0.03612 | 0.03243 | 0.03757 | 0.031   | 0.04912 | 0.02945 | RASSF4   |
| cg13603171 | 0.89486 | 0.81435 | 0.89117 | 0.89077 | 0.76834 | 0.44204 | 0.61444 | 0.11714 | 0.07473 | 0.05942 | MOXD1    |
| cg13603551 | 0.79193 | 0.54394 | 0.29324 | 0.18765 | 0.87417 | 0.86115 | 0.04358 | 0.04558 | 0.3182  | 0.34171 | ABP1     |
| cg13604223 | 0.03997 | 0.04313 | 0.04039 | 0.04353 | 0.04627 | 0.0418  | 0.03392 | 0.03557 | 0.03531 | 0.02833 | XPC      |
| cg13605579 | 0.67438 | 0.50731 | 0.85371 | 0.85701 | 0.87397 | 0.84285 | 0.83198 | 0.75084 | 0.58358 | 0.48114 | ALPP     |
| cg13605690 | 0.02846 | 0.02951 | 0.03733 | 0.03159 | 0.02033 | 0.02868 | 0.02759 | 0.02414 | 0.29392 | 0.02347 | SPBC25   |
| cg13608094 | 0.07506 | 0.14699 | 0.96526 | 0.96583 | 0.95748 | 0.92535 | 0.8375  | 0.46428 | 0.96335 | 0.96222 | CNND1    |
| cg13612524 | 0.08884 | 0.08079 | 0.29213 | 0.37746 | 0.05583 | 0.07222 | 0.09003 | 0.08545 | 0.07881 | 0.07725 | SPFH2    |
| cg13613532 | 0.17092 | 0.07243 | 0.09162 | 0.06556 | 0.06741 | 0.071   | 0.0665  | 0.0587  | 0.04727 | 0.03742 | MGC33948 |
| cg13613682 | 0.06895 | 0.06287 | 0.65197 | 0.8174  | 0.46846 | 0.07584 | 0.61033 | 0.57341 | 0.08676 | 0.06835 | ZIC3     |
| cg13613748 | 0.66176 | 0.46435 | 0.12872 | 0.21762 | 0.05957 | 0.04635 | 0.19062 | 0.08534 | 0.08499 | 0.04188 | VPS4B    |
| cg13614083 | 0.79101 | 0.71662 | 0.79523 | 0.82697 | 0.42501 | 0.37799 | 0.79951 | 0.80344 | 0.55616 | 0.54427 | KCNAB2   |
| cg13614181 | 0.10322 | 0.05591 | 0.84704 | 0.81609 | 0.86255 | 0.82012 | 0.44021 | 0.44163 | 0.21906 | 0.17659 | RGC32    |
| cg13615396 | 0.06511 | 0.06324 | 0.09708 | 0.08612 | 0.10244 | 0.091   | 0.09272 | 0.07596 | 0.07484 | 0.06589 | RACGAP1  |
| cg13615963 | 0.39586 | 0.1235  | 0.2752  | 0.32124 | 0.46013 | 0.26327 | 0.10826 | 0.10043 | 0.13705 | 0.10456 | CCR6     |
| cg13616221 | 0.03844 | 0.03776 | 0.04115 | 0.04427 | 0.02913 | 0.0362  | 0.03072 | 0.03057 | 0.03447 | 0.02833 | WIPI1    |
| cg13617705 | 0.05938 | 0.07014 | 0.07591 | 0.07538 | 0.08063 | 0.08447 | 0.05775 | 0.05213 | 0.05299 | 0.07087 | SMEK2    |
| cg13617782 | 0.05273 | 0.05116 | 0.06862 | 0.06345 | 0.05823 | 0.06724 | 0.05168 | 0.05121 | 0.05295 | 0.04731 | SON      |
| cg13618372 | 0.88307 | 0.87008 | 0.87776 | 0.88058 | 0.8468  | 0.87336 | 0.85406 | 0.84442 | 0.88923 | 0.84802 | SPTBN1   |
| cg13619408 | 0.25856 | 0.0723  | 0.54498 | 0.52545 | 0.08831 | 0.23073 | 0.19213 | 0.06205 | 0.06681 | 0.07023 | SARS     |
| cg13619768 | 0.03758 | 0.03769 | 0.03564 | 0.03416 | 0.0373  | 0.04156 | 0.03368 | 0.02997 | 0.03025 | 0.02649 | PIAS4    |
| cg13619915 | 0.04836 | 0.04149 | 0.05932 | 0.04428 | 0.04532 | 0.03934 | 0.05746 | 0.0327  | 0.06286 | 0.04537 | SLITRK3  |
| cg13619990 | 0.06144 | 0.05981 | 0.06637 | 0.06109 | 0.04484 | 0.04914 | 0.05708 | 0.05231 | 0.04539 | 0.05051 | ACSM1    |
| cg13620770 | 0.21339 | 0.21717 | 0.46926 | 0.51161 | 0.21929 | 0.18157 | 0.20918 | 0.18519 | 0.21754 | 0.17697 | BAD      |
| cg13620808 | 0.02994 | 0.02961 | 0.03298 | 0.02722 | 0.02367 | 0.02867 | 0.02842 | 0.025   | 0.02453 | 0.02636 | UBE2S    |
| cg13621440 | 0.18776 | 0.1761  | 0.60956 | 0.68226 | 0.29331 | 0.41587 | 0.17683 | 0.23762 | 0.11001 | 0.08987 | NXF2     |
| cg13623690 | 0.04461 | 0.05602 | 0.04377 | 0.04064 | 0.05311 | 0.04375 | 0.0404  | 0.04288 | 0.03273 | 0.03336 | COTL1    |
| cg13625113 | 0.07661 | 0.1026  | 0.10562 | 0.08843 | 0.09801 | 0.08694 | 0.06646 | 0.0791  | 0.06797 | 0.06522 | ZNF482   |
| cg13625205 | 0.02629 | 0.02393 | 0.02648 | 0.02495 | 0.02317 | 0.02647 | 0.02096 | 0.02078 | 0.02335 | 0.02251 | SNX27    |
| cg13625403 | 0.75032 | 0.63414 | 0.92512 | 0.94336 | 0.95289 | 0.91604 | 0.097   | 0.06188 | 0.28646 | 0.29718 | TRIM29   |
| cg13626881 | 0.36939 | 0.17847 | 0.77375 | 0.85302 | 0.72746 | 0.66268 | 0.21759 | 0.21568 | 0.15859 | 0.04679 | ADORA1   |
| cg13628514 | 0.57273 | 0.45845 | 0.553   | 0.57761 | 0.80572 | 0.64918 | 0.6215  | 0.84146 | 0.44977 | 0.40274 | TRPV4    |

|            |         |         |         |         |         |         |         |         |         |         |          |
|------------|---------|---------|---------|---------|---------|---------|---------|---------|---------|---------|----------|
| cg13629753 | 0.20051 | 0.17647 | 0.22735 | 0.20421 | 0.29741 | 0.34118 | 0.16586 | 0.11236 | 0.2147  | 0.23843 | GBP2     |
| cg13631259 | 0.09061 | 0.08925 | 0.08916 | 0.08976 | 0.05942 | 0.08563 | 0.08811 | 0.07907 | 0.34469 | 0.1217  | NUDT8    |
| cg13631913 | 0.04598 | 0.0374  | 0.0457  | 0.04333 | 0.03626 | 0.03986 | 0.03604 | 0.03608 | 0.04332 | 0.03625 | MGC4399  |
| cg13633026 | 0.18203 | 0.16468 | 0.24553 | 0.20506 | 0.38018 | 0.19096 | 0.22207 | 0.18632 | 0.15139 | 0.14548 | MS4A8B   |
| cg13633560 | 0.19295 | 0.05621 | 0.47464 | 0.45942 | 0.27565 | 0.23784 | 0.0852  | 0.07922 | 0.51415 | 0.47127 | LRRC32   |
| cg13634319 | 0.86614 | 0.83586 | 0.84895 | 0.86201 | 0.81519 | 0.83714 | 0.75268 | 0.8094  | 0.87151 | 0.8405  | DGKA     |
| cg13634678 | 0.04636 | 0.03797 | 0.03547 | 0.04285 | 0.03285 | 0.03695 | 0.02782 | 0.03979 | 0.03461 | 0.04229 | TM2D3    |
| cg13634864 | 0.95489 | 0.93236 | 0.93719 | 0.94403 | 0.95861 | 0.93661 | 0.92992 | 0.90338 | 0.92986 | 0.91176 | CENTA1   |
| cg13636404 | 0.03333 | 0.03364 | 0.04025 | 0.03067 | 0.12896 | 0.0393  | 0.03005 | 0.0286  | 0.04681 | 0.02626 | ZNF655   |
| cg13637733 | 0.06134 | 0.05234 | 0.05008 | 0.05277 | 0.04598 | 0.04589 | 0.04845 | 0.05311 | 0.04186 | 0.04196 | TLE3     |
| cg13640200 | 0.33697 | 0.09641 | 0.05775 | 0.06485 | 0.04925 | 0.04985 | 0.05324 | 0.07719 | 0.89836 | 0.46613 | AMIGO2   |
| cg13641903 | 0.9684  | 0.97517 | 0.97123 | 0.97635 | 0.97263 | 0.97299 | 0.7367  | 0.96038 | 0.97827 | 0.97686 | WT1      |
| cg13643585 | 0.02351 | 0.02749 | 0.02439 | 0.01913 | 0.0209  | 0.02387 | 0.02671 | 0.02394 | 0.02172 | 0.02194 | HOXB9    |
| cg13643796 | 0.0582  | 0.05363 | 0.06021 | 0.0409  | 0.05097 | 0.05479 | 0.03666 | 0.04314 | 0.04204 | 0.03658 | ADAMTS3  |
| cg13644052 | 0.87516 | 0.69036 | 0.89047 | 0.91971 | 0.29116 | 0.41715 | 0.08595 | 0.05419 | 0.85309 | 0.47483 | PQR4     |
| cg13645078 | 0.05864 | 0.04241 | 0.4114  | 0.34992 | 0.32659 | 0.31883 | 0.06563 | 0.04954 | 0.09574 | 0.03341 | PHLDA3   |
| cg13645811 | 0.26709 | 0.1847  | 0.16801 | 0.2046  | 0.18677 | 0.16463 | 0.20906 | 0.17869 | 0.23343 | 0.15879 | SYNJ2    |
| cg13649728 | 0.8016  | 0.58988 | 0.91507 | 0.94765 | 0.95037 | 0.95424 | 0.90344 | 0.93156 | 0.89916 | 0.45227 | SLC25A31 |
| cg13650137 | 0.03046 | 0.03935 | 0.04154 | 0.03757 | 0.02717 | 0.03256 | 0.03305 | 0.02998 | 0.03731 | 0.0329  | ASPM     |
| cg13650156 | 0.86587 | 0.54526 | 0.87396 | 0.87709 | 0.89219 | 0.85755 | 0.79837 | 0.66105 | 0.85505 | 0.83698 | PILRA    |
| cg13650689 | 0.02524 | 0.0252  | 0.02472 | 0.02325 | 0.01529 | 0.02152 | 0.01912 | 0.02257 | 0.02554 | 0.01998 | PRPF31   |
| cg13652336 | 0.23222 | 0.09369 | 0.83088 | 0.82422 | 0.76492 | 0.58052 | 0.31904 | 0.07    | 0.38784 | 0.22009 | DEPDC2   |
| cg13652556 | 0.10658 | 0.08072 | 0.08862 | 0.08456 | 0.11397 | 0.09318 | 0.09914 | 0.08749 | 0.08718 | 0.07767 | SEPX1    |
| cg13652653 | 0.08981 | 0.07298 | 0.08431 | 0.08023 | 0.09498 | 0.10132 | 0.06321 | 0.0655  | 0.06669 | 0.0655  | TMEM33   |
| cg13653456 | 0.05019 | 0.03835 | 0.04039 | 0.04876 | 0.05872 | 0.07522 | 0.04145 | 0.04804 | 0.03262 | 0.0356  | VARS     |
| cg13654195 | 0.02317 | 0.02722 | 0.03506 | 0.02878 | 0.02451 | 0.0307  | 0.02393 | 0.0238  | 0.02257 | 0.02537 | RIOK1    |
| cg13656062 | 0.38068 | 0.25556 | 0.84133 | 0.88973 | 0.188   | 0.19102 | 0.17217 | 0.15828 | 0.54402 | 0.38844 | CYP4F2   |
| cg13656360 | 0.0752  | 0.07583 | 0.07614 | 0.08054 | 0.05914 | 0.0634  | 0.06683 | 0.06791 | 0.06736 | 0.0609  | MLL      |
| cg13658777 | 0.09892 | 0.10717 | 0.10551 | 0.09233 | 0.07718 | 0.08833 | 0.55814 | 0.56343 | 0.05912 | 0.06631 | PDHA1    |
| cg13662243 | 0.14417 | 0.15118 | 0.3055  | 0.3297  | 0.09541 | 0.1842  | 0.19528 | 0.22769 | 0.18942 | 0.20293 | PCMT1    |
| cg13663218 | 0.03471 | 0.03745 | 0.02673 | 0.02422 | 0.51387 | 0.35511 | 0.12204 | 0.4182  | 0.02147 | 0.01962 | TRHDE    |
| cg13665184 | 0.0351  | 0.03119 | 0.03907 | 0.0416  | 0.03337 | 0.04028 | 0.03001 | 0.02987 | 0.02727 | 0.02277 | DUS2L    |
| cg13665593 | 0.03633 | 0.14947 | 0.03943 | 0.03364 | 0.04999 | 0.06059 | 0.91712 | 0.91902 | 0.02303 | 0.0237  | ZNF435   |
| cg13666340 | 0.28616 | 0.11688 | 0.34319 | 0.51282 | 0.57045 | 0.52346 | 0.19101 | 0.31834 | 0.62417 | 0.35563 | C9orf68  |
| cg13666729 | 0.54994 | 0.13933 | 0.10243 | 0.30806 | 0.04787 | 0.02859 | 0.04208 | 0.02324 | 0.02799 | 0.02167 | ZBTB8    |
| cg13668129 | 0.22564 | 0.14038 | 0.71511 | 0.69684 | 0.72635 | 0.57565 | 0.60468 | 0.36848 | 0.62743 | 0.41149 | HNRPUL1  |
| cg13668397 | 0.06576 | 0.05869 | 0.06236 | 0.06033 | 0.06473 | 0.06484 | 0.06802 | 0.06129 | 0.04763 | 0.04437 | LIG1     |
| cg13669465 | 0.03488 | 0.03572 | 0.04177 | 0.03409 | 0.03516 | 0.03443 | 0.03117 | 0.03054 | 0.03151 | 0.02556 | EXOSC1   |
| cg13669583 | 0.41192 | 0.37463 | 0.42106 | 0.45309 | 0.3811  | 0.34068 | 0.41714 | 0.41767 | 0.29972 | 0.2728  | MGC2474  |
| cg13669740 | 0.84141 | 0.78312 | 0.87726 | 0.89166 | 0.88697 | 0.90486 | 0.85875 | 0.91294 | 0.88779 | 0.76335 | VSIG9    |
| cg13670595 | 0.0214  | 0.02842 | 0.0271  | 0.02596 | 0.02405 | 0.0272  | 0.0225  | 0.02492 | 0.02141 | 0.02383 | CDR2L    |

|            |         |         |         |         |         |         |         |         |         |         |           |
|------------|---------|---------|---------|---------|---------|---------|---------|---------|---------|---------|-----------|
| cg13671818 | 0.03284 | 0.02847 | 0.03159 | 0.03149 | 0.02396 | 0.02689 | 0.02904 | 0.02694 | 0.02729 | 0.02401 | RUNDC2A   |
| cg13671831 | 0.04044 | 0.03836 | 0.04432 | 0.04523 | 0.04286 | 0.03706 | 0.03635 | 0.03397 | 0.03614 | 0.03785 | NF2       |
| cg13672342 | 0.5718  | 0.10301 | 0.4566  | 0.44698 | 0.50646 | 0.40719 | 0.4093  | 0.20943 | 0.84257 | 0.75547 | WDR39     |
| cg13672791 | 0.53579 | 0.39771 | 0.88522 | 0.90209 | 0.9212  | 0.85692 | 0.27264 | 0.39823 | 0.72211 | 0.80548 | CACNG7    |
| cg13673094 | 0.77576 | 0.81623 | 0.69948 | 0.74754 | 0.66583 | 0.77154 | 0.72698 | 0.77446 | 0.73026 | 0.65945 | PTPRC     |
| cg13673514 | 0.07323 | 0.06301 | 0.86806 | 0.87552 | 0.85868 | 0.84506 | 0.76863 | 0.43194 | 0.84236 | 0.83333 | KIAA1446  |
| cg13673779 | 0.03771 | 0.04048 | 0.04781 | 0.04453 | 0.0459  | 0.0468  | 0.04322 | 0.04089 | 0.03596 | 0.04349 | RKHD2     |
| cg13674559 | 0.02541 | 0.0262  | 0.03019 | 0.02999 | 0.02504 | 0.02655 | 0.51305 | 0.44241 | 0.02198 | 0.0226  | WDR44     |
| cg13675849 | 0.0953  | 0.06342 | 0.76562 | 0.88213 | 0.84769 | 0.83002 | 0.05648 | 0.05745 | 0.05194 | 0.04902 | TRPV5     |
| cg13676215 | 0.60126 | 0.18645 | 0.13495 | 0.10957 | 0.14687 | 0.07453 | 0.11577 | 0.0724  | 0.07406 | 0.04923 | AHR       |
| cg13678049 | 0.56749 | 0.34442 | 0.89486 | 0.89788 | 0.90995 | 0.28427 | 0.75355 | 0.37094 | 0.37931 | 0.32235 | PARC      |
| cg13679077 | 0.04427 | 0.04002 | 0.05005 | 0.04155 | 0.06245 | 0.05779 | 0.05144 | 0.04989 | 0.05651 | 0.0487  | TOMM7     |
| cg13681935 | 0.82154 | 0.33717 | 0.85403 | 0.89903 | 0.78749 | 0.70327 | 0.85002 | 0.80723 | 0.80592 | 0.62244 | ASIP      |
| cg13682722 | 0.36846 | 0.48324 | 0.3475  | 0.38579 | 0.4326  | 0.0527  | 0.11603 | 0.04846 | 0.08098 | 0.04368 | C14orf102 |
| cg13683440 | 0.06269 | 0.05369 | 0.24263 | 0.38753 | 0.0373  | 0.04417 | 0.03958 | 0.04135 | 0.0461  | 0.03907 | MGC39662  |
| cg13683864 | 0.10675 | 0.09021 | 0.06558 | 0.05646 | 0.18033 | 0.14476 | 0.07797 | 0.06911 | 0.0611  | 0.05653 | RPL14     |
| cg13685294 | 0.93874 | 0.9388  | 0.94033 | 0.87757 | 0.97139 | 0.9123  | 0.85267 | 0.54621 | 0.96167 | 0.95124 | GRM2      |
| cg13686042 | 0.04952 | 0.04996 | 0.46502 | 0.50698 | 0.26839 | 0.05512 | 0.19148 | 0.06427 | 0.06246 | 0.04531 | SBF1      |
| cg13686115 | 0.08764 | 0.04256 | 0.59813 | 0.65571 | 0.04761 | 0.30454 | 0.04893 | 0.0944  | 0.08739 | 0.05242 | PHYHIPL   |
| cg13687831 | 0.03242 | 0.02468 | 0.03734 | 0.03053 | 0.07808 | 0.02367 | 0.02592 | 0.02332 | 0.03281 | 0.02287 | MCM10     |
| cg13688966 | 0.65462 | 0.16164 | 0.73266 | 0.83706 | 0.76685 | 0.49872 | 0.42795 | 0.50999 | 0.67856 | 0.40331 | TM4SF4    |
| cg13689073 | 0.80208 | 0.53023 | 0.66041 | 0.74645 | 0.81878 | 0.57933 | 0.78161 | 0.69903 | 0.8378  | 0.77532 | LARP1     |
| cg13692433 | 0.02815 | 0.03087 | 0.03271 | 0.02815 | 0.03749 | 0.02764 | 0.0258  | 0.02288 | 0.02516 | 0.02394 | NCAM1     |
| cg13693652 | 0.64806 | 0.42854 | 0.75743 | 0.77727 | 0.68266 | 0.78309 | 0.69402 | 0.84116 | 0.77579 | 0.32877 | CLCA2     |
| cg13694749 | 0.58394 | 0.2279  | 0.83931 | 0.90592 | 0.94089 | 0.89686 | 0.49024 | 0.22377 | 0.57068 | 0.77002 | SCN4A     |
| cg13694867 | 0.06596 | 0.02601 | 0.02992 | 0.02854 | 0.02469 | 0.02481 | 0.05182 | 0.04281 | 0.03929 | 0.01726 | SIM2      |
| cg13696012 | 0.54639 | 0.281   | 0.62716 | 0.79826 | 0.63939 | 0.65644 | 0.62684 | 0.65793 | 0.46693 | 0.3286  | BPIL1     |
| cg13696887 | 0.81048 | 0.48797 | 0.87259 | 0.9198  | 0.92276 | 0.90207 | 0.82962 | 0.78075 | 0.93065 | 0.50815 | KRTHB2    |
| cg13697378 | 0.96922 | 0.97407 | 0.97059 | 0.97263 | 0.97825 | 0.97305 | 0.9708  | 0.979   | 0.97641 | 0.97971 | DIRAS3    |
| cg13697387 | 0.08135 | 0.06796 | 0.08226 | 0.05712 | 0.11051 | 0.06954 | 0.05995 | 0.05694 | 0.0846  | 0.08278 | LCE2A     |
| cg13699808 | 0.13011 | 0.14904 | 0.42592 | 0.43727 | 0.09506 | 0.08327 | 0.0882  | 0.07576 | 0.2565  | 0.07584 | PRKCBP1   |
| cg13700897 | 0.10292 | 0.10367 | 0.17063 | 0.18015 | 0.16977 | 0.15215 | 0.25165 | 0.25981 | 0.11823 | 0.12759 | RSP02     |
| cg13701109 | 0.084   | 0.09898 | 0.61575 | 0.62803 | 0.59741 | 0.25314 | 0.24125 | 0.10017 | 0.12461 | 0.09077 | ADAMTS19  |
| cg13701273 | 0.03548 | 0.04168 | 0.04862 | 0.03989 | 0.04093 | 0.04664 | 0.03572 | 0.03112 | 0.10753 | 0.03838 | EPHA5     |
| cg13702536 | 0.41412 | 0.33363 | 0.19782 | 0.3143  | 0.18053 | 0.34031 | 0.27857 | 0.09551 | 0.08057 | 0.0733  | GPR81     |
| cg13703437 | 0.69163 | 0.4304  | 0.82449 | 0.89055 | 0.61777 | 0.68008 | 0.66756 | 0.78198 | 0.14757 | 0.13606 | FYB       |
| cg13703941 | 0.75244 | 0.7662  | 0.71468 | 0.73264 | 0.57594 | 0.74974 | 0.71711 | 0.77519 | 0.70616 | 0.71971 | AKAP7     |
| cg13704271 | 0.0534  | 0.05589 | 0.06167 | 0.0617  | 0.10433 | 0.06572 | 0.05314 | 0.04857 | 0.05652 | 0.04496 | CCDC28B   |
| cg13704403 | 0.03809 | 0.04039 | 0.03359 | 0.03425 | 0.03082 | 0.03748 | 0.03136 | 0.03461 | 0.03539 | 0.02802 | DGKQ      |
| cg13704548 | 0.13444 | 0.11163 | 0.13309 | 0.12161 | 0.27569 | 0.1367  | 0.16893 | 0.15741 | 0.29753 | 0.16491 | NOPE      |
| cg13705284 | 0.28419 | 0.31748 | 0.79313 | 0.87675 | 0.50913 | 0.56378 | 0.74381 | 0.76716 | 0.36788 | 0.20597 | ACOX2     |

|            |         |         |         |         |         |         |         |         |         |         |           |
|------------|---------|---------|---------|---------|---------|---------|---------|---------|---------|---------|-----------|
| cg13705707 | 0.0513  | 0.05172 | 0.05101 | 0.05281 | 0.0628  | 0.04594 | 0.04413 | 0.03968 | 0.05375 | 0.04192 | PRKAR2B   |
| cg13706352 | 0.03365 | 0.03449 | 0.03124 | 0.02911 | 0.04046 | 0.04397 | 0.03202 | 0.02804 | 0.02825 | 0.02744 | COX10     |
| cg13707395 | 0.04553 | 0.04801 | 0.04931 | 0.04289 | 0.03884 | 0.04052 | 0.06382 | 0.06395 | 0.03966 | 0.02786 | ADAMTS15  |
| cg13707560 | 0.9039  | 0.73954 | 0.90024 | 0.93962 | 0.95039 | 0.93135 | 0.84438 | 0.5189  | 0.52769 | 0.59014 | NME5      |
| cg13713381 | 0.02372 | 0.03307 | 0.02956 | 0.02558 | 0.02013 | 0.02447 | 0.02334 | 0.02579 | 0.02272 | 0.0208  | TMEM44    |
| cg13714039 | 0.02615 | 0.02441 | 0.02573 | 0.02844 | 0.05758 | 0.0246  | 0.02476 | 0.02283 | 0.01781 | 0.02077 | ZNF14     |
| cg13718960 | 0.81449 | 0.83582 | 0.78541 | 0.88282 | 0.53019 | 0.50428 | 0.05802 | 0.07319 | 0.78746 | 0.78262 | RNASE1    |
| cg13719194 | 0.06805 | 0.08274 | 0.06032 | 0.0721  | 0.05403 | 0.08287 | 0.06784 | 0.07583 | 0.06916 | 0.06809 | PAFAH1B1  |
| cg13720744 | 0.04116 | 0.04767 | 0.04339 | 0.03982 | 0.03678 | 0.04074 | 0.03557 | 0.03919 | 0.03388 | 0.03659 | CRKL      |
| cg13721560 | 0.11188 | 0.12509 | 0.09768 | 0.08917 | 0.10345 | 0.09656 | 0.11403 | 0.09113 | 0.09392 | 0.09077 | LRPPRC    |
| cg13722123 | 0.24989 | 0.28573 | 0.42763 | 0.44833 | 0.11397 | 0.31227 | 0.13498 | 0.06081 | 0.11303 | 0.06201 | GRM1      |
| cg13723482 | 0.28295 | 0.27505 | 0.30412 | 0.30138 | 0.56824 | 0.61753 | 0.24557 | 0.44126 | 0.67666 | 0.45531 | HNRPH2    |
| cg13724288 | 0.06077 | 0.05634 | 0.05552 | 0.05789 | 0.07045 | 0.0708  | 0.04589 | 0.04081 | 0.04534 | 0.03941 | VPS13A    |
| cg13724813 | 0.02777 | 0.034   | 0.03801 | 0.03665 | 0.03392 | 0.04095 | 0.02465 | 0.03008 | 0.03164 | 0.02879 | SPSB1     |
| cg13725272 | 0.03068 | 0.02943 | 0.02873 | 0.02686 | 0.02249 | 0.02537 | 0.02541 | 0.02791 | 0.02245 | 0.02553 | MAGI1     |
| cg13726191 | 0.31846 | 0.09409 | 0.21792 | 0.42142 | 0.38858 | 0.10174 | 0.04927 | 0.11682 | 0.08203 | 0.05402 | FGFBP1    |
| cg13726463 | 0.93669 | 0.91527 | 0.89926 | 0.93035 | 0.94643 | 0.9429  | 0.87072 | 0.83947 | 0.56239 | 0.67008 | COX6A2    |
| cg13726507 | 0.80466 | 0.48654 | 0.81904 | 0.86363 | 0.86835 | 0.86907 | 0.34148 | 0.46002 | 0.89871 | 0.71481 | CTAG2     |
| cg13727946 | 0.11106 | 0.06571 | 0.07448 | 0.09934 | 0.05846 | 0.04696 | 0.07407 | 0.06859 | 0.05285 | 0.06012 | MBD3L1    |
| cg13728650 | 0.89488 | 0.85337 | 0.88058 | 0.89102 | 0.88547 | 0.89509 | 0.90115 | 0.91424 | 0.87998 | 0.87047 | GPR175    |
| cg13729392 | 0.07693 | 0.07053 | 0.06279 | 0.04537 | 0.12884 | 0.1018  | 0.07476 | 0.06966 | 0.06517 | 0.09042 | C14orf112 |
| cg13730534 | 0.07064 | 0.07634 | 0.07092 | 0.06354 | 0.03505 | 0.04984 | 0.05394 | 0.05556 | 0.05481 | 0.05058 | NFYC      |
| cg13733733 | 0.0829  | 0.07925 | 0.22458 | 0.21088 | 0.24676 | 0.07939 | 0.06254 | 0.06531 | 0.05518 | 0.06165 | LILRA3    |
| cg13735697 | 0.64358 | 0.45363 | 0.88932 | 0.90649 | 0.92568 | 0.80529 | 0.49239 | 0.49643 | 0.53456 | 0.3813  | MYOG      |
| cg13735974 | 0.16477 | 0.14977 | 0.28502 | 0.2287  | 0.62181 | 0.23909 | 0.22286 | 0.15983 | 0.59863 | 0.35163 | NFYC      |
| cg13736875 | 0.14816 | 0.12132 | 0.02635 | 0.02225 | 0.01964 | 0.02043 | 0.02093 | 0.01877 | 0.02039 | 0.01728 | UBE2C     |
| cg13739345 | 0.07172 | 0.0398  | 0.04492 | 0.04648 | 0.02872 | 0.03857 | 0.04999 | 0.05187 | 0.02513 | 0.02684 | FAM29A    |
| cg13739417 | 0.8454  | 0.3705  | 0.86432 | 0.92119 | 0.90806 | 0.60615 | 0.76577 | 0.73797 | 0.05273 | 0.03512 | IL8RB     |
| cg13741249 | 0.04954 | 0.04578 | 0.08263 | 0.04782 | 0.03081 | 0.03557 | 0.05668 | 0.03924 | 0.04473 | 0.04194 | ZNF524    |
| cg13741326 | 0.1126  | 0.05245 | 0.08312 | 0.0487  | 0.06381 | 0.06984 | 0.03249 | 0.03715 | 0.03555 | 0.03554 | TP53AP1   |
| cg13741802 | 0.03919 | 0.04957 | 0.04493 | 0.04156 | 0.03508 | 0.04436 | 0.29438 | 0.34983 | 0.03916 | 0.03873 | RIBC1     |
| cg13742532 | 0.16558 | 0.1127  | 0.46485 | 0.62706 | 0.30966 | 0.14317 | 0.3462  | 0.35771 | 0.12578 | 0.33672 | CCBP2     |
| cg13743031 | 0.04703 | 0.04677 | 0.03893 | 0.0389  | 0.04973 | 0.02805 | 0.0309  | 0.02758 | 0.05075 | 0.03363 | NEIL3     |
| cg13744070 | 0.03732 | 0.04175 | 0.0445  | 0.04802 | 0.05249 | 0.04858 | 0.04482 | 0.04408 | 0.03843 | 0.03181 | FLJ20487  |
| cg13744194 | 0.12084 | 0.1101  | 0.33502 | 0.50489 | 0.69791 | 0.52058 | 0.20428 | 0.10292 | 0.7706  | 0.5086  | OCLN      |
| cg13744304 | 0.024   | 0.02519 | 0.02387 | 0.02679 | 0.02127 | 0.02223 | 0.02168 | 0.02194 | 0.01978 | 0.01817 | UNC50     |
| cg13745346 | 0.6759  | 0.3887  | 0.67397 | 0.89945 | 0.75488 | 0.84731 | 0.0607  | 0.04913 | 0.12052 | 0.05881 | CBFA2T3   |
| cg13745870 | 0.78969 | 0.4338  | 0.13191 | 0.18166 | 0.1634  | 0.15301 | 0.16038 | 0.31254 | 0.10261 | 0.09426 | SPATA12   |
| cg13749822 | 0.8315  | 0.77207 | 0.86953 | 0.91472 | 0.93017 | 0.87554 | 0.0601  | 0.03968 | 0.67717 | 0.88748 | HHIP      |
| cg13750354 | 0.06146 | 0.05097 | 0.06294 | 0.05109 | 0.04803 | 0.05395 | 0.04567 | 0.04992 | 0.04988 | 0.05538 | OClAD1    |
| cg13752005 | 0.02638 | 0.02596 | 0.0354  | 0.03393 | 0.03024 | 0.04149 | 0.03335 | 0.02567 | 0.03093 | 0.02938 | CCDC64    |

|            |         |         |         |         |         |         |         |         |         |         |          |
|------------|---------|---------|---------|---------|---------|---------|---------|---------|---------|---------|----------|
| cg13752043 | 0.03059 | 0.02983 | 0.02599 | 0.0296  | 0.02076 | 0.03128 | 0.02826 | 0.02894 | 0.02763 | 0.02619 | CCBL1    |
| cg13752949 | 0.0425  | 0.0459  | 0.04874 | 0.04286 | 0.02852 | 0.04117 | 0.03811 | 0.04263 | 0.04788 | 0.03972 | CP110    |
| cg13754949 | 0.03885 | 0.03683 | 0.04947 | 0.03929 | 0.05739 | 0.0298  | 0.02931 | 0.03112 | 0.03616 | 0.03116 | REV1L    |
| cg13755023 | 0.03067 | 0.03636 | 0.0525  | 0.0425  | 0.01833 | 0.02779 | 0.02701 | 0.03019 | 0.02855 | 0.03364 | LRR6     |
| cg13755070 | 0.07652 | 0.08111 | 0.1082  | 0.08484 | 0.17833 | 0.09211 | 0.13858 | 0.12506 | 0.06422 | 0.05776 | FLI1     |
| cg13755535 | 0.04652 | 0.04951 | 0.05466 | 0.04587 | 0.03962 | 0.04511 | 0.0463  | 0.04522 | 0.04412 | 0.04093 | LMAN2    |
| cg13756879 | 0.03154 | 0.03099 | 0.03426 | 0.05755 | 0.03745 | 0.03664 | 0.0289  | 0.0328  | 0.02646 | 0.02479 | IGF2     |
| cg13757640 | 0.76048 | 0.07405 | 0.95076 | 0.96016 | 0.9702  | 0.94079 | 0.32614 | 0.4945  | 0.9431  | 0.92479 | ARHGAP8  |
| cg13758659 | 0.06385 | 0.05982 | 0.07102 | 0.06231 | 0.07913 | 0.07028 | 0.06396 | 0.05894 | 0.06319 | 0.06355 | SDC1     |
| cg13758677 | 0.66427 | 0.15321 | 0.40639 | 0.55652 | 0.42503 | 0.32435 | 0.2073  | 0.22081 | 0.498   | 0.40506 | GAGE4    |
| cg13759143 | 0.05426 | 0.05857 | 0.07797 | 0.05424 | 0.12007 | 0.05483 | 0.06357 | 0.0538  | 0.16559 | 0.04373 | EXPH5    |
| cg13759328 | 0.06875 | 0.06236 | 0.58349 | 0.6139  | 0.22819 | 0.06208 | 0.09353 | 0.07663 | 0.05043 | 0.0413  | CDH13    |
| cg13759778 | 0.78998 | 0.79875 | 0.63276 | 0.68024 | 0.69708 | 0.73453 | 0.71165 | 0.76632 | 0.77968 | 0.76298 | OMG      |
| cg13760253 | 0.53122 | 0.2153  | 0.73074 | 0.80368 | 0.81914 | 0.80036 | 0.66472 | 0.47458 | 0.7094  | 0.60546 | DNAJC5B  |
| cg13760546 | 0.03046 | 0.03181 | 0.03495 | 0.02963 | 0.23483 | 0.03377 | 0.02689 | 0.02944 | 0.03482 | 0.03247 | RNF125   |
| cg13763232 | 0.89376 | 0.73016 | 0.90052 | 0.89765 | 0.77476 | 0.81705 | 0.90684 | 0.75997 | 0.89203 | 0.57611 | SLC6A6   |
| cg13765303 | 0.07646 | 0.03534 | 0.03286 | 0.03045 | 0.0545  | 0.0324  | 0.03203 | 0.0309  | 0.16944 | 0.06915 | BOC      |
| cg13765621 | 0.05439 | 0.03641 | 0.371   | 0.44758 | 0.80593 | 0.30896 | 0.04539 | 0.0469  | 0.06175 | 0.06333 | CD1D     |
| cg13765785 | 0.11127 | 0.09878 | 0.26574 | 0.16692 | 0.11856 | 0.10585 | 0.0913  | 0.09722 | 0.13245 | 0.09817 | SCN3B    |
| cg13765961 | 0.12649 | 0.17925 | 0.20403 | 0.21738 | 0.35727 | 0.14745 | 0.15948 | 0.12713 | 0.31931 | 0.23007 | MS4A1    |
| cg13766096 | 0.06844 | 0.07179 | 0.07523 | 0.0695  | 0.07254 | 0.09453 | 0.06174 | 0.06371 | 0.06477 | 0.06218 | ING1     |
| cg13769204 | 0.0315  | 0.03063 | 0.0345  | 0.04288 | 0.02615 | 0.0325  | 0.03567 | 0.03964 | 0.03219 | 0.02818 | GALNT2   |
| cg13770446 | 0.73733 | 0.47468 | 0.87569 | 0.90572 | 0.75591 | 0.83062 | 0.85787 | 0.76315 | 0.88532 | 0.79842 | CLCNA    |
| cg13771579 | 0.57618 | 0.13058 | 0.82046 | 0.93838 | 0.95264 | 0.94881 | 0.45974 | 0.13223 | 0.07951 | 0.0286  | TCL1B    |
| cg13771629 | 0.16203 | 0.04254 | 0.88857 | 0.87204 | 0.44563 | 0.41033 | 0.53539 | 0.28643 | 0.03845 | 0.03551 | EBP      |
| cg13775495 | 0.03689 | 0.03538 | 0.03166 | 0.02877 | 0.0285  | 0.02753 | 0.02453 | 0.02263 | 0.02491 | 0.02887 | IL12A    |
| cg13777411 | 0.06246 | 0.06746 | 0.06654 | 0.06287 | 0.04357 | 0.05964 | 0.0587  | 0.05812 | 0.05461 | 0.0566  | HPS5     |
| cg13778073 | 0.04692 | 0.05314 | 0.04724 | 0.05287 | 0.03767 | 0.05176 | 0.04569 | 0.04978 | 0.04791 | 0.04711 | HSPA4    |
| cg13781408 | 0.95888 | 0.84281 | 0.97315 | 0.97533 | 0.85934 | 0.75515 | 0.19704 | 0.31999 | 0.97403 | 0.96823 | AATK     |
| cg13782134 | 0.8707  | 0.87148 | 0.85629 | 0.85279 | 0.84636 | 0.8516  | 0.81192 | 0.85549 | 0.87076 | 0.54761 | UNQ2446  |
| cg13782957 | 0.04742 | 0.05273 | 0.04986 | 0.05154 | 0.03937 | 0.0451  | 0.04242 | 0.04225 | 0.04485 | 0.03979 | PSMA4    |
| cg13784557 | 0.61927 | 0.59412 | 0.82845 | 0.87093 | 0.89637 | 0.85869 | 0.05524 | 0.06293 | 0.76484 | 0.73004 | HCP5     |
| cg13784792 | 0.04902 | 0.04569 | 0.12499 | 0.11014 | 0.12174 | 0.04822 | 0.05539 | 0.05041 | 0.04239 | 0.04034 | JUP      |
| cg13784855 | 0.03634 | 0.03381 | 0.03652 | 0.03408 | 0.02916 | 0.03724 | 0.03296 | 0.03746 | 0.03084 | 0.02743 | PVT1     |
| cg13785207 | 0.03922 | 0.03986 | 0.04162 | 0.04225 | 0.03414 | 0.05066 | 0.04006 | 0.04492 | 0.04019 | 0.03949 | RPS19BP1 |
| cg13788062 | 0.09882 | 0.08004 | 0.08274 | 0.08734 | 0.13366 | 0.11143 | 0.09256 | 0.07824 | 0.07222 | 0.08843 | FLJ11331 |
| cg13788301 | 0.02272 | 0.02162 | 0.02203 | 0.02524 | 0.01685 | 0.02254 | 0.02048 | 0.02181 | 0.02371 | 0.02315 | TOM1     |
| cg13789236 | 0.043   | 0.03501 | 0.07453 | 0.09012 | 0.06106 | 0.06932 | 0.05878 | 0.05441 | 0.06911 | 0.07199 | RFK      |
| cg13789523 | 0.02948 | 0.02693 | 0.0249  | 0.02357 | 0.02934 | 0.02763 | 0.02201 | 0.02253 | 0.01939 | 0.01929 | DNCL2A   |
| cg13790571 | 0.0323  | 0.03116 | 0.03578 | 0.03547 | 0.02792 | 0.03152 | 0.03204 | 0.02939 | 0.0273  | 0.03011 | ABC1     |
| cg13791131 | 0.04248 | 0.04445 | 0.12608 | 0.42535 | 0.18558 | 0.09056 | 0.17654 | 0.09814 | 0.11583 | 0.38162 | IGF2AS   |

|            |         |         |         |         |         |         |         |         |         |         |             |
|------------|---------|---------|---------|---------|---------|---------|---------|---------|---------|---------|-------------|
| cg13791589 | 0.0255  | 0.03558 | 0.03127 | 0.0317  | 0.03013 | 0.03023 | 0.03174 | 0.02953 | 0.03188 | 0.02662 | SLC45A3     |
| cg13791658 | 0.04521 | 0.04391 | 0.0624  | 0.05757 | 0.05594 | 0.03637 | 0.03621 | 0.0322  | 0.03479 | 0.03155 | U2AF2       |
| cg13791713 | 0.39079 | 0.43588 | 0.40189 | 0.39685 | 0.38283 | 0.38097 | 0.36096 | 0.38124 | 0.39418 | 0.33076 | HMGN1       |
| cg13792279 | 0.91409 | 0.93242 | 0.67039 | 0.85834 | 0.91415 | 0.90004 | 0.44071 | 0.42945 | 0.77295 | 0.37508 | CLDN17      |
| cg13792569 | 0.65094 | 0.41339 | 0.53369 | 0.56738 | 0.57848 | 0.5568  | 0.31275 | 0.55899 | 0.20672 | 0.22312 | RP13-11B7.1 |
| cg13793354 | 0.22561 | 0.09495 | 0.0799  | 0.09538 | 0.24448 | 0.20632 | 0.27452 | 0.0826  | 0.06839 | 0.06346 | MCCC2       |
| cg13794642 | 0.71227 | 0.39463 | 0.68385 | 0.83893 | 0.72596 | 0.85224 | 0.54754 | 0.63043 | 0.75463 | 0.48857 | ZNF157      |
| cg13794888 | 0.06147 | 0.05689 | 0.05892 | 0.05882 | 0.04197 | 0.0559  | 0.0538  | 0.05787 | 0.05043 | 0.04328 | RNUT1       |
| cg13795840 | 0.05663 | 0.04437 | 0.05287 | 0.04472 | 0.60424 | 0.43635 | 0.83861 | 0.25514 | 0.93321 | 0.8405  | C19orf24    |
| cg13796218 | 0.25163 | 0.14157 | 0.85378 | 0.89129 | 0.86898 | 0.50802 | 0.09277 | 0.10439 | 0.79994 | 0.72128 | C1orf187    |
| cg13797031 | 0.84737 | 0.8347  | 0.83845 | 0.82392 | 0.86364 | 0.81516 | 0.80892 | 0.80521 | 0.21267 | 0.22552 | NIPSNAP1    |
| cg13797282 | 0.90743 | 0.6504  | 0.08978 | 0.07654 | 0.95718 | 0.64672 | 0.92179 | 0.87943 | 0.84416 | 0.0662  | CARD10      |
| cg13798289 | 0.8408  | 0.65998 | 0.69623 | 0.74571 | 0.53159 | 0.33208 | 0.46192 | 0.13649 | 0.45838 | 0.21012 | THAP11      |
| cg13798376 | 0.68464 | 0.38804 | 0.5267  | 0.5501  | 0.59819 | 0.67083 | 0.53009 | 0.47802 | 0.47087 | 0.39054 | DSPG3       |
| cg13798579 | 0.03993 | 0.04363 | 0.04265 | 0.04822 | 0.03463 | 0.04023 | 0.04161 | 0.03988 | 0.04162 | 0.03305 | ANAPC13     |
| cg13799206 | 0.02406 | 0.02566 | 0.03056 | 0.02621 | 0.03257 | 0.02337 | 0.02418 | 0.02408 | 0.02489 | 0.01824 | ASRGL1      |
| cg13800022 | 0.06374 | 0.05685 | 0.06312 | 0.05411 | 0.06012 | 0.0479  | 0.05841 | 0.05644 | 0.05082 | 0.04577 | ITGB1       |
| cg13801381 | 0.02162 | 0.02716 | 0.13013 | 0.03381 | 0.23687 | 0.04227 | 0.0561  | 0.0333  | 0.03563 | 0.0289  | CNCD2       |
| cg13801416 | 0.02739 | 0.02984 | 0.03209 | 0.02982 | 0.02985 | 0.03289 | 0.02159 | 0.02282 | 0.02436 | 0.02292 | AKR1B1      |
| cg13802364 | 0.0203  | 0.02108 | 0.03486 | 0.03953 | 0.15843 | 0.02231 | 0.01743 | 0.01916 | 0.03691 | 0.016   | RCOR2       |
| cg13802966 | 0.58759 | 0.38173 | 0.62795 | 0.57871 | 0.57081 | 0.33828 | 0.32881 | 0.25964 | 0.30635 | 0.21109 | CASP1       |
| cg13804316 | 0.5425  | 0.72749 | 0.63437 | 0.65421 | 0.07215 | 0.09252 | 0.84569 | 0.86789 | 0.85528 | 0.86697 | XKR8        |
| cg13804457 | 0.54886 | 0.14114 | 0.14612 | 0.17405 | 0.12872 | 0.05168 | 0.1214  | 0.06756 | 0.05389 | 0.05031 | NARG2       |
| cg13806135 | 0.04343 | 0.19605 | 0.10418 | 0.23123 | 0.04653 | 0.05294 | 0.03139 | 0.03442 | 0.03782 | 0.04553 | PCDH17      |
| cg13806670 | 0.02203 | 0.02648 | 0.02224 | 0.02412 | 0.02099 | 0.02456 | 0.02096 | 0.02196 | 0.0198  | 0.01904 | 8-Mar       |
| cg13807496 | 0.21103 | 0.03773 | 0.8871  | 0.8807  | 0.90609 | 0.74654 | 0.88562 | 0.60803 | 0.80583 | 0.55081 | ALX4        |
| cg13808561 | 0.04835 | 0.05169 | 0.05728 | 0.04784 | 0.04901 | 0.04735 | 0.04865 | 0.05307 | 0.04502 | 0.04257 | API5        |
| cg13809962 | 0.03454 | 0.04222 | 0.05031 | 0.04803 | 0.05026 | 0.23711 | 0.24586 | 0.04772 | 0.03765 | 0.03331 | ZNF6        |
| cg13810225 | 0.04772 | 0.0437  | 0.05083 | 0.0508  | 0.04594 | 0.04898 | 0.03879 | 0.03718 | 0.04626 | 0.04921 | MYH9        |
| cg13812587 | 0.084   | 0.03102 | 0.16283 | 0.13047 | 0.08627 | 0.02575 | 0.05051 | 0.02507 | 0.0336  | 0.02302 | TMEM15      |
| cg13813391 | 0.91679 | 0.77343 | 0.91806 | 0.93207 | 0.90767 | 0.9187  | 0.91007 | 0.90442 | 0.93313 | 0.91731 | CMTM2       |
| cg13814950 | 0.05368 | 0.0547  | 0.06078 | 0.05553 | 0.05291 | 0.04285 | 0.04669 | 0.04899 | 0.04724 | 0.04505 | DAPK1       |
| cg13815872 | 0.13071 | 0.10518 | 0.08896 | 0.07343 | 0.12964 | 0.09781 | 0.59087 | 0.39782 | 0.09568 | 0.09728 | NDUFB11     |
| cg13817266 | 0.51349 | 0.54156 | 0.55212 | 0.5424  | 0.46641 | 0.31271 | 0.44867 | 0.51881 | 0.63362 | 0.56566 | HSPA6       |
| cg13818368 | 0.03887 | 0.04826 | 0.04396 | 0.04467 | 0.03216 | 0.03507 | 0.03942 | 0.03718 | 0.0334  | 0.03394 | SPAG7       |
| cg13818573 | 0.06254 | 0.06267 | 0.06654 | 0.07066 | 0.09447 | 0.05056 | 0.0595  | 0.04908 | 0.04507 | 0.04259 | C1QL1       |
| cg13821008 | 0.77727 | 0.72091 | 0.7838  | 0.8182  | 0.73634 | 0.77267 | 0.7485  | 0.75958 | 0.76001 | 0.72322 | WASPIP      |
| cg13823136 | 0.03971 | 0.04588 | 0.05277 | 0.04942 | 0.06303 | 0.05776 | 0.03209 | 0.02721 | 0.23491 | 0.15594 | ST6GALNAC5  |
| cg13823701 | 0.73713 | 0.20582 | 0.83899 | 0.86799 | 0.7116  | 0.44553 | 0.30781 | 0.2222  | 0.8429  | 0.64745 | TNXB        |
| cg13823791 | 0.07177 | 0.069   | 0.16665 | 0.58316 | 0.52121 | 0.39404 | 0.07794 | 0.06465 | 0.05017 | 0.07072 | COP3        |
| cg13824734 | 0.04367 | 0.03801 | 0.04589 | 0.04062 | 0.03171 | 0.03392 | 0.03656 | 0.03483 | 0.04503 | 0.03375 | PSMB3       |



|            |         |         |         |         |         |         |         |         |         |                   |
|------------|---------|---------|---------|---------|---------|---------|---------|---------|---------|-------------------|
| cg13825058 | 0.02657 | 0.026   | 0.02737 | 0.02553 | 0.02908 | 0.03077 | 0.02238 | 0.02194 | 0.02354 | 0.02352 GAJ       |
| cg13828047 | 0.72752 | 0.50904 | 0.69369 | 0.81351 | 0.23973 | 0.23107 | 0.84723 | 0.8081  | 0.60066 | 0.49474 MPI       |
| cg13828758 | 0.51632 | 0.51473 | 0.6846  | 0.91211 | 0.78177 | 0.70912 | 0.4202  | 0.60531 | 0.0236  | 0.0256 NDN        |
| cg13828839 | 0.05325 | 0.06063 | 0.06929 | 0.06759 | 0.07855 | 0.06139 | 0.06491 | 0.06514 | 0.04903 | 0.0376 FXYD6      |
| cg13828871 | 0.05711 | 0.06609 | 0.05793 | 0.05206 | 0.04576 | 0.04882 | 0.05496 | 0.05619 | 0.04372 | 0.04975 MYST1     |
| cg13830624 | 0.64239 | 0.62923 | 0.69151 | 0.80735 | 0.74114 | 0.90916 | 0.78557 | 0.86703 | 0.0383  | 0.02131 COL21A1   |
| cg13833831 | 0.85162 | 0.67293 | 0.8852  | 0.9001  | 0.88036 | 0.85208 | 0.56553 | 0.66645 | 0.88243 | 0.74124 MATK      |
| cg13834500 | 0.08923 | 0.05164 | 0.06293 | 0.08817 | 0.06006 | 0.04576 | 0.09775 | 0.04659 | 0.10051 | 0.04036 TM9SF1    |
| cg13834567 | 0.14879 | 0.12062 | 0.21774 | 0.15441 | 0.20841 | 0.12716 | 0.13268 | 0.11111 | 0.09234 | 0.09033 FLJ90805  |
| cg13836627 | 0.05953 | 0.0487  | 0.04503 | 0.04524 | 0.04117 | 0.03531 | 0.03271 | 0.03553 | 0.04454 | 0.03691 TJP1      |
| cg13836770 | 0.3005  | 0.06718 | 0.29039 | 0.21315 | 0.19806 | 0.06656 | 0.10516 | 0.03954 | 0.08307 | 0.06628 TNFRSF1B  |
| cg13837202 | 0.48209 | 0.45874 | 0.39993 | 0.54001 | 0.50575 | 0.22122 | 0.23799 | 0.51775 | 0.28866 | 0.3913 PAGE5      |
| cg13838528 | 0.02163 | 0.02439 | 0.02096 | 0.02328 | 0.01777 | 0.02416 | 0.01919 | 0.02275 | 0.01947 | 0.02172 RPL27A    |
| cg13839778 | 0.04888 | 0.04077 | 0.47653 | 0.53086 | 0.06854 | 0.06452 | 0.55708 | 0.54979 | 0.07741 | 0.05824 SYN1      |
| cg13840968 | 0.95047 | 0.73007 | 0.95337 | 0.95775 | 0.96231 | 0.94047 | 0.93032 | 0.93871 | 0.86601 | 0.93073 CIDEB     |
| cg13841138 | 0.02113 | 0.02181 | 0.02131 | 0.02007 | 0.0198  | 0.02132 | 0.01918 | 0.01613 | 0.01633 | 0.01476 STK11     |
| cg13841804 | 0.06762 | 0.07245 | 0.06383 | 0.06196 | 0.05563 | 0.07201 | 0.06445 | 0.0483  | 0.07717 | 0.06251 ANP32E    |
| cg13842258 | 0.04409 | 0.03652 | 0.03271 | 0.0363  | 0.03045 | 0.03329 | 0.0295  | 0.03108 | 0.03383 | 0.02494 APBB2     |
| cg13842648 | 0.55028 | 0.31677 | 0.75418 | 0.87303 | 0.91139 | 0.88395 | 0.83478 | 0.83564 | 0.9101  | 0.70367 IL9       |
| cg13843603 | 0.0319  | 0.03355 | 0.0329  | 0.03352 | 0.02373 | 0.02899 | 0.02977 | 0.02795 | 0.02694 | 0.0287 PSMD11     |
| cg13843613 | 0.02696 | 0.02684 | 0.71232 | 0.79515 | 0.06597 | 0.03516 | 0.04046 | 0.02415 | 0.06845 | 0.0345 FAM5B      |
| cg13843773 | 0.04533 | 0.04954 | 0.05079 | 0.05166 | 0.07989 | 0.05188 | 0.04381 | 0.03966 | 0.04339 | 0.03678 MGC35043  |
| cg13846555 | 0.05295 | 0.04315 | 0.03903 | 0.04072 | 0.03762 | 0.03984 | 0.03646 | 0.03628 | 0.03314 | 0.03035 PSMB10    |
| cg13846682 | 0.0833  | 0.07681 | 0.07126 | 0.0698  | 0.05804 | 0.07081 | 0.07231 | 0.06984 | 0.06138 | 0.05911 C14orf147 |
| cg13846796 | 0.03138 | 0.03091 | 0.03324 | 0.02879 | 0.02669 | 0.03045 | 0.01564 | 0.02045 | 0.024   | 0.02299 LSM14A    |
| cg13846866 | 0.0961  | 0.08637 | 0.10315 | 0.08224 | 0.17393 | 0.12371 | 0.06484 | 0.0601  | 0.07601 | 0.09539 MLH1      |
| cg13847070 | 0.29466 | 0.34652 | 0.63032 | 0.7077  | 0.66056 | 0.83787 | 0.19673 | 0.19357 | 0.88062 | 0.88579 KLHL3     |
| cg13847113 | 0.91309 | 0.90313 | 0.91756 | 0.90671 | 0.91146 | 0.89753 | 0.88199 | 0.86895 | 0.93644 | 0.91649 MGC24975  |
| cg13849691 | 0.83617 | 0.57209 | 0.83992 | 0.84892 | 0.83686 | 0.86818 | 0.7698  | 0.87178 | 0.88773 | 0.87444 ACSL5     |
| cg13849825 | 0.92072 | 0.93087 | 0.9247  | 0.92701 | 0.93659 | 0.92954 | 0.86411 | 0.89112 | 0.94685 | 0.92506 CCNB1     |
| cg13850625 | 0.07181 | 0.0323  | 0.03564 | 0.02745 | 0.02369 | 0.03233 | 0.0229  | 0.02927 | 0.03051 | 0.02808 FLJ11155  |
| cg13851211 | 0.9232  | 0.76554 | 0.91836 | 0.93128 | 0.94101 | 0.92171 | 0.93365 | 0.9179  | 0.93258 | 0.89128 ADCY7     |
| cg13853198 | 0.90276 | 0.85746 | 0.87811 | 0.89375 | 0.86251 | 0.84084 | 0.86645 | 0.83576 | 0.91231 | 0.81239 FCER1G    |
| cg13853761 | 0.94822 | 0.92362 | 0.95123 | 0.95119 | 0.95732 | 0.95219 | 0.92777 | 0.89915 | 0.94826 | 0.95045 C11orf2   |
| cg13854874 | 0.33996 | 0.06483 | 0.26006 | 0.2563  | 0.16576 | 0.0594  | 0.0626  | 0.05118 | 0.06267 | 0.05157 CHAF1B    |
| cg13856728 | 0.02816 | 0.02716 | 0.02641 | 0.02737 | 0.02096 | 0.0259  | 0.02644 | 0.02331 | 0.02997 | 0.02956 CREBBP    |
| cg13857100 | 0.86066 | 0.85595 | 0.85345 | 0.86888 | 0.86713 | 0.89681 | 0.78998 | 0.80834 | 0.89141 | 0.86327 SLC18A1   |
| cg13857440 | 0.16584 | 0.09042 | 0.27958 | 0.28418 | 0.078   | 0.07426 | 0.07292 | 0.06952 | 0.07714 | 0.07619 TRSPAP1   |
| cg13858139 | 0.08405 | 0.08525 | 0.42294 | 0.45773 | 0.25211 | 0.32608 | 0.54459 | 0.57785 | 0.08334 | 0.07921 ZNF43     |
| cg13859216 | 0.0428  | 0.03787 | 0.03579 | 0.03365 | 0.02777 | 0.03041 | 0.02941 | 0.03382 | 0.03383 | 0.02841 HSPA9B    |
| cg13859324 | 0.43496 | 0.12859 | 0.63798 | 0.82199 | 0.63819 | 0.46065 | 0.28487 | 0.341   | 0.0775  | 0.3078 UNC45B     |

|            |         |         |         |         |         |         |         |         |         |         |          |
|------------|---------|---------|---------|---------|---------|---------|---------|---------|---------|---------|----------|
| cg13859478 | 0.08526 | 0.07761 | 0.07939 | 0.07371 | 0.07094 | 0.05991 | 0.07414 | 0.07674 | 0.06661 | 0.07445 | CANX     |
| cg13859541 | 0.07546 | 0.04265 | 0.0447  | 0.04074 | 0.05823 | 0.04752 | 0.03545 | 0.03498 | 0.03764 | 0.04367 | TGFBR2   |
| cg13861644 | 0.92772 | 0.92268 | 0.60512 | 0.58575 | 0.53139 | 0.36778 | 0.20074 | 0.10612 | 0.38621 | 0.39619 | PIWIL1   |
| cg13864877 | 0.02654 | 0.02905 | 0.0313  | 0.02632 | 0.01914 | 0.02465 | 0.02477 | 0.02449 | 0.02241 | 0.02065 | OPTN     |
| cg13864937 | 0.03513 | 0.03681 | 0.03468 | 0.03469 | 0.02755 | 0.03648 | 0.032   | 0.03426 | 0.02687 | 0.02608 | FAM111B  |
| cg13870494 | 0.24931 | 0.34107 | 0.09706 | 0.08556 | 0.70644 | 0.58805 | 0.66739 | 0.47703 | 0.48031 | 0.33956 | MAMDC2   |
| cg13870866 | 0.03744 | 0.03226 | 0.03162 | 0.02961 | 0.1395  | 0.02751 | 0.02862 | 0.02766 | 0.45838 | 0.21895 | TBX20    |
| cg13873733 | 0.15246 | 0.10973 | 0.15948 | 0.11802 | 0.20181 | 0.15749 | 0.13315 | 0.10345 | 0.34427 | 0.16915 | MASA     |
| cg13875807 | 0.13573 | 0.11527 | 0.10184 | 0.09334 | 0.1397  | 0.14034 | 0.09201 | 0.09159 | 0.07864 | 0.06649 | JMJD2C   |
| cg13876499 | 0.4741  | 0.18795 | 0.55149 | 0.74539 | 0.5121  | 0.47222 | 0.19612 | 0.17814 | 0.43648 | 0.63427 | TMEM27   |
| cg13877465 | 0.02985 | 0.03449 | 0.03115 | 0.03557 | 0.03924 | 0.02976 | 0.03435 | 0.03405 | 0.02918 | 0.03113 | IGF2BP1  |
| cg13877895 | 0.86953 | 0.71399 | 0.87157 | 0.89145 | 0.91    | 0.84778 | 0.8724  | 0.63934 | 0.88415 | 0.58616 | GKN1     |
| cg13877915 | 0.39368 | 0.75548 | 0.94846 | 0.95502 | 0.86299 | 0.92104 | 0.08238 | 0.08712 | 0.25659 | 0.11778 | ZNF132   |
| cg13878010 | 0.05682 | 0.05812 | 0.85124 | 0.92395 | 0.15122 | 0.34017 | 0.10675 | 0.12022 | 0.13559 | 0.09458 | ADCY5    |
| cg13878093 | 0.03573 | 0.03551 | 0.03977 | 0.04177 | 0.03978 | 0.03641 | 0.03203 | 0.02949 | 0.03214 | 0.03101 | TBPL1    |
| cg13878456 | 0.33402 | 0.20552 | 0.2491  | 0.26543 | 0.51878 | 0.6212  | 0.19111 | 0.153   | 0.50486 | 0.42141 | ZNFN1A3  |
| cg13878641 | 0.06265 | 0.05106 | 0.07162 | 0.06339 | 0.03783 | 0.04141 | 0.04951 | 0.05047 | 0.05232 | 0.05401 | GNAI3    |
| cg13880228 | 0.05984 | 0.05415 | 0.09533 | 0.14715 | 0.07732 | 0.05193 | 0.05431 | 0.04499 | 0.04591 | 0.03657 | PRLR     |
| cg13881341 | 0.6058  | 0.13292 | 0.55721 | 0.65326 | 0.34547 | 0.10885 | 0.1364  | 0.05878 | 0.84915 | 0.52595 | FUT1     |
| cg13882267 | 0.03885 | 0.04158 | 0.04121 | 0.04381 | 0.05087 | 0.04399 | 0.03732 | 0.03277 | 0.03643 | 0.03394 | ITGA9    |
| cg13882835 | 0.06263 | 0.0531  | 0.0814  | 0.06933 | 0.13112 | 0.09317 | 0.08211 | 0.08827 | 0.07862 | 0.082   | TLK1     |
| cg13882988 | 0.10956 | 0.11143 | 0.24626 | 0.49019 | 0.75564 | 0.83232 | 0.77725 | 0.78714 | 0.11544 | 0.09941 | MBL2     |
| cg13883681 | 0.91178 | 0.69511 | 0.89543 | 0.89463 | 0.89967 | 0.27606 | 0.79018 | 0.53826 | 0.80254 | 0.44479 | GOT2     |
| cg13884546 | 0.03263 | 0.03284 | 0.04543 | 0.04286 | 0.04882 | 0.04976 | 0.03054 | 0.02808 | 0.02234 | 0.03059 | MRS2L    |
| cg13885201 | 0.04353 | 0.04032 | 0.1291  | 0.32335 | 0.13039 | 0.04013 | 0.14563 | 0.03727 | 0.13869 | 0.31292 | ZNF23    |
| cg13887370 | 0.02793 | 0.02664 | 0.02647 | 0.02714 | 0.02217 | 0.02594 | 0.0259  | 0.02445 | 0.02412 | 0.02253 | DNAJC14  |
| cg13888886 | 0.87825 | 0.80949 | 0.88041 | 0.89628 | 0.91681 | 0.89083 | 0.86179 | 0.65781 | 0.89628 | 0.84267 | SPO11    |
| cg13890487 | 0.03736 | 0.03859 | 0.04124 | 0.03011 | 0.03184 | 0.03817 | 0.03532 | 0.03532 | 0.03057 | 0.03372 | HBLD2    |
| cg13891659 | 0.06001 | 0.05326 | 0.06846 | 0.07044 | 0.07415 | 0.06714 | 0.05238 | 0.04819 | 0.05248 | 0.05828 | C6orf208 |
| cg13892015 | 0.1599  | 0.09456 | 0.06852 | 0.0559  | 0.18523 | 0.11714 | 0.07966 | 0.07423 | 0.09335 | 0.0897  | PPIL5    |
| cg13894021 | 0.10263 | 0.07819 | 0.25138 | 0.13644 | 0.36169 | 0.28766 | 0.11314 | 0.07433 | 0.0704  | 0.06845 | RAB36    |
| cg13896269 | 0.04117 | 0.04639 | 0.03796 | 0.04091 | 0.04482 | 0.03331 | 0.02653 | 0.03161 | 0.02397 | 0.02755 | ZFAND2A  |
| cg13896604 | 0.02865 | 0.0288  | 0.03237 | 0.03371 | 0.02083 | 0.02568 | 0.02736 | 0.02749 | 0.02469 | 0.02734 | ATP5H    |
| cg13897449 | 0.55969 | 0.47288 | 0.67604 | 0.8447  | 0.48102 | 0.48901 | 0.26025 | 0.29486 | 0.79111 | 0.42889 | PFKFB1   |
| cg13897627 | 0.07309 | 0.06997 | 0.15948 | 0.36574 | 0.09355 | 0.07479 | 0.06267 | 0.07194 | 0.0641  | 0.0587  | FLJ44674 |
| cg13899108 | 0.51564 | 0.85928 | 0.88607 | 0.87346 | 0.61203 | 0.5964  | 0.53314 | 0.87046 | 0.65124 | 0.59467 | PDE4C    |
| cg13901134 | 0.02618 | 0.02715 | 0.04106 | 0.0291  | 0.29981 | 0.02891 | 0.02768 | 0.02371 | 0.02624 | 0.02354 | C9orf16  |
| cg13901526 | 0.06919 | 0.0746  | 0.0649  | 0.06988 | 0.07402 | 0.06495 | 0.15844 | 0.08239 | 0.05307 | 0.05011 | GYPC     |
| cg13903548 | 0.84263 | 0.85585 | 0.8212  | 0.83339 | 0.8402  | 0.8327  | 0.83303 | 0.77375 | 0.87824 | 0.84808 | GABRR2   |
| cg13904493 | 0.02005 | 0.0195  | 0.22453 | 0.08809 | 0.02143 | 0.01822 | 0.19617 | 0.18814 | 0.01674 | 0.01747 | KIAA1804 |
| cg13904771 | 0.03816 | 0.03492 | 0.05691 | 0.05119 | 0.06284 | 0.03209 | 0.04561 | 0.03325 | 0.02704 | 0.0282  | C10orf47 |

|            |         |         |         |         |         |         |         |         |         |                   |
|------------|---------|---------|---------|---------|---------|---------|---------|---------|---------|-------------------|
| cg13904968 | 0.76998 | 0.44613 | 0.3754  | 0.46067 | 0.59847 | 0.18086 | 0.3145  | 0.10831 | 0.2228  | 0.12418 PCK1      |
| cg13905388 | 0.10796 | 0.10767 | 0.09345 | 0.08892 | 0.10228 | 0.12919 | 0.10175 | 0.11068 | 0.09249 | 0.11349 CDCA4     |
| cg13906416 | 0.04981 | 0.05205 | 0.05015 | 0.04511 | 0.04194 | 0.04517 | 0.04725 | 0.04516 | 0.04756 | 0.04579 PVR       |
| cg13906548 | 0.03255 | 0.03388 | 0.03332 | 0.03257 | 0.02827 | 0.03056 | 0.02801 | 0.03194 | 0.02506 | 0.02654 GABARAPL2 |
| cg13906813 | 0.5113  | 0.10702 | 0.28172 | 0.33038 | 0.34844 | 0.48198 | 0.37293 | 0.41215 | 0.30133 | 0.2732 HLA-DPA1   |
| cg13908518 | 0.8531  | 0.86583 | 0.77659 | 0.83122 | 0.78944 | 0.82491 | 0.86655 | 0.89222 | 0.8161  | 0.81491 AMY2B     |
| cg13908523 | 0.19243 | 0.05424 | 0.03468 | 0.03134 | 0.0238  | 0.02534 | 0.02195 | 0.02297 | 0.02525 | 0.02103 PRKCD     |
| cg13908977 | 0.26521 | 0.03573 | 0.06055 | 0.16996 | 0.09461 | 0.03917 | 0.04682 | 0.04456 | 0.04499 | 0.03806 RSL1D1    |
| cg13910855 | 0.03742 | 0.04142 | 0.04027 | 0.04304 | 0.0391  | 0.04013 | 0.0561  | 0.04146 | 0.02962 | 0.02825 PBX2      |
| cg13912117 | 0.02481 | 0.02325 | 0.09355 | 0.48485 | 0.22856 | 0.40154 | 0.02137 | 0.02477 | 0.04219 | 0.02544 ADCY8     |
| cg13912204 | 0.04099 | 0.04072 | 0.04427 | 0.04064 | 0.0356  | 0.03884 | 0.03397 | 0.04198 | 0.03739 | 0.03345 SLC19A2   |
| cg13913917 | 0.03261 | 0.04208 | 0.02953 | 0.03067 | 0.03015 | 0.02839 | 0.02901 | 0.03137 | 0.02771 | 0.02513 ATP11B    |
| cg13914438 | 0.56113 | 0.5836  | 0.54246 | 0.54241 | 0.57463 | 0.56772 | 0.55424 | 0.54911 | 0.44139 | 0.41774 HERC2     |
| cg13915726 | 0.1637  | 0.16535 | 0.27844 | 0.31774 | 0.39158 | 0.22155 | 0.37322 | 0.3793  | 0.13622 | 0.15952 DUSP9     |
| cg13916322 | 0.18917 | 0.06829 | 0.04104 | 0.04169 | 0.04063 | 0.04953 | 0.05744 | 0.03796 | 0.03566 | 0.03387 HRASLS3   |
| cg13916742 | 0.08981 | 0.071   | 0.67895 | 0.74365 | 0.77158 | 0.69125 | 0.06246 | 0.06508 | 0.07192 | 0.18814 SCGB1D1   |
| cg13916931 | 0.06087 | 0.06147 | 0.06738 | 0.06046 | 0.07241 | 0.06228 | 0.06775 | 0.06056 | 0.05592 | 0.05199 POLD2     |
| cg13917394 | 0.02321 | 0.02091 | 0.01862 | 0.01897 | 0.01614 | 0.0201  | 0.01844 | 0.02336 | 0.0192  | 0.01799 CCNB2     |
| cg13917504 | 0.90206 | 0.90243 | 0.62119 | 0.61089 | 0.93283 | 0.9109  | 0.67745 | 0.89835 | 0.90916 | 0.90444 MEST      |
| cg13918581 | 0.05557 | 0.04697 | 0.04382 | 0.04298 | 0.06835 | 0.05405 | 0.03556 | 0.03423 | 0.03912 | 0.04191 ANKRD11   |
| cg13918808 | 0.7214  | 0.86724 | 0.88684 | 0.89225 | 0.90227 | 0.88003 | 0.53889 | 0.58819 | 0.87986 | 0.81377 FAM9C     |
| cg13918811 | 0.52827 | 0.59269 | 0.54078 | 0.45392 | 0.45118 | 0.11579 | 0.48371 | 0.17428 | 0.08368 | 0.05909 ANAPC4    |
| cg13919215 | 0.07097 | 0.08126 | 0.11754 | 0.11687 | 0.10885 | 0.09333 | 0.11274 | 0.09849 | 0.09295 | 0.08227 POLR2K    |
| cg13919607 | 0.02567 | 0.02273 | 0.02632 | 0.02521 | 0.01493 | 0.02224 | 0.02221 | 0.02173 | 0.02124 | 0.02304 ZNF434    |
| cg13920529 | 0.82229 | 0.67681 | 0.88848 | 0.89664 | 0.93196 | 0.89587 | 0.69267 | 0.62987 | 0.87951 | 0.85617 AQP7      |
| cg13921319 | 0.46535 | 0.48587 | 0.46016 | 0.44798 | 0.43143 | 0.4753  | 0.41568 | 0.46494 | 0.45794 | 0.45683 PTMA      |
| cg13921352 | 0.10303 | 0.05418 | 0.08851 | 0.09868 | 0.12085 | 0.04948 | 0.117   | 0.91707 | 0.25497 | 0.49184 FAM19A4   |
| cg13925920 | 0.07889 | 0.0832  | 0.10852 | 0.09056 | 0.09769 | 0.1219  | 0.06809 | 0.05645 | 0.09288 | 0.08046 PSMD12    |
| cg13926569 | 0.9201  | 0.52106 | 0.72865 | 0.86399 | 0.95534 | 0.15835 | 0.71806 | 0.40382 | 0.93486 | 0.74132 PAPSS2    |
| cg13927251 | 0.15555 | 0.11974 | 0.41631 | 0.55536 | 0.20527 | 0.12539 | 0.17058 | 0.14901 | 0.12497 | 0.13424 FLT4      |
| cg13928116 | 0.0342  | 0.02559 | 0.11707 | 0.04293 | 0.09615 | 0.03314 | 0.49781 | 0.45033 | 0.33798 | 0.38521 AFF2      |
| cg13928306 | 0.02671 | 0.03016 | 0.1374  | 0.22483 | 0.02464 | 0.02706 | 0.02453 | 0.02427 | 0.0219  | 0.024 ZNF205      |
| cg13928594 | 0.05073 | 0.05345 | 0.06166 | 0.05368 | 0.05661 | 0.04684 | 0.05885 | 0.04939 | 0.05144 | 0.04797 IFT81     |
| cg13928866 | 0.67593 | 0.71171 | 0.63242 | 0.6893  | 0.57528 | 0.71986 | 0.59457 | 0.49969 | 0.7285  | 0.7141 YY2        |
| cg13928961 | 0.86689 | 0.19259 | 0.82741 | 0.9138  | 0.69032 | 0.84512 | 0.05145 | 0.05339 | 0.14592 | 0.05417 K6IRS3    |
| cg13929328 | 0.16558 | 0.38068 | 0.92099 | 0.94985 | 0.81207 | 0.92095 | 0.66419 | 0.50221 | 0.13186 | 0.47375 FLJ46831  |
| cg13929970 | 0.8461  | 0.73524 | 0.85923 | 0.881   | 0.87077 | 0.8339  | 0.6671  | 0.85016 | 0.84358 | 0.74161 FGFBP1    |
| cg13931228 | 0.7362  | 0.11679 | 0.0406  | 0.04037 | 0.04151 | 0.03365 | 0.0869  | 0.04146 | 0.02847 | 0.02979 MPP6      |
| cg13932624 | 0.02464 | 0.0286  | 0.02925 | 0.02576 | 0.02637 | 0.0312  | 0.02672 | 0.03111 | 0.0219  | 0.01969 TBRG1     |
| cg13935507 | 0.06547 | 0.06924 | 0.07832 | 0.07468 | 0.0738  | 0.0598  | 0.06951 | 0.06168 | 0.06627 | 0.06581 ZHX2      |
| cg13936125 | 0.06836 | 0.06047 | 0.0655  | 0.06377 | 0.04208 | 0.04265 | 0.05748 | 0.04832 | 0.04064 | 0.05114 GNAO1     |

|            |         |         |         |         |         |         |         |         |         |         |          |
|------------|---------|---------|---------|---------|---------|---------|---------|---------|---------|---------|----------|
| cg13940405 | 0.02787 | 0.03252 | 0.03191 | 0.02996 | 0.03776 | 0.03546 | 0.03164 | 0.03138 | 0.02837 | 0.02843 | GOSR2    |
| cg13942909 | 0.06066 | 0.07015 | 0.06596 | 0.05604 | 0.07125 | 0.06533 | 0.04971 | 0.04963 | 0.05279 | 0.05313 | GOLGA2   |
| cg13943564 | 0.73335 | 0.75151 | 0.69135 | 0.70915 | 0.42815 | 0.65775 | 0.32062 | 0.41422 | 0.69665 | 0.35364 | SERPINB2 |
| cg13944141 | 0.14329 | 0.16643 | 0.75406 | 0.8249  | 0.70951 | 0.78971 | 0.13094 | 0.14899 | 0.45905 | 0.35822 | PRSS2    |
| cg13945069 | 0.03488 | 0.03705 | 0.03922 | 0.03592 | 0.03184 | 0.04006 | 0.03327 | 0.03471 | 0.04009 | 0.03653 | DDX59    |
| cg13946500 | 0.04983 | 0.05457 | 0.04904 | 0.04714 | 0.03863 | 0.04455 | 0.04283 | 0.04766 | 0.04193 | 0.04055 | PPAN     |
| cg13946860 | 0.02119 | 0.02014 | 0.01917 | 0.0212  | 0.01842 | 0.01988 | 0.0234  | 0.02651 | 0.01551 | 0.01473 | RPN2     |
| cg13948784 | 0.02436 | 0.02579 | 0.03297 | 0.02747 | 0.02428 | 0.02474 | 0.01761 | 0.01779 | 0.02481 | 0.0253  | MGC11332 |
| cg13948987 | 0.13719 | 0.04047 | 0.24222 | 0.4775  | 0.07556 | 0.04723 | 0.03935 | 0.02871 | 0.03099 | 0.02332 | HCRTR2   |
| cg13950558 | 0.10535 | 0.08137 | 0.16686 | 0.11608 | 0.5229  | 0.24768 | 0.10091 | 0.11853 | 0.66267 | 0.51004 | BLOC1S3  |
| cg13951472 | 0.46005 | 0.07197 | 0.07276 | 0.06651 | 0.06038 | 0.05814 | 0.05891 | 0.07939 | 0.06758 | 0.06337 | CDC42EP1 |
| cg13951948 | 0.04701 | 0.02138 | 0.02844 | 0.06162 | 0.01732 | 0.01889 | 0.02238 | 0.02242 | 0.01825 | 0.01612 | MGC2474  |
| cg13952892 | 0.93438 | 0.53708 | 0.92252 | 0.93043 | 0.94214 | 0.91545 | 0.91438 | 0.90869 | 0.78493 | 0.76201 | SRPR     |
| cg13954292 | 0.95146 | 0.9541  | 0.95934 | 0.96214 | 0.94362 | 0.85064 | 0.94664 | 0.71891 | 0.97661 | 0.57317 | ZFR      |
| cg13954572 | 0.46298 | 0.09554 | 0.82089 | 0.87346 | 0.52409 | 0.49847 | 0.43222 | 0.43281 | 0.35285 | 0.45714 | TCP10    |
| cg13956671 | 0.09081 | 0.07809 | 0.10747 | 0.09791 | 0.1122  | 0.08357 | 0.09105 | 0.07723 | 0.07805 | 0.07793 | CUL2     |
| cg13958304 | 0.03808 | 0.04161 | 0.05015 | 0.04529 | 0.03629 | 0.03878 | 0.03726 | 0.03646 | 0.03915 | 0.03902 | RSBN1    |
| cg13958426 | 0.0822  | 0.08892 | 0.46579 | 0.54785 | 0.31506 | 0.23415 | 0.114   | 0.1043  | 0.25848 | 0.47602 | C1orf114 |
| cg13958614 | 0.04247 | 0.04767 | 0.05532 | 0.04268 | 0.03309 | 0.04396 | 0.04603 | 0.04629 | 0.04369 | 0.04475 | FOXO1    |
| cg13958676 | 0.04976 | 0.04535 | 0.08887 | 0.12494 | 0.26403 | 0.23277 | 0.52155 | 0.50476 | 0.04916 | 0.0511  | LGI3     |
| cg13959523 | 0.03684 | 0.04049 | 0.38376 | 0.45562 | 0.18122 | 0.26926 | 0.03364 | 0.0327  | 0.04569 | 0.03157 | CHST8    |
| cg13959611 | 0.05066 | 0.04833 | 0.05171 | 0.04048 | 0.03477 | 0.04001 | 0.04853 | 0.05028 | 0.04577 | 0.04664 | VPS13C   |
| cg13960126 | 0.47747 | 0.34782 | 0.77468 | 0.7951  | 0.49579 | 0.38541 | 0.20447 | 0.16252 | 0.34935 | 0.3584  | CRB3     |
| cg13960192 | 0.221   | 0.04399 | 0.32865 | 0.34693 | 0.0883  | 0.04165 | 0.25847 | 0.0371  | 0.14585 | 0.03006 | GNA11    |
| cg13962355 | 0.10104 | 0.10061 | 0.1022  | 0.12821 | 0.12198 | 0.10886 | 0.1077  | 0.09444 | 0.10412 | 0.09003 | BTRC     |
| cg13964084 | 0.04403 | 0.02783 | 0.43406 | 0.5538  | 0.03617 | 0.02636 | 0.02749 | 0.02814 | 0.02582 | 0.01951 | C6orf134 |
| cg13966710 | 0.31318 | 0.23631 | 0.03213 | 0.0325  | 0.15732 | 0.24442 | 0.10697 | 0.12796 | 0.02778 | 0.02512 | FLJ36116 |
| cg13967780 | 0.03019 | 0.03391 | 0.03828 | 0.03687 | 0.03681 | 0.02755 | 0.02859 | 0.02666 | 0.0285  | 0.03007 | SMAD7    |
| cg13968061 | 0.09919 | 0.09221 | 0.79541 | 0.81399 | 0.30205 | 0.09966 | 0.28078 | 0.10795 | 0.38236 | 0.45112 | APCS     |
| cg13968390 | 0.61121 | 0.09748 | 0.777   | 0.84372 | 0.75376 | 0.82667 | 0.71897 | 0.81397 | 0.13389 | 0.12726 | SULT1C1  |
| cg13969584 | 0.48972 | 0.39892 | 0.36197 | 0.59903 | 0.4498  | 0.06868 | 0.31713 | 0.29203 | 0.10262 | 0.03462 | AFG3L1   |
| cg13970341 | 0.04414 | 0.0525  | 0.05292 | 0.04617 | 0.04343 | 0.04236 | 0.04467 | 0.04625 | 0.0432  | 0.04264 | ABCA2    |
| cg13973816 | 0.03368 | 0.03187 | 0.03829 | 0.03421 | 0.04331 | 0.03582 | 0.03826 | 0.03597 | 0.03108 | 0.02652 | SCAND2   |
| cg13974531 | 0.16779 | 0.15417 | 0.56631 | 0.61923 | 0.64512 | 0.58725 | 0.25995 | 0.18969 | 0.71276 | 0.64446 | PYDC1    |
| cg13975369 | 0.95258 | 0.93706 | 0.68941 | 0.79434 | 0.20834 | 0.20895 | 0.77242 | 0.83191 | 0.50394 | 0.31575 | TSGA14   |
| cg13975625 | 0.7399  | 0.79037 | 0.4838  | 0.5455  | 0.19848 | 0.31653 | 0.11265 | 0.09369 | 0.07805 | 0.05599 | NPY5R    |
| cg13976366 | 0.06055 | 0.05406 | 0.07124 | 0.06513 | 0.09857 | 0.08276 | 0.06063 | 0.04854 | 0.04295 | 0.0491  | TRIM21   |
| cg13976438 | 0.711   | 0.70912 | 0.71143 | 0.75445 | 0.72959 | 0.74645 | 0.60685 | 0.70375 | 0.4544  | 0.33941 | C12orf50 |
| cg13979182 | 0.11557 | 0.12508 | 0.1213  | 0.1214  | 0.07359 | 0.1033  | 0.10126 | 0.09996 | 0.10991 | 0.10623 | ADD1     |
| cg13980308 | 0.04853 | 0.04858 | 0.09899 | 0.06363 | 0.04379 | 0.04102 | 0.04741 | 0.04581 | 0.05841 | 0.04017 | ADCK2    |
| cg13980473 | 0.08222 | 0.09013 | 0.10864 | 0.1116  | 0.11754 | 0.10147 | 0.09257 | 0.06722 | 0.09898 | 0.11114 | TSPYL1   |

|            |         |         |         |         |         |         |         |         |         |                   |
|------------|---------|---------|---------|---------|---------|---------|---------|---------|---------|-------------------|
| cg13980719 | 0.07107 | 0.05856 | 0.21425 | 0.47796 | 0.33588 | 0.65775 | 0.32205 | 0.15763 | 0.1068  | 0.09077 TNP1      |
| cg13980834 | 0.8189  | 0.73156 | 0.77879 | 0.74713 | 0.50794 | 0.64185 | 0.79818 | 0.83348 | 0.81369 | 0.7824 C1orf201   |
| cg13982505 | 0.77579 | 0.74181 | 0.70495 | 0.81772 | 0.61576 | 0.69965 | 0.71954 | 0.74879 | 0.77353 | 0.71717 KCNJ13    |
| cg13982661 | 0.04334 | 0.05236 | 0.046   | 0.03757 | 0.03836 | 0.04495 | 0.04366 | 0.03297 | 0.03412 | 0.03366 SC5DL     |
| cg13983578 | 0.02724 | 0.02753 | 0.02936 | 0.02941 | 0.02539 | 0.02845 | 0.03786 | 0.03431 | 0.02233 | 0.02109 DUSP4     |
| cg13983870 | 0.04558 | 0.04232 | 0.05141 | 0.04623 | 0.16756 | 0.06095 | 0.04142 | 0.04669 | 0.04508 | 0.02923 TSPAN12   |
| cg13984181 | 0.10092 | 0.06404 | 0.06666 | 0.0631  | 0.18886 | 0.05657 | 0.0652  | 0.05655 | 0.07143 | 0.04858 ABHD7     |
| cg13984351 | 0.04306 | 0.04316 | 0.03936 | 0.04468 | 0.03582 | 0.04545 | 0.04381 | 0.03919 | 0.04336 | 0.04314 PCGF4     |
| cg13985639 | 0.62383 | 0.49508 | 0.83642 | 0.85665 | 0.89253 | 0.75935 | 0.8126  | 0.80316 | 0.77385 | 0.64105 C10orf65  |
| cg13986130 | 0.04922 | 0.05481 | 0.0973  | 0.1752  | 0.09037 | 0.04605 | 0.05807 | 0.05364 | 0.23659 | 0.08304 PTGS2     |
| cg13986618 | 0.43273 | 0.42563 | 0.66068 | 0.69279 | 0.59331 | 0.79956 | 0.66426 | 0.69443 | 0.3755  | 0.51041 M160      |
| cg13991029 | 0.38819 | 0.32677 | 0.74539 | 0.79925 | 0.74658 | 0.79518 | 0.48787 | 0.32325 | 0.49333 | 0.59356 PAGE5     |
| cg13991233 | 0.06136 | 0.06283 | 0.57217 | 0.49845 | 0.69086 | 0.77668 | 0.38174 | 0.44459 | 0.06886 | 0.06208 GAS7      |
| cg13992856 | 0.07438 | 0.07403 | 0.24402 | 0.19097 | 0.20378 | 0.08418 | 0.44713 | 0.08991 | 0.10022 | 0.07509 FLOT2     |
| cg13993218 | 0.07309 | 0.04015 | 0.13303 | 0.15762 | 0.21864 | 0.26956 | 0.06526 | 0.05751 | 0.35339 | 0.21745 INS       |
| cg13994175 | 0.03667 | 0.0413  | 0.04083 | 0.04132 | 0.07184 | 0.04152 | 0.02838 | 0.02572 | 0.03437 | 0.0318 KIF9       |
| cg13994177 | 0.59037 | 0.61303 | 0.59552 | 0.65395 | 0.47772 | 0.38931 | 0.43279 | 0.47629 | 0.88861 | 0.82538 PWCR1     |
| cg13995453 | 0.30839 | 0.27602 | 0.7099  | 0.76371 | 0.54124 | 0.54502 | 0.70083 | 0.75268 | 0.23253 | 0.24918 KLRB1     |
| cg13996731 | 0.04342 | 0.03644 | 0.03959 | 0.03493 | 0.03061 | 0.03485 | 0.03388 | 0.03986 | 0.05169 | 0.03251 NR3C2     |
| cg13997068 | 0.54297 | 0.35163 | 0.74182 | 0.8417  | 0.64652 | 0.66547 | 0.28192 | 0.35803 | 0.33107 | 0.37519 TP53BP1   |
| cg13997435 | 0.64801 | 0.21042 | 0.05083 | 0.04129 | 0.03795 | 0.04529 | 0.0384  | 0.04537 | 0.04538 | 0.04904 S100A2    |
| cg13998293 | 0.17223 | 0.11704 | 0.38147 | 0.45006 | 0.26492 | 0.17835 | 0.14274 | 0.11433 | 0.64664 | 0.20075 TRIM63    |
| cg13998904 | 0.66657 | 0.68527 | 0.6937  | 0.79212 | 0.57751 | 0.58618 | 0.38725 | 0.31474 | 0.23772 | 0.18622 TRIM42    |
| cg14001035 | 0.30491 | 0.77462 | 0.45747 | 0.52701 | 0.63031 | 0.73683 | 0.74499 | 0.67561 | 0.17909 | 0.14403 ATP10A    |
| cg14001567 | 0.08133 | 0.08346 | 0.10718 | 0.0782  | 0.11371 | 0.11052 | 0.05675 | 0.05487 | 0.06091 | 0.05238 TP53BP1   |
| cg14002682 | 0.04313 | 0.04737 | 0.04592 | 0.04853 | 0.04415 | 0.04963 | 0.03204 | 0.03529 | 0.03366 | 0.04415 RBJ       |
| cg14003467 | 0.03829 | 0.0328  | 0.03911 | 0.03887 | 0.02638 | 0.03181 | 0.03272 | 0.03638 | 0.02951 | 0.02604 PCYT1A    |
| cg14003512 | 0.48937 | 0.59318 | 0.50777 | 0.65764 | 0.66214 | 0.28337 | 0.3715  | 0.35884 | 0.28323 | 0.18366 PLGLB2    |
| cg14008119 | 0.04306 | 0.04672 | 0.06376 | 0.07512 | 0.05241 | 0.0576  | 0.05225 | 0.05373 | 0.03547 | 0.03761 MGC16028  |
| cg14008883 | 0.06054 | 0.0503  | 0.65035 | 0.67257 | 0.40212 | 0.51432 | 0.13543 | 0.33961 | 0.05074 | 0.04067 SLC18A3   |
| cg14009312 | 0.8823  | 0.88536 | 0.8629  | 0.88263 | 0.86015 | 0.84994 | 0.87931 | 0.88356 | 0.8919  | 0.87981 STK11     |
| cg14009688 | 0.06747 | 0.06847 | 0.12926 | 0.0845  | 0.15379 | 0.11111 | 0.05466 | 0.05879 | 0.05343 | 0.04775 CALD1     |
| cg14011639 | 0.10963 | 0.08713 | 0.79906 | 0.88021 | 0.72229 | 0.62844 | 0.86519 | 0.88372 | 0.44997 | 0.32754 PCDHGB7   |
| cg14011734 | 0.05375 | 0.05254 | 0.05226 | 0.0455  | 0.08553 | 0.06309 | 0.04317 | 0.03378 | 0.04236 | 0.04176 TATDN2    |
| cg14012294 | 0.03724 | 0.03275 | 0.03315 | 0.03404 | 0.02779 | 0.03085 | 0.03212 | 0.03084 | 0.02712 | 0.02515 BTF3      |
| cg14013300 | 0.04649 | 0.03824 | 0.04291 | 0.03732 | 0.04053 | 0.03606 | 0.03355 | 0.03356 | 0.03766 | 0.02925 XBP1      |
| cg14013604 | 0.07694 | 0.06782 | 0.08559 | 0.08279 | 0.1578  | 0.09199 | 0.0936  | 0.09918 | 0.08288 | 0.07986 PTPN2     |
| cg14014225 | 0.93974 | 0.6944  | 0.94342 | 0.94208 | 0.96278 | 0.87714 | 0.84734 | 0.81585 | 0.90891 | 0.77752 SLC16A8   |
| cg14014613 | 0.72385 | 0.85966 | 0.65735 | 0.65413 | 0.71664 | 0.49069 | 0.15488 | 0.11439 | 0.55047 | 0.59987 OR3A1     |
| cg14015044 | 0.16151 | 0.03306 | 0.93532 | 0.93944 | 0.74132 | 0.80357 | 0.05996 | 0.03218 | 0.35344 | 0.01965 TNFRSF10C |
| cg14017991 | 0.0407  | 0.04422 | 0.04351 | 0.04182 | 0.04006 | 0.045   | 0.03922 | 0.03621 | 0.03463 | 0.0417 CCDC21     |

|            |         |         |         |         |         |         |         |         |         |         |           |
|------------|---------|---------|---------|---------|---------|---------|---------|---------|---------|---------|-----------|
| cg14018807 | 0.01762 | 0.02001 | 0.55604 | 0.56138 | 0.02253 | 0.02464 | 0.01495 | 0.0178  | 0.01745 | 0.0146  | GCC1      |
| cg14019317 | 0.04322 | 0.04285 | 0.05105 | 0.0509  | 0.0661  | 0.04659 | 0.05056 | 0.04211 | 0.04705 | 0.03852 | PROX1     |
| cg14021073 | 0.04649 | 0.04025 | 0.07088 | 0.07809 | 0.93277 | 0.85228 | 0.5322  | 0.47132 | 0.88189 | 0.89276 | BRSK2     |
| cg14021698 | 0.22948 | 0.29865 | 0.34479 | 0.3319  | 0.4592  | 0.44192 | 0.26973 | 0.23124 | 0.21745 | 0.32585 | KRTAP21-2 |
| cg14023451 | 0.49336 | 0.51638 | 0.57861 | 0.4343  | 0.20828 | 0.10248 | 0.13256 | 0.40282 | 0.26609 | 0.05801 | GPLD1     |
| cg14023558 | 0.06637 | 0.04988 | 0.06936 | 0.05857 | 0.07932 | 0.07204 | 0.0834  | 0.06941 | 0.06552 | 0.05099 | HNRPA3    |
| cg14026602 | 0.05673 | 0.05444 | 0.05314 | 0.05243 | 0.03426 | 0.0502  | 0.05815 | 0.05045 | 0.05132 | 0.05009 | USP7      |
| cg14026971 | 0.03725 | 0.03504 | 0.03401 | 0.03232 | 0.03365 | 0.04591 | 0.03611 | 0.03431 | 0.03007 | 0.03264 | MLSTD2    |
| cg14027234 | 0.68141 | 0.42777 | 0.78577 | 0.82601 | 0.93376 | 0.83433 | 0.78843 | 0.64249 | 0.87201 | 0.55729 | CD248     |
| cg14028823 | 0.04672 | 0.04367 | 0.04793 | 0.0398  | 0.039   | 0.04086 | 0.04626 | 0.03878 | 0.03238 | 0.03806 | EEF2K     |
| cg14029663 | 0.03966 | 0.04148 | 0.04165 | 0.06022 | 0.05027 | 0.07192 | 0.03263 | 0.04333 | 0.04594 | 0.04157 | C14orf138 |
| cg14030083 | 0.06368 | 0.06794 | 0.07668 | 0.07431 | 0.08288 | 0.08487 | 0.05506 | 0.06719 | 0.05562 | 0.07056 | CDR2L     |
| cg14030359 | 0.06301 | 0.06143 | 0.11245 | 0.14453 | 0.08502 | 0.0865  | 0.06929 | 0.06964 | 0.07464 | 0.08659 | NDRG2     |
| cg14031452 | 0.10583 | 0.0963  | 0.19069 | 0.15534 | 0.14605 | 0.13941 | 0.12315 | 0.10764 | 0.11163 | 0.12604 | NEDD1     |
| cg14034870 | 0.38382 | 0.27514 | 0.62977 | 0.73771 | 0.74739 | 0.70615 | 0.42703 | 0.48314 | 0.47305 | 0.35438 | SFTPG     |
| cg14035045 | 0.08773 | 0.09353 | 0.85943 | 0.88206 | 0.23828 | 0.22323 | 0.6337  | 0.1617  | 0.37462 | 0.26341 | C3orf18   |
| cg14036856 | 0.70159 | 0.3703  | 0.79289 | 0.87258 | 0.7478  | 0.61525 | 0.07774 | 0.101   | 0.44645 | 0.1975  | MGC52423  |
| cg14037413 | 0.03237 | 0.03083 | 0.03074 | 0.03137 | 0.02354 | 0.31114 | 0.0296  | 0.02713 | 0.02814 | 0.02955 | ZNF143    |
| cg14037665 | 0.03625 | 0.04087 | 0.07319 | 0.05206 | 0.0583  | 0.05235 | 0.60083 | 0.6574  | 0.04358 | 0.03246 | PXDN      |
| cg14039952 | 0.07897 | 0.06414 | 0.0622  | 0.05671 | 0.05473 | 0.05187 | 0.07964 | 0.04942 | 0.05575 | 0.06038 | NPM1      |
| cg14042128 | 0.06652 | 0.06308 | 0.12561 | 0.2694  | 0.44036 | 0.47078 | 0.07959 | 0.06052 | 0.06235 | 0.06844 | CHMP2A    |
| cg14043411 | 0.02178 | 0.01957 | 0.02106 | 0.02109 | 0.01706 | 0.02196 | 0.01696 | 0.02055 | 0.02233 | 0.01697 | SIVA      |
| cg14043602 | 0.07193 | 0.04022 | 0.17474 | 0.16563 | 0.06857 | 0.23337 | 0.0377  | 0.03138 | 0.13485 | 0.14111 | OR1E1     |
| cg14044580 | 0.03286 | 0.03889 | 0.02887 | 0.02872 | 0.03078 | 0.02938 | 0.02533 | 0.02314 | 0.03004 | 0.03067 | PCTK1     |
| cg14045072 | 0.20805 | 0.08376 | 0.78123 | 0.80949 | 0.71981 | 0.31971 | 0.41449 | 0.34142 | 0.67441 | 0.11604 | GPR116    |
| cg14045283 | 0.04565 | 0.03031 | 0.09644 | 0.09194 | 0.06096 | 0.03298 | 0.03605 | 0.02718 | 0.0283  | 0.02389 | MADCAM1   |
| cg14046365 | 0.06134 | 0.07653 | 0.08934 | 0.06767 | 0.08682 | 0.07457 | 0.07787 | 0.07789 | 0.07112 | 0.06694 | NMI       |
| cg14046757 | 0.03241 | 0.03172 | 0.03029 | 0.02951 | 0.03095 | 0.03728 | 0.02974 | 0.03166 | 0.02608 | 0.02873 | FLJ11806  |
| cg14046986 | 0.25332 | 0.04658 | 0.58524 | 0.63989 | 0.17316 | 0.44768 | 0.05624 | 0.03207 | 0.04647 | 0.03055 | RCSD1     |
| cg14047008 | 0.80725 | 0.73644 | 0.845   | 0.87125 | 0.86933 | 0.8455  | 0.80627 | 0.8296  | 0.40198 | 0.43067 | SERPINC1  |
| cg14047244 | 0.04071 | 0.03282 | 0.03875 | 0.03023 | 0.02923 | 0.0345  | 0.03219 | 0.03064 | 0.02873 | 0.02864 | LMNB2     |
| cg14047656 | 0.02743 | 0.03469 | 0.03385 | 0.0323  | 0.03363 | 0.03635 | 0.02613 | 0.02806 | 0.029   | 0.03479 | MGC39518  |
| cg14047667 | 0.0788  | 0.0291  | 0.03691 | 0.05868 | 0.04725 | 0.03024 | 0.02326 | 0.02854 | 0.02325 | 0.01783 | F13A1     |
| cg14048487 | 0.76887 | 0.76594 | 0.77179 | 0.77105 | 0.76339 | 0.71545 | 0.73343 | 0.72322 | 0.78333 | 0.76594 | BRCA1     |
| cg14049461 | 0.05862 | 0.06271 | 0.06514 | 0.05994 | 0.07297 | 0.05654 | 0.05631 | 0.05564 | 0.04968 | 0.06084 | GRID2     |
| cg14055374 | 0.03807 | 0.03882 | 0.04691 | 0.04439 | 0.04658 | 0.04084 | 0.03385 | 0.03332 | 0.03978 | 0.0318  | MAF       |
| cg14056306 | 0.93726 | 0.70953 | 0.9098  | 0.93932 | 0.95404 | 0.93791 | 0.93555 | 0.92785 | 0.94127 | 0.92663 | CDK3      |
| cg14056644 | 0.89366 | 0.85424 | 0.94523 | 0.94137 | 0.97162 | 0.93892 | 0.9543  | 0.73914 | 0.50032 | 0.45874 | PITX2     |
| cg14056942 | 0.06172 | 0.06869 | 0.0702  | 0.06282 | 0.03826 | 0.05531 | 0.05611 | 0.05649 | 0.05655 | 0.05511 | TSC22D2   |
| cg14058345 | 0.06349 | 0.05636 | 0.0718  | 0.05831 | 0.08093 | 0.04567 | 0.03985 | 0.04101 | 0.05149 | 0.05279 | TXNDC6    |
| cg14058432 | 0.05256 | 0.05011 | 0.04733 | 0.04667 | 0.05124 | 0.05465 | 0.04548 | 0.04507 | 0.04785 | 0.05445 | PELI2     |

|            |         |         |         |         |         |         |         |         |         |         |           |
|------------|---------|---------|---------|---------|---------|---------|---------|---------|---------|---------|-----------|
| cg14058998 | 0.02696 | 0.0306  | 0.03436 | 0.02473 | 0.02034 | 0.02477 | 0.02733 | 0.02673 | 0.02222 | 0.01953 | SEPW1     |
| cg14059475 | 0.03591 | 0.03865 | 0.03125 | 0.03638 | 0.04721 | 0.04183 | 0.03245 | 0.03133 | 0.03216 | 0.03221 | C2orf34   |
| cg14059729 | 0.0302  | 0.02819 | 0.02629 | 0.02738 | 0.02705 | 0.02689 | 0.02528 | 0.02494 | 0.02369 | 0.02628 | LOC129285 |
| cg14059963 | 0.63723 | 0.65781 | 0.89309 | 0.91212 | 0.93731 | 0.90033 | 0.6235  | 0.87182 | 0.90721 | 0.6505  | GPR19     |
| cg14060060 | 0.03606 | 0.03615 | 0.03721 | 0.03482 | 0.02384 | 0.02719 | 0.0297  | 0.03049 | 0.02659 | 0.027   | KIAA0251  |
| cg14060828 | 0.55366 | 0.50017 | 0.53089 | 0.5344  | 0.38141 | 0.42669 | 0.16895 | 0.17241 | 0.13055 | 0.13502 | TIP39     |
| cg14060836 | 0.01664 | 0.01754 | 0.01778 | 0.01621 | 0.01598 | 0.01571 | 0.01283 | 0.01318 | 0.0139  | 0.01349 | HBLD2     |
| cg14061619 | 0.05888 | 0.0523  | 0.04409 | 0.04082 | 0.05005 | 0.03333 | 0.30107 | 0.06266 | 0.04051 | 0.04001 | SH3BP4    |
| cg14062083 | 0.11089 | 0.08641 | 0.31137 | 0.34611 | 0.37    | 0.23805 | 0.09012 | 0.07837 | 0.15983 | 0.0852  | KRTAP13-4 |
| cg14063008 | 0.03871 | 0.04202 | 0.03989 | 0.03455 | 0.03307 | 0.0326  | 0.0341  | 0.03296 | 0.76546 | 0.75956 | DAB2IP    |
| cg14063673 | 0.89685 | 0.53836 | 0.791   | 0.87197 | 0.80577 | 0.90797 | 0.44475 | 0.47133 | 0.10536 | 0.04578 | XAGE2     |
| cg14066280 | 0.04809 | 0.0436  | 0.06144 | 0.18525 | 0.0489  | 0.05155 | 0.04216 | 0.03131 | 0.03369 | 0.03603 | ZNF613    |
| cg14069619 | 0.77618 | 0.47009 | 0.55867 | 0.54247 | 0.56769 | 0.55578 | 0.57717 | 0.29331 | 0.66929 | 0.33868 | LOC124751 |
| cg14070162 | 0.15381 | 0.11097 | 0.11391 | 0.10046 | 0.10065 | 0.10136 | 0.09247 | 0.09536 | 0.09308 | 0.08364 | PTRF      |
| cg14070647 | 0.06622 | 0.05267 | 0.115   | 0.15021 | 0.03312 | 0.05252 | 0.48321 | 0.4515  | 0.0701  | 0.05601 | RSPO2     |
| cg14072120 | 0.08293 | 0.05025 | 0.39765 | 0.51744 | 0.53736 | 0.43189 | 0.58276 | 0.04953 | 0.84808 | 0.73596 | RAC2      |
| cg14074117 | 0.86307 | 0.86001 | 0.53888 | 0.49191 | 0.86678 | 0.85762 | 0.25579 | 0.06741 | 0.88106 | 0.8278  | MGC35212  |
| cg14074431 | 0.03659 | 0.0404  | 0.03741 | 0.0326  | 0.03778 | 0.03705 | 0.033   | 0.04076 | 0.03632 | 0.03389 | MAP3K10   |
| cg14074641 | 0.25424 | 0.15363 | 0.39142 | 0.38717 | 0.2916  | 0.38014 | 0.42114 | 0.54401 | 0.43698 | 0.36349 | ABCC12    |
| cg14076161 | 0.12925 | 0.43617 | 0.25536 | 0.26957 | 0.0394  | 0.04325 | 0.03926 | 0.04784 | 0.06047 | 0.03767 | PRB4      |
| cg14076411 | 0.06151 | 0.05774 | 0.08772 | 0.07031 | 0.09288 | 0.08249 | 0.05405 | 0.0564  | 0.04574 | 0.05693 | RNMT      |
| cg14078309 | 0.03001 | 0.02693 | 0.03288 | 0.02914 | 0.0217  | 0.03006 | 0.02673 | 0.02669 | 0.03082 | 0.02674 | MT        |
| cg14078518 | 0.85412 | 0.8795  | 0.76997 | 0.844   | 0.79405 | 0.82635 | 0.71585 | 0.86063 | 0.55306 | 0.45618 | GK2       |
| cg14079785 | 0.68183 | 0.34489 | 0.89596 | 0.90784 | 0.92168 | 0.88272 | 0.86935 | 0.38354 | 0.90887 | 0.87818 | SFTPC     |
| cg14080001 | 0.05303 | 0.0685  | 0.04916 | 0.04539 | 0.03713 | 0.04004 | 0.03517 | 0.04045 | 0.04652 | 0.03541 | SH3PX3    |
| cg14081015 | 0.08471 | 0.06482 | 0.11266 | 0.10894 | 0.08369 | 0.07677 | 0.09459 | 0.08793 | 0.05263 | 0.06681 | RIOK2     |
| cg14083376 | 0.03574 | 0.03529 | 0.05106 | 0.03615 | 0.03084 | 0.03432 | 0.03103 | 0.03188 | 0.02645 | 0.02957 | C14orf2   |
| cg14084176 | 0.18843 | 0.16324 | 0.16646 | 0.10057 | 0.25409 | 0.16255 | 0.07483 | 0.07352 | 0.13145 | 0.15939 | FUNDC1    |
| cg14085328 | 0.03984 | 0.04847 | 0.05905 | 0.05387 | 0.05044 | 0.0537  | 0.04782 | 0.04251 | 0.06102 | 0.0439  | DDX59     |
| cg14086033 | 0.05132 | 0.04965 | 0.05225 | 0.05836 | 0.04898 | 0.04676 | 0.05215 | 0.04875 | 0.04895 | 0.04603 | FEN1      |
| cg14086122 | 0.70728 | 0.4704  | 0.50975 | 0.64557 | 0.59048 | 0.3866  | 0.86547 | 0.72431 | 0.55208 | 0.46587 | MGC7036   |
| cg14086647 | 0.06385 | 0.03949 | 0.06202 | 0.07041 | 0.06097 | 0.0329  | 0.04035 | 0.03611 | 0.03678 | 0.03183 | LIMK2     |
| cg14087150 | 0.78428 | 0.65053 | 0.83219 | 0.83605 | 0.81326 | 0.77775 | 0.24771 | 0.07637 | 0.61292 | 0.41647 | KRTAP4-4  |
| cg14088161 | 0.11565 | 0.39879 | 0.20971 | 0.28534 | 0.53739 | 0.81793 | 0.0532  | 0.04985 | 0.06151 | 0.15014 | ACTL6B    |
| cg14088811 | 0.90976 | 0.72855 | 0.91161 | 0.93294 | 0.92376 | 0.91168 | 0.8897  | 0.81784 | 0.82624 | 0.87705 | SPI1      |
| cg14089692 | 0.70885 | 0.88122 | 0.27149 | 0.34713 | 0.05415 | 0.04992 | 0.35971 | 0.04252 | 0.4085  | 0.28365 | ADAM33    |
| cg14091223 | 0.02465 | 0.02963 | 0.03464 | 0.02746 | 0.02333 | 0.03218 | 0.02401 | 0.02457 | 0.02762 | 0.02663 | DNAJB2    |
| cg14091657 | 0.83549 | 0.84819 | 0.85828 | 0.88675 | 0.80342 | 0.82033 | 0.79658 | 0.81188 | 0.8767  | 0.88082 | LHX3      |
| cg14093125 | 0.03454 | 0.03534 | 0.03754 | 0.03795 | 0.02774 | 0.03449 | 0.03161 | 0.0282  | 0.02736 | 0.02301 | MGC13170  |
| cg14093368 | 0.03201 | 0.03534 | 0.02937 | 0.0346  | 0.02974 | 0.03019 | 0.03017 | 0.02881 | 0.02291 | 0.02233 | BAZ1B     |
| cg14093936 | 0.76967 | 0.47747 | 0.81742 | 0.85966 | 0.92758 | 0.87306 | 0.8168  | 0.79025 | 0.87333 | 0.67581 | SEMA7A    |

|            |         |         |         |         |         |         |         |         |         |         |          |
|------------|---------|---------|---------|---------|---------|---------|---------|---------|---------|---------|----------|
| cg14094063 | 0.01983 | 0.02189 | 0.02553 | 0.02075 | 0.0191  | 0.0202  | 0.01813 | 0.01834 | 0.01923 | 0.01788 | BRAF     |
| cg14094960 | 0.0223  | 0.02408 | 0.02519 | 0.02039 | 0.02152 | 0.02418 | 0.02503 | 0.02088 | 0.01867 | 0.01698 | EGFR     |
| cg14095850 | 0.0424  | 0.04354 | 0.04998 | 0.05267 | 0.03853 | 0.04624 | 0.04048 | 0.04026 | 0.03785 | 0.0373  | CSTB     |
| cg14098132 | 0.04573 | 0.04602 | 0.05278 | 0.05423 | 0.03456 | 0.04224 | 0.04606 | 0.04918 | 0.03921 | 0.04242 | CGRRF1   |
| cg14099017 | 0.05814 | 0.06312 | 0.06516 | 0.05634 | 0.0361  | 0.04762 | 0.05232 | 0.0531  | 0.05946 | 0.0561  | MAP2K4   |
| cg14100184 | 0.21029 | 0.05723 | 0.66784 | 0.79368 | 0.73787 | 0.57629 | 0.0447  | 0.04174 | 0.20489 | 0.27042 | GNG13    |
| cg14100578 | 0.11531 | 0.09909 | 0.10618 | 0.09747 | 0.13495 | 0.10237 | 0.11466 | 0.11772 | 0.1095  | 0.11036 | RNF167   |
| cg14101501 | 0.04798 | 0.0502  | 0.05063 | 0.04886 | 0.05503 | 0.05268 | 0.03859 | 0.03426 | 0.04449 | 0.04031 | EHBP1    |
| cg14102807 | 0.58325 | 0.42944 | 0.44125 | 0.54042 | 0.90238 | 0.65444 | 0.5812  | 0.38719 | 0.53532 | 0.33612 | CD19     |
| cg14104257 | 0.02404 | 0.02516 | 0.02381 | 0.02173 | 0.05039 | 0.02498 | 0.02444 | 0.02428 | 0.02494 | 0.02182 | SLC36A1  |
| cg14105047 | 0.07009 | 0.06529 | 0.071   | 0.06668 | 0.06692 | 0.07579 | 0.05885 | 0.06587 | 0.06579 | 0.07061 | PDLIM5   |
| cg14105781 | 0.02433 | 0.02629 | 0.02715 | 0.02552 | 0.01894 | 0.02383 | 0.3691  | 0.67439 | 0.02248 | 0.01994 | TBL1X    |
| cg14106085 | 0.06865 | 0.0549  | 0.06443 | 0.06048 | 0.07595 | 0.06554 | 0.06738 | 0.05317 | 0.44592 | 0.0602  | FOXD2    |
| cg14106263 | 0.0521  | 0.06197 | 0.10225 | 0.09802 | 0.13065 | 0.07983 | 0.08063 | 0.28283 | 0.06478 | 0.08452 | RBMX2    |
| cg14106308 | 0.83781 | 0.78705 | 0.15373 | 0.29171 | 0.56576 | 0.54336 | 0.06272 | 0.08444 | 0.33901 | 0.30689 | VEPH1    |
| cg14106632 | 0.09025 | 0.09031 | 0.10044 | 0.09532 | 0.06697 | 0.0893  | 0.07374 | 0.0859  | 0.085   | 0.07974 | EVI5L    |
| cg14107638 | 0.38959 | 0.30265 | 0.4113  | 0.46709 | 0.75796 | 0.66709 | 0.15804 | 0.13336 | 0.18689 | 0.12097 | MAGEA5   |
| cg14108384 | 0.0543  | 0.0497  | 0.05835 | 0.065   | 0.05884 | 0.0509  | 0.05029 | 0.04952 | 0.05598 | 0.05018 | TMCO1    |
| cg14108394 | 0.03962 | 0.04417 | 0.05145 | 0.04189 | 0.03377 | 0.03698 | 0.03175 | 0.02907 | 0.03668 | 0.03639 | C12orf61 |
| cg14112945 | 0.09262 | 0.08245 | 0.08561 | 0.0785  | 0.08021 | 0.1068  | 0.12849 | 0.10804 | 0.05701 | 0.07053 | SUV420H2 |
| cg14114267 | 0.60779 | 0.63671 | 0.48364 | 0.61187 | 0.5857  | 0.37704 | 0.20948 | 0.16863 | 0.69066 | 0.26763 | SP3      |
| cg14115004 | 0.09207 | 0.10213 | 0.10273 | 0.09837 | 0.11187 | 0.08097 | 0.09832 | 0.08446 | 0.0877  | 0.09432 | STARD3   |
| cg14115346 | 0.59079 | 0.59227 | 0.48954 | 0.75816 | 0.35286 | 0.12358 | 0.12785 | 0.10012 | 0.08504 | 0.05903 | BPHL     |
| cg14116122 | 0.42797 | 0.19491 | 0.40413 | 0.36835 | 0.03087 | 0.03338 | 0.11887 | 0.04016 | 0.02736 | 0.02769 | CART1    |
| cg14116596 | 0.65466 | 0.64506 | 0.72245 | 0.7522  | 0.66481 | 0.76463 | 0.74495 | 0.7935  | 0.83247 | 0.77912 | TBXAS1   |
| cg14117297 | 0.7222  | 0.15431 | 0.80679 | 0.8796  | 0.26483 | 0.3172  | 0.08112 | 0.07671 | 0.09655 | 0.26398 | MGC23244 |
| cg14118546 | 0.0391  | 0.04291 | 0.04908 | 0.04383 | 0.04913 | 0.05826 | 0.04759 | 0.04388 | 0.03685 | 0.04742 | KIAA1012 |
| cg14119236 | 0.63005 | 0.35353 | 0.77256 | 0.83433 | 0.27339 | 0.58023 | 0.08258 | 0.08321 | 0.09003 | 0.07471 | FGF23    |
| cg14119774 | 0.05041 | 0.05944 | 0.05244 | 0.05498 | 0.05048 | 0.05703 | 0.05401 | 0.05311 | 0.03131 | 0.03815 | WDR41    |
| cg14120336 | 0.06784 | 0.06862 | 0.07161 | 0.05425 | 0.10526 | 0.06705 | 0.05766 | 0.04753 | 0.06558 | 0.06339 | DYNC2L1  |
| cg14120436 | 0.33545 | 0.16025 | 0.75705 | 0.81591 | 0.65727 | 0.73622 | 0.62771 | 0.70889 | 0.72406 | 0.42909 | GNB5     |
| cg14120784 | 0.35515 | 0.09909 | 0.2042  | 0.17138 | 0.26369 | 0.15167 | 0.12437 | 0.12624 | 0.10493 | 0.10362 | GTF2IRD1 |
| cg14120879 | 0.78207 | 0.12624 | 0.40554 | 0.60521 | 0.30198 | 0.24538 | 0.13518 | 0.1263  | 0.12854 | 0.0971  | DEFB105A |
| cg14121103 | 0.52702 | 0.4015  | 0.50165 | 0.73118 | 0.45301 | 0.35676 | 0.03291 | 0.03538 | 0.06193 | 0.03672 | ABHD5    |
| cg14123992 | 0.65684 | 0.48863 | 0.72171 | 0.73555 | 0.41692 | 0.11428 | 0.7342  | 0.38128 | 0.74744 | 0.83034 | APOE     |
| cg14125250 | 0.05414 | 0.05607 | 0.06347 | 0.05519 | 0.04085 | 0.0535  | 0.05821 | 0.05244 | 0.04092 | 0.03846 | PIK3R2   |
| cg14126210 | 0.02639 | 0.02435 | 0.02413 | 0.01908 | 0.01975 | 0.0295  | 0.01884 | 0.01731 | 0.01955 | 0.02184 | MCFD2    |
| cg14127336 | 0.79964 | 0.82063 | 0.90416 | 0.9408  | 0.97951 | 0.93502 | 0.1738  | 0.19873 | 0.44353 | 0.25989 | TCL1A    |
| cg14127659 | 0.32919 | 0.07161 | 0.81333 | 0.81043 | 0.09183 | 0.23715 | 0.44531 | 0.11396 | 0.88341 | 0.67677 | C22orf23 |
| cg14127958 | 0.03062 | 0.03425 | 0.03059 | 0.03133 | 0.02768 | 0.02873 | 0.03075 | 0.02947 | 0.03011 | 0.02342 | DIP13B   |
| cg14129103 | 0.52197 | 0.2788  | 0.63305 | 0.7221  | 0.74172 | 0.73229 | 0.55776 | 0.60354 | 0.68737 | 0.16068 | LOC92017 |



|            |         |         |         |         |         |         |         |         |         |         |           |
|------------|---------|---------|---------|---------|---------|---------|---------|---------|---------|---------|-----------|
| cg14129786 | 0.37835 | 0.27181 | 0.15669 | 0.16689 | 0.51679 | 0.5397  | 0.33999 | 0.26537 | 0.32005 | 0.26862 | MGMT      |
| cg14131445 | 0.06997 | 0.07505 | 0.0815  | 0.06434 | 0.04338 | 0.06437 | 0.06343 | 0.06332 | 0.05848 | 0.06228 | C16orf58  |
| cg14132995 | 0.04209 | 0.04631 | 0.04315 | 0.04909 | 0.06155 | 0.04362 | 0.06954 | 0.05149 | 0.04084 | 0.03551 | SLC35A2   |
| cg14133708 | 0.0803  | 0.07961 | 0.10576 | 0.10335 | 0.09824 | 0.10254 | 0.14231 | 0.19627 | 0.10612 | 0.1081  | EMILIN2   |
| cg14134005 | 0.15832 | 0.05358 | 0.05328 | 0.04507 | 0.53152 | 0.5702  | 0.13323 | 0.07813 | 0.04099 | 0.03984 | GATA4     |
| cg14134153 | 0.14864 | 0.10475 | 0.49665 | 0.54451 | 0.18424 | 0.11259 | 0.1204  | 0.10627 | 0.11977 | 0.10725 | RPL26L1   |
| cg14135551 | 0.04368 | 0.0572  | 0.06008 | 0.04904 | 0.07295 | 0.0739  | 0.0503  | 0.05134 | 0.03651 | 0.03711 | DAAM2     |
| cg14137939 | 0.59526 | 0.20773 | 0.90333 | 0.91279 | 0.93613 | 0.824   | 0.85855 | 0.12325 | 0.8874  | 0.60727 | FLJ38159  |
| cg14138171 | 0.68605 | 0.6826  | 0.66275 | 0.73222 | 0.53447 | 0.65344 | 0.64759 | 0.63314 | 0.66197 | 0.49028 | CIR       |
| cg14139633 | 0.02291 | 0.02432 | 0.02372 | 0.02197 | 0.01566 | 0.02077 | 0.0229  | 0.02114 | 0.01623 | 0.01609 | SLC27A4   |
| cg14141399 | 0.12103 | 0.04879 | 0.93723 | 0.95394 | 0.95991 | 0.95561 | 0.96186 | 0.73132 | 0.84124 | 0.94265 | HAS1      |
| cg14142521 | 0.06938 | 0.05835 | 0.06851 | 0.06116 | 0.04856 | 0.08726 | 0.07484 | 0.06611 | 0.03278 | 0.03188 | TAF11     |
| cg14143055 | 0.76365 | 0.75366 | 0.63522 | 0.69915 | 0.6781  | 0.75009 | 0.31111 | 0.27607 | 0.60521 | 0.5345  | ADAMDEC1  |
| cg14144305 | 0.77011 | 0.59567 | 0.73904 | 0.64681 | 0.94162 | 0.9296  | 0.93314 | 0.59744 | 0.93766 | 0.82006 | ALX4      |
| cg14145194 | 0.86916 | 0.86102 | 0.86271 | 0.86161 | 0.89113 | 0.86225 | 0.86327 | 0.65411 | 0.80375 | 0.85242 | ICAM3     |
| cg14145762 | 0.09454 | 0.10279 | 0.13599 | 0.10624 | 0.13296 | 0.12027 | 0.12571 | 0.11397 | 0.12634 | 0.10387 | FLJ10726  |
| cg14147105 | 0.05434 | 0.05295 | 0.06695 | 0.05262 | 0.03799 | 0.04425 | 0.08151 | 0.04649 | 0.03913 | 0.04084 | LOC93343  |
| cg14149007 | 0.03887 | 0.03701 | 0.03545 | 0.03112 | 0.03658 | 0.03524 | 0.05125 | 0.03591 | 0.02943 | 0.02694 | PRKD2     |
| cg14150666 | 0.54137 | 0.42243 | 0.72494 | 0.87177 | 0.84406 | 0.91322 | 0.61771 | 0.14223 | 0.34108 | 0.37738 | IL8RB     |
| cg14153740 | 0.05457 | 0.0536  | 0.55767 | 0.72991 | 0.26156 | 0.44022 | 0.05305 | 0.04467 | 0.04244 | 0.03659 | TRY1      |
| cg14154330 | 0.68234 | 0.07938 | 0.24402 | 0.33087 | 0.79699 | 0.53723 | 0.18987 | 0.29815 | 0.54478 | 0.67583 | ARHGAP27  |
| cg14155397 | 0.08378 | 0.07509 | 0.33062 | 0.27495 | 0.09897 | 0.0643  | 0.43051 | 0.12445 | 0.07985 | 0.07356 | MAP2K1    |
| cg14155416 | 0.65666 | 0.08098 | 0.34812 | 0.24169 | 0.1664  | 0.04047 | 0.06141 | 0.03658 | 0.30776 | 0.0687  | L3MBTL4   |
| cg14155482 | 0.0411  | 0.04212 | 0.0335  | 0.03334 | 0.04885 | 0.04326 | 0.02651 | 0.02943 | 0.04525 | 0.04519 | PIP5K1A   |
| cg14156381 | 0.74018 | 0.42156 | 0.18848 | 0.37359 | 0.16314 | 0.28611 | 0.04498 | 0.07749 | 0.10175 | 0.06046 | FBN3      |
| cg14159672 | 0.90648 | 0.86849 | 0.87157 | 0.89914 | 0.8963  | 0.92764 | 0.90729 | 0.9009  | 0.89624 | 0.87422 | FLJ32569  |
| cg14159818 | 0.02568 | 0.02296 | 0.02005 | 0.03501 | 0.01512 | 0.01718 | 0.01554 | 0.01606 | 0.02711 | 0.01205 | C20orf27  |
| cg14159894 | 0.05566 | 0.06623 | 0.06518 | 0.05327 | 0.09744 | 0.06014 | 0.05374 | 0.04872 | 0.04278 | 0.041   | BTBD3     |
| cg14161241 | 0.38    | 0.443   | 0.77922 | 0.76574 | 0.49078 | 0.26401 | 0.56415 | 0.38981 | 0.70841 | 0.69032 | PLAGL1    |
| cg14161426 | 0.03114 | 0.02661 | 0.02761 | 0.02827 | 0.01697 | 0.02137 | 0.0232  | 0.02441 | 0.02062 | 0.0184  | ARTS-1    |
| cg14161730 | 0.39409 | 0.12699 | 0.13506 | 0.08587 | 0.14977 | 0.08521 | 0.13687 | 0.05723 | 0.07023 | 0.07318 | TIMP1     |
| cg14161885 | 0.60575 | 0.52403 | 0.65374 | 0.68011 | 0.70001 | 0.65256 | 0.63591 | 0.62544 | 0.67138 | 0.61104 | NBPF15    |
| cg14162076 | 0.32747 | 0.34808 | 0.19853 | 0.26397 | 0.15088 | 0.0841  | 0.05923 | 0.05878 | 0.05159 | 0.03895 | CLEC4D    |
| cg14163776 | 0.86056 | 0.65944 | 0.51329 | 0.49561 | 0.28886 | 0.08    | 0.4674  | 0.42633 | 0.19244 | 0.30554 | CENTB2    |
| cg14165663 | 0.19074 | 0.13901 | 0.90335 | 0.92796 | 0.84006 | 0.90128 | 0.52262 | 0.1539  | 0.28149 | 0.16182 | GALR2     |
| cg14166009 | 0.13239 | 0.07339 | 0.90762 | 0.92001 | 0.93733 | 0.92631 | 0.16226 | 0.44764 | 0.44047 | 0.17181 | HKR1      |
| cg14167017 | 0.0451  | 0.04036 | 0.04359 | 0.04111 | 0.03614 | 0.04699 | 0.03799 | 0.04021 | 0.03744 | 0.03915 | UBAP1     |
| cg14167596 | 0.09914 | 0.10573 | 0.123   | 0.13458 | 0.22668 | 0.12394 | 0.10139 | 0.10311 | 0.62553 | 0.1409  | MSX1      |
| cg14168975 | 0.14403 | 0.11131 | 0.1457  | 0.13298 | 0.18101 | 0.11241 | 0.18603 | 0.0955  | 0.08997 | 0.10993 | ALAS2     |
| cg14170423 | 0.52399 | 0.07465 | 0.8343  | 0.8991  | 0.92591 | 0.86818 | 0.82561 | 0.37988 | 0.34224 | 0.16193 | RASGRP2   |
| cg14171478 | 0.0556  | 0.04805 | 0.05407 | 0.04905 | 0.0412  | 0.05103 | 0.04503 | 0.04847 | 0.04178 | 0.03751 | C14orf118 |

|            |         |         |         |         |         |         |         |         |         |                   |
|------------|---------|---------|---------|---------|---------|---------|---------|---------|---------|-------------------|
| cg14171523 | 0.03811 | 0.02977 | 0.04734 | 0.04165 | 0.02972 | 0.03535 | 0.03629 | 0.0324  | 0.02867 | 0.03385 KIAA0446  |
| cg14171882 | 0.26881 | 0.15911 | 0.85053 | 0.84043 | 0.25738 | 0.16225 | 0.36688 | 0.20269 | 0.7274  | 0.48966 HUS1      |
| cg14172532 | 0.03154 | 0.03601 | 0.03164 | 0.03217 | 0.02824 | 0.03392 | 0.02814 | 0.02868 | 0.03105 | 0.02475 STK25     |
| cg14173523 | 0.79886 | 0.35099 | 0.70383 | 0.83905 | 0.84433 | 0.8441  | 0.28244 | 0.136   | 0.29509 | 0.22464 FUT5      |
| cg14173613 | 0.04888 | 0.04798 | 0.04492 | 0.04508 | 0.04493 | 0.04602 | 0.04131 | 0.04218 | 0.04097 | 0.03831 TMEM33    |
| cg14173969 | 0.18458 | 0.26224 | 0.67906 | 0.80416 | 0.75695 | 0.56665 | 0.03531 | 0.03595 | 0.63522 | 0.45416 CD300C    |
| cg14174099 | 0.03196 | 0.03641 | 0.03372 | 0.03219 | 0.05848 | 0.03989 | 0.05445 | 0.03121 | 0.02869 | 0.03233 SLC8A3    |
| cg14175438 | 0.5715  | 0.12141 | 0.18775 | 0.32258 | 0.16048 | 0.14343 | 0.13457 | 0.10478 | 0.05459 | 0.05543 FAM3C     |
| cg14175580 | 0.03535 | 0.03319 | 0.04178 | 0.04145 | 0.03084 | 0.03129 | 0.03223 | 0.03228 | 0.03273 | 0.03232 CAMSAP1L1 |
| cg14175593 | 0.14492 | 0.1266  | 0.15893 | 0.12725 | 0.22293 | 0.14382 | 0.12863 | 0.11965 | 0.11655 | 0.13577 MMS19L    |
| cg14176475 | 0.06562 | 0.07699 | 0.0825  | 0.07818 | 0.10071 | 0.08149 | 0.07203 | 0.06627 | 0.07045 | 0.06698 TTF1      |
| cg14176836 | 0.78826 | 0.42324 | 0.7686  | 0.84886 | 0.74845 | 0.91446 | 0.21114 | 0.1009  | 0.84954 | 0.53792 ITGAL     |
| cg14178895 | 0.40598 | 0.14746 | 0.61466 | 0.71935 | 0.79091 | 0.73298 | 0.82461 | 0.58217 | 0.39302 | 0.32838 C6orf105  |
| cg14178991 | 0.71096 | 0.62052 | 0.62913 | 0.69349 | 0.6057  | 0.60122 | 0.65406 | 0.53856 | 0.73554 | 0.69506 RCHY1     |
| cg14179628 | 0.8763  | 0.58388 | 0.8496  | 0.89251 | 0.89376 | 0.84506 | 0.11877 | 0.3801  | 0.89005 | 0.3993 TCEAL7     |
| cg14181391 | 0.03582 | 0.03295 | 0.03051 | 0.02936 | 0.02502 | 0.02653 | 0.0256  | 0.02894 | 0.02658 | 0.02562 CDC91L1   |
| cg14181459 | 0.06085 | 0.04169 | 0.05695 | 0.05183 | 0.04151 | 0.04797 | 0.04869 | 0.04852 | 0.03535 | 0.03154 SMAD5     |
| cg14182690 | 0.86039 | 0.56824 | 0.90528 | 0.92355 | 0.63694 | 0.31368 | 0.0335  | 0.8386  | 0.75569 | 0.40078 RUNX3     |
| cg14183455 | 0.80826 | 0.42105 | 0.84897 | 0.87288 | 0.87799 | 0.8676  | 0.84695 | 0.85863 | 0.87407 | 0.84953 MATN1     |
| cg14184817 | 0.892   | 0.87564 | 0.91074 | 0.92352 | 0.94403 | 0.88572 | 0.91493 | 0.8946  | 0.92482 | 0.91898 XTP7      |
| cg14186071 | 0.76193 | 0.8592  | 0.67602 | 0.57877 | 0.54343 | 0.85473 | 0.46659 | 0.60364 | 0.76838 | 0.30082 TAB3      |
| cg14186992 | 0.94498 | 0.85938 | 0.92541 | 0.95763 | 0.97006 | 0.74009 | 0.86955 | 0.556   | 0.64953 | 0.18244 HKR3      |
| cg14187678 | 0.31196 | 0.08944 | 0.48411 | 0.67029 | 0.68729 | 0.69643 | 0.69113 | 0.67534 | 0.71653 | 0.60897 TBR1      |
| cg14188111 | 0.79152 | 0.28632 | 0.51408 | 0.57051 | 0.42803 | 0.38147 | 0.77752 | 0.3295  | 0.87687 | 0.79054 S100A13   |
| cg14188232 | 0.04722 | 0.03175 | 0.04299 | 0.02902 | 0.03018 | 0.03525 | 0.03667 | 0.03506 | 0.0489  | 0.17602 ITGA11    |
| cg14189571 | 0.79244 | 0.79488 | 0.76259 | 0.84676 | 0.8317  | 0.84974 | 0.8758  | 0.86654 | 0.20025 | 0.21592 ZFP42     |
| cg14189614 | 0.78746 | 0.80259 | 0.81681 | 0.81703 | 0.85043 | 0.81935 | 0.81462 | 0.81748 | 0.81377 | 0.5632 SLC45A2    |
| cg14191109 | 0.03732 | 0.0352  | 0.04271 | 0.04128 | 0.02202 | 0.04236 | 0.03623 | 0.03696 | 0.03295 | 0.03243 SLC25A16  |
| cg14191360 | 0.07779 | 0.10966 | 0.17256 | 0.19771 | 0.25134 | 0.10682 | 0.07963 | 0.08382 | 0.05744 | 0.05188 MET       |
| cg14195915 | 0.04801 | 0.04669 | 0.05488 | 0.0538  | 0.04138 | 0.04856 | 0.0354  | 0.03396 | 0.03861 | 0.04093 SFRS4     |
| cg14196211 | 0.03056 | 0.02775 | 0.0299  | 0.02739 | 0.02037 | 0.02413 | 0.02463 | 0.03053 | 0.02594 | 0.02321 MRPL12    |
| cg14196790 | 0.1815  | 0.10782 | 0.11659 | 0.09731 | 0.08242 | 0.06867 | 0.10753 | 0.13972 | 0.06936 | 0.06066 SLC22A5   |
| cg14197923 | 0.04392 | 0.04076 | 0.03853 | 0.03338 | 0.03597 | 0.03935 | 0.03937 | 0.03376 | 0.03166 | 0.02584 FGF5      |
| cg14198172 | 0.24328 | 0.13101 | 0.21927 | 0.17547 | 0.11423 | 0.09376 | 0.13398 | 0.14107 | 0.36552 | 0.239 HBXIP       |
| cg14201417 | 0.56167 | 0.04796 | 0.95706 | 0.96284 | 0.87706 | 0.93525 | 0.53924 | 0.04121 | 0.25863 | 0.27163 ADAMTSL2  |
| cg14201617 | 0.91127 | 0.63661 | 0.91125 | 0.89845 | 0.90187 | 0.92079 | 0.92274 | 0.93717 | 0.93446 | 0.91184 FLJ40172  |
| cg14203179 | 0.62994 | 0.60151 | 0.84675 | 0.91601 | 0.94302 | 0.9501  | 0.35033 | 0.48064 | 0.64033 | 0.64381 GNAS      |
| cg14203758 | 0.04621 | 0.04937 | 0.04453 | 0.04434 | 0.03363 | 0.0403  | 0.03651 | 0.04137 | 0.0379  | 0.03877 ASF1B     |
| cg14204735 | 0.62251 | 0.34703 | 0.94316 | 0.93412 | 0.03987 | 0.03443 | 0.92857 | 0.74553 | 0.03039 | 0.02918 CYB561    |
| cg14204791 | 0.04005 | 0.03709 | 0.0399  | 0.03671 | 0.02962 | 0.03704 | 0.03359 | 0.03798 | 0.03195 | 0.03183 PKNOX1    |
| cg14204992 | 0.02192 | 0.02308 | 0.02137 | 0.02137 | 0.01868 | 0.01958 | 0.01972 | 0.02104 | 0.01664 | 0.01473 ZFAND3    |

|            |         |         |         |         |         |         |         |         |         |         |           |
|------------|---------|---------|---------|---------|---------|---------|---------|---------|---------|---------|-----------|
| cg14205126 | 0.08688 | 0.06294 | 0.06883 | 0.07181 | 0.10795 | 0.06502 | 0.07474 | 0.07662 | 0.06117 | 0.06971 | TMEM9B    |
| cg14206730 | 0.03245 | 0.03154 | 0.03802 | 0.03259 | 0.02418 | 0.0235  | 0.02398 | 0.02367 | 0.02529 | 0.02855 | SLC35D1   |
| cg14209518 | 0.29887 | 0.17253 | 0.19156 | 0.19616 | 0.12158 | 0.12117 | 0.175   | 0.21361 | 0.12822 | 0.1395  | NNMT      |
| cg14209569 | 0.0782  | 0.06913 | 0.10083 | 0.09425 | 0.04567 | 0.03726 | 0.07092 | 0.05757 | 0.06846 | 0.06638 | COMMMD4   |
| cg14209870 | 0.89835 | 0.87376 | 0.81363 | 0.87389 | 0.79723 | 0.83858 | 0.87073 | 0.87528 | 0.90079 | 0.78367 | TAS2R5    |
| cg14211646 | 0.09768 | 0.08731 | 0.07506 | 0.07934 | 0.05618 | 0.06498 | 0.07191 | 0.07412 | 0.06166 | 0.06094 | DHDDS     |
| cg14212314 | 0.04434 | 0.04732 | 0.04329 | 0.04015 | 0.02953 | 0.03616 | 0.03864 | 0.03614 | 0.03847 | 0.02933 | HSPD1     |
| cg14213620 | 0.04152 | 0.04763 | 0.04576 | 0.0427  | 0.0303  | 0.04202 | 0.03468 | 0.03772 | 0.03229 | 0.03676 | DFFB      |
| cg14213992 | 0.34109 | 0.30603 | 0.38044 | 0.44327 | 0.38515 | 0.22402 | 0.63891 | 0.56663 | 0.07348 | 0.058   | ZNF546    |
| cg14217102 | 0.02189 | 0.02764 | 0.02345 | 0.02417 | 0.02465 | 0.0238  | 0.02231 | 0.01801 | 0.02051 | 0.01893 | RAB1A     |
| cg14217157 | 0.36704 | 0.30474 | 0.37809 | 0.44724 | 0.56118 | 0.14789 | 0.65405 | 0.14823 | 0.3274  | 0.13933 | WHSC2     |
| cg14217534 | 0.05017 | 0.0516  | 0.05164 | 0.05688 | 0.05025 | 0.04806 | 0.04539 | 0.04272 | 0.04176 | 0.04415 | K-ALPHA-1 |
| cg14218343 | 0.36586 | 0.34386 | 0.55167 | 0.68078 | 0.49906 | 0.3443  | 0.2646  | 0.04902 | 0.04541 | 0.03543 | ZNF32     |
| cg14221171 | 0.06478 | 0.05752 | 0.40834 | 0.57654 | 0.76299 | 0.89081 | 0.0661  | 0.04994 | 0.17219 | 0.17674 | TAC1      |
| cg14221831 | 0.8265  | 0.71624 | 0.82802 | 0.84542 | 0.80446 | 0.84642 | 0.80336 | 0.84027 | 0.66961 | 0.76765 | CDH16     |
| cg14222233 | 0.02431 | 0.02803 | 0.02385 | 0.02636 | 0.02286 | 0.02715 | 0.02142 | 0.02198 | 0.02282 | 0.02209 | PFKFB3    |
| cg14223017 | 0.29355 | 0.31479 | 0.28204 | 0.29778 | 0.22801 | 0.24883 | 0.26716 | 0.26178 | 0.20797 | 0.22377 | AP3D1     |
| cg14223444 | 0.23543 | 0.31573 | 0.20423 | 0.21064 | 0.31204 | 0.29541 | 0.15306 | 0.09602 | 0.62369 | 0.27571 | NCBP1     |
| cg14223995 | 0.33502 | 0.5217  | 0.87674 | 0.90866 | 0.94756 | 0.93008 | 0.60141 | 0.63417 | 0.36851 | 0.56932 | UCP1      |
| cg14225485 | 0.03136 | 0.03399 | 0.9034  | 0.96284 | 0.0652  | 0.03048 | 0.03534 | 0.03073 | 0.03941 | 0.07503 | FAM84A    |
| cg14225544 | 0.05958 | 0.04791 | 0.0494  | 0.048   | 0.02957 | 0.04166 | 0.04394 | 0.04808 | 0.04189 | 0.04187 | PLK2      |
| cg14226064 | 0.85275 | 0.85149 | 0.87253 | 0.88714 | 0.91421 | 0.78042 | 0.86448 | 0.86495 | 0.88436 | 0.86169 | C20orf10  |
| cg14228238 | 0.06131 | 0.06463 | 0.06793 | 0.05286 | 0.05497 | 0.04777 | 0.05323 | 0.04372 | 0.05859 | 0.0447  | EV11      |
| cg14228840 | 0.03651 | 0.03238 | 0.03846 | 0.03646 | 0.03816 | 0.03219 | 0.0285  | 0.02959 | 0.02764 | 0.02601 | MICA      |
| cg14230133 | 0.03975 | 0.04195 | 0.04268 | 0.04587 | 0.04463 | 0.04026 | 0.04199 | 0.03487 | 0.03193 | 0.02633 | IDS       |
| cg14230685 | 0.05345 | 0.05774 | 0.05934 | 0.06051 | 0.04129 | 0.04624 | 0.05029 | 0.05434 | 0.04054 | 0.03675 | SPIN      |
| cg14234680 | 0.0284  | 0.02475 | 0.02954 | 0.02396 | 0.02761 | 0.02018 | 0.02504 | 0.02757 | 0.01917 | 0.01719 | IMPAD1    |
| cg14236389 | 0.24824 | 0.05991 | 0.67011 | 0.82433 | 0.94724 | 0.92616 | 0.89415 | 0.77263 | 0.23443 | 0.28995 | FLJ33860  |
| cg14236602 | 0.07723 | 0.03917 | 0.08744 | 0.07668 | 0.21378 | 0.15558 | 0.12877 | 0.15996 | 0.29965 | 0.03127 | PFKL      |
| cg14237152 | 0.73944 | 0.4141  | 0.74011 | 0.79657 | 0.66748 | 0.73419 | 0.80357 | 0.79152 | 0.55495 | 0.56569 | LGALS9    |
| cg14238120 | 0.51761 | 0.33819 | 0.66297 | 0.74354 | 0.83081 | 0.76359 | 0.41332 | 0.13472 | 0.31401 | 0.28772 | ELA3A     |
| cg14242042 | 0.02974 | 0.02872 | 0.03029 | 0.02495 | 0.03959 | 0.02251 | 0.02315 | 0.034   | 0.02402 | 0.02298 | SOX5      |
| cg14242091 | 0.05432 | 0.0545  | 0.04696 | 0.0512  | 0.04838 | 0.0486  | 0.04599 | 0.04866 | 0.03964 | 0.04269 | TOP3B     |
| cg14243026 | 0.03467 | 0.02785 | 0.04675 | 0.02878 | 0.03726 | 0.02414 | 0.02366 | 0.03021 | 0.026   | 0.02426 | HMP19     |
| cg14244577 | 0.72149 | 0.69789 | 0.44968 | 0.59387 | 0.14947 | 0.09073 | 0.20727 | 0.10259 | 0.05726 | 0.04952 | DDX19B    |
| cg14246617 | 0.05068 | 0.0397  | 0.05696 | 0.04654 | 0.05532 | 0.04397 | 0.04303 | 0.04741 | 0.09225 | 0.02811 | MITF      |
| cg14249872 | 0.16957 | 0.03651 | 0.03614 | 0.03947 | 0.45607 | 0.08311 | 0.13116 | 0.87397 | 0.08758 | 0.03048 | KCNK1     |
| cg14251536 | 0.07628 | 0.07008 | 0.12241 | 0.09708 | 0.10803 | 0.07729 | 0.11015 | 0.06813 | 0.05581 | 0.05617 | C20orf6   |
| cg14252059 | 0.56068 | 0.13514 | 0.44477 | 0.45735 | 0.59839 | 0.1923  | 0.5183  | 0.17545 | 0.72201 | 0.06526 | TECTA     |
| cg14252569 | 0.09931 | 0.0884  | 0.0934  | 0.07817 | 0.13481 | 0.10532 | 0.08958 | 0.09302 | 0.09483 | 0.09853 | DACT1     |
| cg14254380 | 0.05025 | 0.04815 | 0.05955 | 0.05303 | 0.05951 | 0.05129 | 0.04785 | 0.04543 | 0.44621 | 0.1428  | WDR63     |

|            |         |         |         |         |         |         |         |         |         |         |           |
|------------|---------|---------|---------|---------|---------|---------|---------|---------|---------|---------|-----------|
| cg14254419 | 0.51904 | 0.27528 | 0.18734 | 0.4086  | 0.03322 | 0.0352  | 0.05658 | 0.04155 | 0.03014 | 0.03103 | AMPD2     |
| cg14255089 | 0.07988 | 0.06144 | 0.0619  | 0.05826 | 0.0486  | 0.05524 | 0.04957 | 0.04871 | 0.05182 | 0.0595  | ZMYND11   |
| cg14256699 | 0.86263 | 0.21055 | 0.86582 | 0.94617 | 0.96228 | 0.95674 | 0.95389 | 0.91012 | 0.96744 | 0.94837 | SOST      |
| cg14256814 | 0.34661 | 0.07269 | 0.07654 | 0.11428 | 0.03647 | 0.05163 | 0.06359 | 0.06051 | 0.05387 | 0.04465 | POGK      |
| cg14258236 | 0.25875 | 0.30883 | 0.69149 | 0.88909 | 0.68921 | 0.78053 | 0.20989 | 0.30356 | 0.06151 | 0.07593 | OR5V1     |
| cg14260458 | 0.40783 | 0.19609 | 0.3898  | 0.452   | 0.49411 | 0.28461 | 0.30799 | 0.16489 | 0.22909 | 0.15865 | OCM       |
| cg14260643 | 0.07413 | 0.07758 | 0.31285 | 0.43699 | 0.1467  | 0.10329 | 0.09722 | 0.0832  | 0.07857 | 0.07542 | CYP3A5    |
| cg14260918 | 0.03075 | 0.0287  | 0.02237 | 0.0208  | 0.01819 | 0.01968 | 0.39565 | 0.29687 | 0.0231  | 0.01879 | ZNF673    |
| cg14261309 | 0.10493 | 0.06875 | 0.18082 | 0.09784 | 0.10382 | 0.07766 | 0.05901 | 0.06035 | 0.0549  | 0.06105 | C1orf163  |
| cg14261863 | 0.11495 | 0.10494 | 0.11469 | 0.1152  | 0.12611 | 0.10832 | 0.07101 | 0.08265 | 0.06998 | 0.05787 | ELMO2     |
| cg14262937 | 0.35362 | 0.31816 | 0.68634 | 0.80335 | 0.58298 | 0.68913 | 0.34575 | 0.49282 | 0.10326 | 0.02053 | OPRM1     |
| cg14264994 | 0.48746 | 0.41641 | 0.90018 | 0.91507 | 0.93178 | 0.91512 | 0.86609 | 0.89384 | 0.91566 | 0.82986 | CTCFL     |
| cg14265075 | 0.83433 | 0.20878 | 0.877   | 0.87499 | 0.86435 | 0.36029 | 0.79592 | 0.6177  | 0.88789 | 0.29465 | ARHGEF11  |
| cg14265670 | 0.05335 | 0.04758 | 0.03763 | 0.0372  | 0.03167 | 0.0349  | 0.03466 | 0.03632 | 0.03039 | 0.02993 | UPP1      |
| cg14267151 | 0.8171  | 0.686   | 0.73138 | 0.79851 | 0.59831 | 0.58317 | 0.76247 | 0.53119 | 0.87739 | 0.69061 | MUTED     |
| cg14269477 | 0.0973  | 0.07275 | 0.40196 | 0.54461 | 0.36431 | 0.52094 | 0.08098 | 0.06734 | 0.08612 | 0.07333 | TRPV5     |
| cg14269514 | 0.03449 | 0.03387 | 0.03116 | 0.0301  | 0.02545 | 0.02946 | 0.02996 | 0.02814 | 0.02834 | 0.02573 | MRPL9     |
| cg14271400 | 0.02578 | 0.02849 | 0.03362 | 0.02848 | 0.02032 | 0.02834 | 0.0229  | 0.02663 | 0.0288  | 0.02517 | EPHB2     |
| cg14271499 | 0.03886 | 0.03674 | 0.05993 | 0.03805 | 0.07771 | 0.03691 | 0.04425 | 0.03266 | 0.03388 | 0.0271  | THOP1     |
| cg14271690 | 0.88468 | 0.33718 | 0.83314 | 0.85832 | 0.91799 | 0.88135 | 0.76362 | 0.58625 | 0.88592 | 0.8384  | SMAF1     |
| cg14271908 | 0.05102 | 0.05544 | 0.06072 | 0.05403 | 0.04057 | 0.05293 | 0.04951 | 0.04844 | 0.04509 | 0.04788 | TFAM      |
| cg14272175 | 0.03697 | 0.03924 | 0.03934 | 0.03585 | 0.03582 | 0.04032 | 0.04515 | 0.04616 | 0.03175 | 0.03144 | PXK       |
| cg14272706 | 0.86094 | 0.88923 | 0.85337 | 0.89324 | 0.74382 | 0.86556 | 0.77669 | 0.8594  | 0.87111 | 0.86659 | ALS2CR12  |
| cg14275779 | 0.04077 | 0.03841 | 0.04447 | 0.03108 | 0.03783 | 0.045   | 0.03553 | 0.02914 | 0.03289 | 0.03523 | PLEKHH3   |
| cg14277764 | 0.55473 | 0.56958 | 0.33609 | 0.28277 | 0.45622 | 0.43021 | 0.42213 | 0.31872 | 0.24568 | 0.11113 | PMCHL2    |
| cg14277848 | 0.08196 | 0.07464 | 0.13217 | 0.1104  | 0.12841 | 0.09558 | 0.10676 | 0.08895 | 0.19487 | 0.12047 | GPATC4    |
| cg14279899 | 0.12997 | 0.12968 | 0.13068 | 0.12908 | 0.11106 | 0.11645 | 0.11265 | 0.11024 | 0.1166  | 0.11641 | IFNGR1    |
| cg14281160 | 0.07751 | 0.06332 | 0.10786 | 0.10185 | 0.1586  | 0.07977 | 0.05524 | 0.04954 | 0.17996 | 0.08771 | C12orf31  |
| cg14281165 | 0.05636 | 0.05685 | 0.04581 | 0.0502  | 0.05121 | 0.05328 | 0.04425 | 0.03441 | 0.03554 | 0.03618 | PIGO      |
| cg14282941 | 0.05464 | 0.05637 | 0.05102 | 0.05482 | 0.07037 | 0.05956 | 0.04885 | 0.04774 | 0.04743 | 0.05191 | C14orf104 |
| cg14283939 | 0.87257 | 0.78072 | 0.87172 | 0.8969  | 0.8225  | 0.88823 | 0.78934 | 0.77141 | 0.88282 | 0.7924  | THSD4     |
| cg14284171 | 0.83421 | 0.86611 | 0.80846 | 0.86318 | 0.90229 | 0.89536 | 0.1874  | 0.10032 | 0.70942 | 0.88697 | SSX4      |
| cg14284643 | 0.06308 | 0.05927 | 0.06336 | 0.0589  | 0.03794 | 0.05111 | 0.06164 | 0.07793 | 0.06078 | 0.05571 | GNL1      |
| cg14285013 | 0.0717  | 0.07233 | 0.10471 | 0.07947 | 0.07371 | 0.07059 | 0.08533 | 0.0854  | 0.06327 | 0.07399 | MYBL1     |
| cg14287603 | 0.03834 | 0.03849 | 0.0402  | 0.03981 | 0.03508 | 0.03695 | 0.03908 | 0.03779 | 0.03223 | 0.03445 | EPB41L5   |
| cg14287742 | 0.84607 | 0.59609 | 0.80811 | 0.86802 | 0.81536 | 0.89007 | 0.35667 | 0.72603 | 0.85262 | 0.81616 | BLZF1     |
| cg14288464 | 0.70717 | 0.47646 | 0.85227 | 0.90975 | 0.93888 | 0.8249  | 0.61306 | 0.34713 | 0.71509 | 0.61795 | WFDC5     |
| cg14289461 | 0.61066 | 0.04673 | 0.29    | 0.32806 | 0.14536 | 0.04708 | 0.85808 | 0.04029 | 0.03841 | 0.04061 | LAMA4     |
| cg14289511 | 0.11707 | 0.05478 | 0.35021 | 0.6503  | 0.83687 | 0.0506  | 0.05268 | 0.04921 | 0.29437 | 0.44275 | FLJ45256  |
| cg14289985 | 0.04967 | 0.04851 | 0.86684 | 0.87018 | 0.56216 | 0.4251  | 0.04112 | 0.03487 | 0.04097 | 0.03722 | ZNF471    |
| cg14290291 | 0.08375 | 0.04181 | 0.06991 | 0.07147 | 0.03712 | 0.04213 | 0.13034 | 0.058   | 0.92882 | 0.63634 | FLJ14346  |

|            |         |         |         |         |         |         |         |         |         |                       |
|------------|---------|---------|---------|---------|---------|---------|---------|---------|---------|-----------------------|
| cg14290451 | 0.03218 | 0.03156 | 0.03293 | 0.03129 | 0.01957 | 0.03164 | 0.02966 | 0.02757 | 0.02658 | 0.02675 RPL10A        |
| cg14292823 | 0.44572 | 0.0546  | 0.15657 | 0.10798 | 0.52465 | 0.04511 | 0.49062 | 0.20154 | 0.93225 | 0.66907 TIGD5         |
| cg14294758 | 0.07595 | 0.0717  | 0.48415 | 0.48615 | 0.31288 | 0.11456 | 0.08114 | 0.06101 | 0.10267 | 0.07311 LSAMP         |
| cg14296129 | 0.04639 | 0.04781 | 0.06709 | 0.06115 | 0.06999 | 0.06387 | 0.06407 | 0.0545  | 0.06008 | 0.05556 RAB5B         |
| cg14296147 | 0.0248  | 0.02881 | 0.02727 | 0.02516 | 0.02479 | 0.02332 | 0.02398 | 0.02186 | 0.01871 | 0.0193 CSRP2BP        |
| cg14296374 | 0.8887  | 0.88843 | 0.85585 | 0.86245 | 0.53837 | 0.46488 | 0.51928 | 0.50374 | 0.28738 | 0.04559 HSBP1         |
| cg14297029 | 0.93604 | 0.70695 | 0.94137 | 0.94824 | 0.95306 | 0.94275 | 0.87401 | 0.84775 | 0.93876 | 0.89552 SSTR3         |
| cg14297700 | 0.0316  | 0.03244 | 0.03753 | 0.03015 | 0.02609 | 0.02568 | 0.03074 | 0.02791 | 0.02336 | 0.02499 TBL3          |
| cg14297876 | 0.0882  | 0.0828  | 0.08701 | 0.08831 | 0.10399 | 0.09324 | 0.07248 | 0.06921 | 0.07271 | 0.07554 MAGOH         |
| cg14298379 | 0.05132 | 0.04108 | 0.07091 | 0.06959 | 0.04455 | 0.04328 | 0.11195 | 0.04536 | 0.06511 | 0.03465 MYLIP         |
| cg14298726 | 0.11516 | 0.1315  | 0.16828 | 0.14289 | 0.1944  | 0.18607 | 0.13746 | 0.12456 | 0.10623 | 0.1149 DKFZP686A10121 |
| cg14298780 | 0.03944 | 0.039   | 0.04706 | 0.048   | 0.04769 | 0.04182 | 0.03808 | 0.03801 | 0.02876 | 0.02751 ZNF230        |
| cg14298951 | 0.0496  | 0.05176 | 0.05414 | 0.05077 | 0.04609 | 0.04761 | 0.04559 | 0.04001 | 0.04568 | 0.04184 RPS24         |
| cg14299177 | 0.04009 | 0.03533 | 0.03016 | 0.02845 | 0.02294 | 0.02636 | 0.03197 | 0.03386 | 0.04314 | 0.02509 MTFR1         |
| cg14299800 | 0.8977  | 0.88507 | 0.89803 | 0.92068 | 0.94359 | 0.91843 | 0.92452 | 0.8821  | 0.92816 | 0.88038 TOR1B         |
| cg14301635 | 0.74451 | 0.73897 | 0.783   | 0.79318 | 0.56512 | 0.72469 | 0.30414 | 0.22734 | 0.70062 | 0.74069 C2            |
| cg14303330 | 0.07081 | 0.07505 | 0.09136 | 0.07781 | 0.12091 | 0.09202 | 0.06943 | 0.06644 | 0.08888 | 0.09191 RPL22         |
| cg14303674 | 0.81822 | 0.5602  | 0.81206 | 0.82865 | 0.72541 | 0.5166  | 0.7705  | 0.67626 | 0.4079  | 0.29949 MAPRE1        |
| cg14304761 | 0.6533  | 0.64897 | 0.05176 | 0.03815 | 0.06513 | 0.03405 | 0.0923  | 0.04195 | 0.13714 | 0.18723 SYK           |
| cg14306534 | 0.0453  | 0.04955 | 0.05299 | 0.04972 | 0.04722 | 0.04582 | 0.04178 | 0.0359  | 0.04542 | 0.04221 ZBTB2         |
| cg14307212 | 0.10369 | 0.09343 | 0.1306  | 0.15382 | 0.23249 | 0.12325 | 0.49108 | 0.3631  | 0.50463 | 0.3302 SLC12A6        |
| cg14308291 | 0.08238 | 0.07119 | 0.09494 | 0.09575 | 0.10438 | 0.09766 | 0.07867 | 0.06571 | 0.07318 | 0.07142 EIF2C3        |
| cg14308452 | 0.69653 | 0.85407 | 0.87318 | 0.86225 | 0.77124 | 0.82989 | 0.84928 | 0.82637 | 0.88447 | 0.85664 MGC24975      |
| cg14309281 | 0.01783 | 0.01813 | 0.02089 | 0.01797 | 0.01565 | 0.01686 | 0.01632 | 0.0162  | 0.01795 | 0.01637 MAP3K3        |
| cg14310034 | 0.07566 | 0.06568 | 0.05067 | 0.0492  | 0.91609 | 0.9143  | 0.05618 | 0.04636 | 0.59158 | 0.48709 BMP4          |
| cg14310890 | 0.0463  | 0.04966 | 0.04616 | 0.04378 | 0.03346 | 0.0451  | 0.04827 | 0.0446  | 0.04121 | 0.03823 FOXO3A        |
| cg14311811 | 0.76694 | 0.67056 | 0.80348 | 0.78068 | 0.68009 | 0.74215 | 0.31861 | 0.44106 | 0.39791 | 0.52857 DSG2          |
| cg14312526 | 0.09987 | 0.0681  | 0.15198 | 0.31532 | 0.64779 | 0.94715 | 0.05684 | 0.0686  | 0.0907  | 0.05436 FOXL2         |
| cg14313310 | 0.06415 | 0.05032 | 0.0878  | 0.1362  | 0.81198 | 0.4171  | 0.04974 | 0.06821 | 0.32811 | 0.32385 GLT25D2       |
| cg14314795 | 0.02273 | 0.02143 | 0.0225  | 0.02397 | 0.01474 | 0.02127 | 0.01677 | 0.01843 | 0.01944 | 0.0173 TTC4           |
| cg14314889 | 0.08031 | 0.0435  | 0.14806 | 0.1618  | 0.09058 | 0.2435  | 0.03873 | 0.03194 | 0.16532 | 0.15136 OR1E2         |
| cg14315198 | 0.1415  | 0.38937 | 0.57143 | 0.68109 | 0.62811 | 0.33771 | 0.34832 | 0.68369 | 0.41452 | 0.18886 UNC119        |
| cg14317651 | 0.05439 | 0.04571 | 0.05648 | 0.04316 | 0.06411 | 0.04777 | 0.0622  | 0.05009 | 0.06946 | 0.07849 COPS2         |
| cg14318370 | 0.06446 | 0.06326 | 0.0724  | 0.07614 | 0.06197 | 0.06394 | 0.06728 | 0.07278 | 0.0603  | 0.05133 CHCHD5        |
| cg14319409 | 0.11497 | 0.09705 | 0.14193 | 0.3207  | 0.23103 | 0.07684 | 0.09404 | 0.09428 | 0.10699 | 0.08543 GLRA1         |
| cg14320796 | 0.0983  | 0.03741 | 0.05437 | 0.02726 | 0.04054 | 0.03266 | 0.05737 | 0.02938 | 0.04236 | 0.02819 GAJ           |
| cg14321399 | 0.03514 | 0.02999 | 0.04127 | 0.04553 | 0.0328  | 0.03705 | 0.14778 | 0.30021 | 0.02835 | 0.03074 RRAGB         |
| cg14321743 | 0.22974 | 0.04566 | 0.28963 | 0.63939 | 0.81916 | 0.61296 | 0.0542  | 0.04067 | 0.79487 | 0.2413 PLA2G2D        |
| cg14322224 | 0.84818 | 0.34398 | 0.07714 | 0.06904 | 0.33041 | 0.37591 | 0.39273 | 0.37241 | 0.05777 | 0.05753 DDAH1         |
| cg14323109 | 0.1841  | 0.04016 | 0.3303  | 0.53785 | 0.06456 | 0.04179 | 0.38261 | 0.43953 | 0.03562 | 0.02595 KDR           |
| cg14323928 | 0.80945 | 0.88003 | 0.88938 | 0.89468 | 0.89062 | 0.88814 | 0.85843 | 0.8795  | 0.87961 | 0.88511 TRPM1         |

|            |         |         |         |         |         |         |         |         |         |         |          |
|------------|---------|---------|---------|---------|---------|---------|---------|---------|---------|---------|----------|
| cg14324200 | 0.04303 | 0.02367 | 0.24252 | 0.14529 | 0.89101 | 0.64069 | 0.03108 | 0.03415 | 0.88921 | 0.73702 | SAMD11   |
| cg14324675 | 0.91642 | 0.56369 | 0.90101 | 0.92212 | 0.94224 | 0.89963 | 0.52226 | 0.7655  | 0.93305 | 0.86353 | LST1     |
| cg14324838 | 0.77404 | 0.18629 | 0.88505 | 0.90144 | 0.86629 | 0.71611 | 0.79241 | 0.80737 | 0.51239 | 0.44311 | EPB41L1  |
| cg14325649 | 0.05395 | 0.0588  | 0.07718 | 0.051   | 0.09432 | 0.0572  | 0.06379 | 0.05113 | 0.07099 | 0.05775 | RBMS1    |
| cg14329157 | 0.4419  | 0.09065 | 0.49072 | 0.57833 | 0.88293 | 0.67956 | 0.35917 | 0.58322 | 0.56641 | 0.48452 | WDR69    |
| cg14329976 | 0.04521 | 0.04744 | 0.0606  | 0.0485  | 0.03759 | 0.04296 | 0.06276 | 0.06381 | 0.04443 | 0.04322 | NEIL2    |
| cg14331163 | 0.22804 | 0.19043 | 0.17154 | 0.23955 | 0.33958 | 0.19844 | 0.16956 | 0.15166 | 0.12898 | 0.12503 | RORB     |
| cg14332079 | 0.02657 | 0.03011 | 0.0281  | 0.02999 | 0.02266 | 0.02553 | 0.02769 | 0.03316 | 0.02449 | 0.02219 | CDCA2    |
| cg14333454 | 0.77786 | 0.17665 | 0.7631  | 0.79734 | 0.73957 | 0.63819 | 0.68146 | 0.6341  | 0.75565 | 0.7239  | SFN      |
| cg14333565 | 0.82759 | 0.80561 | 0.60407 | 0.73323 | 0.68117 | 0.33233 | 0.0769  | 0.07158 | 0.11246 | 0.1997  | NRTN     |
| cg14334099 | 0.05035 | 0.0548  | 0.05986 | 0.05343 | 0.05323 | 0.06426 | 0.04356 | 0.06436 | 0.04519 | 0.0427  | PTPN12   |
| cg14336578 | 0.03857 | 0.04335 | 0.0515  | 0.03893 | 0.04737 | 0.03801 | 0.06224 | 0.05943 | 0.03388 | 0.03985 | LETM2    |
| cg14337900 | 0.04741 | 0.04993 | 0.04432 | 0.04912 | 0.03403 | 0.04289 | 0.0448  | 0.04609 | 0.04321 | 0.04258 | MYH9     |
| cg14338062 | 0.89854 | 0.83894 | 0.84396 | 0.88719 | 0.90023 | 0.8675  | 0.55656 | 0.85306 | 0.86571 | 0.83934 | ARHGAP9  |
| cg14338548 | 0.89147 | 0.86872 | 0.866   | 0.89711 | 0.90248 | 0.88909 | 0.61456 | 0.62038 | 0.84828 | 0.80287 | LALBA    |
| cg14338887 | 0.96961 | 0.97288 | 0.61686 | 0.78632 | 0.86964 | 0.72487 | 0.97686 | 0.98079 | 0.75705 | 0.83193 | GNMT     |
| cg14341030 | 0.03778 | 0.04167 | 0.05422 | 0.0565  | 0.05956 | 0.03739 | 0.04111 | 0.04729 | 0.04671 | 0.04804 | C12orf60 |
| cg14341418 | 0.90817 | 0.90821 | 0.90767 | 0.9111  | 0.92014 | 0.89018 | 0.91054 | 0.88672 | 0.92594 | 0.87184 | APOM     |
| cg14341579 | 0.02221 | 0.02462 | 0.0233  | 0.0217  | 0.02273 | 0.02867 | 0.02082 | 0.01986 | 0.01771 | 0.01788 | IRS2     |
| cg14343062 | 0.42543 | 0.08231 | 0.08579 | 0.13464 | 0.11723 | 0.10451 | 0.16556 | 0.07529 | 0.48647 | 0.03942 | ERCC6    |
| cg14343107 | 0.04606 | 0.03187 | 0.11279 | 0.04861 | 0.08326 | 0.02955 | 0.03133 | 0.113   | 0.03942 | 0.03237 | BUB1B    |
| cg14343711 | 0.0488  | 0.03816 | 0.0456  | 0.04272 | 0.04644 | 0.03163 | 0.03825 | 0.03413 | 0.04331 | 0.02735 | FAF1     |
| cg14345281 | 0.0386  | 0.03762 | 0.04369 | 0.04166 | 0.01826 | 0.03212 | 0.42273 | 0.52705 | 0.03994 | 0.03511 | NHS      |
| cg14345676 | 0.22557 | 0.1146  | 0.83494 | 0.85741 | 0.71118 | 0.1184  | 0.39764 | 0.10589 | 0.82913 | 0.12998 | HRH2     |
| cg14345882 | 0.25152 | 0.59635 | 0.29789 | 0.2588  | 0.18283 | 0.16005 | 0.1011  | 0.19493 | 0.05829 | 0.05019 | BTN3A2   |
| cg14346035 | 0.04403 | 0.04764 | 0.06262 | 0.06124 | 0.21098 | 0.03719 | 0.06932 | 0.04323 | 0.0427  | 0.03333 | PPM2C    |
| cg14346048 | 0.50348 | 0.62388 | 0.65808 | 0.86468 | 0.41738 | 0.37006 | 0.36073 | 0.51546 | 0.21718 | 0.49707 | TMEM47   |
| cg14348532 | 0.15843 | 0.12192 | 0.28919 | 0.27617 | 0.69987 | 0.92152 | 0.17115 | 0.11106 | 0.11032 | 0.09587 | CALCA    |
| cg14349467 | 0.32345 | 0.30189 | 0.34296 | 0.35548 | 0.29708 | 0.38013 | 0.35902 | 0.41351 | 0.31571 | 0.28139 | PEBP1    |
| cg14350002 | 0.04866 | 0.04746 | 0.04896 | 0.05171 | 0.03705 | 0.03936 | 0.03888 | 0.04324 | 0.04056 | 0.03231 | GAS1     |
| cg14353162 | 0.04847 | 0.04517 | 0.0554  | 0.04993 | 0.05839 | 0.06196 | 0.03865 | 0.03876 | 0.04107 | 0.04816 | TMEM55B  |
| cg14353201 | 0.46563 | 0.36224 | 0.29408 | 0.38347 | 0.36591 | 0.28418 | 0.31065 | 0.23844 | 0.28849 | 0.20592 | ALDH3B2  |
| cg14353516 | 0.14237 | 0.1247  | 0.13349 | 0.13162 | 0.08251 | 0.11043 | 0.11592 | 0.11112 | 0.12057 | 0.09961 | HDLBP    |
| cg14354749 | 0.0746  | 0.06951 | 0.0725  | 0.06746 | 0.05876 | 0.05428 | 0.03493 | 0.0476  | 0.08269 | 0.0802  | EIF1AX   |
| cg14356114 | 0.90527 | 0.92283 | 0.91674 | 0.92674 | 0.92695 | 0.91244 | 0.86706 | 0.69594 | 0.91399 | 0.90878 | PAGE4    |
| cg14356550 | 0.62402 | 0.36074 | 0.34159 | 0.46707 | 0.68315 | 0.6104  | 0.28004 | 0.2481  | 0.07257 | 0.06908 | KLHDC7A  |
| cg14356946 | 0.14593 | 0.13453 | 0.15102 | 0.1438  | 0.25702 | 0.18119 | 0.14066 | 0.10556 | 0.10682 | 0.1085  | EIF2S2   |
| cg14358502 | 0.07338 | 0.06882 | 0.0779  | 0.07609 | 0.11316 | 0.09615 | 0.06066 | 0.05105 | 0.06683 | 0.05826 | NAT6     |
| cg14358709 | 0.02542 | 0.0255  | 0.02694 | 0.02455 | 0.01732 | 0.02635 | 0.02648 | 0.02088 | 0.0232  | 0.02098 | RNF19    |
| cg14358743 | 0.88773 | 0.46591 | 0.8767  | 0.88627 | 0.86381 | 0.84147 | 0.89944 | 0.86398 | 0.90447 | 0.86414 | GAS6     |
| cg14360897 | 0.08072 | 0.08422 | 0.08575 | 0.07793 | 0.07233 | 0.08594 | 0.0724  | 0.0722  | 0.07308 | 0.06899 | RNF167   |

|            |         |         |         |         |         |         |         |         |         |                   |
|------------|---------|---------|---------|---------|---------|---------|---------|---------|---------|-------------------|
| cg14360917 | 0.4567  | 0.43545 | 0.52994 | 0.53845 | 0.80941 | 0.79808 | 0.6838  | 0.69541 | 0.31245 | 0.29326 SP2       |
| cg14363494 | 0.04565 | 0.04238 | 0.03823 | 0.04375 | 0.03051 | 0.02665 | 0.04023 | 0.04929 | 0.02765 | 0.02227 RING1     |
| cg14364739 | 0.02987 | 0.03269 | 0.02994 | 0.02964 | 0.02576 | 0.0299  | 0.02954 | 0.03265 | 0.02703 | 0.02526 NOSIP     |
| cg14365123 | 0.49091 | 0.31693 | 0.87532 | 0.90858 | 0.96988 | 0.96244 | 0.43483 | 0.81692 | 0.54728 | 0.4808 ARPM2      |
| cg14366490 | 0.43309 | 0.23552 | 0.19168 | 0.36258 | 0.22724 | 0.34471 | 0.72427 | 0.50421 | 0.22542 | 0.14028 TXNL6     |
| cg14366598 | 0.39733 | 0.10541 | 0.17329 | 0.29628 | 0.27026 | 0.17104 | 0.06891 | 0.06205 | 0.07343 | 0.10788 IL17E     |
| cg14367014 | 0.68168 | 0.74769 | 0.30575 | 0.48369 | 0.27333 | 0.20534 | 0.41921 | 0.44712 | 0.62449 | 0.62389 ALS2CR14  |
| cg14367344 | 0.02795 | 0.0302  | 0.0302  | 0.02278 | 0.02358 | 0.0248  | 0.02268 | 0.0238  | 0.02205 | 0.02296 PRKAB2    |
| cg14368286 | 0.06369 | 0.06288 | 0.19865 | 0.22281 | 0.33795 | 0.0647  | 0.18373 | 0.3827  | 0.04233 | 0.04116 PRAF2     |
| cg14370448 | 0.07357 | 0.04815 | 0.50865 | 0.63013 | 0.88349 | 0.50602 | 0.74448 | 0.27984 | 0.89196 | 0.20349 TBX6      |
| cg14371329 | 0.79228 | 0.57476 | 0.75706 | 0.75111 | 0.6875  | 0.76234 | 0.6267  | 0.68452 | 0.83006 | 0.74361 GNAL      |
| cg14371590 | 0.88368 | 0.64641 | 0.90144 | 0.90369 | 0.85138 | 0.79378 | 0.76505 | 0.67957 | 0.88662 | 0.74669 SLC26A10  |
| cg14372394 | 0.09517 | 0.10453 | 0.11819 | 0.12466 | 0.19711 | 0.13395 | 0.08139 | 0.06761 | 0.11317 | 0.10527 CHST10    |
| cg14372520 | 0.1249  | 0.17875 | 0.64071 | 0.55228 | 0.56871 | 0.39062 | 0.20861 | 0.08542 | 0.37803 | 0.1051 EDA2R      |
| cg14374842 | 0.32093 | 0.28553 | 0.29969 | 0.37953 | 0.12443 | 0.08902 | 0.24156 | 0.35789 | 0.06756 | 0.05505 ACTR5     |
| cg14375111 | 0.62551 | 0.06476 | 0.78012 | 0.8476  | 0.25562 | 0.05218 | 0.89091 | 0.29558 | 0.94181 | 0.32201 TMEM43    |
| cg14376424 | 0.84475 | 0.65051 | 0.87745 | 0.92941 | 0.85934 | 0.88079 | 0.90743 | 0.923   | 0.27663 | 0.25109 FAM71B    |
| cg14377370 | 0.01981 | 0.01778 | 0.02025 | 0.01936 | 0.01817 | 0.01972 | 0.0157  | 0.01536 | 0.01512 | 0.01488 FLJ20280  |
| cg14377593 | 0.10285 | 0.04218 | 0.04085 | 0.04209 | 0.04432 | 0.03516 | 0.06767 | 0.05803 | 0.04768 | 0.04009 TFPI2     |
| cg14377791 | 0.14445 | 0.15818 | 0.37892 | 0.50306 | 0.2011  | 0.1516  | 0.1532  | 0.11847 | 0.12474 | 0.11835 LOC400696 |
| cg14378057 | 0.72136 | 0.5595  | 0.73274 | 0.75271 | 0.63572 | 0.69724 | 0.71986 | 0.72861 | 0.76546 | 0.72499 KIAA0240  |
| cg14378480 | 0.78834 | 0.84617 | 0.841   | 0.83556 | 0.81735 | 0.84195 | 0.8401  | 0.87097 | 0.79741 | 0.81891 DNASE2B   |
| cg14379865 | 0.66042 | 0.82149 | 0.63269 | 0.76404 | 0.66087 | 0.72334 | 0.6778  | 0.77035 | 0.49007 | 0.4979 GRM5       |
| cg14380517 | 0.93025 | 0.78665 | 0.91861 | 0.94087 | 0.19972 | 0.02542 | 0.21933 | 0.02464 | 0.06867 | 0.0268 BTG3       |
| cg14383135 | 0.03699 | 0.03172 | 0.03157 | 0.02856 | 0.02874 | 0.02602 | 0.0528  | 0.19423 | 0.02319 | 0.02014 NPAS2     |
| cg14384532 | 0.0612  | 0.03343 | 0.64577 | 0.70988 | 0.22615 | 0.38468 | 0.05659 | 0.05065 | 0.20345 | 0.03049 NTRK3     |
| cg14384940 | 0.52225 | 0.50596 | 0.76005 | 0.7946  | 0.76121 | 0.74165 | 0.45112 | 0.45443 | 0.51027 | 0.48416 C21orf81  |
| cg14385738 | 0.8021  | 0.80482 | 0.35817 | 0.84711 | 0.8215  | 0.57597 | 0.07639 | 0.55291 | 0.08308 | 0.07251 PTPN22    |
| cg14386061 | 0.83063 | 0.7205  | 0.80543 | 0.834   | 0.8112  | 0.73396 | 0.69026 | 0.4703  | 0.84254 | 0.69208 DOK2      |
| cg14386312 | 0.59714 | 0.06251 | 0.47278 | 0.49388 | 0.51606 | 0.61942 | 0.56284 | 0.66903 | 0.62418 | 0.36222 ZNF544    |
| cg14386548 | 0.76165 | 0.64539 | 0.81995 | 0.82033 | 0.69917 | 0.72281 | 0.79238 | 0.78494 | 0.78424 | 0.73839 SLC25A20  |
| cg14386691 | 0.66262 | 0.10983 | 0.31099 | 0.51977 | 0.20584 | 0.06149 | 0.08305 | 0.05451 | 0.05606 | 0.04263 C14orf93  |
| cg14387505 | 0.33727 | 0.15916 | 0.26201 | 0.43987 | 0.46586 | 0.26212 | 0.28117 | 0.19476 | 0.13296 | 0.09612 ERAF      |
| cg14391622 | 0.8993  | 0.80229 | 0.91007 | 0.91107 | 0.92317 | 0.92556 | 0.85899 | 0.77144 | 0.91774 | 0.91515 SLC12A8   |
| cg14391855 | 0.77749 | 0.40464 | 0.06474 | 0.05871 | 0.08214 | 0.07729 | 0.07838 | 0.11669 | 0.05639 | 0.07033 RIN1      |
| cg14396117 | 0.73254 | 0.54207 | 0.33699 | 0.37107 | 0.68284 | 0.3927  | 0.32957 | 0.53809 | 0.07693 | 0.05979 MYR8      |
| cg14399060 | 0.88411 | 0.7497  | 0.79936 | 0.8882  | 0.86348 | 0.83681 | 0.89089 | 0.74236 | 0.89725 | 0.85068 HOXD4     |
| cg14399078 | 0.5639  | 0.51292 | 0.13221 | 0.06716 | 0.33998 | 0.44893 | 0.18426 | 0.02244 | 0.02139 | 0.02044 ADPRH     |
| cg14399447 | 0.08993 | 0.06097 | 0.11831 | 0.08758 | 0.05743 | 0.05103 | 0.05446 | 0.0447  | 0.03988 | 0.04096 PLA2G4C   |
| cg14399656 | 0.70042 | 0.61527 | 0.6767  | 0.68891 | 0.75065 | 0.64035 | 0.60025 | 0.61082 | 0.60375 | 0.54782 ZNF567    |
| cg14400118 | 0.06602 | 0.06003 | 0.06903 | 0.05988 | 0.04222 | 0.0542  | 0.05652 | 0.05604 | 0.05502 | 0.05894 MMP2      |

|            |         |         |         |         |         |         |         |         |         |         |           |
|------------|---------|---------|---------|---------|---------|---------|---------|---------|---------|---------|-----------|
| cg14400631 | 0.03544 | 0.04135 | 0.04654 | 0.05798 | 0.06641 | 0.04745 | 0.04068 | 0.03786 | 0.03565 | 0.03219 | PSMA1     |
| cg14401454 | 0.78423 | 0.8026  | 0.86218 | 0.88533 | 0.77477 | 0.79201 | 0.80382 | 0.647   | 0.83153 | 0.5756  | C14orf8   |
| cg14401592 | 0.44981 | 0.28977 | 0.56599 | 0.67936 | 0.61586 | 0.69523 | 0.50226 | 0.45064 | 0.36107 | 0.31494 | ACCN5     |
| cg14401837 | 0.85982 | 0.83096 | 0.65876 | 0.73173 | 0.69595 | 0.84414 | 0.178   | 0.16243 | 0.16054 | 0.20321 | GPR154    |
| cg14401897 | 0.89227 | 0.84411 | 0.91433 | 0.93156 | 0.91847 | 0.8785  | 0.90069 | 0.88115 | 0.88824 | 0.79495 | KIAA0963  |
| cg14402472 | 0.02652 | 0.03042 | 0.02476 | 0.02311 | 0.03912 | 0.03227 | 0.06105 | 0.23298 | 0.01666 | 0.01709 | HLA-F     |
| cg14404298 | 0.07072 | 0.05925 | 0.2355  | 0.22686 | 0.08855 | 0.08566 | 0.05894 | 0.06726 | 0.09649 | 0.04268 | CYP8B1    |
| cg14405589 | 0.02395 | 0.02724 | 0.02415 | 0.02488 | 0.02018 | 0.02515 | 0.02322 | 0.02282 | 0.01797 | 0.01906 | TUBGCP3   |
| cg14407437 | 0.21806 | 0.05749 | 0.43821 | 0.59337 | 0.58309 | 0.27794 | 0.27592 | 0.05924 | 0.2128  | 0.13111 | FABP3     |
| cg14407667 | 0.16774 | 0.06216 | 0.0778  | 0.08313 | 0.07795 | 0.0694  | 0.06081 | 0.04933 | 0.06466 | 0.05795 | EPS15     |
| cg14408969 | 0.05781 | 0.05053 | 0.04968 | 0.05203 | 0.04925 | 0.04982 | 0.05049 | 0.0554  | 0.05078 | 0.04462 | C8orf40   |
| cg14409083 | 0.79419 | 0.57786 | 0.07092 | 0.07643 | 0.08212 | 0.0489  | 0.06104 | 0.07651 | 0.06192 | 0.06735 | EMP1      |
| cg14409941 | 0.03899 | 0.02916 | 0.03649 | 0.03847 | 0.02758 | 0.02835 | 0.02901 | 0.03258 | 0.03136 | 0.02871 | ADAMTS2   |
| cg14409958 | 0.62138 | 0.56879 | 0.59644 | 0.69982 | 0.13418 | 0.16659 | 0.14568 | 0.10883 | 0.09809 | 0.11954 | ENPP2     |
| cg14414534 | 0.86114 | 0.43649 | 0.9225  | 0.93328 | 0.90964 | 0.8995  | 0.67183 | 0.56321 | 0.94824 | 0.88947 | TMOD1     |
| cg14414819 | 0.05523 | 0.05134 | 0.05536 | 0.05799 | 0.04238 | 0.04289 | 0.04865 | 0.05221 | 0.04734 | 0.04801 | C6orf128  |
| cg14415034 | 0.09914 | 0.09822 | 0.14765 | 0.13414 | 0.09788 | 0.1694  | 0.07877 | 0.09566 | 0.11658 | 0.08492 | SACM1L    |
| cg14415214 | 0.02427 | 0.02786 | 0.02566 | 0.02369 | 0.02735 | 0.0259  | 0.02035 | 0.02101 | 0.01828 | 0.01806 | PHLDA2    |
| cg14415300 | 0.40658 | 0.39058 | 0.03358 | 0.03198 | 0.2371  | 0.31845 | 0.04235 | 0.02785 | 0.36622 | 0.40656 | HIST2H2AA |
| cg14417329 | 0.95286 | 0.80322 | 0.04029 | 0.09272 | 0.7641  | 0.68081 | 0.88279 | 0.75449 | 0.97147 | 0.94583 | SLC16A3   |
| cg14419187 | 0.08396 | 0.05034 | 0.96298 | 0.96094 | 0.11667 | 0.07909 | 0.08098 | 0.04335 | 0.70275 | 0.07385 | C2orf21   |
| cg14423778 | 0.68345 | 0.71739 | 0.46435 | 0.36443 | 0.22119 | 0.14621 | 0.61449 | 0.27345 | 0.54312 | 0.52809 | MBNL1     |
| cg14424111 | 0.04384 | 0.03787 | 0.04357 | 0.04798 | 0.03498 | 0.04222 | 0.06003 | 0.05504 | 0.03035 | 0.02869 | C20orf77  |
| cg14424530 | 0.04209 | 0.04234 | 0.04721 | 0.04459 | 0.03888 | 0.0445  | 0.03678 | 0.03228 | 0.03718 | 0.03625 | SLC7A1    |
| cg14424579 | 0.03471 | 0.03793 | 0.039   | 0.03787 | 0.03622 | 0.03676 | 0.03006 | 0.03352 | 0.031   | 0.02992 | FLJ21839  |
| cg14425294 | 0.82175 | 0.31814 | 0.89777 | 0.90654 | 0.53085 | 0.73416 | 0.04216 | 0.04314 | 0.54549 | 0.214   | GUCY2D    |
| cg14426525 | 0.12091 | 0.02697 | 0.02795 | 0.02773 | 0.02336 | 0.02758 | 0.02264 | 0.02108 | 0.02025 | 0.02172 | SMPDL3A   |
| cg14426682 | 0.84623 | 0.82611 | 0.86384 | 0.84488 | 0.79967 | 0.80291 | 0.79661 | 0.75627 | 0.71009 | 0.7637  | MORF4L1   |
| cg14427173 | 0.10349 | 0.10246 | 0.14611 | 0.10802 | 0.15304 | 0.16568 | 0.08948 | 0.10639 | 0.08816 | 0.09118 | RINT-1    |
| cg14430111 | 0.02996 | 0.02857 | 0.03586 | 0.03243 | 0.91391 | 0.92351 | 0.03981 | 0.03687 | 0.47984 | 0.40834 | TM7SF2    |
| cg14430151 | 0.9347  | 0.94177 | 0.90437 | 0.91966 | 0.92816 | 0.90523 | 0.93236 | 0.94237 | 0.94411 | 0.94913 | FLJ35725  |
| cg14433673 | 0.0447  | 0.02172 | 0.02177 | 0.02098 | 0.01891 | 0.02014 | 0.33309 | 0.01718 | 0.01439 | 0.01151 | UCP2      |
| cg14434255 | 0.06914 | 0.06579 | 0.07145 | 0.06849 | 0.11749 | 0.05873 | 0.06713 | 0.05596 | 0.07419 | 0.05203 | ENTPD7    |
| cg14435640 | 0.0318  | 0.03116 | 0.03807 | 0.03064 | 0.02605 | 0.03174 | 0.0342  | 0.04152 | 0.02759 | 0.02635 | AGPAT6    |
| cg14435807 | 0.03298 | 0.02833 | 0.03129 | 0.02628 | 0.0221  | 0.02685 | 0.03369 | 0.03503 | 0.89246 | 0.5773  | LOXL1     |
| cg14436426 | 0.88714 | 0.66019 | 0.88425 | 0.88294 | 0.89756 | 0.87317 | 0.87803 | 0.87266 | 0.89879 | 0.87712 | OPRL1     |
| cg14436761 | 0.13512 | 0.06133 | 0.94034 | 0.95008 | 0.48621 | 0.45095 | 0.11977 | 0.0649  | 0.12007 | 0.0422  | RAMP2     |
| cg14437986 | 0.44786 | 0.32646 | 0.53407 | 0.67311 | 0.60942 | 0.52585 | 0.51041 | 0.36616 | 0.50711 | 0.24991 | C6orf25   |
| cg14438174 | 0.04521 | 0.04798 | 0.05204 | 0.05952 | 0.10576 | 0.05988 | 0.07143 | 0.05196 | 0.0393  | 0.04475 | DVL2      |
| cg14439353 | 0.04205 | 0.03331 | 0.03798 | 0.03359 | 0.02884 | 0.03079 | 0.5589  | 0.55338 | 0.03201 | 0.02716 | EEF1E1    |
| cg14440664 | 0.63339 | 0.19525 | 0.06768 | 0.07079 | 0.16328 | 0.17397 | 0.08239 | 0.18526 | 0.05474 | 0.07275 | PDCD1LG2  |



|            |         |         |         |         |         |         |         |         |         |                  |
|------------|---------|---------|---------|---------|---------|---------|---------|---------|---------|------------------|
| cg14440934 | 0.44669 | 0.19285 | 0.30963 | 0.42149 | 0.33896 | 0.32558 | 0.22884 | 0.19633 | 0.43538 | 0.21304 ZDHC1    |
| cg14443380 | 0.03271 | 0.03148 | 0.0296  | 0.02936 | 0.0272  | 0.02667 | 0.03101 | 0.02985 | 0.02393 | 0.02273 SEMA7A   |
| cg14444244 | 0.78958 | 0.80649 | 0.77778 | 0.79335 | 0.74842 | 0.77326 | 0.73886 | 0.79202 | 0.78721 | 0.76768 FLJ13096 |
| cg14444710 | 0.2821  | 0.11642 | 0.13788 | 0.17433 | 0.3074  | 0.10823 | 0.22449 | 0.14992 | 0.08788 | 0.08128 PDPK1    |
| cg14445076 | 0.18724 | 0.17521 | 0.33358 | 0.41941 | 0.24948 | 0.13923 | 0.19787 | 0.14941 | 0.14591 | 0.13418 DHH      |
| cg14445437 | 0.02656 | 0.02579 | 0.03355 | 0.02523 | 0.03833 | 0.03215 | 0.02512 | 0.02377 | 0.0362  | 0.02313 PIGS     |
| cg14446712 | 0.50919 | 0.24214 | 0.09217 | 0.0572  | 0.10905 | 0.09033 | 0.25497 | 0.12975 | 0.29243 | 0.20021 SDPR     |
| cg14446808 | 0.09355 | 0.09896 | 0.09539 | 0.09065 | 0.05079 | 0.08241 | 0.08573 | 0.09542 | 0.08625 | 0.08084 MGAT4B   |
| cg14448104 | 0.87082 | 0.27787 | 0.90773 | 0.93639 | 0.91743 | 0.91963 | 0.91317 | 0.63929 | 0.7735  | 0.49348 MATN4    |
| cg14448116 | 0.35737 | 0.20842 | 0.74432 | 0.90915 | 0.88199 | 0.06158 | 0.72881 | 0.85845 | 0.81811 | 0.05875 ADAMTS4  |
| cg14448145 | 0.35115 | 0.28122 | 0.51696 | 0.50108 | 0.6894  | 0.75009 | 0.4332  | 0.51589 | 0.21072 | 0.19671 DNAJC5   |
| cg14448864 | 0.03471 | 0.03613 | 0.03372 | 0.03467 | 0.03215 | 0.03596 | 0.02614 | 0.02952 | 0.02888 | 0.026 NAT6       |
| cg14449051 | 0.03509 | 0.36504 | 0.90426 | 0.91167 | 0.03195 | 0.03382 | 0.02974 | 0.03714 | 0.03194 | 0.02806 SLC6A15  |
| cg14449575 | 0.52607 | 0.40583 | 0.88408 | 0.87841 | 0.90053 | 0.77815 | 0.56246 | 0.59158 | 0.87972 | 0.8361 HAPLN4    |
| cg14450506 | 0.73884 | 0.73306 | 0.79048 | 0.87711 | 0.87381 | 0.80872 | 0.71792 | 0.53367 | 0.87963 | 0.83534 DDX56    |
| cg14450605 | 0.18738 | 0.08336 | 0.08983 | 0.06511 | 0.08219 | 0.07442 | 0.06333 | 0.05588 | 0.05481 | 0.05704 NCOA4    |
| cg14451276 | 0.22439 | 0.20951 | 0.45461 | 0.36942 | 0.46375 | 0.6183  | 0.66859 | 0.68309 | 0.41699 | 0.30523 AOA4     |
| cg14452140 | 0.03717 | 0.03532 | 0.06771 | 0.21628 | 0.03894 | 0.03832 | 0.03779 | 0.03435 | 0.03702 | 0.03517 SEC14L2  |
| cg14452392 | 0.04922 | 0.0556  | 0.05295 | 0.04762 | 0.04291 | 0.05088 | 0.04989 | 0.05357 | 0.03615 | 0.03742 CCNH     |
| cg14452789 | 0.01948 | 0.02172 | 0.02035 | 0.01834 | 0.01499 | 0.01815 | 0.01499 | 0.01563 | 0.01503 | 0.01636 GMCL1    |
| cg14452875 | 0.03545 | 0.03888 | 0.03858 | 0.03676 | 0.02928 | 0.03343 | 0.03403 | 0.03756 | 0.03311 | 0.02801 NR1D2    |
| cg14453641 | 0.522   | 0.04564 | 0.08031 | 0.05056 | 0.05849 | 0.04863 | 0.03864 | 0.03516 | 0.05364 | 0.0427 AGL       |
| cg14454278 | 0.04483 | 0.04499 | 0.0384  | 0.03506 | 0.04114 | 0.03942 | 0.03666 | 0.03774 | 0.03232 | 0.03742 TDP1     |
| cg14455307 | 0.01797 | 0.02637 | 0.02603 | 0.02599 | 0.01607 | 0.02084 | 0.02442 | 0.02193 | 0.01967 | 0.02079 BCL2     |
| cg14455487 | 0.15305 | 0.15782 | 0.16    | 0.15131 | 0.14061 | 0.15202 | 0.1587  | 0.16028 | 0.15037 | 0.121 FOXJ3      |
| cg14455991 | 0.55769 | 0.26545 | 0.53226 | 0.62188 | 0.33453 | 0.48981 | 0.14127 | 0.15817 | 0.21597 | 0.20195 GPR82    |
| cg14456683 | 0.26415 | 0.33763 | 0.83194 | 0.85649 | 0.05095 | 0.05064 | 0.04383 | 0.04277 | 0.82325 | 0.83366 ZIC1     |
| cg14457691 | 0.54474 | 0.19602 | 0.14879 | 0.27461 | 0.56644 | 0.53234 | 0.04928 | 0.04768 | 0.82147 | 0.56187 ARMCX4   |
| cg14458615 | 0.24025 | 0.25548 | 0.74556 | 0.78593 | 0.65366 | 0.72023 | 0.61598 | 0.28441 | 0.24834 | 0.1375 IGSF11    |
| cg14458731 | 0.72991 | 0.20839 | 0.71558 | 0.77911 | 0.56092 | 0.37316 | 0.56319 | 0.43675 | 0.80826 | 0.52327 COQ4     |
| cg14458834 | 0.05901 | 0.05365 | 0.06209 | 0.07224 | 0.12416 | 0.13853 | 0.26576 | 0.09841 | 0.06019 | 0.05303 HOXB4    |
| cg14460735 | 0.12175 | 0.10788 | 0.14242 | 0.13519 | 0.38166 | 0.15135 | 0.67289 | 0.6974  | 0.16397 | 0.1452 C1orf71   |
| cg14461963 | 0.04227 | 0.04076 | 0.04473 | 0.04515 | 0.02523 | 0.04062 | 0.03735 | 0.03555 | 0.03211 | 0.03586 DHTKD1   |
| cg14462626 | 0.03235 | 0.03878 | 0.03765 | 0.03093 | 0.03399 | 0.04299 | 0.0376  | 0.04924 | 0.03486 | 0.03778 MRLC2    |
| cg14462830 | 0.76285 | 0.34487 | 0.32763 | 0.2744  | 0.49819 | 0.58851 | 0.68623 | 0.7008  | 0.19956 | 0.26226 TRDN     |
| cg14463304 | 0.22819 | 0.1224  | 0.16118 | 0.23193 | 0.58782 | 0.41068 | 0.28951 | 0.17612 | 0.15137 | 0.14042 DDX47    |
| cg14464791 | 0.0941  | 0.08657 | 0.15473 | 0.10131 | 0.16854 | 0.10451 | 0.11672 | 0.10839 | 0.09499 | 0.06268 DDX6     |
| cg14465910 | 0.03144 | 0.04064 | 0.03821 | 0.03887 | 0.02848 | 0.53151 | 0.03053 | 0.03059 | 0.03166 | 0.0287 GTPBP2    |
| cg14467840 | 0.89991 | 0.81522 | 0.89194 | 0.90522 | 0.94281 | 0.57584 | 0.90275 | 0.55587 | 0.92502 | 0.8351 S100A1    |
| cg14469290 | 0.82791 | 0.8449  | 0.80129 | 0.80941 | 0.78245 | 0.80032 | 0.78161 | 0.81043 | 0.84639 | 0.83295 ALAD     |
| cg14470209 | 0.03607 | 0.03401 | 0.03347 | 0.03115 | 0.02608 | 0.02961 | 0.02805 | 0.0302  | 0.02764 | 0.02981 ACAD9    |

|            |         |         |         |         |         |         |         |         |         |         |          |
|------------|---------|---------|---------|---------|---------|---------|---------|---------|---------|---------|----------|
| cg14471560 | 0.03243 | 0.03406 | 0.04103 | 0.03084 | 0.02723 | 0.03242 | 0.02763 | 0.03578 | 0.03229 | 0.02742 | UNC50    |
| cg14471615 | 0.03269 | 0.03629 | 0.03715 | 0.03549 | 0.02432 | 0.03312 | 0.03659 | 0.03561 | 0.0347  | 0.0247  | LRRCS4   |
| cg14472601 | 0.57893 | 0.0615  | 0.5014  | 0.75522 | 0.84732 | 0.8034  | 0.25233 | 0.08451 | 0.51606 | 0.16255 | SCGB3A1  |
| cg14472778 | 0.72058 | 0.61889 | 0.26428 | 0.2372  | 0.59646 | 0.57078 | 0.67104 | 0.67975 | 0.64101 | 0.6072  | MTHFR    |
| cg14473016 | 0.09018 | 0.02992 | 0.20786 | 0.4348  | 0.69745 | 0.67449 | 0.10024 | 0.02814 | 0.08399 | 0.03178 | RASD2    |
| cg14473123 | 0.06895 | 0.06826 | 0.07847 | 0.07679 | 0.05933 | 0.06754 | 0.1552  | 0.40512 | 0.06576 | 0.06574 | UBE2V2   |
| cg14473145 | 0.86441 | 0.843   | 0.87392 | 0.87945 | 0.88804 | 0.83553 | 0.72451 | 0.86848 | 0.41358 | 0.44354 | CLEC14A  |
| cg14473924 | 0.08411 | 0.12254 | 0.4857  | 0.5716  | 0.09297 | 0.09582 | 0.14076 | 0.0995  | 0.06475 | 0.06024 | PDZRN3   |
| cg14474880 | 0.07957 | 0.08663 | 0.11808 | 0.08864 | 0.13908 | 0.09652 | 0.05323 | 0.05322 | 0.10019 | 0.09787 | MTF2     |
| cg14477619 | 0.66265 | 0.41213 | 0.76208 | 0.8538  | 0.90763 | 0.88208 | 0.50263 | 0.54713 | 0.81678 | 0.65705 | NPC1L1   |
| cg14479329 | 0.20452 | 0.21106 | 0.28788 | 0.41627 | 0.51177 | 0.21677 | 0.14936 | 0.13843 | 0.28168 | 0.27196 | RNASET2  |
| cg14480463 | 0.06284 | 0.04363 | 0.10558 | 0.05621 | 0.13217 | 0.2201  | 0.08979 | 0.05546 | 0.15257 | 0.19507 | INT1     |
| cg14481222 | 0.13419 | 0.11141 | 0.09726 | 0.08504 | 0.16878 | 0.12063 | 0.12503 | 0.10948 | 0.09553 | 0.08605 | BIRC3    |
| cg14481339 | 0.82354 | 0.84911 | 0.80778 | 0.8504  | 0.7655  | 0.82408 | 0.68212 | 0.57305 | 0.57703 | 0.79004 | KCNJ1    |
| cg14482322 | 0.05921 | 0.04523 | 0.05452 | 0.05806 | 0.05466 | 0.05222 | 0.03387 | 0.05483 | 0.04696 | 0.05818 | TARSL2   |
| cg14483391 | 0.79297 | 0.41249 | 0.83068 | 0.85557 | 0.7877  | 0.77506 | 0.11737 | 0.17072 | 0.35692 | 0.3577  | HTR3D    |
| cg14489649 | 0.0989  | 0.10006 | 0.09968 | 0.09683 | 0.0564  | 0.08972 | 0.08398 | 0.0918  | 0.09626 | 0.07682 | KLHL11   |
| cg14489884 | 0.03458 | 0.03733 | 0.03575 | 0.03622 | 0.03459 | 0.03798 | 0.03337 | 0.03357 | 0.02885 | 0.03048 | MRFAP1L1 |
| cg14490250 | 0.04829 | 0.05448 | 0.05771 | 0.05344 | 0.0422  | 0.05248 | 0.05661 | 0.0521  | 0.04184 | 0.04639 | FAM96A   |
| cg14492347 | 0.05083 | 0.03977 | 0.04494 | 0.04348 | 0.02802 | 0.03971 | 0.03898 | 0.03843 | 0.0413  | 0.03875 | ZNF592   |
| cg14493899 | 0.87682 | 0.87676 | 0.88145 | 0.87609 | 0.91321 | 0.89278 | 0.86054 | 0.87482 | 0.90426 | 0.89181 | TAP2     |
| cg14494313 | 0.84016 | 0.83123 | 0.77783 | 0.83213 | 0.7988  | 0.85318 | 0.7688  | 0.77698 | 0.82297 | 0.78429 | NAT2     |
| cg14494596 | 0.51383 | 0.29994 | 0.50968 | 0.64608 | 0.10798 | 0.05826 | 0.19764 | 0.07645 | 0.06381 | 0.06077 | SCOTIN   |
| cg14494812 | 0.88518 | 0.84001 | 0.88143 | 0.9111  | 0.78899 | 0.83968 | 0.83045 | 0.70091 | 0.90002 | 0.83629 | TOB1     |
| cg14495243 | 0.06149 | 0.05749 | 0.06752 | 0.06039 | 0.05139 | 0.05838 | 0.06268 | 0.0542  | 0.05612 | 0.04993 | CCDC59   |
| cg14496375 | 0.83237 | 0.84238 | 0.7239  | 0.78692 | 0.67746 | 0.41143 | 0.86497 | 0.8584  | 0.86784 | 0.70823 | MGC33839 |
| cg14498423 | 0.60596 | 0.40019 | 0.81259 | 0.89951 | 0.92649 | 0.90194 | 0.15149 | 0.12225 | 0.89676 | 0.80653 | CLSTN2   |
| cg14499797 | 0.10344 | 0.08271 | 0.10724 | 0.10116 | 0.1002  | 0.09663 | 0.08845 | 0.09014 | 0.09769 | 0.07236 | SOX4     |
| cg14500718 | 0.32856 | 0.05052 | 0.12382 | 0.41757 | 0.17423 | 0.04197 | 0.0653  | 0.04789 | 0.37052 | 0.04009 | TMEM79   |
| cg14501253 | 0.03446 | 0.03605 | 0.07249 | 0.06023 | 0.05202 | 0.05185 | 0.05907 | 0.05413 | 0.28267 | 0.04139 | FLJ36980 |
| cg14502651 | 0.88155 | 0.86927 | 0.79599 | 0.85332 | 0.78652 | 0.8495  | 0.84682 | 0.80447 | 0.85022 | 0.82756 | PRH2     |
| cg14506552 | 0.07003 | 0.02985 | 0.03609 | 0.02919 | 0.23783 | 0.45472 | 0.55973 | 0.54431 | 0.28263 | 0.19695 | NPPB     |
| cg14506668 | 0.10169 | 0.09128 | 0.19445 | 0.40694 | 0.76396 | 0.08028 | 0.28285 | 0.31028 | 0.07957 | 0.16032 | FHL1     |
| cg14507042 | 0.03981 | 0.04366 | 0.04432 | 0.04507 | 0.02964 | 0.04077 | 0.04013 | 0.03978 | 0.03813 | 0.03568 | TRAF2    |
| cg14509125 | 0.04008 | 0.03865 | 0.03988 | 0.03544 | 0.03452 | 0.03537 | 0.03098 | 0.03908 | 0.0307  | 0.02645 | FLJ20512 |
| cg14511156 | 0.63464 | 0.25679 | 0.71019 | 0.843   | 0.52125 | 0.45488 | 0.09476 | 0.06069 | 0.05204 | 0.08705 | OSCAR    |
| cg14512008 | 0.10532 | 0.08937 | 0.07675 | 0.07405 | 0.12851 | 0.11035 | 0.45288 | 0.48746 | 0.08277 | 0.11462 | PPP2R5C  |
| cg14513226 | 0.03607 | 0.03922 | 0.05018 | 0.0456  | 0.03388 | 0.03379 | 0.03977 | 0.03092 | 0.04098 | 0.0371  | LPGAT1   |
| cg14514226 | 0.04179 | 0.04401 | 0.0555  | 0.05441 | 0.07792 | 0.04119 | 0.04948 | 0.04174 | 0.04605 | 0.03938 | TMCC2    |
| cg14515483 | 0.02403 | 0.02344 | 0.02991 | 0.03041 | 0.02427 | 0.02307 | 0.02113 | 0.01983 | 0.02763 | 0.01865 | SOD2     |
| cg14517922 | 0.86544 | 0.71581 | 0.8852  | 0.88911 | 0.9066  | 0.88834 | 0.87376 | 0.88778 | 0.89442 | 0.87981 |          |

|            |         |         |         |         |         |         |         |         |         |         |               |
|------------|---------|---------|---------|---------|---------|---------|---------|---------|---------|---------|---------------|
| cg14519000 | 0.85886 | 0.48934 | 0.84341 | 0.88288 | 0.92374 | 0.89947 | 0.59326 | 0.48376 | 0.75954 | 0.5729  | GATA5         |
| cg14519036 | 0.02928 | 0.03422 | 0.0327  | 0.02697 | 0.02542 | 0.02713 | 0.02662 | 0.02561 | 0.02277 | 0.02873 | TNKS2         |
| cg14519134 | 0.84192 | 0.87063 | 0.8662  | 0.89498 | 0.9256  | 0.89576 | 0.87381 | 0.89751 | 0.6352  | 0.54073 | H1FOO         |
| cg14519350 | 0.96095 | 0.49814 | 0.97342 | 0.97439 | 0.97965 | 0.96656 | 0.96441 | 0.94762 | 0.97269 | 0.85017 | OSM           |
| cg14519515 | 0.57159 | 0.20411 | 0.70512 | 0.75059 | 0.54832 | 0.17197 | 0.47449 | 0.21276 | 0.74485 | 0.15988 | ADRBK1        |
| cg14519525 | 0.0415  | 0.04451 | 0.05958 | 0.04971 | 0.0618  | 0.05222 | 0.05103 | 0.04554 | 0.04238 | 0.03315 | GANAB         |
| cg14520448 | 0.03699 | 0.04272 | 0.03775 | 0.03034 | 0.03347 | 0.03342 | 0.28313 | 0.19094 | 0.02747 | 0.02782 | PQBP1         |
| cg14520511 | 0.04202 | 0.04942 | 0.05813 | 0.04843 | 0.07578 | 0.07745 | 0.0447  | 0.03932 | 0.03544 | 0.02876 | KRIT1         |
| cg14520892 | 0.05867 | 0.05689 | 0.0436  | 0.05719 | 0.0503  | 0.04655 | 0.5971  | 0.0389  | 0.0422  | 0.03994 | POLA          |
| cg14521746 | 0.09669 | 0.0701  | 0.2389  | 0.20448 | 0.0734  | 0.07273 | 0.08721 | 0.07122 | 0.06554 | 0.05226 | PAK1          |
| cg14522549 | 0.06361 | 0.05282 | 0.05063 | 0.05332 | 0.03329 | 0.04618 | 0.04219 | 0.05151 | 0.04737 | 0.05105 | PDXK          |
| cg14523284 | 0.80664 | 0.71157 | 0.86277 | 0.88064 | 0.90004 | 0.88511 | 0.86841 | 0.87374 | 0.88461 | 0.84707 | IL13          |
| cg14526843 | 0.07716 | 0.08366 | 0.0725  | 0.08477 | 0.06218 | 0.04922 | 0.0515  | 0.06006 | 0.05627 | 0.05965 | KPNA1         |
| cg14527441 | 0.0311  | 0.03495 | 0.04508 | 0.04227 | 0.33862 | 0.32198 | 0.04004 | 0.0246  | 0.04096 | 0.02801 | KHK           |
| cg14527802 | 0.04474 | 0.05442 | 0.0627  | 0.06034 | 0.07417 | 0.05397 | 0.0458  | 0.04091 | 0.04589 | 0.0438  | TNFAIP3       |
| cg14528319 | 0.42246 | 0.10021 | 0.96694 | 0.95999 | 0.95607 | 0.89721 | 0.92142 | 0.5581  | 0.65455 | 0.37661 | GIPC1         |
| cg14529146 | 0.11268 | 0.04189 | 0.07012 | 0.0588  | 0.08565 | 0.06584 | 0.07945 | 0.05076 | 0.04644 | 0.06015 | SC65          |
| cg14530801 | 0.03098 | 0.0323  | 0.04233 | 0.03213 | 0.04136 | 0.03969 | 0.02921 | 0.03025 | 0.03299 | 0.02865 | STX18         |
| cg14532417 | 0.51973 | 0.42433 | 0.55504 | 0.62425 | 0.7582  | 0.74873 | 0.39458 | 0.43839 | 0.56022 | 0.50106 | TBC1D3        |
| cg14532519 | 0.84881 | 0.85805 | 0.85755 | 0.85429 | 0.85663 | 0.54701 | 0.83861 | 0.70274 | 0.85901 | 0.77548 | TCF20         |
| cg14532644 | 0.05028 | 0.05614 | 0.07094 | 0.06109 | 0.06963 | 0.0839  | 0.05532 | 0.05601 | 0.05583 | 0.05292 | FECH          |
| cg14533138 | 0.4159  | 0.38369 | 0.85177 | 0.8972  | 0.78831 | 0.72206 | 0.06606 | 0.06552 | 0.69412 | 0.29723 | KRTHA3B       |
| cg14534464 | 0.12079 | 0.04544 | 0.06275 | 0.06838 | 0.08145 | 0.047   | 0.06158 | 0.04816 | 0.05011 | 0.04159 | NFE2L3        |
| cg14534967 | 0.02245 | 0.02288 | 0.02494 | 0.02021 | 0.01458 | 0.02138 | 0.02355 | 0.02051 | 0.0184  | 0.02018 | ABHD11        |
| cg14535518 | 0.6401  | 0.14382 | 0.21513 | 0.30574 | 0.26832 | 0.19042 | 0.12705 | 0.11209 | 0.32903 | 0.15919 | MAG           |
| cg14538332 | 0.06955 | 0.07311 | 0.06252 | 0.05537 | 0.06222 | 0.06437 | 0.05686 | 0.06019 | 0.0639  | 0.05833 | SDC2          |
| cg14539231 | 0.03028 | 0.05595 | 0.03647 | 0.03286 | 0.02637 | 0.03352 | 0.02386 | 0.02636 | 0.02531 | 0.0224  | EPST11        |
| cg14540150 | 0.02898 | 0.03243 | 0.03026 | 0.02651 | 0.0241  | 0.03366 | 0.02577 | 0.02889 | 0.02482 | 0.02573 | CTBP2         |
| cg14540297 | 0.06692 | 0.05465 | 0.05684 | 0.06916 | 0.05626 | 0.05649 | 0.04095 | 0.0405  | 0.09662 | 0.05769 | LOC339524     |
| cg14541311 | 0.85172 | 0.13593 | 0.86794 | 0.92228 | 0.9558  | 0.91381 | 0.20718 | 0.11096 | 0.1222  | 0.09572 | MYH6          |
| cg14541939 | 0.04428 | 0.04296 | 0.04495 | 0.04272 | 0.03474 | 0.04013 | 0.49215 | 0.48953 | 0.03951 | 0.0399  | NDUFA1        |
| cg14541950 | 0.03297 | 0.03214 | 0.03944 | 0.03493 | 0.03276 | 0.03535 | 0.03139 | 0.02817 | 0.02874 | 0.02787 | HIST3H2BB     |
| cg14542238 | 0.07148 | 0.03018 | 0.03406 | 0.0315  | 0.02362 | 0.03564 | 0.02581 | 0.03032 | 0.02737 | 0.02558 | TGOLN2        |
| cg14542839 | 0.1378  | 0.10016 | 0.5519  | 0.66838 | 0.94709 | 0.83835 | 0.85928 | 0.76449 | 0.58907 | 0.57271 | DKFZP586H2123 |
| cg14543592 | 0.92793 | 0.40351 | 0.73326 | 0.8238  | 0.68988 | 0.38317 | 0.30624 | 0.19966 | 0.69965 | 0.70086 | MYBPC2        |
| cg14544583 | 0.13181 | 0.20617 | 0.61766 | 0.56246 | 0.57751 | 0.40631 | 0.15892 | 0.15305 | 0.16778 | 0.14498 | HBB           |
| cg14545899 | 0.02438 | 0.02263 | 0.03709 | 0.02985 | 0.01605 | 0.02376 | 0.04989 | 0.0192  | 0.0252  | 0.02227 | FAM46C        |
| cg14546153 | 0.29487 | 0.05089 | 0.36018 | 0.47243 | 0.89398 | 0.87086 | 0.58572 | 0.67202 | 0.45844 | 0.43849 | FLJ90166      |
| cg14547335 | 0.18339 | 0.10975 | 0.51911 | 0.61299 | 0.88169 | 0.36682 | 0.27916 | 0.34347 | 0.28489 | 0.09021 | ATP2B2        |
| cg14550007 | 0.0215  | 0.0216  | 0.02278 | 0.02416 | 0.0203  | 0.02028 | 0.02063 | 0.0217  | 0.01847 | 0.01749 | SCMH1         |
| cg14550066 | 0.48311 | 0.39945 | 0.87863 | 0.91974 | 0.77408 | 0.88875 | 0.33999 | 0.10936 | 0.11919 | 0.09035 | NCR1          |

|            |         |         |         |         |         |         |         |         |         |                  |
|------------|---------|---------|---------|---------|---------|---------|---------|---------|---------|------------------|
| cg14550101 | 0.02113 | 0.02149 | 0.02573 | 0.02656 | 0.01446 | 0.02027 | 0.02072 | 0.01755 | 0.01915 | 0.018 HCN3       |
| cg14550518 | 0.05506 | 0.04534 | 0.1822  | 0.27545 | 0.11474 | 0.05268 | 0.03514 | 0.05165 | 0.0533  | 0.049 ZNF659     |
| cg14550570 | 0.01969 | 0.02182 | 0.02509 | 0.0224  | 0.01677 | 0.02337 | 0.02001 | 0.01948 | 0.02025 | 0.01802 LRRC47   |
| cg14552982 | 0.81608 | 0.73451 | 0.74918 | 0.79111 | 0.59243 | 0.76414 | 0.77835 | 0.60597 | 0.81482 | 0.77994 EXOSC2   |
| cg14556189 | 0.01645 | 0.02077 | 0.02264 | 0.02001 | 0.01422 | 0.01712 | 0.01772 | 0.01886 | 0.01529 | 0.01922 SMAD3    |
| cg14556618 | 0.03432 | 0.0357  | 0.04156 | 0.03977 | 0.03727 | 0.03613 | 0.03067 | 0.02836 | 0.03608 | 0.02768 IGF2R    |
| cg14558138 | 0.70107 | 0.44602 | 0.24163 | 0.23256 | 0.73576 | 0.6217  | 0.49721 | 0.69737 | 0.60894 | 0.51596 ANKRD1   |
| cg14560064 | 0.03935 | 0.04181 | 0.03995 | 0.04028 | 0.03155 | 0.04216 | 0.04177 | 0.04159 | 0.03905 | 0.0412 ZNF482    |
| cg14560895 | 0.06847 | 0.06608 | 0.08168 | 0.08242 | 0.0807  | 0.07417 | 0.07253 | 0.05739 | 0.08092 | 0.0753 JARID1B   |
| cg14561282 | 0.4169  | 0.1581  | 0.80638 | 0.84012 | 0.8233  | 0.82979 | 0.73362 | 0.66079 | 0.07686 | 0.1046 ADAM29    |
| cg14562990 | 0.14572 | 0.16751 | 0.13327 | 0.23921 | 0.05012 | 0.04704 | 0.32591 | 0.34786 | 0.04418 | 0.03883 LDOC1    |
| cg14563260 | 0.52349 | 0.10454 | 0.37568 | 0.48197 | 0.25957 | 0.04949 | 0.53689 | 0.12057 | 0.61277 | 0.56167 EDG2     |
| cg14564494 | 0.28607 | 0.13461 | 0.54881 | 0.50065 | 0.46631 | 0.32044 | 0.1122  | 0.08102 | 0.58481 | 0.0875 CBR3      |
| cg14566624 | 0.21517 | 0.03648 | 0.36509 | 0.29473 | 0.73969 | 0.61125 | 0.38556 | 0.16887 | 0.06824 | 0.02958 GPR153   |
| cg14567401 | 0.75559 | 0.68473 | 0.69154 | 0.74389 | 0.47012 | 0.60272 | 0.15    | 0.32764 | 0.30811 | 0.1837 FLJ38288  |
| cg14568338 | 0.0694  | 0.06593 | 0.06361 | 0.05919 | 0.05358 | 0.0629  | 0.06239 | 0.06155 | 0.05727 | 0.05307 IGF1R    |
| cg14569415 | 0.03499 | 0.03572 | 0.03385 | 0.034   | 0.02508 | 0.03619 | 0.03224 | 0.02988 | 0.0279  | 0.02554 GMPPA    |
| cg14570389 | 0.05615 | 0.05267 | 0.10865 | 0.09097 | 0.09706 | 0.08115 | 0.09754 | 0.07807 | 0.06846 | 0.05662 RAP2C    |
| cg14571620 | 0.05103 | 0.04632 | 0.04837 | 0.04632 | 0.03748 | 0.04279 | 0.04119 | 0.04409 | 0.04033 | 0.04103 FLJ38663 |
| cg14572111 | 0.04402 | 0.04379 | 0.05477 | 0.043   | 0.03417 | 0.04104 | 0.04389 | 0.03538 | 0.03814 | 0.03859 SYT7     |
| cg14572485 | 0.03163 | 0.03634 | 0.03705 | 0.03187 | 0.0305  | 0.03871 | 0.02472 | 0.02656 | 0.0277  | 0.03012 AMZ2     |
| cg14576628 | 0.05959 | 0.06359 | 0.06637 | 0.07054 | 0.07096 | 0.06195 | 0.03604 | 0.03381 | 0.04244 | 0.04477 PRMT1    |
| cg14576681 | 0.05589 | 0.05197 | 0.05347 | 0.05271 | 0.03686 | 0.05047 | 0.05    | 0.05112 | 0.0481  | 0.04693 COX7A2L  |
| cg14576824 | 0.26353 | 0.26242 | 0.39738 | 0.73836 | 0.2706  | 0.16605 | 0.10047 | 0.0511  | 0.06679 | 0.05729 RPS6KC1  |
| cg14577211 | 0.10646 | 0.06932 | 0.12046 | 0.12829 | 0.07949 | 0.1129  | 0.08407 | 0.0836  | 0.1346  | 0.10875 ZNF641   |
| cg14578030 | 0.68682 | 0.43189 | 0.85953 | 0.88501 | 0.90263 | 0.88349 | 0.12308 | 0.07125 | 0.48854 | 0.46372 FGF4     |
| cg14579051 | 0.74682 | 0.6264  | 0.63189 | 0.74734 | 0.34964 | 0.55612 | 0.49934 | 0.63866 | 0.41331 | 0.38584 COL9A1   |
| cg14580567 | 0.05631 | 0.05459 | 0.05536 | 0.05277 | 0.1006  | 0.09945 | 0.05349 | 0.0522  | 0.0567  | 0.04496 HHIP     |
| cg14580737 | 0.47029 | 0.5264  | 0.47147 | 0.5709  | 0.46037 | 0.45029 | 0.63616 | 0.45775 | 0.40372 | 0.267 RFXANK     |
| cg14580982 | 0.07094 | 0.05848 | 0.29945 | 0.33357 | 0.45383 | 0.82445 | 0.06377 | 0.12583 | 0.04661 | 0.03128 ATP6V1C2 |
| cg14585160 | 0.02974 | 0.02999 | 0.03706 | 0.03531 | 0.03211 | 0.03303 | 0.03782 | 0.03557 | 0.03219 | 0.03083 ARHGAP1  |
| cg14586939 | 0.05196 | 0.05547 | 0.77741 | 0.79723 | 0.40787 | 0.83439 | 0.06423 | 0.07386 | 0.06343 | 0.10966 NPY2R    |
| cg14587868 | 0.33721 | 0.14548 | 0.56193 | 0.63366 | 0.77286 | 0.51291 | 0.37964 | 0.36924 | 0.28656 | 0.09984 TGM1     |
| cg14588638 | 0.0879  | 0.04444 | 0.05896 | 0.05854 | 0.04872 | 0.04073 | 0.04288 | 0.03671 | 0.03984 | 0.03823 RHBDD3   |
| cg14590817 | 0.04507 | 0.04704 | 0.21114 | 0.42066 | 0.0695  | 0.04217 | 0.04078 | 0.04816 | 0.04255 | 0.0449 ADARB2    |
| cg14592065 | 0.40425 | 0.12862 | 0.24137 | 0.21749 | 0.82556 | 0.84658 | 0.19137 | 0.07833 | 0.60839 | 0.67549 THRAP4   |
| cg14592099 | 0.38886 | 0.24419 | 0.16926 | 0.44678 | 0.08024 | 0.10952 | 0.15245 | 0.09959 | 0.03086 | 0.04026 PCDHB13  |
| cg14592406 | 0.01512 | 0.01695 | 0.0205  | 0.0179  | 0.52998 | 0.51977 | 0.02682 | 0.01417 | 0.01752 | 0.01068 CABP1    |
| cg14594876 | 0.08054 | 0.07073 | 0.43392 | 0.58237 | 0.14166 | 0.07749 | 0.03608 | 0.05063 | 0.04761 | 0.04241 SNTA1    |
| cg14596431 | 0.0481  | 0.04187 | 0.07155 | 0.06507 | 0.03673 | 0.0361  | 0.05554 | 0.04094 | 0.05029 | 0.03475 B3GNTL1  |
| cg14597908 | 0.29278 | 0.35341 | 0.40503 | 0.40401 | 0.17186 | 0.21468 | 0.3008  | 0.22561 | 0.44299 | 0.45533 GNAS     |

|            |         |         |         |         |         |         |         |         |         |         |           |
|------------|---------|---------|---------|---------|---------|---------|---------|---------|---------|---------|-----------|
| cg14598387 | 0.04784 | 0.04847 | 0.06413 | 0.12683 | 0.13571 | 0.24883 | 0.0409  | 0.03183 | 0.03834 | 0.03524 | OR1N1     |
| cg14600040 | 0.0503  | 0.05824 | 0.21086 | 0.15971 | 0.04382 | 0.05361 | 0.43986 | 0.06823 | 0.04905 | 0.04285 | GPC4      |
| cg14600885 | 0.18672 | 0.09094 | 0.13129 | 0.1412  | 0.17407 | 0.09609 | 0.13317 | 0.10029 | 0.08702 | 0.09585 | MYOZ3     |
| cg14601284 | 0.08638 | 0.06283 | 0.73996 | 0.7902  | 0.92691 | 0.89644 | 0.81436 | 0.36952 | 0.92912 | 0.91527 | PLXDC1    |
| cg14601560 | 0.09218 | 0.09037 | 0.08023 | 0.08628 | 0.06599 | 0.08039 | 0.08292 | 0.07407 | 0.07228 | 0.08055 | SCLY      |
| cg14602164 | 0.1832  | 0.19282 | 0.14044 | 0.12051 | 0.15064 | 0.12711 | 0.1187  | 0.10032 | 0.12423 | 0.13659 | FBXO8     |
| cg14602578 | 0.04131 | 0.03575 | 0.05212 | 0.04794 | 0.04427 | 0.05115 | 0.02929 | 0.0333  | 0.02873 | 0.03482 | CASP8AP2  |
| cg14602658 | 0.04607 | 0.04644 | 0.04404 | 0.04137 | 0.04218 | 0.03591 | 0.03368 | 0.04136 | 0.04416 | 0.03673 | TMEM39A   |
| cg14603345 | 0.02293 | 0.02589 | 0.02572 | 0.02407 | 0.02216 | 0.0196  | 0.01941 | 0.01912 | 0.01762 | 0.01745 | BTBD3     |
| cg14603406 | 0.04444 | 0.04603 | 0.05006 | 0.0439  | 0.03576 | 0.04496 | 0.04294 | 0.05399 | 0.03973 | 0.04453 | TRIM8     |
| cg14605021 | 0.58373 | 0.30317 | 0.92472 | 0.92997 | 0.78915 | 0.74192 | 0.60406 | 0.18273 | 0.93418 | 0.78064 | FGF20     |
| cg14605134 | 0.04207 | 0.03815 | 0.05036 | 0.04267 | 0.03396 | 0.03739 | 0.03378 | 0.03531 | 0.03401 | 0.03309 | EFNA4     |
| cg14606768 | 0.7355  | 0.53504 | 0.88914 | 0.89196 | 0.75575 | 0.8507  | 0.76958 | 0.76208 | 0.66235 | 0.60335 | C9        |
| cg14607011 | 0.91232 | 0.51236 | 0.9374  | 0.93954 | 0.9446  | 0.9225  | 0.159   | 0.13487 | 0.9458  | 0.92623 | C10orf125 |
| cg14607642 | 0.77732 | 0.75247 | 0.67859 | 0.74981 | 0.71809 | 0.7826  | 0.69916 | 0.75024 | 0.77884 | 0.73461 | LBR       |
| cg14607813 | 0.05532 | 0.04883 | 0.06546 | 0.05842 | 0.0411  | 0.05122 | 0.0527  | 0.05498 | 0.04598 | 0.05189 | SRP9      |
| cg14609458 | 0.03788 | 0.03584 | 0.09455 | 0.1204  | 0.08098 | 0.04291 | 0.0461  | 0.04552 | 0.04144 | 0.0382  | PRRG4     |
| cg14610746 | 0.06649 | 0.06191 | 0.08173 | 0.07975 | 0.10523 | 0.08405 | 0.11545 | 0.08055 | 0.1027  | 0.08425 | CLN6      |
| cg14611112 | 0.78086 | 0.66835 | 0.53539 | 0.77376 | 0.8015  | 0.81305 | 0.31529 | 0.14117 | 0.46855 | 0.20127 | LCN6      |
| cg14611174 | 0.0501  | 0.05519 | 0.07091 | 0.06279 | 0.04699 | 0.04201 | 0.04056 | 0.05061 | 0.06049 | 0.04556 | SIX6      |
| cg14613546 | 0.4331  | 0.46032 | 0.64799 | 0.71848 | 0.66909 | 0.70127 | 0.68852 | 0.65767 | 0.76628 | 0.73552 | BNC2      |
| cg14613832 | 0.04072 | 0.03703 | 0.04067 | 0.03641 | 0.03837 | 0.03201 | 0.03022 | 0.03531 | 0.03125 | 0.03036 | CYP26A1   |
| cg14613972 | 0.2315  | 0.18273 | 0.24642 | 0.2259  | 0.21461 | 0.20302 | 0.2401  | 0.18358 | 0.18712 | 0.18071 | ATG10     |
| cg14614211 | 0.07578 | 0.03514 | 0.55188 | 0.58354 | 0.02727 | 0.02599 | 0.41326 | 0.45802 | 0.0577  | 0.02544 | IRXL1     |
| cg14614901 | 0.11581 | 0.07506 | 0.20243 | 0.39763 | 0.21879 | 0.10949 | 0.07136 | 0.04444 | 0.30147 | 0.39421 | LOC401498 |
| cg14615807 | 0.47408 | 0.13432 | 0.57717 | 0.6385  | 0.8651  | 0.85449 | 0.2696  | 0.19884 | 0.12432 | 0.32454 | BSND      |
| cg14616651 | 0.54326 | 0.54742 | 0.61529 | 0.6206  | 0.62362 | 0.55476 | 0.55721 | 0.57413 | 0.66927 | 0.66301 | NDUFA1    |
| cg14617642 | 0.02199 | 0.02277 | 0.02721 | 0.02345 | 0.01859 | 0.02323 | 0.02961 | 0.03279 | 0.02254 | 0.02134 | H2AFY2    |
| cg14618681 | 0.02436 | 0.02807 | 0.02813 | 0.0259  | 0.02371 | 0.02363 | 0.02207 | 0.0226  | 0.02044 | 0.01804 | E2F1      |
| cg14620221 | 0.83152 | 0.49167 | 0.87922 | 0.89533 | 0.90606 | 0.89819 | 0.86002 | 0.86377 | 0.05097 | 0.04122 | OR8B8     |
| cg14623313 | 0.06993 | 0.09407 | 0.09547 | 0.10124 | 0.10106 | 0.08161 | 0.06994 | 0.06284 | 0.06625 | 0.07752 | APPBP2    |
| cg14623518 | 0.03435 | 0.03579 | 0.03934 | 0.03787 | 0.04049 | 0.04252 | 0.03602 | 0.03718 | 0.03408 | 0.0326  | BAIAP2    |
| cg14623805 | 0.04922 | 0.04293 | 0.05997 | 0.0482  | 0.04869 | 0.05098 | 0.04375 | 0.04933 | 0.04428 | 0.04018 | CCAR1     |
| cg14625604 | 0.0965  | 0.05039 | 0.04648 | 0.04816 | 0.02961 | 0.03795 | 0.27758 | 0.63234 | 0.0444  | 0.04005 | UBE2A     |
| cg14631703 | 0.09908 | 0.09378 | 0.10274 | 0.10932 | 0.08948 | 0.08439 | 0.095   | 0.08377 | 0.07321 | 0.07322 | EIF3S12   |
| cg14633527 | 0.0848  | 0.10728 | 0.11022 | 0.1152  | 0.12229 | 0.08898 | 0.05191 | 0.06052 | 0.08376 | 0.07161 | SCOTIN    |
| cg14633704 | 0.75921 | 0.65989 | 0.85343 | 0.84    | 0.92375 | 0.69003 | 0.90134 | 0.91047 | 0.61959 | 0.32012 | HSD17B3   |
| cg14634319 | 0.04805 | 0.04845 | 0.15745 | 0.15722 | 0.232   | 0.04129 | 0.04975 | 0.0479  | 0.03803 | 0.04156 | BAZZA     |
| cg14634336 | 0.0833  | 0.08922 | 0.08624 | 0.08871 | 0.06794 | 0.07873 | 0.07736 | 0.07201 | 0.06889 | 0.07246 | REV3L     |
| cg14634738 | 0.2014  | 0.0694  | 0.27353 | 0.21383 | 0.09335 | 0.0564  | 0.04445 | 0.03506 | 0.04175 | 0.03499 | RBM5      |
| cg14636377 | 0.03321 | 0.03371 | 0.03642 | 0.03667 | 0.03511 | 0.03506 | 0.03339 | 0.03344 | 0.03216 | 0.02817 | RHEBL1    |

|            |         |         |         |         |         |         |         |         |         |         |                |
|------------|---------|---------|---------|---------|---------|---------|---------|---------|---------|---------|----------------|
| cg14640481 | 0.02278 | 0.02244 | 0.03062 | 0.02532 | 0.02625 | 0.02947 | 0.02201 | 0.01924 | 0.01721 | 0.01784 | BRI3           |
| cg14640682 | 0.02478 | 0.02265 | 0.02555 | 0.02438 | 0.01856 | 0.0221  | 0.02421 | 0.02176 | 0.02002 | 0.02117 | GYS1           |
| cg14642338 | 0.52654 | 0.49346 | 0.88395 | 0.8702  | 0.90977 | 0.8874  | 0.88518 | 0.9089  | 0.91415 | 0.86823 | DKFZP586H2123  |
| cg14642832 | 0.06231 | 0.0761  | 0.14151 | 0.14286 | 0.21462 | 0.10957 | 0.56321 | 0.46191 | 0.06646 | 0.06116 | BMX            |
| cg14643520 | 0.03151 | 0.02942 | 0.02884 | 0.02998 | 0.02059 | 0.02979 | 0.02335 | 0.02672 | 0.02114 | 0.02254 | ATP1B3         |
| cg14643978 | 0.8997  | 0.89771 | 0.91014 | 0.92616 | 0.84765 | 0.84531 | 0.8701  | 0.89991 | 0.9069  | 0.90757 | TMC1           |
| cg14645085 | 0.10565 | 0.11346 | 0.1647  | 0.1537  | 0.11617 | 0.10824 | 0.08607 | 0.09049 | 0.06831 | 0.08391 | RANBP9         |
| cg14645481 | 0.1262  | 0.09221 | 0.10263 | 0.09717 | 0.11272 | 0.08294 | 0.09789 | 0.10735 | 0.05583 | 0.06136 | HINT1          |
| cg14645650 | 0.9573  | 0.95302 | 0.95273 | 0.94944 | 0.95064 | 0.95811 | 0.95656 | 0.95574 | 0.95305 | 0.95994 | RUNX3          |
| cg14645972 | 0.11438 | 0.10971 | 0.12355 | 0.12101 | 0.09696 | 0.11747 | 0.09382 | 0.10417 | 0.1     | 0.09693 | DKFZp686115217 |
| cg14646244 | 0.21303 | 0.09281 | 0.21828 | 0.30991 | 0.30444 | 0.22967 | 0.10999 | 0.12912 | 0.10912 | 0.09651 | SLC26A4        |
| cg14647515 | 0.82945 | 0.8441  | 0.80124 | 0.81213 | 0.78333 | 0.83072 | 0.80461 | 0.84857 | 0.84231 | 0.83272 | C10orf12       |
| cg14651992 | 0.0648  | 0.04371 | 0.04193 | 0.04075 | 0.02883 | 0.03545 | 0.0351  | 0.0376  | 0.03361 | 0.03138 | TP53AP1        |
| cg14652095 | 0.83331 | 0.91709 | 0.84077 | 0.89527 | 0.86368 | 0.91674 | 0.92349 | 0.94384 | 0.79784 | 0.79472 | HIST1H1A       |
| cg14654385 | 0.84473 | 0.84515 | 0.91306 | 0.92586 | 0.92789 | 0.9045  | 0.90475 | 0.91144 | 0.91985 | 0.91012 | URP2           |
| cg14654731 | 0.91734 | 0.73627 | 0.93079 | 0.92801 | 0.94006 | 0.92442 | 0.86545 | 0.462   | 0.92407 | 0.84254 | FLJ30834       |
| cg14654875 | 0.04402 | 0.03971 | 0.39778 | 0.39922 | 0.64628 | 0.58474 | 0.32635 | 0.29854 | 0.04954 | 0.04981 | ZNF597         |
| cg14654926 | 0.05395 | 0.03553 | 0.25535 | 0.24119 | 0.14876 | 0.25064 | 0.47489 | 0.37818 | 0.40959 | 0.37278 | FGF10          |
| cg14657159 | 0.04525 | 0.04731 | 0.05461 | 0.06265 | 0.084   | 0.05154 | 0.05562 | 0.05904 | 0.0521  | 0.0547  | CIP29          |
| cg14658285 | 0.02301 | 0.02633 | 0.0228  | 0.02481 | 0.02394 | 0.02506 | 0.02109 | 0.0195  | 0.01693 | 0.01718 | LOC113179      |
| cg14658362 | 0.04403 | 0.20953 | 0.03968 | 0.03907 | 0.11016 | 0.03986 | 0.52026 | 0.11141 | 0.02779 | 0.02921 | RBPMS          |
| cg14658900 | 0.02922 | 0.02971 | 0.0289  | 0.03519 | 0.01871 | 0.02076 | 0.02355 | 0.02475 | 0.02856 | 0.02578 | ZNF434         |
| cg14659404 | 0.18073 | 0.14623 | 0.66871 | 0.83315 | 0.16834 | 0.18668 | 0.14479 | 0.12993 | 0.15911 | 0.16188 | ASTN           |
| cg14659547 | 0.73745 | 0.05574 | 0.10827 | 0.36659 | 0.13676 | 0.27354 | 0.34852 | 0.16693 | 0.03364 | 0.04058 | RETNLB         |
| cg14662172 | 0.78814 | 0.80022 | 0.64411 | 0.72601 | 0.60405 | 0.6711  | 0.21372 | 0.18596 | 0.37314 | 0.28176 | CPB2           |
| cg14662379 | 0.07794 | 0.09264 | 0.16512 | 0.18661 | 0.49512 | 0.43372 | 0.10362 | 0.12353 | 0.34256 | 0.15009 | KIF1A          |
| cg14662756 | 0.47016 | 0.34399 | 0.82108 | 0.85423 | 0.90224 | 0.71654 | 0.8372  | 0.80365 | 0.59071 | 0.51135 | NPFF           |
| cg14663065 | 0.04469 | 0.04273 | 0.05227 | 0.04431 | 0.04355 | 0.04208 | 0.03559 | 0.03291 | 0.0411  | 0.03515 | CTNNB1         |
| cg14663792 | 0.0393  | 0.04065 | 0.04099 | 0.03667 | 0.05004 | 0.04762 | 0.03445 | 0.04151 | 0.03004 | 0.03636 | C6orf48        |
| cg14665389 | 0.04652 | 0.04605 | 0.03933 | 0.04907 | 0.04097 | 0.04608 | 0.04175 | 0.04467 | 0.03764 | 0.0337  | TCF7L2         |
| cg14666892 | 0.0296  | 0.03243 | 0.0323  | 0.03144 | 0.02591 | 0.03051 | 0.03377 | 0.0302  | 0.02702 | 0.02642 | BAK1           |
| cg14667033 | 0.04848 | 0.05463 | 0.08204 | 0.05566 | 0.11922 | 0.06344 | 0.0584  | 0.04817 | 0.04359 | 0.0358  | TMEM2          |
| cg14667273 | 0.47714 | 0.16729 | 0.9269  | 0.93005 | 0.9494  | 0.37783 | 0.69426 | 0.05961 | 0.78713 | 0.62771 | VWA1           |
| cg14671453 | 0.03497 | 0.02671 | 0.03198 | 0.02748 | 0.02449 | 0.02708 | 0.02986 | 0.02763 | 0.02496 | 0.0282  | STX4A          |
| cg14671488 | 0.15871 | 0.15652 | 0.13237 | 0.12957 | 0.20621 | 0.17453 | 0.14851 | 0.21    | 0.14478 | 0.15214 | YES1           |
| cg14672622 | 0.03684 | 0.04111 | 0.04752 | 0.04107 | 0.03827 | 0.03392 | 0.0276  | 0.03067 | 0.03791 | 0.03294 | C2orf28        |
| cg14672680 | 0.3074  | 0.19631 | 0.6196  | 0.6564  | 0.92399 | 0.89253 | 0.80465 | 0.51772 | 0.6448  | 0.45339 | TNNI2          |
| cg14672994 | 0.1268  | 0.08827 | 0.51706 | 0.56155 | 0.24946 | 0.06271 | 0.20829 | 0.09557 | 0.40408 | 0.06733 | FLJ20920       |
| cg14674582 | 0.55999 | 0.32931 | 0.69609 | 0.74856 | 0.65077 | 0.55389 | 0.35568 | 0.22358 | 0.27536 | 0.38908 | PLAC1          |
| cg14676817 | 0.03663 | 0.04089 | 0.03793 | 0.03409 | 0.03009 | 0.03514 | 0.03507 | 0.03453 | 0.03277 | 0.03071 | C1orf108       |
| cg14679202 | 0.44782 | 0.37062 | 0.38263 | 0.5338  | 0.33648 | 0.593   | 0.09676 | 0.04145 | 0.06416 | 0.04835 | L3MBTL2        |

|            |         |         |         |         |         |         |         |         |         |                   |
|------------|---------|---------|---------|---------|---------|---------|---------|---------|---------|-------------------|
| cg14679230 | 0.72265 | 0.32635 | 0.70014 | 0.61643 | 0.74419 | 0.80155 | 0.56144 | 0.62213 | 0.60453 | 0.42403 LIPE      |
| cg14679587 | 0.06766 | 0.0437  | 0.79863 | 0.90315 | 0.75892 | 0.89198 | 0.0703  | 0.05377 | 0.07363 | 0.04388 GLS2      |
| cg14681055 | 0.04947 | 0.04056 | 0.4581  | 0.70524 | 0.0357  | 0.03543 | 0.03463 | 0.0397  | 0.04719 | 0.03235 PITX3     |
| cg14681629 | 0.13415 | 0.09026 | 0.09598 | 0.07797 | 0.1937  | 0.24456 | 0.08842 | 0.09102 | 0.08598 | 0.08097 LOC153684 |
| cg14681767 | 0.03411 | 0.03395 | 0.03864 | 0.03852 | 0.02654 | 0.03103 | 0.03721 | 0.04284 | 0.02994 | 0.02835 ARHGEF10  |
| cg14683036 | 0.05481 | 0.06527 | 0.06145 | 0.05924 | 0.0448  | 0.06336 | 0.05846 | 0.05968 | 0.06042 | 0.0608 MMAB       |
| cg14685339 | 0.04009 | 0.04225 | 0.04346 | 0.04572 | 0.03084 | 0.03816 | 0.03983 | 0.03948 | 0.03763 | 0.03811 GSTZ1     |
| cg14686321 | 0.0479  | 0.04482 | 0.05179 | 0.04585 | 0.04265 | 0.04211 | 0.03556 | 0.03737 | 0.03775 | 0.03454 FLJ31951  |
| cg14688272 | 0.73705 | 0.7414  | 0.85991 | 0.89578 | 0.74432 | 0.44329 | 0.84107 | 0.56968 | 0.87558 | 0.52385 FN3KRP    |
| cg14688956 | 0.03466 | 0.03475 | 0.04058 | 0.04411 | 0.18283 | 0.03948 | 0.13755 | 0.06262 | 0.36296 | 0.02829 PAK3      |
| cg14689355 | 0.04604 | 0.05239 | 0.0462  | 0.05049 | 0.03845 | 0.04354 | 0.04477 | 0.04517 | 0.04653 | 0.04169 ACVR2A    |
| cg14693893 | 0.15736 | 0.0509  | 0.15478 | 0.2193  | 0.0411  | 0.03594 | 0.04649 | 0.03226 | 0.24208 | 0.03265 DYNC1H1   |
| cg14694011 | 0.54416 | 0.28382 | 0.71764 | 0.82207 | 0.83969 | 0.82916 | 0.42372 | 0.47236 | 0.50395 | 0.24411 CYP19A1   |
| cg14694232 | 0.03604 | 0.03477 | 0.03579 | 0.03035 | 0.03991 | 0.0378  | 0.02526 | 0.02838 | 0.02689 | 0.02381 TRIM26    |
| cg14694952 | 0.02519 | 0.02911 | 0.03448 | 0.02809 | 0.03006 | 0.02607 | 0.02238 | 0.02922 | 0.02115 | 0.02374 HD        |
| cg14695751 | 0.66684 | 0.33715 | 0.1201  | 0.09659 | 0.21337 | 0.15618 | 0.14528 | 0.17359 | 0.13541 | 0.11027 ALS2CR7   |
| cg14696348 | 0.03406 | 0.03417 | 0.0339  | 0.07721 | 0.02454 | 0.03973 | 0.02844 | 0.02859 | 0.02758 | 0.0273 MC1R       |
| cg14696396 | 0.03845 | 0.0236  | 0.19904 | 0.1886  | 0.53402 | 0.39486 | 0.14077 | 0.03515 | 0.21474 | 0.01903 TM6SF1    |
| cg14696820 | 0.04453 | 0.03532 | 0.17651 | 0.13997 | 0.40672 | 0.45448 | 0.03426 | 0.0399  | 0.0342  | 0.03209 LCE1A     |
| cg14696870 | 0.08029 | 0.08537 | 0.42812 | 0.51184 | 0.11665 | 0.07597 | 0.10553 | 0.07311 | 0.08395 | 0.09669 FCER1A    |
| cg14698961 | 0.05082 | 0.05832 | 0.05001 | 0.04037 | 0.05112 | 0.05774 | 0.04805 | 0.04439 | 0.04474 | 0.04489 LOC129285 |
| cg14700577 | 0.02768 | 0.03145 | 0.03118 | 0.02958 | 0.0262  | 0.02951 | 0.02474 | 0.02719 | 0.02598 | 0.01925 SCAP      |
| cg14700707 | 0.48233 | 0.07883 | 0.40597 | 0.59137 | 0.68143 | 0.40105 | 0.0645  | 0.06266 | 0.06096 | 0.03402 NOTCH4    |
| cg14700821 | 0.07602 | 0.06105 | 0.07485 | 0.0896  | 0.10923 | 0.09185 | 0.08341 | 0.0679  | 0.04552 | 0.03827 ADAMTS6   |
| cg14701410 | 0.02278 | 0.02074 | 0.02948 | 0.02508 | 0.01787 | 0.02142 | 0.01764 | 0.02078 | 0.0198  | 0.01619 SLC4A8    |
| cg14701962 | 0.92868 | 0.68847 | 0.89664 | 0.92858 | 0.64218 | 0.78937 | 0.51011 | 0.7332  | 0.91069 | 0.78386 C1orf111  |
| cg14702264 | 0.14394 | 0.05508 | 0.157   | 0.11156 | 0.04836 | 0.04696 | 0.09267 | 0.06067 | 0.05154 | 0.04874 FLJ10099  |
| cg14704941 | 0.58742 | 0.38199 | 0.82347 | 0.88273 | 0.80902 | 0.88877 | 0.49681 | 0.89391 | 0.55369 | 0.3007 CSRP3      |
| cg14705927 | 0.06126 | 0.0523  | 0.06172 | 0.06514 | 0.06132 | 0.05212 | 0.05345 | 0.0507  | 0.05927 | 0.04925 P4HA1     |
| cg14706178 | 0.02041 | 0.02149 | 0.02965 | 0.02486 | 0.03285 | 0.02506 | 0.01991 | 0.01905 | 0.01654 | 0.01758 FLJ32786  |
| cg14706739 | 0.87196 | 0.538   | 0.86845 | 0.86837 | 0.90051 | 0.87931 | 0.81362 | 0.31217 | 0.83892 | 0.5966 EPB49      |
| cg14707431 | 0.04803 | 0.04345 | 0.06778 | 0.05827 | 0.05883 | 0.05494 | 0.0481  | 0.04844 | 0.04145 | 0.03674 C9orf97   |
| cg14708847 | 0.04928 | 0.05542 | 0.08043 | 0.07015 | 0.06762 | 0.05333 | 0.05313 | 0.06773 | 0.05352 | 0.04824 PAK3      |
| cg14709481 | 0.80492 | 0.20502 | 0.63305 | 0.57387 | 0.55766 | 0.5137  | 0.74082 | 0.6651  | 0.1413  | 0.0889 HK3        |
| cg14709524 | 0.07475 | 0.06856 | 0.06951 | 0.0653  | 0.12116 | 0.09487 | 0.05924 | 0.05343 | 0.04934 | 0.06758 NULP1     |
| cg14710524 | 0.0338  | 0.03391 | 0.03293 | 0.0298  | 0.02987 | 0.02695 | 0.02873 | 0.02618 | 0.03003 | 0.02661 MGC3121   |
| cg14711016 | 0.06812 | 0.05993 | 0.06855 | 0.05465 | 0.05969 | 0.05264 | 0.05349 | 0.06042 | 0.05287 | 0.04881 NARFL     |
| cg14711201 | 0.03335 | 0.02641 | 0.02923 | 0.02546 | 0.02406 | 0.02854 | 0.02427 | 0.02547 | 0.02197 | 0.02221 SKP2      |
| cg14711709 | 0.04028 | 0.03603 | 0.05738 | 0.04012 | 0.02996 | 0.02699 | 0.03593 | 0.03631 | 0.03135 | 0.03443 C16orf51  |
| cg14712964 | 0.042   | 0.04446 | 0.04307 | 0.04233 | 0.03661 | 0.04903 | 0.04294 | 0.04242 | 0.05607 | 0.03875 BRPF1     |
| cg14714578 | 0.0236  | 0.02622 | 0.02169 | 0.02172 | 0.01852 | 0.02052 | 0.01754 | 0.01895 | 0.01816 | 0.01702 B3GTL     |

|            |         |         |         |         |         |         |         |         |         |         |           |
|------------|---------|---------|---------|---------|---------|---------|---------|---------|---------|---------|-----------|
| cg14717170 | 0.0706  | 0.06642 | 0.09666 | 0.0815  | 0.08378 | 0.06669 | 0.15064 | 0.25038 | 0.13951 | 0.06705 | SLITRK3   |
| cg14717946 | 0.15632 | 0.1383  | 0.1811  | 0.14718 | 0.2416  | 0.15312 | 0.14147 | 0.12676 | 0.14655 | 0.16695 | RBBP5     |
| cg14718680 | 0.03988 | 0.04929 | 0.04968 | 0.0416  | 0.03882 | 0.03867 | 0.035   | 0.02924 | 0.03878 | 0.0416  | PGD       |
| cg14719055 | 0.88468 | 0.88389 | 0.11789 | 0.13374 | 0.89649 | 0.79813 | 0.87617 | 0.71514 | 0.05273 | 0.04115 | RBBP7     |
| cg14719352 | 0.63808 | 0.40847 | 0.79314 | 0.86991 | 0.60223 | 0.31774 | 0.20717 | 0.11788 | 0.30372 | 0.22237 | FUT1      |
| cg14721213 | 0.61834 | 0.52051 | 0.61149 | 0.71974 | 0.68178 | 0.79286 | 0.42192 | 0.18521 | 0.19083 | 0.16614 | FMO2      |
| cg14722162 | 0.24409 | 0.08256 | 0.48259 | 0.65941 | 0.83914 | 0.85024 | 0.72275 | 0.81169 | 0.18048 | 0.13985 | C5orf20   |
| cg14723014 | 0.0538  | 0.06379 | 0.07502 | 0.05828 | 0.05771 | 0.07074 | 0.05239 | 0.05909 | 0.05563 | 0.05619 | ZMYM5     |
| cg14723032 | 0.57167 | 0.36446 | 0.85745 | 0.84557 | 0.82686 | 0.80962 | 0.7911  | 0.46729 | 0.85002 | 0.66144 | PITPNM3   |
| cg14723799 | 0.03634 | 0.03715 | 0.03024 | 0.02627 | 0.02382 | 0.03363 | 0.02728 | 0.03455 | 0.03086 | 0.02909 | C14orf104 |
| cg14724265 | 0.82932 | 0.60038 | 0.80856 | 0.86209 | 0.79151 | 0.83923 | 0.29265 | 0.47627 | 0.59133 | 0.22903 | PPEF2     |
| cg14724364 | 0.06346 | 0.05395 | 0.0874  | 0.10158 | 0.12452 | 0.08321 | 0.09002 | 0.0722  | 0.06648 | 0.05499 | KCNJ11    |
| cg14724613 | 0.05547 | 0.03629 | 0.75602 | 0.85083 | 0.07991 | 0.05705 | 0.0434  | 0.04436 | 0.06489 | 0.15664 | GRM3      |
| cg14726525 | 0.05763 | 0.05124 | 0.07442 | 0.06465 | 0.0872  | 0.05046 | 0.10655 | 0.08268 | 0.0453  | 0.05526 | LSM1      |
| cg14726637 | 0.44992 | 0.51669 | 0.91832 | 0.91943 | 0.94624 | 0.93024 | 0.87089 | 0.90562 | 0.63198 | 0.56638 | CR1       |
| cg14727512 | 0.7753  | 0.58543 | 0.87131 | 0.89129 | 0.80727 | 0.79542 | 0.85101 | 0.86907 | 0.87826 | 0.85604 | TSSK2     |
| cg14727952 | 0.07358 | 0.08177 | 0.07185 | 0.06218 | 0.07895 | 0.09381 | 0.09237 | 0.0844  | 0.05968 | 0.06792 | BIRC2     |
| cg14729071 | 0.06239 | 0.06643 | 0.06064 | 0.05532 | 0.04286 | 0.07703 | 0.06516 | 0.0592  | 0.05132 | 0.04982 | RAD21     |
| cg14732136 | 0.03236 | 0.03302 | 0.03091 | 0.02674 | 0.02388 | 0.02697 | 0.02528 | 0.02706 | 0.02321 | 0.02775 | KPNA2     |
| cg14732540 | 0.67132 | 0.42863 | 0.93462 | 0.93461 | 0.88995 | 0.91226 | 0.85124 | 0.85913 | 0.77053 | 0.74191 | BRDT      |
| cg14733672 | 0.35426 | 0.45573 | 0.02948 | 0.03114 | 0.02242 | 0.02589 | 0.0254  | 0.02529 | 0.03017 | 0.02525 | HMOX1     |
| cg14736210 | 0.92129 | 0.92925 | 0.93632 | 0.94652 | 0.964   | 0.92097 | 0.90904 | 0.9236  | 0.93813 | 0.85313 | KCNB1     |
| cg14736911 | 0.4869  | 0.4221  | 0.63101 | 0.70717 | 0.42997 | 0.33007 | 0.58211 | 0.43045 | 0.22436 | 0.28547 | MYO22     |
| cg14737613 | 0.03784 | 0.03878 | 0.06721 | 0.05548 | 0.03982 | 0.03793 | 0.04769 | 0.04488 | 0.03436 | 0.03215 | RANBP3    |
| cg14737977 | 0.13119 | 0.06518 | 0.05738 | 0.0554  | 0.07116 | 0.07466 | 0.07301 | 0.08172 | 0.06475 | 0.05839 | ITGA3     |
| cg14738823 | 0.46984 | 0.20526 | 0.43891 | 0.65809 | 0.20961 | 0.27171 | 0.12095 | 0.13761 | 0.22546 | 0.09656 | C12orf46  |
| cg14740251 | 0.20653 | 0.15247 | 0.11572 | 0.13586 | 0.22496 | 0.12115 | 0.10699 | 0.09521 | 0.0607  | 0.13364 | SIGLEC5   |
| cg14741666 | 0.0362  | 0.03534 | 0.03815 | 0.03613 | 0.02447 | 0.02959 | 0.02942 | 0.02816 | 0.02891 | 0.02644 | ZNHIT3    |
| cg14741922 | 0.14435 | 0.16134 | 0.64137 | 0.77055 | 0.8176  | 0.81272 | 0.16706 | 0.12943 | 0.66268 | 0.84076 | SCGB2A2   |
| cg14743462 | 0.02381 | 0.02681 | 0.03022 | 0.02469 | 0.03258 | 0.02797 | 0.0303  | 0.02369 | 0.02059 | 0.02159 | HIST3H2A  |
| cg14743649 | 0.09845 | 0.08915 | 0.15121 | 0.13542 | 0.16251 | 0.15786 | 0.19073 | 0.27315 | 0.104   | 0.11765 | FSHPRH1   |
| cg14747072 | 0.84499 | 0.84646 | 0.84506 | 0.86085 | 0.86243 | 0.86941 | 0.85097 | 0.84272 | 0.86346 | 0.61348 | STAC3     |
| cg14747225 | 0.16422 | 0.12889 | 0.14107 | 0.13646 | 0.20984 | 0.11956 | 0.15246 | 0.15371 | 0.12864 | 0.15745 | POLR3K    |
| cg14750190 | 0.04022 | 0.03927 | 0.04549 | 0.04549 | 0.03857 | 0.04383 | 0.03161 | 0.0283  | 0.03543 | 0.03549 | CCDC44    |
| cg14751914 | 0.12626 | 0.14538 | 0.15029 | 0.11854 | 0.36285 | 0.50623 | 0.12645 | 0.11356 | 0.10867 | 0.1359  | SMAD7     |
| cg14753432 | 0.87445 | 0.69766 | 0.8883  | 0.89713 | 0.94945 | 0.91867 | 0.92197 | 0.62145 | 0.92933 | 0.69392 | ALX4      |
| cg14754581 | 0.51817 | 0.27791 | 0.16945 | 0.62252 | 0.71465 | 0.537   | 0.55474 | 0.38835 | 0.35735 | 0.07323 | CCRL2     |
| cg14755009 | 0.03217 | 0.03248 | 0.10351 | 0.09635 | 0.02777 | 0.03381 | 0.02636 | 0.02925 | 0.02627 | 0.0282  | TIRAP     |
| cg14755341 | 0.03519 | 0.03715 | 0.03739 | 0.03754 | 0.02675 | 0.02864 | 0.49073 | 0.38294 | 0.02637 | 0.02355 | CDKL5     |
| cg14755852 | 0.4123  | 0.15732 | 0.17872 | 0.12586 | 0.24571 | 0.08167 | 0.13502 | 0.12897 | 0.07411 | 0.07031 | SLC25A37  |
| cg14757296 | 0.79927 | 0.75515 | 0.71645 | 0.75819 | 0.76622 | 0.70194 | 0.68853 | 0.63653 | 0.73028 | 0.68224 | HYAL1     |



|            |         |         |         |         |         |         |         |         |         |         |           |
|------------|---------|---------|---------|---------|---------|---------|---------|---------|---------|---------|-----------|
| cg14757492 | 0.38017 | 0.11257 | 0.14136 | 0.11807 | 0.36296 | 0.29611 | 0.20361 | 0.21998 | 0.84553 | 0.58383 | DDX49     |
| cg14758413 | 0.12357 | 0.04563 | 0.03941 | 0.03189 | 0.03631 | 0.03392 | 0.02513 | 0.02739 | 0.02918 | 0.02735 | DHX30     |
| cg14758526 | 0.83469 | 0.82942 | 0.72598 | 0.77253 | 0.73626 | 0.80881 | 0.66752 | 0.8096  | 0.75396 | 0.81056 | CASP5     |
| cg14759043 | 0.60143 | 0.16929 | 0.27476 | 0.24458 | 0.06839 | 0.04619 | 0.17925 | 0.13692 | 0.90976 | 0.6709  | MGC4266   |
| cg14760714 | 0.08938 | 0.05557 | 0.05308 | 0.13202 | 0.05817 | 0.06779 | 0.06188 | 0.05438 | 0.07717 | 0.08432 | RPUSD2    |
| cg14761227 | 0.50925 | 0.13934 | 0.86218 | 0.83805 | 0.83222 | 0.85211 | 0.70373 | 0.81246 | 0.53083 | 0.38298 | CPA1      |
| cg14764661 | 0.04634 | 0.03401 | 0.03914 | 0.03791 | 0.04539 | 0.03493 | 0.02447 | 0.02743 | 0.09236 | 0.02775 | MRC2      |
| cg14766198 | 0.03044 | 0.03051 | 0.03316 | 0.02994 | 0.02611 | 0.03465 | 0.02902 | 0.0296  | 0.03118 | 0.02756 | CDC14A    |
| cg14766682 | 0.8315  | 0.64145 | 0.85535 | 0.87894 | 0.82887 | 0.83164 | 0.47805 | 0.62191 | 0.87451 | 0.82046 | JM11      |
| cg14767877 | 0.03025 | 0.02584 | 0.02559 | 0.02523 | 0.0236  | 0.02391 | 0.02124 | 0.02189 | 0.02267 | 0.01912 | PSAP      |
| cg14769265 | 0.13056 | 0.1269  | 0.14349 | 0.12782 | 0.11908 | 0.09796 | 0.1192  | 0.12205 | 0.10924 | 0.1041  | PCYT1A    |
| cg14772955 | 0.7653  | 0.37816 | 0.77676 | 0.76537 | 0.86661 | 0.22889 | 0.68213 | 0.363   | 0.82362 | 0.60452 | KIAA0319L |
| cg14773259 | 0.03369 | 0.03635 | 0.03329 | 0.03698 | 0.02462 | 0.03023 | 0.03283 | 0.02982 | 0.03271 | 0.03184 | C1orf19   |
| cg14773282 | 0.04181 | 0.03637 | 0.04444 | 0.04484 | 0.03253 | 0.02823 | 0.03495 | 0.03641 | 0.03318 | 0.0284  | GMP       |
| cg14774175 | 0.67706 | 0.4842  | 0.41381 | 0.36092 | 0.43754 | 0.44943 | 0.15493 | 0.07847 | 0.1544  | 0.06157 | MAGEB3    |
| cg14775560 | 0.14859 | 0.13476 | 0.19867 | 0.16219 | 0.20283 | 0.18769 | 0.19977 | 0.1828  | 0.13357 | 0.16727 | FOLH1     |
| cg14776416 | 0.04302 | 0.04531 | 0.04263 | 0.04117 | 0.02672 | 0.03385 | 0.04147 | 0.04025 | 0.03287 | 0.03285 | MELK      |
| cg14776962 | 0.14102 | 0.13173 | 0.34724 | 0.29948 | 0.43302 | 0.43478 | 0.47303 | 0.58838 | 0.09342 | 0.11419 | HIST1H2BH |
| cg14777972 | 0.09686 | 0.09497 | 0.07632 | 0.06698 | 0.1493  | 0.13977 | 0.09215 | 0.09307 | 0.09061 | 0.1236  | SEC10L1   |
| cg14780914 | 0.06416 | 0.06406 | 0.05917 | 0.06374 | 0.04349 | 0.05707 | 0.05912 | 0.06415 | 0.06136 | 0.06041 | POLR3F    |
| cg14781919 | 0.02355 | 0.0299  | 0.02668 | 0.0209  | 0.02315 | 0.02189 | 0.02297 | 0.02637 | 0.01911 | 0.02071 | GSG2      |
| cg14782678 | 0.11305 | 0.05033 | 0.3566  | 0.52294 | 0.95204 | 0.93868 | 0.16249 | 0.10493 | 0.74762 | 0.4134  | TMEM102   |
| cg14784348 | 0.88073 | 0.68439 | 0.85212 | 0.8613  | 0.82761 | 0.82845 | 0.41373 | 0.51227 | 0.88451 | 0.87569 | HCFC1     |
| cg14784653 | 0.82478 | 0.7748  | 0.85569 | 0.8688  | 0.83499 | 0.84254 | 0.15072 | 0.19156 | 0.75827 | 0.65656 | C10orf30  |
| cg14784788 | 0.02918 | 0.02674 | 0.03133 | 0.03066 | 0.02476 | 0.02665 | 0.03471 | 0.02959 | 0.02066 | 0.01981 | CDC25C    |
| cg14785449 | 0.03511 | 0.04231 | 0.05205 | 0.04717 | 0.05801 | 0.06877 | 0.04218 | 0.04083 | 0.03394 | 0.02992 | ASNS      |
| cg14785479 | 0.31925 | 0.2431  | 0.37425 | 0.40714 | 0.53315 | 0.11311 | 0.03111 | 0.03075 | 0.23479 | 0.10687 | SCARF2    |
| cg14787704 | 0.6663  | 0.44389 | 0.71744 | 0.75648 | 0.58008 | 0.66068 | 0.68448 | 0.36807 | 0.57968 | 0.48586 | SFRS12    |
| cg14789259 | 0.09346 | 0.03994 | 0.62503 | 0.75029 | 0.0779  | 0.04951 | 0.06648 | 0.03915 | 0.39857 | 0.32868 | FAM84A    |
| cg14789590 | 0.53246 | 0.4144  | 0.6421  | 0.67814 | 0.78913 | 0.80999 | 0.4878  | 0.61231 | 0.6099  | 0.28288 | BPIL2     |
| cg14789804 | 0.02858 | 0.0304  | 0.03157 | 0.03384 | 0.02373 | 0.03213 | 0.02843 | 0.02904 | 0.02823 | 0.03019 | OS9       |
| cg14789928 | 0.07493 | 0.08004 | 0.11199 | 0.09932 | 0.13123 | 0.11495 | 0.12343 | 0.09489 | 0.12034 | 0.13425 | RBX1      |
| cg14791831 | 0.03284 | 0.0268  | 0.02856 | 0.02285 | 0.01937 | 0.02042 | 0.02247 | 0.0201  | 0.01707 | 0.01851 | LOC112869 |
| cg14792155 | 0.76108 | 0.15282 | 0.86597 | 0.91746 | 0.95283 | 0.94903 | 0.8443  | 0.93807 | 0.88429 | 0.70745 | PLA2G4E   |
| cg14792480 | 0.30515 | 0.20873 | 0.54835 | 0.56696 | 0.73843 | 0.0755  | 0.2903  | 0.16202 | 0.22369 | 0.2038  | CDH16     |
| cg14795305 | 0.6473  | 0.08499 | 0.32316 | 0.43997 | 0.71662 | 0.63431 | 0.08198 | 0.04256 | 0.0582  | 0.03538 | SMARCD3   |
| cg14795968 | 0.05756 | 0.02378 | 0.23651 | 0.23395 | 0.36112 | 0.06218 | 0.02413 | 0.03943 | 0.08465 | 0.03352 | ACADL     |
| cg14796007 | 0.03224 | 0.03705 | 0.05244 | 0.04133 | 0.03458 | 0.03943 | 0.04734 | 0.03773 | 0.0776  | 0.0456  | AP4M1     |
| cg14797438 | 0.07859 | 0.06525 | 0.06921 | 0.05904 | 0.03986 | 0.0568  | 0.04772 | 0.05154 | 0.05455 | 0.04932 | PPP4R1    |
| cg14797887 | 0.23283 | 0.6215  | 0.04374 | 0.04036 | 0.03145 | 0.03276 | 0.03915 | 0.03489 | 0.03379 | 0.03228 | MNS1      |
| cg14799446 | 0.87232 | 0.52388 | 0.86812 | 0.84475 | 0.60784 | 0.59745 | 0.88021 | 0.11991 | 0.53882 | 0.49169 | STRN4     |

|            |         |         |         |         |         |         |         |         |         |         |          |
|------------|---------|---------|---------|---------|---------|---------|---------|---------|---------|---------|----------|
| cg14800883 | 0.17544 | 0.15268 | 0.15118 | 0.15574 | 0.21066 | 0.20165 | 0.14399 | 0.11874 | 0.13186 | 0.1308  | ARPC4    |
| cg14801726 | 0.07601 | 0.06157 | 0.08802 | 0.07658 | 0.11713 | 0.08094 | 0.06055 | 0.05888 | 0.06937 | 0.08674 | SRP68    |
| cg14802310 | 0.22232 | 0.23212 | 0.24613 | 0.2579  | 0.27427 | 0.25734 | 0.27143 | 0.26181 | 0.24429 | 0.24304 | TUBA3    |
| cg14802951 | 0.82492 | 0.45554 | 0.72897 | 0.8498  | 0.89248 | 0.72817 | 0.41863 | 0.32692 | 0.72937 | 0.04732 | ADAMTS13 |
| cg14804557 | 0.84123 | 0.82228 | 0.80827 | 0.88846 | 0.83056 | 0.63361 | 0.6651  | 0.77612 | 0.6134  | 0.83671 |          |
| cg14807303 | 0.83368 | 0.73312 | 0.33613 | 0.74109 | 0.93478 | 0.93189 | 0.63534 | 0.40232 | 0.53986 | 0.52128 | AR       |
| cg14808739 | 0.88808 | 0.88086 | 0.86858 | 0.84371 | 0.83711 | 0.65185 | 0.87177 | 0.85885 | 0.84907 | 0.75882 | SREBF1   |
| cg14809191 | 0.06764 | 0.03592 | 0.92203 | 0.92022 | 0.39836 | 0.36937 | 0.89926 | 0.75546 | 0.56279 | 0.50067 | FOXQ1    |
| cg14812492 | 0.0492  | 0.07413 | 0.08736 | 0.07389 | 0.12081 | 0.09806 | 0.05125 | 0.04316 | 0.04933 | 0.04852 | DGKH     |
| cg14813083 | 0.84339 | 0.51912 | 0.95455 | 0.96201 | 0.82696 | 0.67861 | 0.93687 | 0.95648 | 0.95862 | 0.9635  | LDHAL6A  |
| cg14813406 | 0.05941 | 0.04561 | 0.05493 | 0.0493  | 0.0721  | 0.05671 | 0.03642 | 0.02897 | 0.04834 | 0.04953 | CDC14A   |
| cg14815778 | 0.08461 | 0.09692 | 0.29279 | 0.12959 | 0.17195 | 0.10828 | 0.44513 | 0.3325  | 0.30202 | 0.07516 | FAM58A   |
| cg14816013 | 0.04571 | 0.0461  | 0.05137 | 0.04844 | 0.03653 | 0.04196 | 0.04445 | 0.04564 | 0.04643 | 0.03882 | OBFC2B   |
| cg14816748 | 0.02799 | 0.02749 | 0.03046 | 0.02995 | 0.02129 | 0.02641 | 0.02474 | 0.02385 | 0.02332 | 0.02279 | PRPSAP1  |
| cg14817143 | 0.0831  | 0.07167 | 0.07232 | 0.07185 | 0.05417 | 0.0528  | 0.06044 | 0.06889 | 0.0586  | 0.06166 | TTPA     |
| cg14817542 | 0.05071 | 0.05218 | 0.06144 | 0.05863 | 0.0469  | 0.04364 | 0.04709 | 0.04437 | 0.0458  | 0.0444  | HIF1AN   |
| cg14817848 | 0.0421  | 0.04836 | 0.04765 | 0.04262 | 0.02817 | 0.04185 | 0.04012 | 0.03892 | 0.03096 | 0.03663 | DUSP16   |
| cg14818279 | 0.86694 | 0.78478 | 0.82355 | 0.8782  | 0.8493  | 0.86476 | 0.80158 | 0.76336 | 0.85312 | 0.44405 | SH3TC2   |
| cg14820573 | 0.90442 | 0.15023 | 0.91514 | 0.89908 | 0.92315 | 0.60284 | 0.92513 | 0.87354 | 0.93029 | 0.84047 | C16orf33 |
| cg14820798 | 0.07616 | 0.07357 | 0.07433 | 0.07156 | 0.11697 | 0.06343 | 0.07181 | 0.0711  | 0.08159 | 0.06188 | FLJ12700 |
| cg14821083 | 0.08879 | 0.06784 | 0.08685 | 0.07129 | 0.08452 | 0.07119 | 0.09632 | 0.06957 | 0.05396 | 0.06034 | SEPHS2   |
| cg14822966 | 0.05044 | 0.04784 | 0.17782 | 0.13816 | 0.06791 | 0.05483 | 0.07863 | 0.05674 | 0.48048 | 0.05387 | SLBP     |
| cg14823109 | 0.03638 | 0.03962 | 0.03708 | 0.03444 | 0.03447 | 0.03261 | 0.03394 | 0.035   | 0.02884 | 0.02482 | BCAS4    |
| cg14823162 | 0.03073 | 0.03428 | 0.06335 | 0.04381 | 0.31196 | 0.03444 | 0.04582 | 0.04321 | 0.04878 | 0.02933 | POU3F2   |
| cg14824983 | 0.87204 | 0.83726 | 0.88141 | 0.88042 | 0.90905 | 0.85754 | 0.88129 | 0.85504 | 0.88219 | 0.85216 | SEMA3B   |
| cg14826456 | 0.03192 | 0.03771 | 0.71688 | 0.82152 | 0.83613 | 0.62521 | 0.45766 | 0.89477 | 0.44257 | 0.08455 | ADRB1    |
| cg14826683 | 0.09953 | 0.07537 | 0.25784 | 0.28232 | 0.30772 | 0.09039 | 0.07678 | 0.05433 | 0.2553  | 0.13966 | SPRR2D   |
| cg14828965 | 0.05904 | 0.05488 | 0.05714 | 0.056   | 0.0425  | 0.05871 | 0.05248 | 0.05333 | 0.05205 | 0.04582 | RNF40    |
| cg14829378 | 0.03125 | 0.03444 | 0.03793 | 0.03048 | 0.02984 | 0.02979 | 0.02598 | 0.02889 | 0.02329 | 0.02522 | B4GALT1  |
| cg14830952 | 0.02394 | 0.02709 | 0.02907 | 0.02556 | 0.02162 | 0.02726 | 0.02322 | 0.02267 | 0.02247 | 0.01884 | E2F5     |
| cg14831798 | 0.89625 | 0.75756 | 0.90644 | 0.91465 | 0.90438 | 0.88157 | 0.91433 | 0.8946  | 0.92929 | 0.86627 | CDYL     |
| cg14831838 | 0.03457 | 0.02949 | 0.03395 | 0.03145 | 0.02871 | 0.03087 | 0.02651 | 0.02692 | 0.02599 | 0.0298  | CDK5R2   |
| cg14832358 | 0.06102 | 0.0608  | 0.05374 | 0.0487  | 0.05879 | 0.05648 | 0.04416 | 0.03527 | 0.04654 | 0.04051 | FLJ10379 |
| cg14832904 | 0.97396 | 0.95316 | 0.96488 | 0.97228 | 0.98059 | 0.97077 | 0.96899 | 0.97362 | 0.97754 | 0.97778 | GPR75    |
| cg14833160 | 0.34121 | 0.04588 | 0.1088  | 0.21745 | 0.1685  | 0.04432 | 0.0677  | 0.03838 | 0.05703 | 0.03789 | BAX      |
| cg14833385 | 0.7747  | 0.14346 | 0.4553  | 0.64117 | 0.14329 | 0.23408 | 0.16695 | 0.13554 | 0.19312 | 0.20212 | HLA-DMA  |
| cg14834436 | 0.16728 | 0.12538 | 0.10663 | 0.09423 | 0.25277 | 0.16297 | 0.17361 | 0.12307 | 0.12814 | 0.18082 | MNAT1    |
| cg14835962 | 0.02769 | 0.02872 | 0.03135 | 0.02834 | 0.02265 | 0.02949 | 0.02767 | 0.02915 | 0.02703 | 0.02544 | THAP7    |
| cg14837082 | 0.47233 | 0.26175 | 0.6192  | 0.69009 | 0.54028 | 0.56281 | 0.56931 | 0.59903 | 0.49688 | 0.41811 | HRH1     |
| cg14837165 | 0.59995 | 0.43389 | 0.0593  | 0.05656 | 0.1607  | 0.02895 | 0.17485 | 0.04247 | 0.03873 | 0.02702 | D4ST1    |
| cg14837411 | 0.09373 | 0.13153 | 0.04701 | 0.04698 | 0.04081 | 0.03597 | 0.02409 | 0.02402 | 0.02629 | 0.03106 | RAD51C   |

|            |         |         |         |         |         |         |         |         |         |         |          |
|------------|---------|---------|---------|---------|---------|---------|---------|---------|---------|---------|----------|
| cg14838256 | 0.02433 | 0.02355 | 0.02719 | 0.02644 | 0.02485 | 0.02719 | 0.02402 | 0.02588 | 0.02293 | 0.02147 | SRD5A2L  |
| cg14839257 | 0.02242 | 0.0202  | 0.04504 | 0.02843 | 0.23507 | 0.34037 | 0.04161 | 0.02471 | 0.02615 | 0.01756 | RPS6KA2  |
| cg14839898 | 0.86638 | 0.82325 | 0.73277 | 0.80046 | 0.83237 | 0.4601  | 0.78632 | 0.75945 | 0.59843 | 0.56305 | SDHD     |
| cg14839932 | 0.08601 | 0.09051 | 0.09681 | 0.08052 | 0.11756 | 0.11222 | 0.06248 | 0.08494 | 0.06801 | 0.0756  | SRF      |
| cg14840416 | 0.05641 | 0.06724 | 0.05734 | 0.05425 | 0.05733 | 0.06088 | 0.04611 | 0.04978 | 0.05871 | 0.05398 | ZFP36L2  |
| cg14841098 | 0.06765 | 0.04469 | 0.04954 | 0.04247 | 0.03725 | 0.04392 | 0.49285 | 0.52025 | 0.05144 | 0.03533 | SLC9A7   |
| cg14841875 | 0.04728 | 0.05333 | 0.06966 | 0.06609 | 0.04733 | 0.04946 | 0.05562 | 0.05689 | 0.0561  | 0.05307 | ATP1A1   |
| cg14844130 | 0.10027 | 0.06627 | 0.09413 | 0.09897 | 0.23455 | 0.23113 | 0.0594  | 0.04798 | 0.05753 | 0.06504 | VPREB1   |
| cg14845091 | 0.76732 | 0.68604 | 0.85674 | 0.84911 | 0.90387 | 0.85278 | 0.79487 | 0.61769 | 0.89116 | 0.81763 | ADPRHL1  |
| cg14846293 | 0.03584 | 0.03863 | 0.03459 | 0.03093 | 0.02743 | 0.02749 | 0.03408 | 0.03079 | 0.0281  | 0.02892 | AXIN2    |
| cg14847483 | 0.64922 | 0.71327 | 0.81587 | 0.82464 | 0.37986 | 0.30946 | 0.12072 | 0.15681 | 0.12895 | 0.07923 | TMEM85   |
| cg14847688 | 0.97831 | 0.98261 | 0.03393 | 0.0354  | 0.98239 | 0.98389 | 0.98297 | 0.98356 | 0.98384 | 0.97624 | GPR135   |
| cg14849423 | 0.44395 | 0.4865  | 0.9501  | 0.95515 | 0.89973 | 0.82461 | 0.54364 | 0.49341 | 0.65851 | 0.66612 | PEG3     |
| cg14849559 | 0.04028 | 0.04155 | 0.04117 | 0.05072 | 0.04871 | 0.04783 | 0.04102 | 0.03788 | 0.04463 | 0.04254 | TMBIM1   |
| cg14850026 | 0.85335 | 0.67493 | 0.92072 | 0.93799 | 0.9676  | 0.93776 | 0.84311 | 0.91392 | 0.92547 | 0.93598 | ECAT11   |
| cg14850181 | 0.02661 | 0.02825 | 0.03207 | 0.0248  | 0.02026 | 0.02371 | 0.0203  | 0.0198  | 0.02785 | 0.02435 | MPST     |
| cg14851685 | 0.42799 | 0.10938 | 0.9359  | 0.94217 | 0.88439 | 0.91296 | 0.0283  | 0.03506 | 0.15494 | 0.12674 | FLJ39501 |
| cg14853515 | 0.03043 | 0.0303  | 0.03521 | 0.03195 | 0.03342 | 0.03012 | 0.02936 | 0.03158 | 0.02049 | 0.02193 | LSM5     |
| cg14854487 | 0.04109 | 0.04103 | 0.05462 | 0.05458 | 0.03958 | 0.04492 | 0.45883 | 0.50778 | 0.04141 | 0.03916 | LAMP2    |
| cg14858551 | 0.08784 | 0.0873  | 0.12977 | 0.10811 | 0.14531 | 0.14634 | 0.10659 | 0.10701 | 0.05903 | 0.08163 | ZNF133   |
| cg14859074 | 0.02841 | 0.03222 | 0.40293 | 0.47746 | 0.03001 | 0.0278  | 0.03051 | 0.03356 | 0.04517 | 0.02433 | CLDN1    |
| cg14859417 | 0.46332 | 0.37035 | 0.44135 | 0.4811  | 0.85615 | 0.67918 | 0.07682 | 0.04367 | 0.15627 | 0.26017 | PTPRE    |
| cg14859460 | 0.11816 | 0.04851 | 0.9576  | 0.97432 | 0.97702 | 0.97165 | 0.08548 | 0.04709 | 0.03777 | 0.02404 | GRM6     |
| cg14859749 | 0.01667 | 0.01839 | 0.02206 | 0.02028 | 0.01439 | 0.01755 | 0.0172  | 0.01703 | 0.01476 | 0.01941 | SF3A1    |
| cg14860494 | 0.08549 | 0.08713 | 0.07882 | 0.07072 | 0.05951 | 0.06848 | 0.0899  | 0.0931  | 0.06074 | 0.06356 | GCLM     |
| cg14861570 | 0.47242 | 0.11373 | 0.8023  | 0.80217 | 0.21466 | 0.35799 | 0.2575  | 0.07146 | 0.52526 | 0.76497 | MMD      |
| cg14862827 | 0.09128 | 0.04398 | 0.05731 | 0.05844 | 0.2166  | 0.06104 | 0.05464 | 0.05023 | 0.04125 | 0.04309 | SUSD1    |
| cg14863484 | 0.05727 | 0.06056 | 0.04919 | 0.0526  | 0.03261 | 0.03425 | 0.05282 | 0.04896 | 0.04544 | 0.04084 | GOT2     |
| cg14864603 | 0.90214 | 0.74267 | 0.89252 | 0.91609 | 0.93731 | 0.87111 | 0.87394 | 0.85997 | 0.9217  | 0.8927  | AANAT    |
| cg14865516 | 0.77161 | 0.06436 | 0.152   | 0.37751 | 0.33926 | 0.04132 | 0.09614 | 0.04837 | 0.27098 | 0.02789 | PAIP1    |
| cg14865868 | 0.7118  | 0.11112 | 0.31977 | 0.35398 | 0.70251 | 0.07405 | 0.31236 | 0.06648 | 0.0847  | 0.05887 | TRIB2    |
| cg14869028 | 0.24616 | 0.07393 | 0.20473 | 0.32618 | 0.78271 | 0.84365 | 0.78095 | 0.78714 | 0.86072 | 0.51859 | TINAGL1  |
| cg14870271 | 0.0593  | 0.10825 | 0.11285 | 0.29658 | 0.06484 | 0.05044 | 0.43102 | 0.0545  | 0.0552  | 0.04825 | LGALS3BP |
| cg14870461 | 0.95229 | 0.59222 | 0.03393 | 0.04513 | 0.20015 | 0.03458 | 0.41223 | 0.04409 | 0.31963 | 0.10501 | AER61    |
| cg14871138 | 0.07962 | 0.06505 | 0.93131 | 0.94318 | 0.85735 | 0.60018 | 0.0373  | 0.04215 | 0.70493 | 0.59849 | NTSR1    |
| cg14871544 | 0.18585 | 0.13738 | 0.46515 | 0.60271 | 0.3171  | 0.20022 | 0.26411 | 0.17492 | 0.18963 | 0.18561 | DSG3     |
| cg14871856 | 0.02745 | 0.02703 | 0.02548 | 0.03021 | 0.01694 | 0.02198 | 0.02546 | 0.02399 | 0.02016 | 0.01779 | GTF2E2   |
| cg14872956 | 0.03252 | 0.03859 | 0.02963 | 0.03004 | 0.02878 | 0.03665 | 0.03307 | 0.03142 | 0.03325 | 0.02862 | IKIP     |
| cg14873135 | 0.06112 | 0.06142 | 0.04869 | 0.04754 | 0.0689  | 0.0707  | 0.04474 | 0.05151 | 0.04654 | 0.05285 | TARS     |
| cg14874121 | 0.02911 | 0.0327  | 0.03643 | 0.03399 | 0.02444 | 0.03305 | 0.02534 | 0.02715 | 0.02406 | 0.02333 | HSD17B4  |
| cg14876043 | 0.76782 | 0.54856 | 0.49411 | 0.77389 | 0.73918 | 0.852   | 0.17405 | 0.16126 | 0.37754 | 0.33639 | NALP7    |

|            |         |         |         |         |         |         |         |         |         |                      |
|------------|---------|---------|---------|---------|---------|---------|---------|---------|---------|----------------------|
| cg14879013 | 0.05009 | 0.04388 | 0.05579 | 0.05112 | 0.05424 | 0.05033 | 0.06203 | 0.05183 | 0.07083 | 0.0684 DTWD1         |
| cg14880655 | 0.82384 | 0.85716 | 0.83191 | 0.85338 | 0.77759 | 0.83769 | 0.86436 | 0.87341 | 0.87735 | 0.86054 MAP1LC3A     |
| cg14880800 | 0.81414 | 0.75251 | 0.85641 | 0.88742 | 0.83001 | 0.35885 | 0.79044 | 0.53818 | 0.80279 | 0.82121 DNAH5        |
| cg14882700 | 0.05221 | 0.04413 | 0.62767 | 0.80884 | 0.69344 | 0.7703  | 0.22907 | 0.44715 | 0.08722 | 0.04078 OTOP1        |
| cg14883392 | 0.11604 | 0.10458 | 0.12366 | 0.17665 | 0.07896 | 0.0883  | 0.13097 | 0.10607 | 0.14175 | 0.0926 ASCL1         |
| cg14884741 | 0.0574  | 0.06131 | 0.08763 | 0.16578 | 0.05684 | 0.05378 | 0.07875 | 0.0423  | 0.34958 | 0.16167 PPP1R14C     |
| cg14885742 | 0.34111 | 0.40032 | 0.27867 | 0.2537  | 0.06581 | 0.09485 | 0.10619 | 0.13811 | 0.06752 | 0.06479 IFITM3       |
| cg14886269 | 0.3628  | 0.05303 | 0.96303 | 0.96908 | 0.97042 | 0.96656 | 0.66416 | 0.40657 | 0.95219 | 0.89243 TNFRSF18     |
| cg14887509 | 0.02625 | 0.02417 | 0.02667 | 0.02424 | 0.02379 | 0.02157 | 0.01844 | 0.0221  | 0.01942 | 0.02128 WASF2        |
| cg14889768 | 0.27881 | 0.32445 | 0.26612 | 0.17786 | 0.03699 | 0.03431 | 0.20584 | 0.08953 | 0.31481 | 0.06107 RAB32        |
| cg14892037 | 0.03626 | 0.03487 | 0.06524 | 0.0508  | 0.04028 | 0.04254 | 0.27051 | 0.32359 | 0.03939 | 0.03332 SNX12        |
| cg14892066 | 0.13907 | 0.09175 | 0.29717 | 0.55066 | 0.38434 | 0.07275 | 0.23504 | 0.04832 | 0.58408 | 0.29926 DCTD         |
| cg14892768 | 0.46739 | 0.47759 | 0.06139 | 0.06681 | 0.06098 | 0.06126 | 0.04703 | 0.06725 | 0.05243 | 0.05144 AXL          |
| cg14893129 | 0.88479 | 0.62589 | 0.82854 | 0.86958 | 0.89999 | 0.91211 | 0.68276 | 0.75488 | 0.88711 | 0.83341 CARD14       |
| cg14893161 | 0.83614 | 0.79695 | 0.83205 | 0.87872 | 0.92764 | 0.90083 | 0.55257 | 0.62189 | 0.65109 | 0.64601 FLJ32569     |
| cg14893163 | 0.08548 | 0.36004 | 0.80288 | 0.77842 | 0.09933 | 0.07021 | 0.03909 | 0.03885 | 0.13449 | 0.06525 PCDH17       |
| cg14894144 | 0.90707 | 0.6606  | 0.90073 | 0.91272 | 0.89501 | 0.86062 | 0.41373 | 0.12123 | 0.93784 | 0.89822 LAMA3        |
| cg14894216 | 0.0924  | 0.07621 | 0.40563 | 0.44053 | 0.17389 | 0.09435 | 0.09974 | 0.08764 | 0.08286 | 0.07337 CATSPER1     |
| cg14896003 | 0.93194 | 0.90202 | 0.92699 | 0.9387  | 0.95556 | 0.93208 | 0.92444 | 0.91715 | 0.93805 | 0.93881 RASSF7       |
| cg14896516 | 0.03502 | 0.02632 | 0.93135 | 0.95169 | 0.38833 | 0.39615 | 0.02711 | 0.02951 | 0.02467 | 0.15655 CRHR2        |
| cg14897096 | 0.8784  | 0.82827 | 0.9022  | 0.91065 | 0.84752 | 0.7434  | 0.88947 | 0.87029 | 0.88096 | 0.67681 PC           |
| cg14898639 | 0.89371 | 0.80113 | 0.90411 | 0.90233 | 0.90908 | 0.70161 | 0.79447 | 0.87139 | 0.92669 | 0.89578 KIAA0889     |
| cg14898779 | 0.86022 | 0.85966 | 0.86906 | 0.87005 | 0.85988 | 0.8762  | 0.83427 | 0.8671  | 0.88556 | 0.89489 STK31        |
| cg14898892 | 0.20606 | 0.18991 | 0.75024 | 0.75237 | 0.50252 | 0.21886 | 0.45045 | 0.14129 | 0.18606 | 0.15649 SHRM         |
| cg14899547 | 0.01875 | 0.02162 | 0.02214 | 0.02098 | 0.01611 | 0.02151 | 0.02114 | 0.01945 | 0.0193  | 0.01642 FLJ40629     |
| cg14900471 | 0.03453 | 0.03433 | 0.03404 | 0.03384 | 0.81572 | 0.97673 | 0.19511 | 0.67283 | 0.03037 | 0.02898 GATA4        |
| cg14902389 | 0.82073 | 0.10484 | 0.64483 | 0.83174 | 0.82398 | 0.63905 | 0.31923 | 0.77312 | 0.1291  | 0.25663 MGAT4A       |
| cg14903309 | 0.02385 | 0.03036 | 0.03835 | 0.03452 | 0.0372  | 0.03799 | 0.03592 | 0.0278  | 0.03286 | 0.03111 TARBP2       |
| cg14904464 | 0.02446 | 0.02666 | 0.07876 | 0.05648 | 0.05548 | 0.18059 | 0.04008 | 0.0333  | 0.03243 | 0.0252 NELL2         |
| cg14908548 | 0.0424  | 0.03772 | 0.04183 | 0.03932 | 0.02554 | 0.04086 | 0.03446 | 0.04228 | 0.03786 | 0.03082 MAML1        |
| cg14910241 | 0.05063 | 0.03493 | 0.03466 | 0.04187 | 0.02626 | 0.02694 | 0.03158 | 0.02749 | 0.02874 | 0.02668 TGFBR2       |
| cg14911395 | 0.12006 | 0.02705 | 0.91888 | 0.94246 | 0.9825  | 0.97132 | 0.97442 | 0.91182 | 0.97445 | 0.94028 SEMA3B       |
| cg14911472 | 0.04873 | 0.0497  | 0.06095 | 0.05097 | 0.04877 | 0.0536  | 0.04838 | 0.0487  | 0.04449 | 0.04577 CRSP3        |
| cg14912034 | 0.28894 | 0.28233 | 0.53484 | 0.79765 | 0.61677 | 0.66971 | 0.34611 | 0.63116 | 0.32702 | 0.16866 LYZL2        |
| cg14912575 | 0.96759 | 0.83676 | 0.96848 | 0.97232 | 0.90474 | 0.7321  | 0.03869 | 0.03527 | 0.04228 | 0.03046 C14orf162    |
| cg14913610 | 0.8936  | 0.89566 | 0.81556 | 0.87913 | 0.52261 | 0.59417 | 0.74684 | 0.65725 | 0.88358 | 0.79245 KLRG1        |
| cg14913925 | 0.06886 | 0.05979 | 0.38717 | 0.18415 | 0.5182  | 0.57317 | 0.0526  | 0.05443 | 0.04537 | 0.05835 DKFZp727G131 |
| cg14914852 | 0.8677  | 0.89063 | 0.87238 | 0.88364 | 0.93419 | 0.8859  | 0.88546 | 0.87    | 0.87087 | 0.86898 ZPBP2        |
| cg14914982 | 0.06548 | 0.06098 | 0.06738 | 0.07035 | 0.08731 | 0.05051 | 0.22984 | 0.33506 | 0.05244 | 0.05395 CCND2        |
| cg14915165 | 0.04077 | 0.04589 | 0.04707 | 0.04496 | 0.03672 | 0.04502 | 0.04056 | 0.03759 | 0.04819 | 0.04107 WDR3         |
| cg14915263 | 0.02567 | 0.02384 | 0.02363 | 0.02318 | 0.02695 | 0.0237  | 0.02279 | 0.02207 | 0.01722 | 0.01605 PTPN1        |

|            |         |         |         |         |         |         |         |         |         |         |          |
|------------|---------|---------|---------|---------|---------|---------|---------|---------|---------|---------|----------|
| cg14916079 | 0.14393 | 0.10753 | 0.7617  | 0.77697 | 0.73885 | 0.599   | 0.8132  | 0.46928 | 0.83182 | 0.65735 | NANOS1   |
| cg14916200 | 0.02421 | 0.02161 | 0.02395 | 0.02234 | 0.01925 | 0.02129 | 0.01934 | 0.02202 | 0.01852 | 0.02185 | HIC2     |
| cg14916213 | 0.0321  | 0.02929 | 0.03309 | 0.03061 | 0.02196 | 0.02292 | 0.02482 | 0.02847 | 0.02348 | 0.02732 | RBM4     |
| cg14916288 | 0.34155 | 0.18056 | 0.72139 | 0.88801 | 0.32415 | 0.33081 | 0.12424 | 0.07002 | 0.2698  | 0.26915 | CCL23    |
| cg14917512 | 0.14447 | 0.16051 | 0.59782 | 0.63876 | 0.44361 | 0.52418 | 0.08196 | 0.01955 | 0.47464 | 0.59177 | GNA11    |
| cg14918082 | 0.03851 | 0.03143 | 0.12949 | 0.0435  | 0.96814 | 0.82121 | 0.0602  | 0.0321  | 0.96926 | 0.95457 | KCNAB3   |
| cg14919562 | 0.02756 | 0.02884 | 0.02614 | 0.02586 | 0.0199  | 0.02228 | 0.02256 | 0.02386 | 0.02202 | 0.02082 | RAD23B   |
| cg14920334 | 0.24909 | 0.26872 | 0.36116 | 0.6142  | 0.12919 | 0.04572 | 0.05011 | 0.0476  | 0.04341 | 0.04237 | GALNT8   |
| cg14920426 | 0.0522  | 0.06054 | 0.05691 | 0.05924 | 0.03869 | 0.05433 | 0.05423 | 0.05737 | 0.05211 | 0.05218 | PDLIM7   |
| cg14920846 | 0.03276 | 0.02719 | 0.03478 | 0.03128 | 0.02241 | 0.02838 | 0.56996 | 0.02618 | 0.39377 | 0.46534 | NAV1     |
| cg14923435 | 0.06105 | 0.06214 | 0.08391 | 0.08917 | 0.11132 | 0.08233 | 0.07855 | 0.07336 | 0.10455 | 0.07069 | EPB41L5  |
| cg14924091 | 0.04046 | 0.02569 | 0.02643 | 0.03112 | 0.01999 | 0.02225 | 0.02117 | 0.0231  | 0.02011 | 0.0216  | D4ST1    |
| cg14924278 | 0.18717 | 0.19157 | 0.53202 | 0.54177 | 0.63372 | 0.77113 | 0.17717 | 0.12247 | 0.37676 | 0.187   | TACC2    |
| cg14925024 | 0.48667 | 0.45716 | 0.79805 | 0.82456 | 0.49214 | 0.65704 | 0.81104 | 0.85334 | 0.11723 | 0.11626 | C1orf35  |
| cg14927277 | 0.08382 | 0.06862 | 0.08412 | 0.08164 | 0.05595 | 0.07418 | 0.06952 | 0.06967 | 0.06645 | 0.06563 | KIF18A   |
| cg14930396 | 0.03571 | 0.03692 | 0.03987 | 0.03999 | 0.02717 | 0.03081 | 0.03089 | 0.03263 | 0.03153 | 0.03053 | SF3B14   |
| cg14930674 | 0.88494 | 0.62961 | 0.78056 | 0.83188 | 0.87587 | 0.70469 | 0.77941 | 0.90848 | 0.46718 | 0.38573 | SLC12A1  |
| cg14930706 | 0.78398 | 0.88004 | 0.82089 | 0.84414 | 0.82533 | 0.64299 | 0.41693 | 0.80356 | 0.87709 | 0.87013 | NALP4    |
| cg14931645 | 0.04133 | 0.03903 | 0.05041 | 0.0552  | 0.03952 | 0.04664 | 0.05504 | 0.05936 | 0.0746  | 0.077   | ZNF672   |
| cg14932645 | 0.79358 | 0.61206 | 0.68132 | 0.78823 | 0.75518 | 0.77817 | 0.66879 | 0.72019 | 0.13476 | 0.13828 | SLC4A5   |
| cg14932684 | 0.03509 | 0.03663 | 0.03072 | 0.03353 | 0.02684 | 0.03232 | 0.0298  | 0.03058 | 0.02797 | 0.02449 | YAF2     |
| cg14934766 | 0.02942 | 0.03823 | 0.03579 | 0.039   | 0.0323  | 0.03441 | 0.02822 | 0.03045 | 0.03194 | 0.02977 | CENPA    |
| cg14934821 | 0.87835 | 0.46706 | 0.91594 | 0.91091 | 0.91874 | 0.87702 | 0.87576 | 0.85572 | 0.8515  | 0.77593 | GPSM1    |
| cg14939652 | 0.05651 | 0.03388 | 0.04384 | 0.03726 | 0.05092 | 0.05344 | 0.03215 | 0.02793 | 0.05639 | 0.04859 | NPAS3    |
| cg14939691 | 0.05033 | 0.0499  | 0.05057 | 0.04793 | 0.04839 | 0.05284 | 0.04261 | 0.03874 | 0.04055 | 0.03999 | TKT      |
| cg14940420 | 0.20961 | 0.0928  | 0.14218 | 0.1444  | 0.23216 | 0.14559 | 0.07748 | 0.06801 | 0.25516 | 0.61329 | IQCF2    |
| cg14942312 | 0.44009 | 0.45469 | 0.51858 | 0.6291  | 0.62586 | 0.54588 | 0.04853 | 0.05226 | 0.1706  | 0.22361 | GPR119   |
| cg14944269 | 0.8025  | 0.17856 | 0.73991 | 0.6734  | 0.62715 | 0.39792 | 0.55028 | 0.16516 | 0.60634 | 0.34534 | RAB15    |
| cg14944362 | 0.20452 | 0.14602 | 0.34413 | 0.41179 | 0.77051 | 0.74546 | 0.06169 | 0.05703 | 0.42878 | 0.32436 | PDYN     |
| cg14946299 | 0.05286 | 0.06127 | 0.09736 | 0.09168 | 0.12144 | 0.11847 | 0.09336 | 0.0718  | 0.05586 | 0.05196 | ZNF273   |
| cg14947494 | 0.03428 | 0.03312 | 0.03749 | 0.04458 | 0.03638 | 0.03707 | 0.03349 | 0.03277 | 0.02972 | 0.03415 | BRP44L   |
| cg14948436 | 0.62563 | 0.31635 | 0.65658 | 0.77826 | 0.69314 | 0.87463 | 0.2996  | 0.42934 | 0.43559 | 0.31923 | KCNK16   |
| cg14948822 | 0.78994 | 0.30714 | 0.6146  | 0.83608 | 0.49366 | 0.34286 | 0.80663 | 0.45244 | 0.68461 | 0.12411 | MPV17    |
| cg14949649 | 0.06689 | 0.067   | 0.07655 | 0.07081 | 0.06232 | 0.06973 | 0.06886 | 0.06423 | 0.0625  | 0.062   | KCTD10   |
| cg14950072 | 0.0985  | 0.16596 | 0.11142 | 0.07445 | 0.05893 | 0.05    | 0.04865 | 0.05875 | 0.0726  | 0.03958 | LAMA1    |
| cg14951292 | 0.60791 | 0.15999 | 0.88811 | 0.89544 | 0.93122 | 0.62336 | 0.63296 | 0.14555 | 0.86392 | 0.21369 | HMOX2    |
| cg14951734 | 0.02408 | 0.02536 | 0.02421 | 0.02509 | 0.02199 | 0.02269 | 0.02131 | 0.0205  | 0.01809 | 0.02235 | FLJ40432 |
| cg14957086 | 0.10232 | 0.04373 | 0.08417 | 0.09399 | 0.1152  | 0.0616  | 0.05652 | 0.05539 | 0.10408 | 0.05049 | CSRP2    |
| cg14958018 | 0.82249 | 0.56487 | 0.84248 | 0.87956 | 0.85092 | 0.72271 | 0.21382 | 0.22499 | 0.42777 | 0.46782 | FLJ25169 |
| cg14958635 | 0.08034 | 0.03473 | 0.93513 | 0.94924 | 0.89056 | 0.91542 | 0.23198 | 0.08696 | 0.07998 | 0.19232 | NEUROG1  |
| cg14958889 | 0.04474 | 0.04339 | 0.04888 | 0.04593 | 0.03626 | 0.04195 | 0.03563 | 0.03602 | 0.03819 | 0.03871 | GPR153   |

|            |         |         |         |         |         |         |         |         |         |         |          |
|------------|---------|---------|---------|---------|---------|---------|---------|---------|---------|---------|----------|
| cg14959707 | 0.9138  | 0.88948 | 0.90909 | 0.92039 | 0.81601 | 0.59882 | 0.88217 | 0.13221 | 0.92827 | 0.86896 | ZC3H7A   |
| cg14960043 | 0.87647 | 0.07507 | 0.36602 | 0.39456 | 0.93385 | 0.24475 | 0.86488 | 0.04647 | 0.91304 | 0.33128 | DEF6     |
| cg14961385 | 0.0472  | 0.05345 | 0.05215 | 0.04171 | 0.04257 | 0.05213 | 0.05143 | 0.04228 | 0.04023 | 0.04502 | SPAG4    |
| cg14961550 | 0.08549 | 0.10222 | 0.1023  | 0.09748 | 0.05108 | 0.07274 | 0.07361 | 0.08155 | 0.07073 | 0.07814 | MCM3     |
| cg14962548 | 0.02345 | 0.02367 | 0.03371 | 0.03117 | 0.02274 | 0.02344 | 0.02511 | 0.02239 | 0.02193 | 0.02291 | TXNDC9   |
| cg14962776 | 0.14949 | 0.128   | 0.14621 | 0.12401 | 0.17916 | 0.1073  | 0.07718 | 0.0759  | 0.0992  | 0.12614 | TRAPPC2  |
| cg14963371 | 0.10438 | 0.1012  | 0.12566 | 0.10836 | 0.11929 | 0.11672 | 0.09002 | 0.08873 | 0.11061 | 0.10199 | GPR3     |
| cg14963897 | 0.90144 | 0.73288 | 0.90096 | 0.92927 | 0.91593 | 0.56477 | 0.82205 | 0.7335  | 0.88885 | 0.79496 | NFS1     |
| cg14964658 | 0.04108 | 0.04014 | 0.05022 | 0.04222 | 0.04702 | 0.04839 | 0.04254 | 0.03524 | 0.03624 | 0.04056 | PEX19    |
| cg14966252 | 0.08242 | 0.07145 | 0.06713 | 0.07569 | 0.05638 | 0.06533 | 0.06766 | 0.05894 | 0.21379 | 0.05604 | ZNF622   |
| cg14967066 | 0.08682 | 0.1979  | 0.8267  | 0.83822 | 0.11258 | 0.2865  | 0.57748 | 0.25755 | 0.38549 | 0.05491 | IFITM1   |
| cg14967972 | 0.19771 | 0.12609 | 0.17061 | 0.13659 | 0.18915 | 0.12524 | 0.11774 | 0.10419 | 0.11582 | 0.13386 | PANK1    |
| cg14971781 | 0.05379 | 0.04753 | 0.06312 | 0.05862 | 0.04103 | 0.03965 | 0.04294 | 0.04308 | 0.04361 | 0.03722 | ACBD3    |
| cg14972143 | 0.48952 | 0.4524  | 0.06593 | 0.05059 | 0.19325 | 0.07577 | 0.05383 | 0.04756 | 0.05208 | 0.06836 | EIF4E    |
| cg14972271 | 0.82061 | 0.27892 | 0.7864  | 0.80545 | 0.78731 | 0.6435  | 0.76785 | 0.71681 | 0.82488 | 0.5253  | CAPN2    |
| cg14973995 | 0.04884 | 0.0395  | 0.27429 | 0.40808 | 0.05047 | 0.04308 | 0.17993 | 0.05374 | 0.529   | 0.5126  | TETTRAN  |
| cg14974772 | 0.05942 | 0.05183 | 0.05787 | 0.04239 | 0.11547 | 0.05743 | 0.09277 | 0.04862 | 0.05102 | 0.06575 | FBLN5    |
| cg14975238 | 0.86333 | 0.8427  | 0.8618  | 0.86193 | 0.90473 | 0.86864 | 0.85424 | 0.82812 | 0.86683 | 0.82531 | BHLHB8   |
| cg14976276 | 0.02843 | 0.03333 | 0.032   | 0.02622 | 0.02808 | 0.02913 | 0.02832 | 0.0266  | 0.0227  | 0.02333 | NEU1     |
| cg14981132 | 0.05721 | 0.06394 | 0.09785 | 0.09033 | 0.14104 | 0.07886 | 0.09167 | 0.09858 | 0.0946  | 0.08283 | HNRPA1   |
| cg14982472 | 0.47672 | 0.17791 | 0.38119 | 0.5691  | 0.3696  | 0.49045 | 0.13572 | 0.15863 | 0.13175 | 0.09546 | ABCG1    |
| cg14984307 | 0.06382 | 0.06045 | 0.05285 | 0.043   | 0.08089 | 0.08041 | 0.05903 | 0.05632 | 0.04902 | 0.0726  | ACYP1    |
| cg14984920 | 0.08907 | 0.07769 | 0.08118 | 0.06401 | 0.14367 | 0.08214 | 0.10173 | 0.10024 | 0.0673  | 0.06882 | CYCS     |
| cg14986136 | 0.11806 | 0.11279 | 0.2054  | 0.1719  | 0.19368 | 0.16589 | 0.10105 | 0.12738 | 0.13572 | 0.151   | WBP5     |
| cg14986420 | 0.13226 | 0.12828 | 0.19534 | 0.18178 | 0.18274 | 0.17102 | 0.249   | 0.10935 | 0.14866 | 0.1503  | YIPF6    |
| cg14987922 | 0.0241  | 0.03374 | 0.02758 | 0.02312 | 0.02436 | 0.02729 | 0.02208 | 0.02027 | 0.02244 | 0.02352 | STRN     |
| cg14988503 | 0.93499 | 0.94023 | 0.93188 | 0.94257 | 0.94587 | 0.91644 | 0.93698 | 0.93044 | 0.69956 | 0.52901 | CDKL2    |
| cg14989191 | 0.09667 | 0.10239 | 0.09735 | 0.09543 | 0.06463 | 0.09235 | 0.13899 | 0.09837 | 0.2282  | 0.11299 | ASPHD1   |
| cg14990333 | 0.08972 | 0.07738 | 0.13542 | 0.10529 | 0.11972 | 0.1127  | 0.0922  | 0.06619 | 0.05967 | 0.07861 | ZNF221   |
| cg14991487 | 0.28065 | 0.03775 | 0.03822 | 0.03732 | 0.33424 | 0.03774 | 0.04002 | 0.03529 | 0.03127 | 0.03289 | HOXD9    |
| cg14992108 | 0.30394 | 0.24428 | 0.16686 | 0.33378 | 0.70305 | 0.67389 | 0.08322 | 0.3762  | 0.40144 | 0.05857 | SNTB1    |
| cg14992253 | 0.05842 | 0.04412 | 0.05667 | 0.05971 | 0.05229 | 0.05235 | 0.04031 | 0.03662 | 0.10995 | 0.04422 | C1orf91  |
| cg14993293 | 0.1042  | 0.08748 | 0.105   | 0.08971 | 0.09126 | 0.08752 | 0.09118 | 0.09601 | 0.0557  | 0.06067 | CETN3    |
| cg14996805 | 0.03924 | 0.03831 | 0.03604 | 0.03902 | 0.05807 | 0.04517 | 0.03699 | 0.02961 | 0.02693 | 0.03711 | SUPT4H1  |
| cg14998713 | 0.07137 | 0.04776 | 0.05047 | 0.05284 | 0.04356 | 0.04771 | 0.08456 | 0.06439 | 0.027   | 0.02329 | ETS1     |
| cg15001372 | 0.50511 | 0.11978 | 0.83979 | 0.87404 | 0.91033 | 0.8884  | 0.64095 | 0.75052 | 0.65527 | 0.4847  | GCK      |
| cg15001381 | 0.05216 | 0.05511 | 0.15747 | 0.17165 | 0.5052  | 0.26479 | 0.6705  | 0.17458 | 0.32863 | 0.06007 | AXIN1    |
| cg15002187 | 0.06595 | 0.05896 | 0.07244 | 0.0769  | 0.05139 | 0.06552 | 0.04597 | 0.05038 | 0.04795 | 0.0488  | SLC37A3  |
| cg15002204 | 0.24267 | 0.12879 | 0.37046 | 0.34322 | 0.33816 | 0.45538 | 0.13389 | 0.15396 | 0.08889 | 0.11634 | C6orf139 |
| cg15002214 | 0.03488 | 0.03564 | 0.03374 | 0.03444 | 0.04203 | 0.04472 | 0.02855 | 0.02741 | 0.03643 | 0.02948 | NOG      |
| cg15003158 | 0.59582 | 0.46981 | 0.67204 | 0.8422  | 0.06874 | 0.04413 | 0.07032 | 0.04871 | 0.06641 | 0.04434 | KENAE    |

|            |         |         |         |         |         |         |         |         |         |                  |
|------------|---------|---------|---------|---------|---------|---------|---------|---------|---------|------------------|
| cg15003434 | 0.03455 | 0.03019 | 0.04687 | 0.04359 | 0.03058 | 0.05367 | 0.04465 | 0.04323 | 0.04367 | 0.03683 SURF6    |
| cg15005385 | 0.47525 | 0.44655 | 0.31862 | 0.2771  | 0.42638 | 0.5925  | 0.11433 | 0.09419 | 0.47354 | 0.47283 CCL3L1   |
| cg15006396 | 0.76085 | 0.73601 | 0.16154 | 0.1211  | 0.12204 | 0.10916 | 0.22707 | 0.19567 | 0.12119 | 0.12798 NFKBIZ   |
| cg15006973 | 0.90979 | 0.82941 | 0.88735 | 0.93526 | 0.96559 | 0.89758 | 0.30538 | 0.31487 | 0.89003 | 0.78813 GJA4     |
| cg15008991 | 0.03833 | 0.04032 | 0.03503 | 0.02864 | 0.03151 | 0.03632 | 0.09043 | 0.03915 | 0.03546 | 0.03288 ZNF673   |
| cg15009698 | 0.14344 | 0.035   | 0.03126 | 0.0317  | 0.01914 | 0.03191 | 0.03447 | 0.02893 | 0.02974 | 0.02735 AP3B1    |
| cg15009813 | 0.24025 | 0.0735  | 0.11559 | 0.27135 | 0.33205 | 0.10619 | 0.07321 | 0.0601  | 0.05302 | 0.06634 TNFSF12  |
| cg15010067 | 0.06383 | 0.06041 | 0.06294 | 0.0662  | 0.10436 | 0.08441 | 0.07225 | 0.05217 | 0.05158 | 0.0403 MRPL54    |
| cg15010390 | 0.05114 | 0.05199 | 0.0621  | 0.05406 | 0.0396  | 0.04932 | 0.05143 | 0.05527 | 0.05523 | 0.03858 NDUFC1   |
| cg15013019 | 0.76083 | 0.55687 | 0.83936 | 0.83517 | 0.91135 | 0.79966 | 0.8604  | 0.6921  | 0.5101  | 0.11148 LYL1     |
| cg15014034 | 0.05044 | 0.05952 | 0.1407  | 0.17245 | 0.15953 | 0.07314 | 0.15356 | 0.06141 | 0.10811 | 0.03624 MAOA     |
| cg15014458 | 0.62029 | 0.07588 | 0.82218 | 0.92888 | 0.96971 | 0.96661 | 0.76471 | 0.79294 | 0.88965 | 0.06777 LYPD3    |
| cg15014549 | 0.14369 | 0.05844 | 0.36124 | 0.4713  | 0.07713 | 0.04454 | 0.06668 | 0.05087 | 0.16581 | 0.36745 FLJ10847 |
| cg15016234 | 0.05169 | 0.04754 | 0.05185 | 0.0435  | 0.03716 | 0.04392 | 0.0434  | 0.04278 | 0.04303 | 0.03917 TRIM62   |
| cg15016628 | 0.60158 | 0.59118 | 0.45018 | 0.56811 | 0.31461 | 0.78686 | 0.08624 | 0.07623 | 0.10375 | 0.2814 BRS3      |
| cg15018760 | 0.03444 | 0.04322 | 0.03655 | 0.03648 | 0.0312  | 0.03678 | 0.037   | 0.03058 | 0.03223 | 0.03442 SCO2     |
| cg15019617 | 0.17347 | 0.12921 | 0.14138 | 0.12301 | 0.20845 | 0.13967 | 0.12934 | 0.13064 | 0.10666 | 0.12211 IFIT1    |
| cg15020645 | 0.09203 | 0.0953  | 0.06343 | 0.06648 | 0.04017 | 0.04467 | 0.04706 | 0.0523  | 0.04886 | 0.04997 APC      |
| cg15021292 | 0.93763 | 0.89611 | 0.92451 | 0.92704 | 0.95749 | 0.92406 | 0.92448 | 0.90675 | 0.93394 | 0.92777 PIK3R1   |
| cg15021531 | 0.04618 | 0.04536 | 0.0508  | 0.04587 | 0.0229  | 0.04207 | 0.04198 | 0.03782 | 0.04035 | 0.03448 DDIT3    |
| cg15025769 | 0.0209  | 0.02091 | 0.02304 | 0.01744 | 0.0199  | 0.02089 | 0.0206  | 0.02206 | 0.01886 | 0.02022 MYO9A    |
| cg15028436 | 0.7255  | 0.25406 | 0.3861  | 0.5576  | 0.76988 | 0.85394 | 0.54642 | 0.16424 | 0.41315 | 0.52552 TXNDC3   |
| cg15031780 | 0.04187 | 0.02404 | 0.04065 | 0.04317 | 0.04519 | 0.02373 | 0.01801 | 0.02308 | 0.05552 | 0.02437 PEX14    |
| cg15032239 | 0.8428  | 0.4679  | 0.17943 | 0.4522  | 0.81145 | 0.5638  | 0.14475 | 0.09311 | 0.49363 | 0.29085 CYFIP1   |
| cg15034135 | 0.03359 | 0.02604 | 0.09183 | 0.10069 | 0.02172 | 0.02505 | 0.02681 | 0.03088 | 0.03765 | 0.12012 ADAMTS19 |
| cg15034763 | 0.03385 | 0.0439  | 0.05505 | 0.05529 | 0.0562  | 0.05408 | 0.0427  | 0.0404  | 0.05052 | 0.05131 C1orf83  |
| cg15035273 | 0.04362 | 0.04322 | 0.05757 | 0.05437 | 0.04985 | 0.04037 | 0.05128 | 0.04892 | 0.04403 | 0.05031 USP52    |
| cg15035713 | 0.03664 | 0.03649 | 0.03437 | 0.0321  | 0.02886 | 0.03432 | 0.03134 | 0.02801 | 0.0303  | 0.03744 TEP1     |
| cg15037004 | 0.63394 | 0.1282  | 0.22989 | 0.25031 | 0.53199 | 0.51966 | 0.26654 | 0.34271 | 0.08449 | 0.10564 ZNF366   |
| cg15039399 | 0.02295 | 0.02461 | 0.02237 | 0.02527 | 0.0248  | 0.02699 | 0.0215  | 0.02544 | 0.02015 | 0.01867 CDK2AP2  |
| cg15041659 | 0.02527 | 0.02587 | 0.03263 | 0.03417 | 0.03019 | 0.03072 | 0.02395 | 0.02013 | 0.02652 | 0.02482 ZBTB40   |
| cg15042080 | 0.03796 | 0.04394 | 0.04943 | 0.05214 | 0.05574 | 0.02926 | 0.03573 | 0.03549 | 0.04197 | 0.03968 TMEM74   |
| cg15042385 | 0.05368 | 0.05527 | 0.06249 | 0.06044 | 0.04506 | 0.04874 | 0.05125 | 0.04826 | 0.20129 | 0.05047 UBE2D4   |
| cg15042806 | 0.04059 | 0.03884 | 0.04708 | 0.0449  | 0.03111 | 0.0398  | 0.03575 | 0.03721 | 0.03485 | 0.03123 DCTN5    |
| cg15043057 | 0.94473 | 0.91303 | 0.93711 | 0.94335 | 0.73478 | 0.46871 | 0.44164 | 0.46844 | 0.31999 | 0.43784 CTPS     |
| cg15043801 | 0.04933 | 0.03264 | 0.0329  | 0.02885 | 0.03209 | 0.03061 | 0.02864 | 0.02931 | 0.02795 | 0.02418 DNMT1    |
| cg15043975 | 0.23953 | 0.13808 | 0.24574 | 0.28589 | 0.08289 | 0.0818  | 0.17964 | 0.09271 | 0.08996 | 0.09392 RASSF1   |
| cg15044041 | 0.93555 | 0.93328 | 0.90411 | 0.83291 | 0.81265 | 0.9052  | 0.91892 | 0.92947 | 0.92568 | 0.92959 WDR52    |
| cg15044073 | 0.21072 | 0.06019 | 0.27113 | 0.52003 | 0.0769  | 0.04621 | 0.85302 | 0.71177 | 0.85674 | 0.50951 SWAP70   |
| cg15045441 | 0.03519 | 0.0316  | 0.03988 | 0.03424 | 0.03257 | 0.03046 | 0.02682 | 0.02793 | 0.02968 | 0.02428 C6orf155 |
| cg15046675 | 0.89576 | 0.89503 | 0.79754 | 0.83759 | 0.83666 | 0.88855 | 0.80601 | 0.55982 | 0.9143  | 0.72647 CD37     |

|            |         |         |         |         |         |         |         |         |         |         |           |
|------------|---------|---------|---------|---------|---------|---------|---------|---------|---------|---------|-----------|
| cg15046693 | 0.88602 | 0.76495 | 0.8992  | 0.89858 | 0.9044  | 0.68546 | 0.91177 | 0.75045 | 0.92038 | 0.76422 | CEBPG     |
| cg15046735 | 0.02968 | 0.02774 | 0.0299  | 0.02686 | 0.02762 | 0.02912 | 0.02388 | 0.02807 | 0.02215 | 0.02514 | C14orf156 |
| cg15047833 | 0.0749  | 0.05834 | 0.07472 | 0.06673 | 0.0324  | 0.04595 | 0.07648 | 0.06054 | 0.06638 | 0.06219 | POLR2C    |
| cg15050111 | 0.5445  | 0.15692 | 0.73855 | 0.70676 | 0.88703 | 0.77633 | 0.15993 | 0.06233 | 0.88294 | 0.81212 | GRHL3     |
| cg15051063 | 0.35667 | 0.69819 | 0.83119 | 0.88568 | 0.16893 | 0.83856 | 0.45944 | 0.88833 | 0.24119 | 0.12169 |           |
| cg15052335 | 0.85992 | 0.80251 | 0.55309 | 0.59969 | 0.7051  | 0.56884 | 0.73732 | 0.57924 | 0.80856 | 0.41928 | LPIN2     |
| cg15052901 | 0.13168 | 0.05232 | 0.60081 | 0.76355 | 0.31292 | 0.06326 | 0.07493 | 0.05055 | 0.24357 | 0.05967 | SLC24A4   |
| cg15054260 | 0.06005 | 0.06253 | 0.06665 | 0.0641  | 0.04202 | 0.05373 | 0.05274 | 0.0492  | 0.04771 | 0.05164 | RIPK2     |
| cg15055101 | 0.60314 | 0.45289 | 0.65826 | 0.67406 | 0.71792 | 0.87613 | 0.05189 | 0.04397 | 0.46555 | 0.38817 | SH2D3A    |
| cg15056107 | 0.03798 | 0.03386 | 0.04808 | 0.03962 | 0.03151 | 0.03404 | 0.04445 | 0.04419 | 0.03362 | 0.02876 | NUP133    |
| cg15056247 | 0.03589 | 0.03642 | 0.04493 | 0.04673 | 0.05591 | 0.03861 | 0.03286 | 0.03583 | 0.03662 | 0.03724 | TSPYL1    |
| cg15056412 | 0.03495 | 0.03595 | 0.17991 | 0.35421 | 0.05597 | 0.03152 | 0.12676 | 0.04846 | 0.02796 | 0.02615 | APBA2BP   |
| cg15057581 | 0.43978 | 0.25912 | 0.20334 | 0.35722 | 0.5263  | 0.555   | 0.31569 | 0.35159 | 0.45576 | 0.43561 | PTPNS1    |
| cg15057726 | 0.05727 | 0.03433 | 0.12637 | 0.04367 | 0.06072 | 0.03665 | 0.04071 | 0.0332  | 0.04751 | 0.03295 | MCM2      |
| cg15059511 | 0.03757 | 0.03697 | 0.0346  | 0.03725 | 0.0276  | 0.03211 | 0.02982 | 0.03178 | 0.03432 | 0.02992 | DNAJC17   |
| cg15059932 | 0.56978 | 0.24998 | 0.05561 | 0.04848 | 0.11788 | 0.05037 | 0.05367 | 0.07434 | 0.20123 | 0.24337 | ZNF236    |
| cg15060177 | 0.03643 | 0.04027 | 0.03629 | 0.03386 | 0.03628 | 0.0394  | 0.02702 | 0.02989 | 0.03067 | 0.03176 | SACM1L    |
| cg15060813 | 0.19318 | 0.05027 | 0.93639 | 0.92414 | 0.44429 | 0.43759 | 0.24161 | 0.43024 | 0.17667 | 0.04926 | LRFN3     |
| cg15061008 | 0.05919 | 0.0548  | 0.05392 | 0.04973 | 0.04611 | 0.04727 | 0.03911 | 0.041   | 0.04725 | 0.0381  | CABIN1    |
| cg15062535 | 0.8759  | 0.6445  | 0.14149 | 0.14483 | 0.39973 | 0.34508 | 0.64046 | 0.43516 | 0.33041 | 0.30167 | ZNF610    |
| cg15062795 | 0.03363 | 0.03763 | 0.05675 | 0.04432 | 0.04875 | 0.03574 | 0.03287 | 0.03748 | 0.03485 | 0.03531 | ETV6      |
| cg15065896 | 0.04837 | 0.05599 | 0.05325 | 0.06005 | 0.03803 | 0.04394 | 0.04975 | 0.05928 | 0.05167 | 0.04586 | GOLGA4    |
| cg15068733 | 0.08057 | 0.0766  | 0.1773  | 0.13569 | 0.7065  | 0.60687 | 0.24543 | 0.135   | 0.18089 | 0.11921 | FGF11     |
| cg15070798 | 0.03874 | 0.03695 | 0.0415  | 0.04101 | 0.02891 | 0.033   | 0.03339 | 0.03904 | 0.03161 | 0.03018 | WDR24     |
| cg15071391 | 0.81855 | 0.77491 | 0.74075 | 0.80074 | 0.45755 | 0.49878 | 0.36917 | 0.2379  | 0.75165 | 0.68348 | MTMR6     |
| cg15075170 | 0.04394 | 0.04407 | 0.06159 | 0.05072 | 0.05062 | 0.03973 | 0.03399 | 0.03618 | 0.03962 | 0.03142 | TMEFF1    |
| cg15075718 | 0.15733 | 0.05751 | 0.44421 | 0.52944 | 0.7909  | 0.56624 | 0.1802  | 0.08353 | 0.20695 | 0.13465 | MFRP      |
| cg15076218 | 0.04778 | 0.05121 | 0.05761 | 0.04978 | 0.045   | 0.05095 | 0.05076 | 0.04566 | 0.0513  | 0.04488 | PIK3R3    |
| cg15076659 | 0.14932 | 0.12951 | 0.19571 | 0.16927 | 0.25293 | 0.17114 | 0.10945 | 0.09653 | 0.17438 | 0.14131 | SLC9A1    |
| cg15077070 | 0.09987 | 0.06303 | 0.72785 | 0.67551 | 0.68206 | 0.14516 | 0.64568 | 0.2569  | 0.78159 | 0.53408 | IL1RL2    |
| cg15077637 | 0.06591 | 0.07237 | 0.09592 | 0.09254 | 0.0843  | 0.06997 | 0.07117 | 0.07316 | 0.05503 | 0.06487 | EFTUD2    |
| cg15078027 | 0.0199  | 0.01918 | 0.02189 | 0.0185  | 0.01372 | 0.01637 | 0.01716 | 0.01836 | 0.01615 | 0.01591 | MGC10471  |
| cg15078479 | 0.03535 | 0.03674 | 0.03155 | 0.03176 | 0.03194 | 0.03745 | 0.02418 | 0.02655 | 0.02541 | 0.02895 | PARP2     |
| cg15081561 | 0.86039 | 0.86418 | 0.79887 | 0.84585 | 0.80079 | 0.82854 | 0.82364 | 0.85437 | 0.82392 | 0.7874  | C18orf14  |
| cg15082782 | 0.89983 | 0.89556 | 0.911   | 0.89612 | 0.93352 | 0.90524 | 0.61502 | 0.72652 | 0.90277 | 0.88501 | H2AFB3    |
| cg15083227 | 0.48408 | 0.25195 | 0.06317 | 0.06735 | 0.06373 | 0.03968 | 0.06109 | 0.05884 | 0.04324 | 0.041   | PLEKHQ1   |
| cg15083233 | 0.55898 | 0.08344 | 0.40795 | 0.58528 | 0.87256 | 0.88474 | 0.87214 | 0.51911 | 0.90512 | 0.59483 | AKAP2     |
| cg15085805 | 0.04865 | 0.04979 | 0.04683 | 0.05374 | 0.04453 | 0.04409 | 0.05237 | 0.04749 | 0.04017 | 0.04136 | LSM4      |
| cg15087147 | 0.03395 | 0.03363 | 0.34114 | 0.49368 | 0.93719 | 0.91665 | 0.91422 | 0.89262 | 0.90897 | 0.91187 | LRRC4     |
| cg15089387 | 0.06684 | 0.06778 | 0.45684 | 0.51851 | 0.69777 | 0.61117 | 0.08518 | 0.07891 | 0.18257 | 0.04762 | TSLP      |
| cg15089487 | 0.0614  | 0.05499 | 0.06669 | 0.0734  | 0.06802 | 0.05791 | 0.09023 | 0.0614  | 0.05396 | 0.05941 | THAP10    |



|            |         |         |         |         |         |         |         |         |         |                  |
|------------|---------|---------|---------|---------|---------|---------|---------|---------|---------|------------------|
| cg15091337 | 0.68959 | 0.06878 | 0.25466 | 0.23944 | 0.24389 | 0.04575 | 0.04774 | 0.03751 | 0.04931 | 0.04649 POLE4    |
| cg15091410 | 0.36072 | 0.27878 | 0.35633 | 0.40201 | 0.48333 | 0.58527 | 0.38739 | 0.39936 | 0.56234 | 0.39297 IL31RA   |
| cg15092544 | 0.01542 | 0.01528 | 0.01645 | 0.01489 | 0.01181 | 0.01378 | 0.01257 | 0.01207 | 0.01191 | 0.01048 RAP1B    |
| cg15092802 | 0.76299 | 0.54005 | 0.84206 | 0.88488 | 0.89447 | 0.86706 | 0.45458 | 0.41681 | 0.45707 | 0.49965 OBP2A    |
| cg15094912 | 0.04865 | 0.04586 | 0.04918 | 0.04684 | 0.04014 | 0.04425 | 0.04301 | 0.04583 | 0.03991 | 0.03841 POFUT2   |
| cg15095327 | 0.78774 | 0.61049 | 0.78544 | 0.79069 | 0.84264 | 0.71016 | 0.6548  | 0.54604 | 0.61132 | 0.25614 IL17RE   |
| cg15096123 | 0.54838 | 0.09274 | 0.8476  | 0.87218 | 0.61584 | 0.65955 | 0.66394 | 0.85504 | 0.07481 | 0.05537 KLK4     |
| cg15096140 | 0.8215  | 0.40584 | 0.35537 | 0.29925 | 0.4146  | 0.1594  | 0.31681 | 0.29061 | 0.37777 | 0.22864 MYO1B    |
| cg15097876 | 0.03662 | 0.03606 | 0.04138 | 0.04427 | 0.04297 | 0.03286 | 0.03323 | 0.03343 | 0.03143 | 0.03013 PPA1     |
| cg15098690 | 0.13186 | 0.12773 | 0.15655 | 0.13411 | 0.19751 | 0.14128 | 0.0959  | 0.09689 | 0.12793 | 0.12833 ZNF330   |
| cg15100639 | 0.03743 | 0.0364  | 0.03933 | 0.03322 | 0.04533 | 0.05068 | 0.03325 | 0.03428 | 0.02808 | 0.0294 BAT5      |
| cg15101633 | 0.52239 | 0.53883 | 0.76711 | 0.7835  | 0.83468 | 0.77259 | 0.05628 | 0.05341 | 0.43223 | 0.49518 MEG3     |
| cg15103426 | 0.03518 | 0.03303 | 0.04056 | 0.03499 | 0.03239 | 0.03055 | 0.0286  | 0.02996 | 0.03063 | 0.02634 FLJ33814 |
| cg15103675 | 0.01878 | 0.02094 | 0.02169 | 0.02239 | 0.02209 | 0.02321 | 0.04962 | 0.05026 | 0.01844 | 0.01636 UAP1     |
| cg15104484 | 0.02835 | 0.02886 | 0.03163 | 0.02905 | 0.02559 | 0.03228 | 0.02666 | 0.02462 | 0.02789 | 0.02773 PEX26    |
| cg15105081 | 0.09504 | 0.09183 | 0.13516 | 0.10421 | 0.13543 | 0.12153 | 0.11826 | 0.10953 | 0.07829 | 0.06916 PTD015   |
| cg15105660 | 0.04055 | 0.04304 | 0.76046 | 0.88966 | 0.45776 | 0.46823 | 0.54768 | 0.55594 | 0.06665 | 0.02853 CLDN1    |
| cg15105703 | 0.42101 | 0.15155 | 0.42641 | 0.59927 | 0.53614 | 0.76135 | 0.39541 | 0.56693 | 0.14967 | 0.0952 NIP       |
| cg15105987 | 0.16157 | 0.07139 | 0.55905 | 0.54377 | 0.35427 | 0.47223 | 0.35322 | 0.27878 | 0.20726 | 0.08917 SOX2     |
| cg15107670 | 0.03244 | 0.03321 | 0.02811 | 0.03124 | 0.0565  | 0.03057 | 0.03344 | 0.03299 | 0.02683 | 0.02361 WT1      |
| cg15109207 | 0.92181 | 0.85331 | 0.91042 | 0.92904 | 0.70525 | 0.61204 | 0.21902 | 0.53047 | 0.9295  | 0.75 PLA2G4C     |
| cg15109571 | 0.0396  | 0.03982 | 0.04208 | 0.04285 | 0.02883 | 0.04939 | 0.05013 | 0.05061 | 0.03334 | 0.03156 SUFU     |
| cg15111734 | 0.10973 | 0.10071 | 0.12412 | 0.10641 | 0.12758 | 0.09864 | 0.10382 | 0.1078  | 0.09594 | 0.09971 C10orf13 |
| cg15113803 | 0.78364 | 0.54073 | 0.69585 | 0.85764 | 0.92898 | 0.90164 | 0.71591 | 0.83926 | 0.33209 | 0.15713 RHO      |
| cg15118204 | 0.23142 | 0.21152 | 0.22896 | 0.2097  | 0.15287 | 0.17316 | 0.19355 | 0.2023  | 0.19318 | 0.19513 SIRT7    |
| cg15118503 | 0.08211 | 0.0846  | 0.08308 | 0.08516 | 0.07658 | 0.08545 | 0.07191 | 0.06582 | 0.07717 | 0.07306 AHSA2    |
| cg15119375 | 0.03734 | 0.03747 | 0.18303 | 0.14075 | 0.03939 | 0.03352 | 0.05218 | 0.03469 | 0.04864 | 0.02864 MGC3020  |
| cg15120247 | 0.893   | 0.86228 | 0.90238 | 0.92119 | 0.82494 | 0.88248 | 0.76495 | 0.68396 | 0.12086 | 0.09335 C1orf54  |
| cg15120497 | 0.85354 | 0.12153 | 0.79268 | 0.88186 | 0.86874 | 0.8414  | 0.85399 | 0.78393 | 0.78938 | 0.66233 TRH      |
| cg15120925 | 0.11535 | 0.09604 | 0.72355 | 0.77454 | 0.65601 | 0.53096 | 0.11497 | 0.09658 | 0.08047 | 0.09304 RASAL1   |
| cg15120942 | 0.54789 | 0.51994 | 0.665   | 0.79653 | 0.94547 | 0.94052 | 0.35875 | 0.11507 | 0.6294  | 0.57935 PLCD1    |
| cg15121304 | 0.87436 | 0.70886 | 0.84854 | 0.85715 | 0.91911 | 0.86004 | 0.7076  | 0.53997 | 0.87103 | 0.82439          |
| cg15125424 | 0.07736 | 0.06827 | 0.12204 | 0.12544 | 0.17185 | 0.11042 | 0.08438 | 0.09462 | 0.10865 | 0.0877 SOCS2     |
| cg15125472 | 0.87882 | 0.86047 | 0.46466 | 0.5772  | 0.04448 | 0.03766 | 0.23274 | 0.06198 | 0.31428 | 0.03451 HSPB6    |
| cg15125634 | 0.04586 | 0.04362 | 0.05825 | 0.04415 | 0.05277 | 0.04751 | 0.06206 | 0.05609 | 0.04176 | 0.05354 RAB11A   |
| cg15127324 | 0.08676 | 0.05708 | 0.163   | 0.11591 | 0.10068 | 0.05275 | 0.11463 | 0.06114 | 0.21033 | 0.08302 CENTD1   |
| cg15127733 | 0.90022 | 0.91167 | 0.84435 | 0.85895 | 0.79214 | 0.89781 | 0.8887  | 0.89028 | 0.92232 | 0.9057 HSPA12B   |
| cg15127806 | 0.05242 | 0.05238 | 0.0573  | 0.05438 | 0.0457  | 0.05459 | 0.05067 | 0.05008 | 0.04619 | 0.04535 MRPL42   |
| cg15128849 | 0.12394 | 0.06218 | 0.11438 | 0.09121 | 0.19827 | 0.07293 | 0.05476 | 0.04375 | 0.07703 | 0.06887 HHLA3    |
| cg15128898 | 0.03435 | 0.03248 | 0.07513 | 0.12596 | 0.02735 | 0.02918 | 0.38668 | 0.39048 | 0.06984 | 0.02357 FLJ23577 |
| cg15129294 | 0.48127 | 0.48732 | 0.25072 | 0.26498 | 0.15679 | 0.11432 | 0.16726 | 0.15255 | 0.44019 | 0.45793 CCL4L2   |

|            |         |         |         |         |         |         |         |         |         |                   |
|------------|---------|---------|---------|---------|---------|---------|---------|---------|---------|-------------------|
| cg15133363 | 0.05301 | 0.05331 | 0.07586 | 0.06729 | 0.08142 | 0.0851  | 0.04318 | 0.04943 | 0.04384 | 0.04084 HIG2      |
| cg15133917 | 0.3342  | 0.30328 | 0.42079 | 0.4026  | 0.54731 | 0.61607 | 0.29749 | 0.19665 | 0.20204 | 0.171 TTN         |
| cg15134628 | 0.03595 | 0.0364  | 0.03701 | 0.03371 | 0.02844 | 0.0311  | 0.03759 | 0.03884 | 0.02866 | 0.03253 MAPK12    |
| cg15134649 | 0.62024 | 0.49875 | 0.04227 | 0.04784 | 0.35466 | 0.52402 | 0.0343  | 0.0429  | 0.94205 | 0.94519 MT1E      |
| cg15139737 | 0.03168 | 0.03298 | 0.0403  | 0.04137 | 0.02573 | 0.03246 | 0.03037 | 0.02962 | 0.02388 | 0.0252 FBXW5      |
| cg15140807 | 0.86206 | 0.88284 | 0.84483 | 0.85115 | 0.74832 | 0.8731  | 0.71599 | 0.50638 | 0.87323 | 0.85941 FLJ31222  |
| cg15142488 | 0.97237 | 0.97124 | 0.96873 | 0.96928 | 0.97362 | 0.96848 | 0.9455  | 0.97006 | 0.97733 | 0.97497 LYPD4     |
| cg15143643 | 0.91411 | 0.68412 | 0.87925 | 0.8961  | 0.77093 | 0.87646 | 0.87746 | 0.87393 | 0.84594 | 0.83422 FBLN1     |
| cg15144793 | 0.019   | 0.02142 | 0.02338 | 0.01719 | 0.01967 | 0.02245 | 0.01821 | 0.01637 | 0.01767 | 0.01734 SH3BP4    |
| cg15146720 | 0.10804 | 0.11622 | 0.07825 | 0.06494 | 0.05401 | 0.06565 | 0.05766 | 0.06163 | 0.06252 | 0.05401 GALNT11   |
| cg15146752 | 0.03456 | 0.03264 | 0.03621 | 0.03629 | 0.04957 | 0.0357  | 0.02625 | 0.06078 | 0.02704 | 0.02256 EPHA2     |
| cg15147435 | 0.54415 | 0.60916 | 0.04128 | 0.04413 | 0.93667 | 0.94647 | 0.93142 | 0.94718 | 0.03474 | 0.02892 FKBP11    |
| cg15147516 | 0.16611 | 0.09951 | 0.29058 | 0.40044 | 0.31659 | 0.09066 | 0.15822 | 0.07242 | 0.60453 | 0.07224 MIXL1     |
| cg15147545 | 0.02631 | 0.02547 | 0.02735 | 0.02813 | 0.0232  | 0.02488 | 0.02556 | 0.02478 | 0.02394 | 0.02094 ITGB1     |
| cg15149098 | 0.83628 | 0.73146 | 0.89347 | 0.88619 | 0.89701 | 0.88179 | 0.53668 | 0.39444 | 0.88658 | 0.72547 SULT2B1   |
| cg15149645 | 0.87758 | 0.70665 | 0.88248 | 0.93887 | 0.05924 | 0.04544 | 0.52941 | 0.35177 | 0.06481 | 0.06662 P8        |
| cg15149938 | 0.71013 | 0.33183 | 0.22609 | 0.52808 | 0.62997 | 0.77827 | 0.17781 | 0.43175 | 0.83906 | 0.84208 LOC348645 |
| cg15153383 | 0.08187 | 0.05292 | 0.06425 | 0.06232 | 0.14966 | 0.04386 | 0.05335 | 0.04736 | 0.10675 | 0.04221 KATNB1    |
| cg15154229 | 0.82577 | 0.76777 | 0.52828 | 0.23885 | 0.89391 | 0.84231 | 0.78316 | 0.52061 | 0.69333 | 0.76112 CPA1      |
| cg15156078 | 0.05013 | 0.04229 | 0.10417 | 0.08061 | 0.42474 | 0.37153 | 0.04244 | 0.04091 | 0.04157 | 0.03338 RASGRF1   |
| cg15156367 | 0.82947 | 0.64061 | 0.73007 | 0.74019 | 0.9097  | 0.66238 | 0.71037 | 0.67146 | 0.84533 | 0.53707 ABHD7     |
| cg15156836 | 0.45911 | 0.11112 | 0.35034 | 0.27332 | 0.47866 | 0.10859 | 0.32955 | 0.07724 | 0.34163 | 0.0533 SEPN1      |
| cg15156844 | 0.95262 | 0.95759 | 0.95404 | 0.95642 | 0.94255 | 0.93679 | 0.87603 | 0.92325 | 0.95575 | 0.93659 DLGAP1    |
| cg15157837 | 0.02871 | 0.02943 | 0.03477 | 0.03275 | 0.02969 | 0.03212 | 0.02656 | 0.02727 | 0.02533 | 0.02431 CNNM3     |
| cg15158783 | 0.76744 | 0.74563 | 0.65381 | 0.70536 | 0.22215 | 0.05714 | 0.36866 | 0.11277 | 0.4602  | 0.71898 PF4       |
| cg15160312 | 0.02832 | 0.0311  | 0.02836 | 0.0234  | 0.02335 | 0.02723 | 0.02473 | 0.02603 | 0.02552 | 0.02354 DLG1      |
| cg15160445 | 0.87511 | 0.89269 | 0.62798 | 0.73552 | 0.86017 | 0.66192 | 0.83767 | 0.89054 | 0.41763 | 0.32642 GNAS      |
| cg15160742 | 0.04511 | 0.03671 | 0.05761 | 0.05084 | 0.05054 | 0.04173 | 0.06578 | 0.05219 | 0.03644 | 0.03983 C1orf121  |
| cg15161055 | 0.05473 | 0.04878 | 0.06101 | 0.05849 | 0.03876 | 0.30726 | 0.05056 | 0.03493 | 0.05686 | 0.03422 SITPEC    |
| cg15161785 | 0.02285 | 0.02109 | 0.02578 | 0.02463 | 0.01843 | 0.02131 | 0.02145 | 0.0167  | 0.01848 | 0.01646 ADI1      |
| cg15164103 | 0.7925  | 0.16603 | 0.74325 | 0.76158 | 0.82627 | 0.6078  | 0.82538 | 0.5383  | 0.69475 | 0.38505 MEST      |
| cg15164958 | 0.07308 | 0.06782 | 0.13318 | 0.24369 | 0.14458 | 0.0866  | 0.14234 | 0.19884 | 0.06585 | 0.06235 MGC33530  |
| cg15165084 | 0.02826 | 0.02587 | 0.0245  | 0.02082 | 0.01697 | 0.01907 | 0.02198 | 0.02445 | 0.01621 | 0.01578 GRAMD3    |
| cg15166050 | 0.92694 | 0.89989 | 0.9209  | 0.93649 | 0.93539 | 0.91554 | 0.91227 | 0.91298 | 0.93551 | 0.90192 LCTL      |
| cg15166089 | 0.804   | 0.7662  | 0.80587 | 0.8326  | 0.85847 | 0.66492 | 0.78984 | 0.60451 | 0.82283 | 0.57085 CD164L2   |
| cg15167433 | 0.08931 | 0.09561 | 0.10138 | 0.09045 | 0.12733 | 0.07861 | 0.10449 | 0.19836 | 0.04836 | 0.05682 XRCC1     |
| cg15169162 | 0.82803 | 0.37379 | 0.88272 | 0.90397 | 0.81402 | 0.85707 | 0.74029 | 0.75993 | 0.45674 | 0.60325 RDS       |
| cg15170424 | 0.04919 | 0.04527 | 0.0435  | 0.04058 | 0.035   | 0.03737 | 0.03261 | 0.03563 | 0.0333  | 0.03134 TMEM55A   |
| cg15170903 | 0.04305 | 0.04108 | 0.04608 | 0.03759 | 0.05064 | 0.04748 | 0.04589 | 0.04022 | 0.03443 | 0.03842 CROP      |
| cg15171237 | 0.75159 | 0.6241  | 0.78051 | 0.77639 | 0.75703 | 0.40965 | 0.8301  | 0.78789 | 0.84007 | 0.61831 CASP3     |
| cg15173196 | 0.05438 | 0.05749 | 0.08997 | 0.0827  | 0.0895  | 0.06029 | 0.07013 | 0.05085 | 0.07054 | 0.08124 UBE2T     |

|            |         |         |         |         |         |         |         |         |         |         |           |
|------------|---------|---------|---------|---------|---------|---------|---------|---------|---------|---------|-----------|
| cg15175266 | 0.68325 | 0.53676 | 0.25868 | 0.27733 | 0.68758 | 0.24522 | 0.26298 | 0.26869 | 0.19645 | 0.24667 | CDH12     |
| cg15175577 | 0.04276 | 0.0367  | 0.04818 | 0.03898 | 0.04259 | 0.04214 | 0.03763 | 0.04309 | 0.03653 | 0.0357  | HSPC117   |
| cg15177359 | 0.57349 | 0.35701 | 0.55239 | 0.6082  | 0.78212 | 0.49309 | 0.37951 | 0.14459 | 0.4916  | 0.05917 | UNC13D    |
| cg15177917 | 0.15209 | 0.06925 | 0.34223 | 0.21803 | 0.17169 | 0.14306 | 0.10875 | 0.0473  | 0.12114 | 0.04227 | DAND5     |
| cg15178040 | 0.78016 | 0.43437 | 0.7441  | 0.76706 | 0.63952 | 0.73611 | 0.74779 | 0.80275 | 0.47606 | 0.42115 | GSTA5     |
| cg15182360 | 0.05229 | 0.067   | 0.51223 | 0.65963 | 0.08681 | 0.0959  | 0.05097 | 0.04551 | 0.12036 | 0.10869 | PCDH20    |
| cg15183083 | 0.12739 | 0.12202 | 0.47022 | 0.57073 | 0.09477 | 0.13233 | 0.1104  | 0.13332 | 0.3043  | 0.13398 | KCNA4     |
| cg15185001 | 0.07496 | 0.04749 | 0.90711 | 0.9709  | 0.74882 | 0.62763 | 0.07425 | 0.32022 | 0.04277 | 0.03641 | LSR       |
| cg15185286 | 0.03858 | 0.03257 | 0.03379 | 0.03727 | 0.03014 | 0.03932 | 0.02762 | 0.02896 | 0.02888 | 0.02542 | AIG1      |
| cg15185794 | 0.12059 | 0.05195 | 0.80427 | 0.79408 | 0.84217 | 0.55611 | 0.24146 | 0.07331 | 0.83892 | 0.78153 | PADI2     |
| cg15185804 | 0.06528 | 0.05009 | 0.06624 | 0.06283 | 0.051   | 0.04732 | 0.04471 | 0.04436 | 0.05459 | 0.03903 | PGM3      |
| cg15186584 | 0.86398 | 0.85574 | 0.86549 | 0.88116 | 0.78996 | 0.85979 | 0.86149 | 0.87562 | 0.89899 | 0.89295 | C9orf24   |
| cg15186869 | 0.0491  | 0.05052 | 0.05375 | 0.05326 | 0.03714 | 0.0437  | 0.04632 | 0.04332 | 0.04475 | 0.04549 | C14orf130 |
| cg15187606 | 0.88809 | 0.87952 | 0.89204 | 0.88627 | 0.91833 | 0.89124 | 0.62478 | 0.87133 | 0.89045 | 0.87749 | PDZK1IP1  |
| cg15188491 | 0.05147 | 0.0528  | 0.06038 | 0.05633 | 0.03652 | 0.08064 | 0.05365 | 0.05279 | 0.04293 | 0.04486 | PRKAB2    |
| cg15188688 | 0.27031 | 0.15469 | 0.35881 | 0.30436 | 0.3239  | 0.13693 | 0.40354 | 0.21122 | 0.85568 | 0.52682 | CDC45L    |
| cg15191648 | 0.04162 | 0.03871 | 0.76928 | 0.91433 | 0.53984 | 0.42343 | 0.04338 | 0.03349 | 0.17904 | 0.04061 | SALL3     |
| cg15195276 | 0.02748 | 0.03299 | 0.03553 | 0.03928 | 0.03448 | 0.02508 | 0.02757 | 0.03159 | 0.02817 | 0.0409  | EDG2      |
| cg15195353 | 0.87254 | 0.85549 | 0.85719 | 0.86218 | 0.89357 | 0.86496 | 0.84387 | 0.8614  | 0.87282 | 0.8591  | GLIS2     |
| cg15195412 | 0.49387 | 0.26532 | 0.4694  | 0.62124 | 0.28133 | 0.11407 | 0.15099 | 0.05989 | 0.12522 | 0.04397 | CX3CL1    |
| cg15198335 | 0.58477 | 0.62571 | 0.03474 | 0.03233 | 0.02252 | 0.02762 | 0.02462 | 0.03205 | 0.02909 | 0.02382 | MGC4562   |
| cg15200096 | 0.23588 | 0.13209 | 0.49066 | 0.56791 | 0.42422 | 0.44346 | 0.26282 | 0.07759 | 0.09463 | 0.09438 | KCND1     |
| cg15201291 | 0.72062 | 0.75521 | 0.59799 | 0.71022 | 0.52889 | 0.4272  | 0.756   | 0.77194 | 0.26336 | 0.26736 | CYP2C8    |
| cg15201599 | 0.04751 | 0.05119 | 0.05023 | 0.05034 | 0.04768 | 0.05011 | 0.04623 | 0.04445 | 0.0409  | 0.04601 | COG3      |
| cg15201635 | 0.02433 | 0.02188 | 0.02636 | 0.02246 | 0.02504 | 0.0241  | 0.02419 | 0.02111 | 0.01746 | 0.01818 | SMPD3     |
| cg15201877 | 0.0324  | 0.03374 | 0.86949 | 0.93077 | 0.4123  | 0.04859 | 0.12727 | 0.04559 | 0.6134  | 0.62184 | PTGER3    |
| cg15201909 | 0.72555 | 0.59177 | 0.61952 | 0.7071  | 0.39545 | 0.72058 | 0.30317 | 0.43542 | 0.72739 | 0.49516 | IL2RG     |
| cg15202954 | 0.12247 | 0.08474 | 0.11284 | 0.10066 | 0.11178 | 0.09933 | 0.36717 | 0.31442 | 0.12637 | 0.22728 | VGCNL1    |
| cg15205507 | 0.12003 | 0.09934 | 0.45121 | 0.53924 | 0.252   | 0.36809 | 0.11515 | 0.11559 | 0.08922 | 0.10286 | ZNF331    |
| cg15206330 | 0.02316 | 0.02701 | 0.02509 | 0.02195 | 0.02172 | 0.0261  | 0.02422 | 0.02461 | 0.02218 | 0.02161 | WDR79     |
| cg15206445 | 0.87209 | 0.54048 | 0.653   | 0.73767 | 0.8205  | 0.16109 | 0.87546 | 0.80701 | 0.88825 | 0.76228 | SPG7      |
| cg15207619 | 0.72843 | 0.4995  | 0.77259 | 0.7767  | 0.61925 | 0.78259 | 0.51666 | 0.75967 | 0.10228 | 0.1354  | CAB39L    |
| cg15207953 | 0.74677 | 0.68769 | 0.64569 | 0.66226 | 0.87608 | 0.91159 | 0.50356 | 0.54379 | 0.58996 | 0.62606 | FLJ45832  |
| cg15209169 | 0.17455 | 0.1129  | 0.37759 | 0.39112 | 0.11378 | 0.10459 | 0.08195 | 0.07174 | 0.27591 | 0.29973 | RABGAP1   |
| cg15210427 | 0.32836 | 0.06439 | 0.10571 | 0.18246 | 0.07349 | 0.47224 | 0.04444 | 0.1002  | 0.05058 | 0.15785 | CST9L     |
| cg15210596 | 0.03811 | 0.03867 | 0.04389 | 0.04255 | 0.03671 | 0.03963 | 0.05078 | 0.04684 | 0.05887 | 0.0454  | SCCPDH    |
| cg15210999 | 0.69776 | 0.80458 | 0.8665  | 0.84953 | 0.43596 | 0.50548 | 0.83335 | 0.67182 | 0.26118 | 0.0843  | DTNBP1    |
| cg15211655 | 0.03432 | 0.03524 | 0.03921 | 0.03736 | 0.03352 | 0.03455 | 0.03222 | 0.03373 | 0.02743 | 0.03761 | OSBPL1A   |
| cg15211677 | 0.11915 | 0.11864 | 0.2262  | 0.14022 | 0.24423 | 0.14354 | 0.08123 | 0.09739 | 0.12837 | 0.11337 | WBP5      |
| cg15212440 | 0.03725 | 0.0415  | 0.03956 | 0.0387  | 0.03032 | 0.04024 | 0.03623 | 0.03301 | 0.03388 | 0.02916 | SFXN2     |
| cg15213605 | 0.10342 | 0.08649 | 0.07768 | 0.08003 | 0.14879 | 0.14306 | 0.11005 | 0.0932  | 0.07084 | 0.07229 | SF3B3     |

|            |         |         |         |         |         |         |         |         |         |                   |
|------------|---------|---------|---------|---------|---------|---------|---------|---------|---------|-------------------|
| cg15214092 | 0.04075 | 0.03508 | 0.04217 | 0.03928 | 0.01959 | 0.02825 | 0.02909 | 0.02935 | 0.03308 | 0.02287 MRPL12    |
| cg15214137 | 0.0334  | 0.03134 | 0.05291 | 0.03948 | 0.03349 | 0.04605 | 0.04006 | 0.04242 | 0.03751 | 0.03528 PGM2L1    |
| cg15215114 | 0.03016 | 0.03231 | 0.0384  | 0.03289 | 0.04575 | 0.04436 | 0.04173 | 0.03786 | 0.03063 | 0.03493 C17orf61  |
| cg15219393 | 0.10043 | 0.09716 | 0.09776 | 0.08235 | 0.08679 | 0.08977 | 0.0813  | 0.08288 | 0.09343 | 0.07643 PPARGC1B  |
| cg15222604 | 0.83905 | 0.83166 | 0.85814 | 0.83349 | 0.88789 | 0.84646 | 0.50448 | 0.54852 | 0.85016 | 0.84126 HCFC1     |
| cg15223781 | 0.11403 | 0.07684 | 0.10185 | 0.08423 | 0.13169 | 0.07619 | 0.08781 | 0.08205 | 0.05435 | 0.06322 FER       |
| cg15225105 | 0.03777 | 0.03615 | 0.04583 | 0.04289 | 0.04815 | 0.04159 | 0.04805 | 0.04097 | 0.03488 | 0.03438 SAC3D1    |
| cg15226751 | 0.85396 | 0.87624 | 0.85908 | 0.85855 | 0.8246  | 0.85934 | 0.89449 | 0.83655 | 0.67956 | 0.59566 LZIC      |
| cg15227610 | 0.81966 | 0.67861 | 0.57403 | 0.8041  | 0.85146 | 0.85007 | 0.53339 | 0.81969 | 0.36409 | 0.39927 CRYAB     |
| cg15227982 | 0.05158 | 0.13255 | 0.05791 | 0.04593 | 0.80723 | 0.87684 | 0.81813 | 0.06205 | 0.11111 | 0.12368 C10orf26  |
| cg15228639 | 0.58167 | 0.28486 | 0.58844 | 0.82337 | 0.70958 | 0.4741  | 0.29535 | 0.23632 | 0.0618  | 0.08725 PLA2G4E   |
| cg15229026 | 0.06552 | 0.07687 | 0.07561 | 0.06816 | 0.11328 | 0.08454 | 0.06676 | 0.06498 | 0.06245 | 0.07673 UBADC1    |
| cg15230273 | 0.0769  | 0.08318 | 0.08512 | 0.07358 | 0.04605 | 0.06146 | 0.06521 | 0.06857 | 0.07    | 0.06597 EFNA5     |
| cg15231886 | 0.04671 | 0.0312  | 0.05775 | 0.13987 | 0.04334 | 0.03927 | 0.57693 | 0.59599 | 0.03238 | 0.02919 UTP14A    |
| cg15232450 | 0.16513 | 0.03332 | 0.09    | 0.33451 | 0.03374 | 0.03589 | 0.03163 | 0.02958 | 0.03027 | 0.03039 SETMAR    |
| cg15233681 | 0.20722 | 0.06444 | 0.80537 | 0.85996 | 0.87765 | 0.13483 | 0.66027 | 0.27325 | 0.81675 | 0.05062 IL1R1     |
| cg15234096 | 0.78844 | 0.63983 | 0.77872 | 0.81245 | 0.7399  | 0.82084 | 0.73079 | 0.77808 | 0.47523 | 0.17212 LIX1      |
| cg15235185 | 0.03445 | 0.03712 | 0.04166 | 0.03583 | 0.02389 | 0.03305 | 0.02921 | 0.03236 | 0.03493 | 0.02878 UCHL5     |
| cg15235832 | 0.07721 | 0.09384 | 0.09867 | 0.0833  | 0.10354 | 0.08505 | 0.06891 | 0.06153 | 0.09705 | 0.07659 ACTR2     |
| cg15236866 | 0.18086 | 0.06779 | 0.25437 | 0.30415 | 0.58358 | 0.09155 | 0.79317 | 0.10128 | 0.85073 | 0.07349 DLX1      |
| cg15238200 | 0.50465 | 0.44377 | 0.86297 | 0.8609  | 0.91237 | 0.48177 | 0.84852 | 0.61258 | 0.81079 | 0.58597 TRIM65    |
| cg15238224 | 0.26903 | 0.0732  | 0.26163 | 0.40764 | 0.41126 | 0.34686 | 0.11658 | 0.05558 | 0.31982 | 0.13137 TRIM31    |
| cg15239123 | 0.03817 | 0.24734 | 0.0742  | 0.11412 | 0.59259 | 0.53995 | 0.0566  | 0.03222 | 0.04015 | 0.02717 SMOC1     |
| cg15239579 | 0.39269 | 0.06447 | 0.22641 | 0.35508 | 0.08601 | 0.05217 | 0.09595 | 0.05934 | 0.16909 | 0.42309 TRAP1     |
| cg15239703 | 0.1063  | 0.10449 | 0.06682 | 0.0556  | 0.0771  | 0.07617 | 0.05103 | 0.05153 | 0.06393 | 0.07301 CBR4      |
| cg15240064 | 0.11764 | 0.09264 | 0.14836 | 0.16846 | 0.27064 | 0.09599 | 0.1298  | 0.10319 | 0.08824 | 0.10574 ZNF12     |
| cg15241084 | 0.30058 | 0.26735 | 0.72546 | 0.79389 | 0.67926 | 0.78901 | 0.21522 | 0.0934  | 0.48673 | 0.39579 TLR7      |
| cg15241708 | 0.7913  | 0.33202 | 0.87172 | 0.89046 | 0.77366 | 0.59467 | 0.85179 | 0.80163 | 0.8861  | 0.3478 CNOT6      |
| cg15242570 | 0.89809 | 0.9392  | 0.10369 | 0.09067 | 0.04669 | 0.05339 | 0.06229 | 0.05597 | 0.04156 | 0.03717 CTSL      |
| cg15243024 | 0.0452  | 0.05755 | 0.05289 | 0.05079 | 0.04062 | 0.04945 | 0.03878 | 0.04057 | 0.04817 | 0.04143 NRBP1     |
| cg15247031 | 0.37684 | 0.41236 | 0.31552 | 0.37875 | 0.30751 | 0.3501  | 0.25561 | 0.30631 | 0.29633 | 0.35336 C14orf126 |
| cg15247144 | 0.09527 | 0.03323 | 0.14899 | 0.25403 | 0.93542 | 0.94239 | 0.87131 | 0.89804 | 0.02454 | 0.02591 PYCARD    |
| cg15248035 | 0.70195 | 0.11553 | 0.88318 | 0.89123 | 0.93447 | 0.88877 | 0.85424 | 0.86409 | 0.89914 | 0.7569 CCIN       |
| cg15248979 | 0.03055 | 0.03487 | 0.03443 | 0.03155 | 0.02243 | 0.02869 | 0.02732 | 0.02467 | 0.02685 | 0.02452 USP37     |
| cg15249164 | 0.02499 | 0.02465 | 0.02861 | 0.02928 | 0.0267  | 0.02718 | 0.02443 | 0.0252  | 0.02135 | 0.02251 ATP5O     |
| cg15250507 | 0.248   | 0.04037 | 0.14631 | 0.47019 | 0.3323  | 0.03233 | 0.03214 | 0.03081 | 0.03153 | 0.02846 C1orf106  |
| cg15250797 | 0.13237 | 0.10969 | 0.72417 | 0.89037 | 0.25731 | 0.72317 | 0.9451  | 0.81097 | 0.63484 | 0.68312 SCTR      |
| cg15253243 | 0.03972 | 0.03639 | 0.03871 | 0.03894 | 0.02739 | 0.03179 | 0.03283 | 0.03052 | 0.03047 | 0.02929 CHPF      |
| cg15253672 | 0.03669 | 0.03424 | 0.03929 | 0.03655 | 0.03067 | 0.03424 | 0.03273 | 0.03174 | 0.03382 | 0.03358 SPR       |
| cg15256539 | 0.03243 | 0.03482 | 0.03858 | 0.03311 | 0.03039 | 0.03051 | 0.02814 | 0.02526 | 0.02723 | 0.0264 BCKDHB     |
| cg15257765 | 0.0461  | 0.04933 | 0.05006 | 0.04518 | 0.03185 | 0.04697 | 0.04627 | 0.03648 | 0.0386  | 0.0373 MRPL46     |

|            |         |         |         |         |         |         |         |         |         |                      |
|------------|---------|---------|---------|---------|---------|---------|---------|---------|---------|----------------------|
| cg15258980 | 0.86021 | 0.77971 | 0.84734 | 0.86022 | 0.84218 | 0.85308 | 0.54376 | 0.44719 | 0.8724  | 0.80581 ARHGAP25     |
| cg15259973 | 0.142   | 0.12001 | 0.15394 | 0.11477 | 0.24645 | 0.20341 | 0.16177 | 0.2035  | 0.26927 | 0.34819 DSG2         |
| cg15260250 | 0.02742 | 0.0254  | 0.0265  | 0.02798 | 0.0206  | 0.02307 | 0.02544 | 0.02381 | 0.02087 | 0.02 AP3S1           |
| cg15261665 | 0.89048 | 0.76827 | 0.9394  | 0.94977 | 0.94944 | 0.9461  | 0.79202 | 0.82163 | 0.94903 | 0.93082 LTF          |
| cg15262516 | 0.33454 | 0.34075 | 0.31729 | 0.30793 | 0.56291 | 0.32149 | 0.32835 | 0.29861 | 0.53055 | 0.30318 COL4A2       |
| cg15262928 | 0.04998 | 0.04902 | 0.04964 | 0.05112 | 0.03856 | 0.04565 | 0.04641 | 0.04711 | 0.04246 | 0.04199 TIMM17A      |
| cg15262984 | 0.06256 | 0.03491 | 0.3287  | 0.43774 | 0.1445  | 0.03326 | 0.08501 | 0.0379  | 0.03991 | 0.0262 UBE2D4        |
| cg15264255 | 0.34912 | 0.23888 | 0.16235 | 0.16475 | 0.23374 | 0.11096 | 0.1447  | 0.14259 | 0.30637 | 0.14129 NPAL2        |
| cg15264273 | 0.82258 | 0.73778 | 0.74033 | 0.80126 | 0.70039 | 0.81915 | 0.79284 | 0.80423 | 0.83018 | 0.80716 ZNF169       |
| cg15264303 | 0.09023 | 0.10201 | 0.12628 | 0.12818 | 0.12609 | 0.07983 | 0.11696 | 0.11438 | 0.0966  | 0.08952 LRRC23       |
| cg15264808 | 0.07279 | 0.0766  | 0.07129 | 0.06735 | 0.13851 | 0.10357 | 0.08382 | 0.05817 | 0.05034 | 0.0529 C16orf61      |
| cg15269294 | 0.05259 | 0.05571 | 0.0452  | 0.044   | 0.05224 | 0.04975 | 0.04562 | 0.04783 | 0.04017 | 0.03817 NUP155       |
| cg15269863 | 0.24443 | 0.18081 | 0.15834 | 0.16601 | 0.26584 | 0.17282 | 0.15807 | 0.14663 | 0.26785 | 0.12255 PRSS35       |
| cg15269875 | 0.8901  | 0.89062 | 0.8366  | 0.91379 | 0.79599 | 0.82518 | 0.91404 | 0.71003 | 0.94041 | 0.89917 H19          |
| cg15270851 | 0.05007 | 0.04113 | 0.0451  | 0.03687 | 0.02271 | 0.03958 | 0.03758 | 0.03358 | 0.03464 | 0.03695 FLJ12118     |
| cg15270950 | 0.40447 | 0.05631 | 0.05328 | 0.0479  | 0.03477 | 0.04373 | 0.04849 | 0.04378 | 0.04349 | 0.04661 TGFBR2       |
| cg15271594 | 0.05197 | 0.05544 | 0.0594  | 0.04663 | 0.09057 | 0.05741 | 0.03935 | 0.03876 | 0.04701 | 0.04954 RPL29        |
| cg15271616 | 0.14756 | 0.08417 | 0.1067  | 0.09085 | 0.0499  | 0.0303  | 0.08968 | 0.07612 | 0.05545 | 0.0681 RUSC2         |
| cg15272684 | 0.83287 | 0.52395 | 0.84164 | 0.8466  | 0.90526 | 0.4065  | 0.68479 | 0.47974 | 0.89229 | 0.57223 KIAA0319L    |
| cg15272690 | 0.11182 | 0.05171 | 0.23536 | 0.21121 | 0.05556 | 0.04579 | 0.07619 | 0.0495  | 0.05272 | 0.04594 HSPC065      |
| cg15275890 | 0.88698 | 0.87183 | 0.85942 | 0.86795 | 0.85357 | 0.63331 | 0.84104 | 0.69811 | 0.49176 | 0.34428 SLC25A17     |
| cg15277108 | 0.83501 | 0.84841 | 0.82685 | 0.83997 | 0.81615 | 0.78969 | 0.76855 | 0.81546 | 0.83542 | 0.82009 SDS          |
| cg15278682 | 0.89034 | 0.92398 | 0.90606 | 0.9146  | 0.93566 | 0.91704 | 0.89236 | 0.6189  | 0.52022 | 0.6919 TACR2         |
| cg15278948 | 0.04709 | 0.04252 | 0.05868 | 0.09619 | 0.24304 | 0.31519 | 0.04841 | 0.07468 | 0.0356  | 0.03201 ZFAND2B      |
| cg15279364 | 0.04286 | 0.03995 | 0.9493  | 0.94297 | 0.86814 | 0.74571 | 0.1116  | 0.11193 | 0.1338  | 0.10052 TMEM130      |
| cg15280964 | 0.10142 | 0.09583 | 0.1215  | 0.11341 | 0.12276 | 0.09276 | 0.16441 | 0.15705 | 0.09988 | 0.08513 RBM34        |
| cg15284635 | 0.081   | 0.04455 | 0.58226 | 0.66187 | 0.74454 | 0.51996 | 0.08558 | 0.09939 | 0.03978 | 0.03606 SLC6A11      |
| cg15286372 | 0.03605 | 0.03981 | 0.0414  | 0.0369  | 0.03481 | 0.03861 | 0.03354 | 0.03495 | 0.03512 | 0.02631 LRRC1        |
| cg15286905 | 0.05958 | 0.06034 | 0.38948 | 0.40191 | 0.07462 | 0.05223 | 0.09713 | 0.06867 | 0.07066 | 0.0448 ACBD5         |
| cg15287183 | 0.16676 | 0.18922 | 0.27291 | 0.21723 | 0.28019 | 0.2673  | 0.20295 | 0.16827 | 0.17438 | 0.15298 PPP1R9A      |
| cg15288179 | 0.0219  | 0.02011 | 0.02131 | 0.0184  | 0.01417 | 0.01809 | 0.01542 | 0.01802 | 0.01346 | 0.01525 SUB1         |
| cg15293750 | 0.0305  | 0.0322  | 0.04049 | 0.03514 | 0.03618 | 0.04121 | 0.03341 | 0.03448 | 0.03572 | 0.03357 DNMT2        |
| cg15296858 | 0.93019 | 0.92015 | 0.93163 | 0.93422 | 0.72891 | 0.89415 | 0.93871 | 0.90251 | 0.93466 | 0.93064 PPM1G        |
| cg15297650 | 0.86829 | 0.58258 | 0.90037 | 0.88334 | 0.92291 | 0.89186 | 0.81727 | 0.73967 | 0.74296 | 0.82614 DKFZP566N034 |
| cg15298323 | 0.34627 | 0.34708 | 0.43193 | 0.36552 | 0.47883 | 0.40387 | 0.5739  | 0.47036 | 0.56537 | 0.47067 ACAT2        |
| cg15298545 | 0.67439 | 0.73137 | 0.69959 | 0.73647 | 0.69937 | 0.78415 | 0.68372 | 0.68014 | 0.79052 | 0.72362 LOC81691     |
| cg15298594 | 0.03037 | 0.02736 | 0.03101 | 0.02915 | 0.0244  | 0.02431 | 0.03069 | 0.03625 | 0.02853 | 0.02672 NAG          |
| cg15299463 | 0.04064 | 0.03785 | 0.04148 | 0.04314 | 0.07307 | 0.03987 | 0.02885 | 0.02914 | 0.02975 | 0.02733 TEAD2        |
| cg15299721 | 0.11563 | 0.02883 | 0.02839 | 0.02627 | 0.02447 | 0.02825 | 0.02161 | 0.02405 | 0.02083 | 0.02475 LOC133308    |
| cg15300989 | 0.05968 | 0.06299 | 0.05603 | 0.04954 | 0.07215 | 0.06687 | 0.04159 | 0.04248 | 0.04637 | 0.05312 SIP1         |
| cg15301525 | 0.0263  | 0.02675 | 0.03265 | 0.03089 | 0.02472 | 0.02834 | 0.02434 | 0.02496 | 0.02564 | 0.02235 ATP6V0D1     |

|            |         |         |         |         |         |         |         |         |         |         |           |
|------------|---------|---------|---------|---------|---------|---------|---------|---------|---------|---------|-----------|
| cg15301694 | 0.51545 | 0.41087 | 0.35588 | 0.40945 | 0.74674 | 0.7234  | 0.50458 | 0.33121 | 0.44274 | 0.31675 | STRN3     |
| cg15301700 | 0.07113 | 0.07718 | 0.06797 | 0.06462 | 0.0552  | 0.06233 | 0.06442 | 0.05513 | 0.05764 | 0.05401 | SCRT1     |
| cg15302379 | 0.54864 | 0.09942 | 0.23845 | 0.34111 | 0.0661  | 0.04416 | 0.90982 | 0.21701 | 0.91253 | 0.55865 | KAZALD1   |
| cg15302567 | 0.05006 | 0.04421 | 0.0647  | 0.05792 | 0.04583 | 0.05271 | 0.04818 | 0.04478 | 0.04764 | 0.03541 | PPME1     |
| cg15303841 | 0.35996 | 0.17799 | 0.51046 | 0.66829 | 0.44428 | 0.6215  | 0.37151 | 0.42084 | 0.3843  | 0.24666 | RFPL1     |
| cg15304928 | 0.04212 | 0.04144 | 0.05401 | 0.04919 | 0.09722 | 0.23543 | 0.0472  | 0.04036 | 0.0456  | 0.05179 | TMEM9     |
| cg15305343 | 0.02299 | 0.02169 | 0.02478 | 0.02262 | 0.02132 | 0.02224 | 0.01973 | 0.01884 | 0.01965 | 0.01911 | NSUN4     |
| cg15305511 | 0.13827 | 0.0691  | 0.40253 | 0.5653  | 0.16825 | 0.05863 | 0.2291  | 0.3205  | 0.05611 | 0.04647 | EVC2      |
| cg15307169 | 0.38933 | 0.43177 | 0.11554 | 0.08759 | 0.21124 | 0.04593 | 0.04757 | 0.04418 | 0.37504 | 0.13124 | FLJ33718  |
| cg15307268 | 0.47317 | 0.09066 | 0.13764 | 0.09475 | 0.05914 | 0.05119 | 0.0625  | 0.05895 | 0.05872 | 0.05693 | GPR176    |
| cg15307449 | 0.68539 | 0.70475 | 0.65603 | 0.69418 | 0.54383 | 0.63589 | 0.64115 | 0.6455  | 0.72063 | 0.62566 | HSA277841 |
| cg15308737 | 0.86205 | 0.82863 | 0.80602 | 0.81691 | 0.73915 | 0.83702 | 0.81648 | 0.74345 | 0.83232 | 0.72125 | ARSG      |
| cg15309006 | 0.8708  | 0.96735 | 0.60932 | 0.86316 | 0.51477 | 0.40999 | 0.53708 | 0.58074 | 0.08991 | 0.02372 | LOC63928  |
| cg15309066 | 0.02236 | 0.02328 | 0.02592 | 0.02091 | 0.01842 | 0.02566 | 0.02205 | 0.0223  | 0.01795 | 0.01693 | CYCS      |
| cg15309223 | 0.03441 | 0.03273 | 0.03489 | 0.03856 | 0.03183 | 0.03869 | 0.02797 | 0.02366 | 0.03056 | 0.03368 | C1orf83   |
| cg15309236 | 0.21302 | 0.63525 | 0.88393 | 0.90723 | 0.12791 | 0.86801 | 0.59488 | 0.9094  | 0.90784 | 0.92265 | BHLHB9    |
| cg15309264 | 0.3068  | 0.07496 | 0.08839 | 0.07695 | 0.03729 | 0.07289 | 0.06926 | 0.0694  | 0.06794 | 0.06828 | VRK2      |
| cg15309578 | 0.62884 | 0.56166 | 0.59007 | 0.64072 | 0.56301 | 0.52025 | 0.66904 | 0.64272 | 0.67731 | 0.61191 | PELI1     |
| cg15310162 | 0.7683  | 0.79578 | 0.74347 | 0.80437 | 0.70191 | 0.76848 | 0.69351 | 0.7935  | 0.77455 | 0.5101  | CLDN14    |
| cg15310873 | 0.95318 | 0.84067 | 0.96653 | 0.9702  | 0.97304 | 0.97244 | 0.95051 | 0.8716  | 0.97358 | 0.95988 | C2orf85   |
| cg15311933 | 0.02532 | 0.02237 | 0.03045 | 0.03158 | 0.02008 | 0.0247  | 0.02058 | 0.02165 | 0.02681 | 0.02134 | PQLC2     |
| cg15312298 | 0.30857 | 0.28729 | 0.28255 | 0.29469 | 0.34641 | 0.29085 | 0.2864  | 0.28443 | 0.27426 | 0.24178 | FAM84B    |
| cg15312323 | 0.66602 | 0.66824 | 0.54299 | 0.60229 | 0.58674 | 0.66101 | 0.32058 | 0.27943 | 0.66387 | 0.55234 | KRTAP4-4  |
| cg15315630 | 0.02932 | 0.03039 | 0.03084 | 0.02828 | 0.0246  | 0.02472 | 0.33789 | 0.37342 | 0.02305 | 0.02288 | ZMYM6     |
| cg15316289 | 0.94465 | 0.76317 | 0.93757 | 0.93369 | 0.90877 | 0.92584 | 0.93558 | 0.75676 | 0.93749 | 0.93921 | CRELD2    |
| cg15316334 | 0.84968 | 0.30732 | 0.10656 | 0.1766  | 0.06906 | 0.0546  | 0.0655  | 0.05581 | 0.04563 | 0.04722 | CEACAM5   |
| cg15317267 | 0.87047 | 0.5852  | 0.77892 | 0.91304 | 0.79655 | 0.7589  | 0.86674 | 0.88953 | 0.78308 | 0.71539 | H19       |
| cg15318532 | 0.02509 | 0.02648 | 0.0276  | 0.0235  | 0.02328 | 0.02576 | 0.02331 | 0.02095 | 0.0216  | 0.01966 | RFXAP     |
| cg15319076 | 0.03997 | 0.03966 | 0.03872 | 0.038   | 0.03065 | 0.03495 | 0.04532 | 0.04055 | 0.03431 | 0.03066 | DCTN6     |
| cg15319451 | 0.07596 | 0.06803 | 0.06412 | 0.06485 | 0.08252 | 0.06795 | 0.06182 | 0.06395 | 0.05802 | 0.05797 | TMEM51    |
| cg15319457 | 0.0219  | 0.02368 | 0.04232 | 0.03047 | 0.51214 | 0.05796 | 0.02644 | 0.02235 | 0.10864 | 0.02215 | HES6      |
| cg15320474 | 0.2714  | 0.06888 | 0.32283 | 0.54705 | 0.62461 | 0.72589 | 0.04164 | 0.19075 | 0.07414 | 0.05333 | UBD       |
| cg15321195 | 0.07063 | 0.08015 | 0.08134 | 0.07615 | 0.07992 | 0.07794 | 0.07564 | 0.07562 | 0.06838 | 0.06628 | AGPAT3    |
| cg15321211 | 0.4082  | 0.14237 | 0.17603 | 0.11799 | 0.60672 | 0.46325 | 0.72983 | 0.7615  | 0.25455 | 0.1006  | HNRPF     |
| cg15322932 | 0.57389 | 0.28046 | 0.05798 | 0.05988 | 0.04393 | 0.05425 | 0.05108 | 0.05525 | 0.04871 | 0.04957 | ALDH3B1   |
| cg15329467 | 0.85335 | 0.4737  | 0.87024 | 0.8913  | 0.83416 | 0.87137 | 0.81202 | 0.83351 | 0.86693 | 0.61432 | CYP19A1   |
| cg15329483 | 0.66704 | 0.34591 | 0.66366 | 0.73124 | 0.55519 | 0.596   | 0.11981 | 0.19282 | 0.34414 | 0.38062 | SSX7      |
| cg15329642 | 0.83344 | 0.58475 | 0.65166 | 0.86102 | 0.96852 | 0.92536 | 0.71706 | 0.43768 | 0.91906 | 0.56417 | PTCH2     |
| cg15329866 | 0.48856 | 0.1959  | 0.70156 | 0.78062 | 0.46469 | 0.58964 | 0.65232 | 0.63683 | 0.71621 | 0.64808 | PLD1      |
| cg15331039 | 0.02413 | 0.02735 | 0.02968 | 0.02528 | 0.02563 | 0.02845 | 0.02213 | 0.02392 | 0.02321 | 0.0238  | SH3BGR12  |
| cg15334028 | 0.08012 | 0.07886 | 0.0887  | 0.08568 | 0.0589  | 0.08212 | 0.07079 | 0.06191 | 0.08572 | 0.07664 | DNM2      |

|            |         |         |         |         |         |         |         |         |         |         |          |
|------------|---------|---------|---------|---------|---------|---------|---------|---------|---------|---------|----------|
| cg15337006 | 0.86918 | 0.85901 | 0.87726 | 0.89258 | 0.87474 | 0.90543 | 0.20199 | 0.04896 | 0.88471 | 0.86012 | ITGAM    |
| cg15337055 | 0.03714 | 0.04399 | 0.04333 | 0.04067 | 0.029   | 0.03353 | 0.03134 | 0.03746 | 0.03796 | 0.03695 | FOS      |
| cg15337897 | 0.02981 | 0.02886 | 0.58946 | 0.7271  | 0.46823 | 0.45489 | 0.02983 | 0.02912 | 0.02863 | 0.02573 | FGF3     |
| cg15339605 | 0.11162 | 0.13882 | 0.23212 | 0.16936 | 0.32318 | 0.21028 | 0.14228 | 0.17766 | 0.14803 | 0.11166 | TFEC     |
| cg15341340 | 0.05049 | 0.05629 | 0.05296 | 0.05511 | 0.10959 | 0.04594 | 0.05991 | 0.04914 | 0.04359 | 0.04121 | DNASE2   |
| cg15341760 | 0.83876 | 0.82866 | 0.87281 | 0.87229 | 0.90054 | 0.8538  | 0.80888 | 0.81955 | 0.87776 | 0.86509 | MGC40168 |
| cg15342384 | 0.0198  | 0.02357 | 0.02082 | 0.02118 | 0.01602 | 0.01834 | 0.01821 | 0.01726 | 0.01618 | 0.01759 | HNRPH3   |
| cg15343119 | 0.11204 | 0.09545 | 0.93492 | 0.94257 | 0.0924  | 0.12813 | 0.40432 | 0.90103 | 0.10583 | 0.08887 | GALR1    |
| cg15344028 | 0.82429 | 0.77564 | 0.77673 | 0.83559 | 0.72735 | 0.77697 | 0.73427 | 0.63706 | 0.5899  | 0.39927 | ICOS     |
| cg15344726 | 0.95563 | 0.94542 | 0.96148 | 0.96036 | 0.97399 | 0.96705 | 0.95952 | 0.96284 | 0.96084 | 0.96468 | GJA3     |
| cg15345126 | 0.05088 | 0.0422  | 0.05164 | 0.0484  | 0.0335  | 0.03795 | 0.03957 | 0.03732 | 0.31834 | 0.19133 | RAB27A   |
| cg15348640 | 0.04293 | 0.03755 | 0.04015 | 0.05078 | 0.05793 | 0.04628 | 0.03252 | 0.03191 | 0.0344  | 0.03488 | ACAA1    |
| cg15348799 | 0.03148 | 0.0351  | 0.03438 | 0.02744 | 0.02828 | 0.02672 | 0.0231  | 0.02137 | 0.02826 | 0.02699 | SKIL     |
| cg15350036 | 0.79566 | 0.79918 | 0.64613 | 0.74759 | 0.56613 | 0.66177 | 0.26485 | 0.37829 | 0.18537 | 0.15969 | CROT     |
| cg15350194 | 0.3156  | 0.03864 | 0.67527 | 0.76165 | 0.93895 | 0.4773  | 0.24466 | 0.13855 | 0.53898 | 0.05597 | FAM70B   |
| cg15350455 | 0.10823 | 0.11103 | 0.11949 | 0.1053  | 0.19367 | 0.10767 | 0.11006 | 0.07551 | 0.09433 | 0.12371 | FLJ21945 |
| cg15352315 | 0.55176 | 0.63832 | 0.26129 | 0.43565 | 0.14006 | 0.10396 | 0.53486 | 0.09411 | 0.07559 | 0.06158 | CD302    |
| cg15352829 | 0.94345 | 0.90413 | 0.92679 | 0.93149 | 0.94681 | 0.93502 | 0.93015 | 0.92798 | 0.94057 | 0.91882 | PLD4     |
| cg15357518 | 0.07642 | 0.05164 | 0.146   | 0.10294 | 0.04443 | 0.04598 | 0.04448 | 0.04844 | 0.05138 | 0.04924 | MGC10433 |
| cg15357639 | 0.92628 | 0.9115  | 0.92118 | 0.92938 | 0.92462 | 0.90775 | 0.93605 | 0.93633 | 0.93437 | 0.93815 | OGG1     |
| cg15357945 | 0.07218 | 0.05827 | 0.09457 | 0.08239 | 0.12053 | 0.09593 | 0.07064 | 0.06456 | 0.05657 | 0.04923 | PRG2     |
| cg15359413 | 0.0356  | 0.03491 | 0.03258 | 0.03353 | 0.03324 | 0.03717 | 0.04058 | 0.03757 | 0.02612 | 0.02896 | FIGNL1   |
| cg15361231 | 0.53138 | 0.69753 | 0.66943 | 0.74345 | 0.6251  | 0.50951 | 0.22108 | 0.35922 | 0.74622 | 0.69674 | GLRX2    |
| cg15361590 | 0.10708 | 0.0501  | 0.89877 | 0.90711 | 0.93151 | 0.92948 | 0.91362 | 0.91647 | 0.92888 | 0.91142 | PCDHGC4  |
| cg15361750 | 0.78128 | 0.49367 | 0.74719 | 0.8406  | 0.76019 | 0.48249 | 0.55822 | 0.57285 | 0.8575  | 0.63194 | GPR77    |
| cg15364303 | 0.07298 | 0.05775 | 0.09306 | 0.07338 | 0.24994 | 0.08509 | 0.05708 | 0.05169 | 0.07057 | 0.06912 | ROR1     |
| cg15364537 | 0.05047 | 0.04464 | 0.14755 | 0.16954 | 0.16581 | 0.16637 | 0.06043 | 0.04329 | 0.06079 | 0.0479  | MFSD4    |
| cg15364618 | 0.94756 | 0.96037 | 0.95483 | 0.95631 | 0.96869 | 0.96495 | 0.92336 | 0.95684 | 0.96604 | 0.96524 | CIDEB    |
| cg15365950 | 0.03216 | 0.03487 | 0.03278 | 0.03304 | 0.02361 | 0.03255 | 0.02762 | 0.03041 | 0.02612 | 0.0293  | KLHDC1   |
| cg15368822 | 0.06131 | 0.06629 | 0.08893 | 0.05801 | 0.04712 | 0.05948 | 0.06368 | 0.06119 | 0.05891 | 0.05654 | TMEM63A  |
| cg15371509 | 0.04792 | 0.05113 | 0.04368 | 0.04578 | 0.0533  | 0.04898 | 0.04364 | 0.04376 | 0.04587 | 0.04333 | C1orf60  |
| cg15372098 | 0.05431 | 0.05075 | 0.05653 | 0.04532 | 0.03782 | 0.04011 | 0.07249 | 0.07278 | 0.04347 | 0.05181 | C3orf26  |
| cg15373285 | 0.56841 | 0.59125 | 0.86812 | 0.89833 | 0.9348  | 0.91648 | 0.26399 | 0.51858 | 0.91314 | 0.88938 | MEG3     |
| cg15373633 | 0.03643 | 0.03647 | 0.24467 | 0.14029 | 0.06142 | 0.04911 | 0.11827 | 0.04905 | 0.04877 | 0.04323 | DACH2    |
| cg15374234 | 0.07951 | 0.06613 | 0.31289 | 0.58319 | 0.29826 | 0.56124 | 0.0557  | 0.04541 | 0.06621 | 0.30735 | CD300LF  |
| cg15375239 | 0.6585  | 0.58416 | 0.98236 | 0.97908 | 0.98406 | 0.98617 | 0.23959 | 0.03048 | 0.98731 | 0.98092 | SPINT2   |
| cg15375586 | 0.16976 | 0.03431 | 0.3118  | 0.61124 | 0.21606 | 0.03265 | 0.03782 | 0.03917 | 0.72201 | 0.75337 | TBX22    |
| cg15376097 | 0.23171 | 0.11734 | 0.25429 | 0.25995 | 0.2571  | 0.12195 | 0.09187 | 0.09493 | 0.14592 | 0.09252 | EVA1     |
| cg15377518 | 0.14551 | 0.13821 | 0.23382 | 0.20303 | 0.24188 | 0.17615 | 0.18807 | 0.1746  | 0.34659 | 0.18889 | ZFHX1B   |
| cg15377649 | 0.0536  | 0.06292 | 0.05405 | 0.0539  | 0.05521 | 0.04688 | 0.05269 | 0.05041 | 0.03828 | 0.03782 | ACTN4    |
| cg15378655 | 0.07337 | 0.06309 | 0.10643 | 0.09076 | 0.12054 | 0.0898  | 0.07519 | 0.06667 | 0.07614 | 0.1013  | TSPYL4   |

|            |         |         |         |         |         |         |         |         |         |                  |
|------------|---------|---------|---------|---------|---------|---------|---------|---------|---------|------------------|
| cg15379237 | 0.04756 | 0.05145 | 0.05237 | 0.04806 | 0.03854 | 0.04518 | 0.04953 | 0.0573  | 0.03889 | 0.03825 B4GALT2  |
| cg15379633 | 0.04229 | 0.03117 | 0.08287 | 0.30098 | 0.69876 | 0.68795 | 0.07724 | 0.02711 | 0.02053 | 0.02418 RAB36    |
| cg15379858 | 0.87785 | 0.61665 | 0.90367 | 0.89031 | 0.91291 | 0.86968 | 0.89951 | 0.76499 | 0.91696 | 0.80747 ChGn     |
| cg15379887 | 0.14782 | 0.15354 | 0.17752 | 0.14956 | 0.22842 | 0.18129 | 0.21334 | 0.22662 | 0.14503 | 0.13621 CGGBP1   |
| cg15381313 | 0.65883 | 0.47814 | 0.18202 | 0.18839 | 0.22312 | 0.17576 | 0.14812 | 0.13774 | 0.13802 | 0.12591 NR1H4    |
| cg15381769 | 0.03197 | 0.03142 | 0.0328  | 0.0356  | 0.02428 | 0.03051 | 0.02675 | 0.03121 | 0.02625 | 0.02672 PTPRK    |
| cg15383087 | 0.42726 | 0.16815 | 0.70076 | 0.81022 | 0.64517 | 0.58854 | 0.76753 | 0.7469  | 0.84246 | 0.64636 ZNF545   |
| cg15383120 | 0.06794 | 0.04965 | 0.56073 | 0.57693 | 0.6542  | 0.64207 | 0.45399 | 0.63119 | 0.03325 | 0.04131 DUSP22   |
| cg15383392 | 0.04771 | 0.0432  | 0.04378 | 0.03829 | 0.04349 | 0.06907 | 0.05801 | 0.05478 | 0.03738 | 0.02908 CTTN     |
| cg15383574 | 0.04786 | 0.05205 | 0.04313 | 0.03929 | 0.03139 | 0.04302 | 0.03677 | 0.04672 | 0.04034 | 0.04236 ATP5S    |
| cg15384392 | 0.04397 | 0.03969 | 0.04206 | 0.04406 | 0.03934 | 0.04217 | 0.04644 | 0.03803 | 0.03504 | 0.03559 ARHGAP1  |
| cg15384599 | 0.2636  | 0.05809 | 0.17716 | 0.14839 | 0.05087 | 0.04584 | 0.03923 | 0.03643 | 0.03981 | 0.03327 SETMAR   |
| cg15384717 | 0.11359 | 0.09669 | 0.07588 | 0.07366 | 0.11789 | 0.10438 | 0.08132 | 0.07807 | 0.12358 | 0.10688 PRPF3    |
| cg15385623 | 0.08618 | 0.07414 | 0.07518 | 0.08191 | 0.06756 | 0.0646  | 0.0782  | 0.0969  | 0.06672 | 0.06696 THRB     |
| cg15387123 | 0.43871 | 0.09338 | 0.87029 | 0.86232 | 0.90211 | 0.86623 | 0.17504 | 0.34147 | 0.85148 | 0.64153 CLIC3    |
| cg15389153 | 0.76409 | 0.75898 | 0.75463 | 0.75119 | 0.67547 | 0.72634 | 0.76404 | 0.80678 | 0.7578  | 0.74832 CCDC13   |
| cg15392792 | 0.03444 | 0.04243 | 0.05234 | 0.05122 | 0.03945 | 0.03846 | 0.03726 | 0.0382  | 0.03208 | 0.03409 DNM2     |
| cg15394409 | 0.03309 | 0.03138 | 0.03421 | 0.03315 | 0.0292  | 0.02949 | 0.02576 | 0.02931 | 0.03118 | 0.02444 TMEM111  |
| cg15396310 | 0.02998 | 0.03129 | 0.03361 | 0.03227 | 0.03171 | 0.03869 | 0.03293 | 0.03376 | 0.02548 | 0.02622 BCL7B    |
| cg15396367 | 0.73695 | 0.28748 | 0.16246 | 0.39271 | 0.58119 | 0.34522 | 0.47054 | 0.15057 | 0.79083 | 0.41044 UAP1L1   |
| cg15397506 | 0.03051 | 0.0256  | 0.03161 | 0.02617 | 0.03095 | 0.02982 | 0.02529 | 0.02565 | 0.02117 | 0.01953 LOC93622 |
| cg15398448 | 0.039   | 0.02467 | 0.03522 | 0.04126 | 0.02321 | 0.0235  | 0.0175  | 0.01627 | 0.01879 | 0.01964 PTOV1    |
| cg15398520 | 0.22751 | 0.49332 | 0.72031 | 0.75099 | 0.66846 | 0.73303 | 0.63907 | 0.72048 | 0.48477 | 0.46066 LPAL2    |
| cg15399561 | 0.02549 | 0.0307  | 0.03694 | 0.03446 | 0.0238  | 0.02894 | 0.02741 | 0.03256 | 0.03    | 0.02837 HRSP12   |
| cg15401952 | 0.06519 | 0.06632 | 0.15286 | 0.1664  | 0.073   | 0.07755 | 0.05943 | 0.83802 | 0.05256 | 0.05799 KCNIP4   |
| cg15403517 | 0.39375 | 0.1292  | 0.773   | 0.84368 | 0.72614 | 0.62828 | 0.51495 | 0.60707 | 0.09139 | 0.07883 SRD5A2   |
| cg15407570 | 0.84834 | 0.86043 | 0.84942 | 0.87456 | 0.92567 | 0.84709 | 0.66774 | 0.43309 | 0.86548 | 0.82871 STAB1    |
| cg15408407 | 0.0231  | 0.02338 | 0.02301 | 0.02303 | 0.02029 | 0.02515 | 0.01748 | 0.02078 | 0.0165  | 0.01829 RPS15    |
| cg15408454 | 0.67109 | 0.34211 | 0.64514 | 0.86496 | 0.91357 | 0.89392 | 0.10338 | 0.07321 | 0.02737 | 0.02507 MAGEA6   |
| cg15409266 | 0.67565 | 0.59045 | 0.38721 | 0.38651 | 0.61453 | 0.32172 | 0.20692 | 0.35405 | 0.75396 | 0.4175 ATG4A     |
| cg15410903 | 0.02538 | 0.02845 | 0.26957 | 0.31725 | 0.02155 | 0.02323 | 0.94053 | 0.95863 | 0.96229 | 0.95993 GSTO2    |
| cg15411984 | 0.0239  | 0.02748 | 0.03989 | 0.02999 | 0.03916 | 0.02846 | 0.03526 | 0.03497 | 0.026   | 0.02766 LRRC23   |
| cg15413566 | 0.10907 | 0.09162 | 0.14019 | 0.18194 | 0.31724 | 0.099   | 0.09669 | 0.09914 | 0.23314 | 0.38294 ICA1     |
| cg15414833 | 0.02696 | 0.02853 | 0.04295 | 0.0423  | 0.0487  | 0.04377 | 0.02713 | 0.02953 | 0.02181 | 0.02144 RPIB9    |
| cg15415507 | 0.18261 | 0.19723 | 0.18861 | 0.17116 | 0.11232 | 0.14063 | 0.16708 | 0.16228 | 0.1657  | 0.14325 EPHA2    |
| cg15415509 | 0.17389 | 0.12954 | 0.20485 | 0.1484  | 0.16069 | 0.12199 | 0.1824  | 0.1535  | 0.12117 | 0.14093 ADRB2    |
| cg15415545 | 0.2572  | 0.06443 | 0.39667 | 0.40862 | 0.95577 | 0.77774 | 0.25988 | 0.115   | 0.82949 | 0.81742 SULT1A3  |
| cg15416233 | 0.02235 | 0.02258 | 0.02555 | 0.02379 | 0.02197 | 0.02182 | 0.02181 | 0.02115 | 0.01969 | 0.01982 PAX2     |
| cg15416577 | 0.0378  | 0.04187 | 0.04167 | 0.04008 | 0.0333  | 0.03589 | 0.03057 | 0.03322 | 0.03208 | 0.03249 CCDC52   |
| cg15417244 | 0.81859 | 0.06498 | 0.29805 | 0.3209  | 0.68583 | 0.75912 | 0.41145 | 0.43104 | 0.18131 | 0.33635 PDZRN4   |
| cg15417900 | 0.05033 | 0.04965 | 0.05101 | 0.05993 | 0.04769 | 0.05919 | 0.05215 | 0.05176 | 0.04277 | 0.04591 TMEM4    |



|            |         |         |         |         |         |         |         |         |         |                  |
|------------|---------|---------|---------|---------|---------|---------|---------|---------|---------|------------------|
| cg15419274 | 0.04006 | 0.04495 | 0.04559 | 0.04399 | 0.04009 | 0.03789 | 0.03319 | 0.04062 | 0.03501 | 0.02632 DNTTIP1  |
| cg15422147 | 0.75063 | 0.54828 | 0.84728 | 0.88739 | 0.08809 | 0.11838 | 0.09923 | 0.08802 | 0.14088 | 0.08907 SERPINB5 |
| cg15422784 | 0.8334  | 0.87563 | 0.80988 | 0.86649 | 0.76743 | 0.83621 | 0.68695 | 0.85367 | 0.75517 | 0.79932 LRRC8B   |
| cg15423613 | 0.02507 | 0.02836 | 0.02981 | 0.02802 | 0.04614 | 0.04603 | 0.02762 | 0.02459 | 0.02417 | 0.02088 KCTD7    |
| cg15423764 | 0.78054 | 0.43088 | 0.61624 | 0.72567 | 0.38621 | 0.19893 | 0.19353 | 0.1745  | 0.15957 | 0.17347 GLYAT    |
| cg15423862 | 0.85028 | 0.86439 | 0.82053 | 0.84181 | 0.87381 | 0.8688  | 0.8246  | 0.8679  | 0.65336 | 0.57122 KCNAB1   |
| cg15425280 | 0.07245 | 0.0593  | 0.50172 | 0.49399 | 0.23177 | 0.08093 | 0.06976 | 0.04813 | 0.13412 | 0.41043 GRIA2    |
| cg15425811 | 0.13321 | 0.05546 | 0.91565 | 0.89921 | 0.66048 | 0.53397 | 0.09427 | 0.04656 | 0.63502 | 0.64428 FLJ35801 |
| cg15426734 | 0.0467  | 0.03534 | 0.92487 | 0.91903 | 0.95451 | 0.87864 | 0.16624 | 0.04068 | 0.30796 | 0.18622 PARD6A   |
| cg15427448 | 0.02938 | 0.0266  | 0.03407 | 0.02745 | 0.02368 | 0.02463 | 0.02562 | 0.02708 | 0.02295 | 0.02448 BACE1    |
| cg15427567 | 0.03368 | 0.03658 | 0.03562 | 0.03822 | 0.02827 | 0.03788 | 0.02916 | 0.02749 | 0.02583 | 0.03461 FLJ20859 |
| cg15427656 | 0.065   | 0.16993 | 0.07289 | 0.07104 | 0.0584  | 0.06396 | 0.06706 | 0.06172 | 0.06298 | 0.05883 ECD      |
| cg15427774 | 0.07364 | 0.07759 | 0.07943 | 0.06865 | 0.11962 | 0.07576 | 0.05959 | 0.05736 | 0.06573 | 0.06829 GORASP1  |
| cg15428653 | 0.0824  | 0.09532 | 0.11164 | 0.08807 | 0.15223 | 0.09088 | 0.08791 | 0.08486 | 0.07742 | 0.11037 ABCA2    |
| cg15430659 | 0.91969 | 0.07955 | 0.91275 | 0.92796 | 0.93379 | 0.91696 | 0.85853 | 0.89814 | 0.90955 | 0.89076 CNM1     |
| cg15431576 | 0.37036 | 0.30322 | 0.12621 | 0.12959 | 0.2801  | 0.33555 | 0.13045 | 0.13537 | 0.13066 | 0.11279 C10orf83 |
| cg15432938 | 0.04992 | 0.05412 | 0.05061 | 0.04944 | 0.04361 | 0.04899 | 0.0462  | 0.05133 | 0.04437 | 0.03832 FRAT1    |
| cg15433631 | 0.03311 | 0.03344 | 0.68986 | 0.68696 | 0.02555 | 0.03166 | 0.26277 | 0.61864 | 0.4166  | 0.68241 IRX2     |
| cg15434599 | 0.0699  | 0.06931 | 0.08013 | 0.06388 | 0.05372 | 0.06338 | 0.0588  | 0.05581 | 0.06837 | 0.06355 MDM2     |
| cg15435730 | 0.06239 | 0.06076 | 0.08123 | 0.07069 | 0.12922 | 0.0888  | 0.05275 | 0.06479 | 0.05322 | 0.05984 TFAP2D   |
| cg15437432 | 0.06147 | 0.05117 | 0.09753 | 0.09305 | 0.09569 | 0.05035 | 0.06035 | 0.05893 | 0.05029 | 0.05024 TMED9    |
| cg15439078 | 0.83034 | 0.79558 | 0.85585 | 0.9218  | 0.94177 | 0.91179 | 0.83026 | 0.73574 | 0.647   | 0.59743 MYL3     |
| cg15439196 | 0.15168 | 0.1239  | 0.11961 | 0.10236 | 0.18016 | 0.12839 | 0.14891 | 0.13401 | 0.1241  | 0.11117 CNM2     |
| cg15439862 | 0.06713 | 0.04213 | 0.92507 | 0.91972 | 0.28973 | 0.34414 | 0.43789 | 0.47714 | 0.38271 | 0.77334 DSC3     |
| cg15441973 | 0.84983 | 0.84988 | 0.84207 | 0.84557 | 0.81175 | 0.80257 | 0.78028 | 0.70539 | 0.85577 | 0.80205 HNMT     |
| cg15442534 | 0.03182 | 0.02852 | 0.02776 | 0.02718 | 0.02052 | 0.02772 | 0.02671 | 0.02489 | 0.02507 | 0.02317 PDCD10   |
| cg15442702 | 0.10221 | 0.08489 | 0.09348 | 0.10605 | 0.06424 | 0.07941 | 0.09008 | 0.0773  | 0.08367 | 0.0755 FGFR4     |
| cg15443822 | 0.07095 | 0.03655 | 0.59978 | 0.71951 | 0.5706  | 0.54734 | 0.06363 | 0.02875 | 0.28539 | 0.26261 ATP2A3   |
| cg15444978 | 0.03664 | 0.03719 | 0.08842 | 0.11651 | 0.23929 | 0.03699 | 0.02781 | 0.03163 | 0.04469 | 0.02596 MARK3    |
| cg15445332 | 0.02542 | 0.02805 | 0.03193 | 0.02751 | 0.02117 | 0.02546 | 0.02115 | 0.02343 | 0.02209 | 0.02141 MKNK1    |
| cg15446391 | 0.90189 | 0.89243 | 0.93325 | 0.93442 | 0.92989 | 0.91616 | 0.3851  | 0.49284 | 0.91637 | 0.89205 WT1      |
| cg15447479 | 0.03849 | 0.04896 | 0.05274 | 0.04997 | 0.05376 | 0.05165 | 0.03802 | 0.03864 | 0.03729 | 0.03204 SMO      |
| cg15447486 | 0.77757 | 0.17123 | 0.87953 | 0.89416 | 0.64528 | 0.40396 | 0.73663 | 0.27169 | 0.47657 | 0.33328 GPR109B  |
| cg15448245 | 0.57756 | 0.25176 | 0.77789 | 0.75134 | 0.80085 | 0.40268 | 0.65474 | 0.64291 | 0.75158 | 0.62038 GGTLA1   |
| cg15448599 | 0.9142  | 0.90427 | 0.91439 | 0.91999 | 0.91344 | 0.90782 | 0.91627 | 0.91651 | 0.91996 | 0.90627 C3orf45  |
| cg15451100 | 0.03317 | 0.03594 | 0.0369  | 0.03932 | 0.02426 | 0.02266 | 0.03187 | 0.03414 | 0.02305 | 0.02499 PSMB8    |
| cg15452204 | 0.93479 | 0.93152 | 0.93869 | 0.9334  | 0.95306 | 0.92926 | 0.92811 | 0.8918  | 0.91152 | 0.91619 CDX1     |
| cg15452426 | 0.02278 | 0.0198  | 0.02639 | 0.02139 | 0.28532 | 0.01901 | 0.02015 | 0.04259 | 0.20817 | 0.01573 DFFA     |
| cg15452573 | 0.0468  | 0.0401  | 0.55206 | 0.57464 | 0.14273 | 0.06529 | 0.0406  | 0.03472 | 0.03948 | 0.04637 SNCA     |
| cg15453943 | 0.76172 | 0.79256 | 0.65566 | 0.72577 | 0.72019 | 0.81068 | 0.69727 | 0.76272 | 0.43213 | 0.57176 RAB9P1   |
| cg15454483 | 0.04046 | 0.02637 | 0.04285 | 0.04897 | 0.02461 | 0.02467 | 0.02874 | 0.02575 | 0.02374 | 0.02216 SNX12    |

|            |         |         |         |         |         |         |         |         |         |                   |
|------------|---------|---------|---------|---------|---------|---------|---------|---------|---------|-------------------|
| cg15456206 | 0.07864 | 0.051   | 0.15583 | 0.12086 | 0.02888 | 0.02465 | 0.03387 | 0.02772 | 0.01939 | 0.01743 ZNF580    |
| cg15457079 | 0.71359 | 0.44521 | 0.60797 | 0.75383 | 0.62129 | 0.76643 | 0.20115 | 0.1472  | 0.48734 | 0.49124 CPN1      |
| cg15457899 | 0.02638 | 0.02547 | 0.49287 | 0.48187 | 0.57648 | 0.62356 | 0.09696 | 0.02261 | 0.10253 | 0.02388 SCN3B     |
| cg15459742 | 0.03669 | 0.03389 | 0.03344 | 0.03136 | 0.02529 | 0.03269 | 0.02942 | 0.03306 | 0.02786 | 0.03184 CTNNAL1   |
| cg15459773 | 0.9213  | 0.8044  | 0.49362 | 0.50296 | 0.57183 | 0.41243 | 0.11783 | 0.09046 | 0.63993 | 0.51158 C1orf124  |
| cg15460516 | 0.03922 | 0.04188 | 0.0355  | 0.03408 | 0.02919 | 0.03297 | 0.0343  | 0.03421 | 0.0288  | 0.02787 TNFRSF12A |
| cg15461516 | 0.03114 | 0.02768 | 0.18549 | 0.15281 | 0.39545 | 0.29552 | 0.14472 | 0.02899 | 0.08262 | 0.02122 CHST1     |
| cg15462232 | 0.04559 | 0.04241 | 0.05649 | 0.05574 | 0.05662 | 0.06318 | 0.05373 | 0.04761 | 0.06747 | 0.06064 FOXD3     |
| cg15464148 | 0.80928 | 0.54907 | 0.87892 | 0.8662  | 0.87932 | 0.51949 | 0.29948 | 0.18617 | 0.49656 | 0.31404 GPR92     |
| cg15465321 | 0.51165 | 0.31565 | 0.41466 | 0.66847 | 0.28475 | 0.32887 | 0.37226 | 0.455   | 0.21428 | 0.06288 PEPP-2    |
| cg15467148 | 0.09267 | 0.09561 | 0.09522 | 0.10189 | 0.07925 | 0.08203 | 0.07302 | 0.08068 | 0.08577 | 0.08119 PCK2      |
| cg15467759 | 0.93986 | 0.92916 | 0.94632 | 0.94931 | 0.95877 | 0.95087 | 0.93532 | 0.94205 | 0.94904 | 0.94692 NDST1     |
| cg15468095 | 0.47268 | 0.14319 | 0.37498 | 0.49631 | 0.76786 | 0.83337 | 0.26263 | 0.2085  | 0.1505  | 0.35445 PYCARD    |
| cg15470298 | 0.24785 | 0.28121 | 0.22788 | 0.16618 | 0.21017 | 0.19985 | 0.24038 | 0.29028 | 0.26287 | 0.23003 COL18A1   |
| cg15470750 | 0.0511  | 0.05061 | 0.10518 | 0.09824 | 0.07284 | 0.05743 | 0.04293 | 0.04165 | 0.06733 | 0.06365 FDPS      |
| cg15473335 | 0.07234 | 0.06372 | 0.09483 | 0.09582 | 0.10032 | 0.08506 | 0.08603 | 0.08532 | 0.09293 | 0.08786 MGC3731   |
| cg15473868 | 0.08589 | 0.03702 | 0.10325 | 0.10195 | 0.03573 | 0.02527 | 0.03458 | 0.03271 | 0.02626 | 0.02161 MT1X      |
| cg15473904 | 0.07991 | 0.05011 | 0.08319 | 0.07287 | 0.12259 | 0.06529 | 0.09213 | 0.04481 | 0.07778 | 0.04856 MRPL41    |
| cg15475323 | 0.06691 | 0.06349 | 0.92333 | 0.94411 | 0.17158 | 0.06579 | 0.91999 | 0.05124 | 0.26856 | 0.04399 FLJ36070  |
| cg15477600 | 0.03695 | 0.03872 | 0.03961 | 0.04117 | 0.03727 | 0.03859 | 0.03564 | 0.03136 | 0.03344 | 0.03188 SDF2L1    |
| cg15479752 | 0.93078 | 0.8969  | 0.77696 | 0.91024 | 0.85099 | 0.88534 | 0.05298 | 0.04116 | 0.91855 | 0.8218 FFAR2      |
| cg15480475 | 0.70401 | 0.62564 | 0.9085  | 0.91352 | 0.63148 | 0.61945 | 0.75093 | 0.53476 | 0.56176 | 0.30565 TUB       |
| cg15480941 | 0.02973 | 0.02945 | 0.03069 | 0.02703 | 0.66724 | 0.61504 | 0.39468 | 0.06042 | 0.02787 | 0.02127 PIM2      |
| cg15481539 | 0.88267 | 0.88223 | 0.8695  | 0.88181 | 0.89945 | 0.87229 | 0.12452 | 0.09914 | 0.29067 | 0.06158 DEFA5     |
| cg15482690 | 0.02339 | 0.02555 | 0.02762 | 0.02645 | 0.0274  | 0.02638 | 0.0215  | 0.01995 | 0.02169 | 0.0205 TARDBP     |
| cg15484019 | 0.03711 | 0.03289 | 0.04352 | 0.03681 | 0.02597 | 0.03342 | 0.0325  | 0.03421 | 0.03699 | 0.03366 KIAA0103  |
| cg15484375 | 0.18274 | 0.1239  | 0.2158  | 0.42751 | 0.18531 | 0.12864 | 0.10362 | 0.11782 | 0.11164 | 0.10592 SAA1      |
| cg15484384 | 0.3005  | 0.21378 | 0.48091 | 0.60771 | 0.48459 | 0.41481 | 0.35705 | 0.33352 | 0.69588 | 0.19339 CEP63     |
| cg15485859 | 0.85874 | 0.8693  | 0.86019 | 0.86437 | 0.87104 | 0.85616 | 0.87043 | 0.66747 | 0.87914 | 0.82164 C1orf116  |
| cg15486645 | 0.03743 | 0.0385  | 0.04088 | 0.03544 | 0.03328 | 0.04116 | 0.03761 | 0.03486 | 0.0304  | 0.03269 LIN7C     |
| cg15488251 | 0.0367  | 0.03609 | 0.04273 | 0.04057 | 0.26319 | 0.15004 | 0.04199 | 0.02853 | 0.02807 | 0.02943 MYH11     |
| cg15488402 | 0.09829 | 0.07711 | 0.10076 | 0.10483 | 0.12609 | 0.09026 | 0.09447 | 0.09545 | 0.06319 | 0.0617 SLC9A8     |
| cg15489294 | 0.10402 | 0.49055 | 0.72863 | 0.73199 | 0.92707 | 0.94467 | 0.86859 | 0.93468 | 0.90859 | 0.86751 FLJ90650  |
| cg15489301 | 0.1322  | 0.12564 | 0.31208 | 0.22679 | 0.29038 | 0.21114 | 0.12986 | 0.1003  | 0.21022 | 0.12665 AKR1B10   |
| cg15489422 | 0.71929 | 0.70863 | 0.6557  | 0.71341 | 0.64273 | 0.74086 | 0.72822 | 0.78018 | 0.75    | 0.72967 TMCC1     |
| cg15491567 | 0.72652 | 0.20936 | 0.31558 | 0.31597 | 0.63599 | 0.75288 | 0.61593 | 0.52435 | 0.59172 | 0.5357 DYSF       |
| cg15492003 | 0.02809 | 0.02921 | 0.03212 | 0.0338  | 0.02719 | 0.02745 | 0.03061 | 0.03155 | 0.02444 | 0.0223 SEC61B     |
| cg15492104 | 0.03219 | 0.03815 | 0.0338  | 0.0336  | 0.02848 | 0.03215 | 0.02986 | 0.03031 | 0.02683 | 0.03237 C14orf44  |
| cg15494458 | 0.52227 | 0.0619  | 0.82738 | 0.89698 | 0.82562 | 0.74712 | 0.46914 | 0.21132 | 0.90881 | 0.83815 BPI       |
| cg15494980 | 0.05614 | 0.06175 | 0.08036 | 0.06636 | 0.10134 | 0.06705 | 0.08563 | 0.06303 | 0.06155 | 0.07682 STX5A     |
| cg15495837 | 0.35108 | 0.2104  | 0.73121 | 0.68677 | 0.71946 | 0.76051 | 0.8072  | 0.50867 | 0.62247 | 0.4769 TRIM43     |

|            |         |         |         |         |         |         |         |         |         |                    |
|------------|---------|---------|---------|---------|---------|---------|---------|---------|---------|--------------------|
| cg15498283 | 0.02383 | 0.02594 | 0.0233  | 0.02465 | 0.02027 | 0.02214 | 0.02097 | 0.02324 | 0.01864 | 0.0196 TALDO1      |
| cg15500658 | 0.02049 | 0.02459 | 0.02483 | 0.02058 | 0.01564 | 0.01853 | 0.01574 | 0.02498 | 0.01733 | 0.01669 SPEN       |
| cg15501381 | 0.41466 | 0.49509 | 0.89978 | 0.9237  | 0.94911 | 0.91243 | 0.44243 | 0.55364 | 0.44304 | 0.46075 NGB        |
| cg15502446 | 0.07392 | 0.06941 | 0.10112 | 0.07562 | 0.08526 | 0.09115 | 0.08676 | 0.08149 | 0.06734 | 0.06481 HSPC138    |
| cg15502888 | 0.03571 | 0.04071 | 0.04049 | 0.03707 | 0.02838 | 0.03153 | 0.03556 | 0.0392  | 0.03368 | 0.0343 SOCS3       |
| cg15503752 | 0.38002 | 0.13983 | 0.30739 | 0.47232 | 0.1713  | 0.37402 | 0.10879 | 0.13443 | 0.10852 | 0.10517 ST6GALNAC1 |
| cg15503799 | 0.05531 | 0.04827 | 0.05687 | 0.05606 | 0.04054 | 0.06661 | 0.04956 | 0.04669 | 0.04788 | 0.0526 PRCC        |
| cg15507817 | 0.02913 | 0.02546 | 0.03638 | 0.02701 | 0.0282  | 0.02168 | 0.0302  | 0.02262 | 0.02556 | 0.02294 WNT7B      |
| cg15508020 | 0.07563 | 0.06746 | 0.06953 | 0.05888 | 0.03454 | 0.04524 | 0.05969 | 0.04949 | 0.04365 | 0.0442 CSNK2A2     |
| cg15512851 | 0.70271 | 0.50295 | 0.80196 | 0.87083 | 0.85885 | 0.62477 | 0.41912 | 0.18178 | 0.64095 | 0.47236 FGD2       |
| cg15512961 | 0.04006 | 0.04207 | 0.04244 | 0.03956 | 0.03665 | 0.04055 | 0.04215 | 0.03903 | 0.03644 | 0.03201 ANXA6      |
| cg15513137 | 0.29329 | 0.21472 | 0.28264 | 0.24915 | 0.3271  | 0.27573 | 0.33291 | 0.2764  | 0.25407 | 0.26633 SCN2A2     |
| cg15514848 | 0.62386 | 0.57779 | 0.55616 | 0.67852 | 0.65077 | 0.70508 | 0.51468 | 0.4249  | 0.2726  | 0.15568 FMO1       |
| cg15516226 | 0.91826 | 0.78563 | 0.86682 | 0.91239 | 0.91381 | 0.90739 | 0.11094 | 0.47614 | 0.41348 | 0.22274 BTNL9      |
| cg15517609 | 0.88927 | 0.3831  | 0.51991 | 0.38866 | 0.17002 | 0.04043 | 0.38788 | 0.35978 | 0.62821 | 0.47272 RYR1       |
| cg15517965 | 0.03175 | 0.02992 | 0.02771 | 0.02659 | 0.02286 | 0.02442 | 0.02595 | 0.02414 | 0.02393 | 0.0226 MGC3123     |
| cg15518883 | 0.90777 | 0.87239 | 0.9173  | 0.91751 | 0.80479 | 0.88769 | 0.91695 | 0.8723  | 0.91563 | 0.84582 SIT1       |
| cg15518950 | 0.96989 | 0.92668 | 0.96958 | 0.96803 | 0.96997 | 0.97018 | 0.97524 | 0.96828 | 0.97961 | 0.97945 PRP2       |
| cg15519208 | 0.119   | 0.1154  | 0.15439 | 0.11891 | 0.3054  | 0.18908 | 0.10477 | 0.09623 | 0.07963 | 0.10704 HIST1H1E   |
| cg15520279 | 0.02095 | 0.01971 | 0.02262 | 0.01848 | 0.01587 | 0.01758 | 0.0179  | 0.0191  | 0.0181  | 0.01423 HOXD8      |
| cg15521097 | 0.31723 | 0.11108 | 0.22955 | 0.38672 | 0.26247 | 0.43302 | 0.07855 | 0.11303 | 0.12234 | 0.14178 ITIH5L     |
| cg15522719 | 0.04361 | 0.05242 | 0.0448  | 0.04301 | 0.05074 | 0.04891 | 0.04138 | 0.0368  | 0.04812 | 0.04365 GLS        |
| cg15522957 | 0.90171 | 0.9239  | 0.9168  | 0.93234 | 0.90924 | 0.89699 | 0.90583 | 0.90829 | 0.91742 | 0.904 ALX4         |
| cg15523238 | 0.08552 | 0.06718 | 0.53341 | 0.78353 | 0.12869 | 0.08973 | 0.09599 | 0.0795  | 0.18182 | 0.12697 ATP10A     |
| cg15525002 | 0.02635 | 0.02809 | 0.03616 | 0.03374 | 0.02077 | 0.02367 | 0.02744 | 0.0236  | 0.02442 | 0.02321 GBA        |
| cg15526708 | 0.04    | 0.03183 | 0.15947 | 0.46248 | 0.19756 | 0.05095 | 0.81824 | 0.37071 | 0.84369 | 0.34027 TGFBR1     |
| cg15527554 | 0.68422 | 0.78113 | 0.58483 | 0.69699 | 0.70638 | 0.76259 | 0.57375 | 0.61936 | 0.6824  | 0.63239 YSK4       |
| cg15528736 | 0.03066 | 0.0443  | 0.18534 | 0.06894 | 0.46304 | 0.56529 | 0.45072 | 0.44722 | 0.15528 | 0.04297 FCGRT      |
| cg15530356 | 0.88213 | 0.88379 | 0.87138 | 0.87393 | 0.91776 | 0.90999 | 0.86811 | 0.88638 | 0.88781 | 0.89006 ZNF414     |
| cg15531099 | 0.08021 | 0.09549 | 0.13747 | 0.10586 | 0.42942 | 0.52193 | 0.02725 | 0.03186 | 0.04261 | 0.04918 LCE1D      |
| cg15532088 | 0.75335 | 0.18492 | 0.54485 | 0.75551 | 0.91031 | 0.77713 | 0.73167 | 0.70798 | 0.65535 | 0.25876 C17orf66   |
| cg15534084 | 0.18689 | 0.17385 | 0.19314 | 0.18738 | 0.4363  | 0.53607 | 0.13481 | 0.11299 | 0.10493 | 0.124 ZNF649       |
| cg15534366 | 0.82204 | 0.35444 | 0.85895 | 0.8757  | 0.78208 | 0.80447 | 0.1562  | 0.19269 | 0.31051 | 0.49475 CDH4       |
| cg15536230 | 0.68249 | 0.5317  | 0.94149 | 0.95448 | 0.96574 | 0.96047 | 0.93956 | 0.91311 | 0.96038 | 0.94898 H2BFS      |
| cg15536242 | 0.69679 | 0.61563 | 0.66276 | 0.70979 | 0.6377  | 0.66649 | 0.63482 | 0.67526 | 0.65256 | 0.67272 MIP        |
| cg15536490 | 0.09692 | 0.1166  | 0.0945  | 0.1254  | 0.48416 | 0.63403 | 0.07288 | 0.09834 | 0.68551 | 0.61332 TFAP2C     |
| cg15536552 | 0.06054 | 0.06364 | 0.11083 | 0.09962 | 0.13176 | 0.09477 | 0.24216 | 0.40599 | 0.0708  | 0.06928 ACSL4      |
| cg15537433 | 0.04474 | 0.04405 | 0.04092 | 0.04042 | 0.03895 | 0.04052 | 0.04129 | 0.04656 | 0.04014 | 0.03676 IK         |
| cg15537850 | 0.76761 | 0.52774 | 0.89096 | 0.91503 | 0.92854 | 0.88234 | 0.67758 | 0.62132 | 0.63814 | 0.57992 NAPRT1     |
| cg15538427 | 0.32461 | 0.05252 | 0.05181 | 0.04834 | 0.03742 | 0.15788 | 0.21686 | 0.10911 | 0.08234 | 0.04911 LOC221091  |
| cg15538820 | 0.86765 | 0.76231 | 0.92878 | 0.9604  | 0.90558 | 0.94005 | 0.09876 | 0.11673 | 0.44978 | 0.29601 OBP2B      |

|            |         |         |         |         |         |         |         |         |         |         |          |
|------------|---------|---------|---------|---------|---------|---------|---------|---------|---------|---------|----------|
| cg15538837 | 0.04034 | 0.0447  | 0.04282 | 0.03945 | 0.02992 | 0.03555 | 0.03712 | 0.03776 | 0.03453 | 0.03369 | H3F3A    |
| cg15539420 | 0.03669 | 0.03884 | 0.03886 | 0.0377  | 0.05085 | 0.04141 | 0.06946 | 0.05768 | 0.94939 | 0.94831 | HOXB8    |
| cg15540054 | 0.03673 | 0.03432 | 0.04407 | 0.03534 | 0.05979 | 0.06169 | 0.04167 | 0.03553 | 0.0253  | 0.02345 | ZNF180   |
| cg15540820 | 0.06241 | 0.0629  | 0.91414 | 0.91775 | 0.91178 | 0.91712 | 0.93551 | 0.93159 | 0.92382 | 0.93479 | EOMES    |
| cg15541230 | 0.03798 | 0.04089 | 0.03768 | 0.04141 | 0.03534 | 0.03403 | 0.02896 | 0.0353  | 0.03043 | 0.02824 | COG1     |
| cg15541315 | 0.17169 | 0.04846 | 0.07193 | 0.06457 | 0.06981 | 0.0668  | 0.06029 | 0.05948 | 0.04211 | 0.03409 | REXO2    |
| cg15542496 | 0.41251 | 0.31858 | 0.68247 | 0.85607 | 0.72176 | 0.82737 | 0.23212 | 0.08259 | 0.38341 | 0.10888 | PIP      |
| cg15543551 | 0.05936 | 0.04691 | 0.85267 | 0.89037 | 0.30811 | 0.03917 | 0.22435 | 0.06728 | 0.25845 | 0.03646 | FGF12    |
| cg15544036 | 0.7528  | 0.91575 | 0.89818 | 0.93038 | 0.93903 | 0.92279 | 0.91834 | 0.9266  | 0.91652 | 0.91488 | CLDN4    |
| cg15544721 | 0.89985 | 0.54617 | 0.85497 | 0.84064 | 0.81215 | 0.29818 | 0.87408 | 0.63121 | 0.83595 | 0.6448  | PPP1R9A  |
| cg15547534 | 0.04449 | 0.04076 | 0.18008 | 0.21686 | 0.42355 | 0.43842 | 0.07337 | 0.03904 | 0.48429 | 0.45719 | MGC22793 |
| cg15547662 | 0.09855 | 0.10097 | 0.11869 | 0.12026 | 0.10868 | 0.12869 | 0.08999 | 0.10589 | 0.10084 | 0.09238 | PAFAH2   |
| cg15550350 | 0.87538 | 0.88883 | 0.81353 | 0.88388 | 0.91792 | 0.88846 | 0.79993 | 0.6159  | 0.86783 | 0.86503 | GRK7     |
| cg15551881 | 0.88483 | 0.86504 | 0.84339 | 0.88654 | 0.84827 | 0.83101 | 0.59434 | 0.69067 | 0.86766 | 0.84881 | TRAF1    |
| cg15552238 | 0.44727 | 0.41112 | 0.28467 | 0.21063 | 0.42402 | 0.27363 | 0.1122  | 0.09559 | 0.40915 | 0.16768 | EMR3     |
| cg15553522 | 0.03947 | 0.03546 | 0.05809 | 0.06014 | 0.07982 | 0.03086 | 0.04032 | 0.03423 | 0.03272 | 0.03102 | HSPA5BP1 |
| cg15554401 | 0.80973 | 0.40897 | 0.93236 | 0.92992 | 0.94121 | 0.92526 | 0.29461 | 0.06156 | 0.87513 | 0.82263 | GJB4     |
| cg15555014 | 0.69514 | 0.42902 | 0.66728 | 0.71367 | 0.19508 | 0.08138 | 0.34341 | 0.08822 | 0.58855 | 0.28343 | SYNGR2   |
| cg15555727 | 0.10032 | 0.08997 | 0.08261 | 0.18835 | 0.07847 | 0.08295 | 0.06802 | 0.0688  | 0.07487 | 0.06532 | PYCRL    |
| cg15556558 | 0.13086 | 0.05628 | 0.04126 | 0.03547 | 0.04762 | 0.04408 | 0.0394  | 0.03505 | 0.04404 | 0.02999 | STRN     |
| cg15557833 | 0.19833 | 0.21882 | 0.29243 | 0.27918 | 0.27782 | 0.28179 | 0.20501 | 0.22927 | 0.24957 | 0.27295 | MGC33302 |
| cg15558658 | 0.06529 | 0.0591  | 0.06367 | 0.06197 | 0.0401  | 0.05472 | 0.05329 | 0.05574 | 0.05893 | 0.04662 | KIAA1279 |
| cg15558971 | 0.05489 | 0.04855 | 0.04939 | 0.0462  | 0.04572 | 0.0518  | 0.04938 | 0.04601 | 0.04756 | 0.0499  | ZFP36L1  |
| cg15559560 | 0.03237 | 0.03914 | 0.0367  | 0.03388 | 0.03167 | 0.02867 | 0.02455 | 0.02994 | 0.02701 | 0.02552 | FLJ20297 |
| cg15559700 | 0.78839 | 0.79315 | 0.75812 | 0.81632 | 0.71527 | 0.75092 | 0.33855 | 0.26252 | 0.77132 | 0.77582 | UGT1A9   |
| cg15559737 | 0.79504 | 0.75472 | 0.86299 | 0.86238 | 0.878   | 0.82332 | 0.76707 | 0.77582 | 0.7379  | 0.50247 | CRYBA4   |
| cg15560112 | 0.05002 | 0.04752 | 0.05639 | 0.04915 | 0.04516 | 0.04735 | 0.03843 | 0.03834 | 0.03826 | 0.03776 | MYBPC2   |
| cg15560337 | 0.26227 | 0.17276 | 0.69714 | 0.83386 | 0.53175 | 0.53188 | 0.83728 | 0.52627 | 0.07025 | 0.04686 | HYAL4    |
| cg15561986 | 0.16371 | 0.11018 | 0.18444 | 0.17295 | 0.42516 | 0.33632 | 0.05125 | 0.05341 | 0.3547  | 0.07382 | POMT2    |
| cg15562197 | 0.04351 | 0.04235 | 0.04637 | 0.04087 | 0.03871 | 0.03876 | 0.04318 | 0.04646 | 0.03713 | 0.03837 | C3orf38  |
| cg15563057 | 0.03868 | 0.03602 | 0.04199 | 0.05067 | 0.03282 | 0.03356 | 0.0397  | 0.03785 | 0.03187 | 0.03443 | PURA     |
| cg15563382 | 0.08623 | 0.04952 | 0.06917 | 0.06314 | 0.08118 | 0.04522 | 0.04742 | 0.04342 | 0.03993 | 0.03832 | RNF141   |
| cg15563952 | 0.08026 | 0.05788 | 0.07089 | 0.06334 | 0.05827 | 0.05906 | 0.04705 | 0.04924 | 0.05421 | 0.04967 | DHTKD1   |
| cg15563993 | 0.03081 | 0.03287 | 0.03168 | 0.0307  | 0.02973 | 0.03308 | 0.03894 | 0.03558 | 0.02664 | 0.03339 | WDR61    |
| cg15564267 | 0.17124 | 0.04304 | 0.62782 | 0.67019 | 0.2958  | 0.05463 | 0.06425 | 0.06351 | 0.66776 | 0.42456 | OTUB1    |
| cg15565533 | 0.11063 | 0.05446 | 0.10919 | 0.07917 | 0.18209 | 0.06419 | 0.05252 | 0.04699 | 0.16715 | 0.03799 | GMPPB    |
| cg15565872 | 0.04425 | 0.04344 | 0.04326 | 0.04149 | 0.034   | 0.03699 | 0.04711 | 0.03685 | 0.04181 | 0.0339  | PTX3     |
| cg15566222 | 0.02632 | 0.03302 | 0.0303  | 0.02805 | 0.02647 | 0.0366  | 0.02872 | 0.03246 | 0.02852 | 0.02952 | LEREPO4  |
| cg15566783 | 0.03432 | 0.02976 | 0.03728 | 0.0278  | 0.03273 | 0.03279 | 0.02894 | 0.03422 | 0.03754 | 0.03825 | NIPA2    |
| cg15568167 | 0.02867 | 0.0271  | 0.22994 | 0.26352 | 0.66024 | 0.73048 | 0.23763 | 0.03017 | 0.02771 | 0.02518 | SAMD10   |
| cg15569340 | 0.09433 | 0.04182 | 0.1348  | 0.06825 | 0.56419 | 0.30266 | 0.03953 | 0.04035 | 0.04871 | 0.03736 | RBP5     |

|            |         |         |         |         |         |         |         |         |         |                   |
|------------|---------|---------|---------|---------|---------|---------|---------|---------|---------|-------------------|
| cg15569512 | 0.04377 | 0.03401 | 0.0337  | 0.02561 | 0.04331 | 0.03056 | 0.03045 | 0.02746 | 0.03478 | 0.03762 C14orf153 |
| cg15571154 | 0.71128 | 0.59603 | 0.57501 | 0.80178 | 0.86823 | 0.84231 | 0.16268 | 0.24568 | 0.85239 | 0.76118 FLJ25660  |
| cg15572745 | 0.43674 | 0.14686 | 0.50712 | 0.53788 | 0.42657 | 0.49225 | 0.272   | 0.13661 | 0.15043 | 0.18286 NRXN3     |
| cg15572787 | 0.02953 | 0.02783 | 0.08911 | 0.27961 | 0.06232 | 0.02663 | 0.03137 | 0.0232  | 0.02582 | 0.01869 RTDR1     |
| cg15573237 | 0.66842 | 0.67098 | 0.68072 | 0.70082 | 0.65365 | 0.64954 | 0.6056  | 0.63412 | 0.60599 | 0.57272 AMY2A     |
| cg15576195 | 0.85266 | 0.72637 | 0.05752 | 0.07524 | 0.86138 | 0.90237 | 0.36573 | 0.54407 | 0.04337 | 0.04144 HTATIP2   |
| cg15576233 | 0.0192  | 0.01724 | 0.02147 | 0.02157 | 0.01875 | 0.01934 | 0.01826 | 0.01982 | 0.01593 | 0.01768 HEY1      |
| cg15579370 | 0.06347 | 0.05934 | 0.07209 | 0.06408 | 0.05406 | 0.04967 | 0.0519  | 0.0493  | 0.05087 | 0.04065 SMOX      |
| cg15580043 | 0.06783 | 0.05198 | 0.05873 | 0.05207 | 0.08887 | 0.0528  | 0.05744 | 0.05826 | 0.12204 | 0.04026 SS18L1    |
| cg15581500 | 0.05666 | 0.06309 | 0.0592  | 0.05755 | 0.04745 | 0.05104 | 0.05152 | 0.05625 | 0.04652 | 0.04827 HSBP1     |
| cg15582789 | 0.88394 | 0.88788 | 0.11443 | 0.10397 | 0.48496 | 0.32429 | 0.61805 | 0.87189 | 0.50321 | 0.0868 SLC35D2    |
| cg15582891 | 0.20662 | 0.2726  | 0.55183 | 0.57732 | 0.34444 | 0.17026 | 0.46946 | 0.16383 | 0.17207 | 0.1718 TAAR1      |
| cg15583058 | 0.15284 | 0.05428 | 0.08546 | 0.06338 | 0.05356 | 0.10722 | 0.05323 | 0.04623 | 0.05823 | 0.04922 SDCCAG3   |
| cg15583072 | 0.52515 | 0.37344 | 0.59403 | 0.68886 | 0.48704 | 0.52948 | 0.44903 | 0.38349 | 0.32949 | 0.19703 IAPP      |
| cg15584630 | 0.02666 | 0.02803 | 0.02728 | 0.02513 | 0.02066 | 0.01916 | 0.02023 | 0.02094 | 0.02247 | 0.02242 TSC22D2   |
| cg15584813 | 0.67224 | 0.55774 | 0.08831 | 0.04226 | 0.70995 | 0.62588 | 0.04077 | 0.04784 | 0.25693 | 0.10173 SLC38A4   |
| cg15585905 | 0.02237 | 0.02206 | 0.02787 | 0.02433 | 0.01879 | 0.02298 | 0.02004 | 0.02046 | 0.01911 | 0.01875 ANAPC1    |
| cg15585987 | 0.66162 | 0.6917  | 0.52265 | 0.55126 | 0.30422 | 0.16642 | 0.49382 | 0.19583 | 0.09349 | 0.09509 SNTG1     |
| cg15586352 | 0.08632 | 0.0361  | 0.78409 | 0.798   | 0.76449 | 0.70191 | 0.60311 | 0.39328 | 0.7152  | 0.61717 PSG5      |
| cg15587603 | 0.06656 | 0.0739  | 0.09287 | 0.08124 | 0.10169 | 0.07205 | 0.06236 | 0.06315 | 0.09182 | 0.06509 RPS27A    |
| cg15589156 | 0.03074 | 0.03007 | 0.05871 | 0.04756 | 0.03138 | 0.02966 | 0.03045 | 0.03546 | 0.15125 | 0.02555 RAB3IL1   |
| cg15589354 | 0.30585 | 0.08046 | 0.14172 | 0.146   | 0.14529 | 0.13099 | 0.14063 | 0.1087  | 0.65675 | 0.18274 KIAA0133  |
| cg15589427 | 0.47167 | 0.60484 | 0.8472  | 0.88618 | 0.19663 | 0.36403 | 0.46954 | 0.34112 | 0.46169 | 0.40756 MUC4      |
| cg15590526 | 0.06945 | 0.03903 | 0.25466 | 0.22168 | 0.37946 | 0.35579 | 0.37048 | 0.37313 | 0.06822 | 0.11059 ZNF124    |
| cg15590780 | 0.23654 | 0.08997 | 0.29223 | 0.36353 | 0.48458 | 0.45096 | 0.12    | 0.07774 | 0.09099 | 0.10201 USH2A     |
| cg15591678 | 0.03091 | 0.02858 | 0.02789 | 0.02636 | 0.02374 | 0.02294 | 0.02031 | 0.02362 | 0.02081 | 0.0204 ZNF365     |
| cg15591837 | 0.0283  | 0.02564 | 0.02457 | 0.0244  | 0.02287 | 0.02399 | 0.02346 | 0.02417 | 0.01783 | 0.01692 PPIL1     |
| cg15594133 | 0.04471 | 0.04065 | 0.04179 | 0.04719 | 0.03756 | 0.03851 | 0.03947 | 0.04339 | 0.03505 | 0.03699 TSPAN14   |
| cg15595739 | 0.54632 | 0.54446 | 0.81862 | 0.84835 | 0.78702 | 0.80209 | 0.75985 | 0.67975 | 0.87224 | 0.62042 RGS9      |
| cg15597540 | 0.9153  | 0.90133 | 0.93058 | 0.93336 | 0.9349  | 0.9213  | 0.89478 | 0.87928 | 0.92794 | 0.90024 CYB561D2  |
| cg15599064 | 0.4583  | 0.45023 | 0.30413 | 0.29305 | 0.05309 | 0.04986 | 0.4836  | 0.54621 | 0.37838 | 0.36371 HIST1H4H  |
| cg15600342 | 0.03432 | 0.03712 | 0.03847 | 0.03514 | 0.02526 | 0.03766 | 0.034   | 0.03087 | 0.02915 | 0.03066 WBP4      |
| cg15600835 | 0.09455 | 0.07306 | 0.11185 | 0.11075 | 0.13785 | 0.10761 | 0.06756 | 0.07542 | 0.07604 | 0.0885 raptor     |
| cg15601535 | 0.10489 | 0.11094 | 0.13728 | 0.09528 | 0.13531 | 0.10202 | 0.08767 | 0.10112 | 0.09004 | 0.07122 SRD5A2L   |
| cg15602735 | 0.08914 | 0.0736  | 0.59326 | 0.72311 | 0.38214 | 0.50884 | 0.20759 | 0.48187 | 0.08581 | 0.07385 MAGEC2    |
| cg15602809 | 0.51078 | 0.51089 | 0.54774 | 0.57299 | 0.56359 | 0.54824 | 0.49258 | 0.52233 | 0.48884 | 0.46987 CHRM3     |
| cg15602950 | 0.03319 | 0.03398 | 0.03347 | 0.03692 | 0.02813 | 0.03396 | 0.02557 | 0.02332 | 0.02422 | 0.02504 SACM1L    |
| cg15602969 | 0.04697 | 0.04852 | 0.05194 | 0.04997 | 0.0562  | 0.04856 | 0.05135 | 0.05023 | 0.04368 | 0.04386 RPL19     |
| cg15603885 | 0.93949 | 0.92968 | 0.92712 | 0.93512 | 0.94158 | 0.93133 | 0.9293  | 0.94263 | 0.75462 | 0.64946 ABRA      |
| cg15604008 | 0.049   | 0.05206 | 0.06065 | 0.06068 | 0.05518 | 0.05777 | 0.0457  | 0.04188 | 0.04815 | 0.04689 FUSIP1    |
| cg15604467 | 0.0364  | 0.04063 | 0.0661  | 0.06836 | 0.19143 | 0.0405  | 0.04555 | 0.03599 | 0.03737 | 0.0327 POU4F1     |

|            |         |         |         |         |         |         |         |         |         |         |           |
|------------|---------|---------|---------|---------|---------|---------|---------|---------|---------|---------|-----------|
| cg15605888 | 0.04367 | 0.04484 | 0.04654 | 0.04089 | 0.05663 | 0.04644 | 0.03956 | 0.03746 | 0.03769 | 0.03643 | FLJ32745  |
| cg15606663 | 0.1476  | 0.13084 | 0.32115 | 0.37107 | 0.28821 | 0.37181 | 0.0996  | 0.09151 | 0.0906  | 0.09917 | KRTAP15-1 |
| cg15607672 | 0.09236 | 0.0757  | 0.69911 | 0.80945 | 0.78978 | 0.83342 | 0.82747 | 0.86976 | 0.76713 | 0.84772 | OTX2      |
| cg15609273 | 0.03184 | 0.03138 | 0.03506 | 0.03174 | 0.03079 | 0.03393 | 0.03749 | 0.03924 | 0.0318  | 0.02523 | RCBTB1    |
| cg15609321 | 0.12449 | 0.09082 | 0.09517 | 0.11127 | 0.12023 | 0.10065 | 0.09602 | 0.07175 | 0.08298 | 0.07882 | ZNF512    |
| cg15610233 | 0.33947 | 0.29572 | 0.34705 | 0.39513 | 0.3015  | 0.24091 | 0.26676 | 0.28789 | 0.14392 | 0.1683  | ADAM7     |
| cg15610792 | 0.03616 | 0.04468 | 0.04322 | 0.03532 | 0.03259 | 0.03711 | 0.03373 | 0.03483 | 0.03485 | 0.03189 | C9orf114  |
| cg15611364 | 0.05559 | 0.06584 | 0.06241 | 0.06452 | 0.10007 | 0.05662 | 0.0418  | 0.03423 | 0.04197 | 0.04786 | OXSM      |
| cg15611923 | 0.04078 | 0.0437  | 0.04367 | 0.038   | 0.04912 | 0.04511 | 0.0284  | 0.03659 | 0.04086 | 0.04864 | RBM8A     |
| cg15612063 | 0.08063 | 0.07637 | 0.07865 | 0.07114 | 0.08546 | 0.06625 | 0.11168 | 0.11809 | 0.08157 | 0.06364 | TMEM45A   |
| cg15612436 | 0.08806 | 0.0297  | 0.10696 | 0.16478 | 0.14584 | 0.49758 | 0.02967 | 0.02736 | 0.0326  | 0.03045 | MPPED1    |
| cg15612546 | 0.04279 | 0.04412 | 0.04765 | 0.04819 | 0.04067 | 0.03998 | 0.0387  | 0.03801 | 0.0321  | 0.0346  | RPS6KC1   |
| cg15612847 | 0.82348 | 0.82694 | 0.78618 | 0.80014 | 0.73128 | 0.80163 | 0.80839 | 0.85885 | 0.78527 | 0.79348 | MRPL30    |
| cg15612927 | 0.07181 | 0.04156 | 0.06432 | 0.05859 | 0.10068 | 0.03729 | 0.26704 | 0.09259 | 0.05167 | 0.0569  | RAD52     |
| cg15613048 | 0.04562 | 0.02163 | 0.48516 | 0.77444 | 0.68121 | 0.55841 | 0.02419 | 0.01887 | 0.0204  | 0.03742 | KIF17     |
| cg15613982 | 0.04751 | 0.05041 | 0.07114 | 0.06332 | 0.09004 | 0.07447 | 0.05762 | 0.06034 | 0.03727 | 0.03385 | SEC23B    |
| cg15615135 | 0.07413 | 0.06946 | 0.07382 | 0.06583 | 0.04672 | 0.06525 | 0.06534 | 0.07185 | 0.06893 | 0.06943 | SNX5      |
| cg15616083 | 0.62782 | 0.50514 | 0.36342 | 0.51611 | 0.29667 | 0.39907 | 0.12596 | 0.33103 | 0.18636 | 0.15745 | KCNQ2     |
| cg15616400 | 0.96295 | 0.73325 | 0.95729 | 0.95359 | 0.97562 | 0.95726 | 0.94186 | 0.92331 | 0.97686 | 0.95728 | SLC25A34  |
| cg15619125 | 0.79726 | 0.59017 | 0.85238 | 0.84898 | 0.88571 | 0.81748 | 0.80548 | 0.79524 | 0.86773 | 0.80236 | MAMDC4    |
| cg15619794 | 0.79585 | 0.30262 | 0.82706 | 0.82951 | 0.85827 | 0.83806 | 0.65203 | 0.55755 | 0.81182 | 0.49458 | IL5       |
| cg15623573 | 0.07505 | 0.06332 | 0.06253 | 0.05552 | 0.09031 | 0.07175 | 0.05041 | 0.04522 | 0.06252 | 0.04885 | APBA1     |
| cg15625636 | 0.64746 | 0.51465 | 0.51833 | 0.6138  | 0.46439 | 0.65877 | 0.39002 | 0.31389 | 0.69038 | 0.61355 | GPR65     |
| cg15626350 | 0.07543 | 0.07404 | 0.44028 | 0.6118  | 0.74771 | 0.68714 | 0.86582 | 0.22061 | 0.91914 | 0.90608 | ESR1      |
| cg15627025 | 0.34478 | 0.2787  | 0.4687  | 0.59226 | 0.87532 | 0.74932 | 0.20316 | 0.13326 | 0.3127  | 0.23399 | KIR3DL1   |
| cg15627502 | 0.07021 | 0.06111 | 0.0595  | 0.06267 | 0.07037 | 0.07332 | 0.12188 | 0.09595 | 0.04416 | 0.05179 | RPN2      |
| cg15627524 | 0.12789 | 0.10823 | 0.16621 | 0.15982 | 0.20228 | 0.16458 | 0.12069 | 0.09712 | 0.12613 | 0.15615 | DOPEY1    |
| cg15628498 | 0.026   | 0.02488 | 0.27481 | 0.27643 | 0.25392 | 0.36384 | 0.02496 | 0.02362 | 0.02319 | 0.02197 | ONECUT1   |
| cg15629064 | 0.0308  | 0.03096 | 0.03923 | 0.03446 | 0.03062 | 0.04704 | 0.06209 | 0.07065 | 0.02318 | 0.02551 | RFP       |
| cg15630759 | 0.03279 | 0.03533 | 0.04282 | 0.03447 | 0.0457  | 0.03005 | 0.02843 | 0.02939 | 0.02599 | 0.02779 | SF3A1     |
| cg15631323 | 0.1317  | 0.14006 | 0.14326 | 0.13302 | 0.19147 | 0.17526 | 0.08665 | 0.10291 | 0.12101 | 0.14622 | EGLN3     |
| cg15633390 | 0.5736  | 0.50259 | 0.10191 | 0.08528 | 0.18408 | 0.13584 | 0.09665 | 0.08713 | 0.08011 | 0.13635 | EIF4E     |
| cg15634735 | 0.04455 | 0.04796 | 0.05091 | 0.04811 | 0.04645 | 0.0495  | 0.04856 | 0.05867 | 0.04404 | 0.04335 | SAP130    |
| cg15636365 | 0.03019 | 0.03521 | 0.03113 | 0.03032 | 0.02456 | 0.03449 | 0.02726 | 0.02655 | 0.02485 | 0.02351 | C9orf111  |
| cg15636587 | 0.0461  | 0.15878 | 0.0395  | 0.03794 | 0.0279  | 0.03353 | 0.39797 | 0.33    | 0.02763 | 0.0251  | GK        |
| cg15637528 | 0.93636 | 0.93461 | 0.93915 | 0.94049 | 0.94078 | 0.9339  | 0.94246 | 0.94427 | 0.9439  | 0.94796 | C6orf146  |
| cg15639045 | 0.11918 | 0.03887 | 0.5942  | 0.70476 | 0.39946 | 0.46991 | 0.04786 | 0.02838 | 0.06021 | 0.02839 | SLC16A11  |
| cg15639951 | 0.94729 | 0.93707 | 0.94954 | 0.9576  | 0.97568 | 0.95714 | 0.94622 | 0.92708 | 0.94923 | 0.9242  | MAP3K14   |
| cg15640375 | 0.07302 | 0.0754  | 0.63083 | 0.67048 | 0.61722 | 0.58614 | 0.15765 | 0.12366 | 0.18537 | 0.07345 | PRG2      |
| cg15641675 | 0.03157 | 0.02728 | 0.0308  | 0.02898 | 0.02135 | 0.0335  | 0.02783 | 0.02808 | 0.02729 | 0.02485 | DDX17     |
| cg15641998 | 0.07071 | 0.06727 | 0.0818  | 0.07886 | 0.10854 | 0.09493 | 0.08397 | 0.0667  | 0.06268 | 0.07657 | DHRS8     |

|            |         |         |         |         |         |         |         |         |         |                   |
|------------|---------|---------|---------|---------|---------|---------|---------|---------|---------|-------------------|
| cg15642035 | 0.1223  | 0.1352  | 0.24161 | 0.24152 | 0.32376 | 0.35194 | 0.10908 | 0.10959 | 0.1446  | 0.15378 C8ORFK32  |
| cg15642326 | 0.04289 | 0.03848 | 0.19092 | 0.04844 | 0.31667 | 0.11889 | 0.03876 | 0.03145 | 0.0409  | 0.03252 MARK4     |
| cg15643724 | 0.04798 | 0.05524 | 0.05633 | 0.04583 | 0.03419 | 0.04641 | 0.04394 | 0.04544 | 0.04333 | 0.0426 GFER       |
| cg15645309 | 0.58992 | 0.39598 | 0.68054 | 0.69202 | 0.54662 | 0.55234 | 0.5124  | 0.32268 | 0.6359  | 0.54933 BATF      |
| cg15645605 | 0.03639 | 0.03912 | 0.03785 | 0.04404 | 0.04877 | 0.0396  | 0.03231 | 0.02986 | 0.04089 | 0.03593 MRPL35    |
| cg15645784 | 0.03896 | 0.03296 | 0.03733 | 0.03649 | 0.02816 | 0.02982 | 0.03276 | 0.03425 | 0.0378  | 0.03305 FLJ22386  |
| cg15646782 | 0.02966 | 0.03079 | 0.03086 | 0.03675 | 0.02446 | 0.0282  | 0.03093 | 0.03899 | 0.03545 | 0.0284 FAM55C     |
| cg15647515 | 0.04014 | 0.03282 | 0.26682 | 0.28046 | 0.24785 | 0.52391 | 0.05022 | 0.06274 | 0.10999 | 0.03378 WNT2      |
| cg15648315 | 0.85605 | 0.1889  | 0.75312 | 0.82059 | 0.91064 | 0.89153 | 0.53937 | 0.57436 | 0.74158 | 0.71555 FLJ26443  |
| cg15648905 | 0.04249 | 0.04588 | 0.0471  | 0.04714 | 0.04163 | 0.0445  | 0.03708 | 0.04242 | 0.03292 | 0.03489 RPL12     |
| cg15649193 | 0.04955 | 0.04756 | 0.06772 | 0.08409 | 0.04276 | 0.06544 | 0.05186 | 0.04813 | 0.04307 | 0.03551 GPSN2     |
| cg15649452 | 0.05161 | 0.05142 | 0.04837 | 0.04679 | 0.04899 | 0.03901 | 0.04355 | 0.04575 | 0.0443  | 0.0466 ATOH8      |
| cg15652120 | 0.06516 | 0.07176 | 0.07291 | 0.07066 | 0.06295 | 0.07089 | 0.07134 | 0.07013 | 0.06313 | 0.06562 ELK3      |
| cg15652212 | 0.93314 | 0.23038 | 0.91804 | 0.93361 | 0.94764 | 0.35911 | 0.84896 | 0.03532 | 0.94663 | 0.01816 FLJ90586  |
| cg15652797 | 0.07092 | 0.05811 | 0.06824 | 0.06003 | 0.03788 | 0.048   | 0.04354 | 0.05193 | 0.04461 | 0.04609 TP53AP1   |
| cg15654964 | 0.08426 | 0.0768  | 0.10991 | 0.0951  | 0.12634 | 0.09191 | 0.07853 | 0.07149 | 0.09023 | 0.08395 BSDC1     |
| cg15657607 | 0.07129 | 0.04996 | 0.05768 | 0.04516 | 0.04023 | 0.06647 | 0.05723 | 0.04731 | 0.04897 | 0.04503 DPH5      |
| cg15657668 | 0.70933 | 0.67114 | 0.72651 | 0.72578 | 0.73119 | 0.69886 | 0.61381 | 0.64392 | 0.65692 | 0.67468 ATP6AP1   |
| cg15658426 | 0.16835 | 0.06797 | 0.18355 | 0.21008 | 0.82093 | 0.6956  | 0.85033 | 0.74293 | 0.84843 | 0.44654 MGC39633  |
| cg15659828 | 0.37679 | 0.08027 | 0.21271 | 0.21911 | 0.34276 | 0.07507 | 0.21912 | 0.04871 | 0.43008 | 0.43654 CHID1     |
| cg15660077 | 0.85097 | 0.72136 | 0.96193 | 0.97179 | 0.97612 | 0.96543 | 0.95747 | 0.96012 | 0.96863 | 0.96392 NLGN2     |
| cg15660498 | 0.14666 | 0.06488 | 0.41509 | 0.81709 | 0.56695 | 0.57873 | 0.07875 | 0.05697 | 0.22742 | 0.17768 LOC148137 |
| cg15661409 | 0.76131 | 0.7708  | 0.78444 | 0.84255 | 0.66791 | 0.71946 | 0.72503 | 0.77049 | 0.60224 | 0.52074 C14orf105 |
| cg15662251 | 0.40397 | 0.30177 | 0.81224 | 0.86111 | 0.87963 | 0.65092 | 0.66478 | 0.46413 | 0.89525 | 0.59264 PAQR7     |
| cg15663121 | 0.04828 | 0.03759 | 0.04203 | 0.03944 | 0.0306  | 0.03109 | 0.03585 | 0.0357  | 0.04003 | 0.03444 N-PAC     |
| cg15664067 | 0.08088 | 0.07712 | 0.08044 | 0.0793  | 0.06847 | 0.06702 | 0.07024 | 0.06231 | 0.0549  | 0.05125 RASA1     |
| cg15664701 | 0.45813 | 0.23725 | 0.16043 | 0.15165 | 0.31467 | 0.07131 | 0.11942 | 0.07397 | 0.09965 | 0.10193 AKAP14    |
| cg15664905 | 0.82744 | 0.82865 | 0.84691 | 0.84109 | 0.86509 | 0.82345 | 0.83462 | 0.83855 | 0.83968 | 0.7709 PHLDB3     |
| cg15665653 | 0.05249 | 0.06011 | 0.08153 | 0.08092 | 0.10674 | 0.07647 | 0.04382 | 0.0475  | 0.07427 | 0.07578 WDTC1     |
| cg15669092 | 0.02757 | 0.03676 | 0.0287  | 0.02999 | 0.02035 | 0.03002 | 0.03096 | 0.03557 | 0.02696 | 0.02387 TUBB3     |
| cg15669228 | 0.16641 | 0.13199 | 0.52276 | 0.43904 | 0.16676 | 0.23495 | 0.31673 | 0.12263 | 0.12726 | 0.11518 IFNA8     |
| cg15669273 | 0.03295 | 0.03182 | 0.03908 | 0.03654 | 0.02588 | 0.0353  | 0.02075 | 0.03109 | 0.02481 | 0.0241 FARS2      |
| cg15670863 | 0.87701 | 0.78419 | 0.88326 | 0.89168 | 0.94604 | 0.90376 | 0.86412 | 0.85795 | 0.55592 | 0.30838 SPACA4    |
| cg15673110 | 0.02631 | 0.03344 | 0.03113 | 0.02918 | 0.02269 | 0.02675 | 0.02507 | 0.02761 | 0.02577 | 0.02704 BIRC6     |
| cg15674432 | 0.72146 | 0.71087 | 0.91971 | 0.93949 | 0.9542  | 0.90153 | 0.82928 | 0.84967 | 0.79049 | 0.4405 SLC26A8    |
| cg15674997 | 0.07536 | 0.03833 | 0.70889 | 0.78403 | 0.89808 | 0.9624  | 0.17583 | 0.44147 | 0.07189 | 0.07109 GRM6      |
| cg15676084 | 0.03342 | 0.03845 | 0.03655 | 0.03706 | 0.02137 | 0.03877 | 0.03148 | 0.03266 | 0.03078 | 0.03153 ENAH      |
| cg15676241 | 0.1365  | 0.14865 | 0.13122 | 0.13977 | 0.08848 | 0.12853 | 0.11517 | 0.14395 | 0.12749 | 0.12517 ITGA2     |
| cg15676488 | 0.05786 | 0.05185 | 0.05642 | 0.04453 | 0.03277 | 0.07719 | 0.05947 | 0.05694 | 0.0329  | 0.03681 SNRPC     |
| cg15677132 | 0.04073 | 0.04139 | 0.04676 | 0.02979 | 0.05384 | 0.05281 | 0.03205 | 0.02968 | 0.03521 | 0.0408 SRP54      |
| cg15677294 | 0.85868 | 0.57507 | 0.89505 | 0.91323 | 0.91357 | 0.55653 | 0.43496 | 0.08497 | 0.70238 | 0.47441 TUBB4     |

|            |         |         |         |         |         |         |         |         |         |         |          |
|------------|---------|---------|---------|---------|---------|---------|---------|---------|---------|---------|----------|
| cg15677344 | 0.69876 | 0.71535 | 0.605   | 0.6974  | 0.59199 | 0.63381 | 0.61123 | 0.71336 | 0.48531 | 0.536   | ADH1A    |
| cg15677355 | 0.91039 | 0.90543 | 0.87911 | 0.90531 | 0.91146 | 0.89346 | 0.85313 | 0.87474 | 0.89894 | 0.66494 | OTUD6A   |
| cg15679095 | 0.86099 | 0.85521 | 0.86512 | 0.87683 | 0.79302 | 0.80947 | 0.85914 | 0.8052  | 0.88889 | 0.86777 | KIAA0240 |
| cg15679098 | 0.91068 | 0.86877 | 0.91233 | 0.92068 | 0.95849 | 0.90619 | 0.90971 | 0.8993  | 0.92985 | 0.92027 | RAPSN    |
| cg15679651 | 0.93874 | 0.23253 | 0.93361 | 0.95431 | 0.9605  | 0.6094  | 0.89052 | 0.08129 | 0.91692 | 0.62888 | MAP4K1   |
| cg15680574 | 0.2383  | 0.06733 | 0.07358 | 0.06937 | 0.05212 | 0.06296 | 0.06118 | 0.05638 | 0.05465 | 0.05566 | CCNL1    |
| cg15681351 | 0.0816  | 0.08299 | 0.13779 | 0.11686 | 0.11646 | 0.12211 | 0.49756 | 0.60564 | 0.09441 | 0.1015  | UPF3B    |
| cg15683488 | 0.07333 | 0.06435 | 0.10111 | 0.08827 | 0.16399 | 0.09754 | 0.05403 | 0.04488 | 0.08333 | 0.08174 | ZFYVE9   |
| cg15683743 | 0.07165 | 0.06598 | 0.07742 | 0.06543 | 0.09013 | 0.08042 | 0.09554 | 0.08233 | 0.10367 | 0.10977 | SPPL2A   |
| cg15684563 | 0.78118 | 0.68591 | 0.19444 | 0.19287 | 0.60535 | 0.53709 | 0.15984 | 0.09859 | 0.16711 | 0.15984 | TSPAN8   |
| cg15686608 | 0.8226  | 0.3638  | 0.92968 | 0.94761 | 0.9625  | 0.95454 | 0.74789 | 0.616   | 0.95006 | 0.92912 | DAB2IP   |
| cg15687659 | 0.0384  | 0.03459 | 0.03953 | 0.03377 | 0.0268  | 0.02926 | 0.03285 | 0.03151 | 0.02974 | 0.02757 | RAB7     |
| cg15688767 | 0.07106 | 0.0502  | 0.06193 | 0.04699 | 0.04711 | 0.04477 | 0.03827 | 0.03564 | 0.11888 | 0.04908 | ZNF148   |
| cg15690721 | 0.09761 | 0.09551 | 0.18903 | 0.16131 | 0.17861 | 0.18164 | 0.72684 | 0.70681 | 0.07396 | 0.07311 | ZNF85    |
| cg15691199 | 0.5278  | 0.13961 | 0.81924 | 0.86675 | 0.86955 | 0.80468 | 0.70848 | 0.34237 | 0.55166 | 0.29426 | CEBPE    |
| cg15691649 | 0.85832 | 0.85463 | 0.85249 | 0.8839  | 0.68664 | 0.82765 | 0.73387 | 0.56927 | 0.87097 | 0.6186  | SLC17A3  |
| cg15691841 | 0.02733 | 0.02808 | 0.0291  | 0.02533 | 0.02015 | 0.02523 | 0.02436 | 0.0228  | 0.02378 | 0.02032 | ZNF687   |
| cg15692239 | 0.0359  | 0.02468 | 0.60783 | 0.74282 | 0.59847 | 0.03022 | 0.03129 | 0.02778 | 0.20115 | 0.03178 | ALDOC    |
| cg15693363 | 0.02974 | 0.03168 | 0.0353  | 0.03299 | 0.03217 | 0.03156 | 0.034   | 0.03206 | 0.02436 | 0.02409 | GARS     |
| cg15693736 | 0.93761 | 0.9185  | 0.90791 | 0.92433 | 0.88817 | 0.90358 | 0.84801 | 0.859   | 0.92545 | 0.92506 | GRTP1    |
| cg15694180 | 0.02273 | 0.02126 | 0.05094 | 0.04431 | 0.02264 | 0.03885 | 0.02285 | 0.02755 | 0.02188 | 0.01695 | ADAM15   |
| cg15696627 | 0.03028 | 0.03545 | 0.03065 | 0.03209 | 0.03154 | 0.03212 | 0.02926 | 0.02689 | 0.03536 | 0.02275 | MSX1     |
| cg15696781 | 0.04371 | 0.01961 | 0.0263  | 0.02093 | 0.02238 | 0.01841 | 0.02326 | 0.01828 | 0.0323  | 0.01444 | MSTO1    |
| cg15698196 | 0.83126 | 0.26991 | 0.84251 | 0.84349 | 0.81344 | 0.56964 | 0.79406 | 0.36747 | 0.85652 | 0.73103 | CAPN12   |
| cg15699524 | 0.69446 | 0.40394 | 0.4424  | 0.53621 | 0.68045 | 0.26786 | 0.75404 | 0.79478 | 0.79095 | 0.27643 | FGF18    |
| cg15700197 | 0.13682 | 0.11403 | 0.38351 | 0.54994 | 0.17731 | 0.12532 | 0.20426 | 0.18709 | 0.10929 | 0.12245 | OR10J1   |
| cg15700739 | 0.08989 | 0.09099 | 0.12864 | 0.11615 | 0.95862 | 0.95812 | 0.83141 | 0.11997 | 0.13013 | 0.12123 | HOXC5    |
| cg15701111 | 0.87066 | 0.80402 | 0.87634 | 0.90255 | 0.7949  | 0.64647 | 0.86128 | 0.85227 | 0.87824 | 0.84005 | KRTHB1   |
| cg15701622 | 0.05706 | 0.06049 | 0.07896 | 0.06668 | 0.07841 | 0.07963 | 0.06464 | 0.06622 | 0.06644 | 0.06589 | MCRS1    |
| cg15702701 | 0.05922 | 0.05587 | 0.16879 | 0.22976 | 0.04161 | 0.05586 | 0.05134 | 0.0471  | 0.04759 | 0.04399 | METTL7B  |
| cg15703357 | 0.69269 | 0.18082 | 0.52339 | 0.77488 | 0.62481 | 0.50622 | 0.49176 | 0.19529 | 0.81913 | 0.45333 | LINCR    |
| cg15703512 | 0.10021 | 0.05859 | 0.05975 | 0.05694 | 0.0451  | 0.05893 | 0.05508 | 0.05456 | 0.05594 | 0.05894 | MGC50721 |
| cg15703690 | 0.05756 | 0.05883 | 0.05866 | 0.05557 | 0.08097 | 0.16568 | 0.05331 | 0.05793 | 0.05219 | 0.05003 | IL6      |
| cg15705469 | 0.04074 | 0.04514 | 0.82077 | 0.88725 | 0.03534 | 0.0462  | 0.03605 | 0.03611 | 0.03121 | 0.03079 | ZNF71    |
| cg15705999 | 0.06493 | 0.06459 | 0.05729 | 0.05416 | 0.04365 | 0.0969  | 0.04818 | 0.05327 | 0.05101 | 0.05214 | ZNF148   |
| cg15707568 | 0.18954 | 0.15769 | 0.21107 | 0.19077 | 0.30807 | 0.16009 | 0.15777 | 0.11086 | 0.47648 | 0.15461 | ATP5J    |
| cg15711744 | 0.20231 | 0.09115 | 0.54998 | 0.76745 | 0.31161 | 0.33785 | 0.2365  | 0.10865 | 0.12615 | 0.0723  | ANP32D   |
| cg15712267 | 0.91544 | 0.91794 | 0.93334 | 0.92228 | 0.65895 | 0.46893 | 0.901   | 0.79553 | 0.941   | 0.85967 | DNAJB1   |
| cg15713086 | 0.0935  | 0.08472 | 0.14891 | 0.34693 | 0.14116 | 0.09806 | 0.06923 | 0.09991 | 0.0563  | 0.05575 | C2orf108 |
| cg15714041 | 0.05229 | 0.03707 | 0.042   | 0.03665 | 0.04939 | 0.05089 | 0.03395 | 0.03397 | 0.02979 | 0.03023 | ACO1     |
| cg15717808 | 0.01966 | 0.02134 | 0.02329 | 0.02355 | 0.03347 | 0.03288 | 0.02053 | 0.01898 | 0.0519  | 0.02679 | KCNQ5    |



|            |         |         |         |         |         |         |         |         |         |                  |
|------------|---------|---------|---------|---------|---------|---------|---------|---------|---------|------------------|
| cg15720064 | 0.83282 | 0.77621 | 0.94274 | 0.95837 | 0.94719 | 0.95722 | 0.39308 | 0.55542 | 0.96474 | 0.96137 FAM9C    |
| cg15720535 | 0.97267 | 0.96321 | 0.97097 | 0.97178 | 0.97587 | 0.91594 | 0.43669 | 0.11363 | 0.9629  | 0.90615 AGPAT2   |
| cg15721424 | 0.05166 | 0.0536  | 0.07433 | 0.0543  | 0.06487 | 0.0629  | 0.06198 | 0.06225 | 0.04547 | 0.0495 ALG8      |
| cg15722679 | 0.21469 | 0.09427 | 0.32738 | 0.22624 | 0.49445 | 0.18651 | 0.0955  | 0.11935 | 0.08557 | 0.11863 SIRPB2   |
| cg15725808 | 0.06137 | 0.0498  | 0.06102 | 0.06144 | 0.06623 | 0.05903 | 0.05103 | 0.05037 | 0.04587 | 0.04184 TAF6L    |
| cg15725933 | 0.04459 | 0.03869 | 0.04259 | 0.03994 | 0.03476 | 0.03988 | 0.04429 | 0.10202 | 0.0404  | 0.03316 SLC19A1  |
| cg15726245 | 0.81204 | 0.77548 | 0.77817 | 0.79052 | 0.68021 | 0.34457 | 0.40075 | 0.66546 | 0.37802 | 0.27673 GPR12    |
| cg15727249 | 0.56051 | 0.23925 | 0.45276 | 0.69241 | 0.62209 | 0.78875 | 0.24042 | 0.25213 | 0.17779 | 0.135 APOA4      |
| cg15727320 | 0.80698 | 0.8374  | 0.76035 | 0.77466 | 0.71462 | 0.76948 | 0.74873 | 0.78055 | 0.60801 | 0.61768 P11      |
| cg15729423 | 0.03646 | 0.03936 | 0.0306  | 0.02969 | 0.03935 | 0.0476  | 0.03753 | 0.03368 | 0.03341 | 0.03616 ZADH1    |
| cg15729869 | 0.02489 | 0.01633 | 0.48758 | 0.54886 | 0.14612 | 0.25298 | 0.03734 | 0.01618 | 0.01468 | 0.01262 BARHL1   |
| cg15731815 | 0.97989 | 0.97168 | 0.97636 | 0.97848 | 0.06795 | 0.02981 | 0.15858 | 0.02905 | 0.04425 | 0.02485 C1orf188 |
| cg15733266 | 0.85768 | 0.59694 | 0.82423 | 0.8391  | 0.80561 | 0.82552 | 0.7853  | 0.78383 | 0.58642 | 0.46945 FLJ10996 |
| cg15733507 | 0.03893 | 0.04261 | 0.03825 | 0.03833 | 0.0332  | 0.04546 | 0.05047 | 0.0432  | 0.03629 | 0.03079 C9orf140 |
| cg15736165 | 0.29836 | 0.07753 | 0.04137 | 0.03993 | 0.04784 | 0.22377 | 0.08486 | 0.05013 | 0.11583 | 0.04083 BNC1     |
| cg15736336 | 0.76301 | 0.82528 | 0.84554 | 0.88258 | 0.87184 | 0.92094 | 0.80883 | 0.85458 | 0.3674  | 0.10274 PLCZ1    |
| cg15736338 | 0.05708 | 0.05476 | 0.09086 | 0.09744 | 0.18141 | 0.0618  | 0.04927 | 0.04001 | 0.07443 | 0.05989 FAM19A2  |
| cg15737168 | 0.81528 | 0.67048 | 0.78895 | 0.81664 | 0.76837 | 0.83975 | 0.78329 | 0.82657 | 0.84553 | 0.72193 TECTA    |
| cg15737319 | 0.04745 | 0.04646 | 0.04931 | 0.04323 | 0.0327  | 0.03877 | 0.03987 | 0.04182 | 0.0377  | 0.03614 MTHFD2   |
| cg15738916 | 0.04575 | 0.04257 | 0.04951 | 0.04167 | 0.03356 | 0.04115 | 0.04024 | 0.0485  | 0.04228 | 0.03963 MAP4K4   |
| cg15739437 | 0.20567 | 0.15263 | 0.28123 | 0.31962 | 0.26517 | 0.25697 | 0.17799 | 0.22846 | 0.10597 | 0.10306 TSLP     |
| cg15739581 | 0.78087 | 0.62417 | 0.74579 | 0.81729 | 0.57457 | 0.68941 | 0.60037 | 0.24719 | 0.2073  | 0.20504 GALNT3   |
| cg15739944 | 0.03743 | 0.0309  | 0.04475 | 0.03972 | 0.02582 | 0.03633 | 0.03137 | 0.03211 | 0.03439 | 0.03136 HABP4    |
| cg15740366 | 0.02425 | 0.03478 | 0.03681 | 0.0292  | 0.02876 | 0.03381 | 0.0242  | 0.02813 | 0.0259  | 0.0238 IMPDH1    |
| cg15740508 | 0.32957 | 0.36119 | 0.6825  | 0.76637 | 0.70207 | 0.78126 | 0.23822 | 0.17456 | 0.46631 | 0.34154 AMPD1    |
| cg15741583 | 0.65716 | 0.4486  | 0.5861  | 0.65311 | 0.56482 | 0.54095 | 0.52828 | 0.53885 | 0.47897 | 0.38652 HPX      |
| cg15741706 | 0.61717 | 0.4625  | 0.71519 | 0.72837 | 0.84721 | 0.89193 | 0.30955 | 0.47953 | 0.67049 | 0.58091 CXorf48  |
| cg15742700 | 0.7571  | 0.55137 | 0.86117 | 0.86605 | 0.7855  | 0.77901 | 0.72814 | 0.33919 | 0.85549 | 0.11216 BLK      |
| cg15743985 | 0.83209 | 0.09789 | 0.41642 | 0.64061 | 0.80325 | 0.61683 | 0.09599 | 0.05208 | 0.75695 | 0.58104 CD22     |
| cg15746187 | 0.82717 | 0.4952  | 0.83847 | 0.87441 | 0.76496 | 0.24757 | 0.62805 | 0.27186 | 0.76257 | 0.74725 FBXO44   |
| cg15746445 | 0.54012 | 0.08434 | 0.44623 | 0.33104 | 0.12101 | 0.07665 | 0.09506 | 0.07195 | 0.26121 | 0.13791 TRPM8    |
| cg15746620 | 0.22274 | 0.14632 | 0.11844 | 0.11467 | 0.22309 | 0.06668 | 0.0921  | 0.07593 | 0.07462 | 0.06313 EMR3     |
| cg15746719 | 0.04797 | 0.05246 | 0.055   | 0.05007 | 0.06056 | 0.04705 | 0.04937 | 0.05998 | 0.6694  | 0.60077 DAPK1    |
| cg15747133 | 0.0622  | 0.06566 | 0.07389 | 0.06328 | 0.08645 | 0.08296 | 0.08597 | 0.0992  | 0.07106 | 0.08045 THOC1    |
| cg15747595 | 0.36558 | 0.41627 | 0.96091 | 0.96445 | 0.95401 | 0.968   | 0.26111 | 0.67019 | 0.9224  | 0.90595 TSPYL5   |
| cg15747933 | 0.13584 | 0.2025  | 0.1614  | 0.14961 | 0.16782 | 0.14088 | 0.18412 | 0.14815 | 0.14214 | 0.12874 NMI      |
| cg15748507 | 0.06077 | 0.13911 | 0.93694 | 0.95739 | 0.54258 | 0.6312  | 0.74826 | 0.27253 | 0.43266 | 0.43741 PRLHR    |
| cg15749322 | 0.03033 | 0.03151 | 0.0352  | 0.03184 | 0.02251 | 0.03258 | 0.0259  | 0.03189 | 0.02923 | 0.033 ANKRD42    |
| cg15749748 | 0.07573 | 0.04902 | 0.30573 | 0.36632 | 0.53983 | 0.63174 | 0.11308 | 0.30441 | 0.06802 | 0.05119 GATA5    |
| cg15749858 | 0.20175 | 0.16472 | 0.59804 | 0.63951 | 0.51236 | 0.61564 | 0.67511 | 0.52391 | 0.67789 | 0.69065 7A5      |
| cg15750102 | 0.0439  | 0.04379 | 0.05025 | 0.04716 | 0.06308 | 0.06122 | 0.04599 | 0.0479  | 0.04241 | 0.05058 MGC16169 |

|            |         |         |         |         |         |         |         |         |         |                  |
|------------|---------|---------|---------|---------|---------|---------|---------|---------|---------|------------------|
| cg15750705 | 0.6637  | 0.45611 | 0.9171  | 0.91529 | 0.67141 | 0.69566 | 0.20858 | 0.05048 | 0.90742 | 0.90029 GJB4     |
| cg15751406 | 0.90306 | 0.89966 | 0.55868 | 0.72135 | 0.92057 | 0.92856 | 0.88529 | 0.8586  | 0.92651 | 0.91741 ZNF558   |
| cg15752043 | 0.04016 | 0.03134 | 0.0322  | 0.02839 | 0.08549 | 0.02379 | 0.4006  | 0.02849 | 0.02237 | 0.02286 NANOS1   |
| cg15753381 | 0.06026 | 0.04581 | 0.08327 | 0.06354 | 0.05308 | 0.03223 | 0.04376 | 0.04685 | 0.06334 | 0.05133 TAF13    |
| cg15753757 | 0.03495 | 0.04408 | 0.06545 | 0.07031 | 0.05959 | 0.1012  | 0.04317 | 0.03435 | 0.03818 | 0.0381 AUTS2     |
| cg15754084 | 0.92767 | 0.12509 | 0.19743 | 0.34383 | 0.16359 | 0.04405 | 0.48787 | 0.06574 | 0.94426 | 0.32484 PEX5     |
| cg15754109 | 0.04693 | 0.05508 | 0.05532 | 0.05218 | 0.05896 | 0.04397 | 0.05274 | 0.04776 | 0.03384 | 0.04213 COPS5    |
| cg15755084 | 0.03402 | 0.03135 | 0.03187 | 0.03026 | 0.02662 | 0.02695 | 0.02811 | 0.02974 | 0.02698 | 0.0272 MSX1      |
| cg15755406 | 0.03714 | 0.03706 | 0.04693 | 0.04583 | 0.02348 | 0.02271 | 0.04219 | 0.03115 | 0.02483 | 0.02502 MGC10471 |
| cg15755548 | 0.06209 | 0.07093 | 0.65983 | 0.78919 | 0.46063 | 0.24508 | 0.06503 | 0.06602 | 0.06498 | 0.05151 ARHGDI8  |
| cg15756091 | 0.47573 | 0.13254 | 0.32385 | 0.36397 | 0.35118 | 0.60705 | 0.09884 | 0.23228 | 0.0859  | 0.08808 RGSL2    |
| cg15757271 | 0.03992 | 0.03579 | 0.03437 | 0.03262 | 0.04395 | 0.03971 | 0.04759 | 0.0359  | 0.03084 | 0.02976 WNT5A    |
| cg15758700 | 0.38083 | 0.42925 | 0.62644 | 0.69635 | 0.35961 | 0.61483 | 0.37587 | 0.31305 | 0.19415 | 0.16501 FLJ36004 |
| cg15759055 | 0.03762 | 0.04128 | 0.04264 | 0.04291 | 0.03346 | 0.03589 | 0.0349  | 0.03522 | 0.03355 | 0.03098 RAPH1    |
| cg15759873 | 0.76499 | 0.5866  | 0.79568 | 0.84197 | 0.64922 | 0.76279 | 0.70264 | 0.79068 | 0.77142 | 0.44116 ATP6V1E2 |
| cg15760840 | 0.22939 | 0.24433 | 0.3395  | 0.38885 | 0.96409 | 0.95544 | 0.04025 | 0.03346 | 0.97818 | 0.95993 HOXA11   |
| cg15760943 | 0.21209 | 0.17813 | 0.20477 | 0.19566 | 0.29308 | 0.14452 | 0.20821 | 0.1867  | 0.17765 | 0.17876 ETV5     |
| cg15761233 | 0.87208 | 0.34732 | 0.31758 | 0.30369 | 0.41612 | 0.35312 | 0.20486 | 0.14121 | 0.4222  | 0.48861 FLJ22555 |
| cg15761405 | 0.15507 | 0.16038 | 0.23348 | 0.23    | 0.23547 | 0.26856 | 0.19827 | 0.16129 | 0.17397 | 0.1928 FCRL2     |
| cg15764655 | 0.86092 | 0.87516 | 0.85307 | 0.86753 | 0.85317 | 0.84605 | 0.82758 | 0.80936 | 0.85897 | 0.84192 SBF1     |
| cg15765212 | 0.06311 | 0.05617 | 0.0572  | 0.05595 | 0.04005 | 0.04683 | 0.05064 | 0.05125 | 0.06612 | 0.05508 BAT2     |
| cg15765532 | 0.03784 | 0.03353 | 0.05193 | 0.05212 | 0.05202 | 0.04626 | 0.04874 | 0.03775 | 0.03794 | 0.03516 C11orf30 |
| cg15765694 | 0.2353  | 0.10263 | 0.57381 | 0.75165 | 0.75463 | 0.76816 | 0.18363 | 0.73549 | 0.08851 | 0.14324 PPP3R2   |
| cg15765896 | 0.03987 | 0.03816 | 0.04299 | 0.04157 | 0.03552 | 0.04452 | 0.04619 | 0.03698 | 0.03609 | 0.04135 SPRYD3   |
| cg15767406 | 0.3234  | 0.09401 | 0.09203 | 0.13452 | 0.16645 | 0.06126 | 0.09285 | 0.04423 | 0.03511 | 0.03815 ZNF660   |
| cg15768203 | 0.25108 | 0.07259 | 0.16662 | 0.32087 | 0.41477 | 0.13883 | 0.08273 | 0.06209 | 0.26986 | 0.11479 PPIG     |
| cg15768270 | 0.04423 | 0.02995 | 0.03962 | 0.03383 | 0.03933 | 0.0425  | 0.03588 | 0.0365  | 0.03498 | 0.03021 NUDT22   |
| cg15769409 | 0.05868 | 0.06302 | 0.06106 | 0.05397 | 0.0405  | 0.04857 | 0.04994 | 0.05323 | 0.0449  | 0.0412 KIAA0649  |
| cg15770654 | 0.92809 | 0.89994 | 0.9248  | 0.9161  | 0.93294 | 0.91479 | 0.9231  | 0.83802 | 0.91702 | 0.907 IIP45      |
| cg15772361 | 0.94625 | 0.95105 | 0.93629 | 0.94656 | 0.89957 | 0.89137 | 0.06917 | 0.05538 | 0.40813 | 0.43999 SERPINB3 |
| cg15772393 | 0.02796 | 0.028   | 0.02658 | 0.02981 | 0.01864 | 0.02667 | 0.02355 | 0.02797 | 0.0221  | 0.02271 SAP30    |
| cg15774133 | 0.07318 | 0.06608 | 0.07429 | 0.07203 | 0.06364 | 0.06187 | 0.07109 | 0.07302 | 0.04953 | 0.06067 EIF3S8   |
| cg15774153 | 0.02769 | 0.02314 | 0.39382 | 0.54376 | 0.63587 | 0.61174 | 0.03672 | 0.02792 | 0.04162 | 0.01982 FGF19    |
| cg15774283 | 0.03361 | 0.03256 | 0.04625 | 0.04304 | 0.03322 | 0.03434 | 0.04109 | 0.03244 | 0.14717 | 0.08225 PTGS2    |
| cg15774495 | 0.76107 | 0.09335 | 0.48668 | 0.51551 | 0.46929 | 0.29535 | 0.28217 | 0.04593 | 0.10256 | 0.03125 GRB10    |
| cg15775914 | 0.7983  | 0.80562 | 0.77991 | 0.81119 | 0.7876  | 0.81304 | 0.66974 | 0.64771 | 0.82339 | 0.77393 CHML     |
| cg15776355 | 0.06238 | 0.05125 | 0.06799 | 0.10109 | 0.11217 | 0.05518 | 0.05273 | 0.06221 | 0.09179 | 0.05518 C1R      |
| cg15777570 | 0.79552 | 0.73517 | 0.77668 | 0.86051 | 0.88166 | 0.86891 | 0.80393 | 0.84657 | 0.80363 | 0.53049 CCL27    |
| cg15777781 | 0.31254 | 0.19509 | 0.89608 | 0.88937 | 0.90288 | 0.88404 | 0.73412 | 0.50992 | 0.88935 | 0.85345 CUGBP2   |
| cg15778232 | 0.58413 | 0.22345 | 0.52637 | 0.46699 | 0.48225 | 0.17456 | 0.41121 | 0.33007 | 0.79334 | 0.28734 PHB2     |
| cg15778350 | 0.03149 | 0.02858 | 0.03944 | 0.02313 | 0.02484 | 0.02545 | 0.03091 | 0.02699 | 0.02671 | 0.02539 CDCA1    |

|            |         |         |         |         |         |         |         |         |         |                  |
|------------|---------|---------|---------|---------|---------|---------|---------|---------|---------|------------------|
| cg15779381 | 0.07499 | 0.09747 | 0.11056 | 0.09935 | 0.12629 | 0.13859 | 0.09389 | 0.07757 | 0.07848 | 0.098 PFAAP5     |
| cg15779716 | 0.86053 | 0.63982 | 0.94442 | 0.94545 | 0.94866 | 0.93125 | 0.94454 | 0.94285 | 0.94654 | 0.90748 CDCP1    |
| cg15780361 | 0.89828 | 0.8266  | 0.84496 | 0.83994 | 0.87536 | 0.88811 | 0.72286 | 0.88305 | 0.07881 | 0.06128 ALS2CR11 |
| cg15780578 | 0.04993 | 0.05831 | 0.06248 | 0.05557 | 0.03993 | 0.0485  | 0.05425 | 0.05556 | 0.04955 | 0.04606 SPATA20  |
| cg15780888 | 0.1133  | 0.06537 | 0.63567 | 0.63297 | 0.10447 | 0.07947 | 0.06981 | 0.06777 | 0.12276 | 0.07266 PRKCABP  |
| cg15781316 | 0.03893 | 0.04188 | 0.05963 | 0.04805 | 0.06389 | 0.06416 | 0.03746 | 0.03303 | 0.03343 | 0.025 SHFM1      |
| cg15781625 | 0.05443 | 0.05536 | 0.06571 | 0.06564 | 0.05754 | 0.05426 | 0.06185 | 0.05506 | 0.05299 | 0.05473 UCK2     |
| cg15781794 | 0.06586 | 0.06605 | 0.06454 | 0.05699 | 0.03676 | 0.05055 | 0.04718 | 0.05654 | 0.04558 | 0.03944 CHCHD1   |
| cg15781838 | 0.87957 | 0.87578 | 0.86282 | 0.86445 | 0.81248 | 0.85161 | 0.67482 | 0.86854 | 0.87563 | 0.87816 LIMS2    |
| cg15782391 | 0.34012 | 0.42208 | 0.67274 | 0.78537 | 0.73083 | 0.396   | 0.36793 | 0.47889 | 0.46906 | 0.17836 ACPT     |
| cg15783027 | 0.03581 | 0.03225 | 0.09976 | 0.03855 | 0.12842 | 0.15766 | 0.04355 | 0.03728 | 0.35148 | 0.02385 NFKBIL2  |
| cg15783800 | 0.9078  | 0.871   | 0.0498  | 0.05771 | 0.05661 | 0.53928 | 0.05522 | 0.18104 | 0.089   | 0.04894 HAK      |
| cg15784332 | 0.05469 | 0.03617 | 0.87796 | 0.90969 | 0.8884  | 0.86648 | 0.27876 | 0.29381 | 0.28759 | 0.15336 COMP     |
| cg15784615 | 0.89172 | 0.67499 | 0.08934 | 0.12755 | 0.03183 | 0.02273 | 0.48727 | 0.7853  | 0.03007 | 0.01892 LTBR     |
| cg15785580 | 0.02314 | 0.02545 | 0.02716 | 0.01652 | 0.01394 | 0.02035 | 0.01889 | 0.022   | 0.02133 | 0.0205 BCKDK     |
| cg15785720 | 0.03571 | 0.03724 | 0.03938 | 0.03863 | 0.03045 | 0.03299 | 0.03254 | 0.02813 | 0.02916 | 0.02873 C9orf140 |
| cg15786541 | 0.03974 | 0.04285 | 0.0397  | 0.04236 | 0.03079 | 0.03712 | 0.03049 | 0.03332 | 0.03087 | 0.03495 PVRL3    |
| cg15786837 | 0.02576 | 0.03178 | 0.18851 | 0.33092 | 0.21498 | 0.40111 | 0.30756 | 0.44207 | 0.05465 | 0.0331 HOXB13    |
| cg15786879 | 0.09274 | 0.06032 | 0.1395  | 0.10769 | 0.07159 | 0.05333 | 0.07029 | 0.06135 | 0.06192 | 0.0482 LOC57146  |
| cg15787039 | 0.74125 | 0.31823 | 0.86449 | 0.86627 | 0.90913 | 0.80791 | 0.78762 | 0.706   | 0.86914 | 0.43887 SGNE1    |
| cg15789095 | 0.88714 | 0.5096  | 0.8845  | 0.89432 | 0.90778 | 0.55339 | 0.71044 | 0.52157 | 0.9145  | 0.82764 SPOCD1   |
| cg15790852 | 0.05418 | 0.04796 | 0.04907 | 0.04953 | 0.03732 | 0.04239 | 0.04102 | 0.05029 | 0.04306 | 0.03919 CNOT6    |
| cg15791248 | 0.87265 | 0.73508 | 0.49126 | 0.75387 | 0.33864 | 0.33725 | 0.20466 | 0.3378  | 0.90158 | 0.89109 FGFR1    |
| cg15792367 | 0.27941 | 0.20213 | 0.28228 | 0.2444  | 0.23656 | 0.36985 | 0.19114 | 0.18727 | 0.26413 | 0.18017 KLK11    |
| cg15792688 | 0.06877 | 0.06406 | 0.06236 | 0.05179 | 0.06053 | 0.06782 | 0.06417 | 0.06126 | 0.06791 | 0.30219 FLJ90036 |
| cg15796682 | 0.04027 | 0.04033 | 0.03923 | 0.03544 | 0.03162 | 0.03393 | 0.03167 | 0.03689 | 0.03176 | 0.02844 RNH1     |
| cg15796819 | 0.0948  | 0.05869 | 0.12923 | 0.13786 | 0.18781 | 0.08749 | 0.1066  | 0.07363 | 0.11744 | 0.05806 ALDH3A1  |
| cg15796941 | 0.07205 | 0.0731  | 0.15647 | 0.18181 | 0.48786 | 0.70582 | 0.1304  | 0.06815 | 0.07862 | 0.05629 BTBD11   |
| cg15796978 | 0.16481 | 0.06019 | 0.06631 | 0.19343 | 0.06023 | 0.30243 | 0.03607 | 0.04287 | 0.04119 | 0.03836 LHCGR    |
| cg15797414 | 0.07496 | 0.07382 | 0.08696 | 0.07403 | 0.15253 | 0.1286  | 0.05846 | 0.0554  | 0.04772 | 0.05165 HIST1H3B |
| cg15798153 | 0.75304 | 0.06485 | 0.68495 | 0.71819 | 0.789   | 0.13596 | 0.81823 | 0.07414 | 0.64879 | 0.06083 PFTK1    |
| cg15798455 | 0.04467 | 0.0254  | 0.25531 | 0.39617 | 0.03621 | 0.02736 | 0.03897 | 0.03052 | 0.02457 | 0.02086 PROK2    |
| cg15798530 | 0.79556 | 0.75823 | 0.74254 | 0.78695 | 0.70977 | 0.81171 | 0.72399 | 0.63471 | 0.79666 | 0.73767 TRPC3    |
| cg15799267 | 0.8599  | 0.40272 | 0.81515 | 0.88009 | 0.90465 | 0.88016 | 0.35843 | 0.17471 | 0.52552 | 0.52046 ALOX15B  |
| cg15799959 | 0.03421 | 0.03581 | 0.03613 | 0.03253 | 0.02349 | 0.03165 | 0.03031 | 0.03019 | 0.0263  | 0.02445 ZNF248   |
| cg15800421 | 0.05015 | 0.05492 | 0.06932 | 0.05877 | 0.05299 | 0.04735 | 0.06608 | 0.04761 | 0.06698 | 0.04223 CCR10    |
| cg15801967 | 0.03998 | 0.04351 | 0.04195 | 0.04537 | 0.03788 | 0.04109 | 0.03824 | 0.03954 | 0.0363  | 0.03352 NHP2L1   |
| cg15802192 | 0.02434 | 0.02611 | 0.0279  | 0.02584 | 0.0163  | 0.0234  | 0.01916 | 0.02261 | 0.01922 | 0.01866 TUBD1    |
| cg15802323 | 0.79084 | 0.19242 | 0.77023 | 0.76482 | 0.27688 | 0.21709 | 0.2229  | 0.11718 | 0.10793 | 0.03608 ARF5     |
| cg15802898 | 0.09271 | 0.05501 | 0.92004 | 0.91882 | 0.77749 | 0.90781 | 0.38767 | 0.07476 | 0.38399 | 0.3509 FOXE1     |
| cg15804118 | 0.03922 | 0.03488 | 0.06881 | 0.05408 | 0.03961 | 0.03651 | 0.03219 | 0.03584 | 0.03659 | 0.03239 DPM3     |

|            |         |         |         |         |         |         |         |         |         |         |          |
|------------|---------|---------|---------|---------|---------|---------|---------|---------|---------|---------|----------|
| cg15804973 | 0.24792 | 0.24356 | 0.30035 | 0.29273 | 0.3134  | 0.14213 | 0.41012 | 0.16768 | 0.28991 | 0.25892 | MAP3K5   |
| cg15806518 | 0.0494  | 0.04855 | 0.06007 | 0.05068 | 0.07033 | 0.05195 | 0.0431  | 0.0744  | 0.03805 | 0.039   | PSMB7    |
| cg15808558 | 0.05985 | 0.04556 | 0.11688 | 0.23678 | 0.04352 | 0.03881 | 0.03597 | 0.04597 | 0.06899 | 0.03972 | EPHA4    |
| cg15809230 | 0.02976 | 0.02842 | 0.02869 | 0.02561 | 0.02937 | 0.0227  | 0.04771 | 0.04422 | 0.02413 | 0.02648 | SIN3A    |
| cg15810326 | 0.07516 | 0.06227 | 0.0692  | 0.06205 | 0.10002 | 0.08166 | 0.05461 | 0.04855 | 0.05741 | 0.07392 | LOC90826 |
| cg15810744 | 0.04229 | 0.05007 | 0.04389 | 0.04061 | 0.0395  | 0.04394 | 0.04446 | 0.03863 | 0.03547 | 0.03833 | CORO1B   |
| cg15811235 | 0.03731 | 0.03786 | 0.05433 | 0.04475 | 0.04148 | 0.03636 | 0.04373 | 0.04139 | 0.08368 | 0.0346  | PFAS     |
| cg15811427 | 0.22957 | 0.19026 | 0.26429 | 0.21409 | 0.30171 | 0.3433  | 0.19852 | 0.15313 | 0.46905 | 0.18372 | FPR1     |
| cg15812071 | 0.49259 | 0.39946 | 0.74267 | 0.72846 | 0.69625 | 0.73785 | 0.77479 | 0.79174 | 0.56914 | 0.52646 | NXF5     |
| cg15812873 | 0.33845 | 0.44207 | 0.35628 | 0.58178 | 0.39688 | 0.43417 | 0.13488 | 0.27236 | 0.52108 | 0.43216 | SULT1A1  |
| cg15812957 | 0.0952  | 0.1009  | 0.13505 | 0.18948 | 0.43783 | 0.12596 | 0.03214 | 0.05244 | 0.07461 | 0.09332 | VCY      |
| cg15814508 | 0.68921 | 0.65921 | 0.70737 | 0.74263 | 0.70071 | 0.6859  | 0.71942 | 0.77556 | 0.71206 | 0.64165 | P2RY14   |
| cg15815016 | 0.23159 | 0.05009 | 0.05616 | 0.04229 | 0.0573  | 0.03403 | 0.04103 | 0.0419  | 0.04041 | 0.03167 | CARD4    |
| cg15815843 | 0.86082 | 0.83653 | 0.80152 | 0.87233 | 0.38384 | 0.5491  | 0.68991 | 0.85053 | 0.69974 | 0.57711 | MFAP5    |
| cg15816080 | 0.02586 | 0.02173 | 0.0209  | 0.0216  | 0.02079 | 0.02628 | 0.01872 | 0.0174  | 0.01524 | 0.01717 | TPST1    |
| cg15817236 | 0.03793 | 0.04014 | 0.03493 | 0.03323 | 0.03672 | 0.0398  | 0.04145 | 0.04083 | 0.03271 | 0.03142 | ALX4     |
| cg15818800 | 0.02247 | 0.02601 | 0.02478 | 0.02168 | 0.0204  | 0.02302 | 0.01891 | 0.01999 | 0.01703 | 0.01877 | DNAJC1   |
| cg15819171 | 0.08462 | 0.0477  | 0.06281 | 0.06939 | 0.04568 | 0.03955 | 0.20287 | 0.45021 | 0.04035 | 0.04721 | FLJ23588 |
| cg15819333 | 0.2284  | 0.19954 | 0.24541 | 0.19771 | 0.36128 | 0.22388 | 0.23322 | 0.22659 | 0.16104 | 0.36318 | COX4I1   |
| cg15819853 | 0.03342 | 0.03545 | 0.03863 | 0.03064 | 0.02533 | 0.03156 | 0.03797 | 0.03897 | 0.03246 | 0.0289  | MFHAS1   |
| cg15820189 | 0.03959 | 0.04067 | 0.04944 | 0.05256 | 0.06032 | 0.04948 | 0.03092 | 0.03667 | 0.03784 | 0.04157 | SAP30BP  |
| cg15820809 | 0.08017 | 0.0364  | 0.06019 | 0.05851 | 0.73143 | 0.58997 | 0.04648 | 0.04137 | 0.13735 | 0.08641 | BIK      |
| cg15820955 | 0.88339 | 0.59738 | 0.91252 | 0.92599 | 0.94235 | 0.90474 | 0.84892 | 0.87432 | 0.93896 | 0.89509 | HDAC7A   |
| cg15821095 | 0.88027 | 0.91575 | 0.9216  | 0.92797 | 0.92943 | 0.90567 | 0.91855 | 0.89792 | 0.93562 | 0.60776 | RBM15B   |
| cg15822346 | 0.0498  | 0.05109 | 0.05283 | 0.04546 | 0.04889 | 0.04752 | 0.04599 | 0.04905 | 0.04316 | 0.04439 | SLC16A10 |
| cg15822411 | 0.84956 | 0.84813 | 0.82973 | 0.86381 | 0.88707 | 0.8324  | 0.85954 | 0.83633 | 0.8648  | 0.83375 | MGC34732 |
| cg15823100 | 0.89251 | 0.70311 | 0.89948 | 0.90033 | 0.74992 | 0.19654 | 0.85213 | 0.43614 | 0.90913 | 0.83624 | PISD     |
| cg15824056 | 0.95297 | 0.92513 | 0.94664 | 0.95143 | 0.97749 | 0.95807 | 0.96088 | 0.87498 | 0.9681  | 0.95516 | SYNJ2    |
| cg15824080 | 0.04898 | 0.05603 | 0.08901 | 0.08181 | 0.06964 | 0.06496 | 0.06286 | 0.06113 | 0.05128 | 0.06891 | TAF15    |
| cg15824705 | 0.03138 | 0.03347 | 0.03285 | 0.03065 | 0.03717 | 0.03351 | 0.02831 | 0.0306  | 0.02758 | 0.0268  | BCAR1    |
| cg15824968 | 0.04785 | 0.04913 | 0.04826 | 0.04066 | 0.03866 | 0.05189 | 0.04761 | 0.04746 | 0.03999 | 0.03959 | AP1G1    |
| cg15827031 | 0.08215 | 0.10621 | 0.34044 | 0.27063 | 0.0249  | 0.23893 | 0.2308  | 0.1379  | 0.63518 | 0.6101  | NUP155   |
| cg15827295 | 0.04192 | 0.03834 | 0.03624 | 0.03708 | 0.03534 | 0.04161 | 0.03285 | 0.02892 | 0.0401  | 0.04225 | LYSMD1   |
| cg15830940 | 0.62871 | 0.51089 | 0.70205 | 0.72439 | 0.49103 | 0.52608 | 0.71592 | 0.42044 | 0.37952 | 0.31212 | SMARCAL1 |
| cg15831452 | 0.03321 | 0.03094 | 0.03354 | 0.03261 | 0.03001 | 0.03989 | 0.02989 | 0.0294  | 0.02664 | 0.0293  | PRPSAP2  |
| cg15831515 | 0.58444 | 0.17105 | 0.65245 | 0.61737 | 0.56294 | 0.64367 | 0.68347 | 0.63557 | 0.62294 | 0.1215  | ANXA3    |
| cg15832292 | 0.03735 | 0.04193 | 0.04707 | 0.04368 | 0.04761 | 0.04513 | 0.03416 | 0.03561 | 0.06293 | 0.07516 | MANEA    |
| cg15832436 | 0.06347 | 0.07747 | 0.06842 | 0.06662 | 0.15523 | 0.0689  | 0.05995 | 0.05266 | 0.07254 | 0.07    | PACRG    |
| cg15834294 | 0.03782 | 0.03813 | 0.03658 | 0.03887 | 0.02837 | 0.02145 | 0.02612 | 0.02772 | 0.02445 | 0.02775 | GSPT1    |
| cg15835232 | 0.03101 | 0.03395 | 0.60465 | 0.70256 | 0.57593 | 0.70333 | 0.09601 | 0.03578 | 0.95896 | 0.96588 | HLF      |
| cg15835825 | 0.02578 | 0.03196 | 0.51327 | 0.75902 | 0.03394 | 0.03556 | 0.02522 | 0.0222  | 0.02596 | 0.02062 | HTR5A    |

|            |         |         |         |         |         |         |         |         |         |         |           |
|------------|---------|---------|---------|---------|---------|---------|---------|---------|---------|---------|-----------|
| cg15836394 | 0.04131 | 0.05327 | 0.04689 | 0.04731 | 0.03805 | 0.04327 | 0.0524  | 0.05818 | 0.04025 | 0.04017 | FDFT1     |
| cg15836660 | 0.04042 | 0.04308 | 0.32176 | 0.31435 | 0.06211 | 0.04237 | 0.0423  | 0.03888 | 0.04125 | 0.03633 | EDNRB     |
| cg15836722 | 0.79019 | 0.82733 | 0.81191 | 0.82884 | 0.62176 | 0.7295  | 0.57077 | 0.60056 | 0.7626  | 0.10807 | IL1B      |
| cg15837252 | 0.34873 | 0.10204 | 0.5186  | 0.54509 | 0.30004 | 0.11508 | 0.07716 | 0.08221 | 0.26904 | 0.24559 | GSCL      |
| cg15839448 | 0.03497 | 0.03132 | 0.04034 | 0.03401 | 0.06323 | 0.03072 | 0.06305 | 0.04247 | 0.02859 | 0.02849 | SFRP1     |
| cg15840658 | 0.03755 | 0.0322  | 0.0402  | 0.03721 | 0.14369 | 0.03144 | 0.02861 | 0.0277  | 0.03417 | 0.02759 | APBA1     |
| cg15840985 | 0.74574 | 0.61576 | 0.79309 | 0.77118 | 0.70933 | 0.68879 | 0.79172 | 0.78849 | 0.79068 | 0.39116 | OSBPL10   |
| cg15841415 | 0.10188 | 0.09276 | 0.07554 | 0.08131 | 0.17501 | 0.111   | 0.10657 | 0.05943 | 0.06337 | 0.07881 | SLC1A3    |
| cg15842276 | 0.41874 | 0.43681 | 0.93838 | 0.93027 | 0.96387 | 0.95758 | 0.94888 | 0.9585  | 0.4557  | 0.67527 | MTNR1B    |
| cg15842400 | 0.02928 | 0.02448 | 0.02911 | 0.0279  | 0.0427  | 0.02169 | 0.02208 | 0.02102 | 0.11714 | 0.02454 | GABPA     |
| cg15842430 | 0.24836 | 0.53163 | 0.15077 | 0.20139 | 0.35836 | 0.33721 | 0.1199  | 0.1103  | 0.30273 | 0.25336 | FAM12B    |
| cg15842483 | 0.09653 | 0.08875 | 0.11734 | 0.09592 | 0.11045 | 0.07985 | 0.08459 | 0.08629 | 0.16314 | 0.09516 | C8orf1    |
| cg15842884 | 0.28052 | 0.0424  | 0.03648 | 0.04521 | 0.06174 | 0.0303  | 0.03024 | 0.03025 | 0.03121 | 0.02271 | KIAA1434  |
| cg15843217 | 0.15929 | 0.16141 | 0.25217 | 0.18882 | 0.60303 | 0.66047 | 0.34202 | 0.27468 | 0.15985 | 0.14977 | PCGF3     |
| cg15843823 | 0.25291 | 0.26258 | 0.84679 | 0.9361  | 0.5416  | 0.53689 | 0.12562 | 0.03204 | 0.88404 | 0.92905 | ALOX15    |
| cg15844609 | 0.05867 | 0.05487 | 0.06603 | 0.05273 | 0.04095 | 0.04941 | 0.05407 | 0.05863 | 0.05269 | 0.05089 | Y1F1B     |
| cg15846641 | 0.16255 | 0.08971 | 0.0592  | 0.04836 | 0.12087 | 0.1686  | 0.03905 | 0.03325 | 0.0394  | 0.04219 | HTLF      |
| cg15846718 | 0.0735  | 0.07681 | 0.1182  | 0.10252 | 0.14398 | 0.09664 | 0.07504 | 0.06528 | 0.05178 | 0.09052 | COX7A2    |
| cg15847988 | 0.77131 | 0.75397 | 0.76774 | 0.75194 | 0.69433 | 0.82913 | 0.77617 | 0.68932 | 0.80961 | 0.41807 | PLSCR2    |
| cg15851800 | 0.03428 | 0.03091 | 0.03612 | 0.03594 | 0.02288 | 0.0333  | 0.02633 | 0.02824 | 0.02565 | 0.02623 | LOC133619 |
| cg15852879 | 0.0183  | 0.02561 | 0.02569 | 0.02436 | 0.01872 | 0.02252 | 0.01863 | 0.01959 | 0.01923 | 0.01594 | ASB6      |
| cg15852891 | 0.04448 | 0.03491 | 0.64646 | 0.73659 | 0.68943 | 0.77757 | 0.63998 | 0.61245 | 0.40252 | 0.52924 | OTP       |
| cg15853125 | 0.15312 | 0.09786 | 0.88836 | 0.90073 | 0.82844 | 0.88868 | 0.46594 | 0.13207 | 0.92654 | 0.90945 | TIAM1     |
| cg15853374 | 0.0415  | 0.03938 | 0.04868 | 0.04087 | 0.035   | 0.04061 | 0.0396  | 0.0383  | 0.03605 | 0.03371 | EIF3S6IP  |
| cg15854296 | 0.06859 | 0.04761 | 0.06588 | 0.06917 | 0.0735  | 0.05645 | 0.10306 | 0.10015 | 0.05555 | 0.05561 | MAP3K11   |
| cg15856055 | 0.25388 | 0.07796 | 0.51956 | 0.63337 | 0.72052 | 0.66753 | 0.2371  | 0.0854  | 0.79531 | 0.6967  | ZNF511    |
| cg15857475 | 0.03002 | 0.02635 | 0.03175 | 0.02694 | 0.01878 | 0.01755 | 0.01727 | 0.01732 | 0.01863 | 0.0201  | RECQL4    |
| cg15860839 | 0.09822 | 0.10112 | 0.08165 | 0.07755 | 0.10664 | 0.12266 | 0.10203 | 0.09508 | 0.07898 | 0.10248 | SNAPC1    |
| cg15861540 | 0.7757  | 0.50822 | 0.06087 | 0.04385 | 0.045   | 0.03021 | 0.04554 | 0.06244 | 0.0265  | 0.02185 | TBXA2R    |
| cg15862544 | 0.78965 | 0.80334 | 0.83147 | 0.84516 | 0.85573 | 0.83308 | 0.77777 | 0.80554 | 0.83914 | 0.84034 | EGFL4     |
| cg15863254 | 0.05743 | 0.06268 | 0.06428 | 0.061   | 0.04356 | 0.05995 | 0.05536 | 0.06148 | 0.05766 | 0.04979 | ACBD3     |
| cg15864184 | 0.14041 | 0.14551 | 0.13033 | 0.14028 | 0.11671 | 0.16536 | 0.15263 | 0.14229 | 0.12889 | 0.14938 | PTPN1     |
| cg15865742 | 0.15179 | 0.10822 | 0.17902 | 0.14459 | 0.37798 | 0.17515 | 0.11944 | 0.12701 | 0.12208 | 0.10801 | SLC31A1   |
| cg15868151 | 0.0342  | 0.03257 | 0.03396 | 0.02872 | 0.02309 | 0.03011 | 0.03533 | 0.02971 | 0.02274 | 0.02707 | ABCC4     |
| cg15868302 | 0.17658 | 0.40962 | 0.91007 | 0.91723 | 0.93714 | 0.92179 | 0.91671 | 0.90534 | 0.85274 | 0.63852 | FOXD2     |
| cg15869022 | 0.82189 | 0.5493  | 0.65564 | 0.85609 | 0.82947 | 0.79393 | 0.74239 | 0.33073 | 0.85958 | 0.68886 | GPR17     |
| cg15869642 | 0.22153 | 0.19433 | 0.67781 | 0.70969 | 0.48654 | 0.48483 | 0.22886 | 0.20978 | 0.16519 | 0.19497 | CBLN1     |
| cg15870225 | 0.90004 | 0.89992 | 0.88189 | 0.88591 | 0.87695 | 0.87199 | 0.84884 | 0.85861 | 0.86626 | 0.85628 | RNF41     |
| cg15872103 | 0.0376  | 0.03638 | 0.04054 | 0.04425 | 0.02455 | 0.03418 | 0.03369 | 0.03227 | 0.02754 | 0.02187 | SLC35F5   |
| cg15873301 | 0.05374 | 0.04288 | 0.94295 | 0.95099 | 0.881   | 0.92605 | 0.89305 | 0.91752 | 0.04092 | 0.03478 | SYN2      |
| cg15873633 | 0.10873 | 0.12231 | 0.15931 | 0.14829 | 0.16762 | 0.1301  | 0.10756 | 0.09767 | 0.08274 | 0.09479 | ZNF37A    |

|            |         |         |         |         |         |         |         |         |         |                  |
|------------|---------|---------|---------|---------|---------|---------|---------|---------|---------|------------------|
| cg15873715 | 0.06972 | 0.0536  | 0.04789 | 0.0476  | 0.05593 | 0.0643  | 0.04338 | 0.04374 | 0.03788 | 0.03821 DAB2     |
| cg15875120 | 0.04372 | 0.03134 | 0.03284 | 0.03982 | 0.02616 | 0.03235 | 0.03217 | 0.03214 | 0.03682 | 0.03687 C10orf97 |
| cg15875314 | 0.35979 | 0.13796 | 0.49555 | 0.56039 | 0.28325 | 0.2139  | 0.55775 | 0.26792 | 0.21919 | 0.08382 DDX4     |
| cg15876417 | 0.2376  | 0.22062 | 0.28746 | 0.26161 | 0.34488 | 0.2622  | 0.28885 | 0.27611 | 0.24501 | 0.27772 ABCD2    |
| cg15877314 | 0.04598 | 0.04323 | 0.04853 | 0.04449 | 0.05116 | 0.04953 | 0.03676 | 0.03324 | 0.03459 | 0.03756 GNAI2    |
| cg15878317 | 0.26793 | 0.5774  | 0.67477 | 0.93767 | 0.35497 | 0.04255 | 0.07185 | 0.05275 | 0.32399 | 0.50701 NMNAT3   |
| cg15879316 | 0.08817 | 0.06464 | 0.1023  | 0.1034  | 0.11729 | 0.09258 | 0.15481 | 0.08263 | 0.10356 | 0.08155 CELSR1   |
| cg15880738 | 0.69295 | 0.50953 | 0.82291 | 0.84996 | 0.90944 | 0.8757  | 0.4653  | 0.83369 | 0.85133 | 0.75884 CD3G     |
| cg15881088 | 0.04069 | 0.04562 | 0.0437  | 0.04369 | 0.03257 | 0.03916 | 0.03986 | 0.03958 | 0.03239 | 0.03718 ARMET    |
| cg15881727 | 0.04397 | 0.04891 | 0.05187 | 0.04699 | 0.06289 | 0.04539 | 0.05542 | 0.05193 | 0.10832 | 0.05404 ZBED4    |
| cg15882999 | 0.03374 | 0.03671 | 0.032   | 0.03497 | 0.02885 | 0.03313 | 0.03479 | 0.03299 | 0.02827 | 0.03393 P4HB     |
| cg15883716 | 0.26808 | 0.25804 | 0.68845 | 0.58559 | 0.39155 | 0.22694 | 0.09177 | 0.08969 | 0.12244 | 0.14609 ANKRD45  |
| cg15883761 | 0.02569 | 0.02845 | 0.02707 | 0.02384 | 0.01586 | 0.02044 | 0.02047 | 0.02014 | 0.02141 | 0.02117 MUS81    |
| cg15884411 | 0.02663 | 0.02964 | 0.03083 | 0.02792 | 0.01988 | 0.02483 | 0.02432 | 0.02665 | 0.02372 | 0.02494 TMEM127  |
| cg15885734 | 0.91502 | 0.90306 | 0.90726 | 0.89453 | 0.9061  | 0.89686 | 0.89914 | 0.91116 | 0.92077 | 0.91676 ATPBD3   |
| cg15887846 | 0.58355 | 0.55194 | 0.83337 | 0.92689 | 0.90755 | 0.92886 | 0.27104 | 0.0724  | 0.74132 | 0.68804 CST6     |
| cg15888522 | 0.29451 | 0.12401 | 0.61754 | 0.70947 | 0.5687  | 0.53337 | 0.4478  | 0.13873 | 0.76602 | 0.62087 XCR1     |
| cg15890111 | 0.05376 | 0.04845 | 0.05087 | 0.05379 | 0.11887 | 0.0447  | 0.04853 | 0.04619 | 0.03834 | 0.02807 ABAT     |
| cg15890484 | 0.14887 | 0.16133 | 0.16748 | 0.14333 | 0.22361 | 0.1553  | 0.14494 | 0.13028 | 0.16797 | 0.14365 DYNC2LI1 |
| cg15893253 | 0.06698 | 0.03687 | 0.0342  | 0.03482 | 0.11522 | 0.02938 | 0.03655 | 0.03081 | 0.08955 | 0.02574 CSTB     |
| cg15894661 | 0.25602 | 0.05769 | 0.06753 | 0.03299 | 0.03208 | 0.03271 | 0.03687 | 0.02973 | 0.02781 | 0.0276 PHACS     |
| cg15895197 | 0.85628 | 0.38602 | 0.02082 | 0.0191  | 0.0174  | 0.01955 | 0.49299 | 0.01813 | 0.74311 | 0.84702 EMILIN1  |
| cg15895359 | 0.04656 | 0.04564 | 0.04953 | 0.0456  | 0.02931 | 0.03934 | 0.07124 | 0.05339 | 0.03517 | 0.03784 EFNB1    |
| cg15896447 | 0.86425 | 0.87968 | 0.86798 | 0.89096 | 0.8704  | 0.86469 | 0.71176 | 0.57435 | 0.88305 | 0.85961 CHMP4A   |
| cg15897310 | 0.05703 | 0.06143 | 0.07239 | 0.064   | 0.06441 | 0.06366 | 0.04839 | 0.04738 | 0.05488 | 0.05055 CTGF     |
| cg15898840 | 0.02473 | 0.02437 | 0.0301  | 0.02693 | 0.02695 | 0.02659 | 0.03073 | 0.02682 | 0.8139  | 0.84696 IGFBP3   |
| cg15900519 | 0.08113 | 0.0806  | 0.07578 | 0.07232 | 0.14998 | 0.09949 | 0.06318 | 0.05376 | 0.06317 | 0.06941 RPL32    |
| cg15900980 | 0.0422  | 0.04991 | 0.04161 | 0.03832 | 0.03607 | 0.04727 | 0.7974  | 0.92831 | 0.04458 | 0.03528 GPX1     |
| cg15901783 | 0.18575 | 0.17776 | 0.8998  | 0.91688 | 0.88564 | 0.89751 | 0.85905 | 0.74126 | 0.04508 | 0.03408 KCTD12   |
| cg15903282 | 0.53136 | 0.5252  | 0.67104 | 0.73945 | 0.78316 | 0.74728 | 0.35749 | 0.43363 | 0.76544 | 0.65628 EPHB1    |
| cg15903395 | 0.70374 | 0.67426 | 0.55523 | 0.81505 | 0.75565 | 0.84768 | 0.24333 | 0.27962 | 0.25012 | 0.40652 FLJ25369 |
| cg15903421 | 0.02659 | 0.03003 | 0.02915 | 0.02606 | 0.04982 | 0.03055 | 0.02625 | 0.02667 | 0.032   | 0.02934 DFNB31   |
| cg15903837 | 0.49378 | 0.10156 | 0.67234 | 0.76476 | 0.722   | 0.81203 | 0.64213 | 0.45928 | 0.50277 | 0.3087 P2RY6     |
| cg15905124 | 0.36662 | 0.10384 | 0.61451 | 0.84656 | 0.69687 | 0.87977 | 0.55947 | 0.8631  | 0.51643 | 0.23787 MGC13034 |
| cg15905634 | 0.7805  | 0.72044 | 0.497   | 0.72886 | 0.72573 | 0.7766  | 0.11999 | 0.11822 | 0.12805 | 0.09497 TAS2R60  |
| cg15905979 | 0.44662 | 0.48385 | 0.66552 | 0.6956  | 0.55859 | 0.73088 | 0.26818 | 0.22782 | 0.19789 | 0.16209 ST18     |
| cg15910079 | 0.45265 | 0.10093 | 0.33577 | 0.49675 | 0.15085 | 0.09274 | 0.10209 | 0.09817 | 0.21933 | 0.09717 RNASE3   |
| cg15910208 | 0.03263 | 0.03403 | 0.24001 | 0.4021  | 0.40745 | 0.62508 | 0.04014 | 0.04525 | 0.02761 | 0.02616 KLK10    |
| cg15910230 | 0.86534 | 0.86102 | 0.81754 | 0.84929 | 0.87167 | 0.88518 | 0.828   | 0.88478 | 0.90565 | 0.89786 C20orf7  |
| cg15911500 | 0.02515 | 0.02831 | 0.02773 | 0.0298  | 0.0201  | 0.02588 | 0.02044 | 0.02426 | 0.02312 | 0.02107 ERCC1    |
| cg15912427 | 0.04122 | 0.0453  | 0.04036 | 0.03801 | 0.05462 | 0.05312 | 0.0446  | 0.03792 | 0.03589 | 0.04803 ABCD4    |

|            |         |         |         |         |         |         |         |         |         |         |           |
|------------|---------|---------|---------|---------|---------|---------|---------|---------|---------|---------|-----------|
| cg15913671 | 0.70821 | 0.39565 | 0.70392 | 0.66071 | 0.83351 | 0.88734 | 0.65533 | 0.72286 | 0.52175 | 0.10466 | TMEM105   |
| cg15914863 | 0.78469 | 0.39424 | 0.88894 | 0.92986 | 0.96002 | 0.92386 | 0.51426 | 0.46222 | 0.72344 | 0.78091 | CYP2W1    |
| cg15915418 | 0.07688 | 0.06135 | 0.41625 | 0.45835 | 0.19508 | 0.13542 | 0.55733 | 0.5697  | 0.09657 | 0.06407 | TLE1      |
| cg15916061 | 0.12946 | 0.05896 | 0.09284 | 0.17172 | 0.34907 | 0.47083 | 0.04198 | 0.04894 | 0.03675 | 0.03675 | SLC17A4   |
| cg15916628 | 0.72853 | 0.0917  | 0.81015 | 0.8544  | 0.63465 | 0.27544 | 0.32813 | 0.12079 | 0.25478 | 0.16801 | ZNF579    |
| cg15918284 | 0.11765 | 0.13506 | 0.4522  | 0.58352 | 0.23456 | 0.16155 | 0.12769 | 0.07994 | 0.11483 | 0.10227 | GABRA2    |
| cg15919045 | 0.01851 | 0.02146 | 0.02548 | 0.02361 | 0.01487 | 0.01722 | 0.01972 | 0.01679 | 0.01832 | 0.01445 | NFIL3     |
| cg15920202 | 0.03706 | 0.03981 | 0.10051 | 0.14019 | 0.03279 | 0.04029 | 0.02782 | 0.02786 | 0.03291 | 0.03499 | FLJ13910  |
| cg15923513 | 0.76313 | 0.49684 | 0.06543 | 0.05195 | 0.05199 | 0.03877 | 0.19833 | 0.04444 | 0.04345 | 0.0368  | CD302     |
| cg15925792 | 0.06945 | 0.06829 | 0.08985 | 0.07999 | 0.05411 | 0.05649 | 0.1487  | 0.35904 | 0.87115 | 0.95229 | MX1       |
| cg15926557 | 0.8569  | 0.71128 | 0.80965 | 0.80283 | 0.79191 | 0.72143 | 0.84203 | 0.8451  | 0.84706 | 0.76618 | KATNA1    |
| cg15926585 | 0.90882 | 0.7475  | 0.45223 | 0.43669 | 0.53976 | 0.63504 | 0.09249 | 0.07827 | 0.89338 | 0.83901 | COMT      |
| cg15927263 | 0.0292  | 0.03152 | 0.02987 | 0.03346 | 0.02878 | 0.02618 | 0.02987 | 0.02375 | 0.02877 | 0.02288 | PLEKHJ1   |
| cg15928132 | 0.40917 | 0.12282 | 0.2333  | 0.56898 | 0.54184 | 0.7116  | 0.14078 | 0.05143 | 0.06949 | 0.06474 | CKKAR     |
| cg15928398 | 0.91453 | 0.56122 | 0.40388 | 0.48359 | 0.95816 | 0.94374 | 0.17657 | 0.05138 | 0.12537 | 0.52923 | ST6GAL1   |
| cg15928446 | 0.12764 | 0.06784 | 0.06513 | 0.08411 | 0.03735 | 0.04601 | 0.05001 | 0.05619 | 0.04977 | 0.03894 | MGC3121   |
| cg15929201 | 0.0297  | 0.03229 | 0.03381 | 0.03408 | 0.03219 | 0.03103 | 0.02515 | 0.02876 | 0.052   | 0.02959 | FLJ11193  |
| cg15931943 | 0.02532 | 0.02465 | 0.12634 | 0.04572 | 0.026   | 0.0225  | 0.02617 | 0.02174 | 0.30113 | 0.0524  | FHIT      |
| cg15932716 | 0.02883 | 0.03153 | 0.03454 | 0.02815 | 0.02585 | 0.02696 | 0.02743 | 0.02721 | 0.02724 | 0.02553 | GDF11     |
| cg15933546 | 0.888   | 0.88904 | 0.87381 | 0.89023 | 0.94671 | 0.88081 | 0.86462 | 0.87321 | 0.92715 | 0.92014 | DNAH8     |
| cg15936718 | 0.18206 | 0.18811 | 0.58534 | 0.413   | 0.79775 | 0.20873 | 0.2403  | 0.1688  | 0.14731 | 0.11177 | GAS8      |
| cg15937081 | 0.101   | 0.09054 | 0.08046 | 0.06536 | 0.17299 | 0.11901 | 0.07699 | 0.07342 | 0.09069 | 0.11891 | C14orf106 |
| cg15937958 | 0.86594 | 0.60957 | 0.87461 | 0.90622 | 0.93055 | 0.83575 | 0.8684  | 0.57141 | 0.90481 | 0.73599 | UNQ473    |
| cg15940569 | 0.11488 | 0.39241 | 0.35276 | 0.40341 | 0.52941 | 0.57649 | 0.11624 | 0.1033  | 0.41405 | 0.355   | GABRB3    |
| cg15942481 | 0.78054 | 0.78938 | 0.57689 | 0.79221 | 0.16579 | 0.07631 | 0.04712 | 0.04085 | 0.06024 | 0.06442 | CAPS2     |
| cg15942562 | 0.68632 | 0.55811 | 0.90694 | 0.91713 | 0.74044 | 0.73777 | 0.83078 | 0.75262 | 0.94534 | 0.92193 | CDCA3     |
| cg15944762 | 0.0491  | 0.03617 | 0.03853 | 0.03663 | 0.03775 | 0.04056 | 0.03347 | 0.03046 | 0.0274  | 0.03053 | SPAG9     |
| cg15944856 | 0.33707 | 0.43077 | 0.58507 | 0.65801 | 0.76563 | 0.85013 | 0.34114 | 0.45713 | 0.33765 | 0.27702 | UNQ6411   |
| cg15945417 | 0.02384 | 0.02078 | 0.02023 | 0.02083 | 0.01829 | 0.02264 | 0.02071 | 0.01865 | 0.01796 | 0.01651 | LLGL1     |
| cg15945602 | 0.75641 | 0.72224 | 0.79137 | 0.81285 | 0.80324 | 0.76181 | 0.65101 | 0.68949 | 0.69409 | 0.70997 | VAT1      |
| cg15945754 | 0.85205 | 0.29622 | 0.8158  | 0.85742 | 0.80658 | 0.83255 | 0.86536 | 0.85463 | 0.87402 | 0.79877 | C6orf204  |
| cg15945769 | 0.08672 | 0.05707 | 0.09176 | 0.09108 | 0.06037 | 0.05142 | 0.04553 | 0.04735 | 0.08855 | 0.04519 | HHAT      |
| cg15946545 | 0.05407 | 0.06406 | 0.06198 | 0.06606 | 0.06168 | 0.06986 | 0.03833 | 0.03975 | 0.03793 | 0.04079 | MRPS31    |
| cg15946807 | 0.88034 | 0.87312 | 0.85217 | 0.87937 | 0.8206  | 0.85584 | 0.85988 | 0.89733 | 0.73941 | 0.47663 | GADL1     |
| cg15947959 | 0.0878  | 0.06784 | 0.07465 | 0.07238 | 0.06134 | 0.07855 | 0.06666 | 0.06757 | 0.06679 | 0.06169 | ERGIC1    |
| cg15948326 | 0.03073 | 0.03473 | 0.0367  | 0.02894 | 0.20378 | 0.45792 | 0.02799 | 0.02918 | 0.02391 | 0.02459 | C11orf45  |
| cg15949277 | 0.07355 | 0.10029 | 0.0673  | 0.07527 | 0.92157 | 0.55264 | 0.18434 | 0.09662 | 0.06681 | 0.05005 | ZC3H12A   |
| cg15951107 | 0.04548 | 0.04524 | 0.04565 | 0.0504  | 0.03046 | 0.04224 | 0.03579 | 0.03433 | 0.03769 | 0.02956 | BAX       |
| cg15952487 | 0.07577 | 0.07539 | 0.12727 | 0.10657 | 0.12147 | 0.09533 | 0.09856 | 0.08703 | 0.0888  | 0.10007 | CD1B      |
| cg15952725 | 0.86901 | 0.74113 | 0.84301 | 0.8671  | 0.85438 | 0.84033 | 0.86433 | 0.86226 | 0.847   | 0.49096 | ELA2A     |
| cg15954792 | 0.27232 | 0.227   | 0.17644 | 0.29166 | 0.51556 | 0.81194 | 0.13244 | 0.56982 | 0.14237 | 0.09827 | CNGA3     |

|            |         |         |         |         |         |         |         |         |         |                  |
|------------|---------|---------|---------|---------|---------|---------|---------|---------|---------|------------------|
| cg15955341 | 0.0308  | 0.02682 | 0.03685 | 0.04576 | 0.16879 | 0.27972 | 0.02339 | 0.02494 | 0.02564 | 0.02285 GSTM4    |
| cg15957394 | 0.05805 | 0.05088 | 0.09477 | 0.07933 | 0.40014 | 0.12034 | 0.0489  | 0.04052 | 0.05586 | 0.04444 AFAP     |
| cg15958424 | 0.23876 | 0.09978 | 0.71986 | 0.79746 | 0.65885 | 0.16415 | 0.69757 | 0.27487 | 0.75435 | 0.40559 ACPP     |
| cg15959756 | 0.04348 | 0.04153 | 0.0406  | 0.03655 | 0.03705 | 0.03484 | 0.03902 | 0.03605 | 0.04181 | 0.03333 SPAST    |
| cg15963417 | 0.0449  | 0.04487 | 0.3311  | 0.45491 | 0.06667 | 0.10406 | 0.07292 | 0.10584 | 0.11542 | 0.05513 PAH      |
| cg15963971 | 0.04396 | 0.04984 | 0.05337 | 0.04896 | 0.05723 | 0.05548 | 0.0533  | 0.05429 | 0.04744 | 0.03965 FEN1     |
| cg15965055 | 0.04685 | 0.04695 | 0.05776 | 0.05803 | 0.09386 | 0.04398 | 0.04564 | 0.04857 | 0.04302 | 0.04271 C1orf32  |
| cg15965510 | 0.06572 | 0.06052 | 0.0705  | 0.06499 | 0.0648  | 0.07413 | 0.07406 | 0.05508 | 0.05886 | 0.04959 BTAF1    |
| cg15965913 | 0.04451 | 0.04898 | 0.05263 | 0.04564 | 0.02896 | 0.04042 | 0.042   | 0.0432  | 0.04028 | 0.04492 C1orf121 |
| cg15966253 | 0.05314 | 0.04579 | 0.0404  | 0.04414 | 0.05326 | 0.05084 | 0.0357  | 0.04103 | 0.03858 | 0.04438 UBE2E1   |
| cg15966757 | 0.88778 | 0.82069 | 0.90034 | 0.90914 | 0.88371 | 0.87862 | 0.42136 | 0.87138 | 0.68789 | 0.69282 SLC6A13  |
| cg15967525 | 0.85155 | 0.8542  | 0.82298 | 0.88301 | 0.81184 | 0.84456 | 0.7936  | 0.60167 | 0.8435  | 0.0982 FLJ20273  |
| cg15970621 | 0.03341 | 0.03244 | 0.04156 | 0.03278 | 0.02598 | 0.02685 | 0.03002 | 0.02978 | 0.02502 | 0.02515 PHKG2    |
| cg15971505 | 0.04377 | 0.04594 | 0.07062 | 0.06196 | 0.06313 | 0.06072 | 0.04671 | 0.03912 | 0.0567  | 0.05449 C6orf203 |
| cg15971836 | 0.04045 | 0.04654 | 0.04602 | 0.04552 | 0.02931 | 0.04134 | 0.035   | 0.03982 | 0.03699 | 0.03494 KIAA1212 |
| cg15972294 | 0.42135 | 0.15658 | 0.6194  | 0.63592 | 0.1411  | 0.15747 | 0.08521 | 0.07156 | 0.09022 | 0.07111 GNAI2    |
| cg15972617 | 0.11435 | 0.09679 | 0.1112  | 0.09009 | 0.12212 | 0.11452 | 0.11115 | 0.1037  | 0.11838 | 0.11601 GM2A     |
| cg15973234 | 0.05303 | 0.04453 | 0.05917 | 0.08514 | 0.05827 | 0.03661 | 0.06116 | 0.05173 | 0.49959 | 0.13017 KIAA1199 |
| cg15974053 | 0.03654 | 0.02385 | 0.02486 | 0.02728 | 0.94077 | 0.54604 | 0.74988 | 0.80888 | 0.69165 | 0.82839 DHRS10   |
| cg15974062 | 0.04128 | 0.04427 | 0.0497  | 0.05007 | 0.04885 | 0.03914 | 0.04396 | 0.04575 | 0.03837 | 0.04081 COPS7A   |
| cg15975283 | 0.50603 | 0.06965 | 0.60294 | 0.65473 | 0.68845 | 0.86044 | 0.60872 | 0.42923 | 0.51254 | 0.41734 SLC9A11  |
| cg15976539 | 0.79127 | 0.55889 | 0.60894 | 0.81077 | 0.43788 | 0.70777 | 0.16397 | 0.35344 | 0.68577 | 0.61729 C18orf16 |
| cg15977272 | 0.05296 | 0.05835 | 0.07737 | 0.06657 | 0.04869 | 0.05347 | 0.59644 | 0.55408 | 0.0465  | 0.05417 EFNB1    |
| cg15977278 | 0.05837 | 0.03018 | 0.03525 | 0.03318 | 0.02327 | 0.02791 | 0.02258 | 0.02573 | 0.02701 | 0.02684 NT5DC3   |
| cg15977816 | 0.34089 | 0.10929 | 0.4067  | 0.57513 | 0.3349  | 0.13681 | 0.13711 | 0.13175 | 0.09595 | 0.12637 KCNN4    |
| cg15979098 | 0.09032 | 0.0743  | 0.07495 | 0.07951 | 0.09002 | 0.07895 | 0.0536  | 0.04925 | 0.05674 | 0.04584 ZNF615   |
| cg15979932 | 0.82993 | 0.61356 | 0.82211 | 0.85968 | 0.78447 | 0.76523 | 0.21148 | 0.4223  | 0.83268 | 0.43671 CUEDC1   |
| cg15980408 | 0.02321 | 0.02205 | 0.02161 | 0.02118 | 0.16919 | 0.20707 | 0.02    | 0.01962 | 0.66401 | 0.67841 TMEM22   |
| cg15981265 | 0.08459 | 0.03316 | 0.11735 | 0.08002 | 0.07781 | 0.03886 | 0.04573 | 0.02989 | 0.11238 | 0.15107 KIAA1900 |
| cg15981554 | 0.82432 | 0.79254 | 0.88427 | 0.89532 | 0.70428 | 0.76766 | 0.8515  | 0.88211 | 0.73282 | 0.79063 CGB2     |
| cg15981753 | 0.46491 | 0.48794 | 0.32853 | 0.37775 | 0.46812 | 0.47231 | 0.30412 | 0.20468 | 0.43926 | 0.36439 SMA3     |
| cg15982308 | 0.04334 | 0.04365 | 0.0463  | 0.04774 | 0.0517  | 0.04894 | 0.04344 | 0.04537 | 0.03467 | 0.04041 AGPAT1   |
| cg15982419 | 0.54045 | 0.34279 | 0.70088 | 0.46462 | 0.89299 | 0.861   | 0.64519 | 0.16625 | 0.49019 | 0.05832 RALBP1   |
| cg15983005 | 0.45965 | 0.25724 | 0.8374  | 0.89189 | 0.87314 | 0.8646  | 0.04484 | 0.04222 | 0.55642 | 0.15342 KRTHA3A  |
| cg15983520 | 0.81662 | 0.66849 | 0.77965 | 0.8303  | 0.86263 | 0.75144 | 0.72908 | 0.73085 | 0.80425 | 0.72765 GPT      |
| cg15983538 | 0.81033 | 0.56455 | 0.83114 | 0.85331 | 0.89937 | 0.84751 | 0.83357 | 0.57087 | 0.70353 | 0.41751 SEMA4A   |
| cg15984612 | 0.03905 | 0.03861 | 0.04179 | 0.03995 | 0.04885 | 0.04421 | 0.03021 | 0.0312  | 0.04157 | 0.03486 BOP1     |
| cg15984661 | 0.06442 | 0.07211 | 0.0577  | 0.06163 | 0.49225 | 0.54155 | 0.78874 | 0.82676 | 0.06407 | 0.06073 CCDC8    |
| cg15984822 | 0.12225 | 0.09798 | 0.11414 | 0.11369 | 0.07022 | 0.10337 | 0.08628 | 0.08727 | 0.0912  | 0.08685 CCDC6    |
| cg15988232 | 0.89952 | 0.77062 | 0.90961 | 0.94426 | 0.91679 | 0.92536 | 0.90916 | 0.78373 | 0.95187 | 0.9468 CSPG5     |
| cg15988792 | 0.25105 | 0.30034 | 0.06849 | 0.0776  | 0.93612 | 0.90166 | 0.81341 | 0.85981 | 0.24012 | 0.06347 ACSS1    |



|            |         |         |         |         |         |         |         |         |         |                  |
|------------|---------|---------|---------|---------|---------|---------|---------|---------|---------|------------------|
| cg15989091 | 0.8262  | 0.38137 | 0.90128 | 0.89878 | 0.34966 | 0.30718 | 0.82802 | 0.55141 | 0.31516 | 0.44295 LOXL3    |
| cg15990015 | 0.06971 | 0.06506 | 0.06455 | 0.07286 | 0.05285 | 0.06024 | 0.05365 | 0.05502 | 0.05847 | 0.05695 DMAP1    |
| cg15991288 | 0.02577 | 0.02497 | 0.026   | 0.02315 | 0.03093 | 0.02546 | 0.02205 | 0.023   | 0.02694 | 0.02266 WDR47    |
| cg15992730 | 0.62284 | 0.54237 | 0.85041 | 0.86008 | 0.73706 | 0.83114 | 0.23668 | 0.1385  | 0.13316 | 0.13967 GDF3     |
| cg15993402 | 0.03375 | 0.03365 | 0.03207 | 0.03063 | 0.0295  | 0.02866 | 0.0273  | 0.03042 | 0.02648 | 0.02382 C16orf55 |
| cg15993674 | 0.03712 | 0.03691 | 0.03612 | 0.03693 | 0.02799 | 0.03121 | 0.02916 | 0.02859 | 0.03356 | 0.03082 PRNP     |
| cg15994159 | 0.04587 | 0.04599 | 0.04993 | 0.05116 | 0.03592 | 0.04179 | 0.03683 | 0.04177 | 0.03737 | 0.03345 RAI1     |
| cg15994781 | 0.05323 | 0.05708 | 0.05942 | 0.05856 | 0.05481 | 0.0565  | 0.0991  | 0.09194 | 0.04959 | 0.06142 TOMM70A  |
| cg15995002 | 0.0594  | 0.06377 | 0.06766 | 0.07598 | 0.07539 | 0.05406 | 0.06911 | 0.06141 | 0.0553  | 0.07102 RAD54B   |
| cg15996947 | 0.85258 | 0.82455 | 0.90185 | 0.9016  | 0.79179 | 0.83653 | 0.88857 | 0.82548 | 0.87454 | 0.79256 L2HGDH   |
| cg15997411 | 0.90328 | 0.55844 | 0.88947 | 0.90794 | 0.87314 | 0.9037  | 0.90521 | 0.90903 | 0.91331 | 0.87218 JAK1     |
| cg15998761 | 0.74738 | 0.40548 | 0.78575 | 0.85299 | 0.65155 | 0.79846 | 0.60364 | 0.75401 | 0.67055 | 0.80304 FLJ20160 |
| cg16000832 | 0.21447 | 0.03141 | 0.03022 | 0.02886 | 0.02661 | 0.02538 | 0.02982 | 0.02999 | 0.0219  | 0.02056 RCBTB2   |
| cg16000888 | 0.03316 | 0.03309 | 0.03584 | 0.03488 | 0.02807 | 0.03296 | 0.0361  | 0.03176 | 0.02818 | 0.02847 C11orf35 |
| cg16001460 | 0.09698 | 0.09949 | 0.15933 | 0.11722 | 0.28564 | 0.13388 | 0.09504 | 0.06951 | 0.08011 | 0.09292 PRIM2A   |
| cg16001913 | 0.49688 | 0.27308 | 0.76356 | 0.82982 | 0.51321 | 0.64554 | 0.48136 | 0.30155 | 0.44569 | 0.5023 HK1       |
| cg16003238 | 0.87245 | 0.71845 | 0.74534 | 0.79303 | 0.93677 | 0.80923 | 0.68761 | 0.59411 | 0.67245 | 0.39071 PUNC     |
| cg16003500 | 0.06276 | 0.05178 | 0.05114 | 0.04991 | 0.0624  | 0.05062 | 0.04906 | 0.05423 | 0.04478 | 0.04048 ADNP     |
| cg16003913 | 0.90612 | 0.53438 | 0.0349  | 0.03915 | 0.07933 | 0.03615 | 0.85556 | 0.71247 | 0.70962 | 0.45295 MPG      |
| cg16004226 | 0.05638 | 0.05193 | 0.33669 | 0.36404 | 0.08715 | 0.04404 | 0.17057 | 0.04834 | 0.07252 | 0.19449 B4GALNT4 |
| cg16004800 | 0.10051 | 0.06736 | 0.09779 | 0.08692 | 0.32052 | 0.09763 | 0.07428 | 0.07664 | 0.07125 | 0.08024 NDUFA9   |
| cg16005224 | 0.69657 | 0.87905 | 0.76293 | 0.8481  | 0.46369 | 0.37885 | 0.42467 | 0.35964 | 0.22484 | 0.43413 SLC5A8   |
| cg16005443 | 0.14096 | 0.03816 | 0.24772 | 0.27913 | 0.4756  | 0.55078 | 0.03611 | 0.04425 | 0.27573 | 0.26849 LILRB3   |
| cg16007185 | 0.03685 | 0.03403 | 0.0354  | 0.02824 | 0.02313 | 0.03032 | 0.02751 | 0.0265  | 0.0227  | 0.02456 TXNDC    |
| cg16007628 | 0.08096 | 0.08049 | 0.14196 | 0.11701 | 0.1122  | 0.08842 | 0.09663 | 0.08623 | 0.06238 | 0.08479 ZNF207   |
| cg16007680 | 0.03194 | 0.02619 | 0.03157 | 0.02783 | 0.02353 | 0.02152 | 0.02544 | 0.02576 | 0.0234  | 0.02187 GLI4     |
| cg16008138 | 0.82699 | 0.45441 | 0.82721 | 0.83969 | 0.88421 | 0.85784 | 0.83833 | 0.81494 | 0.83105 | 0.79738 RNF190   |
| cg16009558 | 0.87862 | 0.80383 | 0.45833 | 0.45953 | 0.47225 | 0.30349 | 0.73868 | 0.83446 | 0.0773  | 0.06021 GRIK2    |
| cg16011258 | 0.07471 | 0.03192 | 0.04583 | 0.03835 | 0.04242 | 0.03145 | 0.02793 | 0.02393 | 0.03734 | 0.03264 NECAP2   |
| cg16013246 | 0.04057 | 0.039   | 0.0612  | 0.06382 | 0.04953 | 0.05132 | 0.03871 | 0.03784 | 0.03847 | 0.03853 RCC1     |
| cg16014085 | 0.48863 | 0.41271 | 0.23923 | 0.38907 | 0.41213 | 0.18962 | 0.22588 | 0.09806 | 0.89049 | 0.79351 ZNF553   |
| cg16016036 | 0.88955 | 0.84657 | 0.82337 | 0.76692 | 0.88728 | 0.88434 | 0.22263 | 0.4628  | 0.14028 | 0.37853 TPO      |
| cg16016641 | 0.06888 | 0.04929 | 0.05752 | 0.05806 | 0.03856 | 0.05152 | 0.07724 | 0.07322 | 0.05116 | 0.05091 C20orf4  |
| cg16016951 | 0.03763 | 0.03367 | 0.03537 | 0.03276 | 0.03103 | 0.03452 | 0.0364  | 0.03433 | 0.03771 | 0.04229 DUT      |
| cg16017358 | 0.04895 | 0.04259 | 0.04906 | 0.04487 | 0.04519 | 0.04174 | 0.0423  | 0.04053 | 0.04059 | 0.04403 HAT1     |
| cg16017492 | 0.9135  | 0.83252 | 0.92134 | 0.92193 | 0.94418 | 0.92951 | 0.91523 | 0.9065  | 0.92952 | 0.89806 EVPL     |
| cg16019273 | 0.86862 | 0.88828 | 0.87802 | 0.85499 | 0.88895 | 0.81761 | 0.35475 | 0.32771 | 0.61993 | 0.23773 EIF2C4   |
| cg16019620 | 0.23992 | 0.3206  | 0.52471 | 0.74346 | 0.33229 | 0.48718 | 0.41683 | 0.21799 | 0.40772 | 0.24019 MEP1A    |
| cg16020904 | 0.78983 | 0.82251 | 0.87777 | 0.87456 | 0.85138 | 0.58852 | 0.8302  | 0.81818 | 0.88341 | 0.7005 SPATA20   |
| cg16022279 | 0.82685 | 0.11632 | 0.56804 | 0.5927  | 0.59515 | 0.49303 | 0.25496 | 0.08043 | 0.79386 | 0.67527 ZNF185   |
| cg16022344 | 0.04019 | 0.04174 | 0.0398  | 0.03565 | 0.03173 | 0.0335  | 0.03778 | 0.03437 | 0.03127 | 0.03707 COX5B    |

|            |         |         |         |         |         |         |         |         |         |                   |
|------------|---------|---------|---------|---------|---------|---------|---------|---------|---------|-------------------|
| cg16025584 | 0.08166 | 0.08496 | 0.09589 | 0.08947 | 0.51367 | 0.51697 | 0.08123 | 0.07693 | 0.08218 | 0.07359 C9orf142  |
| cg16026550 | 0.04092 | 0.04445 | 0.39503 | 0.39038 | 0.70643 | 0.29545 | 0.08317 | 0.05319 | 0.27769 | 0.13679 SORL1     |
| cg16028753 | 0.44473 | 0.08077 | 0.70514 | 0.74351 | 0.6246  | 0.66729 | 0.509   | 0.37758 | 0.56612 | 0.49718 PODN      |
| cg16028934 | 0.05086 | 0.04443 | 0.04933 | 0.04881 | 0.04405 | 0.04661 | 0.04393 | 0.0379  | 0.04429 | 0.03873 TP53BP2   |
| cg16029636 | 0.04458 | 0.04114 | 0.05403 | 0.05261 | 0.03933 | 0.04338 | 0.03747 | 0.04302 | 0.04558 | 0.04043 SLC39A1   |
| cg16029760 | 0.03873 | 0.03739 | 0.12969 | 0.32623 | 0.89062 | 0.9255  | 0.03944 | 0.03782 | 0.03113 | 0.0324 OSTbeta    |
| cg16029957 | 0.41009 | 0.08934 | 0.07927 | 0.07796 | 0.37842 | 0.55698 | 0.05156 | 0.17744 | 0.0733  | 0.0635 QPCT       |
| cg16034046 | 0.02595 | 0.02531 | 0.03144 | 0.0259  | 0.03086 | 0.03193 | 0.02311 | 0.02328 | 0.02543 | 0.02156 KIAA0182  |
| cg16034652 | 0.43866 | 0.26746 | 0.21374 | 0.19009 | 0.51708 | 0.43278 | 0.24598 | 0.20165 | 0.62439 | 0.40755 KIAA1409  |
| cg16035277 | 0.14563 | 0.14067 | 0.1454  | 0.13371 | 0.09323 | 0.10278 | 0.11126 | 0.10923 | 0.10395 | 0.10622 SLC22A18  |
| cg16035531 | 0.78104 | 0.75701 | 0.73392 | 0.75732 | 0.69186 | 0.75257 | 0.74926 | 0.77038 | 0.79227 | 0.53979 TFB1M     |
| cg16036738 | 0.82787 | 0.81039 | 0.8598  | 0.85783 | 0.77639 | 0.78495 | 0.7696  | 0.81453 | 0.82401 | 0.78204 TBPL2     |
| cg16037142 | 0.03436 | 0.04455 | 0.05092 | 0.03531 | 0.04283 | 0.03363 | 0.03    | 0.03204 | 0.0317  | 0.03451 WDR34     |
| cg16040953 | 0.04248 | 0.03871 | 0.03783 | 0.03603 | 0.03685 | 0.03961 | 0.03528 | 0.03622 | 0.02946 | 0.03008 MGC10911  |
| cg16041611 | 0.032   | 0.02542 | 0.02464 | 0.02408 | 0.02126 | 0.02803 | 0.02275 | 0.02628 | 0.02313 | 0.0217 SRF        |
| cg16041660 | 0.02958 | 0.02583 | 0.04622 | 0.0289  | 0.02405 | 0.02577 | 0.02629 | 0.02758 | 0.02314 | 0.0217 PRICKLE1   |
| cg16042149 | 0.06074 | 0.04126 | 0.93346 | 0.9507  | 0.38152 | 0.06486 | 0.26738 | 0.59711 | 0.91028 | 0.81602 NEFH      |
| cg16045696 | 0.42582 | 0.46623 | 0.46016 | 0.49952 | 0.48775 | 0.45682 | 0.35046 | 0.2729  | 0.41216 | 0.43952 LOC389852 |
| cg16046376 | 0.81719 | 0.69493 | 0.92935 | 0.92736 | 0.86642 | 0.67739 | 0.87856 | 0.89645 | 0.92354 | 0.8957 PC         |
| cg16046465 | 0.02846 | 0.03244 | 0.03615 | 0.02949 | 0.04348 | 0.02642 | 0.07005 | 0.03559 | 0.02974 | 0.03186 FRMD5     |
| cg16046951 | 0.14138 | 0.13478 | 0.12669 | 0.12408 | 0.22678 | 0.1775  | 0.16461 | 0.16886 | 0.10289 | 0.08376 MKKS      |
| cg16047482 | 0.02021 | 0.02499 | 0.02012 | 0.02415 | 0.02132 | 0.02358 | 0.01889 | 0.01808 | 0.01955 | 0.01976 WDHD1     |
| cg16049587 | 0.08948 | 0.08994 | 0.1011  | 0.10404 | 0.12255 | 0.12895 | 0.07975 | 0.08943 | 0.06374 | 0.08877 BCDIN3    |
| cg16050349 | 0.79698 | 0.8092  | 0.79307 | 0.80102 | 0.8264  | 0.80819 | 0.77684 | 0.81546 | 0.82976 | 0.69388 PIK3CB    |
| cg16050784 | 0.02541 | 0.02463 | 0.0264  | 0.02865 | 0.02099 | 0.0221  | 0.02261 | 0.0258  | 0.0227  | 0.02187 ASPH      |
| cg16050957 | 0.01638 | 0.01675 | 0.01767 | 0.01646 | 0.01427 | 0.01813 | 0.01509 | 0.01528 | 0.01262 | 0.01312 RBBP6     |
| cg16051027 | 0.20143 | 0.04229 | 0.07542 | 0.06705 | 0.071   | 0.03647 | 0.07107 | 0.04464 | 0.05104 | 0.03722 ZNF341    |
| cg16051685 | 0.19551 | 0.04911 | 0.90102 | 0.92435 | 0.23725 | 0.3024  | 0.07339 | 0.06305 | 0.93919 | 0.8224 TRIM63     |
| cg16052901 | 0.09591 | 0.08336 | 0.10324 | 0.10078 | 0.06178 | 0.05067 | 0.12288 | 0.11476 | 0.35962 | 0.07738 VPS52     |
| cg16054422 | 0.03805 | 0.04357 | 0.05609 | 0.04726 | 0.05523 | 0.05137 | 0.07005 | 0.04768 | 0.04039 | 0.05295 SART3     |
| cg16060664 | 0.01997 | 0.01874 | 0.02136 | 0.02044 | 0.01549 | 0.01995 | 0.01743 | 0.02089 | 0.01487 | 0.01747 AP3M2     |
| cg16062480 | 0.03517 | 0.03601 | 0.04022 | 0.04069 | 0.03511 | 0.03174 | 0.03386 | 0.02966 | 0.02985 | 0.0294 EPRS       |
| cg16063112 | 0.36543 | 0.61257 | 0.28312 | 0.26363 | 0.29085 | 0.0543  | 0.12335 | 0.06698 | 0.08124 | 0.05323 C10orf107 |
| cg16063666 | 0.05436 | 0.06736 | 0.07676 | 0.07619 | 0.10456 | 0.09973 | 0.05109 | 0.0597  | 0.04468 | 0.04258 TP53AP1   |
| cg16065186 | 0.01476 | 0.01922 | 0.02042 | 0.01942 | 0.0161  | 0.01943 | 0.01585 | 0.02035 | 0.07378 | 0.01629 ERBB2     |
| cg16068780 | 0.86545 | 0.83242 | 0.83386 | 0.85888 | 0.7725  | 0.82812 | 0.82995 | 0.83622 | 0.84753 | 0.81206 SBNO1     |
| cg16068833 | 0.71083 | 0.3859  | 0.81901 | 0.83463 | 0.86572 | 0.8443  | 0.70326 | 0.60457 | 0.82396 | 0.59464 CD52      |
| cg16069236 | 0.04484 | 0.04678 | 0.06805 | 0.05808 | 0.09307 | 0.06672 | 0.04589 | 0.04003 | 0.04473 | 0.05228 MRPL39    |
| cg16069910 | 0.53303 | 0.28182 | 0.45379 | 0.67814 | 0.82342 | 0.67132 | 0.32178 | 0.37768 | 0.49469 | 0.29315 TXNL6     |
| cg16070444 | 0.06181 | 0.06206 | 0.09168 | 0.07394 | 0.10945 | 0.06202 | 0.07062 | 0.06705 | 0.07946 | 0.08672 C22orf5   |
| cg16072030 | 0.03401 | 0.03324 | 0.03905 | 0.03653 | 0.02659 | 0.03474 | 0.03081 | 0.03228 | 0.03341 | 0.03118 PPP1R15B  |

|            |         |         |         |         |         |         |         |         |         |                  |
|------------|---------|---------|---------|---------|---------|---------|---------|---------|---------|------------------|
| cg16072462 | 0.51094 | 0.12984 | 0.52044 | 0.55841 | 0.18278 | 0.06348 | 0.32155 | 0.10614 | 0.46022 | 0.19107 PF4      |
| cg16075384 | 0.04318 | 0.03747 | 0.05877 | 0.04888 | 0.06086 | 0.05219 | 0.03797 | 0.03711 | 0.04082 | 0.03326 FLJ10099 |
| cg16075940 | 0.89344 | 0.70134 | 0.8799  | 0.89668 | 0.89522 | 0.87937 | 0.76348 | 0.84564 | 0.89998 | 0.86072 FLJ37396 |
| cg16076328 | 0.97051 | 0.96265 | 0.0483  | 0.06576 | 0.96248 | 0.96453 | 0.16317 | 0.05928 | 0.96571 | 0.9561 TACSTD1   |
| cg16077929 | 0.86152 | 0.26202 | 0.80016 | 0.89206 | 0.31979 | 0.11716 | 0.88091 | 0.82731 | 0.87538 | 0.30598 CDKL1    |
| cg16078836 | 0.12623 | 0.11769 | 0.14433 | 0.12072 | 0.25101 | 0.09619 | 0.14441 | 0.10408 | 0.09594 | 0.11289 MAP3K13  |
| cg16080552 | 0.79263 | 0.76201 | 0.88654 | 0.89769 | 0.87046 | 0.86788 | 0.89454 | 0.90576 | 0.8917  | 0.89283 TACSTD2  |
| cg16082125 | 0.05978 | 0.05828 | 0.04815 | 0.03773 | 0.04796 | 0.04973 | 0.42825 | 0.20477 | 0.04062 | 0.04213 USP11    |
| cg16084788 | 0.91566 | 0.78895 | 0.81381 | 0.88675 | 0.90692 | 0.9048  | 0.38534 | 0.81    | 0.84408 | 0.34793 SLC2A7   |
| cg16085042 | 0.04926 | 0.05279 | 0.0526  | 0.042   | 0.03362 | 0.04867 | 0.04599 | 0.04652 | 0.04144 | 0.04749 HSP90B1  |
| cg16087263 | 0.57027 | 0.47106 | 0.20697 | 0.28645 | 0.5147  | 0.38081 | 0.06816 | 0.06049 | 0.38253 | 0.05944 PLA2G2F  |
| cg16090392 | 0.05415 | 0.06491 | 0.05759 | 0.05686 | 0.04762 | 0.04507 | 0.05487 | 0.05662 | 0.04815 | 0.05049 AFF1     |
| cg16091845 | 0.02392 | 0.02757 | 0.02459 | 0.02776 | 0.03567 | 0.02929 | 0.01905 | 0.02334 | 0.02218 | 0.02636 SMARCA5  |
| cg16092786 | 0.81377 | 0.38528 | 0.09127 | 0.10068 | 0.71368 | 0.22968 | 0.17425 | 0.03748 | 0.06811 | 0.04109 WT1      |
| cg16092956 | 0.07393 | 0.07433 | 0.06161 | 0.05824 | 0.04471 | 0.05306 | 0.06611 | 0.06398 | 0.0503  | 0.04753 ACSL1    |
| cg16094520 | 0.05909 | 0.05597 | 0.0663  | 0.0704  | 0.06522 | 0.0611  | 0.06653 | 0.05963 | 0.06333 | 0.05334 SHMT1    |
| cg16094954 | 0.07974 | 0.07805 | 0.08156 | 0.08004 | 0.08225 | 0.08362 | 0.08512 | 0.07849 | 0.09892 | 0.1022 BCL3      |
| cg16097079 | 0.32033 | 0.35777 | 0.3644  | 0.35901 | 0.32836 | 0.40187 | 0.15537 | 0.23433 | 0.39567 | 0.36315 HLA-C    |
| cg16097772 | 0.87709 | 0.7628  | 0.7874  | 0.8728  | 0.65044 | 0.87549 | 0.57576 | 0.33519 | 0.1933  | 0.34882 LYZ      |
| cg16098170 | 0.86401 | 0.86012 | 0.89456 | 0.8769  | 0.92167 | 0.89231 | 0.87654 | 0.8569  | 0.89618 | 0.86021 JSRP1    |
| cg16098726 | 0.91488 | 0.8055  | 0.92453 | 0.93706 | 0.94599 | 0.9307  | 0.61369 | 0.45014 | 0.91779 | 0.59008 GP9      |
| cg16098981 | 0.14115 | 0.04811 | 0.13282 | 0.04803 | 0.06913 | 0.04301 | 0.03299 | 0.03456 | 0.06493 | 0.04386 C2orf39  |
| cg16101572 | 0.03329 | 0.04205 | 0.0413  | 0.04088 | 0.04044 | 0.04006 | 0.0304  | 0.03146 | 0.03297 | 0.03743 ZNF219   |
| cg16101800 | 0.87454 | 0.69647 | 0.72252 | 0.8108  | 0.86314 | 0.69059 | 0.33152 | 0.53626 | 0.37459 | 0.30347 PCK1     |
| cg16104446 | 0.13682 | 0.12627 | 0.13085 | 0.12018 | 0.07615 | 0.11585 | 0.1049  | 0.10662 | 0.11279 | 0.10529 MCM4     |
| cg16106497 | 0.87465 | 0.6372  | 0.88489 | 0.88607 | 0.9004  | 0.89546 | 0.82705 | 0.83999 | 0.5002  | 0.39954 NALP2    |
| cg16107172 | 0.91919 | 0.90179 | 0.92085 | 0.92548 | 0.93605 | 0.9256  | 0.92073 | 0.91853 | 0.92904 | 0.90273 SLC27A5  |
| cg16107553 | 0.05003 | 0.04366 | 0.03187 | 0.03091 | 0.07599 | 0.05521 | 0.04155 | 0.04074 | 0.03589 | 0.04502 PPP2R5E  |
| cg16108132 | 0.06128 | 0.05577 | 0.05451 | 0.06311 | 0.077   | 0.07972 | 0.05019 | 0.04747 | 0.04814 | 0.04789 ANXA7    |
| cg16109297 | 0.11788 | 0.13434 | 0.09954 | 0.1337  | 0.06803 | 0.10506 | 0.1311  | 0.19352 | 0.08757 | 0.05615 CDC20    |
| cg16111791 | 0.0928  | 0.08273 | 0.21974 | 0.19221 | 0.06907 | 0.06134 | 0.07609 | 0.06708 | 0.12665 | 0.06485 CACNB4   |
| cg16112050 | 0.94132 | 0.93064 | 0.94596 | 0.9445  | 0.95854 | 0.78724 | 0.94753 | 0.94006 | 0.9372  | 0.93006 ENOSF1   |
| cg16112129 | 0.04459 | 0.03965 | 0.88247 | 0.85927 | 0.41802 | 0.03752 | 0.10729 | 0.03831 | 0.51251 | 0.51892 DRD1     |
| cg16112157 | 0.78419 | 0.14026 | 0.76119 | 0.84033 | 0.78909 | 0.82814 | 0.76131 | 0.82876 | 0.18547 | 0.35608 KRT6C    |
| cg16112945 | 0.75455 | 0.37735 | 0.89953 | 0.91606 | 0.85301 | 0.88972 | 0.86783 | 0.28848 | 0.46312 | 0.44352 ADAMTS13 |
| cg16114640 | 0.06935 | 0.06834 | 0.09622 | 0.09592 | 0.13123 | 0.13388 | 0.12029 | 0.0978  | 0.10296 | 0.10767 THSD1    |
| cg16116363 | 0.03249 | 0.03247 | 0.03265 | 0.03027 | 0.02663 | 0.02449 | 0.0253  | 0.0238  | 0.02444 | 0.02329 SH3GLB1  |
| cg16118817 | 0.30062 | 0.38079 | 0.3628  | 0.41305 | 0.44544 | 0.38568 | 0.24255 | 0.21925 | 0.36201 | 0.15582 FEM1A    |
| cg16119128 | 0.10314 | 0.05347 | 0.04288 | 0.04249 | 0.20159 | 0.05085 | 0.04111 | 0.0422  | 0.06902 | 0.03482 FLJ43339 |
| cg16119274 | 0.06832 | 0.0588  | 0.10818 | 0.10443 | 0.06332 | 0.07701 | 0.0538  | 0.05457 | 0.04653 | 0.04854 MPHOSPH6 |
| cg16120811 | 0.03856 | 0.04404 | 0.04041 | 0.03745 | 0.02989 | 0.03207 | 0.03625 | 0.04038 | 0.0299  | 0.03132 WEE1     |

|            |         |         |         |         |         |         |         |         |         |                  |
|------------|---------|---------|---------|---------|---------|---------|---------|---------|---------|------------------|
| cg16121444 | 0.05563 | 0.05195 | 0.08142 | 0.06159 | 0.05721 | 0.04951 | 0.06192 | 0.05242 | 0.05775 | 0.06078 NME7     |
| cg16122592 | 0.09825 | 0.08136 | 0.41386 | 0.7339  | 0.68571 | 0.42459 | 0.03527 | 0.04331 | 0.05671 | 0.04329 MAGEB6   |
| cg16124337 | 0.43531 | 0.37877 | 0.14091 | 0.06184 | 0.051   | 0.03955 | 0.07802 | 0.04146 | 0.05321 | 0.03272 UBE2J1   |
| cg16124821 | 0.02341 | 0.02658 | 0.02695 | 0.02169 | 0.02048 | 0.02424 | 0.02352 | 0.01949 | 0.01835 | 0.0171 ZNF706    |
| cg16125615 | 0.86371 | 0.4876  | 0.84451 | 0.85727 | 0.802   | 0.81732 | 0.82338 | 0.84466 | 0.88337 | 0.86419 CAPS     |
| cg16127845 | 0.6724  | 0.16248 | 0.05852 | 0.06953 | 0.04909 | 0.0465  | 0.04311 | 0.07207 | 0.18141 | 0.06206 GPR30    |
| cg16127900 | 0.27406 | 0.22427 | 0.50756 | 0.53531 | 0.44    | 0.48642 | 0.33892 | 0.18106 | 0.23433 | 0.21959 GPRC6A   |
| cg16128363 | 0.90629 | 0.89179 | 0.85357 | 0.83694 | 0.86884 | 0.88419 | 0.53047 | 0.79318 | 0.59916 | 0.33738 DLGAP1   |
| cg16129797 | 0.03585 | 0.04023 | 0.03946 | 0.03855 | 0.03078 | 0.03872 | 0.03637 | 0.038   | 0.03404 | 0.03232 MRPL15   |
| cg16129988 | 0.06847 | 0.07448 | 0.15175 | 0.12161 | 0.07117 | 0.05356 | 0.09654 | 0.0762  | 0.2104  | 0.06717 UQCRC1   |
| cg16131766 | 0.65629 | 0.75494 | 0.42259 | 0.54466 | 0.48962 | 0.46655 | 0.18377 | 0.1384  | 0.62735 | 0.66823 MKRN3    |
| cg16133244 | 0.83843 | 0.45269 | 0.76322 | 0.85866 | 0.91568 | 0.85492 | 0.86324 | 0.56672 | 0.8962  | 0.87362 GNPTG    |
| cg16137862 | 0.30175 | 0.18794 | 0.12129 | 0.11339 | 0.26286 | 0.11905 | 0.16628 | 0.111   | 0.11014 | 0.07115 BCL2L1   |
| cg16139316 | 0.86653 | 0.7862  | 0.91032 | 0.92318 | 0.91098 | 0.93492 | 0.07783 | 0.05676 | 0.88798 | 0.80786 S100A9   |
| cg16140179 | 0.61823 | 0.45497 | 0.32325 | 0.47177 | 0.41072 | 0.11542 | 0.11032 | 0.23541 | 0.07168 | 0.05838 NURIT    |
| cg16141690 | 0.13769 | 0.13432 | 0.12855 | 0.12756 | 0.09419 | 0.09961 | 0.1285  | 0.11719 | 0.10944 | 0.0921 C14orf119 |
| cg16142218 | 0.82327 | 0.26885 | 0.80174 | 0.85529 | 0.87304 | 0.80398 | 0.6303  | 0.26199 | 0.43242 | 0.09486 CHMP7    |
| cg16142977 | 0.05801 | 0.05729 | 0.0579  | 0.05277 | 0.07348 | 0.06772 | 0.04908 | 0.03749 | 0.03591 | 0.03734 EEF2     |
| cg16144006 | 0.9561  | 0.94909 | 0.9178  | 0.93932 | 0.80118 | 0.69278 | 0.8847  | 0.84465 | 0.75631 | 0.85273 CT45-2   |
| cg16148270 | 0.66841 | 0.69302 | 0.71069 | 0.65809 | 0.76062 | 0.71943 | 0.46677 | 0.43988 | 0.91382 | 0.93858 DIRAS3   |
| cg16148403 | 0.04211 | 0.04461 | 0.04792 | 0.04037 | 0.04929 | 0.05208 | 0.04242 | 0.0313  | 0.0389  | 0.03435 SLALP    |
| cg16148454 | 0.84372 | 0.83152 | 0.86855 | 0.88029 | 0.66968 | 0.78938 | 0.82984 | 0.81933 | 0.88195 | 0.83034 TMED6    |
| cg16150435 | 0.65356 | 0.30263 | 0.69889 | 0.78646 | 0.87701 | 0.72908 | 0.74618 | 0.60178 | 0.55555 | 0.52455 C6orf15  |
| cg16152813 | 0.14135 | 0.06076 | 0.3178  | 0.4657  | 0.30345 | 0.168   | 0.05571 | 0.05966 | 0.05825 | 0.04728 FAM57B   |
| cg16153267 | 0.86576 | 0.86127 | 0.77618 | 0.78748 | 0.79036 | 0.75808 | 0.84429 | 0.77978 | 0.8394  | 0.83206 RB1      |
| cg16154416 | 0.08772 | 0.06482 | 0.93786 | 0.93456 | 0.65558 | 0.63025 | 0.26884 | 0.09281 | 0.52197 | 0.4997 RASGRF1   |
| cg16155382 | 0.3733  | 0.09159 | 0.77963 | 0.75159 | 0.8591  | 0.76525 | 0.11618 | 0.05609 | 0.88196 | 0.8027 GRHL3     |
| cg16155588 | 0.64572 | 0.25764 | 0.30219 | 0.35696 | 0.40041 | 0.20503 | 0.32101 | 0.14537 | 0.51082 | 0.28936 CUL4A    |
| cg16155702 | 0.51927 | 0.33751 | 0.57833 | 0.6963  | 0.73253 | 0.47892 | 0.13059 | 0.34789 | 0.50076 | 0.30072 FGF21    |
| cg16158220 | 0.34564 | 0.42432 | 0.23107 | 0.2018  | 0.25668 | 0.55688 | 0.13445 | 0.13358 | 0.13535 | 0.11578 REGL     |
| cg16158681 | 0.27847 | 0.39622 | 0.92338 | 0.932   | 0.96679 | 0.96815 | 0.81934 | 0.82694 | 0.4969  | 0.59238 MT3      |
| cg16158807 | 0.0744  | 0.08365 | 0.50997 | 0.47582 | 0.54584 | 0.08243 | 0.48818 | 0.30678 | 0.84399 | 0.21172 WNK2     |
| cg16158874 | 0.14902 | 0.32357 | 0.7591  | 0.7241  | 0.68647 | 0.80495 | 0.28618 | 0.08325 | 0.82753 | 0.53939 GPR4     |
| cg16159313 | 0.93886 | 0.93911 | 0.94135 | 0.94149 | 0.92672 | 0.92906 | 0.94948 | 0.94374 | 0.94684 | 0.9394 ACY1      |
| cg16160720 | 0.03334 | 0.03937 | 0.03777 | 0.03668 | 0.02124 | 0.03349 | 0.03454 | 0.03214 | 0.03322 | 0.03207 RASA1    |
| cg16161425 | 0.04199 | 0.04331 | 0.04932 | 0.04129 | 0.03571 | 0.03365 | 0.03909 | 0.03449 | 0.03979 | 0.03501 DHFR     |
| cg16166399 | 0.06745 | 0.05919 | 0.07202 | 0.06843 | 0.10459 | 0.07398 | 0.07054 | 0.06273 | 0.06536 | 0.05419 ZNF499   |
| cg16168311 | 0.06694 | 0.03295 | 0.14784 | 0.14514 | 0.10511 | 0.06849 | 0.04424 | 0.03001 | 0.09618 | 0.09031 APOA1BP  |
| cg16169604 | 0.04959 | 0.0506  | 0.14382 | 0.10554 | 0.20831 | 0.07152 | 0.06694 | 0.05889 | 0.04819 | 0.05437 GPR148   |
| cg16173067 | 0.89503 | 0.89528 | 0.89939 | 0.91671 | 0.93103 | 0.89903 | 0.89279 | 0.8704  | 0.9189  | 0.90604 SDCBP2   |
| cg16173109 | 0.59011 | 0.31224 | 0.82574 | 0.88456 | 0.7336  | 0.77298 | 0.51499 | 0.25941 | 0.25433 | 0.18074 FLJ38379 |

|            |         |         |         |         |         |         |         |         |         |                   |
|------------|---------|---------|---------|---------|---------|---------|---------|---------|---------|-------------------|
| cg16174071 | 0.79655 | 0.76541 | 0.67744 | 0.81401 | 0.76888 | 0.72438 | 0.60374 | 0.59488 | 0.72833 | 0.69682 ANXA8     |
| cg16174234 | 0.18078 | 0.04019 | 0.04412 | 0.05323 | 0.03937 | 0.03852 | 0.06234 | 0.02328 | 0.05366 | 0.02725 MGC32020  |
| cg16175263 | 0.37132 | 0.13515 | 0.89891 | 0.90101 | 0.93086 | 0.90356 | 0.56774 | 0.18894 | 0.7451  | 0.39013 TNFRSF10C |
| cg16175725 | 0.93814 | 0.90811 | 0.91691 | 0.94564 | 0.95123 | 0.92923 | 0.85345 | 0.82581 | 0.93157 | 0.68105 TCF1      |
| cg16175792 | 0.18639 | 0.15888 | 0.26372 | 0.44433 | 0.23878 | 0.52466 | 0.14136 | 0.31216 | 0.14641 | 0.21136 HSD3B1    |
| cg16176301 | 0.0213  | 0.02107 | 0.02728 | 0.02642 | 0.02285 | 0.02198 | 0.02248 | 0.02352 | 0.0222  | 0.0205 C11orf17   |
| cg16176379 | 0.93605 | 0.9395  | 0.05632 | 0.04901 | 0.95421 | 0.93295 | 0.94758 | 0.93677 | 0.04096 | 0.03779 AYTL1     |
| cg16176600 | 0.77947 | 0.65907 | 0.19219 | 0.43313 | 0.06612 | 0.04854 | 0.30894 | 0.27572 | 0.04847 | 0.04877 FRK       |
| cg16177163 | 0.15727 | 0.13739 | 0.24273 | 0.19457 | 0.20583 | 0.2136  | 0.11426 | 0.15729 | 0.51097 | 0.42695 PTDSS1    |
| cg16177830 | 0.67202 | 0.54977 | 0.83605 | 0.87544 | 0.57041 | 0.33123 | 0.48541 | 0.15385 | 0.85172 | 0.77782 TNFRSF17  |
| cg16178491 | 0.11431 | 0.03149 | 0.7688  | 0.87553 | 0.14806 | 0.21949 | 0.35655 | 0.30567 | 0.03305 | 0.02518 SLC5A8    |
| cg16179125 | 0.9557  | 0.9699  | 0.1969  | 0.03904 | 0.03156 | 0.03769 | 0.74719 | 0.75666 | 0.031   | 0.02923 CTSZ      |
| cg16181202 | 0.42956 | 0.43003 | 0.1011  | 0.10135 | 0.06498 | 0.08865 | 0.07862 | 0.0666  | 0.08792 | 0.07919 CTSO      |
| cg16182127 | 0.02937 | 0.02874 | 0.03111 | 0.02633 | 0.02122 | 0.02695 | 0.02536 | 0.02395 | 0.02336 | 0.02033 SASS6     |
| cg16184930 | 0.04373 | 0.0492  | 0.03782 | 0.03455 | 0.04308 | 0.03998 | 0.03489 | 0.02977 | 0.03808 | 0.03853 DICER1    |
| cg16184943 | 0.10051 | 0.06591 | 0.11547 | 0.08799 | 0.08828 | 0.05499 | 0.12984 | 0.04377 | 0.24199 | 0.04106 SUHW2     |
| cg16185365 | 0.02868 | 0.0301  | 0.03037 | 0.03125 | 0.02195 | 0.02576 | 0.02873 | 0.02731 | 0.02637 | 0.02976 RNF168    |
| cg16188038 | 0.02757 | 0.02771 | 0.02347 | 0.02214 | 0.02414 | 0.02412 | 0.02242 | 0.02513 | 0.01905 | 0.01642 ZNF622    |
| cg16188243 | 0.22567 | 0.082   | 0.20235 | 0.19409 | 0.24037 | 0.10889 | 0.16514 | 0.07567 | 0.06028 | 0.07091 SGTA      |
| cg16189954 | 0.03321 | 0.03344 | 0.03263 | 0.0347  | 0.01726 | 0.02907 | 0.02647 | 0.02999 | 0.02687 | 0.0256 CHEK2      |
| cg16191009 | 0.52161 | 0.60782 | 0.90409 | 0.90932 | 0.92782 | 0.88717 | 0.85681 | 0.72461 | 0.90268 | 0.80068 CPNE9     |
| cg16191875 | 0.5931  | 0.60124 | 0.27588 | 0.25696 | 0.46961 | 0.37803 | 0.37342 | 0.43085 | 0.21449 | 0.19175 AGTR2     |
| cg16192029 | 0.91995 | 0.78202 | 0.77148 | 0.91847 | 0.92998 | 0.92775 | 0.95321 | 0.92414 | 0.90442 | 0.92553 ANKRD7    |
| cg16192575 | 0.80998 | 0.82021 | 0.9404  | 0.94968 | 0.93233 | 0.95485 | 0.32306 | 0.62978 | 0.0352  | 0.02961 PTPN20B   |
| cg16192916 | 0.03701 | 0.03986 | 0.03626 | 0.03714 | 0.02789 | 0.03126 | 0.03053 | 0.03561 | 0.03062 | 0.03013 PSME4     |
| cg16193203 | 0.84834 | 0.81646 | 0.84658 | 0.87599 | 0.82144 | 0.86842 | 0.8632  | 0.69758 | 0.83317 | 0.84105 USP54     |
| cg16194715 | 0.87059 | 0.76081 | 0.84433 | 0.8703  | 0.88969 | 0.86898 | 0.86717 | 0.87238 | 0.63589 | 0.83089 SMAD9     |
| cg16195804 | 0.05449 | 0.05152 | 0.06944 | 0.06758 | 0.08848 | 0.06406 | 0.0594  | 0.04227 | 0.05236 | 0.05844 FLJ38663  |
| cg16196602 | 0.09396 | 0.09246 | 0.08544 | 0.09573 | 0.08129 | 0.10386 | 0.09848 | 0.08933 | 0.08923 | 0.08832 SF3B2     |
| cg16196812 | 0.08534 | 0.07636 | 0.7506  | 0.81574 | 0.37028 | 0.43496 | 0.197   | 0.48748 | 0.26344 | 0.51498 PRLHR     |
| cg16199381 | 0.04404 | 0.0467  | 0.07221 | 0.04708 | 0.05909 | 0.06215 | 0.0544  | 0.04897 | 0.0449  | 0.04095 C9orf97   |
| cg16200844 | 0.03467 | 0.03888 | 0.03754 | 0.03079 | 0.02871 | 0.03546 | 0.03026 | 0.03199 | 0.02555 | 0.029 ITCH        |
| cg16202564 | 0.14251 | 0.12909 | 0.16484 | 0.15009 | 0.12741 | 0.26536 | 0.10814 | 0.94378 | 0.78661 | 0.69062 MATN2     |
| cg16204289 | 0.86052 | 0.85157 | 0.8851  | 0.8629  | 0.91629 | 0.86498 | 0.88373 | 0.84261 | 0.86347 | 0.85514 FLJ13391  |
| cg16204757 | 0.04095 | 0.04493 | 0.04576 | 0.04159 | 0.03446 | 0.04426 | 0.10178 | 0.3135  | 0.03751 | 0.03766 MSN       |
| cg16205058 | 0.15656 | 0.13501 | 0.18628 | 0.14932 | 0.37782 | 0.15858 | 0.10606 | 0.10746 | 0.33225 | 0.16864 OSGEP     |
| cg16208136 | 0.09275 | 0.07448 | 0.09725 | 0.08168 | 0.14699 | 0.07813 | 0.08511 | 0.08205 | 0.11922 | 0.07807 GEM       |
| cg16208271 | 0.03484 | 0.03489 | 0.04195 | 0.03253 | 0.03273 | 0.04468 | 0.03055 | 0.03325 | 0.03104 | 0.03214 ENTPD6    |
| cg16208448 | 0.14499 | 0.15019 | 0.15709 | 0.12129 | 0.22065 | 0.21291 | 0.13418 | 0.12261 | 0.0978  | 0.1254 TPP2       |
| cg16208491 | 0.1701  | 0.17586 | 0.17314 | 0.17911 | 0.13103 | 0.15747 | 0.15179 | 0.14964 | 0.16132 | 0.14754 PRPF4B    |
| cg16209630 | 0.02593 | 0.02513 | 0.02588 | 0.0235  | 0.02432 | 0.0249  | 0.02125 | 0.02388 | 0.01861 | 0.01947 ZNHIT2    |

|            |         |         |         |         |         |         |         |         |         |         |           |
|------------|---------|---------|---------|---------|---------|---------|---------|---------|---------|---------|-----------|
| cg16211684 | 0.04616 | 0.04103 | 0.75961 | 0.70352 | 0.11603 | 0.0618  | 0.04232 | 0.04131 | 0.06802 | 0.04651 | PCDH21    |
| cg16213655 | 0.52052 | 0.23095 | 0.94025 | 0.94032 | 0.96693 | 0.93403 | 0.79472 | 0.71723 | 0.94145 | 0.5207  | PPL       |
| cg16213976 | 0.04451 | 0.04176 | 0.05488 | 0.05641 | 0.06483 | 0.06469 | 0.04516 | 0.0418  | 0.03711 | 0.02893 | PIGO      |
| cg16215361 | 0.8506  | 0.84395 | 0.81732 | 0.88269 | 0.78003 | 0.7763  | 0.67715 | 0.34552 | 0.13345 | 0.31006 | MUC15     |
| cg16218254 | 0.2493  | 0.06919 | 0.07639 | 0.06217 | 0.03718 | 0.04823 | 0.04105 | 0.03999 | 0.03652 | 0.0285  | IMMP2L    |
| cg16218377 | 0.02211 | 0.02582 | 0.02247 | 0.0228  | 0.0221  | 0.02007 | 0.0226  | 0.02403 | 0.02232 | 0.02206 | GPIAP1    |
| cg16218387 | 0.03692 | 0.03751 | 0.04072 | 0.03559 | 0.04106 | 0.04017 | 0.03403 | 0.03    | 0.03058 | 0.02968 | FAM8A1    |
| cg16218424 | 0.15635 | 0.10557 | 0.13908 | 0.14541 | 0.12182 | 0.09236 | 0.12521 | 0.12297 | 0.12195 | 0.12101 | CMAS      |
| cg16219122 | 0.16955 | 0.159   | 0.19824 | 0.25079 | 0.32889 | 0.32885 | 0.24617 | 0.34273 | 0.16412 | 0.14675 | ABCB1     |
| cg16220183 | 0.24832 | 0.27673 | 0.35794 | 0.27954 | 0.27095 | 0.05248 | 0.35932 | 0.08391 | 0.6221  | 0.72928 | 4-Sep     |
| cg16220802 | 0.05214 | 0.05044 | 0.0645  | 0.04996 | 0.08285 | 0.05889 | 0.04542 | 0.04089 | 0.0367  | 0.0506  | MAP2K1IP1 |
| cg16221059 | 0.03435 | 0.03617 | 0.03609 | 0.03625 | 0.02381 | 0.03382 | 0.03723 | 0.03728 | 0.02718 | 0.03119 | PLS3      |
| cg16222568 | 0.85512 | 0.54515 | 0.84728 | 0.86577 | 0.8305  | 0.84041 | 0.85163 | 0.84655 | 0.8581  | 0.83428 | APEG1     |
| cg16222698 | 0.04315 | 0.04812 | 0.05481 | 0.05176 | 0.07829 | 0.06516 | 0.05154 | 0.05134 | 0.0354  | 0.03166 | REXO2     |
| cg16222762 | 0.03729 | 0.03647 | 0.21604 | 0.18197 | 0.14414 | 0.45099 | 0.11565 | 0.03695 | 0.03392 | 0.03994 | SYT4      |
| cg16224854 | 0.03387 | 0.03429 | 0.03515 | 0.03482 | 0.03266 | 0.02951 | 0.02634 | 0.02525 | 0.02811 | 0.02823 | SLC25A25  |
| cg16225091 | 0.89955 | 0.73362 | 0.55834 | 0.70812 | 0.65349 | 0.68614 | 0.58569 | 0.53306 | 0.22602 | 0.31359 | ODF3      |
| cg16225429 | 0.0505  | 0.04648 | 0.04755 | 0.04811 | 0.04199 | 0.05494 | 0.05256 | 0.04246 | 0.04272 | 0.04244 | TUSC2     |
| cg16225441 | 0.13335 | 0.1212  | 0.1262  | 0.12529 | 0.12984 | 0.10169 | 0.11699 | 0.12172 | 0.10176 | 0.11513 | BECN1     |
| cg16225753 | 0.0332  | 0.03594 | 0.04377 | 0.03771 | 0.03726 | 0.03612 | 0.02853 | 0.03414 | 0.03212 | 0.03648 | MAD2L1    |
| cg16227684 | 0.148   | 0.08043 | 0.56767 | 0.63444 | 0.24369 | 0.09126 | 0.51654 | 0.42479 | 0.27667 | 0.07224 | GD11      |
| cg16227775 | 0.08943 | 0.08988 | 0.13995 | 0.12572 | 0.14718 | 0.12647 | 0.23163 | 0.14695 | 0.09289 | 0.09421 | ABCB7     |
| cg16228804 | 0.02693 | 0.03051 | 0.03724 | 0.03472 | 0.02868 | 0.03058 | 0.02586 | 0.02747 | 0.02979 | 0.0291  | PKN2      |
| cg16232126 | 0.12055 | 0.24153 | 0.94591 | 0.95506 | 0.73019 | 0.71426 | 0.10988 | 0.50879 | 0.05149 | 0.34913 | SLC5A7    |
| cg16232979 | 0.04691 | 0.04463 | 0.03971 | 0.03924 | 0.03056 | 0.03439 | 0.03249 | 0.03572 | 0.03008 | 0.03083 | TPM4      |
| cg16233911 | 0.03658 | 0.03402 | 0.03664 | 0.03155 | 0.02845 | 0.02946 | 0.02774 | 0.02814 | 0.03132 | 0.03099 | THOC3     |
| cg16233998 | 0.04481 | 0.03685 | 0.04181 | 0.03663 | 0.03038 | 0.04296 | 0.03202 | 0.036   | 0.03147 | 0.03649 | PDIK1L    |
| cg16235034 | 0.34524 | 0.05283 | 0.14266 | 0.2192  | 0.47397 | 0.35369 | 0.04557 | 0.03893 | 0.0521  | 0.0316  | FRMPD1    |
| cg16235860 | 0.02747 | 0.02568 | 0.02814 | 0.02772 | 0.02522 | 0.02888 | 0.02653 | 0.02733 | 0.02355 | 0.02496 | USP1      |
| cg16236759 | 0.02888 | 0.03055 | 0.0312  | 0.03231 | 0.02139 | 0.0279  | 0.03267 | 0.02723 | 0.02412 | 0.02363 | UBE2I     |
| cg16236875 | 0.10523 | 0.08783 | 0.09892 | 0.09563 | 0.06929 | 0.09538 | 0.08269 | 0.08956 | 0.08638 | 0.08126 | C1R       |
| cg16237595 | 0.02045 | 0.01926 | 0.03452 | 0.02866 | 0.03304 | 0.02844 | 0.03081 | 0.02926 | 0.02312 | 0.02371 | RNF41     |
| cg16239406 | 0.0289  | 0.02719 | 0.02731 | 0.027   | 0.02209 | 0.02449 | 0.02506 | 0.02733 | 0.02119 | 0.02097 | MTCH1     |
| cg16240480 | 0.65971 | 0.24353 | 0.11464 | 0.2355  | 0.6808  | 0.77374 | 0.19057 | 0.12101 | 0.39082 | 0.08042 | EDARADD   |
| cg16241648 | 0.03666 | 0.03827 | 0.04661 | 0.04095 | 0.0371  | 0.04126 | 0.03574 | 0.03351 | 0.03264 | 0.0291  | ARPC1A    |
| cg16241714 | 0.02203 | 0.02216 | 0.02182 | 0.02144 | 0.02242 | 0.01857 | 0.02052 | 0.02693 | 0.01714 | 0.01795 | CEBPD     |
| cg16242770 | 0.93602 | 0.71111 | 0.91391 | 0.92534 | 0.90045 | 0.93493 | 0.05876 | 0.05511 | 0.8341  | 0.49136 | KRTAP17-1 |
| cg16243644 | 0.06425 | 0.06953 | 0.08602 | 0.08515 | 0.0611  | 0.06055 | 0.44544 | 0.4315  | 0.06583 | 0.0631  | STAG2     |
| cg16243646 | 0.22516 | 0.12001 | 0.14512 | 0.12139 | 0.15216 | 0.11518 | 0.11372 | 0.09221 | 0.09848 | 0.11783 | PLA2G12A  |
| cg16245261 | 0.30167 | 0.22771 | 0.13603 | 0.1487  | 0.18548 | 0.15324 | 0.14901 | 0.1617  | 0.07775 | 0.10663 | PRKCDBP   |
| cg16245339 | 0.03562 | 0.03386 | 0.03109 | 0.02893 | 0.0268  | 0.03876 | 0.02819 | 0.03582 | 0.02926 | 0.02967 | DECR2     |

|            |         |         |         |         |         |         |         |         |         |         |          |
|------------|---------|---------|---------|---------|---------|---------|---------|---------|---------|---------|----------|
| cg16245844 | 0.03313 | 0.03856 | 0.04567 | 0.04288 | 0.03118 | 0.04302 | 0.04429 | 0.03975 | 0.03208 | 0.03349 | ADIPOR2  |
| cg16246410 | 0.03811 | 0.03558 | 0.04194 | 0.0323  | 0.0359  | 0.03953 | 0.03937 | 0.0411  | 0.03572 | 0.02859 | NR4A2    |
| cg16248277 | 0.15438 | 0.15239 | 0.25069 | 0.22509 | 0.2426  | 0.21381 | 0.16062 | 0.20422 | 0.19732 | 0.17149 | FGF8     |
| cg16249454 | 0.02725 | 0.02727 | 0.027   | 0.02681 | 0.0333  | 0.026   | 0.02029 | 0.02413 | 0.226   | 0.0783  | CXCL2    |
| cg16249711 | 0.95205 | 0.88916 | 0.95256 | 0.95478 | 0.96349 | 0.95783 | 0.96228 | 0.95478 | 0.95252 | 0.91015 | TBPL2    |
| cg16250355 | 0.04711 | 0.05253 | 0.04593 | 0.04861 | 0.0397  | 0.03775 | 0.04409 | 0.0482  | 0.04144 | 0.04007 | SMARCC1  |
| cg16250754 | 0.30513 | 0.37422 | 0.21107 | 0.20284 | 0.44609 | 0.2907  | 0.31345 | 0.3298  | 0.18271 | 0.17165 | CARD6    |
| cg16253168 | 0.02976 | 0.0306  | 0.04404 | 0.04564 | 0.0265  | 0.03208 | 0.02596 | 0.02289 | 0.02559 | 0.02541 | NOL7     |
| cg16253412 | 0.12813 | 0.09488 | 0.10583 | 0.09449 | 0.16377 | 0.11857 | 0.0815  | 0.08126 | 0.08311 | 0.06239 | TPST1    |
| cg16254309 | 0.06505 | 0.05346 | 0.9191  | 0.9456  | 0.07582 | 0.06716 | 0.2415  | 0.69477 | 0.42015 | 0.52345 | CNTNAP2  |
| cg16254764 | 0.25022 | 0.4477  | 0.54465 | 0.5468  | 0.11851 | 0.04494 | 0.36659 | 0.07868 | 0.18808 | 0.05904 | HDAC11   |
| cg16256230 | 0.06841 | 0.06696 | 0.0721  | 0.07912 | 0.06276 | 0.06723 | 0.36665 | 0.61242 | 0.07431 | 0.06562 | KIF4A    |
| cg16256504 | 0.05358 | 0.04533 | 0.26986 | 0.2671  | 0.2794  | 0.1005  | 0.31678 | 0.23256 | 0.61371 | 0.3471  | WNT6     |
| cg16256610 | 0.02155 | 0.02378 | 0.02119 | 0.0232  | 0.01859 | 0.01973 | 0.01914 | 0.01828 | 0.01755 | 0.01713 | REEP4    |
| cg16256643 | 0.19531 | 0.16789 | 0.18063 | 0.18008 | 0.1901  | 0.13457 | 0.16072 | 0.14707 | 0.11903 | 0.13425 | NDUFB7   |
| cg16257040 | 0.02655 | 0.02743 | 0.03245 | 0.02623 | 0.02153 | 0.02623 | 0.02297 | 0.02547 | 0.0245  | 0.02316 | FLJ22318 |
| cg16257086 | 0.04006 | 0.04071 | 0.04356 | 0.04175 | 0.03094 | 0.03684 | 0.03977 | 0.03254 | 0.03574 | 0.03521 | CD46     |
| cg16257091 | 0.1075  | 0.1004  | 0.36499 | 0.38275 | 0.17343 | 0.13352 | 0.18505 | 0.09069 | 0.1401  | 0.15967 | BDNF     |
| cg16257685 | 0.04962 | 0.06235 | 0.06471 | 0.0673  | 0.05965 | 0.08005 | 0.05914 | 0.05003 | 0.05937 | 0.05429 | UCHL3    |
| cg16261965 | 0.07224 | 0.06127 | 0.08827 | 0.08821 | 0.12398 | 0.08603 | 0.09654 | 0.07653 | 0.08171 | 0.07812 | ARF3     |
| cg16263182 | 0.09266 | 0.05174 | 0.70794 | 0.79691 | 0.60734 | 0.74667 | 0.05143 | 0.1238  | 0.08351 | 0.03668 | HBA2     |
| cg16264526 | 0.45921 | 0.56556 | 0.66255 | 0.58268 | 0.43506 | 0.18159 | 0.15914 | 0.12494 | 0.13367 | 0.23144 | EDNRA    |
| cg16267059 | 0.34818 | 0.18318 | 0.1755  | 0.19937 | 0.39826 | 0.03798 | 0.04766 | 0.045   | 0.18694 | 0.0536  | MFAP1    |
| cg16267266 | 0.84352 | 0.74069 | 0.79566 | 0.83704 | 0.90417 | 0.85788 | 0.84791 | 0.76474 | 0.89594 | 0.8422  | IL17F    |
| cg16267491 | 0.07821 | 0.07176 | 0.06705 | 0.06305 | 0.09234 | 0.09145 | 0.06736 | 0.07016 | 0.05533 | 0.07908 | H2AFZ    |
| cg16268051 | 0.0258  | 0.02942 | 0.02882 | 0.03093 | 0.02294 | 0.0293  | 0.02554 | 0.0231  | 0.02635 | 0.02466 | CDC42    |
| cg16268429 | 0.08776 | 0.09656 | 0.09673 | 0.08797 | 0.07301 | 0.08684 | 0.08528 | 0.09746 | 0.09369 | 0.09624 | FLJ30596 |
| cg16268563 | 0.76857 | 0.64576 | 0.76212 | 0.81557 | 0.88024 | 0.83741 | 0.45359 | 0.61037 | 0.45431 | 0.44723 | ATP6V1G2 |
| cg16269097 | 0.03877 | 0.04085 | 0.02386 | 0.02345 | 0.03524 | 0.03418 | 0.5591  | 0.50799 | 0.03222 | 0.0242  | CASK     |
| cg16270091 | 0.07076 | 0.0649  | 0.08163 | 0.06662 | 0.07725 | 0.07776 | 0.05971 | 0.05777 | 0.05277 | 0.04861 | QRICH1   |
| cg16270890 | 0.56439 | 0.70871 | 0.79426 | 0.79011 | 0.94111 | 0.91332 | 0.22426 | 0.12604 | 0.64021 | 0.52048 | FAHD1    |
| cg16270990 | 0.32806 | 0.10019 | 0.87887 | 0.8824  | 0.87674 | 0.88164 | 0.8546  | 0.82936 | 0.85438 | 0.70346 | C11orf44 |
| cg16272420 | 0.30568 | 0.35499 | 0.45604 | 0.57892 | 0.83465 | 0.86793 | 0.04399 | 0.04675 | 0.09838 | 0.28789 | PNLIPRP2 |
| cg16273524 | 0.0334  | 0.03575 | 0.03085 | 0.0289  | 0.0241  | 0.03001 | 0.02918 | 0.03089 | 0.02965 | 0.02621 | THUMPD2  |
| cg16273597 | 0.04034 | 0.03697 | 0.04247 | 0.03967 | 0.04916 | 0.03037 | 0.02837 | 0.02638 | 0.02603 | 0.02196 | CD83     |
| cg16273788 | 0.0593  | 0.06324 | 0.05681 | 0.05578 | 0.03855 | 0.05123 | 0.05299 | 0.06217 | 0.05541 | 0.04498 | LINS1    |
| cg16274148 | 0.03898 | 0.03887 | 0.0406  | 0.04048 | 0.02682 | 0.03618 | 0.03615 | 0.03495 | 0.03348 | 0.03583 | C9orf156 |
| cg16275172 | 0.02778 | 0.029   | 0.02557 | 0.02447 | 0.02246 | 0.02603 | 0.02718 | 0.02599 | 0.02034 | 0.02393 | TMOD3    |
| cg16276070 | 0.03433 | 0.03305 | 0.07031 | 0.03459 | 0.05601 | 0.02987 | 0.02689 | 0.03288 | 0.02805 | 0.02297 | ZNF550   |
| cg16276199 | 0.04891 | 0.06491 | 0.05319 | 0.04598 | 0.04837 | 0.04213 | 0.04289 | 0.05103 | 0.03561 | 0.03695 | PPP1CB   |
| cg16279786 | 0.87228 | 0.92688 | 0.93525 | 0.94615 | 0.95231 | 0.96764 | 0.85129 | 0.94215 | 0.92254 | 0.87859 | NRXN1    |

|            |         |         |         |         |         |         |         |         |         |         |           |
|------------|---------|---------|---------|---------|---------|---------|---------|---------|---------|---------|-----------|
| cg16280313 | 0.04037 | 0.04279 | 0.04681 | 0.04239 | 0.05959 | 0.04984 | 0.04493 | 0.04303 | 0.03808 | 0.04094 | PEX16     |
| cg16280667 | 0.86529 | 0.53106 | 0.8684  | 0.89843 | 0.92837 | 0.75427 | 0.43409 | 0.58216 | 0.68374 | 0.07404 | BLR1      |
| cg16280922 | 0.05547 | 0.05949 | 0.05354 | 0.05428 | 0.03912 | 0.0525  | 0.05275 | 0.0545  | 0.04591 | 0.04686 | C1orf26   |
| cg16281796 | 0.03837 | 0.03358 | 0.03947 | 0.03556 | 0.02601 | 0.03369 | 0.02989 | 0.03639 | 0.03064 | 0.03024 | PEX26     |
| cg16282101 | 0.02741 | 0.02509 | 0.04172 | 0.02817 | 0.03074 | 0.02352 | 0.02648 | 0.02215 | 0.11226 | 0.04688 | FAHD2A    |
| cg16282679 | 0.88637 | 0.8903  | 0.88225 | 0.8942  | 0.90079 | 0.86945 | 0.89421 | 0.8769  | 0.91224 | 0.88486 | EGFL8     |
| cg16284168 | 0.05753 | 0.06951 | 0.07844 | 0.07342 | 0.09153 | 0.09978 | 0.06434 | 0.06286 | 0.0507  | 0.0517  | AP4M1     |
| cg16284292 | 0.07347 | 0.03783 | 0.0668  | 0.04707 | 0.04091 | 0.03322 | 0.0347  | 0.02745 | 0.05006 | 0.27733 | ZNF297B   |
| cg16286776 | 0.02689 | 0.02791 | 0.03266 | 0.03212 | 0.01915 | 0.02385 | 0.02634 | 0.02321 | 0.02527 | 0.0256  | EIF2C2    |
| cg16290693 | 0.07371 | 0.05906 | 0.05546 | 0.04505 | 0.03864 | 0.04601 | 0.05348 | 0.05172 | 0.04977 | 0.04154 | SPSB1     |
| cg16290737 | 0.04982 | 0.04495 | 0.30876 | 0.40216 | 0.06911 | 0.04877 | 0.04335 | 0.03975 | 0.03872 | 0.0388  | CHGA      |
| cg16293088 | 0.05356 | 0.06016 | 0.05129 | 0.05957 | 0.04485 | 0.04945 | 0.05216 | 0.05141 | 0.04705 | 0.05047 | NF2       |
| cg16293105 | 0.0463  | 0.03536 | 0.66885 | 0.81092 | 0.20352 | 0.34605 | 0.03574 | 0.03328 | 0.18304 | 0.22979 | SIGLEC6   |
| cg16293656 | 0.23783 | 0.0363  | 0.86408 | 0.90782 | 0.55172 | 0.08955 | 0.11134 | 0.05553 | 0.4196  | 0.04682 | FGF17     |
| cg16293991 | 0.10263 | 0.09295 | 0.10372 | 0.12081 | 0.08714 | 0.09929 | 0.06466 | 0.06727 | 0.08931 | 0.06581 | CPSF3L    |
| cg16295988 | 0.0459  | 0.04857 | 0.06627 | 0.06216 | 0.04608 | 0.05211 | 0.04771 | 0.04779 | 0.03827 | 0.04255 | C9orf80   |
| cg16296356 | 0.12094 | 0.13359 | 0.22118 | 0.23086 | 0.19202 | 0.17995 | 0.16704 | 0.13657 | 0.11832 | 0.15482 | RAD51L3   |
| cg16297030 | 0.10981 | 0.19504 | 0.78474 | 0.77093 | 0.79606 | 0.76119 | 0.6858  | 0.79541 | 0.26781 | 0.31802 | AGXT2     |
| cg16298264 | 0.0331  | 0.03228 | 0.03481 | 0.0321  | 0.02639 | 0.02762 | 0.02656 | 0.02348 | 0.02634 | 0.02234 | LOC153364 |
| cg16298282 | 0.10602 | 0.11327 | 0.18953 | 0.13807 | 0.21972 | 0.17391 | 0.14392 | 0.11143 | 0.10539 | 0.13247 | KIAA0776  |
| cg16299341 | 0.05787 | 0.05394 | 0.08064 | 0.06627 | 0.08271 | 0.06916 | 0.04181 | 0.03629 | 0.06182 | 0.05774 | OSBPL9    |
| cg16299616 | 0.08312 | 0.04917 | 0.08802 | 0.07447 | 0.0614  | 0.03433 | 0.05913 | 0.04182 | 0.06535 | 0.02817 | NOMO2     |
| cg16301617 | 0.85749 | 0.57377 | 0.8615  | 0.88213 | 0.90061 | 0.59184 | 0.72823 | 0.45933 | 0.86614 | 0.65524 | TMC6      |
| cg16302441 | 0.54541 | 0.5584  | 0.91993 | 0.93299 | 0.90411 | 0.90668 | 0.76694 | 0.65562 | 0.92594 | 0.90934 | POMC      |
| cg16303453 | 0.19346 | 0.10368 | 0.27636 | 0.47729 | 0.14975 | 0.72364 | 0.25687 | 0.06855 | 0.53654 | 0.1639  | CA7       |
| cg16303562 | 0.72444 | 0.5914  | 0.75772 | 0.80183 | 0.7859  | 0.84074 | 0.22908 | 0.19693 | 0.16645 | 0.28542 | MSR1      |
| cg16306115 | 0.17466 | 0.05802 | 0.92501 | 0.93679 | 0.12763 | 0.06804 | 0.78103 | 0.88523 | 0.95454 | 0.96166 | DCDC2     |
| cg16306381 | 0.04275 | 0.04156 | 0.04039 | 0.03848 | 0.03295 | 0.03985 | 0.03965 | 0.03864 | 0.03669 | 0.03507 | LYK5      |
| cg16307860 | 0.22024 | 0.21809 | 0.2693  | 0.23162 | 0.20655 | 0.20175 | 0.27072 | 0.18158 | 0.20462 | 0.21625 | C1orf80   |
| cg16310262 | 0.06244 | 0.06544 | 0.06694 | 0.06431 | 0.05413 | 0.066   | 0.06982 | 0.06487 | 0.0629  | 0.05978 | C15orf44  |
| cg16310717 | 0.18376 | 0.1916  | 0.22189 | 0.20248 | 0.21466 | 0.19201 | 0.18585 | 0.17062 | 0.31371 | 0.1763  | CCND2     |
| cg16312163 | 0.34642 | 0.16813 | 0.06632 | 0.04846 | 0.29269 | 0.09021 | 0.3289  | 0.3413  | 0.04422 | 0.03561 | ALDH1L1   |
| cg16312647 | 0.03403 | 0.03025 | 0.03907 | 0.03333 | 0.03405 | 0.03621 | 0.03885 | 0.03619 | 0.02965 | 0.03709 | PPIB      |
| cg16312916 | 0.03262 | 0.03519 | 0.03819 | 0.03618 | 0.02898 | 0.03329 | 0.02955 | 0.02923 | 0.02802 | 0.02981 | BRAP      |
| cg16313343 | 0.08842 | 0.04722 | 0.36184 | 0.36668 | 0.92013 | 0.61972 | 0.23429 | 0.05567 | 0.832   | 0.21646 | BRF1      |
| cg16313587 | 0.03794 | 0.04523 | 0.0472  | 0.04133 | 0.03791 | 0.04277 | 0.04844 | 0.05651 | 0.03671 | 0.03257 | BRF2      |
| cg16315923 | 0.05813 | 0.05582 | 0.06799 | 0.07056 | 0.0499  | 0.0512  | 0.05951 | 0.05544 | 0.04759 | 0.04478 | KIAA0195  |
| cg16317961 | 0.0402  | 0.04484 | 0.0521  | 0.04641 | 0.04899 | 0.04354 | 0.04122 | 0.04028 | 0.04372 | 0.03908 | MAPRE2    |
| cg16319213 | 0.03649 | 0.03796 | 0.04706 | 0.04822 | 0.04331 | 0.03997 | 0.03774 | 0.0337  | 0.03398 | 0.03199 | PCNT2     |
| cg16319578 | 0.5622  | 0.62899 | 0.05316 | 0.044   | 0.04773 | 0.0356  | 0.92589 | 0.95645 | 0.10441 | 0.02281 | HSPA2     |
| cg16321029 | 0.08946 | 0.07315 | 0.36701 | 0.60922 | 0.61372 | 0.62512 | 0.09371 | 0.08983 | 0.12128 | 0.12503 | SNRPN     |



|            |         |         |         |         |         |         |         |         |         |         |          |
|------------|---------|---------|---------|---------|---------|---------|---------|---------|---------|---------|----------|
| cg16323498 | 0.03757 | 0.03508 | 0.03915 | 0.03724 | 0.03847 | 0.04629 | 0.03955 | 0.03507 | 0.03349 | 0.02563 | C17orf39 |
| cg16324018 | 0.21941 | 0.3826  | 0.23116 | 0.21795 | 0.50756 | 0.40513 | 0.31552 | 0.32036 | 0.5914  | 0.17472 | RBED1    |
| cg16326979 | 0.02958 | 0.02958 | 0.02816 | 0.03232 | 0.02729 | 0.02847 | 0.02487 | 0.02444 | 0.02593 | 0.02648 | OXR1     |
| cg16328273 | 0.02115 | 0.02422 | 0.02434 | 0.02953 | 0.02726 | 0.02568 | 0.02599 | 0.02322 | 0.01928 | 0.02179 | CCNE2    |
| cg16328820 | 0.04323 | 0.05477 | 0.0565  | 0.04712 | 0.04855 | 0.04904 | 0.04337 | 0.04737 | 0.04383 | 0.03935 | DLD      |
| cg16330965 | 0.6581  | 0.16219 | 0.08846 | 0.08821 | 0.51877 | 0.41386 | 0.11025 | 0.06722 | 0.04067 | 0.053   | SNAPC5   |
| cg16332060 | 0.05858 | 0.04727 | 0.07649 | 0.07253 | 0.07688 | 0.06597 | 0.06905 | 0.06517 | 0.04032 | 0.03319 | FLJ21827 |
| cg16332224 | 0.85015 | 0.64272 | 0.55476 | 0.69218 | 0.90943 | 0.88884 | 0.88133 | 0.6319  | 0.84688 | 0.82    | DPM1     |
| cg16332577 | 0.0649  | 0.04903 | 0.2506  | 0.17603 | 0.1714  | 0.04106 | 0.05686 | 0.03804 | 0.08164 | 0.03671 | C17orf37 |
| cg16334519 | 0.49725 | 0.46119 | 0.72289 | 0.77593 | 0.79259 | 0.70526 | 0.51965 | 0.56085 | 0.81792 | 0.75143 | ARL14    |
| cg16334795 | 0.70285 | 0.12831 | 0.77774 | 0.78277 | 0.43991 | 0.13838 | 0.16749 | 0.12612 | 0.74358 | 0.34208 | BACE2    |
| cg16334840 | 0.02678 | 0.03422 | 0.03801 | 0.02978 | 0.02302 | 0.03277 | 0.11301 | 0.03815 | 0.03349 | 0.02629 | SCLY     |
| cg16335762 | 0.1881  | 0.16699 | 0.35519 | 0.33844 | 0.50564 | 0.38523 | 0.23796 | 0.13055 | 0.11151 | 0.14696 | CMTM3    |
| cg16336120 | 0.05424 | 0.06211 | 0.35116 | 0.50227 | 0.06025 | 0.06258 | 0.06062 | 0.06666 | 0.06437 | 0.0442  | RAMP3    |
| cg16338035 | 0.03487 | 0.04286 | 0.04151 | 0.03906 | 0.02833 | 0.03854 | 0.03941 | 0.04201 | 0.03586 | 0.03069 | C3orf58  |
| cg16338347 | 0.04816 | 0.0489  | 0.0467  | 0.04304 | 0.03696 | 0.04953 | 0.04802 | 0.04067 | 0.44945 | 0.34094 | ALCAM    |
| cg16338822 | 0.04647 | 0.04243 | 0.0486  | 0.03854 | 0.06019 | 0.04603 | 0.03609 | 0.03383 | 0.03063 | 0.03069 | TPX2     |
| cg16339185 | 0.03762 | 0.03878 | 0.04224 | 0.03747 | 0.05413 | 0.04649 | 0.03189 | 0.02603 | 0.03277 | 0.0385  | SGOL1    |
| cg16340268 | 0.05914 | 0.0594  | 0.28316 | 0.08785 | 0.63112 | 0.64225 | 0.43723 | 0.05832 | 0.84439 | 0.90807 | ITPKB    |
| cg16340918 | 0.02914 | 0.03467 | 0.03727 | 0.03183 | 0.03046 | 0.03529 | 0.03207 | 0.03167 | 0.03014 | 0.02809 | KIF11    |
| cg16341373 | 0.03778 | 0.03794 | 0.04292 | 0.04904 | 0.03699 | 0.04203 | 0.03697 | 0.03805 | 0.03489 | 0.04129 | CDCA8    |
| cg16342780 | 0.89503 | 0.77556 | 0.92259 | 0.92601 | 0.76339 | 0.64675 | 0.51672 | 0.6221  | 0.91457 | 0.65479 | PLXNB3   |
| cg16343696 | 0.04415 | 0.03625 | 0.04494 | 0.04346 | 0.04114 | 0.04782 | 0.03427 | 0.03567 | 0.04033 | 0.03985 | KPNA6    |
| cg16343842 | 0.02948 | 0.03403 | 0.05037 | 0.04108 | 0.03384 | 0.04169 | 0.06686 | 0.03871 | 0.03047 | 0.02845 | CD99L2   |
| cg16345226 | 0.07362 | 0.06616 | 0.06988 | 0.07395 | 0.05834 | 0.05842 | 0.06602 | 0.06107 | 0.05841 | 0.04725 | TMEM38A  |
| cg16345880 | 0.06787 | 0.08481 | 0.08095 | 0.08015 | 0.04293 | 0.06832 | 0.08466 | 0.06905 | 0.07008 | 0.06658 | SARS     |
| cg16348491 | 0.06084 | 0.04793 | 0.0488  | 0.04298 | 0.04108 | 0.03966 | 0.04003 | 0.04598 | 0.04276 | 0.04092 | MRLC2    |
| cg16351002 | 0.0941  | 0.09645 | 0.08759 | 0.17734 | 0.72468 | 0.64577 | 0.5693  | 0.58663 | 0.09226 | 0.09325 | CUZD1    |
| cg16351184 | 0.02037 | 0.02259 | 0.02461 | 0.02409 | 0.0226  | 0.02138 | 0.01984 | 0.02216 | 0.02063 | 0.01987 | C9orf112 |
| cg16352283 | 0.94669 | 0.94023 | 0.08149 | 0.05889 | 0.93927 | 0.93549 | 0.92091 | 0.93789 | 0.28361 | 0.03122 | FAM46B   |
| cg16353413 | 0.06494 | 0.05681 | 0.06217 | 0.05772 | 0.05209 | 0.05005 | 0.05216 | 0.04865 | 0.04753 | 0.03601 | CENPB    |
| cg16353836 | 0.03504 | 0.03988 | 0.03929 | 0.03674 | 0.02829 | 0.03747 | 0.03806 | 0.03619 | 0.03406 | 0.03125 | SAFB     |
| cg16354207 | 0.41719 | 0.31396 | 0.3051  | 0.37561 | 0.47726 | 0.25607 | 0.05061 | 0.03771 | 0.06565 | 0.04133 | UBE2F    |
| cg16356516 | 0.88285 | 0.90243 | 0.90048 | 0.90577 | 0.75413 | 0.81814 | 0.89895 | 0.89947 | 0.91804 | 0.90173 | EXOSC6   |
| cg16356956 | 0.88394 | 0.70217 | 0.86617 | 0.90261 | 0.92002 | 0.88471 | 0.44894 | 0.54511 | 0.91182 | 0.88898 | CSF2RB   |
| cg16357381 | 0.0712  | 0.0768  | 0.07968 | 0.07706 | 0.08159 | 0.08724 | 0.06925 | 0.06141 | 0.06054 | 0.05942 | COL7A1   |
| cg16357921 | 0.15136 | 0.02193 | 0.03361 | 0.42481 | 0.02495 | 0.02087 | 0.01754 | 0.01901 | 0.01697 | 0.01517 | CCRK     |
| cg16358738 | 0.73939 | 0.16741 | 0.75929 | 0.87747 | 0.96305 | 0.89056 | 0.23303 | 0.31786 | 0.74311 | 0.63051 | AGXT     |
| cg16358826 | 0.30611 | 0.19144 | 0.73249 | 0.85427 | 0.72523 | 0.5393  | 0.12624 | 0.12145 | 0.1455  | 0.3538  | GABRA4   |
| cg16359129 | 0.91367 | 0.90406 | 0.89982 | 0.91167 | 0.9159  | 0.93144 | 0.7932  | 0.91499 | 0.91936 | 0.86382 | C1orf111 |
| cg16360372 | 0.77855 | 0.75026 | 0.7873  | 0.81792 | 0.84004 | 0.77627 | 0.74559 | 0.58575 | 0.77434 | 0.75852 | SPINK1   |

|            |         |         |         |         |         |         |         |         |         |         |          |
|------------|---------|---------|---------|---------|---------|---------|---------|---------|---------|---------|----------|
| cg16360444 | 0.07039 | 0.0649  | 0.08066 | 0.07824 | 0.10752 | 0.07081 | 0.09104 | 0.07988 | 0.08309 | 0.08769 | ITGA7    |
| cg16361890 | 0.46612 | 0.1003  | 0.56282 | 0.56049 | 0.61834 | 0.17902 | 0.4318  | 0.4909  | 0.73879 | 0.57186 | LTC4S    |
| cg16362133 | 0.70267 | 0.20911 | 0.63965 | 0.55479 | 0.42117 | 0.05169 | 0.60556 | 0.10136 | 0.22613 | 0.04247 | SLC11A2  |
| cg16363586 | 0.70794 | 0.8125  | 0.90403 | 0.89188 | 0.1124  | 0.05184 | 0.89643 | 0.87856 | 0.05136 | 0.04547 | BST2     |
| cg16366323 | 0.07561 | 0.05097 | 0.25318 | 0.22656 | 0.07259 | 0.05822 | 0.06958 | 0.05366 | 0.32801 | 0.06657 | DUSP3    |
| cg16367027 | 0.85717 | 0.8395  | 0.80018 | 0.82926 | 0.74672 | 0.82801 | 0.79985 | 0.82316 | 0.85482 | 0.8209  | POLE3    |
| cg16367232 | 0.07495 | 0.07682 | 0.12795 | 0.11088 | 0.12415 | 0.10286 | 0.13333 | 0.08505 | 0.08469 | 0.1132  | UTP14A   |
| cg16370389 | 0.78686 | 0.74854 | 0.87402 | 0.8784  | 0.84699 | 0.84293 | 0.87865 | 0.89371 | 0.86903 | 0.83208 | PTTG2    |
| cg16370737 | 0.15437 | 0.12865 | 0.25988 | 0.41104 | 0.29071 | 0.09559 | 0.13036 | 0.06157 | 0.35269 | 0.11546 | SYP      |
| cg16371833 | 0.56923 | 0.57956 | 0.66419 | 0.69736 | 0.49082 | 0.47365 | 0.37209 | 0.46955 | 0.62365 | 0.60798 | GPR34    |
| cg16372520 | 0.1046  | 0.09606 | 0.08897 | 0.09048 | 0.17649 | 0.11097 | 0.10638 | 0.10146 | 0.07123 | 0.0766  | NRXN3    |
| cg16375728 | 0.04301 | 0.03287 | 0.03313 | 0.02991 | 0.02274 | 0.02963 | 0.03202 | 0.03115 | 0.02297 | 0.02626 | STRA13   |
| cg16376234 | 0.06769 | 0.07466 | 0.07427 | 0.07138 | 0.0495  | 0.07201 | 0.0711  | 0.06232 | 0.06875 | 0.05978 | TOP1     |
| cg16377872 | 0.77952 | 0.85176 | 0.47289 | 0.5746  | 0.5493  | 0.53265 | 0.14464 | 0.06107 | 0.18952 | 0.1548  | SLC1A6   |
| cg16377880 | 0.05269 | 0.04565 | 0.07063 | 0.1144  | 0.30241 | 0.19719 | 0.04218 | 0.04175 | 0.03992 | 0.03608 | CYP4F3   |
| cg16378421 | 0.25162 | 0.60478 | 0.08707 | 0.06237 | 0.21128 | 0.20398 | 0.06947 | 0.04528 | 0.07581 | 0.03091 | ABCC5    |
| cg16379513 | 0.91455 | 0.70591 | 0.9615  | 0.96856 | 0.97239 | 0.97037 | 0.97217 | 0.96927 | 0.97467 | 0.96986 | SSK3     |
| cg16381688 | 0.74906 | 0.65665 | 0.48233 | 0.5171  | 0.66444 | 0.73029 | 0.61435 | 0.47051 | 0.86554 | 0.78076 | THEM2    |
| cg16381752 | 0.08561 | 0.08936 | 0.11672 | 0.09846 | 0.11935 | 0.08182 | 0.08519 | 0.06758 | 0.09161 | 0.09282 | TOR1AIP2 |
| cg16382256 | 0.03575 | 0.03288 | 0.03369 | 0.03721 | 0.02537 | 0.02761 | 0.0306  | 0.02545 | 0.02991 | 0.02038 | EPHB3    |
| cg16382322 | 0.89906 | 0.86727 | 0.03562 | 0.03648 | 0.16024 | 0.03021 | 0.05752 | 0.03338 | 0.0253  | 0.02711 | CENTD3   |
| cg16382382 | 0.02343 | 0.0283  | 0.02874 | 0.02901 | 0.02626 | 0.02783 | 0.02114 | 0.0213  | 0.02189 | 0.02443 | TGFBR3   |
| cg16384137 | 0.76724 | 0.63347 | 0.82342 | 0.86625 | 0.90382 | 0.85924 | 0.83517 | 0.67072 | 0.88298 | 0.75945 | MGC35169 |
| cg16385933 | 0.02841 | 0.02517 | 0.0254  | 0.02619 | 0.02208 | 0.02161 | 0.02082 | 0.024   | 0.02071 | 0.02177 | PDCD4    |
| cg16386080 | 0.35842 | 0.03737 | 0.81856 | 0.89738 | 0.61486 | 0.38736 | 0.28193 | 0.02812 | 0.04091 | 0.02281 | CCRK     |
| cg16386158 | 0.14606 | 0.09774 | 0.65161 | 0.72063 | 0.6468  | 0.73089 | 0.15474 | 0.08533 | 0.48918 | 0.33409 | IL1RL1   |
| cg16387606 | 0.06362 | 0.07374 | 0.05312 | 0.04674 | 0.073   | 0.05695 | 0.04842 | 0.05054 | 0.05918 | 0.05465 | HIST2H4  |
| cg16388829 | 0.04311 | 0.05152 | 0.05123 | 0.04479 | 0.03218 | 0.03675 | 0.04074 | 0.04497 | 0.04222 | 0.03545 | ARID5A   |
| cg16390856 | 0.84879 | 0.61506 | 0.60261 | 0.72485 | 0.86316 | 0.86976 | 0.30478 | 0.2801  | 0.04147 | 0.04477 | MAGEA3   |
| cg16391151 | 0.03362 | 0.03356 | 0.02908 | 0.03427 | 0.02908 | 0.03128 | 0.02681 | 0.03292 | 0.02569 | 0.02664 | CARD4    |
| cg16391792 | 0.80664 | 0.89644 | 0.88503 | 0.88603 | 0.86183 | 0.62969 | 0.64404 | 0.74737 | 0.89884 | 0.79232 | LIPC     |
| cg16393207 | 0.74402 | 0.2     | 0.92286 | 0.93679 | 0.90999 | 0.90862 | 0.51726 | 0.184   | 0.88853 | 0.81932 | GDPD5    |
| cg16394138 | 0.029   | 0.02952 | 0.02982 | 0.02649 | 0.02409 | 0.02229 | 0.02555 | 0.02405 | 0.02318 | 0.02049 | XPR1     |
| cg16396417 | 0.09297 | 0.08847 | 0.22047 | 0.19506 | 0.07917 | 0.08564 | 0.09092 | 0.08604 | 0.09309 | 0.09336 | ZNF42    |
| cg16396488 | 0.37208 | 0.17826 | 0.62542 | 0.78619 | 0.67085 | 0.83701 | 0.34551 | 0.38183 | 0.39888 | 0.47715 | PLA2G1B  |
| cg16396948 | 0.89223 | 0.88944 | 0.89876 | 0.90682 | 0.92497 | 0.87878 | 0.87405 | 0.87794 | 0.89674 | 0.84926 | PHLDB2   |
| cg16398289 | 0.74468 | 0.75824 | 0.72973 | 0.76538 | 0.66545 | 0.78504 | 0.78686 | 0.82775 | 0.74716 | 0.74075 | WDR49    |
| cg16399745 | 0.17978 | 0.13994 | 0.49307 | 0.45192 | 0.29122 | 0.10063 | 0.19621 | 0.16983 | 0.58573 | 0.35357 | CNAP1    |
| cg16400825 | 0.02728 | 0.03609 | 0.04091 | 0.03899 | 0.03668 | 0.035   | 0.08974 | 0.03836 | 0.12699 | 0.03196 | ITPR3    |
| cg16404106 | 0.62185 | 0.44336 | 0.7233  | 0.74282 | 0.75809 | 0.6454  | 0.67427 | 0.58726 | 0.72812 | 0.52252 | FLJ23514 |
| cg16404689 | 0.04181 | 0.04277 | 0.05652 | 0.04825 | 0.04576 | 0.04849 | 0.04565 | 0.03939 | 0.04174 | 0.04024 | C1orf156 |

|            |         |         |         |         |         |         |         |         |         |                    |
|------------|---------|---------|---------|---------|---------|---------|---------|---------|---------|--------------------|
| cg16405575 | 0.03597 | 0.03437 | 0.03895 | 0.03967 | 0.03154 | 0.02693 | 0.03375 | 0.0315  | 0.03384 | 0.02747 TSPAN9     |
| cg16405957 | 0.89073 | 0.74382 | 0.84112 | 0.86248 | 0.84026 | 0.63546 | 0.41694 | 0.55246 | 0.49102 | 0.60028 KRT2A      |
| cg16406212 | 0.0403  | 0.04336 | 0.0445  | 0.04453 | 0.04766 | 0.0443  | 0.03397 | 0.02771 | 0.03364 | 0.03541 UBXD4      |
| cg16408394 | 0.02988 | 0.03003 | 0.0324  | 0.03022 | 0.02233 | 0.02785 | 0.02307 | 0.02818 | 0.03119 | 0.02728 RXRA       |
| cg16408565 | 0.87812 | 0.57385 | 0.91187 | 0.90407 | 0.90647 | 0.90392 | 0.89017 | 0.8827  | 0.9043  | 0.90281 ORM2       |
| cg16408970 | 0.11498 | 0.05271 | 0.49651 | 0.65318 | 0.61303 | 0.39242 | 0.52942 | 0.24145 | 0.06177 | 0.03834 BAMBI      |
| cg16409869 | 0.03381 | 0.03036 | 0.0389  | 0.03727 | 0.03306 | 0.02587 | 0.0299  | 0.027   | 0.02644 | 0.03077 NDUFC2     |
| cg16411152 | 0.61209 | 0.74649 | 0.77618 | 0.80137 | 0.75127 | 0.78083 | 0.77204 | 0.82926 | 0.09531 | 0.13853 ADAM29     |
| cg16413535 | 0.86624 | 0.86235 | 0.84004 | 0.88214 | 0.37078 | 0.89137 | 0.25592 | 0.36351 | 0.10434 | 0.13517 TKTL2      |
| cg16413777 | 0.07699 | 0.04208 | 0.05643 | 0.07178 | 0.04232 | 0.04843 | 0.03941 | 0.04336 | 0.03747 | 0.03177 RSAD1      |
| cg16414852 | 0.69234 | 0.62599 | 0.62795 | 0.70708 | 0.59088 | 0.66055 | 0.43457 | 0.21136 | 0.2015  | 0.13811 SULT1B1    |
| cg16414945 | 0.16356 | 0.15338 | 0.19098 | 0.18501 | 0.19806 | 0.1317  | 0.18265 | 0.15847 | 0.15477 | 0.17827 DUSP12     |
| cg16415058 | 0.08262 | 0.07486 | 0.71107 | 0.85464 | 0.25939 | 0.36072 | 0.08679 | 0.111   | 0.17969 | 0.10254 SORCS1     |
| cg16415646 | 0.5292  | 0.22793 | 0.72975 | 0.7633  | 0.65125 | 0.61315 | 0.37211 | 0.25009 | 0.84177 | 0.74033 INHBA      |
| cg16417437 | 0.07406 | 0.07917 | 0.109   | 0.08627 | 0.13936 | 0.0964  | 0.12477 | 0.08209 | 0.08029 | 0.08249 TMEM126A   |
| cg16417937 | 0.02691 | 0.02374 | 0.03071 | 0.02374 | 0.01906 | 0.01824 | 0.01951 | 0.01808 | 0.02191 | 0.01998 NUDC       |
| cg16418163 | 0.0249  | 0.02603 | 0.02764 | 0.02888 | 0.01905 | 0.02032 | 0.01801 | 0.01861 | 0.02191 | 0.01982 ACPL2      |
| cg16418329 | 0.18092 | 0.14505 | 0.49444 | 0.49289 | 0.67308 | 0.80671 | 0.21221 | 0.09616 | 0.48642 | 0.21281 NYD-SP26   |
| cg16418684 | 0.03674 | 0.03728 | 0.04492 | 0.04436 | 0.76849 | 0.76355 | 0.26718 | 0.03746 | 0.06844 | 0.03709 VWCE       |
| cg16419345 | 0.15125 | 0.0522  | 0.26679 | 0.22428 | 0.1041  | 0.05324 | 0.12333 | 0.04744 | 0.24458 | 0.05344 ACOX1      |
| cg16420530 | 0.04973 | 0.04615 | 0.04652 | 0.03622 | 0.03389 | 0.04158 | 0.03879 | 0.03478 | 0.03666 | 0.03701 ING2       |
| cg16420888 | 0.05224 | 0.05068 | 0.05405 | 0.04564 | 0.05242 | 0.04501 | 0.04684 | 0.0434  | 0.04791 | 0.0413 DRAP1       |
| cg16421285 | 0.58343 | 0.23746 | 0.36848 | 0.48479 | 0.28986 | 0.09886 | 0.55831 | 0.18476 | 0.59969 | 0.16568 SAE1       |
| cg16421589 | 0.05263 | 0.06013 | 0.06359 | 0.05395 | 0.04195 | 0.05522 | 0.05633 | 0.05355 | 0.05193 | 0.0484 PANK3       |
| cg16422907 | 0.95546 | 0.95904 | 0.88339 | 0.80952 | 0.58677 | 0.49485 | 0.93904 | 0.95273 | 0.9108  | 0.53241 CCNA1      |
| cg16425577 | 0.05484 | 0.04631 | 0.05075 | 0.0408  | 0.09295 | 0.03374 | 0.13481 | 0.06068 | 0.25661 | 0.03118 DENND3     |
| cg16426459 | 0.83366 | 0.8251  | 0.64336 | 0.93348 | 0.85707 | 0.94013 | 0.56883 | 0.40211 | 0.02427 | 0.02603 MLPH       |
| cg16427670 | 0.13921 | 0.04434 | 0.30071 | 0.29098 | 0.56811 | 0.17008 | 0.29727 | 0.33132 | 0.21642 | 0.22448 ARHGEF7    |
| cg16428251 | 0.10401 | 0.04113 | 0.57287 | 0.59255 | 0.32752 | 0.0524  | 0.12749 | 0.05735 | 0.07799 | 0.101 SOX14        |
| cg16429439 | 0.02675 | 0.03182 | 0.04506 | 0.04168 | 0.0319  | 0.03356 | 0.34281 | 0.41207 | 0.02933 | 0.031 DKFZp564K142 |
| cg16431978 | 0.14238 | 0.20283 | 0.19577 | 0.14531 | 0.24152 | 0.7184  | 0.12274 | 0.13653 | 0.1245  | 0.10741 KRTAP13-3  |
| cg16433922 | 0.09525 | 0.13127 | 0.0901  | 0.08234 | 0.06957 | 0.07162 | 0.08185 | 0.0694  | 0.09064 | 0.06681 SFRP4      |
| cg16434306 | 0.81702 | 0.87633 | 0.88077 | 0.88041 | 0.85845 | 0.84926 | 0.81173 | 0.87306 | 0.88832 | 0.8694 FLJ14054    |
| cg16434546 | 0.1697  | 0.12439 | 0.2093  | 0.19905 | 0.2004  | 0.12048 | 0.19563 | 0.13089 | 0.25582 | 0.34091 SDCCAG10   |
| cg16435601 | 0.02176 | 0.02021 | 0.02605 | 0.02445 | 0.02383 | 0.02647 | 0.01712 | 0.01766 | 0.01884 | 0.02199 FALZ       |
| cg16438432 | 0.05903 | 0.06208 | 0.06684 | 0.05628 | 0.10267 | 0.06693 | 0.04549 | 0.04561 | 0.04686 | 0.03284 HNRPD      |
| cg16440909 | 0.80487 | 0.44159 | 0.68974 | 0.76635 | 0.65176 | 0.7077  | 0.36221 | 0.40504 | 0.83234 | 0.72071 CXorf6     |
| cg16442715 | 0.09254 | 0.0457  | 0.10084 | 0.19574 | 0.11753 | 0.04448 | 0.06452 | 0.0413  | 0.07142 | 0.03976 MAP3K7IP1  |
| cg16443152 | 0.0681  | 0.0565  | 0.06333 | 0.06105 | 0.04906 | 0.05691 | 0.05231 | 0.05259 | 0.05246 | 0.0595 CAMSAP1L1   |
| cg16443939 | 0.05938 | 0.05373 | 0.12897 | 0.09412 | 0.0585  | 0.04111 | 0.04397 | 0.04619 | 0.07065 | 0.05035 SPFH1      |
| cg16444968 | 0.08075 | 0.05768 | 0.08408 | 0.0806  | 0.85826 | 0.19181 | 0.1183  | 0.27369 | 0.88239 | 0.85292 CPNE7      |

|            |         |         |         |         |         |         |         |         |         |                  |
|------------|---------|---------|---------|---------|---------|---------|---------|---------|---------|------------------|
| cg16446783 | 0.08963 | 0.08383 | 0.44788 | 0.24279 | 0.20694 | 0.12254 | 0.12447 | 0.08473 | 0.49348 | 0.4017 MRGPRX4   |
| cg16449464 | 0.31477 | 0.23776 | 0.6593  | 0.85356 | 0.42743 | 0.32316 | 0.19006 | 0.14182 | 0.09911 | 0.32745 MAP1D    |
| cg16449972 | 0.81961 | 0.72794 | 0.37639 | 0.64618 | 0.65717 | 0.81786 | 0.80542 | 0.72476 | 0.079   | 0.08884 ZNF423   |
| cg16452396 | 0.03153 | 0.03298 | 0.03339 | 0.03449 | 0.02265 | 0.02917 | 0.3867  | 0.48571 | 0.02568 | 0.02433 PHF6     |
| cg16454349 | 0.79985 | 0.8     | 0.74194 | 0.8489  | 0.88499 | 0.82116 | 0.70609 | 0.77027 | 0.75108 | 0.69721 FLJ25410 |
| cg16456919 | 0.29523 | 0.04554 | 0.79622 | 0.90683 | 0.94593 | 0.8852  | 0.04231 | 0.0526  | 0.05875 | 0.03855 LRRN5    |
| cg16462075 | 0.66088 | 0.23631 | 0.57148 | 0.89352 | 0.91007 | 0.84376 | 0.18842 | 0.21375 | 0.53326 | 0.4888 MUC3B     |
| cg16463460 | 0.8698  | 0.88388 | 0.68802 | 0.87167 | 0.91151 | 0.88466 | 0.80752 | 0.62524 | 0.88989 | 0.89007 WT1      |
| cg16464322 | 0.32065 | 0.10029 | 0.11829 | 0.14252 | 0.27977 | 0.08512 | 0.09213 | 0.10089 | 0.09737 | 0.07008 HNRPL    |
| cg16465769 | 0.53973 | 0.33253 | 0.52816 | 0.66047 | 0.91394 | 0.91123 | 0.45485 | 0.35441 | 0.44775 | 0.39123 SLC22A7  |
| cg16465939 | 0.5773  | 0.54309 | 0.35835 | 0.49058 | 0.93522 | 0.72642 | 0.36195 | 0.36938 | 0.75367 | 0.47177 KCNQ1    |
| cg16466334 | 0.80844 | 0.67882 | 0.49345 | 0.83974 | 0.16607 | 0.20519 | 0.55673 | 0.26223 | 0.12054 | 0.08162 MMP3     |
| cg16467694 | 0.03551 | 0.042   | 0.04124 | 0.04094 | 0.03674 | 0.03887 | 0.04084 | 0.03683 | 0.03288 | 0.03461 POLR2G   |
| cg16468729 | 0.20038 | 0.19837 | 0.30194 | 0.22952 | 0.31679 | 0.24451 | 0.24901 | 0.20793 | 0.22704 | 0.19705 IL8      |
| cg16468910 | 0.20719 | 0.1435  | 0.18205 | 0.2015  | 0.17617 | 0.14676 | 0.14845 | 0.11116 | 0.12602 | 0.09805 SNX4     |
| cg16469386 | 0.20195 | 0.0234  | 0.02693 | 0.02291 | 0.01704 | 0.0202  | 0.02147 | 0.02023 | 0.02359 | 0.02142 SLC38A1  |
| cg16470760 | 0.86562 | 0.84397 | 0.67524 | 0.82985 | 0.84683 | 0.76323 | 0.54809 | 0.72    | 0.8236  | 0.59176 CD4      |
| cg16470957 | 0.04428 | 0.03865 | 0.06626 | 0.05571 | 0.03714 | 0.05282 | 0.04768 | 0.04911 | 0.03997 | 0.03737 TUSC4    |
| cg16473288 | 0.34287 | 0.12865 | 0.26737 | 0.17798 | 0.35789 | 0.38534 | 0.11531 | 0.09342 | 0.14492 | 0.09348 OR1N1    |
| cg16474684 | 0.11527 | 0.03515 | 0.04402 | 0.04021 | 0.04721 | 0.02882 | 0.63736 | 0.16383 | 0.03365 | 0.02575 RNF4     |
| cg16474696 | 0.15209 | 0.05379 | 0.08532 | 0.07322 | 0.32102 | 0.26554 | 0.11696 | 0.0752  | 0.10952 | 0.03688 MGC3207  |
| cg16475089 | 0.02412 | 0.02724 | 0.02794 | 0.02613 | 0.03101 | 0.03628 | 0.01902 | 0.02049 | 0.01655 | 0.0178 ZNF451    |
| cg16477324 | 0.06494 | 0.05416 | 0.05667 | 0.05089 | 0.04742 | 0.04697 | 0.05323 | 0.04198 | 0.05027 | 0.03946 ADCK4    |
| cg16478145 | 0.73354 | 0.77826 | 0.68329 | 0.7552  | 0.61169 | 0.55736 | 0.69827 | 0.729   | 0.68383 | 0.41176 TFPI     |
| cg16478792 | 0.50335 | 0.20442 | 0.79673 | 0.76098 | 0.6565  | 0.64824 | 0.12865 | 0.22621 | 0.56978 | 0.50869 RGS11    |
| cg16479674 | 0.03701 | 0.03246 | 0.04016 | 0.03373 | 0.03689 | 0.03183 | 0.04467 | 0.03664 | 0.03585 | 0.03932 ZNF672   |
| cg16480145 | 0.02583 | 0.02681 | 0.02998 | 0.02621 | 0.01949 | 0.02015 | 0.02364 | 0.02194 | 0.0188  | 0.0177 RUSC2     |
| cg16480209 | 0.94952 | 0.91253 | 0.91647 | 0.93765 | 0.96767 | 0.95466 | 0.90135 | 0.82222 | 0.95652 | 0.941 CNGB1      |
| cg16481024 | 0.02932 | 0.02366 | 0.02697 | 0.02644 | 0.02076 | 0.02508 | 0.0243  | 0.02681 | 0.02395 | 0.02174 KLF10    |
| cg16481281 | 0.02899 | 0.023   | 0.02384 | 0.02269 | 0.19648 | 0.0537  | 0.01926 | 0.02062 | 0.02239 | 0.01745 IL11     |
| cg16482226 | 0.02983 | 0.03247 | 0.03002 | 0.03162 | 0.0233  | 0.02894 | 0.02761 | 0.02724 | 0.02417 | 0.02815 CNOT2    |
| cg16483466 | 0.12688 | 0.04564 | 0.11625 | 0.1178  | 0.38431 | 0.41184 | 0.07382 | 0.06854 | 0.06451 | 0.03771 C2orf186 |
| cg16483916 | 0.07098 | 0.03452 | 0.29998 | 0.4169  | 0.45935 | 0.56612 | 0.85299 | 0.84797 | 0.07167 | 0.03369 PLAC2    |
| cg16484842 | 0.04242 | 0.04011 | 0.04299 | 0.0402  | 0.03947 | 0.03477 | 0.03406 | 0.03941 | 0.02884 | 0.03113 TH1L     |
| cg16486059 | 0.06482 | 0.03484 | 0.05288 | 0.04441 | 0.06088 | 0.03731 | 0.06891 | 0.03141 | 0.03123 | 0.03151 C1orf135 |
| cg16488098 | 0.06702 | 0.04342 | 0.32418 | 0.32393 | 0.65216 | 0.2679  | 0.19087 | 0.2394  | 0.26528 | 0.1619 PODXL     |
| cg16488522 | 0.81186 | 0.51763 | 0.80696 | 0.82452 | 0.79495 | 0.51975 | 0.11554 | 0.10307 | 0.8618  | 0.76923 KRT25C   |
| cg16490390 | 0.07334 | 0.08134 | 0.07475 | 0.07074 | 0.08699 | 0.08157 | 0.0568  | 0.05231 | 0.04616 | 0.05139 LENG4    |
| cg16491909 | 0.0485  | 0.04365 | 0.0413  | 0.03437 | 0.04331 | 0.04441 | 0.03369 | 0.03894 | 0.03925 | 0.03675 C1orf43  |
| cg16492735 | 0.41637 | 0.30513 | 0.42377 | 0.41869 | 0.82504 | 0.78561 | 0.51094 | 0.50986 | 0.48418 | 0.54155 PEG10    |
| cg16494477 | 0.06917 | 0.05604 | 0.08365 | 0.07224 | 0.06964 | 0.04871 | 0.87576 | 0.87277 | 0.3587  | 0.30997 FGF18    |

|            |         |         |         |         |         |         |         |         |         |                     |
|------------|---------|---------|---------|---------|---------|---------|---------|---------|---------|---------------------|
| cg16494590 | 0.05814 | 0.05015 | 0.05412 | 0.0537  | 0.0492  | 0.06218 | 0.04861 | 0.05069 | 0.04482 | 0.045 BTN2A3        |
| cg16495265 | 0.86827 | 0.83977 | 0.07404 | 0.08264 | 0.549   | 0.53761 | 0.8519  | 0.83909 | 0.89216 | 0.86695 HOXB5       |
| cg16499669 | 0.7821  | 0.60821 | 0.76353 | 0.77738 | 0.8598  | 0.83537 | 0.64171 | 0.62526 | 0.87421 | 0.8512 PEPP-2       |
| cg16500334 | 0.80741 | 0.5496  | 0.3728  | 0.19785 | 0.71293 | 0.56978 | 0.18921 | 0.08408 | 0.11571 | 0.03169 SUMO3       |
| cg16501028 | 0.95492 | 0.95733 | 0.96301 | 0.96948 | 0.96786 | 0.95188 | 0.44212 | 0.58889 | 0.66403 | 0.74907 WT1         |
| cg16501235 | 0.79597 | 0.67538 | 0.83538 | 0.86305 | 0.86381 | 0.84442 | 0.51528 | 0.80407 | 0.32055 | 0.54214 C1orf54     |
| cg16504670 | 0.73602 | 0.26298 | 0.89422 | 0.87184 | 0.82136 | 0.86116 | 0.7037  | 0.53952 | 0.42767 | 0.29466 FLJ20186    |
| cg16504798 | 0.89433 | 0.43605 | 0.78887 | 0.89962 | 0.26799 | 0.09736 | 0.45712 | 0.37375 | 0.21256 | 0.05369 MYO1F       |
| cg16505204 | 0.47461 | 0.19397 | 0.63527 | 0.53953 | 0.54235 | 0.68305 | 0.61365 | 0.68922 | 0.62886 | 0.59053 THRSP       |
| cg16505550 | 0.73244 | 0.62394 | 0.59804 | 0.57235 | 0.48206 | 0.44916 | 0.57079 | 0.38167 | 0.55071 | 0.51265 PPAP2B      |
| cg16505687 | 0.02873 | 0.02519 | 0.03106 | 0.03254 | 0.03319 | 0.02682 | 0.04683 | 0.04741 | 0.02463 | 0.02015 GPR137B     |
| cg16506346 | 0.16024 | 0.17457 | 0.4322  | 0.4905  | 0.60319 | 0.39398 | 0.21638 | 0.19219 | 0.16906 | 0.18482 OR1E1       |
| cg16507522 | 0.77619 | 0.30985 | 0.86782 | 0.86958 | 0.74229 | 0.80187 | 0.36133 | 0.71308 | 0.85134 | 0.75328 SERPINA3    |
| cg16508857 | 0.07123 | 0.06066 | 0.06017 | 0.05642 | 0.07882 | 0.07518 | 0.06259 | 0.05347 | 0.04616 | 0.04738 WWOX        |
| cg16509045 | 0.59493 | 0.69925 | 0.84657 | 0.88941 | 0.7489  | 0.79335 | 0.50473 | 0.47217 | 0.69635 | 0.6072 TRPM6        |
| cg16509569 | 0.05978 | 0.06724 | 0.88675 | 0.87471 | 0.88614 | 0.88292 | 0.86244 | 0.88071 | 0.89416 | 0.82462 HEM1        |
| cg16509658 | 0.03416 | 0.02557 | 0.75217 | 0.86713 | 0.05289 | 0.0243  | 0.0262  | 0.19458 | 0.02464 | 0.01765 GABRB2      |
| cg16510010 | 0.04926 | 0.04302 | 0.04759 | 0.04597 | 0.04743 | 0.06719 | 0.14238 | 0.03254 | 0.02818 | 0.02885 RP3-473B4.1 |
| cg16510657 | 0.69142 | 0.22025 | 0.87748 | 0.89678 | 0.80803 | 0.83393 | 0.48076 | 0.50874 | 0.90569 | 0.89094 TMEM35      |
| cg16511708 | 0.21197 | 0.06649 | 0.05734 | 0.05471 | 0.05807 | 0.04454 | 0.0378  | 0.03273 | 0.0389  | 0.04134 SS18        |
| cg16512727 | 0.24035 | 0.0583  | 0.15989 | 0.33646 | 0.06362 | 0.0583  | 0.04491 | 0.0666  | 0.06112 | 0.04525 C12orf4     |
| cg16514843 | 0.15545 | 0.05046 | 0.44325 | 0.4768  | 0.83644 | 0.35863 | 0.3314  | 0.28071 | 0.11301 | 0.16219 PAX4        |
| cg16514995 | 0.89269 | 0.67645 | 0.88477 | 0.89059 | 0.89735 | 0.67957 | 0.8968  | 0.78494 | 0.91544 | 0.7661 CCDC76       |
| cg16515820 | 0.05304 | 0.05694 | 0.05633 | 0.05739 | 0.04149 | 0.05034 | 0.05502 | 0.05445 | 0.04842 | 0.04859 ZBTB20      |
| cg16516400 | 0.03763 | 0.05875 | 0.91022 | 0.92553 | 0.53989 | 0.73821 | 0.16727 | 0.28895 | 0.43193 | 0.05983 FAM89A      |
| cg16517394 | 0.61146 | 0.32925 | 0.83963 | 0.86294 | 0.81666 | 0.7274  | 0.83012 | 0.72548 | 0.82032 | 0.80943 TNFSF4      |
| cg16518291 | 0.03555 | 0.03262 | 0.04233 | 0.03898 | 0.03339 | 0.0343  | 0.03085 | 0.03036 | 0.02515 | 0.01931 ZNF272      |
| cg16519321 | 0.12574 | 0.10374 | 0.49532 | 0.52222 | 0.53046 | 0.51608 | 0.12305 | 0.11022 | 0.10676 | 0.0773 MYOD1        |
| cg16519742 | 0.87821 | 0.78626 | 0.84981 | 0.87427 | 0.79566 | 0.90712 | 0.3305  | 0.29357 | 0.66734 | 0.88635 ZIM2        |
| cg16521028 | 0.22478 | 0.24879 | 0.23909 | 0.20516 | 0.2352  | 0.19783 | 0.14794 | 0.13114 | 0.19767 | 0.1988 GLIPR1       |
| cg16521836 | 0.04248 | 0.04373 | 0.04241 | 0.0496  | 0.02961 | 0.0359  | 0.03309 | 0.03277 | 0.0335  | 0.03508 KIAA1407    |
| cg16522484 | 0.83766 | 0.49116 | 0.63345 | 0.65613 | 0.87971 | 0.81477 | 0.57258 | 0.7047  | 0.8674  | 0.83603 C14orf49    |
| cg16523424 | 0.05097 | 0.05497 | 0.04477 | 0.04138 | 0.04004 | 0.04654 | 0.03587 | 0.03518 | 0.03838 | 0.03613 TIMP1       |
| cg16523471 | 0.06647 | 0.06662 | 0.10288 | 0.09667 | 0.10497 | 0.09015 | 0.08418 | 0.09563 | 0.07299 | 0.07446 LOC283377   |
| cg16523653 | 0.03368 | 0.03187 | 0.03148 | 0.02819 | 0.02389 | 0.02471 | 0.02479 | 0.0242  | 0.02403 | 0.02959 DNMT3B      |
| cg16524139 | 0.0398  | 0.04202 | 0.04438 | 0.04323 | 0.03265 | 0.03924 | 0.04778 | 0.0376  | 0.15622 | 0.04442 TCF3        |
| cg16525692 | 0.06379 | 0.06174 | 0.06418 | 0.05795 | 0.06361 | 0.06717 | 0.04803 | 0.04993 | 0.07424 | 0.06049 CHD1L       |
| cg16525761 | 0.09542 | 0.10664 | 0.20977 | 0.15612 | 0.22896 | 0.16891 | 0.11737 | 0.09343 | 0.10619 | 0.16301 RPL34       |
| cg16527805 | 0.05327 | 0.05658 | 0.05475 | 0.05078 | 0.05337 | 0.04975 | 0.05062 | 0.05075 | 0.05267 | 0.05373 MDH1        |
| cg16529592 | 0.86853 | 0.78184 | 0.88291 | 0.90362 | 0.8906  | 0.49986 | 0.24689 | 0.84236 | 0.87513 | 0.82044 RUNX3       |
| cg16530429 | 0.08289 | 0.0676  | 0.86925 | 0.91636 | 0.73052 | 0.72631 | 0.20495 | 0.06462 | 0.39875 | 0.61199 LIN28       |

|            |         |         |         |         |         |         |         |         |         |                  |
|------------|---------|---------|---------|---------|---------|---------|---------|---------|---------|------------------|
| cg16534233 | 0.0286  | 0.03033 | 0.03004 | 0.03234 | 0.12334 | 0.02532 | 0.03559 | 0.02769 | 0.03873 | 0.02408 FAM80A   |
| cg16534499 | 0.09983 | 0.10377 | 0.6332  | 0.76248 | 0.1655  | 0.11933 | 0.11272 | 0.08616 | 0.08256 | 0.07297 ZNF223   |
| cg16535180 | 0.07044 | 0.0745  | 0.08292 | 0.0739  | 0.06698 | 0.0596  | 0.07135 | 0.06101 | 0.06425 | 0.07045 C22orf25 |
| cg16536450 | 0.68212 | 0.16517 | 0.75682 | 0.7968  | 0.61348 | 0.59338 | 0.21115 | 0.06659 | 0.4125  | 0.22553 UNQ2541  |
| cg16536918 | 0.68732 | 0.45447 | 0.79845 | 0.84091 | 0.87758 | 0.88776 | 0.84504 | 0.81305 | 0.81799 | 0.76911 AVP      |
| cg16537367 | 0.62751 | 0.51736 | 0.56712 | 0.68478 | 0.49513 | 0.62213 | 0.55821 | 0.45716 | 0.62555 | 0.44229 OTOR     |
| cg16538604 | 0.02291 | 0.02382 | 0.02305 | 0.02296 | 0.01926 | 0.02312 | 0.01992 | 0.01945 | 0.01968 | 0.01739 WHSC2    |
| cg16539629 | 0.03147 | 0.03337 | 0.05383 | 0.03372 | 0.03151 | 0.03002 | 0.02786 | 0.02967 | 0.02931 | 0.0284 C14orf132 |
| cg16539981 | 0.07221 | 0.06989 | 0.083   | 0.07498 | 0.12071 | 0.10359 | 0.05282 | 0.05666 | 0.05826 | 0.05393 TEAD2    |
| cg16540259 | 0.85887 | 0.83738 | 0.82718 | 0.86141 | 0.84565 | 0.78673 | 0.83693 | 0.82332 | 0.86002 | 0.77869 NDST2    |
| cg16540704 | 0.9139  | 0.92292 | 0.89318 | 0.91224 | 0.92095 | 0.91509 | 0.5682  | 0.5968  | 0.55057 | 0.6125 ASZ1      |
| cg16540768 | 0.07426 | 0.07582 | 0.09223 | 0.07917 | 0.08996 | 0.07597 | 0.06844 | 0.06545 | 0.50307 | 0.15689 TMEM56   |
| cg16541031 | 0.0416  | 0.03589 | 0.08236 | 0.05676 | 0.41939 | 0.37656 | 0.28945 | 0.65223 | 0.04236 | 0.04635 IRF7     |
| cg16542081 | 0.93972 | 0.78009 | 0.83186 | 0.93179 | 0.9121  | 0.74544 | 0.50982 | 0.35032 | 0.59511 | 0.46964 GATA5    |
| cg16543027 | 0.81361 | 0.63649 | 0.74378 | 0.76799 | 0.49162 | 0.35912 | 0.22977 | 0.18712 | 0.42459 | 0.40826 PLCB2    |
| cg16543294 | 0.04086 | 0.04778 | 0.04474 | 0.04357 | 0.04416 | 0.03759 | 0.04307 | 0.0407  | 0.03499 | 0.03818 ASB6     |
| cg16544272 | 0.03676 | 0.04163 | 0.04052 | 0.03906 | 0.0386  | 0.03991 | 0.03689 | 0.03857 | 0.02978 | 0.0329 PIGW      |
| cg16545079 | 0.03209 | 0.03025 | 0.03789 | 0.03999 | 0.29018 | 0.13063 | 0.03577 | 0.0314  | 0.02613 | 0.02685 PER1     |
| cg16545105 | 0.87115 | 0.81835 | 0.90656 | 0.90572 | 0.90622 | 0.90284 | 0.89693 | 0.88954 | 0.9343  | 0.90163 CRHBP    |
| cg16546489 | 0.64245 | 0.35167 | 0.79327 | 0.81644 | 0.7863  | 0.80777 | 0.80581 | 0.54245 | 0.69674 | 0.78781 HSD17B1  |
| cg16547341 | 0.20296 | 0.0867  | 0.44546 | 0.56209 | 0.36837 | 0.42613 | 0.11074 | 0.06714 | 0.08835 | 0.06247 USP29    |
| cg16547450 | 0.03869 | 0.04857 | 0.05427 | 0.0557  | 0.06487 | 0.07919 | 0.05901 | 0.05324 | 0.04232 | 0.04316 TTC10    |
| cg16547529 | 0.93289 | 0.94236 | 0.9306  | 0.94372 | 0.96213 | 0.66604 | 0.94851 | 0.90434 | 0.94136 | 0.88693 FLJ33790 |
| cg16550324 | 0.03156 | 0.02819 | 0.03138 | 0.02816 | 0.05108 | 0.02972 | 0.02353 | 0.02804 | 0.02389 | 0.02185 GMDS     |
| cg16551261 | 0.08924 | 0.07137 | 0.14035 | 0.12571 | 0.12193 | 0.06228 | 0.06393 | 0.07025 | 0.11408 | 0.09547 LRRC6    |
| cg16551326 | 0.07903 | 0.06995 | 0.0789  | 0.07457 | 0.04624 | 0.0656  | 0.06685 | 0.06162 | 0.06626 | 0.0699 ERF       |
| cg16555388 | 0.6633  | 0.46706 | 0.77035 | 0.87082 | 0.61346 | 0.42488 | 0.35007 | 0.35478 | 0.15257 | 0.0925 TNFSF10   |
| cg16557944 | 0.24326 | 0.02631 | 0.40022 | 0.58985 | 0.50876 | 0.61569 | 0.25498 | 0.0213  | 0.03045 | 0.02031 GPX7     |
| cg16558203 | 0.49214 | 0.07782 | 0.81391 | 0.87656 | 0.83545 | 0.49815 | 0.80192 | 0.43308 | 0.85131 | 0.2557 SLC22A14  |
| cg16558348 | 0.02991 | 0.03269 | 0.0309  | 0.02846 | 0.02816 | 0.03233 | 0.02682 | 0.02803 | 0.02311 | 0.02232 UBQLN1   |
| cg16561743 | 0.6689  | 0.67686 | 0.68872 | 0.68674 | 0.66175 | 0.74939 | 0.37843 | 0.3661  | 0.74598 | 0.46875 CXorf23  |
| cg16564824 | 0.03082 | 0.03039 | 0.03916 | 0.03016 | 0.16006 | 0.0339  | 0.03037 | 0.03001 | 0.02025 | 0.02295 SNAP25   |
| cg16567044 | 0.70386 | 0.45402 | 0.34986 | 0.38044 | 0.9184  | 0.87008 | 0.08928 | 0.20767 | 0.65032 | 0.32533 MEG3     |
| cg16570917 | 0.86249 | 0.83432 | 0.88439 | 0.8927  | 0.81927 | 0.82245 | 0.85266 | 0.48645 | 0.88963 | 0.54455 PTPRF    |
| cg16571399 | 0.90227 | 0.91516 | 0.90995 | 0.91418 | 0.88866 | 0.29097 | 0.75286 | 0.76576 | 0.91167 | 0.25856 TLN2     |
| cg16574065 | 0.04392 | 0.04414 | 0.08369 | 0.15772 | 0.03554 | 0.04009 | 0.04266 | 0.04427 | 0.03464 | 0.03598 RAD52B   |
| cg16575408 | 0.90429 | 0.898   | 0.91105 | 0.90974 | 0.87531 | 0.88276 | 0.86933 | 0.90071 | 0.90022 | 0.79333 MMP1     |
| cg16579101 | 0.04474 | 0.03575 | 0.04088 | 0.04391 | 0.04256 | 0.03246 | 0.03946 | 0.04712 | 0.03737 | 0.04069 NOL1     |
| cg16579354 | 0.06206 | 0.06133 | 0.06839 | 0.0644  | 0.0556  | 0.05916 | 0.05598 | 0.05456 | 0.05817 | 0.05786 XRCC5    |
| cg16579646 | 0.39636 | 0.2584  | 0.55802 | 0.71864 | 0.59574 | 0.74619 | 0.57841 | 0.70829 | 0.54933 | 0.47592 HSD3B1   |
| cg16580737 | 0.06045 | 0.04916 | 0.05618 | 0.05358 | 0.04627 | 0.04008 | 0.04118 | 0.04146 | 0.07795 | 0.04882 MME      |

|            |         |         |         |         |         |         |         |         |         |                  |
|------------|---------|---------|---------|---------|---------|---------|---------|---------|---------|------------------|
| cg16581199 | 0.5642  | 0.32665 | 0.51836 | 0.66159 | 0.40313 | 0.38138 | 0.36276 | 0.57165 | 0.57284 | 0.34992 TSSK1    |
| cg16582174 | 0.8764  | 0.87984 | 0.88144 | 0.88377 | 0.92357 | 0.82519 | 0.87071 | 0.85008 | 0.90628 | 0.87529 ENTH     |
| cg16582344 | 0.03237 | 0.0318  | 0.03125 | 0.02613 | 0.02104 | 0.02944 | 0.02864 | 0.02895 | 0.02663 | 0.02684 ARF1     |
| cg16584172 | 0.06211 | 0.06593 | 0.06434 | 0.0622  | 0.05316 | 0.0601  | 0.05408 | 0.0551  | 0.04568 | 0.05554 ZIC2     |
| cg16584573 | 0.02714 | 0.02351 | 0.24372 | 0.5155  | 0.79853 | 0.68575 | 0.08663 | 0.03233 | 0.07725 | 0.02421 FGF8     |
| cg16584911 | 0.17082 | 0.16385 | 0.16126 | 0.16684 | 0.09101 | 0.12718 | 0.1635  | 0.15058 | 0.15351 | 0.1692 KIAA0828  |
| cg16585619 | 0.82504 | 0.71779 | 0.79242 | 0.80158 | 0.7424  | 0.80396 | 0.33693 | 0.63039 | 0.81973 | 0.77653 KRT19    |
| cg16585682 | 0.035   | 0.03398 | 0.09388 | 0.09361 | 0.09743 | 0.27795 | 0.03577 | 0.05858 | 0.03611 | 0.03411 SCGB3A1  |
| cg16588061 | 0.03417 | 0.03499 | 0.04088 | 0.03766 | 0.03902 | 0.03672 | 0.04356 | 0.03793 | 0.02969 | 0.02936 CTSC     |
| cg16590151 | 0.4315  | 0.45323 | 0.4629  | 0.48424 | 0.44691 | 0.45858 | 0.45998 | 0.45754 | 0.33987 | 0.41102 SYNCRIP  |
| cg16592658 | 0.82009 | 0.54455 | 0.48817 | 0.52179 | 0.2405  | 0.0892  | 0.30679 | 0.0654  | 0.25314 | 0.16575 EBI3     |
| cg16593081 | 0.86006 | 0.64441 | 0.89151 | 0.89353 | 0.87855 | 0.88758 | 0.77849 | 0.81762 | 0.89765 | 0.75348 DYX1C1   |
| cg16597172 | 0.03927 | 0.04406 | 0.07109 | 0.06913 | 0.06791 | 0.03907 | 0.03981 | 0.03669 | 0.03447 | 0.03228 MYCN     |
| cg16598810 | 0.0466  | 0.02837 | 0.03897 | 0.03156 | 0.03403 | 0.03234 | 0.07648 | 0.01773 | 0.02605 | 0.02806 DEPCD1   |
| cg16601385 | 0.72583 | 0.42382 | 0.7932  | 0.82868 | 0.68023 | 0.53387 | 0.35812 | 0.47462 | 0.78482 | 0.42142 CFD      |
| cg16601861 | 0.2442  | 0.2298  | 0.47158 | 0.61365 | 0.30529 | 0.19133 | 0.49935 | 0.25697 | 0.20122 | 0.13531 ALDH1A1  |
| cg16604136 | 0.03574 | 0.03578 | 0.0449  | 0.03927 | 0.03587 | 0.0435  | 0.03502 | 0.03814 | 0.02927 | 0.03588 CDCA1    |
| cg16604218 | 0.749   | 0.61739 | 0.65873 | 0.80079 | 0.60645 | 0.10911 | 0.3168  | 0.27712 | 0.13095 | 0.08896 EIF2B3   |
| cg16604516 | 0.60159 | 0.26595 | 0.20671 | 0.5772  | 0.7608  | 0.72496 | 0.32948 | 0.10724 | 0.02477 | 0.02067 FBLN2    |
| cg16605590 | 0.04721 | 0.04931 | 0.04358 | 0.04481 | 0.04998 | 0.05636 | 0.04952 | 0.05141 | 0.04579 | 0.04766 MKI67IP  |
| cg16606185 | 0.02353 | 0.02376 | 0.02527 | 0.02249 | 0.02005 | 0.02604 | 0.02154 | 0.01901 | 0.01996 | 0.01909 C21orf33 |
| cg16606638 | 0.379   | 0.0463  | 0.15558 | 0.22946 | 0.56376 | 0.54895 | 0.15822 | 0.21196 | 0.09302 | 0.28563 GALNT4   |
| cg16607065 | 0.67918 | 0.48034 | 0.37883 | 0.4519  | 0.76881 | 0.80299 | 0.0516  | 0.05313 | 0.04772 | 0.04184 TP73     |
| cg16608348 | 0.02996 | 0.02622 | 0.0294  | 0.02339 | 0.018   | 0.02054 | 0.01935 | 0.02443 | 0.018   | 0.01877 PTPN14   |
| cg16608652 | 0.7157  | 0.29021 | 0.24435 | 0.45253 | 0.3876  | 0.41144 | 0.22286 | 0.06873 | 0.41268 | 0.78769 B3GALT2  |
| cg16609872 | 0.28398 | 0.05345 | 0.58621 | 0.85053 | 0.8428  | 0.74803 | 0.2989  | 0.07838 | 0.11284 | 0.14211 KCNQ1    |
| cg16609957 | 0.80673 | 0.09532 | 0.92824 | 0.94682 | 0.96222 | 0.93797 | 0.94291 | 0.93528 | 0.93781 | 0.93108 APXL2    |
| cg16612562 | 0.93632 | 0.93266 | 0.94246 | 0.9469  | 0.94754 | 0.94788 | 0.94367 | 0.9288  | 0.94683 | 0.93501 RRP22    |
| cg16612699 | 0.82802 | 0.52442 | 0.55703 | 0.60944 | 0.74235 | 0.16521 | 0.80399 | 0.74287 | 0.05688 | 0.03781 OR8B8    |
| cg16613192 | 0.06739 | 0.05807 | 0.07173 | 0.06348 | 0.06347 | 0.07828 | 0.05967 | 0.05381 | 0.05885 | 0.05875 UROD     |
| cg16614332 | 0.05703 | 0.05311 | 0.05516 | 0.05585 | 0.07158 | 0.05036 | 0.0471  | 0.05143 | 0.04198 | 0.04299 SF3B3    |
| cg16614500 | 0.04939 | 0.04717 | 0.07295 | 0.0636  | 0.16879 | 0.06557 | 0.09934 | 0.07091 | 0.05092 | 0.05256 TMEM80   |
| cg16615211 | 0.725   | 0.28682 | 0.77781 | 0.78345 | 0.85453 | 0.87153 | 0.89427 | 0.74547 | 0.32819 | 0.14602 TMEM42   |
| cg16616325 | 0.03457 | 0.03331 | 0.03451 | 0.03583 | 0.02908 | 0.03205 | 0.04273 | 0.03423 | 0.02834 | 0.02633 TSNAX    |
| cg16616734 |         | 0.02942 | 0.02929 | 0.02597 |         | 0.02938 | 0.02838 | 0.02639 | 0.02292 | 0.0231 ANKRD13   |
| cg16616769 | 0.87837 | 0.73817 | 0.87634 | 0.90205 | 0.41283 | 0.16113 | 0.83032 | 0.47669 | 0.88663 | 0.88395 MGC35048 |
| cg16617137 | 0.23924 | 0.17693 | 0.22133 | 0.22946 | 0.26309 | 0.20516 | 0.14869 | 0.14522 | 0.29796 | 0.30174 SIGLEC6  |
| cg16619240 | 0.03331 | 0.03098 | 0.05346 | 0.03714 | 0.03905 | 0.03709 | 0.03287 | 0.0321  | 0.03469 | 0.02684 LIMA1    |
| cg16620032 | 0.08222 | 0.07675 | 0.1104  | 0.10013 | 0.10978 | 0.06994 | 0.07284 | 0.07452 | 0.05625 | 0.06542 GPR4     |
| cg16620731 | 0.14682 | 0.11208 | 0.18278 | 0.13611 | 0.12284 | 0.60485 | 0.09196 | 0.08118 | 0.08282 | 0.07522 ZNF583   |
| cg16621987 | 0.06223 | 0.02923 | 0.16804 | 0.06152 | 0.5481  | 0.2151  | 0.34397 | 0.03128 | 0.04761 | 0.05479 DGCR2    |

|            |         |         |         |         |         |         |         |         |         |         |           |
|------------|---------|---------|---------|---------|---------|---------|---------|---------|---------|---------|-----------|
| cg16625125 | 0.02867 | 0.03688 | 0.0301  | 0.02721 | 0.04245 | 0.03976 | 0.03777 | 0.04145 | 0.02764 | 0.02794 | NUDT8     |
| cg16625216 | 0.03488 | 0.03248 | 0.0317  | 0.03245 | 0.02934 | 0.03456 | 0.02947 | 0.03568 | 0.02628 | 0.02615 | GAK       |
| cg16625901 | 0.61057 | 0.70529 | 0.57628 | 0.64965 | 0.57488 | 0.66811 | 0.58346 | 0.62617 | 0.70807 | 0.71388 | ANKRD32   |
| cg16626670 | 0.53508 | 0.48035 | 0.53154 | 0.58541 | 0.78594 | 0.68471 | 0.05068 | 0.04844 | 0.4681  | 0.27548 | CLEC4G    |
| cg16627949 | 0.38172 | 0.1338  | 0.34106 | 0.35746 | 0.5091  | 0.70802 | 0.45833 | 0.32759 | 0.33963 | 0.35156 | RNASE8    |
| cg16628119 | 0.03231 | 0.03553 | 0.03137 | 0.03614 | 0.03402 | 0.03173 | 0.02863 | 0.02879 | 0.02824 | 0.03325 | ITPK1     |
| cg16628918 | 0.6264  | 0.22573 | 0.75991 | 0.81468 | 0.87742 | 0.61567 | 0.64195 | 0.33216 | 0.67628 | 0.58069 | GPR172A   |
| cg16632280 | 0.05143 | 0.05835 | 0.07191 | 0.05212 | 0.04182 | 0.0467  | 0.06312 | 0.04913 | 0.04914 | 0.04449 | LTBP3     |
| cg16632715 | 0.03401 | 0.02892 | 0.14269 | 0.2171  | 0.11802 | 0.02951 | 0.0663  | 0.02706 | 0.03766 | 0.02571 | HOXD11    |
| cg16632891 | 0.02925 | 0.04056 | 0.03434 | 0.03419 | 0.04129 | 0.04387 | 0.02965 | 0.02843 | 0.02906 | 0.03013 | SSBP3     |
| cg16636110 | 0.91323 | 0.80928 | 0.79943 | 0.8166  | 0.74783 | 0.62032 | 0.39633 | 0.74154 | 0.91893 | 0.89469 | ZNF264    |
| cg16636571 | 0.70057 | 0.77255 | 0.71867 | 0.74024 | 0.65152 | 0.72656 | 0.65331 | 0.77159 | 0.77527 | 0.70049 | GYPB      |
| cg16638540 | 0.41313 | 0.03937 | 0.96509 | 0.97393 | 0.59022 | 0.60098 | 0.06814 | 0.03757 | 0.04134 | 0.02911 | ZNF135    |
| cg16639185 | 0.96517 | 0.96755 | 0.80336 | 0.94411 | 0.25915 | 0.21447 | 0.20521 | 0.05649 | 0.04567 | 0.35961 | LGTN      |
| cg16639595 | 0.43778 | 0.13753 | 0.67426 | 0.59347 | 0.32725 | 0.26554 | 0.74212 | 0.81744 | 0.72167 | 0.42813 | SRI       |
| cg16639637 | 0.03413 | 0.03335 | 0.03994 | 0.03739 | 0.03941 | 0.04336 | 0.03761 | 0.03438 | 0.04259 | 0.0409  | TUBGCP5   |
| cg16640096 | 0.06454 | 0.07265 | 0.36202 | 0.45477 | 0.56107 | 0.5243  | 0.13524 | 0.09218 | 0.0566  | 0.05531 | COL4A3    |
| cg16641915 | 0.02866 | 0.02784 | 0.03573 | 0.0377  | 0.03653 | 0.03447 | 0.03064 | 0.02858 | 0.02664 | 0.02891 | CAPN5     |
| cg16645539 | 0.03903 | 0.03549 | 0.0315  | 0.02749 | 0.01071 | 0.0142  | 0.02504 | 0.02239 | 0.02115 | 0.02269 | SNAPC3    |
| cg16648297 | 0.02359 | 0.02252 | 0.02278 | 0.01996 | 0.02004 | 0.02184 | 0.02089 | 0.01948 | 0.01634 | 0.0183  | ZNF576    |
| cg16648841 | 0.78005 | 0.64778 | 0.25898 | 0.24479 | 0.73277 | 0.79706 | 0.16872 | 0.138   | 0.1065  | 0.11853 | C8A       |
| cg16650125 | 0.63689 | 0.60305 | 0.60346 | 0.63539 | 0.47415 | 0.49075 | 0.434   | 0.49768 | 0.6306  | 0.53505 | MTTP      |
| cg16652063 | 0.06372 | 0.0746  | 0.21376 | 0.26375 | 0.88437 | 0.95631 | 0.24931 | 0.51232 | 0.12028 | 0.07098 | SLC13A5   |
| cg16652241 | 0.06281 | 0.06408 | 0.0862  | 0.0748  | 0.26632 | 0.04974 | 0.06715 | 0.07956 | 0.06018 | 0.05001 | MMP15     |
| cg16652259 | 0.04415 | 0.04689 | 0.04114 | 0.04315 | 0.03739 | 0.03666 | 0.04303 | 0.0364  | 0.03637 | 0.03346 | DLX1      |
| cg16652639 | 0.05305 | 0.05113 | 0.05881 | 0.05284 | 0.05353 | 0.05035 | 0.06043 | 0.06736 | 0.04179 | 0.04467 | TM2D2     |
| cg16653538 | 0.052   | 0.03448 | 0.0337  | 0.03306 | 0.03336 | 0.0303  | 0.02636 | 0.0295  | 0.03027 | 0.02695 | GAS2L3    |
| cg16657615 | 0.04988 | 0.05645 | 0.04712 | 0.05166 | 0.03619 | 0.05222 | 0.0479  | 0.05301 | 0.04167 | 0.03945 | TNFRSF12A |
| cg16658719 | 0.0451  | 0.05152 | 0.0578  | 0.05433 | 0.20597 | 0.11113 | 0.0444  | 0.04268 | 0.04148 | 0.0514  | TGFB2     |
| cg16659043 | 0.03017 | 0.03532 | 0.04907 | 0.04323 | 0.0328  | 0.02485 | 0.02406 | 0.02462 | 0.03015 | 0.03932 | SAMD12    |
| cg16660041 | 0.29279 | 0.31466 | 0.67804 | 0.55089 | 0.7878  | 0.87778 | 0.21572 | 0.32143 | 0.45862 | 0.36907 | IQCF1     |
| cg16660717 | 0.03828 | 0.03684 | 0.04078 | 0.04325 | 0.04047 | 0.04366 | 0.03844 | 0.04226 | 0.03358 | 0.03912 | ORMDL2    |
| cg16664233 | 0.035   | 0.03731 | 0.04612 | 0.04639 | 0.035   | 0.04068 | 0.03685 | 0.03227 | 0.03044 | 0.0272  | ETHE1     |
| cg16665103 | 0.0957  | 0.08414 | 0.11884 | 0.11358 | 0.12693 | 0.12191 | 0.081   | 0.08396 | 0.07157 | 0.0875  | COQ3      |
| cg16666115 | 0.06291 | 0.04931 | 0.05056 | 0.04593 | 0.04967 | 0.06114 | 0.04357 | 0.04898 | 0.04115 | 0.03679 | MRPS18A   |
| cg16666160 | 0.91783 | 0.77349 | 0.95766 | 0.9681  | 0.97788 | 0.96369 | 0.95444 | 0.95135 | 0.76528 | 0.77889 | NR5A1     |
| cg16666456 | 0.03267 | 0.02719 | 0.03326 | 0.03182 | 0.03167 | 0.03082 | 0.02715 | 0.02492 | 0.02837 | 0.02583 | LRRC40    |
| cg16668394 | 0.27334 | 0.06183 | 0.1008  | 0.15349 | 0.10145 | 0.07584 | 0.06745 | 0.07436 | 0.05802 | 0.05257 | MEN1      |
| cg16670497 | 0.05123 | 0.04789 | 0.058   | 0.06442 | 0.33461 | 0.21504 | 0.37217 | 0.3145  | 0.04396 | 0.0318  | GSTM2     |
| cg16672449 | 0.04252 | 0.04289 | 0.04743 | 0.03912 | 0.03602 | 0.04129 | 0.04167 | 0.0377  | 0.03682 | 0.03329 | RUVBL1    |
| cg16673198 | 0.8004  | 0.62151 | 0.49757 | 0.71059 | 0.55998 | 0.64075 | 0.51526 | 0.15987 | 0.22435 | 0.5693  | CPNE4     |



|            |         |         |         |         |         |         |         |         |         |                  |
|------------|---------|---------|---------|---------|---------|---------|---------|---------|---------|------------------|
| cg16677885 | 0.03518 | 0.03854 | 0.05637 | 0.04508 | 0.05115 | 0.04895 | 0.0375  | 0.03747 | 0.03338 | 0.04082 FASTK    |
| cg16678925 | 0.06042 | 0.05648 | 0.08124 | 0.09878 | 0.10142 | 0.2913  | 0.0585  | 0.05489 | 0.04851 | 0.05803 OR1A2    |
| cg16679837 | 0.06023 | 0.07155 | 0.08376 | 0.08362 | 0.06667 | 0.0952  | 0.09065 | 0.09236 | 0.07203 | 0.0679 AR        |
| cg16682903 | 0.70536 | 0.67002 | 0.18117 | 0.17373 | 0.55034 | 0.56519 | 0.18811 | 0.16226 | 0.54831 | 0.5335 ACVR1     |
| cg16685388 | 0.06441 | 0.05123 | 0.0558  | 0.05409 | 0.2197  | 0.07877 | 0.36998 | 0.2483  | 0.04248 | 0.04577 HIVEP3   |
| cg16685860 | 0.02096 | 0.01944 | 0.02062 | 0.0167  | 0.01318 | 0.01501 | 0.01802 | 0.01846 | 0.01825 | 0.01483 PLD2     |
| cg16687447 | 0.01709 | 0.01933 | 0.01667 | 0.018   | 0.01627 | 0.01903 | 0.0149  | 0.01569 | 0.43849 | 0.44698 PTEN     |
| cg16688376 | 0.05573 | 0.06727 | 0.12509 | 0.08454 | 0.12814 | 0.10705 | 0.0887  | 0.07101 | 0.06009 | 0.05102 AKAP9    |
| cg16688911 | 0.02091 | 0.02167 | 0.0209  | 0.02214 | 0.01705 | 0.02528 | 0.01998 | 0.01935 | 0.01672 | 0.01461 VASP     |
| cg16689634 | 0.09013 | 0.04769 | 0.44242 | 0.53441 | 0.60245 | 0.6274  | 0.49488 | 0.75886 | 0.04375 | 0.03343 CYP4X1   |
| cg16691616 | 0.38848 | 0.15625 | 0.03248 | 0.03389 | 0.02719 | 0.03017 | 0.03066 | 0.02908 | 0.03861 | 0.03033 INPP1    |
| cg16691888 | 0.08562 | 0.09112 | 0.11288 | 0.08839 | 0.1963  | 0.17647 | 0.10513 | 0.12131 | 0.09886 | 0.11361 LRP2     |
| cg16692277 | 0.8787  | 0.42896 | 0.05398 | 0.08777 | 0.1432  | 0.06556 | 0.0533  | 0.05248 | 0.05451 | 0.04352 GUCY1B2  |
| cg16692761 | 0.05982 | 0.07398 | 0.09957 | 0.09613 | 0.06828 | 0.06729 | 0.05858 | 0.06245 | 0.05975 | 0.05952 TAF1B    |
| cg16695354 | 0.09037 | 0.06859 | 0.05907 | 0.06333 | 0.0565  | 0.05543 | 0.06253 | 0.06215 | 0.06037 | 0.04879 LYSMD2   |
| cg16698623 | 0.90716 | 0.79584 | 0.2744  | 0.31424 | 0.94092 | 0.91549 | 0.38595 | 0.52729 | 0.78219 | 0.68363 MGMT     |
| cg16698781 | 0.02552 | 0.02745 | 0.02535 | 0.02817 | 0.02194 | 0.0217  | 0.02175 | 0.02393 | 0.02058 | 0.02103 UBE2G2   |
| cg16701105 | 0.03723 | 0.03453 | 0.04413 | 0.03689 | 0.03668 | 0.03565 | 0.04313 | 0.03749 | 0.03045 | 0.03357 DENND4A  |
| cg16703647 | 0.0551  | 0.05029 | 0.30808 | 0.33789 | 0.20587 | 0.08728 | 0.31377 | 0.07116 | 0.52811 | 0.90436 CRABP1   |
| cg16705481 | 0.03481 | 0.03762 | 0.04697 | 0.04708 | 0.04746 | 0.04412 | 0.03694 | 0.03503 | 0.03781 | 0.03253 TRAPPC3  |
| cg16706631 | 0.08322 | 0.08706 | 0.11911 | 0.09678 | 0.24594 | 0.17593 | 0.07699 | 0.05625 | 0.053   | 0.06659 HIST1H4E |
| cg16708012 | 0.8637  | 0.84744 | 0.60618 | 0.36606 | 0.29509 | 0.43724 | 0.80434 | 0.81729 | 0.87365 | 0.48623 TMEM119  |
| cg16708281 | 0.70951 | 0.4738  | 0.74036 | 0.79287 | 0.55902 | 0.46677 | 0.58753 | 0.6022  | 0.64089 | 0.59259 FOXD4L1  |
| cg16708623 | 0.29268 | 0.22652 | 0.75094 | 0.6735  | 0.50224 | 0.44108 | 0.60608 | 0.0865  | 0.13892 | 0.17026 TRIM2    |
| cg16708981 | 0.0976  | 0.03642 | 0.90385 | 0.94542 | 0.78316 | 0.78165 | 0.24926 | 0.24435 | 0.20477 | 0.62595 ZNF677   |
| cg16711185 | 0.05453 | 0.05659 | 0.05404 | 0.05225 | 0.09755 | 0.05812 | 0.0783  | 0.0615  | 0.07322 | 0.07789 SHC4     |
| cg16713727 | 0.85604 | 0.666   | 0.89332 | 0.91267 | 0.94868 | 0.87593 | 0.89133 | 0.74925 | 0.94134 | 0.89376 SLC25A34 |
| cg16713808 | 0.42467 | 0.31848 | 0.77062 | 0.83141 | 0.78192 | 0.76401 | 0.78984 | 0.74741 | 0.15542 | 0.16765 CRNN     |
| cg16714091 | 0.20344 | 0.07698 | 0.5947  | 0.59173 | 0.10307 | 0.06512 | 0.91589 | 0.13656 | 0.92296 | 0.53583 ADAMTSL1 |
| cg16715722 | 0.85022 | 0.84039 | 0.84174 | 0.83415 | 0.74798 | 0.7665  | 0.77323 | 0.48573 | 0.84467 | 0.84762 TLX1     |
| cg16716983 | 0.71303 | 0.3515  | 0.57646 | 0.70042 | 0.50658 | 0.54697 | 0.30309 | 0.43654 | 0.21277 | 0.20703 DRP2     |
| cg16717225 | 0.65374 | 0.84096 | 0.5     | 0.63757 | 0.41239 | 0.57015 | 0.12473 | 0.41214 | 0.15772 | 0.21876 GLT1D1   |
| cg16718094 | 0.04324 | 0.04219 | 0.0325  | 0.03064 | 0.02567 | 0.0305  | 0.0251  | 0.02378 | 0.02711 | 0.02753 SAP30    |
| cg16718678 | 0.03533 | 0.03916 | 0.04363 | 0.04469 | 0.04223 | 0.04592 | 0.0501  | 0.05337 | 0.03261 | 0.03614 NRXN2    |
| cg16718891 | 0.04923 | 0.05156 | 0.05049 | 0.04827 | 0.0329  | 0.04301 | 0.04863 | 0.04452 | 0.03892 | 0.03623 ITGA5    |
| cg16719404 | 0.34521 | 0.3085  | 0.50668 | 0.67678 | 0.41153 | 0.54986 | 0.21756 | 0.52429 | 0.16018 | 0.15924 CD2      |
| cg16720880 | 0.10225 | 0.10067 | 0.10029 | 0.07393 | 0.16693 | 0.10955 | 0.08394 | 0.08242 | 0.0743  | 0.06576 CHMP5    |
| cg16721202 | 0.05728 | 0.05829 | 0.07125 | 0.06231 | 0.06836 | 0.07675 | 0.07078 | 0.06514 | 0.04018 | 0.04844 SP4      |
| cg16721845 | 0.46991 | 0.0215  | 0.72455 | 0.8138  | 0.58399 | 0.43423 | 0.11196 | 0.07125 | 0.14168 | 0.0199 MTL5      |
| cg16722118 | 0.90241 | 0.8206  | 0.74973 | 0.85169 | 0.78686 | 0.80939 | 0.8566  | 0.70572 | 0.91049 | 0.82097 KIAA0738 |
| cg16722536 | 0.90601 | 0.62617 | 0.93622 | 0.93724 | 0.95578 | 0.91539 | 0.30315 | 0.37702 | 0.2709  | 0.4628 TBX1      |

|            |         |         |         |         |         |         |         |         |         |         |           |
|------------|---------|---------|---------|---------|---------|---------|---------|---------|---------|---------|-----------|
| cg16723180 | 0.87763 | 0.86697 | 0.88941 | 0.90043 | 0.92545 | 0.88988 | 0.89255 | 0.88112 | 0.90153 | 0.87717 | HCCA2     |
| cg16725097 | 0.04898 | 0.04415 | 0.06819 | 0.06734 | 0.10099 | 0.06578 | 0.1083  | 0.0879  | 0.04937 | 0.05129 | EBNA1BP2  |
| cg16725130 | 0.3003  | 0.05615 | 0.06765 | 0.09616 | 0.87663 | 0.7316  | 0.28468 | 0.08539 | 0.05238 | 0.04178 | MMP19     |
| cg16725865 | 0.04428 | 0.03891 | 0.04982 | 0.0485  | 0.05387 | 0.06915 | 0.03335 | 0.03477 | 0.03791 | 0.04598 | BTBD8     |
| cg16728114 | 0.0433  | 0.03881 | 0.05822 | 0.05917 | 0.13005 | 0.04107 | 0.05573 | 0.0476  | 0.04325 | 0.04608 | C1orf66   |
| cg16729690 | 0.41444 | 0.06537 | 0.37049 | 0.64554 | 0.19143 | 0.05811 | 0.1557  | 0.09943 | 0.71092 | 0.62231 | FZD3      |
| cg16729794 | 0.64965 | 0.57356 | 0.59586 | 0.63636 | 0.57256 | 0.63959 | 0.53745 | 0.5002  | 0.47251 | 0.33221 | MOBP      |
| cg16731016 | 0.91208 | 0.92206 | 0.89817 | 0.92077 | 0.8963  | 0.90987 | 0.84114 | 0.64422 | 0.93271 | 0.94962 | LGALS4    |
| cg16731240 | 0.07639 | 0.0603  | 0.94275 | 0.94787 | 0.74282 | 0.65949 | 0.06249 | 0.05337 | 0.0551  | 0.04919 | ZNF577    |
| cg16732880 | 0.02514 | 0.0253  | 0.02606 | 0.02287 | 0.01872 | 0.02412 | 0.02362 | 0.02473 | 0.01853 | 0.02119 | NARFL     |
| cg16732901 | 0.70588 | 0.36343 | 0.55546 | 0.70716 | 0.12711 | 0.12123 | 0.18865 | 0.15281 | 0.16171 | 0.12517 | FLJ35784  |
| cg16738336 | 0.03254 | 0.03305 | 0.03728 | 0.03345 | 0.02531 | 0.0296  | 0.03251 | 0.03225 | 0.02265 | 0.0255  | SKIV2L2   |
| cg16739396 | 0.14379 | 0.13188 | 0.22509 | 0.17543 | 0.24105 | 0.19556 | 0.17482 | 0.12295 | 0.16655 | 0.21562 | ATG4C     |
| cg16739580 | 0.59517 | 0.1681  | 0.72263 | 0.78781 | 0.49767 | 0.81157 | 0.13032 | 0.10578 | 0.50649 | 0.32666 | POP2      |
| cg16740543 | 0.02949 | 0.02912 | 0.03581 | 0.03107 | 0.02481 | 0.02538 | 0.0269  | 0.02946 | 0.02487 | 0.02556 | PHF10     |
| cg16741710 | 0.38849 | 0.06435 | 0.38876 | 0.52496 | 0.6025  | 0.48321 | 0.07468 | 0.03396 | 0.33734 | 0.03443 | TP73      |
| cg16742703 | 0.18748 | 0.15533 | 0.29011 | 0.22731 | 0.24935 | 0.54054 | 0.15385 | 0.14275 | 0.11891 | 0.15061 | KLK3      |
| cg16743289 | 0.85375 | 0.80163 | 0.25205 | 0.31483 | 0.11049 | 0.07026 | 0.90257 | 0.55304 | 0.91029 | 0.90055 | CACYBP    |
| cg16743781 | 0.01848 | 0.02146 | 0.02645 | 0.02456 | 0.01902 | 0.01909 | 0.01704 | 0.01719 | 0.01747 | 0.01368 | RHOC      |
| cg16744741 | 0.90397 | 0.65784 | 0.49062 | 0.51373 | 0.87242 | 0.90744 | 0.36029 | 0.91268 | 0.59528 | 0.5856  | PRKG2     |
| cg16745604 | 0.91049 | 0.90848 | 0.90647 | 0.91294 | 0.92612 | 0.89178 | 0.90956 | 0.91161 | 0.91648 | 0.73949 | CASP10    |
| cg16745616 | 0.09066 | 0.10043 | 0.13709 | 0.13042 | 0.10018 | 0.08366 | 0.12197 | 0.09394 | 0.08865 | 0.07647 | ANGPTL4   |
| cg16746462 | 0.11235 | 0.09507 | 0.10606 | 0.10459 | 0.09968 | 0.08115 | 0.11784 | 0.10629 | 0.07341 | 0.06758 | LNPEP     |
| cg16746631 | 0.06903 | 0.0697  | 0.12008 | 0.08484 | 0.15738 | 0.07269 | 0.08682 | 0.07811 | 0.06494 | 0.08736 | IMPA1     |
| cg16746737 | 0.06983 | 0.0255  | 0.02623 | 0.02098 | 0.02112 | 0.02193 | 0.02156 | 0.01903 | 0.0192  | 0.01653 | UBE2D3    |
| cg16747567 | 0.17557 | 0.07333 | 0.05972 | 0.06864 | 0.08561 | 0.05713 | 0.06165 | 0.05423 | 0.05474 | 0.06213 | PCNX      |
| cg16749578 | 0.81251 | 0.32056 | 0.05981 | 0.05291 | 0.82625 | 0.05503 | 0.47602 | 0.13205 | 0.12123 | 0.03394 | NR2F6     |
| cg16749930 | 0.81083 | 0.64286 | 0.85327 | 0.90068 | 0.93848 | 0.77751 | 0.86035 | 0.80167 | 0.81495 | 0.4141  | IL18BP    |
| cg16750914 | 0.022   | 0.02591 | 0.02984 | 0.02767 | 0.0214  | 0.02388 | 0.02109 | 0.02489 | 0.02286 | 0.02535 | KIAA1212  |
| cg16752583 | 0.09869 | 0.11834 | 0.49991 | 0.63013 | 0.77457 | 0.71868 | 0.08755 | 0.08144 | 0.0736  | 0.08073 | TRPV6     |
| cg16752778 | 0.1138  | 0.11544 | 0.15018 | 0.13564 | 0.10694 | 0.12691 | 0.09663 | 0.09646 | 0.11587 | 0.17492 | PIGK      |
| cg16753209 | 0.65007 | 0.42211 | 0.3999  | 0.4488  | 0.57695 | 0.45875 | 0.32382 | 0.55854 | 0.45092 | 0.2211  | NEB       |
| cg16753336 | 0.10728 | 0.10541 | 0.11563 | 0.10828 | 0.0735  | 0.09491 | 0.10207 | 0.0954  | 0.09296 | 0.09827 | NPAS1     |
| cg16756620 | 0.04574 | 0.04811 | 0.05508 | 0.04173 | 0.05429 | 0.05885 | 0.05163 | 0.04486 | 0.05382 | 0.05152 | PPIG      |
| cg16756998 | 0.03558 | 0.03853 | 0.03932 | 0.04683 | 0.02571 | 0.02726 | 0.02916 | 0.02917 | 0.03075 | 0.02359 | ZDHHC8    |
| cg16757724 | 0.9433  | 0.87256 | 0.93756 | 0.94581 | 0.9683  | 0.95321 | 0.93072 | 0.80796 | 0.9376  | 0.93778 | RBPSUHL   |
| cg16758041 | 0.06239 | 0.05625 | 0.07054 | 0.04949 | 0.10315 | 0.09516 | 0.06316 | 0.05548 | 0.04057 | 0.04792 | NDUFB6    |
| cg16759954 | 0.90434 | 0.87127 | 0.9046  | 0.92231 | 0.93341 | 0.92181 | 0.87226 | 0.86115 | 0.91043 | 0.87751 | PITPNM3   |
| cg16761041 | 0.17632 | 0.15632 | 0.1788  | 0.15283 | 0.18309 | 0.18173 | 0.19925 | 0.13664 | 0.11721 | 0.1349  | C9orf100S |
| cg16761581 | 0.03643 | 0.02904 | 0.76836 | 0.8673  | 0.77486 | 0.78072 | 0.53981 | 0.48664 | 0.93994 | 0.841   | ADCY4     |
| cg16762195 | 0.05779 | 0.05475 | 0.40801 | 0.55009 | 0.08473 | 0.04476 | 0.06674 | 0.09873 | 0.03209 | 0.03551 | LGP2      |

|            |         |         |         |         |         |         |         |         |         |                   |
|------------|---------|---------|---------|---------|---------|---------|---------|---------|---------|-------------------|
| cg16762386 | 0.63529 | 0.48754 | 0.80736 | 0.80702 | 0.73035 | 0.8061  | 0.3922  | 0.42331 | 0.1589  | 0.43043 NR0B2     |
| cg16763895 | 0.03997 | 0.04367 | 0.04578 | 0.04086 | 0.03485 | 0.02452 | 0.04046 | 0.04564 | 0.03956 | 0.0294 ILVBL      |
| cg16769376 | 0.03599 | 0.0391  | 0.04744 | 0.04395 | 0.19929 | 0.04741 | 0.03111 | 0.03314 | 0.03908 | 0.03402 MDP-1     |
| cg16769442 | 0.04181 | 0.04463 | 0.04148 | 0.0405  | 0.03131 | 0.03852 | 0.03585 | 0.03761 | 0.03785 | 0.03662 MAGI3     |
| cg16770799 | 0.05182 | 0.06161 | 0.08515 | 0.07521 | 0.0871  | 0.07003 | 0.06842 | 0.07372 | 0.06341 | 0.0552 ITGA5      |
| cg16771596 | 0.0573  | 0.05564 | 0.06666 | 0.06641 | 0.06562 | 0.05588 | 0.05549 | 0.05749 | 0.04122 | 0.04664 C9orf30   |
| cg16772207 | 0.07103 | 0.06327 | 0.61146 | 0.65656 | 0.83463 | 0.8736  | 0.86985 | 0.07332 | 0.20608 | 0.05179 MYT1      |
| cg16772514 | 0.85509 | 0.50566 | 0.89046 | 0.89582 | 0.91653 | 0.86337 | 0.89238 | 0.8156  | 0.89162 | 0.82543 C1QL1     |
| cg16773028 | 0.74376 | 0.28181 | 0.71553 | 0.82118 | 0.88263 | 0.78066 | 0.05739 | 0.08431 | 0.44783 | 0.35435 KCNA2     |
| cg16773899 | 0.03788 | 0.02967 | 0.0326  | 0.0314  | 0.03105 | 0.02641 | 0.03062 | 0.02486 | 0.25444 | 0.31901 EDIL3     |
| cg16774604 | 0.08766 | 0.07738 | 0.09612 | 0.0957  | 0.15583 | 0.09747 | 0.06803 | 0.07087 | 0.0693  | 0.08974 OXA1L     |
| cg16776350 | 0.19868 | 0.08531 | 0.1639  | 0.16733 | 0.39968 | 0.29021 | 0.12237 | 0.08945 | 0.6861  | 0.58948 CD84      |
| cg16776717 | 0.33204 | 0.12675 | 0.4469  | 0.46561 | 0.41945 | 0.25801 | 0.47876 | 0.46757 | 0.33905 | 0.25862 JAKMIP2   |
| cg16777510 | 0.83842 | 0.85468 | 0.72298 | 0.68973 | 0.84406 | 0.82348 | 0.83324 | 0.77629 | 0.61804 | 0.28826 STAT5A    |
| cg16777782 | 0.86537 | 0.90241 | 0.91931 | 0.92954 | 0.89003 | 0.88336 | 0.789   | 0.91223 | 0.93756 | 0.89955 CDH13     |
| cg16777839 | 0.0417  | 0.04809 | 0.0488  | 0.04286 | 0.04945 | 0.054   | 0.04944 | 0.05281 | 0.04177 | 0.03516 PHPT1     |
| cg16778148 | 0.8958  | 0.74661 | 0.91909 | 0.91449 | 0.96297 | 0.92682 | 0.80513 | 0.79903 | 0.89403 | 0.82081 KCNQ1     |
| cg16778809 | 0.04033 | 0.04484 | 0.04176 | 0.03943 | 0.0378  | 0.04238 | 0.04055 | 0.04188 | 0.03403 | 0.04175 ADAM23    |
| cg16778903 | 0.02387 | 0.02892 | 0.02845 | 0.0295  | 0.02187 | 0.02277 | 0.02125 | 0.02399 | 0.02485 | 0.02624 BRUNOL6   |
| cg16779976 | 0.49717 | 0.38929 | 0.42827 | 0.50664 | 0.44625 | 0.51665 | 0.12045 | 0.076   | 0.26222 | 0.09485 BLNK      |
| cg16785344 | 0.29023 | 0.12449 | 0.2239  | 0.20586 | 0.14945 | 0.05576 | 0.07726 | 0.06035 | 0.12035 | 0.08351 PXN       |
| cg16786117 | 0.61139 | 0.25742 | 0.28472 | 0.27532 | 0.56363 | 0.46042 | 0.07945 | 0.27352 | 0.21599 | 0.3962 VSIG4      |
| cg16786458 | 0.77086 | 0.55122 | 0.68161 | 0.78727 | 0.53563 | 0.35712 | 0.24277 | 0.26599 | 0.3638  | 0.23596 PPARGC1B  |
| cg16786703 | 0.07045 | 0.02749 | 0.75186 | 0.84413 | 0.95094 | 0.94812 | 0.71082 | 0.69563 | 0.94223 | 0.80231 ADAM8     |
| cg16787352 | 0.25791 | 0.08643 | 0.27798 | 0.21097 | 0.2693  | 0.1258  | 0.19151 | 0.09216 | 0.63114 | 0.06527 ANKRD9    |
| cg16787600 | 0.06529 | 0.05814 | 0.8739  | 0.89892 | 0.04775 | 0.06115 | 0.09521 | 0.06778 | 0.07599 | 0.05543 SORCS3    |
| cg16788436 | 0.91452 | 0.86189 | 0.90176 | 0.89953 | 0.91489 | 0.90364 | 0.92676 | 0.9124  | 0.92866 | 0.9103 GRLF1      |
| cg16790239 | 0.08729 | 0.07304 | 0.25421 | 0.30786 | 0.53691 | 0.08926 | 0.86385 | 0.11521 | 0.24818 | 0.06361 MC1R      |
| cg16791508 | 0.35582 | 0.17592 | 0.68111 | 0.82179 | 0.7971  | 0.78213 | 0.42481 | 0.32253 | 0.82139 | 0.43622 KRTHB3    |
| cg16791686 | 0.36836 | 0.42572 | 0.47054 | 0.47786 | 0.59826 | 0.60959 | 0.22147 | 0.14167 | 0.0733  | 0.12625 GLTSCR2   |
| cg16792160 | 0.13275 | 0.11648 | 0.15299 | 0.12941 | 0.29945 | 0.3034  | 0.24931 | 0.10582 | 0.08785 | 0.10182 ASAH2     |
| cg16792632 | 0.2627  | 0.42338 | 0.27419 | 0.45531 | 0.44556 | 0.02947 | 0.02856 | 0.02551 | 0.02817 | 0.02214 ESR2      |
| cg16792800 | 0.0609  | 0.06424 | 0.15207 | 0.22816 | 0.05293 | 0.07249 | 0.05355 | 0.04535 | 0.07447 | 0.14153 GPC6      |
| cg16793061 | 0.03134 | 0.03533 | 0.05163 | 0.03712 | 0.03655 | 0.0364  | 0.0403  | 0.03675 | 0.03393 | 0.03556 EYA1      |
| cg16793150 | 0.02862 | 0.02952 | 0.03402 | 0.03316 | 0.02757 | 0.02993 | 0.03299 | 0.02635 | 0.02    | 0.02328 MRPS27    |
| cg16794633 | 0.0515  | 0.04959 | 0.05222 | 0.048   | 0.04477 | 0.04893 | 0.05046 | 0.04412 | 0.05121 | 0.04855 C3orf58   |
| cg16794682 | 0.20482 | 0.36417 | 0.87077 | 0.87461 | 0.88981 | 0.7804  | 0.80876 | 0.77738 | 0.87048 | 0.82285 CCND1     |
| cg16794882 | 0.71789 | 0.74921 | 0.54867 | 0.62013 | 0.52366 | 0.72022 | 0.37792 | 0.46253 | 0.3675  | 0.23611 PMCHL2    |
| cg16796590 | 0.0506  | 0.05524 | 0.07282 | 0.06245 | 0.08985 | 0.05269 | 0.06291 | 0.04621 | 0.05432 | 0.04566 MFS2      |
| cg16796951 | 0.8559  | 0.48032 | 0.72999 | 0.83828 | 0.86711 | 0.666   | 0.40501 | 0.25519 | 0.46018 | 0.21237 C20orf152 |
| cg16797831 | 0.23198 | 0.23633 | 0.84554 | 0.85739 | 0.89294 | 0.84442 | 0.84946 | 0.85018 | 0.8659  | 0.83211 KIAA1324  |

|            |         |         |         |         |         |         |         |         |         |                   |
|------------|---------|---------|---------|---------|---------|---------|---------|---------|---------|-------------------|
| cg16799087 | 0.51092 | 0.36325 | 0.57386 | 0.74001 | 0.83059 | 0.64434 | 0.09284 | 0.08281 | 0.25044 | 0.4156 PRDM7      |
| cg16799583 | 0.03982 | 0.0389  | 0.04402 | 0.03363 | 0.04036 | 0.03662 | 0.03579 | 0.03594 | 0.03023 | 0.03186 EXOSC2    |
| cg16799961 | 0.03395 | 0.03653 | 0.05025 | 0.04219 | 0.05248 | 0.04291 | 0.03577 | 0.02759 | 0.03724 | 0.03696 TXNDC9    |
| cg16802152 | 0.06119 | 0.06029 | 0.04532 | 0.04348 | 0.05243 | 0.05068 | 0.03747 | 0.0368  | 0.04336 | 0.04556 CARF      |
| cg16802646 | 0.08162 | 0.07786 | 0.081   | 0.0702  | 0.08589 | 0.06889 | 0.07932 | 0.06621 | 0.06956 | 0.06487 WWC1      |
| cg16803817 | 0.06502 | 0.06781 | 0.07577 | 0.06936 | 0.04127 | 0.06291 | 0.06157 | 0.0667  | 0.05817 | 0.06542 TMEM50B   |
| cg16806347 | 0.02962 | 0.02476 | 0.02803 | 0.02493 | 0.02751 | 0.03052 | 0.02401 | 0.02567 | 0.02208 | 0.02137 FUK       |
| cg16806597 | 0.68478 | 0.5216  | 0.90369 | 0.93916 | 0.9671  | 0.77613 | 0.93255 | 0.9018  | 0.52993 | 0.29742 GRAP      |
| cg16807911 | 0.12206 | 0.13495 | 0.14409 | 0.14493 | 0.13681 | 0.1463  | 0.11047 | 0.12264 | 0.12863 | 0.14094 CDK4      |
| cg16807989 | 0.62914 | 0.65765 | 0.76927 | 0.71091 | 0.8496  | 0.74036 | 0.75671 | 0.83396 | 0.5591  | 0.64388 OR1F1     |
| cg16812893 | 0.13868 | 0.19512 | 0.18847 | 0.19047 | 0.23819 | 0.22578 | 0.06535 | 0.04973 | 0.0482  | 0.04032 KRTAP15-1 |
| cg16814399 | 0.05606 | 0.05483 | 0.08287 | 0.06379 | 0.10991 | 0.0681  | 0.05117 | 0.04872 | 0.05966 | 0.06688 HIBCH     |
| cg16816226 | 0.09815 | 0.07669 | 0.42695 | 0.24395 | 0.23274 | 0.09182 | 0.3514  | 0.09245 | 0.0564  | 0.05864 EDEM1     |
| cg16817034 | 0.0602  | 0.0619  | 0.09289 | 0.0992  | 0.11266 | 0.07259 | 0.04323 | 0.04093 | 0.06611 | 0.06291 GMEB1     |
| cg16817891 | 0.02386 | 0.02329 | 0.12385 | 0.25552 | 0.04143 | 0.03614 | 0.02175 | 0.01956 | 0.02515 | 0.02012 IGF2AS    |
| cg16821394 | 0.03305 | 0.0308  | 0.02835 | 0.02618 | 0.02248 | 0.02403 | 0.02912 | 0.02901 | 0.02443 | 0.02338 NDFIP1    |
| cg16822189 | 0.02838 | 0.029   | 0.02965 | 0.02738 | 0.02699 | 0.03483 | 0.02732 | 0.03073 | 0.01978 | 0.01847 BACE1     |
| cg16823105 | 0.0425  | 0.03975 | 0.04758 | 0.04669 | 0.10145 | 0.04195 | 0.03709 | 0.03864 | 0.03941 | 0.03487 KIAA1900  |
| cg16823701 | 0.52264 | 0.61338 | 0.62657 | 0.71954 | 0.79388 | 0.71789 | 0.61098 | 0.64232 | 0.48525 | 0.44324 IFNA1     |
| cg16823737 | 0.04508 | 0.04598 | 0.04685 | 0.04469 | 0.03818 | 0.0452  | 0.04179 | 0.04611 | 0.04173 | 0.04033 CKAP5     |
| cg16824731 | 0.05066 | 0.03468 | 0.0546  | 0.04593 | 0.10053 | 0.04331 | 0.03894 | 0.04256 | 0.04521 | 0.0341 ILK        |
| cg16825000 | 0.49873 | 0.02932 | 0.46892 | 0.44622 | 0.75482 | 0.70303 | 0.17919 | 0.07835 | 0.52557 | 0.04935 PLA2G2E   |
| cg16825643 | 0.95124 | 0.95073 | 0.94704 | 0.95324 | 0.96899 | 0.95461 | 0.95374 | 0.93566 | 0.9539  | 0.945 FAM38A      |
| cg16826286 | 0.27452 | 0.37482 | 0.36533 | 0.52154 | 0.17709 | 0.08411 | 0.04607 | 0.03887 | 0.48166 | 0.3267 LYZL6      |
| cg16826718 | 0.21279 | 0.03959 | 0.13778 | 0.05315 | 0.07814 | 0.04908 | 0.05861 | 0.04311 | 0.37391 | 0.44631 HRK       |
| cg16829154 | 0.04273 | 0.05053 | 0.05036 | 0.04772 | 0.03941 | 0.05031 | 0.05106 | 0.04514 | 0.04392 | 0.03879 NOTCH1    |
| cg16829450 | 0.93955 | 0.79382 | 0.03579 | 0.03032 | 0.03001 | 0.0259  | 0.02943 | 0.0303  | 0.02553 | 0.02628 NTN4      |
| cg16831889 | 0.41115 | 0.08962 | 0.48257 | 0.49019 | 0.41226 | 0.4421  | 0.38756 | 0.11831 | 0.14382 | 0.15316 HDC       |
| cg16832407 | 0.0854  | 0.06343 | 0.88397 | 0.89377 | 0.13138 | 0.08545 | 0.30785 | 0.43583 | 0.87736 | 0.87604 TRPM3     |
| cg16833230 | 0.03723 | 0.02949 | 0.03773 | 0.04067 | 0.04335 | 0.03834 | 0.02674 | 0.0258  | 0.03756 | 0.02636 DNTTIP2   |
| cg16833551 | 0.65269 | 0.58527 | 0.68663 | 0.77901 | 0.82066 | 0.78523 | 0.71288 | 0.92728 | 0.37017 | 0.32298 GNAS      |
| cg16834187 | 0.4494  | 0.33209 | 0.66133 | 0.79304 | 0.51905 | 0.75015 | 0.56069 | 0.63302 | 0.1274  | 0.20456 BRD7      |
| cg16834431 | 0.04955 | 0.05752 | 0.09637 | 0.10409 | 0.08372 | 0.06446 | 0.04294 | 0.04075 | 0.06031 | 0.04888 ATP1F1    |
| cg16837769 | 0.05078 | 0.03808 | 0.04838 | 0.05242 | 0.07246 | 0.06315 | 0.06446 | 0.05643 | 0.04278 | 0.04765 NDUFA4    |
| cg16842214 | 0.3528  | 0.04375 | 0.91085 | 0.92674 | 0.91513 | 0.89203 | 0.85057 | 0.88517 | 0.63856 | 0.84862 KBTBD5    |
| cg16842485 | 0.03343 | 0.03625 | 0.03276 | 0.03211 | 0.03764 | 0.04705 | 0.03082 | 0.03532 | 0.0237  | 0.01679 C6orf47   |
| cg16847051 | 0.42596 | 0.19038 | 0.47425 | 0.58984 | 0.4542  | 0.5672  | 0.40603 | 0.07446 | 0.07576 | 0.05412 CALCOCO1  |
| cg16848873 | 0.08926 | 0.08616 | 0.09705 | 0.08497 | 0.17971 | 0.11455 | 0.14891 | 0.10515 | 0.09571 | 0.10792 HOXB6     |
| cg16852884 | 0.04547 | 0.04313 | 0.04378 | 0.04689 | 0.03677 | 0.03665 | 0.04415 | 0.04079 | 0.03752 | 0.03742 FAM100A   |
| cg16852892 | 0.03386 | 0.04275 | 0.04073 | 0.04095 | 0.02762 | 0.03543 | 0.03842 | 0.03458 | 0.04723 | 0.03788 MMP16     |
| cg16853860 | 0.74884 | 0.32391 | 0.7747  | 0.7887  | 0.84832 | 0.70669 | 0.75346 | 0.5076  | 0.26172 | 0.12086 TAP1      |

|            |         |         |         |         |         |         |         |         |         |                       |
|------------|---------|---------|---------|---------|---------|---------|---------|---------|---------|-----------------------|
| cg16853982 | 0.93667 | 0.21151 | 0.94867 | 0.96835 | 0.23487 | 0.25507 | 0.87203 | 0.92095 | 0.85262 | 0.10989 ACTN2         |
| cg16854524 | 0.05002 | 0.04873 | 0.04283 | 0.04438 | 0.0257  | 0.04004 | 0.03467 | 0.03605 | 0.04304 | 0.04304 DKFZp686L1814 |
| cg16854606 | 0.85797 | 0.43655 | 0.80575 | 0.86195 | 0.82128 | 0.69515 | 0.61084 | 0.16332 | 0.69485 | 0.5843 DAND5          |
| cg16855440 | 0.82623 | 0.83468 | 0.82082 | 0.83702 | 0.8157  | 0.82779 | 0.81605 | 0.72371 | 0.88832 | 0.84683 KLC3          |
| cg16855929 | 0.79215 | 0.83845 | 0.78694 | 0.80497 | 0.69845 | 0.66848 | 0.65159 | 0.49671 | 0.68551 | 0.4247 EGLN1          |
| cg16858125 | 0.48248 | 0.12052 | 0.22453 | 0.24722 | 0.28297 | 0.14884 | 0.24038 | 0.12862 | 0.61554 | 0.58564 ELOVL1        |
| cg16860587 | 0.04308 | 0.0521  | 0.04698 | 0.04884 | 0.04029 | 0.04428 | 0.04478 | 0.0486  | 0.04289 | 0.04142 ELAVL1        |
| cg16860694 | 0.09502 | 0.07956 | 0.09804 | 0.10698 | 0.09865 | 0.08153 | 0.05776 | 0.05234 | 0.0572  | 0.0715 FXYD5          |
| cg16861508 | 0.04046 | 0.0345  | 0.04687 | 0.04315 | 0.22878 | 0.11839 | 0.10598 | 0.04006 | 0.03183 | 0.03261 TNFRSF10B     |
| cg16862361 | 0.7629  | 0.26731 | 0.73388 | 0.76391 | 0.65385 | 0.75896 | 0.60196 | 0.33824 | 0.62897 | 0.3945 XDH            |
| cg16862838 | 0.07321 | 0.07276 | 0.07157 | 0.07862 | 0.07623 | 0.06216 | 0.07113 | 0.07666 | 0.06119 | 0.06417 RCN2          |
| cg16863382 | 0.91815 | 0.91729 | 0.91378 | 0.90794 | 0.91567 | 0.90447 | 0.91666 | 0.90751 | 0.9221  | 0.92307 CTB1          |
| cg16863447 | 0.09239 | 0.09016 | 0.09075 | 0.08926 | 0.07467 | 0.08009 | 0.08201 | 0.0866  | 0.08328 | 0.08417 TMEM117       |
| cg16864658 | 0.08613 | 0.12594 | 0.92039 | 0.93457 | 0.14204 | 0.09096 | 0.22419 | 0.2225  | 0.04953 | 0.05363 CCK           |
| cg16864895 | 0.05487 | 0.07297 | 0.06738 | 0.05746 | 0.04219 | 0.06096 | 0.06207 | 0.06001 | 0.05396 | 0.05735 C1orf73       |
| cg16866038 | 0.03171 | 0.03641 | 0.03325 | 0.02979 | 0.02842 | 0.03161 | 0.02824 | 0.0288  | 0.02519 | 0.02679 ARCN1         |
| cg16869108 | 0.87056 | 0.04177 | 0.28851 | 0.34    | 0.78398 | 0.48902 | 0.83326 | 0.85724 | 0.09722 | 0.05113 VHL           |
| cg16870320 | 0.03084 | 0.03194 | 0.03208 | 0.02894 | 0.02558 | 0.02949 | 0.03011 | 0.029   | 0.02731 | 0.02516 GALNT4        |
| cg16872071 | 0.85025 | 0.58339 | 0.94624 | 0.94985 | 0.94587 | 0.87761 | 0.93568 | 0.74771 | 0.78147 | 0.52305 RALGDS        |
| cg16872560 | 0.05958 | 0.03137 | 0.03664 | 0.03369 | 0.04681 | 0.02971 | 0.13348 | 0.02544 | 0.3064  | 0.39389 PPP1R9A       |
| cg16873684 | 0.03633 | 0.03099 | 0.03994 | 0.03137 | 0.02981 | 0.03717 | 0.03149 | 0.03383 | 0.03323 | 0.0333 ORC2L          |
| cg16873863 | 0.74617 | 0.57232 | 0.7593  | 0.7641  | 0.66772 | 0.71146 | 0.71828 | 0.6653  | 0.66148 | 0.26325 SLC22A18      |
| cg16878021 | 0.93502 | 0.8438  | 0.89862 | 0.94845 | 0.96842 | 0.93676 | 0.45209 | 0.50033 | 0.30605 | 0.08615               |
| cg16878652 | 0.02543 | 0.02809 | 0.03203 | 0.02721 | 0.02702 | 0.03416 | 0.02712 | 0.02408 | 0.02487 | 0.02709 GPS1          |
| cg16879115 | 0.66955 | 0.35745 | 0.51086 | 0.76574 | 0.45362 | 0.74042 | 0.14371 | 0.15029 | 0.15435 | 0.15931 APOBEC1       |
| cg16879596 | 0.68634 | 0.25747 | 0.71465 | 0.79902 | 0.80669 | 0.42109 | 0.22074 | 0.17724 | 0.24574 | 0.09094 CYP3A5        |
| cg16880396 | 0.84864 | 0.65218 | 0.78789 | 0.88919 | 0.84371 | 0.86342 | 0.82636 | 0.78992 | 0.76271 | 0.53165 APS           |
| cg16882703 | 0.17995 | 0.17073 | 0.18099 | 0.16598 | 0.24714 | 0.19866 | 0.21227 | 0.16934 | 0.16212 | 0.19515 PSMB6         |
| cg16883145 | 0.95148 | 0.95843 | 0.95948 | 0.96781 | 0.9723  | 0.95821 | 0.95876 | 0.96123 | 0.96732 | 0.95634 TGFB1         |
| cg16883533 | 0.04677 | 0.04625 | 0.04575 | 0.04754 | 0.03449 | 0.04234 | 0.04464 | 0.04347 | 0.04199 | 0.03823 EMG1          |
| cg16884042 | 0.35933 | 0.07575 | 0.73021 | 0.77701 | 0.44505 | 0.48193 | 0.60114 | 0.63614 | 0.50701 | 0.30836 SGPP2         |
| cg16884539 | 0.96497 | 0.97302 | 0.95803 | 0.96983 | 0.97776 | 0.97209 | 0.93366 | 0.96694 | 0.97111 | 0.96591 CXorf55       |
| cg16884569 | 0.03219 | 0.03409 | 0.05297 | 0.05474 | 0.84809 | 0.52579 | 0.02982 | 0.03553 | 0.02743 | 0.02746 RASSF2        |
| cg16886188 | 0.04447 | 0.04088 | 0.0432  | 0.03637 | 0.04206 | 0.04533 | 0.03328 | 0.03303 | 0.03426 | 0.02853 ADRA2A        |
| cg16886259 | 0.1952  | 0.15034 | 0.57514 | 0.59034 | 0.40376 | 0.43081 | 0.62053 | 0.67359 | 0.17951 | 0.10976 CYSLTR2       |
| cg16889368 | 0.05102 | 0.05911 | 0.05665 | 0.0558  | 0.05167 | 0.0461  | 0.09149 | 0.08427 | 0.04807 | 0.04873 MRPL15        |
| cg16890093 | 0.85644 | 0.88199 | 0.85445 | 0.85674 | 0.91543 | 0.85347 | 0.83136 | 0.8245  | 0.90399 | 0.8073 PSMB8          |
| cg16890267 | 0.0933  | 0.04323 | 0.21466 | 0.28227 | 0.46763 | 0.56873 | 0.26625 | 0.07738 | 0.53723 | 0.41062 CXCL2         |
| cg16891895 | 0.04671 | 0.04125 | 0.07634 | 0.09744 | 0.29291 | 0.03559 | 0.09058 | 0.03506 | 0.05142 | 0.03484 RGS16         |
| cg16893574 | 0.09746 | 0.08741 | 0.81289 | 0.86424 | 0.68146 | 0.44531 | 0.09685 | 0.15586 | 0.19674 | 0.08219 CALB2         |
| cg16893614 | 0.88101 | 0.83439 | 0.87628 | 0.89546 | 0.93301 | 0.93109 | 0.82336 | 0.64318 | 0.90064 | 0.86054 ALX3          |

|            |         |         |         |         |         |         |         |         |         |                  |
|------------|---------|---------|---------|---------|---------|---------|---------|---------|---------|------------------|
| cg16894211 | 0.65906 | 0.51181 | 0.35695 | 0.48107 | 0.17674 | 0.28702 | 0.11362 | 0.08791 | 0.72069 | 0.50765 SYN3     |
| cg16896371 | 0.08575 | 0.09708 | 0.18269 | 0.11221 | 0.18424 | 0.12393 | 0.08917 | 0.06945 | 0.09403 | 0.11651 CAND1    |
| cg16896647 | 0.45196 | 0.33293 | 0.28977 | 0.4651  | 0.26381 | 0.05332 | 0.32522 | 0.13533 | 0.08989 | 0.05275 SYK      |
| cg16898150 | 0.02238 | 0.02214 | 0.02031 | 0.02005 | 0.01919 | 0.02009 | 0.01743 | 0.01902 | 0.01748 | 0.0164 CCBL1     |
| cg16898420 | 0.04439 | 0.04646 | 0.28557 | 0.40648 | 0.13578 | 0.03829 | 0.04479 | 0.04795 | 0.4445  | 0.39767 PRG-3    |
| cg16899036 | 0.90033 | 0.53127 | 0.90027 | 0.93786 | 0.95539 | 0.68882 | 0.74165 | 0.27584 | 0.92923 | 0.77532 HOMER3   |
| cg16899306 | 0.60866 | 0.48536 | 0.50965 | 0.53412 | 0.19209 | 0.10558 | 0.15636 | 0.08976 | 0.05749 | 0.06179 HLA-DQB2 |
| cg16899442 | 0.4555  | 0.12371 | 0.41832 | 0.45949 | 0.48656 | 0.12275 | 0.11529 | 0.06405 | 0.42359 | 0.16063 C16orf25 |
| cg16900022 | 0.02693 | 0.02869 | 0.03182 | 0.03084 | 0.02611 | 0.0277  | 0.02667 | 0.02706 | 0.02379 | 0.02111 MDN1     |
| cg16902509 | 0.0878  | 0.36092 | 0.69011 | 0.89937 | 0.83144 | 0.76129 | 0.16134 | 0.07011 | 0.12861 | 0.04596 ITGA8    |
| cg16904306 | 0.04051 | 0.03697 | 0.03446 | 0.03825 | 0.12278 | 0.04452 | 0.03175 | 0.03476 | 0.05675 | 0.03233 PCSK5    |
| cg16904599 | 0.03542 | 0.03337 | 0.0372  | 0.03824 | 0.02699 | 0.03349 | 0.03169 | 0.0292  | 0.03342 | 0.03334 C17orf71 |
| cg16905311 | 0.04351 | 0.0467  | 0.05291 | 0.04009 | 0.04603 | 0.05226 | 0.0441  | 0.03728 | 0.03618 | 0.03334 ARL5B    |
| cg16907024 | 0.65423 | 0.38812 | 0.38991 | 0.46619 | 0.85349 | 0.62686 | 0.3569  | 0.25101 | 0.38636 | 0.28061 TCEB3C   |
| cg16907075 | 0.1047  | 0.08682 | 0.26362 | 0.17127 | 0.2081  | 0.10083 | 0.07868 | 0.06796 | 0.12581 | 0.1244 UBQLN4    |
| cg16907167 | 0.05282 | 0.05056 | 0.06466 | 0.05385 | 0.06397 | 0.05674 | 0.04555 | 0.04327 | 0.04877 | 0.05435 TGOLN2   |
| cg16907488 | 0.76684 | 0.48831 | 0.7803  | 0.84531 | 0.63799 | 0.76202 | 0.82864 | 0.80917 | 0.83705 | 0.75296 CCDC17   |
| cg16907514 | 0.1148  | 0.06237 | 0.03577 | 0.03674 | 0.20328 | 0.0663  | 0.05349 | 0.05478 | 0.04503 | 0.06219 KTN1     |
| cg16907566 | 0.16944 | 0.04282 | 0.81577 | 0.80474 | 0.90396 | 0.9185  | 0.28921 | 0.21206 | 0.87788 | 0.84696 COL14A1  |
| cg16908782 | 0.0523  | 0.05211 | 0.05419 | 0.0461  | 0.06039 | 0.05538 | 0.04983 | 0.04739 | 0.04417 | 0.0571 WDHD1     |
| cg16909124 | 0.06484 | 0.0299  | 0.03902 | 0.03322 | 0.03866 | 0.03188 | 0.02665 | 0.0251  | 0.02909 | 0.02375 NR2C1    |
| cg16909364 | 0.04768 | 0.04861 | 0.06326 | 0.05483 | 0.07708 | 0.07613 | 0.04738 | 0.04792 | 0.06162 | 0.05819 THAP2    |
| cg16910379 | 0.04469 | 0.04455 | 0.115   | 0.06706 | 0.06624 | 0.04713 | 0.05527 | 0.05095 | 0.03916 | 0.04073 C17orf79 |
| cg16910767 | 0.04155 | 0.04273 | 0.05523 | 0.04212 | 0.1792  | 0.05164 | 0.03361 | 0.03882 | 0.0327  | 0.03221 RGS9BP   |
| cg16911220 | 0.67066 | 0.7281  | 0.84629 | 0.8775  | 0.90455 | 0.84262 | 0.46516 | 0.4749  | 0.88829 | 0.79206 KRTHB6   |
| cg16913124 | 0.89962 | 0.8231  | 0.89038 | 0.8997  | 0.91595 | 0.62585 | 0.90689 | 0.74588 | 0.91186 | 0.86219 HYAL3    |
| cg16914151 | 0.0859  | 0.07603 | 0.10252 | 0.11036 | 0.95211 | 0.59658 | 0.32187 | 0.14488 | 0.58264 | 0.18892 RPP25    |
| cg16915794 | 0.05246 | 0.03873 | 0.03696 | 0.05534 | 0.05198 | 0.03971 | 0.03637 | 0.03206 | 0.04326 | 0.04489 RAB13    |
| cg16917279 | 0.0298  | 0.02898 | 0.03142 | 0.02704 | 0.02714 | 0.02552 | 0.02828 | 0.02623 | 0.02766 | 0.02388 MRS2L    |
| cg16918585 | 0.03445 | 0.03997 | 0.05112 | 0.04584 | 0.03815 | 0.03846 | 0.03889 | 0.03604 | 0.03842 | 0.03132 NDUFS5   |
| cg16920242 | 0.11537 | 0.10431 | 0.09924 | 0.09223 | 0.07421 | 0.09374 | 0.08156 | 0.07934 | 0.0842  | 0.08133 TEP1     |
| cg16923271 | 0.08668 | 0.08811 | 0.09437 | 0.08527 | 0.1119  | 0.10405 | 0.08055 | 0.08241 | 0.08213 | 0.07337 POLD1    |
| cg16924616 | 0.03432 | 0.03985 | 0.06735 | 0.04943 | 0.22654 | 0.07991 | 0.04406 | 0.03581 | 0.05138 | 0.04506 DLX5     |
| cg16925486 | 0.07034 | 0.04568 | 0.05683 | 0.04601 | 0.03826 | 0.04318 | 0.04995 | 0.04607 | 0.03336 | 0.03502 RPS6     |
| cg16925970 | 0.07455 | 0.07037 | 0.08404 | 0.08043 | 0.0818  | 0.08766 | 0.0798  | 0.06782 | 0.05951 | 0.06062 CENPJ    |
| cg16927136 | 0.08463 | 0.07119 | 0.07157 | 0.07576 | 0.07747 | 0.06459 | 0.0721  | 0.08239 | 0.06393 | 0.06437 RPL35A   |
| cg16927606 | 0.89883 | 0.88442 | 0.89048 | 0.90515 | 0.93882 | 0.90099 | 0.89452 | 0.88278 | 0.90559 | 0.85667 U2AF1L4  |
| cg16928795 | 0.05297 | 0.05962 | 0.05232 | 0.04731 | 0.03653 | 0.04753 | 0.0439  | 0.04896 | 0.04873 | 0.04943 ERCC8    |
| cg16929104 | 0.85334 | 0.73596 | 0.57817 | 0.51721 | 0.40531 | 0.11049 | 0.19735 | 0.18619 | 0.72398 | 0.60575 GDF15    |
| cg16932672 | 0.04096 | 0.04972 | 0.04583 | 0.04536 | 0.06532 | 0.07316 | 0.05538 | 0.0907  | 0.05128 | 0.06617 KNTC2    |
| cg16933388 | 0.0383  | 0.0391  | 0.08812 | 0.41144 | 0.21239 | 0.34638 | 0.03907 | 0.03022 | 0.03038 | 0.02805 BSN      |

|            |         |         |         |         |         |         |         |         |         |                   |
|------------|---------|---------|---------|---------|---------|---------|---------|---------|---------|-------------------|
| cg16933922 | 0.82309 | 0.66431 | 0.10813 | 0.09483 | 0.12309 | 0.09063 | 0.09249 | 0.08294 | 0.08504 | 0.08576 OAT       |
| cg16935075 | 0.65052 | 0.57817 | 0.66181 | 0.74486 | 0.57699 | 0.65694 | 0.39791 | 0.28591 | 0.31629 | 0.40376 TPH1      |
| cg16935609 | 0.6885  | 0.47763 | 0.26263 | 0.29045 | 0.39454 | 0.37844 | 0.70327 | 0.69148 | 0.78536 | 0.74622 SRD5A1    |
| cg16937611 | 0.72473 | 0.80668 | 0.73182 | 0.79685 | 0.74317 | 0.8135  | 0.49146 | 0.34383 | 0.53903 | 0.43773 SERPINA5  |
| cg16940108 | 0.08481 | 0.06228 | 0.07724 | 0.07725 | 0.04328 | 0.04184 | 0.06843 | 0.08437 | 0.0525  | 0.03982 CANX      |
| cg16940801 | 0.07939 | 0.08838 | 0.07935 | 0.08619 | 0.05562 | 0.0773  | 0.0659  | 0.06368 | 0.06874 | 0.07295 PKM2      |
| cg16940935 | 0.71073 | 0.75822 | 0.48517 | 0.49144 | 0.63267 | 0.6838  | 0.10629 | 0.09876 | 0.2636  | 0.3248 ACSM1      |
| cg16941656 | 0.0748  | 0.05483 | 0.03226 | 0.03048 | 0.02334 | 0.03474 | 0.02489 | 0.02491 | 0.03364 | 0.02254 FRY       |
| cg16944093 | 0.71454 | 0.57886 | 0.89555 | 0.90942 | 0.73249 | 0.88842 | 0.59902 | 0.3373  | 0.57556 | 0.54518 LIMS2     |
| cg16948369 | 0.13706 | 0.29921 | 0.23083 | 0.17282 | 0.57593 | 0.75503 | 0.17746 | 0.16286 | 0.17376 | 0.15832 KLHL4     |
| cg16948979 | 0.05108 | 0.04899 | 0.05635 | 0.05253 | 0.03233 | 0.04502 | 0.04121 | 0.04206 | 0.03667 | 0.04173 WDR21A    |
| cg16949889 | 0.90115 | 0.7889  | 0.92873 | 0.93246 | 0.93855 | 0.91068 | 0.91111 | 0.84584 | 0.94779 | 0.90614 DND1      |
| cg16950012 | 0.04216 | 0.02791 | 0.0403  | 0.03375 | 0.06184 | 0.03152 | 0.02682 | 0.02605 | 0.02798 | 0.02313 ATG5      |
| cg16950616 | 0.11627 | 0.10869 | 0.12771 | 0.12011 | 0.13765 | 0.12061 | 0.09993 | 0.07458 | 0.30154 | 0.10747 STXBP4    |
| cg16953064 | 0.03961 | 0.03998 | 0.05066 | 0.03665 | 0.03762 | 0.04087 | 0.0345  | 0.02949 | 0.03087 | 0.02978 TXNL4B    |
| cg16953612 | 0.56702 | 0.25152 | 0.52131 | 0.45259 | 0.48122 | 0.34717 | 0.07719 | 0.07633 | 0.34555 | 0.28715 DNAJB8    |
| cg16954341 | 0.70792 | 0.90908 | 0.89316 | 0.92038 | 0.14746 | 0.06369 | 0.23823 | 0.4656  | 0.47896 | 0.27339 SCGN      |
| cg16954928 | 0.037   | 0.04111 | 0.03899 | 0.03356 | 0.0295  | 0.03199 | 0.0304  | 0.03246 | 0.03144 | 0.02958 LOC147808 |
| cg16956268 | 0.08494 | 0.07968 | 0.09262 | 0.07481 | 0.06901 | 0.06952 | 0.0747  | 0.06411 | 0.06754 | 0.05641 CDK5RAP2  |
| cg16957313 | 0.14527 | 0.07979 | 0.05698 | 0.05709 | 0.31177 | 0.23911 | 0.06003 | 0.08215 | 0.78132 | 0.77225 DUSP1     |
| cg16957569 | 0.53319 | 0.26334 | 0.34577 | 0.41754 | 0.40728 | 0.44912 | 0.35817 | 0.35937 | 0.35703 | 0.2959 INDOL1     |
| cg16958189 | 0.05224 | 0.05072 | 0.05415 | 0.04706 | 0.03106 | 0.04063 | 0.04853 | 0.04258 | 0.04404 | 0.04195 BTBD1     |
| cg16959606 | 0.42233 | 0.068   | 0.06267 | 0.06256 | 0.19038 | 0.05303 | 0.05682 | 0.0502  | 0.04911 | 0.05226 ATP1B1    |
| cg16959972 | 0.09144 | 0.04734 | 0.11004 | 0.2007  | 0.07987 | 0.06197 | 0.05451 | 0.05386 | 0.07864 | 0.07642 DMC1      |
| cg16961092 | 0.02858 | 0.02401 | 0.02582 | 0.02327 | 0.03018 | 0.03287 | 0.02616 | 0.02429 | 0.02386 | 0.02206 KIAA1737  |
| cg16961218 | 0.02322 | 0.02714 | 0.02962 | 0.0508  | 0.02162 | 0.02229 | 0.02405 | 0.0231  | 0.02319 | 0.02665 ATP9B     |
| cg16962970 | 0.0271  | 0.0333  | 0.03246 | 0.03597 | 0.02686 | 0.03473 | 0.02804 | 0.02734 | 0.03222 | 0.02849 RASAL2    |
| cg16964535 | 0.93671 | 0.93158 | 0.92188 | 0.94018 | 0.94513 | 0.92937 | 0.80217 | 0.90745 | 0.92332 | 0.91032 DNAJC5G   |
| cg16967583 | 0.49362 | 0.07359 | 0.40398 | 0.60054 | 0.19547 | 0.10067 | 0.04224 | 0.05311 | 0.08395 | 0.04284 AGXT      |
| cg16969623 | 0.06344 | 0.05419 | 0.54892 | 0.54239 | 0.22245 | 0.38108 | 0.05247 | 0.05573 | 0.04331 | 0.04414 ZNF331    |
| cg16970232 | 0.08682 | 0.05893 | 0.0686  | 0.06394 | 0.06752 | 0.05203 | 0.06964 | 0.0716  | 0.04806 | 0.05633 APC       |
| cg16970828 | 0.62843 | 0.08577 | 0.20104 | 0.33708 | 0.16181 | 0.08334 | 0.1607  | 0.04216 | 0.05821 | 0.03781 UBE1L     |
| cg16977035 | 0.34223 | 0.23913 | 0.36355 | 0.20226 | 0.92616 | 0.61022 | 0.29145 | 0.15923 | 0.92582 | 0.87001 ALX4      |
| cg16977257 | 0.04469 | 0.04077 | 0.10242 | 0.07816 | 0.08227 | 0.05412 | 0.06014 | 0.04729 | 0.28457 | 0.03621 PRND      |
| cg16977872 | 0.03029 | 0.03358 | 0.07693 | 0.04745 | 0.02329 | 0.02313 | 0.07024 | 0.03199 | 0.15182 | 0.0204 FKBP2      |
| cg16978070 | 0.04303 | 0.04191 | 0.03685 | 0.03689 | 0.03988 | 0.03596 | 0.03913 | 0.03596 | 0.03261 | 0.04488 FLJ39370  |
| cg16978263 | 0.04519 | 0.04599 | 0.04854 | 0.04589 | 0.03401 | 0.04165 | 0.04201 | 0.04373 | 0.04112 | 0.03888 IFT80     |
| cg16979445 | 0.84016 | 0.84739 | 0.8606  | 0.87534 | 0.69443 | 0.77636 | 0.87588 | 0.8539  | 0.91114 | 0.88001 NRM       |
| cg16983159 | 0.07314 | 0.12212 | 0.16116 | 0.23198 | 0.10244 | 0.13691 | 0.11782 | 0.17207 | 0.04412 | 0.05591 LOC340061 |
| cg16983211 | 0.08259 | 0.08948 | 0.11712 | 0.11636 | 0.8596  | 0.88611 | 0.7178  | 0.11827 | 0.10472 | 0.09893 HOXC5     |
| cg16984812 | 0.87907 | 0.78746 | 0.87153 | 0.88604 | 0.89703 | 0.80361 | 0.7928  | 0.85667 | 0.71143 | 0.59546 PLEKHH2   |

|            |         |         |         |         |         |         |         |         |         |                  |
|------------|---------|---------|---------|---------|---------|---------|---------|---------|---------|------------------|
| cg16984944 | 0.53273 | 0.07779 | 0.24792 | 0.46759 | 0.58952 | 0.41451 | 0.12234 | 0.08146 | 0.05851 | 0.0587 TBC1D23   |
| cg16986494 | 0.03121 | 0.02903 | 0.03186 | 0.03084 | 0.03853 | 0.0443  | 0.03708 | 0.04068 | 0.02453 | 0.02483 FHIT     |
| cg16986720 | 0.61345 | 0.35744 | 0.1991  | 0.15285 | 0.78384 | 0.75699 | 0.53538 | 0.77543 | 0.11633 | 0.09475 DLG2     |
| cg16986846 | 0.24762 | 0.1449  | 0.51888 | 0.74439 | 0.87006 | 0.78433 | 0.08788 | 0.08221 | 0.11302 | 0.05957 SCGB2A1  |
| cg16989248 | 0.88169 | 0.70508 | 0.89718 | 0.88268 | 0.86099 | 0.42656 | 0.89594 | 0.86138 | 0.92436 | 0.76267 CCT6A    |
| cg16989646 | 0.06472 | 0.03204 | 0.03266 | 0.03004 | 0.1357  | 0.02677 | 0.03092 | 0.02245 | 0.03782 | 0.01902 SLC25A15 |
| cg16990174 | 0.72668 | 0.58579 | 0.85166 | 0.88617 | 0.62965 | 0.36289 | 0.78981 | 0.29093 | 0.06746 | 0.05158 RYBP     |
| cg16991589 | 0.85726 | 0.48383 | 0.78939 | 0.78609 | 0.31707 | 0.48783 | 0.36849 | 0.30325 | 0.61234 | 0.29563 PABPC3   |
| cg16992787 | 0.92857 | 0.82362 | 0.90896 | 0.93189 | 0.95782 | 0.92916 | 0.78333 | 0.91483 | 0.91339 | 0.87341 CAPS     |
| cg16993440 | 0.03455 | 0.04082 | 0.0414  | 0.03491 | 0.02656 | 0.03639 | 0.03195 | 0.03263 | 0.03097 | 0.03319 ZCCHC9   |
| cg16993794 | 0.21414 | 0.23315 | 0.07881 | 0.09689 | 0.85985 | 0.89253 | 0.07272 | 0.06616 | 0.05583 | 0.05123 SLC2A11  |
| cg16994506 | 0.02932 | 0.04293 | 0.06667 | 0.03851 | 0.35273 | 0.40397 | 0.05463 | 0.0504  | 0.03965 | 0.03528 CCND2    |
| cg16998207 | 0.04597 | 0.04203 | 0.07037 | 0.08641 | 0.05618 | 0.04444 | 0.04058 | 0.04075 | 0.04371 | 0.03722 FCMD     |
| cg16998213 | 0.02543 | 0.02262 | 0.02284 | 0.02431 | 0.02151 | 0.01944 | 0.0222  | 0.02002 | 0.02255 | 0.01921 METRN    |
| cg16998353 | 0.03763 | 0.04009 | 0.04617 | 0.04938 | 0.03609 | 0.0479  | 0.07809 | 0.03584 | 0.03083 | 0.03173 TRIM3    |
| cg16998872 | 0.39338 | 0.3815  | 0.77351 | 0.87914 | 0.63911 | 0.71624 | 0.49228 | 0.48988 | 0.51238 | 0.3753 GYPE      |
| cg17001035 | 0.35171 | 0.08244 | 0.53743 | 0.67095 | 0.62117 | 0.48589 | 0.51703 | 0.19967 | 0.36095 | 0.255 PCGF5      |
| cg17001430 | 0.78333 | 0.79143 | 0.61487 | 0.80516 | 0.7943  | 0.62458 | 0.54448 | 0.22015 | 0.18548 | 0.09521 KIF25    |
| cg17001652 | 0.22284 | 0.19508 | 0.31242 | 0.31371 | 0.53939 | 0.25021 | 0.66038 | 0.54013 | 0.22605 | 0.14015 CXCL13   |
| cg17001703 | 0.03239 | 0.03162 | 0.03861 | 0.04177 | 0.03033 | 0.03649 | 0.27018 | 0.04033 | 0.02607 | 0.02998 LAS1L    |
| cg17002259 | 0.04042 | 0.03605 | 0.03792 | 0.03834 | 0.0289  | 0.03192 | 0.02937 | 0.03155 | 0.0357  | 0.02915 CDC42SE1 |
| cg17003970 | 0.89712 | 0.72527 | 0.8834  | 0.90397 | 0.78915 | 0.70619 | 0.87663 | 0.86726 | 0.88737 | 0.88008 CHFR     |
| cg17004162 | 0.10403 | 0.09158 | 0.10829 | 0.10804 | 0.08295 | 0.08702 | 0.10957 | 0.10649 | 0.0861  | 0.0989 MFGE8     |
| cg17004373 | 0.05852 | 0.05841 | 0.06445 | 0.06509 | 0.08461 | 0.07727 | 0.08354 | 0.0659  | 0.05667 | 0.05712 GNL2     |
| cg17006282 | 0.93143 | 0.90182 | 0.9262  | 0.94105 | 0.92258 | 0.88527 | 0.63918 | 0.21803 | 0.30579 | 0.27786 RPL36    |
| cg17009433 | 0.04644 | 0.05223 | 0.05257 | 0.03859 | 0.08101 | 0.06377 | 0.24603 | 0.04346 | 0.10669 | 0.03359 GLDC     |
| cg17009717 | 0.11323 | 0.12034 | 0.11519 | 0.10589 | 0.0692  | 0.08565 | 0.08741 | 0.08727 | 0.09135 | 0.10264 POLR1B   |
| cg17010112 | 0.1659  | 0.07643 | 0.11579 | 0.07788 | 0.19512 | 0.10314 | 0.08635 | 0.06947 | 0.08885 | 0.0689 GENX-3414 |
| cg17015234 | 0.03611 | 0.02984 | 0.03526 | 0.02864 | 0.02618 | 0.0283  | 0.03013 | 0.02917 | 0.02749 | 0.0217 RABL2A    |
| cg17016000 | 0.86052 | 0.86461 | 0.47628 | 0.67809 | 0.63098 | 0.77326 | 0.85729 | 0.47606 | 0.25786 | 0.46409 RIN2     |
| cg17017278 | 0.10715 | 0.11237 | 0.11053 | 0.12661 | 0.15201 | 0.11784 | 0.10843 | 0.09436 | 0.10026 | 0.11871 TRUB1    |
| cg17018517 | 0.68775 | 0.09008 | 0.85573 | 0.90759 | 0.93745 | 0.86282 | 0.63371 | 0.79918 | 0.8809  | 0.84893 ENTPD2   |
| cg17018527 | 0.05224 | 0.03624 | 0.04652 | 0.03947 | 0.12214 | 0.06283 | 0.03058 | 0.03247 | 0.04846 | 0.02676 TM6SF1   |
| cg17020834 | 0.05063 | 0.03113 | 0.91673 | 0.92602 | 0.17246 | 0.04433 | 0.69522 | 0.47907 | 0.02527 | 0.02125 GRIA1    |
| cg17021265 | 0.12009 | 0.10893 | 0.13473 | 0.13561 | 0.15331 | 0.12756 | 0.09718 | 0.07942 | 0.07627 | 0.09123 CD2AP    |
| cg17022479 | 0.21421 | 0.21333 | 0.23674 | 0.26191 | 0.27378 | 0.22907 | 0.18281 | 0.14823 | 0.21813 | 0.22244 FAF1     |
| cg17022635 | 0.04636 | 0.02931 | 0.02836 | 0.02761 | 0.02267 | 0.02298 | 0.0247  | 0.02314 | 0.0218  | 0.02482 FUS      |
| cg17022914 | 0.24189 | 0.04983 | 0.0485  | 0.07625 | 0.03874 | 0.03857 | 0.0333  | 0.03689 | 0.03613 | 0.03835 BATF2    |
| cg17026456 | 0.04544 | 0.03958 | 0.06134 | 0.06128 | 0.06947 | 0.05968 | 0.04894 | 0.04312 | 0.0546  | 0.05743 PXN      |
| cg17026542 | 0.37116 | 0.4554  | 0.64833 | 0.68763 | 0.54451 | 0.4854  | 0.17186 | 0.15195 | 0.23574 | 0.20496 OR2A4    |
| cg17027046 | 0.14287 | 0.12226 | 0.14161 | 0.14176 | 0.20488 | 0.17195 | 0.15234 | 0.13965 | 0.106   | 0.11527 ITPA     |



|            |         |         |         |         |         |         |         |         |         |         |           |
|------------|---------|---------|---------|---------|---------|---------|---------|---------|---------|---------|-----------|
| cg17028039 | 0.13563 | 0.0425  | 0.3185  | 0.47269 | 0.04701 | 0.04801 | 0.04058 | 0.04126 | 0.04882 | 0.03899 | FGFR2     |
| cg17029151 | 0.80839 | 0.53065 | 0.48711 | 0.69908 | 0.70604 | 0.66096 | 0.03106 | 0.03188 | 0.10994 | 0.02617 | CHMP4C    |
| cg17029168 | 0.05719 | 0.051   | 0.09786 | 0.24792 | 0.06828 | 0.05102 | 0.08248 | 0.07474 | 0.13865 | 0.04405 | NKX2-2    |
| cg17030820 | 0.83371 | 0.47755 | 0.68543 | 0.89982 | 0.897   | 0.89068 | 0.42055 | 0.49176 | 0.91662 | 0.86431 | MSMB      |
| cg17031727 | 0.83236 | 0.61856 | 0.39441 | 0.43034 | 0.48367 | 0.49637 | 0.24354 | 0.05216 | 0.04209 | 0.03675 | COG2      |
| cg17031773 | 0.14459 | 0.13952 | 0.16428 | 0.16733 | 0.32992 | 0.51313 | 0.10308 | 0.09378 | 0.08642 | 0.09508 | KLK9      |
| cg17032587 | 0.36631 | 0.1005  | 0.09261 | 0.10207 | 0.69409 | 0.78139 | 0.067   | 0.11058 | 0.0573  | 0.05958 | CNGA2     |
| cg17034082 | 0.04136 | 0.04026 | 0.04013 | 0.03878 | 0.03675 | 0.03986 | 0.03757 | 0.04456 | 0.04515 | 0.04056 | C5orf3    |
| cg17034109 | 0.45887 | 0.11044 | 0.81539 | 0.83712 | 0.93101 | 0.64095 | 0.51088 | 0.73555 | 0.38937 | 0.27817 | CYB561D1  |
| cg17036441 | 0.04186 | 0.04618 | 0.04706 | 0.04317 | 0.03233 | 0.0393  | 0.04098 | 0.04249 | 0.03776 | 0.03632 | NCBP2     |
| cg17036737 | 0.20186 | 0.12038 | 0.28916 | 0.33324 | 0.24054 | 0.23564 | 0.11992 | 0.12512 | 0.34249 | 0.14382 | RBM8A     |
| cg17037924 | 0.11432 | 0.09479 | 0.10633 | 0.11522 | 0.22581 | 0.10309 | 0.12793 | 0.12103 | 0.18611 | 0.20485 | DUT       |
| cg17038116 | 0.04272 | 0.03993 | 0.09478 | 0.0858  | 0.05419 | 0.04051 | 0.0384  | 0.03882 | 0.05438 | 0.05294 | ASH1L     |
| cg17040807 | 0.85437 | 0.86707 | 0.8446  | 0.85599 | 0.88393 | 0.68776 | 0.84263 | 0.84061 | 0.88083 | 0.86172 | CYGB      |
| cg17041296 | 0.76385 | 0.66274 | 0.3692  | 0.36978 | 0.57844 | 0.74243 | 0.84069 | 0.86225 | 0.1993  | 0.16925 | ASB17     |
| cg17043101 | 0.03544 | 0.03757 | 0.03824 | 0.03499 | 0.02737 | 0.03468 | 0.03594 | 0.03764 | 0.03217 | 0.0321  | NOLC1     |
| cg17043155 | 0.04111 | 0.04614 | 0.05063 | 0.03963 | 0.05879 | 0.03604 | 0.03661 | 0.03373 | 0.04787 | 0.04214 | MRPL19    |
| cg17043366 | 0.02125 | 0.02109 | 0.02325 | 0.02153 | 0.01945 | 0.01864 | 0.02169 | 0.02105 | 0.01645 | 0.01693 | ZNF414    |
| cg17043922 | 0.13285 | 0.13322 | 0.05751 | 0.09477 | 0.03839 | 0.08697 | 0.02098 | 0.02238 | 0.02021 | 0.01798 | C6orf106  |
| cg17044311 | 0.76349 | 0.75818 | 0.75617 | 0.77388 | 0.57346 | 0.74661 | 0.75588 | 0.79825 | 0.8116  | 0.75437 | ABCC2     |
| cg17044611 | 0.0304  | 0.03582 | 0.03853 | 0.03906 | 0.02998 | 0.03471 | 0.04546 | 0.04759 | 0.02715 | 0.03399 | ASAH1     |
| cg17045009 | 0.04447 | 0.05414 | 0.05353 | 0.04511 | 0.03495 | 0.03873 | 0.04785 | 0.05076 | 0.04204 | 0.04904 | VCPIP1    |
| cg17048363 | 0.02719 | 0.03548 | 0.03861 | 0.03628 | 0.02956 | 0.04518 | 0.03713 | 0.03207 | 0.03237 | 0.0275  | CDK8      |
| cg17048483 | 0.02942 | 0.02534 | 0.03264 | 0.02426 | 0.0197  | 0.02518 | 0.02763 | 0.02804 | 0.02642 | 0.0252  | RBM7      |
| cg17049328 | 0.86693 | 0.79036 | 0.8874  | 0.88246 | 0.88463 | 0.879   | 0.15172 | 0.23438 | 0.90492 | 0.88989 | GHRH      |
| cg17050100 | 0.03462 | 0.03515 | 0.04243 | 0.03556 | 0.03535 | 0.03608 | 0.02594 | 0.02917 | 0.04991 | 0.0301  | XAB1      |
| cg17050972 | 0.04086 | 0.03672 | 0.04968 | 0.04318 | 0.03218 | 0.05093 | 0.41685 | 0.19594 | 0.522   | 0.50489 | HIST1H2AJ |
| cg17051321 | 0.05573 | 0.06167 | 0.05349 | 0.0509  | 0.04891 | 0.04986 | 0.30754 | 0.11651 | 0.04681 | 0.04954 | BNC1      |
| cg17051440 | 0.50951 | 0.30684 | 0.80062 | 0.64201 | 0.94708 | 0.08044 | 0.06607 | 0.05006 | 0.54342 | 0.32482 | CLDN2     |
| cg17051623 | 0.02679 | 0.02388 | 0.02916 | 0.03902 | 0.03154 | 0.025   | 0.02192 | 0.02126 | 0.02586 | 0.02498 | DDEFL1    |
| cg17054360 | 0.41516 | 0.41088 | 0.04262 | 0.0334  | 0.03366 | 0.03538 | 0.02664 | 0.02766 | 0.02748 | 0.02387 | MTERF     |
| cg17055145 | 0.02726 | 0.02506 | 0.02674 | 0.02755 | 0.0256  | 0.02784 | 0.02186 | 0.02179 | 0.07108 | 0.01897 | MYO6      |
| cg17055734 | 0.85034 | 0.72243 | 0.85645 | 0.90922 | 0.9048  | 0.87783 | 0.70647 | 0.89412 | 0.80945 | 0.77516 | CRYGA     |
| cg17055959 | 0.14171 | 0.14845 | 0.16985 | 0.17916 | 0.16809 | 0.16703 | 0.12007 | 0.1139  | 0.12521 | 0.13485 | RB1       |
| cg17057072 | 0.07673 | 0.05445 | 0.06476 | 0.05766 | 0.03191 | 0.05272 | 0.04767 | 0.04946 | 0.05634 | 0.04958 | SMYD4     |
| cg17057965 | 0.05295 | 0.04885 | 0.07201 | 0.05964 | 0.04726 | 0.06269 | 0.06144 | 0.05178 | 0.04472 | 0.04339 | FBXO28    |
| cg17058777 | 0.05949 | 0.04535 | 0.06325 | 0.05241 | 0.03443 | 0.03279 | 0.03511 | 0.03508 | 0.03395 | 0.03435 | FLJ20625  |
| cg17061853 | 0.03451 | 0.03359 | 0.03857 | 0.03752 | 0.03336 | 0.03721 | 0.03024 | 0.03752 | 0.03669 | 0.03178 | C12orf11  |
| cg17063018 | 0.02016 | 0.02538 | 0.03283 | 0.03156 | 0.02114 | 0.02163 | 0.02479 | 0.02493 | 0.02251 | 0.02299 | FBXO28    |
| cg17063201 | 0.84978 | 0.85934 | 0.81829 | 0.84564 | 0.76442 | 0.78746 | 0.74324 | 0.71763 | 0.08242 | 0.09996 | HCRTR2    |
| cg17063929 | 0.79117 | 0.81677 | 0.34154 | 0.46522 | 0.56776 | 0.64756 | 0.33358 | 0.88097 | 0.27719 | 0.13738 | NOX4      |

|            |         |         |         |         |         |         |         |         |         |                   |
|------------|---------|---------|---------|---------|---------|---------|---------|---------|---------|-------------------|
| cg17065601 | 0.08033 | 0.02545 | 0.07532 | 0.04797 | 0.03813 | 0.02572 | 0.025   | 0.02604 | 0.02644 | 0.02286 SUMO2     |
| cg17066382 | 0.04563 | 0.04452 | 0.04923 | 0.04242 | 0.049   | 0.0492  | 0.05256 | 0.04141 | 0.04188 | 0.04266 LMBR1L    |
| cg17067005 | 0.84793 | 0.79552 | 0.81983 | 0.84484 | 0.84309 | 0.82889 | 0.78978 | 0.85088 | 0.84441 | 0.84808 IL10      |
| cg17067528 | 0.05022 | 0.03226 | 0.03787 | 0.03276 | 0.04998 | 0.04296 | 0.02794 | 0.02594 | 0.02386 | 0.02404 IER3      |
| cg17067942 | 0.86098 | 0.86983 | 0.85222 | 0.85154 | 0.8814  | 0.85955 | 0.84213 | 0.83952 | 0.85845 | 0.54951 C5orf14   |
| cg17067993 | 0.83708 | 0.51391 | 0.68337 | 0.78204 | 0.73218 | 0.80661 | 0.07919 | 0.05495 | 0.58005 | 0.28188 CCR7      |
| cg17071536 | 0.03793 | 0.03856 | 0.03257 | 0.03085 | 0.06347 | 0.05855 | 0.03757 | 0.03717 | 0.03414 | 0.04611 SEC10L1   |
| cg17071957 | 0.79545 | 0.14107 | 0.66854 | 0.73269 | 0.50347 | 0.28258 | 0.63991 | 0.13804 | 0.27308 | 0.04978 GSN       |
| cg17072268 | 0.7174  | 0.57428 | 0.71653 | 0.7392  | 0.66933 | 0.66704 | 0.6757  | 0.73693 | 0.789   | 0.72623 PLD3      |
| cg17073891 | 0.52519 | 0.27804 | 0.67939 | 0.71118 | 0.57752 | 0.65116 | 0.40782 | 0.4211  | 0.61316 | 0.45943 PLAC1     |
| cg17074151 | 0.56461 | 0.14738 | 0.21204 | 0.47192 | 0.4561  | 0.45964 | 0.27049 | 0.2801  | 0.25371 | 0.16061 UNQ2541   |
| cg17074212 | 0.07517 | 0.08114 | 0.41905 | 0.50961 | 0.12053 | 0.08767 | 0.07507 | 0.16652 | 0.06667 | 0.09763 ZNF215    |
| cg17076012 | 0.12466 | 0.1157  | 0.10662 | 0.0942  | 0.08481 | 0.08512 | 0.23875 | 0.09167 | 0.09033 | 0.10079 KLHDC1    |
| cg17076921 | 0.0837  | 0.09243 | 0.08988 | 0.09574 | 0.05281 | 0.07076 | 0.07552 | 0.06684 | 0.07085 | 0.08867 CAMK2G    |
| cg17078393 | 0.91825 | 0.90858 | 0.90505 | 0.90561 | 0.89388 | 0.87471 | 0.79363 | 0.88082 | 0.90444 | 0.88277 LCK       |
| cg17079378 | 0.01987 | 0.01941 | 0.02261 | 0.02095 | 0.01612 | 0.01657 | 0.01674 | 0.01797 | 0.01457 | 0.01439 RAD54L    |
| cg17080180 | 0.10096 | 0.06022 | 0.18096 | 0.12938 | 0.30707 | 0.06137 | 0.06049 | 0.04252 | 0.11428 | 0.04854 POMT2     |
| cg17080277 | 0.0456  | 0.05108 | 0.06762 | 0.06746 | 0.03878 | 0.04257 | 0.03881 | 0.03901 | 0.07767 | 0.03915 PTPRB     |
| cg17083853 | 0.03944 | 0.04447 | 0.03848 | 0.03515 | 0.03836 | 0.03572 | 0.03279 | 0.03114 | 0.02587 | 0.02813 SURF1     |
| cg17083925 | 0.49547 | 0.66309 | 0.8671  | 0.8544  | 0.38742 | 0.24641 | 0.79714 | 0.7429  | 0.43912 | 0.42266 TGM2      |
| cg17084151 | 0.1556  | 0.15402 | 0.29219 | 0.42728 | 0.27451 | 0.17868 | 0.20148 | 0.17131 | 0.1582  | 0.1884 NCALD      |
| cg17084361 | 0.04112 | 0.03782 | 0.67644 | 0.76875 | 0.29095 | 0.68584 | 0.4088  | 0.18416 | 0.0535  | 0.04288 CDS1      |
| cg17085299 | 0.02303 | 0.02341 | 0.0311  | 0.02513 | 0.02393 | 0.02391 | 0.02605 | 0.02328 | 0.10119 | 0.01656 IRF2BP1   |
| cg17088290 | 0.84127 | 0.6986  | 0.86309 | 0.87004 | 0.88339 | 0.69019 | 0.83913 | 0.84567 | 0.8747  | 0.82705 AMHR2     |
| cg17090012 | 0.7525  | 0.80544 | 0.79444 | 0.7539  | 0.68799 | 0.77848 | 0.7317  | 0.76155 | 0.82282 | 0.80682 DAPK1     |
| cg17091770 | 0.06236 | 0.06235 | 0.04876 | 0.0456  | 0.02888 | 0.03978 | 0.03043 | 0.03721 | 0.0584  | 0.04829 STYX      |
| cg17091851 | 0.63298 | 0.40747 | 0.38605 | 0.47835 | 0.54644 | 0.53141 | 0.23714 | 0.16127 | 0.29583 | 0.29908 LOC348174 |
| cg17092062 | 0.0388  | 0.04765 | 0.03895 | 0.03773 | 0.03221 | 0.03976 | 0.0344  | 0.04117 | 0.03226 | 0.03771 SLC35C1   |
| cg17092637 | 0.73164 | 0.76143 | 0.43068 | 0.43606 | 0.60994 | 0.50633 | 0.28627 | 0.40281 | 0.39219 | 0.36717 CASP4     |
| cg17093267 | 0.27822 | 0.25093 | 0.40569 | 0.57657 | 0.33804 | 0.28642 | 0.41992 | 0.42316 | 0.24897 | 0.20647 XPNPEP1   |
| cg17095279 | 0.79675 | 0.81993 | 0.75841 | 0.76301 | 0.60174 | 0.73386 | 0.82817 | 0.82278 | 0.71557 | 0.58849 APOH      |
| cg17095731 | 0.9333  | 0.49598 | 0.92329 | 0.91002 | 0.95046 | 0.8319  | 0.91648 | 0.58967 | 0.93569 | 0.87529 LRP8      |
| cg17095753 | 0.02276 | 0.03196 | 0.05473 | 0.03919 | 0.04826 | 0.04922 | 0.02399 | 0.0249  | 0.02241 | 0.0185 BRAF       |
| cg17095797 | 0.36023 | 0.1614  | 0.74023 | 0.71068 | 0.88736 | 0.52752 | 0.72382 | 0.57952 | 0.64616 | 0.25857 FOXL1     |
| cg17095936 | 0.89798 | 0.09576 | 0.88833 | 0.89566 | 0.9037  | 0.87593 | 0.88811 | 0.82658 | 0.89613 | 0.75142 TBX19     |
| cg17096191 | 0.11407 | 0.06066 | 0.13103 | 0.16492 | 0.07536 | 0.06034 | 0.07479 | 0.06199 | 0.05567 | 0.04897 NOS1AP    |
| cg17099569 | 0.69311 | 0.35364 | 0.62561 | 0.66982 | 0.42767 | 0.3993  | 0.28682 | 0.38571 | 0.43734 | 0.25809 GLI2      |
| cg17100200 | 0.73608 | 0.26455 | 0.89021 | 0.92729 | 0.9474  | 0.88642 | 0.77905 | 0.88128 | 0.4348  | 0.45957 GUCA2B    |
| cg17100322 | 0.04525 | 0.05453 | 0.05498 | 0.05566 | 0.03331 | 0.04759 | 0.04612 | 0.04555 | 0.04983 | 0.04365 FYN       |
| cg17102807 | 0.81414 | 0.83151 | 0.81879 | 0.82388 | 0.6815  | 0.77108 | 0.78739 | 0.81577 | 0.8665  | 0.86965 POLR1C    |
| cg17103109 | 0.65027 | 0.35312 | 0.79298 | 0.81117 | 0.83237 | 0.87582 | 0.76726 | 0.46417 | 0.80673 | 0.52108 HLA-DOB   |

|            |         |         |         |         |         |         |         |         |         |                  |
|------------|---------|---------|---------|---------|---------|---------|---------|---------|---------|------------------|
| cg17105014 | 0.85133 | 0.75992 | 0.06161 | 0.06247 | 0.08184 | 0.06554 | 0.47743 | 0.49356 | 0.05017 | 0.04702 GYPC     |
| cg17108383 | 0.91096 | 0.79165 | 0.89693 | 0.90955 | 0.9213  | 0.92577 | 0.88828 | 0.89933 | 0.92485 | 0.80965 PCDHGC5  |
| cg17108819 | 0.05952 | 0.02701 | 0.49977 | 0.54963 | 0.47143 | 0.80795 | 0.15768 | 0.02431 | 0.0273  | 0.01898 CD8A     |
| cg17109273 | 0.02591 | 0.02325 | 0.02048 | 0.02117 | 0.03217 | 0.02879 | 0.01931 | 0.02107 | 0.02228 | 0.02484 TINF2    |
| cg17111669 | 0.05291 | 0.05175 | 0.04896 | 0.04899 | 0.05126 | 0.06587 | 0.05398 | 0.05773 | 0.04085 | 0.04047 NCOA5    |
| cg17114257 | 0.17885 | 0.13528 | 0.38441 | 0.52604 | 0.65313 | 0.77486 | 0.47726 | 0.03947 | 0.02031 | 0.01842 FCHSD2   |
| cg17115258 | 0.03252 | 0.0393  | 0.03377 | 0.03847 | 0.0319  | 0.03363 | 0.02684 | 0.03341 | 0.02959 | 0.03238 TM2D3    |
| cg17118262 | 0.08331 | 0.08314 | 0.38263 | 0.49023 | 0.18736 | 0.30507 | 0.11    | 0.17165 | 0.27348 | 0.0824 CCL1      |
| cg17119387 | 0.87405 | 0.40821 | 0.41795 | 0.40832 | 0.02275 | 0.01932 | 0.50448 | 0.03431 | 0.0432  | 0.01934 KIAA0664 |
| cg17119559 | 0.76235 | 0.44529 | 0.62226 | 0.72273 | 0.62594 | 0.18933 | 0.11103 | 0.11821 | 0.7523  | 0.58501 GPR64    |
| cg17119688 | 0.03788 | 0.03429 | 0.03645 | 0.03402 | 0.03072 | 0.03512 | 0.0289  | 0.03297 | 0.03159 | 0.02902 C12orf24 |
| cg17120423 | 0.06591 | 0.02861 | 0.03189 | 0.02722 | 0.01794 | 0.02414 | 0.02122 | 0.02299 | 0.0235  | 0.02212 CIRH1A   |
| cg17122244 | 0.03954 | 0.03567 | 0.04536 | 0.04889 | 0.05583 | 0.04542 | 0.04422 | 0.04292 | 0.04834 | 0.05057 SAPS2    |
| cg17122311 | 0.84916 | 0.46368 | 0.87339 | 0.89714 | 0.90956 | 0.87059 | 0.2948  | 0.07561 | 0.7616  | 0.50391 IL27     |
| cg17124509 | 0.12008 | 0.11303 | 0.11086 | 0.09579 | 0.21911 | 0.11915 | 0.12232 | 0.11572 | 0.10656 | 0.12091 C17orf57 |
| cg17124700 | 0.84015 | 0.61189 | 0.46016 | 0.70958 | 0.78079 | 0.70606 | 0.11719 | 0.79707 | 0.14166 | 0.10531 RGS8     |
| cg17125623 | 0.19199 | 0.16277 | 0.18541 | 0.1408  | 0.33723 | 0.19971 | 0.15839 | 0.17515 | 0.10649 | 0.15165 NFATC3   |
| cg17127132 | 0.06833 | 0.0639  | 0.06755 | 0.06409 | 0.04573 | 0.05858 | 0.05842 | 0.05805 | 0.06178 | 0.05365 GGCX     |
| cg17127587 | 0.06546 | 0.06011 | 0.05625 | 0.05573 | 0.05686 | 0.04725 | 0.10925 | 0.09864 | 0.05056 | 0.05826 TMEM45A  |
| cg17127769 | 0.7892  | 0.82455 | 0.71327 | 0.82073 | 0.82024 | 0.84307 | 0.6237  | 0.55957 | 0.83604 | 0.51138 LCP2     |
| cg17127823 | 0.51489 | 0.20286 | 0.29487 | 0.25064 | 0.3846  | 0.23565 | 0.16588 | 0.084   | 0.57623 | 0.35919 TRAM1    |
| cg17129141 | 0.06277 | 0.06485 | 0.05537 | 0.0587  | 0.04172 | 0.06234 | 0.04883 | 0.04722 | 0.048   | 0.06918 MSH2     |
| cg17129388 | 0.91913 | 0.58751 | 0.84768 | 0.91632 | 0.94596 | 0.78164 | 0.77188 | 0.38643 | 0.91943 | 0.52837 NGFR     |
| cg17130791 | 0.0396  | 0.03107 | 0.04379 | 0.06527 | 0.06074 | 0.03398 | 0.03342 | 0.03315 | 0.03483 | 0.02808 PPT1     |
| cg17132967 | 0.39481 | 0.44712 | 0.32551 | 0.35629 | 0.44872 | 0.66599 | 0.0898  | 0.06724 | 0.05692 | 0.04865 ZNF83    |
| cg17133183 | 0.03186 | 0.03083 | 0.583   | 0.81171 | 0.30515 | 0.59956 | 0.27561 | 0.5792  | 0.349   | 0.81951 CRABP1   |
| cg17133388 | 0.14722 | 0.09595 | 0.26375 | 0.31544 | 0.06193 | 0.04595 | 0.29445 | 0.13487 | 0.06183 | 0.052 C3orf28    |
| cg17135325 | 0.0671  | 0.06309 | 0.06365 | 0.06034 | 0.04692 | 0.05233 | 0.05322 | 0.04904 | 0.05272 | 0.05029 NMD3     |
| cg17136126 | 0.0644  | 0.05259 | 0.62781 | 0.7075  | 0.04236 | 0.04493 | 0.04311 | 0.0429  | 0.04765 | 0.04155 ZNF71    |
| cg17138359 | 0.05806 | 0.05094 | 0.04905 | 0.06394 | 0.06639 | 0.05457 | 0.06046 | 0.06163 | 0.04374 | 0.04995 MRPL45   |
| cg17140815 | 0.04985 | 0.04769 | 0.0684  | 0.07053 | 0.11662 | 0.09101 | 0.05227 | 0.04643 | 0.04308 | 0.03985 ATP6V1F  |
| cg17141902 | 0.5522  | 0.34594 | 0.39422 | 0.44343 | 0.74073 | 0.61652 | 0.30335 | 0.40555 | 0.42208 | 0.34211 NINJ1    |
| cg17142134 | 0.89949 | 0.89901 | 0.91816 | 0.8989  | 0.92936 | 0.90163 | 0.90803 | 0.90874 | 0.90756 | 0.92343 SLC2A2   |
| cg17142149 | 0.86275 | 0.61705 | 0.88396 | 0.89983 | 0.865   | 0.85825 | 0.7175  | 0.6475  | 0.60269 | 0.57629 DSCR1L1  |
| cg17142183 | 0.5807  | 0.1084  | 0.88345 | 0.89387 | 0.70916 | 0.20144 | 0.22867 | 0.05473 | 0.89593 | 0.15114 IL1R2    |
| cg17142470 | 0.41133 | 0.04863 | 0.48238 | 0.51829 | 0.94294 | 0.89075 | 0.8979  | 0.76598 | 0.88813 | 0.74858 SORBS3   |
| cg17145652 | 0.79575 | 0.49756 | 0.74352 | 0.72298 | 0.71386 | 0.21766 | 0.72135 | 0.24571 | 0.84781 | 0.12675 HOOK3    |
| cg17145806 | 0.02817 | 0.0339  | 0.03556 | 0.02696 | 0.02847 | 0.02608 | 0.02532 | 0.025   | 0.02855 | 0.02751 ICMT     |
| cg17146877 | 0.06037 | 0.05733 | 0.05723 | 0.06442 | 0.09385 | 0.0832  | 0.07099 | 0.07112 | 0.07721 | 0.07831 CCDC32   |
| cg17150465 | 0.02381 | 0.02573 | 0.02704 | 0.02892 | 0.01856 | 0.02147 | 0.02271 | 0.02259 | 0.02154 | 0.0221 SCRIB     |
| cg17154022 | 0.04417 | 0.05209 | 0.05274 | 0.0522  | 0.05072 | 0.05142 | 0.03706 | 0.03576 | 0.0475  | 0.04311 HMGN2    |

|            |         |         |         |         |         |         |         |         |         |                  |
|------------|---------|---------|---------|---------|---------|---------|---------|---------|---------|------------------|
| cg17155167 | 0.06933 | 0.07415 | 0.15437 | 0.13061 | 0.102   | 0.0835  | 0.43376 | 0.43362 | 0.0796  | 0.0797 RIT1      |
| cg17155596 | 0.03306 | 0.04296 | 0.04366 | 0.03555 | 0.03161 | 0.03684 | 0.03665 | 0.03752 | 0.03695 | 0.03803 STAMBPL1 |
| cg17158059 | 0.04772 | 0.05019 | 0.04796 | 0.04181 | 0.03895 | 0.04918 | 0.03818 | 0.04097 | 0.04203 | 0.04616 MGC15407 |
| cg17159242 | 0.05411 | 0.05692 | 0.06191 | 0.06036 | 0.04437 | 0.05539 | 0.04661 | 0.04913 | 0.04843 | 0.0484 RPS7      |
| cg17159537 | 0.53905 | 0.28509 | 0.10404 | 0.05611 | 0.06928 | 0.03772 | 0.04377 | 0.03722 | 0.03736 | 0.0297 PEX11G    |
| cg17161537 | 0.06547 | 0.04233 | 0.06944 | 0.10827 | 0.06575 | 0.03017 | 0.03487 | 0.03164 | 0.04419 | 0.03023 MRPL12   |
| cg17162024 | 0.20587 | 0.30483 | 0.29307 | 0.18782 | 0.6293  | 0.67829 | 0.74635 | 0.88554 | 0.09937 | 0.03793 UNQ9433  |
| cg17162271 | 0.03918 | 0.0362  | 0.03982 | 0.0353  | 0.02512 | 0.03191 | 0.03485 | 0.03388 | 0.02735 | 0.02725 GPSN2    |
| cg17163751 | 0.03991 | 0.03693 | 0.03996 | 0.03585 | 0.0377  | 0.03421 | 0.03592 | 0.0336  | 0.03799 | 0.03217 H2AFY2   |
| cg17164340 | 0.04854 | 0.05367 | 0.05922 | 0.05818 | 0.04248 | 0.05028 | 0.04373 | 0.0475  | 0.05227 | 0.04604 VPS36    |
| cg17164520 | 0.8411  | 0.57327 | 0.88681 | 0.90019 | 0.81363 | 0.70029 | 0.7232  | 0.51787 | 0.58749 | 0.48281 CGB1     |
| cg17165266 | 0.14461 | 0.02987 | 0.03514 | 0.03526 | 0.16624 | 0.21379 | 0.09291 | 0.0313  | 0.02843 | 0.029 KRT18      |
| cg17165284 | 0.10003 | 0.0997  | 0.10634 | 0.11862 | 0.0891  | 0.08553 | 0.08172 | 0.06762 | 0.09414 | 0.07837 DNM2     |
| cg17165760 | 0.05546 | 0.04856 | 0.05612 | 0.04449 | 0.05288 | 0.05689 | 0.04722 | 0.04679 | 0.04249 | 0.04899 ANKRD26  |
| cg17166101 | 0.08603 | 0.06523 | 0.39583 | 0.70712 | 0.03856 | 0.05395 | 0.33715 | 0.19297 | 0.24151 | 0.04709 PARC     |
| cg17166338 | 0.95227 | 0.92932 | 0.94344 | 0.93808 | 0.96325 | 0.92259 | 0.69448 | 0.67955 | 0.61923 | 0.65315 TERT     |
| cg17166812 | 0.05817 | 0.06468 | 0.53347 | 0.71359 | 0.19618 | 0.04491 | 0.2104  | 0.08671 | 0.08894 | 0.04559 NDUFS2   |
| cg17168535 | 0.08682 | 0.07072 | 0.09979 | 0.10557 | 0.08991 | 0.07617 | 0.08503 | 0.09212 | 0.06284 | 0.06793 XP07     |
| cg17169613 | 0.03828 | 0.03466 | 0.04396 | 0.03466 | 0.05703 | 0.04358 | 0.03003 | 0.03254 | 0.0295  | 0.0385 RALB      |
| cg17169998 | 0.04368 | 0.13218 | 0.38492 | 0.59209 | 0.78229 | 0.60466 | 0.04441 | 0.04066 | 0.432   | 0.12781 MLC1     |
| cg17170504 | 0.25397 | 0.19179 | 0.67369 | 0.83893 | 0.76154 | 0.88265 | 0.33775 | 0.08111 | 0.2747  | 0.31853 HSPC065  |
| cg17171485 | 0.3362  | 0.05164 | 0.03744 | 0.0409  | 0.03762 | 0.03813 | 0.0331  | 0.03474 | 0.08795 | 0.03724 HEBP2    |
| cg17171916 | 0.03489 | 0.03383 | 0.03923 | 0.03716 | 0.03007 | 0.03264 | 0.03764 | 0.03013 | 0.02532 | 0.02198 ZNF263   |
| cg17173423 | 0.091   | 0.08581 | 0.18591 | 0.33156 | 0.36225 | 0.568   | 0.10376 | 0.08986 | 0.08767 | 0.07507 MS4A3    |
| cg17173856 | 0.40349 | 0.57917 | 0.33897 | 0.27545 | 0.54353 | 0.65882 | 0.28292 | 0.36338 | 0.25378 | 0.26177 GRM5     |
| cg17176395 | 0.03734 | 0.03777 | 0.0393  | 0.03791 | 0.03172 | 0.0326  | 0.0301  | 0.03486 | 0.02828 | 0.02962 RAB2     |
| cg17176732 | 0.06547 | 0.06451 | 0.07839 | 0.07311 | 0.08383 | 0.06375 | 0.04355 | 0.04282 | 0.05825 | 0.06557 OXR1     |
| cg17177336 | 0.05776 | 0.05946 | 0.09487 | 0.07574 | 0.06555 | 0.07505 | 0.05688 | 0.05563 | 0.05525 | 0.05818 HSPC268  |
| cg17177660 | 0.63472 | 0.85416 | 0.66969 | 0.90799 | 0.84679 | 0.47399 | 0.81529 | 0.29383 | 0.9258  | 0.49632 VEGFC    |
| cg17177699 | 0.12803 | 0.10343 | 0.33135 | 0.21884 | 0.4391  | 0.46159 | 0.34529 | 0.57085 | 0.12321 | 0.10678 COL5A3   |
| cg17177829 | 0.02713 | 0.02548 | 0.02852 | 0.02449 | 0.02103 | 0.03104 | 0.01987 | 0.02404 | 0.02114 | 0.02 ATF5        |
| cg17178336 | 0.04151 | 0.0364  | 0.07973 | 0.30011 | 0.11356 | 0.23558 | 0.04422 | 0.06158 | 0.05326 | 0.04191 IHH      |
| cg17178888 | 0.03941 | 0.03579 | 0.04628 | 0.04188 | 0.20412 | 0.03104 | 0.0387  | 0.02861 | 0.12219 | 0.02692 FLJ14166 |
| cg17179099 | 0.0241  | 0.0232  | 0.0255  | 0.02742 | 0.01882 | 0.02636 | 0.02168 | 0.02343 | 0.02125 | 0.02318 APPBP2   |
| cg17179881 | 0.62139 | 0.19911 | 0.50095 | 0.67217 | 0.84046 | 0.86298 | 0.34683 | 0.08645 | 0.87585 | 0.69471 BIK      |
| cg17181653 | 0.9108  | 0.90348 | 0.8469  | 0.86828 | 0.79952 | 0.60952 | 0.22308 | 0.32549 | 0.07148 | 0.26214 SF3B5    |
| cg17183546 | 0.04421 | 0.03441 | 0.46325 | 0.52051 | 0.58634 | 0.50089 | 0.08022 | 0.049   | 0.3804  | 0.30447 D4S234E  |
| cg17183991 | 0.02708 | 0.0245  | 0.03262 | 0.03397 | 0.02811 | 0.02781 | 0.07994 | 0.02459 | 0.03025 | 0.02392 HS6ST3   |
| cg17185543 | 0.10011 | 0.11249 | 0.11014 | 0.10755 | 0.10339 | 0.13066 | 0.11692 | 0.13247 | 0.09749 | 0.09935 EDF1     |
| cg17185639 | 0.46627 | 0.43361 | 0.86593 | 0.84875 | 0.83633 | 0.84032 | 0.82156 | 0.80249 | 0.72209 | 0.64817 ITGB3    |
| cg17186163 | 0.03888 | 0.05914 | 0.09927 | 0.14053 | 0.13499 | 0.42026 | 0.11487 | 0.04629 | 0.04826 | 0.04005 C10orf10 |

|            |         |         |         |         |         |         |         |         |         |         |          |
|------------|---------|---------|---------|---------|---------|---------|---------|---------|---------|---------|----------|
| cg17186444 | 0.02893 | 0.02016 | 0.02613 | 0.02757 | 0.02541 | 0.03161 | 0.03245 | 0.02958 | 0.03626 | 0.03253 | NDNL2    |
| cg17186803 | 0.21824 | 0.03919 | 0.84514 | 0.86947 | 0.92052 | 0.8749  | 0.22833 | 0.10777 | 0.88328 | 0.84619 | SCN4B    |
| cg17188046 | 0.05998 | 0.04496 | 0.68525 | 0.8918  | 0.27455 | 0.55015 | 0.22402 | 0.2123  | 0.65964 | 0.64277 | T        |
| cg17188169 | 0.93406 | 0.80395 | 0.96043 | 0.96952 | 0.975   | 0.96835 | 0.86022 | 0.95607 | 0.40096 | 0.32563 | DDX43    |
| cg17189058 | 0.03222 | 0.03943 | 0.03444 | 0.03272 | 0.02806 | 0.02915 | 0.02541 | 0.02942 | 0.02689 | 0.03058 | FLJ20558 |
| cg17189494 | 0.11971 | 0.05072 | 0.25786 | 0.31758 | 0.06218 | 0.03968 | 0.04936 | 0.04809 | 0.26278 | 0.16701 | MAD2L2   |
| cg17189778 | 0.89859 | 0.86442 | 0.91783 | 0.9134  | 0.94333 | 0.91912 | 0.4548  | 0.45837 | 0.91    | 0.90546 | AVPR2    |
| cg17190608 | 0.02498 | 0.02243 | 0.11971 | 0.22114 | 0.16232 | 0.24994 | 0.03125 | 0.03033 | 0.02753 | 0.02184 | CUTL2    |
| cg17191178 | 0.13803 | 0.11885 | 0.12017 | 0.11836 | 0.13285 | 0.09946 | 0.09444 | 0.08559 | 0.14979 | 0.1178  | SHOX2    |
| cg17191186 | 0.06478 | 0.06606 | 0.0698  | 0.06868 | 0.0343  | 0.0566  | 0.05479 | 0.05505 | 0.05808 | 0.05365 | PSMB6    |
| cg17191715 | 0.10827 | 0.09734 | 0.25712 | 0.34796 | 0.39942 | 0.38462 | 0.45831 | 0.51404 | 0.08013 | 0.11748 | CA1      |
| cg17192247 | 0.70299 | 0.48842 | 0.93528 | 0.93396 | 0.12933 | 0.33712 | 0.42594 | 0.27442 | 0.90811 | 0.47819 | MAPRE3   |
| cg17194182 | 0.04032 | 0.04485 | 0.62978 | 0.83775 | 0.4458  | 0.30598 | 0.08395 | 0.04437 | 0.05366 | 0.03233 | EPO      |
| cg17196716 | 0.691   | 0.7198  | 0.72006 | 0.78761 | 0.76476 | 0.81445 | 0.60249 | 0.72061 | 0.82916 | 0.7999  | CXorf36  |
| cg17197538 | 0.03394 | 0.03675 | 0.04714 | 0.03918 | 0.03564 | 0.02601 | 0.03433 | 0.03577 | 0.03542 | 0.02909 | KRAS     |
| cg17198372 | 0.55456 | 0.45515 | 0.60606 | 0.72383 | 0.50481 | 0.51468 | 0.12935 | 0.15081 | 0.39571 | 0.1798  | PPEF1    |
| cg17198722 | 0.02712 | 0.02739 | 0.02994 | 0.02602 | 0.02163 | 0.02831 | 0.02527 | 0.02612 | 0.02204 | 0.02205 | PRDX3    |
| cg17199483 | 0.73694 | 0.64334 | 0.74416 | 0.7799  | 0.75008 | 0.5452  | 0.67284 | 0.38632 | 0.76964 | 0.36404 | ABCC1    |
| cg17199658 | 0.7691  | 0.3371  | 0.81362 | 0.90979 | 0.93403 | 0.92231 | 0.83138 | 0.91743 | 0.69971 | 0.56393 | MGC39715 |
| cg17200465 | 0.90179 | 0.90388 | 0.91882 | 0.92019 | 0.89762 | 0.90202 | 0.85119 | 0.8878  | 0.91856 | 0.91138 | ENTPD3   |
| cg17204100 | 0.73134 | 0.50573 | 0.87228 | 0.91666 | 0.8773  | 0.90775 | 0.16981 | 0.17422 | 0.30815 | 0.43962 | CFC1     |
| cg17204557 | 0.83957 | 0.65574 | 0.88993 | 0.92981 | 0.93499 | 0.87685 | 0.84995 | 0.28403 | 0.88984 | 0.67743 | FLJ14816 |
| cg17205788 | 0.20627 | 0.16192 | 0.442   | 0.38637 | 0.5552  | 0.48806 | 0.11304 | 0.11873 | 0.39765 | 0.12616 | TBX22    |
| cg17206029 | 0.04    | 0.04199 | 0.06652 | 0.06149 | 0.06073 | 0.05981 | 0.12459 | 0.03765 | 0.04378 | 0.04554 | KIF4A    |
| cg17207590 | 0.81944 | 0.67145 | 0.90463 | 0.91984 | 0.90602 | 0.90571 | 0.89951 | 0.88369 | 0.91171 | 0.8937  | APH1B    |
| cg17208363 | 0.10696 | 0.10134 | 0.12492 | 0.13382 | 0.13934 | 0.09874 | 0.09573 | 0.09016 | 0.12404 | 0.12336 | TYRO3    |
| cg17210604 | 0.05338 | 0.03197 | 0.04033 | 0.03189 | 0.78274 | 0.04877 | 0.11189 | 0.04314 | 0.16002 | 0.03575 | HIC1     |
| cg17213552 | 0.13728 | 0.04082 | 0.21612 | 0.22058 | 0.17683 | 0.02777 | 0.09043 | 0.04037 | 0.41508 | 0.37346 | DLAT     |
| cg17214107 | 0.40201 | 0.1162  | 0.17794 | 0.238   | 0.60024 | 0.09652 | 0.68178 | 0.30225 | 0.50594 | 0.24676 | FGF2     |
| cg17214210 | 0.69262 | 0.73304 | 0.65251 | 0.69481 | 0.61937 | 0.65564 | 0.73625 | 0.74067 | 0.68479 | 0.70028 | USP34    |
| cg17215680 | 0.07391 | 0.04156 | 0.52582 | 0.58459 | 0.14374 | 0.36773 | 0.03793 | 0.02919 | 0.29156 | 0.20444 | SIGLEC10 |
| cg17217654 | 0.18913 | 0.07569 | 0.18509 | 0.32896 | 0.06022 | 0.04549 | 0.04146 | 0.05475 | 0.04123 | 0.03092 | C3orf60  |
| cg17217677 | 0.90393 | 0.808   | 0.93604 | 0.93627 | 0.94802 | 0.91294 | 0.59098 | 0.72025 | 0.89451 | 0.90692 | SMPD3    |
| cg17223189 | 0.04158 | 0.03698 | 0.04643 | 0.06391 | 0.3591  | 0.37534 | 0.03756 | 0.03383 | 0.02676 | 0.02566 | CHMP2A   |
| cg17225169 | 0.80627 | 0.8465  | 0.81852 | 0.84912 | 0.83522 | 0.84599 | 0.81212 | 0.82414 | 0.86913 | 0.84353 | PJA2     |
| cg17226343 | 0.05228 | 0.05733 | 0.43673 | 0.56455 | 0.08047 | 0.06729 | 0.11709 | 0.07641 | 0.16059 | 0.08666 | DIRAS1   |
| cg17228833 | 0.03345 | 0.03459 | 0.0337  | 0.03202 | 0.02614 | 0.03217 | 0.02788 | 0.03355 | 0.02667 | 0.02622 | ARL6IP   |
| cg17229197 | 0.78084 | 0.31078 | 0.72742 | 0.85048 | 0.78416 | 0.78188 | 0.20299 | 0.18266 | 0.53661 | 0.44029 | KCNQ1    |
| cg17229388 | 0.66103 | 0.49369 | 0.77307 | 0.75931 | 0.73337 | 0.63887 | 0.76849 | 0.77774 | 0.54758 | 0.60245 | MGC35169 |
| cg17231524 | 0.26922 | 0.0479  | 0.93861 | 0.9407  | 0.88574 | 0.9269  | 0.72722 | 0.84313 | 0.81053 | 0.86588 | MGC39606 |
| cg17232861 | 0.89865 | 0.74065 | 0.87638 | 0.91749 | 0.90691 | 0.90369 | 0.82215 | 0.57351 | 0.89883 | 0.86621 | TRIM10   |

|            |         |         |         |         |         |         |         |         |         |                   |
|------------|---------|---------|---------|---------|---------|---------|---------|---------|---------|-------------------|
| cg17233506 | 0.37781 | 0.25692 | 0.8287  | 0.84122 | 0.7976  | 0.63233 | 0.45956 | 0.63324 | 0.82754 | 0.56243 HOXB1     |
| cg17233601 | 0.30562 | 0.05221 | 0.93089 | 0.89366 | 0.96303 | 0.92184 | 0.7422  | 0.64873 | 0.26781 | 0.0497 PTPN5      |
| cg17233935 | 0.23922 | 0.16385 | 0.63042 | 0.65049 | 0.60665 | 0.73228 | 0.57495 | 0.70267 | 0.38336 | 0.21323 DSCR10    |
| cg17234150 | 0.11607 | 0.14826 | 0.50878 | 0.59161 | 0.17321 | 0.28732 | 0.11517 | 0.1081  | 0.08301 | 0.08619 CACNG3    |
| cg17236617 | 0.04859 | 0.04038 | 0.05276 | 0.0493  | 0.03977 | 0.03401 | 0.04126 | 0.03924 | 0.06282 | 0.0337 ACOT7      |
| cg17237063 | 0.13386 | 0.09866 | 0.10141 | 0.08889 | 0.13662 | 0.11937 | 0.08668 | 0.06968 | 0.0885  | 0.08023 RBMS3     |
| cg17237813 | 0.80257 | 0.81622 | 0.77698 | 0.79145 | 0.73733 | 0.62957 | 0.83902 | 0.83024 | 0.77715 | 0.72226 TTL7      |
| cg17237881 | 0.90304 | 0.77127 | 0.89718 | 0.91847 | 0.93152 | 0.9145  | 0.88987 | 0.74143 | 0.90904 | 0.89549 BIRC7     |
| cg17238009 | 0.26749 | 0.24476 | 0.80228 | 0.84687 | 0.85498 | 0.85272 | 0.8483  | 0.8812  | 0.85851 | 0.7729 C10orf11   |
| cg17239363 | 0.75319 | 0.66764 | 0.86143 | 0.84948 | 0.85936 | 0.83496 | 0.34867 | 0.54091 | 0.53652 | 0.50922 SPANXC    |
| cg17239761 | 0.06873 | 0.05624 | 0.06213 | 0.05688 | 0.13259 | 0.05762 | 0.06029 | 0.05709 | 0.05397 | 0.04419 SNAP29    |
| cg17240454 | 0.77155 | 0.14411 | 0.87947 | 0.91024 | 0.9194  | 0.87781 | 0.49288 | 0.47997 | 0.79488 | 0.68705 SPDEF     |
| cg17240496 | 0.02805 | 0.02706 | 0.03091 | 0.02933 | 0.03157 | 0.0255  | 0.03021 | 0.02739 | 0.07646 | 0.02632 LOC51035  |
| cg17240836 | 0.04687 | 0.04371 | 0.05688 | 0.05495 | 0.05677 | 0.056   | 0.04887 | 0.04975 | 0.04009 | 0.03916 C9orf80   |
| cg17240987 | 0.70512 | 0.48071 | 0.48198 | 0.5188  | 0.80582 | 0.52617 | 0.11379 | 0.14349 | 0.90947 | 0.69196 WFDC3     |
| cg17241013 | 0.06238 | 0.05956 | 0.08563 | 0.0704  | 0.06577 | 0.06393 | 0.0596  | 0.05153 | 0.0725  | 0.07317 NEK2      |
| cg17241310 | 0.06158 | 0.03991 | 0.92115 | 0.9431  | 0.46388 | 0.53495 | 0.06577 | 0.05066 | 0.11631 | 0.31611 BARHL2    |
| cg17241657 | 0.04722 | 0.04709 | 0.04038 | 0.04241 | 0.07071 | 0.04873 | 0.04091 | 0.03446 | 0.03321 | 0.0394 C4orf16    |
| cg17243643 | 0.80938 | 0.73893 | 0.77905 | 0.78145 | 0.09139 | 0.1839  | 0.74406 | 0.72164 | 0.79624 | 0.7566 RDH5       |
| cg17248183 | 0.03582 | 0.03455 | 0.04741 | 0.04153 | 0.03939 | 0.03817 | 0.04003 | 0.03722 | 0.03281 | 0.03423 LOC162427 |
| cg17250929 | 0.70657 | 0.37547 | 0.38026 | 0.47961 | 0.91954 | 0.89257 | 0.88212 | 0.73976 | 0.9066  | 0.87712 S100A5    |
| cg17251713 | 0.50609 | 0.25242 | 0.32404 | 0.51892 | 0.67303 | 0.6203  | 0.50732 | 0.08531 | 0.10547 | 0.12821 SERPINB7  |
| cg17252960 | 0.02783 | 0.02886 | 0.44355 | 0.7206  | 0.07253 | 0.04645 | 0.02826 | 0.03693 | 0.60209 | 0.67871 ID4       |
| cg17253459 | 0.67321 | 0.68188 | 0.79032 | 0.81737 | 0.87013 | 0.90907 | 0.8925  | 0.86261 | 0.92294 | 0.88082 OLFML3    |
| cg17255302 | 0.87676 | 0.08012 | 0.82103 | 0.85739 | 0.86664 | 0.07674 | 0.71915 | 0.10442 | 0.33331 | 0.05923 K6HF      |
| cg17256157 | 0.10333 | 0.04287 | 0.81911 | 0.86451 | 0.25072 | 0.46383 | 0.05149 | 0.04281 | 0.06681 | 0.03863 NMBR      |
| cg17256555 | 0.11008 | 0.06841 | 0.0937  | 0.07721 | 0.04937 | 0.05519 | 0.04815 | 0.05418 | 0.05767 | 0.06083 C8orf53   |
| cg17257175 | 0.06898 | 0.06711 | 0.10174 | 0.0916  | 0.05702 | 0.06208 | 0.0504  | 0.05156 | 0.06494 | 0.06297 MUC1      |
| cg17258195 | 0.85471 | 0.6908  | 0.85746 | 0.88139 | 0.89049 | 0.84715 | 0.79009 | 0.74031 | 0.86068 | 0.74045 ISLR      |
| cg17259265 | 0.87752 | 0.88532 | 0.86854 | 0.8966  | 0.88925 | 0.88288 | 0.87689 | 0.89099 | 0.90833 | 0.80929 HYLS1     |
| cg17259741 | 0.03016 | 0.03089 | 0.02993 | 0.02794 | 0.02559 | 0.02854 | 0.02451 | 0.02619 | 0.0249  | 0.02233 ZNF509    |
| cg17260124 | 0.90426 | 0.72965 | 0.89771 | 0.90597 | 0.90221 | 0.87799 | 0.89286 | 0.90062 | 0.91777 | 0.90021 KCTD14    |
| cg17260449 | 0.06069 | 0.0593  | 0.0678  | 0.06366 | 0.04933 | 0.05684 | 0.05096 | 0.04144 | 0.05248 | 0.0471 TOPBP1     |
| cg17260725 | 0.04264 | 0.04675 | 0.04815 | 0.04177 | 0.04578 | 0.03906 | 0.0505  | 0.04749 | 0.03715 | 0.03767 CCNB2     |
| cg17260954 | 0.74634 | 0.87719 | 0.66251 | 0.81098 | 0.72034 | 0.84578 | 0.81042 | 0.8402  | 0.74424 | 0.6837 ATP10A     |
| cg17261830 | 0.58742 | 0.63367 | 0.01872 | 0.01772 | 0.01762 | 0.02255 | 0.02014 | 0.01834 | 0.03261 | 0.01516 NEK9      |
| cg17263089 | 0.79459 | 0.80074 | 0.74742 | 0.7609  | 0.74411 | 0.78301 | 0.6683  | 0.73425 | 0.7356  | 0.72411 SLC25A3   |
| cg17264470 | 0.61402 | 0.54131 | 0.89119 | 0.92882 | 0.79431 | 0.81746 | 0.09196 | 0.22215 | 0.48781 | 0.38593 FGF21     |
| cg17264618 | 0.04895 | 0.04518 | 0.54749 | 0.63224 | 0.91155 | 0.91743 | 0.12814 | 0.09629 | 0.93775 | 0.93547 ENTPD3    |
| cg17264817 | 0.02999 | 0.02878 | 0.03336 | 0.02735 | 0.02601 | 0.02758 | 0.02574 | 0.02558 | 0.02555 | 0.02251 BCL2L13   |
| cg17266238 | 0.52988 | 0.55821 | 0.61627 | 0.62481 | 0.87866 | 0.8906  | 0.4713  | 0.59681 | 0.53332 | 0.47818 C21orf94  |

|            |         |         |         |         |         |         |         |         |         |         |           |
|------------|---------|---------|---------|---------|---------|---------|---------|---------|---------|---------|-----------|
| cg17267493 | 0.87533 | 0.83512 | 0.79305 | 0.85062 | 0.92642 | 0.87088 | 0.7621  | 0.54351 | 0.89003 | 0.84583 | TNFSF13   |
| cg17267907 | 0.14827 | 0.12863 | 0.16985 | 0.13937 | 0.0843  | 0.12057 | 0.3697  | 0.11352 | 0.1099  | 0.09896 | DEFA1     |
| cg17269277 | 0.02908 | 0.04243 | 0.04183 | 0.04042 | 0.06324 | 0.03257 | 0.02911 | 0.03244 | 0.02782 | 0.02918 | FGFR3     |
| cg17269548 | 0.11972 | 0.13382 | 0.15383 | 0.15641 | 0.03655 | 0.07504 | 0.07519 | 0.09016 | 0.10018 | 0.07271 | PPIA      |
| cg17271365 | 0.74334 | 0.78757 | 0.73444 | 0.74855 | 0.78023 | 0.80811 | 0.24829 | 0.26834 | 0.14612 | 0.18106 | 1-Mar     |
| cg17272094 | 0.84016 | 0.64031 | 0.80414 | 0.85645 | 0.80411 | 0.78352 | 0.82007 | 0.81553 | 0.68079 | 0.37273 | C3orf45   |
| cg17272491 | 0.03291 | 0.03105 | 0.055   | 0.05776 | 0.04422 | 0.03036 | 0.05113 | 0.03261 | 0.03013 | 0.02797 | GOLGA3    |
| cg17272843 | 0.70511 | 0.43886 | 0.07473 | 0.04589 | 0.27783 | 0.4535  | 0.80222 | 0.78347 | 0.50679 | 0.5033  | KCTD14    |
| cg17274064 | 0.07208 | 0.0795  | 0.08914 | 0.10624 | 0.04987 | 0.17895 | 0.08026 | 0.20617 | 0.05962 | 0.0507  | ERG       |
| cg17274742 | 0.82336 | 0.19445 | 0.07935 | 0.06895 | 0.0916  | 0.07493 | 0.09094 | 0.19085 | 0.06921 | 0.06718 | GPNUMB    |
| cg17277529 | 0.03441 | 0.03823 | 0.2556  | 0.30319 | 0.08807 | 0.1636  | 0.04175 | 0.20946 | 0.03994 | 0.02877 | FGF3      |
| cg17277939 | 0.91055 | 0.89097 | 0.90755 | 0.90666 | 0.8251  | 0.72637 | 0.78655 | 0.62435 | 0.90375 | 0.83645 | MGC13168  |
| cg17279839 | 0.53218 | 0.49835 | 0.88871 | 0.88831 | 0.29958 | 0.70082 | 0.3206  | 0.2793  | 0.619   | 0.52725 | RARRES2   |
| cg17280624 | 0.04529 | 0.04408 | 0.04041 | 0.04091 | 0.04989 | 0.05873 | 0.04381 | 0.04043 | 0.03642 | 0.04632 | PGRMC2    |
| cg17281600 | 0.14256 | 0.13692 | 0.36973 | 0.43454 | 0.71608 | 0.74954 | 0.38048 | 0.22579 | 0.14894 | 0.15991 | FCRL4     |
| cg17283268 | 0.02529 | 0.02491 | 0.02651 | 0.0231  | 0.02058 | 0.0265  | 0.02693 | 0.02117 | 0.01874 | 0.01671 | POLRMT    |
| cg17285325 | 0.05382 | 0.03416 | 0.49014 | 0.64407 | 0.08541 | 0.03656 | 0.06072 | 0.03243 | 0.0381  | 0.03456 | ECGF1     |
| cg17286491 | 0.05814 | 0.05281 | 0.07839 | 0.08502 | 0.06909 | 0.05646 | 0.06737 | 0.04663 | 0.06879 | 0.06152 | CEP350    |
| cg17286640 | 0.0993  | 0.07485 | 0.62064 | 0.67909 | 0.59939 | 0.79307 | 0.05439 | 0.0586  | 0.5935  | 0.50981 | KDR       |
| cg17288121 | 0.57817 | 0.14071 | 0.37785 | 0.48139 | 0.71638 | 0.77579 | 0.10979 | 0.11038 | 0.11464 | 0.1767  | DEFB103A  |
| cg17289734 | 0.0474  | 0.05739 | 0.05332 | 0.04874 | 0.05    | 0.04536 | 0.0499  | 0.05216 | 0.04888 | 0.04157 | SEMA3B    |
| cg17291001 | 0.78786 | 0.47111 | 0.80119 | 0.81658 | 0.89892 | 0.88638 | 0.60681 | 0.42927 | 0.89688 | 0.60611 | SERPINA13 |
| cg17293470 | 0.0315  | 0.03233 | 0.0342  | 0.03068 | 0.02331 | 0.02538 | 0.0279  | 0.02803 | 0.02639 | 0.02354 | COQ10B    |
| cg17293641 | 0.01876 | 0.02067 | 0.02813 | 0.03202 | 0.01593 | 0.01575 | 0.01669 | 0.01607 | 0.01854 | 0.01754 | TNFRSF11B |
| cg17294081 | 0.0504  | 0.05092 | 0.05151 | 0.04867 | 0.06513 | 0.04875 | 0.05573 | 0.05155 | 0.03508 | 0.03799 | ATRN      |
| cg17296078 | 0.30176 | 0.05926 | 0.04891 | 0.04688 | 0.05942 | 0.04046 | 0.05243 | 0.04284 | 0.03647 | 0.03488 | UBTD1     |
| cg17296166 | 0.18948 | 0.03716 | 0.44044 | 0.59894 | 0.43074 | 0.08359 | 0.30404 | 0.32305 | 0.05403 | 0.02636 | FLJ10781  |
| cg17298704 | 0.84265 | 0.15555 | 0.83642 | 0.90868 | 0.90706 | 0.73477 | 0.61593 | 0.78036 | 0.04894 | 0.20197 | CLDN18    |
| cg17299712 | 0.65    | 0.48721 | 0.81332 | 0.80099 | 0.90305 | 0.90072 | 0.49023 | 0.56532 | 0.86644 | 0.78301 | MAGEB2    |
| cg17300307 | 0.05577 | 0.07475 | 0.07909 | 0.05492 | 0.11172 | 0.06685 | 0.05288 | 0.04722 | 0.06837 | 0.08163 | GLS       |
| cg17301902 | 0.04713 | 0.04575 | 0.58986 | 0.79565 | 0.90194 | 0.91436 | 0.59935 | 0.57085 | 0.52917 | 0.60472 | GNA14     |
| cg17302852 | 0.06518 | 0.06481 | 0.06706 | 0.06274 | 0.05394 | 0.06036 | 0.05109 | 0.04812 | 0.05938 | 0.0587  | FXR1      |
| cg17303299 | 0.03783 | 0.0324  | 0.10377 | 0.0936  | 0.09731 | 0.03028 | 0.03929 | 0.04023 | 0.06377 | 0.03448 | ENO2      |
| cg17304433 | 0.04543 | 0.04188 | 0.03629 | 0.03288 | 0.02615 | 0.03202 | 0.03441 | 0.03215 | 0.03715 | 0.03996 | ERGIC1    |
| cg17304878 | 0.02098 | 0.02052 | 0.02008 | 0.01923 | 0.01797 | 0.02245 | 0.01734 | 0.01678 | 0.01477 | 0.01626 | WDR68     |
| cg17305187 | 0.04117 | 0.04055 | 0.04241 | 0.03768 | 0.03798 | 0.0344  | 0.04005 | 0.03354 | 0.03058 | 0.03527 | KLF15     |
| cg17306637 | 0.80943 | 0.82927 | 0.75409 | 0.79254 | 0.67665 | 0.31478 | 0.80214 | 0.83388 | 0.80494 | 0.671   | CLDN20    |
| cg17307280 | 0.04699 | 0.04934 | 0.36769 | 0.42871 | 0.06243 | 0.03189 | 0.04271 | 0.03644 | 0.11481 | 0.09232 | DRD1      |
| cg17309462 | 0.1093  | 0.08586 | 0.64127 | 0.81815 | 0.10887 | 0.10969 | 0.10392 | 0.09798 | 0.06649 | 0.06446 | C2orf38   |
| cg17316750 | 0.12398 | 0.05015 | 0.11017 | 0.14681 | 0.18093 | 0.26243 | 0.06047 | 0.04633 | 0.1542  | 0.09038 | FAM82C    |
| cg17317962 | 0.0321  | 0.0236  | 0.02907 | 0.02867 | 0.02131 | 0.10033 | 0.02387 | 0.02595 | 0.02836 | 0.01916 | ACTG1     |

|            |         |         |         |         |         |         |         |         |         |         |          |
|------------|---------|---------|---------|---------|---------|---------|---------|---------|---------|---------|----------|
| cg17319849 | 0.03747 | 0.03886 | 0.06679 | 0.06382 | 0.03601 | 0.03617 | 0.03031 | 0.03114 | 0.04018 | 0.03786 | GBA      |
| cg17321617 | 0.75805 | 0.2094  | 0.33778 | 0.42451 | 0.25439 | 0.15705 | 0.28131 | 0.14207 | 0.13706 | 0.11521 | BATF2    |
| cg17324128 | 0.19887 | 0.10498 | 0.39758 | 0.53806 | 0.18726 | 0.30879 | 0.30336 | 0.08559 | 0.08793 | 0.0394  | RASSF4   |
| cg17324707 | 0.02753 | 0.02677 | 0.02994 | 0.02397 | 0.02111 | 0.02584 | 0.02386 | 0.02324 | 0.02422 | 0.02182 | C3orf28  |
| cg17327492 | 0.0908  | 0.09881 | 0.16345 | 0.15589 | 0.8186  | 0.51045 | 0.56021 | 0.50519 | 0.09379 | 0.08354 | FSHR     |
| cg17327630 | 0.05192 | 0.05459 | 0.07439 | 0.05654 | 0.04692 | 0.05065 | 0.04324 | 0.04055 | 0.0494  | 0.03818 | ZNF212   |
| cg17328659 | 0.04985 | 0.04447 | 0.90415 | 0.9353  | 0.85161 | 0.47613 | 0.09997 | 0.04115 | 0.04124 | 0.03155 | STUB1    |
| cg17329164 | 0.07724 | 0.07599 | 0.07277 | 0.08658 | 0.54023 | 0.40536 | 0.57956 | 0.24162 | 0.04778 | 0.05381 | PPT2     |
| cg17329249 | 0.07878 | 0.07849 | 0.09978 | 0.0785  | 0.10107 | 0.06957 | 0.08325 | 0.06989 | 0.06247 | 0.06945 | MAT2B    |
| cg17329518 | 0.01989 | 0.02328 | 0.0275  | 0.02207 | 0.01914 | 0.02253 | 0.01701 | 0.01776 | 0.02032 | 0.01758 | WDR4     |
| cg17330200 | 0.03616 | 0.04662 | 0.05977 | 0.05116 | 0.05633 | 0.05646 | 0.06348 | 0.06866 | 0.05025 | 0.04975 | ERMAPP   |
| cg17332016 | 0.05001 | 0.04308 | 0.09099 | 0.11073 | 0.06001 | 0.04787 | 0.04467 | 0.03868 | 0.06105 | 0.034   | FLJ10847 |
| cg17333479 | 0.06195 | 0.05921 | 0.1507  | 0.161   | 0.11493 | 0.10376 | 0.06949 | 0.06256 | 0.04479 | 0.04672 | ZNF571   |
| cg17336076 | 0.21788 | 0.20658 | 0.22212 | 0.20495 | 0.3621  | 0.16925 | 0.21156 | 0.19038 | 0.16018 | 0.20293 | FAM35A   |
| cg17338258 | 0.73403 | 0.73172 | 0.73814 | 0.75381 | 0.70075 | 0.64041 | 0.63489 | 0.6661  | 0.71001 | 0.66068 | SHBG     |
| cg17338403 | 0.72015 | 0.44125 | 0.54997 | 0.63844 | 0.10282 | 0.0396  | 0.03532 | 0.07592 | 0.48498 | 0.11297 | SLCO3A1  |
| cg17339202 | 0.6971  | 0.13548 | 0.30278 | 0.51101 | 0.19741 | 0.15567 | 0.08559 | 0.05316 | 0.07382 | 0.04857 | SYNC1    |
| cg17341358 | 0.03135 | 0.03663 | 0.03256 | 0.02876 | 0.02654 | 0.02939 | 0.02908 | 0.02988 | 0.02605 | 0.02565 | MRPL1    |
| cg17341703 | 0.06212 | 0.06445 | 0.0699  | 0.06368 | 0.06455 | 0.05061 | 0.05512 | 0.0531  | 0.04881 | 0.05122 | SLC35A1  |
| cg17342283 | 0.80213 | 0.61247 | 0.08585 | 0.08703 | 0.49863 | 0.41615 | 0.67379 | 0.22187 | 0.04499 | 0.0521  | PRG1     |
| cg17342759 | 0.14262 | 0.11244 | 0.19893 | 0.43052 | 0.37017 | 0.76804 | 0.25125 | 0.40178 | 0.15079 | 0.11058 | PPP2R2B  |
| cg17345480 | 0.14231 | 0.04988 | 0.17557 | 0.14167 | 0.08918 | 0.05209 | 0.06905 | 0.04643 | 0.05332 | 0.04304 | SPPL3    |
| cg17346022 | 0.83436 | 0.8082  | 0.84675 | 0.85267 | 0.77102 | 0.78871 | 0.83706 | 0.842   | 0.82701 | 0.75128 | SNX6     |
| cg17346115 | 0.02714 | 0.02698 | 0.03042 | 0.03114 | 0.02638 | 0.03213 | 0.02823 | 0.02473 | 0.02387 | 0.02019 | POLA2    |
| cg17347253 | 0.72869 | 0.38598 | 0.3897  | 0.32112 | 0.4699  | 0.52725 | 0.65769 | 0.60611 | 0.61281 | 0.65205 | MEST     |
| cg17347389 | 0.41409 | 0.07225 | 0.06236 | 0.06847 | 0.13524 | 0.07913 | 0.06813 | 0.05982 | 0.05146 | 0.05835 | TRIM9    |
| cg17347634 | 0.69137 | 0.72033 | 0.42762 | 0.511   | 0.72331 | 0.77084 | 0.61319 | 0.63766 | 0.78148 | 0.72432 | CYP7B1   |
| cg17348429 | 0.72628 | 0.62276 | 0.71738 | 0.74296 | 0.86723 | 0.7939  | 0.67415 | 0.64857 | 0.65684 | 0.69046 | ENPP7    |
| cg17348931 | 0.0618  | 0.05877 | 0.11177 | 0.11344 | 0.16527 | 0.13805 | 0.05774 | 0.06051 | 0.05277 | 0.04851 | SHFM1    |
| cg17349199 | 0.95773 | 0.95743 | 0.95862 | 0.95974 | 0.96889 | 0.96839 | 0.44489 | 0.6139  | 0.95719 | 0.96274 | C10orf82 |
| cg17349753 | 0.0906  | 0.0924  | 0.13564 | 0.12823 | 0.28534 | 0.12546 | 0.11339 | 0.12133 | 0.09107 | 0.08078 | RTN4RL2  |
| cg17350448 | 0.07287 | 0.07543 | 0.10277 | 0.10988 | 0.07212 | 0.07922 | 0.05566 | 0.05109 | 0.06644 | 0.07625 | AGTRAP   |
| cg17351116 | 0.0683  | 0.07207 | 0.05949 | 0.06656 | 0.0409  | 0.06115 | 0.06123 | 0.05977 | 0.06819 | 0.07237 | C20orf22 |
| cg17351385 | 0.08718 | 0.09615 | 0.09303 | 0.0861  | 0.10461 | 0.10819 | 0.07825 | 0.08308 | 0.06461 | 0.06394 | ALKBH6   |
| cg17352004 | 0.75069 | 0.43345 | 0.84933 | 0.84776 | 0.6015  | 0.69656 | 0.77714 | 0.82092 | 0.77423 | 0.66013 | C14orf29 |
| cg17353431 | 0.04289 | 0.03886 | 0.03678 | 0.03415 | 0.07294 | 0.0537  | 0.0358  | 0.03664 | 0.03069 | 0.04363 | THAP7    |
| cg17354052 | 0.03762 | 0.03842 | 0.04132 | 0.03851 | 0.02631 | 0.03198 | 0.03308 | 0.03318 | 0.02534 | 0.02792 | UBPH     |
| cg17354708 | 0.06299 | 0.07338 | 0.13204 | 0.13692 | 0.12169 | 0.1016  | 0.07165 | 0.08268 | 0.07715 | 0.06794 | HDAC8    |
| cg17356112 | 0.63324 | 0.74184 | 0.84553 | 0.86933 | 0.87884 | 0.86658 | 0.54882 | 0.55528 | 0.89764 | 0.82751 | PLXNA4B  |
| cg17356181 | 0.91441 | 0.15453 | 0.59143 | 0.74841 | 0.05927 | 0.03328 | 0.64018 | 0.22549 | 0.04429 | 0.03057 | MAP4K5   |
| cg17356252 | 0.61856 | 0.23347 | 0.30069 | 0.36274 | 0.28991 | 0.42398 | 0.05561 | 0.07994 | 0.10815 | 0.04181 | AIRE     |



|            |         |         |         |         |         |         |         |         |         |                  |
|------------|---------|---------|---------|---------|---------|---------|---------|---------|---------|------------------|
| cg17356532 | 0.0458  | 0.04016 | 0.04738 | 0.04981 | 0.03826 | 0.04741 | 0.05362 | 0.03721 | 0.03964 | 0.04035 SPCS2    |
| cg17356733 | 0.59976 | 0.16597 | 0.9006  | 0.90323 | 0.66518 | 0.09784 | 0.90889 | 0.58671 | 0.07234 | 0.07834 IFNGR2   |
| cg17357062 | 0.41427 | 0.16345 | 0.19813 | 0.34667 | 0.55463 | 0.56262 | 0.0597  | 0.06395 | 0.07491 | 0.04804 FCN1     |
| cg17357865 | 0.03452 | 0.03265 | 0.0357  | 0.03426 | 0.02533 | 0.02914 | 0.03166 | 0.03    | 0.02675 | 0.02686 UBLCPC1  |
| cg17357984 | 0.0397  | 0.04384 | 0.04271 | 0.03335 | 0.03222 | 0.03595 | 0.03624 | 0.03736 | 0.03269 | 0.03325 CDC34    |
| cg17361154 | 0.09686 | 0.05496 | 0.26488 | 0.36779 | 0.13654 | 0.05391 | 0.49087 | 0.47999 | 0.03692 | 0.03273 ENTPD8   |
| cg17361641 | 0.02739 | 0.02409 | 0.02521 | 0.0275  | 0.01931 | 0.02417 | 0.02169 | 0.02336 | 0.02114 | 0.02129 JUND     |
| cg17364922 | 0.03748 | 0.03548 | 0.03276 | 0.03324 | 0.03162 | 0.03305 | 0.03165 | 0.0327  | 0.0285  | 0.02618 YTHDF1   |
| cg17366294 | 0.61239 | 0.70325 | 0.09684 | 0.10991 | 0.10875 | 0.09456 | 0.06831 | 0.06854 | 0.45274 | 0.59193 MGC46496 |
| cg17366325 | 0.05421 | 0.05832 | 0.08001 | 0.06769 | 0.10472 | 0.05769 | 0.06748 | 0.0639  | 0.06572 | 0.06522 RPL19    |
| cg17367215 | 0.08182 | 0.07616 | 0.10892 | 0.12508 | 0.1216  | 0.09292 | 0.11462 | 0.09471 | 0.07604 | 0.07806 SUPT5H   |
| cg17371067 | 0.0249  | 0.02797 | 0.02904 | 0.02797 | 0.02114 | 0.02324 | 0.02496 | 0.02754 | 0.0227  | 0.02111 CEBPB    |
| cg17371081 | 0.02934 | 0.03007 | 0.40243 | 0.50606 | 0.05851 | 0.0337  | 0.03605 | 0.02716 | 0.05175 | 0.02942 NELL1    |
| cg17376813 | 0.87752 | 0.48914 | 0.91193 | 0.91055 | 0.9039  | 0.90757 | 0.9018  | 0.76952 | 0.89928 | 0.85621 C1orf21  |
| cg17378989 | 0.18186 | 0.15338 | 0.16892 | 0.16643 | 0.18506 | 0.19335 | 0.16854 | 0.14833 | 0.28785 | 0.13118 ERCC1    |
| cg17380128 | 0.04418 | 0.04149 | 0.04836 | 0.05713 | 0.03347 | 0.04264 | 0.04136 | 0.04238 | 0.03937 | 0.03805 DDX17    |
| cg17383958 | 0.05369 | 0.0582  | 0.07414 | 0.0668  | 0.06061 | 0.06193 | 0.05016 | 0.04142 | 0.05464 | 0.04607 RRAS     |
| cg17384145 | 0.06055 | 0.06058 | 0.05888 | 0.06014 | 0.0405  | 0.08851 | 0.05184 | 0.04228 | 0.04205 | 0.0437 HIST1H2AM |
| cg17384214 | 0.88832 | 0.81633 | 0.88181 | 0.86893 | 0.87734 | 0.82395 | 0.88422 | 0.86148 | 0.89683 | 0.84516 C6orf48  |
| cg17385448 | 0.69974 | 0.36007 | 0.70024 | 0.71692 | 0.19245 | 0.45759 | 0.43093 | 0.18725 | 0.10489 | 0.09957 AGMAT    |
| cg17385674 | 0.03254 | 0.0289  | 0.04186 | 0.03957 | 0.1609  | 0.03221 | 0.03015 | 0.02373 | 0.03677 | 0.02966 ARID1A   |
| cg17386181 | 0.7062  | 0.30283 | 0.84094 | 0.84566 | 0.91574 | 0.84629 | 0.77918 | 0.46993 | 0.84793 | 0.69245 MT1B     |
| cg17386185 | 0.22795 | 0.24623 | 0.26689 | 0.22377 | 0.04649 | 0.05151 | 0.25185 | 0.13569 | 0.12743 | 0.05292 GLYCTK   |
| cg17386433 | 0.02617 | 0.03237 | 0.03315 | 0.03944 | 0.03529 | 0.033   | 0.02329 | 0.02389 | 0.02739 | 0.02364 FAM76A   |
| cg17386700 | 0.02982 | 0.0333  | 0.02998 | 0.02597 | 0.02783 | 0.03158 | 0.02662 | 0.02709 | 0.0231  | 0.0251 MVD       |
| cg17386819 | 0.04286 | 0.03873 | 0.04016 | 0.04467 | 0.03278 | 0.03577 | 0.03692 | 0.03536 | 0.0348  | 0.03428 PRDX6    |
| cg17386991 | 0.03952 | 0.03756 | 0.04192 | 0.0373  | 0.03351 | 0.04219 | 0.03651 | 0.03561 | 0.03142 | 0.03564 POLR3F   |
| cg17387870 | 0.70141 | 0.22623 | 0.58695 | 0.70353 | 0.85638 | 0.91534 | 0.2491  | 0.07452 | 0.38974 | 0.19786 CHFR     |
| cg17387916 | 0.05715 | 0.05676 | 0.06165 | 0.05605 | 0.0609  | 0.06283 | 0.04895 | 0.04672 | 0.03814 | 0.04711 RPL28    |
| cg17388484 | 0.04387 | 0.03964 | 0.05827 | 0.06304 | 0.05035 | 0.05567 | 0.04986 | 0.05012 | 0.03504 | 0.04949 JUP      |
| cg17389295 | 0.06881 | 0.05604 | 0.06393 | 0.06267 | 0.05693 | 0.05451 | 0.05769 | 0.05582 | 0.04136 | 0.04671 FBL      |
| cg17389519 | 0.10158 | 0.40103 | 0.72547 | 0.8546  | 0.712   | 0.79005 | 0.10457 | 0.08717 | 0.34861 | 0.33037 PTF1A    |
| cg17391474 | 0.04018 | 0.04124 | 0.052   | 0.0425  | 0.04144 | 0.04807 | 0.04509 | 0.03828 | 0.04115 | 0.03582 BRP44L   |
| cg17391877 | 0.82899 | 0.53113 | 0.70245 | 0.88064 | 0.85591 | 0.84854 | 0.74944 | 0.7597  | 0.83764 | 0.55731 PGC      |
| cg17391929 | 0.08811 | 0.08343 | 0.09946 | 0.09466 | 0.10732 | 0.10625 | 0.08666 | 0.08814 | 0.08825 | 0.09962 NEDD8    |
| cg17393296 | 0.03143 | 0.03785 | 0.04508 | 0.03499 | 0.0329  | 0.03355 | 0.02795 | 0.03202 | 0.03527 | 0.03031 FLJ10986 |
| cg17397420 | 0.74666 | 0.47476 | 0.64874 | 0.73797 | 0.59812 | 0.68474 | 0.45154 | 0.69873 | 0.55893 | 0.52299 MS4A10   |
| cg17397493 | 0.46996 | 0.63496 | 0.70301 | 0.746   | 0.62916 | 0.70414 | 0.64428 | 0.51671 | 0.55395 | 0.51548 PRLR     |
| cg17398003 | 0.03    | 0.03134 | 0.03458 | 0.03397 | 0.02557 | 0.02988 | 0.0278  | 0.02786 | 0.02437 | 0.0238 FLJ44216  |
| cg17398283 | 0.87655 | 0.70639 | 0.88036 | 0.8845  | 0.91208 | 0.7053  | 0.88134 | 0.74059 | 0.92161 | 0.79742 CCDC76   |
| cg17398312 | 0.04878 | 0.04855 | 0.25396 | 0.33391 | 0.04853 | 0.03365 | 0.10032 | 0.06778 | 0.03347 | 0.03288 FRMPD4   |

|            |         |         |         |         |         |         |         |         |         |                   |
|------------|---------|---------|---------|---------|---------|---------|---------|---------|---------|-------------------|
| cg17398595 | 0.41753 | 0.4598  | 0.84654 | 0.95216 | 0.59936 | 0.45255 | 0.09032 | 0.03694 | 0.47095 | 0.54238 SH3GL2    |
| cg17398613 | 0.90644 | 0.32142 | 0.9537  | 0.9588  | 0.96664 | 0.96187 | 0.89519 | 0.91293 | 0.9679  | 0.93596 SLC37A1   |
| cg17399166 | 0.56441 | 0.26575 | 0.89072 | 0.92322 | 0.91464 | 0.65086 | 0.21477 | 0.30873 | 0.90982 | 0.64679 CD1D      |
| cg17399352 | 0.02983 | 0.02886 | 0.03099 | 0.03177 | 0.10933 | 0.02977 | 0.02921 | 0.02513 | 0.02591 | 0.0245 SPHK1      |
| cg17400229 | 0.03055 | 0.02909 | 0.04213 | 0.03527 | 0.03487 | 0.02894 | 0.02739 | 0.03185 | 0.02781 | 0.02774 U2AF1     |
| cg17403875 | 0.06901 | 0.07326 | 0.03886 | 0.02482 | 0.03251 | 0.02088 | 0.0201  | 0.01988 | 0.04719 | 0.01808 LGALS3    |
| cg17404081 | 0.04027 | 0.0358  | 0.0486  | 0.04203 | 0.0657  | 0.03284 | 0.03356 | 0.03462 | 0.09232 | 0.06031 SAPS3     |
| cg17404605 | 0.03337 | 0.02956 | 0.03315 | 0.03266 | 0.02326 | 0.02559 | 0.03095 | 0.03136 | 0.02456 | 0.02215 MAP2K7    |
| cg17404915 | 0.05703 | 0.05223 | 0.28828 | 0.27123 | 0.80983 | 0.9186  | 0.07354 | 0.06096 | 0.03729 | 0.03485 OVOL2     |
| cg17405586 | 0.26899 | 0.08741 | 0.17777 | 0.22349 | 0.33572 | 0.29282 | 0.11153 | 0.09509 | 0.10243 | 0.17382 KRT1      |
| cg17407908 | 0.89528 | 0.67526 | 0.8798  | 0.8931  | 0.90511 | 0.77535 | 0.66288 | 0.76279 | 0.90557 | 0.82682 AGER      |
| cg17408647 | 0.04703 | 0.04587 | 0.04657 | 0.04173 | 0.03239 | 0.03961 | 0.0443  | 0.04487 | 0.03842 | 0.0393 FLJ10803   |
| cg17408686 | 0.86709 | 0.71256 | 0.22154 | 0.23255 | 0.7062  | 0.4305  | 0.61103 | 0.15692 | 0.76834 | 0.2305 CHCHD6     |
| cg17409393 | 0.02152 | 0.01933 | 0.04158 | 0.02887 | 0.02678 | 0.01758 | 0.01553 | 0.01719 | 0.01855 | 0.01755 ATP9A     |
| cg17410236 | 0.02792 | 0.02594 | 0.02515 | 0.02068 | 0.03683 | 0.02708 | 0.02019 | 0.02365 | 0.36387 | 0.54942 FLRT2     |
| cg17412258 | 0.05464 | 0.05526 | 0.66785 | 0.88325 | 0.75183 | 0.87574 | 0.20612 | 0.4243  | 0.0844  | 0.13835 DLK1      |
| cg17412351 | 0.31246 | 0.10518 | 0.18302 | 0.14561 | 0.28321 | 0.144   | 0.23609 | 0.10626 | 0.12086 | 0.09865 STYXL1    |
| cg17412560 | 0.73685 | 0.31043 | 0.52662 | 0.59069 | 0.51998 | 0.68527 | 0.08509 | 0.11763 | 0.39082 | 0.17603 CSEN      |
| cg17413703 | 0.06824 | 0.07007 | 0.0876  | 0.07358 | 0.04263 | 0.12008 | 0.07466 | 0.07397 | 0.03883 | 0.04513 TAF11     |
| cg17414107 | 0.20129 | 0.15149 | 0.56582 | 0.63825 | 0.08058 | 0.068   | 0.47289 | 0.74029 | 0.08893 | 0.10486 GNAS      |
| cg17414431 | 0.04898 | 0.04333 | 0.04697 | 0.04849 | 0.05212 | 0.0486  | 0.03131 | 0.03293 | 0.04011 | 0.03742 PPPIA3    |
| cg17415555 | 0.03519 | 0.02854 | 0.04185 | 0.02912 | 0.02653 | 0.02689 | 0.0303  | 0.02981 | 0.0337  | 0.02209 TMTC2     |
| cg17415721 | 0.07824 | 0.07781 | 0.09214 | 0.09274 | 0.17086 | 0.13279 | 0.09704 | 0.08827 | 0.26555 | 0.07643 SLC29A2   |
| cg17416146 | 0.38649 | 0.03189 | 0.8743  | 0.94192 | 0.04843 | 0.02458 | 0.81026 | 0.39588 | 0.02937 | 0.02932 EIF4EBP3  |
| cg17416608 | 0.0566  | 0.04188 | 0.05589 | 0.06269 | 0.04621 | 0.0405  | 0.0444  | 0.03736 | 0.05802 | 0.03445 RAB6IP2   |
| cg17417054 | 0.07204 | 0.08066 | 0.08827 | 0.08804 | 0.0685  | 0.0745  | 0.07374 | 0.07497 | 0.07305 | 0.07156 CLSPN     |
| cg17417191 | 0.08541 | 0.08518 | 0.08679 | 0.08417 | 0.06443 | 0.08338 | 0.07485 | 0.06637 | 0.06838 | 0.06015 CGI-115   |
| cg17420360 | 0.03133 | 0.02786 | 0.03051 | 0.03292 | 0.61515 | 0.5215  | 0.46866 | 0.03362 | 0.02728 | 0.02611 FLJ13236  |
| cg17421623 | 0.46544 | 0.08018 | 0.14817 | 0.15894 | 0.03773 | 0.04674 | 0.20596 | 0.04634 | 0.04324 | 0.04099 C3orf9    |
| cg17422427 | 0.03284 | 0.03274 | 0.03387 | 0.03312 | 0.02669 | 0.03212 | 0.03611 | 0.0295  | 0.03374 | 0.03011 RNPEPL1   |
| cg17423978 | 0.17081 | 0.15454 | 0.72222 | 0.80622 | 0.47613 | 0.43921 | 0.21014 | 0.17351 | 0.6207  | 0.41258 SIRPD     |
| cg17425224 | 0.08261 | 0.09072 | 0.10382 | 0.11011 | 0.16716 | 0.13564 | 0.07559 | 0.05932 | 0.10824 | 0.10291 PARK7     |
| cg17425616 | 0.17759 | 0.15118 | 0.29407 | 0.21542 | 0.09749 | 0.10537 | 0.13614 | 0.10893 | 0.11141 | 0.10654 SNX2      |
| cg17428423 | 0.06464 | 0.05417 | 0.47345 | 0.40473 | 0.66743 | 0.32635 | 0.16222 | 0.05713 | 0.09035 | 0.0574 DOC2A      |
| cg17428950 | 0.28688 | 0.39749 | 0.04375 | 0.03959 | 0.02652 | 0.03034 | 0.03613 | 0.03313 | 0.03335 | 0.03236 SQRDL     |
| cg17429424 | 0.02191 | 0.0252  | 0.02209 | 0.02264 | 0.0239  | 0.02009 | 0.02031 | 0.0233  | 0.02255 | 0.02265 DUSP1     |
| cg17430393 | 0.02705 | 0.03107 | 0.07749 | 0.33035 | 0.03145 | 0.03224 | 0.02966 | 0.0287  | 0.02869 | 0.03065 VSNL1     |
| cg17431739 | 0.24682 | 0.03875 | 0.35166 | 0.5271  | 0.05072 | 0.03011 | 0.04997 | 0.03045 | 0.03111 | 0.02815 MSRB2     |
| cg17436805 | 0.06905 | 0.07699 | 0.07086 | 0.07037 | 0.0598  | 0.07381 | 0.06835 | 0.07619 | 0.06785 | 0.05848 MIPEP     |
| cg17439480 | 0.45937 | 0.10073 | 0.47755 | 0.32912 | 0.06355 | 0.06043 | 0.26877 | 0.42193 | 0.05989 | 0.06068 LOC203427 |
| cg17439694 | 0.68614 | 0.71092 | 0.6692  | 0.73234 | 0.67685 | 0.72086 | 0.69638 | 0.75081 | 0.7061  | 0.67868 CP        |

|            |         |         |         |         |         |         |         |         |         |                   |
|------------|---------|---------|---------|---------|---------|---------|---------|---------|---------|-------------------|
| cg17441778 | 0.26245 | 0.07728 | 0.05423 | 0.15705 | 0.27552 | 0.06865 | 0.18705 | 0.06555 | 0.05988 | 0.04973 MYO7A     |
| cg17445987 | 0.04009 | 0.0454  | 0.05039 | 0.05144 | 0.05688 | 0.05576 | 0.03917 | 0.0405  | 0.05454 | 0.04636 DNMT1     |
| cg17446142 | 0.83667 | 0.84191 | 0.82865 | 0.83576 | 0.83505 | 0.84044 | 0.84894 | 0.812   | 0.88978 | 0.56367 GDF9      |
| cg17449882 | 0.86312 | 0.63951 | 0.90637 | 0.92756 | 0.50632 | 0.44574 | 0.81737 | 0.59221 | 0.50375 | 0.44514 C8orf46   |
| cg17451138 | 0.05244 | 0.03027 | 0.04949 | 0.05433 | 0.08284 | 0.03362 | 0.03784 | 0.03097 | 0.0408  | 0.03032 C12orf38  |
| cg17452257 | 0.58901 | 0.55114 | 0.60976 | 0.62315 | 0.42688 | 0.48162 | 0.4552  | 0.43632 | 0.62754 | 0.53938 KIAA0753  |
| cg17452277 | 0.02845 | 0.0314  | 0.0373  | 0.03605 | 0.02232 | 0.02293 | 0.02521 | 0.02387 | 0.02769 | 0.03178 EBAG9     |
| cg17452384 | 0.9345  | 0.92472 | 0.92362 | 0.92577 | 0.94241 | 0.92933 | 0.58225 | 0.53678 | 0.93538 | 0.9127 MAPK10     |
| cg17453778 | 0.50698 | 0.54775 | 0.81677 | 0.84789 | 0.54857 | 0.51698 | 0.77889 | 0.85195 | 0.814   | 0.78693 CASR      |
| cg17454897 | 0.02754 | 0.03077 | 0.06898 | 0.11186 | 0.02239 | 0.02114 | 0.02409 | 0.02672 | 0.02452 | 0.01872 ADAMTS10  |
| cg17455591 | 0.05138 | 0.05149 | 0.06468 | 0.05723 | 0.04818 | 0.05958 | 0.04772 | 0.04954 | 0.052   | 0.05578 15-Sep    |
| cg17456704 | 0.19205 | 0.14628 | 0.16649 | 0.15579 | 0.26454 | 0.15889 | 0.14178 | 0.14429 | 0.14243 | 0.13742 ZNF625    |
| cg17457560 | 0.02757 | 0.03142 | 0.03253 | 0.03352 | 0.0206  | 0.02477 | 0.03434 | 0.0335  | 0.034   | 0.02557 NRG1      |
| cg17460095 | 0.03341 | 0.03716 | 0.04061 | 0.03555 | 0.02755 | 0.03046 | 0.03096 | 0.03468 | 0.02804 | 0.02747 PLEKHC1   |
| cg17460386 | 0.73672 | 0.35575 | 0.74542 | 0.75    | 0.74093 | 0.71982 | 0.62585 | 0.30359 | 0.76491 | 0.61273 FAIM3     |
| cg17460846 | 0.05316 | 0.05555 | 0.06075 | 0.05776 | 0.06067 | 0.05747 | 0.05301 | 0.05293 | 0.04315 | 0.04777 COX15     |
| cg17461214 | 0.84831 | 0.85147 | 0.82695 | 0.84322 | 0.79882 | 0.83605 | 0.72826 | 0.7844  | 0.8508  | 0.83138 CHML      |
| cg17463527 | 0.66263 | 0.56768 | 0.74707 | 0.79534 | 0.86059 | 0.87544 | 0.40379 | 0.37216 | 0.6198  | 0.19695 SGK2      |
| cg17465219 | 0.06562 | 0.06767 | 0.06359 | 0.05822 | 0.06662 | 0.05955 | 0.05078 | 0.05333 | 0.04563 | 0.05208 LOC124491 |
| cg17465304 | 0.89449 | 0.77756 | 0.90717 | 0.90054 | 0.90442 | 0.89578 | 0.89464 | 0.88543 | 0.83993 | 0.90672 KIF12     |
| cg17465631 | 0.39893 | 0.29483 | 0.30575 | 0.35822 | 0.21027 | 0.2215  | 0.42206 | 0.21089 | 0.66678 | 0.34866 BCMO1     |
| cg17465827 | 0.13503 | 0.10384 | 0.20698 | 0.35639 | 0.12493 | 0.12138 | 0.7968  | 0.47811 | 0.104   | 0.11543 TMEM34    |
| cg17466535 | 0.04471 | 0.04646 | 0.04724 | 0.04308 | 0.0447  | 0.05484 | 0.04134 | 0.03301 | 0.03516 | 0.03989 TMEM55B   |
| cg17466768 | 0.06023 | 0.04652 | 0.26521 | 0.07073 | 0.04189 | 0.0392  | 0.04331 | 0.04188 | 0.04226 | 0.03609 RBJ       |
| cg17468440 | 0.14449 | 0.09999 | 0.16793 | 0.12375 | 0.1954  | 0.05035 | 0.07454 | 0.06677 | 0.05794 | 0.04203 PPP2R1B   |
| cg17468841 | 0.0248  | 0.02397 | 0.02516 | 0.02372 | 0.01727 | 0.01715 | 0.0216  | 0.02408 | 0.01741 | 0.01634 CBLB      |
| cg17468997 | 0.68769 | 0.43724 | 0.84677 | 0.89448 | 0.81861 | 0.87834 | 0.88776 | 0.83842 | 0.81678 | 0.64418 NCF1      |
| cg17469356 | 0.05648 | 0.05962 | 0.0666  | 0.0598  | 0.07262 | 0.0711  | 0.04484 | 0.04365 | 0.05204 | 0.05226 TUSC2     |
| cg17469479 | 0.92814 | 0.93744 | 0.91102 | 0.91802 | 0.88538 | 0.9378  | 0.55793 | 0.91849 | 0.92472 | 0.92986 CLEC9A    |
| cg17469978 | 0.03203 | 0.036   | 0.03876 | 0.03708 | 0.04415 | 0.05018 | 0.03611 | 0.03817 | 0.02619 | 0.02672 CAV1      |
| cg17470143 | 0.90273 | 0.60348 | 0.80948 | 0.87077 | 0.26862 | 0.4555  | 0.69339 | 0.28277 | 0.81369 | 0.61708 DCAMKL1   |
| cg17470637 | 0.0849  | 0.0852  | 0.09683 | 0.07724 | 0.05228 | 0.05566 | 0.09321 | 0.07774 | 0.06503 | 0.05299 2-Mar     |
| cg17470697 | 0.03554 | 0.03253 | 0.0692  | 0.0433  | 0.3188  | 0.17985 | 0.42698 | 0.02871 | 0.02934 | 0.02847 C10orf56  |
| cg17471019 | 0.04166 | 0.04396 | 0.04866 | 0.04441 | 0.03461 | 0.03668 | 0.04293 | 0.03976 | 0.03696 | 0.03483 TMEM67    |
| cg17471102 | 0.21964 | 0.09552 | 0.18419 | 0.20919 | 0.0756  | 0.09012 | 0.09697 | 0.08822 | 0.10151 | 0.09452 FUT3      |
| cg17471928 | 0.04359 | 0.037   | 0.38291 | 0.47857 | 0.82564 | 0.78481 | 0.07585 | 0.10721 | 0.60325 | 0.72638 STAC2     |
| cg17474651 | 0.12813 | 0.08934 | 0.8248  | 0.86157 | 0.76184 | 0.86524 | 0.45695 | 0.61646 | 0.08332 | 0.03739 MAGEC3    |
| cg17475456 | 0.19096 | 0.12309 | 0.12927 | 0.12115 | 0.16573 | 0.07526 | 0.1092  | 0.09505 | 0.09623 | 0.10344 CLEC2B    |
| cg17475918 | 0.52908 | 0.57901 | 0.60263 | 0.61197 | 0.79277 | 0.69761 | 0.25993 | 0.36139 | 0.68357 | 0.69542 HLA-E     |
| cg17477756 | 0.08195 | 0.06821 | 0.08132 | 0.07114 | 0.05816 | 0.03438 | 0.0656  | 0.06236 | 0.0466  | 0.04835 HNRPM     |
| cg17479357 | 0.10945 | 0.10048 | 0.20606 | 0.16047 | 0.17235 | 0.11971 | 0.17987 | 0.13497 | 0.08939 | 0.10136 FLJ10803  |

|            |         |         |         |         |         |         |         |         |         |         |               |
|------------|---------|---------|---------|---------|---------|---------|---------|---------|---------|---------|---------------|
| cg17480438 | 0.18918 | 0.179   | 0.52642 | 0.52019 | 0.46988 | 0.54978 | 0.16959 | 0.17985 | 0.17067 | 0.24119 | KIAA1244      |
| cg17482740 | 0.86346 | 0.60915 | 0.82544 | 0.85756 | 0.90321 | 0.40361 | 0.60803 | 0.3362  | 0.70932 | 0.61902 | DNMT3B        |
| cg17483510 | 0.04781 | 0.05334 | 0.06026 | 0.05446 | 0.04215 | 0.03032 | 0.03725 | 0.03532 | 0.04503 | 0.04512 | GNB4          |
| cg17484237 | 0.11205 | 0.06398 | 0.1489  | 0.15397 | 0.17439 | 0.37479 | 0.44549 | 0.31158 | 0.19847 | 0.2188  | HAVCR2        |
| cg17488985 | 0.0445  | 0.03596 | 0.04071 | 0.03884 | 0.02594 | 0.03216 | 0.03559 | 0.03559 | 0.03392 | 0.03548 | NT5E          |
| cg17489451 | 0.65744 | 0.2915  | 0.56416 | 0.63197 | 0.62486 | 0.11939 | 0.61369 | 0.65285 | 0.64368 | 0.39394 | DKFZP779L1558 |
| cg17489622 | 0.10673 | 0.04708 | 0.2461  | 0.16973 | 0.03833 | 0.02773 | 0.03448 | 0.03333 | 0.02458 | 0.02047 | TMEM24        |
| cg17489752 | 0.02942 | 0.03485 | 0.03638 | 0.03304 | 0.05159 | 0.06163 | 0.03225 | 0.04309 | 0.02902 | 0.02998 | BAT1          |
| cg17489897 | 0.03724 | 0.0301  | 0.04634 | 0.03551 | 0.03671 | 0.02883 | 0.03073 | 0.05384 | 0.08349 | 0.05996 | PTEN          |
| cg17491456 | 0.10047 | 0.2085  | 0.07315 | 0.07002 | 0.09104 | 0.09529 | 0.06903 | 0.07285 | 0.06538 | 0.05849 | DAB2          |
| cg17496788 | 0.63793 | 0.76654 | 0.17974 | 0.14656 | 0.21669 | 0.12002 | 0.31909 | 0.21422 | 0.3302  | 0.35392 | DDR2          |
| cg17496921 | 0.7716  | 0.73091 | 0.79615 | 0.84974 | 0.86282 | 0.68022 | 0.77202 | 0.15017 | 0.49739 | 0.33817 | TSPAN16       |
| cg17497271 | 0.03495 | 0.02943 | 0.03088 | 0.02875 | 0.07608 | 0.0228  | 0.02786 | 0.02842 | 0.02517 | 0.02583 | GPR176        |
| cg17498321 | 0.04423 | 0.04567 | 0.07138 | 0.13606 | 0.5377  | 0.33578 | 0.04179 | 0.0374  | 0.04245 | 0.03249 | NOTCH3        |
| cg17498523 | 0.12851 | 0.38516 | 0.09623 | 0.07214 | 0.03056 | 0.03641 | 0.03097 | 0.02847 | 0.02903 | 0.02905 | GTF2A1        |
| cg17499294 | 0.79125 | 0.83128 | 0.77692 | 0.81813 | 0.70299 | 0.7746  | 0.7786  | 0.80104 | 0.81668 | 0.78248 | METAP1        |
| cg17500329 | 0.84792 | 0.79511 | 0.14283 | 0.14421 | 0.63053 | 0.5096  | 0.40121 | 0.5     | 0.75587 | 0.80723 | C8orf17       |
| cg17500962 | 0.6179  | 0.3327  | 0.78993 | 0.83999 | 0.76133 | 0.76749 | 0.77    | 0.79745 | 0.82499 | 0.8034  | C16orf47      |
| cg17501569 | 0.85933 | 0.88665 | 0.91941 | 0.93581 | 0.95888 | 0.93047 | 0.25483 | 0.08706 | 0.93603 | 0.89159 | MSLN          |
| cg17502536 | 0.93517 | 0.81066 | 0.92149 | 0.9279  | 0.93527 | 0.92006 | 0.94348 | 0.93493 | 0.92076 | 0.90607 | PADI1         |
| cg17503456 | 0.06749 | 0.06673 | 0.63307 | 0.62834 | 0.9768  | 0.9786  | 0.03511 | 0.03484 | 0.88038 | 0.96205 | FOXL2         |
| cg17503750 | 0.74775 | 0.69631 | 0.67481 | 0.71532 | 0.59443 | 0.71527 | 0.35342 | 0.35878 | 0.63541 | 0.40703 | KRTAP19-6     |
| cg17504145 | 0.1415  | 0.06819 | 0.41211 | 0.37734 | 0.76955 | 0.82723 | 0.2917  | 0.2401  | 0.08122 | 0.06391 | CRYBB2        |
| cg17504464 | 0.04821 | 0.05386 | 0.04667 | 0.04434 | 0.07184 | 0.06327 | 0.04391 | 0.04378 | 0.0464  | 0.05052 | AK7           |
| cg17505428 | 0.04733 | 0.04884 | 0.0488  | 0.04848 | 0.03897 | 0.04394 | 0.04001 | 0.04681 | 0.03935 | 0.03724 | ARHGAP21      |
| cg17505463 | 0.76719 | 0.35629 | 0.59081 | 0.66864 | 0.81938 | 0.78602 | 0.64782 | 0.56635 | 0.28807 | 0.28437 | GGT2          |
| cg17505757 | 0.10798 | 0.10633 | 0.08309 | 0.08871 | 0.12026 | 0.10771 | 0.11267 | 0.11871 | 0.08705 | 0.09171 | NUP88         |
| cg17506742 | 0.0356  | 0.0366  | 0.04756 | 0.0411  | 0.03868 | 0.03743 | 0.02846 | 0.03201 | 0.03581 | 0.03076 | IL10RB        |
| cg17509612 | 0.33978 | 0.14191 | 0.34836 | 0.40582 | 0.73097 | 0.52199 | 0.53594 | 0.14452 | 0.66402 | 0.70362 | C9orf78       |
| cg17509807 | 0.03452 | 0.04242 | 0.04448 | 0.03688 | 0.03026 | 0.03521 | 0.04121 | 0.03559 | 0.0352  | 0.03307 | GTF3C2        |
| cg17509872 | 0.14739 | 0.11312 | 0.11324 | 0.11274 | 0.10164 | 0.09407 | 0.16429 | 0.14456 | 0.27447 | 0.0929  | CNOT7         |
| cg17511416 | 0.37437 | 0.37228 | 0.05212 | 0.04347 | 0.02406 | 0.02709 | 0.04126 | 0.04561 | 0.03505 | 0.03455 | C9orf93       |
| cg17518825 | 0.82401 | 0.51231 | 0.4368  | 0.48913 | 0.79625 | 0.76178 | 0.80935 | 0.747   | 0.78915 | 0.77011 | EPAS1         |
| cg17518962 | 0.53576 | 0.42105 | 0.72022 | 0.74347 | 0.77796 | 0.60714 | 0.19264 | 0.06225 | 0.04927 | 0.03834 | GAL3ST4       |
| cg17518965 | 0.97306 | 0.96787 | 0.97875 | 0.97792 | 0.97964 | 0.97846 | 0.97987 | 0.84219 | 0.97664 | 0.95196 | EDG6          |
| cg17520176 | 0.04285 | 0.05195 | 0.06723 | 0.05799 | 0.06508 | 0.05714 | 0.0457  | 0.04237 | 0.04712 | 0.04841 | ZMYM4         |
| cg17522249 | 0.08523 | 0.06614 | 0.07915 | 0.05914 | 0.05944 | 0.05464 | 0.06192 | 0.06062 | 0.05114 | 0.05297 | ARTS-1        |
| cg17522601 | 0.93064 | 0.86764 | 0.92638 | 0.93623 | 0.89849 | 0.93652 | 0.92822 | 0.92413 | 0.94248 | 0.93789 | CHFR          |
| cg17523380 | 0.02544 | 0.02943 | 0.13894 | 0.39761 | 0.08793 | 0.18674 | 0.02287 | 0.04616 | 0.03179 | 0.03027 | PPP1R1A       |
| cg17524624 | 0.19964 | 0.12463 | 0.16531 | 0.14495 | 0.15564 | 0.13808 | 0.09333 | 0.10099 | 0.08956 | 0.08141 | GSTK1         |
| cg17524886 | 0.94744 | 0.83403 | 0.93767 | 0.94951 | 0.67923 | 0.54416 | 0.94106 | 0.94516 | 0.95644 | 0.86678 | CHFR          |

|            |         |         |         |         |         |         |         |         |         |                   |
|------------|---------|---------|---------|---------|---------|---------|---------|---------|---------|-------------------|
| cg17525003 | 0.04756 | 0.04845 | 0.04543 | 0.04672 | 0.04047 | 0.05198 | 0.04954 | 0.05854 | 0.04586 | 0.04194 IKIP      |
| cg17525406 | 0.04898 | 0.28153 | 0.63882 | 0.74178 | 0.15155 | 0.34597 | 0.04182 | 0.06574 | 0.04865 | 0.04087 AJAP1     |
| cg17526300 | 0.08604 | 0.10792 | 0.11093 | 0.11182 | 0.1332  | 0.0903  | 0.08929 | 0.07984 | 0.0761  | 0.07944 PTER      |
| cg17527798 | 0.90546 | 0.80772 | 0.9576  | 0.95501 | 0.96933 | 0.96301 | 0.69519 | 0.59242 | 0.95277 | 0.92843 LTF       |
| cg17530977 | 0.05509 | 0.05926 | 0.06165 | 0.05854 | 0.05787 | 0.06261 | 0.0694  | 0.05517 | 0.05014 | 0.05101 GLI3      |
| cg17532978 | 0.04397 | 0.03843 | 0.07123 | 0.08691 | 0.09626 | 0.23412 | 0.03874 | 0.03598 | 0.04221 | 0.04505 NEUROD4   |
| cg17533684 | 0.03404 | 0.03709 | 0.04758 | 0.04379 | 0.07387 | 0.03803 | 0.03673 | 0.03452 | 0.03438 | 0.03437 PIK3R3    |
| cg17533847 | 0.03111 | 0.03156 | 0.03057 | 0.02719 | 0.02461 | 0.03083 | 0.02429 | 0.0289  | 0.02542 | 0.0227 CBX4       |
| cg17534899 | 0.02779 | 0.0261  | 0.04522 | 0.03381 | 0.04038 | 0.02375 | 0.0864  | 0.02161 | 0.02835 | 0.02081 IQSEC1    |
| cg17536071 | 0.4278  | 0.43471 | 0.5705  | 0.60512 | 0.53834 | 0.35993 | 0.29415 | 0.25674 | 0.35041 | 0.30077 UNQ689    |
| cg17536532 | 0.87619 | 0.52696 | 0.89376 | 0.91733 | 0.49664 | 0.25668 | 0.84237 | 0.72051 | 0.77106 | 0.69668 KIAA0649  |
| cg17536848 | 0.2879  | 0.09258 | 0.16917 | 0.13027 | 0.17341 | 0.1432  | 0.08777 | 0.07462 | 0.08275 | 0.07621 LMBR1     |
| cg17539235 | 0.81547 | 0.38265 | 0.83345 | 0.86977 | 0.80606 | 0.83708 | 0.72502 | 0.06214 | 0.87065 | 0.76816 KISS1     |
| cg17541425 | 0.04609 | 0.04205 | 0.04849 | 0.0481  | 0.03726 | 0.04922 | 0.04726 | 0.04657 | 0.04468 | 0.03817 ABCF2     |
| cg17541922 | 0.04117 | 0.04317 | 0.04949 | 0.04316 | 0.03682 | 0.03605 | 0.03811 | 0.03693 | 0.07796 | 0.02861 PRSS23    |
| cg17542385 | 0.14729 | 0.20175 | 0.15331 | 0.13278 | 0.57654 | 0.3875  | 0.15069 | 0.1142  | 0.23504 | 0.16132 LCE4A     |
| cg17542495 | 0.74329 | 0.43401 | 0.40678 | 0.52254 | 0.33238 | 0.16707 | 0.12781 | 0.09006 | 0.04708 | 0.03339 GJB1      |
| cg17542835 | 0.05531 | 0.04227 | 0.05522 | 0.05787 | 0.04734 | 0.04634 | 0.05073 | 0.04912 | 0.03758 | 0.03955 RPL6      |
| cg17543123 | 0.11136 | 0.06661 | 0.43026 | 0.54147 | 0.18369 | 0.05886 | 0.20991 | 0.07283 | 0.06595 | 0.04476 PLEKHF1   |
| cg17547537 | 0.03213 | 0.03944 | 0.03775 | 0.03417 | 0.02834 | 0.03572 | 0.03183 | 0.03188 | 0.02842 | 0.02789 EIF1      |
| cg17547792 | 0.21555 | 0.12782 | 0.04249 | 0.03606 | 0.03253 | 0.0315  | 0.03454 | 0.03859 | 0.12004 | 0.42794 GPR30     |
| cg17550582 | 0.10466 | 0.03267 | 0.06476 | 0.03199 | 0.02523 | 0.029   | 0.03639 | 0.04281 | 0.02651 | 0.02177 SLC2A10   |
| cg17552093 | 0.03626 | 0.03712 | 0.04092 | 0.04073 | 0.03489 | 0.03865 | 0.03484 | 0.03073 | 0.03372 | 0.03683 SIRT7     |
| cg17552650 | 0.04974 | 0.04484 | 0.04421 | 0.04035 | 0.03599 | 0.04521 | 0.09468 | 0.1433  | 0.03908 | 0.0302 WDR45      |
| cg17554194 | 0.34835 | 0.4346  | 0.08163 | 0.08083 | 0.03553 | 0.04305 | 0.07912 | 0.06434 | 0.06299 | 0.09744 HLA-B     |
| cg17556578 | 0.02495 | 0.0261  | 0.02685 | 0.02855 | 0.0269  | 0.02809 | 0.02839 | 0.02614 | 0.02504 | 0.02714 RAB8B     |
| cg17558126 | 0.41425 | 0.15835 | 0.88717 | 0.9468  | 0.97235 | 0.96035 | 0.9479  | 0.94766 | 0.506   | 0.50779 RASSF5    |
| cg17559549 | 0.1663  | 0.16316 | 0.17157 | 0.1654  | 0.17846 | 0.16845 | 0.1656  | 0.16058 | 0.14931 | 0.16321 MAPK7     |
| cg17559711 | 0.02821 | 0.02466 | 0.02862 | 0.0276  | 0.0179  | 0.02398 | 0.02459 | 0.02493 | 0.02252 | 0.02237 JUB       |
| cg17560179 | 0.915   | 0.91537 | 0.78793 | 0.85612 | 0.79352 | 0.83496 | 0.89214 | 0.90689 | 0.92026 | 0.93723 TAS2R5    |
| cg17560327 | 0.03873 | 0.05085 | 0.08305 | 0.0452  | 0.09319 | 0.06243 | 0.0356  | 0.03787 | 0.0306  | 0.0319 ZNF417     |
| cg17560332 | 0.63506 | 0.87978 | 0.90554 | 0.89277 | 0.8675  | 0.9014  | 0.25129 | 0.50173 | 0.90082 | 0.90746 BOLL      |
| cg17560720 | 0.06866 | 0.05477 | 0.06444 | 0.05797 | 0.06673 | 0.05557 | 0.06453 | 0.0567  | 0.06697 | 0.04451 FBXO18    |
| cg17561435 | 0.05743 | 0.05701 | 0.05353 | 0.06193 | 0.04797 | 0.05186 | 0.05872 | 0.05041 | 0.06282 | 0.044 BMPER       |
| cg17561452 | 0.83613 | 0.73424 | 0.74329 | 0.86522 | 0.8475  | 0.61857 | 0.75798 | 0.79177 | 0.76026 | 0.60157 LOC161931 |
| cg17563769 | 0.06646 | 0.05793 | 0.06523 | 0.05481 | 0.08558 | 0.066   | 0.09762 | 0.08638 | 0.05931 | 0.07085 GTF2A2    |
| cg17564818 | 0.77855 | 0.80417 | 0.87347 | 0.88696 | 0.85679 | 0.84158 | 0.83886 | 0.80291 | 0.73259 | 0.75114 CHST5     |
| cg17565490 | 0.03398 | 0.03632 | 0.04192 | 0.03709 | 0.03737 | 0.03608 | 0.03631 | 0.03731 | 0.03391 | 0.02737 CENPB     |
| cg17567317 | 0.0258  | 0.02722 | 0.03021 | 0.03252 | 0.0265  | 0.02641 | 0.02825 | 0.02622 | 0.02596 | 0.02376 POLR2F    |
| cg17568035 | 0.0361  | 0.02884 | 0.04572 | 0.04499 | 0.03022 | 0.02953 | 0.03046 | 0.02695 | 0.02499 | 0.02699 FLOT2     |
| cg17568996 | 0.06482 | 0.08309 | 0.76976 | 0.87037 | 0.87975 | 0.30402 | 0.14887 | 0.05844 | 0.70326 | 0.34204 NFAM1     |

|            |         |         |         |         |         |         |         |         |         |                   |
|------------|---------|---------|---------|---------|---------|---------|---------|---------|---------|-------------------|
| cg17569486 | 0.06621 | 0.06076 | 0.04624 | 0.04823 | 0.11177 | 0.06975 | 0.04446 | 0.0434  | 0.0694  | 0.0693 AP1S3      |
| cg17571291 | 0.79667 | 0.56185 | 0.90293 | 0.91445 | 0.91318 | 0.69245 | 0.87061 | 0.86384 | 0.89734 | 0.77746 BLVRA     |
| cg17571782 | 0.03694 | 0.03178 | 0.04652 | 0.03295 | 0.05101 | 0.02803 | 0.44296 | 0.46864 | 0.02682 | 0.02175 CXorf40A  |
| cg17572572 | 0.02139 | 0.02082 | 0.02399 | 0.02571 | 0.01967 | 0.02183 | 0.01715 | 0.02106 | 0.02013 | 0.01712 ATPBD1B   |
| cg17572791 | 0.03859 | 0.03619 | 0.02915 | 0.02736 | 0.04063 | 0.04762 | 0.03329 | 0.03276 | 0.05404 | 0.04909 HAX1      |
| cg17574251 | 0.87165 | 0.81611 | 0.76214 | 0.75315 | 0.75282 | 0.85536 | 0.8152  | 0.83634 | 0.85519 | 0.75732 FNDC8     |
| cg17575811 | 0.04574 | 0.03229 | 0.60779 | 0.62063 | 0.0427  | 0.04264 | 0.1029  | 0.03654 | 0.05694 | 0.02936 KCNQ1     |
| cg17578903 | 0.02823 | 0.02961 | 0.03313 | 0.03342 | 0.02761 | 0.0258  | 0.02842 | 0.02969 | 0.02382 | 0.02206 EHD1      |
| cg17580045 | 0.07945 | 0.07216 | 0.14061 | 0.10217 | 0.54259 | 0.79228 | 0.10673 | 0.11353 | 0.34597 | 0.11923 CCND2     |
| cg17582250 | 0.13055 | 0.06921 | 0.0746  | 0.06673 | 0.10283 | 0.07548 | 0.06694 | 0.05226 | 0.0505  | 0.0532 RCD-8      |
| cg17582777 | 0.8637  | 0.88887 | 0.79354 | 0.86928 | 0.8878  | 0.87012 | 0.79427 | 0.8553  | 0.87731 | 0.83244 EFNA3     |
| cg17586860 | 0.06734 | 0.06032 | 0.52544 | 0.85289 | 0.53669 | 0.53959 | 0.24673 | 0.51859 | 0.95003 | 0.92322 SSTR4     |
| cg17587934 | 0.05645 | 0.02325 | 0.0245  | 0.02083 | 0.01635 | 0.01948 | 0.0176  | 0.02258 | 0.02218 | 0.01706 HNRPAB    |
| cg17589175 | 0.04003 | 0.03793 | 0.04456 | 0.03998 | 0.04094 | 0.04793 | 0.05022 | 0.04995 | 0.04027 | 0.04584 HSPC152   |
| cg17589341 | 0.09238 | 0.08931 | 0.33557 | 0.59528 | 0.43933 | 0.19048 | 0.13792 | 0.18249 | 0.5861  | 0.12564 SLC14A1   |
| cg17592292 | 0.09485 | 0.09507 | 0.10706 | 0.0973  | 0.06572 | 0.07365 | 0.08453 | 0.07981 | 0.09053 | 0.09203 DGKQ      |
| cg17592734 | 0.0247  | 0.02815 | 0.51847 | 0.5367  | 0.02335 | 0.02609 | 0.02255 | 0.02141 | 0.02147 | 0.02111 ZNF175    |
| cg17592812 | 0.02719 | 0.02893 | 0.03516 | 0.03036 | 0.02673 | 0.026   | 0.02586 | 0.02509 | 0.02268 | 0.01909 FAM32A    |
| cg17593391 | 0.03906 | 0.03203 | 0.05083 | 0.04845 | 0.05897 | 0.04115 | 0.04787 | 0.03852 | 0.03224 | 0.03475 RRAGC     |
| cg17597195 | 0.03471 | 0.04133 | 0.03749 | 0.03365 | 0.02936 | 0.03502 | 0.03632 | 0.0358  | 0.02821 | 0.02716 TMEM126B  |
| cg17598875 | 0.05364 | 0.08556 | 0.06451 | 0.05908 | 0.0732  | 0.06578 | 0.05054 | 0.0436  | 0.05033 | 0.06115 C14orf133 |
| cg17599586 | 0.03374 | 0.03168 | 0.03729 | 0.04077 | 0.02803 | 0.03122 | 0.0361  | 0.02915 | 0.03039 | 0.03244 PISD      |
| cg17601843 | 0.02576 | 0.0256  | 0.02963 | 0.02804 | 0.02764 | 0.02429 | 0.02272 | 0.02462 | 0.02273 | 0.02644 MICAL-L1  |
| cg17602451 | 0.56005 | 0.12374 | 0.95755 | 0.9609  | 0.23916 | 0.44713 | 0.07197 | 0.03204 | 0.08841 | 0.03527 BCL2      |
| cg17603184 | 0.05373 | 0.05795 | 0.06071 | 0.06295 | 0.04844 | 0.04966 | 0.05782 | 0.05696 | 0.05772 | 0.05128 C22orf5   |
| cg17605084 | 0.0552  | 0.05758 | 0.53117 | 0.76727 | 0.72287 | 0.80322 | 0.07662 | 0.0734  | 0.41528 | 0.0669 HEM1       |
| cg17605847 | 0.03657 | 0.03641 | 0.0393  | 0.04193 | 0.05758 | 0.03628 | 0.04078 | 0.02835 | 0.0361  | 0.0332 PREB       |
| cg17606194 | 0.24413 | 0.06466 | 0.56185 | 0.59536 | 0.52701 | 0.51789 | 0.09806 | 0.30291 | 0.05228 | 0.28277 SYCE1     |
| cg17606683 | 0.07055 | 0.07246 | 0.09531 | 0.07934 | 0.0862  | 0.08533 | 0.08822 | 0.08796 | 0.06753 | 0.06266 HSPC138   |
| cg17606785 | 0.02961 | 0.04109 | 0.25182 | 0.50535 | 0.07886 | 0.03266 | 0.06583 | 0.12968 | 0.06414 | 0.03328 EFS       |
| cg17606881 | 0.06646 | 0.06347 | 0.05932 | 0.06062 | 0.05411 | 0.0468  | 0.03869 | 0.04658 | 0.0471  | 0.04376 ECT2      |
| cg17607024 | 0.51347 | 0.29514 | 0.64617 | 0.68675 | 0.53828 | 0.57136 | 0.64598 | 0.56198 | 0.71119 | 0.4845 ZRANB1     |
| cg17607231 | 0.74596 | 0.92819 | 0.93199 | 0.9296  | 0.86129 | 0.91589 | 0.84842 | 0.90208 | 0.42581 | 0.33335 SP140     |
| cg17607973 | 0.08069 | 0.02743 | 0.02787 | 0.01905 | 0.01838 | 0.02474 | 0.01664 | 0.01903 | 0.01919 | 0.01688 BCDIN3    |
| cg17608500 | 0.04277 | 0.05072 | 0.0501  | 0.05543 | 0.03308 | 0.03776 | 0.03634 | 0.05508 | 0.03636 | 0.03841 FLAD1     |
| cg17610929 | 0.03175 | 0.03094 | 0.80742 | 0.8109  | 0.77168 | 0.77387 | 0.33821 | 0.06096 | 0.15393 | 0.03049 ACCN4     |
| cg17611475 | 0.90175 | 0.87148 | 0.82799 | 0.87239 | 0.76855 | 0.8566  | 0.5417  | 0.21477 | 0.50229 | 0.61127 CENTG1    |
| cg17612991 | 0.74109 | 0.09124 | 0.44596 | 0.6749  | 0.32446 | 0.43101 | 0.15214 | 0.0718  | 0.33023 | 0.22807 C3        |
| cg17614750 | 0.0868  | 0.09077 | 0.08567 | 0.07765 | 0.06585 | 0.0792  | 0.08827 | 0.08606 | 0.08764 | 0.06644 P4HB      |
| cg17615007 | 0.0342  | 0.03668 | 0.0379  | 0.04085 | 0.02927 | 0.02609 | 0.02814 | 0.02657 | 0.03367 | 0.02738 ZNF134    |
| cg17616707 | 0.0318  | 0.02928 | 0.03402 | 0.03069 | 0.01995 | 0.03054 | 0.03083 | 0.02727 | 0.02808 | 0.02679 ATP5B     |

|            |         |         |         |         |         |         |         |         |         |         |          |
|------------|---------|---------|---------|---------|---------|---------|---------|---------|---------|---------|----------|
| cg17617223 | 0.26506 | 0.04494 | 0.1747  | 0.2524  | 0.15137 | 0.04077 | 0.03235 | 0.02701 | 0.02811 | 0.02608 | ZYG11BL  |
| cg17618092 | 0.033   | 0.03117 | 0.03175 | 0.02843 | 0.02365 | 0.0274  | 0.02991 | 0.02838 | 0.02692 | 0.02618 | RBM14    |
| cg17619823 | 0.02184 | 0.02261 | 0.50277 | 0.67879 | 0.29212 | 0.6456  | 0.06067 | 0.02535 | 0.04396 | 0.06693 | ADRB3    |
| cg17624892 | 0.04459 | 0.04005 | 0.03915 | 0.03911 | 0.0662  | 0.05629 | 0.03107 | 0.02978 | 0.02912 | 0.027   | HMG4     |
| cg17625032 | 0.13478 | 0.06682 | 0.80871 | 0.80074 | 0.844   | 0.60475 | 0.71387 | 0.73921 | 0.84839 | 0.39598 | NOD27    |
| cg17626563 | 0.68464 | 0.67589 | 0.70178 | 0.74763 | 0.59572 | 0.68939 | 0.3349  | 0.45197 | 0.42829 | 0.32267 | RS1      |
| cg17627559 | 0.53761 | 0.24234 | 0.68231 | 0.59829 | 0.61302 | 0.28931 | 0.41414 | 0.286   | 0.5886  | 0.12373 | TSPAN32  |
| cg17628717 | 0.77574 | 0.50489 | 0.58469 | 0.71532 | 0.83947 | 0.87027 | 0.85049 | 0.84507 | 0.33836 | 0.23783 | HECW1    |
| cg17630127 | 0.8453  | 0.81501 | 0.81649 | 0.83371 | 0.79487 | 0.8294  | 0.77608 | 0.83885 | 0.87813 | 0.85161 | MS4A5    |
| cg17630833 | 0.04183 | 0.02001 | 0.06474 | 0.07815 | 0.04279 | 0.03237 | 0.02007 | 0.01923 | 0.02024 | 0.01732 | MAPT     |
| cg17631429 | 0.9417  | 0.87465 | 0.93531 | 0.94062 | 0.91942 | 0.93338 | 0.94811 | 0.94687 | 0.95835 | 0.95736 | FKHL18   |
| cg17638137 | 0.04352 | 0.04442 | 0.05596 | 0.0524  | 0.04088 | 0.04226 | 0.0466  | 0.04748 | 0.04168 | 0.04205 | TCERG1   |
| cg17638468 | 0.17291 | 0.58657 | 0.55039 | 0.73162 | 0.42467 | 0.6033  | 0.33804 | 0.40502 | 0.10805 | 0.10819 | CD200R1  |
| cg17639046 | 0.06782 | 0.06384 | 0.06616 | 0.05942 | 0.03762 | 0.04965 | 0.05333 | 0.05351 | 0.0605  | 0.05383 | HS3ST3B1 |
| cg17639059 | 0.02308 | 0.02491 | 0.02982 | 0.02561 | 0.01932 | 0.02258 | 0.02394 | 0.02419 | 0.02897 | 0.01787 | NAB2     |
| cg17639290 | 0.04183 | 0.04456 | 0.06807 | 0.06394 | 0.06804 | 0.0555  | 0.05861 | 0.04875 | 0.04322 | 0.03836 | TIMM8B   |
| cg17640201 | 0.03063 | 0.03049 | 0.03694 | 0.02974 | 0.03597 | 0.03418 | 0.02352 | 0.02425 | 0.02658 | 0.02316 | ZNF553   |
| cg17640322 | 0.03808 | 0.03213 | 0.03233 | 0.028   | 0.03013 | 0.02415 | 0.03298 | 0.0303  | 0.02639 | 0.02909 | CD44     |
| cg17641104 | 0.03781 | 0.04744 | 0.04333 | 0.04123 | 0.02855 | 0.04302 | 0.03855 | 0.03964 | 0.03775 | 0.03591 | PCTK2    |
| cg17641252 | 0.45802 | 0.10736 | 0.44464 | 0.60833 | 0.95105 | 0.95017 | 0.95312 | 0.93233 | 0.95331 | 0.8882  | PLEK2    |
| cg17642353 | 0.67063 | 0.65635 | 0.84442 | 0.86781 | 0.88288 | 0.84611 | 0.8474  | 0.78204 | 0.9252  | 0.8905  | PSG6     |
| cg17644208 | 0.46622 | 0.38966 | 0.42125 | 0.42405 | 0.52962 | 0.39419 | 0.47742 | 0.40735 | 0.35631 | 0.32914 | ADCY3    |
| cg17644867 | 0.02762 | 0.02855 | 0.02893 | 0.03052 | 0.22104 | 0.03644 | 0.03397 | 0.02622 | 0.0892  | 0.0274  | FOS      |
| cg17647273 | 0.8852  | 0.74218 | 0.85826 | 0.87222 | 0.90951 | 0.88429 | 0.85685 | 0.82996 | 0.89812 | 0.85096 | UPB1     |
| cg17647744 | 0.02338 | 0.0258  | 0.02511 | 0.02524 | 0.02016 | 0.02492 | 0.02309 | 0.02118 | 0.01901 | 0.02174 | TMEM9B   |
| cg17648241 | 0.05384 | 0.05766 | 0.07088 | 0.0649  | 0.0741  | 0.06215 | 0.06945 | 0.06025 | 0.05322 | 0.0393  | ALKBH8   |
| cg17648620 | 0.09714 | 0.07525 | 0.09845 | 0.08279 | 0.0535  | 0.04698 | 0.05451 | 0.05968 | 0.08306 | 0.05388 | EFHC1    |
| cg17651255 | 0.17409 | 0.13075 | 0.19749 | 0.20184 | 0.31352 | 0.17605 | 0.17918 | 0.13745 | 0.14598 | 0.13864 | SYF2     |
| cg17651821 | 0.7304  | 0.68909 | 0.26969 | 0.36514 | 0.9375  | 0.86503 | 0.11702 | 0.05203 | 0.39944 | 0.312   | HIST1H4L |
| cg17653969 | 0.76157 | 0.79229 | 0.70707 | 0.75463 | 0.72541 | 0.75838 | 0.64312 | 0.72813 | 0.56862 | 0.62599 | SPHAR    |
| cg17655576 | 0.03541 | 0.03478 | 0.03292 | 0.03354 | 0.05137 | 0.04453 | 0.04104 | 0.03965 | 0.0263  | 0.02492 | PIAS4    |
| cg17655614 | 0.59746 | 0.5611  | 0.91731 | 0.92015 | 0.94106 | 0.90006 | 0.89105 | 0.89299 | 0.9133  | 0.90165 | CDH1     |
| cg17657618 | 0.47678 | 0.08041 | 0.12852 | 0.14349 | 0.65105 | 0.46028 | 0.71742 | 0.87838 | 0.81474 | 0.58392 | FLJ43806 |
| cg17659886 | 0.07503 | 0.07031 | 0.07505 | 0.06884 | 0.06221 | 0.0565  | 0.04104 | 0.05457 | 0.05067 | 0.04699 | AP1S2    |
| cg17660026 | 0.07147 | 0.08108 | 0.0416  | 0.03901 | 0.1011  | 0.09696 | 0.11012 | 0.09127 | 0.09359 | 0.06544 | ST13     |
| cg17660655 | 0.10091 | 0.09252 | 0.11077 | 0.11239 | 0.08919 | 0.09682 | 0.10529 | 0.08508 | 0.08885 | 0.08345 | HIST3H2A |
| cg17661881 | 0.03012 | 0.03268 | 0.03115 | 0.02884 | 0.0275  | 0.03267 | 0.02651 | 0.02641 | 0.0284  | 0.02681 | PARP1    |
| cg17662177 | 0.81376 | 0.39194 | 0.87022 | 0.8794  | 0.81606 | 0.85846 | 0.56787 | 0.88816 | 0.78435 | 0.82737 | PFC      |
| cg17663463 | 0.50771 | 0.51733 | 0.92486 | 0.94069 | 0.48812 | 0.65137 | 0.74702 | 0.72685 | 0.68633 | 0.68035 | ZIM2     |
| cg17663577 | 0.0246  | 0.027   | 0.3906  | 0.44456 | 0.96809 | 0.76217 | 0.02201 | 0.02314 | 0.04701 | 0.01999 | SLC2A4   |
| cg17665193 | 0.05535 | 0.04398 | 0.12371 | 0.13471 | 0.33833 | 0.06083 | 0.05888 | 0.04305 | 0.03226 | 0.0312  | GAD2     |

|            |         |         |         |         |         |         |         |         |         |                   |
|------------|---------|---------|---------|---------|---------|---------|---------|---------|---------|-------------------|
| cg17665608 | 0.02748 | 0.02957 | 0.02705 | 0.02164 | 0.01957 | 0.02725 | 0.02507 | 0.02332 | 0.02051 | 0.02416 GALNACT-2 |
| cg17667972 | 0.85442 | 0.38231 | 0.6862  | 0.63821 | 0.8772  | 0.8391  | 0.23157 | 0.10449 | 0.45994 | 0.42945 KRT4      |
| cg17669700 | 0.03494 | 0.0318  | 0.03707 | 0.03298 | 0.03321 | 0.03846 | 0.03182 | 0.0265  | 0.02509 | 0.02336 NDUFS7    |
| cg17671157 | 0.0431  | 0.0416  | 0.36195 | 0.65046 | 0.03566 | 0.0449  | 0.04564 | 0.04391 | 0.03807 | 0.03966 KCNK10    |
| cg17675150 | 0.74872 | 0.16988 | 0.21049 | 0.20971 | 0.61367 | 0.16162 | 0.62443 | 0.21199 | 0.24409 | 0.18089 ZNF532    |
| cg17675882 | 0.10072 | 0.10162 | 0.13618 | 0.12568 | 0.12537 | 0.09606 | 0.06873 | 0.07274 | 0.10437 | 0.09495 NDRG3     |
| cg17676096 | 0.03567 | 0.02914 | 0.03275 | 0.02962 | 0.03395 | 0.03385 | 0.03631 | 0.03935 | 0.02773 | 0.0294 LEO1       |
| cg17676129 | 0.70523 | 0.65187 | 0.97285 | 0.98208 | 0.96762 | 0.90731 | 0.69789 | 0.87019 | 0.04484 | 0.07258 SYCE1     |
| cg17676574 | 0.553   | 0.55645 | 0.68801 | 0.83323 | 0.86461 | 0.84525 | 0.48403 | 0.20529 | 0.37788 | 0.24761 UROC1     |
| cg17677397 | 0.28139 | 0.37564 | 0.62515 | 0.73599 | 0.77364 | 0.81137 | 0.07524 | 0.07633 | 0.11884 | 0.11793 CD300C    |
| cg17677842 | 0.02481 | 0.02577 | 0.02792 | 0.02426 | 0.03723 | 0.02915 | 0.03079 | 0.03301 | 0.02291 | 0.02722 PRDM4     |
| cg17679246 | 0.04931 | 0.02712 | 0.0362  | 0.03843 | 0.04177 | 0.029   | 0.0475  | 0.02978 | 0.0326  | 0.03331 PDK1      |
| cg17680902 | 0.07662 | 0.07069 | 0.08149 | 0.07872 | 0.05959 | 0.09986 | 0.06368 | 0.0816  | 0.06165 | 0.06864 SKIV2L    |
| cg17682309 | 0.06925 | 0.10172 | 0.10255 | 0.10931 | 0.10184 | 0.06701 | 0.11471 | 0.0558  | 0.09492 | 0.05649 STX7      |
| cg17682828 | 0.14101 | 0.08465 | 0.87492 | 0.87438 | 0.88303 | 0.68428 | 0.8033  | 0.57738 | 0.73967 | 0.16389 FXYD7     |
| cg17683775 | 0.80178 | 0.66424 | 0.83643 | 0.8397  | 0.82915 | 0.79089 | 0.78103 | 0.74425 | 0.84524 | 0.76686 PTGES     |
| cg17685111 | 0.49583 | 0.44672 | 0.62688 | 0.66092 | 0.83515 | 0.80263 | 0.75607 | 0.6435  | 0.88916 | 0.81669 BMP8A     |
| cg17685628 | 0.04135 | 0.02901 | 0.03349 | 0.03338 | 0.70267 | 0.96829 | 0.54182 | 0.0373  | 0.06941 | 0.02949 NKX2-8    |
| cg17686260 | 0.86911 | 0.87206 | 0.37239 | 0.48478 | 0.89155 | 0.8868  | 0.39006 | 0.30862 | 0.87799 | 0.6349 MGMT       |
| cg17686885 | 0.22093 | 0.05614 | 0.55684 | 0.5485  | 0.54803 | 0.05596 | 0.34635 | 0.05766 | 0.87741 | 0.58365 TOM1L1    |
| cg17687282 | 0.66952 | 0.58902 | 0.82147 | 0.88067 | 0.81899 | 0.6003  | 0.76034 | 0.84674 | 0.16368 | 0.19911 A4GNT     |
| cg17687883 | 0.60848 | 0.06322 | 0.05341 | 0.04329 | 0.42342 | 0.4197  | 0.14494 | 0.04052 | 0.47971 | 0.48267 MTHFD2    |
| cg17687962 | 0.15625 | 0.03723 | 0.45544 | 0.51915 | 0.31909 | 0.06379 | 0.04283 | 0.02898 | 0.03731 | 0.13115 KLK3      |
| cg17688525 | 0.01851 | 0.02126 | 0.10038 | 0.08499 | 0.12553 | 0.02081 | 0.02267 | 0.02207 | 0.02216 | 0.01739 L3MBTL4   |
| cg17691309 | 0.01673 | 0.01704 | 0.01823 | 0.01304 | 0.01549 | 0.0127  | 0.17007 | 0.01453 | 0.0122  | 0.01111 TPM2      |
| cg17692403 | 0.32408 | 0.3546  | 0.59134 | 0.81309 | 0.85238 | 0.77857 | 0.06875 | 0.04474 | 0.31337 | 0.21173 R3HDML    |
| cg17693270 | 0.36993 | 0.13868 | 0.77759 | 0.81158 | 0.56442 | 0.69526 | 0.14528 | 0.07696 | 0.28403 | 0.11738 DGAT2L6   |
| cg17693957 | 0.35546 | 0.08968 | 0.30669 | 0.3441  | 0.65191 | 0.72164 | 0.06672 | 0.0621  | 0.0684  | 0.05459 TCN2      |
| cg17694279 | 0.15194 | 0.11171 | 0.79482 | 0.72131 | 0.79539 | 0.28446 | 0.41536 | 0.54403 | 0.82476 | 0.15813 ANKRD15   |
| cg17694877 | 0.06283 | 0.06716 | 0.1318  | 0.20543 | 0.04551 | 0.05914 | 0.13549 | 0.0765  | 0.05645 | 0.05317 DIAPH2    |
| cg17696091 | 0.82861 | 0.61581 | 0.84686 | 0.87796 | 0.90086 | 0.76032 | 0.66346 | 0.66999 | 0.8482  | 0.79869 SYCP1     |
| cg17697457 | 0.01944 | 0.02551 | 0.03056 | 0.0251  | 0.02403 | 0.02178 | 0.02317 | 0.0269  | 0.02081 | 0.0205 GEMIN7     |
| cg17698505 | 0.04839 | 0.04485 | 0.04774 | 0.04562 | 0.03178 | 0.10089 | 0.04321 | 0.04298 | 0.04072 | 0.03762 EWSR1     |
| cg17698643 | 0.03266 | 0.03014 | 0.17716 | 0.03593 | 0.02073 | 0.02687 | 0.0282  | 0.02693 | 0.0251  | 0.02644 C16orf63  |
| cg17699374 | 0.30981 | 0.04353 | 0.17939 | 0.11947 | 0.23577 | 0.34117 | 0.06206 | 0.05813 | 0.07725 | 0.06736 MGC35206  |
| cg17701785 | 0.03911 | 0.04276 | 0.0351  | 0.04142 | 0.03488 | 0.03896 | 0.02963 | 0.03334 | 0.03093 | 0.02807 YPEL5     |
| cg17701886 | 0.31232 | 0.08084 | 0.14329 | 0.09699 | 0.38286 | 0.15049 | 0.49082 | 0.46291 | 0.08591 | 0.05691 B3GNT5    |
| cg17703212 | 0.84864 | 0.22654 | 0.82038 | 0.92398 | 0.75799 | 0.92373 | 0.56501 | 0.45474 | 0.17451 | 0.07553 DYDC1     |
| cg17703324 | 0.84586 | 0.67873 | 0.87637 | 0.90948 | 0.90059 | 0.88671 | 0.80041 | 0.41247 | 0.66975 | 0.07767 OPTC      |
| cg17703554 | 0.4123  | 0.57463 | 0.81061 | 0.87265 | 0.70358 | 0.81483 | 0.7686  | 0.85982 | 0.60634 | 0.45744 WDR21C    |
| cg17703658 | 0.03488 | 0.03855 | 0.04301 | 0.03713 | 0.03054 | 0.03898 | 0.03355 | 0.03889 | 0.03641 | 0.03347 DDIT3     |



|            |         |         |         |         |         |         |         |         |         |         |           |
|------------|---------|---------|---------|---------|---------|---------|---------|---------|---------|---------|-----------|
| cg17704839 | 0.62658 | 0.64845 | 0.38689 | 0.46108 | 0.18616 | 0.11887 | 0.52857 | 0.57868 | 0.5203  | 0.48655 | UBL5      |
| cg17705056 | 0.06424 | 0.06966 | 0.07723 | 0.07656 | 0.05577 | 0.08461 | 0.08299 | 0.08532 | 0.07204 | 0.07996 | PQLC1     |
| cg17705081 | 0.86025 | 0.84568 | 0.88276 | 0.86507 | 0.88131 | 0.85653 | 0.48921 | 0.52036 | 0.88759 | 0.80357 | GPKOW     |
| cg17706173 | 0.85165 | 0.52413 | 0.72746 | 0.86251 | 0.93182 | 0.80768 | 0.74024 | 0.61761 | 0.85853 | 0.26025 | C16orf30  |
| cg17709466 | 0.03907 | 0.04445 | 0.04244 | 0.04606 | 0.03191 | 0.04249 | 0.04194 | 0.03788 | 0.04263 | 0.04257 | OBFC2B    |
| cg17709676 | 0.02988 | 0.03354 | 0.03597 | 0.03525 | 0.03257 | 0.03772 | 0.03421 | 0.03435 | 0.02884 | 0.03111 | LMAN1     |
| cg17709873 | 0.87221 | 0.67375 | 0.96184 | 0.95646 | 0.92918 | 0.85014 | 0.61629 | 0.78182 | 0.89355 | 0.81431 | LTA       |
| cg17709884 | 0.13981 | 0.13513 | 0.14614 | 0.11635 | 0.19544 | 0.16932 | 0.11005 | 0.1153  | 0.17162 | 0.14265 | H2AFZ     |
| cg17710021 | 0.38386 | 0.65351 | 0.03809 | 0.04392 | 0.33311 | 0.39467 | 0.05077 | 0.04263 | 0.03223 | 0.03347 | G0S2      |
| cg17710288 | 0.08545 | 0.07807 | 0.09769 | 0.09726 | 0.16749 | 0.0897  | 0.09777 | 0.08708 | 0.08566 | 0.088   | NPM3      |
| cg17711541 | 0.46171 | 0.42958 | 0.50022 | 0.4621  | 0.147   | 0.34626 | 0.33586 | 0.39287 | 0.47877 | 0.48434 | HIST1H2AC |
| cg17711587 | 0.03999 | 0.04216 | 0.04652 | 0.0457  | 0.04354 | 0.0414  | 0.0398  | 0.03545 | 0.03518 | 0.03414 | EIF2S2    |
| cg17711870 | 0.0873  | 0.0946  | 0.13182 | 0.18884 | 0.06154 | 0.08525 | 0.13477 | 0.07466 | 0.06855 | 0.0801  | WWP1      |
| cg17714030 | 0.79678 | 0.78312 | 0.83154 | 0.86714 | 0.81942 | 0.77984 | 0.7463  | 0.77495 | 0.74468 | 0.72821 | HBQ1      |
| cg17714794 | 0.05186 | 0.04463 | 0.04485 | 0.04162 | 0.04811 | 0.04152 | 0.04755 | 0.04035 | 0.04531 | 0.04292 | BNIP1     |
| cg17714799 | 0.08985 | 0.37777 | 0.8174  | 0.77497 | 0.77039 | 0.63236 | 0.87797 | 0.49114 | 0.08642 | 0.11413 | CASP6     |
| cg17714828 | 0.04365 | 0.04434 | 0.04332 | 0.03798 | 0.02741 | 0.03025 | 0.04159 | 0.03826 | 0.03451 | 0.03321 | AYTL2     |
| cg17717588 | 0.82605 | 0.8301  | 0.77283 | 0.78101 | 0.73607 | 0.81221 | 0.78845 | 0.78935 | 0.81582 | 0.72122 | GTDC1     |
| cg17718210 | 0.03242 | 0.03244 | 0.03582 | 0.0313  | 0.02996 | 0.03073 | 0.03106 | 0.02732 | 0.0304  | 0.02854 | MESDC1    |
| cg17718302 | 0.03731 | 0.03934 | 0.04086 | 0.0395  | 0.02198 | 0.06312 | 0.94657 | 0.91932 | 0.03115 | 0.03245 | HIST1H3J  |
| cg17718322 | 0.02243 | 0.02233 | 0.02837 | 0.02617 | 0.0253  | 0.02617 | 0.03713 | 0.04539 | 0.02119 | 0.01719 | OPHN1     |
| cg17718515 | 0.03284 | 0.02914 | 0.02719 | 0.02889 | 0.02308 | 0.02301 | 0.02349 | 0.02728 | 0.02416 | 0.02118 | IPO9      |
| cg17720231 | 0.08313 | 0.09432 | 0.74932 | 0.87901 | 0.89262 | 0.79459 | 0.11667 | 0.09859 | 0.07777 | 0.09608 | IGSF9     |
| cg17720233 | 0.8597  | 0.65002 | 0.92577 | 0.93717 | 0.92114 | 0.92299 | 0.53336 | 0.42259 | 0.93788 | 0.92702 | TNFAIP8L2 |
| cg17723549 | 0.89227 | 0.90133 | 0.77717 | 0.81887 | 0.80763 | 0.85374 | 0.84609 | 0.86053 | 0.88433 | 0.87386 | CCDC55    |
| cg17724365 | 0.20569 | 0.07642 | 0.13009 | 0.16634 | 0.12057 | 0.08006 | 0.07269 | 0.06602 | 0.1092  | 0.11466 | NBN       |
| cg17725461 | 0.02928 | 0.03003 | 0.02991 | 0.02766 | 0.02456 | 0.02376 | 0.02665 | 0.02462 | 0.02068 | 0.01873 | RFX1      |
| cg17725472 | 0.93585 | 0.93212 | 0.91704 | 0.92549 | 0.95506 | 0.9385  | 0.5697  | 0.34155 | 0.93666 | 0.92451 | CHIT1     |
| cg17725968 | 0.78232 | 0.76257 | 0.80227 | 0.79769 | 0.74014 | 0.79281 | 0.73426 | 0.81832 | 0.50167 | 0.17019 | PDHA2     |
| cg17726022 | 0.06298 | 0.06221 | 0.05798 | 0.06006 | 0.054   | 0.04388 | 0.05633 | 0.05309 | 0.05422 | 0.0425  | SLC38A1   |
| cg17727529 | 0.76794 | 0.73605 | 0.78595 | 0.8731  | 0.43187 | 0.28557 | 0.4762  | 0.05951 | 0.86397 | 0.74116 | C1orf61   |
| cg17729667 | 0.06173 | 0.04208 | 0.78853 | 0.73668 | 0.62307 | 0.05419 | 0.16511 | 0.051   | 0.59989 | 0.43355 | KIAA0980  |
| cg17729941 | 0.19621 | 0.11127 | 0.10292 | 0.0864  | 0.17378 | 0.1066  | 0.12598 | 0.08817 | 0.30461 | 0.13906 | S100A13   |
| cg17731079 | 0.02121 | 0.01943 | 0.02135 | 0.0172  | 0.01961 | 0.01748 | 0.01566 | 0.0164  | 0.01705 | 0.01516 | CDC42EP3  |
| cg17731261 | 0.01967 | 0.02037 | 0.04658 | 0.13682 | 0.14348 | 0.0313  | 0.01803 | 0.02318 | 0.01916 | 0.01845 | ACHE      |
| cg17732044 | 0.04094 | 0.04123 | 0.15578 | 0.42382 | 0.08474 | 0.04339 | 0.05863 | 0.04792 | 0.03411 | 0.03235 | PEX11A    |
| cg17732521 | 0.0985  | 0.04879 | 0.06463 | 0.06267 | 0.07977 | 0.05912 | 0.05215 | 0.057   | 0.0675  | 0.05023 | RHOG      |
| cg17733100 | 0.23089 | 0.04406 | 0.1185  | 0.46266 | 0.3284  | 0.03879 | 0.0423  | 0.0348  | 0.03752 | 0.03114 | C1orf106  |
| cg17733331 | 0.12007 | 0.06504 | 0.41098 | 0.53441 | 0.66805 | 0.59648 | 0.17933 | 0.13272 | 0.604   | 0.65212 | CDH3      |
| cg17736259 | 0.95657 | 0.91859 | 0.95168 | 0.9555  | 0.96349 | 0.9611  | 0.95817 | 0.94653 | 0.95913 | 0.96454 | DMRTB1    |
| cg17738133 | 0.04904 | 0.04919 | 0.04462 | 0.0427  | 0.0457  | 0.04289 | 0.03607 | 0.03691 | 0.03021 | 0.02661 | CDKN1C    |

|            |         |         |         |         |         |         |         |         |         |         |               |
|------------|---------|---------|---------|---------|---------|---------|---------|---------|---------|---------|---------------|
| cg17738194 | 0.34053 | 0.5399  | 0.10923 | 0.12675 | 0.15098 | 0.2854  | 0.08392 | 0.14992 | 0.11409 | 0.07189 | GK2           |
| cg17738494 | 0.04259 | 0.04191 | 0.03608 | 0.0397  | 0.02868 | 0.03601 | 0.03859 | 0.03717 | 0.03298 | 0.03095 | BRPF1         |
| cg17740305 | 0.73289 | 0.72462 | 0.79753 | 0.83246 | 0.7408  | 0.70209 | 0.59815 | 0.64054 | 0.64385 | 0.65205 | GBP5          |
| cg17740399 | 0.0262  | 0.02772 | 0.03016 | 0.02761 | 0.03172 | 0.02352 | 0.31491 | 0.05618 | 0.02809 | 0.0264  | IPF1          |
| cg17740645 | 0.08058 | 0.03253 | 0.93787 | 0.93358 | 0.9353  | 0.74102 | 0.88446 | 0.69186 | 0.90983 | 0.71807 | GRB7          |
| cg17741106 | 0.06    | 0.04826 | 0.05528 | 0.0627  | 0.04013 | 0.04119 | 0.04406 | 0.03618 | 0.03919 | 0.04151 | RDH14         |
| cg17741291 | 0.03362 | 0.02905 | 0.03909 | 0.03156 | 0.04142 | 0.0322  | 0.03    | 0.02444 | 0.02844 | 0.03118 | DDX21         |
| cg17741572 | 0.78412 | 0.45963 | 0.91364 | 0.88701 | 0.9536  | 0.91117 | 0.39521 | 0.62257 | 0.93666 | 0.89259 | CFB           |
| cg17742155 | 0.0313  | 0.03562 | 0.03877 | 0.03922 | 0.03387 | 0.03765 | 0.03416 | 0.0332  | 0.03062 | 0.02492 | ATP6V1G1      |
| cg17742874 | 0.04201 | 0.03192 | 0.03664 | 0.03345 | 0.02908 | 0.03168 | 0.03858 | 0.03435 | 0.03237 | 0.0283  | DHPS          |
| cg17745122 | 0.01827 | 0.01625 | 0.01843 | 0.01553 | 0.01278 | 0.01543 | 0.02321 | 0.0155  | 0.014   | 0.01258 | IRX3          |
| cg17746675 | 0.08836 | 0.07047 | 0.09076 | 0.08379 | 0.09091 | 0.1016  | 0.05247 | 0.07222 | 0.075   | 0.07494 | C3orf31       |
| cg17747005 | 0.08678 | 0.09071 | 0.21142 | 0.42899 | 0.1333  | 0.11269 | 0.17893 | 0.15498 | 0.17999 | 0.07386 | DEPDC2        |
| cg17747332 | 0.03412 | 0.03279 | 0.0308  | 0.03339 | 0.02697 | 0.03401 | 0.0279  | 0.02598 | 0.02678 | 0.02245 | SMARCA4       |
| cg17749384 | 0.84232 | 0.83874 | 0.86158 | 0.87181 | 0.87571 | 0.86522 | 0.64056 | 0.13921 | 0.49376 | 0.44433 | MPP7          |
| cg17749443 | 0.02942 | 0.03364 | 0.04172 | 0.03962 | 0.04067 | 0.0315  | 0.02925 | 0.03262 | 0.03197 | 0.03176 | ZFP37         |
| cg17749456 | 0.12195 | 0.16864 | 0.76909 | 0.75663 | 0.21493 | 0.16722 | 0.4979  | 0.12633 | 0.08077 | 0.06588 | HSPBP1        |
| cg17749520 | 0.88901 | 0.80144 | 0.88655 | 0.89363 | 0.92946 | 0.91366 | 0.89625 | 0.89928 | 0.91436 | 0.8216  | ITGA2B        |
| cg17749961 | 0.2525  | 0.1547  | 0.0698  | 0.06647 | 0.35163 | 0.28899 | 0.20508 | 0.06617 | 0.05457 | 0.05145 | LYCAT         |
| cg17751569 | 0.72612 | 0.72781 | 0.71869 | 0.7494  | 0.70347 | 0.7706  | 0.70983 | 0.76515 | 0.74248 | 0.80297 | CD180         |
| cg17751867 | 0.03552 | 0.03169 | 0.02728 | 0.02595 | 0.03127 | 0.03776 | 0.03441 | 0.03176 | 0.02088 | 0.0201  | GOLPH3        |
| cg17753124 | 0.50185 | 0.18306 | 0.79176 | 0.7459  | 0.83009 | 0.33097 | 0.89099 | 0.65509 | 0.90018 | 0.39389 | IER2          |
| cg17754680 | 0.51111 | 0.4296  | 0.2537  | 0.34714 | 0.87146 | 0.82772 | 0.13587 | 0.09152 | 0.2013  | 0.03781 | NPC1L1        |
| cg17754980 | 0.04164 | 0.0379  | 0.0416  | 0.04169 | 0.03908 | 0.039   | 0.03588 | 0.03681 | 0.0376  | 0.03611 | FAM54A        |
| cg17755581 | 0.11616 | 0.09778 | 0.14069 | 0.1081  | 0.17501 | 0.09904 | 0.098   | 0.09403 | 0.10806 | 0.06853 | VAPB          |
| cg17756392 | 0.05308 | 0.06212 | 0.05767 | 0.05336 | 0.02965 | 0.04538 | 0.04831 | 0.04396 | 0.04303 | 0.04389 | CLPP          |
| cg17757055 | 0.4381  | 0.15634 | 0.09033 | 0.09038 | 0.09172 | 0.48713 | 0.07092 | 0.04809 | 0.06282 | 0.03222 | DKFZP564O0823 |
| cg17758148 | 0.71403 | 0.70861 | 0.66658 | 0.75838 | 0.59711 | 0.71961 | 0.7583  | 0.74631 | 0.67585 | 0.70171 | JMY           |
| cg17758721 | 0.08065 | 0.07038 | 0.09216 | 0.07537 | 0.14777 | 0.14367 | 0.10874 | 0.08546 | 0.05492 | 0.05703 | SNRPB         |
| cg17759354 | 0.86006 | 0.67767 | 0.92692 | 0.9315  | 0.96199 | 0.91327 | 0.89983 | 0.87377 | 0.85408 | 0.68294 | SLC12A3       |
| cg17761453 | 0.2793  | 0.07916 | 0.28797 | 0.5468  | 0.79958 | 0.64687 | 0.17128 | 0.13559 | 0.07089 | 0.06613 | LOR           |
| cg17765461 | 0.0975  | 0.09884 | 0.09037 | 0.09187 | 0.11303 | 0.11803 | 0.09494 | 0.07213 | 0.07973 | 0.06235 | DAZAP1        |
| cg17767184 | 0.08276 | 0.08236 | 0.10115 | 0.07862 | 0.08895 | 0.07939 | 0.13543 | 0.12705 | 0.0757  | 0.07699 | DHFR1L1       |
| cg17767659 | 0.04316 | 0.04613 | 0.04847 | 0.04364 | 0.06638 | 0.06018 | 0.04362 | 0.04616 | 0.03188 | 0.03087 | BYSL          |
| cg17767931 | 0.72517 | 0.29474 | 0.72099 | 0.73343 | 0.54188 | 0.67462 | 0.63161 | 0.6412  | 0.76088 | 0.32814 | SLC25A26      |
| cg17769158 | 0.8755  | 0.86699 | 0.89188 | 0.8849  | 0.92125 | 0.90116 | 0.87825 | 0.90513 | 0.90057 | 0.85141 | ODF1          |
| cg17769238 | 0.63396 | 0.69078 | 0.15797 | 0.27438 | 0.60946 | 0.54061 | 0.05149 | 0.05587 | 0.04807 | 0.04744 | H19           |
| cg17770886 | 0.36366 | 0.10002 | 0.39489 | 0.40272 | 0.55162 | 0.21678 | 0.39273 | 0.08703 | 0.86347 | 0.33597 | ZNF511        |
| cg17771150 | 0.87609 | 0.88031 | 0.83619 | 0.72762 | 0.8614  | 0.82434 | 0.48222 | 0.13351 | 0.69249 | 0.47452 | LCP1          |
| cg17771854 | 0.01644 | 0.01877 | 0.01754 | 0.01859 | 0.01599 | 0.02274 | 0.02413 | 0.02516 | 0.01892 | 0.01558 | IPO13         |
| cg17773950 | 0.0424  | 0.04577 | 0.13575 | 0.11768 | 0.05079 | 0.11461 | 0.0503  | 0.07174 | 0.04075 | 0.05195 | IGF2AS        |

|            |         |         |         |         |         |         |         |         |         |                   |
|------------|---------|---------|---------|---------|---------|---------|---------|---------|---------|-------------------|
| cg17774305 | 0.05592 | 0.06138 | 0.06013 | 0.05773 | 0.03508 | 0.05551 | 0.05643 | 0.05563 | 0.04526 | 0.04509 C12orf62  |
| cg17774418 | 0.71605 | 0.27979 | 0.34518 | 0.50767 | 0.51558 | 0.50017 | 0.27956 | 0.32295 | 0.25811 | 0.27108 FLJ33708  |
| cg17775235 | 0.0437  | 0.04    | 0.10194 | 0.41503 | 0.06141 | 0.03631 | 0.04068 | 0.03907 | 0.03605 | 0.03578 NPTX1     |
| cg17775283 | 0.16234 | 0.09902 | 0.09865 | 0.0761  | 0.1836  | 0.13025 | 0.06715 | 0.05149 | 0.10018 | 0.11159 UBE1      |
| cg17775713 | 0.37838 | 0.15713 | 0.74705 | 0.85072 | 0.73926 | 0.85726 | 0.75545 | 0.8286  | 0.39124 | 0.41956 TF        |
| cg17776353 | 0.03814 | 0.03623 | 0.03796 | 0.02909 | 0.03217 | 0.03032 | 0.03016 | 0.03144 | 0.03115 | 0.0266 BMPR1A     |
| cg17777592 | 0.84723 | 0.59815 | 0.75437 | 0.80037 | 0.68624 | 0.74315 | 0.61275 | 0.74128 | 0.47915 | 0.28974 CAB39L    |
| cg17778120 | 0.48505 | 0.50589 | 0.44214 | 0.69426 | 0.80178 | 0.74014 | 0.27116 | 0.64448 | 0.37224 | 0.37677 RBP2      |
| cg17778721 | 0.0279  | 0.03697 | 0.03095 | 0.02574 | 0.02486 | 0.03345 | 0.02865 | 0.02869 | 0.03408 | 0.0311 CBX1       |
| cg17778867 | 0.6799  | 0.76314 | 0.79985 | 0.75402 | 0.3512  | 0.20189 | 0.08702 | 0.07011 | 0.06742 | 0.18555 KRTAP10-8 |
| cg17780098 | 0.03285 | 0.03655 | 0.03987 | 0.03666 | 0.03447 | 0.07959 | 0.02957 | 0.05644 | 0.03532 | 0.02915 CSRP1     |
| cg17783509 | 0.13719 | 0.08881 | 0.48055 | 0.6043  | 0.50432 | 0.4747  | 0.70683 | 0.38399 | 0.54355 | 0.38759 PHOX2B    |
| cg17784922 | 0.18219 | 0.19431 | 0.69641 | 0.83117 | 0.61851 | 0.5171  | 0.10432 | 0.11582 | 0.19446 | 0.1019 KEL        |
| cg17786776 | 0.72829 | 0.51558 | 0.72266 | 0.78662 | 0.71928 | 0.4061  | 0.71369 | 0.58798 | 0.82796 | 0.53282 FKBP9     |
| cg17787710 | 0.03276 | 0.03751 | 0.03864 | 0.03391 | 0.97839 | 0.96889 | 0.03473 | 0.03768 | 0.03405 | 0.02819 RAC3      |
| cg17788013 | 0.3103  | 0.1163  | 0.17345 | 0.12072 | 0.20382 | 0.14675 | 0.21499 | 0.14193 | 0.10816 | 0.11682 SPINK5    |
| cg17788682 | 0.06    | 0.02198 | 0.02479 | 0.03412 | 0.03745 | 0.01786 | 0.50204 | 0.42064 | 0.02013 | 0.0206 ARNT2      |
| cg17788832 | 0.36981 | 0.18701 | 0.48492 | 0.44959 | 0.3977  | 0.54779 | 0.70383 | 0.56884 | 0.46997 | 0.3705 PSKH2      |
| cg17790333 | 0.32794 | 0.15221 | 0.85267 | 0.86885 | 0.8289  | 0.84075 | 0.34379 | 0.16548 | 0.8299  | 0.57869 CYP11A1   |
| cg17791617 | 0.77327 | 0.72639 | 0.78666 | 0.78198 | 0.72137 | 0.78704 | 0.85458 | 0.87553 | 0.81114 | 0.79976 DLG5      |
| cg17791651 | 0.03833 | 0.05317 | 0.88594 | 0.94147 | 0.93831 | 0.93669 | 0.87197 | 0.61833 | 0.86996 | 0.85238 POU3F1    |
| cg17791766 | 0.09795 | 0.09499 | 0.1001  | 0.10261 | 0.14276 | 0.10438 | 0.0845  | 0.07601 | 0.06788 | 0.07078 HSPBP1    |
| cg17791936 | 0.84236 | 0.84332 | 0.81497 | 0.84049 | 0.48188 | 0.5793  | 0.28193 | 0.3138  | 0.44952 | 0.45626 SLC37A4   |
| cg17792192 | 0.90491 | 0.86577 | 0.9076  | 0.90123 | 0.7835  | 0.86226 | 0.89405 | 0.90312 | 0.89993 | 0.90479 CAMSAP1   |
| cg17793621 | 0.08271 | 0.14773 | 0.47587 | 0.53333 | 0.03334 | 0.04153 | 0.03794 | 0.04059 | 0.20566 | 0.04903 ATP10A    |
| cg17794261 | 0.04368 | 0.034   | 0.07356 | 0.06428 | 0.14349 | 0.03068 | 0.0366  | 0.03546 | 0.04001 | 0.02439 ZNF688    |
| cg17795240 | 0.56516 | 0.39914 | 0.57841 | 0.58405 | 0.28658 | 0.46938 | 0.21053 | 0.64639 | 0.48734 | 0.34369 GATA4     |
| cg17795586 | 0.81495 | 0.69571 | 0.78565 | 0.81137 | 0.82065 | 0.83563 | 0.83299 | 0.86011 | 0.74467 | 0.33944 P2RY13    |
| cg17797182 | 0.02692 | 0.02771 | 0.02977 | 0.02893 | 0.02451 | 0.03539 | 0.02843 | 0.02626 | 0.02706 | 0.02966 SNRPD1    |
| cg17797815 | 0.83942 | 0.35907 | 0.54813 | 0.60912 | 0.86646 | 0.86587 | 0.4019  | 0.47117 | 0.88931 | 0.81851 RAB11FIP2 |
| cg17800442 | 0.18216 | 0.19006 | 0.87547 | 0.87363 | 0.87257 | 0.89092 | 0.42764 | 0.40898 | 0.15672 | 0.19208 CTF1      |
| cg17801256 | 0.03243 | 0.03392 | 0.038   | 0.03697 | 0.02984 | 0.02957 | 0.02722 | 0.02835 | 0.03081 | 0.02725 ZMYM4     |
| cg17802847 | 0.07225 | 0.05687 | 0.04792 | 0.04918 | 0.09366 | 0.05667 | 0.03572 | 0.03273 | 0.03934 | 0.04078 CFLAR     |
| cg17803089 | 0.0662  | 0.03824 | 0.71486 | 0.78362 | 0.13887 | 0.049   | 0.04131 | 0.046   | 0.03689 | 0.02745 FANCE     |
| cg17803430 | 0.40983 | 0.09995 | 0.7717  | 0.83084 | 0.59261 | 0.6935  | 0.55498 | 0.36237 | 0.38426 | 0.25496 C4BPA     |
| cg17803807 | 0.0968  | 0.1122  | 0.09543 | 0.08902 | 0.11783 | 0.10588 | 0.09711 | 0.09938 | 0.08142 | 0.09325 PWWP2     |
| cg17803965 | 0.67957 | 0.14802 | 0.54455 | 0.62326 | 0.50775 | 0.23291 | 0.7433  | 0.39657 | 0.47815 | 0.33245 SPOCD1    |
| cg17804302 | 0.03176 | 0.0305  | 0.05667 | 0.09892 | 0.03975 | 0.03317 | 0.02653 | 0.02524 | 0.02306 | 0.02223 NKD1      |
| cg17804987 | 0.02254 | 0.02304 | 0.0251  | 0.02492 | 0.02273 | 0.02477 | 0.01839 | 0.01683 | 0.02146 | 0.01686 MAPKAPK3  |
| cg17805404 | 0.03961 | 0.04384 | 0.16839 | 0.09118 | 0.2865  | 0.04401 | 0.06933 | 0.04506 | 0.30932 | 0.36571 GPR162    |
| cg17806989 | 0.93626 | 0.92848 | 0.92425 | 0.92802 | 0.93792 | 0.91739 | 0.76514 | 0.89567 | 0.93808 | 0.93827 RNF17     |

|            |         |         |         |         |         |         |         |         |         |         |          |
|------------|---------|---------|---------|---------|---------|---------|---------|---------|---------|---------|----------|
| cg17808849 | 0.13669 | 0.05861 | 0.16069 | 0.08681 | 0.25393 | 0.03621 | 0.15045 | 0.04079 | 0.06265 | 0.03099 | HERPUD1  |
| cg17809798 | 0.0681  | 0.06459 | 0.05725 | 0.06169 | 0.13832 | 0.08487 | 0.06974 | 0.06072 | 0.05727 | 0.07373 | SNW1     |
| cg17810944 | 0.06596 | 0.06261 | 0.18567 | 0.20165 | 0.32749 | 0.35596 | 0.08236 | 0.0757  | 0.05344 | 0.06062 | GDAP1L1  |
| cg17811228 | 0.04381 | 0.04044 | 0.03672 | 0.03794 | 0.03148 | 0.04333 | 0.02972 | 0.03066 | 0.03398 | 0.03157 | PSD2     |
| cg17812013 | 0.04043 | 0.04132 | 0.04237 | 0.0402  | 0.03207 | 0.03768 | 0.03457 | 0.03742 | 0.03238 | 0.0345  | GPX4     |
| cg17812431 | 0.33773 | 0.40775 | 0.36923 | 0.35983 | 0.48635 | 0.43001 | 0.14116 | 0.13176 | 0.37439 | 0.51688 | UMOD     |
| cg17813891 | 0.79313 | 0.8327  | 0.84275 | 0.86394 | 0.71885 | 0.80833 | 0.8107  | 0.71267 | 0.82861 | 0.78776 | EVL      |
| cg17814481 | 0.76383 | 0.42849 | 0.6831  | 0.77838 | 0.75791 | 0.78569 | 0.71499 | 0.52358 | 0.12138 | 0.08157 | FBP1     |
| cg17815841 | 0.02675 | 0.0238  | 0.02849 | 0.02762 | 0.02288 | 0.02497 | 0.02647 | 0.02638 | 0.02219 | 0.02483 | SCC-112  |
| cg17818900 | 0.02733 | 0.02623 | 0.03331 | 0.06278 | 0.02196 | 0.03007 | 0.02612 | 0.02486 | 0.02652 | 0.02576 | CRIP2    |
| cg17819635 | 0.82147 | 0.70456 | 0.8023  | 0.88892 | 0.49499 | 0.56284 | 0.42356 | 0.50461 | 0.25795 | 0.11652 | TCTEX1D1 |
| cg17820459 | 0.13495 | 0.04809 | 0.33259 | 0.48061 | 0.92407 | 0.96413 | 0.44134 | 0.22359 | 0.9678  | 0.96312 | GPX3     |
| cg17820591 | 0.08827 | 0.03621 | 0.04214 | 0.04058 | 0.35628 | 0.04028 | 0.40922 | 0.04199 | 0.0681  | 0.03344 | ENO3     |
| cg17820828 | 0.82515 | 0.68366 | 0.90025 | 0.96219 | 0.89643 | 0.81158 | 0.9452  | 0.91363 | 0.94477 | 0.95645 | KCNQ1    |
| cg17823175 | 0.94479 | 0.5235  | 0.88217 | 0.92666 | 0.96291 | 0.94941 | 0.93481 | 0.62275 | 0.94038 | 0.89305 | AZU1     |
| cg17823320 | 0.04415 | 0.05154 | 0.05184 | 0.04304 | 0.03423 | 0.03952 | 0.04656 | 0.04733 | 0.04006 | 0.04162 | C8orf35  |
| cg17824393 | 0.77539 | 0.80312 | 0.7152  | 0.78311 | 0.70611 | 0.75865 | 0.72213 | 0.73379 | 0.81003 | 0.66525 | PTPN3    |
| cg17826679 | 0.94243 | 0.94485 | 0.15257 | 0.1782  | 0.2953  | 0.48158 | 0.0281  | 0.0276  | 0.03975 | 0.02195 | SLC44A2  |
| cg17827767 | 0.05758 | 0.05372 | 0.10087 | 0.12619 | 0.11301 | 0.5849  | 0.05278 | 0.09506 | 0.05223 | 0.03895 | LRRC21   |
| cg17829314 | 0.02407 | 0.02601 | 0.02695 | 0.02507 | 0.02065 | 0.02528 | 0.02043 | 0.02257 | 0.02251 | 0.02217 | C1orf122 |
| cg17829936 | 0.3998  | 0.05775 | 0.76967 | 0.75966 | 0.34001 | 0.36871 | 0.40439 | 0.34938 | 0.0698  | 0.05724 | TAAR5    |
| cg17830308 | 0.07466 | 0.06842 | 0.66495 | 0.728   | 0.93876 | 0.93161 | 0.07187 | 0.06231 | 0.27551 | 0.42422 | NEUROG1  |
| cg17830754 | 0.0412  | 0.04045 | 0.05775 | 0.06437 | 0.0507  | 0.04847 | 0.04452 | 0.03926 | 0.03699 | 0.02975 | SCDR10   |
| cg17832162 | 0.04469 | 0.04529 | 0.05598 | 0.05156 | 0.04503 | 0.05292 | 0.04818 | 0.04369 | 0.04012 | 0.04927 | SEC11L3  |
| cg17832674 | 0.20039 | 0.04978 | 0.80504 | 0.71389 | 0.07827 | 0.14613 | 0.22998 | 0.06372 | 0.05748 | 0.15995 | CALM3    |
| cg17833578 | 0.07973 | 0.06572 | 0.10766 | 0.1272  | 0.15517 | 0.16377 | 0.0617  | 0.13372 | 0.05621 | 0.05618 | LRRC21   |
| cg17834443 | 0.03913 | 0.0406  | 0.05291 | 0.05286 | 0.03192 | 0.036   | 0.0481  | 0.0483  | 0.03005 | 0.03132 | C8orf35  |
| cg17834752 | 0.03042 | 0.03143 | 0.71728 | 0.73667 | 0.11953 | 0.09504 | 0.08491 | 0.03386 | 0.08213 | 0.10269 | KCNK9    |
| cg17836145 | 0.45476 | 0.25104 | 0.56941 | 0.72041 | 0.81087 | 0.8418  | 0.41577 | 0.10836 | 0.38733 | 0.24372 | VNN2     |
| cg17838026 | 0.07264 | 0.05663 | 0.51524 | 0.52917 | 0.72818 | 0.48711 | 0.59679 | 0.4363  | 0.03993 | 0.04452 | KCNC3    |
| cg17838516 | 0.23144 | 0.28691 | 0.7679  | 0.79869 | 0.42346 | 0.84192 | 0.54132 | 0.41679 | 0.57965 | 0.51491 | MTNR1B   |
| cg17838626 | 0.32838 | 0.07675 | 0.5588  | 0.56449 | 0.1525  | 0.04814 | 0.21392 | 0.0533  | 0.10993 | 0.04236 | PHCA     |
| cg17838765 | 0.02421 | 0.02122 | 0.02254 | 0.02113 | 0.02027 | 0.02339 | 0.02115 | 0.02107 | 0.01806 | 0.01911 | ALKBH3   |
| cg17839278 | 0.0483  | 0.05231 | 0.06513 | 0.05398 | 0.04488 | 0.05642 | 0.05858 | 0.04719 | 0.04802 | 0.04795 | MTCH2    |
| cg17839611 | 0.74715 | 0.89783 | 0.51227 | 0.67573 | 0.84178 | 0.55668 | 0.28519 | 0.21743 | 0.46905 | 0.53035 | NGT2     |
| cg17841529 | 0.06523 | 0.0498  | 0.05626 | 0.04893 | 0.04675 | 0.04441 | 0.04627 | 0.04842 | 0.04734 | 0.04372 | OSBPL8   |
| cg17843048 | 0.10246 | 0.10118 | 0.10352 | 0.08355 | 0.08622 | 0.06927 | 0.246   | 0.14048 | 0.08559 | 0.06677 | PHF16    |
| cg17843759 | 0.04471 | 0.04566 | 0.05145 | 0.04267 | 0.04075 | 0.04321 | 0.043   | 0.04689 | 0.03375 | 0.03395 | ELL      |
| cg17846100 | 0.06082 | 0.01821 | 0.04932 | 0.02032 | 0.02175 | 0.01945 | 0.01986 | 0.01679 | 0.02033 | 0.01631 | MT       |
| cg17847607 | 0.04167 | 0.03817 | 0.04119 | 0.03776 | 0.02771 | 0.0353  | 0.03245 | 0.03329 | 0.0351  | 0.0318  | CALR3    |
| cg17849194 | 0.02946 | 0.03398 | 0.03448 | 0.03013 | 0.03722 | 0.03396 | 0.02391 | 0.02708 | 0.02405 | 0.02324 | SAS10    |

|            |         |         |         |         |         |         |         |         |         |         |               |
|------------|---------|---------|---------|---------|---------|---------|---------|---------|---------|---------|---------------|
| cg17849956 | 0.03922 | 0.04051 | 0.05056 | 0.03966 | 0.04169 | 0.03934 | 0.03097 | 0.03273 | 0.02657 | 0.02883 | ZNF304        |
| cg17850880 | 0.04034 | 0.05154 | 0.04201 | 0.04255 | 0.03644 | 0.05397 | 0.04053 | 0.04664 | 0.03542 | 0.03732 | RNF6          |
| cg17850932 | 0.6436  | 0.57566 | 0.72109 | 0.70455 | 0.69251 | 0.78453 | 0.70598 | 0.7606  | 0.72794 | 0.60632 | IL2           |
| cg17851105 | 0.06491 | 0.06025 | 0.09067 | 0.08981 | 0.07797 | 0.0538  | 0.08012 | 0.06234 | 0.08631 | 0.07897 | UNKL          |
| cg17853587 | 0.07168 | 0.06639 | 0.08279 | 0.12619 | 0.15035 | 0.06075 | 0.06101 | 0.04913 | 0.06574 | 0.05038 | NDST3         |
| cg17854440 | 0.88066 | 0.86518 | 0.42648 | 0.53259 | 0.74128 | 0.45947 | 0.63328 | 0.85865 | 0.86631 | 0.83437 | ENPEP         |
| cg17854497 | 0.12392 | 0.1132  | 0.14656 | 0.12946 | 0.16031 | 0.12279 | 0.13168 | 0.11358 | 0.10617 | 0.10905 | SEPHS1        |
| cg17858663 | 0.05347 | 0.05644 | 0.05372 | 0.05017 | 0.06786 | 0.06355 | 0.04398 | 0.04015 | 0.04021 | 0.04028 | C16orf60      |
| cg17860158 | 0.1162  | 0.05925 | 0.48624 | 0.53358 | 0.55605 | 0.60856 | 0.0593  | 0.05544 | 0.07235 | 0.05585 | CNTN2         |
| cg17860186 | 0.05782 | 0.05518 | 0.06152 | 0.05528 | 0.03996 | 0.05577 | 0.05458 | 0.05484 | 0.05291 | 0.05607 | PLEKHG2       |
| cg17861230 | 0.08724 | 0.02971 | 0.97628 | 0.97796 | 0.83099 | 0.97023 | 0.61985 | 0.50958 | 0.35546 | 0.34625 | PDE4C         |
| cg17863168 | 0.0354  | 0.03893 | 0.04087 | 0.0359  | 0.03265 | 0.03603 | 0.03067 | 0.03482 | 0.02783 | 0.02871 | APRT          |
| cg17864730 | 0.07306 | 0.03157 | 0.04664 | 0.03865 | 0.06224 | 0.0278  | 0.03078 | 0.02964 | 0.24822 | 0.32524 | ITGB8         |
| cg17865752 | 0.1096  | 0.10922 | 0.14563 | 0.12577 | 0.12494 | 0.14039 | 0.11994 | 0.12301 | 0.10736 | 0.10461 | CCNT2         |
| cg17866455 | 0.90892 | 0.79568 | 0.79476 | 0.85676 | 0.55007 | 0.55259 | 0.55273 | 0.31282 | 0.63076 | 0.20259 | SCAND2        |
| cg17867194 | 0.06353 | 0.07277 | 0.06819 | 0.0679  | 0.05968 | 0.05854 | 0.07054 | 0.06055 | 0.05677 | 0.06624 | SLC30A6       |
| cg17868994 | 0.05175 | 0.04327 | 0.06462 | 0.04741 | 0.06325 | 0.0609  | 0.03707 | 0.0317  | 0.03909 | 0.02934 | NIPSNAP3B     |
| cg17869167 | 0.5409  | 0.47872 | 0.70756 | 0.7779  | 0.73119 | 0.76753 | 0.4207  | 0.38435 | 0.78394 | 0.67463 | IL18R1        |
| cg17870792 | 0.04424 | 0.04449 | 0.04667 | 0.0458  | 0.04841 | 0.04273 | 0.03995 | 0.03807 | 0.06066 | 0.03677 | LPHN2         |
| cg17872064 | 0.02504 | 0.02513 | 0.03983 | 0.02525 | 0.03125 | 0.03251 | 0.03169 | 0.02594 | 0.02823 | 0.02772 | NOP5/NOP58    |
| cg17872476 | 0.44444 | 0.54248 | 0.44079 | 0.50353 | 0.4102  | 0.63957 | 0.52375 | 0.52369 | 0.58008 | 0.54925 | VT11A         |
| cg17872757 | 0.03549 | 0.04153 | 0.04032 | 0.04046 | 0.04922 | 0.04727 | 0.07363 | 0.05891 | 0.03147 | 0.02221 | FLI1          |
| cg17875156 | 0.04251 | 0.04484 | 0.04895 | 0.04358 | 0.03455 | 0.04049 | 0.04092 | 0.04128 | 0.04355 | 0.03617 | NTN1          |
| cg17877494 | 0.05128 | 0.05518 | 0.05137 | 0.05132 | 0.0551  | 0.05708 | 0.0462  | 0.04395 | 0.04046 | 0.04003 | ACAA1         |
| cg17877656 | 0.04617 | 0.03141 | 0.03371 | 0.03098 | 0.03221 | 0.02891 | 0.02848 | 0.02953 | 0.03332 | 0.02899 | PCGF6         |
| cg17878972 | 0.10999 | 0.05507 | 0.06613 | 0.05642 | 0.05585 | 0.04645 | 0.04738 | 0.04963 | 0.0485  | 0.05262 | HRASLS        |
| cg17880199 | 0.04135 | 0.04056 | 0.08879 | 0.10524 | 0.55125 | 0.48161 | 0.1173  | 0.03601 | 0.21902 | 0.04136 | MYH11         |
| cg17880859 | 0.03454 | 0.03549 | 0.0352  | 0.03162 | 0.02552 | 0.02778 | 0.01923 | 0.02511 | 0.02598 | 0.02658 | RBBP7         |
| cg17881637 | 0.03841 | 0.03186 | 0.03193 | 0.03773 | 0.02074 | 0.0292  | 0.02617 | 0.03104 | 0.02746 | 0.02865 | MRPL40        |
| cg17884373 | 0.51453 | 0.18812 | 0.61272 | 0.74081 | 0.61785 | 0.47465 | 0.2317  | 0.21958 | 0.1015  | 0.15179 | PPM1A         |
| cg17885062 | 0.0716  | 0.07135 | 0.07928 | 0.07921 | 0.06668 | 0.07442 | 0.09899 | 0.06685 | 0.07067 | 0.05225 | NRCAM         |
| cg17886028 | 0.03056 | 0.0304  | 0.11682 | 0.03877 | 0.22142 | 0.1153  | 0.17745 | 0.68891 | 0.03615 | 0.03185 | CCND2         |
| cg17886204 | 0.49137 | 0.38436 | 0.0233  | 0.02037 | 0.03414 | 0.02161 | 0.02849 | 0.02768 | 0.01769 | 0.02131 | DKFZp43411020 |
| cg17886959 | 0.57398 | 0.15026 | 0.08273 | 0.08396 | 0.0512  | 0.05023 | 0.12703 | 0.09979 | 0.06543 | 0.07543 | MT2A          |
| cg17887537 | 0.04617 | 0.03628 | 0.04052 | 0.03571 | 0.02509 | 0.02874 | 0.03644 | 0.03709 | 0.02926 | 0.02926 | RRAGA         |
| cg17889103 | 0.05384 | 0.04782 | 0.05922 | 0.05367 | 0.04476 | 0.04578 | 0.05707 | 0.04446 | 0.04111 | 0.04214 | UQCRB         |
| cg17889912 | 0.15107 | 0.16216 | 0.18063 | 0.1369  | 0.16882 | 0.15263 | 0.40949 | 0.37415 | 0.1128  | 0.11373 | TSPYL2        |
| cg17890764 | 0.82637 | 0.57252 | 0.60337 | 0.81451 | 0.75609 | 0.27824 | 0.28844 | 0.45763 | 0.14329 | 0.09755 | ITI4          |
| cg17891123 | 0.23376 | 0.23709 | 0.24042 | 0.26625 | 0.18094 | 0.19894 | 0.21892 | 0.2082  | 0.21405 | 0.16587 | IQGAP1        |
| cg17891149 | 0.07893 | 0.06448 | 0.1619  | 0.14734 | 0.09051 | 0.07149 | 0.05917 | 0.05153 | 0.07581 | 0.08449 | SHC1          |
| cg17891278 | 0.03004 | 0.03347 | 0.02664 | 0.03023 | 0.02737 | 0.03142 | 0.0288  | 0.02893 | 0.02808 | 0.02423 | ZNF289        |

|            |         |         |         |         |         |         |         |         |         |         |           |
|------------|---------|---------|---------|---------|---------|---------|---------|---------|---------|---------|-----------|
| cg17892328 | 0.02077 | 0.02232 | 0.02696 | 0.02584 | 0.01683 | 0.01937 | 0.02038 | 0.01541 | 0.01932 | 0.01574 | GLUL      |
| cg17892556 | 0.0509  | 0.0429  | 0.04842 | 0.0526  | 0.38309 | 0.66001 | 0.03946 | 0.05316 | 0.03164 | 0.03142 | ZNF625    |
| cg17894008 | 0.65839 | 0.53638 | 0.83949 | 0.91284 | 0.90279 | 0.9287  | 0.70407 | 0.68036 | 0.38604 | 0.35783 | NACAL     |
| cg17895149 | 0.58651 | 0.61667 | 0.95873 | 0.96509 | 0.9618  | 0.92787 | 0.77942 | 0.66352 | 0.93167 | 0.84806 | PLAGL1    |
| cg17895873 | 0.0335  | 0.03606 | 0.02782 | 0.02781 | 0.02822 | 0.02483 | 0.02238 | 0.02495 | 0.02623 | 0.02331 | SMYD5     |
| cg17896097 | 0.05613 | 0.06694 | 0.06251 | 0.0577  | 0.05949 | 0.06625 | 0.05123 | 0.05544 | 0.04625 | 0.05051 | ZBTB26    |
| cg17896229 | 0.70147 | 0.69512 | 0.72884 | 0.728   | 0.71179 | 0.68689 | 0.5511  | 0.42454 | 0.60314 | 0.62514 | PROKR2    |
| cg17896249 | 0.04202 | 0.04507 | 0.04382 | 0.04238 | 0.04559 | 0.04938 | 0.03987 | 0.03975 | 0.03202 | 0.03837 | E2F4      |
| cg17897236 | 0.03067 | 0.02658 | 0.02902 | 0.03037 | 0.03151 | 0.03569 | 0.0346  | 0.03048 | 0.03077 | 0.03461 | NIPA2     |
| cg17897879 | 0.09349 | 0.06814 | 0.55369 | 0.54585 | 0.43913 | 0.52192 | 0.58622 | 0.65927 | 0.06878 | 0.03568 | TNFRSF8   |
| cg17901463 | 0.39347 | 0.38451 | 0.10945 | 0.22301 | 0.02882 | 0.02825 | 0.39763 | 0.37637 | 0.04481 | 0.03797 | GSTM1     |
| cg17902858 | 0.04372 | 0.0426  | 0.04079 | 0.03809 | 0.03032 | 0.02931 | 0.03598 | 0.03288 | 0.03793 | 0.02911 | NPDC1     |
| cg17903316 | 0.19862 | 0.28927 | 0.68502 | 0.74287 | 0.57963 | 0.73449 | 0.67316 | 0.7573  | 0.46781 | 0.48373 | LOXHD1    |
| cg17903544 | 0.06351 | 0.06611 | 0.07179 | 0.06533 | 0.04236 | 0.02979 | 0.16565 | 0.03824 | 0.04779 | 0.03224 | PGAM5     |
| cg17904068 | 0.91849 | 0.92286 | 0.88723 | 0.90235 | 0.90165 | 0.9344  | 0.88535 | 0.88783 | 0.91042 | 0.9035  | CHFR      |
| cg17904739 | 0.713   | 0.18114 | 0.11758 | 0.12003 | 0.22903 | 0.07162 | 0.21677 | 0.19369 | 0.33099 | 0.28082 | MGC4266   |
| cg17904786 | 0.10757 | 0.09118 | 0.29763 | 0.5238  | 0.11843 | 0.09879 | 0.08345 | 0.08351 | 0.07829 | 0.06314 | GTF3A     |
| cg17904815 | 0.03707 | 0.04346 | 0.04088 | 0.03865 | 0.0365  | 0.04779 | 0.03647 | 0.04197 | 0.03186 | 0.0342  | C13orf23  |
| cg17905198 | 0.05059 | 0.03625 | 0.04824 | 0.03824 | 0.04354 | 0.04339 | 0.04944 | 0.04407 | 0.03422 | 0.03336 | NDUFV2    |
| cg17906786 | 0.47295 | 0.15624 | 0.64872 | 0.56808 | 0.57631 | 0.51904 | 0.11372 | 0.09754 | 0.08308 | 0.0627  | LOC400120 |
| cg17907567 | 0.82616 | 0.4348  | 0.73523 | 0.73247 | 0.65226 | 0.43736 | 0.12193 | 0.03192 | 0.48909 | 0.35636 | HAMP      |
| cg17910564 | 0.86894 | 0.47701 | 0.92488 | 0.88985 | 0.46798 | 0.11427 | 0.12604 | 0.12637 | 0.67712 | 0.06364 | VDAC3     |
| cg17913068 | 0.0546  | 0.04548 | 0.12162 | 0.2097  | 0.17978 | 0.04762 | 0.23211 | 0.04073 | 0.04471 | 0.03957 | PPFIA1    |
| cg17914753 | 0.05809 | 0.05716 | 0.21734 | 0.12457 | 0.31192 | 0.3176  | 0.03322 | 0.02799 | 0.0612  | 0.03746 | CYP2S1    |
| cg17915429 | 0.79758 | 0.78496 | 0.68331 | 0.77241 | 0.86529 | 0.78727 | 0.38176 | 0.37189 | 0.77835 | 0.5374  | PGLYRP2   |
| cg17917518 | 0.94775 | 0.93249 | 0.93878 | 0.94165 | 0.94262 | 0.94068 | 0.94097 | 0.8874  | 0.9342  | 0.91279 | P2RX4     |
| cg17918089 | 0.0317  | 0.02985 | 0.02813 | 0.02803 | 0.02897 | 0.02645 | 0.02253 | 0.02451 | 0.03275 | 0.02746 | SETDB1    |
| cg17918201 | 0.03044 | 0.03321 | 0.03174 | 0.03454 | 0.02215 | 0.02818 | 0.03085 | 0.02991 | 0.02385 | 0.03059 | AB1       |
| cg17918239 | 0.22489 | 0.15541 | 0.3112  | 0.46876 | 0.20795 | 0.16416 | 0.22688 | 0.16698 | 0.19208 | 0.22368 | ZNF281    |
| cg17918501 | 0.34919 | 0.03518 | 0.33108 | 0.40045 | 0.50322 | 0.44788 | 0.02891 | 0.02779 | 0.16409 | 0.025   | FNDC4     |
| cg17918700 | 0.82978 | 0.6627  | 0.83876 | 0.84378 | 0.87963 | 0.81376 | 0.82794 | 0.79582 | 0.83701 | 0.77228 | KCNK7     |
| cg17919471 | 0.4335  | 0.1356  | 0.78688 | 0.81966 | 0.26591 | 0.13117 | 0.06604 | 0.05591 | 0.22973 | 0.07582 | XAGE3     |
| cg17920197 | 0.80979 | 0.5946  | 0.78872 | 0.79858 | 0.87522 | 0.77209 | 0.80887 | 0.65645 | 0.86929 | 0.73789 | LGI4      |
| cg17921034 | 0.04356 | 0.05001 | 0.05574 | 0.04289 | 0.04949 | 0.05861 | 0.03679 | 0.03593 | 0.03867 | 0.03402 | AKAP11    |
| cg17921310 | 0.03616 | 0.04309 | 0.0663  | 0.06998 | 0.03967 | 0.04017 | 0.04046 | 0.0392  | 0.04184 | 0.04111 | MABPPIP   |
| cg17922226 | 0.64961 | 0.27857 | 0.77265 | 0.82793 | 0.66594 | 0.53276 | 0.38958 | 0.39021 | 0.67394 | 0.52215 | CLCN1     |
| cg17923358 | 0.07764 | 0.04392 | 0.50253 | 0.58346 | 0.06428 | 0.03993 | 0.13914 | 0.51327 | 0.47189 | 0.40732 | RELN      |
| cg17925436 | 0.55495 | 0.5719  | 0.63297 | 0.69668 | 0.62467 | 0.59556 | 0.24159 | 0.68406 | 0.63593 | 0.44188 | PALLD     |
| cg17925542 | 0.14206 | 0.03909 | 0.14384 | 0.04378 | 0.3489  | 0.11718 | 0.03972 | 0.02989 | 0.05495 | 0.02429 | IDH2      |
| cg17926057 | 0.05174 | 0.05012 | 0.06556 | 0.06426 | 0.0547  | 0.06075 | 0.13086 | 0.06134 | 0.052   | 0.04883 | PSMD10    |
| cg17926869 | 0.91915 | 0.88503 | 0.93193 | 0.93431 | 0.93279 | 0.91133 | 0.89965 | 0.91723 | 0.93504 | 0.92783 | LOC115098 |

|            |         |         |         |         |         |         |         |         |         |         |           |
|------------|---------|---------|---------|---------|---------|---------|---------|---------|---------|---------|-----------|
| cg17927917 | 0.03442 | 0.02234 | 0.02943 | 0.0265  | 0.02205 | 0.0285  | 0.0193  | 0.02513 | 0.01794 | 0.01731 | INSIG1    |
| cg17928268 | 0.40231 | 0.07975 | 0.38818 | 0.49813 | 0.47914 | 0.12127 | 0.26228 | 0.49349 | 0.10211 | 0.46073 | CST11     |
| cg17929627 | 0.0608  | 0.06351 | 0.06171 | 0.06025 | 0.056   | 0.05971 | 0.05553 | 0.05416 | 0.05255 | 0.0555  | MKI67     |
| cg17935677 | 0.03452 | 0.02626 | 0.02886 | 0.02824 | 0.0255  | 0.02715 | 0.02918 | 0.02432 | 0.0325  | 0.02575 | WDR76     |
| cg17936488 | 0.86499 | 0.7383  | 0.83716 | 0.86394 | 0.82774 | 0.82347 | 0.84071 | 0.87586 | 0.274   | 0.24892 | FAM78A    |
| cg17938146 | 0.87981 | 0.66977 | 0.9027  | 0.90329 | 0.8941  | 0.89313 | 0.91442 | 0.90755 | 0.89817 | 0.80752 | ITGA10    |
| cg17939444 | 0.33708 | 0.35621 | 0.67826 | 0.62825 | 0.4495  | 0.26463 | 0.5774  | 0.17092 | 0.53848 | 0.43501 | C8orf4    |
| cg17940013 | 0.29145 | 0.02748 | 0.12418 | 0.04047 | 0.01838 | 0.01857 | 0.09178 | 0.02172 | 0.01542 | 0.01453 | GPR157    |
| cg17940740 | 0.82668 | 0.71727 | 0.88931 | 0.89234 | 0.74016 | 0.86046 | 0.53454 | 0.37473 | 0.843   | 0.74447 | FLJ35801  |
| cg17941312 | 0.7372  | 0.14174 | 0.87568 | 0.88934 | 0.79687 | 0.21742 | 0.88616 | 0.63548 | 0.90946 | 0.83371 | PSF1      |
| cg17942096 | 0.82611 | 0.61426 | 0.79458 | 0.83113 | 0.85683 | 0.82947 | 0.76485 | 0.68958 | 0.8424  | 0.80853 | RFXANK    |
| cg17942553 | 0.83198 | 0.83299 | 0.86027 | 0.87205 | 0.8594  | 0.80287 | 0.83181 | 0.76139 | 0.78423 | 0.80374 | ARNT      |
| cg17943999 | 0.18785 | 0.07206 | 0.07415 | 0.08476 | 0.12492 | 0.04996 | 0.05643 | 0.04521 | 0.06113 | 0.03521 | GEM       |
| cg17945001 | 0.04071 | 0.04019 | 0.58351 | 0.6402  | 0.49097 | 0.47386 | 0.10481 | 0.07075 | 0.08095 | 0.04117 | IGSF21    |
| cg17946497 | 0.02755 | 0.0288  | 0.02516 | 0.02385 | 0.0212  | 0.02644 | 0.02378 | 0.02465 | 0.02306 | 0.02115 | DUSP1     |
| cg17946995 | 0.45449 | 0.16962 | 0.50863 | 0.62513 | 0.26556 | 0.2569  | 0.23718 | 0.2368  | 0.18877 | 0.16548 | LOC196463 |
| cg17947053 | 0.07088 | 0.06355 | 0.07275 | 0.06583 | 0.05288 | 0.0672  | 0.07605 | 0.0652  | 0.05262 | 0.05186 | WDR37     |
| cg17947599 | 0.19275 | 0.1086  | 0.77719 | 0.81242 | 0.65483 | 0.82615 | 0.67446 | 0.78443 | 0.66463 | 0.82104 | ACOXL     |
| cg17948627 | 0.04885 | 0.04245 | 0.06013 | 0.05021 | 0.04778 | 0.04971 | 0.0458  | 0.04397 | 0.04987 | 0.04784 | PSMB2     |
| cg17950095 | 0.04934 | 0.0373  | 0.03046 | 0.04798 | 0.96392 | 0.69939 | 0.04883 | 0.02864 | 0.76711 | 0.4237  | HOXA11    |
| cg17952262 | 0.82509 | 0.64527 | 0.69853 | 0.73649 | 0.90287 | 0.87881 | 0.25205 | 0.19568 | 0.70886 | 0.56986 | MFSD7     |
| cg17959722 | 0.02909 | 0.03491 | 0.03456 | 0.0293  | 0.34853 | 0.03516 | 0.02877 | 0.02619 | 0.04314 | 0.02361 | MRPL41    |
| cg17960516 | 0.67957 | 0.40881 | 0.20678 | 0.13879 | 0.2794  | 0.09607 | 0.0947  | 0.15587 | 0.35135 | 0.21459 | FLJ33718  |
| cg17961200 | 0.92353 | 0.81429 | 0.92554 | 0.91904 | 0.91845 | 0.85037 | 0.91753 | 0.87714 | 0.89998 | 0.87018 | CEL       |
| cg17963089 | 0.04678 | 0.04252 | 0.05521 | 0.04819 | 0.05501 | 0.05675 | 0.05742 | 0.05373 | 0.05265 | 0.04874 | PHPT1     |
| cg17963840 | 0.45572 | 0.32909 | 0.68108 | 0.69535 | 0.83065 | 0.83603 | 0.84146 | 0.84344 | 0.28844 | 0.31627 | ADRA1A    |
| cg17964955 | 0.43076 | 0.24363 | 0.40032 | 0.63262 | 0.84195 | 0.54328 | 0.07097 | 0.06981 | 0.80622 | 0.35289 | RBP3      |
| cg17965019 | 0.05302 | 0.05953 | 0.05454 | 0.0559  | 0.03785 | 0.06312 | 0.93595 | 0.93416 | 0.06075 | 0.0458  | HIST1H3J  |
| cg17965230 | 0.02314 | 0.02194 | 0.0249  | 0.02268 | 0.02864 | 0.02136 | 0.01824 | 0.02201 | 0.01948 | 0.01872 | PRDM1     |
| cg17966192 | 0.38659 | 0.1493  | 0.43177 | 0.48551 | 0.45349 | 0.54381 | 0.47524 | 0.10546 | 0.13671 | 0.13427 | SULT1C2   |
| cg17966619 | 0.03631 | 0.03074 | 0.0299  | 0.02897 | 0.02366 | 0.02785 | 0.02574 | 0.02889 | 0.65056 | 0.50899 | NT5E      |
| cg17969298 | 0.05639 | 0.05584 | 0.05122 | 0.04678 | 0.04623 | 0.06091 | 0.05712 | 0.05328 | 0.04739 | 0.04601 | ANGEL2    |
| cg17971003 | 0.587   | 0.37999 | 0.7535  | 0.79305 | 0.61097 | 0.6974  | 0.1331  | 0.32708 | 0.12601 | 0.15963 | SLN       |
| cg17974185 | 0.16112 | 0.07007 | 0.46031 | 0.53103 | 0.75816 | 0.63915 | 0.12401 | 0.09308 | 0.71667 | 0.68513 | CTNBL1    |
| cg17976381 | 0.09014 | 0.09055 | 0.09011 | 0.09708 | 0.08824 | 0.09271 | 0.07617 | 0.09459 | 0.08434 | 0.09001 | SMARCB1   |
| cg17976829 | 0.14503 | 0.13179 | 0.1401  | 0.14744 | 0.09287 | 0.13382 | 0.128   | 0.12731 | 0.12524 | 0.13192 | TXNL2     |
| cg17977362 | 0.81464 | 0.88792 | 0.80792 | 0.85285 | 0.95617 | 0.90009 | 0.05199 | 0.07831 | 0.86302 | 0.76073 | FLJ45964  |
| cg17977409 | 0.32224 | 0.47567 | 0.66517 | 0.67502 | 0.13245 | 0.03995 | 0.07597 | 0.05838 | 0.21664 | 0.29006 | SH3GL2    |
| cg17978274 | 0.82195 | 0.5628  | 0.579   | 0.775   | 0.90191 | 0.85569 | 0.51638 | 0.30781 | 0.0615  | 0.06474 | C15orf32  |
| cg17979628 | 0.05802 | 0.05378 | 0.07438 | 0.06546 | 0.06782 | 0.05233 | 0.04816 | 0.04935 | 0.04381 | 0.05032 | NENF      |
| cg17980508 | 0.22199 | 0.7682  | 0.55294 | 0.74373 | 0.23786 | 0.13972 | 0.0877  | 0.08554 | 0.16294 | 0.1694  | IFI44L    |

|            |         |         |         |         |         |         |         |         |         |                       |
|------------|---------|---------|---------|---------|---------|---------|---------|---------|---------|-----------------------|
| cg17981339 | 0.87563 | 0.90828 | 0.77448 | 0.87615 | 0.69034 | 0.626   | 0.09749 | 0.12735 | 0.06457 | 0.07557 SBEM          |
| cg17982102 | 0.83694 | 0.87046 | 0.05545 | 0.11485 | 0.35846 | 0.48106 | 0.23275 | 0.22399 | 0.43488 | 0.46648 RAB31         |
| cg17982504 | 0.02599 | 0.02628 | 0.02595 | 0.02468 | 0.01999 | 0.02199 | 0.02086 | 0.02171 | 0.01882 | 0.01719 DUS2L         |
| cg17982671 | 0.51724 | 0.43601 | 0.66458 | 0.84546 | 0.88893 | 0.61481 | 0.09532 | 0.04784 | 0.52591 | 0.4247 IL28B          |
| cg17983064 | 0.75088 | 0.24332 | 0.77372 | 0.8575  | 0.87433 | 0.83139 | 0.63005 | 0.38435 | 0.57674 | 0.38837 IL3           |
| cg17983274 | 0.03469 | 0.03336 | 0.04157 | 0.03691 | 0.04615 | 0.05503 | 0.04583 | 0.043   | 0.03086 | 0.03013 PPME1         |
| cg17983307 | 0.46361 | 0.07999 | 0.86743 | 0.85932 | 0.45576 | 0.38385 | 0.64501 | 0.46275 | 0.47904 | 0.06484 DKFZp434B1231 |
| cg17987231 | 0.03271 | 0.03807 | 0.0445  | 0.03347 | 0.03076 | 0.03325 | 0.03276 | 0.03182 | 0.03132 | 0.03453 COQ10B        |
| cg17987660 | 0.18743 | 0.12834 | 0.09478 | 0.10314 | 0.03731 | 0.04738 | 0.09558 | 0.10872 | 0.09201 | 0.0732 C8orf37        |
| cg17989037 | 0.04843 | 0.05213 | 0.07563 | 0.06708 | 0.08152 | 0.06337 | 0.04252 | 0.04729 | 0.05128 | 0.06304 PRR11         |
| cg17989572 | 0.03014 | 0.03212 | 0.03365 | 0.03885 | 0.03125 | 0.03337 | 0.0315  | 0.02794 | 0.02576 | 0.02831 RAB5C         |
| cg17990871 | 0.03276 | 0.03233 | 0.03624 | 0.03156 | 0.03615 | 0.0416  | 0.02515 | 0.02946 | 0.03219 | 0.02906 SLC35E2       |
| cg17991347 | 0.31366 | 0.1993  | 0.14278 | 0.11568 | 0.11269 | 0.10201 | 0.3783  | 0.42736 | 0.27974 | 0.23108 MAGED1        |
| cg17992056 | 0.82882 | 0.14188 | 0.38825 | 0.4282  | 0.4416  | 0.11718 | 0.06622 | 0.04064 | 0.04244 | 0.04152 ICMT          |
| cg17993772 | 0.03917 | 0.04378 | 0.04327 | 0.03862 | 0.02935 | 0.04051 | 0.0382  | 0.03802 | 0.03456 | 0.03845 COPA          |
| cg17993949 | 0.80441 | 0.69652 | 0.83708 | 0.85299 | 0.89139 | 0.88896 | 0.46145 | 0.14693 | 0.86801 | 0.79214 SLC22A12      |
| cg17994910 | 0.54993 | 0.47844 | 0.42316 | 0.40872 | 0.43013 | 0.55787 | 0.33712 | 0.36185 | 0.5227  | 0.48086 FLJ20972      |
| cg17995823 | 0.10075 | 0.10622 | 0.14391 | 0.11413 | 0.14124 | 0.13932 | 0.13037 | 0.11065 | 0.09602 | 0.09511 CTNND1        |
| cg17997329 | 0.06019 | 0.06073 | 0.05405 | 0.05441 | 0.03706 | 0.05279 | 0.0547  | 0.05796 | 0.04768 | 0.04952 MGC11332      |
| cg17998964 | 0.9051  | 0.54771 | 0.87132 | 0.92605 | 0.93094 | 0.87712 | 0.59468 | 0.79083 | 0.61483 | 0.37963 MARK2         |
| cg18001427 | 0.04641 | 0.04376 | 0.05554 | 0.05095 | 0.03788 | 0.04415 | 0.05321 | 0.04058 | 0.03995 | 0.04156 C21orf6       |
| cg18003135 | 0.66592 | 0.68462 | 0.51879 | 0.63782 | 0.57559 | 0.6786  | 0.32176 | 0.55556 | 0.19762 | 0.21829 EDNRB         |
| cg18003231 | 0.88444 | 0.8907  | 0.87145 | 0.90115 | 0.88162 | 0.89027 | 0.86508 | 0.88327 | 0.88949 | 0.89144 SLC25A18      |
| cg18003698 | 0.8571  | 0.86267 | 0.83501 | 0.86458 | 0.78647 | 0.80359 | 0.83739 | 0.8428  | 0.77507 | 0.60495 GNRHR         |
| cg18003791 | 0.14412 | 0.08768 | 0.19753 | 0.17975 | 0.31512 | 0.15022 | 0.38594 | 0.51929 | 0.63733 | 0.81463 GABRA3        |
| cg18003795 | 0.88434 | 0.58302 | 0.86311 | 0.90509 | 0.90321 | 0.87424 | 0.07118 | 0.07287 | 0.86882 | 0.77065 CECR1         |
| cg18006085 | 0.02423 | 0.02762 | 0.03455 | 0.02598 | 0.02792 | 0.03336 | 0.03116 | 0.02947 | 0.02604 | 0.03003 LRRC59        |
| cg18006568 | 0.89747 | 0.89598 | 0.28178 | 0.17022 | 0.86795 | 0.90523 | 0.7442  | 0.89464 | 0.55035 | 0.5478 FLJ12056       |
| cg18008766 | 0.36125 | 0.05812 | 0.15421 | 0.23735 | 0.06458 | 0.04691 | 0.10903 | 0.05017 | 0.56278 | 0.26661 SFRS7         |
| cg18009798 | 0.04854 | 0.04007 | 0.0484  | 0.05386 | 0.05762 | 0.05064 | 0.04876 | 0.04783 | 0.03279 | 0.03722 FEN1          |
| cg18011401 | 0.10662 | 0.10072 | 0.18291 | 0.13435 | 0.12515 | 0.06168 | 0.09446 | 0.08345 | 0.07842 | 0.06154 CACNA1A       |
| cg18013830 | 0.0383  | 0.03709 | 0.04087 | 0.0353  | 0.04298 | 0.04685 | 0.04694 | 0.03859 | 0.04778 | 0.05471 RPUSD2        |
| cg18014844 | 0.03414 | 0.03053 | 0.03025 | 0.03477 | 0.02244 | 0.02677 | 0.02511 | 0.0272  | 0.02798 | 0.02462 PARS2         |
| cg18015044 | 0.07914 | 0.08071 | 0.0866  | 0.10125 | 0.10842 | 0.09386 | 0.0558  | 0.05999 | 0.05517 | 0.05692 ABCF1         |
| cg18015677 | 0.04103 | 0.03572 | 0.06578 | 0.04795 | 0.05118 | 0.05428 | 0.03434 | 0.03496 | 0.03232 | 0.03104 FLJ12571      |
| cg18016365 | 0.15122 | 0.05367 | 0.83189 | 0.90032 | 0.32687 | 0.46264 | 0.08261 | 0.22948 | 0.51858 | 0.49688 GABRB1        |
| cg18017908 | 0.23358 | 0.07351 | 0.36354 | 0.37244 | 0.73406 | 0.71436 | 0.49446 | 0.18599 | 0.35486 | 0.2187 C17orf76       |
| cg18020749 | 0.64678 | 0.47629 | 0.92106 | 0.94879 | 0.9339  | 0.9017  | 0.77114 | 0.72102 | 0.86493 | 0.57779 LRRC37A       |
| cg18022193 | 0.03694 | 0.03422 | 0.02986 | 0.05106 | 0.03297 | 0.03505 | 0.02757 | 0.0257  | 0.02704 | 0.02685 C19orf22      |
| cg18022322 | 0.0318  | 0.03419 | 0.03644 | 0.03272 | 0.02519 | 0.03186 | 0.02731 | 0.02674 | 0.02583 | 0.02493 PCNX          |
| cg18022344 | 0.83737 | 0.77827 | 0.82625 | 0.81252 | 0.83162 | 0.82533 | 0.79903 | 0.80041 | 0.83477 | 0.80081 IGSF6         |



|            |         |         |         |         |         |         |         |         |         |         |          |
|------------|---------|---------|---------|---------|---------|---------|---------|---------|---------|---------|----------|
| cg18022496 | 0.13049 | 0.14021 | 0.14195 | 0.12784 | 0.09951 | 0.11402 | 0.1444  | 0.12813 | 0.11246 | 0.12426 | SENP5    |
| cg18022926 | 0.05964 | 0.04738 | 0.0668  | 0.05236 | 0.06989 | 0.059   | 0.05607 | 0.05094 | 0.04848 | 0.04273 | MAWBP    |
| cg18023080 | 0.41953 | 0.33786 | 0.41265 | 0.39294 | 0.62494 | 0.31443 | 0.52907 | 0.41359 | 0.47415 | 0.46939 | MASP2    |
| cg18023724 | 0.91304 | 0.91939 | 0.90707 | 0.91396 | 0.88235 | 0.75155 | 0.92324 | 0.91637 | 0.32913 | 0.37442 | LOC92345 |
| cg18027946 | 0.04518 | 0.0545  | 0.04795 | 0.04796 | 0.03539 | 0.04012 | 0.0366  | 0.04151 | 0.04284 | 0.0364  | C21orf2  |
| cg18031008 | 0.05222 | 0.04593 | 0.0415  | 0.03747 | 0.06414 | 0.05539 | 0.04205 | 0.0383  | 0.05295 | 0.05725 | MRPS21   |
| cg18034329 | 0.04448 | 0.05417 | 0.04856 | 0.05299 | 0.04302 | 0.04835 | 0.04869 | 0.04546 | 0.05632 | 0.05267 | RABEP1   |
| cg18034859 | 0.88212 | 0.76135 | 0.90891 | 0.9144  | 0.94271 | 0.91243 | 0.90925 | 0.90648 | 0.89717 | 0.8387  | MYLK2    |
| cg18036707 | 0.0491  | 0.03987 | 0.06086 | 0.04937 | 0.04964 | 0.03851 | 0.07225 | 0.05322 | 0.03991 | 0.03482 | TBCE     |
| cg18042079 | 0.09585 | 0.05471 | 0.05636 | 0.06463 | 0.03278 | 0.05016 | 0.04554 | 0.03864 | 0.03857 | 0.04728 | C17orf40 |
| cg18042806 | 0.33692 | 0.20699 | 0.72625 | 0.61685 | 0.46004 | 0.23607 | 0.48388 | 0.11051 | 0.87403 | 0.06147 | MGC15875 |
| cg18043104 | 0.04649 | 0.03962 | 0.05711 | 0.05037 | 0.05227 | 0.04596 | 0.0357  | 0.03648 | 0.0314  | 0.03864 | TMEM50B  |
| cg18043195 | 0.71196 | 0.7834  | 0.83394 | 0.89784 | 0.91358 | 0.9336  | 0.83253 | 0.90565 | 0.70722 | 0.61916 | C9orf138 |
| cg18043280 | 0.93673 | 0.92903 | 0.93093 | 0.93246 | 0.95663 | 0.94049 | 0.93387 | 0.92527 | 0.94853 | 0.93053 | AOC2     |
| cg18043455 | 0.06373 | 0.07372 | 0.06884 | 0.08137 | 0.06561 | 0.05394 | 0.05471 | 0.04846 | 0.0615  | 0.0577  | SEC61A1  |
| cg18043828 | 0.10268 | 0.09627 | 0.07293 | 0.05758 | 0.0258  | 0.04131 | 0.07467 | 0.06515 | 0.04718 | 0.04411 | C9orf150 |
| cg18044482 | 0.03594 | 0.04115 | 0.05494 | 0.04985 | 0.04944 | 0.04801 | 0.43032 | 0.3957  | 0.03756 | 0.03555 | PSMD10   |
| cg18047509 | 0.03823 | 0.03468 | 0.0404  | 0.0335  | 0.04233 | 0.03074 | 0.03186 | 0.02776 | 0.03061 | 0.03057 | CEP70    |
| cg18047970 | 0.82523 | 0.85    | 0.82547 | 0.8533  | 0.78114 | 0.79179 | 0.82708 | 0.85323 | 0.53257 | 0.53427 | GADL1    |
| cg18049750 | 0.0619  | 0.0542  | 0.06848 | 0.05925 | 0.04553 | 0.05141 | 0.49666 | 0.47073 | 0.04737 | 0.04145 | SCML1    |
| cg18050213 | 0.0268  | 0.02559 | 0.02943 | 0.02448 | 0.02478 | 0.02951 | 0.02502 | 0.02452 | 0.02592 | 0.02396 | FAM14A   |
| cg18053505 | 0.11307 | 0.11335 | 0.13873 | 0.11251 | 0.20104 | 0.13856 | 0.08055 | 0.06956 | 0.10104 | 0.12952 | PCAF     |
| cg18053607 | 0.05898 | 0.05761 | 0.05783 | 0.05421 | 0.06538 | 0.05615 | 0.06163 | 0.05154 | 0.04958 | 0.05005 | PIB5PA   |
| cg18055007 | 0.08452 | 0.06172 | 0.09614 | 0.08763 | 0.14275 | 0.10151 | 0.10869 | 0.07408 | 0.03892 | 0.0481  | DDAH2    |
| cg18055394 | 0.27192 | 0.11437 | 0.25893 | 0.14602 | 0.14601 | 0.08828 | 0.23822 | 0.14986 | 0.11158 | 0.52268 | EPHA3    |
| cg18056600 | 0.45801 | 0.34706 | 0.79508 | 0.86756 | 0.96173 | 0.94403 | 0.75103 | 0.47648 | 0.76588 | 0.79865 | ZMYND15  |
| cg18058833 | 0.08744 | 0.07242 | 0.06616 | 0.06332 | 0.05464 | 0.06118 | 0.09636 | 0.06812 | 0.06275 | 0.05812 | FAM86A   |
| cg18058949 | 0.41603 | 0.08346 | 0.09192 | 0.11344 | 0.06545 | 0.04695 | 0.10477 | 0.0737  | 0.03895 | 0.04017 | NUP133   |
| cg18059088 | 0.05696 | 0.04717 | 0.83406 | 0.8346  | 0.28936 | 0.04189 | 0.34442 | 0.64679 | 0.57446 | 0.65729 | HS3ST1   |
| cg18059223 | 0.7968  | 0.68922 | 0.76834 | 0.79122 | 0.75699 | 0.80144 | 0.30962 | 0.59342 | 0.57032 | 0.6671  | NALP2    |
| cg18059933 | 0.91525 | 0.68455 | 0.7686  | 0.91007 | 0.92629 | 0.6239  | 0.11089 | 0.03349 | 0.85804 | 0.68746 | TP53INP1 |
| cg18060199 | 0.60738 | 0.08278 | 0.04173 | 0.04521 | 0.03188 | 0.03882 | 0.03331 | 0.03566 | 0.03328 | 0.02909 | BCAR3    |
| cg18061485 | 0.05015 | 0.0408  | 0.04571 | 0.04403 | 0.03869 | 0.04234 | 0.03766 | 0.03913 | 0.03425 | 0.03445 | GPX4     |
| cg18062196 | 0.34283 | 0.36609 | 0.87488 | 0.89896 | 0.8664  | 0.88443 | 0.91592 | 0.92473 | 0.6074  | 0.89559 | DHX40    |
| cg18063149 | 0.82261 | 0.59562 | 0.78214 | 0.8467  | 0.82083 | 0.8508  | 0.51268 | 0.25258 | 0.7804  | 0.62078 | FMO3     |
| cg18064655 | 0.06463 | 0.0603  | 0.06707 | 0.06082 | 0.04988 | 0.05363 | 0.04757 | 0.05572 | 0.05568 | 0.0317  | EEF2     |
| cg18070061 | 0.02393 | 0.02069 | 0.02377 | 0.02491 | 0.10701 | 0.02156 | 0.0831  | 0.02191 | 0.01898 | 0.0201  | DUSP4    |
| cg18071006 | 0.03937 | 0.03438 | 0.03672 | 0.03666 | 0.02879 | 0.02991 | 0.02986 | 0.0276  | 0.03834 | 0.02568 | ULBP3    |
| cg18071588 | 0.02527 | 0.02676 | 0.02593 | 0.02118 | 0.02463 | 0.02252 | 0.02168 | 0.02498 | 0.01808 | 0.01869 | DIDO1    |
| cg18074297 | 0.64065 | 0.49538 | 0.92821 | 0.93998 | 0.62893 | 0.31906 | 0.51307 | 0.61483 | 0.68253 | 0.61662 | CLIC6    |
| cg18075299 | 0.8579  | 0.82809 | 0.85685 | 0.88794 | 0.78141 | 0.82244 | 0.84805 | 0.86468 | 0.86892 | 0.83849 | C14orf54 |

|            |         |         |         |         |         |         |         |         |         |                  |
|------------|---------|---------|---------|---------|---------|---------|---------|---------|---------|------------------|
| cg18075454 | 0.05279 | 0.05901 | 0.06598 | 0.06086 | 0.06897 | 0.06296 | 0.051   | 0.04843 | 0.05538 | 0.04849 MTRF1L   |
| cg18079631 | 0.04662 | 0.04336 | 0.05221 | 0.05587 | 0.07395 | 0.06361 | 0.03785 | 0.03914 | 0.04248 | 0.04821 HNRPC    |
| cg18081104 | 0.35171 | 0.06079 | 0.38571 | 0.47842 | 0.82592 | 0.6826  | 0.06388 | 0.04644 | 0.42128 | 0.05253 THEM5    |
| cg18081258 | 0.79267 | 0.81295 | 0.88366 | 0.8819  | 0.90072 | 0.86786 | 0.40978 | 0.31141 | 0.36082 | 0.67065 NDRG2    |
| cg18081313 | 0.84511 | 0.86889 | 0.88106 | 0.89879 | 0.89824 | 0.89485 | 0.88548 | 0.66609 | 0.89156 | 0.85702 ULK1     |
| cg18081750 | 0.03507 | 0.03323 | 0.04296 | 0.0417  | 0.04248 | 0.04489 | 0.03789 | 0.03505 | 0.03402 | 0.03664 DUSP6    |
| cg18081881 | 0.02827 | 0.02545 | 0.02624 | 0.02303 | 0.02474 | 0.02829 | 0.02241 | 0.02349 | 0.02019 | 0.01776 PGM2     |
| cg18084114 | 0.50896 | 0.27241 | 0.73582 | 0.82723 | 0.83469 | 0.83462 | 0.83616 | 0.42126 | 0.83832 | 0.75616 MATN1    |
| cg18084554 | 0.83668 | 0.4142  | 0.93328 | 0.90953 | 0.95349 | 0.67261 | 0.91317 | 0.82885 | 0.90743 | 0.77891 ARID3A   |
| cg18084791 | 0.84761 | 0.7236  | 0.83849 | 0.86335 | 0.83139 | 0.89285 | 0.82326 | 0.86698 | 0.87804 | 0.82405 SLAMF8   |
| cg18084798 | 0.03041 | 0.02859 | 0.03775 | 0.03485 | 0.03763 | 0.03133 | 0.03501 | 0.02712 | 0.02683 | 0.01854 RHPN2    |
| cg18085206 | 0.02117 | 0.0211  | 0.02167 | 0.01932 | 0.0185  | 0.02023 | 0.01648 | 0.01876 | 0.01714 | 0.01567 CRK      |
| cg18085435 | 0.64315 | 0.53378 | 0.79487 | 0.82918 | 0.57038 | 0.43364 | 0.67932 | 0.17454 | 0.56574 | 0.44014 ATP8B1   |
| cg18085517 | 0.43139 | 0.15131 | 0.82692 | 0.82398 | 0.88741 | 0.193   | 0.43295 | 0.07242 | 0.2288  | 0.10259 TRPM1    |
| cg18087477 | 0.82158 | 0.88667 | 0.91474 | 0.91154 | 0.59296 | 0.57465 | 0.92561 | 0.91119 | 0.35587 | 0.44061 SYCP1    |
| cg18087514 | 0.19046 | 0.32557 | 0.61596 | 0.7013  | 0.50475 | 0.60628 | 0.46007 | 0.24189 | 0.47769 | 0.40019 KMO      |
| cg18088324 | 0.0268  | 0.02922 | 0.02514 | 0.02486 | 0.02162 | 0.02567 | 0.02156 | 0.02218 | 0.02126 | 0.02 SET         |
| cg18088775 | 0.04804 | 0.05118 | 0.04868 | 0.04902 | 0.03489 | 0.04891 | 0.03896 | 0.04226 | 0.04325 | 0.04451 RKHD2    |
| cg18089000 | 0.65389 | 0.57608 | 0.85087 | 0.84628 | 0.73638 | 0.45614 | 0.81736 | 0.46589 | 0.86376 | 0.81209 GBGT1    |
| cg18089145 | 0.05049 | 0.05432 | 0.04963 | 0.05228 | 0.03697 | 0.0493  | 0.05057 | 0.04649 | 0.04619 | 0.05162 SEC23A   |
| cg18089852 | 0.02519 | 0.03138 | 0.06162 | 0.07775 | 0.40199 | 0.5356  | 0.02934 | 0.02405 | 0.41041 | 0.37631 PDE8B    |
| cg18090228 | 0.07103 | 0.06937 | 0.09492 | 0.06887 | 0.08628 | 0.0616  | 0.05824 | 0.04891 | 0.06579 | 0.04976 MAK10    |
| cg18091964 | 0.92312 | 0.76712 | 0.89255 | 0.91085 | 0.89054 | 0.90981 | 0.54106 | 0.64906 | 0.71974 | 0.62877 CXorf9   |
| cg18094221 | 0.14473 | 0.10998 | 0.17    | 0.18504 | 0.26943 | 0.14644 | 0.1084  | 0.08565 | 0.11322 | 0.11864 TCTA     |
| cg18096388 | 0.78182 | 0.25712 | 0.63243 | 0.76784 | 0.82296 | 0.52632 | 0.6016  | 0.08628 | 0.38147 | 0.2598 PDCD1     |
| cg18098286 | 0.80737 | 0.72892 | 0.52523 | 0.81549 | 0.69925 | 0.86864 | 0.1241  | 0.13689 | 0.75704 | 0.85704 UGT1A10  |
| cg18099844 | 0.84429 | 0.79314 | 0.83891 | 0.86762 | 0.72901 | 0.81728 | 0.76817 | 0.78719 | 0.78254 | 0.79512 C15orf24 |
| cg18103150 | 0.94929 | 0.91251 | 0.93614 | 0.92396 | 0.93034 | 0.92104 | 0.93295 | 0.92916 | 0.95034 | 0.92875 C11orf47 |
| cg18104321 | 0.03737 | 0.03677 | 0.03387 | 0.03298 | 0.02858 | 0.03041 | 0.03311 | 0.03543 | 0.02869 | 0.03004 MYST2    |
| cg18105315 | 0.08913 | 0.12574 | 0.03848 | 0.03931 | 0.73892 | 0.4029  | 0.05386 | 0.06965 | 0.16087 | 0.03868 MANEAL   |
| cg18105675 | 0.55588 | 0.20644 | 0.62371 | 0.7496  | 0.94573 | 0.92492 | 0.89095 | 0.90166 | 0.18524 | 0.03056 COLEC11  |
| cg18106189 | 0.01953 | 0.02509 | 0.07932 | 0.18413 | 0.13762 | 0.02604 | 0.02393 | 0.02424 | 0.36911 | 0.3462 C18orf1   |
| cg18107072 | 0.06017 | 0.05633 | 0.59372 | 0.71995 | 0.92175 | 0.89032 | 0.26838 | 0.09453 | 0.80191 | 0.50002 CGI-38   |
| cg18107827 | 0.56106 | 0.15335 | 0.56323 | 0.73995 | 0.75721 | 0.28954 | 0.22249 | 0.14746 | 0.18218 | 0.28958 ZNF593   |
| cg18108237 | 0.02591 | 0.02398 | 0.02812 | 0.02509 | 0.02279 | 0.02623 | 0.02392 | 0.02332 | 0.02143 | 0.0219 BRAP      |
| cg18108623 | 0.0496  | 0.04639 | 0.07971 | 0.05717 | 0.04683 | 0.04073 | 0.05002 | 0.06043 | 0.05145 | 0.04195 FLJ34922 |
| cg18109231 | 0.06313 | 0.05726 | 0.04761 | 0.05122 | 0.04369 | 0.04973 | 0.0483  | 0.04174 | 0.03597 | 0.04229 RFX2     |
| cg18109798 | 0.76408 | 0.61862 | 0.38714 | 0.53128 | 0.40563 | 0.16589 | 0.13473 | 0.45207 | 0.08971 | 0.08445 SLCO1C1  |
| cg18110483 | 0.19167 | 0.04604 | 0.68736 | 0.77688 | 0.79219 | 0.84368 | 0.19571 | 0.17713 | 0.49356 | 0.63744 THBS4    |
| cg18110535 | 0.14719 | 0.06426 | 0.05383 | 0.05753 | 0.06818 | 0.05464 | 0.05681 | 0.06404 | 0.04553 | 0.04714 LPIN2    |
| cg18112005 | 0.04096 | 0.03867 | 0.04075 | 0.0352  | 0.04437 | 0.04676 | 0.03528 | 0.03822 | 0.03153 | 0.03867 C14orf80 |

|            |         |         |         |         |         |         |         |         |         |         |           |
|------------|---------|---------|---------|---------|---------|---------|---------|---------|---------|---------|-----------|
| cg18112163 | 0.04171 | 0.03954 | 0.0397  | 0.04096 | 0.04105 | 0.04281 | 0.04278 | 0.04327 | 0.03526 | 0.03032 | STAT3     |
| cg18112431 | 0.18959 | 0.31207 | 0.11376 | 0.0649  | 0.03549 | 0.04949 | 0.05034 | 0.04602 | 0.03773 | 0.03373 | CDADC1    |
| cg18113270 | 0.87893 | 0.88277 | 0.88004 | 0.89838 | 0.86494 | 0.87369 | 0.80433 | 0.87134 | 0.88124 | 0.87506 | MMP3      |
| cg18113787 | 0.02958 | 0.03078 | 0.03621 | 0.03533 | 0.03777 | 0.03371 | 0.03161 | 0.0293  | 0.02568 | 0.02163 | CRSP6     |
| cg18114671 | 0.08924 | 0.1014  | 0.21362 | 0.27578 | 0.24403 | 0.11597 | 0.10743 | 0.10657 | 0.12332 | 0.11751 | NOL4      |
| cg18116253 | 0.09853 | 0.04887 | 0.05457 | 0.07518 | 0.07904 | 0.04858 | 0.04411 | 0.04409 | 0.03826 | 0.03977 | UBE2N     |
| cg18117393 | 0.76004 | 0.69223 | 0.68964 | 0.71861 | 0.65164 | 0.66758 | 0.66471 | 0.81359 | 0.74924 | 0.69733 | NPL       |
| cg18117847 | 0.81166 | 0.48624 | 0.46812 | 0.61432 | 0.662   | 0.87653 | 0.22113 | 0.48123 | 0.27344 | 0.12134 | ZNFN1A1   |
| cg18118795 | 0.56281 | 0.23767 | 0.41421 | 0.43384 | 0.60377 | 0.28836 | 0.6092  | 0.61142 | 0.71637 | 0.67619 | RBBP4     |
| cg18119407 | 0.89228 | 0.8879  | 0.75347 | 0.859   | 0.92317 | 0.86967 | 0.36174 | 0.55727 | 0.2762  | 0.09627 | CFLAR     |
| cg18119529 | 0.05668 | 0.05384 | 0.51719 | 0.53849 | 0.22294 | 0.08908 | 0.11622 | 0.05243 | 0.57183 | 0.40382 | ZNF114    |
| cg18119609 | 0.0384  | 0.03816 | 0.0533  | 0.04943 | 0.03435 | 0.03953 | 0.04367 | 0.03026 | 0.03707 | 0.03621 | MDM4      |
| cg18121684 | 0.87558 | 0.83821 | 0.78409 | 0.82821 | 0.74796 | 0.78787 | 0.11887 | 0.11294 | 0.37915 | 0.13208 | SERPINB13 |
| cg18123596 | 0.02726 | 0.03456 | 0.03428 | 0.03403 | 0.02968 | 0.03009 | 0.03317 | 0.03399 | 0.02661 | 0.03073 | PIP5K2B   |
| cg18123677 | 0.32205 | 0.17333 | 0.19657 | 0.19675 | 0.20269 | 0.12172 | 0.14995 | 0.13517 | 0.42785 | 0.36608 | SERPINI1  |
| cg18123948 | 0.17035 | 0.05817 | 0.84873 | 0.88617 | 0.5696  | 0.79228 | 0.2136  | 0.04623 | 0.05279 | 0.05813 | GATA4     |
| cg18124330 | 0.0407  | 0.03878 | 0.04443 | 0.03447 | 0.03339 | 0.03103 | 0.03911 | 0.03427 | 0.04482 | 0.03027 | C12orf5   |
| cg18124706 | 0.69751 | 0.40585 | 0.3335  | 0.30109 | 0.5905  | 0.53046 | 0.22166 | 0.28301 | 0.72096 | 0.28952 | ATG4A     |
| cg18125479 | 0.03213 | 0.02911 | 0.03489 | 0.03248 | 0.04422 | 0.02802 | 0.02666 | 0.02832 | 0.02634 | 0.02453 | PYGL      |
| cg18127191 | 0.03124 | 0.03318 | 0.04171 | 0.03195 | 0.03174 | 0.03466 | 0.02483 | 0.02286 | 0.03059 | 0.03045 | CDC7      |
| cg18127732 | 0.09628 | 0.10004 | 0.15261 | 0.13762 | 0.2279  | 0.1327  | 0.11963 | 0.09118 | 0.12066 | 0.12411 | USPL1     |
| cg18128666 | 0.85671 | 0.81221 | 0.81752 | 0.85829 | 0.73746 | 0.86712 | 0.81026 | 0.85716 | 0.85468 | 0.85373 | NCOA1     |
| cg18129786 | 0.89623 | 0.71324 | 0.8899  | 0.90821 | 0.87626 | 0.88357 | 0.90877 | 0.91522 | 0.91338 | 0.85235 | ZNF445    |
| cg18130069 | 0.87225 | 0.89969 | 0.88266 | 0.87972 | 0.85265 | 0.87791 | 0.86952 | 0.87506 | 0.89013 | 0.90711 | RGS12     |
| cg18130076 | 0.02986 | 0.02982 | 0.02933 | 0.02912 | 0.02399 | 0.02364 | 0.02406 | 0.02815 | 0.02577 | 0.02319 | RBM14     |
| cg18130100 | 0.03081 | 0.03266 | 0.03534 | 0.05789 | 0.02572 | 0.02783 | 0.02842 | 0.02915 | 0.02652 | 0.02377 | PKD1      |
| cg18133957 | 0.17013 | 0.05331 | 0.78812 | 0.94915 | 0.95709 | 0.96074 | 0.07266 | 0.18215 | 0.96927 | 0.9205  | APC2      |
| cg18133966 | 0.20953 | 0.05281 | 0.34396 | 0.51653 | 0.08073 | 0.08946 | 0.11268 | 0.05529 | 0.20469 | 0.07585 | PLA2G1B   |
| cg18135555 | 0.94662 | 0.86239 | 0.95443 | 0.9588  | 0.97166 | 0.95681 | 0.94083 | 0.91495 | 0.95802 | 0.9331  | PIWIL2    |
| cg18137704 | 0.38499 | 0.07809 | 0.58283 | 0.47039 | 0.847   | 0.7271  | 0.09693 | 0.06554 | 0.28004 | 0.11475 | CECR6     |
| cg18138484 | 0.70885 | 0.07    | 0.85215 | 0.89317 | 0.84029 | 0.63996 | 0.5819  | 0.3196  | 0.87779 | 0.83566 | CABP2     |
| cg18138500 | 0.42431 | 0.35416 | 0.53164 | 0.56471 | 0.53687 | 0.52851 | 0.13152 | 0.12522 | 0.50645 | 0.50998 | GNG7      |
| cg18138552 | 0.08747 | 0.06785 | 0.07416 | 0.0834  | 0.08038 | 0.0729  | 0.07393 | 0.07708 | 0.05304 | 0.05565 | PSMD8     |
| cg18139769 | 0.49999 | 0.42472 | 0.47018 | 0.50982 | 0.94808 | 0.92868 | 0.57768 | 0.58238 | 0.56058 | 0.59379 | SGCE      |
| cg18139900 | 0.07015 | 0.06258 | 0.10381 | 0.08182 | 0.2595  | 0.40582 | 0.07827 | 0.08083 | 0.07131 | 0.07531 | ZNF140    |
| cg18140857 | 0.94034 | 0.4001  | 0.91549 | 0.93326 | 0.97589 | 0.96835 | 0.49712 | 0.34144 | 0.9545  | 0.88626 | RDHE2     |
| cg18142353 | 0.09091 | 0.09171 | 0.09405 | 0.1052  | 0.08362 | 0.08341 | 0.08671 | 0.08585 | 0.08383 | 0.07812 | LRP6      |
| cg18145505 | 0.10097 | 0.06026 | 0.52722 | 0.69436 | 0.88023 | 0.77623 | 0.74764 | 0.64134 | 0.9179  | 0.88095 | GREM1     |
| cg18145683 | 0.81023 | 0.77871 | 0.79842 | 0.81239 | 0.83514 | 0.77394 | 0.72733 | 0.73766 | 0.80283 | 0.77048 | JAK3      |
| cg18146152 | 0.80554 | 0.728   | 0.76587 | 0.79606 | 0.72945 | 0.58972 | 0.48585 | 0.71785 | 0.86073 | 0.84188 | GNPTG     |
| cg18149207 | 0.74568 | 0.3415  | 0.90262 | 0.92769 | 0.95132 | 0.90384 | 0.75904 | 0.52381 | 0.65025 | 0.56582 | RORC      |

|            |         |         |         |         |         |         |         |         |         |         |           |
|------------|---------|---------|---------|---------|---------|---------|---------|---------|---------|---------|-----------|
| cg18149919 | 0.8933  | 0.63376 | 0.91335 | 0.92382 | 0.86639 | 0.6456  | 0.75313 | 0.71177 | 0.53872 | 0.26299 | SIAHBP1   |
| cg18150721 | 0.03234 | 0.03135 | 0.04384 | 0.0579  | 0.04258 | 0.03049 | 0.06893 | 0.2399  | 0.03135 | 0.02631 | EPHB1     |
| cg18151487 | 0.41269 | 0.08097 | 0.53525 | 0.52368 | 0.11967 | 0.23844 | 0.34841 | 0.0875  | 0.44459 | 0.16043 | ARL3      |
| cg18152311 | 0.06218 | 0.05431 | 0.08609 | 0.07783 | 0.0668  | 0.05192 | 0.05563 | 0.04876 | 0.0653  | 0.06988 | FAM49B    |
| cg18152517 | 0.70571 | 0.21208 | 0.53065 | 0.71267 | 0.86365 | 0.8806  | 0.31124 | 0.10497 | 0.67337 | 0.52081 | LOC346673 |
| cg18152712 | 0.05389 | 0.05295 | 0.07623 | 0.06797 | 0.11383 | 0.09691 | 0.04513 | 0.04271 | 0.04476 | 0.04001 | E2F3      |
| cg18152830 | 0.85261 | 0.75666 | 0.90855 | 0.92743 | 0.90691 | 0.88773 | 0.84652 | 0.86128 | 0.90161 | 0.67416 | TNFRSF13B |
| cg18153060 | 0.76929 | 0.49256 | 0.6556  | 0.72668 | 0.45194 | 0.58858 | 0.30045 | 0.0922  | 0.15739 | 0.0829  | KRTHB4    |
| cg18153124 | 0.04122 | 0.04603 | 0.42516 | 0.44437 | 0.06329 | 0.0317  | 0.04288 | 0.03808 | 0.07787 | 0.04453 | KCNQ3     |
| cg18156583 | 0.23444 | 0.27433 | 0.45386 | 0.4299  | 0.35757 | 0.25486 | 0.223   | 0.20907 | 0.23837 | 0.30148 | IL18RAP   |
| cg18159180 | 0.83557 | 0.68156 | 0.76843 | 0.83371 | 0.48747 | 0.21408 | 0.24502 | 0.13239 | 0.21598 | 0.14754 | CUL7      |
| cg18160978 | 0.04949 | 0.0495  | 0.05417 | 0.05391 | 0.04003 | 0.04355 | 0.04877 | 0.0447  | 0.03695 | 0.04035 | ZNF668    |
| cg18164599 | 0.10588 | 0.10076 | 0.06747 | 0.06866 | 0.05792 | 0.06619 | 0.05172 | 0.05542 | 0.07616 | 0.06715 | HPGD      |
| cg18168989 | 0.8653  | 0.88796 | 0.87635 | 0.90626 | 0.82488 | 0.85209 | 0.8805  | 0.87108 | 0.92023 | 0.91    | C9orf41   |
| cg18170080 | 0.21751 | 0.43255 | 0.39691 | 0.37059 | 0.65386 | 0.76193 | 0.22492 | 0.12328 | 0.3819  | 0.11886 | ESAM      |
| cg18172186 | 0.85311 | 0.85577 | 0.85752 | 0.86804 | 0.85043 | 0.77556 | 0.63612 | 0.6485  | 0.76838 | 0.61122 | KIAA1913  |
| cg18173454 | 0.18202 | 0.07559 | 0.07075 | 0.06222 | 0.05211 | 0.06214 | 0.05584 | 0.05496 | 0.06257 | 0.05087 | NMT2      |
| cg18174542 | 0.69848 | 0.19444 | 0.07887 | 0.05696 | 0.83521 | 0.71933 | 0.05883 | 0.08748 | 0.78213 | 0.52711 | CSDC2     |
| cg18175410 | 0.02652 | 0.02955 | 0.02862 | 0.02688 | 0.02448 | 0.03149 | 0.02351 | 0.02508 | 0.02138 | 0.02345 | C18orf8   |
| cg18176712 | 0.8044  | 0.7876  | 0.75899 | 0.82628 | 0.83091 | 0.68043 | 0.56391 | 0.59417 | 0.42601 | 0.56856 | MYL5      |
| cg18176813 | 0.03223 | 0.0359  | 0.03802 | 0.03976 | 0.03601 | 0.04454 | 0.03544 | 0.03433 | 0.02547 | 0.02802 | PDAP1     |
| cg18177682 | 0.05874 | 0.05915 | 0.05764 | 0.05448 | 0.03947 | 0.05    | 0.05367 | 0.05301 | 0.04829 | 0.05145 | PEA15     |
| cg18178963 | 0.03548 | 0.03777 | 0.03749 | 0.03332 | 0.04641 | 0.04427 | 0.03139 | 0.0325  | 0.02614 | 0.02989 | NDUFB6    |
| cg18180155 | 0.785   | 0.13319 | 0.77144 | 0.80769 | 0.18286 | 0.25609 | 0.03555 | 0.03652 | 0.04691 | 0.03921 | RIBC2     |
| cg18180783 | 0.89713 | 0.88293 | 0.87089 | 0.88545 | 0.88413 | 0.87861 | 0.86518 | 0.30215 | 0.90121 | 0.8331  | MYOZ1     |
| cg18181070 | 0.04771 | 0.04692 | 0.05393 | 0.04999 | 0.03567 | 0.04767 | 0.03968 | 0.03848 | 0.04584 | 0.03259 | HTRA2     |
| cg18181161 | 0.90631 | 0.89497 | 0.89044 | 0.89694 | 0.87038 | 0.85272 | 0.88796 | 0.9016  | 0.9171  | 0.91899 | OPN1SW    |
| cg18182038 | 0.11671 | 0.10688 | 0.18803 | 0.14706 | 0.26113 | 0.16266 | 0.12571 | 0.1097  | 0.15252 | 0.16355 | BSDC1     |
| cg18182358 | 0.1219  | 0.13565 | 0.13996 | 0.1239  | 0.15793 | 0.11138 | 0.19977 | 0.19193 | 0.12308 | 0.10993 | ST3GAL6   |
| cg18182399 | 0.97237 | 0.97342 | 0.9763  | 0.97463 | 0.97804 | 0.97646 | 0.97636 | 0.97075 | 0.98109 | 0.98159 | DES       |
| cg18183281 | 0.6189  | 0.53488 | 0.62925 | 0.64347 | 0.9351  | 0.89814 | 0.91639 | 0.87956 | 0.92446 | 0.92298 | MEST      |
| cg18184219 | 0.76872 | 0.75017 | 0.71452 | 0.76558 | 0.69918 | 0.68203 | 0.59315 | 0.65215 | 0.78147 | 0.7839  | CEP170    |
| cg18187335 | 0.06473 | 0.06244 | 0.05794 | 0.06493 | 0.05485 | 0.0499  | 0.05553 | 0.05896 | 0.05583 | 0.04975 | CTTN      |
| cg18189063 | 0.02928 | 0.03338 | 0.03228 | 0.03175 | 0.03048 | 0.03322 | 0.02711 | 0.02528 | 0.02512 | 0.02607 | SPHK2     |
| cg18189601 | 0.11399 | 0.11494 | 0.09005 | 0.11409 | 0.0915  | 0.0717  | 0.13601 | 0.1491  | 0.08547 | 0.10965 | RING1     |
| cg18189938 | 0.02564 | 0.02557 | 0.02984 | 0.02787 | 0.02591 | 0.02561 | 0.01808 | 0.02264 | 0.02221 | 0.01913 | EPB41     |
| cg18190433 | 0.65373 | 0.3678  | 0.52679 | 0.47459 | 0.41553 | 0.25611 | 0.55982 | 0.48631 | 0.46642 | 0.54355 | MYH3      |
| cg18191162 | 0.27869 | 0.22174 | 0.05011 | 0.05303 | 0.04113 | 0.04962 | 0.04517 | 0.04671 | 0.27554 | 0.20017 | KIF6      |
| cg18192417 | 0.87435 | 0.70385 | 0.92861 | 0.92575 | 0.91761 | 0.92828 | 0.62185 | 0.6413  | 0.91796 | 0.91304 | NEBL      |
| cg18194038 | 0.06744 | 0.06765 | 0.06941 | 0.06834 | 0.09933 | 0.08213 | 0.07496 | 0.05861 | 0.05896 | 0.0534  | CIRBP     |
| cg18195628 | 0.08225 | 0.0709  | 0.11391 | 0.09278 | 0.14671 | 0.12121 | 0.11088 | 0.10081 | 0.08136 | 0.06804 | MRPL48    |

|            |         |         |         |         |         |         |         |         |         |         |            |
|------------|---------|---------|---------|---------|---------|---------|---------|---------|---------|---------|------------|
| cg18197795 | 0.04359 | 0.0341  | 0.03904 | 0.0356  | 0.02744 | 0.02981 | 0.03801 | 0.03324 | 0.03039 | 0.02298 | GADD45GIP1 |
| cg18197998 | 0.05788 | 0.06676 | 0.06488 | 0.05255 | 0.04918 | 0.06236 | 0.05974 | 0.05794 | 0.05031 | 0.05376 | CRAT       |
| cg18199266 | 0.73087 | 0.72708 | 0.65826 | 0.70492 | 0.70189 | 0.72823 | 0.3625  | 0.36744 | 0.7459  | 0.70313 | CLEC4F     |
| cg18201077 | 0.29352 | 0.11528 | 0.19837 | 0.226   | 0.19783 | 0.10109 | 0.10785 | 0.09281 | 0.09616 | 0.09115 | RSAD2      |
| cg18201198 | 0.5508  | 0.12424 | 0.33855 | 0.3687  | 0.67602 | 0.85552 | 0.12037 | 0.13981 | 0.38308 | 0.18112 | FLJ33708   |
| cg18202456 | 0.96447 | 0.94119 | 0.9752  | 0.97644 | 0.98387 | 0.98032 | 0.82074 | 0.6256  | 0.97477 | 0.96777 | KLF17      |
| cg18204052 | 0.02158 | 0.02251 | 0.0286  | 0.02686 | 0.02055 | 0.02338 | 0.02071 | 0.02177 | 0.01977 | 0.02068 | C12orf52   |
| cg18204685 | 0.37407 | 0.36857 | 0.54263 | 0.59989 | 0.512   | 0.43325 | 0.35401 | 0.53172 | 0.60364 | 0.48049 | BTD        |
| cg18205517 | 0.0509  | 0.03398 | 0.04124 | 0.04383 | 0.02668 | 0.03281 | 0.03498 | 0.04021 | 0.04826 | 0.02647 | PP2447     |
| cg18206040 | 0.05172 | 0.04831 | 0.05101 | 0.0434  | 0.03752 | 0.0354  | 0.04359 | 0.04044 | 0.0369  | 0.04059 | DNAJA2     |
| cg18208268 | 0.03971 | 0.03888 | 0.04162 | 0.04057 | 0.0327  | 0.04067 | 0.03977 | 0.03882 | 0.03408 | 0.03542 | RPL13A     |
| cg18211447 | 0.05756 | 0.0512  | 0.04777 | 0.04688 | 0.06739 | 0.06563 | 0.03794 | 0.05078 | 0.04607 | 0.05355 | RAGE       |
| cg18212039 | 0.94451 | 0.9145  | 0.94816 | 0.95541 | 0.9407  | 0.92149 | 0.83951 | 0.79947 | 0.96169 | 0.93113 | EXTL1      |
| cg18213440 | 0.03347 | 0.03791 | 0.03153 | 0.02935 | 0.02102 | 0.02227 | 0.04069 | 0.04057 | 0.029   | 0.03124 | TFG        |
| cg18215716 | 0.10075 | 0.09122 | 0.11163 | 0.11007 | 0.15231 | 0.13211 | 0.10446 | 0.08128 | 0.10376 | 0.08622 | TMEM111    |
| cg18216249 | 0.6374  | 0.33824 | 0.5276  | 0.55693 | 0.42948 | 0.24799 | 0.2428  | 0.25381 | 0.17078 | 0.13105 | FLJ21908   |
| cg18216709 | 0.03458 | 0.03733 | 0.03978 | 0.0409  | 0.03195 | 0.04914 | 0.038   | 0.03493 | 0.03325 | 0.03317 | RNF138     |
| cg18217172 | 0.02159 | 0.02299 | 0.02367 | 0.02177 | 0.01724 | 0.02159 | 0.01879 | 0.02042 | 0.01821 | 0.01809 | REPS1      |
| cg18219226 | 0.6445  | 0.40472 | 0.72531 | 0.82918 | 0.72163 | 0.11159 | 0.30107 | 0.13193 | 0.49849 | 0.28675 | GUSB       |
| cg18219418 | 0.88873 | 0.82652 | 0.91893 | 0.917   | 0.91008 | 0.86768 | 0.86872 | 0.8615  | 0.9192  | 0.86817 | PARP6      |
| cg18219951 | 0.09852 | 0.07285 | 0.13906 | 0.1203  | 0.15192 | 0.10504 | 0.10282 | 0.10413 | 0.08377 | 0.0761  | GABRG2     |
| cg18220284 | 0.0652  | 0.05875 | 0.0838  | 0.06704 | 0.06773 | 0.05825 | 0.10771 | 0.0894  | 0.32414 | 0.05052 | TAF5L      |
| cg18220560 | 0.1419  | 0.10849 | 0.12822 | 0.11467 | 0.18497 | 0.12903 | 0.12565 | 0.13293 | 0.34495 | 0.16727 | SMC6L1     |
| cg18221862 | 0.05521 | 0.05498 | 0.11614 | 0.22192 | 0.08755 | 0.05069 | 0.09394 | 0.04523 | 0.07085 | 0.0368  | TMEFF2     |
| cg18221897 | 0.26141 | 0.247   | 0.43033 | 0.53075 | 0.90082 | 0.78335 | 0.17977 | 0.17352 | 0.45669 | 0.48561 | KIR2DL1    |
| cg18222235 | 0.08965 | 0.07817 | 0.09533 | 0.07121 | 0.09199 | 0.08044 | 0.0842  | 0.08335 | 0.06968 | 0.07747 | FBXW8      |
| cg18223379 | 0.11557 | 0.06349 | 0.21773 | 0.27652 | 0.15633 | 0.07782 | 0.06838 | 0.08068 | 0.45017 | 0.21309 | BPIL3      |
| cg18224761 | 0.77752 | 0.5097  | 0.77056 | 0.79652 | 0.7839  | 0.60756 | 0.83327 | 0.65143 | 0.82335 | 0.69398 | C1orf33    |
| cg18226566 | 0.14262 | 0.12226 | 0.12944 | 0.11984 | 0.08499 | 0.06884 | 0.073   | 0.0767  | 0.07605 | 0.07444 | NEDD9      |
| cg18230216 | 0.24127 | 0.27066 | 0.8518  | 0.89683 | 0.77621 | 0.81471 | 0.50771 | 0.25496 | 0.86782 | 0.67699 | NYX        |
| cg18230771 | 0.04409 | 0.0457  | 0.40687 | 0.41246 | 0.26507 | 0.35265 | 0.04312 | 0.04406 | 0.03655 | 0.03298 | AGC1       |
| cg18231267 | 0.93691 | 0.82931 | 0.91317 | 0.92662 | 0.89402 | 0.90656 | 0.93017 | 0.92002 | 0.90982 | 0.88162 | RUNX3      |
| cg18233735 | 0.04144 | 0.04775 | 0.05797 | 0.04933 | 0.06611 | 0.03774 | 0.63051 | 0.5884  | 0.04781 | 0.03211 | PDZD4      |
| cg18234011 | 0.03412 | 0.03261 | 0.03309 | 0.03335 | 0.02428 | 0.02881 | 0.03033 | 0.03054 | 0.04667 | 0.02806 | IGF2BP2    |
| cg18235146 | 0.03866 | 0.03485 | 0.03538 | 0.03987 | 0.03201 | 0.04036 | 0.03703 | 0.0411  | 0.02871 | 0.02626 | MGC5509    |
| cg18236079 | 0.06861 | 0.19488 | 0.04638 | 0.04328 | 0.17094 | 0.05522 | 0.03726 | 0.04386 | 0.04324 | 0.04025 | HS3ST3A1   |
| cg18236297 | 0.21684 | 0.16718 | 0.58143 | 0.70824 | 0.40689 | 0.49969 | 0.52345 | 0.57692 | 0.50671 | 0.52901 | CYSLTR2    |
| cg18236477 | 0.10548 | 0.07349 | 0.52625 | 0.5652  | 0.78771 | 0.74432 | 0.84293 | 0.88591 | 0.54135 | 0.64903 | ATP8A2     |
| cg18236721 | 0.57974 | 0.47495 | 0.46042 | 0.62612 | 0.52755 | 0.57962 | 0.33534 | 0.28142 | 0.57868 | 0.26569 | C9orf26    |
| cg18236734 | 0.3478  | 0.08293 | 0.74535 | 0.76343 | 0.51403 | 0.70377 | 0.13584 | 0.09766 | 0.15661 | 0.08732 | HTR3E      |
| cg18237405 | 0.05329 | 0.04981 | 0.64218 | 0.7735  | 0.13353 | 0.20787 | 0.20194 | 0.2387  | 0.82869 | 0.73342 | CPNE5      |

|            |         |         |         |         |         |         |         |         |         |         |           |
|------------|---------|---------|---------|---------|---------|---------|---------|---------|---------|---------|-----------|
| cg18239253 | 0.87397 | 0.67468 | 0.8519  | 0.90623 | 0.88397 | 0.81027 | 0.06791 | 0.04781 | 0.47465 | 0.4561  | DEFB32    |
| cg18239702 | 0.03803 | 0.03946 | 0.11167 | 0.12258 | 0.05549 | 0.03262 | 0.38905 | 0.18741 | 0.12918 | 0.03303 | NHS       |
| cg18239753 | 0.0765  | 0.06233 | 0.82211 | 0.8908  | 0.2755  | 0.14318 | 0.09397 | 0.05501 | 0.38605 | 0.50959 | KHDRBS2   |
| cg18240496 | 0.03986 | 0.03758 | 0.043   | 0.04228 | 0.04035 | 0.03892 | 0.03518 | 0.03276 | 0.0288  | 0.02927 | SCAMP1    |
| cg18241160 | 0.03052 | 0.02593 | 0.06686 | 0.16336 | 0.08336 | 0.03529 | 0.07544 | 0.02409 | 0.02993 | 0.02993 | CDC2L2    |
| cg18241647 | 0.07825 | 0.05214 | 0.441   | 0.64588 | 0.85107 | 0.8863  | 0.35959 | 0.17526 | 0.06317 | 0.03479 | WFDC12    |
| cg18242139 | 0.86013 | 0.90428 | 0.86691 | 0.86645 | 0.87641 | 0.85757 | 0.56846 | 0.48695 | 0.39842 | 0.41501 | ELAVL4    |
| cg18242682 | 0.02016 | 0.01892 | 0.02002 | 0.0211  | 0.01484 | 0.01865 | 0.01681 | 0.01853 | 0.01776 | 0.01496 | FOXK2     |
| cg18244029 | 0.06924 | 0.05989 | 0.09247 | 0.07929 | 0.07514 | 0.06178 | 0.27842 | 0.21276 | 0.05554 | 0.04899 | ABCD1     |
| cg18244915 | 0.07027 | 0.06713 | 0.08153 | 0.07798 | 0.43448 | 0.40743 | 0.04793 | 0.05032 | 0.04501 | 0.05048 | ZNF569    |
| cg18247054 | 0.02552 | 0.02741 | 0.03171 | 0.03156 | 0.02327 | 0.03092 | 0.02547 | 0.02409 | 0.02708 | 0.02189 | RNASET2   |
| cg18247638 | 0.03472 | 0.03549 | 0.03659 | 0.03701 | 0.02528 | 0.03899 | 0.03293 | 0.03287 | 0.03675 | 0.03299 | BIVM      |
| cg18248112 | 0.29362 | 0.1057  | 0.80827 | 0.8332  | 0.8715  | 0.88966 | 0.88646 | 0.90041 | 0.8129  | 0.69211 | KCNJ15    |
| cg18248891 | 0.05392 | 0.04907 | 0.04525 | 0.04091 | 0.04457 | 0.0411  | 0.03834 | 0.04318 | 0.04122 | 0.0373  | PTK6      |
| cg18249244 | 0.04032 | 0.04187 | 0.04556 | 0.0416  | 0.0393  | 0.03903 | 0.07116 | 0.06342 | 0.03223 | 0.03669 | ELP3      |
| cg18250832 | 0.81837 | 0.33259 | 0.9114  | 0.89105 | 0.95472 | 0.79226 | 0.90446 | 0.88363 | 0.71922 | 0.61786 | NMUR1     |
| cg18251360 | 0.03437 | 0.02987 | 0.03049 | 0.0331  | 0.03356 | 0.03347 | 0.03507 | 0.02886 | 0.0307  | 0.03013 | DGCR8     |
| cg18253802 | 0.05224 | 0.05208 | 0.07146 | 0.09076 | 0.32352 | 0.15663 | 0.04747 | 0.05095 | 0.05999 | 0.05099 | MYB       |
| cg18254848 | 0.26954 | 0.23861 | 0.58682 | 0.6157  | 0.3787  | 0.35885 | 0.23324 | 0.2175  | 0.1991  | 0.19905 | CLC       |
| cg18256128 | 0.09898 | 0.0834  | 0.10332 | 0.09618 | 0.07935 | 0.08949 | 0.61935 | 0.61958 | 0.06488 | 0.06211 | PKD3      |
| cg18259391 | 0.13109 | 0.07887 | 0.10342 | 0.11664 | 0.07483 | 0.11895 | 0.09892 | 0.10048 | 0.04539 | 0.05813 | SERBP1    |
| cg18263030 | 0.03393 | 0.03601 | 0.03473 | 0.02986 | 0.04643 | 0.03787 | 0.03062 | 0.03856 | 0.03564 | 0.04442 | MARK3     |
| cg18263177 | 0.03284 | 0.02974 | 0.03779 | 0.03185 | 0.02646 | 0.0283  | 0.02997 | 0.02686 | 0.02424 | 0.02424 | FLJ10922  |
| cg18263686 | 0.07741 | 0.08022 | 0.10476 | 0.08917 | 0.08073 | 0.08477 | 0.08234 | 0.0709  | 0.06865 | 0.07727 | LOC128153 |
| cg18264687 | 0.20676 | 0.1408  | 0.14657 | 0.13326 | 0.09845 | 0.07001 | 0.14979 | 0.12677 | 0.12355 | 0.11297 | MLLT3     |
| cg18265887 | 0.08933 | 0.07103 | 0.53369 | 0.61139 | 0.96118 | 0.85499 | 0.68649 | 0.48496 | 0.93386 | 0.57174 | RAC2      |
| cg18267374 | 0.02992 | 0.02802 | 0.96491 | 0.9635  | 0.47778 | 0.47697 | 0.05624 | 0.28021 | 0.04295 | 0.02428 | NEF3      |
| cg18267381 | 0.27022 | 0.42619 | 0.3921  | 0.5015  | 0.14587 | 0.08979 | 0.35342 | 0.11452 | 0.67147 | 0.8663  | ZNF659    |
| cg18270343 | 0.90535 | 0.83579 | 0.90407 | 0.90399 | 0.94688 | 0.92375 | 0.9154  | 0.88841 | 0.92715 | 0.91047 | JRK       |
| cg18271969 | 0.78697 | 0.57226 | 0.76201 | 0.75397 | 0.86178 | 0.88324 | 0.18869 | 0.17687 | 0.90686 | 0.89485 | HTR3C     |
| cg18272264 | 0.07744 | 0.06237 | 0.44072 | 0.16476 | 0.46618 | 0.05505 | 0.14497 | 0.03739 | 0.53046 | 0.08514 | CACNB4    |
| cg18273501 | 0.03932 | 0.04609 | 0.17102 | 0.38232 | 0.87972 | 0.77509 | 0.77456 | 0.72926 | 0.04438 | 0.03672 | FAM26B    |
| cg18273566 | 0.04506 | 0.04653 | 0.05376 | 0.05249 | 0.0372  | 0.04254 | 0.04247 | 0.04525 | 0.03965 | 0.04227 | LOC148898 |
| cg18275051 | 0.49001 | 0.74136 | 0.89504 | 0.85373 | 0.95083 | 0.91391 | 0.94669 | 0.93303 | 0.03964 | 0.03518 | CYB5R1    |
| cg18275124 | 0.55283 | 0.63656 | 0.68539 | 0.69983 | 0.58176 | 0.63832 | 0.58353 | 0.62507 | 0.6914  | 0.71471 | SIAE      |
| cg18277508 | 0.12701 | 0.12705 | 0.13528 | 0.13139 | 0.29644 | 0.13649 | 0.11321 | 0.0857  | 0.09425 | 0.11769 | SLC39A8   |
| cg18277754 | 0.03531 | 0.04421 | 0.5997  | 0.60604 | 0.04449 | 0.03956 | 0.19037 | 0.07855 | 0.04047 | 0.03434 | ALK       |
| cg18278261 | 0.02405 | 0.02567 | 0.02231 | 0.02255 | 0.0185  | 0.02296 | 0.02396 | 0.02221 | 0.01726 | 0.02104 | FUS       |
| cg18279742 | 0.36622 | 0.07382 | 0.11024 | 0.17373 | 0.61058 | 0.05281 | 0.5044  | 0.06434 | 0.79855 | 0.05509 | RPS2      |
| cg18282543 | 0.04577 | 0.04032 | 0.62987 | 0.78063 | 0.04729 | 0.03697 | 0.04289 | 0.03556 | 0.06265 | 0.05007 | BAIAP3    |
| cg18282619 | 0.04832 | 0.04945 | 0.06328 | 0.06451 | 0.06783 | 0.04836 | 0.06964 | 0.05581 | 0.04697 | 0.04539 | ZNF706    |

|            |         |         |         |         |         |         |         |         |         |                   |
|------------|---------|---------|---------|---------|---------|---------|---------|---------|---------|-------------------|
| cg18283554 | 0.06847 | 0.07053 | 0.09486 | 0.08708 | 0.11707 | 0.09402 | 0.09198 | 0.08384 | 0.09132 | 0.08133 U1SNRNPBP |
| cg18284523 | 0.04005 | 0.03574 | 0.04151 | 0.0362  | 0.03671 | 0.03819 | 0.03641 | 0.03329 | 0.03536 | 0.03623 TINF2     |
| cg18285544 | 0.19608 | 0.09976 | 0.17368 | 0.15157 | 0.06825 | 0.06717 | 0.09276 | 0.08238 | 0.08907 | 0.0681 C20orf161  |
| cg18285951 | 0.04792 | 0.04709 | 0.04629 | 0.04712 | 0.04939 | 0.03938 | 0.03767 | 0.03536 | 0.04202 | 0.03508 INPP5E    |
| cg18286698 | 0.43702 | 0.11509 | 0.64334 | 0.73579 | 0.67518 | 0.59595 | 0.67747 | 0.44753 | 0.81324 | 0.71367 GDA       |
| cg18287975 | 0.06514 | 0.043   | 0.07283 | 0.06472 | 0.06996 | 0.0408  | 0.05642 | 0.05761 | 0.0461  | 0.03921 MEF2C     |
| cg18289156 | 0.0513  | 0.0578  | 0.12192 | 0.07527 | 0.08076 | 0.05018 | 0.04129 | 0.03747 | 0.0685  | 0.04318 FLJ37357  |
| cg18289259 | 0.03709 | 0.04817 | 0.05777 | 0.05297 | 0.04576 | 0.04224 | 0.10367 | 0.04388 | 0.0394  | 0.03942 TIMM8A    |
| cg18291690 | 0.467   | 0.45335 | 0.44186 | 0.44606 | 0.67407 | 0.6138  | 0.55294 | 0.54644 | 0.52127 | 0.47276 ST13      |
| cg18292394 | 0.22252 | 0.06117 | 0.17966 | 0.15325 | 0.31312 | 0.44348 | 0.04671 | 0.05369 | 0.04738 | 0.04344 MAT1A     |
| cg18292711 | 0.74692 | 0.71351 | 0.7187  | 0.67756 | 0.58911 | 0.73055 | 0.68955 | 0.54604 | 0.75174 | 0.55221 KIF5B     |
| cg18294158 | 0.82974 | 0.54832 | 0.67284 | 0.70785 | 0.17649 | 0.12572 | 0.61854 | 0.53007 | 0.2241  | 0.18343 ORC5L     |
| cg18294257 | 0.03411 | 0.02639 | 0.04484 | 0.05555 | 0.0743  | 0.03358 | 0.02419 | 0.02833 | 0.03017 | 0.02126 SEC14L3   |
| cg18294881 | 0.04545 | 0.03628 | 0.04558 | 0.0381  | 0.04102 | 0.05981 | 0.03415 | 0.02872 | 0.03143 | 0.03276 LARS2     |
| cg18296405 | 0.07415 | 0.06569 | 0.0633  | 0.0661  | 0.04434 | 0.05247 | 0.09658 | 0.08817 | 0.05483 | 0.05276 SENP7     |
| cg18299211 | 0.03493 | 0.03257 | 0.03854 | 0.03418 | 0.02802 | 0.03348 | 0.03389 | 0.03227 | 0.02966 | 0.03375 PIGK      |
| cg18302652 | 0.2194  | 0.22724 | 0.25875 | 0.23856 | 0.33178 | 0.23975 | 0.28928 | 0.20283 | 0.21065 | 0.16287 IL8       |
| cg18303397 | 0.66987 | 0.22298 | 0.31437 | 0.62194 | 0.45224 | 0.28551 | 0.43478 | 0.17222 | 0.85459 | 0.36364 MBD4      |
| cg18304195 | 0.13579 | 0.16227 | 0.17861 | 0.18671 | 0.29885 | 0.22545 | 0.22845 | 0.23227 | 0.14463 | 0.14433 KBTBD8    |
| cg18304674 | 0.12512 | 0.12468 | 0.116   | 0.12366 | 0.08922 | 0.116   | 0.09469 | 0.09943 | 0.09414 | 0.11644 ZDHHC6    |
| cg18305837 | 0.07404 | 0.06241 | 0.06386 | 0.05968 | 0.05393 | 0.05402 | 0.05869 | 0.05811 | 0.05102 | 0.05566 COQ7      |
| cg18306327 | 0.13531 | 0.10657 | 0.12921 | 0.11287 | 0.0988  | 0.08915 | 0.11788 | 0.11032 | 0.08641 | 0.11361 BFAR      |
| cg18307604 | 0.04252 | 0.04455 | 0.05005 | 0.04557 | 0.03566 | 0.04183 | 0.31756 | 0.44052 | 0.03959 | 0.0449 LAMP2      |
| cg18307767 | 0.19605 | 0.06775 | 0.13842 | 0.14384 | 0.04586 | 0.04505 | 0.05374 | 0.04025 | 0.06457 | 0.0407 CCDC5      |
| cg18312429 | 0.23932 | 0.35068 | 0.25109 | 0.2243  | 0.24551 | 0.32379 | 0.1888  | 0.14482 | 0.09077 | 0.11171 SLC10A2   |
| cg18312782 | 0.14588 | 0.09341 | 0.46712 | 0.43569 | 0.2472  | 0.09967 | 0.07684 | 0.07112 | 0.11927 | 0.08778 TEX2      |
| cg18312807 | 0.05101 | 0.04593 | 0.06345 | 0.05173 | 0.05623 | 0.05109 | 0.05443 | 0.05267 | 0.04609 | 0.03928 RAB3GAP1  |
| cg18313110 | 0.04092 | 0.04499 | 0.04769 | 0.04138 | 0.03064 | 0.03533 | 0.03267 | 0.03199 | 0.03473 | 0.03584 COPB2     |
| cg18313702 | 0.031   | 0.03359 | 0.03418 | 0.03469 | 0.02493 | 0.02867 | 0.02639 | 0.03017 | 0.03004 | 0.02668 EIF2B5    |
| cg18313794 | 0.0378  | 0.04225 | 0.0532  | 0.04652 | 0.08749 | 0.04798 | 0.0512  | 0.04473 | 0.04141 | 0.03615 POMZP3    |
| cg18317951 | 0.05197 | 0.04729 | 0.40178 | 0.59927 | 0.07872 | 0.04936 | 0.06136 | 0.06129 | 0.04096 | 0.05465 PLEKHF2   |
| cg18320188 | 0.1041  | 0.1     | 0.07548 | 0.06848 | 0.25846 | 0.07454 | 0.05931 | 0.07141 | 0.06854 | 0.06273 MLH1      |
| cg18320336 | 0.11915 | 0.07171 | 0.43868 | 0.43092 | 0.03245 | 0.03589 | 0.03518 | 0.03402 | 0.03481 | 0.0336 STEAP1     |
| cg18321354 | 0.79593 | 0.41769 | 0.70342 | 0.84616 | 0.65658 | 0.57744 | 0.23045 | 0.3563  | 0.45956 | 0.24913 CARD11    |
| cg18325289 | 0.03135 | 0.03189 | 0.03383 | 0.03436 | 0.02281 | 0.02822 | 0.02761 | 0.02852 | 0.02382 | 0.02767 USP48     |
| cg18328190 | 0.8428  | 0.77185 | 0.85568 | 0.86661 | 0.84157 | 0.85252 | 0.8577  | 0.85643 | 0.86851 | 0.81299 C3orf35   |
| cg18328334 | 0.87461 | 0.86956 | 0.87628 | 0.87757 | 0.88877 | 0.864   | 0.80934 | 0.49685 | 0.87428 | 0.76734 TNS1      |
| cg18328933 | 0.80871 | 0.48864 | 0.9331  | 0.92903 | 0.89464 | 0.23269 | 0.92896 | 0.79283 | 0.88472 | 0.44241 ABHD14A   |
| cg18329036 | 0.08484 | 0.06411 | 0.0756  | 0.07782 | 0.13356 | 0.1098  | 0.0988  | 0.08292 | 0.04632 | 0.04566 C20orf155 |
| cg18329349 | 0.07444 | 0.07476 | 0.08305 | 0.09774 | 0.11713 | 0.13422 | 0.09811 | 0.11586 | 0.08991 | 0.0743 CAV1       |
| cg18330203 | 0.87939 | 0.60292 | 0.82672 | 0.72386 | 0.91398 | 0.85867 | 0.59802 | 0.44777 | 0.89001 | 0.848 TNNT2       |

|            |         |         |         |         |         |         |         |         |         |                   |
|------------|---------|---------|---------|---------|---------|---------|---------|---------|---------|-------------------|
| cg18330611 | 0.0185  | 0.01619 | 0.01827 | 0.01472 | 0.01375 | 0.01593 | 0.01555 | 0.01571 | 0.01419 | 0.01362 NPPC      |
| cg18331396 | 0.03706 | 0.03853 | 0.04242 | 0.04229 | 0.0443  | 0.04105 | 0.03408 | 0.03347 | 0.0317  | 0.03128 RAF1      |
| cg18333690 | 0.8962  | 0.89166 | 0.81311 | 0.93159 | 0.94008 | 0.83286 | 0.08616 | 0.12758 | 0.30459 | 0.03365 PADI4     |
| cg18333807 | 0.04145 | 0.03788 | 0.04277 | 0.03768 | 0.0376  | 0.03959 | 0.03746 | 0.04288 | 0.03728 | 0.03313 GSK3A     |
| cg18333824 | 0.02712 | 0.02707 | 0.02957 | 0.02392 | 0.02463 | 0.02694 | 0.02983 | 0.03147 | 0.02633 | 0.02214 SF3A3     |
| cg18335068 | 0.13601 | 0.40264 | 0.69912 | 0.79719 | 0.22848 | 0.65929 | 0.0671  | 0.03847 | 0.05667 | 0.02303 ZNF677    |
| cg18335243 | 0.04372 | 0.04803 | 0.07057 | 0.07359 | 0.05872 | 0.05749 | 0.04731 | 0.0384  | 0.07372 | 0.05188 PTGS2     |
| cg18335933 | 0.02405 | 0.02084 | 0.02773 | 0.02134 | 0.01834 | 0.01841 | 0.01825 | 0.01674 | 0.01881 | 0.01647 WRNIP1    |
| cg18337803 | 0.10224 | 0.09609 | 0.07928 | 0.07967 | 0.06121 | 0.07809 | 0.06225 | 0.06705 | 0.06343 | 0.05851 CACNA1G   |
| cg18338021 | 0.80072 | 0.12141 | 0.96417 | 0.9763  | 0.9498  | 0.92005 | 0.48439 | 0.37342 | 0.92036 | 0.81244 GZMM      |
| cg18338293 | 0.89774 | 0.86477 | 0.8999  | 0.91425 | 0.90518 | 0.89021 | 0.89204 | 0.86458 | 0.89015 | 0.879 BBS1        |
| cg18338296 | 0.86763 | 0.77947 | 0.92953 | 0.93111 | 0.94711 | 0.9272  | 0.92099 | 0.8939  | 0.94101 | 0.94375 THRSP     |
| cg18338311 | 0.05406 | 0.06157 | 0.14284 | 0.12845 | 0.15816 | 0.05633 | 0.06965 | 0.06996 | 0.26252 | 0.30024 LOC124842 |
| cg18340214 | 0.02581 | 0.02521 | 0.02447 | 0.02368 | 0.0221  | 0.01809 | 0.01742 | 0.01957 | 0.01945 | 0.02085 MRPL33    |
| cg18341054 | 0.10055 | 0.10685 | 0.1336  | 0.11902 | 0.13903 | 0.10482 | 0.13953 | 0.10984 | 0.097   | 0.07675 NARS2     |
| cg18342279 | 0.03418 | 0.02841 | 0.92989 | 0.97438 | 0.20268 | 0.03556 | 0.16466 | 0.97106 | 0.35672 | 0.41985 ZAR1      |
| cg18342900 | 0.26252 | 0.26123 | 0.27652 | 0.29045 | 0.25947 | 0.26765 | 0.25922 | 0.21953 | 0.26331 | 0.26059 LOC388272 |
| cg18343292 | 0.08783 | 0.07684 | 0.1982  | 0.2089  | 0.11286 | 0.10015 | 0.10314 | 0.08519 | 0.23758 | 0.14697 MS4A7     |
| cg18343862 | 0.89244 | 0.91042 | 0.86763 | 0.89519 | 0.88475 | 0.89321 | 0.87697 | 0.85932 | 0.89684 | 0.89244 XLKD1     |
| cg18344063 | 0.79522 | 0.70497 | 0.71162 | 0.80441 | 0.37288 | 0.41466 | 0.66259 | 0.7684  | 0.7149  | 0.74736 MGAT4C    |
| cg18344745 | 0.79351 | 0.51542 | 0.16417 | 0.27082 | 0.42273 | 0.2955  | 0.24288 | 0.11555 | 0.34239 | 0.30359 GLRB      |
| cg18345369 | 0.12958 | 0.0709  | 0.49043 | 0.69783 | 0.61804 | 0.54737 | 0.13246 | 0.08477 | 0.48852 | 0.49799 PRSS22    |
| cg18345635 | 0.86648 | 0.75257 | 0.31044 | 0.48564 | 0.69801 | 0.59838 | 0.84348 | 0.72537 | 0.90361 | 0.86068 SLC16A3   |
| cg18346038 | 0.03677 | 0.03753 | 0.04046 | 0.03465 | 0.02999 | 0.03102 | 0.03436 | 0.03469 | 0.03334 | 0.0272 CDC91L1    |
| cg18347238 | 0.03889 | 0.04539 | 0.04589 | 0.03986 | 0.03353 | 0.03784 | 0.04228 | 0.03883 | 0.04112 | 0.03915 VPS4A     |
| cg18349258 | 0.06623 | 0.07738 | 0.08297 | 0.06774 | 0.1071  | 0.06667 | 0.06124 | 0.06314 | 0.06569 | 0.05972 SMEK2     |
| cg18349835 | 0.01638 | 0.01921 | 0.52408 | 0.899   | 0.14032 | 0.02412 | 0.12249 | 0.05917 | 0.02876 | 0.02026 VIPR2     |
| cg18350391 | 0.57604 | 0.21242 | 0.42855 | 0.79324 | 0.94983 | 0.71597 | 0.38847 | 0.06452 | 0.31957 | 0.03573 IL32      |
| cg18350458 | 0.02855 | 0.02965 | 0.0328  | 0.03304 | 0.0249  | 0.02854 | 0.0386  | 0.04069 | 0.02216 | 0.02567 EIF4EBP1  |
| cg18353563 | 0.47776 | 0.29281 | 0.26999 | 0.24321 | 0.38915 | 0.21773 | 0.41367 | 0.1711  | 0.62177 | 0.45758 ABTB1     |
| cg18354264 | 0.82557 | 0.50292 | 0.76804 | 0.77204 | 0.88812 | 0.81047 | 0.80977 | 0.67914 | 0.63548 | 0.63141 MIXL1     |
| cg18354594 | 0.88332 | 0.57265 | 0.8791  | 0.89757 | 0.55717 | 0.48127 | 0.37962 | 0.33123 | 0.08688 | 0.12302 FLJ45717  |
| cg18356330 | 0.02245 | 0.02344 | 0.02612 | 0.0261  | 0.01708 | 0.02182 | 0.02489 | 0.03446 | 0.02194 | 0.01812 GTF2E2    |
| cg18356799 | 0.28461 | 0.11923 | 0.70076 | 0.79982 | 0.55175 | 0.36529 | 0.17584 | 0.09949 | 0.05895 | 0.06899 DSC1      |
| cg18357098 | 0.02623 | 0.0268  | 0.02603 | 0.02759 | 0.02356 | 0.02568 | 0.02142 | 0.02181 | 0.02203 | 0.01779 C3orf19   |
| cg18357645 | 0.0853  | 0.0912  | 0.15016 | 0.11674 | 0.21192 | 0.13666 | 0.08104 | 0.06332 | 0.11207 | 0.13656 OS9       |
| cg18359921 | 0.08468 | 0.04937 | 0.05072 | 0.05712 | 0.0515  | 0.05167 | 0.05033 | 0.04997 | 0.05207 | 0.04511 MCCC2     |
| cg18360149 | 0.02986 | 0.03206 | 0.03117 | 0.02506 | 0.01938 | 0.02429 | 0.02283 | 0.02221 | 0.02194 | 0.02393 ZNF79     |
| cg18361093 | 0.3713  | 0.04427 | 0.85614 | 0.92347 | 0.95143 | 0.94212 | 0.88004 | 0.67595 | 0.77033 | 0.55981 PAOX      |
| cg18362489 | 0.07068 | 0.07691 | 0.07329 | 0.06852 | 0.04294 | 0.05869 | 0.06589 | 0.06317 | 0.06175 | 0.0578 PHF21A     |
| cg18364088 | 0.70708 | 0.67211 | 0.67979 | 0.72092 | 0.58696 | 0.58574 | 0.71089 | 0.69028 | 0.60944 | 0.57445 CCDC14    |



|            |         |         |         |         |         |         |         |         |         |                   |
|------------|---------|---------|---------|---------|---------|---------|---------|---------|---------|-------------------|
| cg18364820 | 0.04298 | 0.04556 | 0.04195 | 0.03969 | 0.03295 | 0.03506 | 0.02871 | 0.03229 | 0.03344 | 0.03195 CXorf38   |
| cg18365380 | 0.46037 | 0.33082 | 0.52372 | 0.57609 | 0.73119 | 0.6423  | 0.61522 | 0.31375 | 0.49022 | 0.46389 GGTLA1    |
| cg18368125 | 0.90017 | 0.89596 | 0.91312 | 0.92176 | 0.92291 | 0.90537 | 0.9016  | 0.91101 | 0.91691 | 0.90549 TMED6     |
| cg18370227 | 0.80621 | 0.79116 | 0.85103 | 0.85864 | 0.84635 | 0.83731 | 0.08903 | 0.07286 | 0.87141 | 0.84396 KRTHA3A   |
| cg18370979 | 0.71087 | 0.76701 | 0.66962 | 0.74655 | 0.65762 | 0.74021 | 0.66513 | 0.69553 | 0.80491 | 0.79755 C5orf21   |
| cg18371284 | 0.0466  | 0.0452  | 0.04461 | 0.04511 | 0.0369  | 0.0466  | 0.03706 | 0.04171 | 0.04086 | 0.03849 ZFP1      |
| cg18371506 | 0.0344  | 0.03378 | 0.03527 | 0.03132 | 0.02908 | 0.02917 | 0.0294  | 0.03344 | 0.02817 | 0.028 NRP2        |
| cg18372353 | 0.63033 | 0.09085 | 0.3635  | 0.36868 | 0.05667 | 0.05031 | 0.06083 | 0.06044 | 0.39594 | 0.14363 ATPBD4    |
| cg18374517 | 0.71922 | 0.67103 | 0.78636 | 0.8136  | 0.84147 | 0.74662 | 0.74341 | 0.60114 | 0.69924 | 0.55619 ALPL2     |
| cg18379495 | 0.06644 | 0.06737 | 0.08523 | 0.06949 | 0.08233 | 0.05426 | 0.08399 | 0.08282 | 0.05269 | 0.06622 ZNF703    |
| cg18380974 | 0.1092  | 0.11834 | 0.137   | 0.11264 | 0.128   | 0.10165 | 0.10927 | 0.10711 | 0.09974 | 0.10248 WIG1      |
| cg18380975 | 0.04734 | 0.04708 | 0.05328 | 0.07483 | 0.03127 | 0.03821 | 0.04357 | 0.03933 | 0.17915 | 0.03373 C6orf1    |
| cg18381880 | 0.0291  | 0.02809 | 0.02929 | 0.02342 | 0.02411 | 0.02344 | 0.02244 | 0.0357  | 0.02131 | 0.02174 VDAC3     |
| cg18382305 | 0.34805 | 0.26697 | 0.74387 | 0.80352 | 0.27605 | 0.74874 | 0.37722 | 0.25873 | 0.11429 | 0.11687 C18orf34  |
| cg18383069 | 0.02952 | 0.03567 | 0.04176 | 0.04315 | 0.0319  | 0.03073 | 0.02836 | 0.03027 | 0.03225 | 0.03106 LOH12CR1  |
| cg18383160 | 0.05307 | 0.04817 | 0.05232 | 0.04708 | 0.05443 | 0.06164 | 0.04593 | 0.04417 | 0.04131 | 0.04576 C14orf24  |
| cg18383391 | 0.04684 | 0.03805 | 0.06138 | 0.04557 | 0.05972 | 0.04889 | 0.04249 | 0.03022 | 0.03099 | 0.03305 MON1B     |
| cg18384097 | 0.87259 | 0.86127 | 0.87589 | 0.88093 | 0.89307 | 0.86532 | 0.87022 | 0.8761  | 0.88657 | 0.86958 PTPN7     |
| cg18384168 | 0.04116 | 0.04281 | 0.03927 | 0.0466  | 0.04379 | 0.0451  | 0.04061 | 0.03621 | 0.03386 | 0.03052 FGF22     |
| cg18384403 | 0.04636 | 0.0434  | 0.05192 | 0.0445  | 0.09528 | 0.06403 | 0.03729 | 0.04291 | 0.03699 | 0.03395 TUBB2A    |
| cg18384643 | 0.05492 | 0.06131 | 0.15576 | 0.19335 | 0.07515 | 0.06103 | 0.04938 | 0.04756 | 0.04085 | 0.03631 MRPS33    |
| cg18387216 | 0.02048 | 0.0233  | 0.02673 | 0.02192 | 0.02149 | 0.01843 | 0.01842 | 0.01964 | 0.02083 | 0.02081 HDAC2     |
| cg18388972 | 0.08217 | 0.09043 | 0.07436 | 0.07964 | 0.06423 | 0.07926 | 0.08419 | 0.07337 | 0.07371 | 0.08299 CCT3      |
| cg18389062 | 0.20133 | 0.0435  | 0.05502 | 0.04682 | 0.0365  | 0.15017 | 0.04725 | 0.03864 | 0.04779 | 0.03305 MAN1A2    |
| cg18389752 | 0.03889 | 0.03883 | 0.06126 | 0.05256 | 0.059   | 0.06385 | 0.03441 | 0.03463 | 0.04112 | 0.0383 AMOT       |
| cg18389810 | 0.82868 | 0.78118 | 0.82982 | 0.88082 | 0.71383 | 0.84924 | 0.47439 | 0.13685 | 0.76231 | 0.43246 C14orf8   |
| cg18390025 | 0.1556  | 0.08762 | 0.79479 | 0.84664 | 0.8072  | 0.83011 | 0.68381 | 0.6944  | 0.8892  | 0.8314 ELOVL3     |
| cg18392482 | 0.90057 | 0.84632 | 0.82748 | 0.8667  | 0.75741 | 0.5876  | 0.66915 | 0.67364 | 0.89462 | 0.79946 AMDHD1    |
| cg18392783 | 0.9304  | 0.91461 | 0.06597 | 0.0745  | 0.05283 | 0.06619 | 0.31748 | 0.43727 | 0.0469  | 0.05483 PRKCDBP   |
| cg18393014 | 0.02483 | 0.02878 | 0.03241 | 0.03393 | 0.02921 | 0.03729 | 0.04754 | 0.04088 | 0.02444 | 0.02739 SETDB2    |
| cg18393722 | 0.05287 | 0.04963 | 0.13873 | 0.1407  | 0.07512 | 0.10271 | 0.06432 | 0.12166 | 0.05108 | 0.04106 FLJ43276  |
| cg18394496 | 0.01878 | 0.01672 | 0.02449 | 0.02065 | 0.02097 | 0.0204  | 0.02228 | 0.0197  | 0.01596 | 0.01511 LOC374395 |
| cg18394848 | 0.03972 | 0.0414  | 0.04152 | 0.03739 | 0.03318 | 0.03361 | 0.03414 | 0.03069 | 0.03424 | 0.0338 KRAS       |
| cg18396533 | 0.51428 | 0.45311 | 0.70089 | 0.91973 | 0.68648 | 0.81793 | 0.22424 | 0.02779 | 0.92314 | 0.92473 DYDC1     |
| cg18396865 | 0.18039 | 0.19558 | 0.21234 | 0.1942  | 0.2412  | 0.15656 | 0.14129 | 0.16614 | 0.18164 | 0.17143 SNX6      |
| cg18397523 | 0.04622 | 0.03781 | 0.27722 | 0.2943  | 0.29487 | 0.45149 | 0.05211 | 0.03547 | 0.3179  | 0.03578 EVX1      |
| cg18397653 | 0.7329  | 0.73598 | 0.68757 | 0.73325 | 0.58184 | 0.68496 | 0.69608 | 0.76769 | 0.483   | 0.39819 DMP1      |
| cg18399183 | 0.56509 | 0.20576 | 0.46467 | 0.54301 | 0.39786 | 0.28268 | 0.42555 | 0.31592 | 0.07851 | 0.06126 METTL7A   |
| cg18399321 | 0.03295 | 0.03229 | 0.03864 | 0.03706 | 0.0353  | 0.03189 | 0.03372 | 0.03053 | 0.02936 | 0.03207 MGAT3     |
| cg18399703 | 0.46529 | 0.10222 | 0.5899  | 0.60276 | 0.15773 | 0.072   | 0.06034 | 0.05584 | 0.08144 | 0.04842 EVA1      |
| cg18401406 | 0.92234 | 0.70845 | 0.87785 | 0.90676 | 0.90739 | 0.8795  | 0.27713 | 0.40984 | 0.05009 | 0.04378 LOC400120 |

|            |         |         |         |         |         |         |         |         |         |         |           |
|------------|---------|---------|---------|---------|---------|---------|---------|---------|---------|---------|-----------|
| cg18403361 | 0.66782 | 0.45833 | 0.81748 | 0.86421 | 0.72485 | 0.64402 | 0.70935 | 0.81246 | 0.54201 | 0.57187 | CLEC14A   |
| cg18403396 | 0.04515 | 0.0439  | 0.08648 | 0.06272 | 0.05585 | 0.0452  | 0.03796 | 0.03961 | 0.04142 | 0.03509 | B3GAT2    |
| cg18408326 | 0.13858 | 0.10018 | 0.45223 | 0.40776 | 0.42034 | 0.05917 | 0.14603 | 0.07125 | 0.09234 | 0.07357 | CACNB2    |
| cg18408487 | 0.81981 | 0.79418 | 0.89223 | 0.90138 | 0.84133 | 0.60149 | 0.58579 | 0.5698  | 0.67003 | 0.44589 | NT5C3L    |
| cg18409845 | 0.07258 | 0.07915 | 0.08138 | 0.0768  | 0.08328 | 0.10043 | 0.07158 | 0.07369 | 0.07408 | 0.07285 | 5-Mar     |
| cg18410627 | 0.11086 | 0.04826 | 0.60709 | 0.81524 | 0.59594 | 0.61816 | 0.57102 | 0.32826 | 0.69871 | 0.5775  | RALGPS1   |
| cg18411891 | 0.025   | 0.02698 | 0.03703 | 0.03855 | 0.02524 | 0.02442 | 0.02256 | 0.02398 | 0.02041 | 0.0166  | FZD4      |
| cg18411898 | 0.07503 | 0.04173 | 0.16192 | 0.26113 | 0.34829 | 0.12977 | 0.27286 | 0.04308 | 0.04566 | 0.04001 | RPRM      |
| cg18412613 | 0.10914 | 0.1101  | 0.10693 | 0.10572 | 0.06369 | 0.09587 | 0.09038 | 0.08556 | 0.09935 | 0.09651 | YKT6      |
| cg18412984 | 0.55615 | 0.3987  | 0.73637 | 0.80426 | 0.53553 | 0.67369 | 0.71375 | 0.73128 | 0.7831  | 0.63594 | WDR20     |
| cg18413240 | 0.04193 | 0.0446  | 0.04113 | 0.04315 | 0.03188 | 0.03971 | 0.03927 | 0.03995 | 0.0367  | 0.03891 | SLC35A5   |
| cg18413900 | 0.21213 | 0.1688  | 0.28483 | 0.52396 | 0.87505 | 0.24535 | 0.51643 | 0.36371 | 0.46401 | 0.06966 | CYP27B1   |
| cg18414381 | 0.18271 | 0.2697  | 0.84653 | 0.8783  | 0.81426 | 0.86766 | 0.80625 | 0.82812 | 0.63904 | 0.17325 | EHF       |
| cg18414741 | 0.02146 | 0.0211  | 0.01899 | 0.02219 | 0.01826 | 0.01961 | 0.01729 | 0.01735 | 0.01765 | 0.05678 | ZNF77     |
| cg18414950 | 0.06077 | 0.0517  | 0.08611 | 0.08242 | 0.2136  | 0.15441 | 0.45195 | 0.53763 | 0.10338 | 0.11518 | PKD3      |
| cg18416881 | 0.02913 | 0.03242 | 0.02881 | 0.03219 | 0.03108 | 0.03222 | 0.02366 | 0.02659 | 0.02507 | 0.02186 | AKR1B1    |
| cg18417464 | 0.06341 | 0.07124 | 0.10318 | 0.08903 | 0.07424 | 0.08939 | 0.06972 | 0.07162 | 0.07875 | 0.06087 | HSPC268   |
| cg18418460 | 0.0564  | 0.02514 | 0.03262 | 0.02207 | 0.02155 | 0.02293 | 0.0235  | 0.02187 | 0.13058 | 0.02441 | ULBP3     |
| cg18418503 | 0.02794 | 0.02561 | 0.03018 | 0.02679 | 0.02136 | 0.02651 | 0.02689 | 0.03071 | 0.03278 | 0.02882 | STAM      |
| cg18419020 | 0.06684 | 0.07084 | 0.05653 | 0.07007 | 0.05337 | 0.08352 | 0.07164 | 0.08652 | 0.07167 | 0.07209 | TYMS      |
| cg18420965 | 0.11697 | 0.05816 | 0.12383 | 0.29682 | 0.06755 | 0.06476 | 0.05635 | 0.05119 | 0.32457 | 0.8241  | EPHA5     |
| cg18422443 | 0.03927 | 0.036   | 0.03919 | 0.03783 | 0.01936 | 0.03454 | 0.03113 | 0.03333 | 0.11352 | 0.03943 | KITLG     |
| cg18422795 | 0.83454 | 0.68673 | 0.89191 | 0.91663 | 0.93755 | 0.89619 | 0.89539 | 0.90007 | 0.92159 | 0.90222 | C20orf165 |
| cg18424091 | 0.29208 | 0.13569 | 0.11996 | 0.12204 | 0.19545 | 0.09129 | 0.06981 | 0.06821 | 0.05824 | 0.05695 | HSPA1L    |
| cg18424538 | 0.03311 | 0.03473 | 0.0354  | 0.03677 | 0.03979 | 0.03307 | 0.02904 | 0.029   | 0.02786 | 0.0264  | CNO       |
| cg18427589 | 0.03416 | 0.03216 | 0.03744 | 0.05146 | 0.0419  | 0.1864  | 0.03185 | 0.03278 | 0.02132 | 0.03104 | MGC13024  |
| cg18428217 | 0.02307 | 0.02379 | 0.02474 | 0.02374 | 0.01839 | 0.02056 | 0.01979 | 0.02555 | 0.01877 | 0.02006 | C7orf26   |
| cg18428373 | 0.04745 | 0.03991 | 0.05906 | 0.04894 | 0.05938 | 0.05496 | 0.04139 | 0.05713 | 0.03984 | 0.03654 | FRMPD1    |
| cg18428563 | 0.03461 | 0.03178 | 0.03942 | 0.039   | 0.03584 | 0.0434  | 0.03922 | 0.03434 | 0.03174 | 0.02747 | FLJ30707  |
| cg18429742 | 0.08865 | 0.07025 | 0.60398 | 0.60744 | 0.93191 | 0.89041 | 0.21428 | 0.07761 | 0.53429 | 0.39851 | ZDHC11    |
| cg18430208 | 0.75292 | 0.83015 | 0.31161 | 0.6593  | 0.32392 | 0.19966 | 0.86585 | 0.87463 | 0.18951 | 0.15825 | CA5B      |
| cg18431127 | 0.34495 | 0.0832  | 0.54836 | 0.75473 | 0.86287 | 0.8079  | 0.12549 | 0.11117 | 0.39761 | 0.10991 | EPB42     |
| cg18432105 | 0.76174 | 0.71151 | 0.81413 | 0.81888 | 0.74859 | 0.70583 | 0.5     | 0.49219 | 0.12945 | 0.15899 | MYH2      |
| cg18432384 | 0.72409 | 0.27818 | 0.79861 | 0.91823 | 0.91577 | 0.8835  | 0.63933 | 0.51203 | 0.82955 | 0.77952 | FLJ32771  |
| cg18433086 | 0.73784 | 0.51693 | 0.16597 | 0.16131 | 0.15501 | 0.14201 | 0.13877 | 0.36612 | 0.15383 | 0.12795 | ABL2      |
| cg18433380 | 0.89901 | 0.90839 | 0.89155 | 0.90076 | 0.89077 | 0.88706 | 0.77159 | 0.83085 | 0.92302 | 0.90347 | NNAT      |
| cg18433694 | 0.31677 | 0.13409 | 0.49242 | 0.41353 | 0.41167 | 0.20376 | 0.44131 | 0.13728 | 0.80184 | 0.29118 | ATP11C    |
| cg18434152 | 0.39603 | 0.04126 | 0.75242 | 0.88499 | 0.49111 | 0.40206 | 0.1111  | 0.04348 | 0.37262 | 0.06196 | PROK1     |
| cg18435900 | 0.02236 | 0.01923 | 0.15535 | 0.02488 | 0.4458  | 0.0727  | 0.01637 | 0.0163  | 0.01459 | 0.01623 | ZNF485    |
| cg18436172 | 0.04915 | 0.0455  | 0.06168 | 0.06213 | 0.05031 | 0.0705  | 0.06149 | 0.06127 | 0.04996 | 0.03717 | PTCH      |
| cg18437633 | 0.79729 | 0.71049 | 0.73982 | 0.8119  | 0.66788 | 0.78244 | 0.71963 | 0.72439 | 0.76681 | 0.78906 | ITGB6     |

|            |         |         |         |         |         |         |         |         |         |                   |
|------------|---------|---------|---------|---------|---------|---------|---------|---------|---------|-------------------|
| cg18438300 | 0.81534 | 0.33082 | 0.81851 | 0.85506 | 0.82313 | 0.59201 | 0.59655 | 0.73835 | 0.8939  | 0.8336 FZD9       |
| cg18438777 | 0.07819 | 0.07237 | 0.08996 | 0.07372 | 0.3469  | 0.08604 | 0.19242 | 0.36509 | 0.13396 | 0.05962 NPY5R     |
| cg18440048 | 0.22627 | 0.06862 | 0.24787 | 0.25927 | 0.58535 | 0.6245  | 0.37101 | 0.34315 | 0.21686 | 0.03918 ZNF70     |
| cg18440188 | 0.02913 | 0.02942 | 0.02581 | 0.02646 | 0.03049 | 0.033   | 0.02466 | 0.02448 | 0.02225 | 0.02991 MAP4K5    |
| cg18440474 | 0.03589 | 0.03993 | 0.03408 | 0.03361 | 0.23108 | 0.03565 | 0.02843 | 0.03324 | 0.03204 | 0.02973 CHN1      |
| cg18441959 | 0.06436 | 0.04459 | 0.06774 | 0.08141 | 0.07126 | 0.21113 | 0.03857 | 0.04303 | 0.04125 | 0.03892 VPREB1    |
| cg18442986 | 0.07268 | 0.07092 | 0.06812 | 0.06457 | 0.04201 | 0.06151 | 0.05896 | 0.06369 | 0.05258 | 0.06045 TTL       |
| cg18443378 | 0.06467 | 0.06222 | 0.06756 | 0.27058 | 0.04869 | 0.04669 | 0.03753 | 0.03515 | 0.06546 | 0.0534 WDR17      |
| cg18445047 | 0.04646 | 0.04257 | 0.04471 | 0.04292 | 0.06717 | 0.05632 | 0.04124 | 0.03347 | 0.04221 | 0.0413 MGC26885   |
| cg18448480 | 0.65746 | 0.71136 | 0.77076 | 0.78496 | 0.77361 | 0.75784 | 0.68848 | 0.67647 | 0.60669 | 0.56511 FLJ35785  |
| cg18449462 | 0.11687 | 0.12605 | 0.17522 | 0.15246 | 0.17893 | 0.14905 | 0.55038 | 0.43711 | 0.13265 | 0.14033 COX7B     |
| cg18450227 | 0.90847 | 0.55421 | 0.75118 | 0.82527 | 0.83196 | 0.79793 | 0.42412 | 0.06874 | 0.14277 | 0.03423 MAPK4     |
| cg18452324 | 0.3439  | 0.05565 | 0.35351 | 0.40971 | 0.7852  | 0.71673 | 0.32718 | 0.05116 | 0.21384 | 0.04331 MFNG      |
| cg18452600 | 0.11164 | 0.09047 | 0.12268 | 0.09632 | 0.12171 | 0.0585  | 0.16302 | 0.15277 | 0.11236 | 0.06609 MSRA      |
| cg18453621 | 0.09092 | 0.03071 | 0.02826 | 0.03232 | 0.96692 | 0.97891 | 0.02468 | 0.02091 | 0.95113 | 0.89082 LMX1B     |
| cg18454685 | 0.01831 | 0.02344 | 0.60051 | 0.57273 | 0.48814 | 0.4116  | 0.21384 | 0.0273  | 0.52481 | 0.02386 CACNA1G   |
| cg18456149 | 0.04316 | 0.05196 | 0.06107 | 0.04833 | 0.08358 | 0.0758  | 0.05353 | 0.05915 | 0.03247 | 0.03345 NAPB      |
| cg18457737 | 0.45766 | 0.30471 | 0.26199 | 0.20837 | 0.28901 | 0.24382 | 0.34207 | 0.3124  | 0.14774 | 0.14914 SPATA19   |
| cg18457775 | 0.03227 | 0.03051 | 0.03789 | 0.03845 | 0.0316  | 0.03961 | 0.03162 | 0.03094 | 0.02592 | 0.02383 ATM       |
| cg18458993 | 0.04225 | 0.04082 | 0.03584 | 0.02965 | 0.09294 | 0.06441 | 0.04044 | 0.03962 | 0.03395 | 0.04599 ARG2      |
| cg18459342 | 0.20026 | 0.2019  | 0.14578 | 0.1825  | 0.12903 | 0.17175 | 0.26761 | 0.24672 | 0.1617  | 0.14093 TPD52     |
| cg18462653 | 0.06148 | 0.05021 | 0.06146 | 0.05399 | 0.05466 | 0.05751 | 0.04532 | 0.03744 | 0.03889 | 0.03891 DEFB119   |
| cg18463417 | 0.91041 | 0.87772 | 0.91229 | 0.92336 | 0.93337 | 0.90525 | 0.91754 | 0.90321 | 0.93758 | 0.9117 PLAGL2     |
| cg18463686 | 0.35062 | 0.08835 | 0.23383 | 0.17748 | 0.39994 | 0.41839 | 0.06661 | 0.07229 | 0.185   | 0.13458 CLEC5A    |
| cg18464137 | 0.11429 | 0.4845  | 0.16137 | 0.60903 | 0.51873 | 0.10341 | 0.35051 | 0.3253  | 0.09109 | 0.05009 SEMA3E    |
| cg18464559 | 0.03425 | 0.03121 | 0.04601 | 0.03332 | 0.04004 | 0.03528 | 0.02901 | 0.02616 | 0.03459 | 0.03104 ITGB3BP   |
| cg18466173 | 0.62214 | 0.33477 | 0.84019 | 0.84587 | 0.88    | 0.74356 | 0.8149  | 0.38832 | 0.73799 | 0.78546 C21orf93  |
| cg18468219 | 0.13332 | 0.19628 | 0.64074 | 0.75753 | 0.09448 | 0.34885 | 0.5522  | 0.27256 | 0.04279 | 0.029 MARVELD3    |
| cg18468467 | 0.03126 | 0.03693 | 0.06165 | 0.05909 | 0.04734 | 0.04425 | 0.02787 | 0.02967 | 0.04386 | 0.03388 CITED1    |
| cg18468842 | 0.69355 | 0.59203 | 0.19226 | 0.21381 | 0.68787 | 0.68917 | 0.79876 | 0.48885 | 0.61982 | 0.59986 SLC13A3   |
| cg18468844 | 0.84842 | 0.80822 | 0.75625 | 0.78765 | 0.68881 | 0.82935 | 0.59285 | 0.39096 | 0.84625 | 0.8155 PTAFR      |
| cg18469326 | 0.04594 | 0.03993 | 0.07    | 0.05734 | 0.0436  | 0.05573 | 0.05091 | 0.05413 | 0.04194 | 0.04464 C17orf41  |
| cg18470891 | 0.06516 | 0.05619 | 0.08886 | 0.09538 | 0.04344 | 0.04329 | 0.12157 | 0.0635  | 0.04703 | 0.03955 FOXM1     |
| cg18472228 | 0.09303 | 0.08858 | 0.0923  | 0.09558 | 0.06995 | 0.07555 | 0.07314 | 0.07662 | 0.0767  | 0.08801 BAMBI     |
| cg18473117 | 0.79341 | 0.81404 | 0.83197 | 0.85823 | 0.85386 | 0.86971 | 0.87019 | 0.86325 | 0.8258  | 0.87056 CCDC22    |
| cg18473162 | 0.02532 | 0.02569 | 0.03191 | 0.02629 | 0.02422 | 0.02737 | 0.0239  | 0.02371 | 0.02336 | 0.02371 LOC126208 |
| cg18474135 | 0.04915 | 0.05187 | 0.06419 | 0.05777 | 0.0747  | 0.04853 | 0.05455 | 0.05867 | 0.04883 | 0.04786 CDC26     |
| cg18474934 | 0.9473  | 0.94734 | 0.95607 | 0.95525 | 0.97044 | 0.97    | 0.95161 | 0.95684 | 0.68339 | 0.6107 TRPC3      |
| cg18477315 | 0.04738 | 0.04211 | 0.05151 | 0.04417 | 0.08229 | 0.05627 | 0.04609 | 0.03437 | 0.08095 | 0.04551 GOLGA5    |
| cg18481241 | 0.9409  | 0.88693 | 0.91355 | 0.91237 | 0.9034  | 0.8672  | 0.93774 | 0.93347 | 0.92401 | 0.92525 RB1       |
| cg18482268 | 0.09502 | 0.12616 | 0.75404 | 0.79388 | 0.1915  | 0.0869  | 0.22858 | 0.4514  | 0.34602 | 0.42362 POU4F3    |

|            |         |         |         |         |         |         |         |         |         |                  |
|------------|---------|---------|---------|---------|---------|---------|---------|---------|---------|------------------|
| cg18484189 | 0.06901 | 0.0729  | 0.55712 | 0.61254 | 0.79849 | 0.62764 | 0.04766 | 0.08642 | 0.2597  | 0.08521 NALP10   |
| cg18485154 | 0.04487 | 0.04454 | 0.05256 | 0.04664 | 0.05495 | 0.05187 | 0.04689 | 0.04067 | 0.0457  | 0.03842 TTLL4    |
| cg18485485 | 0.02843 | 0.02828 | 0.03443 | 0.03566 | 0.02471 | 0.02986 | 0.04214 | 0.03952 | 0.02776 | 0.02718 DECR1    |
| cg18485955 | 0.82089 | 0.85161 | 0.84097 | 0.8405  | 0.86344 | 0.84953 | 0.81109 | 0.84118 | 0.85788 | 0.83144 TNFRSF17 |
| cg18486150 | 0.62327 | 0.26319 | 0.74304 | 0.83226 | 0.90965 | 0.64317 | 0.8592  | 0.52563 | 0.38448 | 0.06782 KIF17    |
| cg18487515 | 0.14596 | 0.02977 | 0.03502 | 0.02958 | 0.203   | 0.04512 | 0.58704 | 0.36432 | 0.03701 | 0.02694 ZNF342   |
| cg18488623 | 0.04594 | 0.04816 | 0.04531 | 0.05083 | 0.03432 | 0.04671 | 0.04564 | 0.04399 | 0.04247 | 0.04033 TPD52L2  |
| cg18488855 | 0.07843 | 0.07389 | 0.08101 | 0.0676  | 0.11125 | 0.07817 | 0.14093 | 0.05182 | 0.06764 | 0.07922 NOVA1    |
| cg18488970 | 0.84465 | 0.80729 | 0.39848 | 0.46364 | 0.8742  | 0.83234 | 0.40775 | 0.59474 | 0.42075 | 0.25746 MGMT     |
| cg18489434 | 0.01993 | 0.01876 | 0.02361 | 0.02045 | 0.04041 | 0.01762 | 0.01796 | 0.01592 | 0.01872 | 0.01975 VASH1    |
| cg18489440 | 0.21308 | 0.16703 | 0.4412  | 0.50566 | 0.35734 | 0.17602 | 0.1442  | 0.14913 | 0.16228 | 0.14198 KIAA0746 |
| cg18489719 | 0.11338 | 0.10484 | 0.13792 | 0.13114 | 0.17157 | 0.10372 | 0.1086  | 0.10562 | 0.06797 | 0.08128 GFM2     |
| cg18490846 | 0.49657 | 0.43278 | 0.2509  | 0.3608  | 0.47487 | 0.40561 | 0.3769  | 0.26915 | 0.11592 | 0.13644 C17orf73 |
| cg18491230 | 0.03123 | 0.03514 | 0.03309 | 0.02981 | 0.02307 | 0.03059 | 0.03269 | 0.0329  | 0.03186 | 0.02669 ANLN     |
| cg18493147 | 0.95837 | 0.74699 | 0.95875 | 0.96223 | 0.9103  | 0.87171 | 0.19557 | 0.07043 | 0.83949 | 0.75602 C19orf19 |
| cg18493182 | 0.54388 | 0.17454 | 0.62551 | 0.84913 | 0.91983 | 0.82192 | 0.24081 | 0.11264 | 0.63804 | 0.3188 LYPD2     |
| cg18493238 | 0.7856  | 0.9223  | 0.71409 | 0.76436 | 0.9444  | 0.95687 | 0.73398 | 0.89473 | 0.51608 | 0.66498 ANKRD30A |
| cg18493899 | 0.03662 | 0.0379  | 0.04173 | 0.03988 | 0.0355  | 0.04319 | 0.04573 | 0.04048 | 0.03401 | 0.02935 ZDHC5    |
| cg18495298 | 0.06251 | 0.06159 | 0.06566 | 0.05688 | 0.04331 | 0.05586 | 0.05632 | 0.05798 | 0.04608 | 0.04891 FADS3    |
| cg18495563 | 0.12779 | 0.14943 | 0.10658 | 0.07588 | 0.51546 | 0.15135 | 0.11281 | 0.10765 | 0.24352 | 0.06764 TCP11L1  |
| cg18497960 | 0.03853 | 0.04309 | 0.08268 | 0.12347 | 0.03156 | 0.03395 | 0.03269 | 0.03502 | 0.03059 | 0.02682 RBM12    |
| cg18499731 | 0.36276 | 0.18894 | 0.23442 | 0.25733 | 0.59191 | 0.36815 | 0.41302 | 0.45046 | 0.25348 | 0.2412 HBII-438B |
| cg18501026 | 0.31959 | 0.04764 | 0.19446 | 0.33717 | 0.95325 | 0.71864 | 0.58318 | 0.18519 | 0.07806 | 0.03578 DOCK3    |
| cg18502522 | 0.02323 | 0.02781 | 0.02935 | 0.02453 | 0.02163 | 0.02585 | 0.02825 | 0.02548 | 0.02161 | 0.01748 SCAMP2   |
| cg18503052 | 0.22701 | 0.04907 | 0.15364 | 0.16517 | 0.04502 | 0.03461 | 0.42533 | 0.35909 | 0.04749 | 0.03397 PLP2     |
| cg18503260 | 0.63794 | 0.09846 | 0.28339 | 0.36419 | 0.42803 | 0.11341 | 0.11761 | 0.06518 | 0.43005 | 0.06944 CA13     |
| cg18503387 | 0.06881 | 0.06207 | 0.06721 | 0.09168 | 0.37506 | 0.08247 | 0.06271 | 0.05001 | 0.07059 | 0.0787 MRPS23    |
| cg18504358 | 0.04943 | 0.04861 | 0.05409 | 0.04765 | 0.04605 | 0.04867 | 0.039   | 0.04188 | 0.04371 | 0.0393 LRP10     |
| cg18504532 | 0.0606  | 0.0443  | 0.06107 | 0.05586 | 0.0508  | 0.04876 | 0.0535  | 0.04453 | 0.05646 | 0.04981 RABGAP1L |
| cg18505908 | 0.04006 | 0.03289 | 0.0333  | 0.03691 | 0.04676 | 0.03768 | 0.03327 | 0.02926 | 0.03133 | 0.02782 APBA1    |
| cg18506672 | 0.35943 | 0.31536 | 0.37247 | 0.38241 | 0.54339 | 0.53723 | 0.41512 | 0.15225 | 0.14157 | 0.14036 SNURF    |
| cg18506679 | 0.8984  | 0.8308  | 0.89042 | 0.91083 | 0.93997 | 0.91512 | 0.91219 | 0.88993 | 0.92032 | 0.81986 OLFML2A  |
| cg18507125 | 0.08577 | 0.09338 | 0.09307 | 0.08853 | 0.0525  | 0.07476 | 0.56237 | 0.5969  | 0.07306 | 0.0681 RPL36A    |
| cg18508125 | 0.11288 | 0.1163  | 0.16484 | 0.13398 | 0.14657 | 0.13007 | 0.21345 | 0.18261 | 0.098   | 0.1233 FBXO16    |
| cg18508525 | 0.24945 | 0.11317 | 0.85546 | 0.88729 | 0.74419 | 0.65782 | 0.84311 | 0.86117 | 0.38964 | 0.59395 CD36     |
| cg18509239 | 0.748   | 0.76343 | 0.76064 | 0.78527 | 0.80098 | 0.79495 | 0.76839 | 0.81729 | 0.63174 | 0.44018 IGSF10   |
| cg18509435 | 0.58944 | 0.31646 | 0.73994 | 0.80022 | 0.51374 | 0.46405 | 0.45786 | 0.18826 | 0.17578 | 0.20062 CDH20    |
| cg18511007 | 0.88348 | 0.89356 | 0.2732  | 0.41701 | 0.02724 | 0.03159 | 0.2106  | 0.51464 | 0.91013 | 0.78011 COL1A2   |
| cg18511445 | 0.07418 | 0.08241 | 0.06655 | 0.06243 | 0.05882 | 0.06355 | 0.05852 | 0.04109 | 0.05852 | 0.05133 FUNDC1   |
| cg18511989 | 0.05136 | 0.0507  | 0.05435 | 0.05695 | 0.06054 | 0.06391 | 0.0487  | 0.05489 | 0.10095 | 0.05344 CPSF1    |
| cg18512092 | 0.03312 | 0.03802 | 0.04204 | 0.04062 | 0.03293 | 0.03684 | 0.03075 | 0.03664 | 0.03633 | 0.0284 FLJ21839  |

|            |         |         |         |         |         |         |         |         |         |                  |
|------------|---------|---------|---------|---------|---------|---------|---------|---------|---------|------------------|
| cg18515291 | 0.03735 | 0.04118 | 0.04465 | 0.044   | 0.05083 | 0.04311 | 0.03385 | 0.04236 | 0.02795 | 0.02553 STX1A    |
| cg18515587 | 0.67559 | 0.66195 | 0.721   | 0.82851 | 0.83491 | 0.78998 | 0.67779 | 0.24363 | 0.54293 | 0.47674 SELENBP1 |
| cg18516268 | 0.87138 | 0.84882 | 0.83261 | 0.84705 | 0.76253 | 0.8247  | 0.79918 | 0.70711 | 0.86704 | 0.818 RPL23      |
| cg18519564 | 0.11387 | 0.09804 | 0.09682 | 0.0981  | 0.1558  | 0.14875 | 0.07324 | 0.07025 | 0.08391 | 0.04919 RCL1     |
| cg18521771 | 0.84749 | 0.62763 | 0.51553 | 0.51629 | 0.80745 | 0.56376 | 0.74669 | 0.65024 | 0.4921  | 0.3875 C9orf91   |
| cg18521925 | 0.81477 | 0.88787 | 0.91503 | 0.92549 | 0.95405 | 0.92481 | 0.64217 | 0.76393 | 0.88005 | 0.83558 SLC22A16 |
| cg18524091 | 0.71002 | 0.27166 | 0.75459 | 0.79632 | 0.34442 | 0.58052 | 0.42152 | 0.35284 | 0.16273 | 0.30763 TAS1R2   |
| cg18525740 | 0.03948 | 0.03655 | 0.03942 | 0.03718 | 0.02581 | 0.03573 | 0.03703 | 0.03312 | 0.03341 | 0.03014 ZNF346   |
| cg18528640 | 0.06264 | 0.05252 | 0.08061 | 0.07986 | 0.05439 | 0.05622 | 0.05027 | 0.05027 | 0.05398 | 0.05411 MSTO1    |
| cg18530324 | 0.37107 | 0.0531  | 0.24516 | 0.45254 | 0.28156 | 0.09517 | 0.04937 | 0.04782 | 0.04511 | 0.05327 KIAA0427 |
| cg18530716 | 0.17001 | 0.08127 | 0.64869 | 0.70967 | 0.73787 | 0.91662 | 0.08694 | 0.07106 | 0.09652 | 0.06973 SLC16A11 |
| cg18530748 | 0.72921 | 0.9357  | 0.6667  | 0.78439 | 0.95267 | 0.96313 | 0.76892 | 0.73393 | 0.17543 | 0.16806 SULT1A1  |
| cg18533225 | 0.84013 | 0.81669 | 0.90883 | 0.94453 | 0.95934 | 0.91251 | 0.42131 | 0.60939 | 0.87794 | 0.88763 KLHDC7B  |
| cg18533466 | 0.01988 | 0.02245 | 0.02054 | 0.01931 | 0.01416 | 0.01855 | 0.01585 | 0.01946 | 0.01602 | 0.01505 RREB1    |
| cg18534730 | 0.19719 | 0.2053  | 0.56627 | 0.83624 | 0.67641 | 0.30016 | 0.04448 | 0.05019 | 0.09806 | 0.04557 CABP5    |
| cg18534872 | 0.04657 | 0.04605 | 0.04851 | 0.0393  | 0.03356 | 0.03851 | 0.0379  | 0.04191 | 0.03724 | 0.0328 ZWINT     |
| cg18535534 | 0.03615 | 0.02713 | 0.0573  | 0.10909 | 0.14619 | 0.03628 | 0.53834 | 0.53753 | 0.61713 | 0.62129 BCORL1   |
| cg18536148 | 0.96552 | 0.97117 | 0.97918 | 0.97947 | 0.98344 | 0.977   | 0.97306 | 0.97903 | 0.94043 | 0.94347 TBX4     |
| cg18538812 | 0.06748 | 0.27284 | 0.21282 | 0.24481 | 0.59795 | 0.75684 | 0.03393 | 0.0355  | 0.03917 | 0.24798 GIF      |
| cg18540305 | 0.01496 | 0.01608 | 0.0152  | 0.01567 | 0.01339 | 0.01473 | 0.01296 | 0.01215 | 0.01384 | 0.01247 TMCO3    |
| cg18540325 | 0.08031 | 0.05699 | 0.65372 | 0.51489 | 0.26543 | 0.27118 | 0.17481 | 0.36691 | 0.07896 | 0.04196 PRSS3    |
| cg18540871 | 0.81244 | 0.74905 | 0.04141 | 0.04547 | 0.04243 | 0.03617 | 0.03467 | 0.06207 | 0.03867 | 0.02852 FUCA2    |
| cg18542098 | 0.92713 | 0.76423 | 0.93894 | 0.94965 | 0.97572 | 0.9344  | 0.94967 | 0.8994  | 0.93754 | 0.69445 FLJ36445 |
| cg18546419 | 0.04939 | 0.03985 | 0.04427 | 0.04206 | 0.03753 | 0.04635 | 0.03659 | 0.0404  | 0.0387  | 0.03782 RAP80    |
| cg18546622 | 0.93731 | 0.69505 | 0.94023 | 0.94638 | 0.94566 | 0.93933 | 0.92706 | 0.90912 | 0.95493 | 0.89593 ALX4     |
| cg18548413 | 0.06332 | 0.07326 | 0.06002 | 0.063   | 0.07051 | 0.07318 | 0.0649  | 0.06958 | 0.05699 | 0.05852 PHB      |
| cg18552077 | 0.03151 | 0.02905 | 0.03043 | 0.02903 | 0.06228 | 0.0243  | 0.02115 | 0.02319 | 0.06264 | 0.02681 ZC3H3    |
| cg18552413 | 0.03975 | 0.05031 | 0.27409 | 0.39079 | 0.03294 | 0.04942 | 0.03213 | 0.03695 | 0.04294 | 0.03297 DARC     |
| cg18552939 | 0.38011 | 0.41251 | 0.35152 | 0.47713 | 0.64901 | 0.64173 | 0.14898 | 0.10612 | 0.10753 | 0.12394 NDN      |
| cg18555117 | 0.15482 | 0.1513  | 0.50923 | 0.54306 | 0.55302 | 0.46537 | 0.14204 | 0.11143 | 0.15242 | 0.14428 DDHD1    |
| cg18555206 | 0.05363 | 0.04674 | 0.04118 | 0.037   | 0.05865 | 0.05995 | 0.04369 | 0.03735 | 0.0402  | 0.05299 SLC38A6  |
| cg18555440 | 0.1053  | 0.21722 | 0.94042 | 0.96309 | 0.80005 | 0.76267 | 0.31139 | 0.81486 | 0.07715 | 0.28283 MYOD1    |
| cg18555555 | 0.9522  | 0.95653 | 0.93386 | 0.94719 | 0.94399 | 0.93961 | 0.94453 | 0.9558  | 0.94905 | 0.92923 FABP7    |
| cg18556220 | 0.04798 | 0.0553  | 0.05022 | 0.04529 | 0.0353  | 0.0443  | 0.04844 | 0.04499 | 0.04208 | 0.03775 FBXW5    |
| cg18556540 | 0.0347  | 0.03566 | 0.03786 | 0.03286 | 0.04732 | 0.04587 | 0.02946 | 0.03213 | 0.02594 | 0.02401 TRIM26   |
| cg18557086 | 0.06913 | 0.05867 | 0.06349 | 0.06107 | 0.09207 | 0.08409 | 0.06481 | 0.07648 | 0.05835 | 0.07306 MNT      |
| cg18557145 | 0.84336 | 0.44604 | 0.85245 | 0.88372 | 0.95077 | 0.75288 | 0.37522 | 0.10652 | 0.54129 | 0.35961 CD72     |
| cg18561362 | 0.90263 | 0.90579 | 0.90145 | 0.90948 | 0.88198 | 0.89644 | 0.63413 | 0.70983 | 0.91693 | 0.90263 C1QTNF4  |
| cg18564727 | 0.39204 | 0.07751 | 0.63974 | 0.51094 | 0.71351 | 0.35826 | 0.07209 | 0.09207 | 0.33477 | 0.2138 PLP1      |
| cg18565355 | 0.86396 | 0.64968 | 0.87482 | 0.88785 | 0.89912 | 0.88707 | 0.71533 | 0.8539  | 0.65293 | 0.84661 RBM35A   |
| cg18565479 | 0.03329 | 0.03478 | 0.03924 | 0.03651 | 0.02857 | 0.03125 | 0.04247 | 0.03859 | 0.02524 | 0.02733 DISC1    |

|            |         |         |         |         |         |         |         |         |         |         |           |
|------------|---------|---------|---------|---------|---------|---------|---------|---------|---------|---------|-----------|
| cg18565510 | 0.96215 | 0.9552  | 0.96229 | 0.95929 | 0.96876 | 0.95885 | 0.95918 | 0.95075 | 0.96007 | 0.94653 | CENTB5    |
| cg18567470 | 0.06915 | 0.07309 | 0.0392  | 0.04078 | 0.10641 | 0.06338 | 0.06445 | 0.06317 | 0.03922 | 0.03834 | ARHGEF12  |
| cg18568653 | 0.03975 | 0.04108 | 0.07975 | 0.21487 | 0.0789  | 0.05714 | 0.05175 | 0.0451  | 0.03333 | 0.03705 | SERGEF    |
| cg18568838 | 0.05683 | 0.05065 | 0.04317 | 0.04339 | 0.46161 | 0.40827 | 0.03932 | 0.04279 | 0.02522 | 0.03232 | MRPS10    |
| cg18570262 | 0.78334 | 0.79438 | 0.76658 | 0.80621 | 0.75986 | 0.8039  | 0.7437  | 0.76839 | 0.82868 | 0.78772 | LOC90580  |
| cg18572014 | 0.64651 | 0.62233 | 0.73578 | 0.77889 | 0.82581 | 0.79249 | 0.64198 | 0.65794 | 0.63217 | 0.59892 | DCC       |
| cg18573251 | 0.85542 | 0.76225 | 0.79915 | 0.80273 | 0.68632 | 0.79479 | 0.7632  | 0.47613 | 0.82611 | 0.68703 | RAB3IL1   |
| cg18573383 | 0.05277 | 0.03875 | 0.82039 | 0.84709 | 0.29539 | 0.21485 | 0.07265 | 0.08627 | 0.07344 | 0.04509 | KCNC2     |
| cg18575221 | 0.79884 | 0.59937 | 0.81526 | 0.83215 | 0.68034 | 0.71897 | 0.62391 | 0.40073 | 0.27629 | 0.39478 | C14orf162 |
| cg18576883 | 0.03705 | 0.03504 | 0.0346  | 0.03343 | 0.02392 | 0.02832 | 0.02947 | 0.02937 | 0.03067 | 0.02462 | ZNF639    |
| cg18577494 | 0.03661 | 0.03604 | 0.03797 | 0.04086 | 0.0324  | 0.04112 | 0.0357  | 0.03899 | 0.03197 | 0.02629 | MGC22793  |
| cg18579327 | 0.03975 | 0.04294 | 0.04719 | 0.03949 | 0.03058 | 0.03861 | 0.03659 | 0.0381  | 0.05569 | 0.03661 | CREB1     |
| cg18579447 | 0.07652 | 0.08492 | 0.08822 | 0.07953 | 0.10953 | 0.09434 | 0.07966 | 0.07118 | 0.06739 | 0.0815  | MAP2K1IP1 |
| cg18580491 | 0.02387 | 0.02139 | 0.02378 | 0.02086 | 0.0193  | 0.02282 | 0.02063 | 0.02006 | 0.01664 | 0.0181  | EIF2C4    |
| cg18581221 | 0.0386  | 0.02569 | 0.02205 | 0.02581 | 0.01668 | 0.02126 | 0.02486 | 0.02309 | 0.02431 | 0.02131 | FLJ45645  |
| cg18581445 | 0.04742 | 0.04115 | 0.57071 | 0.75692 | 0.23365 | 0.41495 | 0.06333 | 0.03772 | 0.03671 | 0.0315  | SHD       |
| cg18582689 | 0.6446  | 0.36308 | 0.44262 | 0.45379 | 0.48166 | 0.55901 | 0.28366 | 0.4564  | 0.25481 | 0.258   | UNQ9356   |
| cg18585306 | 0.05199 | 0.04435 | 0.05476 | 0.0451  | 0.06005 | 0.05379 | 0.037   | 0.03889 | 0.04245 | 0.04243 | TBC1D5    |
| cg18587018 | 0.04349 | 0.03684 | 0.03884 | 0.03407 | 0.03022 | 0.04028 | 0.03822 | 0.04119 | 0.03444 | 0.03076 | CRSP9     |
| cg18587271 | 0.55232 | 0.54846 | 0.355   | 0.49661 | 0.21592 | 0.17597 | 0.13148 | 0.21717 | 0.08725 | 0.0777  | GPT2      |
| cg18587364 | 0.04547 | 0.04449 | 0.05477 | 0.05792 | 0.33209 | 0.41654 | 0.03603 | 0.03539 | 0.0298  | 0.03026 | ZNF562    |
| cg18587973 | 0.07579 | 0.06864 | 0.07313 | 0.07321 | 0.0581  | 0.07292 | 0.08673 | 0.08262 | 0.06946 | 0.06227 | CDADC1    |
| cg18589624 | 0.69831 | 0.37874 | 0.89455 | 0.88737 | 0.85901 | 0.88486 | 0.52554 | 0.80383 | 0.88736 | 0.71722 | INMT      |
| cg18589858 | 0.83628 | 0.68151 | 0.85936 | 0.87794 | 0.89364 | 0.86755 | 0.51924 | 0.49509 | 0.87677 | 0.83602 | SLCO2B1   |
| cg18591973 | 0.0352  | 0.04009 | 0.04521 | 0.04693 | 0.0471  | 0.05334 | 0.04966 | 0.05011 | 0.03655 | 0.04709 | SMARCD1   |
| cg18592174 | 0.04479 | 0.02803 | 0.92603 | 0.92107 | 0.5353  | 0.61279 | 0.03629 | 0.40278 | 0.03597 | 0.01857 | CHAT      |
| cg18592307 | 0.03053 | 0.03058 | 0.02924 | 0.02534 | 0.03841 | 0.02835 | 0.02755 | 0.02561 | 0.03026 | 0.02634 | WDR76     |
| cg18593668 | 0.04547 | 0.04325 | 0.05141 | 0.07569 | 0.05271 | 0.04069 | 0.03748 | 0.03712 | 0.03977 | 0.03304 | GNAZ      |
| cg18595258 | 0.33288 | 0.2844  | 0.35676 | 0.49948 | 0.32883 | 0.26724 | 0.28469 | 0.45451 | 0.43397 | 0.48622 | HSPC196   |
| cg18596794 | 0.82646 | 0.65925 | 0.80037 | 0.84621 | 0.83202 | 0.41637 | 0.78779 | 0.53587 | 0.6766  | 0.35635 | MPZL1     |
| cg18598959 | 0.70707 | 0.5036  | 0.16997 | 0.32498 | 0.1413  | 0.13583 | 0.21356 | 0.18651 | 0.1758  | 0.37967 | PIK4CB    |
| cg18601293 | 0.07278 | 0.07834 | 0.09029 | 0.07298 | 0.10098 | 0.11257 | 0.06899 | 0.06351 | 0.05956 | 0.05517 | C13orf10  |
| cg18601426 | 0.35328 | 0.39529 | 0.45198 | 0.71083 | 0.27775 | 0.08907 | 0.18768 | 0.37366 | 0.28374 | 0.25455 | PTPRN2    |
| cg18602314 | 0.03331 | 0.03174 | 0.02722 | 0.03644 | 0.08365 | 0.13123 | 0.02998 | 0.04771 | 0.02548 | 0.02359 | GFPT2     |
| cg18602811 | 0.03796 | 0.04053 | 0.0441  | 0.03612 | 0.03833 | 0.05352 | 0.04337 | 0.03919 | 0.0444  | 0.03669 | DYNC1L1   |
| cg18602919 | 0.67701 | 0.54802 | 0.75254 | 0.80549 | 0.96911 | 0.95163 | 0.39178 | 0.63092 | 0.67412 | 0.56968 | NDN       |
| cg18604842 | 0.91798 | 0.72563 | 0.94626 | 0.97282 | 0.97526 | 0.90575 | 0.92271 | 0.76066 | 0.82745 | 0.75594 | FLJ36046  |
| cg18604888 | 0.04501 | 0.03917 | 0.03505 | 0.04148 | 0.02638 | 0.04181 | 0.04256 | 0.04081 | 0.03948 | 0.03231 | ATAD2     |
| cg18606310 | 0.04353 | 0.03923 | 0.04273 | 0.03913 | 0.03232 | 0.03625 | 0.03612 | 0.03049 | 0.0318  | 0.03835 | PYGB      |
| cg18607470 | 0.02414 | 0.02371 | 0.02511 | 0.01947 | 0.02605 | 0.02335 | 0.02672 | 0.02038 | 0.01845 | 0.01837 | KIAA0895  |
| cg18609562 | 0.40544 | 0.26928 | 0.38228 | 0.48383 | 0.56341 | 0.6481  | 0.25057 | 0.17185 | 0.42015 | 0.14223 | FLJ32871  |

|            |         |         |         |         |         |         |         |         |         |                   |
|------------|---------|---------|---------|---------|---------|---------|---------|---------|---------|-------------------|
| cg18611122 | 0.46526 | 0.09324 | 0.68447 | 0.66675 | 0.93252 | 0.81054 | 0.92223 | 0.66086 | 0.9414  | LASS2             |
| cg18611245 | 0.44605 | 0.12844 | 0.16887 | 0.15869 | 0.2148  | 0.05337 | 0.1807  | 0.14539 | 0.66048 | 0.49791 ZGPAT     |
| cg18611281 | 0.20634 | 0.08813 | 0.08834 | 0.08667 | 0.04449 | 0.07919 | 0.06855 | 0.06505 | 0.07292 | 0.06933 ZNF512    |
| cg18611847 | 0.04287 | 0.03244 | 0.04378 | 0.08342 | 0.27302 | 0.02843 | 0.05894 | 0.02702 | 0.02616 | 0.02393 RGS16     |
| cg18613421 | 0.67685 | 0.43182 | 0.73839 | 0.78282 | 0.69764 | 0.91505 | 0.87406 | 0.91912 | 0.6811  | 0.6613 WDR72      |
| cg18616655 | 0.90621 | 0.881   | 0.91585 | 0.92289 | 0.92576 | 0.92079 | 0.66867 | 0.70745 | 0.84654 | 0.81262 SSX5      |
| cg18618334 | 0.04611 | 0.04799 | 0.88686 | 0.90157 | 0.93059 | 0.89836 | 0.6125  | 0.69581 | 0.08259 | 0.03792 CXCL12    |
| cg18618964 | 0.04258 | 0.0534  | 0.05401 | 0.0571  | 0.04381 | 0.04209 | 0.04047 | 0.03754 | 0.0414  | 0.0444 PPP3R1     |
| cg18619267 | 0.04764 | 0.05127 | 0.04447 | 0.03855 | 0.06381 | 0.04345 | 0.03307 | 0.0325  | 0.03338 | 0.03391 LOC389199 |
| cg18619398 | 0.47823 | 0.5264  | 0.89346 | 0.89801 | 0.54339 | 0.49715 | 0.83724 | 0.8281  | 0.61976 | 0.57992 GNAS      |
| cg18619831 | 0.03339 | 0.02382 | 0.02947 | 0.03017 | 0.02035 | 0.02022 | 0.02313 | 0.02219 | 0.01888 | 0.02078 RPAP1     |
| cg18621299 | 0.72601 | 0.74485 | 0.82549 | 0.84487 | 0.71591 | 0.76641 | 0.76952 | 0.78501 | 0.83193 | 0.73346 EVL       |
| cg18623836 | 0.28399 | 0.14957 | 0.2075  | 0.21567 | 0.37098 | 0.12678 | 0.21385 | 0.2539  | 0.31373 | 0.11032 RRM2      |
| cg18624866 | 0.12711 | 0.13613 | 0.22655 | 0.30392 | 0.17381 | 0.10759 | 0.60739 | 0.39338 | 0.09531 | 0.08462 SMS       |
| cg18626709 | 0.03008 | 0.03944 | 0.04153 | 0.03837 | 0.02859 | 0.03323 | 0.02581 | 0.03334 | 0.03429 | 0.03916 LEPREL1   |
| cg18627308 | 0.2155  | 0.07451 | 0.36592 | 0.43644 | 0.39581 | 0.36676 | 0.40804 | 0.31946 | 0.12651 | 0.03009 FLJ10661  |
| cg18627459 | 0.03461 | 0.03873 | 0.04908 | 0.04716 | 0.03886 | 0.04232 | 0.04309 | 0.04023 | 0.03366 | 0.03807 RFC5      |
| cg18627852 | 0.03073 | 0.03044 | 0.03642 | 0.03478 | 0.02908 | 0.02786 | 0.0277  | 0.03007 | 0.02628 | 0.02474 SNRPF     |
| cg18628483 | 0.76979 | 0.21011 | 0.65043 | 0.75416 | 0.76426 | 0.57507 | 0.54326 | 0.34222 | 0.82548 | 0.29441 KIF5A     |
| cg18628674 | 0.76483 | 0.72522 | 0.75024 | 0.79525 | 0.7813  | 0.80145 | 0.65563 | 0.46782 | 0.7753  | 0.77364 ZXDA      |
| cg18630040 | 0.03719 | 0.02632 | 0.02702 | 0.02739 | 0.12223 | 0.0306  | 0.08015 | 0.07779 | 0.02235 | 0.01449 PLA2G7    |
| cg18630855 | 0.03643 | 0.03008 | 0.04198 | 0.02788 | 0.03443 | 0.02654 | 0.02587 | 0.02646 | 0.03295 | 0.01947 CEBPZ     |
| cg18632102 | 0.02901 | 0.02606 | 0.02923 | 0.02793 | 0.02328 | 0.02561 | 0.02792 | 0.02574 | 0.02658 | 0.02617 CNOT8     |
| cg18632631 | 0.48857 | 0.51275 | 0.90527 | 0.91257 | 0.87388 | 0.88571 | 0.82087 | 0.42439 | 0.06374 | 0.06335 TNK1      |
| cg18633178 | 0.03945 | 0.03448 | 0.03752 | 0.03617 | 0.02457 | 0.0274  | 0.03356 | 0.03282 | 0.02577 | 0.02828 GTL3      |
| cg18634211 | 0.1397  | 0.12212 | 0.478   | 0.6699  | 0.11069 | 0.07968 | 0.07707 | 0.0704  | 0.4481  | 0.78272 LIN28     |
| cg18635110 | 0.06867 | 0.05964 | 0.0656  | 0.06554 | 0.11141 | 0.10361 | 0.07341 | 0.05995 | 0.05066 | 0.04586 C20orf116 |
| cg18636558 | 0.26023 | 0.17638 | 0.26333 | 0.24352 | 0.28571 | 0.13643 | 0.50663 | 0.16292 | 0.17706 | 0.20788 SLC15A2   |
| cg18636641 | 0.7968  | 0.58369 | 0.72818 | 0.89297 | 0.44645 | 0.42737 | 0.15959 | 0.33303 | 0.05989 | 0.04598 PPAPDC3   |
| cg18638253 | 0.06143 | 0.06467 | 0.07034 | 0.05826 | 0.05273 | 0.05895 | 0.05971 | 0.06013 | 0.05922 | 0.05498 ACVR1C    |
| cg18638496 | 0.07002 | 0.06041 | 0.06707 | 0.06216 | 0.0535  | 0.06118 | 0.06228 | 0.05219 | 0.61948 | 0.59106 FGF5      |
| cg18638581 | 0.75622 | 0.85381 | 0.87906 | 0.90105 | 0.89433 | 0.37096 | 0.86356 | 0.7425  | 0.89225 | 0.70418 HK2       |
| cg18638931 | 0.92003 | 0.75408 | 0.88727 | 0.88018 | 0.77548 | 0.50707 | 0.12956 | 0.0847  | 0.86367 | 0.85993 MOV10L1   |
| cg18640030 | 0.10896 | 0.09067 | 0.81171 | 0.8622  | 0.76157 | 0.85983 | 0.13188 | 0.09953 | 0.20967 | 0.37081 CRH       |
| cg18641050 | 0.1855  | 0.17477 | 0.20245 | 0.17038 | 0.25123 | 0.17889 | 0.20206 | 0.15508 | 0.32593 | 0.17611 BLOC1S2   |
| cg18641937 | 0.64968 | 0.60283 | 0.56024 | 0.64735 | 0.60413 | 0.55971 | 0.26643 | 0.07515 | 0.89086 | 0.62306 ITLN2     |
| cg18644543 | 0.03651 | 0.02836 | 0.10815 | 0.06313 | 0.72757 | 0.33629 | 0.0624  | 0.02741 | 0.02665 | 0.02315 HMHA1     |
| cg18645952 | 0.62281 | 0.34043 | 0.68373 | 0.72791 | 0.71305 | 0.12478 | 0.5927  | 0.46568 | 0.63782 | 0.65046 PLGLB2    |
| cg18646457 | 0.078   | 0.08946 | 0.11005 | 0.09132 | 0.049   | 0.07321 | 0.07434 | 0.07872 | 0.07503 | 0.08452 HMGCS1    |
| cg18651821 | 0.03174 | 0.03572 | 0.03762 | 0.03897 | 0.02845 | 0.03026 | 0.03194 | 0.02457 | 0.02907 | 0.0268 PDCD2      |
| cg18652121 | 0.05435 | 0.05464 | 0.0524  | 0.04553 | 0.04567 | 0.04295 | 0.03996 | 0.03543 | 0.04365 | 0.03837 NDUFB5    |

|            |         |         |         |         |         |         |         |         |         |         |           |
|------------|---------|---------|---------|---------|---------|---------|---------|---------|---------|---------|-----------|
| cg18652852 | 0.03787 | 0.03716 | 0.04252 | 0.04201 | 0.03212 | 0.0447  | 0.03605 | 0.04192 | 0.04219 | 0.03597 | MAFF      |
| cg18652941 | 0.04799 | 0.04258 | 0.04785 | 0.04489 | 0.03091 | 0.04842 | 0.03947 | 0.04511 | 0.03879 | 0.04531 | CD44      |
| cg18653991 | 0.12425 | 0.10943 | 0.13199 | 0.07598 | 0.78657 | 0.80452 | 0.43816 | 0.25207 | 0.16414 | 0.09166 | PIM2      |
| cg18654873 | 0.02389 | 0.02202 | 0.02217 | 0.02162 | 0.01818 | 0.01916 | 0.01721 | 0.01888 | 0.01606 | 0.01538 | MAP3K7    |
| cg18655584 | 0.84503 | 0.12769 | 0.91352 | 0.92966 | 0.89702 | 0.90652 | 0.82949 | 0.72728 | 0.94338 | 0.91255 | SLC22A18  |
| cg18655915 | 0.40817 | 0.31902 | 0.40316 | 0.37419 | 0.60252 | 0.80616 | 0.34525 | 0.48941 | 0.36585 | 0.22197 | ABCB4     |
| cg18656170 | 0.87905 | 0.88727 | 0.8909  | 0.89538 | 0.82398 | 0.83046 | 0.84017 | 0.64087 | 0.90495 | 0.75792 | LTB       |
| cg18660898 | 0.76956 | 0.21471 | 0.38698 | 0.58982 | 0.31224 | 0.08817 | 0.13052 | 0.15702 | 0.50568 | 0.04867 | MLLT11    |
| cg18661868 | 0.80916 | 0.72635 | 0.65483 | 0.70928 | 0.71051 | 0.65346 | 0.81699 | 0.83296 | 0.32663 | 0.2315  | FES       |
| cg18665023 | 0.03783 | 0.03987 | 0.04819 | 0.04216 | 0.03543 | 0.04434 | 0.03146 | 0.02965 | 0.03243 | 0.02948 | ATP5O     |
| cg18665384 | 0.83432 | 0.40366 | 0.85977 | 0.87916 | 0.86065 | 0.25332 | 0.88256 | 0.6832  | 0.90907 | 0.63752 | FLJ43505  |
| cg18665563 | 0.32918 | 0.10314 | 0.37535 | 0.53648 | 0.85264 | 0.83308 | 0.19521 | 0.08977 | 0.05574 | 0.05305 | HMGB3     |
| cg18666238 | 0.04373 | 0.05158 | 0.0511  | 0.04378 | 0.04918 | 0.04814 | 0.04058 | 0.03825 | 0.04269 | 0.04268 | FUBP1     |
| cg18667426 | 0.04138 | 0.03977 | 0.47847 | 0.72007 | 0.75637 | 0.81945 | 0.06944 | 0.03814 | 0.04281 | 0.03883 | C1orf85   |
| cg18668753 | 0.42039 | 0.21651 | 0.76715 | 0.80881 | 0.54164 | 0.46521 | 0.60131 | 0.61017 | 0.29296 | 0.39972 | PEG3      |
| cg18669381 | 0.32534 | 0.10287 | 0.46329 | 0.60917 | 0.40515 | 0.13114 | 0.32085 | 0.07001 | 0.08695 | 0.05556 | ARHGEF19  |
| cg18669588 | 0.84613 | 0.77871 | 0.84717 | 0.80535 | 0.27446 | 0.13234 | 0.76032 | 0.69955 | 0.87913 | 0.78187 | PTK9L     |
| cg18670235 | 0.05003 | 0.04412 | 0.18075 | 0.09875 | 0.07289 | 0.07977 | 0.04482 | 0.04573 | 0.04218 | 0.03916 | PLOD3     |
| cg18671950 | 0.0279  | 0.02962 | 0.03142 | 0.03278 | 0.02419 | 0.02658 | 0.02708 | 0.02523 | 0.03421 | 0.02731 | FBN1      |
| cg18672421 | 0.05014 | 0.05183 | 0.04103 | 0.03671 | 0.10383 | 0.08979 | 0.0625  | 0.05237 | 0.04632 | 0.05955 | TMED10    |
| cg18674980 | 0.09901 | 0.0574  | 0.20681 | 0.60009 | 0.3108  | 0.31437 | 0.61838 | 0.90889 | 0.27443 | 0.35501 | CA3       |
| cg18675600 | 0.62066 | 0.07769 | 0.20387 | 0.32201 | 0.8088  | 0.45565 | 0.12734 | 0.18122 | 0.1538  | 0.07948 | PTP4A3    |
| cg18676053 | 0.83152 | 0.63569 | 0.87304 | 0.87777 | 0.8613  | 0.84776 | 0.87542 | 0.68707 | 0.4924  | 0.3921  | STOM      |
| cg18676162 | 0.04352 | 0.02423 | 0.17398 | 0.051   | 0.39905 | 0.04996 | 0.96872 | 0.26158 | 0.02387 | 0.01793 | NME4      |
| cg18676237 | 0.73149 | 0.66397 | 0.54095 | 0.80375 | 0.49502 | 0.57831 | 0.23069 | 0.15761 | 0.47945 | 0.38881 | SERPINB9  |
| cg18676393 | 0.18997 | 0.05406 | 0.04492 | 0.04432 | 0.05487 | 0.05621 | 0.04043 | 0.03757 | 0.04268 | 0.04735 | GEMIN6    |
| cg18676679 | 0.03413 | 0.03315 | 0.03507 | 0.03414 | 0.06682 | 0.26264 | 0.032   | 0.035   | 0.0251  | 0.02751 | BANP      |
| cg18676764 | 0.93744 | 0.93393 | 0.921   | 0.93231 | 0.95186 | 0.9307  | 0.92859 | 0.92345 | 0.9365  | 0.90129 | WDR40A    |
| cg18676803 | 0.10178 | 0.08946 | 0.11086 | 0.09162 | 0.11072 | 0.06163 | 0.07421 | 0.07681 | 0.09685 | 0.09748 | MYNN      |
| cg18677965 | 0.05431 | 0.062   | 0.05818 | 0.07085 | 0.04315 | 0.052   | 0.05133 | 0.05161 | 0.05417 | 0.05005 | DDX27     |
| cg18678121 | 0.90281 | 0.8963  | 0.89255 | 0.89511 | 0.86231 | 0.9175  | 0.88987 | 0.91551 | 0.90015 | 0.89989 | SEC61A2   |
| cg18678185 | 0.11101 | 0.05082 | 0.26852 | 0.13945 | 0.07265 | 0.05736 | 0.07092 | 0.05753 | 0.05263 | 0.03842 | KDELRL1   |
| cg18678421 | 0.11883 | 0.08537 | 0.10685 | 0.10549 | 0.12924 | 0.10818 | 0.09079 | 0.08889 | 0.08079 | 0.07798 | LENG8     |
| cg18678763 | 0.06098 | 0.04058 | 0.07672 | 0.08349 | 0.02889 | 0.02958 | 0.06363 | 0.03185 | 0.02829 | 0.02548 | RRM1      |
| cg18679190 | 0.9078  | 0.87191 | 0.90395 | 0.91325 | 0.91685 | 0.91693 | 0.84244 | 0.91273 | 0.91912 | 0.91075 | MFAP2     |
| cg18680021 | 0.03216 | 0.03123 | 0.02807 | 0.02634 | 0.03424 | 0.03764 | 0.03083 | 0.02671 | 0.02563 | 0.02681 | OTUB2     |
| cg18680834 | 0.58688 | 0.44879 | 0.18484 | 0.24587 | 0.26003 | 0.11878 | 0.12037 | 0.10301 | 0.17121 | 0.14665 | ZNF536    |
| cg18688305 | 0.05636 | 0.05735 | 0.05462 | 0.05641 | 0.06649 | 0.04352 | 0.04942 | 0.04738 | 0.05469 | 0.04574 | EIF4ENIF1 |
| cg18689253 | 0.04776 | 0.04525 | 0.04847 | 0.04125 | 0.0324  | 0.04039 | 0.03912 | 0.03867 | 0.04004 | 0.03634 | TLE4      |
| cg18690395 | 0.03588 | 0.0401  | 0.04462 | 0.03819 | 0.03445 | 0.03341 | 0.03278 | 0.03384 | 0.02946 | 0.02681 | CSTF2T    |
| cg18691434 | 0.65674 | 0.56744 | 0.95303 | 0.96301 | 0.85897 | 0.65341 | 0.12266 | 0.30737 | 0.08346 | 0.05287 | GPC2      |



|            |         |         |         |         |         |         |         |         |         |         |           |
|------------|---------|---------|---------|---------|---------|---------|---------|---------|---------|---------|-----------|
| cg18692273 | 0.94582 | 0.9218  | 0.93665 | 0.94131 | 0.94541 | 0.92242 | 0.90799 | 0.90347 | 0.94034 | 0.89562 | TNNT2     |
| cg18692596 | 0.05262 | 0.05033 | 0.05346 | 0.05274 | 0.03605 | 0.05744 | 0.0466  | 0.04755 | 0.05224 | 0.04789 | LOC58486  |
| cg18693704 | 0.17561 | 0.06625 | 0.41979 | 0.57251 | 0.15368 | 0.08587 | 0.08226 | 0.06447 | 0.68323 | 0.0475  | CMTM4     |
| cg18694780 | 0.13465 | 0.12496 | 0.08865 | 0.0517  | 0.1886  | 0.26385 | 0.14541 | 0.05411 | 0.08627 | 0.07682 | CMKOR1    |
| cg18695429 | 0.04369 | 0.03835 | 0.05337 | 0.06322 | 0.03999 | 0.085   | 0.12116 | 0.03817 | 0.03429 | 0.03334 | CSTF2     |
| cg18695917 | 0.05059 | 0.04775 | 0.06626 | 0.04425 | 0.06276 | 0.05446 | 0.04841 | 0.03298 | 0.05421 | 0.05028 | FSTL5     |
| cg18697049 | 0.0252  | 0.02441 | 0.0255  | 0.0258  | 0.02052 | 0.02271 | 0.02223 | 0.01895 | 0.01999 | 0.01889 | CDC2L6    |
| cg18699004 | 0.0275  | 0.02965 | 0.03291 | 0.03078 | 0.02384 | 0.03082 | 0.02867 | 0.03103 | 0.02732 | 0.03063 | FLJ22386  |
| cg18699916 | 0.91049 | 0.90205 | 0.87563 | 0.89774 | 0.72303 | 0.80859 | 0.86461 | 0.88249 | 0.91338 | 0.88513 | EGFL8     |
| cg18700516 | 0.09533 | 0.08231 | 0.11655 | 0.09802 | 0.16193 | 0.1025  | 0.08988 | 0.08488 | 0.06937 | 0.07497 | ZNF230    |
| cg18700967 | 0.03987 | 0.03761 | 0.08206 | 0.07238 | 0.05629 | 0.04475 | 0.04836 | 0.04519 | 0.03232 | 0.04752 | SSH2      |
| cg18701598 | 0.08393 | 0.07303 | 0.11588 | 0.10612 | 0.08247 | 0.07403 | 0.06898 | 0.06548 | 0.1592  | 0.0631  | LIPA      |
| cg18702197 | 0.94367 | 0.78997 | 0.88621 | 0.92423 | 0.76406 | 0.92707 | 0.6201  | 0.58257 | 0.71981 | 0.59437 | HOXD3     |
| cg18702234 | 0.0486  | 0.06677 | 0.06212 | 0.0591  | 0.03243 | 0.05024 | 0.04839 | 0.05068 | 0.05393 | 0.04509 | PSME3     |
| cg18704047 | 0.2175  | 0.16908 | 0.25413 | 0.23093 | 0.2314  | 0.15363 | 0.15429 | 0.13195 | 0.11221 | 0.0904  | PART1     |
| cg18704595 | 0.04681 | 0.05728 | 0.05725 | 0.04841 | 0.06301 | 0.05626 | 0.04509 | 0.11968 | 0.04251 | 0.03604 | ADA       |
| cg18705067 | 0.97542 | 0.71803 | 0.96837 | 0.97145 | 0.96746 | 0.96018 | 0.62985 | 0.78315 | 0.97851 | 0.97816 | FLJ37078  |
| cg18705301 | 0.45889 | 0.49077 | 0.62238 | 0.67953 | 0.84681 | 0.808   | 0.74089 | 0.75669 | 0.53347 | 0.23052 | NDUFAF1   |
| cg18705776 | 0.55357 | 0.09919 | 0.65397 | 0.78589 | 0.71664 | 0.85465 | 0.08205 | 0.07699 | 0.70215 | 0.31929 | CALML3    |
| cg18708106 | 0.07653 | 0.06538 | 0.07865 | 0.07755 | 0.06163 | 0.07519 | 0.06498 | 0.06208 | 0.06049 | 0.05126 | SUCLA2    |
| cg18710383 | 0.37843 | 0.55462 | 0.05411 | 0.04812 | 0.03796 | 0.04693 | 0.05844 | 0.04575 | 0.04665 | 0.04371 | C6orf51   |
| cg18710692 | 0.02442 | 0.02955 | 0.03059 | 0.0315  | 0.03436 | 0.03321 | 0.02306 | 0.0238  | 0.02785 | 0.02296 | ZMYM5     |
| cg18710985 | 0.04709 | 0.03966 | 0.0567  | 0.05018 | 0.04577 | 0.05473 | 0.04746 | 0.05308 | 0.03086 | 0.03113 | C20orf23  |
| cg18711066 | 0.10413 | 0.0845  | 0.11319 | 0.12288 | 0.51869 | 0.6175  | 0.1287  | 0.11003 | 0.09406 | 0.09395 | NFATC3    |
| cg18712119 | 0.03905 | 0.03679 | 0.04381 | 0.04028 | 0.0388  | 0.03716 | 0.03653 | 0.04001 | 0.03656 | 0.03408 | TNFAIP1   |
| cg18712919 | 0.76139 | 0.7646  | 0.66412 | 0.71568 | 0.64625 | 0.69213 | 0.22754 | 0.79067 | 0.60371 | 0.59    | BRE       |
| cg18714560 | 0.48431 | 0.43029 | 0.579   | 0.67694 | 0.85906 | 0.69412 | 0.0606  | 0.05899 | 0.91599 | 0.86884 | SCT       |
| cg18715299 | 0.90493 | 0.9077  | 0.87528 | 0.87781 | 0.81224 | 0.88751 | 0.87008 | 0.89102 | 0.87738 | 0.85234 | AMHR2     |
| cg18715868 | 0.1483  | 0.15064 | 0.18925 | 0.12714 | 0.11193 | 0.22662 | 0.11656 | 0.09679 | 0.10502 | 0.13365 | HIST1H2BN |
| cg18717447 | 0.12502 | 0.09802 | 0.21246 | 0.15854 | 0.2158  | 0.13981 | 0.08396 | 0.10794 | 0.20195 | 0.08097 | LOC159090 |
| cg18718102 | 0.03973 | 0.03527 | 0.66768 | 0.60933 | 0.05526 | 0.03473 | 0.09599 | 0.03768 | 0.0559  | 0.03164 | SURF6     |
| cg18719571 | 0.87623 | 0.55687 | 0.88196 | 0.86556 | 0.83217 | 0.78814 | 0.84246 | 0.84957 | 0.87328 | 0.47722 | DTNBP1    |
| cg18719814 | 0.02578 | 0.02726 | 0.02953 | 0.02378 | 0.02746 | 0.02953 | 0.02154 | 0.02508 | 0.02211 | 0.02738 | NFXL1     |
| cg18721882 | 0.04942 | 0.04117 | 0.05091 | 0.04273 | 0.0498  | 0.04625 | 0.04566 | 0.03786 | 0.05608 | 0.05456 | ARHGAP11A |
| cg18722841 | 0.05858 | 0.04099 | 0.82733 | 0.94127 | 0.75068 | 0.7569  | 0.42499 | 0.49549 | 0.60473 | 0.55525 | PHOX2A    |
| cg18727700 | 0.86509 | 0.77704 | 0.11962 | 0.16748 | 0.14576 | 0.13736 | 0.08655 | 0.22558 | 0.12922 | 0.11488 | SRPX2     |
| cg18728325 | 0.0681  | 0.05911 | 0.06107 | 0.06781 | 0.08414 | 0.07324 | 0.06864 | 0.05767 | 0.04985 | 0.04    | ZNF224    |
| cg18728606 | 0.03199 | 0.02666 | 0.02876 | 0.02894 | 0.02684 | 0.02569 | 0.02232 | 0.02378 | 0.0242  | 0.02212 | MKMK2     |
| cg18729973 | 0.58522 | 0.09108 | 0.55852 | 0.67246 | 0.57428 | 0.39791 | 0.04432 | 0.06401 | 0.2216  | 0.08662 | TFF1      |
| cg18730023 | 0.05704 | 0.06869 | 0.07053 | 0.08442 | 0.07613 | 0.08112 | 0.06671 | 0.05561 | 0.07208 | 0.05451 | PTK9      |
| cg18731014 | 0.04946 | 0.04866 | 0.04866 | 0.04438 | 0.0413  | 0.04415 | 0.03892 | 0.04058 | 0.04508 | 0.04325 | ZNF639    |

|            |         |         |         |         |         |         |         |         |         |                  |
|------------|---------|---------|---------|---------|---------|---------|---------|---------|---------|------------------|
| cg18731789 | 0.0533  | 0.0459  | 0.07737 | 0.06628 | 0.07091 | 0.07127 | 0.05975 | 0.06572 | 0.05069 | 0.05101 FKBP2    |
| cg18731813 | 0.40979 | 0.53226 | 0.1108  | 0.09708 | 0.1012  | 0.0911  | 0.13474 | 0.13548 | 0.06495 | 0.07257 ARMCX1   |
| cg18732541 | 0.21592 | 0.08748 | 0.86712 | 0.87615 | 0.46007 | 0.39447 | 0.32359 | 0.06935 | 0.69971 | 0.68479 MCEMP1   |
| cg18735146 | 0.92202 | 0.81429 | 0.91569 | 0.88976 | 0.9068  | 0.87686 | 0.89882 | 0.70306 | 0.90851 | 0.86619 TTC10    |
| cg18738906 | 0.94754 | 0.55033 | 0.96916 | 0.96762 | 0.96704 | 0.97289 | 0.96719 | 0.96188 | 0.97248 | 0.96578 SCNN1A   |
| cg18740800 | 0.13154 | 0.14957 | 0.64938 | 0.72699 | 0.58179 | 0.64624 | 0.61979 | 0.75831 | 0.18101 | 0.25376 HSPCAL3  |
| cg18741908 | 0.89538 | 0.79607 | 0.9299  | 0.91935 | 0.92442 | 0.92636 | 0.75139 | 0.90365 | 0.14348 | 0.07343 GPR160   |
| cg18741962 | 0.05523 | 0.04804 | 0.06278 | 0.04911 | 0.08388 | 0.07313 | 0.0712  | 0.06175 | 0.03841 | 0.036 TRIM23     |
| cg18742441 | 0.03308 | 0.03675 | 0.04328 | 0.05894 | 0.04991 | 0.04157 | 0.32615 | 0.39183 | 0.02279 | 0.02368 ATP6AP1  |
| cg18742893 | 0.07234 | 0.0272  | 0.03295 | 0.03032 | 0.05399 | 0.02241 | 0.02413 | 0.02042 | 0.04365 | 0.0314 BOC       |
| cg18743730 | 0.52994 | 0.59277 | 0.55208 | 0.52584 | 0.88767 | 0.88374 | 0.39082 | 0.42264 | 0.48758 | 0.38478 CA4      |
| cg18746357 | 0.62609 | 0.2937  | 0.90097 | 0.88123 | 0.87737 | 0.85879 | 0.13322 | 0.07218 | 0.92658 | 0.86472 RELA     |
| cg18748332 | 0.0257  | 0.02847 | 0.02902 | 0.02843 | 0.02151 | 0.03238 | 0.02915 | 0.0279  | 0.02271 | 0.02339 ATF7     |
| cg18750407 | 0.04507 | 0.04246 | 0.05089 | 0.05083 | 0.04914 | 0.04117 | 0.0433  | 0.0389  | 0.039   | 0.03726 RHEBL1   |
| cg18750756 | 0.67131 | 0.24958 | 0.60414 | 0.82143 | 0.5718  | 0.6921  | 0.61178 | 0.60733 | 0.20002 | 0.03521 MGC29671 |
| cg18750833 | 0.19896 | 0.07887 | 0.22701 | 0.13937 | 0.1562  | 0.07913 | 0.07533 | 0.0704  | 0.08954 | 0.07945 MCEE     |
| cg18750960 | 0.92736 | 0.92392 | 0.64067 | 0.65701 | 0.9312  | 0.71666 | 0.04711 | 0.0816  | 0.41689 | 0.39818 HOXD4    |
| cg18752854 | 0.82004 | 0.78211 | 0.81135 | 0.82983 | 0.7724  | 0.78215 | 0.38316 | 0.39118 | 0.80081 | 0.6388 TNS1      |
| cg18752880 | 0.61294 | 0.16184 | 0.41838 | 0.63909 | 0.25354 | 0.38378 | 0.5917  | 0.76932 | 0.4977  | 0.26523 C1QTNF3  |
| cg18753695 | 0.07418 | 0.06965 | 0.07705 | 0.0726  | 0.16298 | 0.07932 | 0.05559 | 0.0565  | 0.07701 | 0.07178 HNRPLL   |
| cg18754342 | 0.79862 | 0.51979 | 0.57592 | 0.7456  | 0.57265 | 0.37316 | 0.35931 | 0.48588 | 0.31632 | 0.23063 GUCY2C   |
| cg18755204 | 0.05299 | 0.05359 | 0.04735 | 0.03779 | 0.04289 | 0.04522 | 0.04204 | 0.04514 | 0.03513 | 0.03879 FAM45A   |
| cg18755783 | 0.02289 | 0.02897 | 0.0288  | 0.02425 | 0.02539 | 0.02776 | 0.02306 | 0.02376 | 0.02329 | 0.02684 SPG20    |
| cg18757066 | 0.03046 | 0.03579 | 0.03885 | 0.0341  | 0.03562 | 0.03311 | 0.03574 | 0.03907 | 0.03084 | 0.0329 LEREPO4   |
| cg18758482 | 0.40713 | 0.26501 | 0.46868 | 0.49346 | 0.36683 | 0.40328 | 0.40597 | 0.41126 | 0.34106 | 0.328 ZBTB80S    |
| cg18759110 | 0.06385 | 0.06009 | 0.08875 | 0.07137 | 0.07344 | 0.05987 | 0.06451 | 0.06589 | 0.056   | 0.06649 HCFC2    |
| cg18759346 | 0.07021 | 0.05523 | 0.069   | 0.0573  | 0.05204 | 0.05171 | 0.04823 | 0.04142 | 0.05831 | 0.06126 COMMD2   |
| cg18760752 | 0.07615 | 0.08313 | 0.0807  | 0.07988 | 0.05917 | 0.07281 | 0.07442 | 0.07309 | 0.07262 | 0.06413 PAFAH1B3 |
| cg18762485 | 0.05326 | 0.04877 | 0.04402 | 0.03977 | 0.05158 | 0.25033 | 0.04896 | 0.06994 | 0.10453 | 0.03491 CH25H    |
| cg18763191 | 0.02995 | 0.0409  | 0.04661 | 0.0339  | 0.29916 | 0.31152 | 0.02891 | 0.03283 | 0.03277 | 0.02777 ST3GAL5  |
| cg18765542 | 0.78706 | 0.1077  | 0.9724  | 0.9705  | 0.9795  | 0.96455 | 0.97513 | 0.71493 | 0.97541 | 0.88409 DGKZ     |
| cg18766755 | 0.20562 | 0.15013 | 0.21995 | 0.19144 | 0.27339 | 0.22587 | 0.15837 | 0.14286 | 0.18131 | 0.21262 SPRR2A   |
| cg18766847 | 0.16834 | 0.1548  | 0.33702 | 0.24847 | 0.73259 | 0.81553 | 0.18947 | 0.20802 | 0.15678 | 0.17075 ACMSD    |
| cg18766912 | 0.17965 | 0.09765 | 0.10607 | 0.1037  | 0.05571 | 0.09529 | 0.09057 | 0.09417 | 0.08358 | 0.09348 UBE3A    |
| cg18768283 | 0.74865 | 0.51849 | 0.72218 | 0.75471 | 0.62275 | 0.59388 | 0.51879 | 0.45315 | 0.65929 | 0.55817 NUT      |
| cg18769818 | 0.06714 | 0.24087 | 0.82831 | 0.83721 | 0.88288 | 0.84023 | 0.34332 | 0.26231 | 0.8634  | 0.82852 CENTD2   |
| cg18770944 | 0.10907 | 0.08767 | 0.17504 | 0.14974 | 0.14736 | 0.0808  | 0.49753 | 0.39289 | 0.11719 | 0.06429 USP51    |
| cg18771300 | 0.22084 | 0.53629 | 0.08477 | 0.09567 | 0.8731  | 0.88151 | 0.29749 | 0.08858 | 0.05225 | 0.06308 RHOJ     |
| cg18772361 | 0.06472 | 0.0317  | 0.04446 | 0.03521 | 0.04612 | 0.03167 | 0.02481 | 0.02502 | 0.03134 | 0.02507 C1orf22  |
| cg18773223 | 0.04845 | 0.05255 | 0.05225 | 0.04627 | 0.03153 | 0.04074 | 0.04447 | 0.04637 | 0.0394  | 0.04208 TBC1D13  |
| cg18776056 | 0.03642 | 0.0397  | 0.04057 | 0.03752 | 0.03924 | 0.03705 | 0.03951 | 0.03771 | 0.03239 | 0.03509 FKBP4    |

|            |         |         |         |         |         |         |         |         |         |                  |
|------------|---------|---------|---------|---------|---------|---------|---------|---------|---------|------------------|
| cg18776764 | 0.04563 | 0.04828 | 0.04165 | 0.04353 | 0.03762 | 0.04514 | 0.04025 | 0.03978 | 0.03782 | 0.0375 BCL6      |
| cg18777448 | 0.96102 | 0.943   | 0.95612 | 0.9564  | 0.96785 | 0.96479 | 0.94676 | 0.79318 | 0.96552 | 0.94846 CXCL16   |
| cg18777554 | 0.89652 | 0.64762 | 0.86442 | 0.90257 | 0.8786  | 0.90677 | 0.59719 | 0.56824 | 0.65116 | 0.61612 FLJ44112 |
| cg18779060 | 0.06692 | 0.07589 | 0.09387 | 0.10326 | 0.05217 | 0.06473 | 0.05287 | 0.05953 | 0.06778 | 0.0529 DYRK1A    |
| cg18780284 | 0.06593 | 0.04953 | 0.09103 | 0.03968 | 0.19323 | 0.06419 | 0.04274 | 0.04232 | 0.05658 | 0.06917 SPRR1B   |
| cg18780401 | 0.03204 | 0.03155 | 0.03233 | 0.02845 | 0.02262 | 0.02543 | 0.47774 | 0.37127 | 0.02264 | 0.02236 OTUD5    |
| cg18780751 | 0.03119 | 0.03232 | 0.04442 | 0.03788 | 0.02896 | 0.04299 | 0.33312 | 0.38966 | 0.03123 | 0.03 G6PD        |
| cg18783781 | 0.86439 | 0.73279 | 0.87715 | 0.84807 | 0.83936 | 0.58077 | 0.80602 | 0.5534  | 0.86322 | 0.61359 MGC4399  |
| cg18783796 | 0.09531 | 0.09784 | 0.1087  | 0.11885 | 0.09331 | 0.10718 | 0.09731 | 0.09854 | 0.09515 | 0.09154 C6orf199 |
| cg18787449 | 0.69773 | 0.55783 | 0.42177 | 0.64352 | 0.80257 | 0.85512 | 0.44206 | 0.55658 | 0.9042  | 0.85533 MAGEA2B  |
| cg18787783 | 0.74804 | 0.68391 | 0.72802 | 0.8016  | 0.75087 | 0.76031 | 0.78066 | 0.76778 | 0.81807 | 0.53019 MMP19    |
| cg18787975 | 0.36419 | 0.15385 | 0.38324 | 0.47663 | 0.12665 | 0.0583  | 0.0959  | 0.07148 | 0.4019  | 0.05905 CTSB     |
| cg18788872 | 0.03101 | 0.02986 | 0.03468 | 0.0287  | 0.023   | 0.02761 | 0.02953 | 0.02683 | 0.02564 | 0.02549 hfl-B5   |
| cg18788940 | 0.79797 | 0.80527 | 0.7884  | 0.75588 | 0.74104 | 0.78419 | 0.54254 | 0.71822 | 0.47058 | 0.13978 HTATIP2  |
| cg18790143 | 0.68893 | 0.44375 | 0.88959 | 0.8304  | 0.90675 | 0.8818  | 0.06589 | 0.04983 | 0.64309 | 0.45226 OTOS     |
| cg18792584 | 0.04076 | 0.03665 | 0.0593  | 0.05395 | 0.04347 | 0.04094 | 0.0455  | 0.03496 | 0.04162 | 0.04539 TOR1AIP1 |
| cg18793806 | 0.80818 | 0.64159 | 0.82064 | 0.85461 | 0.83057 | 0.81115 | 0.4684  | 0.47889 | 0.13069 | 0.24104 ZNF514   |
| cg18794577 | 0.05724 | 0.04456 | 0.69368 | 0.72822 | 0.07947 | 0.23086 | 0.08015 | 0.48166 | 0.06278 | 0.03867 GRIN3A   |
| cg18795395 | 0.0502  | 0.05529 | 0.06794 | 0.05567 | 0.08573 | 0.06019 | 0.04471 | 0.04548 | 0.05993 | 0.0468 GNG12     |
| cg18796520 | 0.04152 | 0.04905 | 0.05281 | 0.06582 | 0.05404 | 0.03667 | 0.04439 | 0.04732 | 0.04538 | 0.04335 NDUFA9   |
| cg18797053 | 0.02206 | 0.02308 | 0.0266  | 0.02535 | 0.02315 | 0.02489 | 0.02096 | 0.02039 | 0.02207 | 0.02231 DNAJB2   |
| cg18797282 | 0.90517 | 0.91441 | 0.91411 | 0.91811 | 0.91678 | 0.9011  | 0.9043  | 0.89596 | 0.88486 | 0.91237 CYB561D2 |
| cg18798750 | 0.10836 | 0.0332  | 0.02737 | 0.03151 | 0.0225  | 0.02948 | 0.02734 | 0.02474 | 0.03012 | 0.02368 MGC14289 |
| cg18799866 | 0.04739 | 0.04377 | 0.03358 | 0.03116 | 0.26795 | 0.03318 | 0.53498 | 0.49637 | 0.6904  | 0.444 SLC9A7     |
| cg18801292 | 0.03646 | 0.03091 | 0.0337  | 0.02986 | 0.03153 | 0.03749 | 0.02853 | 0.02776 | 0.0264  | 0.02811 SUPT16H  |
| cg18801691 | 0.10936 | 0.12326 | 0.35597 | 0.61251 | 0.37324 | 0.23607 | 0.19777 | 0.14755 | 0.19005 | 0.2239 DCC       |
| cg18801806 | 0.04966 | 0.03527 | 0.1502  | 0.16801 | 0.02878 | 0.03061 | 0.23269 | 0.13278 | 0.25752 | 0.04024 DLNB14   |
| cg18804206 | 0.70869 | 0.25979 | 0.27244 | 0.28994 | 0.33163 | 0.04434 | 0.31969 | 0.22825 | 0.34006 | 0.04081 FLII     |
| cg18805835 | 0.16674 | 0.17183 | 0.17672 | 0.15789 | 0.9316  | 0.89976 | 0.89877 | 0.69626 | 0.16393 | 0.14085 DNAJC18  |
| cg18806365 | 0.27804 | 0.2922  | 0.27346 | 0.3035  | 0.31253 | 0.2983  | 0.21001 | 0.21332 | 0.18094 | 0.14709 FABP5    |
| cg18806980 | 0.36145 | 0.14929 | 0.43545 | 0.47984 | 0.34535 | 0.184   | 0.18627 | 0.1266  | 0.27023 | 0.1295 KIAA0703  |
| cg18807515 | 0.53439 | 0.2063  | 0.34746 | 0.48764 | 0.76043 | 0.5608  | 0.35272 | 0.1061  | 0.53454 | 0.32825 PRAMEF2  |
| cg18808261 | 0.40616 | 0.3058  | 0.38214 | 0.4162  | 0.48247 | 0.3884  | 0.25568 | 0.2208  | 0.5122  | 0.51361 SATB1    |
| cg18809151 | 0.05505 | 0.03075 | 0.04046 | 0.03474 | 0.0514  | 0.03374 | 0.03728 | 0.03227 | 0.04057 | 0.03878 NDUFAF1  |
| cg18809289 | 0.12947 | 0.08784 | 0.24766 | 0.2994  | 0.48995 | 0.56039 | 0.28827 | 0.41786 | 0.78837 | 0.37477 ALOX5    |
| cg18809535 | 0.84995 | 0.86014 | 0.86018 | 0.87717 | 0.88371 | 0.85135 | 0.8481  | 0.84351 | 0.87596 | 0.8448 LDHAL6B   |
| cg18811423 | 0.04712 | 0.05817 | 0.08898 | 0.06591 | 0.08992 | 0.0599  | 0.04858 | 0.04393 | 0.04934 | 0.07325 PNPT1    |
| cg18813928 | 0.94798 | 0.94931 | 0.93591 | 0.94221 | 0.93087 | 0.93668 | 0.93473 | 0.94157 | 0.94703 | 0.94861 RUNX3    |
| cg18815539 | 0.03384 | 0.02741 | 0.03295 | 0.02773 | 0.03606 | 0.03554 | 0.02272 | 0.02388 | 0.02415 | 0.02519 SLA/LP   |
| cg18815943 | 0.04009 | 0.02056 | 0.35128 | 0.37649 | 0.29579 | 0.37756 | 0.1319  | 0.14447 | 0.16187 | 0.01929 FOXE3    |
| cg18818531 | 0.91385 | 0.06024 | 0.76988 | 0.8669  | 0.8859  | 0.38299 | 0.85685 | 0.32995 | 0.78578 | 0.21332 FOSL1    |

|            |         |         |         |         |         |         |         |         |         |         |           |
|------------|---------|---------|---------|---------|---------|---------|---------|---------|---------|---------|-----------|
| cg18821742 | 0.05346 | 0.05072 | 0.0509  | 0.04722 | 0.05335 | 0.04768 | 0.04012 | 0.04098 | 0.06655 | 0.39377 | PCDH7     |
| cg18822544 | 0.29195 | 0.19194 | 0.3246  | 0.42166 | 0.37959 | 0.50123 | 0.17154 | 0.12953 | 0.14906 | 0.17431 | KRTAP26-1 |
| cg18824775 | 0.03082 | 0.02847 | 0.02797 | 0.0297  | 0.02168 | 0.02783 | 0.0262  | 0.02605 | 0.02291 | 0.02251 | PX19      |
| cg18825539 | 0.04627 | 0.04378 | 0.04969 | 0.04558 | 0.04557 | 0.04545 | 0.05571 | 0.0494  | 0.04081 | 0.03992 | ATP2A2    |
| cg18825999 | 0.03326 | 0.03025 | 0.03726 | 0.03838 | 0.03657 | 0.03989 | 0.02674 | 0.02382 | 0.03276 | 0.0306  | PNRC2     |
| cg18826520 | 0.04928 | 0.05147 | 0.05381 | 0.05244 | 0.04365 | 0.04781 | 0.04947 | 0.05176 | 0.03494 | 0.03928 | RHOT2     |
| cg18828334 | 0.11987 | 0.03808 | 0.04083 | 0.02987 | 0.02603 | 0.0332  | 0.03229 | 0.03306 | 0.02816 | 0.02903 | PRKD2     |
| cg18829411 | 0.52532 | 0.23181 | 0.85233 | 0.83044 | 0.86623 | 0.82824 | 0.5885  | 0.15534 | 0.27089 | 0.07241 | HMGNI     |
| cg18830459 | 0.01997 | 0.02229 | 0.02259 | 0.02136 | 0.01875 | 0.01724 | 0.0191  | 0.01888 | 0.01872 | 0.01795 | IBRDC3    |
| cg18833140 | 0.37129 | 0.21336 | 0.71244 | 0.78041 | 0.74336 | 0.76559 | 0.67297 | 0.66831 | 0.12236 | 0.06623 | HABP2     |
| cg18834029 | 0.88673 | 0.90412 | 0.85209 | 0.84719 | 0.76399 | 0.62949 | 0.89092 | 0.21646 | 0.91479 | 0.88902 | POLL      |
| cg18838701 | 0.38158 | 0.6407  | 0.89066 | 0.90936 | 0.8299  | 0.86996 | 0.42661 | 0.35153 | 0.69228 | 0.48396 | TNNI3     |
| cg18839416 | 0.6466  | 0.09182 | 0.1007  | 0.12672 | 0.16477 | 0.14783 | 0.05664 | 0.06797 | 0.06859 | 0.06651 | C1orf158  |
| cg18840461 | 0.04478 | 0.03911 | 0.0737  | 0.09345 | 0.05391 | 0.07089 | 0.04821 | 0.03331 | 0.2025  | 0.02669 | ANKRD43   |
| cg18841634 | 0.03604 | 0.03426 | 0.30609 | 0.38165 | 0.27371 | 0.74053 | 0.04844 | 0.0384  | 0.11432 | 0.30641 | DCC       |
| cg18841894 | 0.05474 | 0.05155 | 0.06022 | 0.05462 | 0.06181 | 0.06502 | 0.04755 | 0.04789 | 0.04473 | 0.04361 | SOD1      |
| cg18841952 | 0.23947 | 0.22456 | 0.40567 | 0.62058 | 0.71762 | 0.80276 | 0.19291 | 0.07716 | 0.10419 | 0.10899 | GPR115    |
| cg18843688 | 0.11243 | 0.09563 | 0.08721 | 0.08077 | 0.11568 | 0.17409 | 0.07677 | 0.05721 | 0.05822 | 0.04939 | NUFIP1    |
| cg18844850 | 0.04263 | 0.04328 | 0.0649  | 0.06154 | 0.06827 | 0.03896 | 0.05554 | 0.04869 | 0.05376 | 0.05613 | COP57A    |
| cg18846362 | 0.22584 | 0.03729 | 0.08426 | 0.07957 | 0.0438  | 0.03306 | 0.12155 | 0.08696 | 0.21256 | 0.03212 | CA12      |
| cg18847227 | 0.48961 | 0.38511 | 0.15676 | 0.15552 | 0.14206 | 0.06227 | 0.1178  | 0.36059 | 0.07393 | 0.31574 | SUMF1     |
| cg18848394 | 0.34356 | 0.28517 | 0.73599 | 0.81445 | 0.74549 | 0.81003 | 0.16174 | 0.13654 | 0.61611 | 0.5192  | KRTHA8    |
| cg18849169 | 0.85304 | 0.74242 | 0.74003 | 0.82371 | 0.88067 | 0.86306 | 0.78194 | 0.22256 | 0.8866  | 0.83362 | GPX3      |
| cg18851831 | 0.08968 | 0.07763 | 0.66481 | 0.7802  | 0.83232 | 0.88805 | 0.87234 | 0.88922 | 0.258   | 0.22068 | DYRK1B    |
| cg18854045 | 0.81875 | 0.609   | 0.76791 | 0.81553 | 0.84338 | 0.85692 | 0.64701 | 0.45165 | 0.86672 | 0.85658 | FLJ33534  |
| cg18854666 | 0.8926  | 0.56869 | 0.8819  | 0.90085 | 0.90496 | 0.92708 | 0.44888 | 0.46152 | 0.89155 | 0.82978 | SLC11A1   |
| cg18855178 | 0.03197 | 0.03399 | 0.05366 | 0.04449 | 0.07535 | 0.04211 | 0.11948 | 0.03445 | 0.13356 | 0.05159 | PCSK4     |
| cg18856252 | 0.04883 | 0.05544 | 0.04892 | 0.04897 | 0.03064 | 0.0397  | 0.04334 | 0.04447 | 0.03576 | 0.03674 | TYK2      |
| cg18858343 | 0.03856 | 0.04241 | 0.05268 | 0.06477 | 0.02848 | 0.03849 | 0.03169 | 0.03823 | 0.04232 | 0.0319  | UNC5B     |
| cg18860847 | 0.62643 | 0.35279 | 0.86118 | 0.88643 | 0.90895 | 0.83683 | 0.62954 | 0.76598 | 0.8545  | 0.52296 | NR2E3     |
| cg18862260 | 0.65819 | 0.61228 | 0.68081 | 0.76297 | 0.4874  | 0.54645 | 0.63804 | 0.7446  | 0.52919 | 0.2976  | GDF8      |
| cg18864581 | 0.06248 | 0.04677 | 0.05999 | 0.05912 | 0.07001 | 0.07456 | 0.07297 | 0.06496 | 0.04545 | 0.06708 | ZWILCH    |
| cg18865999 | 0.02939 | 0.0386  | 0.03623 | 0.03057 | 0.03063 | 0.03884 | 0.02934 | 0.02699 | 0.0261  | 0.02918 | PCYOX1    |
| cg18869368 | 0.09796 | 0.07893 | 0.13399 | 0.11518 | 0.15012 | 0.10566 | 0.05768 | 0.06103 | 0.08865 | 0.09068 | MAGEH1    |
| cg18870231 | 0.535   | 0.13642 | 0.66169 | 0.77137 | 0.73141 | 0.78506 | 0.25336 | 0.84668 | 0.44909 | 0.29239 | C1orf87   |
| cg18870413 | 0.02534 | 0.02425 | 0.02724 | 0.025   | 0.01906 | 0.02267 | 0.02273 | 0.01869 | 0.01981 | 0.02135 | BAG3      |
| cg18870712 | 0.03423 | 0.02982 | 0.03288 | 0.02816 | 0.03661 | 0.03074 | 0.02667 | 0.02715 | 0.02779 | 0.02417 | ZNF551    |
| cg18871276 | 0.09756 | 0.07245 | 0.22609 | 0.22612 | 0.29568 | 0.88642 | 0.06619 | 0.05332 | 0.3405  | 0.43747 | FLJ46156  |
| cg18871670 | 0.03939 | 0.03371 | 0.0423  | 0.03521 | 0.03132 | 0.03054 | 0.0302  | 0.03439 | 0.03358 | 0.02622 | ANAPC13   |
| cg18873386 | 0.69867 | 0.60956 | 0.87544 | 0.88345 | 0.70232 | 0.86402 | 0.04826 | 0.46392 | 0.86938 | 0.87534 | DLX5      |
| cg18875839 | 0.06568 | 0.06415 | 0.06475 | 0.07993 | 0.05035 | 0.05156 | 0.05373 | 0.06057 | 0.05381 | 0.04662 | KIF13B    |

|            |         |         |         |         |         |         |         |         |         |                  |
|------------|---------|---------|---------|---------|---------|---------|---------|---------|---------|------------------|
| cg18876189 | 0.76273 | 0.80024 | 0.74105 | 0.80322 | 0.70097 | 0.77611 | 0.46231 | 0.44208 | 0.69518 | 0.44782 FGB      |
| cg18876487 | 0.72945 | 0.13229 | 0.67774 | 0.72316 | 0.73043 | 0.70729 | 0.09962 | 0.06193 | 0.14559 | 0.11905 AIRE     |
| cg18877506 | 0.5981  | 0.23431 | 0.22366 | 0.36345 | 0.02753 | 0.03311 | 0.07002 | 0.04359 | 0.03586 | 0.02832 PDPN     |
| cg18877514 | 0.88403 | 0.07088 | 0.8059  | 0.81585 | 0.95472 | 0.65328 | 0.87655 | 0.75243 | 0.93602 | 0.83141 PXMP2    |
| cg18878034 | 0.02851 | 0.02956 | 0.03143 | 0.02743 | 0.04253 | 0.03851 | 0.02968 | 0.03332 | 0.02516 | 0.02393 C6orf108 |
| cg18878432 | 0.78597 | 0.59544 | 0.82493 | 0.82817 | 0.72295 | 0.76697 | 0.76451 | 0.64161 | 0.82175 | 0.70821 HOXB6    |
| cg18878891 | 0.06474 | 0.06836 | 0.06375 | 0.0657  | 0.04588 | 0.06253 | 0.05785 | 0.06295 | 0.05784 | 0.05927 GLE1L    |
| cg18879041 | 0.7851  | 0.7707  | 0.17215 | 0.13422 | 0.75084 | 0.7741  | 0.74992 | 0.76931 | 0.80448 | 0.7558 LIMS3     |
| cg18881269 | 0.82008 | 0.66471 | 0.89358 | 0.90897 | 0.95478 | 0.89619 | 0.90329 | 0.66523 | 0.92022 | 0.7733 LEPREL2   |
| cg18881501 | 0.8428  | 0.8334  | 0.82613 | 0.87804 | 0.92469 | 0.90015 | 0.8841  | 0.53896 | 0.89498 | 0.833 MAP2K3     |
| cg18881723 | 0.33229 | 0.08591 | 0.56704 | 0.67414 | 0.28101 | 0.43962 | 0.05818 | 0.05916 | 0.43734 | 0.19371 SLAMF1   |
| cg18883209 | 0.76415 | 0.46384 | 0.77908 | 0.77089 | 0.71651 | 0.71769 | 0.75703 | 0.72469 | 0.71101 | 0.71446 PARVB    |
| cg18884137 | 0.38557 | 0.07524 | 0.05771 | 0.04756 | 0.56447 | 0.36648 | 0.83947 | 0.82411 | 0.0441  | 0.05701 CHRNB1   |
| cg18884741 | 0.94605 | 0.60142 | 0.93584 | 0.9478  | 0.80318 | 0.58722 | 0.47519 | 0.5818  | 0.91281 | 0.88594 RABGEF1  |
| cg18885299 | 0.6922  | 0.36724 | 0.48696 | 0.57211 | 0.35714 | 0.36586 | 0.25    | 0.22502 | 0.22278 | 0.23311 MBD3L1   |
| cg18885346 | 0.67396 | 0.54671 | 0.30871 | 0.45635 | 0.45481 | 0.28401 | 0.2158  | 0.15991 | 0.24964 | 0.13588 PKHD1    |
| cg18885999 | 0.02628 | 0.02566 | 0.03281 | 0.0301  | 0.02773 | 0.02598 | 0.02949 | 0.03056 | 0.02719 | 0.02371 CMPK     |
| cg18886444 | 0.84735 | 0.58834 | 0.07879 | 0.08678 | 0.52731 | 0.6403  | 0.17264 | 0.06961 | 0.06774 | 0.05666 USP4     |
| cg18887228 | 0.81402 | 0.83181 | 0.71371 | 0.77259 | 0.64641 | 0.75721 | 0.81621 | 0.83775 | 0.82107 | 0.87844 PHF3     |
| cg18888403 | 0.90611 | 0.83058 | 0.87116 | 0.90315 | 0.82937 | 0.80472 | 0.91811 | 0.90356 | 0.90621 | 0.3472 HMGCL     |
| cg18888520 | 0.04324 | 0.0453  | 0.6492  | 0.68946 | 0.17649 | 0.33444 | 0.03816 | 0.03858 | 0.03955 | 0.03864 ZNF447   |
| cg18888595 | 0.04272 | 0.04641 | 0.06135 | 0.04786 | 0.0595  | 0.04864 | 0.05491 | 0.05074 | 0.03602 | 0.05248 OTUD6B   |
| cg18891387 | 0.03517 | 0.03951 | 0.0419  | 0.04045 | 0.0318  | 0.03114 | 0.0357  | 0.03217 | 0.03297 | 0.03345 NDUFA11  |
| cg18891404 | 0.04372 | 0.03738 | 0.04884 | 0.04718 | 0.04289 | 0.03684 | 0.03704 | 0.04198 | 0.03765 | 0.03548 ZC3H12A  |
| cg18894878 | 0.69415 | 0.57016 | 0.76044 | 0.74196 | 0.79303 | 0.77376 | 0.82608 | 0.83017 | 0.49872 | 0.46156 MAEL     |
| cg18895155 | 0.02794 | 0.02921 | 0.03355 | 0.03473 | 0.03178 | 0.03284 | 0.02626 | 0.0252  | 0.02306 | 0.02032 ZNF498   |
| cg18895413 | 0.02916 | 0.02995 | 0.04314 | 0.03206 | 0.03755 | 0.02657 | 0.02484 | 0.02616 | 0.02761 | 0.02606 ALDH4A1  |
| cg18895813 | 0.04358 | 0.04454 | 0.05467 | 0.05547 | 0.03808 | 0.05014 | 0.03869 | 0.03654 | 0.04651 | 0.04377 ADAMTS5  |
| cg18895972 | 0.44809 | 0.38008 | 0.3681  | 0.43702 | 0.31493 | 0.31394 | 0.42899 | 0.25187 | 0.17999 | 0.19958 PELO     |
| cg18896539 | 0.02792 | 0.03065 | 0.03414 | 0.03295 | 0.02368 | 0.03153 | 0.02654 | 0.03299 | 0.02696 | 0.02472 HTATIP   |
| cg18896687 | 0.04212 | 0.03589 | 0.04636 | 0.04773 | 0.03672 | 0.03203 | 0.03238 | 0.04027 | 0.09158 | 0.03216 MAFK     |
| cg18901940 | 0.74645 | 0.74785 | 0.71419 | 0.78574 | 0.63148 | 0.64971 | 0.73871 | 0.72523 | 0.77108 | 0.69083 FLJ14437 |
| cg18901980 | 0.73549 | 0.88499 | 0.88459 | 0.88838 | 0.56982 | 0.35844 | 0.05569 | 0.0504  | 0.42253 | 0.09471 KRT25A   |
| cg18902090 | 0.0335  | 0.02915 | 0.13889 | 0.17998 | 0.08621 | 0.03014 | 0.14215 | 0.14817 | 0.05584 | 0.0384 PCDHAC1   |
| cg18902203 | 0.94211 | 0.85322 | 0.93932 | 0.93939 | 0.96723 | 0.94237 | 0.89961 | 0.93624 | 0.94632 | 0.94155 TFDP1    |
| cg18904346 | 0.04065 | 0.04072 | 0.04913 | 0.07971 | 0.0853  | 0.03915 | 0.07857 | 0.04369 | 0.04198 | 0.02997 LHX2     |
| cg18905252 | 0.60757 | 0.64291 | 0.82481 | 0.80179 | 0.84011 | 0.85364 | 0.4347  | 0.43154 | 0.15414 | 0.25828 CFC1     |
| cg18905952 | 0.0709  | 0.07098 | 0.0795  | 0.06767 | 0.06591 | 0.06913 | 0.05633 | 0.05723 | 0.06957 | 0.05227 NRPB1    |
| cg18906795 | 0.21125 | 0.22904 | 0.06337 | 0.06698 | 0.1053  | 0.16498 | 0.05723 | 0.05758 | 0.04657 | 0.04993 RANBP6   |
| cg18907029 | 0.03305 | 0.03058 | 0.04873 | 0.04812 | 0.0684  | 0.02485 | 0.123   | 0.02721 | 0.04926 | 0.02353 SYNGR2   |
| cg18908499 | 0.82859 | 0.79263 | 0.78721 | 0.83226 | 0.80295 | 0.82825 | 0.27424 | 0.24911 | 0.23127 | 0.22177 C1orf150 |

|            |         |         |         |         |         |         |         |         |         |         |           |
|------------|---------|---------|---------|---------|---------|---------|---------|---------|---------|---------|-----------|
| cg18909638 | 0.45671 | 0.14353 | 0.13745 | 0.10156 | 0.20922 | 0.13424 | 0.07364 | 0.06839 | 0.06934 | 0.11322 | MIPOL1    |
| cg18910313 | 0.78067 | 0.33609 | 0.83203 | 0.8342  | 0.86953 | 0.60648 | 0.79907 | 0.7458  | 0.87703 | 0.74104 | P2RY11    |
| cg18912933 | 0.72655 | 0.57527 | 0.8135  | 0.81899 | 0.83387 | 0.75211 | 0.57614 | 0.57722 | 0.594   | 0.52559 | NP1P      |
| cg18913171 | 0.5976  | 0.49146 | 0.53472 | 0.73208 | 0.74189 | 0.81997 | 0.27702 | 0.12691 | 0.60958 | 0.49402 | SLAMF9    |
| cg18913951 | 0.91879 | 0.91567 | 0.90898 | 0.93627 | 0.90038 | 0.91803 | 0.88205 | 0.76329 | 0.92266 | 0.89054 | TMEM45B   |
| cg18915143 | 0.91238 | 0.9146  | 0.90529 | 0.89749 | 0.92744 | 0.89445 | 0.90315 | 0.90375 | 0.91491 | 0.85988 | PDE6A     |
| cg18915211 | 0.15175 | 0.0672  | 0.15474 | 0.2551  | 0.1822  | 0.07746 | 0.10231 | 0.06236 | 0.52356 | 0.07618 | ZCRB1     |
| cg18915437 | 0.01833 | 0.02195 | 0.0217  | 0.01927 | 0.01851 | 0.02134 | 0.01573 | 0.0172  | 0.0176  | 0.0178  | USP15     |
| cg18917378 | 0.52886 | 0.44841 | 0.48898 | 0.5138  | 0.7717  | 0.48051 | 0.66588 | 0.64864 | 0.3719  | 0.25548 | BCAS1     |
| cg18919097 | 0.19786 | 0.07577 | 0.88637 | 0.85564 | 0.62529 | 0.5482  | 0.88898 | 0.87445 | 0.89573 | 0.88264 | C3orf57   |
| cg18920397 | 0.33987 | 0.36671 | 0.64456 | 0.79613 | 0.61515 | 0.62846 | 0.04677 | 0.03929 | 0.07057 | 0.33608 | LY9       |
| cg18920846 | 0.83148 | 0.60594 | 0.77616 | 0.82421 | 0.53403 | 0.50012 | 0.76724 | 0.73088 | 0.86257 | 0.7579  | ASCL3     |
| cg18923230 | 0.02798 | 0.03302 | 0.03419 | 0.03533 | 0.02936 | 0.03087 | 0.44903 | 0.35849 | 0.02054 | 0.02154 | RPL10     |
| cg18925548 | 0.02951 | 0.03001 | 0.0325  | 0.0304  | 0.08419 | 0.02961 | 0.03371 | 0.03279 | 0.02803 | 0.02481 | MDK       |
| cg18925884 | 0.05574 | 0.04895 | 0.06383 | 0.14041 | 0.1629  | 0.49854 | 0.08336 | 0.07825 | 0.05544 | 0.04401 | IL17RD    |
| cg18928687 | 0.02196 | 0.02085 | 0.02353 | 0.02159 | 0.0195  | 0.01938 | 0.02449 | 0.02173 | 0.01498 | 0.01964 | DCUN1D5   |
| cg18930892 | 0.91798 | 0.90928 | 0.69852 | 0.94015 | 0.96457 | 0.57276 | 0.45764 | 0.84192 | 0.93983 | 0.86043 | OTEX      |
| cg18931421 | 0.04605 | 0.04547 | 0.08254 | 0.09492 | 0.06074 | 0.05631 | 0.04897 | 0.04299 | 0.04392 | 0.04455 | KIAA0090  |
| cg18931750 | 0.8789  | 0.89492 | 0.88303 | 0.89472 | 0.91143 | 0.90014 | 0.85388 | 0.86383 | 0.91726 | 0.88874 | MGC33407  |
| cg18931815 | 0.90584 | 0.85883 | 0.69365 | 0.89248 | 0.92406 | 0.83006 | 0.42633 | 0.29871 | 0.87603 | 0.8392  | COL8A2    |
| cg18931888 | 0.83059 | 0.805   | 0.81051 | 0.83665 | 0.81624 | 0.86397 | 0.81919 | 0.6286  | 0.59316 | 0.53303 | A4GNT     |
| cg18931895 | 0.04353 | 0.04481 | 0.04328 | 0.03717 | 0.03315 | 0.0327  | 0.03537 | 0.04038 | 0.03564 | 0.03442 | ILKAP     |
| cg18932540 | 0.03411 | 0.0359  | 0.02878 | 0.03221 | 0.02403 | 0.02601 | 0.02426 | 0.02503 | 0.02405 | 0.02891 | STAG1     |
| cg18934103 | 0.02876 | 0.02968 | 0.03177 | 0.02666 | 0.02468 | 0.02745 | 0.02494 | 0.02653 | 0.02499 | 0.02372 | SLC35F2   |
| cg18934187 | 0.70179 | 0.77625 | 0.71632 | 0.77035 | 0.61742 | 0.73085 | 0.71117 | 0.49188 | 0.62644 | 0.45709 | STARD6    |
| cg18936744 | 0.07534 | 0.07748 | 0.07003 | 0.07344 | 0.15152 | 0.1105  | 0.06924 | 0.06889 | 0.05704 | 0.08053 | AK7       |
| cg18937321 | 0.04358 | 0.04281 | 0.04586 | 0.04287 | 0.04031 | 0.04548 | 0.06123 | 0.058   | 0.49028 | 0.21311 | SLC6A9    |
| cg18938150 | 0.03153 | 0.03109 | 0.03379 | 0.03006 | 0.03552 | 0.03131 | 0.02936 | 0.02554 | 0.02928 | 0.02667 | LSM12     |
| cg18938204 | 0.11624 | 0.03789 | 0.18529 | 0.23351 | 0.53784 | 0.83518 | 0.34858 | 0.03665 | 0.29781 | 0.13613 | EMILIN3   |
| cg18939260 | 0.95593 | 0.87167 | 0.94856 | 0.95609 | 0.97173 | 0.95043 | 0.89409 | 0.55837 | 0.95614 | 0.93173 | MTSS1     |
| cg18940763 | 0.87784 | 0.08592 | 0.87035 | 0.85951 | 0.59911 | 0.32134 | 0.86539 | 0.18029 | 0.87454 | 0.83869 | XBP1      |
| cg18942631 | 0.41826 | 0.07288 | 0.72639 | 0.8453  | 0.57191 | 0.84163 | 0.36206 | 0.25477 | 0.48488 | 0.34618 | CASQ2     |
| cg18943195 | 0.03409 | 0.03139 | 0.04034 | 0.03728 | 0.01729 | 0.02713 | 0.03111 | 0.03771 | 0.13183 | 0.02586 | RAB11FIP5 |
| cg18943383 | 0.09476 | 0.08951 | 0.1019  | 0.0931  | 0.06139 | 0.17568 | 0.07555 | 0.07172 | 0.06947 | 0.06573 | HIST1H3H  |
| cg18943599 | 0.04402 | 0.02637 | 0.07431 | 0.08154 | 0.17481 | 0.03826 | 0.03715 | 0.02668 | 0.02665 | 0.02561 | SSTR2     |
| cg18946226 | 0.91986 | 0.70665 | 0.49653 | 0.52419 | 0.49795 | 0.19003 | 0.04693 | 0.02832 | 0.26594 | 0.28532 | MYR8      |
| cg18946802 | 0.04051 | 0.03689 | 0.04239 | 0.03686 | 0.04888 | 0.05277 | 0.02893 | 0.02924 | 0.03093 | 0.04116 | XPC       |
| cg18947521 | 0.04283 | 0.0424  | 0.04193 | 0.03559 | 0.03022 | 0.03516 | 0.03782 | 0.03597 | 0.03    | 0.03199 | H3F3A     |
| cg18950617 | 0.02344 | 0.02576 | 0.07322 | 0.12551 | 0.97057 | 0.96822 | 0.32809 | 0.02343 | 0.02905 | 0.01897 | HMHA1     |
| cg18951427 | 0.69732 | 0.37581 | 0.67119 | 0.67434 | 0.43235 | 0.38598 | 0.65241 | 0.20413 | 0.7964  | 0.68044 | ACYP2     |
| cg18952560 | 0.37904 | 0.09551 | 0.12093 | 0.31683 | 0.46913 | 0.56799 | 0.17923 | 0.09165 | 0.41397 | 0.49013 | PTPNS1    |

|            |         |         |         |         |         |         |         |         |         |                   |
|------------|---------|---------|---------|---------|---------|---------|---------|---------|---------|-------------------|
| cg18952647 | 0.21936 | 0.03291 | 0.03423 | 0.02699 | 0.19648 | 0.03618 | 0.08849 | 0.03516 | 0.46266 | 0.0496 BNC1       |
| cg18953280 | 0.08171 | 0.08026 | 0.08977 | 0.07998 | 0.11697 | 0.12068 | 0.07042 | 0.05689 | 0.06886 | 0.07497 TBC1D19   |
| cg18954434 | 0.02384 | 0.02443 | 0.02621 | 0.02402 | 0.01927 | 0.02324 | 0.0274  | 0.02972 | 0.01874 | 0.01869 GTSE1     |
| cg18956095 | 0.08351 | 0.07655 | 0.07577 | 0.07283 | 0.0539  | 0.0732  | 0.06246 | 0.07099 | 0.0702  | 0.06072 ZHX1      |
| cg18956369 | 0.03375 | 0.03424 | 0.03161 | 0.03451 | 0.02674 | 0.02949 | 0.02998 | 0.03292 | 0.02726 | 0.02034 NPEPPS    |
| cg18956481 | 0.06983 | 0.04925 | 0.93613 | 0.93674 | 0.80559 | 0.94952 | 0.91267 | 0.94138 | 0.54691 | 0.52048 CYP24A1   |
| cg18958531 | 0.1352  | 0.08896 | 0.36802 | 0.46828 | 0.1289  | 0.09324 | 0.07888 | 0.06807 | 0.0674  | 0.0573 M6PRBP1    |
| cg18958584 | 0.03071 | 0.03456 | 0.03214 | 0.03405 | 0.0327  | 0.03554 | 0.02882 | 0.03312 | 0.02811 | 0.03242 SHMT1     |
| cg18959422 | 0.16738 | 0.05025 | 0.54509 | 0.67503 | 0.87527 | 0.82948 | 0.73151 | 0.59397 | 0.47734 | 0.23719 MYBPH     |
| cg18959478 | 0.89656 | 0.83542 | 0.05908 | 0.05813 | 0.04083 | 0.0547  | 0.38064 | 0.49017 | 0.05187 | 0.04534 PRKCDBP   |
| cg18960218 | 0.78061 | 0.4098  | 0.81895 | 0.85783 | 0.85037 | 0.76603 | 0.73764 | 0.32913 | 0.59486 | 0.30944 SLC7A7    |
| cg18962105 | 0.05474 | 0.04852 | 0.15529 | 0.1316  | 0.17889 | 0.34443 | 0.08303 | 0.04705 | 0.04551 | 0.02926 RBM4B     |
| cg18963171 | 0.44767 | 0.09809 | 0.56253 | 0.64989 | 0.72851 | 0.75024 | 0.42402 | 0.21607 | 0.41095 | 0.17862 C21orf121 |
| cg18963330 | 0.0313  | 0.02912 | 0.02692 | 0.02562 | 0.0235  | 0.02671 | 0.02724 | 0.02579 | 0.02332 | 0.02007 OAF       |
| cg18963390 | 0.02803 | 0.02961 | 0.03086 | 0.0299  | 0.02232 | 0.02715 | 0.02456 | 0.03054 | 0.02879 | 0.02684 ZNF9      |
| cg18963800 | 0.34242 | 0.44906 | 0.25894 | 0.29129 | 0.17036 | 0.0576  | 0.07024 | 0.04605 | 0.05051 | 0.0487 LOC158160  |
| cg18964732 | 0.1055  | 0.08625 | 0.13236 | 0.10901 | 0.14275 | 0.10093 | 0.11966 | 0.09448 | 0.10759 | 0.09355 TMCO1     |
| cg18966791 | 0.56035 | 0.33367 | 0.33289 | 0.33614 | 0.24851 | 0.2338  | 0.06497 | 0.08284 | 0.19779 | 0.10345 C1orf61   |
| cg18967533 | 0.20648 | 0.04543 | 0.55339 | 0.70371 | 0.67742 | 0.5767  | 0.04153 | 0.0414  | 0.05574 | 0.03559 KLK6      |
| cg18967846 | 0.10863 | 0.10522 | 0.15129 | 0.13119 | 0.17454 | 0.1687  | 0.10453 | 0.09212 | 0.08274 | 0.07827 CLDN12    |
| cg18971054 | 0.5126  | 0.8886  | 0.76901 | 0.6718  | 0.53012 | 0.5477  | 0.21765 | 0.0594  | 0.09586 | 0.15776 MGAM      |
| cg18971671 | 0.7902  | 0.72893 | 0.73496 | 0.82164 | 0.83872 | 0.64221 | 0.73292 | 0.5686  | 0.83663 | 0.7704 TULP2      |
| cg18972811 | 0.03749 | 0.0285  | 0.0371  | 0.03283 | 0.04057 | 0.0291  | 0.03161 | 0.02705 | 0.03521 | 0.02935 SLIT2     |
| cg18973389 | 0.09644 | 0.07575 | 0.07975 | 0.08094 | 0.08405 | 0.07967 | 0.08542 | 0.06979 | 0.07375 | 0.08479 NUP35     |
| cg18977436 | 0.30324 | 0.27231 | 0.33893 | 0.34122 | 0.34816 | 0.335   | 0.24167 | 0.22111 | 0.30135 | 0.22506 FGF14     |
| cg18978324 | 0.02423 | 0.03166 | 0.03476 | 0.02461 | 0.03404 | 0.03657 | 0.02249 | 0.02154 | 0.02279 | 0.02694 RABGGTA   |
| cg18979223 | 0.43391 | 0.43624 | 0.43787 | 0.43551 | 0.4442  | 0.45445 | 0.92427 | 0.92886 | 0.93995 | 0.93178 CDKN2B    |
| cg18979491 | 0.08667 | 0.05962 | 0.10846 | 0.28406 | 0.25979 | 0.35218 | 0.13354 | 0.12941 | 0.04888 | 0.06841 LBP       |
| cg18979762 | 0.80094 | 0.70584 | 0.75518 | 0.79767 | 0.75212 | 0.82215 | 0.66115 | 0.71953 | 0.82957 | 0.76312 EGLN1     |
| cg18979819 | 0.24951 | 0.14872 | 0.15704 | 0.15414 | 0.08386 | 0.09405 | 0.08961 | 0.13084 | 0.09784 | 0.10084 IQCG      |
| cg18982568 | 0.41565 | 0.15341 | 0.64221 | 0.70387 | 0.47637 | 0.64243 | 0.15595 | 0.12794 | 0.15114 | 0.1173 KRT1B      |
| cg18983672 | 0.82274 | 0.72447 | 0.77775 | 0.81334 | 0.69935 | 0.78733 | 0.75933 | 0.81335 | 0.80048 | 0.80018 FOXE3     |
| cg18984151 | 0.60133 | 0.35899 | 0.34509 | 0.36222 | 0.32078 | 0.30929 | 0.30685 | 0.25799 | 0.10297 | 0.07732 TMEM103   |
| cg18984499 | 0.02605 | 0.03103 | 0.03034 | 0.02856 | 0.02664 | 0.02949 | 0.03346 | 0.02929 | 0.03146 | 0.02791 RPL26     |
| cg18986165 | 0.48365 | 0.3724  | 0.74556 | 0.8471  | 0.85679 | 0.90194 | 0.03876 | 0.03434 | 0.31273 | 0.41228 SIGLEC12  |
| cg18986273 | 0.17928 | 0.16439 | 0.16817 | 0.17932 | 0.1455  | 0.15681 | 0.14905 | 0.17526 | 0.10055 | 0.11722 FAM53C    |
| cg18986332 | 0.01441 | 0.02018 | 0.02033 | 0.01653 | 0.0136  | 0.01797 | 0.01369 | 0.01374 | 0.01273 | 0.01356 CLASP2    |
| cg18986713 | 0.03446 | 0.03386 | 0.03286 | 0.02908 | 0.02371 | 0.02846 | 0.02558 | 0.02779 | 0.02627 | 0.0245 LEPROTL1   |
| cg18986964 | 0.18133 | 0.15065 | 0.16788 | 0.15039 | 0.21811 | 0.16384 | 0.14046 | 0.11739 | 0.12778 | 0.14323 ABL1      |
| cg18987220 | 0.77292 | 0.75276 | 0.86355 | 0.88539 | 0.84258 | 0.85379 | 0.88102 | 0.85469 | 0.87667 | 0.84811 RAB32     |
| cg18988110 | 0.16266 | 0.03583 | 0.42834 | 0.58559 | 0.84823 | 0.04543 | 0.39887 | 0.04253 | 0.12655 | 0.03149 ATAD4     |

|            |         |         |         |         |         |         |         |         |         |         |              |
|------------|---------|---------|---------|---------|---------|---------|---------|---------|---------|---------|--------------|
| cg18988395 | 0.2638  | 0.21884 | 0.68971 | 0.72284 | 0.46361 | 0.36618 | 0.46317 | 0.37922 | 0.39305 | 0.23101 | GLIS3        |
| cg18989919 | 0.86221 | 0.76453 | 0.89829 | 0.89822 | 0.92661 | 0.89989 | 0.90734 | 0.89586 | 0.91127 | 0.89346 | C3orf36      |
| cg18992201 | 0.83952 | 0.74215 | 0.87181 | 0.89152 | 0.90093 | 0.88295 | 0.84188 | 0.8361  | 0.40264 | 0.30721 | DPPA2        |
| cg18992688 | 0.15839 | 0.20447 | 0.66881 | 0.56578 | 0.80759 | 0.55153 | 0.27269 | 0.0809  | 0.06844 | 0.06142 | AVPR1B       |
| cg18993334 | 0.12702 | 0.07195 | 0.11316 | 0.10635 | 0.18929 | 0.08024 | 0.14304 | 0.08473 | 0.12295 | 0.10662 | C1orf182     |
| cg18994063 | 0.07565 | 0.06142 | 0.09232 | 0.06738 | 0.05502 | 0.06819 | 0.2329  | 0.07194 | 0.05173 | 0.03911 | TIMD4        |
| cg18995088 | 0.02661 | 0.02743 | 0.03727 | 0.03578 | 0.03001 | 0.02366 | 0.03496 | 0.02476 | 0.02053 | 0.02031 | CXCL14       |
| cg18996334 | 0.03626 | 0.03862 | 0.04531 | 0.06119 | 0.02758 | 0.03165 | 0.02985 | 0.02826 | 0.02203 | 0.02475 | C19orf15     |
| cg18996776 | 0.1045  | 0.09387 | 0.09951 | 0.08105 | 0.07714 | 0.07713 | 0.08129 | 0.07139 | 0.0876  | 0.07553 | KPNA4        |
| cg18997129 | 0.93511 | 0.92747 | 0.91973 | 0.92956 | 0.9333  | 0.92311 | 0.52615 | 0.55945 | 0.40455 | 0.34197 | EPHA1        |
| cg18997662 | 0.03875 | 0.03776 | 0.04142 | 0.04084 | 0.02788 | 0.03245 | 0.04162 | 0.03298 | 0.02965 | 0.03    | ZNF441       |
| cg18997990 | 0.09004 | 0.07959 | 0.0932  | 0.09578 | 0.1025  | 0.10358 | 0.11286 | 0.09547 | 0.10581 | 0.11246 | SERF2        |
| cg18999668 | 0.79298 | 0.81377 | 0.7759  | 0.82392 | 0.73739 | 0.77561 | 0.75233 | 0.7028  | 0.83977 | 0.82715 | SLC28A3      |
| cg19000186 | 0.19045 | 0.251   | 0.31136 | 0.42709 | 0.30828 | 0.33051 | 0.08882 | 0.0712  | 0.37457 | 0.08192 | CNGA1        |
| cg19001226 | 0.03743 | 0.03806 | 0.03045 | 0.03253 | 0.02279 | 0.03813 | 0.04975 | 0.04015 | 0.03525 | 0.03204 | HOXD1        |
| cg19001490 | 0.11095 | 0.0974  | 0.12086 | 0.11894 | 0.08742 | 0.09218 | 0.09645 | 0.09057 | 0.09579 | 0.09266 | POU2F1       |
| cg19001794 | 0.04279 | 0.04646 | 0.04081 | 0.04192 | 0.03875 | 0.03722 | 0.0399  | 0.03799 | 0.03336 | 0.0337  | HIC1         |
| cg19002579 | 0.46377 | 0.18114 | 0.77678 | 0.80945 | 0.65908 | 0.72549 | 0.41661 | 0.53228 | 0.57175 | 0.3499  | SMPX         |
| cg19005210 | 0.88175 | 0.53076 | 0.84086 | 0.89243 | 0.83561 | 0.82845 | 0.52672 | 0.41018 | 0.90822 | 0.71117 | TREML2       |
| cg19005368 | 0.68046 | 0.88555 | 0.34846 | 0.56303 | 0.44859 | 0.50992 | 0.43146 | 0.87853 | 0.66516 | 0.62491 | PRRG4        |
| cg19006008 | 0.88259 | 0.3199  | 0.05664 | 0.17677 | 0.94277 | 0.71981 | 0.14831 | 0.14248 | 0.3169  | 0.18947 | F2RL3        |
| cg19007602 | 0.04345 | 0.04374 | 0.05476 | 0.04342 | 0.05383 | 0.05265 | 0.05217 | 0.04766 | 0.04773 | 0.03952 | SOCS2        |
| cg19007731 | 0.07853 | 0.12655 | 0.31387 | 0.30396 | 0.46958 | 0.09161 | 0.86651 | 0.45558 | 0.32211 | 0.37343 | RUNX1T1      |
| cg19008097 | 0.19321 | 0.09036 | 0.14569 | 0.16183 | 0.08835 | 0.2878  | 0.16492 | 0.19128 | 0.50386 | 0.42435 | CD14         |
| cg19008649 | 0.06508 | 0.05375 | 0.14264 | 0.09673 | 0.58587 | 0.08714 | 0.08734 | 0.05526 | 0.661   | 0.25347 | IGFBP5       |
| cg19008809 | 0.06621 | 0.0343  | 0.26848 | 0.31733 | 0.44426 | 0.04673 | 0.05066 | 0.03358 | 0.0444  | 0.03479 | SFMBT1       |
| cg19009921 | 0.05418 | 0.0614  | 0.07128 | 0.06323 | 0.04005 | 0.05308 | 0.05641 | 0.05523 | 0.05199 | 0.04818 | RPL23A       |
| cg19011603 | 0.06655 | 0.06512 | 0.0669  | 0.07266 | 0.05897 | 0.05786 | 0.57306 | 0.53639 | 0.06984 | 0.06075 | RP11-311P8.3 |
| cg19012475 | 0.05231 | 0.0475  | 0.05471 | 0.06149 | 0.03727 | 0.03907 | 0.04714 | 0.0535  | 0.04774 | 0.04188 | TOPORS       |
| cg19014419 | 0.04323 | 0.05021 | 0.67845 | 0.77199 | 0.53625 | 0.40483 | 0.22976 | 0.10011 | 0.04349 | 0.06429 | ZNF300       |
| cg19016517 | 0.04772 | 0.04197 | 0.05628 | 0.04773 | 0.03568 | 0.04402 | 0.03948 | 0.04548 | 0.04051 | 0.03744 | NIFIE14      |
| cg19017177 | 0.58091 | 0.47581 | 0.3489  | 0.24809 | 0.2052  | 0.33814 | 0.04161 | 0.03371 | 0.31492 | 0.25373 | SYT3         |
| cg19017193 | 0.02807 | 0.03029 | 0.02827 | 0.0292  | 0.036   | 0.03112 | 0.02635 | 0.02405 | 0.02839 | 0.02585 | ZNF161       |
| cg19017420 | 0.03979 | 0.03955 | 0.0551  | 0.05294 | 0.05328 | 0.05412 | 0.04974 | 0.0485  | 0.04254 | 0.0379  | ARL2         |
| cg19018097 | 0.02705 | 0.02825 | 0.77925 | 0.93065 | 0.2221  | 0.35753 | 0.02686 | 0.02577 | 0.02553 | 0.02372 | FLJ30934     |
| cg19019972 | 0.03581 | 0.03632 | 0.0388  | 0.04207 | 0.03385 | 0.04149 | 0.02972 | 0.03249 | 0.03236 | 0.03125 | MRPL37       |
| cg19020694 | 0.03518 | 0.02983 | 0.0401  | 0.0308  | 0.03034 | 0.03676 | 0.03496 | 0.03287 | 0.03047 | 0.03214 | C12orf24     |
| cg19021732 | 0.11007 | 0.08156 | 0.09447 | 0.09298 | 0.09031 | 0.06744 | 0.07336 | 0.0658  | 0.07867 | 0.06498 | C15orf29     |
| cg19023700 | 0.03693 | 0.03022 | 0.04957 | 0.03789 | 0.02804 | 0.03643 | 0.02727 | 0.03167 | 0.12814 | 0.02577 | MKLN1        |
| cg19025034 | 0.86039 | 0.85479 | 0.85089 | 0.86246 | 0.87646 | 0.85507 | 0.64307 | 0.60457 | 0.86175 | 0.80607 | FUT2         |
| cg19025723 | 0.02233 | 0.02414 | 0.05114 | 0.06172 | 0.02371 | 0.02895 | 0.02251 | 0.03628 | 0.02422 | 0.02325 | ATPIF1       |



|            |         |         |         |         |         |         |         |         |         |         |           |
|------------|---------|---------|---------|---------|---------|---------|---------|---------|---------|---------|-----------|
| cg19026260 | 0.19694 | 0.12871 | 0.36607 | 0.39342 | 0.67792 | 0.32882 | 0.09032 | 0.06692 | 0.3769  | 0.03968 | CNIH2     |
| cg19026306 | 0.04125 | 0.04401 | 0.05079 | 0.04096 | 0.04465 | 0.03771 | 0.03713 | 0.03369 | 0.03288 | 0.02838 | KIAA1539  |
| cg19027571 | 0.05085 | 0.05348 | 0.06844 | 0.05186 | 0.54181 | 0.28548 | 0.05187 | 0.05717 | 0.05045 | 0.04694 | CHFR      |
| cg19028160 | 0.02373 | 0.02687 | 0.0267  | 0.02621 | 0.0214  | 0.02328 | 0.02359 | 0.02362 | 0.02717 | 0.02013 | HDAC4     |
| cg19028369 | 0.05974 | 0.06494 | 0.06448 | 0.06283 | 0.05521 | 0.05935 | 0.05824 | 0.0538  | 0.05977 | 0.05147 | C3orf19   |
| cg19028804 | 0.03951 | 0.03343 | 0.04294 | 0.03928 | 0.03741 | 0.03696 | 0.03353 | 0.03166 | 0.03617 | 0.03281 | C1orf37   |
| cg19029220 | 0.03335 | 0.03441 | 0.03619 | 0.03238 | 0.02654 | 0.03589 | 0.03281 | 0.02978 | 0.03015 | 0.02937 | UGP2      |
| cg19029454 | 0.02886 | 0.03248 | 0.03298 | 0.02831 | 0.02543 | 0.03299 | 0.02463 | 0.02742 | 0.02778 | 0.02485 | RBPSUH    |
| cg19030554 | 0.04625 | 0.04477 | 0.05119 | 0.05144 | 0.31069 | 0.03372 | 0.13514 | 0.06286 | 0.82888 | 0.18908 | NME3      |
| cg19032144 | 0.06003 | 0.05877 | 0.06695 | 0.05918 | 0.04907 | 0.05393 | 0.0554  | 0.05682 | 0.05221 | 0.06273 | RPL31     |
| cg19033555 | 0.74834 | 0.34216 | 0.17056 | 0.22141 | 0.37274 | 0.2533  | 0.11053 | 0.10161 | 0.06611 | 0.07671 | DEFB1     |
| cg19034028 | 0.84938 | 0.66925 | 0.84042 | 0.86594 | 0.76022 | 0.80961 | 0.85284 | 0.82841 | 0.87581 | 0.81703 | CDH3      |
| cg19035457 | 0.1357  | 0.12675 | 0.22501 | 0.16306 | 0.26479 | 0.1827  | 0.12819 | 0.14246 | 0.13915 | 0.12332 | TPARL     |
| cg19035993 | 0.92932 | 0.8556  | 0.9155  | 0.92599 | 0.92961 | 0.90713 | 0.91518 | 0.91564 | 0.92923 | 0.91423 | MGC50372  |
| cg19037167 | 0.07836 | 0.17785 | 0.49249 | 0.57469 | 0.87596 | 0.76879 | 0.46656 | 0.18774 | 0.38962 | 0.04748 | TLR2      |
| cg19038228 | 0.06051 | 0.03761 | 0.08917 | 0.22043 | 0.11357 | 0.04133 | 0.03549 | 0.03081 | 0.04297 | 0.03011 | FLJ90834  |
| cg19038540 | 0.07174 | 0.05401 | 0.0634  | 0.05747 | 0.49991 | 0.22285 | 0.72126 | 0.21716 | 0.5526  | 0.16628 | EDG1      |
| cg19042062 | 0.04979 | 0.05154 | 0.0919  | 0.09991 | 0.06682 | 0.07105 | 0.06058 | 0.05826 | 0.1007  | 0.09504 | KCNJ2     |
| cg19042947 | 0.09698 | 0.08455 | 0.19839 | 0.19415 | 0.24785 | 0.11356 | 0.13712 | 0.11282 | 0.11768 | 0.07405 | SERPINA4  |
| cg19042950 | 0.04935 | 0.03968 | 0.04462 | 0.05075 | 0.05078 | 0.07287 | 0.06027 | 0.04958 | 0.03644 | 0.04052 | IGF2BP3   |
| cg19044630 | 0.0422  | 0.0513  | 0.2448  | 0.37958 | 0.28136 | 0.06945 | 0.04254 | 0.04314 | 0.17916 | 0.0398  | C9orf65   |
| cg19044674 | 0.05347 | 0.06152 | 0.06151 | 0.05862 | 0.04599 | 0.05526 | 0.0511  | 0.05181 | 0.05041 | 0.04647 | LEPRE1    |
| cg19046959 | 0.20619 | 0.1845  | 0.29399 | 0.36486 | 0.22308 | 0.08151 | 0.04276 | 0.04902 | 0.04336 | 0.04254 | COL8A2    |
| cg19047670 | 0.22913 | 0.28766 | 0.886   | 0.89475 | 0.90956 | 0.73434 | 0.4763  | 0.73411 | 0.89535 | 0.64195 | CNCD1     |
| cg19049316 | 0.09938 | 0.10591 | 0.08546 | 0.08418 | 0.07805 | 0.09236 | 0.08527 | 0.10623 | 0.09057 | 0.08588 | FHIT      |
| cg19051578 | 0.03822 | 0.03618 | 0.04215 | 0.03405 | 0.03799 | 0.03204 | 0.03595 | 0.03289 | 0.03832 | 0.02586 | DEPDC1B   |
| cg19055231 | 0.56935 | 0.13471 | 0.04297 | 0.03928 | 0.0378  | 0.03897 | 0.03241 | 0.03091 | 0.03473 | 0.03458 | STAC      |
| cg19055458 | 0.03809 | 0.04424 | 0.06007 | 0.05245 | 0.07934 | 0.06802 | 0.05745 | 0.04023 | 0.03285 | 0.03824 | MYLIP     |
| cg19055639 | 0.45273 | 0.10428 | 0.07581 | 0.07154 | 0.70012 | 0.5728  | 0.0481  | 0.07109 | 0.04824 | 0.04168 | ARMCX2    |
| cg19056418 | 0.89186 | 0.27464 | 0.904   | 0.91064 | 0.92582 | 0.60451 | 0.83532 | 0.44963 | 0.93907 | 0.84685 | TMC8      |
| cg19058629 | 0.21698 | 0.227   | 0.24216 | 0.24364 | 0.28598 | 0.31829 | 0.2491  | 0.31937 | 0.2331  | 0.27987 | RALBP1    |
| cg19058765 | 0.81914 | 0.84164 | 0.74878 | 0.79367 | 0.6716  | 0.80956 | 0.82748 | 0.8613  | 0.82898 | 0.74512 | APOH      |
| cg19061982 | 0.04509 | 0.03978 | 0.05667 | 0.05074 | 0.04991 | 0.0377  | 0.04152 | 0.03957 | 0.04086 | 0.03907 | POLR1B    |
| cg19062098 | 0.04275 | 0.04264 | 0.04463 | 0.04141 | 0.03962 | 0.04963 | 0.04507 | 0.04164 | 0.03344 | 0.03483 | HNRPA2B1  |
| cg19062189 | 0.05097 | 0.03878 | 0.05699 | 0.04579 | 0.38581 | 0.0533  | 0.63154 | 0.59155 | 0.04413 | 0.02843 | TMSL8     |
| cg19063397 | 0.0662  | 0.05004 | 0.38417 | 0.49842 | 0.48261 | 0.08959 | 0.32177 | 0.06386 | 0.06809 | 0.03646 | POLD1     |
| cg19063972 | 0.01573 | 0.01754 | 0.04878 | 0.03673 | 0.0726  | 0.01589 | 0.17354 | 0.02463 | 0.05261 | 0.01516 | SOX21     |
| cg19064258 | 0.1073  | 0.05917 | 0.62738 | 0.65454 | 0.53651 | 0.57634 | 0.14884 | 0.49157 | 0.32183 | 0.05463 | HS3ST2    |
| cg19067730 | 0.40733 | 0.26546 | 0.66128 | 0.82991 | 0.90633 | 0.48721 | 0.36468 | 0.10075 | 0.445   | 0.1281  | PPGB      |
| cg19070338 | 0.03267 | 0.02781 | 0.03972 | 0.02774 | 0.03846 | 0.03298 | 0.03128 | 0.02843 | 0.03187 | 0.02997 | ASNSD1    |
| cg19070798 | 0.02525 | 0.03518 | 0.03444 | 0.03161 | 0.03305 | 0.02871 | 0.02912 | 0.02914 | 0.03218 | 0.0247  | LOC129138 |

|            |         |         |         |         |         |         |         |         |         |                   |
|------------|---------|---------|---------|---------|---------|---------|---------|---------|---------|-------------------|
| cg19070873 | 0.06858 | 0.07509 | 0.07727 | 0.06684 | 0.05643 | 0.0659  | 0.06221 | 0.06558 | 0.06522 | 0.05857 C14orf132 |
| cg19070899 | 0.14639 | 0.10169 | 0.25088 | 0.24692 | 0.12543 | 0.11347 | 0.12668 | 0.09738 | 0.09842 | 0.08986 C11orf56  |
| cg19072037 | 0.02854 | 0.02929 | 0.03045 | 0.0289  | 0.02235 | 0.02569 | 0.0291  | 0.0253  | 0.02453 | 0.02466 NAT10     |
| cg19073614 | 0.04773 | 0.04579 | 0.05034 | 0.04382 | 0.03866 | 0.04589 | 0.03615 | 0.04063 | 0.04017 | 0.03724 TBC1D17   |
| cg19075838 | 0.02865 | 0.03488 | 0.04161 | 0.03455 | 0.02673 | 0.03047 | 0.02817 | 0.03586 | 0.03293 | 0.02627 EPS8      |
| cg19078186 | 0.08497 | 0.0622  | 0.08789 | 0.06184 | 0.05389 | 0.04958 | 0.05484 | 0.0519  | 0.09775 | 0.04553 CPNE3     |
| cg19081759 | 0.02107 | 0.02508 | 0.02469 | 0.02704 | 0.01812 | 0.01986 | 0.01878 | 0.01869 | 0.02115 | 0.0167 YWHAQ      |
| cg19082446 | 0.12737 | 0.14569 | 0.17831 | 0.14832 | 0.13986 | 0.08633 | 0.10859 | 0.14661 | 0.10497 | 0.13899 SGK3      |
| cg19088651 | 0.14597 | 0.12588 | 0.18906 | 0.18262 | 0.31288 | 0.18116 | 0.17944 | 0.15729 | 0.14251 | 0.15588 BRCA1     |
| cg19091474 | 0.03504 | 0.03243 | 0.03998 | 0.03729 | 0.03173 | 0.03907 | 0.0556  | 0.05614 | 0.02925 | 0.03335 NEO1      |
| cg19091641 | 0.77216 | 0.70971 | 0.63044 | 0.74104 | 0.79777 | 0.82119 | 0.66812 | 0.51378 | 0.33807 | 0.43882 ZP2       |
| cg19093820 | 0.15837 | 0.14967 | 0.17689 | 0.15527 | 0.19563 | 0.13064 | 0.1305  | 0.15891 | 0.15433 | 0.13185 GPR156    |
| cg19094438 | 0.66246 | 0.29965 | 0.04771 | 0.05406 | 0.24298 | 0.15768 | 0.21868 | 0.04784 | 0.44743 | 0.06115 BCAR1     |
| cg19096034 | 0.04157 | 0.03918 | 0.04687 | 0.04363 | 0.05127 | 0.04244 | 0.03554 | 0.03404 | 0.04205 | 0.03156 LRPAP1    |
| cg19096475 | 0.93942 | 0.71458 | 0.28236 | 0.46012 | 0.04206 | 0.06546 | 0.86112 | 0.93875 | 0.97732 | 0.97722 ASAM      |
| cg19096540 | 0.09232 | 0.06171 | 0.37287 | 0.47371 | 0.47663 | 0.31354 | 0.08065 | 0.06809 | 0.04954 | 0.04632 MGC13017  |
| cg19098268 | 0.64644 | 0.45698 | 0.97384 | 0.9709  | 0.47637 | 0.69561 | 0.66489 | 0.63876 | 0.80328 | 0.80134 PEG3      |
| cg19098314 | 0.10573 | 0.0886  | 0.18152 | 0.17035 | 0.13946 | 0.12716 | 0.11426 | 0.10676 | 0.09508 | 0.10494 GOSR1     |
| cg19098826 | 0.03817 | 0.03791 | 0.03683 | 0.03863 | 0.03841 | 0.03676 | 0.03608 | 0.03119 | 0.03188 | 0.03293 BIRC6     |
| cg19099213 | 0.3322  | 0.10319 | 0.56501 | 0.71642 | 0.75586 | 0.83887 | 0.75538 | 0.87048 | 0.60154 | 0.37352 SPP2      |
| cg19099850 | 0.09019 | 0.23089 | 0.03453 | 0.02972 | 0.038   | 0.04295 | 0.0339  | 0.03128 | 0.0346  | 0.03637 LGALS3    |
| cg19100810 | 0.04609 | 0.04202 | 0.04425 | 0.04242 | 0.04439 | 0.04295 | 0.04047 | 0.03564 | 0.03342 | 0.0333 RPL32      |
| cg19101893 | 0.78682 | 0.80711 | 0.75426 | 0.78752 | 0.75578 | 0.76406 | 0.68765 | 0.69086 | 0.77829 | 0.74821 CCDC23    |
| cg19102858 | 0.06295 | 0.0605  | 0.06806 | 0.05713 | 0.06043 | 0.06017 | 0.05609 | 0.05208 | 0.06672 | 0.05371 COPS8     |
| cg19103609 | 0.6999  | 0.52244 | 0.92612 | 0.92192 | 0.94679 | 0.69406 | 0.91695 | 0.8641  | 0.94475 | 0.90314 PKN1      |
| cg19103704 | 0.65611 | 0.68048 | 0.14885 | 0.14943 | 0.08739 | 0.06586 | 0.06626 | 0.05992 | 0.06986 | 0.05245 FCGBP     |
| cg19104072 | 0.02261 | 0.02639 | 0.04875 | 0.06428 | 0.127   | 0.03002 | 0.02977 | 0.02604 | 0.02736 | 0.01943 B3GNT6    |
| cg19105504 | 0.60881 | 0.22502 | 0.56274 | 0.59532 | 0.32121 | 0.19882 | 0.41763 | 0.42156 | 0.87594 | 0.67474 MGC35295  |
| cg19105690 | 0.03088 | 0.03442 | 0.05895 | 0.05552 | 0.03429 | 0.03109 | 0.02856 | 0.02837 | 0.02887 | 0.02543 LYPLA3    |
| cg19107595 | 0.59191 | 0.5479  | 0.56289 | 0.59143 | 0.9585  | 0.94717 | 0.45672 | 0.4492  | 0.70589 | 0.71235 PEG10     |
| cg19108718 | 0.84702 | 0.88205 | 0.55231 | 0.50528 | 0.2068  | 0.06614 | 0.11213 | 0.07295 | 0.11194 | 0.05908 LOC317671 |
| cg19108785 | 0.05386 | 0.04334 | 0.03779 | 0.03851 | 0.03096 | 0.04956 | 0.0348  | 0.03212 | 0.03602 | 0.03443 CEP72     |
| cg19109050 | 0.79805 | 0.45605 | 0.90058 | 0.90752 | 0.94355 | 0.89525 | 0.90079 | 0.68534 | 0.92309 | 0.90871 OBSCN     |
| cg19109431 | 0.82699 | 0.39366 | 0.82681 | 0.87255 | 0.92444 | 0.80333 | 0.77193 | 0.4578  | 0.78484 | 0.64195 NFKBIE    |
| cg19110355 | 0.11408 | 0.05884 | 0.05994 | 0.05343 | 0.04473 | 0.04694 | 0.05006 | 0.05599 | 0.05618 | 0.05591 WWP2      |
| cg19110523 | 0.03746 | 0.03722 | 0.05451 | 0.03916 | 0.02265 | 0.02599 | 0.04928 | 0.03014 | 0.03725 | 0.0244 ADRB2      |
| cg19110684 | 0.38454 | 0.1573  | 0.38997 | 0.44186 | 0.52727 | 0.66526 | 0.64421 | 0.50967 | 0.38383 | 0.28507 HAVCR2    |
| cg19111262 | 0.22037 | 0.119   | 0.8994  | 0.75018 | 0.9235  | 0.85351 | 0.42932 | 0.0936  | 0.64046 | 0.12184 IGSF9     |
| cg19112780 | 0.02626 | 0.02699 | 0.03273 | 0.02358 | 0.02477 | 0.02838 | 0.02179 | 0.02397 | 0.02358 | 0.03005 PTPRU     |
| cg19114595 | 0.63499 | 0.68592 | 0.68866 | 0.71515 | 0.87126 | 0.75322 | 0.49412 | 0.42274 | 0.93238 | 0.94798 DIRAS3    |
| cg19118077 | 0.25691 | 0.4519  | 0.32148 | 0.34105 | 0.36987 | 0.30647 | 0.27041 | 0.22706 | 0.21875 | 0.19399 AKR1C3    |

|            |         |         |         |         |         |         |         |         |         |                  |
|------------|---------|---------|---------|---------|---------|---------|---------|---------|---------|------------------|
| cg19118533 | 0.82644 | 0.72047 | 0.06299 | 0.06486 | 0.05926 | 0.07299 | 0.05493 | 0.04986 | 0.05781 | 0.05631 TRAF3IP2 |
| cg19118812 | 0.02935 | 0.02945 | 0.03558 | 0.03035 | 0.03215 | 0.02966 | 0.03008 | 0.02927 | 0.02635 | 0.02611 ELMO1    |
| cg19120125 | 0.77279 | 0.77835 | 0.63373 | 0.71736 | 0.57193 | 0.77919 | 0.72506 | 0.70152 | 0.75412 | 0.63966 TAS2R10  |
| cg19120746 | 0.05846 | 0.05227 | 0.0499  | 0.05104 | 0.04217 | 0.05303 | 0.04883 | 0.04962 | 0.0484  | 0.04449 TRIM45   |
| cg19123107 | 0.29119 | 0.13726 | 0.12425 | 0.22832 | 0.15465 | 0.19628 | 0.18655 | 0.04616 | 0.08162 | 0.07139 C9orf7   |
| cg19123863 | 0.03507 | 0.04053 | 0.04112 | 0.03228 | 0.02318 | 0.0283  | 0.03324 | 0.03485 | 0.03198 | 0.02986 JUNB     |
| cg19124998 | 0.05139 | 0.05965 | 0.05594 | 0.06194 | 0.05154 | 0.04563 | 0.05609 | 0.04525 | 0.0404  | 0.03775 GLTSCR2  |
| cg19125323 | 0.02237 | 0.02363 | 0.0246  | 0.02233 | 0.018   | 0.02077 | 0.01897 | 0.01735 | 0.01768 | 0.01719 SFRS2    |
| cg19125606 | 0.77624 | 0.26004 | 0.574   | 0.69054 | 0.32231 | 0.15244 | 0.60307 | 0.20388 | 0.23439 | 0.09155 AGT      |
| cg19125999 | 0.50781 | 0.35706 | 0.75012 | 0.82869 | 0.42417 | 0.464   | 0.05176 | 0.03873 | 0.85248 | 0.40156 C1orf172 |
| cg19128498 | 0.04622 | 0.04938 | 0.05304 | 0.04805 | 0.03087 | 0.04711 | 0.03923 | 0.04387 | 0.04007 | 0.0453 FBXL5     |
| cg19130550 | 0.13243 | 0.0777  | 0.09727 | 0.08623 | 0.09326 | 0.06552 | 0.069   | 0.06574 | 0.06918 | 0.06998 OLFML2B  |
| cg19132372 | 0.8566  | 0.64839 | 0.88021 | 0.89929 | 0.86519 | 0.87853 | 0.88759 | 0.76196 | 0.64901 | 0.53685 GPR1     |
| cg19132701 | 0.02871 | 0.03394 | 0.02734 | 0.03285 | 0.02899 | 0.02732 | 0.02358 | 0.02829 | 0.02359 | 0.02393 CHMP6    |
| cg19133618 | 0.3874  | 0.45301 | 0.42605 | 0.43371 | 0.43702 | 0.45933 | 0.03399 | 0.03188 | 0.02821 | 0.02406 CDKN2B   |
| cg19133883 | 0.04715 | 0.04114 | 0.1727  | 0.09117 | 0.04468 | 0.0471  | 0.06301 | 0.04396 | 0.02595 | 0.02622 NSFL1C   |
| cg19133903 | 0.03532 | 0.02783 | 0.03034 | 0.033   | 0.02686 | 0.03038 | 0.02818 | 0.02589 | 0.02973 | 0.02205 AVPI1    |
| cg19135706 | 0.12769 | 0.07478 | 0.13138 | 0.13009 | 0.5158  | 0.41635 | 0.16338 | 0.15716 | 0.07366 | 0.07069 RAB3C    |
| cg19135761 | 0.63065 | 0.55592 | 0.8677  | 0.85392 | 0.73867 | 0.64704 | 0.147   | 0.14844 | 0.18099 | 0.17386 WDR8     |
| cg19135982 | 0.09144 | 0.08736 | 0.07384 | 0.06545 | 0.18254 | 0.08694 | 0.06338 | 0.05979 | 0.05678 | 0.05282 SKP2     |
| cg19136075 | 0.57839 | 0.28729 | 0.77203 | 0.77313 | 0.72098 | 0.65374 | 0.68579 | 0.17157 | 0.35199 | 0.37448 NBL1     |
| cg19136717 | 0.04828 | 0.0461  | 0.05187 | 0.0516  | 0.02842 | 0.04786 | 0.06117 | 0.04363 | 0.04218 | 0.04128 ARIH1    |
| cg19138060 | 0.83706 | 0.52378 | 0.86736 | 0.86907 | 0.7673  | 0.75162 | 0.48025 | 0.5872  | 0.84953 | 0.71183 WDR13    |
| cg19138960 | 0.62201 | 0.53144 | 0.82422 | 0.86758 | 0.92319 | 0.88129 | 0.60588 | 0.69745 | 0.84692 | 0.71275 C1QR1    |
| cg19139277 | 0.03426 | 0.03647 | 0.04326 | 0.04291 | 0.03721 | 0.0326  | 0.0578  | 0.05725 | 0.03426 | 0.03601 ZNF395   |
| cg19139729 | 0.33729 | 0.48768 | 0.79487 | 0.86393 | 0.45714 | 0.76674 | 0.07019 | 0.0637  | 0.31646 | 0.06065 SULT2A1  |
| cg19140639 | 0.17216 | 0.33822 | 0.57905 | 0.64624 | 0.67458 | 0.73093 | 0.273   | 0.21594 | 0.50808 | 0.39538 TGIF2LX  |
| cg19141563 | 0.03576 | 0.03379 | 0.03944 | 0.03443 | 0.06183 | 0.03201 | 0.02604 | 0.03132 | 0.02644 | 0.02745 PPM1E    |
| cg19144013 | 0.05822 | 0.0444  | 0.82476 | 0.73886 | 0.38769 | 0.37666 | 0.16811 | 0.03353 | 0.0412  | 0.03108 PIR      |
| cg19145398 | 0.42163 | 0.28313 | 0.22493 | 0.31542 | 0.91163 | 0.76425 | 0.52504 | 0.6138  | 0.3076  | 0.10768 FKHL18   |
| cg19147390 | 0.06951 | 0.06407 | 0.06079 | 0.05866 | 0.04515 | 0.06071 | 0.25005 | 0.09682 | 0.56327 | 0.43416 UHRF1    |
| cg19147570 | 0.06141 | 0.06096 | 0.05638 | 0.06011 | 0.04688 | 0.05216 | 0.05018 | 0.05301 | 0.05139 | 0.04799 MDH1     |
| cg19148051 | 0.03973 | 0.04579 | 0.04857 | 0.04164 | 0.03024 | 0.03787 | 0.03284 | 0.04178 | 0.03583 | 0.03461 LRRC47   |
| cg19149125 | 0.88069 | 0.76888 | 0.84452 | 0.88428 | 0.86203 | 0.85314 | 0.79308 | 0.71996 | 0.89471 | 0.84144 PROSC    |
| cg19149454 | 0.02521 | 0.02684 | 0.02654 | 0.02615 | 0.0241  | 0.02762 | 0.02295 | 0.02841 | 0.02872 | 0.02175 ADSL     |
| cg19149785 | 0.88724 | 0.72331 | 0.67591 | 0.80133 | 0.91387 | 0.88465 | 0.24394 | 0.0674  | 0.76703 | 0.65936 KLK8     |
| cg19150884 | 0.05498 | 0.05274 | 0.05764 | 0.04814 | 0.10064 | 0.04672 | 0.04867 | 0.05449 | 0.05574 | 0.04462 TSTA3    |
| cg19154173 | 0.03514 | 0.03117 | 0.03225 | 0.03305 | 0.0433  | 0.03015 | 0.0294  | 0.02994 | 0.02876 | 0.02576 C12orf8  |
| cg19154438 | 0.58386 | 0.40647 | 0.87203 | 0.91177 | 0.91464 | 0.88747 | 0.27935 | 0.26854 | 0.91426 | 0.71322 CKM      |
| cg19155599 | 0.14478 | 0.12231 | 0.20233 | 0.41083 | 0.39704 | 0.22312 | 0.13719 | 0.11489 | 0.18813 | 0.4622 PTGS2     |
| cg19157069 | 0.09305 | 0.09318 | 0.09801 | 0.08626 | 0.07508 | 0.08588 | 0.08514 | 0.08251 | 0.08265 | 0.07403 WDR23    |

|            |         |         |         |         |         |         |         |         |         |         |           |
|------------|---------|---------|---------|---------|---------|---------|---------|---------|---------|---------|-----------|
| cg19157971 | 0.03878 | 0.0356  | 0.0428  | 0.04054 | 0.0359  | 0.03829 | 0.03616 | 0.03045 | 0.03635 | 0.03918 | RAB1F     |
| cg19159162 | 0.0343  | 0.03577 | 0.03587 | 0.03256 | 0.0258  | 0.02808 | 0.02957 | 0.02854 | 0.02711 | 0.03096 | HSPA1B    |
| cg19160878 | 0.8867  | 0.9106  | 0.90039 | 0.90225 | 0.9101  | 0.8943  | 0.89862 | 0.88643 | 0.89592 | 0.87545 | GTF3C3    |
| cg19161333 | 0.04878 | 0.05328 | 0.05895 | 0.05885 | 0.05319 | 0.04222 | 0.05005 | 0.04816 | 0.04984 | 0.03353 | EIF3S12   |
| cg19162106 | 0.04694 | 0.04752 | 0.0982  | 0.07132 | 0.33224 | 0.05177 | 0.03443 | 0.03763 | 0.0466  | 0.03134 | GPC5      |
| cg19162158 | 0.01832 | 0.02437 | 0.02557 | 0.02426 | 0.02575 | 0.01995 | 0.02057 | 0.02402 | 0.39357 | 0.01624 | NRG1      |
| cg19166347 | 0.0679  | 0.09371 | 0.21628 | 0.53409 | 0.70712 | 0.60501 | 0.37494 | 0.08893 | 0.05858 | 0.05515 | SFRP4     |
| cg19166626 | 0.04524 | 0.05356 | 0.05079 | 0.03666 | 0.04125 | 0.05247 | 0.04076 | 0.03477 | 0.03023 | 0.031   | DNAJC3    |
| cg19166875 | 0.12105 | 0.10641 | 0.1143  | 0.09398 | 0.11236 | 0.09748 | 0.09577 | 0.09013 | 0.09126 | 0.07052 | FER1L3    |
| cg19167673 | 0.03696 | 0.03652 | 0.04991 | 0.04363 | 0.49038 | 0.33502 | 0.0546  | 0.06791 | 0.04591 | 0.0291  | PDGFB     |
| cg19168338 | 0.76615 | 0.60863 | 0.26872 | 0.30472 | 0.64353 | 0.13612 | 0.51509 | 0.40623 | 0.93526 | 0.69133 | CORO7     |
| cg19168631 | 0.02113 | 0.02144 | 0.02258 | 0.02011 | 0.01903 | 0.02139 | 0.01858 | 0.01911 | 0.01865 | 0.01821 | DAAM1     |
| cg19170321 | 0.78919 | 0.48845 | 0.77526 | 0.85567 | 0.77219 | 0.82421 | 0.76273 | 0.79364 | 0.82604 | 0.8016  | CAPN3     |
| cg19172575 | 0.66901 | 0.69318 | 0.83916 | 0.87222 | 0.95227 | 0.95689 | 0.31007 | 0.06738 | 0.96028 | 0.95509 | GATA4     |
| cg19175383 | 0.06693 | 0.04893 | 0.04408 | 0.04131 | 0.0337  | 0.04006 | 0.04329 | 0.04196 | 0.03569 | 0.03307 | C1orf142  |
| cg19176447 | 0.09859 | 0.10438 | 0.149   | 0.11672 | 0.18223 | 0.12059 | 0.13229 | 0.29048 | 0.10466 | 0.09083 | AKAP2     |
| cg19177941 | 0.73433 | 0.50499 | 0.51531 | 0.53039 | 0.04248 | 0.06247 | 0.44068 | 0.64147 | 0.65928 | 0.46329 | ALDH1A3   |
| cg19180541 | 0.81366 | 0.79344 | 0.79195 | 0.81398 | 0.67309 | 0.72924 | 0.78607 | 0.79848 | 0.83965 | 0.84121 | MOBK2B    |
| cg19180828 | 0.08003 | 0.03989 | 0.04183 | 0.04115 | 0.94578 | 0.89736 | 0.5324  | 0.24094 | 0.94574 | 0.87548 | FLJ46380  |
| cg19182046 | 0.07158 | 0.07543 | 0.06366 | 0.05999 | 0.13648 | 0.0906  | 0.06838 | 0.06554 | 0.07475 | 0.09416 | C14orf111 |
| cg19182048 | 0.03223 | 0.02946 | 0.03268 | 0.03252 | 0.02301 | 0.02728 | 0.03126 | 0.03098 | 0.02828 | 0.02604 | KLF13     |
| cg19184518 | 0.03925 | 0.03007 | 0.0363  | 0.03756 | 0.02994 | 0.03139 | 0.03092 | 0.03614 | 0.02819 | 0.0243  | UNQ9217   |
| cg19184963 | 0.09639 | 0.05848 | 0.08961 | 0.07261 | 0.04884 | 0.07448 | 0.24039 | 0.0695  | 0.05373 | 0.04022 | MAPK11    |
| cg19185384 | 0.01995 | 0.02241 | 0.01963 | 0.01887 | 0.01887 | 0.02467 | 0.01854 | 0.02096 | 0.01722 | 0.01613 | TPT1      |
| cg19186356 | 0.31497 | 0.06748 | 0.2557  | 0.42074 | 0.81771 | 0.17998 | 0.3109  | 0.11388 | 0.9142  | 0.55396 | ALDH2     |
| cg19187185 | 0.05709 | 0.05125 | 0.4037  | 0.44406 | 0.32547 | 0.27472 | 0.0514  | 0.05356 | 0.2791  | 0.03833 | RRAGD     |
| cg19187486 | 0.02623 | 0.02737 | 0.03026 | 0.02784 | 0.04414 | 0.024   | 0.01976 | 0.02218 | 0.02445 | 0.02291 | ARID3B    |
| cg19188060 | 0.05611 | 0.06071 | 0.06402 | 0.05784 | 0.04562 | 0.06853 | 0.0514  | 0.03416 | 0.04673 | 0.05226 | PSMD2     |
| cg19188612 | 0.7964  | 0.59462 | 0.2655  | 0.13492 | 0.3665  | 0.34428 | 0.11903 | 0.11635 | 0.79395 | 0.72063 | CTHRC1    |
| cg19189291 | 0.81792 | 0.82444 | 0.76703 | 0.80933 | 0.77233 | 0.7996  | 0.76019 | 0.78174 | 0.81691 | 0.77774 | MYH3      |
| cg19190714 | 0.0353  | 0.03465 | 0.04065 | 0.0326  | 0.02592 | 0.0275  | 0.03077 | 0.02622 | 0.02651 | 0.02419 | GMPR      |
| cg19191401 | 0.06093 | 0.04407 | 0.05944 | 0.05021 | 0.05419 | 0.05664 | 0.03728 | 0.04031 | 0.04582 | 0.04565 | SRGAP1    |
| cg19191883 | 0.02955 | 0.03041 | 0.03107 | 0.03699 | 0.02448 | 0.02663 | 0.03123 | 0.0308  | 0.03333 | 0.02323 | PTD008    |
| cg19192120 | 0.65279 | 0.20647 | 0.15156 | 0.18855 | 0.29762 | 0.08776 | 0.25947 | 0.38514 | 0.06115 | 0.05281 | SSH3      |
| cg19192316 | 0.85336 | 0.83722 | 0.82721 | 0.84762 | 0.71758 | 0.86753 | 0.83739 | 0.86618 | 0.85664 | 0.85242 | SIRT1     |
| cg19194454 | 0.045   | 0.04415 | 0.04391 | 0.03823 | 0.02941 | 0.03321 | 0.03835 | 0.04213 | 0.03768 | 0.03687 | NQO1      |
| cg19194595 | 0.06477 | 0.06285 | 0.04545 | 0.04591 | 0.06193 | 0.04547 | 0.57673 | 0.47546 | 0.04261 | 0.04286 | PHF16     |
| cg19195724 | 0.61579 | 0.58594 | 0.56126 | 0.68679 | 0.4309  | 0.30932 | 0.4562  | 0.44095 | 0.64482 | 0.61655 |           |
| cg19196182 | 0.03955 | 0.04607 | 0.04867 | 0.03795 | 0.07527 | 0.05483 | 0.06349 | 0.05231 | 0.04594 | 0.04614 | APAF1     |
| cg19196684 | 0.8696  | 0.74964 | 0.93808 | 0.94287 | 0.97076 | 0.93057 | 0.81328 | 0.55881 | 0.75926 | 0.66201 | SLC1A7    |
| cg19201019 | 0.85729 | 0.75572 | 0.83619 | 0.86683 | 0.8585  | 0.80101 | 0.81242 | 0.79423 | 0.84882 | 0.74256 | B3GALT7   |

|            |         |         |         |         |         |         |         |         |         |                  |
|------------|---------|---------|---------|---------|---------|---------|---------|---------|---------|------------------|
| cg19201477 | 0.03604 | 0.04043 | 0.04673 | 0.04143 | 0.033   | 0.03626 | 0.04453 | 0.04675 | 0.02863 | 0.03447 XPO7     |
| cg19202384 | 0.2997  | 0.07861 | 0.27618 | 0.29332 | 0.57726 | 0.27831 | 0.55955 | 0.57649 | 0.09108 | 0.0666 PYCR1     |
| cg19203504 | 0.17703 | 0.12181 | 0.18362 | 0.19724 | 0.118   | 0.22047 | 0.14986 | 0.16871 | 0.18178 | 0.19287 RPE      |
| cg19205041 | 0.38206 | 0.23551 | 0.85854 | 0.87233 | 0.88325 | 0.87056 | 0.66534 | 0.61159 | 0.8819  | 0.84333 PHACTR2  |
| cg19205533 | 0.88548 | 0.89215 | 0.53088 | 0.66842 | 0.92151 | 0.3758  | 0.86924 | 0.34508 | 0.85812 | 0.84376 RERG     |
| cg19206010 | 0.77232 | 0.61818 | 0.69421 | 0.5746  | 0.0562  | 0.07515 | 0.33588 | 0.4254  | 0.47904 | 0.04094 UXT      |
| cg19206150 | 0.1211  | 0.126   | 0.1691  | 0.17523 | 0.27208 | 0.15123 | 0.18028 | 0.15209 | 0.15145 | 0.16723 SNF8     |
| cg19207856 | 0.03943 | 0.04145 | 0.04762 | 0.04943 | 0.03834 | 0.04199 | 0.04064 | 0.04362 | 0.04285 | 0.03923 DSCR5    |
| cg19208681 | 0.64574 | 0.43155 | 0.54718 | 0.5201  | 0.21653 | 0.09916 | 0.18581 | 0.07304 | 0.12344 | 0.27206 RAD51C   |
| cg19208897 | 0.05805 | 0.04957 | 0.05725 | 0.05822 | 0.05411 | 0.04934 | 0.0496  | 0.04885 | 0.05024 | 0.04636 TACC3    |
| cg19210770 | 0.03757 | 0.03718 | 0.9062  | 0.9047  | 0.95433 | 0.95802 | 0.58028 | 0.25827 | 0.26325 | 0.3724 ACCN4     |
| cg19211800 | 0.02626 | 0.02319 | 0.02252 | 0.02012 | 0.01957 | 0.02136 | 0.01981 | 0.02242 | 0.02858 | 0.02002 MARCKS   |
| cg19211827 | 0.0573  | 0.05533 | 0.05569 | 0.05688 | 0.06011 | 0.05806 | 0.03642 | 0.0361  | 0.04182 | 0.05157 ANG      |
| cg19213569 | 0.03825 | 0.04103 | 0.04289 | 0.04272 | 0.02356 | 0.03422 | 0.03868 | 0.0385  | 0.04212 | 0.03764 FLJ10986 |
| cg19215261 | 0.9279  | 0.93394 | 0.92856 | 0.93132 | 0.94794 | 0.94109 | 0.92556 | 0.93293 | 0.95029 | 0.93787 SLC25A2  |
| cg19216044 | 0.91407 | 0.91068 | 0.88575 | 0.86417 | 0.91156 | 0.93129 | 0.92749 | 0.92171 | 0.923   | 0.90634 DCST1    |
| cg19216731 | 0.63181 | 0.44983 | 0.22446 | 0.46528 | 0.51196 | 0.40341 | 0.13795 | 0.21802 | 0.36357 | 0.08054 CSRP3    |
| cg19216839 | 0.0273  | 0.02782 | 0.02688 | 0.02571 | 0.02314 | 0.02633 | 0.02469 | 0.02471 | 0.02323 | 0.02569 FANCA    |
| cg19217872 | 0.0883  | 0.09386 | 0.11217 | 0.09484 | 0.14667 | 0.13106 | 0.07718 | 0.06906 | 0.0768  | 0.0758 ZNF187    |
| cg19219366 | 0.04868 | 0.04888 | 0.05697 | 0.05865 | 0.04217 | 0.05621 | 0.05418 | 0.05082 | 0.03887 | 0.0391 TRIM3     |
| cg19219437 | 0.04209 | 0.04078 | 0.05348 | 0.04979 | 0.03647 | 0.03465 | 0.03627 | 0.03619 | 0.03382 | 0.03639 PCOLCE2  |
| cg19219503 | 0.90789 | 0.64773 | 0.81056 | 0.90249 | 0.83937 | 0.51723 | 0.85635 | 0.90552 | 0.43201 | 0.82254 ANKRD30A |
| cg19219920 | 0.0483  | 0.0448  | 0.04907 | 0.0469  | 0.0516  | 0.04913 | 0.04127 | 0.04291 | 0.03918 | 0.03577 FAM53B   |
| cg19220586 | 0.36186 | 0.05425 | 0.14102 | 0.07691 | 0.34796 | 0.42606 | 0.05327 | 0.08921 | 0.07128 | 0.04712 CREG1    |
| cg19220754 | 0.02517 | 0.0259  | 0.02545 | 0.02452 | 0.02064 | 0.0212  | 0.01864 | 0.02065 | 0.01723 | 0.01364 TNPO1    |
| cg19220825 | 0.0777  | 0.07364 | 0.12337 | 0.10237 | 0.62466 | 0.0875  | 0.23105 | 0.08394 | 0.1761  | 0.08066 AQP5     |
| cg19221044 | 0.04882 | 0.05058 | 0.04851 | 0.04881 | 0.03438 | 0.04501 | 0.04273 | 0.04369 | 0.04084 | 0.04007 TAP2     |
| cg19221369 | 0.09315 | 0.10177 | 0.12671 | 0.14525 | 0.06493 | 0.05692 | 0.20061 | 0.07226 | 0.15382 | 0.07806 TAF13    |
| cg19221959 | 0.02791 | 0.03196 | 0.0353  | 0.02917 | 0.02936 | 0.02899 | 0.02401 | 0.02469 | 0.03484 | 0.02594 PPP1R9A  |
| cg19222480 | 0.2584  | 0.11062 | 0.03474 | 0.03161 | 0.02395 | 0.02722 | 0.02617 | 0.03064 | 0.02614 | 0.02373 UBE2C    |
| cg19223616 | 0.67691 | 0.5707  | 0.62269 | 0.74528 | 0.69449 | 0.72962 | 0.4789  | 0.6007  | 0.60012 | 0.56898 CLCN5    |
| cg19224164 | 0.2601  | 0.22339 | 0.29505 | 0.29277 | 0.3886  | 0.1463  | 0.15975 | 0.15672 | 0.15565 | 0.15902 C4orf9   |
| cg19224278 | 0.56003 | 0.4102  | 0.8655  | 0.87135 | 0.86624 | 0.59161 | 0.83693 | 0.63665 | 0.9024  | 0.30273 ALDH1A3  |
| cg19224837 | 0.03054 | 0.03231 | 0.02966 | 0.0344  | 0.05195 | 0.04322 | 0.03386 | 0.02713 | 0.02808 | 0.02759 GSC      |
| cg19226099 | 0.1542  | 0.03559 | 0.20329 | 0.19444 | 0.23285 | 0.27248 | 0.02929 | 0.0843  | 0.76766 | 0.6813 MC3R      |
| cg19226593 | 0.0914  | 0.07589 | 0.11795 | 0.11725 | 0.20092 | 0.08304 | 0.05675 | 0.05514 | 0.28975 | 0.09296 DCTN2    |
| cg19228118 | 0.07461 | 0.07006 | 0.73216 | 0.72839 | 0.53931 | 0.79351 | 0.21451 | 0.4537  | 0.60992 | 0.56935 CSMD2    |
| cg19229809 | 0.04389 | 0.04328 | 0.04593 | 0.04563 | 0.03448 | 0.04515 | 0.03502 | 0.03799 | 0.03079 | 0.03745 ZNF267   |
| cg19229991 | 0.81554 | 0.71706 | 0.55308 | 0.72082 | 0.8235  | 0.85596 | 0.45072 | 0.80227 | 0.11145 | 0.10982 FLJ22655 |
| cg19230917 | 0.02561 | 0.02552 | 0.02668 | 0.02561 | 0.01997 | 0.02035 | 0.02585 | 0.02882 | 0.01837 | 0.02288 C20orf24 |
| cg19233472 | 0.5276  | 0.08311 | 0.87451 | 0.89434 | 0.87861 | 0.75062 | 0.16731 | 0.1598  | 0.86827 | 0.48824 FOXI1    |

|            |         |         |         |         |         |         |         |         |         |         |          |
|------------|---------|---------|---------|---------|---------|---------|---------|---------|---------|---------|----------|
| cg19233923 | 0.03675 | 0.0228  | 0.03332 | 0.02848 | 0.03194 | 0.02629 | 0.02304 | 0.02618 | 0.01958 | 0.02258 | OTUB1    |
| cg19234089 | 0.89526 | 0.88492 | 0.90225 | 0.90961 | 0.86816 | 0.87717 | 0.8539  | 0.88593 | 0.89485 | 0.89707 | SART1    |
| cg19234509 | 0.04545 | 0.03745 | 0.05639 | 0.05079 | 0.04855 | 0.04868 | 0.04105 | 0.03732 | 0.04063 | 0.04411 | BCAS2    |
| cg19235307 | 0.44056 | 0.08372 | 0.13207 | 0.25821 | 0.26142 | 0.11314 | 0.15096 | 0.05479 | 0.47889 | 0.14572 | MBD4     |
| cg19236727 | 0.51786 | 0.58232 | 0.45294 | 0.48246 | 0.46171 | 0.56871 | 0.47365 | 0.49784 | 0.46967 | 0.49823 | ZNF354B  |
| cg19236745 | 0.07733 | 0.06863 | 0.07319 | 0.07884 | 0.11067 | 0.11184 | 0.08858 | 0.07467 | 0.05619 | 0.08403 | CSTF3    |
| cg19237753 | 0.04496 | 0.05161 | 0.06481 | 0.0799  | 0.04211 | 0.05364 | 0.04306 | 0.04568 | 0.04302 | 0.0378  | PTPNS1   |
| cg19237879 | 0.26824 | 0.12406 | 0.26373 | 0.3722  | 0.9111  | 0.90623 | 0.41866 | 0.26899 | 0.30484 | 0.09277 | SCUBE2   |
| cg19238398 | 0.10766 | 0.12978 | 0.1155  | 0.11949 | 0.96174 | 0.96133 | 0.95213 | 0.75931 | 0.11444 | 0.10253 | DNAJC18  |
| cg19238840 | 0.13438 | 0.10778 | 0.12427 | 0.10154 | 0.11344 | 0.08029 | 0.1049  | 0.09402 | 0.06335 | 0.09243 | GP2      |
| cg19239342 | 0.14303 | 0.08092 | 0.33054 | 0.41443 | 0.31495 | 0.07535 | 0.2563  | 0.08253 | 0.13131 | 0.0598  | REEP5    |
| cg19240938 | 0.86773 | 0.69483 | 0.89271 | 0.91002 | 0.86289 | 0.86442 | 0.89916 | 0.88051 | 0.91153 | 0.88949 | SLC22A18 |
| cg19241311 | 0.45024 | 0.26213 | 0.72391 | 0.81213 | 0.87905 | 0.87742 | 0.03102 | 0.02615 | 0.34738 | 0.28769 | DEFB123  |
| cg19241744 | 0.4141  | 0.08098 | 0.20371 | 0.35852 | 0.3332  | 0.47834 | 0.11095 | 0.09905 | 0.82708 | 0.61946 | SLC29A3  |
| cg19242268 | 0.80006 | 0.46596 | 0.90765 | 0.92345 | 0.92723 | 0.86237 | 0.67759 | 0.4289  | 0.88165 | 0.54795 | TCEA2    |
| cg19243777 | 0.05299 | 0.05758 | 0.05249 | 0.05532 | 0.04801 | 0.04597 | 0.04538 | 0.0554  | 0.0437  | 0.04316 | BHLHB3   |
| cg19246110 | 0.05979 | 0.04645 | 0.55566 | 0.61392 | 0.5351  | 0.73553 | 0.20898 | 0.45726 | 0.04483 | 0.0313  | ZNF671   |
| cg19248557 | 0.11812 | 0.05223 | 0.70221 | 0.66642 | 0.17497 | 0.07862 | 0.05487 | 0.06994 | 0.217   | 0.3931  | HLA-DRA  |
| cg19250891 | 0.79634 | 0.81307 | 0.83121 | 0.83029 | 0.87553 | 0.83688 | 0.58282 | 0.69298 | 0.59352 | 0.76372 | ATP1A4   |
| cg19250907 | 0.33231 | 0.15866 | 0.36547 | 0.6035  | 0.57613 | 0.85665 | 0.20431 | 0.16107 | 0.22763 | 0.12619 | CPA6     |
| cg19252175 | 0.23971 | 0.16383 | 0.10687 | 0.10733 | 0.08988 | 0.10198 | 0.08254 | 0.08109 | 0.0923  | 0.11725 | FLJ20035 |
| cg19252956 | 0.70978 | 0.58131 | 0.83063 | 0.85213 | 0.75738 | 0.85131 | 0.79383 | 0.8493  | 0.85629 | 0.86649 | DOCK8    |
| cg19254235 | 0.8009  | 0.76791 | 0.70465 | 0.75341 | 0.7685  | 0.75864 | 0.79042 | 0.79245 | 0.72657 | 0.80189 | RB1      |
| cg19254558 | 0.06057 | 0.07038 | 0.06687 | 0.06661 | 0.04884 | 0.06264 | 0.05714 | 0.05663 | 0.06202 | 0.05073 | PSARL    |
| cg19255783 | 0.63299 | 0.60216 | 0.17474 | 0.15583 | 0.59538 | 0.63178 | 0.17992 | 0.34886 | 0.70253 | 0.38831 | PLAC8    |
| cg19255853 | 0.12754 | 0.04211 | 0.05657 | 0.04954 | 0.04979 | 0.04446 | 0.04391 | 0.0365  | 0.0332  | 0.02974 | LOC93622 |
| cg19256236 | 0.04803 | 0.04673 | 0.17017 | 0.09211 | 0.53436 | 0.06955 | 0.33943 | 0.07578 | 0.32274 | 0.22392 | KCNH3    |
| cg19257200 | 0.84157 | 0.82387 | 0.80324 | 0.84993 | 0.88895 | 0.83487 | 0.73123 | 0.81277 | 0.76504 | 0.69189 | SOX10    |
| cg19257550 | 0.36699 | 0.03716 | 0.76757 | 0.89619 | 0.15574 | 0.03954 | 0.26281 | 0.04846 | 0.70319 | 0.38924 | CA9      |
| cg19258882 | 0.41806 | 0.09062 | 0.18445 | 0.23696 | 0.13416 | 0.06202 | 0.13216 | 0.06557 | 0.13156 | 0.05114 | ERBB3    |
| cg19258973 | 0.79659 | 0.66139 | 0.84768 | 0.93481 | 0.95097 | 0.89398 | 0.91037 | 0.85256 | 0.51724 | 0.4921  | KRTHB3   |
| cg19259146 | 0.04473 | 0.04557 | 0.04097 | 0.04237 | 0.12783 | 0.03691 | 0.03554 | 0.03335 | 0.03642 | 0.03531 | RPS6KA1  |
| cg19262019 | 0.05062 | 0.0535  | 0.05407 | 0.0534  | 0.0472  | 0.05393 | 0.04654 | 0.04808 | 0.04713 | 0.04917 | HNRPM    |
| cg19264123 | 0.15891 | 0.07432 | 0.15267 | 0.08337 | 0.33041 | 0.05569 | 0.11665 | 0.0717  | 0.06787 | 0.05223 | MOCOS    |
| cg19264571 | 0.55514 | 0.07424 | 0.95684 | 0.96184 | 0.96685 | 0.96578 | 0.96275 | 0.0905  | 0.96623 | 0.90701 | APCDD1   |
| cg19267846 | 0.02226 | 0.02093 | 0.05116 | 0.02221 | 0.02291 | 0.02625 | 0.01994 | 0.02036 | 0.08165 | 0.0311  | PHOSPHO1 |
| cg19273182 | 0.03874 | 0.04268 | 0.04343 | 0.0401  | 0.02786 | 0.03434 | 0.033   | 0.03692 | 0.03596 | 0.03033 | PAPOLG   |
| cg19275050 | 0.12123 | 0.12598 | 0.18509 | 0.16127 | 0.1771  | 0.09432 | 0.09678 | 0.08826 | 0.14249 | 0.14545 | HAS2     |
| cg19278165 | 0.04817 | 0.03813 | 0.04449 | 0.04205 | 0.04685 | 0.04026 | 0.03327 | 0.03106 | 0.03341 | 0.02671 | DSCR1    |
| cg19278780 | 0.65949 | 0.20417 | 0.74345 | 0.82537 | 0.79503 | 0.86988 | 0.70249 | 0.31832 | 0.8033  | 0.70815 | SIT1     |
| cg19278809 | 0.03574 | 0.03454 | 0.04226 | 0.03181 | 0.04641 | 0.0392  | 0.0265  | 0.03057 | 0.02494 | 0.02703 | KIAA0232 |

|            |         |         |         |         |         |         |         |         |         |         |          |
|------------|---------|---------|---------|---------|---------|---------|---------|---------|---------|---------|----------|
| cg19279346 | 0.66067 | 0.45442 | 0.80654 | 0.86243 | 0.45008 | 0.81859 | 0.08365 | 0.08367 | 0.10766 | 0.27667 | LILRB2   |
| cg19279529 | 0.03292 | 0.03461 | 0.03422 | 0.03541 | 0.02551 | 0.02896 | 0.02809 | 0.0304  | 0.02522 | 0.02582 | USF2     |
| cg19280014 | 0.03426 | 0.03738 | 0.04219 | 0.03643 | 0.03968 | 0.0473  | 0.03967 | 0.03915 | 0.03146 | 0.03829 | MTX2     |
| cg19280776 | 0.09417 | 0.2745  | 0.42142 | 0.50634 | 0.44549 | 0.16158 | 0.08117 | 0.03398 | 0.28036 | 0.02867 | PAG1     |
| cg19280968 | 0.3868  | 0.07801 | 0.38108 | 0.52651 | 0.47372 | 0.67553 | 0.07762 | 0.04838 | 0.64121 | 0.61019 | PPP1R2   |
| cg19282250 | 0.34093 | 0.10572 | 0.89049 | 0.91203 | 0.72588 | 0.83493 | 0.87035 | 0.85948 | 0.80141 | 0.81597 | KIAA0367 |
| cg19282452 | 0.46375 | 0.0888  | 0.23531 | 0.24204 | 0.44612 | 0.47599 | 0.32817 | 0.31972 | 0.38768 | 0.2556  | FLJ46230 |
| cg19282714 | 0.0495  | 0.02729 | 0.86154 | 0.78005 | 0.89207 | 0.69944 | 0.27284 | 0.03426 | 0.96181 | 0.9605  | PADI2    |
| cg19282782 | 0.47629 | 0.21857 | 0.73357 | 0.75853 | 0.38605 | 0.67556 | 0.65232 | 0.47986 | 0.52483 | 0.29053 | IL27RA   |
| cg19283196 | 0.12535 | 0.06765 | 0.06894 | 0.07025 | 0.64484 | 0.6744  | 0.12236 | 0.07239 | 0.3404  | 0.07042 | SLC10A4  |
| cg19286604 | 0.08599 | 0.06799 | 0.16975 | 0.13123 | 0.24046 | 0.05025 | 0.2665  | 0.19131 | 0.39638 | 0.0475  | MGC39545 |
| cg19286986 | 0.04254 | 0.04623 | 0.04751 | 0.0424  | 0.07304 | 0.03307 | 0.04795 | 0.04236 | 0.0781  | 0.03474 | GPR162   |
| cg19287114 | 0.04294 | 0.03625 | 0.03914 | 0.03487 | 0.02796 | 0.0296  | 0.03304 | 0.03063 | 0.02982 | 0.02938 | SLC44A1  |
| cg19287277 | 0.02978 | 0.02848 | 0.03381 | 0.02993 | 0.16347 | 0.03709 | 0.024   | 0.02592 | 0.02442 | 0.02188 | RKHD3    |
| cg19288520 | 0.02705 | 0.02813 | 0.03036 | 0.02627 | 0.02165 | 0.02497 | 0.02621 | 0.02463 | 0.02137 | 0.0208  | SLC25A32 |
| cg19289461 | 0.63646 | 0.32231 | 0.83027 | 0.87887 | 0.26314 | 0.25872 | 0.42818 | 0.1426  | 0.09631 | 0.10335 | 1-Sep    |
| cg19290962 | 0.73651 | 0.42625 | 0.35241 | 0.5433  | 0.20621 | 0.51456 | 0.1248  | 0.2331  | 0.18787 | 0.106   | TMC2     |
| cg19292008 | 0.04529 | 0.05462 | 0.6952  | 0.80668 | 0.51911 | 0.48862 | 0.0688  | 0.06218 | 0.04075 | 0.03689 | FOXE1    |
| cg19292712 | 0.84078 | 0.6617  | 0.60506 | 0.72222 | 0.76006 | 0.83753 | 0.57643 | 0.77572 | 0.0964  | 0.09354 | SPAM1    |
| cg19296958 | 0.89189 | 0.80843 | 0.88019 | 0.88997 | 0.91111 | 0.85847 | 0.9056  | 0.8531  | 0.90398 | 0.89293 | RB1      |
| cg19297232 | 0.32435 | 0.29372 | 0.79509 | 0.84046 | 0.8444  | 0.86334 | 0.6122  | 0.60681 | 0.61376 | 0.33872 | SMPD3    |
| cg19297688 | 0.73516 | 0.75213 | 0.80915 | 0.88    | 0.72588 | 0.73672 | 0.77375 | 0.75579 | 0.88751 | 0.53771 | INSL4    |
| cg19297823 | 0.63182 | 0.31389 | 0.68808 | 0.68058 | 0.21057 | 0.16317 | 0.59276 | 0.24108 | 0.56662 | 0.15742 | GCNT4    |
| cg19298821 | 0.8203  | 0.84508 | 0.78083 | 0.81873 | 0.73526 | 0.8266  | 0.84182 | 0.63754 | 0.32511 | 0.08245 | FLJ27505 |
| cg19301632 | 0.09235 | 0.08271 | 0.13601 | 0.12759 | 0.09609 | 0.12203 | 0.09893 | 0.09471 | 0.08204 | 0.10681 | OSBPL1A  |
| cg19302283 | 0.81023 | 0.36498 | 0.80127 | 0.83163 | 0.78824 | 0.81285 | 0.47672 | 0.2003  | 0.34167 | 0.2209  | BTC      |
| cg19304352 | 0.70632 | 0.5     | 0.82125 | 0.86164 | 0.66275 | 0.8548  | 0.61127 | 0.1306  | 0.30204 | 0.49038 | DEFA4    |
| cg19304410 | 0.68641 | 0.55188 | 0.27804 | 0.47438 | 0.407   | 0.74347 | 0.23348 | 0.21624 | 0.11572 | 0.03211 | CACHD1   |
| cg19305227 | 0.43721 | 0.28938 | 0.39652 | 0.61928 | 0.73686 | 0.45764 | 0.34936 | 0.14529 | 0.13641 | 0.32082 | SLC28A2  |
| cg19306866 | 0.26927 | 0.11918 | 0.47808 | 0.46269 | 0.52583 | 0.8326  | 0.23517 | 0.1472  | 0.28994 | 0.29185 | KRTAP6-2 |
| cg19306990 | 0.81611 | 0.82479 | 0.81329 | 0.81469 | 0.81854 | 0.80651 | 0.83772 | 0.80523 | 0.71567 | 0.84311 | MAPRE3   |
| cg19307060 | 0.84229 | 0.84684 | 0.7939  | 0.80798 | 0.78949 | 0.74757 | 0.72346 | 0.73857 | 0.85697 | 0.85442 | FAM10A4  |
| cg19308222 | 0.82122 | 0.71877 | 0.79848 | 0.81073 | 0.59513 | 0.1239  | 0.69574 | 0.81712 | 0.67591 | 0.5924  | EREK     |
| cg19310430 | 0.03939 | 0.05948 | 0.03616 | 0.03597 | 0.67318 | 0.25058 | 0.03358 | 0.03924 | 0.04229 | 0.0234  | C11orf45 |
| cg19311602 | 0.03216 | 0.0339  | 0.03856 | 0.03819 | 0.03498 | 0.038   | 0.0321  | 0.03296 | 0.02786 | 0.03222 | FLJ10006 |
| cg19311812 | 0.03523 | 0.03326 | 0.03605 | 0.03279 | 0.02912 | 0.03095 | 0.03206 | 0.02754 | 0.21829 | 0.04652 | TAF7     |
| cg19313758 | 0.03256 | 0.02834 | 0.03391 | 0.03581 | 0.02808 | 0.02729 | 0.02866 | 0.02793 | 0.02679 | 0.02436 | FAU      |
| cg19317638 | 0.20282 | 0.2115  | 0.26917 | 0.21065 | 0.29415 | 0.2169  | 0.22435 | 0.17604 | 0.14981 | 0.14101 | SFRS16   |
| cg19317715 | 0.83789 | 0.74395 | 0.79294 | 0.83718 | 0.60298 | 0.52596 | 0.79864 | 0.6734  | 0.85141 | 0.26119 | AOC2     |
| cg19318326 | 0.03694 | 0.03176 | 0.03537 | 0.03219 | 0.02759 | 0.03476 | 0.0293  | 0.0303  | 0.03163 | 0.02754 | KIAA1919 |
| cg19318511 | 0.06625 | 0.07293 | 0.08412 | 0.08436 | 0.101   | 0.08782 | 0.08309 | 0.07246 | 0.06083 | 0.05613 | C9orf30  |

|            |         |         |         |         |         |         |         |         |         |         |          |
|------------|---------|---------|---------|---------|---------|---------|---------|---------|---------|---------|----------|
| cg19319069 | 0.08214 | 0.08726 | 0.15953 | 0.18545 | 0.23783 | 0.17215 | 0.07945 | 0.08664 | 0.08032 | 0.0665  | UBE2H    |
| cg19319490 | 0.02046 | 0.02716 | 0.02285 | 0.02393 | 0.0251  | 0.04171 | 0.01968 | 0.01695 | 0.01586 | 0.0148  | GUSB     |
| cg19320612 | 0.64105 | 0.76878 | 0.68058 | 0.70578 | 0.76606 | 0.83918 | 0.19422 | 0.17425 | 0.30609 | 0.14593 | SCN9A    |
| cg19324027 | 0.04492 | 0.04146 | 0.05088 | 0.04556 | 0.03331 | 0.04012 | 0.03978 | 0.04153 | 0.04417 | 0.03645 | MRPL53   |
| cg19324172 | 0.08743 | 0.08463 | 0.09363 | 0.07425 | 0.04056 | 0.1019  | 0.06974 | 0.0612  | 0.0684  | 0.09473 | PPID     |
| cg19324313 | 0.82437 | 0.82129 | 0.77111 | 0.76821 | 0.69314 | 0.80327 | 0.78071 | 0.83435 | 0.77652 | 0.78258 | PRDM2    |
| cg19324627 | 0.87856 | 0.56836 | 0.88422 | 0.89193 | 0.94273 | 0.88162 | 0.86158 | 0.85359 | 0.89085 | 0.84027 | APOA1    |
| cg19324791 | 0.03311 | 0.03506 | 0.03461 | 0.03285 | 0.03068 | 0.03072 | 0.02993 | 0.0262  | 0.02723 | 0.02326 | CEECAM1  |
| cg19325985 | 0.84104 | 0.73478 | 0.84964 | 0.85495 | 0.8507  | 0.83363 | 0.82379 | 0.84127 | 0.83421 | 0.84824 | HOXD13   |
| cg19326876 | 0.0619  | 0.04795 | 0.39869 | 0.45926 | 0.10302 | 0.0349  | 0.03508 | 0.03607 | 0.59156 | 0.77335 | ATP10A   |
| cg19327844 | 0.0286  | 0.03381 | 0.03279 | 0.03025 | 0.02991 | 0.04814 | 0.02556 | 0.02984 | 0.02889 | 0.02502 | APBB1    |
| cg19328294 | 0.23168 | 0.03452 | 0.62723 | 0.79367 | 0.73788 | 0.60107 | 0.03543 | 0.02494 | 0.26254 | 0.02635 | PRSS22   |
| cg19329389 | 0.08498 | 0.06394 | 0.09935 | 0.08973 | 0.1332  | 0.09477 | 0.60085 | 0.60622 | 0.0767  | 0.09766 | TRIP4    |
| cg19329556 | 0.04557 | 0.04644 | 0.04253 | 0.03765 | 0.03399 | 0.03975 | 0.02957 | 0.03463 | 0.03036 | 0.03429 | EAF1     |
| cg19332303 | 0.05352 | 0.05262 | 0.05493 | 0.0546  | 0.04556 | 0.04691 | 0.05123 | 0.04036 | 0.05398 | 0.19958 | COMMD2   |
| cg19332710 | 0.02698 | 0.02904 | 0.0489  | 0.07094 | 0.09426 | 0.02837 | 0.08736 | 0.03459 | 0.10145 | 0.08188 | RIMS4    |
| cg19335327 | 0.44683 | 0.50878 | 0.70416 | 0.73539 | 0.44263 | 0.55162 | 0.49516 | 0.55911 | 0.58053 | 0.59007 | PEG3     |
| cg19337279 | 0.8739  | 0.86216 | 0.85302 | 0.85959 | 0.82809 | 0.87615 | 0.38143 | 0.25208 | 0.83093 | 0.78174 | MPL      |
| cg19337295 | 0.03871 | 0.04938 | 0.0475  | 0.04219 | 0.04533 | 0.0512  | 0.04091 | 0.03872 | 0.04589 | 0.04746 | FAM48A   |
| cg19339841 | 0.03337 | 0.03418 | 0.03756 | 0.03133 | 0.03655 | 0.03748 | 0.02876 | 0.02984 | 0.02869 | 0.03122 | CENPE    |
| cg19339848 | 0.25333 | 0.13514 | 0.47332 | 0.47371 | 0.18518 | 0.08728 | 0.16844 | 0.14679 | 0.09701 | 0.07174 | MTO1     |
| cg19342782 | 0.20511 | 0.11467 | 0.64431 | 0.70344 | 0.54597 | 0.5892  | 0.493   | 0.21527 | 0.61763 | 0.309   | ANKRD13C |
| cg19343464 | 0.03566 | 0.03621 | 0.21004 | 0.3351  | 0.0602  | 0.03842 | 0.04426 | 0.04058 | 0.21333 | 0.22391 | GRIA4    |
| cg19345165 | 0.03012 | 0.02666 | 0.02795 | 0.02922 | 0.02471 | 0.02601 | 0.022   | 0.02435 | 0.02275 | 0.02111 | NDUFS3   |
| cg19345602 | 0.10605 | 0.07814 | 0.13635 | 0.09437 | 0.13995 | 0.26701 | 0.09778 | 0.11074 | 0.0619  | 0.05506 | PATE     |
| cg19346193 | 0.54052 | 0.27021 | 0.1182  | 0.32407 | 0.08408 | 0.05256 | 0.0902  | 0.06741 | 0.40727 | 0.29115 | UROS     |
| cg19346899 | 0.05616 | 0.05326 | 0.05551 | 0.05042 | 0.0501  | 0.0394  | 0.04828 | 0.04595 | 0.0388  | 0.04652 | MGC24665 |
| cg19348001 | 0.03785 | 0.03773 | 0.03676 | 0.03125 | 0.02477 | 0.03067 | 0.02969 | 0.03061 | 0.02772 | 0.02556 | PFKFB4   |
| cg19350340 | 0.19521 | 0.18288 | 0.23075 | 0.18667 | 0.20023 | 0.22334 | 0.1961  | 0.15416 | 0.26808 | 0.19904 | ASPM     |
| cg19351638 | 0.75461 | 0.20359 | 0.84554 | 0.85114 | 0.91304 | 0.54773 | 0.18607 | 0.06472 | 0.85713 | 0.57612 | AVPR2    |
| cg19352038 | 0.5415  | 0.87618 | 0.92839 | 0.93534 | 0.9205  | 0.91923 | 0.93154 | 0.93809 | 0.80992 | 0.9033  | PAX3     |
| cg19352977 | 0.04098 | 0.04271 | 0.04754 | 0.03866 | 0.03347 | 0.04288 | 0.04271 | 0.04068 | 0.0342  | 0.03722 | AZIN1    |
| cg19353006 | 0.79385 | 0.18216 | 0.5796  | 0.60616 | 0.81175 | 0.10528 | 0.15624 | 0.14187 | 0.41179 | 0.06218 | TUSC3    |
| cg19355190 | 0.07605 | 0.08377 | 0.16957 | 0.14994 | 0.85395 | 0.66073 | 0.15133 | 0.07691 | 0.07755 | 0.27865 | EGR2     |
| cg19355685 | 0.01387 | 0.01377 | 0.01605 | 0.01353 | 0.01421 | 0.01423 | 0.01237 | 0.01357 | 0.01179 | 0.01045 | ZFAND2B  |
| cg19355919 | 0.03657 | 0.04591 | 0.05374 | 0.0546  | 0.11059 | 0.05699 | 0.04225 | 0.04225 | 0.03867 | 0.04228 | MRO      |
| cg19356189 | 0.19746 | 0.11021 | 0.24244 | 0.36377 | 0.23445 | 0.11796 | 0.18165 | 0.20515 | 0.09118 | 0.07055 | KLK10    |
| cg19356324 | 0.77422 | 0.6734  | 0.73569 | 0.79983 | 0.69669 | 0.74697 | 0.79736 | 0.79055 | 0.86975 | 0.81225 | SLC7A6OS |
| cg19357849 | 0.0858  | 0.06678 | 0.09811 | 0.19152 | 0.05496 | 0.03703 | 0.09977 | 0.07717 | 0.06084 | 0.03998 | ELAVL1   |
| cg19357918 | 0.0506  | 0.05209 | 0.05337 | 0.05173 | 0.04571 | 0.04789 | 0.04851 | 0.05343 | 0.04421 | 0.04788 | STIP1    |
| cg19358442 | 0.96328 | 0.91364 | 0.96544 | 0.96246 | 0.97734 | 0.97484 | 0.97567 | 0.93139 | 0.97631 | 0.97608 | ALX4     |



|            |         |         |         |         |         |         |         |         |         |         |               |
|------------|---------|---------|---------|---------|---------|---------|---------|---------|---------|---------|---------------|
| cg19358493 | 0.05055 | 0.05418 | 0.86333 | 0.90202 | 0.277   | 0.26355 | 0.08681 | 0.03969 | 0.23506 | 0.27423 | EMX2          |
| cg19362572 | 0.18044 | 0.12731 | 0.14611 | 0.16287 | 0.27261 | 0.15987 | 0.22426 | 0.17706 | 0.19458 | 0.2578  | SHC4          |
| cg19363546 | 0.19969 | 0.04701 | 0.83875 | 0.9457  | 0.51281 | 0.48931 | 0.89784 | 0.95633 | 0.17659 | 0.23738 | POU2F3        |
| cg19364957 | 0.04035 | 0.04416 | 0.04676 | 0.04462 | 0.03918 | 0.04213 | 0.03841 | 0.03808 | 0.03917 | 0.033   | GTF3C2        |
| cg19366178 | 0.82979 | 0.71389 | 0.83053 | 0.88396 | 0.83094 | 0.89099 | 0.80092 | 0.84784 | 0.87924 | 0.83461 | GNB5          |
| cg19367388 | 0.05606 | 0.03637 | 0.05432 | 0.06159 | 0.0383  | 0.03856 | 0.03416 | 0.03364 | 0.05155 | 0.02441 | UBE2R2        |
| cg19368582 | 0.68344 | 0.38476 | 0.70773 | 0.75488 | 0.76667 | 0.54074 | 0.42779 | 0.0538  | 0.81662 | 0.5943  | MMRN2         |
| cg19369556 | 0.38679 | 0.04329 | 0.48651 | 0.53039 | 0.12494 | 0.03736 | 0.04532 | 0.0329  | 0.02734 | 0.03155 | CDH13         |
| cg19369775 | 0.02848 | 0.02904 | 0.03371 | 0.02737 | 0.02147 | 0.02182 | 0.0248  | 0.02681 | 0.02295 | 0.02375 | LOC153364     |
| cg19370284 | 0.90793 | 0.90042 | 0.88883 | 0.89101 | 0.86109 | 0.86371 | 0.89963 | 0.88534 | 0.62537 | 0.68207 | ZNF38         |
| cg19370451 | 0.31963 | 0.28309 | 0.73271 | 0.8708  | 0.88483 | 0.8529  | 0.84696 | 0.83125 | 0.06497 | 0.25892 | CRNN          |
| cg19370515 | 0.04309 | 0.04376 | 0.04609 | 0.04373 | 0.04226 | 0.04874 | 0.03855 | 0.04448 | 0.03689 | 0.03396 | RBBP9         |
| cg19371795 | 0.81361 | 0.84265 | 0.57285 | 0.66326 | 0.7536  | 0.73829 | 0.39678 | 0.47271 | 0.41336 | 0.46982 | INSR          |
| cg19372178 | 0.79339 | 0.43093 | 0.27573 | 0.41597 | 0.66129 | 0.72649 | 0.17083 | 0.14731 | 0.26115 | 0.04258 | TMEM16G       |
| cg19373170 | 0.04063 | 0.02612 | 0.0322  | 0.03196 | 0.0362  | 0.03383 | 0.02622 | 0.02331 | 0.03097 | 0.02764 | SFMBT1        |
| cg19376794 | 0.0482  | 0.05162 | 0.05163 | 0.04754 | 0.06212 | 0.04986 | 0.03872 | 0.03627 | 0.05004 | 0.04939 | USP39         |
| cg19378039 | 0.88993 | 0.66661 | 0.8821  | 0.91377 | 0.95534 | 0.91307 | 0.89604 | 0.90768 | 0.90535 | 0.77836 | CRYAA         |
| cg19378133 | 0.03601 | 0.03397 | 0.28979 | 0.34182 | 0.03851 | 0.03878 | 0.03454 | 0.03318 | 0.03662 | 0.02804 | A2BP1         |
| cg19379303 | 0.01761 | 0.02065 | 0.02322 | 0.02159 | 0.0185  | 0.01939 | 0.01904 | 0.02106 | 0.01943 | 0.01578 | AYP1          |
| cg19382175 | 0.82436 | 0.79599 | 0.80122 | 0.82403 | 0.86746 | 0.79099 | 0.77611 | 0.74067 | 0.83267 | 0.60956 | PDE6A         |
| cg19382714 | 0.91015 | 0.619   | 0.75893 | 0.85209 | 0.39554 | 0.19821 | 0.14958 | 0.152   | 0.47858 | 0.38392 | MOG           |
| cg19383689 | 0.03426 | 0.03551 | 0.0291  | 0.02725 | 0.0346  | 0.04173 | 0.0378  | 0.03619 | 0.03339 | 0.03263 | WSB1          |
| cg19384697 | 0.64777 | 0.19583 | 0.65728 | 0.73324 | 0.56679 | 0.15826 | 0.27986 | 0.30009 | 0.19967 | 0.1786  | UPK3B         |
| cg19385139 | 0.47793 | 0.58852 | 0.34071 | 0.3412  | 0.71827 | 0.4188  | 0.46552 | 0.4114  | 0.77992 | 0.22498 | COL4A2        |
| cg19388557 | 0.84999 | 0.75349 | 0.60881 | 0.73866 | 0.64079 | 0.72245 | 0.47575 | 0.67367 | 0.38018 | 0.41133 | GPR174        |
| cg19389852 | 0.1396  | 0.12314 | 0.18341 | 0.15125 | 0.37253 | 0.22827 | 0.09491 | 0.07369 | 0.19207 | 0.16214 | TXNIP         |
| cg19390148 | 0.03587 | 0.0327  | 0.035   | 0.03072 | 0.02349 | 0.02826 | 0.02986 | 0.03161 | 0.01992 | 0.02414 | DDA1          |
| cg19391527 | 0.70313 | 0.11541 | 0.0726  | 0.11866 | 0.05286 | 0.05818 | 0.15893 | 0.79047 | 0.06234 | 0.05234 | PNOC          |
| cg19392109 | 0.4028  | 0.08321 | 0.84441 | 0.85948 | 0.69814 | 0.73151 | 0.77896 | 0.20149 | 0.77122 | 0.48971 | FLJ39531      |
| cg19392138 | 0.0382  | 0.03776 | 0.05588 | 0.04828 | 0.04013 | 0.04291 | 0.06673 | 0.05563 | 0.02969 | 0.02875 | ZNF449        |
| cg19393006 | 0.9077  | 0.1715  | 0.89988 | 0.91507 | 0.89235 | 0.84146 | 0.88745 | 0.41552 | 0.58814 | 0.49344 | TSC1          |
| cg19393233 | 0.92116 | 0.91946 | 0.84406 | 0.91454 | 0.94017 | 0.90092 | 0.85075 | 0.85651 | 0.8837  | 0.82572 | ERV3          |
| cg19394196 | 0.04297 | 0.04159 | 0.05256 | 0.05786 | 0.0569  | 0.04652 | 0.04319 | 0.04099 | 0.03294 | 0.02858 | RPS19         |
| cg19394737 | 0.95252 | 0.90426 | 0.92828 | 0.97043 | 0.97599 | 0.97373 | 0.87891 | 0.79089 | 0.96849 | 0.72333 | DKFZp434O0527 |
| cg19395441 | 0.05813 | 0.05664 | 0.06715 | 0.06095 | 0.07956 | 0.06602 | 0.07107 | 0.06136 | 0.05882 | 0.06431 | C12orf43      |
| cg19398446 | 0.03006 | 0.03244 | 0.03442 | 0.0322  | 0.03671 | 0.03568 | 0.02989 | 0.02721 | 0.02731 | 0.02477 | NUDT2         |
| cg19398783 | 0.10848 | 0.07922 | 0.11335 | 0.09654 | 0.29549 | 0.11272 | 0.06915 | 0.05895 | 0.08941 | 0.08805 | TLR10         |
| cg19399100 | 0.6795  | 0.57412 | 0.575   | 0.56359 | 0.53146 | 0.70717 | 0.46606 | 0.5016  | 0.51095 | 0.44532 | UGT2A1        |
| cg19399532 | 0.80396 | 0.2784  | 0.39402 | 0.42561 | 0.14166 | 0.06008 | 0.40853 | 0.13603 | 0.55314 | 0.06249 | FLJ35530      |
| cg19400725 | 0.11331 | 0.06217 | 0.06799 | 0.05485 | 0.04454 | 0.05    | 0.04696 | 0.06034 | 0.04276 | 0.04163 | RILP          |
| cg19400876 | 0.02057 | 0.02604 | 0.03569 | 0.03729 | 0.02869 | 0.03088 | 0.02336 | 0.02538 | 0.03212 | 0.0302  | LRRC42        |

|            |         |         |         |         |         |         |         |         |         |                   |
|------------|---------|---------|---------|---------|---------|---------|---------|---------|---------|-------------------|
| cg19401923 | 0.03702 | 0.0291  | 0.03377 | 0.02918 | 0.02171 | 0.02674 | 0.02409 | 0.02155 | 0.02595 | 0.02078 MRPL19    |
| cg19402885 | 0.07323 | 0.0627  | 0.57809 | 0.6377  | 0.08311 | 0.06622 | 0.07545 | 0.0584  | 0.73566 | 0.75505 PTPRO     |
| cg19403023 | 0.87267 | 0.42018 | 0.893   | 0.90197 | 0.90412 | 0.89211 | 0.15819 | 0.40571 | 0.8518  | 0.83565 TESSP1    |
| cg19403346 | 0.26032 | 0.2364  | 0.17622 | 0.17499 | 0.41501 | 0.17134 | 0.12866 | 0.10921 | 0.16893 | 0.20636 MGC45800  |
| cg19403377 | 0.31743 | 0.24284 | 0.09878 | 0.22358 | 0.26468 | 0.06764 | 0.06094 | 0.04157 | 0.04578 | 0.0363 TMEM100    |
| cg19404190 | 0.26055 | 0.1482  | 0.27289 | 0.17178 | 0.5215  | 0.45653 | 0.54135 | 0.41918 | 0.38677 | 0.27085 SPINK7    |
| cg19404582 | 0.09448 | 0.04139 | 0.88979 | 0.90683 | 0.38659 | 0.06535 | 0.15412 | 0.0466  | 0.07227 | 0.03245 GRIN1     |
| cg19404832 | 0.21586 | 0.14868 | 0.18203 | 0.22882 | 0.31606 | 0.18937 | 0.14232 | 0.12133 | 0.10999 | 0.12527 TFAP2D    |
| cg19404979 | 0.1742  | 0.13655 | 0.21096 | 0.21191 | 0.37533 | 0.6204  | 0.13773 | 0.11955 | 0.09924 | 0.12219 ELSPBP1   |
| cg19407266 | 0.02947 | 0.033   | 0.03234 | 0.03343 | 0.02612 | 0.0261  | 0.47439 | 0.4272  | 0.02383 | 0.02464 FLJ39827  |
| cg19407886 | 0.64828 | 0.42125 | 0.45091 | 0.53429 | 0.5675  | 0.55813 | 0.35665 | 0.21799 | 0.40235 | 0.13657 SLC38A5   |
| cg19408398 | 0.62543 | 0.4358  | 0.56419 | 0.6321  | 0.75234 | 0.37257 | 0.64362 | 0.36358 | 0.28376 | 0.17355 FIP1L1    |
| cg19409156 | 0.87877 | 0.81251 | 0.85236 | 0.86438 | 0.73462 | 0.62732 | 0.79339 | 0.27525 | 0.43312 | 0.13962 SLC24A5   |
| cg19410364 | 0.82458 | 0.61542 | 0.77952 | 0.82022 | 0.77937 | 0.72857 | 0.75195 | 0.75434 | 0.78542 | 0.7543 P2RX4      |
| cg19410841 | 0.04214 | 0.0431  | 0.05813 | 0.04403 | 0.03714 | 0.04215 | 0.46745 | 0.42008 | 0.03745 | 0.03555 NKAP      |
| cg19412675 | 0.10651 | 0.10044 | 0.10526 | 0.10374 | 0.08298 | 0.08099 | 0.07837 | 0.06458 | 0.07419 | 0.0659 SNX24      |
| cg19413110 | 0.07596 | 0.06501 | 0.06204 | 0.05666 | 0.06117 | 0.05538 | 0.05056 | 0.04905 | 0.06102 | 0.0563 POLR3GL    |
| cg19418515 | 0.44312 | 0.46102 | 0.57836 | 0.63773 | 0.58792 | 0.55258 | 0.45103 | 0.44382 | 0.43176 | 0.38386 IQCH      |
| cg19418958 | 0.58486 | 0.37262 | 0.63196 | 0.71011 | 0.28149 | 0.60251 | 0.29685 | 0.24803 | 0.28094 | 0.19035 TEX15     |
| cg19419801 | 0.07186 | 0.08017 | 0.07363 | 0.08057 | 0.05742 | 0.06186 | 0.0703  | 0.06838 | 0.06204 | 0.06255 PI4K2B    |
| cg19420968 | 0.74328 | 0.21457 | 0.93873 | 0.94003 | 0.95756 | 0.91537 | 0.54515 | 0.53669 | 0.92983 | 0.88098 HCRTR1    |
| cg19421044 | 0.0884  | 0.0888  | 0.08931 | 0.08518 | 0.05013 | 0.06991 | 0.42927 | 0.32405 | 0.08732 | 0.07356 DNASE1L1  |
| cg19421752 | 0.10855 | 0.04492 | 0.13382 | 0.14159 | 0.07926 | 0.20481 | 0.048   | 0.03968 | 0.03199 | 0.03622 SLC6A18   |
| cg19423014 | 0.07717 | 0.06894 | 0.84312 | 0.86296 | 0.79146 | 0.51056 | 0.45982 | 0.27782 | 0.44023 | 0.53357 RNF152    |
| cg19423196 | 0.20066 | 0.06536 | 0.19801 | 0.26218 | 0.39498 | 0.30344 | 0.06676 | 0.05581 | 0.05049 | 0.04559 MAT1A     |
| cg19423311 | 0.74649 | 0.46585 | 0.7914  | 0.83297 | 0.55386 | 0.65021 | 0.15258 | 0.08717 | 0.92059 | 0.86323 IL21R     |
| cg19425528 | 0.03832 | 0.04012 | 0.03493 | 0.03313 | 0.03346 | 0.03647 | 0.0401  | 0.04387 | 0.03298 | 0.03383 KIF1C     |
| cg19426277 | 0.76766 | 0.901   | 0.91192 | 0.9043  | 0.91709 | 0.89087 | 0.9025  | 0.89581 | 0.87804 | 0.86429 GPR146    |
| cg19426827 | 0.12989 | 0.03439 | 0.62787 | 0.73556 | 0.35932 | 0.05111 | 0.38851 | 0.17223 | 0.48521 | 0.13537 ADSSL1    |
| cg19427472 | 0.9334  | 0.90853 | 0.93062 | 0.93805 | 0.96162 | 0.95298 | 0.93636 | 0.94783 | 0.94051 | 0.95025 RB1       |
| cg19427610 | 0.08624 | 0.05919 | 0.66543 | 0.63029 | 0.20458 | 0.19338 | 0.1256  | 0.04915 | 0.6792  | 0.64969 WIF1      |
| cg19428336 | 0.06083 | 0.05126 | 0.05462 | 0.04697 | 0.06998 | 0.0457  | 0.04307 | 0.04409 | 0.04425 | 0.03947 FAT       |
| cg19428417 | 0.84673 | 0.64685 | 0.28883 | 0.40795 | 0.70104 | 0.60899 | 0.81551 | 0.43183 | 0.89011 | 0.55829 RRAD      |
| cg19428735 | 0.55676 | 0.58257 | 0.56628 | 0.56627 | 0.46523 | 0.55689 | 0.50395 | 0.49317 | 0.46386 | 0.43062 RRH       |
| cg19430430 | 0.05102 | 0.03734 | 0.03728 | 0.04224 | 0.25517 | 0.0393  | 0.13648 | 0.03652 | 0.03578 | 0.02729 COL5A3    |
| cg19430897 | 0.25502 | 0.17209 | 0.19397 | 0.21521 | 0.14997 | 0.15973 | 0.15199 | 0.15556 | 0.61988 | 0.46165 HIST1H2AB |
| cg19432434 | 0.03732 | 0.03737 | 0.04098 | 0.04356 | 0.03123 | 0.03692 | 0.03571 | 0.03202 | 0.03146 | 0.03287 SIKE      |
| cg19432894 | 0.01991 | 0.02449 | 0.02827 | 0.02756 | 0.0249  | 0.02646 | 0.01555 | 0.02045 | 0.02078 | 0.01694 DNAJA1    |
| cg19433435 | 0.85152 | 0.14534 | 0.85254 | 0.89271 | 0.86201 | 0.07909 | 0.69398 | 0.17067 | 0.4101  | 0.04899 FEZ1      |
| cg19434066 | 0.03536 | 0.04364 | 0.03956 | 0.03922 | 0.03528 | 0.04153 | 0.03799 | 0.03613 | 0.03657 | 0.03624 ANAPC5    |
| cg19434221 | 0.06119 | 0.05097 | 0.07429 | 0.06093 | 0.09096 | 0.09783 | 0.06513 | 0.06067 | 0.03545 | 0.03557 C2orf22   |

|            |         |         |         |         |         |         |         |         |         |                   |
|------------|---------|---------|---------|---------|---------|---------|---------|---------|---------|-------------------|
| cg19434303 | 0.04327 | 0.03399 | 0.05638 | 0.03882 | 0.16001 | 0.03333 | 0.03438 | 0.03287 | 0.0403  | 0.02971 WARS      |
| cg19434936 | 0.03796 | 0.03607 | 0.03896 | 0.03542 | 0.02291 | 0.02678 | 0.03155 | 0.03259 | 0.03085 | 0.03054 MGC31967  |
| cg19435264 | 0.07658 | 0.02784 | 0.85651 | 0.88917 | 0.93403 | 0.87736 | 0.03899 | 0.06198 | 0.03983 | 0.0356 SLC6A7     |
| cg19435409 | 0.04698 | 0.04038 | 0.06115 | 0.06525 | 0.02403 | 0.06965 | 0.03483 | 0.03296 | 0.03793 | 0.03638 HIST1H2AL |
| cg19436567 | 0.0874  | 0.08901 | 0.14159 | 0.1466  | 0.12982 | 0.0915  | 0.075   | 0.08168 | 0.10362 | 0.08815 ARID1B    |
| cg19437319 | 0.86386 | 0.87752 | 0.80816 | 0.81888 | 0.85477 | 0.86418 | 0.87361 | 0.89147 | 0.8645  | 0.83301 KIAA0196  |
| cg19438514 | 0.20132 | 0.03037 | 0.41631 | 0.64451 | 0.44077 | 0.29876 | 0.40322 | 0.21746 | 0.36608 | 0.34238 C20orf102 |
| cg19439331 | 0.04131 | 0.03743 | 0.04905 | 0.03455 | 0.03451 | 0.03433 | 0.03214 | 0.03082 | 0.02783 | 0.02914 CXXC6     |
| cg19439399 | 0.07072 | 0.07065 | 0.06939 | 0.07057 | 0.29567 | 0.05523 | 0.06156 | 0.0594  | 0.10916 | 0.05629 ELOVL4    |
| cg19441691 | 0.04092 | 0.04132 | 0.08794 | 0.08229 | 0.13744 | 0.07286 | 0.30001 | 0.20415 | 0.03132 | 0.03151 MAOA      |
| cg19445598 | 0.04013 | 0.03772 | 0.03587 | 0.03652 | 0.07326 | 0.04606 | 0.03132 | 0.03202 | 0.03487 | 0.02586 UBE1L2    |
| cg19447496 | 0.90029 | 0.89818 | 0.884   | 0.88102 | 0.87992 | 0.85081 | 0.91168 | 0.92068 | 0.91236 | 0.92944 RB1       |
| cg19447966 | 0.85457 | 0.74374 | 0.84105 | 0.84881 | 0.63787 | 0.82345 | 0.8122  | 0.82605 | 0.85461 | 0.8016 TEAD1      |
| cg19448829 | 0.04479 | 0.03882 | 0.04983 | 0.0396  | 0.09024 | 0.07662 | 0.04991 | 0.04132 | 0.0289  | 0.03491 UBR2      |
| cg19448990 | 0.04797 | 0.0546  | 0.04538 | 0.04806 | 0.03413 | 0.04285 | 0.04197 | 0.04262 | 0.03692 | 0.03702 TOB2      |
| cg19450025 | 0.35907 | 0.19293 | 0.49269 | 0.5358  | 0.95188 | 0.69502 | 0.52577 | 0.18846 | 0.63783 | 0.54147 SULT1A3   |
| cg19451391 | 0.21451 | 0.05831 | 0.05817 | 0.05658 | 0.03972 | 0.0455  | 0.04534 | 0.04551 | 0.05126 | 0.04341 ZNF512    |
| cg19451466 | 0.16915 | 0.17206 | 0.04639 | 0.04518 | 0.0274  | 0.04067 | 0.03999 | 0.03843 | 0.03403 | 0.02973 UHMK1     |
| cg19452316 | 0.03037 | 0.03295 | 0.05144 | 0.04858 | 0.38268 | 0.08355 | 0.05528 | 0.03715 | 0.04308 | 0.04124 RASSF5    |
| cg19453250 | 0.20674 | 0.11597 | 0.23332 | 0.20365 | 0.31609 | 0.20304 | 0.40317 | 0.1622  | 0.26539 | 0.47804 STATIP1   |
| cg19455368 | 0.05068 | 0.05847 | 0.05723 | 0.05513 | 0.73093 | 0.71851 | 0.04555 | 0.0411  | 0.03967 | 0.04529 ZNF587    |
| cg19456540 | 0.56114 | 0.60866 | 0.95111 | 0.96314 | 0.25522 | 0.14105 | 0.46864 | 0.11934 | 0.55394 | 0.94944 SIX6      |
| cg19459093 | 0.04904 | 0.04836 | 0.05592 | 0.05297 | 0.03466 | 0.09736 | 0.04174 | 0.03589 | 0.03123 | 0.03322 HIST1H2AM |
| cg19459675 | 0.06829 | 0.05408 | 0.05513 | 0.05461 | 0.05206 | 0.04668 | 0.05805 | 0.05188 | 0.05763 | 0.04098 SC4MOL    |
| cg19461344 | 0.01869 | 0.01809 | 0.02045 | 0.0172  | 0.4426  | 0.38481 | 0.27435 | 0.01666 | 0.01849 | 0.01356 SLC30A3   |
| cg19461621 | 0.08308 | 0.12964 | 0.55423 | 0.64585 | 0.32097 | 0.12042 | 0.27775 | 0.04885 | 0.86262 | 0.93525 COLEC12   |
| cg19461644 | 0.06247 | 0.06039 | 0.10711 | 0.09333 | 0.14684 | 0.39282 | 0.09082 | 0.04686 | 0.04975 | 0.04675 COL15A1   |
| cg19462352 | 0.14342 | 0.0237  | 0.0252  | 0.02001 | 0.33901 | 0.18043 | 0.4483  | 0.06786 | 0.06046 | 0.01924 PROCA1    |
| cg19463518 | 0.05028 | 0.05097 | 0.05648 | 0.08375 | 0.06637 | 0.05247 | 0.05315 | 0.04517 | 0.04318 | 0.04309 POLRMT    |
| cg19464016 | 0.05247 | 0.04729 | 0.06319 | 0.07075 | 0.12587 | 0.04215 | 0.10469 | 0.09553 | 0.05414 | 0.04597 PRDM1     |
| cg19464252 | 0.89281 | 0.8666  | 0.88625 | 0.90404 | 0.90084 | 0.89394 | 0.87333 | 0.78186 | 0.90694 | 0.87864 FBS1      |
| cg19464944 | 0.46827 | 0.49557 | 0.36043 | 0.36441 | 0.0823  | 0.3008  | 0.19532 | 0.20866 | 0.11647 | 0.05308 FCGR1A    |
| cg19465374 | 0.42227 | 0.23203 | 0.63142 | 0.81743 | 0.47039 | 0.42636 | 0.07174 | 0.07727 | 0.47501 | 0.4248 AZGP1      |
| cg19466563 | 0.09219 | 0.48921 | 0.79213 | 0.85509 | 0.84581 | 0.43583 | 0.78702 | 0.56249 | 0.11701 | 0.07654 SPARCL1   |
| cg19467928 | 0.1187  | 0.02504 | 0.03156 | 0.02561 | 0.16741 | 0.22487 | 0.01921 | 0.0238  | 0.02216 | 0.02086 ABCC6     |
| cg19468534 | 0.60807 | 0.4203  | 0.61601 | 0.6753  | 0.59834 | 0.54931 | 0.44029 | 0.35007 | 0.63539 | 0.49934 NUSAP1    |
| cg19469297 | 0.06269 | 0.06089 | 0.06447 | 0.05966 | 0.04548 | 0.04476 | 0.05072 | 0.05043 | 0.05543 | 0.05808 TBRG4     |
| cg19470701 | 0.02664 | 0.02445 | 0.05968 | 0.04219 | 0.0552  | 0.02547 | 0.02671 | 0.0225  | 0.04422 | 0.02403 C20orf149 |
| cg19471399 | 0.83466 | 0.83125 | 0.7726  | 0.77164 | 0.70055 | 0.75672 | 0.73661 | 0.76709 | 0.80033 | 0.80372 CCDC77    |
| cg19475870 | 0.75    | 0.81779 | 0.7873  | 0.83956 | 0.43234 | 0.55545 | 0.75292 | 0.78616 | 0.24818 | 0.25 CDH9         |
| cg19478478 | 0.8496  | 0.68751 | 0.49683 | 0.60044 | 0.58377 | 0.64564 | 0.718   | 0.79951 | 0.25822 | 0.30906 TRDN      |

|            |         |         |         |         |         |         |         |         |         |         |          |
|------------|---------|---------|---------|---------|---------|---------|---------|---------|---------|---------|----------|
| cg19478743 | 0.07685 | 0.04576 | 0.15481 | 0.08625 | 0.28118 | 0.039   | 0.05347 | 0.0451  | 0.33326 | 0.19688 | CXCL16   |
| cg19479366 | 0.06362 | 0.06578 | 0.06274 | 0.06143 | 0.05135 | 0.05932 | 0.05692 | 0.0583  | 0.05564 | 0.0532  | CDC6     |
| cg19481052 | 0.40579 | 0.19755 | 0.46733 | 0.53799 | 0.5534  | 0.45049 | 0.15265 | 0.19386 | 0.34018 | 0.30334 | PLP1     |
| cg19481686 | 0.38485 | 0.38149 | 0.39404 | 0.39746 | 0.41827 | 0.40796 | 0.91963 | 0.93128 | 0.95045 | 0.94792 | CDKN2B   |
| cg19481811 | 0.47111 | 0.44637 | 0.44132 | 0.44764 | 0.45156 | 0.51938 | 0.42428 | 0.48249 | 0.41421 | 0.48662 | UGT2B17  |
| cg19481953 | 0.82307 | 0.6814  | 0.12469 | 0.13689 | 0.15497 | 0.1386  | 0.08495 | 0.19548 | 0.22581 | 0.09021 | SRPX2    |
| cg19482581 | 0.07086 | 0.0715  | 0.05186 | 0.05708 | 0.05646 | 0.06467 | 0.04474 | 0.05143 | 0.05197 | 0.05502 | ABHD4    |
| cg19483159 | 0.05904 | 0.07376 | 0.10061 | 0.11624 | 0.10753 | 0.08499 | 0.06105 | 0.05687 | 0.08163 | 0.09377 | DYNLT1   |
| cg19485804 | 0.68964 | 0.37772 | 0.60326 | 0.72157 | 0.50382 | 0.4006  | 0.65016 | 0.57636 | 0.8257  | 0.62259 | NGEF     |
| cg19486271 | 0.29539 | 0.3024  | 0.80096 | 0.76279 | 0.06403 | 0.0586  | 0.0566  | 0.0894  | 0.04482 | 0.05417 | DDB2     |
| cg19486673 | 0.06692 | 0.05843 | 0.10196 | 0.10669 | 0.15496 | 0.307   | 0.05131 | 0.04971 | 0.05384 | 0.05454 | LILRA2   |
| cg19490266 | 0.02414 | 0.02435 | 0.02482 | 0.02371 | 0.01621 | 0.02415 | 0.02265 | 0.0221  | 0.02213 | 0.02392 | JTB      |
| cg19491035 | 0.6315  | 0.79583 | 0.83903 | 0.83515 | 0.82539 | 0.41564 | 0.49924 | 0.04419 | 0.50504 | 0.12703 | MANSC1   |
| cg19496782 | 0.05712 | 0.06706 | 0.06616 | 0.06567 | 0.07016 | 0.08243 | 0.06633 | 0.06804 | 0.05166 | 0.076   | GATA6    |
| cg19497444 | 0.9807  | 0.9727  | 0.98117 | 0.98331 | 0.98565 | 0.98329 | 0.97128 | 0.96995 | 0.98033 | 0.97804 | SLC22A18 |
| cg19502744 | 0.10563 | 0.05909 | 0.67662 | 0.80442 | 0.23488 | 0.30698 | 0.43478 | 0.13861 | 0.37266 | 0.2994  | SRD5A2   |
| cg19504245 | 0.09168 | 0.05715 | 0.31853 | 0.53668 | 0.32819 | 0.34494 | 0.02952 | 0.03221 | 0.02906 | 0.02925 | TNNT1    |
| cg19504888 | 0.75972 | 0.70083 | 0.42744 | 0.50109 | 0.6782  | 0.57874 | 0.74303 | 0.76881 | 0.76391 | 0.63417 | C2orf33  |
| cg19506903 | 0.03936 | 0.03757 | 0.04059 | 0.04143 | 0.04764 | 0.04645 | 0.04099 | 0.04397 | 0.03441 | 0.03447 | YIPF3    |
| cg19507591 | 0.69501 | 0.6731  | 0.62618 | 0.64809 | 0.57558 | 0.62579 | 0.55463 | 0.54827 | 0.73433 | 0.68937 | ZFPL1    |
| cg19510180 | 0.60488 | 0.54333 | 0.59152 | 0.642   | 0.47923 | 0.50579 | 0.47137 | 0.3905  | 0.62712 | 0.28226 | TPRSS11B |
| cg19510484 | 0.04053 | 0.03779 | 0.03682 | 0.03361 | 0.02372 | 0.03529 | 0.03117 | 0.03096 | 0.03172 | 0.03238 | METAP2   |
| cg19510604 | 0.85282 | 0.54574 | 0.84823 | 0.87008 | 0.73472 | 0.82795 | 0.80148 | 0.81583 | 0.85336 | 0.80024 | CLK3     |
| cg19510698 | 0.56553 | 0.26846 | 0.72412 | 0.74587 | 0.57501 | 0.65516 | 0.67361 | 0.71876 | 0.76096 | 0.67216 | ALDH1A3  |
| cg19510999 | 0.44156 | 0.44394 | 0.03628 | 0.04595 | 0.03073 | 0.03553 | 0.02936 | 0.03383 | 0.02876 | 0.02603 | CKLF     |
| cg19511844 | 0.39772 | 0.36362 | 0.53732 | 0.74917 | 0.14105 | 0.04399 | 0.09827 | 0.06023 | 0.05777 | 0.03897 | ORMDL3   |
| cg19512848 | 0.73078 | 0.14484 | 0.8137  | 0.84031 | 0.70478 | 0.71394 | 0.66355 | 0.68469 | 0.80794 | 0.67669 | C14orf48 |
| cg19514469 | 0.92929 | 0.74832 | 0.9101  | 0.91407 | 0.94656 | 0.89409 | 0.88691 | 0.87927 | 0.79745 | 0.74554 | ELMO3    |
| cg19514928 | 0.05947 | 0.04704 | 0.17726 | 0.11115 | 0.14339 | 0.29079 | 0.0223  | 0.02457 | 0.05209 | 0.04601 | TMEM56   |
| cg19514961 | 0.05039 | 0.04    | 0.04628 | 0.04209 | 0.03903 | 0.04342 | 0.03211 | 0.03184 | 0.03666 | 0.03465 | LENG8    |
| cg19515324 | 0.04568 | 0.04509 | 0.06089 | 0.05037 | 0.04243 | 0.03878 | 0.06347 | 0.06553 | 0.03463 | 0.03374 | ASH2L    |
| cg19515446 | 0.86437 | 0.87794 | 0.86214 | 0.86136 | 0.83138 | 0.79951 | 0.85141 | 0.88162 | 0.88039 | 0.80677 | HIST1H1T |
| cg19515518 | 0.04555 | 0.04347 | 0.06112 | 0.05563 | 0.19944 | 0.05619 | 0.07157 | 0.05763 | 0.04991 | 0.04493 | TMEM80   |
| cg19516009 | 0.80297 | 0.37761 | 0.85332 | 0.86863 | 0.88835 | 0.88075 | 0.7906  | 0.7817  | 0.69206 | 0.5995  | SFTPC    |
| cg19517291 | 0.13784 | 0.24527 | 0.87504 | 0.86581 | 0.91355 | 0.8699  | 0.86668 | 0.89046 | 0.88057 | 0.79514 | NMB      |
| cg19517525 | 0.03746 | 0.0423  | 0.03945 | 0.0353  | 0.03865 | 0.03812 | 0.08808 | 0.03969 | 0.03171 | 0.03727 | ACTG1    |
| cg19521927 | 0.50471 | 0.42333 | 0.53672 | 0.61964 | 0.68402 | 0.75419 | 0.16721 | 0.09233 | 0.74676 | 0.5688  | PLA2G5   |
| cg19522294 | 0.07572 | 0.07914 | 0.09557 | 0.06957 | 0.07121 | 0.05911 | 0.05573 | 0.05098 | 0.06081 | 0.06914 | PVRL3    |
| cg19522332 | 0.08552 | 0.07523 | 0.07766 | 0.06878 | 0.04269 | 0.06707 | 0.07215 | 0.07793 | 0.06311 | 0.0807  | PIK3CA   |
| cg19523029 | 0.12649 | 0.11168 | 0.09588 | 0.08317 | 0.25626 | 0.17933 | 0.11334 | 0.10386 | 0.08635 | 0.09879 | TLE4     |
| cg19523692 | 0.78158 | 0.84579 | 0.82518 | 0.85328 | 0.86876 | 0.8549  | 0.35582 | 0.36999 | 0.44732 | 0.44089 | ATP1B4   |

|            |         |         |         |         |         |         |         |         |         |         |          |
|------------|---------|---------|---------|---------|---------|---------|---------|---------|---------|---------|----------|
| cg19524009 | 0.80972 | 0.68041 | 0.74138 | 0.77337 | 0.73145 | 0.71011 | 0.71625 | 0.75986 | 0.77348 | 0.74807 | NEK3     |
| cg19524049 | 0.02582 | 0.0249  | 0.0259  | 0.02509 | 0.02131 | 0.02166 | 0.02018 | 0.02242 | 0.02234 | 0.02267 | NCDN     |
| cg19525717 | 0.54551 | 0.10394 | 0.42516 | 0.39669 | 0.84883 | 0.43775 | 0.4504  | 0.51301 | 0.4894  | 0.47912 | PKIG     |
| cg19526600 | 0.81991 | 0.5048  | 0.80366 | 0.85578 | 0.79707 | 0.7532  | 0.8463  | 0.85006 | 0.8522  | 0.69347 | DIO1     |
| cg19526626 | 0.03892 | 0.03911 | 0.48645 | 0.72703 | 0.56684 | 0.53309 | 0.03347 | 0.03413 | 0.02978 | 0.02702 | ZNF491   |
| cg19528976 | 0.04395 | 0.14668 | 0.53532 | 0.6088  | 0.75941 | 0.45857 | 0.15934 | 0.04481 | 0.79599 | 0.72279 | FLJ39237 |
| cg19529363 | 0.15875 | 0.03373 | 0.05911 | 0.07855 | 0.08275 | 0.03904 | 0.03054 | 0.02931 | 0.02351 | 0.02113 | EBI3     |
| cg19530885 | 0.55344 | 0.31859 | 0.10587 | 0.06874 | 0.17424 | 0.25405 | 0.18519 | 0.13646 | 0.22413 | 0.09269 | SCGB3A2  |
| cg19531130 | 0.32024 | 0.49026 | 0.40182 | 0.552   | 0.71478 | 0.12915 | 0.11445 | 0.07008 | 0.0942  | 0.06474 | ANGPTL5  |
| cg19531713 | 0.1     | 0.1061  | 0.10271 | 0.10523 | 0.06311 | 0.09533 | 0.08137 | 0.09967 | 0.09077 | 0.08717 | BRCA1    |
| cg19532954 | 0.05828 | 0.07175 | 0.13394 | 0.12449 | 0.11527 | 0.07978 | 0.04801 | 0.0438  | 0.06354 | 0.0703  | ID3      |
| cg19534879 | 0.03837 | 0.04109 | 0.03934 | 0.04523 | 0.32327 | 0.04305 | 0.0401  | 0.03377 | 0.03881 | 0.0383  | CXXC4    |
| cg19534945 | 0.87727 | 0.86216 | 0.86454 | 0.87318 | 0.91374 | 0.88055 | 0.82451 | 0.78954 | 0.84911 | 0.83731 | LCN12    |
| cg19535609 | 0.82931 | 0.52231 | 0.79743 | 0.75165 | 0.65333 | 0.33179 | 0.62992 | 0.40163 | 0.87756 | 0.62727 | B3GNT4   |
| cg19536127 | 0.38067 | 0.1076  | 0.17912 | 0.18666 | 0.32918 | 0.03842 | 0.14637 | 0.06268 | 0.26902 | 0.03298 | CALM2    |
| cg19537511 | 0.90767 | 0.66442 | 0.91008 | 0.91862 | 0.94515 | 0.92737 | 0.38388 | 0.47009 | 0.90431 | 0.88563 | ARHGEF15 |
| cg19538485 | 0.73151 | 0.74252 | 0.74848 | 0.75178 | 0.79972 | 0.747   | 0.77384 | 0.78225 | 0.75031 | 0.69909 | DHRS2    |
| cg19538699 | 0.02865 | 0.04085 | 0.0348  | 0.03369 | 0.02235 | 0.03367 | 0.02584 | 0.02708 | 0.02602 | 0.03064 | SLC35A5  |
| cg19539004 | 0.75178 | 0.46286 | 0.87464 | 0.91274 | 0.46784 | 0.17194 | 0.21624 | 0.3267  | 0.50851 | 0.16273 | LIF      |
| cg19539519 | 0.9079  | 0.45515 | 0.94255 | 0.93402 | 0.95768 | 0.9408  | 0.83978 | 0.83021 | 0.94952 | 0.9195  | PYY2     |
| cg19540408 | 0.51061 | 0.12975 | 0.65083 | 0.67881 | 0.51519 | 0.56799 | 0.75545 | 0.48133 | 0.21463 | 0.18744 | MGC35154 |
| cg19545851 | 0.03114 | 0.02932 | 0.02985 | 0.02886 | 0.01677 | 0.02411 | 0.02495 | 0.02515 | 0.02004 | 0.02135 | NUDCD2   |
| cg19546781 | 0.79516 | 0.27196 | 0.58427 | 0.55655 | 0.86602 | 0.88451 | 0.40891 | 0.11297 | 0.85139 | 0.82811 | CCL17    |
| cg19547629 | 0.03715 | 0.02948 | 0.28799 | 0.25131 | 0.26562 | 0.37416 | 0.21411 | 0.14685 | 0.16616 | 0.11651 | MYRIP    |
| cg19548738 | 0.04076 | 0.04312 | 0.09148 | 0.06204 | 0.06411 | 0.07261 | 0.03981 | 0.03972 | 0.04808 | 0.0287  | KIAA0738 |
| cg19549068 | 0.21904 | 0.05075 | 0.04989 | 0.05165 | 0.035   | 0.05045 | 0.0444  | 0.04124 | 0.04352 | 0.04095 | CLU      |
| cg19552482 | 0.04234 | 0.05105 | 0.05682 | 0.05272 | 0.05037 | 0.04972 | 0.07832 | 0.0779  | 0.04425 | 0.04238 | ZNF691   |
| cg19553056 | 0.05791 | 0.0606  | 0.05857 | 0.05546 | 0.04638 | 0.04689 | 0.0424  | 0.04416 | 0.04567 | 0.05331 | ZNF330   |
| cg19553463 | 0.45895 | 0.46859 | 0.57884 | 0.58967 | 0.62683 | 0.60259 | 0.51459 | 0.53877 | 0.44262 | 0.44378 | DCC      |
| cg19553721 | 0.64844 | 0.07448 | 0.81056 | 0.86184 | 0.8675  | 0.12516 | 0.66415 | 0.16461 | 0.59487 | 0.023   | FAM106A  |
| cg19554294 | 0.23774 | 0.39425 | 0.20175 | 0.25679 | 0.2338  | 0.11869 | 0.24    | 0.18169 | 0.11255 | 0.10004 | VN1R2    |
| cg19555986 | 0.19147 | 0.14505 | 0.88049 | 0.8715  | 0.64745 | 0.60672 | 0.47659 | 0.54513 | 0.1173  | 0.03504 | MAP7     |
| cg19556572 | 0.79621 | 0.82742 | 0.77054 | 0.81907 | 0.7554  | 0.75917 | 0.76119 | 0.79106 | 0.8493  | 0.83258 | AKNA     |
| cg19557537 | 0.02895 | 0.02862 | 0.03408 | 0.02692 | 0.02011 | 0.03076 | 0.02491 | 0.02459 | 0.0243  | 0.02208 | CYP39A1  |
| cg19559392 | 0.03363 | 0.03286 | 0.03965 | 0.03488 | 0.03613 | 0.03581 | 0.0289  | 0.03003 | 0.03337 | 0.02793 | MORN2    |
| cg19560210 | 0.79045 | 0.57626 | 0.79169 | 0.81481 | 0.49495 | 0.463   | 0.61107 | 0.73717 | 0.85339 | 0.82371 | PGBD5    |
| cg19560287 | 0.27398 | 0.1329  | 0.73338 | 0.64431 | 0.13997 | 0.03108 | 0.08476 | 0.02672 | 0.12604 | 0.02822 | GEMIN5   |
| cg19560758 | 0.03675 | 0.01974 | 0.0236  | 0.0217  | 0.41026 | 0.23947 | 0.01635 | 0.01625 | 0.01392 | 0.01435 | ERRF1    |
| cg19560971 | 0.82787 | 0.60382 | 0.8413  | 0.88494 | 0.92238 | 0.68083 | 0.7671  | 0.53917 | 0.65421 | 0.57564 | MFRP     |
| cg19561186 | 0.54728 | 0.51062 | 0.56887 | 0.6558  | 0.56445 | 0.68435 | 0.47221 | 0.50971 | 0.27661 | 0.25043 | GUCA1C   |
| cg19561774 | 0.55804 | 0.83952 | 0.86666 | 0.90591 | 0.92484 | 0.88802 | 0.58013 | 0.86548 | 0.59779 | 0.87492 | SLC22A2  |

|            |         |         |         |         |         |         |         |         |         |                   |
|------------|---------|---------|---------|---------|---------|---------|---------|---------|---------|-------------------|
| cg19562969 | 0.85525 | 0.52814 | 0.84528 | 0.83908 | 0.85281 | 0.6899  | 0.47538 | 0.149   | 0.88425 | 0.81633 C20orf24  |
| cg19564367 | 0.09568 | 0.04015 | 0.16055 | 0.17296 | 0.54318 | 0.46827 | 0.09897 | 0.04259 | 0.05366 | 0.03697 AFAP      |
| cg19564877 | 0.05321 | 0.05471 | 0.06443 | 0.05814 | 0.05707 | 0.05524 | 0.06102 | 0.06751 | 0.06055 | 0.04969 NTN1      |
| cg19566405 | 0.86816 | 0.44083 | 0.22264 | 0.20362 | 0.15643 | 0.13919 | 0.14663 | 0.14863 | 0.12245 | 0.12971 FLJ10260  |
| cg19567046 | 0.02572 | 0.02592 | 0.03548 | 0.02987 | 0.02722 | 0.02642 | 0.0239  | 0.02398 | 0.01889 | 0.02336 VPS25     |
| cg19568591 | 0.81567 | 0.57217 | 0.47677 | 0.72796 | 0.49497 | 0.44184 | 0.49755 | 0.83122 | 0.76085 | 0.4753 FRZB       |
| cg19569684 | 0.78991 | 0.81791 | 0.89116 | 0.90707 | 0.9286  | 0.89991 | 0.79037 | 0.81508 | 0.85458 | 0.81963 PACAP     |
| cg19570317 | 0.03264 | 0.03466 | 0.04017 | 0.03315 | 0.04368 | 0.03488 | 0.03203 | 0.03451 | 0.03379 | 0.02508 MTA2      |
| cg19570545 | 0.02681 | 0.0294  | 0.94082 | 0.93388 | 0.71462 | 0.64245 | 0.50177 | 0.2148  | 0.06808 | 0.2653 PKP1       |
| cg19570574 | 0.07001 | 0.05833 | 0.06183 | 0.06043 | 0.32705 | 0.2513  | 0.06056 | 0.06661 | 0.07534 | 0.06692 THBS1     |
| cg19571071 | 0.0836  | 0.10928 | 0.12666 | 0.09173 | 0.09656 | 0.1177  | 0.09162 | 0.09464 | 0.07248 | 0.0787 GTF3C1     |
| cg19572242 | 0.03292 | 0.03846 | 0.04953 | 0.06603 | 0.03793 | 0.03526 | 0.35573 | 0.25116 | 0.20252 | 0.02661 IRAK1     |
| cg19572947 | 0.04286 | 0.04076 | 0.05179 | 0.04523 | 0.0256  | 0.03543 | 0.03591 | 0.04352 | 0.03547 | 0.03491 DHX9      |
| cg19573166 | 0.15358 | 0.43307 | 0.39003 | 0.36504 | 0.31709 | 0.11988 | 0.37627 | 0.08422 | 0.32817 | 0.08798 SLC22A17  |
| cg19573464 | 0.02997 | 0.02738 | 0.03091 | 0.02776 | 0.01992 | 0.02482 | 0.02656 | 0.02881 | 0.02452 | 0.02408 KPNB1     |
| cg19574488 | 0.17776 | 0.107   | 0.44768 | 0.33315 | 0.19733 | 0.10229 | 0.22511 | 0.11216 | 0.1475  | 0.06971 FHIT      |
| cg19574623 | 0.15725 | 0.14222 | 0.12619 | 0.12322 | 0.33368 | 0.29993 | 0.11277 | 0.109   | 0.11063 | 0.11126 SSPN      |
| cg19576304 | 0.0383  | 0.03813 | 0.82536 | 0.86784 | 0.13837 | 0.04274 | 0.50294 | 0.79948 | 0.18949 | 0.03737 RAX       |
| cg19576739 | 0.02998 | 0.02896 | 0.03139 | 0.02705 | 0.0277  | 0.02858 | 0.02555 | 0.02032 | 0.0225  | 0.02251 TOP2B     |
| cg19578398 | 0.12228 | 0.12003 | 0.12271 | 0.1386  | 0.13462 | 0.08777 | 0.09583 | 0.10467 | 0.10675 | 0.11188 PEO1      |
| cg19579782 | 0.59368 | 0.6671  | 0.42637 | 0.48699 | 0.30729 | 0.47661 | 0.48635 | 0.35258 | 0.07571 | 0.05709 DNMT2     |
| cg19580810 | 0.40914 | 0.48819 | 0.8617  | 0.8715  | 0.90954 | 0.82351 | 0.86259 | 0.79316 | 0.8873  | 0.83887 RAB25     |
| cg19584733 | 0.5525  | 0.64721 | 0.54445 | 0.61707 | 0.56799 | 0.61192 | 0.5522  | 0.57757 | 0.59952 | 0.62182 DENND4C   |
| cg19584823 | 0.03325 | 0.03456 | 0.03071 | 0.03457 | 0.02385 | 0.03571 | 0.02877 | 0.03306 | 0.03772 | 0.0312 KLHDC2     |
| cg19584957 | 0.87484 | 0.62415 | 0.92419 | 0.96419 | 0.96117 | 0.96506 | 0.54027 | 0.51702 | 0.87636 | 0.8745 TTLL10     |
| cg19585196 | 0.0446  | 0.04402 | 0.05    | 0.04397 | 0.0628  | 0.04232 | 0.05079 | 0.04956 | 0.04588 | 0.0397 GSG2       |
| cg19585882 | 0.72553 | 0.75742 | 0.6232  | 0.63613 | 0.78751 | 0.77471 | 0.07296 | 0.10201 | 0.67755 | 0.74203 SSX1      |
| cg19586576 | 0.04822 | 0.05187 | 0.05306 | 0.05448 | 0.04171 | 0.05012 | 0.06165 | 0.05573 | 0.04721 | 0.04665 GJA7      |
| cg19586645 | 0.02747 | 0.02951 | 0.03387 | 0.02752 | 0.02176 | 0.0249  | 0.02461 | 0.02424 | 0.02436 | 0.02453 MIF4GD    |
| cg19587401 | 0.0213  | 0.02568 | 0.02979 | 0.02443 | 0.02236 | 0.01882 | 0.02443 | 0.02226 | 0.02313 | 0.02207 LOC374395 |
| cg19587887 | 0.5938  | 0.70621 | 0.75104 | 0.83424 | 0.90823 | 0.92615 | 0.89699 | 0.89292 | 0.52825 | 0.44912 PSKH2     |
| cg19589427 | 0.8     | 0.76224 | 0.7983  | 0.79854 | 0.76963 | 0.64214 | 0.76077 | 0.68259 | 0.81098 | 0.6374 TNFSF18    |
| cg19591206 | 0.04026 | 0.03173 | 0.03716 | 0.03277 | 0.08941 | 0.02424 | 0.03065 | 0.02511 | 0.02495 | 0.02904 SLCO2A1   |
| cg19591588 | 0.04472 | 0.04788 | 0.04466 | 0.04886 | 0.04213 | 0.04287 | 0.03863 | 0.04167 | 0.04028 | 0.04041 SACM1L    |
| cg19591881 | 0.40868 | 0.55226 | 0.85533 | 0.84455 | 0.79807 | 0.60658 | 0.08857 | 0.0405  | 0.54933 | 0.56861 CD34      |
| cg19592945 | 0.59247 | 0.21543 | 0.09416 | 0.07473 | 0.11801 | 0.09411 | 0.06583 | 0.21225 | 0.06183 | 0.06383 P2RXL1    |
| cg19593572 | 0.09865 | 0.10181 | 0.09905 | 0.07941 | 0.0684  | 0.08932 | 0.08602 | 0.0858  | 0.07071 | 0.07136 POLR3E    |
| cg19594666 | 0.33253 | 0.32504 | 0.96774 | 0.97393 | 0.97842 | 0.97162 | 0.93386 | 0.93963 | 0.80902 | 0.69804 LEP       |
| cg19594691 | 0.03492 | 0.03394 | 0.03593 | 0.03259 | 0.02659 | 0.03168 | 0.03395 | 0.02797 | 0.02825 | 0.02858 RHOB      |
| cg19595170 | 0.04522 | 0.05533 | 0.05587 | 0.04532 | 0.06084 | 0.04799 | 0.03668 | 0.05132 | 0.02902 | 0.03753 SRF       |
| cg19596204 | 0.02625 | 0.0246  | 0.12575 | 0.06479 | 0.9775  | 0.97323 | 0.64292 | 0.56476 | 0.01826 | 0.01816 ISYNA1    |

|            |         |         |         |         |         |         |         |         |         |                   |
|------------|---------|---------|---------|---------|---------|---------|---------|---------|---------|-------------------|
| cg19596653 | 0.03248 | 0.0316  | 0.033   | 0.03122 | 0.02683 | 0.03214 | 0.02457 | 0.0298  | 0.02635 | 0.02422 KIAA0261  |
| cg19596755 | 0.70786 | 0.22904 | 0.48799 | 0.58185 | 0.32951 | 0.43715 | 0.6743  | 0.5833  | 0.12677 | 0.0575 CPT1A      |
| cg19598544 | 0.03007 | 0.03899 | 0.03864 | 0.04448 | 0.0329  | 0.03722 | 0.3041  | 0.24562 | 0.03247 | 0.02858 TTYH2     |
| cg19601035 | 0.73169 | 0.33723 | 0.83637 | 0.86704 | 0.29372 | 0.34802 | 0.50983 | 0.56077 | 0.35401 | 0.44687 COL2A1    |
| cg19601328 | 0.87161 | 0.58889 | 0.88448 | 0.88824 | 0.82516 | 0.59873 | 0.87002 | 0.69957 | 0.89803 | 0.64226 MAP3K14   |
| cg19603195 | 0.05903 | 0.05526 | 0.07935 | 0.06699 | 0.06096 | 0.0681  | 0.09484 | 0.09547 | 0.05165 | 0.05894 STOML1    |
| cg19604470 | 0.02789 | 0.03205 | 0.02994 | 0.0262  | 0.0249  | 0.02801 | 0.02498 | 0.02744 | 0.02571 | 0.02397 CD81      |
| cg19612574 | 0.5364  | 0.58489 | 0.77894 | 0.81296 | 0.69932 | 0.39743 | 0.77371 | 0.57858 | 0.60814 | 0.25256 MAPK8     |
| cg19614321 | 0.80158 | 0.35513 | 0.50815 | 0.54261 | 0.23496 | 0.05961 | 0.26876 | 0.14958 | 0.615   | 0.40113 RASSF2    |
| cg19615059 | 0.34924 | 0.11042 | 0.10368 | 0.10459 | 0.18553 | 0.04685 | 0.17965 | 0.05781 | 0.25807 | 0.51276 TRPV4     |
| cg19615614 | 0.09258 | 0.08428 | 0.09384 | 0.10759 | 0.08284 | 0.09075 | 0.0948  | 0.08516 | 0.08209 | 0.08245 CDK2      |
| cg19616230 | 0.6764  | 0.66299 | 0.9508  | 0.97449 | 0.93481 | 0.98323 | 0.9832  | 0.98173 | 0.03822 | 0.01959 SLC34A2   |
| cg19618706 | 0.70047 | 0.51838 | 0.08434 | 0.08158 | 0.06785 | 0.07016 | 0.12146 | 0.06047 | 0.05353 | 0.04783 BGN       |
| cg19620294 | 0.16916 | 0.06557 | 0.88931 | 0.90556 | 0.13768 | 0.05414 | 0.12556 | 0.0515  | 0.44796 | 0.23662 TNFRSF11B |
| cg19622360 | 0.02598 | 0.02184 | 0.03201 | 0.02921 | 0.02271 | 0.02284 | 0.02572 | 0.02403 | 0.01991 | 0.01688 MTR       |
| cg19622372 | 0.8358  | 0.64397 | 0.82121 | 0.87595 | 0.91778 | 0.88289 | 0.85271 | 0.88023 | 0.88281 | 0.88088 CYP2D7P1  |
| cg19623751 | 0.81849 | 0.50588 | 0.26625 | 0.27899 | 0.08454 | 0.05578 | 0.07127 | 0.06264 | 0.05007 | 0.04971 CEACAM7   |
| cg19624775 | 0.02602 | 0.02721 | 0.03009 | 0.02886 | 0.02684 | 0.02643 | 0.02374 | 0.02482 | 0.02379 | 0.02419 MORC3     |
| cg19626078 | 0.04941 | 0.05341 | 0.05234 | 0.05246 | 0.03144 | 0.04002 | 0.03849 | 0.03528 | 0.03842 | 0.03439 KNDC1     |
| cg19629292 | 0.04697 | 0.03359 | 0.18792 | 0.23655 | 0.31103 | 0.57107 | 0.0801  | 0.04821 | 0.14905 | 0.37883 ZNF312    |
| cg19630506 | 0.0257  | 0.02778 | 0.02935 | 0.02991 | 0.02237 | 0.02709 | 0.02518 | 0.02412 | 0.02945 | 0.02093 SMTN      |
| cg19630689 | 0.1667  | 0.07638 | 0.37176 | 0.62932 | 0.19045 | 0.09912 | 0.06971 | 0.06297 | 0.06893 | 0.08141 SERPINA12 |
| cg19632026 | 0.02982 | 0.03272 | 0.032   | 0.0309  | 0.03181 | 0.03721 | 0.02611 | 0.02552 | 0.02825 | 0.02424 CHCHD3    |
| cg19632206 | 0.50577 | 0.33171 | 0.44355 | 0.44169 | 0.56152 | 0.14488 | 0.15257 | 0.10876 | 0.11638 | 0.11906 FAM5C     |
| cg19632760 | 0.79299 | 0.44051 | 0.84868 | 0.85486 | 0.52888 | 0.48321 | 0.29572 | 0.24432 | 0.58525 | 0.51074 LACTB2    |
| cg19635695 | 0.17764 | 0.09674 | 0.3078  | 0.49194 | 0.4911  | 0.29546 | 0.13155 | 0.08046 | 0.08439 | 0.06378 PDE6C     |
| cg19635712 | 0.08827 | 0.0583  | 0.10323 | 0.10196 | 0.59903 | 0.38511 | 0.04891 | 0.04934 | 0.1033  | 0.04358 EPB41L4B  |
| cg19635810 | 0.02418 | 0.02564 | 0.02689 | 0.02458 | 0.01742 | 0.02636 | 0.02178 | 0.02344 | 0.02319 | 0.02094 C2orf18   |
| cg19635869 | 0.05756 | 0.0485  | 0.06909 | 0.05283 | 0.07312 | 0.04656 | 0.04547 | 0.04374 | 0.13238 | 0.03944 RRAGD     |
| cg19636861 | 0.90372 | 0.80173 | 0.81703 | 0.72324 | 0.76666 | 0.8721  | 0.54973 | 0.38509 | 0.68064 | 0.65124 ZNF556    |
| cg19636871 | 0.8141  | 0.76082 | 0.89683 | 0.91272 | 0.91742 | 0.91118 | 0.91269 | 0.91338 | 0.88094 | 0.86291 LDHAL6B   |
| cg19637116 | 0.08377 | 0.09333 | 0.05475 | 0.05187 | 0.15727 | 0.11889 | 0.07285 | 0.07716 | 0.07877 | 0.08806 FNTB      |
| cg19638349 | 0.02991 | 0.03721 | 0.03931 | 0.04081 | 0.02728 | 0.03868 | 0.03114 | 0.02751 | 0.03247 | 0.02961 RDH14     |
| cg19639622 | 0.04098 | 0.04221 | 0.09807 | 0.10893 | 0.05221 | 0.03351 | 0.02987 | 0.02835 | 0.03323 | 0.02811 GPM6A     |
| cg19642007 | 0.65631 | 0.06107 | 0.61173 | 0.81263 | 0.8962  | 0.88044 | 0.71864 | 0.31883 | 0.36112 | 0.10422 TNNT3     |
| cg19642148 | 0.1101  | 0.10305 | 0.10869 | 0.10294 | 0.07739 | 0.09499 | 0.10798 | 0.10324 | 0.09593 | 0.10272 DHX30     |
| cg19644162 | 0.03536 | 0.03824 | 0.03774 | 0.03587 | 0.02587 | 0.03099 | 0.02988 | 0.0247  | 0.02776 | 0.02983 TXNL4A    |
| cg19645103 | 0.05116 | 0.0581  | 0.05664 | 0.05169 | 0.0408  | 0.04377 | 0.04503 | 0.05152 | 0.04516 | 0.04067 YEATS4    |
| cg19646028 | 0.10217 | 0.04951 | 0.46784 | 0.43872 | 0.42679 | 0.11333 | 0.06732 | 0.05375 | 0.06668 | 0.04772 C19orf30  |
| cg19649173 | 0.07069 | 0.07328 | 0.0732  | 0.09596 | 0.06411 | 0.06898 | 0.20107 | 0.08867 | 0.05932 | 0.05969 ZNF446    |
| cg19652869 | 0.02454 | 0.02526 | 0.03252 | 0.02594 | 0.02139 | 0.02294 | 0.02211 | 0.02003 | 0.02073 | 0.01935 SLC30A1   |

|            |         |         |         |         |         |         |         |         |         |         |           |
|------------|---------|---------|---------|---------|---------|---------|---------|---------|---------|---------|-----------|
| cg19653161 | 0.06009 | 0.05952 | 0.06132 | 0.05703 | 0.05133 | 0.05433 | 0.05489 | 0.05388 | 0.05532 | 0.05245 | RGS10     |
| cg19654437 | 0.51116 | 0.17704 | 0.17415 | 0.13178 | 0.37371 | 0.23053 | 0.29778 | 0.27364 | 0.31289 | 0.20297 | ALS2CR7   |
| cg19655070 | 0.12135 | 0.11453 | 0.12489 | 0.12373 | 0.21286 | 0.14172 | 0.15398 | 0.14522 | 0.10763 | 0.11495 | HEXIM2    |
| cg19657082 | 0.09171 | 0.08203 | 0.08249 | 0.08485 | 0.07863 | 0.0693  | 0.06717 | 0.07473 | 0.06598 | 0.06631 | ZMPSTE24  |
| cg19658284 | 0.13464 | 0.08258 | 0.09115 | 0.08605 | 0.08242 | 0.07032 | 0.08054 | 0.06461 | 0.0713  | 0.06313 | FLJ45645  |
| cg19662708 | 0.8059  | 0.68386 | 0.78743 | 0.82962 | 0.51984 | 0.7448  | 0.6721  | 0.68346 | 0.80148 | 0.78013 | TEAD1     |
| cg19663795 | 0.8137  | 0.78252 | 0.81248 | 0.82517 | 0.85408 | 0.79917 | 0.83337 | 0.76691 | 0.07388 | 0.08737 | 1-Sep     |
| cg19663942 | 0.07405 | 0.08405 | 0.08082 | 0.07619 | 0.05894 | 0.0699  | 0.07232 | 0.06987 | 0.07304 | 0.06233 | TBC1D16   |
| cg19664945 | 0.87458 | 0.25729 | 0.88273 | 0.87308 | 0.90713 | 0.87199 | 0.88272 | 0.88539 | 0.91    | 0.91137 | GPR75     |
| cg19666391 | 0.39521 | 0.61692 | 0.64092 | 0.66079 | 0.5367  | 0.39757 | 0.51854 | 0.45424 | 0.51524 | 0.25231 | UNQ689    |
| cg19668234 | 0.4702  | 0.75673 | 0.69769 | 0.74269 | 0.88849 | 0.73218 | 0.72376 | 0.77542 | 0.14556 | 0.07435 | TSP50     |
| cg19668255 | 0.05584 | 0.05156 | 0.21193 | 0.13449 | 0.1382  | 0.08061 | 0.06517 | 0.05567 | 0.07962 | 0.15409 | LOC81558  |
| cg19669036 | 0.07192 | 0.03775 | 0.05185 | 0.04148 | 0.20417 | 0.03682 | 0.02496 | 0.02387 | 0.46625 | 0.14205 | SNAP29    |
| cg19669439 | 0.05013 | 0.05195 | 0.05104 | 0.0469  | 0.05355 | 0.05221 | 0.04624 | 0.03921 | 0.03591 | 0.04168 | BTRC      |
| cg19670317 | 0.06415 | 0.06474 | 0.06476 | 0.07229 | 0.04136 | 0.05122 | 0.05428 | 0.05259 | 0.05981 | 0.05436 | C1orf59   |
| cg19674669 | 0.78362 | 0.52541 | 0.71182 | 0.75462 | 0.79668 | 0.59318 | 0.08828 | 0.04325 | 0.20907 | 0.31426 | LOC112937 |
| cg19675684 | 0.06561 | 0.05531 | 0.11034 | 0.08143 | 0.05092 | 0.04482 | 0.04843 | 0.04813 | 0.0446  | 0.0397  | C1orf108  |
| cg19676312 | 0.05067 | 0.0505  | 0.06502 | 0.0713  | 0.05095 | 0.04708 | 0.04669 | 0.04194 | 0.05126 | 0.04988 | RNPEP     |
| cg19678067 | 0.05403 | 0.0541  | 0.06282 | 0.05816 | 0.04358 | 0.05474 | 0.06244 | 0.05786 | 0.05507 | 0.05531 | ZNF403    |
| cg19679281 | 0.0347  | 0.03042 | 0.03282 | 0.02983 | 0.02116 | 0.02638 | 0.02841 | 0.02655 | 0.02486 | 0.02817 | FANCL     |
| cg19680672 | 0.74299 | 0.52536 | 0.08837 | 0.09826 | 0.78279 | 0.80955 | 0.24948 | 0.45019 | 0.4379  | 0.08578 | MGMT      |
| cg19682367 | 0.69866 | 0.47536 | 0.56442 | 0.71402 | 0.70591 | 0.72411 | 0.54527 | 0.34414 | 0.23658 | 0.22245 | FAM79B    |
| cg19684883 | 0.0538  | 0.03718 | 0.0359  | 0.03571 | 0.04759 | 0.05098 | 0.03852 | 0.03391 | 0.02949 | 0.02738 | ZA20D2    |
| cg19685066 | 0.81703 | 0.44984 | 0.42653 | 0.41074 | 0.84382 | 0.57973 | 0.60426 | 0.65103 | 0.07376 | 0.26567 | ACTL8     |
| cg19685976 | 0.06289 | 0.05852 | 0.30286 | 0.53061 | 0.07016 | 0.06538 | 0.06342 | 0.05267 | 0.04337 | 0.04739 | SPTBN4    |
| cg19686152 | 0.09144 | 0.0728  | 0.36882 | 0.46355 | 0.40946 | 0.0698  | 0.07892 | 0.10003 | 0.13487 | 0.05164 | TMOD3     |
| cg19688503 | 0.47264 | 0.15547 | 0.34693 | 0.551   | 0.18932 | 0.25145 | 0.104   | 0.3438  | 0.14062 | 0.13593 | CAPN6     |
| cg19690101 | 0.84056 | 0.58977 | 0.86791 | 0.88275 | 0.79295 | 0.86169 | 0.83507 | 0.88307 | 0.6438  | 0.6135  | DHX57     |
| cg19690214 | 0.59517 | 0.34222 | 0.66624 | 0.79938 | 0.7028  | 0.83425 | 0.36417 | 0.47127 | 0.50431 | 0.39085 | PIP3-E    |
| cg19690404 | 0.451   | 0.29422 | 0.72475 | 0.72196 | 0.53029 | 0.43795 | 0.47902 | 0.59759 | 0.79322 | 0.21385 | CPA4      |
| cg19691267 | 0.06624 | 0.07075 | 0.05838 | 0.05647 | 0.05438 | 0.06007 | 0.05684 | 0.05469 | 0.05575 | 0.05703 | ACYP1     |
| cg19691797 | 0.0272  | 0.03666 | 0.03631 | 0.03006 | 0.02316 | 0.02899 | 0.0395  | 0.04351 | 0.02743 | 0.03371 | TMEM66    |
| cg19692710 | 0.40923 | 0.33591 | 0.62976 | 0.82082 | 0.79867 | 0.8407  | 0.45801 | 0.35766 | 0.36829 | 0.17284 | DNAJB13   |
| cg19693015 | 0.03599 | 0.03476 | 0.04507 | 0.04869 | 0.04038 | 0.03908 | 0.0359  | 0.03473 | 0.03411 | 0.03381 | CHMP6     |
| cg19693403 | 0.88652 | 0.88607 | 0.89391 | 0.89545 | 0.89964 | 0.91813 | 0.90136 | 0.90843 | 0.91288 | 0.89942 | GPR156    |
| cg19694491 | 0.04351 | 0.04502 | 0.03806 | 0.03926 | 0.04125 | 0.04282 | 0.04588 | 0.04431 | 0.03881 | 0.037   | HSPA8     |
| cg19695867 | 0.62295 | 0.19137 | 0.41796 | 0.6187  | 0.15114 | 0.14022 | 0.10077 | 0.11383 | 0.21253 | 0.11641 | WDR47     |
| cg19696622 | 0.28939 | 0.0796  | 0.77727 | 0.83205 | 0.90837 | 0.76348 | 0.48897 | 0.14611 | 0.59739 | 0.35332 | RPS6KA3   |
| cg19697981 | 0.06789 | 0.07464 | 0.47091 | 0.45461 | 0.87185 | 0.63511 | 0.89213 | 0.87732 | 0.92496 | 0.92249 | NR2E1     |
| cg19700658 | 0.76694 | 0.64845 | 0.82359 | 0.85177 | 0.88553 | 0.84245 | 0.83258 | 0.82014 | 0.83976 | 0.82633 | UCP3      |
| cg19703610 | 0.05436 | 0.05401 | 0.87699 | 0.88092 | 0.20226 | 0.08549 | 0.51113 | 0.87245 | 0.48872 | 0.50155 | DSCAML1   |



|            |         |         |         |         |         |         |         |         |         |                  |
|------------|---------|---------|---------|---------|---------|---------|---------|---------|---------|------------------|
| cg19703628 | 0.03039 | 0.03101 | 0.02984 | 0.02908 | 0.02347 | 0.03143 | 0.03076 | 0.02483 | 0.03595 | 0.03335 PSMB4    |
| cg19703826 | 0.05827 | 0.05636 | 0.06479 | 0.05797 | 0.05219 | 0.04753 | 0.05644 | 0.05292 | 0.04767 | 0.05096 ZNF213   |
| cg19704039 | 0.04404 | 0.03479 | 0.04224 | 0.0453  | 0.02926 | 0.0436  | 0.03454 | 0.03887 | 0.034   | 0.03275 GNPDA1   |
| cg19706602 | 0.08117 | 0.06771 | 0.10062 | 0.19042 | 0.06129 | 0.09678 | 0.08095 | 0.07363 | 0.05956 | 0.08428 MGMT     |
| cg19706682 | 0.27796 | 0.03926 | 0.19081 | 0.17812 | 0.0478  | 0.37011 | 0.07228 | 0.0782  | 0.35032 | 0.18834 LRRRC50  |
| cg19709058 | 0.06119 | 0.0405  | 0.044   | 0.03724 | 0.05464 | 0.03387 | 0.03995 | 0.03522 | 0.03948 | 0.02854 MGC43122 |
| cg19709625 | 0.02516 | 0.02837 | 0.02433 | 0.02434 | 0.02008 | 0.02118 | 0.01912 | 0.01875 | 0.01953 | 0.01785 PCOLCE2  |
| cg19712821 | 0.79008 | 0.54697 | 0.7599  | 0.85849 | 0.90678 | 0.35889 | 0.11468 | 0.07415 | 0.40318 | 0.35336 KSP37    |
| cg19713083 | 0.04657 | 0.04476 | 0.04086 | 0.03317 | 0.31093 | 0.43731 | 0.04574 | 0.04429 | 0.03691 | 0.03837 ATP5G3   |
| cg19713196 | 0.71106 | 0.69816 | 0.93373 | 0.94665 | 0.88033 | 0.80386 | 0.65383 | 0.44842 | 0.36426 | 0.50758 LAD1     |
| cg19713460 | 0.03151 | 0.03581 | 0.31155 | 0.42166 | 0.84461 | 0.66661 | 0.39659 | 0.42305 | 0.02859 | 0.01712 SYNGR1   |
| cg19714241 | 0.05643 | 0.04815 | 0.08648 | 0.07385 | 0.09473 | 0.07355 | 0.0836  | 0.05991 | 0.04883 | 0.05031 STCH     |
| cg19714296 | 0.24677 | 0.07906 | 0.50932 | 0.53859 | 0.11615 | 0.082   | 0.07893 | 0.09254 | 0.20841 | 0.10745 CYP4A11  |
| cg19714749 | 0.03648 | 0.03316 | 0.03451 | 0.0311  | 0.02727 | 0.0291  | 0.03508 | 0.03075 | 0.03131 | 0.02851 TPK1     |
| cg19716462 | 0.02663 | 0.03111 | 0.02786 | 0.0274  | 0.02439 | 0.02596 | 0.02463 | 0.02215 | 0.02287 | 0.02337 CCT4     |
| cg19717150 | 0.5509  | 0.32823 | 0.25483 | 0.49522 | 0.76407 | 0.6815  | 0.14514 | 0.17467 | 0.2071  | 0.06777 HNF4A    |
| cg19717326 | 0.17828 | 0.1329  | 0.32534 | 0.25781 | 0.61721 | 0.16784 | 0.76698 | 0.32469 | 0.86624 | 0.7261 MYADM     |
| cg19718882 | 0.10422 | 0.06958 | 0.85624 | 0.94342 | 0.7449  | 0.54963 | 0.42101 | 0.46036 | 0.11151 | 0.04599 WIT-1    |
| cg19721215 | 0.0316  | 0.03409 | 0.03682 | 0.03816 | 0.02437 | 0.02925 | 0.03566 | 0.03349 | 0.02882 | 0.02649 GCDH     |
| cg19721889 | 0.02527 | 0.02167 | 0.36356 | 0.49577 | 0.03594 | 0.02021 | 0.03268 | 0.02152 | 0.02187 | 0.10634 HAND1    |
| cg19722847 | 0.73477 | 0.34922 | 0.18058 | 0.31362 | 0.09536 | 0.08322 | 0.33768 | 0.12522 | 0.11034 | 0.09732 IPO8     |
| cg19723473 | 0.75101 | 0.46666 | 0.61302 | 0.70887 | 0.46089 | 0.63543 | 0.59426 | 0.79737 | 0.08888 | 0.10421 B3GALT1  |
| cg19723775 | 0.01977 | 0.01652 | 0.01783 | 0.01689 | 0.01334 | 0.01502 | 0.01509 | 0.01552 | 0.01438 | 0.01444 HNRPH1   |
| cg19724470 | 0.67959 | 0.74308 | 0.12998 | 0.16664 | 0.50687 | 0.22724 | 0.29951 | 0.38733 | 0.3558  | 0.09603 CD274    |
| cg19728055 | 0.04951 | 0.04894 | 0.06358 | 0.07875 | 0.06005 | 0.05352 | 0.03937 | 0.04644 | 0.04264 | 0.04716 OXSR1    |
| cg19728223 | 0.65815 | 0.34033 | 0.69999 | 0.94266 | 0.48238 | 0.1867  | 0.7285  | 0.57729 | 0.93104 | 0.9022 KCNQ1     |
| cg19728382 | 0.92506 | 0.84176 | 0.92482 | 0.90546 | 0.94374 | 0.83401 | 0.93578 | 0.84811 | 0.85973 | 0.92149 STC2     |
| cg19728485 | 0.02243 | 0.01964 | 0.02939 | 0.02359 | 0.01916 | 0.02185 | 0.01798 | 0.01928 | 0.01985 | 0.0164 PQLC3     |
| cg19728577 | 0.31507 | 0.31699 | 0.62481 | 0.85579 | 0.74973 | 0.30793 | 0.26635 | 0.07757 | 0.10137 | 0.04135 GUCA2B   |
| cg19729279 | 0.05994 | 0.06523 | 0.06797 | 0.0639  | 0.04659 | 0.06227 | 0.05973 | 0.06629 | 0.05646 | 0.06105 PHF15    |
| cg19730092 | 0.47079 | 0.13692 | 0.76548 | 0.77414 | 0.10639 | 0.13944 | 0.72886 | 0.39183 | 0.15041 | 0.12861 ADAMTS14 |
| cg19731122 | 0.61744 | 0.57806 | 0.80051 | 0.85041 | 0.91216 | 0.84909 | 0.85711 | 0.60612 | 0.58725 | 0.61114 MYO1C    |
| cg19731268 | 0.03013 | 0.03969 | 0.04101 | 0.03549 | 0.0382  | 0.0305  | 0.03204 | 0.13739 | 0.03039 | 0.02796 CHST3    |
| cg19734148 | 0.03545 | 0.03476 | 0.03478 | 0.03404 | 0.02986 | 0.03395 | 0.03176 | 0.03134 | 0.03028 | 0.02641 RAE1     |
| cg19734228 | 0.0284  | 0.03259 | 0.03091 | 0.02503 | 0.02866 | 0.02691 | 0.02933 | 0.0348  | 0.03598 | 0.02387 DAPK1    |
| cg19736898 | 0.06182 | 0.02641 | 0.09295 | 0.07329 | 0.02873 | 0.03356 | 0.02307 | 0.02328 | 0.03547 | 0.0294 C1orf77   |
| cg19738333 | 0.04252 | 0.04239 | 0.04687 | 0.04133 | 0.02957 | 0.04054 | 0.04519 | 0.04549 | 0.04244 | 0.04011 REEP4    |
| cg19740287 | 0.03883 | 0.04039 | 0.0446  | 0.04366 | 0.02823 | 0.03538 | 0.21362 | 0.0513  | 0.03626 | 0.03122 MOSPD2   |
| cg19740375 | 0.10138 | 0.05952 | 0.85757 | 0.88899 | 0.86897 | 0.83078 | 0.43874 | 0.2201  | 0.05706 | 0.04332 SCN5A    |
| cg19740763 | 0.0228  | 0.02728 | 0.02624 | 0.01975 | 0.01697 | 0.02247 | 0.02014 | 0.01819 | 0.02128 | 0.01938 INPPL1   |
| cg19740969 | 0.72652 | 0.61433 | 0.6961  | 0.74918 | 0.60984 | 0.66613 | 0.49196 | 0.5334  | 0.57605 | 0.62104 CXCL9    |

|            |         |         |         |         |         |         |         |         |         |                   |
|------------|---------|---------|---------|---------|---------|---------|---------|---------|---------|-------------------|
| cg19742789 | 0.03749 | 0.03929 | 0.04311 | 0.03698 | 0.22822 | 0.38625 | 0.03464 | 0.03763 | 0.04433 | 0.03402 FLJ14166  |
| cg19744122 | 0.01904 | 0.02136 | 0.02703 | 0.02275 | 0.01823 | 0.02914 | 0.01556 | 0.02127 | 0.01946 | 0.01611 SYPL1     |
| cg19744131 | 0.03123 | 0.03454 | 0.0328  | 0.02756 | 0.03634 | 0.03401 | 0.02745 | 0.02533 | 0.03555 | 0.03207 PRUNE     |
| cg19744952 | 0.16471 | 0.16766 | 0.23338 | 0.26394 | 0.1484  | 0.16172 | 0.16947 | 0.16179 | 0.22454 | 0.24651 CIC       |
| cg19746675 | 0.07116 | 0.07038 | 0.0659  | 0.05939 | 0.05669 | 0.07077 | 0.11748 | 0.09949 | 0.06102 | 0.05442 C3orf26   |
| cg19747852 | 0.02867 | 0.02299 | 0.02598 | 0.02028 | 0.02221 | 0.02715 | 0.02464 | 0.02507 | 0.02131 | 0.01803 TRA2A     |
| cg19751300 | 0.21268 | 0.03453 | 0.87901 | 0.89794 | 0.89528 | 0.89202 | 0.35074 | 0.8608  | 0.38992 | 0.37353 ST8SIA5   |
| cg19751951 | 0.06031 | 0.028   | 0.02619 | 0.02868 | 0.02152 | 0.02463 | 0.01922 | 0.02106 | 0.03273 | 0.01928 GYG1      |
| cg19752722 | 0.04774 | 0.04154 | 0.24912 | 0.52474 | 0.04675 | 0.04393 | 0.04165 | 0.04119 | 0.03719 | 0.04271 ERBB2     |
| cg19754094 | 0.05094 | 0.05652 | 0.06    | 0.05293 | 0.06499 | 0.05419 | 0.04077 | 0.03897 | 0.04644 | 0.04653 STAMBP    |
| cg19756068 | 0.37256 | 0.31339 | 0.23236 | 0.33678 | 0.57499 | 0.56083 | 0.14298 | 0.16123 | 0.22116 | 0.06285 CYP2B6    |
| cg19756611 | 0.14267 | 0.1382  | 0.20323 | 0.15023 | 0.25377 | 0.19076 | 0.14175 | 0.10563 | 0.10792 | 0.10518 DACH1     |
| cg19759064 | 0.58194 | 0.10138 | 0.50804 | 0.33968 | 0.02306 | 0.03193 | 0.12456 | 0.0326  | 0.06128 | 0.22346 PHKG1     |
| cg19761273 | 0.15365 | 0.05208 | 0.18409 | 0.29261 | 0.37999 | 0.31301 | 0.05138 | 0.04896 | 0.08736 | 0.03554 CSNK1D    |
| cg19762747 | 0.77726 | 0.19818 | 0.38428 | 0.54304 | 0.41228 | 0.38732 | 0.06137 | 0.06183 | 0.49548 | 0.38335 CRX       |
| cg19763279 | 0.06261 | 0.05435 | 0.07471 | 0.07539 | 0.09259 | 0.06981 | 0.05738 | 0.05429 | 0.05109 | 0.04766 HPSE      |
| cg19763281 | 0.77554 | 0.63942 | 0.76313 | 0.76103 | 0.70384 | 0.68096 | 0.41674 | 0.4283  | 0.57032 | 0.18661 FAM77C    |
| cg19764399 | 0.03505 | 0.04369 | 0.04472 | 0.04728 | 0.04807 | 0.06825 | 0.04699 | 0.04938 | 0.02949 | 0.03226 MED4      |
| cg19764407 | 0.26871 | 0.29096 | 0.34634 | 0.32003 | 0.33957 | 0.27801 | 0.05414 | 0.04867 | 0.03986 | 0.03738 CDKN2B    |
| cg19764418 | 0.88604 | 0.69341 | 0.8854  | 0.90436 | 0.8976  | 0.90579 | 0.1422  | 0.09547 | 0.36214 | 0.5538 RYR2       |
| cg19764436 | 0.03081 | 0.0409  | 0.76182 | 0.7029  | 0.22557 | 0.02481 | 0.48865 | 0.07412 | 0.8811  | 0.02177 GNAZ      |
| cg19764555 | 0.26636 | 0.11167 | 0.04063 | 0.03371 | 0.42255 | 0.4808  | 0.09656 | 0.08247 | 0.82394 | 0.47224 AHNAK     |
| cg19766460 | 0.4967  | 0.05894 | 0.12069 | 0.19479 | 0.83921 | 0.47998 | 0.0527  | 0.05948 | 0.19614 | 0.03805 C21orf128 |
| cg19767249 | 0.06105 | 0.06784 | 0.06802 | 0.06857 | 0.07855 | 0.05928 | 0.07931 | 0.05611 | 0.05907 | 0.06144 DCPS      |
| cg19769182 | 0.03009 | 0.03285 | 0.05674 | 0.03418 | 0.78489 | 0.3384  | 0.15103 | 0.02775 | 0.39039 | 0.0266 PRRT2      |
| cg19770955 | 0.74366 | 0.4368  | 0.49908 | 0.54567 | 0.72072 | 0.76716 | 0.75673 | 0.81574 | 0.86867 | 0.84037 DUS4L     |
| cg19771482 | 0.03872 | 0.03337 | 0.04018 | 0.04174 | 0.03956 | 0.03599 | 0.0515  | 0.04504 | 0.03006 | 0.03913 BNIP2     |
| cg19771541 | 0.04145 | 0.04302 | 0.05979 | 0.05353 | 0.28992 | 0.4857  | 0.33799 | 0.37756 | 0.04273 | 0.04265 MID2      |
| cg19771589 | 0.21996 | 0.28521 | 0.55521 | 0.63059 | 0.27786 | 0.10443 | 0.0782  | 0.05712 | 0.21475 | 0.21171 ZIM2      |
| cg19774122 | 0.94851 | 0.94842 | 0.70181 | 0.82769 | 0.24246 | 0.06679 | 0.37238 | 0.37693 | 0.10548 | 0.07577 LAMA2     |
| cg19774491 | 0.04844 | 0.05724 | 0.05284 | 0.05274 | 0.04566 | 0.04141 | 0.06329 | 0.05614 | 0.04432 | 0.0437 PROS1      |
| cg19776090 | 0.32594 | 0.28288 | 0.28532 | 0.32076 | 0.172   | 0.29138 | 0.14397 | 0.1674  | 0.34689 | 0.24956 SUMO2     |
| cg19776201 | 0.45492 | 0.76313 | 0.67279 | 0.85177 | 0.64215 | 0.6126  | 0.03982 | 0.03806 | 0.18966 | 0.20578 ZNF132    |
| cg19776453 | 0.85672 | 0.49351 | 0.74982 | 0.86004 | 0.92889 | 0.8444  | 0.71325 | 0.55218 | 0.89647 | 0.59042 CEACAM1   |
| cg19777470 | 0.93623 | 0.78833 | 0.67973 | 0.80476 | 0.73986 | 0.74943 | 0.26863 | 0.29321 | 0.97044 | 0.97483 CRABP1    |
| cg19777783 | 0.86976 | 0.83419 | 0.40172 | 0.49157 | 0.75572 | 0.78216 | 0.87552 | 0.87852 | 0.08499 | 0.06698 SLC15A4   |
| cg19778698 | 0.32116 | 0.10035 | 0.37444 | 0.32468 | 0.12466 | 0.06336 | 0.18456 | 0.07766 | 0.18454 | 0.06553 MAFK      |
| cg19779211 | 0.11499 | 0.30139 | 0.76103 | 0.86299 | 0.72752 | 0.70587 | 0.60773 | 0.63822 | 0.17619 | 0.10551 KCNQ1     |
| cg19780563 | 0.75606 | 0.6458  | 0.31053 | 0.21471 | 0.53727 | 0.64543 | 0.51449 | 0.54536 | 0.84228 | 0.53602 EXOC6     |
| cg19781053 | 0.05312 | 0.04945 | 0.04912 | 0.04828 | 0.05252 | 0.04822 | 0.05412 | 0.05279 | 0.05902 | 0.05737 TJP1      |
| cg19781133 | 0.02598 | 0.02527 | 0.16287 | 0.05469 | 0.45294 | 0.35167 | 0.45099 | 0.03227 | 0.25556 | 0.04295 KCNH2     |

|            |         |         |         |         |         |         |         |         |         |                   |
|------------|---------|---------|---------|---------|---------|---------|---------|---------|---------|-------------------|
| cg19781251 | 0.9496  | 0.96188 | 0.94504 | 0.95365 | 0.95581 | 0.95254 | 0.95055 | 0.95592 | 0.93824 | 0.9146 PEG10      |
| cg19782075 | 0.0829  | 0.09502 | 0.12099 | 0.10846 | 0.13963 | 0.11839 | 0.09832 | 0.10079 | 0.09729 | 0.09184 LOC144233 |
| cg19782598 | 0.83428 | 0.75614 | 0.29641 | 0.24141 | 0.40201 | 0.58864 | 0.23019 | 0.56763 | 0.16861 | 0.18596 FLJ30046  |
| cg19783114 | 0.02551 | 0.02104 | 0.02572 | 0.0307  | 0.0181  | 0.02032 | 0.01618 | 0.01916 | 0.01879 | 0.01411 TP73      |
| cg19784449 | 0.10303 | 0.0868  | 0.12141 | 0.12152 | 0.14995 | 0.11885 | 0.08499 | 0.08582 | 0.11633 | 0.10756 WASF2     |
| cg19784470 | 0.5054  | 0.16486 | 0.45674 | 0.59707 | 0.62932 | 0.77952 | 0.16792 | 0.14526 | 0.70271 | 0.12564 OR7C2     |
| cg19784477 | 0.06159 | 0.07144 | 0.14875 | 0.26862 | 0.58475 | 0.1164  | 0.10868 | 0.08293 | 0.42591 | 0.22747 TFPI2     |
| cg19786920 | 0.63891 | 0.13178 | 0.65024 | 0.70559 | 0.78142 | 0.61022 | 0.35068 | 0.39888 | 0.11403 | 0.11319 FLJ14001  |
| cg19787037 | 0.41578 | 0.09793 | 0.14609 | 0.11539 | 0.05363 | 0.12672 | 0.04812 | 0.04789 | 0.03444 | 0.03772 SPAG11    |
| cg19789466 | 0.49955 | 0.4949  | 0.38922 | 0.33315 | 0.3625  | 0.21786 | 0.34799 | 0.3433  | 0.23846 | 0.05977 OAS1      |
| cg19789505 | 0.63844 | 0.40405 | 0.78806 | 0.86762 | 0.26577 | 0.14416 | 0.74203 | 0.50189 | 0.67164 | 0.48823 OBSCN     |
| cg19790294 | 0.07324 | 0.06881 | 0.1444  | 0.35186 | 0.70911 | 0.85134 | 0.3785  | 0.48019 | 0.37364 | 0.36381 CYBA      |
| cg19791253 | 0.05203 | 0.06165 | 0.07529 | 0.07412 | 0.08398 | 0.05576 | 0.0648  | 0.04988 | 0.06828 | 0.05515 ATP2B4    |
| cg19791277 | 0.02312 | 0.02337 | 0.6041  | 0.66422 | 0.01529 | 0.01729 | 0.01741 | 0.01685 | 0.01667 | 0.01676 KHDRBS3   |
| cg19793718 | 0.05579 | 0.05503 | 0.05    | 0.05484 | 0.03711 | 0.04547 | 0.0462  | 0.04217 | 0.04976 | 0.0448 DHX37      |
| cg19794490 | 0.06662 | 0.06099 | 0.06254 | 0.06524 | 0.06263 | 0.05739 | 0.04487 | 0.04368 | 0.04117 | 0.03944 NCOA6     |
| cg19795898 | 0.90579 | 0.27661 | 0.61303 | 0.84083 | 0.53345 | 0.30794 | 0.13696 | 0.04954 | 0.66806 | 0.42168 KIAA1984  |
| cg19796273 | 0.03772 | 0.03278 | 0.38026 | 0.51821 | 0.03086 | 0.03465 | 0.04635 | 0.03744 | 0.0307  | 0.02982 MYO10     |
| cg19797376 | 0.89873 | 0.69779 | 0.85147 | 0.90224 | 0.89025 | 0.90233 | 0.5618  | 0.56824 | 0.86798 | 0.81714 TAL1      |
| cg19797659 | 0.11273 | 0.08309 | 0.10144 | 0.09424 | 0.15127 | 0.09219 | 0.13699 | 0.14028 | 0.07435 | 0.1026 OAZ2       |
| cg19798224 | 0.56863 | 0.08248 | 0.35453 | 0.57796 | 0.87691 | 0.88532 | 0.49636 | 0.45123 | 0.24985 | 0.04494 C14orf68  |
| cg19799744 | 0.05896 | 0.05502 | 0.26022 | 0.34764 | 0.17388 | 0.06372 | 0.16582 | 0.0548  | 0.09532 | 0.21787 ENPP5     |
| cg19800926 | 0.0268  | 0.02862 | 0.02918 | 0.03398 | 0.02915 | 0.03152 | 0.02638 | 0.02902 | 0.02336 | 0.02155 TNFRSF19L |
| cg19801560 | 0.91331 | 0.92378 | 0.91128 | 0.92342 | 0.86952 | 0.89102 | 0.90482 | 0.92894 | 0.93485 | 0.9423 HIST1H4G   |
| cg19803671 | 0.04538 | 0.04851 | 0.05    | 0.04338 | 0.04337 | 0.04016 | 0.04138 | 0.04557 | 0.04194 | 0.03379 UBE2E2    |
| cg19803984 | 0.06566 | 0.05136 | 0.22836 | 0.40781 | 0.15063 | 0.06079 | 0.06713 | 0.14525 | 0.06812 | 0.06495 SNRPN     |
| cg19807685 | 0.77352 | 0.42369 | 0.15365 | 0.1401  | 0.13246 | 0.17368 | 0.35186 | 0.11819 | 0.87373 | 0.09722 HSD17B2   |
| cg19812619 | 0.80813 | 0.42451 | 0.91608 | 0.93671 | 0.90112 | 0.94024 | 0.75337 | 0.9324  | 0.46991 | 0.44478 ITGB7     |
| cg19814116 | 0.06418 | 0.0639  | 0.48876 | 0.56305 | 0.76803 | 0.71718 | 0.96767 | 0.93267 | 0.09765 | 0.02491 KCNAB2    |
| cg19815139 | 0.03007 | 0.0285  | 0.03319 | 0.03326 | 0.03052 | 0.02792 | 0.02998 | 0.0253  | 0.02632 | 0.02617 C14orf133 |
| cg19815376 | 0.84889 | 0.30593 | 0.84148 | 0.86735 | 0.84124 | 0.90147 | 0.87579 | 0.77977 | 0.10712 | 0.07974 FLJ34503  |
| cg19815589 | 0.4624  | 0.21394 | 0.54543 | 0.6722  | 0.68543 | 0.7001  | 0.14814 | 0.12027 | 0.09293 | 0.1038 LOC220070  |
| cg19815720 | 0.51834 | 0.20883 | 0.56191 | 0.7665  | 0.74103 | 0.56503 | 0.08274 | 0.09168 | 0.27268 | 0.06143 HTR3C     |
| cg19815904 | 0.08743 | 0.09816 | 0.10436 | 0.09337 | 0.10053 | 0.08903 | 0.0937  | 0.07958 | 0.08351 | 0.06289 SEMA3C    |
| cg19815928 | 0.04405 | 0.04092 | 0.04045 | 0.03728 | 0.06885 | 0.04508 | 0.03621 | 0.03216 | 0.038   | 0.03189 ATP6V0D1  |
| cg19816938 | 0.02647 | 0.03072 | 0.18139 | 0.33686 | 0.16287 | 0.0354  | 0.03479 | 0.03308 | 0.2172  | 0.0466 ABR        |
| cg19817399 | 0.05935 | 0.05714 | 0.05536 | 0.05443 | 0.04329 | 0.04897 | 0.05722 | 0.09019 | 0.04961 | 0.0465 CYP1A1     |
| cg19819571 | 0.04352 | 0.03965 | 0.04045 | 0.03817 | 0.0531  | 0.03803 | 0.03308 | 0.03334 | 0.02813 | 0.03081 KIAA0174  |
| cg19819891 | 0.03903 | 0.03221 | 0.03157 | 0.02972 | 0.0279  | 0.02914 | 0.03156 | 0.02842 | 0.02567 | 0.02603 MYST1     |
| cg19822214 | 0.07411 | 0.07854 | 0.08058 | 0.07913 | 0.09833 | 0.09131 | 0.06515 | 0.06983 | 0.06569 | 0.07302 CNOT3     |
| cg19823847 | 0.28807 | 0.35861 | 0.71596 | 0.7617  | 0.63559 | 0.82321 | 0.22771 | 0.4098  | 0.15727 | 0.20918 PBOV1     |

|            |         |         |         |         |         |         |         |         |         |         |           |
|------------|---------|---------|---------|---------|---------|---------|---------|---------|---------|---------|-----------|
| cg19824325 | 0.73845 | 0.84308 | 0.09405 | 0.07169 | 0.03814 | 0.0438  | 0.16423 | 0.21563 | 0.04889 | 0.05338 | SETD6     |
| cg19824362 | 0.04415 | 0.02245 | 0.0309  | 0.02619 | 0.02995 | 0.02082 | 0.01714 | 0.01824 | 0.02026 | 0.01839 | NR2C1     |
| cg19824441 | 0.76525 | 0.45313 | 0.83181 | 0.84556 | 0.92999 | 0.85804 | 0.85765 | 0.83802 | 0.8775  | 0.82043 | ADMR      |
| cg19826026 | 0.09799 | 0.11564 | 0.16493 | 0.13467 | 0.6509  | 0.25776 | 0.78864 | 0.74248 | 0.46907 | 0.26253 | ARHGDI8   |
| cg19830147 | 0.04795 | 0.0453  | 0.05215 | 0.05247 | 0.04811 | 0.04158 | 0.03983 | 0.04108 | 0.04596 | 0.04628 | LSS       |
| cg19831077 | 0.7411  | 0.20121 | 0.69285 | 0.8546  | 0.96337 | 0.9522  | 0.86292 | 0.51607 | 0.96232 | 0.83193 | LOC349136 |
| cg19831369 | 0.17876 | 0.11238 | 0.2843  | 0.32828 | 0.5885  | 0.32298 | 0.13099 | 0.43771 | 0.36031 | 0.34642 | HPS4      |
| cg19831575 | 0.05649 | 0.47959 | 0.70237 | 0.71493 | 0.50766 | 0.77319 | 0.03817 | 0.0369  | 0.04715 | 0.04406 | FGF4      |
| cg19832597 | 0.03711 | 0.03289 | 0.05134 | 0.04374 | 0.04844 | 0.04198 | 0.03758 | 0.03618 | 0.03155 | 0.02956 | GARS      |
| cg19832721 | 0.67139 | 0.66036 | 0.79297 | 0.83257 | 0.64192 | 0.74604 | 0.672   | 0.59748 | 0.81818 | 0.77526 | KIAA1267  |
| cg19835478 | 0.10469 | 0.09431 | 0.12931 | 0.13369 | 0.46717 | 0.15601 | 0.23736 | 0.11963 | 0.09813 | 0.09566 | COL6A1    |
| cg19836199 | 0.14948 | 0.14508 | 0.19965 | 0.1407  | 0.23927 | 0.15657 | 0.14462 | 0.12381 | 0.11836 | 0.14517 | RUNX1     |
| cg19836283 | 0.0686  | 0.03373 | 0.05456 | 0.04554 | 0.14409 | 0.04989 | 0.04125 | 0.03687 | 0.04837 | 0.04349 | ITGA11    |
| cg19836808 | 0.03111 | 0.0283  | 0.03576 | 0.03882 | 0.05448 | 0.03689 | 0.02579 | 0.02191 | 0.02948 | 0.02977 | S100A7    |
| cg19837131 | 0.12736 | 0.12442 | 0.1908  | 0.14943 | 0.2483  | 0.22741 | 0.18136 | 0.15997 | 0.14701 | 0.18796 | PIK3C3    |
| cg19837751 | 0.7894  | 0.63549 | 0.5548  | 0.7251  | 0.63389 | 0.54374 | 0.15724 | 0.13469 | 0.78707 | 0.69628 | CECR5     |
| cg19837824 | 0.06891 | 0.0408  | 0.04925 | 0.0509  | 0.04278 | 0.04502 | 0.0467  | 0.03951 | 0.04246 | 0.04002 | NTHL1     |
| cg19839588 | 0.05327 | 0.05354 | 0.05494 | 0.05289 | 0.03682 | 0.04419 | 0.06481 | 0.04783 | 0.04913 | 0.05018 | TRERF1    |
| cg19839691 | 0.03568 | 0.04102 | 0.03923 | 0.03883 | 0.03091 | 0.03146 | 0.03751 | 0.03687 | 0.03374 | 0.03086 | KIAA0101  |
| cg19840387 | 0.04433 | 0.04935 | 0.06308 | 0.04492 | 0.06044 | 0.04647 | 0.04939 | 0.05293 | 0.05126 | 0.05535 | PKP4      |
| cg19840532 | 0.43437 | 0.08167 | 0.18684 | 0.15762 | 0.0651  | 0.04731 | 0.0606  | 0.0411  | 0.05094 | 0.03874 | OMA1      |
| cg19841506 | 0.39392 | 0.25415 | 0.79881 | 0.85404 | 0.97605 | 0.9539  | 0.90778 | 0.45385 | 0.89408 | 0.46309 | ZMYND15   |
| cg19843036 | 0.12064 | 0.09299 | 0.2237  | 0.27281 | 0.48562 | 0.03951 | 0.03821 | 0.03711 | 0.13997 | 0.0361  | FLJ11155  |
| cg19843429 | 0.02984 | 0.03085 | 0.03121 | 0.02844 | 0.0224  | 0.02639 | 0.02689 | 0.03088 | 0.02373 | 0.02437 | OSBPL3    |
| cg19844287 | 0.2097  | 0.03515 | 0.04568 | 0.0469  | 0.03443 | 0.03739 | 0.03315 | 0.03559 | 0.02493 | 0.02471 | MOCS2     |
| cg19845843 | 0.41491 | 0.45353 | 0.69347 | 0.69173 | 0.43551 | 0.56977 | 0.233   | 0.37074 | 0.51978 | 0.55887 | CXorf20   |
| cg19846131 | 0.04441 | 0.04882 | 0.04763 | 0.0409  | 0.03318 | 0.04047 | 0.04015 | 0.0396  | 0.04264 | 0.0384  | ZF        |
| cg19846927 | 0.04999 | 0.04404 | 0.0494  | 0.04417 | 0.06702 | 0.054   | 0.0412  | 0.03849 | 0.05376 | 0.04609 | MRPL44    |
| cg19847271 | 0.05884 | 0.04535 | 0.0627  | 0.06397 | 0.0607  | 0.04779 | 0.05231 | 0.05239 | 0.04975 | 0.03793 | PRIM1     |
| cg19848683 | 0.08517 | 0.09297 | 0.07359 | 0.07428 | 0.19947 | 0.04967 | 0.43929 | 0.06151 | 0.06344 | 0.06332 | EV11      |
| cg19850163 | 0.09548 | 0.10025 | 0.10374 | 0.09391 | 0.08579 | 0.08487 | 0.09446 | 0.06887 | 0.08625 | 0.08757 | HRB       |
| cg19850348 | 0.25823 | 0.02658 | 0.03261 | 0.02938 | 0.04425 | 0.02737 | 0.03263 | 0.0296  | 0.17143 | 0.03295 | PYGO1     |
| cg19850370 | 0.74393 | 0.42347 | 0.74074 | 0.81111 | 0.76438 | 0.7959  | 0.12702 | 0.12779 | 0.59963 | 0.36751 | SLC4A4    |
| cg19850406 | 0.12625 | 0.17933 | 0.10712 | 0.13101 | 0.56979 | 0.35431 | 0.0921  | 0.08137 | 0.48646 | 0.3521  | TMEM118   |
| cg19851137 | 0.06025 | 0.04216 | 0.04122 | 0.04293 | 0.09303 | 0.06346 | 0.04946 | 0.04295 | 0.0322  | 0.03183 | IDH3B     |
| cg19853229 | 0.03993 | 0.03926 | 0.0427  | 0.03951 | 0.03306 | 0.03537 | 0.03576 | 0.03638 | 0.0316  | 0.03115 | PLEKHG2   |
| cg19853494 | 0.18876 | 0.12546 | 0.18581 | 0.20292 | 0.1823  | 0.08494 | 0.26241 | 0.10085 | 0.17996 | 0.10169 | SELL      |
| cg19853703 | 0.23497 | 0.36344 | 0.07635 | 0.07315 | 0.11077 | 0.07041 | 0.06242 | 0.14144 | 0.04391 | 0.04403 | APOL6     |
| cg19853760 | 0.90828 | 0.49683 | 0.03383 | 0.03755 | 0.02603 | 0.0365  | 0.03489 | 0.15333 | 0.03041 | 0.03155 | LGALS1    |
| cg19854301 | 0.71291 | 0.58495 | 0.81221 | 0.85397 | 0.80771 | 0.84087 | 0.5938  | 0.63836 | 0.90715 | 0.34332 | CDH13     |
| cg19855618 | 0.87639 | 0.8906  | 0.8851  | 0.87567 | 0.9182  | 0.89777 | 0.88036 | 0.87248 | 0.90609 | 0.89272 | ZNF623    |

|            |         |         |         |         |         |         |         |         |         |         |          |
|------------|---------|---------|---------|---------|---------|---------|---------|---------|---------|---------|----------|
| cg19856444 | 0.69261 | 0.30808 | 0.43244 | 0.63047 | 0.51282 | 0.4081  | 0.2085  | 0.16317 | 0.20392 | 0.18795 | SLC39A12 |
| cg19856594 | 0.57406 | 0.49983 | 0.57132 | 0.58205 | 0.38521 | 0.36634 | 0.25215 | 0.06901 | 0.10126 | 0.05353 | SAGE1    |
| cg19857457 | 0.04997 | 0.04724 | 0.06114 | 0.04965 | 0.07296 | 0.07258 | 0.05768 | 0.04796 | 0.05114 | 0.053   | RPL17    |
| cg19857537 | 0.03767 | 0.03556 | 0.04445 | 0.03807 | 0.02294 | 0.04313 | 0.03704 | 0.0336  | 0.04152 | 0.03024 | RPUSD4   |
| cg19857538 | 0.04583 | 0.03419 | 0.0501  | 0.06011 | 0.02554 | 0.03856 | 0.03724 | 0.03059 | 0.03991 | 0.03298 | TRUB2    |
| cg19857541 | 0.90435 | 0.74975 | 0.86641 | 0.88321 | 0.95722 | 0.94023 | 0.7199  | 0.87509 | 0.32716 | 0.22027 | MORC1    |
| cg19859270 | 0.69711 | 0.66693 | 0.85241 | 0.90082 | 0.89734 | 0.75445 | 0.81091 | 0.83598 | 0.85844 | 0.49787 | GPR15    |
| cg19861697 | 0.05771 | 0.06716 | 0.08563 | 0.07926 | 0.08176 | 0.09738 | 0.06565 | 0.05535 | 0.05381 | 0.04147 | DMTF1    |
| cg19862344 | 0.20364 | 0.14827 | 0.79245 | 0.78297 | 0.50344 | 0.48073 | 0.11647 | 0.07491 | 0.21354 | 0.20897 | RHAG     |
| cg19863003 | 0.03992 | 0.04154 | 0.04263 | 0.04181 | 0.03135 | 0.03505 | 0.03252 | 0.03589 | 0.02805 | 0.0267  | REEP5    |
| cg19863405 | 0.51211 | 0.54486 | 0.5213  | 0.65704 | 0.87249 | 0.89548 | 0.84634 | 0.86781 | 0.09634 | 0.06932 | ACTL7B   |
| cg19863740 | 0.86567 | 0.44942 | 0.67875 | 0.64869 | 0.94348 | 0.33253 | 0.89246 | 0.53267 | 0.83729 | 0.59176 | PARVG    |
| cg19863773 | 0.85455 | 0.75433 | 0.87653 | 0.88638 | 0.8536  | 0.86173 | 0.86805 | 0.88276 | 0.86556 | 0.86196 | XOXR1    |
| cg19864851 | 0.06624 | 0.06227 | 0.05783 | 0.06962 | 0.07477 | 0.05545 | 0.05303 | 0.06113 | 0.05825 | 0.05396 | SEC24C   |
| cg19866103 | 0.0464  | 0.04816 | 0.04915 | 0.07232 | 0.06725 | 0.05913 | 0.03868 | 0.04054 | 0.03988 | 0.0411  | NICN1    |
| cg19867899 | 0.0588  | 0.05361 | 0.09446 | 0.07873 | 0.05779 | 0.05534 | 0.05305 | 0.05707 | 0.04922 | 0.06622 | PCDHAC2  |
| cg19868691 | 0.66279 | 0.44453 | 0.85904 | 0.86521 | 0.9156  | 0.62772 | 0.88553 | 0.54515 | 0.92786 | 0.83727 | WNT10A   |
| cg19868730 | 0.73453 | 0.77737 | 0.82192 | 0.84109 | 0.82597 | 0.81116 | 0.84004 | 0.78838 | 0.7454  | 0.55566 | POPCD2   |
| cg19869139 | 0.87868 | 0.88851 | 0.8993  | 0.91596 | 0.92999 | 0.9008  | 0.77285 | 0.54125 | 0.64907 | 0.61809 | OPRD1    |
| cg19872681 | 0.9245  | 0.8661  | 0.93389 | 0.9316  | 0.93783 | 0.91361 | 0.82394 | 0.47224 | 0.92485 | 0.8878  | SLC7A7   |
| cg19872814 | 0.04701 | 0.03378 | 0.03799 | 0.03286 | 0.0335  | 0.03884 | 0.03106 | 0.03121 | 0.03051 | 0.02632 | PLAA     |
| cg19873701 | 0.11844 | 0.13707 | 0.68089 | 0.71449 | 0.70808 | 0.62089 | 0.60132 | 0.33654 | 0.68771 | 0.59552 | PSG9     |
| cg19873785 | 0.03123 | 0.03313 | 0.04869 | 0.04276 | 0.04496 | 0.04741 | 0.0318  | 0.03186 | 0.02832 | 0.02564 | ZNHIT1   |
| cg19875047 | 0.0444  | 0.04418 | 0.05064 | 0.03968 | 0.05537 | 0.04657 | 0.0413  | 0.05126 | 0.03549 | 0.03358 | ANKRD42  |
| cg19875216 | 0.02679 | 0.02769 | 0.02418 | 0.02296 | 0.02133 | 0.02272 | 0.01746 | 0.01626 | 0.02004 | 0.02112 | SRPRB    |
| cg19875656 | 0.80924 | 0.75439 | 0.91649 | 0.9221  | 0.92625 | 0.92776 | 0.91743 | 0.93303 | 0.64732 | 0.53212 | TSP50    |
| cg19876444 | 0.07411 | 0.08108 | 0.74837 | 0.88862 | 0.75941 | 0.36452 | 0.11466 | 0.17207 | 0.65828 | 0.58244 | CA2      |
| cg19876838 | 0.76494 | 0.7455  | 0.7701  | 0.78328 | 0.79778 | 0.73058 | 0.78264 | 0.74082 | 0.78733 | 0.73715 | KCNJ14   |
| cg19881177 | 0.0274  | 0.0273  | 0.0273  | 0.02489 | 0.02221 | 0.02835 | 0.02679 | 0.02672 | 0.0231  | 0.02268 | ZNF367   |
| cg19881895 | 0.89422 | 0.87105 | 0.81655 | 0.85852 | 0.4818  | 0.29382 | 0.752   | 0.80371 | 0.87907 | 0.85877 | SLC43A3  |
| cg19882093 | 0.89226 | 0.75317 | 0.85041 | 0.9027  | 0.87306 | 0.90251 | 0.57643 | 0.70221 | 0.63746 | 0.78236 | GGTLA4   |
| cg19883905 | 0.04649 | 0.0477  | 0.88152 | 0.87883 | 0.40431 | 0.09874 | 0.1233  | 0.04921 | 0.54227 | 0.3886  | CIDEA    |
| cg19884262 | 0.0529  | 0.04471 | 0.95883 | 0.9615  | 0.91126 | 0.93078 | 0.2077  | 0.3499  | 0.03598 | 0.03181 | FLJ46831 |
| cg19884600 | 0.33122 | 0.14617 | 0.35791 | 0.46778 | 0.60652 | 0.79777 | 0.19395 | 0.13538 | 0.33103 | 0.30056 | PYHIN1   |
| cg19884658 | 0.86381 | 0.66534 | 0.19846 | 0.13512 | 0.87354 | 0.85825 | 0.57853 | 0.14341 | 0.06943 | 0.05524 | KLHL21   |
| cg19885761 | 0.04835 | 0.04957 | 0.92226 | 0.92468 | 0.31549 | 0.1445  | 0.52689 | 0.56072 | 0.04451 | 0.10318 | CPLX2    |
| cg19886179 | 0.02746 | 0.03232 | 0.03378 | 0.02668 | 0.02473 | 0.02598 | 0.02281 | 0.02611 | 0.02491 | 0.02594 | PSMD14   |
| cg19889584 | 0.90971 | 0.86568 | 0.83098 | 0.71934 | 0.8302  | 0.52214 | 0.77784 | 0.52388 | 0.75105 | 0.59767 | LAT1-3TM |
| cg19889780 | 0.07926 | 0.09115 | 0.10782 | 0.09859 | 0.1118  | 0.087   | 0.08771 | 0.10198 | 0.07704 | 0.07298 | SPR      |
| cg19890739 | 0.91631 | 0.82395 | 0.9293  | 0.92926 | 0.84008 | 0.8542  | 0.87949 | 0.8181  | 0.82887 | 0.71891 | Pfs2     |
| cg19890858 | 0.03333 | 0.03133 | 0.04993 | 0.04038 | 0.04384 | 0.03533 | 0.03728 | 0.03573 | 0.04824 | 0.04192 | PP2447   |

|            |         |         |         |         |         |         |         |         |         |                   |
|------------|---------|---------|---------|---------|---------|---------|---------|---------|---------|-------------------|
| cg19891733 | 0.04091 | 0.04543 | 0.05533 | 0.04474 | 0.04843 | 0.05568 | 0.04421 | 0.03891 | 0.04257 | 0.0465 GABPA      |
| cg19894943 | 0.14035 | 0.11453 | 0.21008 | 0.13922 | 0.27086 | 0.15015 | 0.09313 | 0.06601 | 0.12567 | 0.12732 KTI12     |
| cg19895197 | 0.42554 | 0.2695  | 0.17898 | 0.31525 | 0.17852 | 0.06001 | 0.07063 | 0.13402 | 0.41589 | 0.29023 C1orf37   |
| cg19896198 | 0.36411 | 0.12344 | 0.52416 | 0.55734 | 0.3175  | 0.38099 | 0.73815 | 0.77184 | 0.31429 | 0.15237 TNFRSF8   |
| cg19896347 | 0.8643  | 0.5003  | 0.78243 | 0.78088 | 0.42168 | 0.39622 | 0.6893  | 0.57625 | 0.71456 | 0.32844 DNAH10    |
| cg19899621 | 0.06689 | 0.08303 | 0.11394 | 0.17972 | 0.43302 | 0.33159 | 0.06834 | 0.06595 | 0.07056 | 0.05951 ZNF561    |
| cg19899882 | 0.03334 | 0.03397 | 0.05736 | 0.03909 | 0.03417 | 0.03021 | 0.02967 | 0.03617 | 0.10958 | 0.20747 FOXQ1     |
| cg19902569 | 0.03759 | 0.03759 | 0.0411  | 0.03666 | 0.03061 | 0.03722 | 0.03246 | 0.03661 | 0.03698 | 0.03731 AHNNAK    |
| cg19903229 | 0.65596 | 0.33897 | 0.20856 | 0.23561 | 0.62595 | 0.78915 | 0.34815 | 0.26378 | 0.39252 | 0.27421 C14orf105 |
| cg19903333 | 0.09044 | 0.08312 | 0.10686 | 0.09525 | 0.09107 | 0.07302 | 0.0917  | 0.10994 | 0.0957  | 0.07201 ATP6V0B   |
| cg19904463 | 0.35665 | 0.03814 | 0.25964 | 0.31497 | 0.88994 | 0.53525 | 0.12727 | 0.07243 | 0.58704 | 0.43687 FABP5     |
| cg19904653 | 0.15732 | 0.16002 | 0.22161 | 0.20176 | 0.14591 | 0.27271 | 0.19873 | 0.20369 | 0.13174 | 0.13297 BRF2      |
| cg19905251 | 0.04119 | 0.0417  | 0.13029 | 0.14493 | 0.1328  | 0.23501 | 0.05385 | 0.05031 | 0.04348 | 0.02743 SLIT3     |
| cg19905754 | 0.02774 | 0.02495 | 0.02501 | 0.02266 | 0.01768 | 0.01972 | 0.01622 | 0.0172  | 0.01629 | 0.01749 ANKRD37   |
| cg19906397 | 0.06595 | 0.04502 | 0.07326 | 0.06805 | 0.03046 | 0.03193 | 0.03889 | 0.0361  | 0.03747 | 0.03337 SMARCB1   |
| cg19906550 | 0.63261 | 0.36865 | 0.85067 | 0.89655 | 0.92725 | 0.70553 | 0.8774  | 0.80499 | 0.02547 | 0.03404 SLC22A18  |
| cg19906926 | 0.20177 | 0.19108 | 0.19588 | 0.18985 | 0.2869  | 0.1869  | 0.15544 | 0.10984 | 0.15866 | 0.16115 KLHL5     |
| cg19910382 | 0.19217 | 0.08258 | 0.21001 | 0.45485 | 0.29268 | 0.36946 | 0.06826 | 0.16762 | 0.08795 | 0.06697 FABP1     |
| cg19911362 | 0.1283  | 0.05576 | 0.06582 | 0.07273 | 0.04936 | 0.0571  | 0.05973 | 0.05804 | 0.06707 | 0.05786 USP8      |
| cg19912436 | 0.02838 | 0.03326 | 0.47203 | 0.03818 | 0.13404 | 0.03855 | 0.02624 | 0.03026 | 0.02924 | 0.02552 PALM      |
| cg19913889 | 0.04783 | 0.03482 | 0.03887 | 0.03754 | 0.03588 | 0.03269 | 0.03052 | 0.02992 | 0.04244 | 0.02846 FLJ90024  |
| cg19914607 | 0.0906  | 0.08343 | 0.15786 | 0.19066 | 0.40301 | 0.86616 | 0.09188 | 0.11313 | 0.11382 | 0.08602 SLC38A3   |
| cg19914751 | 0.07418 | 0.06658 | 0.11696 | 0.18318 | 0.1     | 0.07013 | 0.04132 | 0.04223 | 0.0475  | 0.04958 QARS      |
| cg19917856 | 0.31867 | 0.07528 | 0.88563 | 0.89775 | 0.80237 | 0.91171 | 0.71117 | 0.57275 | 0.38464 | 0.37731 LOC342897 |
| cg19918758 | 0.03647 | 0.03396 | 0.04082 | 0.04108 | 0.05894 | 0.04707 | 0.03048 | 0.02926 | 0.03155 | 0.02935 VAV3      |
| cg19921353 | 0.72389 | 0.08351 | 0.2374  | 0.14284 | 0.31058 | 0.1237  | 0.27031 | 0.17825 | 0.38793 | 0.18867 HLA-DPB1  |
| cg19921389 | 0.70302 | 0.66138 | 0.82188 | 0.88938 | 0.93207 | 0.86455 | 0.77979 | 0.38614 | 0.84449 | 0.71541 GP9       |
| cg19921492 | 0.16752 | 0.13941 | 0.14773 | 0.14746 | 0.218   | 0.15556 | 0.18626 | 0.16517 | 0.16364 | 0.14911 PSMB6     |
| cg19921776 | 0.05149 | 0.04113 | 0.04856 | 0.03976 | 0.0388  | 0.03691 | 0.0395  | 0.03483 | 0.03977 | 0.03872 C1orf22   |
| cg19923326 | 0.45969 | 0.16526 | 0.44859 | 0.55544 | 0.46713 | 0.37177 | 0.602   | 0.14993 | 0.18709 | 0.11443 KCNQ1     |
| cg19923810 | 0.39073 | 0.33944 | 0.94442 | 0.95729 | 0.82571 | 0.42169 | 0.93558 | 0.82609 | 0.2584  | 0.2583 NOC2L      |
| cg19928046 | 0.75307 | 0.69376 | 0.7711  | 0.72555 | 0.87769 | 0.88893 | 0.70821 | 0.85667 | 0.78998 | 0.71121 CD74      |
| cg19928247 | 0.05975 | 0.04627 | 0.06971 | 0.06435 | 0.08311 | 0.06223 | 0.0846  | 0.05229 | 0.36227 | 0.04767 TCEAL1    |
| cg19928450 | 0.07598 | 0.07424 | 0.16818 | 0.27389 | 0.38336 | 0.36723 | 0.13146 | 0.24239 | 0.49671 | 0.6702 HOXC12     |
| cg19930802 | 0.74872 | 0.89847 | 0.35705 | 0.46139 | 0.87671 | 0.89329 | 0.89203 | 0.8347  | 0.19937 | 0.09475 ATP10A    |
| cg19931106 | 0.06182 | 0.05796 | 0.07167 | 0.04597 | 0.13404 | 0.13487 | 0.03846 | 0.04688 | 0.11642 | 0.04564 CCDC75    |
| cg19932177 | 0.04317 | 0.04175 | 0.1641  | 0.05537 | 0.04601 | 0.0596  | 0.04301 | 0.04087 | 0.0403  | 0.04051 RFC3      |
| cg19935424 | 0.04264 | 0.04413 | 0.05366 | 0.044   | 0.06148 | 0.04584 | 0.03772 | 0.03468 | 0.0407  | 0.04158 MXRA7     |
| cg19937039 | 0.28418 | 0.09008 | 0.33968 | 0.23967 | 0.66836 | 0.73846 | 0.17357 | 0.30273 | 0.1189  | 0.10333 SERPINA10 |
| cg19939627 | 0.06463 | 0.05378 | 0.05244 | 0.05067 | 0.03559 | 0.04594 | 0.04656 | 0.0431  | 0.04226 | 0.04334 MRPS34    |
| cg19939660 | 0.03288 | 0.03555 | 0.17956 | 0.07247 | 0.05593 | 0.04148 | 0.24602 | 0.0291  | 0.0429  | 0.0641 C19orf36   |

|            |         |         |         |         |         |         |         |         |         |         |          |
|------------|---------|---------|---------|---------|---------|---------|---------|---------|---------|---------|----------|
| cg19941758 | 0.02242 | 0.02224 | 0.02941 | 0.02959 | 0.02436 | 0.03122 | 0.03029 | 0.02793 | 0.02065 | 0.01924 | MDS025   |
| cg19944367 | 0.81077 | 0.52738 | 0.89697 | 0.92455 | 0.94089 | 0.74272 | 0.82011 | 0.88599 | 0.82842 | 0.55289 | RGS3     |
| cg19945840 | 0.74538 | 0.47375 | 0.96588 | 0.96617 | 0.97397 | 0.77072 | 0.93385 | 0.89324 | 0.94947 | 0.52905 | B3GALT6  |
| cg19946699 | 0.0764  | 0.08001 | 0.21096 | 0.19206 | 0.06287 | 0.08062 | 0.09967 | 0.09872 | 0.11562 | 0.07823 | SH3BGR   |
| cg19947621 | 0.77127 | 0.84449 | 0.75646 | 0.80716 | 0.65468 | 0.79686 | 0.83651 | 0.85281 | 0.89386 | 0.84045 | C9orf48  |
| cg19948014 | 0.03217 | 0.03034 | 0.07692 | 0.04012 | 0.08529 | 0.03273 | 0.02868 | 0.03037 | 0.07227 | 0.02726 | SOD1     |
| cg19948393 | 0.96241 | 0.92523 | 0.97736 | 0.97744 | 0.97783 | 0.97385 | 0.96458 | 0.97308 | 0.98174 | 0.97384 | ANKRD33  |
| cg19948397 | 0.02504 | 0.02518 | 0.02462 | 0.02879 | 0.02136 | 0.02471 | 0.02382 | 0.02465 | 0.01919 | 0.01817 | FLJ23342 |
| cg19949137 | 0.02559 | 0.02952 | 0.03417 | 0.03642 | 0.02556 | 0.03214 | 0.38759 | 0.47646 | 0.02168 | 0.02455 | HTATSF1  |
| cg19949550 | 0.69313 | 0.63154 | 0.88043 | 0.8931  | 0.90285 | 0.89537 | 0.81392 | 0.8478  | 0.87351 | 0.66704 | ASB2     |
| cg19950767 | 0.68589 | 0.57138 | 0.34459 | 0.32904 | 0.47914 | 0.52538 | 0.33953 | 0.59651 | 0.39494 | 0.34266 | TPTE2    |
| cg19951443 | 0.0439  | 0.04632 | 0.03351 | 0.02788 | 0.03761 | 0.04763 | 0.02567 | 0.02634 | 0.02487 | 0.02124 | C9orf46  |
| cg19953406 | 0.04571 | 0.03958 | 0.52015 | 0.75486 | 0.43697 | 0.45114 | 0.04011 | 0.0321  | 0.041   | 0.03667 | KLK7     |
| cg19954000 | 0.79908 | 0.4542  | 0.69644 | 0.8493  | 0.62979 | 0.05017 | 0.04948 | 0.04618 | 0.05459 | 0.03854 | FGF1     |
| cg19954739 | 0.05664 | 0.06066 | 0.06379 | 0.06349 | 0.25674 | 0.04978 | 0.06167 | 0.04512 | 0.27918 | 0.12857 | ZMYND19  |
| cg19955257 | 0.90885 | 0.91035 | 0.91788 | 0.9242  | 0.91824 | 0.86748 | 0.84319 | 0.80388 | 0.89795 | 0.87568 | PRSSL1   |
| cg19955521 | 0.11761 | 0.14731 | 0.16583 | 0.15862 | 0.08775 | 0.12415 | 0.12654 | 0.10918 | 0.12736 | 0.13407 | WDR37    |
| cg19957727 | 0.02119 | 0.02919 | 0.02607 | 0.02943 | 0.01587 | 0.0241  | 0.02453 | 0.02143 | 0.02147 | 0.02145 | DNAJB11  |
| cg19959519 | 0.09487 | 0.05761 | 0.07713 | 0.06325 | 0.04933 | 0.04891 | 0.04708 | 0.04425 | 0.05039 | 0.05008 | NF1      |
| cg19961382 | 0.05411 | 0.04266 | 0.06278 | 0.05603 | 0.06399 | 0.05463 | 0.05216 | 0.04467 | 0.05706 | 0.05756 | RANGAP1  |
| cg19961522 | 0.70763 | 0.50319 | 0.83941 | 0.85294 | 0.90462 | 0.85417 | 0.82887 | 0.77152 | 0.80298 | 0.53988 | MYLK2    |
| cg19963522 | 0.48334 | 0.43858 | 0.73593 | 0.79144 | 0.70304 | 0.80267 | 0.80497 | 0.79951 | 0.706   | 0.59365 | PIP3-E   |
| cg19963797 | 0.03374 | 0.03645 | 0.0426  | 0.03732 | 0.0267  | 0.03479 | 0.02869 | 0.02404 | 0.02877 | 0.03188 | GLT28D1  |
| cg19964192 | 0.78531 | 0.08918 | 0.85999 | 0.86515 | 0.95048 | 0.95692 | 0.59114 | 0.47561 | 0.03808 | 0.03263 | MAGEA10  |
| cg19965511 | 0.25781 | 0.05924 | 0.5447  | 0.66651 | 0.76562 | 0.54813 | 0.47074 | 0.3357  | 0.42864 | 0.12237 | HCRT     |
| cg19965810 | 0.03512 | 0.03019 | 0.90046 | 0.92562 | 0.26494 | 0.10278 | 0.0474  | 0.04338 | 0.09485 | 0.3906  | KCNH7    |
| cg19966618 | 0.05105 | 0.05919 | 0.05714 | 0.0492  | 0.05058 | 0.05705 | 0.06472 | 0.08189 | 0.04079 | 0.03892 | ACAD8    |
| cg19968631 | 0.07785 | 0.06654 | 0.54581 | 0.67609 | 0.06635 | 0.05591 | 0.05097 | 0.04273 | 0.06942 | 0.14664 | GLRA3    |
| cg19969873 | 0.05853 | 0.04825 | 0.16528 | 0.09773 | 0.24929 | 0.04367 | 0.06314 | 0.04778 | 0.17419 | 0.04958 | NPPC     |
| cg19970051 | 0.03071 | 0.02975 | 0.48583 | 0.49454 | 0.1714  | 0.22316 | 0.26504 | 0.25586 | 0.03084 | 0.02122 | HBA1     |
| cg19971655 | 0.80621 | 0.36011 | 0.82514 | 0.88899 | 0.94824 | 0.92137 | 0.47619 | 0.3999  | 0.69309 | 0.458   | BSND     |
| cg19971804 | 0.04514 | 0.04538 | 0.05356 | 0.04937 | 0.04841 | 0.04469 | 0.04207 | 0.03903 | 0.04561 | 0.03983 | MORN2    |
| cg19972619 | 0.0545  | 0.047   | 0.05643 | 0.04914 | 0.09244 | 0.05883 | 0.04386 | 0.04907 | 0.04707 | 0.03716 | MYC      |
| cg19972859 | 0.04488 | 0.04254 | 0.04351 | 0.04221 | 0.0312  | 0.03091 | 0.03421 | 0.0342  | 0.03571 | 0.03263 | PURA     |
| cg19973135 | 0.07695 | 0.05437 | 0.70416 | 0.73798 | 0.23074 | 0.57917 | 0.325   | 0.15177 | 0.04148 | 0.03111 | MARVELD3 |
| cg19973884 | 0.0713  | 0.08792 | 0.10266 | 0.09858 | 0.15512 | 0.09081 | 0.0769  | 0.06967 | 0.07964 | 0.0638  | ZDHC12   |
| cg19974223 | 0.8787  | 0.61182 | 0.86285 | 0.85602 | 0.86968 | 0.85522 | 0.81303 | 0.86226 | 0.87171 | 0.86735 | ANKRD33  |
| cg19976011 | 0.03445 | 0.03413 | 0.03701 | 0.03724 | 0.03608 | 0.03441 | 0.02527 | 0.02699 | 0.03203 | 0.03397 | 15-Sep   |
| cg19976467 | 0.82488 | 0.74171 | 0.04723 | 0.04388 | 0.0681  | 0.03268 | 0.0347  | 0.0708  | 0.03872 | 0.03681 | TMCO4    |
| cg19977912 | 0.04678 | 0.04061 | 0.04394 | 0.03935 | 0.03405 | 0.03769 | 0.03791 | 0.03807 | 0.03435 | 0.03297 | PIGQ     |
| cg19979773 | 0.88232 | 0.86268 | 0.84876 | 0.89241 | 0.91037 | 0.90867 | 0.87155 | 0.85857 | 0.76831 | 0.77344 | FCN3     |

|            |         |         |         |         |         |         |         |         |         |         |           |
|------------|---------|---------|---------|---------|---------|---------|---------|---------|---------|---------|-----------|
| cg19979896 | 0.37513 | 0.35716 | 0.4754  | 0.5322  | 0.26211 | 0.20254 | 0.45094 | 0.58488 | 0.39103 | 0.39688 | RAET1E    |
| cg19981839 | 0.05297 | 0.05156 | 0.05318 | 0.04901 | 0.05246 | 0.04322 | 0.05681 | 0.04907 | 0.03466 | 0.05108 | CD2BP2    |
| cg19982860 | 0.37222 | 0.21787 | 0.5764  | 0.67676 | 0.49815 | 0.57697 | 0.17311 | 0.09012 | 0.30339 | 0.16237 | IFNA21    |
| cg19984039 | 0.49797 | 0.2538  | 0.46015 | 0.44229 | 0.38245 | 0.36184 | 0.28459 | 0.24234 | 0.33956 | 0.24576 | RGS13     |
| cg19985911 | 0.8318  | 0.53121 | 0.66092 | 0.77504 | 0.8579  | 0.80536 | 0.7813  | 0.81179 | 0.59928 | 0.22744 | AVIL      |
| cg19986872 | 0.5254  | 0.24995 | 0.67591 | 0.62983 | 0.27936 | 0.04616 | 0.79628 | 0.30057 | 0.41572 | 0.46109 | ACSL6     |
| cg19987219 | 0.9344  | 0.73578 | 0.93512 | 0.93763 | 0.94816 | 0.94094 | 0.93574 | 0.84287 | 0.7614  | 0.91695 | FLJ32011  |
| cg19987840 | 0.041   | 0.03931 | 0.04106 | 0.03845 | 0.02876 | 0.03269 | 0.03532 | 0.02779 | 0.03048 | 0.03867 | NUDT6     |
| cg19988449 | 0.06524 | 0.05103 | 0.0518  | 0.05233 | 0.04933 | 0.05094 | 0.18649 | 0.81753 | 0.0522  | 0.05821 | BNC1      |
| cg19994834 | 0.36887 | 0.32364 | 0.32553 | 0.30649 | 0.31296 | 0.2834  | 0.16449 | 0.16983 | 0.338   | 0.21108 | GRIA3     |
| cg19995014 | 0.03336 | 0.03103 | 0.19384 | 0.03727 | 0.28917 | 0.22983 | 0.03983 | 0.03032 | 0.02192 | 0.02175 | APLP1     |
| cg19996355 | 0.03198 | 0.02969 | 0.72031 | 0.91669 | 0.1489  | 0.02944 | 0.02618 | 0.02612 | 0.02248 | 0.02586 | PBX4      |
| cg19998328 | 0.15774 | 0.10829 | 0.42071 | 0.48943 | 0.68038 | 0.56395 | 0.56473 | 0.30242 | 0.57508 | 0.18695 | LOC90580  |
| cg20000468 | 0.08724 | 0.06605 | 0.28251 | 0.20058 | 0.14729 | 0.1022  | 0.12027 | 0.07229 | 0.1287  | 0.08645 | IFNAR2    |
| cg20001829 | 0.38384 | 0.07418 | 0.86032 | 0.84204 | 0.88287 | 0.88028 | 0.43275 | 0.05715 | 0.80492 | 0.17562 | TMEM25    |
| cg20002248 | 0.05917 | 0.06231 | 0.08845 | 0.06908 | 0.07425 | 0.07286 | 0.0638  | 0.05385 | 0.0519  | 0.04704 | ACN9      |
| cg20006825 | 0.64611 | 0.09851 | 0.1738  | 0.15152 | 0.33705 | 0.03295 | 0.15004 | 0.06223 | 0.1444  | 0.11355 | PTMS      |
| cg20008332 | 0.02766 | 0.03134 | 0.8621  | 0.86855 | 0.13678 | 0.06797 | 0.08268 | 0.22863 | 0.14883 | 0.15631 | SOX11     |
| cg20009671 | 0.02792 | 0.03085 | 0.03317 | 0.03189 | 0.02691 | 0.03374 | 0.02899 | 0.03158 | 0.02513 | 0.02579 | YY1       |
| cg20010396 | 0.05435 | 0.05749 | 0.05486 | 0.05011 | 0.03729 | 0.04947 | 0.04865 | 0.05141 | 0.0566  | 0.05445 | ZNF297    |
| cg20010565 | 0.04837 | 0.04551 | 0.05705 | 0.04157 | 0.04916 | 0.04891 | 0.04788 | 0.03539 | 0.0494  | 0.0454  | FLJ37953  |
| cg20011134 | 0.66762 | 0.67614 | 0.81231 | 0.86047 | 0.73908 | 0.8311  | 0.77571 | 0.59425 | 0.1357  | 0.29849 | DDO       |
| cg20011352 | 0.0218  | 0.0251  | 0.04935 | 0.3314  | 0.48612 | 0.43789 | 0.03302 | 0.03991 | 0.29193 | 0.50632 | GPR124    |
| cg20011794 | 0.0539  | 0.06145 | 0.06394 | 0.05985 | 0.03236 | 0.04945 | 0.04457 | 0.05724 | 0.04842 | 0.04589 | KCTD17    |
| cg20011833 | 0.03553 | 0.04183 | 0.04315 | 0.04038 | 0.02995 | 0.03597 | 0.03513 | 0.03177 | 0.03618 | 0.03234 | DJ12208.2 |
| cg20011974 | 0.06731 | 0.06676 | 0.05142 | 0.05354 | 0.07783 | 0.07924 | 0.06004 | 0.05995 | 0.06509 | 0.0643  | EIF2B2    |
| cg20015689 | 0.16975 | 0.20578 | 0.24328 | 0.22475 | 0.32587 | 0.17591 | 0.18445 | 0.19949 | 0.11232 | 0.12053 | SEMG1     |
| cg20015855 | 0.91371 | 0.82211 | 0.93784 | 0.94249 | 0.94818 | 0.94935 | 0.93128 | 0.93237 | 0.94348 | 0.91839 | CORO2B    |
| cg20016416 | 0.89565 | 0.89061 | 0.89563 | 0.88794 | 0.79008 | 0.89427 | 0.8328  | 0.87503 | 0.79544 | 0.82381 | SPTBN2    |
| cg20016845 | 0.03762 | 0.04047 | 0.06943 | 0.04976 | 0.0657  | 0.07402 | 0.05892 | 0.05206 | 0.04013 | 0.04846 | CXXC1     |
| cg20016874 | 0.02541 | 0.025   | 0.02331 | 0.02105 | 0.02398 | 0.02581 | 0.02246 | 0.0239  | 0.02255 | 0.02422 | C14orf32  |
| cg20017147 | 0.41984 | 0.42645 | 0.69368 | 0.74799 | 0.75091 | 0.68207 | 0.17657 | 0.47853 | 0.6635  | 0.61566 | TEX101    |
| cg20017995 | 0.41199 | 0.07803 | 0.08229 | 0.08183 | 0.09758 | 0.04891 | 0.24464 | 0.10689 | 0.87586 | 0.49375 | SURF5     |
| cg20018806 | 0.1174  | 0.24063 | 0.47809 | 0.29108 | 0.55709 | 0.3877  | 0.15653 | 0.11987 | 0.08985 | 0.3231  | TCN1      |
| cg20019546 | 0.05746 | 0.0792  | 0.47962 | 0.58591 | 0.90713 | 0.66574 | 0.27004 | 0.10647 | 0.26572 | 0.24571 | SFRP4     |
| cg20021244 | 0.02618 | 0.02474 | 0.02654 | 0.02726 | 0.02098 | 0.02517 | 0.02348 | 0.02205 | 0.02015 | 0.02059 | APBB3     |
| cg20022122 | 0.72672 | 0.11952 | 0.80342 | 0.89643 | 0.63331 | 0.70706 | 0.81709 | 0.75764 | 0.47026 | 0.38317 | GCKR      |
| cg20022511 | 0.05275 | 0.04916 | 0.06236 | 0.05674 | 0.0531  | 0.05582 | 0.04652 | 0.04519 | 0.04977 | 0.05194 | G1P2      |
| cg20022541 | 0.55786 | 0.82417 | 0.1314  | 0.16934 | 0.87314 | 0.85865 | 0.07236 | 0.07291 | 0.10661 | 0.06684 | C14orf152 |
| cg20023231 | 0.05835 | 0.05406 | 0.50488 | 0.68611 | 0.14309 | 0.0615  | 0.15652 | 0.1573  | 0.06175 | 0.05009 | HS3ST2    |
| cg20023578 | 0.10089 | 0.11874 | 0.09804 | 0.09534 | 0.10221 | 0.12168 | 0.10268 | 0.10427 | 0.11015 | 0.09417 | TCF7L2    |



|            |         |         |         |         |         |         |         |         |         |         |          |
|------------|---------|---------|---------|---------|---------|---------|---------|---------|---------|---------|----------|
| cg20025656 | 0.09057 | 0.03292 | 0.92755 | 0.9112  | 0.7608  | 0.63245 | 0.54881 | 0.49702 | 0.13862 | 0.06214 | ACTA1    |
| cg20025970 | 0.21642 | 0.36625 | 0.59244 | 0.60757 | 0.47847 | 0.52196 | 0.23157 | 0.41006 | 0.22535 | 0.25893 | ABCC9    |
| cg20028291 | 0.04591 | 0.04618 | 0.05452 | 0.04512 | 0.09565 | 0.04474 | 0.04747 | 0.04763 | 0.04193 | 0.03053 | BCAS4    |
| cg20028470 | 0.12317 | 0.03465 | 0.49595 | 0.56806 | 0.58251 | 0.4774  | 0.38245 | 0.13214 | 0.94057 | 0.92631 | UCN      |
| cg20029201 | 0.22711 | 0.19156 | 0.05575 | 0.05961 | 0.09683 | 0.05845 | 0.07618 | 0.11141 | 0.04747 | 0.04567 | BCL9L    |
| cg20029652 | 0.05677 | 0.06424 | 0.05921 | 0.05658 | 0.06476 | 0.08491 | 0.05023 | 0.04945 | 0.05494 | 0.04821 | PGBD1    |
| cg20030243 | 0.04033 | 0.03388 | 0.04885 | 0.05961 | 0.03339 | 0.03992 | 0.05112 | 0.04777 | 0.04386 | 0.03397 | F2R      |
| cg20030671 | 0.04281 | 0.04174 | 0.04779 | 0.04169 | 0.03948 | 0.03928 | 0.04193 | 0.03786 | 0.03573 | 0.03207 | FBXO28   |
| cg20033731 | 0.0379  | 0.09934 | 0.17054 | 0.05705 | 0.25132 | 0.05243 | 0.04265 | 0.03662 | 0.3093  | 0.05835 | CACNA1C  |
| cg20033864 | 0.02515 | 0.02893 | 0.02539 | 0.02646 | 0.02446 | 0.02169 | 0.02745 | 0.02703 | 0.02286 | 0.02375 | VAPA     |
| cg20034100 | 0.82374 | 0.77705 | 0.73784 | 0.77695 | 0.72732 | 0.67814 | 0.31692 | 0.67776 | 0.56981 | 0.3599  | IBRDC1   |
| cg20035459 | 0.78741 | 0.55726 | 0.8403  | 0.84973 | 0.77896 | 0.86792 | 0.80747 | 0.73046 | 0.77154 | 0.68269 | CLDN6    |
| cg20041257 | 0.08961 | 0.07684 | 0.09908 | 0.11999 | 0.06212 | 0.0944  | 0.08682 | 0.07272 | 0.06485 | 0.05338 | DNM2     |
| cg20041381 | 0.03291 | 0.03466 | 0.0374  | 0.03488 | 0.02812 | 0.03391 | 0.0305  | 0.03048 | 0.0352  | 0.03626 | TPR      |
| cg20042228 | 0.05197 | 0.05215 | 0.06281 | 0.05541 | 0.04808 | 0.04342 | 0.04541 | 0.0446  | 0.05673 | 0.04408 | NOTCH1   |
| cg20043466 | 0.06049 | 0.0528  | 0.08834 | 0.07494 | 0.12737 | 0.09879 | 0.06827 | 0.06466 | 0.04467 | 0.03485 | C2orf19  |
| cg20044189 | 0.02143 | 0.02446 | 0.02619 | 0.02055 | 0.01681 | 0.0182  | 0.01771 | 0.01879 | 0.01658 | 0.01457 | SPRY4    |
| cg20047055 | 0.12073 | 0.19977 | 0.45778 | 0.55715 | 0.15407 | 0.1478  | 0.15025 | 0.50794 | 0.11742 | 0.04187 | KLRC1    |
| cg20047230 | 0.1927  | 0.15365 | 0.17334 | 0.17209 | 0.18444 | 0.116   | 0.14946 | 0.12119 | 0.10145 | 0.12059 | CP110    |
| cg20047732 | 0.05329 | 0.06018 | 0.05768 | 0.05582 | 0.0459  | 0.05185 | 0.05    | 0.04894 | 0.05224 | 0.055   | TTC14    |
| cg20050012 | 0.04193 | 0.04761 | 0.09738 | 0.08665 | 0.05634 | 0.05232 | 0.05306 | 0.05637 | 0.03807 | 0.04724 | KIAA0100 |
| cg20050113 | 0.15001 | 0.1002  | 0.9306  | 0.94332 | 0.64934 | 0.09766 | 0.64068 | 0.37458 | 0.05137 | 0.03334 | SLC9A2   |
| cg20050826 | 0.90868 | 0.67204 | 0.84083 | 0.91157 | 0.78666 | 0.43988 | 0.15949 | 0.07914 | 0.05255 | 0.02887 | K6IRS2   |
| cg20051033 | 0.06802 | 0.05715 | 0.4404  | 0.49042 | 0.34307 | 0.44167 | 0.12262 | 0.04949 | 0.06606 | 0.05549 | CPNE9    |
| cg20051177 | 0.86139 | 0.85638 | 0.7952  | 0.7722  | 0.77335 | 0.78086 | 0.77875 | 0.84155 | 0.80128 | 0.79398 | TCF20    |
| cg20051589 | 0.04854 | 0.04055 | 0.20618 | 0.15453 | 0.12532 | 0.08879 | 0.09859 | 0.08645 | 0.55882 | 0.31336 | DLG3     |
| cg20052411 | 0.04041 | 0.02493 | 0.02425 | 0.02248 | 0.01844 | 0.01947 | 0.01752 | 0.02074 | 0.02041 | 0.01715 | RCE1     |
| cg20052718 | 0.03268 | 0.03265 | 0.03339 | 0.02866 | 0.021   | 0.02909 | 0.02797 | 0.02831 | 0.07081 | 0.0318  | TWIST1   |
| cg20053158 | 0.08674 | 0.04496 | 0.17774 | 0.216   | 0.3167  | 0.18141 | 0.20477 | 0.53526 | 0.4675  | 0.39045 | ASCL1    |
| cg20053799 | 0.03824 | 0.0338  | 0.03291 | 0.03652 | 0.03205 | 0.03001 | 0.03284 | 0.03439 | 0.03475 | 0.02757 | PSCD2    |
| cg20055101 | 0.57886 | 0.28526 | 0.52029 | 0.59604 | 0.23802 | 0.36523 | 0.21258 | 0.09491 | 0.32202 | 0.33952 | ZNF206   |
| cg20057066 | 0.04314 | 0.04884 | 0.07143 | 0.08686 | 0.08059 | 0.05206 | 0.06029 | 0.04917 | 0.04825 | 0.03997 | FLJ42957 |
| cg20059151 | 0.87024 | 0.73446 | 0.76951 | 0.86676 | 0.90043 | 0.8471  | 0.49565 | 0.53576 | 0.71206 | 0.80145 | SLC44A3  |
| cg20059312 | 0.90986 | 0.84017 | 0.91898 | 0.92749 | 0.93326 | 0.92266 | 0.91241 | 0.91074 | 0.93245 | 0.8593  | NGEF     |
| cg20060451 | 0.03909 | 0.03877 | 0.03627 | 0.03724 | 0.02746 | 0.0361  | 0.03643 | 0.03226 | 0.03532 | 0.02982 | MAML1    |
| cg20062122 | 0.80657 | 0.78609 | 0.81665 | 0.84551 | 0.80214 | 0.80636 | 0.5529  | 0.68183 | 0.80672 | 0.79757 | CLCN5    |
| cg20063650 | 0.86725 | 0.88563 | 0.86024 | 0.89227 | 0.89241 | 0.92246 | 0.3732  | 0.54829 | 0.13747 | 0.07454 | ZNF645   |
| cg20065832 | 0.08451 | 0.06814 | 0.517   | 0.55265 | 0.1558  | 0.09606 | 0.11504 | 0.07395 | 0.11918 | 0.09745 | POU3F4   |
| cg20066612 | 0.18324 | 0.03233 | 0.23788 | 0.20212 | 0.23612 | 0.04252 | 0.04874 | 0.04742 | 0.30822 | 0.03947 | KCNJ9    |
| cg20066677 | 0.90262 | 0.45231 | 0.88114 | 0.88759 | 0.87851 | 0.74149 | 0.85434 | 0.53891 | 0.88432 | 0.39783 | CHFR     |
| cg20070077 | 0.02347 | 0.02135 | 0.04254 | 0.02949 | 0.61966 | 0.6091  | 0.47754 | 0.59527 | 0.08299 | 0.0175  | GADD45G  |

|            |         |         |         |         |         |         |         |         |         |                   |
|------------|---------|---------|---------|---------|---------|---------|---------|---------|---------|-------------------|
| cg20070090 | 0.15025 | 0.16005 | 0.16634 | 0.17026 | 0.3669  | 0.48031 | 0.11351 | 0.10633 | 0.14356 | 0.16157 S100A8    |
| cg20073553 | 0.87692 | 0.79736 | 0.80846 | 0.80327 | 0.76548 | 0.84854 | 0.09926 | 0.08359 | 0.88708 | 0.8787 BAPX1      |
| cg20074048 | 0.09265 | 0.07337 | 0.14837 | 0.09185 | 0.07684 | 0.06671 | 0.08878 | 0.06261 | 0.07973 | 0.05487 SECISBP2  |
| cg20074371 | 0.02804 | 0.02815 | 0.02746 | 0.02406 | 0.02726 | 0.02488 | 0.02093 | 0.02195 | 0.01908 | 0.02019 STT3B     |
| cg20074593 | 0.81141 | 0.64241 | 0.83185 | 0.84681 | 0.84845 | 0.84397 | 0.8238  | 0.7618  | 0.86074 | 0.71022 GPR17     |
| cg20074795 | 0.07563 | 0.02369 | 0.02724 | 0.02187 | 0.01617 | 0.02004 | 0.01777 | 0.01976 | 0.0221  | 0.01599 KDELR3    |
| cg20075229 | 0.79604 | 0.62048 | 0.61215 | 0.85152 | 0.69468 | 0.47053 | 0.51047 | 0.53582 | 0.524   | 0.39886 CYP2A7    |
| cg20077393 | 0.11193 | 0.03609 | 0.34315 | 0.40908 | 0.15621 | 0.16155 | 0.11937 | 0.02837 | 0.47831 | 0.41754 CGN       |
| cg20080624 | 0.93142 | 0.91498 | 0.89647 | 0.91749 | 0.59503 | 0.90068 | 0.05465 | 0.85656 | 0.90843 | 0.90947 DLX5      |
| cg20082357 | 0.0224  | 0.02338 | 0.02343 | 0.02151 | 0.02096 | 0.02036 | 0.02098 | 0.02029 | 0.02054 | 0.01953 ATP6V0A1  |
| cg20082641 | 0.92868 | 0.80993 | 0.91689 | 0.91787 | 0.88409 | 0.81934 | 0.80714 | 0.72616 | 0.92534 | 0.89783 PAQR5     |
| cg20083676 | 0.60043 | 0.56377 | 0.44636 | 0.56501 | 0.80768 | 0.44604 | 0.1879  | 0.12961 | 0.64493 | 0.604 EDG3        |
| cg20083730 | 0.62848 | 0.46151 | 0.03166 | 0.02964 | 0.114   | 0.34787 | 0.02581 | 0.04152 | 0.92164 | 0.87375 MT1E      |
| cg20083871 | 0.03677 | 0.042   | 0.04078 | 0.04068 | 0.02428 | 0.03808 | 0.03643 | 0.03635 | 0.03185 | 0.03213 ACAD9     |
| cg20084646 | 0.01958 | 0.02408 | 0.02274 | 0.02049 | 0.01402 | 0.01668 | 0.01799 | 0.01811 | 0.01836 | 0.01504 HSPC023   |
| cg20085077 | 0.20934 | 0.02675 | 0.26407 | 0.26971 | 0.31722 | 0.05509 | 0.48957 | 0.51472 | 0.55803 | 0.49728 ARMCX4    |
| cg20088535 | 0.02803 | 0.02583 | 0.02769 | 0.02872 | 0.02715 | 0.02802 | 0.0248  | 0.02716 | 0.02361 | 0.02374 PLK4      |
| cg20088913 | 0.78528 | 0.62601 | 0.70807 | 0.75608 | 0.63253 | 0.78405 | 0.23328 | 0.22404 | 0.43183 | 0.39254 FLJ46363  |
| cg20088964 | 0.20343 | 0.04977 | 0.12467 | 0.19117 | 0.87242 | 0.13363 | 0.32545 | 0.07365 | 0.88642 | 0.46183 HMGA2     |
| cg20089715 | 0.92271 | 0.9052  | 0.91811 | 0.91408 | 0.92206 | 0.79636 | 0.88053 | 0.71296 | 0.75435 | 0.68026 CACNB1    |
| cg20090467 | 0.5151  | 0.4425  | 0.57952 | 0.6126  | 0.61127 | 0.59672 | 0.4177  | 0.48078 | 0.51107 | 0.47941 ANKRD20A1 |
| cg20090497 | 0.58793 | 0.17767 | 0.40759 | 0.43173 | 0.63565 | 0.71454 | 0.38604 | 0.44889 | 0.46234 | 0.34338 TAS2R9    |
| cg20091107 | 0.02063 | 0.01989 | 0.01899 | 0.01975 | 0.02486 | 0.02196 | 0.01919 | 0.01741 | 0.01779 | 0.01632 ARL6IP2   |
| cg20091959 | 0.70701 | 0.5647  | 0.94173 | 0.95124 | 0.8932  | 0.76412 | 0.48723 | 0.54867 | 0.44518 | 0.45483 L3MBTL    |
| cg20092036 | 0.32265 | 0.05823 | 0.21644 | 0.45589 | 0.24672 | 0.33831 | 0.05909 | 0.08011 | 0.42183 | 0.34605 UBE3B     |
| cg20092677 | 0.02513 | 0.02739 | 0.02754 | 0.0276  | 0.02401 | 0.02458 | 0.02482 | 0.02596 | 0.0231  | 0.0245 ABCF3      |
| cg20092728 | 0.84632 | 0.71957 | 0.18931 | 0.37018 | 0.65669 | 0.81661 | 0.57554 | 0.86488 | 0.10138 | 0.12135 SLC5A12   |
| cg20095338 | 0.07797 | 0.0917  | 0.07075 | 0.08096 | 0.05052 | 0.07045 | 0.06706 | 0.07927 | 0.08545 | 0.07033 NAP1L1    |
| cg20095587 | 0.81244 | 0.54894 | 0.77052 | 0.85061 | 0.49555 | 0.83943 | 0.03099 | 0.03598 | 0.60057 | 0.57658 TREM2     |
| cg20096208 | 0.04132 | 0.05201 | 0.0512  | 0.047   | 0.05184 | 0.05067 | 0.05805 | 0.05852 | 0.03907 | 0.03455 JMJD2D    |
| cg20097268 | 0.17409 | 0.04929 | 0.18718 | 0.08649 | 0.07529 | 0.03384 | 0.04306 | 0.04806 | 0.24971 | 0.08769 HBXIP     |
| cg20098118 | 0.43943 | 0.10764 | 0.09758 | 0.06797 | 0.13347 | 0.09843 | 0.06115 | 0.0964  | 0.07806 | 0.0745 UXT        |
| cg20098478 | 0.81091 | 0.65264 | 0.87726 | 0.89888 | 0.93914 | 0.92771 | 0.88414 | 0.88691 | 0.88644 | 0.87807 WIF1      |
| cg20098659 | 0.87978 | 0.89307 | 0.87251 | 0.86707 | 0.86016 | 0.89565 | 0.70492 | 0.88306 | 0.90003 | 0.87894 CLEC9A    |
| cg20098887 | 0.19382 | 0.07716 | 0.16689 | 0.12567 | 0.04659 | 0.04981 | 0.13733 | 0.04373 | 0.09218 | 0.03955 RAB32     |
| cg20099806 | 0.1816  | 0.11866 | 0.3271  | 0.22788 | 0.26411 | 0.12953 | 0.16062 | 0.10369 | 0.12743 | 0.13048 CCDC47    |
| cg20100381 | 0.09169 | 0.09249 | 0.09898 | 0.0946  | 0.11346 | 0.07638 | 0.07792 | 0.08761 | 0.17241 | 0.07082 APPBP1    |
| cg20102673 | 0.39833 | 0.39888 | 0.61189 | 0.83819 | 0.24808 | 0.14463 | 0.54552 | 0.23153 | 0.47321 | 0.44527 KCNH3     |
| cg20103201 | 0.11972 | 0.12747 | 0.11683 | 0.11304 | 0.08994 | 0.11241 | 0.10637 | 0.10531 | 0.10577 | 0.10584 PANK4     |
| cg20103550 | 0.61808 | 0.59426 | 0.55694 | 0.62725 | 0.52559 | 0.61311 | 0.42188 | 0.54702 | 0.22255 | 0.27311 C14orf155 |
| cg20103758 | 0.07765 | 0.07    | 0.79678 | 0.86315 | 0.4077  | 0.25581 | 0.46674 | 0.40188 | 0.06758 | 0.05551 SLC27A6   |

|            |         |         |         |         |         |         |         |         |         |                   |
|------------|---------|---------|---------|---------|---------|---------|---------|---------|---------|-------------------|
| cg20104688 | 0.05632 | 0.05527 | 0.05738 | 0.05162 | 0.03761 | 0.05715 | 0.05651 | 0.05268 | 0.04643 | 0.05254 TK1       |
| cg20104776 | 0.08242 | 0.06086 | 0.0508  | 0.0474  | 0.04165 | 0.04232 | 0.53398 | 0.0503  | 0.0448  | 0.04493 LDOC1     |
| cg20109151 | 0.02623 | 0.02062 | 0.02476 | 0.02364 | 0.0193  | 0.02087 | 0.01829 | 0.02383 | 0.02073 | 0.01676 NIPSNAP3A |
| cg20112035 | 0.06406 | 0.06721 | 0.06819 | 0.06894 | 0.04711 | 0.05814 | 0.05747 | 0.05601 | 0.05377 | 0.04821 C1orf48   |
| cg20113732 | 0.05874 | 0.02327 | 0.2458  | 0.44986 | 0.08568 | 0.02615 | 0.03502 | 0.02542 | 0.05473 | 0.05544 NELL1     |
| cg20114394 | 0.93497 | 0.9169  | 0.88167 | 0.80171 | 0.96225 | 0.93107 | 0.72493 | 0.33278 | 0.96519 | 0.95564 FSTL1     |
| cg20116574 | 0.02345 | 0.02443 | 0.02308 | 0.0193  | 0.01913 | 0.02355 | 0.02081 | 0.0232  | 0.01966 | 0.01921 NCOA5     |
| cg20117778 | 0.03461 | 0.02996 | 0.03493 | 0.03656 | 0.02192 | 0.02739 | 0.02475 | 0.0257  | 0.02782 | 0.0284 TAF12      |
| cg20118424 | 0.7997  | 0.64676 | 0.77422 | 0.84287 | 0.71987 | 0.78153 | 0.63348 | 0.5066  | 0.77386 | 0.57838 ABCB11    |
| cg20119015 | 0.13965 | 0.09716 | 0.08483 | 0.08229 | 0.08772 | 0.10529 | 0.09727 | 0.08479 | 0.09214 | 0.08133 CENTD1    |
| cg20119051 | 0.05473 | 0.04083 | 0.04816 | 0.04761 | 0.04349 | 0.08235 | 0.04901 | 0.04574 | 0.04426 | 0.04366 R3HDM1    |
| cg20119635 | 0.73878 | 0.80442 | 0.25438 | 0.22448 | 0.19958 | 0.11657 | 0.21305 | 0.10321 | 0.1378  | 0.1081 DYNLT3     |
| cg20119871 | 0.70729 | 0.70858 | 0.55038 | 0.71055 | 0.95168 | 0.92921 | 0.93185 | 0.6949  | 0.51418 | 0.48654 ATP10A    |
| cg20120491 | 0.90379 | 0.81993 | 0.65672 | 0.81896 | 0.40589 | 0.43151 | 0.06903 | 0.05293 | 0.83249 | 0.79818 DMC1      |
| cg20122476 | 0.09657 | 0.09066 | 0.10899 | 0.0867  | 0.37029 | 0.10138 | 0.13456 | 0.10053 | 0.09481 | 0.09799 PITPNA    |
| cg20122491 | 0.02465 | 0.03187 | 0.036   | 0.03676 | 0.03588 | 0.04169 | 0.02295 | 0.02463 | 0.02134 | 0.02093 ZFP95     |
| cg20123891 | 0.14567 | 0.16563 | 0.1672  | 0.1549  | 0.35904 | 0.14809 | 0.15838 | 0.1775  | 0.14045 | 0.16235 NXPH3     |
| cg20125091 | 0.82153 | 0.48556 | 0.8054  | 0.84414 | 0.81235 | 0.87535 | 0.20055 | 0.14868 | 0.09606 | 0.05988 GF11      |
| cg20125159 | 0.07318 | 0.06095 | 0.09116 | 0.05369 | 0.08315 | 0.08054 | 0.05341 | 0.05204 | 0.06415 | 0.05965 TXNDC12   |
| cg20126106 | 0.83607 | 0.61905 | 0.64161 | 0.75395 | 0.40945 | 0.2932  | 0.7833  | 0.86064 | 0.68314 | 0.44353 TAGLN3    |
| cg20126158 | 0.05491 | 0.05032 | 0.04725 | 0.04161 | 0.04737 | 0.0503  | 0.0611  | 0.06518 | 0.03707 | 0.04417 6-Mar     |
| cg20131596 | 0.85279 | 0.65277 | 0.09148 | 0.07788 | 0.54705 | 0.50212 | 0.12033 | 0.57595 | 0.38826 | 0.28151 PAM       |
| cg20131685 | 0.04507 | 0.03986 | 0.04396 | 0.0381  | 0.10818 | 0.07764 | 0.04952 | 0.05524 | 0.04249 | 0.04266 LLGL1     |
| cg20131968 | 0.12222 | 0.06416 | 0.14194 | 0.15088 | 0.11745 | 0.07111 | 0.06335 | 0.05487 | 0.07253 | 0.0733 CCDC47     |
| cg20133313 | 0.10978 | 0.02984 | 0.04163 | 0.04475 | 0.08032 | 0.03048 | 0.02556 | 0.02599 | 0.03956 | 0.03013 CYB5R1    |
| cg20134151 | 0.04921 | 0.04944 | 0.45907 | 0.68528 | 0.13287 | 0.06687 | 0.51069 | 0.18424 | 0.07063 | 0.04852 PPP1R14C  |
| cg20134215 | 0.48944 | 0.50966 | 0.9225  | 0.91249 | 0.87322 | 0.92623 | 0.14712 | 0.11738 | 0.09418 | 0.24007 MCHR2     |
| cg20135306 | 0.03219 | 0.0305  | 0.02887 | 0.02796 | 0.02577 | 0.02479 | 0.02627 | 0.02701 | 0.0238  | 0.02016 SAFB      |
| cg20139214 | 0.04751 | 0.04704 | 0.0436  | 0.0431  | 0.03383 | 0.03786 | 0.04086 | 0.0404  | 0.03611 | 0.03867 ACACA     |
| cg20140452 | 0.09129 | 0.08714 | 0.08942 | 0.09228 | 0.08608 | 0.09175 | 0.0822  | 0.07437 | 0.0805  | 0.08119 NR3C2     |
| cg20141013 | 0.03537 | 0.03399 | 0.04104 | 0.03489 | 0.02602 | 0.03148 | 0.03356 | 0.03465 | 0.03233 | 0.03195 PRO0149   |
| cg20141751 | 0.034   | 0.03065 | 0.03279 | 0.03603 | 0.02978 | 0.03739 | 0.02563 | 0.02881 | 0.0268  | 0.02569 GLT8D1    |
| cg20141916 | 0.05792 | 0.0335  | 0.26344 | 0.04561 | 0.45967 | 0.11654 | 0.63472 | 0.34746 | 0.02894 | 0.02941 PLEK2     |
| cg20142224 | 0.03229 | 0.03663 | 0.04185 | 0.03641 | 0.03308 | 0.02806 | 0.0327  | 0.02898 | 0.03654 | 0.0226 DOK4       |
| cg20143092 | 0.1267  | 0.13323 | 0.13316 | 0.12143 | 0.07132 | 0.09534 | 0.10311 | 0.11379 | 0.10555 | 0.09639 CD44      |
| cg20145360 | 0.65487 | 0.62942 | 0.56278 | 0.66162 | 0.50957 | 0.64464 | 0.33357 | 0.2874  | 0.22695 | 0.24861 ROBO1     |
| cg20147100 | 0.04537 | 0.04142 | 0.0424  | 0.04396 | 0.0549  | 0.05293 | 0.04378 | 0.03461 | 0.03512 | 0.03015 C19orf6   |
| cg20149493 | 0.0457  | 0.03712 | 0.0411  | 0.0317  | 0.03112 | 0.02987 | 0.03532 | 0.03294 | 0.03162 | 0.02895 PDCD5     |
| cg20149766 | 0.02818 | 0.03133 | 0.03112 | 0.0263  | 0.0235  | 0.02364 | 0.02793 | 0.02687 | 0.02435 | 0.02201 POLS      |
| cg20149998 | 0.05364 | 0.05703 | 0.07729 | 0.07438 | 0.13373 | 0.07513 | 0.07493 | 0.07075 | 0.05965 | 0.05682 CHCHD8    |
| cg20150565 | 0.18981 | 0.18058 | 0.18116 | 0.15701 | 0.25266 | 0.19345 | 0.19377 | 0.18528 | 0.12861 | 0.12849 ZNF1      |

|            |         |         |         |         |         |         |         |         |         |         |           |
|------------|---------|---------|---------|---------|---------|---------|---------|---------|---------|---------|-----------|
| cg20150743 | 0.02666 | 0.03182 | 0.03603 | 0.03002 | 0.02508 | 0.03532 | 0.02547 | 0.0264  | 0.02263 | 0.02172 | ZNF3      |
| cg20154346 | 0.28764 | 0.10923 | 0.41625 | 0.58021 | 0.86667 | 0.81566 | 0.10052 | 0.17219 | 0.07804 | 0.06215 | RAI2      |
| cg20158248 | 0.19722 | 0.07153 | 0.19915 | 0.18833 | 0.43409 | 0.15994 | 0.13671 | 0.06602 | 0.50199 | 0.24277 | ABCC1     |
| cg20158826 | 0.55505 | 0.67146 | 0.73646 | 0.83931 | 0.88823 | 0.85977 | 0.54025 | 0.65441 | 0.23302 | 0.10078 | CCS       |
| cg20159072 | 0.02485 | 0.02562 | 0.03334 | 0.02864 | 0.01667 | 0.02397 | 0.40817 | 0.49063 | 0.02574 | 0.02085 | SLC25A20  |
| cg20161089 | 0.63682 | 0.44633 | 0.84226 | 0.84354 | 0.74098 | 0.43991 | 0.80299 | 0.8154  | 0.8396  | 0.75086 | IFI27     |
| cg20161179 | 0.36127 | 0.17407 | 0.0803  | 0.09285 | 0.30123 | 0.06845 | 0.07167 | 0.07463 | 0.92756 | 0.41872 | MSX1      |
| cg20162076 | 0.47654 | 0.4499  | 0.35845 | 0.46918 | 0.47076 | 0.5314  | 0.27106 | 0.27553 | 0.30287 | 0.37985 | LY86      |
| cg20162146 | 0.88109 | 0.66561 | 0.83601 | 0.88511 | 0.86436 | 0.71999 | 0.87036 | 0.87104 | 0.84278 | 0.81109 | MCM5      |
| cg20162159 | 0.03308 | 0.03153 | 0.04811 | 0.04136 | 0.03427 | 0.03137 | 0.03247 | 0.03179 | 0.02751 | 0.02654 | MON1A     |
| cg20162599 | 0.80072 | 0.68633 | 0.8149  | 0.8497  | 0.80671 | 0.79176 | 0.82421 | 0.83652 | 0.84289 | 0.83212 | DNAJC4    |
| cg20163033 | 0.82197 | 0.79413 | 0.86839 | 0.87808 | 0.83544 | 0.81954 | 0.85118 | 0.83668 | 0.86493 | 0.82611 | C4orf8    |
| cg20163288 | 0.06033 | 0.03571 | 0.04939 | 0.04224 | 0.15307 | 0.05782 | 0.35757 | 0.08113 | 0.07138 | 0.03225 | GJA7      |
| cg20164558 | 0.06925 | 0.07007 | 0.06944 | 0.07114 | 0.07486 | 0.06904 | 0.06584 | 0.06629 | 0.0615  | 0.06144 | PPP2R5D   |
| cg20164720 | 0.03849 | 0.03574 | 0.28354 | 0.40609 | 0.04357 | 0.0365  | 0.03377 | 0.02839 | 0.02957 | 0.02835 | AGTRAP    |
| cg20166532 | 0.04976 | 0.052   | 0.04887 | 0.0533  | 0.07893 | 0.04639 | 0.06158 | 0.05738 | 0.05587 | 0.04233 | EDG1      |
| cg20166783 | 0.02645 | 0.02559 | 0.02811 | 0.02477 | 0.02116 | 0.02278 | 0.02046 | 0.02252 | 0.0214  | 0.01966 | RFC1      |
| cg20168375 | 0.05082 | 0.04838 | 0.05077 | 0.06004 | 0.04352 | 0.04734 | 0.04967 | 0.0474  | 0.04546 | 0.04226 | LOC90624  |
| cg20169062 | 0.34942 | 0.18274 | 0.36376 | 0.45149 | 0.24194 | 0.17711 | 0.17374 | 0.13198 | 0.12172 | 0.10982 | HSPB3     |
| cg20171451 | 0.85421 | 0.79192 | 0.83635 | 0.83172 | 0.86844 | 0.8164  | 0.72763 | 0.79215 | 0.63351 | 0.75373 | CSTL1     |
| cg20172280 | 0.07299 | 0.05537 | 0.06229 | 0.06377 | 0.05963 | 0.04548 | 0.04985 | 0.04745 | 0.05057 | 0.04662 | OLFML2B   |
| cg20173259 | 0.06627 | 0.04374 | 0.06048 | 0.05005 | 0.32521 | 0.08231 | 0.0984  | 0.04849 | 0.03361 | 0.02669 | LHB       |
| cg20175449 | 0.44802 | 0.14098 | 0.26107 | 0.36138 | 0.27165 | 0.16624 | 0.21618 | 0.11688 | 0.09949 | 0.09851 | LOC196264 |
| cg20176532 | 0.02848 | 0.02968 | 0.03203 | 0.03122 | 0.11962 | 0.03072 | 0.02417 | 0.02666 | 0.02605 | 0.02529 | ZNF256    |
| cg20176648 | 0.62817 | 0.21186 | 0.62258 | 0.76288 | 0.83084 | 0.72733 | 0.58635 | 0.55567 | 0.62453 | 0.42992 | AQP1      |
| cg20176989 | 0.35581 | 0.2851  | 0.47541 | 0.45207 | 0.61864 | 0.40575 | 0.1331  | 0.09902 | 0.27736 | 0.3063  | KIR3DL2   |
| cg20178764 | 0.90341 | 0.57982 | 0.90165 | 0.92954 | 0.96784 | 0.89663 | 0.59877 | 0.35784 | 0.74625 | 0.63292 | GFRA3     |
| cg20179697 | 0.93413 | 0.87876 | 0.235   | 0.33407 | 0.09691 | 0.06765 | 0.89914 | 0.74805 | 0.94272 | 0.93434 | SNX9      |
| cg20180148 | 0.02157 | 0.02457 | 0.02268 | 0.02545 | 0.01609 | 0.02145 | 0.02146 | 0.0236  | 0.0233  | 0.02022 | DNM1L     |
| cg20182358 | 0.03201 | 0.03021 | 0.03675 | 0.03011 | 0.04712 | 0.02691 | 0.03085 | 0.03067 | 0.02827 | 0.02986 | MLF1      |
| cg20184165 | 0.02229 | 0.02424 | 0.02248 | 0.02132 | 0.02009 | 0.02525 | 0.01866 | 0.0185  | 0.01873 | 0.02016 | NARG1     |
| cg20185083 | 0.80373 | 0.70338 | 0.62554 | 0.72864 | 0.80212 | 0.48494 | 0.5668  | 0.64046 | 0.69588 | 0.39497 | SERPIN9   |
| cg20188282 | 0.02983 | 0.03178 | 0.03138 | 0.02663 | 0.02329 | 0.02634 | 0.02203 | 0.02504 | 0.0224  | 0.02295 | GTF3C5    |
| cg20189782 | 0.89209 | 0.80541 | 0.87001 | 0.89116 | 0.92425 | 0.84459 | 0.85518 | 0.86302 | 0.73443 | 0.68933 | MGC27121  |
| cg20189937 | 0.84842 | 0.48204 | 0.89731 | 0.89848 | 0.79552 | 0.79149 | 0.85297 | 0.57682 | 0.58051 | 0.48164 | L2HGDH    |
| cg20191453 | 0.9643  | 0.96807 | 0.96753 | 0.9697  | 0.95442 | 0.96738 | 0.97335 | 0.96149 | 0.97218 | 0.97395 | AMT       |
| cg20193288 | 0.04171 | 0.03612 | 0.03602 | 0.03544 | 0.0276  | 0.03388 | 0.02964 | 0.03256 | 0.02861 | 0.03054 | TMED1     |
| cg20193716 | 0.10924 | 0.07768 | 0.09446 | 0.11471 | 0.11874 | 0.06689 | 0.08414 | 0.08608 | 0.09695 | 0.08656 | MGAT1     |
| cg20195812 | 0.25893 | 0.26743 | 0.15859 | 0.15203 | 0.65416 | 0.26927 | 0.48151 | 0.35421 | 0.33053 | 0.21412 | STAT4     |
| cg20199333 | 0.88205 | 0.87832 | 0.87873 | 0.89989 | 0.93091 | 0.88533 | 0.89026 | 0.82049 | 0.89624 | 0.89258 | F2        |
| cg20199629 | 0.03889 | 0.03923 | 0.04421 | 0.21452 | 0.2003  | 0.43092 | 0.03695 | 0.03429 | 0.03279 | 0.0331  | SAMD14    |

|            |         |         |         |         |         |         |         |         |         |                  |
|------------|---------|---------|---------|---------|---------|---------|---------|---------|---------|------------------|
| cg20200335 | 0.67394 | 0.39227 | 0.6482  | 0.66703 | 0.62253 | 0.63105 | 0.81634 | 0.86831 | 0.31412 | 0.62362 K6IRS4   |
| cg20202438 | 0.36462 | 0.42063 | 0.80256 | 0.82088 | 0.87653 | 0.61405 | 0.6234  | 0.7095  | 0.85939 | 0.6922 NPPA      |
| cg20203395 | 0.8946  | 0.91624 | 0.13306 | 0.1181  | 0.53809 | 0.44119 | 0.44308 | 0.34327 | 0.07881 | 0.06738 MGC33648 |
| cg20203596 | 0.06862 | 0.06719 | 0.06376 | 0.06319 | 0.04781 | 0.06125 | 0.06585 | 0.05638 | 0.07114 | 0.05285 CCDC38   |
| cg20203792 | 0.04611 | 0.05502 | 0.0554  | 0.06779 | 0.04804 | 0.05379 | 0.04305 | 0.04263 | 0.04458 | 0.0425 MGC29898  |
| cg20206574 | 0.10933 | 0.10487 | 0.13222 | 0.13577 | 0.14372 | 0.10924 | 0.08859 | 0.09348 | 0.09931 | 0.11005 DSCR1    |
| cg20207753 | 0.14534 | 0.13729 | 0.19267 | 0.16499 | 0.26755 | 0.18226 | 0.17918 | 0.16997 | 0.23089 | 0.09853 C20orf72 |
| cg20209009 | 0.14428 | 0.07173 | 0.81592 | 0.87322 | 0.80196 | 0.81511 | 0.41509 | 0.53368 | 0.60596 | 0.68899 TBX21    |
| cg20210637 | 0.89638 | 0.89634 | 0.89786 | 0.89601 | 0.87599 | 0.88723 | 0.83499 | 0.76991 | 0.90973 | 0.62576 SNPH     |
| cg20216130 | 0.06124 | 0.05957 | 0.0689  | 0.05528 | 0.06342 | 0.05631 | 0.05254 | 0.05659 | 0.04245 | 0.04347 C9orf91  |
| cg20216935 | 0.04016 | 0.03978 | 0.03559 | 0.03878 | 0.0328  | 0.03666 | 0.03448 | 0.03105 | 0.03304 | 0.02942 TGFB2    |
| cg20217872 | 0.12628 | 0.14878 | 0.22685 | 0.3134  | 0.23459 | 0.15358 | 0.28118 | 0.15762 | 0.17018 | 0.15034 NAV3     |
| cg20218060 | 0.02639 | 0.02933 | 0.03101 | 0.03014 | 0.02228 | 0.02292 | 0.02302 | 0.02313 | 0.02064 | 0.02069 CLK1     |
| cg20222911 | 0.07229 | 0.06524 | 0.08302 | 0.07858 | 0.05614 | 0.06893 | 0.05608 | 0.05369 | 0.04808 | 0.05698 MTA1     |
| cg20224517 | 0.43367 | 0.08441 | 0.32367 | 0.16044 | 0.06669 | 0.05571 | 0.16691 | 0.08122 | 0.06026 | 0.04261 THUMP2   |
| cg20225275 | 0.06185 | 0.04959 | 0.05316 | 0.04888 | 0.06657 | 0.05028 | 0.04674 | 0.03897 | 0.04354 | 0.04106 ATP6V0E  |
| cg20225681 | 0.9185  | 0.81559 | 0.88024 | 0.92154 | 0.94865 | 0.90225 | 0.89256 | 0.883   | 0.87759 | 0.88649 CILP     |
| cg20225889 | 0.06866 | 0.06689 | 0.08577 | 0.07045 | 0.11274 | 0.11222 | 0.07445 | 0.09516 | 0.04487 | 0.05623 ZNF297   |
| cg20225915 | 0.77221 | 0.53206 | 0.58199 | 0.47563 | 0.2161  | 0.20705 | 0.46768 | 0.23098 | 0.34244 | 0.18957 LRDD     |
| cg20226593 | 0.60873 | 0.51472 | 0.64943 | 0.70382 | 0.54892 | 0.57429 | 0.61602 | 0.703   | 0.59405 | 0.57597 SLC12A1  |
| cg20226764 | 0.79082 | 0.30736 | 0.44445 | 0.5249  | 0.23718 | 0.15808 | 0.37981 | 0.37241 | 0.58623 | 0.50415 MLN      |
| cg20227165 | 0.24036 | 0.04538 | 0.6543  | 0.78194 | 0.90918 | 0.74508 | 0.28456 | 0.21    | 0.72466 | 0.37551 PRDM11   |
| cg20227213 | 0.06652 | 0.07619 | 0.06961 | 0.06516 | 0.06993 | 0.07315 | 0.08057 | 0.0701  | 0.06606 | 0.06606 GOLGA4   |
| cg20227766 | 0.03733 | 0.03535 | 0.044   | 0.04598 | 0.04093 | 0.04016 | 0.02819 | 0.03304 | 0.03603 | 0.03698 G1P3     |
| cg20228512 | 0.01726 | 0.02066 | 0.0197  | 0.02044 | 0.01739 | 0.01762 | 0.01735 | 0.01638 | 0.01516 | 0.01606 PCGF2    |
| cg20229788 | 0.1396  | 0.09125 | 0.64935 | 0.70029 | 0.57297 | 0.28181 | 0.43771 | 0.12866 | 0.12915 | 0.06271 GCKR     |
| cg20233029 | 0.63032 | 0.61716 | 0.21379 | 0.31967 | 0.66188 | 0.48404 | 0.13281 | 0.10859 | 0.12391 | 0.09303 B4GALNT2 |
| cg20234170 | 0.21646 | 0.13043 | 0.17941 | 0.10815 | 0.08538 | 0.06428 | 0.103   | 0.10636 | 0.06642 | 0.05982 CAT      |
| cg20234959 | 0.67193 | 0.33447 | 0.69862 | 0.76271 | 0.55325 | 0.68562 | 0.6034  | 0.5828  | 0.7527  | 0.51091 NID1     |
| cg20235051 | 0.03302 | 0.03072 | 0.03657 | 0.03208 | 0.0255  | 0.03252 | 0.02743 | 0.03136 | 0.02981 | 0.0263 LOC388407 |
| cg20239740 | 0.03615 | 0.03661 | 0.07875 | 0.12074 | 0.92796 | 0.95218 | 0.03406 | 0.0361  | 0.18871 | 0.02788 SYT5     |
| cg20239949 | 0.05816 | 0.05202 | 0.06323 | 0.04636 | 0.042   | 0.04224 | 0.06176 | 0.07919 | 0.04376 | 0.05261 NSMAF    |
| cg20240860 | 0.73922 | 0.55722 | 0.32859 | 0.2873  | 0.05777 | 0.04263 | 0.17962 | 0.05344 | 0.41333 | 0.20351 PHACS    |
| cg20241335 | 0.06978 | 0.07308 | 0.0826  | 0.0671  | 0.06554 | 0.06152 | 0.06144 | 0.05012 | 0.05486 | 0.05067 NUPL1    |
| cg20244073 | 0.15216 | 0.48638 | 0.87378 | 0.88664 | 0.89883 | 0.75133 | 0.08828 | 0.08958 | 0.84232 | 0.63386 MID1     |
| cg20247048 | 0.60727 | 0.26924 | 0.2319  | 0.29714 | 0.40337 | 0.09254 | 0.10686 | 0.17055 | 0.04632 | 0.03325 FLJ32065 |
| cg20247102 | 0.06528 | 0.05914 | 0.05988 | 0.05525 | 0.05877 | 0.04915 | 0.05114 | 0.03983 | 0.05062 | 0.0512 RASA2     |
| cg20247600 | 0.12045 | 0.1265  | 0.12083 | 0.11366 | 0.07552 | 0.10606 | 0.10426 | 0.10859 | 0.11322 | 0.10612 NFE2L2   |
| cg20249919 | 0.06601 | 0.07668 | 0.06969 | 0.06986 | 0.08542 | 0.10542 | 0.20013 | 0.37991 | 0.06811 | 0.06337 PCSK6    |
| cg20251973 | 0.03506 | 0.044   | 0.04208 | 0.0344  | 0.03526 | 0.02913 | 0.02316 | 0.02647 | 0.03215 | 0.0324 MGC11266  |
| cg20252016 | 0.0154  | 0.02028 | 0.02038 | 0.02019 | 0.0192  | 0.0188  | 0.01776 | 0.01893 | 0.01489 | 0.0148 CDCA5     |

|            |         |         |         |         |         |         |         |         |         |         |          |
|------------|---------|---------|---------|---------|---------|---------|---------|---------|---------|---------|----------|
| cg20253551 | 0.05051 | 0.04083 | 0.47543 | 0.62088 | 0.62005 | 0.59212 | 0.06843 | 0.03516 | 0.11149 | 0.05228 | ESR1     |
| cg20253700 | 0.23895 | 0.44721 | 0.54012 | 0.66651 | 0.47111 | 0.69723 | 0.3714  | 0.32132 | 0.43664 | 0.21185 | TSC2     |
| cg20254231 | 0.19957 | 0.05879 | 0.06949 | 0.0821  | 0.09258 | 0.04682 | 0.04583 | 0.04241 | 0.32216 | 0.0423  | WDR33    |
| cg20256494 | 0.09964 | 0.05185 | 0.4626  | 0.53082 | 0.58285 | 0.11719 | 0.49717 | 0.10916 | 0.06411 | 0.04361 | CABP7    |
| cg20256783 | 0.76445 | 0.57577 | 0.87777 | 0.90612 | 0.94653 | 0.66259 | 0.74547 | 0.5871  | 0.41286 | 0.69679 | K6HF     |
| cg20259398 | 0.04549 | 0.04417 | 0.04472 | 0.04981 | 0.03989 | 0.04218 | 0.04607 | 0.04389 | 0.0574  | 0.039   | CDCA7L   |
| cg20259534 | 0.05286 | 0.04604 | 0.05282 | 0.0485  | 0.0436  | 0.04649 | 0.04689 | 0.04021 | 0.05702 | 0.05012 | BUB1B    |
| cg20261167 | 0.16008 | 0.13496 | 0.1684  | 0.2676  | 0.23844 | 0.15571 | 0.28512 | 0.25664 | 0.21558 | 0.34814 | SPP1     |
| cg20261915 | 0.37008 | 0.23654 | 0.87347 | 0.89155 | 0.87573 | 0.85187 | 0.31625 | 0.04089 | 0.56412 | 0.52173 | GLP2R    |
| cg20263942 | 0.11747 | 0.11372 | 0.13635 | 0.14483 | 0.29898 | 0.1882  | 0.21883 | 0.10514 | 0.47943 | 0.32431 | GOLPH2   |
| cg20264534 | 0.05701 | 0.05651 | 0.06401 | 0.06444 | 0.05543 | 0.05327 | 0.09004 | 0.03361 | 0.04121 | 0.03304 | MGC20255 |
| cg20264731 | 0.06888 | 0.0657  | 0.07791 | 0.08288 | 0.07025 | 0.05998 | 0.07672 | 0.10025 | 0.04829 | 0.0605  | POLB     |
| cg20264732 | 0.9284  | 0.93096 | 0.95013 | 0.95555 | 0.96471 | 0.96053 | 0.93751 | 0.95309 | 0.95743 | 0.9629  | RBM35B   |
| cg20267005 | 0.79751 | 0.33066 | 0.79652 | 0.86434 | 0.89325 | 0.87116 | 0.15935 | 0.05409 | 0.78115 | 0.74406 | TYROBP   |
| cg20268522 | 0.05811 | 0.06146 | 0.06104 | 0.06323 | 0.04065 | 0.05709 | 0.05076 | 0.05217 | 0.05541 | 0.04842 | NCAM1    |
| cg20269537 | 0.80684 | 0.48423 | 0.76036 | 0.82339 | 0.74994 | 0.49099 | 0.32607 | 0.22596 | 0.82051 | 0.73849 | ATXN10   |
| cg20269976 | 0.06112 | 0.06128 | 0.07027 | 0.07675 | 0.08665 | 0.07657 | 0.05423 | 0.0521  | 0.08042 | 0.06685 | GAA      |
| cg20270599 | 0.64608 | 0.40654 | 0.12426 | 0.21893 | 0.22373 | 0.20699 | 0.40552 | 0.50358 | 0.87373 | 0.76084 | LEPREL1  |
| cg20271396 | 0.04302 | 0.0493  | 0.04733 | 0.04068 | 0.0364  | 0.0429  | 0.04018 | 0.03858 | 0.03596 | 0.03692 | C1orf19  |
| cg20273774 | 0.10982 | 0.09097 | 0.11261 | 0.10687 | 0.10608 | 0.13083 | 0.10524 | 0.10972 | 0.09345 | 0.09046 | GNB2L1   |
| cg20275133 | 0.11808 | 0.11024 | 0.12403 | 0.14098 | 0.10325 | 0.09659 | 0.09918 | 0.11949 | 0.13327 | 0.10109 | MRPL20   |
| cg20275344 | 0.12414 | 0.05861 | 0.06497 | 0.06608 | 0.46388 | 0.12329 | 0.29425 | 0.38852 | 0.07927 | 0.04284 | RAB9B    |
| cg20276750 | 0.12699 | 0.09249 | 0.17595 | 0.19256 | 0.18482 | 0.02543 | 0.58308 | 0.08859 | 0.51696 | 0.32356 | PPM1M    |
| cg20277250 | 0.74239 | 0.41737 | 0.14123 | 0.10557 | 0.41469 | 0.59551 | 0.13027 | 0.10348 | 0.28487 | 0.31522 | TINP1    |
| cg20277416 | 0.31973 | 0.17552 | 0.80435 | 0.8462  | 0.95442 | 0.93707 | 0.91072 | 0.80779 | 0.94442 | 0.85152 | TM7SF2   |
| cg20277670 | 0.9282  | 0.94728 | 0.94253 | 0.95958 | 0.95848 | 0.93657 | 0.59987 | 0.65649 | 0.95112 | 0.89069 | HRH2     |
| cg20278498 | 0.0465  | 0.04914 | 0.04938 | 0.04969 | 0.04408 | 0.0488  | 0.03849 | 0.0353  | 0.04303 | 0.03667 | RPUSD4   |
| cg20279283 | 0.42996 | 0.4193  | 0.06417 | 0.05792 | 0.83355 | 0.9213  | 0.65909 | 0.92253 | 0.95319 | 0.95334 | GATA4    |
| cg20281815 | 0.853   | 0.61782 | 0.94338 | 0.94988 | 0.97214 | 0.94596 | 0.94326 | 0.89704 | 0.95385 | 0.92495 | PSCA     |
| cg20282199 | 0.10903 | 0.09682 | 0.11865 | 0.1318  | 0.05413 | 0.07268 | 0.10259 | 0.09621 | 0.09355 | 0.09137 | SEC13L1  |
| cg20283107 | 0.85127 | 0.70835 | 0.82892 | 0.85364 | 0.76643 | 0.82585 | 0.68959 | 0.8217  | 0.87098 | 0.83159 | FAM91A1  |
| cg20284440 | 0.02293 | 0.02108 | 0.02422 | 0.02117 | 0.01685 | 0.02138 | 0.02033 | 0.02214 | 0.01851 | 0.01919 | FRMD6    |
| cg20284673 | 0.23    | 0.27065 | 0.24921 | 0.23987 | 0.18228 | 0.19409 | 0.22325 | 0.21809 | 0.24129 | 0.23255 | DOM3Z    |
| cg20286074 | 0.50442 | 0.38569 | 0.56509 | 0.58088 | 0.71711 | 0.63019 | 0.29282 | 0.35292 | 0.2218  | 0.25272 | 2-Apr    |
| cg20286200 | 0.089   | 0.08789 | 0.09035 | 0.09259 | 0.08295 | 0.04681 | 0.04824 | 0.04778 | 0.06535 | 0.05765 | EYA4     |
| cg20287234 | 0.86486 | 0.61775 | 0.84814 | 0.88432 | 0.75801 | 0.8151  | 0.20337 | 0.06874 | 0.8922  | 0.86463 | GPR55    |
| cg20287640 | 0.17753 | 0.08997 | 0.10241 | 0.09773 | 0.15222 | 0.07288 | 0.0899  | 0.09739 | 0.0573  | 0.05591 | IRF1     |
| cg20288630 | 0.07239 | 0.0542  | 0.09405 | 0.13588 | 0.06078 | 0.06254 | 0.04739 | 0.0496  | 0.04024 | 0.05029 | PDE5A    |
| cg20289911 | 0.78769 | 0.37579 | 0.56905 | 0.66194 | 0.27012 | 0.1886  | 0.07588 | 0.09567 | 0.42119 | 0.08068 | C2orf55  |
| cg20289949 | 0.73001 | 0.76032 | 0.23856 | 0.23813 | 0.60049 | 0.56596 | 0.52241 | 0.75557 | 0.55239 | 0.32732 | HAAO     |
| cg20289988 | 0.04401 | 0.04853 | 0.04511 | 0.04005 | 0.02798 | 0.04248 | 0.04659 | 0.0411  | 0.04337 | 0.04598 | NFIA     |

|            |         |         |         |         |         |         |         |         |         |         |          |
|------------|---------|---------|---------|---------|---------|---------|---------|---------|---------|---------|----------|
| cg20291049 | 0.05765 | 0.05399 | 0.74656 | 0.76111 | 0.15312 | 0.35512 | 0.27963 | 0.2706  | 0.40324 | 0.04208 | POU3F3   |
| cg20291222 | 0.82263 | 0.44788 | 0.51095 | 0.78749 | 0.13354 | 0.10956 | 0.09126 | 0.07202 | 0.1398  | 0.10547 | CAPS2    |
| cg20291674 | 0.03341 | 0.03153 | 0.03558 | 0.03596 | 0.0303  | 0.0316  | 0.03361 | 0.03233 | 0.02702 | 0.03152 | VIL2     |
| cg20291846 | 0.1462  | 0.13478 | 0.21171 | 0.19386 | 0.15583 | 0.13415 | 0.14656 | 0.12589 | 0.11264 | 0.12137 | ADAM17   |
| cg20295000 | 0.04154 | 0.0439  | 0.03854 | 0.04132 | 0.02504 | 0.03254 | 0.03305 | 0.03503 | 0.03359 | 0.03326 | LONPL    |
| cg20295671 | 0.56499 | 0.38058 | 0.84032 | 0.9444  | 0.48097 | 0.04609 | 0.0322  | 0.01512 | 0.01417 | 0.01434 | YPEL1    |
| cg20300246 | 0.15597 | 0.07522 | 0.48675 | 0.40336 | 0.68785 | 0.3782  | 0.53012 | 0.46267 | 0.07972 | 0.07508 | LHX3     |
| cg20300655 | 0.49484 | 0.26751 | 0.84861 | 0.87431 | 0.82966 | 0.8775  | 0.71499 | 0.63777 | 0.84676 | 0.78716 | CATSPER3 |
| cg20301340 | 0.02615 | 0.02852 | 0.02611 | 0.02919 | 0.02359 | 0.02795 | 0.02457 | 0.02066 | 0.0218  | 0.02407 | MGC20255 |
| cg20302307 | 0.04639 | 0.04868 | 0.05124 | 0.05022 | 0.03389 | 0.04022 | 0.04746 | 0.04932 | 0.04151 | 0.03989 | NUMB     |
| cg20303303 | 0.02442 | 0.02131 | 0.02558 | 0.02314 | 0.0212  | 0.02157 | 0.01608 | 0.01808 | 0.0166  | 0.01537 | WDR1     |
| cg20304401 | 0.29563 | 0.25717 | 0.24131 | 0.27689 | 0.07085 | 0.04658 | 0.20509 | 0.14865 | 0.28138 | 0.16726 | PABPC1   |
| cg20305610 | 0.03978 | 0.04299 | 0.04015 | 0.04141 | 0.04118 | 0.03725 | 0.03649 | 0.0372  | 0.03273 | 0.03769 | PDLIM5   |
| cg20305726 | 0.15903 | 0.07962 | 0.11351 | 0.0897  | 0.21489 | 0.12162 | 0.14784 | 0.10306 | 0.12867 | 0.07225 | DEFB126  |
| cg20308511 | 0.05748 | 0.05507 | 0.05868 | 0.05309 | 0.05924 | 0.05126 | 0.42415 | 0.33874 | 0.04915 | 0.03633 | SAT      |
| cg20308679 | 0.90831 | 0.89026 | 0.52232 | 0.77686 | 0.43093 | 0.42637 | 0.45451 | 0.85012 | 0.90317 | 0.8163  | FRZB     |
| cg20308817 | 0.52543 | 0.12542 | 0.90936 | 0.93183 | 0.18341 | 0.06794 | 0.8982  | 0.69355 | 0.69555 | 0.77973 | CLEC11A  |
| cg20311501 | 0.06172 | 0.05148 | 0.0546  | 0.05288 | 0.05321 | 0.05376 | 0.07616 | 0.05773 | 0.0415  | 0.04303 | APC      |
| cg20311730 | 0.12937 | 0.19683 | 0.90512 | 0.92659 | 0.93708 | 0.90768 | 0.07319 | 0.1535  | 0.73602 | 0.39887 | NALP10   |
| cg20312228 | 0.89127 | 0.53016 | 0.86813 | 0.90916 | 0.70105 | 0.60784 | 0.50358 | 0.30414 | 0.66886 | 0.59638 | CCDC37   |
| cg20312475 | 0.06581 | 0.05594 | 0.13238 | 0.19305 | 0.06589 | 0.05725 | 0.06501 | 0.05783 | 0.04982 | 0.04794 | GPRC5B   |
| cg20312687 | 0.08444 | 0.07211 | 0.11952 | 0.11033 | 0.1261  | 0.09424 | 0.06785 | 0.05815 | 0.05163 | 0.05471 | DEFB118  |
| cg20313722 | 0.79579 | 0.26527 | 0.83924 | 0.88999 | 0.83406 | 0.72692 | 0.67753 | 0.13109 | 0.93178 | 0.63918 | FKRP     |
| cg20314325 | 0.03476 | 0.03143 | 0.03514 | 0.03271 | 0.03052 | 0.03291 | 0.02858 | 0.03497 | 0.03124 | 0.02945 | CASC5    |
| cg20314660 | 0.0361  | 0.04008 | 0.03421 | 0.03795 | 0.02967 | 0.03318 | 0.03326 | 0.0359  | 0.03248 | 0.02638 | DDX39    |
| cg20315136 | 0.02784 | 0.02356 | 0.0318  | 0.03321 | 0.03652 | 0.02564 | 0.02569 | 0.02276 | 0.0318  | 0.0254  | RGS2     |
| cg20315643 | 0.05477 | 0.05407 | 0.0596  | 0.05097 | 0.03247 | 0.05456 | 0.0491  | 0.04554 | 0.04965 | 0.03902 | TAF1C    |
| cg20315951 | 0.03222 | 0.03525 | 0.59426 | 0.67381 | 0.13553 | 0.06865 | 0.04234 | 0.03728 | 0.35395 | 0.12064 | OVOL1    |
| cg20317180 | 0.02895 | 0.03063 | 0.03029 | 0.02845 | 0.02667 | 0.02545 | 0.02347 | 0.02157 | 0.0216  | 0.02204 | ZNF524   |
| cg20318748 | 0.12852 | 0.03472 | 0.03958 | 0.03529 | 0.02779 | 0.02999 | 0.16085 | 0.04922 | 0.03203 | 0.03045 | NANP     |
| cg20319264 | 0.03825 | 0.03792 | 0.58116 | 0.69902 | 0.04203 | 0.0364  | 0.04041 | 0.03931 | 0.03445 | 0.03754 | NIPSNAP1 |
| cg20319405 | 0.03104 | 0.03049 | 0.0305  | 0.03069 | 0.02426 | 0.03113 | 0.02731 | 0.02843 | 0.02628 | 0.02553 | EIF4G2   |
| cg20320468 | 0.8497  | 0.84113 | 0.81285 | 0.87621 | 0.81051 | 0.75019 | 0.67582 | 0.59179 | 0.86771 | 0.83536 | LAIR1    |
| cg20322862 | 0.87319 | 0.7364  | 0.80685 | 0.84133 | 0.94429 | 0.91168 | 0.82772 | 0.53599 | 0.53683 | 0.59737 | TGIF     |
| cg20322876 | 0.30183 | 0.50954 | 0.62958 | 0.62543 | 0.04925 | 0.54738 | 0.03255 | 0.03792 | 0.18752 | 0.10683 | FLJ45803 |
| cg20322977 | 0.48571 | 0.46313 | 0.86899 | 0.89194 | 0.91402 | 0.87357 | 0.89082 | 0.85749 | 0.90943 | 0.87574 | CYP26C1  |
| cg20324165 | 0.73446 | 0.63331 | 0.60291 | 0.5086  | 0.84555 | 0.73741 | 0.78867 | 0.73724 | 0.79437 | 0.65922 | KRT8     |
| cg20325517 | 0.05931 | 0.06051 | 0.09418 | 0.07293 | 0.08385 | 0.07413 | 0.07923 | 0.06524 | 0.08826 | 0.07195 | FLJ23518 |
| cg20326853 | 0.04364 | 0.03377 | 0.04535 | 0.0397  | 0.05614 | 0.04199 | 0.03873 | 0.03334 | 0.04342 | 0.0302  | CPSF1    |
| cg20326867 | 0.03092 | 0.03537 | 0.03694 | 0.02984 | 0.02852 | 0.03414 | 0.02888 | 0.02429 | 0.0295  | 0.02566 | STIM2    |
| cg20328328 | 0.03129 | 0.03504 | 0.03152 | 0.03289 | 0.03244 | 0.03688 | 0.03922 | 0.02896 | 0.03071 | 0.04031 | CALM1    |

|            |         |         |         |         |         |         |         |         |         |                  |
|------------|---------|---------|---------|---------|---------|---------|---------|---------|---------|------------------|
| cg20329958 | 0.10877 | 0.12106 | 0.74813 | 0.77919 | 0.61171 | 0.82577 | 0.20791 | 0.57373 | 0.78872 | 0.75185 CRH      |
| cg20330296 | 0.06967 | 0.05965 | 0.07418 | 0.06702 | 0.10764 | 0.10475 | 0.07251 | 0.05644 | 0.05198 | 0.04113 NDUFS7   |
| cg20330472 | 0.37682 | 0.12055 | 0.05198 | 0.04697 | 0.08456 | 0.0475  | 0.03893 | 0.03866 | 0.31722 | 0.43125 EYA4     |
| cg20331177 | 0.81513 | 0.84438 | 0.76649 | 0.77873 | 0.71973 | 0.75928 | 0.28418 | 0.26162 | 0.72886 | 0.70924 KRTAP4-2 |
| cg20333306 | 0.86401 | 0.88131 | 0.79893 | 0.83267 | 0.72059 | 0.80639 | 0.42143 | 0.48912 | 0.86533 | 0.89246 RB1      |
| cg20334738 | 0.87951 | 0.88045 | 0.08926 | 0.07811 | 0.6561  | 0.87864 | 0.227   | 0.88484 | 0.89422 | 0.85978 MAB21L2  |
| cg20337106 | 0.6155  | 0.49377 | 0.81904 | 0.85334 | 0.67768 | 0.7649  | 0.48857 | 0.55465 | 0.52487 | 0.48836 C6orf139 |
| cg20337385 | 0.05671 | 0.06159 | 0.05527 | 0.05746 | 0.08648 | 0.09272 | 0.04116 | 0.03677 | 0.0454  | 0.05383 PNN      |
| cg20339230 | 0.04141 | 0.03467 | 0.48149 | 0.48675 | 0.10183 | 0.04053 | 0.50862 | 0.25143 | 0.06002 | 0.0434 ST8SIA2   |
| cg20339650 | 0.04229 | 0.16914 | 0.15486 | 0.04129 | 0.19012 | 0.31086 | 0.16516 | 0.20055 | 0.18562 | 0.37625 IGF2     |
| cg20340242 | 0.09587 | 0.06144 | 0.85013 | 0.87057 | 0.65359 | 0.39196 | 0.31369 | 0.3613  | 0.61142 | 0.16619 IL1R2    |
| cg20340596 | 0.89892 | 0.82067 | 0.63286 | 0.53638 | 0.92168 | 0.85301 | 0.53722 | 0.08544 | 0.07969 | 0.07323 HPS1     |
| cg20342082 | 0.87872 | 0.68518 | 0.81468 | 0.89094 | 0.93053 | 0.92394 | 0.88627 | 0.92255 | 0.31707 | 0.46873 MPN2     |
| cg20342105 | 0.768   | 0.17899 | 0.85696 | 0.87412 | 0.82481 | 0.67314 | 0.85002 | 0.5148  | 0.88383 | 0.61737 BSCL2    |
| cg20345446 | 0.14581 | 0.06191 | 0.33202 | 0.32731 | 0.07231 | 0.05498 | 0.11947 | 0.07668 | 0.4896  | 0.30898 OSBPL5   |
| cg20345840 | 0.04018 | 0.05155 | 0.04825 | 0.04329 | 0.02848 | 0.04    | 0.04563 | 0.04542 | 0.03952 | 0.03469 SLC2A1   |
| cg20345978 | 0.03206 | 0.02999 | 0.30387 | 0.39733 | 0.3185  | 0.12708 | 0.03541 | 0.02621 | 0.03091 | 0.02649 HMG2     |
| cg20346096 | 0.12067 | 0.11972 | 0.18057 | 0.16004 | 0.20939 | 0.17969 | 0.12462 | 0.09931 | 0.1395  | 0.15584 C18orf22 |
| cg20346122 | 0.03866 | 0.03814 | 0.04528 | 0.0379  | 0.02932 | 0.03433 | 0.03423 | 0.03006 | 0.03268 | 0.0309 IFT122    |
| cg20346726 | 0.35301 | 0.33865 | 0.0948  | 0.0648  | 0.22274 | 0.06992 | 0.05062 | 0.05387 | 0.05517 | 0.04658 MGC13040 |
| cg20347268 | 0.04054 | 0.0453  | 0.04594 | 0.03892 | 0.03971 | 0.04075 | 0.03642 | 0.03951 | 0.92163 | 0.91095 TP53I3   |
| cg20349377 | 0.68997 | 0.72846 | 0.60053 | 0.71983 | 0.63415 | 0.63998 | 0.65702 | 0.73326 | 0.6553  | 0.67508 KLHL1    |
| cg20349625 | 0.77301 | 0.7864  | 0.81013 | 0.85283 | 0.69005 | 0.76033 | 0.71618 | 0.71246 | 0.86333 | 0.80799 PLCG2    |
| cg20349695 | 0.03014 | 0.03402 | 0.02993 | 0.02576 | 0.01872 | 0.03251 | 0.03225 | 0.02763 | 0.03031 | 0.02534 FUT10    |
| cg20352371 | 0.7619  | 0.06468 | 0.52567 | 0.56882 | 0.69178 | 0.83901 | 0.57751 | 0.50311 | 0.37895 | 0.50407 PDZRN4   |
| cg20352798 | 0.2607  | 0.27427 | 0.75241 | 0.90736 | 0.19634 | 0.64322 | 0.0453  | 0.04229 | 0.05317 | 0.03608 ZP3      |
| cg20353465 | 0.20493 | 0.06495 | 0.61583 | 0.73635 | 0.8692  | 0.68291 | 0.05525 | 0.05268 | 0.04848 | 0.04064 ABHD1    |
| cg20354892 | 0.2967  | 0.54714 | 0.03142 | 0.03047 | 0.02883 | 0.03101 | 0.02537 | 0.02988 | 0.02364 | 0.02368 MGC33648 |
| cg20356482 | 0.90628 | 0.76263 | 0.88974 | 0.90801 | 0.90864 | 0.87218 | 0.90922 | 0.89143 | 0.70453 | 0.66398 FBP2     |
| cg20357628 | 0.06082 | 0.06422 | 0.39611 | 0.53349 | 0.88135 | 0.8821  | 0.07194 | 0.06158 | 0.04661 | 0.04008 PHACTR3  |
| cg20357806 | 0.734   | 0.7332  | 0.83813 | 0.86289 | 0.82554 | 0.83629 | 0.78362 | 0.62604 | 0.82268 | 0.56493 PPBP     |
| cg20358834 | 0.03197 | 0.03279 | 0.03169 | 0.02995 | 0.03087 | 0.02853 | 0.0292  | 0.0315  | 0.02677 | 0.02505 LRFN4    |
| cg20359349 | 0.84912 | 0.61034 | 0.84024 | 0.90714 | 0.92053 | 0.91572 | 0.6455  | 0.81245 | 0.4359  | 0.38719 2-Apr    |
| cg20360244 | 0.02737 | 0.02527 | 0.02986 | 0.03611 | 0.03666 | 0.03987 | 0.02498 | 0.02023 | 0.02349 | 0.03009 SLC35E3  |
| cg20361540 | 0.04169 | 0.04294 | 0.05556 | 0.05694 | 0.05818 | 0.05331 | 0.05476 | 0.05188 | 0.04879 | 0.05015 VPS37B   |
| cg20362772 | 0.02834 | 0.02741 | 0.02901 | 0.02523 | 0.019   | 0.02245 | 0.01899 | 0.02316 | 0.02123 | 0.02011 PDLIM1   |
| cg20366831 | 0.77646 | 0.57873 | 0.61784 | 0.74157 | 0.73284 | 0.32276 | 0.85768 | 0.86612 | 0.91853 | 0.83664 APBA3    |
| cg20366832 | 0.45063 | 0.21209 | 0.58942 | 0.61504 | 0.80966 | 0.79962 | 0.80659 | 0.67617 | 0.65198 | 0.60611 LLLGL2   |
| cg20366906 | 0.32639 | 0.35382 | 0.86201 | 0.89785 | 0.87591 | 0.77002 | 0.34783 | 0.29405 | 0.13028 | 0.02858 PCDH8    |
| cg20367072 | 0.02983 | 0.03122 | 0.58231 | 0.48757 | 0.02856 | 0.03233 | 0.02394 | 0.02629 | 0.02193 | 0.02301 ETFB     |
| cg20367961 | 0.89085 | 0.67853 | 0.89233 | 0.9103  | 0.91945 | 0.84283 | 0.87457 | 0.72004 | 0.88954 | 0.85518 EDN2     |



|            |         |         |         |         |         |         |         |         |         |                  |
|------------|---------|---------|---------|---------|---------|---------|---------|---------|---------|------------------|
| cg20368904 | 0.8633  | 0.24229 | 0.95838 | 0.9482  | 0.95847 | 0.95682 | 0.95066 | 0.95155 | 0.96297 | 0.9519 TNFAIP2   |
| cg20368979 | 0.0488  | 0.05419 | 0.05534 | 0.05139 | 0.03742 | 0.04655 | 0.05145 | 0.04578 | 0.04353 | 0.0449 FLJ38991  |
| cg20369763 | 0.04414 | 0.04345 | 0.05612 | 0.04948 | 0.04001 | 0.05371 | 0.04069 | 0.04266 | 0.04359 | 0.03996 FNDC4    |
| cg20370277 | 0.10738 | 0.09981 | 0.16336 | 0.19813 | 0.20828 | 0.17219 | 0.11702 | 0.07791 | 0.11835 | 0.11602 NCKIPSD  |
| cg20371650 | 0.14013 | 0.11341 | 0.08808 | 0.086   | 0.14198 | 0.09966 | 0.16099 | 0.07922 | 0.10012 | 0.08889 PRAF2    |
| cg20371891 | 0.03915 | 0.03981 | 0.03861 | 0.04005 | 0.15523 | 0.04177 | 0.08495 | 0.41074 | 0.03559 | 0.02805 RAB20    |
| cg20372689 | 0.12174 | 0.109   | 0.13802 | 0.12169 | 0.16471 | 0.11574 | 0.11671 | 0.12193 | 0.10206 | 0.11125 RCN2     |
| cg20373326 | 0.66459 | 0.09329 | 0.04973 | 0.04544 | 0.0714  | 0.06951 | 0.07154 | 0.05266 | 0.48543 | 0.03949 HSD17B2  |
| cg20375554 | 0.04402 | 0.04906 | 0.04897 | 0.05086 | 0.03388 | 0.08012 | 0.06256 | 0.04331 | 0.03558 | 0.03979 ARHGEF2  |
| cg20375690 | 0.03607 | 0.03545 | 0.0418  | 0.03992 | 0.0326  | 0.03476 | 0.03138 | 0.02463 | 0.03265 | 0.03263 C1orf126 |
| cg20376767 | 0.89523 | 0.86927 | 0.89461 | 0.89748 | 0.90377 | 0.73828 | 0.89239 | 0.87905 | 0.8879  | 0.85814 CGB1     |
| cg20376899 | 0.08051 | 0.07964 | 0.11544 | 0.09803 | 0.05489 | 0.06577 | 0.05792 | 0.06475 | 0.04882 | 0.05591 EDN1     |
| cg20377673 | 0.0229  | 0.02471 | 0.09526 | 0.08801 | 0.02603 | 0.02364 | 0.03382 | 0.02326 | 0.04863 | 0.01874 MIF      |
| cg20377677 | 0.06425 | 0.07175 | 0.07706 | 0.07277 | 0.05668 | 0.06876 | 0.07121 | 0.07974 | 0.06699 | 0.05707 ZNF496   |
| cg20377762 | 0.8257  | 0.39136 | 0.8883  | 0.89329 | 0.85591 | 0.86475 | 0.61369 | 0.89994 | 0.76062 | 0.88503 TMEM61   |
| cg20377955 | 0.11593 | 0.08814 | 0.50486 | 0.50562 | 0.78487 | 0.54282 | 0.24613 | 0.40462 | 0.83342 | 0.82597 SP8      |
| cg20379012 | 0.02964 | 0.03134 | 0.06093 | 0.03898 | 0.05259 | 0.03814 | 0.0259  | 0.02755 | 0.0303  | 0.02916 C8orf36  |
| cg20379125 | 0.03085 | 0.03083 | 0.0419  | 0.03496 | 0.03542 | 0.02413 | 0.02094 | 0.02533 | 0.02458 | 0.02499 NOV      |
| cg20380069 | 0.03557 | 0.03466 | 0.04616 | 0.05301 | 0.04432 | 0.0346  | 0.03293 | 0.04072 | 0.03246 | 0.0326 MSI1      |
| cg20383064 | 0.80389 | 0.094   | 0.83222 | 0.79958 | 0.7705  | 0.84148 | 0.85568 | 0.88834 | 0.09102 | 0.13209 BFSP2    |
| cg20385229 | 0.41476 | 0.09086 | 0.21764 | 0.19286 | 0.18272 | 0.11574 | 0.4566  | 0.12153 | 0.66859 | 0.41241 ALKBH    |
| cg20387341 | 0.07567 | 0.06382 | 0.59077 | 0.65243 | 0.08439 | 0.07755 | 0.10069 | 0.20171 | 0.14042 | 0.08064 FGF10    |
| cg20387706 | 0.83826 | 0.6134  | 0.89726 | 0.89128 | 0.89378 | 0.82759 | 0.77094 | 0.81934 | 0.82018 | 0.74171 FLJ42986 |
| cg20389709 | 0.10075 | 0.04594 | 0.26308 | 0.29178 | 0.03716 | 0.03163 | 0.27174 | 0.30943 | 0.02877 | 0.03214 KLF11    |
| cg20391984 | 0.15279 | 0.03364 | 0.03558 | 0.02871 | 0.03642 | 0.03493 | 0.02491 | 0.02672 | 0.02131 | 0.02711 CAMK2D   |
| cg20392764 | 0.78626 | 0.42057 | 0.90886 | 0.93423 | 0.94321 | 0.91998 | 0.61338 | 0.81994 | 0.51761 | 0.81325 ASCL2    |
| cg20394284 | 0.86425 | 0.16801 | 0.84449 | 0.88322 | 0.67445 | 0.10473 | 0.40689 | 0.07085 | 0.92166 | 0.04039 JAK2     |
| cg20395072 | 0.9395  | 0.17538 | 0.12505 | 0.14644 | 0.09402 | 0.1009  | 0.09646 | 0.11907 | 0.11256 | 0.10322 GNPAT1   |
| cg20395128 | 0.73877 | 0.73794 | 0.72851 | 0.75122 | 0.63516 | 0.74949 | 0.47017 | 0.53531 | 0.77921 | 0.78601 FLJ10374 |
| cg20395892 | 0.88819 | 0.89771 | 0.43302 | 0.48641 | 0.87267 | 0.67213 | 0.27972 | 0.5165  | 0.568   | 0.31419 IRAK3    |
| cg20395940 | 0.06743 | 0.07577 | 0.08221 | 0.07319 | 0.04574 | 0.05808 | 0.06753 | 0.06501 | 0.06029 | 0.06158 ARV1     |
| cg20398120 | 0.90942 | 0.75233 | 0.9323  | 0.93024 | 0.94752 | 0.931   | 0.54864 | 0.8608  | 0.94165 | 0.89662 PRKAG3   |
| cg20398399 | 0.80052 | 0.29529 | 0.74857 | 0.83317 | 0.7213  | 0.67471 | 0.37379 | 0.44276 | 0.83051 | 0.64877 KLHL6    |
| cg20399252 | 0.92788 | 0.90804 | 0.88166 | 0.89003 | 0.47988 | 0.46355 | 0.52776 | 0.70256 | 0.93431 | 0.92504 EBPL     |
| cg20401181 | 0.03961 | 0.04474 | 0.06448 | 0.04157 | 0.04198 | 0.05107 | 0.03671 | 0.03218 | 0.04116 | 0.04063 SLC30A7  |
| cg20401549 | 0.36826 | 0.40297 | 0.41122 | 0.3271  | 0.04955 | 0.05369 | 0.32    | 0.36284 | 0.35884 | 0.34173 PRKY     |
| cg20401945 | 0.73612 | 0.54927 | 0.03329 | 0.03282 | 0.12817 | 0.0324  | 0.65917 | 0.57341 | 0.86259 | 0.55357 ASPHD1   |
| cg20402382 | 0.0825  | 0.08126 | 0.0884  | 0.08568 | 0.18454 | 0.11455 | 0.07372 | 0.06172 | 0.07212 | 0.07479 APEH     |
| cg20404387 | 0.04695 | 0.03556 | 0.1733  | 0.13225 | 0.24314 | 0.4887  | 0.21193 | 0.62708 | 0.12612 | 0.33687 FAM43B   |
| cg20406374 | 0.04798 | 0.04899 | 0.04838 | 0.04897 | 0.03304 | 0.05619 | 0.06307 | 0.06383 | 0.05539 | 0.04343 SQSTM1   |
| cg20406482 | 0.40489 | 0.69445 | 0.90512 | 0.9198  | 0.6897  | 0.658   | 0.12292 | 0.05256 | 0.04351 | 0.04625 KCNH4    |

|            |         |         |         |         |         |         |         |         |         |                   |
|------------|---------|---------|---------|---------|---------|---------|---------|---------|---------|-------------------|
| cg20406878 | 0.6134  | 0.55029 | 0.41946 | 0.372   | 0.26692 | 0.33261 | 0.39731 | 0.52783 | 0.72299 | 0.6028 NR5A2      |
| cg20411654 | 0.0316  | 0.0324  | 0.03769 | 0.03455 | 0.03449 | 0.03906 | 0.03347 | 0.03143 | 0.02668 | 0.02531 CLPB      |
| cg20414506 | 0.86726 | 0.82917 | 0.85899 | 0.89257 | 0.78834 | 0.84065 | 0.84041 | 0.85877 | 0.889   | 0.85399 CAMSAP1   |
| cg20415809 | 0.08793 | 0.06262 | 0.082   | 0.06754 | 0.08023 | 0.09124 | 0.06772 | 0.07753 | 0.08186 | 0.07945 ITGA4     |
| cg20416179 | 0.84073 | 0.49879 | 0.84    | 0.86478 | 0.90469 | 0.90341 | 0.74714 | 0.80419 | 0.42105 | 0.13734 C6orf71   |
| cg20416767 | 0.11411 | 0.05792 | 0.0793  | 0.10806 | 0.04286 | 0.04382 | 0.31719 | 0.05846 | 0.0313  | 0.02918 TCEAL8    |
| cg20419410 | 0.04456 | 0.0241  | 0.03254 | 0.02664 | 0.02006 | 0.02213 | 0.01967 | 0.01971 | 0.02122 | 0.01742 INSIG1    |
| cg20420254 | 0.02191 | 0.02249 | 0.02347 | 0.02209 | 0.01766 | 0.02803 | 0.01912 | 0.02092 | 0.01591 | 0.01846 SMPD1     |
| cg20420433 | 0.06794 | 0.04796 | 0.67496 | 0.70437 | 0.768   | 0.86556 | 0.0383  | 0.04895 | 0.05676 | 0.03316 HLXB9     |
| cg20422318 | 0.30025 | 0.40363 | 0.30124 | 0.34866 | 0.35282 | 0.36519 | 0.27949 | 0.32692 | 0.38542 | 0.28554 CRSP8     |
| cg20423977 | 0.85619 | 0.84167 | 0.78094 | 0.80049 | 0.75834 | 0.7842  | 0.19545 | 0.29808 | 0.85437 | 0.84132 PLAC4     |
| cg20424530 | 0.04506 | 0.05217 | 0.07412 | 0.06301 | 0.08345 | 0.0727  | 0.07304 | 0.05753 | 0.05106 | 0.05865 IRAK4     |
| cg20425130 | 0.91506 | 0.81043 | 0.90852 | 0.90535 | 0.92847 | 0.91877 | 0.88821 | 0.9139  | 0.92627 | 0.91388 KLHL6     |
| cg20425293 | 0.09016 | 0.07628 | 0.0844  | 0.08055 | 0.08885 | 0.08995 | 0.07346 | 0.07402 | 0.06883 | 0.07517 MRPL42    |
| cg20426860 | 0.21945 | 0.20524 | 0.24901 | 0.20173 | 0.19815 | 0.10433 | 0.18745 | 0.17099 | 0.15334 | 0.14587 FLJ20422  |
| cg20427865 | 0.13782 | 0.12627 | 0.74621 | 0.84957 | 0.87755 | 0.21759 | 0.12112 | 0.07469 | 0.14043 | 0.06993 CX3CL1    |
| cg20427879 | 0.09134 | 0.08627 | 0.13876 | 0.09221 | 0.13883 | 0.07344 | 0.0893  | 0.07988 | 0.08317 | 0.06806 EML2      |
| cg20429911 | 0.0586  | 0.06002 | 0.0628  | 0.06229 | 0.05761 | 0.06189 | 0.06193 | 0.06388 | 0.06057 | 0.06247 LDHA      |
| cg20430063 | 0.04351 | 0.04157 | 0.04421 | 0.04119 | 0.03273 | 0.04035 | 0.03477 | 0.03639 | 0.03752 | 0.03544 MSRB3     |
| cg20430101 | 0.64227 | 0.23864 | 0.72808 | 0.77243 | 0.65614 | 0.50888 | 0.52988 | 0.35042 | 0.77495 | 0.72845 RBM10     |
| cg20430816 | 0.56065 | 0.58839 | 0.04075 | 0.03804 | 0.04258 | 0.03775 | 0.0307  | 0.03609 | 0.03496 | 0.03121 GENX-3414 |
| cg20433014 | 0.02899 | 0.02818 | 0.0239  | 0.02239 | 0.04289 | 0.02007 | 0.02953 | 0.03107 | 0.02107 | 0.01788 CYP1A1    |
| cg20434811 | 0.04862 | 0.04901 | 0.11111 | 0.26221 | 0.03438 | 0.04715 | 0.04517 | 0.04421 | 0.03934 | 0.03822 MGC39662  |
| cg20436912 | 0.50102 | 0.41149 | 0.848   | 0.86305 | 0.77288 | 0.74895 | 0.0933  | 0.04065 | 0.59328 | 0.5161 SEC14L4    |
| cg20437604 | 0.62499 | 0.41644 | 0.66955 | 0.68904 | 0.91248 | 0.86355 | 0.65973 | 0.40873 | 0.70926 | 0.26001 ANXA9     |
| cg20439022 | 0.93844 | 0.93731 | 0.96681 | 0.96403 | 0.97774 | 0.96475 | 0.91367 | 0.87532 | 0.97402 | 0.96786 SLC16A8   |
| cg20441175 | 0.04056 | 0.04679 | 0.0476  | 0.04609 | 0.04306 | 0.0418  | 0.03389 | 0.03992 | 0.04048 | 0.03277 DNAJC9    |
| cg20442697 | 0.05961 | 0.06514 | 0.0953  | 0.07547 | 0.47392 | 0.43756 | 0.06447 | 0.0576  | 0.5326  | 0.40638 LRRC17    |
| cg20442709 | 0.06184 | 0.06345 | 0.09235 | 0.07536 | 0.08052 | 0.08048 | 0.08581 | 0.08038 | 0.07155 | 0.07564 C1orf9    |
| cg20443314 | 0.10012 | 0.07755 | 0.12    | 0.10475 | 0.16793 | 0.10897 | 0.13312 | 0.15202 | 0.13542 | 0.09014 VPS25     |
| cg20444256 | 0.6924  | 0.70838 | 0.4891  | 0.64349 | 0.37705 | 0.5299  | 0.29102 | 0.38062 | 0.28055 | 0.14277 CKM       |
| cg20447773 | 0.02102 | 0.0229  | 0.01894 | 0.01753 | 0.02049 | 0.02447 | 0.02187 | 0.02278 | 0.01843 | 0.01814 FLJ23342  |
| cg20449692 | 0.03626 | 0.01579 | 0.01816 | 0.01618 | 0.54512 | 0.84879 | 0.9869  | 0.98587 | 0.98725 | 0.98733 CLDN11    |
| cg20449833 | 0.02868 | 0.02944 | 0.03418 | 0.03045 | 0.02014 | 0.0257  | 0.02075 | 0.02065 | 0.02364 | 0.02021 RHOQ      |
| cg20450764 | 0.63512 | 0.12884 | 0.33981 | 0.20016 | 0.463   | 0.09527 | 0.18426 | 0.08489 | 0.46826 | 0.30459 TSPAN7    |
| cg20451369 | 0.05547 | 0.03735 | 0.05182 | 0.04886 | 0.12082 | 0.03139 | 0.03388 | 0.09532 | 0.04198 | 0.03095 C10orf57  |
| cg20451680 | 0.07149 | 0.03416 | 0.02966 | 0.03757 | 0.03002 | 0.03253 | 0.04804 | 0.04587 | 0.02669 | 0.02129 ESM1      |
| cg20451718 | 0.05711 | 0.06429 | 0.06978 | 0.06142 | 0.06499 | 0.05538 | 0.0512  | 0.05324 | 0.04643 | 0.04727 C21orf67  |
| cg20451802 | 0.05275 | 0.05527 | 0.07813 | 0.07131 | 0.06488 | 0.06991 | 0.04965 | 0.05608 | 0.04672 | 0.0467 SEC8L1     |
| cg20452583 | 0.03655 | 0.0398  | 0.03754 | 0.04042 | 0.03393 | 0.03402 | 0.03629 | 0.03392 | 0.03084 | 0.03197 C16orf51  |
| cg20456055 | 0.0384  | 0.03607 | 0.04303 | 0.04662 | 0.03775 | 0.04228 | 0.03161 | 0.03698 | 0.03447 | 0.03123 ABCB8     |

|            |         |         |         |         |         |         |         |         |         |         |             |
|------------|---------|---------|---------|---------|---------|---------|---------|---------|---------|---------|-------------|
| cg20458981 | 0.06527 | 0.07886 | 0.06618 | 0.07149 | 0.06361 | 0.08238 | 0.04923 | 0.05206 | 0.04706 | 0.04611 | NARG1L      |
| cg20461541 | 0.03439 | 0.04251 | 0.0437  | 0.04268 | 0.04117 | 0.04547 | 0.03975 | 0.03842 | 0.03316 | 0.03376 | PRKRIR      |
| cg20466045 | 0.05493 | 0.05184 | 0.06051 | 0.05245 | 0.03504 | 0.04972 | 0.05186 | 0.05836 | 0.04796 | 0.04642 | CCT8        |
| cg20466180 | 0.20894 | 0.17725 | 0.33966 | 0.26321 | 0.22222 | 0.14216 | 0.16495 | 0.14109 | 0.17247 | 0.17969 | SCHIP1      |
| cg20468883 | 0.38877 | 0.25569 | 0.21258 | 0.40215 | 0.71836 | 0.64254 | 0.57195 | 0.40454 | 0.41213 | 0.15592 | BNIP2       |
| cg20469837 | 0.55445 | 0.47192 | 0.43412 | 0.54936 | 0.15748 | 0.16742 | 0.35032 | 0.16087 | 0.41807 | 0.39904 | GALNT5      |
| cg20470275 | 0.03049 | 0.03124 | 0.03384 | 0.02504 | 0.01962 | 0.02457 | 0.02564 | 0.02584 | 0.02263 | 0.02221 | SNX24       |
| cg20472189 | 0.57352 | 0.53961 | 0.63994 | 0.72928 | 0.68473 | 0.57571 | 0.3819  | 0.47643 | 0.37591 | 0.38456 | VENTX       |
| cg20472433 | 0.04152 | 0.04499 | 0.04557 | 0.03756 | 0.0318  | 0.04002 | 0.03454 | 0.02956 | 0.03318 | 0.03572 | TKT         |
| cg20473453 | 0.73    | 0.50095 | 0.7574  | 0.81344 | 0.55594 | 0.76577 | 0.3018  | 0.24228 | 0.55651 | 0.21415 | TMEM27      |
| cg20476877 | 0.03089 | 0.03874 | 0.0398  | 0.03621 | 0.02926 | 0.02846 | 0.03339 | 0.033   | 0.03148 | 0.02495 | NIFUN       |
| cg20477070 | 0.05647 | 0.05994 | 0.07034 | 0.06407 | 0.07029 | 0.05739 | 0.05674 | 0.06345 | 0.06741 | 0.0479  | ARG2        |
| cg20477318 | 0.06982 | 0.0683  | 0.07214 | 0.06605 | 0.08099 | 0.07086 | 0.08668 | 0.07679 | 0.06107 | 0.06091 | TIMM23      |
| cg20478514 | 0.02169 | 0.02684 | 0.02686 | 0.02413 | 0.02564 | 0.0256  | 0.02869 | 0.02939 | 0.02788 | 0.02367 | SCCPDH      |
| cg20481343 | 0.06333 | 0.04326 | 0.04782 | 0.07352 | 0.04749 | 0.03918 | 0.04186 | 0.05085 | 0.07544 | 0.03948 | MAP7        |
| cg20482071 | 0.03732 | 0.02203 | 0.01986 | 0.01972 | 0.01692 | 0.01917 | 0.01827 | 0.01808 | 0.01498 | 0.01492 | HEXB        |
| cg20482364 | 0.0402  | 0.03881 | 0.05804 | 0.04855 | 0.05047 | 0.04592 | 0.04332 | 0.04431 | 0.05478 | 0.03632 | NACA        |
| cg20483016 | 0.1026  | 0.09885 | 0.10832 | 0.09221 | 0.12721 | 0.10981 | 0.07782 | 0.08327 | 0.1     | 0.09539 | TTC5        |
| cg20483374 | 0.64659 | 0.07579 | 0.59261 | 0.6964  | 0.94036 | 0.60221 | 0.92354 | 0.52426 | 0.30232 | 0.17485 | C1QTNF5     |
| cg20483763 | 0.9744  | 0.56385 | 0.977   | 0.98235 | 0.9838  | 0.98196 | 0.96515 | 0.908   | 0.98408 | 0.98237 | CABP4       |
| cg20484002 | 0.76465 | 0.73984 | 0.69697 | 0.73352 | 0.60548 | 0.5637  | 0.32103 | 0.30236 | 0.61886 | 0.56223 | KRT25D      |
| cg20484306 | 0.02129 | 0.02309 | 0.02169 | 0.02189 | 0.0158  | 0.01835 | 0.02039 | 0.0187  | 0.01853 | 0.01904 | MAP2K1      |
| cg20484352 | 0.85954 | 0.83385 | 0.16202 | 0.27411 | 0.05243 | 0.04507 | 0.16373 | 0.15424 | 0.14279 | 0.0423  | LOC92689    |
| cg20485165 | 0.14072 | 0.04746 | 0.32003 | 0.45313 | 0.54648 | 0.56128 | 0.05082 | 0.06793 | 0.04701 | 0.03347 | WFDC12      |
| cg20488657 | 0.59443 | 0.129   | 0.60572 | 0.79214 | 0.75159 | 0.62612 | 0.05388 | 0.05845 | 0.27787 | 0.19759 | TFF3        |
| cg20491707 | 0.0822  | 0.04651 | 0.71179 | 0.83552 | 0.94938 | 0.92669 | 0.69332 | 0.57762 | 0.08945 | 0.04854 | PPYR1       |
| cg20492121 | 0.02327 | 0.0237  | 0.0294  | 0.02816 | 0.07611 | 0.02824 | 0.02134 | 0.02076 | 0.03683 | 0.01967 | GLUL        |
| cg20492401 | 0.0448  | 0.04229 | 0.05447 | 0.03939 | 0.04188 | 0.0464  | 0.03546 | 0.0381  | 0.0341  | 0.04468 | KIAA0195    |
| cg20492869 | 0.06291 | 0.0615  | 0.06454 | 0.05607 | 0.04513 | 0.05733 | 0.06144 | 0.06074 | 0.05479 | 0.05756 | TAF1A       |
| cg20492912 | 0.55558 | 0.75581 | 0.91987 | 0.93191 | 0.53393 | 0.35214 | 0.58387 | 0.78243 | 0.52677 | 0.46684 | UBE4A       |
| cg20492933 | 0.13167 | 0.11067 | 0.14253 | 0.10164 | 0.14575 | 0.10794 | 0.13721 | 0.11751 | 0.10818 | 0.12278 | MRPL22      |
| cg20495040 | 0.09138 | 0.11004 | 0.21625 | 0.21551 | 0.15784 | 0.11986 | 0.09368 | 0.07585 | 0.22689 | 0.12168 | RAG1AP1     |
| cg20496643 | 0.02375 | 0.02756 | 0.0386  | 0.02646 | 0.03797 | 0.02152 | 0.02295 | 0.0219  | 0.01794 | 0.02089 | RASL10B     |
| cg20497627 | 0.03134 | 0.02838 | 0.03633 | 0.02914 | 0.03122 | 0.02837 | 0.02641 | 0.02739 | 0.02727 | 0.0268  | MTIF2       |
| cg20498685 | 0.04739 | 0.03868 | 0.03842 | 0.0378  | 0.03955 | 0.03699 | 0.04121 | 0.03986 | 0.03633 | 0.03374 | TWIST1      |
| cg20500081 | 0.86651 | 0.85313 | 0.86744 | 0.8899  | 0.39078 | 0.28691 | 0.89933 | 0.8279  | 0.57405 | 0.46166 | LRCH4       |
| cg20500126 | 0.90367 | 0.87664 | 0.88636 | 0.90162 | 0.84985 | 0.86031 | 0.85938 | 0.83787 | 0.90671 | 0.87798 | ITGAE       |
| cg20503117 | 0.04748 | 0.04572 | 0.04879 | 0.0471  | 0.03827 | 0.04733 | 0.04411 | 0.04869 | 0.04008 | 0.04605 | ARL8B       |
| cg20503329 | 0.85673 | 0.6341  | 0.87076 | 0.88212 | 0.88685 | 0.87226 | 0.63021 | 0.83114 | 0.90162 | 0.82667 | COL15A1     |
| cg20504202 | 0.08206 | 0.0504  | 0.06442 | 0.05325 | 0.13695 | 0.0483  | 0.48938 | 0.51278 | 0.05217 | 0.04599 | RP1-112K5.2 |
| cg20506766 | 0.04663 | 0.04906 | 0.04172 | 0.04685 | 0.03315 | 0.04167 | 0.03608 | 0.03704 | 0.03745 | 0.0375  | MFN1        |

|            |         |         |         |         |         |         |         |         |         |                   |
|------------|---------|---------|---------|---------|---------|---------|---------|---------|---------|-------------------|
| cg20506783 | 0.06061 | 0.04818 | 0.22701 | 0.35007 | 0.04669 | 0.08257 | 0.04942 | 0.04846 | 0.04316 | 0.03438 ARHGAP22  |
| cg20507276 | 0.62932 | 0.61552 | 0.58529 | 0.61683 | 0.40379 | 0.4219  | 0.03849 | 0.03886 | 0.16909 | 0.05799 OR2L13    |
| cg20509080 | 0.07757 | 0.24427 | 0.03445 | 0.03098 | 0.03108 | 0.02931 | 0.03111 | 0.03486 | 0.02897 | 0.03326 ARHGEF3   |
| cg20512303 | 0.91285 | 0.63992 | 0.35382 | 0.37688 | 0.90715 | 0.84774 | 0.5307  | 0.59069 | 0.60187 | 0.51612 PDLIM4    |
| cg20513206 | 0.42709 | 0.13862 | 0.31476 | 0.49778 | 0.14574 | 0.13352 | 0.50281 | 0.1647  | 0.36625 | 0.13135 FLJ36888  |
| cg20514061 | 0.0476  | 0.05047 | 0.07429 | 0.07751 | 0.22372 | 0.17745 | 0.51666 | 0.53278 | 0.05702 | 0.04713 MID2      |
| cg20514617 | 0.29312 | 0.29771 | 0.31361 | 0.41791 | 0.45295 | 0.26559 | 0.16481 | 0.1492  | 0.11803 | 0.15331 PCDHA9    |
| cg20516209 | 0.9068  | 0.8998  | 0.13209 | 0.08325 | 0.04087 | 0.04671 | 0.76185 | 0.07708 | 0.88337 | 0.84707 EMILIN1   |
| cg20518716 | 0.04714 | 0.04282 | 0.05352 | 0.04494 | 0.04148 | 0.03802 | 0.04888 | 0.04537 | 0.0429  | 0.03813 EEF1G     |
| cg20519035 | 0.93444 | 0.79098 | 0.92875 | 0.94508 | 0.95268 | 0.94628 | 0.90347 | 0.92263 | 0.93918 | 0.94126 FLJ46072  |
| cg20520365 | 0.93148 | 0.91219 | 0.93563 | 0.94339 | 0.95005 | 0.91801 | 0.93515 | 0.902   | 0.84446 | 0.92025 C20orf144 |
| cg20520725 | 0.10426 | 0.08552 | 0.10503 | 0.0807  | 0.19949 | 0.12401 | 0.10066 | 0.07528 | 0.76402 | 0.58159 HIST1H2AE |
| cg20520888 | 0.12167 | 0.08674 | 0.42775 | 0.61102 | 0.64656 | 0.68701 | 0.15344 | 0.16398 | 0.28851 | 0.16269 SPATC1    |
| cg20523861 | 0.56267 | 0.47328 | 0.77982 | 0.85357 | 0.84009 | 0.8394  | 0.44743 | 0.60174 | 0.67411 | 0.84194 KLHL1     |
| cg20524216 | 0.02297 | 0.02931 | 0.02765 | 0.02547 | 0.01847 | 0.02095 | 0.02342 | 0.02431 | 0.01977 | 0.01864 TMEM103   |
| cg20525378 | 0.15839 | 0.15789 | 0.2404  | 0.16955 | 0.23221 | 0.19824 | 0.18558 | 0.20078 | 0.2065  | 0.19329 C1orf9    |
| cg20525549 | 0.04886 | 0.03929 | 0.08568 | 0.07002 | 0.0435  | 0.04172 | 0.05075 | 0.04757 | 0.03596 | 0.03867 CRLF3     |
| cg20526800 | 0.49954 | 0.28784 | 0.74785 | 0.75358 | 0.55015 | 0.79832 | 0.26523 | 0.21299 | 0.42219 | 0.48185 C20orf128 |
| cg20530056 | 0.89803 | 0.86766 | 0.1377  | 0.41325 | 0.87817 | 0.29373 | 0.03616 | 0.16999 | 0.28909 | 0.03421 IKBKE     |
| cg20530223 | 0.06419 | 0.05992 | 0.04835 | 0.04567 | 0.0674  | 0.04848 | 0.04274 | 0.04132 | 0.05152 | 0.0443 KLHL5      |
| cg20530314 | 0.08288 | 0.07296 | 0.10087 | 0.068   | 0.20343 | 0.06423 | 0.0867  | 0.07406 | 0.07423 | 0.08078 AGTR1     |
| cg20535085 | 0.85581 | 0.83969 | 0.73962 | 0.83792 | 0.61493 | 0.3342  | 0.07911 | 0.06548 | 0.42698 | 0.34052 SLAMF1    |
| cg20535781 | 0.83357 | 0.84665 | 0.8106  | 0.82206 | 0.54243 | 0.53958 | 0.77708 | 0.81585 | 0.83864 | 0.7991 CHFR       |
| cg20536369 | 0.04602 | 0.04704 | 0.04668 | 0.04706 | 0.04365 | 0.04541 | 0.03996 | 0.04027 | 0.03795 | 0.03831 TIMM13    |
| cg20537325 | 0.83228 | 0.85545 | 0.75525 | 0.69747 | 0.82754 | 0.82368 | 0.73396 | 0.84738 | 0.85808 | 0.84497 MGMT      |
| cg20537629 | 0.75111 | 0.54176 | 0.83679 | 0.84663 | 0.09814 | 0.3622  | 0.23549 | 0.53079 | 0.54016 | 0.43247 MAGI2     |
| cg20537992 | 0.1484  | 0.07062 | 0.25439 | 0.19089 | 0.08439 | 0.04977 | 0.06189 | 0.05989 | 0.50164 | 0.38931 CDCA5     |
| cg20538819 | 0.03257 | 0.03338 | 0.03506 | 0.03428 | 0.02472 | 0.0304  | 0.03164 | 0.02753 | 0.03036 | 0.02738 PTPN14    |
| cg20540428 | 0.77983 | 0.58077 | 0.33634 | 0.33787 | 0.0967  | 0.03821 | 0.25692 | 0.06883 | 0.36553 | 0.28229 PPP4R2    |
| cg20540913 | 0.02465 | 0.02498 | 0.03858 | 0.03032 | 0.0317  | 0.02278 | 0.56545 | 0.53275 | 0.02205 | 0.01927 EDA       |
| cg20541456 | 0.74943 | 0.23909 | 0.39629 | 0.66117 | 0.38726 | 0.43049 | 0.42319 | 0.32907 | 0.05747 | 0.03866 CYFIP2    |
| cg20542190 | 0.23018 | 0.09896 | 0.11463 | 0.20193 | 0.06589 | 0.0742  | 0.04907 | 0.04809 | 0.04496 | 0.04459 LILRA4    |
| cg20542800 | 0.89768 | 0.62077 | 0.85681 | 0.90022 | 0.87331 | 0.88299 | 0.8474  | 0.6072  | 0.43748 | 0.3604 LTB4R      |
| cg20543416 | 0.04947 | 0.04929 | 0.08055 | 0.05149 | 0.29835 | 0.03856 | 0.08163 | 0.04986 | 0.03782 | 0.03765 MMP25     |
| cg20543571 | 0.89027 | 0.85848 | 0.8031  | 0.90361 | 0.8361  | 0.91487 | 0.41864 | 0.2559  | 0.6758  | 0.38197 C15orf43  |
| cg20544605 | 0.15073 | 0.60551 | 0.89055 | 0.91898 | 0.78087 | 0.84273 | 0.8864  | 0.88438 | 0.86092 | 0.86254 SORBS2    |
| cg20545295 | 0.07285 | 0.06409 | 0.06941 | 0.06251 | 0.05662 | 0.06532 | 0.05282 | 0.05613 | 0.06363 | 0.07176 GOLGB1    |
| cg20546002 | 0.03038 | 0.02701 | 0.1718  | 0.21104 | 0.02282 | 0.02354 | 0.10256 | 0.05694 | 0.02948 | 0.02204 COL23A1   |
| cg20550118 | 0.83693 | 0.82446 | 0.62124 | 0.71147 | 0.61962 | 0.83493 | 0.47467 | 0.46223 | 0.87247 | 0.8457 CRABP1     |
| cg20550520 | 0.14754 | 0.16292 | 0.1656  | 0.13453 | 0.22046 | 0.1873  | 0.1227  | 0.10792 | 0.1282  | 0.19235 ARHGAP5   |
| cg20551517 | 0.88379 | 0.86114 | 0.91526 | 0.90122 | 0.90071 | 0.87682 | 0.86421 | 0.83029 | 0.91228 | 0.82833 GIP       |

|            |         |         |         |         |         |         |         |         |         |         |           |
|------------|---------|---------|---------|---------|---------|---------|---------|---------|---------|---------|-----------|
| cg20552296 | 0.25548 | 0.1836  | 0.32254 | 0.47534 | 0.4202  | 0.42751 | 0.11811 | 0.11169 | 0.09821 | 0.11184 | HPSE2     |
| cg20555138 | 0.08819 | 0.09889 | 0.09659 | 0.0888  | 0.06817 | 0.07254 | 0.071   | 0.07246 | 0.08565 | 0.08472 | RAP2B     |
| cg20555481 | 0.05028 | 0.05042 | 0.04904 | 0.0502  | 0.45752 | 0.47513 | 0.04566 | 0.0426  | 0.04842 | 0.05262 | MGC3207   |
| cg20555507 | 0.08832 | 0.09211 | 0.17593 | 0.42941 | 0.11283 | 0.10647 | 0.08973 | 0.08888 | 0.10023 | 0.07107 | TRPM3     |
| cg20556988 | 0.0805  | 0.07987 | 0.47216 | 0.63321 | 0.24545 | 0.34028 | 0.15101 | 0.18145 | 0.67402 | 0.62734 | CCL1      |
| cg20557037 | 0.03375 | 0.0275  | 0.0396  | 0.03612 | 0.03256 | 0.03033 | 0.03458 | 0.03199 | 0.03903 | 0.03275 | COBLL1    |
| cg20557104 | 0.07469 | 0.07378 | 0.73299 | 0.88306 | 0.83238 | 0.63392 | 0.84101 | 0.60443 | 0.4569  | 0.48564 | B3GALT7   |
| cg20557202 | 0.03506 | 0.03242 | 0.56899 | 0.87507 | 0.65143 | 0.5531  | 0.04663 | 0.02363 | 0.03856 | 0.02103 | SLC5A5    |
| cg20557567 | 0.05381 | 0.04578 | 0.05133 | 0.05075 | 0.02901 | 0.03766 | 0.06554 | 0.06052 | 0.0296  | 0.03783 | RPS18     |
| cg20559561 | 0.02183 | 0.01996 | 0.02113 | 0.02228 | 0.01654 | 0.01822 | 0.01648 | 0.01799 | 0.01757 | 0.01693 | RNF10     |
| cg20559736 | 0.74307 | 0.75022 | 0.75258 | 0.77388 | 0.77333 | 0.74595 | 0.6713  | 0.68272 | 0.78523 | 0.74562 | CEACAM19  |
| cg20566118 | 0.04185 | 0.04216 | 0.04369 | 0.04028 | 0.13328 | 0.03918 | 0.03801 | 0.03603 | 0.0351  | 0.03447 | TNC       |
| cg20567721 | 0.09242 | 0.09699 | 0.09597 | 0.10243 | 0.06151 | 0.09272 | 0.09159 | 0.08513 | 0.08807 | 0.08351 | C1orf60   |
| cg20570279 | 0.04628 | 0.04819 | 0.45524 | 0.4818  | 0.63505 | 0.43925 | 0.06971 | 0.10086 | 0.06146 | 0.04873 | ZNF259    |
| cg20571908 | 0.15823 | 0.15063 | 0.18442 | 0.12802 | 0.19211 | 0.16053 | 0.15566 | 0.15076 | 0.1119  | 0.15453 | MPHOSPH1  |
| cg20572838 | 0.03587 | 0.03937 | 0.04002 | 0.03529 | 0.03024 | 0.03327 | 0.09388 | 0.03634 | 0.17375 | 0.23105 | EME1      |
| cg20573242 | 0.05772 | 0.05339 | 0.07139 | 0.05979 | 0.06182 | 0.05804 | 0.05599 | 0.05076 | 0.04823 | 0.0575  | CCNA2     |
| cg20573420 | 0.78796 | 0.54549 | 0.25199 | 0.59656 | 0.26337 | 0.14524 | 0.15652 | 0.08061 | 0.06754 | 0.11584 | FLJ38451  |
| cg20576002 | 0.86289 | 0.78256 | 0.79038 | 0.8522  | 0.88535 | 0.87659 | 0.27822 | 0.6324  | 0.54115 | 0.37672 | FAM112B   |
| cg20576510 | 0.87698 | 0.80376 | 0.82325 | 0.82427 | 0.79003 | 0.86466 | 0.89972 | 0.46419 | 0.80539 | 0.35088 | PROM1     |
| cg20576597 | 0.53229 | 0.50872 | 0.17118 | 0.40551 | 0.07435 | 0.1132  | 0.48291 | 0.3549  | 0.03684 | 0.05204 | C21orf29  |
| cg20579480 | 0.41997 | 0.26545 | 0.70223 | 0.72381 | 0.35019 | 0.38393 | 0.71134 | 0.1762  | 0.16451 | 0.14765 | APOBEC4   |
| cg20580177 | 0.10998 | 0.10205 | 0.87098 | 0.84432 | 0.11881 | 0.07758 | 0.09405 | 0.07986 | 0.20196 | 0.40931 | LRFN3     |
| cg20582779 | 0.81556 | 0.55868 | 0.85155 | 0.87686 | 0.81181 | 0.49888 | 0.033   | 0.28448 | 0.85009 | 0.61505 | KIAA1822L |
| cg20582984 | 0.35645 | 0.44843 | 0.83475 | 0.83176 | 0.93851 | 0.93104 | 0.78126 | 0.72541 | 0.76218 | 0.77369 | GNAS      |
| cg20583073 | 0.78776 | 0.37698 | 0.94297 | 0.94871 | 0.96233 | 0.92432 | 0.90974 | 0.5785  | 0.49406 | 0.2078  | EDG6      |
| cg20583316 | 0.11852 | 0.08974 | 0.12208 | 0.11519 | 0.15626 | 0.1573  | 0.3255  | 0.08693 | 0.83751 | 0.3852  | SERPINE1  |
| cg20584011 | 0.23    | 0.04247 | 0.83649 | 0.87929 | 0.80992 | 0.85951 | 0.47107 | 0.47881 | 0.3452  | 0.28138 | ZDHHC11   |
| cg20585500 | 0.80371 | 0.74335 | 0.88549 | 0.88761 | 0.8918  | 0.88114 | 0.85861 | 0.8786  | 0.8953  | 0.86484 | GPHA2     |
| cg20586531 | 0.34438 | 0.24156 | 0.75655 | 0.77366 | 0.20253 | 0.23049 | 0.3233  | 0.11798 | 0.83407 | 0.18051 | PLSCR1    |
| cg20587168 | 0.89848 | 0.89775 | 0.69363 | 0.77722 | 0.36954 | 0.41322 | 0.09095 | 0.05768 | 0.08853 | 0.08098 | MGC33407  |
| cg20587336 | 0.04979 | 0.05    | 0.04863 | 0.05864 | 0.0533  | 0.05293 | 0.08056 | 0.07525 | 0.0455  | 0.05777 | ARMC1     |
| cg20587394 | 0.02653 | 0.02591 | 0.03223 | 0.03067 | 0.02967 | 0.0345  | 0.10316 | 0.0281  | 0.0265  | 0.02835 | HOXC13    |
| cg20587543 | 0.3399  | 0.09784 | 0.06614 | 0.06415 | 0.18456 | 0.04955 | 0.11317 | 0.05087 | 0.0445  | 0.02708 | ABAT      |
| cg20587968 | 0.60222 | 0.0919  | 0.48526 | 0.62416 | 0.88318 | 0.82942 | 0.10767 | 0.08006 | 0.17287 | 0.08719 | UCN3      |
| cg20588045 | 0.09953 | 0.10249 | 0.28461 | 0.18347 | 0.71631 | 0.1087  | 0.14792 | 0.09001 | 0.11003 | 0.07756 | PCDH15    |
| cg20588069 | 0.90771 | 0.64099 | 0.84199 | 0.91148 | 0.88736 | 0.88446 | 0.87159 | 0.86171 | 0.9195  | 0.90977 | MSX1      |
| cg20588892 | 0.05398 | 0.04398 | 0.05849 | 0.05595 | 0.04375 | 0.04202 | 0.04866 | 0.04254 | 0.04139 | 0.03985 | MGC33214  |
| cg20590849 | 0.01341 | 0.01592 | 0.02376 | 0.01595 | 0.01236 | 0.01309 | 0.01262 | 0.01217 | 0.01759 | 0.01477 | MIF4GD    |
| cg20591405 | 0.03293 | 0.03236 | 0.03126 | 0.03838 | 0.02586 | 0.02404 | 0.02535 | 0.02404 | 0.02967 | 0.02223 | RAB6B     |
| cg20592700 | 0.08472 | 0.10339 | 0.07506 | 0.07835 | 0.05689 | 0.05686 | 0.08375 | 0.09293 | 0.08197 | 0.0557  | WIPI2     |

|            |         |         |         |         |         |         |         |         |         |                  |
|------------|---------|---------|---------|---------|---------|---------|---------|---------|---------|------------------|
| cg20595215 | 0.14857 | 0.09587 | 0.18323 | 0.30215 | 0.17734 | 0.13048 | 0.10628 | 0.10159 | 0.06661 | 0.0564 LMCD1     |
| cg20595300 | 0.03906 | 0.03927 | 0.03739 | 0.03326 | 0.03439 | 0.03642 | 0.03188 | 0.03076 | 0.02696 | 0.02523 UHRF2    |
| cg20597908 | 0.08814 | 0.05167 | 0.07608 | 0.06846 | 0.041   | 0.03947 | 0.03747 | 0.03604 | 0.04077 | 0.03341 ARPC3    |
| cg20598389 | 0.08163 | 0.07009 | 0.10337 | 0.09219 | 0.19347 | 0.13221 | 0.08435 | 0.09176 | 0.05351 | 0.06456 C6orf89  |
| cg20603424 | 0.02196 | 0.02617 | 0.02167 | 0.02354 | 0.02097 | 0.02281 | 0.01791 | 0.02165 | 0.01877 | 0.01621 DDX31    |
| cg20603888 | 0.8146  | 0.84829 | 0.78355 | 0.83731 | 0.70348 | 0.79621 | 0.76959 | 0.78149 | 0.78117 | 0.6978 MYEF2     |
| cg20609368 | 0.5808  | 0.14386 | 0.80913 | 0.81091 | 0.73851 | 0.43032 | 0.29582 | 0.52067 | 0.16682 | 0.13456 HBD      |
| cg20610181 | 0.62193 | 0.30988 | 0.70653 | 0.84122 | 0.72844 | 0.48053 | 0.60392 | 0.18536 | 0.44139 | 0.38401 CA9      |
| cg20610545 | 0.06877 | 0.06517 | 0.08107 | 0.0836  | 0.05921 | 0.05783 | 0.07864 | 0.07866 | 0.06366 | 0.05996 WNK1     |
| cg20611872 | 0.5577  | 0.5152  | 0.72076 | 0.74412 | 0.72699 | 0.55859 | 0.19781 | 0.15943 | 0.17365 | 0.08509 XAGE3    |
| cg20612559 | 0.03477 | 0.03318 | 0.03421 | 0.03322 | 0.03566 | 0.03781 | 0.03836 | 0.03575 | 0.03248 | 0.03215 SKIP     |
| cg20612615 | 0.03033 | 0.0248  | 0.02992 | 0.02738 | 0.02604 | 0.02439 | 0.02567 | 0.02137 | 0.02918 | 0.02591 PREP     |
| cg20613151 | 0.03243 | 0.02982 | 0.02996 | 0.02698 | 0.02585 | 0.02978 | 0.02501 | 0.02591 | 0.02534 | 0.02471 TRIM25   |
| cg20613889 | 0.20335 | 0.20823 | 0.27832 | 0.21738 | 0.47359 | 0.59006 | 0.29433 | 0.17535 | 0.224   | 0.18676 FSHR     |
| cg20614736 | 0.75792 | 0.80709 | 0.70608 | 0.76662 | 0.71194 | 0.68953 | 0.70337 | 0.74982 | 0.71796 | 0.75383 CCDC74B  |
| cg20615832 | 0.85586 | 0.68732 | 0.9305  | 0.95235 | 0.92149 | 0.93622 | 0.59322 | 0.18751 | 0.75184 | 0.5155 PF4V1     |
| cg20615951 | 0.02016 | 0.01995 | 0.02146 | 0.02131 | 0.01742 | 0.02006 | 0.01892 | 0.01889 | 0.01788 | 0.01608 C1orf71  |
| cg20616414 | 0.18052 | 0.04122 | 0.69661 | 0.90056 | 0.97406 | 0.97108 | 0.94844 | 0.97275 | 0.97575 | 0.97731 WNK2     |
| cg20616836 | 0.91532 | 0.90151 | 0.91328 | 0.90519 | 0.86793 | 0.87596 | 0.86803 | 0.89676 | 0.76197 | 0.90937 AES      |
| cg20617956 | 0.04853 | 0.04543 | 0.37838 | 0.23273 | 0.69315 | 0.15904 | 0.04216 | 0.04654 | 0.03713 | 0.03518 C10orf58 |
| cg20618842 | 0.08608 | 0.07953 | 0.10137 | 0.08479 | 0.10356 | 0.09721 | 0.07983 | 0.08471 | 0.09271 | 0.10531 OLFML3   |
| cg20622019 | 0.23597 | 0.17296 | 0.93585 | 0.93956 | 0.68441 | 0.10341 | 0.82498 | 0.64527 | 0.94084 | 0.69891 ADA      |
| cg20622056 | 0.34576 | 0.0711  | 0.695   | 0.61369 | 0.75404 | 0.85035 | 0.25783 | 0.14058 | 0.46208 | 0.32019 SLC7A3   |
| cg20623943 | 0.02768 | 0.02456 | 0.0299  | 0.02127 | 0.01903 | 0.02086 | 0.02153 | 0.02098 | 0.01817 | 0.02398 CMPK     |
| cg20624391 | 0.16787 | 0.16654 | 0.21055 | 0.20939 | 0.35002 | 0.20032 | 0.18156 | 0.16538 | 0.18815 | 0.1816 BVES      |
| cg20625138 | 0.0866  | 0.07748 | 0.78239 | 0.79493 | 0.6543  | 0.58233 | 0.7029  | 0.7532  | 0.80591 | 0.68515 UTS2     |
| cg20627106 | 0.88961 | 0.82117 | 0.8595  | 0.87208 | 0.85501 | 0.88416 | 0.91486 | 0.90804 | 0.904   | 0.89327 PDE6G    |
| cg20627916 | 0.28428 | 0.26233 | 0.66002 | 0.73296 | 0.60319 | 0.40453 | 0.40144 | 0.16618 | 0.60209 | 0.7186 ESR1      |
| cg20629089 | 0.0294  | 0.03172 | 0.03073 | 0.02716 | 0.02394 | 0.03488 | 0.02712 | 0.02463 | 0.03142 | 0.03052 SAMD4A   |
| cg20629097 | 0.03763 | 0.03237 | 0.04563 | 0.04534 | 0.04359 | 0.04144 | 0.09547 | 0.06799 | 0.03625 | 0.03351 EXO1     |
| cg20630151 | 0.55366 | 0.46714 | 0.70288 | 0.84538 | 0.8297  | 0.8476  | 0.77801 | 0.37618 | 0.81771 | 0.48 BPESC1      |
| cg20630207 | 0.22059 | 0.22835 | 0.21305 | 0.21647 | 0.21083 | 0.18002 | 0.18151 | 0.18942 | 0.17445 | 0.16875 GPSN2    |
| cg20630386 | 0.51817 | 0.40496 | 0.54584 | 0.5686  | 0.54403 | 0.60145 | 0.50473 | 0.48332 | 0.4575  | 0.52251 AFP      |
| cg20630567 | 0.02117 | 0.02679 | 0.02659 | 0.02181 | 0.11826 | 0.02689 | 0.0238  | 0.02259 | 0.02476 | 0.02329 MGC12981 |
| cg20630655 | 0.50462 | 0.22794 | 0.79655 | 0.83526 | 0.73677 | 0.177   | 0.79809 | 0.60307 | 0.68397 | 0.27732 RNUT1    |
| cg20632573 | 0.03667 | 0.03287 | 0.29547 | 0.33243 | 0.26502 | 0.04957 | 0.04014 | 0.0342  | 0.04047 | 0.03943 SLC6A5   |
| cg20633621 | 0.0405  | 0.03759 | 0.04458 | 0.04226 | 0.0392  | 0.04333 | 0.03907 | 0.03966 | 0.03595 | 0.03394 GAS2L1   |
| cg20633883 | 0.14423 | 0.05834 | 0.09345 | 0.06536 | 0.15511 | 0.05034 | 0.0461  | 0.04777 | 0.05712 | 0.04448 ABCC3    |
| cg20633959 | 0.0552  | 0.08888 | 0.06889 | 0.05182 | 0.07307 | 0.0509  | 0.06067 | 0.04749 | 0.06319 | 0.0401 NRF1      |
| cg20634573 | 0.86258 | 0.85521 | 0.83635 | 0.83094 | 0.85345 | 0.83413 | 0.7285  | 0.49655 | 0.84232 | 0.77935 ADRA2B   |
| cg20636078 | 0.14682 | 0.07376 | 0.07539 | 0.05463 | 0.08055 | 0.04563 | 0.0446  | 0.03696 | 0.34822 | 0.04403 ATR      |

|            |         |         |         |         |         |         |         |         |         |                   |
|------------|---------|---------|---------|---------|---------|---------|---------|---------|---------|-------------------|
| cg20637307 | 0.20244 | 0.02787 | 0.08712 | 0.39732 | 0.03668 | 0.03385 | 0.06636 | 0.02524 | 0.075   | 0.0418 ERBB4      |
| cg20637800 | 0.03332 | 0.02926 | 0.02995 | 0.02669 | 0.03088 | 0.02985 | 0.02343 | 0.02389 | 0.02567 | 0.01902 BRI3      |
| cg20638426 | 0.05218 | 0.05519 | 0.0587  | 0.05926 | 0.05155 | 0.0554  | 0.04781 | 0.06189 | 0.04969 | 0.04594 ZNF14     |
| cg20639263 | 0.05122 | 0.05235 | 0.05359 | 0.05074 | 0.0728  | 0.06915 | 0.04481 | 0.04488 | 0.04552 | 0.05377 NP        |
| cg20640433 | 0.95689 | 0.95852 | 0.60259 | 0.53868 | 0.06454 | 0.04256 | 0.0556  | 0.04911 | 0.13381 | 0.05674 LAMA2     |
| cg20641280 | 0.29927 | 0.56137 | 0.72998 | 0.93859 | 0.95705 | 0.8517  | 0.48817 | 0.4716  | 0.20791 | 0.02583 DXS9879E  |
| cg20641580 | 0.03843 | 0.04128 | 0.03997 | 0.03457 | 0.02678 | 0.03341 | 0.03274 | 0.0365  | 0.02783 | 0.03297 LOC91689  |
| cg20641660 | 0.08303 | 0.09196 | 0.12864 | 0.13139 | 0.17235 | 0.12288 | 0.12326 | 0.10252 | 0.15235 | 0.07157 C11orf30  |
| cg20642765 | 0.04647 | 0.05214 | 0.09513 | 0.0723  | 0.12681 | 0.03929 | 0.05615 | 0.06882 | 0.06512 | 0.06827 MLF2      |
| cg20643362 | 0.02539 | 0.02322 | 0.02444 | 0.0249  | 0.01842 | 0.02415 | 0.02716 | 0.02571 | 0.01798 | 0.0187 C19orf12   |
| cg20643416 | 0.04754 | 0.04604 | 0.03984 | 0.04238 | 0.03327 | 0.04051 | 0.05011 | 0.04909 | 0.03288 | 0.0348 TOMM70A    |
| cg20644453 | 0.02559 | 0.02574 | 0.02741 | 0.02768 | 0.03258 | 0.0271  | 0.0254  | 0.02396 | 0.02723 | 0.02291 C21orf59  |
| cg20644981 | 0.67742 | 0.35015 | 0.23974 | 0.2613  | 0.05989 | 0.04606 | 0.05939 | 0.11139 | 0.80823 | 0.65028 RPS3A     |
| cg20645058 | 0.84041 | 0.6445  | 0.78181 | 0.85527 | 0.89954 | 0.72647 | 0.36246 | 0.48941 | 0.87614 | 0.71814 CLEC12B   |
| cg20645065 | 0.30058 | 0.02433 | 0.95162 | 0.95718 | 0.96915 | 0.92887 | 0.01903 | 0.05428 | 0.98263 | 0.9783 ALPL       |
| cg20645649 | 0.03685 | 0.03852 | 0.04016 | 0.03861 | 0.02693 | 0.0336  | 0.03186 | 0.0353  | 0.03296 | 0.03014 RPL35     |
| cg20646490 | 0.15423 | 0.14884 | 0.15668 | 0.13319 | 0.14435 | 0.15198 | 0.1367  | 0.13456 | 0.11989 | 0.10764 FOSB      |
| cg20647137 | 0.5797  | 0.87334 | 0.82611 | 0.86365 | 0.84495 | 0.84182 | 0.82525 | 0.87017 | 0.87652 | 0.87483 AKR1D1    |
| cg20647888 | 0.16602 | 0.1455  | 0.18195 | 0.19719 | 0.59334 | 0.13796 | 0.18692 | 0.14602 | 0.18106 | 0.11835 CCDC3     |
| cg20648108 | 0.04522 | 0.04738 | 0.05147 | 0.04261 | 0.05369 | 0.04099 | 0.0411  | 0.04249 | 0.04205 | 0.03729 CTTNBP2NL |
| cg20648149 | 0.8626  | 0.4452  | 0.91731 | 0.92135 | 0.85588 | 0.87686 | 0.87958 | 0.85224 | 0.91161 | 0.89831 SYNE2     |
| cg20648463 | 0.07192 | 0.08211 | 0.11479 | 0.10095 | 0.13924 | 0.10747 | 0.07669 | 0.08444 | 0.10237 | 0.0809 GLA        |
| cg20648827 | 0.03443 | 0.03492 | 0.27774 | 0.66557 | 0.16724 | 0.05278 | 0.20188 | 0.26843 | 0.03798 | 0.03869 MAGEE2    |
| cg20649047 | 0.12289 | 0.10278 | 0.07263 | 0.07731 | 0.1959  | 0.15719 | 0.10961 | 0.10714 | 0.11376 | 0.12908 NUMB      |
| cg20649991 | 0.81765 | 0.71705 | 0.56475 | 0.57319 | 0.39486 | 0.18903 | 0.03936 | 0.04442 | 0.06197 | 0.04553 LILRB5    |
| cg20651453 | 0.04788 | 0.04742 | 0.049   | 0.0427  | 0.03663 | 0.03966 | 0.04368 | 0.04705 | 0.04053 | 0.03246 MAP3K6    |
| cg20651681 | 0.18038 | 0.07595 | 0.09238 | 0.08128 | 0.06267 | 0.05266 | 0.06788 | 0.0589  | 0.05256 | 0.05414 GRB10     |
| cg20652640 | 0.04245 | 0.04132 | 0.04588 | 0.04353 | 0.0327  | 0.04197 | 0.03806 | 0.03793 | 0.03442 | 0.03522 ZFPM1     |
| cg20652889 | 0.04332 | 0.04858 | 0.0423  | 0.03906 | 0.02658 | 0.03457 | 0.03302 | 0.03668 | 0.03071 | 0.03326 UNC84B    |
| cg20654468 | 0.87896 | 0.87557 | 0.90036 | 0.89507 | 0.03772 | 0.03897 | 0.88449 | 0.80414 | 0.345   | 0.33356 LPXN      |
| cg20655010 | 0.03394 | 0.03517 | 0.02996 | 0.03376 | 0.03853 | 0.03819 | 0.03101 | 0.03367 | 0.03193 | 0.03047 C2orf34   |
| cg20655558 | 0.88143 | 0.75174 | 0.83484 | 0.84752 | 0.66112 | 0.85993 | 0.78632 | 0.83359 | 0.80696 | 0.78631 DNAJB7    |
| cg20656116 | 0.02867 | 0.02949 | 0.03166 | 0.03206 | 0.02121 | 0.02671 | 0.02974 | 0.03227 | 0.02559 | 0.02527 CD59      |
| cg20657383 | 0.90814 | 0.9101  | 0.9093  | 0.91501 | 0.91179 | 0.90816 | 0.89713 | 0.89542 | 0.93174 | 0.93016 CEACAM1   |
| cg20657421 | 0.78561 | 0.84869 | 0.72439 | 0.80007 | 0.72029 | 0.77145 | 0.32156 | 0.47653 | 0.70383 | 0.59349 CCL4      |
| cg20661303 | 0.47996 | 0.1824  | 0.46667 | 0.68464 | 0.36938 | 0.29236 | 0.57456 | 0.07316 | 0.21147 | 0.08127 LEFTY2    |
| cg20663831 | 0.20492 | 0.50988 | 0.67092 | 0.67757 | 0.46624 | 0.40988 | 0.22805 | 0.30222 | 0.12347 | 0.08816 GIMAP2    |
| cg20663980 | 0.42917 | 0.37105 | 0.23904 | 0.50272 | 0.40483 | 0.37333 | 0.13635 | 0.40638 | 0.08617 | 0.08788 CDX4      |
| cg20664201 | 0.91874 | 0.62735 | 0.72671 | 0.84012 | 0.89558 | 0.10607 | 0.67848 | 0.52723 | 0.88556 | 0.55375 INHBE     |
| cg20664247 | 0.4422  | 0.18124 | 0.63278 | 0.73259 | 0.77847 | 0.07535 | 0.75967 | 0.50866 | 0.59123 | 0.28813 PEX10     |
| cg20668607 | 0.86295 | 0.75408 | 0.87222 | 0.85823 | 0.82285 | 0.61928 | 0.90866 | 0.83375 | 0.73671 | 0.3809 DNAJC11    |

|            |         |         |         |         |         |         |         |         |         |         |           |
|------------|---------|---------|---------|---------|---------|---------|---------|---------|---------|---------|-----------|
| cg20669525 | 0.02022 | 0.01958 | 0.02151 | 0.01559 | 0.016   | 0.0264  | 0.01773 | 0.01713 | 0.01621 | 0.01707 | GPA1      |
| cg20670302 | 0.02162 | 0.01953 | 0.02167 | 0.02103 | 0.01904 | 0.02053 | 0.39604 | 0.34789 | 0.01937 | 0.01663 | PSTPIP2   |
| cg20672044 | 0.84004 | 0.43882 | 0.83866 | 0.85762 | 0.73955 | 0.79315 | 0.77332 | 0.83909 | 0.86114 | 0.79522 | HPR       |
| cg20672744 | 0.02464 | 0.02859 | 0.02487 | 0.02457 | 0.02067 | 0.02396 | 0.44695 | 0.47201 | 0.0201  | 0.01878 | ERICH1    |
| cg20673075 | 0.61864 | 0.22177 | 0.08368 | 0.09361 | 0.06326 | 0.07082 | 0.07139 | 0.0782  | 0.0674  | 0.0689  | STK3      |
| cg20673481 | 0.07247 | 0.04953 | 0.26906 | 0.12765 | 0.25646 | 0.41982 | 0.16462 | 0.39728 | 0.17189 | 0.03982 | KCNS3     |
| cg20673611 | 0.06023 | 0.05691 | 0.07394 | 0.06872 | 0.05436 | 0.04202 | 0.06386 | 0.06229 | 0.05664 | 0.0565  | TM7SF3    |
| cg20674521 | 0.72442 | 0.57868 | 0.80507 | 0.88645 | 0.91158 | 0.80646 | 0.80782 | 0.56301 | 0.90436 | 0.45911 | KCNJ4     |
| cg20674577 | 0.15811 | 0.11082 | 0.77026 | 0.76898 | 0.74943 | 0.77561 | 0.12938 | 0.09883 | 0.17734 | 0.2497  | PHACTR3   |
| cg20675440 | 0.8261  | 0.33577 | 0.76487 | 0.75568 | 0.76247 | 0.56614 | 0.79108 | 0.57843 | 0.84096 | 0.59702 | COG8      |
| cg20676303 | 0.90588 | 0.84796 | 0.88064 | 0.91346 | 0.93213 | 0.89969 | 0.4023  | 0.41858 | 0.55054 | 0.55813 | GAGE7B    |
| cg20676475 | 0.08147 | 0.07539 | 0.16704 | 0.31059 | 0.7923  | 0.60623 | 0.07132 | 0.07138 | 0.14555 | 0.07897 | LCE3D     |
| cg20676542 | 0.02439 | 0.02861 | 0.02496 | 0.021   | 0.02308 | 0.02958 | 0.02205 | 0.02505 | 0.02503 | 0.02179 | TRIM25    |
| cg20678353 | 0.14882 | 0.10919 | 0.26014 | 0.68773 | 0.27158 | 0.4972  | 0.11621 | 0.14895 | 0.28592 | 0.13896 | FLJ35695  |
| cg20681975 | 0.02724 | 0.02543 | 0.03284 | 0.0293  | 0.03502 | 0.03531 | 0.0258  | 0.02576 | 0.02418 | 0.02691 | TNRC5     |
| cg20683151 | 0.87593 | 0.87828 | 0.83233 | 0.87282 | 0.886   | 0.86129 | 0.61074 | 0.74046 | 0.86127 | 0.83187 | TM4SF20   |
| cg20684399 | 0.03921 | 0.03726 | 0.04248 | 0.04194 | 0.05072 | 0.03576 | 0.03844 | 0.03435 | 0.04043 | 0.04383 | PHF2      |
| cg20684549 | 0.93029 | 0.25122 | 0.80582 | 0.92014 | 0.94726 | 0.91685 | 0.86238 | 0.85996 | 0.96376 | 0.68966 | PRG2      |
| cg20684973 | 0.05193 | 0.04655 | 0.0538  | 0.04503 | 0.04198 | 0.05007 | 0.03966 | 0.04408 | 0.03918 | 0.04524 | TAF5      |
| cg20687462 | 0.03558 | 0.03818 | 0.04049 | 0.0371  | 0.36258 | 0.15755 | 0.0312  | 0.03183 | 0.03131 | 0.02759 | MGC10992  |
| cg20688340 | 0.89877 | 0.50859 | 0.87856 | 0.9119  | 0.93936 | 0.89401 | 0.91    | 0.52956 | 0.4977  | 0.27006 | MMP21     |
| cg20691408 | 0.08509 | 0.06639 | 0.5671  | 0.6855  | 0.61288 | 0.46643 | 0.29635 | 0.09721 | 0.65774 | 0.28075 | FADS3     |
| cg20691580 | 0.71071 | 0.33445 | 0.6628  | 0.83987 | 0.77369 | 0.8787  | 0.39329 | 0.3939  | 0.65563 | 0.61957 | APOC3     |
| cg20692181 | 0.68364 | 0.4267  | 0.39603 | 0.46421 | 0.24878 | 0.2721  | 0.1955  | 0.16994 | 0.31069 | 0.19232 | RETN      |
| cg20692569 | 0.50696 | 0.20173 | 0.9719  | 0.97591 | 0.72901 | 0.51628 | 0.48945 | 0.63446 | 0.62069 | 0.67396 | FZD9      |
| cg20693880 | 0.10417 | 0.10861 | 0.1139  | 0.08816 | 0.17161 | 0.10962 | 0.13999 | 0.10852 | 0.08826 | 0.11438 | PSMB6     |
| cg20695057 | 0.04317 | 0.04482 | 0.04677 | 0.04369 | 0.0389  | 0.03863 | 0.038   | 0.03093 | 0.03989 | 0.03241 | TP53BP2   |
| cg20695562 | 0.05354 | 0.04958 | 0.0708  | 0.06464 | 0.04439 | 0.05369 | 0.05169 | 0.05668 | 0.05964 | 0.04677 | USP33     |
| cg20695587 | 0.4269  | 0.43154 | 0.54106 | 0.32895 | 0.47736 | 0.42872 | 0.2477  | 0.13938 | 0.27675 | 0.40289 | TMPRSS11F |
| cg20696985 | 0.03805 | 0.04287 | 0.06169 | 0.08944 | 0.05622 | 0.03626 | 0.04186 | 0.0365  | 0.03717 | 0.03721 | SHF       |
| cg20697204 | 0.8975  | 0.7559  | 0.89602 | 0.88315 | 0.89255 | 0.86516 | 0.87682 | 0.8487  | 0.92488 | 0.79874 | FLJ40172  |
| cg20699736 | 0.04866 | 0.05407 | 0.36931 | 0.26215 | 0.50105 | 0.68838 | 0.35064 | 0.0952  | 0.19067 | 0.17781 | VAX2      |
| cg20700904 | 0.06406 | 0.03251 | 0.03449 | 0.03135 | 0.03259 | 0.02756 | 0.02915 | 0.0292  | 0.02887 | 0.02978 | HNRPH3    |
| cg20701850 | 0.04636 | 0.04075 | 0.07645 | 0.26838 | 0.2563  | 0.16452 | 0.10979 | 0.03797 | 0.04543 | 0.03652 | RECQL     |
| cg20702327 | 0.04811 | 0.05654 | 0.05298 | 0.05664 | 0.0578  | 0.06716 | 0.0665  | 0.05224 | 0.04528 | 0.04469 | CSNK2A1   |
| cg20707333 | 0.95289 | 0.93916 | 0.94492 | 0.94305 | 0.96528 | 0.94495 | 0.94983 | 0.94696 | 0.95243 | 0.94156 | C20orf177 |
| cg20707345 | 0.94963 | 0.93329 | 0.94131 | 0.95199 | 0.9596  | 0.95366 | 0.94195 | 0.93496 | 0.96202 | 0.95257 | ACD       |
| cg20708411 | 0.1845  | 0.08526 | 0.02847 | 0.02826 | 0.02055 | 0.0256  | 0.03504 | 0.02898 | 0.25531 | 0.03642 | CSNK1G3   |
| cg20712430 | 0.03632 | 0.03298 | 0.0392  | 0.03785 | 0.0322  | 0.032   | 0.03471 | 0.03513 | 0.03053 | 0.02637 | KREMEN2   |
| cg20713333 | 0.03478 | 0.03765 | 0.04913 | 0.03952 | 0.04226 | 0.04431 | 0.03511 | 0.03771 | 0.03219 | 0.03636 | RG9MTD2   |
| cg20713492 | 0.35645 | 0.04883 | 0.50674 | 0.64057 | 0.71826 | 0.68505 | 0.50005 | 0.38667 | 0.24798 | 0.26837 | AQP10     |



|            |         |         |         |         |         |         |         |         |         |                   |
|------------|---------|---------|---------|---------|---------|---------|---------|---------|---------|-------------------|
| cg20714328 | 0.7658  | 0.9132  | 0.88035 | 0.89773 | 0.90104 | 0.89951 | 0.86444 | 0.89656 | 0.90601 | 0.88373 THBS4     |
| cg20715219 | 0.02112 | 0.0228  | 0.0263  | 0.01983 | 0.02397 | 0.02467 | 0.0237  | 0.02411 | 0.02942 | 0.02705 DDX17     |
| cg20715764 | 0.36052 | 0.05511 | 0.12291 | 0.20466 | 0.02878 | 0.02737 | 0.02727 | 0.02819 | 0.03854 | 0.02317 ZNF264    |
| cg20716064 | 0.02999 | 0.02967 | 0.03487 | 0.03551 | 0.0889  | 0.02785 | 0.03423 | 0.02758 | 0.03096 | 0.0229 USP6NL     |
| cg20716119 | 0.27455 | 0.13065 | 0.70657 | 0.75141 | 0.62965 | 0.58935 | 0.90487 | 0.87471 | 0.79076 | 0.68754 CDH1      |
| cg20716209 | 0.65743 | 0.0687  | 0.91544 | 0.92275 | 0.72515 | 0.43865 | 0.49431 | 0.07285 | 0.05893 | 0.05494 STAT3     |
| cg20716571 | 0.05147 | 0.0497  | 0.05549 | 0.04773 | 0.04361 | 0.05269 | 0.05281 | 0.04113 | 0.05332 | 0.04268 WDR37     |
| cg20716945 | 0.02692 | 0.0279  | 0.02991 | 0.02878 | 0.03012 | 0.02719 | 0.02541 | 0.0252  | 0.021   | 0.02619 USP38     |
| cg20717059 | 0.03961 | 0.04739 | 0.04633 | 0.04496 | 0.04291 | 0.04182 | 0.0471  | 0.05236 | 0.03965 | 0.03638 C8orf13   |
| cg20718816 | 0.03527 | 0.03196 | 0.0408  | 0.04401 | 0.81054 | 0.46127 | 0.19556 | 0.02843 | 0.02381 | 0.0264 LTBP2      |
| cg20720686 | 0.82172 | 0.82047 | 0.79808 | 0.8101  | 0.81359 | 0.7785  | 0.78798 | 0.75629 | 0.69348 | 0.80588 POR       |
| cg20721467 | 0.72542 | 0.79498 | 0.79595 | 0.80589 | 0.72155 | 0.45773 | 0.75784 | 0.78648 | 0.79786 | 0.7387 MYST4      |
| cg20723355 | 0.08725 | 0.33798 | 0.9555  | 0.9701  | 0.96149 | 0.9588  | 0.94553 | 0.96353 | 0.05975 | 0.02884 FBXO39    |
| cg20724073 | 0.0434  | 0.02699 | 0.10975 | 0.05836 | 0.06976 | 0.02193 | 0.04354 | 0.02393 | 0.05814 | 0.02436 MLX       |
| cg20725021 | 0.75488 | 0.81425 | 0.76131 | 0.85933 | 0.27376 | 0.26959 | 0.08366 | 0.1071  | 0.60936 | 0.43007 MASP1     |
| cg20727114 | 0.04272 | 0.04059 | 0.08628 | 0.12837 | 0.78027 | 0.56686 | 0.33881 | 0.31679 | 0.8864  | 0.66178 CPT1C     |
| cg20727362 | 0.86076 | 0.80613 | 0.80895 | 0.84456 | 0.76442 | 0.7244  | 0.7912  | 0.75381 | 0.37267 | 0.43037 CYB5R3    |
| cg20728496 | 0.11588 | 0.09859 | 0.22937 | 0.42726 | 0.81935 | 0.8448  | 0.80112 | 0.1808  | 0.0886  | 0.06557 NADSYN1   |
| cg20728639 | 0.02105 | 0.02292 | 0.02633 | 0.02214 | 0.01729 | 0.02135 | 0.02897 | 0.02351 | 0.02163 | 0.02124 ABTB2     |
| cg20731798 | 0.05245 | 0.06485 | 0.06044 | 0.16696 | 0.07391 | 0.06399 | 0.065   | 0.05471 | 0.04838 | 0.05852 LOC119710 |
| cg20732137 | 0.85989 | 0.57219 | 0.87754 | 0.8756  | 0.91033 | 0.86466 | 0.86435 | 0.86806 | 0.85686 | 0.86001 GMEB2     |
| cg20732367 | 0.06041 | 0.05639 | 0.07322 | 0.05875 | 0.04409 | 0.05406 | 0.05519 | 0.05075 | 0.06466 | 0.04837 LRRFIP1   |
| cg20736065 | 0.02527 | 0.03713 | 0.03187 | 0.02662 | 0.02679 | 0.02969 | 0.02053 | 0.02009 | 0.02394 | 0.02455 MSI2      |
| cg20737712 | 0.03474 | 0.03793 | 0.04097 | 0.03539 | 0.03425 | 0.04282 | 0.03631 | 0.03647 | 0.02881 | 0.03708 TBRG1     |
| cg20739508 | 0.48863 | 0.23422 | 0.32391 | 0.36709 | 0.34975 | 0.25191 | 0.30519 | 0.23283 | 0.1698  | 0.18133 ARHGEF6   |
| cg20739510 | 0.26056 | 0.04615 | 0.14021 | 0.21428 | 0.11754 | 0.07273 | 0.04774 | 0.04042 | 0.06082 | 0.06224 PEX14     |
| cg20740029 | 0.04094 | 0.02379 | 0.82176 | 0.88734 | 0.07646 | 0.04434 | 0.06096 | 0.0531  | 0.02476 | 0.02079 SLC5A8    |
| cg20743744 | 0.77097 | 0.2221  | 0.55091 | 0.38591 | 0.92249 | 0.65569 | 0.43209 | 0.12482 | 0.7304  | 0.13147 CTBP1     |
| cg20744464 | 0.62541 | 0.04172 | 0.17132 | 0.07402 | 0.09897 | 0.02428 | 0.50482 | 0.24431 | 0.95429 | 0.89406 MFI2      |
| cg20744809 | 0.05617 | 0.05255 | 0.05337 | 0.05026 | 0.03683 | 0.04419 | 0.04454 | 0.04723 | 0.04589 | 0.04638 FLJ11171  |
| cg20747455 | 0.92914 | 0.74429 | 0.93911 | 0.93021 | 0.93821 | 0.93468 | 0.91736 | 0.92204 | 0.93845 | 0.91872 MATN4     |
| cg20748065 | 0.91667 | 0.92571 | 0.94607 | 0.9524  | 0.94326 | 0.94529 | 0.94655 | 0.95312 | 0.96283 | 0.94914 POR       |
| cg20750215 | 0.08906 | 0.08627 | 0.26001 | 0.347   | 0.12634 | 0.15426 | 0.09713 | 0.07535 | 0.07079 | 0.05691 JUNB      |
| cg20751395 | 0.66574 | 0.51812 | 0.84225 | 0.87184 | 0.84629 | 0.87355 | 0.67523 | 0.504   | 0.82463 | 0.76443 KCNQ1     |
| cg20752438 | 0.05692 | 0.066   | 0.06903 | 0.06377 | 0.04819 | 0.05697 | 0.05767 | 0.05796 | 0.05789 | 0.05392 C9orf127  |
| cg20755353 | 0.09804 | 0.04586 | 0.09518 | 0.05414 | 0.12977 | 0.06411 | 0.04145 | 0.04178 | 0.12105 | 0.04003 SSU72     |
| cg20757196 | 0.04346 | 0.04042 | 0.06024 | 0.04099 | 0.03706 | 0.03812 | 0.04098 | 0.04011 | 0.04607 | 0.04621 TRAF7     |
| cg20757526 | 0.02952 | 0.02981 | 0.0321  | 0.02885 | 0.02026 | 0.02422 | 0.02842 | 0.02653 | 0.02612 | 0.02243 DCXR      |
| cg20757758 | 0.09356 | 0.03527 | 0.0431  | 0.05088 | 0.07806 | 0.28791 | 0.03542 | 0.03943 | 0.03349 | 0.02748 ZMYND12   |
| cg20757912 | 0.11376 | 0.10667 | 0.12612 | 0.12315 | 0.09888 | 0.08388 | 0.10201 | 0.10147 | 0.09756 | 0.07466 SSBP2     |
| cg20758803 | 0.01852 | 0.01764 | 0.02047 | 0.02129 | 0.01614 | 0.01958 | 0.01621 | 0.01817 | 0.01751 | 0.0166 MAGI3      |

|            |         |         |         |         |         |         |         |         |         |                  |
|------------|---------|---------|---------|---------|---------|---------|---------|---------|---------|------------------|
| cg20760063 | 0.05515 | 0.03998 | 0.07215 | 0.05592 | 0.06563 | 0.06396 | 0.05538 | 0.04851 | 0.04173 | 0.05976 NBR2     |
| cg20761322 | 0.8053  | 0.41235 | 0.69889 | 0.66707 | 0.55481 | 0.54052 | 0.09773 | 0.07341 | 0.38155 | 0.2778 CIB2      |
| cg20764656 | 0.88893 | 0.88988 | 0.89763 | 0.90309 | 0.88829 | 0.88341 | 0.89744 | 0.86767 | 0.91233 | 0.8946 GPX2      |
| cg20767356 | 0.91943 | 0.91113 | 0.90011 | 0.91422 | 0.86505 | 0.86422 | 0.9067  | 0.92945 | 0.6647  | 0.71774 HORMAD1  |
| cg20767936 | 0.04733 | 0.05343 | 0.05177 | 0.05038 | 0.03793 | 0.05006 | 0.0482  | 0.04894 | 0.04635 | 0.04229 ASNSD1   |
| cg20768743 | 0.19185 | 0.18587 | 0.42633 | 0.27917 | 0.5236  | 0.49385 | 0.34497 | 0.10513 | 0.11924 | 0.14236 CD226    |
| cg20769102 | 0.06896 | 0.07174 | 0.09262 | 0.08643 | 0.07087 | 0.08727 | 0.08587 | 0.07856 | 0.06724 | 0.08792 POLR2K   |
| cg20769774 | 0.0578  | 0.0556  | 0.25208 | 0.11717 | 0.09154 | 0.07161 | 0.0535  | 0.06294 | 0.04211 | 0.04252 CYLD     |
| cg20769842 | 0.29803 | 0.45503 | 0.29334 | 0.32951 | 0.53762 | 0.44119 | 0.26453 | 0.18802 | 0.32712 | 0.52649 MKRN3    |
| cg20770175 | 0.49433 | 0.44102 | 0.18247 | 0.13297 | 0.21992 | 0.15533 | 0.47561 | 0.15683 | 0.1642  | 0.18466 COL3A1   |
| cg20770311 | 0.03098 | 0.03312 | 0.03549 | 0.03337 | 0.02306 | 0.03457 | 0.02719 | 0.03228 | 0.02631 | 0.02694 SMPD1    |
| cg20770803 | 0.02954 | 0.03585 | 0.03354 | 0.03543 | 0.02201 | 0.03181 | 0.02643 | 0.03392 | 0.02964 | 0.0291 CNTD      |
| cg20771670 | 0.03183 | 0.03507 | 0.03475 | 0.03505 | 0.03665 | 0.03082 | 0.02951 | 0.03255 | 0.035   | 0.03189 PHLDA3   |
| cg20772904 | 0.12198 | 0.07787 | 0.10684 | 0.08151 | 0.06055 | 0.05128 | 0.0821  | 0.06523 | 0.05108 | 0.06945 SHCBP1   |
| cg20773127 | 0.32755 | 0.25898 | 0.5108  | 0.51734 | 0.80577 | 0.49501 | 0.5373  | 0.80269 | 0.12886 | 0.15505 ENPEP    |
| cg20774846 | 0.3296  | 0.28198 | 0.88782 | 0.91408 | 0.84524 | 0.82231 | 0.63899 | 0.60637 | 0.66732 | 0.52018 DPYS     |
| cg20775254 | 0.85019 | 0.54568 | 0.86157 | 0.85815 | 0.90978 | 0.8535  | 0.64389 | 0.69272 | 0.8438  | 0.55039 PROM2    |
| cg20775840 | 0.88295 | 0.51805 | 0.05824 | 0.05677 | 0.0415  | 0.05002 | 0.69178 | 0.22532 | 0.05136 | 0.04395 G3BP     |
| cg20775959 | 0.93077 | 0.93535 | 0.31997 | 0.24221 | 0.57486 | 0.3628  | 0.14038 | 0.04438 | 0.11531 | 0.02262 ARNT2    |
| cg20776317 | 0.90174 | 0.83145 | 0.93263 | 0.9393  | 0.96517 | 0.91084 | 0.89896 | 0.8403  | 0.95456 | 0.90565 SNAPC4   |
| cg20777437 | 0.04959 | 0.20774 | 0.78365 | 0.82832 | 0.45877 | 0.08142 | 0.46273 | 0.43007 | 0.3056  | 0.25761 CDCP2    |
| cg20778294 | 0.03787 | 0.04078 | 0.03537 | 0.0387  | 0.03498 | 0.04096 | 0.03663 | 0.02882 | 0.03461 | 0.03323 PPRC1    |
| cg20778669 | 0.80173 | 0.82219 | 0.67832 | 0.7864  | 0.74987 | 0.80102 | 0.4767  | 0.54909 | 0.81315 | 0.84212 MGMT     |
| cg20779414 | 0.04656 | 0.05812 | 0.06059 | 0.05668 | 0.03551 | 0.04959 | 0.04479 | 0.04821 | 0.04158 | 0.04202 STAT6    |
| cg20780953 | 0.07435 | 0.06245 | 0.80986 | 0.91168 | 0.87386 | 0.83405 | 0.33073 | 0.11364 | 0.08198 | 0.05286 RAB3D    |
| cg20781140 | 0.09201 | 0.05478 | 0.04839 | 0.04634 | 0.03827 | 0.04485 | 0.04296 | 0.04962 | 0.04942 | 0.0376 GPR155    |
| cg20781967 | 0.6993  | 0.38001 | 0.66008 | 0.81369 | 0.36953 | 0.20307 | 0.6162  | 0.31819 | 0.08697 | 0.04844 NINJ2    |
| cg20782689 | 0.87068 | 0.87661 | 0.87848 | 0.88976 | 0.84983 | 0.844   | 0.88622 | 0.89444 | 0.89637 | 0.83578 OXA1L    |
| cg20784775 | 0.10842 | 0.1035  | 0.1294  | 0.12949 | 0.3549  | 0.09633 | 0.1126  | 0.11338 | 0.6209  | 0.10436 ARG99    |
| cg20785344 | 0.02333 | 0.02406 | 0.02702 | 0.02638 | 0.02099 | 0.01998 | 0.02125 | 0.02204 | 0.02559 | 0.0262 PGAM5     |
| cg20786074 | 0.66305 | 0.62178 | 0.66139 | 0.61327 | 0.82133 | 0.87741 | 0.88209 | 0.89817 | 0.88919 | 0.73451 EFEMP1   |
| cg20787196 | 0.25744 | 0.17147 | 0.41376 | 0.62065 | 0.57982 | 0.41274 | 0.09005 | 0.10425 | 0.13247 | 0.05337 ITPR2    |
| cg20788083 | 0.86165 | 0.87543 | 0.85251 | 0.86191 | 0.83116 | 0.80819 | 0.83436 | 0.82717 | 0.87142 | 0.83188 VPS33B   |
| cg20789620 | 0.68257 | 0.40716 | 0.48987 | 0.61553 | 0.34527 | 0.43407 | 0.04689 | 0.05704 | 0.05692 | 0.04749 FSD1     |
| cg20789691 | 0.31858 | 0.3985  | 0.56375 | 0.66911 | 0.77393 | 0.74042 | 0.55833 | 0.45359 | 0.41245 | 0.40094 RLN1     |
| cg20789824 | 0.86628 | 0.34994 | 0.89993 | 0.91191 | 0.38739 | 0.36849 | 0.91715 | 0.85696 | 0.91155 | 0.83343 OLFML2A  |
| cg20790056 | 0.86357 | 0.6084  | 0.7958  | 0.87799 | 0.79917 | 0.53588 | 0.40191 | 0.24471 | 0.78318 | 0.45626 MGC23244 |
| cg20790540 | 0.79237 | 0.51512 | 0.83005 | 0.88994 | 0.87956 | 0.8736  | 0.8427  | 0.6065  | 0.68706 | 0.48884 PTCRA    |
| cg20791593 | 0.87225 | 0.43578 | 0.82398 | 0.81896 | 0.86668 | 0.83053 | 0.74182 | 0.56062 | 0.57724 | 0.49942 NEU4     |
| cg20791841 | 0.04912 | 0.04785 | 0.06817 | 0.05295 | 0.02912 | 0.03521 | 0.04821 | 0.04545 | 0.03746 | 0.03495 MAN2B1   |
| cg20792062 | 0.13091 | 0.03978 | 0.66549 | 0.68349 | 0.52919 | 0.35467 | 0.22763 | 0.06998 | 0.03986 | 0.0298 KCNA5     |

|            |         |         |         |         |         |         |         |         |         |         |          |
|------------|---------|---------|---------|---------|---------|---------|---------|---------|---------|---------|----------|
| cg20792294 | 0.04841 | 0.05906 | 0.30285 | 0.45083 | 0.51531 | 0.55123 | 0.08621 | 0.36176 | 0.17932 | 0.47305 | IGF2AS   |
| cg20792833 | 0.87845 | 0.86713 | 0.86112 | 0.88033 | 0.93537 | 0.88739 | 0.88023 | 0.87351 | 0.90209 | 0.88036 | PTPRCAP  |
| cg20793071 | 0.67735 | 0.39007 | 0.74195 | 0.76993 | 0.67223 | 0.74949 | 0.24296 | 0.22877 | 0.74681 | 0.68167 | TMEM59   |
| cg20795401 | 0.79803 | 0.42082 | 0.58726 | 0.61367 | 0.82147 | 0.78725 | 0.81502 | 0.4977  | 0.66673 | 0.30762 | ITGA6    |
| cg20795863 | 0.8334  | 0.79519 | 0.86294 | 0.90472 | 0.73871 | 0.78981 | 0.7627  | 0.60274 | 0.85239 | 0.8185  | NEU2     |
| cg20795913 | 0.51452 | 0.51533 | 0.81122 | 0.80642 | 0.88832 | 0.60306 | 0.7696  | 0.41941 | 0.51829 | 0.51003 | MLX      |
| cg20797216 | 0.87525 | 0.41164 | 0.52837 | 0.58504 | 0.39223 | 0.05572 | 0.03655 | 0.0298  | 0.48454 | 0.09234 | FBN3     |
| cg20797699 | 0.06371 | 0.07413 | 0.06585 | 0.0689  | 0.35492 | 0.17157 | 0.06954 | 0.06697 | 0.0598  | 0.05769 | LIMD2    |
| cg20797766 | 0.06376 | 0.0448  | 0.11968 | 0.14425 | 0.28865 | 0.04856 | 0.2541  | 0.03918 | 0.20867 | 0.05772 | PRSS27   |
| cg20798152 | 0.20555 | 0.09733 | 0.89459 | 0.89712 | 0.93595 | 0.89937 | 0.83652 | 0.88271 | 0.53778 | 0.39003 | CART     |
| cg20801056 | 0.16512 | 0.20833 | 0.56124 | 0.78015 | 0.95693 | 0.94348 | 0.41933 | 0.53491 | 0.95193 | 0.95088 | MBP      |
| cg20802051 | 0.06081 | 0.05475 | 0.07879 | 0.08024 | 0.04505 | 0.05717 | 0.02902 | 0.02474 | 0.05489 | 0.06224 | AK3L1    |
| cg20802392 | 0.8103  | 0.17268 | 0.34929 | 0.54567 | 0.77133 | 0.86861 | 0.79577 | 0.75137 | 0.88689 | 0.60422 | CTSK     |
| cg20803370 | 0.04476 | 0.0459  | 0.05327 | 0.04965 | 0.04079 | 0.04824 | 0.04647 | 0.04548 | 0.04036 | 0.045   | PPOX     |
| cg20804101 | 0.42481 | 0.06818 | 0.78197 | 0.81653 | 0.65197 | 0.81648 | 0.13057 | 0.15171 | 0.58754 | 0.3008  | SLC6A13  |
| cg20804555 | 0.06498 | 0.05117 | 0.0664  | 0.07825 | 0.54085 | 0.22294 | 0.10493 | 0.12727 | 0.0558  | 0.05308 | GSC      |
| cg20804821 | 0.1409  | 0.0941  | 0.58296 | 0.55773 | 0.4541  | 0.3996  | 0.37865 | 0.09318 | 0.35821 | 0.16194 | GPR62    |
| cg20807545 | 0.25621 | 0.07051 | 0.90179 | 0.89699 | 0.88288 | 0.88439 | 0.77568 | 0.55199 | 0.24698 | 0.05771 | ADAMTS18 |
| cg20807701 | 0.15194 | 0.04737 | 0.07999 | 0.06519 | 0.14413 | 0.08608 | 0.05002 | 0.06464 | 0.04071 | 0.03969 | DNAJB9   |
| cg20808145 | 0.03184 | 0.03014 | 0.03253 | 0.02865 | 0.03152 | 0.03688 | 0.03232 | 0.03222 | 0.02794 | 0.02882 | KLC2     |
| cg20811273 | 0.04607 | 0.05173 | 0.03674 | 0.04144 | 0.04382 | 0.04908 | 0.03199 | 0.0342  | 0.03691 | 0.03394 | FLJ33167 |
| cg20811389 | 0.05986 | 0.05739 | 0.05535 | 0.05075 | 0.03851 | 0.04915 | 0.04455 | 0.04325 | 0.042   | 0.0371  | CDC14B   |
| cg20811607 | 0.87964 | 0.12265 | 0.12131 | 0.1173  | 0.13195 | 0.09773 | 0.23281 | 0.12075 | 0.90812 | 0.76439 | SMPD2    |
| cg20812929 | 0.53696 | 0.58511 | 0.43877 | 0.55931 | 0.03322 | 0.04971 | 0.16714 | 0.24518 | 0.06577 | 0.02865 | DHRS4L2  |
| cg20813773 | 0.04241 | 0.03561 | 0.0423  | 0.04256 | 0.03371 | 0.03695 | 0.04161 | 0.03489 | 0.0313  | 0.02781 | MGC34713 |
| cg20815063 | 0.03458 | 0.04177 | 0.03832 | 0.04055 | 0.05808 | 0.03124 | 0.03604 | 0.03393 | 0.0312  | 0.02812 | MRE11A   |
| cg20816612 | 0.15413 | 0.10071 | 0.20309 | 0.15572 | 0.69811 | 0.46881 | 0.16512 | 0.16637 | 0.11791 | 0.10738 | PHKA1    |
| cg20821095 | 0.05067 | 0.03952 | 0.10978 | 0.16315 | 0.04658 | 0.05119 | 0.04457 | 0.0437  | 0.03228 | 0.03145 | FADD     |
| cg20822579 | 0.93331 | 0.82699 | 0.94613 | 0.93345 | 0.92382 | 0.91953 | 0.86109 | 0.81248 | 0.92376 | 0.87798 | RIPK3    |
| cg20822628 | 0.85854 | 0.17005 | 0.95812 | 0.96188 | 0.97027 | 0.9711  | 0.07042 | 0.04532 | 0.49833 | 0.63187 | GATA5    |
| cg20824576 | 0.02441 | 0.02512 | 0.02562 | 0.02485 | 0.02058 | 0.02082 | 0.02027 | 0.02056 | 0.01975 | 0.01622 | CD47     |
| cg20825323 | 0.2258  | 0.07745 | 0.1113  | 0.09537 | 0.14447 | 0.06639 | 0.33372 | 0.35061 | 0.07466 | 0.07132 | IGBP1    |
| cg20828084 | 0.86528 | 0.7378  | 0.8937  | 0.90117 | 0.92804 | 0.89884 | 0.81758 | 0.85058 | 0.85203 | 0.56774 | KIAA1199 |
| cg20830531 | 0.03928 | 0.04352 | 0.04392 | 0.04108 | 0.03411 | 0.03352 | 0.03689 | 0.03503 | 0.03279 | 0.03576 | NUDT6    |
| cg20831492 | 0.04967 | 0.05543 | 0.06483 | 0.07264 | 0.09127 | 0.10399 | 0.06484 | 0.06048 | 0.04765 | 0.04865 | BET1     |
| cg20831708 | 0.06089 | 0.05614 | 0.33605 | 0.61942 | 0.95791 | 0.91009 | 0.52936 | 0.33167 | 0.97026 | 0.914   | SEC31L2  |
| cg20832009 | 0.90745 | 0.56039 | 0.23372 | 0.19156 | 0.08368 | 0.04003 | 0.37527 | 0.05193 | 0.03719 | 0.03459 | STARD8   |
| cg20832020 | 0.28802 | 0.27089 | 0.38486 | 0.54678 | 0.42329 | 0.51492 | 0.26983 | 0.70739 | 0.19775 | 0.18368 | VSIG9    |
| cg20833786 | 0.85145 | 0.65562 | 0.67355 | 0.65345 | 0.5276  | 0.44367 | 0.33095 | 0.27005 | 0.75586 | 0.6023  | MRGPRX3  |
| cg20835282 | 0.40045 | 0.39802 | 0.31478 | 0.6031  | 0.18187 | 0.40386 | 0.37357 | 0.39358 | 0.04453 | 0.03702 | C3orf62  |
| cg20837735 | 0.91599 | 0.91353 | 0.85375 | 0.89045 | 0.07295 | 0.07451 | 0.43131 | 0.3728  | 0.88798 | 0.80727 | SERPINB5 |

|            |         |         |         |         |         |         |         |         |         |                  |
|------------|---------|---------|---------|---------|---------|---------|---------|---------|---------|------------------|
| cg20839025 | 0.54383 | 0.36328 | 0.37872 | 0.38938 | 0.56154 | 0.27575 | 0.43846 | 0.40765 | 0.17318 | 0.18696 PRSS7    |
| cg20839149 | 0.08454 | 0.0992  | 0.18999 | 0.33401 | 0.24514 | 0.08808 | 0.12911 | 0.08457 | 0.08013 | 0.07385 SH2D2A   |
| cg20839219 | 0.06126 | 0.06047 | 0.09248 | 0.0697  | 0.09389 | 0.08444 | 0.07474 | 0.06797 | 0.06235 | 0.07507 SLC39A6  |
| cg20840847 | 0.89553 | 0.76575 | 0.9015  | 0.89371 | 0.75413 | 0.87801 | 0.10346 | 0.08953 | 0.85226 | 0.85488 APBA2    |
| cg20842040 | 0.04207 | 0.04959 | 0.04288 | 0.03603 | 0.03426 | 0.03303 | 0.63652 | 0.64071 | 0.03165 | 0.03138 PRPS2    |
| cg20843052 | 0.06243 | 0.06067 | 0.06482 | 0.06065 | 0.04273 | 0.04806 | 0.05015 | 0.0542  | 0.05551 | 0.0548 KIAA1841  |
| cg20845050 | 0.07814 | 0.04173 | 0.16315 | 0.27514 | 0.08638 | 0.06194 | 0.43123 | 0.07106 | 0.19768 | 0.39322 ZNF7     |
| cg20847746 | 0.77998 | 0.54001 | 0.79261 | 0.77326 | 0.51524 | 0.76147 | 0.77924 | 0.6912  | 0.78093 | 0.76237 S100A1   |
| cg20848130 | 0.87693 | 0.6858  | 0.90277 | 0.89432 | 0.87046 | 0.80563 | 0.83237 | 0.71154 | 0.91091 | 0.79873 GJA12    |
| cg20849549 | 0.03812 | 0.04267 | 0.0455  | 0.04041 | 0.03326 | 0.04152 | 0.03896 | 0.0398  | 0.36343 | 0.34522 PTEN     |
| cg20849987 | 0.82867 | 0.88546 | 0.83923 | 0.86725 | 0.88913 | 0.87364 | 0.59515 | 0.60583 | 0.88012 | 0.89444 LUZP4    |
| cg20850582 | 0.05237 | 0.0654  | 0.05128 | 0.05286 | 0.04609 | 0.05097 | 0.05153 | 0.05018 | 0.04391 | 0.04562 LRBA     |
| cg20850981 | 0.90086 | 0.8929  | 0.1552  | 0.16581 | 0.24175 | 0.20485 | 0.61663 | 0.2417  | 0.93084 | 0.36912 ZNF323   |
| cg20851097 | 0.80651 | 0.74171 | 0.79326 | 0.8361  | 0.83077 | 0.72342 | 0.20717 | 0.53747 | 0.56135 | 0.36157 SPTB     |
| cg20851245 | 0.89049 | 0.89136 | 0.87536 | 0.9004  | 0.886   | 0.87772 | 0.86151 | 0.88815 | 0.88945 | 0.87716 RNF25    |
| cg20852286 | 0.08484 | 0.08177 | 0.08712 | 0.07292 | 0.05976 | 0.0716  | 0.11466 | 0.1041  | 0.07293 | 0.07698 DHFRL1   |
| cg20853593 | 0.13922 | 0.06455 | 0.48248 | 0.51597 | 0.30185 | 0.09485 | 0.07195 | 0.04459 | 0.07763 | 0.08015 DNPEP    |
| cg20854748 | 0.04574 | 0.0518  | 0.0508  | 0.05105 | 0.03907 | 0.046   | 0.04037 | 0.05241 | 0.04531 | 0.0373 PIP5K1A   |
| cg20855303 | 0.09879 | 0.09619 | 0.09813 | 0.09215 | 0.26942 | 0.067   | 0.41696 | 0.61608 | 0.15211 | 0.0712 REPS2     |
| cg20855344 | 0.31791 | 0.15147 | 0.89836 | 0.90179 | 0.69294 | 0.16223 | 0.83606 | 0.11572 | 0.91576 | 0.10039 NR1D2    |
| cg20855565 | 0.03009 | 0.02633 | 0.03278 | 0.03525 | 0.39455 | 0.09016 | 0.03712 | 0.03028 | 0.0283  | 0.02596 TRIM58   |
| cg20856064 | 0.28697 | 0.11216 | 0.09591 | 0.08228 | 0.92418 | 0.95961 | 0.0755  | 0.05899 | 0.09421 | 0.07366 PH-4     |
| cg20856436 | 0.05613 | 0.04704 | 0.05639 | 0.0532  | 0.0645  | 0.04878 | 0.04433 | 0.03821 | 0.0476  | 0.04134 RPS27A   |
| cg20856834 | 0.08315 | 0.07627 | 0.21625 | 0.24615 | 0.14091 | 0.12595 | 0.06838 | 0.06854 | 0.06426 | 0.06591 OR12D3   |
| cg20857253 | 0.52532 | 0.36488 | 0.46567 | 0.60724 | 0.55203 | 0.58961 | 0.10986 | 0.09098 | 0.43376 | 0.35832 TCP10L   |
| cg20857455 | 0.08734 | 0.08361 | 0.09383 | 0.08579 | 0.07357 | 0.07657 | 0.08282 | 0.08906 | 0.07899 | 0.07336 CPNE8    |
| cg20857947 | 0.26411 | 0.11964 | 0.22857 | 0.30237 | 0.13215 | 0.13851 | 0.12391 | 0.09678 | 0.10454 | 0.0764 ASL       |
| cg20858478 | 0.12659 | 0.06164 | 0.07897 | 0.13017 | 0.14134 | 0.12851 | 0.25625 | 0.36593 | 0.11815 | 0.06957 B4GALNT2 |
| cg20858526 | 0.60351 | 0.28181 | 0.79258 | 0.84476 | 0.8966  | 0.75999 | 0.58978 | 0.41651 | 0.51081 | 0.37949 CTCRC    |
| cg20859470 | 0.0671  | 0.06227 | 0.05716 | 0.05976 | 0.04642 | 0.05912 | 0.05729 | 0.05836 | 0.05216 | 0.05415 RPS27    |
| cg20861607 | 0.12334 | 0.05392 | 0.32596 | 0.37424 | 0.0508  | 0.25669 | 0.04843 | 0.03989 | 0.03382 | 0.03129 CHRNA7   |
| cg20862119 | 0.80455 | 0.63844 | 0.81339 | 0.85328 | 0.82129 | 0.84776 | 0.24575 | 0.41671 | 0.34016 | 0.2039 KRT2B     |
| cg20862496 | 0.86741 | 0.79752 | 0.74317 | 0.86338 | 0.79745 | 0.70168 | 0.35884 | 0.38174 | 0.79709 | 0.75914 SLURP1   |
| cg20864636 | 0.81101 | 0.79941 | 0.78084 | 0.78846 | 0.73757 | 0.76538 | 0.78854 | 0.81002 | 0.82255 | 0.81445 GARNL3   |
| cg20865068 | 0.04492 | 0.05244 | 0.05352 | 0.04442 | 0.04853 | 0.0578  | 0.0366  | 0.03903 | 0.03128 | 0.03001 TM9SF2   |
| cg20866788 | 0.05368 | 0.04778 | 0.06777 | 0.12298 | 0.07068 | 0.05334 | 0.05716 | 0.12909 | 0.05353 | 0.06457 ARL1     |
| cg20867633 | 0.12072 | 0.05485 | 0.71915 | 0.87797 | 0.5759  | 0.34149 | 0.38937 | 0.07251 | 0.07019 | 0.04217 GOLT1A   |
| cg20868410 | 0.03632 | 0.041   | 0.04801 | 0.03382 | 0.07167 | 0.0328  | 0.04419 | 0.03908 | 0.02791 | 0.02839 HBEGF    |
| cg20869203 | 0.20769 | 0.20583 | 0.56938 | 0.5633  | 0.30473 | 0.35513 | 0.21139 | 0.18189 | 0.19819 | 0.22098 LHFPL1   |
| cg20869710 | 0.04529 | 0.0434  | 0.04461 | 0.03299 | 0.04159 | 0.03707 | 0.04962 | 0.04538 | 0.03475 | 0.03512 APIP     |
| cg20870362 | 0.53592 | 0.3861  | 0.84132 | 0.90229 | 0.86708 | 0.85327 | 0.89886 | 0.85293 | 0.90919 | 0.55905 CCIN     |

|            |         |         |         |         |         |         |         |         |         |         |          |
|------------|---------|---------|---------|---------|---------|---------|---------|---------|---------|---------|----------|
| cg20870559 | 0.83006 | 0.46806 | 0.59538 | 0.75528 | 0.25311 | 0.42414 | 0.67269 | 0.54963 | 0.04025 | 0.03437 | OAS2     |
| cg20872461 | 0.02375 | 0.0239  | 0.02432 | 0.02481 | 0.01791 | 0.02165 | 0.02107 | 0.02384 | 0.02029 | 0.02018 | RFC4     |
| cg20876010 | 0.88257 | 0.89119 | 0.80817 | 0.86087 | 0.91593 | 0.86304 | 0.802   | 0.81754 | 0.46771 | 0.42612 | CACHD1   |
| cg20877313 | 0.06346 | 0.03173 | 0.1223  | 0.31317 | 0.65299 | 0.65058 | 0.06391 | 0.03131 | 0.0698  | 0.02418 | GLS2     |
| cg20878850 | 0.07923 | 0.0393  | 0.05967 | 0.05891 | 0.07352 | 0.0365  | 0.07558 | 0.04866 | 0.04301 | 0.09645 | AR       |
| cg20879768 | 0.84927 | 0.71485 | 0.77861 | 0.82422 | 0.77471 | 0.80966 | 0.77033 | 0.81786 | 0.78307 | 0.76352 | TCEB3B   |
| cg20879959 | 0.37942 | 0.40321 | 0.39141 | 0.37501 | 0.52736 | 0.47404 | 0.29653 | 0.32458 | 0.47447 | 0.46894 | HLA-A    |
| cg20880234 | 0.05314 | 0.06081 | 0.92108 | 0.88597 | 0.78447 | 0.79967 | 0.45888 | 0.50057 | 0.65775 | 0.72377 | ZNF198   |
| cg20881054 | 0.02568 | 0.02667 | 0.06549 | 0.05837 | 0.16228 | 0.02799 | 0.03658 | 0.02894 | 0.03811 | 0.02556 | VASH1    |
| cg20881888 | 0.03374 | 0.03407 | 0.09351 | 0.05366 | 0.98216 | 0.97726 | 0.46731 | 0.62895 | 0.64568 | 0.62587 | ZMYND10  |
| cg20881910 | 0.05057 | 0.06651 | 0.95702 | 0.96014 | 0.23631 | 0.32276 | 0.95252 | 0.95678 | 0.34917 | 0.2999  | HNT      |
| cg20882852 | 0.06643 | 0.07906 | 0.10009 | 0.08641 | 0.09751 | 0.08138 | 0.07009 | 0.06257 | 0.07356 | 0.15924 | PKIB     |
| cg20884362 | 0.12581 | 0.06229 | 0.72855 | 0.81951 | 0.82629 | 0.34453 | 0.68236 | 0.4304  | 0.26933 | 0.09708 | C21orf70 |
| cg20884697 | 0.03339 | 0.03386 | 0.04572 | 0.04178 | 0.03416 | 0.04194 | 0.02942 | 0.03485 | 0.04985 | 0.06857 | MANEA    |
| cg20885089 | 0.06297 | 0.05431 | 0.05541 | 0.05395 | 0.03999 | 0.054   | 0.0488  | 0.04911 | 0.04737 | 0.04554 | AMPD2    |
| cg20886062 | 0.86571 | 0.76075 | 0.03515 | 0.03487 | 0.02605 | 0.032   | 0.02937 | 0.03054 | 0.03232 | 0.02548 | DCI      |
| cg20887241 | 0.49175 | 0.22292 | 0.65215 | 0.63649 | 0.77024 | 0.81274 | 0.38559 | 0.16524 | 0.68716 | 0.76055 | HTR1D    |
| cg20887455 | 0.06589 | 0.03759 | 0.05345 | 0.04611 | 0.18702 | 0.03468 | 0.03874 | 0.03479 | 0.04529 | 0.03333 | PHB      |
| cg20888386 | 0.02889 | 0.0281  | 0.5735  | 0.63559 | 0.64795 | 0.50374 | 0.02052 | 0.02648 | 0.01902 | 0.01977 | CRYBA2   |
| cg20888907 | 0.06097 | 0.07274 | 0.09096 | 0.07402 | 0.0986  | 0.06513 | 0.12264 | 0.12334 | 0.05242 | 0.07123 | LETM2    |
| cg20890210 | 0.07646 | 0.0758  | 0.36126 | 0.38969 | 0.17794 | 0.12281 | 0.06856 | 0.06594 | 0.08171 | 0.44145 | KCNB2    |
| cg20891301 | 0.95168 | 0.95847 | 0.95579 | 0.95794 | 0.9757  | 0.96623 | 0.95957 | 0.95701 | 0.95413 | 0.96275 | MSX1     |
| cg20891917 | 0.89333 | 0.84344 | 0.885   | 0.90765 | 0.87874 | 0.8066  | 0.86419 | 0.85506 | 0.88978 | 0.72725 | IFRD1    |
| cg20892287 | 0.75154 | 0.71669 | 0.65405 | 0.74293 | 0.60076 | 0.75862 | 0.62617 | 0.61592 | 0.81963 | 0.76156 | RICS     |
| cg20893022 | 0.17064 | 0.15414 | 0.47116 | 0.61492 | 0.12435 | 0.07    | 0.07442 | 0.07511 | 0.05505 | 0.05393 | C19orf30 |
| cg20895028 | 0.81352 | 0.69989 | 0.7807  | 0.8435  | 0.81591 | 0.80421 | 0.78824 | 0.8108  | 0.82959 | 0.80863 | CDH26    |
| cg20895877 | 0.85467 | 0.53672 | 0.67664 | 0.82841 | 0.76293 | 0.84043 | 0.15542 | 0.14063 | 0.17378 | 0.18382 | PRIMA1   |
| cg20896197 | 0.02956 | 0.02796 | 0.03337 | 0.02919 | 0.02838 | 0.02933 | 0.02769 | 0.02888 | 0.02563 | 0.02586 | MPHOSPH1 |
| cg20897667 | 0.55402 | 0.04179 | 0.76889 | 0.79037 | 0.45643 | 0.46614 | 0.53241 | 0.39573 | 0.1865  | 0.16407 | PEG3     |
| cg20899053 | 0.06804 | 0.06459 | 0.07573 | 0.07069 | 0.04733 | 0.06763 | 0.34208 | 0.58058 | 0.05499 | 0.04924 | HLXB9    |
| cg20899321 | 0.90533 | 0.58681 | 0.89199 | 0.89806 | 0.85842 | 0.90711 | 0.86246 | 0.87659 | 0.91142 | 0.88654 | LRRC32   |
| cg20900524 | 0.04881 | 0.04142 | 0.07723 | 0.05091 | 0.05663 | 0.05493 | 0.06559 | 0.04776 | 0.06272 | 0.04487 | PPT1     |
| cg20902737 | 0.08183 | 0.07988 | 0.06997 | 0.0764  | 0.07725 | 0.07959 | 0.07865 | 0.07474 | 0.08071 | 0.08608 | EFTUD2   |
| cg20903926 | 0.95773 | 0.91602 | 0.96226 | 0.97014 | 0.9754  | 0.97284 | 0.96661 | 0.82653 | 0.96776 | 0.96764 | C1orf177 |
| cg20904010 | 0.15993 | 0.26202 | 0.2196  | 0.421   | 0.60565 | 0.85734 | 0.17978 | 0.27259 | 0.60876 | 0.5029  | SYN3     |
| cg20904141 | 0.03672 | 0.03617 | 0.03768 | 0.04113 | 0.02816 | 0.03822 | 0.03284 | 0.03815 | 0.02961 | 0.03517 | MRPL45   |
| cg20906802 | 0.61067 | 0.39699 | 0.68339 | 0.77094 | 0.54345 | 0.68034 | 0.58002 | 0.47446 | 0.38982 | 0.33568 | OPN5     |
| cg20907471 | 0.80909 | 0.12724 | 0.60367 | 0.70108 | 0.80429 | 0.37257 | 0.12508 | 0.12259 | 0.1838  | 0.13554 | PAX1     |
| cg20908204 | 0.43547 | 0.22293 | 0.39669 | 0.59706 | 0.06848 | 0.06824 | 0.05919 | 0.20428 | 0.08487 | 0.16928 | DMPK     |
| cg20908993 | 0.03709 | 0.03973 | 0.03618 | 0.02966 | 0.03029 | 0.03302 | 0.03523 | 0.03273 | 0.03031 | 0.02855 | ATP6V1D  |
| cg20909686 | 0.59466 | 0.06387 | 0.96863 | 0.97788 | 0.97216 | 0.96982 | 0.83433 | 0.79152 | 0.97763 | 0.97606 | OVOL1    |

|            |         |         |         |         |         |         |         |         |         |                   |
|------------|---------|---------|---------|---------|---------|---------|---------|---------|---------|-------------------|
| cg20910436 | 0.06218 | 0.06062 | 0.0573  | 0.05525 | 0.04181 | 0.0598  | 0.0552  | 0.0512  | 0.04851 | 0.0528 P4HA1      |
| cg20910746 | 0.14921 | 0.05745 | 0.54703 | 0.66012 | 0.82458 | 0.72961 | 0.75674 | 0.16649 | 0.33971 | 0.41723 BBOX1     |
| cg20913782 | 0.03792 | 0.03808 | 0.03528 | 0.03484 | 0.0332  | 0.03801 | 0.03059 | 0.02971 | 0.03068 | 0.02942 LOC113444 |
| cg20914508 | 0.26257 | 0.09532 | 0.77415 | 0.8752  | 0.12442 | 0.08377 | 0.18774 | 0.08824 | 0.86313 | 0.81132 GAP43     |
| cg20916483 | 0.02772 | 0.02892 | 0.03144 | 0.03176 | 0.02377 | 0.0248  | 0.0263  | 0.02704 | 0.02164 | 0.021 C11orf56    |
| cg20916523 | 0.93508 | 0.07023 | 0.12113 | 0.14152 | 0.57541 | 0.34754 | 0.93369 | 0.87899 | 0.05883 | 0.05171 VHL       |
| cg20917484 | 0.04586 | 0.04759 | 0.0501  | 0.05027 | 0.04617 | 0.03626 | 0.04237 | 0.0532  | 0.04409 | 0.04014 GAPDH     |
| cg20918903 | 0.04307 | 0.05557 | 0.06588 | 0.04431 | 0.05863 | 0.05439 | 0.03747 | 0.04093 | 0.04287 | 0.04622 JMJ1A     |
| cg20919133 | 0.04297 | 0.04841 | 0.18496 | 0.30744 | 0.13453 | 0.07588 | 0.06219 | 0.1859  | 0.04225 | 0.03763 MLL3      |
| cg20919556 | 0.05802 | 0.05048 | 0.05976 | 0.05828 | 0.0485  | 0.04964 | 0.04116 | 0.0389  | 0.0458  | 0.04623 CNKSR3    |
| cg20919799 | 0.055   | 0.0527  | 0.07776 | 0.06109 | 0.83448 | 0.27482 | 0.04912 | 0.04921 | 0.06106 | 0.04542 CDKN1C    |
| cg20922422 | 0.14268 | 0.19561 | 0.50458 | 0.70129 | 0.11399 | 0.11056 | 0.48529 | 0.1089  | 0.08589 | 0.0879 PCYT1B     |
| cg20923575 | 0.04345 | 0.04513 | 0.04937 | 0.05742 | 0.06964 | 0.06115 | 0.03439 | 0.03859 | 0.0394  | 0.04691 MTMR4     |
| cg20924286 | 0.59504 | 0.52315 | 0.47812 | 0.51502 | 0.35866 | 0.38899 | 0.7455  | 0.79348 | 0.69423 | 0.68741 CLDN11    |
| cg20925178 | 0.18021 | 0.10896 | 0.12813 | 0.11834 | 0.29986 | 0.35684 | 0.0803  | 0.07661 | 0.10023 | 0.08635 CWF19L1   |
| cg20925482 | 0.04786 | 0.04365 | 0.03931 | 0.03412 | 0.03771 | 0.03563 | 0.034   | 0.03723 | 0.03465 | 0.02906 C2orf111  |
| cg20925811 | 0.86285 | 0.66412 | 0.89714 | 0.89689 | 0.84288 | 0.85663 | 0.33504 | 0.04412 | 0.89877 | 0.8615 MMP9       |
| cg20925954 | 0.32012 | 0.23165 | 0.10576 | 0.0972  | 0.28774 | 0.10834 | 0.24187 | 0.10315 | 0.1321  | 0.10125 DUSP5     |
| cg20925955 | 0.90814 | 0.89987 | 0.89468 | 0.90827 | 0.89798 | 0.89535 | 0.93061 | 0.94276 | 0.91788 | 0.92011 TIAM2     |
| cg20927059 | 0.07053 | 0.07    | 0.2079  | 0.32696 | 0.34703 | 0.40395 | 0.3214  | 0.02533 | 0.0299  | 0.02301 TFCP2     |
| cg20930618 | 0.03171 | 0.03077 | 0.02682 | 0.02263 | 0.03857 | 0.02712 | 0.02626 | 0.02163 | 0.03831 | 0.03611 VPS72     |
| cg20931907 | 0.84505 | 0.85185 | 0.70943 | 0.63104 | 0.8576  | 0.90523 | 0.04755 | 0.03121 | 0.22364 | 0.21697 LOC340602 |
| cg20932053 | 0.48955 | 0.81368 | 0.77054 | 0.8731  | 0.72202 | 0.81404 | 0.77732 | 0.86359 | 0.60545 | 0.48028 CPM       |
| cg20932765 | 0.05562 | 0.05414 | 0.07799 | 0.06657 | 0.06377 | 0.0653  | 0.04678 | 0.04622 | 0.05873 | 0.06881 TRIM33    |
| cg20935106 | 0.58883 | 0.45512 | 0.49944 | 0.62998 | 0.16091 | 0.08189 | 0.09401 | 0.08052 | 0.06926 | 0.06921 TAPBPL    |
| cg20937139 | 0.02751 | 0.0264  | 0.02803 | 0.02614 | 0.01892 | 0.02634 | 0.02182 | 0.02307 | 0.02613 | 0.02454 PDGFC     |
| cg20938286 | 0.029   | 0.02551 | 0.02737 | 0.02634 | 0.02351 | 0.02496 | 0.02722 | 0.02741 | 0.02141 | 0.0226 CLDND1     |
| cg20938359 | 0.17427 | 0.05346 | 0.58678 | 0.60192 | 0.29492 | 0.21307 | 0.27832 | 0.06322 | 0.75382 | 0.11353 SLC6A12   |
| cg20938689 | 0.49673 | 0.43437 | 0.35618 | 0.36716 | 0.33667 | 0.36564 | 0.3354  | 0.37592 | 0.39533 | 0.36619 COX7C     |
| cg20939319 | 0.68504 | 0.50649 | 0.55027 | 0.65351 | 0.27061 | 0.58874 | 0.358   | 0.29725 | 0.19179 | 0.18496 TEX15     |
| cg20940661 | 0.02503 | 0.02458 | 0.02959 | 0.02795 | 0.03351 | 0.02165 | 0.02556 | 0.02513 | 0.03859 | 0.11784 KCNS3     |
| cg20945531 | 0.84999 | 0.87211 | 0.46292 | 0.48423 | 0.9073  | 0.88487 | 0.46218 | 0.48128 | 0.88881 | 0.73025 FLJ34503  |
| cg20947775 | 0.05994 | 0.04668 | 0.14618 | 0.18717 | 0.07834 | 0.06084 | 0.062   | 0.05296 | 0.64438 | 0.60944 SCD5      |
| cg20948472 | 0.10331 | 0.07804 | 0.1238  | 0.10182 | 0.12292 | 0.09391 | 0.11612 | 0.09993 | 0.07864 | 0.09658 ZMAT2     |
| cg20950011 | 0.07113 | 0.03784 | 0.803   | 0.81485 | 0.2944  | 0.05523 | 0.24977 | 0.82628 | 0.57666 | 0.74013 CIDEA     |
| cg20950277 | 0.71977 | 0.59759 | 0.68875 | 0.70704 | 0.61089 | 0.33591 | 0.68328 | 0.72757 | 0.7438  | 0.37719 TNIP3     |
| cg20951444 | 0.62774 | 0.27066 | 0.57692 | 0.66966 | 0.78392 | 0.4724  | 0.74122 | 0.48741 | 0.87461 | 0.4372 FNDC5      |
| cg20951539 | 0.30083 | 0.11921 | 0.57687 | 0.62407 | 0.49463 | 0.34082 | 0.49922 | 0.70302 | 0.27519 | 0.08273 PXT1      |
| cg20951726 | 0.05423 | 0.055   | 0.04874 | 0.05783 | 0.04491 | 0.04637 | 0.05694 | 0.07088 | 0.04661 | 0.04999 MTMR9     |
| cg20951821 | 0.02533 | 0.02576 | 0.03032 | 0.02701 | 0.02332 | 0.02575 | 0.02499 | 0.02756 | 0.02046 | 0.02229 ENC1      |
| cg20953047 | 0.84291 | 0.69729 | 0.87397 | 0.89995 | 0.9063  | 0.9078  | 0.59775 | 0.67052 | 0.90485 | 0.81235 PIGR      |

|            |         |         |         |         |         |         |         |         |         |         |          |
|------------|---------|---------|---------|---------|---------|---------|---------|---------|---------|---------|----------|
| cg20955688 | 0.35899 | 0.45402 | 0.14437 | 0.39026 | 0.56949 | 0.5307  | 0.5246  | 0.28082 | 0.24096 | 0.07281 | TMEM71   |
| cg20955831 | 0.03379 | 0.03189 | 0.04219 | 0.03012 | 0.03631 | 0.02967 | 0.03071 | 0.02752 | 0.03137 | 0.0285  | LRRC16   |
| cg20956314 | 0.69953 | 0.43826 | 0.84886 | 0.85911 | 0.72266 | 0.82794 | 0.88522 | 0.89059 | 0.86887 | 0.83428 | XYLB     |
| cg20956373 | 0.0332  | 0.03493 | 0.03815 | 0.04131 | 0.04085 | 0.04386 | 0.03285 | 0.0292  | 0.0353  | 0.03143 | USP48    |
| cg20957193 | 0.0522  | 0.04985 | 0.05386 | 0.04269 | 0.0532  | 0.04754 | 0.04257 | 0.0456  | 0.04325 | 0.05028 | ZNRF1    |
| cg20959523 | 0.069   | 0.07306 | 0.06642 | 0.05865 | 0.06254 | 0.07027 | 0.06005 | 0.0621  | 0.05977 | 0.06518 | FIGN     |
| cg20959866 | 0.08685 | 0.03848 | 0.86336 | 0.93862 | 0.96868 | 0.93622 | 0.87044 | 0.82907 | 0.94283 | 0.93019 | AJAP1    |
| cg20964758 | 0.03989 | 0.03335 | 0.0472  | 0.0401  | 0.03561 | 0.03824 | 0.03707 | 0.03267 | 0.02918 | 0.0327  | COVA1    |
| cg20965815 | 0.7132  | 0.50317 | 0.68531 | 0.71926 | 0.63767 | 0.67289 | 0.69529 | 0.72223 | 0.27027 | 0.20808 | DPCR1    |
| cg20966551 | 0.0271  | 0.0256  | 0.41211 | 0.46584 | 0.03281 | 0.02124 | 0.03126 | 0.02121 | 0.06827 | 0.02112 | MAST1    |
| cg20966972 | 0.04281 | 0.04013 | 0.04222 | 0.04324 | 0.02799 | 0.03648 | 0.03754 | 0.0355  | 0.03413 | 0.03629 | MYST3    |
| cg20967028 | 0.88553 | 0.87659 | 0.84946 | 0.87951 | 0.85907 | 0.88676 | 0.87119 | 0.87497 | 0.87498 | 0.88125 | ART4     |
| cg20967220 | 0.78005 | 0.47668 | 0.75096 | 0.82244 | 0.74543 | 0.64642 | 0.79823 | 0.3424  | 0.86618 | 0.51154 | GCM1     |
| cg20969242 | 0.05765 | 0.05102 | 0.11162 | 0.10677 | 0.08563 | 0.06818 | 0.04724 | 0.03916 | 0.06041 | 0.06132 | GON4     |
| cg20969846 | 0.07077 | 0.07031 | 0.09772 | 0.0732  | 0.08534 | 0.06777 | 0.06673 | 0.07449 | 0.05591 | 0.04576 | DIDO1    |
| cg20970875 | 0.07753 | 0.04091 | 0.05575 | 0.17735 | 0.06975 | 0.03094 | 0.07689 | 0.04129 | 0.03956 | 0.0343  | ANKRD47  |
| cg20972214 | 0.32048 | 0.29664 | 0.03842 | 0.03521 | 0.72669 | 0.52177 | 0.14389 | 0.10993 | 0.02908 | 0.02831 | SLC2A3   |
| cg20972416 | 0.0299  | 0.03054 | 0.03378 | 0.03214 | 0.03762 | 0.03855 | 0.02709 | 0.02744 | 0.02979 | 0.02913 | XLF      |
| cg20972495 | 0.81774 | 0.81069 | 0.80133 | 0.82892 | 0.82383 | 0.84258 | 0.82072 | 0.81824 | 0.81314 | 0.80445 | SEC22L3  |
| cg20972543 | 0.03368 | 0.03787 | 0.03629 | 0.03521 | 0.02583 | 0.03624 | 0.02743 | 0.02893 | 0.0314  | 0.03485 | HERC3    |
| cg20972553 | 0.90815 | 0.76535 | 0.91195 | 0.91754 | 0.88269 | 0.89611 | 0.90308 | 0.92165 | 0.92358 | 0.88847 | JDP2     |
| cg20973210 | 0.31152 | 0.0553  | 0.94066 | 0.93808 | 0.92336 | 0.81948 | 0.90799 | 0.8336  | 0.66619 | 0.70484 | C19orf35 |
| cg20974196 | 0.23305 | 0.07617 | 0.61083 | 0.76234 | 0.5865  | 0.80329 | 0.0654  | 0.04961 | 0.35586 | 0.07364 | CFD      |
| cg20975478 | 0.10041 | 0.09868 | 0.09826 | 0.09312 | 0.05869 | 0.08194 | 0.10056 | 0.09577 | 0.08549 | 0.08432 | CCDC24   |
| cg20977411 | 0.05901 | 0.05856 | 0.14253 | 0.10624 | 0.08397 | 0.05951 | 0.04972 | 0.04467 | 0.0686  | 0.07971 | PMVK     |
| cg20977864 | 0.16149 | 0.07694 | 0.84961 | 0.7811  | 0.85449 | 0.8545  | 0.10202 | 0.0988  | 0.05518 | 0.05558 | HYDIN    |
| cg20979602 | 0.05667 | 0.04149 | 0.04538 | 0.05002 | 0.03704 | 0.0396  | 0.0414  | 0.03995 | 0.03377 | 0.03188 | PAPD4    |
| cg20979799 | 0.13429 | 0.09642 | 0.71759 | 0.77713 | 0.76993 | 0.61082 | 0.42537 | 0.50836 | 0.13065 | 0.10966 | RFXDC1   |
| cg20979896 | 0.03529 | 0.03739 | 0.03931 | 0.04192 | 0.04479 | 0.05214 | 0.03484 | 0.03079 | 0.02896 | 0.03135 | PDRG1    |
| cg20980592 | 0.49266 | 0.63741 | 0.81587 | 0.88196 | 0.64835 | 0.82612 | 0.7957  | 0.46013 | 0.78196 | 0.66398 | MEP1A    |
| cg20981615 | 0.85595 | 0.79208 | 0.86564 | 0.88544 | 0.8302  | 0.83519 | 0.79853 | 0.13407 | 0.87569 | 0.80186 | TXK      |
| cg20981893 | 0.164   | 0.0616  | 0.08413 | 0.08288 | 0.09546 | 0.05934 | 0.07855 | 0.06027 | 0.07723 | 0.04808 | HSD11B2  |
| cg20982583 | 0.02938 | 0.03262 | 0.03189 | 0.03434 | 0.02754 | 0.02857 | 0.03045 | 0.02555 | 0.03019 | 0.02667 | POLR2F   |
| cg20985014 | 0.60386 | 0.42528 | 0.73456 | 0.85442 | 0.8773  | 0.88591 | 0.57172 | 0.81206 | 0.51905 | 0.48015 | WISP3    |
| cg20986134 | 0.03403 | 0.03654 | 0.04086 | 0.0332  | 0.03144 | 0.02951 | 0.03241 | 0.02969 | 0.02642 | 0.02837 | LMNB1    |
| cg20987610 | 0.59062 | 0.55731 | 0.79199 | 0.85038 | 0.48679 | 0.80842 | 0.44045 | 0.81939 | 0.6745  | 0.47832 | CDH17    |
| cg20988616 | 0.66038 | 0.72955 | 0.74772 | 0.79637 | 0.69902 | 0.75444 | 0.76299 | 0.7547  | 0.75359 | 0.68878 | ENPP3    |
| cg20988728 | 0.05    | 0.04585 | 0.05871 | 0.05827 | 0.24336 | 0.0557  | 0.06604 | 0.0545  | 0.10042 | 0.04178 | MGC17330 |
| cg20991095 | 0.03546 | 0.02963 | 0.03192 | 0.03007 | 0.0362  | 0.04309 | 0.03119 | 0.03266 | 0.02098 | 0.01679 | USP49    |
| cg20991801 | 0.04215 | 0.04702 | 0.05012 | 0.04472 | 0.03697 | 0.04813 | 0.03796 | 0.04715 | 0.04125 | 0.03732 | CDC2L5   |
| cg20993403 | 0.38581 | 0.20585 | 0.62426 | 0.71016 | 0.88396 | 0.87848 | 0.69454 | 0.71603 | 0.43682 | 0.52518 | EPB41L1  |

|            |         |         |         |         |         |         |         |         |         |                  |
|------------|---------|---------|---------|---------|---------|---------|---------|---------|---------|------------------|
| cg20994561 | 0.62623 | 0.34203 | 0.91801 | 0.9488  | 0.97935 | 0.94136 | 0.44532 | 0.3724  | 0.94505 | 0.7049 BAI1      |
| cg20994801 | 0.87148 | 0.89389 | 0.88593 | 0.90276 | 0.87999 | 0.88305 | 0.62287 | 0.41915 | 0.88826 | 0.84875 PIK3CD   |
| cg20998885 | 0.7902  | 0.80022 | 0.43478 | 0.48614 | 0.67162 | 0.70865 | 0.46911 | 0.50582 | 0.4085  | 0.34996 C20orf79 |
| cg20999813 | 0.03624 | 0.03685 | 0.03572 | 0.03387 | 0.0257  | 0.03279 | 0.0318  | 0.03041 | 0.02789 | 0.02707 USP10    |
| cg20999934 | 0.03777 | 0.04399 | 0.03817 | 0.03708 | 0.02799 | 0.04033 | 0.03641 | 0.03822 | 0.0358  | 0.03287 NFX1     |
| cg21000021 | 0.22752 | 0.07634 | 0.21901 | 0.27736 | 0.0878  | 0.07776 | 0.11108 | 0.05996 | 0.08936 | 0.0618 MYBBP1A   |
| cg21003606 | 0.88893 | 0.55908 | 0.82762 | 0.87465 | 0.80206 | 0.86251 | 0.57635 | 0.48586 | 0.74689 | 0.89922 CALN1    |
| cg21004129 | 0.3223  | 0.07522 | 0.44198 | 0.65383 | 0.29515 | 0.33665 | 0.19505 | 0.1061  | 0.26186 | 0.13682 IL8RA    |
| cg21006686 | 0.05706 | 0.06229 | 0.32013 | 0.38282 | 0.86446 | 0.80897 | 0.05219 | 0.04593 | 0.04708 | 0.03834 NOS1     |
| cg21008709 | 0.09645 | 0.0834  | 0.0864  | 0.07354 | 0.15347 | 0.11212 | 0.06453 | 0.0603  | 0.06673 | 0.07134 SS18L2   |
| cg21008828 | 0.06043 | 0.07768 | 0.23401 | 0.47864 | 0.48697 | 0.12966 | 0.07296 | 0.05227 | 0.60909 | 0.05321 TNK2     |
| cg21010050 | 0.0387  | 0.03783 | 0.03728 | 0.03607 | 0.02612 | 0.03153 | 0.03728 | 0.03725 | 0.02614 | 0.03247 TBC1D23  |
| cg21010197 | 0.03166 | 0.03436 | 0.0399  | 0.03201 | 0.02718 | 0.02779 | 0.03205 | 0.03063 | 0.02607 | 0.02962 CDCA8    |
| cg21010262 | 0.0744  | 0.04179 | 0.29706 | 0.50626 | 0.80192 | 0.8224  | 0.08736 | 0.03416 | 0.89244 | 0.79169 MRPS2    |
| cg21011830 | 0.07179 | 0.06205 | 0.0606  | 0.0732  | 0.04741 | 0.04839 | 0.04725 | 0.05178 | 0.04736 | 0.05277 RPL18A   |
| cg21012874 | 0.30811 | 0.27754 | 0.97419 | 0.97006 | 0.90346 | 0.59067 | 0.96619 | 0.03505 | 0.71512 | 0.69869 SNCG     |
| cg21016177 | 0.26159 | 0.04694 | 0.1221  | 0.12142 | 0.03464 | 0.03772 | 0.10313 | 0.05082 | 0.23822 | 0.17904 EXOC7    |
| cg21017752 | 0.09025 | 0.05665 | 0.14848 | 0.08701 | 0.03889 | 0.04957 | 0.04818 | 0.05047 | 0.05158 | 0.04636 PPP1R3C  |
| cg21019522 | 0.64914 | 0.26891 | 0.80382 | 0.8569  | 0.85446 | 0.5961  | 0.81623 | 0.60782 | 0.02296 | 0.02521 SLC22A18 |
| cg21019820 | 0.03241 | 0.03164 | 0.03106 | 0.03115 | 0.034   | 0.03312 | 0.0289  | 0.02962 | 0.03022 | 0.02676 DALRD3   |
| cg21020082 | 0.05551 | 0.04629 | 0.06301 | 0.06088 | 0.10167 | 0.06513 | 0.04742 | 0.04    | 0.05893 | 0.05556 C2orf24  |
| cg21020710 | 0.24767 | 0.11836 | 0.08725 | 0.04333 | 0.17141 | 0.35628 | 0.03164 | 0.03458 | 0.03509 | 0.02443 ZNF544   |
| cg21021629 | 0.36733 | 0.21585 | 0.73483 | 0.7638  | 0.68444 | 0.76785 | 0.72903 | 0.74901 | 0.78495 | 0.73739 NRIP1    |
| cg21022247 | 0.91701 | 0.72758 | 0.94606 | 0.95985 | 0.96915 | 0.88526 | 0.93878 | 0.9308  | 0.95841 | 0.92161 BIN2     |
| cg21022395 | 0.83943 | 0.64848 | 0.83145 | 0.85509 | 0.74052 | 0.84389 | 0.8229  | 0.74827 | 0.85596 | 0.842 SHOC2      |
| cg21022435 | 0.90167 | 0.6792  | 0.90267 | 0.91419 | 0.90574 | 0.86917 | 0.85614 | 0.46574 | 0.93608 | 0.59668 NFRKB    |
| cg21023001 | 0.15268 | 0.0844  | 0.45685 | 0.49998 | 0.39492 | 0.83014 | 0.1736  | 0.08348 | 0.42987 | 0.30952 C1QR1    |
| cg21023114 | 0.27958 | 0.26486 | 0.67064 | 0.73979 | 0.84191 | 0.7305  | 0.23349 | 0.17589 | 0.48819 | 0.47359 IFNA14   |
| cg21023770 | 0.61148 | 0.81856 | 0.86184 | 0.89081 | 0.60942 | 0.85808 | 0.81661 | 0.50654 | 0.79873 | 0.591 C20orf165  |
| cg21024145 | 0.03442 | 0.03558 | 0.03493 | 0.03384 | 0.02639 | 0.02844 | 0.03094 | 0.03201 | 0.02322 | 0.0254 RPS15A    |
| cg21024391 | 0.03014 | 0.03715 | 0.05394 | 0.04459 | 0.04687 | 0.03564 | 0.03083 | 0.02324 | 0.03379 | 0.03388 GLMN     |
| cg21026663 | 0.04067 | 0.04456 | 0.05732 | 0.04269 | 0.09176 | 0.06287 | 0.94156 | 0.95312 | 0.0238  | 0.02389 HIST1H4D |
| cg21028326 | 0.03562 | 0.03401 | 0.03932 | 0.03253 | 0.03072 | 0.03308 | 0.03004 | 0.02986 | 0.03083 | 0.03279 TUBGCP6  |
| cg21029904 | 0.094   | 0.0781  | 0.09902 | 0.07487 | 0.30662 | 0.2848  | 0.19137 | 0.30305 | 0.06008 | 0.05552 ZNF91    |
| cg21030400 | 0.85429 | 0.46452 | 0.88168 | 0.87788 | 0.86905 | 0.71412 | 0.84569 | 0.8034  | 0.85836 | 0.75041 MKNK2    |
| cg21030483 | 0.0425  | 0.04463 | 0.29506 | 0.27649 | 0.04955 | 0.04179 | 0.3636  | 0.28222 | 0.04123 | 0.04201 FAM11A   |
| cg21030598 | 0.67958 | 0.417   | 0.75662 | 0.83451 | 0.77673 | 0.77668 | 0.49171 | 0.40179 | 0.81635 | 0.76055 PAK2     |
| cg21032203 | 0.06827 | 0.05705 | 0.10437 | 0.07351 | 0.1504  | 0.10171 | 0.06296 | 0.0503  | 0.08139 | 0.0869 ZNF265    |
| cg21032583 | 0.82735 | 0.8286  | 0.82632 | 0.82585 | 0.74402 | 0.49567 | 0.82135 | 0.64015 | 0.85242 | 0.79686 LMLN     |
| cg21033494 | 0.43887 | 0.24965 | 0.29903 | 0.35949 | 0.41821 | 0.60879 | 0.16063 | 0.41359 | 0.18569 | 0.15969 MSMB     |
| cg21033855 | 0.09669 | 0.04832 | 0.19956 | 0.19113 | 0.23605 | 0.03582 | 0.10835 | 0.04732 | 0.12808 | 0.03277 ZNF690   |



|            |         |         |         |         |         |         |         |         |         |                  |
|------------|---------|---------|---------|---------|---------|---------|---------|---------|---------|------------------|
| cg21034676 | 0.07808 | 0.04186 | 0.24404 | 0.56632 | 0.45426 | 0.4897  | 0.74635 | 0.94685 | 0.71116 | 0.72021 TGFBI    |
| cg21035142 | 0.36504 | 0.09345 | 0.79171 | 0.84408 | 0.84186 | 0.82583 | 0.83985 | 0.87126 | 0.83711 | 0.73479 CRYGN    |
| cg21037570 | 0.03498 | 0.03398 | 0.032   | 0.03264 | 0.02375 | 0.0297  | 0.02848 | 0.03111 | 0.03292 | 0.02902 IMMT     |
| cg21038229 | 0.05345 | 0.04864 | 0.05205 | 0.05256 | 0.04243 | 0.03427 | 0.03991 | 0.04334 | 0.05114 | 0.04124 HMOX2    |
| cg21038703 | 0.74739 | 0.67906 | 0.89041 | 0.90224 | 0.94784 | 0.85228 | 0.67972 | 0.44008 | 0.71944 | 0.87235 ASB16    |
| cg21038964 | 0.0615  | 0.06372 | 0.11121 | 0.09635 | 0.05376 | 0.05999 | 0.05043 | 0.05166 | 0.06589 | 0.06215 DPM3     |
| cg21039631 | 0.45076 | 0.07917 | 0.05405 | 0.07765 | 0.44442 | 0.02955 | 0.3724  | 0.04275 | 0.77754 | 0.13047 CD58     |
| cg21039679 | 0.34276 | 0.11716 | 0.81272 | 0.86113 | 0.6442  | 0.79221 | 0.73959 | 0.39597 | 0.73939 | 0.52952 FLJ35695 |
| cg21039822 | 0.03204 | 0.02915 | 0.03409 | 0.03332 | 0.02987 | 0.03446 | 0.02512 | 0.0256  | 0.02969 | 0.02867 PCYT2    |
| cg21041127 | 0.70679 | 0.69082 | 0.64611 | 0.72738 | 0.56074 | 0.6399  | 0.65042 | 0.65619 | 0.63957 | 0.59467 BCMP11   |
| cg21042619 | 0.0555  | 0.05937 | 0.07615 | 0.06021 | 0.05665 | 0.05936 | 0.05335 | 0.05192 | 0.04889 | 0.04697 EED      |
| cg21043558 | 0.77555 | 0.76724 | 0.60557 | 0.70323 | 0.57852 | 0.66781 | 0.24289 | 0.20752 | 0.53953 | 0.42948 BRAF     |
| cg21043754 | 0.02841 | 0.02936 | 0.03152 | 0.03213 | 0.02841 | 0.03224 | 0.02982 | 0.03225 | 0.02477 | 0.02326 DDB1     |
| cg21044104 | 0.19244 | 0.0514  | 0.54083 | 0.77159 | 0.38766 | 0.17727 | 0.09828 | 0.13816 | 0.04497 | 0.17073 LYZL4    |
| cg21045388 | 0.63299 | 0.58743 | 0.85193 | 0.89801 | 0.89323 | 0.91145 | 0.82855 | 0.90931 | 0.62299 | 0.89006 FLJ43806 |
| cg21045917 | 0.26885 | 0.09826 | 0.28671 | 0.39804 | 0.68918 | 0.81314 | 0.36098 | 0.56131 | 0.10288 | 0.1088 ALAS2     |
| cg21046413 | 0.05798 | 0.0604  | 0.08094 | 0.08296 | 0.06566 | 0.07072 | 0.24372 | 0.35963 | 0.05968 | 0.05589 PDCC8    |
| cg21046940 | 0.04837 | 0.04926 | 0.04591 | 0.04141 | 0.04778 | 0.04211 | 0.04875 | 0.04218 | 0.03498 | 0.037 DAP        |
| cg21047206 | 0.62844 | 0.47048 | 0.69976 | 0.75542 | 0.62516 | 0.56161 | 0.64544 | 0.6158  | 0.65176 | 0.53712 PDE4DIP  |
| cg21048501 | 0.23346 | 0.05557 | 0.04152 | 0.03409 | 0.0369  | 0.04751 | 0.04059 | 0.04291 | 0.03098 | 0.03532 MRPS24   |
| cg21048669 | 0.07615 | 0.06271 | 0.36008 | 0.36831 | 0.12176 | 0.07538 | 0.15345 | 0.05088 | 0.45091 | 0.27851 CLEC3A   |
| cg21049762 | 0.90076 | 0.79622 | 0.90155 | 0.89069 | 0.92308 | 0.81027 | 0.88257 | 0.7759  | 0.90316 | 0.90148 TCIRG1   |
| cg21051046 | 0.45475 | 0.34044 | 0.7026  | 0.83353 | 0.70196 | 0.79388 | 0.18674 | 0.29022 | 0.8659  | 0.31101 EN2      |
| cg21051086 | 0.29404 | 0.25254 | 0.31022 | 0.30361 | 0.32886 | 0.36874 | 0.2181  | 0.23144 | 0.19238 | 0.17403 PPP4R2   |
| cg21051423 | 0.04048 | 0.04371 | 0.05761 | 0.04206 | 0.02976 | 0.03118 | 0.03279 | 0.03156 | 0.03932 | 0.03765 MTBP     |
| cg21052164 | 0.16306 | 0.08439 | 0.24309 | 0.30202 | 0.18272 | 0.12207 | 0.09098 | 0.06705 | 0.15693 | 0.12213 CHRN2    |
| cg21053015 | 0.03956 | 0.04453 | 0.04328 | 0.0434  | 0.04053 | 0.04945 | 0.04597 | 0.0445  | 0.048   | 0.04343 SYNGR1   |
| cg21053323 | 0.02273 | 0.0175  | 0.31835 | 0.1592  | 0.61183 | 0.02154 | 0.01669 | 0.01642 | 0.98438 | 0.78943 SUMO3    |
| cg21053529 | 0.12921 | 0.17599 | 0.81155 | 0.86911 | 0.37462 | 0.4777  | 0.18958 | 0.10549 | 0.56957 | 0.52288 CX36     |
| cg21053748 | 0.0421  | 0.04046 | 0.05314 | 0.04278 | 0.05511 | 0.05282 | 0.04466 | 0.04977 | 0.03821 | 0.03688 NDUFA4   |
| cg21057046 | 0.5223  | 0.44975 | 0.32229 | 0.43999 | 0.55093 | 0.06867 | 0.59658 | 0.31478 | 0.89935 | 0.56342 NBL1     |
| cg21057494 | 0.86464 | 0.2607  | 0.685   | 0.80725 | 0.93169 | 0.59065 | 0.78912 | 0.56125 | 0.53318 | 0.36639 CLEC3B   |
| cg21060429 | 0.91063 | 0.90116 | 0.88789 | 0.89974 | 0.9116  | 0.91564 | 0.92087 | 0.90268 | 0.93018 | 0.90655 NUDT1    |
| cg21060854 | 0.02248 | 0.02778 | 0.02825 | 0.02708 | 0.02711 | 0.02639 | 0.02296 | 0.02027 | 0.02175 | 0.02091 TOR1B    |
| cg21061811 | 0.76241 | 0.77149 | 0.76109 | 0.75802 | 0.7504  | 0.7805  | 0.75315 | 0.7121  | 0.78934 | 0.73757 DDA1     |
| cg21062347 | 0.54993 | 0.07811 | 0.21065 | 0.71847 | 0.81249 | 0.71936 | 0.08327 | 0.09334 | 0.0443  | 0.09514 SLC22A8  |
| cg21063899 | 0.52435 | 0.39515 | 0.39079 | 0.41991 | 0.3267  | 0.50605 | 0.48108 | 0.57111 | 0.33858 | 0.32676 SCEL     |
| cg21065959 | 0.08963 | 0.10514 | 0.27115 | 0.26546 | 0.48909 | 0.30717 | 0.08806 | 0.09303 | 0.08858 | 0.0791 LCE1E     |
| cg21065990 | 0.03226 | 0.03066 | 0.0424  | 0.03968 | 0.02733 | 0.0283  | 0.02892 | 0.0276  | 0.0239  | 0.01947 TASP1    |
| cg21066636 | 0.52455 | 0.06508 | 0.27405 | 0.35939 | 0.30026 | 0.19251 | 0.11378 | 0.0499  | 0.43249 | 0.15154 TM4SF5   |
| cg21067846 | 0.84368 | 0.83349 | 0.70238 | 0.73193 | 0.69517 | 0.81086 | 0.3048  | 0.23525 | 0.79395 | 0.75775 MORC4    |

|            |         |         |         |         |         |         |         |         |         |                  |
|------------|---------|---------|---------|---------|---------|---------|---------|---------|---------|------------------|
| cg21068030 | 0.87151 | 0.75933 | 0.85955 | 0.88103 | 0.8533  | 0.80529 | 0.77457 | 0.70364 | 0.87948 | 0.82935 LSMD1    |
| cg21068152 | 0.05285 | 0.05186 | 0.05894 | 0.06721 | 0.07855 | 0.0626  | 0.0526  | 0.04576 | 0.05373 | 0.05233 SIRT4    |
| cg21068339 | 0.02546 | 0.02346 | 0.03011 | 0.026   | 0.05237 | 0.02238 | 0.15418 | 0.04028 | 0.02954 | 0.05353 DSP      |
| cg21069922 | 0.04119 | 0.0531  | 0.07617 | 0.07781 | 0.05905 | 0.05307 | 0.05991 | 0.05161 | 0.04613 | 0.04835 ERAL1    |
| cg21070087 | 0.82563 | 0.82455 | 0.78088 | 0.81711 | 0.74444 | 0.81155 | 0.79235 | 0.81634 | 0.825   | 0.7972 HECW1     |
| cg21070730 | 0.03366 | 0.02997 | 0.0338  | 0.02871 | 0.02702 | 0.0299  | 0.02949 | 0.02728 | 0.02899 | 0.03121 EHD4     |
| cg21072025 | 0.05565 | 0.03401 | 0.48338 | 0.59013 | 0.29106 | 0.02595 | 0.02965 | 0.02577 | 0.16835 | 0.05711 GNG8     |
| cg21073927 | 0.03812 | 0.0421  | 0.03792 | 0.03332 | 0.82124 | 0.93556 | 0.12298 | 0.04802 | 0.03233 | 0.03121 GATA4    |
| cg21075829 | 0.29877 | 0.08936 | 0.7908  | 0.73983 | 0.71627 | 0.70376 | 0.73738 | 0.62589 | 0.24879 | 0.1349 FAM62C    |
| cg21076470 | 0.72801 | 0.50291 | 0.16926 | 0.23878 | 0.10023 | 0.08746 | 0.0866  | 0.07757 | 0.09438 | 0.08608 MRPS14   |
| cg21080294 | 0.03626 | 0.03526 | 0.04736 | 0.03836 | 0.04145 | 0.04539 | 0.14042 | 0.08129 | 0.03875 | 0.03072 PRPS1    |
| cg21081852 | 0.15417 | 0.16125 | 0.17535 | 0.18458 | 0.18553 | 0.17288 | 0.17713 | 0.16105 | 0.16855 | 0.14871 TXNRD1   |
| cg21081971 | 0.86801 | 0.87803 | 0.05903 | 0.06884 | 0.46752 | 0.28404 | 0.1124  | 0.04621 | 0.16313 | 0.18292 TRPC4    |
| cg21084260 | 0.63494 | 0.573   | 0.70182 | 0.73302 | 0.64066 | 0.73656 | 0.60801 | 0.49234 | 0.56399 | 0.37874 APOD     |
| cg21085553 | 0.07401 | 0.07128 | 0.06276 | 0.06426 | 0.06973 | 0.06379 | 0.06272 | 0.06241 | 0.06545 | 0.06613 PARP8    |
| cg21085625 | 0.03277 | 0.03629 | 0.03425 | 0.03256 | 0.02789 | 0.03096 | 0.02997 | 0.0293  | 0.02692 | 0.02972 DBI      |
| cg21085768 | 0.60005 | 0.5821  | 0.78513 | 0.87481 | 0.79744 | 0.75211 | 0.41564 | 0.62586 | 0.62369 | 0.51511 PRSS21   |
| cg21086464 | 0.03208 | 0.03663 | 0.04573 | 0.04067 | 0.05459 | 0.04321 | 0.04653 | 0.042   | 0.03093 | 0.02922 PAK1     |
| cg21087043 | 0.17326 | 0.18451 | 0.24818 | 0.23059 | 0.24431 | 0.18906 | 0.16279 | 0.17564 | 0.19794 | 0.19697 DCX      |
| cg21087137 | 0.8561  | 0.9527  | 0.93008 | 0.94695 | 0.53662 | 0.43633 | 0.05082 | 0.03942 | 0.94574 | 0.95224 MGC26856 |
| cg21087701 | 0.82611 | 0.71411 | 0.75824 | 0.79667 | 0.81034 | 0.82418 | 0.33994 | 0.46703 | 0.83026 | 0.75246 GPR119   |
| cg21089667 | 0.95196 | 0.95202 | 0.94927 | 0.95553 | 0.96529 | 0.9575  | 0.95954 | 0.95735 | 0.96244 | 0.96175 SMARCA3  |
| cg21090723 | 0.71665 | 0.70181 | 0.62041 | 0.63516 | 0.52195 | 0.63885 | 0.70905 | 0.7349  | 0.66532 | 0.65531 CXorf45  |
| cg21091629 | 0.04352 | 0.02544 | 0.15202 | 0.12381 | 0.11698 | 0.0293  | 0.03491 | 0.02555 | 0.1442  | 0.02578 FRAG1    |
| cg21091679 | 0.05981 | 0.09678 | 0.08657 | 0.17146 | 0.05371 | 0.03442 | 0.04333 | 0.03463 | 0.04475 | 0.0322 ELL2      |
| cg21092324 | 0.55603 | 0.52709 | 0.63202 | 0.64467 | 0.57682 | 0.64297 | 0.4167  | 0.65532 | 0.62495 | 0.54071 MMRN1    |
| cg21092462 | 0.05043 | 0.03918 | 0.05855 | 0.06758 | 0.0403  | 0.03445 | 0.0381  | 0.0496  | 0.36912 | 0.31581 KCNH1    |
| cg21092687 | 0.03595 | 0.04231 | 0.07784 | 0.06484 | 0.10068 | 0.07987 | 0.0537  | 0.12587 | 0.0511  | 0.04834 RECQL4   |
| cg21093060 | 0.85249 | 0.83008 | 0.80627 | 0.83519 | 0.68019 | 0.62256 | 0.84049 | 0.66316 | 0.83302 | 0.66297 TXLNA    |
| cg21094154 | 0.10022 | 0.14193 | 0.48915 | 0.54726 | 0.69156 | 0.47496 | 0.34855 | 0.21129 | 0.1072  | 0.07977 TNFSF11  |
| cg21094669 | 0.19234 | 0.20799 | 0.46859 | 0.50652 | 0.54659 | 0.32831 | 0.13285 | 0.12584 | 0.41939 | 0.15775 GLRA3    |
| cg21096399 | 0.12363 | 0.06303 | 0.49498 | 0.55273 | 0.85232 | 0.73268 | 0.12243 | 0.05854 | 0.47782 | 0.05191 MCAM     |
| cg21096502 | 0.04073 | 0.04267 | 0.04325 | 0.03581 | 0.032   | 0.03481 | 0.03739 | 0.04175 | 0.03512 | 0.03495 CHCHD2   |
| cg21096591 | 0.68167 | 0.49178 | 0.8413  | 0.85881 | 0.3989  | 0.40421 | 0.47864 | 0.42845 | 0.35159 | 0.30844 TP53TG3  |
| cg21096915 | 0.11099 | 0.09826 | 0.03442 | 0.03673 | 0.04729 | 0.03922 | 0.10075 | 0.10559 | 0.10302 | 0.0877 MGC16291  |
| cg21096966 | 0.11738 | 0.09199 | 0.12456 | 0.09426 | 0.147   | 0.11239 | 0.07356 | 0.07264 | 0.60262 | 0.44288 BTBD5    |
| cg21097640 | 0.0426  | 0.04709 | 0.05899 | 0.05907 | 0.03689 | 0.04837 | 0.0552  | 0.05692 | 0.05005 | 0.0529 MGC9850   |
| cg21098323 | 0.85396 | 0.54034 | 0.90058 | 0.89798 | 0.75196 | 0.90878 | 0.90178 | 0.88017 | 0.92435 | 0.90949 OSCAR    |
| cg21099221 | 0.03358 | 0.03381 | 0.03981 | 0.04183 | 0.03605 | 0.03166 | 0.03918 | 0.0331  | 0.03584 | 0.02736 SRM      |
| cg21099326 | 0.02477 | 0.02777 | 0.02974 | 0.02408 | 0.02456 | 0.02108 | 0.02596 | 0.02444 | 0.02253 | 0.01858 TRIM35   |
| cg21099488 | 0.05164 | 0.05047 | 0.04668 | 0.04433 | 0.03595 | 0.0469  | 0.04853 | 0.04746 | 0.0453  | 0.04069 PELI2    |

|            |         |         |         |         |         |         |         |         |         |                   |
|------------|---------|---------|---------|---------|---------|---------|---------|---------|---------|-------------------|
| cg21101222 | 0.0262  | 0.02436 | 0.02237 | 0.0233  | 0.01848 | 0.01961 | 0.024   | 0.02357 | 0.01951 | 0.0195 ATOX1      |
| cg21104946 | 0.07335 | 0.06346 | 0.54822 | 0.52538 | 0.37736 | 0.09725 | 0.37047 | 0.06652 | 0.05711 | 0.03966 WNT7B     |
| cg21105318 | 0.80402 | 0.53253 | 0.79684 | 0.87111 | 0.673   | 0.81859 | 0.74811 | 0.80372 | 0.81718 | 0.70626 ITGB6     |
| cg21109025 | 0.82897 | 0.82025 | 0.69533 | 0.69024 | 0.56214 | 0.6082  | 0.17948 | 0.14667 | 0.53395 | 0.4589 CCL2       |
| cg21111471 | 0.76241 | 0.59552 | 0.86    | 0.87238 | 0.93262 | 0.77632 | 0.82787 | 0.4078  | 0.87524 | 0.78216 FLRT1     |
| cg21111868 | 0.07434 | 0.08231 | 0.15707 | 0.12766 | 0.1273  | 0.06939 | 0.06522 | 0.06247 | 0.07178 | 0.07706 EGR4      |
| cg21112925 | 0.03273 | 0.0282  | 0.03305 | 0.03375 | 0.04048 | 0.04987 | 0.02993 | 0.03184 | 0.02992 | 0.0305 CES2       |
| cg21114485 | 0.0805  | 0.08192 | 0.06042 | 0.06265 | 0.07602 | 0.06301 | 0.04913 | 0.03849 | 0.04659 | 0.05668 FLJ11200  |
| cg21115977 | 0.41651 | 0.2706  | 0.30391 | 0.38161 | 0.41555 | 0.12018 | 0.04701 | 0.11211 | 0.33299 | 0.28981 GDF2      |
| cg21115990 | 0.80638 | 0.82394 | 0.85027 | 0.86466 | 0.83028 | 0.79049 | 0.82    | 0.81343 | 0.85862 | 0.56837 LRP5      |
| cg21116314 | 0.75958 | 0.58191 | 0.90062 | 0.89962 | 0.79449 | 0.92183 | 0.15148 | 0.07452 | 0.9135  | 0.90734 ZNF266    |
| cg21116410 | 0.02841 | 0.02793 | 0.04632 | 0.04151 | 0.03302 | 0.03473 | 0.03394 | 0.03116 | 0.02716 | 0.02555 PEX12     |
| cg21117584 | 0.11396 | 0.09403 | 0.10812 | 0.10878 | 0.10186 | 0.10416 | 0.1086  | 0.10702 | 0.09359 | 0.08935 SNIP1     |
| cg21119032 | 0.05403 | 0.05153 | 0.06842 | 0.05887 | 0.07165 | 0.08295 | 0.05517 | 0.05087 | 0.05708 | 0.05495 LANCL1    |
| cg21120063 | 0.78738 | 0.77546 | 0.78908 | 0.83152 | 0.80137 | 0.85747 | 0.67415 | 0.62819 | 0.4847  | 0.75051 UNQ830    |
| cg21120249 | 0.70691 | 0.63011 | 0.88251 | 0.9104  | 0.81659 | 0.14661 | 0.65913 | 0.59143 | 0.52133 | 0.1113 FLJ36268   |
| cg21120786 | 0.11766 | 0.1108  | 0.11412 | 0.11245 | 0.06769 | 0.10108 | 0.09455 | 0.10424 | 0.10524 | 0.09584 SCAP2     |
| cg21122529 | 0.03953 | 0.02956 | 0.04589 | 0.0384  | 0.03266 | 0.02949 | 0.03628 | 0.03377 | 0.03795 | 0.02969 CHERP     |
| cg21122774 | 0.68045 | 0.20211 | 0.80987 | 0.91709 | 0.91791 | 0.87677 | 0.18181 | 0.24999 | 0.69492 | 0.45289 SARDH     |
| cg21123509 | 0.03243 | 0.03197 | 0.03219 | 0.03352 | 0.02438 | 0.02706 | 0.03205 | 0.028   | 0.02666 | 0.02656 POLD2     |
| cg21123573 | 0.17781 | 0.14139 | 0.21278 | 0.18007 | 0.24119 | 0.18666 | 0.17219 | 0.14329 | 0.1615  | 0.17266 SIRT4     |
| cg21126707 | 0.93737 | 0.93616 | 0.93054 | 0.93887 | 0.95074 | 0.93798 | 0.88715 | 0.94029 | 0.05821 | 0.03736 MYF5      |
| cg21126943 | 0.65867 | 0.46992 | 0.06338 | 0.04939 | 0.03049 | 0.03966 | 0.03621 | 0.03394 | 0.02892 | 0.03256 CEACAM6   |
| cg21129531 | 0.93145 | 0.33619 | 0.9282  | 0.94951 | 0.928   | 0.9255  | 0.96135 | 0.94651 | 0.9618  | 0.95634 LRRC4     |
| cg21130124 | 0.81505 | 0.08884 | 0.86029 | 0.90817 | 0.91983 | 0.89841 | 0.0679  | 0.06692 | 0.92071 | 0.88309 CALML5    |
| cg21130374 | 0.73598 | 0.34737 | 0.32438 | 0.60676 | 0.75745 | 0.8401  | 0.38674 | 0.29431 | 0.45022 | 0.19871 MX2       |
| cg21132104 | 0.05768 | 0.06061 | 0.05379 | 0.05605 | 0.04756 | 0.0513  | 0.04944 | 0.04842 | 0.08313 | 0.07373 SPATA5L1  |
| cg21132577 | 0.4921  | 0.4978  | 0.41907 | 0.7087  | 0.68475 | 0.65062 | 0.20802 | 0.20075 | 0.12373 | 0.08986 MYOM2     |
| cg21134096 | 0.82603 | 0.90333 | 0.08822 | 0.0716  | 0.32683 | 0.19511 | 0.50326 | 0.54901 | 0.06654 | 0.04269 RHEB      |
| cg21137417 | 0.44076 | 0.13252 | 0.76904 | 0.83994 | 0.74226 | 0.80359 | 0.77362 | 0.8339  | 0.61142 | 0.43854 SPP2      |
| cg21137706 | 0.1421  | 0.06952 | 0.13584 | 0.2171  | 0.06138 | 0.04312 | 0.03351 | 0.03344 | 0.03359 | 0.04271 TMEM5     |
| cg21137707 | 0.77007 | 0.34835 | 0.70285 | 0.76296 | 0.67728 | 0.5723  | 0.2143  | 0.15823 | 0.74833 | 0.14178 PNMA5     |
| cg21137823 | 0.27253 | 0.0775  | 0.04259 | 0.04366 | 0.85428 | 0.88852 | 0.12625 | 0.02744 | 0.03529 | 0.03748 PRKCZ     |
| cg21140292 | 0.08342 | 0.07826 | 0.05646 | 0.05668 | 0.05628 | 0.04658 | 0.04854 | 0.05256 | 0.04497 | 0.03882 SMARCA2   |
| cg21142158 | 0.08505 | 0.1068  | 0.13881 | 0.10187 | 0.12451 | 0.12221 | 0.08638 | 0.0828  | 0.08349 | 0.0874 COG6       |
| cg21142188 | 0.06588 | 0.0562  | 0.06211 | 0.06078 | 0.05216 | 0.05339 | 0.47274 | 0.4983  | 0.0482  | 0.04716 ATP7A     |
| cg21142272 | 0.56804 | 0.31378 | 0.62214 | 0.65957 | 0.58759 | 0.86801 | 0.54994 | 0.06853 | 0.36337 | 0.32213 LOC283849 |
| cg21142398 | 0.85221 | 0.57875 | 0.18538 | 0.1525  | 0.26008 | 0.21135 | 0.10793 | 0.22481 | 0.48175 | 0.21512 GLIS1     |
| cg21144270 | 0.6684  | 0.58242 | 0.94628 | 0.96234 | 0.95125 | 0.9184  | 0.86141 | 0.79003 | 0.30965 | 0.32051 STK25     |
| cg21144587 | 0.03593 | 0.0362  | 0.04154 | 0.03176 | 0.03935 | 0.03719 | 0.03087 | 0.02911 | 0.03306 | 0.02866 XAB1      |
| cg21145624 | 0.0807  | 0.04786 | 0.13211 | 0.20875 | 0.04662 | 0.04701 | 0.0617  | 0.23754 | 0.10451 | 0.03672 MEIS3     |

|            |         |         |         |         |         |         |         |         |         |         |           |
|------------|---------|---------|---------|---------|---------|---------|---------|---------|---------|---------|-----------|
| cg21146268 | 0.20477 | 0.26503 | 0.69482 | 0.5881  | 0.54333 | 0.84998 | 0.89291 | 0.85272 | 0.79126 | 0.67303 | HIST1H2BE |
| cg21148892 | 0.88254 | 0.65257 | 0.48197 | 0.61788 | 0.84091 | 0.8794  | 0.11954 | 0.11537 | 0.05721 | 0.03554 | CLEC4F    |
| cg21151355 | 0.30477 | 0.3698  | 0.35535 | 0.5496  | 0.52624 | 0.42906 | 0.12128 | 0.11405 | 0.59594 | 0.34394 | GJB3      |
| cg21152662 | 0.68472 | 0.61549 | 0.7795  | 0.80465 | 0.78248 | 0.70788 | 0.44943 | 0.40214 | 0.67725 | 0.69333 | TEC       |
| cg21152671 | 0.74407 | 0.35402 | 0.76357 | 0.80185 | 0.66927 | 0.7427  | 0.79567 | 0.73646 | 0.81843 | 0.3266  | TRAF1     |
| cg21153758 | 0.03669 | 0.03798 | 0.02731 | 0.0258  | 0.02401 | 0.02362 | 0.02532 | 0.0241  | 0.09928 | 0.01871 | ITGA1     |
| cg21154823 | 0.03305 | 0.03053 | 0.03421 | 0.03229 | 0.02434 | 0.02857 | 0.03388 | 0.03124 | 0.03245 | 0.02269 | RAI16     |
| cg21161070 | 0.07573 | 0.07102 | 0.12596 | 0.15529 | 0.10497 | 0.15362 | 0.08248 | 0.06556 | 0.08278 | 0.07443 | RACGAP1   |
| cg21161651 | 0.03189 | 0.03361 | 0.03233 | 0.03282 | 0.0255  | 0.02823 | 0.03068 | 0.02589 | 0.02862 | 0.02861 | C11orf48  |
| cg21162961 | 0.59832 | 0.44707 | 0.58235 | 0.57846 | 0.5323  | 0.58339 | 0.57112 | 0.50631 | 0.4363  | 0.37053 | RRH       |
| cg21163415 | 0.06559 | 0.05666 | 0.5488  | 0.76107 | 0.38526 | 0.03934 | 0.05493 | 0.04477 | 0.04222 | 0.03276 | EDN3      |
| cg21164303 | 0.0257  | 0.02897 | 0.03098 | 0.03231 | 0.02942 | 0.02524 | 0.03079 | 0.02591 | 0.02825 | 0.02799 | TMED3     |
| cg21165219 | 0.1255  | 0.09951 | 0.47326 | 0.64117 | 0.73067 | 0.73178 | 0.38957 | 0.20825 | 0.70556 | 0.17565 | FAM38B    |
| cg21165909 | 0.49003 | 0.33115 | 0.41112 | 0.37911 | 0.7511  | 0.79224 | 0.2191  | 0.1996  | 0.2653  | 0.27685 | CPS1      |
| cg21166555 | 0.02978 | 0.03471 | 0.03071 | 0.02802 | 0.02657 | 0.02427 | 0.02571 | 0.02962 | 0.02509 | 0.02997 | MAD1L1    |
| cg21166999 | 0.71807 | 0.62533 | 0.78652 | 0.803   | 0.69091 | 0.66546 | 0.38608 | 0.65588 | 0.40198 | 0.38237 | ROS1      |
| cg21167159 | 0.89949 | 0.56468 | 0.87147 | 0.86929 | 0.90221 | 0.89936 | 0.90446 | 0.8597  | 0.90902 | 0.88375 | H19       |
| cg21168622 | 0.24565 | 0.40995 | 0.31221 | 0.26453 | 0.29208 | 0.29599 | 0.23015 | 0.19755 | 0.19709 | 0.22845 | ZNF350    |
| cg21168884 | 0.61708 | 0.15332 | 0.7942  | 0.84405 | 0.80408 | 0.69619 | 0.59005 | 0.53759 | 0.15145 | 0.17228 | C6orf122  |
| cg21169285 | 0.74072 | 0.77843 | 0.72765 | 0.80952 | 0.66444 | 0.81591 | 0.76878 | 0.78127 | 0.77974 | 0.75026 | MAPK9     |
| cg21171130 | 0.0243  | 0.02948 | 0.02877 | 0.02618 | 0.01814 | 0.0229  | 0.02295 | 0.02353 | 0.01969 | 0.02051 | C14orf122 |
| cg21171373 | 0.03628 | 0.03899 | 0.04144 | 0.03545 | 0.03467 | 0.03528 | 0.03272 | 0.03345 | 0.03153 | 0.0313  | WDR5B     |
| cg21171615 | 0.7484  | 0.73436 | 0.6492  | 0.68268 | 0.63749 | 0.72076 | 0.67579 | 0.71748 | 0.55252 | 0.49917 | PTPRC     |
| cg21172540 | 0.06799 | 0.02384 | 0.51808 | 0.52103 | 0.94784 | 0.95846 | 0.72458 | 0.95298 | 0.94006 | 0.96261 | TSSK3     |
| cg21173623 | 0.08392 | 0.09209 | 0.12456 | 0.14832 | 0.12994 | 0.09675 | 0.09019 | 0.07143 | 0.07282 | 0.07743 | MGC14141  |
| cg21176048 | 0.03392 | 0.03497 | 0.93926 | 0.96204 | 0.72983 | 0.53632 | 0.20531 | 0.39544 | 0.46609 | 0.34022 | PEX5L     |
| cg21177096 | 0.687   | 0.45817 | 0.03776 | 0.03177 | 0.18152 | 0.03088 | 0.03533 | 0.03291 | 0.02742 | 0.02696 | MATN3     |
| cg21178548 | 0.08023 | 0.07678 | 0.07817 | 0.07957 | 0.47755 | 0.39781 | 0.10141 | 0.09884 | 0.07859 | 0.09186 | SAMD14    |
| cg21179457 | 0.05263 | 0.04338 | 0.03815 | 0.04533 | 0.06359 | 0.04184 | 0.03623 | 0.03349 | 0.06086 | 0.03257 | INSM2     |
| cg21180599 | 0.12117 | 0.09986 | 0.83432 | 0.84126 | 0.52811 | 0.35602 | 0.32875 | 0.09624 | 0.14748 | 0.09373 | TLE6      |
| cg21182322 | 0.0295  | 0.03223 | 0.04008 | 0.04039 | 0.03572 | 0.03469 | 0.04026 | 0.03323 | 0.03364 | 0.04188 | POU2F1    |
| cg21182407 | 0.05426 | 0.12446 | 0.1699  | 0.16023 | 0.26016 | 0.05575 | 0.05867 | 0.07175 | 0.05997 | 0.04066 | BPHL      |
| cg21182454 | 0.05434 | 0.024   | 0.02562 | 0.026   | 0.02965 | 0.02296 | 0.02226 | 0.02564 | 0.02865 | 0.01927 | MERTK     |
| cg21183846 | 0.1003  | 0.10025 | 0.16083 | 0.12217 | 0.21146 | 0.11995 | 0.13444 | 0.11854 | 0.12707 | 0.13162 | FMO4      |
| cg21183872 | 0.05455 | 0.04937 | 0.08403 | 0.07843 | 0.07181 | 0.06595 | 0.41769 | 0.37393 | 0.05213 | 0.06521 | LONRF3    |
| cg21184011 | 0.12348 | 0.07211 | 0.08757 | 0.07615 | 0.07491 | 0.0695  | 0.05804 | 0.07063 | 0.05988 | 0.05449 | NHN1      |
| cg21184174 | 0.22494 | 0.49336 | 0.33863 | 0.35464 | 0.96692 | 0.90011 | 0.92456 | 0.62991 | 0.38911 | 0.11381 | NGFB      |
| cg21184495 | 0.06422 | 0.05416 | 0.10405 | 0.0753  | 0.05635 | 0.0682  | 0.0633  | 0.04991 | 0.05056 | 0.06585 | ZNF207    |
| cg21185421 | 0.02228 | 0.02282 | 0.0202  | 0.02077 | 0.02168 | 0.02113 | 0.01848 | 0.01505 | 0.016   | 0.01596 | C9orf42   |
| cg21187265 | 0.1171  | 0.0986  | 0.12283 | 0.05725 | 0.44626 | 0.30826 | 0.11668 | 0.10308 | 0.09156 | 0.08348 | SEPN1     |
| cg21194776 | 0.71269 | 0.5482  | 0.77439 | 0.79066 | 0.76194 | 0.76483 | 0.6992  | 0.37865 | 0.78423 | 0.77299 | USP54     |

|            |         |         |         |         |         |         |         |         |         |                   |
|------------|---------|---------|---------|---------|---------|---------|---------|---------|---------|-------------------|
| cg21195120 | 0.13926 | 0.12744 | 0.1244  | 0.10451 | 0.12423 | 0.10636 | 0.08511 | 0.07766 | 0.10558 | 0.09327 MBTPS2    |
| cg21195414 | 0.03159 | 0.0358  | 0.03534 | 0.04059 | 0.04564 | 0.04318 | 0.0315  | 0.03528 | 0.02323 | 0.02379 ELOVL5    |
| cg21196187 | 0.05591 | 0.0505  | 0.04578 | 0.05205 | 0.0728  | 0.05578 | 0.04608 | 0.04202 | 0.04191 | 0.04762 PSKH1     |
| cg21197871 | 0.84742 | 0.68892 | 0.38276 | 0.40805 | 0.75297 | 0.25998 | 0.3691  | 0.09449 | 0.26504 | 0.08204 C8orf38   |
| cg21197973 | 0.19104 | 0.08101 | 0.03698 | 0.03764 | 0.85873 | 0.93561 | 0.03121 | 0.0275  | 0.03127 | 0.03507 PH-4      |
| cg21198021 | 0.72641 | 0.60013 | 0.72736 | 0.71884 | 0.61492 | 0.31132 | 0.79233 | 0.65014 | 0.74439 | 0.27216 PHC2      |
| cg21200380 | 0.06153 | 0.07212 | 0.06877 | 0.06195 | 0.05161 | 0.06574 | 0.06329 | 0.07463 | 0.05572 | 0.06095 C1QBP     |
| cg21200703 | 0.48915 | 0.40809 | 0.83913 | 0.90515 | 0.7323  | 0.88224 | 0.89209 | 0.71319 | 0.4969  | 0.32795 SLC34A2   |
| cg21201109 | 0.88254 | 0.65073 | 0.91691 | 0.91899 | 0.88172 | 0.88015 | 0.73489 | 0.66952 | 0.9426  | 0.8702 ANKRD25    |
| cg21201572 | 0.81711 | 0.7812  | 0.79678 | 0.83392 | 0.74717 | 0.72836 | 0.74143 | 0.76753 | 0.81627 | 0.47745 AGR2      |
| cg21201659 | 0.08387 | 0.08361 | 0.08321 | 0.08616 | 0.06395 | 0.06907 | 0.06423 | 0.06707 | 0.06531 | 0.06213 SEC23IP   |
| cg21203420 | 0.03419 | 0.03944 | 0.0403  | 0.0439  | 0.027   | 0.03502 | 0.02942 | 0.02932 | 0.02586 | 0.03306 BRWD1     |
| cg21206959 | 0.03746 | 0.03855 | 0.03865 | 0.03899 | 0.03106 | 0.04048 | 0.0368  | 0.03788 | 0.03564 | 0.03883 ZWINT     |
| cg21207418 | 0.83076 | 0.5138  | 0.79932 | 0.83235 | 0.88484 | 0.84716 | 0.69387 | 0.57852 | 0.63149 | 0.1036 ACP5       |
| cg21207436 | 0.60111 | 0.41888 | 0.41823 | 0.68547 | 0.677   | 0.84339 | 0.0933  | 0.14259 | 0.4495  | 0.39276 C14orf115 |
| cg21208104 | 0.41771 | 0.05057 | 0.06166 | 0.06444 | 0.04303 | 0.05277 | 0.0564  | 0.04681 | 0.0811  | 0.04488 PRSS12    |
| cg21209091 | 0.40343 | 0.17464 | 0.60748 | 0.49581 | 0.28883 | 0.28607 | 0.25704 | 0.20733 | 0.32315 | 0.11588 DKK4      |
| cg21209356 | 0.83091 | 0.57981 | 0.83824 | 0.85803 | 0.87646 | 0.80234 | 0.35291 | 0.07523 | 0.91216 | 0.83276 CSF2RB    |
| cg21210758 | 0.09989 | 0.08871 | 0.10049 | 0.10855 | 0.12096 | 0.09282 | 0.07375 | 0.07298 | 0.0818  | 0.07829 EVC       |
| cg21210789 | 0.06695 | 0.15933 | 0.45967 | 0.65345 | 0.61157 | 0.62297 | 0.06212 | 0.03156 | 0.45194 | 0.46137 BAI1      |
| cg21211608 | 0.37415 | 0.05765 | 0.05569 | 0.04398 | 0.04557 | 0.02906 | 0.03539 | 0.0251  | 0.04375 | 0.0271 RAP1B      |
| cg21211748 | 0.07009 | 0.07277 | 0.08397 | 0.07627 | 0.07073 | 0.06211 | 0.06814 | 0.0698  | 0.06788 | 0.06147 E2F2      |
| cg21212066 | 0.0516  | 0.05674 | 0.05813 | 0.05623 | 0.04026 | 0.04776 | 0.05487 | 0.05223 | 0.04529 | 0.04667 GLG1      |
| cg21212956 | 0.04132 | 0.03946 | 0.07453 | 0.06037 | 0.04727 | 0.04365 | 0.22234 | 0.04866 | 0.03622 | 0.02849 ZDHHC4    |
| cg21215336 | 0.24424 | 0.34829 | 0.02857 | 0.02519 | 0.02193 | 0.01849 | 0.02272 | 0.04383 | 0.95025 | 0.74245 LRRC8E    |
| cg21218093 | 0.0303  | 0.03193 | 0.03754 | 0.03324 | 0.02514 | 0.02571 | 0.05063 | 0.02932 | 0.02578 | 0.02422 ZNF335    |
| cg21218636 | 0.03823 | 0.03304 | 0.03591 | 0.03045 | 0.02846 | 0.03016 | 0.02722 | 0.03021 | 0.03359 | 0.02813 PCTP      |
| cg21219744 | 0.03101 | 0.03409 | 0.03605 | 0.03511 | 0.03083 | 0.03441 | 0.02761 | 0.0224  | 0.03238 | 0.02661 GUF1      |
| cg21222430 | 0.04448 | 0.05404 | 0.04841 | 0.04943 | 0.04008 | 0.04566 | 0.04031 | 0.04778 | 0.03858 | 0.03796 CDKN1A    |
| cg21223353 | 0.89056 | 0.8995  | 0.89386 | 0.87647 | 0.89558 | 0.87101 | 0.89701 | 0.89581 | 0.89962 | 0.88306 ANGPTL7   |
| cg21223368 | 0.02813 | 0.03028 | 0.02952 | 0.03063 | 0.02227 | 0.02901 | 0.02722 | 0.02861 | 0.02132 | 0.02037 IDH3A     |
| cg21224049 | 0.06992 | 0.07527 | 0.07869 | 0.07517 | 0.04714 | 0.0588  | 0.07201 | 0.07814 | 0.07237 | 0.06706 ATP5I     |
| cg21224759 | 0.05986 | 0.0694  | 0.0606  | 0.05757 | 0.0425  | 0.04742 | 0.4527  | 0.07257 | 0.04629 | 0.05345 PIN4      |
| cg21226224 | 0.94597 | 0.89882 | 0.51234 | 0.54278 | 0.93721 | 0.57136 | 0.72446 | 0.72694 | 0.56698 | 0.04725 SOX17     |
| cg21226225 | 0.13894 | 0.11252 | 0.15477 | 0.12804 | 0.14579 | 0.16782 | 0.15347 | 0.11545 | 0.11695 | 0.13982 TXNRD1    |
| cg21226234 | 0.8997  | 0.55852 | 0.90261 | 0.92585 | 0.91318 | 0.569   | 0.84043 | 0.80895 | 0.9311  | 0.9184 LRRC14     |
| cg21226861 | 0.03499 | 0.03454 | 0.03569 | 0.03527 | 0.0252  | 0.02945 | 0.03006 | 0.03095 | 0.02974 | 0.03054 COMMD3    |
| cg21228284 | 0.05029 | 0.04709 | 0.04278 | 0.04866 | 0.07655 | 0.07814 | 0.04598 | 0.04582 | 0.04031 | 0.04702 TXNL4B    |
| cg21229055 | 0.08679 | 0.06465 | 0.84314 | 0.88582 | 0.73712 | 0.91527 | 0.43651 | 0.25555 | 0.55165 | 0.09598 GPM6B     |
| cg21229859 | 0.06112 | 0.05635 | 0.04794 | 0.05678 | 0.07592 | 0.05669 | 0.05934 | 0.0536  | 0.23192 | 0.06558 MYEF2     |
| cg21230133 | 0.7567  | 0.74457 | 0.84257 | 0.84943 | 0.85737 | 0.83685 | 0.23147 | 0.13048 | 0.82373 | 0.68761 KRTHA1    |

|            |         |         |         |         |         |         |         |         |         |         |           |
|------------|---------|---------|---------|---------|---------|---------|---------|---------|---------|---------|-----------|
| cg21230392 | 0.85828 | 0.87064 | 0.81236 | 0.85497 | 0.84911 | 0.85246 | 0.86259 | 0.88654 | 0.37046 | 0.39671 | PROM1     |
| cg21230435 | 0.87257 | 0.86929 | 0.84986 | 0.85903 | 0.78501 | 0.84723 | 0.88144 | 0.88921 | 0.8873  | 0.91505 | OPN1SW    |
| cg21232015 | 0.85317 | 0.1654  | 0.91397 | 0.91483 | 0.93171 | 0.18412 | 0.92041 | 0.35763 | 0.9176  | 0.14004 | CHFR      |
| cg21232685 | 0.89179 | 0.73874 | 0.81324 | 0.85951 | 0.80418 | 0.87212 | 0.42474 | 0.50131 | 0.64996 | 0.79851 | GPRASP1   |
| cg21233722 | 0.9345  | 0.80156 | 0.92892 | 0.93437 | 0.95903 | 0.93323 | 0.93685 | 0.93874 | 0.54465 | 0.1818  | DOCK2     |
| cg21235838 | 0.02989 | 0.0287  | 0.0288  | 0.02749 | 0.02328 | 0.02257 | 0.0235  | 0.02445 | 0.01821 | 0.02048 | SORBS1    |
| cg21237418 | 0.02868 | 0.02626 | 0.03761 | 0.03326 | 0.02545 | 0.02567 | 0.0249  | 0.03002 | 0.02655 | 0.02728 | RAB34     |
| cg21237591 | 0.09913 | 0.0618  | 0.89748 | 0.9048  | 0.12171 | 0.34057 | 0.15562 | 0.09374 | 0.50028 | 0.33175 | IGF2AS    |
| cg21238457 | 0.13995 | 0.04972 | 0.6771  | 0.69469 | 0.41828 | 0.58958 | 0.94975 | 0.94196 | 0.64357 | 0.78315 | WNT11     |
| cg21238818 | 0.26051 | 0.04419 | 0.9548  | 0.95851 | 0.96592 | 0.95722 | 0.9411  | 0.57269 | 0.87554 | 0.86949 | GAL3ST3   |
| cg21240812 | 0.3237  | 0.09583 | 0.21135 | 0.15105 | 0.12248 | 0.11761 | 0.03995 | 0.0331  | 0.04379 | 0.04122 | TSNARE1   |
| cg21241823 | 0.19857 | 0.12784 | 0.6081  | 0.70506 | 0.1739  | 0.07154 | 0.62106 | 0.26298 | 0.3554  | 0.07575 | PRDM15    |
| cg21242004 | 0.66911 | 0.54328 | 0.56097 | 0.69352 | 0.74207 | 0.7253  | 0.59255 | 0.33617 | 0.83778 | 0.78801 | VT11A     |
| cg21243096 | 0.07034 | 0.02384 | 0.87991 | 0.88203 | 0.61588 | 0.38292 | 0.58492 | 0.56823 | 0.58205 | 0.59486 | POU3F1    |
| cg21243909 | 0.03581 | 0.03601 | 0.03656 | 0.04128 | 0.03238 | 0.03866 | 0.03298 | 0.0322  | 0.03651 | 0.03629 | RCC2      |
| cg21244397 | 0.06945 | 0.06716 | 0.06886 | 0.05789 | 0.06239 | 0.06499 | 0.0709  | 0.05946 | 0.06255 | 0.06108 | MASTL     |
| cg21244955 | 0.8042  | 0.82961 | 0.81732 | 0.81563 | 0.76799 | 0.81458 | 0.79592 | 0.79469 | 0.82308 | 0.76896 | PIK4CA    |
| cg21245135 | 0.07012 | 0.06978 | 0.07141 | 0.06245 | 0.08494 | 0.0567  | 0.07625 | 0.06125 | 0.06202 | 0.05275 | PGAM1     |
| cg21245372 | 0.63857 | 0.0893  | 0.7286  | 0.86899 | 0.14289 | 0.06446 | 0.9048  | 0.66764 | 0.12297 | 0.15552 | NUP98     |
| cg21245652 | 0.28012 | 0.30436 | 0.81044 | 0.81682 | 0.45614 | 0.49126 | 0.1947  | 0.06719 | 0.87822 | 0.66292 | MAL       |
| cg21246431 | 0.03032 | 0.0278  | 0.03094 | 0.02813 | 0.0238  | 0.02497 | 0.02431 | 0.02317 | 0.02322 | 0.02059 | MGC40579  |
| cg21246783 | 0.04159 | 0.04529 | 0.04598 | 0.04976 | 0.03197 | 0.03851 | 0.0385  | 0.03902 | 0.03422 | 0.0324  | CLGN      |
| cg21248478 | 0.37183 | 0.14894 | 0.27014 | 0.23904 | 0.33462 | 0.20193 | 0.17782 | 0.10188 | 0.10372 | 0.1184  | CLIC2     |
| cg21248774 | 0.04279 | 0.04017 | 0.05011 | 0.04376 | 0.04216 | 0.04508 | 0.03735 | 0.04868 | 0.04098 | 0.04376 | SFPQ      |
| cg21250296 | 0.0562  | 0.05045 | 0.62894 | 0.66383 | 0.0946  | 0.09237 | 0.91725 | 0.94142 | 0.08618 | 0.03927 | HIST1H2BB |
| cg21250577 | 0.03218 | 0.03467 | 0.03653 | 0.03333 | 0.02767 | 0.03323 | 0.03349 | 0.03507 | 0.03222 | 0.03469 | ETFA      |
| cg21250978 | 0.67646 | 0.40881 | 0.87405 | 0.90428 | 0.22276 | 0.14456 | 0.62321 | 0.16868 | 0.10049 | 0.05445 | PRKAR2B   |
| cg21252483 | 0.80615 | 0.60269 | 0.93266 | 0.92692 | 0.95819 | 0.92419 | 0.92571 | 0.9088  | 0.93587 | 0.9281  | NUCB1     |
| cg21255605 | 0.1118  | 0.11567 | 0.11483 | 0.09816 | 0.13043 | 0.13559 | 0.09427 | 0.0986  | 0.08932 | 0.1012  | NR2C2     |
| cg21255626 | 0.03369 | 0.03702 | 0.03355 | 0.03632 | 0.02722 | 0.0306  | 0.03984 | 0.03254 | 0.02425 | 0.02456 | UQCRRS1   |
| cg21255732 | 0.03717 | 0.03636 | 0.07998 | 0.04077 | 0.06611 | 0.0331  | 0.04292 | 0.03151 | 0.09328 | 0.02671 | GPD1L     |
| cg21256649 | 0.28764 | 0.2055  | 0.06437 | 0.06774 | 0.81469 | 0.45454 | 0.10832 | 0.05202 | 0.08212 | 0.04918 | PRKAR1A   |
| cg21256656 | 0.83701 | 0.76856 | 0.70564 | 0.71504 | 0.89183 | 0.90735 | 0.08287 | 0.0408  | 0.60272 | 0.54182 | KLK6      |
| cg21257635 | 0.06542 | 0.07011 | 0.09694 | 0.10687 | 0.10354 | 0.07954 | 0.0609  | 0.05558 | 0.06491 | 0.07028 | SYF2      |
| cg21258987 | 0.82443 | 0.50801 | 0.81058 | 0.84313 | 0.77325 | 0.82171 | 0.29219 | 0.28129 | 0.86265 | 0.4882  | GSPT2     |
| cg21259253 | 0.09094 | 0.04953 | 0.05269 | 0.04823 | 0.06256 | 0.06319 | 0.06469 | 0.04646 | 0.04127 | 0.04393 | PHLDA2    |
| cg21260850 | 0.04604 | 0.04782 | 0.05126 | 0.04194 | 0.03005 | 0.04119 | 0.0422  | 0.04596 | 0.04429 | 0.03691 | CANT1     |
| cg21261477 | 0.04123 | 0.04367 | 0.0454  | 0.0448  | 0.03433 | 0.04066 | 0.04322 | 0.04359 | 0.03751 | 0.039   | CABC1     |
| cg21262854 | 0.03599 | 0.04046 | 0.04971 | 0.05178 | 0.04497 | 0.05625 | 0.0408  | 0.03259 | 0.02849 | 0.03431 | FLJ20097  |
| cg21263122 | 0.13919 | 0.09411 | 0.51095 | 0.60005 | 0.49304 | 0.7637  | 0.5041  | 0.41915 | 0.08783 | 0.12335 | SSTR1     |
| cg21263196 | 0.21299 | 0.31105 | 0.04326 | 0.03824 | 0.6085  | 0.03269 | 0.03594 | 0.03434 | 0.03635 | 0.02637 | BCAM      |

|            |         |         |         |         |         |         |         |         |         |                   |
|------------|---------|---------|---------|---------|---------|---------|---------|---------|---------|-------------------|
| cg21264055 | 0.07664 | 0.04079 | 0.10025 | 0.08472 | 0.75623 | 0.14512 | 0.05504 | 0.03427 | 0.61098 | 0.21891 PRR3      |
| cg21264207 | 0.03335 | 0.0347  | 0.03879 | 0.0365  | 0.03145 | 0.04028 | 0.03054 | 0.03411 | 0.02907 | 0.02632 EGR2      |
| cg21264329 | 0.06863 | 0.07208 | 0.08971 | 0.08177 | 0.07617 | 0.0668  | 0.05465 | 0.05882 | 0.06003 | 0.04845 DJ12208.2 |
| cg21265783 | 0.0462  | 0.044   | 0.05794 | 0.05304 | 0.05183 | 0.04263 | 0.03689 | 0.04297 | 0.04677 | 0.04298 CYLN2     |
| cg21269897 | 0.81585 | 0.32488 | 0.29385 | 0.26472 | 0.17924 | 0.14853 | 0.68517 | 0.70197 | 0.28252 | 0.19988 HIST1H4I  |
| cg21269934 | 0.08984 | 0.03193 | 0.92737 | 0.92963 | 0.90753 | 0.50542 | 0.48706 | 0.3176  | 0.97142 | 0.95089 FLJ37478  |
| cg21270015 | 0.77655 | 0.79962 | 0.71198 | 0.75921 | 0.5991  | 0.32214 | 0.70311 | 0.7761  | 0.77919 | 0.5793 HDCMA18P   |
| cg21270593 | 0.96985 | 0.97129 | 0.95178 | 0.96907 | 0.96882 | 0.96191 | 0.97209 | 0.97383 | 0.9693  | 0.96651 PEG10     |
| cg21271753 | 0.23946 | 0.08285 | 0.14405 | 0.20874 | 0.07147 | 0.05257 | 0.04566 | 0.04221 | 0.13246 | 0.05606 TMPRSS6   |
| cg21272774 | 0.05448 | 0.05948 | 0.06456 | 0.06865 | 0.06477 | 0.05511 | 0.06604 | 0.05501 | 0.05635 | 0.04697 HOXC9     |
| cg21273029 | 0.06594 | 0.0683  | 0.07098 | 0.07409 | 0.0348  | 0.0552  | 0.05899 | 0.05756 | 0.05367 | 0.05277 UST       |
| cg21273098 | 0.02275 | 0.02307 | 0.04339 | 0.02573 | 0.03213 | 0.0191  | 0.02453 | 0.02214 | 0.03152 | 0.01846 PPIL6     |
| cg21273125 | 0.07389 | 0.06222 | 0.05561 | 0.05538 | 0.03939 | 0.04786 | 0.04907 | 0.05103 | 0.05271 | 0.04512 ABHD2     |
| cg21274025 | 0.42133 | 0.18381 | 0.84246 | 0.87987 | 0.93476 | 0.79017 | 0.16239 | 0.05353 | 0.49957 | 0.57123 PLA2G3    |
| cg21274570 | 0.69789 | 0.54919 | 0.65553 | 0.68168 | 0.77314 | 0.75539 | 0.14137 | 0.13696 | 0.71598 | 0.64755 CCL25     |
| cg21275690 | 0.63525 | 0.46792 | 0.07898 | 0.07811 | 0.05854 | 0.08492 | 0.05529 | 0.20032 | 0.41516 | 0.08036 WDR58     |
| cg21277505 | 0.90066 | 0.82115 | 0.77881 | 0.89331 | 0.90174 | 0.87028 | 0.7423  | 0.58729 | 0.90503 | 0.80874 LOC284361 |
| cg21279601 | 0.51823 | 0.54248 | 0.6998  | 0.85068 | 0.64953 | 0.39175 | 0.1949  | 0.24294 | 0.47617 | 0.41603 DRD5      |
| cg21279865 | 0.85977 | 0.71424 | 0.81037 | 0.85316 | 0.88209 | 0.79696 | 0.86694 | 0.81317 | 0.86277 | 0.88292 FAM106A   |
| cg21279955 | 0.22346 | 0.19001 | 0.46173 | 0.52614 | 0.88189 | 0.7848  | 0.36985 | 0.09853 | 0.06888 | 0.07537 SLC27A3   |
| cg21280384 | 0.04768 | 0.05224 | 0.06538 | 0.05869 | 0.08619 | 0.05395 | 0.03839 | 0.02657 | 0.04877 | 0.04677 BXDC5     |
| cg21280510 | 0.87101 | 0.84345 | 0.90155 | 0.88731 | 0.66735 | 0.61745 | 0.57955 | 0.47344 | 0.88418 | 0.82798 NT5C1A    |
| cg21281001 | 0.03567 | 0.03477 | 0.03103 | 0.03393 | 0.02429 | 0.02585 | 0.04024 | 0.04351 | 0.02282 | 0.0263 CTSB       |
| cg21281799 | 0.72329 | 0.84683 | 0.81415 | 0.85357 | 0.86601 | 0.6796  | 0.74682 | 0.75594 | 0.84153 | 0.80324 DYRK2     |
| cg21282997 | 0.19138 | 0.18095 | 0.2767  | 0.26087 | 0.30469 | 0.21207 | 0.14189 | 0.13385 | 0.19091 | 0.23033 IL18RAP   |
| cg21283680 | 0.08154 | 0.10686 | 0.79677 | 0.82049 | 0.63166 | 0.44855 | 0.46765 | 0.67994 | 0.21913 | 0.19102 SH3BP5    |
| cg21284636 | 0.08643 | 0.08789 | 0.15245 | 0.13873 | 0.18879 | 0.10362 | 0.07356 | 0.1191  | 0.09344 | 0.0928 PIN4       |
| cg21284731 | 0.64186 | 0.61566 | 0.63913 | 0.69964 | 0.75048 | 0.69435 | 0.62335 | 0.61758 | 0.5796  | 0.56924 DCC       |
| cg21284880 | 0.02579 | 0.03869 | 0.03462 | 0.04424 | 0.03816 | 0.05198 | 0.0277  | 0.02361 | 0.02744 | 0.02502 LHFP      |
| cg21287330 | 0.0377  | 0.03889 | 0.03799 | 0.03647 | 0.03693 | 0.03439 | 0.03762 | 0.03836 | 0.03744 | 0.0303 C17orf81   |
| cg21288099 | 0.02187 | 0.02289 | 0.02068 | 0.0216  | 0.02304 | 0.02283 | 0.01909 | 0.02123 | 0.01583 | 0.01579 RRAS2     |
| cg21289015 | 0.80148 | 0.22229 | 0.81058 | 0.83126 | 0.21712 | 0.08069 | 0.28547 | 0.39252 | 0.17803 | 0.12515 USH1C     |
| cg21289924 | 0.01838 | 0.02007 | 0.01601 | 0.01523 | 0.01406 | 0.01679 | 0.01443 | 0.01532 | 0.0132  | 0.01291 EIF3S10   |
| cg21290885 | 0.07977 | 0.0846  | 0.11126 | 0.08573 | 0.07654 | 0.07226 | 0.06814 | 0.06924 | 0.0857  | 0.07403 TMEM47    |
| cg21291896 | 0.04072 | 0.04085 | 0.04249 | 0.04115 | 0.03062 | 0.03608 | 0.03966 | 0.03964 | 0.04014 | 0.04085 SLC6A6    |
| cg21291985 | 0.12303 | 0.08986 | 0.75478 | 0.84624 | 0.80898 | 0.44351 | 0.80359 | 0.30393 | 0.8515  | 0.78766 BTBD4     |
| cg21295467 | 0.06081 | 0.06379 | 0.08764 | 0.06803 | 0.09857 | 0.08978 | 0.14955 | 0.0717  | 0.06176 | 0.05023 LOH11CR2A |
| cg21295602 | 0.02631 | 0.01947 | 0.02232 | 0.02345 | 0.01633 | 0.0358  | 0.02021 | 0.01863 | 0.0177  | 0.0188 PSMB6      |
| cg21295911 | 0.05603 | 0.0535  | 0.05679 | 0.0545  | 0.04325 | 0.05078 | 0.04714 | 0.04659 | 0.04501 | 0.04159 TNFSF9    |
| cg21296230 | 0.03814 | 0.03997 | 0.06965 | 0.054   | 0.26331 | 0.399   | 0.02887 | 0.02922 | 0.74834 | 0.94216 GREM1     |
| cg21296602 | 0.75634 | 0.5989  | 0.63198 | 0.76418 | 0.71586 | 0.58708 | 0.70593 | 0.6827  | 0.78203 | 0.72753 JOSD3     |

|            |         |         |         |         |         |         |         |         |         |                   |
|------------|---------|---------|---------|---------|---------|---------|---------|---------|---------|-------------------|
| cg21296676 | 0.9136  | 0.90141 | 0.28288 | 0.17872 | 0.9349  | 0.23671 | 0.064   | 0.07064 | 0.90914 | 0.91466 EYA4      |
| cg21298523 | 0.37765 | 0.42077 | 0.07941 | 0.0762  | 0.07345 | 0.08603 | 0.06649 | 0.064   | 0.06323 | 0.07719 NUDT9     |
| cg21299958 | 0.13333 | 0.10224 | 0.15106 | 0.10451 | 0.32429 | 0.16201 | 0.14246 | 0.11159 | 0.18558 | 0.13903 ITM2C     |
| cg21300318 | 0.43776 | 0.29632 | 0.4749  | 0.69523 | 0.11699 | 0.07864 | 0.08524 | 0.0714  | 0.07814 | 0.05846 C19orf30  |
| cg21300561 | 0.02353 | 0.02495 | 0.02706 | 0.0299  | 0.02123 | 0.02554 | 0.02311 | 0.02148 | 0.02587 | 0.02466 K-ALPHA-1 |
| cg21301148 | 0.19351 | 0.10176 | 0.11781 | 0.1364  | 0.0872  | 0.12902 | 0.09964 | 0.09855 | 0.10407 | 0.09552 MYH6      |
| cg21301440 | 0.86307 | 0.86031 | 0.5263  | 0.66525 | 0.82957 | 0.6382  | 0.78792 | 0.47697 | 0.94005 | 0.92218 CYGB      |
| cg21302727 | 0.7952  | 0.78101 | 0.81472 | 0.80239 | 0.74557 | 0.79501 | 0.35682 | 0.45836 | 0.82527 | 0.80698 TACC2     |
| cg21303011 | 0.81977 | 0.91766 | 0.25865 | 0.55871 | 0.96223 | 0.82089 | 0.35248 | 0.01675 | 0.97186 | 0.95319 THR8      |
| cg21303386 | 0.04086 | 0.04247 | 0.05434 | 0.04256 | 0.04699 | 0.03462 | 0.33425 | 0.03734 | 0.04307 | 0.02641 RGS7      |
| cg21304187 | 0.0493  | 0.05174 | 0.04778 | 0.04504 | 0.04181 | 0.05336 | 0.05509 | 0.05204 | 0.04272 | 0.04556 CCPG1     |
| cg21305265 | 0.0542  | 0.05344 | 0.05655 | 0.05384 | 0.04258 | 0.0479  | 0.06686 | 0.06983 | 0.04084 | 0.04853 CDCA2     |
| cg21306212 | 0.04575 | 0.05461 | 0.05016 | 0.04043 | 0.03219 | 0.05202 | 0.04577 | 0.0397  | 0.04636 | 0.04298 C13orf10  |
| cg21306218 | 0.02625 | 0.02456 | 0.02533 | 0.02282 | 0.02374 | 0.0333  | 0.02414 | 0.02552 | 0.02195 | 0.02221 ZNF276    |
| cg21306775 | 0.79481 | 0.07694 | 0.75583 | 0.83105 | 0.65946 | 0.39785 | 0.2844  | 0.29434 | 0.72504 | 0.11444 FLJ44881  |
| cg21307628 | 0.88621 | 0.65167 | 0.89875 | 0.8969  | 0.92818 | 0.88053 | 0.80179 | 0.75734 | 0.70499 | 0.33666 URB       |
| cg21307697 | 0.03959 | 0.04141 | 0.0452  | 0.04068 | 0.0504  | 0.03916 | 0.03295 | 0.0306  | 0.03925 | 0.03296 EXOSC7    |
| cg21309049 | 0.03209 | 0.03234 | 0.03378 | 0.03154 | 0.03472 | 0.03654 | 0.03908 | 0.03564 | 0.02736 | 0.02531 STK17A    |
| cg21309147 | 0.02271 | 0.03034 | 0.03933 | 0.03568 | 0.89712 | 0.90063 | 0.04203 | 0.03909 | 0.03013 | 0.03081 STAC2     |
| cg21311175 | 0.11092 | 0.09882 | 0.14725 | 0.10709 | 0.13895 | 0.0894  | 0.11118 | 0.09883 | 0.10429 | 0.08797 HIRA      |
| cg21312090 | 0.0731  | 0.04413 | 0.05121 | 0.04347 | 0.05575 | 0.02844 | 0.03038 | 0.0311  | 0.0376  | 0.03199 TRPS1     |
| cg21312148 | 0.08201 | 0.12198 | 0.09584 | 0.10879 | 0.45122 | 0.4528  | 0.08522 | 0.05401 | 0.09377 | 0.08195 LCE2D     |
| cg21319693 | 0.05174 | 0.04689 | 0.05439 | 0.05134 | 0.04352 | 0.05605 | 0.04098 | 0.04452 | 0.04455 | 0.04087 PRDX1     |
| cg21319745 | 0.07029 | 0.06883 | 0.11225 | 0.0977  | 0.11815 | 0.0849  | 0.08247 | 0.06491 | 0.07023 | 0.07629 UTP11L    |
| cg21321735 | 0.01889 | 0.0193  | 0.1821  | 0.45618 | 0.2964  | 0.04545 | 0.03216 | 0.15411 | 0.02003 | 0.07392 KIF1A     |
| cg21321885 | 0.01636 | 0.01713 | 0.01543 | 0.01607 | 0.01479 | 0.01402 | 0.01369 | 0.01371 | 0.01194 | 0.01299 NDE1      |
| cg21322149 | 0.03243 | 0.03274 | 0.03263 | 0.03085 | 0.0298  | 0.03074 | 0.0384  | 0.03936 | 0.02843 | 0.03384 SENP7     |
| cg21324308 | 0.31922 | 0.08859 | 0.51896 | 0.55607 | 0.77968 | 0.69794 | 0.0787  | 0.06957 | 0.09373 | 0.07923 PROK1     |
| cg21325760 | 0.93046 | 0.92266 | 0.90949 | 0.92441 | 0.9211  | 0.91799 | 0.90229 | 0.90898 | 0.88872 | 0.85449 MAGEL2    |
| cg21329628 | 0.03387 | 0.02684 | 0.0313  | 0.03084 | 0.46236 | 0.44605 | 0.02803 | 0.02715 | 0.0219  | 0.0204 CD320      |
| cg21330703 | 0.14447 | 0.23507 | 0.67762 | 0.72982 | 0.35424 | 0.49058 | 0.14805 | 0.04351 | 0.0597  | 0.04274 DRD2      |
| cg21331335 | 0.83292 | 0.85752 | 0.86301 | 0.88619 | 0.86191 | 0.87502 | 0.85879 | 0.87272 | 0.89645 | 0.88948 KCNV2     |
| cg21331821 | 0.07253 | 0.05948 | 0.89812 | 0.95661 | 0.49763 | 0.52121 | 0.06221 | 0.16518 | 0.0344  | 0.03911 ZSCAN1    |
| cg21332946 | 0.02439 | 0.02688 | 0.02571 | 0.02316 | 0.02577 | 0.02733 | 0.01844 | 0.01875 | 0.02461 | 0.02244 LIX1L     |
| cg21333964 | 0.1842  | 0.06206 | 0.17293 | 0.12701 | 0.08241 | 0.06645 | 0.08208 | 0.05565 | 0.07126 | 0.04816 HMBS      |
| cg21335556 | 0.59022 | 0.43024 | 0.78197 | 0.8184  | 0.30382 | 0.47698 | 0.50311 | 0.1582  | 0.29634 | 0.21244 FLJ35773  |
| cg21335942 | 0.9777  | 0.98042 | 0.02559 | 0.02392 | 0.02394 | 0.0211  | 0.13488 | 0.07631 | 0.01841 | 0.02193 SETD6     |
| cg21336547 | 0.03378 | 0.03728 | 0.03261 | 0.03195 | 0.02053 | 0.02682 | 0.02929 | 0.03526 | 0.02476 | 0.02117 AKAP8     |
| cg21337430 | 0.0386  | 0.03712 | 0.03981 | 0.04016 | 0.02543 | 0.04247 | 0.03763 | 0.03792 | 0.0347  | 0.03325 APEX1     |
| cg21339926 | 0.0531  | 0.05913 | 0.05588 | 0.0657  | 0.09947 | 0.06864 | 0.05607 | 0.05355 | 0.04956 | 0.05849 CLMN      |
| cg21341271 | 0.0422  | 0.03859 | 0.06906 | 0.1981  | 0.04546 | 0.0432  | 0.04281 | 0.04539 | 0.03321 | 0.02983 C7orf36   |



|            |         |         |         |         |         |         |         |         |         |                  |
|------------|---------|---------|---------|---------|---------|---------|---------|---------|---------|------------------|
| cg21341807 | 0.03851 | 0.04135 | 0.04646 | 0.05614 | 0.04542 | 0.0493  | 0.04054 | 0.04088 | 0.04337 | 0.04346 RABL4    |
| cg21342728 | 0.62692 | 0.3373  | 0.89346 | 0.89678 | 0.95032 | 0.92906 | 0.77717 | 0.21193 | 0.82005 | 0.57948 GPR24    |
| cg21347412 | 0.87739 | 0.87241 | 0.86551 | 0.86469 | 0.82912 | 0.84967 | 0.84987 | 0.88035 | 0.885   | 0.86011 STAP2    |
| cg21348691 | 0.03134 | 0.03325 | 0.03156 | 0.02856 | 0.0441  | 0.04295 | 0.02859 | 0.03124 | 0.02179 | 0.02426 DUS2L    |
| cg21349901 | 0.61926 | 0.57981 | 0.74615 | 0.80535 | 0.79351 | 0.75182 | 0.58659 | 0.62276 | 0.49846 | 0.37246 ERVK6    |
| cg21350115 | 0.32136 | 0.82949 | 0.71064 | 0.8022  | 0.6673  | 0.1907  | 0.67198 | 0.69471 | 0.7276  | 0.6975 CALCRL    |
| cg21350283 | 0.0312  | 0.0238  | 0.02117 | 0.02    | 0.02199 | 0.03029 | 0.02265 | 0.02318 | 0.02207 | 0.02439 ACTN1    |
| cg21351102 | 0.09465 | 0.04586 | 0.03263 | 0.034   | 0.02992 | 0.03773 | 0.03529 | 0.03601 | 0.03124 | 0.03216 MRCL3    |
| cg21351994 | 0.03615 | 0.03928 | 0.1046  | 0.04774 | 0.06177 | 0.02837 | 0.03959 | 0.03893 | 0.03638 | 0.02456 EMX1     |
| cg21353232 | 0.04898 | 0.04358 | 0.73595 | 0.8083  | 0.56622 | 0.54062 | 0.05104 | 0.03431 | 0.12247 | 0.07927 SEZ6L    |
| cg21355508 | 0.29016 | 0.19346 | 0.27274 | 0.26595 | 0.46169 | 0.14858 | 0.35914 | 0.34479 | 0.53182 | 0.36877 RBM10    |
| cg21358381 | 0.82543 | 0.56371 | 0.83809 | 0.87742 | 0.87751 | 0.86572 | 0.81348 | 0.86848 | 0.68094 | 0.52453 PPY      |
| cg21359747 | 0.8627  | 0.58857 | 0.95906 | 0.96304 | 0.67786 | 0.65725 | 0.91613 | 0.9512  | 0.96295 | 0.97152 ALDH1A3  |
| cg21360828 | 0.1905  | 0.21342 | 0.16768 | 0.12676 | 0.37413 | 0.08967 | 0.17218 | 0.05833 | 0.06568 | 0.05751 CENPA    |
| cg21361470 | 0.16725 | 0.19878 | 0.25597 | 0.41569 | 0.42744 | 0.43347 | 0.31832 | 0.27596 | 0.31681 | 0.28885 C6orf117 |
| cg21363706 | 0.89342 | 0.88316 | 0.88179 | 0.88538 | 0.90456 | 0.89723 | 0.78046 | 0.83579 | 0.90006 | 0.85847 NAT1     |
| cg21363943 | 0.0327  | 0.03152 | 0.02866 | 0.02535 | 0.02991 | 0.03058 | 0.02668 | 0.02381 | 0.03085 | 0.02741 SF3B4    |
| cg21364150 | 0.06799 | 0.07678 | 0.08645 | 0.07151 | 0.07747 | 0.06968 | 0.09292 | 0.08925 | 0.08279 | 0.07536 DUSP19   |
| cg21365235 | 0.10476 | 0.0498  | 0.10212 | 0.05816 | 0.03295 | 0.03859 | 0.55923 | 0.44088 | 0.04126 | 0.03148 OCRL     |
| cg21365602 | 0.72939 | 0.85847 | 0.33627 | 0.34082 | 0.15189 | 0.64834 | 0.27592 | 0.29221 | 0.06457 | 0.06108 GBP4     |
| cg21366535 | 0.09873 | 0.10557 | 0.12244 | 0.11543 | 0.10141 | 0.10527 | 0.08914 | 0.09853 | 0.09698 | 0.10819 RSHL2    |
| cg21366834 | 0.84381 | 0.86047 | 0.83416 | 0.84938 | 0.82222 | 0.82501 | 0.83802 | 0.85846 | 0.85391 | 0.69529 CCR4     |
| cg21367040 | 0.01786 | 0.01949 | 0.02443 | 0.02114 | 0.01773 | 0.0219  | 0.01599 | 0.01777 | 0.0211  | 0.01681 TMEM50A  |
| cg21367957 | 0.40132 | 0.11149 | 0.87754 | 0.91505 | 0.69253 | 0.54784 | 0.04475 | 0.03782 | 0.6428  | 0.40494 F10      |
| cg21368354 | 0.03888 | 0.0457  | 0.04618 | 0.04466 | 0.04316 | 0.05784 | 0.03546 | 0.0425  | 0.04178 | 0.04176 FLJ10769 |
| cg21369679 | 0.02403 | 0.02557 | 0.02901 | 0.02462 | 0.0204  | 0.02663 | 0.02225 | 0.02627 | 0.02641 | 0.02271 DNAJA2   |
| cg21369988 | 0.07702 | 0.06393 | 0.03263 | 0.03886 | 0.05531 | 0.02488 | 0.0306  | 0.03708 | 0.03116 | 0.02468 C1QDC1   |
| cg21370143 | 0.90859 | 0.75326 | 0.87573 | 0.90021 | 0.84318 | 0.83843 | 0.81996 | 0.85506 | 0.86522 | 0.44483 MYBPC3   |
| cg21371335 | 0.0654  | 0.06281 | 0.10593 | 0.10941 | 0.08768 | 0.07001 | 0.0674  | 0.06981 | 0.05078 | 0.06435 DNAJC7   |
| cg21372397 | 0.02425 | 0.02559 | 0.0228  | 0.02306 | 0.02026 | 0.01983 | 0.02415 | 0.02028 | 0.02102 | 0.01804 HIC2     |
| cg21372914 | 0.11963 | 0.07895 | 0.09599 | 0.09539 | 0.13229 | 0.08223 | 0.07932 | 0.0716  | 0.07212 | 0.07001 CLEC4M   |
| cg21373526 | 0.08545 | 0.08173 | 0.08362 | 0.09422 | 0.09798 | 0.09233 | 0.08645 | 0.09107 | 0.07213 | 0.08108 RAB30    |
| cg21374864 | 0.06905 | 0.07483 |         |         |         | 0.08281 | 0.05474 | 0.05609 | 0.05407 | 0.05297 TOR1A    |
| cg21375825 | 0.85123 | 0.84958 | 0.82655 | 0.85344 | 0.82596 | 0.83408 | 0.80644 | 0.54506 | 0.84174 | 0.8157 LCT       |
| cg21376883 | 0.10528 | 0.05903 | 0.90285 | 0.96256 | 0.08443 | 0.08135 | 0.17407 | 0.43934 | 0.23409 | 0.05409 ACTN2    |
| cg21377793 | 0.90059 | 0.81406 | 0.90665 | 0.89864 | 0.92704 | 0.8983  | 0.89956 | 0.90333 | 0.90185 | 0.902 TSPAN3     |
| cg21378047 | 0.04071 | 0.04175 | 0.04229 | 0.03828 | 0.03226 | 0.04032 | 0.03712 | 0.03455 | 0.02912 | 0.03398 H1FX     |
| cg21378206 | 0.86554 | 0.66091 | 0.91013 | 0.91545 | 0.91928 | 0.92112 | 0.09137 | 0.06657 | 0.43448 | 0.55498 IL1F5    |
| cg21379008 | 0.03644 | 0.04542 | 0.03393 | 0.03066 | 0.03978 | 0.04952 | 0.0322  | 0.03066 | 0.0451  | 0.03624 ATP8B2   |
| cg21379309 | 0.03707 | 0.03437 | 0.03322 | 0.03505 | 0.04025 | 0.04239 | 0.03099 | 0.02901 | 0.03044 | 0.0337 C14orf147 |
| cg21379816 | 0.0408  | 0.0395  | 0.04178 | 0.03788 | 0.0292  | 0.03616 | 0.03196 | 0.03503 | 0.03343 | 0.03016 SRM      |

|            |         |         |         |         |         |         |         |         |         |                  |
|------------|---------|---------|---------|---------|---------|---------|---------|---------|---------|------------------|
| cg21380294 | 0.3126  | 0.07761 | 0.21247 | 0.24436 | 0.18866 | 0.06283 | 0.1342  | 0.07651 | 0.08295 | 0.12628 ZSCAN2   |
| cg21380842 | 0.0277  | 0.02924 | 0.03922 | 0.03581 | 0.02634 | 0.02455 | 0.05199 | 0.03869 | 0.02676 | 0.02526 KCNJ6    |
| cg21383720 | 0.02153 | 0.0233  | 0.02321 | 0.02091 | 0.01797 | 0.02079 | 0.02117 | 0.01855 | 0.01835 | 0.01734 C9orf10  |
| cg21387281 | 0.55867 | 0.38333 | 0.85874 | 0.90298 | 0.93609 | 0.65926 | 0.7728  | 0.55496 | 0.87468 | 0.67341 OGFR     |
| cg21387302 | 0.11156 | 0.09509 | 0.079   | 0.06848 | 0.10496 | 0.07158 | 0.06452 | 0.06484 | 0.04838 | 0.05881 RFX3     |
| cg21388029 | 0.1007  | 0.03556 | 0.31196 | 0.37851 | 0.04532 | 0.03295 | 0.22904 | 0.02756 | 0.15903 | 0.25782 CREG2    |
| cg21389013 | 0.03858 | 0.03935 | 0.0403  | 0.04004 | 0.0331  | 0.03738 | 0.03448 | 0.03845 | 0.03772 | 0.03412 PPM1G    |
| cg21389884 | 0.02288 | 0.02782 | 0.02693 | 0.02374 | 0.02199 | 0.02381 | 0.02235 | 0.02025 | 0.01975 | 0.01641 PVRL1    |
| cg21391660 | 0.05764 | 0.03916 | 0.55466 | 0.41421 | 0.81897 | 0.83906 | 0.25785 | 0.07227 | 0.34423 | 0.02789 LLGL2    |
| cg21395782 | 0.04079 | 0.03811 | 0.07044 | 0.05829 | 0.02689 | 0.03189 | 0.04219 | 0.04604 | 0.11186 | 0.02512 NDUFA13  |
| cg21395967 | 0.09495 | 0.09684 | 0.17011 | 0.15477 | 0.17316 | 0.12722 | 0.12897 | 0.27172 | 0.12715 | 0.10979 FLJ20298 |
| cg21396405 | 0.01824 | 0.02199 | 0.02015 | 0.01952 | 0.01901 | 0.01917 | 0.01599 | 0.01709 | 0.01678 | 0.0191 MAFG      |
| cg21399079 | 0.73877 | 0.52233 | 0.91983 | 0.93478 | 0.94435 | 0.92656 | 0.93491 | 0.91247 | 0.47437 | 0.10827 GPR45    |
| cg21399198 | 0.03846 | 0.04249 | 0.04433 | 0.03908 | 0.03886 | 0.03796 | 0.03441 | 0.03452 | 0.03463 | 0.02902 FBXL13   |
| cg21400640 | 0.75558 | 0.17628 | 0.12108 | 0.12698 | 0.20173 | 0.10027 | 0.62862 | 0.62067 | 0.63017 | 0.60998 TMSB4X   |
| cg21400896 | 0.16137 | 0.23679 | 0.901   | 0.89958 | 0.9185  | 0.87496 | 0.63561 | 0.65127 | 0.90267 | 0.84703 ABI3     |
| cg21401794 | 0.02834 | 0.0284  | 0.03197 | 0.03103 | 0.02958 | 0.02493 | 0.02527 | 0.024   | 0.02211 | 0.02151 LRRC8C   |
| cg21402035 | 0.29369 | 0.16246 | 0.7926  | 0.86628 | 0.84442 | 0.8076  | 0.32311 | 0.16562 | 0.49866 | 0.2264 GALR3     |
| cg21402071 | 0.50766 | 0.03072 | 0.59553 | 0.75716 | 0.8025  | 0.05228 | 0.28561 | 0.19487 | 0.53872 | 0.02585 CHRNB4   |
| cg21404906 | 0.0861  | 0.08369 | 0.09673 | 0.08446 | 0.1267  | 0.10406 | 0.09215 | 0.07421 | 0.08639 | 0.09297 XRCC5    |
| cg21405195 | 0.86728 | 0.83241 | 0.73354 | 0.81422 | 0.67269 | 0.72483 | 0.77769 | 0.83053 | 0.77308 | 0.77817 PEG10    |
| cg21406461 | 0.31568 | 0.1587  | 0.64535 | 0.71649 | 0.68579 | 0.60418 | 0.3705  | 0.17101 | 0.16381 | 0.13789 IFI16    |
| cg21407055 | 0.62749 | 0.28145 | 0.86323 | 0.90918 | 0.57771 | 0.4868  | 0.17148 | 0.15406 | 0.81008 | 0.71993 ART1     |
| cg21407839 | 0.02769 | 0.02547 | 0.0376  | 0.03927 | 0.02539 | 0.0327  | 0.0239  | 0.02329 | 0.02244 | 0.02049 DYRK1A   |
| cg21409722 | 0.0781  | 0.08222 | 0.0787  | 0.08223 | 0.14662 | 0.10183 | 0.06654 | 0.06352 | 0.07549 | 0.11216 AKAP1    |
| cg21409833 | 0.78793 | 0.76643 | 0.68202 | 0.73673 | 0.60957 | 0.76307 | 0.68839 | 0.80222 | 0.75981 | 0.71357 ANGPTL3  |
| cg21410991 | 0.06091 | 0.04848 | 0.85913 | 0.82647 | 0.50618 | 0.10147 | 0.0623  | 0.05507 | 0.2396  | 0.18993 ISL1     |
| cg21412748 | 0.04524 | 0.04838 | 0.0492  | 0.05222 | 0.0435  | 0.04497 | 0.05107 | 0.04914 | 0.04688 | 0.03592 FCHSD2   |
| cg21413009 | 0.0921  | 0.06486 | 0.101   | 0.08614 | 0.08763 | 0.06739 | 0.05778 | 0.07053 | 0.07433 | 0.06714 DAPK2    |
| cg21413251 | 0.02513 | 0.03103 | 0.03021 | 0.02798 | 0.02308 | 0.01978 | 0.02839 | 0.02124 | 0.02333 | 0.07372 PIP5K1B  |
| cg21414251 | 0.0646  | 0.05289 | 0.10536 | 0.10811 | 0.20833 | 0.08402 | 0.04372 | 0.03683 | 0.04063 | 0.06308 OR12D2   |
| cg21415080 | 0.46704 | 0.36014 | 0.48303 | 0.54126 | 0.5172  | 0.51096 | 0.45241 | 0.50164 | 0.39186 | 0.35446 BANF1    |
| cg21415604 | 0.87306 | 0.70519 | 0.9057  | 0.93301 | 0.95131 | 0.91692 | 0.87045 | 0.91762 | 0.93259 | 0.80344 C4B      |
| cg21415698 | 0.05622 | 0.0544  | 0.06527 | 0.06439 | 0.06135 | 0.06805 | 0.08087 | 0.07164 | 0.05356 | 0.04811 EXPH5    |
| cg21416022 | 0.12814 | 0.10395 | 0.16128 | 0.10063 | 0.16424 | 0.11399 | 0.10307 | 0.10935 | 0.11413 | 0.15242 TTC23    |
| cg21416237 | 0.92439 | 0.41035 | 0.67997 | 0.57908 | 0.16197 | 0.04138 | 0.5182  | 0.30383 | 0.89377 | 0.53467 FKBP10   |
| cg21416602 | 0.02783 | 0.0769  | 0.02884 | 0.02514 | 0.02009 | 0.02417 | 0.02304 | 0.0233  | 0.02298 | 0.02045 ECD      |
| cg21418052 | 0.84843 | 0.32095 | 0.7485  | 0.76632 | 0.65773 | 0.72967 | 0.78472 | 0.8337  | 0.86697 | 0.30165 B3GTL    |
| cg21418076 | 0.89018 | 0.88061 | 0.87806 | 0.8994  | 0.89661 | 0.89751 | 0.89776 | 0.89645 | 0.90262 | 0.88807 LTB4R2   |
| cg21419475 | 0.03911 | 0.04342 | 0.05013 | 0.03728 | 0.03331 | 0.03904 | 0.0395  | 0.03673 | 0.0359  | 0.03838 EIF2B1   |
| cg21420531 | 0.11274 | 0.11335 | 0.13926 | 0.11703 | 0.18578 | 0.10282 | 0.09235 | 0.08289 | 0.28144 | 0.11635 SLC5A6   |

|             |         |         |         |         |         |         |         |         |         |         |          |
|-------------|---------|---------|---------|---------|---------|---------|---------|---------|---------|---------|----------|
| cg21421501  | 0.06441 | 0.07181 | 0.09442 | 0.08815 | 0.09575 | 0.07799 | 0.08365 | 0.08002 | 0.06641 | 0.0728  | FTH1     |
| cg21421701  | 0.03831 | 0.0336  | 0.04206 | 0.03934 | 0.04074 | 0.02449 | 0.02341 | 0.02491 | 0.0262  | 0.02435 | SNFT     |
| cg21422208  | 0.07438 | 0.06218 | 0.07575 | 0.0699  | 0.16097 | 0.11111 | 0.06413 | 0.05649 | 0.05671 | 0.07228 | RFT1     |
| cg21422622  | 0.05789 | 0.05909 | 0.07626 | 0.06083 | 0.0589  | 0.06821 | 0.06435 | 0.06004 | 0.06853 | 0.05889 | RUTBC3   |
| cg21424904  | 0.04386 | 0.04145 | 0.04454 | 0.04274 | 0.03455 | 0.04583 | 0.04841 | 0.03869 | 0.04135 | 0.0392  | GRK6     |
| cg21426387  | 0.02506 | 0.02821 | 0.22326 | 0.40236 | 0.02079 | 0.02083 | 0.02654 | 0.02153 | 0.02177 | 0.01842 | SNN      |
| cg21428681  | 0.20205 | 0.10993 | 0.63236 | 0.63303 | 0.51174 | 0.46979 | 0.3859  | 0.05802 | 0.6272  | 0.46626 | NKX3-1   |
| cg21429500  | 0.05369 | 0.05692 | 0.06448 | 0.05871 | 0.06008 | 0.04442 | 0.05305 | 0.04856 | 0.05449 | 0.04019 | LAP3     |
| cg21430666  | 0.94695 | 0.91941 | 0.96158 | 0.96503 | 0.97273 | 0.96244 | 0.95705 | 0.96142 | 0.96199 | 0.96388 | HIST3H3  |
| cg21431091  | 0.2237  | 0.05075 | 0.10264 | 0.26003 | 0.20672 | 0.18983 | 0.09124 | 0.04014 | 0.05027 | 0.04711 | TMEM9    |
| cg21431536  | 0.61275 | 0.52455 | 0.59726 | 0.70638 | 0.36327 | 0.2924  | 0.66109 | 0.69463 | 0.26406 | 0.22541 | LGR8     |
| cg21432513  | 0.91416 | 0.9161  | 0.9102  | 0.90787 | 0.91887 | 0.91711 | 0.89349 | 0.9197  | 0.91277 | 0.90884 | CHFR     |
| cg21432842  | 0.12247 | 0.11995 | 0.61085 | 0.81282 | 0.63498 | 0.36615 | 0.46631 | 0.3141  | 0.22511 | 0.07012 | CSF3     |
| cg21432954  | 0.959   | 0.944   | 0.0328  | 0.02869 | 0.03211 | 0.03548 | 0.02589 | 0.02257 | 0.038   | 0.02696 | TRPC4    |
| cg21433933  | 0.76272 | 0.61134 | 0.79756 | 0.80793 | 0.79098 | 0.79378 | 0.75162 | 0.74856 | 0.83137 | 0.819   | APXL2    |
| cg21434440  | 0.05074 | 0.04856 | 0.04841 | 0.04589 | 0.04121 | 0.04355 | 0.04903 | 0.04251 | 0.03863 | 0.03629 | CD2AP    |
| cg21434954  | 0.27189 | 0.12513 | 0.42337 | 0.58369 | 0.62298 | 0.6287  | 0.11967 | 0.09111 | 0.3243  | 0.28884 | LCE1B    |
| cg21435336  | 0.03962 | 0.04246 | 0.61543 | 0.7941  | 0.35262 | 0.41855 | 0.19846 | 0.03894 | 0.03515 | 0.03757 | ANKRD41  |
| cg21435394  | 0.06379 | 0.06395 | 0.71075 | 0.79429 | 0.34997 | 0.37821 | 0.26894 | 0.06489 | 0.50379 | 0.3436  | NUDT14   |
| cg21438018  | 0.81894 | 0.77516 | 0.53668 | 0.57441 | 0.66489 | 0.69868 | 0.87216 | 0.87939 | 0.78745 | 0.7178  | MSH4     |
| cg21439450  | 0.02463 | 0.02534 | 0.02504 | 0.02319 | 0.01764 | 0.02032 | 0.02525 | 0.02758 | 0.02491 | 0.01898 | POLR2C   |
| cg21440587  | 0.34987 | 0.27326 | 0.31248 | 0.33199 | 0.40817 | 0.83113 | 0.31526 | 0.37929 | 0.06791 | 0.19781 | AIF1     |
| cg21443261  | 0.04749 | 0.04445 | 0.06392 | 0.10704 | 0.0404  | 0.04088 | 0.0574  | 0.04772 | 0.04032 | 0.03402 | TRIM35   |
| cg21443584  | 0.05586 | 0.04844 | 0.04983 | 0.05267 | 0.06879 | 0.06534 | 0.0374  | 0.03744 | 0.04411 | 0.05216 | MBIP     |
| cg214448423 | 0.59037 | 0.25282 | 0.77597 | 0.7634  | 0.70751 | 0.76241 | 0.79472 | 0.74048 | 0.80044 | 0.75644 | ACOT11   |
| cg214449655 | 0.13378 | 0.12886 | 0.19161 | 0.14965 | 0.21978 | 0.17755 | 0.1212  | 0.10057 | 0.14773 | 0.16357 | CASP9    |
| cg214449843 | 0.04761 | 0.0372  | 0.03751 | 0.03646 | 0.03983 | 0.03713 | 0.07073 | 0.06644 | 0.05951 | 0.02678 | MANBAL   |
| cg21450627  | 0.34962 | 0.18732 | 0.38043 | 0.45245 | 0.42406 | 0.6025  | 0.09074 | 0.09146 | 0.139   | 0.26434 | PSD4     |
| cg21451553  | 0.18055 | 0.1607  | 0.4269  | 0.48802 | 0.29537 | 0.35633 | 0.18369 | 0.15079 | 0.25152 | 0.21257 | NOVA2    |
| cg21452443  | 0.03905 | 0.03903 | 0.0389  | 0.03842 | 0.02777 | 0.03596 | 0.03161 | 0.03246 | 0.03677 | 0.03011 | NMT1     |
| cg21452766  | 0.03635 | 0.03717 | 0.04024 | 0.03976 | 0.05847 | 0.03352 | 0.04347 | 0.03458 | 0.03446 | 0.02679 | CTH      |
| cg21453309  | 0.9486  | 0.60972 | 0.63637 | 0.94777 | 0.12088 | 0.14027 | 0.26048 | 0.08597 | 0.02377 | 0.02955 | FAM101A  |
| cg21453677  | 0.04873 | 0.03994 | 0.0406  | 0.04413 | 0.05475 | 0.06384 | 0.03726 | 0.03439 | 0.02912 | 0.03585 | HIST1H1C |
| cg21457147  | 0.8416  | 0.16245 | 0.80138 | 0.82539 | 0.74616 | 0.20096 | 0.82319 | 0.17711 | 0.86207 | 0.83881 | KCTD4    |
| cg21457804  | 0.57763 | 0.42078 | 0.51834 | 0.66929 | 0.34164 | 0.30821 | 0.15531 | 0.18205 | 0.32088 | 0.29733 | CT45-2   |
| cg21458041  | 0.35503 | 0.11982 | 0.7481  | 0.76455 | 0.78217 | 0.83003 | 0.54276 | 0.79093 | 0.30594 | 0.32275 | TNP2     |
| cg21458116  | 0.04841 | 0.04094 | 0.04333 | 0.04668 | 0.03999 | 0.04238 | 0.04007 | 0.04448 | 0.04219 | 0.03981 | GGA1     |
| cg21458907  | 0.02853 | 0.02823 | 0.02924 | 0.03677 | 0.03831 | 0.03198 | 0.22445 | 0.73458 | 0.09263 | 0.33627 | CADPS    |
| cg21459710  | 0.06584 | 0.07181 | 0.06266 | 0.08081 | 0.0442  | 0.04407 | 0.05629 | 0.06486 | 0.049   | 0.10823 | CDC37    |
| cg21459867  | 0.94365 | 0.93195 | 0.15121 | 0.25187 | 0.02904 | 0.02822 | 0.57037 | 0.32294 | 0.12052 | 0.0286  | IDUA     |
| cg21459921  | 0.04532 | 0.04472 | 0.04088 | 0.04095 | 0.04394 | 0.05064 | 0.04225 | 0.04562 | 0.03219 | 0.03539 | ADRM1    |

|            |         |         |         |         |         |         |         |         |         |                  |
|------------|---------|---------|---------|---------|---------|---------|---------|---------|---------|------------------|
| cg21460081 | 0.05448 | 0.05924 | 0.05502 | 0.04579 | 0.25708 | 0.2807  | 0.85617 | 0.86572 | 0.42407 | 0.29445 HOXB4    |
| cg21460582 | 0.81346 | 0.29102 | 0.85708 | 0.86625 | 0.8462  | 0.74252 | 0.70754 | 0.62565 | 0.81907 | 0.49388 CSPG4    |
| cg21461100 | 0.04931 | 0.03812 | 0.59044 | 0.65349 | 0.06157 | 0.07571 | 0.09597 | 0.04451 | 0.09196 | 0.04773 NOVA2    |
| cg21462299 | 0.62133 | 0.7782  | 0.42568 | 0.63788 | 0.39656 | 0.28966 | 0.2232  | 0.22814 | 0.69464 | 0.62375 VGLL1    |
| cg21463023 | 0.05641 | 0.0584  | 0.05349 | 0.05504 | 0.05148 | 0.06466 | 0.05179 | 0.05354 | 0.05154 | 0.05091 SS18L2   |
| cg21465754 | 0.03226 | 0.03346 | 0.03172 | 0.02901 | 0.03205 | 0.03425 | 0.02663 | 0.03246 | 0.03243 | 0.03436 RAD51    |
| cg21466821 | 0.74114 | 0.17248 | 0.66362 | 0.80092 | 0.86297 | 0.80301 | 0.61883 | 0.40804 | 0.45937 | 0.05368 HIPK4    |
| cg21468416 | 0.78121 | 0.26796 | 0.12197 | 0.09165 | 0.44635 | 0.38847 | 0.54468 | 0.35285 | 0.53023 | 0.55263 NEK6     |
| cg21472099 | 0.04626 | 0.04816 | 0.04874 | 0.04234 | 0.03723 | 0.03576 | 0.02901 | 0.02814 | 0.0307  | 0.03447 SYAP1    |
| cg21472642 | 0.07219 | 0.13653 | 0.855   | 0.88157 | 0.89258 | 0.85602 | 0.55436 | 0.3944  | 0.90644 | 0.74561 CHN2     |
| cg21474838 | 0.73304 | 0.74982 | 0.73151 | 0.78955 | 0.75457 | 0.83566 | 0.78609 | 0.78827 | 0.67178 | 0.68494 KLRD1    |
| cg21475255 | 0.05356 | 0.05168 | 0.0456  | 0.05692 | 0.09058 | 0.07467 | 0.04509 | 0.03744 | 0.05395 | 0.04758 DAG1     |
| cg21475402 | 0.03533 | 0.03263 | 0.3245  | 0.42167 | 0.84286 | 0.90435 | 0.44217 | 0.47368 | 0.04378 | 0.03069 BCAN     |
| cg21476940 | 0.07902 | 0.11538 | 0.13093 | 0.12649 | 0.1546  | 0.08992 | 0.10115 | 0.1055  | 0.08398 | 0.14995 ITLN1    |
| cg21478222 | 0.04226 | 0.05173 | 0.05477 | 0.06361 | 0.06582 | 0.04526 | 0.05452 | 0.03778 | 0.04967 | 0.04972 ELK4     |
| cg21478437 | 0.85177 | 0.67022 | 0.88784 | 0.88541 | 0.91532 | 0.85984 | 0.63175 | 0.25148 | 0.89869 | 0.71631 CTSE     |
| cg21478490 | 0.79899 | 0.39009 | 0.82455 | 0.83506 | 0.55395 | 0.47205 | 0.08475 | 0.06632 | 0.52654 | 0.51656 PROP1    |
| cg21480743 | 0.79452 | 0.79225 | 0.55708 | 0.68753 | 0.78471 | 0.80766 | 0.73126 | 0.74878 | 0.22218 | 0.20972 PTEN     |
| cg21481775 | 0.23477 | 0.08333 | 0.1827  | 0.18933 | 0.7623  | 0.36001 | 0.06284 | 0.05377 | 0.61253 | 0.21457 NKX3-1   |
| cg21484834 | 0.87739 | 0.46571 | 0.94434 | 0.94583 | 0.96475 | 0.88614 | 0.91581 | 0.73014 | 0.9488  | 0.86971 PTK6     |
| cg21484964 | 0.87804 | 0.84788 | 0.86942 | 0.88596 | 0.77437 | 0.82807 | 0.80511 | 0.83642 | 0.84397 | 0.818 C15orf24   |
| cg21486659 | 0.06218 | 0.05059 | 0.08761 | 0.07107 | 0.04053 | 0.04786 | 0.05002 | 0.04323 | 0.04657 | 0.03672 TMEM14B  |
| cg21486954 | 0.03112 | 0.03104 | 0.34935 | 0.35721 | 0.51189 | 0.06194 | 0.03382 | 0.03518 | 0.03633 | 0.03441 RPIP8    |
| cg21487067 | 0.0399  | 0.0412  | 0.03928 | 0.0384  | 0.0299  | 0.03585 | 0.03872 | 0.03654 | 0.03376 | 0.03324 KIAA0152 |
| cg21487207 | 0.04839 | 0.03725 | 0.04997 | 0.05084 | 0.05288 | 0.04859 | 0.05083 | 0.04943 | 0.04396 | 0.03933 HOXC4    |
| cg21488617 | 0.85363 | 0.61838 | 0.87245 | 0.87498 | 0.90165 | 0.85234 | 0.52624 | 0.24621 | 0.14782 | 0.34047 DNALI1   |
| cg21489722 | 0.46499 | 0.53776 | 0.76368 | 0.82256 | 0.71139 | 0.93486 | 0.43067 | 0.61059 | 0.86528 | 0.53072 FAM9B    |
| cg21489873 | 0.87066 | 0.8576  | 0.85613 | 0.89851 | 0.92068 | 0.86962 | 0.83914 | 0.84944 | 0.86763 | 0.76412 C9orf45  |
| cg21491028 | 0.04592 | 0.04946 | 0.06001 | 0.06047 | 0.06669 | 0.06812 | 0.05508 | 0.06237 | 0.04901 | 0.05871 PSMD3    |
| cg21491308 | 0.08062 | 0.126   | 0.35364 | 0.5296  | 0.4591  | 0.36903 | 0.09567 | 0.36467 | 0.07103 | 0.07518 TEX101   |
| cg21492378 | 0.74179 | 0.56386 | 0.6339  | 0.75286 | 0.5746  | 0.7324  | 0.70254 | 0.7365  | 0.78631 | 0.7306 CEP1      |
| cg21493583 | 0.75209 | 0.52462 | 0.45671 | 0.54554 | 0.2696  | 0.30419 | 0.09736 | 0.08141 | 0.78203 | 0.58603 CRIPT    |
| cg21493666 | 0.09626 | 0.08206 | 0.11636 | 0.09786 | 0.10443 | 0.09192 | 0.10676 | 0.08171 | 0.07797 | 0.08498 PPME1    |
| cg21494337 | 0.08143 | 0.08617 | 0.11151 | 0.10248 | 0.14816 | 0.09503 | 0.07428 | 0.05747 | 0.08838 | 0.08543 MGC11266 |
| cg21494776 | 0.04778 | 0.20284 | 0.94941 | 0.94649 | 0.96407 | 0.94634 | 0.93111 | 0.74259 | 0.58211 | 0.66305 ICAM4    |
| cg21495715 | 0.33434 | 0.07    | 0.88966 | 0.91143 | 0.69065 | 0.21931 | 0.80613 | 0.49927 | 0.86032 | 0.77241 SLC5A10  |
| cg21497439 | 0.70479 | 0.31891 | 0.57459 | 0.77903 | 0.79833 | 0.80242 | 0.29013 | 0.12405 | 0.81769 | 0.70929 HAPLN4   |
| cg21500966 | 0.05916 | 0.06532 | 0.16665 | 0.13383 | 0.07022 | 0.06821 | 0.07441 | 0.0661  | 0.30382 | 0.25819 NAALAD2  |
| cg21501064 | 0.83887 | 0.36795 | 0.83747 | 0.82731 | 0.84799 | 0.67754 | 0.34123 | 0.16613 | 0.68844 | 0.22661 6-Sep    |
| cg21503093 | 0.02385 | 0.0269  | 0.02526 | 0.02348 | 0.01907 | 0.02097 | 0.01972 | 0.02141 | 0.01813 | 0.02087 EMP2     |
| cg21504624 | 0.40934 | 0.20863 | 0.60913 | 0.55137 | 0.50553 | 0.41237 | 0.76565 | 0.38302 | 0.69456 | 0.60241 IL11RA   |

|            |         |         |         |         |         |         |         |         |         |         |            |
|------------|---------|---------|---------|---------|---------|---------|---------|---------|---------|---------|------------|
| cg21504918 | 0.3822  | 0.08354 | 0.42322 | 0.44299 | 0.67955 | 0.85243 | 0.42034 | 0.06659 | 0.86762 | 0.8384  | GPX3       |
| cg21505334 | 0.82809 | 0.86372 | 0.84211 | 0.84287 | 0.59289 | 0.53502 | 0.43152 | 0.45203 | 0.06654 | 0.06632 | CEACAM5    |
| cg21505886 | 0.16219 | 0.06489 | 0.13674 | 0.15597 | 0.0771  | 0.20402 | 0.13045 | 0.08659 | 0.6479  | 0.55335 | TMEM129    |
| cg21508214 | 0.02755 | 0.02384 | 0.02807 | 0.0253  | 0.0207  | 0.02276 | 0.02121 | 0.02291 | 0.02201 | 0.02169 | IFT80      |
| cg21509023 | 0.02865 | 0.02365 | 0.50348 | 0.48704 | 0.1588  | 0.21484 | 0.23719 | 0.24166 | 0.03334 | 0.02284 | HBA2       |
| cg21509097 | 0.43446 | 0.37171 | 0.19586 | 0.13889 | 0.53895 | 0.09278 | 0.08607 | 0.10261 | 0.47243 | 0.07971 | LYPLA3     |
| cg21509846 | 0.07822 | 0.04183 | 0.67937 | 0.68769 | 0.63475 | 0.63665 | 0.24115 | 0.04344 | 0.13823 | 0.03063 | BEX1       |
| cg21510697 | 0.05956 | 0.03988 | 0.05945 | 0.03959 | 0.03504 | 0.0326  | 0.03531 | 0.03741 | 0.03278 | 0.03512 | USP31      |
| cg21511069 | 0.03289 | 0.03754 | 0.04075 | 0.03906 | 0.04352 | 0.04293 | 0.0423  | 0.03051 | 0.03209 | 0.03018 | UBAP2      |
| cg21512370 | 0.58784 | 0.61482 | 0.62118 | 0.62182 | 0.65178 | 0.65813 | 0.51027 | 0.58576 | 0.62154 | 0.58612 | P2RY5      |
| cg21513385 | 0.84353 | 0.40328 | 0.0916  | 0.36524 | 0.85867 | 0.61869 | 0.13065 | 0.22984 | 0.59759 | 0.03225 | LOC57228   |
| cg21513553 | 0.02366 | 0.02603 | 0.02687 | 0.0246  | 0.01773 | 0.0246  | 0.0228  | 0.02515 | 0.02127 | 0.02129 | COL6A2     |
| cg21514871 | 0.48723 | 0.09055 | 0.12394 | 0.12291 | 0.18351 | 0.08205 | 0.16525 | 0.05715 | 0.28696 | 0.23854 | MEFV       |
| cg21515243 | 0.14397 | 0.12984 | 0.14465 | 0.14318 | 0.0708  | 0.11643 | 0.12354 | 0.12817 | 0.12102 | 0.10323 | RIOK3      |
| cg21515329 | 0.81251 | 0.80612 | 0.80843 | 0.80101 | 0.79495 | 0.84901 | 0.66538 | 0.74531 | 0.845   | 0.83876 | SMC1L1     |
| cg21515744 | 0.39749 | 0.10267 | 0.33934 | 0.31888 | 0.03314 | 0.02473 | 0.02081 | 0.02295 | 0.0281  | 0.02227 | GUK1       |
| cg21516287 | 0.03851 | 0.03537 | 0.07496 | 0.05408 | 0.77622 | 0.89786 | 0.3939  | 0.20622 | 0.83479 | 0.61052 | LRRC61     |
| cg21516384 | 0.63396 | 0.30431 | 0.3349  | 0.24052 | 0.05848 | 0.03611 | 0.03782 | 0.03817 | 0.16041 | 0.03502 | KIAA1618   |
| cg21516478 | 0.12862 | 0.08646 | 0.36481 | 0.47286 | 0.9005  | 0.96374 | 0.37356 | 0.10437 | 0.95698 | 0.9178  | GPX3       |
| cg21516819 | 0.05792 | 0.05622 | 0.0723  | 0.07985 | 0.05903 | 0.21133 | 0.24378 | 0.07529 | 0.04477 | 0.0462  | TSPAN7     |
| cg21517055 | 0.92778 | 0.92851 | 0.92441 | 0.92953 | 0.32456 | 0.18116 | 0.6388  | 0.43832 | 0.05299 | 0.03603 | MGC11271   |
| cg21518208 | 0.33606 | 0.04609 | 0.52304 | 0.5875  | 0.50325 | 0.66984 | 0.34572 | 0.04697 | 0.44862 | 0.23738 | KRTHB5     |
| cg21518938 | 0.06127 | 0.03669 | 0.04166 | 0.03725 | 0.05208 | 0.04239 | 0.03962 | 0.03155 | 0.03449 | 0.03146 | RBBP8      |
| cg21518947 | 0.57665 | 0.16999 | 0.49436 | 0.68219 | 0.72675 | 0.66794 | 0.37447 | 0.36614 | 0.40425 | 0.08584 | CABP4      |
| cg21519900 | 0.25156 | 0.07467 | 0.78277 | 0.85942 | 0.38986 | 0.11937 | 0.11323 | 0.0559  | 0.08831 | 0.14308 | C20orf186  |
| cg21521452 | 0.03493 | 0.0352  | 0.02731 | 0.02417 | 0.02056 | 0.02598 | 0.02218 | 0.02059 | 0.01881 | 0.02085 | AGA        |
| cg21522303 | 0.04007 | 0.02757 | 0.43582 | 0.48959 | 0.59182 | 0.67906 | 0.47568 | 0.48172 | 0.02949 | 0.02192 | ST6GALNAC2 |
| cg21522797 | 0.39666 | 0.08504 | 0.55972 | 0.63734 | 0.84557 | 0.89859 | 0.46026 | 0.58415 | 0.07603 | 0.08673 | PLCG2      |
| cg21522988 | 0.54613 | 0.42851 | 0.79599 | 0.78944 | 0.77234 | 0.20237 | 0.74707 | 0.40675 | 0.79776 | 0.13193 | MLSTD1     |
| cg21523528 | 0.02713 | 0.02975 | 0.02956 | 0.02856 | 0.03972 | 0.04059 | 0.02426 | 0.02189 | 0.02255 | 0.02431 | CBFA2T2    |
| cg21526212 | 0.04063 | 0.04203 | 0.04565 | 0.04015 | 0.04057 | 0.04877 | 0.03862 | 0.04072 | 0.04119 | 0.03407 | PTCH       |
| cg21529533 | 0.94074 | 0.89599 | 0.93357 | 0.92364 | 0.5499  | 0.60377 | 0.15256 | 0.05071 | 0.93185 | 0.85447 | HLA-G      |
| cg21529807 | 0.12636 | 0.06145 | 0.06263 | 0.07064 | 0.08585 | 0.06472 | 0.06884 | 0.06123 | 0.04589 | 0.03804 | CEACAM4    |
| cg21530453 | 0.06444 | 0.06092 | 0.13935 | 0.10214 | 0.04469 | 0.04108 | 0.06507 | 0.0563  | 0.04429 | 0.0511  | GNAO1      |
| cg21530890 | 0.03697 | 0.03411 | 0.75042 | 0.79484 | 0.52641 | 0.6544  | 0.09638 | 0.04564 | 0.27096 | 0.03379 | SOX8       |
| cg21533271 | 0.04042 | 0.03994 | 0.06374 | 0.05514 | 0.06016 | 0.06131 | 0.56356 | 0.44976 | 0.03705 | 0.03274 | PLXNA3     |
| cg21533958 | 0.83842 | 0.84972 | 0.8295  | 0.82992 | 0.80183 | 0.84734 | 0.75363 | 0.71252 | 0.8448  | 0.76137 | GPR124     |
| cg21537939 | 0.88275 | 0.20096 | 0.18446 | 0.25283 | 0.46698 | 0.22561 | 0.81475 | 0.71457 | 0.82113 | 0.81767 | 10-Sep     |
| cg21538194 | 0.05389 | 0.04927 | 0.04669 | 0.04659 | 0.03787 | 0.04479 | 0.03756 | 0.03664 | 0.04187 | 0.04571 | DZIP1L     |
| cg21539243 | 0.0896  | 0.04715 | 0.06462 | 0.04925 | 0.03723 | 0.04587 | 0.04535 | 0.04841 | 0.0506  | 0.04315 | PHTF1      |
| cg21540749 | 0.06603 | 0.05407 | 0.06388 | 0.05728 | 0.06213 | 0.05229 | 0.0567  | 0.05708 | 0.03922 | 0.04196 | MOCS2      |

|            |         |         |         |         |         |         |         |         |         |                  |
|------------|---------|---------|---------|---------|---------|---------|---------|---------|---------|------------------|
| cg21541083 | 0.18966 | 0.07105 | 0.87804 | 0.90251 | 0.67043 | 0.61969 | 0.05891 | 0.04146 | 0.87859 | 0.21376 STXBP2   |
| cg21542094 | 0.03597 | 0.0351  | 0.24147 | 0.18365 | 0.92361 | 0.85707 | 0.15247 | 0.07505 | 0.93967 | 0.8736 PFKFB3    |
| cg21542793 | 0.77914 | 0.64132 | 0.94952 | 0.96821 | 0.97214 | 0.969   | 0.30004 | 0.27699 | 0.89975 | 0.83895 ADRA2B   |
| cg21544377 | 0.02922 | 0.02881 | 0.02976 | 0.02414 | 0.02145 | 0.02556 | 0.02534 | 0.02499 | 0.02345 | 0.02244 C12orf61 |
| cg21545849 | 0.02411 | 0.02811 | 0.02806 | 0.02474 | 0.01723 | 0.02507 | 0.02271 | 0.02242 | 0.02247 | 0.01999 CHD6     |
| cg21546057 | 0.04219 | 0.04231 | 0.05808 | 0.28717 | 0.04248 | 0.03589 | 0.03727 | 0.04179 | 0.04192 | 0.03372 FIBP     |
| cg21546671 | 0.06244 | 0.06699 | 0.07418 | 0.05537 | 0.09634 | 0.08816 | 0.25656 | 0.09528 | 0.0634  | 0.06215 HOXB4    |
| cg21547708 | 0.03656 | 0.03502 | 0.05581 | 0.04422 | 0.04624 | 0.16987 | 0.03698 | 0.02784 | 0.03175 | 0.02689 SSTR2    |
| cg21547976 | 0.02749 | 0.0275  | 0.03041 | 0.02733 | 0.02727 | 0.02788 | 0.0269  | 0.02094 | 0.02106 | 0.02027 STK11    |
| cg21548414 | 0.0403  | 0.03106 | 0.04105 | 0.04861 | 0.03226 | 0.03009 | 0.02833 | 0.02454 | 0.0328  | 0.02144 CLIC5    |
| cg21548788 | 0.03329 | 0.03113 | 0.03061 | 0.03167 | 0.02887 | 0.02919 | 0.02545 | 0.02797 | 0.02221 | 0.02255 CCNI     |
| cg21549639 | 0.05602 | 0.04777 | 0.04863 | 0.03937 | 0.03349 | 0.04098 | 0.0401  | 0.04181 | 0.03985 | 0.03459 TOMM40   |
| cg21549904 | 0.03263 | 0.0268  | 0.03027 | 0.02892 | 0.01961 | 0.02403 | 0.02018 | 0.02423 | 0.02175 | 0.02176 GALNT7   |
| cg21550442 | 0.87975 | 0.80608 | 0.87409 | 0.87533 | 0.84804 | 0.82711 | 0.86836 | 0.85127 | 0.88678 | 0.73869 FLJ36445 |
| cg21550483 | 0.75562 | 0.27815 | 0.85669 | 0.86465 | 0.3955  | 0.18466 | 0.08622 | 0.10352 | 0.86916 | 0.49208 CLEC10A  |
| cg21552947 | 0.03262 | 0.0395  | 0.03617 | 0.03012 | 0.05694 | 0.04273 | 0.0362  | 0.02431 | 0.02889 | 0.0307 THRAP5    |
| cg21553524 | 0.01538 | 0.01827 | 0.0414  | 0.03725 | 0.02074 | 0.01799 | 0.03732 | 0.01746 | 0.01637 | 0.03105 MGC33926 |
| cg21553596 | 0.49661 | 0.55415 | 0.79896 | 0.82044 | 0.35938 | 0.08384 | 0.21886 | 0.21234 | 0.97865 | 0.95802 FAM3B    |
| cg21554249 | 0.08572 | 0.08154 | 0.13282 | 0.12482 | 0.16839 | 0.13808 | 0.14135 | 0.12075 | 0.11417 | 0.12737 SUOX     |
| cg21554552 | 0.84833 | 0.94189 | 0.04745 | 0.02867 | 0.38046 | 0.02972 | 0.42598 | 0.56857 | 0.93266 | 0.94725 RASSF1   |
| cg21557231 | 0.71513 | 0.81813 | 0.29018 | 0.32903 | 0.74623 | 0.70057 | 0.494   | 0.47688 | 0.75409 | 0.79428 MCF2     |
| cg21559783 | 0.03929 | 0.04199 | 0.04513 | 0.04012 | 0.02625 | 0.04295 | 0.0357  | 0.03757 | 0.03713 | 0.03359 FLJ36779 |
| cg21561142 | 0.06927 | 0.07347 | 0.0652  | 0.06625 | 0.07801 | 0.0922  | 0.06159 | 0.06038 | 0.05185 | 0.04996 DEK      |
| cg21561173 | 0.08416 | 0.07716 | 0.30101 | 0.38109 | 0.59576 | 0.61337 | 0.06251 | 0.06131 | 0.27042 | 0.22365 C21orf81 |
| cg21565972 | 0.94107 | 0.88171 | 0.93592 | 0.94952 | 0.95401 | 0.93202 | 0.93383 | 0.86957 | 0.94844 | 0.9244 FLJ23754  |
| cg21566550 | 0.02578 | 0.0265  | 0.02537 | 0.02117 | 0.01859 | 0.02233 | 0.02087 | 0.01962 | 0.01986 | 0.02271 BMPR2    |
| cg21567017 | 0.65575 | 0.71002 | 0.67826 | 0.70447 | 0.61804 | 0.69496 | 0.45597 | 0.54765 | 0.72005 | 0.65568 MGC4825  |
| cg21567332 | 0.95748 | 0.91737 | 0.96665 | 0.9687  | 0.9739  | 0.96704 | 0.96069 | 0.96173 | 0.97689 | 0.9662 HCCA2     |
| cg21570220 | 0.12883 | 0.12375 | 0.13854 | 0.15023 | 0.11807 | 0.12104 | 0.11656 | 0.1195  | 0.12258 | 0.12592 SLC11A2  |
| cg21570468 | 0.04592 | 0.04451 | 0.0454  | 0.04351 | 0.0343  | 0.03493 | 0.03632 | 0.03975 | 0.04114 | 0.03664 RBL1     |
| cg21570818 | 0.81266 | 0.57443 | 0.791   | 0.81837 | 0.73324 | 0.76722 | 0.77579 | 0.70879 | 0.81787 | 0.61684 FUT5     |
| cg21571665 | 0.05103 | 0.05074 | 0.04992 | 0.05674 | 0.04223 | 0.04686 | 0.04917 | 0.05165 | 0.0442  | 0.04566 ZNF410   |
| cg21571937 | 0.05352 | 0.05296 | 0.04967 | 0.06087 | 0.0382  | 0.04621 | 0.04591 | 0.04629 | 0.04385 | 0.04699 FZD2     |
| cg21572316 | 0.19962 | 0.04852 | 0.16858 | 0.31426 | 0.1163  | 0.1244  | 0.34673 | 0.53669 | 0.04148 | 0.04071 ABCA1    |
| cg21572897 | 0.67962 | 0.33142 | 0.52901 | 0.6843  | 0.74208 | 0.80945 | 0.21314 | 0.2315  | 0.10617 | 0.18089 CD80     |
| cg21572997 | 0.03023 | 0.03514 | 0.03027 | 0.03179 | 0.03889 | 0.03282 | 0.09556 | 0.03452 | 0.03038 | 0.02663 LRP5     |
| cg21573601 | 0.02442 | 0.02667 | 0.02612 | 0.03475 | 0.04003 | 0.0588  | 0.02163 | 0.02297 | 0.44007 | 0.41604 PTEN     |
| cg21574400 | 0.06188 | 0.0376  | 0.04201 | 0.03698 | 0.96787 | 0.69772 | 0.27588 | 0.03535 | 0.59768 | 0.54836 LIPG     |
| cg21574752 | 0.0626  | 0.06745 | 0.07724 | 0.08864 | 0.11753 | 0.2766  | 0.04373 | 0.0455  | 0.03504 | 0.0285 COPG2     |
| cg21575929 | 0.95271 | 0.42538 | 0.97012 | 0.9638  | 0.97158 | 0.96341 | 0.96214 | 0.79834 | 0.96895 | 0.9465 ADRA1B    |
| cg21576698 | 0.09547 | 0.09788 | 0.14091 | 0.11861 | 0.14382 | 0.10554 | 0.09733 | 0.08076 | 0.11002 | 0.09787 UQCRH    |

|            |         |         |         |         |         |         |         |         |         |                  |
|------------|---------|---------|---------|---------|---------|---------|---------|---------|---------|------------------|
| cg21577049 | 0.07033 | 0.04158 | 0.79486 | 0.78689 | 0.93125 | 0.72223 | 0.05335 | 0.04067 | 0.14699 | 0.25295 WDR69    |
| cg21578207 | 0.31402 | 0.17941 | 0.44211 | 0.57816 | 0.44544 | 0.37035 | 0.50174 | 0.38942 | 0.31641 | 0.16887 C1orf164 |
| cg21578541 | 0.86041 | 0.23716 | 0.80615 | 0.84568 | 0.95108 | 0.88692 | 0.84577 | 0.56151 | 0.90149 | 0.75136 TLR9     |
| cg21578906 | 0.28242 | 0.13967 | 0.58429 | 0.79564 | 0.32966 | 0.47197 | 0.17143 | 0.05173 | 0.36156 | 0.29281 SLC5A4   |
| cg21581873 | 0.07076 | 0.04554 | 0.35753 | 0.31703 | 0.56546 | 0.16488 | 0.09572 | 0.0541  | 0.50346 | 0.14358 PLEKHA6  |
| cg21584430 | 0.4442  | 0.22413 | 0.89506 | 0.91291 | 0.90051 | 0.57895 | 0.73644 | 0.48536 | 0.92505 | 0.73433 ADORA2A  |
| cg21584983 | 0.03621 | 0.03452 | 0.03338 | 0.02961 | 0.01816 | 0.02707 | 0.03212 | 0.03135 | 0.024   | 0.02292 SITPEC   |
| cg21586107 | 0.02255 | 0.0263  | 0.0237  | 0.0234  | 0.02063 | 0.02368 | 0.01973 | 0.02013 | 0.01818 | 0.01873 TMSB10   |
| cg21587861 | 0.03648 | 0.03745 | 0.03857 | 0.0329  | 0.07761 | 0.02891 | 0.03234 | 0.02957 | 0.03051 | 0.02614 BICD1    |
| cg21588305 | 0.90839 | 0.92556 | 0.89807 | 0.90892 | 0.93645 | 0.90494 | 0.79841 | 0.85102 | 0.92619 | 0.9187 NNAT      |
| cg21589115 | 0.11792 | 0.0513  | 0.54208 | 0.54088 | 0.08698 | 0.0368  | 0.05446 | 0.06365 | 0.04407 | 0.03687 DKKL1    |
| cg21589280 | 0.07627 | 0.02191 | 0.0226  | 0.02011 | 0.01483 | 0.01861 | 0.53092 | 0.52979 | 0.01982 | 0.01933 DDAH1    |
| cg21591452 | 0.95855 | 0.94353 | 0.96209 | 0.95937 | 0.97229 | 0.95771 | 0.93793 | 0.93819 | 0.96545 | 0.93114 TMEM105  |
| cg21591742 | 0.87234 | 0.88055 | 0.86429 | 0.88717 | 0.92176 | 0.86598 | 0.47719 | 0.39135 | 0.51122 | 0.51641 HOXD10   |
| cg21595737 | 0.11775 | 0.12192 | 0.07343 | 0.06754 | 0.17723 | 0.13112 | 0.07464 | 0.07633 | 0.10388 | 0.18544 GMFB     |
| cg21596317 | 0.06472 | 0.04081 | 0.05272 | 0.03784 | 0.0422  | 0.03668 | 0.04143 | 0.03692 | 0.03423 | 0.0293 PAM       |
| cg21596858 | 0.75758 | 0.61136 | 0.79585 | 0.86388 | 0.60813 | 0.45797 | 0.45327 | 0.16494 | 0.30019 | 0.23323 DCST2    |
| cg21597649 | 0.0732  | 0.073   | 0.08164 | 0.08265 | 0.1416  | 0.07867 | 0.07328 | 0.06904 | 0.06352 | 0.07188 TMEM106B |
| cg21599792 | 0.05529 | 0.05598 | 0.06638 | 0.05574 | 0.04702 | 0.05786 | 0.04807 | 0.05348 | 0.04507 | 0.04066 FZD4     |
| cg21600563 | 0.01691 | 0.01549 | 0.02015 | 0.01809 | 0.01269 | 0.01576 | 0.01461 | 0.01489 | 0.01446 | 0.01493 FBXO33   |
| cg21601405 | 0.34796 | 0.06252 | 0.87727 | 0.88591 | 0.91094 | 0.86106 | 0.31227 | 0.09655 | 0.38498 | 0.4122 CD40      |
| cg21602160 | 0.22124 | 0.14483 | 0.33219 | 0.5124  | 0.60654 | 0.94181 | 0.15987 | 0.15753 | 0.09766 | 0.10713 AOC3     |
| cg21602520 | 0.83502 | 0.25496 | 0.95173 | 0.95687 | 0.65157 | 0.88951 | 0.15692 | 0.096   | 0.56161 | 0.23252 BCL2     |
| cg21604042 | 0.11332 | 0.1817  | 0.95367 | 0.95794 | 0.97114 | 0.95821 | 0.95287 | 0.94841 | 0.78443 | 0.88388 SCUBE3   |
| cg21604615 | 0.27447 | 0.07652 | 0.08861 | 0.17452 | 0.44256 | 0.20945 | 0.09201 | 0.48658 | 0.45511 | 0.09485 SYTL1    |
| cg21604803 | 0.03817 | 0.04389 | 0.45868 | 0.65966 | 0.92607 | 0.94282 | 0.40275 | 0.30201 | 0.87834 | 0.65176 CPT1C    |
| cg21604856 | 0.7188  | 0.48409 | 0.69598 | 0.77137 | 0.14697 | 0.10251 | 0.0989  | 0.08024 | 0.07902 | 0.07888 SUHW1    |
| cg21605986 | 0.02905 | 0.02879 | 0.02802 | 0.02684 | 0.023   | 0.02456 | 0.02369 | 0.02193 | 0.02047 | 0.02237 KIAA1191 |
| cg21606237 | 0.07281 | 0.05166 | 0.14137 | 0.15792 | 0.11613 | 0.11382 | 0.06756 | 0.04672 | 0.14386 | 0.06644 STX17    |
| cg21607066 | 0.03536 | 0.03658 | 0.04457 | 0.03674 | 0.0324  | 0.03524 | 0.03379 | 0.03886 | 0.03251 | 0.0337 PHIP      |
| cg21607649 | 0.33722 | 0.08859 | 0.18471 | 0.32742 | 0.30181 | 0.31736 | 0.07898 | 0.0885  | 0.07156 | 0.08199 GPR123   |
| cg21608116 | 0.08258 | 0.08284 | 0.08616 | 0.09383 | 0.08623 | 0.08131 | 0.0735  | 0.07202 | 0.06614 | 0.0625 NFX1      |
| cg21608192 | 0.06207 | 0.04705 | 0.21274 | 0.34235 | 0.08141 | 0.08359 | 0.06609 | 0.05112 | 0.16262 | 0.06103 XYLT1    |
| cg21608489 | 0.134   | 0.08383 | 0.52832 | 0.54708 | 0.91985 | 0.72891 | 0.70154 | 0.48569 | 0.33596 | 0.20594 POU2F2   |
| cg21609430 | 0.0312  | 0.03102 | 0.03281 | 0.03205 | 0.03273 | 0.03004 | 0.03038 | 0.03387 | 0.0298  | 0.02991 FAM62A   |
| cg21610192 | 0.11758 | 0.05903 | 0.06294 | 0.05299 | 0.07254 | 0.05916 | 0.05019 | 0.04402 | 0.03724 | 0.04335 DYNC1L12 |
| cg21610516 | 0.14504 | 0.14836 | 0.14848 | 0.14066 | 0.08778 | 0.14025 | 0.14751 | 0.1356  | 0.13326 | 0.13426 MTHFD1L  |
| cg21611708 | 0.84964 | 0.79955 | 0.83928 | 0.85122 | 0.58703 | 0.52302 | 0.7474  | 0.66772 | 0.47839 | 0.41955 TGM3     |
| cg21612046 | 0.04994 | 0.05423 | 0.07807 | 0.05223 | 0.05053 | 0.04674 | 0.02348 | 0.02596 | 0.02607 | 0.02816 ZNF550   |
| cg21613754 | 0.80965 | 0.64759 | 0.86713 | 0.87563 | 0.77387 | 0.76962 | 0.73258 | 0.50463 | 0.85953 | 0.65423 PNKD     |
| cg21614231 | 0.85274 | 0.86408 | 0.85399 | 0.87152 | 0.77441 | 0.82839 | 0.84916 | 0.86935 | 0.8957  | 0.90003 BAG1     |

|            |         |         |         |         |         |         |         |         |         |                      |
|------------|---------|---------|---------|---------|---------|---------|---------|---------|---------|----------------------|
| cg21614638 | 0.8207  | 0.20216 | 0.80925 | 0.83965 | 0.65431 | 0.76387 | 0.63666 | 0.78698 | 0.81699 | 0.51136 DAPP1        |
| cg21615127 | 0.40108 | 0.31923 | 0.0871  | 0.08156 | 0.14365 | 0.06952 | 0.0604  | 0.056   | 0.07207 | 0.06632 TMCO4        |
| cg21615171 | 0.77526 | 0.60515 | 0.85478 | 0.87605 | 0.85719 | 0.8496  | 0.87789 | 0.88281 | 0.84623 | 0.8318 SLC22A13      |
| cg21615663 | 0.8749  | 0.84842 | 0.8918  | 0.88934 | 0.91756 | 0.85518 | 0.86193 | 0.78626 | 0.9029  | 0.87107 MGC35048     |
| cg21616088 | 0.28419 | 0.1299  | 0.27981 | 0.32039 | 0.27233 | 0.08559 | 0.13007 | 0.09073 | 0.14363 | 0.13055 FBXL4        |
| cg21618439 | 0.31907 | 0.02817 | 0.03058 | 0.02812 | 0.44572 | 0.05531 | 0.03241 | 0.02296 | 0.33487 | 0.1004 CORO2A        |
| cg21618713 | 0.05156 | 0.04347 | 0.04763 | 0.04269 | 0.03335 | 0.04247 | 0.04164 | 0.04549 | 0.04245 | 0.03497 ARFIP1       |
| cg21621114 | 0.59458 | 0.2856  | 0.47088 | 0.50374 | 0.50968 | 0.42491 | 0.09194 | 0.10209 | 0.16884 | 0.10593 CRX          |
| cg21621204 | 0.68283 | 0.70849 | 0.58325 | 0.69319 | 0.59972 | 0.7214  | 0.52834 | 0.72488 | 0.51893 | 0.57376 HTN1         |
| cg21621248 | 0.04105 | 0.04462 | 0.33077 | 0.58119 | 0.15287 | 0.32079 | 0.06216 | 0.04355 | 0.09034 | 0.08144 LRRTM1       |
| cg21623671 | 0.07071 | 0.07093 | 0.05739 | 0.06276 | 0.05763 | 0.05592 | 0.05563 | 0.05263 | 0.05136 | 0.04685 ANXA6        |
| cg21624282 | 0.10482 | 0.08224 | 0.24932 | 0.36929 | 0.65079 | 0.66424 | 0.14948 | 0.34802 | 0.09343 | 0.07563 LOC122258    |
| cg21624359 | 0.13149 | 0.12977 | 0.3618  | 0.63743 | 0.4429  | 0.4693  | 0.09671 | 0.07814 | 0.79807 | 0.50739 FFAR3        |
| cg21624883 | 0.0368  | 0.0308  | 0.03215 | 0.03069 | 0.02345 | 0.02773 | 0.02671 | 0.02954 | 0.0245  | 0.02564 IPPK         |
| cg21625881 | 0.72262 | 0.6536  | 0.75779 | 0.79304 | 0.96116 | 0.97351 | 0.65927 | 0.7451  | 0.64172 | 0.70732 GNAS         |
| cg21626086 | 0.86449 | 0.64601 | 0.8597  | 0.87302 | 0.90291 | 0.87053 | 0.82535 | 0.86429 | 0.87596 | 0.85276 C6orf81      |
| cg21627181 | 0.26703 | 0.20636 | 0.19936 | 0.22712 | 0.61117 | 0.53151 | 0.04836 | 0.06005 | 0.04588 | 0.05067 SLC17A4      |
| cg21628553 | 0.82665 | 0.52426 | 0.80651 | 0.86488 | 0.8286  | 0.82751 | 0.85348 | 0.73193 | 0.34836 | 0.2876 NPBWR2        |
| cg21629895 | 0.85379 | 0.61776 | 0.83044 | 0.70497 | 0.88515 | 0.56221 | 0.63279 | 0.25154 | 0.87094 | 0.77895 DNMT3A       |
| cg21631409 | 0.53102 | 0.36055 | 0.2792  | 0.39074 | 0.49725 | 0.36576 | 0.29308 | 0.17267 | 0.23565 | 0.1782 ALDH3B2       |
| cg21631754 | 0.96474 | 0.94954 | 0.95453 | 0.96431 | 0.96921 | 0.95783 | 0.95608 | 0.96546 | 0.96828 | 0.95944 XTP7         |
| cg21633208 | 0.03513 | 0.03336 | 0.07679 | 0.24441 | 0.07298 | 0.03131 | 0.03263 | 0.03095 | 0.02905 | 0.03255 LNK          |
| cg21633698 | 0.89735 | 0.46594 | 0.91753 | 0.92404 | 0.93852 | 0.91902 | 0.92174 | 0.90459 | 0.86402 | 0.43331 THY1         |
| cg21634602 | 0.04124 | 0.03715 | 0.03513 | 0.03376 | 0.03073 | 0.03261 | 0.03799 | 0.03906 | 0.02425 | 0.02789 APC          |
| cg21636577 | 0.69783 | 0.49543 | 0.80895 | 0.83518 | 0.86593 | 0.77532 | 0.71149 | 0.64745 | 0.58567 | 0.30811 ACADVL       |
| cg21636748 | 0.06513 | 0.06135 | 0.07936 | 0.07417 | 0.07356 | 0.07051 | 0.07523 | 0.07499 | 0.05368 | 0.05638 PLEKHA8      |
| cg21637033 | 0.0369  | 0.04277 | 0.04361 | 0.043   | 0.03374 | 0.03105 | 0.0354  | 0.03776 | 0.03606 | 0.03508 TEAD4        |
| cg21638219 | 0.08675 | 0.0687  | 0.07584 | 0.0647  | 0.11506 | 0.10563 | 0.04855 | 0.05576 | 0.06215 | 0.06466 PHYH2        |
| cg21639401 | 0.5988  | 0.48636 | 0.74471 | 0.82038 | 0.84954 | 0.79489 | 0.57115 | 0.45022 | 0.47473 | 0.56775 FLJ31222     |
| cg21639968 | 0.02188 | 0.02106 | 0.02376 | 0.02335 | 0.01881 | 0.02161 | 0.02027 | 0.0174  | 0.01865 | 0.01531 UBE2M        |
| cg21640749 | 0.08012 | 0.03246 | 0.52092 | 0.45336 | 0.82221 | 0.89056 | 0.03042 | 0.02606 | 0.19603 | 0.2233 CD300LF       |
| cg21642076 | 0.8791  | 0.91047 | 0.88357 | 0.88766 | 0.84782 | 0.90918 | 0.89163 | 0.57651 | 0.8979  | 0.87981 DKFZp434N035 |
| cg21642649 | 0.11912 | 0.13139 | 0.07312 | 0.07459 | 0.06056 | 0.06227 | 0.04156 | 0.04143 | 0.04401 | 0.03567 C21orf66     |
| cg21643045 | 0.93815 | 0.92093 | 0.91462 | 0.91971 | 0.89465 | 0.91658 | 0.74017 | 0.85967 | 0.87597 | 0.85085 CCL20        |
| cg21643191 | 0.18239 | 0.15264 | 0.72052 | 0.78561 | 0.68541 | 0.77263 | 0.60919 | 0.60694 | 0.45875 | 0.29148 ABCB5        |
| cg21643361 | 0.85757 | 0.54574 | 0.20233 | 0.27125 | 0.69124 | 0.50979 | 0.46694 | 0.26892 | 0.28125 | 0.22628 ZNF135       |
| cg21643860 | 0.02865 | 0.02895 | 0.03172 | 0.02906 | 0.02329 | 0.02865 | 0.05296 | 0.02691 | 0.02432 | 0.0242 RBM21         |
| cg21644628 | 0.69135 | 0.69673 | 0.68572 | 0.70484 | 0.51159 | 0.72913 | 0.5567  | 0.49362 | 0.63743 | 0.6881 FLJ20718      |
| cg21644826 | 0.09869 | 0.10978 | 0.14201 | 0.14539 | 0.09986 | 0.08861 | 0.10851 | 0.09902 | 0.09641 | 0.08332 ACSM3        |
| cg21649520 | 0.71415 | 0.34546 | 0.58764 | 0.49399 | 0.651   | 0.72407 | 0.42401 | 0.37774 | 0.29165 | 0.19852 PMP2         |
| cg21650900 | 0.02489 | 0.02974 | 0.02309 | 0.01516 | 0.01664 | 0.01775 | 0.01479 | 0.01361 | 0.02336 | 0.01364 ARL4C        |



|            |         |         |         |         |         |         |         |         |         |         |              |
|------------|---------|---------|---------|---------|---------|---------|---------|---------|---------|---------|--------------|
| cg21651436 | 0.0346  | 0.03624 | 0.0343  | 0.03801 | 0.03052 | 0.02862 | 0.03035 | 0.03322 | 0.0301  | 0.02707 | MAP3K11      |
| cg21652012 | 0.73621 | 0.82189 | 0.83717 | 0.87935 | 0.91038 | 0.87965 | 0.48158 | 0.85824 | 0.82997 | 0.63622 | GABRP        |
| cg21652958 | 0.2319  | 0.08461 | 0.37816 | 0.35771 | 0.10709 | 0.09463 | 0.09975 | 0.15018 | 0.06994 | 0.07248 | THBS2        |
| cg21655480 | 0.05412 | 0.05395 | 0.89531 | 0.90825 | 0.86567 | 0.92532 | 0.85065 | 0.90997 | 0.92104 | 0.92212 | RP11-450P7.3 |
| cg21655693 | 0.07444 | 0.06925 | 0.08273 | 0.0746  | 0.11944 | 0.07072 | 0.0675  | 0.0673  | 0.0528  | 0.05319 | SYMPK        |
| cg21655790 | 0.13414 | 0.13365 | 0.19838 | 0.18254 | 0.22779 | 0.21331 | 0.13011 | 0.09754 | 0.18483 | 0.18828 | LEPR         |
| cg21656748 | 0.81293 | 0.04605 | 0.32993 | 0.3617  | 0.46395 | 0.03593 | 0.03728 | 0.02452 | 0.02388 | 0.01829 | SCARB2       |
| cg21657816 | 0.03073 | 0.02825 | 0.03266 | 0.03262 | 0.02103 | 0.0271  | 0.02305 | 0.02621 | 0.02435 | 0.02445 | COQ7         |
| cg21658946 | 0.02758 | 0.03045 | 0.02638 | 0.02694 | 0.02685 | 0.02992 | 0.02865 | 0.02843 | 0.02372 | 0.02576 | PDF          |
| cg21660130 | 0.83738 | 0.46847 | 0.92513 | 0.90304 | 0.93371 | 0.90995 | 0.87823 | 0.56516 | 0.60341 | 0.68499 | CLCNKB       |
| cg21660392 | 0.82515 | 0.45384 | 0.37945 | 0.33914 | 0.2625  | 0.13738 | 0.1918  | 0.28515 | 0.14619 | 0.1466  | ABCA8        |
| cg21660424 | 0.07125 | 0.07258 | 0.07042 | 0.07196 | 0.05096 | 0.05854 | 0.05947 | 0.06984 | 0.0596  | 0.06051 | IPO4         |
| cg21660687 | 0.03315 | 0.03517 | 0.04184 | 0.0356  | 0.03685 | 0.03932 | 0.02925 | 0.03452 | 0.03615 | 0.03504 | GLI1         |
| cg21660727 | 0.07436 | 0.06483 | 0.08169 | 0.07837 | 0.07743 | 0.07182 | 0.05634 | 0.05667 | 0.06956 | 0.06044 | PCGF3        |
| cg21663122 | 0.07136 | 0.07711 | 0.27987 | 0.25053 | 0.15957 | 0.13605 | 0.4538  | 0.5088  | 0.07207 | 0.05966 | HIST1H2BH    |
| cg21663431 | 0.94999 | 0.92215 | 0.19069 | 0.43249 | 0.18037 | 0.07725 | 0.11974 | 0.05962 | 0.03621 | 0.03077 | SLC44A2      |
| cg21663580 | 0.03114 | 0.02889 | 0.05618 | 0.03331 | 0.0366  | 0.03686 | 0.03013 | 0.02513 | 0.0232  | 0.02313 | PTK7         |
| cg21663722 | 0.19488 | 0.10295 | 0.60098 | 0.68506 | 0.41476 | 0.3343  | 0.55405 | 0.22697 | 0.39098 | 0.35302 | C20orf91     |
| cg21664310 | 0.07078 | 0.0786  | 0.09797 | 0.07691 | 0.08392 | 0.06035 | 0.07191 | 0.06813 | 0.05791 | 0.0543  | LSM4         |
| cg21664828 | 0.08815 | 0.08666 | 0.1165  | 0.09555 | 0.07361 | 0.07966 | 0.08909 | 0.08256 | 0.07697 | 0.07137 | ZNF148       |
| cg21665000 | 0.03739 | 0.03568 | 0.15198 | 0.19314 | 0.04118 | 0.03498 | 0.02638 | 0.03126 | 0.04959 | 0.0381  | MYOCD        |
| cg21665774 | 0.71049 | 0.74626 | 0.7404  | 0.7532  | 0.70833 | 0.73192 | 0.80255 | 0.81057 | 0.78043 | 0.77715 | KIAA0355     |
| cg21666217 | 0.02288 | 0.02279 | 0.02749 | 0.02233 | 0.02108 | 0.02079 | 0.02147 | 0.0221  | 0.02033 | 0.02294 | TRIM33       |
| cg21666675 | 0.05008 | 0.04684 | 0.04988 | 0.04802 | 0.03234 | 0.03996 | 0.04585 | 0.04745 | 0.04112 | 0.04039 | CHCHD4       |
| cg21667836 | 0.10858 | 0.07808 | 0.17421 | 0.13835 | 0.33705 | 0.10349 | 0.1206  | 0.09411 | 0.11175 | 0.1046  | PRMT8        |
| cg21667943 | 0.13547 | 0.12113 | 0.18982 | 0.13632 | 0.20645 | 0.15714 | 0.19256 | 0.15413 | 0.15159 | 0.19347 | CIP29        |
| cg21669679 | 0.07358 | 0.07473 | 0.69925 | 0.735   | 0.27424 | 0.23179 | 0.2248  | 0.14572 | 0.18888 | 0.13727 | DCC          |
| cg21671476 | 0.92426 | 0.79669 | 0.04197 | 0.04653 | 0.94993 | 0.71052 | 0.07094 | 0.34508 | 0.91087 | 0.74255 | MYL9         |
| cg21672276 | 0.15297 | 0.10868 | 0.74278 | 0.80563 | 0.35863 | 0.44531 | 0.08346 | 0.06273 | 0.06014 | 0.06723 | ZNF502       |
| cg21673646 | 0.02582 | 0.02845 | 0.21154 | 0.39189 | 0.05887 | 0.02016 | 0.03229 | 0.02405 | 0.02489 | 0.02237 | SHF          |
| cg21674595 | 0.22398 | 0.22943 | 0.3798  | 0.3666  | 0.35465 | 0.28571 | 0.33555 | 0.32332 | 0.34434 | 0.33832 | C12orf54     |
| cg21675030 | 0.05051 | 0.05216 | 0.05389 | 0.05313 | 0.03949 | 0.04056 | 0.04064 | 0.04634 | 0.04864 | 0.04584 | ABHD10       |
| cg21678388 | 0.11835 | 0.08702 | 0.13907 | 0.11467 | 0.11018 | 0.08667 | 0.09994 | 0.07964 | 0.08496 | 0.09175 | ZNF354B      |
| cg21680178 | 0.06724 | 0.06269 | 0.07451 | 0.06362 | 0.04356 | 0.0996  | 0.06352 | 0.06563 | 0.07214 | 0.07501 | GPATC3       |
| cg21680717 | 0.02935 | 0.03158 | 0.03026 | 0.03296 | 0.02141 | 0.03064 | 0.02788 | 0.02615 | 0.02565 | 0.02438 | AKAP8        |
| cg21681756 | 0.03346 | 0.02626 | 0.04715 | 0.03283 | 0.01857 | 0.02271 | 0.02359 | 0.02473 | 0.05357 | 0.02777 | NDUFS3       |
| cg21682382 | 0.09783 | 0.05728 | 0.04459 | 0.04744 | 0.04953 | 0.04138 | 0.0539  | 0.04677 | 0.03909 | 0.04149 | TMEM39B      |
| cg21682826 | 0.03606 | 0.03856 | 0.03595 | 0.03732 | 0.02248 | 0.02863 | 0.03089 | 0.03295 | 0.03105 | 0.03487 | HERPUD1      |
| cg21682902 | 0.88743 | 0.59913 | 0.86182 | 0.88182 | 0.80051 | 0.88058 | 0.84942 | 0.85248 | 0.89164 | 0.81094 | HAL          |
| cg21684385 | 0.03264 | 0.03063 | 0.04506 | 0.03673 | 0.0276  | 0.03483 | 0.02647 | 0.02314 | 0.02891 | 0.02849 | PEX3         |
| cg21685266 | 0.38604 | 0.1506  | 0.15235 | 0.13671 | 0.1332  | 0.13037 | 0.13952 | 0.12494 | 0.22032 | 0.11055 | EHHADH       |

|            |         |         |         |         |         |         |         |         |         |         |          |
|------------|---------|---------|---------|---------|---------|---------|---------|---------|---------|---------|----------|
| cg21685427 | 0.90299 | 0.51193 | 0.7018  | 0.88229 | 0.94108 | 0.91609 | 0.54209 | 0.78532 | 0.8559  | 0.68907 | SGK2     |
| cg21685565 | 0.05618 | 0.03071 | 0.05639 | 0.03648 | 0.05228 | 0.03642 | 0.04169 | 0.02674 | 0.03734 | 0.0183  | GNA12    |
| cg21686523 | 0.03562 | 0.03277 | 0.0399  | 0.03135 | 0.03125 | 0.03249 | 0.0311  | 0.02747 | 0.03673 | 0.02743 | PHF22    |
| cg21686900 | 0.01553 | 0.01721 | 0.01725 | 0.01418 | 0.01308 | 0.01214 | 0.01483 | 0.01368 | 0.01281 | 0.01133 | DAZAP2   |
| cg21686987 | 0.45957 | 0.21694 | 0.64375 | 0.7786  | 0.84315 | 0.76847 | 0.56071 | 0.50774 | 0.49779 | 0.29279 | CTRB1    |
| cg21688264 | 0.02639 | 0.03645 | 0.03163 | 0.03362 | 0.0298  | 0.03257 | 0.02641 | 0.03677 | 0.02368 | 0.02456 | SNAP91   |
| cg21688707 | 0.04536 | 0.05174 | 0.0496  | 0.04243 | 0.04183 | 0.04468 | 0.04579 | 0.047   | 0.0392  | 0.03511 | MASA     |
| cg21690806 | 0.10284 | 0.07089 | 0.08382 | 0.07474 | 0.05876 | 0.07017 | 0.08946 | 0.09574 | 0.07118 | 0.06518 | SLC9A8   |
| cg21690892 | 0.90057 | 0.63008 | 0.92455 | 0.92986 | 0.91026 | 0.90885 | 0.92428 | 0.88929 | 0.93836 | 0.91215 | GUCA1B   |
| cg21692936 | 0.04202 | 0.03945 | 0.05455 | 0.0526  | 0.07484 | 0.06133 | 0.10503 | 0.04739 | 0.04111 | 0.04218 | SLC3A2   |
| cg21693321 | 0.0655  | 0.0636  | 0.06409 | 0.07404 | 0.04284 | 0.05462 | 0.4751  | 0.41806 | 0.05318 | 0.05755 | MED12    |
| cg21693780 | 0.0565  | 0.05257 | 0.05289 | 0.05665 | 0.04243 | 0.04129 | 0.04569 | 0.05053 | 0.04466 | 0.0427  | DDX1     |
| cg21694349 | 0.0656  | 0.06424 | 0.06316 | 0.05678 | 0.04036 | 0.05246 | 0.05905 | 0.05392 | 0.05402 | 0.06192 | FBXO24   |
| cg21695020 | 0.91995 | 0.89771 | 0.91688 | 0.91693 | 0.91439 | 0.88006 | 0.85994 | 0.86718 | 0.8987  | 0.90496 | DPEP3    |
| cg21696393 | 0.91931 | 0.92258 | 0.66518 | 0.74367 | 0.97207 | 0.95138 | 0.11866 | 0.23928 | 0.96773 | 0.94793 | SOX8     |
| cg21697134 | 0.79972 | 0.70182 | 0.90869 | 0.77142 | 0.95729 | 0.54461 | 0.93954 | 0.80818 | 0.2422  | 0.0183  | FN3K     |
| cg21697779 | 0.04917 | 0.05895 | 0.05523 | 0.05437 | 0.04593 | 0.0577  | 0.35869 | 0.16907 | 0.04689 | 0.03777 | FUNDC2   |
| cg21698790 | 0.02294 | 0.0241  | 0.02714 | 0.02514 | 0.03085 | 0.02442 | 0.02603 | 0.02334 | 0.02634 | 0.01995 | HRK      |
| cg21700070 | 0.03611 | 0.03953 | 0.03732 | 0.035   | 0.03588 | 0.03353 | 0.02938 | 0.03163 | 0.02726 | 0.02412 | CNOT3    |
| cg21700166 | 0.53855 | 0.44126 | 0.73821 | 0.79254 | 0.92186 | 0.87423 | 0.46262 | 0.15089 | 0.21317 | 0.39422 | GPR68    |
| cg21703138 | 0.03023 | 0.02927 | 0.03124 | 0.03128 | 0.02776 | 0.02756 | 0.02978 | 0.02699 | 0.02222 | 0.0231  | PPP2CA   |
| cg21703572 | 0.05846 | 0.06155 | 0.0596  | 0.06086 | 0.04125 | 0.05611 | 0.0531  | 0.05245 | 0.05176 | 0.05137 | SNRPD3   |
| cg21705120 | 0.26975 | 0.23109 | 0.15023 | 0.26945 | 0.09176 | 0.06808 | 0.0531  | 0.05056 | 0.04688 | 0.05288 | UBE2G1   |
| cg21706946 | 0.83701 | 0.70759 | 0.82753 | 0.86326 | 0.85609 | 0.8215  | 0.80346 | 0.72478 | 0.86451 | 0.65389 | TMEM40   |
| cg21707816 | 0.24258 | 0.10495 | 0.49543 | 0.69417 | 0.66855 | 0.51853 | 0.17289 | 0.38335 | 0.16705 | 0.08772 | ENDOGL1  |
| cg21709140 | 0.02982 | 0.03538 | 0.02927 | 0.03281 | 0.02626 | 0.02936 | 0.03226 | 0.03378 | 0.02869 | 0.02975 | GORASP2  |
| cg21710060 | 0.91325 | 0.7278  | 0.92226 | 0.93625 | 0.95851 | 0.93064 | 0.77794 | 0.68871 | 0.90281 | 0.88207 | GRK1     |
| cg21712678 | 0.028   | 0.0269  | 0.03025 | 0.02787 | 0.02511 | 0.02685 | 0.02238 | 0.02427 | 0.02784 | 0.02646 | ZC3H7B   |
| cg21712685 | 0.09585 | 0.04838 | 0.13365 | 0.08152 | 0.1749  | 0.04964 | 0.16504 | 0.48043 | 0.0346  | 0.03278 | UNQ3045  |
| cg21713257 | 0.02914 | 0.03723 | 0.03212 | 0.03504 | 0.02112 | 0.03107 | 0.02863 | 0.02846 | 0.02762 | 0.02884 | ETFDH    |
| cg21713812 | 0.02667 | 0.02901 | 0.03142 | 0.02813 | 0.02647 | 0.02721 | 0.02535 | 0.02774 | 0.02638 | 0.02121 | KHDRBS1  |
| cg21715963 | 0.44087 | 0.21476 | 0.80842 | 0.81348 | 0.71447 | 0.68747 | 0.29241 | 0.24489 | 0.44373 | 0.36334 | C1orf51  |
| cg21716693 | 0.56009 | 0.22983 | 0.9368  | 0.93426 | 0.82867 | 0.71909 | 0.92962 | 0.88939 | 0.93677 | 0.90441 | CPNE5    |
| cg21717724 | 0.34055 | 0.13263 | 0.17937 | 0.30266 | 0.39711 | 0.36845 | 0.10144 | 0.08839 | 0.91586 | 0.80058 | PSMD5    |
| cg21718857 | 0.08988 | 0.09474 | 0.19799 | 0.61562 | 0.38706 | 0.20928 | 0.07544 | 0.0813  | 0.72444 | 0.1673  | DLL3     |
| cg21721126 | 0.03758 | 0.03154 | 0.03377 | 0.03266 | 0.02279 | 0.02638 | 0.02379 | 0.02351 | 0.03136 | 0.02182 | KIAA0103 |
| cg21721155 | 0.07679 | 0.07242 | 0.07171 | 0.0714  | 0.10073 | 0.06467 | 0.05232 | 0.05634 | 0.05134 | 0.05706 | HADHSC   |
| cg21721865 | 0.0382  | 0.04532 | 0.06222 | 0.04898 | 0.06675 | 0.07838 | 0.05192 | 0.04141 | 0.04184 | 0.04077 | UFM1     |
| cg21722058 | 0.04416 | 0.04469 | 0.04488 | 0.04289 | 0.04893 | 0.05029 | 0.04367 | 0.0429  | 0.03532 | 0.04959 | PLK4     |
| cg21722680 | 0.02524 | 0.0291  | 0.02924 | 0.02422 | 0.02232 | 0.03015 | 0.02214 | 0.02134 | 0.0222  | 0.02013 | TBK1     |
| cg21723486 | 0.75524 | 0.68413 | 0.72588 | 0.7835  | 0.60407 | 0.66813 | 0.61345 | 0.74438 | 0.2472  | 0.24768 | TP73L    |

|            |         |         |         |         |         |         |         |         |         |                   |
|------------|---------|---------|---------|---------|---------|---------|---------|---------|---------|-------------------|
| cg21727574 | 0.77063 | 0.66942 | 0.36171 | 0.34271 | 0.65851 | 0.77308 | 0.78658 | 0.80897 | 0.83435 | 0.8439 ZNF137     |
| cg21728447 | 0.03742 | 0.0381  | 0.04857 | 0.04922 | 0.04334 | 0.04699 | 0.04076 | 0.0415  | 0.04444 | 0.03916 ALDH4A1   |
| cg21729186 | 0.03303 | 0.03384 | 0.03321 | 0.03438 | 0.03348 | 0.03517 | 0.02736 | 0.02833 | 0.02576 | 0.02761 HIST1H4H  |
| cg21730067 | 0.02452 | 0.02791 | 0.02734 | 0.02367 | 0.01454 | 0.02627 | 0.02414 | 0.02579 | 0.02004 | 0.02622 ZNF326    |
| cg21731286 | 0.90352 | 0.77324 | 0.87793 | 0.90291 | 0.89373 | 0.84257 | 0.80841 | 0.84685 | 0.33185 | 0.29113 TAS1R2    |
| cg21732383 | 0.76658 | 0.74624 | 0.83027 | 0.90976 | 0.75693 | 0.89047 | 0.83582 | 0.74593 | 0.59204 | 0.17535 THBS2     |
| cg21736205 | 0.85734 | 0.85149 | 0.77422 | 0.82709 | 0.70798 | 0.82912 | 0.79754 | 0.84456 | 0.8438  | 0.81515 ERVWE1    |
| cg21736592 | 0.43673 | 0.09478 | 0.34326 | 0.55874 | 0.2657  | 0.2605  | 0.25419 | 0.12507 | 0.1386  | 0.15106 PSCD4     |
| cg21740204 | 0.20323 | 0.06798 | 0.05381 | 0.05478 | 0.09815 | 0.07489 | 0.05382 | 0.04901 | 0.04729 | 0.04487 SMC5L1    |
| cg21742836 | 0.45728 | 0.14671 | 0.71491 | 0.812   | 0.73065 | 0.3126  | 0.33803 | 0.12676 | 0.3881  | 0.17296 PPP4C     |
| cg21743569 | 0.0345  | 0.03442 | 0.03524 | 0.037   | 0.02769 | 0.02969 | 0.02954 | 0.03164 | 0.02964 | 0.0269 NR1H2      |
| cg21743649 | 0.903   | 0.8351  | 0.90634 | 0.90214 | 0.91541 | 0.87637 | 0.90386 | 0.88217 | 0.90777 | 0.89702 NUP98     |
| cg21743830 | 0.74349 | 0.74296 | 0.71364 | 0.76769 | 0.86135 | 0.67994 | 0.20887 | 0.12302 | 0.7252  | 0.66741 CCL25     |
| cg21745164 | 0.57805 | 0.28458 | 0.30584 | 0.46197 | 0.79312 | 0.84083 | 0.0942  | 0.07511 | 0.46194 | 0.4681 LOC63928   |
| cg21745320 | 0.07975 | 0.07057 | 0.16537 | 0.13731 | 0.05811 | 0.05547 | 0.10848 | 0.06632 | 0.06951 | 0.05619 SMG6      |
| cg21746459 | 0.03544 | 0.03612 | 0.03895 | 0.04291 | 0.0516  | 0.04987 | 0.04521 | 0.04208 | 0.0323  | 0.03157 MRPL50    |
| cg21746887 | 0.07266 | 0.08901 | 0.13054 | 0.10673 | 0.19488 | 0.14849 | 0.08622 | 0.0725  | 0.06592 | 0.06351 FZD1      |
| cg21747271 | 0.3641  | 0.42404 | 0.44883 | 0.49605 | 0.08339 | 0.07067 | 0.71969 | 0.5604  | 0.14225 | 0.06171 AIP       |
| cg21750545 | 0.03288 | 0.03405 | 0.0372  | 0.03303 | 0.02034 | 0.03653 | 0.0243  | 0.02691 | 0.0252  | 0.02582 DCUN1D4   |
| cg21750589 | 0.72233 | 0.63209 | 0.24779 | 0.22939 | 0.28563 | 0.19934 | 0.43275 | 0.23579 | 0.73965 | 0.50493 ZNF323    |
| cg21750602 | 0.69226 | 0.54636 | 0.70508 | 0.7332  | 0.66568 | 0.73544 | 0.70691 | 0.66681 | 0.76478 | 0.73394 PPP2R2D   |
| cg21750887 | 0.30215 | 0.26859 | 0.287   | 0.44975 | 0.48426 | 0.68745 | 0.14404 | 0.11473 | 0.1552  | 0.08989 CPA6      |
| cg21751787 | 0.02075 | 0.02287 | 0.02507 | 0.01976 | 0.0193  | 0.01987 | 0.02072 | 0.02081 | 0.01736 | 0.02077 LMAN2     |
| cg21753834 | 0.02845 | 0.03233 | 0.03428 | 0.03791 | 0.02711 | 0.03304 | 0.02794 | 0.02707 | 0.02891 | 0.02505 TTC16     |
| cg21754343 | 0.17507 | 0.13081 | 0.32366 | 0.43544 | 0.61688 | 0.65665 | 0.11717 | 0.08305 | 0.17173 | 0.25985 LCE2B     |
| cg21755709 | 0.88882 | 0.68143 | 0.32223 | 0.22346 | 0.8924  | 0.8523  | 0.82409 | 0.85427 | 0.7771  | 0.81217 C21orf124 |
| cg21756353 | 0.02895 | 0.02975 | 0.03007 | 0.03032 | 0.01944 | 0.02488 | 0.02362 | 0.03519 | 0.02251 | 0.02227 DHPS      |
| cg21759080 | 0.02777 | 0.03033 | 0.0345  | 0.02895 | 0.02351 | 0.02904 | 0.02672 | 0.0266  | 0.0242  | 0.02342 STX5A     |
| cg21762107 | 0.02389 | 0.02429 | 0.02416 | 0.02229 | 0.01916 | 0.02025 | 0.01792 | 0.02074 | 0.01885 | 0.01913 NEURL2    |
| cg21762589 | 0.73833 | 0.60431 | 0.48589 | 0.70033 | 0.8227  | 0.76113 | 0.73701 | 0.37884 | 0.81852 | 0.75557 BNIP3     |
| cg21765730 | 0.79822 | 0.22701 | 0.74948 | 0.78707 | 0.74855 | 0.68009 | 0.72342 | 0.1351  | 0.39607 | 0.19587 NOX3      |
| cg21768899 | 0.01875 | 0.01956 | 0.02282 | 0.02106 | 0.01604 | 0.01906 | 0.01558 | 0.01654 | 0.01868 | 0.01593 LOC387882 |
| cg21769943 | 0.03237 | 0.02666 | 0.03013 | 0.02522 | 0.02283 | 0.02558 | 0.0256  | 0.02732 | 0.02264 | 0.01992 PIM1      |
| cg21769969 | 0.56733 | 0.1694  | 0.11753 | 0.2161  | 0.18969 | 0.21895 | 0.17762 | 0.0978  | 0.30585 | 0.03838 OSTM1     |
| cg21770145 | 0.61723 | 0.82446 | 0.74541 | 0.8095  | 0.85    | 0.83081 | 0.66649 | 0.75571 | 0.85588 | 0.70707 PCYT2     |
| cg21770617 | 0.57394 | 0.3459  | 0.8681  | 0.88406 | 0.92453 | 0.87161 | 0.83509 | 0.86913 | 0.88403 | 0.68492 FAM3D     |
| cg21771250 | 0.65819 | 0.56706 | 0.89759 | 0.89558 | 0.91216 | 0.88789 | 0.7891  | 0.53095 | 0.90178 | 0.78405 FAM83F    |
| cg21772838 | 0.02715 | 0.02349 | 0.02363 | 0.02426 | 0.02112 | 0.02129 | 0.02144 | 0.02314 | 0.01986 | 0.01901 CSTF1     |
| cg21774863 | 0.04322 | 0.04261 | 0.06975 | 0.05228 | 0.05798 | 0.04957 | 0.03156 | 0.03454 | 0.03946 | 0.03055 RAB28     |
| cg21781546 | 0.67151 | 0.51303 | 0.89157 | 0.8934  | 0.87935 | 0.85384 | 0.82923 | 0.79012 | 0.87409 | 0.84122 ZNF142    |
| cg21783004 | 0.22665 | 0.3663  | 0.81851 | 0.82734 | 0.75374 | 0.83122 | 0.79131 | 0.789   | 0.74292 | 0.68536 LECT2     |

|            |         |         |         |         |         |         |         |         |         |         |          |
|------------|---------|---------|---------|---------|---------|---------|---------|---------|---------|---------|----------|
| cg21784498 | 0.02543 | 0.02046 | 0.0293  | 0.02748 | 0.02275 | 0.02662 | 0.02156 | 0.02095 | 0.01925 | 0.01854 | TMEM97   |
| cg21784940 | 0.76041 | 0.72001 | 0.52699 | 0.60708 | 0.478   | 0.50845 | 0.67344 | 0.70006 | 0.76234 | 0.69889 | REPIN1   |
| cg21785260 | 0.03884 | 0.0361  | 0.04769 | 0.03934 | 0.04358 | 0.04335 | 0.04548 | 0.04021 | 0.03969 | 0.03276 | C2orf24  |
| cg21785307 | 0.05277 | 0.05827 | 0.05635 | 0.04826 | 0.03959 | 0.04668 | 0.05466 | 0.04658 | 0.05241 | 0.04337 | ZFYVE16  |
| cg21785536 | 0.15896 | 0.1068  | 0.19614 | 0.17079 | 0.20782 | 0.10118 | 0.16114 | 0.14798 | 0.14783 | 0.10526 | AER61    |
| cg21787206 | 0.0319  | 0.04103 | 0.0519  | 0.04909 | 0.04555 | 0.04636 | 0.03957 | 0.04851 | 0.04474 | 0.04755 | PSMD9    |
| cg21787280 | 0.83289 | 0.83651 | 0.86154 | 0.87467 | 0.72078 | 0.80923 | 0.79846 | 0.8211  | 0.85774 | 0.78221 | FLJ25976 |
| cg21787291 | 0.02791 | 0.02724 | 0.06638 | 0.03284 | 0.26334 | 0.02057 | 0.02163 | 0.0239  | 0.05127 | 0.01948 | TCBA1    |
| cg21788470 | 0.34246 | 0.28662 | 0.8242  | 0.83988 | 0.72922 | 0.71903 | 0.77358 | 0.74313 | 0.84643 | 0.60409 | PTHLH    |
| cg21789545 | 0.46942 | 0.28289 | 0.2482  | 0.3279  | 0.34415 | 0.50471 | 0.05637 | 0.1449  | 0.235   | 0.05541 | COL9A1   |
| cg21790626 | 0.49106 | 0.5798  | 0.84213 | 0.86066 | 0.8464  | 0.91322 | 0.97054 | 0.97138 | 0.96858 | 0.96531 | ZNF154   |
| cg21792432 | 0.77203 | 0.26258 | 0.66542 | 0.70565 | 0.57799 | 0.60822 | 0.7322  | 0.69535 | 0.77202 | 0.57078 | POT1     |
| cg21792737 | 0.29006 | 0.15493 | 0.28042 | 0.31352 | 0.41667 | 0.14945 | 0.23011 | 0.11049 | 0.14228 | 0.15998 | NOX3     |
| cg21794225 | 0.89684 | 0.83533 | 0.8152  | 0.83299 | 0.94774 | 0.67935 | 0.43899 | 0.41862 | 0.9399  | 0.8954  | PRKD1    |
| cg21795497 | 0.09468 | 0.10238 | 0.10766 | 0.14078 | 0.18995 | 0.23997 | 0.10853 | 0.10103 | 0.07633 | 0.06119 | FLJ23554 |
| cg21796234 | 0.04716 | 0.0463  | 0.04431 | 0.04226 | 0.04259 | 0.04545 | 0.04067 | 0.03361 | 0.03928 | 0.04629 | C3orf23  |
| cg21796825 | 0.02578 | 0.02456 | 0.02769 | 0.0258  | 0.02273 | 0.0229  | 0.01828 | 0.02004 | 0.01863 | 0.01776 | TMEM5    |
| cg21800088 | 0.03328 | 0.03763 | 0.04041 | 0.04027 | 0.03425 | 0.03866 | 0.03531 | 0.03375 | 0.03328 | 0.03095 | POLR2B   |
| cg21800439 | 0.03389 | 0.03404 | 0.03755 | 0.03679 | 0.04471 | 0.04826 | 0.03847 | 0.04466 | 0.03601 | 0.03199 | STAT2    |
| cg21801378 | 0.07505 | 0.02426 | 0.27302 | 0.30699 | 0.36374 | 0.02115 | 0.03553 | 0.03041 | 0.04429 | 0.02073 | BRUNOL6  |
| cg21802726 | 0.0438  | 0.03549 | 0.04378 | 0.04377 | 0.04997 | 0.04222 | 0.04767 | 0.03315 | 0.03383 | 0.02799 | C20orf31 |
| cg21803417 | 0.09004 | 0.0696  | 0.05584 | 0.06658 | 0.06414 | 0.07598 | 0.07394 | 0.07891 | 0.05144 | 0.05367 | MTRR     |
| cg21803680 | 0.34371 | 0.07717 | 0.082   | 0.08675 | 0.08134 | 0.05865 | 0.03859 | 0.04121 | 0.04853 | 0.03851 | LOC92691 |
| cg21804822 | 0.04076 | 0.02727 | 0.02809 | 0.03022 | 0.02081 | 0.02486 | 0.02491 | 0.02648 | 0.02442 | 0.02036 | ORAOV1   |
| cg21804950 | 0.19849 | 0.33833 | 0.09098 | 0.11701 | 0.05469 | 0.0367  | 0.03433 | 0.04065 | 0.05103 | 0.02953 | MTMR3    |
| cg21807589 | 0.40363 | 0.32963 | 0.39302 | 0.31707 | 0.46767 | 0.55742 | 0.2808  | 0.49134 | 0.29806 | 0.31462 | CYBB     |
| cg21808053 | 0.31274 | 0.30662 | 0.41863 | 0.6477  | 0.34391 | 0.35402 | 0.38936 | 0.69985 | 0.36861 | 0.53869 | DIRAS3   |
| cg21815667 | 0.03931 | 0.03691 | 0.88685 | 0.88392 | 0.06899 | 0.04452 | 0.15145 | 0.0376  | 0.91097 | 0.36246 | HOXD8    |
| cg21816539 | 0.03678 | 0.03851 | 0.12139 | 0.27202 | 0.06012 | 0.03578 | 0.1312  | 0.11347 | 0.09482 | 0.04144 | GRIK1    |
| cg21817450 | 0.51302 | 0.54001 | 0.80314 | 0.83378 | 0.73269 | 0.77199 | 0.84177 | 0.86768 | 0.85951 | 0.70067 | PIG38    |
| cg21818252 | 0.23623 | 0.40094 | 0.09014 | 0.07619 | 0.08878 | 0.07908 | 0.07563 | 0.08576 | 0.04952 | 0.0614  | SEC24B   |
| cg21820677 | 0.02959 | 0.04514 | 0.3795  | 0.4214  | 0.0494  | 0.2069  | 0.04445 | 0.23799 | 0.03106 | 0.0279  | GABRA2   |
| cg21820890 | 0.91429 | 0.93697 | 0.92204 | 0.95221 | 0.94996 | 0.92315 | 0.92825 | 0.93355 | 0.94024 | 0.9272  | PLA2G12B |
| cg21824213 | 0.28173 | 0.17484 | 0.02481 | 0.01917 | 0.02339 | 0.03142 | 0.26845 | 0.31144 | 0.0751  | 0.01929 | CASC5    |
| cg21824902 | 0.01744 | 0.02165 | 0.02374 | 0.02133 | 0.01512 | 0.01942 | 0.01744 | 0.01685 | 0.01651 | 0.01897 | WDTC1    |
| cg21825027 | 0.2224  | 0.49326 | 0.73331 | 0.89717 | 0.96025 | 0.93405 | 0.07192 | 0.03138 | 0.20798 | 0.36078 | SH3YL1   |
| cg21825364 | 0.47108 | 0.4404  | 0.62077 | 0.79364 | 0.5307  | 0.47922 | 0.20994 | 0.30264 | 0.3988  | 0.43387 | VCY      |
| cg21828898 | 0.0481  | 0.04703 | 0.04569 | 0.05102 | 0.03526 | 0.03358 | 0.03519 | 0.0338  | 0.03819 | 0.03554 | UBE1DC1  |
| cg21829265 | 0.05046 | 0.05702 | 0.07257 | 0.05261 | 0.11798 | 0.08465 | 0.03604 | 0.04544 | 0.03522 | 0.04363 | ZNF451   |
| cg21830413 | 0.03513 | 0.03559 | 0.03469 | 0.03383 | 0.03125 | 0.03092 | 0.03154 | 0.03179 | 0.03192 | 0.02635 | VPS26    |
| cg21831174 | 0.65577 | 0.23995 | 0.6255  | 0.70502 | 0.48617 | 0.47626 | 0.17211 | 0.21841 | 0.36638 | 0.15578 | MASP1    |

|            |         |         |         |         |         |         |         |         |         |                  |
|------------|---------|---------|---------|---------|---------|---------|---------|---------|---------|------------------|
| cg21832150 | 0.15865 | 0.04774 | 0.04541 | 0.04016 | 0.05797 | 0.03816 | 0.03793 | 0.16372 | 0.03306 | 0.02771 PLEKHN1  |
| cg21832243 | 0.78365 | 0.26916 | 0.46634 | 0.50895 | 0.308   | 0.31695 | 0.34717 | 0.25542 | 0.56861 | 0.23764 TTC3     |
| cg21833459 | 0.44607 | 0.25019 | 0.18615 | 0.13811 | 0.05344 | 0.05042 | 0.0697  | 0.0388  | 0.03755 | 0.03066 FAM111B  |
| cg21835622 | 0.06757 | 0.06884 | 0.06796 | 0.07195 | 0.05117 | 0.05428 | 0.06432 | 0.0618  | 0.0565  | 0.05313 DPYSL3   |
| cg21835643 | 0.9515  | 0.87761 | 0.94496 | 0.95578 | 0.95985 | 0.9562  | 0.89301 | 0.78654 | 0.55437 | 0.55015 RBPSUHL  |
| cg21836062 | 0.21582 | 0.18168 | 0.6248  | 0.79333 | 0.22595 | 0.14984 | 0.2633  | 0.11679 | 0.1538  | 0.15246 DMD      |
| cg21837443 | 0.05455 | 0.05271 | 0.05379 | 0.05262 | 0.14041 | 0.05486 | 0.04779 | 0.04747 | 0.04585 | 0.05061 FLJ20647 |
| cg21838233 | 0.03629 | 0.03811 | 0.04534 | 0.03568 | 0.05411 | 0.04432 | 0.02988 | 0.03517 | 0.02874 | 0.03233 TPX2     |
| cg21838334 | 0.5181  | 0.03941 | 0.95514 | 0.96535 | 0.9634  | 0.96303 | 0.9448  | 0.96326 | 0.62821 | 0.64959 NES      |
| cg21839522 | 0.03768 | 0.04422 | 0.03775 | 0.03827 | 0.04219 | 0.0426  | 0.04372 | 0.04073 | 0.02889 | 0.04216 CD68     |
| cg21840599 | 0.05702 | 0.04435 | 0.04239 | 0.04254 | 0.03393 | 0.04352 | 0.04428 | 0.04259 | 0.0364  | 0.04097 PAK2     |
| cg21842274 | 0.41292 | 0.1997  | 0.7849  | 0.78351 | 0.73577 | 0.7399  | 0.75876 | 0.57412 | 0.54945 | 0.26689 CRHBP    |
| cg21842478 | 0.032   | 0.03125 | 0.02704 | 0.02655 | 0.03512 | 0.04313 | 0.03956 | 0.03699 | 0.0263  | 0.02598 HOXB13   |
| cg21842664 | 0.04577 | 0.04701 | 0.0742  | 0.04782 | 0.07021 | 0.10987 | 0.05124 | 0.04462 | 0.22654 | 0.09138 CAB39    |
| cg21844038 | 0.60685 | 0.35981 | 0.64608 | 0.59031 | 0.29878 | 0.08281 | 0.28375 | 0.06707 | 0.05677 | 0.0426 FAM100A   |
| cg21844956 | 0.05521 | 0.08101 | 0.08304 | 0.07409 | 0.1168  | 0.07734 | 0.04608 | 0.0469  | 0.04504 | 0.04177 TRIM38   |
| cg21845297 | 0.6831  | 0.7365  | 0.44891 | 0.51346 | 0.58284 | 0.60879 | 0.59214 | 0.48374 | 0.71421 | 0.67799 OTOR     |
| cg21846488 | 0.06807 | 0.05453 | 0.21254 | 0.22912 | 0.49607 | 0.37621 | 0.06299 | 0.053   | 0.06272 | 0.05446 LCE4A    |
| cg21846903 | 0.73686 | 0.56305 | 0.82581 | 0.83837 | 0.86598 | 0.68785 | 0.15207 | 0.08385 | 0.3881  | 0.24829 VTN      |
| cg21849289 | 0.02534 | 0.03709 | 0.03823 | 0.03155 | 0.0301  | 0.02971 | 0.02778 | 0.02232 | 0.02397 | 0.02523 C1orf123 |
| cg21850069 | 0.07917 | 0.0688  | 0.08759 | 0.0747  | 0.06787 | 0.07627 | 0.07328 | 0.07537 | 0.06147 | 0.0583 TRIM41    |
| cg21850239 | 0.03796 | 0.03313 | 0.04243 | 0.03939 | 0.03164 | 0.04141 | 0.03324 | 0.03523 | 0.03142 | 0.0331 POLR2G    |
| cg21850254 | 0.11408 | 0.07867 | 0.50988 | 0.77044 | 0.8602  | 0.8963  | 0.18194 | 0.08155 | 0.22301 | 0.33318 ZNF570   |
| cg21852292 | 0.46044 | 0.16568 | 0.50106 | 0.73009 | 0.70668 | 0.4308  | 0.34176 | 0.38926 | 0.91188 | 0.7386 C1orf115  |
| cg21856603 | 0.83378 | 0.80883 | 0.8429  | 0.85022 | 0.84817 | 0.83459 | 0.82119 | 0.82807 | 0.84542 | 0.80486 ITGAE    |
| cg21858376 | 0.02865 | 0.03148 | 0.03381 | 0.03109 | 0.03056 | 0.03169 | 0.02517 | 0.02646 | 0.0268  | 0.0241 ITPR1     |
| cg21859434 | 0.02166 | 0.02188 | 0.02963 | 0.02497 | 0.12598 | 0.26597 | 0.03007 | 0.01982 | 0.31392 | 0.34513 CXCR4    |
| cg21860846 | 0.04407 | 0.03065 | 0.06275 | 0.04854 | 0.02351 | 0.02842 | 0.51526 | 0.4451  | 0.03599 | 0.02595 ELK1     |
| cg21861211 | 0.04832 | 0.04345 | 0.04133 | 0.03698 | 0.06429 | 0.05698 | 0.05256 | 0.04218 | 0.04445 | 0.05529 ZFYVE26  |
| cg21862373 | 0.04769 | 0.04387 | 0.04378 | 0.04132 | 0.03551 | 0.03585 | 0.03913 | 0.03654 | 0.03002 | 0.03528 RPS2     |
| cg21865006 | 0.71277 | 0.73526 | 0.65287 | 0.65984 | 0.76784 | 0.72258 | 0.66523 | 0.67874 | 0.65085 | 0.6788 ZCCHC14   |
| cg21869055 | 0.04326 | 0.04207 | 0.11495 | 0.16761 | 0.04303 | 0.25934 | 0.03243 | 0.03809 | 0.03427 | 0.03288 KLK10    |
| cg21869532 | 0.12452 | 0.15621 | 0.16927 | 0.16865 | 0.11198 | 0.14299 | 0.12939 | 0.12142 | 0.11975 | 0.11495 ZNF561   |
| cg21870662 | 0.32778 | 0.05162 | 0.06495 | 0.0711  | 0.8907  | 0.31474 | 0.04391 | 0.07492 | 0.50242 | 0.15494 TSR1     |
| cg21870668 | 0.19512 | 0.16286 | 0.7098  | 0.74384 | 0.48799 | 0.43261 | 0.42778 | 0.46946 | 0.67692 | 0.55524 SNRPN    |
| cg21870884 | 0.92149 | 0.82884 | 0.94809 | 0.96559 | 0.97233 | 0.96413 | 0.93375 | 0.91742 | 0.97024 | 0.94163 GPR25    |
| cg21872129 | 0.05674 | 0.04668 | 0.07671 | 0.0744  | 0.20096 | 0.09769 | 0.04073 | 0.04037 | 0.04476 | 0.02729 PTP4A1   |
| cg21872391 | 0.02844 | 0.02788 | 0.02803 | 0.02378 | 0.02354 | 0.02582 | 0.02031 | 0.02232 | 0.02539 | 0.02172 SMNDC1   |
| cg21872393 | 0.04358 | 0.04269 | 0.0411  | 0.03943 | 0.0332  | 0.04197 | 0.03908 | 0.0444  | 0.03194 | 0.03621 MRCL3    |
| cg21874193 | 0.78937 | 0.71037 | 0.73067 | 0.76015 | 0.73764 | 0.76682 | 0.72727 | 0.7377  | 0.78215 | 0.70264 TAS2R48  |
| cg21875234 | 0.03164 | 0.02721 | 0.03287 | 0.02802 | 0.02315 | 0.02493 | 0.02416 | 0.0261  | 0.02262 | 0.02303 GSPT1    |

|            |         |         |         |         |         |         |         |         |         |         |          |
|------------|---------|---------|---------|---------|---------|---------|---------|---------|---------|---------|----------|
| cg21877855 | 0.03665 | 0.0335  | 0.04829 | 0.03901 | 0.03853 | 0.03835 | 0.0323  | 0.03025 | 0.03411 | 0.03326 | ITGB3BP  |
| cg21878918 | 0.03437 | 0.04641 | 0.47719 | 0.56354 | 0.3731  | 0.20537 | 0.31195 | 0.07465 | 0.06871 | 0.04505 | LOC56901 |
| cg21879981 | 0.08548 | 0.09046 | 0.07488 | 0.07251 | 0.08081 | 0.0784  | 0.07151 | 0.07919 | 0.07746 | 0.06173 | EPC1     |
| cg21880328 | 0.36363 | 0.23411 | 0.15427 | 0.12436 | 0.30546 | 0.06675 | 0.13904 | 0.09038 | 0.55455 | 0.59368 | CTTNBP2  |
| cg21880903 | 0.53026 | 0.1548  | 0.74005 | 0.7969  | 0.46223 | 0.40999 | 0.53781 | 0.42416 | 0.53046 | 0.32453 | KLB      |
| cg21885525 | 0.25658 | 0.13565 | 0.13773 | 0.10335 | 0.23667 | 0.18709 | 0.12749 | 0.11532 | 0.45108 | 0.46721 | SCYE1    |
| cg21885650 | 0.04579 | 0.04779 | 0.043   | 0.04292 | 0.03338 | 0.04138 | 0.04332 | 0.04191 | 0.04278 | 0.03334 | FLJ10560 |
| cg21885995 | 0.17603 | 0.16222 | 0.81905 | 0.81334 | 0.51576 | 0.29085 | 0.83794 | 0.57024 | 0.30036 | 0.2783  | SRP68    |
| cg21888438 | 0.05249 | 0.04282 | 0.04339 | 0.04395 | 0.0436  | 0.04265 | 0.16681 | 0.05433 | 0.03169 | 0.03174 | MID1IP1  |
| cg21890738 | 0.84048 | 0.71154 | 0.68069 | 0.76671 | 0.03237 | 0.03313 | 0.21168 | 0.15752 | 0.03205 | 0.03057 | CYB561   |
| cg21892409 | 0.08569 | 0.09299 | 0.10377 | 0.08601 | 0.13704 | 0.11119 | 0.11133 | 0.10325 | 0.07418 | 0.09368 | C1orf49  |
| cg21892708 | 0.84004 | 0.476   | 0.77804 | 0.77625 | 0.81789 | 0.82677 | 0.83907 | 0.83871 | 0.85281 | 0.8289  | PDIA6    |
| cg21893220 | 0.0234  | 0.02353 | 0.02974 | 0.02357 | 0.02096 | 0.0254  | 0.02416 | 0.02333 | 0.01884 | 0.02178 | SMC2L1   |
| cg21896452 | 0.04362 | 0.04646 | 0.05321 | 0.04975 | 0.0471  | 0.05201 | 0.04064 | 0.0372  | 0.04408 | 0.03983 | TPRKB    |
| cg21898046 | 0.9543  | 0.94631 | 0.6802  | 0.89365 | 0.94538 | 0.80527 | 0.19526 | 0.27157 | 0.95254 | 0.84127 | MGAT1    |
| cg21900416 | 0.0283  | 0.03249 | 0.03375 | 0.03619 | 0.03198 | 0.03286 | 0.03179 | 0.03002 | 0.02455 | 0.02439 | SERTAD3  |
| cg21902119 | 0.03638 | 0.03156 | 0.04292 | 0.03922 | 0.03966 | 0.03523 | 0.03687 | 0.03649 | 0.03077 | 0.032   | VAT1     |
| cg21902327 | 0.83959 | 0.48617 | 0.62777 | 0.81179 | 0.3736  | 0.6578  | 0.19418 | 0.20358 | 0.54789 | 0.42996 | FGF6     |
| cg21902346 | 0.03422 | 0.03636 | 0.03933 | 0.03548 | 0.03224 | 0.03275 | 0.03062 | 0.02951 | 0.02768 | 0.02635 | LRP16    |
| cg21902544 | 0.05916 | 0.06305 | 0.52102 | 0.66723 | 0.06856 | 0.06668 | 0.05612 | 0.05139 | 0.40565 | 0.52164 | CBLN2    |
| cg21903324 | 0.06182 | 0.05778 | 0.08411 | 0.0825  | 0.27464 | 0.13055 | 0.06188 | 0.06043 | 0.06642 | 0.0718  | CABYR    |
| cg21905630 | 0.07495 | 0.05479 | 0.60349 | 0.7159  | 0.91133 | 0.94951 | 0.04011 | 0.04404 | 0.04757 | 0.03706 | GSH2     |
| cg21906716 | 0.91429 | 0.40425 | 0.86449 | 0.89317 | 0.83984 | 0.89098 | 0.70522 | 0.72662 | 0.71574 | 0.60528 | TP73     |
| cg21907579 | 0.91466 | 0.93566 | 0.90454 | 0.89434 | 0.88197 | 0.9009  | 0.82988 | 0.91948 | 0.82872 | 0.84414 | TBX5     |
| cg21908116 | 0.02952 | 0.03417 | 0.03157 | 0.03167 | 0.03252 | 0.03178 | 0.02536 | 0.02645 | 0.02064 | 0.02403 | LRRC1    |
| cg21908259 | 0.73735 | 0.79157 | 0.06225 | 0.06454 | 0.97178 | 0.96167 | 0.97083 | 0.97041 | 0.04936 | 0.04314 | FKBP11   |
| cg21909391 | 0.46051 | 0.36532 | 0.08817 | 0.09208 | 0.86621 | 0.85334 | 0.4485  | 0.45909 | 0.86528 | 0.84748 | FLJ42393 |
| cg21910663 | 0.04194 | 0.04408 | 0.04002 | 0.04161 | 0.14589 | 0.11238 | 0.04058 | 0.05028 | 0.03527 | 0.03565 | MVD      |
| cg21911019 | 0.28959 | 0.17692 | 0.28442 | 0.35248 | 0.80644 | 0.42567 | 0.05886 | 0.05828 | 0.17727 | 0.05222 | GPR78    |
| cg21912241 | 0.10395 | 0.10113 | 0.10581 | 0.09566 | 0.07716 | 0.09333 | 0.07816 | 0.05872 | 0.07395 | 0.06692 | MGC32020 |
| cg21912567 | 0.04848 | 0.04668 | 0.05031 | 0.04646 | 0.07543 | 0.04462 | 0.03808 | 0.0457  | 0.06395 | 0.0413  | GADD45G  |
| cg21914262 | 0.05127 | 0.05914 | 0.05516 | 0.05177 | 0.04442 | 0.05655 | 0.05149 | 0.05109 | 0.04499 | 0.03899 | MTIF3    |
| cg21917349 | 0.87218 | 0.88046 | 0.87579 | 0.8842  | 0.88316 | 0.68974 | 0.46327 | 0.45031 | 0.86797 | 0.82141 | APBA2    |
| cg21918026 | 0.10672 | 0.10712 | 0.09539 | 0.11045 | 0.08394 | 0.11108 | 0.1181  | 0.10686 | 0.08988 | 0.08751 | PRMT7    |
| cg21918500 | 0.07524 | 0.02888 | 0.10598 | 0.06085 | 0.54999 | 0.51812 | 0.49467 | 0.46682 | 0.14279 | 0.03779 | ZNF124   |
| cg21919219 | 0.83195 | 0.79723 | 0.77434 | 0.81308 | 0.84202 | 0.84849 | 0.40021 | 0.4753  | 0.77962 | 0.78808 | AMY1A    |
| cg21921474 | 0.58553 | 0.08687 | 0.94557 | 0.94007 | 0.94189 | 0.93723 | 0.50671 | 0.40248 | 0.91039 | 0.76403 | C1orf172 |
| cg21922574 | 0.02327 | 0.02615 | 0.74088 | 0.80593 | 0.04809 | 0.0355  | 0.03213 | 0.03682 | 0.02606 | 0.0286  | NETO1    |
| cg21922731 | 0.48688 | 0.15194 | 0.37402 | 0.3999  | 0.83656 | 0.44179 | 0.72044 | 0.39908 | 0.62393 | 0.35241 | HSD17B6  |
| cg21922841 | 0.28274 | 0.04273 | 0.37874 | 0.40367 | 0.06591 | 0.04376 | 0.09142 | 0.04504 | 0.25104 | 0.03723 | SLC9A3R1 |
| cg21925493 | 0.05915 | 0.05095 | 0.05256 | 0.05062 | 0.05624 | 0.05261 | 0.04539 | 0.045   | 0.03444 | 0.03481 | C9orf89  |

|            |         |         |         |         |         |         |         |         |         |                  |
|------------|---------|---------|---------|---------|---------|---------|---------|---------|---------|------------------|
| cg21926138 | 0.26557 | 0.07461 | 0.78015 | 0.85775 | 0.52769 | 0.35778 | 0.15772 | 0.08427 | 0.34206 | 0.3641 C1orf88   |
| cg21926612 | 0.38686 | 0.12381 | 0.06462 | 0.06284 | 0.02772 | 0.02129 | 0.02262 | 0.02154 | 0.02099 | 0.01684 PARK2    |
| cg21927363 | 0.67155 | 0.70887 | 0.18615 | 0.20029 | 0.12467 | 0.10802 | 0.14876 | 0.11205 | 0.10405 | 0.0762 C9orf93   |
| cg21927975 | 0.05591 | 0.05456 | 0.15184 | 0.11188 | 0.05614 | 0.05686 | 0.0517  | 0.04855 | 0.06521 | 0.04213 GPR153   |
| cg21929875 | 0.95271 | 0.6773  | 0.96607 | 0.9695  | 0.97551 | 0.969   | 0.84201 | 0.84672 | 0.95595 | 0.90774 VSIG2    |
| cg21929993 | 0.04074 | 0.04269 | 0.03621 | 0.03222 | 0.03841 | 0.03528 | 0.03836 | 0.03785 | 0.036   | 0.0304 RNF130    |
| cg21930712 | 0.14233 | 0.0963  | 0.09731 | 0.14648 | 0.23426 | 0.08699 | 0.06652 | 0.06678 | 0.07234 | 0.06998 FLJ40235 |
| cg21931212 | 0.06371 | 0.06256 | 0.07833 | 0.0982  | 0.1224  | 0.04996 | 0.07975 | 0.0801  | 0.06731 | 0.06369 C12orf57 |
| cg21932800 | 0.03993 | 0.03431 | 0.26429 | 0.23614 | 0.09623 | 0.21724 | 0.05043 | 0.33852 | 0.06479 | 0.034 TMEM32     |
| cg21932814 | 0.6863  | 0.66398 | 0.55829 | 0.58441 | 0.70113 | 0.40167 | 0.24611 | 0.1347  | 0.12975 | 0.11826 CSTA     |
| cg21934269 | 0.03292 | 0.03797 | 0.04061 | 0.04042 | 0.03601 | 0.03618 | 0.06311 | 0.03903 | 0.03772 | 0.02874 RPL39    |
| cg21935083 | 0.43635 | 0.0904  | 0.49455 | 0.60343 | 0.26744 | 0.63828 | 0.09613 | 0.08236 | 0.28244 | 0.06866 RAD50    |
| cg21935292 | 0.02518 | 0.02832 | 0.02787 | 0.02939 | 0.01897 | 0.02488 | 0.0251  | 0.02351 | 0.02922 | 0.02282 GNS      |
| cg21937169 | 0.05244 | 0.0614  | 0.05804 | 0.0555  | 0.07153 | 0.06781 | 0.05479 | 0.04972 | 0.04868 | 0.03966 ASL      |
| cg21937886 | 0.06101 | 0.04971 | 0.05748 | 0.05376 | 0.36562 | 0.05923 | 0.04091 | 0.04371 | 0.0441  | 0.04097 GFPT2    |
| cg21939221 | 0.86944 | 0.84632 | 0.85259 | 0.87663 | 0.83212 | 0.78634 | 0.77099 | 0.81002 | 0.84427 | 0.83073 AGBL2    |
| cg21939482 | 0.05331 | 0.05259 | 0.06861 | 0.05647 | 0.24766 | 0.04704 | 0.04602 | 0.03826 | 0.0532  | 0.03831 MGC12966 |
| cg21942082 | 0.21581 | 0.04378 | 0.90061 | 0.91876 | 0.64842 | 0.43532 | 0.91472 | 0.91361 | 0.90765 | 0.89655 ACOT12   |
| cg21942438 | 0.75378 | 0.75858 | 0.60904 | 0.70932 | 0.44009 | 0.39242 | 0.69301 | 0.60528 | 0.17925 | 0.13859 ZNF619   |
| cg21942546 | 0.93926 | 0.93489 | 0.92243 | 0.92428 | 0.88699 | 0.89171 | 0.92565 | 0.92239 | 0.94085 | 0.94452 ABHD11   |
| cg21942576 | 0.69686 | 0.64249 | 0.71955 | 0.7282  | 0.65965 | 0.5521  | 0.63106 | 0.53022 | 0.58585 | 0.57956 GPBP1L1  |
| cg21943652 | 0.01993 | 0.02013 | 0.02528 | 0.02619 | 0.01701 | 0.02192 | 0.01658 | 0.01907 | 0.01671 | 0.02052 HIPK1    |
| cg21944455 | 0.8687  | 0.71182 | 0.88464 | 0.8993  | 0.07608 | 0.16142 | 0.34587 | 0.32309 | 0.85817 | 0.79364 GFAP     |
| cg21944757 | 0.03877 | 0.03888 | 0.03613 | 0.03864 | 0.03231 | 0.03381 | 0.03196 | 0.03787 | 0.0308  | 0.02708 ARFGAP1  |
| cg21946698 | 0.77139 | 0.28245 | 0.8799  | 0.88277 | 0.88778 | 0.87961 | 0.55234 | 0.15802 | 0.93007 | 0.8947 RGS11     |
| cg21948169 | 0.0407  | 0.04661 | 0.0531  | 0.05589 | 0.08764 | 0.04259 | 0.04589 | 0.04391 | 0.03781 | 0.03384 CXXC6    |
| cg21948655 | 0.09944 | 0.08061 | 0.37733 | 0.45929 | 0.86845 | 0.90648 | 0.17962 | 0.16356 | 0.09676 | 0.10567 SMCP     |
| cg21948783 | 0.11708 | 0.07468 | 0.42689 | 0.52252 | 0.45234 | 0.57266 | 0.40124 | 0.08284 | 0.0795  | 0.03703 WNT1     |
| cg21949305 | 0.89874 | 0.82713 | 0.88296 | 0.8822  | 0.53773 | 0.15759 | 0.77929 | 0.07908 | 0.90166 | 0.89674 ADORA2A  |
| cg21949781 | 0.07985 | 0.045   | 0.07969 | 0.04884 | 0.05124 | 0.11369 | 0.2594  | 0.15382 | 0.05345 | 0.04136 PSTPIP2  |
| cg21950493 | 0.06789 | 0.06245 | 0.07778 | 0.09859 | 0.09407 | 0.06946 | 0.08277 | 0.07421 | 0.07399 | 0.05888 ATPBD1C  |
| cg21950518 | 0.06873 | 0.05909 | 0.40233 | 0.43481 | 0.2853  | 0.33345 | 0.2188  | 0.37932 | 0.06866 | 0.04167 IL6ST    |
| cg21951612 | 0.8747  | 0.74854 | 0.8637  | 0.88979 | 0.90782 | 0.79467 | 0.8791  | 0.8821  | 0.8886  | 0.60291 MRAS     |
| cg21954346 | 0.04473 | 0.03326 | 0.03462 | 0.03144 | 0.0263  | 0.0277  | 0.032   | 0.03199 | 0.02524 | 0.02789 RBM35B   |
| cg21954994 | 0.03557 | 0.0302  | 0.03648 | 0.03553 | 0.02763 | 0.02756 | 0.02401 | 0.02567 | 0.02918 | 0.02711 POLE4    |
| cg21955402 | 0.03684 | 0.03498 | 0.04152 | 0.03687 | 0.03859 | 0.04311 | 0.0315  | 0.03702 | 0.02574 | 0.02441 SMCR7    |
| cg21958034 | 0.72281 | 0.5799  | 0.78429 | 0.8756  | 0.92521 | 0.73777 | 0.5228  | 0.5195  | 0.6164  | 0.56395 MST1     |
| cg21958798 | 0.06926 | 0.075   | 0.07789 | 0.06643 | 0.66957 | 0.621   | 0.05181 | 0.06794 | 0.52441 | 0.40249 GUCY1A2  |
| cg21959619 | 0.16559 | 0.06553 | 0.30153 | 0.2274  | 0.65323 | 0.70653 | 0.52099 | 0.26264 | 0.51367 | 0.442 GPR172A    |
| cg21960110 | 0.91484 | 0.534   | 0.92685 | 0.93307 | 0.91716 | 0.57264 | 0.29337 | 0.06564 | 0.40803 | 0.26066 HBZ      |
| cg21960882 | 0.84159 | 0.93683 | 0.92888 | 0.95903 | 0.89004 | 0.93974 | 0.65716 | 0.88492 | 0.55218 | 0.52991 TP53TG3  |

|            |         |         |         |         |         |         |         |         |         |                   |
|------------|---------|---------|---------|---------|---------|---------|---------|---------|---------|-------------------|
| cg21961766 | 0.82364 | 0.76968 | 0.73105 | 0.83179 | 0.58775 | 0.60404 | 0.60519 | 0.25542 | 0.70508 | 0.43832 PRRG2     |
| cg21964481 | 0.6853  | 0.1119  | 0.91796 | 0.94405 | 0.96216 | 0.90456 | 0.52468 | 0.20446 | 0.9072  | 0.60058 SLC34A3   |
| cg21965997 | 0.04633 | 0.03325 | 0.54053 | 0.52154 | 0.27767 | 0.10986 | 0.10879 | 0.03664 | 0.09849 | 0.0349 DRD1IP     |
| cg21966410 | 0.03805 | 0.03441 | 0.04035 | 0.03718 | 0.07934 | 0.04175 | 0.39149 | 0.42748 | 0.02997 | 0.02657 AR        |
| cg21968169 | 0.04415 | 0.04969 | 0.05939 | 0.05263 | 0.07161 | 0.05173 | 0.06469 | 0.05799 | 0.04808 | 0.04512 LOC338799 |
| cg21968580 | 0.10309 | 0.09099 | 0.13423 | 0.0932  | 0.16535 | 0.12056 | 0.06769 | 0.04877 | 0.1042  | 0.12554 DNAJB4    |
| cg21968796 | 0.38806 | 0.23257 | 0.79165 | 0.81469 | 0.74186 | 0.73543 | 0.82453 | 0.84816 | 0.87571 | 0.78077 C21orf70  |
| cg21969640 | 0.76565 | 0.52546 | 0.89199 | 0.93109 | 0.94547 | 0.90681 | 0.51679 | 0.45571 | 0.61619 | 0.37591 GPR84     |
| cg21970438 | 0.75269 | 0.51097 | 0.70236 | 0.82983 | 0.35714 | 0.12241 | 0.06324 | 0.06218 | 0.54584 | 0.47837 TTL2      |
| cg21972382 | 0.12806 | 0.09175 | 0.08171 | 0.07098 | 0.07499 | 0.06206 | 0.08089 | 0.0681  | 0.07344 | 0.07074 RSNL2     |
| cg21972430 | 0.03507 | 0.03107 | 0.07018 | 0.04912 | 0.32328 | 0.54994 | 0.02833 | 0.02757 | 0.04803 | 0.02984 TPD52L1   |
| cg21973276 | 0.05462 | 0.05028 | 0.04846 | 0.04617 | 0.04909 | 0.04237 | 0.05733 | 0.04597 | 0.04733 | 0.04415 SMAD6     |
| cg21973517 | 0.08517 | 0.0716  | 0.08455 | 0.08303 | 0.1591  | 0.08968 | 0.05644 | 0.05532 | 0.07569 | 0.09369 VGLL4     |
| cg21973800 | 0.04174 | 0.03501 | 0.0386  | 0.02947 | 0.07196 | 0.04707 | 0.04073 | 0.03591 | 0.03263 | 0.04554 CINP      |
| cg21974239 | 0.17873 | 0.0782  | 0.31737 | 0.40786 | 0.33262 | 0.05204 | 0.3617  | 0.06182 | 0.69524 | 0.04472 MAPK12    |
| cg21974766 | 0.88588 | 0.72442 | 0.68743 | 0.71991 | 0.06246 | 0.03086 | 0.11096 | 0.02112 | 0.41187 | 0.03162 NBLA04196 |
| cg21974996 | 0.05063 | 0.05475 | 0.06084 | 0.05295 | 0.04134 | 0.04623 | 0.05188 | 0.04963 | 0.04636 | 0.04041 C14orf156 |
| cg21975377 | 0.11499 | 0.03895 | 0.04832 | 0.04588 | 0.18504 | 0.32043 | 0.03674 | 0.04393 | 0.0395  | 0.03222 FZD6      |
| cg21978299 | 0.02164 | 0.0282  | 0.03917 | 0.03954 | 0.03323 | 0.03034 | 0.26389 | 0.06084 | 0.03257 | 0.02705 MCTS1     |
| cg21979032 | 0.54128 | 0.43598 | 0.65723 | 0.84426 | 0.64817 | 0.54731 | 0.42448 | 0.59743 | 0.10248 | 0.33957 CYP8B1    |
| cg21982518 | 0.05497 | 0.05714 | 0.05784 | 0.05268 | 0.03847 | 0.05306 | 0.05199 | 0.04448 | 0.04643 | 0.047 TMC7        |
| cg21983579 | 0.02898 | 0.02809 | 0.02728 | 0.02755 | 0.02173 | 0.02355 | 0.024   | 0.02599 | 0.02259 | 0.02307 CAPNS1    |
| cg21984310 | 0.02492 | 0.02594 | 0.0255  | 0.02689 | 0.02031 | 0.02384 | 0.022   | 0.0222  | 0.0214  | 0.02207 C9orf127  |
| cg21985356 | 0.05358 | 0.03783 | 0.04477 | 0.03816 | 0.03837 | 0.04211 | 0.03674 | 0.03153 | 0.02929 | 0.02969 ZBED3     |
| cg21985470 | 0.55719 | 0.42282 | 0.76406 | 0.5954  | 0.8687  | 0.868   | 0.35148 | 0.1742  | 0.385   | 0.19369 PKLR      |
| cg21988041 | 0.09727 | 0.05682 | 0.05906 | 0.05534 | 0.05714 | 0.0625  | 0.05972 | 0.05523 | 0.05066 | 0.04437 GLT8D2    |
| cg21988465 | 0.69804 | 0.3773  | 0.97061 | 0.97191 | 0.94641 | 0.93894 | 0.63416 | 0.90418 | 0.75536 | 0.92139 GNAS      |
| cg21989094 | 0.02644 | 0.02649 | 0.02815 | 0.02705 | 0.01709 | 0.02469 | 0.0248  | 0.02177 | 0.02354 | 0.02075 MRPS12    |
| cg21989500 | 0.0312  | 0.03844 | 0.03172 | 0.0285  | 0.02336 | 0.02676 | 0.02851 | 0.02802 | 0.03053 | 0.02528 NDUFAB1   |
| cg21991396 | 0.81583 | 0.6686  | 0.84441 | 0.82663 | 0.74661 | 0.73749 | 0.14677 | 0.11187 | 0.47616 | 0.82556 CIAS1     |
| cg21991830 | 0.03853 | 0.04416 | 0.04659 | 0.03796 | 0.03014 | 0.03329 | 0.03727 | 0.04375 | 0.02849 | 0.03131 RB1CC1    |
| cg21992250 | 0.95785 | 0.94    | 0.95271 | 0.96393 | 0.96628 | 0.95583 | 0.94166 | 0.94831 | 0.95595 | 0.95662 SLC15A3   |
| cg21993406 | 0.3822  | 0.13122 | 0.13939 | 0.12219 | 0.25405 | 0.09249 | 0.10937 | 0.09837 | 0.06352 | 0.06179 CENPH     |
| cg21995126 | 0.26877 | 0.27009 | 0.60679 | 0.61364 | 0.60227 | 0.19259 | 0.36935 | 0.14581 | 0.22657 | 0.18686 BCHE      |
| cg22001782 | 0.10479 | 0.09655 | 0.11012 | 0.08295 | 0.12042 | 0.11227 | 0.07458 | 0.06503 | 0.1204  | 0.10333 BCL9      |
| cg22004151 | 0.04496 | 0.04891 | 0.04997 | 0.04798 | 0.07079 | 0.06409 | 0.04719 | 0.04991 | 0.04369 | 0.03875 PPP2R5D   |
| cg22005565 | 0.56845 | 0.37871 | 0.64842 | 0.57751 | 0.84729 | 0.62655 | 0.8066  | 0.6671  | 0.81833 | 0.62168 FLJ23878  |
| cg22006386 | 0.05938 | 0.04925 | 0.08545 | 0.06359 | 0.05526 | 0.04391 | 0.06095 | 0.06767 | 0.06711 | 0.04818 C19orf15  |
| cg22007326 | 0.04496 | 0.03739 | 0.04834 | 0.04706 | 0.04326 | 0.04269 | 0.04303 | 0.04082 | 0.03999 | 0.03807 TMED2     |
| cg22007439 | 0.02751 | 0.0245  | 0.02322 | 0.02304 | 0.42421 | 0.44475 | 0.02044 | 0.02187 | 0.0176  | 0.01569 DMRTA1    |
| cg22009138 | 0.10677 | 0.08426 | 0.11095 | 0.08517 | 0.12136 | 0.10034 | 0.09211 | 0.07943 | 0.05501 | 0.06118 ERBB2IP   |



|            |         |         |         |         |         |         |         |         |         |                   |
|------------|---------|---------|---------|---------|---------|---------|---------|---------|---------|-------------------|
| cg22009489 | 0.02914 | 0.02642 | 0.03333 | 0.03133 | 0.02968 | 0.03241 | 0.02911 | 0.02992 | 0.02993 | 0.02318 MYEOV2    |
| cg22009923 | 0.75351 | 0.57674 | 0.79993 | 0.79414 | 0.90274 | 0.5557  | 0.48266 | 0.37966 | 0.68068 | 0.51982 CD151     |
| cg22010317 | 0.25104 | 0.29302 | 0.53131 | 0.58816 | 0.74806 | 0.65712 | 0.32933 | 0.47199 | 0.56289 | 0.45496 CXorf36   |
| cg22012054 | 0.04671 | 0.04248 | 0.05461 | 0.05265 | 0.0445  | 0.05328 | 0.04294 | 0.05612 | 0.04514 | 0.04656 ATP5B     |
| cg22012981 | 0.89835 | 0.65125 | 0.93843 | 0.94458 | 0.1602  | 0.80444 | 0.92886 | 0.92666 | 0.91966 | 0.84832 ACOX2     |
| cg22013966 | 0.7084  | 0.38334 | 0.87837 | 0.9031  | 0.9039  | 0.92518 | 0.70996 | 0.63537 | 0.93874 | 0.71002 SERPINA13 |
| cg22016571 | 0.0586  | 0.05588 | 0.05896 | 0.05487 | 0.06184 | 0.0488  | 0.42687 | 0.09452 | 0.05231 | 0.04956 MASK      |
| cg22016649 | 0.51803 | 0.3822  | 0.64937 | 0.78425 | 0.65272 | 0.24317 | 0.04732 | 0.08902 | 0.17966 | 0.1258 PNPLA2     |
| cg22016818 | 0.02994 | 0.03387 | 0.0294  | 0.03077 | 0.02716 | 0.02649 | 0.0276  | 0.03065 | 0.02692 | 0.02333 TULP3     |
| cg22017387 | 0.05187 | 0.05012 | 0.05715 | 0.06495 | 0.04069 | 0.04366 | 0.04677 | 0.04387 | 0.04967 | 0.04124 VPS33B    |
| cg22019980 | 0.06878 | 0.06119 | 0.09112 | 0.07497 | 0.32867 | 0.09169 | 0.06509 | 0.05494 | 0.06773 | 0.06446 RNF146    |
| cg22021786 | 0.24405 | 0.04814 | 0.48507 | 0.70564 | 0.66896 | 0.7911  | 0.1759  | 0.05142 | 0.45776 | 0.47161 WFDC8     |
| cg22022041 | 0.46313 | 0.2524  | 0.59369 | 0.74889 | 0.63674 | 0.81961 | 0.29159 | 0.55903 | 0.17635 | 0.15672 CCR9      |
| cg22023770 | 0.08293 | 0.07321 | 0.09707 | 0.08174 | 0.45363 | 0.58332 | 0.07481 | 0.07783 | 0.09217 | 0.06878 C6orf114  |
| cg22024281 | 0.02288 | 0.02834 | 0.03173 | 0.03276 | 0.01892 | 0.01616 | 0.01556 | 0.0182  | 0.02022 | 0.02208 EXT1      |
| cg22024657 | 0.83399 | 0.84554 | 0.34533 | 0.23254 | 0.57161 | 0.62291 | 0.26848 | 0.46585 | 0.34375 | 0.16086 SLC13A1   |
| cg22024876 | 0.03269 | 0.03075 | 0.03428 | 0.03089 | 0.02305 | 0.02735 | 0.02937 | 0.02609 | 0.0269  | 0.02475 KBTBD3    |
| cg22025233 | 0.7611  | 0.56603 | 0.83785 | 0.87068 | 0.8925  | 0.84324 | 0.5991  | 0.78922 | 0.8487  | 0.78521 CYP2W1    |
| cg22026853 | 0.02131 | 0.02305 | 0.0577  | 0.03814 | 0.06348 | 0.04483 | 0.0226  | 0.02228 | 0.01893 | 0.01796 POU3F2    |
| cg22029275 | 0.06072 | 0.08481 | 0.13265 | 0.10337 | 0.27656 | 0.1224  | 0.25816 | 0.11885 | 0.14367 | 0.09951 FLJ25477  |
| cg22029504 | 0.05669 | 0.06741 | 0.06493 | 0.06203 | 0.0499  | 0.04886 | 0.05029 | 0.05877 | 0.04477 | 0.04211 PGLS      |
| cg22030890 | 0.8924  | 0.89954 | 0.04051 | 0.04765 | 0.03547 | 0.03541 | 0.03723 | 0.04996 | 0.03917 | 0.03378 RAB32     |
| cg22031736 | 0.04328 | 0.03759 | 0.07445 | 0.06401 | 0.05873 | 0.04972 | 0.04828 | 0.0472  | 0.05852 | 0.0481 LOC129138  |
| cg22034555 | 0.07667 | 0.0714  | 0.07536 | 0.0827  | 0.06577 | 0.05145 | 0.05683 | 0.05322 | 0.06624 | 0.05745 DHX36     |
| cg22035229 | 0.91214 | 0.74231 | 0.40613 | 0.45276 | 0.79861 | 0.63358 | 0.92727 | 0.91025 | 0.92055 | 0.64557 MSH4      |
| cg22036233 | 0.04586 | 0.04779 | 0.03924 | 0.03455 | 0.08221 | 0.06894 | 0.05416 | 0.04988 | 0.04636 | 0.06411 ZFYVE26   |
| cg22036988 | 0.03417 | 0.042   | 0.05744 | 0.039   | 0.03462 | 0.0299  | 0.03527 | 0.03483 | 0.03642 | 0.03108 SPSB4     |
| cg22037121 | 0.39655 | 0.40631 | 0.66139 | 0.73315 | 0.76036 | 0.8737  | 0.09799 | 0.13595 | 0.3263  | 0.07289 C2orf21   |
| cg22037648 | 0.03    | 0.02801 | 0.97091 | 0.97391 | 0.9749  | 0.97278 | 0.95935 | 0.56231 | 0.96631 | 0.92889 SEMA3B    |
| cg22037919 | 0.10593 | 0.09902 | 0.11501 | 0.09203 | 0.16511 | 0.13353 | 0.10667 | 0.11638 | 0.07313 | 0.08542 CCM2      |
| cg22038738 | 0.46429 | 0.22219 | 0.04293 | 0.04994 | 0.87633 | 0.70022 | 0.7398  | 0.04997 | 0.03549 | 0.0247 PLAT       |
| cg22039287 | 0.35652 | 0.21192 | 0.31722 | 0.27424 | 0.42195 | 0.49283 | 0.62889 | 0.67803 | 0.21172 | 0.21845 RIT2      |
| cg22039846 | 0.38034 | 0.28849 | 0.47999 | 0.61171 | 0.8747  | 0.75614 | 0.21692 | 0.15363 | 0.31137 | 0.27355 KIR2DL1   |
| cg22040627 | 0.21855 | 0.17938 | 0.15412 | 0.3088  | 0.93531 | 0.95711 | 0.19738 | 0.03565 | 0.02625 | 0.02802 SLC13A5   |
| cg22041635 | 0.05356 | 0.04409 | 0.04668 | 0.0436  | 0.03923 | 0.03577 | 0.04398 | 0.03644 | 0.03366 | 0.03548 HCN3      |
| cg22041658 | 0.03495 | 0.03539 | 0.0311  | 0.03223 | 0.03033 | 0.04454 | 0.05243 | 0.05202 | 0.02585 | 0.02509 POP4      |
| cg22043361 | 0.04002 | 0.04242 | 0.04728 | 0.04278 | 0.0258  | 0.03121 | 0.03457 | 0.03713 | 0.03572 | 0.03414 ZBTB25    |
| cg22044848 | 0.05183 | 0.04653 | 0.05208 | 0.04879 | 0.03575 | 0.04142 | 0.04309 | 0.04577 | 0.04434 | 0.04402 RAFTLIN   |
| cg22045288 | 0.30212 | 0.22341 | 0.20741 | 0.1506  | 0.23962 | 0.10069 | 0.27419 | 0.11302 | 0.74031 | 0.37062 C10orf91  |
| cg22048492 | 0.03751 | 0.03746 | 0.07741 | 0.09347 | 0.03856 | 0.03951 | 0.03425 | 0.03088 | 0.02766 | 0.03266 HTATIP    |
| cg22050705 | 0.03841 | 0.04178 | 0.04253 | 0.0505  | 0.06248 | 0.05294 | 0.03004 | 0.02842 | 0.03408 | 0.03219 ZNF197    |

|            |         |         |         |         |         |         |         |         |         |                  |
|------------|---------|---------|---------|---------|---------|---------|---------|---------|---------|------------------|
| cg22050893 | 0.1     | 0.08757 | 0.13394 | 0.09243 | 0.21884 | 0.11005 | 0.11901 | 0.10469 | 0.10237 | 0.11602 FKBP7    |
| cg22051636 | 0.59274 | 0.48787 | 0.7555  | 0.79686 | 0.10832 | 0.08228 | 0.68835 | 0.87885 | 0.6517  | 0.63013 MRGPRX2  |
| cg22051763 | 0.06908 | 0.0487  | 0.09305 | 0.08253 | 0.11898 | 0.10209 | 0.08922 | 0.08026 | 0.07076 | 0.07985 UTP20    |
| cg22051865 | 0.02573 | 0.0293  | 0.03189 | 0.02712 | 0.02661 | 0.02596 | 0.02788 | 0.02716 | 0.02482 | 0.01901 ARHGEF17 |
| cg22052955 | 0.11969 | 0.10695 | 0.11261 | 0.10615 | 0.0805  | 0.10765 | 0.09809 | 0.10151 | 0.10243 | 0.10533 RARG     |
| cg22054164 | 0.85078 | 0.68902 | 0.91525 | 0.90397 | 0.89154 | 0.89079 | 0.91527 | 0.91754 | 0.92531 | 0.80459 ECE1     |
| cg22054191 | 0.74304 | 0.12717 | 0.82139 | 0.8826  | 0.89687 | 0.77862 | 0.23566 | 0.41334 | 0.71268 | 0.29977 POU2F2   |
| cg22055427 | 0.04625 | 0.05541 | 0.06164 | 0.05407 | 0.06592 | 0.03791 | 0.0564  | 0.04878 | 0.07889 | 0.04791 P2RY1    |
| cg22058458 | 0.03232 | 0.03656 | 0.0493  | 0.03933 | 0.04678 | 0.03554 | 0.03494 | 0.02936 | 0.03633 | 0.02747 HMG3     |
| cg22059008 | 0.62424 | 0.66849 | 0.83863 | 0.89252 | 0.8271  | 0.7898  | 0.47861 | 0.6625  | 0.65823 | 0.52387 TESSP1   |
| cg22061523 | 0.05504 | 0.05467 | 0.05676 | 0.07215 | 0.05422 | 0.05458 | 0.0531  | 0.04959 | 0.05102 | 0.05172 TK1      |
| cg22062068 | 0.0964  | 0.11705 | 0.17597 | 0.18588 | 0.29804 | 0.11487 | 0.11471 | 0.09832 | 0.15654 | 0.1806 HNRNPG-T  |
| cg22062239 | 0.02774 | 0.02548 | 0.02437 | 0.02455 | 0.02008 | 0.02319 | 0.02589 | 0.02197 | 0.02043 | 0.02018 VKORC1   |
| cg22063056 | 0.02241 | 0.02394 | 0.0269  | 0.02323 | 0.01609 | 0.01811 | 0.02181 | 0.02153 | 0.01868 | 0.02417 CLCC1    |
| cg22063653 | 0.03956 | 0.03961 | 0.06449 | 0.04573 | 0.05228 | 0.06332 | 0.03503 | 0.03262 | 0.03187 | 0.02953 BPGM     |
| cg22063989 | 0.05689 | 0.03868 | 0.53878 | 0.56505 | 0.55851 | 0.44022 | 0.05223 | 0.04281 | 0.03444 | 0.03837 RSPO1    |
| cg22064129 | 0.76866 | 0.81695 | 0.75113 | 0.80887 | 0.77516 | 0.73499 | 0.7523  | 0.80677 | 0.8133  | 0.73929 SLC14A2  |
| cg22064451 | 0.7331  | 0.50067 | 0.41438 | 0.47972 | 0.54049 | 0.67957 | 0.42509 | 0.41933 | 0.18509 | 0.17772 TUBA3    |
| cg22064942 | 0.05469 | 0.057   | 0.0558  | 0.04952 | 0.03957 | 0.04767 | 0.04472 | 0.04712 | 0.04284 | 0.04684 SEC24B   |
| cg22065439 | 0.06925 | 0.06216 | 0.06908 | 0.07344 | 0.07117 | 0.06046 | 0.07568 | 0.06509 | 0.05192 | 0.05198 C5orf15  |
| cg22065500 | 0.02762 | 0.02672 | 0.03047 | 0.03243 | 0.02505 | 0.02741 | 0.02262 | 0.02597 | 0.02337 | 0.02208 TNPO3    |
| cg22066521 | 0.18128 | 0.17181 | 0.66216 | 0.72522 | 0.62965 | 0.69645 | 0.4527  | 0.38565 | 0.3462  | 0.27413 ABCB5    |
| cg22067472 | 0.13276 | 0.09447 | 0.09852 | 0.107   | 0.16175 | 0.12319 | 0.09948 | 0.08696 | 0.08283 | 0.09496 CYB5-M   |
| cg22068038 | 0.03302 | 0.03318 | 0.03227 | 0.033   | 0.02606 | 0.02599 | 0.03583 | 0.02907 | 0.02993 | 0.02598 PARP16   |
| cg22068211 | 0.91057 | 0.88901 | 0.92064 | 0.9381  | 0.92104 | 0.8486  | 0.82727 | 0.81456 | 0.69487 | 0.69528 C3orf27  |
| cg22068473 | 0.08395 | 0.07368 | 0.08243 | 0.07893 | 0.05783 | 0.07648 | 0.06814 | 0.07648 | 0.06942 | 0.06305 DDIT4    |
| cg22068764 | 0.02647 | 0.02419 | 0.02877 | 0.02244 | 0.02063 | 0.02397 | 0.0215  | 0.02303 | 0.02057 | 0.0198 SCYL1BP1  |
| cg22074467 | 0.23798 | 0.21445 | 0.61747 | 0.62366 | 0.60918 | 0.66555 | 0.17874 | 0.16287 | 0.27351 | 0.2242 AKR1C2    |
| cg22074666 | 0.61993 | 0.34887 | 0.634   | 0.73117 | 0.57654 | 0.60351 | 0.7805  | 0.52101 | 0.79597 | 0.6677 C21orf7   |
| cg22074858 | 0.33504 | 0.12195 | 0.14753 | 0.14173 | 0.20461 | 0.15115 | 0.08882 | 0.12012 | 0.11902 | 0.15428 GBP3     |
| cg22077101 | 0.20493 | 0.18287 | 0.24837 | 0.18258 | 0.27958 | 0.16324 | 0.22573 | 0.17092 | 0.19586 | 0.18233 MRPL22   |
| cg22077553 | 0.57816 | 0.41184 | 0.77325 | 0.864   | 0.4188  | 0.68044 | 0.61637 | 0.1855  | 0.09645 | 0.26786 MYOC     |
| cg22080282 | 0.09144 | 0.09615 | 0.08688 | 0.08492 | 0.04646 | 0.07572 | 0.07868 | 0.08021 | 0.07389 | 0.06984 ZADH2    |
| cg22081096 | 0.39961 | 0.71456 | 0.61878 | 0.70145 | 0.33073 | 0.36873 | 0.17615 | 0.15751 | 0.37504 | 0.18328 ABCA6    |
| cg22082243 | 0.04801 | 0.05277 | 0.05811 | 0.05469 | 0.04755 | 0.05361 | 0.0479  | 0.05229 | 0.04407 | 0.04202 C10orf84 |
| cg22082462 | 0.3035  | 0.11915 | 0.79145 | 0.85735 | 0.78321 | 0.69885 | 0.69385 | 0.43547 | 0.29211 | 0.37956 CPNE6    |
| cg22083047 | 0.70948 | 0.34274 | 0.5118  | 0.59211 | 0.61954 | 0.29068 | 0.1935  | 0.19596 | 0.78601 | 0.30197 PRICKLE2 |
| cg22083639 | 0.10797 | 0.06241 | 0.18309 | 0.15885 | 0.11011 | 0.04849 | 0.05309 | 0.04391 | 0.28524 | 0.04959 SLC05A1  |
| cg22083798 | 0.08854 | 0.07947 | 0.3656  | 0.46741 | 0.73382 | 0.85055 | 0.16519 | 0.0948  | 0.88385 | 0.82474 IGFBP3   |
| cg22084336 | 0.05897 | 0.0552  | 0.05545 | 0.0508  | 0.08105 | 0.0716  | 0.04544 | 0.04591 | 0.04553 | 0.04481 UB1      |
| cg22084611 | 0.13292 | 0.13288 | 0.14568 | 0.14791 | 0.54011 | 0.27663 | 0.3209  | 0.13154 | 0.13717 | 0.10621 SULF2    |

|            |         |         |         |         |         |         |         |         |         |                   |
|------------|---------|---------|---------|---------|---------|---------|---------|---------|---------|-------------------|
| cg22085335 | 0.0445  | 0.0489  | 0.05588 | 0.05355 | 0.03407 | 0.03441 | 0.09151 | 0.04106 | 0.04307 | 0.03671 KCNF1     |
| cg22088368 | 0.81574 | 0.51319 | 0.64733 | 0.84322 | 0.84699 | 0.84952 | 0.54064 | 0.80452 | 0.09152 | 0.0673 MGC35206   |
| cg22088594 | 0.55206 | 0.82132 | 0.60925 | 0.53657 | 0.11919 | 0.11035 | 0.25496 | 0.08673 | 0.1164  | 0.07726 FAM48A    |
| cg22090592 | 0.53644 | 0.05716 | 0.50259 | 0.48011 | 0.93548 | 0.71239 | 0.76526 | 0.16546 | 0.90535 | 0.84539 C14orf173 |
| cg22091798 | 0.02633 | 0.02667 | 0.02525 | 0.02384 | 0.01672 | 0.02508 | 0.02458 | 0.02582 | 0.02514 | 0.02683 LOC51035  |
| cg22093158 | 0.09293 | 0.08145 | 0.13321 | 0.11153 | 0.20824 | 0.14689 | 0.13222 | 0.10391 | 0.08291 | 0.09276 OSBP      |
| cg22096513 | 0.33655 | 0.09701 | 0.32576 | 0.24958 | 0.10205 | 0.04787 | 0.15536 | 0.10624 | 0.07794 | 0.04517 UBA2      |
| cg22100821 | 0.03143 | 0.03046 | 0.58407 | 0.53164 | 0.02605 | 0.03894 | 0.04122 | 0.03291 | 0.03341 | 0.03053 SCRT2     |
| cg22101098 | 0.77323 | 0.27238 | 0.60998 | 0.67291 | 0.55046 | 0.53657 | 0.19854 | 0.1186  | 0.77352 | 0.60241 SLC17A1   |
| cg22101147 | 0.17164 | 0.23127 | 0.23491 | 0.25984 | 0.13092 | 0.07801 | 0.05842 | 0.05354 | 0.05264 | 0.04952 TMEM110   |
| cg22101336 | 0.05165 | 0.05824 | 0.05428 | 0.05724 | 0.03948 | 0.05503 | 0.05111 | 0.04791 | 0.04565 | 0.04629 AP1M1     |
| cg22103585 | 0.02379 | 0.02575 | 0.02548 | 0.02444 | 0.01747 | 0.02481 | 0.02024 | 0.01975 | 0.02069 | 0.01705 CCNT1     |
| cg22103999 | 0.0413  | 0.03628 | 0.04622 | 0.03826 | 0.03145 | 0.03059 | 0.03671 | 0.04098 | 0.03787 | 0.03618 DNAJA3    |
| cg22105022 | 0.43629 | 0.12919 | 0.77463 | 0.8045  | 0.59589 | 0.57344 | 0.53362 | 0.35254 | 0.77524 | 0.55136 TOR2A     |
| cg22105582 | 0.09712 | 0.05681 | 0.08853 | 0.07234 | 0.07163 | 0.06241 | 0.05241 | 0.05517 | 0.05826 | 0.0541 RAB27B     |
| cg22108175 | 0.10822 | 0.13846 | 0.36192 | 0.58809 | 0.26271 | 0.21589 | 0.3524  | 0.20862 | 0.63278 | 0.428 LPL         |
| cg22108265 | 0.03262 | 0.02978 | 0.05119 | 0.07184 | 0.02859 | 0.03506 | 0.03461 | 0.0396  | 0.03297 | 0.02914 RAB6A     |
| cg22110261 | 0.05652 | 0.05853 | 0.05624 | 0.0565  | 0.05586 | 0.04139 | 0.03995 | 0.04194 | 0.04642 | 0.0368 PGAP1      |
| cg22110492 | 0.50504 | 0.57501 | 0.49901 | 0.49447 | 0.45314 | 0.49437 | 0.43669 | 0.46188 | 0.41309 | 0.41345 REXO4     |
| cg22111003 | 0.02446 | 0.02779 | 0.02875 | 0.02463 | 0.02563 | 0.02755 | 0.02515 | 0.02152 | 0.02565 | 0.02597 ACSL3     |
| cg22113807 | 0.10284 | 0.08    | 0.15321 | 0.17052 | 0.36072 | 0.15626 | 0.16951 | 0.09995 | 0.06999 | 0.06876 FLJ13149  |
| cg22114222 | 0.01974 | 0.01991 | 0.02105 | 0.01718 | 0.01735 | 0.0155  | 0.01618 | 0.01658 | 0.01483 | 0.0133 TIPARP     |
| cg22115808 | 0.02138 | 0.0257  | 0.02375 | 0.01817 | 0.01467 | 0.01815 | 0.01752 | 0.01836 | 0.01701 | 0.01752 NUDT16L1  |
| cg22116290 | 0.06937 | 0.09029 | 0.24086 | 0.10123 | 0.08914 | 0.06214 | 0.06799 | 0.06025 | 0.06452 | 0.05621 SMPD3     |
| cg22117143 | 0.81903 | 0.76242 | 0.83847 | 0.87537 | 0.94825 | 0.90108 | 0.8541  | 0.86828 | 0.88401 | 0.86984 MPDZ      |
| cg22120948 | 0.03574 | 0.03805 | 0.039   | 0.03992 | 0.02565 | 0.03476 | 0.0342  | 0.03902 | 0.0345  | 0.03264 GIT1      |
| cg22122449 | 0.91192 | 0.4604  | 0.8471  | 0.8869  | 0.83523 | 0.62395 | 0.43206 | 0.07522 | 0.89849 | 0.85594 ACR       |
| cg22123464 | 0.08793 | 0.0916  | 0.88567 | 0.9114  | 0.19337 | 0.0999  | 0.65114 | 0.08571 | 0.32978 | 0.21543 SLC8A2    |
| cg22125370 | 0.57091 | 0.60216 | 0.0703  | 0.06393 | 0.38793 | 0.32493 | 0.48313 | 0.47345 | 0.89143 | 0.89431 SOCS2     |
| cg22125922 | 0.06218 | 0.05786 | 0.09565 | 0.07918 | 0.08979 | 0.101   | 0.0709  | 0.07538 | 0.04271 | 0.04203 ZNF337    |
| cg22126032 | 0.0653  | 0.05025 | 0.05115 | 0.04974 | 0.0312  | 0.04595 | 0.05241 | 0.11298 | 0.04816 | 0.0391 CAV1       |
| cg22126266 | 0.04443 | 0.0472  | 0.05012 | 0.04387 | 0.05914 | 0.0359  | 0.03543 | 0.04248 | 0.03697 | 0.04129 LHX4      |
| cg22127491 | 0.04935 | 0.04852 | 0.05505 | 0.05015 | 0.07712 | 0.054   | 0.04173 | 0.02968 | 0.04098 | 0.05292 NDUFC1    |
| cg22129364 | 0.12829 | 0.04074 | 0.28857 | 0.53923 | 0.44634 | 0.36446 | 0.3585  | 0.15385 | 0.42498 | 0.38006 GPX7      |
| cg22130834 | 0.31849 | 0.46825 | 0.87235 | 0.85012 | 0.67474 | 0.60375 | 0.39037 | 0.36174 | 0.43033 | 0.61151 TTC22     |
| cg22131172 | 0.74095 | 0.29857 | 0.05456 | 0.05541 | 0.04395 | 0.05875 | 0.04769 | 0.09183 | 0.04697 | 0.04038 LOC283487 |
| cg22131691 | 0.10037 | 0.17891 | 0.85189 | 0.87799 | 0.10488 | 0.05175 | 0.06797 | 0.03451 | 0.04269 | 0.03443 PDE1C     |
| cg22134325 | 0.3334  | 0.42163 | 0.94741 | 0.9537  | 0.93419 | 0.83575 | 0.93009 | 0.92272 | 0.3967  | 0.25848 NPAS4     |
| cg22136326 | 0.02993 | 0.03348 | 0.03458 | 0.03193 | 0.02433 | 0.02666 | 0.02857 | 0.03097 | 0.02545 | 0.0325 ARL2BP     |
| cg22136365 | 0.06424 | 0.05718 | 0.33492 | 0.63082 | 0.12326 | 0.08811 | 0.06655 | 0.08358 | 0.04498 | 0.04909 TAT       |
| cg22136753 | 0.73699 | 0.83974 | 0.10411 | 0.13053 | 0.14781 | 0.10772 | 0.15004 | 0.06736 | 0.04987 | 0.04288 CSRP2BP   |

|            |         |         |         |         |         |         |         |         |         |         |          |
|------------|---------|---------|---------|---------|---------|---------|---------|---------|---------|---------|----------|
| cg22138278 | 0.03207 | 0.03753 | 0.03844 | 0.03773 | 0.02427 | 0.03919 | 0.03175 | 0.03832 | 0.03545 | 0.03529 | MAF1     |
| cg22138461 | 0.04968 | 0.04514 | 0.03997 | 0.04495 | 0.03971 | 0.0381  | 0.04017 | 0.03747 | 0.03791 | 0.03665 | FLJ13984 |
| cg22139563 | 0.60439 | 0.49575 | 0.75071 | 0.76807 | 0.71962 | 0.7687  | 0.2462  | 0.14293 | 0.78175 | 0.61401 | KRTHA8   |
| cg22139878 | 0.03804 | 0.03352 | 0.04009 | 0.03079 | 0.03648 | 0.03353 | 0.03357 | 0.03053 | 0.03067 | 0.02856 | IFIT5    |
| cg22140675 | 0.0821  | 0.0731  | 0.08824 | 0.07739 | 0.11491 | 0.09654 | 0.10905 | 0.10946 | 0.07311 | 0.07823 | G6PC3    |
| cg22141781 | 0.09697 | 0.0738  | 0.08426 | 0.10164 | 0.07921 | 0.06137 | 0.07272 | 0.06576 | 0.06742 | 0.05902 | NDUFA12  |
| cg22143352 | 0.73734 | 0.74113 | 0.77413 | 0.8119  | 0.64824 | 0.53222 | 0.68702 | 0.4868  | 0.74747 | 0.50942 | JDP2     |
| cg22148243 | 0.05604 | 0.06525 | 0.0759  | 0.05169 | 0.05078 | 0.05399 | 0.03154 | 0.02825 | 0.04657 | 0.04371 | CXorf38  |
| cg22148652 | 0.03734 | 0.03787 | 0.04034 | 0.04504 | 0.0405  | 0.04174 | 0.04244 | 0.04063 | 0.03516 | 0.03526 | ARL5     |
| cg22149792 | 0.47515 | 0.41067 | 0.45061 | 0.4907  | 0.53629 | 0.53736 | 0.57    | 0.52687 | 0.66691 | 0.62331 | KIAA1641 |
| cg22150335 | 0.86283 | 0.84989 | 0.88405 | 0.8927  | 0.92542 | 0.87927 | 0.87392 | 0.71341 | 0.87433 | 0.87689 | ANK3     |
| cg22151768 | 0.07577 | 0.02275 | 0.05234 | 0.07211 | 0.12085 | 0.26032 | 0.30907 | 0.02457 | 0.40296 | 0.04259 | FBXL14   |
| cg22152192 | 0.51787 | 0.7237  | 0.68824 | 0.75304 | 0.64692 | 0.79053 | 0.66418 | 0.61164 | 0.65845 | 0.63763 | CRYM     |
| cg22152328 | 0.04366 | 0.02768 | 0.03504 | 0.03872 | 0.02289 | 0.03078 | 0.1793  | 0.4287  | 0.60551 | 0.5516  | MX1      |
| cg22152667 | 0.89795 | 0.89618 | 0.85882 | 0.91136 | 0.89379 | 0.88905 | 0.35458 | 0.47138 | 0.57042 | 0.73513 | OCM      |
| cg22153116 | 0.10216 | 0.03075 | 0.03135 | 0.02933 | 0.08342 | 0.02795 | 0.02663 | 0.02392 | 0.02376 | 0.02638 | C9orf52  |
| cg22153481 | 0.03442 | 0.037   | 0.08187 | 0.11192 | 0.05089 | 0.04029 | 0.0436  | 0.03713 | 0.04273 | 0.03373 | PRKAG1   |
| cg22153873 | 0.0481  | 0.05727 | 0.08159 | 0.07152 | 0.08304 | 0.04803 | 0.04787 | 0.04381 | 0.05029 | 0.04132 | BCL11A   |
| cg22154562 | 0.02017 | 0.02126 | 0.02335 | 0.02318 | 0.0181  | 0.02263 | 0.01771 | 0.01813 | 0.01512 | 0.01462 | HRBL     |
| cg22155248 | 0.25464 | 0.12015 | 0.42628 | 0.5412  | 0.11676 | 0.06711 | 0.07697 | 0.07981 | 0.07696 | 0.08123 | TAPBPL   |
| cg22156632 | 0.03228 | 0.0432  | 0.12909 | 0.17374 | 0.33601 | 0.37164 | 0.25879 | 0.11005 | 0.04166 | 0.04297 | WNT6     |
| cg22158923 | 0.77558 | 0.09732 | 0.71176 | 0.85762 | 0.37665 | 0.19822 | 0.28833 | 0.0649  | 0.77178 | 0.63366 | FLJ39237 |
| cg22158956 | 0.03001 | 0.03655 | 0.02951 | 0.03013 | 0.03079 | 0.03505 | 0.02715 | 0.02483 | 0.02716 | 0.02485 | UGDH     |
| cg22161476 | 0.74078 | 0.69883 | 0.64481 | 0.80455 | 0.08284 | 0.06911 | 0.13883 | 0.15521 | 0.0465  | 0.04246 | FSTL5    |
| cg22161874 | 0.71182 | 0.78403 | 0.77314 | 0.8133  | 0.72771 | 0.74981 | 0.64427 | 0.45085 | 0.86037 | 0.6798  | TRPM6    |
| cg22165175 | 0.03453 | 0.03557 | 0.17627 | 0.09496 | 0.43414 | 0.16357 | 0.03572 | 0.08597 | 0.04658 | 0.03078 | KCNA2    |
| cg22165507 | 0.05589 | 0.06361 | 0.06107 | 0.06914 | 0.05536 | 0.05798 | 0.0538  | 0.06068 | 0.05806 | 0.05015 | MGST3    |
| cg22165685 | 0.0255  | 0.02261 | 0.66083 | 0.75502 | 0.92968 | 0.60606 | 0.12852 | 0.04418 | 0.02803 | 0.04168 | VENTX    |
| cg22166290 | 0.11813 | 0.12637 | 0.12866 | 0.14322 | 0.11366 | 0.11627 | 0.09872 | 0.09317 | 0.09909 | 0.11344 | BCL11A   |
| cg22168676 | 0.43654 | 0.13197 | 0.71277 | 0.74321 | 0.695   | 0.3438  | 0.33059 | 0.12131 | 0.25127 | 0.10496 | OFCC1    |
| cg22169418 | 0.03927 | 0.04205 | 0.04594 | 0.04836 | 0.04865 | 0.05268 | 0.04633 | 0.04763 | 0.03087 | 0.04195 | RBM21    |
| cg22170618 | 0.06339 | 0.0721  | 0.0753  | 0.06809 | 0.07529 | 0.06261 | 0.06304 | 0.0561  | 0.05793 | 0.05536 | CDK9     |
| cg22171829 | 0.64416 | 0.53166 | 0.08665 | 0.06627 | 0.43337 | 0.06161 | 0.13743 | 0.02811 | 0.04547 | 0.02517 | PKD4     |
| cg22172230 | 0.02056 | 0.01954 | 0.02132 | 0.0206  | 0.01476 | 0.01594 | 0.68767 | 0.63691 | 0.01476 | 0.01483 | SWAP70   |
| cg22172494 | 0.71645 | 0.57696 | 0.86375 | 0.94346 | 0.90868 | 0.77616 | 0.90467 | 0.90942 | 0.8127  | 0.73883 | H19      |
| cg22173227 | 0.86454 | 0.83795 | 0.83749 | 0.8601  | 0.88797 | 0.88323 | 0.70457 | 0.8628  | 0.85638 | 0.80377 | C4B      |
| cg22174355 | 0.89419 | 0.90492 | 0.8689  | 0.89062 | 0.83269 | 0.87827 | 0.87355 | 0.87927 | 0.9096  | 0.90217 | GNG10    |
| cg22175764 | 0.04847 | 0.04878 | 0.06067 | 0.06866 | 0.14258 | 0.16196 | 0.23104 | 0.38222 | 0.27923 | 0.32075 | C20orf86 |
| cg22175811 | 0.04333 | 0.04623 | 0.04483 | 0.03858 | 0.0432  | 0.04226 | 0.04373 | 0.04838 | 0.03408 | 0.04058 | TP53     |
| cg22176017 | 0.08928 | 0.06627 | 0.09067 | 0.11492 | 0.09671 | 0.08215 | 0.09575 | 0.07264 | 0.13785 | 0.08854 | POLR2G   |
| cg22176097 | 0.03308 | 0.03739 | 0.0378  | 0.03851 | 0.03126 | 0.03049 | 0.03176 | 0.03272 | 0.03151 | 0.03562 | MGC23280 |

|            |         |         |         |         |         |         |         |         |         |         |          |
|------------|---------|---------|---------|---------|---------|---------|---------|---------|---------|---------|----------|
| cg22176895 | 0.04258 | 0.04416 | 0.06318 | 0.06696 | 0.04236 | 0.04749 | 0.03852 | 0.03794 | 0.05008 | 0.03333 | PROX1    |
| cg22177707 | 0.04317 | 0.04148 | 0.04241 | 0.04764 | 0.04133 | 0.04901 | 0.039   | 0.03897 | 0.03351 | 0.04322 | FLJ30655 |
| cg22178085 | 0.03646 | 0.03424 | 0.03623 | 0.03464 | 0.03001 | 0.02948 | 0.0313  | 0.03329 | 0.03143 | 0.0325  | LKAP     |
| cg22179082 | 0.07917 | 0.05706 | 0.24522 | 0.35381 | 0.19471 | 0.05143 | 0.09227 | 0.05601 | 0.08578 | 0.03718 | GPR12    |
| cg22181664 | 0.33646 | 0.15265 | 0.32355 | 0.31738 | 0.23226 | 0.13026 | 0.19371 | 0.22059 | 0.28287 | 0.07778 | CLCA1    |
| cg22182110 | 0.07955 | 0.07199 | 0.07734 | 0.07243 | 0.0525  | 0.07349 | 0.07231 | 0.06318 | 0.068   | 0.06819 | GOLGB1   |
| cg22182666 | 0.84035 | 0.59473 | 0.60823 | 0.68086 | 0.91004 | 0.87768 | 0.79018 | 0.5637  | 0.68179 | 0.76644 | BZRAP1   |
| cg22182945 | 0.21344 | 0.12104 | 0.64059 | 0.75288 | 0.50196 | 0.56736 | 0.36159 | 0.18005 | 0.2562  | 0.09568 | NYD-SP26 |
| cg22182975 | 0.9028  | 0.9216  | 0.9131  | 0.94543 | 0.95041 | 0.91242 | 0.72881 | 0.69589 | 0.93803 | 0.91244 | GPR31    |
| cg22183626 | 0.05376 | 0.05786 | 0.06222 | 0.05879 | 0.0456  | 0.05236 | 0.05432 | 0.0539  | 0.05033 | 0.05193 | TSC22D1  |
| cg22183706 | 0.25725 | 0.16761 | 0.80305 | 0.85363 | 0.69002 | 0.79728 | 0.50188 | 0.18431 | 0.28591 | 0.09994 | CALCA    |
| cg22183849 | 0.02619 | 0.02921 | 0.03087 | 0.02793 | 0.02216 | 0.02156 | 0.02383 | 0.02356 | 0.02209 | 0.02365 | DHX36    |
| cg22184145 | 0.11727 | 0.10511 | 0.15308 | 0.10439 | 0.25525 | 0.1684  | 0.12513 | 0.10147 | 0.10354 | 0.08021 | POLR2B   |
| cg22185378 | 0.95784 | 0.95338 | 0.93278 | 0.94996 | 0.93406 | 0.93191 | 0.92847 | 0.94245 | 0.95774 | 0.95697 | WBCSR14  |
| cg22186533 | 0.0625  | 0.06187 | 0.06574 | 0.06263 | 0.0526  | 0.04584 | 0.05505 | 0.05103 | 0.06241 | 0.05039 | EEF1D    |
| cg22187094 | 0.04286 | 0.03683 | 0.04337 | 0.03621 | 0.03447 | 0.03998 | 0.03748 | 0.04834 | 0.03164 | 0.03816 | POLG     |
| cg22187630 | 0.17803 | 0.03833 | 0.93128 | 0.94019 | 0.57082 | 0.64826 | 0.37511 | 0.065   | 0.06309 | 0.04678 | CACNA1A  |
| cg22187826 | 0.03762 | 0.03818 | 0.04072 | 0.03988 | 0.02852 | 0.04115 | 0.03128 | 0.02565 | 0.03064 | 0.03132 | EAF2     |
| cg22188058 | 0.02735 | 0.03119 | 0.03675 | 0.02693 | 0.02615 | 0.02618 | 0.02594 | 0.02623 | 0.02313 | 0.02147 | SDC4     |
| cg22188495 | 0.05862 | 0.05948 | 0.11874 | 0.13907 | 0.24518 | 0.08492 | 0.0778  | 0.07034 | 0.13529 | 0.07539 | PRICKLE1 |
| cg22189019 | 0.09177 | 0.08092 | 0.89479 | 0.91791 | 0.94354 | 0.92899 | 0.62568 | 0.56801 | 0.92105 | 0.84194 | FGF22    |
| cg22189286 | 0.47458 | 0.35562 | 0.81256 | 0.85967 | 0.44563 | 0.20495 | 0.25751 | 0.12265 | 0.65035 | 0.10962 | HSPB8    |
| cg22189519 | 0.64392 | 0.50445 | 0.67173 | 0.70443 | 0.54927 | 0.57684 | 0.64357 | 0.70906 | 0.75496 | 0.66966 | CDC37L1  |
| cg22189618 | 0.03896 | 0.04321 | 0.13054 | 0.07258 | 0.24047 | 0.05015 | 0.04873 | 0.03859 | 0.04914 | 0.0377  | NAP1L3   |
| cg22189725 | 0.05389 | 0.05889 | 0.09255 | 0.12034 | 0.08006 | 0.07143 | 0.09484 | 0.04056 | 0.05615 | 0.05771 | ADC      |
| cg22190090 | 0.0333  | 0.02691 | 0.03238 | 0.03266 | 0.0254  | 0.02727 | 0.02496 | 0.02791 | 0.04043 | 0.02599 | PIP5K2B  |
| cg22190114 | 0.17841 | 0.15804 | 0.39524 | 0.43218 | 0.29578 | 0.40256 | 0.12369 | 0.09517 | 0.12869 | 0.13247 | NALP8    |
| cg22190291 | 0.02985 | 0.03135 | 0.03489 | 0.03923 | 0.03848 | 0.03643 | 0.02993 | 0.0212  | 0.02955 | 0.02877 | NBPF3    |
| cg22190705 | 0.07362 | 0.0435  | 0.20031 | 0.18006 | 0.13379 | 0.06672 | 0.33742 | 0.06482 | 0.07701 | 0.05893 | DDEF2    |
| cg22190819 | 0.49274 | 0.45522 | 0.52137 | 0.54234 | 0.64399 | 0.65655 | 0.4551  | 0.46328 | 0.49242 | 0.50631 | C20orf91 |
| cg22190861 | 0.02776 | 0.0268  | 0.02928 | 0.02556 | 0.02198 | 0.02712 | 0.02534 | 0.02427 | 0.02149 | 0.02193 | GPR155   |
| cg22192762 | 0.02912 | 0.03154 | 0.03797 | 0.03367 | 0.03074 | 0.03201 | 0.02922 | 0.03461 | 0.03054 | 0.02698 | PLXNC1   |
| cg22193702 | 0.86374 | 0.74665 | 0.87855 | 0.88567 | 0.88586 | 0.877   | 0.86455 | 0.84489 | 0.87893 | 0.81814 | PADI1    |
| cg22194129 | 0.71288 | 0.61956 | 0.68228 | 0.83631 | 0.92149 | 0.88247 | 0.09133 | 0.08435 | 0.12503 | 0.09608 | CLEC4C   |
| cg22194305 | 0.03304 | 0.03525 | 0.03565 | 0.03292 | 0.02735 | 0.03329 | 0.02797 | 0.03041 | 0.03038 | 0.02878 | MXD4     |
| cg22195268 | 0.075   | 0.04937 | 0.06091 | 0.05204 | 0.06174 | 0.04876 | 0.05477 | 0.04997 | 0.29425 | 0.04634 | FAM104A  |
| cg22197033 | 0.07808 | 0.02977 | 0.40874 | 0.7192  | 0.02656 | 0.08562 | 0.04863 | 0.0259  | 0.03045 | 0.02324 | CCDC42   |
| cg22197708 | 0.49938 | 0.48143 | 0.24564 | 0.21736 | 0.64905 | 0.76257 | 0.19944 | 0.18022 | 0.45778 | 0.31012 | MS4A2    |
| cg22197787 | 0.02993 | 0.0384  | 0.03946 | 0.03872 | 0.10612 | 0.2169  | 0.03161 | 0.03048 | 0.0375  | 0.02879 | KCNH1    |
| cg22197830 | 0.88895 | 0.54933 | 0.903   | 0.91132 | 0.3984  | 0.13811 | 0.82792 | 0.31027 | 0.35972 | 0.12882 | C5orf14  |
| cg22198425 | 0.03851 | 0.04286 | 0.04006 | 0.03812 | 0.0273  | 0.03557 | 0.03184 | 0.03608 | 0.03295 | 0.03378 | TCEB3    |

|            |         |         |         |         |         |         |         |         |         |                  |
|------------|---------|---------|---------|---------|---------|---------|---------|---------|---------|------------------|
| cg22198623 | 0.19096 | 0.04276 | 0.73128 | 0.85526 | 0.86861 | 0.80772 | 0.61632 | 0.33339 | 0.15222 | 0.20387 MT1G     |
| cg22199080 | 0.60321 | 0.20127 | 0.55132 | 0.58162 | 0.25305 | 0.25681 | 0.13562 | 0.04907 | 0.24931 | 0.20382 CENTG1   |
| cg22199118 | 0.14738 | 0.16189 | 0.23119 | 0.17937 | 0.2678  | 0.33408 | 0.23763 | 0.22261 | 0.18618 | 0.16041 C8orf34  |
| cg22199779 | 0.06331 | 0.05964 | 0.05824 | 0.05567 | 0.06175 | 0.05717 | 0.05387 | 0.0492  | 0.04536 | 0.04738 SMU1     |
| cg22201387 | 0.03814 | 0.03916 | 0.0312  | 0.03307 | 0.0384  | 0.04258 | 0.02759 | 0.02775 | 0.03348 | 0.03157 ENTPD5   |
| cg22202141 | 0.35184 | 0.06392 | 0.46171 | 0.62623 | 0.31593 | 0.37556 | 0.05838 | 0.05092 | 0.14768 | 0.11425 FCGR3A   |
| cg22209624 | 0.02508 | 0.02331 | 0.02634 | 0.02199 | 0.02248 | 0.02339 | 0.02013 | 0.02009 | 0.02186 | 0.02119 SERTAD4  |
| cg22211866 | 0.10593 | 0.11735 | 0.11287 | 0.11743 | 0.18479 | 0.11021 | 0.15724 | 0.12976 | 0.11386 | 0.13706 HMG20A   |
| cg22213042 | 0.86684 | 0.80814 | 0.80503 | 0.81562 | 0.7192  | 0.76995 | 0.82814 | 0.83694 | 0.86282 | 0.72335 CPA2     |
| cg22214414 | 0.79859 | 0.81204 | 0.82191 | 0.86124 | 0.66061 | 0.80597 | 0.77653 | 0.81271 | 0.86184 | 0.82061 SYCP2    |
| cg22215192 | 0.8059  | 0.80843 | 0.23474 | 0.33943 | 0.76213 | 0.72479 | 0.28188 | 0.30677 | 0.25011 | 0.2292 AMY2A     |
| cg22215520 | 0.07574 | 0.02816 | 0.02893 | 0.02586 | 0.02496 | 0.02839 | 0.0282  | 0.02269 | 0.02279 | 0.02107 PAIP1    |
| cg22215728 | 0.19127 | 0.53822 | 0.36568 | 0.63165 | 0.53163 | 0.0413  | 0.06515 | 0.04586 | 0.03855 | 0.03426 FHIT     |
| cg22218909 | 0.73931 | 0.75976 | 0.87314 | 0.88011 | 0.8999  | 0.87933 | 0.71426 | 0.63776 | 0.11732 | 0.37501 DEFA3    |
| cg22220722 | 0.15025 | 0.05192 | 0.32479 | 0.41869 | 0.3831  | 0.5892  | 0.03749 | 0.03819 | 0.82562 | 0.36533 PLA2G2A  |
| cg22222251 | 0.36929 | 0.2446  | 0.49087 | 0.53387 | 0.65613 | 0.5695  | 0.51295 | 0.37522 | 0.47259 | 0.45639 WBSR19   |
| cg22223602 | 0.03114 | 0.03186 | 0.03208 | 0.03055 | 0.02683 | 0.03122 | 0.03022 | 0.02947 | 0.02574 | 0.02208 CBL      |
| cg22224704 | 0.0963  | 0.0341  | 0.2835  | 0.29978 | 0.40726 | 0.03444 | 0.61259 | 0.12354 | 0.88859 | 0.27015 GSTP1    |
| cg22226765 | 0.09815 | 0.05272 | 0.05859 | 0.05595 | 0.04101 | 0.04659 | 0.05369 | 0.05157 | 0.05224 | 0.04622 GGA3     |
| cg22226839 | 0.20133 | 0.21011 | 0.23512 | 0.23786 | 0.26557 | 0.23992 | 0.25776 | 0.19809 | 0.27224 | 0.28431 ATP2B4   |
| cg22227058 | 0.05203 | 0.05173 | 0.06562 | 0.0425  | 0.04732 | 0.051   | 0.05233 | 0.05487 | 0.03987 | 0.0403 SLU7      |
| cg22227689 | 0.02756 | 0.03408 | 0.02978 | 0.02931 | 0.0278  | 0.04057 | 0.02645 | 0.02783 | 0.02623 | 0.02703 SCPEP1   |
| cg22227965 | 0.41655 | 0.12941 | 0.13936 | 0.1473  | 0.14953 | 0.1843  | 0.37468 | 0.35665 | 0.51493 | 0.18452 LMO7     |
| cg22228134 | 0.13058 | 0.13722 | 0.12939 | 0.11489 | 0.42267 | 0.35539 | 0.18274 | 0.32952 | 0.10429 | 0.08661 GZMH     |
| cg22228205 | 0.09958 | 0.08945 | 0.12283 | 0.12453 | 0.22168 | 0.10693 | 0.08735 | 0.0781  | 0.0923  | 0.09212 DDHD1    |
| cg22228296 | 0.02868 | 0.02833 | 0.02873 | 0.02821 | 0.02136 | 0.02032 | 0.02313 | 0.02302 | 0.02138 | 0.02183 RNF7     |
| cg22229034 | 0.03082 | 0.03179 | 0.03044 | 0.02678 | 0.02371 | 0.02561 | 0.02675 | 0.02504 | 0.02414 | 0.02471 DUSP1    |
| cg22229142 | 0.90549 | 0.63344 | 0.83873 | 0.87564 | 0.7614  | 0.88941 | 0.89701 | 0.70649 | 0.91631 | 0.84596 KCTD17   |
| cg22230395 | 0.05561 | 0.04078 | 0.0445  | 0.03635 | 0.03715 | 0.03985 | 0.04083 | 0.0409  | 0.04517 | 0.04468 C5orf3   |
| cg22231902 | 0.042   | 0.04723 | 0.05518 | 0.0522  | 0.05097 | 0.05475 | 0.04451 | 0.04694 | 0.05727 | 0.06564 EN1      |
| cg22232206 | 0.18905 | 0.28671 | 0.08878 | 0.08964 | 0.16133 | 0.15387 | 0.26939 | 0.06725 | 0.05174 | 0.04804 SRF      |
| cg22232859 | 0.89759 | 0.72567 | 0.84797 | 0.87736 | 0.84107 | 0.86169 | 0.8761  | 0.88086 | 0.91316 | 0.89594 HIATL1   |
| cg22233974 | 0.76005 | 0.70497 | 0.70496 | 0.71772 | 0.67955 | 0.74244 | 0.55161 | 0.19692 | 0.64649 | 0.74069 MACF1    |
| cg22234344 | 0.0606  | 0.05749 | 0.04905 | 0.04782 | 0.05968 | 0.05676 | 0.04351 | 0.03729 | 0.06333 | 0.04487 HIBCH    |
| cg22234962 | 0.30351 | 0.45114 | 0.73845 | 0.70167 | 0.92024 | 0.3062  | 0.43879 | 0.18597 | 0.90409 | 0.33662 C1orf104 |
| cg22236626 | 0.08988 | 0.04778 | 0.08345 | 0.14678 | 0.25039 | 0.04216 | 0.09166 | 0.05453 | 0.07452 | 0.03585 NENF     |
| cg22238923 | 0.03851 | 0.03877 | 0.03974 | 0.03734 | 0.02791 | 0.02989 | 0.03342 | 0.03534 | 0.02719 | 0.02732 DOK1     |
| cg22241124 | 0.11459 | 0.05738 | 0.10692 | 0.12374 | 0.4338  | 0.38404 | 0.17868 | 0.59248 | 0.07869 | 0.04985 CNGA3    |
| cg22242539 | 0.55846 | 0.06813 | 0.41496 | 0.36316 | 0.71705 | 0.07019 | 0.77458 | 0.39427 | 0.4263  | 0.06674 SERPINF1 |
| cg22243662 | 0.03843 | 0.03466 | 0.1478  | 0.08101 | 0.47459 | 0.19964 | 0.12087 | 0.47775 | 0.03959 | 0.02863 ATP6V1C2 |
| cg22243733 | 0.4843  | 0.67896 | 0.64254 | 0.81023 | 0.8904  | 0.40354 | 0.49505 | 0.71047 | 0.53493 | 0.3232 OLFML1    |

|            |         |         |         |         |         |         |         |         |         |                   |
|------------|---------|---------|---------|---------|---------|---------|---------|---------|---------|-------------------|
| cg22243844 | 0.02391 | 0.02251 | 0.03206 | 0.02551 | 0.02415 | 0.02387 | 0.02248 | 0.02187 | 0.01799 | 0.01801 SEC23B    |
| cg22244118 | 0.0934  | 0.0969  | 0.08525 | 0.09644 | 0.07559 | 0.07747 | 0.059   | 0.04679 | 0.05355 | 0.04522 TTK       |
| cg22244122 | 0.2133  | 0.06291 | 0.75074 | 0.72562 | 0.46275 | 0.25875 | 0.73423 | 0.56567 | 0.61643 | 0.44768 SURF4     |
| cg22244418 | 0.65155 | 0.16247 | 0.29515 | 0.16684 | 0.42695 | 0.33641 | 0.17865 | 0.11336 | 0.86272 | 0.87378 OGFOD1    |
| cg22247240 | 0.87241 | 0.81931 | 0.89435 | 0.91332 | 0.9046  | 0.89079 | 0.30093 | 0.18338 | 0.87922 | 0.80344 C14orf115 |
| cg22248011 | 0.03689 | 0.02812 | 0.02771 | 0.0261  | 0.01981 | 0.02306 | 0.02187 | 0.02097 | 0.02224 | 0.01955 TRAM2     |
| cg22252999 | 0.20036 | 0.1198  | 0.60942 | 0.66361 | 0.7232  | 0.19849 | 0.53677 | 0.3341  | 0.3295  | 0.11706 ART3      |
| cg22253036 | 0.08243 | 0.085   | 0.43158 | 0.53176 | 0.40593 | 0.26848 | 0.65348 | 0.5139  | 0.90113 | 0.89921 DDX6      |
| cg22253945 | 0.32658 | 0.23617 | 0.9065  | 0.92912 | 0.76095 | 0.93157 | 0.87444 | 0.7609  | 0.27454 | 0.07679 GPR45     |
| cg22254104 | 0.06812 | 0.08512 | 0.12107 | 0.09787 | 0.15393 | 0.10617 | 0.07298 | 0.0655  | 0.0651  | 0.06914 LHX6      |
| cg22255355 | 0.02163 | 0.02525 | 0.02591 | 0.02786 | 0.01777 | 0.01995 | 0.02032 | 0.02545 | 0.01836 | 0.01822 HKR2      |
| cg22258437 | 0.02769 | 0.02806 | 0.03179 | 0.02518 | 0.02629 | 0.02796 | 0.02298 | 0.02194 | 0.02333 | 0.02371 ID3       |
| cg22262140 | 0.46576 | 0.03314 | 0.89409 | 0.916   | 0.87814 | 0.55889 | 0.79773 | 0.2563  | 0.35439 | 0.19394 FLJ36046  |
| cg22262168 | 0.05029 | 0.04821 | 0.07185 | 0.07005 | 0.31007 | 0.45484 | 0.05578 | 0.04784 | 0.04899 | 0.04422 MOBKL2B   |
| cg22262549 | 0.05248 | 0.04933 | 0.04258 | 0.04429 | 0.05738 | 0.05061 | 0.03894 | 0.03189 | 0.05153 | 0.05265 POLR3C    |
| cg22262964 | 0.04653 | 0.04621 | 0.07795 | 0.06634 | 0.03967 | 0.05006 | 0.03671 | 0.03483 | 0.0435  | 0.03901           |
| cg22264436 | 0.39518 | 0.09352 | 0.80649 | 0.84862 | 0.89796 | 0.81818 | 0.49738 | 0.57916 | 0.41541 | 0.06918 SOST      |
| cg22264946 | 0.02303 | 0.0238  | 0.02561 | 0.02459 | 0.02085 | 0.02282 | 0.0202  | 0.01953 | 0.01806 | 0.01941 C6orf84   |
| cg22266967 | 0.64604 | 0.29646 | 0.80499 | 0.87077 | 0.82262 | 0.79979 | 0.683   | 0.79587 | 0.6375  | 0.4402 S100P      |
| cg22267176 | 0.03477 | 0.02276 | 0.03736 | 0.03271 | 0.21098 | 0.2728  | 0.0551  | 0.01979 | 0.02924 | 0.01882 TCTE3     |
| cg22268164 | 0.71    | 0.17567 | 0.26761 | 0.21882 | 0.24512 | 0.45246 | 0.57536 | 0.86254 | 0.0794  | 0.08083 TRHR      |
| cg22268231 | 0.5478  | 0.35611 | 0.83318 | 0.88695 | 0.95575 | 0.84456 | 0.25519 | 0.19947 | 0.75725 | 0.7142 SPIB       |
| cg22269180 | 0.76539 | 0.65851 | 0.69611 | 0.69009 | 0.74656 | 0.69577 | 0.64147 | 0.68821 | 0.62521 | 0.67048 ATP10A    |
| cg22269795 | 0.02647 | 0.02693 | 0.11805 | 0.12255 | 0.4896  | 0.23024 | 0.02433 | 0.02011 | 0.02985 | 0.02497 EFHD2     |
| cg22271212 | 0.12371 | 0.13805 | 0.25504 | 0.21562 | 0.6324  | 0.28168 | 0.49678 | 0.13957 | 0.19196 | 0.10355 TLE2      |
| cg22272545 | 0.0324  | 0.03697 | 0.0376  | 0.0349  | 0.02701 | 0.03331 | 0.03373 | 0.03463 | 0.03709 | 0.02916 STK17B    |
| cg22274662 | 0.06031 | 0.04863 | 0.07162 | 0.05255 | 0.05183 | 0.04711 | 0.052   | 0.04271 | 0.08547 | 0.04694 FLJ31413  |
| cg22276571 | 0.06925 | 0.0635  | 0.089   | 0.06639 | 0.1197  | 0.10674 | 0.09781 | 0.08538 | 0.05458 | 0.05572 DSTN      |
| cg22281080 | 0.07741 | 0.06538 | 0.07802 | 0.06016 | 0.0736  | 0.06231 | 0.07984 | 0.07403 | 0.06763 | 0.06316 MGC3265   |
| cg22281207 | 0.05388 | 0.06412 | 0.05749 | 0.05591 | 0.04721 | 0.05023 | 0.04791 | 0.05327 | 0.08014 | 0.04778 MAT2A     |
| cg22282672 | 0.15833 | 0.14714 | 0.17057 | 0.16413 | 0.17251 | 0.10887 | 0.18058 | 0.14303 | 0.16021 | 0.08677 FLJ32921  |
| cg22282941 | 0.21665 | 0.1022  | 0.18079 | 0.15346 | 0.2937  | 0.16643 | 0.15812 | 0.13511 | 0.08083 | 0.08877 HLA-DQA2  |
| cg22283058 | 0.82077 | 0.74026 | 0.84912 | 0.87358 | 0.75942 | 0.75632 | 0.77926 | 0.54026 | 0.88827 | 0.37581 GPR37L1   |
| cg22283148 | 0.06761 | 0.05344 | 0.05308 | 0.0515  | 0.06734 | 0.06503 | 0.04306 | 0.03789 | 0.04578 | 0.05142 LSM6      |
| cg22284302 | 0.37005 | 0.15468 | 0.19136 | 0.18583 | 0.19203 | 0.17782 | 0.22536 | 0.1201  | 0.16349 | 0.13095 C1orf163  |
| cg22284975 | 0.06103 | 0.06345 | 0.50261 | 0.47112 | 0.04613 | 0.05529 | 0.06136 | 0.05794 | 0.05564 | 0.05337 C7orf11   |
| cg22285621 | 0.96498 | 0.93667 | 0.03674 | 0.03112 | 0.26415 | 0.45578 | 0.41883 | 0.6457  | 0.02217 | 0.02126 SSH3      |
| cg22285897 | 0.07338 | 0.07447 | 0.10319 | 0.0894  | 0.12667 | 0.09687 | 0.06251 | 0.06317 | 0.04807 | 0.0573 LONPL      |
| cg22286764 | 0.83449 | 0.77679 | 0.90542 | 0.90338 | 0.90761 | 0.87852 | 0.87779 | 0.87839 | 0.62407 | 0.6192 C3orf35    |
| cg22289115 | 0.93833 | 0.6857  | 0.96885 | 0.96521 | 0.97702 | 0.93526 | 0.96668 | 0.96836 | 0.96774 | 0.9674 MUCDHL     |
| cg22289360 | 0.06834 | 0.04345 | 0.04534 | 0.04518 | 0.06918 | 0.04021 | 0.03883 | 0.03647 | 0.06138 | 0.02483 GCNT1     |

|            |         |         |         |         |         |         |         |         |         |                  |
|------------|---------|---------|---------|---------|---------|---------|---------|---------|---------|------------------|
| cg22289810 | 0.07427 | 0.0776  | 0.53196 | 0.72707 | 0.40716 | 0.06789 | 0.17085 | 0.07797 | 0.35469 | 0.07128 NF1      |
| cg22289837 | 0.15977 | 0.25889 | 0.45853 | 0.64678 | 0.39707 | 0.31839 | 0.65134 | 0.83312 | 0.30373 | 0.2884 CA3       |
| cg22290566 | 0.85875 | 0.58932 | 0.91898 | 0.921   | 0.94872 | 0.86981 | 0.87835 | 0.85531 | 0.85713 | 0.44699 LMAN1L   |
| cg22294577 | 0.33845 | 0.24445 | 0.60074 | 0.71504 | 0.82624 | 0.5524  | 0.188   | 0.25835 | 0.32153 | 0.27526 SLC26A3  |
| cg22294908 | 0.86499 | 0.86678 | 0.88328 | 0.87398 | 0.91409 | 0.87742 | 0.88215 | 0.84102 | 0.89198 | 0.87655 ZHX3     |
| cg22295573 | 0.78179 | 0.6289  | 0.63538 | 0.78317 | 0.74264 | 0.785   | 0.33604 | 0.52326 | 0.55256 | 0.17342 AQP4     |
| cg22296149 | 0.61704 | 0.12749 | 0.86646 | 0.90097 | 0.86909 | 0.29775 | 0.72382 | 0.31909 | 0.31357 | 0.20933 AMH      |
| cg22297305 | 0.03382 | 0.02766 | 0.03818 | 0.04488 | 0.07475 | 0.02808 | 0.03218 | 0.02699 | 0.03275 | 0.02815 PRODH    |
| cg22298088 | 0.87088 | 0.87955 | 0.86791 | 0.8882  | 0.82223 | 0.86831 | 0.73836 | 0.80146 | 0.89685 | 0.88576 NNAT     |
| cg22298208 | 0.54733 | 0.63236 | 0.8816  | 0.90533 | 0.91419 | 0.90342 | 0.07675 | 0.08615 | 0.72316 | 0.71656 C7orf34  |
| cg22303211 | 0.17137 | 0.07446 | 0.56275 | 0.53446 | 0.35059 | 0.4801  | 0.33418 | 0.29191 | 0.20091 | 0.10197 SOX1     |
| cg22305782 | 0.94832 | 0.93219 | 0.94952 | 0.95703 | 0.96409 | 0.94097 | 0.95438 | 0.95178 | 0.96473 | 0.95859 FBXL19   |
| cg22307649 | 0.04992 | 0.04854 | 0.0481  | 0.05488 | 0.03485 | 0.04513 | 0.04221 | 0.04849 | 0.04652 | 0.04624 TRAPPC4  |
| cg22307908 | 0.0448  | 0.04352 | 0.0395  | 0.04261 | 0.03151 | 0.03801 | 0.03003 | 0.02963 | 0.03003 | 0.02817 ZNF264   |
| cg22308759 | 0.02032 | 0.0225  | 0.02268 | 0.02257 | 0.01544 | 0.02312 | 0.02236 | 0.01959 | 0.02104 | 0.01875 ZNF161   |
| cg22309489 | 0.89589 | 0.62255 | 0.88316 | 0.9159  | 0.84021 | 0.88073 | 0.73866 | 0.24235 | 0.92174 | 0.89264 OKL38    |
| cg22309826 | 0.03323 | 0.03461 | 0.03027 | 0.02863 | 0.02293 | 0.03066 | 0.02742 | 0.02647 | 0.02319 | 0.02265 COPS3    |
| cg22311533 | 0.78283 | 0.77069 | 0.81912 | 0.80031 | 0.81464 | 0.78485 | 0.76324 | 0.78123 | 0.83497 | 0.83468 GDF9     |
| cg22313024 | 0.19227 | 0.24436 | 0.41924 | 0.35736 | 0.0964  | 0.11432 | 0.11502 | 0.08463 | 0.08302 | 0.07277 UQCRB    |
| cg22313025 | 0.08083 | 0.06103 | 0.06572 | 0.06182 | 0.06564 | 0.04868 | 0.05182 | 0.0542  | 0.05969 | 0.04919 HACE1    |
| cg22315542 | 0.06757 | 0.05453 | 0.11979 | 0.11593 | 0.17088 | 0.20417 | 0.05714 | 0.04575 | 0.08274 | 0.04576 MLR1     |
| cg22318304 | 0.07097 | 0.08566 | 0.07007 | 0.06034 | 0.10916 | 0.10472 | 0.12854 | 0.08581 | 0.05416 | 0.04846 SPA17    |
| cg22318989 | 0.06459 | 0.0461  | 0.04921 | 0.0572  | 0.09859 | 0.05526 | 0.05285 | 0.04042 | 0.08775 | 0.07111 NPR1     |
| cg22319147 | 0.9702  | 0.92084 | 0.96497 | 0.96524 | 0.69795 | 0.42983 | 0.96434 | 0.74732 | 0.94441 | 0.5519 CDH5      |
| cg22319470 | 0.03764 | 0.02849 | 0.152   | 0.06585 | 0.02064 | 0.02272 | 0.02606 | 0.02121 | 0.02254 | 0.01849 HDAC11   |
| cg22320000 | 0.03336 | 0.03589 | 0.03577 | 0.03822 | 0.02989 | 0.0446  | 0.03518 | 0.03507 | 0.02936 | 0.02884 HNRPU    |
| cg22321558 | 0.05236 | 0.02581 | 0.06777 | 0.0364  | 0.06081 | 0.02542 | 0.02256 | 0.02056 | 0.02253 | 0.01956 FLJ90024 |
| cg22322184 | 0.84317 | 0.84605 | 0.79716 | 0.86296 | 0.60695 | 0.68914 | 0.50801 | 0.49623 | 0.85668 | 0.639 RETN       |
| cg22324153 | 0.79601 | 0.80389 | 0.72274 | 0.75575 | 0.67089 | 0.70519 | 0.71542 | 0.73307 | 0.8096  | 0.41654 SLC35D2  |
| cg22325572 | 0.45241 | 0.29169 | 0.42058 | 0.50009 | 0.43426 | 0.50855 | 0.09245 | 0.08096 | 0.08374 | 0.07779 CD53     |
| cg22325646 | 0.05904 | 0.05209 | 0.3892  | 0.33763 | 0.88143 | 0.88684 | 0.1344  | 0.06036 | 0.89403 | 0.78048 RND2     |
| cg22325703 | 0.03618 | 0.03497 | 0.28799 | 0.38203 | 0.09673 | 0.10199 | 0.03688 | 0.03537 | 0.04646 | 0.02831 GPR83    |
| cg22325715 | 0.94236 | 0.94511 | 0.94813 | 0.94021 | 0.9713  | 0.94342 | 0.93765 | 0.93852 | 0.9378  | 0.93249 CNTD     |
| cg22325823 | 0.07576 | 0.04868 | 0.15893 | 0.15169 | 0.11921 | 0.07134 | 0.04671 | 0.04837 | 0.06366 | 0.0733 RAB37     |
| cg22328890 | 0.03384 | 0.03097 | 0.02848 | 0.03296 | 0.03211 | 0.02858 | 0.03244 | 0.03331 | 0.02828 | 0.02877 SLC7A6   |
| cg22332306 | 0.55137 | 0.38455 | 0.75173 | 0.76349 | 0.62411 | 0.65574 | 0.64247 | 0.56    | 0.81695 | 0.54711 C3orf63  |
| cg22333016 | 0.0441  | 0.04759 | 0.04961 | 0.03476 | 0.0261  | 0.04715 | 0.03108 | 0.03994 | 0.03998 | 0.03243 FIP1L1   |
| cg22333868 | 0.79996 | 0.7979  | 0.77137 | 0.81848 | 0.68527 | 0.83691 | 0.76119 | 0.76664 | 0.14108 | 0.14752 SYT1     |
| cg22333888 | 0.71814 | 0.30424 | 0.544   | 0.454   | 0.85725 | 0.27222 | 0.51009 | 0.17792 | 0.67434 | 0.65396 ADAM33   |
| cg22334000 | 0.07462 | 0.07348 | 0.075   | 0.06709 | 0.05858 | 0.07482 | 0.06619 | 0.05421 | 0.05736 | 0.04812 MGC35043 |
| cg22334665 | 0.12711 | 0.03942 | 0.79932 | 0.84177 | 0.59766 | 0.68903 | 0.66568 | 0.48226 | 0.3186  | 0.45616 SLC22A16 |



|            |         |         |         |         |         |         |         |         |         |         |           |
|------------|---------|---------|---------|---------|---------|---------|---------|---------|---------|---------|-----------|
| cg22335340 | 0.87493 | 0.78596 | 0.87614 | 0.88947 | 0.91493 | 0.85828 | 0.87465 | 0.82505 | 0.88397 | 0.82343 | PTPN6     |
| cg22335801 | 0.72478 | 0.4296  | 0.89899 | 0.95386 | 0.96861 | 0.43538 | 0.14683 | 0.03021 | 0.92083 | 0.8335  | TNFRSF4   |
| cg22336401 | 0.02782 | 0.03341 | 0.1428  | 0.24893 | 0.06113 | 0.03049 | 0.03898 | 0.03596 | 0.02501 | 0.02039 | ENTPD8    |
| cg22336633 | 0.47589 | 0.45366 | 0.04491 | 0.04375 | 0.06445 | 0.05032 | 0.04064 | 0.04918 | 0.04343 | 0.04063 | RPS13     |
| cg22337624 | 0.41769 | 0.30228 | 0.63704 | 0.68263 | 0.58032 | 0.41922 | 0.14965 | 0.12066 | 0.3114  | 0.14449 | DHX38     |
| cg22338307 | 0.24971 | 0.06727 | 0.63745 | 0.60142 | 0.07587 | 0.3127  | 0.44393 | 0.35713 | 0.06767 | 0.0648  | TPRKB     |
| cg22339278 | 0.05271 | 0.04466 | 0.44071 | 0.51025 | 0.62729 | 0.5423  | 0.05938 | 0.05317 | 0.31938 | 0.04192 | KIRREL2   |
| cg22339744 | 0.05808 | 0.059   | 0.06211 | 0.06319 | 0.04099 | 0.04943 | 0.05617 | 0.05145 | 0.05906 | 0.04617 | BTBD14B   |
| cg22340747 | 0.75211 | 0.27222 | 0.65206 | 0.72897 | 0.64055 | 0.78435 | 0.51328 | 0.47064 | 0.41062 | 0.23135 | GATM      |
| cg22341104 | 0.62435 | 0.442   | 0.20489 | 0.18841 | 0.52785 | 0.76175 | 0.04712 | 0.04029 | 0.05613 | 0.05367 | GFI1      |
| cg22341310 | 0.85347 | 0.56833 | 0.91894 | 0.92055 | 0.94081 | 0.83437 | 0.84185 | 0.52318 | 0.92133 | 0.85338 | ZNF541    |
| cg22343001 | 0.89741 | 0.83881 | 0.45311 | 0.647   | 0.52083 | 0.39151 | 0.09544 | 0.18832 | 0.41414 | 0.41563 | ARMCX2    |
| cg22344641 | 0.06286 | 0.06022 | 0.0799  | 0.07185 | 0.06351 | 0.07637 | 0.07318 | 0.05297 | 0.07517 | 0.07145 | TRUB2     |
| cg22346765 | 0.47634 | 0.64617 | 0.6607  | 0.70462 | 0.76705 | 0.78381 | 0.2064  | 0.10616 | 0.55644 | 0.44818 | UNC5CL    |
| cg22349489 | 0.05493 | 0.04835 | 0.05729 | 0.04348 | 0.10383 | 0.08023 | 0.04256 | 0.03407 | 0.03495 | 0.041   | HIST1H2AH |
| cg22354595 | 0.54686 | 0.61183 | 0.94829 | 0.95072 | 0.78047 | 0.63781 | 0.69536 | 0.79965 | 0.68819 | 0.61481 | ZIM2      |
| cg22356117 | 0.81775 | 0.70919 | 0.84476 | 0.8827  | 0.63955 | 0.82685 | 0.06603 | 0.3472  | 0.85712 | 0.83831 | LAMP3     |
| cg22359217 | 0.21317 | 0.03514 | 0.03005 | 0.02929 | 0.03669 | 0.04156 | 0.02707 | 0.02953 | 0.03116 | 0.03021 | FBXO4     |
| cg22359606 | 0.08077 | 0.06087 | 0.92425 | 0.93944 | 0.17346 | 0.13534 | 0.15784 | 0.08844 | 0.11655 | 0.10082 | NEUROD1   |
| cg22362636 | 0.35485 | 0.0569  | 0.53804 | 0.50092 | 0.14222 | 0.04742 | 0.16767 | 0.1028  | 0.26305 | 0.18833 | TNIP2     |
| cg22366626 | 0.03845 | 0.03821 | 0.04552 | 0.03886 | 0.03244 | 0.0328  | 0.03063 | 0.03074 | 0.02909 | 0.03039 | ZFYVE20   |
| cg22367264 | 0.75452 | 0.24949 | 0.76639 | 0.80629 | 0.71529 | 0.7968  | 0.7416  | 0.61792 | 0.35192 | 0.15834 | FLJ90579  |
| cg22367970 | 0.14259 | 0.14816 | 0.28316 | 0.23577 | 0.25794 | 0.16934 | 0.12455 | 0.10886 | 0.1549  | 0.17356 | GON4      |
| cg22367989 | 0.30388 | 0.0845  | 0.28223 | 0.53587 | 0.7758  | 0.74958 | 0.05044 | 0.07541 | 0.4727  | 0.54999 | NRP2      |
| cg22368262 | 0.43103 | 0.04955 | 0.13194 | 0.14746 | 0.08269 | 0.04909 | 0.08743 | 0.26908 | 0.08819 | 0.03936 | C10orf35  |
| cg22368307 | 0.05382 | 0.0641  | 0.05952 | 0.06367 | 0.07623 | 0.08484 | 0.07349 | 0.05275 | 0.04867 | 0.04319 | RPS3      |
| cg22369818 | 0.03483 | 0.03287 | 0.03652 | 0.03629 | 0.03136 | 0.03411 | 0.037   | 0.03385 | 0.0374  | 0.0322  | GABPB2    |
| cg22370370 | 0.02744 | 0.03115 | 0.03167 | 0.0354  | 0.02899 | 0.03453 | 0.03324 | 0.03669 | 0.02637 | 0.02377 | ZNF652    |
| cg22373097 | 0.17415 | 0.74526 | 0.55523 | 0.64277 | 0.39909 | 0.58842 | 0.19936 | 0.15826 | 0.18131 | 0.17942 | KRTAP21-1 |
| cg22373112 | 0.6789  | 0.39924 | 0.87373 | 0.893   | 0.90386 | 0.88342 | 0.91341 | 0.59822 | 0.06895 | 0.02922 | RAB5C     |
| cg22374142 | 0.53721 | 0.20989 | 0.83309 | 0.90555 | 0.97845 | 0.97609 | 0.95826 | 0.97346 | 0.75871 | 0.46996 | HSF4      |
| cg22374901 | 0.04923 | 0.04815 | 0.55852 | 0.55799 | 0.07519 | 0.2754  | 0.06881 | 0.04778 | 0.05094 | 0.04613 | TESC      |
| cg22375192 | 0.02376 | 0.02558 | 0.02768 | 0.0256  | 0.02513 | 0.02784 | 0.02012 | 0.02058 | 0.02051 | 0.01994 | IGF1R     |
| cg22375610 | 0.3273  | 0.09744 | 0.30425 | 0.44757 | 0.13818 | 0.35271 | 0.07717 | 0.12045 | 0.09849 | 0.03518 | APOBEC2   |
| cg22376897 | 0.64195 | 0.29231 | 0.17296 | 0.17166 | 0.62637 | 0.62178 | 0.15649 | 0.18573 | 0.24466 | 0.25142 | ARSE      |
| cg22377142 | 0.05619 | 0.05886 | 0.41315 | 0.60892 | 0.81817 | 0.84044 | 0.1693  | 0.06709 | 0.06393 | 0.05403 | C10orf85  |
| cg22377237 | 0.04634 | 0.04607 | 0.04428 | 0.04147 | 0.03114 | 0.03767 | 0.03955 | 0.04407 | 0.03917 | 0.03561 | GNB2      |
| cg22377389 | 0.59336 | 0.15391 | 0.94131 | 0.96705 | 0.96873 | 0.95244 | 0.90853 | 0.54046 | 0.95517 | 0.88285 | GJB6      |
| cg22377428 | 0.85707 | 0.78793 | 0.83869 | 0.87976 | 0.89435 | 0.84341 | 0.16698 | 0.33867 | 0.50282 | 0.49964 | GPR142    |
| cg22377963 | 0.73832 | 0.14127 | 0.87559 | 0.88793 | 0.39933 | 0.16215 | 0.35897 | 0.09146 | 0.26169 | 0.04433 | BCL7C     |
| cg22377998 | 0.05276 | 0.03068 | 0.45457 | 0.37905 | 0.37356 | 0.22223 | 0.40223 | 0.07081 | 0.08209 | 0.22215 | ARVCF     |

|            |         |         |         |         |         |         |         |         |         |         |          |
|------------|---------|---------|---------|---------|---------|---------|---------|---------|---------|---------|----------|
| cg22378065 | 0.64006 | 0.6445  | 0.98204 | 0.9857  | 0.71982 | 0.71025 | 0.69596 | 0.6894  | 0.03406 | 0.04114 | PLAGL1   |
| cg22379207 | 0.06408 | 0.06734 | 0.18936 | 0.13537 | 0.16101 | 0.22263 | 0.05267 | 0.05368 | 0.03936 | 0.04248 | MGC62100 |
| cg22380033 | 0.03913 | 0.03783 | 0.04065 | 0.03466 | 0.04064 | 0.03945 | 0.04723 | 0.04041 | 0.04699 | 0.04061 | GRB14    |
| cg22381196 | 0.91346 | 0.90725 | 0.88574 | 0.91636 | 0.84656 | 0.84444 | 0.88913 | 0.53928 | 0.92202 | 0.91109 | DHODH    |
| cg22381955 | 0.97062 | 0.86924 | 0.97653 | 0.97617 | 0.97282 | 0.93812 | 0.97638 | 0.97296 | 0.98121 | 0.95105 | CHFR     |
| cg22384366 | 0.06924 | 0.07614 | 0.07684 | 0.07322 | 0.06343 | 0.06458 | 0.0604  | 0.05236 | 0.07185 | 0.06433 | PIK3CA   |
| cg22385477 | 0.11688 | 0.10392 | 0.09745 | 0.07914 | 0.07305 | 0.10563 | 0.08927 | 0.07212 | 0.0786  | 0.08908 | KM-HN-1  |
| cg22385764 | 0.04003 | 0.04795 | 0.06611 | 0.06122 | 0.06906 | 0.0583  | 0.05635 | 0.05184 | 0.04595 | 0.05456 | ASB8     |
| cg22386311 | 0.20713 | 0.19855 | 0.45838 | 0.66862 | 0.36156 | 0.31574 | 0.26655 | 0.24009 | 0.22272 | 0.24189 | DSG1     |
| cg22386774 | 0.77176 | 0.75305 | 0.59379 | 0.70695 | 0.76459 | 0.82103 | 0.19981 | 0.76381 | 0.62531 | 0.12571 | CRYGA    |
| cg22387994 | 0.04839 | 0.04638 | 0.0522  | 0.04805 | 0.04945 | 0.05237 | 0.04869 | 0.04534 | 0.03854 | 0.04299 | NAPA     |
| cg22388943 | 0.03586 | 0.0419  | 0.0353  | 0.03441 | 0.05988 | 0.03641 | 0.04274 | 0.03389 | 0.0335  | 0.034   | EIF5     |
| cg22391400 | 0.04607 | 0.03086 | 0.04077 | 0.04033 | 0.03537 | 0.03314 | 0.03135 | 0.03121 | 0.03746 | 0.02894 | SLK      |
| cg22392276 | 0.09279 | 0.10398 | 0.06875 | 0.08935 | 0.18589 | 0.16875 | 0.05953 | 0.08409 | 0.08184 | 0.06482 | KCB      |
| cg22392666 | 0.03465 | 0.0349  | 0.96808 | 0.97025 | 0.9763  | 0.96749 | 0.63565 | 0.4746  | 0.97345 | 0.97531 | FXYD7    |
| cg22392708 | 0.66825 | 0.28601 | 0.73573 | 0.81207 | 0.63078 | 0.41555 | 0.08241 | 0.04064 | 0.45444 | 0.04729 | KRT23    |
| cg22395019 | 0.09416 | 0.05331 | 0.09911 | 0.09255 | 0.10951 | 0.04954 | 0.05718 | 0.04398 | 0.05555 | 0.04415 | GALNT14  |
| cg22395192 | 0.91642 | 0.29787 | 0.02989 | 0.02512 | 0.02157 | 0.02894 | 0.43893 | 0.41685 | 0.02354 | 0.02033 | FAM46B   |
| cg22396129 | 0.59568 | 0.0722  | 0.61752 | 0.65498 | 0.17644 | 0.08008 | 0.361   | 0.09288 | 0.89738 | 0.23441 | ZCRB1    |
| cg22396353 | 0.01902 | 0.01822 | 0.02054 | 0.02083 | 0.02156 | 0.02403 | 0.01871 | 0.0217  | 0.01963 | 0.02459 | GTSE1    |
| cg22396691 | 0.11063 | 0.07677 | 0.06877 | 0.07541 | 0.08322 | 0.07352 | 0.05693 | 0.05473 | 0.06178 | 0.05412 | MRPS25   |
| cg22396755 | 0.50621 | 0.03694 | 0.85399 | 0.90916 | 0.97803 | 0.96053 | 0.77437 | 0.30483 | 0.98052 | 0.96161 | RAP1GA1  |
| cg22397447 | 0.03289 | 0.04196 | 0.0384  | 0.0408  | 0.02889 | 0.03284 | 0.04196 | 0.0454  | 0.02951 | 0.02812 | ALDH1B1  |
| cg22397854 | 0.47106 | 0.41844 | 0.3904  | 0.49951 | 0.23389 | 0.10045 | 0.11279 | 0.04926 | 0.04579 | 0.03779 | C1orf102 |
| cg22398616 | 0.46522 | 0.5639  | 0.84816 | 0.88716 | 0.37493 | 0.49299 | 0.80678 | 0.41754 | 0.85146 | 0.74403 | LECT1    |
| cg22401066 | 0.05773 | 0.04647 | 0.0495  | 0.05676 | 0.03036 | 0.04818 | 0.04403 | 0.03502 | 0.04396 | 0.03888 | SMPDL3A  |
| cg22402007 | 0.06342 | 0.04657 | 0.30071 | 0.6519  | 0.26934 | 0.2542  | 0.25053 | 0.04897 | 0.8881  | 0.90246 | NTRK2    |
| cg22403851 | 0.02637 | 0.02985 | 0.04097 | 0.03723 | 0.0254  | 0.02615 | 0.02175 | 0.02498 | 0.0241  | 0.02255 | PDIA6    |
| cg22404646 | 0.01747 | 0.01866 | 0.02265 | 0.02274 | 0.01347 | 0.01791 | 0.0175  | 0.02025 | 0.01719 | 0.01786 | CD151    |
| cg22405555 | 0.02778 | 0.02708 | 0.0305  | 0.02507 | 0.02685 | 0.0227  | 0.02577 | 0.02368 | 0.02603 | 0.02422 | ALG12    |
| cg22406518 | 0.07054 | 0.0621  | 0.06154 | 0.05705 | 0.04799 | 0.06607 | 0.06413 | 0.06644 | 0.05157 | 0.05156 | AMOTL2   |
| cg22407458 | 0.95859 | 0.92263 | 0.9659  | 0.96947 | 0.97916 | 0.96659 | 0.96705 | 0.96861 | 0.97134 | 0.96801 | TCP11    |
| cg22407504 | 0.79644 | 0.27987 | 0.89137 | 0.91987 | 0.91307 | 0.84801 | 0.1884  | 0.0708  | 0.75067 | 0.54705 | MUC5B    |
| cg22407574 | 0.02984 | 0.0308  | 0.03312 | 0.03452 | 0.02529 | 0.02781 | 0.02993 | 0.02222 | 0.02384 | 0.02602 | DONSON   |
| cg22409223 | 0.12896 | 0.13775 | 0.13963 | 0.13658 | 0.09657 | 0.11787 | 0.11441 | 0.11423 | 0.12285 | 0.11915 | PIK3R4   |
| cg22409383 | 0.04268 | 0.0343  | 0.03873 | 0.03674 | 0.0396  | 0.02942 | 0.03428 | 0.03169 | 0.02813 | 0.02771 | MATR3    |
| cg22411068 | 0.02094 | 0.02018 | 0.01951 | 0.01817 | 0.0155  | 0.02064 | 0.01993 | 0.02433 | 0.01452 | 0.0164  | ROPN1L   |
| cg22411207 | 0.11256 | 0.07045 | 0.84012 | 0.88332 | 0.51692 | 0.60858 | 0.06089 | 0.05319 | 0.07563 | 0.04898 | MOS      |
| cg22412741 | 0.86045 | 0.84571 | 0.87313 | 0.8865  | 0.81895 | 0.87321 | 0.89076 | 0.89302 | 0.90641 | 0.92247 | GLTSCR1  |
| cg22415432 | 0.0596  | 0.05685 | 0.17883 | 0.26402 | 0.17333 | 0.05009 | 0.06048 | 0.06276 | 0.29896 | 0.4838  | PCDH11Y  |
| cg22415472 | 0.8078  | 0.4949  | 0.28952 | 0.46209 | 0.86192 | 0.84588 | 0.15676 | 0.86915 | 0.06995 | 0.06253 | SLC5A7   |

|            |         |         |         |         |         |         |         |         |         |                  |
|------------|---------|---------|---------|---------|---------|---------|---------|---------|---------|------------------|
| cg22416721 | 0.83737 | 0.7198  | 0.85373 | 0.88586 | 0.77475 | 0.82503 | 0.86768 | 0.68485 | 0.87037 | 0.43012 DMP1     |
| cg22417398 | 0.13398 | 0.09614 | 0.16913 | 0.14041 | 0.06789 | 0.05322 | 0.07675 | 0.06745 | 0.45499 | 0.19241 SCYL1    |
| cg22417789 | 0.0429  | 0.04422 | 0.04323 | 0.04138 | 0.02495 | 0.03698 | 0.05046 | 0.03858 | 0.03879 | 0.03813 SPRY2    |
| cg22418360 | 0.10772 | 0.0823  | 0.09572 | 0.07547 | 0.10494 | 0.06649 | 0.07225 | 0.07853 | 0.08266 | 0.08148 UBE2F    |
| cg22418909 | 0.03384 | 0.03614 | 0.03612 | 0.03292 | 0.04051 | 0.03309 | 0.16747 | 0.03876 | 0.02676 | 0.02952 SFRP1    |
| cg22419075 | 0.0308  | 0.03769 | 0.03322 | 0.02852 | 0.45312 | 0.03424 | 0.04232 | 0.03795 | 0.02819 | 0.02319 DPP7     |
| cg22419732 | 0.68561 | 0.56351 | 0.64211 | 0.70481 | 0.64943 | 0.76335 | 0.72775 | 0.75773 | 0.60129 | 0.49393 C6orf188 |
| cg22421699 | 0.2864  | 0.18428 | 0.22334 | 0.19641 | 0.43334 | 0.1653  | 0.2499  | 0.18451 | 0.18947 | 0.1609 SMPDL3B   |
| cg22421766 | 0.5222  | 0.13689 | 0.27699 | 0.45372 | 0.18847 | 0.3047  | 0.11063 | 0.14044 | 0.03237 | 0.02568 SCNN1D   |
| cg22424108 | 0.86808 | 0.69309 | 0.58779 | 0.52245 | 0.63209 | 0.50133 | 0.09438 | 0.28373 | 0.30757 | 0.04372 SLC44A3  |
| cg22424444 | 0.15539 | 0.07308 | 0.10726 | 0.09502 | 0.90011 | 0.82539 | 0.90419 | 0.91634 | 0.44845 | 0.23434 TOLLIP   |
| cg22424746 | 0.24721 | 0.26333 | 0.12532 | 0.20682 | 0.82023 | 0.80232 | 0.04812 | 0.29899 | 0.42196 | 0.23144 VTCN1    |
| cg22425806 | 0.05405 | 0.05104 | 0.08714 | 0.06805 | 0.03999 | 0.05012 | 0.07798 | 0.05128 | 0.0603  | 0.03939 TGFA     |
| cg22427279 | 0.27468 | 0.15011 | 0.51525 | 0.49765 | 0.31076 | 0.31664 | 0.49917 | 0.4118  | 0.21585 | 0.25756 NHLH2    |
| cg22428102 | 0.02219 | 0.02942 | 0.02437 | 0.01884 | 0.016   | 0.01722 | 0.01532 | 0.01489 | 0.01522 | 0.01716 FLJ30277 |
| cg22429822 | 0.02643 | 0.02461 | 0.02044 | 0.02076 | 0.02311 | 0.01779 | 0.02051 | 0.01949 | 0.01974 | 0.01802 RAB3B    |
| cg22430790 | 0.63029 | 0.16363 | 0.09323 | 0.09532 | 0.06255 | 0.08468 | 0.08983 | 0.10727 | 0.08424 | 0.07959 FRMD6    |
| cg22432269 | 0.02829 | 0.02375 | 0.02365 | 0.02267 | 0.02183 | 0.02484 | 0.02197 | 0.02302 | 0.02126 | 0.02415 CYFIP1   |
| cg22432367 | 0.03824 | 0.05042 | 0.06407 | 0.04869 | 0.03338 | 0.04248 | 0.05001 | 0.04255 | 0.04789 | 0.05019 ARID1B   |
| cg22432908 | 0.77673 | 0.67343 | 0.39679 | 0.34259 | 0.64199 | 0.6568  | 0.5591  | 0.55083 | 0.7486  | 0.73482 KLRC2    |
| cg22436229 | 0.11033 | 0.07755 | 0.07111 | 0.07319 | 0.31867 | 0.24179 | 0.07118 | 0.05563 | 0.07226 | 0.04711 PDIK1L   |
| cg22436411 | 0.07437 | 0.0596  | 0.89401 | 0.91893 | 0.89603 | 0.91091 | 0.20798 | 0.07605 | 0.90978 | 0.73103 FCGR2B   |
| cg22437284 | 0.84313 | 0.62865 | 0.86189 | 0.87821 | 0.79462 | 0.85378 | 0.71535 | 0.75227 | 0.90813 | 0.83498 SRC      |
| cg22437699 | 0.90853 | 0.72807 | 0.90054 | 0.88987 | 0.90861 | 0.76867 | 0.43192 | 0.57346 | 0.90519 | 0.89199 ARX      |
| cg22438324 | 0.02472 | 0.02425 | 0.02522 | 0.02592 | 0.02156 | 0.02711 | 0.02214 | 0.024   | 0.0203  | 0.02253 APEX1    |
| cg22438810 | 0.65026 | 0.5504  | 0.76556 | 0.83353 | 0.80927 | 0.76673 | 0.45255 | 0.4971  | 0.32263 | 0.11241 LCN2     |
| cg22441882 | 0.11933 | 0.05853 | 0.28613 | 0.32245 | 0.0567  | 0.10905 | 0.11153 | 0.1087  | 0.07288 | 0.05878 SLC18A1  |
| cg22442090 | 0.73653 | 0.09359 | 0.20165 | 0.26598 | 0.40784 | 0.54788 | 0.08919 | 0.07869 | 0.14062 | 0.07124 GIMAP5   |
| cg22442730 | 0.39508 | 0.0676  | 0.38924 | 0.50802 | 0.33714 | 0.06848 | 0.10291 | 0.06978 | 0.36462 | 0.07152 SRMS     |
| cg22443330 | 0.21333 | 0.10353 | 0.90614 | 0.92157 | 0.89234 | 0.90839 | 0.1223  | 0.10988 | 0.83833 | 0.85857 KIAA1018 |
| cg22444610 | 0.16976 | 0.12232 | 0.22354 | 0.29257 | 0.08192 | 0.06256 | 0.07322 | 0.05355 | 0.19145 | 0.06705 KCTD18   |
| cg22445920 | 0.154   | 0.06732 | 0.40902 | 0.41808 | 0.70476 | 0.86133 | 0.36841 | 0.07141 | 0.36218 | 0.27665 SLC36A3  |
| cg22448677 | 0.04725 | 0.02523 | 0.02965 | 0.03046 | 0.04346 | 0.02966 | 0.02234 | 0.01997 | 0.02821 | 0.01684 RNF6     |
| cg22449114 | 0.12842 | 0.03157 | 0.29053 | 0.38564 | 0.94626 | 0.8935  | 0.26431 | 0.57249 | 0.67879 | 0.48996 TCF15    |
| cg22449795 | 0.0298  | 0.02954 | 0.02935 | 0.03198 | 0.01763 | 0.02619 | 0.02503 | 0.02579 | 0.02431 | 0.02095 USP30    |
| cg22451189 | 0.03929 | 0.03104 | 0.04338 | 0.03743 | 0.02943 | 0.03353 | 0.02929 | 0.02663 | 0.0343  | 0.03125 MRPS22   |
| cg22456522 | 0.64648 | 0.20028 | 0.74969 | 0.83999 | 0.48087 | 0.61824 | 0.17571 | 0.23447 | 0.33564 | 0.20714 LILRB3   |
| cg22458065 | 0.73561 | 0.56381 | 0.84117 | 0.85222 | 0.9136  | 0.87527 | 0.82886 | 0.84554 | 0.85989 | 0.84778 PSORS1C2 |
| cg22458082 | 0.55672 | 0.58618 | 0.59475 | 0.62563 | 0.68468 | 0.70818 | 0.84306 | 0.80571 | 0.36202 | 0.50623 OTUD7    |
| cg22459146 | 0.21372 | 0.09228 | 0.87617 | 0.87248 | 0.76962 | 0.87534 | 0.16865 | 0.13691 | 0.43156 | 0.51411 GHSR     |
| cg22459359 | 0.01515 | 0.01452 | 0.01802 | 0.01387 | 0.01391 | 0.01499 | 0.44219 | 0.06771 | 0.0128  | 0.01263 ZMYM6    |

|            |         |         |         |         |         |         |         |         |         |         |          |
|------------|---------|---------|---------|---------|---------|---------|---------|---------|---------|---------|----------|
| cg22459930 | 0.04993 | 0.0506  | 0.04865 | 0.04587 | 0.04063 | 0.04563 | 0.04352 | 0.04415 | 0.03882 | 0.04121 | TXNL5    |
| cg22461018 | 0.73588 | 0.79699 | 0.38278 | 0.53432 | 0.40525 | 0.63878 | 0.17556 | 0.17317 | 0.18103 | 0.21688 | MORF4    |
| cg22461615 | 0.02629 | 0.02837 | 0.02777 | 0.02585 | 0.02602 | 0.02576 | 0.02137 | 0.02148 | 0.02158 | 0.01879 | THAP9    |
| cg22461835 | 0.06112 | 0.03581 | 0.8469  | 0.86329 | 0.32885 | 0.34421 | 0.50695 | 0.45932 | 0.2217  | 0.05585 | ADRA1A   |
| cg22462235 | 0.60545 | 0.30611 | 0.58296 | 0.72038 | 0.7078  | 0.23302 | 0.59843 | 0.07769 | 0.44553 | 0.49322 | LEFTY2   |
| cg22463915 | 0.89491 | 0.88347 | 0.90489 | 0.90151 | 0.9033  | 0.82898 | 0.52387 | 0.50614 | 0.9116  | 0.917   | EEF1A2   |
| cg22464182 | 0.04051 | 0.04009 | 0.04054 | 0.03801 | 0.03232 | 0.03448 | 0.03438 | 0.03644 | 0.03388 | 0.03376 | ACVR2A   |
| cg22464186 | 0.06229 | 0.06988 | 0.0861  | 0.08363 | 0.02676 | 0.03011 | 0.06596 | 0.04909 | 0.069   | 0.04958 | TNFRSF21 |
| cg22464423 | 0.11176 | 0.11212 | 0.127   | 0.21572 | 0.39372 | 0.17919 | 0.12704 | 0.1054  | 0.07912 | 0.07745 | IGSF4C   |
| cg22467071 | 0.88427 | 0.73165 | 0.80038 | 0.86629 | 0.88324 | 0.477   | 0.35593 | 0.50252 | 0.79905 | 0.47954 | PECAM1   |
| cg22467216 | 0.02752 | 0.03421 | 0.03442 | 0.03062 | 0.02762 | 0.03196 | 0.02484 | 0.04113 | 0.02437 | 0.02551 | TUBB6    |
| cg22467534 | 0.48116 | 0.1693  | 0.48827 | 0.667   | 0.33872 | 0.28179 | 0.19268 | 0.06859 | 0.46056 | 0.12506 | UNC13D   |
| cg22467567 | 0.05875 | 0.05307 | 0.69745 | 0.86904 | 0.72865 | 0.71347 | 0.37908 | 0.07929 | 0.91671 | 0.88027 | IGFBP5   |
| cg22468055 | 0.34937 | 0.16952 | 0.31756 | 0.40027 | 0.24491 | 0.13313 | 0.14602 | 0.12364 | 0.20536 | 0.2115  | PARP15   |
| cg22468123 | 0.03741 | 0.03607 | 0.03571 | 0.03579 | 0.38943 | 0.50011 | 0.0293  | 0.03118 | 0.03051 | 0.02501 | KLP1     |
| cg22468803 | 0.06645 | 0.06972 | 0.06569 | 0.0597  | 0.05177 | 0.05216 | 0.06017 | 0.05253 | 0.0512  | 0.0548  | ANKRD12  |
| cg22469141 | 0.05368 | 0.05008 | 0.0451  | 0.0447  | 0.04194 | 0.0501  | 0.0391  | 0.04432 | 0.03276 | 0.03545 | GPSN2    |
| cg22469841 | 0.02158 | 0.02241 | 0.02228 | 0.02251 | 0.01572 | 0.017   | 0.01862 | 0.01746 | 0.01854 | 0.01713 | FSTL1    |
| cg22470827 | 0.02277 | 0.0249  | 0.02548 | 0.02291 | 0.02113 | 0.02581 | 0.02632 | 0.02824 | 0.01873 | 0.02205 | CHMP2B   |
| cg22471346 | 0.03375 | 0.02244 | 0.57765 | 0.60753 | 0.69085 | 0.66453 | 0.90413 | 0.96796 | 0.05462 | 0.01441 | GAS7     |
| cg22472290 | 0.07423 | 0.07969 | 0.80293 | 0.82455 | 0.57895 | 0.76512 | 0.14277 | 0.09655 | 0.05325 | 0.05445 | ZNF577   |
| cg22473095 | 0.06149 | 0.0566  | 0.06719 | 0.06568 | 0.06756 | 0.07089 | 0.05774 | 0.05951 | 0.05214 | 0.0448  | RBBP9    |
| cg22473973 | 0.05482 | 0.05405 | 0.16427 | 0.14418 | 0.24083 | 0.11472 | 0.1032  | 0.09838 | 0.0788  | 0.10625 | BNIP3    |
| cg22474507 | 0.05271 | 0.0579  | 0.04193 | 0.04053 | 0.04459 | 0.04909 | 0.03786 | 0.0411  | 0.03635 | 0.03897 | CINP     |
| cg22475430 | 0.07684 | 0.05351 | 0.08294 | 0.07805 | 0.07034 | 0.04408 | 0.07347 | 0.05084 | 0.06656 | 0.04583 | ATN1     |
| cg22476084 | 0.08167 | 0.06434 | 0.09217 | 0.10015 | 0.14252 | 0.06787 | 0.09954 | 0.07443 | 0.06904 | 0.05305 | FXVD6    |
| cg22476251 | 0.72221 | 0.59593 | 0.68497 | 0.71868 | 0.60592 | 0.68163 | 0.53586 | 0.49733 | 0.69911 | 0.66388 | PPEF2    |
| cg22476295 | 0.02266 | 0.02525 | 0.02564 | 0.02486 | 0.01959 | 0.02425 | 0.41822 | 0.40049 | 0.02058 | 0.01728 | PDGFA    |
| cg22477592 | 0.0262  | 0.02958 | 0.03306 | 0.02809 | 0.02685 | 0.03214 | 0.02659 | 0.02449 | 0.02306 | 0.02358 | ATM      |
| cg22477971 | 0.11307 | 0.06539 | 0.10649 | 0.07086 | 0.86193 | 0.86718 | 0.05606 | 0.05164 | 0.05727 | 0.05494 | C1QB     |
| cg22478328 | 0.03876 | 0.0393  | 0.03722 | 0.03975 | 0.02583 | 0.03236 | 0.02974 | 0.03289 | 0.03415 | 0.03054 | YWHAH    |
| cg22478614 | 0.2012  | 0.03791 | 0.47872 | 0.61773 | 0.49568 | 0.43432 | 0.02758 | 0.02885 | 0.02919 | 0.02817 | DEFB4    |
| cg22479947 | 0.03213 | 0.03557 | 0.03556 | 0.04051 | 0.03716 | 0.04214 | 0.03611 | 0.03352 | 0.0308  | 0.02532 | CARS     |
| cg22482381 | 0.02937 | 0.02829 | 0.02909 | 0.02936 | 0.01665 | 0.02885 | 0.02927 | 0.02722 | 0.02356 | 0.02612 | MGEA5    |
| cg22484793 | 0.77719 | 0.39716 | 0.78173 | 0.76172 | 0.63282 | 0.36919 | 0.77073 | 0.37871 | 0.8578  | 0.82522 | TLR9     |
| cg22484980 | 0.94465 | 0.89158 | 0.94718 | 0.95318 | 0.93925 | 0.93404 | 0.92963 | 0.90735 | 0.95213 | 0.94417 | TPCN2    |
| cg22485810 | 0.81277 | 0.4565  | 0.84565 | 0.85279 | 0.93052 | 0.83734 | 0.84377 | 0.838   | 0.87237 | 0.82597 | CENTA2   |
| cg22487322 | 0.8999  | 0.85565 | 0.86253 | 0.88664 | 0.8393  | 0.88712 | 0.87201 | 0.91779 | 0.8884  | 0.88477 | IL20RA   |
| cg22490255 | 0.04034 | 0.04039 | 0.04627 | 0.04201 | 0.03609 | 0.04079 | 0.08923 | 0.0426  | 0.03174 | 0.03129 | TSPAN31  |
| cg22492020 | 0.06769 | 0.06848 | 0.07356 | 0.06818 | 0.05677 | 0.06884 | 0.07212 | 0.07344 | 0.06992 | 0.06149 | FLJ20516 |
| cg22492966 | 0.1262  | 0.12379 | 0.13369 | 0.13868 | 0.15936 | 0.13167 | 0.12403 | 0.1002  | 0.10455 | 0.11434 | JMJD1C   |

|            |         |         |         |         |         |         |         |         |         |         |          |
|------------|---------|---------|---------|---------|---------|---------|---------|---------|---------|---------|----------|
| cg22493172 | 0.04259 | 0.0439  | 0.05142 | 0.04636 | 0.03493 | 0.03729 | 0.04034 | 0.03748 | 0.03747 | 0.03526 | POU6F1   |
| cg22494492 | 0.04521 | 0.0488  | 0.04715 | 0.04624 | 0.03755 | 0.04066 | 0.04076 | 0.04356 | 0.0356  | 0.03009 | SUPT5H   |
| cg22495120 | 0.46541 | 0.45502 | 0.45107 | 0.73895 | 0.87254 | 0.88874 | 0.49962 | 0.61345 | 0.24118 | 0.3319  | FMR1NB   |
| cg22495124 | 0.31611 | 0.0756  | 0.87607 | 0.89498 | 0.92473 | 0.90738 | 0.07349 | 0.50047 | 0.06918 | 0.0556  | CACNG5   |
| cg22495162 | 0.08063 | 0.07289 | 0.08436 | 0.07862 | 0.14186 | 0.1028  | 0.0674  | 0.05478 | 0.06214 | 0.08432 | LSM6     |
| cg22496254 | 0.18529 | 0.18238 | 0.26408 | 0.28656 | 0.34417 | 0.25922 | 0.18114 | 0.13849 | 0.19432 | 0.13635 | HCAP-G   |
| cg22496652 | 0.65789 | 0.63402 | 0.65887 | 0.70167 | 0.64964 | 0.65497 | 0.5225  | 0.57278 | 0.55177 | 0.58498 | SEMA4D   |
| cg22496683 | 0.82556 | 0.74665 | 0.70424 | 0.89269 | 0.53336 | 0.92645 | 0.25138 | 0.08628 | 0.05706 | 0.07582 | MGC27016 |
| cg22496859 | 0.0392  | 0.0422  | 0.03873 | 0.03634 | 0.03695 | 0.0436  | 0.04212 | 0.03986 | 0.03429 | 0.04222 | BRF1     |
| cg22497867 | 0.81807 | 0.80152 | 0.79964 | 0.81153 | 0.75294 | 0.81816 | 0.67394 | 0.49185 | 0.86765 | 0.84129 | MAGEA4   |
| cg22498251 | 0.15651 | 0.15467 | 0.60043 | 0.5727  | 0.92522 | 0.89647 | 0.13607 | 0.10038 | 0.88415 | 0.84661 | TWIST1   |
| cg22498840 | 0.04472 | 0.03638 | 0.05054 | 0.04483 | 0.03924 | 0.03813 | 0.03242 | 0.03506 | 0.05713 | 0.03593 | Mcart1   |
| cg22499237 | 0.0389  | 0.03013 | 0.09974 | 0.11263 | 0.03419 | 0.03117 | 0.0333  | 0.03621 | 0.03284 | 0.03156 | PDPK1    |
| cg22499964 | 0.16869 | 0.04123 | 0.05319 | 0.05491 | 0.0938  | 0.05293 | 0.11181 | 0.03071 | 0.03896 | 0.03469 | EGLN2    |
| cg22500004 | 0.5365  | 0.63003 | 0.51992 | 0.58353 | 0.66707 | 0.65433 | 0.35047 | 0.3595  | 0.91332 | 0.91638 | DIRAS3   |
| cg22501393 | 0.06284 | 0.06506 | 0.05814 | 0.06262 | 0.05747 | 0.05958 | 0.05412 | 0.05741 | 0.05505 | 0.05524 | ALKBH6   |
| cg22502171 | 0.78502 | 0.77775 | 0.73843 | 0.7386  | 0.6612  | 0.77042 | 0.65604 | 0.64021 | 0.79226 | 0.6814  | GNRH1    |
| cg22502502 | 0.08203 | 0.49541 | 0.39504 | 0.62862 | 0.20801 | 0.15238 | 0.07436 | 0.05914 | 0.1921  | 0.07633 | TRIM38   |
| cg22505977 | 0.23067 | 0.19793 | 0.21175 | 0.18386 | 0.22732 | 0.20133 | 0.22987 | 0.19456 | 0.20856 | 0.25541 | SLC36A2  |
| cg22506059 | 0.92318 | 0.55044 | 0.92781 | 0.93192 | 0.93959 | 0.90086 | 0.90721 | 0.88276 | 0.91953 | 0.81279 | CARD10   |
| cg22506453 | 0.79255 | 0.81651 | 0.7494  | 0.76807 | 0.7169  | 0.77262 | 0.25255 | 0.17195 | 0.63449 | 0.66206 | KA35     |
| cg22510412 | 0.86974 | 0.88286 | 0.88054 | 0.89275 | 0.86898 | 0.86405 | 0.77579 | 0.80577 | 0.88113 | 0.88539 | NNAT     |
| cg22510822 | 0.09502 | 0.05448 | 0.42532 | 0.57921 | 0.67203 | 0.57624 | 0.06632 | 0.06361 | 0.0586  | 0.26579 | OR1E2    |
| cg22510943 | 0.20228 | 0.1696  | 0.17786 | 0.17737 | 0.25786 | 0.19513 | 0.18798 | 0.15933 | 0.14143 | 0.1358  | LMNB2    |
| cg22511262 | 0.75644 | 0.61888 | 0.4706  | 0.55451 | 0.68936 | 0.18027 | 0.07328 | 0.06472 | 0.07417 | 0.07136 | WT1      |
| cg22511633 | 0.03005 | 0.03099 | 0.16277 | 0.17141 | 0.26151 | 0.03093 | 0.04513 | 0.02459 | 0.06015 | 0.02618 | TBL2     |
| cg22511947 | 0.23759 | 0.10127 | 0.13808 | 0.09867 | 0.15667 | 0.1374  | 0.10444 | 0.09328 | 0.10781 | 0.10897 | FN1      |
| cg22512531 | 0.89084 | 0.70855 | 0.87076 | 0.89959 | 0.75025 | 0.83919 | 0.84131 | 0.84563 | 0.87347 | 0.88824 | CRTAM    |
| cg22517351 | 0.08498 | 0.07471 | 0.08567 | 0.0792  | 0.06283 | 0.0608  | 0.06355 | 0.06456 | 0.05412 | 0.06651 | GLT25D1  |
| cg22518733 | 0.5475  | 0.56823 | 0.18065 | 0.28266 | 0.29864 | 0.41948 | 0.03284 | 0.03065 | 0.27994 | 0.14259 | CCL3     |
| cg22520471 | 0.04514 | 0.04493 | 0.04743 | 0.04727 | 0.04181 | 0.04453 | 0.03347 | 0.03527 | 0.04204 | 0.04372 | DDX42    |
| cg22521310 | 0.20439 | 0.09109 | 0.03841 | 0.03421 | 0.04685 | 0.03705 | 0.02999 | 0.03626 | 0.03862 | 0.02999 | SERTAD2  |
| cg22524267 | 0.02487 | 0.02429 | 0.02583 | 0.02703 | 0.02214 | 0.02534 | 0.02371 | 0.02407 | 0.02249 | 0.02288 | STX18    |
| cg22524514 | 0.39038 | 0.3675  | 0.91644 | 0.95496 | 0.95767 | 0.95277 | 0.63773 | 0.29821 | 0.73019 | 0.84462 | CST6     |
| cg22527345 | 0.2797  | 0.07001 | 0.50775 | 0.62235 | 0.08615 | 0.06066 | 0.15523 | 0.08355 | 0.27511 | 0.09916 | CCDC71   |
| cg22527415 | 0.06756 | 0.05368 | 0.06836 | 0.06157 | 0.08732 | 0.07995 | 0.14225 | 0.14006 | 0.06864 | 0.07794 | LSM16    |
| cg22529861 | 0.04402 | 0.04478 | 0.05082 | 0.0554  | 0.04468 | 0.04597 | 0.04685 | 0.04933 | 0.0387  | 0.04443 | GALNTL4  |
| cg22532997 | 0.12167 | 0.1024  | 0.2496  | 0.29572 | 0.52891 | 0.104   | 0.24217 | 0.08373 | 0.10407 | 0.06135 | LRRc16   |
| cg22533573 | 0.66203 | 0.56561 | 0.84568 | 0.90868 | 0.62231 | 0.57948 | 0.37304 | 0.63375 | 0.45402 | 0.60903 | WT1      |
| cg22534509 | 0.78723 | 0.8049  | 0.4562  | 0.66302 | 0.25026 | 0.27003 | 0.22518 | 0.22995 | 0.07669 | 0.06188 | GPR81    |
| cg22534599 | 0.01821 | 0.01857 | 0.01866 | 0.01718 | 0.01538 | 0.01633 | 0.01534 | 0.01568 | 0.01451 | 0.01387 | ALAS1    |

|            |         |         |         |         |         |         |         |         |         |                  |
|------------|---------|---------|---------|---------|---------|---------|---------|---------|---------|------------------|
| cg22536398 | 0.02241 | 0.02892 | 0.50654 | 0.49709 | 0.95297 | 0.39283 | 0.30388 | 0.03702 | 0.03621 | 0.02146 NTN2L    |
| cg22539738 | 0.6069  | 0.05144 | 0.80735 | 0.74942 | 0.92317 | 0.72497 | 0.51877 | 0.78341 | 0.94671 | 0.79889 KIAA1704 |
| cg22541143 | 0.24078 | 0.14532 | 0.20656 | 0.22063 | 0.23055 | 0.23354 | 0.06669 | 0.11332 | 0.24305 | 0.12132 HEL308   |
| cg22543128 | 0.83518 | 0.8147  | 0.59636 | 0.67344 | 0.86742 | 0.8898  | 0.58164 | 0.68995 | 0.68059 | 0.65357 MGC42630 |
| cg22543648 | 0.733   | 0.63655 | 0.76882 | 0.83421 | 0.62584 | 0.67078 | 0.21572 | 0.10187 | 0.62321 | 0.4394 GATA1     |
| cg22544376 | 0.03694 | 0.03825 | 0.04294 | 0.03752 | 0.03761 | 0.03707 | 0.03204 | 0.02907 | 0.02927 | 0.03366 DGUOK    |
| cg22545356 | 0.80889 | 0.82208 | 0.85927 | 0.86028 | 0.9099  | 0.81109 | 0.6373  | 0.19292 | 0.70435 | 0.79124 MMRN2    |
| cg22546318 | 0.17883 | 0.04812 | 0.56711 | 0.6741  | 0.12882 | 0.04647 | 0.65778 | 0.10661 | 0.90966 | 0.88311 ATP5G2   |
| cg22549408 | 0.85601 | 0.46387 | 0.83066 | 0.85062 | 0.75948 | 0.26436 | 0.20414 | 0.15986 | 0.84507 | 0.09979 PMAIP1   |
| cg22552168 | 0.064   | 0.07436 | 0.0986  | 0.10048 | 0.09927 | 0.06048 | 0.13507 | 0.13065 | 0.07163 | 0.08085 BMP1     |
| cg22552669 | 0.03206 | 0.03566 | 0.05    | 0.03979 | 0.04673 | 0.04504 | 0.06774 | 0.0628  | 0.03447 | 0.02809 SSSCA1   |
| cg22552684 | 0.05752 | 0.04991 | 0.05072 | 0.05721 | 0.0339  | 0.03842 | 0.04389 | 0.04519 | 0.05034 | 0.04075 C7orf25  |
| cg22552966 | 0.84987 | 0.3919  | 0.88261 | 0.96393 | 0.96658 | 0.95871 | 0.87528 | 0.90264 | 0.94071 | 0.70553 FLJ31196 |
| cg22555495 | 0.41938 | 0.44933 | 0.36206 | 0.40557 | 0.62981 | 0.8691  | 0.22149 | 0.5072  | 0.02666 | 0.03043 SNRPN    |
| cg22557067 | 0.05465 | 0.05167 | 0.05743 | 0.05468 | 0.06284 | 0.07358 | 0.03851 | 0.03806 | 0.04686 | 0.05046 NISCH    |
| cg22559669 | 0.03744 | 0.03115 | 0.0293  | 0.0271  | 0.0287  | 0.02964 | 0.03106 | 0.02551 | 0.02543 | 0.02026 TSPAN5   |
| cg22560190 | 0.09416 | 0.08901 | 0.31279 | 0.47998 | 0.11563 | 0.10668 | 0.09746 | 0.10403 | 0.10133 | 0.09613 CNTN1    |
| cg22562335 | 0.84252 | 0.84342 | 0.77408 | 0.84953 | 0.78259 | 0.82796 | 0.29024 | 0.21499 | 0.37973 | 0.31918 XAGE5    |
| cg22563182 | 0.03545 | 0.03428 | 0.03307 | 0.03145 | 0.0332  | 0.03434 | 0.03186 | 0.03386 | 0.02864 | 0.02673 QIL1     |
| cg22563697 | 0.81085 | 0.66925 | 0.86306 | 0.86981 | 0.92547 | 0.86011 | 0.86085 | 0.80824 | 0.74525 | 0.68446 PPP1R16A |
| cg22563815 | 0.87592 | 0.4141  | 0.8974  | 0.89858 | 0.46695 | 0.61327 | 0.83783 | 0.36395 | 0.72517 | 0.56091 CHRNA5   |
| cg22566906 | 0.64848 | 0.32097 | 0.80592 | 0.87659 | 0.78406 | 0.75866 | 0.85025 | 0.69769 | 0.89395 | 0.82104 GRASP    |
| cg22568540 | 0.95462 | 0.51337 | 0.96516 | 0.95676 | 0.96484 | 0.96528 | 0.84453 | 0.78287 | 0.96633 | 0.94355 A1BG     |
| cg22568695 | 0.76102 | 0.73231 | 0.64031 | 0.7036  | 0.52813 | 0.66338 | 0.65937 | 0.72773 | 0.73478 | 0.64118 KIAA1468 |
| cg22571217 | 0.05563 | 0.05511 | 0.05879 | 0.05477 | 0.05817 | 0.05556 | 0.0516  | 0.0525  | 0.04713 | 0.04309 DAPK1    |
| cg22571530 | 0.0837  | 0.0588  | 0.51108 | 0.83047 | 0.41163 | 0.26834 | 0.05375 | 0.2702  | 0.48865 | 0.49719 NFASC    |
| cg22572159 | 0.05294 | 0.05212 | 0.06749 | 0.06852 | 0.05638 | 0.05234 | 0.05049 | 0.05139 | 0.73075 | 0.20032 NGFB     |
| cg22572214 | 0.07122 | 0.06093 | 0.06568 | 0.06216 | 0.05781 | 0.04952 | 0.04607 | 0.03535 | 0.04736 | 0.04379 SLC33A1  |
| cg22572779 | 0.75354 | 0.45693 | 0.63959 | 0.80245 | 0.57495 | 0.55879 | 0.31697 | 0.53288 | 0.203   | 0.25095 MGC40222 |
| cg22573917 | 0.39296 | 0.20461 | 0.28866 | 0.38204 | 0.38516 | 0.11499 | 0.09098 | 0.05673 | 0.11775 | 0.06417 WNT1     |
| cg22575540 | 0.83752 | 0.60278 | 0.88771 | 0.89232 | 0.93122 | 0.90915 | 0.87614 | 0.59997 | 0.87276 | 0.66165 TRIM54   |
| cg22577136 | 0.02746 | 0.03312 | 0.03045 | 0.03094 | 0.02443 | 0.02492 | 0.02337 | 0.02242 | 0.02955 | 0.02522 IKBKE    |
| cg22578204 | 0.07961 | 0.04551 | 0.04606 | 0.04353 | 0.03728 | 0.04032 | 0.05064 | 0.04129 | 0.03555 | 0.03358 TIMP3    |
| cg22578610 | 0.91148 | 0.64465 | 0.9088  | 0.92836 | 0.9365  | 0.90525 | 0.9054  | 0.91192 | 0.92749 | 0.85445 FAM89B   |
| cg22579849 | 0.05016 | 0.03739 | 0.15599 | 0.07574 | 0.03139 | 0.03548 | 0.03222 | 0.02982 | 0.03382 | 0.0339 DCTN3     |
| cg22580173 | 0.06923 | 0.03831 | 0.03817 | 0.03698 | 0.04525 | 0.0392  | 0.04758 | 0.04103 | 0.05548 | 0.04019 THBS1    |
| cg22580353 | 0.85413 | 0.52625 | 0.65484 | 0.58957 | 0.35943 | 0.23312 | 0.37991 | 0.31556 | 0.68703 | 0.21778 PVR      |
| cg22580372 | 0.02325 | 0.02062 | 0.02278 | 0.02599 | 0.01786 | 0.02473 | 0.02351 | 0.0258  | 0.02118 | 0.02013 MGC10993 |
| cg22580512 | 0.05781 | 0.07788 | 0.29833 | 0.23606 | 0.08209 | 0.07578 | 0.08954 | 0.06546 | 0.22977 | 0.05242 NCOR2    |
| cg22580905 | 0.05317 | 0.05607 | 0.05705 | 0.05442 | 0.0653  | 0.05318 | 0.05634 | 0.05067 | 0.05001 | 0.04521 TIMELESS |
| cg22582569 | 0.04756 | 0.06077 | 0.08245 | 0.0602  | 0.13491 | 0.08076 | 0.07032 | 0.0597  | 0.18002 | 0.0458 PPP2R1B   |

|            |         |         |         |         |         |         |         |         |         |                      |
|------------|---------|---------|---------|---------|---------|---------|---------|---------|---------|----------------------|
| cg22584138 | 0.48674 | 0.35706 | 0.72253 | 0.73001 | 0.84749 | 0.85474 | 0.56582 | 0.16275 | 0.87888 | 0.56372 SLC6A4       |
| cg22584335 | 0.11605 | 0.06267 | 0.07246 | 0.05849 | 0.0717  | 0.07135 | 0.05479 | 0.05272 | 0.05755 | 0.05097 ZNF512       |
| cg22585269 | 0.16027 | 0.13416 | 0.14118 | 0.1398  | 0.20624 | 0.15284 | 0.14771 | 0.15318 | 0.12862 | 0.14129 CHEK2        |
| cg22585988 | 0.86029 | 0.53951 | 0.95725 | 0.94693 | 0.96965 | 0.94683 | 0.94616 | 0.78086 | 0.96091 | 0.91439 PVRL4        |
| cg22586527 | 0.65674 | 0.54921 | 0.42061 | 0.51832 | 0.40671 | 0.43555 | 0.37985 | 0.55701 | 0.19087 | 0.25154 SOX6         |
| cg22587514 | 0.0253  | 0.03276 | 0.03031 | 0.03378 | 0.02687 | 0.03247 | 0.0253  | 0.02528 | 0.02438 | 0.02406 MRPS2        |
| cg22587758 | 0.27107 | 0.1435  | 0.3955  | 0.57598 | 0.32469 | 0.23783 | 0.19645 | 0.18382 | 0.32244 | 0.25036 SAA4         |
| cg22591065 | 0.08479 | 0.08938 | 0.0909  | 0.08004 | 0.05434 | 0.06938 | 0.0712  | 0.07138 | 0.07334 | 0.06648 OBFC2B       |
| cg22593486 | 0.87377 | 0.91204 | 0.96145 | 0.96723 | 0.97619 | 0.97029 | 0.6591  | 0.65837 | 0.62943 | 0.71755 OR10H1       |
| cg22593785 | 0.0517  | 0.03892 | 0.05783 | 0.05569 | 0.05455 | 0.0407  | 0.0547  | 0.04202 | 0.0508  | 0.04074 C1RL         |
| cg22594309 | 0.02339 | 0.02961 | 0.18502 | 0.10768 | 0.35741 | 0.1867  | 0.03035 | 0.0299  | 0.05412 | 0.07835 SYT2         |
| cg22598028 | 0.62939 | 0.81819 | 0.43184 | 0.50815 | 0.73913 | 0.69568 | 0.41869 | 0.36606 | 0.03223 | 0.03516 ZNF660       |
| cg22598563 | 0.17354 | 0.06606 | 0.25314 | 0.21893 | 0.89355 | 0.76659 | 0.4783  | 0.07839 | 0.13466 | 0.04723 P4HA2        |
| cg22598744 | 0.58427 | 0.62114 | 0.73514 | 0.78101 | 0.49746 | 0.43598 | 0.54827 | 0.6571  | 0.2434  | 0.17655 MLANA        |
| cg22601215 | 0.14656 | 0.1431  | 0.12402 | 0.1167  | 0.11553 | 0.13838 | 0.08488 | 0.09582 | 0.12046 | 0.10429 GSPT2        |
| cg22601917 | 0.59271 | 0.53959 | 0.60015 | 0.68628 | 0.82992 | 0.38212 | 0.67379 | 0.47999 | 0.05139 | 0.03522 H6PD         |
| cg22603964 | 0.04805 | 0.0325  | 0.06521 | 0.03903 | 0.02218 | 0.02952 | 0.02711 | 0.02693 | 0.0243  | 0.02124 MAN2A1       |
| cg22605063 | 0.05077 | 0.05252 | 0.05287 | 0.04845 | 0.33316 | 0.04689 | 0.04648 | 0.04498 | 0.05045 | 0.04121 DBN1         |
| cg22605342 | 0.04867 | 0.04837 | 0.0491  | 0.05287 | 0.0459  | 0.03421 | 0.04655 | 0.04591 | 0.03785 | 0.04068 RSL1D1       |
| cg22605643 | 0.14405 | 0.09903 | 0.25324 | 0.34299 | 0.43402 | 0.6319  | 0.71534 | 0.5786  | 0.58011 | 0.36763 RGS4         |
| cg22606062 | 0.04617 | 0.04186 | 0.05063 | 0.03826 | 0.05166 | 0.05266 | 0.03509 | 0.03609 | 0.04189 | 0.03277 CCNI         |
| cg22606869 | 0.03069 | 0.0331  | 0.0312  | 0.02807 | 0.02374 | 0.0287  | 0.03025 | 0.02762 | 0.02571 | 0.0244 TUBA6         |
| cg22607339 | 0.80886 | 0.4679  | 0.72039 | 0.8366  | 0.57388 | 0.58341 | 0.28291 | 0.27071 | 0.47857 | 0.26692 MPL          |
| cg22609068 | 0.04142 | 0.03737 | 0.26418 | 0.26273 | 0.08199 | 0.03388 | 0.0369  | 0.03972 | 0.05456 | 0.03903 MGC3020      |
| cg22609576 | 0.03644 | 0.04337 | 0.03986 | 0.0447  | 0.04203 | 0.03983 | 0.0302  | 0.032   | 0.03536 | 0.02903 SPG20        |
| cg22609784 | 0.79119 | 0.77357 | 0.7897  | 0.81385 | 0.7326  | 0.75739 | 0.79617 | 0.76907 | 0.79546 | 0.80262 MSX1         |
| cg22610305 | 0.02698 | 0.0312  | 0.02901 | 0.02655 | 0.01995 | 0.02789 | 0.02129 | 0.02247 | 0.0239  | 0.02371 CHRAC1       |
| cg22613010 | 0.06869 | 0.05428 | 0.06976 | 0.21471 | 0.06426 | 0.0498  | 0.05692 | 0.05887 | 0.05275 | 0.0496 CLCN2         |
| cg22614355 | 0.03114 | 0.03659 | 0.12537 | 0.19098 | 0.07577 | 0.05587 | 0.05364 | 0.05104 | 0.06386 | 0.0292 HTR6          |
| cg22617367 | 0.08481 | 0.04446 | 0.06799 | 0.05442 | 0.05797 | 0.05771 | 0.43652 | 0.31952 | 0.04146 | 0.04245 NKRF         |
| cg22619018 | 0.07751 | 0.05865 | 0.52859 | 0.5309  | 0.13415 | 0.13183 | 0.0621  | 0.06004 | 0.03392 | 0.04914 CSMD1        |
| cg22619563 | 0.05813 | 0.03889 | 0.05988 | 0.04654 | 0.05705 | 0.03706 | 0.04044 | 0.04765 | 0.08466 | 0.03207 EPHA3        |
| cg22620680 | 0.18777 | 0.07745 | 0.09212 | 0.08249 | 0.10045 | 0.06348 | 0.08714 | 0.07876 | 0.07382 | 0.05426 SEC22L2      |
| cg22621695 | 0.15049 | 0.13648 | 0.15102 | 0.17051 | 0.13782 | 0.19335 | 0.12624 | 0.123   | 0.18395 | 0.18102 DYRK2        |
| cg22621736 | 0.03561 | 0.03364 | 0.03679 | 0.02992 | 0.02978 | 0.03272 | 0.02907 | 0.03684 | 0.02993 | 0.02865 FADD         |
| cg22622495 | 0.03089 | 0.03192 | 0.036   | 0.03809 | 0.03631 | 0.0382  | 0.02584 | 0.0213  | 0.02864 | 0.03023 CDC7         |
| cg22622686 | 0.04582 | 0.04821 | 0.05664 | 0.04914 | 0.05119 | 0.06578 | 0.03602 | 0.04441 | 0.04373 | 0.04219 DKFZp727G131 |
| cg22623062 | 0.03588 | 0.04192 | 0.03728 | 0.03875 | 0.03609 | 0.04492 | 0.04131 | 0.04389 | 0.03679 | 0.03189 TP53111      |
| cg22624926 | 0.05896 | 0.05319 | 0.0608  | 0.0536  | 0.07351 | 0.06885 | 0.04777 | 0.04358 | 0.04754 | 0.05509 PSMA6        |
| cg22625415 | 0.08686 | 0.06813 | 0.07694 | 0.06013 | 0.35787 | 0.06632 | 0.06222 | 0.06256 | 0.04022 | 0.04426 ITGA1        |
| cg22627427 | 0.81986 | 0.57608 | 0.68157 | 0.77813 | 0.89206 | 0.93208 | 0.88279 | 0.88343 | 0.94439 | 0.80954 C11orf9      |

|            |         |         |         |         |         |         |         |         |         |         |           |
|------------|---------|---------|---------|---------|---------|---------|---------|---------|---------|---------|-----------|
| cg22627950 | 0.05327 | 0.03838 | 0.115   | 0.34311 | 0.02938 | 0.03259 | 0.03371 | 0.03333 | 0.04072 | 0.03282 | TMED4     |
| cg22628694 | 0.81093 | 0.83413 | 0.77462 | 0.81908 | 0.73312 | 0.76797 | 0.8106  | 0.83356 | 0.83964 | 0.82208 | ZNF329    |
| cg22628840 | 0.0384  | 0.04157 | 0.04421 | 0.04011 | 0.04363 | 0.0396  | 0.03633 | 0.0361  | 0.03869 | 0.03603 | LOC116143 |
| cg22628873 | 0.87951 | 0.74914 | 0.88902 | 0.90492 | 0.80726 | 0.77938 | 0.82222 | 0.6274  | 0.90314 | 0.87713 | GGT6      |
| cg22628926 | 0.08442 | 0.04815 | 0.10699 | 0.10803 | 0.22767 | 0.06011 | 0.08315 | 0.07261 | 0.46379 | 0.21497 | SLC25A11  |
| cg22630160 | 0.11683 | 0.11257 | 0.07466 | 0.07388 | 0.06745 | 0.12621 | 0.13479 | 0.07786 | 0.17309 | 0.17707 | HIST1H2AB |
| cg22630748 | 0.88368 | 0.50051 | 0.6125  | 0.66749 | 0.88173 | 0.40064 | 0.5401  | 0.51361 | 0.87174 | 0.80671 | INHBE     |
| cg22631642 | 0.02324 | 0.01986 | 0.02416 | 0.02331 | 0.02108 | 0.02314 | 0.01704 | 0.0191  | 0.01725 | 0.01668 | POLR2J2   |
| cg22631938 | 0.66674 | 0.53966 | 0.67899 | 0.86508 | 0.81046 | 0.90393 | 0.88827 | 0.63304 | 0.94263 | 0.93272 | GPR27     |
| cg22632663 | 0.18268 | 0.18631 | 0.18381 | 0.18192 | 0.09678 | 0.13978 | 0.15923 | 0.16101 | 0.15657 | 0.14109 | RNF41     |
| cg22633722 | 0.56636 | 0.04151 | 0.04074 | 0.04283 | 0.50449 | 0.32428 | 0.04596 | 0.03878 | 0.70225 | 0.48617 | CBS       |
| cg22634689 | 0.05403 | 0.05413 | 0.11882 | 0.13172 | 0.0544  | 0.058   | 0.11776 | 0.09067 | 0.04539 | 0.04714 | TMEM121   |
| cg22635155 | 0.05584 | 0.05011 | 0.15691 | 0.14571 | 0.16178 | 0.05716 | 0.05877 | 0.05144 | 0.04824 | 0.03808 | PDE2A     |
| cg22636253 | 0.02602 | 0.02465 | 0.03231 | 0.02624 | 0.02403 | 0.02952 | 0.02778 | 0.02416 | 0.02213 | 0.01961 | SSRP1     |
| cg22637507 | 0.05867 | 0.06749 | 0.07111 | 0.0593  | 0.03118 | 0.05357 | 0.04865 | 0.0498  | 0.0584  | 0.05433 | ALKBH3    |
| cg22637834 | 0.7815  | 0.63628 | 0.79119 | 0.82139 | 0.77739 | 0.70082 | 0.76139 | 0.7935  | 0.8568  | 0.88109 | AKT3      |
| cg22637941 | 0.88524 | 0.78384 | 0.91634 | 0.92538 | 0.95591 | 0.91266 | 0.60239 | 0.85886 | 0.92419 | 0.85007 | WISP1     |
| cg22638542 | 0.86791 | 0.86874 | 0.87462 | 0.87679 | 0.86746 | 0.85983 | 0.87902 | 0.84725 | 0.87787 | 0.5037  | SEC22L3   |
| cg22639768 | 0.04937 | 0.04328 | 0.13382 | 0.06433 | 0.07237 | 0.04671 | 0.04538 | 0.04143 | 0.06057 | 0.03877 | FAM13C1   |
| cg22640452 | 0.02572 | 0.02674 | 0.02588 | 0.02739 | 0.02374 | 0.02788 | 0.0254  | 0.02326 | 0.02138 | 0.02022 | NR1D1     |
| cg22642718 | 0.75703 | 0.62125 | 0.85849 | 0.91594 | 0.96004 | 0.96145 | 0.58298 | 0.5238  | 0.72028 | 0.67255 | KCNJ12    |
| cg22643217 | 0.32939 | 0.20528 | 0.30132 | 0.3294  | 0.28053 | 0.12915 | 0.14787 | 0.12901 | 0.2672  | 0.46237 | KRTAP11-1 |
| cg22646528 | 0.04043 | 0.04017 | 0.07721 | 0.06393 | 0.06714 | 0.04636 | 0.04159 | 0.03952 | 0.04075 | 0.04943 | DTNA      |
| cg22646710 | 0.19509 | 0.09054 | 0.45722 | 0.71488 | 0.14604 | 0.05108 | 0.02971 | 0.03426 | 0.04047 | 0.03905 | SYT6      |
| cg22646937 | 0.59615 | 0.58697 | 0.25712 | 0.4116  | 0.23099 | 0.41657 | 0.08195 | 0.18098 | 0.50958 | 0.32062 | KCNMB1    |
| cg22647018 | 0.85412 | 0.6423  | 0.87538 | 0.86378 | 0.46833 | 0.56464 | 0.83059 | 0.7362  | 0.90451 | 0.85191 | AGT       |
| cg22647507 | 0.86025 | 0.85179 | 0.79487 | 0.86586 | 0.83132 | 0.84083 | 0.84484 | 0.85562 | 0.84202 | 0.81663 | PEG10     |
| cg22650146 | 0.05739 | 0.05254 | 0.05913 | 0.05214 | 0.03546 | 0.04139 | 0.04765 | 0.05289 | 0.04336 | 0.04309 | DUSP10    |
| cg22654935 | 0.5711  | 0.63675 | 0.81625 | 0.8552  | 0.83359 | 0.66744 | 0.77756 | 0.76601 | 0.65475 | 0.81726 | LOC126248 |
| cg22655224 | 0.10039 | 0.03198 | 0.65637 | 0.75036 | 0.62825 | 0.59796 | 0.04245 | 0.03182 | 0.05074 | 0.02704 | MT3       |
| cg22657536 | 0.07751 | 0.05533 | 0.097   | 0.1028  | 0.12881 | 0.0654  | 0.14316 | 0.13124 | 0.06361 | 0.07048 | LSM16     |
| cg22658979 | 0.82426 | 0.49705 | 0.34793 | 0.59858 | 0.80893 | 0.3932  | 0.15265 | 0.14625 | 0.67202 | 0.21004 | MMP13     |
| cg22658985 | 0.02765 | 0.02904 | 0.03163 | 0.02788 | 0.01744 | 0.02881 | 0.02617 | 0.02481 | 0.02577 | 0.02434 | WDR40A    |
| cg22659356 | 0.06387 | 0.04047 | 0.05089 | 0.04508 | 0.13876 | 0.05642 | 0.05436 | 0.04589 | 0.04605 | 0.04412 | STK39     |
| cg22659426 | 0.03518 | 0.0335  | 0.03177 | 0.03158 | 0.02643 | 0.03112 | 0.03064 | 0.03405 | 0.02701 | 0.02698 | CLN3      |
| cg22660544 | 0.04589 | 0.04716 | 0.04606 | 0.04758 | 0.04674 | 0.04514 | 0.03258 | 0.03128 | 0.02987 | 0.02961 | RPS11     |
| cg22660578 | 0.03325 | 0.03029 | 0.03083 | 0.02713 | 0.07254 | 0.03029 | 0.29495 | 0.53491 | 0.02257 | 0.02284 | LHX1      |
| cg22663080 | 0.15286 | 0.12877 | 0.25722 | 0.25641 | 0.45043 | 0.16419 | 0.10566 | 0.09851 | 0.13423 | 0.12753 | GCLM      |
| cg22663117 | 0.02645 | 0.03057 | 0.0299  | 0.03068 | 0.02171 | 0.02949 | 0.02464 | 0.02608 | 0.02712 | 0.02544 | MRPL12    |
| cg22665276 | 0.05415 | 0.05894 | 0.07068 | 0.05161 | 0.06487 | 0.05931 | 0.83525 | 0.57488 | 0.04036 | 0.04566 | ZNF85     |
| cg22667787 | 0.05846 | 0.05983 | 0.04414 | 0.04125 | 0.04687 | 0.05545 | 0.0386  | 0.03342 | 0.03178 | 0.0335  | APTX      |



|            |         |         |         |         |         |         |         |         |         |                  |
|------------|---------|---------|---------|---------|---------|---------|---------|---------|---------|------------------|
| cg22668533 | 0.03603 | 0.03361 | 0.0418  | 0.03747 | 0.02939 | 0.03353 | 0.03226 | 0.03509 | 0.03321 | 0.03235 SMC4L1   |
| cg22670329 | 0.76751 | 0.8199  | 0.81975 | 0.84858 | 0.80305 | 0.83171 | 0.83385 | 0.84452 | 0.84655 | 0.8422 CXCL6     |
| cg22670349 | 0.02984 | 0.03064 | 0.03292 | 0.02806 | 0.02587 | 0.02877 | 0.02758 | 0.03039 | 0.02662 | 0.02442 FLJ40432 |
| cg22670733 | 0.70776 | 0.55846 | 0.91869 | 0.91586 | 0.86291 | 0.90989 | 0.88518 | 0.58258 | 0.92329 | 0.87886 CHRNA3   |
| cg22671726 | 0.02745 | 0.03014 | 0.03159 | 0.02702 | 0.02353 | 0.03409 | 0.02426 | 0.02664 | 0.0255  | 0.02268 EGLN2    |
| cg22672790 | 0.11656 | 0.09963 | 0.15654 | 0.1135  | 0.16905 | 0.1077  | 0.14336 | 0.11747 | 0.09756 | 0.09284 GABRA6   |
| cg22674717 | 0.0277  | 0.03061 | 0.06337 | 0.03634 | 0.02658 | 0.03051 | 0.02363 | 0.02607 | 0.02202 | 0.02612 SALL1    |
| cg22675150 | 0.81173 | 0.7976  | 0.77043 | 0.82616 | 0.87767 | 0.83372 | 0.75413 | 0.7974  | 0.5319  | 0.52019 TUBA2    |
| cg22677246 | 0.02571 | 0.02587 | 0.02411 | 0.0248  | 0.02339 | 0.02435 | 0.02094 | 0.0208  | 0.02073 | 0.02034 COTL1    |
| cg22678136 | 0.55866 | 0.5146  | 0.93539 | 0.94865 | 0.83815 | 0.78166 | 0.52447 | 0.68321 | 0.26158 | 0.16177 SNRPN    |
| cg22679003 | 0.04402 | 0.05013 | 0.05222 | 0.04843 | 0.05064 | 0.05658 | 0.04882 | 0.05198 | 0.04829 | 0.04923 CDH2     |
| cg22679120 | 0.54416 | 0.34104 | 0.19395 | 0.21615 | 0.89033 | 0.80601 | 0.53131 | 0.3495  | 0.13289 | 0.15395 SNX8     |
| cg22680204 | 0.11002 | 0.09662 | 0.89282 | 0.87015 | 0.24381 | 0.08574 | 0.09628 | 0.07869 | 0.07545 | 0.08451 CRMP1    |
| cg22680812 | 0.897   | 0.38683 | 0.92684 | 0.93428 | 0.96056 | 0.93734 | 0.80567 | 0.8385  | 0.93629 | 0.91525 EPB42    |
| cg22681784 | 0.80352 | 0.80734 | 0.86675 | 0.84203 | 0.80371 | 0.80314 | 0.84862 | 0.86963 | 0.85672 | 0.80575 SPINK2   |
| cg22682953 | 0.03802 | 0.03698 | 0.03874 | 0.03797 | 0.03144 | 0.03641 | 0.04027 | 0.04283 | 0.03791 | 0.03395 PTPN11   |
| cg22685251 | 0.07706 | 0.07836 | 0.09628 | 0.10726 | 0.10065 | 0.07648 | 0.05896 | 0.05222 | 0.08154 | 0.08185 MAP3K4   |
| cg22685463 | 0.06003 | 0.0617  | 0.06736 | 0.06426 | 0.08089 | 0.0706  | 0.07801 | 0.07621 | 0.06817 | 0.07712 POLR2A   |
| cg22686523 | 0.79684 | 0.7796  | 0.72745 | 0.74358 | 0.58635 | 0.79611 | 0.72658 | 0.77242 | 0.81752 | 0.76739 FLJ25006 |
| cg22688260 | 0.02531 | 0.02792 | 0.0284  | 0.02224 | 0.02213 | 0.023   | 0.02229 | 0.02122 | 0.02296 | 0.0205 ZCSL2     |
| cg22689690 | 0.2662  | 0.08758 | 0.21392 | 0.16923 | 0.39081 | 0.0553  | 0.08648 | 0.05552 | 0.06126 | 0.04067 ADCY6    |
| cg22691736 | 0.06638 | 0.11115 | 0.13519 | 0.10114 | 0.14523 | 0.1419  | 0.06888 | 0.05376 | 0.06289 | 0.07765 MTRF1    |
| cg22692158 | 0.58716 | 0.61325 | 0.85002 | 0.88467 | 0.86792 | 0.88781 | 0.60576 | 0.40192 | 0.82678 | 0.77971 PRB4     |
| cg22699062 | 0.04766 | 0.05056 | 0.0581  | 0.05778 | 0.07251 | 0.06508 | 0.0581  | 0.05695 | 0.0485  | 0.06197 HSP90B1  |
| cg22699362 | 0.32784 | 0.23494 | 0.62217 | 0.67072 | 0.68199 | 0.69712 | 0.61816 | 0.17623 | 0.52921 | 0.46008 FLJ10996 |
| cg22700017 | 0.05848 | 0.06693 | 0.10652 | 0.08934 | 0.09285 | 0.05141 | 0.07052 | 0.06269 | 0.06576 | 0.06211 CAMK2N2  |
| cg22704775 | 0.03418 | 0.03532 | 0.03694 | 0.03513 | 0.02613 | 0.03014 | 0.02946 | 0.03326 | 0.03264 | 0.0292 FEN1      |
| cg22705225 | 0.38193 | 0.07165 | 0.76049 | 0.8588  | 0.90933 | 0.88732 | 0.61077 | 0.47108 | 0.88487 | 0.81839 PDZK3    |
| cg22705929 | 0.78571 | 0.34297 | 0.53551 | 0.73112 | 0.53894 | 0.45303 | 0.6728  | 0.46072 | 0.79544 | 0.21378 YPEL4    |
| cg22705954 | 0.12972 | 0.14009 | 0.8076  | 0.78407 | 0.47888 | 0.26795 | 0.10968 | 0.10503 | 0.18792 | 0.14673 NR0B1    |
| cg22708853 | 0.07181 | 0.04769 | 0.04747 | 0.05123 | 0.04847 | 0.05508 | 0.03491 | 0.03632 | 0.03854 | 0.04021 FLT3LG   |
| cg22708914 | 0.84823 | 0.4689  | 0.13222 | 0.04547 | 0.03895 | 0.03578 | 0.84717 | 0.74363 | 0.54344 | 0.32585 SH2D4A   |
| cg22709192 | 0.02444 | 0.02663 | 0.02944 | 0.03139 | 0.04225 | 0.02805 | 0.62546 | 0.23779 | 0.98425 | 0.87248 HOXC11   |
| cg22710329 | 0.06014 | 0.0456  | 0.54588 | 0.57454 | 0.03871 | 0.04606 | 0.57239 | 0.23074 | 0.07973 | 0.03668 ANUBL1   |
| cg22716127 | 0.01638 | 0.02274 | 0.02824 | 0.0212  | 0.01713 | 0.02037 | 0.01706 | 0.0163  | 0.01662 | 0.01548 SMAP1    |
| cg22717127 | 0.02533 | 0.02217 | 0.02627 | 0.02262 | 0.02381 | 0.02735 | 0.02115 | 0.02305 | 0.02067 | 0.01499 CBWD2    |
| cg22718139 | 0.91404 | 0.89264 | 0.88953 | 0.90791 | 0.90751 | 0.91476 | 0.90198 | 0.90291 | 0.90734 | 0.62492 HMGCS2   |
| cg22719586 | 0.02228 | 0.02734 | 0.02738 | 0.02518 | 0.01938 | 0.02508 | 0.02508 | 0.02648 | 0.03981 | 0.02202 NDOR1    |
| cg22719623 | 0.41558 | 0.16054 | 0.82003 | 0.88586 | 0.53462 | 0.49157 | 0.27436 | 0.12543 | 0.2864  | 0.2216 OPRM1     |
| cg22721186 | 0.02513 | 0.02776 | 0.02619 | 0.02639 | 0.02047 | 0.02378 | 0.02353 | 0.02041 | 0.01957 | 0.02151 ATAD2    |
| cg22721827 | 0.2622  | 0.14662 | 0.84594 | 0.50902 | 0.90819 | 0.09344 | 0.80166 | 0.07856 | 0.32863 | 0.50017 NTN2L    |

|            |         |         |         |         |         |         |         |         |         |         |          |
|------------|---------|---------|---------|---------|---------|---------|---------|---------|---------|---------|----------|
| cg22722454 | 0.88766 | 0.76749 | 0.86419 | 0.87374 | 0.85698 | 0.84665 | 0.85135 | 0.54033 | 0.87729 | 0.84072 | CNDP1    |
| cg22722802 | 0.32481 | 0.55944 | 0.32108 | 0.52187 | 0.35831 | 0.43507 | 0.16602 | 0.24526 | 0.5298  | 0.50671 | FLJ39599 |
| cg22722822 | 0.06406 | 0.07388 | 0.0753  | 0.05847 | 0.03161 | 0.07668 | 0.05149 | 0.0587  | 0.04935 | 0.04376 | CHIC2    |
| cg22723026 | 0.04055 | 0.03944 | 0.04001 | 0.03937 | 0.04639 | 0.048   | 0.03036 | 0.03282 | 0.03972 | 0.03765 | ANG      |
| cg22724153 | 0.5712  | 0.43681 | 0.18903 | 0.32312 | 0.21543 | 0.21542 | 0.26438 | 0.09829 | 0.11562 | 0.12397 | SPAM1    |
| cg22726338 | 0.75761 | 0.61703 | 0.71101 | 0.75108 | 0.7769  | 0.72126 | 0.72061 | 0.78628 | 0.61945 | 0.65985 | C1orf62  |
| cg22727416 | 0.03211 | 0.03678 | 0.04806 | 0.03524 | 0.02735 | 0.03335 | 0.03854 | 0.03658 | 0.03332 | 0.03537 | ADAM10   |
| cg22728790 | 0.05793 | 0.05522 | 0.05385 | 0.05274 | 0.04074 | 0.04729 | 0.04619 | 0.04628 | 0.04333 | 0.04244 | PIN1     |
| cg22730004 | 0.17769 | 0.18988 | 0.30878 | 0.22785 | 0.33241 | 0.19369 | 0.25559 | 0.2021  | 0.20904 | 0.2356  | SPTA1    |
| cg22730042 | 0.08833 | 0.04679 | 0.45569 | 0.40686 | 0.34864 | 0.36284 | 0.11506 | 0.06697 | 0.32691 | 0.09638 | U2AF1    |
| cg22730357 | 0.03616 | 0.03717 | 0.04239 | 0.03181 | 0.02606 | 0.03251 | 0.03191 | 0.03348 | 0.03401 | 0.02727 | PTPN4    |
| cg22730560 | 0.35859 | 0.38024 | 0.29476 | 0.33666 | 0.26502 | 0.32141 | 0.22688 | 0.17985 | 0.28641 | 0.28387 | SNRPA1   |
| cg22730830 | 0.32581 | 0.26645 | 0.94099 | 0.9519  | 0.65196 | 0.4926  | 0.56016 | 0.61417 | 0.96572 | 0.96282 | PRSS21   |
| cg22731373 | 0.09718 | 0.08869 | 0.41642 | 0.36222 | 0.12036 | 0.06586 | 0.39956 | 0.05542 | 0.08162 | 0.07955 | PCYT1B   |
| cg22732515 | 0.06892 | 0.06631 | 0.07955 | 0.08369 | 0.05967 | 0.07466 | 0.06966 | 0.05767 | 0.05738 | 0.05542 | ETHE1    |
| cg22732672 | 0.03482 | 0.0338  | 0.03848 | 0.03497 | 0.03169 | 0.03407 | 0.03155 | 0.0333  | 0.03286 | 0.03459 | CSTF1    |
| cg22733478 | 0.02429 | 0.03045 | 0.02489 | 0.02425 | 0.02017 | 0.02205 | 0.02221 | 0.02364 | 0.02369 | 0.01838 | KIAA1893 |
| cg22734085 | 0.03592 | 0.04165 | 0.02975 | 0.02784 | 0.02798 | 0.02882 | 0.02195 | 0.01947 | 0.0221  | 0.02521 | FLJ30277 |
| cg22734315 | 0.02979 | 0.03304 | 0.03194 | 0.02762 | 0.02244 | 0.03006 | 0.02481 | 0.02719 | 0.02134 | 0.02431 | ASCIZ    |
| cg22734480 | 0.0298  | 0.03201 | 0.37996 | 0.48866 | 0.6359  | 0.44409 | 0.02919 | 0.03031 | 0.02773 | 0.02633 | ABHD8    |
| cg22736107 | 0.03405 | 0.0331  | 0.03231 | 0.02499 | 0.03328 | 0.03534 | 0.02807 | 0.02667 | 0.03437 | 0.02974 | PSMB4    |
| cg22736323 | 0.10129 | 0.06606 | 0.07128 | 0.04588 | 0.31524 | 0.35974 | 0.06455 | 0.04223 | 0.91975 | 0.39009 | PDGFRA   |
| cg22736354 | 0.4095  | 0.39643 | 0.81383 | 0.93384 | 0.20135 | 0.13642 | 0.36715 | 0.12258 | 0.56345 | 0.55648 | NHLRC1   |
| cg22737001 | 0.03911 | 0.02353 | 0.02817 | 0.02893 | 0.04881 | 0.02215 | 0.95638 | 0.91974 | 0.62046 | 0.61113 | RUNX3    |
| cg22740783 | 0.07391 | 0.04419 | 0.49176 | 0.55315 | 0.17465 | 0.28964 | 0.22209 | 0.04377 | 0.29639 | 0.16739 | CGREF1   |
| cg22740835 | 0.60755 | 0.60211 | 0.07729 | 0.069   | 0.08647 | 0.06153 | 0.08099 | 0.08806 | 0.07119 | 0.0682  | DDR2     |
| cg22744680 | 0.07795 | 0.08922 | 0.10027 | 0.08839 | 0.26973 | 0.07234 | 0.07306 | 0.08375 | 0.07736 | 0.06167 | KREMEN2  |
| cg22745747 | 0.83549 | 0.82211 | 0.84635 | 0.87711 | 0.05417 | 0.04458 | 0.43438 | 0.52079 | 0.89415 | 0.88135 | BMX      |
| cg22747092 | 0.85182 | 0.15689 | 0.73212 | 0.67134 | 0.92139 | 0.38943 | 0.85158 | 0.1155  | 0.25804 | 0.03753 | BTBD14A  |
| cg22748452 | 0.52104 | 0.37793 | 0.86727 | 0.87287 | 0.6629  | 0.8026  | 0.49754 | 0.57537 | 0.66318 | 0.38819 | SRXN1    |
| cg22748573 | 0.04959 | 0.05446 | 0.04885 | 0.04613 | 0.03462 | 0.04272 | 0.04613 | 0.04356 | 0.04154 | 0.04108 | CITED4   |
| cg22748850 | 0.05189 | 0.05923 | 0.05702 | 0.05119 | 0.04113 | 0.04993 | 0.05179 | 0.04589 | 0.04653 | 0.03956 | CDC25C   |
| cg22750254 | 0.39566 | 0.28823 | 0.42467 | 0.28017 | 0.47848 | 0.31926 | 0.03657 | 0.03439 | 0.06027 | 0.17165 | CCDC3    |
| cg22751696 | 0.12836 | 0.38848 | 0.79856 | 0.85301 | 0.61429 | 0.32437 | 0.73924 | 0.81198 | 0.09509 | 0.10295 | C3orf14  |
| cg22752533 | 0.6342  | 0.6081  | 0.94044 | 0.96885 | 0.61339 | 0.62332 | 0.74936 | 0.80529 | 0.15307 | 0.1605  | SLC12A5  |
| cg22753607 | 0.06164 | 0.05338 | 0.06485 | 0.06477 | 0.04403 | 0.06143 | 0.0546  | 0.06239 | 0.05629 | 0.05751 | ZCCHC7   |
| cg22753768 | 0.06822 | 0.05288 | 0.06978 | 0.06275 | 0.05049 | 0.04694 | 0.04902 | 0.04888 | 0.04623 | 0.04962 | BAP1     |
| cg22757447 | 0.67081 | 0.59261 | 0.06632 | 0.08211 | 0.04162 | 0.03772 | 0.06215 | 0.1194  | 0.06827 | 0.03255 | IMPACT   |
| cg22759185 | 0.90628 | 0.8817  | 0.92282 | 0.92519 | 0.93158 | 0.90563 | 0.45435 | 0.31546 | 0.92848 | 0.90227 | REEP6    |
| cg22759686 | 0.13598 | 0.13694 | 0.07809 | 0.07628 | 0.1126  | 0.1263  | 0.23971 | 0.08727 | 0.03066 | 0.03342 | ARSD     |
| cg22760576 | 0.03405 | 0.03732 | 0.05124 | 0.0534  | 0.03905 | 0.04233 | 0.0313  | 0.03215 | 0.03805 | 0.03193 | EYA3     |

|            |         |         |         |         |         |         |         |         |         |                   |
|------------|---------|---------|---------|---------|---------|---------|---------|---------|---------|-------------------|
| cg22762180 | 0.17015 | 0.1415  | 0.21155 | 0.32387 | 0.26839 | 0.21851 | 0.07738 | 0.09372 | 0.58286 | 0.14294 PERP      |
| cg22762309 | 0.7073  | 0.40742 | 0.45284 | 0.41303 | 0.49136 | 0.1587  | 0.20421 | 0.13424 | 0.26874 | 0.1398 OTUD6A     |
| cg22762951 | 0.06038 | 0.05015 | 0.06625 | 0.0671  | 0.05241 | 0.05732 | 0.05241 | 0.05207 | 0.05283 | 0.05006 NVL       |
| cg22763181 | 0.0543  | 0.05437 | 0.04139 | 0.03524 | 0.05172 | 0.06055 | 0.03827 | 0.04548 | 0.03992 | 0.04974 YY1       |
| cg22764338 | 0.05333 | 0.06    | 0.05603 | 0.06627 | 0.08075 | 0.04207 | 0.0584  | 0.06011 | 0.05621 | 0.0599 PCDH1      |
| cg22764341 | 0.53964 | 0.33031 | 0.18998 | 0.11506 | 0.24874 | 0.39791 | 0.19387 | 0.09653 | 0.35012 | 0.16756 ATP10D    |
| cg22764925 | 0.08394 | 0.05425 | 0.36561 | 0.47639 | 0.36382 | 0.08104 | 0.07995 | 0.05471 | 0.06417 | 0.05194 GGT1      |
| cg22766145 | 0.07612 | 0.09103 | 0.50399 | 0.67767 | 0.21179 | 0.36533 | 0.11281 | 0.10853 | 0.22617 | 0.06706 BHLHB5    |
| cg22767079 | 0.02497 | 0.03402 | 0.03028 | 0.02793 | 0.02552 | 0.03501 | 0.02543 | 0.02361 | 0.02204 | 0.02513 BIVM      |
| cg22767466 | 0.71541 | 0.67748 | 0.3103  | 0.2272  | 0.66947 | 0.82515 | 0.20038 | 0.20153 | 0.16686 | 0.16533 TRIM49    |
| cg22767735 | 0.03004 | 0.0294  | 0.02961 | 0.02849 | 0.02027 | 0.02855 | 0.02892 | 0.02427 | 0.02572 | 0.02429 ALDH3A2   |
| cg22769406 | 0.05825 | 0.06196 | 0.06221 | 0.05594 | 0.06456 | 0.06109 | 0.05514 | 0.05271 | 0.04724 | 0.03337 COX6B1    |
| cg22771603 | 0.04363 | 0.04434 | 0.04917 | 0.045   | 0.03389 | 0.03608 | 0.03571 | 0.03912 | 0.02436 | 0.02418 HSPA4     |
| cg22772698 | 0.52222 | 0.46155 | 0.55086 | 0.60131 | 0.57812 | 0.55688 | 0.4864  | 0.44897 | 0.56387 | 0.6189 ZBP1       |
| cg22772878 | 0.13567 | 0.08443 | 0.90232 | 0.93109 | 0.87679 | 0.67934 | 0.66024 | 0.54198 | 0.67397 | 0.53851 DIRAS1    |
| cg22774012 | 0.04449 | 0.0428  | 0.04379 | 0.04633 | 0.05868 | 0.05381 | 0.04673 | 0.04277 | 0.03989 | 0.03395 HEL308    |
| cg22774127 | 0.03459 | 0.03148 | 0.03119 | 0.02852 | 0.03218 | 0.03573 | 0.02928 | 0.03145 | 0.02689 | 0.02886 COX10     |
| cg22774472 | 0.07879 | 0.28498 | 0.08262 | 0.07029 | 0.10294 | 0.08322 | 0.07267 | 0.06583 | 0.61814 | 0.57799 COL5A2    |
| cg22775000 | 0.03716 | 0.02951 | 0.11406 | 0.07376 | 0.69729 | 0.19463 | 0.04245 | 0.0335  | 0.1992  | 0.09757 TMEFF1    |
| cg22775896 | 0.05442 | 0.04199 | 0.04684 | 0.04147 | 0.04692 | 0.04341 | 0.04481 | 0.04723 | 0.04088 | 0.03863 GM2A      |
| cg22776578 | 0.04308 | 0.03888 | 0.44218 | 0.38987 | 0.12725 | 0.28571 | 0.04104 | 0.03972 | 0.04419 | 0.02655 CPLX2     |
| cg22777952 | 0.0413  | 0.03975 | 0.46048 | 0.61218 | 0.18812 | 0.0381  | 0.58971 | 0.72034 | 0.06459 | 0.03766 FOXB1     |
| cg22778145 | 0.74325 | 0.20514 | 0.56127 | 0.7155  | 0.36395 | 0.19037 | 0.38676 | 0.28554 | 0.08705 | 0.09088 CLK4      |
| cg22778180 | 0.04269 | 0.0389  | 0.06155 | 0.0512  | 0.07059 | 0.03984 | 0.04549 | 0.04185 | 0.23894 | 0.03637 C12orf47  |
| cg22778947 | 0.12365 | 0.10948 | 0.16132 | 0.1439  | 0.22796 | 0.15854 | 0.13348 | 0.11961 | 0.1036  | 0.10298 FSD1NL    |
| cg22778981 | 0.07452 | 0.08463 | 0.09182 | 0.07017 | 0.07975 | 0.08841 | 0.09354 | 0.08384 | 0.0673  | 0.0882 ERBB2      |
| cg22780428 | 0.06519 | 0.05591 | 0.08625 | 0.06604 | 0.05332 | 0.04847 | 0.0603  | 0.05063 | 0.06453 | 0.06214 CEPT1     |
| cg22780475 | 0.9012  | 0.89581 | 0.91781 | 0.91158 | 0.92396 | 0.90595 | 0.92182 | 0.85406 | 0.89707 | 0.85131 CBLC      |
| cg22781236 | 0.02245 | 0.03267 | 0.02748 | 0.02536 | 0.02285 | 0.02906 | 0.02062 | 0.02607 | 0.02397 | 0.02391 UBL3      |
| cg22781397 | 0.03336 | 0.03266 | 0.03723 | 0.03557 | 0.02814 | 0.02803 | 0.03104 | 0.03042 | 0.02583 | 0.02496 CDK2      |
| cg22782492 | 0.05207 | 0.04136 | 0.04448 | 0.03625 | 0.05217 | 0.04372 | 0.06422 | 0.04732 | 0.04837 | 0.03385 VHL       |
| cg22783258 | 0.78559 | 0.7755  | 0.74037 | 0.79167 | 0.72761 | 0.73968 | 0.7856  | 0.81932 | 0.79813 | 0.77834 LMO7      |
| cg22783363 | 0.05536 | 0.04153 | 0.34676 | 0.25594 | 0.96322 | 0.91703 | 0.04486 | 0.04932 | 0.40232 | 0.04373 TNFRSF10D |
| cg22784047 | 0.81532 | 0.83543 | 0.82457 | 0.83939 | 0.86715 | 0.79377 | 0.76069 | 0.26359 | 0.82724 | 0.8101 MVP        |
| cg22788223 | 0.03722 | 0.03824 | 0.04553 | 0.03821 | 0.0551  | 0.06183 | 0.03739 | 0.04542 | 0.02776 | 0.02772 NFYA      |
| cg22789545 | 0.48195 | 0.18503 | 0.47669 | 0.59244 | 0.66694 | 0.84662 | 0.33448 | 0.23956 | 0.72212 | 0.57966 C20orf114 |
| cg22791453 | 0.48311 | 0.13563 | 0.68991 | 0.61466 | 0.865   | 0.09589 | 0.46489 | 0.11034 | 0.67008 | 0.56964 ASS       |
| cg22792432 | 0.02006 | 0.01932 | 0.02085 | 0.02059 | 0.02142 | 0.02231 | 0.0205  | 0.02327 | 0.01799 | 0.02014 ROCK1     |
| cg22792910 | 0.764   | 0.7462  | 0.52674 | 0.64135 | 0.47198 | 0.40598 | 0.68463 | 0.36617 | 0.76883 | 0.69713 ANXA4     |
| cg22792938 | 0.02837 | 0.02444 | 0.0265  | 0.0281  | 0.02063 | 0.02275 | 0.02148 | 0.03202 | 0.02397 | HRB               |
| cg22793458 | 0.03989 | 0.03454 | 0.03966 | 0.03661 | 0.02755 | 0.0361  | 0.03728 | 0.03857 | 0.03478 | 0.03177 ZBTB11    |

|            |         |         |         |         |         |         |         |         |         |                  |
|------------|---------|---------|---------|---------|---------|---------|---------|---------|---------|------------------|
| cg22794078 | 0.06    | 0.04957 | 0.10254 | 0.10954 | 0.06663 | 0.025   | 0.04854 | 0.03283 | 0.08628 | 0.026 C15orf44   |
| cg22796458 | 0.03257 | 0.02938 | 0.04033 | 0.05373 | 0.03248 | 0.0313  | 0.03636 | 0.02644 | 0.03351 | 0.03212 UBQLN4   |
| cg22797169 | 0.36584 | 0.18532 | 0.84412 | 0.86225 | 0.89278 | 0.84994 | 0.84777 | 0.64127 | 0.86829 | 0.72372 IL1RL2   |
| cg22797991 | 0.08351 | 0.07124 | 0.33916 | 0.50281 | 0.19493 | 0.10174 | 0.12047 | 0.10157 | 0.18383 | 0.15811 ATP10A   |
| cg22799132 | 0.09454 | 0.07875 | 0.62347 | 0.74429 | 0.83703 | 0.88854 | 0.40167 | 0.50962 | 0.10131 | 0.09676 TRPC5    |
| cg22799321 | 0.05797 | 0.05179 | 0.07598 | 0.07924 | 0.18421 | 0.07255 | 0.11807 | 0.31741 | 0.06564 | 0.0345 TFPI2     |
| cg22799850 | 0.04302 | 0.03972 | 0.0449  | 0.03921 | 0.03232 | 0.03714 | 0.03668 | 0.04095 | 0.24802 | 0.03354 FBXL13   |
| cg22799917 | 0.04125 | 0.04284 | 0.04214 | 0.03789 | 0.03794 | 0.03792 | 0.03945 | 0.04091 | 0.02803 | 0.02998 YWHAB    |
| cg22800191 | 0.03032 | 0.03131 | 0.03492 | 0.03197 | 0.02591 | 0.02725 | 0.02589 | 0.02611 | 0.02625 | 0.03061 HPS3     |
| cg22800631 | 0.08544 | 0.11088 | 0.13192 | 0.10875 | 0.13679 | 0.15794 | 0.08858 | 0.09247 | 0.08654 | 0.09452 TRRAP    |
| cg22801690 | 0.79541 | 0.8137  | 0.64686 | 0.73915 | 0.67655 | 0.80264 | 0.54215 | 0.45628 | 0.69433 | 0.67803 DAO      |
| cg22802439 | 0.72279 | 0.34839 | 0.50345 | 0.42909 | 0.6963  | 0.47017 | 0.17323 | 0.32626 | 0.90653 | 0.75361 UPK1A    |
| cg22802739 | 0.04595 | 0.04762 | 0.0512  | 0.05547 | 0.07096 | 0.06821 | 0.04731 | 0.04255 | 0.03861 | 0.03012 DBF4     |
| cg22805308 | 0.20007 | 0.21497 | 0.73518 | 0.81581 | 0.36163 | 0.074   | 0.34615 | 0.04604 | 0.12395 | 0.03487 PLEKHG5  |
| cg22805517 | 0.0329  | 0.0372  | 0.0409  | 0.03321 | 0.02252 | 0.03344 | 0.03141 | 0.02571 | 0.03039 | 0.027 C7orf25    |
| cg22805632 | 0.87206 | 0.68426 | 0.81842 | 0.85779 | 0.78219 | 0.8453  | 0.76334 | 0.84882 | 0.53858 | 0.44757 KRT10    |
| cg22807551 | 0.06959 | 0.06997 | 0.06901 | 0.0613  | 0.18805 | 0.25453 | 0.10669 | 0.08981 | 0.62226 | 0.44884 MTUS1    |
| cg22807700 | 0.70655 | 0.64693 | 0.77131 | 0.81377 | 0.33854 | 0.22525 | 0.28069 | 0.22025 | 0.23367 | 0.08841 DNTTIP2  |
| cg22807823 | 0.1379  | 0.12593 | 0.10631 | 0.11068 | 0.23541 | 0.16822 | 0.13514 | 0.11804 | 0.08771 | 0.0978 C9orf76   |
| cg22808175 | 0.04744 | 0.03932 | 0.05481 | 0.07287 | 0.03697 | 0.03444 | 0.03628 | 0.0394  | 0.24488 | 0.03317 PHOSPHO1 |
| cg22809047 | 0.91477 | 0.93306 | 0.80395 | 0.86524 | 0.65761 | 0.60208 | 0.73688 | 0.55198 | 0.4583  | 0.11774 RPL31    |
| cg22812892 | 0.02674 | 0.02707 | 0.03159 | 0.02848 | 0.02326 | 0.02682 | 0.02454 | 0.02591 | 0.02332 | 0.02036 IDE      |
| cg22813220 | 0.03634 | 0.0389  | 0.04642 | 0.03914 | 0.04037 | 0.04516 | 0.02885 | 0.03113 | 0.03507 | 0.03774 C1orf83  |
| cg22814247 | 0.04064 | 0.04344 | 0.0391  | 0.04189 | 0.03652 | 0.04197 | 0.03581 | 0.03782 | 0.02956 | 0.0307 SIRT2     |
| cg22814929 | 0.1489  | 0.19024 | 0.14022 | 0.13633 | 0.33364 | 0.2161  | 0.12213 | 0.1293  | 0.11786 | 0.12557 BTN2A1   |
| cg22815110 | 0.03488 | 0.02967 | 0.06534 | 0.03664 | 0.36842 | 0.23828 | 0.03559 | 0.02653 | 0.03043 | 0.0261 FOXD3     |
| cg22815214 | 0.28116 | 0.16636 | 0.55284 | 0.55993 | 0.24664 | 0.1081  | 0.17582 | 0.11215 | 0.68451 | 0.25716 CACNA1S  |
| cg22815534 | 0.41403 | 0.22122 | 0.73187 | 0.76775 | 0.49618 | 0.41014 | 0.07958 | 0.07165 | 0.1757  | 0.12818 CECR5    |
| cg22816171 | 0.04764 | 0.04205 | 0.05344 | 0.04796 | 0.05156 | 0.0485  | 0.04434 | 0.03497 | 0.04334 | 0.04074 DDX50    |
| cg22820108 | 0.06103 | 0.06752 | 0.06736 | 0.05825 | 0.03872 | 0.05064 | 0.05138 | 0.05606 | 0.04644 | 0.04652 NCOR2    |
| cg22821324 | 0.14382 | 0.05802 | 0.07237 | 0.05759 | 0.05763 | 0.04677 | 0.0458  | 0.04584 | 0.09765 | 0.21119 GPM6A    |
| cg22821606 | 0.05484 | 0.05862 | 0.07533 | 0.05743 | 0.07254 | 0.0635  | 0.06872 | 0.05978 | 0.04688 | 0.04958 PTD015   |
| cg22821834 | 0.64023 | 0.95858 | 0.04012 | 0.04866 | 0.96406 | 0.96231 | 0.96428 | 0.9517  | 0.96689 | 0.96319 GPR135   |
| cg22821930 | 0.05872 | 0.05844 | 0.05959 | 0.04426 | 0.06228 | 0.06507 | 0.06639 | 0.05834 | 0.04789 | 0.04374 RNPC2    |
| cg22825487 | 0.37632 | 0.13275 | 0.80501 | 0.79791 | 0.61623 | 0.54278 | 0.19211 | 0.1284  | 0.53509 | 0.37685 VNN3     |
| cg22825979 | 0.04821 | 0.0547  | 0.06863 | 0.07722 | 0.06467 | 0.08814 | 0.11557 | 0.12248 | 0.04036 | 0.03537 RFP2     |
| cg22826936 | 0.03692 | 0.0396  | 0.04099 | 0.03175 | 0.04648 | 0.03692 | 0.0329  | 0.03485 | 0.04495 | 0.02852 ULK2     |
| cg22827290 | 0.04164 | 0.03141 | 0.07115 | 0.10769 | 0.45818 | 0.45906 | 0.03381 | 0.03974 | 0.16399 | 0.02753 MGC13024 |
| cg22827524 | 0.84981 | 0.82686 | 0.85597 | 0.8685  | 0.89755 | 0.86552 | 0.8401  | 0.84309 | 0.88093 | 0.8344 FLJ43505  |
| cg22827640 | 0.02116 | 0.02109 | 0.03404 | 0.04011 | 0.03571 | 0.02306 | 0.02122 | 0.01841 | 0.01904 | 0.01738 HPCAL4   |
| cg22828602 | 0.50955 | 0.32894 | 0.16171 | 0.15994 | 0.19011 | 0.15776 | 0.12253 | 0.16841 | 0.28139 | 0.06695 RNF133   |

|            |         |         |         |         |         |         |         |         |         |                  |
|------------|---------|---------|---------|---------|---------|---------|---------|---------|---------|------------------|
| cg22828804 | 0.02933 | 0.03275 | 0.03631 | 0.03033 | 0.04356 | 0.03711 | 0.03575 | 0.03063 | 0.02634 | 0.02308 FLJ13149 |
| cg22830590 | 0.03802 | 0.03918 | 0.05132 | 0.04388 | 0.06782 | 0.05263 | 0.05898 | 0.05061 | 0.04435 | 0.04859 SCR3     |
| cg22830895 | 0.48219 | 0.07318 | 0.76225 | 0.85803 | 0.85439 | 0.66672 | 0.90089 | 0.78447 | 0.688   | 0.362 CRYGN      |
| cg22831263 | 0.10093 | 0.03616 | 0.04291 | 0.03676 | 0.03781 | 0.03895 | 0.03673 | 0.04599 | 0.04456 | 0.04556 KIAA1840 |
| cg22831514 | 0.10033 | 0.111   | 0.13509 | 0.12066 | 0.2117  | 0.15766 | 0.13323 | 0.10581 | 0.14482 | 0.13138 DHRS8    |
| cg22832044 | 0.27878 | 0.12269 | 0.77735 | 0.79834 | 0.56152 | 0.50036 | 0.40362 | 0.22749 | 0.94386 | 0.92577 CDH1     |
| cg22833027 | 0.06121 | 0.04641 | 0.21377 | 0.49521 | 0.63304 | 0.37302 | 0.18543 | 0.06146 | 0.06012 | 0.05434 CHR      |
| cg22833175 | 0.84059 | 0.70808 | 0.30924 | 0.56527 | 0.79826 | 0.82175 | 0.72723 | 0.2649  | 0.60996 | 0.60917 WBP11    |
| cg22833292 | 0.03933 | 0.04429 | 0.03921 | 0.04357 | 0.02766 | 0.03947 | 0.03428 | 0.03894 | 0.03742 | 0.03647 RPS6KA4  |
| cg22835805 | 0.55128 | 0.51441 | 0.58275 | 0.65265 | 0.47256 | 0.58298 | 0.39119 | 0.51637 | 0.591   | 0.59664 GPR34    |
| cg22836132 | 0.7899  | 0.74281 | 0.67755 | 0.73813 | 0.6626  | 0.74732 | 0.59054 | 0.64432 | 0.73622 | 0.70736 LONRF1   |
| cg22836153 | 0.03741 | 0.03612 | 0.03415 | 0.0319  | 0.02647 | 0.03114 | 0.03905 | 0.02836 | 0.5107  | 0.49018 LOX      |
| cg22836229 | 0.47286 | 0.63261 | 0.83276 | 0.8599  | 0.65434 | 0.40455 | 0.60684 | 0.04637 | 0.97241 | 0.77477 EFCAB1   |
| cg22836370 | 0.05043 | 0.04924 | 0.06416 | 0.0605  | 0.0744  | 0.06255 | 0.05749 | 0.0545  | 0.04743 | 0.05768 MBD2     |
| cg22836470 | 0.62694 | 0.38595 | 0.60436 | 0.48453 | 0.11695 | 0.11973 | 0.45045 | 0.49632 | 0.43737 | 0.41166 TMEM119  |
| cg22837289 | 0.0567  | 0.05952 | 0.06449 | 0.06793 | 0.06602 | 0.04676 | 0.06452 | 0.07188 | 0.05388 | 0.06066 MDS028   |
| cg22838674 | 0.02415 | 0.02963 | 0.0376  | 0.03162 | 0.02315 | 0.02393 | 0.02176 | 0.02534 | 0.02752 | 0.02118 PROSC    |
| cg22841169 | 0.06518 | 0.08159 | 0.08796 | 0.09054 | 0.08415 | 0.08327 | 0.06587 | 0.06186 | 0.07097 | 0.07161 YPEL5    |
| cg22842233 | 0.71279 | 0.87633 | 0.87229 | 0.87578 | 0.8797  | 0.87185 | 0.84831 | 0.80948 | 0.59605 | 0.87052 UPK1B    |
| cg22843446 | 0.50713 | 0.0844  | 0.04312 | 0.03755 | 0.02446 | 0.02939 | 0.03207 | 0.09257 | 0.27375 | 0.10297 ASAM     |
| cg22844623 | 0.91469 | 0.90981 | 0.92538 | 0.93303 | 0.94131 | 0.9132  | 0.8603  | 0.78797 | 0.91507 | 0.83538 GJA12    |
| cg22845362 | 0.02782 | 0.02473 | 0.02863 | 0.02716 | 0.02395 | 0.02893 | 0.02274 | 0.02228 | 0.02294 | 0.01974 ANAPC4   |
| cg22851319 | 0.14921 | 0.07545 | 0.11894 | 0.17197 | 0.43242 | 0.30039 | 0.2321  | 0.06445 | 0.05742 | 0.04611 PLCG1    |
| cg22853986 | 0.06206 | 0.06181 | 0.09635 | 0.07647 | 0.12924 | 0.05433 | 0.05141 | 0.04568 | 0.06099 | 0.07422 TRMT12   |
| cg22854223 | 0.04552 | 0.04157 | 0.07765 | 0.23553 | 0.03088 | 0.0381  | 0.05092 | 0.03802 | 0.03391 | 0.02731 CD82     |
| cg22854546 | 0.02257 | 0.0261  | 0.02395 | 0.02151 | 0.02347 | 0.02153 | 0.0194  | 0.02186 | 0.01991 | 0.01584 WDR33    |
| cg22855405 | 0.23737 | 0.07041 | 0.10556 | 0.1651  | 0.84767 | 0.85676 | 0.65564 | 0.42989 | 0.74774 | 0.44765 TINAGL1  |
| cg22857604 | 0.04032 | 0.03978 | 0.04125 | 0.04231 | 0.08402 | 0.07282 | 0.03441 | 0.03151 | 0.03344 | 0.03205 RASSF5   |
| cg22857957 | 0.15865 | 0.09526 | 0.09665 | 0.07325 | 0.13701 | 0.12447 | 0.05359 | 0.048   | 0.11286 | 0.11963 FMO5     |
| cg22858288 | 0.92733 | 0.88024 | 0.93974 | 0.94366 | 0.96306 | 0.91164 | 0.93141 | 0.9353  | 0.94652 | 0.94062 SLC22A18 |
| cg22858308 | 0.86081 | 0.78173 | 0.94478 | 0.94851 | 0.94861 | 0.86403 | 0.13539 | 0.12202 | 0.94001 | 0.91146 HIVEP2   |
| cg22858728 | 0.0628  | 0.04965 | 0.075   | 0.08049 | 0.04598 | 0.04982 | 0.26046 | 0.2763  | 0.03564 | 0.03094 MPP1     |
| cg22858861 | 0.0769  | 0.06859 | 0.08192 | 0.07849 | 0.08332 | 0.09165 | 0.0735  | 0.0627  | 0.06393 | 0.07749 CCDC5    |
| cg22861316 | 0.49079 | 0.19471 | 0.79002 | 0.89381 | 0.76766 | 0.7054  | 0.58893 | 0.76694 | 0.46896 | 0.43545 FABP6    |
| cg22862656 | 0.91341 | 0.78597 | 0.90539 | 0.91674 | 0.92576 | 0.90693 | 0.53021 | 0.58087 | 0.86565 | 0.59032 SCGB2A2  |
| cg22863122 | 0.01428 | 0.02171 | 0.02391 | 0.02015 | 0.01815 | 0.0236  | 0.01384 | 0.01352 | 0.01514 | 0.0131 DUSP7     |
| cg22864416 | 0.02972 | 0.03059 | 0.03826 | 0.02684 | 0.02258 | 0.02541 | 0.02203 | 0.0257  | 0.02277 | 0.02598 CCNJ     |
| cg22867063 | 0.08024 | 0.0493  | 0.51066 | 0.56565 | 0.05097 | 0.03758 | 0.0446  | 0.04006 | 0.0351  | 0.03484 ZNF214   |
| cg22870256 | 0.02729 | 0.03302 | 0.0315  | 0.03096 | 0.02453 | 0.03124 | 0.03714 | 0.03286 | 0.02171 | 0.02889 FDFT1    |
| cg22870280 | 0.88279 | 0.64097 | 0.89787 | 0.91384 | 0.93237 | 0.89179 | 0.8423  | 0.7236  | 0.90114 | 0.82268 BCL2L10  |
| cg22873668 | 0.17497 | 0.34043 | 0.47339 | 0.49363 | 0.5387  | 0.52481 | 0.07512 | 0.05969 | 0.25093 | 0.22274 CXorf56  |

|            |         |         |         |         |         |         |         |         |         |                  |
|------------|---------|---------|---------|---------|---------|---------|---------|---------|---------|------------------|
| cg22873892 | 0.05783 | 0.05436 | 0.0679  | 0.0611  | 0.05124 | 0.07933 | 0.06871 | 0.06086 | 0.07943 | 0.07177 COPS2    |
| cg22874046 | 0.02354 | 0.02172 | 0.0247  | 0.02398 | 0.48302 | 0.59156 | 0.22851 | 0.02184 | 0.01498 | 0.01379 ICAM1    |
| cg22874560 | 0.05487 | 0.04935 | 0.0431  | 0.0444  | 0.04762 | 0.05418 | 0.04288 | 0.0525  | 0.03422 | 0.03392 C6orf128 |
| cg22874695 | 0.03779 | 0.04293 | 0.04279 | 0.04056 | 0.03686 | 0.04086 | 0.04506 | 0.05677 | 0.03692 | 0.03396 C8orf40  |
| cg22874960 | 0.05512 | 0.06841 | 0.06259 | 0.05754 | 0.04075 | 0.03751 | 0.04888 | 0.05626 | 0.04416 | 0.0527 LKAP      |
| cg22875391 | 0.69076 | 0.59309 | 0.64766 | 0.75958 | 0.70609 | 0.65514 | 0.63168 | 0.72674 | 0.5119  | 0.22019 FAM79B   |
| cg22876908 | 0.73022 | 0.4677  | 0.27367 | 0.32597 | 0.20511 | 0.26802 | 0.44497 | 0.33063 | 0.7434  | 0.42466 DGKA     |
| cg22878324 | 0.02617 | 0.0322  | 0.03188 | 0.03023 | 0.01686 | 0.031   | 0.02459 | 0.02589 | 0.0245  | 0.02132 PURB     |
| cg22879289 | 0.47286 | 0.16443 | 0.56417 | 0.68946 | 0.34258 | 0.78584 | 0.46849 | 0.23462 | 0.63161 | 0.28441 NID1     |
| cg22879515 | 0.0461  | 0.03573 | 0.76394 | 0.89706 | 0.65905 | 0.66155 | 0.04275 | 0.03537 | 0.22948 | 0.03677 BTG4     |
| cg22880820 | 0.13916 | 0.13966 | 0.28324 | 0.32222 | 0.11992 | 0.10399 | 0.1571  | 0.13443 | 0.12063 | 0.12137 C9orf100 |
| cg22881914 | 0.10265 | 0.03018 | 0.02425 | 0.02469 | 0.44603 | 0.60314 | 0.063   | 0.02378 | 0.03671 | 0.02392 NID2     |
| cg22882178 | 0.04824 | 0.03986 | 0.40234 | 0.65589 | 0.03645 | 0.03529 | 0.03721 | 0.03718 | 0.05917 | 0.03556 PITX3    |
| cg22884082 | 0.75364 | 0.73812 | 0.71798 | 0.72942 | 0.72462 | 0.68159 | 0.71407 | 0.7346  | 0.71414 | 0.71513 GJB7     |
| cg22885821 | 0.03886 | 0.03497 | 0.33766 | 0.27497 | 0.0871  | 0.03346 | 0.03034 | 0.03165 | 0.03004 | 0.02744 GNAS     |
| cg22885965 | 0.04825 | 0.04137 | 0.05941 | 0.06032 | 0.08134 | 0.05538 | 0.03366 | 0.03777 | 0.0538  | 0.04652 QRSL1    |
| cg22886005 | 0.04847 | 0.04627 | 0.04722 | 0.0403  | 0.04932 | 0.04407 | 0.03878 | 0.04089 | 0.04042 | 0.04585 ILKAP    |
| cg22886089 | 0.03948 | 0.03354 | 0.37679 | 0.55773 | 0.32994 | 0.51641 | 0.12363 | 0.114   | 0.07987 | 0.23964 SCG3     |
| cg22889448 | 0.32185 | 0.11348 | 0.12279 | 0.1184  | 0.41328 | 0.55171 | 0.09333 | 0.09877 | 0.09436 | 0.07435 EMR1     |
| cg22889570 | 0.03262 | 0.0331  | 0.03955 | 0.03486 | 0.03369 | 0.02663 | 0.30329 | 0.25486 | 0.02068 | 0.02635 ZNF596   |
| cg22892110 | 0.04603 | 0.03258 | 0.89661 | 0.9467  | 0.81564 | 0.83319 | 0.34494 | 0.25598 | 0.66438 | 0.64594 MAPK15   |
| cg22892237 | 0.05687 | 0.0516  | 0.06091 | 0.05593 | 0.05355 | 0.04646 | 0.04113 | 0.03848 | 0.04019 | 0.03695 DPY19L3  |
| cg22892904 | 0.88328 | 0.78931 | 0.87011 | 0.89485 | 0.84771 | 0.75441 | 0.86857 | 0.45839 | 0.65654 | 0.63804 CBX2     |
| cg22898761 | 0.63406 | 0.61786 | 0.63017 | 0.66838 | 0.55619 | 0.4898  | 0.52132 | 0.47428 | 0.62249 | 0.59734 CASP8    |
| cg22899145 | 0.87742 | 0.70192 | 0.92382 | 0.93601 | 0.95136 | 0.94547 | 0.57051 | 0.71279 | 0.91949 | 0.83966 OPN1LW   |
| cg22901146 | 0.06849 | 0.12997 | 0.78872 | 0.81095 | 0.84329 | 0.84948 | 0.24253 | 0.40249 | 0.83153 | 0.7745 GUCY2F    |
| cg22901840 | 0.69648 | 0.92111 | 0.59641 | 0.55766 | 0.95167 | 0.92523 | 0.70337 | 0.62592 | 0.93936 | 0.94608 DIRAS3   |
| cg22902083 | 0.06177 | 0.0789  | 0.06154 | 0.05237 | 0.04876 | 0.06554 | 0.05414 | 0.05194 | 0.05398 | 0.0395 CNN2      |
| cg22903365 | 0.03641 | 0.03806 | 0.04271 | 0.03624 | 0.04382 | 0.03955 | 0.03217 | 0.02854 | 0.03489 | 0.04137 KIAA0423 |
| cg22903370 |         | 0.13087 | 0.18777 | 0.17082 | 0.67208 | 0.30948 | 0.07758 | 0.08076 |         | 0.10053 SSR4     |
| cg22905097 | 0.04052 | 0.05677 | 0.03471 | 0.03751 | 0.04259 | 0.05387 | 0.02776 | 0.0323  | 0.03321 | 0.03064 EPST11   |
| cg22905968 | 0.05607 | 0.05    | 0.05935 | 0.05604 | 0.05381 | 0.06513 | 0.0627  | 0.0629  | 0.04437 | 0.04733 SERTAD1  |
| cg22906389 | 0.02376 | 0.02724 | 0.02719 | 0.02677 | 0.01633 | 0.02486 | 0.01968 | 0.02285 | 0.01783 | 0.02548 CASP7    |
| cg22907065 | 0.02988 | 0.03487 | 0.02738 | 0.02792 | 0.02849 | 0.02843 | 0.02201 | 0.02256 | 0.02086 | 0.02178 RHOA     |
| cg22908581 | 0.61504 | 0.08485 | 0.14719 | 0.24367 | 0.19981 | 0.28284 | 0.30014 | 0.32927 | 0.10635 | 0.04617 CD4      |
| cg22909609 | 0.78785 | 0.61953 | 0.14513 | 0.10935 | 0.18339 | 0.15465 | 0.54663 | 0.82497 | 0.70035 | 0.58739 ITGBL1   |
| cg22909962 | 0.0399  | 0.04043 | 0.04423 | 0.03747 | 0.03763 | 0.03666 | 0.03513 | 0.04219 | 0.037   | 0.03898 RPL7L1   |
| cg22913584 | 0.0171  | 0.01639 | 0.01632 | 0.01636 | 0.01448 | 0.0148  | 0.01461 | 0.01411 | 0.017   | 0.01437 SSBP2    |
| cg22915732 | 0.12909 | 0.10674 | 0.17891 | 0.24874 | 0.12046 | 0.07848 | 0.1947  | 0.22315 | 0.0995  | 0.10652 MGC34646 |
| cg22916109 | 0.02675 | 0.02604 | 0.47046 | 0.51794 | 0.02261 | 0.02154 | 0.02569 | 0.02375 | 0.02241 | 0.01902 IREB2    |
| cg22917082 | 0.03614 | 0.04112 | 0.0428  | 0.03618 | 0.03115 | 0.03279 | 0.02583 | 0.03377 | 0.03079 | 0.02883 CXorf15  |

|            |         |         |         |         |         |         |         |         |         |                   |
|------------|---------|---------|---------|---------|---------|---------|---------|---------|---------|-------------------|
| cg22917487 | 0.88241 | 0.65263 | 0.92197 | 0.92564 | 0.92095 | 0.89078 | 0.73535 | 0.52031 | 0.92415 | 0.83679 CX3CR1    |
| cg22918700 | 0.8305  | 0.57361 | 0.85613 | 0.88816 | 0.7862  | 0.83961 | 0.8507  | 0.59102 | 0.71291 | 0.74745 LOC161247 |
| cg22919370 | 0.10146 | 0.09516 | 0.09301 | 0.10208 | 0.05667 | 0.15474 | 0.07074 | 0.06088 | 0.05759 | 0.07179 HIST1H3I  |
| cg22919728 | 0.29163 | 0.17916 | 0.50469 | 0.62623 | 0.62926 | 0.38985 | 0.09181 | 0.05862 | 0.06477 | 0.05893 CHST13    |
| cg22920417 | 0.14165 | 0.11471 | 0.50015 | 0.65269 | 0.22326 | 0.18398 | 0.17353 | 0.12792 | 0.32182 | 0.15746 FLJ44881  |
| cg22920538 | 0.03208 | 0.02581 | 0.04291 | 0.03357 | 0.02726 | 0.03515 | 0.03188 | 0.02637 | 0.07544 | 0.03404 UROD      |
| cg22920873 | 0.02717 | 0.02525 | 0.03198 | 0.03044 | 0.0293  | 0.03335 | 0.02172 | 0.02104 | 0.0244  | 0.0171 HSPC268    |
| cg22925006 | 0.0815  | 0.08465 | 0.12754 | 0.13313 | 0.18462 | 0.08596 | 0.11054 | 0.09974 | 0.08853 | 0.10947 ATP6V1C1  |
| cg22925639 | 0.72264 | 0.59138 | 0.42423 | 0.49122 | 0.70347 | 0.82342 | 0.4798  | 0.51687 | 0.83812 | 0.72065 CHRNA1    |
| cg22926560 | 0.11579 | 0.3053  | 0.77236 | 0.67428 | 0.38758 | 0.23463 | 0.08804 | 0.04403 | 0.07297 | 0.05682 PFKFB2    |
| cg22927043 | 0.05055 | 0.05385 | 0.06875 | 0.07655 | 0.08649 | 0.05962 | 0.0432  | 0.04118 | 0.06115 | 0.06451 NPPB      |
| cg22927134 | 0.41684 | 0.17629 | 0.15977 | 0.16078 | 0.4504  | 0.26874 | 0.22739 | 0.3828  | 0.35991 | 0.1543 CHRM5      |
| cg22927153 | 0.05393 | 0.03932 | 0.05182 | 0.03712 | 0.05903 | 0.04125 | 0.07207 | 0.05197 | 0.03511 | 0.05141 MAP2K5    |
| cg22930187 | 0.70872 | 0.47368 | 0.55125 | 0.61979 | 0.84694 | 0.8704  | 0.85312 | 0.84322 | 0.88822 | 0.88014 ARTN      |
| cg22931889 | 0.83453 | 0.25919 | 0.85615 | 0.87968 | 0.73323 | 0.11475 | 0.60718 | 0.59467 | 0.85802 | 0.06364 TUBB1     |
| cg22932215 | 0.08326 | 0.08254 | 0.08908 | 0.07356 | 0.19298 | 0.10963 | 0.08492 | 0.08298 | 0.11328 | 0.09212 COPS7B    |
| cg22932819 | 0.86474 | 0.84514 | 0.8501  | 0.83017 | 0.84171 | 0.55317 | 0.86368 | 0.8648  | 0.90258 | 0.86227 GPNMB     |
| cg22933847 | 0.82892 | 0.37611 | 0.31887 | 0.28581 | 0.92043 | 0.68576 | 0.74351 | 0.53325 | 0.83885 | 0.45959 MRGPRF    |
| cg22936016 | 0.06572 | 0.06201 | 0.06427 | 0.0542  | 0.12311 | 0.09812 | 0.09503 | 0.08578 | 0.09451 | 0.09949 FSIP1     |
| cg22937320 | 0.50634 | 0.08086 | 0.93825 | 0.96259 | 0.97653 | 0.95953 | 0.82825 | 0.92578 | 0.80898 | 0.51288 C9orf138  |
| cg22937804 | 0.329   | 0.1929  | 0.2834  | 0.40914 | 0.42654 | 0.50475 | 0.23128 | 0.22125 | 0.07449 | 0.18619 MGC44505  |
| cg22938407 | 0.06861 | 0.05751 | 0.05668 | 0.05463 | 0.03651 | 0.06062 | 0.03976 | 0.0424  | 0.0423  | 0.04498 CEP72     |
| cg22939715 | 0.03127 | 0.0348  | 0.03659 | 0.0355  | 0.02638 | 0.02602 | 0.02393 | 0.02641 | 0.02625 | 0.02723 C1orf2    |
| cg22940152 | 0.64109 | 0.27258 | 0.81403 | 0.8014  | 0.89074 | 0.76846 | 0.7901  | 0.41216 | 0.46248 | 0.42173 LOC284739 |
| cg22940789 | 0.36477 | 0.04488 | 0.64161 | 0.64708 | 0.5372  | 0.04444 | 0.10046 | 0.04166 | 0.35839 | 0.19297 DCAMKL1   |
| cg22940988 | 0.77427 | 0.72017 | 0.77194 | 0.81602 | 0.7242  | 0.75477 | 0.76247 | 0.73059 | 0.78807 | 0.75203 IQCH      |
| cg22941086 | 0.87147 | 0.8221  | 0.87661 | 0.89491 | 0.84853 | 0.89096 | 0.87866 | 0.88208 | 0.46682 | 0.58425 C12orf40  |
| cg22946150 | 0.01599 | 0.01871 | 0.01948 | 0.01972 | 0.01749 | 0.01727 | 0.14192 | 0.01906 | 0.01829 | 0.01825 SH3GL3    |
| cg22946876 | 0.04708 | 0.04744 | 0.06428 | 0.06155 | 0.06178 | 0.04237 | 0.05178 | 0.06329 | 0.05415 | 0.05191 RASSF8    |
| cg22947000 | 0.16085 | 0.1701  | 0.16274 | 0.17364 | 0.28673 | 0.22065 | 0.17494 | 0.16101 | 0.13326 | 0.14219 BCMO1     |
| cg22949637 | 0.03023 | 0.03029 | 0.03174 | 0.03341 | 0.02208 | 0.03312 | 0.02787 | 0.02579 | 0.03076 | 0.02698 PRPF38B   |
| cg22950347 | 0.0348  | 0.03557 | 0.03892 | 0.03966 | 0.03229 | 0.03257 | 0.03294 | 0.02571 | 0.03571 | 0.02696 C13orf23  |
| cg22950391 | 0.03076 | 0.04197 | 0.0349  | 0.03818 | 0.05775 | 0.04135 | 0.02979 | 0.02824 | 0.03269 | 0.02566 ZNF192    |
| cg22951794 | 0.0581  | 0.15009 | 0.15069 | 0.20346 | 0.65972 | 0.71537 | 0.40959 | 0.43656 | 0.58197 | 0.41721 OR10A5    |
| cg22954265 | 0.70932 | 0.67897 | 0.77408 | 0.80704 | 0.91078 | 0.87451 | 0.64609 | 0.61277 | 0.57626 | 0.75591 FLJ45832  |
| cg22954818 | 0.51826 | 0.05647 | 0.60279 | 0.77948 | 0.32245 | 0.43023 | 0.20712 | 0.15076 | 0.20144 | 0.16001 APOBEC3A  |
| cg22956254 | 0.17514 | 0.11723 | 0.51641 | 0.67158 | 0.38969 | 0.11672 | 0.15012 | 0.13936 | 0.17084 | 0.15771 GDF3      |
| cg22956315 | 0.10447 | 0.06524 | 0.05894 | 0.05696 | 0.0606  | 0.05317 | 0.04529 | 0.04127 | 0.03982 | 0.03595 TTC1      |
| cg22956483 | 0.42357 | 0.06558 | 0.82892 | 0.89206 | 0.83501 | 0.82621 | 0.10536 | 0.06133 | 0.56713 | 0.76709 IGF2      |
| cg22956956 | 0.07706 | 0.08575 | 0.417   | 0.33665 | 0.20545 | 0.07545 | 0.13138 | 0.0812  | 0.11761 | 0.06181 TFRC      |
| cg22957381 | 0.04997 | 0.03872 | 0.23734 | 0.05049 | 0.21315 | 0.03768 | 0.07534 | 0.03495 | 0.09387 | 0.03554 KCND3     |

|            |         |         |         |         |         |         |         |         |         |                  |
|------------|---------|---------|---------|---------|---------|---------|---------|---------|---------|------------------|
| cg22959932 | 0.72609 | 0.36658 | 0.71856 | 0.78453 | 0.38871 | 0.78781 | 0.46815 | 0.80715 | 0.79334 | 0.76948 C3orf32  |
| cg22960185 | 0.05196 | 0.0519  | 0.15476 | 0.10005 | 0.22988 | 0.04016 | 0.05431 | 0.04784 | 0.04319 | 0.0295 TMEM38A   |
| cg22960284 | 0.0606  | 0.05173 | 0.04912 | 0.0369  | 0.06623 | 0.06733 | 0.03544 | 0.03889 | 0.04572 | 0.06182 PYGL     |
| cg22960501 | 0.03259 | 0.03255 | 0.03316 | 0.03176 | 0.02682 | 0.03154 | 0.03672 | 0.04863 | 0.0236  | 0.02576 IKKB     |
| cg22960952 | 0.41917 | 0.10523 | 0.11279 | 0.17375 | 0.28879 | 0.11561 | 0.10488 | 0.08543 | 0.09888 | 0.07841 FLJ23657 |
| cg22963452 | 0.77098 | 0.73603 | 0.8059  | 0.80894 | 0.75224 | 0.8101  | 0.67818 | 0.73412 | 0.78976 | 0.57256 IFITM1   |
| cg22967016 | 0.3472  | 0.04428 | 0.26188 | 0.45337 | 0.18729 | 0.08829 | 0.05427 | 0.03689 | 0.04024 | 0.03177 MICAL2   |
| cg22967284 | 0.09225 | 0.05202 | 0.06856 | 0.07004 | 0.35008 | 0.57389 | 0.04664 | 0.05191 | 0.04946 | 0.04578 SLIT1    |
| cg22967298 | 0.05224 | 0.05404 | 0.05219 | 0.04923 | 0.0404  | 0.05154 | 0.05465 | 0.05331 | 0.0519  | 0.04817 PCNP     |
| cg22968401 | 0.15131 | 0.08146 | 0.56862 | 0.77735 | 0.15195 | 0.05355 | 0.12581 | 0.04798 | 0.18649 | 0.04302 PIPOX    |
| cg22968727 | 0.04751 | 0.03727 | 0.04886 | 0.05253 | 0.04578 | 0.05727 | 0.03311 | 0.03002 | 0.04515 | 0.04726 RPL11    |
| cg22970435 | 0.52655 | 0.52576 | 0.67137 | 0.82928 | 0.45591 | 0.11733 | 0.27519 | 0.07838 | 0.68936 | 0.72441 SPATS1   |
| cg22971191 | 0.28117 | 0.25641 | 0.34401 | 0.42552 | 0.34778 | 0.41613 | 0.12126 | 0.09039 | 0.13279 | 0.13367 SLC10A2  |
| cg22972055 | 0.93547 | 0.91558 | 0.14181 | 0.12101 | 0.86379 | 0.89435 | 0.28729 | 0.87413 | 0.84919 | 0.49192 UNC84A   |
| cg22973038 | 0.04327 | 0.04101 | 0.04693 | 0.04999 | 0.04252 | 0.0334  | 0.03655 | 0.03298 | 0.03923 | 0.02921 TUFM     |
| cg22973042 | 0.13417 | 0.17188 | 0.16788 | 0.15439 | 0.25829 | 0.17874 | 0.17017 | 0.17832 | 0.15293 | 0.10786 AKT2     |
| cg22974215 | 0.1355  | 0.0353  | 0.03693 | 0.0357  | 0.02686 | 0.0351  | 0.03264 | 0.03151 | 0.02693 | 0.02548 B3GAT3   |
| cg22975568 | 0.74364 | 0.52773 | 0.62377 | 0.72682 | 0.85006 | 0.86614 | 0.75572 | 0.56263 | 0.81953 | 0.42231 CD74     |
| cg22975712 | 0.85234 | 0.55401 | 0.44895 | 0.53554 | 0.18621 | 0.46424 | 0.10313 | 0.08739 | 0.5794  | 0.42209 GALR3    |
| cg22975913 | 0.10889 | 0.10803 | 0.33553 | 0.41819 | 0.3032  | 0.1828  | 0.16658 | 0.17361 | 0.07618 | 0.11789 WT1      |
| cg22978941 | 0.05837 | 0.02937 | 0.03714 | 0.03352 | 0.02997 | 0.02906 | 0.02994 | 0.03321 | 0.02834 | 0.03068 UNG      |
| cg22979433 | 0.82717 | 0.84138 | 0.84857 | 0.89467 | 0.83433 | 0.74043 | 0.84714 | 0.8615  | 0.74392 | 0.85562 CKMT2    |
| cg22980079 | 0.91205 | 0.90639 | 0.90079 | 0.91977 | 0.87029 | 0.87566 | 0.90749 | 0.89695 | 0.92695 | 0.92006 C4orf8   |
| cg22980351 | 0.19779 | 0.15084 | 0.82273 | 0.85725 | 0.10967 | 0.10039 | 0.37925 | 0.53556 | 0.47914 | 0.44057 WDR40B   |
| cg22981461 | 0.32158 | 0.07172 | 0.47934 | 0.59267 | 0.1903  | 0.08701 | 0.07894 | 0.05805 | 0.06076 | 0.06628 OTUB2    |
| cg22982528 | 0.02714 | 0.02917 | 0.02745 | 0.0279  | 0.02378 | 0.02387 | 0.02397 | 0.02507 | 0.02352 | 0.02077 BRWD1    |
| cg22983092 | 0.90335 | 0.93322 | 0.90296 | 0.92801 | 0.55869 | 0.30086 | 0.04956 | 0.0424  | 0.27605 | 0.04494 KRT25A   |
| cg22983460 | 0.06156 | 0.05496 | 0.04716 | 0.04452 | 0.04695 | 0.04176 | 0.47762 | 0.36554 | 0.03998 | 0.03797 SUV39H1  |
| cg22983529 | 0.59919 | 0.78592 | 0.04894 | 0.04505 | 0.03385 | 0.03914 | 0.08429 | 0.04513 | 0.04036 | 0.0429 GNG11     |
| cg22983885 | 0.08481 | 0.0464  | 0.09013 | 0.08403 | 0.0967  | 0.047   | 0.1626  | 0.08074 | 0.04598 | 0.04865 C1orf128 |
| cg22984277 | 0.74262 | 0.50979 | 0.68507 | 0.71478 | 0.65929 | 0.6551  | 0.53541 | 0.56327 | 0.45655 | 0.47079 CLEC4E   |
| cg22984616 | 0.03176 | 0.0331  | 0.03747 | 0.03113 | 0.03437 | 0.03617 | 0.02464 | 0.02692 | 0.02469 | 0.02101 BAG2     |
| cg22986077 | 0.69151 | 0.70841 | 0.42323 | 0.43963 | 0.54571 | 0.7135  | 0.44674 | 0.47625 | 0.73654 | 0.7228 HBXAP     |
| cg22986271 | 0.08957 | 0.08884 | 0.09604 | 0.09197 | 0.05306 | 0.07225 | 0.07752 | 0.08361 | 0.07706 | 0.07539 SACM1L   |
| cg22986999 | 0.6212  | 0.15436 | 0.08741 | 0.05021 | 0.20001 | 0.24635 | 0.42354 | 0.06639 | 0.20022 | 0.06303 MRGPRF   |
| cg22988566 | 0.07892 | 0.08287 | 0.44515 | 0.5216  | 0.23684 | 0.32365 | 0.09463 | 0.11611 | 0.07704 | 0.07067 WFDC10B  |
| cg22991148 | 0.67588 | 0.5286  | 0.67841 | 0.85071 | 0.16565 | 0.29833 | 0.27853 | 0.10612 | 0.03953 | 0.03817 C21orf29 |
| cg22992570 | 0.02102 | 0.02307 | 0.02713 | 0.02188 | 0.01703 | 0.02048 | 0.0208  | 0.02051 | 0.02083 | 0.01883 PHCA     |
| cg22994720 | 0.04052 | 0.03394 | 0.62476 | 0.69735 | 0.63639 | 0.78926 | 0.0445  | 0.03428 | 0.07524 | 0.03599 CHRDL2   |
| cg22995106 | 0.11608 | 0.1313  | 0.13287 | 0.11286 | 0.11739 | 0.11805 | 0.12803 | 0.10671 | 0.16132 | 0.11289 COG4     |
| cg22995176 | 0.15976 | 0.08101 | 0.78937 | 0.76256 | 0.38351 | 0.46991 | 0.20878 | 0.15913 | 0.66736 | 0.48607 UPK3B    |



|            |         |         |         |         |         |         |         |         |         |         |          |
|------------|---------|---------|---------|---------|---------|---------|---------|---------|---------|---------|----------|
| cg22996555 | 0.01875 | 0.01939 | 0.02117 | 0.02003 | 0.01592 | 0.01648 | 0.01714 | 0.01476 | 0.01652 | 0.01766 | GCS1     |
| cg22997415 | 0.78726 | 0.55841 | 0.52724 | 0.70241 | 0.60027 | 0.76224 | 0.50915 | 0.63594 | 0.18716 | 0.36791 | OVGP1    |
| cg22997490 | 0.05119 | 0.06177 | 0.06324 | 0.06772 | 0.14217 | 0.08055 | 0.05941 | 0.06365 | 0.0578  | 0.07659 | ZNF286   |
| cg22998811 | 0.04145 | 0.03472 | 0.09917 | 0.08412 | 0.04033 | 0.05651 | 0.06389 | 0.06295 | 0.05225 | 0.05309 | ZNF563   |
| cg22998840 | 0.49089 | 0.3956  | 0.53732 | 0.43368 | 0.3285  | 0.15379 | 0.11669 | 0.10501 | 0.10917 | 0.09718 | TCEAL3   |
| cg23001457 | 0.11796 | 0.05697 | 0.23576 | 0.23334 | 0.27782 | 0.22056 | 0.06443 | 0.06405 | 0.0797  | 0.07871 | MRGPRX1  |
| cg23001650 | 0.14187 | 0.08466 | 0.15321 | 0.11497 | 0.06978 | 0.06283 | 0.12277 | 0.11147 | 0.06144 | 0.05643 | B4GALT2  |
| cg23002761 | 0.0232  | 0.02593 | 0.02958 | 0.02594 | 0.56833 | 0.51875 | 0.44474 | 0.20083 | 0.02253 | 0.01932 | FBLIM1   |
| cg23002907 | 0.05524 | 0.05298 | 0.06002 | 0.05274 | 0.04811 | 0.03907 | 0.04578 | 0.04421 | 0.03977 | 0.04393 | RBMS2    |
| cg23003832 | 0.08071 | 0.05032 | 0.52371 | 0.49633 | 0.15507 | 0.28723 | 0.34588 | 0.28345 | 0.04515 | 0.03943 | ZDHC12   |
| cg23003881 | 0.11174 | 0.09379 | 0.11492 | 0.09183 | 0.14955 | 0.0906  | 0.10453 | 0.07994 | 0.08781 | 0.09741 | FAM44B   |
| cg23004625 | 0.05736 | 0.05926 | 0.07773 | 0.06153 | 0.10148 | 0.05148 | 0.05365 | 0.05769 | 0.04747 | 0.04087 | PIGM     |
| cg23006204 | 0.58286 | 0.50696 | 0.91904 | 0.90614 | 0.92314 | 0.89272 | 0.72668 | 0.40536 | 0.26638 | 0.37151 | DPM2     |
| cg23009046 | 0.12657 | 0.06915 | 0.61213 | 0.63682 | 0.22322 | 0.29684 | 0.15801 | 0.21803 | 0.06201 | 0.06169 | PVRL1    |
| cg23013392 | 0.04684 | 0.04565 | 0.04988 | 0.04396 | 0.03797 | 0.04452 | 0.04367 | 0.04294 | 0.03653 | 0.03985 | PARP3    |
| cg23013864 | 0.49513 | 0.27162 | 0.23568 | 0.27919 | 0.63469 | 0.13831 | 0.26156 | 0.12579 | 0.57602 | 0.38347 | CAP2     |
| cg23013931 | 0.03017 | 0.03382 | 0.03988 | 0.03249 | 0.02795 | 0.03802 | 0.03421 | 0.03241 | 0.03396 | 0.02967 | SLC25A17 |
| cg23018448 | 0.08773 | 0.08435 | 0.3964  | 0.45733 | 0.1437  | 0.24616 | 0.33333 | 0.11838 | 0.06125 | 0.05636 | QTRT1    |
| cg23018891 | 0.04377 | 0.04058 | 0.05665 | 0.05084 | 0.04607 | 0.04294 | 0.03906 | 0.04484 | 0.05071 | 0.05522 | BCAS2    |
| cg23020402 | 0.03846 | 0.03872 | 0.05677 | 0.05008 | 0.16483 | 0.04962 | 0.02386 | 0.02575 | 0.04171 | 0.02762 | TTRAP    |
| cg23022999 | 0.83022 | 0.79566 | 0.8321  | 0.80641 | 0.83978 | 0.82901 | 0.7541  | 0.62426 | 0.53961 | 0.30862 | FLJ45909 |
| cg23026920 | 0.03155 | 0.03466 | 0.03498 | 0.02903 | 0.02854 | 0.02941 | 0.02536 | 0.02978 | 0.02318 | 0.02171 | TP53RK   |
| cg23026995 | 0.07504 | 0.07839 | 0.75019 | 0.55142 | 0.66232 | 0.60311 | 0.24415 | 0.07854 | 0.12543 | 0.07025 | XPNPEP2  |
| cg23029193 | 0.1815  | 0.05312 | 0.75382 | 0.86949 | 0.08785 | 0.05056 | 0.2842  | 0.28309 | 0.25811 | 0.3223  | FLJ39155 |
| cg23029491 | 0.04402 | 0.04741 | 0.05039 | 0.03777 | 0.04195 | 0.04618 | 0.04405 | 0.03856 | 0.03671 | 0.03406 | UBAP2    |
| cg23029494 | 0.06696 | 0.06154 | 0.05957 | 0.06199 | 0.05877 | 0.06326 | 0.04088 | 0.0398  | 0.04548 | 0.04203 | BCL2L12  |
| cg23029519 | 0.272   | 0.29199 | 0.61325 | 0.65132 | 0.72718 | 0.79397 | 0.2183  | 0.20383 | 0.33189 | 0.25786 | IFNA4    |
| cg23030090 | 0.10206 | 0.0868  | 0.11946 | 0.11133 | 0.11897 | 0.1182  | 0.11463 | 0.08972 | 0.0751  | 0.07905 | RPS19    |
| cg23032316 | 0.17377 | 0.17193 | 0.19447 | 0.19252 | 0.2224  | 0.22106 | 0.20408 | 0.20871 | 0.19153 | 0.18717 | AAAS     |
| cg23032612 | 0.76775 | 0.72443 | 0.69605 | 0.72    | 0.66559 | 0.67297 | 0.39168 | 0.24706 | 0.3259  | 0.33203 | POSTN    |
| cg23033024 | 0.82741 | 0.86022 | 0.68857 | 0.70985 | 0.73678 | 0.77682 | 0.58505 | 0.81673 | 0.29811 | 0.4881  | CST8     |
| cg23033845 | 0.88653 | 0.8542  | 0.06816 | 0.04591 | 0.92501 | 0.88714 | 0.89354 | 0.87808 | 0.91733 | 0.90186 | TMEM88   |
| cg23033866 | 0.03634 | 0.03426 | 0.0373  | 0.0355  | 0.02429 | 0.03665 | 0.03671 | 0.03449 | 0.03825 | 0.02903 | MRPL12   |
| cg23034818 | 0.10229 | 0.0623  | 0.1826  | 0.12968 | 0.63105 | 0.55526 | 0.24049 | 0.0707  | 0.0811  | 0.04713 | BTBD6    |
| cg23035555 | 0.04313 | 0.03742 | 0.04607 | 0.04018 | 0.04138 | 0.03656 | 0.03936 | 0.03673 | 0.03136 | 0.03115 | HLRC1    |
| cg23036025 | 0.87363 | 0.84196 | 0.85658 | 0.86704 | 0.91857 | 0.85599 | 0.84058 | 0.84346 | 0.62737 | 0.8301  | SLC27A5  |
| cg23036555 | 0.02065 | 0.02241 | 0.02372 | 0.02254 | 0.02665 | 0.0248  | 0.01539 | 0.01989 | 0.01751 | 0.01843 | PGD      |
| cg23037133 | 0.07496 | 0.07568 | 0.76114 | 0.83532 | 0.08509 | 0.06538 | 0.15214 | 0.06886 | 0.07636 | 0.07485 | OXGR1    |
| cg23037403 | 0.41622 | 0.56087 | 0.89438 | 0.89306 | 0.60197 | 0.52693 | 0.07039 | 0.36608 | 0.04818 | 0.04319 | ZNF454   |
| cg23040064 | 0.02731 | 0.03139 | 0.09297 | 0.03659 | 0.42386 | 0.49194 | 0.02786 | 0.0371  | 0.04031 | 0.02313 | JPH3     |
| cg23042138 | 0.87889 | 0.86305 | 0.86346 | 0.86614 | 0.90249 | 0.86098 | 0.85213 | 0.82195 | 0.85123 | 0.8532  | HYPB     |

|            |         |         |         |         |         |         |         |         |         |         |           |
|------------|---------|---------|---------|---------|---------|---------|---------|---------|---------|---------|-----------|
| cg23043119 | 0.05277 | 0.0418  | 0.04149 | 0.03754 | 0.02674 | 0.03167 | 0.03223 | 0.03254 | 0.04976 | 0.0294  | STARD4    |
| cg23043245 | 0.31321 | 0.08826 | 0.75891 | 0.84381 | 0.73886 | 0.83377 | 0.4789  | 0.46683 | 0.8313  | 0.7814  | PACSN1    |
| cg23043438 | 0.02162 | 0.02241 | 0.02374 | 0.02281 | 0.02023 | 0.02275 | 0.02019 | 0.01847 | 0.01933 | 0.01575 | TEX10     |
| cg23045073 | 0.13503 | 0.09409 | 0.26671 | 0.27121 | 0.28722 | 0.32745 | 0.17606 | 0.11119 | 0.13259 | 0.1107  | NPHS2     |
| cg23045373 | 0.02141 | 0.02546 | 0.02718 | 0.02494 | 0.02885 | 0.02202 | 0.02829 | 0.03091 | 0.02014 | 0.02011 | C8orf13   |
| cg23047271 | 0.11083 | 0.10575 | 0.37152 | 0.38887 | 0.14772 | 0.1427  | 0.12737 | 0.1185  | 0.58069 | 0.28939 | PRICKLE2  |
| cg23047681 | 0.0726  | 0.04672 | 0.06024 | 0.05941 | 0.05295 | 0.05472 | 0.04249 | 0.03987 | 0.04716 | 0.04734 | HACE1     |
| cg23048366 | 0.04139 | 0.03726 | 0.04366 | 0.04931 | 0.03352 | 0.0411  | 0.0491  | 0.04698 | 0.04578 | 0.04709 | HAGH      |
| cg23050981 | 0.03073 | 0.02436 | 0.03546 | 0.08101 | 0.08558 | 0.02917 | 0.03552 | 0.01937 | 0.37236 | 0.30535 | L1CAM     |
| cg23051598 | 0.29266 | 0.26814 | 0.26653 | 0.34777 | 0.17022 | 0.20688 | 0.13988 | 0.18406 | 0.2566  | 0.20321 | ATXN2L    |
| cg23051655 | 0.04163 | 0.04075 | 0.0472  | 0.04375 | 0.03256 | 0.03629 | 0.04162 | 0.04151 | 0.03531 | 0.03478 | SCYL3     |
| cg23051664 | 0.051   | 0.05178 | 0.05545 | 0.04909 | 0.58399 | 0.54332 | 0.0615  | 0.06229 | 0.06694 | 0.04535 | TNFRSF10D |
| cg23054437 | 0.77004 | 0.76718 | 0.15449 | 0.14105 | 0.5047  | 0.1973  | 0.18637 | 0.2628  | 0.13419 | 0.1223  | MOSC2     |
| cg23054676 | 0.03075 | 0.0298  | 0.03244 | 0.02376 | 0.01935 | 0.03551 | 0.02736 | 0.02808 | 0.02097 | 0.02347 | MTRR      |
| cg23054883 | 0.07589 | 0.04311 | 0.83187 | 0.81245 | 0.25276 | 0.53692 | 0.13465 | 0.04607 | 0.96378 | 0.93385 | FZD10     |
| cg23055159 | 0.09209 | 0.0758  | 0.0821  | 0.0546  | 0.12075 | 0.09362 | 0.06749 | 0.06661 | 0.066   | 0.06788 | COMMD8    |
| cg23055678 | 0.0493  | 0.05937 | 0.1836  | 0.25583 | 0.1012  | 0.10768 | 0.11176 | 0.0687  | 0.05292 | 0.05284 | IL1RAPL2  |
| cg23057732 | 0.07003 | 0.07716 | 0.07145 | 0.06418 | 0.0914  | 0.09219 | 0.05805 | 0.04994 | 0.0559  | 0.05719 | C3orf39   |
| cg23058901 | 0.8582  | 0.79318 | 0.82115 | 0.85538 | 0.84444 | 0.83741 | 0.81371 | 0.80442 | 0.85043 | 0.48849 | ALX4      |
| cg23060239 | 0.03056 | 0.02956 | 0.03549 | 0.03468 | 0.02122 | 0.02514 | 0.02495 | 0.02963 | 0.02784 | 0.02077 | RUSC1     |
| cg23061257 | 0.12604 | 0.10481 | 0.2758  | 0.29295 | 0.20516 | 0.23306 | 0.14546 | 0.1358  | 0.09854 | 0.06885 | YIPF1     |
| cg23061578 | 0.06275 | 0.06028 | 0.15353 | 0.3547  | 0.09996 | 0.10271 | 0.05066 | 0.05575 | 0.09143 | 0.06991 | SLC9A3    |
| cg23062876 | 0.08046 | 0.06941 | 0.08984 | 0.07469 | 0.09595 | 0.09115 | 0.05015 | 0.05325 | 0.07638 | 0.08513 | DBT       |
| cg23064554 | 0.82853 | 0.52042 | 0.7991  | 0.80695 | 0.80346 | 0.81782 | 0.77234 | 0.7855  | 0.83059 | 0.78475 | CTRC      |
| cg23065097 | 0.05694 | 0.07329 | 0.12117 | 0.21604 | 0.73213 | 0.30729 | 0.4828  | 0.04543 | 0.07432 | 0.05006 | FKBP1B    |
| cg23066860 | 0.066   | 0.07193 | 0.10282 | 0.07503 | 0.22434 | 0.21428 | 0.3711  | 0.52114 | 0.06534 | 0.05939 | GPRASP2   |
| cg23066879 | 0.0372  | 0.03423 | 0.05997 | 0.04771 | 0.04799 | 0.04952 | 0.02863 | 0.03544 | 0.03245 | 0.0293  | BRAF      |
| cg23067535 | 0.94555 | 0.82717 | 0.92233 | 0.92396 | 0.95453 | 0.8937  | 0.92998 | 0.76943 | 0.92287 | 0.874   | FAM83A    |
| cg23069305 | 0.09949 | 0.09389 | 0.12912 | 0.09197 | 0.18402 | 0.13051 | 0.11172 | 0.09777 | 0.1     | 0.08156 | SENP1     |
| cg23070249 | 0.089   | 0.0714  | 0.10195 | 0.09498 | 0.21811 | 0.13885 | 0.0735  | 0.06174 | 0.06121 | 0.0818  | HIST1H2BC |
| cg23070585 | 0.02162 | 0.022   | 0.02086 | 0.02049 | 0.01608 | 0.01718 | 0.02185 | 0.02253 | 0.01452 | 0.01576 | RXRB      |
| cg23073111 | 0.26034 | 0.24238 | 0.21208 | 0.23905 | 0.15258 | 0.18759 | 0.1618  | 0.21653 | 0.19311 | 0.15088 | ESRRA     |
| cg23074401 | 0.0311  | 0.02878 | 0.035   | 0.03397 | 0.02664 | 0.03353 | 0.03041 | 0.03075 | 0.02645 | 0.02424 | DDX10     |
| cg23074453 | 0.08115 | 0.06014 | 0.26424 | 0.34379 | 0.34631 | 0.24013 | 0.07219 | 0.06546 | 0.355   | 0.1197  | FRMD5     |
| cg23074747 | 0.03098 | 0.02993 | 0.03354 | 0.03071 | 0.03021 | 0.03035 | 0.0238  | 0.02263 | 0.01974 | 0.01886 | C9orf72   |
| cg23075286 | 0.81047 | 0.55331 | 0.50458 | 0.66396 | 0.27796 | 0.40188 | 0.06699 | 0.04396 | 0.08702 | 0.05013 | GALP      |
| cg23075568 | 0.03151 | 0.03162 | 0.05505 | 0.0358  | 0.03957 | 0.02782 | 0.03196 | 0.03276 | 0.02462 | 0.02086 | CORO2A    |
| cg23076086 | 0.04751 | 0.05648 | 0.07836 | 0.07638 | 0.07336 | 0.06349 | 0.04711 | 0.03864 | 0.07264 | 0.05002 | FYN       |
| cg23078294 | 0.02977 | 0.03655 | 0.03481 | 0.03091 | 0.02808 | 0.02896 | 0.03072 | 0.0311  | 0.03115 | 0.0307  | RSBN1     |
| cg23078779 | 0.04718 | 0.04937 | 0.06529 | 0.05404 | 0.0785  | 0.05441 | 0.21803 | 0.19412 | 0.03421 | 0.03347 | MAGED4    |
| cg23079782 | 0.75347 | 0.61635 | 0.50112 | 0.73021 | 0.65545 | 0.44329 | 0.35591 | 0.16004 | 0.44379 | 0.4279  | P2RY10    |

|            |         |         |         |         |         |         |         |         |         |                  |
|------------|---------|---------|---------|---------|---------|---------|---------|---------|---------|------------------|
| cg23080667 | 0.03219 | 0.03686 | 0.04273 | 0.04428 | 0.05359 | 0.04931 | 0.04148 | 0.03788 | 0.0336  | 0.02848 STK35    |
| cg23081213 | 0.5665  | 0.43591 | 0.90241 | 0.91225 | 0.67008 | 0.89178 | 0.27988 | 0.20653 | 0.90281 | 0.82476 PRKAG3   |
| cg23082632 | 0.0662  | 0.06363 | 0.08414 | 0.07751 | 0.0704  | 0.06839 | 0.07427 | 0.07388 | 0.06558 | 0.06548 B4GALT3  |
| cg23082877 | 0.73931 | 0.25544 | 0.88599 | 0.89349 | 0.92222 | 0.8682  | 0.86472 | 0.84854 | 0.89899 | 0.77917 RASIP1   |
| cg23083672 | 0.75266 | 0.62059 | 0.83408 | 0.85456 | 0.63035 | 0.55179 | 0.42476 | 0.52062 | 0.89828 | 0.84849 EGFL6    |
| cg23087084 | 0.038   | 0.04085 | 0.04586 | 0.04005 | 0.03393 | 0.03687 | 0.04151 | 0.03529 | 0.03497 | 0.03952 PXMP3    |
| cg23087130 | 0.05932 | 0.04766 | 0.05789 | 0.05058 | 0.05278 | 0.05723 | 0.04709 | 0.05417 | 0.04352 | 0.04258 ABI1     |
| cg23088430 | 0.04001 | 0.03526 | 0.03428 | 0.02986 | 0.02527 | 0.03043 | 0.02946 | 0.02953 | 0.03132 | 0.02407 EEF1D    |
| cg23089298 | 0.03285 | 0.03536 | 0.03698 | 0.03916 | 0.05119 | 0.03555 | 0.03061 | 0.03196 | 0.03686 | 0.03146 SEMA4C   |
| cg23089438 | 0.11327 | 0.1042  | 0.11882 | 0.11495 | 0.07362 | 0.09116 | 0.07151 | 0.08679 | 0.08781 | 0.09017 CSF1     |
| cg23089840 | 0.37162 | 0.12749 | 0.80248 | 0.85772 | 0.33935 | 0.2815  | 0.51729 | 0.83971 | 0.11606 | 0.0848 LRRC3     |
| cg23090046 | 0.77851 | 0.78841 | 0.07949 | 0.12343 | 0.03835 | 0.0503  | 0.04945 | 0.35782 | 0.03163 | 0.02866 KNS2     |
| cg23090824 | 0.2103  | 0.64222 | 0.26953 | 0.22845 | 0.22982 | 0.19869 | 0.25168 | 0.19189 | 0.4346  | 0.30026 PDE7B    |
| cg23091824 | 0.0889  | 0.06553 | 0.27781 | 0.42658 | 0.51513 | 0.19389 | 0.08597 | 0.08388 | 0.21246 | 0.06424 SLC12A7  |
| cg23092072 | 0.05546 | 0.0562  | 0.04862 | 0.05749 | 0.09131 | 0.08668 | 0.0402  | 0.04359 | 0.04247 | 0.04313 AFF1     |
| cg23092086 | 0.71234 | 0.61725 | 0.40091 | 0.54037 | 0.61788 | 0.65844 | 0.5639  | 0.45777 | 0.10565 | 0.31269 CES7     |
| cg23092823 | 0.57101 | 0.37071 | 0.91829 | 0.92273 | 0.95256 | 0.83934 | 0.59049 | 0.44322 | 0.64299 | 0.71722 PODN     |
| cg23093462 | 0.05636 | 0.0483  | 0.05347 | 0.04678 | 0.07054 | 0.04647 | 0.05767 | 0.04497 | 0.04023 | 0.04133 PARD3    |
| cg23093496 | 0.88903 | 0.87535 | 0.87579 | 0.89024 | 0.92919 | 0.89655 | 0.49091 | 0.40957 | 0.84361 | 0.47607 C16orf54 |
| cg23095584 | 0.05987 | 0.04854 | 0.49792 | 0.52822 | 0.30871 | 0.26151 | 0.41466 | 0.05497 | 0.89653 | 0.73062 GBX2     |
| cg23096553 | 0.01895 | 0.02382 | 0.02313 | 0.02372 | 0.02194 | 0.02278 | 0.01842 | 0.01768 | 0.01984 | 0.02107 KCNMB4   |
| cg23096644 | 0.06456 | 0.07404 | 0.11692 | 0.09488 | 0.16279 | 0.11399 | 0.07645 | 0.069   | 0.12198 | 0.12513 PEG10    |
| cg23097006 | 0.06419 | 0.05413 | 0.66178 | 0.81893 | 0.52279 | 0.11569 | 0.22027 | 0.12281 | 0.16068 | 0.2155 VSX1      |
| cg23097681 | 0.05318 | 0.04574 | 0.05315 | 0.04644 | 0.04566 | 0.05887 | 0.0515  | 0.04668 | 0.56342 | 0.5099 ARHGAP24  |
| cg23099347 | 0.02819 | 0.02666 | 0.02894 | 0.03198 | 0.02255 | 0.02497 | 0.02602 | 0.02777 | 0.02135 | 0.0242 C16orf53  |
| cg23099349 | 0.05804 | 0.04778 | 0.05014 | 0.05098 | 0.09811 | 0.06576 | 0.03933 | 0.04626 | 0.03625 | 0.0428 HIST1H3B  |
| cg23101680 | 0.21075 | 0.19221 | 0.22489 | 0.22571 | 0.31423 | 0.24868 | 0.21901 | 0.22292 | 0.14057 | 0.13997 NURIT    |
| cg23104823 | 0.05857 | 0.06278 | 0.06275 | 0.06487 | 0.03755 | 0.04891 | 0.05923 | 0.0474  | 0.05441 | 0.0479 PRPF39    |
| cg23104955 | 0.02716 | 0.0294  | 0.02821 | 0.02858 | 0.02341 | 0.02338 | 0.0269  | 0.02303 | 0.02217 | 0.02687 RPL7     |
| cg23106559 | 0.86842 | 0.74402 | 0.80983 | 0.83673 | 0.79788 | 0.71905 | 0.80828 | 0.693   | 0.83603 | 0.7534 METTL1    |
| cg23106779 | 0.89863 | 0.69891 | 0.90755 | 0.91109 | 0.90226 | 0.89126 | 0.62602 | 0.70634 | 0.73681 | 0.66105 CXorf2   |
| cg23106864 | 0.04676 | 0.04413 | 0.04547 | 0.0455  | 0.03647 | 0.04491 | 0.04001 | 0.04593 | 0.03865 | 0.04179 SASS6    |
| cg23109191 | 0.03864 | 0.03062 | 0.03271 | 0.03219 | 0.02858 | 0.03228 | 0.03353 | 0.03131 | 0.02926 | 0.02294 GAB2     |
| cg23109897 | 0.1585  | 0.1395  | 0.20083 | 0.18628 | 0.25641 | 0.16584 | 0.33451 | 0.2538  | 0.17173 | 0.16678 PRKDC    |
| cg23110514 | 0.0926  | 0.08747 | 0.12553 | 0.17489 | 0.24684 | 0.28099 | 0.08354 | 0.07587 | 0.18695 | 0.08571 LCE3E    |
| cg23110832 | 0.04856 | 0.04696 | 0.052   | 0.0488  | 0.04287 | 0.05186 | 0.03859 | 0.0451  | 0.03763 | 0.04427 FAM100B  |
| cg23111544 | 0.8063  | 0.7201  | 0.2249  | 0.21056 | 0.54013 | 0.53456 | 0.29566 | 0.1354  | 0.19168 | 0.45585 REG1A    |
| cg23112213 | 0.13712 | 0.12888 | 0.13312 | 0.13509 | 0.10422 | 0.13458 | 0.13095 | 0.13156 | 0.11524 | 0.10995 CDC23    |
| cg23113963 | 0.87186 | 0.69837 | 0.39387 | 0.49872 | 0.50193 | 0.49765 | 0.8108  | 0.88739 | 0.09488 | 0.12191 SCNN1B   |
| cg23114594 | 0.07938 | 0.49045 | 0.87499 | 0.90462 | 0.88432 | 0.54922 | 0.11482 | 0.19932 | 0.90043 | 0.11783 C10orf30 |
| cg23114866 | 0.02458 | 0.0238  | 0.03918 | 0.03663 | 0.02646 | 0.02622 | 0.02793 | 0.02477 | 0.02739 | 0.0206 NKX2-2    |

|            |         |         |         |         |         |         |         |         |         |         |          |
|------------|---------|---------|---------|---------|---------|---------|---------|---------|---------|---------|----------|
| cg23116589 | 0.14378 | 0.29331 | 0.14689 | 0.13533 | 0.1576  | 0.09957 | 0.09724 | 0.07745 | 0.0916  | 0.11107 | ARMCX1   |
| cg23118151 | 0.07035 | 0.06779 | 0.08905 | 0.06934 | 0.06248 | 0.0583  | 0.06351 | 0.06425 | 0.06787 | 0.06215 | FLJ21945 |
| cg23121547 | 0.01809 | 0.01808 | 0.02043 | 0.01753 | 0.0156  | 0.02016 | 0.01734 | 0.01851 | 0.01545 | 0.0139  | DUSP8    |
| cg23123262 | 0.03211 | 0.02533 | 0.03626 | 0.04113 | 0.02869 | 0.03438 | 0.02766 | 0.03012 | 0.03391 | 0.03018 | ACTR1B   |
| cg23123362 | 0.17756 | 0.1584  | 0.19507 | 0.13343 | 0.15068 | 0.12707 | 0.15056 | 0.14036 | 0.11234 | 0.12801 | ICF45    |
| cg23123694 | 0.01905 | 0.02735 | 0.02359 | 0.02141 | 0.02439 | 0.02082 | 0.02119 | 0.02139 | 0.01948 | 0.01862 | SLC38A2  |
| cg23124451 | 0.94678 | 0.29725 | 0.84139 | 0.92727 | 0.97178 | 0.95157 | 0.39052 | 0.11427 | 0.95101 | 0.82831 | CBX7     |
| cg23124755 | 0.05666 | 0.03482 | 0.04334 | 0.03383 | 0.48451 | 0.79639 | 0.02896 | 0.04061 | 0.03539 | 0.02551 | AQP3     |
| cg23125689 | 0.50281 | 0.48084 | 0.90721 | 0.90484 | 0.91505 | 0.85517 | 0.68209 | 0.72601 | 0.88202 | 0.39365 | CD81     |
| cg23126915 | 0.89321 | 0.86695 | 0.68087 | 0.78453 | 0.72289 | 0.79522 | 0.83299 | 0.83345 | 0.85691 | 0.8522  | XRCC2    |
| cg23126947 | 0.70588 | 0.72236 | 0.69371 | 0.74819 | 0.67929 | 0.74384 | 0.6138  | 0.64823 | 0.74611 | 0.72129 | NSUN3    |
| cg23126949 | 0.13107 | 0.11146 | 0.15974 | 0.19766 | 0.26818 | 0.11696 | 0.16439 | 0.14605 | 0.13678 | 0.15302 | ACCN2    |
| cg23127998 | 0.29159 | 0.17876 | 0.40784 | 0.42694 | 0.14239 | 0.08875 | 0.12417 | 0.08049 | 0.40645 | 0.52556 | FLRT3    |
| cg23128056 | 0.61956 | 0.34389 | 0.82072 | 0.87769 | 0.83151 | 0.90281 | 0.04746 | 0.03392 | 0.69611 | 0.49737 | KRT15    |
| cg23128146 | 0.17121 | 0.0692  | 0.08343 | 0.06901 | 0.06667 | 0.06233 | 0.07612 | 0.06089 | 0.06214 | 0.05548 | DCTN4    |
| cg23129478 | 0.11419 | 0.05303 | 0.73425 | 0.81443 | 0.65946 | 0.43286 | 0.87211 | 0.8909  | 0.58318 | 0.11273 | ST8SIA5  |
| cg23130254 | 0.94388 | 0.95458 | 0.93789 | 0.95175 | 0.95977 | 0.95856 | 0.93001 | 0.95017 | 0.86732 | 0.89391 | HOXD12   |
| cg23131007 | 0.71012 | 0.64514 | 0.51355 | 0.64577 | 0.13748 | 0.07097 | 0.43243 | 0.12661 | 0.07757 | 0.0568  | TCF12    |
| cg23131777 | 0.45771 | 0.28718 | 0.86915 | 0.92006 | 0.92063 | 0.8778  | 0.51761 | 0.85366 | 0.58893 | 0.27911 | ADAM30   |
| cg23131950 | 0.9125  | 0.69714 | 0.84893 | 0.93775 | 0.90715 | 0.90423 | 0.19447 | 0.05756 | 0.94189 | 0.83074 | AP2S1    |
| cg23134169 | 0.02543 | 0.02283 | 0.02291 | 0.02408 | 0.02055 | 0.01978 | 0.01819 | 0.01855 | 0.02427 | 0.02    | SLC35E1  |
| cg23134520 | 0.02681 | 0.02482 | 0.05602 | 0.05304 | 0.02497 | 0.02969 | 0.02312 | 0.0281  | 0.02071 | 0.02024 | ACOT8    |
| cg23137254 | 0.02283 | 0.02411 | 0.01847 | 0.01947 | 0.02483 | 0.02022 | 0.02242 | 0.02688 | 0.01651 | 0.01778 | RNPC1    |
| cg23137494 | 0.21834 | 0.148   | 0.46071 | 0.64284 | 0.2548  | 0.13387 | 0.38374 | 0.17132 | 0.10702 | 0.0584  | SLC16A2  |
| cg23137807 | 0.06559 | 0.07146 | 0.07291 | 0.06204 | 0.04389 | 0.06236 | 0.06214 | 0.06758 | 0.05627 | 0.06083 | MEIS2    |
| cg23140706 | 0.74172 | 0.59155 | 0.79527 | 0.85452 | 0.88731 | 0.84083 | 0.77048 | 0.81303 | 0.77066 | 0.36998 | NFE2     |
| cg23141333 | 0.03432 | 0.03424 | 0.04188 | 0.04526 | 0.03013 | 0.03585 | 0.02891 | 0.0295  | 0.03701 | 0.03611 | DENND2C  |
| cg23141855 | 0.04763 | 0.04451 | 0.05372 | 0.04513 | 0.05883 | 0.03923 | 0.14442 | 0.13285 | 0.0649  | 0.03642 | TFPI2    |
| cg23142900 | 0.03781 | 0.03916 | 0.03071 | 0.03462 | 0.05282 | 0.05423 | 0.03027 | 0.02859 | 0.0288  | 0.03466 | GTF2H4   |
| cg23142935 | 0.02856 | 0.02745 | 0.02733 | 0.03084 | 0.01996 | 0.02207 | 0.02158 | 0.02153 | 0.02396 | 0.02047 | CDR2     |
| cg23142964 | 0.02106 | 0.02099 | 0.02563 | 0.02068 | 0.01847 | 0.01606 | 0.01616 | 0.01545 | 0.01913 | 0.01861 | SSX2IP   |
| cg23143093 | 0.68154 | 0.84587 | 0.83413 | 0.88131 | 0.76186 | 0.83168 | 0.85288 | 0.88138 | 0.83976 | 0.75215 | NEK10    |
| cg23144899 | 0.79525 | 0.80147 | 0.75731 | 0.81872 | 0.80431 | 0.78435 | 0.46428 | 0.7771  | 0.61423 | 0.56145 | CRYGC    |
| cg23146358 | 0.02459 | 0.02467 | 0.02657 | 0.02335 | 0.01638 | 0.02265 | 0.02554 | 0.01871 | 0.01925 | 0.01844 | CDKN1C   |
| cg23147597 | 0.82463 | 0.82002 | 0.81062 | 0.81469 | 0.72324 | 0.82011 | 0.79344 | 0.81951 | 0.85396 | 0.86296 | CEACAM19 |
| cg23149053 | 0.9239  | 0.38527 | 0.92296 | 0.92318 | 0.93514 | 0.88314 | 0.90205 | 0.86809 | 0.92303 | 0.8543  | MMP17    |
| cg23150219 | 0.02838 | 0.02313 | 0.02871 | 0.0255  | 0.02472 | 0.02532 | 0.02139 | 0.02442 | 0.02572 | 0.02248 | C19orf26 |
| cg23150609 | 0.03273 | 0.03171 | 0.03102 | 0.02562 | 0.02603 | 0.02578 | 0.02697 | 0.02569 | 0.02323 | 0.02462 | YARS     |
| cg23152667 | 0.16577 | 0.15264 | 0.16756 | 0.15352 | 0.09421 | 0.13319 | 0.13227 | 0.15486 | 0.15579 | 0.13234 | TBCA     |
| cg23152755 | 0.46625 | 0.19709 | 0.27912 | 0.30152 | 0.26498 | 0.43546 | 0.21373 | 0.19466 | 0.1086  | 0.15786 | DEFB105A |
| cg23152772 | 0.16764 | 0.05669 | 0.62223 | 0.56187 | 0.77956 | 0.85577 | 0.22871 | 0.23274 | 0.56064 | 0.51456 | FIBCD1   |

|            |         |         |         |         |         |         |         |         |         |                   |
|------------|---------|---------|---------|---------|---------|---------|---------|---------|---------|-------------------|
| cg23154002 | 0.02842 | 0.03087 | 0.03181 | 0.03897 | 0.07692 | 0.03034 | 0.03883 | 0.03114 | 0.59505 | 0.27295 ZNF278    |
| cg23154064 | 0.73598 | 0.74386 | 0.68687 | 0.72527 | 0.71873 | 0.70224 | 0.58039 | 0.61966 | 0.71571 | 0.726 C3orf63     |
| cg23154272 | 0.74391 | 0.58315 | 0.57752 | 0.80268 | 0.78815 | 0.66295 | 0.67498 | 0.66309 | 0.62676 | 0.43482 LENEPE    |
| cg23158022 | 0.85181 | 0.85448 | 0.84689 | 0.85589 | 0.8541  | 0.88938 | 0.85135 | 0.85184 | 0.88577 | 0.87965 FLJ21742  |
| cg23158811 | 0.02932 | 0.02919 | 0.47922 | 0.62413 | 0.06579 | 0.02952 | 0.02985 | 0.0282  | 0.02526 | 0.0257 PBX4       |
| cg23159296 | 0.02252 | 0.02281 | 0.02264 | 0.02124 | 0.02236 | 0.02473 | 0.0595  | 0.02268 | 0.01792 | 0.01585 SREBF1    |
| cg23159337 | 0.26477 | 0.15201 | 0.42668 | 0.49868 | 0.23841 | 0.11725 | 0.1494  | 0.12942 | 0.1311  | 0.15638 ATP13A4   |
| cg23159857 | 0.07912 | 0.07763 | 0.08591 | 0.07356 | 0.10712 | 0.0912  | 0.09109 | 0.08018 | 0.25862 | 0.15283 PSMC3     |
| cg23162441 | 0.04994 | 0.05081 | 0.05304 | 0.05024 | 0.03644 | 0.04706 | 0.04273 | 0.04389 | 0.05003 | 0.04687 STK35     |
| cg23163471 | 0.02206 | 0.02238 | 0.02253 | 0.02149 | 0.01854 | 0.02012 | 0.02058 | 0.0217  | 0.01993 | 0.01909 SVIL      |
| cg23163573 | 0.22516 | 0.04786 | 0.11605 | 0.12515 | 0.50658 | 0.40628 | 0.07047 | 0.05422 | 0.06446 | 0.10035 SULT1C1   |
| cg23163644 | 0.04897 | 0.02868 | 0.43352 | 0.7744  | 0.04295 | 0.10983 | 0.12836 | 0.03001 | 0.35509 | 0.32284 TCEAL2    |
| cg23164327 | 0.0757  | 0.06766 | 0.05457 | 0.05248 | 0.09292 | 0.07818 | 0.05083 | 0.0522  | 0.04408 | 0.029 OSRF        |
| cg23165541 | 0.2047  | 0.05876 | 0.21893 | 0.27564 | 0.05983 | 0.04976 | 0.22999 | 0.05678 | 0.82605 | 0.36396 DAPK2     |
| cg23166289 | 0.77445 | 0.08027 | 0.71228 | 0.67503 | 0.37061 | 0.12566 | 0.41717 | 0.05382 | 0.39803 | 0.20222 C1orf107  |
| cg23166362 | 0.03068 | 0.02875 | 0.05846 | 0.03298 | 0.06733 | 0.03294 | 0.14048 | 0.43493 | 0.03173 | 0.02515 PIK3CD    |
| cg23172864 | 0.03661 | 0.02847 | 0.03484 | 0.02755 | 0.0256  | 0.02583 | 0.02752 | 0.02073 | 0.0378  | 0.02154 GOPC      |
| cg23173032 | 0.04269 | 0.04082 | 0.0397  | 0.03321 | 0.04135 | 0.04061 | 0.03384 | 0.0316  | 0.03392 | 0.03733 ARF6      |
| cg23173455 | 0.71986 | 0.55259 | 0.61801 | 0.67664 | 0.73156 | 0.6487  | 0.64262 | 0.50324 | 0.58228 | 0.48328 GGTL4     |
| cg23173910 | 0.85684 | 0.17406 | 0.28268 | 0.45736 | 0.91491 | 0.32032 | 0.6985  | 0.26001 | 0.88844 | 0.35401 ACTG2     |
| cg23174481 | 0.8721  | 0.75394 | 0.82769 | 0.7811  | 0.82855 | 0.87837 | 0.72404 | 0.14331 | 0.90576 | 0.83346 FLJ35784  |
| cg23175281 | 0.02258 | 0.02578 | 0.02727 | 0.02167 | 0.02209 | 0.0219  | 0.02226 | 0.02339 | 0.01791 | 0.01768 ACTB      |
| cg23178308 | 0.52099 | 0.04006 | 0.03169 | 0.02891 | 0.65487 | 0.42043 | 0.09047 | 0.37682 | 0.02288 | 0.02524 C21orf124 |
| cg23179168 | 0.03706 | 0.04612 | 0.04493 | 0.04944 | 0.17205 | 0.08076 | 0.06996 | 0.25882 | 0.03843 | 0.0466 FAM84B     |
| cg23179321 | 0.06282 | 0.05136 | 0.2013  | 0.1374  | 0.09249 | 0.0598  | 0.07702 | 0.04681 | 0.05523 | 0.04736 RPP38     |
| cg23180270 | 0.50598 | 0.22039 | 0.29546 | 0.23796 | 0.28237 | 0.17543 | 0.3856  | 0.47467 | 0.18973 | 0.22911 RNF113A   |
| cg23180365 | 0.02418 | 0.0278  | 0.03168 | 0.02543 | 0.02384 | 0.02973 | 0.02107 | 0.02629 | 0.02226 | 0.02192 GLB1      |
| cg23180489 | 0.85091 | 0.85436 | 0.83476 | 0.84706 | 0.89584 | 0.86545 | 0.67513 | 0.68716 | 0.86836 | 0.83333 LYNX1     |
| cg23181133 | 0.72527 | 0.08602 | 0.10562 | 0.09964 | 0.11887 | 0.0703  | 0.08119 | 0.08084 | 0.05331 | 0.06436 CEACAM3   |
| cg23181138 | 0.02313 | 0.02434 | 0.02661 | 0.05776 | 0.0244  | 0.02163 | 0.02163 | 0.023   | 0.01834 | 0.01568 AGTPBP1   |
| cg23181170 | 0.64346 | 0.39075 | 0.61856 | 0.74489 | 0.67513 | 0.76515 | 0.25863 | 0.74197 | 0.55424 | 0.38247 GABRP     |
| cg23181434 | 0.15047 | 0.10583 | 0.18136 | 0.21123 | 0.23254 | 0.22206 | 0.1959  | 0.22391 | 0.04604 | 0.12852 TLK2      |
| cg23182299 | 0.03975 | 0.03577 | 0.48949 | 0.44094 | 0.3555  | 0.76063 | 0.03546 | 0.03397 | 0.04427 | 0.02918 LHX5      |
| cg23182539 | 0.02752 | 0.02701 | 0.02935 | 0.02954 | 0.01539 | 0.05123 | 0.02401 | 0.0228  | 0.02654 | 0.0262 TIAL1      |
| cg23183296 | 0.29496 | 0.61783 | 0.53113 | 0.56636 | 0.51057 | 0.57804 | 0.5016  | 0.37572 | 0.35275 | 0.33593 UGT2B28   |
| cg23185262 | 0.84518 | 0.82501 | 0.82574 | 0.83408 | 0.82832 | 0.82227 | 0.83307 | 0.82178 | 0.83673 | 0.78427 PDXK      |
| cg23185402 | 0.0274  | 0.03062 | 0.03298 | 0.02575 | 0.02121 | 0.03167 | 0.02556 | 0.02709 | 0.0251  | 0.02323 PHKB      |
| cg23185657 | 0.04303 | 0.04333 | 0.06181 | 0.04603 | 0.05842 | 0.06581 | 0.06204 | 0.04732 | 0.03656 | 0.03861 TIMM10    |
| cg23186643 | 0.02772 | 0.03137 | 0.39301 | 0.19236 | 0.96521 | 0.95663 | 0.64256 | 0.85455 | 0.03092 | 0.02477 NPB       |
| cg23187653 | 0.05083 | 0.04742 | 0.88297 | 0.84967 | 0.82775 | 0.70978 | 0.56129 | 0.04464 | 0.13082 | 0.06416 PCSK1     |
| cg23188547 | 0.07685 | 0.05477 | 0.11058 | 0.14812 | 0.24315 | 0.09806 | 0.05971 | 0.05238 | 0.05923 | 0.05521 CDC6      |

|            |         |         |         |         |         |         |         |         |         |         |          |
|------------|---------|---------|---------|---------|---------|---------|---------|---------|---------|---------|----------|
| cg23189044 | 0.02475 | 0.03853 | 0.92283 | 0.9327  | 0.94475 | 0.92624 | 0.92508 | 0.79369 | 0.89812 | 0.67594 | KCNE3    |
| cg23190203 | 0.02525 | 0.02548 | 0.02658 | 0.02396 | 0.02398 | 0.02433 | 0.02152 | 0.02727 | 0.02118 | 0.02048 | SFXN3    |
| cg23191772 | 0.0411  | 0.03934 | 0.04835 | 0.04261 | 0.06085 | 0.05245 | 0.0516  | 0.04297 | 0.02984 | 0.02943 | IDH3B    |
| cg23191950 | 0.46136 | 0.35943 | 0.92551 | 0.90677 | 0.89754 | 0.76499 | 0.87194 | 0.88097 | 0.72069 | 0.86544 | ALDH1A3  |
| cg23192899 | 0.05027 | 0.04308 | 0.05788 | 0.04752 | 0.10906 | 0.03024 | 0.02803 | 0.03501 | 0.03639 | 0.0277  | MGC15407 |
| cg23196133 | 0.02751 | 0.02484 | 0.02587 | 0.0245  | 0.02789 | 0.028   | 0.02714 | 0.02485 | 0.02457 | 0.02325 | POLR2A   |
| cg23196557 | 0.48366 | 0.52107 | 0.53364 | 0.58338 | 0.53702 | 0.59039 | 0.36952 | 0.47225 | 0.25827 | 0.30914 | FLJ44691 |
| cg23196831 | 0.03432 | 0.02819 | 0.9381  | 0.93662 | 0.58239 | 0.93615 | 0.33764 | 0.36918 | 0.94442 | 0.94012 | COL14A1  |
| cg23197881 | 0.03856 | 0.03591 | 0.04788 | 0.04201 | 0.05579 | 0.04225 | 0.04342 | 0.03626 | 0.04109 | 0.04269 | RAB3IP   |
| cg23202277 | 0.03236 | 0.02861 | 0.03278 | 0.02649 | 0.12113 | 0.03308 | 0.03492 | 0.0329  | 0.02448 | 0.02677 | MAPT     |
| cg23202409 | 0.02998 | 0.02974 | 0.03274 | 0.03427 | 0.02641 | 0.02899 | 0.02849 | 0.02663 | 0.02593 | 0.02426 | C11orf48 |
| cg23205183 | 0.70394 | 0.6424  | 0.69342 | 0.64092 | 0.62291 | 0.78378 | 0.69988 | 0.72463 | 0.70411 | 0.41109 | NECAP1   |
| cg23205633 | 0.79005 | 0.54109 | 0.83342 | 0.84573 | 0.88118 | 0.75246 | 0.09256 | 0.05008 | 0.57231 | 0.35353 | KRTAP4-2 |
| cg23207527 | 0.88441 | 0.83503 | 0.31081 | 0.37913 | 0.71975 | 0.77411 | 0.84659 | 0.57341 | 0.91237 | 0.60784 | RBM24    |
| cg23207616 | 0.01612 | 0.02412 | 0.02004 | 0.01835 | 0.01814 | 0.01903 | 0.01523 | 0.01599 | 0.02026 | 0.01916 | RER1     |
| cg23207985 | 0.05464 | 0.06087 | 0.0605  | 0.05451 | 0.03701 | 0.04648 | 0.04564 | 0.053   | 0.04826 | 0.0488  | ADRBK1   |
| cg23207990 | 0.08609 | 0.062   | 0.92355 | 0.90929 | 0.30755 | 0.55846 | 0.07768 | 0.04107 | 0.22057 | 0.53586 | SFRP2    |
| cg23208152 | 0.02213 | 0.02303 | 0.05336 | 0.02363 | 0.97335 | 0.96919 | 0.32397 | 0.50423 | 0.49019 | 0.47624 | ZMYND10  |
| cg23208881 | 0.83115 | 0.68284 | 0.87398 | 0.86829 | 0.89655 | 0.83736 | 0.61433 | 0.7844  | 0.88203 | 0.56269 | FURIN    |
| cg23211240 | 0.27628 | 0.03043 | 0.7041  | 0.84705 | 0.72269 | 0.63677 | 0.15117 | 0.03095 | 0.41904 | 0.52747 | BTG4     |
| cg23213170 | 0.03664 | 0.03498 | 0.03923 | 0.0341  | 0.03894 | 0.036   | 0.03315 | 0.03698 | 0.02905 | 0.02881 | FCMD     |
| cg23213217 | 0.8852  | 0.7687  | 0.86946 | 0.87762 | 0.85038 | 0.85396 | 0.871   | 0.88559 | 0.8963  | 0.83071 | DEGS1    |
| cg23213688 | 0.03272 | 0.03124 | 0.02927 | 0.0287  | 0.01837 | 0.03115 | 0.02793 | 0.029   | 0.02711 | 0.02363 | EXOC8    |
| cg23214267 | 0.07928 | 0.07045 | 0.10091 | 0.17349 | 0.12869 | 0.08348 | 0.09015 | 0.08551 | 0.04946 | 0.04327 | EYA2     |
| cg23214764 | 0.91563 | 0.81097 | 0.31221 | 0.20752 | 0.64249 | 0.47844 | 0.14963 | 0.05713 | 0.1521  | 0.04094 | PRSS23   |
| cg23216015 | 0.72311 | 0.07173 | 0.31431 | 0.5161  | 0.60364 | 0.83834 | 0.16175 | 0.59581 | 0.15896 | 0.26698 | C7orf16  |
| cg23216184 | 0.09628 | 0.08028 | 0.10248 | 0.08781 | 0.11901 | 0.07864 | 0.09248 | 0.0677  | 0.08501 | 0.07045 | DGCR8    |
| cg23217005 | 0.05752 | 0.05629 | 0.25069 | 0.52471 | 0.89585 | 0.95204 | 0.75165 | 0.63636 | 0.05346 | 0.03446 | MT1F     |
| cg23218877 | 0.76704 | 0.66539 | 0.77388 | 0.79613 | 0.7655  | 0.76912 | 0.73428 | 0.57803 | 0.78859 | 0.63103 | C10orf9  |
| cg23219570 | 0.43424 | 0.05336 | 0.8748  | 0.87907 | 0.42375 | 0.31355 | 0.06836 | 0.05478 | 0.05435 | 0.03944 | FGF23    |
| cg23219720 | 0.12955 | 0.12843 | 0.24285 | 0.2644  | 0.17712 | 0.14245 | 0.10438 | 0.10047 | 0.28604 | 0.35562 | FLJ32110 |
| cg23221013 | 0.66964 | 0.36707 | 0.66278 | 0.71077 | 0.66598 | 0.65762 | 0.66817 | 0.67128 | 0.56519 | 0.59122 | MGC2463  |
| cg23221122 | 0.0346  | 0.03579 | 0.0391  | 0.04042 | 0.03167 | 0.03575 | 0.03072 | 0.03358 | 0.0313  | 0.0289  | DUSP10   |
| cg23222573 | 0.03399 | 0.03202 | 0.03444 | 0.02925 | 0.02609 | 0.02827 | 0.02949 | 0.02837 | 0.02435 | 0.02883 | C20orf6  |
| cg23226134 | 0.04744 | 0.04501 | 0.05764 | 0.05482 | 0.06767 | 0.06125 | 0.03748 | 0.04319 | 0.04931 | 0.04897 | CLCN6    |
| cg23228048 | 0.03217 | 0.03411 | 0.04005 | 0.03759 | 0.20248 | 0.03449 | 0.03544 | 0.03174 | 0.04798 | 0.0279  | BAHD1    |
| cg23228178 | 0.18247 | 0.11737 | 0.14335 | 0.15513 | 0.2721  | 0.19951 | 0.14007 | 0.0883  | 0.13717 | 0.08356 | PADI4    |
| cg23230018 | 0.06601 | 0.06862 | 0.06969 | 0.07241 | 0.05353 | 0.05823 | 0.0615  | 0.06364 | 0.05234 | 0.0511  | F25965   |
| cg23231873 | 0.08237 | 0.07864 | 0.10315 | 0.09532 | 0.10817 | 0.10343 | 0.07891 | 0.07198 | 0.07474 | 0.0839  | USP32    |
| cg23232084 | 0.87068 | 0.83586 | 0.86298 | 0.8514  | 0.8903  | 0.66206 | 0.51647 | 0.54155 | 0.92005 | 0.66393 | UBL4A    |
| cg23233234 | 0.01704 | 0.01784 | 0.02051 | 0.01944 | 0.01427 | 0.0183  | 0.01335 | 0.0143  | 0.015   | 0.01072 | FLJ14668 |

|            |         |         |         |         |         |         |         |         |         |         |          |
|------------|---------|---------|---------|---------|---------|---------|---------|---------|---------|---------|----------|
| cg23234154 | 0.45039 | 0.49237 | 0.18194 | 0.13457 | 0.26198 | 0.18194 | 0.15408 | 0.09773 | 0.44819 | 0.51254 | MANBA    |
| cg23234510 | 0.04343 | 0.04523 | 0.04835 | 0.0437  | 0.03091 | 0.03902 | 0.04084 | 0.04143 | 0.04081 | 0.03107 | APTX     |
| cg23234999 | 0.86004 | 0.86876 | 0.83013 | 0.80167 | 0.45813 | 0.44246 | 0.39755 | 0.04212 | 0.87398 | 0.84868 | MKRN3    |
| cg23235603 | 0.02881 | 0.02633 | 0.02968 | 0.02836 | 0.01979 | 0.02661 | 0.02694 | 0.02507 | 0.02519 | 0.02592 | CDC2L6   |
| cg23239039 | 0.03643 | 0.04241 | 0.14145 | 0.08645 | 0.27208 | 0.08436 | 0.04016 | 0.3411  | 0.04586 | 0.03452 | D4S234E  |
| cg23239052 | 0.02894 | 0.02993 | 0.03363 | 0.02947 | 0.02822 | 0.02722 | 0.02678 | 0.02477 | 0.02392 | 0.02565 | BAIAP2   |
| cg23239396 | 0.07559 | 0.0546  | 0.78814 | 0.87305 | 0.19632 | 0.11325 | 0.08359 | 0.06027 | 0.08384 | 0.07168 | CALCR    |
| cg23239444 | 0.7537  | 0.15669 | 0.94471 | 0.95139 | 0.94773 | 0.9337  | 0.71395 | 0.49156 | 0.93719 | 0.93606 | PACSIN1  |
| cg23239828 | 0.10628 | 0.05293 | 0.18684 | 0.1905  | 0.50911 | 0.0804  | 0.08939 | 0.05907 | 0.16802 | 0.14617 | SEC6L1   |
| cg23239842 | 0.03014 | 0.03416 | 0.03949 | 0.0333  | 0.02505 | 0.03249 | 0.02966 | 0.0327  | 0.03195 | 0.02741 | NCOA2    |
| cg23240895 | 0.85196 | 0.43263 | 0.74928 | 0.85361 | 0.85889 | 0.85056 | 0.4696  | 0.22238 | 0.76857 | 0.06521 | PRR5     |
| cg23240961 | 0.02076 | 0.02193 | 0.02506 | 0.02548 | 0.09048 | 0.02453 | 0.01919 | 0.01917 | 0.01964 | 0.01785 | LOC56901 |
| cg23242017 | 0.02876 | 0.03214 | 0.03848 | 0.03074 | 0.03523 | 0.04323 | 0.02829 | 0.02896 | 0.02405 | 0.02207 | LMTK2    |
| cg23242898 | 0.08576 | 0.08649 | 0.80646 | 0.83469 | 0.25771 | 0.15236 | 0.16384 | 0.12725 | 0.12461 | 0.11139 | DCC      |
| cg23243617 | 0.04553 | 0.04651 | 0.52723 | 0.53921 | 0.54228 | 0.55818 | 0.21216 | 0.13748 | 0.62619 | 0.54645 | CAMK1    |
| cg23244421 | 0.03089 | 0.03853 | 0.03932 | 0.04101 | 0.03392 | 0.03582 | 0.03163 | 0.03249 | 0.02794 | 0.02857 | FASN     |
| cg23244913 | 0.60634 | 0.58203 | 0.95027 | 0.95517 | 0.93534 | 0.93761 | 0.96377 | 0.96576 | 0.97162 | 0.97034 | HCG9     |
| cg23246978 | 0.07195 | 0.09195 | 0.10663 | 0.11023 | 0.13243 | 0.12731 | 0.06867 | 0.06729 | 0.04445 | 0.04555 | GPC6     |
| cg23248452 | 0.18715 | 0.16739 | 0.67386 | 0.75725 | 0.61038 | 0.41228 | 0.21965 | 0.19527 | 0.14408 | 0.19001 | TAS2R1   |
| cg23248587 | 0.06156 | 0.05193 | 0.07041 | 0.05864 | 0.05215 | 0.04886 | 0.05262 | 0.04917 | 0.0374  | 0.04022 | XRCC4    |
| cg23248865 | 0.03018 | 0.03185 | 0.03775 | 0.03053 | 0.0301  | 0.02957 | 0.02973 | 0.02888 | 0.02909 | 0.02684 | SEMA4C   |
| cg23250700 | 0.83508 | 0.78287 | 0.85793 | 0.86111 | 0.86475 | 0.80253 | 0.79269 | 0.64633 | 0.87786 | 0.86404 | RAD23A   |
| cg23254045 | 0.20246 | 0.12843 | 0.41115 | 0.35335 | 0.30642 | 0.18851 | 0.20309 | 0.15665 | 0.3587  | 0.23576 | TMCO5    |
| cg23256150 | 0.53568 | 0.37354 | 0.22685 | 0.28486 | 0.37687 | 0.16105 | 0.16348 | 0.19401 | 0.09169 | 0.10847 | NR1H4    |
| cg23256971 | 0.6675  | 0.49222 | 0.67566 | 0.74487 | 0.62548 | 0.55428 | 0.56031 | 0.56341 | 0.53563 | 0.50071 | LRRC51   |
| cg23257840 | 0.03183 | 0.02792 | 0.03574 | 0.03242 | 0.03345 | 0.02875 | 0.02866 | 0.02872 | 0.02448 | 0.02153 | ZNF264   |
| cg23258063 | 0.03788 | 0.04407 | 0.05083 | 0.04381 | 0.03472 | 0.03792 | 0.04304 | 0.04005 | 0.04025 | 0.03935 | SCYL3    |
| cg23260026 | 0.31882 | 0.29713 | 0.86415 | 0.87273 | 0.84815 | 0.85529 | 0.85759 | 0.80665 | 0.86822 | 0.87885 | FSTL3    |
| cg23260799 | 0.04986 | 0.04828 | 0.0438  | 0.04375 | 0.043   | 0.03751 | 0.0357  | 0.03833 | 0.05592 | 0.03209 | PTDSS2   |
| cg23261102 | 0.04832 | 0.04193 | 0.04981 | 0.04675 | 0.93109 | 0.93317 | 0.90646 | 0.89325 | 0.0427  | 0.04913 | DNAJC18  |
| cg23261233 | 0.04012 | 0.03679 | 0.03388 | 0.03223 | 0.03231 | 0.03107 | 0.03514 | 0.03735 | 0.02905 | 0.02904 | ACTB     |
| cg23262918 | 0.05352 | 0.0528  | 0.05703 | 0.04921 | 0.04698 | 0.04725 | 0.05033 | 0.0566  | 0.04831 | 0.04286 | OSBPL8   |
| cg23263923 | 0.05536 | 0.06535 | 0.04948 | 0.06055 | 0.17822 | 0.05349 | 0.05517 | 0.04544 | 0.04385 | 0.04133 | TNFSF7   |
| cg23264413 | 0.09386 | 0.0603  | 0.87803 | 0.88738 | 0.83616 | 0.83237 | 0.68318 | 0.43857 | 0.66024 | 0.63925 | PSG4     |
| cg23264519 | 0.05974 | 0.05414 | 0.06507 | 0.06315 | 0.07883 | 0.06847 | 0.06439 | 0.0618  | 0.0583  | 0.05821 | TMPO     |
| cg23265096 | 0.85122 | 0.80075 | 0.75635 | 0.86052 | 0.71399 | 0.49066 | 0.86349 | 0.77597 | 0.63007 | 0.5148  | CTSZ     |
| cg23266266 | 0.07181 | 0.0479  | 0.05459 | 0.04283 | 0.04451 | 0.04584 | 0.03742 | 0.03964 | 0.03909 | 0.03082 | DCUN1D4  |
| cg23267110 | 0.04921 | 0.04816 | 0.05417 | 0.05659 | 0.06577 | 0.04763 | 0.04512 | 0.05581 | 0.04345 | 0.03974 | EPN2     |
| cg23268677 | 0.0734  | 0.07192 | 0.07006 | 0.07592 | 0.0446  | 0.06088 | 0.0579  | 0.05653 | 0.06437 | 0.04712 | TXNRD2   |
| cg23269225 | 0.03186 | 0.03314 | 0.0307  | 0.03117 | 0.03089 | 0.02977 | 0.02919 | 0.02917 | 0.02357 | 0.02188 | FBXL4    |
| cg23269489 | 0.03074 | 0.03564 | 0.04694 | 0.04235 | 0.03717 | 0.03192 | 0.05802 | 0.04132 | 0.02987 | 0.03399 | BCORL1   |

|            |         |         |         |         |         |         |         |         |         |                   |
|------------|---------|---------|---------|---------|---------|---------|---------|---------|---------|-------------------|
| cg23271318 | 0.07721 | 0.07275 | 0.08955 | 0.0711  | 0.12743 | 0.07992 | 0.07713 | 0.07976 | 0.05752 | 0.05745 ZSWIM1    |
| cg23272214 | 0.8207  | 0.82764 | 0.82153 | 0.8439  | 0.85344 | 0.85392 | 0.74419 | 0.86582 | 0.87775 | 0.85337 PCBP3     |
| cg23273333 | 0.1767  | 0.13803 | 0.36357 | 0.25784 | 0.40944 | 0.25808 | 0.20301 | 0.12719 | 0.18517 | 0.15956 ESRRG     |
| cg23273897 | 0.10235 | 0.09092 | 0.1397  | 0.14657 | 0.74603 | 0.60387 | 0.12545 | 0.16969 | 0.82221 | 0.82853 MME       |
| cg23274030 | 0.49555 | 0.56135 | 0.63448 | 0.67457 | 0.81853 | 0.54947 | 0.49956 | 0.35269 | 0.12719 | 0.10887 SFXN4     |
| cg23274123 | 0.02299 | 0.02707 | 0.03111 | 0.02232 | 0.02167 | 0.02296 | 0.02836 | 0.03319 | 0.02197 | 0.02229 C1orf96   |
| cg23274244 | 0.80224 | 0.73179 | 0.86844 | 0.87596 | 0.85245 | 0.84709 | 0.76969 | 0.59104 | 0.85927 | 0.85931 TNFRSF13B |
| cg23276115 | 0.51348 | 0.34938 | 0.81055 | 0.87471 | 0.91483 | 0.5781  | 0.79932 | 0.71852 | 0.42815 | 0.20411 GRAP      |
| cg23276695 | 0.0649  | 0.06752 | 0.16179 | 0.17076 | 0.14542 | 0.67607 | 0.17256 | 0.65066 | 0.0636  | 0.07053 CNR1      |
| cg23278885 | 0.8829  | 0.56033 | 0.86159 | 0.89939 | 0.80591 | 0.58909 | 0.74918 | 0.79603 | 0.92837 | 0.5066 TGM6       |
| cg23279136 | 0.0329  | 0.03039 | 0.04816 | 0.04312 | 0.03461 | 0.04312 | 0.19681 | 0.42364 | 0.03104 | 0.02882 ABCB7     |
| cg23280339 | 0.03898 | 0.04523 | 0.03376 | 0.03472 | 0.04051 | 0.03742 | 0.26537 | 0.21585 | 0.03351 | 0.0326 PQBP1      |
| cg23280807 | 0.84966 | 0.59797 | 0.91831 | 0.91587 | 0.94349 | 0.8748  | 0.41009 | 0.47081 | 0.92184 | 0.89845 SLC5A11   |
| cg23281417 | 0.04835 | 0.03875 | 0.04569 | 0.04646 | 0.04643 | 0.0462  | 0.03842 | 0.03988 | 0.04508 | 0.03374 STK17A    |
| cg23282559 | 0.8143  | 0.92952 | 0.6221  | 0.7634  | 0.93506 | 0.92466 | 0.30532 | 0.48675 | 0.61525 | 0.59044 KL        |
| cg23282674 | 0.56411 | 0.08668 | 0.80734 | 0.81477 | 0.78363 | 0.8072  | 0.76285 | 0.21119 | 0.83016 | 0.73565 IL20      |
| cg23282771 | 0.09471 | 0.03613 | 0.03552 | 0.03281 | 0.02532 | 0.03799 | 0.04083 | 0.03461 | 0.63378 | 0.44162 ASS       |
| cg23282949 | 0.60654 | 0.27456 | 0.93613 | 0.94435 | 0.37028 | 0.55617 | 0.42416 | 0.50327 | 0.29012 | 0.20966 RENBP     |
| cg23283495 | 0.90863 | 0.68112 | 0.92405 | 0.92299 | 0.73556 | 0.73015 | 0.19307 | 0.04615 | 0.42108 | 0.04959 IRF6      |
| cg23283875 | 0.02323 | 0.02199 | 0.0227  | 0.02262 | 0.01782 | 0.02148 | 0.02137 | 0.02026 | 0.01879 | 0.01945 FLJ21062  |
| cg23285573 | 0.25791 | 0.33809 | 0.05718 | 0.05778 | 0.04659 | 0.05653 | 0.04773 | 0.05097 | 0.04427 | 0.03816 PON2      |
| cg23286660 | 0.05793 | 0.04623 | 0.05077 | 0.04595 | 0.03681 | 0.03949 | 0.03951 | 0.037   | 0.03513 | 0.03535 PLOD1     |
| cg23287547 | 0.099   | 0.05222 | 0.04285 | 0.04359 | 0.05168 | 0.03636 | 0.04844 | 0.04412 | 0.04294 | 0.04855 MYO5A     |
| cg23290344 | 0.02424 | 0.02655 | 0.9738  | 0.97642 | 0.81198 | 0.85242 | 0.077   | 0.10599 | 0.04868 | 0.03437 NEF3      |
| cg23291865 | 0.05644 | 0.03574 | 0.07094 | 0.0796  | 0.07045 | 0.10284 | 0.06518 | 0.08635 | 0.05009 | 0.04729 C20orf30  |
| cg23293787 | 0.61567 | 0.56583 | 0.31027 | 0.52292 | 0.92289 | 0.8016  | 0.82873 | 0.65451 | 0.93375 | 0.93532 DPM1      |
| cg23297477 | 0.0487  | 0.04593 | 0.06774 | 0.04469 | 0.07463 | 0.07122 | 0.04461 | 0.04614 | 0.03722 | 0.04819 CMTM3     |
| cg23299127 | 0.06249 | 0.06842 | 0.06499 | 0.06367 | 0.05805 | 0.05252 | 0.04832 | 0.04738 | 0.04791 | 0.0424 MAP3K6     |
| cg23300372 | 0.05214 | 0.03154 | 0.67155 | 0.73922 | 0.27757 | 0.03619 | 0.05788 | 0.14398 | 0.22603 | 0.24835 CART      |
| cg23300897 | 0.06598 | 0.06509 | 0.09894 | 0.08493 | 0.08609 | 0.05931 | 0.05552 | 0.05421 | 0.08333 | 0.05211 USP20     |
| cg23301687 | 0.81257 | 0.33369 | 0.88578 | 0.88891 | 0.83011 | 0.68532 | 0.44248 | 0.11711 | 0.91115 | 0.76557 RAP1A     |
| cg23303074 | 0.11151 | 0.05806 | 0.82754 | 0.88196 | 0.62817 | 0.76528 | 0.30815 | 0.47746 | 0.10305 | 0.06767 LRAT      |
| cg23303408 | 0.04614 | 0.02865 | 0.92227 | 0.91738 | 0.53012 | 0.37851 | 0.46341 | 0.60078 | 0.06793 | 0.57474 POU4F3    |
| cg23303782 | 0.04341 | 0.04137 | 0.05237 | 0.04436 | 0.03525 | 0.03652 | 0.04038 | 0.03918 | 0.04455 | 0.03727 GRK5      |
| cg23306832 | 0.10098 | 0.10821 | 0.07442 | 0.06154 | 0.17213 | 0.1309  | 0.1149  | 0.11016 | 0.20465 | 0.06428 KIAA0999  |
| cg23307264 | 0.08018 | 0.08275 | 0.0853  | 0.08453 | 0.10002 | 0.0835  | 0.07775 | 0.07002 | 0.05748 | 0.05592 KHSRP     |
| cg23307338 | 0.08127 | 0.07683 | 0.11687 | 0.20669 | 0.2228  | 0.24197 | 0.0747  | 0.07741 | 0.06582 | 0.06689 MS4A12    |
| cg23309825 | 0.07767 | 0.0804  | 0.14894 | 0.18068 | 0.07104 | 0.06006 | 0.06661 | 0.05581 | 0.0616  | 0.05276 MLC1SA    |
| cg23310538 | 0.03824 | 0.04003 | 0.04212 | 0.0443  | 0.03751 | 0.03735 | 0.03907 | 0.0439  | 0.03783 | 0.03586 PLEKHA9   |
| cg23311549 | 0.03422 | 0.03624 | 0.03351 | 0.0333  | 0.02635 | 0.03276 | 0.03304 | 0.03443 | 0.02942 | 0.02768 MLF2      |
| cg23311628 | 0.01797 | 0.01566 | 0.01697 | 0.0176  | 0.01663 | 0.01472 | 0.01675 | 0.0188  | 0.01421 | 0.0167 RAB8B      |



|            |         |         |         |         |         |         |         |         |         |         |          |
|------------|---------|---------|---------|---------|---------|---------|---------|---------|---------|---------|----------|
| cg23316360 | 0.1624  | 0.06316 | 0.67022 | 0.72439 | 0.35783 | 0.12181 | 0.18111 | 0.34317 | 0.07312 | 0.20425 | EDNRB    |
| cg23317501 | 0.50775 | 0.50826 | 0.65741 | 0.73719 | 0.52544 | 0.50419 | 0.58302 | 0.4625  | 0.07755 | 0.13222 | UGT3A1   |
| cg23318804 | 0.02228 | 0.02584 | 0.02553 | 0.02448 | 0.02316 | 0.02133 | 0.02681 | 0.02927 | 0.0205  | 0.01865 | C15orf39 |
| cg23320056 | 0.08428 | 0.10795 | 0.08907 | 0.09627 | 0.06155 | 0.09077 | 0.11488 | 0.11483 | 0.0778  | 0.09303 | ARHGEF2  |
| cg23320649 | 0.8199  | 0.83712 | 0.74371 | 0.81725 | 0.24073 | 0.0865  | 0.65643 | 0.40177 | 0.31106 | 0.31092 | C3orf18  |
| cg23322112 | 0.83453 | 0.85396 | 0.79002 | 0.81261 | 0.81837 | 0.82269 | 0.7157  | 0.82019 | 0.83642 | 0.79699 | ABCC13   |
| cg23322316 | 0.12159 | 0.10376 | 0.09449 | 0.11138 | 0.09852 | 0.08077 | 0.06206 | 0.06105 | 0.08949 | 0.06655 | SPATA4   |
| cg23322523 | 0.33615 | 0.2517  | 0.73028 | 0.78932 | 0.71975 | 0.60823 | 0.75187 | 0.35479 | 0.79863 | 0.66504 | TRIM55   |
| cg23323671 | 0.89753 | 0.83554 | 0.87458 | 0.88844 | 0.86572 | 0.86059 | 0.8623  | 0.57868 | 0.88461 | 0.56787 | STMN1    |
| cg23323711 | 0.01846 | 0.02073 | 0.02234 | 0.02243 | 0.02175 | 0.02112 | 0.01559 | 0.01632 | 0.01639 | 0.01844 | RPL22    |
| cg23323879 | 0.91683 | 0.50415 | 0.92448 | 0.92274 | 0.9409  | 0.86764 | 0.90423 | 0.74933 | 0.91583 | 0.81323 | CILP     |
| cg23324259 | 0.03814 | 0.0484  | 0.07456 | 0.06192 | 0.04505 | 0.04617 | 0.10462 | 0.09399 | 0.03454 | 0.04122 | SNX16    |
| cg23324787 | 0.69953 | 0.78171 | 0.80756 | 0.82986 | 0.71416 | 0.79375 | 0.582   | 0.79476 | 0.81217 | 0.71305 | RAG2     |
| cg23325242 | 0.11454 | 0.12077 | 0.23533 | 0.26171 | 0.04895 | 0.05654 | 0.06136 | 0.05425 | 0.06217 | 0.04379 | CYB5R3   |
| cg23325932 | 0.14252 | 0.13113 | 0.14272 | 0.13939 | 0.23624 | 0.14896 | 0.07491 | 0.07277 | 0.09626 | 0.10303 | EXOSC5   |
| cg23326197 | 0.08301 | 0.06239 | 0.12582 | 0.12224 | 0.39518 | 0.67446 | 0.06121 | 0.07352 | 0.05345 | 0.0515  | CYP3A4   |
| cg23326301 | 0.8335  | 0.43971 | 0.8421  | 0.87495 | 0.90773 | 0.85163 | 0.73174 | 0.82721 | 0.84146 | 0.75071 | ADAM30   |
| cg23326689 | 0.21692 | 0.44524 | 0.87002 | 0.90122 | 0.9188  | 0.89237 | 0.35308 | 0.07127 | 0.67375 | 0.83245 | STMN2    |
| cg23326785 | 0.11638 | 0.06174 | 0.17251 | 0.1121  | 0.28058 | 0.07609 | 0.07229 | 0.07038 | 0.05546 | 0.04099 | TMEM25   |
| cg23328124 | 0.75937 | 0.70717 | 0.75721 | 0.76307 | 0.64906 | 0.75744 | 0.73584 | 0.75504 | 0.78769 | 0.7575  | GRLF1    |
| cg23328404 | 0.32479 | 0.20217 | 0.59208 | 0.5764  | 0.62551 | 0.21591 | 0.42411 | 0.25541 | 0.13601 | 0.18926 | ChGn     |
| cg23333306 | 0.02092 | 0.02568 | 0.02545 | 0.02329 | 0.01954 | 0.02345 | 0.01885 | 0.0216  | 0.01948 | 0.02061 | CDC42EP4 |
| cg23333420 | 0.02664 | 0.02612 | 0.02244 | 0.02505 | 0.01918 | 0.02236 | 0.02245 | 0.0213  | 0.02045 | 0.01798 | OBFC1    |
| cg23335946 | 0.04239 | 0.05179 | 0.05016 | 0.04644 | 0.02975 | 0.03994 | 0.04158 | 0.04382 | 0.04246 | 0.04505 | C1orf26  |
| cg23337289 | 0.04848 | 0.05173 | 0.72015 | 0.65024 | 0.58854 | 0.53514 | 0.85427 | 0.82986 | 0.04145 | 0.04067 | ZNF513   |
| cg23337382 | 0.13886 | 0.02624 | 0.03403 | 0.02691 | 0.02414 | 0.02509 | 0.03135 | 0.02304 | 0.02601 | 0.02137 | GPR125   |
| cg23337754 | 0.042   | 0.04483 | 0.53309 | 0.73477 | 0.34937 | 0.5251  | 0.20785 | 0.16953 | 0.37581 | 0.79136 | CRABP1   |
| cg23338195 | 0.18087 | 0.20333 | 0.2417  | 0.42844 | 0.48021 | 0.76822 | 0.62016 | 0.4207  | 0.58373 | 0.37415 | SLC30A8  |
| cg23338993 | 0.76749 | 0.40846 | 0.29609 | 0.33813 | 0.32531 | 0.66754 | 0.11933 | 0.12967 | 0.29456 | 0.11381 | UGT1A6   |
| cg23345864 | 0.04647 | 0.04621 | 0.04833 | 0.04602 | 0.03568 | 0.03817 | 0.03958 | 0.04321 | 0.04132 | 0.03648 | VPS26    |
| cg23346960 | 0.09599 | 0.09536 | 0.1219  | 0.12101 | 0.10302 | 0.08917 | 0.10934 | 0.07594 | 0.08943 | 0.05861 | ZFP36    |
| cg23347400 | 0.02742 | 0.02968 | 0.02736 | 0.03124 | 0.02401 | 0.02685 | 0.02553 | 0.02528 | 0.02367 | 0.02287 | RBM4B    |
| cg23347911 | 0.91167 | 0.90234 | 0.89544 | 0.89947 | 0.93106 | 0.90855 | 0.90865 | 0.8842  | 0.91682 | 0.89116 | RPS6KB2  |
| cg23347958 | 0.09718 | 0.06284 | 0.07897 | 0.07603 | 0.08455 | 0.06763 | 0.07056 | 0.0657  | 0.06141 | 0.06878 | DHX8     |
| cg23348028 | 0.02833 | 0.02789 | 0.03852 | 0.03982 | 0.02544 | 0.02811 | 0.02535 | 0.026   | 0.02952 | 0.02391 | MAN1A1   |
| cg23349242 | 0.68116 | 0.14989 | 0.71706 | 0.80322 | 0.70925 | 0.09053 | 0.59175 | 0.51352 | 0.57173 | 0.07686 | SUSD2    |
| cg23349790 | 0.0358  | 0.03557 | 0.8148  | 0.95587 | 0.07724 | 0.03728 | 0.16841 | 0.1727  | 0.05518 | 0.028   | IGSF21   |
| cg23350087 | 0.02553 | 0.02685 | 0.02226 | 0.02377 | 0.01706 | 0.01887 | 0.02424 | 0.02214 | 0.0189  | 0.01948 | MCOLN1   |
| cg23350274 | 0.62614 | 0.18478 | 0.85775 | 0.89813 | 0.63517 | 0.78084 | 0.49533 | 0.15008 | 0.71778 | 0.48169 | RDH12    |
| cg23350446 | 0.07304 | 0.07463 | 0.06897 | 0.07467 | 0.08218 | 0.06879 | 0.06882 | 0.0721  | 0.06896 | 0.06359 | PDCD2    |
| cg23350580 | 0.50809 | 0.35514 | 0.50279 | 0.58587 | 0.54103 | 0.561   | 0.36317 | 0.34395 | 0.42724 | 0.41233 | TBC1D3C  |

|            |         |         |         |         |         |         |         |         |         |                   |
|------------|---------|---------|---------|---------|---------|---------|---------|---------|---------|-------------------|
| cg23352030 | 0.9746  | 0.96158 | 0.97603 | 0.97504 | 0.97799 | 0.9717  | 0.97798 | 0.9679  | 0.97965 | 0.97467 PRIC285   |
| cg23352579 | 0.03266 | 0.03382 | 0.03935 | 0.03411 | 0.0263  | 0.02846 | 0.02867 | 0.03193 | 0.0279  | 0.02595 RDX       |
| cg23352695 | 0.77959 | 0.75928 | 0.2649  | 0.50766 | 0.44854 | 0.60483 | 0.19389 | 0.74417 | 0.8012  | 0.54454 EVI2A     |
| cg23352747 | 0.69298 | 0.22372 | 0.32046 | 0.28929 | 0.61447 | 0.43548 | 0.31032 | 0.09081 | 0.09248 | 0.04408 ALPL      |
| cg23353982 | 0.19363 | 0.02751 | 0.18077 | 0.30522 | 0.09481 | 0.02588 | 0.04246 | 0.02968 | 0.04048 | 0.02113 TBX6      |
| cg23355492 | 0.37091 | 0.25557 | 0.86142 | 0.86708 | 0.89455 | 0.82993 | 0.75091 | 0.29308 | 0.66007 | 0.4009 SP6        |
| cg23355725 | 0.05957 | 0.05521 | 0.0818  | 0.06331 | 0.05387 | 0.04044 | 0.05542 | 0.05402 | 0.05884 | 0.12772 IIP45     |
| cg23356993 | 0.01981 | 0.02228 | 0.0193  | 0.02077 | 0.01728 | 0.02027 | 0.01689 | 0.01664 | 0.01686 | 0.01541 TIMP2     |
| cg23357981 | 0.03431 | 0.03384 | 0.20851 | 0.36289 | 0.04443 | 0.40546 | 0.06748 | 0.06203 | 0.29433 | 0.03461 GRP       |
| cg23360251 | 0.04807 | 0.04571 | 0.05708 | 0.0528  | 0.05857 | 0.04318 | 0.04947 | 0.04739 | 0.04611 | 0.04682 LEPREL2   |
| cg23361608 | 0.03417 | 0.03468 | 0.03951 | 0.03258 | 0.03525 | 0.03228 | 0.03267 | 0.02981 | 0.03497 | 0.02739 DSCR5     |
| cg23362667 | 0.16345 | 0.09941 | 0.12106 | 0.13917 | 0.12633 | 0.11827 | 0.1226  | 0.1112  | 0.11463 | 0.11308 RIPK5     |
| cg23363832 | 0.05558 | 0.06553 | 0.38169 | 0.19081 | 0.95227 | 0.7437  | 0.43781 | 0.04141 | 0.83337 | 0.52089 RBP1      |
| cg23364287 | 0.04518 | 0.04686 | 0.0446  | 0.03951 | 0.05764 | 0.04821 | 0.04266 | 0.0337  | 0.03594 | 0.03856 IHPK2     |
| cg23365832 | 0.02772 | 0.02641 | 0.02862 | 0.02649 | 0.02136 | 0.02174 | 0.02065 | 0.02467 | 0.02935 | 0.02504 TPST2     |
| cg23366119 | 0.05997 | 0.05728 | 0.08397 | 0.06816 | 0.08317 | 0.0815  | 0.08581 | 0.05249 | 0.05583 | 0.06948 CNDP2     |
| cg23366752 | 0.935   | 0.80811 | 0.38585 | 0.48292 | 0.9755  | 0.97039 | 0.94798 | 0.95332 | 0.9581  | 0.95178 DNAJA4    |
| cg23367478 | 0.02078 | 0.02221 | 0.02545 | 0.02319 | 0.01912 | 0.01925 | 0.02181 | 0.02096 | 0.02038 | 0.01757 PDE3A     |
| cg23370883 | 0.44955 | 0.06663 | 0.44699 | 0.70311 | 0.49899 | 0.16067 | 0.1774  | 0.10715 | 0.06354 | 0.04785 MYL7      |
| cg23372001 | 0.0817  | 0.07834 | 0.09731 | 0.07365 | 0.04801 | 0.13029 | 0.07047 | 0.05495 | 0.04658 | 0.06961 HIST1H4J  |
| cg23376526 | 0.03757 | 0.03235 | 0.05942 | 0.03639 | 0.82949 | 0.96381 | 0.03518 | 0.0295  | 0.02918 | 0.02878 SLC27A3   |
| cg23377693 | 0.04786 | 0.04473 | 0.04065 | 0.04221 | 0.02789 | 0.45837 | 0.03757 | 0.03736 | 0.0388  | 0.0386 GTPBP2     |
| cg23378094 | 0.82407 | 0.8308  | 0.69757 | 0.75462 | 0.73175 | 0.78177 | 0.83382 | 0.80071 | 0.80381 | 0.75777 GLT28D1   |
| cg23378495 | 0.03212 | 0.04072 | 0.04263 | 0.04455 | 0.0372  | 0.0459  | 0.03721 | 0.0377  | 0.03198 | 0.0311 PIGO       |
| cg23381116 | 0.1983  | 0.02292 | 0.02588 | 0.02374 | 0.01704 | 0.03518 | 0.0208  | 0.02451 | 0.02298 | 0.01998 PSME2     |
| cg23382741 | 0.75243 | 0.71328 | 0.74178 | 0.74578 | 0.87703 | 0.85489 | 0.7462  | 0.82225 | 0.29786 | 0.0899 PPP1R14D   |
| cg23384185 | 0.09994 | 0.10144 | 0.10496 | 0.08858 | 0.14228 | 0.12698 | 0.36326 | 0.15623 | 0.13457 | 0.12789 TYMS      |
| cg23384620 | 0.04241 | 0.04091 | 0.12972 | 0.22583 | 0.10387 | 0.05204 | 0.05334 | 0.20581 | 0.06084 | 0.04358 IL1RAPL2  |
| cg23389061 | 0.04378 | 0.03726 | 0.24031 | 0.18128 | 0.17382 | 0.04533 | 0.04036 | 0.03223 | 0.05103 | 0.03484 C14orf122 |
| cg23390397 | 0.04442 | 0.04703 | 0.05311 | 0.04873 | 0.04155 | 0.05558 | 0.04856 | 0.04644 | 0.03992 | 0.04696 MICAL1    |
| cg23391006 | 0.04265 | 0.0332  | 0.04373 | 0.04353 | 0.04699 | 0.04711 | 0.03464 | 0.03156 | 0.04508 | 0.03136 OXTR      |
| cg23391785 | 0.04913 | 0.04622 | 0.07479 | 0.06516 | 0.0757  | 0.04454 | 0.05157 | 0.04362 | 0.04598 | 0.05069 DNMT3     |
| cg23392730 | 0.24447 | 0.14241 | 0.17118 | 0.16646 | 0.23635 | 0.15273 | 0.19475 | 0.16922 | 0.15573 | 0.14612 CHCHD1    |
| cg23392782 | 0.03995 | 0.04204 | 0.04388 | 0.04467 | 0.03139 | 0.03322 | 0.04327 | 0.03555 | 0.03789 | 0.03172 RNF166    |
| cg23393291 | 0.06027 | 0.07109 | 0.07215 | 0.06299 | 0.04515 | 0.05543 | 0.05509 | 0.06007 | 0.05121 | 0.05369 LINS1     |
| cg23397015 | 0.08842 | 0.07307 | 0.08707 | 0.08772 | 0.74654 | 0.83865 | 0.09397 | 0.09468 | 0.19296 | 0.36317 INHBB     |
| cg23398173 | 0.2103  | 0.15081 | 0.28415 | 0.24528 | 0.2756  | 0.20417 | 0.12732 | 0.13968 | 0.13196 | 0.12236 MTPN      |
| cg23398241 | 0.32603 | 0.08379 | 0.43688 | 0.56548 | 0.3232  | 0.2979  | 0.24511 | 0.08249 | 0.39257 | 0.42785 CHRND     |
| cg23398385 | 0.09687 | 0.08354 | 0.09444 | 0.08258 | 0.08057 | 0.07967 | 0.07257 | 0.06693 | 0.08532 | 0.08057 PIK3R4    |
| cg23400451 | 0.22726 | 0.10778 | 0.31876 | 0.54192 | 0.52348 | 0.57194 | 0.16432 | 0.12852 | 0.10445 | 0.10641 MYH4      |
| cg23401756 | 0.97361 | 0.95313 | 0.97971 | 0.98193 | 0.98279 | 0.98031 | 0.97386 | 0.97806 | 0.98451 | 0.96333 DPEP3     |

|            |         |         |         |         |         |         |         |         |         |         |          |
|------------|---------|---------|---------|---------|---------|---------|---------|---------|---------|---------|----------|
| cg23402444 | 0.04747 | 0.04585 | 0.62807 | 0.67025 | 0.20794 | 0.48866 | 0.09545 | 0.05613 | 0.05986 | 0.04379 | PSD      |
| cg23403256 | 0.93129 | 0.92481 | 0.92457 | 0.92257 | 0.94296 | 0.87526 | 0.89749 | 0.91627 | 0.93613 | 0.94156 | MBD1     |
| cg23404467 | 0.78921 | 0.57266 | 0.74513 | 0.81149 | 0.77503 | 0.82368 | 0.71173 | 0.83142 | 0.70078 | 0.66409 | KIR3DL3  |
| cg23407366 | 0.71907 | 0.76135 | 0.34816 | 0.26223 | 0.62984 | 0.69227 | 0.47176 | 0.46932 | 0.28768 | 0.23997 | PABPC5   |
| cg23407670 | 0.67913 | 0.92777 | 0.05479 | 0.05073 | 0.11104 | 0.06663 | 0.06895 | 0.05181 | 0.34797 | 0.51621 | MLH3     |
| cg23408620 | 0.33202 | 0.33599 | 0.48896 | 0.62807 | 0.60536 | 0.66705 | 0.33212 | 0.49364 | 0.27845 | 0.42786 | F11      |
| cg23408913 | 0.04103 | 0.04192 | 0.03992 | 0.04099 | 0.03517 | 0.03704 | 0.03689 | 0.03721 | 0.02712 | 0.03617 | 11-Sep   |
| cg23410113 | 0.71775 | 0.73585 | 0.57078 | 0.59112 | 0.6215  | 0.55863 | 0.61498 | 0.60241 | 0.64693 | 0.64771 | CASP8    |
| cg23410627 | 0.04945 | 0.05733 | 0.2526  | 0.41082 | 0.24255 | 0.39021 | 0.55212 | 0.73076 | 0.89665 | 0.87933 | CH25H    |
| cg23411876 | 0.04414 | 0.04514 | 0.06856 | 0.05631 | 0.06339 | 0.07008 | 0.04223 | 0.04134 | 0.03319 | 0.03342 | NDUFB2   |
| cg23412777 | 0.84309 | 0.77862 | 0.71865 | 0.83184 | 0.82844 | 0.85722 | 0.85054 | 0.84168 | 0.85992 | 0.71108 | PYGO1    |
| cg23412850 | 0.49998 | 0.60815 | 0.0284  | 0.0264  | 0.56052 | 0.46736 | 0.86603 | 0.91577 | 0.96006 | 0.9541  | SOCS2    |
| cg23412875 | 0.03383 | 0.03591 | 0.04193 | 0.03121 | 0.03116 | 0.02498 | 0.02987 | 0.03202 | 0.0241  | 0.02627 | ZNF263   |
| cg23413307 | 0.07216 | 0.06603 | 0.15151 | 0.20955 | 0.47019 | 0.48483 | 0.05685 | 0.04559 | 0.08197 | 0.06853 | LCE1F    |
| cg23414387 | 0.44376 | 0.40894 | 0.65226 | 0.53066 | 0.62975 | 0.32764 | 0.05571 | 0.05793 | 0.05997 | 0.06781 | CYP4B1   |
| cg23414431 | 0.83575 | 0.52373 | 0.7826  | 0.85923 | 0.78274 | 0.8126  | 0.7964  | 0.83172 | 0.81473 | 0.7815  | CAPN3    |
| cg23418591 | 0.47687 | 0.08447 | 0.43052 | 0.57317 | 0.94148 | 0.92153 | 0.70917 | 0.9041  | 0.57102 | 0.53635 | FLJ90166 |
| cg23422659 | 0.04204 | 0.03459 | 0.06229 | 0.04137 | 0.09411 | 0.0571  | 0.03555 | 0.04182 | 0.03538 | 0.05435 | WNT9B    |
| cg23423382 | 0.04248 | 0.04204 | 0.0696  | 0.04886 | 0.03831 | 0.04805 | 0.0388  | 0.04452 | 0.03967 | 0.04183 | ZNF287   |
| cg23424268 | 0.02091 | 0.02934 | 0.04396 | 0.0398  | 0.03913 | 0.04312 | 0.02464 | 0.02406 | 0.02399 | 0.02527 | GCHFR    |
| cg23424962 | 0.10424 | 0.04489 | 0.07118 | 0.04738 | 0.67808 | 0.5943  | 0.12492 | 0.48762 | 0.54972 | 0.57087 | GRIA3    |
| cg23426587 | 0.04956 | 0.03864 | 0.04183 | 0.03988 | 0.02065 | 0.0338  | 0.03381 | 0.03504 | 0.03601 | 0.03055 | KLHL9    |
| cg23427565 | 0.05835 | 0.06493 | 0.06397 | 0.06442 | 0.04411 | 0.0537  | 0.05776 | 0.06049 | 0.04929 | 0.05066 | ATG4D    |
| cg23427666 | 0.80003 | 0.35374 | 0.79092 | 0.80603 | 0.87837 | 0.69421 | 0.8467  | 0.67375 | 0.7657  | 0.76529 | TG       |
| cg23428445 | 0.03033 | 0.02732 | 0.37321 | 0.42816 | 0.28662 | 0.03408 | 0.03192 | 0.03143 | 0.02894 | 0.02048 | GPR37    |
| cg23429696 | 0.02061 | 0.02387 | 0.0257  | 0.02261 | 0.02571 | 0.02806 | 0.01793 | 0.01849 | 0.01699 | 0.01845 | B3GAT2   |
| cg23430634 | 0.87571 | 0.84133 | 0.44406 | 0.64482 | 0.58194 | 0.6149  | 0.64619 | 0.83777 | 0.79416 | 0.79727 | C8orf17  |
| cg23430664 | 0.07603 | 0.05461 | 0.36048 | 0.48653 | 0.51214 | 0.40386 | 0.21641 | 0.05246 | 0.27826 | 0.04164 | XYLT2    |
| cg23431988 | 0.86702 | 0.78084 | 0.87372 | 0.8861  | 0.89287 | 0.87798 | 0.8415  | 0.80418 | 0.88084 | 0.83919 | PIWIL2   |
| cg23432345 | 0.05195 | 0.03978 | 0.04703 | 0.04048 | 0.06871 | 0.05145 | 0.05395 | 0.04595 | 0.03992 | 0.03919 | HOXA7    |
| cg23433532 | 0.47576 | 0.42491 | 0.69641 | 0.73417 | 0.68318 | 0.49912 | 0.49842 | 0.36779 | 0.36275 | 0.32464 | ZDHC16   |
| cg23433607 | 0.0265  | 0.02919 | 0.03003 | 0.0321  | 0.02434 | 0.02725 | 0.02499 | 0.03137 | 0.02157 | 0.02004 | CHGB     |
| cg23434459 | 0.04635 | 0.05094 | 0.05435 | 0.05066 | 0.03949 | 0.0487  | 0.04312 | 0.04054 | 0.03841 | 0.03572 | BCAP29   |
| cg23434919 | 0.02826 | 0.0277  | 0.03017 | 0.03062 | 0.02245 | 0.02723 | 0.0258  | 0.02557 | 0.0249  | 0.02058 | STK10    |
| cg23435440 | 0.14589 | 0.10944 | 0.25517 | 0.20931 | 0.25369 | 0.14164 | 0.09903 | 0.09263 | 0.12943 | 0.12861 | HCAP-G   |
| cg23435746 | 0.06171 | 0.05841 | 0.20194 | 0.1423  | 0.30993 | 0.19537 | 0.11159 | 0.1157  | 0.0865  | 0.09609 | TWSG1    |
| cg23439277 | 0.76951 | 0.5369  | 0.79338 | 0.77653 | 0.72218 | 0.79335 | 0.38761 | 0.65428 | 0.83231 | 0.62183 | PLCE1    |
| cg23440155 | 0.16214 | 0.201   | 0.22841 | 0.26033 | 0.20092 | 0.26522 | 0.16018 | 0.12989 | 0.14501 | 0.14323 | CYP4B1   |
| cg23441167 | 0.038   | 0.03942 | 0.03822 | 0.03838 | 0.03303 | 0.03543 | 0.03477 | 0.03133 | 0.0344  | 0.03377 | GNG5     |
| cg23441208 | 0.04207 | 0.03783 | 0.03846 | 0.04245 | 0.03435 | 0.03815 | 0.0386  | 0.03139 | 0.03449 | 0.03175 | BCAT2    |
| cg23442323 | 0.52536 | 0.34778 | 0.07309 | 0.06165 | 0.04057 | 0.03962 | 0.03133 | 0.03769 | 0.06324 | 0.0316  | CD109    |

|             |         |         |         |         |         |         |         |         |         |                  |
|-------------|---------|---------|---------|---------|---------|---------|---------|---------|---------|------------------|
| cg23444894  | 0.07763 | 0.27111 | 0.18035 | 0.24902 | 0.88842 | 0.87548 | 0.45837 | 0.754   | 0.06842 | 0.05774 UNQ5810  |
| cg23444511  | 0.04188 | 0.0515  | 0.04725 | 0.04541 | 0.0319  | 0.04231 | 0.0413  | 0.04818 | 0.04327 | 0.03557 NIP7     |
| cg234446109 | 0.08481 | 0.09098 | 0.07519 | 0.08766 | 0.09861 | 0.10851 | 0.06513 | 0.05265 | 0.05034 | 0.04145 PCCA     |
| cg23447996  | 0.67098 | 0.57146 | 0.15218 | 0.17112 | 0.31742 | 0.3114  | 0.36598 | 0.10865 | 0.73339 | 0.61597 SYK      |
| cg23448096  | 0.02928 | 0.02953 | 0.06991 | 0.088   | 0.02505 | 0.0274  | 0.0256  | 0.02568 | 0.02417 | 0.02188 LYSMD4   |
| cg23451311  | 0.08709 | 0.08518 | 0.08489 | 0.08552 | 0.06922 | 0.08638 | 0.08044 | 0.07545 | 0.08117 | 0.07933 DMAP1    |
| cg23452458  | 0.16023 | 0.17141 | 0.09811 | 0.32555 | 0.0447  | 0.04514 | 0.0604  | 0.04171 | 0.03228 | 0.03802 OSBPL7   |
| cg23455517  | 0.05912 | 0.05843 | 0.08148 | 0.06983 | 0.29801 | 0.0537  | 0.13273 | 0.03794 | 0.96375 | 0.91463 BCAT2    |
| cg23455614  | 0.11652 | 0.10253 | 0.07385 | 0.08633 | 0.1232  | 0.10784 | 0.0847  | 0.07772 | 0.05488 | 0.05446 MRPS30   |
| cg23455897  | 0.03758 | 0.03731 | 0.04939 | 0.04038 | 0.03662 | 0.03957 | 0.03796 | 0.03518 | 0.02943 | 0.02624 C2orf23  |
| cg23456306  | 0.02275 | 0.02256 | 0.03364 | 0.02646 | 0.24881 | 0.32111 | 0.02089 | 0.0192  | 0.02249 | 0.01518 EFNA2    |
| cg23456692  | 0.04201 | 0.03771 | 0.04041 | 0.04021 | 0.03847 | 0.0362  | 0.03139 | 0.0296  | 0.03349 | 0.02984 EDEM1    |
| cg23458892  | 0.83041 | 0.74731 | 0.72764 | 0.82393 | 0.60916 | 0.68475 | 0.31638 | 0.34928 | 0.83927 | 0.69664 SIGLEC7  |
| cg23459997  | 0.0314  | 0.0375  | 0.03876 | 0.03768 | 0.02724 | 0.03319 | 0.02914 | 0.02725 | 0.02866 | 0.02905 JAGN1    |
| cg23460697  | 0.73568 | 0.75839 | 0.75072 | 0.7483  | 0.74529 | 0.25995 | 0.73713 | 0.76855 | 0.71698 | 0.68488 UBN1     |
| cg23462402  | 0.85287 | 0.70826 | 0.86189 | 0.88452 | 0.76615 | 0.81837 | 0.83248 | 0.80598 | 0.90742 | 0.87683 FAM113A  |
| cg23464269  | 0.74188 | 0.58245 | 0.36658 | 0.44132 | 0.11493 | 0.33821 | 0.05836 | 0.05912 | 0.54394 | 0.07096 UGT1A3   |
| cg23470272  | 0.04936 | 0.04343 | 0.05276 | 0.05844 | 0.03732 | 0.05611 | 0.04692 | 0.03718 | 0.04048 | 0.03582 GSPN2    |
| cg23471482  | 0.55439 | 0.52861 | 0.73262 | 0.82929 | 0.92236 | 0.88323 | 0.68745 | 0.30039 | 0.68044 | 0.37935 CCL22    |
| cg23472215  | 0.02311 | 0.02425 | 0.02431 | 0.02452 | 0.06354 | 0.16812 | 0.01852 | 0.01711 | 0.01985 | 0.01764 GSTM3    |
| cg23473726  | 0.0339  | 0.03016 | 0.03157 | 0.03124 | 0.03645 | 0.03231 | 0.02391 | 0.02755 | 0.02058 | 0.02364 ZNF324   |
| cg23473849  | 0.05024 | 0.05766 | 0.04897 | 0.04937 | 0.03425 | 0.04569 | 0.04428 | 0.04858 | 0.0454  | 0.03965 PPP2R5B  |
| cg23473904  | 0.12747 | 0.03919 | 0.04216 | 0.03432 | 0.02367 | 0.03027 | 0.03228 | 0.03299 | 0.02888 | 0.03094 COL6A2   |
| cg23475963  | 0.02234 | 0.02432 | 0.02106 | 0.02626 | 0.01853 | 0.0246  | 0.02047 | 0.02166 | 0.02165 | 0.01752 CALU     |
| cg23476955  | 0.04042 | 0.04469 | 0.03812 | 0.04553 | 0.03202 | 0.03598 | 0.03437 | 0.03369 | 0.02797 | 0.02946 AP1M1    |
| cg23477967  | 0.12922 | 0.1653  | 0.17385 | 0.13911 | 0.3     | 0.15347 | 0.44462 | 0.5025  | 0.24886 | 0.17786 TFPI     |
| cg23478284  | 0.0407  | 0.03787 | 0.03869 | 0.04264 | 0.05475 | 0.04304 | 0.03692 | 0.03193 | 0.03458 | 0.03404 PTPN13   |
| cg23479658  | 0.05895 | 0.06316 | 0.05636 | 0.05578 | 0.12639 | 0.09967 | 0.0473  | 0.04739 | 0.05076 | 0.05572 LIAS     |
| cg23480499  | 0.03615 | 0.04156 | 0.05427 | 0.05204 | 0.05072 | 0.05251 | 0.04783 | 0.04521 | 0.04212 | 0.04313 METAP2   |
| cg23481221  | 0.05375 | 0.04699 | 0.0518  | 0.04603 | 0.03759 | 0.04087 | 0.04381 | 0.04186 | 0.03708 | 0.03625 TOMM34   |
| cg23481748  | 0.60102 | 0.68848 | 0.09187 | 0.0749  | 0.10506 | 0.08212 | 0.1647  | 0.07314 | 0.58871 | 0.62284 UNQ9438  |
| cg23484278  | 0.06604 | 0.06134 | 0.10493 | 0.07632 | 0.12131 | 0.06454 | 0.14023 | 0.12711 | 0.07105 | 0.07608 C15orf27 |
| cg23486067  | 0.03986 | 0.03961 | 0.03757 | 0.04364 | 0.03455 | 0.03539 | 0.03102 | 0.03046 | 0.03367 | 0.02836 PLSCR1   |
| cg23487586  | 0.87702 | 0.9005  | 0.88776 | 0.90304 | 0.88917 | 0.85936 | 0.88331 | 0.88719 | 0.89868 | 0.89616 MGC22001 |
| cg23488190  | 0.03915 | 0.03976 | 0.03835 | 0.0459  | 0.02918 | 0.03614 | 0.03214 | 0.03924 | 0.03116 | 0.02891 POLR2J2  |
| cg23489497  | 0.0219  | 0.02005 | 0.02442 | 0.02236 | 0.01743 | 0.02585 | 0.01792 | 0.01911 | 0.01964 | 0.01965 ATPBD1B  |
| cg23490074  | 0.19462 | 0.19419 | 0.25495 | 0.22474 | 0.19393 | 0.22159 | 0.23559 | 0.22838 | 0.1447  | 0.12941 C19orf2  |
| cg23491309  | 0.03085 | 0.03175 | 0.04313 | 0.03687 | 0.03516 | 0.03523 | 0.06147 | 0.03249 | 0.08055 | 0.02387 UBE2L6   |
| cg23492043  | 0.3446  | 0.07406 | 0.57608 | 0.55564 | 0.08802 | 0.07053 | 0.31039 | 0.37992 | 0.08386 | 0.05716 ASTN     |
| cg23493704  | 0.85827 | 0.67873 | 0.81938 | 0.84273 | 0.87375 | 0.50613 | 0.81785 | 0.69117 | 0.86764 | 0.58343 SLC10A3  |
| cg23494853  | 0.05135 | 0.05334 | 0.05833 | 0.05578 | 0.04765 | 0.05842 | 0.05412 | 0.05133 | 0.05098 | 0.04861 C2orf25  |

|            |         |         |         |         |         |         |         |         |         |                   |
|------------|---------|---------|---------|---------|---------|---------|---------|---------|---------|-------------------|
| cg23495059 | 0.02794 | 0.03251 | 0.03557 | 0.03274 | 0.03526 | 0.03149 | 0.03771 | 0.03334 | 0.02786 | 0.02599 RRAGC     |
| cg23495733 | 0.34658 | 0.02777 | 0.04077 | 0.03502 | 0.02594 | 0.02972 | 0.02842 | 0.02902 | 0.02893 | 0.02605 CPNE8     |
| cg23496260 | 0.08005 | 0.06209 | 0.06168 | 0.06435 | 0.04842 | 0.06364 | 0.0379  | 0.04179 | 0.05895 | 0.043 BASP1       |
| cg23499129 | 0.11067 | 0.10064 | 0.2291  | 0.31962 | 0.75563 | 0.94354 | 0.16717 | 0.158   | 0.30329 | 0.19752 MGC35308  |
| cg23499956 | 0.7156  | 0.38634 | 0.24492 | 0.32195 | 0.36994 | 0.47824 | 0.432   | 0.20476 | 0.69053 | 0.70274 S100A16   |
| cg23502772 | 0.04633 | 0.03042 | 0.29059 | 0.38729 | 0.81103 | 0.89645 | 0.30681 | 0.06507 | 0.47005 | 0.54382 MGC42105  |
| cg23503501 | 0.19242 | 0.0373  | 0.56325 | 0.78535 | 0.05588 | 0.04124 | 0.0318  | 0.03685 | 0.06641 | 0.0388 RIBC2      |
| cg23504246 | 0.33236 | 0.07122 | 0.63824 | 0.80843 | 0.14494 | 0.16155 | 0.45826 | 0.2344  | 0.67671 | 0.49144 FGF7      |
| cg23504707 | 0.78878 | 0.61786 | 0.84356 | 0.8463  | 0.72678 | 0.70789 | 0.73779 | 0.81391 | 0.63754 | 0.71131 PPM1A     |
| cg23506842 | 0.87879 | 0.75049 | 0.8716  | 0.9051  | 0.94986 | 0.8313  | 0.81184 | 0.8039  | 0.87905 | 0.62653 PTPN7     |
| cg23507131 | 0.05556 | 0.04232 | 0.40756 | 0.50803 | 0.24276 | 0.04944 | 0.03858 | 0.04758 | 0.04751 | 0.03499 DARC      |
| cg23508052 | 0.02971 | 0.03221 | 0.02859 | 0.03083 | 0.02261 | 0.02549 | 0.02594 | 0.02964 | 0.02546 | 0.02449 SCD       |
| cg23508540 | 0.03133 | 0.03523 | 0.03441 | 0.03588 | 0.03456 | 0.03141 | 0.02954 | 0.02696 | 0.03025 | 0.02954 CLSTN1    |
| cg23508786 | 0.15123 | 0.14668 | 0.16683 | 0.15403 | 0.17054 | 0.16551 | 0.15266 | 0.12729 | 0.14916 | 0.16172 IFNGR2    |
| cg23509027 | 0.83561 | 0.5686  | 0.57271 | 0.68221 | 0.8533  | 0.86333 | 0.21304 | 0.24662 | 0.03544 | 0.03119 CSAG3A    |
| cg23509064 | 0.10114 | 0.11439 | 0.1126  | 0.11883 | 0.10679 | 0.0848  | 0.1004  | 0.08736 | 0.09782 | 0.09978 FN3KRP    |
| cg23509869 | 0.72561 | 0.22736 | 0.61312 | 0.62369 | 0.53021 | 0.50145 | 0.15591 | 0.10328 | 0.63994 | 0.51113 LST1      |
| cg23512028 | 0.05632 | 0.06686 | 0.0601  | 0.05538 | 0.0691  | 0.06338 | 0.05051 | 0.0528  | 0.0497  | 0.05126 RBAK      |
| cg23512958 | 0.04559 | 0.05327 | 0.08419 | 0.07374 | 0.069   | 0.05557 | 0.05936 | 0.05577 | 0.04455 | 0.06959 IL7       |
| cg23513504 | 0.1314  | 0.14055 | 0.1383  | 0.13613 | 0.10639 | 0.13377 | 0.12142 | 0.12768 | 0.12799 | 0.11379 TMEM1     |
| cg23513644 | 0.0277  | 0.02238 | 0.02715 | 0.02146 | 0.02256 | 0.02217 | 0.02132 | 0.02207 | 0.01979 | 0.01673 MPHOSPH10 |
| cg23513690 | 0.04641 | 0.03734 | 0.04559 | 0.03958 | 0.03441 | 0.03634 | 0.04052 | 0.03921 | 0.05409 | 0.09583 SH3RF2    |
| cg23514672 | 0.79267 | 0.31885 | 0.81973 | 0.90269 | 0.90464 | 0.91801 | 0.09477 | 0.05951 | 0.57431 | 0.37892 FLJ32871  |
| cg23517548 | 0.0483  | 0.04158 | 0.04296 | 0.04313 | 0.04066 | 0.03992 | 0.04265 | 0.04339 | 0.03612 | 0.03474 NFATC2IP  |
| cg23517605 | 0.03894 | 0.04506 | 0.51165 | 0.62531 | 0.68083 | 0.77756 | 0.75736 | 0.52111 | 0.90334 | 0.88101 TUBB2B    |
| cg23517664 | 0.03756 | 0.03822 | 0.03809 | 0.03779 | 0.03173 | 0.03517 | 0.03534 | 0.03545 | 0.03103 | 0.02893 SBDS      |
| cg23517677 | 0.84539 | 0.71674 | 0.82192 | 0.84154 | 0.81336 | 0.80291 | 0.71026 | 0.7562  | 0.85306 | 0.81711 POLR2G    |
| cg23519022 | 0.84251 | 0.83299 | 0.85217 | 0.82299 | 0.84451 | 0.82193 | 0.83809 | 0.85366 | 0.86398 | 0.85773 CAPZB     |
| cg23519969 | 0.75941 | 0.37439 | 0.82392 | 0.84843 | 0.77239 | 0.82735 | 0.30381 | 0.33287 | 0.387   | 0.37985 CCR8      |
| cg23520347 | 0.07351 | 0.05966 | 0.06251 | 0.05908 | 0.1219  | 0.05639 | 0.06189 | 0.05262 | 0.05857 | 0.05745 RASSF5    |
| cg23521069 | 0.05169 | 0.0479  | 0.05286 | 0.04562 | 0.07565 | 0.07344 | 0.04235 | 0.03991 | 0.03865 | 0.05636 SIP1      |
| cg23521281 | 0.02954 | 0.0255  | 0.03114 | 0.02689 | 0.02545 | 0.02816 | 0.02701 | 0.02474 | 0.0247  | 0.02681 WDR75     |
| cg23523368 | 0.56335 | 0.52466 | 0.75205 | 0.80147 | 0.66568 | 0.74381 | 0.30103 | 0.20167 | 0.43459 | 0.4006 AMPD1      |
| cg23525180 | 0.06048 | 0.07038 | 0.10684 | 0.10268 | 0.07037 | 0.09025 | 0.07964 | 0.06925 | 0.06523 | 0.06134 ID2       |
| cg23526055 | 0.06789 | 0.06535 | 0.07036 | 0.06018 | 0.04751 | 0.05688 | 0.05781 | 0.05966 | 0.0559  | 0.0494 TCEB1      |
| cg23527067 | 0.82708 | 0.51819 | 0.81666 | 0.83384 | 0.77566 | 0.8215  | 0.80239 | 0.66535 | 0.82723 | 0.7267 PRH2       |
| cg23528708 | 0.04718 | 0.05092 | 0.05512 | 0.04341 | 0.03226 | 0.04493 | 0.04258 | 0.04338 | 0.04339 | 0.03862 C6orf79   |
| cg23529954 | 0.09668 | 0.09881 | 0.10297 | 0.10164 | 0.06724 | 0.08897 | 0.08153 | 0.09239 | 0.09477 | 0.08398 HERC1     |
| cg23530288 | 0.03197 | 0.03165 | 0.04053 | 0.03199 | 0.02599 | 0.02879 | 0.02994 | 0.03301 | 0.027   | 0.02725 SIRT3     |
| cg23530850 | 0.04716 | 0.0521  | 0.03878 | 0.03878 | 0.05182 | 0.04498 | 0.04327 | 0.03831 | 0.26931 | 0.03428 KIAA0182  |
| cg23533073 | 0.03312 | 0.03006 | 0.03413 | 0.02519 | 0.08514 | 0.03069 | 0.0256  | 0.02595 | 0.03306 | 0.02973 CHES1     |

|            |         |         |         |         |         |         |         |         |         |                   |
|------------|---------|---------|---------|---------|---------|---------|---------|---------|---------|-------------------|
| cg23534142 | 0.64566 | 0.76984 | 0.87481 | 0.91549 | 0.80036 | 0.67936 | 0.80905 | 0.74218 | 0.848   | 0.61949 ATF3      |
| cg23536300 | 0.03215 | 0.02799 | 0.02822 | 0.02867 | 0.02365 | 0.03405 | 0.03098 | 0.03165 | 0.03026 | 0.02713 PPP1R12A  |
| cg23538064 | 0.65886 | 0.34482 | 0.75341 | 0.78378 | 0.14605 | 0.39107 | 0.6375  | 0.11559 | 0.21485 | 0.06599 CFB       |
| cg23538854 | 0.07584 | 0.06079 | 0.10799 | 0.12663 | 0.05297 | 0.05798 | 0.05844 | 0.06051 | 0.07064 | 0.04741 IL7       |
| cg23539753 | 0.61558 | 0.68452 | 0.03792 | 0.04547 | 0.03588 | 0.04722 | 0.04936 | 0.19804 | 0.03613 | 0.03736 SP100     |
| cg23539966 | 0.02713 | 0.02753 | 0.03147 | 0.02651 | 0.0247  | 0.02221 | 0.02633 | 0.03064 | 0.02002 | 0.02256 RTN4      |
| cg23540518 | 0.23317 | 0.20244 | 0.46217 | 0.5357  | 0.8212  | 0.87491 | 0.26534 | 0.20704 | 0.44584 | 0.25046 TRIM17    |
| cg23540651 | 0.25939 | 0.18338 | 0.76056 | 0.83903 | 0.75183 | 0.82754 | 0.78804 | 0.52574 | 0.78824 | 0.69559 GBP3      |
| cg23540745 | 0.77184 | 0.78877 | 0.75346 | 0.79347 | 0.77932 | 0.74829 | 0.77757 | 0.81089 | 0.78678 | 0.85861 HIST1H4G  |
| cg23543604 | 0.04271 | 0.0398  | 0.05008 | 0.0451  | 0.03142 | 0.03693 | 0.04056 | 0.0381  | 0.04007 | 0.03185 TAF12     |
| cg23545272 | 0.07066 | 0.0695  | 0.08818 | 0.08008 | 0.07029 | 0.06054 | 0.20886 | 0.23641 | 0.07324 | 0.07234 EFN1      |
| cg23546413 | 0.0284  | 0.03078 | 0.03512 | 0.03466 | 0.03494 | 0.03084 | 0.02638 | 0.02781 | 0.02645 | 0.02773 GDPD1     |
| cg23547073 | 0.09712 | 0.09128 | 0.10382 | 0.08393 | 0.05847 | 0.07203 | 0.09388 | 0.10018 | 0.07533 | 0.08364 ABCB6     |
| cg23547429 | 0.85115 | 0.54375 | 0.10501 | 0.30969 | 0.02362 | 0.03445 | 0.03308 | 0.04773 | 0.02953 | 0.03477 SLC43A3   |
| cg23548479 | 0.042   | 0.03691 | 0.06154 | 0.05073 | 0.69776 | 0.5479  | 0.04903 | 0.03438 | 0.03519 | 0.03168 CDKN1C    |
| cg23548920 | 0.02863 | 0.03316 | 0.03438 | 0.03444 | 0.02996 | 0.02848 | 0.02757 | 0.03317 | 0.02572 | 0.02765 ARRDC2    |
| cg23552468 | 0.45466 | 0.2475  | 0.64279 | 0.64234 | 0.50403 | 0.67237 | 0.59469 | 0.70509 | 0.66043 | 0.67822 MGC41945  |
| cg23555120 | 0.93594 | 0.93309 | 0.07421 | 0.06803 | 0.20939 | 0.56283 | 0.06405 | 0.07516 | 0.94069 | 0.92924 NUA1      |
| cg23557926 | 0.15422 | 0.13404 | 0.2573  | 0.22841 | 0.24277 | 0.15546 | 0.21301 | 0.11781 | 0.31127 | 0.19535 CFH       |
| cg23558650 | 0.05541 | 0.05687 | 0.07244 | 0.07371 | 0.06209 | 0.06428 | 0.0713  | 0.06442 | 0.05518 | 0.05374 PPME1     |
| cg23559331 | 0.15755 | 0.05703 | 0.73085 | 0.91411 | 0.58429 | 0.66824 | 0.53016 | 0.55935 | 0.07226 | 0.04514 KCN4      |
| cg23560113 | 0.09696 | 0.09936 | 0.10735 | 0.11043 | 0.10113 | 0.10663 | 0.12367 | 0.08892 | 0.09465 | 0.09745 MXD1      |
| cg23563234 | 0.23287 | 0.1948  | 0.93156 | 0.93518 | 0.91062 | 0.85881 | 0.93398 | 0.94116 | 0.90607 | 0.86782 PCDHGB7   |
| cg23564033 | 0.04142 | 0.04211 | 0.03792 | 0.03681 | 0.03381 | 0.03858 | 0.03632 | 0.03891 | 0.0316  | 0.02947 THOC3     |
| cg23566335 | 0.78523 | 0.65451 | 0.51883 | 0.75203 | 0.59767 | 0.71492 | 0.53865 | 0.12291 | 0.3779  | 0.22865 ADAM18    |
| cg23566503 | 0.92992 | 0.93826 | 0.90896 | 0.93742 | 0.93086 | 0.93073 | 0.89974 | 0.89524 | 0.94098 | 0.94675 NNAT      |
| cg23568913 | 0.0219  | 0.02153 | 0.03223 | 0.02266 | 0.02179 | 0.02155 | 0.02178 | 0.02102 | 0.02951 | 0.04207 PES1      |
| cg23570261 | 0.03635 | 0.03219 | 0.03889 | 0.04847 | 0.04052 | 0.04023 | 0.03978 | 0.04197 | 0.03381 | 0.03445 FLJ10006  |
| cg23571457 | 0.54451 | 0.32819 | 0.21962 | 0.45528 | 0.81647 | 0.44379 | 0.19232 | 0.38175 | 0.71061 | 0.31419 GPRASP1   |
| cg23571857 | 0.77163 | 0.78963 | 0.88055 | 0.88462 | 0.31354 | 0.37872 | 0.89438 | 0.5863  | 0.91464 | 0.57945 BIRC4BP   |
| cg23574449 | 0.05266 | 0.05775 | 0.06951 | 0.05551 | 0.20014 | 0.04361 | 0.05069 | 0.05456 | 0.04871 | 0.04411 E2F2      |
| cg23575320 | 0.65738 | 0.20084 | 0.05752 | 0.05022 | 0.10435 | 0.08058 | 0.07298 | 0.07216 | 0.05201 | 0.07025 C14orf58  |
| cg23576473 | 0.03208 | 0.03709 | 0.03533 | 0.0276  | 0.0338  | 0.03277 | 0.03435 | 0.0315  | 0.02811 | 0.03064 SLC35B1   |
| cg23577242 | 0.85155 | 0.85472 | 0.78597 | 0.84701 | 0.70264 | 0.80182 | 0.79436 | 0.8468  | 0.61136 | 0.41081 MPPED2    |
| cg23578193 | 0.08126 | 0.04016 | 0.45499 | 0.53723 | 0.45366 | 0.48723 | 0.44096 | 0.22058 | 0.03567 | 0.02667 LGR6      |
| cg23579062 | 0.2918  | 0.08129 | 0.07746 | 0.07936 | 0.07223 | 0.04541 | 0.0443  | 0.0468  | 0.07348 | 0.0483 DNAI1      |
| cg23580000 | 0.96753 | 0.83033 | 0.96288 | 0.96776 | 0.97763 | 0.96416 | 0.9698  | 0.93465 | 0.96241 | 0.95072 ADCY7     |
| cg23580945 | 0.61033 | 0.40492 | 0.43972 | 0.69544 | 0.37936 | 0.37542 | 0.08858 | 0.07923 | 0.209   | 0.14567 FLJ43826  |
| cg23581186 | 0.27954 | 0.32172 | 0.38538 | 0.39577 | 0.39099 | 0.44075 | 0.25455 | 0.23838 | 0.27249 | 0.31325 KRTAP21-2 |
| cg23582408 | 0.02991 | 0.02106 | 0.07645 | 0.09712 | 0.09803 | 0.0189  | 0.02001 | 0.02098 | 0.08921 | 0.03926 EEF1A2    |
| cg23582919 | 0.03234 | 0.0341  | 0.0498  | 0.03847 | 0.03727 | 0.03416 | 0.07935 | 0.03792 | 0.03274 | 0.02993 UBPH      |

|            |         |         |         |         |         |         |         |         |         |                   |
|------------|---------|---------|---------|---------|---------|---------|---------|---------|---------|-------------------|
| cg23583739 | 0.1411  | 0.03391 | 0.04204 | 0.05096 | 0.05016 | 0.0291  | 0.03441 | 0.03356 | 0.03359 | 0.03698 KDELR3    |
| cg23585575 | 0.06661 | 0.05642 | 0.06019 | 0.06068 | 0.05146 | 0.05508 | 0.05091 | 0.05208 | 0.06036 | 0.04706 PPIF      |
| cg23587449 | 0.37561 | 0.03427 | 0.81524 | 0.88589 | 0.44369 | 0.03416 | 0.18759 | 0.02814 | 0.49048 | 0.44286 LRAT      |
| cg23587532 | 0.62435 | 0.32366 | 0.9047  | 0.89954 | 0.82671 | 0.62174 | 0.78622 | 0.81007 | 0.91147 | 0.81477 BM88      |
| cg23588553 | 0.04665 | 0.04216 | 0.05834 | 0.06571 | 0.05066 | 0.0557  | 0.05394 | 0.04802 | 0.04826 | 0.05635 SHMT2     |
| cg23588759 | 0.77948 | 0.77946 | 0.72239 | 0.73171 | 0.64968 | 0.71438 | 0.70816 | 0.7766  | 0.78471 | 0.7371 GJB7       |
| cg23588893 | 0.03976 | 0.04104 | 0.03734 | 0.04074 | 0.03633 | 0.03542 | 0.03382 | 0.0362  | 0.03412 | 0.02837 FUT11     |
| cg23591853 | 0.7409  | 0.3959  | 0.3627  | 0.46501 | 0.22018 | 0.22938 | 0.2529  | 0.091   | 0.10445 | 0.22344 IFT172    |
| cg23591869 | 0.94263 | 0.93554 | 0.78532 | 0.816   | 0.82181 | 0.5164  | 0.16872 | 0.09963 | 0.41372 | 0.49293 FLJ45803  |
| cg23594876 | 0.04289 | 0.04459 | 0.04882 | 0.04019 | 0.03141 | 0.03726 | 0.0544  | 0.04461 | 0.03454 | 0.03512 BLCAP     |
| cg23595927 | 0.65326 | 0.07481 | 0.8914  | 0.91122 | 0.80859 | 0.60726 | 0.49732 | 0.26089 | 0.54207 | 0.06426 MYL5      |
| cg23596123 | 0.22231 | 0.14678 | 0.33312 | 0.45556 |         | 0.43468 | 0.2212  | 0.18766 | 0.18685 | 0.15794 PCDHB6    |
| cg23599056 | 0.82648 | 0.84535 | 0.80921 | 0.83062 | 0.81212 | 0.80373 | 0.80828 | 0.80334 | 0.84113 | 0.8 ZMYND17       |
| cg23599843 | 0.1163  | 0.12147 | 0.21319 | 0.1644  | 0.3304  | 0.11235 | 0.12522 | 0.13035 | 0.1223  | 0.12316 JPH1      |
| cg23602533 | 0.05346 | 0.05353 | 0.20932 | 0.37274 | 0.04289 | 0.0414  | 0.07656 | 0.06757 | 0.0605  | 0.04041 TTPA      |
| cg23602684 | 0.02762 | 0.02576 | 0.02966 | 0.02878 | 0.02535 | 0.03331 | 0.02254 | 0.02215 | 0.02114 | 0.02283 NRL       |
| cg23606023 | 0.79491 | 0.30235 | 0.87569 | 0.93432 | 0.93786 | 0.88847 | 0.59543 | 0.12326 | 0.77637 | 0.91768 CBFA2T3   |
| cg23606079 | 0.10629 | 0.04364 | 0.09098 | 0.12474 | 0.08439 | 0.0498  | 0.07146 | 0.04728 | 0.87568 | 0.47948 CRISPLD2  |
| cg23609672 | 0.58425 | 0.61156 | 0.72421 | 0.8363  | 0.8927  | 0.88096 | 0.77184 | 0.758   | 0.88351 | 0.82219 MYBPH     |
| cg23609821 | 0.04571 | 0.04735 | 0.04732 | 0.0435  | 0.06062 | 0.0745  | 0.04032 | 0.0401  | 0.04782 | 0.05373 NP        |
| cg23610018 | 0.02219 | 0.02239 | 0.02265 | 0.02066 | 0.01969 | 0.02288 | 0.01691 | 0.01577 | 0.01922 | 0.01534 VGLL4     |
| cg23610820 | 0.39405 | 0.42303 | 0.73938 | 0.74827 | 0.77194 | 0.70859 | 0.69832 | 0.58575 | 0.83182 | 0.80904 PSG9      |
| cg23610841 | 0.18695 | 0.19567 | 0.19238 | 0.19227 | 0.17607 | 0.17782 | 0.16344 | 0.16724 | 0.16798 | 0.15947 PURG      |
| cg23612220 | 0.84798 | 0.82785 | 0.87107 | 0.8749  | 0.84161 | 0.83201 | 0.85315 | 0.87274 | 0.81536 | 0.80822 TNFAIP8L2 |
| cg23613030 | 0.90252 | 0.86753 | 0.90088 | 0.91156 | 0.91118 | 0.91096 | 0.86146 | 0.67726 | 0.90862 | 0.89879 GPR115    |
| cg23613177 | 0.06111 | 0.0537  | 0.07728 | 0.07196 | 0.06855 | 0.05515 | 0.05342 | 0.05508 | 0.05171 | 0.04551 C10orf89  |
| cg23613305 | 0.02514 | 0.02742 | 0.0231  | 0.02666 | 0.02424 | 0.02717 | 0.02263 | 0.02263 | 0.02327 | 0.02344 FVT1      |
| cg23613317 | 0.87417 | 0.86824 | 0.87188 | 0.88657 | 0.90491 | 0.79375 | 0.86298 | 0.85855 | 0.88984 | 0.83753 LARP1     |
| cg23614979 | 0.04776 | 0.04403 | 0.04386 | 0.06394 | 0.03508 | 0.04362 | 0.04422 | 0.051   | 0.03745 | 0.043 NAV2        |
| cg23615676 | 0.04529 | 0.03721 | 0.12235 | 0.14541 | 0.08047 | 0.08781 | 0.06319 | 0.04089 | 0.0721  | 0.03179 KCNN2     |
| cg23616377 | 0.05782 | 0.05593 | 0.15206 | 0.12646 | 0.1152  | 0.06684 | 0.07666 | 0.06538 | 0.07109 | 0.05189 CA8       |
| cg23616741 | 0.85531 | 0.53288 | 0.36725 | 0.60334 | 0.86722 | 0.55985 | 0.1424  | 0.12736 | 0.32072 | 0.3216 PGAM2      |
| cg23617121 | 0.95938 | 0.95309 | 0.95003 | 0.95296 | 0.89863 | 0.94084 | 0.94263 | 0.95436 | 0.96647 | 0.95569 OSBPL5    |
| cg23617760 | 0.3949  | 0.87141 | 0.91483 | 0.92123 | 0.91456 | 0.84535 | 0.84514 | 0.34984 | 0.37831 | 0.10235 C16orf44  |
| cg23618830 | 0.06545 | 0.07296 | 0.05655 | 0.05737 | 0.05931 | 0.0579  | 0.07032 | 0.07441 | 0.06008 | 0.04359 ARHGEF12  |
| cg23619829 | 0.05512 | 0.05607 | 0.06612 | 0.05818 | 0.07028 | 0.05059 | 0.07674 | 0.08193 | 0.04086 | 0.04534 MTFR1     |
| cg23620639 | 0.1263  | 0.04013 | 0.12163 | 0.11192 | 0.25585 | 0.05925 | 0.04191 | 0.03467 | 0.50853 | 0.03604 COL13A1   |
| cg23621115 | 0.82953 | 0.78105 | 0.84907 | 0.86735 | 0.89799 | 0.84069 | 0.71802 | 0.3871  | 0.30188 | 0.06564 PRKCABP   |
| cg23621689 | 0.95347 | 0.84112 | 0.93519 | 0.93722 | 0.95853 | 0.94925 | 0.9547  | 0.91796 | 0.94765 | 0.93598 C6orf25   |
| cg23621817 | 0.84959 | 0.69088 | 0.85914 | 0.88738 | 0.79273 | 0.81658 | 0.13556 | 0.43537 | 0.88057 | 0.85526 CHRNA9    |
| cg23623692 | 0.63069 | 0.5666  | 0.76225 | 0.79141 | 0.78937 | 0.80872 | 0.75211 | 0.78925 | 0.73878 | 0.59301 ATP10A    |

|            |         |         |         |         |         |         |         |         |         |                  |
|------------|---------|---------|---------|---------|---------|---------|---------|---------|---------|------------------|
| cg23625458 | 0.91167 | 0.60732 | 0.94044 | 0.9714  | 0.97818 | 0.82153 | 0.93052 | 0.95071 | 0.94041 | 0.9071 AFAR3     |
| cg23626798 | 0.8561  | 0.83161 | 0.87064 | 0.9556  | 0.80471 | 0.7291  | 0.40977 | 0.27868 | 0.35195 | 0.44753 L3MBTL   |
| cg23627134 | 0.78915 | 0.64778 | 0.61175 | 0.70661 | 0.57011 | 0.7238  | 0.4592  | 0.72174 | 0.38694 | 0.28501 ARHGAP15 |
| cg23628240 | 0.03214 | 0.03381 | 0.03688 | 0.03383 | 0.0212  | 0.03102 | 0.0275  | 0.02556 | 0.02925 | 0.02531 MLR2     |
| cg23629183 | 0.03834 | 0.04213 | 0.04559 | 0.04367 | 0.0254  | 0.02873 | 0.05    | 0.05415 | 0.03349 | 0.03391 MINA     |
| cg23629496 | 0.37159 | 0.09946 | 0.74333 | 0.80068 | 0.81225 | 0.77676 | 0.75364 | 0.72987 | 0.82892 | 0.50077 C2orf75  |
| cg23631636 | 0.02349 | 0.02008 | 0.02564 | 0.02465 | 0.02838 | 0.03121 | 0.02233 | 0.01791 | 0.02229 | 0.01848 RPL37A   |
| cg23632840 | 0.03546 | 0.03652 | 0.03461 | 0.03154 | 0.03988 | 0.04507 | 0.03638 | 0.03714 | 0.02625 | 0.02444 MKKS     |
| cg23637791 | 0.10177 | 0.08337 | 0.62432 | 0.74584 | 0.09527 | 0.15773 | 0.20595 | 0.09363 | 0.07787 | 0.06841 ODF3L1   |
| cg23637943 | 0.04433 | 0.04883 | 0.05348 | 0.04568 | 0.03349 | 0.04061 | 0.04662 | 0.04842 | 0.04169 | 0.0398 PSMA5     |
| cg23639989 | 0.0256  | 0.02559 | 0.0342  | 0.25989 | 0.10649 | 0.02577 | 0.04583 | 0.02457 | 0.02016 | 0.02079 FAM105A  |
| cg23640092 | 0.0729  | 0.06475 | 0.08402 | 0.08264 | 0.05596 | 0.07297 | 0.06671 | 0.07473 | 0.05989 | 0.06307 ZNRF2    |
| cg23640701 | 0.91754 | 0.935   | 0.89025 | 0.94036 | 0.95353 | 0.92979 | 0.68303 | 0.53554 | 0.77015 | 0.6664 ACVRL1    |
| cg23640903 | 0.05155 | 0.06076 | 0.05139 | 0.04977 | 0.03762 | 0.05136 | 0.0495  | 0.05167 | 0.05019 | 0.04762 GFOD1    |
| cg23641145 | 0.05445 | 0.05876 | 0.31214 | 0.40771 | 0.10523 | 0.06741 | 0.08116 | 0.07237 | 0.05675 | 0.05163 PGR      |
| cg23641264 | 0.87297 | 0.18481 | 0.84848 | 0.85711 | 0.9047  | 0.29585 | 0.86055 | 0.1527  | 0.87636 | 0.13687 JRK      |
| cg23641267 | 0.81256 | 0.74939 | 0.72415 | 0.7809  | 0.63601 | 0.56449 | 0.73919 | 0.73491 | 0.80756 | 0.53225 LPXN     |
| cg23641648 | 0.03799 | 0.03289 | 0.03484 | 0.03506 | 0.02629 | 0.03101 | 0.02937 | 0.03466 | 0.02945 | 0.03012 MRPS9    |
| cg23642747 | 0.06024 | 0.05028 | 0.90796 | 0.93262 | 0.93834 | 0.90578 | 0.3963  | 0.39879 | 0.90808 | 0.87144 INA      |
| cg23643330 | 0.02844 | 0.02718 | 0.03026 | 0.02482 | 0.02566 | 0.03027 | 0.02671 | 0.02826 | 0.17367 | 0.0215 JAG1      |
| cg23644127 | 0.07515 | 0.07352 | 0.07956 | 0.07164 | 0.06422 | 0.06688 | 0.07951 | 0.06466 | 0.06524 | 0.06645 C8orf38  |
| cg23644213 | 0.06089 | 0.04728 | 0.05291 | 0.05242 | 0.08232 | 0.07079 | 0.06397 | 0.05153 | 0.04467 | 0.03937 PIGO     |
| cg23645091 | 0.78658 | 0.53299 | 0.69125 | 0.70323 | 0.88182 | 0.54599 | 0.84828 | 0.74893 | 0.42546 | 0.25809 KRT5     |
| cg23651356 | 0.57839 | 0.4341  | 0.4005  | 0.38415 | 0.90963 | 0.56061 | 0.59793 | 0.2652  | 0.84994 | 0.47229 RGS17    |
| cg23651728 | 0.58029 | 0.18582 | 0.51579 | 0.44437 | 0.2169  | 0.1456  | 0.16727 | 0.10814 | 0.16278 | 0.05046 BFSP1    |
| cg23652526 | 0.06326 | 0.06477 | 0.06747 | 0.06397 | 0.05739 | 0.06676 | 0.0512  | 0.05396 | 0.05394 | 0.04982 HNRPUL1  |
| cg23652631 | 0.05823 | 0.05903 | 0.07411 | 0.0641  | 0.08669 | 0.05769 | 0.04772 | 0.04069 | 0.07003 | 0.0751 SPATA1    |
| cg23652939 | 0.02511 | 0.02327 | 0.02945 | 0.02396 | 0.02608 | 0.02618 | 0.01877 | 0.01995 | 0.0256  | 0.02441 C1orf160 |
| cg23653008 | 0.03958 | 0.03279 | 0.03793 | 0.03234 | 0.17155 | 0.06811 | 0.03256 | 0.0297  | 0.03032 | 0.02968 CHFR     |
| cg23653187 | 0.07615 | 0.06684 | 0.08315 | 0.09294 | 0.11547 | 0.06959 | 0.07661 | 0.07611 | 0.08989 | 0.0786 ADPN      |
| cg23653712 | 0.06043 | 0.05971 | 0.07623 | 0.05774 | 0.02943 | 0.07049 | 0.04747 | 0.0517  | 0.05397 | 0.04444 SGCB     |
| cg23654219 | 0.82804 | 0.72527 | 0.53338 | 0.65469 | 0.43399 | 0.12168 | 0.09169 | 0.11325 | 0.90314 | 0.48872 TCF19    |
| cg23654545 | 0.02391 | 0.0253  | 0.0301  | 0.02611 | 0.02223 | 0.03124 | 0.01624 | 0.02179 | 0.0171  | 0.01677 GNL1     |
| cg23654549 | 0.03161 | 0.02566 | 0.02104 | 0.02237 | 0.37528 | 0.33563 | 0.01771 | 0.02178 | 0.01998 | 0.01622 CD24     |
| cg23655719 | 0.83077 | 0.2081  | 0.77547 | 0.84886 | 0.78766 | 0.82063 | 0.7711  | 0.52403 | 0.85504 | 0.8213 CCL19     |
| cg23656380 | 0.03827 | 0.03639 | 0.06134 | 0.11963 | 0.0473  | 0.03955 | 0.03295 | 0.0368  | 0.06029 | 0.02795 ADRM1    |
| cg23656386 | 0.65279 | 0.52918 | 0.86777 | 0.83376 | 0.82368 | 0.6171  | 0.77305 | 0.53658 | 0.79689 | 0.38377 SLC12A4  |
| cg23657252 | 0.04637 | 0.04811 | 0.04801 | 0.04812 | 0.0373  | 0.04252 | 0.03354 | 0.03543 | 0.03705 | 0.03107 BMP2K    |
| cg23657409 | 0.05772 | 0.06187 | 0.3615  | 0.37843 | 0.04595 | 0.05734 | 0.06015 | 0.05312 | 0.06197 | 0.06001 PLCB1    |
| cg23659398 | 0.81573 | 0.44991 | 0.15336 | 0.33395 | 0.05647 | 0.04569 | 0.46081 | 0.19767 | 0.1334  | 0.03812 PPP3CC   |
| cg23660082 | 0.72753 | 0.11964 | 0.74593 | 0.81081 | 0.70493 | 0.69469 | 0.20496 | 0.38994 | 0.63916 | 0.56969 CST1     |



|            |         |         |         |         |         |         |         |         |         |         |           |
|------------|---------|---------|---------|---------|---------|---------|---------|---------|---------|---------|-----------|
| cg23660191 | 0.03999 | 0.04852 | 0.04723 | 0.042   | 0.03716 | 0.04106 | 0.04222 | 0.04194 | 0.03305 | 0.02694 | ZNF688    |
| cg23660999 | 0.0316  | 0.02771 | 0.03149 | 0.03568 | 0.02395 | 0.02752 | 0.03114 | 0.03089 | 0.02594 | 0.02628 | PDDC1     |
| cg23661676 | 0.24327 | 0.04746 | 0.3582  | 0.30655 | 0.38876 | 0.4413  | 0.07108 | 0.0402  | 0.43898 | 0.04409 | GPR42     |
| cg23662675 | 0.0323  | 0.03738 | 0.03246 | 0.03451 | 0.03275 | 0.03127 | 0.02935 | 0.03215 | 0.02457 | 0.02242 | PRKCBP1   |
| cg23663332 | 0.89142 | 0.85314 | 0.85564 | 0.78434 | 0.90559 | 0.83289 | 0.86394 | 0.81992 | 0.86758 | 0.76224 | RBM13     |
| cg23663476 | 0.23072 | 0.10636 | 0.58278 | 0.64049 | 0.94817 | 0.91927 | 0.05265 | 0.6346  | 0.72505 | 0.88278 | LAT       |
| cg23663653 | 0.35004 | 0.09225 | 0.4311  | 0.4361  | 0.69388 | 0.69792 | 0.04404 | 0.07807 | 0.04604 | 0.04528 |           |
| cg23665568 | 0.76228 | 0.79124 | 0.19874 | 0.38465 | 0.52185 | 0.72967 | 0.3322  | 0.6436  | 0.60313 | 0.0563  | BCL10     |
| cg23665603 | 0.53253 | 0.16408 | 0.51125 | 0.53877 | 0.43515 | 0.55186 | 0.64963 | 0.19638 | 0.59562 | 0.08718 | SEC14L2   |
| cg23667407 | 0.04011 | 0.05078 | 0.0459  | 0.04265 | 0.05365 | 0.04402 | 0.03367 | 0.03501 | 0.03799 | 0.03672 | LOC51255  |
| cg23667432 | 0.23063 | 0.20179 | 0.77376 | 0.79995 | 0.47127 | 0.66995 | 0.69227 | 0.25057 | 0.24114 | 0.08832 | ALPP      |
| cg23667933 | 0.04455 | 0.04014 | 0.03596 | 0.04034 | 0.03759 | 0.03863 | 0.04003 | 0.0339  | 0.03747 | 0.03222 | FXN       |
| cg23668257 | 0.0616  | 0.06228 | 0.07831 | 0.07424 | 0.06461 | 0.06971 | 0.05015 | 0.04896 | 0.04777 | 0.04428 | ZFP95     |
| cg23668631 | 0.90949 | 0.71529 | 0.8957  | 0.91166 | 0.94179 | 0.78743 | 0.70921 | 0.53241 | 0.92155 | 0.61607 | CAMKK1    |
| cg23670203 | 0.84724 | 0.8568  | 0.85447 | 0.85878 | 0.85729 | 0.8345  | 0.79709 | 0.84606 | 0.8779  | 0.81779 | STK38     |
| cg23671708 | 0.74096 | 0.57138 | 0.05757 | 0.04356 | 0.90894 | 0.86213 | 0.91201 | 0.66342 | 0.92201 | 0.90724 | TMEM88    |
| cg23673107 | 0.93513 | 0.10167 | 0.95955 | 0.96544 | 0.97962 | 0.96572 | 0.94464 | 0.40344 | 0.95491 | 0.69645 | ZNF491    |
| cg23674788 | 0.72589 | 0.67771 | 0.80033 | 0.83877 | 0.88661 | 0.84313 | 0.04661 | 0.08151 | 0.8033  | 0.78793 | KRTHA2    |
| cg23674882 | 0.81921 | 0.51023 | 0.85263 | 0.86734 | 0.42406 | 0.23822 | 0.83854 | 0.64242 | 0.41946 | 0.29377 | LOXL3     |
| cg23679085 | 0.03153 | 0.03231 | 0.03534 | 0.0377  | 0.02376 | 0.02891 | 0.03108 | 0.02822 | 0.0297  | 0.02895 | AP2M1     |
| cg23679141 | 0.0969  | 0.10769 | 0.09615 | 0.10468 | 0.27273 | 0.18664 | 0.08599 | 0.0959  | 0.02785 | 0.0265  | ANP32C    |
| cg23679724 | 0.91867 | 0.75799 | 0.69637 | 0.81383 | 0.37392 | 0.05978 | 0.90045 | 0.91504 | 0.44989 | 0.37691 | CTSZ      |
| cg23680518 | 0.36385 | 0.07629 | 0.86189 | 0.91784 | 0.82767 | 0.74551 | 0.06559 | 0.06714 | 0.92092 | 0.67013 | SBSN      |
| cg23680936 | 0.023   | 0.01935 | 0.02383 | 0.02206 | 0.01721 | 0.02159 | 0.01764 | 0.02027 | 0.02099 | 0.01906 | C10orf22  |
| cg23681213 | 0.05998 | 0.04996 | 0.06904 | 0.05672 | 0.03649 | 0.05119 | 0.04304 | 0.03767 | 0.05033 | 0.04675 | PNMA1     |
| cg23681243 | 0.0362  | 0.03407 | 0.03969 | 0.0354  | 0.02534 | 0.02907 | 0.03811 | 0.02975 | 0.02653 | 0.02905 | UBE3A     |
| cg23683201 | 0.63707 | 0.52737 | 0.42365 | 0.44689 | 0.34256 | 0.33247 | 0.48195 | 0.11074 | 0.08607 | 0.09671 | SLC22A9   |
| cg23684521 | 0.46278 | 0.20317 | 0.11535 | 0.19293 | 0.03893 | 0.02773 | 0.08494 | 0.04029 | 0.02627 | 0.02615 | SDFR1     |
| cg23685580 | 0.85673 | 0.83907 | 0.83446 | 0.8082  | 0.77574 | 0.78658 | 0.78111 | 0.73607 | 0.71565 | 0.74705 | CATSPER2  |
| cg23686014 | 0.05338 | 0.04822 | 0.05122 | 0.05059 | 0.06541 | 0.04743 | 0.09036 | 0.10125 | 0.04356 | 0.03487 | TFPI2     |
| cg23687186 | 0.08463 | 0.07645 | 0.0868  | 0.08164 | 0.07693 | 0.0811  | 0.08665 | 0.07578 | 0.08109 | 0.07801 | IPO9      |
| cg23687319 | 0.08969 | 0.08973 | 0.13796 | 0.13086 | 0.15453 | 0.1066  | 0.23484 | 0.18798 | 0.08595 | 0.10235 | GGPS1     |
| cg23687960 | 0.03109 | 0.0313  | 0.03687 | 0.02462 | 0.01781 | 0.02601 | 0.02282 | 0.02835 | 0.02259 | 0.02915 | GGH       |
| cg23689916 | 0.13087 | 0.11018 | 0.13165 | 0.09073 | 0.23317 | 0.12944 | 0.11456 | 0.11844 | 0.08308 | 0.09796 | CHMP5     |
| cg23690380 | 0.06785 | 0.06526 | 0.07632 | 0.05944 | 0.18179 | 0.10292 | 0.05311 | 0.04954 | 0.05374 | 0.07255 | PRMT5     |
| cg23692497 | 0.04739 | 0.04914 | 0.04811 | 0.04819 | 0.03498 | 0.04308 | 0.04304 | 0.04128 | 0.03416 | 0.03789 | INT4      |
| cg23693510 | 0.10622 | 0.06757 | 0.79167 | 0.83621 | 0.38854 | 0.40711 | 0.32066 | 0.05639 | 0.41003 | 0.32289 | ELAVL2    |
| cg23694248 | 0.11181 | 0.18857 | 0.90886 | 0.93148 | 0.79199 | 0.7101  | 0.06273 | 0.09978 | 0.07953 | 0.0635  | PTPRR     |
| cg23695504 | 0.08853 | 0.03455 | 0.30848 | 0.27971 | 0.47017 | 0.54331 | 0.03646 | 0.02816 | 0.13135 | 0.02598 | FLJ45717  |
| cg23696618 | 0.61344 | 0.31302 | 0.57599 | 0.6921  | 0.32094 | 0.28044 | 0.26833 | 0.23101 | 0.37331 | 0.29093 | SERPINB10 |
| cg23696712 | 0.65636 | 0.66022 | 0.89501 | 0.92102 | 0.95234 | 0.88392 | 0.37804 | 0.12886 | 0.90052 | 0.83195 | KRT6L     |

|            |         |         |         |         |         |         |         |         |         |                   |
|------------|---------|---------|---------|---------|---------|---------|---------|---------|---------|-------------------|
| cg23696834 | 0.78817 | 0.80552 | 0.45565 | 0.64121 | 0.59499 | 0.59002 | 0.90518 | 0.93213 | 0.66126 | 0.71541 GNMT      |
| cg23696886 | 0.77428 | 0.26296 | 0.64137 | 0.69814 | 0.97199 | 0.97035 | 0.96604 | 0.93375 | 0.20786 | 0.13356 PDLIM2    |
| cg23696949 | 0.92591 | 0.80865 | 0.94775 | 0.93623 | 0.95826 | 0.94689 | 0.94417 | 0.94129 | 0.93878 | 0.82015 LAMC2     |
| cg23698058 | 0.02061 | 0.01886 | 0.02337 | 0.02252 | 0.01797 | 0.02066 | 0.01418 | 0.01446 | 0.02087 | 0.01837 PRKACB    |
| cg23698287 | 0.09243 | 0.06243 | 0.12525 | 0.07923 | 0.27479 | 0.17347 | 0.07006 | 0.06882 | 0.10857 | 0.05634 HDAC1     |
| cg23698956 | 0.03469 | 0.03654 | 0.37319 | 0.19874 | 0.04645 | 0.04269 | 0.25413 | 0.05879 | 0.03556 | 0.03071 FAM3A     |
| cg23698969 | 0.93203 | 0.78333 | 0.9314  | 0.94155 | 0.93917 | 0.93573 | 0.9321  | 0.93941 | 0.94442 | 0.93847 SLC22A18  |
| cg23699324 | 0.05376 | 0.05249 | 0.55807 | 0.83021 | 0.08908 | 0.04981 | 0.05736 | 0.05722 | 0.07316 | 0.06944 CTNNA2    |
| cg23700778 | 0.02003 | 0.02183 | 0.01994 | 0.0205  | 0.02816 | 0.02091 | 0.02014 | 0.02241 | 0.01494 | 0.01491 KIAA0895  |
| cg23702568 | 0.04513 | 0.04626 | 0.04928 | 0.05179 | 0.03436 | 0.04558 | 0.04644 | 0.03819 | 0.04107 | 0.03938 KIAA0261  |
| cg23704082 | 0.21285 | 0.48484 | 0.03322 | 0.03286 | 0.06174 | 0.03635 | 0.03474 | 0.03103 | 0.2458  | 0.04771 TRIM59    |
| cg23704362 | 0.36968 | 0.17362 | 0.86057 | 0.87805 | 0.09536 | 0.05959 | 0.53959 | 0.1496  | 0.06467 | 0.05947 C8orf46   |
| cg23704703 | 0.85975 | 0.79389 | 0.87502 | 0.88427 | 0.88288 | 0.88341 | 0.87175 | 0.87993 | 0.88974 | 0.85812 C21orf13  |
| cg23705973 | 0.05401 | 0.05688 | 0.07087 | 0.06466 | 0.15647 | 0.10752 | 0.05443 | 0.05943 | 0.13484 | 0.03957 HIST1H1D  |
| cg23706211 | 0.06656 | 0.06263 | 0.30441 | 0.4426  | 0.83754 | 0.76201 | 0.68245 | 0.27145 | 0.04456 | 0.03216 CELSR2    |
| cg23706422 | 0.05502 | 0.05751 | 0.05509 | 0.05799 | 0.04532 | 0.05358 | 0.04912 | 0.04597 | 0.05075 | 0.0465 PAPS2      |
| cg23707493 | 0.05786 | 0.05168 | 0.05494 | 0.06073 | 0.07727 | 0.04908 | 0.0474  | 0.05632 | 0.03951 | 0.04177 TNKS2     |
| cg23707905 | 0.8842  | 0.89496 | 0.76718 | 0.84158 | 0.71082 | 0.85537 | 0.89478 | 0.9013  | 0.83502 | 0.83487 AMY2B     |
| cg23709121 | 0.03127 | 0.02818 | 0.02805 | 0.02654 | 0.02691 | 0.02862 | 0.0254  | 0.02769 | 0.02443 | 0.02844 C14orf149 |
| cg23709838 | 0.08032 | 0.07707 | 0.07015 | 0.06333 | 0.07238 | 0.06607 | 0.11458 | 0.06399 | 0.06584 | 0.05767 SLC35A2   |
| cg23710218 | 0.08192 | 0.08326 | 0.37127 | 0.6611  | 0.11536 | 0.06414 | 0.07185 | 0.07331 | 0.09041 | 0.07888 MSC       |
| cg23713520 | 0.84862 | 0.16853 | 0.91391 | 0.91892 | 0.93658 | 0.92239 | 0.71607 | 0.2952  | 0.92694 | 0.25326 TM4SF11   |
| cg23713742 | 0.86742 | 0.27366 | 0.93493 | 0.94228 | 0.86143 | 0.83703 | 0.86986 | 0.74784 | 0.94724 | 0.70617 SPAG4     |
| cg23717696 | 0.89441 | 0.90727 | 0.83346 | 0.86651 | 0.89991 | 0.86815 | 0.46319 | 0.88105 | 0.91674 | 0.8888 ITGB1BP2   |
| cg23719124 | 0.87789 | 0.86189 | 0.79858 | 0.84193 | 0.86664 | 0.82789 | 0.85523 | 0.9252  | 0.88464 | 0.67523 GSTM5     |
| cg23719367 | 0.78675 | 0.78728 | 0.69225 | 0.7521  | 0.65926 | 0.75284 | 0.60667 | 0.65326 | 0.78695 | 0.71693 LONRF1    |
| cg23721140 | 0.03836 | 0.03872 | 0.12944 | 0.27221 | 0.06672 | 0.03272 | 0.03091 | 0.03111 | 0.03209 | 0.03109 ZNF514    |
| cg23722792 | 0.92366 | 0.92412 | 0.94084 | 0.9506  | 0.9648  | 0.92344 | 0.90426 | 0.87645 | 0.94323 | 0.93323 SCN4A     |
| cg23723933 | 0.0544  | 0.04554 | 0.05206 | 0.05947 | 0.04415 | 0.05516 | 0.04412 | 0.045   | 0.04139 | 0.043 AKAP9       |
| cg23724447 | 0.11829 | 0.11774 | 0.12032 | 0.11861 | 0.11077 | 0.12266 | 0.09969 | 0.10057 | 0.09741 | 0.1051 BUB3       |
| cg23727043 | 0.34503 | 0.09031 | 0.52768 | 0.59779 | 0.15735 | 0.0577  | 0.07709 | 0.05931 | 0.06547 | 0.05566 ADAMTS7   |
| cg23727583 | 0.03964 | 0.04328 | 0.06557 | 0.05289 | 0.05133 | 0.05774 | 0.03596 | 0.03761 | 0.04026 | 0.04782 FDXR      |
| cg23731764 | 0.03021 | 0.02712 | 0.03145 | 0.02857 | 0.02406 | 0.02808 | 0.0249  | 0.02342 | 0.02203 | 0.0252 EXOSC10    |
| cg23732024 | 0.63536 | 0.51581 | 0.16005 | 0.28675 | 0.10725 | 0.10993 | 0.14202 | 0.11311 | 0.09007 | 0.26507 LY96      |
| cg23732182 | 0.88291 | 0.49785 | 0.8796  | 0.9242  | 0.25996 | 0.09015 | 0.84226 | 0.40058 | 0.02621 | 0.0333 C21orf84   |
| cg23733753 | 0.05385 | 0.04695 | 0.12573 | 0.27144 | 0.08168 | 0.04589 | 0.04758 | 0.04839 | 0.05627 | 0.03952 CYP46A1   |
| cg23735442 | 0.04848 | 0.05423 | 0.05764 | 0.05521 | 0.04927 | 0.05914 | 0.05235 | 0.04939 | 0.05562 | 0.05583 SMG7      |
| cg23736819 | 0.12023 | 0.09868 | 0.13971 | 0.10015 | 0.19023 | 0.14695 | 0.86514 | 0.89774 | 0.09054 | 0.07795 LOC115648 |
| cg23737055 | 0.14916 | 0.10819 | 0.14134 | 0.1281  | 0.06881 | 0.09373 | 0.09997 | 0.10332 | 0.14088 | 0.09699 ANKRD46   |
| cg23737768 | 0.78241 | 0.82317 | 0.63969 | 0.78353 | 0.64304 | 0.81054 | 0.12364 | 0.29303 | 0.121   | 0.26803 KRT24     |
| cg23738770 | 0.03674 | 0.0357  | 0.03826 | 0.0414  | 0.07951 | 0.03787 | 0.03145 | 0.03272 | 0.03007 | 0.0283 NFKB2      |

|            |         |         |         |         |         |         |         |         |         |                  |
|------------|---------|---------|---------|---------|---------|---------|---------|---------|---------|------------------|
| cg23739036 | 0.02086 | 0.02244 | 0.02262 | 0.02064 | 0.01991 | 0.02137 | 0.01958 | 0.01752 | 0.01707 | 0.01362 PEX10    |
| cg23739862 | 0.02229 | 0.02624 | 0.88301 | 0.95432 | 0.41392 | 0.02766 | 0.12249 | 0.06291 | 0.0249  | 0.02496 PRMT8    |
| cg23740844 | 0.05454 | 0.0706  | 0.05948 | 0.05537 | 0.06441 | 0.06584 | 0.06562 | 0.0614  | 0.05732 | 0.04938 ATP5L    |
| cg23741330 | 0.7586  | 0.42714 | 0.53838 | 0.7187  | 0.23722 | 0.12843 | 0.23853 | 0.08757 | 0.12746 | 0.11958 C6orf188 |
| cg23743114 | 0.60635 | 0.6305  | 0.56298 | 0.70243 | 0.63737 | 0.76671 | 0.09805 | 0.09085 | 0.50426 | 0.19405 CCL15    |
| cg23743472 | 0.82871 | 0.28842 | 0.76331 | 0.78571 | 0.3626  | 0.3201  | 0.52711 | 0.43315 | 0.90915 | 0.74492 C11orf38 |
| cg23744433 | 0.07373 | 0.082   | 0.08825 | 0.07981 | 0.05677 | 0.07364 | 0.08747 | 0.07242 | 0.07984 | 0.07169 WDR78    |
| cg23746359 | 0.53514 | 0.51751 | 0.5872  | 0.5506  | 0.32446 | 0.12154 | 0.2032  | 0.11812 | 0.30167 | 0.14479 FAM19A3  |
| cg23748737 | 0.02102 | 0.02505 | 0.02729 | 0.02525 | 0.02324 | 0.0214  | 0.02044 | 0.02289 | 0.01953 | 0.01905 SCARF2   |
| cg23749046 | 0.61566 | 0.22266 | 0.50517 | 0.67077 | 0.65259 | 0.75761 | 0.50667 | 0.78246 | 0.32986 | 0.23879 GPR61    |
| cg23749163 | 0.03188 | 0.02914 | 0.02526 | 0.02652 | 0.02534 | 0.02595 | 0.02844 | 0.02706 | 0.02189 | 0.02247 KIAA1737 |
| cg23749760 | 0.1092  | 0.0348  | 0.57726 | 0.63433 | 0.93004 | 0.20039 | 0.29972 | 0.02939 | 0.70979 | 0.42282 ZNF467   |
| cg23750142 | 0.03773 | 0.04716 | 0.03112 | 0.02561 | 0.05859 | 0.27198 | 0.02412 | 0.02864 | 0.02275 | 0.02069 CA8      |
| cg23750556 | 0.07388 | 0.07298 | 0.07968 | 0.07698 | 0.06885 | 0.06632 | 0.30882 | 0.45375 | 0.07027 | 0.0718 SRPX      |
| cg23751724 | 0.04042 | 0.04182 | 0.29544 | 0.42898 | 0.02529 | 0.03665 | 0.03542 | 0.03386 | 0.03883 | 0.03422 C2orf133 |
| cg23751922 | 0.24446 | 0.07285 | 0.13038 | 0.13057 | 0.10354 | 0.07062 | 0.1052  | 0.08343 | 0.08488 | 0.08016 CREG1    |
| cg23752923 | 0.03446 | 0.02681 | 0.02936 | 0.02649 | 0.02894 | 0.03552 | 0.02294 | 0.01752 | 0.02926 | 0.02414 MCOLN3   |
| cg23752985 | 0.59526 | 0.43948 | 0.89444 | 0.88728 | 0.68929 | 0.56453 | 0.91568 | 0.56659 | 0.67242 | 0.56656 VAMP8    |
| cg23753610 | 0.92269 | 0.9418  | 0.89384 | 0.94428 | 0.94671 | 0.96007 | 0.27291 | 0.35338 | 0.94413 | 0.95906 DNAHL1   |
| cg23756219 | 0.86979 | 0.80664 | 0.90835 | 0.89927 | 0.91208 | 0.88146 | 0.33977 | 0.47923 | 0.86295 | 0.83923 DRP2     |
| cg23756272 | 0.87697 | 0.79155 | 0.85789 | 0.8823  | 0.54217 | 0.3516  | 0.59816 | 0.26664 | 0.54764 | 0.8532 BCL2      |
| cg23758485 | 0.04958 | 0.05259 | 0.07462 | 0.06552 | 0.09046 | 0.08666 | 0.10027 | 0.11834 | 0.05216 | 0.06341 SMPD3    |
| cg23759214 | 0.07033 | 0.08987 | 0.09569 | 0.08286 | 0.06351 | 0.07567 | 0.07055 | 0.07509 | 0.06517 | 0.06596 MRE11A   |
| cg23759710 | 0.75673 | 0.76522 | 0.78273 | 0.77366 | 0.82834 | 0.79596 | 0.74874 | 0.59091 | 0.79389 | 0.75554 OXER1    |
| cg23760945 | 0.8487  | 0.87139 | 0.85981 | 0.83164 | 0.87087 | 0.90043 | 0.8006  | 0.85594 | 0.87246 | 0.88001 ELOF1    |
| cg23761196 | 0.26154 | 0.12098 | 0.12088 | 0.1199  | 0.0898  | 0.11839 | 0.09353 | 0.0991  | 0.1676  | 0.10795 CNOT1    |
| cg23761264 | 0.03414 | 0.03485 | 0.03297 | 0.0295  | 0.02554 | 0.02991 | 0.02953 | 0.02629 | 0.02626 | 0.02565 PLCG1    |
| cg23762517 | 0.10218 | 0.07839 | 0.14945 | 0.11423 | 0.41165 | 0.11974 | 0.52078 | 0.29593 | 0.11437 | 0.09929 HIVEP3   |
| cg23764381 | 0.04918 | 0.05882 | 0.05861 | 0.04726 | 0.05529 | 0.05058 | 0.05411 | 0.04439 | 0.04846 | 0.04297 ATRNL1   |
| cg23765993 | 0.08772 | 0.10521 | 0.20825 | 0.18758 | 0.32246 | 0.26398 | 0.10699 | 0.10089 | 0.10044 | 0.06764 SPINLW1  |
| cg23767977 | 0.40419 | 0.14491 | 0.59528 | 0.78435 | 0.88811 | 0.84207 | 0.30872 | 0.10042 | 0.27961 | 0.20615 KRT6IRS  |
| cg23769143 | 0.04557 | 0.06555 | 0.2576  | 0.24193 | 0.88584 | 0.76003 | 0.14472 | 0.09581 | 0.85983 | 0.73683 TIMP4    |
| cg23771603 | 0.03459 | 0.03372 | 0.95559 | 0.96661 | 0.25874 | 0.46173 | 0.0552  | 0.03246 | 0.39045 | 0.89849 MYO3A    |
| cg23771661 | 0.67837 | 0.27113 | 0.84393 | 0.88999 | 0.43304 | 0.30298 | 0.15429 | 0.08795 | 0.90921 | 0.60345 B3GNT3   |
| cg23771929 | 0.75031 | 0.27446 | 0.75267 | 0.89136 | 0.9669  | 0.50732 | 0.8065  | 0.42363 | 0.80517 | 0.50779 FREQ     |
| cg23772500 | 0.04127 | 0.04573 | 0.04777 | 0.04778 | 0.04041 | 0.04985 | 0.04279 | 0.04493 | 0.04001 | 0.03526 PSMD3    |
| cg23772557 | 0.03208 | 0.03512 | 0.03206 | 0.03037 | 0.03148 | 0.03362 | 0.02974 | 0.03012 | 0.02873 | 0.03123 USP16    |
| cg23773532 | 0.56955 | 0.32142 | 0.46036 | 0.66966 | 0.71678 | 0.52265 | 0.60312 | 0.38891 | 0.52851 | 0.2532 GPRC5D    |
| cg23776012 | 0.64971 | 0.15774 | 0.29729 | 0.44634 | 0.37531 | 0.21235 | 0.74728 | 0.19853 | 0.58984 | 0.44725 KA21     |
| cg23776217 | 0.0665  | 0.05575 | 0.06828 | 0.06093 | 0.05868 | 0.06175 | 0.05487 | 0.05011 | 0.05002 | 0.05049 C18orf10 |
| cg23776892 | 0.85513 | 0.75016 | 0.80589 | 0.89431 | 0.85042 | 0.84443 | 0.21231 | 0.42416 | 0.55005 | 0.46395 MAGEA1   |

|            |         |         |         |         |         |         |         |         |         |                  |
|------------|---------|---------|---------|---------|---------|---------|---------|---------|---------|------------------|
| cg23777956 | 0.17902 | 0.26541 | 0.63894 | 0.63401 | 0.23538 | 0.0943  | 0.12588 | 0.06917 | 0.56392 | 0.57326 CREB3L3  |
| cg23779106 | 0.02025 | 0.02055 | 0.02318 | 0.01988 | 0.01752 | 0.02024 | 0.01795 | 0.01804 | 0.01764 | 0.01682 DUSP12   |
| cg23779331 | 0.05034 | 0.04935 | 0.06419 | 0.0512  | 0.07705 | 0.05364 | 0.05617 | 0.05257 | 0.06299 | 0.04842 ARRB2    |
| cg23780937 | 0.0349  | 0.03682 | 0.04475 | 0.03531 | 0.03224 | 0.0394  | 0.03419 | 0.03496 | 0.02969 | 0.02827 C7orf24  |
| cg23780947 | 0.1254  | 0.08183 | 0.75843 | 0.78333 | 0.46827 | 0.52312 | 0.10471 | 0.0666  | 0.28905 | 0.19087 TMEM48   |
| cg23786576 | 0.11375 | 0.03995 | 0.05164 | 0.04867 | 0.06005 | 0.03414 | 0.10102 | 0.03836 | 0.03625 | 0.03477 ATPAF1   |
| cg23788167 | 0.02709 | 0.03173 | 0.02779 | 0.02689 | 0.03298 | 0.0311  | 0.02852 | 0.03073 | 0.02524 | 0.02372 ZA20D2   |
| cg23790767 | 0.02884 | 0.02282 | 0.02823 | 0.02185 | 0.02222 | 0.02625 | 0.05281 | 0.02595 | 0.02338 | 0.02024 ELL3     |
| cg23792364 | 0.10615 | 0.08874 | 0.0864  | 0.07783 | 0.16217 | 0.10736 | 0.08809 | 0.06135 | 0.06248 | 0.05685 C19orf6  |
| cg23792978 | 0.21969 | 0.03524 | 0.07641 | 0.13255 | 0.18814 | 0.04352 | 0.0313  | 0.03018 | 0.03024 | 0.29926 PDE2A    |
| cg23795623 | 0.03533 | 0.0366  | 0.03303 | 0.03035 | 0.02803 | 0.0341  | 0.02689 | 0.02891 | 0.02659 | 0.02496 FLJ10769 |
| cg23796040 | 0.71444 | 0.7806  | 0.84617 | 0.85722 | 0.86501 | 0.83891 | 0.85383 | 0.81415 | 0.8499  | 0.82531 KIAA0143 |
| cg23797100 | 0.76213 | 0.89701 | 0.51113 | 0.58325 | 0.956   | 0.86667 | 0.03892 | 0.75075 | 0.61615 | 0.78603 LAT      |
| cg23799276 | 0.19497 | 0.05678 | 0.07452 | 0.05377 | 0.07606 | 0.04828 | 0.06588 | 0.05636 | 0.11575 | 0.04441 NUP210   |
| cg23799313 | 0.31959 | 0.09797 | 0.7281  | 0.75438 | 0.63064 | 0.25707 | 0.66764 | 0.17873 | 0.48449 | 0.20858 PAQR7    |
| cg23801057 | 0.78298 | 0.62312 | 0.79063 | 0.79856 | 0.81896 | 0.76515 | 0.75127 | 0.59937 | 0.80352 | 0.30468 P2RX7    |
| cg23806715 | 0.03925 | 0.03395 | 0.05619 | 0.04537 | 0.09068 | 0.07465 | 0.03063 | 0.03345 | 0.03723 | 0.03308 H3F3B    |
| cg23807009 | 0.03229 | 0.03418 | 0.05932 | 0.0456  | 0.04202 | 0.0349  | 0.03723 | 0.02995 | 0.03346 | 0.04399 MDM4     |
| cg23807559 | 0.02999 | 0.02742 | 0.02732 | 0.02903 | 0.02198 | 0.02507 | 0.02287 | 0.0248  | 0.01971 | 0.02061 COG1     |
| cg23807646 | 0.78259 | 0.82221 | 0.91074 | 0.9353  | 0.85886 | 0.78954 | 0.85036 | 0.90432 | 0.94553 | 0.92028 SLC26A8  |
| cg23808301 | 0.06038 | 0.06171 | 0.06262 | 0.05914 | 0.04409 | 0.05095 | 0.06015 | 0.05252 | 0.07194 | 0.04285 PLD2     |
| cg23812886 | 0.65114 | 0.50309 | 0.4268  | 0.66691 | 0.57005 | 0.67265 | 0.08397 | 0.09576 | 0.48376 | 0.54457 SSX5     |
| cg23813257 | 0.5908  | 0.17735 | 0.10553 | 0.45939 | 0.37521 | 0.16561 | 0.16553 | 0.03954 | 0.02777 | 0.02492 IL32     |
| cg23813564 | 0.89504 | 0.89112 | 0.89201 | 0.92139 | 0.92693 | 0.91177 | 0.72145 | 0.70912 | 0.61395 | 0.42873 MAGEC2   |
| cg23815000 | 0.4455  | 0.1157  | 0.77931 | 0.82177 | 0.40987 | 0.75339 | 0.04176 | 0.19029 | 0.58515 | 0.32636 LCN1     |
| cg23815306 | 0.22786 | 0.07117 | 0.11339 | 0.09848 | 0.83294 | 0.58484 | 0.81048 | 0.72021 | 0.84217 | 0.81329 TRIP13   |
| cg23815491 | 0.66684 | 0.15694 | 0.64222 | 0.74622 | 0.30797 | 0.3138  | 0.55624 | 0.60576 | 0.4645  | 0.51291 HP       |
| cg23815845 | 0.23866 | 0.03484 | 0.08917 | 0.08692 | 0.12579 | 0.04131 | 0.24313 | 0.25339 | 0.12878 | 0.14327 ARHGEF5  |
| cg23816572 | 0.02615 | 0.02658 | 0.02352 | 0.02588 | 0.0232  | 0.02566 | 0.01735 | 0.02049 | 0.01961 | 0.01969 CEP68    |
| cg23817637 | 0.62363 | 0.59968 | 0.5229  | 0.57564 | 0.38042 | 0.3882  | 0.24027 | 0.19414 | 0.30688 | 0.20933 TMEM12   |
| cg23818978 | 0.6692  | 0.37781 | 0.65294 | 0.75135 | 0.63095 | 0.64239 | 0.31178 | 0.20945 | 0.46598 | 0.49237 AMICA1   |
| cg23820285 | 0.02504 | 0.02502 | 0.02592 | 0.02153 | 0.01956 | 0.0218  | 0.021   | 0.02153 | 0.02032 | 0.02015 PIP5K2A  |
| cg23822915 | 0.15251 | 0.17406 | 0.18319 | 0.19884 | 0.20016 | 0.17018 | 0.15084 | 0.14401 | 0.1392  | 0.12882 CYB5R4   |
| cg23824713 | 0.82832 | 0.60343 | 0.89274 | 0.91353 | 0.90509 | 0.91072 | 0.1327  | 0.22306 | 0.81641 | 0.64484 SERPINB5 |
| cg23824815 | 0.04354 | 0.05635 | 0.03352 | 0.04778 | 0.03488 | 0.0425  | 0.04052 | 0.04088 | 0.03274 | 0.03668 ZNF333   |
| cg23827867 | 0.03816 | 0.03778 | 0.03984 | 0.03326 | 0.02951 | 0.03365 | 0.03392 | 0.03335 | 0.03137 | 0.03002 SOX12    |
| cg23828212 | 0.02834 | 0.02668 | 0.03907 | 0.03468 | 0.02432 | 0.03017 | 0.02378 | 0.02931 | 0.02897 | 0.0258 MAN1A2    |
| cg23828595 | 0.03331 | 0.02406 | 0.08105 | 0.39018 | 0.02148 | 0.02403 | 0.03013 | 0.03362 | 0.06467 | 0.02526 PRKG1    |
| cg23829949 | 0.63769 | 0.33142 | 0.21139 | 0.20821 | 0.41352 | 0.45553 | 0.45499 | 0.22365 | 0.21064 | 0.17289 ZNF238   |
| cg23830037 | 0.04289 | 0.03712 | 0.0448  | 0.03757 | 0.04568 | 0.04751 | 0.05637 | 0.07273 | 0.03711 | 0.03387 DRG2     |
| cg23830326 | 0.03085 | 0.03438 | 0.04104 | 0.03183 | 0.036   | 0.03746 | 0.03457 | 0.03531 | 0.0316  | 0.0336 NHN1      |

|            |         |         |         |         |         |         |         |         |         |         |            |
|------------|---------|---------|---------|---------|---------|---------|---------|---------|---------|---------|------------|
| cg23830611 | 0.05768 | 0.05253 | 0.057   | 0.05921 | 0.05336 | 0.04084 | 0.04443 | 0.04506 | 0.04315 | 0.03728 | NOMO1      |
| cg23832061 | 0.02268 | 0.02443 | 0.02674 | 0.02583 | 0.0263  | 0.02227 | 0.02397 | 0.0209  | 0.03058 | 0.01785 | PPIL6      |
| cg23833452 | 0.39033 | 0.54437 | 0.06761 | 0.07758 | 0.04728 | 0.06937 | 0.06811 | 0.06205 | 0.04406 | 0.04471 | RAB32      |
| cg23833896 | 0.08704 | 0.09216 | 0.20529 | 0.24125 | 0.2806  | 0.32317 | 0.20007 | 0.25124 | 0.09473 | 0.10162 | CLN8       |
| cg23834593 | 0.56181 | 0.06285 | 0.55084 | 0.63668 | 0.90496 | 0.57059 | 0.27601 | 0.11567 | 0.5729  | 0.15261 | HNF4A      |
| cg23835812 | 0.07556 | 0.07043 | 0.06107 | 0.05728 | 0.0631  | 0.08398 | 0.07974 | 0.08167 | 0.0636  | 0.06432 | CHMP2B     |
| cg23836174 | 0.86819 | 0.77408 | 0.87388 | 0.8762  | 0.82808 | 0.83421 | 0.87963 | 0.84469 | 0.87866 | 0.87246 | VPREB3     |
| cg23837897 | 0.04901 | 0.05246 | 0.05765 | 0.05427 | 0.04818 | 0.05259 | 0.04807 | 0.04762 | 0.04575 | 0.04542 | COX11      |
| cg23838179 | 0.05426 | 0.03802 | 0.03892 | 0.04861 | 0.06256 | 0.02987 | 0.0259  | 0.03113 | 0.06015 | 0.0259  | ZNF592     |
| cg23838531 | 0.03281 | 0.03621 | 0.03581 | 0.03374 | 0.0409  | 0.04278 | 0.03628 | 0.03397 | 0.03023 | 0.02822 | TTC19      |
| cg23839398 | 0.81772 | 0.82145 | 0.81793 | 0.84169 | 0.70051 | 0.73861 | 0.81125 | 0.80778 | 0.82832 | 0.79696 | KLHDC4     |
| cg23839680 | 0.4646  | 0.1892  | 0.38983 | 0.43549 | 0.26828 | 0.20918 | 0.39949 | 0.3353  | 0.32045 | 0.16855 | CCT6A      |
| cg23841186 | 0.16508 | 0.13456 | 0.16031 | 0.14622 | 0.14916 | 0.16315 | 0.12845 | 0.19194 | 0.11597 | 0.13678 | SOAT2      |
| cg23843505 | 0.18421 | 0.14701 | 0.8664  | 0.85113 | 0.90116 | 0.45544 | 0.35315 | 0.16288 | 0.48034 | 0.35983 | MYBL2      |
| cg23843812 | 0.13515 | 0.11498 | 0.13662 | 0.13413 | 0.03281 | 0.03158 | 0.07706 | 0.03433 | 0.06456 | 0.03646 | FLJ43582   |
| cg23844090 | 0.04773 | 0.05044 | 0.10055 | 0.0502  | 0.73346 | 0.72596 | 0.36036 | 0.03876 | 0.04163 | 0.04499 | TMEM42     |
| cg23845507 | 0.02901 | 0.03241 | 0.03492 | 0.03085 | 0.02322 | 0.02888 | 0.02459 | 0.02356 | 0.02941 | 0.02589 | CDC7       |
| cg23845773 | 0.02941 | 0.03427 | 0.03389 | 0.03573 | 0.03817 | 0.04639 | 0.03799 | 0.03522 | 0.02528 | 0.03089 | TAF10      |
| cg23850212 | 0.02712 | 0.02952 | 0.56654 | 0.77128 | 0.0946  | 0.24503 | 0.02404 | 0.02526 | 0.02219 | 0.02088 | ZFP28      |
| cg23850272 | 0.2429  | 0.13231 | 0.12065 | 0.1116  | 0.11155 | 0.08022 | 0.05686 | 0.03775 | 0.04496 | 0.03073 | ZNF228     |
| cg23850377 | 0.05602 | 0.05182 | 0.06106 | 0.05304 | 0.04139 | 0.05004 | 0.04999 | 0.06084 | 0.04693 | 0.05366 | LAPTM4A    |
| cg23851011 | 0.87019 | 0.75731 | 0.85317 | 0.90695 | 0.78127 | 0.71265 | 0.82161 | 0.83396 | 0.86318 | 0.82559 | S100A16    |
| cg23854009 | 0.05918 | 0.04803 | 0.06317 | 0.0531  | 0.06819 | 0.04852 | 0.03854 | 0.03404 | 0.05249 | 0.03752 | ZNF530     |
| cg23854921 | 0.02282 | 0.02724 | 0.02487 | 0.02393 | 0.02214 | 0.02803 | 0.02183 | 0.02055 | 0.02167 | 0.01919 | AFTIPHILIN |
| cg23855093 | 0.47082 | 0.22418 | 0.77849 | 0.81566 | 0.41481 | 0.23795 | 0.41627 | 0.45969 | 0.61115 | 0.33142 | GPR128     |
| cg23855121 | 0.79384 | 0.44821 | 0.53801 | 0.54981 | 0.76126 | 0.72049 | 0.42402 | 0.40064 | 0.52982 | 0.49412 | TLR10      |
| cg23855392 | 0.19018 | 0.08811 | 0.50947 | 0.60331 | 0.23339 | 0.05751 | 0.07447 | 0.06284 | 0.06995 | 0.06632 | MTHFS      |
| cg23855566 | 0.05993 | 0.05362 | 0.05915 | 0.05993 | 0.05659 | 0.07004 | 0.03668 | 0.04244 | 0.04959 | 0.05181 | FAM73A     |
| cg23855818 | 0.31103 | 0.23679 | 0.71768 | 0.74953 | 0.60345 | 0.58855 | 0.65386 | 0.72539 | 0.75876 | 0.48326 | SLC41A2    |
| cg23855989 | 0.58587 | 0.43696 | 0.94598 | 0.95182 | 0.95351 | 0.92926 | 0.65971 | 0.55469 | 0.82737 | 0.93338 | AQP5       |
| cg23857226 | 0.06483 | 0.04696 | 0.38228 | 0.41376 | 0.14144 | 0.31963 | 0.17457 | 0.54456 | 0.0746  | 0.04168 | ZNF671     |
| cg23858074 | 0.03069 | 0.0314  | 0.03535 | 0.0319  | 0.03077 | 0.03395 | 0.03284 | 0.02804 | 0.03156 | 0.02462 | C6orf167   |
| cg23858360 | 0.15685 | 0.12597 | 0.20438 | 0.15568 | 0.1973  | 0.20958 | 0.1978  | 0.13653 | 0.09711 | 0.10268 | TSPAN14    |
| cg23858565 | 0.05027 | 0.05278 | 0.07432 | 0.06309 | 0.08048 | 0.05953 | 0.04489 | 0.04115 | 0.04    | 0.04163 | CTCF       |
| cg23859078 | 0.02665 | 0.02408 | 0.02634 | 0.02339 | 0.02111 | 0.0238  | 0.02225 | 0.02248 | 0.02106 | 0.02129 | C7orf30    |
| cg23861715 | 0.31342 | 0.09117 | 0.13837 | 0.11383 | 0.14002 | 0.08897 | 0.0739  | 0.07576 | 0.12817 | 0.04517 | CDC14B     |
| cg23862908 | 0.02588 | 0.0348  | 0.0414  | 0.0375  | 0.02699 | 0.0313  | 0.03166 | 0.02978 | 0.02647 | 0.02675 | C8orf37    |
| cg23863670 | 0.67673 | 0.58242 | 0.43035 | 0.50181 | 0.78252 | 0.75829 | 0.79104 | 0.17749 | 0.37614 | 0.24585 | CCL28      |
| cg23864823 | 0.15807 | 0.06043 | 0.05023 | 0.05057 | 0.09488 | 0.05051 | 0.04554 | 0.04135 | 0.0666  | 0.05137 | MRPL9      |
| cg23865067 | 0.05569 | 0.0696  | 0.05517 | 0.05932 | 0.04835 | 0.05089 | 0.04857 | 0.05388 | 0.05203 | 0.04818 | ARPP-19    |
| cg23865698 | 0.85855 | 0.09035 | 0.77068 | 0.88382 | 0.93396 | 0.89791 | 0.86583 | 0.48158 | 0.94326 | 0.85715 | WFDC1      |

|            |         |         |         |         |         |         |         |         |         |         |               |
|------------|---------|---------|---------|---------|---------|---------|---------|---------|---------|---------|---------------|
| cg23866755 | 0.04114 | 0.04305 | 0.04956 | 0.04223 | 0.04913 | 0.04206 | 0.03817 | 0.03757 | 0.04798 | 0.03808 | CNP           |
| cg23867494 | 0.28662 | 0.07316 | 0.65502 | 0.7281  | 0.78908 | 0.64549 | 0.79293 | 0.47749 | 0.36818 | 0.30556 | TNFRSF4       |
| cg23867624 | 0.02316 | 0.02293 | 0.02771 | 0.02526 | 0.02659 | 0.03076 | 0.02592 | 0.03285 | 0.01822 | 0.01728 | FOXC1         |
| cg23868119 | 0.04724 | 0.05072 | 0.05625 | 0.05359 | 0.06897 | 0.05171 | 0.04298 | 0.04673 | 0.05305 | 0.04584 | PTPLA         |
| cg23871659 | 0.58043 | 0.39846 | 0.26688 | 0.19687 | 0.66348 | 0.55727 | 0.68613 | 0.28122 | 0.70588 | 0.49533 | TANK          |
| cg23871933 | 0.04284 | 0.05332 | 0.05426 | 0.05099 | 0.03835 | 0.0445  | 0.05951 | 0.18533 | 0.05233 | 0.04064 | Pfs2          |
| cg23873703 | 0.82548 | 0.53637 | 0.95308 | 0.96543 | 0.08538 | 0.03294 | 0.514   | 0.18839 | 0.93874 | 0.84143 | KCNAB1        |
| cg23874078 | 0.06821 | 0.05766 | 0.08694 | 0.09692 | 0.09037 | 0.05784 | 0.08575 | 0.06465 | 0.07385 | 0.08186 | CEPT1         |
| cg23877385 | 0.72949 | 0.56833 | 0.86819 | 0.89667 | 0.42216 | 0.3669  | 0.45221 | 0.48707 | 0.88559 | 0.84205 | GCNT3         |
| cg23877786 | 0.06914 | 0.07026 | 0.06843 | 0.06163 | 0.066   | 0.07757 | 0.06291 | 0.05931 | 0.05686 | 0.06122 | RPL13         |
| cg23877831 | 0.06623 | 0.0661  | 0.09142 | 0.09933 | 0.12191 | 0.05759 | 0.08768 | 0.08584 | 0.07766 | 0.0752  | MRPL51        |
| cg23878206 | 0.7628  | 0.07974 | 0.48626 | 0.52495 | 0.42037 | 0.30104 | 0.80101 | 0.63107 | 0.38118 | 0.59132 | ATF5          |
| cg23879147 | 0.07682 | 0.07813 | 0.08641 | 0.08223 | 0.06473 | 0.0747  | 0.06571 | 0.0652  | 0.06806 | 0.06712 | C1orf42       |
| cg23881601 | 0.01686 | 0.01732 | 0.01717 | 0.01733 | 0.01469 | 0.01656 | 0.0163  | 0.01535 | 0.01469 | 0.01284 | C1orf66       |
| cg23881725 | 0.06361 | 0.07515 | 0.93666 | 0.93833 | 0.91174 | 0.92233 | 0.5782  | 0.33683 | 0.07045 | 0.06338 | DLEC1         |
| cg23881971 | 0.09583 | 0.07502 | 0.09833 | 0.09194 | 0.21279 | 0.13705 | 0.14382 | 0.14614 | 0.09568 | 0.09023 | ZNF10         |
| cg23882824 | 0.04378 | 0.04164 | 0.03821 | 0.04078 | 0.0277  | 0.03512 | 0.03433 | 0.03191 | 0.03126 | 0.03072 | GART          |
| cg23886551 | 0.05343 | 0.03177 | 0.21193 | 0.37038 | 0.49275 | 0.20584 | 0.0379  | 0.30955 | 0.02847 | 0.20641 | TMEM121       |
| cg23886755 | 0.89191 | 0.89838 | 0.8794  | 0.88678 | 0.86651 | 0.866   | 0.88971 | 0.90864 | 0.89765 | 0.88952 | PHC2          |
| cg23887102 | 0.59991 | 0.60553 | 0.68414 | 0.77064 | 0.72696 | 0.78712 | 0.45121 | 0.36018 | 0.54366 | 0.69741 | TAAR6         |
| cg23887396 | 0.03767 | 0.04953 | 0.15988 | 0.08784 | 0.03715 | 0.04138 | 0.3652  | 0.63815 | 0.20519 | 0.0471  | SARM1         |
| cg23888423 | 0.04293 | 0.04069 | 0.04966 | 0.05174 | 0.04685 | 0.0345  | 0.0361  | 0.03777 | 0.04375 | 0.03507 | 2-Sep         |
| cg23889010 | 0.16373 | 0.06857 | 0.67417 | 0.77679 | 0.80008 | 0.38318 | 0.14671 | 0.40804 | 0.34316 | 0.17302 | SLPI          |
| cg23889021 | 0.04829 | 0.04844 | 0.04581 | 0.04469 | 0.04937 | 0.05377 | 0.04773 | 0.04507 | 0.04296 | 0.04503 | CTDSP1        |
| cg23889093 | 0.07184 | 0.06673 | 0.12575 | 0.10644 | 0.13701 | 0.10117 | 0.12586 | 0.0903  | 0.07314 | 0.08871 | EIF1          |
| cg23889771 | 0.02821 | 0.03004 | 0.04057 | 0.03719 | 0.02337 | 0.02548 | 0.02814 | 0.02758 | 0.02706 | 0.0271  | CPSF3         |
| cg23894003 | 0.84171 | 0.82458 | 0.83716 | 0.85244 | 0.86256 | 0.85307 | 0.83818 | 0.83216 | 0.8653  | 0.82435 | FBS1          |
| cg23894058 | 0.49391 | 0.23956 | 0.25685 | 0.29198 | 0.19424 | 0.21925 | 0.22234 | 0.2149  | 0.22512 | 0.24265 | KLK12         |
| cg23894539 | 0.01745 | 0.02378 | 0.02618 | 0.02228 | 0.02596 | 0.0225  | 0.01979 | 0.01935 | 0.01944 | 0.01931 | STARD3        |
| cg23896056 | 0.11256 | 0.09766 | 0.09253 | 0.10364 | 0.16772 | 0.13595 | 0.10428 | 0.097   | 0.09132 | 0.081   | DKFZp686L1814 |
| cg23896545 | 0.35736 | 0.36643 | 0.49634 | 0.5583  | 0.49797 | 0.38179 | 0.31686 | 0.31456 | 0.24022 | 0.11938 | NOMO1         |
| cg23897067 | 0.02786 | 0.03018 | 0.02797 | 0.02884 | 0.02882 | 0.02765 | 0.02809 | 0.02698 | 0.0246  | 0.02428 | NDOR1         |
| cg23898073 | 0.03259 | 0.03864 | 0.03829 | 0.03367 | 0.03471 | 0.03138 | 0.03712 | 0.03152 | 0.101   | 0.52862 | GFRA1         |
| cg23900225 | 0.86286 | 0.77463 | 0.80986 | 0.81769 | 0.92259 | 0.85624 | 0.56165 | 0.66122 | 0.09306 | 0.04806 | CX40.1        |
| cg23901896 | 0.84949 | 0.87077 | 0.81435 | 0.8448  | 0.82402 | 0.82563 | 0.85601 | 0.86316 | 0.8537  | 0.8363  | ELF3          |
| cg23902550 | 0.52448 | 0.08603 | 0.20748 | 0.20058 | 0.54644 | 0.17102 | 0.55736 | 0.3221  | 0.92474 | 0.7635  | TIGD5         |
| cg23904249 | 0.84542 | 0.47704 | 0.19284 | 0.22545 | 0.11705 | 0.13563 | 0.09043 | 0.05703 | 0.90627 | 0.78947 | MGC2574       |
| cg23905308 | 0.03291 | 0.04128 | 0.08007 | 0.05884 | 0.16398 | 0.04282 | 0.03714 | 0.03268 | 0.11202 | 0.04433 | PER2          |
| cg23906144 | 0.03624 | 0.03769 | 0.031   | 0.03132 | 0.0546  | 0.04027 | 0.04215 | 0.03594 | 0.03079 | 0.03166 | OVCA2         |
| cg23906291 | 0.02754 | 0.02873 | 0.61463 | 0.79966 | 0.02864 | 0.03188 | 0.03417 | 0.03258 | 0.03018 | 0.03589 | ERBB2         |
| cg23906760 | 0.04993 | 0.05028 | 0.06595 | 0.05364 | 0.05733 | 0.04947 | 0.04685 | 0.04881 | 0.05854 | 0.03395 | UBL5          |

|            |         |         |         |         |         |         |         |         |         |                  |
|------------|---------|---------|---------|---------|---------|---------|---------|---------|---------|------------------|
| cg23909343 | 0.29562 | 0.22629 | 0.22648 | 0.12551 | 0.12054 | 0.06721 | 0.09264 | 0.08879 | 0.07539 | 0.06133 PPP2R5A  |
| cg23909633 | 0.85094 | 0.8397  | 0.81145 | 0.8544  | 0.82484 | 0.82798 | 0.81196 | 0.83013 | 0.63798 | 0.35513 IL24     |
| cg23910243 | 0.79259 | 0.80331 | 0.88146 | 0.88434 | 0.90168 | 0.49959 | 0.88754 | 0.57091 | 0.9215  | 0.4818 TGFB111   |
| cg23910835 | 0.13347 | 0.05049 | 0.28779 | 0.35913 | 0.20287 | 0.35883 | 0.29004 | 0.03188 | 0.10022 | 0.06975 SFRP2    |
| cg23911465 | 0.10063 | 0.10283 | 0.09684 | 0.09755 | 0.09229 | 0.09641 | 0.09669 | 0.09939 | 0.09533 | 0.10476 EIF2B2   |
| cg23911972 | 0.02135 | 0.02167 | 0.02597 | 0.02259 | 0.01793 | 0.02153 | 0.02191 | 0.02277 | 0.01948 | 0.01831 C12orf44 |
| cg23912721 | 0.06147 | 0.06307 | 0.05633 | 0.05734 | 0.09089 | 0.0834  | 0.0446  | 0.04548 | 0.05113 | 0.05395 PHYH2    |
| cg23912823 | 0.03527 | 0.04129 | 0.05133 | 0.05704 | 0.04625 | 0.04822 | 0.04894 | 0.04908 | 0.04889 | 0.04849 NAB2     |
| cg23913400 | 0.20579 | 0.02623 | 0.04118 | 0.26018 | 0.60524 | 0.16216 | 0.2052  | 0.02466 | 0.02211 | 0.02168 ITGB4    |
| cg23915008 | 0.05959 | 0.05363 | 0.06313 | 0.05608 | 0.04918 | 0.05221 | 0.05557 | 0.05173 | 0.04902 | 0.04839 RPS16    |
| cg23915111 | 0.12504 | 0.12035 | 0.13394 | 0.14038 | 0.10132 | 0.1132  | 0.13081 | 0.11358 | 0.13236 | 0.13126 KIF14    |
| cg23916158 | 0.04007 | 0.03943 | 0.03775 | 0.03372 | 0.04008 | 0.04502 | 0.04186 | 0.04103 | 0.03129 | 0.03007 MYBBP1A  |
| cg23916751 | 0.04639 | 0.04006 | 0.04206 | 0.04337 | 0.0373  | 0.04834 | 0.04187 | 0.04035 | 0.03557 | 0.04051 PKD2     |
| cg23916845 | 0.04402 | 0.04005 | 0.06685 | 0.07702 | 0.05972 | 0.05374 | 0.03894 | 0.0427  | 0.03731 | 0.03901 DFNB31   |
| cg23916948 | 0.02419 | 0.02624 | 0.02621 | 0.02449 | 0.02067 | 0.0274  | 0.02399 | 0.02626 | 0.02128 | 0.02169 RAG1AP1  |
| cg23917399 | 0.19027 | 0.06539 | 0.08027 | 0.04172 | 0.04719 | 0.03366 | 0.07614 | 0.0434  | 0.05824 | 0.0352 TNFAIP8   |
| cg23918047 | 0.07061 | 0.06863 | 0.0713  | 0.06753 | 0.04943 | 0.05494 | 0.05543 | 0.04689 | 0.08622 | 0.05194 ARHGDI3  |
| cg23918676 | 0.1844  | 0.18192 | 0.2255  | 0.19726 | 0.30901 | 0.174   | 0.17088 | 0.13789 | 0.21689 | 0.19909 C1D      |
| cg23919568 | 0.06181 | 0.05471 | 0.06012 | 0.05344 | 0.03762 | 0.04523 | 0.04396 | 0.03767 | 0.03955 | 0.03955 FAM32A   |
| cg23919867 | 0.93804 | 0.93653 | 0.92659 | 0.92908 | 0.93378 | 0.93703 | 0.9139  | 0.92927 | 0.92771 | 0.93344 RUNX3    |
| cg23920441 | 0.08024 | 0.06839 | 0.45083 | 0.46658 | 0.5757  | 0.10316 | 0.08658 | 0.08791 | 0.13081 | 0.05165 ATP1A3   |
| cg23920917 | 0.06504 | 0.04829 | 0.08574 | 0.092   | 0.15593 | 0.06412 | 0.06208 | 0.0473  | 0.07167 | 0.06054 CPSF6    |
| cg23921534 | 0.09005 | 0.07634 | 0.58319 | 0.68855 | 0.42827 | 0.68369 | 0.33458 | 0.21575 | 0.20814 | 0.13808 POU3F4   |
| cg23921699 | 0.0182  | 0.01867 | 0.02066 | 0.01998 | 0.10143 | 0.01751 | 0.02233 | 0.01742 | 0.02117 | 0.01702 CACNB3   |
| cg23922081 | 0.03775 | 0.03644 | 0.0421  | 0.03551 | 0.03773 | 0.03901 | 0.0413  | 0.0364  | 0.02907 | 0.02736 SOX12    |
| cg23922454 | 0.34984 | 0.12082 | 0.60084 | 0.72469 | 0.55793 | 0.17426 | 0.07055 | 0.20637 | 0.04569 | 0.054 LHX5       |
| cg23922708 | 0.04616 | 0.03783 | 0.07063 | 0.05394 | 0.32187 | 0.03126 | 0.03945 | 0.03556 | 0.04972 | 0.02984 PARD6G   |
| cg23922914 | 0.03135 | 0.0355  | 0.03919 | 0.03249 | 0.03162 | 0.03784 | 0.02616 | 0.02778 | 0.0261  | 0.02222 TGDS     |
| cg23923462 | 0.06509 | 0.06212 | 0.06076 | 0.06032 | 0.04751 | 0.05685 | 0.05263 | 0.05665 | 0.053   | 0.05216 PGAM1    |
| cg23926526 | 0.05906 | 0.05268 | 0.33693 | 0.25827 | 0.08187 | 0.08776 | 0.09455 | 0.06837 | 0.05146 | 0.05884 MDM1     |
| cg23926715 | 0.03232 | 0.03069 | 0.08263 | 0.07621 | 0.05355 | 0.04123 | 0.03633 | 0.0578  | 0.03676 | 0.03208 KIAA1166 |
| cg23927367 | 0.05594 | 0.06528 | 0.06406 | 0.08097 | 0.10862 | 0.05707 | 0.09155 | 0.07373 | 0.1079  | 0.1023 ACAD8     |
| cg23933345 | 0.03365 | 0.03831 | 0.06197 | 0.04647 | 0.03861 | 0.03528 | 0.03852 | 0.04127 | 0.04757 | 0.04406 AP4B1    |
| cg23934633 | 0.92118 | 0.8274  | 0.92122 | 0.93527 | 0.9332  | 0.91524 | 0.93384 | 0.89961 | 0.92637 | 0.93446 RNF113B  |
| cg23935746 | 0.05053 | 0.04047 | 0.03762 | 0.04288 | 0.03727 | 0.04344 | 0.03837 | 0.03512 | 0.02916 | 0.02787 CCNB1    |
| cg23936476 | 0.0272  | 0.0166  | 0.68646 | 0.70587 | 0.52095 | 0.4834  | 0.54337 | 0.5251  | 0.18572 | 0.06643 BEX1     |
| cg23937047 | 0.57702 | 0.6637  | 0.61933 | 0.71766 | 0.6415  | 0.62741 | 0.42618 | 0.39068 | 0.28392 | 0.29324 PAGE1    |
| cg23938476 | 0.02591 | 0.02771 | 0.02486 | 0.02631 | 0.02701 | 0.02741 | 0.02117 | 0.02094 | 0.02389 | 0.02106 C6orf136 |
| cg23940655 | 0.03433 | 0.04549 | 0.03388 | 0.03246 | 0.04304 | 0.04408 | 0.03633 | 0.03414 | 0.03377 | 0.03806 C14orf43 |
| cg23941599 | 0.08616 | 0.08346 | 0.08757 | 0.07572 | 0.04291 | 0.06833 | 0.07241 | 0.05875 | 0.07197 | 0.05867 FEM1C    |
| cg23943360 | 0.05537 | 0.05965 | 0.05138 | 0.05623 | 0.05209 | 0.04939 | 0.0573  | 0.05321 | 0.04232 | 0.03955 LDLR     |

|            |         |         |         |         |         |         |         |         |         |         |         |
|------------|---------|---------|---------|---------|---------|---------|---------|---------|---------|---------|---------|
| cg23943801 | 0.03394 | 0.02872 | 0.03558 | 0.02756 | 0.06033 | 0.02382 | 0.02898 | 0.03029 | 0.02819 | 0.02412 | RAB21   |
| cg23947872 | 0.04334 | 0.04977 | 0.05953 | 0.05659 | 0.07563 | 0.05041 | 0.47981 | 0.28655 | 0.03845 | 0.03695 | MTMR1   |
| cg23948756 | 0.03088 | 0.02879 | 0.0239  | 0.02482 | 0.0193  | 0.02576 | 0.02109 | 0.02232 | 0.01903 | 0.02261 | KNS2    |
| cg23948874 | 0.03034 | 0.03215 | 0.02718 | 0.03266 | 0.02689 | 0.02752 | 0.02818 | 0.02563 | 0.02652 | 0.02673 | EIF4G2  |
| cg23950724 | 0.21989 | 0.10652 | 0.65192 | 0.61861 | 0.91056 | 0.88593 | 0.20989 | 0.21583 | 0.10062 | 0.08465 | SYT10   |
| cg23953133 | 0.03549 | 0.03258 | 0.035   | 0.0326  | 0.0258  | 0.02915 | 0.02974 | 0.03036 | 0.02643 | 0.02385 | LMNB1   |
| cg23953396 | 0.04646 | 0.04307 | 0.05594 | 0.04007 | 0.69125 | 0.37999 | 0.12067 | 0.03794 | 0.03456 | 0.03971 | GPRC5C  |
| cg23953831 | 0.6128  | 0.82025 | 0.59853 | 0.7578  | 0.68335 | 0.83169 | 0.64647 | 0.83419 | 0.69684 | 0.52871 | IGSF2   |
| cg23957084 | 0.03492 | 0.03399 | 0.03608 | 0.03361 | 0.0294  | 0.0302  | 0.03175 | 0.03232 | 0.02717 | 0.0292  | MRPL40  |
| cg23957424 | 0.2371  | 0.04665 | 0.04536 | 0.03609 | 0.03673 | 0.03349 | 0.03324 | 0.03903 | 0.03312 | 0.04355 | TRAF6   |
| cg23957915 | 0.02297 | 0.02674 | 0.02747 | 0.02524 | 0.45753 | 0.03534 | 0.02352 | 0.02633 | 0.02434 | 0.02161 | RCOR2   |
| cg23959705 | 0.49323 | 0.21335 | 0.46211 | 0.48425 | 0.38516 | 0.51022 | 0.40849 | 0.22431 | 0.44037 | 0.38933 | TNFRSF9 |
| cg23960723 | 0.27792 | 0.09228 | 0.13625 | 0.18001 | 0.23322 | 0.05951 | 0.55137 | 0.10009 | 0.05989 | 0.11535 | ECHDC3  |
| cg23963136 | 0.03189 | 0.03217 | 0.0359  | 0.03012 | 0.68674 | 0.63641 | 0.02978 | 0.03136 | 0.02389 | 0.02544 | CD320   |
| cg23964386 | 0.64175 | 0.38782 | 0.79071 | 0.84178 | 0.35625 | 0.20285 | 0.25469 | 0.07815 | 0.07101 | 0.04307 | LTB4DH  |
| cg23966705 | 0.03226 | 0.0285  | 0.03667 | 0.03213 | 0.02798 | 0.03189 | 0.03045 | 0.03249 | 0.02571 | 0.02861 | SPAG9   |
| cg23967169 | 0.12329 | 0.04182 | 0.36406 | 0.39069 | 0.08457 | 0.04    | 0.44444 | 0.84858 | 0.0917  | 0.06715 | FAM19A4 |
| cg23968383 | 0.83325 | 0.35756 | 0.8623  | 0.85969 | 0.72099 | 0.69772 | 0.86757 | 0.86918 | 0.0829  | 0.05494 | ZNF572  |
| cg23968678 | 0.03552 | 0.03999 | 0.03492 | 0.03782 | 0.02771 | 0.03254 | 0.034   | 0.03672 | 0.03043 | 0.03139 | LENG4   |
| cg23970089 | 0.07578 | 0.02961 | 0.23855 | 0.40594 | 0.22379 | 0.02613 | 0.54558 | 0.06043 | 0.62926 | 0.63723 | ATP5I   |
| cg23970338 | 0.04053 | 0.04281 | 0.05849 | 0.0606  | 0.06911 | 0.06334 | 0.03954 | 0.03389 | 0.04696 | 0.06256 | TSFM    |
| cg23970523 | 0.04342 | 0.04264 | 0.04077 | 0.03928 | 0.0292  | 0.03254 | 0.03669 | 0.03932 | 0.02844 | 0.02674 | FKBP8   |
| cg23970785 | 0.07511 | 0.04743 | 0.04718 | 0.06799 | 0.03894 | 0.03405 | 0.03983 | 0.03607 | 0.03613 | 0.03364 | DEXI    |
| cg23972869 | 0.80236 | 0.76727 | 0.80636 | 0.80749 | 0.57767 | 0.75277 | 0.83341 | 0.52446 | 0.86502 | 0.83419 | RPL18   |
| cg23973000 | 0.70227 | 0.54809 | 0.6378  | 0.75939 | 0.88641 | 0.85453 | 0.56717 | 0.86937 | 0.76675 | 0.58397 | TSSK1   |
| cg23973566 | 0.76013 | 0.85358 | 0.78793 | 0.81988 | 0.69681 | 0.79112 | 0.83965 | 0.85262 | 0.7864  | 0.73217 | C6orf32 |
| cg23974202 | 0.04168 | 0.04263 | 0.04913 | 0.04504 | 0.0388  | 0.04382 | 0.04015 | 0.04212 | 0.0419  | 0.04166 | CCNT2   |
| cg23977670 | 0.80578 | 0.57023 | 0.83796 | 0.91864 | 0.51137 | 0.53189 | 0.80418 | 0.79961 | 0.89114 | 0.8331  | H19     |
| cg23978322 | 0.81678 | 0.80731 | 0.22788 | 0.19741 | 0.57646 | 0.61758 | 0.38057 | 0.33873 | 0.09454 | 0.11076 | FHL5    |
| cg23978557 | 0.85097 | 0.18181 | 0.24142 | 0.22514 | 0.21328 | 0.29492 | 0.29551 | 0.22426 | 0.89119 | 0.84017 | SMPD2   |
| cg23979923 | 0.03093 | 0.02945 | 0.03676 | 0.03806 | 0.02569 | 0.02951 | 0.03429 | 0.0333  | 0.02347 | 0.02097 | CIB1    |
| cg23980887 | 0.03129 | 0.03172 | 0.03005 | 0.03328 | 0.03393 | 0.03549 | 0.03791 | 0.03642 | 0.02765 | 0.0283  | POLR2J  |
| cg23983173 | 0.11519 | 0.10371 | 0.11719 | 0.11802 | 0.29011 | 0.12085 | 0.13149 | 0.12483 | 0.17091 | 0.15191 | TMEM87A |
| cg23983340 | 0.03426 | 0.03343 | 0.03792 | 0.03056 | 0.02828 | 0.03146 | 0.02677 | 0.03151 | 0.03241 | 0.03173 | CD46    |
| cg23983366 | 0.28866 | 0.29238 | 0.21678 | 0.17911 | 0.38067 | 0.33935 | 0.21837 | 0.17759 | 0.13285 | 0.12517 | RANBP6  |
| cg23983449 | 0.12116 | 0.23429 | 0.5308  | 0.56179 | 0.25773 | 0.04867 | 0.07992 | 0.06904 | 0.18163 | 0.03541 | GABARAP |
| cg23983884 | 0.13494 | 0.12411 | 0.17892 | 0.16501 | 0.15666 | 0.12484 | 0.20057 | 0.13092 | 0.17997 | 0.14941 | DBN1    |
| cg23984059 | 0.05826 | 0.05085 | 0.05203 | 0.04447 | 0.04302 | 0.07468 | 0.04233 | 0.0441  | 0.03972 | 0.0432  | COPB    |
| cg23984130 | 0.10037 | 0.09121 | 0.14304 | 0.31194 | 0.38868 | 0.31693 | 0.07778 | 0.08283 | 0.07976 | 0.09079 |         |
| cg23984434 | 0.04544 | 0.04752 | 0.05019 | 0.04384 | 0.03346 | 0.04426 | 0.0468  | 0.04252 | 0.14228 | 0.03703 | GUCY1A2 |
| cg23986186 | 0.12876 | 0.13609 | 0.21289 | 0.17912 | 0.27026 | 0.17227 | 0.16612 | 0.25699 | 0.17744 | 0.18663 | TAF1    |



|            |         |         |         |         |         |         |         |         |         |         |           |
|------------|---------|---------|---------|---------|---------|---------|---------|---------|---------|---------|-----------|
| cg23988310 | 0.08711 | 0.10229 | 0.12072 | 0.13058 | 0.15968 | 0.11089 | 0.0905  | 0.07666 | 0.24051 | 0.09907 | SCG2      |
| cg23988567 | 0.33415 | 0.10474 | 0.41487 | 0.4593  | 0.68892 | 0.698   | 0.04478 | 0.09241 | 0.05117 | 0.04411 |           |
| cg23989635 | 0.08368 | 0.06222 | 0.89673 | 0.92407 | 0.58927 | 0.68298 | 0.62647 | 0.61985 | 0.37172 | 0.52037 | CDH1      |
| cg23993660 | 0.0559  | 0.03817 | 0.05267 | 0.05684 | 0.0259  | 0.03672 | 0.03875 | 0.03583 | 0.03291 | 0.03087 | PINK1     |
| cg23995753 | 0.9103  | 0.92771 | 0.86456 | 0.92976 | 0.60076 | 0.27652 | 0.52615 | 0.72577 | 0.9173  | 0.92649 | LY75      |
| cg23995778 | 0.53289 | 0.34745 | 0.54482 | 0.59277 | 0.56635 | 0.61235 | 0.51208 | 0.41965 | 0.48188 | 0.26297 | CGB5      |
| cg23996241 | 0.04084 | 0.04129 | 0.05013 | 0.0439  | 0.03374 | 0.0338  | 0.038   | 0.03701 | 0.0358  | 0.0324  | AP2B1     |
| cg23996306 | 0.23745 | 0.17693 | 0.76303 | 0.68011 | 0.0799  | 0.03549 | 0.0365  | 0.03282 | 0.03151 | 0.03125 | DARS      |
| cg23998987 | 0.04621 | 0.03352 | 0.04449 | 0.05636 | 0.03248 | 0.03785 | 0.03557 | 0.03514 | 0.03026 | 0.03187 | TBL3      |
| cg24000099 | 0.02752 | 0.02349 | 0.02806 | 0.02636 | 0.02505 | 0.02512 | 0.02529 | 0.02661 | 0.02135 | 0.01775 | LOC221955 |
| cg24000189 | 0.03242 | 0.03202 | 0.03276 | 0.02962 | 0.03588 | 0.0425  | 0.02544 | 0.02411 | 0.0242  | 0.02355 | FLOT1     |
| cg24001070 | 0.09223 | 0.0897  | 0.09229 | 0.07961 | 0.18109 | 0.13665 | 0.10355 | 0.10282 | 0.08532 | 0.11422 | SMCR8     |
| cg24003306 | 0.06157 | 0.05369 | 0.04722 | 0.04581 | 0.03767 | 0.03762 | 0.03922 | 0.04322 | 0.03388 | 0.03915 | MRPL36    |
| cg24003542 | 0.049   | 0.04426 | 0.03681 | 0.03925 | 0.03643 | 0.0347  | 0.04059 | 0.03819 | 0.02739 | 0.03139 | MCC       |
| cg24006341 | 0.84517 | 0.81751 | 0.7702  | 0.79617 | 0.80559 | 0.81957 | 0.42841 | 0.80496 | 0.51599 | 0.42651 | ZCCHC13   |
| cg24006361 | 0.19298 | 0.25401 | 0.47486 | 0.55338 | 0.07794 | 0.04232 | 0.05569 | 0.04562 | 0.0489  | 0.03573 | EPN3      |
| cg24008892 | 0.90006 | 0.76512 | 0.88972 | 0.87644 | 0.92016 | 0.89402 | 0.78639 | 0.63207 | 0.92051 | 0.86244 | PMF1      |
| cg24009109 | 0.11723 | 0.10746 | 0.12228 | 0.10984 | 0.1266  | 0.10612 | 0.08864 | 0.0871  | 0.09775 | 0.0881  | CCDC12    |
| cg24009736 | 0.06484 | 0.05554 | 0.08331 | 0.10175 | 0.07789 | 0.05795 | 0.05101 | 0.04755 | 0.62171 | 0.38118 | GALGT     |
| cg24010336 | 0.28002 | 0.06975 | 0.66651 | 0.82785 | 0.71996 | 0.39751 | 0.72008 | 0.3058  | 0.80004 | 0.54754 | FBXO17    |
| cg24010952 | 0.54434 | 0.30755 | 0.36895 | 0.34426 | 0.60306 | 0.18235 | 0.0817  | 0.08763 | 0.08514 | 0.08573 | BDKRB2    |
| cg24012034 | 0.03258 | 0.03208 | 0.06833 | 0.04217 | 0.03243 | 0.02798 | 0.03447 | 0.03654 | 0.03303 | 0.03132 | ETNK1     |
| cg24012157 | 0.05741 | 0.05121 | 0.05747 | 0.05716 |         | 0.04258 | 0.05238 | 0.0528  | 0.04454 | 0.04971 | DDX50     |
| cg24012708 | 0.74394 | 0.5789  | 0.74535 | 0.78129 | 0.75284 | 0.73821 | 0.73875 | 0.75006 | 0.78386 | 0.73237 | HDHD3     |
| cg24012887 | 0.07265 | 0.07341 | 0.07038 | 0.06251 | 0.0462  | 0.03169 | 0.07482 | 0.06054 | 0.0469  | 0.04621 | BTBD14B   |
| cg24012925 | 0.08473 | 0.05327 | 0.04255 | 0.03885 | 0.02955 | 0.03612 | 0.03459 | 0.04438 | 0.03517 | 0.03495 | SRXN1     |
| cg24014020 | 0.05481 | 0.05227 | 0.06461 | 0.05534 | 0.0609  | 0.03843 | 0.06005 | 0.05073 | 0.04745 | 0.04159 | PIGQ      |
| cg24014661 | 0.03395 | 0.04335 | 0.07388 | 0.05684 | 0.06676 | 0.06327 | 0.15421 | 0.2342  | 0.02661 | 0.02929 | MGC33600  |
| cg24016044 | 0.05919 | 0.0549  | 0.07709 | 0.06339 | 0.0497  | 0.05002 | 0.04568 | 0.04718 | 0.04868 | 0.05138 | CPEB4     |
| cg24019564 | 0.93946 | 0.8732  | 0.92694 | 0.94192 | 0.96044 | 0.82817 | 0.95176 | 0.91554 | 0.9557  | 0.83841 | RUNX3     |
| cg24019851 | 0.93941 | 0.9199  | 0.93779 | 0.94277 | 0.9507  | 0.94062 | 0.92981 | 0.935   | 0.94231 | 0.91374 | SEMA3B    |
| cg24022301 | 0.08493 | 0.06038 | 0.07878 | 0.07902 | 0.04724 | 0.0531  | 0.06184 | 0.05401 | 0.07166 | 0.05218 | PTGFR     |
| cg24022829 | 0.1396  | 0.02493 | 0.02467 | 0.02716 | 0.01983 | 0.02179 | 0.02226 | 0.02328 | 0.01834 | 0.02071 | EIF2AK2   |
| cg24023606 | 0.02558 | 0.0235  | 0.02561 | 0.02267 | 0.02063 | 0.02949 | 0.02349 | 0.02464 | 0.02298 | 0.02701 | TDP1      |
| cg24024214 | 0.41494 | 0.16667 | 0.45646 | 0.40453 | 0.33752 | 0.14532 | 0.21022 | 0.39835 | 0.44369 | 0.27876 | BTNL8     |
| cg24027342 | 0.7526  | 0.71393 | 0.81885 | 0.84914 | 0.91306 | 0.79537 | 0.74845 | 0.72454 | 0.69369 | 0.72463 | ATM       |
| cg24027679 | 0.82118 | 0.44999 | 0.79456 | 0.85209 | 0.92921 | 0.78048 | 0.26584 | 0.46436 | 0.80415 | 0.65406 | SLC2A7    |
| cg24028122 | 0.06789 | 0.06443 | 0.09142 | 0.08315 | 0.06438 | 0.0734  | 0.06701 | 0.06374 | 0.06059 | 0.05982 | KIAA0776  |
| cg24030425 | 0.04771 | 0.04712 | 0.05222 | 0.04598 | 0.05669 | 0.0554  | 0.04145 | 0.04011 | 0.09823 | 0.04592 | PEX1      |
| cg24030449 | 0.27234 | 0.06041 | 0.92361 | 0.91427 | 0.91479 | 0.90767 | 0.82874 | 0.84453 | 0.90197 | 0.7202  | FGF20     |
| cg24030609 | 0.66573 | 0.31544 | 0.65386 | 0.76814 | 0.74552 | 0.80344 | 0.64762 | 0.55442 | 0.27555 | 0.22309 | ELA2B     |

|            |         |         |         |         |         |         |         |         |         |         |           |
|------------|---------|---------|---------|---------|---------|---------|---------|---------|---------|---------|-----------|
| cg24030627 | 0.89994 | 0.56971 | 0.84655 | 0.9213  | 0.78182 | 0.8861  | 0.03605 | 0.02794 | 0.55429 | 0.59096 | FCGBP     |
| cg24030630 | 0.09746 | 0.03159 | 0.03348 | 0.0302  | 0.02909 | 0.0248  | 0.06354 | 0.06106 | 0.06226 | 0.0194  | TCIRG1    |
| cg24031606 | 0.03883 | 0.04474 | 0.03854 | 0.03983 | 0.02358 | 0.03823 | 0.03388 | 0.03216 | 0.03825 | 0.03233 | CDC25A    |
| cg24034289 | 0.08549 | 0.06701 | 0.21201 | 0.16825 | 0.14425 | 0.09962 | 0.07692 | 0.061   | 0.10182 | 0.11756 | SCAMP3    |
| cg24034992 | 0.17037 | 0.15718 | 0.19356 | 0.18385 | 0.16839 | 0.18096 | 0.37065 | 0.3152  | 0.16971 | 0.16863 | YIPF6     |
| cg24035370 | 0.05806 | 0.03138 | 0.24065 | 0.07017 | 0.58979 | 0.8832  | 0.05942 | 0.03282 | 0.54433 | 0.0924  | PRKCZ     |
| cg24035962 | 0.19547 | 0.11971 | 0.10732 | 0.10125 | 0.10725 | 0.117   | 0.1045  | 0.0914  | 0.07889 | 0.07974 | NCOA4     |
| cg24038764 | 0.68259 | 0.45339 | 0.18295 | 0.15095 | 0.19962 | 0.11926 | 0.07913 | 0.09088 | 0.11872 | 0.11213 | CXorf42   |
| cg24041453 | 0.18041 | 0.17178 | 0.21576 | 0.2075  | 0.32068 | 0.48904 | 0.193   | 0.15207 | 0.16681 | 0.16274 | CCDC11    |
| cg24041977 | 0.03292 | 0.03511 | 0.03862 | 0.03608 | 0.03738 | 0.03694 | 0.04281 | 0.04275 | 0.04797 | 0.04347 | CERK      |
| cg24041995 | 0.05034 | 0.04541 | 0.04888 | 0.04205 | 0.03979 | 0.04443 | 0.04568 | 0.04222 | 0.03878 | 0.04205 | LIG3      |
| cg24042452 | 0.87954 | 0.78486 | 0.87455 | 0.87254 | 0.88048 | 0.66541 | 0.85815 | 0.85697 | 0.89378 | 0.84801 | C1orf182  |
| cg24043192 | 0.13335 | 0.11855 | 0.08812 | 0.10102 | 0.12697 | 0.10623 | 0.10176 | 0.09094 | 0.0808  | 0.06509 | FLJ32363  |
| cg24043307 | 0.16502 | 0.17728 | 0.18048 | 0.18814 | 0.1827  | 0.20425 | 0.19759 | 0.18513 | 0.17873 | 0.18453 | ATF1      |
| cg24046110 | 0.06944 | 0.04801 | 0.28601 | 0.65696 | 0.07269 | 0.04573 | 0.32008 | 0.6975  | 0.04525 | 0.05253 | LYNX1     |
| cg24046474 | 0.12756 | 0.15382 | 0.20266 | 0.14783 | 0.24065 | 0.14261 | 0.11843 | 0.1083  | 0.23336 | 0.10897 | LRSAM1    |
| cg24051818 | 0.59607 | 0.59372 | 0.83411 | 0.84295 | 0.31425 | 0.37917 | 0.78247 | 0.44844 | 0.87889 | 0.78478 | C1orf175  |
| cg24053375 | 0.89259 | 0.90667 | 0.90416 | 0.91952 | 0.93522 | 0.91298 | 0.57525 | 0.56895 | 0.92727 | 0.90467 | RBP3      |
| cg24053587 | 0.05807 | 0.06478 | 0.09066 | 0.07997 | 0.10867 | 0.05607 | 0.068   | 0.07013 | 0.47244 | 0.50906 | PTPRO     |
| cg24053619 | 0.03053 | 0.03275 | 0.03257 | 0.02727 | 0.02602 | 0.02788 | 0.02377 | 0.02587 | 0.02525 | 0.02546 | KIAA1841  |
| cg24054653 | 0.02538 | 0.01663 | 0.02257 | 0.02011 | 0.01417 | 0.01887 | 0.56111 | 0.51378 | 0.02028 | 0.01696 | C1GALT1C1 |
| cg24056562 | 0.05521 | 0.04431 | 0.04945 | 0.04514 | 0.02856 | 0.03309 | 0.04653 | 0.04223 | 0.03348 | 0.03702 | RNASEH2A  |
| cg24056567 | 0.20519 | 0.08022 | 0.09666 | 0.08542 | 0.76321 | 0.63289 | 0.08348 | 0.07821 | 0.92629 | 0.92498 | PSD3      |
| cg24058120 | 0.13467 | 0.02394 | 0.0891  | 0.08297 | 0.24637 | 0.02242 | 0.08414 | 0.02857 | 0.52891 | 0.514   | MF12      |
| cg24058132 | 0.90058 | 0.89897 | 0.57786 | 0.73762 | 0.34558 | 0.4162  | 0.30759 | 0.08158 | 0.07696 | 0.04386 | GALC      |
| cg24059075 | 0.09062 | 0.04619 | 0.31397 | 0.50135 | 0.29026 | 0.11885 | 0.11878 | 0.04708 | 0.088   | 0.04918 | PRPH      |
| cg24060938 | 0.8485  | 0.59966 | 0.83914 | 0.82966 | 0.74664 | 0.79606 | 0.83894 | 0.85394 | 0.87811 | 0.85484 | CPA2      |
| cg24063382 | 0.45032 | 0.30846 | 0.36213 | 0.44692 | 0.43827 | 0.49584 | 0.21437 | 0.22005 | 0.19516 | 0.17452 | MAS1L     |
| cg24063470 | 0.0861  | 0.07204 | 0.07331 | 0.07593 | 0.04013 | 0.10125 | 0.09995 | 0.06206 | 0.06265 | 0.06403 | FOXC2     |
| cg24068372 | 0.03796 | 0.05311 | 0.06576 | 0.04764 | 0.31249 | 0.52776 | 0.05881 | 0.0492  | 0.04062 | 0.03326 | LOC349136 |
| cg24068708 | 0.05462 | 0.05465 | 0.16299 | 0.16008 | 0.39842 | 0.04936 | 0.04514 | 0.05042 | 0.1028  | 0.06715 | GDPD5     |
| cg24069559 | 0.05095 | 0.05225 | 0.33407 | 0.41849 | 0.04444 | 0.04999 | 0.36492 | 0.15917 | 0.04236 | 0.04074 | HNRPL     |
| cg24070292 | 0.26011 | 0.03495 | 0.02689 | 0.02653 | 0.39486 | 0.46527 | 0.31829 | 0.31108 | 0.02442 | 0.0243  | TPM2      |
| cg24070847 | 0.11337 | 0.11345 | 0.08273 | 0.08473 | 0.09604 | 0.11652 | 0.08191 | 0.0706  | 0.08791 | 0.10083 | HIST2H2BE |
| cg24073022 | 0.88627 | 0.55357 | 0.82721 | 0.8638  | 0.82459 | 0.25122 | 0.47358 | 0.71673 | 0.69395 | 0.53878 | TAL2      |
| cg24073051 | 0.21062 | 0.10613 | 0.12243 | 0.09269 | 0.10186 | 0.08973 | 0.08615 | 0.07129 | 0.08747 | 0.083   | CDV3      |
| cg24073161 | 0.03965 | 0.04263 | 0.05089 | 0.04582 | 0.04769 | 0.05505 | 0.05336 | 0.04772 | 0.05118 | 0.04501 | ZNF403    |
| cg24075743 | 0.75437 | 0.51109 | 0.77498 | 0.76173 | 0.81733 | 0.84171 | 0.76415 | 0.51542 | 0.8326  | 0.37209 | PRM1      |
| cg24076392 | 0.03632 | 0.03758 | 0.03343 | 0.03617 | 0.0293  | 0.03563 | 0.03252 | 0.02904 | 0.03052 | 0.02702 | LOC129285 |
| cg24076399 | 0.03488 | 0.0342  | 0.04037 | 0.03493 | 0.03498 | 0.03989 | 0.02952 | 0.03425 | 0.02485 | 0.02218 | CST3      |
| cg24076830 | 0.17953 | 0.11189 | 0.49092 | 0.59858 | 0.28855 | 0.18719 | 0.12805 | 0.10796 | 0.141   | 0.09738 | OR5V1     |

|            |         |         |         |         |         |         |         |         |         |         |           |
|------------|---------|---------|---------|---------|---------|---------|---------|---------|---------|---------|-----------|
| cg24076884 | 0.88154 | 0.44821 | 0.85942 | 0.90779 | 0.93938 | 0.8508  | 0.2254  | 0.12625 | 0.55252 | 0.53881 | PCDHAC2   |
| cg24077317 | 0.0231  | 0.02727 | 0.02532 | 0.02325 | 0.02184 | 0.02684 | 0.0277  | 0.02874 | 0.02117 | 0.02021 | UBE1C     |
| cg24078828 | 0.0295  | 0.0279  | 0.02937 | 0.0282  | 0.02372 | 0.03022 | 0.02109 | 0.02418 | 0.02346 | 0.02049 | WWTR1     |
| cg24079455 | 0.03118 | 0.03506 | 0.03596 | 0.02951 | 0.02941 | 0.03101 | 0.02758 | 0.02902 | 0.0282  | 0.02401 | C10orf137 |
| cg24080529 | 0.27896 | 0.06198 | 0.83489 | 0.7958  | 0.86458 | 0.80335 | 0.81253 | 0.54507 | 0.64324 | 0.48281 | TIMP3     |
| cg24081819 | 0.49011 | 0.22112 | 0.60592 | 0.69563 | 0.20364 | 0.02824 | 0.46987 | 0.05918 | 0.09347 | 0.03252 | EPHX2     |
| cg24082826 | 0.03242 | 0.03186 | 0.03475 | 0.02957 | 0.02747 | 0.03221 | 0.02374 | 0.02835 | 0.02689 | 0.02968 | ITPR2     |
| cg24083641 | 0.75667 | 0.90767 | 0.04099 | 0.03234 | 0.03206 | 0.03708 | 0.03227 | 0.03026 | 0.04681 | 0.03775 | MGC46496  |
| cg24084891 | 0.1348  | 0.1267  | 0.27207 | 0.19207 | 0.373   | 0.39622 | 0.24893 | 0.14526 | 0.19996 | 0.23437 | DCC       |
| cg24085207 | 0.12183 | 0.06517 | 0.08211 | 0.06681 | 0.07772 | 0.03945 | 0.02865 | 0.02773 | 0.03144 | 0.03669 | FLJ32065  |
| cg24085258 | 0.05822 | 0.06137 | 0.06121 | 0.07051 | 0.09331 | 0.08051 | 0.05743 | 0.05643 | 0.04374 | 0.0495  | CHAF1A    |
| cg24087944 | 0.39038 | 0.19333 | 0.84817 | 0.87511 | 0.86845 | 0.82147 | 0.81968 | 0.50971 | 0.8455  | 0.8077  | GABRD     |
| cg24088229 | 0.09055 | 0.08175 | 0.0842  | 0.07325 | 0.12395 | 0.10774 | 0.0794  | 0.07332 | 0.05552 | 0.06556 | SMU1      |
| cg24088408 | 0.7364  | 0.29632 | 0.58044 | 0.68794 | 0.625   | 0.41674 | 0.32594 | 0.18208 | 0.30972 | 0.36041 | E2F1      |
| cg24088438 | 0.02943 | 0.21025 | 0.87184 | 0.89923 | 0.94589 | 0.79157 | 0.87984 | 0.86397 | 0.73681 | 0.31632 | URP2      |
| cg24088639 | 0.04438 | 0.053   | 0.04943 | 0.05096 | 0.04059 | 0.04163 | 0.04497 | 0.04999 | 0.04325 | 0.04486 | APIP      |
| cg24088751 | 0.038   | 0.03647 | 0.04631 | 0.03711 | 0.0316  | 0.03576 | 0.03135 | 0.03314 | 0.03326 | 0.03326 | GTF2A2    |
| cg24091474 | 0.93525 | 0.51388 | 0.90712 | 0.939   | 0.95833 | 0.92427 | 0.84913 | 0.68001 | 0.9603  | 0.94088 | TYROBP    |
| cg24091698 | 0.07567 | 0.07201 | 0.08484 | 0.08266 | 0.06146 | 0.06457 | 0.07408 | 0.07047 | 0.05534 | 0.05033 | ERCC4     |
| cg24092253 | 0.60789 | 0.41914 | 0.61325 | 0.6769  | 0.5312  | 0.27226 | 0.68151 | 0.47316 | 0.22291 | 0.06912 | YTHDF1    |
| cg24092914 | 0.83871 | 0.1138  | 0.7018  | 0.7881  | 0.83238 | 0.64498 | 0.84312 | 0.86348 | 0.77957 | 0.27287 | VHL       |
| cg24098302 | 0.04459 | 0.04653 | 0.04754 | 0.04614 | 0.03439 | 0.05021 | 0.04774 | 0.05411 | 0.05153 | 0.0513  | CTDSPL2   |
| cg24098951 | 0.0212  | 0.0271  | 0.02794 | 0.0246  | 0.02685 | 0.02051 | 0.01754 | 0.0242  | 0.02228 | 0.02284 | LRP12     |
| cg24099544 | 0.0216  | 0.022   | 0.026   | 0.01956 | 0.02079 | 0.01788 | 0.02201 | 0.02197 | 0.01627 | 0.01921 | MADD      |
| cg24100167 | 0.9478  | 0.76701 | 0.9439  | 0.93912 | 0.94179 | 0.92899 | 0.94223 | 0.92656 | 0.50753 | 0.73325 | PNLDC1    |
| cg24101359 | 0.96101 | 0.96576 | 0.56627 | 0.78307 | 0.85111 | 0.75955 | 0.97154 | 0.9725  | 0.79146 | 0.8503  | GNMT      |
| cg24101388 | 0.88112 | 0.72443 | 0.82181 | 0.8387  | 0.81572 | 0.86353 | 0.33695 | 0.17871 | 0.06304 | 0.06618 | SAGE1     |
| cg24101578 | 0.17296 | 0.06471 | 0.92342 | 0.93974 | 0.30641 | 0.13087 | 0.44474 | 0.39571 | 0.09702 | 0.05211 | CDH22     |
| cg24101873 | 0.86195 | 0.88959 | 0.85084 | 0.90494 | 0.82876 | 0.85044 | 0.57956 | 0.6407  | 0.89548 | 0.84001 | C20orf70  |
| cg24102360 | 0.04586 | 0.04538 | 0.05037 | 0.04571 | 0.03952 | 0.0403  | 0.04264 | 0.04129 | 0.05139 | 0.03738 | ZNF333    |
| cg24103438 | 0.5304  | 0.69984 | 0.61474 | 0.57698 | 0.21402 | 0.1335  | 0.0858  | 0.09642 | 0.20757 | 0.12707 | NLGN4X    |
| cg24104611 | 0.12051 | 0.08873 | 0.79938 | 0.7778  | 0.341   | 0.13253 | 0.30691 | 0.18308 | 0.20594 | 0.13618 | C22orf9   |
| cg24105685 | 0.61997 | 0.72647 | 0.69575 | 0.72348 | 0.61055 | 0.66303 | 0.69283 | 0.69052 | 0.7522  | 0.72201 | ECM2      |
| cg24105933 | 0.92189 | 0.83594 | 0.92799 | 0.92736 | 0.93271 | 0.93538 | 0.92345 | 0.9173  | 0.92486 | 0.91128 | HTRA3     |
| cg24107142 | 0.89217 | 0.48686 | 0.74923 | 0.90488 | 0.65009 | 0.8709  | 0.87189 | 0.86807 | 0.63459 | 0.56589 | HK2       |
| cg24107581 | 0.07521 | 0.06686 | 0.09253 | 0.0899  | 0.11602 | 0.10634 | 0.10768 | 0.09279 | 0.06747 | 0.08228 | POLR3B    |
| cg24107665 | 0.31162 | 0.18395 | 0.54672 | 0.30291 | 0.3226  | 0.40354 | 0.38029 | 0.34577 | 0.08616 | 0.05132 | ZNF696    |
| cg24109894 | 0.21583 | 0.14685 | 0.26668 | 0.23485 | 0.39055 | 0.27667 | 0.21915 | 0.1711  | 0.47338 | 0.36264 | PSMB2     |
| cg24110050 | 0.90447 | 0.85597 | 0.89673 | 0.91505 | 0.56365 | 0.53841 | 0.44487 | 0.6177  | 0.28362 | 0.07282 | TCTEX1D1  |
| cg24110063 | 0.83405 | 0.70179 | 0.49383 | 0.48251 | 0.28872 | 0.42113 | 0.23219 | 0.0805  | 0.28059 | 0.28928 | COX6A2    |
| cg24110916 | 0.05271 | 0.06488 | 0.03599 | 0.04228 | 0.04176 | 0.0382  | 0.04525 | 0.04251 | 0.03476 | 0.03615 | SPG21     |

|            |         |         |         |         |         |         |         |         |         |                  |
|------------|---------|---------|---------|---------|---------|---------|---------|---------|---------|------------------|
| cg24113449 | 0.1812  | 0.19504 | 0.24372 | 0.31745 | 0.20174 | 0.31009 | 0.03582 | 0.16911 | 0.05172 | 0.03015 ADRBK2   |
| cg24115040 | 0.09355 | 0.07918 | 0.61319 | 0.84218 | 0.26517 | 0.22702 | 0.07211 | 0.0701  | 0.27619 | 0.08225 DLX5     |
| cg24115571 | 0.23367 | 0.06929 | 0.09423 | 0.07602 | 0.14578 | 0.10009 | 0.0683  | 0.06708 | 0.13811 | 0.08525 FZD6     |
| cg24115593 | 0.02878 | 0.03293 | 0.03041 | 0.0296  | 0.02813 | 0.03189 | 0.02876 | 0.02734 | 0.02481 | 0.0267 FLJ20364  |
| cg24115627 | 0.94712 | 0.90514 | 0.95356 | 0.95326 | 0.96684 | 0.92513 | 0.94762 | 0.91686 | 0.95628 | 0.93846 HSD3B7   |
| cg24116028 | 0.9562  | 0.91785 | 0.94005 | 0.9455  | 0.9621  | 0.94283 | 0.93379 | 0.93582 | 0.94996 | 0.91089 LYPD4    |
| cg24116886 | 0.75656 | 0.83092 | 0.78966 | 0.83433 | 0.58916 | 0.44685 | 0.54065 | 0.38281 | 0.60052 | 0.57891 DEFB127  |
| cg24117442 | 0.10203 | 0.10073 | 0.12758 | 0.13091 | 0.13404 | 0.12646 | 0.11009 | 0.14474 | 0.11183 | 0.13644 SOCS2    |
| cg24117468 | 0.86003 | 0.70996 | 0.18751 | 0.33762 | 0.27609 | 0.17309 | 0.13472 | 0.04986 | 0.08825 | 0.04215 P4HA2    |
| cg24120841 | 0.03955 | 0.03994 | 0.03771 | 0.03538 | 0.08179 | 0.04288 | 0.03596 | 0.0351  | 0.03549 | 0.02739 THR3     |
| cg24121001 | 0.14607 | 0.14634 | 0.14718 | 0.1535  | 0.13703 | 0.14254 | 0.1268  | 0.10705 | 0.12559 | 0.12253 TTC16    |
| cg24121436 | 0.02655 | 0.02982 | 0.03354 | 0.03089 | 0.02372 | 0.0293  | 0.02657 | 0.02631 | 0.09426 | 0.03218 RTN1     |
| cg24122922 | 0.92916 | 0.89707 | 0.90452 | 0.91759 | 0.66286 | 0.87434 | 0.81586 | 0.78614 | 0.03529 | 0.02465 C2orf39  |
| cg24123124 | 0.04214 | 0.03526 | 0.05475 | 0.05241 | 0.04313 | 0.03648 | 0.09413 | 0.04234 | 0.03155 | 0.03579 MRPS17   |
| cg24124398 | 0.03007 | 0.02931 | 0.03205 | 0.02676 | 0.02112 | 0.02636 | 0.02602 | 0.02544 | 0.02263 | 0.02267 ACLY     |
| cg24124789 | 0.06447 | 0.03314 | 0.07602 | 0.06237 | 0.04426 | 0.03214 | 0.0537  | 0.0288  | 0.24292 | 0.02885 IARS2    |
| cg24124977 | 0.03882 | 0.03656 | 0.05499 | 0.03727 | 0.03571 | 0.03182 | 0.0376  | 0.03373 | 0.03295 | 0.0304 TBC1D16   |
| cg24125648 | 0.66165 | 0.50962 | 0.50922 | 0.61712 | 0.48695 | 0.5125  | 0.42539 | 0.42127 | 0.09669 | 0.07133 HYPK     |
| cg24126851 | 0.88121 | 0.83866 | 0.89572 | 0.90148 | 0.87035 | 0.88175 | 0.87884 | 0.84623 | 0.89928 | 0.83381 DCHS1    |
| cg24127874 | 0.96673 | 0.35523 | 0.81854 | 0.86857 | 0.96839 | 0.94033 | 0.95914 | 0.10448 | 0.97159 | 0.9692 HES6      |
| cg24127989 | 0.02704 | 0.06616 | 0.57026 | 0.60738 | 0.88152 | 0.75119 | 0.22586 | 0.05331 | 0.29772 | 0.10038 IMPDH1   |
| cg24130010 | 0.36889 | 0.09714 | 0.56533 | 0.88764 | 0.2015  | 0.08566 | 0.29707 | 0.5502  | 0.56169 | 0.3439 CHODL     |
| cg24130043 | 0.04737 | 0.03981 | 0.06503 | 0.05728 | 0.05062 | 0.04262 | 0.03988 | 0.03116 | 0.2877  | 0.03025 ZNF197   |
| cg24132694 | 0.09573 | 0.0837  | 0.72425 | 0.70333 | 0.5858  | 0.24755 | 0.50219 | 0.17866 | 0.59891 | 0.53542 SNAPC2   |
| cg24133080 | 0.41111 | 0.54884 |         |         |         | 0.32693 | 0.39541 | 0.30812 | 0.26493 | 0.24332 RGS18    |
| cg24133115 | 0.04736 | 0.03904 | 0.06279 | 0.03933 | 0.0589  | 0.0387  | 0.04937 | 0.05387 | 0.55961 | 0.50269 PDE10A   |
| cg24134767 | 0.39897 | 0.29643 | 0.26906 | 0.35155 | 0.14138 | 0.05104 | 0.03965 | 0.04197 | 0.14891 | 0.11537 HTR3A    |
| cg24136586 | 0.08762 | 0.06315 | 0.11425 | 0.08796 | 0.09148 | 0.05204 | 0.08339 | 0.06611 | 0.06799 | 0.05009 ATG10    |
| cg24137081 | 0.01955 | 0.02518 | 0.02408 | 0.01715 | 0.01703 | 0.01953 | 0.01941 | 0.01932 | 0.01745 | 0.01875 IQCC     |
| cg24138639 | 0.04268 | 0.0399  | 0.05017 | 0.04885 | 0.04489 | 0.04907 | 0.05025 | 0.03998 | 0.03978 | 0.03971 TEGT     |
| cg24139421 | 0.02581 | 0.02949 | 0.03241 | 0.03022 | 0.02861 | 0.02418 | 0.02416 | 0.02442 | 0.02318 | 0.02451 SLC22A18 |
| cg24139739 | 0.03657 | 0.03509 | 0.05171 | 0.05158 | 0.04375 | 0.05124 | 0.38322 | 0.51331 | 0.03531 | 0.03651 EFNB1    |
| cg24141135 | 0.02745 | 0.02934 | 0.03072 | 0.03499 | 0.03291 | 0.03459 | 0.02699 | 0.02417 | 0.02211 | 0.0298 MARS      |
| cg24142014 | 0.05403 | 0.05071 | 0.05377 | 0.04659 | 0.03875 | 0.04892 | 0.05183 | 0.04933 | 0.04534 | 0.03996 PCGF1    |
| cg24142106 | 0.21444 | 0.14394 | 0.51976 | 0.67118 | 0.3698  | 0.20767 | 0.1658  | 0.29805 | 0.6934  | 0.59557 PIP5K1B  |
| cg24145210 | 0.09985 | 0.07287 | 0.08015 | 0.06693 | 0.07896 | 0.05853 | 0.09132 | 0.06262 | 0.0674  | 0.06643 NPM1     |
| cg24146166 | 0.06708 | 0.06611 | 0.08389 | 0.29451 | 0.06288 | 0.06881 | 0.06163 | 0.06234 | 0.05212 | 0.05909 ZNF25    |
| cg24146183 | 0.03701 | 0.03329 | 0.03439 | 0.03566 | 0.02545 | 0.03261 | 0.02866 | 0.02974 | 0.02935 | 0.02719 JMJD2D   |
| cg24147596 | 0.71865 | 0.70262 | 0.62929 | 0.62092 | 0.34103 | 0.33454 | 0.43363 | 0.33521 | 0.07825 | 0.05427 ARL14    |
| cg24148044 | 0.04272 | 0.05032 | 0.04974 | 0.04302 | 0.06144 | 0.04833 | 0.03251 | 0.03785 | 0.03942 | 0.03152 KIAA0513 |
| cg24150528 | 0.88232 | 0.68269 | 0.91327 | 0.91595 | 0.92913 | 0.84788 | 0.88497 | 0.52496 | 0.93234 | 0.92035 FLJ10246 |

|            |         |         |         |         |         |         |         |         |         |                  |
|------------|---------|---------|---------|---------|---------|---------|---------|---------|---------|------------------|
| cg24154474 | 0.05902 | 0.05007 | 0.05049 | 0.04569 | 0.05665 | 0.05583 | 0.05739 | 0.0576  | 0.0692  | 0.06137 NIPA1    |
| cg24155668 | 0.33381 | 0.03944 | 0.43418 | 0.55827 | 0.97935 | 0.97437 | 0.39589 | 0.03114 | 0.96415 | 0.90262 MAPK13   |
| cg24158546 | 0.0385  | 0.03756 | 0.04329 | 0.04049 | 0.03558 | 0.04314 | 0.06519 | 0.07214 | 0.03173 | 0.02967 SCAND1   |
| cg24160158 | 0.05264 | 0.05028 | 0.0537  | 0.04774 | 0.06796 | 0.05649 | 0.0598  | 0.05385 | 0.04645 | 0.05102 NUP160   |
| cg24164563 | 0.86903 | 0.74258 | 0.83007 | 0.89388 | 0.77321 | 0.83208 | 0.59819 | 0.50816 | 0.7147  | 0.5945 FOXJ1     |
| cg24165720 | 0.30488 | 0.31815 | 0.28043 | 0.28409 | 0.19988 | 0.27126 | 0.36608 | 0.35425 | 0.3276  | 0.26968 NACAL    |
| cg24165760 | 0.70129 | 0.06093 | 0.8207  | 0.79918 | 0.2312  | 0.06464 | 0.37254 | 0.05168 | 0.18027 | 0.05683 TRAF3    |
| cg24166097 | 0.1224  | 0.10436 | 0.12821 | 0.12056 | 0.15891 | 0.12289 | 0.13182 | 0.10952 | 0.11375 | 0.10408 NPM3     |
| cg24166628 | 0.90114 | 0.83988 | 0.71444 | 0.7133  | 0.93699 | 0.6235  | 0.5386  | 0.5113  | 0.66448 | 0.73793 TNNC1    |
| cg24167037 | 0.26387 | 0.57114 | 0.82226 | 0.85009 | 0.84759 | 0.72088 | 0.82227 | 0.48241 | 0.55689 | 0.69011 ITGB2    |
| cg24167841 | 0.89522 | 0.90754 | 0.88825 | 0.91573 | 0.93798 | 0.91373 | 0.91009 | 0.89075 | 0.91198 | 0.88273 ADMR     |
| cg24167928 | 0.87002 | 0.85157 | 0.75677 | 0.79513 | 0.6799  | 0.72724 | 0.73869 | 0.81624 | 0.81908 | 0.79115 UTP14C   |
| cg24169822 | 0.31919 | 0.25989 | 0.22677 | 0.19067 | 0.16466 | 0.0676  | 0.11077 | 0.05822 | 0.45776 | 0.16728 HOXA4    |
| cg24169915 | 0.287   | 0.17181 | 0.11332 | 0.09195 | 0.15036 | 0.1547  | 0.07303 | 0.06811 | 0.07053 | 0.09256 FLJ25773 |
| cg24170090 | 0.10847 | 0.04779 | 0.05097 | 0.0598  | 0.09324 | 0.05528 | 0.04456 | 0.04588 | 0.06176 | 0.03928 M-RIP    |
| cg24170535 | 0.04591 | 0.046   | 0.04786 | 0.04118 | 0.04082 | 0.04341 | 0.04032 | 0.04118 | 0.03501 | 0.02765 C6orf69  |
| cg24171152 | 0.83865 | 0.70184 | 0.86095 | 0.87487 | 0.86687 | 0.89481 | 0.86361 | 0.85952 | 0.88061 | 0.80649 ATP2B1   |
| cg24172553 | 0.81193 | 0.70193 | 0.65611 | 0.82824 | 0.84372 | 0.79746 | 0.34731 | 0.20946 | 0.82467 | 0.52671 FLJ25660 |
| cg24173049 | 0.03212 | 0.03527 | 0.34673 | 0.38723 | 0.60265 | 0.316   | 0.10053 | 0.06101 | 0.97276 | 0.90686 SLC16A13 |
| cg24176037 | 0.08924 | 0.09178 | 0.12503 | 0.12143 | 0.16785 | 0.12356 | 0.08878 | 0.07764 | 0.09459 | 0.14269 TBPL1    |
| cg24176563 | 0.04556 | 0.04156 | 0.04103 | 0.03822 | 0.03148 | 0.03478 | 0.03834 | 0.03869 | 0.04438 | 0.03179 EYA4     |
| cg24178740 | 0.09404 | 0.0854  | 0.88508 | 0.88693 | 0.89715 | 0.85361 | 0.45063 | 0.42899 | 0.33335 | 0.26527 FEV      |
| cg24181591 | 0.04384 | 0.0493  | 0.04164 | 0.04747 | 0.05242 | 0.04491 | 0.04846 | 0.04148 | 0.03644 | 0.04147 EIF5A    |
| cg24182328 | 0.24873 | 0.29258 | 0.08531 | 0.09526 | 0.17636 | 0.11205 | 0.10811 | 0.09687 | 0.07083 | 0.08366 VMO1     |
| cg24183173 | 0.05465 | 0.0551  | 0.93751 | 0.94123 | 0.94415 | 0.93679 | 0.6673  | 0.90414 | 0.95242 | 0.9417 BCOR      |
| cg24183484 | 0.0706  | 0.07852 | 0.13417 | 0.14314 | 0.07253 | 0.07543 | 0.06575 | 0.07408 | 0.05877 | 0.05519 GGN      |
| cg24183958 | 0.02977 | 0.02742 | 0.03269 | 0.03049 | 0.02525 | 0.02177 | 0.03208 | 0.03422 | 0.02543 | 0.02193 GRB10    |
| cg24189717 | 0.06302 | 0.06392 | 0.06963 | 0.0689  | 0.03737 | 0.05985 | 0.06495 | 0.06498 | 0.0563  | 0.05933 SNX17    |
| cg24192663 | 0.73761 | 0.49676 | 0.50082 | 0.60312 | 0.76255 | 0.84876 | 0.55997 | 0.57344 | 0.37059 | 0.25863 HSPA6    |
| cg24194132 | 0.07573 | 0.03172 | 0.23868 | 0.29012 | 0.05736 | 0.02307 | 0.04328 | 0.03262 | 0.02997 | 0.02321 B4GALNT4 |
| cg24194539 | 0.03176 | 0.02424 | 0.02779 | 0.02245 | 0.0325  | 0.02296 | 0.02214 | 0.02455 | 0.03013 | 0.02194 AIM1     |
| cg24194775 | 0.93088 | 0.93581 | 0.58132 | 0.76394 | 0.11147 | 0.06672 | 0.81591 | 0.92946 | 0.58568 | 0.34701 NPR2     |
| cg24196046 | 0.10431 | 0.1265  | 0.22303 | 0.17132 | 0.21629 | 0.1363  | 0.15695 | 0.13921 | 0.14564 | 0.15174 EIF2C3   |
| cg24197445 | 0.5421  | 0.28967 | 0.65659 | 0.70544 | 0.48729 | 0.65829 | 0.32025 | 0.29735 | 0.35996 | 0.3583 FLJ23049  |
| cg24198678 | 0.90067 | 0.76663 | 0.90057 | 0.91362 | 0.91569 | 0.81653 | 0.89097 | 0.81967 | 0.71396 | 0.83777 DNASE1   |
| cg24198840 | 0.91511 | 0.57724 | 0.92728 | 0.93267 | 0.93584 | 0.91272 | 0.90807 | 0.91661 | 0.93079 | 0.84368 NEU2     |
| cg24199834 | 0.07001 | 0.05197 | 0.93367 | 0.94335 | 0.11843 | 0.07786 | 0.23073 | 0.64609 | 0.05727 | 0.06014 POU4F2   |
| cg24200059 | 0.07989 | 0.05833 | 0.50998 | 0.38235 | 0.05378 | 0.05607 | 0.22472 | 0.07649 | 0.30218 | 0.0533 FLJ22222  |
| cg24202119 | 0.09956 | 0.07606 | 0.56899 | 0.7556  | 0.52897 | 0.53973 | 0.66659 | 0.78003 | 0.0587  | 0.05708 CAPSL    |
| cg24204740 | 0.0596  | 0.04639 | 0.05428 | 0.05626 | 0.23787 | 0.07146 | 0.04229 | 0.03797 | 0.04396 | 0.03429 RWDD2    |
| cg24205633 | 0.0286  | 0.03336 | 0.03882 | 0.03722 | 0.03552 | 0.04893 | 0.02835 | 0.02726 | 0.02553 | 0.02281 ACN9     |

|            |         |         |         |         |         |         |         |         |         |                   |
|------------|---------|---------|---------|---------|---------|---------|---------|---------|---------|-------------------|
| cg24206256 | 0.13531 | 0.12647 | 0.15108 | 0.11246 | 0.17356 | 0.10771 | 0.13443 | 0.11009 | 0.11145 | 0.10001 MAT2B     |
| cg24206694 | 0.06887 | 0.0374  | 0.08764 | 0.10296 | 0.04974 | 0.30824 | 0.0433  | 0.03329 | 0.03026 | 0.02602 JMJD5     |
| cg24207176 | 0.05372 | 0.04358 | 0.0826  | 0.08693 | 0.05641 | 0.04245 | 0.04914 | 0.03696 | 0.03531 | 0.03578 ABCG2     |
| cg24208172 | 0.04114 | 0.04303 | 0.05062 | 0.05824 | 0.05078 | 0.04848 | 0.05362 | 0.04242 | 0.04123 | 0.03271 CDS1      |
| cg24208206 | 0.12237 | 0.10178 | 0.14146 | 0.12627 | 0.24762 | 0.11479 | 0.31454 | 0.06267 | 0.0959  | 0.07687 FYCO1     |
| cg24210717 | 0.26667 | 0.14298 | 0.88916 | 0.87872 | 0.88644 | 0.69431 | 0.4725  | 0.31827 | 0.158   | 0.07144 GPD1      |
| cg24211388 | 0.69172 | 0.55634 | 0.88542 | 0.91612 | 0.92894 | 0.8489  | 0.88059 | 0.40965 | 0.90578 | 0.07483 AIF1      |
| cg24211742 | 0.10925 | 0.07014 | 0.19041 | 0.22564 | 0.08913 | 0.08131 | 0.07439 | 0.06546 | 0.47411 | 0.35897 NOC4L     |
| cg24214470 | 0.87825 | 0.34265 | 0.89339 | 0.88495 | 0.93532 | 0.58148 | 0.90335 | 0.85696 | 0.78913 | 0.77918 SERPINF1  |
| cg24215443 | 0.13381 | 0.10269 | 0.91029 | 0.91701 | 0.02766 | 0.07398 | 0.7032  | 0.35963 | 0.70648 | 0.67935 TCF21     |
| cg24215727 | 0.14887 | 0.04101 | 0.0441  | 0.04937 | 0.03587 | 0.03768 | 0.03541 | 0.0279  | 0.03655 | 0.03227 ABCD3     |
| cg24216294 | 0.90235 | 0.90211 | 0.89922 | 0.89756 | 0.93512 | 0.91102 | 0.90397 | 0.90538 | 0.90505 | 0.90619 ZNF623    |
| cg24216701 | 0.93263 | 0.2225  | 0.95571 | 0.96587 | 0.97217 | 0.18097 | 0.95038 | 0.11259 | 0.96632 | 0.44514 CDX1      |
| cg24216915 | 0.04742 | 0.04234 | 0.06888 | 0.04687 | 0.06373 | 0.05498 | 0.04235 | 0.03508 | 0.03719 | 0.06305 WDR18     |
| cg24217726 | 0.73736 | 0.74891 | 0.73563 | 0.74185 | 0.52688 | 0.6801  | 0.60135 | 0.68033 | 0.73808 | 0.72637 ASB14     |
| cg24217877 | 0.14149 | 0.04469 | 0.48599 | 0.66076 | 0.16222 | 0.05355 | 0.05862 | 0.0499  | 0.03721 | 0.04077 FLJ44674  |
| cg24219058 | 0.03702 | 0.03821 | 0.03543 | 0.03522 | 0.0333  | 0.03664 | 0.03253 | 0.03204 | 0.06991 | 0.03283 PCDH7     |
| cg24219638 | 0.0205  | 0.01937 | 0.02013 | 0.02027 | 0.01595 | 0.01897 | 0.01675 | 0.01795 | 0.01592 | 0.01654 STX3A     |
| cg24219962 | 0.03467 | 0.03838 | 0.03943 | 0.03787 | 0.03267 | 0.03652 | 0.03066 | 0.03196 | 0.03202 | 0.02801 WBP4      |
| cg24220122 | 0.07359 | 0.05331 | 0.06159 | 0.05482 | 0.13809 | 0.0965  | 0.05535 | 0.05355 | 0.05273 | 0.0463 ZNF322A    |
| cg24221059 | 0.03438 | 0.03296 | 0.0355  | 0.03028 | 0.0221  | 0.03301 | 0.02802 | 0.03033 | 0.03064 | 0.03242 PSMB6     |
| cg24222324 | 0.06808 | 0.79533 | 0.61653 | 0.64047 | 0.8417  | 0.46051 | 0.67575 | 0.69085 | 0.63054 | 0.54407 TNFSF11   |
| cg24222435 | 0.10344 | 0.05447 | 0.05681 | 0.05788 | 0.05055 | 0.05953 | 0.29022 | 0.36949 | 0.05388 | 0.04577 LOC221143 |
| cg24229819 | 0.02684 | 0.03024 | 0.03026 | 0.02981 | 0.02184 | 0.02608 | 0.0264  | 0.02868 | 0.02218 | 0.02038 DUSP3     |
| cg24229963 | 0.04774 | 0.04022 | 0.11754 | 0.09383 | 0.03416 | 0.03522 | 0.04694 | 0.04095 | 0.0327  | 0.03018 ZFAND1    |
| cg24231716 | 0.14597 | 0.1287  | 0.22168 | 0.29331 | 0.378   | 0.1553  | 0.34126 | 0.31932 | 0.15822 | 0.14083 OTP       |
| cg24234277 | 0.03347 | 0.03375 | 0.03498 | 0.02957 | 0.02798 | 0.03153 | 0.03141 | 0.03647 | 0.02959 | 0.02543 EXOC8     |
| cg24235037 | 0.61525 | 0.31081 | 0.3571  | 0.31646 | 0.11798 | 0.30071 | 0.72821 | 0.76728 | 0.36892 | 0.26891 PLA2R1    |
| cg24235633 | 0.92235 | 0.75614 | 0.95657 | 0.95264 | 0.97039 | 0.85411 | 0.9499  | 0.93801 | 0.81548 | 0.87087 CDIPT     |
| cg24236559 | 0.06051 | 0.05057 | 0.09482 | 0.09081 | 0.07564 | 0.04594 | 0.05326 | 0.04608 | 0.04706 | 0.04578 TEX261    |
| cg24236938 | 0.57037 | 0.32205 | 0.66115 | 0.69538 | 0.41953 | 0.34832 | 0.47518 | 0.17012 | 0.37699 | 0.20806 EGFL9     |
| cg24237439 | 0.24016 | 0.12926 | 0.27959 | 0.51769 | 0.25488 | 0.19106 | 0.20047 | 0.12178 | 0.11574 | 0.11769 FLJ25422  |
| cg24237576 | 0.6668  | 0.4548  | 0.84919 | 0.86035 | 0.85707 | 0.6367  | 0.81754 | 0.53527 | 0.88421 | 0.57467 DNASE1L2  |
| cg24238205 | 0.297   | 0.04894 | 0.0434  | 0.04828 | 0.02856 | 0.03291 | 0.03891 | 0.03808 | 0.03607 | 0.0349 FAM111A    |
| cg24239808 | 0.76944 | 0.8427  | 0.83333 | 0.86655 | 0.79343 | 0.82543 | 0.83633 | 0.84022 | 0.85003 | 0.84513 BTD       |
| cg24240626 | 0.12489 | 0.14375 | 0.16154 | 0.14535 | 0.17647 | 0.1498  | 0.1185  | 0.11589 | 0.13785 | 0.13444 REG3A     |
| cg24241455 | 0.04069 | 0.04282 | 0.05835 | 0.04374 | 0.04049 | 0.04028 | 0.04416 | 0.04499 | 0.04189 | 0.04203 KLHL20    |
| cg24242194 | 0.02314 | 0.02336 | 0.02369 | 0.02317 | 0.02413 | 0.02001 | 0.01905 | 0.02045 | 0.01729 | 0.01803 MDH2      |
| cg24242519 | 0.09832 | 0.13072 | 0.24158 | 0.25117 | 0.21557 | 0.15701 | 0.20215 | 0.15553 | 0.2421  | 0.21853 FAM49A    |
| cg24243265 | 0.86613 | 0.84945 | 0.79764 | 0.83225 | 0.84787 | 0.79095 | 0.82934 | 0.7807  | 0.84507 | 0.14573 MLZE      |
| cg24243406 | 0.03375 | 0.03721 | 0.05905 | 0.03515 | 0.10033 | 0.03696 | 0.03718 | 0.0322  | 0.0361  | 0.02294 MGC13138  |

|            |         |         |         |         |         |         |         |         |         |         |           |
|------------|---------|---------|---------|---------|---------|---------|---------|---------|---------|---------|-----------|
| cg24244000 | 0.21359 | 0.11731 | 0.36984 | 0.47669 | 0.4712  | 0.77507 | 0.13187 | 0.10643 | 0.1772  | 0.15522 | GABRG3    |
| cg24247865 | 0.11419 | 0.1211  | 0.16917 | 0.13789 | 0.15792 | 0.14684 | 0.13194 | 0.12394 | 0.11905 | 0.11126 | CHORDC1   |
| cg24248317 | 0.87982 | 0.88583 | 0.8924  | 0.88238 | 0.91246 | 0.88275 | 0.8954  | 0.87391 | 0.88528 | 0.84805 | C2orf18   |
| cg24249486 | 0.02876 | 0.02811 | 0.02809 | 0.02838 | 0.02043 | 0.02918 | 0.25944 | 0.20936 | 0.0274  | 0.024   | ARHGAP6   |
| cg24249775 | 0.80605 | 0.787   | 0.70664 | 0.77166 | 0.61512 | 0.69397 | 0.6255  | 0.7548  | 0.77248 | 0.42344 | KRT10     |
| cg24250393 | 0.06198 | 0.0766  | 0.88699 | 0.93245 | 0.94469 | 0.91811 | 0.67721 | 0.76473 | 0.05403 | 0.0567  | PRKCB1    |
| cg24251035 | 0.73484 | 0.20376 | 0.4165  | 0.31275 | 0.09745 | 0.06952 | 0.21656 | 0.18215 | 0.77335 | 0.17568 | MGC14289  |
| cg24252723 | 0.03988 | 0.03959 | 0.03958 | 0.03742 | 0.03788 | 0.03692 | 0.03293 | 0.03883 | 0.03188 | 0.03256 | CNNM2     |
| cg24252809 | 0.1415  | 0.24237 | 0.28484 | 0.59389 | 0.39699 | 0.38632 | 0.06967 | 0.07284 | 0.06261 | 0.05748 | MRGPRX1   |
| cg24254120 | 0.04403 | 0.05094 | 0.07321 | 0.06818 | 0.10257 | 0.06798 | 0.05921 | 0.04856 | 0.22214 | 0.0484  | RFC3      |
| cg24254206 | 0.10779 | 0.08736 | 0.10825 | 0.09821 | 0.14231 | 0.09574 | 0.12329 | 0.08017 | 0.11859 | 0.072   | SNRPD2    |
| cg24256211 | 0.50119 | 0.12824 | 0.03325 | 0.03506 | 0.0647  | 0.05672 | 0.03642 | 0.03806 | 0.03932 | 0.04552 | SAMD4A    |
| cg24257768 | 0.05568 | 0.05789 | 0.05775 | 0.0631  | 0.04023 | 0.06206 | 0.05759 | 0.05759 | 0.05159 | 0.05626 | C10orf84  |
| cg24262376 | 0.22025 | 0.1249  | 0.88605 | 0.92074 | 0.49056 | 0.51984 | 0.55096 | 0.37762 | 0.47993 | 0.37824 | SCNM1     |
| cg24262469 | 0.72796 | 0.26669 | 0.37611 | 0.48458 | 0.41515 | 0.123   | 0.74518 | 0.27573 | 0.22201 | 0.12689 | TIPARP    |
| cg24264506 | 0.97607 | 0.97856 | 0.02501 | 0.02314 | 0.01614 | 0.02485 | 0.02193 | 0.024   | 0.02311 | 0.02034 | TTC12     |
| cg24264578 | 0.66334 | 0.14729 | 0.83443 | 0.89924 | 0.82742 | 0.90271 | 0.22307 | 0.12566 | 0.82116 | 0.92705 | OR2C1     |
| cg24265806 | 0.05689 | 0.05499 | 0.06153 | 0.05962 | 0.06788 | 0.06317 | 0.06344 | 0.05793 | 0.04813 | 0.0526  | DRCTNNB1A |
| cg24266238 | 0.04996 | 0.05523 | 0.06977 | 0.05547 | 0.05419 | 0.04528 | 0.04661 | 0.03785 | 0.04813 | 0.04325 | PFN2      |
| cg24266542 | 0.03895 | 0.04211 | 0.05379 | 0.06082 | 0.05539 | 0.05303 | 0.04011 | 0.04953 | 0.04861 | 0.03701 | POLR3B    |
| cg24267801 | 0.05431 | 0.04951 | 0.05335 | 0.05406 | 0.03283 | 0.04811 | 0.05082 | 0.04684 | 0.04464 | 0.04792 | COX6C     |
| cg24269276 | 0.02727 | 0.02662 | 0.03233 | 0.0235  | 0.02013 | 0.02644 | 0.02176 | 0.02663 | 0.02166 | 0.02636 | SFRS1     |
| cg24269657 | 0.87277 | 0.5934  | 0.73181 | 0.8263  | 0.47735 | 0.15369 | 0.36865 | 0.47748 | 0.88725 | 0.61967 | F7        |
| cg24269846 | 0.02845 | 0.02415 | 0.02763 | 0.02696 | 0.02284 | 0.02554 | 0.02265 | 0.02545 | 0.02133 | 0.02192 | PRIM1     |
| cg24270244 | 0.02562 | 0.033   | 0.03214 | 0.03143 | 0.02869 | 0.03115 | 0.027   | 0.03256 | 0.02448 | 0.0231  | RBM7      |
| cg24272559 | 0.8185  | 0.80914 | 0.55747 | 0.55475 | 0.8258  | 0.85017 | 0.75965 | 0.51672 | 0.39142 | 0.34596 | LOC116123 |
| cg24272907 | 0.60065 | 0.51685 | 0.30481 | 0.41562 | 0.38131 | 0.32583 | 0.23153 | 0.2034  | 0.19463 | 0.20752 | RIMBP2    |
| cg24273512 | 0.17921 | 0.10753 | 0.07119 | 0.06697 | 0.16048 | 0.0522  | 0.05227 | 0.05409 | 0.05717 | 0.05504 | POPDC3    |
| cg24274272 | 0.96263 | 0.94627 | 0.96116 | 0.96611 | 0.96796 | 0.96909 | 0.9423  | 0.81226 | 0.97373 | 0.974   | DNAI2     |
| cg24274600 | 0.0312  | 0.02383 | 0.02608 | 0.02727 | 0.02054 | 0.02106 | 0.02381 | 0.0231  | 0.01783 | 0.01898 | RHOBTB3   |
| cg24275354 | 0.03471 | 0.03237 | 0.04268 | 0.03204 | 0.1096  | 0.03342 | 0.03172 | 0.03284 | 0.03309 | 0.02637 | NDUFA10   |
| cg24276445 | 0.62592 | 0.85165 | 0.87458 | 0.881   | 0.88582 | 0.86727 | 0.87357 | 0.90047 | 0.86314 | 0.86399 | CNR1      |
| cg24276491 | 0.66173 | 0.8871  | 0.83211 | 0.88481 | 0.54375 | 0.48858 | 0.46047 | 0.05097 | 0.03769 | 0.02627 | C14orf11  |
| cg24278076 | 0.7304  | 0.84595 | 0.83907 | 0.87028 | 0.52636 | 0.61096 | 0.88023 | 0.89194 | 0.86102 | 0.82592 | PLS1      |
| cg24278423 | 0.03276 | 0.02678 | 0.68802 | 0.75984 | 0.13136 | 0.04404 | 0.03357 | 0.02654 | 0.17205 | 0.26543 | FOXA3     |
| cg24283842 | 0.03534 | 0.03772 | 0.03594 | 0.02963 | 0.03574 | 0.03406 | 0.04214 | 0.0396  | 0.03483 | 0.03506 | RPLP1     |
| cg24284910 | 0.16564 | 0.06649 | 0.08902 | 0.08472 | 0.09522 | 0.08276 | 0.07393 | 0.06063 | 0.04625 | 0.04719 | SNX14     |
| cg24286301 | 0.38847 | 0.6653  | 0.14227 | 0.18471 | 0.10437 | 0.09854 | 0.11775 | 0.26932 | 0.28756 | 0.26161 | GUCY2F    |
| cg24286767 | 0.03181 | 0.03806 | 0.03239 | 0.03487 | 0.02562 | 0.03201 | 0.02753 | 0.02984 | 0.02419 | 0.0286  | LOC51255  |
| cg24287460 | 0.7657  | 0.42485 | 0.65085 | 0.82104 | 0.81358 | 0.71695 | 0.61383 | 0.61462 | 0.77134 | 0.30682 | CCDC48    |
| cg24289167 | 0.10767 | 0.10928 | 0.09216 | 0.10734 | 0.16495 | 0.10915 | 0.1004  | 0.10218 | 0.09201 | 0.08406 | POLR3A    |

|            |         |         |         |         |         |         |         |         |         |                   |
|------------|---------|---------|---------|---------|---------|---------|---------|---------|---------|-------------------|
| cg24290574 | 0.1586  | 0.1085  | 0.75669 | 0.78537 | 0.81311 | 0.77828 | 0.24864 | 0.17764 | 0.40365 | 0.11278 CPA3      |
| cg24291845 | 0.02599 | 0.0244  | 0.02904 | 0.02922 | 0.02428 | 0.02915 | 0.01994 | 0.02196 | 0.02232 | 0.02591 WBP2      |
| cg24292612 | 0.34055 | 0.08047 | 0.15742 | 0.51908 | 0.06016 | 0.07033 | 0.08404 | 0.0761  | 0.11541 | 0.08018 DEFB1     |
| cg24293567 | 0.09772 | 0.0853  | 0.08777 | 0.06969 | 0.04873 | 0.07021 | 0.06765 | 0.07115 | 0.0697  | 0.06841 C9orf9    |
| cg24297976 | 0.06358 | 0.0459  | 0.05088 | 0.05052 | 0.0417  | 0.04736 | 0.04804 | 0.04091 | 0.03865 | 0.04202 WDR35     |
| cg24298280 | 0.8316  | 0.71101 | 0.63439 | 0.73876 | 0.67557 | 0.67566 | 0.56847 | 0.63916 | 0.80487 | 0.55814 IBRDC1    |
| cg24300924 | 0.03119 | 0.0335  | 0.03938 | 0.04114 | 0.02599 | 0.03199 | 0.02483 | 0.03712 | 0.02672 | 0.02424 C18orf43  |
| cg24302095 | 0.0394  | 0.04416 | 0.0389  | 0.03843 | 0.03611 | 0.04067 | 0.03542 | 0.03621 | 0.03084 | 0.03088 GRB10     |
| cg24304712 | 0.33647 | 0.04436 | 0.93579 | 0.93865 | 0.59137 | 0.56592 | 0.13871 | 0.05613 | 0.04019 | 0.03222 C1orf101  |
| cg24304714 | 0.09979 | 0.10758 | 0.11207 | 0.09853 | 0.12358 | 0.08718 | 0.08304 | 0.08332 | 0.09678 | 0.09069 LCE1C     |
| cg24305835 | 0.02948 | 0.02494 | 0.03192 | 0.03246 | 0.02593 | 0.03356 | 0.0208  | 0.02255 | 0.02649 | 0.02403 SDHB      |
| cg24306924 | 0.02868 | 0.02858 | 0.03083 | 0.02937 | 0.03048 | 0.02112 | 0.03111 | 0.03301 | 0.03894 | 0.02968 GPT2      |
| cg24307225 | 0.02387 | 0.02667 | 0.03351 | 0.02958 | 0.05537 | 0.02955 | 0.02415 | 0.02604 | 0.02836 | 0.02324 CSNK2A2   |
| cg24309555 | 0.65654 | 0.61001 | 0.91605 | 0.93095 | 0.71672 | 0.91768 | 0.03718 | 0.03145 | 0.56495 | 0.46059 APOB      |
| cg24310246 | 0.76475 | 0.61134 | 0.51574 | 0.58351 | 0.41621 | 0.27875 | 0.44484 | 0.58436 | 0.82534 | 0.73057 RAXL1     |
| cg24311282 | 0.7054  | 0.36343 | 0.52961 | 0.52955 | 0.58698 | 0.80878 | 0.43256 | 0.44655 | 0.45599 | 0.44572 SIGLEC11  |
| cg24311382 | 0.05216 | 0.04512 | 0.05352 | 0.0548  | 0.0503  | 0.06336 | 0.04608 | 0.04366 | 0.05092 | 0.04657 CTGF      |
| cg24313770 | 0.11059 | 0.04133 | 0.11117 | 0.05532 | 0.06461 | 0.03542 | 0.03301 | 0.03387 | 0.04795 | 0.0329 CGI-115    |
| cg24315815 | 0.87263 | 0.8842  | 0.88139 | 0.90983 | 0.03961 | 0.04405 | 0.84024 | 0.04302 | 0.08932 | 0.04732 PLSCR4    |
| cg24315860 | 0.03722 | 0.03854 | 0.06125 | 0.05514 | 0.04682 | 0.05125 | 0.03248 | 0.03516 | 0.03231 | 0.02518 SRPK2     |
| cg24317255 | 0.04683 | 0.0436  | 0.05198 | 0.04861 | 0.05541 | 0.04466 | 0.04709 | 0.0443  | 0.04525 | 0.04398 RGS17     |
| cg24318412 | 0.02626 | 0.02876 | 0.02711 | 0.02906 | 0.01943 | 0.02322 | 0.0307  | 0.02852 | 0.022   | 0.02187 ASH2L     |
| cg24319545 | 0.05687 | 0.06238 | 0.06386 | 0.06669 | 0.05448 | 0.05412 | 0.05487 | 0.04855 | 0.05461 | 0.05477 H2AFV     |
| cg24320643 | 0.08413 | 0.09406 | 0.15117 | 0.15455 | 0.09847 | 0.09828 | 0.10661 | 0.09283 | 0.09581 | 0.08855 ADAM17    |
| cg24321030 | 0.02593 | 0.02967 | 0.02703 | 0.02506 | 0.03999 | 0.03698 | 0.02331 | 0.02369 | 0.02456 | 0.02196 LOC283537 |
| cg24322623 | 0.12824 | 0.0559  | 0.65832 | 0.76986 | 0.90714 | 0.8713  | 0.03658 | 0.35179 | 0.07589 | 0.44699 MYOD1     |
| cg24323031 | 0.06534 | 0.07192 | 0.06493 | 0.07417 | 0.06601 | 0.10285 | 0.05492 | 0.04776 | 0.05603 | 0.05605 PAQR8     |
| cg24323434 | 0.02958 | 0.02746 | 0.0297  | 0.02767 | 0.026   | 0.03011 | 0.03074 | 0.03696 | 0.03773 | 0.03938 SERF2     |
| cg24323726 | 0.78457 | 0.41891 | 0.87159 | 0.90408 | 0.91911 | 0.89316 | 0.38024 | 0.6376  | 0.5954  | 0.54101 ZBED2     |
| cg24324379 | 0.0613  | 0.05531 | 0.07293 | 0.06533 | 0.0773  | 0.0774  | 0.05712 | 0.05367 | 0.06892 | 0.05985 IDH1      |
| cg24325790 | 0.73923 | 0.62694 | 0.75058 | 0.73252 | 0.82961 | 0.88903 | 0.45488 | 0.57052 | 0.7195  | 0.34631 CCL23     |
| cg24326142 | 0.08314 | 0.06761 | 0.08063 | 0.07574 | 0.13759 | 0.04095 | 0.05674 | 0.05111 | 0.06238 | 0.06573 CSF1      |
| cg24329374 | 0.02074 | 0.02452 | 0.02359 | 0.02284 | 0.02002 | 0.02112 | 0.01938 | 0.02189 | 0.01921 | 0.01946 NIPSNAP3A |
| cg24329717 | 0.93323 | 0.9272  | 0.94111 | 0.9463  | 0.95598 | 0.93228 | 0.86397 | 0.93226 | 0.95166 | 0.92781 P2RX3     |
| cg24329794 | 0.04054 | 0.03791 | 0.03222 | 0.0399  | 0.03971 | 0.04294 | 0.03172 | 0.03609 | 0.03776 | 0.02719 GRSF1     |
| cg24330042 | 0.57148 | 0.38595 | 0.0405  | 0.0521  | 0.45597 | 0.42757 | 0.02158 | 0.02247 | 0.92818 | 0.90283 GSTT1     |
| cg24330485 | 0.04577 | 0.04905 | 0.05518 | 0.0497  | 0.03289 | 0.04766 | 0.04322 | 0.04189 | 0.04123 | 0.04134 EEF1B2    |
| cg24331079 | 0.92616 | 0.92573 | 0.92554 | 0.92988 | 0.93795 | 0.92207 | 0.91775 | 0.91012 | 0.9277  | 0.91493 STAT4     |
| cg24331162 | 0.6446  | 0.40172 | 0.48727 | 0.65705 | 0.64964 | 0.61081 | 0.59695 | 0.47899 | 0.57218 | 0.44511 SYT8      |
| cg24332422 | 0.16857 | 0.14022 | 0.10219 | 0.12044 | 0.06098 | 0.08653 | 0.09166 | 0.08744 | 0.09572 | 0.09898 APC       |
| cg24332433 | 0.08457 | 0.08804 | 0.09476 | 0.08729 | 0.09937 | 0.08153 | 0.06131 | 0.06108 | 0.06824 | 0.08549 SLC39A11  |



|            |         |         |         |         |         |         |         |         |         |                  |
|------------|---------|---------|---------|---------|---------|---------|---------|---------|---------|------------------|
| cg24333473 | 0.06329 | 0.06945 | 0.43626 | 0.35273 | 0.59509 | 0.62498 | 0.35728 | 0.42538 | 0.07482 | 0.06483 ZNF597   |
| cg24334790 | 0.0759  | 0.03357 | 0.0435  | 0.0414  | 0.02556 | 0.03398 | 0.0397  | 0.03634 | 0.03362 | 0.03407 ARL5     |
| cg24334879 | 0.03317 | 0.03559 | 0.0307  | 0.03347 | 0.02806 | 0.0329  | 0.02898 | 0.03367 | 0.02874 | 0.03011 NKTR     |
| cg24334983 | 0.17172 | 0.07321 | 0.07968 | 0.09025 | 0.07145 | 0.06403 | 0.05496 | 0.06018 | 0.05249 | 0.0489 ANXA11    |
| cg24335149 | 0.85274 | 0.83693 | 0.8472  | 0.87122 | 0.90366 | 0.86538 | 0.77499 | 0.83528 | 0.87837 | 0.84162 PLA2G5   |
| cg24335895 | 0.81081 | 0.85856 | 0.84966 | 0.86209 | 0.83397 | 0.69163 | 0.82498 | 0.86867 | 0.88235 | 0.70009 COX7A1   |
| cg24336531 | 0.03862 | 0.04158 | 0.04253 | 0.04014 | 0.0416  | 0.0396  | 0.04038 | 0.03687 | 0.03259 | 0.03078 ARL6IP5  |
| cg24337809 | 0.03398 | 0.02881 | 0.05332 | 0.0383  | 0.18268 | 0.05539 | 0.05205 | 0.02826 | 0.04041 | 0.0271 BTG2      |
| cg24338843 | 0.64971 | 0.30603 | 0.19205 | 0.2359  | 0.55227 | 0.59011 | 0.1205  | 0.34725 | 0.50368 | 0.38059 C1orf158 |
| cg24340657 | 0.9286  | 0.85106 | 0.88442 | 0.91753 | 0.91692 | 0.88798 | 0.55435 | 0.81773 | 0.88454 | 0.75685 KRT24    |
| cg24340926 | 0.02575 | 0.03159 | 0.05795 | 0.16368 | 0.81833 | 0.94528 | 0.9211  | 0.94279 | 0.66784 | 0.92732 RAB33A   |
| cg24341129 | 0.44781 | 0.41582 | 0.17726 | 0.16748 | 0.18048 | 0.08454 | 0.22929 | 0.12458 | 0.14225 | 0.08471 BNC2     |
| cg24341177 | 0.03375 | 0.03484 | 0.03749 | 0.03512 | 0.02532 | 0.03098 | 0.02973 | 0.03113 | 0.03112 | 0.03083 DIABLO   |
| cg24341220 | 0.04413 | 0.04424 | 0.04562 | 0.04089 | 0.03574 | 0.03853 | 0.03706 | 0.03853 | 0.03052 | 0.03882 RetSat   |
| cg24341236 | 0.02699 | 0.02752 | 0.03715 | 0.03177 | 0.02905 | 0.03229 | 0.32218 | 0.47027 | 0.01704 | 0.01938 MTCP1    |
| cg24341536 | 0.06143 | 0.05754 | 0.07727 | 0.05661 | 0.05342 | 0.04937 | 0.05879 | 0.04956 | 0.05188 | 0.04313 SQSTM1   |
| cg24341800 | 0.2523  | 0.25285 | 0.27604 | 0.26438 | 0.28715 | 0.24795 | 0.24428 | 0.23602 | 0.21666 | 0.21332 ACAT1    |
| cg24341944 | 0.04164 | 0.03997 | 0.04035 | 0.03981 | 0.03216 | 0.032   | 0.03242 | 0.03145 | 0.03523 | 0.02619 RSRC1    |
| cg24342628 | 0.04791 | 0.04302 | 0.04629 | 0.04424 | 0.05798 | 0.04979 | 0.03703 | 0.03921 | 0.03459 | 0.03402 TPMT     |
| cg24343515 | 0.03271 | 0.02689 | 0.03636 | 0.02974 | 0.02876 | 0.03218 | 0.03189 | 0.02887 | 0.02727 | 0.02474 PI4KII   |
| cg24345138 | 0.04753 | 0.05479 | 0.05117 | 0.05379 | 0.16155 | 0.03981 | 0.04579 | 0.04096 | 0.04938 | 0.04188 KLHL25   |
| cg24345247 | 0.05193 | 0.05934 | 0.08457 | 0.06896 | 0.13015 | 0.12908 | 0.04446 | 0.07374 | 0.03874 | 0.04724 HIST1H4A |
| cg24345793 | 0.05394 | 0.05407 | 0.06861 | 0.06503 | 0.07597 | 0.0464  | 0.06175 | 0.05319 | 0.05646 | 0.05398 USP5     |
| cg24346429 | 0.45526 | 0.38217 | 0.52084 | 0.58414 | 0.37471 | 0.40451 | 0.54765 | 0.51918 | 0.44068 | 0.34186 GNAS     |
| cg24346637 | 0.20331 | 0.03411 | 0.75349 | 0.88196 | 0.90736 | 0.7701  | 0.04613 | 0.10075 | 0.72693 | 0.18498 UBL4B    |
| cg24349555 | 0.02472 | 0.02971 | 0.02944 | 0.02493 | 0.02146 | 0.02318 | 0.02369 | 0.02594 | 0.01879 | 0.02202 HECA     |
| cg24352499 | 0.08747 | 0.07726 | 0.08371 | 0.11897 | 0.14939 | 0.10823 | 0.08148 | 0.0922  | 0.07355 | 0.07203 AQP6     |
| cg24352530 | 0.91508 | 0.66566 | 0.0633  | 0.05497 | 0.1228  | 0.06086 | 0.05936 | 0.03934 | 0.03809 | 0.05189 ABCG2    |
| cg24352688 | 0.66743 | 0.32799 | 0.20079 | 0.20159 | 0.16213 | 0.08789 | 0.11169 | 0.07595 | 0.51533 | 0.36023 OFD1     |
| cg24352736 | 0.02135 | 0.02445 | 0.02652 | 0.0219  | 0.0275  | 0.0211  | 0.02506 | 0.02397 | 0.07572 | 0.01888 YIPF2    |
| cg24353217 | 0.91258 | 0.90448 | 0.8968  | 0.91765 | 0.92534 | 0.92068 | 0.38098 | 0.14195 | 0.91978 | 0.8958 MYL2      |
| cg24353466 | 0.02824 | 0.03636 | 0.03065 | 0.02645 | 0.02074 | 0.02301 | 0.02129 | 0.02318 | 0.02317 | 0.02099 RNF13    |
| cg24353833 | 0.06173 | 0.0628  | 0.07098 | 0.06426 | 0.11643 | 0.07451 | 0.04395 | 0.05138 | 0.0456  | 0.0479 NRM       |
| cg24354652 | 0.86466 | 0.79873 | 0.83829 | 0.82051 | 0.85269 | 0.84014 | 0.86182 | 0.87481 | 0.84774 | 0.84624 PTAFR    |
| cg24355006 | 0.7863  | 0.75647 | 0.92365 | 0.94224 | 0.95055 | 0.9103  | 0.94887 | 0.92494 | 0.94493 | 0.95344 CSNK1G2  |
| cg24355048 | 0.07849 | 0.0742  | 0.11035 | 0.07794 | 0.20597 | 0.12497 | 0.07737 | 0.08792 | 0.06045 | 0.07338 CTSG     |
| cg24355091 | 0.1957  | 0.21944 | 0.17299 | 0.391   | 0.36432 | 0.06755 | 0.07914 | 0.06747 | 0.72395 | 0.25973 PSARL    |
| cg24355174 | 0.07896 | 0.08273 | 0.15892 | 0.17173 | 0.08818 | 0.08724 | 0.12452 | 0.11351 | 0.06229 | 0.05688 FLJ21827 |
| cg24356289 | 0.033   | 0.03358 | 0.0357  | 0.03506 | 0.0297  | 0.03363 | 0.03105 | 0.02952 | 0.02599 | 0.02939 C12orf22 |
| cg24356544 | 0.84368 | 0.85294 | 0.81206 | 0.82875 | 0.78606 | 0.82564 | 0.67544 | 0.57975 | 0.26298 | 0.17748 OGDHL    |
| cg24356797 | 0.04806 | 0.0374  | 0.07091 | 0.05894 | 0.03214 | 0.02958 | 0.03    | 0.03469 | 0.0458  | 0.02262 UBA52    |

|            |         |         |         |         |         |         |         |         |         |         |           |
|------------|---------|---------|---------|---------|---------|---------|---------|---------|---------|---------|-----------|
| cg24357161 | 0.05583 | 0.04561 | 0.89557 | 0.90778 | 0.94361 | 0.87953 | 0.10565 | 0.05108 | 0.51607 | 0.46117 | RCV1      |
| cg24358465 | 0.03198 | 0.03031 | 0.0298  | 0.03055 | 0.04766 | 0.04617 | 0.02327 | 0.02499 | 0.02259 | 0.02361 | HIST1H2AG |
| cg24358529 | 0.05843 | 0.06461 | 0.09097 | 0.06831 | 0.08517 | 0.06725 | 0.06197 | 0.07    | 0.07651 | 0.08232 | PPIE      |
| cg24362016 | 0.85097 | 0.82339 | 0.80595 | 0.82958 | 0.69657 | 0.49587 | 0.70046 | 0.36322 | 0.57267 | 0.5323  | ZNF44     |
| cg24362401 | 0.10471 | 0.11332 | 0.18259 | 0.141   | 0.22386 | 0.17622 | 0.14464 | 0.13126 | 0.12381 | 0.16689 | PIK3C3    |
| cg24362726 | 0.13747 | 0.10557 | 0.12164 | 0.11025 | 0.1991  | 0.11393 | 0.08668 | 0.08242 | 0.09418 | 0.13224 | LOC132321 |
| cg24363955 | 0.10892 | 0.73896 | 0.85169 | 0.87964 | 0.86118 | 0.86516 | 0.32424 | 0.80497 | 0.68887 | 0.70709 | FLJ14054  |
| cg24364574 | 0.14112 | 0.1311  | 0.13714 | 0.12965 | 0.68615 | 0.30541 | 0.27364 | 0.13447 | 0.10448 | 0.10537 | PREX1     |
| cg24365013 | 0.58686 | 0.48621 | 0.75758 | 0.8339  | 0.75904 | 0.84857 | 0.78095 | 0.77847 | 0.27649 | 0.1222  | USH3A     |
| cg24365867 | 0.68342 | 0.41996 | 0.65147 | 0.80574 | 0.65511 | 0.27508 | 0.66766 | 0.04315 | 0.88281 | 0.71881 | MRV11     |
| cg24371157 | 0.10323 | 0.03889 | 0.04814 | 0.06608 | 0.03482 | 0.03425 | 0.03165 | 0.02828 | 0.0277  | 0.02586 | PDCD4     |
| cg24371225 | 0.02563 | 0.02005 | 0.02222 | 0.0224  | 0.49553 | 0.44822 | 0.02052 | 0.0199  | 0.02423 | 0.0213  | MGC42105  |
| cg24371383 | 0.05295 | 0.05507 | 0.04385 | 0.04665 | 0.04299 | 0.04427 | 0.03922 | 0.04192 | 0.03935 | 0.04601 | CEP55     |
| cg24373308 | 0.02404 | 0.03459 | 0.03566 | 0.02808 | 0.03998 | 0.05026 | 0.02086 | 0.02296 | 0.02439 | 0.02664 | BAG2      |
| cg24373760 | 0.03898 | 0.03629 | 0.05236 | 0.09152 | 0.04442 | 0.03802 | 0.03531 | 0.03244 | 0.03199 | 0.02849 | LGR5      |
| cg24376537 | 0.06281 | 0.05145 | 0.18747 | 0.36223 | 0.09191 | 0.04762 | 0.43322 | 0.52244 | 0.06707 | 0.39752 | DLG3      |
| cg24377133 | 0.03897 | 0.0461  | 0.07777 | 0.06409 | 0.03068 | 0.03835 | 0.04095 | 0.03909 | 0.04773 | 0.05033 | HHCM      |
| cg24378421 | 0.87853 | 0.89642 | 0.89395 | 0.87959 | 0.92806 | 0.88749 | 0.10655 | 0.11312 | 0.61981 | 0.89011 | MTMR9     |
| cg24382521 | 0.71189 | 0.75548 | 0.77681 | 0.78588 | 0.69361 | 0.70345 | 0.7209  | 0.56136 | 0.79927 | 0.74196 | C7        |
| cg24384676 | 0.34055 | 0.1592  | 0.09946 | 0.0762  | 0.14351 | 0.0808  | 0.30427 | 0.28979 | 0.32222 | 0.57546 | SLC25A21  |
| cg24385322 | 0.58187 | 0.21243 | 0.06648 | 0.07343 | 0.87441 | 0.80768 | 0.15104 | 0.04882 | 0.16416 | 0.11946 | HDAC3     |
| cg24386906 | 0.03693 | 0.04105 | 0.04374 | 0.04414 | 0.03305 | 0.04094 | 0.03832 | 0.03601 | 0.04383 | 0.04069 | SART2     |
| cg24387380 | 0.15209 | 0.59201 | 0.13066 | 0.10613 | 0.17317 | 0.1658  | 0.13183 | 0.09744 | 0.14643 | 0.17467 | GABRA5    |
| cg24387818 | 0.15469 | 0.11743 | 0.1403  | 0.1224  | 0.41104 | 0.73083 | 0.06766 | 0.113   | 0.07467 | 0.09624 | POF1B     |
| cg24388263 | 0.91692 | 0.90813 | 0.92119 | 0.92687 | 0.91352 | 0.90028 | 0.88116 | 0.88326 | 0.92799 | 0.93027 | FLJ10374  |
| cg24389347 | 0.76185 | 0.43239 | 0.8871  | 0.89991 | 0.88037 | 0.3731  | 0.9031  | 0.42399 | 0.37697 | 0.26851 | C3orf22   |
| cg24389359 | 0.85518 | 0.66609 | 0.64607 | 0.78694 | 0.70147 | 0.70044 | 0.58582 | 0.262   | 0.87048 | 0.79148 | CCDC63    |
| cg24391122 | 0.06941 | 0.05707 | 0.38267 | 0.3973  | 0.08306 | 0.0415  | 0.16176 | 0.08173 | 0.05358 | 0.04394 | SNAPC2    |
| cg24392274 | 0.39052 | 0.07614 | 0.74326 | 0.74795 | 0.2729  | 0.40295 | 0.53808 | 0.29569 | 0.42989 | 0.11101 | C9orf16   |
| cg24392479 | 0.05282 | 0.06683 | 0.08181 | 0.08776 | 0.23978 | 0.20748 | 0.10439 | 0.06069 | 0.06135 | 0.05184 | ASPCR1    |
| cg24392574 | 0.93401 | 0.88001 | 0.93581 | 0.94951 | 0.95996 | 0.94772 | 0.86286 | 0.90288 | 0.9419  | 0.91882 | CALML5    |
| cg24394865 | 0.04149 | 0.04288 | 0.03792 | 0.04094 | 0.03503 | 0.03944 | 0.04401 | 0.04147 | 0.03682 | 0.03721 | MRPL11    |
| cg24396745 | 0.03057 | 0.02307 | 0.04999 | 0.14842 | 0.45993 | 0.21339 | 0.03606 | 0.02121 | 0.12892 | 0.01787 | HCN4      |
| cg24399106 | 0.09198 | 0.08295 | 0.06211 | 0.0641  | 0.07625 | 0.07629 | 0.05705 | 0.05891 | 0.06577 | 0.06312 | MGC45800  |
| cg24399405 | 0.90567 | 0.50496 | 0.90249 | 0.9103  | 0.93325 | 0.88302 | 0.91277 | 0.88221 | 0.90748 | 0.8074  | C16orf35  |
| cg24399529 | 0.1825  | 0.18221 | 0.45369 | 0.56857 | 0.40706 | 0.30239 | 0.32265 | 0.18757 | 0.18038 | 0.163   | TMEM84    |
| cg24400943 | 0.80118 | 0.50926 | 0.70627 | 0.81969 | 0.79877 | 0.78721 | 0.5506  | 0.77157 | 0.51192 | 0.46284 | MGC39681  |
| cg24401441 | 0.83315 | 0.31394 | 0.51607 | 0.76304 | 0.7539  | 0.81717 | 0.10311 | 0.09278 | 0.04918 | 0.04402 | PAX1      |
| cg24401912 | 0.05111 | 0.03885 | 0.15053 | 0.39864 | 0.03236 | 0.03288 | 0.03582 | 0.03553 | 0.03505 | 0.03206 | STYK1     |
| cg24402880 | 0.68877 | 0.64634 | 0.23502 | 0.20944 | 0.51691 | 0.5546  | 0.2146  | 0.61697 | 0.74103 | 0.65638 | PLAC8     |
| cg24403722 | 0.05146 | 0.05044 | 0.06474 | 0.05996 | 0.06027 | 0.04569 | 0.09241 | 0.07377 | 0.03967 | 0.05387 | EGR3      |

|            |         |         |         |         |         |         |         |         |         |                   |
|------------|---------|---------|---------|---------|---------|---------|---------|---------|---------|-------------------|
| cg24404909 | 0.15922 | 0.05507 | 0.07096 | 0.07617 | 0.14187 | 0.1315  | 0.07645 | 0.05021 | 0.50782 | 0.08914 C14orf173 |
| cg24405636 | 0.06387 | 0.06195 | 0.0657  | 0.06672 | 0.05601 | 0.05437 | 0.06498 | 0.05882 | 0.04235 | 0.04296 ZNF526    |
| cg24407065 | 0.80467 | 0.73317 | 0.87344 | 0.88411 | 0.909   | 0.89474 | 0.38787 | 0.78316 | 0.8963  | 0.88243 BLZF1     |
| cg24407308 | 0.0403  | 0.04013 | 0.75862 | 0.87627 | 0.90351 | 0.77385 | 0.92481 | 0.80566 | 0.14041 | 0.04804 DGKZ      |
| cg24408199 | 0.04545 | 0.04524 | 0.05354 | 0.04894 | 0.04115 | 0.04233 | 0.05421 | 0.03684 | 0.04211 | 0.04136 EIF2B5    |
| cg24408313 | 0.86688 | 0.3895  | 0.87527 | 0.89166 | 0.89164 | 0.68768 | 0.89638 | 0.86766 | 0.90306 | 0.78538 BCL2      |
| cg24408511 | 0.70306 | 0.88295 | 0.85858 | 0.85589 | 0.74637 | 0.86583 | 0.76588 | 0.86149 | 0.87522 | 0.83885 C12orf51  |
| cg24408817 | 0.14179 | 0.08496 | 0.10387 | 0.08831 | 0.11537 | 0.08868 | 0.06795 | 0.05943 | 0.08336 | 0.08531 CCNL1     |
| cg24409107 | 0.024   | 0.02638 | 0.02662 | 0.02343 | 0.0195  | 0.02374 | 0.02255 | 0.02292 | 0.02099 | 0.01847 GALE      |
| cg24411312 | 0.33651 | 0.05744 | 0.72097 | 0.74228 | 0.91618 | 0.89367 | 0.84536 | 0.8452  | 0.51383 | 0.54702 ST14      |
| cg24412846 | 0.3611  | 0.14218 | 0.74647 | 0.81108 | 0.67419 | 0.58678 | 0.15539 | 0.0833  | 0.39274 | 0.29146 GOLGA1    |
| cg24414089 | 0.05067 | 0.04146 | 0.05091 | 0.04411 | 0.03583 | 0.03905 | 0.03989 | 0.03498 | 0.04125 | 0.042 MRC2        |
| cg24414383 | 0.78665 | 0.81073 | 0.72241 | 0.74764 | 0.59419 | 0.73566 | 0.52786 | 0.37043 | 0.7628  | 0.46998 KRTAP1-1  |
| cg24415468 | 0.07167 | 0.0737  | 0.0824  | 0.07256 | 0.10797 | 0.37302 | 0.42261 | 0.21941 | 0.0706  | 0.06312 ZNF6      |
| cg24417499 | 0.07246 | 0.05193 | 0.88969 | 0.87351 | 0.54585 | 0.28779 | 0.13218 | 0.04789 | 0.41508 | 0.31021 HPCA      |
| cg24418574 | 0.33932 | 0.20871 | 0.23507 | 0.20478 | 0.27058 | 0.21138 | 0.20414 | 0.15156 | 0.19472 | 0.20717 HADHB     |
| cg24420778 | 0.04722 | 0.04763 | 0.0468  | 0.04338 | 0.02935 | 0.03521 | 0.03839 | 0.0359  | 0.03866 | 0.02978 PRDX6     |
| cg24421410 | 0.46738 | 0.19072 | 0.60655 | 0.60476 | 0.81253 | 0.81238 | 0.43175 | 0.3856  | 0.40797 | 0.21786 HLA-DMA   |
| cg24422489 | 0.89372 | 0.8877  | 0.83201 | 0.87406 | 0.81112 | 0.89078 | 0.83885 | 0.82441 | 0.87071 | 0.87559 FCGR2A    |
| cg24423088 | 0.27444 | 0.14273 | 0.33608 | 0.62372 | 0.71871 | 0.82058 | 0.0479  | 0.03281 | 0.04256 | 0.02776 KRTAP8-1  |
| cg24424381 | 0.04916 | 0.04874 | 0.0441  | 0.05233 | 0.0497  | 0.04746 | 0.04609 | 0.05056 | 0.0512  | 0.04337 PEX11A    |
| cg24426405 | 0.40106 | 0.47345 | 0.43653 | 0.4718  | 0.31607 | 0.1775  | 0.30004 | 0.37575 | 0.12683 | 0.15159 AGR2      |
| cg24427660 | 0.89019 | 0.84585 | 0.91339 | 0.91608 | 0.94407 | 0.77202 | 0.23229 | 0.34532 | 0.50951 | 0.63262 PNPLA2    |
| cg24428042 | 0.09245 | 0.62727 | 0.02861 | 0.02533 | 0.03429 | 0.03631 | 0.92002 | 0.96036 | 0.02887 | 0.03691 ECHDC3    |
| cg24428760 | 0.04181 | 0.03986 | 0.03698 | 0.03744 | 0.03159 | 0.03082 | 0.03457 | 0.03733 | 0.03272 | 0.03604 RALY      |
| cg24428913 | 0.78342 | 0.82301 | 0.82353 | 0.88212 | 0.76798 | 0.83251 | 0.5167  | 0.69961 | 0.84202 | 0.84285 WAS       |
| cg24429836 | 0.64782 | 0.15158 | 0.39386 | 0.51314 | 0.6403  | 0.41435 | 0.15448 | 0.09576 | 0.09719 | 0.09817 LDHD      |
| cg24430616 | 0.82671 | 0.66046 | 0.81396 | 0.81813 | 0.76736 | 0.79451 | 0.69252 | 0.70126 | 0.83001 | 0.68558 ENTPD4    |
| cg24432073 | 0.91469 | 0.92717 | 0.92325 | 0.92175 | 0.92556 | 0.92888 | 0.92767 | 0.92625 | 0.94231 | 0.93422 CDKL2     |
| cg24432916 | 0.0509  | 0.04413 | 0.64204 | 0.80007 | 0.27496 | 0.40438 | 0.27597 | 0.52616 | 0.04536 | 0.03576 SOX3      |
| cg24433189 | 0.03978 | 0.02184 | 0.02481 | 0.02262 | 0.01654 | 0.0212  | 0.02124 | 0.02513 | 0.01925 | 0.02123 SSTR5     |
| cg24434118 | 0.0413  | 0.03488 | 0.05847 | 0.03826 | 0.03217 | 0.03439 | 0.02936 | 0.03071 | 0.95778 | 0.94252 TP53INP1  |
| cg24435562 | 0.39227 | 0.26476 | 0.14516 | 0.29073 | 0.24386 | 0.30679 | 0.22044 | 0.20537 | 0.098   | 0.09532 PCDHB13   |
| cg24435704 | 0.92179 | 0.90964 | 0.90737 | 0.91695 | 0.90574 | 0.89073 | 0.91684 | 0.90091 | 0.94554 | 0.91853 PARP12    |
| cg24438217 | 0.64567 | 0.55362 | 0.55899 | 0.65026 | 0.45205 | 0.34786 | 0.40052 | 0.35706 | 0.44579 | 0.31575 SCC-112   |
| cg24438655 | 0.04576 | 0.05279 | 0.04895 | 0.0494  | 0.04712 | 0.04095 | 0.04448 | 0.04688 | 0.04282 | 0.04056 KPNB1     |
| cg24440147 | 0.87163 | 0.18295 | 0.8505  | 0.79153 | 0.35312 | 0.07573 | 0.77613 | 0.70686 | 0.52359 | 0.17421 PKN3      |
| cg24441350 | 0.02808 | 0.02414 | 0.53636 | 0.49422 | 0.37735 | 0.46103 | 0.03129 | 0.02569 | 0.11749 | 0.14655 TPPP      |
| cg24441911 | 0.88056 | 0.84127 | 0.88557 | 0.90559 | 0.89033 | 0.91624 | 0.70854 | 0.89545 | 0.91815 | 0.91011 RBP5      |
| cg24442290 | 0.07176 | 0.06721 | 0.06666 | 0.06376 | 0.06028 | 0.05714 | 0.06527 | 0.06191 | 0.06246 | 0.05677 C20orf111 |
| cg24443136 | 0.88535 | 0.5998  | 0.83656 | 0.92978 | 0.93619 | 0.94901 | 0.08003 | 0.12139 | 0.64678 | 0.53012 ATP2B3    |

|            |         |         |         |         |         |         |         |         |         |         |          |
|------------|---------|---------|---------|---------|---------|---------|---------|---------|---------|---------|----------|
| cg24443250 | 0.82041 | 0.55801 | 0.59985 | 0.81717 | 0.79654 | 0.6732  | 0.13814 | 0.51942 | 0.31711 | 0.36822 | TNFSF8   |
| cg24443367 | 0.71243 | 0.51773 | 0.29997 | 0.53795 | 0.61007 | 0.71068 | 0.51579 | 0.68117 | 0.30341 | 0.28924 | SLC16A9  |
| cg24443885 | 0.06048 | 0.05483 | 0.0666  | 0.05861 | 0.06275 | 0.0578  | 0.05965 | 0.04985 | 0.0426  | 0.03231 | ZNF227   |
| cg24443925 | 0.05098 | 0.04858 | 0.05867 | 0.05496 | 0.06929 | 0.06739 | 0.0708  | 0.0698  | 0.06349 | 0.06938 | NCOR1    |
| cg24444408 | 0.05449 | 0.05874 | 0.06304 | 0.05824 | 0.09317 | 0.06221 | 0.05549 | 0.06112 | 0.04966 | 0.05607 | KLHDC4   |
| cg24445405 | 0.74924 | 0.75044 | 0.7217  | 0.76944 | 0.6128  | 0.72271 | 0.68533 | 0.70503 | 0.72334 | 0.65748 | MIS12    |
| cg24446548 | 0.06901 | 0.07915 | 0.08326 | 0.06713 | 0.59907 | 0.09175 | 0.06686 | 0.0763  | 0.54241 | 0.48794 | TWIST1   |
| cg24447042 | 0.31918 | 0.21062 | 0.90286 | 0.90315 | 0.93605 | 0.63282 | 0.88327 | 0.50565 | 0.64336 | 0.72924 | SMARCA1  |
| cg24447890 | 0.78885 | 0.45117 | 0.9289  | 0.93499 | 0.78795 | 0.61584 | 0.84561 | 0.71181 | 0.76467 | 0.70679 | LMAN1L   |
| cg24448231 | 0.04761 | 0.06157 | 0.05511 | 0.06506 |         | 0.04261 | 0.05706 | 0.05009 | 0.03522 | 0.0301  | ZNFX1    |
| cg24448259 | 0.04441 | 0.0413  | 0.06344 | 0.04757 | 0.18488 | 0.0685  | 0.06341 | 0.06429 | 0.03961 | 0.03693 | CPVL     |
| cg24449371 | 0.04827 | 0.03142 | 0.10682 | 0.06013 | 0.17369 | 0.11181 | 0.03999 | 0.03856 | 0.03119 | 0.02688 | CIB2     |
| cg24450157 | 0.03828 | 0.03404 | 0.03805 | 0.03416 | 0.04861 | 0.05181 | 0.02754 | 0.02476 | 0.02595 | 0.02096 | DHX16    |
| cg24450312 | 0.07285 | 0.06715 | 0.13764 | 0.21471 | 0.80489 | 0.70527 | 0.28852 | 0.53219 | 0.09779 | 0.06085 | RASSF5   |
| cg24450631 | 0.18077 | 0.20416 | 0.11215 | 0.13692 | 0.08838 | 0.11836 | 0.11784 | 0.1186  | 0.11683 | 0.10694 | IGF2BP2  |
| cg24453353 | 0.04645 | 0.05264 | 0.05532 | 0.05221 | 0.0661  | 0.07976 | 0.04692 | 0.03677 | 0.03839 | 0.04262 | HIST1H4C |
| cg24453664 | 0.19965 | 0.12343 | 0.05771 | 0.06607 | 0.04212 | 0.03705 | 0.04818 | 0.05774 | 0.03801 | 0.03942 | CD59     |
| cg24454143 | 0.15908 | 0.10134 | 0.40474 | 0.37779 | 0.12644 | 0.13851 | 0.18222 | 0.09933 | 0.35593 | 0.4432  | FLT3     |
| cg24454435 | 0.07755 | 0.07893 | 0.08369 | 0.07853 | 0.07425 | 0.06115 | 0.06957 | 0.05917 | 0.06604 | 0.06926 | MAK3     |
| cg24454579 | 0.71023 | 0.68678 | 0.49985 | 0.64965 | 0.47915 | 0.45504 | 0.41817 | 0.71179 | 0.12941 | 0.27033 | BIRC8    |
| cg24456340 | 0.78953 | 0.8155  | 0.79371 | 0.83218 | 0.70846 | 0.80265 | 0.57278 | 0.48229 | 0.83901 | 0.75941 | GNGT2    |
| cg24457403 | 0.84602 | 0.5598  | 0.65136 | 0.80404 | 0.92825 | 0.87122 | 0.22162 | 0.23622 | 0.39173 | 0.06318 | KRT16    |
| cg24457521 | 0.03838 | 0.04106 | 0.03526 | 0.03264 | 0.0341  | 0.04918 | 0.03324 | 0.04094 | 0.03074 | 0.03108 | ATP5E    |
| cg24459023 | 0.03383 | 0.03748 | 0.04999 | 0.03878 | 0.04979 | 0.02986 | 0.03748 | 0.03205 | 0.03303 | 0.02986 | CRSP7    |
| cg24459209 | 0.30637 | 0.07382 | 0.77802 | 0.78117 | 0.5393  | 0.52633 | 0.35082 | 0.43088 | 0.0799  | 0.06272 | PRG3     |
| cg24459563 | 0.78275 | 0.78097 | 0.81239 | 0.82395 | 0.83373 | 0.82672 | 0.83152 | 0.8118  | 0.84465 | 0.82711 | CACNG1   |
| cg24461814 | 0.77741 | 0.56508 | 0.77941 | 0.85008 | 0.85534 | 0.8539  | 0.54654 | 0.30496 | 0.14926 | 0.05944 | KRTHB4   |
| cg24467291 | 0.08788 | 0.07352 | 0.07693 | 0.25764 | 0.06053 | 0.05066 | 0.40365 | 0.05827 | 0.05926 | 0.04941 | RSN      |
| cg24468890 | 0.22063 | 0.17293 | 0.28592 | 0.32169 | 0.17189 | 0.20465 | 0.13111 | 0.17447 | 0.30016 | 0.16539 | HDAC1    |
| cg24469114 | 0.04303 | 0.05375 | 0.05713 | 0.06356 | 0.05011 | 0.04949 | 0.03572 | 0.03783 | 0.04224 | 0.04003 | RCC1     |
| cg24469803 | 0.14092 | 0.13599 | 0.12796 | 0.10988 | 0.17772 | 0.16083 | 0.1489  | 0.12892 | 0.13356 | 0.13323 | POLR3A   |
| cg24469977 | 0.65797 | 0.59936 | 0.70117 | 0.75194 | 0.67698 | 0.80287 | 0.77754 | 0.82952 | 0.84982 | 0.81197 | FLJ40288 |
| cg24471268 | 0.05044 | 0.05624 | 0.14358 | 0.10569 | 0.03223 | 0.04937 | 0.04296 | 0.04598 | 0.27606 | 0.04291 | SPSB2    |
| cg24471555 | 0.88521 | 0.77835 | 0.87667 | 0.89122 | 0.84737 | 0.89681 | 0.7935  | 0.78147 | 0.89099 | 0.86049 | RAI16    |
| cg24471867 | 0.0401  | 0.04428 | 0.04734 | 0.04091 | 0.03943 | 0.04059 | 0.04208 | 0.04443 | 0.04227 | 0.0378  | MLL4     |
| cg24471894 | 0.79451 | 0.79861 | 0.62152 | 0.75605 | 0.66018 | 0.32782 | 0.44133 | 0.70399 | 0.61948 | 0.53811 | KIAA0020 |
| cg24473385 | 0.02981 | 0.02895 | 0.03138 | 0.03607 | 0.03856 | 0.04017 | 0.03672 | 0.02888 | 0.02937 | 0.03085 | ZNHIT3   |
| cg24473633 | 0.02725 | 0.02782 | 0.03091 | 0.02828 | 0.01624 | 0.02663 | 0.02398 | 0.02737 | 0.0235  | 0.02549 | DENND3   |
| cg24474182 | 0.74915 | 0.66912 | 0.73264 | 0.76536 | 0.70873 | 0.8022  | 0.7824  | 0.81261 | 0.75355 | 0.65962 | P2RY13   |
| cg24474998 | 0.03666 | 0.0354  | 0.03456 | 0.03177 | 0.03027 | 0.0329  | 0.03388 | 0.03384 | 0.02996 | 0.03127 | MIR16    |
| cg24475171 | 0.81601 | 0.4601  | 0.75012 | 0.80227 | 0.74222 | 0.81601 | 0.83018 | 0.38355 | 0.8832  | 0.82994 | C9orf78  |

|            |         |         |         |         |         |         |         |         |         |         |         |
|------------|---------|---------|---------|---------|---------|---------|---------|---------|---------|---------|---------|
| cg24476569 | 0.70587 | 0.16716 | 0.77384 | 0.78305 | 0.18622 | 0.13705 | 0.4117  | 0.09621 | 0.33615 | 0.06081 | ABCC4   |
| cg24477567 | 0.22407 | 0.09686 | 0.88497 | 0.89185 | 0.86816 | 0.74443 | 0.72324 | 0.34047 | 0.74599 | 0.54589 | EPOR    |
| cg24477636 | 0.13083 | 0.0941  | 0.22611 | 0.36469 | 0.31425 | 0.19519 | 0.07405 | 0.07374 | 0.30574 | 0.19952 | OR10H1  |
| cg24478145 | 0.20575 | 0.12759 | 0.3753  | 0.57771 | 0.28857 | 0.15837 | 0.10312 | 0.09245 | 0.12145 | 0.17186 | SCFD1   |
| cg24478387 | 0.12083 | 0.11539 | 0.13599 | 0.11223 | 0.1391  | 0.12538 | 0.12277 | 0.1104  | 0.094   | 0.09222 | SUMF2   |
| cg24478630 | 0.02761 | 0.03264 | 0.03403 | 0.03424 | 0.02672 | 0.03013 | 0.02627 | 0.0278  | 0.0313  | 0.02766 | GCS1    |
| cg24480194 | 0.02922 | 0.03085 | 0.04287 | 0.03852 | 0.03708 | 0.03905 | 0.03199 | 0.03398 | 0.03681 | 0.04009 | GGA1    |
| cg24480859 | 0.07365 | 0.10975 | 0.79625 | 0.82486 | 0.68849 | 0.18027 | 0.12327 | 0.03998 | 0.76068 | 0.12975 | SLC2A5  |
| cg24481163 | 0.42974 | 0.27447 | 0.61651 | 0.58819 | 0.11056 | 0.07561 | 0.23339 | 0.0726  | 0.22006 | 0.12055 | POM121  |
| cg24481633 | 0.02413 | 0.02526 | 0.03325 | 0.03044 | 0.02827 | 0.03295 | 0.02246 | 0.02536 | 0.02034 | 0.0166  | DOCK4   |
| cg24482053 | 0.75267 | 0.88893 | 0.07253 | 0.04601 | 0.07845 | 0.06134 | 0.08727 | 0.05379 | 0.3851  | 0.52705 | MLH3    |
| cg24482234 | 0.07038 | 0.07638 | 0.08506 | 0.0704  | 0.06629 | 0.0603  | 0.08276 | 0.0772  | 0.26368 | 0.34261 | LASS1   |
| cg24484103 | 0.08227 | 0.0703  | 0.07507 | 0.07744 | 0.0965  | 0.08405 | 0.04917 | 0.04799 | 0.05771 | 0.05638 | VRK3    |
| cg24484296 | 0.6876  | 0.39941 | 0.20633 | 0.20705 | 0.31647 | 0.13576 | 0.56985 | 0.46905 | 0.39665 | 0.38737 | ZFPL    |
| cg24485466 | 0.0264  | 0.0276  | 0.02957 | 0.02825 | 0.02451 | 0.02641 | 0.02456 | 0.02357 | 0.02452 | 0.02573 | KIF14   |
| cg24488435 | 0.05842 | 0.04904 | 0.0525  | 0.05543 | 0.03775 | 0.04106 | 0.04066 | 0.04405 | 0.03819 | 0.03796 | SMUG1   |
| cg24489015 | 0.51288 | 0.09508 | 0.43182 | 0.51044 | 0.5     | 0.41012 | 0.14086 | 0.30348 | 0.10257 | 0.08052 | LPO     |
| cg24489034 | 0.83375 | 0.56143 | 0.67235 | 0.76757 | 0.83556 | 0.86626 | 0.2657  | 0.32506 | 0.4319  | 0.56945 | LW-1    |
| cg24489237 | 0.0746  | 0.08667 | 0.12244 | 0.11996 | 0.06871 | 0.09385 | 0.0785  | 0.0853  | 0.08308 | 0.07897 | PBX1    |
| cg24490338 | 0.51196 | 0.57651 | 0.65277 | 0.75996 | 0.78555 | 0.90416 | 0.17923 | 0.47866 | 0.78604 | 0.63916 | TPM3    |
| cg24490859 | 0.03271 | 0.03117 | 0.04072 | 0.03664 | 0.02623 | 0.03081 | 0.0274  | 0.02548 | 0.0295  | 0.02437 | MAGEF1  |
| cg24492022 | 0.89035 | 0.87747 | 0.89555 | 0.9025  | 0.80941 | 0.53907 | 0.3433  | 0.2101  | 0.91356 | 0.86451 | RPS15A  |
| cg24493940 | 0.07579 | 0.07715 | 0.08982 | 0.08507 | 0.052   | 0.0749  | 0.077   | 0.06604 | 0.06561 | 0.07074 | MMP17   |
| cg24494008 | 0.1363  | 0.13634 | 0.16648 | 0.15766 | 0.14311 | 0.11617 | 0.12067 | 0.09794 | 0.12308 | 0.12589 | SMC4L1  |
| cg24494556 | 0.03713 | 0.03721 | 0.03532 | 0.03651 | 0.03602 | 0.03421 | 0.03065 | 0.03405 | 0.03165 | 0.0278  | ZNF11B  |
| cg24495017 | 0.14067 | 0.08567 | 0.0934  | 0.08177 | 0.08543 | 0.08528 | 0.07953 | 0.05951 | 0.85668 | 0.41683 | PITX1   |
| cg24496423 | 0.94588 | 0.72218 | 0.31597 | 0.33782 | 0.54008 | 0.02893 | 0.0432  | 0.03162 | 0.02909 | 0.02283 | STK23   |
| cg24496666 | 0.67167 | 0.87746 | 0.31948 | 0.49624 | 0.84279 | 0.87405 | 0.67207 | 0.69682 | 0.89403 | 0.89254 | GIPC2   |
| cg24497270 | 0.02263 | 0.02087 | 0.02046 | 0.01786 | 0.01931 | 0.01861 | 0.01789 | 0.0189  | 0.01743 | 0.01685 | CGI-69  |
| cg24497819 | 0.82608 | 0.70866 | 0.85866 | 0.87577 | 0.91746 | 0.87985 | 0.28695 | 0.82904 | 0.86665 | 0.77634 | SELPLG  |
| cg24497877 | 0.04204 | 0.04543 | 0.03656 | 0.04023 | 0.03113 | 0.03686 | 0.03752 | 0.04242 | 0.03426 | 0.0351  | PUSL1   |
| cg24498554 | 0.59515 | 0.3694  | 0.80218 | 0.84796 | 0.70735 | 0.80978 | 0.66147 | 0.73633 | 0.84903 | 0.78146 | CSH1    |
| cg24499411 | 0.41931 | 0.05414 | 0.87856 | 0.90383 | 0.8887  | 0.88981 | 0.86266 | 0.86055 | 0.91192 | 0.84589 | TNS3    |
| cg24499839 | 0.12036 | 0.12258 | 0.07609 | 0.09831 | 0.04684 | 0.18994 | 0.11958 | 0.10026 | 0.03203 | 0.03513 | DISC1   |
| cg24500683 | 0.65073 | 0.24963 | 0.14778 | 0.15869 | 0.2096  | 0.15506 | 0.09562 | 0.0841  | 0.09174 | 0.06822 | PTP4A1  |
| cg24502084 | 0.03612 | 0.03423 | 0.05083 | 0.06026 | 0.02661 | 0.03433 | 0.03158 | 0.03044 | 0.03728 | 0.03609 | MAPBPIP |
| cg24504986 | 0.03123 | 0.02865 | 0.02799 | 0.02823 | 0.01994 | 0.02488 | 0.02595 | 0.02907 | 0.02441 | 0.02645 | ZNF346  |
| cg24505122 | 0.88664 | 0.74897 | 0.87013 | 0.87761 | 0.88333 | 0.88449 | 0.84092 | 0.85305 | 0.86916 | 0.82367 | WNT5B   |
| cg24505341 | 0.45902 | 0.87876 | 0.74061 | 0.7825  | 0.88704 | 0.88839 | 0.17635 | 0.10908 | 0.72889 | 0.89824 | CADPS   |
| cg24505375 | 0.60842 | 0.6096  | 0.68178 | 0.71566 | 0.58543 | 0.70004 | 0.59686 | 0.57603 | 0.65042 | 0.52162 | AMAC1L2 |
| cg24505527 | 0.03536 | 0.03175 | 0.04286 | 0.05729 | 0.05084 | 0.03937 | 0.03889 | 0.03602 | 0.03574 | 0.02821 | NKIRAS2 |

|            |         |         |         |         |         |         |         |         |         |                   |
|------------|---------|---------|---------|---------|---------|---------|---------|---------|---------|-------------------|
| cg24506604 | 0.74787 | 0.20025 | 0.69697 | 0.79662 | 0.85713 | 0.82641 | 0.77056 | 0.75775 | 0.68936 | 0.54899 LOC144501 |
| cg24507762 | 0.1662  | 0.04894 | 0.50961 | 0.57887 | 0.60529 | 0.88963 | 0.46668 | 0.18244 | 0.13238 | 0.08355 KCNB1     |
| cg24509668 | 0.12297 | 0.11898 | 0.12112 | 0.12486 | 0.39598 | 0.2574  | 0.11352 | 0.10966 | 0.11848 | 0.10391 SSPN      |
| cg24511534 | 0.06443 | 0.0653  | 0.0559  | 0.0396  | 0.06565 | 0.06811 | 0.40711 | 0.34309 | 0.04925 | 0.05255 RP2       |
| cg24511869 | 0.03846 | 0.03651 | 0.11738 | 0.13293 | 0.05466 | 0.03187 | 0.03215 | 0.03264 | 0.04375 | 0.02495 RELB      |
| cg24512303 | 0.78173 | 0.78254 | 0.61061 | 0.65386 | 0.61552 | 0.82646 | 0.67025 | 0.78942 | 0.20476 | 0.18787 HNF4G     |
| cg24512400 | 0.02837 | 0.02351 | 0.29177 | 0.55896 | 0.4968  | 0.61062 | 0.04694 | 0.1094  | 0.02097 | 0.01709 KLK10     |
| cg24512973 | 0.85837 | 0.87997 | 0.7048  | 0.73385 | 0.74393 | 0.85231 | 0.85232 | 0.88331 | 0.77291 | 0.82725 MUC1      |
| cg24513045 | 0.10083 | 0.12471 | 0.24543 | 0.24167 | 0.12145 | 0.10983 | 0.10952 | 0.10735 | 0.13754 | 0.10989 RGS19     |
| cg24514921 | 0.0457  | 0.04111 | 0.05303 | 0.05274 | 0.03571 | 0.04724 | 0.03931 | 0.03778 | 0.05243 | 0.04782 VPS54     |
| cg24515202 | 0.05319 | 0.04552 | 0.06726 | 0.05594 | 0.08573 | 0.05961 | 0.06146 | 0.05262 | 0.04341 | 0.04833 TTC9C     |
| cg24516061 | 0.0289  | 0.02525 | 0.03816 | 0.03191 | 0.02907 | 0.02365 | 0.03247 | 0.02484 | 0.0234  | 0.01912 RGS19     |
| cg24516901 | 0.83273 | 0.29194 | 0.34086 | 0.31953 | 0.89701 | 0.26319 | 0.88927 | 0.8394  | 0.12731 | 0.05565 FLJ22746  |
| cg24517042 | 0.86598 | 0.83531 | 0.85682 | 0.88695 | 0.91024 | 0.89232 | 0.87329 | 0.83914 | 0.89992 | 0.81084 CAV3      |
| cg24517609 | 0.06575 | 0.06154 | 0.06179 | 0.05575 | 0.05529 | 0.06068 | 0.06366 | 0.06032 | 0.05131 | 0.05136 SSR3      |
| cg24520070 | 0.94727 | 0.86156 | 0.97573 | 0.97856 | 0.98287 | 0.9801  | 0.97666 | 0.78124 | 0.98279 | 0.9714 C14orf48   |
| cg24520800 | 0.03089 | 0.03292 | 0.03616 | 0.03633 | 0.03036 | 0.03525 | 0.03002 | 0.02909 | 0.02217 | 0.02533 RIOK1     |
| cg24522076 | 0.02444 | 0.03067 | 0.03745 | 0.02708 | 0.0228  | 0.02044 | 0.44279 | 0.38477 | 0.02039 | 0.01844 MLLT7     |
| cg24523000 | 0.10008 | 0.08937 | 0.37969 | 0.47928 | 0.56282 | 0.53713 | 0.09739 | 0.08155 | 0.09138 | 0.06085 GABRA1    |
| cg24523456 | 0.79769 | 0.76738 | 0.74032 | 0.77393 | 0.72868 | 0.71547 | 0.7552  | 0.76267 | 0.79273 | 0.79251 HLCS      |
| cg24523758 | 0.66599 | 0.60176 | 0.04363 | 0.04037 | 0.07261 | 0.03746 | 0.03544 | 0.03184 | 0.03579 | 0.02891 UBE2E3    |
| cg24524435 | 0.0685  | 0.08444 | 0.16849 | 0.23326 | 0.05965 | 0.08035 | 0.28377 | 0.07214 | 0.06274 | 0.05676 UCKL1     |
| cg24525573 | 0.85527 | 0.89213 | 0.90217 | 0.91774 | 0.92402 | 0.89841 | 0.87948 | 0.75008 | 0.91766 | 0.83057 C1orf64   |
| cg24526899 | 0.34729 | 0.13752 | 0.27751 | 0.38062 | 0.74805 | 0.7922  | 0.11576 | 0.50592 | 0.80033 | 0.64757 BMP4      |
| cg24527001 | 0.02957 | 0.02922 | 0.03063 | 0.02623 | 0.03256 | 0.03485 | 0.02116 | 0.02646 | 0.02717 | 0.02693 NDUFB1    |
| cg24528447 | 0.0859  | 0.06527 | 0.09093 | 0.08565 | 0.07346 | 0.06363 | 0.08233 | 0.06759 | 0.0539  | 0.04318 NR2F1     |
| cg24528523 | 0.17458 | 0.17716 | 0.17297 | 0.18556 | 0.12283 | 0.1482  | 0.15155 | 0.15566 | 0.14358 | 0.14552 SLC22A18  |
| cg24529858 | 0.54811 | 0.39553 | 0.66085 | 0.73809 | 0.6048  | 0.61443 | 0.48026 | 0.47655 | 0.74761 | 0.49435 F11       |
| cg24530795 | 0.06354 | 0.03346 | 0.04286 | 0.08148 | 0.43552 | 0.72025 | 0.03334 | 0.0346  | 0.0301  | 0.02673 FAM109A   |
| cg24532476 | 0.88548 | 0.38979 | 0.86064 | 0.87907 | 0.84926 | 0.84298 | 0.86691 | 0.82077 | 0.88402 | 0.65369 CHFR      |
| cg24532669 | 0.05166 | 0.03763 | 0.19716 | 0.23677 | 0.04788 | 0.04002 | 0.0461  | 0.03781 | 0.04189 | 0.03545 BRMS1     |
| cg24535573 | 0.05259 | 0.04415 | 0.05827 | 0.04548 | 0.073   | 0.06123 | 0.03591 | 0.0372  | 0.0487  | 0.04643 C1orf126  |
| cg24541550 | 0.80181 | 0.58269 | 0.80342 | 0.86977 | 0.82341 | 0.85934 | 0.7911  | 0.49996 | 0.51849 | 0.47988 MRV11     |
| cg24543400 | 0.03055 | 0.03225 | 0.03416 | 0.03262 | 0.02041 | 0.03192 | 0.03161 | 0.03051 | 0.02841 | 0.02425 TRIB2     |
| cg24545967 | 0.79265 | 0.67761 | 0.89542 | 0.90414 | 0.94182 | 0.85098 | 0.82026 | 0.43561 | 0.88012 | 0.82507 SH2D3C    |
| cg24546463 | 0.69103 | 0.26163 | 0.8353  | 0.84359 | 0.50652 | 0.70703 | 0.50247 | 0.73431 | 0.36726 | 0.71684 MGC39715  |
| cg24546942 | 0.7582  | 0.79739 | 0.72199 | 0.76533 | 0.523   | 0.73475 | 0.14949 | 0.10239 | 0.13466 | 0.15108 SERPINB4  |
| cg24547948 | 0.03367 | 0.03771 | 0.03714 | 0.04421 | 0.03966 | 0.039   | 0.02995 | 0.03125 | 0.03247 | 0.03989 ADPRHL2   |
| cg24549085 | 0.02286 | 0.02334 | 0.0243  | 0.02673 | 0.02283 | 0.02666 | 0.0236  | 0.02658 | 0.02126 | 0.01821 RTEL1     |
| cg24549507 | 0.75696 | 0.44254 | 0.20129 | 0.15538 | 0.27219 | 0.34554 | 0.11669 | 0.05063 | 0.27962 | 0.14649 C6orf145  |
| cg24552358 | 0.76996 | 0.31928 | 0.88529 | 0.91817 | 0.87322 | 0.65906 | 0.67347 | 0.68443 | 0.63714 | 0.48522 ORM1      |

|            |         |         |         |         |         |         |         |         |         |         |          |
|------------|---------|---------|---------|---------|---------|---------|---------|---------|---------|---------|----------|
| cg24552431 | 0.04494 | 0.04527 | 0.04739 | 0.04758 | 0.03047 | 0.03771 | 0.03779 | 0.03824 | 0.50686 | 0.48667 | ATAD1    |
| cg24555600 | 0.03459 | 0.03611 | 0.04491 | 0.04055 | 0.0269  | 0.03063 | 0.03083 | 0.0343  | 0.03553 | 0.0297  | DHRS4    |
| cg24555656 | 0.02941 | 0.03089 | 0.04126 | 0.03174 | 0.04637 | 0.05367 | 0.02588 | 0.02987 | 0.02235 | 0.02206 | TAF6     |
| cg24556026 | 0.882   | 0.83533 | 0.64843 | 0.75874 | 0.7898  | 0.76534 | 0.74473 | 0.6933  | 0.2551  | 0.19306 | GNE      |
| cg24558204 | 0.34908 | 0.07195 | 0.08829 | 0.08381 | 0.05501 | 0.05177 | 0.05295 | 0.04929 | 0.0466  | 0.04003 | HBS1L    |
| cg24560809 | 0.88514 | 0.7438  | 0.90661 | 0.9155  | 0.9373  | 0.91509 | 0.73667 | 0.85527 | 0.92978 | 0.86822 | PROM2    |
| cg24562819 | 0.04854 | 0.04617 | 0.07777 | 0.06349 | 0.6103  | 0.78583 | 0.07652 | 0.05862 | 0.73488 | 0.79334 | THBD     |
| cg24568646 | 0.04056 | 0.04142 | 0.04901 | 0.04661 | 0.06743 | 0.1436  | 0.04535 | 0.03567 | 0.04431 | 0.04572 | CCT8     |
| cg24570987 | 0.02277 | 0.01991 | 0.02083 | 0.02096 | 0.0209  | 0.02313 | 0.02144 | 0.01969 | 0.01663 | 0.01633 | RPS6KB2  |
| cg24573310 | 0.05684 | 0.0543  | 0.06848 | 0.05359 | 0.07011 | 0.07468 | 0.06759 | 0.04924 | 0.04744 | 0.05694 | C10orf70 |
| cg24573501 | 0.11687 | 0.11116 | 0.82365 | 0.79897 | 0.66395 | 0.75246 | 0.14065 | 0.20709 | 0.39986 | 0.22725 | F2RL1    |
| cg24574111 | 0.44082 | 0.47149 | 0.85561 | 0.88997 | 0.83244 | 0.86781 | 0.59214 | 0.84238 | 0.37052 | 0.38502 | EDG7     |
| cg24576270 | 0.03055 | 0.03218 | 0.0324  | 0.02873 | 0.02674 | 0.03088 | 0.03075 | 0.0306  | 0.02478 | 0.02592 | CUGBP1   |
| cg24576425 | 0.69229 | 0.74273 | 0.64181 | 0.75485 | 0.22969 | 0.27434 | 0.48162 | 0.1121  | 0.14785 | 0.08385 | GALNT5   |
| cg24576735 | 0.03545 | 0.03711 | 0.04138 | 0.03589 | 0.02995 | 0.03265 | 0.03554 | 0.03573 | 0.03611 | 0.02828 | MARVELD1 |
| cg24577137 | 0.07447 | 0.07308 | 0.06395 | 0.06135 | 0.04743 | 0.06606 | 0.0627  | 0.07157 | 0.06233 | 0.05981 | TPR      |
| cg24579667 | 0.73704 | 0.73188 | 0.75007 | 0.78712 | 0.76654 | 0.77539 | 0.71649 | 0.75327 | 0.40528 | 0.20366 | GPD2     |
| cg24579896 | 0.10252 | 0.09591 | 0.08375 | 0.07814 | 0.13984 | 0.1078  | 0.09111 | 0.08212 | 0.15917 | 0.11057 | KTN1     |
| cg24580001 | 0.87645 | 0.46145 | 0.91196 | 0.91783 | 0.83416 | 0.8449  | 0.78541 | 0.17803 | 0.89032 | 0.59887 | FLJ37970 |
| cg24580056 | 0.86893 | 0.86379 | 0.83758 | 0.86559 | 0.86841 | 0.87429 | 0.76833 | 0.87375 | 0.85729 | 0.87301 | MGMT     |
| cg24580185 | 0.03067 | 0.02952 | 0.0347  | 0.02748 | 0.03571 | 0.03856 | 0.04631 | 0.04271 | 0.04279 | 0.03543 | WDSUB1   |
| cg24580526 | 0.03699 | 0.0349  | 0.07874 | 0.06685 | 0.07766 | 0.04886 | 0.06015 | 0.05457 | 0.04815 | 0.04623 | CDK2AP1  |
| cg24580782 | 0.95704 | 0.9426  | 0.94239 | 0.9494  | 0.95451 | 0.95153 | 0.93198 | 0.76337 | 0.94459 | 0.92364 | NR0B2    |
| cg24582500 | 0.15119 | 0.09248 | 0.18287 | 0.18926 | 0.06585 | 0.08877 | 0.12991 | 0.09375 | 0.14789 | 0.11688 | TXNL2    |
| cg24585690 | 0.59602 | 0.19597 | 0.71892 | 0.75204 | 0.69982 | 0.77293 | 0.72205 | 0.74556 | 0.81971 | 0.66423 | IL9      |
| cg24587268 | 0.034   | 0.02757 | 0.28783 | 0.19857 | 0.05288 | 0.06655 | 0.13457 | 0.02759 | 0.10699 | 0.01886 | OSBPL2   |
| cg24588599 | 0.05128 | 0.05308 | 0.05901 | 0.05334 | 0.05313 | 0.05735 | 0.05548 | 0.0563  | 0.04805 | 0.04676 | C12orf24 |
| cg24592207 | 0.03158 | 0.03504 | 0.03272 | 0.02952 | 0.02167 | 0.03257 | 0.02885 | 0.03002 | 0.02991 | 0.03417 | TOMM40L  |
| cg24592364 | 0.03375 | 0.03799 | 0.03915 | 0.03695 | 0.02867 | 0.03366 | 0.03407 | 0.03373 | 0.03444 | 0.02921 | ANKH     |
| cg24593475 | 0.04255 | 0.04794 | 0.04947 | 0.04248 | 0.03646 | 0.04031 | 0.04718 | 0.0531  | 0.02954 | 0.03862 | SNAI2    |
| cg24594997 | 0.38235 | 0.4094  | 0.46099 | 0.39469 | 0.6798  | 0.80078 | 0.23474 | 0.07495 | 0.62709 | 0.61113 | RBP1     |
| cg24595957 | 0.02452 | 0.02804 | 0.0296  | 0.02561 | 0.0176  | 0.02847 | 0.02372 | 0.02314 | 0.01979 | 0.02628 | PARP2    |
| cg24596472 | 0.08206 | 0.08691 | 0.09968 | 0.10496 | 0.06503 | 0.08044 | 0.07843 | 0.09285 | 0.07914 | 0.08104 | TOP1MT   |
| cg24596576 | 0.03634 | 0.03853 | 0.04291 | 0.04088 | 0.05399 | 0.04394 | 0.02662 | 0.02871 | 0.03929 | 0.03275 | FANCD2   |
| cg24597988 | 0.72566 | 0.74132 | 0.6639  | 0.70377 | 0.67615 | 0.74523 | 0.54365 | 0.50122 | 0.67756 | 0.70453 | SELL     |
| cg24599739 | 0.03271 | 0.02685 | 0.03012 | 0.02863 | 0.02234 | 0.02488 | 0.18223 | 0.0236  | 0.02196 | 0.0225  | DDT      |
| cg24599942 | 0.6752  | 0.09229 | 0.43172 | 0.26791 | 0.28939 | 0.19014 | 0.06208 | 0.06614 | 0.3079  | 0.06664 | SLD5     |
| cg24602243 | 0.05873 | 0.04791 | 0.05559 | 0.05137 | 0.03208 | 0.04389 | 0.0387  | 0.0503  | 0.04716 | 0.04336 | TRIO     |
| cg24603941 | 0.73794 | 0.78489 | 0.75782 | 0.77548 | 0.58318 | 0.57138 | 0.80807 | 0.82333 | 0.65109 | 0.69684 | MIA2     |
| cg24605304 | 0.05979 | 0.04071 | 0.20349 | 0.3869  | 0.07757 | 0.04002 | 0.0472  | 0.04085 | 0.04224 | 0.03161 | KCNA5    |
| cg24606773 | 0.04236 | 0.03851 | 0.04253 | 0.03716 | 0.03861 | 0.03794 | 0.03452 | 0.0346  | 0.0377  | 0.03376 | RAB21    |

|            |         |         |         |         |         |         |         |         |         |                  |
|------------|---------|---------|---------|---------|---------|---------|---------|---------|---------|------------------|
| cg24607398 | 0.14399 | 0.14904 | 0.10262 | 0.09256 | 0.18915 | 0.13162 | 0.07556 | 0.08653 | 0.32852 | 0.08076 MLH1     |
| cg24607535 | 0.59666 | 0.14982 | 0.50579 | 0.68293 | 0.43962 | 0.42658 | 0.57174 | 0.60747 | 0.24436 | 0.12544 CDH26    |
| cg24608308 | 0.03074 | 0.0313  | 0.03267 | 0.03584 | 0.029   | 0.03047 | 0.03145 | 0.03235 | 0.03028 | 0.02916 RAPGEF3  |
| cg24608774 | 0.0483  | 0.04692 | 0.35309 | 0.27245 | 0.09125 | 0.07528 | 0.07004 | 0.05744 | 0.04655 | 0.04438 STEAP1   |
| cg24611092 | 0.91084 | 0.83281 | 0.80906 | 0.78144 | 0.7565  | 0.37371 | 0.5968  | 0.61093 | 0.42249 | 0.33292 HAT1     |
| cg24611631 | 0.04639 | 0.04766 | 0.04007 | 0.03487 | 0.04117 | 0.05087 | 0.03855 | 0.03797 | 0.03293 | 0.02654 SLC1A1   |
| cg24612198 | 0.70909 | 0.7318  | 0.7204  | 0.79265 | 0.70637 | 0.72592 | 0.16092 | 0.36883 | 0.62963 | 0.72109 CD3E     |
| cg24612772 | 0.09442 | 0.11063 | 0.12317 | 0.09868 | 0.19436 | 0.10272 | 0.15088 | 0.10702 | 0.08556 | 0.09494 EXT2     |
| cg24613957 | 0.91376 | 0.89887 | 0.90846 | 0.92586 | 0.95324 | 0.9105  | 0.59589 | 0.43721 | 0.95517 | 0.87996 PLA2G2E  |
| cg24615044 | 0.03624 | 0.02992 | 0.03551 | 0.02982 | 0.02172 | 0.03452 | 0.02851 | 0.03019 | 0.02728 | 0.03185 MGC3123  |
| cg24615251 | 0.68167 | 0.59407 | 0.73027 | 0.76344 | 0.80692 | 0.7748  | 0.30538 | 0.79465 | 0.82375 | 0.80238 CCL13    |
| cg24616461 | 0.04754 | 0.04369 | 0.05016 | 0.04834 | 0.04181 | 0.05364 | 0.03802 | 0.04579 | 0.04088 | 0.03922 PRR11    |
| cg24616736 | 0.06015 | 0.05962 | 0.05469 | 0.04477 | 0.05129 | 0.04962 | 0.04216 | 0.04236 | 0.04134 | 0.0385 HDAC6     |
| cg24618244 | 0.03599 | 0.0319  | 0.02743 | 0.03243 | 0.02424 | 0.03061 | 0.02695 | 0.03101 | 0.02638 | 0.02555 INPP5F   |
| cg24618716 | 0.03348 | 0.03027 | 0.02815 | 0.02747 | 0.0332  | 0.03524 | 0.02721 | 0.02816 | 0.03073 | 0.02538 PTMA     |
| cg24619694 | 0.73093 | 0.56213 | 0.06302 | 0.05918 | 0.8822  | 0.82847 | 0.23207 | 0.60402 | 0.86785 | 0.83927 TAGLN    |
| cg24620905 | 0.34712 | 0.10048 | 0.11576 | 0.23005 | 0.83212 | 0.32521 | 0.47206 | 0.30436 | 0.06572 | 0.0605 MTMR11    |
| cg24621042 | 0.54537 | 0.62136 | 0.76887 | 0.7096  | 0.8052  | 0.63077 | 0.79679 | 0.68019 | 0.83845 | 0.72782 SERPINA1 |
| cg24621354 | 0.17024 | 0.03052 | 0.95062 | 0.94365 | 0.1773  | 0.03898 | 0.57959 | 0.0878  | 0.02875 | 0.02371 TES      |
| cg24623271 | 0.04347 | 0.04596 | 0.04782 | 0.04645 | 0.03597 | 0.03977 | 0.04384 | 0.04371 | 0.36604 | 0.26088 ZIC2     |
| cg24623694 | 0.6257  | 0.10265 | 0.65609 | 0.66554 | 0.25478 | 0.10047 | 0.29687 | 0.05263 | 0.64249 | 0.50423 PRX      |
| cg24624819 | 0.02518 | 0.0311  | 0.0396  | 0.02852 | 0.02021 | 0.0274  | 0.02494 | 0.02854 | 0.02606 | 0.02373 LPIN1    |
| cg24624841 | 0.14872 | 0.07251 | 0.19463 | 0.177   | 0.17763 | 0.07036 | 0.09265 | 0.18462 | 0.07529 | 0.05288 RPS9     |
| cg24625128 | 0.02955 | 0.03106 | 0.03352 | 0.02929 | 0.23782 | 0.03035 | 0.03681 | 0.04014 | 0.02284 | 0.02308 JAM3     |
| cg24625388 | 0.5196  | 0.56827 | 0.83566 | 0.87155 | 0.81911 | 0.85765 | 0.48307 | 0.56887 | 0.8659  | 0.84664 NEBL     |
| cg24626923 | 0.89073 | 0.57616 | 0.76104 | 0.73261 | 0.923   | 0.69106 | 0.40116 | 0.48783 | 0.67015 | 0.86097 PROKR1   |
| cg24628744 | 0.51439 | 0.0896  | 0.81906 | 0.86043 | 0.77784 | 0.3237  | 0.86068 | 0.72677 | 0.88694 | 0.69782 H2AFY    |
| cg24631950 | 0.07215 | 0.07697 | 0.06065 | 0.05707 | 0.06267 | 0.05877 | 0.05498 | 0.04895 | 0.05346 | 0.04744 UBE2D1   |
| cg24633242 | 0.07502 | 0.08072 | 0.07497 | 0.08014 | 0.05301 | 0.06079 | 0.07199 | 0.07878 | 0.07059 | 0.07088 FTS      |
| cg24633648 | 0.10415 | 0.14162 | 0.60709 | 0.67261 | 0.84119 | 0.44505 | 0.49359 | 0.85103 | 0.31082 | 0.07617 MTAC2D1  |
| cg24635866 | 0.02945 | 0.02801 | 0.03447 | 0.0308  | 0.03412 | 0.0353  | 0.02434 | 0.02349 | 0.02535 | 0.02698 CCT2     |
| cg24636657 | 0.53257 | 0.22923 | 0.55988 | 0.32958 | 0.17938 | 0.21675 | 0.40778 | 0.23559 | 0.23023 | 0.20282 SERPINA7 |
| cg24638647 | 0.06294 | 0.05855 | 0.07359 | 0.06776 | 0.06578 | 0.06988 | 0.07459 | 0.07366 | 0.06178 | 0.06073 TMEM101  |
| cg24641352 | 0.80821 | 0.33505 | 0.90842 | 0.90698 | 0.95887 | 0.92382 | 0.41353 | 0.42644 | 0.64375 | 0.66447 ZFP41    |
| cg24641737 | 0.69333 | 0.40235 | 0.48727 | 0.62353 | 0.90685 | 0.84001 | 0.29345 | 0.5937  | 0.77635 | 0.38541 DENND2D  |
| cg24642468 | 0.09531 | 0.0966  | 0.1191  | 0.10483 | 0.25303 | 0.11166 | 0.09093 | 0.09482 | 0.08411 | 0.08853 MGC33367 |
| cg24642516 | 0.02611 | 0.02023 | 0.03152 | 0.03762 | 0.02481 | 0.02748 | 0.02547 | 0.02257 | 0.02489 | 0.02138 HYPE     |
| cg24642523 | 0.87662 | 0.57373 | 0.05082 | 0.05565 | 0.52883 | 0.44836 | 0.88788 | 0.88026 | 0.91495 | 0.89946 HSPA2    |
| cg24642820 | 0.9193  | 0.93025 | 0.927   | 0.91872 | 0.95669 | 0.91027 | 0.9172  | 0.84069 | 0.92342 | 0.88183 NUP210   |
| cg24643262 | 0.70271 | 0.67419 | 0.76449 | 0.83283 | 0.81395 | 0.82167 | 0.23296 | 0.43782 | 0.09356 | 0.12647 BMX      |
| cg24645221 | 0.0225  | 0.02685 | 0.64685 | 0.78394 | 0.1042  | 0.19746 | 0.02782 | 0.02456 | 0.04091 | 0.025 PENK       |



|            |         |         |         |         |         |         |         |         |         |         |          |
|------------|---------|---------|---------|---------|---------|---------|---------|---------|---------|---------|----------|
| cg24646414 | 0.39768 | 0.06084 | 0.05805 | 0.06057 | 0.76052 | 0.93385 | 0.74703 | 0.93086 | 0.94676 | 0.95336 | GATA4    |
| cg24646513 | 0.10596 | 0.21632 | 0.12884 | 0.1446  | 0.13552 | 0.13614 | 0.07857 | 0.10417 | 0.07805 | 0.05156 | MTERFD3  |
| cg24646710 | 0.03996 | 0.04647 | 0.06026 | 0.05847 | 0.05998 | 0.05457 | 0.04291 | 0.03466 | 0.06687 | 0.04468 | FLJ23191 |
| cg24647726 | 0.43658 | 0.59812 | 0.4885  | 0.47583 | 0.47463 | 0.51726 | 0.32462 | 0.31056 | 0.28503 | 0.25401 | HCCS     |
| cg24648061 | 0.7181  | 0.55332 | 0.59085 | 0.61571 | 0.53084 | 0.63658 | 0.62357 | 0.48835 | 0.68606 | 0.68342 | GPR22    |
| cg24648715 | 0.16412 | 0.09243 | 0.10664 | 0.11175 | 0.31098 | 0.09021 | 0.42022 | 0.6322  | 0.08247 | 0.0818  | TCEAL3   |
| cg24649346 | 0.05172 | 0.05081 | 0.06138 | 0.06395 | 0.05847 | 0.06087 | 0.05452 | 0.0572  | 0.06609 | 0.0579  | CBX6     |
| cg24649641 | 0.0495  | 0.05121 | 0.33135 | 0.53578 | 0.04207 | 0.04469 | 0.04271 | 0.04156 | 0.04206 | 0.04498 | ERBB2    |
| cg24649713 | 0.04174 | 0.04461 | 0.08146 | 0.09472 | 0.09875 | 0.08196 | 0.08401 | 0.07817 | 0.05601 | 0.05602 | C1orf86  |
| cg24650229 | 0.93299 | 0.93983 | 0.93735 | 0.94361 | 0.97116 | 0.94519 | 0.92751 | 0.92775 | 0.6806  | 0.70889 | IGSF11   |
| cg24650353 | 0.03729 | 0.03732 | 0.04875 | 0.04244 | 0.04938 | 0.04962 | 0.04153 | 0.04404 | 0.03701 | 0.02796 | HIP1     |
| cg24650394 | 0.90791 | 0.8773  | 0.88139 | 0.9119  | 0.85894 | 0.88601 | 0.8856  | 0.90388 | 0.89098 | 0.87525 | PLEKHH2  |
| cg24650501 | 0.14595 | 0.04246 | 0.48131 | 0.5162  | 0.90939 | 0.87677 | 0.1111  | 0.07516 | 0.11276 | 0.04109 | LMX1A    |
| cg24651706 | 0.03078 | 0.03032 | 0.03759 | 0.03955 | 0.02296 | 0.03308 | 0.02716 | 0.03003 | 0.0265  | 0.02971 | CHCHD5   |
| cg24652271 | 0.02803 | 0.0256  | 0.02784 | 0.02709 | 0.0182  | 0.02607 | 0.0216  | 0.02656 | 0.02103 | 0.02186 | JAG1     |
| cg24652919 | 0.62031 | 0.53205 | 0.09366 | 0.10161 | 0.09436 | 0.09899 | 0.07618 | 0.11325 | 0.08424 | 0.08416 | WDR58    |
| cg24653181 | 0.64838 | 0.58307 | 0.96878 | 0.97048 | 0.97456 | 0.96964 | 0.03783 | 0.04006 | 0.12115 | 0.04617 | RHCG     |
| cg24653967 | 0.90826 | 0.85593 | 0.87667 | 0.87207 | 0.83512 | 0.88328 | 0.84855 | 0.86055 | 0.8756  | 0.86276 | PRH1     |
| cg24654350 | 0.12011 | 0.12562 | 0.1359  | 0.12072 | 0.79816 | 0.77616 | 0.06642 | 0.07492 | 0.09373 | 0.24309 | KIR3DL1  |
| cg24654547 | 0.05866 | 0.02742 | 0.02866 | 0.02463 | 0.01939 | 0.02958 | 0.02695 | 0.02561 | 0.02257 | 0.021   | DUS2L    |
| cg24655310 | 0.83141 | 0.8166  | 0.78629 | 0.88446 | 0.82386 | 0.81409 | 0.16371 | 0.07808 | 0.4595  | 0.49108 | CYP4F11  |
| cg24659201 | 0.04591 | 0.0431  | 0.04401 | 0.0423  | 0.03257 | 0.04087 | 0.03698 | 0.03946 | 0.03669 | 0.03396 | GPR39    |
| cg24660086 | 0.08786 | 0.06411 | 0.32779 | 0.44733 | 0.56837 | 0.83327 | 0.06492 | 0.06377 | 0.05833 | 0.04747 | RGR      |
| cg24661752 | 0.865   | 0.84686 | 0.85275 | 0.85863 | 0.86974 | 0.85425 | 0.83294 | 0.73365 | 0.89887 | 0.8825  | AP2M1    |
| cg24662718 | 0.05251 | 0.04747 | 0.10154 | 0.16148 | 0.316   | 0.32799 | 0.06108 | 0.05481 | 0.40625 | 0.05633 | VAV3     |
| cg24662961 | 0.06539 | 0.06487 | 0.0747  | 0.06475 | 0.06714 | 0.06364 | 0.06585 | 0.06134 | 0.0695  | 0.0573  | IRX3     |
| cg24664861 | 0.86522 | 0.80483 | 0.06158 | 0.09815 | 0.10068 | 0.06288 | 0.04321 | 0.04029 | 0.05101 | 0.05045 | SPAG16   |
| cg24664957 | 0.74818 | 0.44632 | 0.90098 | 0.90926 | 0.93225 | 0.87374 | 0.90794 | 0.87807 | 0.64359 | 0.52417 | VPS37B   |
| cg24668150 | 0.05264 | 0.05166 | 0.05433 | 0.04464 | 0.04099 | 0.04369 | 0.04575 | 0.04648 | 0.04497 | 0.03773 | ANKRD26  |
| cg24670151 | 0.58187 | 0.47986 | 0.60717 | 0.65724 | 0.55556 | 0.56061 | 0.45378 | 0.38159 | 0.44884 | 0.44233 | MRPS7    |
| cg24670715 | 0.26124 | 0.74623 | 0.07422 | 0.07296 | 0.89346 | 0.86862 | 0.72875 | 0.71084 | 0.8677  | 0.73403 | ANGPT2   |
| cg24673765 | 0.92948 | 0.93752 | 0.80576 | 0.93344 | 0.93255 | 0.70378 | 0.93687 | 0.74513 | 0.51691 | 0.33395 | HSPB6    |
| cg24674220 | 0.90372 | 0.64695 | 0.89058 | 0.91175 | 0.90478 | 0.83015 | 0.89973 | 0.83488 | 0.90677 | 0.89003 | GMEB2    |
| cg24674703 | 0.78431 | 0.17416 | 0.7685  | 0.87816 | 0.9246  | 0.76022 | 0.92608 | 0.65126 | 0.69262 | 0.14459 | CD5      |
| cg24675098 | 0.04813 | 0.04183 | 0.06039 | 0.07147 | 0.04251 | 0.04875 | 0.36446 | 0.3861  | 0.03747 | 0.03483 | FLJ23577 |
| cg24677780 | 0.04464 | 0.03844 | 0.20024 | 0.14145 | 0.38379 | 0.04071 | 0.04465 | 0.04472 | 0.04762 | 0.03549 | CA11     |
| cg24678320 | 0.84208 | 0.82367 | 0.1749  | 0.49639 | 0.61396 | 0.37052 | 0.05893 | 0.07532 | 0.06166 | 0.08973 | FLJ38451 |
| cg24678429 | 0.03051 | 0.0309  | 0.04564 | 0.02993 | 0.02889 | 0.02733 | 0.02922 | 0.03418 | 0.03144 | 0.02456 | PTPRE    |
| cg24679082 | 0.04036 | 0.04322 | 0.04643 | 0.04339 | 0.03855 | 0.0454  | 0.03861 | 0.04316 | 0.03387 | 0.03631 | ETV4     |
| cg24680602 | 0.24685 | 0.10699 | 0.44522 | 0.62639 | 0.20006 | 0.06364 | 0.0751  | 0.04787 | 0.27205 | 0.04221 | ZNF232   |
| cg24680924 | 0.03621 | 0.03039 | 0.04965 | 0.09048 | 0.11775 | 0.56267 | 0.0637  | 0.22076 | 0.036   | 0.02031 | EPHB6    |

|            |         |         |         |         |         |         |         |         |         |                  |
|------------|---------|---------|---------|---------|---------|---------|---------|---------|---------|------------------|
| cg24682149 | 0.02995 | 0.03132 | 0.03458 | 0.03145 | 0.0263  | 0.02911 | 0.03066 | 0.03276 | 0.02597 | 0.03151 LSM12    |
| cg24682740 | 0.04173 | 0.04575 | 0.05111 | 0.04443 | 0.05112 | 0.05598 | 0.03859 | 0.03468 | 0.04003 | 0.0447 UBP1      |
| cg24683061 | 0.04163 | 0.03375 | 0.04059 | 0.0403  | 0.04235 | 0.03409 | 0.03765 | 0.038   | 0.03305 | 0.03653 PAIP2    |
| cg24683129 | 0.04304 | 0.03862 | 0.05809 | 0.06271 | 0.03476 | 0.03979 | 0.03013 | 0.03368 | 0.04164 | 0.03751 MUC1     |
| cg24685926 | 0.04687 | 0.04685 | 0.04944 | 0.04618 | 0.08988 | 0.04498 | 0.04118 | 0.04033 | 0.04726 | 0.03811 MDP-1    |
| cg24686224 | 0.04075 | 0.03367 | 0.03889 | 0.03826 | 0.04631 | 0.03473 | 0.0315  | 0.03144 | 0.0411  | 0.03407 FARSLB   |
| cg24686358 | 0.74206 | 0.6351  | 0.73755 | 0.81648 | 0.9653  | 0.95604 | 0.91891 | 0.93553 | 0.95109 | 0.92521 COL9A2   |
| cg24686542 | 0.0877  | 0.08318 | 0.11564 | 0.105   | 0.10916 | 0.09334 | 0.04811 | 0.04566 | 0.08241 | 0.0764 SSX2IP    |
| cg24687051 | 0.03185 | 0.02826 | 0.03196 | 0.03419 | 0.03262 | 0.03523 | 0.03641 | 0.03003 | 0.02941 | 0.02347 KCNQ5    |
| cg24687335 | 0.02291 | 0.02437 | 0.02911 | 0.02916 | 0.04464 | 0.0229  | 0.02123 | 0.02219 | 0.0184  | 0.01672 SLC37A4  |
| cg24687764 | 0.05513 | 0.05824 | 0.06504 | 0.05432 | 0.06986 | 0.07593 | 0.05443 | 0.05836 | 0.05128 | 0.05439 C16orf46 |
| cg24688248 | 0.39098 | 0.17977 | 0.07499 | 0.09033 | 0.19774 | 0.06481 | 0.06738 | 0.06643 | 0.06516 | 0.05939 CD276    |
| cg24690731 | 0.18977 | 0.16159 | 0.89435 | 0.89635 | 0.89991 | 0.87894 | 0.50581 | 0.82383 | 0.90058 | 0.79378 SOX7     |
| cg24691255 | 0.91404 | 0.91516 | 0.89069 | 0.91583 | 0.89285 | 0.86517 | 0.61805 | 0.10295 | 0.91747 | 0.84424 SERPINB2 |
| cg24691453 | 0.9136  | 0.76377 | 0.80508 | 0.77924 | 0.52649 | 0.78602 | 0.54165 | 0.78869 | 0.62035 | 0.88493 S100A4   |
| cg24691461 | 0.11806 | 0.03945 | 0.10205 | 0.13307 | 0.11637 | 0.19525 | 0.0356  | 0.1483  | 0.03766 | 0.29471 C2orf160 |
| cg24691578 | 0.03343 | 0.02971 | 0.02961 | 0.02573 | 0.02247 | 0.03083 | 0.02683 | 0.02797 | 0.02665 | 0.02625 CRY2     |
| cg24692716 | 0.02603 | 0.02751 | 0.03342 | 0.03347 | 0.02501 | 0.02655 | 0.02636 | 0.01984 | 0.02633 | 0.02244 C6orf192 |
| cg24692964 | 0.04669 | 0.05559 | 0.05726 | 0.04892 | 0.06582 | 0.05288 | 0.04481 | 0.04064 | 0.04281 | 0.05042 NT5C2    |
| cg24693053 | 0.95238 | 0.96465 | 0.73011 | 0.66319 | 0.96835 | 0.95817 | 0.93658 | 0.94927 | 0.95964 | 0.968 MFSD7      |
| cg24693368 | 0.08017 | 0.04326 | 0.52448 | 0.55873 | 0.1095  | 0.05614 | 0.11989 | 0.06974 | 0.08702 | 0.05099 KCNJ3    |
| cg24693620 | 0.02711 | 0.03133 | 0.02949 | 0.02846 | 0.02327 | 0.02853 | 0.02375 | 0.02449 | 0.02015 | 0.02247 RAB5B    |
| cg24693909 | 0.13984 | 0.10037 | 0.13337 | 0.13385 | 0.30817 | 0.14273 | 0.09812 | 0.08615 | 0.10561 | 0.13217 RG9MTD2  |
| cg24694549 | 0.65312 | 0.73874 | 0.87537 | 0.88449 | 0.88787 | 0.58783 | 0.79187 | 0.79942 | 0.88354 | 0.86964 GRIP1    |
| cg24695828 | 0.05431 | 0.06167 | 0.10467 | 0.05186 | 0.52051 | 0.56592 | 0.05435 | 0.05373 | 0.06033 | 0.05274 ZNF566   |
| cg24697031 | 0.80609 | 0.62635 | 0.86217 | 0.85548 | 0.89964 | 0.77233 | 0.79537 | 0.69946 | 0.84025 | 0.74941 EVPL     |
| cg24697184 | 0.73258 | 0.55235 | 0.95878 | 0.96871 | 0.97347 | 0.95933 | 0.91075 | 0.94245 | 0.94221 | 0.91272 TTC22    |
| cg24697329 | 0.71563 | 0.401   | 0.8287  | 0.87865 | 0.68212 | 0.92944 | 0.11016 | 0.10027 | 0.86283 | 0.80984 ARHGEF4  |
| cg24697682 | 0.03069 | 0.03566 | 0.02655 | 0.02767 | 0.02658 | 0.02592 | 0.02428 | 0.02131 | 0.02277 | 0.02247 SLC25A4  |
| cg24698533 | 0.55312 | 0.43764 | 0.81951 | 0.83463 | 0.72341 | 0.73483 | 0.77714 | 0.80575 | 0.81812 | 0.76962 LYZL2    |
| cg24698622 | 0.08545 | 0.04189 | 0.06926 | 0.04808 | 0.03359 | 0.03605 | 0.03432 | 0.03572 | 0.03338 | 0.03287 PPP2CB   |
| cg24701874 | 0.06046 | 0.05857 | 0.05635 | 0.05952 | 0.05618 | 0.05632 | 0.05904 | 0.06468 | 0.0475  | 0.04574 DNAJB12  |
| cg24703623 | 0.12387 | 0.12408 | 0.13358 | 0.11721 | 0.08316 | 0.0987  | 0.11131 | 0.10062 | 0.12596 | 0.12501 CLCC1    |
| cg24703717 | 0.02306 | 0.02578 | 0.02954 | 0.02827 | 0.02924 | 0.032   | 0.04106 | 0.25586 | 0.02089 | 0.01833 HLA-F    |
| cg24705286 | 0.02697 | 0.02524 | 0.02552 | 0.02711 | 0.01895 | 0.02364 | 0.02057 | 0.02187 | 0.01966 | 0.02047 JMJD5    |
| cg24709471 | 0.21661 | 0.23465 | 0.26411 | 0.2565  | 0.21989 | 0.15684 | 0.16095 | 0.13738 | 0.34479 | 0.36683 CRABP1   |
| cg24710073 | 0.16599 | 0.12293 | 0.14627 | 0.12949 | 0.19068 | 0.09302 | 0.0972  | 0.07893 | 0.11613 | 0.10672 TBP      |
| cg24710886 | 0.18728 | 0.04054 | 0.07372 | 0.04776 | 0.10516 | 0.03947 | 0.07466 | 0.03552 | 0.04316 | 0.03975 PUM1     |
| cg24711626 | 0.02559 | 0.02314 | 0.02706 | 0.02387 | 0.0203  | 0.02926 | 0.02142 | 0.02397 | 0.01996 | 0.01948 KIAA1012 |
| cg24711914 | 0.23709 | 0.25989 | 0.61028 | 0.67959 | 0.31406 | 0.45418 | 0.31066 | 0.27944 | 0.24441 | 0.24282 DSG4     |
| cg24712395 | 0.89102 | 0.75498 | 0.88953 | 0.90105 | 0.91219 | 0.87995 | 0.86738 | 0.49544 | 0.88912 | 0.87319 CAPN12   |

|            |         |         |         |         |         |         |         |         |         |         |          |
|------------|---------|---------|---------|---------|---------|---------|---------|---------|---------|---------|----------|
| cg24713080 | 0.27911 | 0.11749 | 0.20239 | 0.2472  | 0.14498 | 0.03913 | 0.04208 | 0.03739 | 0.38632 | 0.03847 | NDUFS8   |
| cg24713204 | 0.02939 | 0.03093 | 0.90748 | 0.9484  | 0.65331 | 0.31058 | 0.02272 | 0.03359 | 0.02757 | 0.02044 | ZNF471   |
| cg24714666 | 0.07054 | 0.06122 | 0.06861 | 0.06006 | 0.04344 | 0.04935 | 0.04488 | 0.04325 | 0.04844 | 0.04434 | TRAPPC2  |
| cg24715106 | 0.04298 | 0.02619 | 0.03163 | 0.03287 | 0.58607 | 0.32597 | 0.02043 | 0.02239 | 0.02236 | 0.01927 | AQP11    |
| cg24715245 | 0.03816 | 0.039   | 0.03568 | 0.0329  | 0.82248 | 0.51231 | 0.03658 | 0.02899 | 0.89217 | 0.60923 | UCHL1    |
| cg24715735 | 0.91464 | 0.87336 | 0.85106 | 0.94258 | 0.95509 | 0.93921 | 0.44934 | 0.41819 | 0.93791 | 0.90404 | HPN      |
| cg24719575 | 0.08048 | 0.08034 | 0.13582 | 0.09995 | 0.12877 | 0.1064  | 0.08341 | 0.06931 | 0.07273 | 0.06083 | REST     |
| cg24719601 | 0.07138 | 0.04954 | 0.54518 | 0.66056 | 0.82318 | 0.67507 | 0.55694 | 0.40601 | 0.04557 | 0.04193 | PHOX2B   |
| cg24719984 | 0.06545 | 0.15239 | 0.82476 | 0.79159 | 0.25054 | 0.35011 | 0.22387 | 0.3462  | 0.61307 | 0.57671 | PPFIA2   |
| cg24723331 | 0.06853 | 0.03798 | 0.0552  | 0.08574 | 0.04403 | 0.05253 | 0.04053 | 0.03929 | 0.9213  | 0.8878  | ST8SIA1  |
| cg24724583 | 0.41735 | 0.10147 | 0.81712 | 0.84349 | 0.85711 | 0.57584 | 0.83932 | 0.74864 | 0.82365 | 0.74846 | PLXDC1   |
| cg24727182 | 0.3265  | 0.13405 | 0.2411  | 0.1503  | 0.02821 | 0.02826 | 0.02689 | 0.02633 | 0.03613 | 0.02776 | AGXT2L1  |
| cg24727203 | 0.25426 | 0.14892 | 0.05915 | 0.0532  | 0.06197 | 0.04967 | 0.1103  | 0.09132 | 0.05361 | 0.05367 | PPP1R3B  |
| cg24727568 | 0.05047 | 0.04945 | 0.04665 | 0.05139 | 0.0384  | 0.04111 | 0.04063 | 0.04578 | 0.04444 | 0.04112 | PCBP1    |
| cg24728447 | 0.04609 | 0.04527 | 0.04844 | 0.04879 | 0.05479 | 0.05551 | 0.03908 | 0.04362 | 0.04184 | 0.04109 | PHKB     |
| cg24730207 | 0.9403  | 0.92999 | 0.93809 | 0.93336 | 0.93366 | 0.92351 | 0.93248 | 0.90905 | 0.94059 | 0.93643 | PTGES2   |
| cg24731756 | 0.03675 | 0.03826 | 0.05565 | 0.04853 | 0.05167 | 0.06293 | 0.04882 | 0.04183 | 0.03714 | 0.04295 | ILK      |
| cg24733384 | 0.1547  | 0.05736 | 0.07416 | 0.08219 | 0.08913 | 0.05742 | 0.04052 | 0.03742 | 0.29253 | 0.05143 | C14orf24 |
| cg24734575 | 0.86541 | 0.87173 | 0.8729  | 0.87533 | 0.84473 | 0.85197 | 0.90962 | 0.90618 | 0.8772  | 0.88285 | SLC7A9   |
| cg24735489 | 0.47382 | 0.06836 | 0.89106 | 0.90655 | 0.9263  | 0.79551 | 0.73838 | 0.39019 | 0.70463 | 0.23093 | CDSN     |
| cg24735937 | 0.81399 | 0.8253  | 0.81647 | 0.88163 | 0.76347 | 0.63641 | 0.79037 | 0.68585 | 0.54131 | 0.46348 | CLTB     |
| cg24736099 | 0.74077 | 0.77778 | 0.75237 | 0.761   | 0.72763 | 0.77781 | 0.53662 | 0.77365 | 0.80099 | 0.64964 | PLCB4    |
| cg24737900 | 0.07871 | 0.07882 | 0.12534 | 0.12067 | 0.09073 | 0.06928 | 0.09333 | 0.07299 | 0.09702 | 0.07296 | FDXR     |
| cg24738006 | 0.03606 | 0.02701 | 0.02827 | 0.0296  | 0.02583 | 0.02723 | 0.02211 | 0.03222 | 0.02176 | 0.02084 | SS18L1   |
| cg24739326 | 0.0997  | 0.09549 | 0.65601 | 0.76479 | 0.13704 | 0.07486 | 0.065   | 0.05113 | 0.14847 | 0.11032 | CHST8    |
| cg24740435 | 0.03579 | 0.03338 | 0.04275 | 0.03764 | 0.04211 | 0.0448  | 0.03295 | 0.03538 | 0.02994 | 0.03151 | UBR2     |
| cg24743283 | 0.18018 | 0.07217 | 0.12541 | 0.0963  | 0.09435 | 0.09434 | 0.1525  | 0.07029 | 0.14653 | 0.04904 | GNA12    |
| cg24743310 | 0.6777  | 0.54059 | 0.78346 | 0.86249 | 0.08135 | 0.3014  | 0.29378 | 0.51642 | 0.85937 | 0.6621  | FLJ31196 |
| cg24744425 | 0.02332 | 0.02553 | 0.02685 | 0.02486 | 0.0212  | 0.02809 | 0.02567 | 0.02087 | 0.0245  | 0.02336 | RABIF    |
| cg24745738 | 0.15283 | 0.31989 | 0.58641 | 0.53525 | 0.25349 | 0.46679 | 0.1359  | 0.13859 | 0.10021 | 0.11253 | EDNRB    |
| cg24747122 | 0.83982 | 0.86179 | 0.79719 | 0.84054 | 0.79728 | 0.7218  | 0.79547 | 0.63583 | 0.82862 | 0.69674 | GNA13    |
| cg24747396 | 0.06951 | 0.06081 | 0.07269 | 0.0916  | 0.06733 | 0.04849 | 0.04966 | 0.04531 | 0.05595 | 0.04575 | BAP1     |
| cg24748786 | 0.23053 | 0.19426 | 0.24751 | 0.19661 | 0.34749 | 0.21942 | 0.33047 | 0.16778 | 0.18004 | 0.13969 | SLC4A4   |
| cg24748945 | 0.33973 | 0.25094 | 0.33355 | 0.33697 | 0.28415 | 0.27663 | 0.36018 | 0.35702 | 0.28411 | 0.23904 | MAP2K2   |
| cg24749970 | 0.03358 | 0.02941 | 0.0346  | 0.02891 | 0.03019 | 0.03    | 0.02586 | 0.02504 | 0.0243  | 0.02932 | ALS2CR2  |
| cg24750391 | 0.80235 | 0.51815 | 0.79852 | 0.88331 | 0.93873 | 0.89177 | 0.82801 | 0.82213 | 0.03309 | 0.03065 | PON3     |
| cg24751129 | 0.95939 | 0.93366 | 0.95283 | 0.96292 | 0.95609 | 0.84359 | 0.95217 | 0.96112 | 0.97206 | 0.84609 | GNMT     |
| cg24754277 | 0.15177 | 0.13436 | 0.16741 | 0.14559 | 0.38125 | 0.12221 | 0.15003 | 0.18142 | 0.85317 | 0.14093 | DAPK1    |
| cg24758027 | 0.07598 | 0.07589 | 0.12352 | 0.12239 | 0.12905 | 0.08715 | 0.06051 | 0.06041 | 0.08287 | 0.0961  | PKIB     |
| cg24759821 | 0.08672 | 0.05753 | 0.57574 | 0.7322  | 0.48024 | 0.54305 | 0.42754 | 0.08523 | 0.42294 | 0.34308 | PAH      |
| cg24760768 | 0.87553 | 0.8828  | 0.86374 | 0.88255 | 0.94589 | 0.85533 | 0.85224 | 0.87262 | 0.9155  | 0.91852 | DNAH8    |

|            |         |         |         |         |         |         |         |         |         |         |           |
|------------|---------|---------|---------|---------|---------|---------|---------|---------|---------|---------|-----------|
| cg24762359 | 0.21059 | 0.04831 | 0.12314 | 0.15137 | 0.30321 | 0.22501 | 0.06476 | 0.06666 | 0.11673 | 0.05671 | ATP12A    |
| cg24762437 | 0.038   | 0.03816 | 0.04623 | 0.04591 | 0.03384 | 0.03299 | 0.03045 | 0.03416 | 0.03839 | 0.03105 | ZZZ3      |
| cg24765005 | 0.07341 | 0.0592  | 0.53423 | 0.74673 | 0.06618 | 0.10668 | 0.06324 | 0.03925 | 0.08312 | 0.03559 | BEX2      |
| cg24765079 | 0.90122 | 0.23641 | 0.9346  | 0.95883 | 0.91988 | 0.94688 | 0.7698  | 0.18354 | 0.94828 | 0.76276 | CDH1      |
| cg24765446 | 0.1118  | 0.05378 | 0.11094 | 0.11047 | 0.15173 | 0.23117 | 0.05051 | 0.05469 | 0.75531 | 0.81746 | WFDC6     |
| cg24767315 | 0.01983 | 0.02169 | 0.02479 | 0.02175 | 0.01936 | 0.0223  | 0.02018 | 0.02034 | 0.01796 | 0.01999 | CAPN10    |
| cg24768561 | 0.85689 | 0.8649  | 0.58019 | 0.51075 | 0.86055 | 0.84732 | 0.07839 | 0.13044 | 0.86149 | 0.82877 | CENTG2    |
| cg24769045 | 0.04731 | 0.05181 | 0.04792 | 0.04493 | 0.03882 | 0.03865 | 0.03731 | 0.04203 | 0.03737 | 0.03487 | TIPRL     |
| cg24770649 | 0.05237 | 0.05606 | 0.06608 | 0.0702  | 0.03781 | 0.04493 | 0.04795 | 0.044   | 0.04823 | 0.04951 | KIAA1539  |
| cg24770850 | 0.02812 | 0.02495 | 0.0225  | 0.02559 | 0.02333 | 0.02126 | 0.02145 | 0.02027 | 0.02164 | 0.02042 | PLXND1    |
| cg24774956 | 0.29546 | 0.27269 | 0.33758 | 0.33574 | 0.29198 | 0.21424 | 0.23226 | 0.16707 | 0.48536 | 0.14778 | SH3KBP1   |
| cg24775607 | 0.95874 | 0.95058 | 0.97717 | 0.9817  | 0.97737 | 0.81371 | 0.9615  | 0.88877 | 0.88876 | 0.62604 | SSTR5     |
| cg24776019 | 0.77183 | 0.80147 | 0.7549  | 0.77078 | 0.61001 | 0.74089 | 0.78146 | 0.80644 | 0.77537 | 0.74465 | HYPB      |
| cg24776407 | 0.65034 | 0.08515 | 0.87774 | 0.87691 | 0.86915 | 0.05078 | 0.86006 | 0.73543 | 0.53766 | 0.03246 | MYEOV     |
| cg24777065 | 0.04827 | 0.04502 | 0.04545 | 0.04039 | 0.04612 | 0.05013 | 0.05952 | 0.04759 | 0.05518 | 0.04265 | FBLN5     |
| cg24777454 | 0.13135 | 0.13733 | 0.64573 | 0.61913 | 0.17396 | 0.24122 | 0.14517 | 0.08372 | 0.72626 | 0.77262 | LRRC34    |
| cg24777710 | 0.88159 | 0.81648 | 0.77439 | 0.82581 | 0.67464 | 0.79083 | 0.86965 | 0.86028 | 0.87606 | 0.87175 | NAG8      |
| cg24777762 | 0.08112 | 0.06772 | 0.08499 | 0.08344 | 0.06866 | 0.06067 | 0.0675  | 0.06059 | 0.08667 | 0.05751 | TNFRSF19L |
| cg24777950 | 0.86064 | 0.82115 | 0.8522  | 0.87594 | 0.85247 | 0.81988 | 0.8081  | 0.85736 | 0.32176 | 0.38019 | CTSG      |
| cg24778383 | 0.03736 | 0.03935 | 0.03539 | 0.03979 | 0.08564 | 0.035   | 0.03189 | 0.03519 | 0.026   | 0.02481 | TNFSF7    |
| cg24779015 | 0.87427 | 0.88322 | 0.82372 | 0.81538 | 0.79459 | 0.80472 | 0.87617 | 0.87102 | 0.84031 | 0.8252  | MARS      |
| cg24779040 | 0.03948 | 0.03582 | 0.03512 | 0.03835 | 0.02489 | 0.03323 | 0.60886 | 0.53376 | 0.02693 | 0.01864 | TSPYL2    |
| cg24781100 | 0.59245 | 0.50031 | 0.35722 | 0.34723 | 0.35655 | 0.30082 | 0.26664 | 0.24584 | 0.24865 | 0.20419 | MYBPC1    |
| cg24783979 | 0.04431 | 0.04289 | 0.04645 | 0.04131 | 0.05429 | 0.0365  | 0.03756 | 0.04166 | 0.03171 | 0.03658 | 5-Sep     |
| cg24784109 | 0.12517 | 0.11437 | 0.18112 | 0.17817 | 0.18579 | 0.20733 | 0.36451 | 0.3719  | 0.29771 | 0.25385 | HIST1H3D  |
| cg24789424 | 0.80172 | 0.85712 | 0.79387 | 0.87757 | 0.82668 | 0.91217 | 0.64268 | 0.84586 | 0.51504 | 0.18979 | BDH       |
| cg24789869 | 0.03472 | 0.02129 | 0.0277  | 0.02989 | 0.01804 | 0.02264 | 0.04247 | 0.02012 | 0.15809 | 0.02256 | DDX11     |
| cg24790296 | 0.03359 | 0.03811 | 0.91465 | 0.926   | 0.03061 | 0.0304  | 0.03234 | 0.03348 | 0.02918 | 0.0272  | GTF3A     |
| cg24791546 | 0.09181 | 0.07127 | 0.09854 | 0.08076 | 0.21328 | 0.06122 | 0.06349 | 0.05489 | 0.40562 | 0.07184 | DDX23     |
| cg24792272 | 0.05216 | 0.06612 | 0.06274 | 0.06462 | 0.05941 | 0.0565  | 0.07951 | 0.09461 | 0.04845 | 0.06011 | MCM4      |
| cg24792360 | 0.21321 | 0.16897 | 0.26104 | 0.38006 | 0.15556 | 0.16652 | 0.19944 | 0.1692  | 0.30463 | 0.14787 | FUCA1     |
| cg24792749 | 0.03234 | 0.03166 | 0.03693 | 0.03173 | 0.02667 | 0.03078 | 0.02697 | 0.02441 | 0.02427 | 0.0238  | RGS9BP    |
| cg24793265 | 0.88239 | 0.76742 | 0.876   | 0.88726 | 0.8624  | 0.8571  | 0.81656 | 0.8227  | 0.86516 | 0.81466 | CARD9     |
| cg24793470 | 0.11945 | 0.1332  | 0.20953 | 0.21826 | 0.20918 | 0.18383 | 0.14946 | 0.14633 | 0.11958 | 0.13857 | GOSR1     |
| cg24793903 | 0.04006 | 0.05142 | 0.05399 | 0.07046 | 0.03295 | 0.03029 | 0.02746 | 0.02822 | 0.02647 | 0.02894 | SCRN2     |
| cg24794433 | 0.94035 | 0.05815 | 0.05293 | 0.05185 | 0.05162 | 0.04485 | 0.28409 | 0.44548 | 0.95957 | 0.80538 | DAB2IP    |
| cg24794531 | 0.03684 | 0.04678 | 0.03584 | 0.02719 | 0.06982 | 0.0288  | 0.02449 | 0.02847 | 0.9713  | 0.9683  | TRPC1     |
| cg24794734 | 0.06086 | 0.05108 | 0.07268 | 0.05515 | 0.06562 | 0.06779 | 0.03956 | 0.03837 | 0.04797 | 0.04409 | AGL       |
| cg24794758 | 0.04235 | 0.03964 | 0.0426  | 0.03958 | 0.03667 | 0.04014 | 0.03697 | 0.03637 | 0.03587 | 0.03437 | LENG1     |
| cg24794992 | 0.17092 | 0.14911 | 0.31056 | 0.37611 | 0.21468 | 0.40097 | 0.17376 | 0.34976 | 0.38161 | 0.26837 | OTOA      |
| cg24796403 | 0.04866 | 0.05024 | 0.04499 | 0.04013 | 0.0515  | 0.05149 | 0.06951 | 0.06686 | 0.04189 | 0.0426  | FHIT      |

|            |         |         |         |         |         |         |         |         |         |         |          |
|------------|---------|---------|---------|---------|---------|---------|---------|---------|---------|---------|----------|
| cg24797830 | 0.04498 | 0.04685 | 0.06268 | 0.05447 | 0.07092 | 0.0686  | 0.04799 | 0.04308 | 0.03513 | 0.03649 | COP56    |
| cg24797967 | 0.07364 | 0.07982 | 0.09069 | 0.08878 | 0.05227 | 0.06036 | 0.08022 | 0.07987 | 0.06498 | 0.06994 | FLJ39739 |
| cg24798047 | 0.62557 | 0.35902 | 0.61179 | 0.75843 | 0.3124  | 0.2601  | 0.12807 | 0.06162 | 0.43685 | 0.59215 | GOLT1A   |
| cg24800810 | 0.07497 | 0.06416 | 0.76034 | 0.83439 | 0.633   | 0.47511 | 0.33722 | 0.22487 | 0.08573 | 0.06143 | RGS7     |
| cg24800887 | 0.89272 | 0.89528 | 0.8749  | 0.89759 | 0.88679 | 0.87088 | 0.91051 | 0.8948  | 0.89275 | 0.88738 | FANCA    |
| cg24801210 | 0.12359 | 0.11138 | 0.11174 | 0.11122 | 0.08232 | 0.10976 | 0.13043 | 0.11357 | 0.10217 | 0.09041 | PCNP     |
| cg24805239 | 0.14321 | 0.0455  | 0.04144 | 0.04454 | 0.03613 | 0.03718 | 0.04224 | 0.03781 | 0.05499 | 0.0294  | DFNA5    |
| cg24807354 | 0.09217 | 0.07088 | 0.40175 | 0.51735 | 0.7146  | 0.31009 | 0.14965 | 0.08279 | 0.06082 | 0.05675 | EDG8     |
| cg24808674 | 0.0556  | 0.0561  | 0.05182 | 0.04993 | 0.04236 | 0.04902 | 0.05104 | 0.05651 | 0.05829 | 0.04058 | RNF11    |
| cg24809640 | 0.28734 | 0.07774 | 0.30224 | 0.3452  | 0.10042 | 0.0498  | 0.06619 | 0.05062 | 0.10257 | 0.03357 | MED4     |
| cg24809768 | 0.04965 | 0.0344  | 0.03729 | 0.04158 | 0.03137 | 0.0302  | 0.03489 | 0.03202 | 0.03863 | 0.04414 | RARS     |
| cg24812103 | 0.31091 | 0.33314 | 0.76892 | 0.76096 | 0.61176 | 0.42207 | 0.65929 | 0.1868  | 0.61338 | 0.34428 | PABPC1   |
| cg24812167 | 0.20823 | 0.07126 | 0.25891 | 0.31286 | 0.5072  | 0.2868  | 0.17454 | 0.11194 | 0.40557 | 0.164   | SNAPC4   |
| cg24812297 | 0.03318 | 0.03698 | 0.0393  | 0.03429 | 0.0282  | 0.0264  | 0.03181 | 0.0328  | 0.02843 | 0.02714 | NTAN1    |
| cg24812523 | 0.78569 | 0.52858 | 0.80406 | 0.83189 | 0.65327 | 0.72008 | 0.79355 | 0.85372 | 0.82809 | 0.67164 | AKAP6    |
| cg24813163 | 0.95035 | 0.37387 | 0.29211 | 0.24134 | 0.17094 | 0.04859 | 0.07825 | 0.04858 | 0.04599 | 0.03053 | FLJ30058 |
| cg24813212 | 0.02798 | 0.02531 | 0.3039  | 0.61052 | 0.5923  | 0.70295 | 0.0254  | 0.0247  | 0.0483  | 0.02289 | TEKT2    |
| cg24815853 | 0.11049 | 0.07769 | 0.11618 | 0.11363 | 0.08539 | 0.36873 | 0.05593 | 0.06284 | 0.07205 | 0.05809 | KLK12    |
| cg24816298 | 0.13268 | 0.13437 | 0.31194 | 0.20729 | 0.23587 | 0.17497 | 0.19989 | 0.12624 | 0.10685 | 0.12557 | PTH      |
| cg24816455 | 0.08746 | 0.11765 | 0.91128 | 0.87764 | 0.97665 | 0.89686 | 0.95387 | 0.76649 | 0.6407  | 0.59721 | SEMA3B   |
| cg24816866 | 0.76403 | 0.69301 | 0.76492 | 0.85267 | 0.50778 | 0.75993 | 0.36096 | 0.55615 | 0.56216 | 0.25252 | PARK2    |
| cg24817430 | 0.03563 | 0.03031 | 0.03262 | 0.03256 | 0.02829 | 0.02786 | 0.03384 | 0.03223 | 0.0272  | 0.02204 | MESDC1   |
| cg24818418 | 0.89893 | 0.69126 | 0.90151 | 0.8963  | 0.88056 | 0.42394 | 0.73955 | 0.08362 | 0.40331 | 0.36584 | EGF      |
| cg24818434 | 0.03759 | 0.04035 | 0.05924 | 0.05803 | 0.03557 | 0.0389  | 0.04057 | 0.0405  | 0.04038 | 0.03132 | KIAA0446 |
| cg24820250 | 0.80723 | 0.80775 | 0.71716 | 0.77001 | 0.69256 | 0.78436 | 0.20649 | 0.17424 | 0.76195 | 0.70985 | CLEC2A   |
| cg24820508 | 0.0711  | 0.07598 | 0.09992 | 0.10304 | 0.18192 | 0.08879 | 0.06763 | 0.06782 | 0.06809 | 0.06161 | TXNDC6   |
| cg24820809 | 0.8653  | 0.86945 | 0.86965 | 0.88245 | 0.89595 | 0.84649 | 0.88801 | 0.87783 | 0.87956 | 0.82894 | MB       |
| cg24821554 | 0.90688 | 0.8123  | 0.91966 | 0.92907 | 0.92712 | 0.83185 | 0.88388 | 0.86184 | 0.90337 | 0.79418 | GUCY1B2  |
| cg24822446 | 0.0405  | 0.03887 | 0.04124 | 0.03501 | 0.03154 | 0.03951 | 0.03574 | 0.03391 | 0.02752 | 0.02924 | ZFAND3   |
| cg24823993 | 0.03438 | 0.0319  | 0.04174 | 0.04043 | 0.04309 | 0.03782 | 0.03977 | 0.03461 | 0.04164 | 0.03938 | NHP2L1   |
| cg24824266 | 0.03492 | 0.0349  | 0.27038 | 0.23141 | 0.21469 | 0.19329 | 0.30968 | 0.4022  | 0.03892 | 0.02924 | SV2B     |
| cg24824840 | 0.9274  | 0.90231 | 0.56466 | 0.81139 | 0.92667 | 0.91827 | 0.50824 | 0.04161 | 0.66433 | 0.58878 | SHANK1   |
| cg24825722 | 0.69246 | 0.20979 | 0.85007 | 0.884   | 0.91331 | 0.87124 | 0.69398 | 0.81375 | 0.29533 | 0.07017 | ACADVL   |
| cg24826645 | 0.09938 | 0.10494 | 0.12291 | 0.10569 | 0.14907 | 0.13334 | 0.08719 | 0.08243 | 0.11752 | 0.10666 | LAMP1    |
| cg24826867 | 0.05757 | 0.04403 | 0.04075 | 0.03435 | 0.46572 | 0.82745 | 0.13426 | 0.09725 | 0.20249 | 0.35846 | IRF8     |
| cg24829483 | 0.49868 | 0.57825 | 0.71048 | 0.7063  | 0.67664 | 0.52011 | 0.78958 | 0.66048 | 0.74968 | 0.71199 | C1QTNF7  |
| cg24831427 | 0.77033 | 0.52123 | 0.59529 | 0.70456 | 0.30337 | 0.32303 | 0.41186 | 0.21663 | 0.52437 | 0.45928 | COQ3     |
| cg24832140 | 0.08828 | 0.09461 | 0.12796 | 0.11218 | 0.29281 | 0.10515 | 0.09636 | 0.07754 | 0.05906 | 0.05907 | ZNF114   |
| cg24832353 | 0.03378 | 0.02957 | 0.03461 | 0.03223 | 0.03549 | 0.04078 | 0.02659 | 0.02741 | 0.03055 | 0.02974 | SMARCC1  |
| cg24833176 | 0.07755 | 0.04977 | 0.05405 | 0.06005 | 0.03992 | 0.0412  | 0.03481 | 0.03907 | 0.04803 | 0.04084 | PHF20L1  |
| cg24833277 | 0.92542 | 0.79999 | 0.91713 | 0.94007 | 0.95523 | 0.89225 | 0.75744 | 0.85594 | 0.93257 | 0.84229 | FAM83A   |

|            |         |         |         |         |         |         |         |         |         |                  |
|------------|---------|---------|---------|---------|---------|---------|---------|---------|---------|------------------|
| cg24834740 | 0.0493  | 0.03451 | 0.08499 | 0.17214 | 0.21199 | 0.35819 | 0.12916 | 0.03319 | 0.43113 | 0.41745 PPP1R16B |
| cg24835159 | 0.86778 | 0.8713  | 0.74669 | 0.75239 | 0.3336  | 0.59247 | 0.48453 | 0.78427 | 0.75284 | 0.57688 RNF43    |
| cg24836175 | 0.04723 | 0.04463 | 0.05054 | 0.0475  | 0.07442 | 0.06845 | 0.05478 | 0.04457 | 0.03079 | 0.03601 CSNK2B   |
| cg24836583 | 0.06786 | 0.06128 | 0.07648 | 0.06582 | 0.04076 | 0.04594 | 0.05911 | 0.0528  | 0.04656 | 0.04473 HOMER3   |
| cg24838010 | 0.0742  | 0.03463 | 0.74691 | 0.79704 | 0.81001 | 0.59751 | 0.77337 | 0.42591 | 0.46791 | 0.3538 SLC26A11  |
| cg24840099 | 0.92014 | 0.92345 | 0.91727 | 0.91084 | 0.87718 | 0.88493 | 0.90354 | 0.92687 | 0.92989 | 0.93892 MSX1     |
| cg24841244 | 0.79191 | 0.38273 | 0.76894 | 0.83442 | 0.88357 | 0.86634 | 0.45951 | 0.59214 | 0.65504 | 0.62225 CD3D     |
| cg24844534 | 0.0273  | 0.02811 | 0.0422  | 0.03122 | 0.12528 | 0.02812 | 0.03137 | 0.02592 | 0.02169 | 0.02256 C1QTNF1  |
| cg24845207 | 0.9505  | 0.92752 | 0.95514 | 0.95427 | 0.95611 | 0.94971 | 0.95152 | 0.9224  | 0.95003 | 0.93904 DMRTB1   |
| cg24847163 | 0.02337 | 0.02199 | 0.02379 | 0.02223 | 0.01849 | 0.02501 | 0.02513 | 0.0243  | 0.01781 | 0.01706 GABBR1   |
| cg24847572 | 0.02312 | 0.02663 | 0.03216 | 0.02869 | 0.02134 | 0.02715 | 0.02386 | 0.02755 | 0.02553 | 0.0216 STCH      |
| cg24849648 | 0.39658 | 0.11716 | 0.65517 | 0.73706 | 0.4183  | 0.44529 | 0.26549 | 0.24619 | 0.19898 | 0.08928 WNT16    |
| cg24851490 | 0.45577 | 0.1778  | 0.40254 | 0.43481 | 0.43235 | 0.44031 | 0.06741 | 0.06921 | 0.71095 | 0.52311 RNASE2   |
| cg24852661 | 0.09697 | 0.06306 | 0.09436 | 0.28976 | 0.5599  | 0.12315 | 0.53087 | 0.23167 | 0.94035 | 0.79088 GOLPH2   |
| cg24854010 | 0.92314 | 0.75766 | 0.91428 | 0.93042 | 0.92816 | 0.91513 | 0.88313 | 0.90062 | 0.90352 | 0.88066 WNT5B    |
| cg24855780 | 0.72459 | 0.4258  | 0.82747 | 0.89403 | 0.92873 | 0.88809 | 0.74562 | 0.81483 | 0.90432 | 0.81888 TNKS1BP1 |
| cg24856383 | 0.04145 | 0.04644 | 0.0478  | 0.03974 | 0.03019 | 0.03522 | 0.03787 | 0.03866 | 0.03938 | 0.03173 SIAH2    |
| cg24856732 | 0.06202 | 0.06429 | 0.08004 | 0.07372 | 0.06085 | 0.06162 | 0.0757  | 0.08982 | 0.09607 | 0.07097 SCO2     |
| cg24857117 | 0.08227 | 0.07481 | 0.07409 | 0.06904 | 0.1494  | 0.10624 | 0.0606  | 0.052   | 0.07127 | 0.09046 PSMB5    |
| cg24857545 | 0.80536 | 0.45473 | 0.77093 | 0.80755 | 0.74665 | 0.7506  | 0.70945 | 0.77772 | 0.85747 | 0.55908 GDI1     |
| cg24857721 | 0.82226 | 0.67641 | 0.86069 | 0.91469 | 0.92419 | 0.89711 | 0.87486 | 0.79905 | 0.64552 | 0.62166 RHD      |
| cg24858591 | 0.08192 | 0.06616 | 0.09057 | 0.07041 | 0.12082 | 0.08172 | 0.06033 | 0.04761 | 0.06464 | 0.06162 KIAA1143 |
| cg24859228 | 0.05099 | 0.04864 | 0.0482  | 0.04802 | 0.03618 | 0.04505 | 0.04625 | 0.04793 | 0.04466 | 0.04372 CAMK1D   |
| cg24860534 | 0.0528  | 0.03588 | 0.06977 | 0.12197 | 0.6302  | 0.5128  | 0.13324 | 0.03107 | 0.05866 | 0.02854 CDC42BPA |
| cg24861272 | 0.85915 | 0.30921 | 0.07481 | 0.06889 | 0.15281 | 0.10047 | 0.06761 | 0.04571 | 0.91226 | 0.31422 TCF8     |
| cg24862483 | 0.65284 | 0.11124 | 0.45086 | 0.62113 | 0.78854 | 0.84524 | 0.16397 | 0.05506 | 0.27813 | 0.04551 CD300LG  |
| cg24866437 | 0.77597 | 0.72426 | 0.7204  | 0.75127 | 0.70262 | 0.74014 | 0.76785 | 0.79893 | 0.71167 | 0.42592 ALPK1    |
| cg24867501 | 0.84857 | 0.55356 | 0.46065 | 0.67569 | 0.78483 | 0.51727 | 0.05711 | 0.31826 | 0.49338 | 0.40873 MIOX     |
| cg24868271 | 0.92786 | 0.90174 | 0.92515 | 0.93719 | 0.94694 | 0.93517 | 0.90585 | 0.91087 | 0.92361 | 0.93729 PLCD1    |
| cg24868525 | 0.10352 | 0.119   | 0.10803 | 0.10798 | 0.08029 | 0.10592 | 0.11338 | 0.11046 | 0.10659 | 0.10527 TMEM1    |
| cg24870273 | 0.47733 | 0.12573 | 0.78731 | 0.833   | 0.18116 | 0.07567 | 0.18436 | 0.10093 | 0.75797 | 0.50622 STK19    |
| cg24870391 | 0.05638 | 0.06008 | 0.58107 | 0.68654 | 0.74693 | 0.72035 | 0.05787 | 0.70715 | 0.539   | 0.62738 CCL11    |
| cg24871743 | 0.7798  | 0.82191 | 0.81542 | 0.79616 | 0.63649 | 0.77055 | 0.829   | 0.82672 | 0.61707 | 0.78021 DIRAS3   |
| cg24873414 | 0.08988 | 0.06881 | 0.11898 | 0.16225 | 0.10007 | 0.08409 | 0.10106 | 0.07497 | 0.06647 | 0.06147 KLHL26   |
| cg24874111 | 0.06233 | 0.03769 | 0.05757 | 0.06344 | 0.08853 | 0.04692 | 0.0389  | 0.0418  | 0.03369 | 0.03035 ZNF562   |
| cg24875415 | 0.66536 | 0.62731 | 0.85425 | 0.89301 | 0.81609 | 0.84686 | 0.09246 | 0.06873 | 0.55503 | 0.53286 CST4     |
| cg24877842 | 0.86352 | 0.71271 | 0.83997 | 0.88713 | 0.56408 | 0.73515 | 0.72599 | 0.62022 | 0.89847 | 0.46531 TRAK1    |
| cg24879335 | 0.40889 | 0.44925 | 0.92257 | 0.935   | 0.60113 | 0.78406 | 0.92528 | 0.88672 | 0.13233 | 0.04865 TF       |
| cg24879595 | 0.09622 | 0.10421 | 0.0902  | 0.08039 | 0.0991  | 0.11282 | 0.09189 | 0.08655 | 0.10411 | 0.10496 ARF6     |
| cg24880821 | 0.06781 | 0.08067 | 0.0834  | 0.06064 | 0.05963 | 0.05767 | 0.05912 | 0.0547  | 0.06879 | 0.0573 TIGD1     |
| cg24881834 | 0.88625 | 0.7997  | 0.08585 | 0.08812 | 0.04738 | 0.06278 | 0.06832 | 0.05016 | 0.73469 | 0.69866 ME1      |

|            |         |         |         |         |         |         |         |         |         |         |              |
|------------|---------|---------|---------|---------|---------|---------|---------|---------|---------|---------|--------------|
| cg24883276 | 0.02821 | 0.02734 | 0.02742 | 0.0249  | 0.02246 | 0.02217 | 0.02097 | 0.02041 | 0.02077 | 0.01952 | PSAP         |
| cg24883732 | 0.89465 | 0.90482 | 0.84429 | 0.86921 | 0.87024 | 0.88218 | 0.81665 | 0.81965 | 0.89606 | 0.87335 | TCEB3B       |
| cg24884084 | 0.09044 | 0.09861 | 0.08106 | 0.07085 | 0.10679 | 0.0831  | 0.0653  | 0.06274 | 0.08609 | 0.0861  | SPRR1B       |
| cg24886748 | 0.03491 | 0.04207 | 0.03424 | 0.03675 | 0.02956 | 0.02925 | 0.03314 | 0.03733 | 0.03919 | 0.03095 | SLC12A7      |
| cg24887211 | 0.5427  | 0.14698 | 0.20361 | 0.18621 | 0.23417 | 0.12905 | 0.11258 | 0.2456  | 0.5073  | 0.33557 | C14orf166B   |
| cg24888049 | 0.72279 | 0.46461 | 0.87696 | 0.89388 | 0.94053 | 0.61946 | 0.62893 | 0.34951 | 0.88515 | 0.34023 | FES          |
| cg24889366 | 0.03586 | 0.03501 | 0.56013 | 0.65047 | 0.21683 | 0.0628  | 0.04052 | 0.03123 | 0.0418  | 0.02757 | NGG13        |
| cg24889744 | 0.03877 | 0.03847 | 0.09393 | 0.14634 | 0.04102 | 0.03975 | 0.04737 | 0.03774 | 0.07764 | 0.03803 | C20orf28     |
| cg24890043 | 0.02884 | 0.02483 | 0.03944 | 0.09489 | 0.10558 | 0.02135 | 0.21816 | 0.2448  | 0.03231 | 0.01576 | DKFZP566N034 |
| cg24890286 | 0.85057 | 0.84722 | 0.77363 | 0.83377 | 0.70557 | 0.75524 | 0.84073 | 0.83067 | 0.87068 | 0.86691 | HIPK2        |
| cg24890446 | 0.09587 | 0.04341 | 0.12479 | 0.09077 | 0.41889 | 0.03312 | 0.05175 | 0.03277 | 0.05618 | 0.03172 | NAP1L4       |
| cg24891133 | 0.95753 | 0.88928 | 0.20269 | 0.44075 | 0.0469  | 0.03634 | 0.03101 | 0.02315 | 0.56041 | 0.35267 | FLJ14834     |
| cg24892074 | 0.03866 | 0.0336  | 0.03207 | 0.03636 | 0.02517 | 0.02947 | 0.02669 | 0.0314  | 0.02682 | 0.02494 | PIGY         |
| cg24892510 | 0.03337 | 0.03356 | 0.24496 | 0.30947 | 0.11199 | 0.17453 | 0.03108 | 0.03251 | 0.02335 | 0.02862 | ZNF415       |
| cg24893837 | 0.70559 | 0.6797  | 0.32448 | 0.22639 | 0.54429 | 0.35347 | 0.34585 | 0.27509 | 0.31499 | 0.16913 | ARSB         |
| cg24895052 | 0.86035 | 0.46428 | 0.86552 | 0.86854 | 0.88724 | 0.47315 | 0.8715  | 0.69736 | 0.87985 | 0.64448 | MPP3         |
| cg24896109 | 0.02763 | 0.02721 | 0.03407 | 0.03188 | 0.02926 | 0.03906 | 0.02335 | 0.02281 | 0.02228 | 0.01957 | CYP51A1      |
| cg24898753 | 0.04358 | 0.03057 | 0.55782 | 0.70308 | 0.96305 | 0.42819 | 0.16072 | 0.05645 | 0.44882 | 0.02568 | FTH1         |
| cg24898863 | 0.05538 | 0.04863 | 0.09644 | 0.09565 | 0.2028  | 0.11078 | 0.04447 | 0.03899 | 0.06692 | 0.04524 | S100A8       |
| cg24899750 | 0.82012 | 0.14681 | 0.82267 | 0.84571 | 0.60815 | 0.62004 | 0.81061 | 0.79772 | 0.39013 | 0.34885 | SNRPB2       |
| cg24901042 | 0.64817 | 0.39347 | 0.9357  | 0.94096 | 0.90721 | 0.92883 | 0.24031 | 0.06016 | 0.82382 | 0.75592 | TMPRSS2      |
| cg24901474 | 0.6994  | 0.4901  | 0.16107 | 0.19174 | 0.75986 | 0.34003 | 0.54839 | 0.35903 | 0.35809 | 0.27343 | RGS5         |
| cg24903376 | 0.05517 | 0.05303 | 0.07058 | 0.06209 | 0.06732 | 0.06139 | 0.05681 | 0.04304 | 0.05374 | 0.05    | STIL         |
| cg24903794 | 0.03483 | 0.0368  | 0.04831 | 0.04148 | 0.03739 | 0.03521 | 0.03677 | 0.03265 | 0.02901 | 0.02771 | EPRS         |
| cg24904765 | 0.07307 | 0.06787 | 0.07696 | 0.0784  | 0.07346 | 0.06718 | 0.07131 | 0.07665 | 0.07489 | 0.06967 | STAM2        |
| cg24905739 | 0.02664 | 0.02608 | 0.03125 | 0.02872 | 0.02386 | 0.02711 | 0.02663 | 0.02563 | 0.02485 | 0.02227 | FBXW8        |
| cg24906202 | 0.08705 | 0.07108 | 0.09584 | 0.08508 | 0.07321 | 0.07592 | 0.06645 | 0.0697  | 0.06655 | 0.06814 | NEO1         |
| cg24906992 | 0.06184 | 0.06114 | 0.06121 | 0.05485 | 0.09089 | 0.06099 | 0.06544 | 0.04712 | 0.04593 | 0.04721 | C20orf44     |
| cg24907852 | 0.08303 | 0.09221 | 0.08808 | 0.09497 | 0.13633 | 0.11301 | 0.1195  | 0.13273 | 0.10851 | 0.12683 | ENOSF1       |
| cg24908058 | 0.77654 | 0.34718 | 0.96577 | 0.97226 | 0.96193 | 0.91649 | 0.9537  | 0.70292 | 0.83687 | 0.74092 | CGB5         |
| cg24908499 | 0.03316 | 0.03136 | 0.04988 | 0.05772 | 0.03465 | 0.03277 | 0.03782 | 0.03182 | 0.03213 | 0.03338 | EGFL9        |
| cg24909445 | 0.03095 | 0.03557 | 0.0367  | 0.03945 | 0.03307 | 0.03614 | 0.0305  | 0.03526 | 0.03229 | 0.02737 | SLC3A2       |
| cg24909737 | 0.03043 | 0.0303  | 0.0303  | 0.03192 | 0.02342 | 0.02539 | 0.02684 | 0.02792 | 0.03354 | 0.02081 | EBPL         |
| cg24909975 | 0.02894 | 0.02972 | 0.03344 | 0.027   | 0.02483 | 0.02421 | 0.02727 | 0.02356 | 0.02205 | 0.02267 | WTAP         |
| cg24910675 | 0.03946 | 0.04319 | 0.05022 | 0.0452  | 0.04172 | 0.03583 | 0.37948 | 0.19875 | 0.03371 | 0.03247 | ENG          |
| cg24911803 | 0.04859 | 0.05924 | 0.07241 | 0.07495 | 0.04482 | 0.0599  | 0.06037 | 0.05963 | 0.0494  | 0.04723 | EIF3S4       |
| cg24912023 | 0.14915 | 0.12094 | 0.5232  | 0.42359 | 0.41398 | 0.35401 | 0.62    | 0.30257 | 0.15242 | 0.14421 | LOC205251    |
| cg24912560 | 0.63955 | 0.92124 | 0.89177 | 0.93082 | 0.96419 | 0.92696 | 0.84232 | 0.93718 | 0.91663 | 0.87758 | HNRNPG-T     |
| cg24914244 | 0.87655 | 0.87856 | 0.19524 | 0.34375 | 0.74309 | 0.84294 | 0.84424 | 0.83271 | 0.8593  | 0.84803 | RTN4IP1      |
| cg24914860 | 0.06354 | 0.06493 | 0.08347 | 0.06894 | 0.07573 | 0.08756 | 0.06421 | 0.08143 | 0.07198 | 0.06763 | CDK2         |
| cg24916177 | 0.05192 | 0.0394  | 0.0436  | 0.03861 | 0.06599 | 0.03378 | 0.03238 | 0.03326 | 0.25893 | 0.06228 | RGC32        |

|            |         |         |         |         |         |         |         |         |         |                   |
|------------|---------|---------|---------|---------|---------|---------|---------|---------|---------|-------------------|
| cg24917645 | 0.0445  | 0.04554 | 0.0427  | 0.04544 | 0.0357  | 0.04053 | 0.03963 | 0.03943 | 0.04911 | 0.03529 C20orf29  |
| cg24919884 | 0.88693 | 0.40495 | 0.92021 | 0.92362 | 0.89966 | 0.87292 | 0.63891 | 0.17489 | 0.44151 | 0.78041 ARHGEF16  |
| cg24919972 | 0.49525 | 0.17808 | 0.6555  | 0.65112 | 0.61998 | 0.37125 | 0.35523 | 0.14976 | 0.38601 | 0.1174 FYCO1      |
| cg24920358 | 0.90197 | 0.83298 | 0.51726 | 0.46665 | 0.05078 | 0.04301 | 0.08029 | 0.06542 | 0.90369 | 0.85493 PPIE      |
| cg24921089 | 0.35974 | 0.48048 | 0.82026 | 0.78108 | 0.90652 | 0.89167 | 0.49622 | 0.16856 | 0.88131 | 0.88839 AMPD3     |
| cg24921858 | 0.45862 | 0.10815 | 0.33413 | 0.53604 | 0.31551 | 0.72549 | 0.33693 | 0.7088  | 0.19236 | 0.13681 BCL2L14   |
| cg24922045 | 0.71979 | 0.60042 | 0.93114 | 0.93089 | 0.9689  | 0.92301 | 0.70462 | 0.58238 | 0.61141 | 0.63247 GAS2L2    |
| cg24922992 | 0.65313 | 0.51565 | 0.65465 | 0.68582 | 0.18697 | 0.23217 | 0.65243 | 0.17733 | 0.52304 | 0.56041 SLC22A7   |
| cg24923526 | 0.03473 | 0.02946 | 0.03749 | 0.0351  | 0.04213 | 0.0398  | 0.03787 | 0.03116 | 0.02706 | 0.02778 SH3GL1    |
| cg24924631 | 0.89041 | 0.73843 | 0.89805 | 0.90823 | 0.84259 | 0.90224 | 0.74772 | 0.86755 | 0.90232 | 0.87854 BCL2A1    |
| cg24924779 | 0.11737 | 0.03446 | 0.86654 | 0.83258 | 0.46423 | 0.09398 | 0.13307 | 0.04189 | 0.04097 | 0.02425 KCNG1     |
| cg24926042 | 0.25485 | 0.12341 | 0.28374 | 0.37247 | 0.39973 | 0.15707 | 0.17997 | 0.08626 | 0.11528 | 0.05749 KRTHB2    |
| cg24926276 | 0.79869 | 0.70374 | 0.81226 | 0.81054 | 0.86    | 0.7385  | 0.71633 | 0.15656 | 0.57931 | 0.45205 LRG1      |
| cg24926780 | 0.07465 | 0.05104 | 0.33262 | 0.34123 | 0.27239 | 0.29617 | 0.04795 | 0.03603 | 0.34784 | 0.15705 OR10H2    |
| cg24928161 | 0.84172 | 0.70947 | 0.87616 | 0.88161 | 0.88855 | 0.87373 | 0.84791 | 0.78062 | 0.67313 | 0.58201 SHBG      |
| cg24928378 | 0.08167 | 0.06915 | 0.0874  | 0.08413 | 0.12469 | 0.08705 | 0.09922 | 0.07571 | 0.07172 | 0.06498 RND1      |
| cg24928687 | 0.88824 | 0.90009 | 0.77689 | 0.88303 | 0.89602 | 0.86161 | 0.85157 | 0.78973 | 0.90434 | 0.69771 EPHX1     |
| cg24929737 | 0.02985 | 0.03331 | 0.03581 | 0.03455 | 0.03083 | 0.02981 | 0.02851 | 0.02215 | 0.07821 | 0.03368 EFNB2     |
| cg24929834 | 0.84051 | 0.75818 | 0.82276 | 0.87675 | 0.82892 | 0.83984 | 0.84038 | 0.81483 | 0.72734 | 0.78239 HS747E2A  |
| cg24930915 | 0.08842 | 0.08747 | 0.21683 | 0.09706 | 0.90162 | 0.47555 | 0.70284 | 0.47542 | 0.06863 | 0.07806 RAB26     |
| cg24934431 | 0.56739 | 0.35854 | 0.72608 | 0.75132 | 0.62904 | 0.80709 | 0.69961 | 0.44909 | 0.55897 | 0.51528 CYP17A1   |
| cg24935900 | 0.054   | 0.04694 | 0.04621 | 0.0402  | 0.03368 | 0.03626 | 0.04142 | 0.03843 | 0.04274 | 0.03615 RAB11FIP5 |
| cg24936630 | 0.09202 | 0.06491 | 0.07802 | 0.07728 | 0.0911  | 0.07705 | 0.07712 | 0.05823 | 0.05672 | 0.04236 DDX10     |
| cg24936956 | 0.37564 | 0.39929 | 0.44784 | 0.5069  | 0.40706 | 0.48984 | 0.412   | 0.40624 | 0.41608 | 0.43082 ZNF600    |
| cg24937126 | 0.02449 | 0.0262  | 0.03052 | 0.02884 | 0.02673 | 0.02914 | 0.02037 | 0.02179 | 0.01995 | 0.0218 LAMB1      |
| cg24937706 | 0.03922 | 0.0432  | 0.03963 | 0.04117 | 0.0377  | 0.04257 | 0.03477 | 0.03729 | 0.02899 | 0.03052 RB1       |
| cg24938727 | 0.75213 | 0.84274 | 0.61375 | 0.70878 | 0.39981 | 0.06315 | 0.14676 | 0.04587 | 0.0513  | 0.03126 GUP1      |
| cg24939733 | 0.78982 | 0.56611 | 0.8203  | 0.84443 | 0.73813 | 0.17837 | 0.79328 | 0.21284 | 0.83678 | 0.37189 FLJ38159  |
| cg24940601 | 0.13223 | 0.1323  | 0.22208 | 0.16465 | 0.35507 | 0.16464 | 0.22946 | 0.10568 | 0.17152 | 0.15966 KCNE4     |
| cg24941797 | 0.01904 | 0.01629 | 0.01987 | 0.02192 | 0.02117 | 0.01803 | 0.01861 | 0.01822 | 0.01828 | 0.01389 CAPN10    |
| cg24946133 | 0.05704 | 0.05959 | 0.05572 | 0.05502 | 0.04108 | 0.04918 | 0.06167 | 0.06127 | 0.05282 | 0.04943 JUN       |
| cg24946408 | 0.0454  | 0.04188 | 0.03985 | 0.03784 | 0.03354 | 0.03747 | 0.03137 | 0.03007 | 0.03018 | 0.02903 PPP1R15A  |
| cg24946544 | 0.04805 | 0.04587 | 0.04868 | 0.04322 | 0.03219 | 0.04015 | 0.04347 | 0.04034 | 0.03991 | 0.0403 LOC352909  |
| cg24947394 | 0.03968 | 0.0366  | 0.04798 | 0.04534 | 0.04213 | 0.04244 | 0.03067 | 0.02638 | 0.04117 | 0.03504 USP33     |
| cg24949049 | 0.8451  | 0.84963 | 0.72887 | 0.78714 | 0.71174 | 0.72412 | 0.78501 | 0.83007 | 0.85384 | 0.76579 TDRD3     |
| cg24949344 | 0.05258 | 0.06062 | 0.07215 | 0.06527 | 0.10786 | 0.06759 | 0.07446 | 0.06271 | 0.06304 | 0.06283 PLEKHA9   |
| cg24949488 | 0.22234 | 0.26738 | 0.13719 | 0.15124 | 0.26741 | 0.86343 | 0.04866 | 0.04198 | 0.13276 | 0.05596 DNMT      |
| cg24950749 | 0.83925 | 0.76818 | 0.88989 | 0.88964 | 0.88787 | 0.87527 | 0.79294 | 0.69084 | 0.90002 | 0.56725 SDCBP2    |
| cg24951114 | 0.04154 | 0.03551 | 0.05198 | 0.05295 | 0.15366 | 0.03494 | 0.03046 | 0.03549 | 0.05179 | 0.02896 LRRC57    |
| cg24956866 | 0.05017 | 0.05563 | 0.0826  | 0.06442 | 0.08726 | 0.06099 | 0.04208 | 0.04195 | 0.03293 | 0.03598 CALD1     |
| cg24957240 | 0.2345  | 0.21711 | 0.29574 | 0.26898 | 0.31199 | 0.26814 | 0.28421 | 0.24763 | 0.26004 | 0.23424 MTERFD3   |



|            |         |         |         |         |         |         |         |         |         |                  |
|------------|---------|---------|---------|---------|---------|---------|---------|---------|---------|------------------|
| cg24957950 | 0.03272 | 0.03103 | 0.03241 | 0.0296  | 0.02401 | 0.03042 | 0.02452 | 0.02867 | 0.02452 | 0.0218 PAK4      |
| cg24958765 | 0.04646 | 0.05427 | 0.04451 | 0.04234 | 0.05264 | 0.07124 | 0.04328 | 0.04518 | 0.04026 | 0.03645 RAB4B    |
| cg24959428 | 0.7935  | 0.52937 | 0.52275 | 0.69178 | 0.43516 | 0.76872 | 0.41927 | 0.4449  | 0.231   | 0.33727 GBP6     |
| cg24964364 | 0.84578 | 0.87249 | 0.90017 | 0.88632 | 0.54062 | 0.38357 | 0.82682 | 0.6884  | 0.56795 | 0.53843 BCAP31   |
| cg24964368 | 0.16875 | 0.13062 | 0.77227 | 0.82173 | 0.73938 | 0.7969  | 0.76952 | 0.80355 | 0.64941 | 0.68492 FPRL1    |
| cg24965984 | 0.11198 | 0.08989 | 0.10548 | 0.10586 | 0.1502  | 0.10005 | 0.10721 | 0.08875 | 0.08116 | 0.08289 GPAM     |
| cg24966460 | 0.09615 | 0.10405 | 0.09108 | 0.08555 | 0.11111 | 0.09897 | 0.09287 | 0.08772 | 0.06866 | 0.07089 KARS     |
| cg24968336 | 0.14425 | 0.0773  | 0.39386 | 0.39901 | 0.38905 | 0.40536 | 0.08702 | 0.05777 | 0.76553 | 0.7618 KCNK6     |
| cg24968786 | 0.05204 | 0.0529  | 0.04489 | 0.04311 | 0.04994 | 0.05942 | 0.05834 | 0.05584 | 0.04405 | 0.03891 FLJ10786 |
| cg24970539 | 0.06676 | 0.085   | 0.07195 | 0.07216 | 0.04678 | 0.06564 | 0.06499 | 0.07151 | 0.06747 | 0.05026 RPS6KA4  |
| cg24971490 | 0.05894 | 0.05736 | 0.05419 | 0.05677 | 0.05056 | 0.05806 | 0.05713 | 0.05474 | 0.05079 | 0.04773 C8orf53  |
| cg24974130 | 0.04441 | 0.03686 | 0.043   | 0.04301 | 0.04102 | 0.0323  | 0.03697 | 0.04577 | 0.03046 | 0.03522 RAD50    |
| cg24974477 | 0.06196 | 0.0546  | 0.0975  | 0.07278 | 0.15015 | 0.07268 | 0.05934 | 0.05084 | 0.06766 | 0.06898 PLA2G12A |
| cg24974599 | 0.76523 | 0.78317 | 0.6653  | 0.75593 | 0.68901 | 0.39415 | 0.63865 | 0.73457 | 0.56975 | 0.19422 CFH      |
| cg24975222 | 0.04673 | 0.0446  | 0.61302 | 0.63043 | 0.97065 | 0.96584 | 0.75701 | 0.97331 | 0.40498 | 0.41453 CDCP1    |
| cg24975564 | 0.03639 | 0.03561 | 0.05484 | 0.05073 | 0.04658 | 0.03649 | 0.04032 | 0.041   | 0.10637 | 0.11067 PDE3A    |
| cg24975769 | 0.03392 | 0.0333  | 0.0368  | 0.03254 | 0.02643 | 0.0329  | 0.0315  | 0.03121 | 0.03082 | 0.02972 ARFIP2   |
| cg24975842 | 0.34701 | 0.38835 | 0.98177 | 0.98077 | 0.8141  | 0.94641 | 0.97949 | 0.95641 | 0.85512 | 0.9683 GNAS      |
| cg24977027 | 0.86269 | 0.83965 | 0.84229 | 0.86997 | 0.81489 | 0.83458 | 0.80182 | 0.87761 | 0.85767 | 0.86183 FLJ10916 |
| cg24977709 | 0.0497  | 0.05151 | 0.0562  | 0.0588  | 0.03806 | 0.04458 | 0.05288 | 0.05415 | 0.10445 | 0.04645 SSSCA1   |
| cg24979630 | 0.07832 | 0.07572 | 0.10942 | 0.10182 | 0.11319 | 0.09342 | 0.09597 | 0.09936 | 0.09708 | 0.084 PPP1R12A   |
| cg24980458 | 0.0422  | 0.03867 | 0.04258 | 0.03734 | 0.03553 | 0.03734 | 0.03319 | 0.0378  | 0.03552 | 0.03119 FOXP1    |
| cg24980583 | 0.03677 | 0.03655 | 0.06365 | 0.04299 | 0.04936 | 0.04453 | 0.03283 | 0.03699 | 0.03474 | 0.03248 SSBP1    |
| cg24981018 | 0.0916  | 0.05859 | 0.79176 | 0.82591 | 0.48975 | 0.45513 | 0.25841 | 0.12199 | 0.06867 | 0.04986 ARC      |
| cg24983959 | 0.05818 | 0.05416 | 0.07072 | 0.05551 | 0.17946 | 0.05932 | 0.05615 | 0.05203 | 0.37016 | 0.08439 RTN4RL2  |
| cg24986572 | 0.30322 | 0.47918 | 0.04046 | 0.03398 | 0.0388  | 0.03831 | 0.03132 | 0.03052 | 0.03084 | 0.03009 ZNF193   |
| cg24986868 | 0.18117 | 0.14271 | 0.35315 | 0.21865 | 0.20731 | 0.16004 | 0.19559 | 0.18711 | 0.8003  | 0.65562 PKP4     |
| cg24987170 | 0.26268 | 0.05657 | 0.24957 | 0.16675 | 0.25661 | 0.06216 | 0.12142 | 0.04008 | 0.15472 | 0.04453 ADCK1    |
| cg24987706 | 0.86647 | 0.76582 | 0.81173 | 0.83529 | 0.85068 | 0.85848 | 0.83184 | 0.86301 | 0.87749 | 0.84634 GPA33    |
| cg24988345 | 0.20936 | 0.17419 | 0.56403 | 0.70796 | 0.36067 | 0.59995 | 0.20366 | 0.18174 | 0.18598 | 0.13972 SCHIP1   |
| cg24989962 | 0.46706 | 0.18165 | 0.96777 | 0.9709  | 0.96322 | 0.96529 | 0.95341 | 0.96063 | 0.89578 | 0.89872 PTGDR    |
| cg24990612 | 0.13064 | 0.0729  | 0.27039 | 0.25953 | 0.68322 | 0.8414  | 0.31097 | 0.0877  | 0.09701 | 0.07566 PDGFB    |
| cg24991452 | 0.02996 | 0.03452 | 0.03512 | 0.03658 | 0.02696 | 0.02771 | 0.02755 | 0.02776 | 0.02499 | 0.02422 MAPK14   |
| cg24992780 | 0.88979 | 0.58765 | 0.6502  | 0.69213 | 0.47467 | 0.35257 | 0.11986 | 0.09343 | 0.7648  | 0.43568 OR7C1    |
| cg24993443 | 0.33134 | 0.45251 | 0.90457 | 0.94609 | 0.7643  | 0.7329  | 0.65892 | 0.70631 | 0.44259 | 0.55095 SNRPN    |
| cg24994350 | 0.04596 | 0.04149 | 0.05662 | 0.0526  | 0.05621 | 0.04437 | 0.03484 | 0.03995 | 0.03952 | 0.04266 LATS1    |
| cg24995240 | 0.14021 | 0.12147 | 0.21026 | 0.14421 | 0.29622 | 0.17599 | 0.08252 | 0.07333 | 0.15385 | 0.14549 SPATA1   |
| cg24995381 | 0.41323 | 0.45294 | 0.78675 | 0.87371 | 0.85172 | 0.86896 | 0.56425 | 0.44162 | 0.07307 | 0.04557 GPR141   |
| cg24995798 | 0.06011 | 0.05683 | 0.08696 | 0.06208 | 0.05503 | 0.06174 | 0.05224 | 0.04967 | 0.04581 | 0.04289 C10orf63 |
| cg24995836 | 0.1476  | 0.15496 | 0.85176 | 0.88437 | 0.55582 | 0.77196 | 0.67176 | 0.53603 | 0.90964 | 0.91345 GABRA3   |
| cg24997562 | 0.20189 | 0.05559 | 0.36851 | 0.53853 | 0.24063 | 0.04687 | 0.06694 | 0.04377 | 0.05417 | 0.0375 OASL      |

|            |         |         |         |         |         |         |         |         |         |                   |
|------------|---------|---------|---------|---------|---------|---------|---------|---------|---------|-------------------|
| cg24997944 | 0.03385 | 0.03647 | 0.29518 | 0.45595 | 0.04654 | 0.05176 | 0.02917 | 0.02719 | 0.03011 | 0.02761 KCNH8     |
| cg24999727 | 0.65641 | 0.17308 | 0.48478 | 0.64519 | 0.58652 | 0.20518 | 0.71287 | 0.17956 | 0.30872 | 0.17039 HSD17B13  |
| cg24999924 | 0.04543 | 0.03873 | 0.03638 | 0.04025 | 0.06338 | 0.04236 | 0.05056 | 0.04694 | 0.03363 | 0.03433 C2orf20   |
| cg25000382 | 0.04351 | 0.04495 | 0.04442 | 0.04441 | 0.03274 | 0.03723 | 0.04148 | 0.0384  | 0.03539 | 0.03013 LOC124216 |
| cg25002911 | 0.66163 | 0.65064 | 0.8036  | 0.8438  | 0.93691 | 0.91976 | 0.6102  | 0.64894 | 0.57155 | 0.58154 RB1       |
| cg25003924 | 0.92288 | 0.69221 | 0.91084 | 0.92445 | 0.95144 | 0.89233 | 0.89395 | 0.50655 | 0.92883 | 0.85809 ARPP-19   |
| cg25004981 | 0.97403 | 0.96569 | 0.96924 | 0.97329 | 0.97684 | 0.9758  | 0.97277 | 0.97514 | 0.9778  | 0.97785 LASS3     |
| cg25006823 | 0.70276 | 0.25036 | 0.489   | 0.49459 | 0.60655 | 0.33097 | 0.3554  | 0.09346 | 0.11734 | 0.05121 FLJ33387  |
| cg25007250 | 0.78532 | 0.47459 | 0.84322 | 0.88171 | 0.72786 | 0.77668 | 0.19798 | 0.1168  | 0.78468 | 0.8602 NOS3       |
| cg25007680 | 0.0507  | 0.05199 | 0.06419 | 0.05953 | 0.05551 | 0.05437 | 0.0466  | 0.04362 | 0.04811 | 0.05012 PARK7     |
| cg25010118 | 0.08061 | 0.07928 | 0.09872 | 0.0923  | 0.07623 | 0.09442 | 0.07436 | 0.07178 | 0.06509 | 0.09571 C1orf4    |
| cg25011395 | 0.43016 | 0.22558 | 0.43302 | 0.59025 | 0.93551 | 0.73867 | 0.1195  | 0.07026 | 0.76393 | 0.61278 CNTROB    |
| cg25013053 | 0.77443 | 0.66435 | 0.72023 | 0.75968 | 0.80353 | 0.79068 | 0.66101 | 0.51376 | 0.27568 | 0.44887 UNC45B    |
| cg25013058 | 0.0695  | 0.06434 | 0.10676 | 0.07818 | 0.11472 | 0.08651 | 0.06933 | 0.05869 | 0.07943 | 0.07899 NCOA7     |
| cg25013838 | 0.78683 | 0.51572 | 0.79379 | 0.83089 | 0.89454 | 0.86233 | 0.63151 | 0.85428 | 0.88671 | 0.84289 MYO18B    |
| cg25013852 | 0.10267 | 0.03273 | 0.04247 | 0.03578 | 0.05822 | 0.03134 | 0.02943 | 0.02926 | 0.03753 | 0.02764 PGM1      |
| cg25014318 | 0.13315 | 0.16331 | 0.72458 | 0.65453 | 0.35116 | 0.22591 | 0.22519 | 0.06578 | 0.29285 | 0.19996 GLP1R     |
| cg25017250 | 0.55684 | 0.39004 | 0.43771 | 0.53969 | 0.50229 | 0.52029 | 0.4629  | 0.26182 | 0.51426 | 0.45021 APOC4     |
| cg25017304 | 0.07349 | 0.08164 | 0.09296 | 0.08158 | 0.04968 | 0.07348 | 0.06961 | 0.07127 | 0.07192 | 0.06645 ARHGEF11  |
| cg25017837 | 0.03497 | 0.03437 | 0.03227 | 0.03    | 0.04502 | 0.04407 | 0.03321 | 0.03405 | 0.02889 | 0.03443 WARS      |
| cg25018329 | 0.03989 | 0.0437  | 0.04541 | 0.04212 | 0.06618 | 0.0686  | 0.04242 | 0.05219 | 0.03279 | 0.04097 E2F8      |
| cg25018755 | 0.08127 | 0.04185 | 0.0747  | 0.09097 | 0.13797 | 0.03799 | 0.05069 | 0.0437  | 0.16647 | 0.04813 BIK       |
| cg25018881 | 0.5732  | 0.20584 | 0.57971 | 0.56322 | 0.60826 | 0.50474 | 0.40959 | 0.22517 | 0.42392 | 0.16469 IKBKAP    |
| cg25020204 | 0.42668 | 0.09288 | 0.59979 | 0.76695 | 0.52777 | 0.46199 | 0.09579 | 0.08507 | 0.30681 | 0.03547 DBH       |
| cg25020459 | 0.03216 | 0.02819 | 0.02762 | 0.02257 | 0.02027 | 0.02066 | 0.01792 | 0.02713 | 0.01945 | 0.01846 COL6A1    |
| cg25020850 | 0.45452 | 0.36848 | 0.43794 | 0.61222 | 0.78678 | 0.49442 | 0.04752 | 0.31673 | 0.12187 | 0.05595 RGS8      |
| cg25021182 | 0.84731 | 0.55783 | 0.83521 | 0.87165 | 0.90789 | 0.87468 | 0.8605  | 0.82358 | 0.74347 | 0.65 ELA2B        |
| cg25021247 | 0.70829 | 0.64581 | 0.74105 | 0.77158 | 0.76995 | 0.6971  | 0.72942 | 0.72449 | 0.75257 | 0.72516 AMT       |
| cg25022327 | 0.8857  | 0.37991 | 0.87352 | 0.89477 | 0.91087 | 0.88542 | 0.79937 | 0.86019 | 0.56914 | 0.78622 P53AIP1   |
| cg25023057 | 0.05541 | 0.05784 | 0.06167 | 0.0556  | 0.04028 | 0.05467 | 0.04943 | 0.05307 | 0.04904 | 0.049 ADIPOR1     |
| cg25023245 | 0.04272 | 0.03918 | 0.04132 | 0.03833 | 0.03286 | 0.03473 | 0.04063 | 0.03286 | 0.03626 | 0.03136 AXIN1     |
| cg25023829 | 0.60266 | 0.79285 | 0.72766 | 0.78392 | 0.78808 | 0.71213 | 0.68373 | 0.82964 | 0.82816 | 0.80964 H2BFS     |
| cg25023941 | 0.87673 | 0.76468 | 0.8699  | 0.87446 | 0.88342 | 0.88665 | 0.68182 | 0.77285 | 0.90187 | 0.88243 QPRT      |
| cg25023994 | 0.84992 | 0.8539  | 0.45575 | 0.5687  | 0.46282 | 0.84168 | 0.05196 | 0.05164 | 0.80608 | 0.69874 BANK1     |
| cg25025243 | 0.65995 | 0.74334 | 0.81296 | 0.8202  | 0.64862 | 0.68188 | 0.50928 | 0.26056 | 0.16332 | 0.13252 GSTP1     |
| cg25025866 | 0.1296  | 0.08836 | 0.3431  | 0.41774 | 0.31939 | 0.2586  | 0.20112 | 0.09309 | 0.17725 | 0.10627 NTE       |
| cg25026013 | 0.02841 | 0.03003 | 0.0297  | 0.03037 | 0.03049 | 0.03437 | 0.03161 | 0.03308 | 0.0275  | 0.02553 TAX1BP3   |
| cg25026754 | 0.02842 | 0.03013 | 0.03475 | 0.02692 | 0.01937 | 0.02259 | 0.02614 | 0.0261  | 0.02075 | 0.02439 PDCD7     |
| cg25027167 | 0.52074 | 0.06778 | 0.12063 | 0.31876 | 0.39888 | 0.45552 | 0.18606 | 0.06739 | 0.04636 | 0.04619 DGAT1     |
| cg25027501 | 0.09064 | 0.12774 | 0.24128 | 0.36342 | 0.25167 | 0.06162 | 0.04058 | 0.02439 | 0.03486 | 0.02137 GSTM3     |
| cg25028542 | 0.15864 | 0.08248 | 0.16958 | 0.29189 | 0.05893 | 0.04343 | 0.08439 | 0.0645  | 0.04098 | 0.0275 ANLN       |

|            |         |         |         |         |         |         |         |         |         |         |          |
|------------|---------|---------|---------|---------|---------|---------|---------|---------|---------|---------|----------|
| cg25032865 | 0.26472 | 0.13123 | 0.40906 | 0.51584 | 0.51083 | 0.45804 | 0.3499  | 0.36351 | 0.4129  | 0.29061 | FLJ44186 |
| cg25033144 | 0.05139 | 0.04172 | 0.59663 | 0.49974 | 0.18738 | 0.06984 | 0.04879 | 0.03237 | 0.11064 | 0.03684 | FLJ00060 |
| cg25033972 | 0.09753 | 0.08649 | 0.16415 | 0.11052 | 0.40218 | 0.22592 | 0.10364 | 0.09393 | 0.74257 | 0.52722 | RIPK4    |
| cg25033993 | 0.52504 | 0.07897 | 0.82472 | 0.82514 | 0.70207 | 0.77195 | 0.45541 | 0.12375 | 0.37184 | 0.35285 | STX1B2   |
| cg25034557 | 0.06998 | 0.0613  | 0.05559 | 0.04903 | 0.09974 | 0.07361 | 0.07065 | 0.06588 | 0.05039 | 0.04964 | PACS1    |
| cg25040282 | 0.70448 | 0.37611 | 0.58275 | 0.72564 | 0.58824 | 0.67769 | 0.33811 | 0.30754 | 0.45835 | 0.35162 | HTN3     |
| cg25040733 | 0.11044 | 0.12046 | 0.12956 | 0.10655 | 0.086   | 0.11647 | 0.11396 | 0.11922 | 0.11302 | 0.11624 | SPRY4    |
| cg25040783 | 0.21216 | 0.12199 | 0.09231 | 0.08793 | 0.1153  | 0.09356 | 0.14686 | 0.12575 | 0.06873 | 0.07397 | APPL     |
| cg25041148 | 0.03693 | 0.04012 | 0.03666 | 0.03611 | 0.03275 | 0.0377  | 0.03199 | 0.03318 | 0.02809 | 0.02656 | HKR2     |
| cg25041439 | 0.18517 | 0.09153 | 0.46211 | 0.53445 | 0.39992 | 0.35122 | 0.64262 | 0.72625 | 0.68252 | 0.64198 | HYLS1    |
| cg25042226 | 0.75693 | 0.46612 | 0.95543 | 0.95601 | 0.96279 | 0.96019 | 0.95574 | 0.95621 | 0.94009 | 0.89024 | PAX8     |
| cg25043279 | 0.76275 | 0.2067  | 0.67753 | 0.78765 | 0.42404 | 0.43255 | 0.35803 | 0.5136  | 0.38438 | 0.45487 | C7orf33  |
| cg25044651 | 0.55584 | 0.35051 | 0.87191 | 0.90843 | 0.7241  | 0.72648 | 0.95696 | 0.95712 | 0.9562  | 0.92025 | FLJ90650 |
| cg25047001 | 0.03904 | 0.0331  | 0.42463 | 0.70639 | 0.39746 | 0.64125 | 0.04689 | 0.03725 | 0.05057 | 0.05063 | GRIN2A   |
| cg25047102 | 0.02979 | 0.0317  | 0.03089 | 0.02893 | 0.02405 | 0.02376 | 0.02695 | 0.02859 | 0.0238  | 0.02316 | VKORC1   |
| cg25047280 | 0.05916 | 0.06994 | 0.05006 | 0.0477  | 0.04868 | 0.04977 | 0.04626 | 0.04737 | 0.93316 | 0.90697 | HOXA9    |
| cg25047378 | 0.04246 | 0.0409  | 0.04257 | 0.04109 | 0.02813 | 0.03938 | 0.03851 | 0.03918 | 0.03621 | 0.03296 | IPO13    |
| cg25048564 | 0.45077 | 0.11132 | 0.51589 | 0.54373 | 0.901   | 0.50633 | 0.12521 | 0.14466 | 0.90867 | 0.46077 | HUNK     |
| cg25050026 | 0.37146 | 0.21137 | 0.75984 | 0.84211 | 0.51017 | 0.29496 | 0.41864 | 0.24126 | 0.70165 | 0.61039 | MFS1     |
| cg25053301 | 0.12412 | 0.10099 | 0.15588 | 0.13148 | 0.16271 | 0.11424 | 0.52942 | 0.5171  | 0.09779 | 0.07905 | WDR13    |
| cg25053891 | 0.07017 | 0.06315 | 0.08758 | 0.0733  | 0.06777 | 0.06184 | 0.06218 | 0.05271 | 0.0589  | 0.06415 | TRIAP1   |
| cg25053900 | 0.8836  | 0.10934 | 0.90818 | 0.92904 | 0.94027 | 0.9284  | 0.86736 | 0.94132 | 0.94005 | 0.94803 | ARX      |
| cg25054311 | 0.40154 | 0.06206 | 0.06267 | 0.05892 | 0.20359 | 0.24641 | 0.04731 | 0.04933 | 0.37803 | 0.56088 | SLC26A2  |
| cg25055403 | 0.04786 | 0.04663 | 0.04494 | 0.03569 | 0.05632 | 0.05757 | 0.02807 | 0.03129 | 0.03734 | 0.03999 | NEDD8    |
| cg25055477 | 0.09257 | 0.06598 | 0.2316  | 0.21346 | 0.18998 | 0.05382 | 0.43214 | 0.16262 | 0.1235  | 0.04822 | NUDT3    |
| cg25057743 | 0.0646  | 0.05919 | 0.60666 | 0.70454 | 0.34328 | 0.06227 | 0.09537 | 0.05589 | 0.14754 | 0.11547 | PTHR2    |
| cg25058957 | 0.93578 | 0.80082 | 0.77434 | 0.83183 | 0.9557  | 0.9346  | 0.79834 | 0.59952 | 0.82642 | 0.66206 | RAXL1    |
| cg25059428 | 0.07209 | 0.06666 | 0.05381 | 0.04504 | 0.06875 | 0.0579  | 0.03427 | 0.03808 | 0.04798 | 0.06407 | UBE1     |
| cg25059436 | 0.04145 | 0.047   | 0.04492 | 0.03781 | 0.04239 | 0.03573 | 0.03369 | 0.03243 | 0.03463 | 0.03567 | CUGBP1   |
| cg25059792 | 0.04887 | 0.04847 | 0.04746 | 0.04671 | 0.04536 | 0.03089 | 0.04021 | 0.03773 | 0.06695 | 0.03481 | EIF3S4   |
| cg25059899 | 0.87996 | 0.88416 | 0.87578 | 0.89318 | 0.81416 | 0.74452 | 0.86498 | 0.75093 | 0.90994 | 0.85785 | BCL2     |
| cg25060020 | 0.04    | 0.04157 | 0.04165 | 0.0432  | 0.0407  | 0.03814 | 0.03122 | 0.029   | 0.03448 | 0.03058 | SERTAD1  |
| cg25060573 | 0.03786 | 0.042   | 0.03565 | 0.03552 | 0.0411  | 0.03765 | 0.03954 | 0.03652 | 0.03504 | 0.03337 | CCND1    |
| cg25061755 | 0.68549 | 0.64834 | 0.36286 | 0.66134 | 0.87161 | 0.8893  | 0.82951 | 0.86578 | 0.38591 | 0.08353 | STON1    |
| cg25063710 | 0.04907 | 0.05958 | 0.09937 | 0.08595 | 0.0652  | 0.06812 | 0.08777 | 0.06161 | 0.06701 | 0.05711 | BRWD3    |
| cg25065147 | 0.08106 | 0.0985  | 0.10089 | 0.09619 | 0.1535  | 0.09311 | 0.08755 | 0.0747  | 0.07329 | 0.09621 | MCFD2    |
| cg25066857 | 0.57325 | 0.58848 | 0.83844 | 0.86731 | 0.89323 | 0.83722 | 0.4073  | 0.52467 | 0.40914 | 0.2489  | GNLY     |
| cg25067197 | 0.11619 | 0.12799 | 0.14991 | 0.16081 | 0.19786 | 0.14362 | 0.10374 | 0.10851 | 0.12198 | 0.1342  | SLC39A11 |
| cg25068445 | 0.04548 | 0.04587 | 0.04338 | 0.04068 | 0.03725 | 0.04229 | 0.04221 | 0.03924 | 0.03305 | 0.03451 | TRAF2    |
| cg25070010 | 0.04271 | 0.04412 | 0.71895 | 0.84022 | 0.33404 | 0.4389  | 0.10113 | 0.04532 | 0.53417 | 0.51786 | MYRIP    |
| cg25070480 | 0.07252 | 0.07319 | 0.09571 | 0.10293 | 0.11919 | 0.08295 | 0.08433 | 0.08332 | 0.07451 | 0.08552 | PPHLN1   |

|            |         |         |         |         |         |         |         |         |         |                   |
|------------|---------|---------|---------|---------|---------|---------|---------|---------|---------|-------------------|
| cg25070637 | 0.05359 | 0.05462 | 0.06504 | 0.05814 | 0.04559 | 0.05397 | 0.05386 | 0.0552  | 0.05266 | 0.05526 SDC2      |
| cg25071429 | 0.79793 | 0.863   | 0.41337 | 0.52413 | 0.86719 | 0.81719 | 0.29213 | 0.31785 | 0.79942 | 0.87307 TEX13B    |
| cg25072179 | 0.54604 | 0.31827 | 0.255   | 0.20609 | 0.82193 | 0.35163 | 0.07923 | 0.07233 | 0.06827 | 0.06661 AGTRL1    |
| cg25072962 | 0.3589  | 0.23827 | 0.20122 | 0.3895  | 0.3919  | 0.29111 | 0.37944 | 0.34715 | 0.19119 | 0.16334 MGC35295  |
| cg25076881 | 0.047   | 0.03921 | 0.18574 | 0.13868 | 0.04902 | 0.04354 | 0.09015 | 0.05098 | 0.04993 | 0.04929 OR10J1    |
| cg25077328 | 0.91178 | 0.89319 | 0.91323 | 0.91745 | 0.92393 | 0.88977 | 0.90381 | 0.54012 | 0.91747 | 0.89866 BZRP      |
| cg25077654 | 0.03049 | 0.02978 | 0.03436 | 0.03169 | 0.02379 | 0.02705 | 0.02331 | 0.02665 | 0.0239  | 0.02423 DSCR2     |
| cg25077752 | 0.86166 | 0.86155 | 0.8329  | 0.8402  | 0.80921 | 0.81987 | 0.78383 | 0.83574 | 0.857   | 0.86572 LOC126295 |
| cg25081201 | 0.95124 | 0.69796 | 0.85429 | 0.92834 | 0.86269 | 0.6193  | 0.62066 | 0.90476 | 0.76398 | 0.26964 FXYD4     |
| cg25082710 | 0.0972  | 0.12192 | 0.11075 | 0.17819 | 0.40016 | 0.22895 | 0.10038 | 0.08062 | 0.15057 | 0.19577 IVL       |
| cg25083781 | 0.03672 | 0.03798 | 0.03639 | 0.03463 | 0.03145 | 0.03454 | 0.03263 | 0.03625 | 0.03076 | 0.02874 HM13      |
| cg25084220 | 0.02169 | 0.02409 | 0.02169 | 0.02195 | 0.01713 | 0.01886 | 0.01984 | 0.02042 | 0.01638 | 0.01849 3-Mar     |
| cg25084525 | 0.03814 | 0.04065 | 0.04031 | 0.03296 | 0.05641 | 0.04968 | 0.03155 | 0.03521 | 0.04486 | 0.03448 NPAL1     |
| cg25084878 | 0.16081 | 0.1181  | 0.12072 | 0.13434 | 0.30956 | 0.12088 | 0.12418 | 0.11585 | 0.16624 | 0.41158 FBN2      |
| cg25085950 | 0.22462 | 0.22398 | 0.23418 | 0.22398 | 0.22959 | 0.2061  | 0.15857 | 0.14089 | 0.47374 | 0.16289 ATP5J     |
| cg25086702 | 0.04698 | 0.04932 | 0.03544 | 0.03859 | 0.02802 | 0.03939 | 0.0265  | 0.02965 | 0.03088 | 0.03982 HMGB2     |
| cg25086957 | 0.94358 | 0.94912 | 0.95297 | 0.94374 | 0.47755 | 0.66487 | 0.75477 | 0.90334 | 0.89913 | 0.91324 WDR40B    |
| cg25087423 | 0.94709 | 0.13197 | 0.93599 | 0.94168 | 0.94466 | 0.78812 | 0.42618 | 0.2651  | 0.95976 | 0.03167 BLR1      |
| cg25088874 | 0.03508 | 0.03399 | 0.03174 | 0.03007 | 0.0498  | 0.03459 | 0.03007 | 0.03451 | 0.05336 | 0.03267 BMPR1B    |
| cg25089231 | 0.09188 | 0.08058 | 0.10288 | 0.08915 | 0.08353 | 0.09209 | 0.07931 | 0.08055 | 0.08155 | 0.07884 UST       |
| cg25092283 | 0.12918 | 0.08933 | 0.11628 | 0.10391 | 0.09885 | 0.09605 | 0.0895  | 0.07754 | 0.06426 | 0.07069 SORBS1    |
| cg25092328 | 0.03701 | 0.03493 | 0.63772 | 0.75604 | 0.18093 | 0.4182  | 0.04377 | 0.03661 | 0.03216 | 0.03033 PXMP4     |
| cg25092540 | 0.88573 | 0.88457 | 0.88516 | 0.89684 | 0.92596 | 0.89709 | 0.89909 | 0.8713  | 0.89619 | 0.88312 NUP188    |
| cg25093045 | 0.42347 | 0.49427 | 0.14057 | 0.15065 | 0.16553 | 0.08051 | 0.04736 | 0.04689 | 0.2776  | 0.247 FLJ46481    |
| cg25094569 | 0.66994 | 0.72306 | 0.92385 | 0.93484 | 0.14758 | 0.0671  | 0.11679 | 0.1041  | 0.30673 | 0.04118 WT1       |
| cg25094927 | 0.04212 | 0.04252 | 0.04582 | 0.03843 | 0.03807 | 0.03688 | 0.04025 | 0.0374  | 0.0382  | 0.03915 RANGAP1   |
| cg25095380 | 0.04251 | 0.03516 | 0.04357 | 0.04175 | 0.04929 | 0.04651 | 0.03577 | 0.03728 | 0.03253 | 0.0408 PRDM5      |
| cg25095612 | 0.06468 | 0.06004 | 0.062   | 0.06251 | 0.07357 | 0.05913 | 0.05943 | 0.05329 | 0.06813 | 0.04675 NFKB2     |
| cg25095814 | 0.31079 | 0.18376 | 0.09017 | 0.06442 | 0.4745  | 0.09314 | 0.09019 | 0.07232 | 0.07337 | 0.06925 CASP8     |
| cg25095951 | 0.10114 | 0.0699  | 0.13264 | 0.10446 | 0.13152 | 0.10892 | 0.11184 | 0.08855 | 0.0918  | 0.07273 RPS26     |
| cg25096582 | 0.02062 | 0.02288 | 0.02317 | 0.0203  | 0.01873 | 0.02453 | 0.02099 | 0.0196  | 0.01909 | 0.01952 CFL2      |
| cg25097436 | 0.08598 | 0.07039 | 0.25855 | 0.1719  | 0.31494 | 0.09104 | 0.16435 | 0.07165 | 0.5423  | 0.0901 RTN1       |
| cg25097676 | 0.05471 | 0.0548  | 0.05402 | 0.05544 | 0.05581 | 0.05211 | 0.05493 | 0.05338 | 0.04381 | 0.04517 ARHGAP19  |
| cg25098095 | 0.07049 | 0.06763 | 0.0731  | 0.07937 | 0.05491 | 0.05885 | 0.05683 | 0.04462 | 0.07229 | 0.0541 C6orf55    |
| cg25098401 | 0.0867  | 0.06955 | 0.11924 | 0.10079 | 0.13622 | 0.07637 | 0.06868 | 0.05937 | 0.06595 | 0.05839 LCE2B     |
| cg25098644 | 0.06878 | 0.04571 | 0.06922 | 0.08356 | 0.04952 | 0.04769 | 0.04417 | 0.0387  | 0.03974 | 0.0416 SUZ12      |
| cg25100404 | 0.06553 | 0.07128 | 0.06692 | 0.06467 | 0.0524  | 0.05301 | 0.04445 | 0.04562 | 0.05165 | 0.04766 AP1S2     |
| cg25101056 | 0.79642 | 0.77239 | 0.78916 | 0.81401 | 0.76403 | 0.76134 | 0.12449 | 0.11609 | 0.61722 | 0.51654 KCNG4     |
| cg25101936 | 0.88101 | 0.68802 | 0.84429 | 0.87387 | 0.89682 | 0.86302 | 0.70631 | 0.78081 | 0.65107 | 0.65345 ZBTB16    |
| cg25103286 | 0.82183 | 0.82047 | 0.81562 | 0.8212  | 0.70889 | 0.74887 | 0.80677 | 0.84637 | 0.82435 | 0.81799 NT5DC2    |
| cg25104030 | 0.09523 | 0.04923 | 0.29156 | 0.08988 | 0.08218 | 0.04591 | 0.05015 | 0.04772 | 0.04676 | 0.041 RASGEF1A    |

|            |         |         |         |         |         |         |         |         |         |         |          |
|------------|---------|---------|---------|---------|---------|---------|---------|---------|---------|---------|----------|
| cg25104511 | 0.41406 | 0.37873 | 0.54057 | 0.90407 | 0.95333 | 0.90231 | 0.9247  | 0.87254 | 0.51614 | 0.40533 | RAPGEFL1 |
| cg25106358 | 0.86726 | 0.82991 | 0.77851 | 0.83792 |         | 0.8144  | 0.83513 | 0.84433 | 0.81925 | 0.63636 | CLDN20   |
| cg25106814 | 0.05946 | 0.04275 | 0.04605 | 0.0442  | 0.04783 | 0.05657 | 0.05574 | 0.05627 | 0.04922 | 0.04268 | C9orf82  |
| cg25107791 | 0.43716 | 0.192   | 0.62169 | 0.80046 | 0.71169 | 0.81958 | 0.19367 | 0.15028 | 0.47851 | 0.38682 | CLPS     |
| cg25107903 | 0.35187 | 0.06556 | 0.10161 | 0.09022 | 0.05324 | 0.05287 | 0.0839  | 0.1355  | 0.04603 | 0.1146  | SPAG11   |
| cg25107978 | 0.0474  | 0.05005 | 0.04257 | 0.04721 | 0.02987 | 0.0416  | 0.04333 | 0.04235 | 0.03606 | 0.03857 | MBD6     |
| cg25109024 | 0.04827 | 0.0536  | 0.06026 | 0.05567 | 0.04467 | 0.05027 | 0.05638 | 0.05437 | 0.0492  | 0.04402 | DDX21    |
| cg25110234 | 0.03044 | 0.03866 | 0.03309 | 0.03194 | 0.02218 | 0.03013 | 0.02601 | 0.02739 | 0.02675 | 0.02773 | PCNT2    |
| cg25111781 | 0.04846 | 0.04915 | 0.05181 | 0.04897 | 0.03897 | 0.04691 | 0.05407 | 0.05031 | 0.03975 | 0.04601 | MRPS16   |
| cg25112044 | 0.04165 | 0.03191 | 0.04557 | 0.03471 | 0.04194 | 0.03957 | 0.03495 | 0.03838 | 0.02354 | 0.0215  | CDK7     |
| cg25112191 | 0.57823 | 0.20568 | 0.55244 | 0.61501 | 0.63472 | 0.60656 | 0.14023 | 0.07905 | 0.11075 | 0.26492 | RORC     |
| cg25112853 | 0.56146 | 0.40015 | 0.6368  | 0.63092 | 0.60192 | 0.69181 | 0.56756 | 0.47714 | 0.58417 | 0.51633 | HSC20    |
| cg25115460 | 0.95793 | 0.52427 | 0.95972 | 0.96249 | 0.96007 | 0.95711 | 0.0608  | 0.03232 | 0.04719 | 0.04108 | TP73     |
| cg25117362 | 0.10876 | 0.10421 | 0.66925 | 0.65008 | 0.7207  | 0.55138 | 0.35522 | 0.15759 | 0.32805 | 0.16664 | C10orf77 |
| cg25117976 | 0.0388  | 0.03784 | 0.03519 | 0.03597 | 0.0373  | 0.03766 | 0.03013 | 0.02943 | 0.03137 | 0.03216 | UGDH     |
| cg25118574 | 0.06839 | 0.06988 | 0.07997 | 0.06959 | 0.06376 | 0.07473 | 0.06487 | 0.05731 | 0.05764 | 0.05984 | PSMB7    |
| cg25119415 | 0.08285 | 0.08633 | 0.1768  | 0.16159 | 0.11886 | 0.10121 | 0.1461  | 0.09331 | 0.38669 | 0.41861 | MNDA     |
| cg25122941 | 0.02011 | 0.02034 | 0.02428 | 0.0209  | 0.01567 | 0.02036 | 0.02043 | 0.01817 | 0.02009 | 0.02006 | VPS39    |
| cg25123470 | 0.07941 | 0.07942 | 0.76903 | 0.88604 | 0.90778 | 0.88054 | 0.89081 | 0.88868 | 0.9066  | 0.86636 | KCNIP2   |
| cg25124030 | 0.75925 | 0.29509 | 0.6164  | 0.61662 | 0.3671  | 0.19854 | 0.46284 | 0.1892  | 0.75592 | 0.48099 | MRPL48   |
| cg25124223 | 0.03357 | 0.0313  | 0.03618 | 0.03249 | 0.02812 | 0.02951 | 0.02774 | 0.02374 | 0.02771 | 0.02821 | NUP43    |
| cg25124433 | 0.86105 | 0.85334 | 0.82424 | 0.85121 | 0.82387 | 0.8097  | 0.6132  | 0.80602 | 0.6857  | 0.74585 | KRT20    |
| cg25124636 | 0.04985 | 0.04987 | 0.04623 | 0.04653 | 0.18567 | 0.04293 | 0.04183 | 0.04212 | 0.04611 | 0.04275 | HPCAL1   |
| cg25125453 | 0.21231 | 0.17212 | 0.74391 | 0.84784 | 0.25348 | 0.16553 | 0.24646 | 0.22558 | 0.12864 | 0.15766 | C20orf38 |
| cg25126052 | 0.09171 | 0.08269 | 0.10908 | 0.10235 | 0.13305 | 0.10559 | 0.10246 | 0.10497 | 0.08017 | 0.08424 | INT4     |
| cg25126812 | 0.02678 | 0.02869 | 0.02634 | 0.0272  | 0.02113 | 0.02712 | 0.02268 | 0.02203 | 0.02129 | 0.02035 | ACTN1    |
| cg25128803 | 0.03657 | 0.03483 | 0.04128 | 0.0386  | 0.03271 | 0.03409 | 0.02913 | 0.02998 | 0.03367 | 0.0296  | SLC16A1  |
| cg25130333 | 0.02576 | 0.03093 | 0.05326 | 0.05438 | 0.03387 | 0.03433 | 0.04016 | 0.03571 | 0.02184 | 0.02204 | CD99L2   |
| cg25131727 | 0.03845 | 0.03776 | 0.03974 | 0.03854 | 0.02796 | 0.03445 | 0.0356  | 0.04047 | 0.03525 | 0.03173 | PTS      |
| cg25132078 | 0.06184 | 0.03781 | 0.06363 | 0.05293 | 0.04898 | 0.04308 | 0.04614 | 0.04118 | 0.04641 | 0.0429  | PFDN1    |
| cg25133016 | 0.46733 | 0.05205 | 0.24108 | 0.16362 | 0.14996 | 0.20114 | 0.09312 | 0.05092 | 0.04984 | 0.03596 | PIP5K2C  |
| cg25133685 | 0.1492  | 0.09876 | 0.18015 | 0.21807 | 0.25806 | 0.16304 | 0.10616 | 0.12677 | 0.06257 | 0.08369 | OR2W1    |
| cg25133753 | 0.08332 | 0.07478 | 0.12746 | 0.09284 | 0.1785  | 0.08194 | 0.08666 | 0.11457 | 0.0563  | 0.06086 | WFDC11   |
| cg25134071 | 0.78527 | 0.82275 | 0.83792 | 0.84785 | 0.87022 | 0.79199 | 0.81694 | 0.83207 | 0.61228 | 0.7994  | KLK8     |
| cg25136045 | 0.11707 | 0.09554 | 0.13698 | 0.1226  | 0.16891 | 0.11292 | 0.11361 | 0.10804 | 0.05908 | 0.06872 | SDCCAG10 |
| cg25136310 | 0.04224 | 0.04418 | 0.0388  | 0.03703 | 0.02947 | 0.03504 | 0.04047 | 0.03802 | 0.03406 | 0.03562 | RPL36    |
| cg25136687 | 0.05346 | 0.04763 | 0.04794 | 0.04492 | 0.03683 | 0.04642 | 0.0473  | 0.05026 | 0.04584 | 0.04474 | REV3L    |
| cg25136926 | 0.71182 | 0.70502 | 0.70941 | 0.70761 | 0.56226 | 0.55985 | 0.46166 | 0.53879 | 0.63978 | 0.57912 | DDX12    |
| cg25138936 | 0.02403 | 0.02227 | 0.05066 | 0.04308 | 0.02465 | 0.02987 | 0.02926 | 0.02809 | 0.02197 | 0.02221 | RPL23A   |
| cg25139619 | 0.03329 | 0.03883 | 0.03578 | 0.03282 | 0.05164 | 0.04608 | 0.02651 | 0.02828 | 0.02328 | 0.02161 | C13orf25 |
| cg25140370 | 0.06188 | 0.06805 | 0.23276 | 0.26678 | 0.27141 | 0.15956 | 0.11566 | 0.10954 | 0.24003 | 0.04393 | IRF4     |

|            |         |         |         |         |         |         |         |         |         |                  |
|------------|---------|---------|---------|---------|---------|---------|---------|---------|---------|------------------|
| cg25140501 | 0.03618 | 0.03318 | 0.0358  | 0.03865 | 0.0426  | 0.05357 | 0.03029 | 0.02943 | 0.03234 | 0.04278 ACIN1    |
| cg25140571 | 0.22089 | 0.22246 | 0.23844 | 0.27603 | 0.33778 | 0.20395 | 0.2752  | 0.22199 | 0.19773 | 0.23362 OXTR     |
| cg25141490 | 0.80328 | 0.64865 | 0.79878 | 0.83147 | 0.86376 | 0.77295 | 0.77074 | 0.55563 | 0.77792 | 0.6562 IL17B     |
| cg25141674 | 0.04862 | 0.05803 | 0.05292 | 0.04823 | 0.05325 | 0.05563 | 0.03846 | 0.04102 | 0.06148 | 0.04339 C6orf155 |
| cg25141720 | 0.06817 | 0.06254 | 0.06819 | 0.06271 | 0.04897 | 0.0674  | 0.06052 | 0.06067 | 0.15329 | 0.06178 GAS1     |
| cg25141995 | 0.89772 | 0.5113  | 0.39711 | 0.42331 | 0.93118 | 0.61022 | 0.86616 | 0.6355  | 0.91589 | 0.85092 VDAC1    |
| cg25142416 | 0.2406  | 0.17029 | 0.7249  | 0.83561 | 0.5383  | 0.61153 | 0.76672 | 0.81127 | 0.13053 | 0.12707 CA1      |
| cg25145670 | 0.13363 | 0.14418 | 0.1109  | 0.10218 | 0.18853 | 0.15001 | 0.19564 | 0.13675 | 0.11468 | 0.11166 HOXB4    |
| cg25148589 | 0.12034 | 0.04233 | 0.82706 | 0.83205 | 0.44166 | 0.26567 | 0.45067 | 0.44637 | 0.2877  | 0.13135 GRIA2    |
| cg25149155 | 0.20497 | 0.15949 | 0.165   | 0.15845 | 0.10986 | 0.13363 | 0.14364 | 0.16079 | 0.14419 | 0.12019 BCL2L2   |
| cg25149927 | 0.08417 | 0.08433 | 0.11626 | 0.10765 | 0.11873 | 0.12567 | 0.12221 | 0.09476 | 0.08638 | 0.098 SSH1       |
| cg25151295 | 0.88054 | 0.89408 | 0.84307 | 0.87407 | 0.84312 | 0.84808 | 0.07458 | 0.2078  | 0.48494 | 0.59654 RANBP5   |
| cg25151806 | 0.85934 | 0.80667 | 0.77713 | 0.7858  | 0.85733 | 0.86925 | 0.82931 | 0.86491 | 0.90733 | 0.61552 ELOVL2   |
| cg25152348 | 0.02109 | 0.02209 | 0.02803 | 0.02558 | 0.01888 | 0.0259  | 0.02481 | 0.02631 | 0.02951 | 0.02322 hCAP-H2  |
| cg25152631 | 0.04453 | 0.04186 | 0.04427 | 0.04474 | 0.03478 | 0.03685 | 0.02985 | 0.03484 | 0.02967 | 0.0382 SLC25A36  |
| cg25152942 | 0.6632  | 0.31737 | 0.61229 | 0.70266 | 0.71551 | 0.59068 | 0.59453 | 0.24369 | 0.08005 | 0.08933 MIA      |
| cg25153340 | 0.21598 | 0.08464 | 0.20775 | 0.20154 | 0.06205 | 0.05208 | 0.07435 | 0.07843 | 0.04837 | 0.04264 PLEKHK1  |
| cg25156443 | 0.1901  | 0.18571 | 0.4606  | 0.80957 | 0.5981  | 0.70287 | 0.22493 | 0.16271 | 0.61057 | 0.25786 SFRP5    |
| cg25157408 | 0.56682 | 0.35375 | 0.5     | 0.58579 | 0.68802 | 0.82183 | 0.56014 | 0.68791 | 0.34529 | 0.28599 HAO1     |
| cg25157874 | 0.07615 | 0.07013 | 0.09472 | 0.10565 | 0.11499 | 0.07204 | 0.06461 | 0.05592 | 0.07845 | 0.08614 QKI      |
| cg25159539 | 0.03994 | 0.04172 | 0.0429  | 0.0402  | 0.03208 | 0.03748 | 0.04393 | 0.03688 | 0.0344  | 0.03471 FEM1B    |
| cg25159610 | 0.05925 | 0.04499 | 0.05076 | 0.04533 | 0.06319 | 0.05538 | 0.04686 | 0.04333 | 0.04247 | 0.03355 PLK2     |
| cg25159668 | 0.68659 | 0.67374 | 0.56204 | 0.68138 | 0.57983 | 0.695   | 0.626   | 0.69554 | 0.31992 | 0.23235 AADACL2  |
| cg25160554 | 0.09319 | 0.07759 | 0.10342 | 0.06514 | 0.11182 | 0.06933 | 0.12269 | 0.1265  | 0.07242 | 0.07333 ARL6     |
| cg25162301 | 0.90882 | 0.85751 | 0.78797 | 0.86421 | 0.90222 | 0.89089 | 0.06425 | 0.06327 | 0.32236 | 0.24817 AHSG     |
| cg25162794 | 0.85536 | 0.84853 | 0.85123 | 0.83457 | 0.85096 | 0.85245 | 0.84627 | 0.83437 | 0.85643 | 0.83075 ANKRD23  |
| cg25162921 | 0.50178 | 0.50191 | 0.50251 | 0.50891 | 0.21885 | 0.30565 | 0.28068 | 0.12417 | 0.44475 | 0.37109 MTAP     |
| cg25163134 | 0.17879 | 0.10933 | 0.14118 | 0.14043 | 0.21851 | 0.1147  | 0.16388 | 0.11475 | 0.11794 | 0.09584 PSMC4    |
| cg25163476 | 0.05439 | 0.05208 | 0.40612 | 0.46723 | 0.06698 | 0.13988 | 0.1764  | 0.52672 | 0.08344 | 0.42135 IGF2AS   |
| cg25165199 | 0.8259  | 0.83131 | 0.77715 | 0.78895 | 0.78226 | 0.74541 | 0.58771 | 0.6202  | 0.81713 | 0.66911 RCBTB2   |
| cg25165880 | 0.70294 | 0.24789 | 0.28833 | 0.32719 | 0.46388 | 0.2082  | 0.26744 | 0.24178 | 0.24122 | 0.21717 ACOT7    |
| cg25166896 | 0.04838 | 0.0552  | 0.06055 | 0.05118 | 0.04147 | 0.04289 | 0.04898 | 0.04238 | 0.04646 | 0.03809 C22orf25 |
| cg25167447 | 0.13278 | 0.12651 | 0.23784 | 0.18    | 0.28901 | 0.25142 | 0.38493 | 0.15646 | 0.63651 | 0.35093 NAV1     |
| cg25167643 | 0.03524 | 0.03629 | 0.28776 | 0.15934 | 0.0652  | 0.0612  | 0.03837 | 0.04362 | 0.04612 | 0.02788 PTPRZ1   |
| cg25167838 | 0.02648 | 0.03888 | 0.05947 | 0.04507 | 0.05224 | 0.04422 | 0.02572 | 0.03289 | 0.03086 | 0.02316 SHH      |
| cg25168545 | 0.7663  | 0.10589 | 0.17615 | 0.22675 | 0.51926 | 0.77024 | 0.07152 | 0.07037 | 0.07495 | 0.05426 GIMAP1   |
| cg25169784 | 0.33892 | 0.0656  | 0.13173 | 0.08218 | 0.04433 | 0.06229 | 0.036   | 0.03774 | 0.03245 | 0.02848 UGCGL2   |
| cg25171089 | 0.06813 | 0.0337  | 0.03244 | 0.03761 | 0.19182 | 0.09638 | 0.03461 | 0.03072 | 0.03908 | 0.02597 ASB13    |
| cg25172835 | 0.84556 | 0.83302 | 0.83664 | 0.86864 | 0.70993 | 0.80902 | 0.80818 | 0.83726 | 0.79519 | 0.67857 PUNC     |
| cg25173010 | 0.06662 | 0.07151 | 0.06671 | 0.06583 | 0.1394  | 0.08458 | 0.04323 | 0.03394 | 0.08494 | 0.07841 TXNIP    |
| cg25174591 | 0.06481 | 0.06575 | 0.66282 | 0.77937 | 0.20065 | 0.07611 | 0.11402 | 0.0836  | 0.11099 | 0.0686 DNAH9     |

|            |         |         |         |         |         |         |         |         |         |                  |
|------------|---------|---------|---------|---------|---------|---------|---------|---------|---------|------------------|
| cg25175370 | 0.02476 | 0.02641 | 0.02637 | 0.02823 | 0.02553 | 0.02361 | 0.0228  | 0.02584 | 0.02106 | 0.01887 C7orf27  |
| cg25176823 | 0.39839 | 0.34776 | 0.33512 | 0.34155 | 0.30527 | 0.36135 | 0.13222 | 0.26485 | 0.05178 | 0.03933 FSCN1    |
| cg25177139 | 0.84016 | 0.83708 | 0.84067 | 0.85343 | 0.72732 | 0.77419 | 0.83357 | 0.8418  | 0.85295 | 0.76095 SLC10A6  |
| cg25177452 | 0.03237 | 0.03254 | 0.03341 | 0.02834 | 0.03125 | 0.02862 | 0.12055 | 0.03092 | 0.04848 | 0.01764 PRP2     |
| cg25178645 | 0.98186 | 0.9692  | 0.97776 | 0.97539 | 0.98301 | 0.97464 | 0.98044 | 0.97451 | 0.97851 | 0.97515 RUNX3    |
| cg25179291 | 0.03821 | 0.03692 | 0.0417  | 0.0395  | 0.06322 | 0.03807 | 0.04099 | 0.03284 | 0.03517 | 0.03617 FNBP1    |
| cg25179963 | 0.01963 | 0.02247 | 0.02542 | 0.02142 | 0.01566 | 0.01776 | 0.01718 | 0.0165  | 0.01741 | 0.01348 NT5DC1   |
| cg25181284 | 0.89261 | 0.69564 | 0.90009 | 0.89713 | 0.93919 | 0.91834 | 0.90444 | 0.89439 | 0.90419 | 0.90171 GPD1     |
| cg25181693 | 0.26639 | 0.0695  | 0.11527 | 0.07531 | 0.91692 | 0.45513 | 0.40434 | 0.06756 | 0.26891 | 0.03609 ALDH5A1  |
| cg25182523 | 0.83208 | 0.75515 | 0.83095 | 0.86861 | 0.87971 | 0.63746 | 0.834   | 0.60735 | 0.8282  | 0.65181 C1orf24  |
| cg25182621 | 0.9525  | 0.89411 | 0.79199 | 0.86087 | 0.96414 | 0.91042 | 0.54112 | 0.53568 | 0.63415 | 0.21116 CHR1     |
| cg25186143 | 0.24034 | 0.17106 | 0.53457 | 0.57604 | 0.57198 | 0.12706 | 0.85221 | 0.3544  | 0.96514 | 0.82053 FAM57A   |
| cg25186211 | 0.04959 | 0.06099 | 0.0646  | 0.05862 | 0.03813 | 0.05402 | 0.04963 | 0.04847 | 0.04536 | 0.04611 C9orf18  |
| cg25187533 | 0.08524 | 0.11657 | 0.61841 | 0.67107 | 0.67033 | 0.60357 | 0.59209 | 0.36947 | 0.60629 | 0.56363 PSG2     |
| cg25189085 | 0.50575 | 0.44922 | 0.84678 | 0.8781  | 0.81804 | 0.84982 | 0.82282 | 0.82547 | 0.87541 | 0.78657 STAC3    |
| cg25191725 | 0.91115 | 0.90842 | 0.90622 | 0.93113 | 0.956   | 0.92783 | 0.69288 | 0.48506 | 0.92385 | 0.91781 PYY2     |
| cg25192419 | 0.0297  | 0.03243 | 0.02869 | 0.03357 | 0.02707 | 0.02978 | 0.04222 | 0.04212 | 0.02277 | 0.02892 DOCK5    |
| cg25193278 | 0.24415 | 0.39252 | 0.14221 | 0.14232 | 0.23594 | 0.17746 | 0.11992 | 0.1194  | 0.12116 | 0.11681 BTN3A3   |
| cg25193494 | 0.84636 | 0.8128  | 0.59232 | 0.69734 | 0.69153 | 0.54806 | 0.77869 | 0.38085 | 0.91731 | 0.56928 FLJ20186 |
| cg25194415 | 0.03029 | 0.03606 | 0.02936 | 0.03033 | 0.03359 | 0.03016 | 0.02764 | 0.03126 | 0.02559 | 0.02801 KIAA0232 |
| cg25195673 | 0.83557 | 0.46495 | 0.61487 | 0.70371 | 0.86993 | 0.34044 | 0.59232 | 0.48734 | 0.39413 | 0.28442 GFPT1    |
| cg25198545 | 0.04095 | 0.04127 | 0.04022 | 0.04009 | 0.03223 | 0.03428 | 0.03503 | 0.03786 | 0.0343  | 0.03507 ACTL6A   |
| cg25201363 | 0.68453 | 0.52845 | 0.88487 | 0.86727 | 0.90659 | 0.85881 | 0.87076 | 0.81312 | 0.65448 | 0.47508 LRPAP1   |
| cg25201980 | 0.02141 | 0.02252 | 0.02708 | 0.02372 | 0.02037 | 0.02056 | 0.02149 | 0.02015 | 0.01917 | 0.01996 ZNF250   |
| cg25202404 | 0.02891 | 0.03307 | 0.03359 | 0.03088 | 0.02365 | 0.02975 | 0.02955 | 0.02917 | 0.04818 | 0.02497 PXMP3    |
| cg25202471 | 0.0475  | 0.03724 | 0.05258 | 0.05979 | 0.07546 | 0.03618 | 0.34698 | 0.33033 | 0.03138 | 0.02925 TFAP2A   |
| cg25203561 | 0.89213 | 0.90206 | 0.91965 | 0.91862 | 0.90981 | 0.91087 | 0.88669 | 0.81488 | 0.92022 | 0.67578 SFRS16   |
| cg25203856 | 0.0756  | 0.08192 | 0.27448 | 0.31656 | 0.80008 | 0.78494 | 0.22684 | 0.39813 | 0.68913 | 0.35695 NALP14   |
| cg25203980 | 0.94995 | 0.89823 | 0.955   | 0.95731 | 0.9758  | 0.94045 | 0.95783 | 0.92664 | 0.95701 | 0.93382 CENTB5   |
| cg25206802 | 0.87183 | 0.79418 | 0.81027 | 0.86962 | 0.74561 | 0.82046 | 0.8145  | 0.8588  | 0.86162 | 0.84798 SACS     |
| cg25208892 | 0.83849 | 0.81204 | 0.82718 | 0.85399 | 0.85315 | 0.89082 | 0.84592 | 0.80109 | 0.82825 | 0.74549 C1orf105 |
| cg25211252 | 0.87927 | 0.8879  | 0.89614 | 0.90516 | 0.92449 | 0.89059 | 0.8205  | 0.67678 | 0.90574 | 0.84592 KCNMB3   |
| cg25211525 | 0.01824 | 0.01766 | 0.01723 | 0.01761 | 0.01946 | 0.01777 | 0.0157  | 0.01809 | 0.01619 | 0.01305 C6orf145 |
| cg25214346 | 0.74982 | 0.38029 | 0.89958 | 0.91557 | 0.58648 | 0.44039 | 0.72539 | 0.68508 | 0.67297 | 0.60575 NR1I3    |
| cg25214366 | 0.42492 | 0.04582 | 0.35499 | 0.49072 | 0.70076 | 0.6027  | 0.05938 | 0.05053 | 0.03129 | 0.03744 DEFB103A |
| cg25215340 | 0.02648 | 0.02908 | 0.05242 | 0.05012 | 0.02549 | 0.02877 | 0.02175 | 0.02632 | 0.01885 | 0.02303 CDKN1C   |
| cg25216696 | 0.53702 | 0.1622  | 0.03532 | 0.03973 | 0.61924 | 0.5977  | 0.66566 | 0.91946 | 0.96015 | 0.9503 GATA4     |
| cg25217357 | 0.02764 | 0.03356 | 0.03304 | 0.03655 | 0.02592 | 0.03109 | 0.02411 | 0.02452 | 0.02763 | 0.02668 C12orf61 |
| cg25217765 | 0.25651 | 0.20388 | 0.68499 | 0.69338 | 0.59063 | 0.81745 | 0.33939 | 0.28919 | 0.31099 | 0.31572 CX62     |
| cg25218351 | 0.63518 | 0.60169 | 0.79201 | 0.85898 | 0.95088 | 0.74314 | 0.55701 | 0.4587  | 0.74954 | 0.42602 TRIM54   |
| cg25219047 | 0.033   | 0.03705 | 0.04101 | 0.03937 | 0.03332 | 0.03866 | 0.03252 | 0.02692 | 0.02634 | 0.02531 HLRC1    |

|            |         |         |         |         |         |         |         |         |         |                  |
|------------|---------|---------|---------|---------|---------|---------|---------|---------|---------|------------------|
| cg25219134 | 0.06419 | 0.0618  | 0.07942 | 0.08903 | 0.08309 | 0.07013 | 0.08003 | 0.05921 | 0.07454 | 0.08121 IQWD1    |
| cg25219333 | 0.79303 | 0.7767  | 0.8244  | 0.82297 | 0.75203 | 0.75928 | 0.7793  | 0.83536 | 0.81202 | 0.72437 FXC1     |
| cg25221254 | 0.87238 | 0.72364 | 0.48702 | 0.66826 | 0.67832 | 0.88671 | 0.07059 | 0.07621 | 0.53504 | 0.28981 ASAH3    |
| cg25221625 | 0.84489 | 0.85668 | 0.88317 | 0.89152 | 0.90847 | 0.88351 | 0.85882 | 0.80791 | 0.9016  | 0.89995 CRYBB3   |
| cg25225073 | 0.05696 | 0.05083 | 0.84799 | 0.89388 | 0.15526 | 0.09661 | 0.09504 | 0.04809 | 0.09021 | 0.03803 KCNK13   |
| cg25225238 | 0.06989 | 0.07435 | 0.15888 | 0.1342  | 0.11247 | 0.09246 | 0.07172 | 0.09074 | 0.06124 | 0.06836 GRM3     |
| cg25226014 | 0.79462 | 0.78695 | 0.81158 | 0.80029 | 0.72095 | 0.71152 | 0.72178 | 0.78351 | 0.76967 | 0.78097 CXCR6    |
| cg25226247 | 0.42343 | 0.44218 | 0.69798 | 0.77547 | 0.52594 | 0.45919 | 0.51483 | 0.60209 | 0.82038 | 0.72846 TFAP2B   |
| cg25226891 | 0.02354 | 0.02069 | 0.02161 | 0.02487 | 0.01924 | 0.02271 | 0.55222 | 0.26227 | 0.01689 | 0.01843 ZMYM3    |
| cg25227148 | 0.05211 | 0.0591  | 0.07519 | 0.05618 | 0.10719 | 0.09531 | 0.06757 | 0.05264 | 0.05056 | 0.07632 ZNF271   |
| cg25228126 | 0.39236 | 0.15582 | 0.06728 | 0.0588  | 0.38316 | 0.07528 | 0.07643 | 0.05266 | 0.79731 | 0.59428 FZD2     |
| cg25228746 | 0.27681 | 0.03429 | 0.04237 | 0.03269 | 0.58437 | 0.48465 | 0.34654 | 0.03416 | 0.6199  | 0.1138 BIN1      |
| cg25229015 | 0.03239 | 0.03046 | 0.03296 | 0.03599 | 0.03202 | 0.02935 | 0.03411 | 0.03633 | 0.03422 | 0.02917 WDR61    |
| cg25229172 | 0.06052 | 0.04694 | 0.07223 | 0.06846 | 0.22947 | 0.2786  | 0.37005 | 0.07264 | 0.88451 | 0.78896 CCDC38   |
| cg25229305 | 0.38084 | 0.13897 | 0.39434 | 0.54833 | 0.23257 | 0.37977 | 0.115   | 0.12578 | 0.10171 | 0.10555 KCNK18   |
| cg25229706 | 0.05423 | 0.04036 | 0.04415 | 0.03908 | 0.02369 | 0.04077 | 0.03913 | 0.03552 | 0.03896 | 0.03587 SAMD8    |
| cg25229964 | 0.86982 | 0.85997 | 0.86081 | 0.87202 | 0.85428 | 0.8495  | 0.84624 | 0.86687 | 0.86822 | 0.85611 CNKSR1   |
| cg25230532 | 0.24085 | 0.24852 | 0.22623 | 0.2129  | 0.25092 | 0.27962 | 0.21457 | 0.19937 | 0.1963  | 0.17443 GALT     |
| cg25232934 | 0.03827 | 0.04332 | 0.04685 | 0.04993 | 0.04064 | 0.03632 | 0.06806 | 0.07689 | 0.0435  | 0.04041 THEX1    |
| cg25234611 | 0.20395 | 0.03546 | 0.44932 | 0.5405  | 0.35504 | 0.50507 | 0.07689 | 0.02927 | 0.09703 | 0.03353 VWA1     |
| cg25234963 | 0.03368 | 0.0398  | 0.038   | 0.03242 | 0.02189 | 0.03369 | 0.03687 | 0.03424 | 0.0327  | 0.03449 SFRS14   |
| cg25239996 | 0.08149 | 0.08458 | 0.89156 | 0.90377 | 0.75199 | 0.65782 | 0.07543 | 0.07288 | 0.06518 | 0.0611 CD40      |
| cg25240333 | 0.07872 | 0.08153 | 0.09001 | 0.08224 | 0.0717  | 0.07658 | 0.0877  | 0.08482 | 0.07155 | 0.07683 RPP14    |
| cg25241845 | 0.02105 | 0.01945 | 0.02225 | 0.02086 | 0.02516 | 0.01742 | 0.01817 | 0.01618 | 0.01457 | 0.01372 NEURL2   |
| cg25242557 | 0.0434  | 0.04285 | 0.0425  | 0.03963 | 0.09902 | 0.03292 | 0.65822 | 0.53965 | 0.86392 | 0.87927 PAX6     |
| cg25243721 | 0.07235 | 0.05898 | 0.0683  | 0.07003 | 0.05494 | 0.06134 | 0.05828 | 0.06795 | 0.04845 | 0.05339 XRCC4    |
| cg25245322 | 0.04424 | 0.05282 | 0.05523 | 0.06785 | 0.06014 | 0.04137 | 0.04675 | 0.05132 | 0.05969 | 0.0486 OBFC2B    |
| cg25248094 | 0.52806 | 0.16931 | 0.30126 | 0.40443 | 0.35426 | 0.26044 | 0.07819 | 0.09337 | 0.50017 | 0.27278 SH2D1A   |
| cg25249068 | 0.34394 | 0.40322 | 0.65748 | 0.69462 | 0.62108 | 0.72684 | 0.81602 | 0.75995 | 0.23787 | 0.30292 BFSP2    |
| cg25250358 | 0.04081 | 0.03417 | 0.0306  | 0.03241 | 0.02356 | 0.03796 | 0.02668 | 0.02928 | 0.02637 | 0.02668 PLOD2    |
| cg25250998 | 0.03918 | 0.03663 | 0.17204 | 0.40264 | 0.04885 | 0.04312 | 0.85789 | 0.83289 | 0.90021 | 0.887 GSTO2      |
| cg25251635 | 0.03499 | 0.03297 | 0.03702 | 0.03609 | 0.02546 | 0.03408 | 0.03042 | 0.03211 | 0.03053 | 0.03063 POP7     |
| cg25255679 | 0.02465 | 0.02411 | 0.0291  | 0.02395 | 0.01974 | 0.01853 | 0.02053 | 0.0196  | 0.0199  | 0.02095 C8orf51  |
| cg25255854 | 0.31507 | 0.04887 | 0.03702 | 0.03074 | 0.03534 | 0.04117 | 0.0299  | 0.02803 | 0.03726 | 0.0323 IRF2      |
| cg25256723 | 0.55073 | 0.3633  | 0.59444 | 0.50958 | 0.65595 | 0.51032 | 0.68917 | 0.45247 | 0.4953  | 0.21412 F5       |
| cg25257360 | 0.82584 | 0.84008 | 0.85837 | 0.86175 | 0.8688  | 0.88088 | 0.4067  | 0.53534 | 0.87971 | 0.8734 CXorf23   |
| cg25258291 | 0.02318 | 0.02437 | 0.03027 | 0.02652 | 0.02143 | 0.02325 | 0.01931 | 0.02188 | 0.01767 | 0.01695 FARP1    |
| cg25259754 | 0.04661 | 0.03866 | 0.07755 | 0.06912 | 0.05662 | 0.04852 | 0.06471 | 0.0572  | 0.05299 | 0.04949 FCRL3    |
| cg25261329 | 0.05213 | 0.05311 | 0.04957 | 0.05032 | 0.03404 | 0.04549 | 0.04743 | 0.04962 | 0.04229 | 0.04692 RAD51AP1 |
| cg25261908 | 0.05643 | 0.0497  | 0.05011 | 0.04689 | 0.02989 | 0.0437  | 0.0456  | 0.0444  | 0.04724 | 0.03981 TRPM4    |
| cg25263140 | 0.03894 | 0.0437  | 0.04474 | 0.0397  | 0.03208 | 0.04214 | 0.0394  | 0.03988 | 0.0408  | 0.03875 AIM1     |



|            |         |         |         |         |         |         |         |         |         |         |           |
|------------|---------|---------|---------|---------|---------|---------|---------|---------|---------|---------|-----------|
| cg25263559 | 0.04729 | 0.04821 | 0.0516  | 0.05178 | 0.03663 | 0.03714 | 0.04029 | 0.04296 | 0.03243 | 0.03506 | PTD008    |
| cg25264554 | 0.04141 | 0.043   | 0.04402 | 0.03973 | 0.02634 | 0.04415 | 0.03609 | 0.04209 | 0.03827 | 0.03443 | XRN1      |
| cg25266232 | 0.03488 | 0.03225 | 0.19132 | 0.16676 | 0.41873 | 0.4294  | 0.0699  | 0.34635 | 0.33712 | 0.03226 | DCC       |
| cg25267732 | 0.0933  | 0.07476 | 0.15071 | 0.14424 | 0.06851 | 0.07512 | 0.07514 | 0.07273 | 0.05834 | 0.06463 | MGC39633  |
| cg25268283 | 0.61783 | 0.17316 | 0.6612  | 0.6563  | 0.27097 | 0.36256 | 0.17201 | 0.13891 | 0.1497  | 0.16057 | DMRTC1    |
| cg25268451 | 0.21481 | 0.07496 | 0.42158 | 0.4648  | 0.26667 | 0.28417 | 0.06589 | 0.07652 | 0.56378 | 0.56547 | GNAS      |
| cg25268678 | 0.63747 | 0.70856 | 0.97764 | 0.98234 | 0.98393 | 0.97897 | 0.98127 | 0.97656 | 0.98187 | 0.98216 | PLEKHG6   |
| cg25268718 | 0.6957  | 0.36155 | 0.59517 | 0.72518 | 0.90455 | 0.41464 | 0.76278 | 0.15563 | 0.07347 | 0.04988 | PSME1     |
| cg25270201 | 0.0461  | 0.05244 | 0.04045 | 0.0391  | 0.03662 | 0.04264 | 0.59852 | 0.51692 | 0.03648 | 0.03698 | WWC3      |
| cg25270252 | 0.90621 | 0.87536 | 0.04815 | 0.04212 | 0.03449 | 0.03561 | 0.04092 | 0.03902 | 0.9397  | 0.93062 | ASTE1     |
| cg25274750 | 0.81305 | 0.79938 | 0.80052 | 0.79618 | 0.70574 | 0.72117 | 0.78884 | 0.77768 | 0.84803 | 0.83192 | HIPK2     |
| cg25276849 | 0.0352  | 0.03465 | 0.03492 | 0.03714 | 0.02649 | 0.03245 | 0.03129 | 0.03176 | 0.03175 | 0.03063 | TFRC      |
| cg25277950 | 0.66687 | 0.32929 | 0.77925 | 0.67326 | 0.34999 | 0.04218 | 0.4707  | 0.16872 | 0.85436 | 0.42055 | EML2      |
| cg25282410 | 0.08564 | 0.09497 | 0.12303 | 0.17495 | 0.09116 | 0.08502 | 0.11076 | 0.07565 | 0.12011 | 0.12176 | MRPL18    |
| cg25282780 | 0.16934 | 0.14981 | 0.10792 | 0.1085  | 0.17068 | 0.20734 | 0.11577 | 0.09911 | 0.93261 | 0.91269 | AK3       |
| cg25283297 | 0.73227 | 0.70772 | 0.88493 | 0.9608  | 0.93692 | 0.96322 | 0.60614 | 0.6281  | 0.77714 | 0.77592 | GNAS      |
| cg25283338 | 0.07893 | 0.08327 | 0.09167 | 0.09651 | 0.04302 | 0.07661 | 0.0652  | 0.06452 | 0.08376 | 0.07128 | PTPN9     |
| cg25283823 | 0.04998 | 0.0396  | 0.03302 | 0.03086 | 0.03067 | 0.04016 | 0.03734 | 0.04374 | 0.04341 | 0.04009 | HIST2H2BE |
| cg25284492 | 0.03383 | 0.03916 | 0.03941 | 0.04729 | 0.04349 | 0.03406 | 0.02653 | 0.03032 | 0.03465 | 0.02865 | H6PD      |
| cg25287375 | 0.05399 | 0.04861 | 0.04601 | 0.0429  | 0.05613 | 0.06261 | 0.04831 | 0.04443 | 0.03632 | 0.03124 | OSTF1     |
| cg25288155 | 0.86452 | 0.77048 | 0.78038 | 0.85467 | 0.74049 | 0.8426  | 0.57528 | 0.67551 | 0.50202 | 0.43355 | PLEKHB1   |
| cg25290938 | 0.14    | 0.06524 | 0.05601 | 0.08974 | 0.03855 | 0.04656 | 0.0577  | 0.05098 | 0.04789 | 0.04207 | ARHGAP22  |
| cg25291907 | 0.01377 | 0.01987 | 0.01933 | 0.01933 | 0.01828 | 0.01656 | 0.01473 | 0.01717 | 0.01206 | 0.01457 | MIB1      |
| cg25293251 | 0.82795 | 0.93599 | 0.96156 | 0.95621 | 0.54111 | 0.50152 | 0.27772 | 0.33195 | 0.03249 | 0.03338 | GOLGA5    |
| cg25294646 | 0.07307 | 0.06447 | 0.06655 | 0.05901 | 0.07391 | 0.07325 | 0.06505 | 0.05224 | 0.05375 | 0.05564 | OBFC1     |
| cg25298754 | 0.3254  | 0.22516 | 0.68273 | 0.85186 | 0.89864 | 0.87285 | 0.24604 | 0.2418  | 0.51169 | 0.39615 | ZBED2     |
| cg25299176 | 0.07496 | 0.07902 | 0.07536 | 0.07709 | 0.0352  | 0.04513 | 0.05547 | 0.08086 | 0.07167 | 0.08844 | YWHAE     |
| cg25299676 | 0.81768 | 0.08976 | 0.12773 | 0.10838 | 0.13828 | 0.12302 | 0.08492 | 0.10022 | 0.07369 | 0.07085 | MET       |
| cg25300386 | 0.89793 | 0.83505 | 0.11787 | 0.22102 | 0.02832 | 0.0372  | 0.07188 | 0.41753 | 0.56815 | 0.31854 | COL1A2    |
| cg25300941 | 0.04043 | 0.04034 | 0.05142 | 0.03621 | 0.05244 | 0.0452  | 0.04401 | 0.04055 | 0.03694 | 0.03685 | VPS4A     |
| cg25301180 | 0.05212 | 0.04844 | 0.05618 | 0.04399 | 0.04653 | 0.04711 | 0.05754 | 0.05955 | 0.04758 | 0.03876 | CAST1     |
| cg25302370 | 0.09059 | 0.08385 | 0.11194 | 0.10565 | 0.14291 | 0.11207 | 0.09239 | 0.07048 | 0.06982 | 0.10013 | C6orf165  |
| cg25302419 | 0.04144 | 0.04083 | 0.44924 | 0.63348 | 0.04498 | 0.03826 | 0.04142 | 0.04057 | 0.0371  | 0.03044 | CTNND2    |
| cg25303383 | 0.38797 | 0.29592 | 0.5998  | 0.54398 | 0.50658 | 0.31642 | 0.42377 | 0.31845 | 0.28799 | 0.27637 | BCDO2     |
| cg25304860 | 0.05602 | 0.06382 | 0.0551  | 0.05015 | 0.05584 | 0.05563 | 0.04645 | 0.0452  | 0.04654 | 0.04749 | C14orf166 |
| cg25306170 | 0.88552 | 0.86449 | 0.85629 | 0.87003 | 0.86729 | 0.82541 | 0.22588 | 0.09929 | 0.79339 | 0.82189 | CSNK1A1L  |
| cg25306927 | 0.031   | 0.03307 | 0.22565 | 0.51346 | 0.0354  | 0.03421 | 0.03376 | 0.03098 | 0.03653 | 0.03715 | VSNL1     |
| cg25307081 | 0.23458 | 0.27513 | 0.2461  | 0.25671 | 0.29296 | 0.3397  | 0.26387 | 0.33099 | 0.27591 | 0.24394 | BRD7      |
| cg25307641 | 0.77048 | 0.0964  | 0.89485 | 0.88485 | 0.34105 | 0.05968 | 0.59751 | 0.46565 | 0.86078 | 0.69138 | SURF2     |
| cg25307902 | 0.09224 | 0.08743 | 0.11257 | 0.11338 | 0.16782 | 0.10898 | 0.08827 | 0.07534 | 0.0609  | 0.06326 | SNAP25    |
| cg25308542 | 0.0768  | 0.07414 | 0.10534 | 0.09585 | 0.07252 | 0.11542 | 0.07768 | 0.07954 | 0.07694 | 0.06685 | C13orf25  |

|            |         |         |         |         |         |         |         |         |         |                   |
|------------|---------|---------|---------|---------|---------|---------|---------|---------|---------|-------------------|
| cg25309588 | 0.05054 | 0.05924 | 0.06116 | 0.06042 | 0.04995 | 0.06994 | 0.05439 | 0.06127 | 0.05335 | 0.05137 ATP8A1    |
| cg25310567 | 0.23099 | 0.21306 | 0.23093 | 0.20749 | 0.25445 | 0.16781 | 0.09156 | 0.09086 | 0.07488 | 0.0705 GALNTL5    |
| cg25313204 | 0.96928 | 0.96239 | 0.97937 | 0.96485 | 0.97852 | 0.97304 | 0.87216 | 0.65335 | 0.97951 | 0.97491 SLC22A3   |
| cg25314216 | 0.90099 | 0.88674 | 0.88559 | 0.87639 | 0.81897 | 0.8391  | 0.87818 | 0.84523 | 0.89016 | 0.85788 NARS      |
| cg25315362 | 0.05938 | 0.11449 | 0.47492 | 0.44343 | 0.80711 | 0.04441 | 0.58702 | 0.11851 | 0.06607 | 0.04215 LSAMP     |
| cg25316166 | 0.05434 | 0.05852 | 0.16601 | 0.07649 | 0.04091 | 0.04896 | 0.46157 | 0.43391 | 0.04496 | 0.04607 USP11     |
| cg25316898 | 0.06557 | 0.05934 | 0.0968  | 0.05881 | 0.08821 | 0.07787 | 0.05605 | 0.05683 | 0.07931 | 0.07777 C18orf21  |
| cg25317260 | 0.06458 | 0.06477 | 0.08871 | 0.09455 | 0.09711 | 0.07787 | 0.41812 | 0.07949 | 0.07452 | 0.06534 PDCD8     |
| cg25322008 | 0.32396 | 0.23636 | 0.59509 | 0.70948 | 0.33416 | 0.46194 | 0.18606 | 0.16514 | 0.15217 | 0.18929 OR51E2    |
| cg25322211 | 0.03982 | 0.04112 | 0.03711 | 0.03814 | 0.02997 | 0.03435 | 0.03742 | 0.03527 | 0.03305 | 0.02837 TRIM65    |
| cg25323711 | 0.11186 | 0.05508 | 0.08301 | 0.06412 | 0.13695 | 0.07683 | 0.06829 | 0.04302 | 0.05873 | 0.08939 CLGN      |
| cg25324046 | 0.03045 | 0.02862 | 0.02836 | 0.03104 | 0.02019 | 0.02855 | 0.02866 | 0.03069 | 0.02931 | 0.02747 SRPK1     |
| cg25325612 | 0.03112 | 0.03391 | 0.03097 | 0.03106 | 0.02368 | 0.03016 | 0.03174 | 0.02824 | 0.02434 | 0.02438 VPS35     |
| cg25327013 | 0.0811  | 0.07204 | 0.08362 | 0.08139 | 0.17948 | 0.09295 | 0.06168 | 0.06267 | 0.06268 | 0.08689 RNASE4    |
| cg25327247 | 0.06821 | 0.06791 | 0.07824 | 0.06651 | 0.09408 | 0.08399 | 0.07481 | 0.06576 | 0.05521 | 0.05926 SH3GL1    |
| cg25328975 | 0.67736 | 0.72879 | 0.88348 | 0.90778 | 0.90613 | 0.92186 | 0.75754 | 0.82848 | 0.44569 | 0.47407 SPANXA1   |
| cg25329939 | 0.03988 | 0.05304 | 0.05112 | 0.04317 | 0.04257 | 0.05097 | 0.04197 | 0.04164 | 0.03755 | 0.03496 RAP2A     |
| cg25332298 | 0.04265 | 0.04352 | 0.04992 | 0.04708 | 0.38201 | 0.15675 | 0.05092 | 0.03957 | 0.03734 | 0.03923 ELAVL3    |
| cg25335775 | 0.57507 | 0.59611 | 0.07179 | 0.05535 | 0.04522 | 0.05109 | 0.05264 | 0.04049 | 0.05229 | 0.04748 MRPS14    |
| cg25336198 | 0.20216 | 0.28834 | 0.14294 | 0.30182 | 0.31226 | 0.42128 | 0.06632 | 0.04692 | 0.15517 | 0.04936 INS       |
| cg25336579 | 0.0163  | 0.01552 | 0.01387 | 0.01278 | 0.01329 | 0.01614 | 0.01213 | 0.01266 | 0.01373 | 0.01109 PSAT1     |
| cg25340056 | 0.02309 | 0.02275 | 0.02023 | 0.02447 | 0.02132 | 0.02367 | 0.0191  | 0.02113 | 0.01913 | 0.0205 DPH1       |
| cg25340403 | 0.84406 | 0.58027 | 0.84517 | 0.86018 | 0.88741 | 0.85315 | 0.84464 | 0.86028 | 0.86723 | 0.77174 LYPD3     |
| cg25341032 | 0.25955 | 0.25178 | 0.30084 | 0.38456 | 0.36105 | 0.23408 | 0.32496 | 0.21188 | 0.39636 | 0.21847 ADD3      |
| cg25341653 | 0.97358 | 0.93959 | 0.97474 | 0.97724 | 0.98068 | 0.97354 | 0.97734 | 0.9324  | 0.9781  | 0.97379 ELMO3     |
| cg25341726 | 0.61683 | 0.3195  | 0.80895 | 0.75687 | 0.85112 | 0.86464 | 0.32765 | 0.12188 | 0.808   | 0.61906 IL27      |
| cg25344367 | 0.80973 | 0.72418 | 0.78235 | 0.79897 | 0.82467 | 0.7803  | 0.7848  | 0.77039 | 0.74822 | 0.70641 IRGC      |
| cg25344639 | 0.03827 | 0.0448  | 0.04553 | 0.0456  | 0.04039 | 0.04823 | 0.03398 | 0.0372  | 0.03599 | 0.0381 SEC14L1    |
| cg25344672 | 0.23003 | 0.24195 | 0.82376 | 0.8216  | 0.93322 | 0.91609 | 0.78984 | 0.65598 | 0.33041 | 0.17376 FLJ46082  |
| cg25345005 | 0.02929 | 0.03277 | 0.03004 | 0.0294  | 0.02634 | 0.02464 | 0.02469 | 0.02578 | 0.02493 | 0.02111 C3orf9    |
| cg25345738 | 0.73294 | 0.58608 | 0.72799 | 0.75307 | 0.54394 | 0.29839 | 0.68962 | 0.26074 | 0.10988 | 0.10182 PWP1      |
| cg25346576 | 0.04218 | 0.04362 | 0.04571 | 0.04231 | 0.0336  | 0.03598 | 0.03863 | 0.03614 | 0.03179 | 0.03378 CCDC55    |
| cg25346972 | 0.03715 | 0.03843 | 0.03461 | 0.03371 | 0.02585 | 0.03536 | 0.03167 | 0.03229 | 0.02688 | 0.03148 C14orf112 |
| cg25349574 | 0.24902 | 0.16625 | 0.03824 | 0.03748 | 0.02985 | 0.03889 | 0.02648 | 0.03134 | 0.026   | 0.02697 CAMTA2    |
| cg25350411 | 0.30125 | 0.1348  | 0.89154 | 0.92054 | 0.66304 | 0.66129 | 0.6733  | 0.56578 | 0.06791 | 0.08186 PLAGL1    |
| cg25351036 | 0.05028 | 0.0547  | 0.05271 | 0.05383 | 0.07912 | 0.04517 | 0.05655 | 0.04842 | 0.04534 | 0.04319 NPAL1     |
| cg25352650 | 0.05034 | 0.04998 | 0.05345 | 0.05194 | 0.04002 | 0.0457  | 0.0456  | 0.04766 | 0.04099 | 0.03818 RRS1      |
| cg25355065 | 0.07254 | 0.06058 | 0.07105 | 0.06933 | 0.09845 | 0.0733  | 0.07698 | 0.06742 | 0.04896 | 0.06418 SFXN2     |
| cg25355803 | 0.43999 | 0.43232 | 0.56392 | 0.53901 | 0.5843  | 0.19008 | 0.77815 | 0.63548 | 0.47052 | 0.37189 MARVELD1  |
| cg25356214 | 0.07423 | 0.0766  | 0.09122 | 0.09097 | 0.07446 | 0.07368 | 0.07872 | 0.08064 | 0.07857 | 0.07112 POU6F1    |
| cg25356886 | 0.7779  | 0.70314 | 0.73677 | 0.80307 | 0.74309 | 0.7644  | 0.51273 | 0.61575 | 0.72995 | 0.60568 CRYGD     |

|            |         |         |         |         |         |         |         |         |         |         |           |
|------------|---------|---------|---------|---------|---------|---------|---------|---------|---------|---------|-----------|
| cg25358289 | 0.33937 | 0.12949 | 0.25012 | 0.362   | 0.34034 | 0.54764 | 0.56791 | 0.3854  | 0.53618 | 0.43289 | CD14      |
| cg25358938 | 0.05573 | 0.06082 | 0.06788 | 0.07325 | 0.08247 | 0.05367 | 0.11426 | 0.12172 | 0.04815 | 0.06057 | TMEM66    |
| cg25359581 | 0.46145 | 0.89279 | 0.04459 | 0.0424  | 0.03467 | 0.03804 | 0.17462 | 0.09392 | 0.03791 | 0.0374  | DYNLT3    |
| cg25361106 | 0.17255 | 0.09239 | 0.815   | 0.88192 | 0.62097 | 0.87802 | 0.28696 | 0.38807 | 0.47635 | 0.63302 | TLX2      |
| cg25361844 | 0.03803 | 0.0487  | 0.04848 | 0.0534  | 0.04917 | 0.05564 | 0.08304 | 0.07149 | 0.03782 | 0.0327  | SIPA1     |
| cg25363317 | 0.0394  | 0.04635 | 0.05558 | 0.03863 | 0.04389 | 0.04759 | 0.0439  | 0.03895 | 0.04054 | 0.03748 | GTF2F1    |
| cg25363445 | 0.23964 | 0.41071 | 0.60738 | 0.53309 | 0.7513  | 0.78489 | 0.75185 | 0.77953 | 0.81681 | 0.77812 | ALX4      |
| cg25366404 | 0.56913 | 0.21463 | 0.44193 | 0.73897 | 0.80184 | 0.40845 | 0.25765 | 0.06968 | 0.52417 | 0.36195 | MOCS1     |
| cg25368212 | 0.72914 | 0.74383 | 0.74954 | 0.79024 | 0.66485 | 0.71405 | 0.6304  | 0.73586 | 0.73466 | 0.70091 | SSX1      |
| cg25368651 | 0.92925 | 0.9108  | 0.89098 | 0.91661 | 0.85065 | 0.84944 | 0.89713 | 0.90079 | 0.93886 | 0.90329 | C11orf47  |
| cg25370441 | 0.25795 | 0.1791  | 0.64671 | 0.712   | 0.21658 | 0.13113 | 0.39931 | 0.10219 | 0.10043 | 0.12165 | FLJ20184  |
| cg25371038 | 0.06548 | 0.04499 | 0.07903 | 0.06973 | 0.05046 | 0.05621 | 0.06081 | 0.0585  | 0.05514 | 0.04875 | TOP3B     |
| cg25371088 | 0.0677  | 0.07053 | 0.0747  | 0.06686 | 0.04935 | 0.06073 | 0.06018 | 0.05907 | 0.06414 | 0.06878 | MRPL24    |
| cg25371182 | 0.06733 | 0.07006 | 0.07227 | 0.06976 | 0.06056 | 0.06823 | 0.06202 | 0.06767 | 0.05685 | 0.06049 | CTNS      |
| cg25371560 | 0.03812 | 0.03777 | 0.05833 | 0.05253 | 0.04673 | 0.04415 | 0.04219 | 0.03065 | 0.04272 | 0.04125 | MED18     |
| cg25372103 | 0.15644 | 0.16419 | 0.1603  | 0.18351 | 0.09704 | 0.12688 | 0.1473  | 0.15387 | 0.14377 | 0.14692 | DLL1      |
| cg25372135 | 0.04308 | 0.04695 | 0.06061 | 0.04931 | 0.04211 | 0.04286 | 0.04283 | 0.03901 | 0.04003 | 0.04705 | DARS2     |
| cg25372195 | 0.59363 | 0.71301 | 0.09681 | 0.11032 | 0.08254 | 0.52698 | 0.06921 | 0.06458 | 0.0565  | 0.06019 | DCD       |
| cg25372693 | 0.39621 | 0.08152 | 0.06623 | 0.05341 | 0.04155 | 0.04922 | 0.09719 | 0.04557 | 0.04773 | 0.04112 | B4GALT4   |
| cg25374813 | 0.41747 | 0.06958 | 0.37218 | 0.58025 | 0.48123 | 0.29453 | 0.61758 | 0.17145 | 0.25073 | 0.22347 | SLC23A1   |
| cg25374854 | 0.54649 | 0.52464 | 0.87159 | 0.88999 | 0.90175 | 0.86279 | 0.65114 | 0.45022 | 0.8293  | 0.80614 | ABR       |
| cg25375711 | 0.03381 | 0.03273 | 0.04902 | 0.03984 | 0.03023 | 0.02861 | 0.0284  | 0.02945 | 0.03407 | 0.04083 | TRMT12    |
| cg25375764 | 0.58912 | 0.52892 | 0.76838 | 0.81576 | 0.72539 | 0.77203 | 0.63416 | 0.60747 | 0.79158 | 0.83485 | ALDH5A1   |
| cg25376316 | 0.95835 | 0.87456 | 0.60762 | 0.87586 | 0.85722 | 0.42216 | 0.95905 | 0.93259 | 0.0233  | 0.0237  | CA5B      |
| cg25377358 | 0.05546 | 0.05658 | 0.05351 | 0.0527  | 0.04316 | 0.04779 | 0.04771 | 0.05035 | 0.04794 | 0.04378 | SEC23IP   |
| cg25378769 | 0.02919 | 0.02532 | 0.03567 | 0.02775 | 0.04166 | 0.02665 | 0.02526 | 0.0284  | 0.02519 | 0.02318 | C3orf37   |
| cg25381844 | 0.03266 | 0.03238 | 0.04038 | 0.0343  | 0.14907 | 0.02437 | 0.35375 | 0.15366 | 0.27831 | 0.02541 | SH3GL3    |
| cg25383093 | 0.53215 | 0.40672 | 0.20025 | 0.29468 | 0.16937 | 0.13897 | 0.25232 | 0.19053 | 0.66414 | 0.30298 | PGM3      |
| cg25383242 | 0.15099 | 0.13474 | 0.65077 | 0.8024  | 0.79742 | 0.81324 | 0.15192 | 0.26979 | 0.52509 | 0.481   | CNTNAP4   |
| cg25384157 | 0.45038 | 0.5192  | 0.62913 | 0.79924 | 0.49147 | 0.46054 | 0.30665 | 0.29465 | 0.15901 | 0.05859 | ARRDC1    |
| cg25384595 | 0.38345 | 0.26757 | 0.43675 | 0.48211 | 0.68319 | 0.54199 | 0.13149 | 0.05717 | 0.06207 | 0.05592 | LILRA1    |
| cg25385272 | 0.04973 | 0.04221 | 0.05315 | 0.04968 | 0.04072 | 0.04475 | 0.04166 | 0.03475 | 0.03819 | 0.03581 | TAF1A     |
| cg25388528 | 0.15079 | 0.15177 | 0.32942 | 0.18846 | 0.37027 | 0.15814 | 0.15626 | 0.12071 | 0.15392 | 0.15376 | KRTAP20-1 |
| cg25391023 | 0.13355 | 0.11777 | 0.15047 | 0.12676 | 0.2314  | 0.13983 | 0.11684 | 0.12344 | 0.07621 | 0.08423 | BTNL2     |
| cg25392935 | 0.03375 | 0.03553 | 0.03129 | 0.03394 | 0.02817 | 0.03119 | 0.02656 | 0.02964 | 0.03053 | 0.02552 | VCL       |
| cg25395108 | 0.03197 | 0.02882 | 0.03084 | 0.03109 | 0.02589 | 0.03037 | 0.02586 | 0.02531 | 0.03095 | 0.0244  | FGFR10P   |
| cg25396537 | 0.03886 | 0.04817 | 0.04837 | 0.04645 | 0.03811 | 0.04465 | 0.04555 | 0.04199 | 0.0411  | 0.03932 | TERF1     |
| cg25397076 | 0.22523 | 0.04384 | 0.02623 | 0.02617 | 0.25916 | 0.3092  | 0.03411 | 0.02132 | 0.02853 | 0.02051 | RBP7      |
| cg25397562 | 0.03872 | 0.0403  | 0.03719 | 0.04249 | 0.02366 | 0.02745 | 0.03335 | 0.04054 | 0.02711 | 0.02796 | ZNF653    |
| cg25397779 | 0.03568 | 0.04351 | 0.04287 | 0.04518 | 0.03614 | 0.03799 | 0.03857 | 0.03962 | 0.03485 | 0.03857 | MRPL20    |
| cg25398949 | 0.06788 | 0.06283 | 0.0605  | 0.0468  | 0.09614 | 0.09967 | 0.0643  | 0.05603 | 0.05783 | 0.08497 | RPS6KA5   |

|            |         |         |         |         |         |         |         |         |         |         |            |
|------------|---------|---------|---------|---------|---------|---------|---------|---------|---------|---------|------------|
| cg25399367 | 0.10013 | 0.07226 | 0.08156 | 0.07108 | 0.06781 | 0.06757 | 0.06679 | 0.06528 | 0.07303 | 0.06479 | FBXO30     |
| cg25400358 | 0.39351 | 0.34384 | 0.8432  | 0.8663  | 0.92164 | 0.76032 | 0.75    | 0.50422 | 0.85448 | 0.69301 | GPR137     |
| cg25402049 | 0.85729 | 0.45551 | 0.83147 | 0.85673 | 0.8241  | 0.7717  | 0.85939 | 0.88801 | 0.87469 | 0.82351 | PRDM2      |
| cg25404088 | 0.39085 | 0.20838 | 0.09854 | 0.0923  | 0.09404 | 0.07918 | 0.08464 | 0.08427 | 0.09133 | 0.08711 | HRIHFB2122 |
| cg25406518 | 0.83395 | 0.21248 | 0.41402 | 0.65763 | 0.31572 | 0.07627 | 0.10643 | 0.11251 | 0.30558 | 0.06347 | DAK        |
| cg25406735 | 0.07388 | 0.04908 | 0.0403  | 0.03678 | 0.03854 | 0.02714 | 0.03208 | 0.03028 | 0.02801 | 0.02425 | FBXO32     |
| cg25409040 | 0.08142 | 0.03857 | 0.03601 | 0.03416 | 0.067   | 0.05616 | 0.03973 | 0.0367  | 0.0376  | 0.03795 | CSTF3      |
| cg25410053 | 0.45223 | 0.5233  | 0.92332 | 0.93094 | 0.94578 | 0.91514 | 0.91791 | 0.93017 | 0.51825 | 0.44035 | ZIC3       |
| cg25410279 | 0.03474 | 0.03912 | 0.07485 | 0.08404 | 0.16204 | 0.14159 | 0.49992 | 0.48864 | 0.03671 | 0.03377 | DXS9879E   |
| cg25411534 | 0.0531  | 0.04542 | 0.07097 | 0.0684  | 0.09975 | 0.05772 | 0.04816 | 0.03999 | 0.05764 | 0.05562 | C2orf15    |
| cg25411725 | 0.79886 | 0.81011 | 0.82002 | 0.82731 | 0.81499 | 0.81044 | 0.82422 | 0.82572 | 0.83777 | 0.79689 | SLC22A13   |
| cg25412384 | 0.03706 | 0.03584 | 0.03659 | 0.03886 | 0.02887 | 0.03218 | 0.03234 | 0.03928 | 0.02858 | 0.02724 | LRP10      |
| cg25412453 | 0.66775 | 0.11754 | 0.72554 | 0.81619 | 0.8669  | 0.78339 | 0.72599 | 0.55657 | 0.72763 | 0.49483 | DCST2      |
| cg25413757 | 0.03908 | 0.03404 | 0.04384 | 0.04469 | 0.03116 | 0.03197 | 0.03311 | 0.0337  | 0.02932 | 0.0312  | C1orf75    |
| cg25414165 | 0.18784 | 0.09038 | 0.63565 | 0.73048 | 0.69355 | 0.73014 | 0.72619 | 0.7539  | 0.73127 | 0.5001  | C10orf11   |
| cg25415932 | 0.55203 | 0.09387 | 0.53862 | 0.56719 | 0.13825 | 0.0616  | 0.73054 | 0.08113 | 0.35634 | 0.10074 | OGG1       |
| cg25416014 | 0.04782 | 0.04778 | 0.15258 | 0.123   | 0.27719 | 0.33954 | 0.08874 | 0.04852 | 0.63688 | 0.03871 | MCF2L2     |
| cg25416363 | 0.04491 | 0.04193 | 0.05842 | 0.05555 | 0.03364 | 0.03862 | 0.04078 | 0.03984 | 0.04429 | 0.05042 | RBM15      |
| cg25416372 | 0.03771 | 0.03572 | 0.04398 | 0.04555 | 0.48492 | 0.43985 | 0.03724 | 0.0477  | 0.3124  | 0.19844 | EDG8       |
| cg25417405 | 0.48441 | 0.14284 | 0.80321 | 0.84993 | 0.49575 | 0.53686 | 0.60634 | 0.1866  | 0.87963 | 0.42653 | SLC27A2    |
| cg25418748 | 0.06903 | 0.05515 | 0.08326 | 0.05842 | 0.09005 | 0.05765 | 0.06757 | 0.06892 | 0.0886  | 0.0881  | RUFY1      |
| cg25418831 | 0.03114 | 0.03732 | 0.02846 | 0.02736 | 0.03775 | 0.03784 | 0.02134 | 0.02058 | 0.0223  | 0.02682 | VPS13A     |
| cg25420398 | 0.09821 | 0.09074 | 0.07998 | 0.07747 | 0.0669  | 0.11763 | 0.07579 | 0.06603 | 0.08091 | 0.07545 | RYK        |
| cg25420583 | 0.06856 | 0.0741  | 0.06641 | 0.07158 | 0.07482 | 0.07905 | 0.05106 | 0.05282 | 0.06824 | 0.06406 | WBP1       |
| cg25420952 | 0.88206 | 0.64537 | 0.83039 | 0.86567 | 0.77052 | 0.83419 | 0.84994 | 0.80077 | 0.87239 | 0.33884 | AMBP       |
| cg25421002 | 0.56655 | 0.14358 | 0.74322 | 0.85245 | 0.80046 | 0.79673 | 0.8635  | 0.51884 | 0.62447 | 0.15039 | MMAA       |
| cg25421647 | 0.12542 | 0.15608 | 0.58197 | 0.59771 | 0.07227 | 0.03635 | 0.07511 | 0.04476 | 0.04215 | 0.03151 | UBE2L3     |
| cg25421694 | 0.18257 | 0.15354 | 0.17242 | 0.16329 | 0.21772 | 0.21759 | 0.13329 | 0.11794 | 0.13411 | 0.1363  | RAB5A      |
| cg25422943 | 0.01602 | 0.01524 | 0.02382 | 0.01684 | 0.01639 | 0.01906 | 0.01687 | 0.01474 | 0.03247 | 0.01634 | PCDH9      |
| cg25423111 | 0.62534 | 0.66652 | 0.62983 | 0.64334 | 0.59524 | 0.59139 | 0.667   | 0.71598 | 0.67247 | 0.4691  | TSSK4      |
| cg25423402 | 0.0196  | 0.02101 | 0.02611 | 0.02093 | 0.01913 | 0.01888 | 0.01942 | 0.01757 | 0.01929 | 0.02046 | IVNS1ABP   |
| cg25423576 | 0.04849 | 0.02832 | 0.8039  | 0.86383 | 0.25225 | 0.75872 | 0.20255 | 0.23989 | 0.03778 | 0.02803 | RFXDC1     |
| cg25424525 | 0.82311 | 0.86098 | 0.80506 | 0.84898 | 0.70415 | 0.81086 | 0.87226 | 0.86892 | 0.86007 | 0.74279 | OTUD4      |
| cg25424556 | 0.02569 | 0.02539 | 0.03003 | 0.02917 | 0.0286  | 0.13381 | 0.46278 | 0.43231 | 0.23739 | 0.18055 | USP51      |
| cg25425005 | 0.91085 | 0.8065  | 0.88184 | 0.86226 | 0.94633 | 0.91416 | 0.72141 | 0.56112 | 0.92389 | 0.90455 | HBZ        |
| cg25425074 | 0.35515 | 0.56089 | 0.84829 | 0.87095 | 0.65302 | 0.59315 | 0.74734 | 0.20085 | 0.39737 | 0.18394 | C17orf53   |
| cg25425078 | 0.03108 | 0.03978 | 0.46729 | 0.50745 | 0.17759 | 0.17976 | 0.02854 | 0.03976 | 0.27349 | 0.033   | CNND2      |
| cg25426302 | 0.14867 | 0.08889 | 0.39398 | 0.58191 | 0.79664 | 0.84035 | 0.87372 | 0.82945 | 0.08314 | 0.05428 | PRRT1      |
| cg25426743 | 0.68852 | 0.6632  | 0.83085 | 0.82733 | 0.71865 | 0.81482 | 0.7801  | 0.37899 | 0.57474 | 0.57091 | HOXA3      |
| cg25427580 | 0.86727 | 0.85294 | 0.793   | 0.85251 | 0.70107 | 0.83519 | 0.75981 | 0.84876 | 0.57237 | 0.46922 | B3GALT1    |
| cg25427638 | 0.33159 | 0.05931 | 0.14192 | 0.12497 | 0.1862  | 0.23867 | 0.05481 | 0.13452 | 0.12685 | 0.08831 | CYP2A7     |

|            |         |         |         |         |         |         |         |         |         |         |           |
|------------|---------|---------|---------|---------|---------|---------|---------|---------|---------|---------|-----------|
| cg25428293 | 0.02982 | 0.02957 | 0.02973 | 0.03012 | 0.02184 | 0.02538 | 0.03076 | 0.02795 | 0.02346 | 0.02433 | TIGD6     |
| cg25428451 | 0.18382 | 0.08033 | 0.10172 | 0.10927 | 0.11731 | 0.05072 | 0.09525 | 0.07702 | 0.38809 | 0.05341 | LOC339524 |
| cg25429010 | 0.03015 | 0.03384 | 0.03525 | 0.02936 | 0.03027 | 0.03098 | 0.0328  | 0.03413 | 0.02618 | 0.02501 | IMP3      |
| cg25430696 | 0.05765 | 0.05341 | 0.14713 | 0.0838  | 0.07172 | 0.04086 | 0.12426 | 0.06676 | 0.04722 | 0.04106 | TSR1      |
| cg25431974 | 0.86689 | 0.54905 | 0.97401 | 0.96608 | 0.97555 | 0.95123 | 0.97694 | 0.93856 | 0.98124 | 0.97321 | ECEL1     |
| cg25432323 | 0.04428 | 0.05357 | 0.05023 | 0.04021 | 0.04652 | 0.05325 | 0.04667 | 0.05019 | 0.03939 | 0.03444 | AARS      |
| cg25432696 | 0.45797 | 0.79644 | 0.92725 | 0.92277 | 0.33948 | 0.45638 | 0.92694 | 0.92665 | 0.87957 | 0.91039 | CXCL6     |
| cg25432997 | 0.03918 | 0.04824 | 0.04314 | 0.03685 | 0.0245  | 0.03673 | 0.03559 | 0.03673 | 0.03795 | 0.03615 | DVL2      |
| cg25433648 | 0.77999 | 0.61862 | 0.9053  | 0.9097  | 0.95787 | 0.90009 | 0.83918 | 0.6829  | 0.9238  | 0.64807 | S100A14   |
| cg25434223 | 0.0324  | 0.03144 | 0.80411 | 0.92176 | 0.30016 | 0.42487 | 0.02526 | 0.02699 | 0.03402 | 0.02385 | ELAVL3    |
| cg25436946 | 0.03384 | 0.04274 | 0.03489 | 0.03495 | 0.03796 | 0.0396  | 0.05153 | 0.04167 | 0.02942 | 0.02596 | TMF1      |
| cg25437385 | 0.08446 | 0.04648 | 0.93038 | 0.94537 | 0.47971 | 0.55985 | 0.81869 | 0.92494 | 0.04246 | 0.03301 | SLC35F3   |
| cg25437402 | 0.01606 | 0.02114 | 0.02175 | 0.01699 | 0.02168 | 0.01736 | 0.01774 | 0.01736 | 0.01576 | 0.01391 | PICALM    |
| cg25438054 | 0.06744 | 0.07098 | 0.06638 | 0.05515 | 0.06651 | 0.0632  | 0.05557 | 0.05284 | 0.04762 | 0.05155 | SGTB      |
| cg25438415 | 0.08429 | 0.06941 | 0.07712 | 0.07509 | 0.11842 | 0.12673 | 0.06629 | 0.06452 | 0.04799 | 0.03944 | ZNF426    |
| cg25438440 | 0.04299 | 0.03771 | 0.03725 | 0.04004 | 0.03038 | 0.03233 | 0.04491 | 0.05066 | 0.03228 | 0.03044 | CLDND1    |
| cg25438963 | 0.0975  | 0.09825 | 0.68622 | 0.7562  | 0.11829 | 0.11804 | 0.96145 | 0.96804 | 0.09559 | 0.07774 | HIST1H3C  |
| cg25443975 | 0.8689  | 0.66503 | 0.84962 | 0.86691 | 0.83437 | 0.88295 | 0.86015 | 0.69074 | 0.90317 | 0.86753 | BRSK1     |
| cg25446086 | 0.10261 | 0.04452 | 0.1101  | 0.10092 | 0.0345  | 0.03775 | 0.10594 | 0.03641 | 0.06078 | 0.03896 | SYT11     |
| cg25447894 | 0.83271 | 0.48472 | 0.42183 | 0.38249 | 0.92189 | 0.88889 | 0.04215 | 0.17702 | 0.863   | 0.63956 | CSDC2     |
| cg25448636 | 0.03074 | 0.03471 | 0.03613 | 0.03561 | 0.02692 | 0.03525 | 0.03311 | 0.0329  | 0.03216 | 0.03586 | FLCN      |
| cg25450806 | 0.83133 | 0.72999 | 0.78398 | 0.80005 | 0.74122 | 0.77222 | 0.75662 | 0.8578  | 0.83014 | 0.8113  | PRDM2     |
| cg25454755 | 0.0313  | 0.03899 | 0.03412 | 0.03416 | 0.02583 | 0.03322 | 0.03041 | 0.03276 | 0.03026 | 0.02456 | NR4A3     |
| cg25454890 | 0.06068 | 0.05698 | 0.06645 | 0.05997 | 0.05596 | 0.05261 | 0.05621 | 0.05348 | 0.05885 | 0.05411 | CYP2R1    |
| cg25455753 | 0.72725 | 0.82281 | 0.50285 | 0.64238 | 0.90554 | 0.89981 | 0.12489 | 0.10141 | 0.07932 | 0.08959 | C15orf32  |
| cg25456959 | 0.12687 | 0.12163 | 0.22414 | 0.16364 | 0.20295 | 0.1491  | 0.07758 | 0.15652 | 0.11807 | 0.16289 | ASB12     |
| cg25457027 | 0.91511 | 0.86367 | 0.90394 | 0.91823 | 0.94752 | 0.91479 | 0.91717 | 0.89263 | 0.71065 | 0.5758  | PROC      |
| cg25457331 | 0.06688 | 0.04878 | 0.31396 | 0.52674 | 0.5129  | 0.08106 | 0.05918 | 0.04863 | 0.56622 | 0.04355 | GMPR      |
| cg25458920 | 0.08414 | 0.0639  | 0.06712 | 0.05726 | 0.10744 | 0.07795 | 0.05954 | 0.05382 | 0.06576 | 0.07212 | EIF2AK2   |
| cg25459323 | 0.11144 | 0.03678 | 0.52368 | 0.64954 | 0.08836 | 0.03322 | 0.05605 | 0.03011 | 0.05671 | 0.02948 | 3-Sep     |
| cg25459778 | 0.02934 | 0.0303  | 0.03082 | 0.02878 | 0.02136 | 0.02793 | 0.02945 | 0.02907 | 0.02329 | 0.02362 | CRAMP1L   |
| cg25461905 | 0.94177 | 0.93501 | 0.93937 | 0.93163 | 0.96539 | 0.91189 | 0.92842 | 0.92379 | 0.93505 | 0.90591 | C1orf49   |
| cg25461934 | 0.88011 | 0.88773 | 0.872   | 0.88554 | 0.85873 | 0.88464 | 0.86761 | 0.89079 | 0.91523 | 0.90176 | PROCR     |
| cg25462291 | 0.11146 | 0.3714  | 0.16639 | 0.20669 | 0.84064 | 0.95648 | 0.96    | 0.95656 | 0.96415 | 0.95884 | HEYL      |
| cg25462303 | 0.73468 | 0.14968 | 0.69051 | 0.8389  | 0.48909 | 0.62284 | 0.60981 | 0.11456 | 0.83932 | 0.72578 | GCET2     |
| cg25463135 | 0.77313 | 0.80899 | 0.69862 | 0.73324 | 0.55086 | 0.75611 | 0.56022 | 0.62492 | 0.47121 | 0.43332 | GBP7      |
| cg25463409 | 0.57952 | 0.64099 | 0.44006 | 0.48853 | 0.58165 | 0.65166 | 0.26735 | 0.17195 | 0.41184 | 0.34318 | COX7B2    |
| cg25463428 | 0.03019 | 0.02927 | 0.03304 | 0.03001 | 0.02648 | 0.02461 | 0.02389 | 0.02792 | 0.02511 | 0.02353 | TBC1D10B  |
| cg25463779 | 0.51367 | 0.16438 | 0.53821 | 0.55313 | 0.66395 | 0.74108 | 0.5523  | 0.52249 | 0.37048 | 0.28849 | FAM101A   |
| cg25464840 | 0.09413 | 0.55742 | 0.88193 | 0.90202 | 0.92005 | 0.85953 | 0.78423 | 0.7155  | 0.86874 | 0.70327 | FRMD4A    |
| cg25465406 | 0.66799 | 0.34978 | 0.93328 | 0.93506 | 0.87363 | 0.62761 | 0.12816 | 0.11542 | 0.91649 | 0.90228 | GUCY2D    |

|            |         |         |         |         |         |         |         |         |         |         |              |
|------------|---------|---------|---------|---------|---------|---------|---------|---------|---------|---------|--------------|
| cg25465634 | 0.06324 | 0.04336 | 0.04291 | 0.03193 | 0.09732 | 0.06301 | 0.04874 | 0.04638 | 0.04145 | 0.05767 | DLG7         |
| cg25466368 | 0.06772 | 0.06963 | 0.06491 | 0.07129 | 0.05828 | 0.05979 | 0.12324 | 0.06326 | 0.0651  | 0.06047 | HES1         |
| cg25466974 | 0.02516 | 0.02813 | 0.03107 | 0.03143 | 0.02492 | 0.02893 | 0.02054 | 0.02319 | 0.0261  | 0.02573 | SLC30A1      |
| cg25467043 | 0.04195 | 0.04031 | 0.04885 | 0.04327 | 0.03975 | 0.05121 | 0.03472 | 0.03426 | 0.03909 | 0.03324 | THAP6        |
| cg25467603 | 0.0226  | 0.02274 | 0.02077 | 0.01778 | 0.02301 | 0.02123 | 0.01849 | 0.01597 | 0.01466 | 0.01412 | WDR18        |
| cg25468723 | 0.089   | 0.04342 | 0.10656 | 0.11598 | 0.03883 | 0.04145 | 0.04015 | 0.03761 | 0.0426  | 0.03895 | SEZ6L        |
| cg25470175 | 0.06572 | 0.04669 | 0.05312 | 0.04718 | 0.05809 | 0.0493  | 0.03003 | 0.03434 | 0.04454 | 0.03667 | FAM73A       |
| cg25473396 | 0.12819 | 0.04105 | 0.02726 | 0.02592 | 0.01808 | 0.02447 | 0.02813 | 0.03411 | 0.01495 | 0.02229 | MPG          |
| cg25475171 | 0.02237 | 0.02056 | 0.24532 | 0.34266 | 0.04275 | 0.0253  | 0.02905 | 0.02111 | 0.02025 | 0.0209  | SV2B         |
| cg25475443 | 0.83946 | 0.71278 | 0.80318 | 0.8562  | 0.86855 | 0.85713 | 0.2301  | 0.0974  | 0.86697 | 0.85662 | GALNAC4S-6ST |
| cg25476145 | 0.03525 | 0.03529 | 0.04902 | 0.04313 | 0.05116 | 0.0284  | 0.02352 | 0.02631 | 0.03073 | 0.02221 | GALT         |
| cg25477181 | 0.03914 | 0.04376 | 0.04166 | 0.04228 | 0.03418 | 0.04162 | 0.03757 | 0.0341  | 0.02977 | 0.02741 | PITPNB       |
| cg25477904 | 0.24075 | 0.24412 | 0.85644 | 0.86941 | 0.75956 | 0.80929 | 0.83331 | 0.76165 | 0.87468 | 0.86565 | PSG1         |
| cg25477928 | 0.11752 | 0.0727  | 0.07861 | 0.07548 | 0.0763  | 0.06779 | 0.07722 | 0.06254 | 0.07416 | 0.05735 | ITSN2        |
| cg25478157 | 0.03392 | 0.02722 | 0.03229 | 0.0306  | 0.02506 | 0.0256  | 0.02592 | 0.02273 | 0.02322 | 0.02347 | CEP350       |
| cg25478603 | 0.13559 | 0.12146 | 0.12201 | 0.11573 | 0.08451 | 0.10669 | 0.12133 | 0.12035 | 0.10278 | 0.10704 | ALDH1B1      |
| cg25479216 | 0.04969 | 0.04973 | 0.04029 | 0.04733 | 0.0432  | 0.04048 | 0.03703 | 0.04064 | 0.03037 | 0.02898 | NANS         |
| cg25481253 | 0.1088  | 0.09801 | 0.28482 | 0.2117  | 0.3507  | 0.19932 | 0.13762 | 0.13888 | 0.11552 | 0.10552 | TAS2R38      |
| cg25482967 | 0.12038 | 0.11542 | 0.11668 | 0.11617 | 0.19558 | 0.2088  | 0.12725 | 0.12574 | 0.09179 | 0.10373 | MRPS10       |
| cg25483003 | 0.94235 | 0.33844 | 0.97253 | 0.97024 | 0.97423 | 0.97017 | 0.94937 | 0.9217  | 0.97589 | 0.9734  | ENTPD2       |
| cg25483839 | 0.11595 | 0.10673 | 0.12764 | 0.11356 | 0.22869 | 0.14378 | 0.13087 | 0.11163 | 0.09536 | 0.10211 | RAD23B       |
| cg25484319 | 0.14001 | 0.14004 | 0.10571 | 0.08479 | 0.21962 | 0.20128 | 0.14504 | 0.14316 | 0.1228  | 0.16661 | RDH11        |
| cg25484373 | 0.04504 | 0.04067 | 0.03741 | 0.03475 | 0.031   | 0.03714 | 0.03364 | 0.03635 | 0.02952 | 0.03181 | CCT5         |
| cg25484904 | 0.86428 | 0.90469 | 0.92838 | 0.94517 | 0.95151 | 0.89272 | 0.53446 | 0.73932 | 0.08328 | 0.0546  | FLJ21511     |
| cg25485128 | 0.03578 | 0.03564 | 0.03749 | 0.03549 | 0.03127 | 0.03425 | 0.03412 | 0.02678 | 0.03026 | 0.02665 | UBA2         |
| cg25485913 | 0.67795 | 0.25457 | 0.78639 | 0.81504 | 0.93859 | 0.82627 | 0.60111 | 0.25083 | 0.34121 | 0.04171 | NTF5         |
| cg25487438 | 0.05636 | 0.05557 | 0.05504 | 0.05544 | 0.05696 | 0.0744  | 0.05139 | 0.04913 | 0.05002 | 0.05394 | NRL          |
| cg25488021 | 0.86184 | 0.84828 | 0.82015 | 0.85587 | 0.82258 | 0.85092 | 0.85005 | 0.85758 | 0.85196 | 0.83823 | EPB41L2      |
| cg25488082 | 0.05337 | 0.0519  | 0.05555 | 0.05172 | 0.03424 | 0.05278 | 0.05127 | 0.05218 | 0.04549 | 0.04663 | LOC116143    |
| cg25488206 | 0.05805 | 0.04949 | 0.08662 | 0.06634 | 0.06814 | 0.05691 | 0.03853 | 0.03617 | 0.08542 | 0.07425 | RBM9         |
| cg25488547 | 0.82178 | 0.8355  | 0.3163  | 0.63673 | 0.71774 | 0.79795 | 0.44105 | 0.42381 | 0.1971  | 0.15194 | CHM          |
| cg25490410 | 0.06551 | 0.05567 | 0.06894 | 0.06014 | 0.0784  | 0.08125 | 0.0963  | 0.06919 | 0.07413 | 0.08356 | TUBGCP5      |
| cg25490411 | 0.03114 | 0.03421 | 0.03489 | 0.02899 | 0.02973 | 0.03135 | 0.02822 | 0.02681 | 0.02782 | 0.02493 | MANBA        |
| cg25492727 | 0.03358 | 0.03066 | 0.03066 | 0.02833 | 0.02709 | 0.02883 | 0.02648 | 0.02779 | 0.02834 | 0.02627 | PTD004       |
| cg25494064 | 0.7714  | 0.68393 | 0.74379 | 0.75583 | 0.68694 | 0.75    | 0.31513 | 0.21416 | 0.8032  | 0.77059 | TMOD1        |
| cg25494227 | 0.49945 | 0.25421 | 0.78035 | 0.83235 | 0.55398 | 0.15664 | 0.13661 | 0.29519 | 0.59035 | 0.41038 | C12orf59     |
| cg25494789 | 0.05981 | 0.05452 | 0.05301 | 0.04743 | 0.04868 | 0.05042 | 0.04814 | 0.04961 | 0.04723 | 0.0379  | KIF11        |
| cg25495394 | 0.02535 | 0.03044 | 0.03162 | 0.0255  | 0.02439 | 0.03849 | 0.02948 | 0.02902 | 0.02459 | 0.02273 | SAP18        |
| cg25499017 | 0.02855 | 0.02634 | 0.03141 | 0.02889 | 0.02591 | 0.0314  | 0.0248  | 0.02165 | 0.02446 | 0.02262 | CIT          |
| cg25499099 | 0.29944 | 0.04626 | 0.93144 | 0.95881 | 0.97234 | 0.96934 | 0.14838 | 0.21176 | 0.02814 | 0.02239 | TNK1         |
| cg25500285 | 0.04717 | 0.05051 | 0.05301 | 0.05808 | 0.04603 | 0.04907 | 0.06004 | 0.05691 | 0.05209 | 0.04321 | EIF4EBP1     |

|            |         |         |         |         |         |         |         |         |         |                  |
|------------|---------|---------|---------|---------|---------|---------|---------|---------|---------|------------------|
| cg25500444 | 0.22516 | 0.41037 | 0.74814 | 0.83873 | 0.63306 | 0.6252  | 0.82053 | 0.70802 | 0.42394 | 0.4108 FLJ23514  |
| cg25501446 | 0.77052 | 0.78347 | 0.74917 | 0.77434 | 0.7065  | 0.77886 | 0.75918 | 0.7215  | 0.55166 | 0.46109 CDC2     |
| cg25503559 | 0.04398 | 0.04525 | 0.04491 | 0.04617 | 0.03666 | 0.04119 | 0.03699 | 0.04381 | 0.03689 | 0.0366 MRPL24    |
| cg25505610 | 0.04844 | 0.03809 | 0.05258 | 0.04537 | 0.03309 | 0.03877 | 0.04586 | 0.02999 | 0.03761 | 0.03088 hfl-B5   |
| cg25505974 | 0.02277 | 0.02964 | 0.03017 | 0.02633 | 0.02931 | 0.03011 | 0.0248  | 0.02403 | 0.02173 | 0.02056 C21orf59 |
| cg25506396 | 0.06771 | 0.06003 | 0.21014 | 0.39264 | 0.10602 | 0.05374 | 0.07159 | 0.05808 | 0.06595 | 0.04552 DGKD     |
| cg25506900 | 0.03457 | 0.03591 | 0.04181 | 0.03453 | 0.02864 | 0.02961 | 0.03003 | 0.03247 | 0.0309  | 0.03117 TSEN54   |
| cg25507001 | 0.59448 | 0.07044 | 0.7116  | 0.70732 | 0.68109 | 0.8496  | 0.1598  | 0.4741  | 0.25927 | 0.24254 NME5     |
| cg25509184 | 0.92676 | 0.93335 | 0.9305  | 0.92921 | 0.93648 | 0.9218  | 0.80984 | 0.92774 | 0.79931 | 0.7622 CFTR      |
| cg25510610 | 0.48641 | 0.31557 | 0.07077 | 0.08567 | 0.65389 | 0.46609 | 0.08664 | 0.17193 | 0.06131 | 0.05758 WHSC1L1  |
| cg25511429 | 0.04354 | 0.0414  | 0.0736  | 0.06153 | 0.08544 | 0.03259 | 0.03558 | 0.03493 | 0.04118 | 0.03335 NRN1     |
| cg25511807 | 0.62405 | 0.44252 | 0.51463 | 0.83561 | 0.25872 | 0.23367 | 0.23045 | 0.35771 | 0.57148 | 0.14845 MMP7     |
| cg25512587 | 0.15615 | 0.07203 | 0.08653 | 0.0843  | 0.32205 | 0.06484 | 0.09076 | 0.07136 | 0.06879 | 0.05605 SLC2A6   |
| cg25513133 | 0.02588 | 0.04034 | 0.03825 | 0.03845 | 0.02846 | 0.03393 | 0.02844 | 0.02566 | 0.03095 | 0.02897 C6orf72  |
| cg25514304 | 0.91458 | 0.42584 | 0.70932 | 0.74012 | 0.92674 | 0.52454 | 0.82128 | 0.39107 | 0.58203 | 0.13794 PSEN2    |
| cg25514503 | 0.91675 | 0.92098 | 0.91412 | 0.91176 | 0.93136 | 0.91651 | 0.92225 | 0.92779 | 0.92508 | 0.91082 PER3     |
| cg25515063 | 0.03259 | 0.04018 | 0.03834 | 0.03953 | 0.03822 | 0.04138 | 0.03258 | 0.0352  | 0.03578 | 0.02876 POP5     |
| cg25516544 | 0.02577 | 0.02598 | 0.03415 | 0.02612 | 0.01947 | 0.02523 | 0.02346 | 0.02661 | 0.0206  | 0.01987 DEPDC4   |
| cg25519930 | 0.07327 | 0.0388  | 0.21098 | 0.06403 | 0.17676 | 0.07201 | 0.0343  | 0.04027 | 0.25271 | 0.03313 CACNA1C  |
| cg25522312 | 0.06603 | 0.07464 | 0.06786 | 0.06756 | 0.05023 | 0.06261 | 0.05863 | 0.07209 | 0.06223 | 0.06495 MAD2L1   |
| cg25523185 | 0.08103 | 0.09059 | 0.08172 | 0.06453 | 0.0566  | 0.06405 | 0.15267 | 0.1743  | 0.06568 | 0.05643 CTPS2    |
| cg25523753 | 0.16674 | 0.06874 | 0.08333 | 0.06981 | 0.08727 | 0.07256 | 0.08258 | 0.08698 | 0.06388 | 0.07973 ABHD2    |
| cg25524350 | 0.1816  | 0.07287 | 0.05386 | 0.05336 | 0.05962 | 0.05678 | 0.04682 | 0.04441 | 0.15477 | 0.20935 PEG10    |
| cg25524473 | 0.05873 | 0.05934 | 0.03604 | 0.03383 | 0.45402 | 0.41432 | 0.2384  | 0.10697 | 0.08242 | 0.0406 DUSP5     |
| cg25526759 | 0.72346 | 0.60106 | 0.84017 | 0.78189 | 0.80891 | 0.82327 | 0.79175 | 0.49894 | 0.86413 | 0.80542 GP1BA    |
| cg25527547 | 0.18358 | 0.37998 | 0.73251 | 0.82499 | 0.62033 | 0.09608 | 0.0962  | 0.07557 | 0.26372 | 0.32663 PLOD3    |
| cg25530169 | 0.03608 | 0.03083 | 0.035   | 0.03828 | 0.04202 | 0.02646 | 0.027   | 0.02761 | 0.02585 | 0.02246 SPIN     |
| cg25531166 | 0.70295 | 0.51073 | 0.84757 | 0.90576 | 0.92197 | 0.89374 | 0.33975 | 0.23384 | 0.66678 | 0.68384 CTAG1B   |
| cg25533361 | 0.04316 | 0.03073 | 0.06162 | 0.05172 | 0.06004 | 0.03544 | 0.03831 | 0.04981 | 0.03228 | 0.0356 EIF3S9    |
| cg25533774 | 0.09254 | 0.17074 | 0.61573 | 0.80258 | 0.14057 | 0.09567 | 0.34014 | 0.10509 | 0.07755 | 0.07891 SOSTDC1  |
| cg25535027 | 0.06048 | 0.05849 | 0.09574 | 0.07025 | 0.04642 | 0.03255 | 0.05792 | 0.05309 | 0.04962 | 0.04417 RXRB     |
| cg25536300 | 0.01826 | 0.01699 | 0.01598 | 0.01499 | 0.01426 | 0.01696 | 0.01374 | 0.01423 | 0.01303 | 0.01331 PTBP1    |
| cg25536676 | 0.82851 | 0.06288 | 0.04249 | 0.04244 | 0.03015 | 0.02768 | 0.02628 | 0.02875 | 0.02745 | 0.02123 DHCR24   |
| cg25537724 | 0.0356  | 0.03705 | 0.03493 | 0.03243 | 0.02736 | 0.02917 | 0.02636 | 0.02735 | 0.02824 | 0.02792 MAP4K3   |
| cg25537774 | 0.0251  | 0.0255  | 0.02886 | 0.02356 | 0.0211  | 0.02295 | 0.02973 | 0.02384 | 0.02287 | 0.01592 AGPAT2   |
| cg25537962 | 0.31167 | 0.09093 | 0.14233 | 0.1484  | 0.13929 | 0.08505 | 0.06452 | 0.06198 | 0.05244 | 0.07304 CD109    |
| cg25538571 | 0.34504 | 0.3534  | 0.05159 | 0.0405  | 0.03734 | 0.04484 | 0.06335 | 0.06662 | 0.03619 | 0.0521 FLJ46365  |
| cg25539131 | 0.73506 | 0.77875 | 0.74169 | 0.76296 | 0.58806 | 0.71529 | 0.78025 | 0.79695 | 0.7659  | 0.69587 VHL      |
| cg25543604 | 0.02295 | 0.02605 | 0.02572 | 0.0255  | 0.02291 | 0.02386 | 0.02246 | 0.02081 | 0.0202  | 0.02152 EID-3    |
| cg25543676 | 0.04983 | 0.05504 | 0.06584 | 0.05827 | 0.07299 | 0.06665 | 0.06294 | 0.04885 | 0.04392 | 0.05369 SMARCE1  |
| cg25544551 | 0.02474 | 0.0263  | 0.02526 | 0.02614 | 0.02047 | 0.02344 | 0.02034 | 0.02215 | 0.02131 | 0.02176 NFYB     |

|            |         |         |         |         |         |         |         |         |         |         |          |
|------------|---------|---------|---------|---------|---------|---------|---------|---------|---------|---------|----------|
| cg25545088 | 0.72369 | 0.50463 | 0.7466  | 0.78558 | 0.60561 | 0.58769 | 0.72883 | 0.64985 | 0.81144 | 0.67938 | ABCC10   |
| cg25545182 | 0.03452 | 0.02812 | 0.03321 | 0.02786 | 0.01932 | 0.02637 | 0.02236 | 0.02531 | 0.02461 | 0.02122 | DRG1     |
| cg25545210 | 0.48461 | 0.46728 | 0.87297 | 0.89624 | 0.81103 | 0.72888 | 0.07613 | 0.05754 | 0.73704 | 0.33479 | KRTHA4   |
| cg25545845 | 0.12397 | 0.12158 | 0.17966 | 0.15378 | 0.19754 | 0.17738 | 0.14759 | 0.13599 | 0.13265 | 0.15096 | PTK9     |
| cg25546588 | 0.12811 | 0.18428 | 0.07649 | 0.15562 | 0.1057  | 0.06003 | 0.08956 | 0.04296 | 0.21217 | 0.21271 | IL15     |
| cg25547939 | 0.78942 | 0.56964 | 0.87596 | 0.87917 | 0.88921 | 0.82    | 0.83859 | 0.83941 | 0.90694 | 0.46028 | VEGFB    |
| cg25548825 | 0.85974 | 0.41721 | 0.89033 | 0.90642 | 0.79104 | 0.88455 | 0.65638 | 0.34836 | 0.71273 | 0.51314 | TBX10    |
| cg25549230 | 0.02258 | 0.02113 | 0.0221  | 0.01667 | 0.02117 | 0.02139 | 0.01884 | 0.0184  | 0.01431 | 0.01689 | ZNF272   |
| cg25549413 | 0.07686 | 0.06393 | 0.07506 | 0.07054 | 0.0511  | 0.06042 | 0.07211 | 0.05618 | 0.05455 | 0.05467 | ZNF688   |
| cg25549459 | 0.04773 | 0.03798 | 0.19823 | 0.32442 | 0.22676 | 0.05542 | 0.09352 | 0.06562 | 0.04656 | 0.03936 | POU3F3   |
| cg25550573 | 0.15856 | 0.08044 | 0.85045 | 0.90014 | 0.88929 | 0.86019 | 0.24324 | 0.12466 | 0.90614 | 0.88021 | FLJ23191 |
| cg25551168 | 0.86501 | 0.7013  | 0.79794 | 0.89959 | 0.93242 | 0.87804 | 0.72486 | 0.81059 | 0.86538 | 0.75788 | AVP      |
| cg25552492 | 0.04853 | 0.02626 | 0.53133 | 0.66429 | 0.48589 | 0.09121 | 0.12805 | 0.04116 | 0.58421 | 0.576   | LGI3     |
| cg25552889 | 0.87466 | 0.83251 | 0.88258 | 0.89572 | 0.90416 | 0.87194 | 0.85338 | 0.87282 | 0.88862 | 0.85448 | C3orf40  |
| cg25553916 | 0.4999  | 0.10999 | 0.67275 | 0.65526 | 0.85531 | 0.39566 | 0.77285 | 0.53546 | 0.6004  | 0.24333 | FLJ22318 |
| cg25554036 | 0.04735 | 0.03937 | 0.13518 | 0.28027 | 0.94562 | 0.84455 | 0.16529 | 0.04413 | 0.18353 | 0.22473 | WFS1     |
| cg25555137 | 0.02661 | 0.02324 | 0.0241  | 0.0235  | 0.02343 | 0.02365 | 0.02519 | 0.0222  | 0.02362 | 0.01728 | BCR      |
| cg25556101 | 0.0331  | 0.03158 | 0.03691 | 0.02884 | 0.02859 | 0.03181 | 0.0314  | 0.02964 | 0.03174 | 0.02711 | RPS19BP1 |
| cg25557858 | 0.07392 | 0.07271 | 0.07704 | 0.08022 | 0.08461 | 0.06375 | 0.10615 | 0.10826 | 0.07761 | 0.07779 | EXTL3    |
| cg25558099 | 0.07201 | 0.04213 | 0.26751 | 0.28601 | 0.08279 | 0.05346 | 0.03064 | 0.0317  | 0.06165 | 0.03808 | SMCR8    |
| cg25559100 | 0.04276 | 0.0459  | 0.05092 | 0.04472 | 0.06621 | 0.05224 | 0.05626 | 0.04941 | 0.03377 | 0.03577 | CSNK2A1  |
| cg25559243 | 0.03357 | 0.04254 | 0.0422  | 0.03955 | 0.03868 | 0.03353 | 0.02892 | 0.03077 | 0.03869 | 0.03822 | AAMP     |
| cg25559625 | 0.04917 | 0.05139 | 0.0703  | 0.06342 | 0.03626 | 0.04277 | 0.04246 | 0.04377 | 0.0355  | 0.03861 | EDN1     |
| cg25560840 | 0.02867 | 0.0285  | 0.03235 | 0.03001 | 0.03076 | 0.03643 | 0.0325  | 0.02866 | 0.02631 | 0.02907 | KIAA0427 |
| cg25563456 | 0.28691 | 0.03845 | 0.02844 | 0.03053 | 0.14887 | 0.17928 | 0.06589 | 0.05103 | 0.02886 | 0.03054 | WT1      |
| cg25563642 | 0.05022 | 0.04937 | 0.05268 | 0.04944 | 0.03613 | 0.0421  | 0.04252 | 0.03786 | 0.03824 | 0.04132 | RPL18A   |
| cg25564800 | 0.04667 | 0.04416 | 0.04659 | 0.0439  | 0.03204 | 0.03473 | 0.03129 | 0.03036 | 0.03033 | 0.03206 | KPNA1    |
| cg25565479 | 0.17914 | 0.18604 | 0.19651 | 0.20202 | 0.15559 | 0.19065 | 0.14789 | 0.18909 | 0.14565 | 0.18348 | PANX1    |
| cg25567232 | 0.43847 | 0.13059 | 0.73107 | 0.74617 | 0.65959 | 0.73775 | 0.65654 | 0.63338 | 0.32865 | 0.35166 | GSTA5    |
| cg25568243 | 0.02484 | 0.02239 | 0.02956 | 0.02454 | 0.07251 | 0.02566 | 0.02771 | 0.02741 | 0.02377 | 0.02076 | C1orf176 |
| cg25569462 | 0.67656 | 0.66345 | 0.27842 | 0.28286 | 0.69332 | 0.89682 | 0.75134 | 0.85703 | 0.15626 | 0.22458 | FLJ25801 |
| cg25569582 | 0.04899 | 0.04608 | 0.05333 | 0.04909 | 0.03488 | 0.04418 | 0.04285 | 0.04097 | 0.04591 | 0.04188 | BRD3     |
| cg25572812 | 0.12478 | 0.1137  | 0.15309 | 0.10225 | 0.27037 | 0.18332 | 0.13975 | 0.12312 | 0.13738 | 0.14733 | DCDC1    |
| cg25573386 | 0.47019 | 0.66398 | 0.73774 | 0.79982 | 0.4173  | 0.72654 | 0.31863 | 0.37852 | 0.1385  | 0.07592 | PLCZ1    |
| cg25574024 | 0.02457 | 0.02852 | 0.09631 | 0.44265 | 0.16117 | 0.1285  | 0.14695 | 0.21236 | 0.11267 | 0.43746 | IGF2AS   |
| cg25574548 | 0.07695 | 0.07467 | 0.07697 | 0.08271 | 0.06305 | 0.06564 | 0.06869 | 0.06355 | 0.06287 | 0.07256 | C20orf45 |
| cg25575065 | 0.04426 | 0.04468 | 0.07127 | 0.06662 | 0.03544 | 0.04079 | 0.04244 | 0.04277 | 0.04982 | 0.03811 | ARSA     |
| cg25575359 | 0.03918 | 0.02955 | 0.03688 | 0.0316  | 0.03069 | 0.02856 | 0.0285  | 0.02536 | 0.06432 | 0.02547 | PRPF19   |
| cg25577842 | 0.49426 | 0.40551 | 0.90057 | 0.90255 | 0.25281 | 0.53718 | 0.04793 | 0.06065 | 0.05716 | 0.03609 | WIT-1    |
| cg25580018 | 0.32674 | 0.0389  | 0.63961 | 0.64999 | 0.56915 | 0.64119 | 0.28415 | 0.03187 | 0.14278 | 0.05026 | ADAMTSL2 |
| cg25580076 | 0.2566  | 0.07168 | 0.84723 | 0.85693 | 0.47924 | 0.40782 | 0.6254  | 0.20881 | 0.50809 | 0.80552 | MRPL43   |



|            |         |         |         |         |         |         |         |         |         |         |           |
|------------|---------|---------|---------|---------|---------|---------|---------|---------|---------|---------|-----------|
| cg25583174 | 0.04729 | 0.05054 | 0.04374 | 0.04558 | 0.03633 | 0.04154 | 0.04653 | 0.04438 | 0.03806 | 0.04254 | FGF2      |
| cg25584626 | 0.02974 | 0.02931 | 0.04104 | 0.02897 | 0.01943 | 0.02532 | 0.02349 | 0.02659 | 0.08947 | 0.14726 | LOC51334  |
| cg25587233 | 0.78206 | 0.4512  | 0.82635 | 0.85608 | 0.9024  | 0.59626 | 0.75878 | 0.66296 | 0.88    | 0.52741 | PPP2R4    |
| cg25589890 | 0.03991 | 0.03792 | 0.03872 | 0.04492 | 0.19356 | 0.03448 | 0.03621 | 0.04185 | 0.94348 | 0.83288 | ULBP1     |
| cg25590938 | 0.06323 | 0.05684 | 0.06673 | 0.06206 | 0.04713 | 0.0615  | 0.06041 | 0.05912 | 0.05155 | 0.06009 | GOLGA2    |
| cg25591670 | 0.22917 | 0.04335 | 0.0607  | 0.05687 | 0.12801 | 0.05368 | 0.48935 | 0.24305 | 0.37189 | 0.03595 | CXorf26   |
| cg25591867 | 0.03872 | 0.03537 | 0.0403  | 0.03851 | 0.02664 | 0.03733 | 0.03281 | 0.03551 | 0.031   | 0.03221 | CKAP4     |
| cg25593040 | 0.04559 | 0.04877 | 0.05321 | 0.05626 | 0.04322 | 0.05053 | 0.04785 | 0.04542 | 0.04468 | 0.03612 | DDX18     |
| cg25593948 | 0.40465 | 0.57551 | 0.48785 | 0.62568 | 0.6575  | 0.26546 | 0.18699 | 0.18542 | 0.58978 | 0.4779  | TFAP2B    |
| cg25595446 | 0.04339 | 0.04332 | 0.04782 | 0.04379 | 0.04971 | 0.05564 | 0.03667 | 0.03058 | 0.03478 | 0.0295  | PRMT1     |
| cg25596297 | 0.05312 | 0.05173 | 0.87774 | 0.90519 | 0.08568 | 0.07262 | 0.58405 | 0.6591  | 0.05721 | 0.06306 | FLJ32447  |
| cg25598083 | 0.58152 | 0.3278  | 0.23962 | 0.30424 | 0.52406 | 0.73517 | 0.17242 | 0.41814 | 0.87111 | 0.70161 | ACOT2     |
| cg25599211 | 0.84857 | 0.63835 | 0.85486 | 0.8681  | 0.91218 | 0.85878 | 0.84106 | 0.82067 | 0.81639 | 0.80666 | P4HA3     |
| cg25599242 | 0.38934 | 0.11956 | 0.27605 | 0.29532 | 0.1976  | 0.10458 | 0.22877 | 0.0997  | 0.11791 | 0.08607 | RARRES3   |
| cg25600236 | 0.50298 | 0.44138 | 0.45645 | 0.48412 | 0.53694 | 0.53576 | 0.33023 | 0.25659 | 0.32856 | 0.23641 | C4orf7    |
| cg25600606 | 0.90116 | 0.88127 | 0.87874 | 0.90563 | 0.88183 | 0.89076 | 0.85925 | 0.88704 | 0.90153 | 0.88458 | HIPK3     |
| cg25602457 | 0.02689 | 0.02997 | 0.10706 | 0.25082 | 0.16327 | 0.33689 | 0.36547 | 0.13814 | 0.1919  | 0.33124 | DCC       |
| cg25604883 | 0.0406  | 0.02871 | 0.34043 | 0.25415 | 0.35279 | 0.29661 | 0.17456 | 0.05922 | 0.1896  | 0.05405 | AK5       |
| cg25605045 | 0.02798 | 0.03139 | 0.03176 | 0.02814 | 0.02449 | 0.02565 | 0.02891 | 0.02867 | 0.02406 | 0.02139 | ANKRD39   |
| cg25605408 | 0.85642 | 0.85789 | 0.85836 | 0.85188 | 0.82791 | 0.78851 | 0.8196  | 0.76016 | 0.82899 | 0.84503 | FLJ40142  |
| cg25607161 | 0.16723 | 0.1416  | 0.27966 | 0.41618 | 0.30534 | 0.16031 | 0.18223 | 0.16215 | 0.12965 | 0.17379 | OR1A1     |
| cg25608041 | 0.07697 | 0.05665 | 0.90128 | 0.9084  | 0.77896 | 0.69253 | 0.86077 | 0.59086 | 0.923   | 0.88617 | TBC1D1    |
| cg25608949 | 0.67153 | 0.32082 | 0.51557 | 0.54932 | 0.63054 | 0.57698 | 0.14915 | 0.14094 | 0.29487 | 0.09062 | TMPRSS3   |
| cg25611931 | 0.0333  | 0.03658 | 0.04025 | 0.04024 | 0.02909 | 0.02973 | 0.03629 | 0.03984 | 0.16846 | 0.04042 | TMEM24    |
| cg25612145 | 0.90669 | 0.86546 | 0.91872 | 0.91812 | 0.9341  | 0.93341 | 0.92626 | 0.9244  | 0.93079 | 0.93052 | STK31     |
| cg25612480 | 0.91646 | 0.59714 | 0.72127 | 0.74984 | 0.83143 | 0.51767 | 0.91729 | 0.4056  | 0.05592 | 0.04646 | UBE2V2    |
| cg25615963 | 0.14544 | 0.05743 | 0.05499 | 0.06696 | 0.04076 | 0.03556 | 0.04439 | 0.04477 | 0.04486 | 0.03558 | EIF4G1    |
| cg25616762 | 0.04055 | 0.03857 | 0.05086 | 0.04542 | 0.03436 | 0.02509 | 0.04425 | 0.03361 | 0.24159 | 0.02803 | CRR9      |
| cg25619607 | 0.41108 | 0.03345 | 0.03204 | 0.0314  | 0.0248  | 0.02503 | 0.02844 | 0.02818 | 0.0242  | 0.02528 | IMPACT    |
| cg25620220 | 0.58738 | 0.39793 | 0.06575 | 0.06285 | 0.03936 | 0.57996 | 0.81595 | 0.45372 | 0.46472 | 0.52087 | LOC221091 |
| cg25622628 | 0.02923 | 0.02672 | 0.03133 | 0.02597 | 0.02533 | 0.02866 | 0.02647 | 0.0278  | 0.02355 | 0.02294 | C19orf24  |
| cg25623459 | 0.22567 | 0.12057 | 0.47553 | 0.63862 | 0.67189 | 0.6717  | 0.59765 | 0.33036 | 0.21496 | 0.09884 | TNNI2     |
| cg25623640 | 0.63349 | 0.30893 | 0.59368 | 0.63748 | 0.30333 | 0.28033 | 0.32576 | 0.26029 | 0.18232 | 0.13458 | IGJ       |
| cg25624712 | 0.04024 | 0.03835 | 0.03503 | 0.03804 | 0.01929 | 0.01861 | 0.03041 | 0.0289  | 0.03302 | 0.03865 | LOC92345  |
| cg25629118 | 0.75733 | 0.49456 | 0.72826 | 0.73355 | 0.61886 | 0.70154 | 0.73074 | 0.68113 | 0.73535 | 0.4553  | FLJ44955  |
| cg25629694 | 0.48706 | 0.48    | 0.09765 | 0.10186 | 0.45512 | 0.44329 | 0.04478 | 0.05597 | 0.45911 | 0.48955 | SMURF2    |
| cg25631352 | 0.16217 | 0.15362 | 0.62712 | 0.61441 | 0.27787 | 0.2251  | 0.18619 | 0.17673 | 0.18149 | 0.16339 | ADD2      |
| cg25632001 | 0.0638  | 0.05718 | 0.04395 | 0.05102 | 0.02706 | 0.03389 | 0.04552 | 0.05248 | 0.04225 | 0.03659 | MRPL36    |
| cg25632203 | 0.03041 | 0.03287 | 0.03644 | 0.03383 | 0.03285 | 0.0331  | 0.03473 | 0.03204 | 0.03473 | 0.03153 | ZNF643    |
| cg25634666 | 0.66657 | 0.3982  | 0.81903 | 0.8308  | 0.89668 | 0.85953 | 0.84089 | 0.82851 | 0.83581 | 0.72388 | FOLR3     |
| cg25635316 | 0.03996 | 0.04974 | 0.04929 | 0.04946 | 0.03751 | 0.03997 | 0.04734 | 0.04237 | 0.04277 | 0.03658 | LOC90693  |

|            |         |         |         |         |         |         |         |         |         |                   |
|------------|---------|---------|---------|---------|---------|---------|---------|---------|---------|-------------------|
| cg25635352 | 0.36346 | 0.11696 | 0.0446  | 0.04666 | 0.31279 | 0.41217 | 0.02626 | 0.02951 | 0.02546 | 0.0216 B3GALT3    |
| cg25635500 | 0.83194 | 0.45689 | 0.91804 | 0.95212 | 0.95551 | 0.92394 | 0.92812 | 0.83013 | 0.82857 | 0.93754 RRP22     |
| cg25636075 | 0.88758 | 0.50389 | 0.86172 | 0.90919 | 0.91914 | 0.8359  | 0.62871 | 0.71643 | 0.89846 | 0.8901 TMEM41A    |
| cg25637824 | 0.02962 | 0.02991 | 0.03661 | 0.03427 | 0.02394 | 0.03191 | 0.02835 | 0.02285 | 0.02502 | 0.02175 TMEM48    |
| cg25638984 | 0.0511  | 0.05028 | 0.05065 | 0.0597  | 0.08153 | 0.04433 | 0.04547 | 0.04601 | 0.04924 | 0.04409 TMTC2     |
| cg25640176 | 0.03456 | 0.03278 | 0.03286 | 0.03931 | 0.037   | 0.0327  | 0.0308  | 0.03062 | 0.02415 | 0.02608 MGC11335  |
| cg25645462 | 0.85591 | 0.60397 | 0.86652 | 0.88258 | 0.91104 | 0.84797 | 0.8782  | 0.79882 | 0.89504 | 0.8167 GPR56      |
| cg25645748 | 0.85975 | 0.15578 | 0.80916 | 0.84967 | 0.33412 | 0.24186 | 0.27948 | 0.15753 | 0.51341 | 0.50727 AKAP14    |
| cg25650110 | 0.03804 | 0.04019 | 0.0348  | 0.04116 | 0.03127 | 0.03191 | 0.03622 | 0.03616 | 0.03284 | 0.03227 ZDHH8     |
| cg25650811 | 0.75082 | 0.77628 | 0.43204 | 0.39572 | 0.36763 | 0.5181  | 0.24244 | 0.14848 | 0.45445 | 0.52154 LOC223075 |
| cg25651505 | 0.87435 | 0.85091 | 0.25343 | 0.53213 | 0.214   | 0.38583 | 0.41942 | 0.59922 | 0.0961  | 0.03481 VAMP5     |
| cg25651984 | 0.04948 | 0.16197 | 0.88525 | 0.94457 | 0.96382 | 0.96156 | 0.55423 | 0.4903  | 0.05225 | 0.03473 MAGEC1    |
| cg25653103 | 0.05023 | 0.05372 | 0.05222 | 0.05094 | 0.03628 | 0.05106 | 0.04486 | 0.04716 | 0.04682 | 0.04624 SEPX1     |
| cg25655096 | 0.92129 | 0.4499  | 0.75683 | 0.85169 | 0.0774  | 0.12864 | 0.04968 | 0.20031 | 0.59441 | 0.26616 GPR92     |
| cg25657700 | 0.44084 | 0.3672  | 0.95209 | 0.9582  | 0.76891 | 0.64369 | 0.51548 | 0.58342 | 0.92643 | 0.93388 SNRPN     |
| cg25657834 | 0.07008 | 0.0527  | 0.39091 | 0.52243 | 0.52852 | 0.43924 | 0.05401 | 0.04155 | 0.0579  | 0.04131 NTSR2     |
| cg25658178 | 0.13468 | 0.123   | 0.03021 | 0.02832 | 0.06577 | 0.027   | 0.02848 | 0.03577 | 0.05044 | 0.02112 CCND3     |
| cg25658980 | 0.04059 | 0.03201 | 0.03049 | 0.02904 | 0.01771 | 0.02871 | 0.0299  | 0.02793 | 0.02704 | 0.02447 FLJ20643  |
| cg25659818 | 0.40335 | 0.31375 | 0.14875 | 0.11955 | 0.21622 | 0.36056 | 0.0527  | 0.0533  | 0.44014 | 0.0897 CCL4       |
| cg25661781 | 0.11082 | 0.11687 | 0.1743  | 0.35695 | 0.16482 | 0.1313  | 0.09044 | 0.07596 | 0.09263 | 0.12588 WIPI1     |
| cg25661884 | 0.19778 | 0.05919 | 0.8092  | 0.84437 | 0.21373 | 0.20697 | 0.34391 | 0.05802 | 0.06548 | 0.05787 RDH8      |
| cg25662535 | 0.06889 | 0.04372 | 0.27032 | 0.34982 | 0.55083 | 0.0386  | 0.14799 | 0.039   | 0.33682 | 0.03312 ART5      |
| cg25662680 | 0.03602 | 0.03427 | 0.03531 | 0.03386 | 0.02979 | 0.0362  | 0.02868 | 0.03157 | 0.02604 | 0.03488 NUTF2     |
| cg25664034 | 0.33793 | 0.13792 | 0.1383  | 0.15428 | 0.18489 | 0.18911 | 0.13853 | 0.17725 | 0.12514 | 0.13634 FLNC      |
| cg25664725 | 0.02089 | 0.02206 | 0.0207  | 0.02201 | 0.01889 | 0.02001 | 0.01618 | 0.01753 | 0.01817 | 0.01858 NAGLU     |
| cg25665528 | 0.88686 | 0.79532 | 0.8558  | 0.88022 | 0.89922 | 0.78868 | 0.84192 | 0.78427 | 0.87976 | 0.83445 MGC21830  |
| cg25665697 | 0.56816 | 0.15795 | 0.43244 | 0.47212 | 0.77317 | 0.35385 | 0.12257 | 0.11221 | 0.06467 | 0.04909 LCTL      |
| cg25667202 | 0.07896 | 0.07508 | 0.06089 | 0.05318 | 0.07239 | 0.05725 | 0.04544 | 0.04377 | 0.06579 | 0.06477 RPS27     |
| cg25668368 | 0.07348 | 0.05405 | 0.35025 | 0.49162 | 0.34954 | 0.41272 | 0.08218 | 0.05419 | 0.06598 | 0.37629 KCNH7     |
| cg25668626 | 0.82353 | 0.33102 | 0.70102 | 0.72453 | 0.60786 | 0.18208 | 0.39002 | 0.18482 | 0.40193 | 0.16528 OAS1      |
| cg25670376 | 0.76923 | 0.79244 | 0.77955 | 0.80338 | 0.69619 | 0.78043 | 0.72037 | 0.75476 | 0.79535 | 0.74838 MBTD1     |
| cg25670900 | 0.81158 | 0.77975 | 0.6858  | 0.74318 | 0.68536 | 0.73623 | 0.47211 | 0.52583 | 0.49286 | 0.24467 ZCCHC5    |
| cg25671438 | 0.8703  | 0.82514 | 0.81878 | 0.82177 | 0.83234 | 0.84985 | 0.69437 | 0.46627 | 0.83151 | 0.80409 CENTB1    |
| cg25671651 | 0.03259 | 0.03766 | 0.04107 | 0.03795 | 0.04347 | 0.04201 | 0.03729 | 0.0361  | 0.03434 | 0.03678 WDR12     |
| cg25672287 | 0.02126 | 0.02197 | 0.01963 | 0.01967 | 0.01996 | 0.01994 | 0.02224 | 0.02052 | 0.01972 | 0.01705 DECR2     |
| cg25673373 | 0.0316  | 0.03844 | 0.04515 | 0.03661 | 0.03765 | 0.04867 | 0.04359 | 0.0378  | 0.03058 | 0.03773 ARL4D     |
| cg25674286 | 0.17479 | 0.10083 | 0.68929 | 0.73012 | 0.35316 | 0.24192 | 0.41462 | 0.10914 | 0.75061 | 0.47594 ADORA3    |
| cg25675349 | 0.0255  | 0.02438 | 0.02408 | 0.02033 | 0.0243  | 0.02061 | 0.0172  | 0.0179  | 0.01682 | 0.01648 TEX264    |
| cg25677688 | 0.78699 | 0.75679 | 0.81159 | 0.8179  | 0.74776 | 0.82826 | 0.73139 | 0.71789 | 0.84791 | 0.82666 TAS2R48   |
| cg25677709 | 0.87256 | 0.88688 | 0.89345 | 0.90703 | 0.9337  | 0.88703 | 0.88839 | 0.86675 | 0.88788 | 0.89539 NDST1     |
| cg25680829 | 0.23763 | 0.04259 | 0.86409 | 0.88272 | 0.63362 | 0.61284 | 0.46657 | 0.14817 | 0.0752  | 0.03826 LHX4      |

|            |         |         |         |         |         |         |         |         |         |         |          |
|------------|---------|---------|---------|---------|---------|---------|---------|---------|---------|---------|----------|
| cg25681177 | 0.05874 | 0.03354 | 0.09466 | 0.08561 | 0.04383 | 0.04117 | 0.02809 | 0.03304 | 0.34604 | 0.12668 | GAPDHS   |
| cg25682080 | 0.44988 | 0.43781 | 0.45208 | 0.47076 | 0.67006 | 0.48025 | 0.27866 | 0.40019 | 0.2745  | 0.18391 | APOA5    |
| cg25682559 | 0.0322  | 0.04146 | 0.04408 | 0.03454 | 0.07849 | 0.04206 | 0.03918 | 0.03409 | 0.03329 | 0.03734 | FHOD3    |
| cg25682936 | 0.17037 | 0.16021 | 0.15084 | 0.15348 | 0.10598 | 0.1308  | 0.1441  | 0.11959 | 0.13426 | 0.14179 | SF3A3    |
| cg25683012 | 0.03846 | 0.04131 | 0.04149 | 0.04103 | 0.07933 | 0.02935 | 0.03049 | 0.02736 | 0.0427  | 0.02318 | BAZ2A    |
| cg25683185 | 0.85825 | 0.6938  | 0.828   | 0.81501 | 0.70742 | 0.86424 | 0.84464 | 0.81602 | 0.82694 | 0.83282 | ACRBP    |
| cg25683904 | 0.3347  | 0.24594 | 0.32568 | 0.25093 | 0.30154 | 0.2267  | 0.30562 | 0.25619 | 0.24139 | 0.25514 | PARG     |
| cg25685640 | 0.07264 | 0.08559 | 0.07907 | 0.06534 | 0.16739 | 0.13425 | 0.09118 | 0.07648 | 0.06445 | 0.08213 | E2F8     |
| cg25685838 | 0.91031 | 0.76151 | 0.9306  | 0.93331 | 0.95861 | 0.92267 | 0.53365 | 0.59676 | 0.92242 | 0.90958 | GDPD2    |
| cg25687894 | 0.14932 | 0.05829 | 0.25392 | 0.14343 | 0.3067  | 0.05016 | 0.20704 | 0.06178 | 0.27913 | 0.05704 | ACLY     |
| cg25689649 | 0.23212 | 0.13127 | 0.76933 | 0.73964 | 0.30038 | 0.23285 | 0.25046 | 0.17134 | 0.67459 | 0.5557  | FLJ22709 |
| cg25689955 | 0.76382 | 0.38278 | 0.80019 | 0.838   | 0.76296 | 0.77953 | 0.52499 | 0.5013  | 0.83468 | 0.76024 | KBTBD4   |
| cg25690265 | 0.46089 | 0.27825 | 0.85648 | 0.8899  | 0.89622 | 0.89997 | 0.53907 | 0.53206 | 0.83908 | 0.87325 | TMC5     |
| cg25691167 | 0.0413  | 0.02801 | 0.95004 | 0.95536 | 0.95381 | 0.95354 | 0.94209 | 0.94433 | 0.89466 | 0.85765 | FERD3L   |
| cg25692323 | 0.64861 | 0.35661 | 0.71487 | 0.74126 | 0.81082 | 0.72284 | 0.03416 | 0.03985 | 0.44871 | 0.16841 | ZNF485   |
| cg25692621 | 0.52862 | 0.74092 | 0.62796 | 0.68003 | 0.44836 | 0.41138 | 0.47886 | 0.69189 | 0.45511 | 0.31863 | ASB4     |
| cg25694542 | 0.02301 | 0.02707 | 0.0249  | 0.02179 | 0.02303 | 0.02462 | 0.01995 | 0.02015 | 0.02409 | 0.02285 | ZFYVE1   |
| cg25697050 | 0.90604 | 0.84511 | 0.87552 | 0.89319 | 0.79652 | 0.87091 | 0.87028 | 0.88559 | 0.88294 | 0.85736 | INPP5D   |
| cg25697314 | 0.3007  | 0.12032 | 0.79404 | 0.81757 | 0.61875 | 0.39308 | 0.7557  | 0.76029 | 0.74982 | 0.67221 | IL26     |
| cg25699533 | 0.05573 | 0.05659 | 0.05826 | 0.04986 | 0.04308 | 0.04373 | 0.04554 | 0.04422 | 0.03584 | 0.03988 | UBA52    |
| cg25705900 | 0.12771 | 0.05638 | 0.18856 | 0.14332 | 0.09817 | 0.04951 | 0.06806 | 0.05435 | 0.34517 | 0.26748 | RNF144   |
| cg25707005 | 0.09755 | 0.07194 | 0.0938  | 0.08688 | 0.91271 | 0.92677 | 0.90176 | 0.90794 | 0.07859 | 0.08562 | DNAJC18  |
| cg25708912 | 0.85467 | 0.88348 | 0.88456 | 0.84347 | 0.84794 | 0.8382  | 0.70088 | 0.87346 | 0.853   | 0.88677 | DUSP21   |
| cg25710140 | 0.70544 | 0.72721 | 0.77436 | 0.80465 | 0.79304 | 0.71121 | 0.43772 | 0.45056 | 0.80917 | 0.73312 | MID1     |
| cg25711779 | 0.43625 | 0.13429 | 0.82013 | 0.68163 | 0.91681 | 0.87623 | 0.89164 | 0.75511 | 0.86702 | 0.79542 | EFEMP1   |
| cg25712380 | 0.73341 | 0.25685 | 0.81038 | 0.85491 | 0.78339 | 0.80929 | 0.6318  | 0.40542 | 0.8065  | 0.55975 | GRAP2    |
| cg25713185 | 0.16828 | 0.07006 | 0.59546 | 0.69314 | 0.31558 | 0.05897 | 0.09792 | 0.06271 | 0.0717  | 0.0579  | SLC19A3  |
| cg25713309 | 0.02219 | 0.02244 | 0.02223 | 0.02418 | 0.02346 | 0.02539 | 0.02259 | 0.02269 | 0.01721 | 0.01911 | FLJ22709 |
| cg25714610 | 0.02665 | 0.02768 | 0.03505 | 0.03683 | 0.02916 | 0.03146 | 0.33714 | 0.30514 | 0.0218  | 0.02214 | FAM3A    |
| cg25716286 | 0.0307  | 0.02952 | 0.04726 | 0.04699 | 0.03405 | 0.03663 | 0.02596 | 0.02433 | 0.02856 | 0.02762 | MED18    |
| cg25716740 | 0.0279  | 0.03308 | 0.03165 | 0.03018 | 0.02737 | 0.03064 | 0.02791 | 0.02735 | 0.02773 | 0.02786 | WDR50    |
| cg25716871 | 0.03827 | 0.03767 | 0.04361 | 0.03638 | 0.06767 | 0.04764 | 0.03362 | 0.03325 | 0.0328  | 0.03538 | MAPKAPK3 |
| cg25717844 | 0.06714 | 0.08803 | 0.76444 | 0.7971  | 0.65125 | 0.3735  | 0.25646 | 0.09722 | 0.09725 | 0.07603 | GAL3ST4  |
| cg25718402 | 0.49606 | 0.3034  | 0.98058 | 0.97819 | 0.86177 | 0.90069 | 0.20105 | 0.02975 | 0.97322 | 0.98048 | CLDN7    |
| cg25718438 | 0.42114 | 0.34495 | 0.81904 | 0.85458 | 0.90661 | 0.86028 | 0.67051 | 0.50011 | 0.65812 | 0.43316 | WFDC5    |
| cg25720804 | 0.04072 | 0.03785 | 0.88638 | 0.79466 | 0.55766 | 0.66067 | 0.66772 | 0.97583 | 0.44483 | 0.19878 | TLX3     |
| cg25722142 | 0.22106 | 0.21971 | 0.22837 | 0.20731 | 0.13641 | 0.17837 | 0.2016  | 0.21261 | 0.19252 | 0.1877  | CITED2   |
| cg25723866 | 0.89333 | 0.87446 | 0.89485 | 0.90293 | 0.87408 | 0.87988 | 0.86405 | 0.86396 | 0.89389 | 0.8276  | LTBP4    |
| cg25724441 | 0.03519 | 0.03541 | 0.03693 | 0.03283 | 0.02525 | 0.03242 | 0.03478 | 0.03561 | 0.0365  | 0.02851 | KCNJ2    |
| cg25725843 | 0.30127 | 0.45663 | 0.33053 | 0.33941 | 0.54288 | 0.33925 | 0.24322 | 0.06235 | 0.30903 | 0.27042 | STGAL2   |
| cg25729068 | 0.03611 | 0.03597 | 0.46264 | 0.52971 | 0.14573 | 0.06142 | 0.17656 | 0.42043 | 0.04552 | 0.03106 | MTAC2D1  |

|            |         |         |         |         |         |         |         |         |         |                   |
|------------|---------|---------|---------|---------|---------|---------|---------|---------|---------|-------------------|
| cg25729716 | 0.873   | 0.85475 | 0.73516 | 0.72855 | 0.84195 | 0.84431 | 0.64593 | 0.37506 | 0.64917 | 0.77412 CD79B     |
| cg25729765 | 0.05835 | 0.0559  | 0.05082 | 0.05127 | 0.0428  | 0.05865 | 0.05437 | 0.04753 | 0.0537  | 0.04661 SP3       |
| cg25729957 | 0.07223 | 0.06164 | 0.07517 | 0.06208 | 0.1034  | 0.06495 | 0.05803 | 0.05719 | 0.06568 | 0.05981 C10orf32  |
| cg25732252 | 0.66237 | 0.21202 | 0.8922  | 0.9054  | 0.78539 | 0.36755 | 0.84286 | 0.4678  | 0.51665 | 0.3186 ST6GALNAC4 |
| cg25734864 | 0.88633 | 0.81764 | 0.88024 | 0.88948 | 0.92259 | 0.86468 | 0.80324 | 0.77499 | 0.8943  | 0.82267 PROZ      |
| cg25735280 | 0.04538 | 0.04068 | 0.04937 | 0.04776 | 0.15944 | 0.03577 | 0.03759 | 0.03569 | 0.02999 | 0.03091 PDZK3     |
| cg25736482 | 0.77369 | 0.38007 | 0.8532  | 0.86982 | 0.80203 | 0.34807 | 0.19866 | 0.11825 | 0.59219 | 0.53828 TMC4      |
| cg25737491 | 0.04435 | 0.05275 | 0.05022 | 0.04571 | 0.05335 | 0.05565 | 0.0574  | 0.04782 | 0.04117 | 0.04748 GABARAP   |
| cg25737664 | 0.39615 | 0.31414 | 0.8765  | 0.87033 | 0.86517 | 0.87871 | 0.06144 | 0.43879 | 0.78221 | 0.65769 SIRPD     |
| cg25737836 | 0.78945 | 0.32851 | 0.29002 | 0.64663 | 0.62614 | 0.58782 | 0.55681 | 0.31325 | 0.59983 | 0.56879 MCM3AP    |
| cg25738273 | 0.03754 | 0.03689 | 0.17995 | 0.20083 | 0.15245 | 0.07198 | 0.03197 | 0.03172 | 0.03707 | 0.03588 DUSP26    |
| cg25739003 | 0.06408 | 0.0674  | 0.06915 | 0.06367 | 0.03901 | 0.05185 | 0.06195 | 0.06541 | 0.0542  | 0.05806 EEF1G     |
| cg25741319 | 0.07585 | 0.0758  | 0.08968 | 0.12696 | 0.1762  | 0.12704 | 0.07237 | 0.08133 | 0.10945 | 0.06878 FLJ32745  |
| cg25741452 | 0.0335  | 0.02866 | 0.0279  | 0.03376 | 0.01933 | 0.02751 | 0.02907 | 0.02712 | 0.10152 | 0.06744 KITLG     |
| cg25741794 | 0.06347 | 0.07893 | 0.07642 | 0.07764 | 0.08772 | 0.07131 | 0.05138 | 0.04862 | 0.0587  | 0.05736 EFHD2     |
| cg25742201 | 0.06885 | 0.06253 | 0.07433 | 0.05964 | 0.04539 | 0.04676 | 0.05194 | 0.04968 | 0.06516 | 0.04823 AATF      |
| cg25743584 | 0.76097 | 0.77631 | 0.65213 | 0.7116  | 0.73499 | 0.74622 | 0.69457 | 0.72705 | 0.74801 | 0.71554 TIAF1     |
| cg25745343 | 0.05846 | 0.07717 | 0.08982 | 0.08021 | 0.08621 | 0.08575 | 0.08499 | 0.07361 | 0.07797 | 0.07433 PLEKHB2   |
| cg25746138 | 0.05194 | 0.04233 | 0.06604 | 0.08332 | 0.05804 | 0.04656 | 0.04377 | 0.04425 | 0.03892 | 0.03737 MLL4      |
| cg25748127 | 0.02662 | 0.02618 | 0.03371 | 0.02915 | 0.02528 | 0.02677 | 0.02724 | 0.02598 | 0.02353 | 0.02218 POLR2L    |
| cg25748736 | 0.11839 | 0.04999 | 0.26391 | 0.36112 | 0.13125 | 0.03919 | 0.12926 | 0.09564 | 0.13312 | 0.03375 LANCL3    |
| cg25750259 | 0.03784 | 0.03722 | 0.06594 | 0.06902 | 0.03599 | 0.03534 | 0.03484 | 0.04132 | 0.03418 | 0.02594 C20orf121 |
| cg25750404 | 0.04893 | 0.05242 | 0.05288 | 0.05256 | 0.03866 | 0.04872 | 0.05373 | 0.05043 | 0.04326 | 0.04503 VAMP1     |
| cg25751295 | 0.03122 | 0.03109 | 0.03254 | 0.03892 | 0.03021 | 0.03857 | 0.03769 | 0.0472  | 0.03238 | 0.02977 DUSP4     |
| cg25752527 | 0.03733 | 0.04089 | 0.04266 | 0.03879 | 0.03642 | 0.037   | 0.03691 | 0.04235 | 0.03375 | 0.0358 UBXD2      |
| cg25753817 | 0.92807 | 0.49846 | 0.0773  | 0.10879 | 0.06753 | 0.05082 | 0.06187 | 0.05891 | 0.05258 | 0.0492 INPP1      |
| cg25755261 | 0.04184 | 0.04457 | 0.04748 | 0.04307 | 0.03445 | 0.04109 | 0.03967 | 0.04104 | 0.04117 | 0.03201 C14orf110 |
| cg25756129 | 0.04568 | 0.0486  | 0.04527 | 0.04572 | 0.03703 | 0.03913 | 0.04256 | 0.03729 | 0.03708 | 0.03118 SFRS10    |
| cg25757737 | 0.03625 | 0.03631 | 0.03266 | 0.03756 | 0.04359 | 0.03365 | 0.02543 | 0.02347 | 0.03292 | 0.02941 PTPN23    |
| cg25758314 | 0.69379 | 0.12142 | 0.50035 | 0.57802 | 0.33632 | 0.05919 | 0.49315 | 0.37679 | 0.03405 | 0.02369 ARD1A     |
| cg25759381 | 0.91506 | 0.69403 | 0.90479 | 0.9198  | 0.93122 | 0.78856 | 0.88298 | 0.87655 | 0.78609 | 0.76366 TSSK2     |
| cg25759517 | 0.03478 | 0.03473 | 0.03656 | 0.03593 | 0.03457 | 0.03485 | 0.03415 | 0.03525 | 0.03094 | 0.0344 PYCR1      |
| cg25760229 | 0.02152 | 0.01974 | 0.03192 | 0.034   | 0.01971 | 0.01634 | 0.01788 | 0.02039 | 0.02103 | 0.01889 CACNA1H   |
| cg25762395 | 0.02303 | 0.0281  | 0.02912 | 0.02958 | 0.03848 | 0.05566 | 0.02435 | 0.02451 | 0.0236  | 0.02092 C1orf174  |
| cg25762706 | 0.90797 | 0.17314 | 0.5665  | 0.59138 | 0.51134 | 0.58797 | 0.08517 | 0.1432  | 0.85007 | 0.3407 STMN4      |
| cg25763788 | 0.14551 | 0.31964 | 0.90732 | 0.88596 | 0.71228 | 0.64696 | 0.16437 | 0.06348 | 0.05524 | 0.03725 HTR1B     |
| cg25764191 | 0.02605 | 0.02683 | 0.5739  | 0.49761 | 0.70939 | 0.63984 | 0.07225 | 0.02325 | 0.02932 | 0.01785 INA       |
| cg25764464 | 0.04743 | 0.04613 | 0.05302 | 0.04981 | 0.02576 | 0.03856 | 0.04519 | 0.04365 | 0.03981 | 0.04315 PLEKHA5   |
| cg25764570 | 0.15318 | 0.08987 | 0.85472 | 0.858   | 0.82585 | 0.80778 | 0.18644 | 0.09659 | 0.7583  | 0.67688 HLA-DRA   |
| cg25766046 | 0.0868  | 0.02703 | 0.03956 | 0.03207 | 0.37764 | 0.04787 | 0.05622 | 0.02622 | 0.05931 | 0.02107 ROR2      |
| cg25766774 | 0.18352 | 0.12452 | 0.41813 | 0.54271 | 0.31573 | 0.2295  | 0.12172 | 0.10065 | 0.35494 | 0.15469 ZDHHC3    |

|             |         |         |         |         |         |         |         |         |         |         |              |
|-------------|---------|---------|---------|---------|---------|---------|---------|---------|---------|---------|--------------|
| cg25769980  | 0.59325 | 0.4855  | 0.83751 | 0.87375 | 0.55    | 0.66883 | 0.86383 | 0.77401 | 0.84748 | 0.7948  | TLR6         |
| cg257770411 | 0.74607 | 0.85636 | 0.82266 | 0.83381 | 0.68844 | 0.76027 | 0.77661 | 0.77475 | 0.64558 | 0.62579 | WBSCR23      |
| cg25771195  | 0.90578 | 0.79976 | 0.86952 | 0.88897 | 0.92449 | 0.50581 | 0.8628  | 0.30846 | 0.91404 | 0.574   | GTL3         |
| cg25771201  | 0.51243 | 0.41148 | 0.58316 | 0.70667 | 0.82006 | 0.76283 | 0.45292 | 0.39563 | 0.84891 | 0.50981 | SCDR10       |
| cg25775449  | 0.59262 | 0.69708 | 0.72005 | 0.70036 | 0.55397 | 0.66039 | 0.69921 | 0.74362 | 0.70059 | 0.64328 | LTB4R        |
| cg25776555  | 0.03084 | 0.03723 | 0.03579 | 0.03525 | 0.0727  | 0.03258 | 0.02783 | 0.0265  | 0.02807 | 0.03049 | ZNF614       |
| cg25778166  | 0.80695 | 0.59269 | 0.73618 | 0.84605 | 0.78613 | 0.84957 | 0.52482 | 0.37165 | 0.76228 | 0.44874 | FMO3         |
| cg25778479  | 0.13864 | 0.07344 | 0.09338 | 0.08849 | 0.13109 | 0.09321 | 0.10557 | 0.09438 | 0.07972 | 0.07191 | ANKMY2       |
| cg25780543  | 0.03515 | 0.323   | 0.9488  | 0.97077 | 0.95259 | 0.92394 | 0.06156 | 0.03127 | 0.0904  | 0.08048 | HTR5A        |
| cg25781123  | 0.20354 | 0.06946 | 0.05618 | 0.05468 | 0.06724 | 0.06426 | 0.07162 | 0.04971 | 0.05397 | 0.04478 | THUMPD3      |
| cg25781162  | 0.90992 | 0.89684 | 0.89182 | 0.90919 | 0.92703 | 0.90413 | 0.85161 | 0.86609 | 0.88476 | 0.84691 | ABCG5        |
| cg25781202  | 0.04987 | 0.04753 | 0.05384 | 0.05372 | 0.0381  | 0.04037 | 0.06096 | 0.05636 | 0.04022 | 0.03622 | RNF122       |
| cg25782229  | 0.85524 | 0.84134 | 0.86629 | 0.88671 | 0.68295 | 0.73997 | 0.14788 | 0.13155 | 0.65657 | 0.8165  | WT1          |
| cg25782563  | 0.05754 | 0.05487 | 0.06952 | 0.05793 | 0.10927 | 0.09248 | 0.0747  | 0.06105 | 0.05509 | 0.06644 | MED9         |
| cg25784308  | 0.11431 | 0.09539 | 0.58749 | 0.63517 | 0.20765 | 0.45132 | 0.15807 | 0.13213 | 0.10581 | 0.07879 | FLJ38377     |
| cg25784394  | 0.03218 | 0.03041 | 0.03609 | 0.03132 | 0.02811 | 0.0308  | 0.02967 | 0.02809 | 0.02724 | 0.02885 | TROAP        |
| cg25785378  | 0.0658  | 0.06461 | 0.07125 | 0.06443 | 0.05999 | 0.06086 | 0.05956 | 0.05788 | 0.06202 | 0.05095 | PCQAP        |
| cg25786436  | 0.02362 | 0.02196 | 0.05529 | 0.03818 | 0.04955 | 0.02923 | 0.02782 | 0.02294 | 0.02506 | 0.02003 | PRKAG2       |
| cg25786862  | 0.05767 | 0.06082 | 0.04625 | 0.03842 | 0.07021 | 0.05387 | 0.05267 | 0.0561  | 0.07908 | 0.04273 | MUT          |
| cg25787984  | 0.22892 | 0.04843 | 0.28133 | 0.39523 | 0.58247 | 0.13291 | 0.48182 | 0.19895 | 0.89112 | 0.38123 | DKK3         |
| cg25788012  | 0.02227 | 0.02409 | 0.03181 | 0.0329  | 0.02521 | 0.02081 | 0.02296 | 0.02281 | 0.02055 | 0.02106 | EXOSC4       |
| cg25791888  | 0.04776 | 0.03602 | 0.05306 | 0.04845 | 0.03978 | 0.04598 | 0.03927 | 0.0383  | 0.04983 | 0.0453  | HSF2BP       |
| cg25797366  | 0.88285 | 0.85872 | 0.89956 | 0.91775 | 0.775   | 0.85931 | 0.86954 | 0.87935 | 0.85275 | 0.84126 | HSPA2        |
| cg25799433  | 0.16124 | 0.11671 | 0.79221 | 0.83087 | 0.51543 | 0.75773 | 0.11076 | 0.21611 | 0.11399 | 0.12409 | SIRPB1       |
| cg25799986  | 0.50351 | 0.1375  | 0.55785 | 0.62676 | 0.77881 | 0.67536 | 0.30242 | 0.24252 | 0.56264 | 0.53605 | WFDC2        |
| cg25802093  | 0.11334 | 0.03846 | 0.95174 | 0.89805 | 0.69833 | 0.20147 | 0.45217 | 0.17643 | 0.87486 | 0.593   | SPAG6        |
| cg25802424  | 0.02129 | 0.0223  | 0.02412 | 0.0235  | 0.01771 | 0.02431 | 0.02103 | 0.01966 | 0.02007 | 0.01624 | IRS2         |
| cg25802871  | 0.18525 | 0.20508 | 0.1829  | 0.16655 | 0.13299 | 0.1647  | 0.17972 | 0.16576 | 0.17282 | 0.16983 | FTSJ2        |
| cg25803423  | 0.09355 | 0.07486 | 0.09187 | 0.08065 | 0.19644 | 0.10269 | 0.0526  | 0.06098 | 0.06447 | 0.08284 | C14orf119    |
| cg25803583  | 0.90599 | 0.92301 | 0.92397 | 0.91758 | 0.94097 | 0.9183  | 0.90197 | 0.64386 | 0.92922 | 0.93178 | SERPINF2     |
| cg25806808  | 0.17516 | 0.03807 | 0.03243 | 0.11634 | 0.46302 | 0.52786 | 0.27073 | 0.02969 | 0.52826 | 0.67568 | CXCL1        |
| cg25807810  | 0.02926 | 0.03153 | 0.04082 | 0.03466 | 0.03606 | 0.0333  | 0.03303 | 0.03006 | 0.02893 | 0.02847 | DKFZp434N062 |
| cg25808839  | 0.03151 | 0.02623 | 0.03311 | 0.02869 | 0.02886 | 0.02897 | 0.03148 | 0.03109 | 0.02613 | 0.02691 | LACTB        |
| cg25808906  | 0.05333 | 0.04106 | 0.10648 | 0.10842 | 0.08836 | 0.04065 | 0.09104 | 0.05465 | 0.04904 | 0.03218 | DGKG         |
| cg25809905  | 0.8779  | 0.81959 | 0.89944 | 0.91455 | 0.92561 | 0.90492 | 0.81776 | 0.47864 | 0.91193 | 0.79732 | ITGA2B       |
| cg25811575  | 0.07347 | 0.05896 | 0.17504 | 0.14809 | 0.75029 | 0.51021 | 0.1259  | 0.06063 | 0.09242 | 0.04504 | EGR3         |
| cg25811820  | 0.04295 | 0.04133 | 0.04691 | 0.04034 | 0.03111 | 0.0415  | 0.04542 | 0.04724 | 0.04378 | 0.0453  | POFUT1       |
| cg25812668  | 0.10199 | 0.10531 | 0.10655 | 0.09086 | 0.10348 | 0.07712 | 0.1812  | 0.17249 | 0.07556 | 0.07371 | MID1IP1      |
| cg25812776  | 0.08198 | 0.03395 | 0.03017 | 0.03066 | 0.02413 | 0.02457 | 0.02505 | 0.02172 | 0.02841 | 0.02804 | TRAF5        |
| cg25813714  | 0.10948 | 0.05764 | 0.62894 | 0.70144 | 0.76256 | 0.79138 | 0.5705  | 0.41547 | 0.64882 | 0.54384 | CYP4F12      |
| cg25813820  | 0.3354  | 0.0322  | 0.03202 | 0.03593 | 0.02665 | 0.02479 | 0.4908  | 0.52296 | 0.02993 | 0.01847 | MPP1         |

|            |         |         |         |         |         |         |         |         |         |         |          |
|------------|---------|---------|---------|---------|---------|---------|---------|---------|---------|---------|----------|
| cg25814686 | 0.04605 | 0.05234 | 0.05477 | 0.05007 | 0.04295 | 0.03934 | 0.04565 | 0.04342 | 0.04302 | 0.04075 | ZNF696   |
| cg25816468 | 0.02939 | 0.02794 | 0.05969 | 0.04478 | 0.03158 | 0.18252 | 0.02703 | 0.02845 | 0.41507 | 0.04018 | PBXIP1   |
| cg25817752 | 0.03901 | 0.04414 | 0.05499 | 0.04799 | 0.03835 | 0.04227 | 0.04006 | 0.03382 | 0.04678 | 0.03429 | PDIK1L   |
| cg25820693 | 0.03925 | 0.04295 | 0.04685 | 0.0466  | 0.03673 | 0.0341  | 0.039   | 0.03819 | 0.03544 | 0.03272 | SEMA6C   |
| cg25820971 | 0.10346 | 0.11925 | 0.08589 | 0.09001 | 0.10567 | 0.15534 | 0.06674 | 0.07397 | 0.05643 | 0.05523 | SUPT16H  |
| cg25821963 | 0.06876 | 0.0534  | 0.1422  | 0.18516 | 0.03179 | 0.03403 | 0.03792 | 0.04081 | 0.03487 | 0.03414 | ABLM3    |
| cg25822709 | 0.16266 | 0.08684 | 0.12372 | 0.09957 | 0.08813 | 0.05087 | 0.08861 | 0.07342 | 0.20291 | 0.05321 | RRAGA    |
| cg25823578 | 0.04144 | 0.03672 | 0.1557  | 0.35284 | 0.09316 | 0.0812  | 0.04372 | 0.03423 | 0.04749 | 0.03126 | PTGER2   |
| cg25824226 | 0.04958 | 0.05519 | 0.05841 | 0.04728 | 0.04327 | 0.04657 | 0.04144 | 0.05101 | 0.05778 | 0.0479  | EBAG9    |
| cg25824330 | 0.03438 | 0.02837 | 0.02715 | 0.02695 | 0.03069 | 0.03223 | 0.02621 | 0.0275  | 0.01883 | 0.02434 | MRPS18A  |
| cg25826526 | 0.02437 | 0.02701 | 0.02571 | 0.02654 | 0.01968 | 0.02757 | 0.02224 | 0.02096 | 0.02202 | 0.02056 | C20orf20 |
| cg25827112 | 0.02513 | 0.02812 | 0.02724 | 0.02782 | 0.02062 | 0.02463 | 0.02254 | 0.02586 | 0.02194 | 0.0203  | TESK2    |
| cg25827139 | 0.89344 | 0.90431 | 0.90553 | 0.89829 | 0.89438 | 0.90001 | 0.87822 | 0.88527 | 0.91888 | 0.88843 | C17orf44 |
| cg25827666 | 0.91129 | 0.89915 | 0.71991 | 0.81604 | 0.9316  | 0.90021 | 0.88149 | 0.8575  | 0.90463 | 0.88293 | NTRK1    |
| cg25828381 | 0.97173 | 0.97295 | 0.96682 | 0.96643 | 0.97358 | 0.96972 | 0.96631 | 0.9692  | 0.97211 | 0.97555 | H2-ALPHA |
| cg25829226 | 0.07695 | 0.07864 | 0.07071 | 0.07034 | 0.07213 | 0.05447 | 0.06071 | 0.07081 | 0.05887 | 0.0552  | PLEKHQ1  |
| cg25829729 | 0.84837 | 0.68896 | 0.80673 | 0.86665 | 0.89074 | 0.82862 | 0.81188 | 0.84146 | 0.80094 | 0.83916 | TEB1     |
| cg25830052 | 0.87342 | 0.87072 | 0.87172 | 0.89554 | 0.89477 | 0.87322 | 0.85957 | 0.87546 | 0.87179 | 0.8552  | TULP1    |
| cg25831111 | 0.65348 | 0.38192 | 0.71173 | 0.65471 | 0.2687  | 0.52966 | 0.03442 | 0.03315 | 0.07364 | 0.03584 | COASY    |
| cg25832796 | 0.10233 | 0.06965 | 0.14181 | 0.20002 | 0.33199 | 0.09294 | 0.12982 | 0.04448 | 0.10303 | 0.08909 | AP1G2    |
| cg25833031 | 0.68706 | 0.48696 | 0.68264 | 0.73075 | 0.85463 | 0.58451 | 0.48192 | 0.30783 | 0.51714 | 0.49938 | PAPD1    |
| cg25834275 | 0.02088 | 0.02321 | 0.02563 | 0.02158 | 0.02235 | 0.02172 | 0.02009 | 0.01866 | 0.01779 | 0.01794 | NFIC     |
| cg25834568 | 0.07237 | 0.08086 | 0.07741 | 0.08856 | 0.09391 | 0.07805 | 0.08054 | 0.07532 | 0.07491 | 0.07688 | RSPO3    |
| cg25835225 | 0.04759 | 0.048   | 0.05417 | 0.04454 | 0.05    | 0.04566 | 0.03816 | 0.04202 | 0.0404  | 0.04221 | ZNF350   |
| cg25836159 | 0.03257 | 0.03134 | 0.03655 | 0.03142 | 0.02788 | 0.02953 | 0.03023 | 0.02937 | 0.02609 | 0.02703 | AGGF1    |
| cg25836271 | 0.05112 | 0.04583 | 0.40243 | 0.47452 | 0.90502 | 0.69472 | 0.06599 | 0.07018 | 0.05259 | 0.04325 | RASGRP2  |
| cg25836301 | 0.48717 | 0.50359 | 0.71503 | 0.84736 | 0.86871 | 0.89463 | 0.14422 | 0.08676 | 0.59536 | 0.43894 | MEG3     |
| cg25836326 | 0.12405 | 0.09487 | 0.17738 | 0.15926 | 0.18244 | 0.0854  | 0.09234 | 0.07329 | 0.10059 | 0.08063 | DRD3     |
| cg25839227 | 0.08469 | 0.1952  | 0.92349 | 0.90389 | 0.89827 | 0.83165 | 0.42688 | 0.12315 | 0.63035 | 0.42521 | ABI3     |
| cg25839766 | 0.30744 | 0.32319 | 0.79256 | 0.84302 | 0.83869 | 0.78647 | 0.61957 | 0.49584 | 0.75444 | 0.64943 | PSG1     |
| cg25840094 | 0.1958  | 0.16381 | 0.26455 | 0.2018  | 0.26531 | 0.17263 | 0.19391 | 0.15031 | 0.18851 | 0.1952  | CFHR5    |
| cg25841091 | 0.03418 | 0.03213 | 0.03915 | 0.03492 | 0.02568 | 0.03619 | 0.03092 | 0.03383 | 0.03259 | 0.03493 | UFD1L    |
| cg25841987 | 0.16799 | 0.1427  | 0.16563 | 0.13172 | 0.08826 | 0.1567  | 0.10646 | 0.09376 | 0.14422 | 0.17787 | C4orf18  |
| cg25842356 | 0.70559 | 0.8615  | 0.86227 | 0.86884 | 0.88815 | 0.88416 | 0.86738 | 0.86486 | 0.86342 | 0.87731 | 3-Mar    |
| cg25842633 | 0.16921 | 0.12076 | 0.63205 | 0.74732 | 0.75997 | 0.33462 | 0.29287 | 0.1935  | 0.16953 | 0.18345 | SCUBE1   |
| cg25843439 | 0.05955 | 0.15486 | 0.08256 | 0.09415 | 0.04923 | 0.03949 | 0.0601  | 0.04993 | 0.06249 | 0.0414  | OR10H3   |
| cg25847835 | 0.04988 | 0.05945 | 0.06176 | 0.05288 | 0.04262 | 0.05272 | 0.05221 | 0.05056 | 0.05111 | 0.04577 | FBXO38   |
| cg25848060 | 0.03698 | 0.03859 | 0.03751 | 0.03812 | 0.05417 | 0.05072 | 0.03068 | 0.03076 | 0.03199 | 0.03506 | SLBP     |
| cg25849332 | 0.03907 | 0.03486 | 0.04023 | 0.03146 | 0.07611 | 0.03178 | 0.03563 | 0.04147 | 0.03161 | 0.02805 | MGC2574  |
| cg25852472 | 0.58269 | 0.27405 | 0.49652 | 0.78566 | 0.68537 | 0.66283 | 0.75563 | 0.23541 | 0.64683 | 0.31382 | H19      |
| cg25852715 | 0.91856 | 0.71417 | 0.9126  | 0.91152 | 0.89231 | 0.87951 | 0.91434 | 0.90613 | 0.92637 | 0.88081 | OSBPL5   |

|            |         |         |         |         |         |         |         |         |         |         |           |
|------------|---------|---------|---------|---------|---------|---------|---------|---------|---------|---------|-----------|
| cg25852941 | 0.46237 | 0.08488 | 0.20077 | 0.30353 | 0.16351 | 0.05654 | 0.08005 | 0.06454 | 0.04193 | 0.03444 | DNAJA5    |
| cg25853020 | 0.16308 | 0.04924 | 0.23498 | 0.19432 | 0.37296 | 0.08902 | 0.19282 | 0.10936 | 0.0879  | 0.03573 | IL6R      |
| cg25853078 | 0.69931 | 0.42217 | 0.42959 | 0.57016 | 0.12091 | 0.21135 | 0.10889 | 0.10842 | 0.17916 | 0.14381 | OPCML     |
| cg25853833 | 0.02955 | 0.02631 | 0.03159 | 0.02589 | 0.02745 | 0.02897 | 0.02591 | 0.03127 | 0.02459 | 0.02643 | C2orf29   |
| cg25854162 | 0.46707 | 0.07121 | 0.5364  | 0.64427 | 0.75624 | 0.12383 | 0.16675 | 0.08799 | 0.12139 | 0.04782 | IGFBP2    |
| cg25856179 | 0.02978 | 0.02988 | 0.03264 | 0.02928 | 0.02804 | 0.03126 | 0.0278  | 0.02971 | 0.02893 | 0.03008 | STAT1     |
| cg25856383 | 0.42413 | 0.71954 | 0.26901 | 0.47765 | 0.40674 | 0.04145 | 0.95    | 0.0381  | 0.95869 | 0.96195 | CYP1B1    |
| cg25856811 | 0.05204 | 0.05307 | 0.09687 | 0.05782 | 0.06412 | 0.05595 | 0.04326 | 0.04687 | 0.06296 | 0.05432 | SPRR3     |
| cg25857886 | 0.7925  | 0.79574 | 0.72353 | 0.74357 | 0.64212 | 0.74368 | 0.70758 | 0.75553 | 0.81164 | 0.8098  | FLJ21103  |
| cg25858682 | 0.02346 | 0.02305 | 0.02482 | 0.02228 | 0.01572 | 0.01997 | 0.02077 | 0.01932 | 0.01806 | 0.01797 | CCDC51    |
| cg25859012 | 0.0757  | 0.07711 | 0.07934 | 0.07173 | 0.05702 | 0.06779 | 0.07405 | 0.076   | 0.06791 | 0.06086 | BCS1L     |
| cg25860314 | 0.05548 | 0.04242 | 0.05207 | 0.04835 | 0.05037 | 0.05039 | 0.04334 | 0.05168 | 0.04686 | 0.05206 | SEC24D    |
| cg25861458 | 0.04568 | 0.03532 | 0.03856 | 0.0354  | 0.0309  | 0.03967 | 0.04498 | 0.05386 | 0.02875 | 0.04167 | FLJ23356  |
| cg25864727 | 0.53175 | 0.5733  | 0.70361 | 0.77801 | 0.64563 | 0.7668  | 0.25768 | 0.5606  | 0.17285 | 0.1719  | C2orf42   |
| cg25866075 | 0.79876 | 0.81094 | 0.76255 | 0.81782 | 0.81621 | 0.82184 | 0.08916 | 0.06807 | 0.86878 | 0.79036 | NALP12    |
| cg25867173 | 0.34151 | 0.34201 | 0.36531 | 0.37007 | 0.36981 | 0.42566 | 0.28447 | 0.37606 | 0.2461  | 0.26783 | UGT2B17   |
| cg25869832 | 0.0282  | 0.03313 | 0.04751 | 0.04073 | 0.04528 | 0.0389  | 0.02788 | 0.03499 | 0.03658 | 0.03656 | RPS4X     |
| cg25870263 | 0.64696 | 0.24626 | 0.76267 | 0.73739 | 0.5992  | 0.49761 | 0.61871 | 0.19488 | 0.75802 | 0.45056 | FNDC5     |
| cg25870420 | 0.04564 | 0.0321  | 0.09695 | 0.19669 | 0.10609 | 0.27608 | 0.08608 | 0.08813 | 0.03921 | 0.02638 | ITGA9     |
| cg25873362 | 0.03805 | 0.03977 | 0.04175 | 0.04032 | 0.02758 | 0.032   | 0.03606 | 0.03387 | 0.03265 | 0.031   | RPL7A     |
| cg25875213 | 0.03996 | 0.03894 | 0.94769 | 0.94996 | 0.69966 | 0.28303 | 0.0434  | 0.03356 | 0.02491 | 0.0239  | FLJ37549  |
| cg25876934 | 0.06422 | 0.05375 | 0.05672 | 0.06139 | 0.10264 | 0.05958 | 0.06163 | 0.06119 | 0.04735 | 0.05979 | WEE1      |
| cg25881193 | 0.10853 | 0.11826 | 0.11867 | 0.10413 | 0.12154 | 0.09436 | 0.09715 | 0.10414 | 0.0943  | 0.09442 | BTN2A2    |
| cg25882056 | 0.86806 | 0.66341 | 0.84606 | 0.83649 | 0.87024 | 0.83296 | 0.79187 | 0.80018 | 0.83477 | 0.7898  | CRELD2    |
| cg25882366 | 0.06478 | 0.09656 | 0.05751 | 0.06238 | 0.03539 | 0.04879 | 0.05524 | 0.05729 | 0.05047 | 0.05061 | HOXB2     |
| cg25884854 | 0.08219 | 0.0544  | 0.11019 | 0.13954 | 0.0969  | 0.05115 | 0.042   | 0.03941 | 0.05643 | 0.04227 | TMEM106C  |
| cg25885108 | 0.03024 | 0.0279  | 0.04022 | 0.03051 | 0.03108 | 0.02807 | 0.05535 | 0.02768 | 0.03527 | 0.02399 | TP73      |
| cg25885771 | 0.08909 | 0.07846 | 0.09215 | 0.09222 | 0.05942 | 0.14188 | 0.07793 | 0.07155 | 0.06687 | 0.06628 | HIST1H2AK |
| cg25886284 | 0.03505 | 0.04173 | 0.12779 | 0.21082 | 0.29729 | 0.10417 | 0.33974 | 0.40627 | 0.02916 | 0.02692 | ZNF545    |
| cg25886875 | 0.04322 | 0.04598 | 0.04826 | 0.04669 | 0.0397  | 0.0443  | 0.04314 | 0.04347 | 0.03079 | 0.03158 | PSMC4     |
| cg25887294 | 0.05453 | 0.06632 | 0.05795 | 0.05703 | 0.04028 | 0.05061 | 0.0573  | 0.05065 | 0.05165 | 0.05139 | CASP8AP2  |
| cg25887739 | 0.85547 | 0.86194 | 0.81696 | 0.82739 | 0.79379 | 0.84448 | 0.84208 | 0.87542 | 0.86624 | 0.81233 | TBC1D8    |
| cg25889160 | 0.63613 | 0.19362 | 0.83592 | 0.86442 | 0.84994 | 0.82145 | 0.78519 | 0.30057 | 0.87469 | 0.83538 | SERPINA5  |
| cg25890048 | 0.13728 | 0.12942 | 0.30016 | 0.40104 | 0.50835 | 0.39496 | 0.15855 | 0.1099  | 0.37853 | 0.11462 | OR511     |
| cg25892041 | 0.79041 | 0.67973 | 0.68076 | 0.7813  | 0.5779  | 0.21862 | 0.39625 | 0.30723 | 0.73341 | 0.68889 | UGT8      |
| cg25892434 | 0.02794 | 0.03184 | 0.03048 | 0.02689 | 0.02463 | 0.02902 | 0.02324 | 0.02498 | 0.02617 | 0.02334 | ADK       |
| cg25893483 | 0.26316 | 0.18603 | 0.26805 | 0.22368 | 0.29013 | 0.19499 | 0.44362 | 0.34484 | 0.13628 | 0.12698 | CXorf53   |
| cg25894551 | 0.85239 | 0.56167 | 0.63231 | 0.8276  | 0.75004 | 0.78578 | 0.06065 | 0.37207 | 0.65272 | 0.6103  | FXRD2     |
| cg25895922 | 0.07346 | 0.03894 | 0.14181 | 0.20962 | 0.82737 | 0.94786 | 0.29372 | 0.30398 | 0.0215  | 0.02339 | MLPH      |
| cg25896975 | 0.02415 | 0.02843 | 0.02763 | 0.0271  | 0.02159 | 0.02958 | 0.02203 | 0.02806 | 0.02338 | 0.02634 | SNX17     |
| cg25898500 | 0.06127 | 0.06624 | 0.05809 | 0.05589 | 0.04917 | 0.05861 | 0.05537 | 0.05932 | 0.0532  | 0.06013 | HAGH      |

|            |         |         |         |         |         |         |         |         |         |                  |
|------------|---------|---------|---------|---------|---------|---------|---------|---------|---------|------------------|
| cg25900806 | 0.38749 | 0.28394 | 0.34438 | 0.4548  | 0.59668 | 0.58784 | 0.29645 | 0.15625 | 0.3834  | 0.33216 MYADML   |
| cg25902460 | 0.08186 | 0.0948  | 0.11189 | 0.10429 | 0.0859  | 0.06204 | 0.05512 | 0.06058 | 0.0669  | 0.06825 STRBP    |
| cg25902889 | 0.86112 | 0.08128 | 0.93857 | 0.90797 | 0.89595 | 0.92211 | 0.61292 | 0.68203 | 0.9198  | 0.79743 FSD1     |
| cg25903122 | 0.6053  | 0.07904 | 0.8781  | 0.8931  | 0.76829 | 0.07032 | 0.87285 | 0.14114 | 0.89326 | 0.08999 MGC2747  |
| cg25903375 | 0.02863 | 0.03373 | 0.02838 | 0.02777 | 0.02618 | 0.02906 | 0.03013 | 0.02775 | 0.0235  | 0.02796 SET7     |
| cg25903497 | 0.02553 | 0.0253  | 0.02559 | 0.02503 | 0.02465 | 0.03058 | 0.28037 | 0.03591 | 0.02307 | 0.02235 TMBIM1   |
| cg25905459 | 0.05582 | 0.06127 | 0.0783  | 0.06834 | 0.08885 | 0.06923 | 0.04981 | 0.04805 | 0.05998 | 0.05563 LOC51136 |
| cg25905648 | 0.07415 | 0.07092 | 0.07567 | 0.0662  | 0.09265 | 0.07163 | 0.05135 | 0.05133 | 0.05359 | 0.05747 SACM1L   |
| cg25905812 | 0.03461 | 0.03213 | 0.87299 | 0.9606  | 0.1455  | 0.02222 | 0.0527  | 0.02377 | 0.49026 | 0.37289 DMRT1    |
| cg25906332 | 0.03449 | 0.03551 | 0.03083 | 0.02831 | 0.38303 | 0.03241 | 0.02761 | 0.02934 | 0.02562 | 0.03228 SLC25A29 |
| cg25906419 | 0.04854 | 0.04295 | 0.06103 | 0.04707 | 0.03875 | 0.04    | 0.36889 | 0.44077 | 0.03717 | 0.04051 BACE2    |
| cg25907916 | 0.02212 | 0.02425 | 0.0253  | 0.01968 | 0.01988 | 0.02271 | 0.01932 | 0.0213  | 0.01818 | 0.017 C10orf56   |
| cg25908985 | 0.05171 | 0.03518 | 0.23761 | 0.33684 | 0.67709 | 0.30529 | 0.31885 | 0.51871 | 0.18614 | 0.15103 IHH      |
| cg25909811 | 0.03961 | 0.04024 | 0.03244 | 0.03356 | 0.03074 | 0.03234 | 0.03147 | 0.0363  | 0.02648 | 0.03101 KDELR2   |
| cg25910443 | 0.02684 | 0.02779 | 0.02943 | 0.02086 | 0.02289 | 0.02603 | 0.02338 | 0.02382 | 0.02055 | 0.02005 C9orf3   |
| cg25912611 | 0.29004 | 0.10209 | 0.16285 | 0.24312 | 0.20847 | 0.25931 | 0.13325 | 0.11085 | 0.52644 | 0.38814 STK6     |
| cg25912717 | 0.07696 | 0.06815 | 0.16175 | 0.15891 | 0.39557 | 0.31197 | 0.07621 | 0.10081 | 0.36657 | 0.2347 THBS3     |
| cg25913233 | 0.05588 | 0.06961 | 0.046   | 0.04317 | 0.04318 | 0.04327 | 0.04339 | 0.07525 | 0.04334 | 0.04651 SPARC    |
| cg25915982 | 0.93281 | 0.85741 | 0.9394  | 0.94101 | 0.94526 | 0.91751 | 0.92965 | 0.7021  | 0.94183 | 0.93475 GRB10    |
| cg25917510 | 0.0344  | 0.03916 | 0.03493 | 0.03821 | 0.03712 | 0.03084 | 0.04331 | 0.18546 | 0.03521 | 0.03035 HOXC8    |
| cg25918245 | 0.08601 | 0.08779 | 0.18442 | 0.15801 | 0.20431 | 0.15846 | 0.09425 | 0.08308 | 0.06262 | 0.08027 GIMAP2   |
| cg25919221 | 0.78566 | 0.62178 | 0.8199  | 0.8198  | 0.73656 | 0.80709 | 0.62575 | 0.63177 | 0.65424 | 0.26758 CA6      |
| cg25920792 | 0.03637 | 0.0352  | 0.03314 | 0.02863 | 0.06115 | 0.07832 | 0.03269 | 0.03204 | 0.0267  | 0.0254 HTRA1     |
| cg25920951 | 0.03558 | 0.03549 | 0.04043 | 0.03816 | 0.03379 | 0.04367 | 0.03819 | 0.03081 | 0.02946 | 0.03403 FAM70B   |
| cg25921910 | 0.20867 | 0.20747 | 0.23543 | 0.20514 | 0.18284 | 0.13667 | 0.20797 | 0.21338 | 0.17987 | 0.1779 CDC73     |
| cg25922239 | 0.04319 | 0.04129 | 0.03504 | 0.03693 | 0.06002 | 0.05536 | 0.03755 | 0.0439  | 0.02659 | 0.02674 LEMD2    |
| cg25922353 | 0.75685 | 0.78917 | 0.7775  | 0.79136 | 0.70762 | 0.74278 | 0.74621 | 0.76455 | 0.76976 | 0.73849 FUT8     |
| cg25923018 | 0.02753 | 0.02811 | 0.03564 | 0.03286 | 0.02484 | 0.0291  | 0.02648 | 0.03066 | 0.03488 | 0.02874 C1orf75  |
| cg25923856 | 0.06231 | 0.06038 | 0.06829 | 0.06085 | 0.04431 | 0.06088 | 0.05373 | 0.05494 | 0.05251 | 0.05694 TMEM14A  |
| cg25924032 | 0.03272 | 0.03158 | 0.03738 | 0.03172 | 0.03778 | 0.03356 | 0.03127 | 0.02858 | 0.02684 | 0.02523 BMS1L    |
| cg25926679 | 0.30567 | 0.28518 | 0.29815 | 0.30191 | 0.35579 | 0.30042 | 0.26281 | 0.24327 | 0.30079 | 0.27662 ZNF512   |
| cg25927124 | 0.03783 | 0.03527 | 0.03006 | 0.02979 | 0.02352 | 0.02606 | 0.02871 | 0.02408 | 0.0267  | 0.02334 PRKAR2A  |
| cg25928444 | 0.79953 | 0.50407 | 0.79519 | 0.79047 | 0.79381 | 0.75699 | 0.72012 | 0.76452 | 0.76927 | 0.47962 INHA     |
| cg25928579 | 0.0632  | 0.06811 | 0.13419 | 0.14281 | 0.10367 | 0.08341 | 0.28346 | 0.08121 | 0.83524 | 0.63041 HOXB8    |
| cg25929421 | 0.03648 | 0.03941 | 0.03447 | 0.033   | 0.02785 | 0.03099 | 0.03348 | 0.03619 | 0.03152 | 0.03007 DEDD     |
| cg25932713 | 0.82971 | 0.83655 | 0.86402 | 0.88083 | 0.83719 | 0.8952  | 0.87721 | 0.80832 | 0.86835 | 0.84467 PARP9    |
| cg25932752 | 0.22626 | 0.0685  | 0.49152 | 0.60734 | 0.19228 | 0.06044 | 0.10418 | 0.05906 | 0.05636 | 0.04661 MSL3L1   |
| cg25933726 | 0.05644 | 0.04677 | 0.04574 | 0.0451  | 0.03365 | 0.04629 | 0.39684 | 0.4643  | 0.04162 | 0.03782 RPGR     |
| cg25934198 | 0.83663 | 0.6939  | 0.85594 | 0.86695 | 0.85669 | 0.853   | 0.86011 | 0.84217 | 0.88972 | 0.85174 FLJ36268 |
| cg25935911 | 0.25085 | 0.04883 | 0.79928 | 0.89954 | 0.79112 | 0.70863 | 0.05722 | 0.0835  | 0.15719 | 0.38715 DBC1     |
| cg25936385 | 0.86239 | 0.78567 | 0.8862  | 0.9022  | 0.86569 | 0.89349 | 0.6347  | 0.85854 | 0.90403 | 0.87838 FAIM2    |



|            |         |         |         |         |         |         |         |         |         |         |           |
|------------|---------|---------|---------|---------|---------|---------|---------|---------|---------|---------|-----------|
| cg25937494 | 0.0209  | 0.02188 | 0.02461 | 0.02182 | 0.02094 | 0.01919 | 0.01915 | 0.01805 | 0.01706 | 0.01789 | SREBF2    |
| cg25937832 | 0.03341 | 0.03717 | 0.03509 | 0.03349 | 0.02488 | 0.0307  | 0.02884 | 0.03152 | 0.02618 | 0.02681 | RPL15     |
| cg25938646 | 0.05955 | 0.05038 | 0.71687 | 0.73995 | 0.80711 | 0.08701 | 0.12654 | 0.12122 | 0.30532 | 0.0461  | SLITRK1   |
| cg25941716 | 0.03974 | 0.04428 | 0.03614 | 0.03469 | 0.02824 | 0.03418 | 0.43236 | 0.60869 | 0.03333 | 0.03111 | SH3KBP1   |
| cg25942450 | 0.03647 | 0.03932 | 0.72998 | 0.70683 | 0.43581 | 0.45454 | 0.34894 | 0.47192 | 0.35432 | 0.35171 | TLX3      |
| cg25943131 | 0.05958 | 0.05725 | 0.07645 | 0.0757  | 0.05112 | 0.05132 | 0.05238 | 0.05412 | 0.0618  | 0.05053 | IPO8      |
| cg25943276 | 0.89247 | 0.59979 | 0.29822 | 0.44234 | 0.86457 | 0.91158 | 0.87436 | 0.82617 | 0.06366 | 0.03437 | C11orf39  |
| cg25943702 | 0.80848 | 0.79053 | 0.77997 | 0.81104 | 0.75124 | 0.793   | 0.76253 | 0.7632  | 0.76015 | 0.78518 | BRD1      |
| cg25944100 | 0.09784 | 0.12912 | 0.15547 | 0.13144 | 0.24182 | 0.26757 | 0.14768 | 0.11926 | 0.09381 | 0.13513 | MS4A3     |
| cg25944700 | 0.02247 | 0.02262 | 0.02232 | 0.02457 | 0.01683 | 0.0205  | 0.02242 | 0.02211 | 0.02071 | 0.01783 | SLC25A37  |
| cg25945303 | 0.04078 | 0.04309 | 0.03823 | 0.03705 | 0.02627 | 0.03373 | 0.03462 | 0.03607 | 0.03261 | 0.03508 | KLF6      |
| cg25945374 | 0.3585  | 0.05547 | 0.18089 | 0.22214 | 0.26205 | 0.15872 | 0.03492 | 0.03616 | 0.03879 | 0.0336  | KHDRBS3   |
| cg25945961 | 0.02964 | 0.02869 | 0.03151 | 0.02974 | 0.02495 | 0.02364 | 0.02502 | 0.02243 | 0.02432 | 0.02074 | SET7      |
| cg25946374 | 0.8286  | 0.4323  | 0.31588 | 0.53623 | 0.12219 | 0.15883 | 0.18915 | 0.24444 | 0.14968 | 0.12598 | IL22RA1   |
| cg25946389 | 0.3968  | 0.0537  | 0.84386 | 0.89734 | 0.15732 | 0.33296 | 0.50836 | 0.49712 | 0.0976  | 0.03498 | MGMT      |
| cg25946758 | 0.08264 | 0.04743 | 0.41511 | 0.48721 | 0.18266 | 0.26153 | 0.24586 | 0.06363 | 0.10117 | 0.06519 | PHYHIP1   |
| cg25946952 | 0.09444 | 0.09301 | 0.21766 | 0.16582 | 0.16344 | 0.18944 | 0.09361 | 0.09317 | 0.08774 | 0.07259 | KIAA0773  |
| cg25947945 | 0.9612  | 0.93747 | 0.9717  | 0.96684 | 0.9745  | 0.96893 | 0.86884 | 0.85552 | 0.97251 | 0.96382 | LAD1      |
| cg25948180 | 0.50217 | 0.24932 | 0.6817  | 0.79732 | 0.67907 | 0.78176 | 0.7526  | 0.47126 | 0.8434  | 0.50765 | PDHX      |
| cg25948993 | 0.02796 | 0.03393 | 0.03812 | 0.03895 | 0.02782 | 0.03049 | 0.05307 | 0.05244 | 0.02761 | 0.03566 | UBXD6     |
| cg25949363 | 0.7223  | 0.32696 | 0.73321 | 0.79426 | 0.80163 | 0.42771 | 0.7358  | 0.35083 | 0.41188 | 0.30578 | TMEM92    |
| cg25951582 | 0.07254 | 0.06299 | 0.07185 | 0.06883 | 0.09367 | 0.07758 | 0.08731 | 0.08377 | 0.09415 | 0.09672 | DTWD1     |
| cg25953146 | 0.72371 | 0.59203 | 0.70688 | 0.74011 | 0.68356 | 0.59903 | 0.62987 | 0.63304 | 0.72354 | 0.55864 | MGC50273  |
| cg25954162 | 0.06008 | 0.12044 | 0.27153 | 0.38375 | 0.06642 | 0.06206 | 0.08516 | 0.07692 | 0.05832 | 0.05387 | MLC1SA    |
| cg25954354 | 0.24099 | 0.09666 | 0.20845 | 0.18372 | 0.33974 | 0.26011 | 0.17321 | 0.10554 | 0.10108 | 0.08604 | C9orf58   |
| cg25955816 | 0.71252 | 0.70193 | 0.68675 | 0.67956 | 0.65517 | 0.76179 | 0.68098 | 0.67183 | 0.73011 | 0.75443 | HIST3H3   |
| cg25955899 | 0.01715 | 0.02166 | 0.02085 | 0.02028 | 0.01822 | 0.01719 | 0.01825 | 0.01568 | 0.01742 | 0.01475 | C13orf12  |
| cg25955969 | 0.0396  | 0.04676 | 0.05629 | 0.04778 | 0.04403 | 0.0472  | 0.06319 | 0.06359 | 0.04451 | 0.04357 | DPH2      |
| cg25956985 | 0.24421 | 0.17632 | 0.24003 | 0.24843 | 0.38723 | 0.33019 | 0.10745 | 0.15632 | 0.13073 | 0.14383 | MAP3K7IP1 |
| cg25957124 | 0.96019 | 0.62704 | 0.70965 | 0.88625 | 0.97445 | 0.87025 | 0.96473 | 0.75126 | 0.96784 | 0.9612  | DNAH3     |
| cg25957967 | 0.02922 | 0.03359 | 0.82727 | 0.83074 | 0.89274 | 0.8876  | 0.04774 | 0.0291  | 0.042   | 0.02955 | PCSK9     |
| cg25958361 | 0.06736 | 0.06641 | 0.08105 | 0.08452 | 0.07031 | 0.06583 | 0.05725 | 0.05379 | 0.0717  | 0.0703  | LOC129531 |
| cg25959506 | 0.03219 | 0.03832 | 0.04114 | 0.03802 | 0.4274  | 0.58289 | 0.02997 | 0.03106 | 0.04106 | 0.04078 | RASD2     |
| cg25960313 | 0.04645 | 0.04863 | 0.05793 | 0.04845 | 0.04429 | 0.04133 | 0.03803 | 0.03835 | 0.0434  | 0.04259 | FBXO5     |
| cg25960567 | 0.11821 | 0.05114 | 0.0565  | 0.07497 | 0.06433 | 0.04595 | 0.05207 | 0.05246 | 0.05166 | 0.05195 | ITPR2     |
| cg25961684 | 0.03847 | 0.04187 | 0.04527 | 0.04286 | 0.03894 | 0.04378 | 0.03781 | 0.03692 | 0.03538 | 0.03701 | STK36     |
| cg25964007 | 0.03871 | 0.03756 | 0.10967 | 0.42133 | 0.95859 | 0.948   | 0.04714 | 0.03752 | 0.03806 | 0.03671 | WDRPUH    |
| cg25965576 | 0.53531 | 0.25357 | 0.75622 | 0.83988 | 0.54078 | 0.31476 | 0.10381 | 0.11822 | 0.26497 | 0.39169 | CST4      |
| cg25969212 | 0.04702 | 0.05029 | 0.04781 | 0.0445  | 0.04769 | 0.04446 | 0.04627 | 0.04854 | 0.04293 | 0.05159 | EXOSC9    |
| cg25969673 | 0.04257 | 0.04161 | 0.04542 | 0.04385 | 0.04254 | 0.04377 | 0.03327 | 0.03615 | 0.0334  | 0.03583 | TBC1D19   |
| cg25971347 | 0.034   | 0.03437 | 0.21283 | 0.35929 | 0.30084 | 0.71856 | 0.0473  | 0.12884 | 0.02807 | 0.02821 | FOXF1     |

|            |         |         |         |         |         |         |         |         |         |         |           |
|------------|---------|---------|---------|---------|---------|---------|---------|---------|---------|---------|-----------|
| cg25973092 | 0.02957 | 0.02665 | 0.04335 | 0.04002 | 0.0296  | 0.03344 | 0.02778 | 0.02421 | 0.03143 | 0.02549 | SESN2     |
| cg25974617 | 0.8741  | 0.4418  | 0.55265 | 0.57238 | 0.62499 | 0.29632 | 0.37289 | 0.43266 | 0.50925 | 0.34222 | TRAM1     |
| cg25974764 | 0.03206 | 0.03489 | 0.04021 | 0.03574 | 0.03212 | 0.03251 | 0.03202 | 0.03085 | 0.02935 | 0.02706 | KLHDC2    |
| cg25974870 | 0.0445  | 0.04016 | 0.0374  | 0.0416  | 0.03281 | 0.04121 | 0.03998 | 0.03533 | 0.03487 | 0.04014 | NUDT21    |
| cg25975818 | 0.87132 | 0.81208 | 0.82348 | 0.86073 | 0.93762 | 0.84651 | 0.78739 | 0.79669 | 0.81738 | 0.78785 | ENPP7     |
| cg25978208 | 0.58209 | 0.59491 | 0.93995 | 0.94814 | 0.95828 | 0.95054 | 0.90536 | 0.9366  | 0.93983 | 0.60851 | SNRPN     |
| cg25979644 | 0.87254 | 0.87671 | 0.83098 | 0.85488 | 0.73242 | 0.79648 | 0.7556  | 0.82768 | 0.84481 | 0.75132 | ATP8B1    |
| cg25982743 | 0.39422 | 0.0719  | 0.03684 | 0.0382  | 0.54971 | 0.60296 | 0.03555 | 0.03327 | 0.92758 | 0.91233 | TIMP4     |
| cg25983380 | 0.34151 | 0.04396 | 0.63562 | 0.66788 | 0.84629 | 0.79577 | 0.57308 | 0.57444 | 0.21607 | 0.12723 | GNAS      |
| cg25984124 | 0.75057 | 0.48821 | 0.72604 | 0.7387  | 0.64278 | 0.7272  | 0.69762 | 0.73836 | 0.82275 | 0.71555 | CDS2      |
| cg25985103 | 0.14587 | 0.14322 | 0.13899 | 0.14132 | 0.1778  | 0.1632  | 0.19731 | 0.21462 | 0.13469 | 0.14744 | MAN2C1    |
| cg25985437 | 0.03886 | 0.03836 | 0.04217 | 0.03983 | 0.03245 | 0.03242 | 0.04148 | 0.03827 | 0.03051 | 0.02946 | FAM96A    |
| cg25985488 | 0.03271 | 0.02993 | 0.03331 | 0.0344  | 0.02851 | 0.03151 | 0.03147 | 0.03361 | 0.03506 | 0.03266 | GALNTL4   |
| cg25985778 | 0.04782 | 0.04496 | 0.06348 | 0.05705 | 0.03187 | 0.04363 | 0.04473 | 0.03849 | 0.03504 | 0.03377 | RPL38     |
| cg25989745 | 0.58629 | 0.46655 | 0.73146 | 0.78099 | 0.88127 | 0.80952 | 0.19993 | 0.19894 | 0.50974 | 0.15405 | TYRP1     |
| cg25990230 | 0.0392  | 0.03525 | 0.0492  | 0.04426 | 0.04575 | 0.04879 | 0.03976 | 0.04067 | 0.03225 | 0.03109 | PMS2L3    |
| cg25990314 | 0.04011 | 0.04082 | 0.05481 | 0.03751 | 0.04157 | 0.04263 | 0.0423  | 0.03899 | 0.04033 | 0.03539 | GNB1L     |
| cg25990647 | 0.03759 | 0.03125 | 0.06718 | 0.0897  | 0.04403 | 0.02994 | 0.0579  | 0.04329 | 0.40285 | 0.44389 | OPRK1     |
| cg25993152 | 0.5663  | 0.25473 | 0.67928 | 0.76007 | 0.41972 | 0.82664 | 0.10132 | 0.10152 | 0.18944 | 0.14715 | XAGE5     |
| cg25993718 | 0.07136 | 0.05811 | 0.66242 | 0.75523 | 0.16539 | 0.06872 | 0.09135 | 0.06993 | 0.21778 | 0.17524 | CBLN4     |
| cg25994725 | 0.84855 | 0.58367 | 0.80151 | 0.85132 | 0.7269  | 0.8619  | 0.78563 | 0.84256 | 0.67019 | 0.71797 | C6orf81   |
| cg25995212 | 0.81192 | 0.59989 | 0.6491  | 0.60309 | 0.69792 | 0.83559 | 0.10885 | 0.11254 | 0.12182 | 0.11612 | SCN7A     |
| cg25995460 | 0.1242  | 0.09141 | 0.82778 | 0.88566 | 0.56286 | 0.44825 | 0.10715 | 0.09569 | 0.63354 | 0.53956 | C1QA      |
| cg25995916 | 0.06308 | 0.06416 | 0.08714 | 0.1044  | 0.05158 | 0.05299 | 0.05866 | 0.05561 | 0.05742 | 0.04955 | PRDM4     |
| cg25996835 | 0.25955 | 0.04097 | 0.09068 | 0.13469 | 0.10678 | 0.03983 | 0.15903 | 0.0708  | 0.58322 | 0.13219 | BBS4      |
| cg25997474 | 0.39071 | 0.37576 | 0.41752 | 0.50268 | 0.44421 | 0.30941 | 0.27531 | 0.26442 | 0.25865 | 0.28111 | ADH1C     |
| cg25999015 | 0.06998 | 0.05013 | 0.19609 | 0.40129 | 0.19665 | 0.04521 | 0.04817 | 0.03757 | 0.04675 | 0.02651 | ZNF575    |
| cg25999267 | 0.03386 | 0.0314  | 0.03699 | 0.03036 | 0.03164 | 0.0367  | 0.02907 | 0.02867 | 0.02754 | 0.02468 | FLJ20551  |
| cg25999486 | 0.02276 | 0.02868 | 0.02706 | 0.0254  | 0.02365 | 0.02484 | 0.02186 | 0.02218 | 0.02248 | 0.0194  | TBC1D4    |
| cg25999867 | 0.02646 | 0.02977 | 0.0381  | 0.02451 | 0.02747 | 0.02189 | 0.05191 | 0.04916 | 0.05239 | 0.08884 | LOC112937 |
| cg26001030 | 0.03149 | 0.03026 | 0.03376 | 0.03025 | 0.03518 | 0.0331  | 0.03327 | 0.03214 | 0.03036 | 0.03028 | RABGAP1L  |
| cg26001336 | 0.02815 | 0.02881 | 0.03125 | 0.03047 | 0.01869 | 0.02187 | 0.02532 | 0.02301 | 0.02343 | 0.02488 | RAB3A     |
| cg26003813 | 0.55072 | 0.07491 | 0.23689 | 0.27722 | 0.49385 | 0.15302 | 0.06884 | 0.04902 | 0.06282 | 0.03346 | PLK1      |
| cg26005082 | 0.04465 | 0.04271 | 0.07652 | 0.11172 | 0.06352 | 0.05407 | 0.04178 | 0.04469 | 0.03366 | 0.03863 | C19orf30  |
| cg26007077 | 0.04641 | 0.04999 | 0.04353 | 0.03914 | 0.02405 | 0.02852 | 0.03463 | 0.0353  | 0.03217 | 0.02959 | SNAPC3    |
| cg26008464 | 0.0432  | 0.03597 | 0.02596 | 0.02313 | 0.02398 | 0.02306 | 0.02311 | 0.02069 | 0.02488 | 0.02125 | SLC2A12   |
| cg26012103 | 0.06853 | 0.06448 | 0.05638 | 0.05607 | 0.04786 | 0.04595 | 0.07122 | 0.06287 | 0.06634 | 0.05421 | SOCS1     |
| cg26014197 | 0.82941 | 0.68309 | 0.6628  | 0.77537 | 0.75876 | 0.78422 | 0.3149  | 0.1155  | 0.3348  | 0.57393 | ZNF206    |
| cg26014796 | 0.30468 | 0.04191 | 0.40648 | 0.68853 | 0.67149 | 0.3966  | 0.05888 | 0.2733  | 0.12032 | 0.04303 | RNF39     |
| cg26015133 | 0.61045 | 0.4909  | 0.821   | 0.82497 | 0.88625 | 0.85094 | 0.80605 | 0.21133 | 0.87881 | 0.77499 | FCRLM2    |
| cg26018901 | 0.1485  | 0.27664 | 0.20677 | 0.27171 | 0.80397 | 0.63006 | 0.26062 | 0.27447 | 0.54824 | 0.24363 | CORIN     |

|            |         |         |         |         |         |         |         |         |         |         |          |
|------------|---------|---------|---------|---------|---------|---------|---------|---------|---------|---------|----------|
| cg26020513 | 0.87355 | 0.87695 | 0.87758 | 0.87765 | 0.86625 | 0.90897 | 0.71713 | 0.79109 | 0.90301 | 0.89094 | GATA4    |
| cg26021103 | 0.02707 | 0.02373 | 0.03079 | 0.02911 | 0.02386 | 0.02676 | 0.03212 | 0.02722 | 0.02757 | 0.02428 | OACT5    |
| cg26021476 | 0.02281 | 0.02934 | 0.03848 | 0.03483 | 0.02112 | 0.02529 | 0.02029 | 0.02014 | 0.02951 | 0.02677 | ENY2     |
| cg26021627 | 0.31038 | 0.32071 | 0.56647 | 0.50437 | 0.53062 | 0.48956 | 0.09168 | 0.09762 | 0.06099 | 0.04961 | UNQ9433  |
| cg26022315 | 0.03103 | 0.0284  | 0.04427 | 0.03564 | 0.04503 | 0.02629 | 0.03027 | 0.0263  | 0.02432 | 0.02616 | SNF8     |
| cg26022401 | 0.48872 | 0.41816 | 0.22801 | 0.27659 | 0.51422 | 0.51344 | 0.41882 | 0.40809 | 0.11417 | 0.04737 | APOBEC3G |
| cg26023204 | 0.03828 | 0.03648 | 0.04189 | 0.03712 | 0.0321  | 0.03688 | 0.03418 | 0.03332 | 0.03112 | 0.03044 | MCM7     |
| cg26023389 | 0.74493 | 0.40717 | 0.75291 | 0.79458 | 0.6676  | 0.66133 | 0.77445 | 0.51742 | 0.52279 | 0.15365 | GCM1     |
| cg26023751 | 0.02564 | 0.02624 | 0.02817 | 0.02535 | 0.02366 | 0.02628 | 0.02537 | 0.02594 | 0.02399 | 0.02491 | C1orf156 |
| cg26024206 | 0.08887 | 0.04844 | 0.08367 | 0.06206 | 0.06554 | 0.06814 | 0.05055 | 0.04253 | 0.04415 | 0.03786 | ZNF282   |
| cg26024531 | 0.18761 | 0.05083 | 0.26846 | 0.2276  | 0.11116 | 0.07517 | 0.04226 | 0.0514  | 0.10756 | 0.04081 | CHAF1B   |
| cg26024843 | 0.03471 | 0.03403 | 0.03953 | 0.02995 | 0.03291 | 0.02955 | 0.02869 | 0.03093 | 0.02459 | 0.02563 | COL5A1   |
| cg26025891 | 0.62415 | 0.51314 | 0.85766 | 0.87597 | 0.84164 | 0.87298 | 0.83825 | 0.71819 | 0.474   | 0.56686 | PSTPIP1  |
| cg26025944 | 0.09366 | 0.09841 | 0.12509 | 0.14926 | 0.10982 | 0.10064 | 0.10348 | 0.08603 | 0.07765 | 0.09101 | SCNN1G   |
| cg26026726 | 0.75623 | 0.51905 | 0.38066 | 0.49087 | 0.15924 | 0.09132 | 0.05773 | 0.05103 | 0.51419 | 0.15034 | GPR42    |
| cg26029248 | 0.02975 | 0.0276  | 0.03042 | 0.02449 | 0.02406 | 0.02684 | 0.02632 | 0.02697 | 0.02296 | 0.02213 | PFKFB4   |
| cg26029902 | 0.28269 | 0.49298 | 0.90492 | 0.9163  | 0.08617 | 0.10201 | 0.08959 | 0.11014 | 0.213   | 0.10263 | RAB22A   |
| cg26033681 | 0.19429 | 0.1586  | 0.20384 | 0.27839 | 0.31737 | 0.23618 | 0.24606 | 0.23802 | 0.24958 | 0.24271 | SNRPN    |
| cg26033710 | 0.13153 | 0.07342 | 0.76238 | 0.88376 | 0.8995  | 0.68135 | 0.71272 | 0.5719  | 0.3637  | 0.33562 | TACR1    |
| cg26035366 | 0.06564 | 0.06169 | 0.59844 | 0.88867 | 0.06743 | 0.05943 | 0.04389 | 0.04095 | 0.09402 | 0.05261 | LRRC3B   |
| cg26035463 | 0.04463 | 0.0444  | 0.04527 | 0.04629 | 0.02939 | 0.04126 | 0.04092 | 0.03931 | 0.05786 | 0.04204 | FBXO21   |
| cg26035633 | 0.03751 | 0.03653 | 0.04459 | 0.03955 | 0.03435 | 0.0381  | 0.11573 | 0.05761 | 0.03323 | 0.03327 | IDH3G    |
| cg26036443 | 0.12698 | 0.05822 | 0.05841 | 0.05319 | 0.05291 | 0.05013 | 0.05259 | 0.04758 | 0.04063 | 0.04179 | EHD2     |
| cg26039806 | 0.0493  | 0.04451 | 0.06009 | 0.05399 | 0.058   | 0.05438 | 0.05584 | 0.04743 | 0.04425 | 0.03711 | RNF121   |
| cg26041297 | 0.046   | 0.06843 | 0.22706 | 0.24285 | 0.21646 | 0.27331 | 0.04011 | 0.03992 | 0.0399  | 0.07828 | SCGB1D2  |
| cg26043257 | 0.71657 | 0.72123 | 0.87399 | 0.90902 | 0.43856 | 0.44439 | 0.32251 | 0.35939 | 0.48564 | 0.08005 | CD38     |
| cg26043391 | 0.07768 | 0.06971 | 0.08612 | 0.0675  | 0.05812 | 0.08123 | 0.07613 | 0.07357 | 0.0705  | 0.07206 | FBXO28   |
| cg26044825 | 0.02822 | 0.02673 | 0.04525 | 0.05012 | 0.31495 | 0.04838 | 0.02795 | 0.02565 | 0.05747 | 0.0339  | NFIC     |
| cg26045205 | 0.93782 | 0.92881 | 0.93303 | 0.9546  | 0.96077 | 0.95472 | 0.95325 | 0.9604  | 0.93202 | 0.89728 | C1orf179 |
| cg26045220 | 0.06009 | 0.03925 | 0.90405 | 0.93689 | 0.63533 | 0.65321 | 0.53271 | 0.6481  | 0.66302 | 0.62362 | KIAA1324 |
| cg26045434 | 0.18955 | 0.04691 | 0.88759 | 0.91451 | 0.66455 | 0.82886 | 0.73489 | 0.6841  | 0.0569  | 0.03553 | HR       |
| cg26049501 | 0.12733 | 0.16254 | 0.21983 | 0.13906 | 0.30223 | 0.22954 | 0.15291 | 0.11969 | 0.16963 | 0.137   | STARD13  |
| cg26050734 | 0.1679  | 0.03558 | 0.75813 | 0.75084 | 0.88948 | 0.79381 | 0.28955 | 0.05893 | 0.85517 | 0.75397 | TNRC4    |
| cg26052367 | 0.29388 | 0.16126 | 0.05218 | 0.0562  | 0.0718  | 0.04627 | 0.05894 | 0.05628 | 0.06951 | 0.06017 | GANC     |
| cg26053787 | 0.41979 | 0.35337 | 0.47109 | 0.50558 | 0.41406 | 0.42865 | 0.3197  | 0.39106 | 0.4257  | 0.40302 | PRPS1    |
| cg26053864 | 0.0975  | 0.03444 | 0.05464 | 0.17791 | 0.06932 | 0.03879 | 0.15135 | 0.13533 | 0.95472 | 0.95153 | ACTC     |
| cg26054395 | 0.04319 | 0.03884 | 0.04846 | 0.03965 | 0.04879 | 0.04831 | 0.0295  | 0.02555 | 0.04459 | 0.04087 | MTF2     |
| cg26054540 | 0.01968 | 0.01981 | 0.01943 | 0.01999 | 0.01517 | 0.0168  | 0.0352  | 0.01747 | 0.01897 | 0.01289 | NKD2     |
| cg26055770 | 0.04141 | 0.03816 | 0.1725  | 0.20155 | 0.04783 | 0.03968 | 0.05079 | 0.04442 | 0.03416 | 0.0256  | PDZRN3   |
| cg26057752 | 0.5097  | 0.35766 | 0.46555 | 0.58747 | 0.92108 | 0.60951 | 0.09393 | 0.05737 | 0.32253 | 0.04579 | PGAM2    |
| cg26059153 | 0.01888 | 0.0209  | 0.95867 | 0.94942 | 0.02133 | 0.01885 | 0.02048 | 0.01766 | 0.01518 | 0.01671 | C2orf133 |

|            |         |         |         |         |         |         |         |         |         |         |          |
|------------|---------|---------|---------|---------|---------|---------|---------|---------|---------|---------|----------|
| cg26059632 | 0.14314 | 0.13512 | 0.146   | 0.13658 | 0.22227 | 0.13631 | 0.13214 | 0.09672 | 0.15303 | 0.14564 | SPRR2A   |
| cg26060255 | 0.48446 | 0.14107 | 0.79069 | 0.83223 | 0.59702 | 0.1557  | 0.25388 | 0.2462  | 0.53759 | 0.22436 | MRPS26   |
| cg26061555 | 0.59129 | 0.62752 | 0.73062 | 0.85904 | 0.74968 | 0.66837 | 0.61121 | 0.62336 | 0.25599 | 0.19244 | FLJ43855 |
| cg26061772 | 0.05589 | 0.05547 | 0.08152 | 0.06838 | 0.07111 | 0.07711 | 0.08317 | 0.06215 | 0.05268 | 0.06015 | CASC3    |
| cg26062370 | 0.06093 | 0.05293 | 0.10747 | 0.09457 | 0.05658 | 0.04226 | 0.05483 | 0.04277 | 0.11046 | 0.12261 | MGC18079 |
| cg26062856 | 0.51805 | 0.45859 | 0.52252 | 0.7176  | 0.96881 | 0.87886 | 0.82467 | 0.18197 | 0.69134 | 0.74236 | ATP10A   |
| cg26063872 | 0.49993 | 0.09314 | 0.89003 | 0.92763 | 0.87714 | 0.64692 | 0.64011 | 0.18196 | 0.57557 | 0.47441 | DEFB123  |
| cg26065841 | 0.87279 | 0.30786 | 0.84322 | 0.84989 | 0.90134 | 0.41807 | 0.88019 | 0.63927 | 0.87775 | 0.06004 | CHAC1    |
| cg26065952 | 0.0937  | 0.10101 | 0.08473 | 0.08049 | 0.08901 | 0.08367 | 0.08071 | 0.08753 | 0.08325 | 0.0758  | MRPL21   |
| cg26066361 | 0.43984 | 0.24149 | 0.51683 | 0.63792 | 0.39501 | 0.31698 | 0.20027 | 0.25958 | 0.23823 | 0.20045 | CLEC7A   |
| cg26069252 | 0.03623 | 0.03833 | 0.03528 | 0.03149 | 0.02983 | 0.03169 | 0.03361 | 0.0366  | 0.03289 | 0.0318  | EGR1     |
| cg26069745 | 0.14578 | 0.11486 | 0.39626 | 0.40096 | 0.95527 | 0.95151 | 0.95063 | 0.93883 | 0.95843 | 0.95689 | HOXA2    |
| cg26071823 | 0.06862 | 0.06328 | 0.06651 | 0.0655  | 0.04016 | 0.04944 | 0.05433 | 0.0524  | 0.05247 | 0.04771 | WDR23    |
| cg26071978 | 0.03104 | 0.02823 | 0.03209 | 0.03061 | 0.02842 | 0.03276 | 0.0239  | 0.02794 | 0.02924 | 0.02005 | HMFN0839 |
| cg26073060 | 0.70463 | 0.67897 | 0.91328 | 0.91368 | 0.7564  | 0.66514 | 0.88812 | 0.70795 | 0.91672 | 0.88321 | EIF3S2   |
| cg26073856 | 0.29718 | 0.28306 | 0.53794 | 0.60151 | 0.52556 | 0.3324  | 0.2951  | 0.21803 | 0.36775 | 0.28406 | FABP2    |
| cg26074851 | 0.02993 | 0.02454 | 0.02843 | 0.02761 | 0.03021 | 0.02901 | 0.02406 | 0.02722 | 0.02042 | 0.02636 | SKP1A    |
| cg26079320 | 0.1456  | 0.066   | 0.11503 | 0.10035 | 0.13459 | 0.05302 | 0.12455 | 0.07019 | 0.50262 | 0.15844 | POGK     |
| cg26079992 | 0.02866 | 0.03214 | 0.04229 | 0.02887 | 0.02992 | 0.03143 | 0.02446 | 0.02501 | 0.02944 | 0.02926 | CDK5RAP1 |
| cg26081162 | 0.45022 | 0.44509 | 0.05088 | 0.05467 | 0.40963 | 0.49983 | 0.42497 | 0.62775 | 0.04629 | 0.04463 | C6orf141 |
| cg26081812 | 0.62161 | 0.34226 | 0.71609 | 0.76117 | 0.63529 | 0.63663 | 0.31576 | 0.4718  | 0.21395 | 0.19391 | IL5      |
| cg26082838 | 0.11984 | 0.1091  | 0.19326 | 0.13764 | 0.16064 | 0.13018 | 0.17417 | 0.12462 | 0.11202 | 0.11448 | FLRT3    |
| cg26083396 | 0.01707 | 0.02007 | 0.02063 | 0.01674 | 0.01719 | 0.01946 | 0.0157  | 0.01374 | 0.01731 | 0.01258 | IMPDH1   |
| cg26087862 | 0.27475 | 0.29722 | 0.12938 | 0.21572 | 0.17482 | 0.25745 | 0.09187 | 0.13233 | 0.02539 | 0.02595 | ENSA     |
| cg26088104 | 0.08689 | 0.06474 | 0.0583  | 0.05594 | 0.06742 | 0.0747  | 0.06471 | 0.05836 | 0.04344 | 0.04228 | FLJ32363 |
| cg26089280 | 0.03197 | 0.03042 | 0.02718 | 0.0265  | 0.02859 | 0.0252  | 0.02453 | 0.02515 | 0.02364 | 0.02314 | ARMC9    |
| cg26090652 | 0.10507 | 0.03987 | 0.37843 | 0.3302  | 0.94461 | 0.93812 | 0.87328 | 0.44162 | 0.05103 | 0.04817 | C1QTNF5  |
| cg26090660 | 0.53285 | 0.51889 | 0.58891 | 0.67065 | 0.74427 | 0.64994 | 0.49033 | 0.49805 | 0.46827 | 0.37529 | GDEP     |
| cg26091119 | 0.02982 | 0.03004 | 0.02967 | 0.03359 | 0.02558 | 0.02669 | 0.02606 | 0.02987 | 0.0234  | 0.02424 | HIAT1    |
| cg26091142 | 0.05141 | 0.04726 | 0.49894 | 0.53863 | 0.43227 | 0.14822 | 0.20946 | 0.42159 | 0.09105 | 0.0312  | ISLR2    |
| cg26091510 | 0.0524  | 0.06058 | 0.05195 | 0.04835 | 0.04799 | 0.04922 | 0.04591 | 0.05037 | 0.05193 | 0.0539  | LRIG2    |
| cg26091679 | 0.06896 | 0.05518 | 0.07322 | 0.05789 | 0.08122 | 0.05915 | 0.06105 | 0.0642  | 0.06209 | 0.05464 | PCGF1    |
| cg26091688 | 0.06004 | 0.05734 | 0.05735 | 0.06659 | 0.04486 | 0.04222 | 0.04536 | 0.04385 | 0.03206 | 0.04225 | ZNF200   |
| cg26091981 | 0.81566 | 0.50503 | 0.76115 | 0.78795 | 0.81772 | 0.72723 | 0.71666 | 0.62273 | 0.73683 | 0.70216 | LCT      |
| cg26093148 | 0.15576 | 0.14193 | 0.87775 | 0.90437 | 0.85099 | 0.85473 | 0.46165 | 0.30759 | 0.87443 | 0.77097 | TNRC4    |
| cg26093687 | 0.87682 | 0.71359 | 0.90302 | 0.89224 | 0.93471 | 0.78334 | 0.89539 | 0.78913 | 0.91694 | 0.83466 | EIF3S2   |
| cg26093711 | 0.223   | 0.05527 | 0.06333 | 0.05175 | 0.09628 | 0.05666 | 0.03971 | 0.04195 | 0.05878 | 0.05455 | VRK2     |
| cg26095194 | 0.04172 | 0.04262 | 0.03944 | 0.03663 | 0.02945 | 0.03403 | 0.03026 | 0.0375  | 0.18791 | 0.03095 | DUSP1    |
| cg26096837 | 0.03487 | 0.03189 | 0.76911 | 0.89387 | 0.90517 | 0.91548 | 0.0669  | 0.05041 | 0.68909 | 0.49913 | FGF19    |
| cg26097271 | 0.06393 | 0.06835 | 0.05935 | 0.05679 | 0.07049 | 0.06088 | 0.05777 | 0.05911 | 0.05426 | 0.05593 | MED6     |
| cg26099316 | 0.7414  | 0.49041 | 0.70247 | 0.84156 | 0.85897 | 0.71545 | 0.6622  | 0.54382 | 0.418   | 0.04997 | ITIH3    |

|            |         |         |         |         |         |         |         |         |         |                   |
|------------|---------|---------|---------|---------|---------|---------|---------|---------|---------|-------------------|
| cg26102760 | 0.02057 | 0.0176  | 0.02074 | 0.0208  | 0.01816 | 0.02019 | 0.01705 | 0.01676 | 0.0198  | 0.01522 PASK      |
| cg26104204 | 0.03404 | 0.03493 | 0.04042 | 0.03416 | 0.03213 | 0.03443 | 0.02963 | 0.03151 | 0.02874 | 0.02862 MAP3K10   |
| cg26104206 | 0.39904 | 0.18596 | 0.6354  | 0.68395 | 0.64012 | 0.67183 | 0.25825 | 0.12598 | 0.91658 | 0.75863 PHYHIP    |
| cg26104469 | 0.44206 | 0.52051 | 0.34257 | 0.30914 | 0.4202  | 0.63716 | 0.3129  | 0.31128 | 0.18459 | 0.20591 SGCZ      |
| cg26105232 | 0.36847 | 0.11514 | 0.52381 | 0.65143 | 0.35675 | 0.3829  | 0.34453 | 0.26552 | 0.33472 | 0.34005 IL2RA     |
| cg26106720 | 0.80668 | 0.81133 | 0.74077 | 0.74945 | 0.73449 | 0.82057 | 0.82831 | 0.81399 | 0.823   | 0.7905 STX12      |
| cg26107778 | 0.029   | 0.03203 | 0.03531 | 0.0306  | 0.02053 | 0.02585 | 0.0219  | 0.02971 | 0.02492 | 0.02333 KIAA1407  |
| cg26109803 | 0.67549 | 0.46083 | 0.62884 | 0.73891 | 0.34536 | 0.54378 | 0.20099 | 0.1141  | 0.71259 | 0.66727 WNT8B     |
| cg26111030 | 0.03224 | 0.03493 | 0.03981 | 0.03833 | 0.03462 | 0.04274 | 0.03675 | 0.02849 | 0.03558 | 0.03172 ERBB2     |
| cg26111757 | 0.30253 | 0.07324 | 0.11391 | 0.18988 | 0.19669 | 0.88044 | 0.10799 | 0.16523 | 0.05067 | 0.09272 C20orf185 |
| cg26112353 | 0.07766 | 0.07149 | 0.08391 | 0.08371 | 0.13781 | 0.09486 | 0.07572 | 0.06526 | 0.07304 | 0.04891 BMP2K     |
| cg26112639 | 0.82428 | 0.4421  | 0.82502 | 0.81456 | 0.83578 | 0.53867 | 0.03981 | 0.04106 | 0.82346 | 0.05028 CIAS1     |
| cg26112901 | 0.56775 | 0.51888 | 0.80223 | 0.83357 | 0.66576 | 0.62162 | 0.31734 | 0.34073 | 0.25639 | 0.12779 IL22RA2   |
| cg26113512 | 0.02138 | 0.02513 | 0.04597 | 0.02712 | 0.0383  | 0.02339 | 0.21464 | 0.02768 | 0.02224 | 0.01961 VILL      |
| cg26114571 | 0.03457 | 0.03846 | 0.04827 | 0.04634 | 0.03083 | 0.03461 | 0.03317 | 0.03055 | 0.03114 | 0.02175 BRUNOL5   |
| cg26116103 | 0.03701 | 0.03857 | 0.04837 | 0.04129 | 0.03227 | 0.03379 | 0.03254 | 0.04465 | 0.03644 | 0.03304 ATF1      |
| cg26116400 | 0.05804 | 0.05669 | 0.09235 | 0.08783 | 0.09201 | 0.08997 | 0.32494 | 0.26251 | 0.04691 | 0.04125 FUNDC2    |
| cg26116551 | 0.68368 | 0.39692 | 0.56806 | 0.52582 | 0.63714 | 0.64915 | 0.25572 | 0.15739 | 0.70434 | 0.65564 ZNF536    |
| cg26117023 | 0.02711 | 0.04747 | 0.02752 | 0.02816 | 0.9634  | 0.8683  | 0.02376 | 0.02498 | 0.9545  | 0.91561 DOK1      |
| cg26117431 | 0.8273  | 0.63706 | 0.70989 | 0.78536 | 0.77764 | 0.79994 | 0.74619 | 0.66478 | 0.18377 | 0.13243 LRRC39    |
| cg26119740 | 0.08356 | 0.07585 | 0.13801 | 0.11458 | 0.09078 | 0.12922 | 0.12857 | 0.08703 | 0.12173 | 0.12413 PPME1     |
| cg26119796 | 0.81686 | 0.7401  | 0.72772 | 0.73361 | 0.75893 | 0.6659  | 0.76415 | 0.73771 | 0.73122 | 0.77291 RB1       |
| cg26123414 | 0.08637 | 0.0355  | 0.03437 | 0.03635 | 0.0237  | 0.02886 | 0.02785 | 0.03073 | 0.02292 | 0.02587 ORAOV1    |
| cg26124016 | 0.06095 | 0.06221 | 0.07922 | 0.05912 | 0.07986 | 0.05938 | 0.04915 | 0.04306 | 0.058   | 0.0401 RARB       |
| cg26125443 | 0.03749 | 0.03918 | 0.04255 | 0.04158 | 0.04237 | 0.03955 | 0.03654 | 0.03579 | 0.04282 | 0.0275 POLR2G     |
| cg26125600 | 0.85993 | 0.74207 | 0.84601 | 0.87565 | 0.83401 | 0.83857 | 0.82169 | 0.74543 | 0.82579 | 0.63181 PF4V1     |
| cg26127679 | 0.0828  | 0.10038 | 0.13081 | 0.11965 | 0.17614 | 0.07491 | 0.08538 | 0.10628 | 0.09717 | 0.09776 RAD51AP1  |
| cg26128092 | 0.58798 | 0.62508 | 0.93897 | 0.95899 | 0.95488 | 0.95939 | 0.03408 | 0.08287 | 0.09519 | 0.03863 WDR8      |
| cg26128441 | 0.82739 | 0.75236 | 0.87123 | 0.88915 | 0.66986 | 0.61801 | 0.77178 | 0.78027 | 0.72794 | 0.47962 P2RX3     |
| cg26129270 | 0.05415 | 0.03946 | 0.05981 | 0.05219 | 0.05765 | 0.05306 | 0.04666 | 0.03811 | 0.05129 | 0.0494 FZD5       |
| cg26129916 | 0.05247 | 0.04923 | 0.06285 | 0.05774 | 0.05007 | 0.0577  | 0.0489  | 0.0442  | 0.04947 | 0.04706 GGA3      |
| cg26130726 | 0.08722 | 0.08752 | 0.12139 | 0.11496 | 0.12639 | 0.09338 | 0.07175 | 0.07323 | 0.07959 | 0.07705 CYB5R4    |
| cg26131019 | 0.06242 | 0.05845 | 0.05324 | 0.05764 | 0.09562 | 0.06729 | 0.06751 | 0.08252 | 0.05756 | 0.0609 LRIG1      |
| cg26131911 | 0.02428 | 0.02545 | 0.02612 | 0.02805 | 0.02229 | 0.02856 | 0.02225 | 0.01989 | 0.02541 | 0.02311 ZBTB80S   |
| cg26132665 | 0.06289 | 0.06415 | 0.10827 | 0.07957 | 0.17736 | 0.06234 | 0.06328 | 0.0541  | 0.05214 | 0.0524 C6orf165   |
| cg26132853 | 0.03527 | 0.03359 | 0.03722 | 0.02957 | 0.05557 | 0.04277 | 0.03247 | 0.03898 | 0.02432 | 0.02493 NOL5A     |
| cg26133068 | 0.60209 | 0.4316  | 0.11466 | 0.1181  | 0.72693 | 0.38942 | 0.09795 | 0.09107 | 0.07459 | 0.08587 SLC2A11   |
| cg26134665 | 0.80002 | 0.56069 | 0.88311 | 0.8883  | 0.90893 | 0.88188 | 0.84866 | 0.52145 | 0.89563 | 0.84059 STX1B2    |
| cg26135325 | 0.12307 | 0.07911 | 0.2578  | 0.49478 | 0.05076 | 0.10379 | 0.08783 | 0.0921  | 0.08023 | 0.05916 LCE3A     |
| cg26135716 | 0.02963 | 0.02892 | 0.02933 | 0.02378 | 0.03779 | 0.02503 | 0.01847 | 0.02064 | 0.02709 | 0.02584 GLUL      |
| cg26136776 | 0.84427 | 0.59539 | 0.92381 | 0.95355 | 0.59743 | 0.60896 | 0.12176 | 0.06451 | 0.15058 | 0.02352 KLF1      |

|            |         |         |         |         |         |         |         |         |         |                   |
|------------|---------|---------|---------|---------|---------|---------|---------|---------|---------|-------------------|
| cg26137790 | 0.02662 | 0.03062 | 0.02804 | 0.02514 | 0.02644 | 0.0274  | 0.02703 | 0.0247  | 0.02393 | 0.02881 ACAA2     |
| cg26137794 | 0.02088 | 0.02398 | 0.026   | 0.02814 | 0.02635 | 0.02397 | 0.02376 | 0.02537 | 0.02484 | 0.02065 ATP6V0A2  |
| cg26138224 | 0.05932 | 0.06088 | 0.05534 | 0.06293 | 0.03497 | 0.04947 | 0.05022 | 0.05534 | 0.05087 | 0.04525 PFAS      |
| cg26139360 | 0.02779 | 0.03152 | 0.02893 | 0.03161 | 0.02235 | 0.02859 | 0.02528 | 0.02607 | 0.0238  | 0.02459 IFRD2     |
| cg26141626 | 0.07367 | 0.06569 | 0.26684 | 0.36431 | 0.06819 | 0.06343 | 0.12596 | 0.06584 | 0.10318 | 0.05847 GPR37     |
| cg26143719 | 0.03739 | 0.0359  | 0.05938 | 0.35223 | 0.67758 | 0.02552 | 0.77682 | 0.36005 | 0.02325 | 0.02214 C1QTNF6   |
| cg26144265 | 0.03686 | 0.04255 | 0.04326 | 0.03725 | 0.03544 | 0.04446 | 0.04644 | 0.04258 | 0.03546 | 0.03719 BZW2      |
| cg26145103 | 0.06689 | 0.06765 | 0.03939 | 0.03972 | 0.08268 | 0.06939 | 0.06959 | 0.10456 | 0.04797 | 0.04062 MGC17839  |
| cg26145228 | 0.2569  | 0.2489  | 0.34801 | 0.40443 | 0.6358  | 0.23313 | 0.25398 | 0.29716 | 0.28215 | 0.22921 NTNG1     |
| cg26146086 | 0.03361 | 0.03966 | 0.03928 | 0.03219 | 0.03225 | 0.03416 | 0.03228 | 0.03075 | 0.02651 | 0.02932 RPS12     |
| cg26147132 | 0.04165 | 0.04516 | 0.07001 | 0.07234 | 0.13701 | 0.05886 | 0.05439 | 0.05304 | 0.16908 | 0.052 PIGS        |
| cg26147338 | 0.8595  | 0.86551 | 0.86049 | 0.88848 | 0.92986 | 0.77013 | 0.80606 | 0.78614 | 0.89878 | 0.86888 LOC124751 |
| cg26147480 | 0.91144 | 0.67413 | 0.90339 | 0.90195 | 0.82274 | 0.3097  | 0.89665 | 0.79256 | 0.92567 | 0.90178 KIAA0157  |
| cg26147657 | 0.04172 | 0.04452 | 0.04484 | 0.0445  | 0.0414  | 0.0413  | 0.04543 | 0.04239 | 0.03302 | 0.03283 FLJ13946  |
| cg26149550 | 0.20475 | 0.08183 | 0.38656 | 0.57705 | 0.34662 | 0.11834 | 0.08929 | 0.067   | 0.08872 | 0.059 KLK15       |
| cg26149678 | 0.90967 | 0.50493 | 0.92093 | 0.93755 | 0.90202 | 0.80433 | 0.90417 | 0.81316 | 0.91804 | 0.75644 IL18BP    |
| cg26149738 | 0.14011 | 0.12263 | 0.13446 | 0.13927 | 0.12582 | 0.13478 | 0.09723 | 0.09191 | 0.09732 | 0.08071 KCTD15    |
| cg26150490 | 0.04312 | 0.04064 | 0.03906 | 0.04344 | 0.03528 | 0.0317  | 0.32415 | 0.37731 | 0.02959 | 0.02988 LOC389852 |
| cg26151310 | 0.06969 | 0.05908 | 0.08963 | 0.06559 | 0.06301 | 0.04321 | 0.04099 | 0.04524 | 0.06188 | 0.05385 SMARCA3   |
| cg26151675 | 0.2616  | 0.06673 | 0.66612 | 0.67677 | 0.65425 | 0.35417 | 0.62811 | 0.0565  | 0.83936 | 0.2472 CNR2       |
| cg26152597 | 0.04514 | 0.04198 | 0.055   | 0.04678 | 0.03955 | 0.03884 | 0.04406 | 0.03658 | 0.03919 | 0.04203 ZBTB20    |
| cg26153631 | 0.0817  | 0.07638 | 0.08738 | 0.0886  | 0.06182 | 0.10343 | 0.08714 | 0.09215 | 0.84816 | 0.74782 HOXC10    |
| cg26153642 | 0.88542 | 0.88822 | 0.88632 | 0.90132 | 0.91856 | 0.83928 | 0.34622 | 0.38364 | 0.88257 | 0.52454 HTR3E     |
| cg26154999 | 0.86323 | 0.84179 | 0.39402 | 0.33177 | 0.91051 | 0.72566 | 0.68779 | 0.85693 | 0.89563 | 0.86742 FLJ22746  |
| cg26155152 | 0.56767 | 0.62305 | 0.66862 | 0.71119 | 0.68095 | 0.78914 | 0.41438 | 0.20634 | 0.8483  | 0.8527 ZNF77      |
| cg26155617 | 0.80988 | 0.79305 | 0.7774  | 0.78585 | 0.83816 | 0.78777 | 0.79635 | 0.80898 | 0.7802  | 0.78966 DDO       |
| cg26158194 | 0.70946 | 0.17672 | 0.802   | 0.90699 | 0.84758 | 0.5109  | 0.82067 | 0.53616 | 0.8827  | 0.67638 LSP1      |
| cg26158980 | 0.89674 | 0.83182 | 0.9051  | 0.92007 | 0.95624 | 0.80075 | 0.91009 | 0.89479 | 0.91029 | 0.63254 CHRNA10   |
| cg26159905 | 0.73216 | 0.2866  | 0.645   | 0.73501 | 0.84149 | 0.65502 | 0.28422 | 0.21617 | 0.37286 | 0.32067 ASB10     |
| cg26159933 | 0.25488 | 0.24853 | 0.51158 | 0.60433 | 0.64427 | 0.64107 | 0.22517 | 0.25814 | 0.49123 | 0.43687 CHIA      |
| cg26160573 | 0.6563  | 0.79692 | 0.06545 | 0.06611 | 0.37051 | 0.24808 | 0.17359 | 0.15181 | 0.0276  | 0.0292 PTPN18     |
| cg26162582 | 0.10797 | 0.07111 | 0.90563 | 0.92756 | 0.27676 | 0.0618  | 0.10046 | 0.07459 | 0.10015 | 0.06577 KCNA6     |
| cg26162695 | 0.03719 | 0.0334  | 0.02322 | 0.02274 | 0.0342  | 0.03769 | 0.02575 | 0.02636 | 0.0201  | 0.02415 ELAC2     |
| cg26163537 | 0.8556  | 0.28591 | 0.62094 | 0.6916  | 0.70259 | 0.53954 | 0.75493 | 0.13319 | 0.43992 | 0.18243 GRB10     |
| cg26164184 | 0.61132 | 0.11859 | 0.50483 | 0.68774 | 0.48515 | 0.34656 | 0.27606 | 0.32493 | 0.08703 | 0.08252 FCN2      |
| cg26164310 | 0.08093 | 0.18696 | 0.84489 | 0.91322 | 0.44079 | 0.08046 | 0.18151 | 0.05661 | 0.45575 | 0.61515 LPPR4     |
| cg26165608 | 0.02754 | 0.02673 | 0.02501 | 0.02467 | 0.02151 | 0.02423 | 0.02266 | 0.02573 | 0.02053 | 0.02192 FARS2     |
| cg26168249 | 0.06812 | 0.06852 | 0.06312 | 0.05938 | 0.0859  | 0.06289 | 0.05172 | 0.05143 | 0.05919 | 0.05406 ZFYVE20   |
| cg26168975 | 0.05845 | 0.05953 | 0.07403 | 0.07008 | 0.08277 | 0.05513 | 0.04957 | 0.04969 | 0.04963 | 0.044 C1orf80     |
| cg26170257 | 0.70482 | 0.70694 | 0.65804 | 0.66234 | 0.58423 | 0.64625 | 0.67526 | 0.61686 | 0.82275 | 0.79578 ZNF336    |
| cg26170660 | 0.41976 | 0.12219 | 0.15799 | 0.13671 | 0.24962 | 0.18675 | 0.0855  | 0.07013 | 0.10146 | 0.07465 GPX5      |

|            |         |         |         |         |         |         |         |         |         |         |          |
|------------|---------|---------|---------|---------|---------|---------|---------|---------|---------|---------|----------|
| cg26171231 | 0.14533 | 0.15159 | 0.10959 | 0.09536 | 0.14694 | 0.14596 | 0.08018 | 0.06982 | 0.08774 | 0.12599 | CLCN3    |
| cg26172108 | 0.29411 | 0.06871 | 0.07639 | 0.06688 | 0.04574 | 0.04861 | 0.06899 | 0.05005 | 0.06807 | 0.04424 | C7orf31  |
| cg26174387 | 0.08341 | 0.08091 | 0.11869 | 0.10378 | 0.0937  | 0.10064 | 0.09435 | 0.07431 | 0.06736 | 0.08615 | TMEM30A  |
| cg26174752 | 0.91499 | 0.26896 | 0.90168 | 0.90065 | 0.55762 | 0.57781 | 0.37135 | 0.21342 | 0.05297 | 0.19319 | GPR63    |
| cg26177629 | 0.03225 | 0.03439 | 0.03654 | 0.03463 | 0.02568 | 0.02576 | 0.03083 | 0.02758 | 0.02726 | 0.02646 | RAB18    |
| cg26179948 | 0.05531 | 0.0449  | 0.10075 | 0.07822 | 0.072   | 0.04641 | 0.04817 | 0.04165 | 0.03828 | 0.03513 | JAZF1    |
| cg26180557 | 0.80478 | 0.80755 | 0.74931 | 0.80609 | 0.72893 | 0.80062 | 0.61577 | 0.80379 | 0.72935 | 0.79336 | POU6F2   |
| cg26181372 | 0.18703 | 0.14526 | 0.25113 | 0.38921 | 0.50398 | 0.56314 | 0.23469 | 0.17962 | 0.14242 | 0.13009 | ALDOB    |
| cg26183662 | 0.09718 | 0.09201 | 0.08639 | 0.08245 | 0.13173 | 0.08683 | 0.07423 | 0.08203 | 0.06643 | 0.07827 | NFAT5    |
| cg26185508 | 0.07679 | 0.14252 | 0.81257 | 0.8668  | 0.75233 | 0.14729 | 0.81754 | 0.55437 | 0.32845 | 0.40078 | CDPC2    |
| cg26186727 | 0.0393  | 0.03499 | 0.95365 | 0.96093 | 0.06107 | 0.03124 | 0.8021  | 0.92489 | 0.10436 | 0.0337  | NETO1    |
| cg26187237 | 0.03749 | 0.0295  | 0.04356 | 0.03492 | 0.044   | 0.03062 | 0.06563 | 0.02917 | 0.03279 | 0.03333 | IGFBP2   |
| cg26189983 | 0.10306 | 0.02572 | 0.85374 | 0.94608 | 0.93946 | 0.7739  | 0.88116 | 0.63167 | 0.29269 | 0.02015 | TNFRSF1B |
| cg26190136 | 0.0786  | 0.05857 | 0.07237 | 0.0751  | 0.09878 | 0.07852 | 0.08433 | 0.07851 | 0.05935 | 0.07255 | IDH3A    |
| cg26191951 | 0.4931  | 0.12923 | 0.35752 | 0.53777 | 0.16441 | 0.11352 | 0.11715 | 0.11374 | 0.24494 | 0.09914 | RNASE2   |
| cg26194560 | 0.0973  | 0.10514 | 0.12149 | 0.12065 | 0.13945 | 0.10674 | 0.09654 | 0.09078 | 0.09776 | 0.10477 | GTF3C3   |
| cg26195577 | 0.11125 | 0.10252 | 0.11372 | 0.09671 | 0.14333 | 0.13118 | 0.08436 | 0.0934  | 0.05234 | 0.04912 | C2orf3   |
| cg26195812 | 0.03858 | 0.0438  | 0.09205 | 0.08653 | 0.46008 | 0.06558 | 0.0428  | 0.04467 | 0.16524 | 0.0407  | DPYSL5   |
| cg26196700 | 0.0333  | 0.03046 | 0.0318  | 0.03019 | 0.02646 | 0.03197 | 0.02878 | 0.03411 | 0.03589 | 0.03298 | SORD     |
| cg26197220 | 0.0263  | 0.03425 | 0.0327  | 0.03241 | 0.03808 | 0.04045 | 0.02303 | 0.02308 | 0.02311 | 0.02477 | TSC22D1  |
| cg26198776 | 0.05276 | 0.04561 | 0.04172 | 0.03815 | 0.03007 | 0.03737 | 0.04101 | 0.03888 | 0.03881 | 0.04055 | EIF3S5   |
| cg26198807 | 0.43259 | 0.39879 | 0.3744  | 0.61311 | 0.4543  | 0.55021 | 0.15005 | 0.121   | 0.53456 | 0.31489 | C11orf49 |
| cg26199493 | 0.10524 | 0.05948 | 0.08706 | 0.08063 | 0.10961 | 0.0436  | 0.11303 | 0.04567 | 0.05514 | 0.04469 | LIN9     |
| cg26200580 | 0.07735 | 0.03973 | 0.19634 | 0.07835 | 0.22344 | 0.04177 | 0.20775 | 0.14063 | 0.19466 | 0.02298 | KIAA1838 |
| cg26200585 | 0.92777 | 0.54139 | 0.92021 | 0.93648 | 0.94472 | 0.93852 | 0.9257  | 0.83332 | 0.94479 | 0.90424 | PRX      |
| cg26201213 | 0.36462 | 0.05475 | 0.56111 | 0.59166 | 0.6732  | 0.1058  | 0.27974 | 0.42547 | 0.95298 | 0.54313 | MGMT     |
| cg26201579 | 0.0231  | 0.02647 | 0.0295  | 0.026   | 0.02612 | 0.02781 | 0.02174 | 0.02324 | 0.01908 | 0.02199 | MTO1     |
| cg26202340 | 0.15467 | 0.18391 | 0.67866 | 0.736   | 0.74077 | 0.73513 | 0.66772 | 0.48349 | 0.4891  | 0.28173 | TIRAP    |
| cg26203861 | 0.70586 | 0.51925 | 0.66898 | 0.87636 | 0.92343 | 0.83855 | 0.81102 | 0.65532 | 0.49056 | 0.69309 | TMEM58   |
| cg26205131 | 0.03707 | 0.03568 | 0.38154 | 0.54572 | 0.18648 | 0.21693 | 0.06138 | 0.07517 | 0.04542 | 0.0378  | SLC6A3   |
| cg26205432 | 0.65018 | 0.67854 | 0.55556 | 0.63315 | 0.52041 | 0.60368 | 0.63618 | 0.6792  | 0.63204 | 0.6299  | PLN      |
| cg26206598 | 0.16347 | 0.31472 | 0.70149 | 0.75844 | 0.9076  | 0.70341 | 0.85235 | 0.70014 | 0.6125  | 0.1303  | PREX1    |
| cg26207503 | 0.95268 | 0.94612 | 0.94261 | 0.94911 | 0.95168 | 0.94779 | 0.94323 | 0.94244 | 0.5538  | 0.52181 | MYF5     |
| cg26208930 | 0.78315 | 0.50678 | 0.90833 | 0.86357 | 0.97773 | 0.77259 | 0.06513 | 0.05138 | 0.05168 | 0.03629 | TP73     |
| cg26209058 | 0.03962 | 0.04535 | 0.03894 | 0.03567 | 0.03089 | 0.02829 | 0.03112 | 0.02973 | 0.03225 | 0.02892 | EIF5A2   |
| cg26209676 | 0.07396 | 0.06645 | 0.07724 | 0.06881 | 0.09782 | 0.0597  | 0.73413 | 0.66242 | 0.56313 | 0.38639 | ZNF581   |
| cg26211698 | 0.03914 | 0.03795 | 0.04084 | 0.0368  | 0.03629 | 0.03325 | 0.03986 | 0.04116 | 0.03248 | 0.02779 | FLJ22639 |
| cg26212229 | 0.87098 | 0.88626 | 0.84145 | 0.85948 | 0.84036 | 0.80681 | 0.84651 | 0.81951 | 0.87847 | 0.80111 | SNRPD1   |
| cg26212924 | 0.10279 | 0.04459 | 0.04319 | 0.03699 | 0.02982 | 0.03501 | 0.03584 | 0.03414 | 0.03421 | 0.03377 | CYC1     |
| cg26215428 | 0.89098 | 0.86613 | 0.89831 | 0.89224 | 0.90918 | 0.83564 | 0.87324 | 0.78578 | 0.89589 | 0.45429 | PKD2     |
| cg26215727 | 0.67051 | 0.21783 | 0.28876 | 0.29404 | 0.12471 | 0.11094 | 0.0787  | 0.13875 | 0.08294 | 0.09033 | SCNN1A   |

|            |         |         |         |         |         |         |         |         |         |                   |
|------------|---------|---------|---------|---------|---------|---------|---------|---------|---------|-------------------|
| cg26216632 | 0.61291 | 0.56527 | 0.66319 | 0.68984 | 0.77522 | 0.74847 | 0.60036 | 0.61079 | 0.62683 | 0.57408 C2orf27   |
| cg26217633 | 0.04665 | 0.03995 | 0.06205 | 0.05814 | 0.0358  | 0.04553 | 0.04585 | 0.03997 | 0.03471 | 0.03265 NLE1      |
| cg26218269 | 0.61043 | 0.67757 | 0.1606  | 0.12381 | 0.3151  | 0.41052 | 0.19174 | 0.66468 | 0.74842 | 0.71195 MAB21L2   |
| cg26219051 | 0.18613 | 0.04345 | 0.19346 | 0.2402  | 0.87969 | 0.74753 | 0.17364 | 0.24227 | 0.07042 | 0.28013 SCUBE1    |
| cg26220350 | 0.03822 | 0.0337  | 0.5379  | 0.57191 | 0.29652 | 0.4074  | 0.03278 | 0.04008 | 0.17158 | 0.03147 PLTP      |
| cg26220985 | 0.26711 | 0.23541 | 0.36428 | 0.36029 | 0.15098 | 0.06056 | 0.62593 | 0.23041 | 0.3738  | 0.1189 DPT        |
| cg26221491 | 0.83785 | 0.87197 | 0.84626 | 0.87529 | 0.88943 | 0.87448 | 0.85602 | 0.87367 | 0.86138 | 0.80888 C20orf173 |
| cg26221631 | 0.02966 | 0.02939 | 0.06936 | 0.09173 | 0.04065 | 0.02828 | 0.03968 | 0.0335  | 0.03258 | 0.02343 BARX2     |
| cg26222045 | 0.05266 | 0.04884 | 0.16473 | 0.19848 | 0.8955  | 0.86154 | 0.21864 | 0.43678 | 0.05368 | 0.05461 UNQ5810   |
| cg26222229 | 0.04275 | 0.04489 | 0.04458 | 0.04674 | 0.03568 | 0.04785 | 0.04509 | 0.04316 | 0.04208 | 0.03798 PPIL1     |
| cg26222407 | 0.12919 | 0.13909 | 0.16433 | 0.16427 | 0.1496  | 0.12444 | 0.16947 | 0.14771 | 0.13729 | 0.13703 STAG2     |
| cg26223987 | 0.03533 | 0.03988 | 0.03742 | 0.03882 | 0.03704 | 0.03312 | 0.03504 | 0.03799 | 0.03852 | 0.03119 ZDHC14    |
| cg26224139 | 0.79194 | 0.11331 | 0.80295 | 0.81407 | 0.9516  | 0.63234 | 0.92799 | 0.7188  | 0.91896 | 0.86447 C9orf116  |
| cg26226968 | 0.04414 | 0.04066 | 0.03793 | 0.0403  | 0.03778 | 0.04344 | 0.03834 | 0.0346  | 0.03015 | 0.03726 SMARCAD1  |
| cg26227005 | 0.6621  | 0.1583  | 0.20915 | 0.15565 | 0.58709 | 0.5317  | 0.10615 | 0.08446 | 0.12781 | 0.14602 ELAVL4    |
| cg26227465 | 0.30277 | 0.10695 | 0.59305 | 0.74922 | 0.4582  | 0.51966 | 0.82346 | 0.85186 | 0.27925 | 0.11215 IFNG      |
| cg26228569 | 0.04918 | 0.07195 | 0.06053 | 0.059   | 0.07557 | 0.07237 | 0.05936 | 0.05087 | 0.05916 | 0.05621 CRSP8     |
| cg26229274 | 0.02797 | 0.02791 | 0.02815 | 0.02804 | 0.02482 | 0.02857 | 0.02312 | 0.02648 | 0.02353 | 0.02222 SLC22A4   |
| cg26229607 | 0.15734 | 0.16465 | 0.24991 | 0.20319 | 0.16392 | 0.17617 | 0.12878 | 0.12298 | 0.22535 | 0.19381 ARHGAP29  |
| cg26229648 | 0.85327 | 0.77979 | 0.80454 | 0.84366 | 0.79449 | 0.79275 | 0.8041  | 0.79726 | 0.85621 | 0.79964 CNTF      |
| cg26232005 | 0.1441  | 0.14604 | 0.14184 | 0.14017 | 0.22384 | 0.12909 | 0.12823 | 0.13586 | 0.11395 | 0.11313 SMOX      |
| cg26232187 | 0.01999 | 0.0205  | 0.02349 | 0.02095 | 0.01998 | 0.02169 | 0.02082 | 0.01902 | 0.14024 | 0.01886 NTRK3     |
| cg26232558 | 0.36305 | 0.36235 | 0.48868 | 0.51825 | 0.63572 | 0.50575 | 0.32413 | 0.37746 | 0.10303 | 0.09643 OR3A1     |
| cg26233209 | 0.14156 | 0.11704 | 0.1307  | 0.1575  | 0.14073 | 0.09516 | 0.11418 | 0.1114  | 0.15456 | 0.0894 ATG12      |
| cg26233253 | 0.80823 | 0.67819 | 0.57546 | 0.56659 | 0.47292 | 0.17516 | 0.59652 | 0.34211 | 0.0616  | 0.05647 SLC35E4   |
| cg26233468 | 0.02019 | 0.02209 | 0.02292 | 0.02113 | 0.01867 | 0.01998 | 0.01672 | 0.01681 | 0.0193  | 0.01824 KRTCAP2   |
| cg26233529 | 0.02359 | 0.0236  | 0.02554 | 0.02315 | 0.02366 | 0.03064 | 0.01859 | 0.0198  | 0.01828 | 0.01751 WDR32     |
| cg26233914 | 0.07028 | 0.0328  | 0.07744 | 0.1111  | 0.07886 | 0.15147 | 0.02727 | 0.03018 | 0.06075 | 0.02664 ITGAX     |
| cg26235710 | 0.06794 | 0.0585  | 0.1032  | 0.1174  | 0.0814  | 0.06713 | 0.04794 | 0.04287 | 0.05413 | 0.04855 FLJ38984  |
| cg26238727 | 0.83271 | 0.64368 | 0.7938  | 0.85032 | 0.68056 | 0.51355 | 0.53594 | 0.4149  | 0.806   | 0.71903 UGT1A10   |
| cg26239051 | 0.03794 | 0.05292 | 0.0482  | 0.04733 | 0.04265 | 0.04543 | 0.03964 | 0.03258 | 0.04196 | 0.03281 EHBP1     |
| cg26239233 | 0.13474 | 0.12182 | 0.56149 | 0.61165 | 0.50289 | 0.11477 | 0.3     | 0.09967 | 0.55891 | 0.28061 CIITA     |
| cg26240353 | 0.02465 | 0.02968 | 0.02799 | 0.02636 | 0.02285 | 0.02996 | 0.02421 | 0.02624 | 0.02437 | 0.02689 LTA4H     |
| cg26240433 | 0.09602 | 0.08665 | 0.07288 | 0.06715 | 0.15177 | 0.12883 | 0.09266 | 0.08761 | 0.07758 | 0.10855 FAM14B    |
| cg26240939 | 0.74478 | 0.73374 | 0.76576 | 0.75639 | 0.84853 | 0.62323 | 0.70733 | 0.72784 | 0.76196 | 0.72597 LOC57149  |
| cg26244225 | 0.59582 | 0.43034 | 0.76473 | 0.8195  | 0.23152 | 0.34342 | 0.43474 | 0.43721 | 0.81775 | 0.18155 APOLD1    |
| cg26245011 | 0.02416 | 0.02637 | 0.02405 | 0.0222  | 0.02087 | 0.0229  | 0.0191  | 0.02041 | 0.01954 | 0.01833 FLJ13910  |
| cg26245202 | 0.8079  | 0.83673 | 0.83848 | 0.8644  | 0.72764 | 0.80908 | 0.80205 | 0.82555 | 0.84585 | 0.83138 ELK4      |
| cg26246138 | 0.02064 | 0.02272 | 0.02171 | 0.0202  | 0.01688 | 0.02041 | 0.20873 | 0.5928  | 0.0161  | 0.01587 SCML2     |
| cg26246296 | 0.03036 | 0.02944 | 0.03348 | 0.02861 | 0.01992 | 0.02278 | 0.03061 | 0.02605 | 0.02619 | 0.02107 TXN       |
| cg26247501 | 0.74878 | 0.68078 | 0.61174 | 0.73355 | 0.56763 | 0.70524 | 0.34716 | 0.46462 | 0.71656 | 0.37805 GBP7      |



|            |         |         |         |         |         |         |         |         |         |                   |
|------------|---------|---------|---------|---------|---------|---------|---------|---------|---------|-------------------|
| cg26248486 | 0.03311 | 0.0296  | 0.05273 | 0.03486 | 0.02279 | 0.02742 | 0.0276  | 0.0263  | 0.03057 | 0.02316 C12orf58  |
| cg26251101 | 0.31191 | 0.25378 | 0.23084 | 0.17652 | 0.14746 | 0.07391 | 0.08806 | 0.05623 | 0.13202 | 0.0582 RHOQ       |
| cg26251865 | 0.51453 | 0.06987 | 0.26976 | 0.24736 | 0.40274 | 0.29678 | 0.15462 | 0.12625 | 0.41583 | 0.23311 IRGC      |
| cg26252167 | 0.2079  | 0.03333 | 0.95548 | 0.96026 | 0.80346 | 0.91359 | 0.28781 | 0.32044 | 0.02736 | 0.10737 GPR6      |
| cg26255649 | 0.02183 | 0.02745 | 0.02167 | 0.02303 | 0.02135 | 0.02623 | 0.01913 | 0.02004 | 0.02188 | 0.02245 ATP5S     |
| cg26255848 | 0.27975 | 0.25579 | 0.29909 | 0.26803 | 0.27412 | 0.23592 | 0.26944 | 0.25909 | 0.22041 | 0.22963 FBL       |
| cg26256793 | 0.5811  | 0.76808 | 0.25059 | 0.37236 | 0.54888 | 0.47967 | 0.27573 | 0.4087  | 0.09703 | 0.04924 COL11A1   |
| cg26258330 | 0.03851 | 0.03438 | 0.03336 | 0.03172 | 0.02269 | 0.03317 | 0.0316  | 0.03112 | 0.03253 | 0.03068 ZFAND1    |
| cg26258845 | 0.03121 | 0.03962 | 0.04018 | 0.03419 | 0.04382 | 0.04188 | 0.0333  | 0.05738 | 0.03273 | 0.03214 ADAM23    |
| cg26259363 | 0.87102 | 0.73606 | 0.83152 | 0.84381 | 0.37808 | 0.56672 | 0.18399 | 0.30948 | 0.50944 | 0.27819 DES       |
| cg26259575 | 0.02648 | 0.02342 | 0.02366 | 0.02425 | 0.02363 | 0.02712 | 0.02238 | 0.01839 | 0.02109 | 0.01986 TUBB      |
| cg26259610 | 0.04434 | 0.04818 | 0.0477  | 0.04454 | 0.0326  | 0.04717 | 0.0431  | 0.04013 | 0.04216 | 0.0393 PDAP1      |
| cg26259865 | 0.62986 | 0.55979 | 0.94227 | 0.93303 | 0.9237  | 0.80525 | 0.12765 | 0.21265 | 0.73163 | 0.56469 LOC124220 |
| cg26260201 | 0.02281 | 0.02329 | 0.02531 | 0.02302 | 0.01898 | 0.02201 | 0.02028 | 0.01931 | 0.01814 | 0.01865 PCSK4     |
| cg26260350 | 0.05213 | 0.05309 | 0.06729 | 0.07283 | 0.07723 | 0.06061 | 0.05541 | 0.0565  | 0.05742 | 0.06308 OTX1      |
| cg26261431 | 0.05531 | 0.05554 | 0.18738 | 0.23619 | 0.0877  | 0.04346 | 0.11489 | 0.08194 | 0.06996 | 0.05317 PBK       |
| cg26264314 | 0.15266 | 0.13753 | 0.56785 | 0.6163  | 0.20304 | 0.54058 | 0.57152 | 0.61581 | 0.14836 | 0.14356 NALP5     |
| cg26265060 | 0.0882  | 0.07646 | 0.09557 | 0.08487 | 0.08823 | 0.08263 | 0.07089 | 0.06757 | 0.06316 | 0.0641 SON        |
| cg26265187 | 0.91305 | 0.89374 | 0.88021 | 0.89926 | 0.87056 | 0.86455 | 0.8724  | 0.89311 | 0.89542 | 0.90179 USP52     |
| cg26266098 | 0.20763 | 0.21324 | 0.20974 | 0.21469 | 0.22482 | 0.18985 | 0.19744 | 0.18484 | 0.17679 | 0.18433 LZTS2     |
| cg26266326 | 0.7576  | 0.77152 | 0.68544 | 0.76526 | 0.64698 | 0.72658 | 0.66376 | 0.7528  | 0.66899 | 0.63837 GCG       |
| cg26267038 | 0.04572 | 0.04277 | 0.1215  | 0.53751 | 0.10458 | 0.04218 | 0.60791 | 0.5924  | 0.18214 | 0.30032 CNKSR2    |
| cg26267310 | 0.09254 | 0.03551 | 0.03805 | 0.03666 | 0.95261 | 0.58189 | 0.79822 | 0.81922 | 0.92101 | 0.87257 DHRS10    |
| cg26267341 | 0.02872 | 0.03428 | 0.03392 | 0.03283 | 0.02181 | 0.03359 | 0.02892 | 0.03319 | 0.03214 | 0.02448 BIRC5     |
| cg26267561 | 0.95114 | 0.95329 | 0.94663 | 0.96006 | 0.91562 | 0.93457 | 0.93634 | 0.94882 | 0.96611 | 0.94591 OXT       |
| cg26270746 | 0.07628 | 0.06174 | 0.55857 | 0.5392  | 0.06983 | 0.04438 | 0.13487 | 0.07237 | 0.05647 | 0.05196 GSH1      |
| cg26271255 | 0.03264 | 0.0397  | 0.03889 | 0.03314 | 0.0274  | 0.03569 | 0.03221 | 0.03426 | 0.03153 | 0.03211 ARHGAP12  |
| cg26272237 | 0.03828 | 0.03678 | 0.09384 | 0.03001 | 0.03246 | 0.02164 | 0.01953 | 0.01967 | 0.02141 | 0.01916 FLJ12118  |
| cg26276530 | 0.03542 | 0.03428 | 0.04282 | 0.03978 | 0.03781 | 0.02847 | 0.03182 | 0.03675 | 0.03388 | 0.02939 CMAS      |
| cg26277709 | 0.02757 | 0.03495 | 0.03538 | 0.03622 | 0.03227 | 0.03188 | 0.03004 | 0.03021 | 0.02762 | 0.02789 C9orf3    |
| cg26277809 | 0.04881 | 0.04303 | 0.06999 | 0.0639  | 0.0755  | 0.04492 | 0.04602 | 0.05585 | 0.04962 | 0.05822 M6PR      |
| cg26279025 | 0.51422 | 0.60256 | 0.0947  | 0.08381 | 0.55803 | 0.49432 | 0.08033 | 0.08815 | 0.43683 | 0.48148 IL11      |
| cg26282150 | 0.1441  | 0.14049 | 0.23249 | 0.21918 | 0.12543 | 0.11269 | 0.17431 | 0.15698 | 0.18997 | 0.21061 GNAI3     |
| cg26282384 | 0.22849 | 0.1664  | 0.28929 | 0.33496 | 0.82092 | 0.7823  | 0.89028 | 0.90887 | 0.30846 | 0.14928 PCDHGB4   |
| cg26284390 | 0.91453 | 0.90589 | 0.1457  | 0.12722 | 0.1759  | 0.11022 | 0.22247 | 0.19502 | 0.12027 | 0.12469 NFKBIZ    |
| cg26285698 | 0.95587 | 0.76337 | 0.95903 | 0.9622  | 0.97564 | 0.88528 | 0.43876 | 0.33981 | 0.81629 | 0.34134 C16orf54  |
| cg26286036 | 0.02914 | 0.02967 | 0.0291  | 0.02854 | 0.0235  | 0.03249 | 0.03113 | 0.02909 | 0.022   | 0.02767 UBE2L3    |
| cg26287783 | 0.03582 | 0.03991 | 0.03974 | 0.05135 | 0.02367 | 0.04982 | 0.03418 | 0.04058 | 0.03138 | 0.03421 C6orf64   |
| cg26287988 | 0.8895  | 0.88587 | 0.90371 | 0.90482 | 0.84187 | 0.81467 | 0.86911 | 0.89947 | 0.40448 | 0.35763 BAGE      |
| cg26288160 | 0.04654 | 0.03676 | 0.04001 | 0.04601 | 0.0383  | 0.22972 | 0.03094 | 0.03305 | 0.03579 | 0.02539 C1orf56   |
| cg26289824 | 0.02968 | 0.03583 | 0.03998 | 0.03571 | 0.02785 | 0.0313  | 0.03097 | 0.03208 | 0.02698 | 0.0242 KBTBD3     |

|            |         |         |         |         |         |         |         |         |         |                  |
|------------|---------|---------|---------|---------|---------|---------|---------|---------|---------|------------------|
| cg26289880 | 0.04916 | 0.05401 | 0.06625 | 0.05298 | 0.03505 | 0.04678 | 0.05627 | 0.04656 | 0.04488 | 0.04444 C21orf45 |
| cg26292028 | 0.75932 | 0.41344 | 0.85903 | 0.89789 | 0.92948 | 0.89458 | 0.86487 | 0.78982 | 0.90774 | 0.86323 FLJ37587 |
| cg26292864 | 0.03999 | 0.04045 | 0.04578 | 0.03515 | 0.04714 | 0.03844 | 0.03942 | 0.03844 | 0.0411  | 0.03506 ITM2C    |
| cg26293512 | 0.68046 | 0.62259 | 0.56448 | 0.71332 | 0.75587 | 0.43015 | 0.47417 | 0.34366 | 0.27922 | 0.2396 TEPP      |
| cg26294551 | 0.86608 | 0.85985 | 0.84674 | 0.86594 | 0.89015 | 0.84945 | 0.84249 | 0.87952 | 0.88921 | 0.87563 GP5      |
| cg26294850 | 0.15654 | 0.05566 | 0.28357 | 0.39187 | 0.5994  | 0.4818  | 0.07665 | 0.05467 | 0.07077 | 0.04101 TSPAN1   |
| cg26295990 | 0.03388 | 0.03687 | 0.03818 | 0.03583 | 0.0228  | 0.03378 | 0.03004 | 0.03095 | 0.02886 | 0.03202 FLJ23436 |
| cg26297688 | 0.06108 | 0.04811 | 0.05887 | 0.05443 | 0.07174 | 0.05841 | 0.04635 | 0.05335 | 0.05008 | 0.04753 C12orf23 |
| cg26298099 | 0.86723 | 0.86317 | 0.63961 | 0.62378 | 0.89806 | 0.8473  | 0.06645 | 0.09751 | 0.86835 | 0.76501 ESRRB    |
| cg26299767 | 0.11135 | 0.06996 | 0.47162 | 0.50385 | 0.70877 | 0.45584 | 0.09578 | 0.07335 | 0.07029 | 0.06179 REM1     |
| cg26301689 | 0.97918 | 0.9742  | 0.97712 | 0.98147 | 0.9846  | 0.98017 | 0.98148 | 0.98238 | 0.98182 | 0.98364 PAQR9    |
| cg26301777 | 0.90021 | 0.85003 | 0.86671 | 0.88541 | 0.86879 | 0.82103 | 0.87785 | 0.88015 | 0.89071 | 0.87519 NARG1L   |
| cg26301908 | 0.09541 | 0.05343 | 0.05834 | 0.09763 | 0.08328 | 0.03343 | 0.03847 | 0.04598 | 0.04348 | 0.0355 SOCS1     |
| cg26303908 | 0.07776 | 0.07569 | 0.06897 | 0.05816 | 0.10577 | 0.10097 | 0.0567  | 0.05244 | 0.06557 | 0.06278 GNPDA2   |
| cg26304237 | 0.07987 | 0.0384  | 0.06756 | 0.08279 | 0.08525 | 0.06357 | 0.04546 | 0.03823 | 0.05421 | 0.04912 DNAJC6   |
| cg26306976 | 0.89    | 0.67694 | 0.82384 | 0.86237 | 0.89592 | 0.86384 | 0.87178 | 0.85083 | 0.90779 | 0.85268 ITGB1BP1 |
| cg26309134 | 0.03965 | 0.04104 | 0.96557 | 0.96736 | 0.2323  | 0.6509  | 0.08079 | 0.03577 | 0.02719 | 0.02686 ZNF542   |
| cg26309498 | 0.70425 | 0.24927 | 0.64558 | 0.75063 | 0.78046 | 0.80462 | 0.27508 | 0.29323 | 0.43398 | 0.4053 EDAR      |
| cg26309951 | 0.03548 | 0.04547 | 0.05086 | 0.04929 | 0.0352  | 0.03979 | 0.09963 | 0.13564 | 0.03928 | 0.03792 MORF4L2  |
| cg26312150 | 0.04805 | 0.04444 | 0.05095 | 0.0434  | 0.04532 | 0.04602 | 0.05057 | 0.05387 | 0.05625 | 0.03847 TWIST1   |
| cg26312920 | 0.69273 | 0.29935 | 0.21893 | 0.18552 | 0.22591 | 0.15516 | 0.16007 | 0.14289 | 0.09776 | 0.14436 NEUROD6  |
| cg26314781 | 0.15303 | 0.13835 | 0.14322 | 0.13126 | 0.20289 | 0.1625  | 0.11717 | 0.11795 | 0.12853 | 0.11593 BTN3A2   |
| cg26315493 | 0.07468 | 0.06385 | 0.06492 | 0.06636 | 0.13918 | 0.089   | 0.07111 | 0.07238 | 0.04294 | 0.04254 VCP      |
| cg26315802 | 0.11494 | 0.11593 | 0.11118 | 0.11763 | 0.08296 | 0.11104 | 0.10938 | 0.09981 | 0.10594 | 0.10252 TAPBP    |
| cg26316946 | 0.90352 | 0.92561 | 0.42294 | 0.4078  | 0.92388 | 0.92149 | 0.90384 | 0.91928 | 0.74134 | 0.7374 GRIK2     |
| cg26317056 | 0.03034 | 0.02966 | 0.03097 | 0.02599 | 0.01908 | 0.02431 | 0.02423 | 0.02637 | 0.02971 | 0.0234 NNT       |
| cg26317111 | 0.94348 | 0.91712 | 0.94393 | 0.9548  | 0.95906 | 0.94155 | 0.95073 | 0.95218 | 0.93539 | 0.90192 UBE2U    |
| cg26320696 | 0.03628 | 0.02869 | 0.03149 | 0.02773 | 0.02413 | 0.02619 | 0.02688 | 0.02676 | 0.02344 | 0.02284 PARVA    |
| cg26322315 | 0.75819 | 0.42071 | 0.35717 | 0.3923  | 0.39023 | 0.3211  | 0.26313 | 0.27366 | 0.29614 | 0.29889 RPA3     |
| cg26323655 | 0.57829 | 0.15069 | 0.52404 | 0.67023 | 0.63851 | 0.22034 | 0.34363 | 0.15475 | 0.46005 | 0.29332 FSBP     |
| cg26324201 | 0.06967 | 0.05972 | 0.06582 | 0.0644  | 0.07328 | 0.06195 | 0.06075 | 0.06313 | 0.0468  | 0.04226 CDK7     |
| cg26324973 | 0.02579 | 0.03092 | 0.02762 | 0.02644 | 0.02113 | 0.02688 | 0.0252  | 0.02329 | 0.02168 | 0.02316 MAP3K3   |
| cg26328002 | 0.06263 | 0.07071 | 0.1461  | 0.12676 | 0.18567 | 0.11738 | 0.08547 | 0.11647 | 0.11829 | 0.10869 APCDD1   |
| cg26328611 | 0.12618 | 0.1473  | 0.54235 | 0.56594 | 0.4472  | 0.39536 | 0.22345 | 0.09885 | 0.20927 | 0.17115 EDA2R    |
| cg26330371 | 0.10814 | 0.11405 | 0.10598 | 0.09424 | 0.06487 | 0.08564 | 0.06675 | 0.08667 | 0.08058 | 0.06848 LMAN1    |
| cg26331192 | 0.03778 | 0.03719 | 0.05134 | 0.04077 | 0.0556  | 0.05486 | 0.02639 | 0.02719 | 0.02438 | 0.02306 GMNN     |
| cg26331247 | 0.13696 | 0.04739 | 0.30286 | 0.33574 | 0.68464 | 0.55557 | 0.23079 | 0.30011 | 0.21944 | 0.05635 FLJ33706 |
| cg26332534 | 0.09454 | 0.09183 | 0.09687 | 0.09407 | 0.10936 | 0.09702 | 0.07652 | 0.07735 | 0.07143 | 0.07785 HTR7     |
| cg26333317 | 0.18869 | 0.17304 | 0.57997 | 0.63193 | 0.70612 | 0.23805 | 0.62845 | 0.07613 | 0.26054 | 0.40806 METTL7A  |
| cg26333591 | 0.42011 | 0.09081 | 0.04285 | 0.04487 | 0.0567  | 0.0403  | 0.04252 | 0.03603 | 0.0594  | 0.03406 PTPN4    |
| cg26333641 | 0.35469 | 0.14878 | 0.7214  | 0.80746 | 0.67812 | 0.83383 | 0.72459 | 0.47251 | 0.53409 | 0.76878 IL22     |

|            |         |         |         |         |         |         |         |         |         |                    |
|------------|---------|---------|---------|---------|---------|---------|---------|---------|---------|--------------------|
| cg26335299 | 0.25668 | 0.05005 | 0.05726 | 0.05185 | 0.38605 | 0.03393 | 0.07214 | 0.03208 | 0.32765 | 0.028 C16orf48     |
| cg26336164 | 0.02174 | 0.02313 | 0.02238 | 0.02361 | 0.02185 | 0.02437 | 0.02198 | 0.01815 | 0.01647 | 0.01733 FEM1A      |
| cg26336277 | 0.08336 | 0.08234 | 0.09111 | 0.0808  | 0.11093 | 0.06519 | 0.10317 | 0.07703 | 0.07473 | 0.07135 FYTTD1     |
| cg26339797 | 0.05563 | 0.04953 | 0.07141 | 0.06091 | 0.0953  | 0.06854 | 0.03901 | 0.03365 | 0.05643 | 0.06796 DBT        |
| cg26344532 | 0.03268 | 0.03812 | 0.03105 | 0.03054 | 0.03602 | 0.02774 | 0.16667 | 0.05119 | 0.03188 | 0.02579 IPF1       |
| cg26347745 | 0.04435 | 0.04718 | 0.04915 | 0.04484 | 0.03515 | 0.04123 | 0.04617 | 0.05013 | 0.04236 | 0.0387 IFT122      |
| cg26349773 | 0.16453 | 0.04836 | 0.87114 | 0.90892 | 0.93684 | 0.90271 | 0.37352 | 0.12838 | 0.13256 | 0.07399 ATP6V0A4   |
| cg26350286 | 0.04952 | 0.05325 | 0.15364 | 0.3413  | 0.31903 | 0.35139 | 0.04343 | 0.05267 | 0.04783 | 0.04659 RBM35A     |
| cg26350691 | 0.0863  | 0.08838 | 0.06987 | 0.07662 | 0.08352 | 0.06799 | 0.07146 | 0.06533 | 0.05962 | 0.06597 ZNF646     |
| cg26352374 | 0.02503 | 0.02339 | 0.02473 | 0.02408 | 0.01961 | 0.02267 | 0.02257 | 0.02351 | 0.01958 | 0.02021 MGC10992   |
| cg26353877 | 0.13282 | 0.27459 | 0.83931 | 0.89854 | 0.09805 | 0.07344 | 0.52838 | 0.33565 | 0.46422 | 0.39738 APCS       |
| cg26354238 | 0.07499 | 0.05616 | 0.08705 | 0.08365 | 0.10827 | 0.06408 | 0.05497 | 0.04824 | 0.10877 | 0.06465 RQCD1      |
| cg26354398 | 0.73492 | 0.6834  | 0.78526 | 0.86411 | 0.85759 | 0.5559  | 0.34543 | 0.49598 | 0.30901 | 0.1403 RGS3        |
| cg26354413 | 0.04704 | 0.05198 | 0.0545  | 0.04707 | 0.03324 | 0.04755 | 0.04482 | 0.04448 | 0.0399  | 0.04202 SUV39H2    |
| cg26356176 | 0.0616  | 0.06564 | 0.06985 | 0.06363 | 0.05863 | 0.05946 | 0.06098 | 0.06231 | 0.05571 | 0.05564 SNAG1      |
| cg26357241 | 0.05739 | 0.05371 | 0.07762 | 0.07135 | 0.05003 | 0.04876 | 0.05864 | 0.05485 | 0.06644 | 0.04498 STXPB3     |
| cg26357453 | 0.08089 | 0.07388 | 0.09118 | 0.08413 | 0.21072 | 0.13786 | 0.12342 | 0.10172 | 0.07762 | 0.09695 DHRS7B     |
| cg26357744 | 0.04904 | 0.0502  | 0.05693 | 0.05501 | 0.05806 | 0.05476 | 0.04451 | 0.04332 | 0.05267 | 0.04294 RASSF1     |
| cg26358059 | 0.02504 | 0.01936 | 0.02313 | 0.02113 | 0.01828 | 0.01942 | 0.01618 | 0.01904 | 0.01812 | 0.01692 GSTO1      |
| cg26358246 | 0.04795 | 0.04986 | 0.04502 | 0.0462  | 0.02827 | 0.0427  | 0.03991 | 0.0426  | 0.03838 | 0.04051 TMEM60     |
| cg26359204 | 0.03755 | 0.04089 | 0.04555 | 0.03786 | 0.04111 | 0.04753 | 0.03094 | 0.03208 | 0.03251 | 0.02981 NKX6-1     |
| cg26359240 | 0.17885 | 0.10438 | 0.8548  | 0.87349 | 0.86157 | 0.89501 | 0.12163 | 0.0856  | 0.51043 | 0.61872 HSDL1      |
| cg26360732 | 0.09098 | 0.06434 | 0.08926 | 0.10015 | 0.06585 | 0.08808 | 0.06686 | 0.06794 | 0.07996 | 0.07102 PPP1R2     |
| cg26361780 | 0.45695 | 0.16517 | 0.8196  | 0.85215 | 0.82862 | 0.85317 | 0.71707 | 0.83484 | 0.8178  | 0.79886 CPB1       |
| cg26361928 | 0.03312 | 0.04223 | 0.03002 | 0.02887 | 0.02655 | 0.03108 | 0.03286 | 0.03499 | 0.0289  | 0.03158 G3BP       |
| cg26363196 | 0.09288 | 0.05803 | 0.59629 | 0.67142 | 0.33359 | 0.05235 | 0.06634 | 0.06883 | 0.13798 | 0.04232 ST6GALNAC3 |
| cg26365553 | 0.02933 | 0.03216 | 0.03538 | 0.03489 | 0.82354 | 0.33025 | 0.03436 | 0.0397  | 0.02508 | 0.02839 MADD       |
| cg26365668 | 0.24865 | 0.33105 | 0.49891 | 0.71467 | 0.8531  | 0.85159 | 0.39106 | 0.15594 | 0.59632 | 0.55115 MRPS18C    |
| cg26365854 | 0.04535 | 0.04136 | 0.04375 | 0.03846 | 0.06039 | 0.04131 | 0.04228 | 0.04671 | 0.04576 | 0.03493 ALX4       |
| cg26366091 | 0.15524 | 0.09314 | 0.55769 | 0.6156  | 0.24227 | 0.20275 | 0.58542 | 0.30687 | 0.37556 | 0.1972 CHI3L2      |
| cg26368842 | 0.93942 | 0.91443 | 0.93357 | 0.93405 | 0.86796 | 0.84866 | 0.90588 | 0.84899 | 0.90513 | 0.7578 PIP5K2A     |
| cg26369642 | 0.78264 | 0.71695 | 0.79666 | 0.83456 | 0.84536 | 0.85122 | 0.36976 | 0.17492 | 0.1412  | 0.50685 C8orf72    |
| cg26369667 | 0.01454 | 0.01938 | 0.01806 | 0.01398 | 0.01706 | 0.01498 | 0.01603 | 0.01729 | 0.01331 | 0.01136 YAP1       |
| cg26371206 | 0.0544  | 0.03301 | 0.04767 | 0.03991 | 0.03283 | 0.02734 | 0.02806 | 0.03496 | 0.03594 | 0.02398 BFSP1      |
| cg26372517 | 0.31549 | 0.03792 | 0.04062 | 0.03756 | 0.40225 | 0.62423 | 0.08358 | 0.0467  | 0.09276 | 0.03156 TFAP2E     |
| cg26372557 | 0.95633 | 0.95052 | 0.94568 | 0.95429 | 0.91772 | 0.94432 | 0.94801 | 0.95432 | 0.95968 | 0.96802 TICAM1     |
| cg26374101 | 0.04554 | 0.09608 | 0.11711 | 0.11481 | 0.48834 | 0.16601 | 0.05043 | 0.03444 | 0.05652 | 0.02416 ARRDC1     |
| cg26376809 | 0.0159  | 0.01586 | 0.01562 | 0.01431 | 0.01243 | 0.01367 | 0.01333 | 0.01286 | 0.01427 | 0.0141 USP13       |
| cg26377677 | 0.85842 | 0.7545  | 0.84351 | 0.89426 | 0.8982  | 0.73821 | 0.79295 | 0.78157 | 0.90266 | 0.74884 FURIN      |
| cg26379475 | 0.59952 | 0.48152 | 0.71125 | 0.81889 | 0.70886 | 0.43781 | 0.20241 | 0.10791 | 0.60295 | 0.2152 SH2D1B      |
| cg26380756 | 0.01526 | 0.01717 | 0.01681 | 0.01708 | 0.01733 | 0.0162  | 0.01455 | 0.01419 | 0.01531 | 0.01449 JOSD1      |

|            |         |         |         |         |         |         |         |         |         |                  |
|------------|---------|---------|---------|---------|---------|---------|---------|---------|---------|------------------|
| cg26381263 | 0.79929 | 0.8262  | 0.78599 | 0.8166  | 0.74223 | 0.80874 | 0.77699 | 0.8069  | 0.82441 | 0.77117 PPP2R2D  |
| cg26381783 | 0.05797 | 0.04283 | 0.6189  | 0.70208 | 0.03489 | 0.03545 | 0.47158 | 0.52274 | 0.38571 | 0.44326 ANKRD15  |
| cg26382071 | 0.03545 | 0.03926 | 0.03644 | 0.03376 | 0.03881 | 0.03345 | 0.04525 | 0.03902 | 0.04007 | 0.03773 TXNL5    |
| cg26384034 | 0.15423 | 0.10939 | 0.09353 | 0.06954 | 0.04634 | 0.043   | 0.05915 | 0.0377  | 0.05251 | 0.05676 C6orf117 |
| cg26385222 | 0.93642 | 0.92536 | 0.91331 | 0.93646 | 0.94832 | 0.91031 | 0.10583 | 0.06    | 0.62961 | 0.07614 HCA112   |
| cg26385286 | 0.83874 | 0.68807 | 0.74318 | 0.83033 | 0.84429 | 0.64801 | 0.2059  | 0.10795 | 0.82462 | 0.82019 GCNT2    |
| cg26385743 | 0.51245 | 0.04575 | 0.79014 | 0.74468 | 0.65909 | 0.05219 | 0.94201 | 0.29115 | 0.95918 | 0.72056 IMP4     |
| cg26387998 | 0.04106 | 0.04411 | 0.05259 | 0.04793 | 0.0424  | 0.04432 | 0.03442 | 0.03477 | 0.03653 | 0.04094 HELZ     |
| cg26388152 | 0.03995 | 0.03573 | 0.53191 | 0.66713 | 0.53919 | 0.57826 | 0.70923 | 0.62552 | 0.67542 | 0.61656 CORO6    |
| cg26389232 | 0.58595 | 0.62075 | 0.72056 | 0.8224  | 0.66886 | 0.47709 | 0.44774 | 0.4906  | 0.91553 | 0.90955 PWCR1    |
| cg26390526 | 0.75154 | 0.85798 | 0.57855 | 0.81372 | 0.56085 | 0.62435 | 0.86755 | 0.90698 | 0.49303 | 0.4091 FLG       |
| cg26391080 | 0.74577 | 0.09572 | 0.88986 | 0.89249 | 0.79159 | 0.82085 | 0.83705 | 0.77695 | 0.67011 | 0.45197 SH2D4B   |
| cg26392924 | 0.18724 | 0.10494 | 0.12508 | 0.1945  | 0.2933  | 0.35975 | 0.12513 | 0.10571 | 0.06757 | 0.03131 SLC23A1  |
| cg26393983 | 0.03678 | 0.03673 | 0.03563 | 0.03217 | 0.02258 | 0.0282  | 0.0291  | 0.03091 | 0.02966 | 0.02707 KNTC2    |
| cg26394380 | 0.39881 | 0.10303 | 0.25466 | 0.20076 | 0.13931 | 0.11775 | 0.27422 | 0.32112 | 0.39607 | 0.28205 SFTPb    |
| cg26394737 | 0.07808 | 0.0692  | 0.06708 | 0.06193 | 0.06571 | 0.07132 | 0.05598 | 0.05527 | 0.05227 | 0.05929 ABHD4    |
| cg26394940 | 0.04624 | 0.04005 | 0.09311 | 0.05722 | 0.04787 | 0.04166 | 0.07472 | 0.04308 | 0.04829 | 0.04689 FLJ10945 |
| cg26399035 | 0.63363 | 0.62196 | 0.66179 | 0.6435  | 0.56807 | 0.43658 | 0.70096 | 0.42713 | 0.23739 | 0.16506 THUMPd1  |
| cg26399113 | 0.07788 | 0.04937 | 0.07204 | 0.07842 | 0.06693 | 0.0663  | 0.27438 | 0.42671 | 0.05263 | 0.0539 OGT       |
| cg26399201 | 0.06247 | 0.03832 | 0.19591 | 0.13206 | 0.47375 | 0.03391 | 0.23134 | 0.06346 | 0.55469 | 0.25691 ANKRD43  |
| cg26401870 | 0.4601  | 0.32123 | 0.85166 | 0.90002 | 0.92218 | 0.88989 | 0.78123 | 0.88542 | 0.92494 | 0.88348 NPM2     |
| cg26402828 | 0.05018 | 0.05059 | 0.04961 | 0.0516  | 0.03874 | 0.04657 | 0.04642 | 0.05406 | 0.04393 | 0.04885 PCK2     |
| cg26403198 | 0.02778 | 0.0297  | 0.03739 | 0.03817 | 0.03661 | 0.0321  | 0.02536 | 0.02573 | 0.03321 | 0.02675 FBXL6    |
| cg26404725 | 0.79951 | 0.85853 | 0.85008 | 0.84934 | 0.83251 | 0.68737 | 0.81953 | 0.78904 | 0.70698 | 0.65562 CYP26C1  |
| cg26406994 | 0.05274 | 0.05963 | 0.06077 | 0.05973 | 0.04493 | 0.05078 | 0.05082 | 0.05334 | 0.04451 | 0.0492 RAP1GDS1  |
| cg26408003 | 0.90332 | 0.92207 | 0.91866 | 0.92347 | 0.89386 | 0.90106 | 0.92221 | 0.87526 | 0.92239 | 0.8853 C14orf94  |
| cg26408937 | 0.03704 | 0.03963 | 0.04403 | 0.04218 | 0.0337  | 0.03371 | 0.03884 | 0.03891 | 0.03383 | 0.03054 DDB2     |
| cg26409237 | 0.4512  | 0.0856  | 0.57143 | 0.58966 | 0.62093 | 0.44806 | 0.12778 | 0.06937 | 0.78345 | 0.53022 SLC2A9   |
| cg26410550 | 0.49959 | 0.53681 | 0.49215 | 0.51848 | 0.55031 | 0.29273 | 0.39711 | 0.4127  | 0.65212 | 0.65773 HBII-13  |
| cg26411702 | 0.35643 | 0.08744 | 0.9353  | 0.94878 | 0.96363 | 0.89952 | 0.5932  | 0.13106 | 0.94689 | 0.93426 NPM2     |
| cg26412379 | 0.63711 | 0.60366 | 0.34783 | 0.40388 | 0.29304 | 0.1978  | 0.15669 | 0.15604 | 0.21699 | 0.36064 NLGN4X   |
| cg26413355 | 0.13451 | 0.04996 | 0.09055 | 0.06878 | 0.17915 | 0.05156 | 0.08133 | 0.04802 | 0.03676 | 0.03238 UNQ9217  |
| cg26413827 | 0.14517 | 0.16883 | 0.24938 | 0.20857 | 0.28183 | 0.21982 | 0.17707 | 0.14032 | 0.27017 | 0.2837 DACH1     |
| cg26414720 | 0.77164 | 0.47782 | 0.66686 | 0.84993 | 0.19215 | 0.16158 | 0.4228  | 0.42265 | 0.11921 | 0.08302 MAGEA1   |
| cg26414731 | 0.6493  | 0.37181 | 0.77704 | 0.83488 | 0.60987 | 0.60713 | 0.56167 | 0.59156 | 0.62315 | 0.31761 PSMF1    |
| cg26415633 | 0.50263 | 0.17451 | 0.20818 | 0.46856 | 0.19125 | 0.18925 | 0.0509  | 0.03607 | 0.03794 | 0.04016 KLK1     |
| cg26415655 | 0.62527 | 0.34986 | 0.50804 | 0.53072 | 0.54455 | 0.63063 | 0.49654 | 0.64438 | 0.70492 | 0.64282 IL31RA   |
| cg26416466 | 0.39223 | 0.3008  | 0.86636 | 0.92232 | 0.95229 | 0.88047 | 0.19563 | 0.1651  | 0.23365 | 0.29105 MEGF11   |
| cg26417554 | 0.87675 | 0.72024 | 0.84827 | 0.84436 | 0.78545 | 0.65654 | 0.70503 | 0.66471 | 0.17468 | 0.11945 RPUSD3   |
| cg26418544 | 0.32882 | 0.36933 | 0.38613 | 0.36228 | 0.44245 | 0.36958 | 0.29827 | 0.3547  | 0.33616 | 0.35486 USP26    |
| cg26420196 | 0.11116 | 0.03668 | 0.03794 | 0.05102 | 0.03047 | 0.04229 | 0.49286 | 0.27777 | 0.95484 | 0.94458 GAS6     |

|            |         |         |         |         |         |         |         |         |         |         |          |
|------------|---------|---------|---------|---------|---------|---------|---------|---------|---------|---------|----------|
| cg26421123 | 0.03929 | 0.03565 | 0.05    | 0.04155 | 0.04936 | 0.06187 | 0.03143 | 0.03214 | 0.04434 | 0.03706 | COMMD5   |
| cg26422060 | 0.86528 | 0.12117 | 0.91341 | 0.94459 | 0.88246 | 0.7772  | 0.80095 | 0.47785 | 0.72922 | 0.32571 | TBX10    |
| cg26422832 | 0.19498 | 0.12395 | 0.52216 | 0.6067  | 0.22634 | 0.16621 | 0.13243 | 0.10499 | 0.16102 | 0.08752 | MKRN1    |
| cg26424013 | 0.01563 | 0.0135  | 0.01512 | 0.01379 | 0.00978 | 0.01265 | 0.01103 | 0.01273 | 0.01051 | 0.01341 | DCUN1D3  |
| cg26424956 | 0.16621 | 0.0506  | 0.45618 | 0.42514 | 0.74007 | 0.86819 | 0.04373 | 0.04928 | 0.2796  | 0.26046 | GRM4     |
| cg26426223 | 0.06261 | 0.05536 | 0.08326 | 0.12767 | 0.09077 | 0.05764 | 0.0435  | 0.04555 | 0.06045 | 0.04983 | NICN1    |
| cg26426582 | 0.84677 | 0.83419 | 0.83117 | 0.86572 | 0.87663 | 0.84993 | 0.79712 | 0.82347 | 0.77522 | 0.80095 | TRIM60   |
| cg26427308 | 0.95173 | 0.68745 | 0.9668  | 0.96998 | 0.97849 | 0.95935 | 0.9448  | 0.86627 | 0.97121 | 0.94419 | PRLH     |
| cg26428825 | 0.80772 | 0.80957 | 0.86015 | 0.87861 | 0.83844 | 0.85364 | 0.85264 | 0.86336 | 0.8831  | 0.86411 | KCNV2    |
| cg26430450 | 0.03859 | 0.0373  | 0.04497 | 0.04231 | 0.0485  | 0.05026 | 0.0285  | 0.03026 | 0.0328  | 0.03796 | RAB23    |
| cg26431343 | 0.36862 | 0.29031 | 0.37799 | 0.51581 | 0.16325 | 0.36463 | 0.17796 | 0.10838 | 0.29155 | 0.27025 | HSPC117  |
| cg26436158 | 0.03486 | 0.0365  | 0.03964 | 0.03355 | 0.03005 | 0.04328 | 0.03182 | 0.02963 | 0.03297 | 0.02963 | SEC6L1   |
| cg26436315 | 0.90261 | 0.86653 | 0.0496  | 0.04503 | 0.70482 | 0.48343 | 0.02687 | 0.02783 | 0.03541 | 0.0342  | KLF15    |
| cg26443244 | 0.54461 | 0.39913 | 0.6152  | 0.63726 | 0.5728  | 0.62977 | 0.57316 | 0.62335 | 0.63392 | 0.66123 | GDPD4    |
| cg26446827 | 0.06335 | 0.06599 | 0.06244 | 0.05512 | 0.03332 | 0.04766 | 0.04261 | 0.05004 | 0.05844 | 0.06192 | ZNF133   |
| cg26449836 | 0.03412 | 0.03767 | 0.0892  | 0.05878 | 0.10903 | 0.08426 | 0.04735 | 0.04094 | 0.03275 | 0.03313 | SSBP1    |
| cg26450541 | 0.08715 | 0.09606 | 0.10079 | 0.0847  | 0.14964 | 0.1451  | 0.07602 | 0.05906 | 0.05679 | 0.07248 | ZNF187   |
| cg26450769 | 0.04897 | 0.04998 | 0.04667 | 0.04752 | 0.04441 | 0.05491 | 0.047   | 0.045   | 0.0422  | 0.0433  | FAM14B   |
| cg26450866 | 0.03213 | 0.03185 | 0.19817 | 0.45245 | 0.42272 | 0.62804 | 0.24144 | 0.02596 | 0.42502 | 0.13131 | KCNA7    |
| cg26451923 | 0.07569 | 0.08283 | 0.08099 | 0.07895 | 0.06277 | 0.07222 | 0.06901 | 0.07295 | 0.06819 | 0.06417 | NUDT5    |
| cg26453588 | 0.35429 | 0.47426 | 0.88092 | 0.88557 | 0.79409 | 0.87636 | 0.27991 | 0.05282 | 0.05906 | 0.0377  | BIK      |
| cg26453670 | 0.34875 | 0.03814 | 0.56881 | 0.60398 | 0.46538 | 0.1797  | 0.30159 | 0.07136 | 0.10308 | 0.03523 | RNPC1    |
| cg26453990 | 0.03403 | 0.03117 | 0.04675 | 0.05217 | 0.05243 | 0.02668 | 0.02937 | 0.03082 | 0.04832 | 0.02726 | FIBP     |
| cg26454191 | 0.04093 | 0.03986 | 0.04136 | 0.04252 | 0.03704 | 0.04951 | 0.03926 | 0.03566 | 0.04291 | 0.03152 | PMS1     |
| cg26454299 | 0.03895 | 0.03952 | 0.04141 | 0.03996 | 0.03415 | 0.03886 | 0.03441 | 0.03649 | 0.0352  | 0.03058 | PPP3CA   |
| cg26456957 | 0.05164 | 0.06026 | 0.04787 | 0.05775 | 0.05534 | 0.04925 | 0.04307 | 0.04375 | 0.04169 | 0.04332 | PPP1R12C |
| cg26457013 | 0.94065 | 0.64063 | 0.93297 | 0.94205 | 0.97127 | 0.75617 | 0.92396 | 0.83499 | 0.80932 | 0.74324 | TMEM86B  |
| cg26459500 | 0.74554 | 0.8712  | 0.08502 | 0.08766 | 0.06887 | 0.07883 | 0.0746  | 0.0728  | 0.07829 | 0.07753 | NUDT16   |
| cg26461352 | 0.04302 | 0.06215 | 0.14485 | 0.14407 | 0.09868 | 0.13721 | 0.08345 | 0.03684 | 0.06481 | 0.03371 | TIMM8A   |
| cg26461637 | 0.02553 | 0.02655 | 0.03281 | 0.04078 | 0.01953 | 0.0232  | 0.01956 | 0.02476 | 0.02218 | 0.02005 | FAS      |
| cg26464596 | 0.03538 | 0.0375  | 0.03887 | 0.03832 | 0.02479 | 0.02901 | 0.03113 | 0.03051 | 0.02972 | 0.027   | RDH10    |
| cg26465611 | 0.92887 | 0.91002 | 0.9367  | 0.94317 | 0.95449 | 0.02388 | 0.61146 | 0.02441 | 0.38773 | 0.34898 | MEGF10   |
| cg26465666 | 0.56573 | 0.57307 | 0.6187  | 0.64403 | 0.63831 | 0.69434 | 0.64679 | 0.71788 | 0.65888 | 0.50199 | PDE1A    |
| cg26466094 | 0.03706 | 0.03744 | 0.03939 | 0.03793 | 0.0311  | 0.03551 | 0.02955 | 0.03199 | 0.06678 | 0.06344 | AK5      |
| cg26466858 | 0.38589 | 0.16538 | 0.5294  | 0.56298 | 0.47962 | 0.1896  | 0.49971 | 0.45315 | 0.10489 | 0.07696 | LCE3A    |
| cg26470338 | 0.70385 | 0.72159 | 0.71759 | 0.72043 | 0.60503 | 0.72923 | 0.69011 | 0.74751 | 0.80412 | 0.79048 | ARSB     |
| cg26471020 | 0.04191 | 0.04709 | 0.05217 | 0.04943 | 0.05909 | 0.06355 | 0.04259 | 0.0394  | 0.03435 | 0.03188 | MOSPD3   |
| cg26471445 | 0.0247  | 0.03009 | 0.02819 | 0.0286  | 0.01848 | 0.01858 | 0.02479 | 0.02555 | 0.01999 | 0.02446 | GBA2     |
| cg26473272 | 0.3972  | 0.11133 | 0.88381 | 0.92781 | 0.95497 | 0.89891 | 0.89474 | 0.62446 | 0.64605 | 0.26153 | SYT8     |
| cg26475085 | 0.11184 | 0.024   | 0.0239  | 0.02422 | 0.02375 | 0.02702 | 0.02093 | 0.01884 | 0.01928 | 0.01989 | OSMR     |
| cg26475097 | 0.03812 | 0.04719 | 0.04613 | 0.04538 | 0.05685 | 0.047   | 0.03322 | 0.03008 | 0.03791 | 0.03889 | QRICH1   |

|            |         |         |         |         |         |         |         |         |         |         |           |
|------------|---------|---------|---------|---------|---------|---------|---------|---------|---------|---------|-----------|
| cg26477793 | 0.07465 | 0.02824 | 0.03303 | 0.03125 | 0.02474 | 0.08258 | 0.02584 | 0.02581 | 0.02897 | 0.02454 | ACTR1A    |
| cg26478074 | 0.02811 | 0.02911 | 0.0314  | 0.06405 | 0.01979 | 0.03024 | 0.02883 | 0.02693 | 0.02555 | 0.0264  | HSD17B12  |
| cg26478992 | 0.86455 | 0.81881 | 0.85791 | 0.86756 | 0.85295 | 0.77312 | 0.86396 | 0.86592 | 0.88636 | 0.59534 | ASPN      |
| cg26482939 | 0.89224 | 0.86748 | 0.89136 | 0.90536 | 0.84635 | 0.86559 | 0.84938 | 0.85788 | 0.91768 | 0.85499 | GNA15     |
| cg26484333 | 0.05425 | 0.04971 | 0.05051 | 0.04467 | 0.08297 | 0.07022 | 0.04695 | 0.03816 | 0.04486 | 0.05974 | TMEM34    |
| cg26486663 | 0.26348 | 0.31109 | 0.79887 | 0.75214 | 0.78293 | 0.55607 | 0.38692 | 0.4716  | 0.86931 | 0.67909 | SYNGR3    |
| cg26486702 | 0.0926  | 0.10288 | 0.09007 | 0.10499 | 0.05434 | 0.08869 | 0.09479 | 0.09545 | 0.13491 | 0.0849  | USP21     |
| cg26488636 | 0.07658 | 0.04476 | 0.0884  | 0.06087 | 0.55016 | 0.05313 | 0.04389 | 0.04101 | 0.05964 | 0.03682 | TALDO1    |
| cg26489108 | 0.32635 | 0.16748 | 0.62329 | 0.67716 | 0.86888 | 0.84862 | 0.78007 | 0.73893 | 0.62655 | 0.57045 | DMRT3     |
| cg26490372 | 0.76246 | 0.19477 | 0.56084 | 0.61332 | 0.62541 | 0.20247 | 0.65362 | 0.42526 | 0.72238 | 0.2169  | TATDN1    |
| cg26490839 | 0.04999 | 0.05042 | 0.04786 | 0.05035 | 0.03783 | 0.04101 | 0.04625 | 0.04994 | 0.04289 | 0.04293 | RPS11     |
| cg26491213 | 0.36957 | 0.07647 | 0.5151  | 0.7742  | 0.40512 | 0.31463 | 0.04776 | 0.03674 | 0.30059 | 0.23393 | SIX3      |
| cg26491425 | 0.05831 | 0.05495 | 0.07338 | 0.06349 | 0.20756 | 0.071   | 0.09609 | 0.05921 | 0.09065 | 0.09193 | RHOV      |
| cg26491484 | 0.85583 | 0.8689  | 0.85219 | 0.85944 | 0.89914 | 0.79347 | 0.84959 | 0.63811 | 0.85886 | 0.83712 | LAMC3     |
| cg26493932 | 0.06905 | 0.0486  | 0.06039 | 0.05225 | 0.07172 | 0.05157 | 0.05086 | 0.04922 | 0.05585 | 0.04508 | ZNF664    |
| cg26499286 | 0.29195 | 0.06435 | 0.3778  | 0.57309 | 0.23225 | 0.06106 | 0.03933 | 0.03467 | 0.05405 | 0.10365 | KRTAP17-1 |
| cg26499611 | 0.08882 | 0.0979  | 0.13563 | 0.20153 | 0.085   | 0.07974 | 0.0872  | 0.08105 | 0.07628 | 0.07035 | BAIAP3    |
| cg26500816 | 0.05045 | 0.03522 | 0.03594 | 0.03667 | 0.0414  | 0.02963 | 0.03288 | 0.04007 | 0.0305  | 0.02629 | AIPL1     |
| cg26502489 | 0.8227  | 0.13217 | 0.70852 | 0.84689 | 0.70649 | 0.80161 | 0.131   | 0.13742 | 0.51041 | 0.5006  | SCN2B     |
| cg26502594 | 0.1542  | 0.12863 | 0.0832  | 0.07397 | 0.02859 | 0.03228 | 0.05598 | 0.03685 | 0.03905 | 0.02635 | CCDC9     |
| cg26504021 | 0.35547 | 0.06568 | 0.35323 | 0.50852 | 0.60145 | 0.36031 | 0.9139  | 0.93671 | 0.1392  | 0.20519 | IRX2      |
| cg26504906 | 0.56026 | 0.211   | 0.58459 | 0.80389 | 0.77346 | 0.8424  | 0.04286 | 0.0524  | 0.06488 | 0.03197 | PRSS16    |
| cg26506209 | 0.05297 | 0.04632 | 0.05673 | 0.06509 | 0.05158 | 0.04943 | 0.05515 | 0.04349 | 0.05254 | 0.05321 | ATP6V1E1  |
| cg26507094 | 0.05494 | 0.05891 | 0.05512 | 0.05415 | 0.03649 | 0.04953 | 0.04854 | 0.0509  | 0.04387 | 0.04022 | PYCRL     |
| cg26507477 | 0.37491 | 0.37241 | 0.35625 | 0.41034 | 0.4487  | 0.48142 | 0.21322 | 0.2335  | 0.23474 | 0.16659 | AMY1A     |
| cg26508537 | 0.0879  | 0.08551 | 0.59823 | 0.65855 | 0.24888 | 0.0816  | 0.34262 | 0.09811 | 0.08778 | 0.0881  | C10orf6   |
| cg26509022 | 0.12602 | 0.04051 | 0.74982 | 0.77746 | 0.82451 | 0.61787 | 0.95341 | 0.94902 | 0.65317 | 0.09158 | ALDH1A3   |
| cg26511075 | 0.9059  | 0.88813 | 0.85657 | 0.90327 | 0.17452 | 0.11126 | 0.75952 | 0.10535 | 0.8893  | 0.70723 | FLJ25422  |
| cg26511321 | 0.32182 | 0.52143 | 0.77385 | 0.49729 | 0.90256 | 0.83966 | 0.87745 | 0.49901 | 0.78655 | 0.69976 | HOXA7     |
| cg26512148 | 0.19031 | 0.0876  | 0.04357 | 0.04033 | 0.09423 | 0.05387 | 0.04062 | 0.03722 | 0.09884 | 0.04429 | SOS2      |
| cg26514492 | 0.65737 | 0.40917 | 0.43394 | 0.69984 | 0.86752 | 0.82945 | 0.07145 | 0.35131 | 0.25741 | 0.03177 | GPR132    |
| cg26514942 | 0.81985 | 0.82967 | 0.77093 | 0.80725 | 0.74048 | 0.77993 | 0.75117 | 0.83547 | 0.81747 | 0.70441 | FLJ30294  |
| cg26516759 | 0.0305  | 0.02505 | 0.02382 | 0.02228 | 0.04205 | 0.02204 | 0.04166 | 0.02884 | 0.01948 | 0.01914 | BMP7      |
| cg26516764 | 0.05686 | 0.06221 | 0.06754 | 0.06297 | 0.07069 | 0.09043 | 0.0564  | 0.05333 | 0.05885 | 0.05438 | APRIN     |
| cg26516941 | 0.04255 | 0.04236 | 0.04297 | 0.04283 | 0.03442 | 0.04617 | 0.04021 | 0.03994 | 0.03997 | 0.03817 | DPAGT1    |
| cg26516954 | 0.0183  | 0.02553 | 0.0224  | 0.02136 | 0.02036 | 0.01969 | 0.01806 | 0.0175  | 0.01632 | 0.0185  | B3GNTL1   |
| cg26519339 | 0.50083 | 0.07628 | 0.07076 | 0.09024 | 0.05679 | 0.06069 | 0.05952 | 0.06459 | 0.05395 | 0.05121 | TMEM39A   |
| cg26520371 | 0.04866 | 0.04857 | 0.04572 | 0.04572 | 0.03482 | 0.04402 | 0.04297 | 0.03947 | 0.04164 | 0.03918 | M6PR      |
| cg26521404 | 0.02441 | 0.02538 | 0.02524 | 0.02416 | 0.02176 | 0.02811 | 0.02192 | 0.02155 | 0.9884  | 0.98729 | HOXA9     |
| cg26521448 | 0.94781 | 0.9454  | 0.94235 | 0.95438 | 0.94875 | 0.86939 | 0.93969 | 0.47723 | 0.95218 | 0.93356 | ZC3H7A    |
| cg26523005 | 0.73267 | 0.86883 | 0.85326 | 0.85278 | 0.82233 | 0.87655 | 0.49098 | 0.58904 | 0.87098 | 0.84337 | ZNF662    |

|            |         |         |         |         |         |         |         |         |         |                  |
|------------|---------|---------|---------|---------|---------|---------|---------|---------|---------|------------------|
| cg26523389 | 0.03817 | 0.04841 | 0.05704 | 0.05084 | 0.04375 | 0.05304 | 0.0409  | 0.0468  | 0.03675 | 0.03795 NFYA     |
| cg26524263 | 0.05927 | 0.04301 | 0.37157 | 0.21347 | 0.06338 | 0.03945 | 0.30038 | 0.41449 | 0.03793 | 0.02885 KLK13    |
| cg26524899 | 0.14882 | 0.15311 | 0.16476 | 0.15604 | 0.27598 | 0.19554 | 0.16232 | 0.14875 | 0.13973 | 0.12841 AKAP5    |
| cg26525091 | 0.16813 | 0.05673 | 0.63722 | 0.62466 | 0.6438  | 0.4964  | 0.0786  | 0.06664 | 0.14656 | 0.04405 MADCAM1  |
| cg26526440 | 0.04659 | 0.04825 | 0.04873 | 0.0484  | 0.03304 | 0.0372  | 0.04257 | 0.04533 | 0.03865 | 0.03849 PPP1R12B |
| cg26527984 | 0.8868  | 0.81863 | 0.82487 | 0.85495 | 0.57822 | 0.44427 | 0.62852 | 0.32234 | 0.90392 | 0.58321 GALK1    |
| cg26528713 | 0.03141 | 0.03476 | 0.03172 | 0.03037 | 0.03238 | 0.02991 | 0.02809 | 0.02712 | 0.0254  | 0.02386 TRUB1    |
| cg26530200 | 0.1132  | 0.08976 | 0.20193 | 0.17204 | 0.26313 | 0.28349 | 0.14639 | 0.11573 | 0.1158  | 0.11151 ZNF140   |
| cg26530341 | 0.9036  | 0.05451 | 0.88378 | 0.89475 | 0.91155 | 0.74425 | 0.87654 | 0.81417 | 0.9036  | 0.4452 TNFRSF10A |
| cg26530497 | 0.8904  | 0.88375 | 0.88199 | 0.89665 | 0.8845  | 0.87427 | 0.87819 | 0.88413 | 0.86473 | 0.86275 TEB1     |
| cg26531804 | 0.77675 | 0.05811 | 0.9097  | 0.91346 | 0.93716 | 0.84252 | 0.87255 | 0.84068 | 0.94035 | 0.14833 SPINT1   |
| cg26532905 | 0.56958 | 0.56298 | 0.6038  | 0.67753 | 0.6355  | 0.7492  | 0.69327 | 0.62108 | 0.69274 | 0.67295 RNASEL   |
| cg26533949 | 0.04592 | 0.04729 | 0.04214 | 0.04663 | 0.03161 | 0.03369 | 0.03276 | 0.02666 | 0.03783 | 0.03507 DZIP1L   |
| cg26534002 | 0.76793 | 0.50527 | 0.73918 | 0.80957 | 0.77623 | 0.8369  | 0.2831  | 0.20528 | 0.20484 | 0.06019 CSAG3A   |
| cg26534508 | 0.02955 | 0.03119 | 0.03716 | 0.043   | 0.04949 | 0.04362 | 0.06694 | 0.04968 | 0.03291 | 0.02672 GPR137B  |
| cg26535072 | 0.10733 | 0.0691  | 0.06004 | 0.05663 | 0.11053 | 0.07157 | 0.04685 | 0.04584 | 0.04969 | 0.05142 APBA1    |
| cg26536164 | 0.93962 | 0.92672 | 0.93973 | 0.94615 | 0.93728 | 0.86297 | 0.90584 | 0.86749 | 0.94814 | 0.89264 RTP3     |
| cg26536259 | 0.09072 | 0.08356 | 0.1146  | 0.25449 | 0.21303 | 0.08513 | 0.08415 | 0.0806  | 0.23725 | 0.06907 BMP2     |
| cg26537639 | 0.04357 | 0.04303 | 0.12215 | 0.41698 | 0.81394 | 0.95325 | 0.58999 | 0.31891 | 0.52988 | 0.52663 CYBA     |
| cg26538116 | 0.03645 | 0.03108 | 0.0263  | 0.02254 | 0.03046 | 0.02945 | 0.02077 | 0.02032 | 0.02702 | 0.02347 LRPPRC   |
| cg26538214 | 0.04146 | 0.04385 | 0.04702 | 0.04296 | 0.04476 | 0.0505  | 0.0446  | 0.04217 | 0.03599 | 0.04218 KLF6     |
| cg26538349 | 0.06863 | 0.06598 | 0.04689 | 0.04809 | 0.03359 | 0.03658 | 0.03066 | 0.02955 | 0.03233 | 0.04244 FLJ20035 |
| cg26538442 | 0.5209  | 0.60376 | 0.7682  | 0.76794 | 0.45557 | 0.40037 | 0.35668 | 0.38803 | 0.66541 | 0.49601 FLJ21736 |
| cg26540127 | 0.04615 | 0.04122 | 0.06093 | 0.05417 | 0.05972 | 0.04645 | 0.04804 | 0.0423  | 0.04854 | 0.04334 ACTR3    |
| cg26540515 | 0.49678 | 0.05486 | 0.63221 | 0.60124 | 0.88016 | 0.81207 | 0.78356 | 0.78777 | 0.50413 | 0.40465 ANGPT4   |
| cg26541516 | 0.02652 | 0.03453 | 0.02936 | 0.02489 | 0.02223 | 0.02634 | 0.02655 | 0.02576 | 0.02302 | 0.0241 C1orf159  |
| cg26542130 | 0.05265 | 0.05083 | 0.04917 | 0.04438 | 0.03885 | 0.05179 | 0.03893 | 0.03819 | 0.04427 | 0.0353 PCBP1     |
| cg26542888 | 0.78016 | 0.20938 | 0.69024 | 0.74495 | 0.45592 | 0.23727 | 0.19789 | 0.05768 | 0.03923 | 0.03077 RNF2     |
| cg26545162 | 0.07963 | 0.049   | 0.63127 | 0.59406 | 0.54064 | 0.55726 | 0.22786 | 0.05846 | 0.05009 | 0.05243 LGICZ1   |
| cg26545968 | 0.47091 | 0.14038 | 0.37914 | 0.32385 | 0.66016 | 0.7364  | 0.11719 | 0.12827 | 0.4804  | 0.1744 P2RY4     |
| cg26547788 | 0.10004 | 0.09593 | 0.09757 | 0.09806 | 0.08106 | 0.08498 | 0.08054 | 0.08421 | 0.08148 | 0.0724 HDHD1A    |
| cg26548883 | 0.11791 | 0.118   | 0.19043 | 0.17936 | 0.28728 | 0.33592 | 0.16118 | 0.13048 | 0.12212 | 0.13922 CCL15    |
| cg26550234 | 0.7733  | 0.36501 | 0.76725 | 0.81331 | 0.70014 | 0.80488 | 0.42171 | 0.35228 | 0.66297 | 0.78805 SLC39A12 |
| cg26551843 | 0.09133 | 0.04445 | 0.04687 | 0.04207 | 0.37949 | 0.40151 | 0.78276 | 0.76488 | 0.03787 | 0.03434 RPS6KL1  |
| cg26553682 | 0.0423  | 0.04337 | 0.16392 | 0.06051 | 0.0807  | 0.05312 | 0.03884 | 0.04091 | 0.04034 | 0.03189 ZNF498   |
| cg26555310 | 0.84451 | 0.78106 | 0.84517 | 0.87267 | 0.78647 | 0.86308 | 0.89313 | 0.90691 | 0.89039 | 0.88394 RPE65    |
| cg26556134 | 0.36546 | 0.15721 | 0.19326 | 0.16064 | 0.26639 | 0.35912 | 0.15777 | 0.49875 | 0.1372  | 0.16796 SOAT2    |
| cg26556719 | 0.40843 | 0.49204 | 0.53033 | 0.7393  | 0.55016 | 0.56769 | 0.63868 | 0.5079  | 0.10474 | 0.07557 PCDHA13  |
| cg26556918 | 0.04397 | 0.04199 | 0.05457 | 0.04639 | 0.04552 | 0.05324 | 0.03936 | 0.0432  | 0.05002 | 0.04466 ALS2CR15 |
| cg26557658 | 0.04124 | 0.04827 | 0.91525 | 0.89192 | 0.94336 | 0.92047 | 0.20878 | 0.08808 | 0.36749 | 0.39223 FAM43B   |
| cg26560960 | 0.06282 | 0.05414 | 0.05499 | 0.04693 | 0.03559 | 0.04715 | 0.05563 | 0.04769 | 0.04546 | 0.04425 CBWD2    |

|            |         |         |         |         |         |         |         |         |         |         |           |
|------------|---------|---------|---------|---------|---------|---------|---------|---------|---------|---------|-----------|
| cg26561254 | 0.81075 | 0.65805 | 0.36899 | 0.53921 | 0.38441 | 0.09531 | 0.29941 | 0.16101 | 0.36607 | 0.08598 | ISG20L1   |
| cg26561611 | 0.02495 | 0.02589 | 0.03793 | 0.03271 | 0.05298 | 0.04504 | 0.03467 | 0.03029 | 0.02297 | 0.02222 | WBSCR22   |
| cg26561773 | 0.27646 | 0.26571 | 0.43856 | 0.34833 | 0.36833 | 0.3293  | 0.21129 | 0.26125 | 0.31089 | 0.30106 | VSIG4     |
| cg26563737 | 0.25236 | 0.07795 | 0.35992 | 0.29883 | 0.90628 | 0.81669 | 0.15259 | 0.12064 | 0.56773 | 0.8025  | PCOLN3    |
| cg26565838 | 0.08522 | 0.07285 | 0.08515 | 0.07572 | 0.09532 | 0.07178 | 0.08491 | 0.08218 | 0.06809 | 0.07906 | GALNT10   |
| cg26565975 | 0.66078 | 0.48917 | 0.79141 | 0.81054 | 0.76746 | 0.818   | 0.57247 | 0.57382 | 0.84408 | 0.79624 | KRTAP20-1 |
| cg26567442 | 0.04408 | 0.04487 | 0.05778 | 0.0454  | 0.49585 | 0.28378 | 0.04272 | 0.0518  | 0.03717 | 0.03894 | PSMD6     |
| cg26568669 | 0.03423 | 0.03827 | 0.05702 | 0.04658 | 0.04516 | 0.03868 | 0.0237  | 0.02244 | 0.0268  | 0.03517 | C6orf57   |
| cg26568722 | 0.04242 | 0.04241 | 0.04472 | 0.03934 | 0.03888 | 0.04901 | 0.03995 | 0.03988 | 0.03282 | 0.03413 | MCM7      |
| cg26570233 | 0.72781 | 0.65927 | 0.53181 | 0.5274  | 0.54591 | 0.44868 | 0.6649  | 0.64282 | 0.77763 | 0.75602 | JOSD3     |
| cg26571739 | 0.07152 | 0.07709 | 0.6576  | 0.71595 | 0.77764 | 0.67266 | 0.09681 | 0.08282 | 0.45081 | 0.38638 | VAV1      |
| cg26572597 | 0.64811 | 0.71642 | 0.89943 | 0.90606 | 0.90426 | 0.91183 | 0.72422 | 0.80918 | 0.42659 | 0.47247 | SPANXD    |
| cg26574610 | 0.65398 | 0.10666 | 0.75365 | 0.87121 | 0.78932 | 0.85912 | 0.7359  | 0.27775 | 0.35375 | 0.28891 | VPREB3    |
| cg26575445 | 0.25863 | 0.04113 | 0.52109 | 0.56555 | 0.63807 | 0.62778 | 0.05965 | 0.05967 | 0.03273 | 0.0266  | GPR160    |
| cg26577178 | 0.54832 | 0.14554 | 0.10283 | 0.1101  | 0.08873 | 0.0547  | 0.053   | 0.05263 | 0.05938 | 0.05778 | HRB2      |
| cg26577529 | 0.48102 | 0.30664 | 0.44296 | 0.48383 | 0.83143 | 0.69684 | 0.6462  | 0.62138 | 0.50423 | 0.46735 | KRT6E     |
| cg26577945 | 0.04056 | 0.04049 | 0.04124 | 0.03683 | 0.03508 | 0.03648 | 0.0356  | 0.0363  | 0.03325 | 0.02503 | STAM      |
| cg26578617 | 0.52812 | 0.40397 | 0.74592 | 0.79401 | 0.34864 | 0.30065 | 0.32488 | 0.15545 | 0.27544 | 0.35792 | SNCA      |
| cg26580095 | 0.47568 | 0.22987 | 0.48042 | 0.69746 | 0.46633 | 0.27631 | 0.13028 | 0.06895 | 0.63367 | 0.17871 | BTBD8     |
| cg26581729 | 0.42084 | 0.10303 | 0.53814 | 0.62788 | 0.41459 | 0.47456 | 0.66303 | 0.30556 | 0.94179 | 0.91422 | NPDC1     |
| cg26583078 | 0.3942  | 0.75214 | 0.81997 | 0.86709 | 0.81002 | 0.87913 | 0.81625 | 0.7334  | 0.65297 | 0.74199 | SORBS2    |
| cg26586164 | 0.05954 | 0.06468 | 0.06471 | 0.05916 | 0.04666 | 0.07654 | 0.05351 | 0.06171 | 0.0531  | 0.04596 | DTNB      |
| cg26588422 | 0.8694  | 0.76163 | 0.56457 | 0.65365 | 0.86169 | 0.87474 | 0.85945 | 0.8686  | 0.53886 | 0.42434 | DHX33     |
| cg26589285 | 0.71913 | 0.53937 | 0.49979 | 0.52603 | 0.79666 | 0.87905 | 0.41022 | 0.04092 | 0.61362 | 0.36017 | IL29      |
| cg26590537 | 0.27556 | 0.29156 | 0.20031 | 0.2091  | 0.4825  | 0.22432 | 0.35239 | 0.31909 | 0.03747 | 0.03436 | KCNA1     |
| cg26591879 | 0.11541 | 0.10849 | 0.14932 | 0.16036 | 0.19523 | 0.11794 | 0.18717 | 0.12402 | 0.12074 | 0.14331 | ATF6      |
| cg26594445 | 0.85205 | 0.28734 | 0.77783 | 0.84117 | 0.8127  | 0.60359 | 0.62466 | 0.83339 | 0.86676 | 0.85557 | MRPL49    |
| cg26594488 | 0.72457 | 0.74209 | 0.66217 | 0.71101 | 0.57211 | 0.64947 | 0.68267 | 0.68876 | 0.7876  | 0.75429 | LOC54103  |
| cg26596161 | 0.16087 | 0.16988 | 0.29122 | 0.36829 | 0.20307 | 0.18199 | 0.18627 | 0.16037 | 0.16763 | 0.18771 | SLC26A7   |
| cg26599006 | 0.04642 | 0.03101 | 0.8856  | 0.87993 | 0.08146 | 0.06592 | 0.18111 | 0.04196 | 0.02647 | 0.0215  | GSLC      |
| cg26601286 | 0.02651 | 0.02902 | 0.03012 | 0.033   | 0.02858 | 0.03147 | 0.03085 | 0.02915 | 0.0256  | 0.02405 | NSUN4     |
| cg26602920 | 0.06141 | 0.05747 | 0.06079 | 0.05885 | 0.03663 | 0.05487 | 0.04775 | 0.05975 | 0.05687 | 0.04908 | LOC51315  |
| cg26605086 | 0.04509 | 0.03901 | 0.04386 | 0.04174 | 0.03204 | 0.03889 | 0.05354 | 0.04768 | 0.03433 | 0.03112 | CNCE1     |
| cg26606064 | 0.28081 | 0.25778 | 0.30897 | 0.28257 | 0.35047 | 0.257   | 0.2934  | 0.24008 | 0.1807  | 0.15653 | EI24      |
| cg26606552 | 0.04458 | 0.03782 | 0.05736 | 0.04763 | 0.27051 | 0.27511 | 0.15198 | 0.05189 | 0.03139 | 0.02262 | CCDC22    |
| cg26607785 | 0.11353 | 0.10382 | 0.42318 | 0.4845  | 0.76842 | 0.52478 | 0.46849 | 0.19336 | 0.35473 | 0.38094 | TBX21     |
| cg26608032 | 0.02488 | 0.02551 | 0.02714 | 0.02191 | 0.0226  | 0.02987 | 0.01994 | 0.02156 | 0.01868 | 0.01916 | MKL1      |
| cg26608199 | 0.87142 | 0.75091 | 0.83908 | 0.89372 | 0.92636 | 0.85511 | 0.43778 | 0.0841  | 0.61021 | 0.58313 | F10       |
| cg26608332 | 0.89242 | 0.563   | 0.89141 | 0.89847 | 0.86027 | 0.58257 | 0.18804 | 0.32034 | 0.91123 | 0.8802  | PCQAP     |
| cg26608667 | 0.93982 | 0.94028 | 0.08688 | 0.26463 | 0.10167 | 0.78553 | 0.07108 | 0.78032 | 0.46819 | 0.77264 | MGC11257  |
| cg26609631 | 0.03505 | 0.06344 | 0.96122 | 0.94496 | 0.09261 | 0.04021 | 0.03765 | 0.04021 | 0.02993 | 0.02508 | GSH1      |



|            |         |         |         |         |         |         |         |         |         |         |          |
|------------|---------|---------|---------|---------|---------|---------|---------|---------|---------|---------|----------|
| cg26609691 | 0.96639 | 0.9713  | 0.96239 | 0.96911 | 0.97025 | 0.96591 | 0.96775 | 0.96399 | 0.9701  | 0.97352 | CHFR     |
| cg26610808 | 0.62647 | 0.13862 | 0.08677 | 0.12596 | 0.06353 | 0.05412 | 0.07167 | 0.05382 | 0.05228 | 0.04969 | BLOC1S2  |
| cg26611683 | 0.21791 | 0.08169 | 0.18018 | 0.12927 | 0.90821 | 0.82577 | 0.4107  | 0.12097 | 0.58598 | 0.2312  | FOXO1A   |
| cg26612644 | 0.30267 | 0.34311 | 0.59305 | 0.62713 | 0.44665 | 0.6668  | 0.57482 | 0.44602 | 0.66747 | 0.54771 | KCTD2    |
| cg26614073 | 0.16951 | 0.11507 | 0.92796 | 0.92867 | 0.52015 | 0.37564 | 0.89559 | 0.88527 | 0.71863 | 0.49899 | SCAP     |
| cg26614346 | 0.73058 | 0.73617 | 0.7697  | 0.80697 | 0.76119 | 0.68895 | 0.66475 | 0.66617 | 0.67543 | 0.65985 | SP110    |
| cg26615126 | 0.74977 | 0.57832 | 0.8131  | 0.87129 | 0.92706 | 0.87378 | 0.82044 | 0.77371 | 0.11448 | 0.05243 | COLEC11  |
| cg26615712 | 0.02819 | 0.02617 | 0.03129 | 0.0277  | 0.02498 | 0.02925 | 0.02146 | 0.02129 | 0.02139 | 0.02056 | GPI      |
| cg26615830 | 0.0319  | 0.03199 | 0.03249 | 0.03064 | 0.02868 | 0.029   | 0.02658 | 0.02724 | 0.02823 | 0.02484 | MSX1     |
| cg26616347 | 0.56722 | 0.33516 | 0.73334 | 0.79375 | 0.81139 | 0.19929 | 0.29586 | 0.43306 | 0.46353 | 0.20451 | IRF5     |
| cg26617508 | 0.06551 | 0.07419 | 0.23554 | 0.25653 | 0.21247 | 0.11209 | 0.18015 | 0.06108 | 0.09501 | 0.10148 | EDA      |
| cg26619317 | 0.03062 | 0.03479 | 0.03228 | 0.03098 | 0.02442 | 0.02779 | 0.02885 | 0.02597 | 0.02618 | 0.02702 | CNN3     |
| cg26620157 | 0.9078  | 0.5339  | 0.90197 | 0.92175 | 0.90675 | 0.89971 | 0.8119  | 0.66848 | 0.61356 | 0.8026  | PAX9     |
| cg26620356 | 0.82669 | 0.33967 | 0.87157 | 0.89806 | 0.79515 | 0.73706 | 0.18183 | 0.20217 | 0.8783  | 0.42475 | KIAA1191 |
| cg26620959 | 0.06624 | 0.04945 | 0.19897 | 0.52037 | 0.08364 | 0.05347 | 0.11403 | 0.04777 | 0.05925 | 0.03676 | SYNE1    |
| cg26623224 | 0.05858 | 0.06805 | 0.05877 | 0.06587 | 0.05547 | 0.06736 | 0.0493  | 0.05888 | 0.05625 | 0.0473  | TRPM4    |
| cg26623286 | 0.03645 | 0.02495 | 0.0454  | 0.04004 | 0.02037 | 0.02162 | 0.02292 | 0.02461 | 0.02052 | 0.02071 | MED31    |
| cg26624118 | 0.05348 | 0.05271 | 0.05121 | 0.05719 | 0.06154 | 0.05101 | 0.05067 | 0.05431 | 0.04823 | 0.04192 | SLC43A1  |
| cg26624134 | 0.77014 | 0.8121  | 0.80915 | 0.77296 | 0.6787  | 0.55635 | 0.40347 | 0.21543 | 0.70774 | 0.63678 | KCNJ5    |
| cg26624273 | 0.04032 | 0.0386  | 0.0455  | 0.04528 | 0.04465 | 0.03878 | 0.03871 | 0.03572 | 0.03251 | 0.03992 | SNIP1    |
| cg26624294 | 0.03003 | 0.03062 | 0.03002 | 0.02624 | 0.02681 | 0.0253  | 0.46437 | 0.50055 | 0.02449 | 0.02221 | CETN2    |
| cg26624914 | 0.86821 | 0.32129 | 0.871   | 0.89721 | 0.79083 | 0.79748 | 0.84307 | 0.48518 | 0.7627  | 0.88943 | AQP3     |
| cg26625319 | 0.03134 | 0.03038 | 0.03042 | 0.03164 | 0.02337 | 0.02231 | 0.02731 | 0.02612 | 0.02375 | 0.02198 | BRRN1    |
| cg26626042 | 0.89772 | 0.88895 | 0.87991 | 0.90153 | 0.93543 | 0.87063 | 0.88206 | 0.8771  | 0.88057 | 0.85391 | AGER     |
| cg26626089 | 0.12266 | 0.05326 | 0.66892 | 0.74454 | 0.7211  | 0.62578 | 0.18492 | 0.16422 | 0.09142 | 0.05187 | PRKCG    |
| cg26627486 | 0.06264 | 0.07355 | 0.06936 | 0.06268 | 0.05078 | 0.05862 | 0.06149 | 0.06412 | 0.05614 | 0.05546 | C7orf27  |
| cg26628634 | 0.05629 | 0.05701 | 0.07211 | 0.06324 | 0.05648 | 0.06422 | 0.06287 | 0.05977 | 0.06238 | 0.06712 | NME7     |
| cg26628847 | 0.06333 | 0.05137 | 0.22381 | 0.31647 | 0.08226 | 0.07583 | 0.04774 | 0.04947 | 0.06498 | 0.05281 | PIP      |
| cg26631477 | 0.06472 | 0.02807 | 0.4007  | 0.42136 | 0.22421 | 0.0279  | 0.07644 | 0.02482 | 0.04009 | 0.02013 | GPR125   |
| cg26632776 | 0.04726 | 0.04396 | 0.08987 | 0.10384 | 0.05364 | 0.03427 | 0.47154 | 0.50885 | 0.03972 | 0.0302  | LRRC3    |
| cg26634132 | 0.04489 | 0.04467 | 0.04153 | 0.04337 | 0.0447  | 0.03775 | 0.04332 | 0.03979 | 0.03735 | 0.04389 | PIGT     |
| cg26635603 | 0.08058 | 0.06953 | 0.07398 | 0.07134 | 0.0516  | 0.06453 | 0.05924 | 0.06473 | 0.06557 | 0.06306 | BACH1    |
| cg26637069 | 0.80701 | 0.83611 | 0.8085  | 0.89475 | 0.88386 | 0.89817 | 0.34796 | 0.45497 | 0.53846 | 0.50973 | AGTRL1   |
| cg26637901 | 0.05018 | 0.05329 | 0.16103 | 0.19583 | 0.05327 | 0.04164 | 0.05131 | 0.04917 | 0.04629 | 0.04217 | ATF7IP   |
| cg26640549 | 0.09987 | 0.09778 | 0.10582 | 0.09856 | 0.13956 | 0.12024 | 0.07986 | 0.06301 | 0.08012 | 0.08112 | RAD18    |
| cg26643856 | 0.1284  | 0.04986 | 0.06903 | 0.15359 | 0.14372 | 0.12592 | 0.04979 | 0.05164 | 0.17893 | 0.03922 | HLA-DOA  |
| cg26644395 | 0.18844 | 0.08715 | 0.22115 | 0.31831 | 0.22789 | 0.16219 | 0.12119 | 0.10206 | 0.09163 | 0.08526 | UCN3     |
| cg26644504 | 0.69027 | 0.42586 | 0.63434 | 0.66366 | 0.66015 | 0.66169 | 0.32942 | 0.41351 | 0.70682 | 0.67585 | KCNE1L   |
| cg26645834 | 0.87662 | 0.88036 | 0.83822 | 0.89574 | 0.92758 | 0.9033  | 0.78044 | 0.74538 | 0.88713 | 0.85084 | SPO11    |
| cg26646370 | 0.05238 | 0.04568 | 0.16341 | 0.59678 | 0.12707 | 0.08754 | 0.05317 | 0.1695  | 0.05871 | 0.1875  | SHD      |
| cg26646411 | 0.13795 | 0.12668 | 0.33881 | 0.21399 | 0.2022  | 0.12676 | 0.16391 | 0.13519 | 0.35158 | 0.26989 | FLJ21125 |

|            |         |         |         |         |         |         |         |         |         |         |          |
|------------|---------|---------|---------|---------|---------|---------|---------|---------|---------|---------|----------|
| cg26646980 | 0.86426 | 0.86322 | 0.77784 | 0.8469  | 0.68469 | 0.84016 | 0.83516 | 0.84635 | 0.88591 | 0.8807  | PTPN3    |
| cg26647453 | 0.19804 | 0.19733 | 0.20793 | 0.31403 | 0.26873 | 0.22487 | 0.20762 | 0.17165 | 0.14662 | 0.20467 | C4orf17  |
| cg26647600 | 0.86773 | 0.78571 | 0.8602  | 0.87973 | 0.75923 | 0.85557 | 0.57624 | 0.62623 | 0.6354  | 0.57873 | CCR8     |
| cg26648592 | 0.02813 | 0.03136 | 0.03285 | 0.03432 | 0.02648 | 0.02757 | 0.02771 | 0.03308 | 0.02752 | 0.02243 | HEBP1    |
| cg26649005 | 0.03614 | 0.03834 | 0.0881  | 0.04483 | 0.03557 | 0.03443 | 0.03405 | 0.03257 | 0.04328 | 0.02501 | ZNF32    |
| cg26649834 | 0.03197 | 0.02857 | 0.02936 | 0.02835 | 0.02995 | 0.03257 | 0.03202 | 0.03263 | 0.0271  | 0.02877 | C1orf109 |
| cg26651073 | 0.1153  | 0.10077 | 0.14463 | 0.0962  | 0.3034  | 0.15547 | 0.12485 | 0.11036 | 0.09259 | 0.10198 | KARS     |
| cg26651233 | 0.09798 | 0.10028 | 0.10546 | 0.09483 | 0.09704 | 0.11458 | 0.10177 | 0.10114 | 0.19869 | 0.1773  | FLRT2    |
| cg26651830 | 0.08193 | 0.07252 | 0.0954  | 0.07293 | 0.10242 | 0.09608 | 0.06248 | 0.06716 | 0.04675 | 0.03964 | BCAP29   |
| cg26655138 | 0.03011 | 0.02994 | 0.04554 | 0.04875 | 0.02988 | 0.03842 | 0.1987  | 0.54324 | 0.03388 | 0.02945 | RBMX2    |
| cg26656113 | 0.09574 | 0.05789 | 0.84294 | 0.88407 | 0.57881 | 0.24635 | 0.08932 | 0.23148 | 0.09111 | 0.05713 | NPFFR2   |
| cg26656135 | 0.02398 | 0.02316 | 0.02513 | 0.02412 | 0.01894 | 0.01861 | 0.01758 | 0.01957 | 0.02382 | 0.01885 | EYA4     |
| cg26656452 | 0.7783  | 0.60213 | 0.7643  | 0.74432 | 0.8621  | 0.62817 | 0.80701 | 0.5441  | 0.87247 | 0.33739 | HABP2    |
| cg26657648 | 0.24757 | 0.3353  | 0.66765 | 0.7248  | 0.69973 | 0.83453 | 0.76419 | 0.39182 | 0.78497 | 0.58658 | IL1R1    |
| cg26660414 | 0.08934 | 0.07118 | 0.07992 | 0.077   | 0.51883 | 0.51656 | 0.07937 | 0.05154 | 0.88123 | 0.79074 | SLC7A8   |
| cg26660631 | 0.06749 | 0.06343 | 0.71223 | 0.7991  | 0.72539 | 0.66522 | 0.52299 | 0.15351 | 0.0404  | 0.03516 | FLJ32011 |
| cg26661257 | 0.04726 | 0.04791 | 0.04048 | 0.03901 | 0.04408 | 0.05534 | 0.04572 | 0.04292 | 0.03924 | 0.04691 | HIF1A    |
| cg26661481 | 0.84126 | 0.37567 | 0.82803 | 0.8441  | 0.87816 | 0.87941 | 0.47218 | 0.46466 | 0.91472 | 0.79434 | IL10RA   |
| cg26661623 | 0.79536 | 0.78774 | 0.68408 | 0.78875 | 0.77732 | 0.83557 | 0.34988 | 0.22047 | 0.63328 | 0.29425 | ASGR2    |
| cg26661897 | 0.06679 | 0.05204 | 0.07527 | 0.07284 | 0.07561 | 0.07019 | 0.0455  | 0.04408 | 0.06954 | 0.06    | RTCD1    |
| cg26665419 | 0.04755 | 0.0533  | 0.05555 | 0.05762 | 0.03912 | 0.04501 | 0.04517 | 0.04531 | 0.04703 | 0.03707 | C6orf203 |
| cg26666286 | 0.74131 | 0.76138 | 0.81511 | 0.82895 | 0.68364 | 0.70068 | 0.73298 | 0.7007  | 0.78326 | 0.78588 | KIAA0317 |
| cg26667975 | 0.04913 | 0.02824 | 0.05704 | 0.05939 | 0.43251 | 0.02525 | 0.0319  | 0.02423 | 0.06728 | 0.02217 | C19orf26 |
| cg26668713 | 0.03702 | 0.03738 | 0.04571 | 0.05486 | 0.03251 | 0.03402 | 0.0334  | 0.03481 | 0.09237 | 0.02726 | SIPA1    |
| cg26670626 | 0.01697 | 0.02094 | 0.02329 | 0.02447 | 0.01559 | 0.02529 | 0.01684 | 0.01656 | 0.0149  | 0.01611 | ZKSCAN1  |
| cg26672426 | 0.57925 | 0.26035 | 0.85808 | 0.86851 | 0.9496  | 0.88972 | 0.13921 | 0.08153 | 0.88402 | 0.83295 | PTGES    |
| cg26673195 | 0.10383 | 0.08918 | 0.11432 | 0.14172 | 0.19949 | 0.19749 | 0.09725 | 0.09533 | 0.07685 | 0.11509 | G6PC     |
| cg26673943 | 0.44972 | 0.40985 | 0.41271 | 0.45325 | 0.44318 | 0.45108 | 0.10513 | 0.0914  | 0.07109 | 0.06497 | CDKN2A   |
| cg26674132 | 0.3101  | 0.23713 | 0.27456 | 0.26813 | 0.22556 | 0.21307 | 0.17141 | 0.2442  | 0.12152 | 0.09918 | ZNF559   |
| cg26674929 | 0.01693 | 0.01758 | 0.01991 | 0.01924 | 0.01548 | 0.01607 | 0.01696 | 0.01733 | 0.01584 | 0.01384 | IREB2    |
| cg26675077 | 0.931   | 0.38564 | 0.91746 | 0.93186 | 0.95744 | 0.93102 | 0.77863 | 0.90263 | 0.9317  | 0.89225 | TUBB8    |
| cg26675382 | 0.16337 | 0.14049 | 0.21886 | 0.31592 | 0.21064 | 0.1653  | 0.16224 | 0.12124 | 0.16631 | 0.16123 | NUP43    |
| cg26675934 | 0.02586 | 0.0272  | 0.02349 | 0.02561 | 0.02304 | 0.02133 | 0.01992 | 0.02197 | 0.01673 | 0.01899 | NDUFB10  |
| cg26677448 | 0.05719 | 0.05678 | 0.07731 | 0.06272 | 0.05163 | 0.04723 | 0.05806 | 0.04863 | 0.05796 | 0.04427 | PAX2     |
| cg26677874 | 0.03317 | 0.03357 | 0.03623 | 0.0344  | 0.02606 | 0.02923 | 0.02387 | 0.03051 | 0.02899 | 0.02486 | LRRC28   |
| cg26678313 | 0.05174 | 0.04914 | 0.06806 | 0.06169 | 0.07139 | 0.07558 | 0.07033 | 0.06665 | 0.05781 | 0.07873 | LRP1     |
| cg26679231 | 0.03219 | 0.03241 | 0.03    | 0.03316 | 0.02047 | 0.03004 | 0.02831 | 0.02853 | 0.0237  | 0.02782 | C6orf152 |
| cg26680127 | 0.06359 | 0.05468 | 0.07753 | 0.1442  | 0.07532 | 0.06177 | 0.05966 | 0.03927 | 0.03293 | 0.04396 | MLCK     |
| cg26681081 | 0.03663 | 0.03706 | 0.04252 | 0.04251 | 0.03186 | 0.03823 | 0.03705 | 0.03526 | 0.02858 | 0.02635 | CKAP1    |
| cg26681123 | 0.88256 | 0.6031  | 0.88298 | 0.89477 | 0.93315 | 0.88715 | 0.89185 | 0.8728  | 0.89163 | 0.86032 | SLC34A3  |
| cg26682500 | 0.57093 | 0.49739 | 0.7618  | 0.77481 | 0.75529 | 0.75113 | 0.84224 | 0.84286 | 0.82603 | 0.56154 | FLJ40919 |

|            |         |         |         |         |         |         |         |         |         |         |           |
|------------|---------|---------|---------|---------|---------|---------|---------|---------|---------|---------|-----------|
| cg26682717 | 0.03185 | 0.03419 | 0.06789 | 0.03847 | 0.04708 | 0.04175 | 0.02933 | 0.0299  | 0.02952 | 0.02188 | ATP6V1F   |
| cg26683005 | 0.437   | 0.13361 | 0.5417  | 0.73547 | 0.84278 | 0.85986 | 0.85091 | 0.86985 | 0.83071 | 0.67199 | CARD8     |
| cg26683023 | 0.89188 | 0.89001 | 0.86145 | 0.85426 | 0.86999 | 0.64094 | 0.82333 | 0.61768 | 0.89217 | 0.87044 | ZNF678    |
| cg26685339 | 0.03787 | 0.04101 | 0.0538  | 0.04479 | 0.03138 | 0.07388 | 0.03752 | 0.03568 | 0.03404 | 0.03288 | HIVEP1    |
| cg26687173 | 0.94778 | 0.94842 | 0.9524  | 0.95545 | 0.96983 | 0.94663 | 0.95368 | 0.95686 | 0.95324 | 0.95783 | LOC126248 |
| cg26689483 | 0.14303 | 0.05897 | 0.14276 | 0.11514 | 0.0971  | 0.07969 | 0.71767 | 0.3734  | 0.29849 | 0.15922 | QDPR      |
| cg26692016 | 0.73816 | 0.51244 | 0.74503 | 0.83367 | 0.68178 | 0.87475 | 0.50177 | 0.18626 | 0.35    | 0.28384 | APOBEC1   |
| cg26697117 | 0.67455 | 0.31532 | 0.68795 | 0.75956 | 0.93209 | 0.85559 | 0.63987 | 0.47579 | 0.47296 | 0.64486 | P2RX1     |
| cg26698580 | 0.9194  | 0.80604 | 0.92486 | 0.91168 | 0.93015 | 0.91028 | 0.92332 | 0.91018 | 0.91204 | 0.9211  | ACD       |
| cg26699283 | 0.91329 | 0.91091 | 0.06408 | 0.05888 | 0.06101 | 0.04628 | 0.04923 | 0.03494 | 0.03916 | 0.03183 | AMID      |
| cg26701198 | 0.06022 | 0.06116 | 0.07828 | 0.07041 | 0.06157 | 0.08146 | 0.04749 | 0.04809 | 0.05329 | 0.05111 | COG6      |
| cg26701826 | 0.21366 | 0.14807 | 0.83209 | 0.84496 | 0.71881 | 0.82997 | 0.84819 | 0.7561  | 0.86205 | 0.58834 | MGC26963  |
| cg26702254 | 0.05979 | 0.0575  | 0.08589 | 0.07343 | 0.11649 | 0.10507 | 0.05962 | 0.05621 | 0.06167 | 0.04785 | KCND2     |
| cg26702875 | 0.04057 | 0.04696 | 0.05443 | 0.05973 | 0.05396 | 0.0544  | 0.06416 | 0.0351  | 0.04718 | 0.02852 | COPG2     |
| cg26703664 | 0.04825 | 0.05665 | 0.06622 | 0.05878 | 0.05609 | 0.0576  | 0.05514 | 0.06118 | 0.05722 | 0.05175 | DUSP6     |
| cg26704579 | 0.14085 | 0.11019 | 0.1327  | 0.12131 | 0.15036 | 0.12588 | 0.17158 | 0.14909 | 0.1233  | 0.10396 | CYP1A1    |
| cg26705553 | 0.14488 | 0.05716 | 0.2502  | 0.36296 | 0.30467 | 0.11756 | 0.12028 | 0.20757 | 0.04096 | 0.04465 | MMP25     |
| cg26705561 | 0.38456 | 0.11916 | 0.62983 | 0.72816 | 0.85082 | 0.88099 | 0.61885 | 0.55431 | 0.90814 | 0.87911 | SEC31L2   |
| cg26706003 | 0.49512 | 0.28811 | 0.57225 | 0.60279 | 0.27782 | 0.26812 | 0.36052 | 0.46161 | 0.20578 | 0.21147 | AVPR1A    |
| cg26706070 | 0.04977 | 0.04733 | 0.04918 | 0.04731 | 0.03502 | 0.03952 | 0.04284 | 0.03968 | 0.04021 | 0.04066 | BCKDK     |
| cg26709720 | 0.10142 | 0.05566 | 0.82363 | 0.89347 | 0.77582 | 0.73444 | 0.14943 | 0.04561 | 0.24132 | 0.07749 | B3GALT5   |
| cg26709859 | 0.03821 | 0.04177 | 0.03883 | 0.02981 | 0.04092 | 0.04594 | 0.03679 | 0.03152 | 0.02668 | 0.03787 | SYNJ2BP   |
| cg26709863 | 0.87921 | 0.88977 | 0.87786 | 0.87598 | 0.90632 | 0.87539 | 0.88001 | 0.85421 | 0.89085 | 0.88819 | BECN1     |
| cg26709950 | 0.08433 | 0.20609 | 0.07763 | 0.07991 | 0.70397 | 0.70032 | 0.11655 | 0.06663 | 0.39533 | 0.2344  | RRAD      |
| cg26710722 | 0.7353  | 0.54471 | 0.66953 | 0.8038  | 0.98076 | 0.9755  | 0.95267 | 0.93073 | 0.97929 | 0.98286 | COL9A2    |
| cg26711820 | 0.52503 | 0.67899 | 0.73098 | 0.82749 | 0.82431 | 0.83677 | 0.71324 | 0.838   | 0.04489 | 0.04094 | MYF6      |
| cg26713220 | 0.05592 | 0.03216 | 0.04516 | 0.03748 | 0.03417 | 0.02432 | 0.02869 | 0.02843 | 0.03209 | 0.03076 | C16orf45  |
| cg26715540 | 0.04686 | 0.04671 | 0.04706 | 0.04393 | 0.02936 | 0.04383 | 0.04465 | 0.04368 | 0.04422 | 0.04101 | RABL3     |
| cg26716323 | 0.0424  | 0.04283 | 0.03767 | 0.03791 | 0.04313 | 0.03967 | 0.053   | 0.03878 | 0.0327  | 0.03472 | TOMM7     |
| cg26717133 | 0.68171 | 0.59255 | 0.8914  | 0.88757 | 0.93594 | 0.90159 | 0.29189 | 0.10693 | 0.90706 | 0.90841 | PCDH21    |
| cg26717786 | 0.06889 | 0.04479 | 0.10785 | 0.20262 | 0.68855 | 0.24477 | 0.106   | 0.04097 | 0.06338 | 0.03917 | FLJ44861  |
| cg26718122 | 0.23447 | 0.27409 | 0.2242  | 0.25127 | 0.092   | 0.15107 | 0.18105 | 0.21112 | 0.21319 | 0.18047 | SFRS6     |
| cg26718420 | 0.81789 | 0.74088 | 0.81128 | 0.83767 | 0.77431 | 0.81956 | 0.16913 | 0.42715 | 0.83679 | 0.60107 | C12orf59  |
| cg26718574 | 0.03608 | 0.03764 | 0.03577 | 0.03824 | 0.02891 | 0.03192 | 0.0327  | 0.03311 | 0.02941 | 0.028   | PAPD1     |
| cg26718585 | 0.62897 | 0.63231 | 0.85838 | 0.85133 | 0.53297 | 0.65268 | 0.82224 | 0.86073 | 0.66513 | 0.35966 | PROC      |
| cg26721264 | 0.04411 | 0.05117 | 0.95324 | 0.9638  | 0.06837 | 0.05109 | 0.50862 | 0.77361 | 0.04991 | 0.08041 | GALR1     |
| cg26721993 | 0.01535 | 0.01711 | 0.01801 | 0.01722 | 0.01433 | 0.01315 | 0.01417 | 0.01471 | 0.01328 | 0.01328 | CRR9      |
| cg26723847 | 0.11476 | 0.09766 | 0.09647 | 0.11647 | 0.08566 | 0.07284 | 0.10777 | 0.09931 | 0.17277 | 0.05027 | hCAP-D3   |
| cg26727372 | 0.45142 | 0.30974 | 0.26322 | 0.2752  | 0.28994 | 0.24558 | 0.25535 | 0.21175 | 0.33713 | 0.21682 | ME2       |
| cg26728422 | 0.04704 | 0.04913 | 0.0591  | 0.06597 | 0.03503 | 0.04253 | 0.05027 | 0.04586 | 0.05428 | 0.03786 | C16orf28  |
| cg26728886 | 0.18373 | 0.07355 | 0.11604 | 0.09433 | 0.1643  | 0.13604 | 0.05264 | 0.0398  | 0.0928  | 0.09689 | C1orf118  |

|            |         |         |         |         |         |         |         |         |         |         |           |
|------------|---------|---------|---------|---------|---------|---------|---------|---------|---------|---------|-----------|
| cg26729026 | 0.81337 | 0.82855 | 0.7787  | 0.79178 | 0.73453 | 0.76312 | 0.27527 | 0.76378 | 0.7989  | 0.74494 | HSD17B1   |
| cg26736450 | 0.05198 | 0.05404 | 0.07318 | 0.0647  | 0.0647  | 0.05543 | 0.04588 | 0.03282 | 0.04602 | 0.04961 | OTX1      |
| cg26738010 | 0.78325 | 0.54347 | 0.91049 | 0.94655 | 0.94791 | 0.9228  | 0.53793 | 0.57153 | 0.71015 | 0.23411 | CETN1     |
| cg26738080 | 0.86689 | 0.63353 | 0.90004 | 0.90191 | 0.88134 | 0.65742 | 0.72639 | 0.79197 | 0.89508 | 0.83929 | TNNC1     |
| cg26738880 | 0.12212 | 0.13915 | 0.25976 | 0.20532 | 0.28941 | 0.20994 | 0.15783 | 0.12843 | 0.09969 | 0.1125  | DPP6      |
| cg26738912 | 0.03587 | 0.04379 | 0.04232 | 0.03873 | 0.0498  | 0.04332 | 0.47913 | 0.48103 | 0.02505 | 0.02521 | MAGED4    |
| cg26741595 | 0.20953 | 0.20151 | 0.21327 | 0.20007 | 0.3026  | 0.33497 | 0.15304 | 0.17008 | 0.1494  | 0.15487 | HIST1H2BD |
| cg26743024 | 0.38731 | 0.21801 | 0.8278  | 0.83766 | 0.80511 | 0.59067 | 0.8524  | 0.5494  | 0.87102 | 0.69545 | CACNG4    |
| cg26745032 | 0.07888 | 0.02644 | 0.02886 | 0.02665 | 0.02129 | 0.02496 | 0.61337 | 0.58776 | 0.02362 | 0.02036 | REPS2     |
| cg26745540 | 0.13768 | 0.12805 | 0.1463  | 0.13633 | 0.10874 | 0.10379 | 0.10065 | 0.10403 | 0.10898 | 0.13427 | NPY1R     |
| cg26746469 | 0.65326 | 0.23922 | 0.53252 | 0.48739 | 0.78234 | 0.64714 | 0.73034 | 0.56762 | 0.85334 | 0.62427 | KIAA0406  |
| cg26747293 | 0.04604 | 0.03429 | 0.03289 | 0.04072 | 0.05984 | 0.03986 | 0.03567 | 0.03791 | 0.03613 | 0.03092 | FLJ39155  |
| cg26750002 | 0.88645 | 0.90458 | 0.88469 | 0.9031  | 0.88167 | 0.87364 | 0.60744 | 0.54763 | 0.90682 | 0.69521 | RASIP1    |
| cg26750139 | 0.02888 | 0.02719 | 0.03648 | 0.02824 | 0.03073 | 0.03162 | 0.02914 | 0.02482 | 0.02421 | 0.02245 | ACBD6     |
| cg26750319 | 0.7801  | 0.54212 | 0.74922 | 0.78177 | 0.91901 | 0.92206 | 0.35583 | 0.10625 | 0.33637 | 0.3034  | KCNQ1     |
| cg26750747 | 0.38117 | 0.26876 | 0.64799 | 0.8193  | 0.86924 | 0.89364 | 0.63576 | 0.27488 | 0.39134 | 0.34786 | FOLR1     |
| cg26751195 | 0.86898 | 0.88407 | 0.86787 | 0.88765 | 0.90223 | 0.88131 | 0.6202  | 0.89086 | 0.90131 | 0.8488  | SPN       |
| cg26751631 | 0.11019 | 0.06265 | 0.20398 | 0.20588 | 0.13937 | 0.18875 | 0.49373 | 0.46111 | 0.10282 | 0.10193 | RNF12     |
| cg26752657 | 0.05434 | 0.04826 | 0.05893 | 0.05835 | 0.06128 | 0.06118 | 0.04056 | 0.03882 | 0.05042 | 0.06001 | C1orf171  |
| cg26753137 | 0.09422 | 0.0948  | 0.14768 | 0.1095  | 0.10707 | 0.08384 | 0.08398 | 0.08104 | 0.06778 | 0.0656  | SIRT5     |
| cg26753512 | 0.06342 | 0.06525 | 0.06466 | 0.06218 | 0.06896 | 0.06229 | 0.05561 | 0.05836 | 0.06025 | 0.06008 | RABEPK    |
| cg26754448 | 0.12111 | 0.12099 | 0.21881 | 0.18067 | 0.2647  | 0.0934  | 0.27609 | 0.13605 | 0.1554  | 0.14687 | C12orf57  |
| cg26755715 | 0.0795  | 0.05994 | 0.05139 | 0.04872 | 0.09013 | 0.05144 | 0.04035 | 0.03362 | 0.05533 | 0.0451  | FEZ2      |
| cg26755793 | 0.57898 | 0.32569 | 0.42685 | 0.50173 | 0.47245 | 0.34413 | 0.24933 | 0.35562 | 0.49547 | 0.23058 | KCTD1     |
| cg26756083 | 0.07875 | 0.06917 | 0.06499 | 0.06666 | 0.07747 | 0.06357 | 0.05948 | 0.06246 | 0.09219 | 0.05607 | MMP16     |
| cg26756862 | 0.78589 | 0.646   | 0.56035 | 0.73767 | 0.91971 | 0.90338 | 0.25041 | 0.30407 | 0.68858 | 0.4383  | CLCN1     |
| cg26757053 | 0.13032 | 0.11402 | 0.15442 | 0.17071 | 0.22012 | 0.11266 | 0.11396 | 0.0973  | 0.11758 | 0.11743 | LYPLAL1   |
| cg26757673 | 0.93686 | 0.90376 | 0.89239 | 0.92769 | 0.90427 | 0.92671 | 0.8435  | 0.80668 | 0.91354 | 0.84948 | IL2RB     |
| cg26757722 | 0.61063 | 0.51397 | 0.73557 | 0.77232 | 0.34954 | 0.27646 | 0.37532 | 0.42126 | 0.71608 | 0.69735 | CACNG2    |
| cg26757793 | 0.42719 | 0.49567 | 0.59625 | 0.78919 | 0.55046 | 0.6287  | 0.19412 | 0.63054 | 0.3298  | 0.45464 | MMP20     |
| cg26759551 | 0.39994 | 0.44602 | 0.94737 | 0.9589  | 0.96307 | 0.91306 | 0.94318 | 0.60861 | 0.16164 | 0.05953 | FBP1      |
| cg26759925 | 0.12566 | 0.05536 | 0.42542 | 0.58585 | 0.47865 | 0.79127 | 0.07508 | 0.06051 | 0.57535 | 0.30005 | IL1F9     |
| cg26760212 | 0.21982 | 0.30769 | 0.50915 | 0.63611 | 0.19446 | 0.0664  | 0.34422 | 0.08574 | 0.07925 | 0.05865 | GM632     |
| cg26762198 | 0.01729 | 0.01874 | 0.01948 | 0.01897 | 0.01482 | 0.01519 | 0.01944 | 0.0159  | 0.01534 | 0.01392 | C16orf9   |
| cg26763524 | 0.06019 | 0.063   | 0.06541 | 0.07276 | 0.07982 | 0.06002 | 0.08015 | 0.07098 | 0.05086 | 0.03954 | FDX1      |
| cg26764244 | 0.13582 | 0.06085 | 0.05384 | 0.04956 | 0.06396 | 0.05128 | 0.03935 | 0.03308 | 0.04016 | 0.04039 | GNG12     |
| cg26764555 | 0.11841 | 0.12884 | 0.11092 | 0.10871 | 0.10908 | 0.09524 | 0.09498 | 0.08753 | 0.09606 | 0.09417 | RASA2     |
| cg26766480 | 0.62016 | 0.66219 | 0.67969 | 0.72751 | 0.88867 | 0.89006 | 0.62896 | 0.70262 | 0.75032 | 0.74662 | IFNA6     |
| cg26767761 | 0.03506 | 0.04196 | 0.04539 | 0.04394 | 0.03986 | 0.04998 | 0.04422 | 0.04355 | 0.02854 | 0.03597 | ZNF198    |
| cg26767897 | 0.86662 | 0.64468 | 0.8376  | 0.86985 | 0.85165 | 0.85547 | 0.58865 | 0.46172 | 0.87377 | 0.86989 | XDH       |
| cg26770281 | 0.40572 | 0.69849 | 0.9409  | 0.93762 | 0.9475  | 0.93498 | 0.9282  | 0.88417 | 0.94689 | 0.92349 | FLJ14768  |

|            |         |         |         |         |         |         |         |         |         |                  |
|------------|---------|---------|---------|---------|---------|---------|---------|---------|---------|------------------|
| cg26770882 | 0.2963  | 0.24846 | 0.62728 | 0.66853 | 0.64274 | 0.55204 | 0.30583 | 0.48589 | 0.33185 | 0.07024 AIPL1    |
| cg26771217 | 0.04074 | 0.0396  | 0.13295 | 0.07316 | 0.03907 | 0.03831 | 0.04054 | 0.03296 | 0.04217 | 0.03506 CLK2     |
| cg26771272 | 0.8719  | 0.73518 | 0.18446 | 0.36981 | 0.51193 | 0.48811 | 0.47033 | 0.72342 | 0.13168 | 0.10368 SMCR7    |
| cg26774312 | 0.03561 | 0.03475 | 0.0377  | 0.0352  | 0.02421 | 0.02806 | 0.02892 | 0.02487 | 0.10664 | 0.02443 CAV2     |
| cg26774430 | 0.02903 | 0.0301  | 0.02787 | 0.02686 | 0.02918 | 0.02914 | 0.02487 | 0.0266  | 0.02124 | 0.02156 PSCD3    |
| cg26775866 | 0.11525 | 0.07312 | 0.08864 | 0.0729  | 0.09576 | 0.09313 | 0.10416 | 0.09863 | 0.06964 | 0.06151 PTTG1    |
| cg26776069 | 0.04281 | 0.02102 | 0.0265  | 0.02191 | 0.4166  | 0.13612 | 0.21079 | 0.02292 | 0.02254 | 0.01901 C1orf176 |
| cg26776077 | 0.83261 | 0.76052 | 0.73134 | 0.78894 | 0.95192 | 0.88921 | 0.07951 | 0.03672 | 0.76008 | 0.72216 FLJ45202 |
| cg26776924 | 0.89538 | 0.8042  | 0.85953 | 0.88792 | 0.96718 | 0.90381 | 0.88421 | 0.89315 | 0.92082 | 0.79922 CSNK1G2  |
| cg26777475 | 0.75957 | 0.25232 | 0.05663 | 0.05116 | 0.07308 | 0.06393 | 0.04142 | 0.03869 | 0.12559 | 0.03259 PCOLCE   |
| cg26778754 | 0.22972 | 0.13338 | 0.11329 | 0.25018 | 0.15383 | 0.07724 | 0.0901  | 0.08595 | 0.09904 | 0.07056 SSFA2    |
| cg26778807 | 0.01918 | 0.02034 | 0.02315 | 0.02106 | 0.01796 | 0.01802 | 0.01729 | 0.01666 | 0.01665 | 0.01441 WSB2     |
| cg26778908 | 0.03856 | 0.0454  | 0.04197 | 0.04073 | 0.02894 | 0.04057 | 0.04129 | 0.03603 | 0.03577 | 0.04151 PRPF18   |
| cg26780333 | 0.41652 | 0.42564 | 0.47855 | 0.53685 | 0.6611  | 0.64403 | 0.134   | 0.03055 | 0.07552 | 0.06274 ACOT4    |
| cg26780404 | 0.03154 | 0.03115 | 0.03551 | 0.03178 | 0.02826 | 0.03481 | 0.02365 | 0.02487 | 0.02056 | 0.02309 COL12A1  |
| cg26781150 | 0.0289  | 0.03072 | 0.03484 | 0.03149 | 0.21747 | 0.10412 | 0.03729 | 0.11481 | 0.02911 | 0.02537 GLOXD1   |
| cg26781575 | 0.17321 | 0.27819 | 0.10853 | 0.06451 | 0.15713 | 0.04625 | 0.0471  | 0.04838 | 0.0457  | 0.04235 KIAA1946 |
| cg26781886 | 0.08883 | 0.08304 | 0.08215 | 0.07581 | 0.35258 | 0.07378 | 0.06735 | 0.06225 | 0.06274 | 0.0621 EMB       |
| cg26782833 | 0.5447  | 0.10797 | 0.31537 | 0.35489 | 0.37091 | 0.29892 | 0.36005 | 0.16198 | 0.54117 | 0.43892 MGC4268  |
| cg26783353 | 0.92324 | 0.929   | 0.92122 | 0.91052 | 0.91505 | 0.93811 | 0.91491 | 0.91619 | 0.93614 | 0.92518 SLC25A2  |
| cg26783856 | 0.11252 | 0.07447 | 0.11228 | 0.08894 | 0.28442 | 0.07593 | 0.32961 | 0.11582 | 0.32257 | 0.08489 LRRC8D   |
| cg26787239 | 0.83712 | 0.44643 | 0.89295 | 0.9159  | 0.92619 | 0.88443 | 0.87724 | 0.85955 | 0.74366 | 0.68218 IL4      |
| cg26787505 | 0.02844 | 0.02525 | 0.04246 | 0.04152 | 0.02951 | 0.0325  | 0.02716 | 0.03052 | 0.02003 | 0.02438 TLCD1    |
| cg26788107 | 0.13666 | 0.10333 | 0.11815 | 0.11548 | 0.14861 | 0.10757 | 0.06853 | 0.04979 | 0.07272 | 0.08384 MGC13096 |
| cg26788215 | 0.03143 | 0.03337 | 0.03107 | 0.03652 | 0.02528 | 0.02939 | 0.02784 | 0.02925 | 0.02597 | 0.02661 SFRS8    |
| cg26789453 | 0.65873 | 0.19654 | 0.49795 | 0.66717 | 0.76713 | 0.70323 | 0.72074 | 0.26288 | 0.65086 | 0.31817 TMEM116  |
| cg26790059 | 0.90484 | 0.85783 | 0.86225 | 0.86525 | 0.85077 | 0.73808 | 0.86174 | 0.92872 | 0.4344  | 0.37636 MGC27121 |
| cg26790132 | 0.04744 | 0.0638  | 0.0666  | 0.10864 | 0.07965 | 0.04906 | 0.03998 | 0.04469 | 0.05292 | 0.03568 IL17D    |
| cg26791659 | 0.06057 | 0.0575  | 0.07156 | 0.05782 | 0.13172 | 0.08988 | 0.06422 | 0.05959 | 0.05152 | 0.04483 GP3M3    |
| cg26791905 | 0.03671 | 0.03808 | 0.03934 | 0.03824 | 0.02851 | 0.03174 | 0.05065 | 0.03444 | 0.45474 | 0.41946 PHGDH    |
| cg26792080 | 0.10571 | 0.10573 | 0.12427 | 0.10121 | 0.16957 | 0.11806 | 0.09149 | 0.08992 | 0.10224 | 0.11929 SATB2    |
| cg26792365 | 0.14098 | 0.11499 | 0.14862 | 0.13541 | 0.17764 | 0.15856 | 0.15935 | 0.12828 | 0.24029 | 0.17764 LOC63929 |
| cg26793710 | 0.03094 | 0.03295 | 0.0321  | 0.03228 | 0.02678 | 0.03244 | 0.03025 | 0.03171 | 0.03444 | 0.02773 CDC73    |
| cg26794638 | 0.04923 | 0.05127 | 0.05766 | 0.06929 | 0.0443  | 0.04969 | 0.05387 | 0.04571 | 0.04107 | 0.0405 KIAA0999  |
| cg26796190 | 0.07763 | 0.02432 | 0.07499 | 0.29449 | 0.96903 | 0.95904 | 0.9646  | 0.92419 | 0.9678  | 0.97009 PYY      |
| cg26796283 | 0.10031 | 0.09551 | 0.09943 | 0.08628 | 0.12574 | 0.08776 | 0.09223 | 0.08572 | 0.08739 | 0.08038 MSX2     |
| cg26798624 | 0.02275 | 0.02452 | 0.03123 | 0.0289  | 0.02516 | 0.02595 | 0.02382 | 0.02525 | 0.02585 | 0.02148 ATAD3B   |
| cg26798786 | 0.09631 | 0.09042 | 0.06872 | 0.05954 | 0.16372 | 0.11982 | 0.07069 | 0.06192 | 0.06109 | 0.06862 KLF9     |
| cg26799474 | 0.78672 | 0.80858 | 0.24249 | 0.15885 | 0.67856 | 0.2864  | 0.73607 | 0.53269 | 0.13669 | 0.1562 CASP8     |
| cg26799802 | 0.0507  | 0.04274 | 0.04513 | 0.04382 | 0.04335 | 0.03904 | 0.03971 | 0.05556 | 0.04263 | 0.03535 PHLDA2   |
| cg26802333 | 0.12609 | 0.10508 | 0.07833 | 0.07081 | 0.06409 | 0.11279 | 0.08052 | 0.07003 | 0.10385 | 0.1162 MT1X      |

|            |         |         |         |         |         |         |         |         |         |         |              |
|------------|---------|---------|---------|---------|---------|---------|---------|---------|---------|---------|--------------|
| cg26803305 | 0.20398 | 0.16435 | 0.66839 | 0.67997 | 0.48553 | 0.69719 | 0.29674 | 0.40361 | 0.73594 | 0.32971 | SLC14A1      |
| cg26803566 | 0.13086 | 0.0704  | 0.18466 | 0.21549 | 0.13748 | 0.06633 | 0.08159 | 0.06116 | 0.04736 | 0.04836 | SGPP1        |
| cg26804057 | 0.65531 | 0.29468 | 0.78345 | 0.75072 | 0.72336 | 0.53904 | 0.69247 | 0.16321 | 0.90278 | 0.88785 | POP1         |
| cg26805528 | 0.23549 | 0.22402 | 0.21827 | 0.24343 | 0.19822 | 0.22202 | 0.20469 | 0.22847 | 0.24295 | 0.2078  | CRAT         |
| cg26806924 | 0.23603 | 0.05791 | 0.04838 | 0.11998 | 0.03805 | 0.03266 | 0.17197 | 0.08433 | 0.03703 | 0.03049 | PROCR        |
| cg26808606 | 0.45044 | 0.43263 | 0.34849 | 0.35788 | 0.30467 | 0.29204 | 0.26985 | 0.34625 | 0.44297 | 0.41738 | COX17        |
| cg26808784 | 0.90937 | 0.38499 | 0.90242 | 0.94969 | 0.91587 | 0.55177 | 0.83518 | 0.72864 | 0.94942 | 0.83928 | H19          |
| cg26809210 | 0.04113 | 0.03996 | 0.04136 | 0.0351  | 0.03651 | 0.04376 | 0.03583 | 0.03602 | 0.03837 | 0.0308  | STAMPB       |
| cg26809911 | 0.03264 | 0.02879 | 0.03226 | 0.02978 | 0.02472 | 0.03076 | 0.02804 | 0.02889 | 0.02742 | 0.02674 | COG7         |
| cg26809968 | 0.8645  | 0.69817 | 0.88578 | 0.89256 | 0.938   | 0.88284 | 0.5085  | 0.47785 | 0.8311  | 0.60384 | OPN1LW       |
| cg26810336 | 0.17858 | 0.19615 | 0.5044  | 0.71702 | 0.49044 | 0.16992 | 0.10957 | 0.11793 | 0.13478 | 0.13436 | IL1RAPL1     |
| cg26812418 | 0.13486 | 0.05923 | 0.05941 | 0.05565 | 0.08454 | 0.05647 | 0.04294 | 0.03827 | 0.05325 | 0.06433 | CPE          |
| cg26813458 | 0.8073  | 0.63994 | 0.65891 | 0.7621  | 0.42788 | 0.41395 | 0.08771 | 0.06157 | 0.38016 | 0.30342 | CEACAM6      |
| cg26813908 | 0.42822 | 0.21473 | 0.22138 | 0.20049 | 0.15705 | 0.11405 | 0.14477 | 0.13246 | 0.09036 | 0.122   | CCDC55       |
| cg26815021 | 0.18045 | 0.18252 | 0.20544 | 0.19419 | 0.15577 | 0.18864 | 0.15304 | 0.17185 | 0.17453 | 0.20206 | SFRS2        |
| cg26815229 | 0.55128 | 0.14187 | 0.23219 | 0.20299 | 0.30734 | 0.17524 | 0.12532 | 0.16102 | 0.13706 | 0.17147 | CYP2J2       |
| cg26815414 | 0.84137 | 0.18548 | 0.90166 | 0.90463 | 0.25756 | 0.48943 | 0.6661  | 0.67303 | 0.61566 | 0.60568 | FLJ26443     |
| cg26817382 | 0.02648 | 0.02537 | 0.02432 | 0.02192 | 0.02491 | 0.0285  | 0.02535 | 0.0261  | 0.01982 | 0.01864 | TMED4        |
| cg26817573 | 0.78022 | 0.57513 | 0.18082 | 0.27172 | 0.44925 | 0.45919 | 0.47817 | 0.32148 | 0.08849 | 0.03403 | HERC1        |
| cg26820922 | 0.03181 | 0.03658 | 0.03093 | 0.03048 | 0.02594 | 0.03073 | 0.02332 | 0.0228  | 0.02271 | 0.02209 | YIPF4        |
| cg26822175 | 0.36396 | 0.28877 | 0.867   | 0.8659  | 0.86935 | 0.85927 | 0.42203 | 0.41919 | 0.84489 | 0.54584 | CRYBA4       |
| cg26822241 | 0.25459 | 0.30524 | 0.6825  | 0.79403 | 0.24503 | 0.2388  | 0.26136 | 0.09203 | 0.07956 | 0.08404 | CYP2C9       |
| cg26822601 | 0.1254  | 0.10412 | 0.09898 | 0.09696 | 0.1003  | 0.08284 | 0.08819 | 0.07206 | 0.10856 | 0.09881 | GNL3L        |
| cg26823505 | 0.12161 | 0.09324 | 0.0671  | 0.13654 | 0.10934 | 0.47309 | 0.0487  | 0.06976 | 0.04142 | 0.03666 | CLPS         |
| cg26824091 | 0.06594 | 0.04953 | 0.05403 | 0.05007 | 0.03277 | 0.05149 | 0.08297 | 0.04167 | 0.07772 | 0.03449 | GLO1         |
| cg26824408 | 0.02446 | 0.02772 | 0.0311  | 0.02919 | 0.02576 | 0.02525 | 0.02748 | 0.02448 | 0.01932 | 0.02013 | COG5         |
| cg26824467 | 0.05139 | 0.04418 | 0.0564  | 0.0513  | 0.05724 | 0.04804 | 0.04883 | 0.04428 | 0.0433  | 0.04833 | LASS6        |
| cg26825412 | 0.04014 | 0.07077 | 0.88038 | 0.87027 | 0.93323 | 0.3313  | 0.61252 | 0.25422 | 0.89175 | 0.60597 | SOX18        |
| cg26825755 | 0.05771 | 0.05183 | 0.06298 | 0.06082 | 0.04316 | 0.04482 | 0.05664 | 0.04992 | 0.05594 | 0.05561 | ACSM2        |
| cg26826852 | 0.02519 | 0.02226 | 0.02899 | 0.0239  | 0.01667 | 0.02362 | 0.02136 | 0.0206  | 0.02243 | 0.02162 | ACTR5        |
| cg26829131 | 0.02973 | 0.03188 | 0.03697 | 0.04002 | 0.03476 | 0.03128 | 0.03588 | 0.03268 | 0.02851 | 0.02466 | HOXC9        |
| cg26829318 | 0.08214 | 0.05693 | 0.07876 | 0.07153 | 0.0809  | 0.06262 | 0.07101 | 0.06689 | 0.04418 | 0.04956 | GLRX         |
| cg26829529 | 0.10901 | 0.04844 | 0.08517 | 0.08859 | 0.04996 | 0.07539 | 0.04831 | 0.05539 | 0.03635 | 0.0374  | SPACA3       |
| cg26831415 | 0.02777 | 0.03001 | 0.03227 | 0.02926 | 0.02471 | 0.024   | 0.03421 | 0.03469 | 0.02325 | 0.02537 | EFHA2        |
| cg26831968 | 0.02442 | 0.02353 | 0.0231  | 0.02365 | 0.02076 | 0.0224  | 0.01854 | 0.01916 | 0.01981 | 0.0184  | GBF1         |
| cg26832142 | 0.11424 | 0.05361 | 0.37363 | 0.42495 | 0.28619 | 0.04442 | 0.06772 | 0.19395 | 0.10671 | 0.04493 | PDE4B        |
| cg26832154 | 0.81318 | 0.7228  | 0.82291 | 0.8513  | 0.78754 | 0.80667 | 0.82121 | 0.81126 | 0.84294 | 0.83171 | DKFZp434N035 |
| cg26832211 | 0.90321 | 0.26824 | 0.84828 | 0.82015 | 0.90865 | 0.90217 | 0.1577  | 0.04719 | 0.44533 | 0.43664 | KRTAP5-9     |
| cg26832879 | 0.82516 | 0.85941 | 0.83707 | 0.85239 | 0.79617 | 0.84445 | 0.85515 | 0.85018 | 0.88014 | 0.78462 | TFPT         |
| cg26833169 | 0.30374 | 0.17719 | 0.32848 | 0.39873 | 0.64649 | 0.6733  | 0.22162 | 0.25162 | 0.08566 | 0.09111 | CALCA        |
| cg26833602 | 0.40199 | 0.05932 | 0.88691 | 0.92706 | 0.92481 | 0.93771 | 0.62417 | 0.54395 | 0.36493 | 0.24184 | SUSD3        |

|            |         |         |         |         |         |         |         |         |         |                  |
|------------|---------|---------|---------|---------|---------|---------|---------|---------|---------|------------------|
| cg26838900 | 0.70856 | 0.44472 | 0.84707 | 0.87252 | 0.88402 | 0.85953 | 0.39604 | 0.55578 | 0.87285 | 0.55206 LRRC15   |
| cg26839325 | 0.35376 | 0.19845 | 0.23368 | 0.41186 | 0.40843 | 0.3261  | 0.06417 | 0.42967 | 0.11236 | 0.14529 BMP15    |
| cg26840318 | 0.04782 | 0.05296 | 0.05561 | 0.0529  | 0.03907 | 0.04248 | 0.04949 | 0.05269 | 0.04188 | 0.04116 IRF2BP2  |
| cg26842024 | 0.0441  | 0.04073 | 0.03885 | 0.03799 | 0.02958 | 0.03415 | 0.03474 | 0.04478 | 0.0997  | 0.03931 KLF2     |
| cg26843008 | 0.02862 | 0.02886 | 0.02668 | 0.03152 | 0.02327 | 0.02691 | 0.02762 | 0.02891 | 0.02248 | 0.01905 RBL1     |
| cg26843567 | 0.62405 | 0.13329 | 0.7278  | 0.74194 | 0.66705 | 0.18227 | 0.66796 | 0.26731 | 0.73978 | 0.21967 CHST11   |
| cg26845278 | 0.78351 | 0.58927 | 0.79575 | 0.83447 | 0.80124 | 0.81187 | 0.73065 | 0.71047 | 0.8147  | 0.54162 SPATA21  |
| cg26845300 | 0.95738 | 0.71387 | 0.03244 | 0.02864 | 0.02301 | 0.01745 | 0.69065 | 0.04517 | 0.97893 | 0.9779 SNX9      |
| cg26845838 | 0.02483 | 0.0251  | 0.03131 | 0.02764 | 0.02207 | 0.02312 | 0.02223 | 0.02307 | 0.02136 | 0.021 OACT2      |
| cg26847093 | 0.05348 | 0.04802 | 0.06569 | 0.05205 | 0.0543  | 0.06539 | 0.05092 | 0.05517 | 0.07314 | 0.04534 FLJ11712 |
| cg26847490 | 0.66052 | 0.64457 | 0.55776 | 0.72587 | 0.4743  | 0.43033 | 0.62701 | 0.55349 | 0.52606 | 0.36624 ASB4     |
| cg26847866 | 0.35886 | 0.50128 | 0.30731 | 0.22713 | 0.04466 | 0.06213 | 0.21519 | 0.18098 | 0.81248 | 0.40116 SCARA3   |
| cg26848126 | 0.17539 | 0.37899 | 0.29144 | 0.27176 | 0.22105 | 0.20298 | 0.32774 | 0.1206  | 0.16373 | 0.1691 CYSLTR1   |
| cg26848248 | 0.05791 | 0.05748 | 0.10175 | 0.09655 | 0.0922  | 0.08472 | 0.05746 | 0.06126 | 0.04474 | 0.04233 SSR1     |
| cg26850145 | 0.04478 | 0.03961 | 0.04085 | 0.03871 | 0.04267 | 0.04487 | 0.03571 | 0.04105 | 0.03609 | 0.0308 ZBTB5     |
| cg26850503 | 0.04125 | 0.04217 | 0.03672 | 0.03496 | 0.05264 | 0.04996 | 0.03415 | 0.03352 | 0.03942 | 0.0411 DACT1     |
| cg26850754 | 0.6171  | 0.1182  | 0.91253 | 0.95983 | 0.77009 | 0.57401 | 0.08315 | 0.14497 | 0.42906 | 0.05353 CD8B1    |
| cg26851374 | 0.76675 | 0.7685  | 0.69741 | 0.76415 | 0.67547 | 0.74639 | 0.76162 | 0.65289 | 0.74882 | 0.50818 C8B      |
| cg26851800 | 0.59763 | 0.24393 | 0.26162 | 0.19692 | 0.59549 | 0.75864 | 0.46973 | 0.50598 | 0.69696 | 0.39132 SPINK5L2 |
| cg26852159 | 0.92156 | 0.91785 | 0.91395 | 0.91264 | 0.93225 | 0.92888 | 0.91102 | 0.89565 | 0.93381 | 0.91584 ASB16    |
| cg26853640 | 0.03867 | 0.03142 | 0.03535 | 0.03215 | 0.0466  | 0.11635 | 0.06128 | 0.03855 | 0.02942 | 0.02514 GGN      |
| cg26853855 | 0.18436 | 0.16393 | 0.53244 | 0.57018 | 0.503   | 0.31804 | 0.44282 | 0.4464  | 0.27646 | 0.24041 TAIP-2   |
| cg26855724 | 0.03048 | 0.02759 | 0.03662 | 0.03469 | 0.03301 | 0.03741 | 0.02251 | 0.02118 | 0.0285  | 0.03077 C1orf171 |
| cg26856388 | 0.14794 | 0.10457 | 0.12128 | 0.11462 | 0.14583 | 0.09033 | 0.09282 | 0.09328 | 0.1081  | 0.08865 VKORC1L1 |
| cg26861460 | 0.72466 | 0.40322 | 0.77347 | 0.77985 | 0.76255 | 0.41324 | 0.18751 | 0.09436 | 0.16723 | 0.12514 PARVG    |
| cg26862286 | 0.92592 | 0.17969 | 0.93057 | 0.93939 | 0.93767 | 0.56972 | 0.93842 | 0.84639 | 0.92138 | 0.78209 NCL      |
| cg26863324 | 0.042   | 0.0351  | 0.04923 | 0.04371 | 0.05305 | 0.04569 | 0.04275 | 0.04605 | 0.0388  | 0.04967 DDX52    |
| cg26864028 | 0.03693 | 0.0436  | 0.03923 | 0.03867 | 0.88151 | 0.59972 | 0.04513 | 0.0389  | 0.03535 | 0.02986 EPOR     |
| cg26864061 | 0.07091 | 0.06566 | 0.06088 | 0.07178 | 0.05112 | 0.0634  | 0.05265 | 0.0586  | 0.05393 | 0.05752 SACM1L   |
| cg26866014 | 0.85703 | 0.70245 | 0.65851 | 0.7683  | 0.61069 | 0.70178 | 0.70376 | 0.76028 | 0.65212 | 0.67366 C7orf33  |
| cg26866325 | 0.77008 | 0.64233 | 0.7433  | 0.77168 | 0.71016 | 0.75499 | 0.63181 | 0.49686 | 0.54947 | 0.45361 PPBPL2   |
| cg26868799 | 0.03404 | 0.03877 | 0.03933 | 0.03334 | 0.0275  | 0.03154 | 0.03572 | 0.03224 | 0.03195 | 0.02789 SYVN1    |
| cg26869604 | 0.05707 | 0.04899 | 0.04768 | 0.05189 | 0.04142 | 0.04404 | 0.04607 | 0.04237 | 0.04463 | 0.04157 LRRC20   |
| cg26870337 | 0.86736 | 0.8799  | 0.84793 | 0.84486 | 0.82817 | 0.85209 | 0.86056 | 0.87779 | 0.86382 | 0.86359 ZBTB40   |
| cg26870566 | 0.86326 | 0.62018 | 0.82617 | 0.85688 | 0.87457 | 0.76843 | 0.81045 | 0.67515 | 0.83551 | 0.5304 KIRREL    |
| cg26872475 | 0.17581 | 0.05531 | 0.05881 | 0.06147 | 0.04491 | 0.05442 | 0.06265 | 0.04517 | 0.0405  | 0.0463 NOD9      |
| cg26872564 | 0.84167 | 0.50921 | 0.45621 | 0.47213 | 0.81693 | 0.72724 | 0.2936  | 0.17123 | 0.89046 | 0.59958 ZNF185   |
| cg26873164 | 0.60174 | 0.11818 | 0.64892 | 0.62491 | 0.90374 | 0.78593 | 0.37254 | 0.08778 | 0.16783 | 0.03634 SNAI1    |
| cg26875522 | 0.04555 | 0.04569 | 0.04533 | 0.05333 | 0.05192 | 0.05271 | 0.03876 | 0.03754 | 0.2008  | 0.03197 ZNF307   |
| cg26879282 | 0.91914 | 0.88185 | 0.93594 | 0.94132 | 0.95958 | 0.93411 | 0.88333 | 0.67912 | 0.91096 | 0.86301 KCNQ1    |
| cg26884154 | 0.05711 | 0.03149 | 0.47648 | 0.47845 | 0.41043 | 0.30263 | 0.06486 | 0.0373  | 0.44068 | 0.13826 STXBP2   |

|            |         |         |         |         |         |         |         |         |         |         |          |
|------------|---------|---------|---------|---------|---------|---------|---------|---------|---------|---------|----------|
| cg26884376 | 0.03776 | 0.03709 | 0.04201 | 0.03658 | 0.07015 | 0.0627  | 0.03174 | 0.0307  | 0.02712 | 0.02637 | ABCF1    |
| cg26884581 | 0.81852 | 0.36738 | 0.78784 | 0.79203 | 0.91229 | 0.09212 | 0.66454 | 0.09036 | 0.85    | 0.14678 | PYGM     |
| cg26885858 | 0.04103 | 0.03417 | 0.16658 | 0.21402 | 0.05668 | 0.04173 | 0.06106 | 0.07472 | 0.03643 | 0.0289  | NBPF3    |
| cg26887625 | 0.02029 | 0.01802 | 0.01963 | 0.02106 | 0.01702 | 0.01934 | 0.01914 | 0.01646 | 0.01585 | 0.01373 | ZNF497   |
| cg26889928 | 0.02567 | 0.02346 | 0.02971 | 0.02897 | 0.02348 | 0.02419 | 0.0194  | 0.02456 | 0.02093 | 0.02168 | TRIM24   |
| cg26889990 | 0.06506 | 0.06628 | 0.08733 | 0.05216 | 0.6284  | 0.61438 | 0.38785 | 0.04695 | 0.04532 | 0.05048 | TMEM42   |
| cg26891849 | 0.03283 | 0.03479 | 0.03446 | 0.0312  | 0.02643 | 0.03524 | 0.03223 | 0.03295 | 0.02827 | 0.02917 | LSM11    |
| cg26894575 | 0.74591 | 0.47025 | 0.17649 | 0.10053 | 0.04555 | 0.29161 | 0.36459 | 0.25415 | 0.55499 | 0.0781  | S100A4   |
| cg26895595 | 0.36398 | 0.25191 | 0.51964 | 0.57899 | 0.45439 | 0.39153 | 0.10043 | 0.09543 | 0.18172 | 0.15745 | MAGEB3   |
| cg26896762 | 0.06128 | 0.05997 | 0.0869  | 0.07195 | 0.06621 | 0.05665 | 0.07379 | 0.05716 | 0.08688 | 0.04289 | ISL1     |
| cg26897054 | 0.0446  | 0.04452 | 0.0512  | 0.04931 | 0.02586 | 0.047   | 0.04598 | 0.04361 | 0.05045 | 0.04979 | DEDD2    |
| cg26898166 | 0.14838 | 0.05352 | 0.24084 | 0.47273 | 0.6348  | 0.57996 | 0.52976 | 0.30149 | 0.04064 | 0.03581 | EMX1     |
| cg26898336 | 0.53835 | 0.07058 | 0.21281 | 0.18241 | 0.67313 | 0.53486 | 0.39981 | 0.10115 | 0.03442 | 0.02998 | TEKT3    |
| cg26900034 | 0.09004 | 0.10736 | 0.09137 | 0.09001 | 0.09097 | 0.0964  | 0.08739 | 0.09159 | 0.0792  | 0.07217 | LOC51315 |
| cg26900154 | 0.44557 | 0.08746 | 0.89964 | 0.92522 | 0.92978 | 0.66299 | 0.72232 | 0.128   | 0.93747 | 0.67345 | OTOF     |
| cg26902873 | 0.05691 | 0.05295 | 0.06919 | 0.04655 | 0.04859 | 0.04851 | 0.19699 | 0.04104 | 0.12194 | 0.03776 | PRKX     |
| cg26904212 | 0.04972 | 0.05609 | 0.06074 | 0.04908 | 0.04691 | 0.05334 | 0.05153 | 0.05584 | 0.04736 | 0.04734 | FXR2     |
| cg26904406 | 0.84849 | 0.8164  | 0.06998 | 0.06341 | 0.05985 | 0.06229 | 0.04634 | 0.04864 | 0.05734 | 0.05729 | TRAF3IP2 |
| cg26907768 | 0.05419 | 0.05156 | 0.06037 | 0.05362 | 0.0397  | 0.05135 | 0.05014 | 0.05136 | 0.06105 | 0.03932 | SLC7A5   |
| cg26907889 | 0.06742 | 0.07227 | 0.10101 | 0.1033  | 0.09438 | 0.08196 | 0.13373 | 0.07697 | 0.07691 | 0.07968 | NONO     |
| cg26908611 | 0.05319 | 0.04825 | 0.0548  | 0.04904 | 0.04087 | 0.04383 | 0.05216 | 0.04584 | 0.04512 | 0.04364 | MFSD2    |
| cg26909237 | 0.08406 | 0.07625 | 0.10941 | 0.09852 | 0.12123 | 0.08819 | 0.08056 | 0.08721 | 0.07842 | 0.08389 | FBXO15   |
| cg26909431 | 0.07565 | 0.0651  | 0.11674 | 0.26187 | 0.06072 | 0.06037 | 0.05774 | 0.06038 | 0.07951 | 0.05807 | SMAD4    |
| cg26910205 | 0.04835 | 0.0472  | 0.04552 | 0.04195 | 0.07181 | 0.05822 | 0.05564 | 0.05272 | 0.04284 | 0.05172 | KIAA2010 |
| cg26910651 | 0.02627 | 0.03148 | 0.031   | 0.02996 | 0.02517 | 0.02617 | 0.03351 | 0.03754 | 0.02606 | 0.02704 | PPP2CB   |
| cg26911140 | 0.03822 | 0.04181 | 0.03959 | 0.03984 | 0.02565 | 0.03069 | 0.03253 | 0.03459 | 0.0313  | 0.03529 | RPL8     |
| cg26911787 | 0.77542 | 0.131   | 0.08575 | 0.06786 | 0.71407 | 0.0729  | 0.13047 | 0.06096 | 0.24578 | 0.07642 | ELK3     |
| cg26912636 | 0.38711 | 0.26729 | 0.74985 | 0.80883 | 0.85951 | 0.42454 | 0.43228 | 0.2296  | 0.50219 | 0.08326 | TMEPAI   |
| cg26916607 | 0.86023 | 0.61307 | 0.85192 | 0.87811 | 0.93189 | 0.71683 | 0.69318 | 0.57922 | 0.86538 | 0.73586 | CETP     |
| cg26916927 | 0.04462 | 0.04702 | 0.04544 | 0.04059 | 0.03545 | 0.04087 | 0.03538 | 0.04216 | 0.04359 | 0.03703 | GLO1     |
| cg26917625 | 0.02956 | 0.02829 | 0.03442 | 0.03151 | 0.02417 | 0.03794 | 0.02684 | 0.0265  | 0.02067 | 0.02139 | XRN2     |
| cg26917999 | 0.87925 | 0.49654 | 0.88841 | 0.91822 | 0.86329 | 0.88585 | 0.9174  | 0.82345 | 0.92547 | 0.91452 | LZTS1    |
| cg26918442 | 0.02625 | 0.02501 | 0.02536 | 0.02251 | 0.02012 | 0.02343 | 0.02898 | 0.02959 | 0.02488 | 0.02993 | LCMT2    |
| cg26918645 | 0.28835 | 0.23932 | 0.62439 | 0.80359 | 0.06392 | 0.04711 | 0.06476 | 0.04735 | 0.08716 | 0.13163 | ZNF285   |
| cg26918728 | 0.55904 | 0.53251 | 0.9382  | 0.94565 | 0.95945 | 0.93846 | 0.92995 | 0.93123 | 0.94717 | 0.93321 | SEMA3B   |
| cg26920757 | 0.83697 | 0.74415 | 0.64794 | 0.75554 | 0.40505 | 0.28478 | 0.46747 | 0.04635 | 0.55432 | 0.49558 | SH2D3C   |
| cg26922202 | 0.16376 | 0.11659 | 0.39749 | 0.57179 | 0.72626 | 0.66194 | 0.26431 | 0.10655 | 0.29922 | 0.22236 | OR2S2    |
| cg26924825 | 0.89563 | 0.5633  | 0.94908 | 0.95025 | 0.92016 | 0.66659 | 0.87336 | 0.84    | 0.95075 | 0.82584 | LCAT     |
| cg26926521 | 0.0382  | 0.0394  | 0.04713 | 0.0387  | 0.2761  | 0.39125 | 0.03598 | 0.03513 | 0.05447 | 0.15684 | ADRA2A   |
| cg26927807 | 0.93836 | 0.41294 | 0.9439  | 0.95501 | 0.95021 | 0.88383 | 0.93828 | 0.55242 | 0.70552 | 0.06077 | BTBD2    |
| cg26928603 | 0.08364 | 0.07911 | 0.08707 | 0.08296 | 0.06468 | 0.07245 | 0.0621  | 0.06656 | 0.07393 | 0.05726 | KIRREL   |



|            |         |         |         |         |         |         |         |         |         |         |           |
|------------|---------|---------|---------|---------|---------|---------|---------|---------|---------|---------|-----------|
| cg26928682 | 0.79177 | 0.38756 | 0.75078 | 0.89696 | 0.61383 | 0.66175 | 0.37871 | 0.20035 | 0.81081 | 0.48403 | TREML2    |
| cg26928972 | 0.72792 | 0.48841 | 0.70382 | 0.73193 | 0.66727 | 0.21918 | 0.72531 | 0.576   | 0.39954 | 0.51302 | CSTA      |
| cg26929490 | 0.0323  | 0.02802 | 0.02943 | 0.02671 | 0.02856 | 0.02796 | 0.02825 | 0.0267  | 0.02454 | 0.02039 | NIPBL     |
| cg26929536 | 0.39012 | 0.27142 | 0.65396 | 0.65449 | 0.33494 | 0.25209 | 0.08797 | 0.07296 | 0.09447 | 0.06209 | SCG3      |
| cg26932976 | 0.02025 | 0.02228 | 0.02244 | 0.01951 | 0.01618 | 0.02236 | 0.01972 | 0.02001 | 0.01843 | 0.01729 | KIAA0664  |
| cg26934034 | 0.86883 | 0.85386 | 0.88226 | 0.88949 | 0.67029 | 0.40444 | 0.863   | 0.87024 | 0.8922  | 0.88104 | SDSL      |
| cg26937148 | 0.05315 | 0.0423  | 0.05335 | 0.04903 | 0.04049 | 0.03855 | 0.05552 | 0.04574 | 0.03625 | 0.06794 | NR2F1     |
| cg26937500 | 0.92043 | 0.07876 | 0.9115  | 0.92506 | 0.91077 | 0.91423 | 0.28631 | 0.38825 | 0.09813 | 0.04174 | CARD11    |
| cg26937530 | 0.08963 | 0.09633 | 0.13353 | 0.11883 | 0.13135 | 0.12011 | 0.08722 | 0.09283 | 0.09847 | 0.10357 | SH3BGRL   |
| cg26940261 | 0.10956 | 0.06431 | 0.04315 | 0.03616 | 0.09966 | 0.05986 | 0.06062 | 0.04707 | 0.05399 | 0.03478 | LOC387882 |
| cg26940725 | 0.06058 | 0.07635 | 0.07938 | 0.07762 | 0.0908  | 0.09651 | 0.08208 | 0.07164 | 0.07147 | 0.06284 | RPL21     |
| cg26942392 | 0.02847 | 0.0362  | 0.032   | 0.04724 | 0.03191 | 0.04335 | 0.02323 | 0.02478 | 0.02439 | 0.02295 | KIAA1434  |
| cg26943001 | 0.05235 | 0.04702 | 0.04932 | 0.21335 | 0.16373 | 0.15037 | 0.041   | 0.04037 | 0.03789 | 0.03079 | SPAG8     |
| cg26944151 | 0.03696 | 0.04446 | 0.54886 | 0.56186 | 0.11877 | 0.0632  | 0.21199 | 0.39203 | 0.0342  | 0.03066 | FAM69B    |
| cg26946769 | 0.71261 | 0.12252 | 0.17274 | 0.25    | 0.27068 | 0.15379 | 0.14096 | 0.14619 | 0.10421 | 0.1416  | MAPK4     |
| cg26949796 | 0.05181 | 0.0504  | 0.05623 | 0.04486 | 0.05182 | 0.05319 | 0.04135 | 0.03626 | 0.04429 | 0.05548 | CFL2      |
| cg26952188 | 0.67842 | 0.75667 | 0.85146 | 0.85709 | 0.86825 | 0.82014 | 0.80719 | 0.8205  | 0.85738 | 0.82562 | MYO7A     |
| cg26952662 | 0.05294 | 0.02782 | 0.73696 | 0.76691 | 0.97576 | 0.97476 | 0.02764 | 0.02822 | 0.45814 | 0.45551 | CTHRC1    |
| cg26954174 | 0.67377 | 0.19226 | 0.62167 | 0.80731 | 0.79286 | 0.59222 | 0.2712  | 0.13812 | 0.13816 | 0.07739 | CARD15    |
| cg26955512 | 0.1182  | 0.12939 | 0.12462 | 0.11807 | 0.06831 | 0.10811 | 0.16423 | 0.13354 | 0.11496 | 0.09767 | HDAC8     |
| cg26955850 | 0.86258 | 0.84841 | 0.81893 | 0.87008 | 0.87296 | 0.90095 | 0.49411 | 0.84271 | 0.78988 | 0.59025 | OXT       |
| cg26956535 | 0.92823 | 0.91733 | 0.92356 | 0.92256 | 0.92269 | 0.93127 | 0.91605 | 0.90277 | 0.9167  | 0.90236 | LAG3      |
| cg26960719 | 0.57539 | 0.59403 | 0.67825 | 0.76509 | 0.59861 | 0.71104 | 0.73305 | 0.46776 | 0.28242 | 0.22414 | KCNJ16    |
| cg26962295 | 0.49954 | 0.0969  | 0.44564 | 0.58284 | 0.12724 | 0.07786 | 0.08737 | 0.08325 | 0.41521 | 0.17549 | NFATC2IP  |
| cg26963271 | 0.22825 | 0.23469 | 0.40348 | 0.37052 | 0.19804 | 0.09965 | 0.01899 | 0.01603 | 0.08429 | 0.0158  | PDE4B     |
| cg26964415 | 0.07354 | 0.08075 | 0.07568 | 0.06738 | 0.05344 | 0.06612 | 0.07061 | 0.07184 | 0.07222 | 0.06571 | MGC2749   |
| cg26964989 | 0.14613 | 0.08378 | 0.10814 | 0.08754 | 0.06516 | 0.07786 | 0.07555 | 0.07066 | 0.09041 | 0.07941 | LAMC3     |
| cg26965059 | 0.02074 | 0.02446 | 0.02458 | 0.02073 | 0.01856 | 0.02741 | 0.0224  | 0.02087 | 0.02231 | 0.01872 | ATF2      |
| cg26966384 | 0.04821 | 0.05301 | 0.06078 | 0.05342 | 0.04659 | 0.0717  | 0.04738 | 0.04932 | 0.0472  | 0.05184 | CLTA      |
| cg26967875 | 0.06206 | 0.03574 | 0.18207 | 0.17639 | 0.07131 | 0.03606 | 0.045   | 0.04001 | 0.06402 | 0.03338 | KLC2      |
| cg26968812 | 0.41026 | 0.09947 | 0.22478 | 0.23521 | 0.30903 | 0.19088 | 0.04367 | 0.04215 | 0.79731 | 0.41869 | TPM4      |
| cg26970800 | 0.89993 | 0.90242 | 0.18679 | 0.31207 | 0.86887 | 0.77403 | 0.05085 | 0.05374 | 0.67119 | 0.76948 | GIF       |
| cg26974738 | 0.05834 | 0.05363 | 0.05901 | 0.06197 | 0.04398 | 0.05351 | 0.0489  | 0.04794 | 0.04321 | 0.04453 | CUTA      |
| cg26975609 | 0.03594 | 0.02585 | 0.02987 | 0.02652 | 0.02063 | 0.03179 | 0.02442 | 0.02685 | 0.02508 | 0.02187 | FASTK     |
| cg26976437 | 0.80071 | 0.34641 | 0.049   | 0.04871 | 0.16022 | 0.12962 | 0.07242 | 0.03971 | 0.10631 | 0.04983 | LY6K      |
| cg26977045 | 0.07758 | 0.0635  | 0.3357  | 0.22206 | 0.09192 | 0.06934 | 0.06388 | 0.04889 | 0.05372 | 0.04138 | TIGD3     |
| cg26979012 | 0.03078 | 0.03043 | 0.02922 | 0.02522 | 0.02512 | 0.04432 | 0.02509 | 0.02605 | 0.02482 | 0.02956 | PSMC6     |
| cg26979339 | 0.02445 | 0.02765 | 0.02765 | 0.02445 | 0.02128 | 0.02612 | 0.02374 | 0.02137 | 0.01932 | 0.02251 | RIC8B     |
| cg26980692 | 0.45802 | 0.1219  | 0.29108 | 0.53902 | 0.83862 | 0.8237  | 0.42548 | 0.15934 | 0.08997 | 0.09156 | SLC15A3   |
| cg26981881 | 0.64484 | 0.53898 | 0.76508 | 0.75343 | 0.6782  | 0.78977 | 0.72177 | 0.64882 | 0.77601 | 0.73243 | 1-Dec     |
| cg26982998 | 0.05007 | 0.04901 | 0.04485 | 0.04916 | 0.05328 | 0.05934 | 0.04963 | 0.03494 | 0.03523 | 0.03427 | MBD3      |

|            |         |         |         |         |         |         |         |         |         |                   |
|------------|---------|---------|---------|---------|---------|---------|---------|---------|---------|-------------------|
| cg26984624 | 0.59223 | 0.33954 | 0.07903 | 0.10372 | 0.02477 | 0.03869 | 0.03397 | 0.03375 | 0.31711 | 0.21152 ANK1      |
| cg26984805 | 0.87001 | 0.53543 | 0.89302 | 0.92829 | 0.94942 | 0.74416 | 0.90047 | 0.64387 | 0.92345 | 0.87996 TACR2     |
| cg26985138 | 0.06397 | 0.05857 | 0.10675 | 0.10147 | 0.09206 | 0.07264 | 0.06251 | 0.06935 | 0.05804 | 0.05532 C6orf151  |
| cg26985201 | 0.08936 | 0.04698 | 0.09082 | 0.05688 | 0.09366 | 0.04084 | 0.06205 | 0.0488  | 0.04409 | 0.04048 LRCH3     |
| cg26985289 | 0.63005 | 0.38808 | 0.73918 | 0.79521 | 0.41544 | 0.10157 | 0.35432 | 0.06682 | 0.06084 | 0.0535 CLSTN1     |
| cg26986236 | 0.16676 | 0.06587 | 0.28421 | 0.39892 | 0.16368 | 0.21068 | 0.1439  | 0.06999 | 0.06267 | 0.04928 GPI       |
| cg26986815 | 0.76334 | 0.69386 | 0.7707  | 0.79941 | 0.63922 | 0.63347 | 0.65528 | 0.63888 | 0.70311 | 0.68688 CASP8     |
| cg26987645 | 0.58832 | 0.3154  | 0.88398 | 0.91449 | 0.92172 | 0.87991 | 0.66591 | 0.56488 | 0.63305 | 0.58187 FMOD      |
| cg26989103 | 0.81449 | 0.5739  | 0.49436 | 0.48384 | 0.53215 | 0.86406 | 0.73382 | 0.80802 | 0.11305 | 0.12891 TRHR      |
| cg26989531 | 0.21085 | 0.21369 | 0.2609  | 0.23324 | 0.21458 | 0.16917 | 0.33453 | 0.40957 | 0.21856 | 0.21797 CCND2     |
| cg26990660 | 0.04901 | 0.0499  | 0.63355 | 0.65581 | 0.06893 | 0.05145 | 0.0985  | 0.05108 | 0.04966 | 0.048 RAMP2       |
| cg26991199 | 0.10127 | 0.05978 | 0.07096 | 0.05698 | 0.11415 | 0.06013 | 0.03959 | 0.04689 | 0.05823 | 0.05571 FUSIP1    |
| cg26991292 | 0.05778 | 0.05584 | 0.06942 | 0.06269 | 0.06504 | 0.0719  | 0.06019 | 0.05848 | 0.055   | 0.05352 NFKBIL1   |
| cg26991946 | 0.78943 | 0.66029 | 0.8457  | 0.87357 | 0.87185 | 0.87041 | 0.71332 | 0.80085 | 0.85439 | 0.60449 SEMA4G    |
| cg26993951 | 0.13745 | 0.06614 | 0.11272 | 0.11424 | 0.04737 | 0.05314 | 0.05076 | 0.04663 | 0.39663 | 0.05654 C2orf7    |
| cg27000831 | 0.22327 | 0.10627 | 0.50654 | 0.60316 | 0.68186 | 0.57842 | 0.19233 | 0.31545 | 0.73676 | 0.30354 CCL8      |
| cg27003571 | 0.69206 | 0.73172 | 0.66223 | 0.72325 | 0.67201 | 0.69881 | 0.66166 | 0.69129 | 0.66509 | 0.52136 GTDC1     |
| cg27003827 | 0.05268 | 0.05554 | 0.0485  | 0.04763 | 0.03347 | 0.04498 | 0.04437 | 0.04537 | 0.04553 | 0.04079 SFRS9     |
| cg27005053 | 0.02808 | 0.02591 | 0.02995 | 0.02924 | 0.03031 | 0.03157 | 0.02181 | 0.01995 | 0.02191 | 0.02036 CFDP1     |
| cg27005179 | 0.03237 | 0.0303  | 0.03238 | 0.03423 | 0.04373 | 0.03048 | 0.02938 | 0.03179 | 0.1771  | 0.06851 ERBB2     |
| cg27005181 | 0.03598 | 0.03921 | 0.04166 | 0.042   | 0.03226 | 0.04468 | 0.03839 | 0.03579 | 0.03453 | 0.03222 HSMPP8    |
| cg27007358 | 0.03615 | 0.03455 | 0.03546 | 0.03892 | 0.02848 | 0.03317 | 0.0325  | 0.03197 | 0.0357  | 0.03307 SP4       |
| cg27009631 | 0.02393 | 0.0271  | 0.03803 | 0.03043 | 0.03403 | 0.03923 | 0.05369 | 0.04038 | 0.02152 | 0.01876 FNDC3A    |
| cg27009703 | 0.10385 | 0.04419 | 0.02336 | 0.02259 | 0.01584 | 0.02075 | 0.02022 | 0.02023 | 0.97369 | 0.97464 HOXA9     |
| cg27011042 | 0.07454 | 0.07423 | 0.06003 | 0.06699 | 0.16822 | 0.06453 | 0.05864 | 0.06781 | 0.05719 | 0.0641 MFGE8      |
| cg27011193 | 0.15071 | 0.15585 | 0.54795 | 0.56521 | 0.4007  | 0.3884  | 0.34942 | 0.30487 | 0.19401 | 0.23583 LOC654342 |
| cg27012203 | 0.03029 | 0.02796 | 0.0298  | 0.03246 | 0.02674 | 0.03094 | 0.02594 | 0.02468 | 0.02618 | 0.02454 MTHFR     |
| cg27014642 | 0.05003 | 0.04002 | 0.03678 | 0.04119 | 0.02799 | 0.02953 | 0.03606 | 0.03256 | 0.03922 | 0.0295 CELSR2     |
| cg27015047 | 0.58322 | 0.41681 | 0.73595 | 0.69799 | 0.69732 | 0.69667 | 0.2429  | 0.20738 | 0.1994  | 0.1728 DMBT1      |
| cg27015174 | 0.04171 | 0.036   | 0.04108 | 0.04259 | 0.03792 | 0.0321  | 0.04715 | 0.04371 | 0.05503 | 0.05185 LCMT2     |
| cg27015931 | 0.13831 | 0.09693 | 0.17029 | 0.13966 | 0.12687 | 0.08993 | 0.08424 | 0.08258 | 0.13059 | 0.07646 MGC50721  |
| cg27016307 | 0.52512 | 0.09532 | 0.23144 | 0.41512 | 0.11716 | 0.05793 | 0.2099  | 0.06291 | 0.03405 | 0.03213 HRC       |
| cg27016494 | 0.90323 | 0.82588 | 0.88147 | 0.9053  | 0.83856 | 0.80973 | 0.04879 | 0.75734 | 0.89693 | 0.88438 DLX5      |
| cg27016609 | 0.71344 | 0.5064  | 0.63278 | 0.73647 | 0.7239  | 0.6746  | 0.69022 | 0.67067 | 0.42476 | 0.21478 STON1     |
| cg27016863 | 0.03128 | 0.03015 | 0.04373 | 0.03852 | 0.03796 | 0.03988 | 0.02336 | 0.02358 | 0.03779 | 0.03247 CDC7      |
| cg27016990 | 0.01394 | 0.01522 | 0.40691 | 0.29862 | 0.12267 | 0.01288 | 0.04981 | 0.01102 | 0.52042 | 0.58315 KCNQ3     |
| cg27018070 | 0.04299 | 0.05017 | 0.05321 | 0.0614  | 0.07152 | 0.0632  | 0.0583  | 0.05448 | 0.05009 | 0.04726 FHL3      |
| cg27019278 | 0.83377 | 0.81671 | 0.81984 | 0.8365  | 0.75803 | 0.81013 | 0.77867 | 0.68199 | 0.12405 | 0.1271 EMCN       |
| cg27020281 | 0.02842 | 0.02945 | 0.03248 | 0.03398 | 0.02829 | 0.03026 | 0.03065 | 0.02985 | 0.02431 | 0.02495 NOL11     |
| cg27020690 | 0.62444 | 0.73176 | 0.10116 | 0.14834 | 0.13185 | 0.04246 | 0.40571 | 0.17743 | 0.05998 | 0.05082 TERC      |
| cg27022827 | 0.43202 | 0.07441 | 0.23486 | 0.44526 | 0.25476 | 0.14401 | 0.05798 | 0.0604  | 0.19774 | 0.06231 TJP3      |

|            |         |         |         |         |         |         |         |         |         |                   |
|------------|---------|---------|---------|---------|---------|---------|---------|---------|---------|-------------------|
| cg27024922 | 0.048   | 0.04403 | 0.22712 | 0.23304 | 0.80906 | 0.44841 | 0.88122 | 0.69557 | 0.11604 | 0.05077 POMT1     |
| cg27025856 | 0.30793 | 0.53901 | 0.68605 | 0.76311 | 0.15909 | 0.07129 | 0.53617 | 0.05922 | 0.55234 | 0.07599 HDAC11    |
| cg27026509 | 0.04147 | 0.04574 | 0.04125 | 0.04474 | 0.03013 | 0.04481 | 0.04484 | 0.04041 | 0.03442 | 0.03412 EIF2C1    |
| cg27027803 | 0.76224 | 0.7383  | 0.67432 | 0.68719 | 0.8271  | 0.59018 | 0.62517 | 0.65062 | 0.66045 | 0.64675 GNAS      |
| cg27028749 | 0.04721 | 0.05351 | 0.05154 | 0.04753 | 0.10291 | 0.0867  | 0.04447 | 0.03918 | 0.03658 | 0.03502 ABT1      |
| cg27032184 | 0.48053 | 0.18693 | 0.61886 | 0.48509 | 0.76625 | 0.40339 | 0.94954 | 0.82116 | 0.84603 | 0.75033 TRMU      |
| cg27032352 | 0.09245 | 0.08617 | 0.13557 | 0.16548 | 0.20542 | 0.11725 | 0.07929 | 0.07981 | 0.06806 | 0.09524 C21orf94  |
| cg27033479 | 0.05911 | 0.04424 | 0.16264 | 0.14614 | 0.39739 | 0.24267 | 0.14733 | 0.04043 | 0.04288 | 0.0322 TMEM44     |
| cg27034836 | 0.8208  | 0.32922 | 0.29657 | 0.25822 | 0.09914 | 0.09691 | 0.09531 | 0.07946 | 0.07953 | 0.06756 GLB1      |
| cg27035169 | 0.33954 | 0.29007 | 0.49603 | 0.4185  | 0.51578 | 0.70224 | 0.53705 | 0.27263 | 0.73267 | 0.66161 SLC7A8    |
| cg27035806 | 0.90052 | 0.90445 | 0.90375 | 0.9154  | 0.91863 | 0.89104 | 0.89608 | 0.8984  | 0.92402 | 0.90885 HSPC111   |
| cg27037648 | 0.02895 | 0.02179 | 0.02095 | 0.01936 | 0.02034 | 0.01689 | 0.02002 | 0.01617 | 0.01902 | 0.01541 CASKIN2   |
| cg27038197 | 0.02552 | 0.02473 | 0.02694 | 0.02815 | 0.01944 | 0.02129 | 0.02442 | 0.02034 | 0.02082 | 0.02114 C6orf152  |
| cg27038439 | 0.97115 | 0.95792 | 0.96356 | 0.9637  | 0.95245 | 0.95706 | 0.96665 | 0.97026 | 0.97275 | 0.96475 MSX1      |
| cg27039606 | 0.84864 | 0.83446 | 0.84122 | 0.87359 | 0.22874 | 0.35761 | 0.84587 | 0.84685 | 0.07996 | 0.06679 PRODH2    |
| cg27040030 | 0.16915 | 0.24997 | 0.55647 | 0.62553 | 0.94217 | 0.89468 | 0.42286 | 0.54657 | 0.89966 | 0.89484 PDIA2     |
| cg27040423 | 0.13245 | 0.05872 | 0.06853 | 0.0775  | 0.28795 | 0.2876  | 0.07221 | 0.06605 | 0.05962 | 0.05861 CHFR      |
| cg27041096 | 0.58558 | 0.52586 | 0.66342 | 0.66269 | 0.84651 | 0.8919  | 0.77836 | 0.70243 | 0.40978 | 0.4008 COLEC10    |
| cg27042767 | 0.03968 | 0.03993 | 0.03685 | 0.03248 | 0.03025 | 0.03297 | 0.02916 | 0.0307  | 0.0269  | 0.02627 DDX3X     |
| cg27043141 | 0.65846 | 0.2896  | 0.67797 | 0.73552 | 0.66198 | 0.57532 | 0.69064 | 0.59479 | 0.72973 | 0.70778 GCET2     |
| cg27043427 | 0.0325  | 0.02935 | 0.03188 | 0.03004 | 0.02317 | 0.02561 | 0.02781 | 0.02803 | 0.02561 | 0.02419 PSMD12    |
| cg27043582 | 0.08708 | 0.09125 | 0.09608 | 0.09247 | 0.08848 | 0.08058 | 0.10502 | 0.16384 | 0.07158 | 0.09153 RNF170    |
| cg27043630 | 0.05826 | 0.05368 | 0.05198 | 0.05755 | 0.08719 | 0.06078 | 0.04082 | 0.04479 | 0.05157 | 0.04425 MYD88     |
| cg27043873 | 0.40589 | 0.15584 | 0.61983 | 0.69127 | 0.70104 | 0.81883 | 0.22321 | 0.20017 | 0.11935 | 0.14142 CDH18     |
| cg27044702 | 0.43102 | 0.27375 | 0.64624 | 0.66321 | 0.88831 | 0.6862  | 0.36137 | 0.12825 | 0.50084 | 0.45169 TPSAB1    |
| cg27049761 | 0.0414  | 0.03628 | 0.54045 | 0.54006 | 0.59171 | 0.39383 | 0.0346  | 0.03068 | 0.03153 | 0.02609 B3GNT4    |
| cg27050763 | 0.86942 | 0.93882 | 0.82493 | 0.82577 | 0.9427  | 0.93587 | 0.86057 | 0.39983 | 0.82194 | 0.82993 AHCTF1    |
| cg27050793 | 0.49959 | 0.36885 | 0.85884 | 0.89081 | 0.92054 | 0.87191 | 0.40887 | 0.46811 | 0.91366 | 0.69104 SBSN      |
| cg27056119 | 0.86964 | 0.42642 | 0.02923 | 0.02616 | 0.08601 | 0.04673 | 0.33141 | 0.05423 | 0.02638 | 0.02527 SERPINB1  |
| cg27056145 | 0.87251 | 0.87918 | 0.88256 | 0.89644 | 0.85633 | 0.85374 | 0.89575 | 0.91974 | 0.90731 | 0.88381 ATG7      |
| cg27056559 | 0.83697 | 0.84692 | 0.83739 | 0.85605 | 0.84791 | 0.8501  | 0.77092 | 0.83649 | 0.85935 | 0.853 MGMT        |
| cg27056853 | 0.04076 | 0.0422  | 0.04616 | 0.0461  | 0.04455 | 0.041   | 0.04824 | 0.04656 | 0.03828 | 0.04808 DPP8      |
| cg27059238 | 0.30432 | 0.2965  | 0.12985 | 0.16293 | 0.36012 | 0.40455 | 0.36715 | 0.38942 | 0.36474 | 0.34679 HIST1H2BI |
| cg27060381 | 0.1148  | 0.08587 | 0.67871 | 0.73221 | 0.36081 | 0.37154 | 0.24215 | 0.08179 | 0.8444  | 0.40549 TBC1D10A  |
| cg27061366 | 0.03315 | 0.02819 | 0.02911 | 0.02503 | 0.0188  | 0.02176 | 0.02628 | 0.02702 | 0.02    | 0.01914 FARSLA    |
| cg27061947 | 0.04341 | 0.03998 | 0.04839 | 0.05021 | 0.04334 | 0.0406  | 0.03945 | 0.03975 | 0.03464 | 0.03435 COL4A3BP  |
| cg27062284 | 0.02975 | 0.028   | 0.03245 | 0.02786 | 0.02797 | 0.0254  | 0.02617 | 0.02409 | 0.02785 | 0.02579 RGS2      |
| cg27062617 | 0.0285  | 0.03517 | 0.03401 | 0.03524 | 0.02546 | 0.03908 | 0.02907 | 0.03204 | 0.02221 | 0.02293 FHOD1     |
| cg27063525 | 0.03788 | 0.03095 | 0.03089 | 0.03165 | 0.03066 | 0.0315  | 0.28955 | 0.30687 | 0.02469 | 0.02201 C6orf68   |
| cg27063607 | 0.04991 | 0.04464 | 0.04559 | 0.04448 | 0.05703 | 0.04581 | 0.03401 | 0.03564 | 0.0421  | 0.03569 MRPL33    |
| cg27063986 | 0.25914 | 0.29699 | 0.81427 | 0.85753 | 0.49834 | 0.44946 | 0.52908 | 0.43987 | 0.20367 | 0.22815 NDST4     |

|            |         |         |         |         |         |         |         |         |         |         |           |
|------------|---------|---------|---------|---------|---------|---------|---------|---------|---------|---------|-----------|
| cg27065979 | 0.89671 | 0.89461 | 0.8966  | 0.90874 | 0.9242  | 0.9034  | 0.88595 | 0.88021 | 0.89449 | 0.65869 | NEK3      |
| cg27067618 | 0.09009 | 0.07872 | 0.09429 | 0.08459 | 0.08358 | 0.06465 | 0.07236 | 0.06269 | 0.06873 | 0.05858 | CYP4F3    |
| cg27067621 | 0.54207 | 0.38938 | 0.72956 | 0.76559 | 0.6124  | 0.68037 | 0.31046 | 0.39543 | 0.13335 | 0.14578 | NOX1      |
| cg27068170 | 0.03826 | 0.03933 | 0.04768 | 0.04444 | 0.0667  | 0.03703 | 0.04836 | 0.03225 | 0.0371  | 0.04096 | HSD17B12  |
| cg27069263 | 0.0585  | 0.05947 | 0.06458 | 0.05829 | 0.06766 | 0.06518 | 0.05353 | 0.05086 | 0.05234 | 0.11002 | RTN4      |
| cg27069753 | 0.27374 | 0.15494 | 0.22608 | 0.32884 | 0.50876 | 0.5701  | 0.12505 | 0.1716  | 0.08667 | 0.05679 | ELA3B     |
| cg27070899 | 0.87284 | 0.60096 | 0.76056 | 0.83345 | 0.96181 | 0.88118 | 0.88025 | 0.82154 | 0.80037 | 0.72418 | GGT2      |
| cg27071517 | 0.50113 | 0.54904 | 0.63359 | 0.75908 | 0.79539 | 0.8474  | 0.2257  | 0.20352 | 0.41076 | 0.42243 | KRTAP13-1 |
| cg27072323 | 0.04717 | 0.05142 | 0.05118 | 0.0509  | 0.03977 | 0.04719 | 0.04273 | 0.04609 | 0.04465 | 0.04413 | CAP1      |
| cg27072387 | 0.05071 | 0.05755 | 0.10214 | 0.05818 | 0.06026 | 0.04398 | 0.04527 | 0.04147 | 0.15508 | 0.04792 | LTBP1     |
| cg27074297 | 0.02951 | 0.03185 | 0.02699 | 0.02537 | 0.02548 | 0.02546 | 0.02438 | 0.02737 | 0.023   | 0.02404 | SOS1      |
| cg27076046 | 0.47324 | 0.17643 | 0.4394  | 0.64681 | 0.59494 | 0.14251 | 0.25569 | 0.10263 | 0.34374 | 0.09398 | DNMT3L    |
| cg27076139 | 0.03865 | 0.03338 | 0.39452 | 0.48889 | 0.0939  | 0.05393 | 0.03655 | 0.03607 | 0.02989 | 0.03004 | ADCYAP1R1 |
| cg27076799 | 0.06527 | 0.07243 | 0.09127 | 0.08972 | 0.09872 | 0.08556 | 0.08235 | 0.08656 | 0.07054 | 0.07021 | POLD3     |
| cg27076812 | 0.06743 | 0.06484 | 0.07747 | 0.08339 | 0.07178 | 0.04955 | 0.06446 | 0.06672 | 0.05289 | 0.05741 | TM7SF3    |
| cg27077685 | 0.89844 | 0.89423 | 0.89349 | 0.88969 | 0.87671 | 0.85604 | 0.88521 | 0.88612 | 0.91833 | 0.90407 | SLC7A6OS  |
| cg27079104 | 0.7304  | 0.58338 | 0.04538 | 0.03799 | 0.03295 | 0.03332 | 0.04733 | 0.04032 | 0.10263 | 0.03234 | HEXA      |
| cg27079464 | 0.18258 | 0.12075 | 0.2466  | 0.2086  | 0.35982 | 0.11384 | 0.16889 | 0.11102 | 0.17507 | 0.10888 | CBX8      |
| cg27081230 | 0.62062 | 0.11049 | 0.51299 | 0.71672 | 0.53722 | 0.79853 | 0.72782 | 0.218   | 0.41965 | 0.20462 | SLIC1     |
| cg27083787 | 0.90408 | 0.56448 | 0.89883 | 0.91329 | 0.87994 | 0.88751 | 0.80429 | 0.78668 | 0.90007 | 0.87792 | IL1A      |
| cg27087525 | 0.0523  | 0.04409 | 0.05351 | 0.06009 | 0.05683 | 0.05507 | 0.03121 | 0.03689 | 0.04243 | 0.03178 | FAM8A1    |
| cg27087572 | 0.06697 | 0.06337 | 0.06144 | 0.0548  | 0.03284 | 0.04898 | 0.07092 | 0.06301 | 0.05073 | 0.05268 | LSM1      |
| cg27087809 | 0.46746 | 0.13906 | 0.65006 | 0.80467 | 0.79051 | 0.90207 | 0.76086 | 0.73778 | 0.09597 | 0.09987 | ACSBG1    |
| cg27088655 | 0.01964 | 0.02251 | 0.03285 | 0.02342 | 0.31923 | 0.06223 | 0.02121 | 0.01898 | 0.03067 | 0.01432 | FBXL16    |
| cg27088844 | 0.04264 | 0.04214 | 0.04753 | 0.05437 | 0.04792 | 0.04534 | 0.05153 | 0.04454 | 0.03457 | 0.04296 | EZH1      |
| cg27088877 | 0.02016 | 0.01933 | 0.01648 | 0.01738 | 0.01894 | 0.01936 | 0.01458 | 0.01576 | 0.01441 | 0.01454 | MON1A     |
| cg27089714 | 0.45835 | 0.20665 | 0.73146 | 0.73846 | 0.75362 | 0.69751 | 0.58312 | 0.44717 | 0.32117 | 0.52208 | KIAA0196  |
| cg27089973 | 0.04808 | 0.05442 | 0.06732 | 0.06102 | 0.08196 | 0.08583 | 0.05662 | 0.05567 | 0.04494 | 0.03981 | DMTF1     |
| cg27090024 | 0.1256  | 0.10284 | 0.09689 | 0.08198 | 0.08899 | 0.09738 | 0.08761 | 0.07721 | 0.08629 | 0.08262 | CHKA      |
| cg27090087 | 0.18779 | 0.20863 | 0.50904 | 0.52838 | 0.38364 | 0.23169 | 0.14186 | 0.54949 | 0.10339 | 0.11641 | TINAG     |
| cg27090216 | 0.07662 | 0.02439 | 0.97528 | 0.97699 | 0.97253 | 0.97047 | 0.58747 | 0.02889 | 0.58854 | 0.15073 | TNFRSF10C |
| cg27091233 | 0.02395 | 0.02514 | 0.02676 | 0.02686 | 0.03446 | 0.02665 | 0.02348 | 0.02449 | 0.06851 | 0.02144 | BAT3      |
| cg27091343 | 0.72066 | 0.39718 | 0.67773 | 0.77797 | 0.61685 | 0.72481 | 0.59997 | 0.47531 | 0.53747 | 0.52669 | TRIM15    |
| cg27091703 | 0.08027 | 0.09051 | 0.09663 | 0.08891 | 0.10496 | 0.09036 | 0.09971 | 0.08305 | 0.06918 | 0.098   | RAD54B    |
| cg27091787 | 0.71636 | 0.72244 | 0.67822 | 0.7626  | 0.60985 | 0.67086 | 0.75772 | 0.75349 | 0.74264 | 0.75217 | HYAL2     |
| cg27092035 | 0.04502 | 0.04321 | 0.36683 | 0.46554 | 0.50881 | 0.67813 | 0.03759 | 0.03913 | 0.18748 | 0.03574 | ARL10     |
| cg27094076 | 0.56969 | 0.16349 | 0.69452 | 0.80048 | 0.63664 | 0.76919 | 0.34018 | 0.3613  | 0.37608 | 0.26879 | ZBPB      |
| cg27094188 | 0.90018 | 0.86444 | 0.84157 | 0.87402 | 0.8195  | 0.8178  | 0.8544  | 0.87129 | 0.85017 | 0.80445 | EIF2C1    |
| cg27096144 | 0.03812 | 0.07527 | 0.03601 | 0.03854 | 0.02442 | 0.03086 | 0.03192 | 0.03232 | 0.0294  | 0.02733 | MSX2      |
| cg27100123 | 0.90168 | 0.68184 | 0.87831 | 0.89629 | 0.8842  | 0.86045 | 0.87639 | 0.76736 | 0.90539 | 0.84299 | SERPIN8   |
| cg27104271 | 0.11873 | 0.09273 | 0.34926 | 0.41603 | 0.20091 | 0.25648 | 0.08637 | 0.07417 | 0.07136 | 0.06937 | SLCO2B1   |

|            |         |         |         |         |         |         |         |         |         |         |           |
|------------|---------|---------|---------|---------|---------|---------|---------|---------|---------|---------|-----------|
| cg27105123 | 0.43936 | 0.26887 | 0.08249 | 0.11806 | 0.08172 | 0.08091 | 0.07108 | 0.07007 | 0.0678  | 0.06014 | EPS8L1    |
| cg27106233 | 0.04122 | 0.03892 | 0.03855 | 0.03382 | 0.0322  | 0.02728 | 0.02816 | 0.03082 | 0.02946 | 0.02616 | DDIT4     |
| cg27108154 | 0.91929 | 0.92952 | 0.92441 | 0.92694 | 0.91071 | 0.91183 | 0.88361 | 0.94412 | 0.89892 | 0.87374 | PDHA2     |
| cg27109647 | 0.07063 | 0.07437 | 0.12403 | 0.09997 | 0.22766 | 0.14429 | 0.06975 | 0.06387 | 0.05516 | 0.0551  | PSMC2     |
| cg27109971 | 0.2148  | 0.23428 | 0.22271 | 0.21584 | 0.23045 | 0.17787 | 0.18003 | 0.17639 | 0.1869  | 0.18137 | THOC1     |
| cg27112247 | 0.29644 | 0.35794 | 0.38969 | 0.40064 | 0.38462 | 0.33823 | 0.47499 | 0.42415 | 0.47673 | 0.45224 | TMED2     |
| cg27114026 | 0.84876 | 0.62816 | 0.87245 | 0.86472 | 0.87781 | 0.86596 | 0.84081 | 0.85257 | 0.89329 | 0.77458 | ELA1      |
| cg27114086 | 0.02623 | 0.02971 | 0.02655 | 0.02518 | 0.01508 | 0.02786 | 0.02647 | 0.02548 | 0.02637 | 0.02365 | YY1AP1    |
| cg27114120 | 0.19558 | 0.04678 | 0.89643 | 0.86873 | 0.94535 | 0.93555 | 0.66698 | 0.91443 | 0.16886 | 0.30983 | PROKR2    |
| cg27116713 | 0.01971 | 0.01988 | 0.01962 | 0.01901 | 0.01672 | 0.0173  | 0.017   | 0.01527 | 0.01676 | 0.01645 | GRK6      |
| cg27117399 | 0.7428  | 0.30841 | 0.7021  | 0.82226 | 0.81593 | 0.76703 | 0.69766 | 0.79875 | 0.19255 | 0.38772 | CNDP1     |
| cg27118809 | 0.08474 | 0.04742 | 0.03587 | 0.04159 | 0.02799 | 0.03438 | 0.0344  | 0.03132 | 0.0327  | 0.03119 | FLJ20699  |
| cg27118825 | 0.40583 | 0.40932 | 0.78638 | 0.80368 | 0.888   | 0.72968 | 0.79552 | 0.67278 | 0.81814 | 0.50348 | RSHL1     |
| cg27119222 | 0.41783 | 0.35234 | 0.24342 | 0.23459 | 0.35949 | 0.21676 | 0.46613 | 0.46329 | 0.47762 | 0.45403 | KCNQ1     |
| cg27119451 | 0.06939 | 0.06598 | 0.08235 | 0.07497 | 0.08224 | 0.06244 | 0.07725 | 0.06621 | 0.04735 | 0.0487  | BRD8      |
| cg27120999 | 0.63605 | 0.72316 | 0.61649 | 0.68235 | 0.96328 | 0.96229 | 0.96894 | 0.97251 | 0.96535 | 0.96956 | HSPA2     |
| cg27121132 | 0.07602 | 0.0634  | 0.13424 | 0.23353 | 0.06132 | 0.03956 | 0.04563 | 0.04189 | 0.06874 | 0.05598 | DERL1     |
| cg27124774 | 0.214   | 0.16337 | 0.23623 | 0.28255 | 0.21411 | 0.15379 | 0.22295 | 0.17481 | 0.13465 | 0.14501 | PCDHB10   |
| cg27126442 | 0.83063 | 0.83755 | 0.78017 | 0.77541 | 0.77432 | 0.79066 | 0.78627 | 0.79098 | 0.50114 | 0.2538  | FLJ20184  |
| cg27127056 | 0.04309 | 0.04574 | 0.05239 | 0.04685 | 0.03462 | 0.03694 | 0.03887 | 0.038   | 0.03512 | 0.03579 | FLJ20280  |
| cg27132814 | 0.18555 | 0.06427 | 0.10342 | 0.10652 | 0.15158 | 0.11079 | 0.07619 | 0.43088 | 0.06254 | 0.05288 | C2orf79   |
| cg27133864 | 0.10345 | 0.10451 | 0.12795 | 0.1212  | 0.21812 | 0.1389  | 0.08692 | 0.06943 | 0.84863 | 0.81514 | HIST1H2AE |
| cg27138018 | 0.37847 | 0.33175 | 0.24033 | 0.34229 | 0.47878 | 0.29436 | 0.11837 | 0.09082 | 0.62862 | 0.60776 | HAPLN2    |
| cg27138584 | 0.29686 | 0.29633 | 0.70983 | 0.70629 | 0.45822 | 0.42631 | 0.13186 | 0.05512 | 0.09159 | 0.02842 | KCNK12    |
| cg27140220 | 0.04326 | 0.04579 | 0.07073 | 0.05825 | 0.08685 | 0.05001 | 0.0501  | 0.04966 | 0.04757 | 0.04995 | PKIA      |
| cg27140880 | 0.04182 | 0.03889 | 0.04302 | 0.03936 | 0.04592 | 0.04814 | 0.03801 | 0.03655 | 0.03968 | 0.03867 | RPL37A    |
| cg27141427 | 0.11255 | 0.08694 | 0.0741  | 0.06631 | 0.15778 | 0.10485 | 0.08883 | 0.07838 | 0.08609 | 0.08917 | KIAA0247  |
| cg27143049 | 0.15211 | 0.1522  | 0.07766 | 0.10751 | 0.07298 | 0.09174 | 0.10276 | 0.14409 | 0.0826  | 0.09586 | PDE3B     |
| cg27143938 | 0.04553 | 0.04694 | 0.05004 | 0.04593 | 0.03421 | 0.0403  | 0.04902 | 0.04339 | 0.05314 | 0.03986 | ZNF211    |
| cg27144162 | 0.04536 | 0.02968 | 0.03279 | 0.02605 | 0.04121 | 0.03602 | 0.02573 | 0.02616 | 0.02668 | 0.03188 | CNIH      |
| cg27144395 | 0.04411 | 0.04047 | 0.06328 | 0.06194 | 0.07726 | 0.04893 | 0.04665 | 0.04271 | 0.04404 | 0.0413  | FOXN4     |
| cg27146152 | 0.23252 | 0.0773  | 0.31371 | 0.44384 | 0.03245 | 0.03201 | 0.75389 | 0.16828 | 0.02258 | 0.02869 | BIRC4BP   |
| cg27147004 | 0.77068 | 0.71727 | 0.88081 | 0.91136 | 0.8997  | 0.89265 | 0.56122 | 0.52869 | 0.75556 | 0.75816 | PIWIL1    |
| cg27147306 | 0.064   | 0.07052 | 0.07703 | 0.08223 | 0.07048 | 0.06497 | 0.07262 | 0.07803 | 0.07249 | 0.06653 | STK3      |
| cg27149093 | 0.76626 | 0.79468 | 0.71096 | 0.74693 | 0.45353 | 0.60421 | 0.59983 | 0.72702 | 0.7435  | 0.73331 | SLC41A2   |
| cg27152280 | 0.03677 | 0.03955 | 0.03452 | 0.03648 | 0.02579 | 0.02843 | 0.03152 | 0.03182 | 0.02646 | 0.02562 | NRG2      |
| cg27153400 | 0.02291 | 0.02222 | 0.02282 | 0.02238 | 0.02086 | 0.02002 | 0.01463 | 0.01711 | 0.01862 | 0.01789 | ISOC2     |
| cg27154163 | 0.63914 | 0.0407  | 0.49609 | 0.51432 | 0.53167 | 0.89881 | 0.519   | 0.15556 | 0.94295 | 0.88675 | KIT       |
| cg27155653 | 0.03188 | 0.03125 | 0.03372 | 0.02692 | 0.02743 | 0.02865 | 0.02755 | 0.02528 | 0.02574 | 0.02635 | ARPC5     |
| cg27157038 | 0.82113 | 0.82594 | 0.75962 | 0.82697 | 0.77842 | 0.84491 | 0.64314 | 0.70328 | 0.83027 | 0.77344 | DNTT      |
| cg27158143 | 0.08051 | 0.05404 | 0.05658 | 0.05234 | 0.05946 | 0.04539 | 0.03947 | 0.0457  | 0.05222 | 0.04277 | EIF3S7    |

|            |         |         |         |         |         |         |         |         |         |         |          |
|------------|---------|---------|---------|---------|---------|---------|---------|---------|---------|---------|----------|
| cg27158867 | 0.07004 | 0.03574 | 0.21724 | 0.18955 | 0.92764 | 0.65636 | 0.32921 | 0.03728 | 0.4463  | 0.02622 | LRRCS6   |
| cg27159719 | 0.58648 | 0.64865 | 0.53941 | 0.57996 | 0.80326 | 0.80225 | 0.43121 | 0.24522 | 0.30168 | 0.31022 | TMEM71   |
| cg27160701 | 0.77993 | 0.84965 | 0.24115 | 0.26598 | 0.26402 | 0.15852 | 0.17665 | 0.15339 | 0.1339  | 0.1468  | SBEM     |
| cg27161973 | 0.04996 | 0.04509 | 0.05023 | 0.04644 | 0.04635 | 0.05553 | 0.0471  | 0.04993 | 0.04039 | 0.03841 | DDX27    |
| cg27164762 | 0.02877 | 0.02757 | 0.02499 | 0.02624 | 0.02011 | 0.02642 | 0.02811 | 0.02159 | 0.02613 | 0.02318 | HIGD2A   |
| cg27165888 | 0.05203 | 0.05296 | 0.05246 | 0.0545  | 0.03342 | 0.0436  | 0.04754 | 0.04629 | 0.04506 | 0.03541 | PMF1     |
| cg27167439 | 0.07099 | 0.07581 | 0.07797 | 0.07296 | 0.05353 | 0.06786 | 0.06287 | 0.06249 | 0.06445 | 0.06106 | C1orf21  |
| cg27167601 | 0.67955 | 0.23821 | 0.31438 | 0.57912 | 0.26729 | 0.11716 | 0.47772 | 0.07693 | 0.07948 | 0.06233 | RORA     |
| cg27168073 | 0.03754 | 0.03788 | 0.03785 | 0.03849 | 0.02507 | 0.03692 | 0.03579 | 0.03558 | 0.03089 | 0.03184 | NOMO2    |
| cg27168844 | 0.60353 | 0.42334 | 0.49539 | 0.67068 | 0.20156 | 0.24362 | 0.16094 | 0.12443 | 0.11243 | 0.10939 | IL17     |
| cg27169020 | 0.899   | 0.18354 | 0.05894 | 0.05869 | 0.91736 | 0.90468 | 0.18357 | 0.20864 | 0.92157 | 0.90851 | BNC1     |
| cg27170159 | 0.48422 | 0.33668 | 0.40442 | 0.41061 | 0.53287 | 0.29347 | 0.33913 | 0.35482 | 0.26809 | 0.3302  | SPAG1    |
| cg27170298 | 0.09583 | 0.08588 | 0.12945 | 0.0994  | 0.22134 | 0.12627 | 0.12483 | 0.07751 | 0.12611 | 0.14076 | BCS1L    |
| cg27173322 | 0.02034 | 0.02185 | 0.02319 | 0.02143 | 0.03646 | 0.01861 | 0.01851 | 0.02062 | 0.01923 | 0.01598 | FADS1    |
| cg27176392 | 0.86218 | 0.30226 | 0.88441 | 0.89342 | 0.79808 | 0.20293 | 0.8227  | 0.37163 | 0.92    | 0.75557 | GNG7     |
| cg27176536 | 0.40672 | 0.19991 | 0.55791 | 0.60438 | 0.59942 | 0.66772 | 0.49422 | 0.37609 | 0.55507 | 0.43402 | RAB26    |
| cg27177839 | 0.05473 | 0.03866 | 0.77309 | 0.86532 | 0.90121 | 0.77971 | 0.79135 | 0.04491 | 0.75096 | 0.07612 | JAG2     |
| cg27178345 | 0.87468 | 0.87597 | 0.87152 | 0.88791 | 0.90222 | 0.88763 | 0.85698 | 0.76956 | 0.88258 | 0.88748 | CSH2     |
| cg27180443 | 0.62824 | 0.46348 | 0.71417 | 0.76903 | 0.65854 | 0.55541 | 0.31469 | 0.41669 | 0.56037 | 0.42169 | SCARB1   |
| cg27181079 | 0.07979 | 0.08188 | 0.18988 | 0.19399 | 0.10224 | 0.09703 | 0.11911 | 0.11778 | 0.15584 | 0.10959 | FLJ10292 |
| cg27182551 | 0.96115 | 0.94302 | 0.96623 | 0.96467 | 0.97634 | 0.94992 | 0.96837 | 0.96699 | 0.97237 | 0.96738 | RB1      |
| cg27182555 | 0.02897 | 0.03062 | 0.02907 | 0.02392 | 0.02139 | 0.02609 | 0.02436 | 0.0238  | 0.02049 | 0.02493 | THAP9    |
| cg27182761 | 0.8624  | 0.83373 | 0.11888 | 0.1035  | 0.38766 | 0.06571 | 0.16899 | 0.0606  | 0.06533 | 0.06504 | PHLDA1   |
| cg27183007 | 0.748   | 0.67251 | 0.84916 | 0.85591 | 0.89777 | 0.84111 | 0.82911 | 0.86432 | 0.75409 | 0.78307 | ZPBP     |
| cg27185377 | 0.13323 | 0.10581 | 0.12736 | 0.09562 | 0.13066 | 0.11215 | 0.13625 | 0.10438 | 0.0902  | 0.08088 | PTTG1    |
| cg27187881 | 0.16415 | 0.07405 | 0.27035 | 0.30849 | 0.31432 | 0.28099 | 0.13689 | 0.09465 | 0.07504 | 0.05396 | NAGA     |
| cg27188703 | 0.65972 | 0.39656 | 0.7098  | 0.7781  | 0.9074  | 0.76934 | 0.65999 | 0.3653  | 0.12344 | 0.08112 | FAIM2    |
| cg27190239 | 0.46647 | 0.20063 | 0.46786 | 0.65493 | 0.44907 | 0.5342  | 0.13682 | 0.16562 | 0.14394 | 0.11392 | CLEC2A   |
| cg27190537 | 0.03939 | 0.03883 | 0.03897 | 0.04361 | 0.04219 | 0.0428  | 0.04218 | 0.0493  | 0.03058 | 0.03634 | SUMF2    |
| cg27193335 | 0.0512  | 0.05836 | 0.05032 | 0.05028 | 0.08425 | 0.07532 | 0.04404 | 0.04095 | 0.04243 | 0.05081 | EIF1B    |
| cg27194614 | 0.03936 | 0.04006 | 0.0668  | 0.0613  | 0.04222 | 0.04043 | 0.04393 | 0.04456 | 0.03141 | 0.02726 | STK4     |
| cg27194921 | 0.04871 | 0.04614 | 0.64945 | 0.70978 | 0.2379  | 0.25131 | 0.04742 | 0.04965 | 0.03855 | 0.04091 | PXMP4    |
| cg27195224 | 0.23058 | 0.12905 | 0.29862 | 0.44402 | 0.21638 | 0.13461 | 0.12693 | 0.11722 | 0.5385  | 0.24122 | BPIL2    |
| cg27195917 | 0.07113 | 0.06519 | 0.08602 | 0.08533 | 0.0766  | 0.05259 | 0.05705 | 0.05738 | 0.05838 | 0.04784 | COPG2    |
| cg27196102 | 0.04441 | 0.04499 | 0.05819 | 0.06959 | 0.05687 | 0.0391  | 0.04316 | 0.04052 | 0.03063 | 0.04052 | COG7     |
| cg27196129 | 0.05577 | 0.05567 | 0.05171 | 0.05801 | 0.04159 | 0.04361 | 0.04918 | 0.05054 | 0.04317 | 0.03995 | C16orf58 |
| cg27196467 | 0.16404 | 0.16016 | 0.26351 | 0.32321 | 0.28117 | 0.19175 | 0.11765 | 0.69202 | 0.13514 | 0.1503  | KCNIP4   |
| cg27196745 | 0.08314 | 0.05387 | 0.53201 | 0.5677  | 0.0914  | 0.04994 | 0.11847 | 0.05325 | 0.77795 | 0.67989 | PTPRO    |
| cg27198071 | 0.1978  | 0.0939  | 0.04543 | 0.0556  | 0.07864 | 0.25473 | 0.32774 | 0.35072 | 0.02786 | 0.02995 | CXX1     |
| cg27198824 | 0.0425  | 0.04729 | 0.0827  | 0.11185 | 0.13919 | 0.04977 | 0.247   | 0.20261 | 0.09901 | 0.15682 | AFF2     |
| cg27199523 | 0.02237 | 0.02288 | 0.02748 | 0.0233  | 0.02124 | 0.02404 | 0.02029 | 0.02178 | 0.01877 | 0.02005 | CCDC28A  |

|            |         |         |         |         |         |         |         |         |         |         |          |
|------------|---------|---------|---------|---------|---------|---------|---------|---------|---------|---------|----------|
| cg27201297 | 0.13194 | 0.12636 | 0.1345  | 0.14349 | 0.23137 | 0.14759 | 0.11792 | 0.11119 | 0.18626 | 0.11922 | CTDSPL   |
| cg27202708 | 0.05254 | 0.02791 | 0.16201 | 0.49639 | 0.39419 | 0.65204 | 0.3724  | 0.03594 | 0.04814 | 0.03007 | C1orf65  |
| cg27204739 | 0.0295  | 0.02948 | 0.05225 | 0.10703 | 0.07928 | 0.02105 | 0.02815 | 0.02344 | 0.02035 | 0.01857 | ANKRD5   |
| cg27205791 | 0.03603 | 0.02827 | 0.03208 | 0.02947 | 0.0256  | 0.02882 | 0.02587 | 0.0323  | 0.02457 | 0.02436 | COPZ1    |
| cg27207041 | 0.04711 | 0.04228 | 0.07133 | 0.05258 | 0.07684 | 0.06744 | 0.06568 | 0.06158 | 0.06099 | 0.0626  | WDR50    |
| cg27207274 | 0.0473  | 0.04912 | 0.05739 | 0.0585  | 0.02891 | 0.03281 | 0.04384 | 0.04653 | 0.04824 | 0.04352 | MYC      |
| cg27208307 | 0.84084 | 0.67944 | 0.57108 | 0.55094 | 0.57358 | 0.5598  | 0.8122  | 0.57472 | 0.26218 | 0.10774 | PRG1     |
| cg27210136 | 0.18863 | 0.29563 | 0.8902  | 0.89566 | 0.83429 | 0.87555 | 0.75104 | 0.31432 | 0.72019 | 0.44583 | SP6      |
| cg27210390 | 0.06123 | 0.06011 | 0.07353 | 0.06818 | 0.06682 | 0.06015 | 0.07455 | 0.05858 | 0.34066 | 0.05904 | TOM1L1   |
| cg27210447 | 0.60759 | 0.29129 | 0.75463 | 0.80462 | 0.83776 | 0.83652 | 0.84668 | 0.85539 | 0.74588 | 0.73539 | CLCNKA   |
| cg27210766 | 0.02721 | 0.03232 | 0.04006 | 0.03116 | 0.02497 | 0.029   | 0.02935 | 0.02838 | 0.02622 | 0.02487 | BUB1     |
| cg27212099 | 0.06687 | 0.06888 | 0.0659  | 0.06621 | 0.05052 | 0.06306 | 0.05465 | 0.05994 | 0.06008 | 0.0623  | C2orf30  |
| cg27212359 | 0.02489 | 0.02845 | 0.02445 | 0.02313 | 0.02271 | 0.02477 | 0.02147 | 0.02386 | 0.05229 | 0.01991 | FRAT2    |
| cg27212977 | 0.79754 | 0.23898 | 0.42277 | 0.47271 | 0.11986 | 0.06433 | 0.06401 | 0.06861 | 0.05184 | 0.04816 | DEFA6    |
| cg27214365 | 0.38957 | 0.34779 | 0.7945  | 0.87714 | 0.62094 | 0.73545 | 0.47506 | 0.49236 | 0.53713 | 0.36665 | GYPB     |
| cg27214652 | 0.04041 | 0.04258 | 0.04006 | 0.04309 | 0.03433 | 0.03733 | 0.03359 | 0.0353  | 0.036   | 0.03481 | PPP2R5E  |
| cg27214774 | 0.38235 | 0.30639 | 0.88076 | 0.8964  | 0.3951  | 0.7154  | 0.28524 | 0.53453 | 0.26848 | 0.25316 | C2orf175 |
| cg27215108 | 0.06408 | 0.07295 | 0.06471 | 0.05823 | 0.04175 | 0.05591 | 0.05461 | 0.05857 | 0.06447 | 0.05701 | CD63     |
| cg27217148 | 0.28439 | 0.07669 | 0.53379 | 0.60554 | 0.23584 | 0.06877 | 0.26396 | 0.11861 | 0.08646 | 0.06263 | PCGF6    |
| cg27218220 | 0.55209 | 0.11873 | 0.94065 | 0.93464 | 0.9484  | 0.93865 | 0.87563 | 0.39337 | 0.95304 | 0.90523 | TTL11    |
| cg27219973 | 0.25024 | 0.1725  | 0.39581 | 0.37275 | 0.63542 | 0.39679 | 0.17451 | 0.11696 | 0.12888 | 0.07002 | GNRHR    |
| cg27221338 | 0.93031 | 0.94194 | 0.92983 | 0.94146 | 0.92427 | 0.93989 | 0.93281 | 0.93189 | 0.94446 | 0.95504 | KDEL2    |
| cg27222589 | 0.84441 | 0.82086 | 0.81861 | 0.82111 | 0.81812 | 0.73203 | 0.78148 | 0.7792  | 0.69615 | 0.77574 | K6IRS4   |
| cg27223047 | 0.19461 | 0.07245 | 0.06067 | 0.05093 | 0.42193 | 0.11505 | 0.06863 | 0.06551 | 0.89145 | 0.9167  | FBN2     |
| cg27223827 | 0.6572  | 0.21962 | 0.08026 | 0.06593 | 0.77005 | 0.42456 | 0.74813 | 0.1044  | 0.12865 | 0.05829 | FHL2     |
| cg27225570 | 0.01948 | 0.03872 | 0.03883 | 0.31217 | 0.10872 | 0.0193  | 0.02018 | 0.01957 | 0.01708 | 0.01277 | DUSP15   |
| cg27226214 | 0.78728 | 0.79598 | 0.82272 | 0.82524 | 0.74312 | 0.81214 | 0.8677  | 0.87337 | 0.85321 | 0.83271 | VHL      |
| cg27226618 | 0.37405 | 0.2204  | 0.36911 | 0.4081  | 0.63687 | 0.69869 | 0.51799 | 0.49174 | 0.79832 | 0.63607 | ACP1     |
| cg27226949 | 0.03273 | 0.04453 | 0.03898 | 0.04098 | 0.07147 | 0.05047 | 0.03317 | 0.03177 | 0.59248 | 0.49131 | EFNB2    |
| cg27227156 | 0.31106 | 0.20934 | 0.28185 | 0.24972 | 0.55074 | 0.59345 | 0.24101 | 0.21015 | 0.28571 | 0.17854 | FAM55A   |
| cg27227786 | 0.06949 | 0.07624 | 0.08226 | 0.07627 | 0.06289 | 0.09108 | 0.06979 | 0.07975 | 0.07048 | 0.07105 | DGKE     |
| cg27227797 | 0.86017 | 0.78538 | 0.71471 | 0.63821 | 0.9394  | 0.83088 | 0.78604 | 0.77399 | 0.87516 | 0.82333 | THEG     |
| cg27234090 | 0.05434 | 0.04924 | 0.5196  | 0.66705 | 0.63579 | 0.56089 | 0.48002 | 0.12413 | 0.25318 | 0.03446 | USP2     |
| cg27235662 | 0.79675 | 0.83931 | 0.8904  | 0.90702 | 0.91178 | 0.90749 | 0.74302 | 0.62166 | 0.83339 | 0.64515 | CLDN16   |
| cg27236973 | 0.76279 | 0.54073 | 0.58449 | 0.7372  | 0.39607 | 0.20984 | 0.07994 | 0.09078 | 0.1673  | 0.08181 | KRT17    |
| cg27238470 | 0.89293 | 0.73693 | 0.88278 | 0.86198 | 0.77808 | 0.78216 | 0.69476 | 0.20238 | 0.91806 | 0.82336 | EDN2     |
| cg27239147 | 0.04486 | 0.04753 | 0.0486  | 0.0385  | 0.03161 | 0.04583 | 0.0404  | 0.04553 | 0.03741 | 0.03261 | TUSC4    |
| cg27239157 | 0.15823 | 0.3863  | 0.51975 | 0.54424 | 0.38798 | 0.34399 | 0.71547 | 0.63055 | 0.44152 | 0.04651 | MCF2L2   |
| cg27239921 | 0.19135 | 0.2214  | 0.43396 | 0.44501 | 0.8908  | 0.81227 | 0.19225 | 0.06354 | 0.10315 | 0.33148 | CACNA1D  |
| cg27241190 | 0.04859 | 0.04544 | 0.05259 | 0.04928 | 0.04388 | 0.04692 | 0.05547 | 0.05658 | 0.05129 | 0.04042 | RND1     |
| cg27242945 | 0.03141 | 0.03163 | 0.03103 | 0.03097 | 0.022   | 0.03062 | 0.02594 | 0.02702 | 0.02874 | 0.02457 | CAV1     |

|            |         |         |         |         |         |         |         |         |         |         |           |
|------------|---------|---------|---------|---------|---------|---------|---------|---------|---------|---------|-----------|
| cg27243140 | 0.22613 | 0.07771 | 0.69387 | 0.76677 | 0.94566 | 0.52172 | 0.11815 | 0.03257 | 0.49282 | 0.17315 | OTOP3     |
| cg27244432 | 0.03838 | 0.03825 | 0.08081 | 0.07172 | 0.04435 | 0.03131 | 0.02999 | 0.04122 | 0.02969 | 0.02975 | ACP6      |
| cg27244482 | 0.8358  | 0.30347 | 0.90383 | 0.91761 | 0.90938 | 0.91402 | 0.90278 | 0.91766 | 0.916   | 0.8604  | CAMK2A    |
| cg27246571 | 0.95149 | 0.94815 | 0.94881 | 0.95934 | 0.98038 | 0.96652 | 0.95634 | 0.95076 | 0.96603 | 0.95542 | HAL       |
| cg27247832 | 0.30619 | 0.03554 | 0.60461 | 0.73015 | 0.83454 | 0.36236 | 0.31045 | 0.02996 | 0.05425 | 0.02588 | C16orf52  |
| cg27248887 | 0.4203  | 0.09641 | 0.10633 | 0.08604 | 0.52014 | 0.1002  | 0.17067 | 0.07329 | 0.11417 | 0.08893 | NDUFS1    |
| cg27250462 | 0.78553 | 0.79913 | 0.67667 | 0.71608 | 0.65433 | 0.7356  | 0.76374 | 0.79126 | 0.76026 | 0.73896 | OTEX      |
| cg27250759 | 0.04339 | 0.04824 | 0.05658 | 0.05285 | 0.06187 | 0.06892 | 0.03412 | 0.03063 | 0.03204 | 0.0321  | E2F3      |
| cg27250927 | 0.06232 | 0.06626 | 0.07813 | 0.0675  | 0.0789  | 0.07746 | 0.05943 | 0.06013 | 0.0653  | 0.05887 | HPS5      |
| cg27253386 | 0.0249  | 0.0255  | 0.0232  | 0.02419 | 0.01828 | 0.02202 | 0.01907 | 0.01707 | 0.01722 | 0.01758 | BRCA2     |
| cg27254601 | 0.03158 | 0.03036 | 0.03081 | 0.03411 | 0.02526 | 0.02792 | 0.02897 | 0.02789 | 0.02344 | 0.0258  | MAZ       |
| cg27256309 | 0.35191 | 0.27222 | 0.84696 | 0.8626  | 0.48834 | 0.08622 | 0.7698  | 0.16809 | 0.49313 | 0.03642 | FLJ36070  |
| cg27257408 | 0.85771 | 0.55711 | 0.64522 | 0.84493 | 0.9029  | 0.90461 | 0.36233 | 0.34756 | 0.08532 | 0.0593  | ACSBG1    |
| cg27257987 | 0.14675 | 0.11469 | 0.81596 | 0.87619 | 0.62814 | 0.65605 | 0.7722  | 0.39719 | 0.71802 | 0.68293 | PSG4      |
| cg27258399 | 0.92536 | 0.93398 | 0.71121 | 0.84236 | 0.94824 | 0.93063 | 0.90723 | 0.91667 | 0.93735 | 0.93583 | HTRA4     |
| cg27258787 | 0.05151 | 0.04331 | 0.05298 | 0.04974 | 0.04048 | 0.03784 | 0.03952 | 0.03939 | 0.03481 | 0.03018 | ILF3      |
| cg27261136 | 0.03342 | 0.03025 | 0.03177 | 0.02632 | 0.0245  | 0.0262  | 0.02705 | 0.02835 | 0.02531 | 0.02612 | ARL8A     |
| cg27262488 | 0.02951 | 0.0296  | 0.02633 | 0.03052 | 0.02785 | 0.02685 | 0.02453 | 0.02473 | 0.0243  | 0.02281 | ITCH      |
| cg27263448 | 0.90981 | 0.90724 | 0.89646 | 0.91237 | 0.88946 | 0.89718 | 0.92343 | 0.91337 | 0.92734 | 0.92087 | NAG8      |
| cg27264345 | 0.06844 | 0.04382 | 0.14156 | 0.09375 | 0.30437 | 0.23983 | 0.3198  | 0.16635 | 0.05388 | 0.02835 | REEP2     |
| cg27265637 | 0.06211 | 0.06636 | 0.07229 | 0.07054 | 0.06906 | 0.06662 | 0.06574 | 0.06741 | 0.05873 | 0.05585 | SEC24C    |
| cg27268486 | 0.03257 | 0.02752 | 0.04086 | 0.03473 | 0.03775 | 0.04235 | 0.03405 | 0.03075 | 0.02904 | 0.02683 | GNAI1     |
| cg27268717 | 0.06624 | 0.06003 | 0.11787 | 0.07705 | 0.0463  | 0.04545 | 0.04923 | 0.04826 | 0.0569  | 0.05556 | GBAS      |
| cg27269917 | 0.81358 | 0.41212 | 0.44324 | 0.67183 | 0.64816 | 0.74553 | 0.20649 | 0.17525 | 0.39503 | 0.09192 | SLC5A10   |
| cg27269921 | 0.02229 | 0.01992 | 0.02295 | 0.02319 | 0.01773 | 0.0195  | 0.01958 | 0.02157 | 0.01763 | 0.01486 | MN1       |
| cg27270218 | 0.07152 | 0.07868 | 0.0756  | 0.07043 | 0.04749 | 0.07103 | 0.0597  | 0.06663 | 0.07003 | 0.06574 | ITGB4BP   |
| cg27270684 | 0.43634 | 0.09379 | 0.35974 | 0.52605 | 0.8078  | 0.55352 | 0.43064 | 0.22474 | 0.22844 | 0.24778 | FKBP9L    |
| cg27271368 | 0.05401 | 0.0571  | 0.05984 | 0.05758 | 0.05606 | 0.04895 | 0.07412 | 0.05884 | 0.05227 | 0.04167 | AR        |
| cg27271445 | 0.04177 | 0.05301 | 0.0534  | 0.05053 | 0.04189 | 0.04843 | 0.53171 | 0.4743  | 0.04073 | 0.04157 | IDH3G     |
| cg27272402 | 0.90207 | 0.80458 | 0.91023 | 0.9266  | 0.92696 | 0.89432 | 0.89966 | 0.89407 | 0.91832 | 0.90913 | C20orf135 |
| cg27274028 | 0.02687 | 0.03053 | 0.03104 | 0.0348  | 0.02532 | 0.02559 | 0.03024 | 0.02731 | 0.02758 | 0.02495 | WDR37     |
| cg27274728 | 0.03873 | 0.03303 | 0.03765 | 0.03899 | 0.05205 | 0.04091 | 0.03624 | 0.03323 | 0.03478 | 0.03528 | CASP6     |
| cg27276456 | 0.43099 | 0.18618 | 0.87181 | 0.7849  | 0.91624 | 0.57623 | 0.48637 | 0.50254 | 0.82093 | 0.81739 | ZSCAN4    |
| cg27277403 | 0.1638  | 0.14717 | 0.20057 | 0.16467 | 0.21909 | 0.18054 | 0.2712  | 0.23757 | 0.1709  | 0.16492 | KMO       |
| cg27278294 | 0.89016 | 0.88898 | 0.79329 | 0.70436 | 0.55866 | 0.50497 | 0.54373 | 0.4743  | 0.67842 | 0.60995 | MTM1      |
| cg27278802 | 0.85854 | 0.89735 | 0.88434 | 0.90654 | 0.7362  | 0.47129 | 0.72237 | 0.5384  | 0.72349 | 0.86984 | CCS       |
| cg27279652 | 0.07066 | 0.04227 | 0.11784 | 0.10262 | 0.23033 | 0.05761 | 0.0321  | 0.02793 | 0.03285 | 0.02041 | ITPR2     |
| cg27281008 | 0.09429 | 0.11139 | 0.105   | 0.12152 | 0.10491 | 0.1026  | 0.10505 | 0.10592 | 0.08615 | 0.07709 | NARS2     |
| cg27281093 | 0.8714  | 0.43317 | 0.10287 | 0.11945 | 0.034   | 0.03108 | 0.04705 | 0.03642 | 0.61407 | 0.23586 | USP18     |
| cg27284019 | 0.05066 | 0.0426  | 0.06113 | 0.0616  | 0.06012 | 0.05578 | 0.04892 | 0.04446 | 0.05465 | 0.04743 | DDX20     |
| cg27285056 | 0.73395 | 0.46835 | 0.51366 | 0.589   | 0.78888 | 0.57426 | 0.32614 | 0.17801 | 0.86183 | 0.61119 | NAPSA     |



|            |         |         |         |         |         |         |         |         |         |         |          |
|------------|---------|---------|---------|---------|---------|---------|---------|---------|---------|---------|----------|
| cg27285278 | 0.06468 | 0.05267 | 0.06481 | 0.05799 | 0.05103 | 0.05708 | 0.05609 | 0.05572 | 0.05007 | 0.04113 | TRIM41   |
| cg27285599 | 0.89407 | 0.5881  | 0.89618 | 0.91947 | 0.91921 | 0.91187 | 0.91042 | 0.86423 | 0.92202 | 0.88394 | FLJ13841 |
| cg27285616 | 0.75561 | 0.34108 | 0.48774 | 0.67689 | 0.89547 | 0.67671 | 0.233   | 0.20312 | 0.16554 | 0.0734  | TNFRSF14 |
| cg27285720 | 0.80553 | 0.82678 | 0.4193  | 0.71948 | 0.60994 | 0.57068 | 0.54894 | 0.56394 | 0.16386 | 0.14941 | GBP4     |
| cg27286107 | 0.01903 | 0.02185 | 0.02573 | 0.02104 | 0.01844 | 0.02502 | 0.01982 | 0.02089 | 0.01688 | 0.01756 | CGGBP1   |
| cg27286999 | 0.04285 | 0.04333 | 0.20633 | 0.21307 | 0.04432 | 0.04516 | 0.05467 | 0.03965 | 0.03691 | 0.03596 | OLFM1    |
| cg27287498 | 0.0497  | 0.05464 | 0.06106 | 0.05786 | 0.05928 | 0.05572 | 0.05627 | 0.05412 | 0.05305 | 0.04612 | IBRDC3   |
| cg27287808 | 0.03273 | 0.03349 | 0.03471 | 0.03516 | 0.03033 | 0.03258 | 0.02761 | 0.02757 | 0.0279  | 0.02876 | PLK3     |
| cg27288777 | 0.04136 | 0.04998 | 0.05984 | 0.04891 | 0.03552 | 0.03791 | 0.03947 | 0.04026 | 0.03818 | 0.04083 | SUZ12    |
| cg27289104 | 0.0455  | 0.0344  | 0.04078 | 0.03985 | 0.09147 | 0.05182 | 0.04355 | 0.03564 | 0.04263 | 0.06717 | SDCCAG1  |
| cg27291231 | 0.57805 | 0.52304 | 0.74575 | 0.76977 | 0.84008 | 0.89711 | 0.18891 | 0.1002  | 0.4834  | 0.41783 | SSNA1    |
| cg27291501 | 0.0443  | 0.04744 | 0.05222 | 0.04442 | 0.05154 | 0.05025 | 0.04326 | 0.04548 | 0.04515 | 0.03991 | PEMT     |
| cg27292431 | 0.79846 | 0.78023 | 0.83673 | 0.87494 | 0.88199 | 0.8645  | 0.85259 | 0.85448 | 0.86142 | 0.81464 | SLC22A1  |
| cg27293353 | 0.04235 | 0.04366 | 0.05367 | 0.04898 | 0.06534 | 0.05337 | 0.03554 | 0.02842 | 0.0289  | 0.03441 | PRIM2A   |
| cg27294629 | 0.14292 | 0.11504 | 0.13293 | 0.10985 | 0.13254 | 0.08174 | 0.11365 | 0.1183  | 0.11843 | 0.11934 | FGFR4    |
| cg27297176 | 0.63667 | 0.57917 | 0.67941 | 0.70673 | 0.62608 | 0.75226 | 0.73247 | 0.78523 | 0.77136 | 0.77371 | TRIM43   |
| cg27298262 | 0.90259 | 0.44428 | 0.90666 | 0.91735 | 0.94607 | 0.88249 | 0.86261 | 0.58382 | 0.9038  | 0.86946 | MGC3101  |
| cg27298559 | 0.06924 | 0.07218 | 0.09018 | 0.08234 | 0.08011 | 0.07445 | 0.06088 | 0.06194 | 0.06787 | 0.07375 | PTRH2    |
| cg27298878 | 0.14559 | 0.15229 | 0.16842 | 0.16078 | 0.25629 | 0.13541 | 0.13191 | 0.13486 | 0.13313 | 0.12028 | C1orf89  |
| cg27299588 | 0.59218 | 0.65099 | 0.68671 | 0.84535 | 0.58569 | 0.12246 | 0.44968 | 0.14886 | 0.90725 | 0.67978 | PTPRS    |
| cg27301343 | 0.13618 | 0.12047 | 0.1356  | 0.10425 | 0.6433  | 0.16252 | 0.23076 | 0.11506 | 0.08277 | 0.07131 | EML2     |
| cg27303880 | 0.04224 | 0.04464 | 0.04359 | 0.04329 | 0.03419 | 0.04521 | 0.05522 | 0.05327 | 0.0552  | 0.04684 | ROR1     |
| cg27303882 | 0.63616 | 0.50201 | 0.58062 | 0.74359 | 0.41067 | 0.5566  | 0.21336 | 0.29589 | 0.56715 | 0.57037 | PAGE2    |
| cg27304754 | 0.05279 | 0.04573 | 0.60142 | 0.69863 | 0.22111 | 0.07234 | 0.04219 | 0.04093 | 0.13817 | 0.03607 | CALB2    |
| cg27305303 | 0.52328 | 0.04379 | 0.38326 | 0.50288 | 0.86899 | 0.79588 | 0.47471 | 0.18219 | 0.31854 | 0.22451 | OTOF     |
| cg27305662 | 0.91981 | 0.64969 | 0.8944  | 0.90844 | 0.85138 | 0.86349 | 0.90218 | 0.88622 | 0.94386 | 0.91366 | C6orf15  |
| cg27305895 | 0.1146  | 0.08946 | 0.08389 | 0.08135 | 0.25198 | 0.12935 | 0.09631 | 0.08123 | 0.07467 | 0.07399 | C9orf76  |
| cg27308387 | 0.04726 | 0.04788 | 0.05462 | 0.06241 | 0.0532  | 0.04982 | 0.03367 | 0.04118 | 0.04347 | 0.05021 | CTNNBIP1 |
| cg27309253 | 0.02238 | 0.02694 | 0.08473 | 0.08146 | 0.09744 | 0.02757 | 0.0227  | 0.02536 | 0.02786 | 0.02826 | ZNF155   |
| cg27310234 | 0.75769 | 0.42847 | 0.80059 | 0.84182 | 0.75478 | 0.84719 | 0.75965 | 0.72251 | 0.85421 | 0.78813 | RAG2     |
| cg27310686 | 0.09771 | 0.02723 | 0.03224 | 0.03705 | 0.0393  | 0.03066 | 0.02471 | 0.02383 | 0.03695 | 0.02798 | C6orf72  |
| cg27313662 | 0.0641  | 0.05929 | 0.05608 | 0.05881 | 0.05721 | 0.05726 | 0.05892 | 0.05037 | 0.06137 | 0.05318 | PPA2     |
| cg27315279 | 0.02422 | 0.02608 | 0.02799 | 0.0238  | 0.01665 | 0.02336 | 0.02343 | 0.02353 | 0.0218  | 0.01904 | GRK5     |
| cg27316224 | 0.02724 | 0.02915 | 0.03713 | 0.03161 | 0.023   | 0.025   | 0.02876 | 0.02388 | 0.0258  | 0.02687 | AP2A2    |
| cg27316956 | 0.61779 | 0.48533 | 0.53538 | 0.68219 | 0.46047 | 0.41362 | 0.28532 | 0.13147 | 0.36728 | 0.31423 | SYNE1    |
| cg27318281 | 0.8349  | 0.83679 | 0.84703 | 0.84864 | 0.84966 | 0.83892 | 0.84617 | 0.84307 | 0.86235 | 0.81559 | C18orf37 |
| cg27318318 | 0.38593 | 0.11939 | 0.83544 | 0.86027 | 0.45296 | 0.73991 | 0.68626 | 0.17463 | 0.61497 | 0.06604 | ALX4     |
| cg27318546 | 0.47755 | 0.1983  | 0.38151 | 0.24013 | 0.2309  | 0.13229 | 0.10316 | 0.1972  | 0.1179  | 0.14249 | MRO      |
| cg27319898 | 0.05436 | 0.05263 | 0.53221 | 0.50258 | 0.25583 | 0.07468 | 0.05637 | 0.04619 | 0.17246 | 0.07216 | FLJ32110 |
| cg27320127 | 0.03628 | 0.03104 | 0.05974 | 0.08134 | 0.15324 | 0.05707 | 0.24889 | 0.33263 | 0.07022 | 0.02376 | KCNK12   |
| cg27321538 | 0.0502  | 0.04782 | 0.05512 | 0.04595 | 0.05928 | 0.05726 | 0.03804 | 0.03732 | 0.04425 | 0.04678 | DNPEP    |

|            |         |         |         |         |         |         |         |         |         |                  |
|------------|---------|---------|---------|---------|---------|---------|---------|---------|---------|------------------|
| cg27321931 | 0.0432  | 0.0424  | 0.06041 | 0.06089 | 0.2506  | 0.05244 | 0.04906 | 0.04279 | 0.17251 | 0.03034 DSP      |
| cg27321979 | 0.39016 | 0.0642  | 0.17275 | 0.19675 | 0.09493 | 0.05829 | 0.05375 | 0.05618 | 0.05339 | 0.04512 C15orf27 |
| cg27322545 | 0.03087 | 0.02856 | 0.03035 | 0.03146 | 0.02742 | 0.02887 | 0.02549 | 0.02588 | 0.02437 | 0.02039 PLAA     |
| cg27323780 | 0.03251 | 0.04119 | 0.04283 | 0.04086 | 0.03549 | 0.04036 | 0.04428 | 0.03674 | 0.03432 | 0.03602 MTIF3    |
| cg27324619 | 0.14683 | 0.09053 | 0.11901 | 0.13412 | 0.73064 | 0.39607 | 0.12183 | 0.06817 | 0.08074 | 0.05122 PIB5PA   |
| cg27327588 | 0.04478 | 0.04657 | 0.74958 | 0.86118 | 0.49714 | 0.71037 | 0.04675 | 0.04149 | 0.03314 | 0.03555 ZNF345   |
| cg27329371 | 0.52948 | 0.07177 | 0.5729  | 0.78616 | 0.04338 | 0.05008 | 0.34812 | 0.06156 | 0.28074 | 0.1201 ALDH3A1   |
| cg27331144 | 0.01925 | 0.02033 | 0.02582 | 0.02152 | 0.01507 | 0.01777 | 0.01998 | 0.01751 | 0.01751 | 0.01708 RING1    |
| cg27333993 | 0.05214 | 0.05685 | 0.04606 | 0.03371 | 0.04656 | 0.05699 | 0.049   | 0.04579 | 0.03749 | 0.04247 RBM3     |
| cg27336379 | 0.21758 | 0.09077 | 0.35684 | 0.32901 | 0.77179 | 0.8857  | 0.51668 | 0.45969 | 0.47215 | 0.28226 SLC44A5  |
| cg27337148 | 0.14366 | 0.12341 | 0.67584 | 0.59226 | 0.63379 | 0.46809 | 0.51157 | 0.34145 | 0.54016 | 0.52914 CAMK1G   |
| cg27339143 | 0.04311 | 0.03919 | 0.05516 | 0.04616 | 0.03146 | 0.0338  | 0.04388 | 0.04491 | 0.04599 | 0.04024 PSRC1    |
| cg27341860 | 0.82929 | 0.83963 | 0.75474 | 0.82066 | 0.96167 | 0.91682 | 0.0623  | 0.04257 | 0.56769 | 0.44218 OR2L13   |
| cg27342122 | 0.06544 | 0.05432 | 0.08852 | 0.06437 | 0.04682 | 0.04387 | 0.04092 | 0.04496 | 0.04681 | 0.03816 PHF20L1  |
| cg27342801 | 0.09714 | 0.08461 | 0.09119 | 0.06704 | 0.47651 | 0.33898 | 0.05055 | 0.05401 | 0.06884 | 0.05831 REG3A    |
| cg27344326 | 0.31703 | 0.27669 | 0.39906 | 0.35538 | 0.19286 | 0.47936 | 0.09221 | 0.10463 | 0.06507 | 0.04125 DMRTC1   |
| cg27345286 | 0.0324  | 0.03449 | 0.03127 | 0.03832 | 0.03587 | 0.03678 | 0.03753 | 0.03472 | 0.02818 | 0.03502 FBXO3    |
| cg27345534 | 0.19125 | 0.27518 | 0.32312 | 0.32147 | 0.25253 | 0.1646  | 0.17908 | 0.17583 | 0.1682  | 0.13964 PRB2     |
| cg27345946 | 0.22331 | 0.10321 | 0.34159 | 0.49714 | 0.73874 | 0.60574 | 0.20822 | 0.16786 | 0.84342 | 0.38006 TADA3L   |
| cg27347104 | 0.7084  | 0.27848 | 0.83825 | 0.84583 | 0.86423 | 0.69016 | 0.67219 | 0.23594 | 0.86169 | 0.60378 VWF      |
| cg27348440 | 0.77956 | 0.18192 | 0.7786  | 0.76325 | 0.45851 | 0.4792  | 0.34478 | 0.60363 | 0.33578 | 0.44678          |
| cg27349244 | 0.62994 | 0.83532 | 0.90474 | 0.92401 | 0.91508 | 0.8912  | 0.86953 | 0.91553 | 0.90957 | 0.92243 MLXIP    |
| cg27349746 | 0.06445 | 0.07116 | 0.06319 | 0.05612 | 0.09679 | 0.08654 | 0.06823 | 0.06941 | 0.05771 | 0.07457 UBTF     |
| cg27351358 | 0.11007 | 0.146   | 0.55693 | 0.71723 | 0.61602 | 0.7999  | 0.84895 | 0.83029 | 0.62858 | 0.64295 BDNF     |
| cg27351998 | 0.60237 | 0.62404 | 0.30859 | 0.50849 | 0.83256 | 0.50234 | 0.22368 | 0.182   | 0.49181 | 0.14239 IFNA5    |
| cg27352063 | 0.02542 | 0.02842 | 0.02497 | 0.02445 | 0.02024 | 0.02455 | 0.02115 | 0.02412 | 0.02006 | 0.01911 PPIF     |
| cg27352136 | 0.0257  | 0.0269  | 0.02936 | 0.02773 | 0.02752 | 0.03267 | 0.02223 | 0.02411 | 0.02301 | 0.02154 SLC12A9  |
| cg27352992 | 0.21464 | 0.05548 | 0.71113 | 0.66394 | 0.24636 | 0.05518 | 0.34481 | 0.51396 | 0.82496 | 0.79959 CNTN1    |
| cg27356438 | 0.66964 | 0.73548 | 0.40152 | 0.53508 | 0.53677 | 0.66072 | 0.45019 | 0.69901 | 0.48156 | 0.61103 C7orf9   |
| cg27360003 | 0.05079 | 0.03319 | 0.22786 | 0.21907 | 0.28205 | 0.0395  | 0.03257 | 0.02941 | 0.03008 | 0.03186 NEURL    |
| cg27360098 | 0.04489 | 0.04562 | 0.85484 | 0.90421 | 0.95689 | 0.84958 | 0.84912 | 0.14036 | 0.56088 | 0.40327 ELN      |
| cg27360282 | 0.92463 | 0.94623 | 0.93438 | 0.94628 | 0.96708 | 0.93696 | 0.92557 | 0.84226 | 0.94289 | 0.93806 RUNX3    |
| cg27360560 | 0.06562 | 0.08002 | 0.08384 | 0.07738 | 0.06567 | 0.07467 | 0.07888 | 0.07612 | 0.0735  | 0.07459 TMEM67   |
| cg27361716 | 0.08321 | 0.07518 | 0.08558 | 0.08612 | 0.05751 | 0.07786 | 0.07723 | 0.07889 | 0.06719 | 0.07113 PPM1B    |
| cg27363310 | 0.04557 | 0.04571 | 0.05383 | 0.05112 | 0.03801 | 0.04856 | 0.04388 | 0.04651 | 0.04318 | 0.04369 ZNF84    |
| cg27363486 | 0.61119 | 0.63975 | 0.89564 | 0.89907 | 0.91775 | 0.90089 | 0.57409 | 0.27865 | 0.73563 | 0.48179 TRIM17   |
| cg27365426 | 0.74678 | 0.64194 | 0.62361 | 0.70357 | 0.58839 | 0.69506 | 0.43653 | 0.67479 | 0.42072 | 0.31406 ARHGAP15 |
| cg27366669 | 0.02837 | 0.0373  | 0.04636 | 0.04302 | 0.02661 | 0.03112 | 0.03066 | 0.02277 | 0.02651 | 0.02108 SH3YL1   |
| cg27367554 | 0.02619 | 0.02573 | 0.02618 | 0.02413 | 0.04153 | 0.03511 | 0.02923 | 0.0341  | 0.02234 | 0.02073 CGI-09   |
| cg27367952 | 0.18394 | 0.16082 | 0.151   | 0.14702 | 0.10714 | 0.12704 | 0.13731 | 0.1349  | 0.13956 | 0.13065 MGC50811 |
| cg27368011 | 0.03443 | 0.03393 | 0.02554 | 0.0231  | 0.03541 | 0.03461 | 0.02515 | 0.02655 | 0.02561 | 0.02703 CGRRF1   |

|            |         |         |         |         |         |         |         |         |         |         |          |
|------------|---------|---------|---------|---------|---------|---------|---------|---------|---------|---------|----------|
| cg27371741 | 0.86    | 0.87058 | 0.87547 | 0.91127 | 0.75039 | 0.7228  | 0.41004 | 0.36382 | 0.7025  | 0.46332 | TDGF1    |
| cg27372468 | 0.03558 | 0.03224 | 0.0333  | 0.02986 | 0.02192 | 0.03235 | 0.03094 | 0.02839 | 0.0262  | 0.02307 | SLC22A4  |
| cg27375072 | 0.0454  | 0.03322 | 0.03801 | 0.03653 | 0.03496 | 0.03395 | 0.02663 | 0.02846 | 0.03112 | 0.03237 | SMPDL3A  |
| cg27376271 | 0.04365 | 0.04923 | 0.06711 | 0.05811 | 0.0634  | 0.06172 | 0.0537  | 0.04775 | 0.0607  | 0.05068 | CBLN2    |
| cg27376817 | 0.05561 | 0.06688 | 0.09007 | 0.07825 | 0.12446 | 0.12517 | 0.18284 | 0.07425 | 0.05789 | 0.05725 | HSPB1    |
| cg27377213 | 0.91474 | 0.89673 | 0.90991 | 0.92018 | 0.94549 | 0.93625 | 0.75186 | 0.32883 | 0.92363 | 0.59067 | PPP1R16B |
| cg27377450 | 0.77699 | 0.65714 | 0.76684 | 0.79069 | 0.78256 | 0.87367 | 0.31636 | 0.23645 | 0.68753 | 0.56114 | ARHGEF18 |
| cg27378216 | 0.83541 | 0.31865 | 0.75491 | 0.81499 | 0.73871 | 0.81356 | 0.7979  | 0.8108  | 0.34492 | 0.12301 | SETBP1   |
| cg27378424 | 0.02293 | 0.02497 | 0.02323 | 0.02135 | 0.02072 | 0.02444 | 0.01728 | 0.02344 | 0.01888 | 0.01963 | DRG1     |
| cg27379417 | 0.04559 | 0.03703 | 0.04154 | 0.04166 | 0.04792 | 0.05439 | 0.04377 | 0.04403 | 0.05026 | 0.04976 | PGBD4    |
| cg27379587 | 0.71715 | 0.08845 | 0.25653 | 0.23841 | 0.83648 | 0.87211 | 0.30667 | 0.11607 | 0.60804 | 0.09672 | NMB      |
| cg27380758 | 0.66827 | 0.51838 | 0.69714 | 0.58065 | 0.90838 | 0.69205 | 0.83801 | 0.52638 | 0.81964 | 0.82535 | SORBS3   |
| cg27382389 | 0.67205 | 0.32226 | 0.18629 | 0.18304 | 0.35558 | 0.14402 | 0.16747 | 0.0965  | 0.08822 | 0.07728 | CHRNA    |
| cg27383362 | 0.78983 | 0.23399 | 0.8755  | 0.89815 | 0.75587 | 0.89058 | 0.45998 | 0.56277 | 0.79698 | 0.71325 | ATAD3C   |
| cg27383744 | 0.83314 | 0.82848 | 0.81741 | 0.81873 | 0.80642 | 0.8256  | 0.79967 | 0.79968 | 0.82551 | 0.82535 | BRCA1    |
| cg27383956 | 0.94032 | 0.93681 | 0.73879 | 0.71717 | 0.95936 | 0.91978 | 0.13978 | 0.07121 | 0.91965 | 0.91777 | FLJ13265 |
| cg27387222 | 0.90814 | 0.90636 | 0.90329 | 0.91567 | 0.93606 | 0.89121 | 0.88131 | 0.87325 | 0.92189 | 0.91032 | DNM1L    |
| cg27388462 | 0.75884 | 0.58817 | 0.80328 | 0.88207 | 0.93801 | 0.88934 | 0.73637 | 0.7232  | 0.6615  | 0.53833 | POU5F1   |
| cg27388792 | 0.03296 | 0.03278 | 0.04085 | 0.03128 | 0.0368  | 0.03366 | 0.03117 | 0.0357  | 0.02815 | 0.02873 | DPP3     |
| cg27389185 | 0.21504 | 0.08542 | 0.7804  | 0.86221 | 0.70264 | 0.61208 | 0.04859 | 0.06151 | 0.15077 | 0.10651 | ZNF540   |
| cg27390220 | 0.82429 | 0.37735 | 0.83809 | 0.86319 | 0.70453 | 0.51108 | 0.83289 | 0.61575 | 0.87785 | 0.66787 | RIS1     |
| cg27393372 | 0.03588 | 0.03722 | 0.11919 | 0.1782  | 0.04504 | 0.03733 | 0.03631 | 0.0349  | 0.03929 | 0.02838 | SCRN3    |
| cg27394038 | 0.04004 | 0.03398 | 0.03765 | 0.03506 | 0.02748 | 0.02713 | 0.03299 | 0.03402 | 0.03244 | 0.03273 | SFRS3    |
| cg27394046 | 0.11215 | 0.09639 | 0.17209 | 0.15415 | 0.30365 | 0.18851 | 0.147   | 0.11829 | 0.07749 | 0.08137 | XRN2     |
| cg27394486 | 0.86744 | 0.83231 | 0.88565 | 0.92525 | 0.92087 | 0.90116 | 0.28234 | 0.25474 | 0.88511 | 0.87862 | C15orf2  |
| cg27394563 | 0.03339 | 0.03279 | 0.04374 | 0.03725 | 0.03509 | 0.03365 | 0.03207 | 0.03479 | 0.17458 | 0.02904 | SART3    |
| cg27394566 | 0.89707 | 0.85462 | 0.87203 | 0.89458 | 0.93097 | 0.87685 | 0.8602  | 0.69072 | 0.88012 | 0.86702 | PLD4     |
| cg27395450 | 0.04587 | 0.04462 | 0.0561  | 0.0505  | 0.08148 | 0.06169 | 0.04177 | 0.03735 | 0.04222 | 0.03634 | GLYCTK   |
| cg27397287 | 0.05626 | 0.06029 | 0.13152 | 0.15856 | 0.06532 | 0.05065 | 0.38837 | 0.05051 | 0.31369 | 0.05161 | CD97     |
| cg27398499 | 0.36105 | 0.28327 | 0.71869 | 0.73034 | 0.60437 | 0.37978 | 0.16977 | 0.2194  | 0.60429 | 0.4693  | TACSTD2  |
| cg27398547 | 0.31487 | 0.25186 | 0.61968 | 0.76616 | 0.47975 | 0.37681 | 0.24676 | 0.23481 | 0.25978 | 0.3071  | C14orf39 |
| cg27400772 | 0.14914 | 0.1257  | 0.14348 | 0.14352 | 0.21334 | 0.16003 | 0.15221 | 0.11601 | 0.08101 | 0.12678 | DPF1     |
| cg27401095 | 0.28072 | 0.0734  | 0.48773 | 0.63205 | 0.24859 | 0.27673 | 0.45414 | 0.48978 | 0.33864 | 0.26564 | ZNF324   |
| cg27402949 | 0.03988 | 0.03333 | 0.05517 | 0.0419  | 0.04139 | 0.05    | 0.03349 | 0.03227 | 0.02698 | 0.02937 | FLJ20097 |
| cg27403635 | 0.0501  | 0.04322 | 0.82476 | 0.85211 | 0.26568 | 0.3634  | 0.22093 | 0.03853 | 0.33151 | 0.30375 | KCNN2    |
| cg27403822 | 0.19537 | 0.042   | 0.05261 | 0.04497 | 0.03189 | 0.04063 | 0.03771 | 0.03575 | 0.03751 | 0.03667 | TOR3A    |
| cg27404050 | 0.37325 | 0.06283 | 0.33459 | 0.29474 | 0.31281 | 0.34859 | 0.16065 | 0.10594 | 0.09081 | 0.0609  | PRODH2   |
| cg27406727 | 0.04661 | 0.04325 | 0.04272 | 0.03195 | 0.03323 | 0.04129 | 0.03847 | 0.03836 | 0.03514 | 0.03203 | UGDH     |
| cg27409012 | 0.04386 | 0.02845 | 0.0285  | 0.02791 | 0.02364 | 0.0233  | 0.02754 | 0.02475 | 0.02453 | 0.02202 | UAP1     |
| cg27409364 | 0.88669 | 0.95184 | 0.98045 | 0.98349 | 0.9783  | 0.98128 | 0.87229 | 0.80575 | 0.92309 | 0.9145  | KCNC1    |
| cg27412093 | 0.89396 | 0.81751 | 0.8422  | 0.88185 | 0.8927  | 0.7809  | 0.82083 | 0.80013 | 0.70676 | 0.56112 | CAPN9    |

|            |         |         |         |         |         |         |         |         |         |                   |
|------------|---------|---------|---------|---------|---------|---------|---------|---------|---------|-------------------|
| cg27412902 | 0.82403 | 0.38145 | 0.86252 | 0.88507 | 0.88164 | 0.85878 | 0.079   | 0.08026 | 0.09588 | 0.05244 IL29      |
| cg27413025 | 0.09081 | 0.09256 | 0.17006 | 0.27458 | 0.12542 | 0.11338 | 0.09543 | 0.07635 | 0.09786 | 0.1147 CYP20A1    |
| cg27413508 | 0.34144 | 0.40106 | 0.4208  | 0.5344  | 0.83289 | 0.7397  | 0.21337 | 0.15355 | 0.35084 | 0.2394 COX4I2     |
| cg27413543 | 0.05528 | 0.0625  | 0.0579  | 0.05768 | 0.04369 | 0.05584 | 0.05144 | 0.05735 | 0.04678 | 0.04883 SEC31L1   |
| cg27416067 | 0.48511 | 0.1727  | 0.50342 | 0.40812 | 0.47522 | 0.19387 | 0.39836 | 0.47062 | 0.12296 | 0.0499 IL12RB2    |
| cg27416437 | 0.02933 | 0.02759 | 0.02822 | 0.02766 | 0.02319 | 0.02152 | 0.02839 | 0.02587 | 0.02594 | 0.01945 EWSR1     |
| cg27417997 | 0.28372 | 0.21499 | 0.65045 | 0.65894 | 0.35968 | 0.23058 | 0.47176 | 0.19698 | 0.66043 | 0.63131 SHRM      |
| cg27418851 | 0.06517 | 0.06608 | 0.35265 | 0.5066  | 0.84862 | 0.84877 | 0.69898 | 0.79555 | 0.32764 | 0.20501 MBL2      |
| cg27419217 | 0.03093 | 0.03391 | 0.04282 | 0.0339  | 0.03629 | 0.03865 | 0.03594 | 0.03495 | 0.03628 | 0.03251 TROAP     |
| cg27420123 | 0.07417 | 0.18819 | 0.12478 | 0.30665 | 0.12957 | 0.09213 | 0.14268 | 0.11228 | 0.06729 | 0.06984 FSHB      |
| cg27420236 | 0.03933 | 0.03196 | 0.4282  | 0.59051 | 0.37165 | 0.10689 | 0.03782 | 0.02801 | 0.05766 | 0.18537 RPRM      |
| cg27425193 | 0.09063 | 0.06243 | 0.07056 | 0.06283 | 0.05088 | 0.04626 | 0.36269 | 0.05276 | 0.04851 | 0.05131 HSPB1     |
| cg27425675 | 0.64462 | 0.63507 | 0.53813 | 0.51538 | 0.56256 | 0.56287 | 0.18455 | 0.26673 | 0.3374  | 0.47751 DEXI      |
| cg27426707 | 0.06325 | 0.0523  | 0.29941 | 0.31972 | 0.27223 | 0.08256 | 0.1797  | 0.10363 | 0.05463 | 0.06619 CACNA1G   |
| cg27427207 | 0.05609 | 0.05935 | 0.07492 | 0.05442 | 0.06703 | 0.0357  | 0.05205 | 0.04632 | 0.05787 | 0.05207 ATP8A1    |
| cg27429194 | 0.18906 | 0.18282 | 0.21135 | 0.21298 | 0.22924 | 0.19716 | 0.1744  | 0.16767 | 0.15654 | 0.14675 OR1A2     |
| cg27431150 | 0.38267 | 0.50208 | 0.54455 | 0.60951 | 0.90026 | 0.88503 | 0.79087 | 0.5243  | 0.85674 | 0.67794 SLIC1     |
| cg27431247 | 0.03685 | 0.04093 | 0.03651 | 0.03516 | 0.02961 | 0.04064 | 0.03757 | 0.04169 | 0.03416 | 0.02838 CHKA      |
| cg27431396 | 0.94113 | 0.93076 | 0.93137 | 0.94675 | 0.96186 | 0.94094 | 0.91279 | 0.92442 | 0.94268 | 0.92419 C20orf144 |
| cg27431859 | 0.06388 | 0.06091 | 0.08288 | 0.06692 | 0.09509 | 0.07096 | 0.06638 | 0.05772 | 0.06284 | 0.05279 CDC34     |
| cg27433062 | 0.77164 | 0.73097 | 0.70516 | 0.74314 | 0.76503 | 0.80034 | 0.65227 | 0.50689 | 0.79224 | 0.73084 APOA2     |
| cg27433088 | 0.19948 | 0.13201 | 0.09966 | 0.08712 | 0.16516 | 0.09899 | 0.08506 | 0.08955 | 0.17837 | 0.10165 GALNT7    |
| cg27436184 | 0.70314 | 0.80709 | 0.72212 | 0.72252 | 0.84155 | 0.8382  | 0.68097 | 0.76793 | 0.75236 | 0.62708 APOC2     |
| cg27437944 | 0.03706 | 0.04572 | 0.04586 | 0.04013 | 0.0314  | 0.0336  | 0.03104 | 0.02703 | 0.03711 | 0.03796 FXR1      |
| cg27440002 | 0.74019 | 0.4752  | 0.74629 | 0.74651 | 0.72582 | 0.74972 | 0.68119 | 0.73413 | 0.81327 | 0.77552 LEAP-2    |
| cg27440834 | 0.78682 | 0.79653 | 0.77915 | 0.7965  | 0.82641 | 0.78175 | 0.72854 | 0.79692 | 0.84965 | 0.80327 SNX4      |
| cg27441551 | 0.02193 | 0.02416 | 0.02587 | 0.02212 | 0.02433 | 0.02627 | 0.02448 | 0.02565 | 0.02164 | 0.01961 DPP3      |
| cg27442349 | 0.46333 | 0.20337 | 0.77935 | 0.86869 | 0.93848 | 0.82963 | 0.78099 | 0.46079 | 0.75995 | 0.46526 NFKBIB    |
| cg27443050 | 0.06704 | 0.05762 | 0.06587 | 0.06785 | 0.0443  | 0.05323 | 0.05256 | 0.05297 | 0.05458 | 0.04143 DLG7      |
| cg27443224 | 0.64187 | 0.55709 | 0.60705 | 0.76569 | 0.84567 | 0.81053 | 0.25206 | 0.17616 | 0.09822 | 0.06749 CCL21     |
| cg27444994 | 0.04262 | 0.04567 | 0.42275 | 0.65199 | 0.39339 | 0.27917 | 0.0362  | 0.03259 | 0.10639 | 0.03932 CDH8      |
| cg27445265 | 0.05204 | 0.05416 | 0.05628 | 0.06601 | 0.04605 | 0.05012 | 0.05462 | 0.05066 | 0.04629 | 0.05796 BCCIP     |
| cg27446185 | 0.12183 | 0.07764 | 0.11488 | 0.1562  | 0.87668 | 0.54772 | 0.07708 | 0.25811 | 0.09224 | 0.07993 VTCN1     |
| cg27446233 | 0.71048 | 0.4613  | 0.82357 | 0.85093 | 0.70702 | 0.82693 | 0.61372 | 0.75896 | 0.83965 | 0.65242 PFKM      |
| cg27447599 | 0.26623 | 0.26179 | 0.52871 | 0.5651  | 0.7419  | 0.80754 | 0.8341  | 0.82977 | 0.81935 | 0.69144 IGFBP1    |
| cg27447740 | 0.06108 | 0.0519  | 0.07752 | 0.07516 | 0.21307 | 0.23304 | 0.0637  | 0.05017 | 0.09035 | 0.11792 FLJ30313  |
| cg27449489 | 0.81224 | 0.35476 | 0.87582 | 0.88314 | 0.49935 | 0.48142 | 0.42742 | 0.38407 | 0.12827 | 0.04636 FLJ35767  |
| cg27449959 | 0.07154 | 0.05691 | 0.09756 | 0.08976 | 0.15422 | 0.10505 | 0.0584  | 0.03857 | 0.06013 | 0.06209 ZNF517    |
| cg27453644 | 0.84835 | 0.76754 | 0.89621 | 0.91246 | 0.406   | 0.11856 | 0.82865 | 0.55786 | 0.72218 | 0.49325 BCAP31    |
| cg27456885 | 0.30491 | 0.49146 | 0.60672 | 0.65344 | 0.55374 | 0.71306 | 0.25176 | 0.20754 | 0.36095 | 0.22177 KRTAP22-1 |
| cg27457941 | 0.05848 | 0.06034 | 0.12625 | 0.06731 | 0.30978 | 0.40619 | 0.1258  | 0.04594 | 0.57333 | 0.52027 RBP1      |

|            |         |         |         |         |         |         |         |         |         |         |          |
|------------|---------|---------|---------|---------|---------|---------|---------|---------|---------|---------|----------|
| cg27458888 | 0.09549 | 0.03673 | 0.17974 | 0.16981 | 0.03372 | 0.0298  | 0.09303 | 0.02844 | 0.02645 | 0.02964 | UBE3A    |
| cg27459381 | 0.89037 | 0.88878 | 0.81821 | 0.88713 | 0.86542 | 0.85851 | 0.86639 | 0.88029 | 0.89501 | 0.87995 | CHST12   |
| cg27460755 | 0.66681 | 0.63848 | 0.67309 | 0.73061 | 0.76065 | 0.73945 | 0.49141 | 0.53166 | 0.68685 | 0.61727 | GALNT13  |
| cg27461196 | 0.88639 | 0.56212 | 0.83375 | 0.9088  | 0.93042 | 0.86079 | 0.58131 | 0.43022 | 0.85934 | 0.71868 | FXYP1    |
| cg27462160 | 0.0746  | 0.07231 | 0.19949 | 0.14986 | 0.51151 | 0.08496 | 0.08635 | 0.06591 | 0.07712 | 0.06759 | MGC26885 |
| cg27462371 | 0.07671 | 0.05895 | 0.06841 | 0.07119 | 0.10013 | 0.06725 | 0.08191 | 0.08984 | 0.05996 | 0.0557  | ATXN7    |
| cg27462398 | 0.92396 | 0.80141 | 0.89127 | 0.89655 | 0.86383 | 0.08781 | 0.55404 | 0.35784 | 0.64104 | 0.23477 | C1orf181 |
| cg27462969 | 0.04341 | 0.04618 | 0.04577 | 0.04064 | 0.02939 | 0.03915 | 0.0432  | 0.04723 | 0.03561 | 0.03403 | SERBP1   |
| cg27464755 | 0.07475 | 0.08436 | 0.07604 | 0.07261 | 0.20349 | 0.1577  | 0.06771 | 0.06159 | 0.05709 | 0.07024 | HMGNA4   |
| cg27465531 | 0.10552 | 0.09505 | 0.1231  | 0.09499 | 0.09966 | 0.08289 | 0.39126 | 0.40276 | 0.07512 | 0.07823 | MBTPS2   |
| cg27465566 | 0.17145 | 0.14929 | 0.11946 | 0.19415 | 0.73321 | 0.39446 | 0.05514 | 0.04438 | 0.41084 | 0.07456 | TRIO     |
| cg27465569 | 0.58309 | 0.58122 | 0.75722 | 0.65131 | 0.86913 | 0.86607 | 0.5274  | 0.29283 | 0.8828  | 0.88194 | PUS7L    |
| cg27465849 | 0.7624  | 0.10275 | 0.70021 | 0.77021 | 0.32299 | 0.43938 | 0.40461 | 0.55177 | 0.85415 | 0.55923 | THEDC1   |
| cg27465858 | 0.08311 | 0.09358 | 0.08571 | 0.08801 | 0.08867 | 0.09346 | 0.09073 | 0.08901 | 0.07611 | 0.07837 | ANKRD40  |
| cg27467734 | 0.05987 | 0.05818 | 0.07156 | 0.05806 | 0.06827 | 0.17634 | 0.0563  | 0.06506 | 0.05429 | 0.05635 | MFSO5    |
| cg27470406 | 0.02416 | 0.02451 | 0.02454 | 0.02863 | 0.022   | 0.02451 | 0.02225 | 0.02128 | 0.01928 | 0.02129 | FBXL14   |
| cg27470554 | 0.27709 | 0.18553 | 0.25845 | 0.32213 | 0.4773  | 0.41891 | 0.50738 | 0.13726 | 0.54466 | 0.07361 | FCGR2A   |
| cg27472032 | 0.07057 | 0.04077 | 0.09094 | 0.06004 | 0.08619 | 0.03546 | 0.04331 | 0.03341 | 0.06538 | 0.03573 | VPS39    |
| cg27472295 | 0.0462  | 0.04885 | 0.05309 | 0.05707 | 0.05428 | 0.0445  | 0.03794 | 0.04036 | 0.03956 | 0.03559 | TPBG     |
| cg27475152 | 0.88652 | 0.88261 | 0.88738 | 0.8803  | 0.8517  | 0.86987 | 0.88593 | 0.87665 | 0.89756 | 0.89141 | BTN1A1   |
| cg27476329 | 0.77298 | 0.76674 | 0.74783 | 0.79238 | 0.73312 | 0.77325 | 0.73975 | 0.73741 | 0.72343 | 0.71613 | GOLGA2L1 |
| cg27477205 | 0.07496 | 0.08557 | 0.08692 | 0.07126 | 0.1087  | 0.10082 | 0.05928 | 0.05665 | 0.06174 | 0.07117 | MKRN2    |
| cg27477594 | 0.03344 | 0.03818 | 0.03811 | 0.03839 | 0.02462 | 0.03163 | 0.03304 | 0.02842 | 0.03395 | 0.03428 | MGST3    |
| cg27477990 | 0.02463 | 0.02569 | 0.02445 | 0.01942 | 0.01945 | 0.01907 | 0.02241 | 0.01998 | 0.0161  | 0.01556 | C20orf31 |
| cg27478651 | 0.01852 | 0.02038 | 0.02328 | 0.02239 | 0.01881 | 0.02158 | 0.01592 | 0.01553 | 0.01746 | 0.01645 | ACADM    |
| cg27478659 | 0.7744  | 0.42654 | 0.73656 | 0.80885 | 0.75207 | 0.26368 | 0.21689 | 0.14485 | 0.09014 | 0.05614 | KRT16    |
| cg27480700 | 0.03523 | 0.03984 | 0.44725 | 0.43304 | 0.06643 | 0.08861 | 0.03456 | 0.03165 | 0.02364 | 0.02888 | ZNF480   |
| cg27485235 | 0.05506 | 0.06094 | 0.06172 | 0.06084 | 0.05019 | 0.05294 | 0.06371 | 0.05386 | 0.05025 | 0.0458  | CLCN2    |
| cg27485921 | 0.53555 | 0.24902 | 0.50937 | 0.7039  | 0.90509 | 0.63748 | 0.64951 | 0.56419 | 0.77006 | 0.30404 | ATP6V1E2 |
| cg27486427 | 0.03957 | 0.03219 | 0.06264 | 0.03581 | 0.05878 | 0.038   | 0.02591 | 0.02422 | 0.02527 | 0.03345 | RARB     |
| cg27488807 | 0.31801 | 0.20201 | 0.18144 | 0.28474 | 0.47265 | 0.45595 | 0.27408 | 0.46935 | 0.15486 | 0.17589 | SPINK7   |
| cg27489994 | 0.04953 | 0.07356 | 0.06919 | 0.06753 | 0.09091 | 0.10376 | 0.06602 | 0.0478  | 0.04856 | 0.05252 | TPT1     |
| cg27490193 | 0.04571 | 0.04179 | 0.04869 | 0.03787 | 0.02646 | 0.02951 | 0.03935 | 0.03932 | 0.03223 | 0.03259 | HINT2    |
| cg27491887 | 0.34568 | 0.09083 | 0.02636 | 0.03104 | 0.87512 | 0.89591 | 0.0242  | 0.07601 | 0.89556 | 0.50854 | KCNQ1    |
| cg27493997 | 0.06216 | 0.0575  | 0.06826 | 0.05348 | 0.35136 | 0.10939 | 0.21958 | 0.11066 | 0.06759 | 0.04893 | CRABP2   |
| cg27494383 | 0.07814 | 0.03686 | 0.04492 | 0.03798 | 0.77794 | 0.6186  | 0.05202 | 0.06324 | 0.06863 | 0.05882 | LTK      |
| cg27495845 | 0.07525 | 0.13068 | 0.8304  | 0.67479 | 0.29377 | 0.05935 | 0.60091 | 0.26684 | 0.58135 | 0.17993 | FCRLM2   |
| cg27495908 | 0.83868 | 0.73625 | 0.86655 | 0.86667 | 0.78487 | 0.84486 | 0.76386 | 0.86286 | 0.7865  | 0.74667 | C9orf79  |
| cg27496506 | 0.63993 | 0.33007 | 0.85449 | 0.89091 | 0.88273 | 0.74567 | 0.42358 | 0.65705 | 0.77487 | 0.68565 | TGM5     |
| cg27497687 | 0.03757 | 0.03765 | 0.04214 | 0.04227 | 0.04179 | 0.04812 | 0.04751 | 0.03997 | 0.03605 | 0.03503 | MED19    |
| cg27497781 | 0.25358 | 0.20923 | 0.38175 | 0.40671 | 0.43652 | 0.25214 | 0.17221 | 0.14718 | 0.35925 | 0.21711 | CHIA     |

|            |         |         |         |         |         |         |         |         |         |                  |
|------------|---------|---------|---------|---------|---------|---------|---------|---------|---------|------------------|
| cg27497900 | 0.05225 | 0.05103 | 0.07345 | 0.06089 | 0.06626 | 0.04864 | 0.07583 | 0.05502 | 0.06023 | 0.05893 NCSTN    |
| cg27498304 | 0.02958 | 0.02598 | 0.03814 | 0.03558 | 0.02606 | 0.02669 | 0.02218 | 0.02176 | 0.02478 | 0.02467 EYA3     |
| cg27501380 | 0.02875 | 0.03297 | 0.02873 | 0.0278  | 0.01895 | 0.02539 | 0.02712 | 0.02808 | 0.02274 | 0.025 RBBP6      |
| cg27501458 | 0.117   | 0.03157 | 0.52551 | 0.57067 | 0.33449 | 0.23196 | 0.11591 | 0.23335 | 0.0404  | 0.02797 SULT4A1  |
| cg27504117 | 0.53309 | 0.10463 | 0.92377 | 0.93687 | 0.70859 | 0.55485 | 0.87024 | 0.8551  | 0.93761 | 0.94869 ANKMY1   |
| cg27504299 | 0.8026  | 0.72656 | 0.51311 | 0.62059 | 0.81602 | 0.84966 | 0.05779 | 0.16994 | 0.34174 | 0.62183 TCL1B    |
| cg27504805 | 0.06066 | 0.05995 | 0.48047 | 0.42041 | 0.06141 | 0.08004 | 0.05553 | 0.0611  | 0.04404 | 0.05341 NPY2R    |
| cg27504991 | 0.9658  | 0.9013  | 0.95367 | 0.97096 | 0.93683 | 0.21707 | 0.54032 | 0.41741 | 0.41424 | 0.47415 CUL7     |
| cg27505538 | 0.03587 | 0.03317 | 0.03902 | 0.04134 | 0.03488 | 0.03655 | 0.0352  | 0.03337 | 0.02977 | 0.04068 STARD5   |
| cg27507704 | 0.02348 | 0.02607 | 0.02627 | 0.023   | 0.0153  | 0.02118 | 0.01987 | 0.01917 | 0.0202  | 0.0197 ETFDH     |
| cg27508002 | 0.77806 | 0.38597 | 0.62034 | 0.72423 | 0.77104 | 0.79669 | 0.82055 | 0.75637 | 0.72629 | 0.68387 SMAD9    |
| cg27508071 | 0.71739 | 0.2624  | 0.86834 | 0.8832  | 0.91842 | 0.63943 | 0.63197 | 0.24674 | 0.89191 | 0.75234 C7orf26  |
| cg27508821 | 0.03951 | 0.03649 | 0.0437  | 0.03562 | 0.06339 | 0.02968 | 0.03295 | 0.03154 | 0.03082 | 0.03191 CLMN     |
| cg27510871 | 0.02874 | 0.02593 | 0.02975 | 0.03527 | 0.03214 | 0.02873 | 0.02822 | 0.02872 | 0.02393 | 0.02149 C9orf43  |
| cg27512828 | 0.04237 | 0.05176 | 0.05977 | 0.06192 | 0.05956 | 0.06101 | 0.05507 | 0.0523  | 0.04108 | 0.04649 UVRAG    |
| cg27513764 | 0.33277 | 0.15143 | 0.176   | 0.16675 | 0.38231 | 0.35349 | 0.08272 | 0.05772 | 0.1046  | 0.10235 EFCAB3   |
| cg27514224 | 0.92198 | 0.91633 | 0.90969 | 0.92198 | 0.89004 | 0.90532 | 0.91939 | 0.92769 | 0.93277 | 0.93261 NUP188   |
| cg27518692 | 0.04781 | 0.042   | 0.06585 | 0.05003 | 0.05193 | 0.05114 | 0.04042 | 0.03548 | 0.04922 | 0.04645 WDR68    |
| cg27519140 | 0.89247 | 0.7839  | 0.86813 | 0.88172 | 0.83872 | 0.68031 | 0.82021 | 0.63274 | 0.74422 | 0.45068 RPP21    |
| cg27519236 | 0.02997 | 0.03584 | 0.03178 | 0.02737 | 0.02489 | 0.02305 | 0.02856 | 0.02847 | 0.03758 | 0.05006 KIFC3    |
| cg27519373 | 0.31791 | 0.33534 | 0.44563 | 0.3968  | 0.24903 | 0.19176 | 0.43551 | 0.42301 | 0.12428 | 0.10269 ZIM2     |
| cg27519424 | 0.06351 | 0.04805 | 0.07892 | 0.09448 | 0.03852 | 0.05882 | 0.04268 | 0.0585  | 0.04632 | 0.05008 HLCS     |
| cg27520502 | 0.04337 | 0.04493 | 0.05221 | 0.04325 | 0.04051 | 0.04742 | 0.04935 | 0.04953 | 0.03667 | 0.04277 C17orf32 |
| cg27522780 | 0.0799  | 0.08393 | 0.34962 | 0.22697 | 0.09664 | 0.04325 | 0.04085 | 0.03066 | 0.03731 | 0.03846 ACADS    |
| cg27523951 | 0.03036 | 0.03861 | 0.04287 | 0.04945 | 0.0363  | 0.0555  | 0.0352  | 0.02728 | 0.02789 | 0.035 COG3       |
| cg27524460 | 0.65799 | 0.42287 | 0.37751 | 0.44099 | 0.40582 | 0.36475 | 0.34306 | 0.38562 | 0.28448 | 0.10502 PTGER1   |
| cg27525902 | 0.64086 | 0.29033 | 0.73914 | 0.74771 | 0.42453 | 0.71678 | 0.7119  | 0.71597 | 0.66578 | 0.59708 FGF7     |
| cg27529628 | 0.66116 | 0.13476 | 0.26683 | 0.08581 | 0.58814 | 0.05728 | 0.03084 | 0.033   | 0.03189 | 0.02684 GAS2L3   |
| cg27530424 | 0.3862  | 0.36551 | 0.43574 | 0.47251 | 0.36965 | 0.34504 | 0.39934 | 0.47138 | 0.37357 | 0.358 YBX1       |
| cg27532722 | 0.76301 | 0.47207 | 0.82036 | 0.80852 | 0.89685 | 0.76943 | 0.88848 | 0.79905 | 0.87214 | 0.82197 MMP11    |
| cg27533013 | 0.80813 | 0.81091 | 0.75149 | 0.77018 | 0.76316 | 0.73554 | 0.63883 | 0.69123 | 0.78185 | 0.79671 KCNRG    |
| cg27534796 | 0.08339 | 0.05649 | 0.06377 | 0.0654  | 0.0737  | 0.06516 | 0.04849 | 0.04484 | 0.05168 | 0.05312 AIG1     |
| cg27535305 | 0.60077 | 0.23569 | 0.46578 | 0.56158 | 0.5305  | 0.06435 | 0.32296 | 0.17108 | 0.13095 | 0.04002 SCP2     |
| cg27537453 | 0.05109 | 0.05221 | 0.04932 | 0.05103 | 0.03535 | 0.04233 | 0.05038 | 0.04334 | 0.04109 | 0.03925 KCTD5    |
| cg27537561 | 0.0884  | 0.09023 | 0.12061 | 0.12126 | 0.15444 | 0.13596 | 0.13151 | 0.11046 | 0.11248 | 0.12381 VDR      |
| cg27537600 | 0.05773 | 0.03879 | 0.04731 | 0.04282 | 0.06964 | 0.03129 | 0.04473 | 0.03866 | 0.04341 | 0.03007 SPAG1    |
| cg27538954 | 0.02837 | 0.02288 | 0.0277  | 0.01818 | 0.02735 | 0.03049 | 0.02271 | 0.02541 | 0.01794 | 0.0188 ZCCHC7    |
| cg27539233 | 0.17977 | 0.20296 | 0.40753 | 0.57032 | 0.43243 | 0.63074 | 0.47221 | 0.18337 | 0.30812 | 0.20581 SPATA7   |
| cg27541374 | 0.12631 | 0.04172 | 0.05917 | 0.07054 | 0.07806 | 0.06175 | 0.04456 | 0.043   | 0.04866 | 0.0567 LOC51136  |
| cg27541515 | 0.1153  | 0.11958 | 0.16964 | 0.12503 | 0.21939 | 0.12672 | 0.14242 | 0.12057 | 0.1093  | 0.08224 ZNF235   |
| cg27541541 | 0.72712 | 0.55191 | 0.59993 | 0.72753 | 0.60613 | 0.63567 | 0.60191 | 0.7462  | 0.25571 | 0.22891 PRL      |

|            |         |         |         |         |         |         |         |         |         |                  |
|------------|---------|---------|---------|---------|---------|---------|---------|---------|---------|------------------|
| cg27542948 | 0.86377 | 0.88089 | 0.43495 | 0.52096 | 0.83007 | 0.84526 | 0.31179 | 0.33338 | 0.66734 | 0.5963 ERV3      |
| cg27543230 | 0.49923 | 0.26335 | 0.09698 | 0.17772 | 0.86228 | 0.75258 | 0.467   | 0.30313 | 0.11407 | 0.02538 PPP2CA   |
| cg27544190 | 0.08741 | 0.0415  | 0.85329 | 0.87405 | 0.9292  | 0.64978 | 0.17237 | 0.09049 | 0.81603 | 0.62098 C21orf63 |
| cg27546237 | 0.04951 | 0.05522 | 0.0513  | 0.04893 | 0.72914 | 0.38605 | 0.26302 | 0.42299 | 0.04747 | 0.04278 COL4A1   |
| cg27546682 | 0.04642 | 0.0389  | 0.05014 | 0.05038 | 0.04189 | 0.0474  | 0.03984 | 0.03727 | 0.04005 | 0.04256 STK40    |
| cg27547703 | 0.83574 | 0.8328  | 0.84218 | 0.84631 | 0.72698 | 0.79773 | 0.78713 | 0.79665 | 0.06986 | 0.08275 TDRD1    |
| cg27549944 | 0.07131 | 0.05288 | 0.36703 | 0.45176 | 0.68804 | 0.79025 | 0.18783 | 0.06399 | 0.06087 | 0.04428 PLEKHA6  |
| cg27550442 | 0.05185 | 0.05105 | 0.06137 | 0.04918 | 0.04633 | 0.04923 | 0.03861 | 0.06287 | 0.04563 | 0.04086 ZNHIT1   |
| cg27550918 | 0.76743 | 0.43576 | 0.85325 | 0.85247 | 0.77403 | 0.84435 | 0.23485 | 0.39018 | 0.39318 | 0.46812 SYNPO2L  |
| cg27552599 | 0.34444 | 0.07183 | 0.14755 | 0.35224 | 0.22077 | 0.05088 | 0.22566 | 0.40888 | 0.04807 | 0.03606 DHX35    |
| cg27553433 | 0.05521 | 0.05182 | 0.03755 | 0.04276 | 0.06049 | 0.05651 | 0.04921 | 0.04671 | 0.03465 | 0.04742 SPTLC2   |
| cg27553637 | 0.03793 | 0.03227 | 0.03206 | 0.02915 | 0.02384 | 0.02714 | 0.03027 | 0.02828 | 0.02808 | 0.02599 CDC42EP1 |
| cg27553955 | 0.84682 | 0.6799  | 0.38358 | 0.45913 | 0.71687 | 0.57852 | 0.69965 | 0.72513 | 0.89984 | 0.89978 KCNG3    |
| cg27554769 | 0.03267 | 0.03283 | 0.03653 | 0.02847 | 0.02481 | 0.0296  | 0.03248 | 0.03214 | 0.02912 | 0.0276 KLHL12    |
| cg27554782 | 0.1762  | 0.11517 | 0.91232 | 0.93542 | 0.59633 | 0.60248 | 0.47616 | 0.30555 | 0.47279 | 0.44001 CHRNB4   |
| cg27555365 | 0.0429  | 0.05199 | 0.08667 | 0.08166 | 0.37256 | 0.07253 | 0.04677 | 0.04722 | 0.04228 | 0.03794 TMEM102  |
| cg27555479 | 0.13584 | 0.1274  | 0.69688 | 0.80203 | 0.08947 | 0.10209 | 0.11219 | 0.10011 | 0.11299 | 0.09834 DYNLRB2  |
| cg27555776 | 0.03256 | 0.03238 | 0.03779 | 0.03753 | 0.0263  | 0.03309 | 0.02945 | 0.03105 | 0.0345  | 0.02814 OPTN     |
| cg27556566 | 0.04751 | 0.04956 | 0.05518 | 0.05118 | 0.0404  | 0.04014 | 0.04352 | 0.03919 | 0.04128 | 0.03757 RNF138   |
| cg27557143 | 0.04288 | 0.03628 | 0.03563 | 0.03979 | 0.03183 | 0.03057 | 0.03536 | 0.03822 | 0.03017 | 0.0319 GMIP      |
| cg27557796 | 0.57757 | 0.378   | 0.63411 | 0.5507  | 0.91053 | 0.88895 | 0.72915 | 0.44518 | 0.48189 | 0.06277 LY6G6C   |
| cg27558666 | 0.7136  | 0.7486  | 0.70474 | 0.79641 | 0.55342 | 0.71496 | 0.7744  | 0.77132 | 0.72314 | 0.71158 KLB      |
| cg27559343 | 0.02158 | 0.02347 | 0.02728 | 0.02513 | 0.02488 | 0.02679 | 0.0226  | 0.02131 | 0.02109 | 0.02372 SETD3    |
| cg27560292 | 0.35519 | 0.05431 | 0.14356 | 0.15237 | 0.30735 | 0.29186 | 0.37289 | 0.0974  | 0.48653 | 0.27375 TAF10    |
| cg27560864 | 0.86758 | 0.64017 | 0.76493 | 0.88813 | 0.92728 | 0.89967 | 0.11909 | 0.10016 | 0.85443 | 0.79847 SCN4B    |
| cg27560922 | 0.06248 | 0.05672 | 0.12184 | 0.2111  | 0.25697 | 0.50529 | 0.19185 | 0.29807 | 0.08459 | 0.0366 ARHGDI3   |
| cg27561006 | 0.09234 | 0.10858 | 0.10969 | 0.0946  | 0.13296 | 0.11183 | 0.12897 | 0.0934  | 0.1705  | 0.07764 PRCP     |
| cg27561421 | 0.02743 | 0.02696 | 0.02916 | 0.02738 | 0.02763 | 0.02901 | 0.02419 | 0.02528 | 0.02442 | 0.02047 BZW1     |
| cg27562023 | 0.79975 | 0.67183 | 0.71401 | 0.75777 | 0.61997 | 0.80149 | 0.50646 | 0.55088 | 0.71613 | 0.59585 RPH3AL   |
| cg27563210 | 0.05561 | 0.0542  | 0.05786 | 0.0555  | 0.07517 | 0.07706 | 0.05738 | 0.05593 | 0.04167 | 0.04852 USP49    |
| cg27563778 | 0.63686 | 0.68417 | 0.66252 | 0.664   | 0.52398 | 0.61564 | 0.39618 | 0.29802 | 0.6049  | 0.5318 C4orf17   |
| cg27566805 | 0.57603 | 0.1127  | 0.59029 | 0.68061 | 0.81468 | 0.49913 | 0.14239 | 0.05568 | 0.06991 | 0.06839 USH2A    |
| cg27567335 | 0.09857 | 0.11651 | 0.20034 | 0.14828 | 0.11431 | 0.10456 | 0.23305 | 0.10958 | 0.12129 | 0.09974 RAMP1    |
| cg27573806 | 0.06047 | 0.04532 | 0.04863 | 0.04291 | 0.09147 | 0.06449 | 0.04472 | 0.043   | 0.0342  | 0.03461 LSM2     |
| cg27573888 | 0.90648 | 0.76909 | 0.93198 | 0.93868 | 0.95839 | 0.93531 | 0.92394 | 0.87585 | 0.94717 | 0.88548 C1orf38  |
| cg27574244 | 0.10567 | 0.03743 | 0.60854 | 0.71729 | 0.20103 | 0.02915 | 0.04129 | 0.02667 | 0.02631 | 0.02353 TBCD     |
| cg27575501 | 0.02904 | 0.02961 | 0.03437 | 0.02818 | 0.02241 | 0.02625 | 0.02382 | 0.02604 | 0.0266  | 0.02308 TREX1    |
| cg27579745 | 0.04081 | 0.04206 | 0.05355 | 0.04914 | 0.04594 | 0.03592 | 0.04855 | 0.04334 | 0.06018 | 0.03906 LDB1     |
| cg27581839 | 0.06227 | 0.05969 | 0.0796  | 0.08489 | 0.09778 | 0.11195 | 0.11769 | 0.06192 | 0.09448 | 0.06248 AMOT     |
| cg27582235 | 0.80802 | 0.75534 | 0.61969 | 0.74478 | 0.68708 | 0.42729 | 0.56871 | 0.31239 | 0.19282 | 0.08254 MYO1F    |
| cg27583030 | 0.11788 | 0.12335 | 0.12886 | 0.12428 | 0.09784 | 0.12102 | 0.11189 | 0.11744 | 0.10976 | 0.11314 SLC25A4  |

|            |         |         |         |         |         |         |         |         |         |                   |
|------------|---------|---------|---------|---------|---------|---------|---------|---------|---------|-------------------|
| cg27583102 | 0.63694 | 0.52026 | 0.69664 | 0.86816 | 0.7854  | 0.60999 | 0.28667 | 0.26107 | 0.06982 | 0.0305 KLK5       |
| cg27584171 | 0.28081 | 0.08127 | 0.28574 | 0.48257 | 0.08265 | 0.03815 | 0.04005 | 0.03907 | 0.05337 | 0.04442 KIAA0256  |
| cg27584469 | 0.03198 | 0.03332 | 0.1636  | 0.16321 | 0.03117 | 0.02841 | 0.04937 | 0.03665 | 0.23198 | 0.05653 SLITRK2   |
| cg27585441 | 0.61407 | 0.53552 | 0.58827 | 0.66125 | 0.59315 | 0.73144 | 0.57206 | 0.57831 | 0.5243  | 0.57964 CCDC54    |
| cg27586455 | 0.03135 | 0.03348 | 0.03583 | 0.03614 | 0.02403 | 0.02735 | 0.02543 | 0.02367 | 0.02503 | 0.02501 ZNF688    |
| cg27588902 | 0.86047 | 0.85099 | 0.6704  | 0.7973  | 0.79715 | 0.61853 | 0.91457 | 0.78191 | 0.62527 | 0.70478 GNMT      |
| cg27589921 | 0.83229 | 0.85769 | 0.83156 | 0.85763 | 0.91557 | 0.9045  | 0.83413 | 0.86383 | 0.89923 | 0.87256 CIAPIN1   |
| cg27590397 | 0.07978 | 0.06525 | 0.88859 | 0.91097 | 0.78737 | 0.8847  | 0.76974 | 0.85011 | 0.10761 | 0.05774 SSTR1     |
| cg27591196 | 0.06103 | 0.06061 | 0.0598  | 0.05197 | 0.05842 | 0.06217 | 0.05572 | 0.05772 | 0.04732 | 0.03292 GALNACT-2 |
| cg27592112 | 0.50341 | 0.44735 | 0.65114 | 0.81725 | 0.82998 | 0.87001 | 0.26742 | 0.13449 | 0.57964 | 0.50619 GABRG3    |
| cg27592318 | 0.86805 | 0.78056 | 0.82803 | 0.84903 | 0.89774 | 0.91014 | 0.33802 | 0.45167 | 0.4339  | 0.43527 HEMGN     |
| cg27596068 | 0.79277 | 0.81631 | 0.87313 | 0.86896 | 0.67526 | 0.42349 | 0.80794 | 0.86158 | 0.90419 | 0.86109 SERPINH1  |
| cg27600136 | 0.68346 | 0.7046  | 0.74447 | 0.7593  | 0.74772 | 0.73469 | 0.71138 | 0.70581 | 0.7449  | 0.4994 RASL11A    |
| cg27600794 | 0.74587 | 0.45558 | 0.48974 | 0.63834 | 0.82821 | 0.80029 | 0.05549 | 0.05828 | 0.51478 | 0.49907 PNLIPRP1  |
| cg27601516 | 0.09248 | 0.06694 | 0.19492 | 0.18004 | 0.08042 | 0.08658 | 0.08572 | 0.07652 | 0.60591 | 0.06277 JUB       |
| cg27601582 | 0.38616 | 0.04314 | 0.76286 | 0.8064  | 0.9227  | 0.54351 | 0.0235  | 0.02645 | 0.24192 | 0.01831 ITGB1BP3  |
| cg27603796 | 0.04245 | 0.03367 | 0.4871  | 0.52688 | 0.3128  | 0.03073 | 0.12062 | 0.03535 | 0.28382 | 0.25203 CTTNBP2   |
| cg27606341 | 0.83727 | 0.80866 | 0.9054  | 0.92077 | 0.89542 | 0.87926 | 0.5638  | 0.60638 | 0.09206 | 0.16798 FYB       |
| cg27607639 | 0.02899 | 0.02693 | 0.02911 | 0.02229 | 0.02197 | 0.02387 | 0.02369 | 0.0311  | 0.02142 | 0.01918 UNC119    |
| cg27608154 | 0.82051 | 0.82926 | 0.71753 | 0.70696 | 0.74725 | 0.81568 | 0.78485 | 0.7967  | 0.8222  | 0.81933 BCL2L11   |
| cg27609819 | 0.65292 | 0.52086 | 0.60823 | 0.6785  | 0.7117  | 0.78977 | 0.75028 | 0.81952 | 0.27621 | 0.29603 PLCL1     |
| cg27610250 | 0.05788 | 0.03847 | 0.08059 | 0.10454 | 0.04751 | 0.03221 | 0.04468 | 0.03855 | 0.03532 | 0.03014 LOC91137  |
| cg27610561 | 0.91997 | 0.91051 | 0.91959 | 0.91027 | 0.93602 | 0.90211 | 0.89556 | 0.88215 | 0.93342 | 0.87588 SLC2A10   |
| cg27611665 | 0.02248 | 0.02564 | 0.02815 | 0.02742 | 0.01945 | 0.01971 | 0.0204  | 0.02142 | 0.01969 | 0.01787 FBXL12    |
| cg27611781 | 0.096   | 0.09622 | 0.15654 | 0.14158 | 0.21596 | 0.15596 | 0.13542 | 0.12071 | 0.15547 | 0.18239 PDXP      |
| cg27613076 | 0.07885 | 0.05485 | 0.07288 | 0.0506  | 0.40317 | 0.05372 | 0.31741 | 0.06684 | 0.08275 | 0.03906 INPP5F    |
| cg27614038 | 0.03056 | 0.03114 | 0.03701 | 0.03011 | 0.02383 | 0.02654 | 0.03081 | 0.02582 | 0.02594 | 0.02333 AZI2      |
| cg27619475 | 0.0269  | 0.03212 | 0.0313  | 0.02699 | 0.64153 | 0.70321 | 0.8416  | 0.71363 | 0.0461  | 0.01885 SLC16A5   |
| cg27622610 | 0.03674 | 0.02949 | 0.06749 | 0.16936 | 0.24987 | 0.04322 | 0.03769 | 0.03694 | 0.02934 | 0.03425 OR1G1     |
| cg27623214 | 0.79554 | 0.8174  | 0.78579 | 0.79378 | 0.65241 | 0.64711 | 0.816   | 0.82667 | 0.85155 | 0.81187 C19orf18  |
| cg27625732 | 0.86036 | 0.87221 | 0.87582 | 0.87997 | 0.90274 | 0.87069 | 0.87186 | 0.79951 | 0.61123 | 0.4503 TBC1D13    |
| cg27626102 | 0.18461 | 0.11078 | 0.42683 | 0.71226 | 0.50704 | 0.11756 | 0.27817 | 0.17039 | 0.82157 | 0.51164 STEAP2    |
| cg27626299 | 0.08051 | 0.07575 | 0.48096 | 0.59743 | 0.33042 | 0.56951 | 0.09614 | 0.05999 | 0.33072 | 0.04809 EVX1      |
| cg27626318 | 0.05393 | 0.04735 | 0.35876 | 0.29724 | 0.14762 | 0.05432 | 0.04517 | 0.04545 | 0.0365  | 0.03732 VAC14     |
| cg27626424 | 0.44673 | 0.32832 | 0.68362 | 0.86639 | 0.881   | 0.89139 | 0.36515 | 0.23255 | 0.08197 | 0.29656 LOR       |
| cg27626899 | 0.32178 | 0.08331 | 0.27671 | 0.22357 | 0.14524 | 0.04352 | 0.26798 | 0.06151 | 0.5095  | 0.04753 HDCC3     |
| cg27627570 | 0.02693 | 0.02696 | 0.02713 | 0.02571 | 0.02354 | 0.03004 | 0.02277 | 0.0268  | 0.02184 | 0.02113 CEECAM1   |
| cg27628312 | 0.02372 | 0.03648 | 0.06547 | 0.04061 | 0.0804  | 0.09527 | 0.15372 | 0.09613 | 0.02522 | 0.02334 EPHB6     |
| cg27631256 | 0.85089 | 0.70712 | 0.78513 | 0.8256  | 0.74406 | 0.80391 | 0.7423  | 0.45487 | 0.84433 | 0.77497 TNFSF8    |
| cg27631817 | 0.44491 | 0.27322 | 0.7127  | 0.81832 | 0.36714 | 0.54821 | 0.29448 | 0.24967 | 0.23878 | 0.22533 OFCC1     |
| cg27633903 | 0.10676 | 0.11149 | 0.14127 | 0.17051 | 0.10424 | 0.11128 | 0.10132 | 0.10336 | 0.28465 | 0.09997 MBD6      |



|            |         |         |         |         |         |         |         |         |         |                  |
|------------|---------|---------|---------|---------|---------|---------|---------|---------|---------|------------------|
| cg27634151 | 0.045   | 0.03145 | 0.15567 | 0.27742 | 0.36131 | 0.06981 | 0.05196 | 0.02962 | 0.1103  | 0.27594 GPR83    |
| cg27635271 | 0.88073 | 0.46174 | 0.78694 | 0.86256 | 0.73075 | 0.71433 | 0.78982 | 0.64363 | 0.87495 | 0.66788 SH3PX3   |
| cg27635983 | 0.03583 | 0.03526 | 0.03487 | 0.03384 | 0.02802 | 0.03016 | 0.03259 | 0.03108 | 0.02792 | 0.02733 MAP2K7   |
| cg27637521 | 0.04055 | 0.02681 | 0.02716 | 0.02617 | 0.02352 | 0.02972 | 0.02349 | 0.02638 | 0.02068 | 0.01883 SOCS3    |
| cg27638597 | 0.02278 | 0.01954 | 0.02763 | 0.02363 | 0.02    | 0.02202 | 0.01557 | 0.01668 | 0.01605 | 0.01647 SNTA1    |
| cg27638672 | 0.10237 | 0.09005 | 0.08866 | 0.07535 | 0.07047 | 0.07836 | 0.09238 | 0.0862  | 0.07564 | 0.07313 PIGB     |
| cg27638713 | 0.06692 | 0.06666 | 0.08038 | 0.06072 | 0.1949  | 0.06395 | 0.06384 | 0.06141 | 0.09758 | 0.05882 MCM3     |
| cg27641018 | 0.75877 | 0.63756 | 0.70396 | 0.73351 | 0.68227 | 0.66538 | 0.44815 | 0.70235 | 0.26159 | 0.30402 EPDR1    |
| cg27643859 | 0.85282 | 0.85924 | 0.84003 | 0.86157 | 0.81024 | 0.83341 | 0.84946 | 0.87034 | 0.87005 | 0.84749 TM9SF4   |
| cg27644292 | 0.41802 | 0.26992 | 0.60905 | 0.74186 | 0.46691 | 0.61473 | 0.22992 | 0.18796 | 0.19969 | 0.22848 SNRPN    |
| cg27648946 | 0.09295 | 0.075   | 0.71191 | 0.74243 | 0.78947 | 0.73985 | 0.50554 | 0.21554 | 0.08326 | 0.05926 RHOBTB1  |
| cg27649653 | 0.23231 | 0.17454 | 0.26651 | 0.3137  | 0.25718 | 0.26358 | 0.22174 | 0.19711 | 0.16629 | 0.14702 ZNF8     |
| cg27649764 | 0.03392 | 0.03534 | 0.03219 | 0.03677 | 0.04588 | 0.04031 | 0.04889 | 0.03864 | 0.04383 | 0.03853 CTDSPL2  |
| cg27650175 | 0.08569 | 0.0249  | 0.02285 | 0.02388 | 0.02238 | 0.01837 | 0.01846 | 0.02092 | 0.68688 | 0.71912 DAB2IP   |
| cg27650434 | 0.11955 | 0.09994 | 0.4545  | 0.41161 | 0.53109 | 0.35267 | 0.3937  | 0.20117 | 0.23677 | 0.18102 MYCL1    |
| cg27651218 | 0.94235 | 0.93972 | 0.90044 | 0.94002 | 0.96581 | 0.93922 | 0.94057 | 0.934   | 0.92906 | 0.93784 COX8C    |
| cg27652350 | 0.9655  | 0.82822 | 0.96391 | 0.96932 | 0.91208 | 0.79128 | 0.9324  | 0.87581 | 0.96879 | 0.95677 ALDH1A3  |
| cg27653134 | 0.82672 | 0.70056 | 0.81734 | 0.85021 | 0.44154 | 0.4471  | 0.52869 | 0.27316 | 0.52566 | 0.53771 A2ML1    |
| cg27654142 | 0.05117 | 0.03588 | 0.18676 | 0.17584 | 0.0954  | 0.03808 | 0.54714 | 0.95421 | 0.03529 | 0.02894 ZFP2     |
| cg27655855 | 0.67308 | 0.33674 | 0.70079 | 0.82373 | 0.40345 | 0.82098 | 0.0868  | 0.1668  | 0.19676 | 0.51205 CST9L    |
| cg27655905 | 0.06911 | 0.06885 | 0.07252 | 0.06432 | 0.0682  | 0.07177 | 0.07434 | 0.06778 | 0.06001 | 0.05492 C11orf24 |
| cg27657249 | 0.18873 | 0.20339 | 0.1996  | 0.18863 | 0.43181 | 0.21065 | 0.21326 | 0.17443 | 0.19873 | 0.15266 QPRT     |
| cg27657283 | 0.11765 | 0.07113 | 0.11221 | 0.12751 | 0.15271 | 0.08113 | 0.13917 | 0.12846 | 0.12576 | 0.06607 LEPRE1   |
| cg27661264 | 0.23292 | 0.34536 | 0.44253 | 0.47535 | 0.24723 | 0.05346 | 0.30879 | 0.67214 | 0.22268 | 0.17183 GNAS     |
| cg27662379 | 0.03045 | 0.03048 | 0.03263 | 0.02507 | 0.02518 | 0.02456 | 0.02288 | 0.02517 | 0.02276 | 0.01732 RPN1     |
| cg27662877 | 0.04263 | 0.04784 | 0.0629  | 0.0748  | 0.95087 | 0.94923 | 0.06042 | 0.06183 | 0.04072 | 0.04054 CYB5A    |
| cg27665659 | 0.03525 | 0.03834 | 0.03941 | 0.03658 | 0.02796 | 0.03123 | 0.02918 | 0.02958 | 0.02848 | 0.02885 AP1S1    |
