# Supplementary material
Source: PubMed Central journal article supplement (PMC3470785)
Supplement: NIHMS377161-supplement-4.pdf [file NIHMS377161-supplement-4.pdf]

| TargetID   | Fold change([Rep-Sarcoma] v: Regulation([Rep-Sarcoma] vs [SYMBOL |           |
|------------|------------------------------------------------------------------|-----------|
| cg21501064 | 1.1955645 down                                                   | Sept6.    |
| cg07393322 | 1.1500018 down                                                   | A4GALT    |
| cg10266490 | 1.1811023 down                                                   | ACOT11    |
| cg08256781 | 1.3634218 down                                                   | ACSBG2    |
| cg14519515 | 1.2388589 down                                                   | ADRBK1    |
| cg14870461 | 1.1642816 down                                                   | AER61     |
| cg03929796 | 1.2303102 down                                                   | ALAS1     |
| cg25181693 | 1.192218 down                                                    | ALDH5A1   |
| cg09427311 | 1.2411556 down                                                   | ANGPTL2   |
| cg03399459 | 1.1843191 down                                                   | ANXA8     |
| cg14265075 | 1.3018976 down                                                   | ARHGEF11  |
| cg10878307 | 1.161942 down                                                    | ATAD4     |
| cg18433694 | 1.1948537 down                                                   | ATP11C    |
| cg19535609 | 1.1733066 down                                                   | B3GNT4    |
| cg22747092 | 1.3649538 down                                                   | BTBD14A   |
| cg23166289 | 1.237225 down                                                    | C1orf107  |
| cg01119135 | 1.1585352 down                                                   | C1orf116  |
| cg08253405 | 1.2810155 down                                                   | C1orf62   |
| cg00431114 | 1.2347851 down                                                   | C20orf121 |
| cg13236107 | 1.3549691 down                                                   | C20orf152 |
| cg09882647 | 1.166102 down                                                    | C20orf35  |
| cg01869233 | 1.1735783 down                                                   | C20orf75  |
| cg01684901 | 1.218672 down                                                    | C3orf40   |
| cg05659947 | 1.2047317 down                                                   | C4BPB     |
| cg22197830 | 1.2041608 down                                                   | C5orf14   |
| cg03003256 | 1.2169484 down                                                   | C6orf78   |
| cg02564523 | 1.3437959 down                                                   | C7orf19   |
| cg27508071 | 1.1882052 down                                                   | C7orf26   |
| cg09547190 | 1.2045982 down                                                   | C9orf89   |
| cg18272264 | 1.1900415 down                                                   | CACNB4    |
| cg00953256 | 1.1559812 down                                                   | CCND1     |
| cg21039631 | 1.2727208 down                                                   | CD58      |
| cg18557145 | 1.1509811 down                                                   | CD72      |

|            |                |          |
|------------|----------------|----------|
| cg08999352 | 1.2396492 down | CDK9     |
| cg24735489 | 1.2045797 down | CDSN     |
| cg24216701 | 1.4845524 down | CDX1     |
| cg26065841 | 1.3379573 down | CHAC1    |
| cg17408686 | 1.2160765 down | CHCHD6   |
| cg02519218 | 1.4687146 down | CHFR     |
| cg20066677 | 1.2113032 down | CHFR     |
| cg21232015 | 1.469136 down  | CHFR     |
| cg07484827 | 1.2837054 down | CHRNA10  |
| cg26843567 | 1.2981274 down | CHST11   |
| cg11984608 | 1.3213549 down | CLDN16   |
| cg26151675 | 1.256677 down  | CNR2     |
| cg20675440 | 1.1732318 down | COG8     |
| cg02989257 | 1.1965379 down | COL16A1  |
| cg17133183 | 1.1968464 up   | CRABP1   |
| cg20743744 | 1.2989753 down | CTBP1    |
| cg07294541 | 1.5290802 down | DEF6     |
| cg14960043 | 1.487022 down  | DEF6     |
| cg10763288 | 1.2524699 down | DHCR7    |
| cg02067021 | 1.1644866 down | DNAJC5B  |
| cg24237576 | 1.1507736 down | DNASE1L2 |
| cg07369274 | 1.3328699 down | DNASE1L3 |
| cg21629895 | 1.1740843 down | DNMT3A   |
| cg01148741 | 1.2358743 down | DUSP2    |
| cg01963696 | 1.3448433 down | ELA2     |
| cg25277950 | 1.2289567 down | EML2     |
| cg12449183 | 1.2622205 down | ERAS     |
| cg03718539 | 1.1858225 down | ETNK2    |
| cg19553721 | 1.3825061 down | FAM106A  |
| cg07846167 | 1.2228115 down | FBLIM1   |
| cg10667970 | 1.2817919 down | FBXO6    |
| cg24888049 | 1.2119532 down | FES      |
| cg19433435 | 1.381916 down  | FEZ1     |
| cg17214107 | 1.2088506 down | FGF2     |

|            |                |          |
|------------|----------------|----------|
| cg21416237 | 1.1989721 down | FKBP10   |
| cg05600717 | 1.1823852 down | FLJ13639 |
| cg25553916 | 1.2245927 down | FLJ22318 |
| cg02401978 | 1.1544679 down | FLJ31413 |
| cg22262140 | 1.2195661 down | FLJ36046 |
| cg24939733 | 1.284257 down  | FLJ38159 |
| cg18665384 | 1.2293553 down | FLJ43505 |
| cg09424308 | 1.1590928 down | FLJ90575 |
| cg15652212 | 1.5194677 down | FLJ90586 |
| cg02456292 | 1.2240224 down | FLJ90805 |
| cg25870263 | 1.1906687 down | FNDC5    |
| cg18818531 | 1.3868119 down | FOSL1    |
| cg17095797 | 1.1679852 down | FOXL1    |
| cg24919972 | 1.1557841 down | FYCO1    |
| cg01601573 | 1.2095748 down | GAB1     |
| cg07378350 | 1.2326609 down | GDF5     |
| cg14528319 | 1.1533769 down | GIPC1    |
| cg12234947 | 1.209808 down  | GNAT2    |
| cg27176392 | 1.2766049 down | GNG7     |
| cg13883681 | 1.2227675 down | GOT2     |
| cg06665322 | 1.295808 down  | GPA33    |
| cg26656452 | 1.1855973 down | HABP2    |
| cg21960110 | 1.1638039 down | HBZ      |
| cg27626899 | 1.1585771 down | HDDC3    |
| cg06154570 | 1.1870198 down | HEYL     |
| cg14951292 | 1.2988349 down | HMOX2    |
| cg16899036 | 1.1839039 down | HOMER3   |
| cg17145652 | 1.321637 down  | HOOK3    |
| cg21922731 | 1.1969327 down | HSD17B6  |
| cg17753124 | 1.2493625 down | IER2     |
| cg19111262 | 1.1768937 down | IGSF9    |
| cg17142183 | 1.2992382 down | IL1R2    |
| cg26385743 | 1.3210709 down | IMP4     |
| cg20394284 | 1.4033822 down | JAK2     |

|            |                |           |
|------------|----------------|-----------|
| cg23641264 | 1.4611901 down | JRK       |
| cg17255302 | 1.4023029 down | K6HF      |
| cg01352108 | 1.2194681 down | KCNK4     |
| cg04439215 | 1.3743563 down | KCTD4     |
| cg08158289 | 1.180896 down  | KIAA0141  |
| cg14772955 | 1.243922 down  | KIAA0319L |
| cg15272684 | 1.2021077 down | KIAA0319L |
| cg10737521 | 1.2127498 down | KIAA0676  |
| cg12080675 | 1.2081286 down | KIAA0676  |
| cg18486150 | 1.1789594 down | KIF17     |
| cg12998614 | 1.247476 down  | KISS1R    |
| cg10064162 | 1.2583576 down | LAMB1     |
| cg10117369 | 1.2343521 down | LAX1      |
| cg00532335 | 1.2167307 down | LGI1      |
| cg00233307 | 1.264897 down  | MAP4K1    |
| cg15679651 | 1.3442262 down | MAP4K1    |
| cg03569412 | 1.1553068 down | MBD3      |
| cg04491089 | 1.1762462 down | MBTPS1    |
| cg25903122 | 1.462911 down  | MGC2747   |
| cg00411097 | 1.2077752 down | MGC9712   |
| cg19368582 | 1.160506 down  | MMRN2     |
| cg24895052 | 1.1837218 down | MPP3      |
| cg08727202 | 1.1577454 down | MPST      |
| cg18596794 | 1.1662184 down | MPZL1     |
| cg22933847 | 1.19915 down   | MRGPRF    |
| cg25124030 | 1.1778975 down | MRPL48    |
| cg23595927 | 1.2267488 down | MYL5      |
| cg09541248 | 1.1624173 down | MYO1A     |
| cg04223956 | 1.3023362 down | NEK7      |
| cg03172991 | 1.1685017 down | NFIX      |
| cg12552392 | 1.1719751 down | NFS1      |
| cg11378484 | 1.2191571 down | NIF3L1BP1 |
| cg02196655 | 1.1555487 down | NOL10     |
| cg20855344 | 1.3621503 down | NR1D2     |

|            |                |         |
|------------|----------------|---------|
| cg25485913 | 1.173946 down  | NTF5    |
| cg07986773 | 1.3378366 down | NUP50   |
| cg25668626 | 1.203575 down  | OAS1    |
| cg00208967 | 1.4085025 down | OLFM2   |
| cg10537079 | 1.1803625 down | OTC     |
| cg26900154 | 1.2239393 down | OTOF    |
| cg13315690 | 1.1513113 down | OVCA2   |
| cg07753644 | 1.1512778 down | P2RY11  |
| cg06882877 | 1.1588051 down | PAQR6   |
| cg23799313 | 1.2030911 down | PAQR7   |
| cg19863740 | 1.2592075 down | PARVG   |
| cg07713493 | 1.1521912 down | PCTK3   |
| cg04991214 | 1.2182295 down | PFDN2   |
| cg03112433 | 1.3801125 down | PFTK1   |
| cg15798153 | 1.4419369 down | PFTK1   |
| cg10818781 | 1.1782813 down | PHB2    |
| cg15778232 | 1.1999531 down | PHB2    |
| cg11115427 | 1.1972364 down | PHYH    |
| cg04375036 | 1.2020743 down | PPP1CC  |
| cg15544721 | 1.2001377 down | PPP1R9A |
| cg25587233 | 1.1575993 down | PPP2R4  |
| cg09134726 | 1.1713904 down | PRTN3   |
| cg25514304 | 1.2718142 down | PSEN2   |
| cg10280342 | 1.3069808 down | PSPN    |
| cg08361238 | 1.171103 down  | PTGFRN  |
| cg26884581 | 1.4229689 down | PYGM    |
| cg14944269 | 1.242426 down  | RAB15   |
| cg15982419 | 1.2102826 down | RALBP1  |
| cg11594228 | 1.1835986 down | RANBP1  |
| cg06611744 | 1.2026576 down | RASL11A |
| cg23363832 | 1.164472 down  | RBP1    |
| cg12311132 | 1.1625913 down | RCN1    |
| cg05023691 | 1.1703889 down | RGS13   |
| cg23651356 | 1.1842781 down | RGS17   |

|            |                |            |
|------------|----------------|------------|
| cg09088508 | 1.2076714 down | RHOF       |
| cg04099420 | 1.2728637 down | RIPK1      |
| cg27390220 | 1.1554717 down | RIS1       |
| cg20630655 | 1.2140956 down | RNUT1      |
| cg01797043 | 1.180104 down  | RPL3L      |
| cg18279742 | 1.3140681 down | RPS2       |
| cg09454892 | 1.2003124 down | SAMD8      |
| cg03963654 | 1.4073684 down | SCOC       |
| cg04457051 | 1.3038917 down | SCOC       |
| cg10249734 | 1.1812218 down | SECTM1     |
| cg15156836 | 1.2034231 down | SEPN1      |
| cg22242539 | 1.3065587 down | SERPINF1   |
| cg16362133 | 1.2545344 down | SLC11A2    |
| cg23656386 | 1.1508964 down | SLC12A4    |
| cg16558203 | 1.2576095 down | SLC22A14   |
| cg12408911 | 1.1527582 down | SLC7A5     |
| cg25802093 | 1.1782176 down | SPAG6      |
| cg00186954 | 1.2006903 down | ST5        |
| cg25732252 | 1.218934 down  | ST6GALNAC4 |
| cg03001305 | 1.2585757 down | STAT5A     |
| cg26490372 | 1.2608511 down | TATDN1     |
| cg14252059 | 1.2867484 down | TECTA      |
| cg06469542 | 1.2406585 down | THSD3      |
| cg14292823 | 1.2262915 down | TIGD5      |
| cg23902550 | 1.1838235 down | TIGD5      |
| cg03870261 | 1.2055721 down | TIMM13     |
| cg08794763 | 1.2062241 down | TLE6       |
| cg11761535 | 1.2484552 down | TM4SF18    |
| cg16301617 | 1.1569544 down | TMC6       |
| cg14375111 | 1.3034797 down | TMEM43     |
| cg00138126 | 1.2293417 down | TMEPAI     |
| cg09918674 | 1.2501888 down | TNFAIP8L1  |
| cg08074477 | 1.2240038 down | TNS4       |
| cg17686885 | 1.1888198 down | TOM1L1     |

|            |                |         |
|------------|----------------|---------|
| cg02085507 | 1.1856284 down | TRIP10  |
| cg27032184 | 1.1509794 down | TRMU    |
| cg17627559 | 1.1968164 down | TSPAN32 |
| cg20450764 | 1.193617 down  | TSPAN7  |
| cg06899329 | 1.1524915 down | TSSK6   |
| cg15677294 | 1.181063 down  | TUBB4   |
| cg04582938 | 1.1721897 down | UAP1L1  |
| cg15177359 | 1.1674899 down | UNC13D  |
| cg27347104 | 1.1959143 down | VWF     |
| cg03608974 | 1.2475348 down | ZAK     |
| cg00929606 | 1.2523971 down | ZNF3    |
| cg17770886 | 1.2182161 down | ZNF511  |
| cg11177693 | 1.1749506 down | ZNF513  |
