# Supplementary material
Source: PubMed Central journal article supplement (PMC3470785)
Supplement: NIHMS377161-supplement-5.pdf [file NIHMS377161-supplement-5.pdf]

| Probe Set ID | p-value ( T T regulation ( | FCAbsolute ( T Test paired p-value P <= 0.05 ) | Gene Symbol |
|--------------|----------------------------|------------------------------------------------|-------------|
| 201791_s_at  | 0.0337666 down             | 2.318062                                       | DHCR7       |
| 202913_at    | 0.0469508 down             | 1.158668                                       | ARHGEF11    |
| 204794_at    | 0.0215535 down             | 2.7998335                                      | DUSP2       |
| 206192_at    | 0.0163132 down             | 1.136272                                       | CDSN        |
| 207693_at    | 0.0337915 down             | 3.0389533                                      | CACNB4      |
| 210032_s_at  | 0.0485447 down             | 1.1124951                                      | SPAG6       |
| 210210_at    | 0.0054842 down             | 1.2910166                                      | MPZL1       |
| 211112_at    | 0.0143194 down             | 1.1930116                                      | SLC12A4     |
| 212411_at    | 0.0433504 down             | 1.6341357                                      | IMP4        |
| 218188_s_at  | 0.044928 down              | 1.6450179                                      | TIMM13      |
| 218295_s_at  | 0.0120693 down             | 1.5705556                                      | NUP50       |
| 218455_at    | 0.0134561 down             | 1.639495                                       | NFS1        |
| 221293_s_at  | 0.0245022 down             | 1.3287699                                      | DEF6        |
| 221716_s_at  | 0.032513 down              | 1.0570351                                      | ACSBG2      |
| 221915_s_at  | 0.027576 down              | 1.2325428                                      | RANBP1      |
| 222583_s_at  | 0.00755 down               | 1.5436001                                      | NUP50       |
| 222640_at    | 0.0215691 down             | 1.3852891                                      | DNMT3A      |
| 223562_at    | 0.028505 down              | 1.279317                                       | PARVG       |
| 224462_s_at  | 0.0020432 down             | 1.1757898                                      | CHCHD6      |
| 225998_at    | 0.036424 down              | 1.6894983                                      | GAB1        |
| 226002_at    | 0.0167066 down             | 1.8293827                                      | GAB1        |
| 226659_at    | 0.0061151 down             | 2.4969766                                      | DEF6        |
| 229114_at    | 0.0392223 down             | 2.091971                                       | GAB1        |
| 239717_at    | 0.0056531 down             | 1.159967                                       | CHRNA10     |
| 240261_at    | 0.0087418 down             | 1.2117853                                      | TOM1L1      |
| 204647_at    | 0.0017942 up               | 1.3780755                                      | HOMER3      |
| 205841_at    | 0.0300821 up               | 1.5812043                                      | JAK2        |
| 205842_s_at  | 0.041865 up                | 1.7036841                                      | JAK2        |
| 207408_at    | 0.043678 up                | 1.1099343                                      | SLC22A14    |
| 209941_at    | 0.0164631 up               | 1.4054135                                      | RIPK1       |
| 215489_x_a   | 0.0044821 up               | 1.6441947                                      | HOMER3      |
| 216322_at    | 0.0401626 up               | 1.1204196                                      | CD58        |
| 222222_s_at  | 0.0026712 up               | 1.2481266                                      | HOMER3      |
| 226395_at    | 0.03712 up                 | 1.5592209                                      | HOOK3       |
| 226551_at    | 0.0061458 up               | 1.6044394                                      | RIPK1       |
| 227056_at    | 0.0298988 up               | 1.2771562                                      | KIAA0141    |
| 1555483_x_   | 0.027397 up                | 1.554966                                       | FBLIM1      |

| Gene Symbol | Primer 1                | Primer 2              |
|-------------|-------------------------|-----------------------|
| ARHGEF11    | TCTCCCAGAGAAGACAGGCT    | GATTCTGGAACCGTGGAGAC  |
| CACNB4      | GGCCTGCTTGTGTAGGAATC    | GCCTTGAAAGAGGTGCTCTG  |
| CD58        | GCACATTGCTTGGTACATGG    | GTCCTCAGCGTGGTCTGC    |
| CDSN        | TCGTTAGGGGAGGTGATACG    | CTGCTGGCTGGTCTCCTC    |
| CHCHD6      | TCTTCCTCTCAATACGCTCCA   | GAGGAGCAGAAGTCAGTCCG  |
| CHRNA10     | GGACCACGTTGGTGCTG       | CTATGGTGGCCTGGATGC    |
| DEF6        | GTATCCCTGGCTGGACACAG    | GTCTCCAAGTCCCAGCTCAA  |
| DHCR7       | GACTCTTGGCTTTGGGAATG    | AACTTTTAAGGGGCCGGT    |
| DNMT3A      | CTTTCAGGCTACGATCCACG    | TACTTCCAGAGCTTCAGGGC  |
| DUSP2       | GCAGGTCTGACGAGTGACTG    | GACTCCAGGGCTCCTGTCTA  |
| GAB1        | TGGATCTCCAGTTAAACGGC    | GGTGGTGAAGTGGTCTGCTC  |
| HOMER3      | GCCATCCTGAGATTTCTCCC    | GCTTTGCCTCTGAACAGCAT  |
| HOOK3       | TCAGTTTTGATTCTGTTTAGCCA | GCCAGACCGTGGGAAGATTTA |
| IMP4        | GACCCCTGTAAGGCCAGAG     | CTCAGCCCAGGAGAGGAAG   |
| JAK2        | CCATTCCCATGCAGAGTCTT    | CAGAAGCAGGCAACAGGAAC  |
| MPZL1       | GGATATCCGCATACACCACAG   | TCTGCCTTCTGGATCTCACC  |
| NFS1        | GGCTGCTTCACTCCAATCTC    | CCTACCTCCCAGTGCAGAAG  |
| NUP50       | CCTCCAGAAGGTACCACCAA    | CATGGCCAGTGAGGAAGTCT  |
| PARVG       | TGGCATCCTTGTTACGATA     | CCTCACTCCCACTCTCCTG   |
| RANBP1      | CAGAGGCAAATCGGAACAGT    | AGTCCAACCATGACCCTCAG  |
| RIPK1       | TCACAACCTGCATTTTCGTTTG  | CATTTCTGGCATTGAAGAAA  |
| SLC12A4     | CTCCAAGGGGGAAAGAAAAG    | CTCAGTTGGGTGGACTACGG  |
| SLC22A14    | CCTCCTTACCTTCCCTTTC     | GGTGGGTGGGATACTTGTGA  |
| SPAG6       | TGTTGAATTGTTGGGACCAC    | GCGACTAGACCCCAAACAT   |
| TIMM13      | GAGTTGTAGGCGCGAGACA     | TGTATAGGGAAACCTGGGGG  |
| TOM1L1      | GCATCTCCCGACCTGTTTTA    | TGATGTCCGCCATATTGATG  |
