# Supplementary material
Source: PubMed Central journal article supplement (PMC3470785)
Supplement: NIHMS377161-supplement-6.pdf [file NIHMS377161-supplement-6.pdf]

| Entrez ID ▼         | Gene Symbol | Gene Name                                        | Refseq mRNA                | Refseq Protein<br>(linked to MSKCC) | Ensembl Gene ID                 | UCSC Genomic Coordinates                    | GO Categories                                                                                                                                                                | Sources                                            |
|---------------------|-------------|--------------------------------------------------|----------------------------|-------------------------------------|---------------------------------|---------------------------------------------|------------------------------------------------------------------------------------------------------------------------------------------------------------------------------|----------------------------------------------------|
| <a href="#">25</a>  | ABL1        | leukemia viral oncogene homolog 1                | NM_007313,<br>NM_005157    | NP_009297.2,<br>NP_005148.2         | <a href="#">ENSG00000097007</a> | <a href="#">chr9:132579527 - 132750891</a>  | adhesion;cellular_component;cytoplasm;cytoskeleton;DNA binding;DNA damage response, signal transduction resulting in induction of apoptosis;intracellular                    | Receptor, Futreal et al 2004, Mitelman 2000,       |
| <a href="#">27</a>  | ABL2        | leukemia viral oncogene homolog 2 (arg, Abelson- | NM_001100108,<br>NM_007314 | NP_001093578.1,<br>NP_009298.1      |                                 | <a href="#">chr1:177343475 - 177378802</a>  | cascade;magnesium ion binding;manganese ion binding;nucleotide binding;peptidyl-tyrosine phosphorylation;phosphoinositide 3-kinase complex;phosphoinositide 3-               | Mitelman 2000, Protein Kinase, Tyrosine Kinase,    |
| <a href="#">60</a>  | ACTB        | actin, beta                                      | NM_001101                  | <a href="#">NP_001092.1</a>         | <a href="#">ENSG00000075624</a> | <a href="#">chr7:5533904 - 5535814</a>      | acetyltransferase complex;nucleotide binding;protein binding;sensory perception of sound;soluble fraction;structural constituent of cytoskeleton                             | Entrez Query:Oncogene                              |
| <a href="#">207</a> | AKT1        | viral oncogene homolog 1                         | NM_001014431               | <a href="#">NP_005154.2</a>         | <a href="#">ENSG00000142208</a> | <a href="#">chr14:104307722 - 104330025</a> | metabolic process;cytoplasm;G-protein coupled receptor protein signaling pathway;germ cell development;glucose metabolic process;glucose                                     | Androgen Receptor, EGFR1, Kit Receptor,            |
| <a href="#">208</a> | AKT2        | viral oncogene homolog 2                         | NM_001626                  | <a href="#">NP_001617.1</a>         | <a href="#">ENSG00000105221</a> | <a href="#">chr19:45431618 - 45463014</a>   | phosphorylation;protein binding;protein modification process;protein serine/threonine kinase activity;regulation of JNK cascade;transferase activity                         | et al 2004, Vogelstein and Kinzler 2004, Protein   |
| <a href="#">302</a> | ANXA2       | annexin A2                                       | NM_001002858,<br>NM_004039 | NP_001002858.1,<br>NP_004030.1      | <a href="#">ENSG00000182718</a> | <a href="#">chr15:58427120 - 58477404</a>   | binding;phospholipase inhibitor activity;plasma membrane;skeletal development;soluble fraction                                                                               | Stability, Entrez Query:Oncogene                   |
| <a href="#">369</a> | ARAF        | 3611 viral oncogene homolog                      | NM_001654                  | <a href="#">NP_001645.1</a>         | <a href="#">ENSG00000078061</a> | <a href="#">chrX:47307310 - 47315800</a>    | cascade;metal ion binding;nucleotide binding;protein amino acid phosphorylation;protein binding;protein modification process;protein                                         | EGFR1, Entrez Query:Oncogene                       |
| <a href="#">387</a> | RHOA        | ras homolog gene family, member A                | NM_001664                  | <a href="#">NP_001655.1</a>         | <a href="#">ENSG00000067560</a> | <a href="#">chr3:49372645 - 49388026</a>    | activity;intracellular;magnesium ion binding;membrane;nucleotide binding;positive regulation of I-kappaB kinase/NF-kappaB cascade;positive regulation of NF-kappaB           | Wnt, Stability, Tumor Suppressor, Entrez           |
| <a href="#">388</a> | RHOB        | ras homolog gene family, member B                | NM_004040                  | <a href="#">NP_004031.1</a>         | <a href="#">ENSG00000143878</a> | <a href="#">chr2:20510707 - 20511298</a>    | membrane;endosome to lysosome transport;GTP binding;GTPase activity;intracellular;multicellular organismal development;negative regulation of                                | Tumor Suppressor, Entrez Query:Oncogene            |
| <a href="#">389</a> | RHOC        | ras homolog gene family, member C                | NM_175744                  | <a href="#">NP_786886.1</a>         | <a href="#">ENSG00000155366</a> | <a href="#">chr1:113045684 - 113047944</a>  | regulation of I-kappaB kinase/NF-kappaB cascade;protein binding;signal transducer activity;small GTPase mediated signal transduction                                         | Entrez Query:Oncogene                              |
| <a href="#">390</a> | RND3        | Rho family GTPase 3                              | NM_005168                  | <a href="#">NP_005159.1</a>         | <a href="#">ENSG00000115963</a> | <a href="#">chr2:151034746 - 151052177</a>  | activity;intracellular;membrane;nucleotide binding;small GTPase mediated signal transduction                                                                                 | Tumor Suppressor, Entrez Query:Oncogene            |
| <a href="#">466</a> | ATF1        | activating transcription factor 1                | NM_005171                  | <a href="#">NP_005162.1</a>         | <a href="#">ENSG00000123268</a> | <a href="#">chr12:49460195 - 49499829</a>   | nucleus;protein dimerization activity;regulation of transcription, DNA-dependent;sequence-specific DNA binding;transcription;transcription factor activity                   | Mitelman 2000, Entrez Query:Oncogene,              |
| <a href="#">558</a> | AXL         | AXL receptor tyrosine kinase                     | NM_001699,<br>NM_021913    | NP_001690.2,<br>NP_068713.2         | <a href="#">ENSG00000167601</a> | <a href="#">chr19:46417137 - 46457649</a>   | amino acid phosphorylation;receptor activity;regulation of progression through cell cycle;signal transduction;transferase activity;transmembrane receptor protein            | Kinase, Entrez Query:Oncogene                      |
| <a href="#">572</a> | BAD         | BCL2-antagonist of cell death                    | NM_004322                  | <a href="#">NP_116784.1</a>         | <a href="#">ENSG00000002330</a> | <a href="#">chr11:63794256 - 63808416</a>   | homeostasis;induction of apoptosis by extracellular signals;mitochondrial outer membrane;mitochondrion;positive regulation of B cell differentiation;positive                | Protein Kinase, Entrez Query:Oncogene              |
| <a href="#">573</a> | BAG1        | BCL2-associated athanogene                       | NM_004323                  | <a href="#">NP_004314.4</a>         | <a href="#">ENSG00000107262</a> | <a href="#">chr9:33245216 - 33254672</a>    | transduction;cytoplasm;nucleus;protein binding;protein folding;protein modification process;receptor signaling protein activity                                              | Androgen Receptor, Entrez Query:Oncogene           |
| <a href="#">581</a> | BAX         | BCL2-associated X protein                        | NM_004324,<br>NM_138764,   | NP_004315.1,<br>NP_620119.1,        | <a href="#">ENSG00000087088</a> | <a href="#">chr19:54149997 - 54156166</a>   | proliferation;BH3 domain binding;caspase activation;caspase activation via cytochrome c;cell cycle;cellular_component;cleavage of                                            | Vogelstein and Kinzler 2004, Tumor Suppressor,     |
| <a href="#">595</a> | CCND1       | cyclin D1                                        | NM_053056                  | <a href="#">NP_444284.1</a>         | <a href="#">ENSG00000110092</a> | <a href="#">chr11:69165262 - 69175231</a>   | holoenzyme complex;cyclin-dependent protein kinase regulator activity;cytosol;fat cell differentiation;G1/S transition of mitotic cell cycle;intracellular;nucleus;protein   | TGFBR, Futreal et al 2004, Hahn and Weinberg 2002, |
| <a href="#">596</a> | BCL2        | B-cell CLL/lymphoma 2                            | NM_000633,<br>NM_000657    | NP_000624.2,<br>NP_000648.2         | <a href="#">ENSG00000171791</a> | <a href="#">chr18:58946837 - 59136879</a>   | virus;endoplasmic reticulum;humoral immune response;integral to membrane;membrane;mitochondrial outer membrane;mitochondrion;negative                                        | Mitelman 2000, Vogelstein and Kinzler              |
| <a href="#">602</a> | BCL3        | B-cell CLL/lymphoma 3                            | NM_005178                  | <a href="#">NP_005169.2</a>         | <a href="#">ENSG00000069399</a> | <a href="#">chr19:49943911 - 49954712</a>   | damage response, signal transduction by p53 class mediator resulting in induction of apoptosis;extracellular matrix organization and biogenesis;follicular dendritic cell    | et al 2004, Mitelman 2000, Tumor Suppressor,       |
| <a href="#">604</a> | BCL6        | B-cell CLL/lymphoma 6 (zinc finger protein 51)   | NM_001706                  | <a href="#">NP_001697.2</a>         | <a href="#">ENSG00000113916</a> | <a href="#">chr3:188922939 - 188934175</a>  | morphogenesis;chromatin binding;DNA binding;erythrocyte development;germinal center formation;intracellular;metal ion binding;negative regulation of B cell                  | Mitelman 2000, Vogelstein and Kinzler              |
| <a href="#">613</a> | BCR         | breakpoint cluster region                        | NM_004327,<br>NM_021574    | NP_004318.3,<br>NP_067585.2         | <a href="#">ENSG00000186716</a> | <a href="#">chr22:21853147 - 21987709</a>   | activity;intracellular;intracellular signaling cascade;kinase activity;protein amino acid phosphorylation;protein serine/threonine kinase activity;regulation of Rho protein | Mitelman 2000, Tumor Suppressor, Entrez            |
| <a href="#">648</a> | BMI1        | BMI1 polycomb ring finger oncogene               | NM_005180                  | <a href="#">NP_005171.4</a>         | <a href="#">ENSG00000168283</a> | <a href="#">chr10:22645352 - 22658477</a>   | chromatin modification;metal ion binding;nucleus;protein binding;regulation of transcription, DNA-dependent;segment specification;transcription;zinc ion binding             | Tumor Suppressor, Entrez Query:Oncogene            |
| <a href="#">672</a> | BRCA1       | breast cancer 1, early onset                     | NM_007300,<br>NM_007303,   | NP_009231.1,<br>NP_009234.1,        | <a href="#">ENSG00000012048</a> | <a href="#">chr17:38451220 - 38529639</a>   | complex;cell cycle;cell cycle checkpoint;cellular_component;chromosome segregation;DNA binding;DNA damage response, signal transduction by p53 class                         | and Weinberg 2002, Vogelstein and Kinzler          |
| <a href="#">673</a> | BRAF        | viral oncogene homolog B1                        | NM_004333                  | <a href="#">NP_004324.2</a>         | <a href="#">ENSG00000157764</a> | <a href="#">chr7:140080865 - 140270972</a>  | cascade;metal ion binding;nucleotide binding;organ morphogenesis;plasma membrane;protein amino acid phosphorylation;protein binding;protein                                  | and Weinberg 2002, Vogelstein and Kinzler          |
| <a href="#">718</a> | C3          | complement component 3                           | NM_000064                  | <a href="#">NP_000055.2</a>         | <a href="#">ENSG00000125730</a> | <a href="#">chr19:6628892 - 6671600</a>     | pathway;endopeptidase inhibitor activity;extracellular region;G-protein coupled receptor protein signaling pathway;inflammatory response;positive regulation of              | Entrez Query:Oncogene                              |
| <a href="#">727</a> | C5          | complement component 5                           | NM_001735                  | <a href="#">NP_001726.2</a>         | <a href="#">ENSG00000106804</a> | <a href="#">chr9:122754837 - 122852345</a>  | activation;complement activation, alternative pathway;complement activation, classical pathway;cytolysis;endopeptidase inhibitor activity;extracellular                      | Entrez Query:Oncogene                              |

|                      |        |                                                 |                            |                                |                                 |                                             |                                                                                                                                                                     |                                                  |
|----------------------|--------|-------------------------------------------------|----------------------------|--------------------------------|---------------------------------|---------------------------------------------|---------------------------------------------------------------------------------------------------------------------------------------------------------------------|--------------------------------------------------|
| <a href="#">768</a>  | CA9    | carbonic anhydrase IX                           | NM_001216                  | <a href="#">NP_001207.2</a>    | <a href="#">ENSG00000107159</a> | <a href="#">chr9:35663956 - 35671022</a>    | activity;membrane;metal ion binding;morphogenesis of an epithelium;nucleus;one-carbon compound metabolic process;secretion;zinc ion binding                         | Tumor Suppressor, Entrez Query:Oncogene          |
| <a href="#">841</a>  | CASP8  | related cysteine peptidase                      | NM_033358, NM_033355,      | NP_203522.1, NP_203519.1,      | <a href="#">ENSG00000064012</a> | <a href="#">chr2:201831199 - 201859562</a>  | activity;cytoskeleton;identical protein binding;mitochondrion;positive regulation of kappaB kinase/NF-kappaB cascade;protein binding;proteolysis;regulation of      | Stability, Tumor Suppressor, Entrez              |
| <a href="#">860</a>  | RUNX2  | runt-related transcription factor 2             | NM_001015051, NM_001024630 | NP_001015051.2, NP_001019801.2 | <a href="#">ENSG00000124813</a> | <a href="#">chr6:45404037 - 45623020</a>    | differentiation;protein binding;regulation of transcription, DNA-dependent;RNA polymerase II transcription factor activity;transcription;transcription factor       | TGFBR, Wnt, Entrez Query:Oncogene                |
| <a href="#">861</a>  | RUNX1  | transcription factor 1 (acute myeloid leukemia) | NM_001001890, NM_001122607 | NP_001001890.1, NP_001116079.1 | <a href="#">ENSG00000159216</a> | <a href="#">chr21:35086301 - 35343066</a>   | binding;hemopoiesis;molecular_function;multicellular organismal development;nucleus;positive regulation of angiogenesis;positive regulation of                      | Futreal et al 2004, Mitelman 2000,               |
| <a href="#">864</a>  | RUNX3  | runt-related transcription factor 3             | NM_001031680, NM_004350    | NP_001026850.1, NP_004341.1    | <a href="#">ENSG00000020633</a> | <a href="#">chr1:25101199 - 25128946</a>    | epithelial cell proliferation;negative regulation of progression through cell cycle;nucleus;protein binding;regulation of transcription, DNA-                       | Tumor Suppressor, Entrez Query:Oncogene          |
| <a href="#">867</a>  | CBL    | ecotropic retroviral transforming sequence      | NM_005188                  | <a href="#">NP_005179.2</a>    | <a href="#">ENSG00000110395</a> | <a href="#">chr11:118582337 - 118675701</a> | growth factor receptor signaling pathway;ligase activity;nucleus;plasma membrane;positive regulation of receptor mediated endocytosis;protein                       | Futreal et al 2004, Mitelman 2000, Entrez        |
| <a href="#">868</a>  | CBLB   | ecotropic retroviral transforming sequence b    | NM_170662                  | <a href="#">NP_733762.2</a>    | <a href="#">ENSG00000114423</a> | <a href="#">chr3:106860503 - 107069111</a>  | response;intracellular signaling cascade;ligase activity;negative regulation of T cell receptor signaling pathway;NLS-bearing substrate import into                 | EGFR1, Kit Receptor, Entrez Query:Oncogene       |
| <a href="#">894</a>  | CCND2  | cyclin D2                                       | NM_001759                  | <a href="#">NP_001750.1</a>    | <a href="#">ENSG00000118971</a> | <a href="#">chr12:4253467 - 4279436</a>     | cell cycle;cell division;nucleus;protein binding;regulation of progression through cell cycle                                                                       | and Weinberg 2002, Mitelman 2000, Stability,     |
| <a href="#">896</a>  | CCND3  | cyclin D3                                       | NM_001760                  | <a href="#">NP_001751.1</a>    | <a href="#">ENSG00000112576</a> | <a href="#">chr6:42011655 - 42017365</a>    | cell cycle;cell division;nucleus;protein binding;regulation of progression through cell cycle                                                                       | and Weinberg 2002, Mitelman 2000, Tumor          |
| <a href="#">957</a>  | ENTPD5 | triphosphate diphosphohydrolase 5               | NM_001249                  | <a href="#">NP_001240.1</a>    | <a href="#">ENSG00000187097</a> | <a href="#">chr14:73503383 - 73524558</a>   | calcium ion binding;endoplasmic reticulum;hydrolase activity;integral to membrane;magnesium ion binding;membrane;nucleoside-diphosphatase activity                  | Entrez Query:Oncogene                            |
| <a href="#">988</a>  | CDC5L  | CDC5 cell division cycle 5-like (S. pombe)      | NM_001253                  | <a href="#">NP_001244.1</a>    | <a href="#">ENSG00000096401</a> | <a href="#">chr6:44463538 - 44522426</a>    | cell cycle;DNA binding;mRNA processing;nucleus;protein binding;regulation of transcription, DNA-dependent;RNA binding;RNA splicing;spliceosome                      | Entrez Query:Oncogene                            |
| <a href="#">993</a>  | CDC25A | cell division cycle 25 homolog A (S. pombe)     | NM_201567, NM_001789       | NP_963861.1, NP_001780.2       | <a href="#">ENSG00000164045</a> | <a href="#">chr3:48175438 - 48204441</a>    | activity;intracellular;mitosis;protein amino acid dephosphorylation;protein binding;protein tyrosine phosphatase activity;regulation of cyclin-dependent            | Protein Kinase, Stability, Entrez Query:Oncogene |
| <a href="#">998</a>  | CDC42  | (GTP binding protein, 25kDa)                    | NM_044472, NM_001039802    | NP_426359.1, NP_001782.1       | <a href="#">ENSG00000070831</a> | <a href="#">chr1:22277558 - 22290597</a>    | division;cytoplasm;establishment and/or maintenance of cell polarity;filopodium;G1 phase;GTP binding;GTPase activity;intracellular;macrophage                       | EGFR1, Entrez Query:Oncogene                     |
| <a href="#">1015</a> | CDH17  | cadherin 17, LI cadherin (liver-intestine)      | NM_004063                  | <a href="#">NP_004054.3</a>    | <a href="#">ENSG00000079112</a> | <a href="#">chr8:95209643 - 95276089</a>    | cell adhesion;integral to plasma membrane;membrane;membrane fraction;oligopeptide transport;protein binding;proton-dependent oligopeptide                           | Entrez Query:Oncogene                            |
| <a href="#">1029</a> | CDKN2A | inhibitor 2A (melanoma, p16, inhibits CDK4)     | NM_058197, NM_058195       | NP_478104.2, NP_478102.1       | <a href="#">ENSG00000147889</a> | <a href="#">chr9:21961001 - 21984453</a>    | checkpoint;cellular_component;cyclin-dependent protein kinase inhibitor activity;cytoplasm;DNA binding;epidermis development;negative regulation of cell            | and Weinberg 2002, Mitelman 2000,                |
| <a href="#">1044</a> | CDX1   | caudal type homeobox transcription factor 1     | NM_001804                  | <a href="#">NP_001795.2</a>    | <a href="#">ENSG00000113722</a> | <a href="#">chr5:149526632 - 149543436</a>  | transcription, DNA-dependent;sequence-specific DNA binding;transcription factor activity                                                                            | Wnt, Entrez Query:Oncogene                       |
| <a href="#">1045</a> | CDX2   | caudal type homeobox transcription factor 2     | NM_001265                  | <a href="#">NP_001256.2</a>    | <a href="#">ENSG00000165556</a> | <a href="#">chr13:27435251 - 27441143</a>   | nuclear chromosome;nucleus;pattern specification process;placenta development;regulation of transcription, DNA-dependent;sequence-specific DNA                      | Mitelman 2000, Entrez Query:Oncogene,            |
| <a href="#">1051</a> | CEBPB  | CCAAT/enhancer binding protein (C/EBP), beta    | NM_005194                  | <a href="#">NP_005185.2</a>    | <a href="#">ENSG00000172216</a> | <a href="#">chr20:48240977 - 48242015</a>   | development;fat cell differentiation;immune response;induction of apoptosis;inflammatory response;neuron differentiation;nucleus;positive regulation                | EGFR1, Entrez Query:Oncogene                     |
| <a href="#">1163</a> | CKS1B  | CDC28 protein kinase regulatory subunit 1B      | NM_001826                  | <a href="#">NP_001817.1</a>    | <a href="#">ENSG00000173207</a> | <a href="#">chr1:153213845 - 153217877</a>  | activity;kinase activity;protein binding;regulation of cyclin-dependent protein kinase activity                                                                     | Tumor Suppressor, Entrez Query:Oncogene          |
| <a href="#">1236</a> | CCR7   | chemokine (C-C motif) receptor 7                | NM_001838                  | <a href="#">NP_001829.1</a>    | <a href="#">ENSG00000126353</a> | <a href="#">chr17:35964519 - 35975187</a>   | concentration;G-protein coupled receptor protein signaling pathway;inflammatory response;integral to plasma membrane;plasma membrane;receptor                       | Entrez Query:Oncogene                            |
| <a href="#">1316</a> | KLF6   | Kruppel-like factor 6                           | NM_001300                  | <a href="#">NP_001291.3</a>    | <a href="#">ENSG00000067082</a> | <a href="#">chr10:3811730 - 3817206</a>     | binding;intracellular;metal ion binding;molecular_function;nucleic acid binding;nucleus;regulation of transcription, DNA-                                           | Stability, Tumor Suppressor, Entrez              |
| <a href="#">1326</a> | MAP3K8 | protein kinase kinase kinase 8                  | NM_005204                  | <a href="#">NP_005195.2</a>    | <a href="#">ENSG00000107968</a> | <a href="#">chr10:30767873 - 30789771</a>   | binding;protein kinase activity;protein serine/threonine kinase activity;transferase activity                                                                       | Protein Kinase, Stability, Entrez Query:Oncogene |
| <a href="#">1398</a> | CRK    | oncogene homolog (avian)                        | NM_016823, NM_005206       | NP_058431.2, NP_005197.3       | <a href="#">ENSG00000167193</a> | <a href="#">chr17:1273556 - 1306161</a>     | signaling cascade;nucleus;protein binding;protein phosphorylated amino acid binding;regulation of transcription from RNA polymerase II promoter;SH2 domain          | Stability, Tumor Suppressor, Entrez              |
| <a href="#">1399</a> | CRKL   | oncogene homolog (avian)-like                   | NM_005207                  | <a href="#">NP_005198.1</a>    | <a href="#">ENSG00000099942</a> | <a href="#">chr22:19602222 - 19634133</a>   | development;intracellular signaling cascade;JNK cascade;organ morphogenesis;parathyroid gland development;pattern specification                                     | Protein Kinase, Entrez Query:Oncogene            |
| <a href="#">1436</a> | CSF1R  | 1 receptor, formerly McDonough feline           | NM_005211                  | <a href="#">NP_005202.2</a>    | <a href="#">ENSG00000182578</a> | <a href="#">chr5:149413824 - 149446183</a>  | stimulating factor receptor activity;multicellular organismal development;nucleotide binding;plasma membrane;protein amino acid phosphorylation;protein             | Tyrosine Kinase, Entrez Query:Oncogene           |
| <a href="#">1499</a> | CTNNB1 | associated protein), beta 1, 88kDa              | NM_001904                  | <a href="#">NP_001895.1</a>    | <a href="#">ENSG00000168036</a> | <a href="#">chr3:41240563 - 41255837</a>    | pathway;apical part of cell;basolateral plasma membrane;beta-catenin destruction complex;binding;bone resorption;cadherin binding;cell fate determination;cell fate | TGFBR, Wnt, Futreal et al 2004, Mitelman 2000,   |
| <a href="#">1540</a> | CYLD   | cylindromatosis (turban tumor syndrome)         | NM_001042412, NM_015247    | NP_001035877.1, NP_056062.1    | <a href="#">ENSG00000083799</a> | <a href="#">chr16:49341110 - 49387920</a>   | regulation of progression through cell cycle;ribosome;structural constituent of ribosome;translation;ubiquitin cycle;ubiquitin thiolesterase activity;ubiquitin-    | et al 2004, Vogelstein and Kinzler 2004, Tumor   |



|                      |         |                                                   |                         |                             |                                 |                                             |                                                                                                                                                                       |                                                   |
|----------------------|---------|---------------------------------------------------|-------------------------|-----------------------------|---------------------------------|---------------------------------------------|-----------------------------------------------------------------------------------------------------------------------------------------------------------------------|---------------------------------------------------|
| <a href="#">1591</a> | CYP24A1 | 24, subfamily A, polypeptide 1                    | NM_001128915, NM_000782 | NP_001122387.1, NP_000773.2 | <a href="#">ENSG00000019186</a> | <a href="#">chr20:52207124 - 52223525</a>   | hydroxycholecalciferol-24-hydroxylase activity;cellular_component;electron transport;heme binding;iron ion binding;metal ion                                          | Entrez Query:Oncogene                             |
| <a href="#">1602</a> | DACH1   | dachshund homolog 1 (Drosophila)                  | NM_004392, NM_080759    | NP_004383.2, NP_542937.1    | <a href="#">ENSG00000165659</a> | <a href="#">chr13:70912787 - 71338908</a>   | DNA binding;multicellular organismal development;nucleus;protein binding;regulation of transcription, DNA-dependent;transcription                                     | Entrez Query:Oncogene                             |
| <a href="#">1612</a> | DAPK1   | death-associated protein kinase 1                 | NM_004938               | <a href="#">NP_004929.2</a> | <a href="#">ENSG00000196730</a> | <a href="#">chr9:89303812 - 89512099</a>    | by extracellular signals;kinase activity;nucleotide binding;protein amino acid phosphorylation;protein kinase cascade;protein serine/threonine kinase                 | Tumor Suppressor, Entrez Query:Oncogene           |
| <a href="#">1616</a> | DAXX    | death-associated protein 6                        | NM_001350               | <a href="#">NP_001341.1</a> | <a href="#">ENSG00000007565</a> | <a href="#">chr6:33394497 - 33397680</a>    | pathway;apoptosis;cytoplasm;heat shock protein binding;identical protein binding;induction of apoptosis via death domain receptors;negative regulation of             | TGFBR, Entrez Query:Oncogene                      |
| <a href="#">1643</a> | DDB2    | damage-specific DNA binding protein 2, 48kDa      | NM_000107               | <a href="#">NP_000098.1</a> | <a href="#">ENSG00000134574</a> | <a href="#">chr11:47193263 - 47216976</a>   | damaged DNA binding;nucleotide-excision repair;nucleus;protein binding                                                                                                | Vogelstein and Kinzler 2004, Stability, Entrez    |
| <a href="#">1649</a> | DDIT3   | DNA-damage-inducible transcript 3                 | NM_004083               | <a href="#">NP_004074.2</a> | <a href="#">ENSG00000175197</a> | <a href="#">chr12:56196858 - 56197456</a>   | polymerase II promoter;nucleus;protein dimerization activity;regulation of apoptosis;regulation of cell redox homeostasis;regulation of progression through           | Mitelman 2000, Stability, Entrez Query:Oncogene,  |
| <a href="#">1656</a> | DDX6    | DEAD (Asp-Glu-Ala-Asp) box polypeptide 6          | NM_004397               | <a href="#">NP_004388.2</a> | <a href="#">ENSG00000110367</a> | <a href="#">chr11:118130630 - 118162170</a> | ATP binding;ATP-dependent helicase activity;hydrolase activity;nucleotide binding;nucleus;protein binding;RNA binding;RNA helicase activity                           | Mitelman 2000, Entrez Query:Oncogene,             |
| <a href="#">1672</a> | DEFB1   | defensin, beta 1                                  | NM_005218               | <a href="#">NP_005209.1</a> | <a href="#">ENSG00000164825</a> | <a href="#">chr8:6715612 - 6722789</a>      | chemotaxis;defense response to bacterium;extracellular region;G-protein coupled receptor protein signaling pathway;innate immune response                             | Entrez Query:Oncogene                             |
| <a href="#">1749</a> | DLX5    | distal-less homeobox 5                            | NM_005221               | <a href="#">NP_005212.1</a> | <a href="#">ENSG00000105880</a> | <a href="#">chr7:96487983 - 96491871</a>    | organismal development;nervous system development;nucleus;protein binding;regulation of transcription, DNA-dependent;sequence-specific DNA                            | Entrez Query:Oncogene                             |
| <a href="#">1789</a> | DNMT3B  | DNA (cytosine-5-)-methyltransferase 3 beta        | NM_175849, NM_006892    | NP_787045.1, NP_008823.1    | <a href="#">ENSG00000088305</a> | <a href="#">chr20:30831790 - 30859370</a>   | ion binding;methyltransferase activity;nucleus;protein binding;site-specific DNA-methyltransferase (cytosine-specific) activity;transferase activity;zinc ion binding | Tumor Suppressor, Entrez Query:Oncogene           |
| <a href="#">1894</a> | ECT2    | transforming sequence 2 oncogene                  | NM_018098               | <a href="#">NP_060568.3</a> | <a href="#">ENSG00000114346</a> | <a href="#">chr3:173955014 - 174020721</a>  | cascade;positive regulation of I-kappaB kinase/NF-kappaB cascade;protein binding;regulation of Rho protein signal transduction;Rho guanyl-nucleotide                  | Tumor Suppressor, Entrez Query:Oncogene           |
| <a href="#">1908</a> | EDN3    | endothelin 3                                      | NM_207032, NM_207034    | NP_996915.1, NP_996917.1    | <a href="#">ENSG00000124205</a> | <a href="#">chr20:57309262 - 57332909</a>   | region;multicellular organismal development;pathogenesis;receptor binding;regulation of vasoconstriction;sensory perception of sound;signal                           | Entrez Query:Oncogene                             |
| <a href="#">1917</a> | EEF1A2  | elongation factor 1 alpha 2                       | NM_001958               | <a href="#">NP_001949.1</a> | <a href="#">ENSG00000101210</a> | <a href="#">chr20:61590094 - 61599560</a>   | binding;GTPase activity;nucleotide binding;nucleus;protein binding;translation elongation factor activity;translational elongation                                    | Entrez Query:Oncogene                             |
| <a href="#">1942</a> | EFNA1   | ephrin-A1                                         | NM_004428, NM_182685    | NP_004419.2, NP_872626.1    | <a href="#">ENSG00000169242</a> | <a href="#">chr1:153367077 - 153373167</a>  | cell-cell signaling;ephrin receptor binding;GPI anchor binding;integral to plasma membrane;membrane                                                                   | Entrez Query:Oncogene                             |
| <a href="#">1956</a> | EGFR    | receptor (erythroblastic leukemia viral (v-erb-b) | NM_005228, NM_201283,   | NP_005219.2, NP_958440.1,   | <a href="#">ENSG00000146648</a> | <a href="#">chr7:55054464 - 55240804</a>    | phospholipase A2 activation;cell cycle;cell proliferation;cell surface receptor linked signal transduction;cell-cell adhesion;cytoplasm;double-stranded DNA           | EGFR1, Futreal et al 2004, Vogelstein and Kinzler |
| <a href="#">1958</a> | EGR1    | early growth response 1                           | NM_001964               | <a href="#">NP_001955.1</a> | <a href="#">ENSG00000120738</a> | <a href="#">chr5:137829349 - 137831669</a>  | transcription;regulation of transcription, DNA-dependent;T cell differentiation;transcription;transcription factor activity;zinc ion binding                          | Tumor Suppressor, Entrez Query:Oncogene           |
| <a href="#">1969</a> | EPHA2   | EPH receptor A2                                   | NM_004431               | <a href="#">NP_004422.2</a> | <a href="#">ENSG00000142627</a> | <a href="#">chr1:16324296 - 16355014</a>    | plasma membrane;membrane;multicellular organismal development;neuron differentiation;nucleotide binding;protein amino acid phosphorylation;protein-                   | Kinase, Entrez Query:Oncogene                     |
| <a href="#">1991</a> | ELA2    | elastase 2, neutrophil                            | NM_001972               | <a href="#">NP_001963.1</a> | <a href="#">ENSG00000197561</a> | <a href="#">chr19:803328 - 807164</a>       | activity;extracellular region;leukocyte migration;negative regulation of chemokine biosynthetic process;negative regulation of chemotaxis;negative regulation of      | Entrez Query:Oncogene                             |
| <a href="#">2002</a> | ELK1    | ELK1, member of ETS oncogene family               | NM_005229, NM_001114123 | NP_005220.2, NP_001107595.1 | <a href="#">ENSG00000126767</a> | <a href="#">chrX:47381171 - 47385784</a>    | promoter;protein binding;regulation of transcription, DNA-dependent;sequence-specific DNA binding;transcription;transcription factor activity                         | EGFR1, ID, Entrez Query:Oncogene                  |
| <a href="#">2005</a> | ELK4    | protein (SRF accessory protein 1)                 | NM_021795, NM_001973    | NP_068567.1, NP_001964.2    | <a href="#">ENSG00000158711</a> | <a href="#">chr1:203852296 - 203859633</a>  | specific DNA binding;transcription cofactor activity;transcription factor activity;transcription from RNA polymerase II promoter                                      | EGFR1, ID, Entrez Query:Oncogene                  |
| <a href="#">2017</a> | CTTN    | cortactin                                         | NM_138565, NM_005231    | NP_612632.1, NP_005222.2    | <a href="#">ENSG00000085733</a> | <a href="#">chr11:69931051 - 69958916</a>   | cell cortex;cytoplasm;cytoskeleton;lamellipodium;protein binding;ruffle;soluble fraction                                                                              | Entrez Query:Oncogene                             |
| <a href="#">2041</a> | EPHA1   | EPH receptor A1                                   | NM_005232               | <a href="#">NP_005223.4</a> | <a href="#">ENSG00000146904</a> | <a href="#">chr7:142798671 - 142816020</a>  | membrane;membrane;nucleotide binding;protein amino acid phosphorylation;receptor activity;signal transduction;transferase                                             | Kinase, Entrez Query:Oncogene                     |
| <a href="#">2063</a> | NR2F6   | subfamily 2, group F, member 6                    | NM_005234               | <a href="#">NP_005225.2</a> | <a href="#">ENSG00000160113</a> | <a href="#">chr19:17204160 - 17217029</a>   | of circadian clock by photoperiod;metal ion binding;neuron development;nucleus;regulation of transcription, DNA-dependent;sequence-specific                           | Entrez Query:Oncogene                             |
| <a href="#">2064</a> | ERBB2   | leukemia viral oncogene homolog 2,                | NM_001005862, NM_004448 | NP_001005862.1, NP_004439.2 | <a href="#">ENSG00000141736</a> | <a href="#">chr17:35110017 - 35137823</a>   | factor receptor activity;ErbB-3 class receptor binding;extracellular region;heart development;identical protein binding;integral to membrane;mammary gland            | Futreal et al 2004, Vogelstein and Kinzler        |
| <a href="#">2065</a> | ERBB3   | leukemia viral oncogene homolog 3 (avian)         | NM_001982, NM_001005915 | NP_001973.2, NP_001005915.1 | <a href="#">ENSG00000065361</a> | <a href="#">chr12:54760351 - 54782106</a>   | activity;heart development;integral to plasma membrane;lateral plasma membrane;membrane;nucleotide binding;peripheral nervous system                                  | Tyrosine Kinase, Entrez Query:Oncogene            |
| <a href="#">2066</a> | ERBB4   | leukemia viral oncogene homolog 4 (avian)         | NM_005235, NM_001042599 | NP_005226.1, NP_001036064.1 | <a href="#">ENSG00000178568</a> | <a href="#">chr2:211956584 - 213111499</a>  | organismal development;nucleotide binding;protein amino acid phosphorylation;protein binding;protein heterodimerization activity;receptor                             | Kinase, Entrez Query:Oncogene                     |
| <a href="#">2069</a> | EREG    | epiregulin                                        | NM_001432               | <a href="#">NP_001423.1</a> | <a href="#">ENSG00000124882</a> | <a href="#">chr4:75449889 - 75469389</a>    | pathway;epidermal growth factor receptor binding;epidermal growth factor receptor signaling pathway;extracellular space;female meiosis;growth factor                  | Protein Kinase, Entrez Query:Oncogene             |

|                      |       |                                              |                            |                                |                                 |                                             |                                                                                                                                                                                |                                                    |
|----------------------|-------|----------------------------------------------|----------------------------|--------------------------------|---------------------------------|---------------------------------------------|--------------------------------------------------------------------------------------------------------------------------------------------------------------------------------|----------------------------------------------------|
| <a href="#">2078</a> | ERG   | virus E26 oncogene homolog (avian)           | NM_182918,<br>NM_004449    | NP_891548.1,<br>NP_004440.1    | <a href="#">ENSG00000157554</a> | <a href="#">chr21:38677194 - 38792174</a>   | phosphorylation;protein binding;regulation of transcription, DNA-dependent;sequence-specific DNA binding;signal transducer activity;signal                                     | Mitelman 2000, Entrez Query:Oncogene,              |
| <a href="#">2113</a> | ETS1  | virus E26 oncogene homolog 1 (avian)         | NM_005238                  | <a href="#">NP_005229.1</a>    | <a href="#">ENSG00000134954</a> | <a href="#">chr11:127837465 - 127897099</a> | regulation of erythrocyte differentiation;regulation of transcription, DNA-dependent;sequence-specific DNA binding;transcription;transcription factor                          | TGFBR, Mitelman 2000, Entrez Query:Oncogene        |
| <a href="#">2114</a> | ETS2  | virus E26 oncogene homolog 2 (avian)         | NM_005239                  | <a href="#">NP_005230.1</a>    | <a href="#">ENSG00000157557</a> | <a href="#">chr21:39103828 - 39116683</a>   | nucleus;regulation of transcription, DNA-dependent;sequence-specific DNA binding;skeletal development;transcription factor activity                                            | Tumor Suppressor, Entrez Query:Oncogene            |
| <a href="#">2118</a> | ETV4  | enhancer binding protein, E1AF)              | NM_001079675               | <a href="#">NP_001977.1</a>    | <a href="#">ENSG00000175832</a> | <a href="#">chr17:38961412 - 38978511</a>   | transcription;regulation of transcription, DNA-dependent;sequence-specific DNA binding;transcription;transcription factor activity;transcriptional activator activity          | Mitelman 2000, Entrez Query:Oncogene,              |
| <a href="#">2120</a> | ETV6  | ets variant gene 6 (TEL oncogene)            | NM_001987                  | <a href="#">NP_001978.1</a>    | <a href="#">ENSG00000139083</a> | <a href="#">chr12:11694328 - 11935247</a>   | cell differentiation;nucleus;protein binding;regulation of transcription, DNA-dependent;sequence-specific DNA binding;transcription;transcription factor activity              | Mitelman 2000, Stability, Entrez Query:Oncogene,   |
| <a href="#">2122</a> | EVI1  | ecotropic viral integration site 1           | NM_005241,<br>NM_001105077 | NP_005232.2,<br>NP_001098547.2 | <a href="#">ENSG00000085276</a> | <a href="#">chr3:170285390 - 170345481</a>  | binding;molecular_function;multicellular organismal development;nucleic acid binding;nucleus;positive regulation of transcription from RNA polymerase II                       | Mitelman 2000, Vogelstein and Kinzler              |
| <a href="#">2130</a> | EWSR1 | Ewing sarcoma breakpoint region 1            | NM_005243,<br>NM_013986    | NP_005234.1,<br>NP_053733.1    | <a href="#">ENSG00000182944</a> | <a href="#">chr22:27994325 - 28026151</a>   | binding;nucleus;regulation of transcription, DNA-dependent;RNA binding;transcription;zinc ion binding                                                                          | Mitelman 2000, Vogelstein and Kinzler              |
| <a href="#">2146</a> | EZH2  | enhancer of zeste homolog 2 (Drosophila)     | NM_004456,<br>NM_152998    | NP_004447.2,<br>NP_694543.1    | <a href="#">ENSG00000106462</a> | <a href="#">chr7:148135670 - 148175323</a>  | architecture;histone methyltransferase activity;nucleus;protein binding;regulation of transcription, DNA-dependent;transcription                                               | Suppressor, Entrez Query:Oncogene                  |
| <a href="#">2152</a> | F3    | (thromboplastin, tissue factor)              | NM_001993                  | <a href="#">NP_001984.1</a>    | <a href="#">ENSG00000117525</a> | <a href="#">chr1:94768603 - 94779780</a>    | blood coagulation;immune response;integral to membrane;plasma membrane;transmembrane receptor activity                                                                         | Tumor Suppressor, Entrez Query:Oncogene            |
| <a href="#">2194</a> | FASN  | fatty acid synthase                          | NM_004104                  | <a href="#">NP_004095.4</a>    | <a href="#">ENSG00000169710</a> | <a href="#">chr17:77630307 - 77647610</a>   | protein] reductase activity;3-oxoacyl-[acyl-carrier-protein] synthase activity;acyl-ACP thioesterase activity;catalytic activity;cofactor binding;enoyl-[acyl-carrier-protein] | Entrez Query:Oncogene                              |
| <a href="#">2241</a> | FER   | tyrosine kinase (phosphoprotein NCP94)       | NM_005246                  | <a href="#">NP_005237.2</a>    | <a href="#">ENSG00000151422</a> | <a href="#">chr5:108161782 - 108551175</a>  | binding;nucleus;protein amino acid autophosphorylation;protein binding;protein-tyrosine kinase activity;transferase activity                                                   | Tyrosine Kinase, Entrez Query:Oncogene             |
| <a href="#">2242</a> | FES   | feline sarcoma oncogene                      | NM_002005                  | <a href="#">NP_001996.1</a>    | <a href="#">ENSG00000182511</a> | <a href="#">chr15:89229279 - 89239792</a>   | development;nucleotide binding;protein amino acid phosphorylation;protein-tyrosine kinase activity;transferase activity                                                        | and Kinzler 2004, Protein Kinase, Tyrosine Kinase, |
| <a href="#">2248</a> | FGF3  | 3 (murine mammary tumor virus integration    | NM_005247                  | <a href="#">NP_005238.1</a>    | <a href="#">ENSG00000186895</a> | <a href="#">chr11:69334253 - 69342638</a>   | region;extracellular space;growth factor activity;induction of an organ;regulation of progression through cell cycle;signal transduction                                       | Entrez Query:Oncogene                              |
| <a href="#">2249</a> | FGF4  | 4 (heparin secretory transforming protein 1, | NM_002007                  | <a href="#">NP_001998.1</a>    | <a href="#">ENSG00000075388</a> | <a href="#">chr11:69297257 - 69299033</a>   | morphogenesis;extracellular region;growth factor activity;heparin binding;mitosis;negative regulation of apoptosis;odontogenesis (sensu                                        | Entrez Query:Oncogene                              |
| <a href="#">2250</a> | FGF5  | fibroblast growth factor 5                   | NM_033143,<br>NM_004464    | NP_149134.1,<br>NP_004455.2    | <a href="#">ENSG00000138675</a> | <a href="#">chr4:81407002 - 81426850</a>    | receptor signaling pathway;growth factor activity;nervous system development;regulation of progression through cell cycle                                                      | Entrez Query:Oncogene                              |
| <a href="#">2260</a> | FGFR1 | receptor 1 (fms-related tyrosine kinase 2,   | NM_023105,<br>NM_023110,   | NP_075593.1,<br>NP_075598.2,   | <a href="#">ENSG00000077782</a> | <a href="#">chr8:38390302 - 38434121</a>    | factor receptor signaling pathway;heparin binding;integral to plasma membrane;MAPKKK cascade;membrane;membrane fraction;nucleotide                                             | Mitelman 2000, Vogelstein and Kinzler              |
| <a href="#">2263</a> | FGFR2 | receptor 2 (bacteria-expressed kinase,       | NM_000141,<br>NM_022970    | NP_000132.3,<br>NP_075259.4    | <a href="#">ENSG00000066468</a> | <a href="#">chr10:123229360 - 123343321</a> | activity;heparin binding;integral to membrane;membrane;nucleotide binding;protein amino acid phosphorylation;protein binding;protein-tyrosine kinase                           | Vogelstein and Kinzler 2004, Protein Kinase,       |
| <a href="#">2268</a> | FGR   | sarcoma viral (v-fgr) oncogene homolog       | NM_001042729               | <a href="#">NP_005239.1</a>    | <a href="#">ENSG00000000938</a> | <a href="#">chr1:27812011 - 27823014</a>    | phosphorylation;protein-tyrosine kinase activity;response to virus;transferase activity                                                                                        | Kinase, Tyrosine Kinase, Entrez Query:Oncogene     |
| <a href="#">2290</a> | FOXP1 | forkhead box G1B                             | NM_005249                  | <a href="#">NP_005240.3</a>    | <a href="#">ENSG00000176165</a> | <a href="#">chr14:28306236 - 28307706</a>   | transcription, DNA-dependent;sequence-specific DNA binding;transcription;transcription factor activity                                                                         | TGFBR, Entrez Query:Oncogene                       |
| <a href="#">2313</a> | FLI1  | Friend leukemia virus integration 1          | NM_002017                  | <a href="#">NP_002008.2</a>    | <a href="#">ENSG00000151702</a> | <a href="#">chr11:128069363 - 128186093</a> | DNA-dependent;sequence-specific DNA binding;transcription;transcription factor activity                                                                                        | Mitelman 2000, Tumor Suppressor, Entrez            |
| <a href="#">2321</a> | FLT1  | kinase 1 (vascular endothelial growth        | NM_002019                  | <a href="#">NP_002010.2</a>    | <a href="#">ENSG00000102755</a> | <a href="#">chr13:27775303 - 27966980</a>   | binding;integral to plasma membrane;membrane;multicellular organismal development;nucleotide binding;patterning of blood vessels;positive regulation of                        | Stability, Tyrosine Kinase, Entrez Query:Oncogene  |
| <a href="#">2353</a> | FOS   | osteosarcoma viral oncogene homolog          | NM_005252                  | <a href="#">NP_005243.1</a>    | <a href="#">ENSG00000170345</a> | <a href="#">chr14:74815438 - 74817880</a>   | development;nucleus;protein dimerization activity;regulation of transcription from RNA polymerase II promoter;sequence-specific DNA binding;specific RNA                       | EGFR1, TGFBR, Stability, Entrez Query:Oncogene     |
| <a href="#">2354</a> | FOSB  | osteosarcoma viral oncogene homolog B        | NM_006732,<br>NM_001114171 | NP_006723.2,<br>NP_001107643.1 | <a href="#">ENSG00000125740</a> | <a href="#">chr19:50663684 - 50668110</a>   | from RNA polymerase II promoter;nucleus;protein dimerization activity;regulation of progression through cell cycle;regulation of transcription, DNA-                           | TGFBR, Entrez Query:Oncogene                       |
| <a href="#">2521</a> | FUS   | t(12;16) in malignant liposarcoma)           | NM_004960                  | <a href="#">NP_004951.1</a>    | <a href="#">ENSG00000089280</a> | <a href="#">chr16:31099036 - 31110260</a>   | binding;molecular_function;nucleic acid binding;nucleotide binding;nucleus;protein binding;RNA binding;zinc ion binding                                                        | Mitelman 2000, Entrez Query:Oncogene,              |
| <a href="#">2534</a> | FYN   | FYN oncogene related to SRC, FGR, YES        | NM_153048,<br>NM_153047    | NP_694593.1,<br>NP_694592.1    | <a href="#">ENSG00000010810</a> | <a href="#">chr6:112089634 - 112147947</a>  | cascade;learning;manganese ion binding;metal ion binding;multicellular organismal development;nucleotide binding;protein amino acid phosphorylation;protein kinase             | Receptor, Protein Kinase, Tyrosine Kinase, Entrez  |
| <a href="#">2621</a> | GAS6  | growth arrest-specific 6                     | NM_000820                  | <a href="#">NP_000811.1</a>    | <a href="#">ENSG00000183087</a> | <a href="#">chr13:113547049 - 113590106</a> | calcium ion binding;cell proliferation;extracellular region;receptor binding;regulation of cell growth;signal transduction                                                     | Stability, Entrez Query:Oncogene                   |
| <a href="#">2668</a> | GDNF  | glial cell derived neurotrophic factor       | NM_199231,<br>NM_199234    | NP_954701.1,<br>NP_954704.1    | <a href="#">ENSG00000168621</a> | <a href="#">chr5:37851509 - 37870655</a>    | activity;nervous system development;neural crest cell migration;neurite development;signal transduction                                                                        | Entrez Query:Oncogene                              |



|                      |          |                                                |                               |                                   |                                 |                                             |                                                                                                                                                                     |                                                  |
|----------------------|----------|------------------------------------------------|-------------------------------|-----------------------------------|---------------------------------|---------------------------------------------|---------------------------------------------------------------------------------------------------------------------------------------------------------------------|--------------------------------------------------|
| <a href="#">2672</a> | GF1      | growth factor independent 1                    | NM_001127215,<br>NM_001127216 | NP_001120687.1,<br>NP_001120688.1 | <a href="#">ENSG00000162676</a> | <a href="#">chr1:92714173 - 92721632</a>    | specific transcription in mitotic cell cycle;inner ear morphogenesis;intracellular;mechanosensory behavior;metal ion binding;negative                               | Stability, Entrez Query:Oncogene                 |
| <a href="#">2735</a> | GLI1     | oncogene homolog 1 (zinc finger protein)       | NM_005269                     | <a href="#">NP_005260.1</a>       | <a href="#">ENSG00000111087</a> | <a href="#">chr12:56143741 - 56152111</a>   | binding;dorsal/ventral pattern formation;epidermal cell differentiation;intracellular;lung development;metal ion binding;microtubule                                | Kinzler 2004, Entrez Query:Oncogene              |
| <a href="#">2736</a> | GLI2     | GLI-Kruppel family member GLI2                 | NM_005270                     | <a href="#">NP_005261.2</a>       | <a href="#">ENSG00000074047</a> | <a href="#">chr2:121271366 - 121464721</a>  | cortex morphogenesis;developmental growth;embryonic gut development;floor plate formation;heart development;hindbrain development;hindgut                           | Entrez Query:Oncogene                            |
| <a href="#">2737</a> | GLI3     | member GLI3 (Greig cephalopolysyndactyly)      | NM_000168                     | <a href="#">NP_000159.3</a>       | <a href="#">ENSG00000106571</a> | <a href="#">chr7:41970452 - 42229377</a>    | binding;cytoplasm;developmental growth;embryonic gut morphogenesis;embryonic limb morphogenesis;embryonic morphogenesis;forebrain development;heart                 | Entrez Query:Oncogene                            |
| <a href="#">2738</a> | GLI4     | GLI-Kruppel family member GLI4                 | NM_138465                     | <a href="#">NP_612474.1</a>       | <a href="#">ENSG00000181638</a> | <a href="#">chr8:144422941 - 144430349</a>  | biological_process;DNA binding;intracellular;metal ion binding;molecular_function;nucleic acid binding;nucleus;zinc ion binding                                     | Entrez Query:Oncogene                            |
| <a href="#">2889</a> | RAPGEF1  | Rap guanine nucleotide exchange factor (GEF) 1 | NM_005312,<br>NM_198679       | NP_005303.2,<br>NP_941372.1       | <a href="#">ENSG00000107263</a> | <a href="#">chr9:133444704 - 133574891</a>  | small GTPase mediated signal transduction;signal transduction;small GTPase mediated signal transduction;transmembrane receptor protein tyrosine kinase              | Protein Kinase, Entrez Query:Oncogene            |
| <a href="#">2907</a> | GRINA    | ionotropic, N-methyl D-aspartate-associated    | NM_001009184                  | <a href="#">NP_001009184.1</a>    | <a href="#">ENSG00000178719</a> | <a href="#">chr8:145137379 - 145138997</a>  | receptor activity                                                                                                                                                   | Entrez Query:Oncogene                            |
| <a href="#">2919</a> | CXCL1    | ligand 1 (melanoma growth stimulating)         | NM_001511                     | <a href="#">NP_001502.1</a>       | <a href="#">ENSG00000163739</a> | <a href="#">chr4:74954051 - 74955117</a>    | activity;chemotaxis;enzyme activator activity;extracellular region;extracellular space;G-protein coupled receptor protein signaling pathway;growth factor           | Entrez Query:Oncogene                            |
| <a href="#">2920</a> | CXCL2    | chemokine (C-X-C motif) ligand 2               | NM_002089                     | <a href="#">NP_002080.1</a>       | <a href="#">ENSG00000081041</a> | <a href="#">chr4:75182336 - 75183701</a>    | coupled receptor protein signaling pathway;immune response;inflammatory response;soluble fraction                                                                   | Entrez Query:Oncogene                            |
| <a href="#">2921</a> | CXCL3    | chemokine (C-X-C motif) ligand 3               | NM_002090                     | <a href="#">NP_002081.2</a>       | <a href="#">ENSG00000163734</a> | <a href="#">chr4:75121842 - 75123192</a>    | coupled receptor protein signaling pathway;immune response;inflammatory response                                                                                    | Entrez Query:Oncogene                            |
| <a href="#">2932</a> | GSK3B    | glycogen synthase kinase 3 beta                | NM_002093                     | <a href="#">NP_002084.2</a>       | <a href="#">ENSG00000082701</a> | <a href="#">chr3:121028324 - 121294971</a>  | response;glycogen metabolic process;glycogen synthase kinase 3 activity;negative regulation of apoptosis;NF-kappaB binding;nucleotide binding;nucleus;p53           | TNF_alpha_NF_kB, Wnt, Protein Kinase, Stability, |
| <a href="#">3074</a> | HEXB     | hexosaminidase B (beta polypeptide)            | NM_000521                     | <a href="#">NP_000512.1</a>       | <a href="#">ENSG00000049860</a> | <a href="#">chr5:74016841 - 74052756</a>    | homeostasis;carbohydrate metabolic process;cation binding;cellular protein metabolic process;ganglioside catabolic process;glycosaminoglycan metabolic              | Entrez Query:Oncogene                            |
| <a href="#">3082</a> | HGF      | factor (hepapoietin A; scatter factor)         | NM_001010931,<br>NM_000601,   | NP_001010931.1,<br>NP_000592.3,   | <a href="#">ENSG00000019991</a> | <a href="#">chr7:81169832 - 81237223</a>    | cellular_component;epithelial to mesenchymal transition;growth factor activity;mitosis;protein binding;proteolysis;serine-type endopeptidase activity               | Entrez Query:Oncogene                            |
| <a href="#">3087</a> | HHEX     | hematopoietically expressed homeobox           | NM_002729                     | <a href="#">NP_002720.1</a>       | <a href="#">ENSG00000152804</a> | <a href="#">chr10:94439723 - 94444505</a>   | development;multicellular organismal development;nucleus;protein binding;regulation of cell proliferation;regulation of transcription, DNA-                         | Entrez Query:Oncogene                            |
| <a href="#">3091</a> | HIF1A    | 1, alpha subunit (basic helix-loop-helix)      | NM_181054,<br>NM_001530       | NP_851397.1,<br>NP_001521.1       | <a href="#">ENSG00000100644</a> | <a href="#">chr14:61232275 - 61283556</a>   | of transcription;protein binding;protein heterodimerization activity;regulation of transcription, DNA-dependent;response to hypoxia;RNA polymerase II transcription | Suppressor, Entrez Query:Oncogene                |
| <a href="#">3159</a> | HMGA1    | high mobility group AT-hook 1                  | NM_145905                     | <a href="#">NP_665912.1</a>       | <a href="#">ENSG00000137309</a> | <a href="#">chr6:34316535 - 34320639</a>    | (sensu Eukaryota);DNA binding;DNA unwinding during replication;ligand-dependent nuclear receptor transcription coactivator activity;loss of chromatin               | Mitelman 2000, Entrez Query:Oncogene,            |
| <a href="#">3169</a> | FOXA1    | forkhead box A1                                | NM_004496                     | <a href="#">NP_004487.2</a>       | <a href="#">ENSG00000129514</a> | <a href="#">chr14:37130320 - 37133928</a>   | homeostasis;hormone metabolic process;lung development;nucleus;positive regulation of transcription from RNA polymerase II promoter;regulation of                   | Entrez Query:Oncogene                            |
| <a href="#">3172</a> | HNF4A    | hepatocyte nuclear factor 4, alpha             | NM_178850,<br>NM_178849,      | NP_849181.1,<br>NP_849180.1,      | <a href="#">ENSG00000101076</a> | <a href="#">chr20:42463426 - 42491719</a>   | binding;regulation of transcription from RNA polymerase II promoter;regulation of transcription, DNA-dependent;RNA polymerase II transcription factor               | Entrez Query:Oncogene                            |
| <a href="#">3195</a> | TLX1     | T-cell leukemia homeobox 1                     | NM_005521                     | <a href="#">NP_005512.1</a>       | <a href="#">ENSG00000107807</a> | <a href="#">chr10:102881288 - 102886660</a> | development;neuron differentiation;nucleus;organ formation;positive regulation of cell proliferation;positive regulation of transcription from RNA polymerase II    | Mitelman 2000, Vogelstein and Kinzler            |
| <a href="#">3198</a> | HOXA1    | homeobox A1                                    | NM_153620,<br>NM_005522       | NP_705873.2,<br>NP_005513.1       | <a href="#">ENSG00000105991</a> | <a href="#">chr7:27100583 - 27102056</a>    | morphogenesis;multicellular organismal development;nervous system development;nucleus;regulation of transcription from RNA polymerase II                            | Entrez Query:Oncogene                            |
| <a href="#">3265</a> | HRAS     | sarcoma viral oncogene homolog                 | NM_176795,<br>NM_005343       | NP_789765.1,<br>NP_005334.1       | <a href="#">ENSG00000174775</a> | <a href="#">chr11:522635 - 524322</a>       | binding;intracellular;membrane;nucleotide binding;organ morphogenesis;plasma membrane;protein C-terminus binding;regulation of progression through cell             | Futreal et al 2004, Hahn and Weinberg 2002,      |
| <a href="#">3266</a> | ERAS     | ES cell expressed Ras                          | NM_181532                     | <a href="#">NP_853510.1</a>       | <a href="#">ENSG00000187682</a> | <a href="#">chrX:48572477 - 48573179</a>    | GTP binding;intracellular;membrane;nucleotide binding;small GTPase mediated signal transduction                                                                     | Entrez Query:Oncogene                            |
| <a href="#">3298</a> | HSF2     | heat shock transcription factor 2              | NM_004506                     | <a href="#">NP_004497.1</a>       | <a href="#">ENSG00000025156</a> | <a href="#">chr6:122762581 - 122795064</a>  | binding;transcription;transcription coactivator activity;transcription factor activity;transcription from RNA polymerase II promoter                                | Entrez Query:Oncogene                            |
| <a href="#">3315</a> | HSPB1    | heat shock 27kDa protein 1                     | NM_001540                     | <a href="#">NP_001531.1</a>       | <a href="#">ENSG00000106211</a> | <a href="#">chr7:75769965 - 75771426</a>    | anti-apoptosis;cell motility;cell surface;cytoplasm;cytoskeleton;protein binding;regulation of translational initiation;response to unfolded protein                | Stability, Entrez Query:Oncogene                 |
| <a href="#">3320</a> | HSP90AA1 | 90kDa alpha (cytosolic), class A member 1      | NM_001017963                  | <a href="#">NP_005339.3</a>       | <a href="#">ENSG00000080824</a> | <a href="#">chr14:101617801 - 101675494</a> | transport;molecular_function;nitric-oxide synthase regulator activity;nucleotide binding;positive regulation of nitric oxide biosynthetic process;protein           | et al 2004, Stability, Entrez Query:Oncogene,    |
| <a href="#">3371</a> | TNC      | tenascin C (hexabrachion)                      | NM_002160                     | <a href="#">NP_002151.2</a>       | <a href="#">ENSG00000041982</a> | <a href="#">chr9:116823256 - 116893118</a>  | cell adhesion;proteinaceous extracellular matrix;receptor binding;signal transduction                                                                               | Stability, Entrez Query:Oncogene                 |
| <a href="#">3397</a> | ID1      | 1, dominant negative helix-loop-helix protein  | NM_181353,<br>NM_002165       | NP_851998.1,<br>NP_002156.2       | <a href="#">ENSG00000125968</a> | <a href="#">chr20:29656851 - 29657558</a>   | regulation of transcription factor activity;nucleus;protein binding;regulation of transcription from RNA polymerase II promoter;transcriptional repressor activity  | ID, Stability, Entrez Query:Oncogene             |

|                      |         |                                                |                         |                                             |                                 |                                            |                                                                                                                                                                      |                                                   |
|----------------------|---------|------------------------------------------------|-------------------------|---------------------------------------------|---------------------------------|--------------------------------------------|----------------------------------------------------------------------------------------------------------------------------------------------------------------------|---------------------------------------------------|
| <a href="#">3428</a> | IFI16   | interferon, gamma-inducible protein 16         | NM_005531               | <a href="#">NP_005522.2</a>                 | <a href="#">ENSG00000163565</a> | <a href="#">chr1:157251094 - 157291315</a> | class mediator resulting in induction of apoptosis;double-stranded DNA binding;immune response;monocyte differentiation;myeloid cell                                 | ID, Entrez Query:Oncogene                         |
| <a href="#">3486</a> | IGFBP3  | insulin-like growth factor binding protein 3   | NM_001013398, NM_000598 | <a href="#">NP_001013416.1, NP_000589.2</a> | <a href="#">ENSG00000146674</a> | <a href="#">chr7:45920943 - 45927264</a>   | regulation of signal transduction;positive regulation of apoptosis;positive regulation of myoblast differentiation;protein tyrosine phosphatase activator            | Tumor Suppressor, Entrez Query:Oncogene           |
| <a href="#">3490</a> | IGFBP7  | insulin-like growth factor binding protein 7   | NM_001553               | <a href="#">NP_001544.1</a>                 | <a href="#">ENSG00000163453</a> | <a href="#">chr4:57592239 - 57671274</a>   | extracellular region;insulin-like growth factor binding;negative regulation of cell proliferation;regulation of cell growth                                          | Tumor Suppressor, Entrez Query:Oncogene           |
| <a href="#">3576</a> | IL8     | interleukin 8                                  | NM_000584               | <a href="#">NP_000575.1</a>                 | <a href="#">ENSG00000169429</a> | <a href="#">chr4:74825239 - 74827045</a>   | signaling;chemokine activity;chemotaxis;extracellular region;extracellular space;G-protein coupled receptor protein signaling pathway;immune response;induction of   | Stability, Entrez Query:Oncogene                  |
| <a href="#">3579</a> | IL8RB   | interleukin 8 receptor, beta                   | NM_001557               | <a href="#">NP_001548.1</a>                 | <a href="#">ENSG00000180871</a> | <a href="#">chr2:218707769 - 218708852</a> | coupled to IP3 second messenger (phospholipase C activating);inflammatory response;integral to plasma membrane;interleukin-8 receptor                                | Entrez Query:Oncogene                             |
| <a href="#">3646</a> | EIF3E   | initiation factor 3, subunit 6 48kDa           | NM_001568               | <a href="#">NP_001559.1</a>                 | <a href="#">ENSG00000104408</a> | <a href="#">chr8:109283289 - 109330107</a> | eukaryotic translation initiation factor 3 complex;protein binding;regulation of translational initiation;translation;translation initiation factor activity         | Entrez Query:Oncogene                             |
| <a href="#">3662</a> | IRF4    | interferon regulatory factor 4                 | NM_002460               | <a href="#">NP_002451.2</a>                 | <a href="#">ENSG00000137265</a> | <a href="#">chr6:338152 - 352598</a>       | process;positive regulation of interleukin-13 biosynthetic process;positive regulation of interleukin-2 biosynthetic process;positive regulation of interleukin-4    | Mitelman 2000, Entrez Query:Oncogene,             |
| <a href="#">3688</a> | ITGB1   | (fibronectin receptor, beta polypeptide,       | NM_033668, NM_133376,   | <a href="#">NP_391988.1, NP_596867.1,</a>   | <a href="#">ENSG00000150093</a> | <a href="#">chr10:33230503 - 33264492</a>  | response;homophilic cell adhesion;identical protein binding;integral to membrane;integrin complex;integrin-mediated signaling                                        | Tumor Suppressor, Entrez Query:Oncogene           |
| <a href="#">3704</a> | ITPA    | (nucleoside triphosphate pyrophosphatase)      | NM_181493, NM_033453    | <a href="#">NP_852470.1, NP_258412.1</a>    | <a href="#">ENSG00000125877</a> | <a href="#">chr20:3138197 - 3152108</a>    | hydrolase activity;nucleoside-triphosphate diphosphatase activity;nucleotide metabolic process                                                                       | Stability, Entrez Query:Oncogene                  |
| <a href="#">3725</a> | JUN     | jun oncogene                                   | NM_002228               | <a href="#">NP_002219.1</a>                 | <a href="#">ENSG00000177606</a> | <a href="#">chr1:59020334 - 59021330</a>   | chromosome;nucleus;positive regulation of transcription from RNA polymerase II promoter;protein dimerization activity;regulation of progression through cell         | EGFR1, TGFBR, Stability, Entrez Query:Oncogene    |
| <a href="#">3726</a> | JUNB    | jun B proto-oncogene                           | NM_002229               | <a href="#">NP_002220.1</a>                 | <a href="#">ENSG00000171223</a> | <a href="#">chr19:12763585 - 12764629</a>  | progression through cell cycle;regulation of transcription from RNA polymerase II promoter;RNA polymerase II transcription factor activity;sequence-specific DNA     | TGFBR, Entrez Query:Oncogene                      |
| <a href="#">3727</a> | JUND    | jun D proto-oncogene                           | NM_005354               | <a href="#">NP_005345.3</a>                 | <a href="#">ENSG00000130522</a> | <a href="#">chr19:18252250 - 18253294</a>  | RNA polymerase II promoter;RNA polymerase II transcription factor activity;sequence-specific DNA binding;transcription;transcription factor activity                 | EGFR1, TGFBR, Entrez Query:Oncogene               |
| <a href="#">3728</a> | JUP     | junction plakoglobin                           | NM_021991               | <a href="#">NP_068831.1</a>                 | <a href="#">ENSG00000173801</a> | <a href="#">chr17:37165521 - 37181632</a>  | binding;cytoskeleton;cytosol;desmosome;membrane fraction;soluble fraction;structural molecule activity;Wnt receptor signaling pathway                                | Suppressor, Entrez Query:Oncogene                 |
| <a href="#">3815</a> | KIT     | feline sarcoma viral oncogene homolog          | NM_000222, NM_001093772 | <a href="#">NP_000213.1, NP_001087241.1</a> | <a href="#">ENSG00000157404</a> | <a href="#">chr4:55218938 - 55299480</a>   | plasma membrane;hemopoiesis;integral to membrane;membrane;nucleotide binding;peptidyl-tyrosine phosphorylation;pigmentation during                                   | 2004, Vogelstein and Kinzler 2004, Protein        |
| <a href="#">3816</a> | KLK1    | kallikrein 1                                   | NM_002257               | <a href="#">NP_002248.1</a>                 | <a href="#">ENSG00000167748</a> | <a href="#">chr19:56014261 - 56018816</a>  | cellular component;peptidase activity;proteolysis;tissue kallikrein activity                                                                                         | Entrez Query:Oncogene                             |
| <a href="#">3845</a> | KRAS    | sarcoma viral oncogene homolog                 | NM_004985, NM_033360    | <a href="#">NP_004976.2, NP_203524.1</a>    | <a href="#">ENSG00000133703</a> | <a href="#">chr12:25259641 - 25289585</a>  | binding;regulation of progression through cell cycle;sensory perception of sound;small GTPase mediated signal transduction                                           | Vogelstein and Kinzler 2004, Tumor Suppressor,    |
| <a href="#">3861</a> | KRT14   | (epidermolysis bullosa simplex, Dowling-Meara, | NM_000526               | <a href="#">NP_000517.2</a>                 | <a href="#">ENSG00000186847</a> | <a href="#">chr17:36992212 - 36996612</a>  | filament;keratin filament;protein binding;structural constituent of cytoskeleton;structural constituent of epidermis                                                 | Entrez Query:Oncogene                             |
| <a href="#">3899</a> | AFF3    | AF4/FMR2 family, member 3                      | NM_001025108, NM_002285 | <a href="#">NP_001020279.1, NP_002276.2</a> | <a href="#">ENSG00000144218</a> | <a href="#">chr2:99534367 - 100087348</a>  | DNA binding;multicellular organismal development;nucleus;regulation of transcription, DNA-dependent;transcription                                                    | Mitelman 2000, Entrez Query:Oncogene,             |
| <a href="#">3932</a> | LCK     | lymphocyte-specific protein tyrosine kinase    | NM_005356               | <a href="#">NP_005347.3</a>                 | <a href="#">ENSG00000182866</a> | <a href="#">chr1:32512517 - 32523904</a>   | binding;glycoprotein binding;hemopoiesis;induction of apoptosis;intracellular signaling cascade;lipid raft;nucleotide binding;pericentriolar                         | Mitelman 2000, Protein Kinase, Tyrosine Kinase,   |
| <a href="#">3934</a> | LCN2    | lipocalin 2 (oncogene 24p3)                    | NM_005564               | <a href="#">NP_005555.2</a>                 | <a href="#">ENSG00000148346</a> | <a href="#">chr9:129951625 - 129955219</a> | binding;cytoplasm;soluble fraction;transport;transporter activity                                                                                                    | Suppressor, Entrez Query:Oncogene                 |
| <a href="#">4005</a> | LMO2    | LIM domain only 2 (rhombotin-like 1)           | NM_005574               | <a href="#">NP_005565.2</a>                 | <a href="#">ENSG00000135363</a> | <a href="#">chr11:33837477 - 33847508</a>  | metal ion binding;multicellular organismal development;nucleus;protein binding;zinc ion binding                                                                      | Mitelman 2000, Entrez Query:Oncogene,             |
| <a href="#">4067</a> | LYN     | sarcoma viral related oncogene homolog         | NM_001111097, NM_002350 | <a href="#">NP_001104567.1, NP_002341.1</a> | <a href="#">ENSG00000147507</a> | <a href="#">chr8:57016972 - 57085223</a>   | binding;hemoglobin biosynthetic process;intracellular signaling cascade;nucleotide binding;nucleus;positive regulation of cell proliferation;positive regulation of  | Kinase, Tumor Suppressor, Tyrosine Kinase, Entrez |
| <a href="#">4070</a> | TACSTD2 | calcium signal transducer 2                    | NM_002353               | <a href="#">NP_002344.2</a>                 | <a href="#">ENSG00000184292</a> | <a href="#">chr1:58814444 - 58815416</a>   | plasma membrane;membrane;receptor activity;response to stimulus;visual perception                                                                                    | Entrez Query:Oncogene                             |
| <a href="#">4072</a> | TACSTD1 | calcium signal transducer 1                    | NM_002354               | <a href="#">NP_002345.2</a>                 | <a href="#">ENSG00000119888</a> | <a href="#">chr2:47450148 - 47467256</a>   | integral to membrane;plasma membrane                                                                                                                                 | Entrez Query:Oncogene                             |
| <a href="#">4094</a> | MAF     | musculoaponeurotic fibrosarcoma oncogene       | NM_001031804, NM_005360 | <a href="#">NP_001026974.1, NP_005351.2</a> | <a href="#">ENSG00000178573</a> | <a href="#">chr16:78185857 - 78191300</a>  | transcription from RNA polymerase II promoter;protein dimerization activity;regulation of transcription, DNA-dependent;RNA polymerase II transcription               | Mitelman 2000, Entrez Query:Oncogene,             |
| <a href="#">4097</a> | MAFG    | musculoaponeurotic fibrosarcoma oncogene       | NM_032711               | <a href="#">NP_116100.2</a>                 | <a href="#">ENSG00000197063</a> | <a href="#">chr17:77473772 - 77474353</a>  | dimerization activity;regulation of cell proliferation;regulation of epidermal cell differentiation;regulation of transcription, DNA-dependent;sequence-specific DNA | Entrez Query:Oncogene                             |
| <a href="#">4142</a> | MAS1    | MAS1 oncogene                                  | NM_002377               | <a href="#">NP_002368.1</a>                 | <a href="#">ENSG00000130368</a> | <a href="#">chr6:160247977 - 160248955</a> | proliferation;G-protein coupled receptor protein signaling pathway;integral to plasma membrane;membrane;receptor activity;rhodopsin-like receptor                    | Protein Kinase, Entrez Query:Oncogene             |



|                      |        |                                                  |                            |                                |                                 |                                             |                                                                                                                                                                             |                                                  |
|----------------------|--------|--------------------------------------------------|----------------------------|--------------------------------|---------------------------------|---------------------------------------------|-----------------------------------------------------------------------------------------------------------------------------------------------------------------------------|--------------------------------------------------|
| <a href="#">4149</a> | MAX    | MYC associated factor X                          | NM_145113,<br>NM_145116,   | NP_660088.1,<br>NP_660092.1,   | <a href="#">ENSG00000125952</a> | <a href="#">chr14:64612946 - 64638810</a>   | dependent;transcription coactivator activity;transcription factor activity;transcription from RNA polymerase II promoter;transcription regulator                            | Entrez Query:Oncogene                            |
| <a href="#">4168</a> | MCF2   | MCF.2 cell line derived transforming sequence    | NM_001099855,<br>NM_005369 | NP_001093325.1,<br>NP_005360.3 | <a href="#">ENSG00000101977</a> | <a href="#">chrX:138492295 - 138561569</a>  | activity;intracellular;intracellular signaling cascade;membrane fraction;regulation of Rho protein signal transduction;Rho guanyl-nucleotide exchange factor activity       | EGFR1, Entrez Query:Oncogene                     |
| <a href="#">4172</a> | MCM3   | maintenance complex component 3                  | NM_002388                  | <a href="#">NP_002379.2</a>    | <a href="#">ENSG00000112118</a> | <a href="#">chr6:52237344 - 52257431</a>    | replication;DNA replication initiation;DNA-dependent ATPase activity;nucleoside-triphosphatase activity;nucleotide binding;nucleus;protein binding;regulation of            | Entrez Query:Oncogene                            |
| <a href="#">4193</a> | MDM2   | cell double minute 2, p53 binding protein        | NM_006878,<br>NM_006882,   | NP_006869.3,<br>NP_006873.3,   | <a href="#">ENSG00000135679</a> | <a href="#">chr12:67488524 - 67519896</a>   | cell proliferation;negative regulation of transcription from RNA polymerase II promoter;negative regulator of basal transcription                                           | and Weinberg 2002, Vogelstein and Kinzler        |
| <a href="#">4218</a> | RAB8A  | RAB8A, member RAS oncogene family                | NM_005370                  | <a href="#">NP_005361.2</a>    | <a href="#">ENSG00000167461</a> | <a href="#">chr19:16099786 - 16104134</a>   | transport;regulation of transcription, DNA-dependent;small GTPase mediated signal transduction;transcription factor binding                                                 | Stability, Entrez Query:Oncogene                 |
| <a href="#">4233</a> | MET    | (hepatocyte growth factor receptor)              | NM_001127500,<br>NM_000245 | NP_001120972.1,<br>NP_000236.2 | <a href="#">ENSG00000105976</a> | <a href="#">chr7:116126374 - 116223414</a>  | membrane;brain development;cell surface receptor linked signal transduction;hepatocyte growth factor receptor activity;hepatocyte growth factor                             | Futrel et al 2004, Vogelstein and Kinzler        |
| <a href="#">4286</a> | MITF   | associated transcription factor                  | NM_198159,<br>NM_000248,   | NP_937802.1,<br>NP_000239.1,   | <a href="#">ENSG00000187098</a> | <a href="#">chr3:69871438 - 70097089</a>    | development;nucleus;regulation of transcription, DNA-dependent;sensory perception of sound;transcriptional activator activity                                               | Kit Receptor, Entrez Query:Oncogene              |
| <a href="#">4297</a> | MLL    | mixed-lineage leukemia (trithorax homolog,       | NM_005933                  | <a href="#">NP_005924.2</a>    | <a href="#">ENSG00000118058</a> | <a href="#">chr11:117812437 - 117898097</a> | methylation;embryonic hemopoiesis;metal ion binding;nuclear part;protein amino acid phosphorylation;protein binding;protein complex assembly;protein                        | Mitelman 2000, Vogelstein and Kinzler            |
| <a href="#">4299</a> | AFF1   | AF4/FMR2 family, member 1                        | NM_005935                  | <a href="#">NP_005926.1</a>    | <a href="#">ENSG00000172493</a> | <a href="#">chr4:88147583 - 88275877</a>    | nucleus;transcription factor activity                                                                                                                                       | Mitelman 2000, Entrez Query:Oncogene,            |
| <a href="#">4313</a> | MMP2   | 2 (gelatinase A, 72kDa gelatinase, 72kDa type    | NM_004530,<br>NM_001127891 | NP_004521.1,<br>NP_001121363.1 | <a href="#">ENSG00000087245</a> | <a href="#">chr16:54070892 - 54096855</a>   | space;gelatinase A activity;peptidoglycan metabolic process;protein binding;proteinaceous extracellular matrix;proteolysis;zinc ion binding                                 | Tumor Suppressor, Entrez Query:Oncogene          |
| <a href="#">4316</a> | MMP7   | matrix metalloproteinase 7 (matrilysin, uterine) | NM_002423                  | <a href="#">NP_002414.1</a>    | <a href="#">ENSG00000137673</a> | <a href="#">chr11:101896716 - 101906641</a> | activity;peptidoglycan metabolic process;proteinaceous extracellular matrix;proteolysis;zinc ion binding                                                                    | Alpha6Beta4 Integrin, Entrez Query:Oncogene      |
| <a href="#">4321</a> | MMP12  | 12 (macrophage elastase)                         | NM_002426                  | <a href="#">NP_002417.2</a>    | <a href="#">ENSG00000110347</a> | <a href="#">chr11:102239040 - 102250877</a> | calcium ion binding;cell motility;macrophage elastase activity;peptidoglycan metabolic process;proteinaceous extracellular matrix;proteolysis;zinc ion binding              | Entrez Query:Oncogene                            |
| <a href="#">4330</a> | MN1    | in balanced translocation) 1                     | NM_002430                  | <a href="#">NP_002421.3</a>    |                                 | <a href="#">chr22:26476902 - 26526531</a>   | biological_process;cell cycle;cellular_component;molecular_function;negative regulation of progression through cell cycle                                                   | Mitelman 2000, Tumor Suppressor, Entrez          |
| <a href="#">4342</a> | MOS    | sarcoma viral oncogene homolog                   | NM_005372                  | <a href="#">NP_005363.1</a>    | <a href="#">ENSG00000172680</a> | <a href="#">chr8:57188054 - 57189095</a>    | serine/threonine kinase activity;regulation of progression through cell cycle;transferase activity                                                                          | Protein Kinase, Stability, Entrez Query:Oncogene |
| <a href="#">4352</a> | MPL    | myeloproliferative leukemia virus oncogene       | NM_005373                  | <a href="#">NP_005364.1</a>    | <a href="#">ENSG00000117400</a> | <a href="#">chr1:43576106 - 43591030</a>    | transduction;hematopoietin/interferon-class (D200-domain) cytokine receptor activity;integral to plasma membrane;membrane                                                   | Entrez Query:Oncogene                            |
| <a href="#">4477</a> | MSMB   | microseminoprotein, beta-                        | NM_002443,<br>NM_138634    | NP_002434.1,<br>NP_619540.1    | <a href="#">ENSG00000138294</a> | <a href="#">chr10:51219590 - 51232406</a>   | biological_process;extracellular space;molecular_function;nucleus                                                                                                           | Tumor Suppressor, Entrez Query:Oncogene          |
| <a href="#">4486</a> | MST1R  | 1 receptor (c-met-related tyrosine kinase)       | NM_002447                  | <a href="#">NP_002438.2</a>    | <a href="#">ENSG00000164078</a> | <a href="#">chr3:49899743 - 49916046</a>    | membrane;macrophage colony stimulating factor receptor activity;membrane;multicellular organismal development;nucleotide                                                    | Protein Kinase, Tyrosine Kinase, Entrez          |
| <a href="#">4585</a> | MUC4   | mucin 4, cell surface associated                 | NM_004532,<br>NM_138297    | NP_004523.3,<br>NP_612154.2    | <a href="#">ENSG00000145113</a> | <a href="#">chr3:196959717 - 197023085</a>  | cell adhesion;cell-matrix adhesion;ErbB-2 class receptor binding;integral to plasma membrane;membrane;protein binding                                                       | Entrez Query:Oncogene                            |
| <a href="#">4602</a> | MYB    | viral oncogene homolog (avian)                   | NM_005375                  | <a href="#">NP_005366.2</a>    | <a href="#">ENSG00000118513</a> | <a href="#">chr6:135544344 - 135580811</a>  | binding;regulation of transcription;regulation of transcription, DNA-dependent;RNA splicing;spliceosome;transcription regulator activity;transcriptional activator activity | Mitelman 2000, Stability, Entrez Query:Oncogene  |
| <a href="#">4603</a> | MYBL1  | viral oncogene homolog (avian)-like 1            | NM_001080416               | <a href="#">NP_001073885.1</a> | <a href="#">ENSG00000185697</a> | <a href="#">chr8:67639485 - 67687627</a>    | transcription;regulation of transcription, DNA-dependent;RNA splicing;spliceosome;transcription regulator activity;transcriptional activator activity                       | Entrez Query:Oncogene                            |
| <a href="#">4605</a> | MYBL2  | viral oncogene homolog (avian)-like 2            | NM_002466                  | <a href="#">NP_002457.1</a>    | <a href="#">ENSG00000101057</a> | <a href="#">chr20:41729337 - 41778141</a>   | of progression through cell cycle;regulation of transcription, DNA-dependent;transcription factor activity;transcription from RNA polymerase II                             | Entrez Query:Oncogene                            |
| <a href="#">4609</a> | MYC    | viral oncogene homolog (avian)                   | NM_002467                  | <a href="#">NP_002458.2</a>    | <a href="#">ENSG00000136997</a> | <a href="#">chr8:128818021 - 128822386</a>  | binding;DNA fragmentation during apoptosis;induction of apoptosis by intracellular signals;iron ion homeostasis;negative regulation of survival gene product                | al 2004, Hahn and Weinberg 2002, Mitelman        |
| <a href="#">4610</a> | MYCL1  | viral oncogene homolog 1, lung carcinoma         | NM_001033081,<br>NM_005376 | NP_001028254.1,<br>NP_005367.1 | <a href="#">ENSG00000116990</a> | <a href="#">chr1:40135630 - 40139693</a>    | nucleus;regulation of transcription, DNA-dependent;transcription factor activity                                                                                            | Vogelstein and Kinzler 2004, Entrez              |
| <a href="#">4613</a> | MYCN   | viral related oncogene, neuroblastoma derived    | NM_005378                  | <a href="#">NP_005369.2</a>    | <a href="#">ENSG00000134323</a> | <a href="#">chr2:15999637 - 16003670</a>    | regulation of cell proliferation;protein binding;regulation of transcription from RNA polymerase II promoter;transcription factor activity                                  | Vogelstein and Kinzler 2004, Stability, Tumor    |
| <a href="#">4718</a> | NDUFC2 | (ubiquinone) 1, subcomplex unknown, 2,           | NM_004549                  | <a href="#">NP_004540.1</a>    | <a href="#">ENSG00000151366</a> | <a href="#">chr11:77458680 - 77468438</a>   | inner membrane;mitochondrial respiratory chain complex I;mitochondrion;NADH dehydrogenase (ubiquinone) activity;NADH dehydrogenase activity;oxidoreductase                  | Entrez Query:Oncogene                            |
| <a href="#">4734</a> | NEDD4  | expressed, developmentally down-                 | NM_198400,<br>NM_006154    | NP_940682.2,<br>NP_006145.2    | <a href="#">ENSG00000069869</a> | <a href="#">chr15:53909386 - 53996321</a>   | intracellular;ligase activity;protein modification process;ubiquitin cycle;ubiquitin-protein ligase activity                                                                | Entrez Query:Oncogene                            |
| <a href="#">4790</a> | NFKB1  | light polypeptide gene enhancer in B-cells 1     | NM_003998                  | <a href="#">NP_003989.2</a>    | <a href="#">ENSG00000109320</a> | <a href="#">chr4:103665705 - 103756797</a>  | interleukin-12 biosynthetic process;negative regulation of transcription, DNA-dependent;nucleus;positive regulation of transcription;positive regulation of                 | TNF_alpha_NF_kB, Stability, Tumor                |

|                      |          |                                                   |                            |                                |                                 |                                             |                                                                                                                                                                       |                                                    |
|----------------------|----------|---------------------------------------------------|----------------------------|--------------------------------|---------------------------------|---------------------------------------------|-----------------------------------------------------------------------------------------------------------------------------------------------------------------------|----------------------------------------------------|
| <a href="#">4791</a> | NFKB2    | light polypeptide gene enhancer in B-cells 2      | NM_002502, NM_001077494    | NP_002493.3, NP_001070962.1    | <a href="#">ENSG00000077150</a> | <a href="#">chr10:104145706 - 104152123</a> | differentiation;germinal center formation;nucleus;protein binding;regulation of transcription, DNA-dependent;signal transduction;spleen                               | et al 2004, Mitelman 2000, Tumor Suppressor,       |
| <a href="#">4830</a> | NME1     | protein (NM23A) expressed in                      |                            |                                | <a href="#">ENSG00000011052</a> | <a href="#">chr17:null</a>                  | activity;DNA binding;GTP biosynthetic process;kinase activity;magnesium ion binding;negative regulation of cell proliferation;negative regulation of progression      | Tumor Suppressor, Entrez Query:Oncogene            |
| <a href="#">4869</a> | NPM1     | (nucleolar phosphoprotein B23,                    | NM_001037738, NM_199185    | NP_001032827.1, NP_954654.1    | <a href="#">ENSG00000181163</a> | <a href="#">chr5:170747557 - 170770174</a>  | aging;centrosome;centrosome cycle;cytoplasm;intracellular protein transport;negative regulation of cell proliferation;NF-kappaB                                       | Mitelman 2000, Stability, Tumor Suppressor, Entrez |
| <a href="#">4893</a> | NRAS     | (v-ras) oncogene homolog                          | NM_002524                  | <a href="#">NP_002515.1</a>    | <a href="#">ENSG00000168638</a> | <a href="#">chr1:115052678 - 115060304</a>  | GTP binding;GTPase activity;intracellular;membrane;nucleotide binding;regulation of progression through cell cycle;small GTPase mediated signal transduction          | Hahn and Weinberg 2002, Entrez Query:Oncogene,     |
| <a href="#">4914</a> | NTRK1    | neurotrophic tyrosine kinase, receptor, type 1    | NM_002529, NM_001007792    | NP_002520.2, NP_001007793.1    | <a href="#">ENSG00000198400</a> | <a href="#">chr1:155097350 - 155118058</a>  | differentiation;biological_process;cellular_component;cytoplasm;integral to membrane;integral to plasma membrane;kinase activity;mechanoreceptor                      | Mitelman 2000, Vogelstein and Kinzler              |
| <a href="#">4927</a> | NUP88    | nucleoporin 88kDa                                 | NM_002532                  | <a href="#">NP_002523.2</a>    | <a href="#">ENSG00000108559</a> | <a href="#">chr17:5230249 - 5263694</a>     | nuclear pore;nucleus;protein transport;transporter activity                                                                                                           | Entrez Query:Oncogene                              |
| <a href="#">5015</a> | OTX2     | orthodenticle homeobox 2                          | NM_021728, NM_172337       | NP_068374.1, NP_758840.1       | <a href="#">ENSG00000165588</a> | <a href="#">chr14:56338205 - 56341927</a>   | nervous system development;dorsal/ventral pattern formation;eukaryotic initiation factor 4E binding;eye photoreceptor cell fate commitment;forebrain                  | Entrez Query:Oncogene                              |
| <a href="#">5034</a> | P4HB     | oxoglutarate 4-dioxygenase (proline 4-            | NM_000918                  | <a href="#">NP_000909.2</a>    | <a href="#">ENSG00000185624</a> | <a href="#">chr17:77395176 - 77411636</a>   | compartment;extracellular region;isomerase activity;membrane;microsome;peptidyl-proline hydroxylation to 4-hydroxy-L-                                                 | Entrez Query:Oncogene                              |
| <a href="#">5055</a> | SERPINB2 | inhibitor, clade B (ovalbumin), member 2          | NM_002575                  | <a href="#">NP_002566.1</a>    | <a href="#">ENSG00000197632</a> | <a href="#">chr18:59709658 - 59721519</a>   | anti-apoptosis;plasminogen activator activity;serine-type endopeptidase inhibitor activity                                                                            | Tumor Suppressor, Entrez Query:Oncogene            |
| <a href="#">5058</a> | PAK1     | activated kinase 1 (STE20 homolog, yeast)         | NM_002576, NM_001128620    | NP_002567.3, NP_001122092.1    | <a href="#">ENSG00000149269</a> | <a href="#">chr11:76711966 - 76781213</a>   | biogenesis;dendrite development;ER-nuclear signaling pathway;growth cone;JNK cascade;nucleotide binding;nucleus;plasma membrane;protein amino acid                    | EGFR1, Protein Kinase, Entrez Query:Oncogene       |
| <a href="#">5076</a> | PAX2     | paired box gene 2                                 | NM_003987, NM_003988,      | NP_003978.2, NP_003979.2,      | <a href="#">ENSG00000075891</a> | <a href="#">chr10:102496007 - 102577430</a> | development;nucleus;regulation of transcription, DNA-dependent;transcription;transcription from RNA polymerase II promoter;visual                                     | ID, Wnt, Entrez Query:Oncogene                     |
| <a href="#">5078</a> | PAX4     | paired box gene 4                                 | NM_006193                  | <a href="#">NP_006184.2</a>    | <a href="#">ENSG00000106631</a> | <a href="#">chr7:127038353 - 127042810</a>  | morphogenesis;regulation of transcription, DNA-dependent;sequence-specific DNA binding;transcription factor activity                                                  | Tumor Suppressor, Entrez Query:Oncogene            |
| <a href="#">5155</a> | PDGFB    | factor beta polypeptide (simian sarcoma viral (v- | NM_002608, NM_033016       | NP_002599.1, NP_148937.1       | <a href="#">ENSG00000100311</a> | <a href="#">chr22:37951673 - 37969914</a>   | derived growth factor receptor binding;regulation of progression through cell cycle;response to wounding                                                              | Mitelman 2000, Vogelstein and Kinzler              |
| <a href="#">5204</a> | PFDN5    | prefoldin subunit 5                               | NM_145897, NM_002624       | NP_665904.1, NP_002615.2       | <a href="#">ENSG00000123349</a> | <a href="#">chr12:51975618 - 51979396</a>   | cytoplasm;nucleus;prefoldin complex;protein folding;regulation of transcription, DNA-dependent;transcription corepressor activity;unfolded protein binding            | Entrez Query:Oncogene                              |
| <a href="#">5245</a> | PHB      | prohibitin                                        | NM_002634                  | <a href="#">NP_002625.1</a>    | <a href="#">ENSG00000167085</a> | <a href="#">chr17:44837352 - 44845625</a>   | membrane;membrane;mitochondrial inner membrane;mitochondrion;negative regulation of cell proliferation;negative regulation of                                         | Tumor Suppressor, Entrez Query:Oncogene            |
| <a href="#">5290</a> | PIK3CA   | kinase, catalytic, alpha polypeptide              | NM_006218                  | <a href="#">NP_006209.2</a>    | <a href="#">ENSG00000121879</a> | <a href="#">chr3:180399307 - 180434846</a>  | process;inositol or phosphatidylinositol kinase activity;insulin receptor substrate binding;lamellipodium;phosphatidylinositol-4,5-bisphosphate 3-kinase              | EGFR1, Futreal et al 2004, Hahn and Weinberg 2002, |
| <a href="#">5292</a> | PIM1     | pim-1 oncogene                                    | NM_002648                  | <a href="#">NP_002639.1</a>    | <a href="#">ENSG00000137193</a> | <a href="#">chr6:37246329 - 37249845</a>    | binding;multicellular organismal development;negative regulation of apoptosis;nucleotide binding;nucleus;protein amino acid phosphorylation;protein                   | Mitelman 2000, Protein Kinase, Stability, Entrez   |
| <a href="#">5294</a> | PIK3CG   | kinase, catalytic, gamma polypeptide              | NM_002649                  | <a href="#">NP_002640.2</a>    | <a href="#">ENSG00000105851</a> | <a href="#">chr7:106295242 - 106333068</a>  | signaling pathway;inositol or phosphatidylinositol kinase activity;negative regulation of apoptosis;phosphatidylinositol-4,5-bisphosphate 3-kinase                    | EGFR1, Kit Receptor, Hahn and Weinberg 2002,       |
| <a href="#">5324</a> | PLAG1    | pleiomorphic adenoma gene 1                       | NM_001114634, NM_002655    | NP_001108106.1, NP_001108107.1 | <a href="#">ENSG00000181690</a> | <a href="#">chr8:57241355 - 57243382</a>    | intracellular;metal ion binding;nucleic acid binding;transcription factor activity;zinc ion binding                                                                   | Mitelman 2000, Entrez Query:Oncogene,              |
| <a href="#">5328</a> | PLAU     | plasminogen activator, urokinase                  | NM_002658                  | <a href="#">NP_002649.1</a>    | <a href="#">ENSG00000122861</a> | <a href="#">chr10:75341319 - 75346329</a>   | activity;peptidase activity;plasminogen activator activity;proteolysis;serine-type endopeptidase activity;signal transduction                                         | Stability, Entrez Query:Oncogene                   |
| <a href="#">5329</a> | PLAUR    | plasminogen activator, urokinase receptor         | NM_001005376, NM_001005377 | NP_001005376.1, NP_001005377.1 | <a href="#">ENSG00000011422</a> | <a href="#">chr19:48844881 - 48866112</a>   | transduction;chemotaxis;enzyme binding;extrinsic to membrane;GPI anchor binding;integral to membrane;plasma membrane;regulation of proteolysis;U-                     | Stability, Entrez Query:Oncogene                   |
| <a href="#">5336</a> | PLCG2    | 2 (phosphatidylinositol-specific)                 | NM_002661                  | <a href="#">NP_002652.2</a>    | <a href="#">ENSG00000197943</a> | <a href="#">chr16:80377095 - 80549104</a>   | activity;intracellular signaling cascade;lipid catabolic process;phosphoinositide phospholipase C activity;phospholipid metabolic process;protein binding;signal      | Entrez Query:Oncogene                              |
| <a href="#">5371</a> | PML      | promyelocytic leukemia                            | NM_033238, NM_033250,      | NP_150241.2, NP_150253.2,      | <a href="#">ENSG00000140464</a> | <a href="#">chr15:72074206 - 72124402</a>   | mediator resulting in cell cycle arrest;DNA damage response, signal transduction by p53 class mediator resulting in induction of apoptosis;DNA repair;induction of    | et al 2004, Mitelman 2000, Tumor Suppressor,       |
| <a href="#">5468</a> | PPARG    | activated receptor gamma                          | NM_015869                  | NP_619726.2, NP_056953.2       | <a href="#">ENSG00000132170</a> | <a href="#">chr3:12368091 - 12450644</a>    | metabolites and energy;lipid metabolic process;metal ion binding;negative regulation of transcription from RNA polymerase II promoter;nucleus;positive                | Mitelman 2000, Entrez Query:Oncogene,              |
| <a href="#">5573</a> | PRKAR1A  | dependent, regulatory, type I, alpha (tissue      | NM_002734                  | <a href="#">NP_997637.1</a>    | <a href="#">ENSG00000108946</a> | <a href="#">chr17:64023135 - 64038185</a>   | kinase regulator activity;intracellular signaling cascade;kinase activity;mesoderm formation;neuromuscular junction;nucleotide binding;protein amino acid             | Mitelman 2000, Tumor Suppressor, Entrez            |
| <a href="#">5584</a> | PRKCI    | protein kinase C, iota                            | NM_002740                  | <a href="#">NP_002731.4</a>    | <a href="#">ENSG00000163558</a> | <a href="#">chr3:171423151 - 171503609</a>  | activity;cytoplasm;cytoskeleton organization and biogenesis;cytosol;diacylglycerol binding;establishment and/or maintenance of epithelial cell polarity;establishment | EGFR1, Entrez Query:Oncogene                       |
| <a href="#">5594</a> | MAPK1    | mitogen-activated protein kinase 1                | NM_002745                  | <a href="#">NP_620407.1</a>    | <a href="#">ENSG00000100030</a> | <a href="#">chr22:20453492 - 20551730</a>   | of apoptosis;MAP kinase activity;MAPKKK cascade;negative regulation of cell differentiation;nucleotide binding;nucleus;organ morphogenesis;phosphotyrosine            | Tumor Suppressor, Entrez Query:Oncogene            |



|                      |           |                                              |                            |                                |                                 |                                             |                                                                                                                                                                |                                                   |
|----------------------|-----------|----------------------------------------------|----------------------------|--------------------------------|---------------------------------|---------------------------------------------|----------------------------------------------------------------------------------------------------------------------------------------------------------------|---------------------------------------------------|
| <a href="#">5595</a> | MAPK3     | mitogen-activated protein kinase 3           | NM_002746,<br>NM_001040056 | NP_002737.2,<br>NP_001035145.1 | <a href="#">ENSG00000102882</a> | <a href="#">chr16:30035489 - 30042031</a>   | binding;protein amino acid phosphorylation;protein binding;protein kinase activity;protein serine/threonine kinase activity;regulation of progression through  | Kinase, Tumor Suppressor, Entrez Query:Oncogene   |
| <a href="#">5606</a> | MAP2K3    | mitogen-activated protein kinase kinase 3    | NM_002756                  | <a href="#">NP_002747.2</a>    | <a href="#">ENSG00000034152</a> | <a href="#">chr17:21128825 - 21158135</a>   | protein kinase activity;positive regulation of transcription, DNA-dependent;protein amino acid phosphorylation;protein binding;protein serine/threonine kinase | Protein Kinase, Stability, Entrez Query:Oncogene  |
| <a href="#">5610</a> | EIF2AK2   | initiation factor 2-alpha kinase 2           | NM_002759                  | <a href="#">NP_002750.1</a>    | <a href="#">ENSG00000055332</a> | <a href="#">chr2:37187919 - 37228453</a>    | translation initiation factor 2alpha kinase activity;immune response;intracellular;negative regulation of cell proliferation;nucleotide                        | Suppressor, Entrez Query:Oncogene                 |
| <a href="#">5728</a> | PTEN      | homolog (mutated in multiple advanced        | NM_000314                  | <a href="#">NP_000305.3</a>    | <a href="#">ENSG00000171862</a> | <a href="#">chr10:89614206 - 89715209</a>   | development;cytoplasm;heart development;hydrolase activity;induction of apoptosis;inositol phosphate dephosphorylation;inositol-1,3,4,5-tetrakisphosphate      | Futreal et al 2004, Hahn and Weinberg 2002,       |
| <a href="#">5743</a> | PTGS2     | endoperoxide synthase 2 (prostaglandin G/H   | NM_000963                  | <a href="#">NP_000954.1</a>    | <a href="#">ENSG00000073756</a> | <a href="#">chr1:184910107 - 184916045</a>  | pathway;cytoplasm;fatty acid biosynthetic process;iron ion binding;keratinocyte differentiation;membrane;metal ion binding;nucleus;oxidoreductase              | Suppressor, Entrez Query:Oncogene                 |
| <a href="#">5747</a> | PTK2      | PTK2 protein tyrosine kinase 2               | NM_005607,<br>NM_153831    | NP_005598.3,<br>NP_722560.1    | <a href="#">ENSG00000169398</a> | <a href="#">chr8:141738746 - 142063392</a>  | binding;protein amino acid phosphorylation;protein binding;protein-tyrosine kinase activity;SH2 domain binding;transferase activity                            | TNF_alpha_NF_kB, Protein Kinase, Stability,       |
| <a href="#">5781</a> | PTPN11    | phosphatase, non-receptor type 11            | NM_002834                  | <a href="#">NP_002825.3</a>    | <a href="#">ENSG00000179295</a> | <a href="#">chr12:111341298 - 111426951</a> | tyrosine phosphatase activity;protein amino acid dephosphorylation;protein binding;sensory perception of sound                                                 | TNF_alpha_NF_kB, Futreal et al 2004, Phosphatase, |
| <a href="#">5782</a> | PTPN12    | phosphatase, non-receptor type 12            | NM_002835                  | <a href="#">NP_002826.3</a>    | <a href="#">ENSG00000127947</a> | <a href="#">chr7:77004799 - 77106533</a>    | phosphatase activity;protein amino acid dephosphorylation;SH3 domain binding;soluble fraction                                                                  | EGFR1, Phosphatase, Entrez Query:Oncogene         |
| <a href="#">5820</a> | NR_003367 | Pvt1 oncogene homolog, MYC activator (mouse) |                            |                                |                                 | <a href="#">chr8:null</a>                   |                                                                                                                                                                | Mitelman 2000, Entrez Query:Oncogene              |
| <a href="#">5861</a> | RAB1A     | RAB1A, member RAS oncogene family            | NM_004161                  | <a href="#">NP_004152.1</a>    | <a href="#">ENSG00000138069</a> | <a href="#">chr2:65169130 - 65210553</a>    | activity;nucleotide binding;protein transport;small GTPase mediated signal transduction;vesicle-mediated transport                                             | Entrez Query:Oncogene                             |
| <a href="#">5862</a> | RAB2A     | RAB2A, member RAS oncogene family            | NM_002865                  | <a href="#">NP_002856.1</a>    | <a href="#">ENSG00000104388</a> | <a href="#">chr8:61592320 - 61695882</a>    | binding;GTPase activity;nucleotide binding;protein transport;small GTPase mediated signal transduction                                                         | Entrez Query:Oncogene                             |
| <a href="#">5863</a> | RGL2      | dissociation stimulator-like 2               | NM_004761                  | <a href="#">NP_004752.1</a>    | <a href="#">ENSG00000056687</a> | <a href="#">chr6:33367856 - 33374365</a>    | guanyl-nucleotide exchange factor activity;Ras protein signal transduction;regulation of small GTPase mediated signal transduction;signal                      | Entrez Query:Oncogene                             |
| <a href="#">5864</a> | RAB3A     | RAB3A, member RAS oncogene family            | NM_002866                  | <a href="#">NP_002857.1</a>    | <a href="#">ENSG00000105649</a> | <a href="#">chr19:18169279 - 18174550</a>   | binding;protein binding;protein transport;regulation of exocytosis;small GTPase mediated signal transduction;synaptic vesicle                                  | Entrez Query:Oncogene                             |
| <a href="#">5865</a> | RAB3B     | RAB3B, member RAS oncogene family            | NM_002867                  | <a href="#">NP_002858.2</a>    | <a href="#">ENSG00000169213</a> | <a href="#">chr1:52158186 - 52215377</a>    | transport;regulation of exocytosis;secretory granule;small GTPase mediated signal transduction;synaptic vesicle                                                | Entrez Query:Oncogene                             |
| <a href="#">5867</a> | RAB4A     | RAB4A, member RAS oncogene family            | NM_004578                  | <a href="#">NP_004569.2</a>    | <a href="#">ENSG00000168118</a> | <a href="#">chr1:227473709 - 227505347</a>  | cytoplasm;GTP binding;GTPase activity;intracellular;nucleotide binding;protein transport;small GTPase mediated signal transduction                             | Entrez Query:Oncogene                             |
| <a href="#">5868</a> | RAB5A     | RAB5A, member RAS oncogene family            | NM_004162                  | <a href="#">NP_004153.2</a>    | <a href="#">ENSG00000144566</a> | <a href="#">chr3:19967394 - 20000319</a>    | raft;nucleotide binding;plasma membrane;protein binding;protein transport;ruffle;small GTPase mediated signal transduction                                     | EGFR1, Entrez Query:Oncogene                      |
| <a href="#">5869</a> | RAB5B     | RAB5B, member RAS oncogene family            | NM_002868                  | <a href="#">NP_002859.1</a>    | <a href="#">ENSG00000111540</a> | <a href="#">chr12:54667011 - 54672263</a>   | activity;intracellular;membrane fraction;nucleotide binding;plasma membrane;protein transport;small GTPase mediated signal transduction                        | Entrez Query:Oncogene                             |
| <a href="#">5870</a> | RAB6A     | RAB6A, member RAS oncogene family            | NM_198896,<br>NM_002869    | NP_942599.1,<br>NP_002860.2    | <a href="#">ENSG00000175582</a> | <a href="#">chr11:73066590 - 73149328</a>   | activity;nucleotide binding;protein binding;protein transport;small GTPase mediated signal transduction                                                        | Entrez Query:Oncogene                             |
| <a href="#">5872</a> | RAB13     | RAB13, member RAS oncogene family            | NM_002870                  | <a href="#">NP_002861.1</a>    | <a href="#">ENSG00000143545</a> | <a href="#">chr1:152221198 - 152225336</a>  | transport;small GTPase mediated signal transduction;tight junction;vesicle-mediated transport                                                                  | Entrez Query:Oncogene                             |
| <a href="#">5873</a> | RAB27A    | RAB27A, member RAS oncogene family           | NM_004580                  | <a href="#">NP_899059.1</a>    | <a href="#">ENSG00000069974</a> | <a href="#">chr15:53284996 - 53314424</a>   | binding;GTPase activity;melanocyte differentiation;melanosome;melanosome localization;melanosome transport;myosin V binding;natural killer cell                | Entrez Query:Oncogene                             |
| <a href="#">5874</a> | RAB27B    | RAB27B, member RAS oncogene family           | NM_004163                  | <a href="#">NP_004154.2</a>    | <a href="#">ENSG00000041353</a> | <a href="#">chr18:50695814 - 50707642</a>   | Golgi apparatus;GTP binding;GTPase activity;nucleotide binding;protein binding;protein transport;small GTPase mediated signal transduction                     | Entrez Query:Oncogene                             |
| <a href="#">5878</a> | RAB5C     | RAB5C, member RAS oncogene family            | NM_201434                  | <a href="#">NP_958842.1</a>    | <a href="#">ENSG00000108774</a> | <a href="#">chr17:37531326 - 37536046</a>   | activity;nucleotide binding;protein transport;regulation of endocytosis;small GTPase mediated signal transduction                                              | Entrez Query:Oncogene                             |
| <a href="#">5884</a> | RAD17     | RAD17 homolog (S. pombe)                     | NM_002873,<br>NM_133340    | NP_579922.1,<br>NP_579918.1    | <a href="#">ENSG00000152942</a> | <a href="#">chr5:68703098 - 68745875</a>    | checkpoint;mitotic checkpoint;nucleoside-triphosphatase activity;nucleotide binding;nucleus;protein binding                                                    | Stability, Entrez Query:Oncogene                  |
| <a href="#">5894</a> | RAF1      | viral oncogene homolog 1                     | NM_002880                  | <a href="#">NP_002871.1</a>    | <a href="#">ENSG00000132155</a> | <a href="#">chr3:12601012 - 12635220</a>    | biogenesis;diacylglycerol binding;intracellular signaling cascade;metal ion binding;mitochondrial outer membrane;nucleotide binding;protein amino acid         | and Weinberg 2002, Stability, Tumor               |
| <a href="#">5898</a> | RALA      | viral oncogene homolog A (ras related)       | NM_005402                  | <a href="#">NP_005393.2</a>    | <a href="#">ENSG00000006451</a> | <a href="#">chr7:39692791 - 39712369</a>    | chemotaxis;GTP binding;intracellular;membrane;nucleotide binding;protein binding;signal transduction;small GTPase mediated signal transduction                 | Tumor Suppressor, Entrez Query:Oncogene           |
| <a href="#">5899</a> | RALB      | viral oncogene homolog B (ras related; GTP   | NM_002881                  | <a href="#">NP_002872.1</a>    | <a href="#">ENSG00000144118</a> | <a href="#">chr2:120752710 - 120767306</a>  | GTP binding;intracellular;membrane;nucleotide binding;protein binding;signal transduction;small GTPase mediated signal transduction                            | EGFR1, Entrez Query:Oncogene                      |
| <a href="#">5901</a> | RAN       | RAN, member RAS oncogene family              | NM_006325                  | <a href="#">NP_006316.1</a>    | <a href="#">ENSG00000132341</a> | <a href="#">chr12:129923091 - 129926424</a> | pathway;chromatin;chromatin binding;cytoplasm;DNA metabolic process;GTP binding;GTPase activity;intracellular protein transport;mitosis;mitotic spindle        | Androgen Receptor, Entrez Query:Oncogene          |

|                      |         |                                              |                               |                                                                 |                                 |                                            |                                                                                                                                                                     |                                                    |
|----------------------|---------|----------------------------------------------|-------------------------------|-----------------------------------------------------------------|---------------------------------|--------------------------------------------|---------------------------------------------------------------------------------------------------------------------------------------------------------------------|----------------------------------------------------|
| <a href="#">5906</a> | RAP1A   | RAP1A, member of RAS oncogene family         | NM_001010935                  | <a href="#">NP_002875.1</a>                                     | <a href="#">ENSG00000116473</a> | <a href="#">chr1:112035505 - 112053380</a> | progression through cell cycle;nucleotide binding;protein binding;signal transduction;small GTPase mediated signal transduction                                     | Entrez Query:Oncogene                              |
| <a href="#">5908</a> | RAP1B   | RAP1B, member of RAS oncogene family         | NM_001089704,<br>NM_001010942 | <a href="#">NP_001083173.1</a> ,<br><a href="#">NP_056461.1</a> | <a href="#">ENSG00000127314</a> | <a href="#">chr12:67328771 - 67337234</a>  | cell proliferation;GTP binding;intracellular;membrane;nucleotide binding;protein binding;small GTPase mediated signal transduction                                  | Entrez Query:Oncogene                              |
| <a href="#">5911</a> | RAP2A   | RAP2A, member of RAS oncogene family         | NM_021033                     | <a href="#">NP_066361.1</a>                                     | <a href="#">ENSG00000125249</a> | <a href="#">chr13:96884725 - 96914697</a>  | GTP binding;GTPase activity;intracellular;membrane;nucleotide binding;signal transduction;small GTPase mediated signal transduction                                 | Entrez Query:Oncogene                              |
| <a href="#">5912</a> | RAP2B   | RAP2B, member of RAS oncogene family         | NM_002886                     | <a href="#">NP_002877.2</a>                                     | <a href="#">ENSG00000181467</a> | <a href="#">chr3:154363172 - 154363724</a> | GTP binding;intracellular;membrane;nucleotide binding;signal transduction;small GTPase mediated signal transduction                                                 | Entrez Query:Oncogene                              |
| <a href="#">5925</a> | RB1     | retinoblastoma 1 (including osteosarcoma)    | NM_000321                     | <a href="#">NP_000312.2</a>                                     | <a href="#">ENSG00000139687</a> | <a href="#">chr13:47776049 - 47952208</a>  | checkpoint;chromatin;chromatin modification;G1 phase;kinase binding;M phase;molecular_function;negative regulation of cell growth;negative regulation of            | TGFBR, Futreal et al 2004, Hahn and Weinberg 2002, |
| <a href="#">5935</a> | RBM3    | RNA binding motif (RNP1, RRM) protein 3      | NM_006743                     | <a href="#">NP_006734.1</a>                                     | <a href="#">ENSG00000102317</a> | <a href="#">chrX:48318512 - 48320418</a>   | nucleic acid binding;nucleotide binding;RNA binding;RNA processing                                                                                                  | Entrez Query:Oncogene                              |
| <a href="#">5937</a> | RBMS1   | single stranded interacting protein 1        | NM_016836,<br>NM_002897       | <a href="#">NP_058520.1</a> ,<br><a href="#">NP_002888.1</a>    | <a href="#">ENSG00000153250</a> | <a href="#">chr2:160840393 - 161058120</a> | binding;nucleotide binding;nucleus;RNA binding;RNA processing;single-stranded DNA binding                                                                           | Entrez Query:Oncogene                              |
| <a href="#">5940</a> | RBMY1A1 | protein, Y-linked, family 1, member A1       | NM_005058,<br>NM_001006121    | <a href="#">NP_001006121.1</a> ,<br><a href="#">NP_005049.1</a> | <a href="#">ENSG00000174622</a> | <a href="#">chrY:22435888 - 22448048</a>   | nucleic acid binding;nucleotide binding;nucleus;RNA binding;RNA processing;spermatogenesis                                                                          | Entrez Query:Oncogene                              |
| <a href="#">5966</a> | REL     | reticuloendotheliosis viral oncogene homolog | NM_002908                     | <a href="#">NP_002899.1</a>                                     | <a href="#">ENSG00000162924</a> | <a href="#">chr2:60962479 - 61003174</a>   | transcription, DNA-dependent;signal transducer activity;transcription factor activity;transcription from RNA polymerase II promoter                                 | et al 2004, Mitelman 2000, Entrez                  |
| <a href="#">5970</a> | RELA    | reticuloendotheliosis viral oncogene homolog | NM_021975                     | <a href="#">NP_068810.3</a>                                     | <a href="#">ENSG00000173039</a> | <a href="#">chr11:65178424 - 65186879</a>  | response;cytokine and chemokine mediated signaling pathway;cytoplasm;defense response to virus;hair follicle development;identical protein binding;inflammatory     | NOTCH, TNF_alpha_NF_kB,                            |
| <a href="#">5971</a> | RELB    | reticuloendotheliosis viral oncogene homolog | NM_006509                     | <a href="#">NP_006500.2</a>                                     | <a href="#">ENSG00000104856</a> | <a href="#">chr19:50196677 - 50232888</a>  | differentiation;nucleus;protein binding;regulation of transcription, DNA-dependent;T-helper 1 cell differentiation;transcription corepressor                        | TNF_alpha_NF_kB, Entrez Query:Oncogene             |
| <a href="#">5979</a> | RET     | ret proto-oncogene                           | NM_020630,<br>NM_020975       | <a href="#">NP_065681.1</a> ,<br><a href="#">NP_066124.1</a>    | <a href="#">ENSG00000165731</a> | <a href="#">chr10:42892712 - 42943723</a>  | transduction;homophilic cell adhesion;integral to membrane;kinase activity;membrane;nucleotide binding;posterior midgut development;protein amino                   | Mitelman 2000, Vogelstein and Kinzler              |
| <a href="#">6098</a> | ROS1    | oncogene homolog 1 (avian)                   | NM_002944                     | <a href="#">NP_002935.2</a>                                     | <a href="#">ENSG00000047936</a> | <a href="#">chr6:117716347 - 117853512</a> | binding;protein amino acid phosphorylation;receptor activity;signal transduction;sodium:potassium-exchanging ATPase complex;transferase                             | Mitelman 2000, Protein Kinase, Stability, Tyrosine |
| <a href="#">6130</a> | RPL7A   | ribosomal protein L7a                        | NM_000972                     | <a href="#">NP_000963.1</a>                                     | <a href="#">ENSG00000148303</a> | <a href="#">chr9:135204919 - 135208042</a> | fraction;polysomal ribosome;ribosome;ribosome biogenesis and assembly;RNA binding;structural constituent of ribosome;translation                                    | Entrez Query:Oncogene                              |
| <a href="#">6237</a> | RRAS    | related RAS viral (r-ras) oncogene homolog   | NM_006270                     | <a href="#">NP_006261.1</a>                                     | <a href="#">ENSG00000126458</a> | <a href="#">chr19:54830644 - 54835167</a>  | GTP binding;GTPase activity;intracellular;membrane;nucleotide binding;Ras protein signal transduction                                                               | Entrez Query:Oncogene                              |
| <a href="#">6286</a> | S100P   | S100 calcium binding protein P               | NM_005980                     | <a href="#">NP_005971.1</a>                                     | <a href="#">ENSG00000163993</a> | <a href="#">chr4:6746560 - 6749670</a>     | calcium ion binding;calcium-dependent protein binding;cytoplasm;endothelial cell migration;magnesium ion binding;nucleus                                            | Entrez Query:Oncogene                              |
| <a href="#">6418</a> | SET     | (myeloid leukemia-associated)                | NM_001122821,<br>NM_003011    | <a href="#">NP_001116293.1</a> ,<br><a href="#">NP_003002.2</a> | <a href="#">ENSG00000119335</a> | <a href="#">chr9:130485995 - 130496764</a> | histone acetylation;nucleocytoplasmic transport;nucleosome assembly;nucleosome disassembly;nucleus;perinuclear region of cytoplasm;protein phosphatase inhibitor    | Suppressor, Entrez Query:Oncogene,                 |
| <a href="#">6446</a> | SGK1    | serum/glucocorticoid regulated kinase        | NM_005627,<br>NM_001143676    | <a href="#">NP_005618.2</a> ,<br><a href="#">NP_001137148.1</a> | <a href="#">ENSG00000118515</a> | <a href="#">chr6:134533098 - 134537638</a> | amino acid phosphorylation;protein binding;protein serine/threonine kinase activity;response to DNA damage stimulus;sodium ion transport;transferase activity       | Protein Kinase, Stability, Entrez Query:Oncogene   |
| <a href="#">6497</a> | SKI     | oncogene homolog (avian)                     | NM_003036                     | <a href="#">NP_003027.1</a>                                     | <a href="#">ENSG00000157933</a> | <a href="#">chr1:2150065 - 2228064</a>     | morphogenesis;molecular_function;nucleus;protein binding;transcriptional repressor complex                                                                          | Suppressor, Entrez Query:Oncogene                  |
| <a href="#">6498</a> | SKIL    | SKI-like oncogene                            | NM_005414                     | <a href="#">NP_005405.2</a>                                     | <a href="#">ENSG00000136603</a> | <a href="#">chr3:171560813 - 171592899</a> | development;nucleus;protein binding;signal transduction;transcription corepressor activity;transcription from RNA polymerase II promoter;transforming growth factor | TGFBR, Entrez Query:Oncogene                       |
| <a href="#">6528</a> | SLC5A5  | (sodium iodide symporter), member 5          | NM_000453                     | <a href="#">NP_000444.1</a>                                     | <a href="#">ENSG00000105641</a> | <a href="#">chr19:17844128 - 17865686</a>  | ion binding;sodium ion transport;sodium:iodide symporter activity;symporter activity;transporter activity                                                           | Entrez Query:Oncogene                              |
| <a href="#">6598</a> | SMARCB1 | associated, actin dependent regulator of     | NM_003073,<br>NM_001007468    | <a href="#">NP_003064.2</a> ,<br><a href="#">NP_001007469.1</a> | <a href="#">ENSG00000099956</a> | <a href="#">chr22:22459356 - 22506367</a>  | through cell cycle;nuclear chromosome;nucleoplasm;nucleus;protein binding;regulation of transcription from RNA polymerase II promoter;retroviral                    | et al 2004, Tumor Suppressor, Entrez               |
| <a href="#">6608</a> | SMO     | smoothed homolog (Drosophila)                | NM_005631                     | <a href="#">NP_005622.1</a>                                     | <a href="#">ENSG00000128602</a> | <a href="#">chr7:128616228 - 128639528</a> | morphogenesis;cilium;determination of left/right symmetry;developmental growth;dorsal/ventral pattern formation;G-protein coupled receptor activity;G-              | 2004, Tumor Suppressor, Entrez Query:Oncogene,     |
| <a href="#">6635</a> | SNRPE   | ribonucleoprotein polypeptide E              | NM_003094                     | <a href="#">NP_003085.1</a>                                     | <a href="#">ENSG00000182225</a> | <a href="#">chr1:202097410 - 202105683</a> | mRNA processing;nucleus;protein binding;RNA binding;RNA splicing;small nuclear ribonucleoprotein complex;spliceosome;spliceosome assembly                           | Entrez Query:Oncogene                              |
| <a href="#">6654</a> | SOS1    | son of sevenless homolog 1 (Drosophila)      | NM_005633                     | <a href="#">NP_005624.2</a>                                     | <a href="#">ENSG00000115904</a> | <a href="#">chr2:39066468 - 39201067</a>   | activity;intracellular;nucleosome;nucleus;protein binding;Ras protein signal transduction;regulation of Rho protein signal transduction;regulation of small         | EGFR1, Kit Receptor, Entrez Query:Oncogene         |
| <a href="#">6659</a> | SOX4    | SRY (sex determining region Y)-box 4         | NM_003107                     | <a href="#">NP_003098.1</a>                                     | <a href="#">ENSG00000124766</a> | <a href="#">chr6:21702744 - 21704169</a>   | exocrine pancreas development;nucleus;regulation of transcription, DNA-dependent;transcription;transcription factor activity                                        | Tumor Suppressor, Entrez Query:Oncogene            |
| <a href="#">6667</a> | SP1     | Sp1 transcription factor                     | NM_138473                     | <a href="#">NP_612482.2</a>                                     | <a href="#">ENSG00000185591</a> | <a href="#">chr12:52060342 - 52091291</a>  | regulation of global transcription from RNA polymerase II promoter;positive regulation of transcription, DNA-dependent;protein C-terminus binding;protein           | EGFR1, TGFBR, Stability, Tumor Suppressor, Entrez  |



|                      |        |                                                    |                                |                                    |                                 |                                            |                                                                                                                                                                         |                                                |
|----------------------|--------|----------------------------------------------------|--------------------------------|------------------------------------|---------------------------------|--------------------------------------------|-------------------------------------------------------------------------------------------------------------------------------------------------------------------------|------------------------------------------------|
| <a href="#">6688</a> | SPI1   | virus (SFFV) proviral integration oncogene         | NM_003120,<br>NM_001080547     | NP_003111.2,<br>NP_001074016.1     | <a href="#">ENSG00000066336</a> | <a href="#">chr11:47333353 - 47356480</a>  | promoter;nucleus;protein binding;regulation of transcription, DNA-dependent;RNA binding;sequence-specific DNA binding;transcription;transcription factor activity       | Entrez Query:Oncogene                          |
| <a href="#">6696</a> | SPP1   | phosphoprotein 1 (osteopontin, bone                | NM_001040058,<br>NM_001040060  | NP_001035147.1,<br>NP_001035149.1  | <a href="#">ENSG00000118785</a> | <a href="#">chr4:89117071 - 89123072</a>   | region;extracellular space;integrin binding;negative regulation of bone mineralization;ossification;protein binding;proteinaceous extracellular matrix                  | Suppressor, Entrez Query:Oncogene              |
| <a href="#">6714</a> | SRC    | Ruppin A-2) viral oncogene homolog                 | NM_198291                      | <a href="#">NP_938033.1</a>        | <a href="#">ENSG00000197122</a> | <a href="#">chr20:35445970 - 35465196</a>  | acid phosphorylation;protein binding;protein kinase cascade;protein-tyrosine kinase activity;receptor activity;SH2 domain binding;SH3/SH2 adaptor activity;signal       | Tumor Suppressor, Tyrosine Kinase, Entrez      |
| <a href="#">6720</a> | SREBF1 | element binding transcription factor 1             | NM_001005291,<br>NM_004176     | NP_001005291.1,<br>NP_004167.3     | <a href="#">ENSG00000072310</a> | <a href="#">chr17:17656660 - 17680856</a>  | reticulum;endoplasmic reticulum membrane;integral to membrane;lipid metabolic process;membrane;nuclear envelope;nucleus;regulation of transcription;regulation          | Entrez Query:Oncogene                          |
| <a href="#">6760</a> | SS18   | translocation, chromosome 18                       | NM_005637,<br>NM_001007559     | NP_005628.2,<br>NP_001007560.1     | <a href="#">ENSG00000141380</a> | <a href="#">chr18:21852315 - 21924531</a>  | nucleus                                                                                                                                                                 | Mitelman 2000, Vogelstein and Kinzler          |
| <a href="#">6774</a> | STAT3  | activator of transcription 3 (acute-phase response | NM_139276,<br>NM_003150        | NP_644805.1,<br>NP_003141.2        | <a href="#">ENSG00000168610</a> | <a href="#">chr17:37721288 - 37754060</a>  | mediated signaling pathway;cytoplasm;hematopoietin/interferon-class (D200-domain) cytokine receptor signal transducer activity;intracellular signaling                  | EGFR1, NOTCH, Protein Kinase, Stability, Tumor |
| <a href="#">6794</a> | STK11  | serine/threonine kinase 11                         | NM_000455                      | <a href="#">NP_000446.1</a>        | <a href="#">ENSG00000118046</a> | <a href="#">chr19:1157912 - 1177646</a>    | ion binding;nucleotide binding;nucleus;protein amino acid phosphorylation;protein binding;protein serine/threonine kinase activity;transferase activity                 | Vogelstein and Kinzler 2004, Protein Kinase,   |
| <a href="#">7009</a> | TMBIM6 | transcript (BAX inhibitor 1)                       | NM_003217,<br>NM_001098576     | NP_003208.2,<br>NP_001092046.1     | <a href="#">ENSG00000139644</a> | <a href="#">chr12:48422186 - 48442946</a>  | apoptosis;endoplasmic reticulum;insoluble fraction;integral to plasma membrane;membrane;negative regulation of apoptosis;nucleus                                        | Entrez Query:Oncogene                          |
| <a href="#">7040</a> | TGFB1  | transforming growth factor, beta 1                 | NM_000660                      | <a href="#">NP_000651.3</a>        | <a href="#">ENSG00000105329</a> | <a href="#">chr19:46528796 - 46550789</a>  | cell migration;growth factor activity;inflammatory response;lymph node development;negative regulation of cell proliferation;negative regulation of                     | Stability, Tumor Suppressor, Entrez            |
| <a href="#">7066</a> | THPO   | (myeloproliferative leukemia virus oncogene        | NM_000460                      | <a href="#">NP_000451.1</a>        | <a href="#">ENSG00000090534</a> | <a href="#">chr3:185572994 - 185576741</a> | cell proliferation;cytokine activity;extracellular region;extracellular space;growth factor activity;hormone activity;multicellular organismal development              | Entrez Query:Oncogene                          |
| <a href="#">7067</a> | THRA   | receptor, alpha (erythroblastic leukemia           | NM_199334,<br>NM_003250        | NP_955366.1,<br>NP_003241.2        | <a href="#">ENSG00000126351</a> | <a href="#">chr17:35484267 - 35503161</a>  | transcription;nucleus;organ morphogenesis;ossification;protein binding;regulation of heart contraction;regulation of transcription, DNA-dependent;sequence-specific     | Entrez Query:Oncogene                          |
| <a href="#">7068</a> | THRB   | receptor, beta (erythroblastic leukemia            | NM_001128176,<br>NM_001128177  | NP_001121648.1,<br>NP_001121649.1  | <a href="#">ENSG00000151090</a> | <a href="#">chr3:24139378 - 24245454</a>   | morphogenesis;positive regulation of transcription from RNA polymerase II promoter;protein binding;receptor activity;regulation of heart                                | Entrez Query:Oncogene                          |
| <a href="#">7078</a> | TIMP3  | inhibitor 3 (Sorsby fundus dystrophy,              | NM_000362                      | <a href="#">NP_000353.1</a>        | <a href="#">ENSG00000100234</a> | <a href="#">chr22:31527987 - 31585364</a>  | extracellular signals;metalloendopeptidase inhibitor activity;molecular function;proteinaceous extracellular matrix;response to                                         | Tumor Suppressor, Entrez Query:Oncogene        |
| <a href="#">7157</a> | TP53   | tumor protein p53 (Li-Fraumeni syndrome)           | NM_001126117,<br>NM_000546,    | NP_001119589.1,<br>NP_001119587.1, | <a href="#">ENSG00000141510</a> | <a href="#">chr17:7513651 - 7520637</a>    | cycle;cell cycle arrest;cell differentiation;cell proliferation;cellular response to glucose starvation;copper ion binding;cytoplasm;DNA damage response, signal        | Vogelstein and Kinzler 2004, Stability, Tumor  |
| <a href="#">7161</a> | TP73   | tumor protein p73                                  | NM_001126241,<br>NM_001126242, | NP_001119713.1,<br>NP_001119714.1, | <a href="#">ENSG00000078900</a> | <a href="#">chr1:3588789 - 3639503</a>     | induction of apoptosis;metal ion binding;mismatch repair;negative regulation of progression through cell cycle;nucleus;protein binding;regulation of transcription,     | TGFBR, Stability, Tumor Suppressor, Entrez     |
| <a href="#">7163</a> | TPD52  | tumor protein D52                                  | NM_001025252,<br>NM_001025253  | NP_001020423.1,<br>NP_001020424.1  | <a href="#">ENSG00000076554</a> | <a href="#">chr8:81112905 - 81155243</a>   | binding;cytoplasm;endoplasmic reticulum;perinuclear region of cytoplasm;protein heterodimerization activity;protein homodimerization activity;secretion                 | Entrez Query:Oncogene                          |
| <a href="#">7175</a> | TPR    | region (to activated MET oncogene)                 | NM_003292                      | <a href="#">NP_003283.2</a>        | <a href="#">ENSG00000047410</a> | <a href="#">chr1:184549725 - 184610783</a> | cytoplasm;nuclear envelope;nuclear pore;nucleus;protein import into nucleus;transport                                                                                   | Mitelman 2000, Entrez Query:Oncogene,          |
| <a href="#">7249</a> | TSC2   | tuberous sclerosis 2                               | NM_001077183,<br>NM_000548     | NP_001070651.1,<br>NP_000539.2     | <a href="#">ENSG00000103197</a> | <a href="#">chr16:2038617 - 2078612</a>    | activity;intracellular;membrane fraction;negative regulation of progression through cell cycle;plasma membrane;positive regulation of GTPase activity;protein           | Vogelstein and Kinzler 2004, Protein Kinase,   |
| <a href="#">7291</a> | TWIST1 | (acrocephalosyndactyly 3; Saethre-Chotzen          | NM_000474                      | <a href="#">NP_000465.1</a>        | <a href="#">ENSG00000122691</a> | <a href="#">chr7:19122860 - 19123469</a>   | and biogenesis (sensu Eukaryota);DNA binding;enzyme inhibitor activity;multicellular organismal development;negative regulation of transcription                        | Entrez Query:Oncogene                          |
| <a href="#">7298</a> | TYMS   | thymidylate synthetase                             | NM_001071                      | <a href="#">NP_001062.1</a>        | <a href="#">ENSG00000176890</a> | <a href="#">chr18:647742 - 662997</a>      | replication;dTMP biosynthetic process;methyltransferase activity;nucleobase, nucleoside, nucleotide and nucleic acid metabolic process;nucleotide biosynthetic          | Stability, Entrez Query:Oncogene               |
| <a href="#">7335</a> | UBE2V1 | ubiquitin-conjugating enzyme E2 variant 1          |                                |                                    | <a href="#">ENSG00000124208</a> | <a href="#">chr20:null</a>                 | differentiation;cytoplasm;nucleus;positive regulation of I-kappaB kinase/NF-kappaB cascade;protein binding;protein modification process;protein                         | Stability, Entrez Query:Oncogene               |
| <a href="#">7337</a> | UBE3A  | E3A (human papilloma virus E6-associated           | NM_130838,<br>NM_130839        | NP_570853.1,<br>NP_570854.1        | <a href="#">ENSG00000114062</a> | <a href="#">chr15:23135376 - 23204888</a>  | binding;protein complex;protein modification process;proteolysis;ubiquitin cycle;ubiquitin-dependent protein catabolic process;ubiquitin-protein ligase activity        | Stability, Tumor Suppressor, Entrez            |
| <a href="#">7343</a> | UBTF   | transcription factor, RNA polymerase I             | NM_001076683,<br>NM_014233     | NP_001070152.1,<br>NP_055048.1     | <a href="#">ENSG00000108312</a> | <a href="#">chr17:39640135 - 39651123</a>  | polymerase I promoter;regulation of transcription, DNA-dependent;RNA polymerase I transcription factor activity;transcription                                           | Entrez Query:Oncogene                          |
| <a href="#">7375</a> | USP4   | peptidase 4 (proto-oncogene)                       | NM_199443,<br>NM_003363        | NP_955475.1,<br>NP_003354.2        | <a href="#">ENSG00000114316</a> | <a href="#">chr3:49290729 - 49352461</a>   | cysteine-type endopeptidase activity;lysosome;nucleus;peptidase activity;ubiquitin cycle;ubiquitin thiolesterase activity;ubiquitin-dependent protein catabolic process | Entrez Query:Oncogene                          |
| <a href="#">7409</a> | VAV1   | vav 1 oncogene                                     | NM_005428                      | <a href="#">NP_005419.2</a>        | <a href="#">ENSG00000141968</a> | <a href="#">chr19:6723818 - 6808118</a>    | response;integrin-mediated signaling pathway;intracellular;intracellular signaling cascade;metal ion binding;nucleus;phagocytosis;positive regulation of cell           | EGFR1, Kit Receptor, Entrez Query:Oncogene     |
| <a href="#">7410</a> | VAV2   | vav 2 oncogene                                     | NM_003371                      | <a href="#">NP_003362.2</a>        | <a href="#">ENSG00000160293</a> | <a href="#">chr9:135619004 - 135847221</a> | activity;intracellular;intracellular signaling cascade;metal ion binding;protein binding;regulation of Rho protein signal transduction;Rho guanyl-nucleotide            | Entrez Query:Oncogene                          |
| <a href="#">7422</a> | VEGFA  | vascular endothelial growth factor A               | NM_001025367,<br>NM_001033756, | NP_001020538.2,<br>NP_001028928.1, | <a href="#">ENSG00000112715</a> | <a href="#">chr6:43846421 - 43860277</a>   | binding;extracellular space;growth factor activity;heparin binding;induction of positive chemotaxis;membrane;multicellular organismal development;negative              | Stability, Entrez Query:Oncogene               |

|                      |         |                                                |                         |                             |                                 |                                             |                                                                                                                                                                      |                                                  |
|----------------------|---------|------------------------------------------------|-------------------------|-----------------------------|---------------------------------|---------------------------------------------|----------------------------------------------------------------------------------------------------------------------------------------------------------------------|--------------------------------------------------|
| <a href="#">7424</a> | VEGFC   | vascular endothelial growth factor C           | NM_005429               | <a href="#">NP_005420.1</a> | <a href="#">ENSG00000150630</a> | <a href="#">chr4:177842070 - 177950459</a>  | activity;membrane;morphogenesis of embryonic epithelium;multicellular organismal development;organ morphogenesis;positive regulation of cell                         | Entrez Query:Oncogene                            |
| <a href="#">7471</a> | WNT1    | integration site family, member 1              | NM_005430               | <a href="#">NP_005421.1</a> | <a href="#">ENSG00000125084</a> | <a href="#">chr12:47658700 - 47661690</a>   | migration;central nervous system development;establishment and/or maintenance of cell polarity;extracellular region;multicellular organismal development;receptor    | Wnt, Entrez Query:Oncogene                       |
| <a href="#">7473</a> | WNT3    | integration site family, member 3              | NM_030753               | <a href="#">NP_110380.1</a> | <a href="#">ENSG00000108379</a> | <a href="#">chr17:42200854 - 42250962</a>   | constituent;extracellular region;multicellular organismal development;protein binding;proteinaceous extracellular matrix;signal transducer activity;Wnt receptor     | Wnt, Entrez Query:Oncogene                       |
| <a href="#">7476</a> | WNT7A   | integration site family, member 7A             | NM_004625               | <a href="#">NP_004616.2</a> | <a href="#">ENSG00000154764</a> | <a href="#">chr3:13835441 - 13896314</a>    | differentiation;dorsal/ventral pattern formation;embryonic forelimb morphogenesis;embryonic hindlimb morphogenesis;extracellular                                     | Wnt, Entrez Query:Oncogene                       |
| <a href="#">7480</a> | WNT10B  | integration site family, member 10B            | NM_003394               | <a href="#">NP_003385.2</a> | <a href="#">ENSG00000169884</a> | <a href="#">chr12:47646144 - 47650579</a>   | activity;signal transduction;Wnt receptor signaling pathway, calcium modulating pathway                                                                              | Entrez Query:Oncogene                            |
| <a href="#">7525</a> | YES1    | sarcoma viral oncogene homolog 1               | NM_005433               | <a href="#">NP_005424.1</a> | <a href="#">ENSG00000176105</a> | <a href="#">chr18:714423 - 746827</a>       | binding;protein amino acid phosphorylation;protein binding;protein modification process;protein-tyrosine kinase activity;transferase activity                        | Receptor, Tyrosine Kinase, Entrez Query:Oncogene |
| <a href="#">7849</a> | PAX8    | paired box gene 8                              | NM_003466, NM_013952,   | NP_003457.1, NP_039246.1,   | <a href="#">ENSG00000125618</a> | <a href="#">chr2:113694139 - 113752441</a>  | development;nucleoplasm;nucleus;positive regulation of transcription, DNA-dependent;protein binding;thyroid-stimulating hormone receptor                             | Mitelman 2000, Entrez Query:Oncogene,            |
| <a href="#">7852</a> | CXCR4   | chemokine (C-X-C motif) receptor 4             | NM_001008540, NM_003467 | NP_001008540.1, NP_003458.1 | <a href="#">ENSG00000121966</a> | <a href="#">chr2:136588908 - 136592100</a>  | development;C-C chemokine receptor activity;C-X-C chemokine receptor activity;chemotaxis;coreceptor activity;cytoplasm;elevation of cytosolic calcium ion            | Suppressor, Entrez Query:Oncogene                |
| <a href="#">7879</a> | RAB7A   | RAB7A, member RAS oncogene family              | NM_004637               | <a href="#">NP_004628.4</a> | <a href="#">ENSG00000075785</a> | <a href="#">chr3:129996900 - 130014955</a>  | binding;protein binding;protein transport;small GTPase mediated signal transduction                                                                                  | Entrez Query:Oncogene                            |
| <a href="#">7913</a> | DEK     | DEK oncogene (DNA binding)                     | NM_003472               | <a href="#">NP_003463.1</a> | <a href="#">ENSG00000124795</a> | <a href="#">chr6:18333928 - 18372197</a>    | polymerase II promoter;signal transduction;specific RNA polymerase II transcription factor activity;viral genome replication                                         | Mitelman 2000, Entrez Query:Oncogene,            |
| <a href="#">7975</a> | MAFK    | musculoaponeurotic fibrosarcoma oncogene       |                         |                             | <a href="#">ENSG00000198517</a> | <a href="#">chr7:null</a>                   | chromatin;nucleus;protein dimerization activity;regulation of transcription, DNA-dependent;sequence-specific DNA binding;transcription;transcription factor activity | Entrez Query:Oncogene                            |
| <a href="#">7984</a> | ARHGEF5 | Rho guanine nucleotide exchange factor (GEF) 5 | NM_005435               | <a href="#">NP_005426.2</a> | <a href="#">ENSG00000050327</a> | <a href="#">chr7:143690695 - 143708082</a>  | binding;regulation of Rho protein signal transduction;Rho guanyl-nucleotide exchange factor activity                                                                 | Entrez Query:Oncogene                            |
| <a href="#">8021</a> | NUP214  | nucleoporin 214kDa                             | NM_005085               | <a href="#">NP_005076.3</a> | <a href="#">ENSG00000126883</a> | <a href="#">chr9:132990912 - 133098695</a>  | membrane;porin activity;protein binding;protein export from nucleus;transport;transporter activity                                                                   | Mitelman 2000, Entrez Query:Oncogene,            |
| <a href="#">8031</a> | NCOA4   | nuclear receptor coactivator 4                 | NM_005437               | <a href="#">NP_005428.1</a> | <a href="#">ENSG00000138293</a> | <a href="#">chr10:51249147 - 51259236</a>   | development;nucleus;positive regulation of transcription, DNA-dependent;protein binding;receptor activity;transcription;transcription coactivator                    | Futreal et al 2004, Mitelman 2000, Entrez        |
| <a href="#">8061</a> | FOSL1   | FOS-like antigen 1                             | NM_005438               | <a href="#">NP_005429.1</a> | <a href="#">ENSG00000175592</a> | <a href="#">chr11:65416932 - 65424386</a>   | proliferation;protein dimerization activity;regulation of transcription from RNA polymerase II promoter;response to virus;sequence-specific DNA                      | Entrez Query:Oncogene                            |
| <a href="#">8082</a> | SSPN    | oncogene-associated gene)                      | NM_005086               | <a href="#">NP_005077.2</a> | <a href="#">ENSG00000123096</a> | <a href="#">chr12:26239872 - 26275276</a>   | cell adhesion;cytoskeleton;dystrophin-associated glycoprotein complex;integral to plasma membrane;membrane;muscle contraction;transport vesicle                      | Entrez Query:Oncogene                            |
| <a href="#">8091</a> | HMGA2   | high mobility group AT-hook 2                  | NM_003483, NM_003484    | NP_003474.1, NP_003475.1    | <a href="#">ENSG00000149948</a> | <a href="#">chr12:64505317 - 64643339</a>   | (sensu Eukaryota);DNA binding;establishment and/or maintenance of chromatin architecture;multicellular organismal development;nucleus;protein                        | Mitelman 2000, Vogelstein and Kinzler            |
| <a href="#">8115</a> | TCL1A   | T-cell leukemia/lymphoma 1A                    | NM_001098725            | <a href="#">NP_068801.1</a> | <a href="#">ENSG00000100721</a> | <a href="#">chr14:95247844 - 95250156</a>   | cell cortex;endoplasmic reticulum;microsome;multicellular organismal development;pronucleus;protein binding                                                          | Mitelman 2000, Tumor Suppressor, Entrez          |
| <a href="#">8379</a> | MAD1L1  | MAD1 mitotic arrest deficient-like 1 (yeast)   | NM_003550               | <a href="#">NP_003541.2</a> | <a href="#">ENSG00000002822</a> | <a href="#">chr7:1822231 - 2236294</a>      | cell cycle;cell division;centrosome;mitotic anaphase;mitotic checkpoint;mitotic metaphase;mitotic telophase;molecular function;nucleus;spindle                       | Tumor Suppressor, Entrez Query:Oncogene          |
| <a href="#">8434</a> | RECK    | cysteine-rich protein with kazal motifs        | NM_021111               | <a href="#">NP_066934.1</a> | <a href="#">ENSG00000122707</a> | <a href="#">chr9:36026995 - 36113042</a>    | activity;negative regulation of progression through cell cycle;peripheral to membrane of membrane fraction;protein binding;serine-type endopeptidase                 | Tumor Suppressor, Entrez Query:Oncogene          |
| <a href="#">8493</a> | PPM1D   | magnesium-dependent, delta isoform             | NM_003620               | <a href="#">NP_003611.1</a> | <a href="#">ENSG00000170836</a> | <a href="#">chr17:56032557 - 56095695</a>   | binding;manganese ion binding;negative regulation of cell proliferation;nucleus;protein amino acid dephosphorylation;protein phosphatase                             | Tumor Suppressor, Entrez Query:Oncogene          |
| <a href="#">8537</a> | BCAS1   | breast carcinoma amplified sequence 1          | NM_003657               | <a href="#">NP_003648.2</a> | <a href="#">ENSG00000064787</a> | <a href="#">chr20:51994867 - 52108664</a>   | protein binding                                                                                                                                                      | Entrez Query:Oncogene                            |
| <a href="#">8543</a> | LMO4    | LIM domain only 4                              | NM_006769               | <a href="#">NP_006760.1</a> | <a href="#">ENSG00000143013</a> | <a href="#">chr1:87570286 - 87583067</a>    | dependent;transcription;transcription factor activity;transcription factor binding;transcription factor complex;transcription from RNA polymerase II                 | Entrez Query:Oncogene                            |
| <a href="#">8562</a> | DENR    | density-regulated protein                      | NM_003677               | <a href="#">NP_003668.2</a> | <a href="#">ENSG00000139726</a> | <a href="#">chr12:121804201 - 121819578</a> | biological_process;cellular_component;molecular_function;translation initiation factor activity;translational initiation                                             | Entrez Query:Oncogene                            |
| <a href="#">8682</a> | PEA15   | phosphoprotein enriched in astrocytes 15       | NM_003768               | <a href="#">NP_003759.1</a> | <a href="#">ENSG00000162734</a> | <a href="#">chr1:158447958 - 158449900</a>  | anti-apoptosis;microtubule associated complex;negative regulation of glucose import;protein binding;regulation of apoptosis;sugar porter activity;transport          | Stability, Entrez Query:Oncogene                 |
| <a href="#">8766</a> | RAB11A  | RAB11A, member RAS oncogene family             | NM_004663               | <a href="#">NP_004654.1</a> | <a href="#">ENSG00000103769</a> | <a href="#">chr15:63948977 - 63967232</a>   | transport;protein binding;protein transport;small GTPase mediated signal transduction;syntaxin binding;trans-Golgi network;transporter activity                      | Entrez Query:Oncogene                            |
| <a href="#">8772</a> | FADD    | associated via death domain                    | NM_003824               | <a href="#">NP_003815.1</a> | <a href="#">ENSG00000168040</a> | <a href="#">chr11:69727213 - 69730227</a>   | receptor binding;identical protein binding;induction of apoptosis via death domain receptors;positive regulation of I-kappaB kinase/NF-kappaB cascade;regulation of  | TNF_alpha_NF_kB, Entrez Query:Oncogene           |



|                       |          |                                                     |                               |                                   |                                 |                                            |                                                                                                                                                                         |                                       |
|-----------------------|----------|-----------------------------------------------------|-------------------------------|-----------------------------------|---------------------------------|--------------------------------------------|-------------------------------------------------------------------------------------------------------------------------------------------------------------------------|---------------------------------------|
| <a href="#">8829</a>  | NRP1     | neuropilin 1                                        | NM_001024628,<br>NM_001024629 | NP_001019799.1,<br>NP_001019800.1 | <a href="#">ENSG00000099250</a> | <a href="#">chr10:33509009 - 33663316</a>  | signaling;endoplasmic reticulum;integral to membrane;membrane;membrane fraction;multicellular organismal development;nervous system development;organ                   | Suppressor, Entrez Query:Oncogene     |
| <a href="#">8883</a>  | NAE1     | amyloid beta precursor protein binding protein 1    | NM_001018159                  | <a href="#">NP_001018170.1</a>    | <a href="#">ENSG00000159593</a> | <a href="#">chr16:65394412 - 65422303</a>  | activating enzyme activity;protein binding;protein heterodimerization activity;protein neddylation;regulation of apoptosis;S-M checkpoint;signal                        | Entrez Query:Oncogene                 |
| <a href="#">8934</a>  | RAB7L1   | RAB7, member RAS oncogene family-like 1             | NM_003929                     | <a href="#">NP_003920.1</a>       | <a href="#">ENSG00000117280</a> | <a href="#">chr1:204006092 - 204010707</a> | GTP binding;GTPase activity;membrane;nucleotide binding;protein binding;protein transport;small GTPase mediated signal transduction                                     | Entrez Query:Oncogene                 |
| <a href="#">9043</a>  | SPAG9    | sperm associated antigen 9                          | NM_003971                     | <a href="#">NP_003962.3</a>       | <a href="#">ENSG00000008294</a> | <a href="#">chr17:46398631 - 46553016</a>  | integral to membrane;spermatogenesis                                                                                                                                    | Entrez Query:Oncogene                 |
| <a href="#">9098</a>  | USP6     | peptidase 6 (Tre-2 oncogene)                        | NM_004505                     | <a href="#">NP_004496.2</a>       | <a href="#">ENSG00000129204</a> | <a href="#">chr17:4974386 - 5016997</a>    | binding;protein binding;protein modification process;Rab GTPase activator activity;regulation of Rab GTPase activity;ubiquitin cycle;ubiquitin thiolesterase            | Entrez Query:Oncogene                 |
| <a href="#">9111</a>  | NMI      | N-myc (and STAT) interactor                         | NM_004688                     | <a href="#">NP_004679.2</a>       | <a href="#">ENSG00000123609</a> | <a href="#">chr2:151835452 - 151847708</a> | cytoplasm;inflammatory response;JAK-STAT cascade;protein binding;transcription cofactor activity;transcription from RNA polymerase II promoter                          | Entrez Query:Oncogene                 |
| <a href="#">9230</a>  | RAB11B   | RAB11B, member RAS oncogene family                  | NM_004218                     | <a href="#">NP_004209.2</a>       | <a href="#">ENSG00000185236</a> | <a href="#">chr19:8361300 - 8374442</a>    | GTP binding;GTPase activity;membrane;nucleotide binding;protein transport;small GTPase mediated signal transduction                                                     | Entrez Query:Oncogene                 |
| <a href="#">9232</a>  | PTTG1    | pituitary tumor-transforming 1                      | NM_004219                     | <a href="#">NP_004210.1</a>       | <a href="#">ENSG00000164611</a> | <a href="#">chr5:159781897 - 159788266</a> | biogenesis;chromosome segregation;cysteine protease inhibitor activity;cytoplasm;DNA metabolic process;DNA                                                              | Stability, Entrez Query:Oncogene      |
| <a href="#">9258</a>  | MFHAS1   | histiocytoma amplified sequence 1                   | NM_004225                     | <a href="#">NP_004216.2</a>       | <a href="#">ENSG00000147324</a> | <a href="#">chr8:8680941 - 8787978</a>     | GTP binding;protein binding;small GTPase mediated signal transduction                                                                                                   | Entrez Query:Oncogene                 |
| <a href="#">9363</a>  | RAB33A   | RAB33A, member RAS oncogene family                  | NM_004794                     | <a href="#">NP_004785.1</a>       | <a href="#">ENSG00000134594</a> | <a href="#">chrX:129133717 - 129146395</a> | GTP binding;GTPase activity;membrane;nucleotide binding;protein transport;small GTPase mediated signal transduction                                                     | Entrez Query:Oncogene                 |
| <a href="#">9364</a>  | RAB28    | RAB28, member RAS oncogene family                   | NM_001017979,<br>NM_004249    | NP_001017979.1,<br>NP_004240.1    | <a href="#">ENSG00000157869</a> | <a href="#">chr4:12979279 - 13094872</a>   | GTP binding;GTPase activity;membrane;nucleotide binding;small GTPase mediated signal transduction                                                                       | Entrez Query:Oncogene                 |
| <a href="#">9366</a>  | RAB9P1   | oncogene family, pseudogene 1                       |                               |                                   |                                 | <a href="#">chr5:null</a>                  |                                                                                                                                                                         | Entrez Query:Oncogene                 |
| <a href="#">9367</a>  | RAB9A    | RAB9A, member RAS oncogene family                   | NM_004251                     | <a href="#">NP_004242.1</a>       | <a href="#">ENSG00000123595</a> | <a href="#">chrX:13636786 - 13637392</a>   | GTP binding;GTPase activity;late endosome;lysosome;membrane;nucleotide binding;protein transport;small GTPase mediated signal transduction                              | Entrez Query:Oncogene                 |
| <a href="#">9545</a>  | RAB3D    | RAB3D, member RAS oncogene family                   | NM_004283                     | <a href="#">NP_004274.1</a>       | <a href="#">ENSG00000105514</a> | <a href="#">chr19:11297073 - 11309075</a>  | binding;protein binding;protein transport;regulation of exocytosis;small GTPase mediated signal transduction;zymogen granule                                            | Entrez Query:Oncogene                 |
| <a href="#">9557</a>  | CHD1L    | DNA binding protein 1-like                          | NM_004284                     | <a href="#">NP_004275.3</a>       | <a href="#">ENSG00000131778</a> | <a href="#">chr1:145180977 - 145233814</a> | ATP binding;ATP-dependent helicase activity;DNA binding;helicase activity                                                                                               | Stability, Entrez Query:Oncogene      |
| <a href="#">9609</a>  | RAB36    | RAB36, member RAS oncogene family                   | NM_004914                     | <a href="#">NP_004905.2</a>       | <a href="#">ENSG00000100228</a> | <a href="#">chr22:21817552 - 21833751</a>  | Golgi apparatus;GTP binding;GTPase activity;nucleotide binding;protein transport;small GTPase mediated signal transduction                                              | Entrez Query:Oncogene                 |
| <a href="#">9623</a>  | TCL1B    | T-cell leukemia/lymphoma 1B                         | NM_004918                     | <a href="#">NP_954676.1</a>       | <a href="#">ENSG00000187621</a> | <a href="#">chr14:95222557 - 95227411</a>  | protein binding                                                                                                                                                         | Entrez Query:Oncogene                 |
| <a href="#">9641</a>  | IKBKE    | polypeptide gene enhancer in B-cells,               | NM_014002                     | <a href="#">NP_054721.1</a>       | <a href="#">ENSG00000143466</a> | <a href="#">chr1:204713193 - 204736101</a> | inducing kinase activity;nucleotide binding;positive regulation of I-kappaB kinase/NF-kappaB cascade;protein amino acid phosphorylation;protein binding;signal          | Suppressor, Entrez Query:Oncogene     |
| <a href="#">9700</a>  | ESPL1    | extra spindle pole bodies homolog 1 (S. cerevisiae) | NM_012291                     | <a href="#">NP_036423.4</a>       | <a href="#">ENSG00000135476</a> | <a href="#">chr12:51948817 - 51973525</a>  | activity;cytokinesis;establishment of mitotic spindle localization;homologous chromosome segregation;meiotic spindle organization and biogenesis;mitotic sister         | Entrez Query:Oncogene                 |
| <a href="#">9798</a>  | KIAA0174 | KIAA0174                                            | NM_014761                     | <a href="#">NP_055576.2</a>       | <a href="#">ENSG00000182149</a> | <a href="#">chr16:70507044 - 70519203</a>  | ER-Golgi intermediate compartment;protein binding                                                                                                                       | Entrez Query:Oncogene                 |
| <a href="#">9820</a>  | CUL7     | cullin 7                                            | NM_014780                     | <a href="#">NP_055595.2</a>       | <a href="#">ENSG00000044090</a> | <a href="#">chr6:43113403 - 43128504</a>   | endothelial cell differentiation;regulation of mitotic metaphase/anaphase transition;ubiquitin cycle;vasculogenesis                                                     | Entrez Query:Oncogene                 |
| <a href="#">9839</a>  | ZEB2     | zinc finger E-box binding homeobox 2                | NM_014795                     | <a href="#">NP_055610.1</a>       | <a href="#">ENSG00000169554</a> | <a href="#">chr2:144863487 - 144991387</a> | ion binding;negative regulation of transcription;neural crest cell migration;neural tube closure;nucleic acid binding;nucleus;phosphatase regulator activity;regulation | TGFBR, Entrez Query:Oncogene          |
| <a href="#">9846</a>  | GAB2     | GRB2-associated binding protein 2                   | NM_012296                     | <a href="#">NP_036428.1</a>       | <a href="#">ENSG00000033327</a> | <a href="#">chr11:77607965 - 77806414</a>  |                                                                                                                                                                         | Protein Kinase, Entrez Query:Oncogene |
| <a href="#">9857</a>  | CEP350   | centrosomal protein 350kDa                          | NM_014810                     | <a href="#">NP_055625.4</a>       | <a href="#">ENSG00000135837</a> | <a href="#">chr1:178221939 - 178346919</a> | nucleus                                                                                                                                                                 | Entrez Query:Oncogene                 |
| <a href="#">9935</a>  | MAFB     | musculoaponeurotic fibrosarcoma oncogene            | NM_005461                     | <a href="#">NP_005452.2</a>       | <a href="#">ENSG00000179050</a> | <a href="#">chr20:38749932 - 38750904</a>  | differentiation;nucleus;positive regulation of transcription from RNA polymerase II promoter;protein dimerization activity;respiratory gaseous exchange;segment         | Mitelman 2000, Entrez Query:Oncogene, |
| <a href="#">9950</a>  | GOLGA5   | golgi autoantigen, golgin subfamily a, 5            | NM_005113                     | <a href="#">NP_005104.2</a>       | <a href="#">ENSG00000066455</a> | <a href="#">chr14:92333535 - 92375544</a>  | apparatus;Golgi cisterna;Golgi organization and biogenesis;Golgi vesicle transport;integral to membrane;membrane;protein amino acid                                     | Mitelman 2000, Protein Kinase, Entrez |
| <a href="#">10000</a> | AKT3     | viral oncogene homolog 3 (protein kinase B,         | NM_005465,<br>NM_181690       | NP_005456.1,<br>NP_859029.1       | <a href="#">ENSG00000117020</a> | <a href="#">chr1:241735173 - 242073095</a> | binding;protein serine/threonine kinase activity;signal transduction;transferase activity                                                                               | Protein Kinase, Entrez Query:Oncogene |

|                       |         |                                            |                            |                                |                                 |                                             |                                                                                                                                                                    |                                             |
|-----------------------|---------|--------------------------------------------|----------------------------|--------------------------------|---------------------------------|---------------------------------------------|--------------------------------------------------------------------------------------------------------------------------------------------------------------------|---------------------------------------------|
| <a href="#">10018</a> | BCL2L11 | BCL2-like 11 (apoptosis facilitator)       | NM_207002,<br>NM_006538    | NP_996885.1,<br>NP_006529.1    | <a href="#">ENSG00000153094</a> | <a href="#">chr2:111597793 - 111638279</a>  | apoptosis;induction of apoptosis;membrane;membrane fraction;positive regulation of apoptosis;protein binding                                                       | Stability, Entrez<br>Query:Oncogene         |
| <a href="#">10023</a> | FRAT1   | advanced T-cell lymphomas                  | NM_005479                  | <a href="#">NP_005470.2</a>    | <a href="#">ENSG00000165879</a> | <a href="#">chr10:99069200 - 99070040</a>   | Wnt receptor signaling pathway                                                                                                                                     | Entrez Query:Oncogene                       |
| <a href="#">10040</a> | TOM1L1  | target of myb1 (chicken)-like 1            | NM_005486                  | <a href="#">NP_005477.2</a>    | <a href="#">ENSG00000141198</a> | <a href="#">chr17:50333225 - 50392986</a>   | endosome;intracellular;intracellular protein transport;lysosome;membrane;protein binding;protein kinase activator activity                                         | Protein Kinase, Entrez<br>Query:Oncogene    |
| <a href="#">10043</a> | TOM1    | target of myb1 (chicken)                   | NM_005488                  | <a href="#">NP_005479.1</a>    | <a href="#">ENSG00000100284</a> | <a href="#">chr22:34025921 - 34073202</a>   | transport;intracellular;intracellular protein transport;lysosome;membrane;protein binding                                                                          | Entrez Query:Oncogene                       |
| <a href="#">10048</a> | RANBP9  | RAN binding protein 9                      | NM_005493                  | <a href="#">NP_005484.2</a>    | <a href="#">ENSG00000010017</a> | <a href="#">chr6:13730572 - 13819716</a>    | microtubule associated complex;microtubule nucleation;nucleus;protein binding;protein complex assembly;Ran GTPase binding                                          | Androgen Receptor,<br>Entrez Query:Oncogene |
| <a href="#">10140</a> | TOB1    | transducer of ERBB2, 1                     | NM_005749                  | <a href="#">NP_005740.1</a>    | <a href="#">ENSG00000141232</a> | <a href="#">chr17:46295339 - 46296377</a>   | proliferation;negative regulation of osteoblast differentiation;SH3/SH2 adaptor activity;SMAD binding;SMAD protein nuclear translocation;transcription corepressor | Entrez Query:Oncogene                       |
| <a href="#">10152</a> | ABI2    | abl interactor 2                           | NM_005759                  | <a href="#">NP_005750.4</a>    | <a href="#">ENSG00000138443</a> | <a href="#">chr2:203901482 - 204000320</a>  | migration;cytoplasm;cytoskeletal adaptor activity;cytoskeleton;cytoskeleton organization and biogenesis;DNA binding;filopodium;kinase                              | Stability, Entrez<br>Query:Oncogene         |
| <a href="#">10189</a> | THOC4   | THO complex 4                              | NM_005782                  | <a href="#">NP_005773.2</a>    | <a href="#">ENSG00000183684</a> | <a href="#">chr17:77439302 - 77442731</a>   | binding;protein folding;RNA binding;RNA splicing;single-stranded DNA binding;spliceosome;transport                                                                 | Entrez Query:Oncogene                       |
| <a href="#">10226</a> | M6PRBP1 | receptor binding protein 1                 | NM_005817                  | <a href="#">NP_005808.2</a>    | <a href="#">ENSG00000105355</a> | <a href="#">chr19:4790203 - 4812406</a>     | cytoplasm;endosome;Golgi apparatus;membrane;vesicle-mediated transport                                                                                             | Stability, Entrez<br>Query:Oncogene         |
| <a href="#">10257</a> | ABCC4   | sub-family C (CFTR/MRP), member 4          | NM_001105515,<br>NM_005845 | NP_001098985.1,<br>NP_005836.2 | <a href="#">ENSG00000125257</a> | <a href="#">chr13:94471829 - 94751569</a>   | activity;ATPase activity, coupled to transmembrane movement of substances;biological process;cellular component;chloride channel activity;integral                 | Entrez Query:Oncogene                       |
| <a href="#">10276</a> | NET1    | neuroepithelial cell transforming gene 1   | NM_001047160,<br>NM_005863 | NP_001040625.1,<br>NP_005854.2 | <a href="#">ENSG00000173848</a> | <a href="#">chr10:5444655 - 5488957</a>     | activity;intracellular;nucleus;regulation of cell growth;regulation of Rho protein signal transduction;Rho guanyl-nucleotide exchange factor activity;signal       | Entrez Query:Oncogene                       |
| <a href="#">10296</a> | MAEA    | macrophage erythroblast attacher           | NM_001017405,<br>NM_005882 | NP_001017405.1,<br>NP_005873.2 | <a href="#">ENSG00000090316</a> | <a href="#">chr4:1273701 - 1322957</a>      | apoptosis;cell adhesion;integral to plasma membrane;membrane fraction;multicellular organismal development                                                         | Entrez Query:Oncogene                       |
| <a href="#">10342</a> | TFG     | TRK-fused gene                             | NM_006070                  | <a href="#">NP_006061.2</a>    | <a href="#">ENSG00000114354</a> | <a href="#">chr3:101915219 - 101950065</a>  | kappaB kinase/NF-kappaB cascade;protein amino acid phosphorylation;signal transducer activity;transmembrane receptor protein tyrosine kinase                       | Mitelman 2000, Entrez<br>Query:Oncogene,    |
| <a href="#">10399</a> | GNB2L1  | binding protein (G protein), beta          | NM_006098                  | <a href="#">NP_006089.1</a>    |                                 | <a href="#">chr5:180596582 - 180603406</a>  | cell soma;cytoplasm;protein kinase C activation;protein kinase C binding;receptor binding;signal transduction                                                      | TNF_alpha_NF_kB, Entrez<br>Query:Oncogene   |
| <a href="#">10413</a> | YAP1    | Yes-associated protein 1, 65kDa            | NM_006106                  | <a href="#">NP_006097.1</a>    | <a href="#">ENSG00000137693</a> | <a href="#">chr11:101486789 - 101605881</a> | positive regulation of transcription from RNA polymerase II promoter;protein binding;transcription factor complex;transcriptional activator activity               | Suppressor, Entrez<br>Query:Oncogene        |
| <a href="#">10451</a> | VAV3    | vav 3 oncogene                             | NM_001079874,<br>NM_006113 | NP_001073343.1,<br>NP_006104.4 | <a href="#">ENSG00000134215</a> | <a href="#">chr1:107917475 - 108309014</a>  | activity;intracellular;intracellular signaling cascade;metal ion binding;regulation of Rho protein signal transduction;Rho guanyl-nucleotide exchange factor       | EGFR1, Entrez<br>Query:Oncogene             |
| <a href="#">10461</a> | MERTK   | c-mer proto-oncogene tyrosine kinase       | NM_006343                  | <a href="#">NP_006334.2</a>    | <a href="#">ENSG00000153208</a> | <a href="#">chr2:112372783 - 112502912</a>  | signaling;integral to plasma membrane;membrane;nucleotide binding;protein amino acid phosphorylation;receptor activity;response to stimulus;soluble                | Kinase, Entrez<br>Query:Oncogene            |
| <a href="#">10890</a> | RAB10   | RAB10, member RAS oncogene family          | NM_016131                  | <a href="#">NP_057215.2</a>    | <a href="#">ENSG00000084733</a> | <a href="#">chr2:26110981 - 26211394</a>    | Golgi apparatus;GTP binding;membrane;nucleotide binding;protein binding;protein transport;small GTPase mediated signal transduction                                | Entrez Query:Oncogene                       |
| <a href="#">10966</a> | RAB40B  | RAB40B, member RAS oncogene family         | NM_006822                  | <a href="#">NP_006813.1</a>    | <a href="#">ENSG00000141542</a> | <a href="#">chr17:78209027 - 78249761</a>   | GTP binding;membrane;nucleotide binding;protein transport;small GTPase mediated signal transduction                                                                | Entrez Query:Oncogene                       |
| <a href="#">10981</a> | RAB32   | RAB32, member RAS oncogene family          | NM_006834                  | <a href="#">NP_006825.1</a>    | <a href="#">ENSG00000118508</a> | <a href="#">chr6:146906700 - 146917434</a>  | GTP binding;mitochondrion;nucleotide binding;protein transport;small GTPase mediated signal transduction                                                           | Entrez Query:Oncogene                       |
| <a href="#">11020</a> | RABL4   | RAB, member of RAS oncogene family-like 4  | NM_006860                  | <a href="#">NP_006851.1</a>    | <a href="#">ENSG00000100360</a> | <a href="#">chr22:35484300 - 35501697</a>   | GTP binding;intracellular;nucleotide binding;small GTPase mediated signal transduction                                                                             | Entrez Query:Oncogene                       |
| <a href="#">11021</a> | RAB35   | RAB35, member RAS oncogene family          | NM_006861                  | <a href="#">NP_006852.1</a>    | <a href="#">ENSG00000111737</a> | <a href="#">chr12:119018601 - 119019432</a> | pit;cytokinesis;endosome transport;GTP binding;GTPase activity;intercellular bridge;nucleotide binding;phosphatidylinositol-4,5-bisphosphate binding;plasma        | Entrez Query:Oncogene                       |
| <a href="#">11031</a> | RAB31   | RAB31, member RAS oncogene family          | NM_006868                  | <a href="#">NP_006859.2</a>    | <a href="#">ENSG00000168461</a> | <a href="#">chr18:9698402 - 9849322</a>     | GTP binding;GTPase activity;membrane;nucleotide binding;protein transport;small GTPase mediated signal transduction                                                | Entrez Query:Oncogene                       |
| <a href="#">11040</a> | PIM2    | pim-2 oncogene                             | NM_006875                  | <a href="#">NP_006866.2</a>    | <a href="#">ENSG00000102096</a> | <a href="#">chrX:48656351 - 48661055</a>    | meiosis;nucleotide binding;protein amino acid phosphorylation;protein binding;protein serine/threonine kinase activity;transferase activity                        | Protein Kinase, Entrez<br>Query:Oncogene    |
| <a href="#">11116</a> | FGFR1OP | FGFR1 oncogene partner                     | NM_194429,<br>NM_007045    | NP_919410.1,<br>NP_008976.1    | <a href="#">ENSG00000112486</a> | <a href="#">chr6:167332890 - 167373456</a>  | positive regulation of cell proliferation                                                                                                                          | Mitelman 2000, Protein<br>Kinase, Entrez    |
| <a href="#">11158</a> | RABL2B  | RAB, member of RAS oncogene family-like 2B | NM_001003789,<br>NM_007081 | NP_001003789.1,<br>NP_009012.1 | <a href="#">ENSG00000079974</a> | <a href="#">chr22:49554069 - 49567588</a>   | GTP binding;GTPase activity;nucleotide binding;small GTPase mediated signal transduction                                                                           | Entrez Query:Oncogene                       |
| <a href="#">11159</a> | RABL2A  | RAB, member of RAS oncogene family-like 2A | NM_013412                  | <a href="#">NP_038198.1</a>    | <a href="#">ENSG00000144134</a> | <a href="#">chr2:114102653 - 114116176</a>  | GTP binding;GTPase activity;nucleotide binding;small GTPase mediated signal transduction                                                                           | Entrez Query:Oncogene                       |



|                       |          |                                                |                             |                                 |                                 |                                             |                                                                                                                                                                   |                                           |
|-----------------------|----------|------------------------------------------------|-----------------------------|---------------------------------|---------------------------------|---------------------------------------------|-------------------------------------------------------------------------------------------------------------------------------------------------------------------|-------------------------------------------|
| <a href="#">11186</a> | RASSF1   | (RalGDS/AF-6) domain family 1                  | NM_170714                   | <a href="#">NP_733830.1</a>     | <a href="#">ENSG00000068028</a> | <a href="#">chr3:50343015 - 50353240</a>    | binding;intracellular signaling cascade;metal ion binding;microtubule;nucleus;Ras protein signal transduction;zinc ion binding                                    | Tumor Suppressor, Entrez Query:Oncogene   |
| <a href="#">11214</a> | AKAP13   | A kinase (PKA) anchor protein 13               | NM_007200, NM_006738        | NP_009131.2, NP_006729.4        | <a href="#">ENSG00000170776</a> | <a href="#">chr15:83829955 - 84088912</a>   | activity;intracellular;intracellular signaling cascade;membrane;membrane fraction;metal ion binding;nucleus;receptor activity;regulation of Rho protein signal    | Protein Kinase, Entrez Query:Oncogene     |
| <a href="#">11315</a> | PARK7    | (autosomal recessive, early onset) 7           | NM_001123377, NM_007262     | NP_001116849.1, NP_009193.2     | <a href="#">ENSG00000116288</a> | <a href="#">chr1:7945432 - 7967701</a>      | binding;protein folding;Ras protein signal transduction;response to hydrogen peroxide                                                                             | Tumor Suppressor, Entrez Query:Oncogene   |
| <a href="#">22800</a> | RRAS2    | related RAS viral (r-ras) oncogene homolog 2   | NM_012250                   | <a href="#">NP_001096139.1</a>  | <a href="#">ENSG00000133818</a> | <a href="#">chr11:14257458 - 14336992</a>   | activity;intracellular;nucleotide binding;plasma membrane;protein binding;Ras protein signal transduction                                                         | Entrez Query:Oncogene                     |
| <a href="#">22808</a> | MRAS     | muscle RAS oncogene homolog                    | NM_012219                   | <a href="#">NP_036351.3</a>     | <a href="#">ENSG00000158186</a> | <a href="#">chr3:139574415 - 139603801</a>  | binding;GTPase activity;intracellular;multicellular organismal development;muscle development;nucleotide binding;plasma membrane;Ras protein signal transduction  | Entrez Query:Oncogene                     |
| <a href="#">22931</a> | RAB18    | RAB18, member RAS oncogene family              | NM_021252                   | <a href="#">NP_067075.1</a>     | <a href="#">ENSG00000099246</a> | <a href="#">chr10:27833304 - 27866986</a>   | activity;intracellular;membrane;nucleotide binding;protein transport;regulation of transcription, DNA-dependent;small GTPase mediated signal                      | Entrez Query:Oncogene                     |
| <a href="#">22950</a> | SLC4A1AP | (anion exchanger), member 1, adaptor           | NM_018158                   | <a href="#">NP_060628.2</a>     | <a href="#">ENSG00000163798</a> | <a href="#">chr2:27740123 - 27771054</a>    | double-stranded RNA binding;intracellular;nucleus                                                                                                                 | Entrez Query:Oncogene                     |
| <a href="#">22954</a> | TRIM32   | tripartite motif-containing 32                 | NM_012210                   | <a href="#">NP_036342.2</a>     | <a href="#">ENSG00000119401</a> | <a href="#">chr9:118499842 - 118501804</a>  | intracellular;ligase activity;metal ion binding;nucleus;protein binding;transcription coactivator activity;ubiquitin cycle;zinc ion binding                       | Stability, Entrez Query:Oncogene          |
| <a href="#">23011</a> | RAB21    | RAB21, member RAS oncogene family              | NM_014999                   | <a href="#">NP_055814.1</a>     | <a href="#">ENSG00000080371</a> | <a href="#">chr12:70435176 - 70465720</a>   | endosome;GTP binding;nucleotide binding;protein transport;small GTPase mediated signal transduction                                                               | Entrez Query:Oncogene                     |
| <a href="#">23017</a> | FAIM2    | Fas apoptotic inhibitory molecule 2            | NM_012306                   | <a href="#">NP_036438.2</a>     | <a href="#">ENSG00000135472</a> | <a href="#">chr12:48550553 - 48583842</a>   | anti-apoptosis;apoptosis;cellular_component;integral to membrane;membrane;protein binding                                                                         | Entrez Query:Oncogene                     |
| <a href="#">23081</a> | JMJD2C   | jumonji domain containing 2C                   | NM_015061                   | <a href="#">NP_055876.2</a>     | <a href="#">ENSG00000107077</a> | <a href="#">chr9:6782988 - 7164729</a>      | binding;metal ion binding;molecular_function;nucleic acid binding;nucleus;oxidoreductase activity;oxidoreductase activity, acting on single                       | Entrez Query:Oncogene                     |
| <a href="#">23089</a> | PEG10    | paternally expressed 10                        | NM_015068                   | <a href="#">NP_055883.2</a>     | <a href="#">ENSG00000198872</a> | <a href="#">chr7:94130804 - 94132930</a>    | cytoplasm;negative regulation of transforming growth factor beta receptor signaling pathway;nucleic acid binding;protein binding;zinc ion binding                 | Entrez Query:Oncogene                     |
| <a href="#">23373</a> | CRTC1    | transcription coactivator 1                    | NM_001098482, NM_015321     | NP_001091952.1, NP_056136.2     | <a href="#">ENSG00000105662</a> | <a href="#">chr19:18655512 - 18749192</a>   | transcription from RNA polymerase II promoter;protein binding;regulation of transcription, DNA-dependent;transcription                                            | Mitelman 2000, Entrez Query:Oncogene      |
| <a href="#">23585</a> | TMEM50A  | transmembrane protein 50A                      | NM_014313                   | <a href="#">NP_055128.1</a>     | <a href="#">ENSG00000183726</a> | <a href="#">chr1:25539564 - 25559783</a>    | cytoplasm;endoplasmic reticulum;integral to membrane;membrane                                                                                                     | Entrez Query:Oncogene                     |
| <a href="#">23598</a> | PATZ1    | POZ (BTB) and AT hook containing zinc finger 1 | NM_032050, NM_014323,       | NP_114439.1, NP_055138.2,       | <a href="#">ENSG00000100105</a> | <a href="#">chr22:30052876 - 30071588</a>   | transcription, DNA-dependent;transcription;transcriptional repressor activity;zinc ion binding                                                                    | Futreal et al 2004, Mitelman 2000, Entrez |
| <a href="#">23624</a> | CBLC     | ecotropic retroviral transforming sequence c   | NM_012116                   | <a href="#">NP_036248.3</a>     | <a href="#">ENSG00000142273</a> | <a href="#">chr19:49973028 - 49995540</a>   |                                                                                                                                                                   | EGFR1, Entrez Query:Oncogene              |
| <a href="#">23682</a> | RAB38    | RAB38, member RAS oncogene family              | NM_022337                   | <a href="#">NP_071732.1</a>     | <a href="#">ENSG00000123892</a> | <a href="#">chr11:87486803 - 87548200</a>   | cellular_component;GTP binding;GTPase activity;membrane;nucleotide binding;protein transport;small GTPase mediated signal transduction                            | Entrez Query:Oncogene                     |
| <a href="#">23764</a> | MAFF     | musculoaponeurotic fibrosarcoma oncogene       | NM_012323                   | <a href="#">NP_690617.1</a>     | <a href="#">ENSG00000185022</a> | <a href="#">chr22:36939806 - 36940831</a>   | activity;regulation of epidermal cell differentiation;regulation of transcription, DNA-dependent;sequence-specific DNA binding;transcription;transcription factor | Entrez Query:Oncogene                     |
| <a href="#">25837</a> | RAB26    | RAB26, member RAS oncogene family              | NM_014353                   | <a href="#">NP_055168.2</a>     | <a href="#">ENSG00000167964</a> | <a href="#">chr16:2138785 - 2143423</a>     | development;GTP binding;intracellular;intrinsic to plasma membrane;membrane;nucleotide binding;protein transport;regulation of                                    | Entrez Query:Oncogene                     |
| <a href="#">25875</a> | LETMD1   | LETMD1 domain containing 1                     | NM_001024668, NM_015416     | NP_001019839.1, NP_056231.3     | <a href="#">ENSG00000050426</a> | <a href="#">chr12:49728406 - 49739481</a>   |                                                                                                                                                                   | Tumor Suppressor, Entrez Query:Oncogene   |
| <a href="#">26127</a> | FGFR1OP2 | FGFR1 oncogene partner 2                       | NM_015633                   | <a href="#">NP_056448.1</a>     | <a href="#">ENSG00000111790</a> | <a href="#">chr12:26998358 - 27008933</a>   |                                                                                                                                                                   | Entrez Query:Oncogene                     |
| <a href="#">27043</a> | PELP1    | and leucine rich protein 1                     | NM_014389                   | <a href="#">NP_055204.2</a>     |                                 | <a href="#">chr17:4521482 - 4554155</a>     | nucleus;transcription                                                                                                                                             | Entrez Query:Oncogene                     |
| <a href="#">27069</a> | GHITM    | inducible transmembrane protein                | NM_014394                   | <a href="#">NP_055209.2</a>     | <a href="#">ENSG00000165678</a> | <a href="#">chr10:85891236 - 85902084</a>   | biological_process;integral to membrane;membrane;mitochondrion;molecular_function                                                                                 | Entrez Query:Oncogene                     |
| <a href="#">27113</a> | BBC3     | BCL2 binding component 3                       | NM_001127240, NM_001127242, | NP_001120712.1, NP_001120714.1, | <a href="#">ENSG00000105327</a> | <a href="#">chr19:52416898 - 52423528</a>   | apoptosis;caspase activation;induction of apoptosis;mitochondrion;negative regulation of growth;protein binding;release of cytochrome c from mitochondria         | Entrez Query:Oncogene                     |
| <a href="#">27173</a> | SLC39A1  | (zinc transporter), member 1                   | NM_014437                   | <a href="#">NP_055252.2</a>     | <a href="#">ENSG00000143570</a> | <a href="#">chr1:152199197 - 152201815</a>  | activity;endoplasmic reticulum;integral to membrane;ion transport;membrane;membrane fraction;metal ion transport;metal ion transporter                            | Tumor Suppressor, Entrez Query:Oncogene   |
| <a href="#">27250</a> | PDCD4    | (neoplastic transformation inhibitor)          | NM_145341, NM_014456        | NP_663314.1, NP_055271.2        | <a href="#">ENSG00000150593</a> | <a href="#">chr10:112625775 - 112647836</a> | activity;negative regulation of progression through cell cycle;negative regulation of transcription;nucleus;protein binding;RNA binding                           | Tumor Suppressor, Entrez Query:Oncogene   |
| <a href="#">27257</a> | LSM1     | nuclear RNA associated (S. cerevisiae)         | NM_014462                   | <a href="#">NP_055277.1</a>     | <a href="#">ENSG00000175324</a> | <a href="#">chr8:38140344 - 38152995</a>    | mRNA processing;nucleus;protein binding;ribonucleoprotein complex;RNA splicing;RNA splicing factor activity, transesterification mechanism                        | Entrez Query:Oncogene                     |

|                       |         |                                               |                         |                             |                                 |                                             |                                                                                                                                                                             |                                            |
|-----------------------|---------|-----------------------------------------------|-------------------------|-----------------------------|---------------------------------|---------------------------------------------|-----------------------------------------------------------------------------------------------------------------------------------------------------------------------------|--------------------------------------------|
| <a href="#">27314</a> | RAB30   | RAB30, member RAS oncogene family             | NM_014488               | <a href="#">NP_055303.2</a> | <a href="#">ENSG00000137502</a> | <a href="#">chr11:82370854 - 82386006</a>   | Golgi stack;GTP binding;GTPase activity;membrane;nucleotide binding;protein transport;small GTPase mediated signal transduction                                             | Entrez Query:Oncogene                      |
| <a href="#">28951</a> | TRIB2   | tribbles homolog 2 (Drosophila)               | NM_021643               | <a href="#">NP_067675.1</a> | <a href="#">ENSG00000071575</a> | <a href="#">chr2:12775884 - 12798371</a>    | phosphorylation;protein binding;protein kinase activity;protein kinase inhibitor activity;regulation of MAPK activity                                                       | Protein Kinase, Entrez Query:Oncogene      |
| <a href="#">29126</a> | CD274   | CD274 molecule                                | NM_014143               | <a href="#">NP_054862.1</a> | <a href="#">ENSG00000120217</a> | <a href="#">chr9:5446113 - 5457862</a>      | cell proliferation;cell surface receptor linked signal transduction;immune response;integral to membrane;membrane;receptor activity                                         | Entrez Query:Oncogene                      |
| <a href="#">29933</a> | GPR132  | G protein-coupled receptor 132                | NM_013345               | <a href="#">NP_037477.1</a> | <a href="#">ENSG00000183484</a> | <a href="#">chr14:104588375 - 104592802</a> | cycle;integral to membrane;membrane;receptor activity;rhodopsin-like receptor activity;signal transduction                                                                  | Entrez Query:Oncogene                      |
| <a href="#">30011</a> | SH3KBP1 | SH3-domain kinase binding protein 1           | NM_031892, NM_001024666 | NP_114098.1, NP_001019837.1 | <a href="#">ENSG00000147010</a> | <a href="#">chrX:19464455 - 19815349</a>    | apoptosis;cell-cell signaling;endocytosis;kinase activity;membrane;molecular_function;protein binding;synapse;synaptosome                                                   | EGFR1, Kit Receptor, Entrez Query:Oncogene |
| <a href="#">50943</a> | FOXP3   | forkhead box P3                               | NM_014009, NM_001114377 | NP_054728.2, NP_001107849.1 | <a href="#">ENSG00000049768</a> | <a href="#">chrX:48994738 - 49001906</a>    | transcription factor;inhibition of NF-kappaB transcription factor;intracellular;metal ion binding;negative regulation of activated T cell proliferation;negative regulation | Suppressor, Entrez Query:Oncogene          |
| <a href="#">51209</a> | RAB9B   | RAB9B, member RAS oncogene family             | NM_016370               | <a href="#">NP_057454.1</a> | <a href="#">ENSG00000123570</a> | <a href="#">chrX:102966764 - 102967370</a>  | binding;membrane;nucleotide binding;protein transport;small GTPase mediated signal transduction                                                                             | Entrez Query:Oncogene                      |
| <a href="#">51341</a> | ZBTB7A  | zinc finger and BTB domain containing 7A      | NM_015898               | <a href="#">NP_056982.1</a> | <a href="#">ENSG00000178951</a> | <a href="#">chr19:3998749 - 4006230</a>     | binding;intracellular;metal ion binding;negative regulation of transcription, DNA-dependent;nucleus;protein binding;transcription;transcriptional repressor                 | Tumor Suppressor, Entrez Query:Oncogene    |
| <a href="#">51513</a> | ETV7    | ets variant gene 7 (TEL2 oncogene)            | NM_016135               | <a href="#">NP_057219.1</a> | <a href="#">ENSG00000010030</a> | <a href="#">chr6:36442399 - 36463296</a>    | dependent;sequence-specific DNA binding;specific RNA polymerase II transcription factor activity;transcription;transcription factor activity;transcription from RNA         | Entrez Query:Oncogene                      |
| <a href="#">51552</a> | RAB14   | RAB14, member RAS oncogene family             | NM_016322               | <a href="#">NP_057406.2</a> | <a href="#">ENSG00000119396</a> | <a href="#">chr9:122983494 - 122995511</a>  | binding;GTPase activity;intracellular;intracellular transport;late endosome;lysosome;membrane fraction;neurotransmitter secretion;nuclear                                   | Entrez Query:Oncogene                      |
| <a href="#">51560</a> | RAB6B   | RAB6B, member RAS oncogene family             | NM_016577               | <a href="#">NP_057661.3</a> | <a href="#">ENSG00000154917</a> | <a href="#">chr3:135030321 - 135097000</a>  | activity;nucleotide binding;protein transport;retrograde vesicle-mediated transport, Golgi to ER;small GTPase mediated signal transduction                                  | Entrez Query:Oncogene                      |
| <a href="#">51643</a> | TMBIM4  | inhibitor motif containing 4                  | NM_016056               | <a href="#">NP_057140.2</a> | <a href="#">ENSG00000155957</a> | <a href="#">chr12:64818006 - 64849998</a>   | integral to membrane;membrane;protein binding                                                                                                                               | Entrez Query:Oncogene                      |
| <a href="#">51715</a> | RAB23   | RAB23, member RAS oncogene family             | NM_183227               | <a href="#">NP_899050.1</a> | <a href="#">ENSG00000112210</a> | <a href="#">chr6:57163217 - 57183137</a>    | proteolysis;nervous system development;nucleotide binding;protein transport;signal transduction;small GTPase mediated signal transduction;spinal cord                       | Hedgehog, Entrez Query:Oncogene            |
| <a href="#">51762</a> | RAB8B   | RAB8B, member RAS oncogene family             | NM_016530               | <a href="#">NP_057614.1</a> | <a href="#">ENSG00000166128</a> | <a href="#">chr15:61268876 - 61342871</a>   | activity;intracellular;membrane;nucleotide binding;protein transport;regulation of transcription, DNA-dependent;small GTPase mediated signal                                | Entrez Query:Oncogene                      |
| <a href="#">51773</a> | RSF1    | remodeling and spacing factor 1               | NM_016578               | <a href="#">NP_057662.3</a> | <a href="#">ENSG00000048649</a> | <a href="#">chr11:77055609 - 77209408</a>   | regulation of DNA binding;negative regulation of transcription, DNA-dependent;nucleosome assembly;nucleosome spacing;nucleus;positive regulation                            | Entrez Query:Oncogene                      |
| <a href="#">53335</a> | BCL11A  | B-cell CLL/lymphoma 11A (zinc finger protein) | NM_138559, NM_018014    | NP_612569.1, NP_060484.2    | <a href="#">ENSG00000119866</a> | <a href="#">chr2:60541042 - 60633909</a>    | binding;nucleus;regulation of transcription, DNA-dependent;transcription;zinc ion binding                                                                                   | Mitelman 2000, Entrez Query:Oncogene,      |
| <a href="#">53916</a> | RAB4B   | RAB4B, member RAS oncogene family             | NM_016154               | <a href="#">NP_057238.3</a> | <a href="#">ENSG00000167578</a> | <a href="#">chr19:45976120 - 45984708</a>   | GTP binding;GTPase activity;intracellular;membrane;nucleotide binding;protein transport;small GTPase mediated signal transduction;vesicle-mediated transport                | Entrez Query:Oncogene                      |
| <a href="#">53917</a> | RAB24   | RAB24, member RAS oncogene family             | NM_001031677            | <a href="#">NP_570137.2</a> | <a href="#">ENSG00000169236</a> | <a href="#">chr5:176661349 - 176662895</a>  | autophagy;endoplasmic reticulum;GTP binding;membrane;nucleotide binding;protein transport;small GTPase mediated signal transduction                                         | Entrez Query:Oncogene                      |
| <a href="#">54165</a> | DCUN1D1 | neddylaton 1, domain containing 1 (S.         | NM_020640               | <a href="#">NP_065691.2</a> | <a href="#">ENSG00000043093</a> | <a href="#">chr3:184145575 - 184180971</a>  | biological_process;cellular_component;molecular_function                                                                                                                    | Entrez Query:Oncogene                      |
| <a href="#">54206</a> | ERRFI1  | ERBB receptor feedback inhibitor 1            | NM_018948               | <a href="#">NP_061821.1</a> | <a href="#">ENSG00000116285</a> | <a href="#">chr1:7995856 - 7998266</a>      | cytoplasm;protein binding;response to stress;Rho GTPase activator activity                                                                                                  | Tumor Suppressor, Entrez Query:Oncogene    |
| <a href="#">54734</a> | RAB39   | RAB39, member RAS oncogene family             | NM_017516               | <a href="#">NP_059986.1</a> | <a href="#">ENSG00000179331</a> | <a href="#">chr11:107304504 - 107338308</a> | biological_process;cellular_component;GTP binding;membrane;nucleotide binding;protein transport;small GTPase mediated signal transduction                                   | Entrez Query:Oncogene                      |
| <a href="#">54738</a> | FEV     | FEV (ETS oncogene family)                     | NM_017521               | <a href="#">NP_059991.1</a> | <a href="#">ENSG00000163497</a> | <a href="#">chr2:219554632 - 219558041</a>  | binding;transcription corepressor activity;transcription factor activity;transcription from RNA polymerase II promoter                                                      | Mitelman 2000, Entrez Query:Oncogene,      |
| <a href="#">54790</a> | TET2    | KIAA1546                                      | NM_001127208, NM_017628 | NP_001120680.1, NP_060098.3 | <a href="#">ENSG00000168769</a> | <a href="#">chr4:106374548 - 106417125</a>  |                                                                                                                                                                             | Entrez Query:Oncogene                      |
| <a href="#">55038</a> | CDCA4   | cell division cycle associated 4              | NM_145701               | <a href="#">NP_663747.1</a> | <a href="#">ENSG00000170779</a> | <a href="#">chr14:104548585 - 104549311</a> | nucleus                                                                                                                                                                     | Entrez Query:Oncogene                      |
| <a href="#">55165</a> | CEP55   | centrosomal protein 55kDa                     | NM_018131, NM_001127182 | NP_060601.3, NP_001120654.1 | <a href="#">ENSG00000138180</a> | <a href="#">chr10:95249798 - 95277900</a>   | cell cycle;cell division;mitosis                                                                                                                                            | Entrez Query:Oncogene                      |
| <a href="#">55359</a> | STYK1   | serine/threonine/tyrosine kinase 1            | NM_018423               | <a href="#">NP_060893.2</a> | <a href="#">ENSG00000060140</a> | <a href="#">chr12:10664009 - 10678484</a>   | ATP binding;integral to membrane;nucleotide binding;plasma membrane;protein amino acid phosphorylation;protein-tyrosine kinase activity;transferase activity                | Kinase, Entrez Query:Oncogene              |
| <a href="#">55647</a> | RAB20   | RAB20, member RAS oncogene family             | NM_017817               | <a href="#">NP_060287.1</a> | <a href="#">ENSG00000139832</a> | <a href="#">chr13:109974012 - 110011867</a> | GTP binding;nucleotide binding;protein transport;small GTPase mediated signal transduction                                                                                  | Entrez Query:Oncogene                      |



|                       |          |                                                |                      |                             |                                 |                                            |                                                                                                                                                                          |                                               |
|-----------------------|----------|------------------------------------------------|----------------------|-----------------------------|---------------------------------|--------------------------------------------|--------------------------------------------------------------------------------------------------------------------------------------------------------------------------|-----------------------------------------------|
| <a href="#">56832</a> | IFNK     | interferon, kappa                              | NM_020124            | <a href="#">NP_064509.2</a> | <a href="#">ENSG00000147896</a> | <a href="#">chr9:27514334 - 27514958</a>   | region;extracellular space;interferon-alpha/beta receptor binding;natural killer cell activation;negative regulation of cell proliferation;positive regulation of innate | Entrez Query:Oncogene                         |
| <a href="#">56899</a> | ANKS1B   | sterile alpha motif domain containing 1B       | NM_152788, NM_020140 | NP_690001.3, NP_064525.1    | <a href="#">ENSG00000185046</a> | <a href="#">chr12:97653468 - 98902146</a>  |                                                                                                                                                                          | Entrez Query:Oncogene                         |
| <a href="#">56946</a> | C11orf30 | chromosome 11 open reading frame 30            | NM_020193            | <a href="#">NP_064578.2</a> | <a href="#">ENSG00000158636</a> | <a href="#">chr11:75835630 - 75938838</a>  | chromatin modification;DNA repair;nucleus;regulation of transcription, DNA-dependent;transcription                                                                       | Stability, Entrez Query:Oncogene              |
| <a href="#">57016</a> | AKR1B10  | family 1, member B10 (aldose reductase)        | NM_020299            | <a href="#">NP_064695.3</a> | <a href="#">ENSG00000198074</a> | <a href="#">chr7:133863203 - 133876381</a> | activity;cellular_component;digestion;oxidoreductase activity;steroid metabolic process                                                                                  | Suppressor, Entrez Query:Oncogene             |
| <a href="#">57111</a> | RAB25    | RAB25, member RAS oncogene family              | NM_020387            | <a href="#">NP_065120.2</a> | <a href="#">ENSG00000132698</a> | <a href="#">chr1:154297815 - 154306702</a> | GTP binding;membrane;nucleotide binding;protein binding;protein transport;small GTPase mediated signal transduction                                                      | Entrez Query:Oncogene                         |
| <a href="#">57118</a> | CAMK1D   | dependent protein kinase ID                    | NM_153498, NM_020397 | NP_705718.1, NP_065130.1    | <a href="#">ENSG00000183049</a> | <a href="#">chr10:12431823 - 12910892</a>  | complex;calmodulin binding;nucleotide binding;nucleus;protein amino acid phosphorylation;protein serine/threonine kinase activity;transferase activity                   | Protein Kinase, Entrez Query:Oncogene         |
| <a href="#">57120</a> | GOPC     | coiled-coil motif containing                   |                      |                             | <a href="#">ENSG00000047932</a> | <a href="#">chr6:null</a>                  | binding;cytoplasm;cytoplasmic sequestering of CFTR protein;ER to Golgi vesicle-mediated transport;Golgi apparatus;Golgi to plasma membrane                               | Mitelman 2000, Entrez Query:Oncogene          |
| <a href="#">57403</a> | RAB22A   | RAB22A, member RAS oncogene family             | NM_020673            | <a href="#">NP_065724.1</a> | <a href="#">ENSG00000124209</a> | <a href="#">chr20:56318438 - 56368165</a>  | binding;GTPase activity;nucleotide binding;plasma membrane;protein binding;protein transport;small GTPase mediated signal transduction                                   | Entrez Query:Oncogene                         |
| <a href="#">57799</a> | RAB40C   | RAB40C, member RAS oncogene family             | NM_021168            | <a href="#">NP_066991.2</a> | <a href="#">ENSG00000197562</a> | <a href="#">chr16:580292 - 617623</a>      | GTP binding;membrane;nucleotide binding;protein transport;small GTPase mediated signal transduction                                                                      | Entrez Query:Oncogene                         |
| <a href="#">57826</a> | RAP2C    | RAP2C, member of RAS oncogene family           | NM_021183            | <a href="#">NP_067006.3</a> | <a href="#">ENSG00000123728</a> | <a href="#">chrX:131175876 - 131178977</a> | GTP binding;intracellular;membrane;nucleotide binding;small GTPase mediated signal transduction                                                                          | Entrez Query:Oncogene                         |
| <a href="#">60385</a> | TSKS     | -                                              | NM_021733            | <a href="#">NP_068379.1</a> | <a href="#">ENSG00000126467</a> | <a href="#">chr19:54934844 - 54958316</a>  | protein binding                                                                                                                                                          | Entrez Query:Oncogene                         |
| <a href="#">60468</a> | BACH2    | 1, basic leucine zipper transcription factor 2 | NM_021813            | <a href="#">NP_068585.1</a> | <a href="#">ENSG00000112182</a> | <a href="#">chr6:90698847 - 90775284</a>   | DNA-dependent;sequence-specific DNA binding;transcription;transcription factor activity                                                                                  | Entrez Query:Oncogene                         |
| <a href="#">63967</a> | CLSPN    | claspin homolog (Xenopus laevis)               | NM_022111            | <a href="#">NP_071394.2</a> | <a href="#">ENSG00000092853</a> | <a href="#">chr1:35974683 - 36008058</a>   | biological_process;cell cycle;cellular_component;chromosome;DNA binding;DNA repair;nucleus;protein binding                                                               | Suppressor, Entrez Query:Oncogene             |
| <a href="#">64083</a> | GOLPH3   | golgi phosphoprotein 3 (coat-protein)          | NM_022130            | <a href="#">NP_071413.1</a> | <a href="#">ENSG00000113384</a> | <a href="#">chr5:32162074 - 32209897</a>   | Golgi apparatus;membrane                                                                                                                                                 | Entrez Query:Oncogene                         |
| <a href="#">64114</a> | TMBIM1   | inhibitor motif containing 1                   | NM_022152            | <a href="#">NP_071435.2</a> | <a href="#">ENSG00000135926</a> | <a href="#">chr2:218848441 - 218855108</a> | integral to membrane;membrane                                                                                                                                            | Entrez Query:Oncogene                         |
| <a href="#">64284</a> | RAB17    | RAB17, member RAS oncogene family              | NM_022449            | <a href="#">NP_071894.1</a> | <a href="#">ENSG00000124839</a> | <a href="#">chr2:238148400 - 238159536</a> | GTP binding;intracellular;membrane;nucleotide binding;protein binding;protein transport;small GTPase mediated signal transduction                                        | Entrez Query:Oncogene                         |
| <a href="#">64792</a> | RABL5    | RAB, member RAS oncogene family-like 5         | NM_022777            | <a href="#">NP_073614.1</a> | <a href="#">ENSG00000128581</a> | <a href="#">chr7:100745134 - 100751710</a> | GTP binding;nucleotide binding                                                                                                                                           | Entrez Query:Oncogene                         |
| <a href="#">64927</a> | TTC23    | tetratricopeptide repeat domain 23             | NM_022905            | <a href="#">NP_075056.3</a> | <a href="#">ENSG00000103852</a> | <a href="#">chr15:97495737 - 97586440</a>  | binding                                                                                                                                                                  | Entrez Query:Oncogene                         |
| <a href="#">64963</a> | MRPS11   | mitochondrial ribosomal protein S11            | NM_176805, NM_022839 | NP_789775.1, NP_073750.2    | <a href="#">ENSG00000181991</a> | <a href="#">chr15:86811952 - 86822214</a>  | ribosomal subunit;mitochondrion;peptide biosynthetic process;ribosome;structural constituent of ribosome;translation                                                     | Entrez Query:Oncogene                         |
| <a href="#">65991</a> | FUNDC2   | FUN14 domain containing 2                      | NM_023934            | <a href="#">NP_076423.2</a> | <a href="#">ENSG00000165775</a> | <a href="#">chrX:153908407 - 153936141</a> |                                                                                                                                                                          | Entrez Query:Oncogene                         |
| <a href="#">79577</a> | CDC73    | Paf1/RNA polymerase II complex component,      | NM_024529            | <a href="#">NP_078805.3</a> | <a href="#">ENSG00000134371</a> | <a href="#">chr1:191357953 - 191486465</a> | cell cycle;negative regulation of progression through cell cycle;nucleus;protein binding;transcription                                                                   | 2004, Tumor Suppressor, Entrez Query:Oncogene |
| <a href="#">80312</a> | TET1     | CXXC finger 6                                  | NM_030625            | <a href="#">NP_085128.2</a> | <a href="#">ENSG00000138336</a> | <a href="#">chr10:70002101 - 70121577</a>  | DNA binding;metal ion binding;nucleus;zinc ion binding                                                                                                                   | Mitelman 2000, Entrez Query:Oncogene,         |
| <a href="#">81876</a> | RAB1B    | RAB1B, member RAS oncogene family              | NM_030981            | <a href="#">NP_112243.1</a> | <a href="#">ENSG00000174903</a> | <a href="#">chr11:65792726 - 65800285</a>  | binding;protein binding;protein transport;regulation of transcription, DNA-dependent;small GTPase mediated signal transduction;transcription factor binding              | Entrez Query:Oncogene                         |
| <a href="#">83452</a> | RAB33B   | RAB33B, member RAS oncogene family             | NM_031296            | <a href="#">NP_112586.1</a> | <a href="#">ENSG00000172007</a> | <a href="#">chr4:140594799 - 140613730</a> | Golgi apparatus;GTP binding;nucleotide binding;protein transport;small GTPase mediated signal transduction                                                               | Entrez Query:Oncogene                         |
| <a href="#">83871</a> | RAB34    | RAB34, member RAS oncogene family              | NM_031934            | <a href="#">NP_114140.4</a> | <a href="#">ENSG00000109113</a> | <a href="#">chr17:24065787 - 24068411</a>  | GTP binding;membrane;nucleotide binding;protein transport;small GTPase mediated signal transduction                                                                      | Entrez Query:Oncogene                         |
| <a href="#">84084</a> | RAB6C    | RAB6C, member RAS oncogene family              | NM_032144            | <a href="#">NP_115520.2</a> | <a href="#">ENSG00000185023</a> | <a href="#">chr2:130454158 - 130454923</a> | GTP binding;GTPase activity;intracellular;nucleotide binding;protein transport;response to drug;small GTPase mediated signal transduction                                | Entrez Query:Oncogene                         |
| <a href="#">84433</a> | CARD11   | domain family, member 11                       | NM_032415            | <a href="#">NP_115791.3</a> | <a href="#">ENSG00000198286</a> | <a href="#">chr7:2912797 - 2964666</a>     |                                                                                                                                                                          | Entrez Query:Oncogene                         |

|                        |           |                                           |                            |                                |                                 |                                             |                                                                                                                                                           |                                         |
|------------------------|-----------|-------------------------------------------|----------------------------|--------------------------------|---------------------------------|---------------------------------------------|-----------------------------------------------------------------------------------------------------------------------------------------------------------|-----------------------------------------|
| <a href="#">84441</a>  | MAML2     | mastermind-like 2 (Drosophila)            | NM_032427                  | <a href="#">NP_115803.1</a>    |                                 | <a href="#">chr11:95351759 - 95714707</a>   | polymerase II promoter;regulation of transcription, DNA-dependent;transcription;transcription coactivator activity                                        | Mitelman 2000, Entrez Query:Oncogene,   |
| <a href="#">84932</a>  | RAB2B     | RAB2B, member RAS oncogene family         | NM_032846                  | <a href="#">NP_116235.2</a>    | <a href="#">ENSG00000129472</a> | <a href="#">chr14:20999194 - 21014871</a>   | binding;membrane;nucleotide binding;protein transport;small GTPase mediated signal transduction                                                           | Entrez Query:Oncogene                   |
| <a href="#">92140</a>  | MTDH      | metadherin                                | NM_178812                  | <a href="#">NP_848927.2</a>    | <a href="#">ENSG00000147649</a> | <a href="#">chr8:98725910 - 98806074</a>    | endoplasmic reticulum;integral to membrane;membrane;nucleus                                                                                               | Entrez Query:Oncogene                   |
| <a href="#">113201</a> | CASC4     | cancer susceptibility candidate 4         | NM_177974, NM_138423       | NP_816929.1, NP_612432.2       | <a href="#">ENSG00000166734</a> | <a href="#">chr15:42368519 - 42492896</a>   |                                                                                                                                                           | Entrez Query:Oncogene                   |
| <a href="#">114614</a> | NR_001458 | -                                         |                            |                                |                                 | <a href="#">chr21:null</a>                  |                                                                                                                                                           | Entrez Query:Oncogene                   |
| <a href="#">115273</a> | RAB42     | RAB42, member RAS oncogene family         | NM_152304                  | <a href="#">NP_689517.1</a>    | <a href="#">ENSG00000188060</a> | <a href="#">chr1:28792898 - 28793216</a>    | GTP binding;membrane;nucleotide binding;small GTPase mediated signal transduction                                                                         | Entrez Query:Oncogene                   |
| <a href="#">115827</a> | RAB3C     | RAB3C, member RAS oncogene family         | NM_138453                  | <a href="#">NP_612462.1</a>    | <a href="#">ENSG00000152932</a> | <a href="#">chr5:57914792 - 58182935</a>    | transport;regulation of exocytosis;small GTPase mediated signal transduction;synaptic vesicle                                                             | Entrez Query:Oncogene                   |
| <a href="#">116442</a> | RAB39B    | RAB39B, member RAS oncogene family        | NM_171998                  | <a href="#">NP_741995.1</a>    | <a href="#">ENSG00000155961</a> | <a href="#">chrX:154143281 - 154146767</a>  | GTP binding;intracellular;membrane;nucleotide binding;protein transport;small GTPase mediated signal transduction                                         | Entrez Query:Oncogene                   |
| <a href="#">116511</a> | MAS1L     | MAS1 oncogene-like                        | NM_052967                  | <a href="#">NP_443199.1</a>    | <a href="#">ENSG00000168771</a> | <a href="#">chr6:29562521 - 29563658</a>    | membrane;membrane;receptor activity;rhodopsin-like receptor activity;signal transduction                                                                  | Entrez Query:Oncogene                   |
| <a href="#">116986</a> | CENTG1    | centaurin, gamma 1                        | NM_001122772, NM_014770    | NP_001116244.1, NP_055585.1    | <a href="#">ENSG00000135439</a> | <a href="#">chr12:56406601 - 56418296</a>   | binding;nucleotide binding;nucleus;protein transport;regulation of GTPase activity;signal transduction;small GTPase mediated signal transduction;zinc ion | Protein Kinase, Entrez Query:Oncogene   |
| <a href="#">117159</a> | DCD       | dermcidin                                 | NM_053283                  | <a href="#">NP_444513.1</a>    | <a href="#">ENSG00000161634</a> | <a href="#">chr12:53324763 - 53328354</a>   | defense response to bacterium;defense response to fungus;extracellular region;manganese ion binding;protein binding;xenobiotic metabolic process          | Entrez Query:Oncogene                   |
| <a href="#">128869</a> | PIGU      | glycan anchor biosynthesis, class U       | NM_080476                  | <a href="#">NP_536724.1</a>    | <a href="#">ENSG00000101464</a> | <a href="#">chr20:32612330 - 32728550</a>   | membrane;GPI anchor binding;GPI-anchor transamidase activity;GPI-anchor transamidase complex;integral to membrane;membrane                                | Entrez Query:Oncogene                   |
| <a href="#">132851</a> | SPATA4    | spermatogenesis associated 4              | NM_144644                  | <a href="#">NP_653245.2</a>    | <a href="#">ENSG00000150628</a> | <a href="#">chr4:177342924 - 177353707</a>  | apoptosis;cellular_component;molecular_function;spermatogenesis                                                                                           | Entrez Query:Oncogene                   |
| <a href="#">140707</a> | BRI3BP    | BRI3 binding protein                      | NM_080626                  | <a href="#">NP_542193.3</a>    | <a href="#">ENSG00000184992</a> | <a href="#">chr12:124044289 - 124075929</a> | integral to membrane;membrane                                                                                                                             | Entrez Query:Oncogene                   |
| <a href="#">142684</a> | RAB40A    | RAB40A, member RAS oncogene family        | NM_080879                  | <a href="#">NP_543155.2</a>    | <a href="#">ENSG00000172476</a> | <a href="#">chrX:102641506 - 102642340</a>  | GTP binding;membrane;nucleotide binding;protein transport;small GTPase mediated signal transduction                                                       | Entrez Query:Oncogene                   |
| <a href="#">146691</a> | TOM1L2    | target of myb1-like 2 (chicken)           | NM_001082968, NM_001033551 | NP_001076437.1, NP_001028723.1 | <a href="#">ENSG00000175662</a> | <a href="#">chr17:17691673 - 17816352</a>   | intracellular;intracellular protein transport;membrane                                                                                                    | Entrez Query:Oncogene                   |
| <a href="#">158158</a> | RASEF     | RAS and EF-hand domain containing         | NM_152573                  | <a href="#">NP_689786.2</a>    | <a href="#">ENSG00000165105</a> | <a href="#">chr9:84787411 - 84867602</a>    | calcium ion binding;GTP binding;protein transport;small GTPase mediated signal transduction                                                               | Entrez Query:Oncogene                   |
| <a href="#">200424</a> | TET3      | -                                         | NM_144993                  | <a href="#">NP_659430.1</a>    | <a href="#">ENSG00000187605</a> | <a href="#">chr2:74126957 - 74182811</a>    |                                                                                                                                                           | Entrez Query:Oncogene                   |
| <a href="#">200958</a> | MUC20     | mucin 20, cell surface associated         | NM_152673, NM_001098516    | NP_689886.2, NP_001091986.1    |                                 | <a href="#">chr3:196933549 - 196945760</a>  | basal plasma membrane;glucan 1,4-alpha-glucosidase activity;protein homooligomerization                                                                   | Entrez Query:Oncogene                   |
| <a href="#">201475</a> | RAB12     | RAB12, member RAS oncogene family         | NM_001025300               | <a href="#">NP_001020471.2</a> |                                 | <a href="#">chr18:8599725 - 8628260</a>     | GTP binding;nucleotide binding;protein transport;small GTPase mediated signal transduction                                                                | Entrez Query:Oncogene                   |
| <a href="#">266747</a> | RGL4      | -                                         | NM_153615                  | <a href="#">NP_705843.1</a>    | <a href="#">ENSG00000159496</a> | <a href="#">chr22:22364217 - 22371070</a>   | guanyl-nucleotide exchange factor activity;intracellular;small GTPase mediated signal transduction                                                        | Entrez Query:Oncogene                   |
| <a href="#">282808</a> | RAB40AL   | -                                         | NM_001031834               | <a href="#">NP_001027004.1</a> |                                 | <a href="#">chrX:102078902 - 102079739</a>  |                                                                                                                                                           | Entrez Query:Oncogene                   |
| <a href="#">282991</a> | BLOC1S2   | related organelles complex-1, subunit 2   | NM_173809                  | <a href="#">NP_001001342.1</a> | <a href="#">ENSG00000196072</a> | <a href="#">chr10:102025208 - 102036406</a> | identical protein binding                                                                                                                                 | Entrez Query:Oncogene                   |
| <a href="#">283120</a> | H19       | maternally expressed untranslated mRNA    |                            |                                |                                 | <a href="#">chr11:null</a>                  |                                                                                                                                                           | Tumor Suppressor, Entrez Query:Oncogene |
| <a href="#">283349</a> | RASSF3    | (RalGDS/AF-6) domain family 3             | NM_178169                  | <a href="#">NP_835463.1</a>    | <a href="#">ENSG00000153179</a> | <a href="#">chr12:63290679 - 63374959</a>   | microtubule;protein binding;signal transduction                                                                                                           | Entrez Query:Oncogene                   |
| <a href="#">284459</a> | HKR1      | GLI-Kruppel family member HKR1            | NM_181786                  | <a href="#">NP_861451.1</a>    | <a href="#">ENSG00000181666</a> | <a href="#">chr19:42527426 - 42546517</a>   | development;nucleic acid binding;nucleus;regulation of transcription, DNA-dependent;transcription;zinc ion binding                                        | Entrez Query:Oncogene                   |
| <a href="#">285282</a> | RABL3     | RAB, member of RAS oncogene family-like 3 | NM_173825                  | <a href="#">NP_776186.2</a>    | <a href="#">ENSG00000144840</a> | <a href="#">chr3:121891359 - 121944044</a>  | ATP binding;GTP binding;intracellular;regulation of transcription, DNA-dependent;small GTPase mediated signal transduction;transcription factor binding   | Entrez Query:Oncogene                   |



|                        |           |                                          |                            |                                   |                                 |                                            |                                                                                                                                                                         |                                       |
|------------------------|-----------|------------------------------------------|----------------------------|-----------------------------------|---------------------------------|--------------------------------------------|-------------------------------------------------------------------------------------------------------------------------------------------------------------------------|---------------------------------------|
| <a href="#">326624</a> | RAB37     | RAB37, member RAS oncogene family        | NM_001006638,<br>NM_175738 | NP_001006639.1,<br>NP_783865.1    | <a href="#">ENSG00000172794</a> | <a href="#">chr17:70245006 - 70253145</a>  | binding;protein binding;protein transport;secretory granule;small GTPase mediated signal transduction                                                                   | Entrez Query:Oncogene                 |
| <a href="#">339122</a> | RAB43     | RAB43, member RAS oncogene family        | NM_020701,<br>NM_198490    | NP_065752.1,<br>NP_940892.1       | <a href="#">ENSG00000172780</a> | <a href="#">chr3:130292628 - 130323022</a> | transport;membrane;nucleocytoplasmic transport;nucleotide binding;protein binding;signal transduction;small GTPase mediated signal transduction                         | Entrez Query:Oncogene                 |
| <a href="#">345930</a> | C6orf91   | -                                        | NM_001077706               | <a href="#">NP_001071174.1</a>    |                                 | <a href="#">chr6:139176104 - 139265457</a> | chitin binding;chitin metabolic process;extracellular region;intracellular;regulation of Rho protein signal transduction;Rho guanyl-nucleotide exchange factor activity | Entrez Query:Oncogene                 |
| <a href="#">347517</a> | RAB41     | RAB41, member RAS oncogene family        | NM_001032726               | <a href="#">NP_001027898.1</a>    | <a href="#">ENSG00000147127</a> | <a href="#">chrX:69418792 - 69421218</a>   | GTP binding;nucleotide binding;protein transport;small GTPase mediated signal transduction                                                                              | Entrez Query:Oncogene                 |
| <a href="#">376267</a> | RAB15     | RAB15, member RAS onocogene family       | NM_198686                  | <a href="#">NP_941959.1</a>       | <a href="#">ENSG00000139998</a> | <a href="#">chr14:64484967 - 64508547</a>  | GTP binding;membrane;nucleotide binding;protein transport;small GTPase mediated signal transduction                                                                     | Entrez Query:Oncogene                 |
| <a href="#">389692</a> | MAFA      | musculoaponeurotic fibrosarcoma oncogene | NM_201589                  | <a href="#">NP_963883.2</a>       | <a href="#">ENSG00000182759</a> | <a href="#">chr8:144582657 - 144583719</a> | activity;regulation of transcription, DNA-dependent;response to glucose stimulus;sequence-specific DNA binding;transcription factor activity                            | Stability, Entrez Query:Oncogene      |
| <a href="#">401409</a> | RAB19     | -                                        | NM_001008749               | <a href="#">NP_001008749.1</a>    | <a href="#">ENSG00000146955</a> | <a href="#">chr7:139753915 - 139772419</a> | GTP binding;nucleotide binding;small GTPase mediated signal transduction                                                                                                | Entrez Query:Oncogene                 |
| <a href="#">414060</a> | TBC1D3C   | TBC1 domain family, member 3C            | NM_001001418               | NP_001001418.2,<br>NP_001035372.2 | <a href="#">ENSG00000188849</a> | <a href="#">chr17:31605512 - 31614567</a>  |                                                                                                                                                                         | Entrez Query:Oncogene                 |
| <a href="#">415116</a> | PIM3      | pim-3 oncogene                           | NM_001001852               | <a href="#">NP_001001852.2</a>    | <a href="#">ENSG00000198355</a> | <a href="#">chr22:48740599 - 48742779</a>  | ATP binding;nucleotide binding;protein amino acid phosphorylation;protein kinase activity;protein serine/threonine kinase activity;transferase activity                 | Protein Kinase, Entrez Query:Oncogene |
| <a href="#">646996</a> | NR_003543 | -                                        |                            |                                   |                                 | <a href="#">chr14:null</a>                 | GTP binding;protein transport;small GTPase mediated signal transduction                                                                                                 | Entrez Query:Oncogene                 |
