# Supplementary material
Source: PubMed Central journal article supplement (PMC3470785)
Supplement: NIHMS377161-supplement-7.pdf [file NIHMS377161-supplement-7.pdf]

| Symbol   | Name                                                                  | GeneID | Chr | Chr Band         |
|----------|-----------------------------------------------------------------------|--------|-----|------------------|
| ABL1     | v-abl Abelson murine leukemia viral oncogene homolog 1                | 25     |     | 9 9q34.1         |
| ABL2     | v-abl Abelson murine leukemia viral oncogene homolog 2                | 27     |     | 1 1q24-q25       |
| ACSL3    | acyl-CoA synthetase long-chain family member 3                        | 2181   |     | 2 2q36           |
| AF15Q14  | AF15q14 protein                                                       | 57082  |     | 15 15q14         |
| AF1Q     | ALL1-fused gene from chromosome 1q                                    | 10962  |     | 1 1q21           |
| AF3p21   | SH3 protein interacting with Nck, 90 kDa (ALL1 fused gene from 3p21)  | 51517  |     | 3 3p21           |
| AF5q31   | ALL1 fused gene from 5q31                                             | 27125  |     | 5 5q31           |
| AKAP9    | A kinase (PRKA) anchor protein (yotiao) 9                             | 10142  |     | 7 7q21-q22       |
| AKT1     | v-akt murine thymoma viral oncogene homolog 1                         | 207    |     | 14 14q32.32      |
| AKT2     | v-akt murine thymoma viral oncogene homolog 2                         | 208    |     | 19 19q13.1-q13.2 |
| ALDH2    | aldehyde dehydrogenase 2 family (mitochondrial)                       | 217    |     | 12 12q24.2       |
| ALK      | anaplastic lymphoma kinase (Ki-1)                                     | 238    |     | 2 2p23           |
| ALO17    | KIAA1618 protein                                                      | 57714  |     | 17 17q25.3       |
| APC      | adenomatous polyposis of the colon gene                               | 324    |     | 5 5q21           |
| ARHGEF12 | RHO guanine nucleotide exchange factor (GEF) 12 (LARG)                | 23365  |     | 11 11q23.3       |
| ARHH     | RAS homolog gene family, member H (TTF)                               | 399    |     | 4 4p13           |
| ARID1A   | AT rich interactive domain 1A (SWI-like)                              | 8289   |     | 1 1p35.3         |
| ARNT     | aryl hydrocarbon receptor nuclear translocator                        | 405    |     | 1 1q21           |
| ASPCR1   | alveolar soft part sarcoma chromosome region, candidate 1             | 79058  |     | 17 17q25         |
| ASXL1    | additional sex combs like 1                                           | 171023 |     | 20 20q11.1       |
| ATF1     | activating transcription factor 1                                     | 466    |     | 12 12q13         |
| ATIC     | 5-aminoimidazole-4-carboxamide ribonucleotide formyltransferase/IMP c | 471    |     | 2 2q35           |
| ATM      | ataxia telangiectasia mutated                                         | 472    |     | 11 11q22.3       |
| ATRX     | alpha thalassemia/mental retardation syndrome X-linked                | 546    | X   | Xq21.1           |
| BAP1     | BRCA1 associated protein-1 (ubiquitin carboxy-terminal hydrolase)     | 8314   |     | 3 3p21.31-p21.2  |
| BCL10    | B-cell CLL/lymphoma 10                                                | 8915   |     | 1 1p22           |
| BCL11A   | B-cell CLL/lymphoma 11A                                               | 53335  |     | 2 2p13           |
| BCL11B   | B-cell CLL/lymphoma 11B (CTIP2)                                       | 64919  |     | 14 14q32.1       |
| BCL2     | B-cell CLL/lymphoma 2                                                 | 596    |     | 18 18q21.3       |
| BCL3     | B-cell CLL/lymphoma 3                                                 | 602    |     | 19 19q13         |
| BCL5     | B-cell CLL/lymphoma 5                                                 | 603    |     | 17 17q22         |
| BCL6     | B-cell CLL/lymphoma 6                                                 | 604    |     | 3 3q27           |
| BCL7A    | B-cell CLL/lymphoma 7A                                                | 605    |     | 12 12q24.1       |
| BCL9     | B-cell CLL/lymphoma 9                                                 | 607    |     | 1 1q21           |
| BCR      | breakpoint cluster region                                             | 613    |     | 22 22q11.21      |
| BHD      | folliculin, Birt-Hogg-Dube syndrome                                   | 201163 |     | 17 17p11.2       |
| BIRC3    | baculoviral IAP repeat-containing 3                                   | 330    |     | 11 11q22-q23     |
| BLM      | Bloom Syndrome                                                        | 641    |     | 15 15q26.1       |
| BMPR1A   | bone morphogenetic protein receptor, type IA                          | 657    |     | 10 10q22.3       |
| BRAF     | v-raf murine sarcoma viral oncogene homolog B1                        | 673    |     | 7 7q34           |
| BRCA1    | familial breast/ovarian cancer gene 1                                 | 672    |     | 17 17q21         |
| BRCA2    | familial breast/ovarian cancer gene 2                                 | 675    |     | 13 13q12         |

|                    |                                                                            |        |              |
|--------------------|----------------------------------------------------------------------------|--------|--------------|
| BRD3               | bromodomain containing 3                                                   | 8019   | 9 9q34       |
| BRD4               | bromodomain containing 4                                                   | 23476  | 19 19p13.1   |
| BRIP1              | BRCA1 interacting protein C-terminal helicase 1                            | 83990  | 17 17q22     |
| BTG1               | B-cell translocation gene 1, anti-proliferative                            | 694    | 12 12q22     |
| BUB1B              | BUB1 budding uninhibited by benzimidazoles 1 homolog beta (yeast)          | 701    | 15 15q15     |
| C12orf9            | chromosome 12 open reading frame 9                                         | 93669  | 12 12q14.3   |
| C15orf21           | chromosome 15 open reading frame 21                                        | 283651 | 15 15q21.1   |
| C15orf55           | chromosome 15 open reading frame 55                                        | 256646 | 15 15q14     |
| C16orf75           | chromosome 16 open reading frame 75                                        | 116028 | 16 16p13.13  |
| CANT1              | calcium activated nucleotidase 1                                           | 124583 | 17 17q25     |
| CARD11             | caspase recruitment domain family, member 11                               | 84433  | 7 7p22       |
| CARS               | cysteinyl-tRNA synthetase                                                  | 833    | 11 11p15.5   |
| CBFA2T1            | core-binding factor, runt domain, alpha subunit 2;translocated to, 1 (ETC) | 862    | 8 8q22       |
| CBFA2T3            | core-binding factor, runt domain, alpha subunit 2; translocated to, 3 (MT) | 863    | 16 16q24     |
| CBFB               | core-binding factor, beta subunit                                          | 865    | 16 16q22     |
| CBL                | Cas-Br-M (murine) ecotropic retroviral transforming                        | 867    | 11 11q23.3   |
| CBLB               | Cas-Br-M (murine) ecotropic retroviral transforming sequence b             | 868    | 3 3q13.11    |
| CBLC               | Cas-Br-M (murine) ecotropic retroviral transforming sequence c             | 23624  | 19 19q13.2   |
| CCNB1IP1           | cyclin B1 interacting protein 1, E3 ubiquitin protein ligase               | 57820  | 14 14q11.2   |
| CCND1              | cyclin D1                                                                  | 595    | 11 11q13     |
| CCND2              | cyclin D2                                                                  | 894    | 12 12p13     |
| CCND3              | cyclin D3                                                                  | 896    | 6 6p21       |
| CD273              | programmed cell death 1 ligand 2                                           | 80380  | 9 9p24.2     |
| CD274              | CD274 molecule                                                             | 29126  | 9 9p24       |
| CD74               | CD74 molecule, major histocompatibility complex, class II invariant chain  | 972    | 5 5q32       |
| CD79A              | CD79a molecule, immunoglobulin-associated alpha                            | 973    | 19 19q13.2   |
| CD79B              | CD79b molecule, immunoglobulin-associated beta                             | 974    | 17 17q23     |
| CDH1               | cadherin 1, type 1, E-cadherin (epithelial) (ECAD)                         | 999    | 16 16q22.1   |
| CDH11              | cadherin 11, type 2, OB-cadherin (osteoblast)                              | 1009   | 16 16q22.1   |
| CDK4               | cyclin-dependent kinase 4                                                  | 1019   | 12 12q14     |
| CDK6               | cyclin-dependent kinase 6                                                  | 1021   | 7 7q21-q22   |
| CDKN2A -p16(INK4a) | cyclin-dependent kinase inhibitor 2A (p16(INK4a)) gene                     | 1029   | 9 9p21       |
| CDKN2A- p14ARF     | cyclin-dependent kinase inhibitor 2A-- p14ARF protein                      | 1029   | 9 9p21       |
| CDKN2C             | cyclin-dependent kinase inhibitor 2C (p18, inhibits CDK4)                  | 1031   | 1 1p32       |
| CDX2               | caudal type homeo box transcription factor 2                               | 1045   | 13 13q12.3   |
| CEBPA              | CCAAT/enhancer binding protein (C/EBP), alpha                              | 1050   | 19 19q13.1   |
| CEP1               | centrosomal protein 1                                                      | 11064  | 9 9q33       |
| CHCHD7             | coiled-coil-helix-coiled-coil-helix domain containing 7                    | 79145  | 8 8q11.2     |
| CHEK2              | CHK2 checkpoint homolog (S. pombe)                                         | 11200  | 22 22q12.1   |
| CHIC2              | cysteine-rich hydrophobic domain 2                                         | 26511  | 4 4q11-q12   |
| CHN1               | chimerin (chimaerin) 1                                                     | 1123   | 2 2q31-q32.1 |
| CIC                | capicua homolog (Drosophila)                                               | 23152  | 19 19q13.2   |
| CIITA              | class II, major histocompatibility complex, transactivator                 | 4261   | 16 16p13     |

|         |                                                                             |       |     |                   |
|---------|-----------------------------------------------------------------------------|-------|-----|-------------------|
| CLTC    | clathrin, heavy polypeptide (Hc)                                            | 1213  |     | 17 17q11-qter     |
| CLTCL1  | clathrin, heavy polypeptide-like 1                                          | 8218  |     | 22 22q11.21       |
| CMKOR1  | chemokine orphan receptor 1                                                 | 57007 |     | 2 2q37.3          |
| COL1A1  | collagen, type I, alpha 1                                                   | 1277  |     | 17 17q21.31-q22   |
| COPEB   | core promoter element binding protein (KLF6)                                | 1316  |     | 10 10p15          |
| COX6C   | cytochrome c oxidase subunit VIc                                            | 1345  |     | 8 8q22-q23        |
| CREB1   | cAMP responsive element binding protein 1                                   | 1385  |     | 2 2q34            |
| CREB3L1 | cAMP responsive element binding protein 3-like 1                            | 90993 |     | 11 11p11.2        |
| CREB3L2 | cAMP responsive element binding protein 3-like 2                            | 64764 |     | 7 7q34            |
| CREBBP  | CREB binding protein (CBP)                                                  | 1387  |     | 16 16p13.3        |
| CRLF2   | cytokine receptor-like factor 2                                             | 64109 | X,Y | Xp22.3; Yp11.3    |
| CRTC3   | CREB regulated transcription coactivator 3                                  | 64784 |     | 15 15q26.1        |
| CTNNB1  | catenin (cadherin-associated protein), beta 1                               | 1499  |     | 3 3p22-p21.3      |
| CYLD    | familial cylindromatosis gene                                               | 1540  |     | 16 16q12-q13      |
| D10S170 | DNA segment on chromosome 10 (unique) 170, H4 gene (PTC1)                   | 8030  |     | 10 10q21          |
| DAXX    | death-domain associated protein                                             | 1616  |     | 6 6p21.3          |
| DDB2    | damage-specific DNA binding protein 2                                       | 1643  |     | 11 11p12          |
| DDIT3   | DNA-damage-inducible transcript 3                                           | 1649  |     | 12 12q13.1-q13.2  |
| DDX10   | DEAD (Asp-Glu-Ala-Asp) box polypeptide 10                                   | 1662  |     | 11 11q22-q23      |
| DDX5    | DEAD (Asp-Glu-Ala-Asp) box polypeptide 5                                    | 1655  |     | 17 17q21          |
| DDX6    | DEAD (Asp-Glu-Ala-Asp) box polypeptide 6                                    | 1656  |     | 11 11q23.3        |
| DEK     | DEK oncogene (DNA binding)                                                  | 7913  |     | 6 6p23            |
| DICER1  | dicer 1, ribonuclease type III                                              | 23405 |     | 14 14q32.13       |
| DNMT3A  | DNA (cytosine-5-)-methyltransferase 3 alpha                                 | 1788  |     | 2 2p23            |
| DUX4    | double homeobox, 4                                                          | 22947 |     | 4 4q35            |
| EBF1    | early B-cell factor 1                                                       | 1879  |     | 5 5q34            |
| EGFR    | epidermal growth factor receptor (erythroblastic leukemia viral (v-erb-b) ) | 1956  |     | 7 7p12.3-p12.1    |
| EIF4A2  | eukaryotic translation initiation factor 4A, isoform 2                      | 1974  |     | 3 3q27.3          |
| ELF4    | E74-like factor 4 (ets domain transcription factor)                         | 2000  | X   | Xq26              |
| ELK4    | ELK4, ETS-domain protein (SRF accessory protein 1)                          | 2005  |     | 1 1q32            |
| ELKS    | ELKS protein                                                                | 23085 |     | 12 12p13.3        |
| ELL     | ELL gene (11-19 lysine-rich leukemia gene)                                  | 8178  |     | 19 19p13.1        |
| ELN     | elastin                                                                     | 2006  |     | 7 7q11.23         |
| EML4    | echinoderm microtubule associated protein like 4                            | 27436 |     | 2 2p21            |
| EP300   | 300 kd E1A-Binding protein gene                                             | 2033  |     | 22 22q13          |
| EPS15   | epidermal growth factor receptor pathway substrate 15 (AF1p)                | 2060  |     | 1 1p32            |
| ERBB2   | v-erb-b2 erythroblastic leukemia viral oncogene homolog 2, neuro/gliobl     | 2064  |     | 17 17q21.1        |
| ERCC2   | excision repair cross-complementing rodent repair deficiency, compleme      | 2068  |     | 19 19q13.2-q13.3  |
| ERCC3   | excision repair cross-complementing rodent repair deficiency, compleme      | 2071  |     | 2 2q21            |
| ERCC4   | excision repair cross-complementing rodent repair deficiency, compleme      | 2072  |     | 16 16p13.3-p13.13 |
| ERCC5   | excision repair cross-complementing rodent repair deficiency, compleme      | 2073  |     | 13 13q33          |
| ERG     | v-ets erythroblastosis virus E26 oncogene like (avian)                      | 2078  |     | 21 21q22.3        |
| ETV1    | ets variant gene 1                                                          | 2115  |     | 7 7p22            |

|          |                                                                     |        |                  |
|----------|---------------------------------------------------------------------|--------|------------------|
| ETV4     | ets variant gene 4 (E1A enhancer binding protein, E1AF)             | 2118   | 17 17q21         |
| ETV5     | ets variant gene 5                                                  | 2119   | 3 3q28           |
| ETV6     | ets variant gene 6 (TEL oncogene)                                   | 2120   | 12 12p13         |
| EVI1     | ecotropic viral integration site 1                                  | 2122   | 3 3q26           |
| EWSR1    | Ewing sarcoma breakpoint region 1 (EWS)                             | 2130   | 22 22q12         |
| EXT1     | multiple exostoses type 1 gene                                      | 2131   | 8 8q24.11-q24.13 |
| EXT2     | multiple exostoses type 2 gene                                      | 2132   | 11 11p12-p11     |
| EZH2     | enhancer of zeste homolog 2                                         | 2146   | 7 7q35-q36       |
| FACL6    | fatty-acid-coenzyme A ligase, long-chain 6                          | 23305  | 5 5q31           |
| FANCA    | Fanconi anemia, complementation group A                             | 2175   | 16 16q24.3       |
| FANCC    | Fanconi anemia, complementation group C                             | 2176   | 9 9q22.3         |
| FANCD2   | Fanconi anemia, complementation group D2                            | 2177   | 3 3p26           |
| FANCE    | Fanconi anemia, complementation group E                             | 2178   | 6 6p21-p22       |
| FANCF    | Fanconi anemia, complementation group F                             | 2188   | 11 11p15         |
| FANCG    | Fanconi anemia, complementation group G                             | 2189   | 9 9p13           |
| FBXW7    | F-box and WD-40 domain protein 7 (archipelago homolog, Drosophila)  | 55294  | 4 4q31.3         |
| FCGR2B   | Fc fragment of IgG, low affinity IIb, receptor for (CD32)           | 2213   | 1 1q23           |
| FEV      | FEV protein - (HSRNAFEV)                                            | 54738  | 2 2q36           |
| FGFR1    | fibroblast growth factor receptor 1                                 | 2260   | 8 8p11.2-p11.1   |
| FGFR10P  | FGFR1 oncogene partner (FOP)                                        | 11116  | 6 6q27           |
| FGFR2    | fibroblast growth factor receptor 2                                 | 2263   | 10 10q26         |
| FGFR3    | fibroblast growth factor receptor 3                                 | 2261   | 4 4p16.3         |
| FH       | fumarate hydratase                                                  | 2271   | 1 1q42.1         |
| FHIT     | fragile histidine triad gene                                        | 2272   | 3 3p14.2         |
| FIP1L1   | FIP1 like 1 ( <i>S. cerevisiae</i> )                                | 81608  | 4 4q12           |
| FLI1     | Friend leukemia virus integration 1                                 | 2313   | 11 11q24         |
| FLJ27352 | BX648577, FLJ27352 hypothetical LOC145788                           | 145788 | 15 15q21.3       |
| FLT3     | fms-related tyrosine kinase 3                                       | 2322   | 13 13q12         |
| FNBP1    | formin binding protein 1 (FBP17)                                    | 23048  | 9 9q23           |
| FOXL2    | forkhead box L2                                                     | 668    | 3 3q23           |
| FOXO1A   | forkhead box O1A (FKHR)                                             | 2308   | 13 13q14.1       |
| FOXO3A   | forkhead box O3A                                                    | 2309   | 6 6q21           |
| FOXP1    | forkhead box P1                                                     | 27086  | 3 3p14.1         |
| FSTL3    | follistatin-like 3 (secreted glycoprotein)                          | 10272  | 19 19p13         |
| FUS      | fusion, derived from t(12;16) malignant liposarcoma                 | 2521   | 16 16p11.2       |
| FVT1     | follicular lymphoma variant translocation 1                         | 2531   | 18 18q21.3       |
| GAS7     | growth arrest-specific 7                                            | 8522   | 17 17p           |
| GATA1    | GATA binding protein 1 (globin transcription factor 1)              | 2623   | X Xp11.23        |
| GATA2    | GATA binding protein 2                                              | 2624   | 3 3q21.3         |
| GATA3    | GATA binding protein 3                                              | 2625   | 10 10p15         |
| GMPS     | guanine monphosphate synthetase                                     | 8833   | 3 3q24           |
| GNA11    | guanine nucleotide binding protein (G protein), alpha 11 (Gq class) | 2767   | 19 19p13.3       |
| GNAQ     | guanine nucleotide binding protein (G protein), q polypeptide       | 2776   | 9 9q21           |

|           |                                                                            |       |                  |
|-----------|----------------------------------------------------------------------------|-------|------------------|
| GNAS      | guanine nucleotide binding protein (G protein), alpha stimulating activity | 2778  | 20 20q13.2       |
| GOLGA5    | golgi autoantigen, golgin subfamily a, 5 (PTC5)                            | 9950  | 14 14q           |
| GOPC      | golgi associated PDZ and coiled-coil motif containing                      | 57120 | 6 6q21           |
| GPC3      | glypican 3                                                                 | 2719  | X Xq26.1         |
| GPHN      | gephyrin (GPH)                                                             | 10243 | 14 14q24         |
| GRAF      | GTPase regulator associated with focal adhesion kinase pp125(FAK)          | 23092 | 5 5q31           |
| HCMOGT-1  | sperm antigen HCMOGT-1                                                     | 92521 | 17 17p11.2       |
| HEAB      | ATP_GTP binding protein                                                    | 10978 | 11 11q12         |
| HEI10     | enhancer of invasion 10 - fused to HMGA2                                   | 57820 | 14 14q11.1       |
| HERPUD1   | homocysteine-inducible, endoplasmic reticulum stress-inducible, ubiquiti   | 9709  | 16 16q12.2-q13   |
| HIP1      | huntingtin interacting protein 1                                           | 3092  | 7 7q11.23        |
| HIST1H4I  | histone 1, H4i (H4FM)                                                      | 8294  | 6 6p21.3         |
| HLF       | hepatic leukemia factor                                                    | 3131  | 17 17q22         |
| HLXB9     | homeo box HB9                                                              | 3110  | 7 7q36           |
| HMGA1     | high mobility group AT-hook 1                                              | 3159  | 6 6p21           |
| HMGA2     | high mobility group AT-hook 2 (HMGIC)                                      | 8091  | 12 12q15         |
| HNRNPA2B1 | heterogeneous nuclear ribonucleoprotein A2/B1                              | 3181  | 7 7p15           |
| HOOK3     | hook homolog 3                                                             | 84376 | 8 8p11.21        |
| HOXA11    | homeo box A11                                                              | 3207  | 7 7p15-p14.2     |
| HOXA13    | homeo box A13                                                              | 3209  | 7 7p15-p14.2     |
| HOXA9     | homeo box A9                                                               | 3205  | 7 7p15-p14.2     |
| HOXC11    | homeo box C11                                                              | 3227  | 12 12q13.3       |
| HOXC13    | homeo box C13                                                              | 3229  | 12 12q13.3       |
| HOXD11    | homeo box D11                                                              | 3237  | 2 2q31-q32       |
| HOXD13    | homeo box D13                                                              | 3239  | 2 2q31-q32       |
| HRAS      | v-Ha-ras Harvey rat sarcoma viral oncogene homolog                         | 3265  | 11 11p15.5       |
| HRPT2     | hyperparathyroidism 2                                                      | 3279  | 1 1q21-q31       |
| HSPCA     | heat shock 90kDa protein 1, alpha                                          | 3320  | 14 14q32.31      |
| HSPCB     | heat shock 90kDa protein 1, beta                                           | 3326  | 6 6p12           |
| IDH1      | isocitrate dehydrogenase 1 (NADP+), soluble                                | 3417  | 2 2q33.3         |
| IDH2      | socitrate dehydrogenase 2 (NADP+), mitochondrial                           | 3418  | 15 15q26.1       |
| IGH@      | immunoglobulin heavy locus                                                 | 3492  | 14 14q32.33      |
| IGK@      | immunoglobulin kappa locus                                                 | 50802 | 2 2p12           |
| IGL@      | immunoglobulin lambda locus                                                | 3535  | 22 22q11.1-q11.2 |
| IKZF1     | IKAROS family zinc finger 1                                                | 10320 | 7 7p12.2         |
| IL2       | interleukin 2                                                              | 3558  | 4 4q26-q27       |
| IL21R     | interleukin 21 receptor                                                    | 50615 | 16 16p11         |
| IL6ST     | interleukin 6 signal transducer (gp130, oncostatin M receptor)             | 3572  | 5 5q11           |
| IRF4      | interferon regulatory factor 4                                             | 3662  | 6 6p25-p23       |
| IRTA1     | immunoglobulin superfamily receptor translocation associated 1             | 83417 | 1 1q21           |
| ITK       | IL2-inducible T-cell kinase                                                | 3702  | 5 5q31-q32       |
| JAK1      | Janus kinase 1                                                             | 3716  | 1 1p32.3-p31.3   |
| JAK2      | Janus kinase 2                                                             | 3717  | 9 9p24           |

|          |                                                                       |        |   |                  |
|----------|-----------------------------------------------------------------------|--------|---|------------------|
| JAK3     | Janus kinase 3                                                        | 3718   |   | 19 19p13.1       |
| JAZF1    | juxtaposed with another zinc finger gene 1                            | 221895 |   | 7 7p15.2-p15.1   |
| JUN      | jun oncogene                                                          | 3725   |   | 1 1p32-p31       |
| KDM5A    | lysine (K)-specific demethylase 5A, JARID1A                           | 5927   |   | 12 12p11         |
| KDM5C    | lysine (K)-specific demethylase 5C ( <b>JARID1C</b> )                 | 8242   | X | Xp11.22-p11.21   |
| KDM6A    | lysine (K)-specific demethylase 6A, <b>UTX</b>                        | 7403   | X | Xp11.2           |
| KDR      | vascular endothelial growth factor receptor 2                         | 3791   |   | 4 4q11-q12       |
| KIAA1549 | KIAA1549                                                              | 57670  |   | 7 7q34           |
| KIT      | v-kit Hardy-Zuckerman 4 feline sarcoma viral oncogene homolog         | 3815   |   | 4 4q12           |
| KLK2     | kallikrein-related peptidase 2                                        | 3817   |   | 19 19q13.41      |
| KRAS     | v-Ki-ras2 Kirsten rat sarcoma 2 viral oncogene homolog                | 3845   |   | 12 12p12.1       |
| KTN1     | kinectin 1 (kinesin receptor)                                         | 3895   |   | 14 14q22.1       |
| LAF4     | lymphoid nuclear protein related to AF4                               | 3899   |   | 2 2q11.2-q12     |
| LASP1    | LIM and SH3 protein 1                                                 | 3927   |   | 17 17q11-q21.3   |
| LCK      | lymphocyte-specific protein tyrosine kinase                           | 3932   |   | 1 1p35-p34.3     |
| LCP1     | lymphocyte cytosolic protein 1 (L-plastin)                            | 3936   |   | 13 13q14.1-q14.3 |
| LCX      | leukemia-associated protein with a CXXC domain                        | 80312  |   | 10 10q21         |
| LHFP     | lipoma HMGIC fusion partner                                           | 10186  |   | 13 13q12         |
| LIFR     | leukemia inhibitory factor receptor                                   | 3977   |   | 5 5p13-p12       |
| LMO1     | LIM domain only 1 (rhombotin 1) (RBTN1)                               | 4004   |   | 11 11p15         |
| LMO2     | LIM domain only 2 (rhombotin-like 1) (RBTN2)                          | 4005   |   | 11 11p13         |
| LPP      | LIM domain containing preferred translocation partner in lipoma       | 4026   |   | 3 3q28           |
| LYL1     | lymphoblastic leukemia derived sequence 1                             | 4066   |   | 19 19p13.2-p13.1 |
| MADH4    | Homolog of Drosophila Mothers Against Decapentaplegic 4 gene          | 4089   |   | 18 18q21.1       |
| MAF      | v-maf musculoaponeurotic fibrosarcoma oncogene homolog                | 4094   |   | 16 16q22-q23     |
| MAFB     | v-maf musculoaponeurotic fibrosarcoma oncogene homolog B (avian)      | 9935   |   | 20 20q11.2-q13.1 |
| MALT1    | mucosa associated lymphoid tissue lymphoma translocation gene 1       | 10892  |   | 18 18q21         |
| MAML2    | mastermind-like 2 (Drosophila)                                        | 84441  |   | 11 11q22-q23     |
| MAP2K4   | mitogen-activated protein kinase kinase 4                             | 6416   |   | 17 17p11.2       |
| MDM2     | Mdm2 p53 binding protein homolog                                      | 4193   |   | 12 12q15         |
| MDM4     | Mdm4 p53 binding protein homolog                                      | 4194   |   | 1 1q32           |
| MDS1     | myelodysplasia syndrome 1                                             | 4197   |   | 3 3q26           |
| MDS2     | myelodysplastic syndrome 2                                            | 259283 |   | 1 1p36           |
| MECT1    | mucoepidermoid translocated 1                                         | 94159  |   | 19 19p13         |
| MEN1     | multiple endocrine neoplasia type 1 gene                              | 4221   |   | 11 11q13         |
| MET      | met proto-oncogene (hepatocyte growth factor receptor)                | 4233   |   | 7 7q31           |
| MHC2TA   | MHC class II transactivator                                           | 4261   |   | 16 16p13         |
| MITF     | microphthalmia-associated transcription factor                        | 4286   |   | 3 3p14.1         |
| MKL1     | megakaryoblastic leukemia (translocation) 1                           | 57591  |   | 22 22q13         |
| MLF1     | myeloid leukemia factor 1                                             | 4291   |   | 3 3q25.1         |
| MLH1     | E.coli MutL homolog gene                                              | 4292   |   | 3 3p21.3         |
| MLL      | myeloid/lymphoid or mixed-lineage leukemia (trithorax homolog, Drosop | 4297   |   | 11 11q23         |
| MLL2     | myeloid/lymphoid or mixed-lineage leukemia 2                          | 8085   |   | 12 12q12-q14     |

|        |                                                                          |        |   |                    |
|--------|--------------------------------------------------------------------------|--------|---|--------------------|
| MLL3   | myeloid/lymphoid or mixed-lineage leukemia 3                             | 58508  |   | 7 7q36.1           |
| MLLT1  | myeloid/lymphoid or mixed-lineage leukemia (trithorax homolog, Drosop    | 4298   |   | 19 19p13.3         |
| MLLT10 | myeloid/lymphoid or mixed-lineage leukemia (trithorax homolog, Drosop    | 8028   |   | 10 10p12           |
| MLLT2  | myeloid/lymphoid or mixed-lineage leukemia (trithorax homolog, Drosop    | 4299   |   | 4 4q21             |
| MLLT3  | myeloid/lymphoid or mixed-lineage leukemia (trithorax homolog, Drosop    | 4300   |   | 9 9p22             |
| MLLT4  | myeloid/lymphoid or mixed-lineage leukemia (trithorax homolog, Drosop    | 4301   |   | 6 6q27             |
| MLLT6  | myeloid/lymphoid or mixed-lineage leukemia (trithorax homolog, Drosop    | 4302   |   | 17 17q21           |
| MLLT7  | myeloid/lymphoid or mixed-lineage leukemia (trithorax homolog, Drosop    | 4303   | X | Xq13.1             |
| MN1    | meningioma (disrupted in balanced translocation) 1                       | 4330   |   | 22 22q13           |
| MPL    | myeloproliferative leukemia virus oncogene, thrombopoietin receptor      | 4352   |   | 1 p34              |
| MSF    | MLL septin-like fusion                                                   | 10801  |   | 17 17q25           |
| MSH2   | mutS homolog 2 (E. coli)                                                 | 4436   |   | 2 2p22-p21         |
| MSH6   | mutS homolog 6 (E. coli)                                                 | 2956   |   | 2 2p16             |
| MSI2   | musashi homolog 2 (Drosophila)                                           | 124540 |   | 17 17q23.2         |
| MSN    | moesin                                                                   | 4478   | X | Xq11.2-q12         |
| MTCP1  | mature T-cell proliferation 1                                            | 4515   | X | Xq28               |
| MUC1   | mucin 1, transmembrane                                                   | 4582   |   | 1 1q21             |
| MUTYH  | mutY homolog (E. coli)                                                   | 4595   |   | 1 1p34.3-1p32.1    |
| MYB    | v-myb myeloblastosis viral oncogene homolog                              | 4602   |   | 6 6q22-23          |
| MYC    | v-myc myelocytomatosis viral oncogene homolog (avian)                    | 4609   |   | 8 8q24.12-q24.13   |
| MYCL1  | v-myc myelocytomatosis viral oncogene homolog 1, lung carcinoma deri     | 4610   |   | 1 1p34.3           |
| MYCN   | v-myc myelocytomatosis viral related oncogene, neuroblastoma derived     | 4613   |   | 2 2p24.1           |
| MYD88  | myeloid differentiation primary response gene (88)                       | 4615   |   | 3 3p22             |
| MYH11  | myosin, heavy polypeptide 11, smooth muscle                              | 4629   |   | 16 16p13.13-p13.12 |
| MYH9   | myosin, heavy polypeptide 9, non-muscle                                  | 4627   |   | 22 22q13.1         |
| MYST4  | MYST histone acetyltransferase (monocytic leukemia) 4 (MORF)             | 23522  |   | 10 10q22           |
| NACA   | nascent-polypeptide-associated complex alpha polypeptide                 | 4666   |   | 12 12q23-q24.1     |
| NBS1   | Nijmegen breakage syndrome 1 (nibrin)                                    | 4683   |   | 8 8q21             |
| NCOA1  | nuclear receptor coactivator 1                                           | 8648   |   | 2 2p23             |
| NCOA2  | nuclear receptor coactivator 2 (TIF2)                                    | 10499  |   | 8 8q13.1           |
| NCOA4  | nuclear receptor coactivator 4 - PTC3 (ELE1)                             | 8031   |   | 10 10q11.2         |
| NF1    | neurofibromatosis type 1 gene                                            | 4763   |   | 17 17q12           |
| NF2    | neurofibromatosis type 2 gene                                            | 4771   |   | 22 22q12.2         |
| NFE2L2 | nuclear factor (erythroid-derived 2)-like 2 (NRF2)                       | 4780   |   | 2 2q31             |
| NFIB   | nuclear factor I/B                                                       | 4781   |   | 9 9p24.1           |
| NFKB2  | nuclear factor of kappa light polypeptide gene enhancer in B-cells 2 (p4 | 4791   |   | 10 10q24           |
| NIN    | ninein (GSK3B interacting protein)                                       | 51199  |   | 14 14q24           |
| NKX2-1 | NK2 homeobox 1                                                           | 7080   |   | 14 14q13           |
| NONO   | non-POU domain containing, octamer-binding                               | 4841   | X | Xq13.1             |
| NOTCH1 | Notch homolog 1, translocation-associated (Drosophila) (TAN1)            | 4851   |   | 9 9q34.3           |
| NOTCH2 | Notch homolog 2                                                          | 4853   |   | 1 1p13-p11         |
| NPM1   | nucleophosmin (nucleolar phosphoprotein B23, numatrin)                   | 4869   |   | 5 5q35             |
| NR4A3  | nuclear receptor subfamily 4, group A, member 3 (NOR1)                   | 8013   |   | 9 9q22             |

|          |                                                                            |        |     |                  |
|----------|----------------------------------------------------------------------------|--------|-----|------------------|
| NRAS     | neuroblastoma RAS viral (v-ras) oncogene homolog                           | 4893   |     | 1 1p13.2         |
| NSD1     | nuclear receptor binding SET domain protein 1                              | 64324  |     | 5 5q35           |
| NTRK1    | neurotrophic tyrosine kinase, receptor, type 1                             | 4914   |     | 1 1q21-q22       |
| NTRK3    | neurotrophic tyrosine kinase, receptor, type 3                             | 4916   |     | 15 15q25         |
| NUMA1    | nuclear mitotic apparatus protein 1                                        | 4926   |     | 11 11q13         |
| NUP214   | nucleoporin 214kDa (CAN)                                                   | 8021   |     | 9 9q34.1         |
| NUP98    | nucleoporin 98kDa                                                          | 4928   |     | 11 11p15         |
| NUT      | nuclear protien in testis                                                  | 256646 |     | 15 q13           |
| OLIG2    | oligodendrocyte lineage transcription factor 2 (BHLHB1)                    | 10215  |     | 21 21q22.11      |
| OMD      | osteomodulin                                                               | 4958   |     | 9 9q22.31        |
| P2RY8    | purinergic receptor P2Y, G-protein coupled, 8                              | 286530 | X,Y | Xp22.3; Yp11.3   |
| PAFAH1B2 | platelet-activating factor acetylhydrolase, isoform Ib, beta subunit 30kDa | 5049   |     | 11 11q23         |
| PALB2    | partner and localizer of BRCA2                                             | 79728  |     | 16 16p12.1       |
| PAX3     | paired box gene 3                                                          | 5077   |     | 2 2q35           |
| PAX5     | paired box gene 5 (B-cell lineage specific activator protein)              | 5079   |     | 9 9p13           |
| PAX7     | paired box gene 7                                                          | 5081   |     | 1 1p36.2-p36.12  |
| PAX8     | paired box gene 8                                                          | 7849   |     | 2 2q12-q14       |
| PBRM1    | polybromo 1                                                                | 55193  |     | 3 3p21           |
| PBX1     | pre-B-cell leukemia transcription factor 1                                 | 5087   |     | 1 1q23           |
| PCM1     | pericentriolar material 1 (PTC4)                                           | 5108   |     | 8 8p22-p21.3     |
| PCSK7    | proprotein convertase subtilisin/kexin type 7                              | 9159   |     | 11 11q23.3       |
| PDE4DIP  | phosphodiesterase 4D interacting protein (myomegalin)                      | 9659   |     | 1 1q12           |
| PDGFB    | platelet-derived growth factor beta polypeptide (simian sarcoma viral (v-  | 5155   |     | 22 22q12.3-q13.1 |
| PDGFRA   | platelet-derived growth factor, alpha-receptor                             | 5156   |     | 4 4q11-q13       |
| PDGFRB   | platelet-derived growth factor receptor, beta polypeptide                  | 5159   |     | 5 5q31-q32       |
| PER1     | period homolog 1 (Drosophila)                                              | 5187   |     | 17 17p13.1-17p12 |
| PHOX2B   | paired-like homeobox 2b                                                    | 8929   |     | 4 4p12           |
| PICALM   | phosphatidylinositol binding clathrin assembly protein (CALM)              | 8301   |     | 11 11q14         |
| PIK3CA   | phosphoinositide-3-kinase, catalytic, alpha polypeptide                    | 5290   |     | 3 3q26.3         |
| PIK3R1   | phosphoinositide-3-kinase, regulatory subunit 1 (alpha)                    | 5295   |     | 5 5q13.1         |
| PIM1     | pim-1 oncogene                                                             | 5292   |     | 6 6p21.2         |
| PLAG1    | pleiomorphic adenoma gene 1                                                | 5324   |     | 8 8q12           |
| PML      | promyelocytic leukemia                                                     | 5371   |     | 15 15q22         |
| PMS1     | PMS1 postmeiotic segregation increased 1 (S. cerevisiae)                   | 5378   |     | 2 2q31-q33       |
| PMS2     | PMS2 postmeiotic segregation increased 2 (S. cerevisiae)                   | 5395   |     | 7 7p22           |
| PMX1     | paired mesoderm homeo box 1                                                | 5396   |     | 1 1q24           |
| PNUTL1   | peanut-like 1 (Drosophila)                                                 | 5413   |     | 22 22q11.2       |
| POU2AF1  | POU domain, class 2, associating factor 1 (OBF1)                           | 5450   |     | 11 11q23.1       |
| POU5F1   | POU domain, class 5, transcription factor 1                                | 5460   |     | 6 6p21.31        |
| PPARG    | peroxisome proliferative activated receptor, gamma                         | 5468   |     | 3 3p25           |
| PPP2R1A  | protein phosphatase 2, regulatory subunit A, alpha                         | 5518   |     | 19 19q13.41      |
| PRCC     | papillary renal cell carcinoma (translocation-associated)                  | 5546   |     | 1 1q21.1         |
| PRDM1    | PR domain containing 1, with ZNF domain                                    | 639    |     | 6 6q21           |



|          |                                                                             |       |    |              |
|----------|-----------------------------------------------------------------------------|-------|----|--------------|
| PRDM16   | PR domain containing 16                                                     | 63976 | 1  | 1p36.23-p33  |
| PRF1     | perforin 1 (pore forming protein)                                           | 5551  | 10 | 10q22        |
| PRKAR1A  | protein kinase, cAMP-dependent, regulatory, type I, alpha (tissue specific) | 5573  | 17 | 17q23-q24    |
| PRO1073  | PRO1073 protein (ALPHA)                                                     | 29005 | 11 | 11q31.1      |
| PSIP2    | PC4 and SFRS1 interacting protein 2 (LEDGF)                                 | 11168 | 9  | 9p22.2       |
| PTCH     | Homolog of Drosophila Patched gene                                          | 5727  | 9  | 9q22.3       |
| PTEN     | phosphatase and tensin homolog gene                                         | 5728  | 10 | 10q23.3      |
| PTPN11   | protein tyrosine phosphatase, non-receptor type 11                          | 5781  | 12 | 12q24.1      |
| RAB5EP   | rabaptin, RAB GTPase binding effector protein 1 (RABPT5)                    | 9135  | 17 | 17p13        |
| RAD51L1  | RAD51-like 1 ( <i>S. cerevisiae</i> ) (RAD51B)                              | 5890  | 14 | 14q23-q24.2  |
| RAF1     | v-raf-1 murine leukemia viral oncogene homolog 1                            | 5894  | 3  | 3p25         |
| RALGDS   | ral guanine nucleotide dissociation stimulator                              | 5900  | 9  | 9q34.3       |
| RANBP17  | RAN binding protein 17                                                      | 64901 | 5  | 5q34         |
| RAP1GDS1 | RAP1, GTP-GDP dissociation stimulator 1                                     | 5910  | 4  | 4q21-q25     |
| RARA     | retinoic acid receptor, alpha                                               | 5914  | 17 | 17q12        |
| RB1      | retinoblastoma gene                                                         | 5925  | 13 | 13q14        |
| RBM15    | RNA binding motif protein 15                                                | 64783 | 1  | 1p13         |
| RECQL4   | RecQ protein-like 4                                                         | 9401  | 8  | 8q24.3       |
| REL      | v-rel reticuloendotheliosis viral oncogene homolog (avian)                  | 5966  | 2  | 2p13-p12     |
| RET      | ret proto-oncogene                                                          | 5979  | 10 | 10q11.2      |
| ROS1     | v-ros UR2 sarcoma virus oncogene homolog 1 (avian)                          | 6098  | 6  | 6q22         |
| RPL22    | ribosomal protein L22 (EAP)                                                 | 6146  | 1  | 1p36.31      |
| RPN1     | ribophorin I                                                                | 6184  | 3  | 3q21.3-q25.2 |
| RUNDC2A  | RUN domain containing 2A                                                    | 84127 | 16 | 16p13.13     |
| RUNX1    | runt-related transcription factor 1 (AML1)                                  | 861   | 21 | 21q22.3      |
| RUNXBP2  | runt-related transcription factor binding protein 2 (MOZ/ZNF220)            | 7994  | 8  | 8p11         |
| SBDS     | Shwachman-Bodian-Diamond syndrome protein                                   | 51119 | 7  | 7q11         |
| SDH5     | chromosome 11 open reading frame 79                                         | 54949 | 11 | 11q12.2      |
| SDHB     | succinate dehydrogenase complex, subunit B, iron sulfur (lp)                | 6390  | 1  | 1p36.1-p35   |
| SDHC     | succinate dehydrogenase complex, subunit C, integral membrane protei        | 6391  | 1  | 1q21         |
| SDHD     | succinate dehydrogenase complex, subunit D, integral membrane protei        | 6392  | 11 | 11q23        |
| SEPT6    | septin 6                                                                    | 23157 | X  | Xq24         |
| SET      | SET translocation                                                           | 6418  | 9  | 9q34         |
| SETD2    | SET domain containing 2                                                     | 29072 | 3  | 3p21.31      |
| SFPQ     | splicing factor proline/glutamine rich(polypyrimidine tract binding protein | 6421  | 1  | 1p34.3       |
| SFRS3    | splicing factor, arginine/serine-rich 3                                     | 6428  | 6  | 6p21         |
| SH3GL1   | SH3-domain GRB2-like 1 (EEN)                                                | 6455  | 19 | 19p13.3      |
| SIL      | TAL1 (SCL) interrupting locus                                               | 6491  | 1  | 1p32         |
| SLC45A3  | solute carrier family 45, member 3                                          | 85414 | 1  | 1q32         |
| SMARCA4  | SWI/SNF related, matrix associated, actin dependent regulator of chrom      | 6597  | 19 | 19p13.2      |
| SMARCB1  | SWI/SNF related, matrix associated, actin dependent regulator of chrom      | 6598  | 22 | 22q11        |
| SMO      | smoothened homolog ( <i>Drosophila</i> )                                    | 6608  | 7  | 7q31-q32     |
| SOCS1    | suppressor of cytokine signaling 1                                          | 8651  | 16 | 16p13.13     |

|          |                                                                          |       |   |                  |
|----------|--------------------------------------------------------------------------|-------|---|------------------|
| SOX2     | SRY (sex determining region Y)-box 2                                     | 6657  |   | 3 3q26.3-q27     |
| SRGAP3   | SLIT-ROBO Rho GTPase activating protein 3                                | 9901  |   | 3 3p25.3         |
| SS18     | synovial sarcoma translocation, chromosome 18                            | 6760  |   | 18 18q11.2       |
| SS18L1   | synovial sarcoma translocation gene on chromosome 18-like 1              | 26039 |   | 20 20q13.3       |
| SSH3BP1  | spectrin SH3 domain binding protein 1                                    | 10006 |   | 10 10p11.2       |
| SSX1     | synovial sarcoma, X breakpoint 1                                         | 6756  | X | Xp11.23-p11.22   |
| SSX2     | synovial sarcoma, X breakpoint 2                                         | 6757  | X | Xp11.23-p11.22   |
| SSX4     | synovial sarcoma, X breakpoint 4                                         | 6759  | X | Xp11.23          |
| STK11    | serine/threonine kinase 11 gene (LKB1)                                   | 6794  |   | 19 19p13.3       |
| STL      | Six-twelve leukemia gene                                                 | 7955  |   | 6 6q23           |
| SUFU     | suppressor of fused homolog (Drosophila)                                 | 51684 |   | 10 10q24.32      |
| SUZ12    | suppressor of zeste 12 homolog (Drosophila)                              | 23512 |   | 17 17q11.2       |
| SYK      | spleen tyrosine kinase                                                   | 6850  |   | 9 9q22           |
| TAF15    | TAF15 RNA polymerase II, TATA box binding protein (TBP)-associated       | 8148  |   | 17 17q11.1-q11.2 |
| TAL1     | T-cell acute lymphocytic leukemia 1 (SCL)                                | 6886  |   | 1 1p32           |
| TAL2     | T-cell acute lymphocytic leukemia 2                                      | 6887  |   | 9 9q31           |
| TCEA1    | transcription elongation factor A (SII), 1                               | 6917  |   | 8 8q11.2         |
| TCF1     | transcription factor 1, hepatic (HNF1)                                   | 6927  |   | 12 12q24.2       |
| TCF12    | transcription factor 12 (HTF4, helix-loop-helix transcription factors 4) | 6938  |   | 15 15q21         |
| TCF3     | transcription factor 3 (E2A immunoglobulin enhancer binding factors E12) | 6929  |   | 19 19p13.3       |
| TCL1A    | T-cell leukemia/lymphoma 1A                                              | 8115  |   | 14 14q32.1       |
| TCL6     | T-cell leukemia/lymphoma 6                                               | 27004 |   | 14 14q32.1       |
| TET2     | tet oncogene family member 2                                             | 54790 |   | 4 4q24           |
| TFE3     | transcription factor binding to IGHM enhancer 3                          | 7030  | X | Xp11.22          |
| TFEB     | transcription factor EB                                                  | 7942  |   | 6 6p21           |
| TFG      | TRK-fused gene                                                           | 10342 |   | 3 3q11-q12       |
| TFPT     | TCF3 (E2A) fusion partner (in childhood Leukemia)                        | 29844 |   | 19 19q13         |
| TFRC     | transferrin receptor (p90, CD71)                                         | 7037  |   | 3 3q29           |
| THRAP3   | thyroid hormone receptor associated protein 3 (TRAP150)                  | 9967  |   | 1 1p34.3         |
| TIF1     | transcriptional intermediary factor 1 (PTC6, TIF1A)                      | 8805  |   | 7 7q32-q34       |
| TLX1     | T-cell leukemia, homeobox 1 (HOX11)                                      | 3195  |   | 10 10q24         |
| TLX3     | T-cell leukemia, homeobox 3 (HOX11L2)                                    | 30012 |   | 5 5q35.1         |
| TMPRSS2  | transmembrane protease, serine 2                                         | 7113  |   | 21 21q22.3       |
| TNFAIP3  | tumor necrosis factor, alpha-induced protein 3                           | 7128  |   | 6 6q23           |
| TNFRSF14 | tumor necrosis factor receptor superfamily, member 14 (herpesvirus ent)  | 8764  |   | 1 1p36.32        |
| TNFRSF17 | tumor necrosis factor receptor superfamily, member 17                    | 608   |   | 16 16p13.1       |
| TNFRSF6  | tumor necrosis factor receptor superfamily, member 6 (FAS)               | 355   |   | 10 10q24.1       |
| TOP1     | topoisomerase (DNA) I                                                    | 7150  |   | 20 20q12-q13.1   |
| TP53     | tumor protein p53                                                        | 7157  |   | 17 17p13         |
| TPM3     | tropomyosin 3                                                            | 7170  |   | 1 1q22-q23       |
| TPM4     | tropomyosin 4                                                            | 7171  |   | 19 19p13.1       |
| TPR      | translocated promoter region                                             | 7175  |   | 1 1q25           |
| TRA@     | T cell receptor alpha locus                                              | 6955  |   | 14 14q11.2       |

|         |                                                                            |        |   |                  |
|---------|----------------------------------------------------------------------------|--------|---|------------------|
| TRB@    | T cell receptor beta locus                                                 | 6957   |   | 7 7q35           |
| TRD@    | T cell receptor delta locus                                                | 6964   |   | 14 14q11         |
| TRIM27  | tripartite motif-containing 27                                             | 5987   |   | 6 6p22           |
| TRIM33  | tripartite motif-containing 33 (PTC7,TIF1G)                                | 51592  |   | 1 1p13           |
| TRIP11  | thyroid hormone receptor interactor 11                                     | 9321   |   | 14 14q31-q32     |
| TSC1    | tuberous sclerosis 1 gene                                                  | 7248   |   | 9 9q34           |
| TSC2    | tuberous sclerosis 2 gene                                                  | 7249   |   | 16 16p13.3       |
| TSHR    | thyroid stimulating hormone receptor                                       | 7253   |   | 14 14q31         |
| TTL     | tubulin tyrosine ligase                                                    | 150465 |   | 2 2q13           |
| USP6    | ubiquitin specific peptidase 6 (Tre-2 oncogene)                            | 9098   |   | 17 17p13         |
| VHL     | von Hippel-Lindau syndrome gene                                            | 7428   |   | 3 3p25           |
| WAS     | Wiskott-Aldrich syndrome                                                   | 7454   | X | Xp11.23-p11.22   |
| WHSC1   | Wolf-Hirschhorn syndrome candidate 1(MMSET)                                | 7468   |   | 4 4p16.3         |
| WHSC1L1 | Wolf-Hirschhorn syndrome candidate 1-like 1 (NSD3)                         | 54904  |   | 8 8p12           |
| WIF1    | WNT inhibitory factor 1                                                    | 11197  |   | 12 12q14.3       |
| WRN     | Werner syndrome (RECQL2)                                                   | 7486   |   | 8 8p12-p11.2     |
| WT1     | Wilms tumour 1 gene                                                        | 7490   |   | 11 11p13         |
| WTX     | family with sequence similarity 123B (FAM123B)                             | 139285 | X | Xq11.1           |
| XPA     | xeroderma pigmentosum, complementation group A                             | 7507   |   | 9 9q22.3         |
| XPC     | xeroderma pigmentosum, complementation group C                             | 7508   |   | 3 3p25           |
| ZNF145  | zinc finger protein 145 (PLZF)                                             | 7704   |   | 11 11q23.1       |
| ZNF198  | zinc finger protein 198                                                    | 7750   |   | 13 13q11-q12     |
| ZNF278  | zinc finger protein 278 (ZSG)                                              | 23598  |   | 22 22q12-q14     |
| ZNF331  | zinc finger protein 331                                                    | 55422  |   | 19 19q13.3-q13.4 |
| ZNF384  | zinc finger protein 384 (CIZ/NMP4)                                         | 171017 |   | 12 12p13         |
| ZNF521  | zinc finger protein 521                                                    | 25925  |   | 18 18q11.2       |
| ZNF9    | zinc finger protein 9 (a cellular retroviral nucleic acid binding protein) | 7555   |   | 3 3q21           |
| ZNFN1A1 | zinc finger protein, subfamily 1A, 1 (Ikaros)                              | 10320  |   | 7 7p12           |

## Abbreviatic Term

|           |                                                             |
|-----------|-------------------------------------------------------------|
| A         | amplification                                               |
| AEL       | acute eosinophilic leukemia                                 |
| AL        | acute leukemia                                              |
| ALCL      | anaplastic large-cell lymphoma                              |
| ALL       | acute lymphocytic leukemia                                  |
| AML       | acute myelogenous leukemia                                  |
| AML*      | acute myelogenous leukemia (primarily treatment associated) |
| APL       | acute promyelocytic leukemia                                |
| B-ALL     | B-cell acute lymphocytic leukaemia                          |
| B-CLL     | B-cell Lymphocytic leukemia                                 |
| B-NHL     | B-cell Non-Hodgkin Lymphoma                                 |
| CLL       | chronic lymphatic leukemia                                  |
| CML       | chronic myeloid leukemia                                    |
| CMML      | chronic myelomonocytic leukemia                             |
| CNS       | central nervous system                                      |
| D         | large deletion                                              |
| DFSP      | dermatofibrosarcoma protuberans                             |
| DLBCL     | diffuse large B-cell lymphoma                               |
| DLCL      | diffuse large-cell lymphoma                                 |
| Dom       | dominant                                                    |
| E         | epithelial                                                  |
| F         | frameshift                                                  |
| GIST      | gastrointestinal stromal tumour                             |
| JMML      | juvenile myelomonocytic leukemia                            |
| L         | leukaemia/lymphoma                                          |
| M         | mesenchymal                                                 |
| MALT      | mucosa-associated lymphoid tissue lymphoma                  |
| MDS       | myelodysplastic syndrome                                    |
| Mis       | Missense                                                    |
| MLCLS     | mediastinal large cell lymphoma with sclerosis              |
| MM        | multiple myeloma                                            |
| MPD       | Myeloproliferative disorder                                 |
| N         | nonsense                                                    |
| NHL       | non-Hodgkin lymphoma                                        |
| NK/T      | natural killer T cell                                       |
| NSCLC     | non small cell lung cancer                                  |
| O         | other                                                       |
| PMBL      | primary mediastinal B-cell lymphoma                         |
| pre-B All | pre-B-cell acute lymphoblastic leukaemia                    |
| Rec       | recessive                                                   |
| S         | splice site                                                 |
| T         | translocation                                               |
| T-ALL     | T-cell acute lymphoblastic leukemia                         |
| T-CLL     | T-cell chronic lymphocytic leukaemia                        |
| TGCT      | testicular germ cell tumour                                 |
| T-PLL     | T cell polyclonal lymphocytic leukaemia                     |
