# Supplementary material
Source: PubMed Central journal article supplement (PMC3470785)
Supplement: NIHMS377161-supplement-8.pdf [file NIHMS377161-supplement-8.pdf]

| TargetID  | p-value  | regulation | FCAbsolute | SYMBOL    | . |
|-----------|----------|------------|------------|-----------|---|
| cg0005470 | 0.031428 | down       | 1.00229    | C1D       | . |
| cg0008393 | 0.036149 | down       | 1.090762   | MAPK8IP2  | . |
| cg0010748 | 0.019874 | down       | 1.006852   | TXNRD2    | . |
| cg0011717 | 0.004887 | down       | 1.005766   | RUNX3     | . |
| cg0013812 | 0.027855 | down       | 1.229342   | TMEPAI    | . |
| cg0014965 | 4.18E-04 | down       | 1.002842   | C3orf10   | . |
| cg0016489 | 0.032253 | down       | 1.012301   | MAPK11    | . |
| cg0018063 | 0.032884 | down       | 1.089237   | MTM1      | . |
| cg0018378 | 0.030236 | up         | 1.023614   | MEF2A     | . |
| cg0018614 | 0.031685 | down       | 1.005389   | PODXL     | . |
| cg0018695 | 0.005702 | down       | 1.20069    | ST5       | . |
| cg0019764 | 0.040901 | down       | 1.004016   | MRPL52    | . |
| cg0020271 | 0.014894 | up         | 1.030738   | HTR2C     | . |
| cg0020896 | 0.027407 | down       | 1.408503   | OLFM2     | . |
| cg0021333 | 0.028872 | up         | 1.013863   | SIL1      | . |
| cg0023330 | 0.036018 | down       | 1.264897   | MAP4K1    | . |
| cg0023496 | 0.04506  | down       | 1.135694   | ZBED4     | . |
| cg0032718 | 0.008487 | up         | 1.008614   | DLAT      | . |
| cg0041109 | 0.037473 | down       | 1.207775   | MGC9712   | . |
| cg0041815 | 0.008745 | down       | 1.028629   | ALX4      | . |
| cg0043094 | 0.028642 | down       | 1.031386   | LIN7B     | . |
| cg0043111 | 0.022116 | down       | 1.234785   | C20orf121 | . |
| cg0043628 | 0.005024 | up         | 1.074495   | STATH     | . |
| cg0046184 | 0.023911 | up         | 1.027191   | ATF7IP2   | . |
| cg0052159 | 0.02005  | down       | 1.010558   | MYCBP     | . |
| cg0053233 | 0.037113 | down       | 1.216731   | LGI1      | . |
| cg0053995 | 0.016604 | down       | 1.020289   | PARVB     | . |
| cg0056011 | 0.031528 | down       | 1.044306   | STXBP1    | . |
| cg0056507 | 0.026409 | down       | 1.071832   | EIF3S6IP  | . |
| cg0056774 | 0.028901 | down       | 1.011079   | CSPG2     | . |
| cg0058237 | 0.043945 | up         | 1.022999   | S100G     | . |
| cg0059668 | 0.013    | up         | 1.046971   | STS       | . |
| cg0064614 | 0.015311 | down       | 1.129819   | ARSD      | . |

|           |          |      |          |           |   |
|-----------|----------|------|----------|-----------|---|
| cg0064774 | 0.049267 | down | 1.053921 | ZNF274    | . |
| cg0065087 | 0.037733 | up   | 1.002054 | YBX1      | . |
| cg0065338 | 0.023632 | down | 1.10624  | PTN       | . |
| cg0065530 | 0.010517 | down | 1.050423 | ESR1      | . |
| cg0072466 | 0.011717 | up   | 1.004527 | NXF1      | . |
| cg0079526 | 3.99E-04 | up   | 1.023855 | C11orf55  | . |
| cg0081458 | 0.048903 | down | 1.026688 | TRAPPC6A  | . |
| cg0081869 | 0.04957  | up   | 1.00276  | TTC14     | . |
| cg0082860 | 0.04978  | down | 1.006805 | WNT5A     | . |
| cg0084040 | 0.044557 | down | 1.032981 | CHST4     | . |
| cg0090176 | 0.024828 | down | 1.005232 | MLLT1     | . |
| cg0091016 | 0.048879 | down | 1.14568  | DHX37     | . |
| cg0092272 | 0.047545 | down | 1.00737  | SESN1     | . |
| cg0092960 | 0.023193 | down | 1.252397 | ZNF3      | . |
| cg0095325 | 0.02978  | down | 1.155981 | CCND1     | . |
| cg0096279 | 0.023387 | up   | 1.028698 | SSX8      | . |
| cg0099742 | 0.011002 | down | 1.014661 | PI4KII    | . |
| cg0100399 | 0.03944  | up   | 1.005013 | LOC388152 | . |
| cg0103614 | 0.045268 | up   | 1.003206 | RNPEP     | . |
| cg0107868 | 0.040521 | down | 1.041889 | PSG5      | . |
| cg0109156 | 0.049594 | down | 1.035699 | MESP1     | . |
| cg0109256 | 0.030267 | down | 1.002651 | PPP1R3B   | . |
| cg0110078 | 6.11E-04 | down | 1.003534 | MAPK8IP3  | . |
| cg0111913 | 0.040774 | down | 1.158535 | C1orf116  | . |
| cg0112860 | 0.011874 | down | 1.017477 | SF3B2     | . |
| cg0113996 | 0.015389 | down | 1.009371 | GOLPH3L   | . |
| cg0114874 | 0.037448 | down | 1.235874 | DUSP2     | . |
| cg0124565 | 0.006264 | down | 1.011951 | ASNS      | . |
| cg0125354 | 0.041374 | down | 1.016014 | RNF185    | . |
| cg0127583 | 0.023377 | down | 1.005176 | C10orf95  | . |
| cg0129949 | 0.016737 | down | 1.015907 | NOLA3     | . |
| cg0131351 | 0.041111 | down | 1.038188 | WNT3A     | . |
| cg0132004 | 0.043113 | up   | 1.003541 | ZNF295    | . |
| cg0132050 | 0.021604 | up   | 1.023573 | SPHAR     | . |

|           |          |      |          |           |   |
|-----------|----------|------|----------|-----------|---|
| cg0135210 | 0.032343 | down | 1.219468 | KCNK4     | . |
| cg0136218 | 0.023762 | up   | 1.004858 | MAP3K7IP2 | . |
| cg0136985 | 0.015779 | down | 1.012002 | ZNF175    | . |
| cg0137667 | 0.027439 | up   | 1.004456 | ANAPC5    | . |
| cg0142233 | 0.020264 | up   | 1.032504 | CARD8     | . |
| cg0143111 | 0.03842  | down | 1.014383 | PDE10A    | . |
| cg0143208 | 0.004974 | down | 1.036421 | FLJ21749  | . |
| cg0144749 | 0.01735  | down | 1.01956  | TSNAX     | . |
| cg0144941 | 0.029519 | up   | 1.002576 | ZNF213    | . |
| cg0146564 | 0.042751 | down | 1.004993 | ITSN1     | . |
| cg0151366 | 0.049804 | down | 1.007193 | SAPS2     | . |
| cg0153277 | 0.044373 | down | 1.046495 | CLEC4M    | . |
| cg0156833 | 0.019667 | down | 1.009947 | COX5B     | . |
| cg0160157 | 0.042523 | down | 1.209575 | GAB1      | . |
| cg0163925 | 0.041911 | down | 1.099587 | FLJ25084  | . |
| cg0166329 | 0.01659  | down | 1.046913 | PACS1     | . |
| cg0166846 | 0.038841 | down | 1.029262 | SCG2      | . |
| cg0167717 | 0.010507 | up   | 1.008392 | ZBTB26    | . |
| cg0168490 | 0.030289 | down | 1.218672 | C3orf40   | . |
| cg0172677 | 0.045037 | down | 1.13568  | C1RL      | . |
| cg0173753 | 0.038546 | up   | 1.046581 | FRG1      | . |
| cg0174608 | 0.036996 | up   | 1.002175 | SFRS7     | . |
| cg0176711 | 0.019463 | down | 1.080755 | FBXL22    | . |
| cg0177298 | 0.043598 | down | 1.006445 | SCGB1D1   | . |
| cg0177541 | 0.036506 | down | 1.002254 | PHF21B    | . |
| cg0178232 | 0.048163 | down | 1.001272 | YME1L1    | . |
| cg0179704 | 0.024157 | down | 1.180104 | RPL3L     | . |
| cg0180305 | 0.032954 | down | 1.029726 | SMAD1     | . |
| cg0181333 | 0.011824 | down | 1.004484 | EIF3S9    | . |
| cg0184978 | 0.017081 | down | 1.008073 | ZC3H7B    | . |
| cg0186923 | 0.015495 | down | 1.173578 | C20orf75  | . |
| cg0187364 | 0.024794 | down | 1.003312 | C9orf85   | . |
| cg0191888 | 0.00701  | down | 1.002827 | RLF       | . |
| cg0194318 | 0.022912 | down | 1.060705 | NMU       | . |

|           |          |      |          |           |   |
|-----------|----------|------|----------|-----------|---|
| cg0196369 | 0.046317 | down | 1.344843 | ELA2      | . |
| cg0197112 | 0.047096 | up   | 1.091435 | CALCA     | . |
| cg0199030 | 0.020325 | down | 1.001677 | OPA3      | . |
| cg0206702 | 0.020977 | down | 1.164487 | DNAJC5B   | . |
| cg0208550 | 0.045601 | down | 1.185628 | TRIP10    | . |
| cg0210062 | 0.024397 | down | 1.014498 | AMID      | . |
| cg0210264 | 0.010719 | up   | 1.002064 | AP1GBP1   | . |
| cg0217100 | 0.0458   | down | 1.001336 | RPL27A    | . |
| cg0219665 | 0.025749 | down | 1.155549 | NOL10     | . |
| cg0223908 | 0.030991 | down | 1.001625 | PSCD2     | . |
| cg0227807 | 0.040529 | down | 1.003671 | DUSP18    | . |
| cg0228418 | 0.03144  | down | 1.047992 | TRIM49    | . |
| cg0228699 | 0.030264 | down | 1.002166 | CCDC28B   | . |
| cg0229050 | 0.025497 | up   | 1.000972 | TBL2      | . |
| cg0236795 | 9.09E-04 | up   | 1.02379  | HIST1H2AK | . |
| cg0237616 | 0.037542 | down | 1.008734 | FBXO38    | . |
| cg0239944 | 0.04381  | down | 1.012455 | CLDN12    | . |
| cg0240197 | 0.02942  | down | 1.154468 | FLJ31413  | . |
| cg0241385 | 0.044967 | down | 1.012876 | SLC35C2   | . |
| cg0242010 | 0.00579  | down | 1.004829 | MGC33948  | . |
| cg0244164 | 0.047573 | down | 1.043342 | COL8A1    | . |
| cg0245167 | 0.039714 | down | 1.023992 | DTL       | . |
| cg0245629 | 0.027918 | down | 1.224022 | FLJ90805  | . |
| cg0249101 | 0.018515 | up   | 1.003457 | SPIN1     | . |
| cg0251286 | 0.044612 | down | 1.013503 | CLDN15    | . |
| cg0251921 | 0.020804 | down | 1.468715 | CHFR      | . |
| cg0256452 | 0.040502 | down | 1.343796 | C7orf19   | . |
| cg0261128 | 0.040153 | down | 1.087862 | CREB5     | . |
| cg0263069 | 0.009325 | down | 1.038966 | C10orf7   | . |
| cg0264754 | 0.047531 | down | 1.021789 | FLJ90652  | . |
| cg0267565 | 0.026    | down | 1.072433 | C12orf22  | . |
| cg0267974 | 0.038932 | down | 1.1396   | FUT7      | . |
| cg0281551 | 0.017972 | down | 1.132796 | ANKRD25   | . |
| cg0281832 | 0.047326 | up   | 1.072713 | MAGEC3    | . |

|           |          |      |          |          |   |
|-----------|----------|------|----------|----------|---|
| cg0282272 | 9.44E-04 | down | 1.002047 | TRIP13   | . |
| cg0288323 | 0.035809 | down | 1.072701 | PARP6    | . |
| cg0297609 | 0.042747 | down | 1.002615 | NPAL3    | . |
| cg0298925 | 0.049236 | down | 1.196538 | COL16A1  | . |
| cg0300060 | 0.036373 | down | 1.0139   | DHX34    | . |
| cg0300130 | 0.040087 | down | 1.258576 | STAT5A   | . |
| cg0300325 | 0.038524 | down | 1.216948 | C6orf78  | . |
| cg0301150 | 0.00873  | down | 1.00549  | CGN      | . |
| cg0302095 | 0.03809  | down | 1.09631  | HMGA1    | . |
| cg0311243 | 0.040398 | down | 1.380113 | PFTK1    | . |
| cg0312509 | 0.004908 | down | 1.013053 | ARPC5    | . |
| cg0312733 | 0.037092 | down | 1.028783 | ERG      | . |
| cg0316081 | 0.019041 | down | 1.0931   | NPB      | . |
| cg0317299 | 0.028104 | down | 1.168502 | NFIX     | . |
| cg0317986 | 0.02707  | up   | 1.017075 | MMP12    | . |
| cg0319752 | 0.001633 | down | 1.005948 | TNIP1    | . |
| cg0322577 | 0.034796 | down | 1.013747 | COL27A1  | . |
| cg0327518 | 0.031924 | down | 1.005724 | COPS8    | . |
| cg0331212 | 0.046005 | up   | 1.001659 | RFFL     | . |
| cg0332875 | 0.015775 | down | 1.001539 | ARHGAP26 | . |
| cg0339945 | 0.041729 | down | 1.184319 | ANXA8    | . |
| cg0341071 | 0.008908 | down | 1.007014 | FLJ45684 | . |
| cg0342443 | 0.044731 | down | 1.022242 | CEP250   | . |
| cg0349306 | 0.040474 | down | 1.007844 | PSCD1    | . |
| cg0350679 | 0.021606 | down | 1.012611 | CHSY1    | . |
| cg0356212 | 0.044667 | down | 1.083991 | WISP2    | . |
| cg0356941 | 0.03324  | down | 1.155307 | MBD3     | . |
| cg0359159 | 0.014037 | down | 1.003039 | VLDLR    | . |
| cg0360625 | 0.036845 | up   | 1.016384 | GNAS     | . |
| cg0360897 | 0.017916 | down | 1.247535 | ZAK      | . |
| cg0363423 | 0.049158 | down | 1.029816 | MLL3     | . |
| cg0371853 | 0.019775 | down | 1.185823 | ETNK2    | . |
| cg0373713 | 0.007852 | down | 1.006199 | HSPA14   | . |
| cg0375262 | 0.03684  | down | 1.049453 | PTGFRN   | . |

|           |          |      |          |          |   |
|-----------|----------|------|----------|----------|---|
| cg0379455 | 0.030796 | down | 1.007732 | FANCF    | . |
| cg0385111 | 0.01298  | down | 1.028442 | BBS1     | . |
| cg0387026 | 0.035362 | down | 1.205572 | TIMM13   | . |
| cg0387412 | 0.048182 | down | 1.103322 | ARMC2    | . |
| cg0391090 | 0.021994 | down | 1.009509 | COPS6    | . |
| cg0392023 | 0.040645 | down | 1.022993 | DOC2A    | . |
| cg0392979 | 0.039225 | down | 1.23031  | ALAS1    | . |
| cg0395065 | 0.022244 | down | 1.006865 | ARRB2    | . |
| cg0396365 | 0.0247   | down | 1.407368 | SCOC     | . |
| cg0403922 | 0.038301 | up   | 1.024261 | SAMD7    | . |
| cg0405504 | 0.025022 | down | 1.036164 | GPR153   | . |
| cg0405710 | 0.014706 | up   | 1.011714 | C9orf48  | . |
| cg0407648 | 0.037309 | down | 1.007337 | FLJ12949 | . |
| cg0408843 | 0.01379  | down | 1.119743 | DCN      | . |
| cg0409942 | 0.015777 | down | 1.272864 | RIPK1    | . |
| cg0411243 | 0.022507 | up   | 1.003025 | PWP1     | . |
| cg0414380 | 0.017781 | up   | 1.06181  | FLJ39822 | . |
| cg0422395 | 0.035728 | down | 1.302336 | NEK7     | . |
| cg0425956 | 0.042244 | down | 1.118994 | FLJ35773 | . |
| cg0427079 | 0.043278 | down | 1.094764 | KIF5A    | . |
| cg0428604 | 0.037441 | down | 1.014934 | C6orf69  | . |
| cg0429372 | 0.025244 | down | 1.001861 | YIPF5    | . |
| cg0431677 | 0.041161 | down | 1.00228  | RUTBC3   | . |
| cg0434744 | 0.023682 | down | 1.102231 | CACNA2D2 | . |
| cg0437503 | 0.037878 | down | 1.202074 | PPP1CC   | . |
| cg0439828 | 0.003555 | up   | 1.03168  | BRDG1    | . |
| cg0440143 | 0.024396 | down | 1.00462  | FLJ90709 | . |
| cg0441568 | 0.044384 | down | 1.045512 | TMEM16G  | . |
| cg0443921 | 0.022177 | down | 1.374356 | KCTD4    | . |
| cg0445705 | 0.030088 | down | 1.303892 | SCOC     | . |
| cg0447483 | 0.034879 | down | 1.096953 | ABHD14A  | . |
| cg0449108 | 0.031569 | down | 1.176246 | MBTPS1   | . |
| cg0455786 | 0.03519  | down | 1.029465 | REL      | . |
| cg0457444 | 0.049923 | down | 1.011054 | ALG8     | . |

|           |          |      |          |          |   |
|-----------|----------|------|----------|----------|---|
| cg0458137 | 0.031855 | down | 1.009917 | SLC35F2  | . |
| cg0458293 | 0.004259 | down | 1.17219  | UAP1L1   | . |
| cg0471091 | 0.049004 | down | 1.036182 | GSS      | . |
| cg0471704 | 0.023972 | down | 1.135225 | CCND1    | . |
| cg0473574 | 0.013721 | down | 1.002157 | ZBED3    | . |
| cg0474580 | 0.039001 | down | 1.059027 | STAT5B   | . |
| cg0475709 | 0.036054 | down | 1.092086 | RUNX3    | . |
| cg0481562 | 0.003564 | up   | 1.004001 | MSRA     | . |
| cg0484804 | 0.047851 | down | 1.063198 | FNDC3B   | . |
| cg0487815 | 0.034295 | down | 1.01494  | AGTR1    | . |
| cg0492586 | 0.024212 | down | 1.088852 | FAM65A   | . |
| cg0494043 | 0.015853 | down | 1.118994 | DNTTIP1  | . |
| cg0496470 | 0.031521 | down | 1.0079   | CBL      | . |
| cg0499121 | 0.04253  | down | 1.21823  | PFDN2    | . |
| cg0502369 | 0.042431 | down | 1.170389 | RGS13    | . |
| cg0503812 | 0.043103 | down | 1.026206 | FAH      | . |
| cg0504578 | 0.027796 | down | 1.09871  | FHL3     | . |
| cg0512064 | 0.047052 | up   | 1.001421 | CHAC1    | . |
| cg0516840 | 0.0319   | down | 1.131911 | SLC29A4  | . |
| cg0520666 | 0.018856 | down | 1.090193 | FLJ33534 | . |
| cg0522989 | 0.014857 | down | 1.009311 | EGR1     | . |
| cg0525404 | 0.019767 | down | 1.040792 | SYN1     | . |
| cg0526096 | 0.022152 | down | 1.109084 | TIMP3    | . |
| cg0528856 | 0.045886 | up   | 1.00251  | KLHL11   | . |
| cg0536640 | 0.039665 | up   | 1.00129  | TM9SF1   | . |
| cg0538256 | 0.025476 | down | 1.003406 | TIGD6    | . |
| cg0540226 | 0.023282 | up   | 1.003362 | ICK      | . |
| cg0540960 | 0.026123 | down | 1.003839 | CCNG2    | . |
| cg0544941 | 0.012343 | down | 1.006416 | ABCA11   | . |
| cg0549227 | 0.038091 | down | 1.009508 | RNF121   | . |
| cg0550804 | 0.031428 | up   | 1.002014 | DDX26    | . |
| cg0560071 | 0.018524 | down | 1.182385 | FLJ13639 | . |
| cg0565709 | 0.049608 | down | 1.129827 | RNASEH2A | . |
| cg0565994 | 0.044049 | down | 1.204732 | C4BPB    | . |

|           |          |      |          |           |   |
|-----------|----------|------|----------|-----------|---|
| cg0567135 | 0.03879  | down | 1.042321 | P4HA3     | . |
| cg0567226 | 0.024974 | up   | 1.001714 | SLC20A1   | . |
| cg0570111 | 0.046784 | up   | 1.02095  | DLEU1     | . |
| cg0576197 | 0.038449 | up   | 1.033927 | FAM82A    | . |
| cg0579531 | 0.026073 | down | 1.016389 | ZNF641    | . |
| cg0579871 | 0.039994 | down | 1.071399 | FABP7     | . |
| cg0585241 | 0.015633 | up   | 1.001287 | NFKBIA    | . |
| cg0594608 | 0.00428  | down | 1.002925 | RBMXL1    | . |
| cg0597632 | 0.037758 | down | 1.005632 | LOC284912 | . |
| cg0603482 | 0.042278 | down | 1.016174 | USF1      | . |
| cg0611130 | 8.95E-05 | up   | 1.003832 | RAP2A     | . |
| cg0615457 | 0.037695 | down | 1.18702  | HEYL      | . |
| cg0617807 | 0.03704  | down | 1.004017 | HSPC176   | . |
| cg0619005 | 0.022374 | up   | 1.040564 | PGM5      | . |
| cg0620298 | 0.027326 | down | 1.002986 | FANCC     | . |
| cg0624200 | 0.012009 | down | 1.015914 | MGC2408   | . |
| cg0627390 | 0.019186 | down | 1.006593 | UBE2A     | . |
| cg0631816 | 0.021108 | down | 1.003786 | TMEM15    | . |
| cg0632409 | 0.001322 | down | 1.018921 | JTB       | . |
| cg0639818 | 0.046995 | down | 1.122591 | ZNF236    | . |
| cg0646679 | 0.0067   | down | 1.005218 | FLJ22313  | . |
| cg0646954 | 0.046103 | down | 1.240659 | THSD3     | . |
| cg0647633 | 0.049703 | down | 1.017327 | NDUFS4    | . |
| cg0647660 | 0.047507 | down | 1.013258 | IFIT2     | . |
| cg0649956 | 0.038287 | down | 1.009296 | NDRG3     | . |
| cg0650047 | 0.036278 | up   | 1.131782 | FLJ11017  | . |
| cg0651827 | 0.017563 | up   | 1.073711 | ADH6      | . |
| cg0652893 | 0.008703 | up   | 1.002319 | GNL2      | . |
| cg0654094 | 0.010819 | down | 1.013233 | VAMP4     | . |
| cg0655760 | 0.006975 | up   | 1.007636 | ATP6V1H   | . |
| cg0656490 | 0.033867 | down | 1.012605 | FIGN      | . |
| cg0656568 | 0.013283 | down | 1.005244 | EXTL2     | . |
| cg0658031 | 0.011442 | down | 1.01046  | SPBC25    | . |
| cg0659863 | 0.010749 | down | 1.001669 | ORC3L     | . |



|           |          |      |          |          |   |
|-----------|----------|------|----------|----------|---|
| cg0661174 | 0.024211 | down | 1.202658 | RASL11A  | . |
| cg0662581 | 0.017634 | down | 1.024499 | KIFAP3   | . |
| cg0664602 | 0.044861 | down | 1.115211 | RAB4A    | . |
| cg0665510 | 0.027286 | up   | 1.141248 | KLF8     | . |
| cg0666532 | 0.024497 | down | 1.295808 | GPA33    | . |
| cg0669295 | 0.032863 | down | 1.008344 | GNAQ     | . |
| cg0671156 | 0.034855 | down | 1.029641 | MAMDC4   | . |
| cg0673148 | 0.014144 | down | 1.005279 | IVD      | . |
| cg0673159 | 0.007894 | down | 1.016742 | ATP6AP2  | . |
| cg0676285 | 0.033813 | down | 1.035861 | PILRA    | . |
| cg0682127 | 0.023982 | down | 1.007774 | SSR2     | . |
| cg0688287 | 0.025933 | down | 1.158805 | PAQR6    | . |
| cg0689892 | 0.006107 | down | 1.011341 | RAB18    | . |
| cg0689932 | 0.039087 | down | 1.152492 | TSSK6    | . |
| cg0690754 | 0.029357 | down | 1.069805 | FLJ35785 | . |
| cg0694978 | 0.039792 | down | 1.001593 | RPL15    | . |
| cg0699037 | 0.024891 | down | 1.001239 | DPYD     | . |
| cg0699341 | 0.039735 | down | 1.029014 | DPP8     | . |
| cg0700078 | 0.046698 | up   | 1.00554  | GADD45A  | . |
| cg0702288 | 0.01455  | up   | 1.001776 | FLJ32675 | . |
| cg0705464 | 0.038648 | down | 1.02137  | WDR52    | . |
| cg0711221 | 0.013958 | down | 1.138402 | MGAT5B   | . |
| cg0719676 | 0.020542 | down | 1.086039 | WDR71    | . |
| cg0720480 | 0.046248 | up   | 1.013565 | ARL13B   | . |
| cg0721819 | 0.049145 | up   | 1.003682 | MPP5     | . |
| cg0729454 | 0.020144 | down | 1.52908  | DEF6     | . |
| cg0732732 | 0.016089 | down | 1.005148 | CEP250   | . |
| cg0733032 | 0.033127 | down | 1.047645 | TRIM48   | . |
| cg0735126 | 0.04724  | down | 1.116318 | LRP3     | . |
| cg0735677 | 0.03099  | down | 1.066405 | CHDH     | . |
| cg0736927 | 0.025567 | down | 1.33287  | DNASE1L3 | . |
| cg0737835 | 0.044434 | down | 1.232661 | GDF5     | . |
| cg0738049 | 0.01545  | down | 1.001994 | MAP1B    | . |
| cg0739332 | 0.008856 | down | 1.150002 | A4GALT   | . |

|           |          |      |          |           |   |
|-----------|----------|------|----------|-----------|---|
| cg0742168 | 0.043207 | down | 1.099363 | PCSK6     | . |
| cg0746653 | 0.018307 | down | 1.007051 | SRP14     | . |
| cg0748482 | 0.019941 | down | 1.283705 | CHRNA10   | . |
| cg0749686 | 5.20E-04 | down | 1.002091 | LOC151194 | . |
| cg0754971 | 0.0412   | down | 1.126927 | GNRH2     | . |
| cg0758047 | 0.027473 | down | 1.016766 | SEMA3B    | . |
| cg0767247 | 0.019061 | up   | 1.001165 | DYNC1H1   | . |
| cg0771349 | 0.023089 | down | 1.152191 | PCTK3     | . |
| cg0771589 | 0.031878 | down | 1.002462 | MGC24665  | . |
| cg0775364 | 0.047132 | down | 1.151278 | P2RY11    | . |
| cg0780616 | 0.043215 | up   | 1.002444 | UBE2E2    | . |
| cg0780770 | 0.038178 | up   | 1.004478 | HIST2H2AB | . |
| cg0780781 | 0.033073 | down | 1.030944 | C14orf44  | . |
| cg0782625 | 0.028027 | up   | 1.037059 | SGCA      | . |
| cg0784616 | 0.032435 | down | 1.222812 | FBLIM1    | . |
| cg0789471 | 0.045558 | down | 1.124427 | CORT      | . |
| cg0797339 | 0.021991 | down | 1.006279 | CARF      | . |
| cg0798677 | 0.040982 | down | 1.337837 | NUP50     | . |
| cg0799262 | 0.030424 | down | 1.007679 | ATF7      | . |
| cg0802369 | 0.022864 | up   | 1.023496 | TFDP3     | . |
| cg0807447 | 0.023465 | down | 1.224004 | TNS4      | . |
| cg0815828 | 0.039589 | down | 1.180896 | KIAA0141  | . |
| cg0817400 | 0.033968 | up   | 1.023258 | ZNF600    | . |
| cg0820142 | 0.039039 | down | 1.125889 | TNNC2     | . |
| cg0823308 | 0.037981 | down | 1.010622 | C15orf15  | . |
| cg0825139 | 0.049392 | down | 1.083393 | EHD3      | . |
| cg0825340 | 0.026832 | down | 1.281016 | C1orf62   | . |
| cg0825678 | 0.038251 | down | 1.363422 | ACSBG2    | . |
| cg0828459 | 0.035653 | down | 1.093228 | SLC4A11   | . |
| cg0835534 | 0.02659  | down | 1.002954 | MPHOSPH6  | . |
| cg0836123 | 0.017755 | down | 1.171103 | PTGFRN    | . |
| cg0839589 | 0.04218  | up   | 1.003757 | UPF2      | . |
| cg0840001 | 0.008955 | down | 1.007073 | NSUN6     | . |
| cg0841811 | 0.0181   | down | 1.109024 | LDHC      | . |

|           |          |      |          |          |   |
|-----------|----------|------|----------|----------|---|
| cg0846139 | 0.027327 | down | 1.031273 | SNTB2    | . |
| cg0849776 | 0.020494 | down | 1.005179 | IL15RA   | . |
| cg0851986 | 0.042162 | down | 1.006795 | CRSP9    | . |
| cg0851990 | 0.022409 | down | 1.13582  | CD9      | . |
| cg0859822 | 0.02091  | down | 1.074396 | SNTB1    | . |
| cg0860488 | 0.02888  | down | 1.005441 | TRIM4    | . |
| cg0862502 | 0.03998  | down | 1.005106 | OSTF1    | . |
| cg0865433 | 0.018293 | up   | 1.051749 | DIRC1    | . |
| cg0866129 | 0.025216 | down | 1.005992 | PHF13    | . |
| cg0872720 | 0.023045 | down | 1.157745 | MPST     | . |
| cg0879476 | 0.025441 | down | 1.206224 | TLE6     | . |
| cg0880312 | 0.037196 | down | 1.001296 | SLC39A6  | . |
| cg0881717 | 0.002624 | up   | 1.002417 | KIF23    | . |
| cg0883343 | 0.030978 | down | 1.14282  | PSMA7    | . |
| cg0885991 | 6.34E-05 | down | 1.011486 | PTEN     | . |
| cg0889662 | 0.047519 | up   | 1.00214  | TYK2     | . |
| cg0893524 | 0.028435 | down | 1.001876 | CETN3    | . |
| cg0896629 | 4.72E-05 | down | 1.043262 | MAPK3    | . |
| cg0897217 | 1.46E-04 | up   | 1.018612 | Ells1    | . |
| cg0899650 | 0.003915 | down | 1.010868 | SCRIB    | . |
| cg0899935 | 0.049614 | down | 1.239649 | CDK9     | . |
| cg0906519 | 0.046733 | down | 1.003152 | ASXL1    | . |
| cg0907612 | 0.032235 | down | 1.069688 | NCF2     | . |
| cg0908074 | 0.02952  | down | 1.007282 | PTHB1    | . |
| cg0908850 | 0.030599 | down | 1.207671 | RHOF     | . |
| cg0909556 | 0.042952 | down | 1.142646 | GTF3C5   | . |
| cg0910699 | 0.048459 | down | 1.134237 | CDK2     | . |
| cg0910999 | 0.035048 | down | 1.018291 | LOH11CR2 | . |
| cg0913472 | 0.042894 | down | 1.17139  | PRTN3    | . |
| cg0915142 | 0.035704 | down | 1.002603 | LPHN1    | . |
| cg0915502 | 0.026866 | down | 1.040524 | SLC39A4  | . |
| cg0916455 | 0.040456 | down | 1.010003 | KIAA1279 | . |
| cg0921246 | 0.024113 | down | 1.079013 | C16orf50 | . |
| cg0922713 | 0.022779 | up   | 1.000846 | GOLGA1   | . |

|           |          |      |          |          |   |
|-----------|----------|------|----------|----------|---|
| cg0923487 | 0.002577 | up   | 1.005418 | TRAF7    | . |
| cg0926056 | 0.019794 | up   | 1.003107 | VAPA     | . |
| cg0927635 | 0.04441  | up   | 1.002152 | C13orf1  | . |
| cg0928300 | 0.032414 | up   | 1.018149 | FAM47B   | . |
| cg0930727 | 0.044898 | up   | 1.00146  | GLT8D1   | . |
| cg0934715 | 0.015404 | down | 1.111198 | MGC39606 | . |
| cg0935014 | 0.025287 | down | 1.105859 | PPM1F    | . |
| cg0942430 | 0.013025 | down | 1.159093 | FLJ90575 | . |
| cg0942731 | 0.043115 | down | 1.241156 | ANGPTL2  | . |
| cg0942911 | 0.048578 | down | 1.013029 | PTPDC1   | . |
| cg0943509 | 0.002425 | down | 1.010212 | QDPR     | . |
| cg0943909 | 0.031731 | up   | 1.002429 | PECI     | . |
| cg0944028 | 0.045847 | down | 1.012577 | PTPRO    | . |
| cg0945489 | 0.002511 | down | 1.200312 | SAMD8    | . |
| cg0947847 | 0.046914 | down | 1.08505  | CD1E     | . |
| cg0949177 | 0.041233 | down | 1.032456 | C9orf82  | . |
| cg0950067 | 0.02536  | down | 1.007004 | MGC52057 | . |
| cg0951458 | 0.041013 | up   | 1.00246  | ETFA     | . |
| cg0951580 | 0.019056 | up   | 1.00184  | PGM2L1   | . |
| cg0953673 | 0.036383 | down | 1.02742  | EFHD1    | . |
| cg0954124 | 0.019699 | down | 1.162417 | MYO1A    | . |
| cg0954719 | 0.025853 | down | 1.204598 | C9orf89  | . |
| cg0955567 | 0.030815 | up   | 1.038673 | CCNB3    | . |
| cg0961802 | 0.030133 | up   | 1.004584 | COX11    | . |
| cg0963043 | 0.044623 | down | 1.05232  | SLC39A3  | . |
| cg0965693 | 0.045141 | down | 1.043111 | TDRD5    | . |
| cg0967639 | 0.01838  | down | 1.142082 | ADARB1   | . |
| cg0972501 | 0.047418 | up   | 1.001716 | GTF3C1   | . |
| cg0975008 | 0.046154 | down | 1.009733 | ETAA16   | . |
| cg0979987 | 0.003221 | down | 1.039143 | NDUFA7   | . |
| cg0980184 | 0.020015 | up   | 1.001437 | SFXN1    | . |
| cg0980501 | 0.037384 | down | 1.003106 | THRB     | . |
| cg0980995 | 0.013347 | down | 1.002125 | MRPL39   | . |
| cg0983027 | 0.011918 | up   | 1.015117 | SHOC2    | . |

|           |          |      |          |           |   |
|-----------|----------|------|----------|-----------|---|
| cg0983554 | 0.036577 | down | 1.03801  | DIRAS2    | . |
| cg0987060 | 0.02099  | down | 1.011914 | GLG1      | . |
| cg0987826 | 0.035539 | down | 1.045727 | PROZ      | . |
| cg0987979 | 0.040126 | down | 1.092142 | WSB2      | . |
| cg0988264 | 0.046342 | down | 1.166102 | C2orf35   | . |
| cg0989176 | 0.029037 | down | 1.08308  | F5        | . |
| cg0991867 | 0.045046 | down | 1.250189 | TNFAIP8L1 | . |
| cg0993876 | 0.02771  | down | 1.004692 | EPHB3     | . |
| cg0995312 | 0.049329 | up   | 1.050752 | CST8      | . |
| cg0998563 | 0.019856 | down | 1.015079 | PCDH1     | . |
| cg1000172 | 0.037462 | down | 1.082124 | LAPTM5    | . |
| cg1003689 | 0.019577 | up   | 1.047012 | MGMT      | . |
| cg1005706 | 0.028456 | down | 1.141401 | C1orf104  | . |
| cg1005854 | 0.009298 | down | 1.003661 | DCTN2     | . |
| cg1006416 | 0.029136 | down | 1.258358 | LAMB1     | . |
| cg1011736 | 0.039469 | down | 1.234352 | LAX1      | . |
| cg1015492 | 0.038751 | down | 1.002436 | HAP1      | . |
| cg1015808 | 0.019811 | down | 1.003907 | SOX5      | . |
| cg1015818 | 0.040577 | down | 1.002464 | GRK4      | . |
| cg1021187 | 0.035712 | down | 1.000913 | PDRG1     | . |
| cg1024973 | 0.024126 | down | 1.181222 | SECTM1    | . |
| cg1026649 | 0.043827 | down | 1.181102 | ACOT11    | . |
| cg1027288 | 0.042235 | down | 1.001864 | SNAPAP    | . |
| cg1027450 | 0.040038 | down | 1.00586  | SPEN      | . |
| cg1028034 | 0.029674 | down | 1.306981 | PSPN      | . |
| cg1031512 | 0.047113 | up   | 1.002752 | SMAD4     | . |
| cg1031663 | 0.036395 | down | 1.007954 | INADL     | . |
| cg1034864 | 0.005255 | down | 1.005041 | C1orf198  | . |
| cg1039647 | 0.024981 | down | 1.003811 | NUP107    | . |
| cg1039895 | 0.015384 | down | 1.023309 | CRKRS     | . |
| cg1040326 | 0.034462 | down | 1.001936 | PHF21A    | . |
| cg1045789 | 0.038287 | down | 1.003757 | RSRC1     | . |
| cg1047543 | 0.037856 | down | 1.006026 | FLJ11171  | . |
| cg1048572 | 0.008955 | down | 1.001614 | PMS2      | . |

|           |          |      |          |          |   |
|-----------|----------|------|----------|----------|---|
| cg1053707 | 0.036415 | down | 1.180363 | OTC      | . |
| cg1054652 | 0.012331 | down | 1.002735 | SEMA3B   | . |
| cg1057573 | 0.04836  | up   | 1.128173 | SSX4     | . |
| cg1057584 | 0.038884 | down | 1.001208 | TMED7    | . |
| cg1060961 | 0.042715 | down | 1.003937 | TRAP1    | . |
| cg1062444 | 0.03982  | down | 1.120161 | CNGB1    | . |
| cg1066797 | 0.014703 | down | 1.281792 | FBXO6    | . |
| cg1069854 | 0.02528  | down | 1.000864 | SRRM1    | . |
| cg1070902 | 0.020885 | down | 1.079032 | WRN      | . |
| cg1071660 | 0.038654 | down | 1.007407 | TOPORS   | . |
| cg1073752 | 0.040967 | down | 1.21275  | KIAA0676 | . |
| cg1076328 | 0.04212  | down | 1.25247  | DHCR7    | . |
| cg1077386 | 0.011202 | up   | 1.00096  | GMCL1    | . |
| cg1080544 | 0.029882 | up   | 1.002764 | ZNF297B  | . |
| cg1081878 | 0.04121  | down | 1.178281 | PHB2     | . |
| cg1086303 | 0.030586 | down | 1.00101  | OBFC2A   | . |
| cg1087830 | 0.045221 | down | 1.161942 | ATAD4    | . |
| cg1091356 | 0.042244 | down | 1.002903 | C8orf55  | . |
| cg1091932 | 0.046179 | up   | 1.002068 | SLC35A1  | . |
| cg1095418 | 0.04467  | down | 1.097553 | NFYB     | . |
| cg1096543 | 0.024458 | up   | 1.001971 | FTS      | . |
| cg1098485 | 0.010332 | down | 1.010484 | ECHS1    | . |
| cg1100022 | 0.04593  | down | 1.008898 | DHX40    | . |
| cg1105184 | 0.011107 | down | 1.003647 | SEMA3C   | . |
| cg1106209 | 0.042572 | down | 1.051227 | C5orf15  | . |
| cg1107094 | 0.013691 | down | 1.003313 | STX11    | . |
| cg1111542 | 0.024604 | down | 1.197236 | PHYH     | . |
| cg1113987 | 0.039052 | down | 1.028242 | CD5L     | . |
| cg1114156 | 0.010355 | down | 1.001651 | CAMLG    | . |
| cg1116434 | 0.00944  | down | 1.023567 | TRAPPC3  | . |
| cg1117769 | 0.039521 | down | 1.174951 | ZNF513   | . |
| cg1120823 | 0.017792 | down | 1.003617 | BCAR3    | . |
| cg1122204 | 0.047384 | down | 1.003614 | TOR1A    | . |
| cg1122632 | 0.049187 | down | 1.116029 | EPB41    | . |

|           |          |      |          |           |   |
|-----------|----------|------|----------|-----------|---|
| cg1123445 | 0.029247 | up   | 1.055368 | FTMT      | . |
| cg1126042 | 0.032426 | down | 1.00375  | FOXA1     | . |
| cg1126084 | 0.030298 | down | 1.021334 | ALX4      | . |
| cg1126287 | 0.044389 | up   | 1.026759 | ZNF681    | . |
| cg1127421 | 0.035875 | down | 1.002269 | C9orf42   | . |
| cg1132854 | 0.032425 | down | 1.035076 | OR7C1     | . |
| cg1137848 | 0.042185 | down | 1.219157 | NIF3L1BP1 | . |
| cg1138674 | 0.024467 | down | 1.116425 | CDH15     | . |
| cg1139345 | 0.03679  | down | 1.002316 | FAM59A    | . |
| cg1139561 | 0.046486 | down | 1.007412 | RAB28     | . |
| cg1139597 | 0.020244 | down | 1.016679 | GBL       | . |
| cg1140359 | 0.046924 | down | 1.131374 | COG8      | . |
| cg1142399 | 0.028746 | up   | 1.002001 | TXN2      | . |
| cg1144378 | 0.019215 | down | 1.015524 | MLLT10    | . |
| cg1147625 | 0.020523 | up   | 1.00803  | LOC197322 | . |
| cg1150301 | 0.030244 | down | 1.027201 | EBF       | . |
| cg1151637 | 0.040247 | down | 1.109968 | DPH1      | . |
| cg1154662 | 0.045892 | down | 1.07259  | PTGDS     | . |
| cg1156386 | 0.04802  | down | 1.052402 | CNTN4     | . |
| cg1159422 | 0.02135  | down | 1.183599 | RANBP1    | . |
| cg1163820 | 0.033977 | down | 1.010036 | PRKCQ     | . |
| cg1165569 | 0.004842 | down | 1.008931 | CBARA1    | . |
| cg1173010 | 0.043019 | down | 1.006496 | FEN1      | . |
| cg1173535 | 0.009968 | up   | 1.001583 | ATP5F1    | . |
| cg1175018 | 0.049231 | down | 1.005654 | C9orf40   | . |
| cg1176153 | 0.022311 | down | 1.248455 | TM4SF18   | . |
| cg1176311 | 0.01477  | up   | 1.002087 | C6orf84   | . |
| cg1176669 | 0.024677 | down | 1.011298 | UQCRC2    | . |
| cg1180067 | 0.043321 | down | 1.027874 | SLC39A4   | . |
| cg1180674 | 0.047537 | down | 1.004652 | SUPT3H    | . |
| cg1180875 | 0.041554 | down | 1.111452 | TUBGCP6   | . |
| cg1182759 | 0.021901 | down | 1.01703  | C3orf10   | . |
| cg1186802 | 0.003081 | up   | 1.001847 | CTSC      | . |
| cg1187427 | 0.025845 | down | 1.102957 | CD86      | . |

|           |          |      |          |          |   |
|-----------|----------|------|----------|----------|---|
| cg1189692 | 0.039943 | down | 1.037869 | PNMT     | . |
| cg1192182 | 0.001324 | down | 1.036375 | FCRL2    | . |
| cg1193337 | 0.047656 | down | 1.005396 | FLJ10815 | . |
| cg1194410 | 0.034993 | up   | 1.082838 | CD40LG   | . |
| cg1195333 | 0.016038 | down | 1.063055 | GRIN2D   | . |
| cg1195788 | 0.044132 | up   | 1.001471 | UBE2N    | . |
| cg1197368 | 0.001323 | up   | 1.001584 | FPGS     | . |
| cg1197763 | 0.002252 | down | 1.001527 | DDR1     | . |
| cg1198460 | 0.034628 | down | 1.321355 | CLDN16   | . |
| cg1200509 | 0.006132 | down | 1.020725 | SLC16A12 | . |
| cg1201332 | 0.027278 | down | 1.056287 | GCLC     | . |
| cg1203262 | 0.0443   | down | 1.003719 | TP53BP1  | . |
| cg1206299 | 0.031979 | down | 1.051016 | RFC1     | . |
| cg1206492 | 0.043081 | down | 1.058263 | MGC16186 | . |
| cg1207280 | 0.03929  | down | 1.006854 | JMJD2B   | . |
| cg1207353 | 0.020031 | up   | 1.002304 | TUBA6    | . |
| cg1208067 | 0.022739 | down | 1.208129 | KIAA0676 | . |
| cg1208504 | 0.008225 | down | 1.013334 | APPBP1   | . |
| cg1209194 | 0.029304 | down | 1.03873  | BARD1    | . |
| cg1221345 | 0.019877 | down | 1.138369 | CHPT1    | . |
| cg1222917 | 0.009909 | down | 1.010138 | MGST2    | . |
| cg1223494 | 0.029421 | down | 1.209808 | GNAT2    | . |
| cg1224112 | 0.047493 | down | 1.016346 | WBSCR1   | . |
| cg1224599 | 0.042871 | down | 1.012121 | PRKCQ    | . |
| cg1227447 | 0.033673 | down | 1.057294 | HSPG2    | . |
| cg1227690 | 0.03984  | up   | 1.002474 | H1FX     | . |
| cg1231113 | 0.019322 | down | 1.162591 | RCN1     | . |
| cg1231356 | 0.003994 | down | 1.006286 | ATXN2    | . |
| cg1237771 | 0.01196  | down | 1.003159 | ATP6V1G1 | . |
| cg1238290 | 0.034092 | down | 1.009529 | CCND2    | . |
| cg1238294 | 0.033109 | down | 1.062276 | SYTL4    | . |
| cg1239104 | 0.020464 | down | 1.008751 | PRSS27   | . |
| cg1240891 | 0.01367  | down | 1.152758 | SLC7A5   | . |
| cg1243575 | 0.035576 | down | 1.002754 | LGI2     | . |



|           |          |      |          |           |   |
|-----------|----------|------|----------|-----------|---|
| cg1244918 | 0.036751 | down | 1.262221 | ERAS      | . |
| cg1249756 | 0.015744 | down | 1.092367 | RBP1      | . |
| cg1252602 | 0.037015 | up   | 1.005048 | LARGE     | . |
| cg1253266 | 0.00567  | up   | 1.050921 | EMCN      | . |
| cg1253446 | 0.001836 | down | 1.003672 | FLJ20551  | . |
| cg1255239 | 0.038449 | down | 1.171975 | NFS1      | . |
| cg1255699 | 0.022382 | up   | 1.001784 | RPL27     | . |
| cg1258200 | 0.032792 | up   | 1.098218 | OLFM4     | . |
| cg1258390 | 0.04033  | down | 1.02694  | RFC4      | . |
| cg1258471 | 0.021824 | down | 1.111237 | BCDIN3    | . |
| cg1259246 | 0.029858 | up   | 1.001204 | C1orf63   | . |
| cg1264166 | 0.018719 | down | 1.007387 | TTF2      | . |
| cg1264522 | 0.019347 | down | 1.020428 | PAK7      | . |
| cg1264758 | 0.017117 | up   | 1.04406  | C10orf129 | . |
| cg1265078 | 0.028406 | down | 1.045476 | SH3BGRL   | . |
| cg1265101 | 0.004449 | down | 1.005562 | CCDC7     | . |
| cg1265484 | 0.039257 | down | 1.141838 | CLDN2     | . |
| cg1268392 | 0.029507 | down | 1.062236 | BLOC1S1   | . |
| cg1280281 | 0.044743 | down | 1.007133 | PUS3      | . |
| cg1281584 | 0.048576 | down | 1.141552 | LHPP      | . |
| cg1283069 | 0.035818 | down | 1.010711 | PPP1R14A  | . |
| cg1285851 | 0.047478 | down | 1.067522 | PADI3     | . |
| cg1286685 | 0.029142 | down | 1.105792 | HEXIM1    | . |
| cg1288803 | 0.016497 | up   | 1.001761 | ADIPOR1   | . |
| cg1292079 | 0.001858 | down | 1.001082 | MGC4093   | . |
| cg1292777 | 0.041005 | up   | 1.019743 | C9orf64   | . |
| cg1295512 | 0.006462 | down | 1.13891  | ATP5F1    | . |
| cg1295881 | 0.031134 | up   | 1.048848 | ATP6V1G3  | . |
| cg1299861 | 0.041365 | down | 1.247476 | KISS1R    | . |
| cg1312551 | 0.021419 | up   | 1.093463 | C11orf44  | . |
| cg1313220 | 0.00745  | down | 1.00234  | ELMOD2    | . |
| cg1319215 | 0.02602  | up   | 1.028754 | ERAS      | . |
| cg1321737 | 0.041851 | down | 1.129774 | RPS6KA2   | . |
| cg1322158 | 0.013855 | down | 1.004543 | TTF2      | . |

|           |          |      |          |           |   |
|-----------|----------|------|----------|-----------|---|
| cg1323464 | 0.024554 | down | 1.003678 | CTSL2     | . |
| cg1323610 | 0.032568 | down | 1.354969 | C20orf152 | . |
| cg1323782 | 0.049    | up   | 1.004595 | GPSN2     | . |
| cg1326996 | 0.031612 | down | 1.010009 | CD300LG   | . |
| cg1327958 | 0.016973 | down | 1.01663  |           | . |
| cg1331569 | 0.043823 | down | 1.151311 | OVCA2     | . |
| cg1334255 | 0.033017 | down | 1.052338 | TECTB     | . |
| cg1334348 | 0.032629 | down | 1.01151  | KLK10     | . |
| cg1335169 | 0.024585 | down | 1.001694 | CBX3      | . |
| cg1336878 | 0.020975 | down | 1.088454 | ACSS2     | . |
| cg1338269 | 0.030654 | down | 1.119782 | ZNF652    | . |
| cg1338349 | 0.015291 | down | 1.005643 | TSG101    | . |
| cg1338623 | 0.010879 | up   | 1.001292 | DAD1      | . |
| cg1340198 | 0.038439 | up   | 1.000678 | APH1B     | . |
| cg1343085 | 0.026999 | down | 1.019698 | C10orf7   | . |
| cg1347338 | 0.03967  | down | 1.086271 | ZDHHCS    | . |
| cg1350405 | 0.042248 | down | 1.138071 | CCR7      | . |
| cg1351679 | 0.017372 | down | 1.00392  | ALG1      | . |
| cg1352032 | 0.025504 | down | 1.114466 | KCNH6     | . |
| cg1361418 | 0.021756 | down | 1.022675 | RGC32     | . |
| cg1361539 | 0.014231 | down | 1.006953 | RACGAP1   | . |
| cg1361991 | 0.015935 | down | 1.009771 | SLITRK3   | . |
| cg1365233 | 0.020245 | down | 1.109013 | DEPDC2    | . |
| cg1365255 | 0.021815 | down | 1.010013 | SEPX1     | . |
| cg1366812 | 0.02533  | down | 1.102879 | HNRPUL1   | . |
| cg1367907 | 0.013412 | down | 1.003718 | TOMM7     | . |
| cg1375865 | 0.036775 | down | 1.003646 | SDC1      | . |
| cg1379828 | 0.044957 | down | 1.133597 | THAP11    | . |
| cg1380002 | 0.015551 | down | 1.004883 | ITGB1     | . |
| cg1380296 | 0.024795 | down | 1.094606 | CASP1     | . |
| cg1380749 | 0.021732 | down | 1.128473 | ALX4      | . |
| cg1381258 | 0.016224 | down | 1.025535 | TMEM15    | . |
| cg1383677 | 0.046837 | down | 1.075415 | TNFRSF1B  | . |
| cg1383852 | 0.010905 | up   | 1.002398 | RPL27A    | . |

|           |          |      |          |          |   |
|-----------|----------|------|----------|----------|---|
| cg1384711 | 0.001514 | down | 1.009434 | MGC24975 | . |
| cg1388368 | 0.046092 | down | 1.222768 | GOT2     | . |
| cg1391693 | 0.038563 | down | 1.003829 | POLD2    | . |
| cg1395667 | 0.04778  | down | 1.009031 | CUL2     | . |
| cg1397381 | 0.015799 | down | 1.002809 | SCAND2   | . |
| cg1400268 | 0.020647 | up   | 1.003621 | RBJ      | . |
| cg1401330 | 0.025528 | down | 1.00371  | XBP1     | . |
| cg1402355 | 0.00146  | down | 1.008783 | HNRPA3   | . |
| cg1409165 | 0.016785 | up   | 1.010802 | LHX3     | . |
| cg1417188 | 0.030943 | down | 1.089278 | HUS1     | . |
| cg1420956 | 0.012478 | down | 1.00549  | COMMD4   | . |
| cg1422301 | 0.049583 | up   | 1.009502 | AP3D1    | . |
| cg1425205 | 0.028144 | down | 1.286748 | TECTA    | . |
| cg1425823 | 0.043723 | up   | 1.063941 | OR5V1    | . |
| cg1426507 | 0.036809 | down | 1.301898 | ARHGEF11 | . |
| cg1429282 | 0.01534  | down | 1.226292 | TIGD5    | . |
| cg1432079 | 0.039387 | down | 1.019321 | GAJ      | . |
| cg1434371 | 0.022549 | down | 1.006734 | FAF1     | . |
| cg1435850 | 0.032463 | down | 1.005778 | NAT6     | . |
| cg1437511 | 0.04787  | down | 1.30348  | TMEM43   | . |
| cg1437986 | 0.027062 | up   | 1.065148 | GRM5     | . |
| cg1443676 | 0.043691 | down | 1.032692 | RAMP2    | . |
| cg1444338 | 0.012977 | down | 1.000605 | SEMA7A   | . |
| cg1446479 | 0.044814 | down | 1.023225 | DDX6     | . |
| cg1448122 | 0.036419 | down | 1.01511  | BIRC3    | . |
| cg1451951 | 0.039887 | down | 1.238859 | ADRBK1   | . |
| cg1452174 | 0.034745 | down | 1.012688 | PAK1     | . |
| cg1452831 | 0.046625 | down | 1.153377 | GIPC1    | . |
| cg1456662 | 0.018462 | down | 1.091694 | GPR153   | . |
| cg1457038 | 0.008608 | down | 1.009525 | RAP2C    | . |
| cg1459643 | 0.03635  | down | 1.006046 | B3GNTL1  | . |
| cg1461397 | 0.046275 | down | 1.020136 | ATG10    | . |
| cg1466306 | 0.033666 | down | 1.002779 | CTNNB1   | . |
| cg1470743 | 0.046049 | down | 1.003103 | C9orf97  | . |

|           |          |      |          |           |   |
|-----------|----------|------|----------|-----------|---|
| cg1471052 | 0.020331 | down | 1.001653 | MGC3121   | . |
| cg1477295 | 0.037379 | down | 1.243922 | KIAA0319L | . |
| cg1482498 | 0.024514 | down | 1.020101 | SEMA3B    | . |
| cg1483235 | 0.04002  | down | 1.003123 | FLJ10379  | . |
| cg1484509 | 0.048661 | down | 1.055658 | ADPRHL1   | . |
| cg1487046 | 0.035025 | down | 1.164282 | AER61     | . |
| cg1487901 | 0.014474 | down | 1.003809 | DTWD1     | . |
| cg1491526 | 0.041104 | down | 1.001029 | PTPN1     | . |
| cg1494426 | 0.027957 | down | 1.242426 | RAB15     | . |
| cg1495129 | 0.026962 | down | 1.298835 | HMOX2     | . |
| cg1496004 | 0.021479 | down | 1.487022 | DEF6      | . |
| cg1497178 | 0.048904 | down | 1.002553 | ACBD3     | . |
| cg1497523 | 0.026465 | down | 1.017371 | BHLHB8    | . |
| cg1502064 | 0.008262 | up   | 1.002383 | APC       | . |
| cg1504669 | 0.022277 | down | 1.095525 | CEBPG     | . |
| cg1506873 | 0.030794 | down | 1.044972 | FGF11     | . |
| cg1507665 | 0.046427 | down | 1.024419 | SLC9A1    | . |
| cg1507847 | 0.045933 | up   | 1.001807 | PARP2     | . |
| cg1512732 | 0.022996 | down | 1.043261 | CENTD1    | . |
| cg1515683 | 0.006774 | down | 1.203423 | SEPN1     | . |
| cg1517735 | 0.048163 | down | 1.16749  | UNC13D    | . |
| cg1517791 | 0.008409 | down | 1.053506 | DAND5     | . |
| cg1518868 | 0.018698 | down | 1.129468 | CDC45L    | . |
| cg1522510 | 0.046975 | down | 1.002596 | SAC3D1    | . |
| cg1524703 | 5.47E-04 | up   | 1.035132 | C14orf126 | . |
| cg1527268 | 0.032294 | down | 1.202108 | KIAA0319L | . |
| cg1528096 | 0.042724 | down | 1.009162 | RBM34     | . |
| cg1529832 | 0.021106 | down | 1.048088 | ACAT2     | . |
| cg1535794 | 0.017494 | down | 1.008927 | PRG2      | . |
| cg1538471 | 0.031418 | down | 1.007316 | PRPF3     | . |
| cg1542278 | 0.031209 | up   | 1.053871 | LRRC8B    | . |
| cg1543919 | 0.025588 | down | 1.017427 | CNNM2     | . |
| cg1545394 | 0.011362 | up   | 1.056508 | RAB9P1    | . |
| cg1546151 | 0.039205 | down | 1.044375 | CHST1     | . |

|           |          |      |          |          |   |
|-----------|----------|------|----------|----------|---|
| cg1546414 | 0.035663 | down | 1.137383 | GPR92    | . |
| cg1547390 | 0.012795 | down | 1.024409 | MRPL41   | . |
| cg1548930 | 0.025064 | down | 1.040188 | AKR1B10  | . |
| cg1549828 | 0.002175 | up   | 1.001187 | TALDO1   | . |
| cg1550781 | 0.008754 | down | 1.004134 | WNT7B    | . |
| cg1554472 | 0.034134 | down | 1.200138 | PPP1R9A  | . |
| cg1556553 | 0.048834 | down | 1.048085 | GMPPB    | . |
| cg1557937 | 0.013901 | down | 1.004077 | SMOX     | . |
| cg1558481 | 0.048126 | down | 1.055956 | SLC38A4  | . |
| cg1559754 | 0.048688 | down | 1.00947  | CYB561D2 | . |
| cg1562357 | 0.009309 | down | 1.007816 | APBA1    | . |
| cg1564890 | 0.035027 | up   | 1.001889 | RPL12    | . |
| cg1565221 | 0.021529 | down | 1.519468 | FLJ90586 | . |
| cg1566406 | 0.041754 | down | 1.002489 | RASA1    | . |
| cg1567729 | 0.02506  | down | 1.181063 | TUBB4    | . |
| cg1567734 | 0.019202 | up   | 1.042991 | ADH1A    | . |
| cg1567965 | 0.046558 | down | 1.344226 | MAP4K1   | . |
| cg1572732 | 0.023847 | up   | 1.01975  | P11      | . |
| cg1575338 | 0.04078  | down | 1.008905 | TAF13    | . |
| cg1577823 | 0.036673 | down | 1.199953 | PHB2     | . |
| cg1578654 | 0.00497  | up   | 1.002639 | PVRL3    | . |
| cg1578687 | 0.011531 | down | 1.014684 | LOC57146 | . |
| cg1579815 | 0.020776 | down | 1.441937 | PFTK1    | . |
| cg1594654 | 0.030905 | up   | 1.003685 | MRPS31   | . |
| cg1595975 | 0.030134 | down | 1.002729 | SPAST    | . |
| cg1597261 | 0.032464 | down | 1.007806 | GM2A     | . |
| cg1598241 | 0.027789 | down | 1.210283 | RALBP1   | . |
| cg1603465 | 0.043655 | down | 1.077781 | KIAA1409 | . |
| cg1607538 | 0.014314 | down | 1.004542 | FLJ10099 | . |
| cg1609817 | 0.017663 | down | 1.014876 | JSRP1    | . |
| cg1611636 | 0.02609  | down | 1.000997 | SH3GLB1  | . |
| cg1612433 | 0.029085 | down | 1.0287   | UBE2J1   | . |
| cg1613786 | 0.044477 | down | 1.051142 | BCL2L1   | . |
| cg1620428 | 0.037629 | down | 1.018455 | FLJ13391 | . |

|           |          |      |          |          |   |
|-----------|----------|------|----------|----------|---|
| cg1625341 | 0.048916 | down | 1.015472 | TPST1    | . |
| cg1629308 | 0.04514  | up   | 1.003075 | NF2      | . |
| cg1629934 | 0.02379  | down | 1.005763 | OSBPL9   | . |
| cg1629961 | 0.004881 | down | 1.018053 | NOMO2    | . |
| cg1630161 | 0.02469  | down | 1.156954 | TMC6     | . |
| cg1633206 | 0.0099   | down | 1.005169 | FLJ21827 | . |
| cg1634137 | 0.045454 | up   | 1.00261  | CDCA8    | . |
| cg1635341 | 0.026179 | down | 1.004119 | CENPB    | . |
| cg1636213 | 0.017416 | down | 1.254534 | SLC11A2  | . |
| cg1640410 | 0.045844 | down | 1.081365 | FLJ23514 | . |
| cg1641115 | 0.043828 | up   | 1.040962 | ADAM29   | . |
| cg1641934 | 0.026319 | down | 1.065766 | ACOX1    | . |
| cg1642088 | 0.013018 | down | 1.00381  | DRAP1    | . |
| cg1646872 | 0.031138 | down | 1.030651 | IL8      | . |
| cg1647469 | 0.017995 | down | 1.03962  | MGC3207  | . |
| cg1647732 | 0.020362 | down | 1.005431 | ADCK4    | . |
| cg1648605 | 0.045893 | down | 1.013853 | C1orf135 | . |
| cg1650033 | 0.007408 | down | 1.111888 | SUMO3    | . |
| cg1651499 | 0.028703 | down | 1.100287 | CCDC76   | . |
| cg1655820 | 0.037616 | down | 1.25761  | SLC22A14 | . |
| cg1660559 | 0.044671 | up   | 1.001869 | MKI67IP  | . |
| cg1662590 | 0.021406 | up   | 1.043889 | ANKRD32  | . |
| cg1666645 | 0.035019 | down | 1.00174  | LRRC40   | . |
| cg1671722 | 0.010687 | up   | 1.122099 | GLT1D1   | . |
| cg1671867 | 0.003878 | up   | 1.002134 | NRXN2    | . |
| cg1674646 | 0.028775 | down | 1.007606 | LNPEP    | . |
| cg1677635 | 0.040436 | down | 1.049564 | CD84     | . |
| cg1677890 | 0.04573  | up   | 1.001544 | BRUNOL6  | . |
| cg1680264 | 0.01714  | down | 1.006866 | WWC1     | . |
| cg1680791 | 0.01332  | up   | 1.006635 | CDK4     | . |
| cg1687207 | 0.043463 | down | 1.113869 | RALGDS   | . |
| cg1689903 | 0.049473 | down | 1.183904 | HOMER3   | . |
| cg1691727 | 0.019464 | down | 1.001755 | MRS2L    | . |
| cg1695626 | 0.044976 | down | 1.006157 | CDK5RAP2 | . |

|           |          |      |          |            |   |
|-----------|----------|------|----------|------------|---|
| cg1697703 | 0.025335 | down | 1.112397 | ALX4       | . |
| cg1698315 | 0.011411 | up   | 1.031013 | LOC340061. |   |
| cg1701011 | 0.03617  | down | 1.036154 | GENX-3414. |   |
| cg1704461 | 0.026333 | up   | 1.002728 | ASAH1      | . |
| cg1709206 | 0.035959 | up   | 1.003806 | SLC35C1    | . |
| cg1709579 | 0.028854 | down | 1.167985 | FOXL1      | . |
| cg1711525 | 0.010818 | up   | 1.003134 | TM2D3      | . |
| cg1712782 | 0.028468 | down | 1.117927 | TRAM1      | . |
| cg1713318 | 0.027366 | up   | 1.196846 | CRABP1     | . |
| cg1714218 | 0.046693 | down | 1.299238 | IL1R2      | . |
| cg1714565 | 0.026114 | down | 1.321637 | HOOK3      | . |
| cg1716375 | 0.003292 | down | 1.002599 | H2AFY2     | . |
| cg1716452 | 0.047498 | down | 1.098519 | CGB1       | . |
| cg1719117 | 0.037637 | down | 1.013288 | SHOX2      | . |
| cg1721410 | 0.043325 | down | 1.208851 | FGF2       | . |
| cg1721421 | 0.021195 | up   | 1.019442 | USP34      | . |
| cg1723360 | 0.04646  | down | 1.093294 | PTPN5      | . |
| cg1723706 | 0.017123 | down | 1.012589 | RBMS3      | . |
| cg1725530 | 0.039318 | down | 1.402303 | K6HF       | . |
| cg1727136 | 0.006078 | up   | 1.019769 | 1-Mar      | . |
| cg1734548 | 0.049599 | down | 1.027589 | SPPL3      | . |
| cg1738421 | 0.017072 | down | 1.029921 | C6orf48    | . |
| cg1739828 | 0.023509 | down | 1.092436 | CCDC76     | . |
| cg1740868 | 0.046765 | down | 1.216077 | CHCHD6     | . |
| cg1741225 | 0.047201 | up   | 1.088553 | DLK1       | . |
| cg1741235 | 0.03562  | down | 1.077127 | STYXL1     | . |
| cg1756072 | 0.012091 | down | 1.008606 | FBXO18     | . |
| cg1762755 | 0.019972 | down | 1.196816 | TSPAN32    | . |
| cg1765396 | 0.006774 | up   | 1.035786 | SPHAR      | . |
| cg1768688 | 0.035418 | down | 1.18882  | TOM1L1     | . |
| cg1771479 | 0.006937 | down | 1.0037   | BNIP1      | . |
| cg1772994 | 0.044102 | down | 1.052923 | S100A13    | . |
| cg1774064 | 0.038148 | down | 1.091412 | GRB7       | . |
| cg1775156 | 0.023206 | up   | 1.030303 | CD180      | . |

|           |          |      |          |           |   |
|-----------|----------|------|----------|-----------|---|
| cg1775312 | 0.020454 | down | 1.249363 | IER2      | . |
| cg1775558 | 0.048237 | down | 1.023909 | VAPB      | . |
| cg1777088 | 0.02962  | down | 1.218216 | ZNF511    | . |
| cg1780884 | 0.031334 | down | 1.073409 | HERPUD1   | . |
| cg1786899 | 0.025975 | down | 1.006001 | NIPSNAP3E | . |
| cg1790331 | 0.023791 | up   | 1.057519 | LOXHD1    | . |
| cg1792019 | 0.032851 | down | 1.085573 | LGI4      | . |
| cg1796120 | 0.04504  | down | 1.035841 | CEL       | . |
| cg1802292 | 0.00609  | down | 1.006742 | MAWBP     | . |
| cg1803670 | 0.007806 | down | 1.007789 | TBCE      | . |
| cg1804328 | 0.048113 | down | 1.006803 | AOC2      | . |
| cg1804797 | 0.023909 | up   | 1.012709 | GADL1     | . |
| cg1808479 | 0.014298 | down | 1.003778 | RHPN2     | . |
| cg1809022 | 0.028006 | down | 1.010837 | MAK10     | . |
| cg1810315 | 0.044457 | down | 1.011663 | C11orf47  | . |
| cg1813770 | 0.031585 | down | 1.107406 | CECR6     | . |
| cg1819562 | 0.005609 | down | 1.011344 | MRPL48    | . |
| cg1821571 | 0.021523 | down | 1.010033 | TMEM111   | . |
| cg1822476 | 0.039442 | down | 1.106407 | C1orf33   | . |
| cg1826468 | 0.047012 | down | 1.019783 | MLLT3     | . |
| cg1827226 | 0.040044 | down | 1.190042 | CACNB4    | . |
| cg1827512 | 0.023593 | up   | 1.030908 | SIAE      | . |
| cg1827974 | 0.044368 | down | 1.314068 | RPS2      | . |
| cg1831280 | 0.019904 | down | 1.004239 | RAB3GAP1  | . |
| cg1833020 | 0.041435 | down | 1.090795 | TNNT2     | . |
| cg1835045 | 0.033321 | up   | 1.001468 | EIF4EBP1  | . |
| cg1835356 | 0.01133  | down | 1.115725 | ABTB1     | . |
| cg1837097 | 0.044756 | up   | 1.033644 | C5orf21   | . |
| cg1838339 | 0.039161 | down | 1.006347 | MON1B     | . |
| cg1839449 | 0.029234 | down | 1.001373 | LOC374395 | . |
| cg1843369 | 0.024354 | down | 1.194854 | ATP11C    | . |
| cg1845260 | 0.024086 | down | 1.023458 | MSRA      | . |
| cg1846455 | 0.044364 | down | 1.003735 | ITGB3BP   | . |
| cg1847731 | 0.042286 | down | 1.011964 | GOLGA5    | . |



|           |          |      |          |           |   |
|-----------|----------|------|----------|-----------|---|
| cg1848515 | 0.02266  | down | 1.00317  | TTLL4     | . |
| cg1848615 | 0.046012 | down | 1.178959 | KIF17     | . |
| cg1849323 | 0.026354 | up   | 1.073125 | ANKRD30A  | . |
| cg1850453 | 0.030802 | down | 1.005445 | RABGAP1L  | . |
| cg1852177 | 0.040938 | down | 1.096395 | C9orf91   | . |
| cg1854841 | 0.042421 | up   | 1.003027 | PHB       | . |
| cg1855714 | 0.043837 | down | 1.150981 | CD72      | . |
| cg1856551 | 0.00845  | down | 1.005816 | CENTB5    | . |
| cg1859679 | 0.047287 | down | 1.166218 | MPZL1     | . |
| cg1863085 | 0.036972 | down | 1.005732 | CEBPZ     | . |
| cg1863511 | 0.03445  | down | 1.004885 | C20orf116 | . |
| cg1865212 | 0.035576 | down | 1.002653 | NDUFB5    | . |
| cg1866538 | 0.048214 | down | 1.229355 | FLJ43505  | . |
| cg1866958 | 0.009456 | down | 1.058395 | PTK9L     | . |
| cg1869591 | 0.044406 | down | 1.007306 | FSTL5     | . |
| cg1870404 | 0.02438  | down | 1.027194 | PART1     | . |
| cg1871810 | 0.037126 | down | 1.023267 | SURF6     | . |
| cg1872188 | 0.013753 | down | 1.00407  | ARHGAP11  | . |
| cg1874080 | 0.018132 | up   | 1.05283  | HSPCAL3   | . |
| cg1874196 | 0.009999 | down | 1.006044 | TRIM23    | . |
| cg1877094 | 0.023429 | down | 1.038254 | USP51     | . |
| cg1878378 | 0.015418 | down | 1.136269 | MGC4399   | . |
| cg1881392 | 0.022053 | up   | 1.003035 | RUNX3     | . |
| cg1881853 | 0.038616 | down | 1.386812 | FOSL1     | . |
| cg1887071 | 0.029042 | down | 1.002518 | ZNF551    | . |
| cg1888722 | 0.033626 | up   | 1.037618 | PHF3      | . |
| cg1893254 | 0.022827 | up   | 1.00178  | STAG1     | . |
| cg1893815 | 0.01237  | down | 1.002055 | LSM12     | . |
| cg1895858 | 0.001809 | up   | 1.002389 | SHMT1     | . |
| cg1896473 | 0.006165 | down | 1.017288 | TMCO1     | . |
| cg1896784 | 0.041913 | down | 1.006429 | CLDN12    | . |
| cg1897281 | 0.007193 | down | 1.004885 | SLIT2     | . |
| cg1899677 | 0.02618  | down | 1.007105 | KPNA4     | . |
| cg1902173 | 0.039405 | down | 1.010328 | C15orf29  | . |

|           |          |      |          |           |   |
|-----------|----------|------|----------|-----------|---|
| cg1902880 | 0.030806 | down | 1.00214  | C1orf37   | . |
| cg1905157 | 0.027774 | down | 1.004392 | DEPDC1B   | . |
| cg1906198 | 0.045276 | down | 1.003776 | POLR1B    | . |
| cg1907033 | 0.037424 | down | 1.00376  | ASNSD1    | . |
| cg1909603 | 0.044117 | down | 1.003673 | LRPAP1    | . |
| cg1910081 | 0.047499 | down | 1.001705 | RPL32     | . |
| cg1911126 | 0.049885 | down | 1.176894 | IGSF9     | . |
| cg1916687 | 0.005023 | down | 1.010622 | FER1L3    | . |
| cg1923672 | 0.032611 | up   | 1.0358   | ZNF354B   | . |
| cg1927816 | 0.01911  | down | 1.003886 | DSCR1     | . |
| cg1927952 | 0.019536 | up   | 1.001282 | USF2      | . |
| cg1933532 | 0.030703 | up   | 1.038954 | PEG3      | . |
| cg1936858 | 0.039187 | down | 1.160506 | MMRN2     | . |
| cg1940419 | 5.30E-04 | down | 1.074231 | SPINK7    | . |
| cg1941267 | 0.048302 | down | 1.004399 | SNX24     | . |
| cg1941311 | 0.020276 | down | 1.003938 | POLR3GL   | . |
| cg1942761 | 0.030151 | down | 1.025175 | WIF1      | . |
| cg1943343 | 0.033286 | down | 1.381916 | FEZ1      | . |
| cg1945967 | 0.045041 | down | 1.005969 | SC4MOL    | . |
| cg1947070 | 0.045621 | down | 1.010285 | C20orf149 | . |
| cg1948258 | 0.023535 | up   | 1.003306 | ABHD4     | . |
| cg1953560 | 0.009485 | down | 1.173307 | B3GNT4    | . |
| cg1953612 | 0.040105 | down | 1.129124 | CALM2     | . |
| cg1955372 | 0.026168 | down | 1.382506 | FAM106A   | . |
| cg1956028 | 0.001843 | down | 1.071016 | GEMIN5    | . |
| cg1957448 | 4.51E-04 | down | 1.067484 | FHIT      | . |
| cg1958473 | 0.020729 | up   | 1.036547 | DENND4C   | . |
| cg1959158 | 0.043837 | up   | 1.001564 | SACM1L    | . |
| cg1960132 | 0.021766 | down | 1.137859 | MAP3K14   | . |
| cg1962236 | 0.033188 | down | 1.0016   | MTR       | . |
| cg1970905 | 0.019754 | down | 1.008896 | MGC43122  | . |
| cg1971424 | 0.047376 | down | 1.008954 | STCH      | . |
| cg1977869 | 0.021165 | down | 1.080393 | MAFK      | . |
| cg1978105 | 0.026108 | down | 1.001636 | TJP1      | . |

|           |          |      |          |          |   |
|-----------|----------|------|----------|----------|---|
| cg1980156 | 0.009592 | up   | 1.010547 | HIST1H4G | . |
| cg1982384 | 0.027769 | up   | 1.077419 | PBOV1    | . |
| cg1983259 | 0.023156 | down | 1.003009 | GARS     | . |
| cg1984692 | 0.015908 | down | 1.004805 | MRPL44   | . |
| cg1986234 | 0.049622 | down | 1.018706 | RHAG     | . |
| cg1986374 | 0.025732 | down | 1.259208 | PARVG    | . |
| cg1986869 | 0.043221 | down | 1.137754 | WNT10A   | . |
| cg1988958 | 0.021778 | down | 1.128349 | LAT1-3TM | . |
| cg1989085 | 0.02725  | down | 1.003879 | PP2447   | . |
| cg1992177 | 0.043889 | down | 1.003718 | C1orf22  | . |
| cg1996138 | 0.026903 | down | 1.004801 | RANGAP1  | . |
| cg1997180 | 0.029338 | down | 1.002289 | MORN2    | . |
| cg2000046 | 0.008169 | down | 1.033607 | IFNAR2   | . |
| cg2002565 | 0.022685 | down | 1.0469   | ACTA1    | . |
| cg2003067 | 0.047279 | down | 1.002096 | FBXO28   | . |
| cg2004346 | 0.042413 | down | 1.008786 | C20orf19 | . |
| cg2006667 | 0.041815 | down | 1.211303 | CHFR     | . |
| cg2007404 | 0.024739 | down | 1.019168 | SECISBP2 | . |
| cg2008264 | 0.04906  | down | 1.041167 | PAQR5    | . |
| cg2009267 | 0.04398  | up   | 1.000753 | ABCF3    | . |
| cg2009726 | 0.046606 | down | 1.060535 | HBXIP    | . |
| cg2009888 | 0.045094 | down | 1.042594 | RAB32    | . |
| cg2009980 | 0.038077 | down | 1.049807 | CCDC47   | . |
| cg2014949 | 0.046817 | down | 1.003372 | PDCD5    | . |
| cg2015824 | 0.045851 | down | 1.10812  | ABCC1    | . |
| cg2022527 | 0.027577 | down | 1.00599  | ATP6V0E  | . |
| cg2022591 | 0.026166 | down | 1.108821 | LRDD     | . |
| cg2024086 | 0.039297 | down | 1.082889 | PHACS    | . |
| cg2024710 | 0.04005  | down | 1.004324 | RASA2    | . |
| cg2030572 | 0.008451 | down | 1.042132 | DEFB126  | . |
| cg2032416 | 0.00194  | down | 1.070315 | KRT8     | . |
| cg2032551 | 0.033906 | down | 1.008362 | FLJ23518 | . |
| cg2032685 | 0.00622  | down | 1.006716 | CPSF1    | . |
| cg2033029 | 0.012385 | down | 1.006535 | NDUFS7   | . |

|           |          |      |          |           |   |
|-----------|----------|------|----------|-----------|---|
| cg2033330 | 0.023546 | up   | 1.032636 | RB1       | . |
| cg2038522 | 0.036697 | down | 1.149799 | ALKBH     | . |
| cg2039428 | 0.037073 | down | 1.403382 | JAK2      | . |
| cg2045076 | 0.030699 | down | 1.193617 | TSPAN7    | . |
| cg2051871 | 0.006474 | down | 1.003422 | EEF1G     | . |
| cg2053799 | 0.036561 | down | 1.041055 | CDCA5     | . |
| cg2055151 | 0.045837 | down | 1.025047 | GIP       | . |
| cg2055703 | 0.009104 | down | 1.002892 | COBLL1    | . |
| cg2061261 | 0.006921 | down | 1.0024   | PREP      | . |
| cg2063065 | 0.049959 | down | 1.214096 | RNUT1     | . |
| cg2067544 | 0.039993 | down | 1.173232 | COG8      | . |
| cg2070733 | 0.045105 | down | 1.00691  | C20orf177 | . |
| cg2072407 | 0.008926 | down | 1.023708 | MLX       | . |
| cg2074374 | 0.010834 | down | 1.298975 | CTBP1     | . |
| cg2075535 | 0.025484 | down | 1.033769 | SSU72     | . |
| cg2077631 | 0.028235 | down | 1.031758 | SNAPC4    | . |
| cg2077866 | 0.023676 | up   | 1.039731 | MGMT      | . |
| cg2083378 | 0.03173  | down | 1.073903 | MRGPRX3   | . |
| cg2084813 | 0.03077  | down | 1.07139  | GJA12     | . |
| cg2085534 | 0.047691 | down | 1.36215  | NR1D2     | . |
| cg2085643 | 0.019145 | down | 1.005614 | RPS27A    | . |
| cg2090052 | 0.030528 | down | 1.009904 | PPT1      | . |
| cg2092595 | 0.049494 | down | 1.06378  | DUSP5     | . |
| cg2095583 | 0.045903 | down | 1.003704 | LRRC16    | . |
| cg2103963 | 0.032155 | down | 1.272721 | CD58      | . |
| cg2107582 | 0.040705 | down | 1.071516 | FAM62C    | . |
| cg2112252 | 0.01276  | down | 1.004363 | CHERP     | . |
| cg2119512 | 0.003444 | down | 1.009659 | MBTPS2    | . |
| cg2120342 | 0.029465 | up   | 1.003328 | BRWD1     | . |
| cg2123039 | 0.031106 | up   | 1.015158 | PROM1     | . |
| cg2123201 | 0.018138 | down | 1.469136 | CHFR      | . |
| cg2128051 | 0.032158 | down | 1.035841 | NT5C1A    | . |
| cg2131117 | 0.029107 | down | 1.018253 | HIRA      | . |
| cg2138728 | 0.039652 | down | 1.121483 | OGFR      | . |

|           |          |      |          |           |   |
|-----------|----------|------|----------|-----------|---|
| cg2141623 | 0.028216 | down | 1.198972 | FKBP10    | . |
| cg2150106 | 0.046124 | down | 1.195565 | 6-Sep     | . |
| cg2150462 | 0.049729 | down | 1.121385 | IL11RA    | . |
| cg2154209 | 0.016713 | down | 1.037955 | PFKFB3    | . |
| cg2158443 | 0.027658 | down | 1.14323  | ADORA2A   | . |
| cg2159631 | 0.047774 | down | 1.007479 | PAM       | . |
| cg2161170 | 0.037948 | down | 1.033928 | TGM3      | . |
| cg2161566 | 0.038567 | down | 1.027946 | MGC35048  | . |
| cg2162120 | 0.026175 | up   | 1.073059 | HTN1      | . |
| cg2162989 | 0.013975 | down | 1.174084 | DNMT3A    | . |
| cg2166072 | 0.041811 | down | 1.003785 | PCGF3     | . |
| cg2167838 | 0.047981 | down | 1.012941 | ZNF354B   | . |
| cg2168282 | 0.01959  | up   | 1.002207 | HERPUD1   | . |
| cg2168556 | 5.09E-04 | down | 1.013289 | GNA12     | . |
| cg2169713 | 0.024393 | down | 1.149194 | FN3K      | . |
| cg2170914 | 0.020926 | up   | 1.002051 | GORASP2   | . |
| cg2172918 | 0.003046 | up   | 1.0009   | HIST1H4H  | . |
| cg2175058 | 0.033904 | down | 1.090751 | ZNF323    | . |
| cg2178526 | 0.032003 | down | 1.003266 | C2orf24   | . |
| cg2178553 | 0.041069 | down | 1.033814 | AER61     | . |
| cg2180272 | 0.035309 | down | 1.005063 | C20orf31  | . |
| cg2184403 | 0.034788 | down | 1.109513 | FAM100A   | . |
| cg2184690 | 0.039346 | down | 1.078841 | VTN       | . |
| cg2191850 | 0.021167 | down | 1.036157 | ZNF124    | . |
| cg2192273 | 0.02475  | down | 1.196933 | HSD17B6   | . |
| cg2194365 | 0.048128 | up   | 1.001709 | HIPK1     | . |
| cg2196011 | 0.035242 | down | 1.163804 | HBZ       | . |
| cg2197327 | 0.026486 | down | 1.003874 | SMAD6     | . |
| cg2198547 | 0.017972 | down | 1.097685 | PKLR      | . |
| cg2200178 | 0.018784 | down | 1.009777 | BCL9      | . |
| cg2200556 | 0.003581 | down | 1.120007 | FLJ23878  | . |
| cg2200992 | 0.046696 | down | 1.116275 | CD151     | . |
| cg2203173 | 0.014816 | down | 1.005092 | LOC129138 | . |
| cg2204528 | 0.044092 | down | 1.11811  | C10orf91  | . |

|           |          |      |          |          |   |
|-----------|----------|------|----------|----------|---|
| cg2207710 | 0.040665 | down | 1.038503 | MRPL22   | . |
| cg2213987 | 0.027236 | down | 1.003043 | IFIT5    | . |
| cg2216867 | 0.042905 | down | 1.145664 | OFCC1    | . |
| cg2218414 | 0.043747 | down | 1.027357 | POLR2B   | . |
| cg2219783 | 0.034674 | down | 1.204161 | C5orf14  | . |
| cg2224253 | 0.016904 | down | 1.306559 | SERPINF1 | . |
| cg2224412 | 0.00964  | down | 1.104478 | SURF4    | . |
| cg2225535 | 0.044512 | up   | 1.001768 | HKR2     | . |
| cg2226214 | 0.045237 | down | 1.219566 | FLJ36046 | . |
| cg2227466 | 0.048606 | down | 1.011613 | FLJ31413 | . |
| cg2228108 | 0.012777 | down | 1.007159 | MGC3265  | . |
| cg2228267 | 0.046153 | down | 1.027011 | FLJ32921 | . |
| cg2233534 | 0.045068 | down | 1.034179 | PTPN6    | . |
| cg2238003 | 0.026846 | down | 1.00301  | GRB14    | . |
| cg2240555 | 0.029483 | down | 1.001968 | ALG12    | . |
| cg2247543 | 0.006594 | down | 1.013656 | ATN1     | . |
| cg2249825 | 0.014771 | down | 1.018404 | TWIST1   | . |
| cg2250139 | 0.025853 | up   | 1.001705 | ALKBH6   | . |
| cg2252986 | 0.035697 | up   | 1.002059 | GALNTL4  | . |
| cg2257221 | 0.009944 | down | 1.005058 | SLC33A1  | . |
| cg2259378 | 0.008473 | down | 1.007166 | C1RL     | . |
| cg2267279 | 0.037852 | down | 1.021285 | GABRA6   | . |
| cg2274709 | 0.027786 | down | 1.364954 | BTBD14A  | . |
| cg2276230 | 0.043824 | down | 1.128379 | OTUD6A   | . |
| cg2278042 | 0.038507 | down | 1.006453 | CEPT1    | . |
| cg2278139 | 0.034446 | down | 1.000549 | CDK2     | . |
| cg2278249 | 0.002346 | down | 1.008186 | VHL      | . |
| cg2281424 | 0.017009 | up   | 1.001969 | SIRT2    | . |
| cg2281617 | 0.01227  | down | 1.003625 | DDX50    | . |
| cg2289223 | 0.004149 | down | 1.003226 | DPY19L3  | . |
| cg2293384 | 0.022777 | down | 1.19915  | MRGPRF   | . |
| cg2303384 | 0.005464 | down | 1.017251 | TMEM88   | . |
| cg2303481 | 0.040181 | down | 1.05299  | BTBD6    | . |
| cg2303555 | 0.023401 | down | 1.002674 | HLRC1    | . |

|           |          |      |          |          |   |
|-----------|----------|------|----------|----------|---|
| cg2306930 | 0.041072 | down | 1.017995 | SENP1    | . |
| cg2310655 | 0.049923 | down | 1.05325  | METTL1   | . |
| cg2313025 | 0.0402   | up   | 1.009765 | HOXD12   | . |
| cg2314185 | 0.032444 | down | 1.009942 | TFPI2    | . |
| cg2316628 | 0.049235 | down | 1.237225 | C1orf107 | . |
| cg2317286 | 0.043272 | down | 1.005317 | GOPC     | . |
| cg2317932 | 0.042721 | down | 1.020465 | RPP38    | . |
| cg2319177 | 0.041615 | down | 1.003463 | IDH3B    | . |
| cg2319613 | 0.03509  | down | 1.001046 | POLR2A   | . |
| cg2319655 | 0.006527 | up   | 1.041616 | FLJ44691 | . |
| cg2321476 | 7.72E-04 | down | 1.083284 | PRSS23   | . |
| cg2321618 | 0.011169 | down | 1.01542  | DGCR8    | . |
| cg2322817 | 0.036808 | down | 1.032583 | PADI4    | . |
| cg2325404 | 0.005785 | down | 1.059824 | TMCO5    | . |
| cg2325784 | 0.021749 | down | 1.002057 | ZNF264   | . |
| cg2327333 | 0.02541  | down | 1.056606 | ESRRG    | . |
| cg2332005 | 0.047205 | up   | 1.010489 | ARHGEF2  | . |
| cg2335203 | 0.027217 | down | 1.004914 | PRIC285  | . |
| cg2336383 | 0.032513 | down | 1.164472 | RBP1     | . |
| cg2339838 | 0.034552 | down | 1.00507  | PIK3R4   | . |
| cg2340862 | 0.027257 | up   | 1.074109 | F11      | . |
| cg2343234 | 0.032094 | down | 1.006217 | HOXA7    | . |
| cg2345669 | 0.02759  | down | 1.001694 | EDEM1    | . |
| cg2349370 | 0.049488 | down | 1.138347 | SLC10A3  | . |
| cg2355792 | 0.021592 | down | 1.049353 | CFH      | . |
| cg2359592 | 0.049855 | down | 1.226749 | MYL5     | . |
| cg2364126 | 0.017671 | down | 1.46119  | JRK      | . |
| cg2364421 | 0.025614 | down | 1.00603  | PIGO     | . |
| cg2364509 | 0.048697 | down | 1.124148 | KRT5     | . |
| cg2365135 | 0.025435 | down | 1.184278 | RGS17    | . |
| cg2365638 | 0.032806 | down | 1.150896 | SLC12A4  | . |
| cg2366333 | 0.005206 | down | 1.047048 | RBM13    | . |
| cg2366863 | 0.034542 | down | 1.119594 | CAMKK1   | . |
| cg2367488 | 0.038607 | down | 1.117585 | LOXL3    | . |

|           |          |      |          |           |   |
|-----------|----------|------|----------|-----------|---|
| cg2369828 | 0.047818 | down | 1.032515 | HDAC1     | . |
| cg2373776 | 0.00494  | up   | 1.097107 | KRT24     | . |
| cg2374635 | 0.047267 | down | 1.071641 | FAM19A3   | . |
| cg2379931 | 0.036468 | down | 1.203091 | PAQR7     | . |
| cg2381657 | 0.048844 | up   | 1.001175 | CEP68     | . |
| cg2382481 | 0.040812 | up   | 1.00542  | ZNF333    | . |
| cg2383389 | 0.039809 | up   | 1.019839 | CLN8      | . |
| cg2385400 | 0.008867 | down | 1.008403 | ZNF530    | . |
| cg2387165 | 0.028833 | down | 1.14451  | TANK      | . |
| cg2390255 | 0.033971 | down | 1.183824 | TIGD5     | . |
| cg2396867 | 0.010161 | up   | 1.002204 | LENG4     | . |
| cg2398388 | 0.040168 | down | 1.021971 | DBN1      | . |
| cg2400910 | 0.023847 | down | 1.007497 | CCDC12    | . |
| cg2401402 | 0.043162 | down | 1.00688  | PIGQ      | . |
| cg2408052 | 0.027432 | down | 1.10883  | TIMP3     | . |
| cg2410989 | 0.0105   | down | 1.053139 | PSMB2     | . |
| cg2411562 | 0.028501 | down | 1.018548 | HSD3B7    | . |
| cg2413658 | 0.003312 | down | 1.017533 | ATG10     | . |
| cg2414521 | 0.023526 | down | 1.012597 | NPM1      | . |
| cg2416609 | 0.021111 | down | 1.013072 | NPM3      | . |
| cg2420625 | 0.046224 | down | 1.020883 | MAT2B     | . |
| cg2421071 | 0.021743 | down | 1.081782 | GPD1      | . |
| cg2421670 | 0.021159 | down | 1.484552 | CDX1      | . |
| cg2423757 | 0.023066 | down | 1.150774 | DNASE1L2  | . |
| cg2425420 | 0.01181  | down | 1.023386 | SNRPD2    | . |
| cg2428676 | 0.007637 | up   | 1.003032 | LOC51255  | . |
| cg2432437 | 0.032579 | down | 1.003612 | IDH1      | . |
| cg2433487 | 0.008751 | up   | 1.002233 | NKTR      | . |
| cg2434112 | 0.029888 | down | 1.04246  | BNC2      | . |
| cg2434153 | 0.037905 | down | 1.006478 | SQSTM1    | . |
| cg2437138 | 0.028405 | up   | 1.002159 | CEP55     | . |
| cg2444229 | 0.001694 | down | 1.002726 | C20orf111 | . |
| cg2444388 | 0.001952 | down | 1.005377 | ZNF227    | . |
| cg2446980 | 0.037839 | down | 1.008382 | POLR3A    | . |



|           |          |      |          |          |   |
|-----------|----------|------|----------|----------|---|
| cg2447838 | 0.039462 | down | 1.007943 | SUMF2    | . |
| cg2448116 | 0.027716 | down | 1.068634 | POM121   | . |
| cg2449787 | 0.011199 | up   | 1.002572 | PUSL1    | . |
| cg2451297 | 0.036843 | up   | 1.034456 | MUC1     | . |
| cg2451606 | 0.00153  | down | 1.003782 | RGS19    | . |
| cg2452844 | 0.009018 | down | 1.00852  | NR2F1    | . |
| cg2459647 | 0.037754 | up   | 1.00582  | TOP1MT   | . |
| cg2463324 | 0.016477 | up   | 1.003573 | FTS      | . |
| cg2466296 | 0.046211 | down | 1.004262 | IRX3     | . |
| cg2468654 | 0.030202 | down | 1.005483 | SSX2IP   | . |
| cg2469703 | 0.023824 | down | 1.071846 | EVPL     | . |
| cg2471957 | 0.046611 | down | 1.011766 | REST     | . |
| cg2473020 | 0.038323 | down | 1.007344 | PTGES2   | . |
| cg2473548 | 0.042382 | down | 1.20458  | CDSN     | . |
| cg2473790 | 0.045675 | down | 1.009809 | FDXR     | . |
| cg2474328 | 0.038472 | down | 1.044901 | GNA12    | . |
| cg2474878 | 0.031964 | down | 1.0597   | SLC4A4   | . |
| cg2478110 | 0.036274 | down | 1.031414 | MYBPC1   | . |
| cg2482399 | 0.015103 | down | 1.002287 | NHP2L1   | . |
| cg2485859 | 0.037921 | down | 1.012662 | KIAA1143 | . |
| cg2488327 | 0.047996 | down | 1.000761 | PSAP     | . |
| cg2488804 | 0.036357 | down | 1.211953 | FES      | . |
| cg2489383 | 0.020839 | down | 1.076452 | ARSB     | . |
| cg2489505 | 0.033938 | down | 1.183722 | MPP3     | . |
| cg2491997 | 0.018225 | down | 1.155784 | FYCO1    | . |
| cg2492035 | 0.03     | down | 1.026832 | PPIE     | . |
| cg2493663 | 0.024642 | down | 1.010472 | DDX10    | . |
| cg2493770 | 0.012398 | up   | 1.002004 | RB1      | . |
| cg2493973 | 0.035121 | down | 1.284257 | FLJ38159 | . |
| cg2494739 | 0.040316 | down | 1.002197 | USP33    | . |
| cg2495724 | 0.002816 | down | 1.021066 | MTERFD3  | . |
| cg2498717 | 0.007703 | down | 1.098079 | ADCK1    | . |
| cg2501888 | 0.037458 | down | 1.137766 | IKBKAP   | . |
| cg2503314 | 0.043133 | down | 1.044537 | FLJ00060 | . |

|           |          |      |          |          |   |
|-----------|----------|------|----------|----------|---|
| cg2505330 | 0.014385 | down | 1.01777  | WDR13    | . |
| cg2508422 | 0.028699 | up   | 1.000982 | 3-Mar    | . |
| cg2508670 | 0.033996 | up   | 1.004021 | HMGB2    | . |
| cg2509595 | 3.21E-04 | down | 1.017392 | RPS26    | . |
| cg2512403 | 0.035853 | down | 1.177898 | MRPL48   | . |
| cg2515961 | 0.011906 | down | 1.005554 | PLK2     | . |
| cg2517864 | 0.024269 | down | 1.004542 | RUNX3    | . |
| cg2518169 | 0.022856 | down | 1.192218 | ALDH5A1  | . |
| cg2519241 | 0.037544 | up   | 1.002272 | DOCK5    | . |
| cg2520136 | 0.045463 | down | 1.065625 | LRPAP1   | . |
| cg2520398 | 0.03477  | down | 1.019476 | CENTB5   | . |
| cg2525672 | 0.005463 | down | 1.13852  | F5       | . |
| cg2525975 | 0.001467 | down | 1.004932 | FCRL3    | . |
| cg2527795 | 0.005084 | down | 1.228957 | EML2     | . |
| cg2530338 | 0.037316 | down | 1.065104 | BCDO2    | . |
| cg2532897 | 0.019492 | up   | 1.026801 | SPANXA1  | . |
| cg2539756 | 0.032915 | up   | 1.002597 | ZNF653   | . |
| cg2539777 | 0.049215 | up   | 1.002326 | MRPL20   | . |
| cg2545489 | 0.003068 | down | 1.002916 | CYP2R1   | . |
| cg2548591 | 0.049258 | down | 1.173946 | NTF5     | . |
| cg2548820 | 0.02054  | down | 1.007458 | RBM9     | . |
| cg2551430 | 0.022078 | down | 1.271814 | PSEN2    | . |
| cg2554455 | 0.023873 | up   | 1.001064 | NFYB     | . |
| cg2555391 | 0.019614 | down | 1.224593 | FLJ22318 | . |
| cg2556547 | 0.032304 | up   | 1.017691 | PANX1    | . |
| cg2558723 | 0.049402 | down | 1.157599 | PPP2R4   | . |
| cg2559167 | 0.046246 | down | 1.124469 | CXorf26  | . |
| cg2560488 | 0.02076  | down | 1.057786 | AK5      | . |
| cg2566472 | 0.003296 | up   | 1.000743 | NAGLU    | . |
| cg2566862 | 0.042332 | down | 1.203575 | OAS1     | . |
| cg2568390 | 0.039995 | down | 1.038719 | PARG     | . |
| cg2568789 | 0.006698 | down | 1.12123  | ACLY     | . |
| cg2568964 | 0.006491 | down | 1.056444 | FLJ22709 | . |
| cg2570590 | 0.010484 | down | 1.036217 | RNF144   | . |

|           |          |      |          |           |   |
|-----------|----------|------|----------|-----------|---|
| cg2571177 | 0.037944 | down | 1.100252 | EFEMP1    | . |
| cg2571330 | 0.046279 | up   | 1.00085  | FLJ22709  | . |
| cg2573225 | 0.029858 | down | 1.218934 | ST6GALNA6 | . |
| cg2573486 | 0.046387 | down | 1.030574 | PROZ      | . |
| cg2580209 | 0.043056 | down | 1.178218 | SPAG6     | . |
| cg2587026 | 0.034911 | down | 1.190669 | FNDC5     | . |
| cg2589348 | 0.018481 | down | 1.046044 | CXorf53   | . |
| cg2589697 | 0.045276 | up   | 1.002878 | SNX17     | . |
| cg2590312 | 0.020741 | down | 1.462911 | MGC2747   | . |
| cg2590981 | 0.04573  | up   | 1.001764 | KDEL2     | . |
| cg2592403 | 0.021617 | down | 1.002126 | BMS1L     | . |
| cg2594596 | 0.012486 | down | 1.001415 | SET7      | . |
| cg2594794 | 0.031521 | down | 1.007817 | LAD1      | . |
| cg2595435 | 0.045205 | down | 1.047014 | C9orf58   | . |
| cg2600103 | 0.048461 | down | 1.001114 | RABGAP1L  | . |
| cg2600846 | 0.031796 | down | 1.002364 | SLC2A12   | . |
| cg2603980 | 0.002053 | down | 1.004176 | RNF121    | . |
| cg2605073 | 0.034296 | down | 1.08179  | TNRC4     | . |
| cg2605439 | 0.032772 | down | 1.002959 | MTF2      | . |
| cg2606584 | 0.040733 | down | 1.337957 | CHAC1     | . |
| cg2609368 | 0.019702 | down | 1.073844 | EIF3S2    | . |
| cg2612401 | 0.044054 | down | 1.008815 | RARB      | . |
| cg2612927 | 0.025633 | down | 1.00519  | FZD5      | . |
| cg2613936 | 0.049216 | up   | 1.001975 | IFRD2     | . |
| cg2615167 | 0.045095 | down | 1.256677 | CNR2      | . |
| cg2617994 | 0.037038 | down | 1.009499 | JAZF1     | . |
| cg2619949 | 0.040637 | down | 1.027545 | LIN9      | . |
| cg2620058 | 0.015094 | down | 1.083137 | KIAA1838  | . |
| cg2620543 | 0.043965 | up   | 1.032413 | PLN       | . |
| cg2625110 | 0.001639 | down | 1.04126  | RHOQ      | . |
| cg2630390 | 0.032921 | down | 1.003434 | GNPDA2    | . |
| cg2638574 | 0.024665 | down | 1.321071 | IMP4      | . |
| cg2640282 | 0.037356 | up   | 1.003164 | PCK2      | . |
| cg2649037 | 0.040885 | down | 1.260851 | TATDN1    | . |

|           |          |      |          |           |   |
|-----------|----------|------|----------|-----------|---|
| cg2649393 | 0.027695 | down | 1.008513 | ZNF664    | . |
| cg2652509 | 0.048732 | down | 1.054944 | MADCAM1   | . |
| cg2653811 | 0.036769 | down | 1.001962 | LRPPRC    | . |
| cg2654012 | 0.009887 | down | 1.004989 | ACTR3     | . |
| cg2660606 | 0.03135  | down | 1.031024 | EI24      | . |
| cg2661168 | 0.037077 | down | 1.135097 | FOXO1A    | . |
| cg2664641 | 0.033335 | down | 1.045641 | FLJ21125  | . |
| cg2665645 | 0.042555 | down | 1.185597 | HABP2     | . |
| cg2667744 | 0.03501  | down | 1.005912 | PAX2      | . |
| cg2669928 | 0.023531 | down | 1.006109 | AMID      | . |
| cg2670225 | 0.022931 | down | 1.006035 | KCND2     | . |
| cg2670457 | 0.002384 | down | 1.015135 | CYP1A1    | . |
| cg2674302 | 0.028777 | down | 1.125441 | CACNG4    | . |
| cg2674646 | 0.033044 | down | 1.146497 | KIAA0406  | . |
| cg2678385 | 0.036564 | down | 1.105171 | LRRRC8D   | . |
| cg2678821 | 0.038913 | up   | 1.00188  | SFRS8     | . |
| cg2679236 | 0.024238 | down | 1.021295 | LOC63929  | . |
| cg2682260 | 0.016956 | down | 1.009281 | GNL3L     | . |
| cg2684356 | 0.019475 | down | 1.298127 | CHST11    | . |
| cg2688458 | 0.023293 | down | 1.422969 | PYGM      | . |
| cg2690015 | 0.042827 | down | 1.223939 | OTOF      | . |
| cg2691114 | 0.023224 | up   | 1.002072 | RPL8      | . |
| cg2691660 | 0.046342 | down | 1.09878  | CETP      | . |
| cg2692949 | 0.020793 | down | 1.001846 | NIPBL     | . |
| cg2694026 | 0.028882 | down | 1.017452 | LOC387882 | . |
| cg2696787 | 0.032145 | down | 1.014364 | KLC2      | . |
| cg2698520 | 0.032841 | down | 1.020446 | LRCH3     | . |
| cg2701593 | 0.019446 | down | 1.023101 | MGC50721  | . |
| cg2703218 | 0.018362 | down | 1.150979 | TRMU      | . |
| cg2703764 | 0.012039 | down | 1.002729 | CASKIN2   | . |
| cg2706228 | 0.006999 | down | 1.001811 | RGS2      | . |
| cg2706761 | 0.002491 | down | 1.008327 | CYP4F3    | . |
| cg2714304 | 0.042751 | up   | 1.014422 | PDE3B     | . |
| cg2717639 | 0.040338 | down | 1.276605 | GNG7      | . |

|           |          |      |          |         |   |
|-----------|----------|------|----------|---------|---|
| cg2718537 | 0.005465 | down | 1.016614 | PTTG1   | . |
| cg2722133 | 0.025458 | up   | 1.006752 | KDEL2   | . |
| cg2722779 | 0.015419 | down | 1.045895 | THEG    | . |
| cg2725878 | 0.046803 | down | 1.002615 | ILF3    | . |
| cg2727740 | 0.014529 | down | 1.018283 | KMO     | . |
| cg2727829 | 0.019344 | down | 1.039825 | MTM1    | . |
| cg2728401 | 0.034062 | down | 1.003278 | DDX20   | . |
| cg2734710 | 0.036321 | down | 1.195914 | VWF     | . |
| cg2735643 | 0.009238 | up   | 1.102156 | C7orf9  | . |
| cg2738075 | 0.040274 | down | 1.115527 | SORBS3  | . |
| cg2739022 | 0.049344 | down | 1.155472 | RIS1    | . |
| cg2743185 | 0.026413 | down | 1.0086   | CDC34   | . |
| cg2745364 | 0.045105 | down | 1.125327 | BCAP31  | . |
| cg2747203 | 0.009486 | down | 1.021151 | VPS39   | . |
| cg2750807 | 0.042508 | down | 1.188205 | C7orf26 | . |
| cg2751914 | 0.043123 | down | 1.107173 | RPP21   | . |
| cg2755779 | 0.046714 | down | 1.149917 | LY6G6C  | . |
| cg2762689 | 0.040181 | down | 1.158577 | HDDC3   | . |
