# Supplementary material
Source: PubMed Central journal article supplement (PMC3470785)
Supplement: NIHMS377161-supplement-9.pdf [file NIHMS377161-supplement-9.pdf]

## DNA METHYLATION OVERLAP WITH TSGs

| TargetID   | p-value     | Regulation | Fold              |
|------------|-------------|------------|-------------------|
| cg00117172 | 0.004886982 | down       | 1.0057656 RUNX3   |
| cg00233307 | 0.03601812  | down       | 1.264897 MAP4K1   |
| cg00532335 | 0.037113205 | down       | 1.2167307 LGI1    |
| cg00655307 | 0.010517343 | down       | 1.0504227 ESR1    |
| cg00828602 | 0.049779586 | down       | 1.0068048 WNT5A   |
| cg00953256 | 0.02978021  | down       | 1.1559812 CCND1   |
| cg02519218 | 0.020803574 | down       | 1.4687146 CHFR    |
| cg03000603 | 0.036373258 | down       | 1.0139004 DHX34   |
| cg03001305 | 0.040087022 | down       | 1.2585757 STAT5A  |
| cg03950654 | 0.022243641 | down       | 1.0068648 ARRB2   |
| cg04717045 | 0.02397187  | down       | 1.1352248 CCND1   |
| cg04757093 | 0.0360537   | down       | 1.0920857 RUNX3   |
| cg05229898 | 0.014857085 | down       | 1.0093105 EGR1    |
| cg05260966 | 0.022152323 | down       | 1.1090835 TIMP3   |
| cg05852416 | 0.01563264  | up         | 1.0012873 NFKBIA  |
| cg06611744 | 0.024211025 | down       | 1.2026576 RASL11A |
| cg07380496 | 0.015449618 | down       | 1.0019941 MAP1B   |
| cg07580475 | 0.027472828 | down       | 1.0167663 SEMA3B  |
| cg08859916 | 6.34E-05    | down       | 1.0114857 PTEN    |
| cg08966293 | 4.72E-05    | down       | 1.0432624 MAPK3   |
| cg08996502 | 0.003914906 | down       | 1.0108676 SCRIB   |
| cg09106999 | 0.04845918  | down       | 1.1342369 CDK2    |
| cg09440289 | 0.04584665  | down       | 1.0125773 PTPRO   |
| cg10315128 | 0.04711259  | up         | 1.0027515 SMAD4   |
| cg10546523 | 0.0123313   | down       | 1.0027348 SEMA3B  |
| cg10709021 | 0.020885138 | down       | 1.0790322 WRN     |
| cg10716607 | 0.038653936 | down       | 1.0074066 TOPORS  |
| cg10818781 | 0.04121037  | down       | 1.1782813 PHB2    |
| cg11226328 | 0.04918694  | down       | 1.1160285 EPB41   |
| cg11516377 | 0.040247273 | down       | 1.109968 DPH1     |
| cg11563860 | 0.048019584 | down       | 1.0524021 CNTN4   |
| cg12032620 | 0.044300444 | down       | 1.0037194 TP53BP1 |

|            |                  |                   |
|------------|------------------|-------------------|
| cg12091944 | 0.02930433 down  | 1.0387295 BARD1   |
| cg12382902 | 0.03409247 down  | 1.0095288 CCND2   |
| cg12497564 | 0.015743613 down | 1.0923673 RBP1    |
| cg12654845 | 0.039256725 down | 1.141838 CLDN2    |
| cg12998614 | 0.041364744 down | 1.247476 KISS1R   |
| cg13315690 | 0.043822892 down | 1.1513113 OVCA2   |
| cg13343486 | 0.032629494 down | 1.0115095 KLK10   |
| cg13800022 | 0.015550529 down | 1.0048833 ITGB1   |
| cg13956671 | 0.047779813 down | 1.0090307 CUL2    |
| cg14358502 | 0.032462515 down | 1.0057781 NAT6    |
| cg14663065 | 0.033665977 down | 1.0027792 CTNNB1  |
| cg14824983 | 0.024514422 down | 1.020101 SEMA3B   |
| cg15020645 | 0.008261918 up   | 1.0023831 APC     |
| cg15489301 | 0.025064114 down | 1.0401878 AKR1B10 |
| cg15597540 | 0.048687726 down | 1.00947 CYB561D2  |
| cg15664067 | 0.041754406 down | 1.0024887 RASA1   |
| cg15679651 | 0.046557788 down | 1.3442262 MAP4K1  |
| cg15778232 | 0.036673088 down | 1.1999531 PHB2    |
| cg16293088 | 0.0451398 up     | 1.0030754 NF2     |
| cg16872071 | 0.04346331 down  | 1.1138693 RALGDS  |
| cg17412258 | 0.047201145 up   | 1.0885533 DLK1    |
| cg17627559 | 0.019972404 down | 1.1968164 TSPAN32 |
| cg18353563 | 0.011329789 down | 1.1157254 ABTB1   |
| cg18548413 | 0.04242135 up    | 1.0030267 PHB     |
| cg18813928 | 0.022053117 up   | 1.0030351 RUNX3   |
| cg18972811 | 0.007193056 down | 1.0048847 SLIT2   |
| cg19335327 | 0.030703343 up   | 1.0389541 PEG3    |
| cg19427610 | 0.030151248 down | 1.0251749 WIF1    |
| cg19574488 | 4.51E-04 down    | 1.0674837 FHIT    |
| cg19781053 | 0.026108159 down | 1.0016358 TJP1    |
| cg19863740 | 0.02573217 down  | 1.2592075 PARVG   |
| cg20066677 | 0.041814808 down | 1.2113032 CHFR    |
| cg20225915 | 0.026165586 down | 1.1088207 LRDD    |
| cg20333306 | 0.023546262 up   | 1.032636 RB1      |

|            |                  |                 |
|------------|------------------|-----------------|
| cg20394284 | 0.03707339 down  | 1.4033822 JAK2  |
| cg21039631 | 0.03215471 down  | 1.2727208 CD58  |
| cg21232015 | 0.018138077 down | 1.469136 CHFR   |
| cg22781397 | 0.03444608 down  | 1.0005491 CDK2  |
| cg22782492 | 0.002346391 down | 1.0081861 VHL   |
| cg22814247 | 0.017009337 up   | 1.0019691 SIRT2 |
| cg23069305 | 0.041072425 down | 1.0179946 SENP1 |
| cg23363832 | 0.03251344 down  | 1.164472 RBP1   |
| cg23698287 | 0.04781826 down  | 1.0325145 HDAC1 |
| cg24080529 | 0.027431753 down | 1.1088299 TIMP3 |
| cg24145210 | 0.023525612 down | 1.012597 NPM1   |
| cg24324379 | 0.032578666 down | 1.0036123 IDH1  |
| cg24895052 | 0.033938408 down | 1.1837218 MPP3  |
| cg24937706 | 0.012397943 up   | 1.0020038 RB1   |
| cg25178645 | 0.024269171 down | 1.0045421 RUNX3 |
| cg26124016 | 0.044053968 down | 1.0088153 RARB  |
