# Supplementary material
Source: PubMed Central journal article supplement (PMC3470785)
Supplement: NIHMS377161-supplement-10.pdf [file NIHMS377161-supplement-10.pdf]

| TargetID  | p-value  | (regulation) | FC       | Absolute SYMBOL |
|-----------|----------|--------------|----------|-----------------|
| cg0011717 | 0.004887 | down         | 1.005766 | RUNX3           |
| cg0095325 | 0.02978  | down         | 1.155981 | CCND1           |
| cg0196369 | 0.046317 | down         | 1.344843 | ELA2            |
| cg0302095 | 0.03809  | down         | 1.09631  | HMGA1           |
| cg0312733 | 0.037092 | down         | 1.028783 | ERG             |
| cg0317986 | 0.02707  | up           | 1.017075 | MMP12           |
| cg0455786 | 0.03519  | down         | 1.029465 | REL             |
| cg0496470 | 0.031521 | down         | 1.0079   | CBL             |
| cg0522989 | 0.014857 | down         | 1.009311 | EGR1            |
| cg0526096 | 0.022152 | down         | 1.109084 | TIMP3           |
| cg0611130 | 8.95E-05 | up           | 1.003832 | RAP2A           |
| cg0664602 | 0.044861 | down         | 1.115211 | RAB4A           |
| cg0689892 | 0.006107 | down         | 1.011341 | RAB18           |
| cg0885991 | 6.34E-05 | down         | 1.011486 | PTEN            |
| cg0896629 | 4.72E-05 | down         | 1.043262 | MAPK3           |
| cg0980501 | 0.037384 | down         | 1.003106 | THRB            |
| cg1126042 | 0.032426 | down         | 1.00375  | FOXA1           |
| cg1139561 | 0.046486 | down         | 1.007412 | RAB28           |
| cg1238290 | 0.034092 | down         | 1.009529 | CCND2           |
| cg1244918 | 0.036751 | down         | 1.262221 | ERAS            |
| cg1350405 | 0.042248 | down         | 1.138071 | CCR7            |
| cg1380002 | 0.015551 | down         | 1.004883 | ITGB1           |
| cg1446479 | 0.044814 | down         | 1.023225 | DDX6            |
| cg1452174 | 0.034745 | down         | 1.012688 | PAK1            |
| cg1457038 | 0.008608 | down         | 1.009525 | RAP2C           |
| cg1466306 | 0.033666 | down         | 1.002779 | CTNNB1          |
| cg1494426 | 0.027957 | down         | 1.242426 | RAB15           |
| cg1545394 | 0.011362 | up           | 1.056508 | RAB9P1          |
| cg1548930 | 0.025064 | down         | 1.040188 | AKR1B10         |
| cg1646872 | 0.031138 | down         | 1.030651 | IL8             |
| cg1768688 | 0.035418 | down         | 1.18882  | TOM1L1          |
| cg1847731 | 0.042286 | down         | 1.011964 | GOLGA5          |
