# Supplementary material
Source: PubMed Central journal article supplement (PMC3470785)
Supplement: NIHMS377161-supplement-11.pdf [file NIHMS377161-supplement-11.pdf]

Gene Symbol

SSEA3

SSEA4

SSEA1

XIST

FBX15

MYC

KLF4

SOX2

POU51

LIN28

NANOG

CDK6

TP53

CDKN2A

CDKN1A

THY1

ZEB2

COL6A2

EGR2

TGFB1

FGF7

GAS1

FOXP1

TGFBR2

CCND2

CASP8

CAMK2D

ID3

JAK2

CBX4

SLC38A5

PERP

SYNE2

CCND1  
FOXD1  
TCFAP2A  
PHOX2B  
CDH13  
ZIC3  
FGF4  
ETV5  
PHC1  
COBL  
DSG2  
JARID2  
DPPA5  
DNMT3L  
REX1  
TDGF1  
CBX7  
ASH2L  
SUV39H2  
MYST4  
CCNB1
