# Supplementary material
Source: PubMed Central journal article supplement (PMC3470785)
Supplement: NIHMS377161-supplement-12.pdf [file NIHMS377161-supplement-12.pdf]

| Probe Set  | Corrected p-value | Gene Symbol | Entrez Gene |
|------------|-------------------|-------------|-------------|
| AFFX-BioB- | 8.04E-07          | 3.71E-08    | .           |
| AFFX-BioB- | 1.38E-06          | 7.69E-08    | .           |
| AFFX-BioB- | 1.60E-06          | 9.34E-08    | .           |
| AFFX-BioC- | 3.43E-07          | 1.21E-08    | .           |
| AFFX-BioC- | 2.62E-07          | 8.42E-09    | .           |
| AFFX-BioDr | 2.59E-06          | 1.73E-07    | .           |
| AFFX-BioDr | 5.05E-06          | 4.13E-07    | .           |
| AFFX-CreX- | 2.88E-04          | 7.20E-05    | .           |
| AFFX-CreX- | 1.62E-04          | 3.52E-05    | .           |
| AFFX-DapX  | 0.008891          | 0.00457     | .           |
| AFFX-DapX  | 0.001097          | 3.74E-04    | .           |
| AFFX-DapX  | 8.01E-04          | 2.55E-04    | .           |
| AFFX-LysX- | 0.007696          | 0.003864    | .           |
| AFFX-LysX- | 0.009657          | 0.005038    | .           |
| AFFX-LysX- | 0.003132          | 0.001322    | .           |
| AFFX-PheX- | 0.002363          | 9.43E-04    | .           |
| AFFX-PheX- | 0.001634          | 6.04E-04    | .           |
| AFFX-PheX- | 0.002014          | 7.79E-04    | .           |
| AFFX-ThrX- | 0.010451          | 0.005524    | .           |
| AFFX-ThrX- | 0.004034          | 0.00179     | .           |
| AFFX-r2-Ec | 4.48E-06          | 3.55E-07    | .           |
| AFFX-r2-Ec | 8.25E-07          | 3.84E-08    | .           |
| AFFX-r2-Ec | 1.05E-04          | 2.05E-05    | .           |
| AFFX-r2-Ec | 6.72E-07          | 2.92E-08    | .           |
| AFFX-r2-Ec | 2.59E-07          | 8.31E-09    | .           |
| AFFX-r2-Ec | 1.08E-05          | 1.12E-06    | .           |
| AFFX-r2-Ec | 1.64E-05          | 1.94E-06    | .           |
| AFFX-r2-P1 | 1.97E-04          | 4.50E-05    | .           |
| AFFX-r2-P1 | 0.002706          | 0.00111     | .           |
| AFFX-r2-Bs | 0.006619          | 0.003231    | .           |
| AFFX-r2-Bs | 7.76E-04          | 2.45E-04    | .           |
| AFFX-r2-Bs | 8.83E-04          | 2.87E-04    | .           |
| AFFX-r2-Bs | 0.003461          | 0.001491    | .           |

|            |          |          |                           |
|------------|----------|----------|---------------------------|
| AFFX-r2-Bs | 0.001899 | 7.25E-04 | .                         |
| AFFX-r2-Bs | 0.001444 | 5.21E-04 | .                         |
| AFFX-r2-Bs | 0.001394 | 5.00E-04 | .                         |
| AFFX-r2-Bs | 0.001289 | 4.54E-04 | .                         |
| AFFX-r2-Bs | 0.004005 | 0.001775 | .                         |
| AFFX-r2-Bs | 0.001634 | 6.05E-04 | .                         |
| AFFX-r2-Bs | 0.006464 | 0.003142 | .                         |
| AFFX-HUM   | 2.69E-07 | 8.69E-09 | STAT1 6772 .              |
| AFFX-HUM   | 6.62E-08 | 1.31E-09 | STAT1 6772 .              |
| AFFX-HUM   | 4.59E-06 | 3.65E-07 | STAT1 6772 .              |
| AFFX-HUM   | 5.99E-06 | 5.17E-07 | STAT1 6772 .              |
| AFFX-HUM   | 4.69E-04 | 1.32E-04 | .                         |
| AFFX-HUM   | 7.39E-05 | 1.32E-05 | .                         |
| AFFX-HUM   | 2.44E-05 | 3.22E-06 | .                         |
| AFFX-HUM   | 0.005327 | 0.002497 | GAPDH 2597 .              |
| AFFX-HSAC  | 0.001462 | 5.29E-04 | ACTB 60 .                 |
| AFFX-HSAC  | 0.007629 | 0.003824 | ACTB 60 .                 |
| AFFX-HSAC  | 0.010624 | 0.005633 | ACTB 60 .                 |
| AFFX-M278  | 3.84E-04 | 1.03E-04 | .                         |
| AFFX-M278  | 0.047851 | 0.032614 | .                         |
| AFFX-M278  | 6.09E-04 | 1.82E-04 | .                         |
| AFFX-hum_  | 1.09E-06 | 5.50E-08 | .                         |
| 1007_s_at  | 5.01E-05 | 8.02E-06 | DDR1 780 .                |
| 1053_at    | 2.36E-04 | 5.61E-05 | RFC2 5982 .               |
| 117_at     | 0.026296 | 0.016273 | HSPA6 3310 .              |
| 121_at     | 2.92E-04 | 7.35E-05 | PAX8 7849 .               |
| 1255_g_at  | 2.13E-07 | 6.33E-09 | GUCA1A 2978 .             |
| 1294_at    | 3.32E-05 | 4.73E-06 | UBA7 7318 .               |
| 1316_at    | 4.11E-08 | 6.85E-10 | THRA 7067 .               |
| 1320_at    | 1.69E-05 | 2.01E-06 | PTPN21 11099 .            |
| 1438_at    | 0.007196 | 0.00357  | EPHB3 2049 .              |
| 1487_at    | 0.002949 | 0.001228 | ESRRA 2101 .              |
| 1598_g_at  | 3.13E-10 | 1.16E-12 | GAS6 /// LOC100133684 //. |
| 160020_at  | 0.00337  | 0.001445 | MMP14 4323 .              |

|           |          |          |         |          |
|-----------|----------|----------|---------|----------|
| 1729_at   | 1.70E-08 | 2.16E-10 | TRADD   | 8717 .   |
| 1773_at   | 0.00253  | 0.001024 | FNTB    | 2342 .   |
| 177_at    | 1.82E-04 | 4.09E-05 | PLD1    | 5337 .   |
| 179_at    | 1.08E-06 | 5.46E-08 | PMS2L11 | 441263 . |
| 1861_at   | 1.98E-04 | 4.53E-05 | BAD     | 572 .    |
| 200000_s_ | 2.04E-05 | 2.55E-06 | PRPF8   | 10594 .  |
| 200001_at | 1.60E-06 | 9.33E-08 | CAPNS1  | 826 .    |
| 200002_at | 5.84E-06 | 5.01E-07 | RPL35   | 11224 .  |
| 200003_s_ | 0.006254 | 0.003021 | RPL28   | 6158 .   |
| 200004_at | 0.004564 | 0.002078 | EIF4G2  | 1982 .   |
| 200005_at | 0.011291 | 0.006051 | EIF3D   | 8664 .   |
| 200008_s_ | 6.66E-04 | 2.03E-04 | GDI2    | 2665 .   |
| 200009_at | 1.95E-05 | 2.41E-06 | GDI2    | 2665 .   |
| 200010_at | 0.003161 | 0.001337 | RPL11   | 6135 .   |
| 200011_s_ | 0.002118 | 8.27E-04 | ARF3    | 377 .    |
| 200012_x_ | 0.021829 | 0.013119 | RPL21   | 6144 .   |
| 200013_at | 0.049392 | 0.033836 | RPL24   | 6152 .   |
| 200014_s_ | 2.18E-05 | 2.79E-06 | HNRNPC  | 3183 .   |
| 200015_s_ | 5.53E-05 | 9.07E-06 | 2-Sep   | 4735 .   |
| 200016_x_ | 2.73E-06 | 1.86E-07 | HNRNPA1 | 3178 .   |
| 200017_at | 1.31E-04 | 2.71E-05 | RPS27A  | 6233 .   |
| 200019_s_ | 2.58E-05 | 3.45E-06 | FAU     | 2197 .   |
| 200020_at | 6.86E-04 | 2.11E-04 | TARDBP  | 23435 .  |
| 200021_at | 0.006685 | 0.003271 | CFL1    | 1072 .   |
| 200025_s_ | 9.11E-05 | 1.72E-05 | RPL27   | 6155 .   |
| 200026_at | 0.021369 | 0.012794 | RPL34   | 6164 .   |
| 200028_s_ | 0.028399 | 0.017794 | STARD7  | 56910 .  |
| 200030_s_ | 0.034941 | 0.022634 | SLC25A3 | 5250 .   |
| 200032_s_ | 0.018006 | 0.01046  | RPL9    | 6133 .   |
| 200034_s_ | 0.007062 | 0.003493 | RPL6    | 6128 .   |
| 200035_at | 0.01442  | 0.008061 | DULLARD | 23399 .  |
| 200037_s_ | 6.64E-04 | 2.02E-04 | CBX3    | 11335 .  |
| 200038_s_ | 0.014601 | 0.008183 | RPL17   | 6139 .   |
| 200039_s_ | 1.81E-04 | 4.06E-05 | PSMB2   | 5690 .   |

|           |          |          |                              |         |
|-----------|----------|----------|------------------------------|---------|
| 200040_at | 1.01E-04 | 1.94E-05 | KHDRBS1                      | 10657 . |
| 200041_s_ | 3.10E-06 | 2.20E-07 | BAT1                         | 7919 .  |
| 200042_at | 3.86E-04 | 1.03E-04 | C22orf28                     | 51493 . |
| 200043_at | 3.20E-05 | 4.52E-06 | ERH                          | 2079 .  |
| 200044_at | 7.70E-04 | 2.43E-04 | SFRS9                        | 8683 .  |
| 200045_at | 0.002692 | 0.001103 | ABCF1                        | 23 .    |
| 200046_at | 1.02E-04 | 1.98E-05 | DAD1                         | 1603 .  |
| 200047_s_ | 0.007253 | 0.003604 | YY1                          | 7528 .  |
| 200048_s_ | 3.77E-06 | 2.83E-07 | JTB                          | 10899 . |
| 200049_at | 3.82E-07 | 1.39E-08 | MYST2                        | 11143 . |
| 200050_at | 1.10E-05 | 1.15E-06 | ZNF146                       | 7705 .  |
| 200051_at | 4.77E-04 | 1.34E-04 | SART1                        | 9092 .  |
| 200052_s_ | 7.56E-05 | 1.36E-05 | ILF2                         | 3608 .  |
| 200054_at | 0.001397 | 5.01E-04 | ZNF259                       | 8882 .  |
| 200057_s_ | 8.35E-05 | 1.54E-05 | NONO                         | 4841 .  |
| 200058_s_ | 4.30E-08 | 7.31E-10 | SNRNP200                     | 23020 . |
| 200059_s_ | 2.13E-05 | 2.71E-06 | RHOA                         | 387 .   |
| 200060_s_ | 3.99E-08 | 6.56E-10 | RNPS1                        | 10921 . |
| 200061_s_ | 0.038084 | 0.025023 | RPS24                        | 6229 .  |
| 200063_s_ | 1.74E-05 | 2.09E-06 | NPM1                         | 4869 .  |
| 200064_at | 5.11E-05 | 8.24E-06 | HSP90AB1                     | 3326 .  |
| 200066_at | 0.008499 | 0.004336 | IK                           | 3550 .  |
| 200067_x_ | 0.001801 | 6.79E-04 | SNX3                         | 8724 .  |
| 200069_at | 4.45E-06 | 3.52E-07 | SART3                        | 9733 .  |
| 200070_at | 0.003934 | 0.001738 | C2orf24                      | 27013 . |
| 200071_at | 0.002941 | 0.001224 | SMNDC1                       | 10285 . |
| 200072_s_ | 7.87E-05 | 1.43E-05 | HNRNPM                       | 4670 .  |
| 200073_s_ | 1.32E-05 | 1.47E-06 | HNRNPD                       | 3184 .  |
| 200075_s_ | 7.15E-05 | 1.26E-05 | GUK1                         | 2987 .  |
| 200077_s_ | 0.004266 | 0.001914 | OAZ1                         | 4946 .  |
| 200079_s_ | 0.001709 | 6.38E-04 | KARS                         | 3735 .  |
| 200080_s_ | 2.41E-04 | 5.77E-05 | H3F3A /// H3F:3020 /// 302:. |         |
| 200081_s_ | 0.025197 | 0.015502 | RPS6                         | 6194 .  |
| 200083_at | 0.021012 | 0.012546 | USP22                        | 23326 . |

|           |          |          |          |         |
|-----------|----------|----------|----------|---------|
| 200084_at | 0.047106 | 0.03204  | C11orf58 | 10944 . |
| 200091_s_ | 0.038057 | 0.025    | RPS25    | 6230 .  |
| 200092_s_ | 0.009592 | 0.004995 | RPL37    | 6167 .  |
| 200093_s_ | 3.32E-04 | 8.63E-05 | HINT1    | 3094 .  |
| 200095_x_ | 6.07E-04 | 1.81E-04 | RPS10    | 6204 .  |
| 200096_s_ | 2.07E-06 | 1.31E-07 | ATP6V0E1 | 8992 .  |
| 200097_s_ | 0.010179 | 0.005354 | HNRNPK   | 3190 .  |
| 200098_s_ | 5.93E-04 | 1.75E-04 | ANAPC5   | 51433 . |
| 200099_s_ | 0.002051 | 7.96E-04 | RPS3A    | 6189 .  |
| 200593_s_ | 4.70E-05 | 7.41E-06 | HNRNPU   | 3192 .  |
| 200594_x_ | 2.85E-06 | 1.97E-07 | HNRNPU   | 3192 .  |
| 200596_s_ | 1.15E-05 | 1.22E-06 | EIF3A    | 8661 .  |
| 200597_at | 3.00E-04 | 7.59E-05 | EIF3A    | 8661 .  |
| 200598_s_ | 0.001362 | 4.86E-04 | HSP90B1  | 7184 .  |
| 200600_at | 2.98E-04 | 7.53E-05 | MSN      | 4478 .  |
| 200601_at | 0.002633 | 0.001074 | ACTN4    | 81 .    |
| 200602_at | 4.01E-05 | 6.01E-06 | APP      | 351 .   |
| 200603_at | 0.031369 | 0.019981 | PRKAR1A  | 5573 .  |
| 200604_s_ | 1.62E-06 | 9.51E-08 | PRKAR1A  | 5573 .  |
| 200605_s_ | 0.002613 | 0.001065 | PRKAR1A  | 5573 .  |
| 200606_at | 0.001099 | 3.75E-04 | DSP      | 1832 .  |
| 200607_s_ | 0.008374 | 0.004262 | RAD21    | 5885 .  |
| 200608_s_ | 3.36E-04 | 8.73E-05 | RAD21    | 5885 .  |
| 200609_s_ | 9.25E-06 | 9.19E-07 | WDR1     | 9948 .  |
| 200610_s_ | 8.17E-08 | 1.75E-09 | NCL      | 4691 .  |
| 200611_s_ | 2.89E-04 | 7.25E-05 | WDR1     | 9948 .  |
| 200613_at | 2.50E-08 | 3.59E-10 | AP2M1    | 1173 .  |
| 200615_s_ | 1.93E-05 | 2.39E-06 | AP2B1    | 163 .   |
| 200616_s_ | 2.80E-04 | 6.98E-05 | MLEC     | 9761 .  |
| 200617_at | 1.62E-06 | 9.47E-08 | MLEC     | 9761 .  |
| 200618_at | 1.45E-04 | 3.06E-05 | LASP1    | 3927 .  |
| 200619_at | 4.21E-04 | 1.15E-04 | SF3B2    | 10992 . |
| 200620_at | 0.001438 | 5.19E-04 | TMEM59   | 9528 .  |
| 200621_at | 1.27E-08 | 1.42E-10 | CSRP1    | 1465 .  |

|           |          |          |                              |         |
|-----------|----------|----------|------------------------------|---------|
| 200624_s_ | 1.03E-04 | 1.99E-05 | MATR3                        | 9782 .  |
| 200625_s_ | 6.51E-04 | 1.97E-04 | CAP1                         | 10487 . |
| 200626_s_ | 3.60E-05 | 5.24E-06 | MATR3                        | 9782 .  |
| 200627_at | 3.54E-07 | 1.26E-08 | PTGES3                       | 10728 . |
| 200628_s_ | 0.013626 | 0.007545 | WARS                         | 7453 .  |
| 200630_x_ | 6.80E-05 | 1.18E-05 | SET                          | 6418 .  |
| 200631_s_ | 7.92E-07 | 3.62E-08 | SET                          | 6418 .  |
| 200633_at | 0.007579 | 0.003795 | UBB                          | 7314 .  |
| 200635_s_ | 0.013643 | 0.007555 | PTPRF                        | 5792 .  |
| 200636_s_ | 0.027961 | 0.017483 | PTPRF                        | 5792 .  |
| 200639_s_ | 0.002977 | 0.001242 | YWHAZ                        | 7534 .  |
| 200640_at | 0.006779 | 0.003325 | YWHAZ                        | 7534 .  |
| 200642_at | 6.98E-05 | 1.23E-05 | SOD1                         | 6647 .  |
| 200643_at | 5.14E-06 | 4.22E-07 | HDLBP                        | 3069 .  |
| 200644_at | 2.04E-04 | 4.68E-05 | MARCKSL1                     | 65108 . |
| 200645_at | 2.59E-06 | 1.74E-07 | GABARAP                      | 11337 . |
| 200646_s_ | 3.02E-05 | 4.22E-06 | NUCB1                        | 4924 .  |
| 200647_x_ | 0.043228 | 0.028989 | EIF3C /// EIF3C728689 /// 8( |         |
| 200648_s_ | 1.18E-06 | 6.18E-08 | GLUL                         | 2752 .  |
| 200649_at | 1.22E-08 | 1.36E-10 | NUCB1                        | 4924 .  |
| 200650_s_ | 0.009615 | 0.005009 | LDHA                         | 3939 .  |
| 200654_at | 2.50E-04 | 6.06E-05 | P4HB                         | 5034 .  |
| 200655_s_ | 0.030387 | 0.019265 | CALM1                        | 801 .   |
| 200656_s_ | 0.047255 | 0.03216  | P4HB                         | 5034 .  |
| 200657_at | 2.65E-06 | 1.80E-07 | SLC25A5                      | 292 .   |
| 200658_s_ | 1.30E-04 | 2.68E-05 | PHB                          | 5245 .  |
| 200659_s_ | 0.022648 | 0.013686 | PHB                          | 5245 .  |
| 200660_at | 1.25E-05 | 1.36E-06 | S100A11                      | 6282 .  |
| 200661_at | 1.94E-07 | 5.53E-09 | CTSA                         | 5476 .  |
| 200662_s_ | 0.001069 | 3.62E-04 | TOMM20                       | 9804 .  |
| 200663_at | 1.33E-06 | 7.30E-08 | CD63                         | 967 .   |
| 200665_s_ | 1.73E-04 | 3.82E-05 | SPARC                        | 6678 .  |
| 200667_at | 1.70E-04 | 3.74E-05 | UBE2D3                       | 7323 .  |
| 200668_s_ | 7.69E-05 | 1.39E-05 | UBE2D3                       | 7323 .  |

|           |          |          |         |         |
|-----------|----------|----------|---------|---------|
| 200669_s_ | 3.52E-04 | 9.26E-05 | UBE2D3  | 7323 .  |
| 200670_at | 0.00969  | 0.005058 | XBP1    | 7494 .  |
| 200671_s_ | 0.02871  | 0.018033 | SPTBN1  | 6711 .  |
| 200673_at | 6.76E-07 | 2.95E-08 | LAPTM4A | 9741 .  |
| 200675_at | 3.34E-06 | 2.43E-07 | CD81    | 975 .   |
| 200677_at | 3.26E-04 | 8.41E-05 | PTTG1IP | 754 .   |
| 200678_x_ | 8.93E-06 | 8.75E-07 | GRN     | 2896 .  |
| 200679_x_ | 1.67E-04 | 3.66E-05 | HMGB1   | 3146 .  |
| 200680_x_ | 1.16E-06 | 6.01E-08 | HMGB1   | 3146 .  |
| 200681_at | 4.68E-04 | 1.31E-04 | GLO1    | 2739 .  |
| 200683_s_ | 2.08E-04 | 4.82E-05 | UBE2L3  | 7332 .  |
| 200685_at | 3.70E-04 | 9.82E-05 | SFRS11  | 9295 .  |
| 200686_s_ | 6.86E-04 | 2.11E-04 | SFRS11  | 9295 .  |
| 200687_s_ | 9.85E-04 | 3.28E-04 | SF3B3   | 23450 . |
| 200688_at | 0.003149 | 0.001331 | SF3B3   | 23450 . |
| 200689_x_ | 0.0396   | 0.026178 | EEF1G   | 1937 .  |
| 200690_at | 0.003148 | 0.00133  | HSPA9   | 3313 .  |
| 200691_s_ | 3.18E-04 | 8.18E-05 | HSPA9   | 3313 .  |
| 200692_s_ | 7.77E-04 | 2.46E-04 | HSPA9   | 3313 .  |
| 200694_s_ | 0.037068 | 0.02426  | DDX24   | 57062 . |
| 200695_at | 1.56E-06 | 8.95E-08 | PPP2R1A | 5518 .  |
| 200696_s_ | 2.45E-04 | 5.90E-05 | GSN     | 2934 .  |
| 200697_at | 0.007752 | 0.003896 | HK1     | 3098 .  |
| 200698_at | 1.12E-06 | 5.70E-08 | KDEL2   | 11014 . |
| 200699_at | 4.23E-06 | 3.29E-07 | KDEL2   | 11014 . |
| 200700_s_ | 2.28E-06 | 1.48E-07 | KDEL2   | 11014 . |
| 200701_at | 0.00167  | 6.21E-04 | NPC2    | 10577 . |
| 200702_s_ | 6.63E-05 | 1.14E-05 | DDX24   | 57062 . |
| 200704_at | 0.003782 | 0.001659 | LITAF   | 9516 .  |
| 200706_s_ | 3.47E-04 | 9.08E-05 | LITAF   | 9516 .  |
| 200707_at | 9.48E-07 | 4.61E-08 | PRKCSH  | 5589 .  |
| 200708_at | 0.012897 | 0.00708  | GOT2    | 2806 .  |
| 200712_s_ | 0.009342 | 0.004844 | MAPRE1  | 22919 . |
| 200713_s_ | 9.06E-04 | 2.97E-04 | MAPRE1  | 22919 . |

|           |          |          |         |         |
|-----------|----------|----------|---------|---------|
| 200714_x_ | 3.38E-06 | 2.46E-07 | OS9     | 10956 . |
| 200716_x_ | 0.016519 | 0.009462 | RPL13A  | 23521 . |
| 200717_x_ | 2.51E-04 | 6.10E-05 | RPL7    | 6129 .  |
| 200719_at | 0.014148 | 0.00788  | SKP1    | 6500 .  |
| 200720_s_ | 7.72E-05 | 1.39E-05 | ACTR1A  | 10121 . |
| 200721_s_ | 0.009715 | 0.005073 | ACTR1A  | 10121 . |
| 200722_s_ | 0.001808 | 6.83E-04 | CAPRIN1 | 4076 .  |
| 200723_s_ | 0.012056 | 0.006533 | CAPRIN1 | 4076 .  |
| 200724_at | 0.040867 | 0.027152 | RPL10   | 6134 .  |
| 200726_at | 1.32E-06 | 7.18E-08 | PPP1CC  | 5501 .  |
| 200727_s_ | 9.21E-04 | 3.02E-04 | ACTR2   | 10097 . |
| 200728_at | 6.57E-06 | 5.81E-07 | ACTR2   | 10097 . |
| 200729_s_ | 8.31E-06 | 7.92E-07 | ACTR2   | 10097 . |
| 200730_s_ | 0.010533 | 0.005574 | PTP4A1  | 7803 .  |
| 200731_s_ | 0.007173 | 0.003557 | PTP4A1  | 7803 .  |
| 200732_s_ | 5.08E-04 | 1.45E-04 | PTP4A1  | 7803 .  |
| 200735_x_ | 0.001247 | 4.37E-04 | NACA    | 4666 .  |
| 200737_at | 0.034631 | 0.022402 | PGK1    | 5230 .  |
| 200739_s_ | 6.01E-04 | 1.79E-04 | SUMO3   | 6612 .  |
| 200740_s_ | 0.003698 | 0.001614 | SUMO3   | 6612 .  |
| 200741_s_ | 4.05E-05 | 6.10E-06 | RPS27   | 6232 .  |
| 200742_s_ | 1.67E-08 | 2.09E-10 | TPP1    | 1200 .  |
| 200743_s_ | 3.58E-05 | 5.20E-06 | TPP1    | 1200 .  |
| 200747_s_ | 6.40E-06 | 5.62E-07 | NUMA1   | 4926 .  |
| 200748_s_ | 2.12E-04 | 4.91E-05 | FTH1    | 2495 .  |
| 200749_at | 0.04128  | 0.027466 | RAN     | 5901 .  |
| 200750_s_ | 1.18E-04 | 2.36E-05 | RAN     | 5901 .  |
| 200751_s_ | 0.007299 | 0.003632 | HNRNPC  | 3183 .  |
| 200752_s_ | 4.32E-05 | 6.64E-06 | CAPN1   | 823 .   |
| 200753_x_ | 0.00338  | 0.00145  | SFRS2   | 6427 .  |
| 200754_x_ | 8.70E-05 | 1.62E-05 | SFRS2   | 6427 .  |
| 200755_s_ | 5.00E-07 | 1.97E-08 | CALU    | 813 .   |
| 200756_x_ | 3.35E-07 | 1.17E-08 | CALU    | 813 .   |
| 200757_s_ | 7.18E-07 | 3.19E-08 | CALU    | 813 .   |



|           |          |          |                         |               |
|-----------|----------|----------|-------------------------|---------------|
| 200758_s_ | 0.004171 | 0.001863 | NFE2L1                  | 4779 .        |
| 200759_x_ | 0.016914 | 0.009722 | NFE2L1                  | 4779 .        |
| 200760_s_ | 5.04E-07 | 1.99E-08 | ARL6IP5                 | 10550 .       |
| 200761_s_ | 2.94E-06 | 2.05E-07 | ARL6IP5                 | 10550 .       |
| 200762_at | 0.006788 | 0.003331 | DPYSL2                  | 1808 .        |
| 200763_s_ | 3.00E-04 | 7.60E-05 | RPLP1                   | 6176 .        |
| 200764_s_ | 0.025125 | 0.015446 | CTNNA1                  | 1495 .        |
| 200766_at | 6.10E-06 | 5.29E-07 | CTSD                    | 1509 .        |
| 200767_s_ | 3.79E-05 | 5.60E-06 | FAM120A                 | 23196 .       |
| 200768_s_ | 0.002552 | 0.001035 | MAT2A                   | 4144 .        |
| 200769_s_ | 0.016191 | 0.009245 | MAT2A                   | 4144 .        |
| 200770_s_ | 3.17E-07 | 1.09E-08 | LAMC1                   | 3915 .        |
| 200771_at | 5.57E-05 | 9.15E-06 | LAMC1                   | 3915 .        |
| 200772_x_ | 3.82E-09 | 2.99E-11 | PTMA                    | 5757 .        |
| 200773_x_ | 1.23E-07 | 3.02E-09 | PTMA                    | 5757 .        |
| 200774_at | 4.31E-05 | 6.63E-06 | FAM120A                 | 23196 .       |
| 200775_s_ | 1.22E-06 | 6.42E-08 | HNRNPK                  | 3190 .        |
| 200776_s_ | 7.33E-05 | 1.31E-05 | BZW1 /// BZW 151579 /// | 96 .          |
| 200778_s_ | 1.55E-06 | 8.89E-08 | 2-Sep                   | 4735 .        |
| 200782_at | 2.63E-06 | 1.77E-07 | ANXA5                   | 308 .         |
| 200783_s_ | 0.001908 | 7.29E-04 | STMN1                   | 3925 .        |
| 200784_s_ | 3.30E-05 | 4.71E-06 | LOC100134190            | 100134190 //. |
| 200785_s_ | 3.75E-06 | 2.81E-07 | LOC100134190            | 100134190 //. |
| 200786_at | 0.001886 | 7.19E-04 | PSMB7                   | 5695 .        |
| 200787_s_ | 5.00E-05 | 8.00E-06 | PEA15                   | 8682 .        |
| 200788_s_ | 1.41E-05 | 1.60E-06 | PEA15                   | 8682 .        |
| 200789_at | 0.013069 | 0.007188 | ECH1                    | 1891 .        |
| 200790_at | 1.76E-05 | 2.12E-06 | ODC1                    | 4953 .        |
| 200791_s_ | 0.00105  | 3.54E-04 | IQGAP1                  | 8826 .        |
| 200792_at | 2.44E-04 | 5.88E-05 | XRCC6                   | 2547 .        |
| 200793_s_ | 0.037821 | 0.024824 | ACO2                    | 50 .          |
| 200794_x_ | 1.69E-04 | 3.72E-05 | DAZAP2                  | 9802 .        |
| 200795_at | 0.042996 | 0.02879  | SPARCL1                 | 8404 .        |
| 200796_s_ | 4.87E-05 | 7.75E-06 | MCL1                    | 4170 .        |

|           |          |          |                             |         |
|-----------|----------|----------|-----------------------------|---------|
| 200799_at | 0.003431 | 0.001475 | HSPA1A                      | 3303 .  |
| 200800_s_ | 0.027269 | 0.01698  | HSPA1A /// HS 3303 /// 3304 | .       |
| 200801_x_ | 0.010293 | 0.005427 | ACTB                        | 60 .    |
| 200802_at | 0.018793 | 0.010999 | SARS                        | 6301 .  |
| 200803_s_ | 2.02E-04 | 4.64E-05 | TMBIM6                      | 7009 .  |
| 200805_at | 0.015963 | 0.009093 | LMAN2                       | 10960 . |
| 200806_s_ | 0.001117 | 3.82E-04 | HSPD1                       | 3329 .  |
| 200807_s_ | 3.16E-10 | 1.18E-12 | HSPD1                       | 3329 .  |
| 200808_s_ | 3.35E-06 | 2.43E-07 | ZYX                         | 7791 .  |
| 200809_x_ | 0.019338 | 0.01137  | RPL12                       | 6136 .  |
| 200810_s_ | 3.00E-04 | 7.60E-05 | CIRBP                       | 1153 .  |
| 200811_at | 4.08E-04 | 1.11E-04 | CIRBP                       | 1153 .  |
| 200812_at | 1.47E-05 | 1.69E-06 | CCT7                        | 10574 . |
| 200813_s_ | 0.001759 | 6.60E-04 | PAFAH1B1                    | 5048 .  |
| 200814_at | 2.44E-04 | 5.86E-05 | PSME1                       | 5720 .  |
| 200815_s_ | 0.006813 | 0.003347 | PAFAH1B1                    | 5048 .  |
| 200816_s_ | 1.41E-06 | 7.88E-08 | PAFAH1B1                    | 5048 .  |
| 200817_x_ | 0.002047 | 7.94E-04 | RPS10                       | 6204 .  |
| 200818_at | 2.12E-04 | 4.93E-05 | ATP5O                       | 539 .   |
| 200821_at | 7.34E-04 | 2.29E-04 | LAMP2                       | 3920 .  |
| 200822_x_ | 0.006648 | 0.003249 | TPI1                        | 7167 .  |
| 200824_at | 0.001632 | 6.04E-04 | GSTP1                       | 2950 .  |
| 200826_at | 0.005427 | 0.002553 | SNRPD2                      | 6633 .  |
| 200827_at | 1.06E-04 | 2.08E-05 | PLOD1                       | 5351 .  |
| 200828_s_ | 6.11E-04 | 1.82E-04 | ZNF207                      | 7756 .  |
| 200829_x_ | 3.01E-05 | 4.20E-06 | ZNF207                      | 7756 .  |
| 200831_s_ | 5.38E-04 | 1.56E-04 | SCD                         | 6319 .  |
| 200833_s_ | 0.003699 | 0.001614 | hCG_1757335_5908 /// 6437   | .       |
| 200834_s_ | 2.15E-07 | 6.40E-09 | RPS21                       | 6227 .  |
| 200835_s_ | 5.46E-07 | 2.21E-08 | MAP4                        | 4134 .  |
| 200836_s_ | 0.041319 | 0.027496 | MAP4                        | 4134 .  |
| 200837_at | 2.59E-04 | 6.33E-05 | BCAP31                      | 10134 . |
| 200838_at | 6.67E-06 | 5.93E-07 | CTSB                        | 1508 .  |
| 200839_s_ | 1.17E-05 | 1.24E-06 | CTSB                        | 1508 .  |

|           |          |          |          |         |
|-----------|----------|----------|----------|---------|
| 200840_at | 7.55E-04 | 2.37E-04 | KARS     | 3735 .  |
| 200842_s_ | 3.10E-05 | 4.36E-06 | EPRS     | 2058 .  |
| 200843_s_ | 2.64E-05 | 3.55E-06 | EPRS     | 2058 .  |
| 200844_s_ | 0.004644 | 0.002122 | PRDX6    | 9588 .  |
| 200845_s_ | 0.044659 | 0.030112 | PRDX6    | 9588 .  |
| 200848_at | 0.007505 | 0.003752 | AHCYL1   | 10768 . |
| 200849_s_ | 6.62E-05 | 1.14E-05 | AHCYL1   | 10768 . |
| 200851_s_ | 9.65E-04 | 3.20E-04 | KIAA0174 | 9798 .  |
| 200853_at | 3.28E-05 | 4.66E-06 | H2AFZ    | 3015 .  |
| 200854_at | 0.006998 | 0.003455 | NCOR1    | 9611 .  |
| 200858_s_ | 0.031347 | 0.019963 | RPS8     | 6202 .  |
| 200859_x_ | 5.05E-04 | 1.44E-04 | FLNA     | 2316 .  |
| 200860_s_ | 1.43E-05 | 1.63E-06 | CNOT1    | 23019 . |
| 200861_at | 8.48E-08 | 1.83E-09 | CNOT1    | 23019 . |
| 200862_at | 0.029677 | 0.018741 | DHCR24   | 1718 .  |
| 200863_s_ | 0.001804 | 6.80E-04 | RAB11A   | 8766 .  |
| 200865_at | 6.61E-05 | 1.14E-05 | EIF3F    | 8665 .  |
| 200866_s_ | 1.81E-05 | 2.20E-06 | PSAP     | 5660 .  |
| 200867_at | 9.95E-05 | 1.92E-05 | RNF114   | 55905 . |
| 200870_at | 0.009253 | 0.004791 | STRAP    | 11171 . |
| 200871_s_ | 4.88E-04 | 1.38E-04 | PSAP     | 5660 .  |
| 200872_at | 0.04504  | 0.030412 | S100A10  | 6281 .  |
| 200873_s_ | 1.87E-07 | 5.29E-09 | CCT8     | 10694 . |
| 200874_s_ | 8.49E-05 | 1.57E-05 | NOP56    | 10528 . |
| 200875_s_ | 1.63E-06 | 9.53E-08 | NOP56    | 10528 . |
| 200876_s_ | 1.42E-05 | 1.61E-06 | PSMB1    | 5689 .  |
| 200877_at | 3.92E-07 | 1.44E-08 | CCT4     | 10575 . |
| 200878_at | 5.26E-04 | 1.51E-04 | EPAS1    | 2034 .  |
| 200879_s_ | 6.80E-08 | 1.35E-09 | EPAS1    | 2034 .  |
| 200880_at | 0.003829 | 0.001683 | DNAJA1   | 3301 .  |
| 200881_s_ | 0.018031 | 0.010481 | DNAJA1   | 3301 .  |
| 200882_s_ | 7.76E-05 | 1.41E-05 | PSMD4    | 5710 .  |
| 200884_at | 1.50E-06 | 8.53E-08 | CKB      | 1152 .  |
| 200885_at | 5.59E-06 | 4.72E-07 | RHOC     | 389 .   |

|           |          |          |        |         |
|-----------|----------|----------|--------|---------|
| 200886_s_ | 0.015285 | 0.008639 | PGAM1  | 5223 .  |
| 200887_s_ | 1.66E-06 | 9.82E-08 | STAT1  | 6772 .  |
| 200888_s_ | 0.042241 | 0.028216 | RPL23  | 9349 .  |
| 200889_s_ | 0.046389 | 0.031465 | SSR1   | 6745 .  |
| 200890_s_ | 0.007599 | 0.003807 | SSR1   | 6745 .  |
| 200891_s_ | 0.001026 | 3.44E-04 | SSR1   | 6745 .  |
| 200892_s_ | 8.77E-04 | 2.85E-04 | TRA2B  | 6434 .  |
| 200893_at | 6.94E-05 | 1.22E-05 | TRA2B  | 6434 .  |
| 200894_s_ | 1.04E-06 | 5.16E-08 | FKBP4  | 2288 .  |
| 200895_s_ | 2.70E-08 | 4.00E-10 | FKBP4  | 2288 .  |
| 200896_x_ | 0.002226 | 8.78E-04 | HDGF   | 3068 .  |
| 200897_s_ | 1.63E-04 | 3.56E-05 | PALLD  | 23022 . |
| 200898_s_ | 2.96E-05 | 4.10E-06 | MGEA5  | 10724 . |
| 200899_s_ | 3.79E-04 | 1.01E-04 | MGEA5  | 10724 . |
| 200900_s_ | 4.14E-04 | 1.13E-04 | M6PR   | 4074 .  |
| 200902_at | 0.013095 | 0.007205 | 15-Sep | 9403 .  |
| 200903_s_ | 8.14E-07 | 3.76E-08 | AHCY   | 191 .   |
| 200904_at | 7.85E-06 | 7.35E-07 | HLA-E  | 3133 .  |
| 200905_x_ | 3.39E-07 | 1.19E-08 | HLA-E  | 3133 .  |
| 200906_s_ | 0.002642 | 0.001079 | PALLD  | 23022 . |
| 200907_s_ | 9.80E-05 | 1.88E-05 | PALLD  | 23022 . |
| 200909_s_ | 0.003862 | 0.0017   | RPLP2  | 6181 .  |
| 200910_at | 3.33E-08 | 5.22E-10 | CCT3   | 7203 .  |
| 200911_s_ | 1.73E-05 | 2.08E-06 | TACC1  | 6867 .  |
| 200912_s_ | 8.04E-05 | 1.47E-05 | EIF4A2 | 1974 .  |
| 200913_at | 9.29E-06 | 9.24E-07 | PPM1G  | 5496 .  |
| 200914_x_ | 3.93E-05 | 5.86E-06 | KTN1   | 3895 .  |
| 200915_x_ | 0.010137 | 0.005328 | KTN1   | 3895 .  |
| 200916_at | 5.01E-04 | 1.42E-04 | TAGLN2 | 8407 .  |
| 200917_s_ | 3.16E-05 | 4.45E-06 | SRPR   | 6734 .  |
| 200918_s_ | 2.31E-05 | 3.00E-06 | SRPR   | 6734 .  |
| 200919_at | 8.57E-06 | 8.25E-07 | PHC2   | 1912 .  |
| 200920_s_ | 0.001468 | 5.32E-04 | BTG1   | 694 .   |
| 200921_s_ | 0.022524 | 0.013598 | BTG1   | 694 .   |

|           |          |          |                             |         |
|-----------|----------|----------|-----------------------------|---------|
| 200922_at | 0.012429 | 0.006775 | KDELR1                      | 10945 . |
| 200923_at | 6.45E-04 | 1.95E-04 | LGALS3BP /// L100133842 //. |         |
| 200924_s_ | 6.44E-04 | 1.95E-04 | SLC3A2                      | 6520 .  |
| 200925_at | 4.61E-05 | 7.22E-06 | COX6A1                      | 1337 .  |
| 200926_at | 3.72E-04 | 9.90E-05 | RPS23                       | 6228 .  |
| 200927_s_ | 0.004631 | 0.002114 | RAB14                       | 51552 . |
| 200929_at | 3.10E-06 | 2.20E-07 | TMED10                      | 10972 . |
| 200930_s_ | 2.47E-04 | 5.95E-05 | VCL                         | 7414 .  |
| 200931_s_ | 0.00644  | 0.003128 | VCL                         | 7414 .  |
| 200933_x_ | 0.039348 | 0.025984 | RPS4X                       | 6191 .  |
| 200934_at | 3.45E-04 | 9.03E-05 | DEK                         | 7913 .  |
| 200935_at | 0.004664 | 0.002133 | CALR                        | 811 .   |
| 200936_at | 0.031716 | 0.020229 | RPL8                        | 6132 .  |
| 200937_s_ | 0.005031 | 0.002334 | RPL5                        | 6125 .  |
| 200938_s_ | 0.002738 | 0.001126 | RERE                        | 473 .   |
| 200940_s_ | 6.94E-04 | 2.13E-04 | RERE                        | 473 .   |
| 200943_at | 3.44E-05 | 4.96E-06 | HMG1                        | 3150 .  |
| 200944_s_ | 2.62E-05 | 3.51E-06 | HMG1                        | 3150 .  |
| 200945_s_ | 2.36E-07 | 7.31E-09 | SEC31A                      | 22872 . |
| 200947_s_ | 0.024933 | 0.015309 | GLUD1                       | 2746 .  |
| 200948_at | 3.10E-04 | 7.93E-05 | MLF2                        | 8079 .  |
| 200951_s_ | 0.002169 | 8.51E-04 | CCND2                       | 894 .   |
| 200952_s_ | 0.033928 | 0.021886 | CCND2                       | 894 .   |
| 200953_s_ | 0.004012 | 0.001778 | CCND2                       | 894 .   |
| 200954_at | 0.001398 | 5.02E-04 | ATP6VOC                     | 527 .   |
| 200955_at | 7.18E-08 | 1.46E-09 | IMMT                        | 10989 . |
| 200956_s_ | 8.41E-05 | 1.56E-05 | SSRP1                       | 6749 .  |
| 200957_s_ | 1.95E-06 | 1.21E-07 | SSRP1                       | 6749 .  |
| 200958_s_ | 0.002123 | 8.30E-04 | SDCBP                       | 6386 .  |
| 200959_at | 1.72E-04 | 3.78E-05 | FUS                         | 2521 .  |
| 200964_at | 0.016506 | 0.009453 | UBA1                        | 7317 .  |
| 200965_s_ | 2.78E-05 | 3.79E-06 | ABLIM1                      | 3983 .  |
| 200966_x_ | 0.017737 | 0.010278 | ALDOA                       | 226 .   |
| 200967_at | 1.75E-04 | 3.90E-05 | PPIB                        | 5479 .  |

|           |          |          |                            |         |
|-----------|----------|----------|----------------------------|---------|
| 200968_s_ | 0.001164 | 4.02E-04 | PPIB                       | 5479 .  |
| 200972_at | 0.001318 | 4.67E-04 | TSPAN3                     | 10099 . |
| 200973_s_ | 0.012568 | 0.006867 | TSPAN3                     | 10099 . |
| 200974_at | 1.18E-06 | 6.19E-08 | ACTA2                      | 59 .    |
| 200975_at | 0.002382 | 9.52E-04 | PPT1                       | 5538 .  |
| 200978_at | 0.002986 | 0.001247 | MDH1                       | 4190 .  |
| 200979_at | 1.98E-04 | 4.54E-05 | PDHA1                      | 5160 .  |
| 200980_s_ | 3.30E-07 | 1.16E-08 | PDHA1                      | 5160 .  |
| 200982_s_ | 0.001994 | 7.69E-04 | ANXA6                      | 309 .   |
| 200983_x_ | 7.30E-07 | 3.26E-08 | CD59                       | 966 .   |
| 200984_s_ | 4.16E-07 | 1.56E-08 | CD59                       | 966 .   |
| 200985_s_ | 1.75E-07 | 4.82E-09 | CD59                       | 966 .   |
| 200986_at | 5.36E-07 | 2.16E-08 | SERPING1                   | 710 .   |
| 200988_s_ | 0.014661 | 0.008221 | PSME3                      | 10197 . |
| 200989_at | 0.003305 | 0.001411 | HIF1A                      | 3091 .  |
| 200990_at | 5.01E-04 | 1.43E-04 | TRIM28                     | 10155 . |
| 200991_s_ | 7.68E-08 | 1.61E-09 | SNX17                      | 9784 .  |
| 200992_at | 0.031246 | 0.019887 | IPO7                       | 10527 . |
| 200993_at | 0.004166 | 0.001859 | IPO7                       | 10527 . |
| 200994_at | 6.35E-04 | 1.91E-04 | IPO7                       | 10527 . |
| 200995_at | 3.61E-07 | 1.29E-08 | IPO7                       | 10527 . |
| 200996_at | 0.005157 | 0.002405 | ACTR3                      | 10096 . |
| 200997_at | 0.00255  | 0.001034 | RBM4                       | 5936 .  |
| 200998_s_ | 5.25E-05 | 8.52E-06 | CKAP4                      | 10970 . |
| 200999_s_ | 3.92E-05 | 5.83E-06 | CKAP4                      | 10970 . |
| 201000_at | 0.003741 | 0.001637 | AARS                       | 16 .    |
| 201001_s_ | 0.007149 | 0.003543 | TMEM189-UBE387522 /// 7:   |         |
| 201003_x_ | 5.03E-04 | 1.43E-04 | RNPEP /// TME387521 /// 3: |         |
| 201004_at | 0.022591 | 0.013646 | SSR4                       | 6748 .  |
| 201005_at | 0.001234 | 4.32E-04 | CD9                        | 928 .   |
| 201006_at | 0.044981 | 0.030369 | PRDX2                      | 7001 .  |
| 201007_at | 1.58E-06 | 9.17E-08 | HADHB                      | 3032 .  |
| 201008_s_ | 0.008876 | 0.00456  | TXNIP                      | 10628 . |
| 201012_at | 0.003012 | 0.001261 | ANXA1                      | 301 .   |

|           |          |          |                              |         |
|-----------|----------|----------|------------------------------|---------|
| 201013_s_ | 5.61E-07 | 2.30E-08 | PAICS                        | 10606 . |
| 201014_s_ | 5.03E-06 | 4.10E-07 | PAICS                        | 10606 . |
| 201015_s_ | 2.46E-04 | 5.94E-05 | JUP                          | 3728 .  |
| 201017_at | 0.004319 | 0.001944 | EIF1AX                       | 1964 .  |
| 201018_at | 0.009137 | 0.004719 | EIF1AX                       | 1964 .  |
| 201019_s_ | 0.017744 | 0.010283 | EIF1AP1 /// EIF1964 /// 2806 | 1964 .  |
| 201021_s_ | 2.45E-04 | 5.90E-05 | DSTN                         | 11034 . |
| 201022_s_ | 8.05E-05 | 1.47E-05 | DSTN                         | 11034 . |
| 201024_x_ | 6.67E-04 | 2.03E-04 | EIF5B                        | 9669 .  |
| 201025_at | 0.023165 | 0.014044 | EIF5B                        | 9669 .  |
| 201026_at | 2.94E-04 | 7.39E-05 | EIF5B                        | 9669 .  |
| 201027_s_ | 0.004582 | 0.002088 | EIF5B                        | 9669 .  |
| 201028_s_ | 5.01E-04 | 1.43E-04 | CD99                         | 4267 .  |
| 201029_s_ | 5.54E-05 | 9.10E-06 | CD99                         | 4267 .  |
| 201030_x_ | 1.99E-06 | 1.24E-07 | LDHB                         | 3945 .  |
| 201031_s_ | 2.69E-06 | 1.82E-07 | HNRNPH1                      | 3187 .  |
| 201034_at | 0.001081 | 3.67E-04 | ADD3                         | 120 .   |
| 201036_s_ | 0.0297   | 0.018762 | HADH                         | 3033 .  |
| 201037_at | 6.73E-05 | 1.17E-05 | PFKP                         | 5214 .  |
| 201038_s_ | 4.25E-06 | 3.31E-07 | ANP32A                       | 8125 .  |
| 201040_at | 2.89E-05 | 3.98E-06 | GNAI2                        | 2771 .  |
| 201041_s_ | 6.89E-05 | 1.20E-05 | DUSP1                        | 1843 .  |
| 201042_at | 0.001693 | 6.31E-04 | TGM2                         | 7052 .  |
| 201043_s_ | 1.35E-04 | 2.82E-05 | ANP32A /// LO 100128146 //   | 1843 .  |
| 201044_x_ | 3.52E-04 | 9.24E-05 | DUSP1                        | 1843 .  |
| 201045_s_ | 0.007138 | 0.003536 | RAB6A                        | 5870 .  |
| 201047_x_ | 0.001274 | 4.48E-04 | RAB6A                        | 5870 .  |
| 201048_x_ | 1.13E-06 | 5.80E-08 | RAB6A                        | 5870 .  |
| 201050_at | 1.13E-07 | 2.70E-09 | PLD3                         | 23646 . |
| 201051_at | 5.57E-07 | 2.28E-08 | ANP32A                       | 8125 .  |
| 201053_s_ | 0.005506 | 0.002598 | PSMF1                        | 9491 .  |
| 201054_at | 0.043396 | 0.029123 | HNRNPA0                      | 10949 . |
| 201055_s_ | 0.003908 | 0.001725 | HNRNPA0                      | 10949 . |
| 201056_at | 0.00319  | 0.001351 | GOLGB1                       | 2804 .  |

|           |          |          |                              |         |
|-----------|----------|----------|------------------------------|---------|
| 201057_s_ | 0.040754 | 0.027066 | GOLGB1                       | 2804 .  |
| 201058_s_ | 3.76E-06 | 2.82E-07 | MYL9                         | 10398 . |
| 201060_x_ | 0.032572 | 0.020874 | STOM                         | 2040 .  |
| 201062_at | 0.03617  | 0.023573 | STOM                         | 2040 .  |
| 201063_at | 0.008798 | 0.004513 | RCN1                         | 5954 .  |
| 201064_s_ | 0.005879 | 0.002809 | PABPC4                       | 8761 .  |
| 201065_s_ | 0.037707 | 0.024738 | GTF2I /// GTF2 100093631 //. |         |
| 201066_at | 9.51E-05 | 1.81E-05 | CYC1                         | 1537 .  |
| 201067_at | 2.48E-06 | 1.64E-07 | PSMC2                        | 5701 .  |
| 201068_s_ | 0.005721 | 0.002716 | PSMC2                        | 5701 .  |
| 201069_at | 3.03E-05 | 4.23E-06 | MMP2                         | 4313 .  |
| 201070_x_ | 0.040681 | 0.027009 | SF3B1                        | 23451 . |
| 201071_x_ | 6.78E-05 | 1.18E-05 | SF3B1                        | 23451 . |
| 201072_s_ | 2.61E-09 | 1.82E-11 | SMARCC1                      | 6599 .  |
| 201073_s_ | 0.004049 | 0.001798 | SMARCC1                      | 6599 .  |
| 201074_at | 9.95E-07 | 4.91E-08 | SMARCC1                      | 6599 .  |
| 201075_s_ | 0.001103 | 3.76E-04 | SMARCC1                      | 6599 .  |
| 201076_at | 2.92E-04 | 7.32E-05 | NHP2L1                       | 4809 .  |
| 201077_s_ | 0.010531 | 0.005572 | NHP2L1                       | 4809 .  |
| 201079_at | 0.036468 | 0.023797 | SYNGR2                       | 9144 .  |
| 201081_s_ | 0.033646 | 0.021686 | PIP4K2B                      | 8396 .  |
| 201082_s_ | 0.001494 | 5.43E-04 | DCTN1                        | 1639 .  |
| 201083_s_ | 0.008608 | 0.0044   | BCLAF1                       | 9774 .  |
| 201084_s_ | 4.23E-04 | 1.16E-04 | BCLAF1                       | 9774 .  |
| 201085_s_ | 6.52E-05 | 1.12E-05 | SON                          | 6651 .  |
| 201086_x_ | 0.034991 | 0.022671 | SON                          | 6651 .  |
| 201088_at | 4.71E-05 | 7.43E-06 | KPNA2                        | 3838 .  |
| 201089_at | 0.036933 | 0.024151 | ATP6V1B2                     | 526 .   |
| 201091_s_ | 0.01453  | 0.008133 | CBX3                         | 11335 . |
| 201092_at | 7.20E-05 | 1.27E-05 | RBBP7                        | 5931 .  |
| 201093_x_ | 1.98E-04 | 4.52E-05 | SDHA                         | 6389 .  |
| 201094_at | 0.019371 | 0.011394 | RPS29                        | 6235 .  |
| 201095_at | 1.94E-04 | 4.42E-05 | DAP                          | 1611 .  |
| 201096_s_ | 3.54E-06 | 2.60E-07 | ARF4                         | 378 .   |



|           |          |          |                             |         |
|-----------|----------|----------|-----------------------------|---------|
| 201097_s_ | 3.20E-07 | 1.11E-08 | ARF4                        | 378 .   |
| 201099_at | 0.036273 | 0.023652 | USP9X                       | 8239 .  |
| 201100_s_ | 0.00186  | 7.07E-04 | USP9X                       | 8239 .  |
| 201101_s_ | 0.003009 | 0.001259 | BCLAF1                      | 9774 .  |
| 201102_s_ | 1.20E-04 | 2.43E-05 | PFKL                        | 5211 .  |
| 201103_x_ | 4.97E-05 | 7.94E-06 | NBPF10 /// NB 100132406 //. |         |
| 201104_x_ | 0.001185 | 4.11E-04 | NBPF10 /// NB 100132406 //. |         |
| 201105_at | 9.49E-07 | 4.62E-08 | LGALS1                      | 3956 .  |
| 201107_s_ | 3.84E-09 | 3.05E-11 | THBS1                       | 7057 .  |
| 201108_s_ | 4.55E-09 | 3.87E-11 | THBS1                       | 7057 .  |
| 201109_s_ | 2.12E-06 | 1.35E-07 | THBS1                       | 7057 .  |
| 201110_s_ | 3.64E-04 | 9.63E-05 | THBS1                       | 7057 .  |
| 201111_at | 4.91E-06 | 3.98E-07 | CSE1L                       | 1434 .  |
| 201112_s_ | 6.93E-06 | 6.23E-07 | CSE1L                       | 1434 .  |
| 201113_at | 6.77E-04 | 2.07E-04 | TUFM                        | 7284 .  |
| 201114_x_ | 9.68E-08 | 2.20E-09 | PSMA7                       | 5688 .  |
| 201115_at | 8.79E-04 | 2.86E-04 | POLD2                       | 5425 .  |
| 201117_s_ | 0.039215 | 0.025881 | CPE                         | 1363 .  |
| 201118_at | 0.009049 | 0.004663 | PGD                         | 5226 .  |
| 201119_s_ | 2.00E-05 | 2.49E-06 | COX8A                       | 1351 .  |
| 201120_s_ | 5.98E-04 | 1.77E-04 | PGRMC1                      | 10857 . |
| 201121_s_ | 3.00E-05 | 4.18E-06 | PGRMC1                      | 10857 . |
| 201124_at | 4.60E-04 | 1.28E-04 | ITGB5                       | 3693 .  |
| 201125_s_ | 0.00347  | 0.001496 | ITGB5                       | 3693 .  |
| 201126_s_ | 3.45E-06 | 2.53E-07 | MGAT1                       | 4245 .  |
| 201127_s_ | 0.01468  | 0.008236 | ACLY                        | 47 .    |
| 201129_at | 2.59E-04 | 6.32E-05 | SFRS7                       | 6432 .  |
| 201130_s_ | 2.57E-09 | 1.79E-11 | CDH1                        | 999 .   |
| 201131_s_ | 7.09E-19 | 1.37E-23 | CDH1                        | 999 .   |
| 201134_x_ | 1.17E-07 | 2.82E-09 | COX7C                       | 1350 .  |
| 201136_at | 7.60E-09 | 7.30E-11 | PLP2                        | 5355 .  |
| 201137_s_ | 0.003776 | 0.001656 | HLA-DPB1                    | 3115 .  |
| 201138_s_ | 2.52E-04 | 6.13E-05 | SSB                         | 6741 .  |
| 201139_s_ | 0.005754 | 0.002736 | SSB                         | 6741 .  |

|           |          |          |          |         |
|-----------|----------|----------|----------|---------|
| 201141_at | 3.40E-06 | 2.48E-07 | GPNMB    | 10457 . |
| 201142_at | 7.95E-07 | 3.64E-08 | EIF2S1   | 1965 .  |
| 201143_s_ | 1.19E-05 | 1.27E-06 | EIF2S1   | 1965 .  |
| 201144_s_ | 0.010279 | 0.005419 | EIF2S1   | 1965 .  |
| 201145_at | 0.001285 | 4.53E-04 | HAX1     | 10456 . |
| 201146_at | 4.15E-05 | 6.29E-06 | NFE2L2   | 4780 .  |
| 201147_s_ | 3.04E-05 | 4.26E-06 | TIMP3    | 7078 .  |
| 201148_s_ | 1.58E-06 | 9.14E-08 | TIMP3    | 7078 .  |
| 201149_s_ | 1.27E-05 | 1.40E-06 | TIMP3    | 7078 .  |
| 201150_s_ | 7.93E-06 | 7.44E-07 | TIMP3    | 7078 .  |
| 201151_s_ | 1.25E-06 | 6.66E-08 | MBNL1    | 4154 .  |
| 201152_s_ | 7.18E-08 | 1.47E-09 | MBNL1    | 4154 .  |
| 201153_s_ | 1.60E-08 | 1.96E-10 | MBNL1    | 4154 .  |
| 201155_s_ | 7.72E-09 | 7.55E-11 | MFN2     | 9927 .  |
| 201158_at | 0.001754 | 6.59E-04 | NMT1     | 4836 .  |
| 201159_s_ | 0.045568 | 0.030822 | NMT1     | 4836 .  |
| 201162_at | 1.62E-04 | 3.53E-05 | IGFBP7   | 3490 .  |
| 201163_s_ | 0.00724  | 0.003596 | IGFBP7   | 3490 .  |
| 201164_s_ | 0.005031 | 0.002333 | PUM1     | 9698 .  |
| 201165_s_ | 1.79E-04 | 4.00E-05 | PUM1     | 9698 .  |
| 201166_s_ | 0.012083 | 0.006553 | PUM1     | 9698 .  |
| 201168_x_ | 0.010599 | 0.005617 | ARHGDI1  | 396 .   |
| 201169_s_ | 0.002712 | 0.001113 | BHLHE40  | 8553 .  |
| 201171_at | 0.004664 | 0.002133 | ATP6V0E1 | 8992 .  |
| 201172_x_ | 9.60E-07 | 4.69E-08 | ATP6V0E1 | 8992 .  |
| 201173_x_ | 2.48E-07 | 7.83E-09 | NUDC     | 10726 . |
| 201174_s_ | 9.51E-05 | 1.81E-05 | TERF2IP  | 54386 . |
| 201175_at | 0.01518  | 0.008568 | TMX2     | 51075 . |
| 201176_s_ | 0.007758 | 0.0039   | ARCN1    | 372 .   |
| 201177_s_ | 2.70E-05 | 3.65E-06 | UBA2     | 10054 . |
| 201180_s_ | 0.007542 | 0.003774 | GNAI3    | 2773 .  |
| 201182_s_ | 2.01E-06 | 1.26E-07 | CHD4     | 1108 .  |
| 201183_s_ | 3.36E-04 | 8.75E-05 | CHD4     | 1108 .  |
| 201184_s_ | 1.07E-04 | 2.11E-05 | CHD4     | 1108 .  |

|           |          |          |                             |         |
|-----------|----------|----------|-----------------------------|---------|
| 201185_at | 1.76E-06 | 1.07E-07 | HTRA1                       | 5654 .  |
| 201186_at | 4.28E-04 | 1.18E-04 | LRPAP1                      | 4043 .  |
| 201190_s_ | 1.75E-04 | 3.87E-05 | PITPNA                      | 5306 .  |
| 201191_at | 0.001137 | 3.90E-04 | PITPNA                      | 5306 .  |
| 201193_at | 8.13E-04 | 2.60E-04 | IDH1                        | 3417 .  |
| 201194_at | 4.33E-04 | 1.19E-04 | SEPW1                       | 6415 .  |
| 201195_s_ | 7.88E-04 | 2.50E-04 | SLC7A5                      | 8140 .  |
| 201196_s_ | 0.001554 | 5.69E-04 | AMD1                        | 262 .   |
| 201197_at | 3.18E-06 | 2.27E-07 | AMD1                        | 262 .   |
| 201198_s_ | 0.024524 | 0.015012 | PSMD1                       | 5707 .  |
| 201199_s_ | 0.022413 | 0.013522 | PSMD1                       | 5707 .  |
| 201200_at | 0.015171 | 0.008562 | CREG1                       | 8804 .  |
| 201201_at | 0.001481 | 5.38E-04 | CSTB                        | 1476 .  |
| 201202_at | 3.49E-04 | 9.16E-05 | PCNA                        | 5111 .  |
| 201203_s_ | 0.003749 | 0.001641 | RRBP1                       | 6238 .  |
| 201206_s_ | 0.010076 | 0.005293 | RRBP1                       | 6238 .  |
| 201207_at | 5.89E-05 | 9.83E-06 | TNFAIP1                     | 7126 .  |
| 201208_s_ | 3.14E-05 | 4.43E-06 | TNFAIP1                     | 7126 .  |
| 201209_at | 6.85E-04 | 2.10E-04 | HDAC1                       | 3065 .  |
| 201211_s_ | 0.003196 | 0.001355 | DDX3X                       | 1654 .  |
| 201212_at | 0.002706 | 0.00111  | LGMN                        | 5641 .  |
| 201213_at | 0.023516 | 0.0143   | PPP1R7                      | 5510 .  |
| 201214_s_ | 4.82E-05 | 7.66E-06 | PPP1R7                      | 5510 .  |
| 201216_at | 0.031119 | 0.0198   | ERP29                       | 10961 . |
| 201217_x_ | 0.005099 | 0.002373 | RPL3                        | 6122 .  |
| 201218_at | 1.17E-05 | 1.24E-06 | CTBP2                       | 1488 .  |
| 201219_at | 3.47E-04 | 9.08E-05 | CTBP2                       | 1488 .  |
| 201220_x_ | 0.001952 | 7.50E-04 | CTBP2                       | 1488 .  |
| 201221_s_ | 0.001205 | 4.19E-04 | SNRNP70                     | 6625 .  |
| 201223_s_ | 0.015615 | 0.008859 | RAD23B                      | 5887 .  |
| 201224_s_ | 3.65E-06 | 2.71E-07 | SRRM1                       | 10250 . |
| 201225_s_ | 1.07E-05 | 1.10E-06 | SRRM1                       | 10250 . |
| 201226_at | 2.40E-04 | 5.76E-05 | NDUFB8 /// SE 25956 /// 47. |         |
| 201228_s_ | 0.048695 | 0.033284 | ARIH2                       | 10425 . |

|           |          |          |                              |         |
|-----------|----------|----------|------------------------------|---------|
| 201229_s_ | 0.006799 | 0.003338 | ARIH2                        | 10425 . |
| 201230_s_ | 1.18E-04 | 2.36E-05 | ARIH2                        | 10425 . |
| 201231_s_ | 2.64E-05 | 3.55E-06 | ENO1                         | 2023 .  |
| 201232_s_ | 2.15E-05 | 2.75E-06 | PSMD13                       | 5719 .  |
| 201233_at | 0.019498 | 0.011481 | PSMD13                       | 5719 .  |
| 201234_at | 4.20E-08 | 7.05E-10 | ILK                          | 3611 .  |
| 201235_s_ | 9.11E-06 | 9.00E-07 | BTG2                         | 7832 .  |
| 201236_s_ | 0.010235 | 0.00539  | BTG2                         | 7832 .  |
| 201238_s_ | 0.006785 | 0.003329 | CAPZA2                       | 830 .   |
| 201240_s_ | 2.44E-04 | 5.88E-05 | LOC653566 /// 653566 /// 97. |         |
| 201241_at | 0.018673 | 0.010916 | DDX1                         | 1653 .  |
| 201242_s_ | 0.003382 | 0.001451 | ATP1B1                       | 481 .   |
| 201244_s_ | 0.007914 | 0.003993 | RAF1                         | 5894 .  |
| 201246_s_ | 0.020132 | 0.011918 | OTUB1                        | 55611 . |
| 201247_at | 0.023151 | 0.014034 | SREBF2                       | 6721 .  |
| 201250_s_ | 0.025152 | 0.015468 | SLC2A1                       | 6513 .  |
| 201251_at | 6.16E-06 | 5.34E-07 | PKM2                         | 5315 .  |
| 201253_s_ | 6.62E-04 | 2.01E-04 | CDIPT                        | 10423 . |
| 201255_x_ | 0.009671 | 0.005046 | BAT3                         | 7917 .  |
| 201257_x_ | 0.007423 | 0.003705 | RPS3A                        | 6189 .  |
| 201258_at | 0.010188 | 0.005361 | RPS16                        | 6217 .  |
| 201259_s_ | 0.019712 | 0.011626 | SYPL1                        | 6856 .  |
| 201261_x_ | 2.26E-04 | 5.31E-05 | BGN                          | 633 .   |
| 201262_s_ | 2.98E-04 | 7.52E-05 | BGN                          | 633 .   |
| 201263_at | 0.006763 | 0.003316 | TARS                         | 6897 .  |
| 201266_at | 0.001239 | 4.33E-04 | TXNRD1                       | 7296 .  |
| 201268_at | 0.003713 | 0.001622 | NME1 /// NME4830 /// 483.    |         |
| 201269_s_ | 0.036548 | 0.023857 | NUDCD3                       | 23386 . |
| 201270_x_ | 2.16E-04 | 5.05E-05 | NUDCD3                       | 23386 . |
| 201271_s_ | 0.001209 | 4.21E-04 | RALY                         | 22913 . |
| 201272_at | 0.033775 | 0.021779 | AKR1B1                       | 231 .   |
| 201273_s_ | 5.43E-04 | 1.57E-04 | SRP9                         | 6726 .  |
| 201274_at | 0.014623 | 0.008197 | PSMA5                        | 5686 .  |
| 201276_at | 0.030968 | 0.019689 | RAB5B                        | 5869 .  |

|           |          |          |                             |         |
|-----------|----------|----------|-----------------------------|---------|
| 201277_s_ | 3.54E-04 | 9.31E-05 | HNRNPAB                     | 3182 .  |
| 201278_at | 4.32E-06 | 3.38E-07 | DAB2                        | 1601 .  |
| 201279_s_ | 3.06E-06 | 2.16E-07 | DAB2                        | 1601 .  |
| 201280_s_ | 1.14E-06 | 5.87E-08 | DAB2                        | 1601 .  |
| 201281_at | 0.008821 | 0.004527 | ADRM1                       | 11047 . |
| 201285_at | 0.011207 | 0.005999 | MKRN1                       | 23608 . |
| 201287_s_ | 0.022424 | 0.01353  | SDC1                        | 6382 .  |
| 201289_at | 0.003361 | 0.00144  | CYR61                       | 3491 .  |
| 201291_s_ | 1.22E-06 | 6.47E-08 | TOP2A                       | 7153 .  |
| 201292_at | 6.43E-05 | 1.10E-05 | TOP2A                       | 7153 .  |
| 201297_s_ | 9.64E-04 | 3.19E-04 | MOBKL1B                     | 55233 . |
| 201298_s_ | 3.00E-04 | 7.60E-05 | MOBKL1B                     | 55233 . |
| 201299_s_ | 7.76E-04 | 2.45E-04 | MOBKL1B                     | 55233 . |
| 201300_s_ | 9.04E-06 | 8.90E-07 | PRNP                        | 5621 .  |
| 201301_s_ | 1.47E-06 | 8.32E-08 | ANXA4                       | 307 .   |
| 201302_at | 4.82E-06 | 3.88E-07 | ANXA4                       | 307 .   |
| 201303_at | 3.21E-07 | 1.12E-08 | EIF4A3                      | 9775 .  |
| 201305_x_ | 3.64E-06 | 2.71E-07 | ANP32B                      | 10541 . |
| 201306_s_ | 1.85E-04 | 4.17E-05 | ANP32B                      | 10541 . |
| 201307_at | 1.76E-06 | 1.06E-07 | 11-Sep                      | 55752 . |
| 201308_s_ | 2.48E-06 | 1.64E-07 | 11-Sep                      | 55752 . |
| 201309_x_ | 3.18E-06 | 2.27E-07 | C5orf13                     | 9315 .  |
| 201310_s_ | 3.77E-05 | 5.57E-06 | C5orf13                     | 9315 .  |
| 201311_s_ | 0.004276 | 0.001919 | SH3BGRL                     | 6451 .  |
| 201312_s_ | 0.012103 | 0.006565 | SH3BGRL                     | 6451 .  |
| 201313_at | 0.031769 | 0.020271 | ENO2                        | 2026 .  |
| 201315_x_ | 8.46E-04 | 2.73E-04 | IFITM2                      | 10581 . |
| 201316_at | 0.002082 | 8.10E-04 | PSMA2                       | 5683 .  |
| 201317_s_ | 2.10E-05 | 2.66E-06 | PSMA2                       | 5683 .  |
| 201318_s_ | 0.001427 | 5.14E-04 | MYL12A /// M' 103910 /// 1( |         |
| 201319_at | 2.76E-04 | 6.83E-05 | MYL12A                      | 10627 . |
| 201320_at | 0.001182 | 4.10E-04 | SMARCC2                     | 6601 .  |
| 201321_s_ | 3.87E-04 | 1.04E-04 | SMARCC2                     | 6601 .  |
| 201322_at | 4.21E-05 | 6.42E-06 | ATP5B                       | 506 .   |

|           |          |          |          |         |
|-----------|----------|----------|----------|---------|
| 201323_at | 0.004909 | 0.002266 | EBNA1BP2 | 10969 . |
| 201324_at | 1.65E-04 | 3.61E-05 | EMP1     | 2012 .  |
| 201325_s_ | 2.82E-05 | 3.84E-06 | EMP1     | 2012 .  |
| 201326_at | 1.85E-05 | 2.26E-06 | CCT6A    | 908 .   |
| 201327_s_ | 1.37E-04 | 2.85E-05 | CCT6A    | 908 .   |
| 201328_at | 6.08E-05 | 1.02E-05 | ETS2     | 2114 .  |
| 201329_s_ | 0.004744 | 0.002177 | ETS2     | 2114 .  |
| 201331_s_ | 2.77E-06 | 1.89E-07 | STAT6    | 6778 .  |
| 201332_s_ | 5.08E-05 | 8.17E-06 | STAT6    | 6778 .  |
| 201333_s_ | 0.040601 | 0.026949 | ARHGEF12 | 23365 . |
| 201334_s_ | 3.69E-05 | 5.40E-06 | ARHGEF12 | 23365 . |
| 201335_s_ | 0.002764 | 0.001138 | ARHGEF12 | 23365 . |
| 201336_at | 8.21E-09 | 8.23E-11 | VAMP3    | 9341 .  |
| 201337_s_ | 2.59E-07 | 8.27E-09 | VAMP3    | 9341 .  |
| 201338_x_ | 0.006189 | 0.002983 | GTF3A    | 2971 .  |
| 201339_s_ | 1.56E-04 | 3.37E-05 | SCP2     | 6342 .  |
| 201340_s_ | 0.02488  | 0.015271 | ENC1     | 8507 .  |
| 201342_at | 2.33E-06 | 1.52E-07 | SNRPC    | 6631 .  |
| 201345_s_ | 0.007343 | 0.003657 | UBE2D2   | 7322 .  |
| 201346_at | 0.003226 | 0.00137  | ADIPOR2  | 79602 . |
| 201347_x_ | 0.013385 | 0.007389 | GRHPR    | 9380 .  |
| 201348_at | 2.49E-04 | 6.01E-05 | GPX3     | 2878 .  |
| 201349_at | 1.01E-05 | 1.03E-06 | SLC9A3R1 | 9368 .  |
| 201350_at | 0.019325 | 0.011361 | FLOT2    | 2319 .  |
| 201352_at | 0.002185 | 8.59E-04 | YME1L1   | 10730 . |
| 201354_s_ | 5.16E-04 | 1.48E-04 | BAZ2A    | 11176 . |
| 201355_s_ | 0.00278  | 0.001147 | BAZ2A    | 11176 . |
| 201356_at | 1.83E-05 | 2.22E-06 | SF3A1    | 10291 . |
| 201359_at | 0.001037 | 3.49E-04 | COPB1    | 1315 .  |
| 201360_at | 1.82E-04 | 4.08E-05 | CST3     | 1471 .  |
| 201361_at | 8.48E-07 | 3.98E-08 | TMEM109  | 79073 . |
| 201362_at | 0.001212 | 4.22E-04 | IVNS1ABP | 10625 . |
| 201363_s_ | 0.023648 | 0.014394 | IVNS1ABP | 10625 . |
| 201364_s_ | 6.41E-04 | 1.93E-04 | OAZ2     | 4947 .  |

|           |          |          |              |               |
|-----------|----------|----------|--------------|---------------|
| 201365_at | 0.001059 | 3.58E-04 | OAZ2         | 4947 .        |
| 201366_at | 0.002396 | 9.60E-04 | ANXA7        | 310 .         |
| 201367_s_ | 0.001863 | 7.08E-04 | ZFP36L2      | 678 .         |
| 201368_at | 5.34E-04 | 1.54E-04 | ZFP36L2      | 678 .         |
| 201369_s_ | 0.027044 | 0.016819 | ZFP36L2      | 678 .         |
| 201370_s_ | 0.009681 | 0.005053 | CUL3         | 8452 .        |
| 201373_at | 0.002634 | 0.001075 | PLEC1        | 5339 .        |
| 201374_x_ | 0.047881 | 0.032638 | PPP2CB       | 5516 .        |
| 201376_s_ | 6.55E-04 | 1.99E-04 | HNRNPF       | 3185 .        |
| 201377_at | 0.001933 | 7.41E-04 | UBAP2L       | 9898 .        |
| 201379_s_ | 2.94E-04 | 7.40E-05 | TPD52L2      | 7165 .        |
| 201380_at | 1.80E-04 | 4.03E-05 | CRTAP        | 10491 .       |
| 201381_x_ | 2.86E-06 | 1.98E-07 | CACYBP       | 27101 .       |
| 201383_s_ | 0.003845 | 0.001691 | LOC100133166 | 100133166 //. |
| 201384_s_ | 0.00172  | 6.43E-04 | LOC100133166 | 100133166 //. |
| 201385_at | 6.87E-04 | 2.11E-04 | DHX15        | 1665 .        |
| 201386_s_ | 1.28E-04 | 2.64E-05 | DHX15        | 1665 .        |
| 201388_at | 7.67E-04 | 2.42E-04 | PSMD3        | 5709 .        |
| 201389_at | 3.77E-07 | 1.37E-08 | ITGA5        | 3678 .        |
| 201391_at | 6.04E-05 | 1.01E-05 | TRAP1        | 10131 .       |
| 201392_s_ | 2.86E-05 | 3.92E-06 | IGF2R        | 3482 .        |
| 201396_s_ | 0.009083 | 0.004685 | SGTA         | 6449 .        |
| 201398_s_ | 3.71E-05 | 5.44E-06 | TRAM1        | 23471 .       |
| 201399_s_ | 1.23E-06 | 6.54E-08 | TRAM1        | 23471 .       |
| 201400_at | 4.57E-05 | 7.15E-06 | PSMB3        | 5691 .        |
| 201401_s_ | 0.014154 | 0.007886 | ADRBK1       | 156 .         |
| 201402_at | 0.015215 | 0.008592 | ADRBK1       | 156 .         |
| 201405_s_ | 0.029482 | 0.018598 | COPS6        | 10980 .       |
| 201410_at | 0.035232 | 0.022853 | PLEKHB2      | 55041 .       |
| 201412_at | 8.90E-08 | 1.96E-09 | LRP10        | 26020 .       |
| 201413_at | 6.86E-05 | 1.20E-05 | HSD17B4      | 3295 .        |
| 201414_s_ | 0.00229  | 9.09E-04 | NAP1L4       | 4676 .        |
| 201415_at | 5.48E-07 | 2.23E-08 | GSS          | 2937 .        |
| 201416_at | 0.01636  | 0.009355 | SOX4         | 6659 .        |

|           |          |          |                              |         |
|-----------|----------|----------|------------------------------|---------|
| 201417_at | 0.009123 | 0.00471  | SOX4                         | 6659 .  |
| 201418_s_ | 0.003292 | 0.001404 | SOX4                         | 6659 .  |
| 201420_s_ | 0.022462 | 0.013557 | WDR77                        | 79084 . |
| 201421_s_ | 0.014109 | 0.007856 | WDR77                        | 79084 . |
| 201423_s_ | 6.48E-05 | 1.11E-05 | CUL4A                        | 8451 .  |
| 201424_s_ | 0.015887 | 0.009041 | CUL4A                        | 8451 .  |
| 201426_s_ | 1.28E-04 | 2.61E-05 | VIM                          | 7431 .  |
| 201427_s_ | 0.001509 | 5.50E-04 | SEPP1                        | 6414 .  |
| 201428_at | 0.007629 | 0.003825 | CLDN4                        | 1364 .  |
| 201431_s_ | 0.020532 | 0.012198 | DPYSL3                       | 1809 .  |
| 201432_at | 9.33E-09 | 9.76E-11 | CAT                          | 847 .   |
| 201433_s_ | 4.53E-05 | 7.07E-06 | PTDSS1                       | 9791 .  |
| 201434_at | 0.020238 | 0.01199  | TTC1                         | 7265 .  |
| 201435_s_ | 7.46E-04 | 2.34E-04 | EIF4E                        | 1977 .  |
| 201436_at | 0.002095 | 8.16E-04 | EIF4E                        | 1977 .  |
| 201437_s_ | 7.20E-04 | 2.23E-04 | EIF4E                        | 1977 .  |
| 201438_at | 0.001017 | 3.41E-04 | COL6A3                       | 1293 .  |
| 201440_at | 0.009674 | 0.005048 | DDX23                        | 9416 .  |
| 201441_at | 0.011299 | 0.006056 | COX6B1                       | 1340 .  |
| 201443_s_ | 0.002783 | 0.001148 | ATP6AP2                      | 10159 . |
| 201444_s_ | 0.002699 | 0.001106 | ATP6AP2                      | 10159 . |
| 201446_s_ | 0.002683 | 0.001098 | TIA1                         | 7072 .  |
| 201447_at | 0.001088 | 3.70E-04 | TIA1                         | 7072 .  |
| 201448_at | 5.23E-04 | 1.50E-04 | TIA1                         | 7072 .  |
| 201449_at | 1.78E-04 | 3.95E-05 | TIA1                         | 7072 .  |
| 201450_s_ | 0.00457  | 0.002081 | TIA1                         | 7072 .  |
| 201451_x_ | 0.001544 | 5.65E-04 | RHEB                         | 6009 .  |
| 201456_s_ | 9.48E-07 | 4.61E-08 | BUB3                         | 9184 .  |
| 201458_s_ | 4.10E-05 | 6.19E-06 | BUB3                         | 9184 .  |
| 201459_at | 1.49E-05 | 1.72E-06 | RUVBL2                       | 10856 . |
| 201460_at | 0.042524 | 0.028435 | MAPKAPK2                     | 9261 .  |
| 201461_s_ | 0.001049 | 3.53E-04 | MAPKAPK2                     | 9261 .  |
| 201463_s_ | 0.008765 | 0.004493 | LOC100133665 LOC100133665 // |         |
| 201467_s_ | 4.87E-04 | 1.38E-04 | NQO1                         | 1728 .  |



|           |          |          |         |         |
|-----------|----------|----------|---------|---------|
| 201468_s_ | 1.34E-04 | 2.77E-05 | NQO1    | 1728 .  |
| 201469_s_ | 0.00201  | 7.77E-04 | SHC1    | 6464 .  |
| 201470_at | 0.004998 | 0.002314 | GSTO1   | 9446 .  |
| 201471_s_ | 0.001734 | 6.49E-04 | SQSTM1  | 8878 .  |
| 201472_at | 3.92E-04 | 1.06E-04 | VBP1    | 7411 .  |
| 201473_at | 8.97E-04 | 2.93E-04 | JUNB    | 3726 .  |
| 201474_s_ | 9.72E-04 | 3.22E-04 | ITGA3   | 3675 .  |
| 201475_x_ | 0.002292 | 9.10E-04 | MARS    | 4141 .  |
| 201477_s_ | 9.74E-05 | 1.87E-05 | RRM1    | 6240 .  |
| 201478_s_ | 4.44E-08 | 7.71E-10 | DKC1    | 1736 .  |
| 201479_at | 2.19E-07 | 6.57E-09 | DKC1    | 1736 .  |
| 201480_s_ | 0.010977 | 0.005854 | SUPT5H  | 6829 .  |
| 201481_s_ | 0.012613 | 0.006896 | PYGB    | 5834 .  |
| 201482_at | 1.43E-05 | 1.63E-06 | QSOX1   | 5768 .  |
| 201483_s_ | 0.012165 | 0.006604 | SUPT4H1 | 6827 .  |
| 201484_at | 6.51E-05 | 1.12E-05 | SUPT4H1 | 6827 .  |
| 201485_s_ | 0.007439 | 0.003715 | RCN2    | 5955 .  |
| 201486_at | 0.012732 | 0.006973 | RCN2    | 5955 .  |
| 201487_at | 1.37E-06 | 7.57E-08 | CTSC    | 1075 .  |
| 201488_x_ | 3.03E-07 | 1.02E-08 | KHDRBS1 | 10657 . |
| 201489_at | 0.024511 | 0.015001 | PPIF    | 10105 . |
| 201491_at | 9.81E-05 | 1.88E-05 | AHSA1   | 10598 . |
| 201493_s_ | 0.004193 | 0.001875 | PUM2    | 23369 . |
| 201494_at | 6.76E-05 | 1.17E-05 | PRCP    | 5547 .  |
| 201495_x_ | 1.99E-04 | 4.57E-05 | MYH11   | 4629 .  |
| 201496_x_ | 9.93E-04 | 3.31E-04 | MYH11   | 4629 .  |
| 201497_x_ | 0.024491 | 0.014987 | MYH11   | 4629 .  |
| 201498_at | 1.56E-05 | 1.81E-06 | USP7    | 7874 .  |
| 201499_s_ | 1.70E-04 | 3.74E-05 | USP7    | 7874 .  |
| 201500_s_ | 5.31E-06 | 4.40E-07 | PPP1R11 | 6992 .  |
| 201502_s_ | 0.001769 | 6.65E-04 | NFKBIA  | 4792 .  |
| 201503_at | 0.004815 | 0.002217 | G3BP1   | 10146 . |
| 201505_at | 0.023346 | 0.014175 | LAMB1   | 3912 .  |
| 201506_at | 0.009389 | 0.004873 | TGFBI   | 7045 .  |

|           |          |          |                       |         |
|-----------|----------|----------|-----------------------|---------|
| 201507_at | 0.00351  | 0.001517 | PFDN1                 | 5201 .  |
| 201508_at | 7.56E-10 | 3.67E-12 | IGFBP4                | 3487 .  |
| 201509_at | 0.021449 | 0.012845 | IDH3B                 | 3420 .  |
| 201510_at | 0.007361 | 0.003667 | ELF3                  | 1999 .  |
| 201511_at | 3.34E-05 | 4.77E-06 | AAMP                  | 14 .    |
| 201513_at | 0.006406 | 0.003109 | TSN                   | 7247 .  |
| 201514_s_ | 0.011913 | 0.006442 | G3BP1                 | 10146 . |
| 201515_s_ | 0.009616 | 0.00501  | TSN                   | 7247 .  |
| 201516_at | 0.017868 | 0.010367 | SRM                   | 6723 .  |
| 201517_at | 0.041982 | 0.028015 | NCBP2                 | 22916 . |
| 201518_at | 4.93E-05 | 7.88E-06 | CBX1                  | 10951 . |
| 201519_at | 0.04849  | 0.033117 | TOMM70A               | 9868 .  |
| 201522_x_ | 0.013968 | 0.007763 | SNRPN /// SNU6638 /// | 8926 .  |
| 201524_x_ | 0.008392 | 0.004274 | UBE2N                 | 7334 .  |
| 201525_at | 6.86E-07 | 3.01E-08 | APOD                  | 347 .   |
| 201528_at | 2.20E-06 | 1.41E-07 | RPA1                  | 6117 .  |
| 201529_s_ | 1.09E-04 | 2.14E-05 | RPA1                  | 6117 .  |
| 201530_x_ | 0.013839 | 0.007682 | EIF4A1                | 1973 .  |
| 201531_at | 7.18E-07 | 3.19E-08 | ZFP36                 | 7538 .  |
| 201532_at | 6.09E-04 | 1.82E-04 | PSMA3                 | 5684 .  |
| 201534_s_ | 5.76E-05 | 9.56E-06 | UBL3                  | 5412 .  |
| 201535_at | 7.95E-04 | 2.53E-04 | UBL3                  | 5412 .  |
| 201536_at | 0.008758 | 0.004489 | DUSP3                 | 1845 .  |
| 201537_s_ | 0.003764 | 0.001649 | DUSP3                 | 1845 .  |
| 201538_s_ | 0.04186  | 0.027917 | DUSP3                 | 1845 .  |
| 201539_s_ | 1.23E-04 | 2.51E-05 | FHL1                  | 2273 .  |
| 201540_at | 2.14E-06 | 1.36E-07 | FHL1                  | 2273 .  |
| 201541_s_ | 0.023782 | 0.014487 | ZNHIT1                | 10467 . |
| 201542_at | 8.55E-04 | 2.76E-04 | SAR1A                 | 56681 . |
| 201543_s_ | 0.002859 | 0.001185 | SAR1A                 | 56681 . |
| 201544_x_ | 8.81E-04 | 2.86E-04 | PABPN1                | 8106 .  |
| 201545_s_ | 2.08E-06 | 1.32E-07 | PABPN1                | 8106 .  |
| 201546_at | 0.001536 | 5.61E-04 | TRIP12                | 9320 .  |
| 201548_s_ | 9.55E-04 | 3.16E-04 | KDM5B                 | 10765 . |

|           |          |          |        |         |
|-----------|----------|----------|--------|---------|
| 201549_x_ | 4.26E-05 | 6.54E-06 | KDM5B  | 10765 . |
| 201550_x_ | 0.001296 | 4.57E-04 | ACTG1  | 71 .    |
| 201551_s_ | 0.005156 | 0.002404 | LAMP1  | 3916 .  |
| 201552_at | 1.26E-04 | 2.56E-05 | LAMP1  | 3916 .  |
| 201553_s_ | 0.001061 | 3.59E-04 | LAMP1  | 3916 .  |
| 201554_x_ | 8.55E-04 | 2.76E-04 | GYG1   | 2992 .  |
| 201555_at | 4.90E-08 | 8.79E-10 | MCM3   | 4172 .  |
| 201556_s_ | 0.0154   | 0.008715 | VAMP2  | 6844 .  |
| 201557_at | 3.97E-04 | 1.07E-04 | VAMP2  | 6844 .  |
| 201558_at | 1.60E-08 | 1.97E-10 | RAE1   | 8480 .  |
| 201559_s_ | 7.77E-07 | 3.53E-08 | CLIC4  | 25932 . |
| 201560_at | 1.01E-06 | 4.99E-08 | CLIC4  | 25932 . |
| 201561_s_ | 4.88E-04 | 1.38E-04 | CLSTN1 | 22883 . |
| 201562_s_ | 0.030738 | 0.019523 | SORD   | 6652 .  |
| 201563_at | 7.18E-04 | 2.23E-04 | SORD   | 6652 .  |
| 201564_s_ | 0.007538 | 0.003771 | FSCN1  | 6624 .  |
| 201565_s_ | 0.021975 | 0.013224 | ID2    | 3398 .  |
| 201566_x_ | 0.039443 | 0.026058 | ID2    | 3398 .  |
| 201568_at | 1.27E-05 | 1.39E-06 | UQCRQ  | 27089 . |
| 201570_at | 0.013061 | 0.007182 | SAMM50 | 25813 . |
| 201571_s_ | 6.13E-05 | 1.03E-05 | DCTD   | 1635 .  |
| 201572_x_ | 8.90E-04 | 2.90E-04 | DCTD   | 1635 .  |
| 201575_at | 5.09E-04 | 1.45E-04 | SNW1   | 22938 . |
| 201576_s_ | 5.75E-05 | 9.55E-06 | GLB1   | 2720 .  |
| 201577_at | 7.72E-05 | 1.40E-05 | NME1   | 4830 .  |
| 201578_at | 2.68E-07 | 8.64E-09 | PODXL  | 5420 .  |
| 201580_s_ | 1.14E-07 | 2.72E-09 | TMX4   | 56255 . |
| 201581_at | 3.76E-04 | 1.00E-04 | TMX4   | 56255 . |
| 201583_s_ | 0.003842 | 0.00169  | SEC23B | 10483 . |
| 201584_s_ | 6.56E-07 | 2.83E-08 | DDX39  | 10212 . |
| 201585_s_ | 2.29E-05 | 2.96E-06 | SFPQ   | 6421 .  |
| 201586_s_ | 4.54E-04 | 1.26E-04 | SFPQ   | 6421 .  |
| 201587_s_ | 8.33E-08 | 1.79E-09 | IRAK1  | 3654 .  |
| 201589_at | 0.001091 | 3.71E-04 | SMC1A  | 8243 .  |

|           |          |          |          |         |
|-----------|----------|----------|----------|---------|
| 201590_x_ | 1.81E-04 | 4.04E-05 | ANXA2    | 302 .   |
| 201591_s_ | 0.035081 | 0.022741 | NISCH    | 11188 . |
| 201592_at | 7.10E-04 | 2.20E-04 | EIF3H    | 8667 .  |
| 201593_s_ | 4.23E-06 | 3.29E-07 | ZC3H15   | 55854 . |
| 201595_s_ | 0.001365 | 4.88E-04 | ZC3H15   | 55854 . |
| 201596_x_ | 1.15E-05 | 1.22E-06 | KRT18    | 3875 .  |
| 201597_at | 0.001939 | 7.44E-04 | COX7A2   | 1347 .  |
| 201598_s_ | 0.006368 | 0.003086 | INPPL1   | 3636 .  |
| 201599_at | 0.004405 | 0.001991 | OAT      | 4942 .  |
| 201600_at | 0.003386 | 0.001453 | PHB2     | 11331 . |
| 201601_x_ | 1.77E-04 | 3.93E-05 | IFITM1   | 8519 .  |
| 201602_s_ | 0.003243 | 0.001379 | PPP1R12A | 4659 .  |
| 201605_x_ | 2.42E-04 | 5.81E-05 | CNN2     | 1265 .  |
| 201606_s_ | 0.001673 | 6.22E-04 | PWP1     | 11137 . |
| 201607_at | 2.95E-04 | 7.44E-05 | PWP1     | 11137 . |
| 201608_s_ | 3.61E-04 | 9.55E-05 | PWP1     | 11137 . |
| 201609_x_ | 0.006022 | 0.00289  | ICMT     | 23463 . |
| 201610_at | 0.012724 | 0.006968 | ICMT     | 23463 . |
| 201612_at | 0.018532 | 0.01082  | ALDH9A1  | 223 .   |
| 201613_s_ | 2.96E-05 | 4.10E-06 | AP1G2    | 8906 .  |
| 201614_s_ | 8.10E-06 | 7.65E-07 | RUVBL1   | 8607 .  |
| 201615_x_ | 2.72E-04 | 6.73E-05 | CALD1    | 800 .   |
| 201616_s_ | 1.16E-06 | 6.05E-08 | CALD1    | 800 .   |
| 201617_x_ | 1.74E-06 | 1.05E-07 | CALD1    | 800 .   |
| 201618_x_ | 9.28E-05 | 1.75E-05 | GPAA1    | 8733 .  |
| 201619_at | 0.020466 | 0.012151 | PRDX3    | 10935 . |
| 201620_at | 5.15E-07 | 2.04E-08 | MBTPS1   | 8720 .  |
| 201621_at | 4.85E-06 | 3.92E-07 | NBL1     | 4681 .  |
| 201622_at | 7.30E-04 | 2.27E-04 | SND1     | 27044 . |
| 201623_s_ | 0.004973 | 0.002301 | DARS     | 1615 .  |
| 201626_at | 0.025183 | 0.015492 | INSIG1   | 3638 .  |
| 201627_s_ | 0.017611 | 0.010194 | INSIG1   | 3638 .  |
| 201628_s_ | 0.00321  | 0.001362 | RRAGA    | 10670 . |
| 201629_s_ | 0.004058 | 0.001803 | ACP1     | 52 .    |

|           |          |          |         |         |
|-----------|----------|----------|---------|---------|
| 201630_s_ | 0.01447  | 0.008094 | ACP1    | 52 .    |
| 201631_s_ | 0.001164 | 4.02E-04 | IER3    | 8870 .  |
| 201632_at | 8.89E-06 | 8.69E-07 | EIF2B1  | 1967 .  |
| 201635_s_ | 0.002033 | 7.87E-04 | FXR1    | 8087 .  |
| 201636_at | 7.01E-07 | 3.09E-08 | FXR1    | 8087 .  |
| 201637_s_ | 0.002608 | 0.001063 | FXR1    | 8087 .  |
| 201638_s_ | 0.020656 | 0.01229  | CPSF1   | 29894 . |
| 201639_s_ | 0.024652 | 0.015104 | CPSF1   | 29894 . |
| 201640_x_ | 0.044992 | 0.030377 | CLPTM1  | 1209 .  |
| 201642_at | 7.00E-05 | 1.23E-05 | IFNGR2  | 3460 .  |
| 201643_x_ | 2.85E-05 | 3.90E-06 | KDM3B   | 51780 . |
| 201644_at | 0.00532  | 0.002493 | TSTA3   | 7264 .  |
| 201645_at | 0.011109 | 0.005936 | TNC     | 3371 .  |
| 201646_at | 2.70E-05 | 3.64E-06 | SCARB2  | 950 .   |
| 201647_s_ | 1.17E-07 | 2.82E-09 | SCARB2  | 950 .   |
| 201648_at | 3.03E-06 | 2.14E-07 | JAK1    | 3716 .  |
| 201649_at | 0.026085 | 0.016127 | UBE2L6  | 9246 .  |
| 201650_at | 2.40E-06 | 1.58E-07 | KRT19   | 3880 .  |
| 201651_s_ | 0.001556 | 5.70E-04 | PACSIN2 | 11252 . |
| 201652_at | 7.33E-04 | 2.28E-04 | COP5    | 10987 . |
| 201653_at | 0.029192 | 0.018384 | CNIH    | 10175 . |
| 201654_s_ | 3.49E-05 | 5.03E-06 | HSPG2   | 3339 .  |
| 201655_s_ | 1.16E-05 | 1.24E-06 | HSPG2   | 3339 .  |
| 201656_at | 3.13E-04 | 8.01E-05 | ITGA6   | 3655 .  |
| 201657_at | 9.57E-04 | 3.16E-04 | ARL1    | 400 .   |
| 201658_at | 0.00606  | 0.002912 | ARL1    | 400 .   |
| 201659_s_ | 0.001011 | 3.38E-04 | ARL1    | 400 .   |
| 201663_s_ | 4.47E-04 | 1.24E-04 | SMC4    | 10051 . |
| 201664_at | 7.09E-06 | 6.42E-07 | SMC4    | 10051 . |
| 201665_x_ | 0.002261 | 8.96E-04 | RPS17   | 6218 .  |
| 201666_at | 2.15E-07 | 6.38E-09 | TIMP1   | 7076 .  |
| 201667_at | 0.01267  | 0.006933 | GJA1    | 2697 .  |
| 201668_x_ | 1.62E-04 | 3.53E-05 | MARCKS  | 4082 .  |
| 201669_s_ | 0.048211 | 0.032896 | MARCKS  | 4082 .  |

|           |          |          |          |         |
|-----------|----------|----------|----------|---------|
| 201670_s_ | 0.014781 | 0.008304 | MARCKS   | 4082 .  |
| 201673_s_ | 0.001797 | 6.77E-04 | GYS1     | 2997 .  |
| 201674_s_ | 1.95E-07 | 5.56E-09 | AKAP1    | 8165 .  |
| 201675_at | 2.56E-07 | 8.16E-09 | AKAP1    | 8165 .  |
| 201676_x_ | 0.006641 | 0.003245 | PSMA1    | 5682 .  |
| 201677_at | 0.007336 | 0.003653 | C3orf37  | 56941 . |
| 201678_s_ | 2.92E-04 | 7.35E-05 | C3orf37  | 56941 . |
| 201680_x_ | 5.11E-05 | 8.23E-06 | SRRT     | 51593 . |
| 201681_s_ | 0.019496 | 0.011479 | DLG5     | 9231 .  |
| 201682_at | 1.68E-04 | 3.68E-05 | PMPCB    | 9512 .  |
| 201683_x_ | 0.014023 | 0.007798 | TOX4     | 9878 .  |
| 201685_s_ | 6.66E-04 | 2.03E-04 | TOX4     | 9878 .  |
| 201686_x_ | 1.40E-05 | 1.58E-06 | API5     | 8539 .  |
| 201687_s_ | 0.001301 | 4.60E-04 | API5     | 8539 .  |
| 201688_s_ | 2.93E-10 | 1.05E-12 | TPD52    | 7163 .  |
| 201689_s_ | 4.38E-10 | 1.82E-12 | TPD52    | 7163 .  |
| 201690_s_ | 1.03E-10 | 2.71E-13 | TPD52    | 7163 .  |
| 201691_s_ | 6.26E-05 | 1.06E-05 | TPD52    | 7163 .  |
| 201692_at | 0.004947 | 0.002286 | SIGMAR1  | 10280 . |
| 201695_s_ | 7.74E-06 | 7.22E-07 | NP       | 4860 .  |
| 201696_at | 7.30E-05 | 1.30E-05 | SFRS4    | 6429 .  |
| 201697_s_ | 8.62E-08 | 1.87E-09 | DNMT1    | 1786 .  |
| 201698_s_ | 4.55E-05 | 7.11E-06 | SFRS9    | 8683 .  |
| 201699_at | 0.034761 | 0.022497 | PSMC6    | 5706 .  |
| 201700_at | 4.83E-04 | 1.36E-04 | CCND3    | 896 .   |
| 201701_s_ | 3.63E-04 | 9.59E-05 | PGRMC2   | 10424 . |
| 201702_s_ | 0.041758 | 0.027836 | PPP1R10  | 5514 .  |
| 201703_s_ | 0.003818 | 0.001677 | PPP1R10  | 5514 .  |
| 201704_at | 0.039238 | 0.0259   | ENTPD6   | 955 .   |
| 201706_s_ | 4.92E-09 | 4.23E-11 | PEX19    | 5824 .  |
| 201708_s_ | 0.00974  | 0.005089 | NIPSNAP1 | 8508 .  |
| 201709_s_ | 0.004173 | 0.001864 | NIPSNAP1 | 8508 .  |
| 201710_at | 7.16E-07 | 3.18E-08 | MYBL2    | 4605 .  |
| 201711_x_ | 4.87E-05 | 7.76E-06 | RANBP2   | 5903 .  |

|           |          |          |          |         |
|-----------|----------|----------|----------|---------|
| 201712_s_ | 5.39E-04 | 1.56E-04 | RANBP2   | 5903 .  |
| 201714_at | 0.039563 | 0.026148 | TUBG1    | 7283 .  |
| 201715_s_ | 0.005732 | 0.002723 | ACIN1    | 22985 . |
| 201716_at | 4.27E-07 | 1.62E-08 | SNX1     | 6642 .  |
| 201717_at | 0.023367 | 0.014191 | MRPL49   | 740 .   |
| 201719_s_ | 0.025156 | 0.015471 | EPB41L2  | 2037 .  |
| 201722_s_ | 1.14E-07 | 2.71E-09 | GALNT1   | 2589 .  |
| 201723_s_ | 2.32E-06 | 1.51E-07 | GALNT1   | 2589 .  |
| 201724_s_ | 6.14E-06 | 5.32E-07 | GALNT1   | 2589 .  |
| 201725_at | 0.002212 | 8.72E-04 | CDC123   | 8872 .  |
| 201726_at | 1.21E-04 | 2.43E-05 | ELAVL1   | 1994 .  |
| 201729_s_ | 6.15E-04 | 1.83E-04 | KIAA0100 | 9703 .  |
| 201730_s_ | 1.30E-04 | 2.67E-05 | TPR      | 7175 .  |
| 201731_s_ | 4.58E-06 | 3.64E-07 | TPR      | 7175 .  |
| 201733_at | 0.004592 | 0.002093 | CLCN3    | 1182 .  |
| 201736_s_ | 0.028382 | 0.017782 | 6-Mar    | 10299 . |
| 201738_at | 0.006726 | 0.003295 | EIF1B    | 10289 . |
| 201739_at | 0.005518 | 0.002606 | SGK1     | 6446 .  |
| 201740_at | 1.20E-04 | 2.42E-05 | NDUFS3   | 4722 .  |
| 201741_x_ | 0.004654 | 0.002128 | SFRS1    | 6426 .  |
| 201742_x_ | 0.030923 | 0.019654 | SFRS1    | 6426 .  |
| 201743_at | 0.014162 | 0.007891 | CD14     | 929 .   |
| 201744_s_ | 5.37E-04 | 1.55E-04 | LUM      | 4060 .  |
| 201745_at | 9.46E-04 | 3.12E-04 | TWF1     | 5756 .  |
| 201747_s_ | 0.016885 | 0.009703 | SAFB     | 6294 .  |
| 201748_s_ | 1.35E-05 | 1.51E-06 | SAFB     | 6294 .  |
| 201749_at | 0.018594 | 0.010862 | ECE1     | 1889 .  |
| 201750_s_ | 4.25E-04 | 1.16E-04 | ECE1     | 1889 .  |
| 201751_at | 1.50E-05 | 1.73E-06 | JOSD1    | 9929 .  |
| 201752_s_ | 0.004419 | 0.001999 | ADD3     | 120 .   |
| 201753_s_ | 3.96E-04 | 1.07E-04 | ADD3     | 120 .   |
| 201754_at | 6.76E-04 | 2.07E-04 | COX6C    | 1345 .  |
| 201755_at | 5.57E-04 | 1.62E-04 | MCM5     | 4174 .  |
| 201756_at | 8.51E-05 | 1.58E-05 | RPA2     | 6118 .  |

|           |          |          |                              |         |
|-----------|----------|----------|------------------------------|---------|
| 201757_at | 0.009724 | 0.005079 | NDUFS5 /// RP 4725 /// 6134. |         |
| 201759_at | 0.002838 | 0.001174 | TBCD                         | 6904 .  |
| 201760_s_ | 1.30E-04 | 2.68E-05 | WSB2                         | 55884 . |
| 201764_at | 1.03E-06 | 5.12E-08 | TMEM106C                     | 79022 . |
| 201765_s_ | 0.038773 | 0.025545 | HEXA                         | 3073 .  |
| 201766_at | 5.95E-05 | 9.95E-06 | ELAC2                        | 60528 . |
| 201767_s_ | 7.33E-05 | 1.31E-05 | ELAC2                        | 60528 . |
| 201768_s_ | 1.60E-05 | 1.88E-06 | CLINT1                       | 9685 .  |
| 201770_at | 1.49E-04 | 3.19E-05 | SNRPA                        | 6626 .  |
| 201771_at | 0.002273 | 9.01E-04 | SCAMP3                       | 10067 . |
| 201772_at | 2.40E-04 | 5.74E-05 | AZIN1                        | 51582 . |
| 201773_at | 0.010735 | 0.005702 | ADNP                         | 23394 . |
| 201774_s_ | 1.34E-06 | 7.38E-08 | NCAPD2                       | 9918 .  |
| 201775_s_ | 5.03E-05 | 8.07E-06 | KIAA0494                     | 9813 .  |
| 201776_s_ | 3.82E-04 | 1.02E-04 | KIAA0494                     | 9813 .  |
| 201777_s_ | 5.54E-04 | 1.62E-04 | KIAA0494                     | 9813 .  |
| 201778_s_ | 0.005183 | 0.002419 | KIAA0494                     | 9813 .  |
| 201779_s_ | 0.001295 | 4.57E-04 | RNF13                        | 11342 . |
| 201781_s_ | 2.73E-04 | 6.74E-05 | AIP                          | 9049 .  |
| 201782_s_ | 4.48E-04 | 1.24E-04 | AIP                          | 9049 .  |
| 201783_s_ | 4.56E-06 | 3.62E-07 | RELA                         | 5970 .  |
| 201785_at | 6.46E-11 | 1.53E-13 | RNASE1                       | 6035 .  |
| 201787_at | 0.001344 | 4.78E-04 | FBLN1 /// LOC:100133843 //.  |         |
| 201788_at | 1.27E-06 | 6.85E-08 | DDX42                        | 11325 . |
| 201790_s_ | 0.018197 | 0.010592 | DHCR7                        | 1717 .  |
| 201792_at | 3.85E-05 | 5.71E-06 | AEBP1                        | 165 .   |
| 201793_x_ | 0.001723 | 6.44E-04 | SMG7                         | 9887 .  |
| 201794_s_ | 3.99E-07 | 1.47E-08 | SMG7                         | 9887 .  |
| 201795_at | 1.65E-04 | 3.60E-05 | LBR                          | 3930 .  |
| 201797_s_ | 0.008853 | 0.004546 | VARS                         | 7407 .  |
| 201798_s_ | 0.002391 | 9.57E-04 | MYOF                         | 26509 . |
| 201799_s_ | 0.007099 | 0.003514 | OSBP                         | 5007 .  |
| 201801_s_ | 0.018305 | 0.010665 | SLC29A1                      | 2030 .  |
| 201802_at | 0.032421 | 0.020763 | SLC29A1                      | 2030 .  |



|           |          |          |         |         |
|-----------|----------|----------|---------|---------|
| 201803_at | 0.001178 | 4.08E-04 | POLR2B  | 5431 .  |
| 201804_x_ | 0.043973 | 0.029581 | TBCB    | 1155 .  |
| 201805_at | 1.11E-04 | 2.20E-05 | PRKAG1  | 5571 .  |
| 201806_s_ | 2.90E-05 | 4.00E-06 | ATXN2L  | 11273 . |
| 201807_at | 0.001053 | 3.55E-04 | VPS26A  | 9559 .  |
| 201808_s_ | 3.34E-05 | 4.77E-06 | ENG     | 2022 .  |
| 201809_s_ | 2.04E-08 | 2.67E-10 | ENG     | 2022 .  |
| 201810_s_ | 0.043254 | 0.029013 | SH3BP5  | 9467 .  |
| 201811_x_ | 0.017299 | 0.009981 | SH3BP5  | 9467 .  |
| 201813_s_ | 0.001576 | 5.79E-04 | TBC1D5  | 9779 .  |
| 201814_at | 0.001004 | 3.35E-04 | TBC1D5  | 9779 .  |
| 201815_s_ | 3.36E-04 | 8.74E-05 | TBC1D5  | 9779 .  |
| 201817_at | 0.003286 | 0.001401 | UBE3C   | 9690 .  |
| 201818_at | 0.004032 | 0.001789 | LPCAT1  | 79888 . |
| 201819_at | 5.45E-04 | 1.58E-04 | SCARB1  | 949 .   |
| 201821_s_ | 0.024062 | 0.014683 | TIMM17A | 10440 . |
| 201822_at | 1.41E-04 | 2.97E-05 | TIMM17A | 10440 . |
| 201823_s_ | 1.22E-04 | 2.47E-05 | RNF14   | 9604 .  |
| 201824_at | 5.53E-05 | 9.08E-06 | RNF14   | 9604 .  |
| 201825_s_ | 0.004611 | 0.002104 | SCCPDH  | 51097 . |
| 201826_s_ | 6.23E-04 | 1.87E-04 | SCCPDH  | 51097 . |
| 201827_at | 1.70E-04 | 3.73E-05 | SMARCD2 | 6603 .  |
| 201828_x_ | 1.03E-06 | 5.13E-08 | FAM127A | 8933 .  |
| 201829_at | 0.041865 | 0.027921 | NET1    | 10276 . |
| 201830_s_ | 0.002966 | 0.001236 | NET1    | 10276 . |
| 201831_s_ | 7.73E-08 | 1.62E-09 | USO1    | 8615 .  |
| 201832_s_ | 9.86E-08 | 2.25E-09 | USO1    | 8615 .  |
| 201833_at | 2.43E-06 | 1.60E-07 | HDAC2   | 3066 .  |
| 201834_at | 0.001578 | 5.80E-04 | PRKAB1  | 5564 .  |
| 201835_s_ | 7.72E-04 | 2.44E-04 | PRKAB1  | 5564 .  |
| 201836_s_ | 6.79E-04 | 2.08E-04 | SUPT7L  | 9913 .  |
| 201837_s_ | 0.044742 | 0.030182 | SUPT7L  | 9913 .  |
| 201839_s_ | 5.14E-08 | 9.35E-10 | EPCAM   | 4072 .  |
| 201841_s_ | 2.20E-06 | 1.41E-07 | HSPB1   | 3315 .  |

|           |          |          |         |         |
|-----------|----------|----------|---------|---------|
| 201842_s_ | 3.09E-07 | 1.05E-08 | EFEMP1  | 2202 .  |
| 201843_s_ | 1.23E-07 | 2.99E-09 | EFEMP1  | 2202 .  |
| 201844_s_ | 0.020728 | 0.012343 | RYBP    | 23429 . |
| 201845_s_ | 0.027524 | 0.017161 | RYBP    | 23429 . |
| 201846_s_ | 0.003268 | 0.001391 | RYBP    | 23429 . |
| 201847_at | 1.30E-06 | 7.04E-08 | LIPA    | 3988 .  |
| 201849_at | 0.018285 | 0.010652 | BNIP3   | 664 .   |
| 201850_at | 0.008416 | 0.004288 | CAPG    | 822 .   |
| 201851_at | 2.24E-04 | 5.28E-05 | SH3GL1  | 6455 .  |
| 201852_x_ | 0.020315 | 0.012047 | COL3A1  | 1281 .  |
| 201853_s_ | 3.06E-05 | 4.29E-06 | CDC25B  | 994 .   |
| 201854_s_ | 0.011502 | 0.006182 | ATMIN   | 23300 . |
| 201855_s_ | 4.32E-04 | 1.19E-04 | ATMIN   | 23300 . |
| 201857_at | 0.036775 | 0.024031 | ZFR     | 51663 . |
| 201858_s_ | 3.32E-06 | 2.40E-07 | SRGN    | 5552 .  |
| 201859_at | 1.58E-05 | 1.85E-06 | SRGN    | 5552 .  |
| 201860_s_ | 0.002595 | 0.001056 | PLAT    | 5327 .  |
| 201861_s_ | 6.81E-10 | 3.19E-12 | LRRFIP1 | 9208 .  |
| 201862_s_ | 1.53E-04 | 3.30E-05 | LRRFIP1 | 9208 .  |
| 201864_at | 0.005255 | 0.002457 | GDI1    | 2664 .  |
| 201865_x_ | 0.001059 | 3.58E-04 | NR3C1   | 2908 .  |
| 201866_s_ | 2.11E-05 | 2.68E-06 | NR3C1   | 2908 .  |
| 201867_s_ | 0.011222 | 0.006008 | TBL1X   | 6907 .  |
| 201868_s_ | 0.012815 | 0.007025 | TBL1X   | 6907 .  |
| 201870_at | 0.005898 | 0.002819 | TOMM34  | 10953 . |
| 201872_s_ | 0.004746 | 0.002179 | ABCE1   | 6059 .  |
| 201873_s_ | 0.002306 | 9.17E-04 | ABCE1   | 6059 .  |
| 201874_at | 2.30E-05 | 2.97E-06 | MPZL1   | 9019 .  |
| 201875_s_ | 0.019174 | 0.011253 | MPZL1   | 9019 .  |
| 201876_at | 0.029369 | 0.018508 | PON2    | 5445 .  |
| 201877_s_ | 0.037846 | 0.024848 | PPP2R5C | 5527 .  |
| 201882_x_ | 0.001368 | 4.89E-04 | B4GALT1 | 2683 .  |
| 201883_s_ | 0.003538 | 0.00153  | B4GALT1 | 2683 .  |
| 201884_at | 0.045627 | 0.03087  | CEACAM5 | 1048 .  |

|           |          |          |          |         |
|-----------|----------|----------|----------|---------|
| 201885_s_ | 3.06E-08 | 4.71E-10 | CYB5R3   | 1727 .  |
| 201887_at | 1.28E-05 | 1.41E-06 | IL13RA1  | 3597 .  |
| 201888_s_ | 3.63E-07 | 1.31E-08 | IL13RA1  | 3597 .  |
| 201889_at | 0.01613  | 0.009204 | FAM3C    | 10447 . |
| 201890_at | 0.006266 | 0.003028 | RRM2     | 6241 .  |
| 201891_s_ | 2.21E-09 | 1.48E-11 | B2M      | 567 .   |
| 201892_s_ | 0.001449 | 5.24E-04 | IMPDH2   | 3615 .  |
| 201893_x_ | 2.82E-08 | 4.25E-10 | DCN      | 1634 .  |
| 201894_s_ | 4.31E-04 | 1.18E-04 | SSR1     | 6745 .  |
| 201896_s_ | 9.11E-06 | 9.00E-07 | PSRC1    | 84722 . |
| 201897_s_ | 5.45E-07 | 2.20E-08 | CKS1B    | 1163 .  |
| 201899_s_ | 1.07E-04 | 2.09E-05 | UBE2A    | 7319 .  |
| 201900_s_ | 0.003569 | 0.001547 | AKR1A1   | 10327 . |
| 201901_s_ | 9.86E-04 | 3.28E-04 | YY1      | 7528 .  |
| 201902_s_ | 0.005772 | 0.002746 | YY1      | 7528 .  |
| 201903_at | 0.011811 | 0.006373 | UQCRC1   | 7384 .  |
| 201905_s_ | 0.003231 | 0.001372 | CTDSPL   | 10217 . |
| 201907_x_ | 0.007896 | 0.003984 | DVL3     | 1857 .  |
| 201908_at | 9.96E-06 | 1.01E-06 | DVL3     | 1857 .  |
| 201909_at | 0.033119 | 0.021288 | RPS4Y1   | 6192 .  |
| 201910_at | 0.012458 | 0.006795 | FARP1    | 10160 . |
| 201911_s_ | 6.29E-05 | 1.07E-05 | FARP1    | 10160 . |
| 201914_s_ | 0.006035 | 0.002898 | SEC63    | 11231 . |
| 201917_s_ | 6.02E-05 | 1.01E-05 | SLC25A36 | 55186 . |
| 201918_at | 1.66E-04 | 3.64E-05 | SLC25A36 | 55186 . |
| 201920_at | 0.001391 | 4.99E-04 | SLC20A1  | 6574 .  |
| 201921_at | 0.01828  | 0.010649 | GNG10    | 2790 .  |
| 201922_at | 0.038983 | 0.025706 | TINP1    | 10412 . |
| 201925_s_ | 0.013685 | 0.007583 | CD55     | 1604 .  |
| 201926_s_ | 0.028778 | 0.018086 | CD55     | 1604 .  |
| 201927_s_ | 0.001128 | 3.87E-04 | PKP4     | 8502 .  |
| 201930_at | 1.43E-05 | 1.63E-06 | MCM6     | 4175 .  |
| 201931_at | 4.59E-04 | 1.28E-04 | ETFA     | 2108 .  |
| 201932_at | 1.43E-05 | 1.63E-06 | LRRC41   | 10489 . |

|           |          |          |                              |         |
|-----------|----------|----------|------------------------------|---------|
| 201933_at | 0.021252 | 0.012712 | CHMP1A                       | 5119 .  |
| 201934_at | 0.003378 | 0.001449 | WDR82                        | 80335 . |
| 201935_s_ | 6.93E-04 | 2.13E-04 | EIF4G3                       | 8672 .  |
| 201936_s_ | 0.006208 | 0.002995 | EIF4G3                       | 8672 .  |
| 201937_s_ | 0.044172 | 0.029734 | DNPEP                        | 23549 . |
| 201938_at | 8.72E-06 | 8.45E-07 | CDK2AP1                      | 8099 .  |
| 201940_at | 0.014144 | 0.007878 | CPD                          | 1362 .  |
| 201942_s_ | 1.35E-04 | 2.80E-05 | CPD                          | 1362 .  |
| 201943_s_ | 0.00829  | 0.004213 | CPD                          | 1362 .  |
| 201944_at | 0.003016 | 0.001263 | HEXB                         | 3074 .  |
| 201945_at | 3.53E-04 | 9.27E-05 | FURIN                        | 5045 .  |
| 201946_s_ | 0.029745 | 0.018795 | CCT2                         | 10576 . |
| 201947_s_ | 7.95E-07 | 3.65E-08 | CCT2                         | 10576 . |
| 201948_at | 1.42E-05 | 1.61E-06 | GNL2                         | 29889 . |
| 201949_x_ | 2.90E-04 | 7.26E-05 | CAPZB                        | 832 .   |
| 201950_x_ | 0.001199 | 4.17E-04 | CAPZB                        | 832 .   |
| 201951_at | 0.006139 | 0.002955 | ALCAM                        | 214 .   |
| 201952_at | 0.039369 | 0.026001 | ALCAM                        | 214 .   |
| 201953_at | 3.63E-06 | 2.69E-07 | CIB1                         | 10519 . |
| 201954_at | 2.20E-06 | 1.42E-07 | ARPC1B                       | 10095 . |
| 201955_at | 2.12E-06 | 1.35E-07 | CCNC                         | 892 .   |
| 201960_s_ | 1.01E-04 | 1.96E-05 | MYCBP2                       | 23077 . |
| 201961_s_ | 4.68E-04 | 1.31E-04 | RNF41                        | 10193 . |
| 201963_at | 3.04E-05 | 4.26E-06 | ACSL1                        | 2180 .  |
| 201964_at | 0.001723 | 6.44E-04 | SETX                         | 23064 . |
| 201966_at | 0.004155 | 0.001854 | NDUFS2                       | 4720 .  |
| 201967_at | 2.28E-07 | 6.95E-09 | RBM6                         | 10180 . |
| 201968_s_ | 9.36E-06 | 9.33E-07 | PGM1                         | 5236 .  |
| 201969_at | 2.94E-05 | 4.06E-06 | NASP                         | 4678 .  |
| 201970_s_ | 6.66E-07 | 2.88E-08 | NASP                         | 4678 .  |
| 201973_s_ | 0.001718 | 6.42E-04 | C7orf28A /// C 100133775 //. |         |
| 201974_s_ | 0.002713 | 0.001113 | C7orf28A                     | 51622 . |
| 201975_at | 0.022286 | 0.013439 | CLIP1                        | 6249 .  |
| 201977_s_ | 2.05E-04 | 4.72E-05 | KIAA0141                     | 9812 .  |

|           |          |          |          |         |
|-----------|----------|----------|----------|---------|
| 201980_s_ | 3.76E-06 | 2.82E-07 | RSU1     | 6251 .  |
| 201981_at | 0.001597 | 5.88E-04 | PAPPA    | 5069 .  |
| 201982_s_ | 4.42E-06 | 3.48E-07 | PAPPA    | 5069 .  |
| 201983_s_ | 3.01E-04 | 7.62E-05 | EGFR     | 1956 .  |
| 201984_s_ | 0.021751 | 0.013062 | EGFR     | 1956 .  |
| 201985_at | 3.54E-04 | 9.32E-05 | KIAA0196 | 9897 .  |
| 201987_at | 0.04722  | 0.03213  | MED13    | 9969 .  |
| 201988_s_ | 1.39E-04 | 2.92E-05 | CREBL2   | 1389 .  |
| 201989_s_ | 0.007178 | 0.00356  | CREBL2   | 1389 .  |
| 201991_s_ | 0.016141 | 0.009211 | KIF5B    | 3799 .  |
| 201992_s_ | 0.003707 | 0.001619 | KIF5B    | 3799 .  |
| 201993_x_ | 8.02E-07 | 3.69E-08 | HNRPDL   | 9987 .  |
| 201995_at | 1.89E-04 | 4.28E-05 | EXT1     | 2131 .  |
| 201996_s_ | 6.87E-06 | 6.16E-07 | SPEN     | 23013 . |
| 201997_s_ | 5.12E-05 | 8.26E-06 | SPEN     | 23013 . |
| 201998_at | 1.21E-04 | 2.46E-05 | ST6GAL1  | 6480 .  |
| 202002_at | 8.24E-04 | 2.64E-04 | ACAA2    | 10449 . |
| 202003_s_ | 1.78E-04 | 3.95E-05 | ACAA2    | 10449 . |
| 202005_at | 1.59E-09 | 9.85E-12 | ST14     | 6768 .  |
| 202006_at | 3.64E-04 | 9.63E-05 | PTPN12   | 5782 .  |
| 202007_at | 9.91E-05 | 1.91E-05 | NID1     | 4811 .  |
| 202008_s_ | 9.66E-07 | 4.73E-08 | NID1     | 4811 .  |
| 202009_at | 0.00259  | 0.001054 | TWF2     | 11344 . |
| 202010_s_ | 3.87E-04 | 1.04E-04 | ZNF410   | 57862 . |
| 202012_s_ | 4.82E-08 | 8.59E-10 | EXT2     | 2132 .  |
| 202013_s_ | 2.78E-07 | 9.19E-09 | EXT2     | 2132 .  |
| 202014_at | 0.012833 | 0.007037 | PPP1R15A | 23645 . |
| 202016_at | 1.29E-05 | 1.42E-06 | MEST     | 4232 .  |
| 202017_at | 2.57E-07 | 8.18E-09 | EPHX1    | 2052 .  |
| 202019_s_ | 1.48E-04 | 3.15E-05 | LANCL1   | 10314 . |
| 202022_at | 0.022718 | 0.013735 | ALDOC    | 230 .   |
| 202023_at | 0.004026 | 0.001786 | EFNA1    | 1942 .  |
| 202024_at | 0.004376 | 0.001975 | ASNA1    | 439 .   |
| 202025_x_ | 1.08E-04 | 2.12E-05 | ACAA1    | 30 .    |

|           |          |          |          |         |
|-----------|----------|----------|----------|---------|
| 202026_at | 0.018996 | 0.011134 | SDHD     | 6392 .  |
| 202027_at | 2.51E-04 | 6.10E-05 | TMEM184B | 25829 . |
| 202029_x  | 0.013723 | 0.007608 | RPL38    | 6169 .  |
| 202031_s  | 3.93E-04 | 1.06E-04 | WIPI2    | 26100 . |
| 202032_s  | 3.50E-04 | 9.20E-05 | MAN2A2   | 4122 .  |
| 202036_s  | 0.006419 | 0.003117 | SFRP1    | 6422 .  |
| 202037_s  | 0.038134 | 0.025063 | SFRP1    | 6422 .  |
| 202038_at | 2.20E-04 | 5.16E-05 | UBE4A    | 9354 .  |
| 202040_s  | 1.97E-04 | 4.50E-05 | KDM5A    | 5927 .  |
| 202041_s  | 0.010032 | 0.005267 | FIBP     | 9158 .  |
| 202042_at | 1.43E-04 | 3.02E-05 | HARS     | 3035 .  |
| 202043_s  | 1.66E-05 | 1.96E-06 | SMS      | 6611 .  |
| 202044_at | 0.013443 | 0.007427 | GRLF1    | 2909 .  |
| 202045_s  | 7.85E-04 | 2.49E-04 | GRLF1    | 2909 .  |
| 202046_s  | 0.023208 | 0.014077 | GRLF1    | 2909 .  |
| 202047_s  | 6.02E-07 | 2.52E-08 | CBX6     | 23466 . |
| 202048_s  | 2.27E-04 | 5.36E-05 | CBX6     | 23466 . |
| 202050_s  | 0.005937 | 0.002842 | ZMYM4    | 9202 .  |
| 202051_s  | 0.011544 | 0.006209 | ZMYM4    | 9202 .  |
| 202053_s  | 6.00E-05 | 1.01E-05 | ALDH3A2  | 224 .   |
| 202054_s  | 5.17E-05 | 8.37E-06 | ALDH3A2  | 224 .   |
| 202055_at | 0.024398 | 0.014922 | KPNA1    | 3836 .  |
| 202057_at | 0.021755 | 0.013066 | KPNA1    | 3836 .  |
| 202059_s  | 0.00131  | 4.63E-04 | KPNA1    | 3836 .  |
| 202060_at | 0.028473 | 0.01785  | CTR9     | 9646 .  |
| 202061_s  | 2.16E-04 | 5.04E-05 | SEL1L    | 6400 .  |
| 202062_s  | 4.50E-04 | 1.25E-04 | SEL1L    | 6400 .  |
| 202063_s  | 0.001026 | 3.44E-04 | SEL1L    | 6400 .  |
| 202064_s  | 1.68E-07 | 4.58E-09 | SEL1L    | 6400 .  |
| 202066_at | 0.017948 | 0.010422 | PPFIA1   | 8500 .  |
| 202069_s  | 4.84E-05 | 7.68E-06 | IDH3A    | 3419 .  |
| 202070_s  | 4.27E-06 | 3.33E-07 | IDH3A    | 3419 .  |
| 202072_at | 2.55E-05 | 3.39E-06 | HNRNPL   | 3191 .  |
| 202073_at | 1.62E-06 | 9.47E-08 | OPTN     | 10133 . |

|           |          |          |         |         |
|-----------|----------|----------|---------|---------|
| 202074_s_ | 6.42E-06 | 5.64E-07 | OPTN    | 10133 . |
| 202075_s_ | 0.002993 | 0.001251 | PLTP    | 5360 .  |
| 202077_at | 8.37E-07 | 3.91E-08 | NDUFAB1 | 4706 .  |
| 202078_at | 0.001465 | 5.31E-04 | COPS3   | 8533 .  |
| 202081_at | 0.006788 | 0.003331 | IER2    | 9592 .  |
| 202082_s_ | 4.13E-05 | 6.26E-06 | SEC14L1 | 6397 .  |
| 202083_s_ | 0.011919 | 0.006446 | SEC14L1 | 6397 .  |
| 202084_s_ | 0.003651 | 0.00159  | SEC14L1 | 6397 .  |
| 202087_s_ | 0.021006 | 0.012541 | CTSL1   | 1514 .  |
| 202088_at | 2.83E-04 | 7.08E-05 | SLC39A6 | 25800 . |
| 202089_s_ | 6.09E-04 | 1.81E-04 | SLC39A6 | 25800 . |
| 202090_s_ | 2.10E-05 | 2.65E-06 | UQCR    | 10975 . |
| 202091_at | 0.024325 | 0.014868 | ARL2BP  | 23568 . |
| 202092_s_ | 8.13E-05 | 1.49E-05 | ARL2BP  | 23568 . |
| 202093_s_ | 3.62E-06 | 2.68E-07 | PAF1    | 54623 . |
| 202094_at | 0.001008 | 3.37E-04 | BIRC5   | 332 .   |
| 202095_s_ | 1.53E-04 | 3.28E-05 | BIRC5   | 332 .   |
| 202096_s_ | 3.06E-10 | 1.11E-12 | TSPO    | 706 .   |
| 202097_at | 2.04E-04 | 4.69E-05 | NUP153  | 9972 .  |
| 202098_s_ | 0.001627 | 6.01E-04 | PRMT2   | 3275 .  |
| 202099_s_ | 0.009818 | 0.005135 | DGCR2   | 9993 .  |
| 202100_at | 1.24E-08 | 1.38E-10 | RALB    | 5899 .  |
| 202101_s_ | 4.78E-06 | 3.84E-07 | RALB    | 5899 .  |
| 202102_s_ | 3.53E-05 | 5.12E-06 | BRD4    | 23476 . |
| 202103_at | 0.047233 | 0.032141 | BRD4    | 23476 . |
| 202106_at | 6.46E-04 | 1.95E-04 | GOLGA3  | 2802 .  |
| 202107_s_ | 1.17E-05 | 1.25E-06 | MCM2    | 4171 .  |
| 202108_at | 0.027062 | 0.016833 | PEPD    | 5184 .  |
| 202109_at | 0.039667 | 0.026228 | ARFIP2  | 23647 . |
| 202110_at | 6.45E-04 | 1.95E-04 | COX7B   | 1349 .  |
| 202111_at | 6.17E-04 | 1.84E-04 | SLC4A2  | 6522 .  |
| 202112_at | 8.41E-07 | 3.94E-08 | VWF     | 7450 .  |
| 202113_s_ | 0.001569 | 5.76E-04 | SNX2    | 6643 .  |
| 202115_s_ | 8.71E-06 | 8.43E-07 | NOC2L   | 26155 . |

|           |          |          |          |         |
|-----------|----------|----------|----------|---------|
| 202116_at | 0.014967 | 0.00843  | DPF2     | 5977 .  |
| 202117_at | 1.87E-08 | 2.41E-10 | ARHGAP1  | 392 .   |
| 202118_s_ | 1.00E-06 | 4.97E-08 | CPNE3    | 8895 .  |
| 202119_s_ | 0.001422 | 5.12E-04 | CPNE3    | 8895 .  |
| 202122_s_ | 2.71E-05 | 3.67E-06 | M6PRBP1  | 10226 . |
| 202123_s_ | 3.60E-04 | 9.50E-05 | ABL1     | 25 .    |
| 202124_s_ | 1.01E-05 | 1.03E-06 | TRAK2    | 66008 . |
| 202125_s_ | 3.95E-07 | 1.45E-08 | TRAK2    | 66008 . |
| 202127_at | 1.82E-05 | 2.22E-06 | PRPF4B   | 8899 .  |
| 202128_at | 0.003919 | 0.001731 | KIAA0317 | 9870 .  |
| 202132_at | 6.09E-05 | 1.03E-05 | WWTR1    | 25937 . |
| 202133_at | 1.39E-04 | 2.92E-05 | WWTR1    | 25937 . |
| 202135_s_ | 0.002723 | 0.001118 | ACTR1B   | 10120 . |
| 202136_at | 1.04E-07 | 2.41E-09 | ZMYND11  | 10771 . |
| 202137_s_ | 1.08E-05 | 1.12E-06 | ZMYND11  | 10771 . |
| 202138_x_ | 0.001234 | 4.31E-04 | JTV1     | 7965 .  |
| 202139_at | 9.70E-04 | 3.22E-04 | AKR7A2   | 8574 .  |
| 202141_s_ | 0.033171 | 0.021325 | COPS8    | 10920 . |
| 202144_s_ | 0.0013   | 4.59E-04 | ADSL     | 158 .   |
| 202145_at | 3.98E-05 | 5.95E-06 | LY6E     | 4061 .  |
| 202148_s_ | 0.045934 | 0.031111 | PYCR1    | 5831 .  |
| 202149_at | 0.036521 | 0.023837 | NEDD9    | 4739 .  |
| 202151_s_ | 9.45E-05 | 1.80E-05 | UBAC1    | 10422 . |
| 202152_x_ | 0.003707 | 0.001619 | USF2     | 7392 .  |
| 202153_s_ | 1.93E-05 | 2.39E-06 | NUP62    | 23636 . |
| 202154_x_ | 6.27E-04 | 1.88E-04 | TUBB3    | 10381 . |
| 202155_s_ | 2.12E-07 | 6.20E-09 | NUP214   | 8021 .  |
| 202157_s_ | 0.002131 | 8.34E-04 | CUGBP2   | 10659 . |
| 202158_s_ | 0.002294 | 9.11E-04 | CUGBP2   | 10659 . |
| 202159_at | 0.004968 | 0.002298 | FARSA    | 2193 .  |
| 202161_at | 0.035901 | 0.023366 | PKN1     | 5585 .  |
| 202162_s_ | 0.018693 | 0.01093  | CNOT8    | 9337 .  |
| 202164_s_ | 0.013694 | 0.007589 | CNOT8    | 9337 .  |
| 202167_s_ | 0.033352 | 0.021461 | MMS19    | 64210 . |



|           |          |          |                          |         |
|-----------|----------|----------|--------------------------|---------|
| 202169_s_ | 0.00559  | 0.002645 | AASDHPPT                 | 60496 . |
| 202170_s_ | 9.67E-05 | 1.85E-05 | AASDHPPT                 | 60496 . |
| 202171_at | 6.44E-04 | 1.94E-04 | VEZF1                    | 7716 .  |
| 202172_at | 0.018441 | 0.010758 | VEZF1                    | 7716 .  |
| 202174_s_ | 0.014741 | 0.008275 | PCM1                     | 5108 .  |
| 202175_at | 3.55E-06 | 2.62E-07 | CHPF                     | 79586 . |
| 202176_at | 9.60E-06 | 9.65E-07 | ERCC3                    | 2071 .  |
| 202177_at | 1.55E-09 | 9.51E-12 | GAS6 /// LOC100133684 // |         |
| 202178_at | 5.26E-05 | 8.53E-06 | PRKCZ                    | 5590 .  |
| 202179_at | 5.59E-04 | 1.63E-04 | BLMH                     | 642 .   |
| 202180_s_ | 3.15E-06 | 2.24E-07 | MVP                      | 9961 .  |
| 202181_at | 4.42E-05 | 6.85E-06 | KIAA0247                 | 9766 .  |
| 202182_at | 1.90E-05 | 2.34E-06 | KAT2A                    | 2648 .  |
| 202183_s_ | 7.88E-07 | 3.60E-08 | KIF22                    | 3835 .  |
| 202184_s_ | 0.006075 | 0.00292  | NUP133                   | 55746 . |
| 202185_at | 1.41E-04 | 2.96E-05 | PLOD3                    | 8985 .  |
| 202186_x_ | 2.38E-05 | 3.11E-06 | PPP2R5A                  | 5525 .  |
| 202187_s_ | 0.018251 | 0.010628 | PPP2R5A                  | 5525 .  |
| 202188_at | 3.99E-06 | 3.05E-07 | NUP93                    | 9688 .  |
| 202189_x_ | 6.77E-05 | 1.18E-05 | PTBP1                    | 5725 .  |
| 202190_at | 8.20E-05 | 1.51E-05 | CSTF1                    | 1477 .  |
| 202191_s_ | 0.041593 | 0.027709 | GAS7                     | 8522 .  |
| 202192_s_ | 0.004986 | 0.002307 | GAS7                     | 8522 .  |
| 202194_at | 1.02E-04 | 1.97E-05 | TMED5                    | 50999 . |
| 202195_s_ | 2.15E-04 | 5.00E-05 | TMED5                    | 50999 . |
| 202196_s_ | 0.002308 | 9.18E-04 | DKK3                     | 27122 . |
| 202197_at | 0.029691 | 0.018751 | MTMR3                    | 8897 .  |
| 202198_s_ | 3.01E-05 | 4.19E-06 | MTMR3                    | 8897 .  |
| 202199_s_ | 1.99E-05 | 2.48E-06 | SRPK1                    | 6732 .  |
| 202200_s_ | 8.47E-06 | 8.14E-07 | SRPK1                    | 6732 .  |
| 202202_s_ | 9.12E-06 | 9.01E-07 | LAMA4                    | 3910 .  |
| 202203_s_ | 0.002709 | 0.001111 | AMFR                     | 267 .   |
| 202204_s_ | 0.001307 | 4.62E-04 | AMFR                     | 267 .   |
| 202205_at | 0.009925 | 0.005203 | VASP                     | 7408 .  |

|           |          |          |          |         |
|-----------|----------|----------|----------|---------|
| 202209_at | 4.48E-04 | 1.24E-04 | LSM3     | 27258 . |
| 202210_x_ | 0.005076 | 0.00236  | GSK3A    | 2931 .  |
| 202211_at | 8.46E-04 | 2.73E-04 | ARFGAP3  | 26286 . |
| 202212_at | 0.049141 | 0.033643 | PES1     | 23481 . |
| 202213_s_ | 8.29E-05 | 1.53E-05 | CUL4B    | 8450 .  |
| 202214_s_ | 5.79E-04 | 1.70E-04 | CUL4B    | 8450 .  |
| 202215_s_ | 2.16E-04 | 5.03E-05 | NFYC     | 4802 .  |
| 202216_x_ | 0.049763 | 0.034138 | NFYC     | 4802 .  |
| 202217_at | 0.024054 | 0.014676 | C21orf33 | 8209 .  |
| 202219_at | 4.00E-04 | 1.08E-04 | SLC6A8   | 6535 .  |
| 202220_at | 4.12E-04 | 1.12E-04 | KIAA0907 | 22889 . |
| 202222_s_ | 0.012036 | 0.006519 | DES      | 1674 .  |
| 202223_at | 0.013329 | 0.007355 | STT3A    | 3703 .  |
| 202224_at | 0.003611 | 0.001569 | CRK      | 1398 .  |
| 202225_at | 0.005723 | 0.002718 |          | .       |
| 202226_s_ | 0.049089 | 0.033602 | CRK      | 1398 .  |
| 202227_s_ | 9.17E-06 | 9.08E-07 | BRD8     | 10902 . |
| 202228_s_ | 5.75E-04 | 1.69E-04 | NPTN     | 27020 . |
| 202229_s_ | 0.001409 | 5.06E-04 | CHERP    | 10523 . |
| 202230_s_ | 2.17E-07 | 6.49E-09 | CHERP    | 10523 . |
| 202231_at | 0.015023 | 0.008464 | EIF3M    | 10480 . |
| 202233_s_ | 2.61E-07 | 8.37E-09 | UQCRH    | 7388 .  |
| 202234_s_ | 2.86E-09 | 2.03E-11 | SLC16A1  | 6566 .  |
| 202235_at | 9.89E-09 | 1.05E-10 | SLC16A1  | 6566 .  |
| 202236_s_ | 5.19E-07 | 2.07E-08 | SLC16A1  | 6566 .  |
| 202237_at | 4.58E-05 | 7.17E-06 | NNMT     | 4837 .  |
| 202238_s_ | 1.85E-05 | 2.26E-06 | NNMT     | 4837 .  |
| 202239_at | 2.30E-06 | 1.49E-07 | PARP4    | 143 .   |
| 202240_at | 1.35E-04 | 2.82E-05 | PLK1     | 5347 .  |
| 202241_at | 1.71E-04 | 3.76E-05 | TRIB1    | 10221 . |
| 202242_at | 0.003009 | 0.001259 | TSPAN7   | 7102 .  |
| 202243_s_ | 1.57E-05 | 1.83E-06 | PSMB4    | 5692 .  |
| 202244_at | 1.83E-05 | 2.22E-06 | PSMB4    | 5692 .  |
| 202245_at | 0.018405 | 0.010734 | LSS      | 4047 .  |

|           |          |          |          |         |
|-----------|----------|----------|----------|---------|
| 202246_s_ | 0.001058 | 3.57E-04 | CDK4     | 1019 .  |
| 202247_s_ | 0.007227 | 0.003588 | MTA1     | 9112 .  |
| 202249_s_ | 0.006411 | 0.003112 | WDR42A   | 50717 . |
| 202250_s_ | 3.71E-04 | 9.85E-05 | WDR42A   | 50717 . |
| 202251_at | 4.54E-05 | 7.08E-06 | PRPF3    | 9129 .  |
| 202252_at | 0.006117 | 0.002943 | RAB13    | 5872 .  |
| 202254_at | 0.003723 | 0.001627 | SIPA1L1  | 26037 . |
| 202255_s_ | 0.004995 | 0.002313 | SIPA1L1  | 26037 . |
| 202256_at | 0.020765 | 0.01237  | CD2BP2   | 10421 . |
| 202257_s_ | 0.001572 | 5.77E-04 | CD2BP2   | 10421 . |
| 202258_s_ | 0.028713 | 0.018037 | N4BP2L2  | 10443 . |
| 202259_s_ | 0.02549  | 0.015712 | N4BP2L2  | 10443 . |
| 202260_s_ | 3.01E-06 | 2.11E-07 | STXBP1   | 6812 .  |
| 202261_at | 3.26E-04 | 8.42E-05 | VPS72    | 6944 .  |
| 202262_x_ | 8.70E-04 | 2.82E-04 | DDAH2    | 23564 . |
| 202263_at | 1.02E-05 | 1.04E-06 | CYB5R1   | 51706 . |
| 202264_s_ | 0.012376 | 0.00674  | TOMM40   | 10452 . |
| 202265_at | 1.42E-04 | 2.98E-05 | BMI1     | 648 .   |
| 202268_s_ | 0.003202 | 0.001358 | NAE1     | 8883 .  |
| 202269_x_ | 1.80E-07 | 5.00E-09 | GBP1     | 2633 .  |
| 202270_at | 1.19E-06 | 6.26E-08 | GBP1     | 2633 .  |
| 202271_at | 0.006679 | 0.003267 | FBXO28   | 23219 . |
| 202272_s_ | 0.004855 | 0.002237 | FBXO28   | 23219 . |
| 202273_at | 1.34E-07 | 3.39E-09 | PDGFRB   | 5159 .  |
| 202275_at | 0.007573 | 0.003792 | G6PD     | 2539 .  |
| 202276_at | 1.21E-04 | 2.46E-05 | SHFM1    | 7979 .  |
| 202277_at | 0.017629 | 0.010206 | SPTLC1   | 10558 . |
| 202278_s_ | 1.17E-06 | 6.08E-08 | SPTLC1   | 10558 . |
| 202280_at | 0.023765 | 0.014476 |          | .       |
| 202282_at | 3.25E-04 | 8.39E-05 | HSD17B10 | 3028 .  |
| 202283_at | 1.52E-04 | 3.27E-05 | SERPINF1 | 5176 .  |
| 202284_s_ | 9.24E-10 | 4.82E-12 | CDKN1A   | 1026 .  |
| 202285_s_ | 9.12E-06 | 9.01E-07 | TACSTD2  | 4070 .  |
| 202286_s_ | 0.009206 | 0.004762 | TACSTD2  | 4070 .  |

|           |          |          |         |         |
|-----------|----------|----------|---------|---------|
| 202287_s_ | 0.022215 | 0.013391 | TACSTD2 | 4070 .  |
| 202288_at | 2.28E-05 | 2.94E-06 | FRAP1   | 2475 .  |
| 202292_x_ | 0.00612  | 0.002945 | LYPLA2  | 11313 . |
| 202293_at | 3.82E-04 | 1.02E-04 | STAG1   | 10274 . |
| 202294_at | 7.95E-07 | 3.65E-08 | STAG1   | 10274 . |
| 202295_s_ | 2.49E-04 | 6.03E-05 | CTSH    | 1512 .  |
| 202296_s_ | 0.001885 | 7.19E-04 | RER1    | 11079 . |
| 202297_s_ | 3.79E-07 | 1.37E-08 | RER1    | 11079 . |
| 202298_at | 1.19E-04 | 2.39E-05 | NDUFA1  | 4694 .  |
| 202299_s_ | 2.26E-04 | 5.32E-05 | HBXIP   | 10542 . |
| 202300_at | 1.04E-04 | 2.03E-05 | HBXIP   | 10542 . |
| 202301_s_ | 2.40E-04 | 5.74E-05 | RSRC2   | 65117 . |
| 202302_s_ | 0.001924 | 7.36E-04 | RSRC2   | 65117 . |
| 202303_x_ | 4.49E-05 | 6.99E-06 | SMARCA5 | 8467 .  |
| 202304_at | 0.004141 | 0.001847 | FNDC3A  | 22862 . |
| 202305_s_ | 7.75E-05 | 1.40E-05 | FEZ2    | 9637 .  |
| 202306_at | 0.001792 | 6.75E-04 | POLR2G  | 5436 .  |
| 202307_s_ | 1.83E-06 | 1.12E-07 | TAP1    | 6890 .  |
| 202309_at | 0.017013 | 0.009785 | MTHFD1  | 4522 .  |
| 202310_s_ | 1.52E-05 | 1.76E-06 | COL1A1  | 1277 .  |
| 202311_s_ | 3.02E-04 | 7.67E-05 | COL1A1  | 1277 .  |
| 202312_s_ | 1.66E-05 | 1.97E-06 | COL1A1  | 1277 .  |
| 202313_at | 0.00211  | 8.23E-04 | PPP2R2A | 5520 .  |
| 202315_s_ | 5.36E-04 | 1.55E-04 | BCR     | 613 .   |
| 202316_x_ | 0.011182 | 0.005983 | UBE4B   | 10277 . |
| 202317_s_ | 0.036286 | 0.023663 | UBE4B   | 10277 . |
| 202320_at | 0.036338 | 0.023701 | GTF3C1  | 2975 .  |
| 202325_s_ | 6.22E-05 | 1.05E-05 | ATP5J   | 522 .   |
| 202326_at | 0.017047 | 0.009808 | EHMT2   | 10919 . |
| 202327_s_ | 8.72E-04 | 2.83E-04 | PKD1    | 5310 .  |
| 202328_s_ | 4.77E-04 | 1.34E-04 | PKD1    | 5310 .  |
| 202329_at | 7.36E-05 | 1.31E-05 | CSK     | 1445 .  |
| 202330_s_ | 1.12E-06 | 5.72E-08 | UNG     | 7374 .  |
| 202332_at | 4.12E-04 | 1.12E-04 | CSNK1E  | 1454 .  |

|           |          |          |            |               |
|-----------|----------|----------|------------|---------------|
| 202333_s_ | 0.014666 | 0.008225 | UBE2B      | 7320 .        |
| 202334_s_ | 0.005215 | 0.002435 | UBE2B      | 7320 .        |
| 202335_s_ | 0.001911 | 7.30E-04 | UBE2B      | 7320 .        |
| 202336_s_ | 9.48E-07 | 4.61E-08 | PAM        | 5066 .        |
| 202337_at | 1.03E-05 | 1.05E-06 | PMF1       | 11243 .       |
| 202338_at | 0.014788 | 0.008309 | TK1        | 7083 .        |
| 202341_s_ | 0.012542 | 0.006851 | TRIM2      | 23321 .       |
| 202342_s_ | 0.040141 | 0.026592 | TRIM2      | 23321 .       |
| 202343_x_ | 0.004166 | 0.001859 | COX5B      | 1329 .        |
| 202345_s_ | 1.32E-04 | 2.73E-05 | FABP5      | 2171 .        |
| 202348_s_ | 0.005786 | 0.002755 | TOR1A      | 1861 .        |
| 202349_at | 3.00E-04 | 7.60E-05 | TOR1A      | 1861 .        |
| 202351_at | 6.37E-04 | 1.92E-04 | ITGAV      | 3685 .        |
| 202352_s_ | 5.25E-05 | 8.52E-06 | PSMD12     | 5718 .        |
| 202353_s_ | 1.49E-04 | 3.16E-05 | PSMD12     | 5718 .        |
| 202357_s_ | 0.001178 | 4.08E-04 | C2 /// CFB | 629 /// 717 . |
| 202358_s_ | 4.09E-06 | 3.15E-07 | SNX19      | 399979 .      |
| 202359_s_ | 8.02E-07 | 3.69E-08 | SNX19      | 399979 .      |
| 202360_at | 0.001032 | 3.47E-04 | MAML1      | 9794 .        |
| 202361_at | 0.037527 | 0.024601 | SEC24C     | 9632 .        |
| 202362_at | 7.65E-04 | 2.41E-04 | RAP1A      | 5906 .        |
| 202363_at | 0.0026   | 0.001059 | SPOCK1     | 6695 .        |
| 202365_at | 0.012843 | 0.007044 | UNC119B    | 84747 .       |
| 202366_at | 3.73E-04 | 9.92E-05 | ACADS      | 35 .          |
| 202367_at | 5.52E-06 | 4.64E-07 | CUX1       | 1523 .        |
| 202368_s_ | 0.001337 | 4.75E-04 | TRAM2      | 9697 .        |
| 202369_s_ | 0.002509 | 0.001015 | TRAM2      | 9697 .        |
| 202370_s_ | 0.001184 | 4.10E-04 | CBFB       | 865 .         |
| 202371_at | 2.67E-05 | 3.60E-06 | TCEAL4     | 79921 .       |
| 202373_s_ | 0.002416 | 9.70E-04 | RAB3GAP2   | 25782 .       |
| 202374_s_ | 0.026385 | 0.016341 | RAB3GAP2   | 25782 .       |
| 202375_at | 2.40E-05 | 3.14E-06 | SEC24D     | 9871 .        |
| 202377_at | 2.23E-07 | 6.71E-09 |            | .             |
| 202378_s_ | 2.50E-07 | 7.90E-09 | LEPROT     | 54741 .       |

|           |          |          |          |         |
|-----------|----------|----------|----------|---------|
| 202379_s_ | 1.50E-05 | 1.73E-06 | NKTR     | 4820 .  |
| 202380_s_ | 9.03E-05 | 1.69E-05 | NKTR     | 4820 .  |
| 202381_at | 2.11E-05 | 2.68E-06 | ADAM9    | 8754 .  |
| 202382_s_ | 0.004321 | 0.001945 | GNPDA1   | 10007 . |
| 202383_at | 0.04641  | 0.031483 | KDM5C    | 8242 .  |
| 202384_s_ | 5.14E-06 | 4.22E-07 | TCOF1    | 6949 .  |
| 202385_s_ | 8.78E-06 | 8.54E-07 | TCOF1    | 6949 .  |
| 202386_s_ | 3.35E-05 | 4.79E-06 | KIAA0430 | 9665 .  |
| 202387_at | 1.87E-05 | 2.28E-06 | BAG1     | 573 .   |
| 202388_at | 0.003588 | 0.001557 | RGS2     | 5997 .  |
| 202389_s_ | 2.77E-04 | 6.88E-05 | HTT      | 3064 .  |
| 202391_at | 4.22E-05 | 6.44E-06 | BASP1    | 10409 . |
| 202392_s_ | 0.016715 | 0.00959  | PISD     | 23761 . |
| 202395_at | 3.26E-04 | 8.42E-05 | NSF      | 4905 .  |
| 202396_at | 1.31E-07 | 3.29E-09 | TCERG1   | 10915 . |
| 202397_at | 4.07E-04 | 1.11E-04 | NUTF2    | 10204 . |
| 202400_s_ | 8.89E-05 | 1.66E-05 | SRF      | 6722 .  |
| 202402_s_ | 0.002787 | 0.00115  | CARS     | 833 .   |
| 202403_s_ | 5.73E-04 | 1.68E-04 | COL1A2   | 1278 .  |
| 202404_s_ | 0.001591 | 5.86E-04 | COL1A2   | 1278 .  |
| 202405_at | 7.96E-06 | 7.48E-07 | TIAL1    | 7073 .  |
| 202406_s_ | 0.001876 | 7.14E-04 | TIAL1    | 7073 .  |
| 202408_s_ | 5.91E-06 | 5.08E-07 | PRPF31   | 26121 . |
| 202412_s_ | 1.04E-04 | 2.02E-05 | USP1     | 7398 .  |
| 202413_s_ | 1.21E-05 | 1.30E-06 | USP1     | 7398 .  |
| 202414_at | 4.69E-05 | 7.38E-06 | ERCC5    | 2073 .  |
| 202416_at | 0.003908 | 0.001725 | DNAJC7   | 7266 .  |
| 202417_at | 0.003017 | 0.001264 | KEAP1    | 9817 .  |
| 202418_at | 6.28E-05 | 1.07E-05 | YIF1A    | 10897 . |
| 202419_at | 0.01784  | 0.010348 | KDSR     | 2531 .  |
| 202420_s_ | 1.29E-06 | 6.96E-08 | DHX9     | 1660 .  |
| 202421_at | 1.60E-07 | 4.29E-09 | IGSF3    | 3321 .  |
| 202423_at | 0.002397 | 9.60E-04 | MYST3    | 7994 .  |
| 202425_x_ | 1.86E-04 | 4.17E-05 | PPP3CA   | 5530 .  |

|           |          |          |         |         |
|-----------|----------|----------|---------|---------|
| 202426_s_ | 0.033605 | 0.021654 | RXRA    | 6256 .  |
| 202427_s_ | 0.006402 | 0.003107 | BRP44   | 25874 . |
| 202429_s_ | 5.25E-05 | 8.52E-06 | PPP3CA  | 5530 .  |
| 202430_s_ | 0.017432 | 0.010068 | PLSCR1  | 5359 .  |
| 202432_at | 1.26E-04 | 2.58E-05 | PPP3CB  | 5532 .  |
| 202433_at | 0.023716 | 0.014443 | SLC35B1 | 10237 . |
| 202434_s_ | 0.003098 | 0.001305 | CYP1B1  | 1545 .  |
| 202435_s_ | 0.003445 | 0.001483 | CYP1B1  | 1545 .  |
| 202436_s_ | 0.006055 | 0.002909 | CYP1B1  | 1545 .  |
| 202437_s_ | 0.005943 | 0.002845 | CYP1B1  | 1545 .  |
| 202438_x_ | 5.95E-06 | 5.13E-07 | IDS     | 3423 .  |
| 202439_s_ | 2.96E-05 | 4.11E-06 | IDS     | 3423 .  |
| 202440_s_ | 0.001314 | 4.66E-04 | ST5     | 6764 .  |
| 202441_at | 0.002404 | 9.64E-04 | ERLIN1  | 10613 . |
| 202442_at | 3.72E-04 | 9.89E-05 | AP3S1   | 1176 .  |
| 202443_x_ | 1.09E-05 | 1.14E-06 | NOTCH2  | 4853 .  |
| 202444_s_ | 2.10E-06 | 1.34E-07 | ERLIN1  | 10613 . |
| 202445_s_ | 1.79E-04 | 3.98E-05 | NOTCH2  | 4853 .  |
| 202446_s_ | 0.007338 | 0.003654 | PLSCR1  | 5359 .  |
| 202447_at | 4.92E-04 | 1.39E-04 | DECR1   | 1666 .  |
| 202448_s_ | 0.002256 | 8.93E-04 | ZER1    | 10444 . |
| 202449_s_ | 7.74E-05 | 1.40E-05 | RXRA    | 6256 .  |
| 202450_s_ | 3.42E-06 | 2.50E-07 | CTSK    | 1513 .  |
| 202451_at | 1.75E-07 | 4.83E-09 | GTF2H1  | 2965 .  |
| 202452_at | 8.31E-05 | 1.54E-05 | ZER1    | 10444 . |
| 202453_s_ | 1.05E-04 | 2.05E-05 | GTF2H1  | 2965 .  |
| 202454_s_ | 1.04E-07 | 2.39E-09 | ERBB3   | 2065 .  |
| 202456_s_ | 0.001539 | 5.63E-04 | ZER1    | 10444 . |
| 202457_s_ | 1.00E-04 | 1.94E-05 | PPP3CA  | 5530 .  |
| 202458_at | 6.41E-04 | 1.94E-04 | PRSS23  | 11098 . |
| 202459_s_ | 0.002093 | 8.15E-04 | LPIN2   | 9663 .  |
| 202460_s_ | 0.008897 | 0.004574 | LPIN2   | 9663 .  |
| 202462_s_ | 3.27E-06 | 2.35E-07 | DDX46   | 9879 .  |
| 202465_at | 6.69E-06 | 5.96E-07 | PCOLCE  | 5118 .  |

|           |          |          |          |         |
|-----------|----------|----------|----------|---------|
| 202466_at | 1.10E-05 | 1.16E-06 | POLS     | 11044 . |
| 202467_s_ | 0.039382 | 0.026011 | COPS2    | 9318 .  |
| 202469_s_ | 0.018454 | 0.010767 | CPSF6    | 11052 . |
| 202470_s_ | 9.18E-04 | 3.01E-04 | CPSF6    | 11052 . |
| 202471_s_ | 0.001642 | 6.08E-04 | IDH3G    | 3421 .  |
| 202473_x_ | 3.84E-04 | 1.03E-04 | HCFC1    | 3054 .  |
| 202474_s_ | 1.38E-04 | 2.90E-05 | HCFC1    | 3054 .  |
| 202477_s_ | 0.029695 | 0.018755 | TUBGCP2  | 10844 . |
| 202478_at | 0.042519 | 0.02843  | TRIB2    | 28951 . |
| 202480_s_ | 0.008582 | 0.004385 | DEDD     | 9191 .  |
| 202482_x_ | 0.016546 | 0.009478 | RANBP1   | 5902 .  |
| 202483_s_ | 1.14E-05 | 1.21E-06 | RANBP1   | 5902 .  |
| 202484_s_ | 1.79E-09 | 1.15E-11 | MBD2     | 8932 .  |
| 202485_s_ | 3.35E-05 | 4.80E-06 | MBD2     | 8932 .  |
| 202486_at | 9.86E-05 | 1.89E-05 | AFG3L2   | 10939 . |
| 202487_s_ | 8.49E-04 | 2.74E-04 | H2AFV    | 94239 . |
| 202488_s_ | 1.58E-05 | 1.84E-06 | FXD3     | 5349 .  |
| 202490_at | 7.55E-05 | 1.36E-05 | IKBKAP   | 8518 .  |
| 202491_s_ | 4.81E-05 | 7.63E-06 | IKBKAP   | 8518 .  |
| 202492_at | 3.90E-04 | 1.05E-04 | ATG9A    | 79065 . |
| 202494_at | 1.11E-04 | 2.21E-05 | PPIE     | 10450 . |
| 202495_at | 0.043085 | 0.028868 | TBCC     | 6903 .  |
| 202496_at | 7.25E-05 | 1.29E-05 | EDC4     | 23644 . |
| 202497_x_ | 4.33E-09 | 3.58E-11 | SLC2A3   | 6515 .  |
| 202498_s_ | 1.36E-09 | 8.16E-12 | SLC2A3   | 6515 .  |
| 202499_s_ | 8.91E-08 | 1.96E-09 | SLC2A3   | 6515 .  |
| 202501_at | 0.013061 | 0.007183 | MAPRE2   | 10982 . |
| 202502_at | 0.002435 | 9.79E-04 | ACADM    | 34 .    |
| 202503_s_ | 0.001217 | 4.24E-04 | KIAA0101 | 9768 .  |
| 202504_at | 0.019656 | 0.011585 | TRIM29   | 23650 . |
| 202505_at | 0.001326 | 4.71E-04 | SNRPB2   | 6629 .  |
| 202506_at | 0.001072 | 3.63E-04 | SSFA2    | 6744 .  |
| 202509_s_ | 0.012143 | 0.00659  | TNFAIP2  | 7127 .  |
| 202511_s_ | 0.041113 | 0.027342 | ATG5     | 9474 .  |



|           |          |          |         |         |
|-----------|----------|----------|---------|---------|
| 202514_at | 0.037872 | 0.024867 | DLG1    | 1739 .  |
| 202515_at | 0.002476 | 9.99E-04 | DLG1    | 1739 .  |
| 202516_s_ | 0.002965 | 0.001236 | DLG1    | 1739 .  |
| 202517_at | 8.87E-04 | 2.89E-04 | CRMP1   | 1400 .  |
| 202518_at | 0.002924 | 0.001216 | BCL7B   | 9275 .  |
| 202519_at | 0.002256 | 8.93E-04 | MLXIP   | 22877 . |
| 202520_s_ | 0.021613 | 0.012964 | MLH1    | 4292 .  |
| 202521_at | 6.07E-07 | 2.55E-08 | CTCF    | 10664 . |
| 202522_at | 5.40E-06 | 4.50E-07 | PITPNB  | 23760 . |
| 202523_s_ | 2.33E-04 | 5.55E-05 | SPOCK2  | 9806 .  |
| 202524_s_ | 0.006952 | 0.003429 | SPOCK2  | 9806 .  |
| 202525_at | 1.64E-12 | 9.85E-16 | PRSS8   | 5652 .  |
| 202526_at | 2.73E-04 | 6.74E-05 | SMAD4   | 4089 .  |
| 202527_s_ | 0.023301 | 0.014143 | SMAD4   | 4089 .  |
| 202528_at | 4.90E-05 | 7.81E-06 | GALE    | 2582 .  |
| 202529_at | 0.001382 | 4.95E-04 | PRPSAP1 | 5635 .  |
| 202530_at | 5.87E-06 | 5.04E-07 | MAPK14  | 1432 .  |
| 202531_at | 8.92E-04 | 2.91E-04 | IRF1    | 3659 .  |
| 202532_s_ | 1.37E-05 | 1.54E-06 | DHFR    | 1719 .  |
| 202533_s_ | 0.008347 | 0.004247 | DHFR    | 1719 .  |
| 202534_x_ | 3.60E-06 | 2.66E-07 | DHFR    | 1719 .  |
| 202536_at | 5.02E-04 | 1.43E-04 | CHMP2B  | 25978 . |
| 202537_s_ | 0.003062 | 0.001287 | CHMP2B  | 25978 . |
| 202538_s_ | 3.19E-07 | 1.10E-08 | CHMP2B  | 25978 . |
| 202539_s_ | 1.45E-04 | 3.08E-05 | HMGCR   | 3156 .  |
| 202540_s_ | 0.00366  | 0.001595 | HMGCR   | 3156 .  |
| 202541_at | 0.017511 | 0.010123 | SCYE1   | 9255 .  |
| 202543_s_ | 0.001325 | 4.70E-04 | GMFB    | 2764 .  |
| 202546_at | 3.36E-07 | 1.18E-08 | VAMP8   | 8673 .  |
| 202547_s_ | 0.001499 | 5.46E-04 | ARHGEF7 | 8874 .  |
| 202548_s_ | 0.020504 | 0.012177 | ARHGEF7 | 8874 .  |
| 202549_at | 0.003112 | 0.001312 | VAPB    | 9217 .  |
| 202550_s_ | 0.001288 | 4.54E-04 | VAPB    | 9217 .  |
| 202551_s_ | 1.44E-05 | 1.65E-06 | CRIM1   | 51232 . |

|           |          |          |                             |         |
|-----------|----------|----------|-----------------------------|---------|
| 202552_s_ | 2.50E-04 | 6.05E-05 | CRIM1                       | 51232 . |
| 202553_s_ | 0.006387 | 0.003097 | SYF2                        | 25949 . |
| 202554_s_ | 2.76E-07 | 9.10E-09 | GSTM3                       | 2947 .  |
| 202555_s_ | 2.24E-06 | 1.45E-07 | MYLK                        | 4638 .  |
| 202558_s_ | 0.04442  | 0.029933 | HSPA13                      | 6782 .  |
| 202559_x_ | 5.92E-04 | 1.75E-04 | C1orf77                     | 26097 . |
| 202560_s_ | 3.79E-04 | 1.01E-04 | C1orf77                     | 26097 . |
| 202567_at | 7.71E-06 | 7.18E-07 | SNRPD3                      | 6634 .  |
| 202571_s_ | 0.00198  | 7.62E-04 | DLGAP4                      | 22839 . |
| 202572_s_ | 3.96E-04 | 1.07E-04 | DLGAP4                      | 22839 . |
| 202573_at | 0.024474 | 0.014974 | CSNK1G2                     | 1455 .  |
| 202574_s_ | 1.62E-04 | 3.53E-05 | CSNK1G2                     | 1455 .  |
| 202575_at | 8.20E-07 | 3.80E-08 | CRABP2                      | 1382 .  |
| 202576_s_ | 0.014616 | 0.008192 | DDX19A /// DC 11269 /// 55: |         |
| 202577_s_ | 0.015799 | 0.008981 | DDX19A                      | 55308 . |
| 202580_x_ | 5.79E-04 | 1.70E-04 | FOXM1                       | 2305 .  |
| 202584_at | 1.41E-07 | 3.62E-09 | NFX1                        | 4799 .  |
| 202585_s_ | 3.68E-04 | 9.77E-05 | NFX1                        | 4799 .  |
| 202586_at | 0.00488  | 0.002251 | POLR2L                      | 5441 .  |
| 202587_s_ | 8.76E-08 | 1.91E-09 | AK1                         | 203 .   |
| 202588_at | 7.53E-06 | 6.96E-07 | AK1                         | 203 .   |
| 202589_at | 0.002228 | 8.79E-04 | TYMS                        | 7298 .  |
| 202590_s_ | 1.42E-06 | 7.97E-08 | PDK2                        | 5164 .  |
| 202591_s_ | 0.016098 | 0.009182 | SSBP1                       | 6742 .  |
| 202592_at | 0.002235 | 8.83E-04 | BLOC1S1                     | 2647 .  |
| 202593_s_ | 0.004359 | 0.001965 | GDE1                        | 51573 . |
| 202594_at | 0.016634 | 0.009536 | LEPROTL1                    | 23484 . |
| 202596_at | 4.57E-05 | 7.15E-06 | ENSA                        | 2029 .  |
| 202597_at | 8.63E-05 | 1.61E-05 | IRF6                        | 3664 .  |
| 202598_at | 8.25E-04 | 2.64E-04 | S100A13                     | 6284 .  |
| 202602_s_ | 0.010681 | 0.005668 | HTATSF1                     | 27336 . |
| 202603_at | 9.37E-04 | 3.09E-04 |                             | .       |
| 202604_x_ | 1.85E-07 | 5.19E-09 | ADAM10                      | 102 .   |
| 202605_at | 0.004925 | 0.002275 | GUSB                        | 2990 .  |

|           |          |          |                            |         |
|-----------|----------|----------|----------------------------|---------|
| 202607_at | 0.001185 | 4.11E-04 | NDST1                      | 3340 .  |
| 202608_s_ | 2.90E-05 | 3.99E-06 | NDST1                      | 3340 .  |
| 202609_at | 0.001423 | 5.12E-04 | EPS8                       | 2059 .  |
| 202610_s_ | 1.52E-04 | 3.26E-05 | MED14                      | 9282 .  |
| 202611_s_ | 0.00965  | 0.005032 | MED14                      | 9282 .  |
| 202613_at | 2.30E-04 | 5.46E-05 | CTPS                       | 1503 .  |
| 202614_at | 0.043731 | 0.029387 | SLC30A9                    | 10463 . |
| 202615_at | 0.002858 | 0.001184 | GNAQ                       | 2776 .  |
| 202616_s_ | 4.92E-05 | 7.85E-06 | MECP2                      | 4204 .  |
| 202617_s_ | 0.018696 | 0.010932 | MECP2                      | 4204 .  |
| 202619_s_ | 5.27E-04 | 1.52E-04 | PLOD2                      | 5352 .  |
| 202620_s_ | 7.22E-04 | 2.24E-04 | PLOD2                      | 5352 .  |
| 202621_at | 2.39E-04 | 5.72E-05 | IRF3                       | 3661 .  |
| 202623_at | 0.021321 | 0.01276  | EAPP                       | 55837 . |
| 202626_s_ | 0.018026 | 0.010475 | LYN                        | 4067 .  |
| 202627_s_ | 2.43E-06 | 1.61E-07 | SERPINE1                   | 5054 .  |
| 202628_s_ | 5.32E-06 | 4.41E-07 | SERPINE1                   | 5054 .  |
| 202629_at | 4.08E-05 | 6.15E-06 | APPBP2                     | 10513 . |
| 202630_at | 7.01E-04 | 2.16E-04 | APPBP2                     | 10513 . |
| 202631_s_ | 1.40E-06 | 7.83E-08 | APPBP2                     | 10513 . |
| 202632_at | 3.82E-04 | 1.02E-04 | DPH1 /// OVCA124641 /// 18 |         |
| 202633_at | 2.23E-07 | 6.74E-09 | TOPBP1                     | 11073 . |
| 202636_at | 3.24E-04 | 8.37E-05 | RNF103                     | 7844 .  |
| 202638_s_ | 0.021397 | 0.012812 | ICAM1                      | 3383 .  |
| 202639_s_ | 3.64E-07 | 1.31E-08 | RANBP3                     | 8498 .  |
| 202640_s_ | 0.002846 | 0.001178 | RANBP3                     | 8498 .  |
| 202642_s_ | 5.92E-06 | 5.10E-07 | TRRAP                      | 8295 .  |
| 202643_s_ | 0.020403 | 0.012103 | TNFAIP3                    | 7128 .  |
| 202644_s_ | 0.004096 | 0.001822 | TNFAIP3                    | 7128 .  |
| 202647_s_ | 0.017096 | 0.009842 | NRAS                       | 4893 .  |
| 202651_at | 6.94E-05 | 1.22E-05 | LPGAT1                     | 9926 .  |
| 202652_at | 0.017735 | 0.010276 | APBB1                      | 322 .   |
| 202653_s_ | 0.008701 | 0.004455 | 7-Mar                      | 64844 . |
| 202654_x_ | 6.30E-04 | 1.89E-04 | 7-Mar                      | 64844 . |

|           |          |          |         |         |
|-----------|----------|----------|---------|---------|
| 202656_s_ | 1.90E-04 | 4.30E-05 | SERTAD2 | 9792 .  |
| 202657_s_ | 6.94E-05 | 1.22E-05 | SERTAD2 | 9792 .  |
| 202658_at | 2.54E-07 | 8.07E-09 | PEX11B  | 8799 .  |
| 202659_at | 7.76E-06 | 7.26E-07 | PSMB10  | 5699 .  |
| 202660_at | 0.024708 | 0.015143 | ITPR2   | 3709 .  |
| 202661_at | 0.030121 | 0.019069 | ITPR2   | 3709 .  |
| 202662_s_ | 0.031965 | 0.020423 | ITPR2   | 3709 .  |
| 202663_at | 1.37E-06 | 7.61E-08 | WIPF1   | 7456 .  |
| 202664_at | 0.006475 | 0.003147 | WIPF1   | 7456 .  |
| 202665_s_ | 2.22E-09 | 1.49E-11 | WIPF1   | 7456 .  |
| 202666_s_ | 0.001487 | 5.40E-04 | ACTL6A  | 86 .    |
| 202667_s_ | 3.55E-04 | 9.36E-05 | SLC39A7 | 7922 .  |
| 202668_at | 0.015981 | 0.009108 | EFNB2   | 1948 .  |
| 202670_at | 3.93E-04 | 1.06E-04 | MAP2K1  | 5604 .  |
| 202671_s_ | 4.10E-04 | 1.11E-04 | PDXK    | 8566 .  |
| 202672_s_ | 0.009506 | 0.004944 | ATF3    | 467 .   |
| 202673_at | 0.003659 | 0.001594 | DPM1    | 8813 .  |
| 202674_s_ | 1.15E-06 | 5.96E-08 | LMO7    | 4008 .  |
| 202675_at | 6.68E-04 | 2.04E-04 | SDHB    | 6390 .  |
| 202676_x_ | 3.85E-05 | 5.71E-06 | FASTK   | 10922 . |
| 202677_at | 0.001126 | 3.86E-04 | RASA1   | 5921 .  |
| 202678_at | 0.008587 | 0.004387 | GTF2A2  | 2958 .  |
| 202681_at | 4.80E-05 | 7.61E-06 | USP4    | 7375 .  |
| 202682_s_ | 4.57E-04 | 1.27E-04 | USP4    | 7375 .  |
| 202683_s_ | 0.00212  | 8.29E-04 | RNMT    | 8731 .  |
| 202685_s_ | 9.72E-08 | 2.22E-09 | AXL     | 558 .   |
| 202686_s_ | 4.97E-05 | 7.95E-06 | AXL     | 558 .   |
| 202689_at | 0.001884 | 7.18E-04 | RBM15B  | 29890 . |
| 202690_s_ | 2.00E-06 | 1.25E-07 | SNRPD1  | 6632 .  |
| 202691_at | 0.005691 | 0.0027   | SNRPD1  | 6632 .  |
| 202692_s_ | 2.12E-04 | 4.94E-05 | UBTF    | 7343 .  |
| 202693_s_ | 5.65E-07 | 2.32E-08 | STK17A  | 9263 .  |
| 202694_at | 7.87E-04 | 2.49E-04 | STK17A  | 9263 .  |
| 202695_s_ | 6.22E-10 | 2.84E-12 | STK17A  | 9263 .  |

|           |          |          |                            |         |
|-----------|----------|----------|----------------------------|---------|
| 202697_at | 0.013776 | 0.007642 | NUDT21                     | 11051 . |
| 202699_s_ | 0.007865 | 0.003965 | TMEM63A                    | 9725 .  |
| 202700_s_ | 0.00236  | 9.42E-04 | TMEM63A                    | 9725 .  |
| 202701_at | 5.80E-10 | 2.61E-12 | BMP1                       | 649 .   |
| 202703_at | 0.001206 | 4.20E-04 | DUSP11                     | 8446 .  |
| 202704_at | 0.012032 | 0.006516 | TOB1                       | 10140 . |
| 202705_at | 5.01E-05 | 8.03E-06 | CCNB2                      | 9133 .  |
| 202706_s_ | 7.56E-06 | 6.99E-07 | UMPS                       | 7372 .  |
| 202707_at | 0.041116 | 0.027345 | UMPS                       | 7372 .  |
| 202709_at | 5.15E-05 | 8.33E-06 | FMOD                       | 2331 .  |
| 202712_s_ | 0.00221  | 8.71E-04 | CKMT1A /// CK1159 /// 548! |         |
| 202713_s_ | 0.002989 | 0.001249 | KIAA0391                   | 9692 .  |
| 202714_s_ | 4.47E-05 | 6.95E-06 | KIAA0391                   | 9692 .  |
| 202715_at | 1.65E-04 | 3.61E-05 | CAD                        | 790 .   |
| 202716_at | 3.47E-09 | 2.61E-11 | PTPN1                      | 5770 .  |
| 202717_s_ | 0.0064   | 0.003105 | CDC16                      | 8881 .  |
| 202721_s_ | 5.72E-06 | 4.86E-07 | GFPT1                      | 2673 .  |
| 202722_s_ | 1.78E-04 | 3.96E-05 | GFPT1                      | 2673 .  |
| 202723_s_ | 6.61E-05 | 1.14E-05 | FOXO1                      | 2308 .  |
| 202724_s_ | 3.55E-05 | 5.15E-06 | FOXO1                      | 2308 .  |
| 202726_at | 7.34E-08 | 1.51E-09 | LIG1                       | 3978 .  |
| 202727_s_ | 0.006819 | 0.00335  | IFNGR1                     | 3459 .  |
| 202728_s_ | 0.002596 | 0.001057 | LTBP1                      | 4052 .  |
| 202729_s_ | 0.004534 | 0.002062 | LTBP1                      | 4052 .  |
| 202730_s_ | 0.021057 | 0.012577 | PDCD4                      | 27250 . |
| 202731_at | 0.010407 | 0.005495 | PDCD4                      | 27250 . |
| 202732_at | 5.24E-05 | 8.50E-06 | PKIG                       | 11142 . |
| 202733_at | 1.37E-05 | 1.55E-06 | P4HA2                      | 8974 .  |
| 202734_at | 1.45E-08 | 1.69E-10 | TRIP10                     | 9322 .  |
| 202735_at | 0.035383 | 0.02297  | EBP                        | 10682 . |
| 202736_s_ | 0.001595 | 5.88E-04 | LSM4                       | 25804 . |
| 202737_s_ | 5.48E-07 | 2.22E-08 | LSM4                       | 25804 . |
| 202738_s_ | 3.14E-06 | 2.23E-07 | PHKB                       | 5257 .  |
| 202741_at | 0.007572 | 0.003791 | PRKACB                     | 5567 .  |

|           |          |          |                             |          |
|-----------|----------|----------|-----------------------------|----------|
| 202742_s_ | 2.75E-04 | 6.82E-05 | PRKACB                      | 5567 .   |
| 202744_at | 0.027515 | 0.017154 | SLC20A2                     | 6575 .   |
| 202746_at | 0.029886 | 0.018898 | ITM2A                       | 9452 .   |
| 202750_s_ | 1.95E-04 | 4.42E-05 | TFIP11                      | 24144 .  |
| 202751_at | 0.019718 | 0.011631 | TFIP11                      | 24144 .  |
| 202752_x_ | 8.96E-04 | 2.93E-04 | SLC7A8                      | 23428 .  |
| 202754_at | 0.001268 | 4.46E-04 | R3HDM1                      | 23518 .  |
| 202755_s_ | 0.00193  | 7.39E-04 | GPC1                        | 2817 .   |
| 202756_s_ | 9.44E-05 | 1.79E-05 | GPC1                        | 2817 .   |
| 202757_at | 0.005732 | 0.002723 | COBRA1                      | 25920 .  |
| 202758_s_ | 0.045296 | 0.030612 | RFXANK                      | 8625 .   |
| 202759_s_ | 2.10E-04 | 4.86E-05 | AKAP2 /// PALI11217 /// 114 | . .      |
| 202760_s_ | 2.92E-04 | 7.33E-05 | PALM2-AKAP2                 | 445815 . |
| 202761_s_ | 2.38E-07 | 7.39E-09 | SYNE2                       | 23224 .  |
| 202762_at | 3.21E-07 | 1.11E-08 | ROCK2                       | 9475 .   |
| 202763_at | 4.54E-04 | 1.26E-04 | CASP3                       | 836 .    |
| 202764_at | 4.69E-05 | 7.40E-06 | STIM1                       | 6786 .   |
| 202765_s_ | 5.83E-07 | 2.42E-08 | FBN1                        | 2200 .   |
| 202766_s_ | 5.92E-06 | 5.09E-07 | FBN1                        | 2200 .   |
| 202767_at | 0.001154 | 3.98E-04 | ACP2                        | 53 .     |
| 202770_s_ | 0.006981 | 0.003446 | CCNG2                       | 901 .    |
| 202771_at | 8.07E-08 | 1.72E-09 | FAM38A                      | 9780 .   |
| 202772_at | 0.004639 | 0.002119 | HMGCL                       | 3155 .   |
| 202773_s_ | 0.042647 | 0.028527 | SFRS8                       | 6433 .   |
| 202774_s_ | 4.51E-08 | 7.86E-10 | SFRS8                       | 6433 .   |
| 202775_s_ | 8.89E-09 | 9.17E-11 | SFRS8                       | 6433 .   |
| 202776_at | 2.05E-04 | 4.71E-05 | DNTTIP2                     | 30836 .  |
| 202777_at | 0.015821 | 0.008996 | SHOC2                       | 8036 .   |
| 202778_s_ | 0.001325 | 4.70E-04 | ZMYM2                       | 7750 .   |
| 202779_s_ | 0.002796 | 0.001154 | LOC731049 /// 27338 /// 73  | . . .    |
| 202780_at | 0.003209 | 0.001361 | OXCT1                       | 5019 .   |
| 202781_s_ | 0.005033 | 0.002336 | INPP5K                      | 51763 .  |
| 202782_s_ | 0.010817 | 0.005755 | INPP5K                      | 51763 .  |
| 202783_at | 3.47E-05 | 5.00E-06 | NNT                         | 23530 .  |

|           |          |          |          |         |
|-----------|----------|----------|----------|---------|
| 202784_s_ | 7.75E-05 | 1.40E-05 | NNT      | 23530 . |
| 202785_at | 1.46E-04 | 3.11E-05 | NDUFA7   | 4701 .  |
| 202786_at | 0.037802 | 0.02481  | STK39    | 27347 . |
| 202789_at | 2.22E-06 | 1.43E-07 | PLCG1    | 5335 .  |
| 202790_at | 1.31E-10 | 3.63E-13 | CLDN7    | 1366 .  |
| 202791_s_ | 0.014831 | 0.008338 | SAPS2    | 9701 .  |
| 202792_s_ | 0.003035 | 0.001273 | SAPS2    | 9701 .  |
| 202794_at | 0.001452 | 5.25E-04 | INPP1    | 3628 .  |
| 202795_x_ | 1.81E-05 | 2.19E-06 | TRIOBP   | 11078 . |
| 202796_at | 8.83E-05 | 1.65E-05 | SYNPO    | 11346 . |
| 202797_at | 5.50E-04 | 1.60E-04 | SACM1L   | 22908 . |
| 202799_at | 0.004914 | 0.002269 | CLPP     | 8192 .  |
| 202801_at | 0.022902 | 0.013861 | PRKACA   | 5566 .  |
| 202804_at | 0.001044 | 3.51E-04 | ABCC1    | 4363 .  |
| 202806_at | 0.032905 | 0.021129 | DBN1     | 1627 .  |
| 202807_s_ | 1.41E-07 | 3.62E-09 | TOM1     | 10043 . |
| 202808_at | 3.65E-04 | 9.65E-05 | C10orf26 | 54838 . |
| 202809_s_ | 0.017335 | 0.010005 | INTS3    | 65123 . |
| 202810_at | 0.007505 | 0.003752 | DRG1     | 4733 .  |
| 202811_at | 0.004169 | 0.001861 | STAMBP   | 10617 . |
| 202813_at | 6.77E-04 | 2.07E-04 | TARBP1   | 6894 .  |
| 202815_s_ | 0.004373 | 0.001974 | HEXIM1   | 10614 . |
| 202816_s_ | 0.001829 | 6.93E-04 | SS18     | 6760 .  |
| 202818_s_ | 1.53E-04 | 3.31E-05 | TCEB3    | 6924 .  |
| 202819_s_ | 1.11E-04 | 2.18E-05 | TCEB3    | 6924 .  |
| 202820_at | 2.16E-05 | 2.76E-06 | AHR      | 196 .   |
| 202821_s_ | 0.0088   | 0.004515 | LPP      | 4026 .  |
| 202824_s_ | 0.024946 | 0.015318 | TCEB1    | 6921 .  |
| 202825_at | 2.31E-05 | 3.00E-06 | SLC25A4  | 291 .   |
| 202826_at | 4.49E-10 | 1.89E-12 | SPINT1   | 6692 .  |
| 202827_s_ | 8.47E-04 | 2.73E-04 | MMP14    | 4323 .  |
| 202828_s_ | 9.95E-04 | 3.32E-04 | MMP14    | 4323 .  |
| 202829_s_ | 6.93E-04 | 2.13E-04 | VAMP7    | 6845 .  |
| 202830_s_ | 3.02E-04 | 7.65E-05 | SLC37A4  | 2542 .  |

|           |          |          |          |         |
|-----------|----------|----------|----------|---------|
| 202831_at | 4.57E-08 | 8.03E-10 | GPX2     | 2877 .  |
| 202835_at | 0.014804 | 0.008321 | TXNL4A   | 10907 . |
| 202836_s_ | 0.001287 | 4.53E-04 | TXNL4A   | 10907 . |
| 202838_at | 0.025104 | 0.015431 | FUCA1    | 2517 .  |
| 202839_s_ | 0.005535 | 0.002615 | NDUFB7   | 4713 .  |
| 202840_at | 2.07E-04 | 4.78E-05 | TAF15    | 8148 .  |
| 202841_x_ | 0.004171 | 0.001863 | OGFR     | 11054 . |
| 202844_s_ | 9.14E-04 | 2.99E-04 | RALBP1   | 10928 . |
| 202846_s_ | 0.016916 | 0.009724 | PIGC     | 5279 .  |
| 202848_s_ | 0.014716 | 0.008259 | GRK6     | 2870 .  |
| 202849_x_ | 0.005733 | 0.002724 | GRK6     | 2870 .  |
| 202850_at | 0.013203 | 0.007275 | ABCD3    | 5825 .  |
| 202851_at | 3.72E-04 | 9.90E-05 | FLJ11506 | 79719 . |
| 202854_at | 7.86E-05 | 1.43E-05 | HPRT1    | 3251 .  |
| 202855_s_ | 0.014747 | 0.00828  | SLC16A3  | 9123 .  |
| 202857_at | 0.007277 | 0.003618 | CNPY2    | 10330 . |
| 202858_at | 4.88E-09 | 4.19E-11 | U2AF1    | 7307 .  |
| 202859_x_ | 0.045776 | 0.03099  | IL8      | 3576 .  |
| 202860_at | 3.06E-07 | 1.04E-08 | DENND4B  | 9909 .  |
| 202861_at | 4.79E-04 | 1.35E-04 | PER1     | 5187 .  |
| 202862_at | 0.001346 | 4.80E-04 | FAH      | 2184 .  |
| 202863_at | 2.16E-05 | 2.76E-06 | SP100    | 6672 .  |
| 202864_s_ | 7.45E-05 | 1.33E-05 | SP100    | 6672 .  |
| 202865_at | 5.27E-05 | 8.56E-06 | DNAJB12  | 54788 . |
| 202866_at | 6.33E-04 | 1.90E-04 | DNAJB12  | 54788 . |
| 202867_s_ | 6.29E-04 | 1.89E-04 | DNAJB12  | 54788 . |
| 202868_s_ | 2.55E-04 | 6.20E-05 | POP4     | 10775 . |
| 202870_s_ | 2.48E-04 | 5.99E-05 | CDC20    | 991 .   |
| 202871_at | 0.004998 | 0.002315 | TRAF4    | 9618 .  |
| 202873_at | 1.34E-04 | 2.78E-05 | ATP6V1C1 | 528 .   |
| 202875_s_ | 0.018532 | 0.010821 | PBX2     | 5089 .  |
| 202879_s_ | 3.20E-05 | 4.54E-06 | CYTH1    | 9267 .  |
| 202880_s_ | 6.11E-04 | 1.82E-04 | CYTH1    | 9267 .  |
| 202881_x_ | 0.002534 | 0.001026 |          | .       |



|           |          |          |          |          |
|-----------|----------|----------|----------|----------|
| 202882_x_ | 0.001539 | 5.63E-04 | NOL7     | 51406 .  |
| 202883_s_ | 1.58E-05 | 1.84E-06 | PPP2R1B  | 5519 .   |
| 202884_s_ | 0.003862 | 0.0017   | PPP2R1B  | 5519 .   |
| 202885_s_ | 5.85E-05 | 9.74E-06 | PPP2R1B  | 5519 .   |
| 202886_s_ | 0.014251 | 0.007947 | PPP2R1B  | 5519 .   |
| 202888_s_ | 3.50E-05 | 5.06E-06 | ANPEP    | 290 .    |
| 202889_x_ | 1.22E-08 | 1.36E-10 | MAP7     | 9053 .   |
| 202890_at | 2.73E-08 | 4.07E-10 | MAP7     | 9053 .   |
| 202892_at | 0.001084 | 3.68E-04 | CDC23    | 8697 .   |
| 202893_at | 0.014073 | 0.007834 | UNC13B   | 10497 .  |
| 202894_at | 9.27E-04 | 3.04E-04 | EPHB4    | 2050 .   |
| 202895_s_ | 5.49E-06 | 4.61E-07 | SIRPA    | 140885 . |
| 202896_s_ | 7.29E-05 | 1.30E-05 | SIRPA    | 140885 . |
| 202897_at | 3.17E-06 | 2.26E-07 | SIRPA    | 140885 . |
| 202898_at | 0.00423  | 0.001895 | SDC3     | 9672 .   |
| 202899_s_ | 0.008256 | 0.004192 | SFRS3    | 6428 .   |
| 2028_s_at | 6.73E-04 | 2.05E-04 | E2F1     | 1869 .   |
| 202900_s_ | 0.003998 | 0.001771 | NUP88    | 4927 .   |
| 202901_x_ | 0.003533 | 0.001528 | CTSS     | 1520 .   |
| 202902_s_ | 4.73E-04 | 1.33E-04 | CTSS     | 1520 .   |
| 202903_at | 8.09E-04 | 2.58E-04 | LSM5     | 23658 .  |
| 202904_s_ | 1.21E-04 | 2.46E-05 | LSM5     | 23658 .  |
| 202905_x_ | 2.31E-04 | 5.49E-05 | NBN      | 4683 .   |
| 202907_s_ | 0.043243 | 0.029001 | NBN      | 4683 .   |
| 202908_at | 0.001686 | 6.28E-04 | WFS1     | 7466 .   |
| 202909_at | 0.003304 | 0.00141  | EPM2AIP1 | 9852 .   |
| 202910_s_ | 2.31E-06 | 1.50E-07 | CD97     | 976 .    |
| 202911_at | 4.39E-09 | 3.67E-11 | MSH6     | 2956 .   |
| 202912_at | 4.23E-05 | 6.47E-06 | ADM      | 133 .    |
| 202913_at | 0.0182   | 0.010594 | ARHGEF11 | 9826 .   |
| 202914_s_ | 0.003701 | 0.001615 | ARHGEF11 | 9826 .   |
| 202915_s_ | 0.001385 | 4.96E-04 | FAM20B   | 9917 .   |
| 202916_s_ | 1.68E-05 | 2.00E-06 | FAM20B   | 9917 .   |
| 202918_s_ | 0.046287 | 0.031386 | MOBK13   | 25843 .  |

|           |          |          |                              |         |
|-----------|----------|----------|------------------------------|---------|
| 202919_at | 0.002361 | 9.42E-04 | MOBK13                       | 25843 . |
| 202920_at | 8.66E-04 | 2.81E-04 | ANK2                         | 287 .   |
| 202921_s_ | 4.23E-04 | 1.16E-04 | ANK2                         | 287 .   |
| 202922_at | 0.036635 | 0.023924 | GCLC                         | 2729 .  |
| 202923_s_ | 7.16E-05 | 1.27E-05 | GCLC                         | 2729 .  |
| 202925_s_ | 8.75E-06 | 8.48E-07 | PLAGL2                       | 5326 .  |
| 202926_at | 6.55E-05 | 1.12E-05 | NBAS                         | 51594 . |
| 202927_at | 0.016483 | 0.009437 | PIN1                         | 5300 .  |
| 202928_s_ | 0.001574 | 5.78E-04 | PHF1                         | 5252 .  |
| 202929_s_ | 0.00697  | 0.003439 | DDT                          | 1652 .  |
| 202930_s_ | 0.011518 | 0.006192 | SUCLA2                       | 8803 .  |
| 202931_x_ | 0.005338 | 0.002503 | BIN1                         | 274 .   |
| 202932_at | 0.014746 | 0.008279 | YES1                         | 7525 .  |
| 202933_s_ | 0.009704 | 0.005067 | YES1                         | 7525 .  |
| 202934_at | 0.001516 | 5.53E-04 | HK2                          | 3099 .  |
| 202935_s_ | 0.033927 | 0.021885 | SOX9                         | 6662 .  |
| 202938_x_ | 0.032688 | 0.020962 | RRP7A /// RRP' 27341 /// 916 |         |
| 202939_at | 2.92E-04 | 7.34E-05 | ZMPSTE24                     | 10269 . |
| 202940_at | 2.68E-04 | 6.60E-05 | WNK1                         | 65125 . |
| 202942_at | 0.027754 | 0.017332 | ETFB                         | 2109 .  |
| 202943_s_ | 1.04E-05 | 1.07E-06 | NAGA                         | 4668 .  |
| 202944_at | 0.04978  | 0.034157 | NAGA                         | 4668 .  |
| 202946_s_ | 6.62E-04 | 2.01E-04 | BTBD3                        | 22903 . |
| 202948_at | 1.55E-08 | 1.87E-10 | IL1R1                        | 3554 .  |
| 202949_s_ | 4.36E-06 | 3.42E-07 | FHL2                         | 2274 .  |
| 202951_at | 1.36E-05 | 1.52E-06 | STK38                        | 11329 . |
| 202952_s_ | 5.81E-07 | 2.40E-08 | ADAM12                       | 8038 .  |
| 202953_at | 0.004805 | 0.002211 | C1QB                         | 713 .   |
| 202954_at | 1.38E-05 | 1.55E-06 | UBE2C                        | 11065 . |
| 202955_s_ | 1.58E-05 | 1.86E-06 | ARFGEF1                      | 10565 . |
| 202956_at | 9.32E-05 | 1.76E-05 | ARFGEF1                      | 10565 . |
| 202958_at | 0.00496  | 0.002293 | PTPN9                        | 5780 .  |
| 202959_at | 5.76E-04 | 1.69E-04 | MUT                          | 4594 .  |
| 202960_s_ | 2.08E-04 | 4.81E-05 | MUT                          | 4594 .  |

|           |          |          |                            |         |
|-----------|----------|----------|----------------------------|---------|
| 202962_at | 0.005478 | 0.002582 | KIF13B                     | 23303 . |
| 202963_at | 7.40E-06 | 6.81E-07 | RFX5                       | 5993 .  |
| 202965_s_ | 4.74E-05 | 7.49E-06 | CAPN6                      | 827 .   |
| 202966_at | 1.45E-05 | 1.66E-06 | CAPN6                      | 827 .   |
| 202971_s_ | 0.014955 | 0.008421 | DYRK2                      | 8445 .  |
| 202974_at | 0.00663  | 0.003238 | MPP1                       | 4354 .  |
| 202975_s_ | 0.00281  | 0.001161 | RHOBTB3                    | 22836 . |
| 202976_s_ | 0.00135  | 4.81E-04 | RHOBTB3                    | 22836 . |
| 202977_s_ | 3.51E-05 | 5.08E-06 | CREBZF                     | 58487 . |
| 202978_s_ | 8.36E-04 | 2.69E-04 | CREBZF                     | 58487 . |
| 202979_s_ | 0.004559 | 0.002075 | CREBZF                     | 58487 . |
| 202980_s_ | 0.020582 | 0.012236 | SIAH1                      | 6477 .  |
| 202982_s_ | 2.83E-05 | 3.87E-06 | ACOT1 /// ACC10965 /// 64: |         |
| 202983_at | 3.06E-04 | 7.80E-05 | HLTF                       | 6596 .  |
| 202984_s_ | 1.43E-05 | 1.63E-06 | BAG5                       | 9529 .  |
| 202985_s_ | 2.36E-04 | 5.62E-05 | BAG5                       | 9529 .  |
| 202986_at | 0.001493 | 5.43E-04 | ARNT2                      | 9915 .  |
| 202987_at | 0.016644 | 0.009542 | TRAF3IP2                   | 10758 . |
| 202992_at | 0.004298 | 0.001932 | C7                         | 730 .   |
| 202994_s_ | 3.67E-05 | 5.36E-06 | FBLN1                      | 2192 .  |
| 202995_s_ | 1.20E-05 | 1.29E-06 | FBLN1                      | 2192 .  |
| 202996_at | 0.003211 | 0.001363 | POLD4                      | 57804 . |
| 202997_s_ | 1.52E-05 | 1.76E-06 | LOXL2                      | 4017 .  |
| 202998_s_ | 3.49E-04 | 9.16E-05 | LOXL2                      | 4017 .  |
| 203000_at | 0.006957 | 0.003432 | STMN2                      | 11075 . |
| 203001_s_ | 0.007334 | 0.003652 | STMN2                      | 11075 . |
| 203002_at | 4.59E-04 | 1.28E-04 | AMOTL2                     | 51421 . |
| 203003_at | 6.52E-04 | 1.98E-04 | MEF2D                      | 4209 .  |
| 203004_s_ | 4.05E-06 | 3.11E-07 | MEF2D                      | 4209 .  |
| 203005_at | 1.13E-04 | 2.24E-05 | LTBR                       | 4055 .  |
| 203006_at | 0.007006 | 0.00346  | INPP5A                     | 3632 .  |
| 203007_x_ | 2.29E-04 | 5.43E-05 | LYPLA1                     | 10434 . |
| 203009_at | 2.09E-05 | 2.65E-06 | BCAM                       | 4059 .  |
| 203013_at | 0.022733 | 0.013746 | ECD                        | 11319 . |

|           |          |          |          |          |
|-----------|----------|----------|----------|----------|
| 203015_s_ | 0.004523 | 0.002056 | SSX2IP   | 117178 . |
| 203016_s_ | 4.90E-05 | 7.81E-06 | SSX2IP   | 117178 . |
| 203017_s_ | 0.00109  | 3.71E-04 | SSX2IP   | 117178 . |
| 203018_s_ | 7.22E-04 | 2.24E-04 | SSX2IP   | 117178 . |
| 203019_x_ | 0.001148 | 3.95E-04 | SSX2IP   | 117178 . |
| 203020_at | 2.58E-06 | 1.73E-07 | RABGAP1L | 9910 .   |
| 203022_at | 2.15E-05 | 2.74E-06 | RNASEH2A | 10535 .  |
| 203023_at | 8.25E-05 | 1.52E-05 | NOP16    | 51491 .  |
| 203024_s_ | 0.022057 | 0.01328  | C5orf15  | 56951 .  |
| 203025_at | 5.53E-05 | 9.07E-06 | ARD1A    | 8260 .   |
| 203026_at | 0.03113  | 0.019808 | ZBTB5    | 9925 .   |
| 203027_s_ | 0.004047 | 0.001797 | MVD      | 4597 .   |
| 203028_s_ | 0.027657 | 0.017263 | CYBA     | 1535 .   |
| 203031_s_ | 2.54E-05 | 3.38E-06 | UROS     | 7390 .   |
| 203035_s_ | 4.14E-05 | 6.27E-06 | PIAS3    | 10401 .  |
| 203036_s_ | 0.001156 | 3.98E-04 | MTSS1    | 9788 .   |
| 203039_s_ | 1.30E-04 | 2.66E-05 | NDUFS1   | 4719 .   |
| 203040_s_ | 0.002536 | 0.001027 | HMBS     | 3145 .   |
| 203041_s_ | 2.89E-06 | 2.00E-07 | LAMP2    | 3920 .   |
| 203042_at | 6.95E-06 | 6.25E-07 | LAMP2    | 3920 .   |
| 203046_s_ | 4.49E-07 | 1.73E-08 | TIMELESS | 8914 .   |
| 203047_at | 0.006966 | 0.003437 | STK10    | 6793 .   |
| 203048_s_ | 9.73E-04 | 3.23E-04 | TTC37    | 9652 .   |
| 203049_s_ | 0.026138 | 0.016166 | TTC37    | 9652 .   |
| 203051_at | 0.001289 | 4.54E-04 | BAHD1    | 22893 .  |
| 203052_at | 2.23E-05 | 2.87E-06 | C2       | 717 .    |
| 203053_at | 4.68E-05 | 7.37E-06 | BCAS2    | 10286 .  |
| 203054_s_ | 1.45E-05 | 1.65E-06 | TCTA     | 6988 .   |
| 203055_s_ | 0.005366 | 0.002519 | ARHGEF1  | 9138 .   |
| 203056_s_ | 3.13E-06 | 2.23E-07 | PRDM2    | 7799 .   |
| 203057_s_ | 9.40E-04 | 3.10E-04 | PRDM2    | 7799 .   |
| 203058_s_ | 0.001189 | 4.13E-04 | PAPSS2   | 9060 .   |
| 203059_s_ | 2.06E-05 | 2.59E-06 | PAPSS2   | 9060 .   |
| 203060_s_ | 0.002452 | 9.87E-04 | PAPSS2   | 9060 .   |

|           |          |          |                      |         |
|-----------|----------|----------|----------------------|---------|
| 203061_s_ | 1.94E-05 | 2.40E-06 | MDC1                 | 9656 .  |
| 203062_s_ | 1.36E-07 | 3.46E-09 | MDC1                 | 9656 .  |
| 203063_at | 9.22E-04 | 3.03E-04 | PPM1F                | 9647 .  |
| 203064_s_ | 4.44E-04 | 1.23E-04 | FOXK2                | 3607 .  |
| 203065_s_ | 1.35E-04 | 2.81E-05 | CAV1                 | 857 .   |
| 203068_at | 2.93E-06 | 2.04E-07 | KLHL21               | 9903 .  |
| 203070_at | 1.47E-04 | 3.13E-05 | SEMA3B               | 7869 .  |
| 203071_at | 0.007652 | 0.003838 | SEMA3B               | 7869 .  |
| 203074_at | 2.56E-04 | 6.25E-05 | ANXA8 /// ANX244 /// | 65314 . |
| 203075_at | 0.017134 | 0.009868 | SMAD2                | 4087 .  |
| 203076_s_ | 0.001141 | 3.92E-04 | SMAD2                | 4087 .  |
| 203078_at | 0.019379 | 0.011399 | CUL2                 | 8453 .  |
| 203082_at | 1.12E-05 | 1.18E-06 | BMS1                 | 9790 .  |
| 203083_at | 4.63E-08 | 8.15E-10 | THBS2                | 7058 .  |
| 203084_at | 0.001129 | 3.87E-04 | TGFB1                | 7040 .  |
| 203085_s_ | 0.006935 | 0.003418 | TGFB1                | 7040 .  |
| 203087_s_ | 0.010201 | 0.005369 | KIF2A                | 3796 .  |
| 203088_at | 9.48E-10 | 5.02E-12 | FBLN5                | 10516 . |
| 203089_s_ | 9.43E-08 | 2.11E-09 | HTRA2                | 27429 . |
| 203090_at | 0.005864 | 0.0028   | SDF2                 | 6388 .  |
| 203091_at | 1.01E-04 | 1.94E-05 | FUBP1                | 8880 .  |
| 203092_at | 7.21E-04 | 2.24E-04 | TIMM44               | 10469 . |
| 203093_s_ | 0.009337 | 0.00484  | TIMM44               | 10469 . |
| 203094_at | 0.002611 | 0.001064 | MAD2L1BP             | 9587 .  |
| 203095_at | 8.83E-07 | 4.20E-08 | MTIF2                | 4528 .  |
| 203097_s_ | 0.01017  | 0.005348 | RAPGEF2              | 9693 .  |
| 203098_at | 0.00385  | 0.001694 | CDYL                 | 9425 .  |
| 203099_s_ | 4.28E-04 | 1.17E-04 | CDYL                 | 9425 .  |
| 203100_s_ | 0.020408 | 0.012107 | CDYL                 | 9425 .  |
| 203101_s_ | 1.18E-04 | 2.37E-05 | MGAT2                | 4247 .  |
| 203102_s_ | 9.80E-05 | 1.88E-05 | MGAT2                | 4247 .  |
| 203103_s_ | 1.04E-04 | 2.03E-05 | PRPF19               | 27339 . |
| 203104_at | 0.024182 | 0.014767 | CSF1R                | 1436 .  |
| 203106_s_ | 0.025251 | 0.015545 | VPS41                | 27072 . |

|           |          |          |         |         |
|-----------|----------|----------|---------|---------|
| 203107_x_ | 0.007309 | 0.003637 | RPS2    | 6187 .  |
| 203108_at | 0.033088 | 0.021266 | GPRC5A  | 9052 .  |
| 203110_at | 0.006213 | 0.002997 | PTK2B   | 2185 .  |
| 203111_s_ | 9.94E-06 | 1.01E-06 | PTK2B   | 2185 .  |
| 203112_s_ | 5.41E-07 | 2.18E-08 | WHSC2   | 7469 .  |
| 203113_s_ | 0.006204 | 0.002992 | EEF1D   | 1936 .  |
| 203115_at | 8.86E-06 | 8.65E-07 | FECH    | 2235 .  |
| 203116_s_ | 0.043991 | 0.029595 | FECH    | 2235 .  |
| 203117_s_ | 1.70E-04 | 3.74E-05 | PAN2    | 9924 .  |
| 203119_at | 0.012507 | 0.006829 | CCDC86  | 79080 . |
| 203120_at | 2.44E-04 | 5.87E-05 | TP53BP2 | 7159 .  |
| 203122_at | 0.009421 | 0.004892 | TTC15   | 51112 . |
| 203123_s_ | 4.03E-06 | 3.09E-07 | SLC11A2 | 4891 .  |
| 203124_s_ | 5.67E-05 | 9.37E-06 | SLC11A2 | 4891 .  |
| 203125_x_ | 6.28E-04 | 1.88E-04 | SLC11A2 | 4891 .  |
| 203126_at | 9.92E-04 | 3.30E-04 | IMPA2   | 3613 .  |
| 203127_s_ | 0.023152 | 0.014035 | SPTLC2  | 9517 .  |
| 203128_at | 0.023112 | 0.014007 | SPTLC2  | 9517 .  |
| 203129_s_ | 8.72E-04 | 2.83E-04 | KIF5C   | 3800 .  |
| 203130_s_ | 8.44E-07 | 3.95E-08 | KIF5C   | 3800 .  |
| 203131_at | 3.26E-04 | 8.45E-05 | PDGFRA  | 5156 .  |
| 203133_at | 0.00164  | 6.07E-04 | SEC61B  | 10952 . |
| 203134_at | 9.23E-04 | 3.03E-04 | PICALM  | 8301 .  |
| 203135_at | 2.46E-04 | 5.93E-05 | TBP     | 6908 .  |
| 203136_at | 4.72E-05 | 7.44E-06 | RABAC1  | 10567 . |
| 203137_at | 9.01E-04 | 2.95E-04 | WTAP    | 9589 .  |
| 203138_at | 0.00311  | 0.001311 | HAT1    | 8520 .  |
| 203139_at | 0.015419 | 0.008729 | DAPK1   | 1612 .  |
| 203140_at | 1.07E-04 | 2.09E-05 | BCL6    | 604 .   |
| 203145_at | 5.43E-06 | 4.55E-07 | SPAG5   | 10615 . |
| 203147_s_ | 3.94E-04 | 1.06E-04 | TRIM14  | 9830 .  |
| 203148_s_ | 0.002379 | 9.51E-04 | TRIM14  | 9830 .  |
| 203149_at | 0.005392 | 0.002533 | PVRL2   | 5819 .  |
| 203150_at | 8.45E-04 | 2.72E-04 | RABEPK  | 10244 . |

|           |          |          |          |         |
|-----------|----------|----------|----------|---------|
| 203151_at | 2.30E-07 | 7.06E-09 | MAP1A    | 4130 .  |
| 203152_at | 0.002036 | 7.89E-04 | MRPL40   | 64976 . |
| 203153_at | 0.021508 | 0.012885 | IFIT1    | 3434 .  |
| 203154_s_ | 1.31E-04 | 2.71E-05 | PAK4     | 10298 . |
| 203155_at | 5.96E-05 | 9.99E-06 | SETDB1   | 9869 .  |
| 203156_at | 0.001877 | 7.15E-04 | AKAP11   | 11215 . |
| 203157_s_ | 8.28E-08 | 1.78E-09 | GLS      | 2744 .  |
| 203158_s_ | 7.69E-07 | 3.48E-08 | GLS      | 2744 .  |
| 203159_at | 6.79E-07 | 2.97E-08 | GLS      | 2744 .  |
| 203160_s_ | 8.85E-05 | 1.65E-05 | RNF8     | 9025 .  |
| 203164_at | 7.72E-04 | 2.44E-04 | SLC33A1  | 9197 .  |
| 203165_s_ | 8.00E-04 | 2.55E-04 | SLC33A1  | 9197 .  |
| 203166_at | 0.001065 | 3.60E-04 | CFDP1    | 10428 . |
| 203167_at | 1.47E-05 | 1.69E-06 | TIMP2    | 7077 .  |
| 203168_at | 0.003588 | 0.001557 | ATF6B    | 1388 .  |
| 203171_s_ | 7.02E-06 | 6.34E-07 | RRP8     | 23378 . |
| 203172_at | 0.010556 | 0.005589 | FXR2     | 9513 .  |
| 203173_s_ | 0.011111 | 0.005938 | C16orf62 | 57020 . |
| 203174_s_ | 0.019587 | 0.01154  | ARFRP1   | 10139 . |
| 203175_at | 8.92E-05 | 1.67E-05 | RHOG     | 391 .   |
| 203176_s_ | 4.01E-09 | 3.21E-11 | TFAM     | 7019 .  |
| 203177_x_ | 7.39E-05 | 1.32E-05 | TFAM     | 7019 .  |
| 203178_at | 3.95E-07 | 1.45E-08 | GATM     | 2628 .  |
| 203179_at | 0.044642 | 0.030099 | GALT     | 2592 .  |
| 203181_x_ | 5.05E-04 | 1.44E-04 | SRPK2    | 6733 .  |
| 203182_s_ | 0.044615 | 0.030079 | SRPK2    | 6733 .  |
| 203183_s_ | 2.32E-04 | 5.50E-05 | SMARCD1  | 6602 .  |
| 203184_at | 0.009397 | 0.004877 | FBN2     | 2201 .  |
| 203185_at | 0.014222 | 0.00793  | RASSF2   | 9770 .  |
| 203186_s_ | 1.34E-04 | 2.79E-05 | S100A4   | 6275 .  |
| 203187_at | 4.50E-05 | 7.00E-06 | DOCK1    | 1793 .  |
| 203189_s_ | 0.026766 | 0.016623 | NDUFS8   | 4728 .  |
| 203190_at | 0.015037 | 0.008473 | NDUFS8   | 4728 .  |
| 203191_at | 7.26E-06 | 6.63E-07 | ABCB6    | 10058 . |

|           |          |          |                            |         |
|-----------|----------|----------|----------------------------|---------|
| 203192_at | 2.29E-06 | 1.49E-07 | ABCB6                      | 10058 . |
| 203193_at | 0.028646 | 0.017982 | ESRRA                      | 2101 .  |
| 203194_s_ | 0.041441 | 0.027595 | NUP98                      | 4928 .  |
| 203195_s_ | 2.80E-05 | 3.82E-06 | NUP98                      | 4928 .  |
| 203196_at | 0.001873 | 7.13E-04 | ABCC4                      | 10257 . |
| 203197_s_ | 0.004202 | 0.00188  | C1orf123                   | 54987 . |
| 203200_s_ | 0.012433 | 0.006778 | MTRR                       | 4552 .  |
| 203201_at | 0.005361 | 0.002516 | PMM2                       | 5373 .  |
| 203202_at | 3.87E-04 | 1.04E-04 | KRR1                       | 11103 . |
| 203203_s_ | 0.002055 | 7.97E-04 | KRR1                       | 11103 . |
| 203204_s_ | 0.002129 | 8.32E-04 | KDM4A                      | 9682 .  |
| 203205_at | 0.02101  | 0.012544 | KDM4A                      | 9682 .  |
| 203206_at | 1.49E-04 | 3.16E-05 | FAM53B                     | 9679 .  |
| 203209_at | 4.21E-07 | 1.59E-08 | RFC5                       | 5985 .  |
| 203210_s_ | 5.43E-06 | 4.55E-07 | RFC5                       | 5985 .  |
| 203211_s_ | 0.007616 | 0.003817 | MTMR2                      | 8898 .  |
| 203212_s_ | 0.012063 | 0.006539 | MTMR2                      | 8898 .  |
| 203213_at | 3.38E-06 | 2.46E-07 | CDC2                       | 983 .   |
| 203214_x_ | 7.74E-06 | 7.22E-07 | CDC2                       | 983 .   |
| 203215_s_ | 0.041091 | 0.027322 | MYO6                       | 4646 .  |
| 203217_s_ | 7.56E-05 | 1.36E-05 | ST3GAL5                    | 8869 .  |
| 203218_at | 0.026001 | 0.016069 | MAPK9                      | 5601 .  |
| 203220_s_ | 1.85E-04 | 4.17E-05 | TLE1                       | 7088 .  |
| 203221_at | 0.005679 | 0.002693 | TLE1                       | 7088 .  |
| 203222_s_ | 0.005606 | 0.002654 | TLE1                       | 7088 .  |
| 203225_s_ | 0.001355 | 4.84E-04 | RFK                        | 55312 . |
| 203226_s_ | 0.011224 | 0.00601  | TSPAN31                    | 6302 .  |
| 203227_s_ | 0.048539 | 0.033158 | TSPAN31                    | 6302 .  |
| 203228_at | 0.001268 | 4.46E-04 | PAFAH1B3                   | 5050 .  |
| 203229_s_ | 0.023401 | 0.014216 | CLK2                       | 1196 .  |
| 203230_at | 1.70E-04 | 3.74E-05 | DVL1 /// LOC61855 /// 6424 |         |
| 203231_s_ | 0.029353 | 0.018497 | ATXN1                      | 6310 .  |
| 203232_s_ | 0.003074 | 0.001293 | ATXN1                      | 6310 .  |
| 203233_at | 0.036731 | 0.023998 | IL4R                       | 3566 .  |



|           |          |          |                              |          |
|-----------|----------|----------|------------------------------|----------|
| 203235_at | 0.006624 | 0.003235 | THOP1                        | 7064 .   |
| 203236_s_ | 0.002313 | 9.20E-04 | LGALS9                       | 3965 .   |
| 203238_s_ | 1.32E-07 | 3.31E-09 | NOTCH3                       | 4854 .   |
| 203241_at | 0.005179 | 0.002416 | UVRAG                        | 7405 .   |
| 203242_s_ | 2.16E-06 | 1.38E-07 | PDLIM5                       | 10611 .  |
| 203243_s_ | 2.23E-06 | 1.44E-07 | PDLIM5                       | 10611 .  |
| 203244_at | 3.73E-04 | 9.91E-05 | PEX5                         | 5830 .   |
| 203245_s_ | 2.89E-06 | 2.01E-07 | NCRNA00094                   | 266655 . |
| 203246_s_ | 0.004276 | 0.001919 | TUSC4                        | 10641 .  |
| 203247_s_ | 0.001182 | 4.09E-04 | ZNF24                        | 7572 .   |
| 203248_at | 0.029365 | 0.018506 | ZNF24                        | 7572 .   |
| 203250_at | 2.39E-05 | 3.12E-06 | RBM16                        | 22828 .  |
| 203254_s_ | 0.008071 | 0.004086 | TLN1                         | 7094 .   |
| 203255_at | 0.007892 | 0.003981 | FBXO11                       | 80204 .  |
| 203256_at | 4.04E-10 | 1.63E-12 | CDH3                         | 1001 .   |
| 203258_at | 0.001249 | 4.38E-04 | DRAP1                        | 10589 .  |
| 203259_s_ | 5.26E-04 | 1.51E-04 | HDDC2                        | 51020 .  |
| 203262_s_ | 2.15E-04 | 5.02E-05 | FAM50A                       | 9130 .   |
| 203263_s_ | 0.014861 | 0.008359 | ARHGEF9                      | 23229 .  |
| 203264_s_ | 0.03187  | 0.020348 | ARHGEF9                      | 23229 .  |
| 203269_at | 0.002725 | 0.00112  | NSMAF                        | 8439 .   |
| 203270_at | 9.32E-05 | 1.76E-05 | DTYMK                        | 1841 .   |
| 203272_s_ | 0.011421 | 0.006132 | TUSC2                        | 11334 .  |
| 203274_at | 0.003257 | 0.001386 | F8A1 /// F8A2 ,474383 /// 47 | 474383 . |
| 203275_at | 2.53E-04 | 6.15E-05 | IRF2                         | 3660 .   |
| 203276_at | 1.13E-07 | 2.70E-09 | LMNB1                        | 4001 .   |
| 203277_at | 4.24E-06 | 3.30E-07 | DFFA                         | 1676 .   |
| 203278_s_ | 5.45E-04 | 1.58E-04 | PHF21A                       | 51317 .  |
| 203279_at | 0.001019 | 3.41E-04 | EDEM1                        | 9695 .   |
| 203280_at | 0.008952 | 0.004607 | SAFB2                        | 9667 .   |
| 203281_s_ | 4.22E-04 | 1.15E-04 | UBA7                         | 7318 .   |
| 203282_at | 7.51E-04 | 2.35E-04 | GBE1                         | 2632 .   |
| 203283_s_ | 0.004291 | 0.001928 | HS2ST1                       | 9653 .   |
| 203285_s_ | 0.003105 | 0.001308 | HS2ST1                       | 9653 .   |

|           |          |          |          |         |
|-----------|----------|----------|----------|---------|
| 203286_at | 3.75E-09 | 2.91E-11 | RNF44    | 22838 . |
| 203287_at | 7.74E-07 | 3.52E-08 | LAD1     | 3898 .  |
| 203290_at | 0.016615 | 0.009523 | HLA-DQA1 | 3117 .  |
| 203291_at | 0.0076   | 0.003807 | CNOT4    | 4850 .  |
| 203292_s_ | 5.31E-05 | 8.64E-06 | VPS11    | 55823 . |
| 203293_s_ | 9.02E-07 | 4.32E-08 | LMAN1    | 3998 .  |
| 203294_s_ | 2.38E-08 | 3.33E-10 | LMAN1    | 3998 .  |
| 203295_s_ | 6.78E-04 | 2.07E-04 | ATP1A2   | 477 .   |
| 203296_s_ | 8.25E-06 | 7.83E-07 | ATP1A2   | 477 .   |
| 203297_s_ | 1.74E-05 | 2.08E-06 | JARID2   | 3720 .  |
| 203298_s_ | 1.23E-05 | 1.34E-06 | JARID2   | 3720 .  |
| 203300_x_ | 0.027922 | 0.017454 | AP1S2    | 8905 .  |
| 203301_s_ | 0.007161 | 0.00355  | DMTF1    | 9988 .  |
| 203304_at | 4.60E-06 | 3.67E-07 | BAMBI    | 25805 . |
| 203306_s_ | 0.02257  | 0.01363  | SLC35A1  | 10559 . |
| 203307_at | 0.004133 | 0.001843 | GNL1     | 2794 .  |
| 203308_x_ | 6.65E-06 | 5.90E-07 | HPS1     | 3257 .  |
| 203309_s_ | 3.03E-04 | 7.70E-05 | HPS1     | 3257 .  |
| 203313_s_ | 1.08E-05 | 1.13E-06 | TGIF1    | 7050 .  |
| 203316_s_ | 8.79E-08 | 1.93E-09 | SNRPE    | 6635 .  |
| 203317_at | 6.58E-05 | 1.13E-05 | PSD4     | 23550 . |
| 203318_s_ | 3.26E-05 | 4.63E-06 | ZNF148   | 7707 .  |
| 203320_at | 0.04233  | 0.028287 | SH2B3    | 10019 . |
| 203321_s_ | 1.50E-04 | 3.22E-05 | ADNP2    | 22850 . |
| 203322_at | 4.18E-06 | 3.24E-07 | ADNP2    | 22850 . |
| 203323_at | 1.74E-06 | 1.05E-07 | CAV2     | 858 .   |
| 203324_s_ | 2.35E-07 | 7.26E-09 | CAV2     | 858 .   |
| 203325_s_ | 1.72E-06 | 1.03E-07 | COL5A1   | 1289 .  |
| 203326_x_ | 0.003386 | 0.001453 |          | .       |
| 203327_at | 0.001243 | 4.35E-04 | IDE      | 3416 .  |
| 203329_at | 0.025859 | 0.015971 | PTPRM    | 5797 .  |
| 203330_s_ | 5.76E-06 | 4.91E-07 | STX5     | 6811 .  |
| 203331_s_ | 4.59E-06 | 3.65E-07 | INPP5D   | 3635 .  |
| 203332_s_ | 5.22E-09 | 4.54E-11 | INPP5D   | 3635 .  |

|           |          |          |          |         |
|-----------|----------|----------|----------|---------|
| 203333_at | 0.00428  | 0.001921 | KIFAP3   | 22920 . |
| 203334_at | 7.23E-04 | 2.24E-04 | DHX8     | 1659 .  |
| 203335_at | 0.00752  | 0.003761 | PHYH     | 5264 .  |
| 203336_s_ | 7.34E-06 | 6.73E-07 | ITGB1BP1 | 9270 .  |
| 203337_x_ | 0.01926  | 0.011315 | ITGB1BP1 | 9270 .  |
| 203339_at | 3.62E-04 | 9.57E-05 | SLC25A12 | 8604 .  |
| 203340_s_ | 3.11E-08 | 4.81E-10 | SLC25A12 | 8604 .  |
| 203341_at | 1.54E-08 | 1.84E-10 | CEBPZ    | 10153 . |
| 203342_at | 1.33E-04 | 2.77E-05 | TIMM17B  | 10245 . |
| 203343_at | 0.012579 | 0.006874 | UGDH     | 7358 .  |
| 203344_s_ | 3.37E-04 | 8.76E-05 | RBBP8    | 5932 .  |
| 203345_s_ | 3.59E-08 | 5.77E-10 | MTF2     | 22823 . |
| 203346_s_ | 4.57E-08 | 8.03E-10 | MTF2     | 22823 . |
| 203347_s_ | 1.99E-06 | 1.24E-07 | MTF2     | 22823 . |
| 203348_s_ | 0.007327 | 0.003648 | ETV5     | 2119 .  |
| 203349_s_ | 0.002897 | 0.001203 | ETV5     | 2119 .  |
| 203351_s_ | 1.92E-05 | 2.37E-06 | ORC4L    | 5000 .  |
| 203352_at | 2.29E-04 | 5.43E-05 | ORC4L    | 5000 .  |
| 203353_s_ | 8.95E-04 | 2.92E-04 | MBD1     | 4152 .  |
| 203354_s_ | 4.55E-04 | 1.27E-04 | PSD3     | 23362 . |
| 203355_s_ | 0.027641 | 0.017251 | PSD3     | 23362 . |
| 203358_s_ | 6.37E-05 | 1.09E-05 | EZH2     | 2146 .  |
| 203359_s_ | 0.002045 | 7.93E-04 | MYCBP    | 26292 . |
| 203360_s_ | 0.014298 | 0.007981 | MYCBP    | 26292 . |
| 203361_s_ | 0.016739 | 0.009607 | MYCBP    | 26292 . |
| 203362_s_ | 1.73E-05 | 2.07E-06 | MAD2L1   | 4085 .  |
| 203363_s_ | 3.21E-07 | 1.11E-08 | KIAA0652 | 9776 .  |
| 203364_s_ | 0.001095 | 3.73E-04 | KIAA0652 | 9776 .  |
| 203365_s_ | 5.77E-06 | 4.92E-07 | MMP15    | 4324 .  |
| 203366_at | 1.83E-05 | 2.23E-06 | POLG     | 5428 .  |
| 203367_at | 4.17E-07 | 1.57E-08 | DUSP14   | 11072 . |
| 203368_at | 0.031731 | 0.020242 | CRELD1   | 78987 . |
| 203369_x_ | 1.01E-04 | 1.95E-05 | PDLIM7   | 9260 .  |
| 203370_s_ | 2.39E-07 | 7.43E-09 | PDLIM7   | 9260 .  |

|           |          |          |         |         |
|-----------|----------|----------|---------|---------|
| 203371_s_ | 7.98E-04 | 2.54E-04 | NDUFB3  | 4709 .  |
| 203372_s_ | 0.002512 | 0.001016 | SOCS2   | 8835 .  |
| 203373_at | 0.014294 | 0.007977 | SOCS2   | 8835 .  |
| 203374_s_ | 0.00233  | 9.28E-04 | TPP2    | 7174 .  |
| 203375_s_ | 2.50E-04 | 6.05E-05 | TPP2    | 7174 .  |
| 203378_at | 0.019982 | 0.011814 | PCF11   | 51585 . |
| 203379_at | 1.12E-07 | 2.67E-09 | RPS6KA1 | 6195 .  |
| 203381_s_ | 3.96E-10 | 1.57E-12 | APOE    | 348 .   |
| 203382_s_ | 3.97E-10 | 1.59E-12 | APOE    | 348 .   |
| 203383_s_ | 3.45E-05 | 4.97E-06 | GOLGA1  | 2800 .  |
| 203384_s_ | 6.20E-08 | 1.19E-09 | GOLGA1  | 2800 .  |
| 203385_at | 1.06E-09 | 5.71E-12 | DGKA    | 1606 .  |
| 203388_at | 0.002098 | 8.18E-04 | ARRB2   | 409 .   |
| 203389_at | 2.12E-05 | 2.69E-06 | KIF3C   | 3797 .  |
| 203390_s_ | 0.006714 | 0.003287 | KIF3C   | 3797 .  |
| 203391_at | 0.040434 | 0.026814 | FKBP2   | 2286 .  |
| 203392_s_ | 0.002962 | 0.001234 | CTBP1   | 1487 .  |
| 203394_s_ | 8.87E-06 | 8.68E-07 | HES1    | 3280 .  |
| 203395_s_ | 8.06E-06 | 7.60E-07 | HES1    | 3280 .  |
| 203396_at | 4.82E-06 | 3.88E-07 | PSMA4   | 5685 .  |
| 203397_s_ | 1.72E-06 | 1.03E-07 | GALNT3  | 2591 .  |
| 203398_s_ | 0.008462 | 0.004314 | GALNT3  | 2591 .  |
| 203399_x_ | 1.70E-05 | 2.02E-06 | PSG3    | 5671 .  |
| 203401_at | 8.83E-06 | 8.60E-07 | PRPS2   | 5634 .  |
| 203403_s_ | 3.59E-04 | 9.47E-05 | RNF6    | 6049 .  |
| 203404_at | 1.87E-04 | 4.22E-05 | ARMCX2  | 9823 .  |
| 203405_at | 0.010802 | 0.005746 | PSMG1   | 8624 .  |
| 203406_at | 0.012582 | 0.006877 | MFAP1   | 4236 .  |
| 203407_at | 2.69E-08 | 3.97E-10 | PPL     | 5493 .  |
| 203408_s_ | 0.042627 | 0.028513 | SATB1   | 6304 .  |
| 203410_at | 9.93E-04 | 3.31E-04 | AP3M2   | 10947 . |
| 203411_s_ | 5.46E-06 | 4.58E-07 | LMNA    | 4000 .  |
| 203412_at | 2.19E-05 | 2.81E-06 | LZTR1   | 8216 .  |
| 203413_at | 0.003868 | 0.001703 | NELL2   | 4753 .  |

|           |          |          |         |          |
|-----------|----------|----------|---------|----------|
| 203414_at | 3.17E-04 | 8.13E-05 | MMD     | 23531 .  |
| 203415_at | 1.88E-04 | 4.24E-05 | PDCD6   | 10016 .  |
| 203416_at | 3.25E-04 | 8.40E-05 | CD53    | 963 .    |
| 203417_at | 0.001399 | 5.02E-04 | MFAP2   | 4237 .   |
| 203418_at | 1.73E-04 | 3.83E-05 | CCNA2   | 890 .    |
| 203419_at | 0.002282 | 9.05E-04 | MLL4    | 9757 .   |
| 203420_at | 0.001976 | 7.60E-04 | FAM8A1  | 51439 .  |
| 203421_at | 0.00722  | 0.003584 | TP53I11 | 9537 .   |
| 203422_at | 1.43E-06 | 8.02E-08 | POLD1   | 5424 .   |
| 203423_at | 0.001153 | 3.97E-04 | RBP1    | 5947 .   |
| 203425_s_ | 0.002398 | 9.61E-04 | IGFBP5  | 3488 .   |
| 203426_s_ | 2.15E-04 | 5.00E-05 | IGFBP5  | 3488 .   |
| 203428_s_ | 0.00727  | 0.003614 | ASF1A   | 25842 .  |
| 203429_s_ | 0.005053 | 0.002347 | C1orf9  | 51430 .  |
| 203431_s_ | 0.017322 | 0.009995 | RICS    | 9743 .   |
| 203432_at | 2.81E-05 | 3.83E-06 | TMPO    | 7112 .   |
| 203433_at | 0.043159 | 0.028931 | MTHFS   | 10588 .  |
| 203434_s_ | 0.001053 | 3.55E-04 | MME     | 4311 .   |
| 203435_s_ | 2.02E-04 | 4.63E-05 | MME     | 4311 .   |
| 203436_at | 1.31E-04 | 2.69E-05 | RPP30   | 10556 .  |
| 203437_at | 0.023394 | 0.01421  | TMEM11  | 8834 .   |
| 203438_at | 1.52E-06 | 8.71E-08 | STC2    | 8614 .   |
| 203439_s_ | 0.001764 | 6.63E-04 | STC2    | 8614 .   |
| 203440_at | 8.26E-04 | 2.65E-04 | CDH2    | 1000 .   |
| 203441_s_ | 6.28E-05 | 1.07E-05 | CDH2    | 1000 .   |
| 203442_x_ | 1.53E-04 | 3.29E-05 | EML3    | 256364 . |
| 203443_at | 0.010428 | 0.005509 | EML3    | 256364 . |
| 203444_s_ | 0.037113 | 0.024297 | MTA2    | 9219 .   |
| 203445_s_ | 0.003619 | 0.001573 | CTDSP2  | 10106 .  |
| 203446_s_ | 3.00E-05 | 4.18E-06 | OCRL    | 4952 .   |
| 203448_s_ | 2.88E-06 | 1.99E-07 | TERF1   | 7013 .   |
| 203449_s_ | 5.93E-06 | 5.11E-07 | TERF1   | 7013 .   |
| 203450_at | 0.020964 | 0.012511 | CBY1    | 25776 .  |
| 203451_at | 0.017591 | 0.010179 | LDB1    | 8861 .   |

|           |          |          |              |               |
|-----------|----------|----------|--------------|---------------|
| 203452_at | 0.036757 | 0.024017 | B3GAT3       | 26229 .       |
| 203453_at | 8.66E-13 | 4.57E-16 | SCNN1A       | 6337 .        |
| 203454_s_ | 0.012351 | 0.006724 | ATOX1        | 475 .         |
| 203456_at | 1.05E-07 | 2.43E-09 | PRAF2        | 11230 .       |
| 203457_at | 1.19E-06 | 6.23E-08 | STX7         | 8417 .        |
| 203458_at | 7.52E-07 | 3.38E-08 | SPR          | 6697 .        |
| 203459_s_ | 0.014671 | 0.00823  | VPS16A       | 64601 .       |
| 203462_x_ | 2.41E-06 | 1.59E-07 | EIF3B        | 8662 .        |
| 203465_at | 0.024706 | 0.015142 | MRPL19       | 9801 .        |
| 203466_at | 5.30E-06 | 4.38E-07 | MPV17        | 4358 .        |
| 203467_at | 2.13E-07 | 6.28E-09 | PMM1         | 5372 .        |
| 203468_at | 0.001139 | 3.91E-04 | CDK10        | 8558 .        |
| 203470_s_ | 2.32E-04 | 5.52E-05 | PLEK         | 5341 .        |
| 203471_s_ | 0.003994 | 0.001769 | PLEK         | 5341 .        |
| 203474_at | 9.45E-08 | 2.12E-09 | IQGAP2       | 10788 .       |
| 203476_at | 9.75E-05 | 1.87E-05 | TPBG         | 7162 .        |
| 203477_at | 4.20E-05 | 6.42E-06 | COL15A1      | 1306 .        |
| 203478_at | 2.46E-04 | 5.92E-05 | NDUFC1       | 4717 .        |
| 203479_s_ | 0.046396 | 0.031471 | OTUD4        | 54726 .       |
| 203480_s_ | 0.020454 | 0.012141 | OTUD4        | 54726 .       |
| 203482_at | 0.010566 | 0.005596 | FAM178A      | 55719 .       |
| 203483_at | 2.33E-08 | 3.22E-10 | LOC100133896 | 100133896 //. |
| 203486_s_ | 0.046362 | 0.031443 | ARMC8        | 25852 .       |
| 203488_at | 2.86E-05 | 3.92E-06 | LPHN1        | 22859 .       |
| 203489_at | 0.039673 | 0.026233 | SIVA1        | 10572 .       |
| 203490_at | 6.47E-07 | 2.77E-08 | ELF4         | 2000 .        |
| 203491_s_ | 2.55E-05 | 3.40E-06 | CEP57        | 9702 .        |
| 203492_x_ | 1.34E-04 | 2.77E-05 | CEP57        | 9702 .        |
| 203493_s_ | 2.88E-04 | 7.20E-05 | CEP57        | 9702 .        |
| 203494_s_ | 0.004231 | 0.001896 | CEP57        | 9702 .        |
| 203495_at | 0.00184  | 6.98E-04 | LRRC14       | 9684 .        |
| 203496_s_ | 7.73E-05 | 1.40E-05 | MED1         | 5469 .        |
| 203497_at | 6.00E-04 | 1.78E-04 | MED1         | 5469 .        |
| 203498_at | 3.95E-05 | 5.89E-06 | RCAN2        | 10231 .       |

|           |          |          |                         |         |
|-----------|----------|----------|-------------------------|---------|
| 203499_at | 7.10E-06 | 6.45E-07 | EPHA2                   | 1969 .  |
| 203500_at | 0.002365 | 9.44E-04 | GCDH                    | 2639 .  |
| 203501_at | 2.50E-06 | 1.66E-07 | PGCP                    | 10404 . |
| 203502_at | 0.001449 | 5.24E-04 | BPGM                    | 669 .   |
| 203504_s_ | 7.09E-04 | 2.19E-04 | ABCA1                   | 19 .    |
| 203505_at | 0.004276 | 0.001919 | ABCA1                   | 19 .    |
| 203507_at | 6.41E-04 | 1.93E-04 | CD68 /// EIF4A 1973 /// | 968 .   |
| 203509_at | 7.83E-06 | 7.33E-07 | SORL1                   | 6653 .  |
| 203510_at | 1.45E-05 | 1.66E-06 | MET                     | 4233 .  |
| 203511_s_ | 0.00722  | 0.003584 | TRAPPC3                 | 27095 . |
| 203512_at | 1.04E-04 | 2.03E-05 | TRAPPC3                 | 27095 . |
| 203515_s_ | 0.001524 | 5.56E-04 | PMVK                    | 10654 . |
| 203516_at | 0.030786 | 0.019557 | SNTA1                   | 6640 .  |
| 203517_at | 7.76E-05 | 1.40E-05 | MTX2                    | 10651 . |
| 203518_at | 2.78E-07 | 9.20E-09 | LYST                    | 1130 .  |
| 203519_s_ | 2.75E-05 | 3.74E-06 | UPF2                    | 26019 . |
| 203521_s_ | 0.0147   | 0.008248 | ZNF318                  | 24149 . |
| 203523_at | 0.008286 | 0.004211 | LSP1                    | 4046 .  |
| 203527_s_ | 0.026596 | 0.016493 | APC                     | 324 .   |
| 203528_at | 3.08E-07 | 1.05E-08 | SEMA4D                  | 10507 . |
| 203529_at | 0.002623 | 0.00107  | PPP6C                   | 5537 .  |
| 203530_s_ | 6.31E-05 | 1.07E-05 | STX4                    | 6810 .  |
| 203531_at | 0.015925 | 0.009068 | CUL5                    | 8065 .  |
| 203534_at | 0.011753 | 0.006339 | LSM1                    | 27257 . |
| 203535_at | 0.026896 | 0.016717 | S100A9                  | 6280 .  |
| 203536_s_ | 7.56E-04 | 2.37E-04 | CIAO1                   | 9391 .  |
| 203537_at | 0.002555 | 0.001037 | PRPSAP2                 | 5636 .  |
| 203539_s_ | 0.002975 | 0.001242 |                         | .       |
| 203540_at | 0.026195 | 0.016207 | GFAP                    | 2670 .  |
| 203541_s_ | 0.003243 | 0.001379 | KLF9                    | 687 .   |
| 203542_s_ | 6.24E-06 | 5.42E-07 | KLF9                    | 687 .   |
| 203543_s_ | 1.61E-07 | 4.34E-09 | KLF9                    | 687 .   |
| 203545_at | 0.017804 | 0.010323 | ALG8                    | 79053 . |
| 203546_at | 0.004462 | 0.002023 | IPO13                   | 9670 .  |

|           |          |          |           |         |
|-----------|----------|----------|-----------|---------|
| 203547_at | 6.11E-05 | 1.03E-05 | CD4       | 920 .   |
| 203550_s_ | 0.041775 | 0.027851 | C1orf2    | 10712 . |
| 203551_s_ | 0.001173 | 4.06E-04 | COX11     | 1353 .  |
| 203552_at | 0.001792 | 6.75E-04 | MAP4K5    | 11183 . |
| 203553_s_ | 5.26E-04 | 1.52E-04 | MAP4K5    | 11183 . |
| 203554_x_ | 4.51E-06 | 3.57E-07 | PTTG1     | 9232 .  |
| 203555_at | 7.33E-05 | 1.31E-05 | PTPN18    | 26469 . |
| 203556_at | 0.037503 | 0.024583 | ZHX2      | 22882 . |
| 203557_s_ | 0.015874 | 0.009032 | PCBD1     | 5092 .  |
| 203558_at | 5.62E-04 | 1.64E-04 | CUL7      | 9820 .  |
| 203560_at | 0.005783 | 0.002753 | GGH       | 8836 .  |
| 203562_at | 0.030517 | 0.019361 | FEZ1      | 9638 .  |
| 203563_at | 0.001719 | 6.42E-04 | AFAP1     | 60312 . |
| 203564_at | 1.63E-04 | 3.55E-05 | FANCG     | 2189 .  |
| 203565_s_ | 0.028099 | 0.017583 | MNAT1     | 4331 .  |
| 203566_s_ | 6.15E-04 | 1.83E-04 | AGL       | 178 .   |
| 203567_s_ | 3.50E-06 | 2.57E-07 | TRIM38    | 10475 . |
| 203568_s_ | 6.41E-05 | 1.10E-05 | TRIM38    | 10475 . |
| 203569_s_ | 0.014294 | 0.007977 | OFD1      | 8481 .  |
| 203570_at | 3.88E-04 | 1.04E-04 | LOXL1     | 4016 .  |
| 203571_s_ | 9.36E-06 | 9.33E-07 | C10orf116 | 10974 . |
| 203572_s_ | 5.89E-04 | 1.74E-04 | TAF6      | 6878 .  |
| 203573_s_ | 1.40E-04 | 2.95E-05 | RABGGTA   | 5875 .  |
| 203574_at | 0.003889 | 0.001714 | NFIL3     | 4783 .  |
| 203576_at | 0.048226 | 0.032908 | BCAT2     | 587 .   |
| 203577_at | 3.94E-04 | 1.06E-04 | GTF2H4    | 2968 .  |
| 203580_s_ | 0.008938 | 0.004599 | SLC7A6    | 9057 .  |
| 203583_at | 0.018916 | 0.011081 | UNC50     | 25972 . |
| 203585_at | 0.018619 | 0.010878 | ZNF185    | 7739 .  |
| 203586_s_ | 5.71E-07 | 2.35E-08 | ARL4D     | 379 .   |
| 203587_at | 0.010242 | 0.005394 | ARL4D     | 379 .   |
| 203588_s_ | 4.70E-08 | 8.31E-10 | TFDP2     | 7029 .  |
| 203589_s_ | 0.001227 | 4.29E-04 | TFDP2     | 7029 .  |
| 203590_at | 0.003106 | 0.001309 | DYNC1LI2  | 1783 .  |



|           |          |          |         |         |
|-----------|----------|----------|---------|---------|
| 203592_s_ | 8.22E-06 | 7.79E-07 | FSTL3   | 10272 . |
| 203593_at | 8.65E-05 | 1.61E-05 | CD2AP   | 23607 . |
| 203595_s_ | 1.99E-04 | 4.55E-05 | IFIT5   | 24138 . |
| 203596_s_ | 0.002455 | 9.89E-04 | IFIT5   | 24138 . |
| 203597_s_ | 7.08E-05 | 1.25E-05 | WBP4    | 11193 . |
| 203598_s_ | 0.004026 | 0.001786 | WBP4    | 11193 . |
| 203600_s_ | 0.001619 | 5.98E-04 | C4orf8  | 8603 .  |
| 203601_s_ | 3.25E-04 | 8.39E-05 | ZBTB17  | 7709 .  |
| 203602_s_ | 0.016017 | 0.009132 | ZBTB17  | 7709 .  |
| 203603_s_ | 0.003731 | 0.001632 | ZEB2    | 9839 .  |
| 203606_at | 0.002025 | 7.83E-04 | NDUFS6  | 4726 .  |
| 203607_at | 2.99E-08 | 4.56E-10 | INPP5F  | 22876 . |
| 203608_at | 2.71E-05 | 3.67E-06 | ALDH5A1 | 7915 .  |
| 203610_s_ | 1.11E-06 | 5.68E-08 | TRIM38  | 10475 . |
| 203611_at | 0.010859 | 0.005781 | TERF2   | 7014 .  |
| 203612_at | 6.01E-04 | 1.79E-04 | BYSL    | 705 .   |
| 203613_s_ | 0.042411 | 0.02835  | NDUFB6  | 4712 .  |
| 203615_x_ | 0.004265 | 0.001913 | SULT1A1 | 6817 .  |
| 203616_at | 2.51E-05 | 3.34E-06 | POLB    | 5423 .  |
| 203618_at | 0.002053 | 7.96E-04 | FAIM2   | 23017 . |
| 203619_s_ | 0.019707 | 0.011621 | FAIM2   | 23017 . |
| 203620_s_ | 1.03E-06 | 5.12E-08 | FCHSD2  | 9873 .  |
| 203621_at | 4.42E-04 | 1.22E-04 | NDUFB5  | 4711 .  |
| 203622_s_ | 0.021188 | 0.012668 | PNO1    | 56902 . |
| 203623_at | 4.43E-05 | 6.86E-06 | PLXNA3  | 55558 . |
| 203624_at | 0.00314  | 0.001326 | SFRS17A | 8227 .  |
| 203625_x_ | 0.002286 | 9.07E-04 | SKP2    | 6502 .  |
| 203626_s_ | 2.07E-05 | 2.61E-06 | SKP2    | 6502 .  |
| 203627_at | 0.037666 | 0.024706 | IGF1R   | 3480 .  |
| 203628_at | 0.004125 | 0.001838 | IGF1R   | 3480 .  |
| 203629_s_ | 1.25E-04 | 2.54E-05 | COG5    | 10466 . |
| 203630_s_ | 0.036906 | 0.024128 | COG5    | 10466 . |
| 203631_s_ | 1.49E-07 | 3.91E-09 | GPRC5B  | 51704 . |
| 203632_s_ | 1.39E-06 | 7.75E-08 | GPRC5B  | 51704 . |

|           |          |          |          |         |
|-----------|----------|----------|----------|---------|
| 203633_at | 9.69E-06 | 9.76E-07 | CPT1A    | 1374 .  |
| 203634_s_ | 2.83E-05 | 3.87E-06 | CPT1A    | 1374 .  |
| 203635_at | 7.00E-04 | 2.16E-04 | DSCR3    | 10311 . |
| 203638_s_ | 8.96E-06 | 8.79E-07 | FGFR2    | 2263 .  |
| 203639_s_ | 7.87E-07 | 3.59E-08 | FGFR2    | 2263 .  |
| 203640_at | 7.21E-04 | 2.24E-04 | MBNL2    | 10150 . |
| 203641_s_ | 0.038389 | 0.025257 | COBLL1   | 22837 . |
| 203644_s_ | 0.002124 | 8.30E-04 | MON1B    | 22879 . |
| 203648_at | 3.14E-05 | 4.42E-06 | TATDN2   | 9797 .  |
| 203649_s_ | 1.06E-09 | 5.70E-12 | PLA2G2A  | 5320 .  |
| 203653_s_ | 1.28E-05 | 1.40E-06 | COIL     | 8161 .  |
| 203654_s_ | 1.21E-05 | 1.31E-06 | COIL     | 8161 .  |
| 203655_at | 0.001406 | 5.05E-04 | XRCC1    | 7515 .  |
| 203656_at | 0.018699 | 0.010935 | FIG4     | 9896 .  |
| 203657_s_ | 0.004637 | 0.002118 | CTSF     | 8722 .  |
| 203658_at | 6.36E-04 | 1.91E-04 | SLC25A20 | 788 .   |
| 203659_s_ | 0.0043   | 0.001934 | TRIM13   | 10206 . |
| 203660_s_ | 1.38E-06 | 7.65E-08 | PCNT     | 5116 .  |
| 203661_s_ | 9.34E-05 | 1.77E-05 | TMOD1    | 7111 .  |
| 203662_s_ | 0.001233 | 4.31E-04 | TMOD1    | 7111 .  |
| 203663_s_ | 9.60E-04 | 3.17E-04 | COX5A    | 9377 .  |
| 203664_s_ | 1.03E-04 | 2.01E-05 | POLR2D   | 5433 .  |
| 203665_at | 0.005447 | 0.002565 | HMOX1    | 3162 .  |
| 203666_at | 5.94E-08 | 1.12E-09 | CXCL12   | 6387 .  |
| 203667_at | 1.08E-07 | 2.53E-09 | TBCA     | 6902 .  |
| 203668_at | 0.006014 | 0.002886 | MAN2C1   | 4123 .  |
| 203670_at | 0.00437  | 0.001971 | TTLL3    | 26140 . |
| 203671_at | 0.010537 | 0.005576 | TPMT     | 7172 .  |
| 203673_at | 0.035441 | 0.023014 | TG       | 7038 .  |
| 203675_at | 1.22E-05 | 1.33E-06 | NUCB2    | 4925 .  |
| 203676_at | 3.30E-06 | 2.38E-07 | GNS      | 2799 .  |
| 203677_s_ | 8.41E-04 | 2.71E-04 | TARBP2   | 6895 .  |
| 203678_at | 0.001412 | 5.08E-04 | MTMR15   | 22909 . |
| 203680_at | 1.79E-04 | 4.00E-05 | PRKAR2B  | 5577 .  |

|           |          |          |          |         |
|-----------|----------|----------|----------|---------|
| 203683_s_ | 0.002236 | 8.83E-04 | VEGFB    | 7423 .  |
| 203685_at | 0.040625 | 0.026966 | BCL2     | 596 .   |
| 203686_at | 0.041073 | 0.027308 | MPG      | 4350 .  |
| 203688_at | 1.03E-05 | 1.06E-06 | PKD2     | 5311 .  |
| 203689_s_ | 0.001128 | 3.86E-04 | FMR1     | 2332 .  |
| 203690_at | 2.39E-05 | 3.14E-06 | TUBGCP3  | 10426 . |
| 203692_s_ | 7.48E-05 | 1.34E-05 | E2F3     | 1871 .  |
| 203693_s_ | 1.16E-04 | 2.32E-05 | E2F3     | 1871 .  |
| 203694_s_ | 1.75E-04 | 3.90E-05 | DHX16    | 8449 .  |
| 203695_s_ | 1.04E-05 | 1.08E-06 | DFNA5    | 1687 .  |
| 203696_s_ | 2.99E-04 | 7.57E-05 | RFC2     | 5982 .  |
| 203697_at | 2.11E-07 | 6.15E-09 | FRZB     | 2487 .  |
| 203698_s_ | 4.01E-08 | 6.62E-10 | FRZB     | 2487 .  |
| 203700_s_ | 0.044505 | 0.029999 | DIO2     | 1734 .  |
| 203701_s_ | 0.036956 | 0.024169 | TRMT1    | 55621 . |
| 203702_s_ | 8.76E-08 | 1.91E-09 | TTLL4    | 9654 .  |
| 203703_s_ | 0.004414 | 0.001996 | TTLL4    | 9654 .  |
| 203704_s_ | 0.003722 | 0.001626 | RREB1    | 6239 .  |
| 203705_s_ | 1.23E-05 | 1.34E-06 | FZD7     | 8324 .  |
| 203706_s_ | 7.45E-06 | 6.86E-07 | FZD7     | 8324 .  |
| 203707_at | 5.13E-05 | 8.29E-06 | ZNF263   | 10127 . |
| 203708_at | 0.02638  | 0.016338 | PDE4B    | 5142 .  |
| 203709_at | 0.030073 | 0.019034 | PHKG2    | 5261 .  |
| 203710_at | 2.99E-06 | 2.10E-07 | ITPR1    | 3708 .  |
| 203711_s_ | 0.002573 | 0.001045 | HIBCH    | 26275 . |
| 203712_at | 0.003058 | 0.001285 | KIAA0020 | 9933 .  |
| 203713_s_ | 2.00E-06 | 1.26E-07 | LLGL2    | 3993 .  |
| 203714_s_ | 0.044331 | 0.02986  | TBCE     | 6905 .  |
| 203715_at | 0.031331 | 0.019951 | TBCE     | 6905 .  |
| 203716_s_ | 3.47E-09 | 2.60E-11 | DPP4     | 1803 .  |
| 203717_at | 5.06E-07 | 2.00E-08 | DPP4     | 1803 .  |
| 203718_at | 0.003882 | 0.00171  | PNPLA6   | 10908 . |
| 203719_at | 3.77E-05 | 5.56E-06 | ERCC1    | 2067 .  |
| 203720_s_ | 2.05E-05 | 2.57E-06 | ERCC1    | 2067 .  |

|           |          |          |          |         |
|-----------|----------|----------|----------|---------|
| 203721_s_ | 9.02E-07 | 4.33E-08 | UTP18    | 51096 . |
| 203722_at | 0.002698 | 0.001106 | ALDH4A1  | 8659 .  |
| 203723_at | 6.01E-04 | 1.78E-04 | ITPKB    | 3707 .  |
| 203725_at | 6.23E-04 | 1.87E-04 | GADD45A  | 1647 .  |
| 203728_at | 0.045122 | 0.030475 | BAK1     | 578 .   |
| 203729_at | 1.94E-07 | 5.53E-09 | EMP3     | 2014 .  |
| 203731_s_ | 0.003075 | 0.001293 | ZKSCAN5  | 23660 . |
| 203733_at | 0.015606 | 0.008853 | DEXI     | 28955 . |
| 203734_at | 0.012949 | 0.007114 | FOXJ2    | 55810 . |
| 203735_x_ | 0.002571 | 0.001044 | PPFIBP1  | 8496 .  |
| 203736_s_ | 9.86E-04 | 3.28E-04 | PPFIBP1  | 8496 .  |
| 203737_s_ | 5.65E-05 | 9.33E-06 | PPRC1    | 23082 . |
| 203739_at | 2.05E-04 | 4.71E-05 | ZNF217   | 7764 .  |
| 203740_at | 0.027561 | 0.017189 | MPHOSPH6 | 10200 . |
| 203741_s_ | 1.09E-04 | 2.15E-05 | ADCY7    | 113 .   |
| 203742_s_ | 2.06E-04 | 4.75E-05 | TDG      | 6996 .  |
| 203743_s_ | 4.20E-05 | 6.40E-06 | TDG      | 6996 .  |
| 203744_at | 5.54E-06 | 4.67E-07 | HMGB3    | 3149 .  |
| 203745_at | 0.029675 | 0.018737 | HCCS     | 3052 .  |
| 203746_s_ | 0.012047 | 0.006527 | HCCS     | 3052 .  |
| 203749_s_ | 8.00E-06 | 7.53E-07 | RARA     | 5914 .  |
| 203750_s_ | 1.35E-05 | 1.51E-06 | RARA     | 5914 .  |
| 203751_x_ | 0.004326 | 0.001948 | JUND     | 3727 .  |
| 203752_s_ | 0.003081 | 0.001296 | JUND     | 3727 .  |
| 203755_at | 1.94E-05 | 2.40E-06 | BUB1B    | 701 .   |
| 203756_at | 1.50E-07 | 3.92E-09 | ARHGEF17 | 9828 .  |
| 203758_at | 3.93E-07 | 1.44E-08 | CTSO     | 1519 .  |
| 203759_at | 0.001559 | 5.71E-04 | ST3GAL4  | 6484 .  |
| 203764_at | 8.00E-05 | 1.46E-05 | DLGAP5   | 9787 .  |
| 203765_at | 7.62E-05 | 1.37E-05 | GCA      | 25801 . |
| 203766_s_ | 5.00E-14 | 1.45E-17 | LMOD1    | 25802 . |
| 203767_s_ | 2.26E-04 | 5.34E-05 | STS      | 412 .   |
| 203768_s_ | 1.34E-06 | 7.32E-08 | STS      | 412 .   |
| 203769_s_ | 0.001091 | 3.71E-04 | STS      | 412 .   |

|           |          |          |          |         |
|-----------|----------|----------|----------|---------|
| 203770_s_ | 1.28E-06 | 6.87E-08 | STS      | 412 .   |
| 203771_s_ | 3.08E-04 | 7.86E-05 | BLVRA    | 644 .   |
| 203772_at | 0.042271 | 0.028241 | BLVRA    | 644 .   |
| 203773_x_ | 0.004016 | 0.00178  | BLVRA    | 644 .   |
| 203774_at | 0.008044 | 0.00407  | MTR      | 4548 .  |
| 203775_at | 2.21E-06 | 1.42E-07 | SLC25A13 | 10165 . |
| 203776_at | 2.51E-04 | 6.08E-05 | GPKOW    | 27238 . |
| 203777_s_ | 0.008501 | 0.004337 | RPS6KB2  | 6199 .  |
| 203778_at | 0.006456 | 0.003137 | MANBA    | 4126 .  |
| 203782_s_ | 8.41E-05 | 1.56E-05 | POLRMT   | 5442 .  |
| 203784_s_ | 0.002312 | 9.20E-04 | DDX28    | 55794 . |
| 203785_s_ | 7.43E-05 | 1.33E-05 | DDX28    | 55794 . |
| 203786_s_ | 0.004956 | 0.002292 | TPD52L1  | 7164 .  |
| 203788_s_ | 4.92E-06 | 3.99E-07 | SEMA3C   | 10512 . |
| 203789_s_ | 0.008121 | 0.004114 | SEMA3C   | 10512 . |
| 203792_x_ | 7.05E-04 | 2.18E-04 | PCGF2    | 7703 .  |
| 203793_x_ | 0.048662 | 0.033258 | PCGF2    | 7703 .  |
| 203794_at | 2.20E-04 | 5.16E-05 | CDC42BPA | 8476 .  |
| 203796_s_ | 0.005088 | 0.002368 | BCL7A    | 605 .   |
| 203797_at | 6.88E-04 | 2.11E-04 | VSNL1    | 7447 .  |
| 203798_s_ | 4.31E-04 | 1.19E-04 | VSNL1    | 7447 .  |
| 203799_at | 9.02E-07 | 4.33E-08 | CD302    | 9936 .  |
| 203801_at | 0.020423 | 0.012118 | MRPS14   | 63931 . |
| 203802_x_ | 3.63E-04 | 9.60E-05 | NSUN5    | 55695 . |
| 203803_at | 6.54E-05 | 1.12E-05 | PCYOX1   | 51449 . |
| 203804_s_ | 0.001717 | 6.41E-04 | CROP     | 51747 . |
| 203805_s_ | 0.001708 | 6.38E-04 | FANCA    | 2175 .  |
| 203806_s_ | 8.43E-06 | 8.09E-07 | FANCA    | 2175 .  |
| 203807_x_ | 0.003971 | 0.001756 | CSH2     | 1443 .  |
| 203809_s_ | 8.96E-04 | 2.92E-04 | AKT2     | 208 .   |
| 203810_at | 0.004671 | 0.002137 | DNAJB4   | 11080 . |
| 203811_s_ | 0.001445 | 5.22E-04 | DNAJB4   | 11080 . |
| 203812_at | 1.10E-06 | 5.61E-08 |          | .       |
| 203813_s_ | 1.56E-08 | 1.88E-10 | SLIT3    | 6586 .  |

|           |          |          |                            |         |
|-----------|----------|----------|----------------------------|---------|
| 203815_at | 0.032736 | 0.020998 | GSTT1                      | 2952 .  |
| 203816_at | 2.65E-05 | 3.56E-06 | DGUOK                      | 1716 .  |
| 203817_at | 0.005535 | 0.002615 | GUCY1B3                    | 2983 .  |
| 203818_s_ | 7.37E-04 | 2.30E-04 | SF3A3                      | 10946 . |
| 203819_s_ | 6.93E-09 | 6.47E-11 | IGF2BP3                    | 10643 . |
| 203820_s_ | 3.33E-10 | 1.27E-12 | IGF2BP3                    | 10643 . |
| 203821_at | 0.006431 | 0.003122 | HBEGF                      | 1839 .  |
| 203822_s_ | 0.015421 | 0.008731 | ELF2                       | 1998 .  |
| 203823_at | 4.26E-04 | 1.17E-04 | RGS3                       | 5998 .  |
| 203825_at | 4.07E-04 | 1.10E-04 | BRD3                       | 8019 .  |
| 203826_s_ | 0.016138 | 0.009209 | PITPNM1                    | 9600 .  |
| 203827_at | 2.97E-04 | 7.48E-05 | WIP1                       | 55062 . |
| 203828_s_ | 0.010256 | 0.005404 | IL32                       | 9235 .  |
| 203830_at | 7.71E-05 | 1.39E-05 | C17orf75                   | 64149 . |
| 203832_at | 1.11E-06 | 5.61E-08 | SNRPF                      | 6636 .  |
| 203833_s_ | 3.44E-06 | 2.51E-07 | TGOLN2                     | 10618 . |
| 203834_s_ | 1.92E-07 | 5.44E-09 | TGOLN2                     | 10618 . |
| 203835_at | 9.60E-07 | 4.69E-08 | LRRC32                     | 2615 .  |
| 203836_s_ | 0.004834 | 0.002226 | MAP3K5                     | 4217 .  |
| 203837_at | 0.001835 | 6.95E-04 | MAP3K5                     | 4217 .  |
| 203838_s_ | 2.03E-04 | 4.65E-05 | TNK2                       | 10188 . |
| 203839_s_ | 0.042529 | 0.028439 | TNK2                       | 10188 . |
| 203840_at | 0.001722 | 6.44E-04 | BLZF1                      | 8548 .  |
| 203841_x_ | 0.006231 | 0.003008 | MAPRE3                     | 22924 . |
| 203842_s_ | 1.83E-04 | 4.12E-05 | MAPRE3                     | 22924 . |
| 203843_at | 3.82E-08 | 6.22E-10 | RPS6KA3                    | 6197 .  |
| 203845_at | 2.26E-04 | 5.32E-05 | KAT2B                      | 8850 .  |
| 203846_at | 1.09E-05 | 1.14E-06 | TRIM32                     | 22954 . |
| 203847_s_ | 1.14E-04 | 2.26E-05 | AKAP8                      | 10270 . |
| 203848_at | 0.001973 | 7.59E-04 | AKAP8                      | 10270 . |
| 203849_s_ | 0.033183 | 0.021339 | KIF1A                      | 547 .   |
| 203851_at | 3.89E-06 | 2.94E-07 | IGFBP6                     | 3489 .  |
| 203852_s_ | 7.45E-05 | 1.34E-05 | SMN1 /// SMN 6606 /// 6607 | 22911 . |
| 203855_at | 0.00221  | 8.71E-04 | WDR47                      | 22911 . |

|           |          |          |           |         |
|-----------|----------|----------|-----------|---------|
| 203856_at | 1.31E-07 | 3.28E-09 | VRK1      | 7443 .  |
| 203857_s_ | 1.97E-04 | 4.49E-05 | PDIA5     | 10954 . |
| 203858_s_ | 0.00362  | 0.001573 | COX10     | 1352 .  |
| 203860_at | 0.001259 | 4.42E-04 | PCCA      | 5095 .  |
| 203865_s_ | 4.78E-06 | 3.84E-07 | ADARB1    | 104 .   |
| 203866_at | 5.70E-04 | 1.67E-04 | NLE1      | 54475 . |
| 203867_s_ | 0.002915 | 0.001211 | NLE1      | 54475 . |
| 203868_s_ | 1.01E-06 | 4.98E-08 | VCAM1     | 7412 .  |
| 203869_at | 0.005006 | 0.002319 | USP46     | 64854 . |
| 203871_at | 0.020582 | 0.012236 | SENP3     | 26168 . |
| 203872_at | 2.64E-08 | 3.86E-10 | ACTA1     | 58 .    |
| 203873_at | 0.021392 | 0.012809 | SMARCA1   | 6594 .  |
| 203876_s_ | 0.035739 | 0.023246 | MMP11     | 4320 .  |
| 203877_at | 0.035076 | 0.022737 | MMP11     | 4320 .  |
| 203878_s_ | 0.003546 | 0.001535 | MMP11     | 4320 .  |
| 203880_at | 1.16E-05 | 1.23E-06 | COX17     | 10063 . |
| 203882_at | 4.03E-06 | 3.08E-07 | IRF9      | 10379 . |
| 203883_s_ | 6.73E-04 | 2.06E-04 | RAB11FIP2 | 22841 . |
| 203884_s_ | 0.010679 | 0.005666 | RAB11FIP2 | 22841 . |
| 203885_at | 0.001191 | 4.13E-04 | RAB21     | 23011 . |
| 203886_s_ | 5.37E-06 | 4.48E-07 | FBLN2     | 2199 .  |
| 203889_at | 0.001591 | 5.86E-04 | SCG5      | 6447 .  |
| 203890_s_ | 0.002207 | 8.69E-04 | DAPK3     | 1613 .  |
| 203891_s_ | 2.21E-04 | 5.19E-05 | DAPK3     | 1613 .  |
| 203892_at | 1.42E-06 | 7.97E-08 | WFDC2     | 10406 . |
| 203894_at | 0.003893 | 0.001716 | TUBG2     | 27175 . |
| 203896_s_ | 0.041216 | 0.027418 | PLCB4     | 5332 .  |
| 203897_at | 0.001241 | 4.35E-04 | LYRM1     | 57149 . |
| 203898_at | 0.001294 | 4.57E-04 | CRCP      | 27297 . |
| 203900_at | 0.011544 | 0.006209 | KIAA0467  | 23334 . |
| 203903_s_ | 1.24E-04 | 2.51E-05 | HEPH      | 9843 .  |
| 203908_at | 1.37E-04 | 2.87E-05 | SLC4A4    | 8671 .  |
| 203909_at | 0.001159 | 4.00E-04 | SLC9A6    | 10479 . |
| 203912_s_ | 0.00276  | 0.001136 | DNASE1L1  | 1774 .  |

|           |          |          |         |         |
|-----------|----------|----------|---------|---------|
| 203913_s_ | 2.60E-06 | 1.75E-07 | HPGD    | 3248 .  |
| 203914_x_ | 8.03E-05 | 1.47E-05 | HPGD    | 3248 .  |
| 203915_at | 0.007572 | 0.003791 | CXCL9   | 4283 .  |
| 203916_at | 2.28E-04 | 5.39E-05 | NDST2   | 8509 .  |
| 203917_at | 9.68E-11 | 2.47E-13 | CXADR   | 1525 .  |
| 203918_at | 1.64E-06 | 9.61E-08 | PCDH1   | 5097 .  |
| 203919_at | 0.002353 | 9.38E-04 | TCEA2   | 6919 .  |
| 203921_at | 2.36E-04 | 5.62E-05 | CHST2   | 9435 .  |
| 203922_s_ | 0.029206 | 0.018393 | CYBB    | 1536 .  |
| 203924_at | 1.30E-05 | 1.44E-06 | GSTA1   | 2938 .  |
| 203925_at | 0.015777 | 0.008966 | GCLM    | 2730 .  |
| 203926_x_ | 0.043779 | 0.029426 | ATP5D   | 513 .   |
| 203927_at | 9.69E-04 | 3.21E-04 | NFKBIE  | 4794 .  |
| 203931_s_ | 3.47E-06 | 2.55E-07 | MRPL12  | 6182 .  |
| 203932_at | 0.024702 | 0.015138 | HLA-DMB | 3109 .  |
| 203934_at | 3.51E-08 | 5.59E-10 | KDR     | 3791 .  |
| 203935_at | 6.46E-07 | 2.76E-08 | ACVR1   | 90 .    |
| 203936_s_ | 2.41E-04 | 5.78E-05 | MMP9    | 4318 .  |
| 203937_s_ | 0.015109 | 0.00852  | TAF1C   | 9013 .  |
| 203938_s_ | 1.40E-04 | 2.94E-05 | TAF1C   | 9013 .  |
| 203939_at | 7.52E-06 | 6.94E-07 | NT5E    | 4907 .  |
| 203941_at | 0.003258 | 0.001386 | INTS9   | 55756 . |
| 203943_at | 0.002577 | 0.001047 | KIF3B   | 9371 .  |
| 203944_x_ | 8.54E-05 | 1.59E-05 | BTN2A1  | 11120 . |
| 203945_at | 0.001424 | 5.13E-04 | ARG2    | 384 .   |
| 203946_s_ | 0.001815 | 6.86E-04 | ARG2    | 384 .   |
| 203947_at | 4.07E-05 | 6.13E-06 | CSTF3   | 1479 .  |
| 203948_s_ | 0.020752 | 0.01236  | MPO     | 4353 .  |
| 203949_at | 0.011093 | 0.005926 | MPO     | 4353 .  |
| 203950_s_ | 0.0142   | 0.007915 | CLCN6   | 1185 .  |
| 203951_at | 1.53E-06 | 8.79E-08 | CNN1    | 1264 .  |
| 203952_at | 0.002635 | 0.001076 | ATF6    | 22926 . |
| 203953_s_ | 0.001788 | 6.73E-04 | CLDN3   | 1365 .  |
| 203954_x_ | 0.003973 | 0.001757 | CLDN3   | 1365 .  |



|           |          |          |          |         |
|-----------|----------|----------|----------|---------|
| 203955_at | 9.85E-04 | 3.27E-04 | KIAA0649 | 9858 .  |
| 203956_at | 1.83E-05 | 2.23E-06 | MORC2    | 22880 . |
| 203957_at | 7.22E-04 | 2.24E-04 | E2F6     | 1876 .  |
| 203958_s_ | 2.00E-07 | 5.76E-09 | ZBTB40   | 9923 .  |
| 203959_s_ | 1.75E-04 | 3.89E-05 | ZBTB40   | 9923 .  |
| 203960_s_ | 0.006488 | 0.003156 | HSPB11   | 51668 . |
| 203961_at | 1.24E-07 | 3.02E-09 | NEBL     | 10529 . |
| 203962_s_ | 2.87E-08 | 4.35E-10 | NEBL     | 10529 . |
| 203963_at | 2.61E-04 | 6.38E-05 | CA12     | 771 .   |
| 203964_at | 4.52E-08 | 7.89E-10 | NMI      | 9111 .  |
| 203965_at | 0.015619 | 0.008862 | USP20    | 10868 . |
| 203966_s_ | 4.59E-04 | 1.28E-04 | PPM1A    | 5494 .  |
| 203967_at | 4.43E-05 | 6.87E-06 | CDC6     | 990 .   |
| 203968_s_ | 2.59E-06 | 1.74E-07 | CDC6     | 990 .   |
| 203970_s_ | 1.12E-04 | 2.21E-05 | PEX3     | 8504 .  |
| 203971_at | 0.040837 | 0.027126 | SLC31A1  | 1317 .  |
| 203972_s_ | 0.00131  | 4.64E-04 | PEX3     | 8504 .  |
| 203973_s_ | 6.92E-05 | 1.21E-05 | CEBPD    | 1052 .  |
| 203975_s_ | 3.00E-06 | 2.11E-07 | CHAF1A   | 10036 . |
| 203976_s_ | 6.60E-05 | 1.14E-05 | CHAF1A   | 10036 . |
| 203977_at | 0.002226 | 8.79E-04 | TAZ      | 6901 .  |
| 203978_at | 0.038481 | 0.025329 | NUBP1    | 4682 .  |
| 203979_at | 0.011634 | 0.006264 | CYP27A1  | 1593 .  |
| 203980_at | 0.003175 | 0.001344 | FABP4    | 2167 .  |
| 203981_s_ | 1.46E-04 | 3.10E-05 | ABCD4    | 5826 .  |
| 203982_s_ | 0.0039   | 0.00172  | ABCD4    | 5826 .  |
| 203984_s_ | 0.034915 | 0.022612 | CASP9    | 842 .   |
| 203985_at | 3.62E-04 | 9.58E-05 | ZNF212   | 7988 .  |
| 203986_at | 1.18E-05 | 1.27E-06 | STBD1    | 8987 .  |
| 203987_at | 0.040008 | 0.026488 | FZD6     | 8323 .  |
| 203989_x_ | 0.004843 | 0.002231 | F2R      | 2149 .  |
| 203990_s_ | 4.46E-04 | 1.24E-04 | KDM6A    | 7403 .  |
| 203991_s_ | 0.034936 | 0.02263  | KDM6A    | 7403 .  |
| 203992_s_ | 1.46E-04 | 3.09E-05 | KDM6A    | 7403 .  |

|           |          |          |                             |         |
|-----------|----------|----------|-----------------------------|---------|
| 203993_x_ | 0.049103 | 0.033615 | C21orf2                     | 755 .   |
| 203994_s_ | 0.003013 | 0.001262 | C21orf2                     | 755 .   |
| 203995_at | 6.25E-05 | 1.06E-05 | C21orf2                     | 755 .   |
| 203996_s_ | 3.15E-05 | 4.45E-06 | C21orf2                     | 755 .   |
| 203997_at | 3.40E-06 | 2.48E-07 | PTPN3                       | 5774 .  |
| 203998_s_ | 0.002099 | 8.18E-04 | SYT1                        | 6857 .  |
| 203999_at | 1.69E-05 | 2.02E-06 | SYT1                        | 6857 .  |
| 204000_at | 0.00307  | 0.001291 | GNB5                        | 10681 . |
| 204002_s_ | 0.003465 | 0.001493 | ICA1                        | 3382 .  |
| 204003_s_ | 8.89E-04 | 2.90E-04 | NUPL2                       | 11097 . |
| 204004_at | 2.14E-05 | 2.72E-06 | PAWR                        | 5074 .  |
| 204005_s_ | 3.47E-04 | 9.08E-05 | PAWR                        | 5074 .  |
| 204009_s_ | 3.88E-05 | 5.77E-06 | KRAS                        | 3845 .  |
| 204011_at | 8.54E-05 | 1.58E-05 | SPRY2                       | 10253 . |
| 204012_s_ | 0.002181 | 8.57E-04 | LCMT2                       | 9836 .  |
| 204014_at | 0.003219 | 0.001367 | DUSP4                       | 1846 .  |
| 204015_s_ | 0.00144  | 5.20E-04 | DUSP4                       | 1846 .  |
| 204016_at | 0.005048 | 0.002344 | LARS2                       | 23395 . |
| 204017_at | 7.63E-09 | 7.42E-11 | KDEL3                       | 11015 . |
| 204018_x_ | 0.001686 | 6.27E-04 | HBA1 /// HBA2 3039 /// 3040 |         |
| 204019_s_ | 0.043049 | 0.028835 | SH3YL1                      | 26751 . |
| 204020_at | 2.35E-04 | 5.60E-05 | PURA                        | 5813 .  |
| 204021_s_ | 1.73E-05 | 2.08E-06 | PURA                        | 5813 .  |
| 204022_at | 0.011096 | 0.005928 | WWP2                        | 11060 . |
| 204023_at | 2.33E-07 | 7.18E-09 | RFC4                        | 5984 .  |
| 204025_s_ | 0.020156 | 0.011934 | PDCD2                       | 5134 .  |
| 204026_s_ | 1.41E-04 | 2.98E-05 | ZWINT                       | 11130 . |
| 204027_s_ | 9.06E-04 | 2.96E-04 | METTL1                      | 4234 .  |
| 204028_s_ | 1.90E-05 | 2.34E-06 | RABGAP1                     | 23637 . |
| 204029_at | 2.32E-04 | 5.50E-05 | CELSR2                      | 1952 .  |
| 204033_at | 1.89E-04 | 4.26E-05 | TRIP13                      | 9319 .  |
| 204034_at | 2.64E-04 | 6.47E-05 | ETHE1                       | 23474 . |
| 204036_at | 5.09E-05 | 8.19E-06 | LPAR1                       | 1902 .  |
| 204037_at | 7.40E-05 | 1.32E-05 | LPAR1                       | 1902 .  |

|           |          |          |                             |          |
|-----------|----------|----------|-----------------------------|----------|
| 204038_s_ | 3.54E-05 | 5.13E-06 | LPAR1                       | 1902 .   |
| 204040_at | 0.005362 | 0.002517 | RNF144A                     | 9781 .   |
| 204043_at | 4.51E-06 | 3.57E-07 | TCN2                        | 6948 .   |
| 204044_at | 7.59E-04 | 2.39E-04 | QPRT                        | 23475 .  |
| 204045_at | 1.84E-07 | 5.18E-09 | TCEAL1                      | 9338 .   |
| 204046_at | 6.30E-05 | 1.07E-05 | PLCB2                       | 5330 .   |
| 204047_s_ | 0.002043 | 7.92E-04 | PHACTR2                     | 9749 .   |
| 204049_s_ | 0.005796 | 0.002761 | PHACTR2                     | 9749 .   |
| 204053_x_ | 0.004231 | 0.001896 | PTEN                        | 5728 .   |
| 204054_at | 2.91E-04 | 7.31E-05 | PTEN                        | 5728 .   |
| 204055_s_ | 1.63E-04 | 3.55E-05 | CTAGE5                      | 4253 .   |
| 204058_at | 8.98E-05 | 1.68E-05 | ME1                         | 4199 .   |
| 204059_s_ | 0.008752 | 0.004485 | ME1                         | 4199 .   |
| 204060_s_ | 1.10E-08 | 1.19E-10 | PRKX /// PRKY 5613 /// 5614 | 5613 .   |
| 204061_at | 2.16E-07 | 6.45E-09 | PRKX                        | 5613 .   |
| 204064_at | 0.009049 | 0.004664 | THOC1                       | 9984 .   |
| 204065_at | 0.002412 | 9.68E-04 | CHST10                      | 9486 .   |
| 204066_s_ | 2.24E-04 | 5.27E-05 | AGAP1                       | 116987 . |
| 204067_at | 0.012567 | 0.006866 | SUOX                        | 6821 .   |
| 204068_at | 0.045598 | 0.030846 | STK3                        | 6788 .   |
| 204069_at | 6.17E-04 | 1.84E-04 | MEIS1                       | 4211 .   |
| 204071_s_ | 0.017527 | 0.010136 | TOPORS                      | 10210 .  |
| 204072_s_ | 1.53E-04 | 3.29E-05 | FRY                         | 10129 .  |
| 204073_s_ | 0.010228 | 0.005386 | C11orf9                     | 745 .    |
| 204074_s_ | 0.042052 | 0.028068 | KIAA0562                    | 9731 .   |
| 204075_s_ | 1.45E-04 | 3.06E-05 | KIAA0562                    | 9731 .   |
| 204078_at | 5.30E-07 | 2.12E-08 | SC65                        | 10609 .  |
| 204079_at | 2.52E-04 | 6.12E-05 | TPST2                       | 8459 .   |
| 204080_at | 3.11E-04 | 7.94E-05 | TOE1                        | 114034 . |
| 204081_at | 1.21E-05 | 1.31E-06 | NRGN                        | 4900 .   |
| 204083_s_ | 7.27E-05 | 1.29E-05 | TPM2                        | 7169 .   |
| 204084_s_ | 5.60E-07 | 2.29E-08 | CLN5                        | 1203 .   |
| 204085_s_ | 1.09E-05 | 1.14E-06 | CLN5                        | 1203 .   |
| 204086_at | 3.53E-10 | 1.37E-12 | PRAME                       | 23532 .  |

|           |          |          |         |         |
|-----------|----------|----------|---------|---------|
| 204087_s_ | 4.16E-06 | 3.21E-07 | SLC5A6  | 8884 .  |
| 204088_at | 0.004404 | 0.00199  | P2RX4   | 5025 .  |
| 204089_x_ | 0.001603 | 5.91E-04 | MAP3K4  | 4216 .  |
| 204090_at | 0.012603 | 0.006889 | STK19   | 8859 .  |
| 204091_at | 0.008592 | 0.004391 | PDE6D   | 5147 .  |
| 204092_s_ | 6.58E-05 | 1.13E-05 | AURKA   | 6790 .  |
| 204093_at | 0.03382  | 0.021813 | CCNH    | 902 .   |
| 204095_s_ | 0.025322 | 0.015592 | ELL     | 8178 .  |
| 204096_s_ | 0.002555 | 0.001037 | ELL     | 8178 .  |
| 204097_s_ | 5.62E-05 | 9.28E-06 | RBMX2   | 51634 . |
| 204098_at | 0.002305 | 9.16E-04 | RBMX2   | 51634 . |
| 204099_at | 2.59E-04 | 6.34E-05 | SMARCD3 | 6604 .  |
| 204100_at | 0.012191 | 0.006622 | THRA    | 7067 .  |
| 204103_at | 0.039965 | 0.026454 | CCL4    | 6351 .  |
| 204104_at | 1.44E-05 | 1.65E-06 | SNAPC2  | 6618 .  |
| 204105_s_ | 0.006454 | 0.003136 | NRCAM   | 4897 .  |
| 204106_at | 4.47E-04 | 1.24E-04 | TESK1   | 7016 .  |
| 204107_at | 0.019231 | 0.011294 | NFYA    | 4800 .  |
| 204108_at | 6.37E-04 | 1.92E-04 | NFYA    | 4800 .  |
| 204109_s_ | 0.002123 | 8.30E-04 | NFYA    | 4800 .  |
| 204110_at | 0.002123 | 8.30E-04 | HNMT    | 3176 .  |
| 204111_at | 1.07E-06 | 5.35E-08 | HNMT    | 3176 .  |
| 204112_s_ | 9.44E-06 | 9.42E-07 | HNMT    | 3176 .  |
| 204114_at | 1.98E-04 | 4.53E-05 | NID2    | 22795 . |
| 204115_at | 7.09E-04 | 2.19E-04 | GNG11   | 2791 .  |
| 204116_at | 0.006996 | 0.003454 | IL2RG   | 3561 .  |
| 204117_at | 8.30E-04 | 2.66E-04 | PREP    | 5550 .  |
| 204118_at | 2.79E-04 | 6.94E-05 | CD48    | 962 .   |
| 204119_s_ | 0.019202 | 0.011274 | ADK     | 132 .   |
| 204120_s_ | 0.012415 | 0.006766 | ADK     | 132 .   |
| 204122_at | 1.19E-04 | 2.38E-05 | TYROBP  | 7305 .  |
| 204123_at | 4.22E-06 | 3.28E-07 | LIG3    | 3980 .  |
| 204125_at | 0.003747 | 0.00164  | NDUFAF1 | 51103 . |
| 204126_s_ | 7.71E-06 | 7.19E-07 | CDC45L  | 8318 .  |

|           |          |          |                             |         |
|-----------|----------|----------|-----------------------------|---------|
| 204127_at | 1.20E-06 | 6.33E-08 | RFC3                        | 5983 .  |
| 204128_s_ | 2.40E-04 | 5.75E-05 | RFC3                        | 5983 .  |
| 204129_at | 0.036905 | 0.024126 | BCL9                        | 607 .   |
| 204130_at | 0.048405 | 0.03305  | HSD11B2                     | 3291 .  |
| 204131_s_ | 0.029323 | 0.018476 | FOXO3                       | 2309 .  |
| 204133_at | 0.004569 | 0.002081 | RRP9                        | 9136 .  |
| 204134_at | 0.001749 | 6.56E-04 | PDE2A                       | 5138 .  |
| 204135_at | 2.52E-06 | 1.68E-07 | FILIP1L                     | 11259 . |
| 204136_at | 0.012244 | 0.006657 | COL7A1                      | 1294 .  |
| 204137_at | 0.015075 | 0.008499 | GPR137B                     | 7107 .  |
| 204138_s_ | 1.24E-04 | 2.53E-05 | MZF1                        | 7593 .  |
| 204140_at | 6.67E-07 | 2.89E-08 | TPST1                       | 8460 .  |
| 204141_at | 2.19E-04 | 5.12E-05 | TUBB2A                      | 7280 .  |
| 204144_s_ | 0.004118 | 0.001834 | PIGQ                        | 9091 .  |
| 204146_at | 4.01E-06 | 3.07E-07 | RAD51AP1                    | 10635 . |
| 204148_s_ | 0.028544 | 0.017904 | POMZP3 /// ZP 22932 /// 778 |         |
| 204149_s_ | 0.012827 | 0.007034 | GSTM4                       | 2948 .  |
| 204151_x_ | 4.57E-05 | 7.15E-06 | AKR1C1                      | 1645 .  |
| 204153_s_ | 0.049478 | 0.033903 | MFNG                        | 4242 .  |
| 204154_at | 2.29E-06 | 1.49E-07 | CDO1                        | 1036 .  |
| 204155_s_ | 5.86E-06 | 5.03E-07 | KIAA0999                    | 23387 . |
| 204156_at | 0.026986 | 0.016776 | KIAA0999                    | 23387 . |
| 204157_s_ | 1.87E-04 | 4.22E-05 | KIAA0999                    | 23387 . |
| 204158_s_ | 1.99E-05 | 2.48E-06 | TCIRG1                      | 10312 . |
| 204159_at | 7.97E-08 | 1.70E-09 | CDKN2C                      | 1031 .  |
| 204162_at | 0.001771 | 6.65E-04 | NDC80                       | 10403 . |
| 204163_at | 6.92E-05 | 1.21E-05 | EMILIN1                     | 11117 . |
| 204166_at | 4.40E-04 | 1.22E-04 | SBNO2                       | 22904 . |
| 204167_at | 0.019837 | 0.011711 | BTD                         | 686 .   |
| 204168_at | 0.00445  | 0.002016 | MGST2                       | 4258 .  |
| 204169_at | 1.64E-05 | 1.94E-06 | IMPDH1                      | 3614 .  |
| 204170_s_ | 6.23E-05 | 1.06E-05 | CKS2                        | 1164 .  |
| 204171_at | 0.001207 | 4.20E-04 | RPS6KB1                     | 6198 .  |
| 204175_at | 1.44E-06 | 8.13E-08 | ZNF593                      | 51042 . |

|           |          |          |          |         |
|-----------|----------|----------|----------|---------|
| 204176_at | 0.00495  | 0.002288 | KLHL20   | 27252 . |
| 204177_s_ | 6.72E-08 | 1.34E-09 | KLHL20   | 27252 . |
| 204178_s_ | 1.10E-04 | 2.17E-05 | RBM14    | 10432 . |
| 204180_s_ | 5.23E-06 | 4.32E-07 | ZBTB43   | 23099 . |
| 204181_s_ | 0.045655 | 0.030894 | ZBTB43   | 23099 . |
| 204182_s_ | 2.00E-05 | 2.50E-06 | ZBTB43   | 23099 . |
| 204183_s_ | 0.002473 | 9.97E-04 | ADRBK2   | 157 .   |
| 204184_s_ | 0.006225 | 0.003004 | ADRBK2   | 157 .   |
| 204185_x_ | 0.001281 | 4.51E-04 | PPID     | 5481 .  |
| 204186_s_ | 0.00215  | 8.42E-04 | PPID     | 5481 .  |
| 204188_s_ | 1.09E-06 | 5.51E-08 | RARG     | 5916 .  |
| 204189_at | 2.82E-06 | 1.94E-07 | RARG     | 5916 .  |
| 204190_at | 0.014916 | 0.008395 | USPL1    | 10208 . |
| 204191_at | 4.24E-05 | 6.50E-06 | IFNAR1   | 3454 .  |
| 204192_at | 0.044674 | 0.030126 | CD37     | 951 .   |
| 204193_at | 0.004567 | 0.00208  | CHKB     | 1120 .  |
| 204197_s_ | 1.74E-04 | 3.86E-05 | RUNX3    | 864 .   |
| 204198_s_ | 5.01E-04 | 1.42E-04 | RUNX3    | 864 .   |
| 204199_at | 0.004288 | 0.001926 | RALGPS1  | 9649 .  |
| 204200_s_ | 3.92E-07 | 1.43E-08 | PDGFB    | 5155 .  |
| 204201_s_ | 0.037831 | 0.024834 | PTPN13   | 5783 .  |
| 204202_at | 0.003155 | 0.001334 | IQCE     | 23288 . |
| 204203_at | 0.007753 | 0.003897 | CEBPG    | 1054 .  |
| 204204_at | 1.52E-06 | 8.70E-08 | SLC31A2  | 1318 .  |
| 204205_at | 0.010549 | 0.005584 | APOBEC3G | 60489 . |
| 204206_at | 4.20E-04 | 1.15E-04 | MNT      | 4335 .  |
| 204207_s_ | 0.033198 | 0.021349 | RNGTT    | 8732 .  |
| 204208_at | 1.12E-05 | 1.17E-06 | RNGTT    | 8732 .  |
| 204209_at | 1.15E-05 | 1.23E-06 | PCYT1A   | 5130 .  |
| 204210_s_ | 3.64E-05 | 5.31E-06 | PCYT1A   | 5130 .  |
| 204212_at | 0.01758  | 0.01017  | ACOT8    | 10005 . |
| 204213_at | 0.004551 | 0.002071 | PIGR     | 5284 .  |
| 204214_s_ | 5.98E-04 | 1.77E-04 | RAB32    | 10981 . |
| 204215_at | 3.50E-04 | 9.19E-05 | C7orf23  | 79161 . |

|           |          |          |        |         |
|-----------|----------|----------|--------|---------|
| 204216_s_ | 8.28E-04 | 2.66E-04 | ZC3H14 | 79882 . |
| 204217_s_ | 1.72E-05 | 2.05E-06 | RTN2   | 6253 .  |
| 204219_s_ | 0.013241 | 0.007299 | PSMC1  | 5700 .  |
| 204220_at | 0.001139 | 3.91E-04 | GMFG   | 9535 .  |
| 204221_x_ | 1.11E-06 | 5.65E-08 | GLIPR1 | 11010 . |
| 204222_s_ | 1.86E-06 | 1.14E-07 | GLIPR1 | 11010 . |
| 204223_at | 9.07E-08 | 2.01E-09 | PRELP  | 5549 .  |
| 204224_s_ | 1.98E-05 | 2.47E-06 | GCH1   | 2643 .  |
| 204225_at | 5.17E-04 | 1.48E-04 | HDAC4  | 9759 .  |
| 204227_s_ | 2.49E-06 | 1.65E-07 | TK2    | 7084 .  |
| 204228_at | 2.09E-04 | 4.83E-05 | PPIH   | 10465 . |
| 204231_s_ | 0.032936 | 0.021154 | FAAH   | 2166 .  |
| 204232_at | 0.011154 | 0.005966 | FCER1G | 2207 .  |
| 204233_s_ | 1.28E-04 | 2.63E-05 | CHKA   | 1119 .  |
| 204234_s_ | 1.79E-04 | 3.99E-05 | ZNF195 | 7748 .  |
| 204235_s_ | 5.08E-07 | 2.02E-08 | GULP1  | 51454 . |
| 204236_at | 1.80E-04 | 4.01E-05 | FLI1   | 2313 .  |
| 204237_at | 7.42E-06 | 6.82E-07 | GULP1  | 51454 . |
| 204239_s_ | 0.00251  | 0.001015 | NNAT   | 4826 .  |
| 204240_s_ | 1.63E-04 | 3.54E-05 | SMC2   | 10592 . |
| 204241_at | 2.49E-04 | 6.01E-05 | ACOX3  | 8310 .  |
| 204242_s_ | 6.36E-06 | 5.56E-07 | ACOX3  | 8310 .  |
| 204243_at | 0.001595 | 5.87E-04 | RLF    | 6018 .  |
| 204244_s_ | 9.95E-06 | 1.01E-06 | DBF4   | 10926 . |
| 204246_s_ | 7.02E-08 | 1.42E-09 | DCTN3  | 11258 . |
| 204248_at | 1.17E-04 | 2.34E-05 | GNA11  | 2767 .  |
| 204251_s_ | 3.42E-06 | 2.50E-07 | CEP164 | 22897 . |
| 204252_at | 0.001641 | 6.08E-04 | CDK2   | 1017 .  |
| 204253_s_ | 3.03E-04 | 7.68E-05 | VDR    | 7421 .  |
| 204254_s_ | 2.13E-07 | 6.31E-09 | VDR    | 7421 .  |
| 204255_s_ | 5.09E-09 | 4.40E-11 | VDR    | 7421 .  |
| 204256_at | 0.009849 | 0.005154 | ELOVL6 | 79071 . |
| 204257_at | 1.49E-05 | 1.72E-06 | FADS3  | 3995 .  |
| 204258_at | 2.85E-07 | 9.47E-09 | CHD1   | 1105 .  |

|           |          |          |                               |         |
|-----------|----------|----------|-------------------------------|---------|
| 204260_at | 0.01068  | 0.005667 | CHGB                          | 1114 .  |
| 204261_s_ | 0.005056 | 0.002349 | PSEN2                         | 5664 .  |
| 204263_s_ | 0.001781 | 6.70E-04 | CPT2                          | 1376 .  |
| 204266_s_ | 6.54E-06 | 5.77E-07 | CHKA                          | 1119 .  |
| 204267_x_ | 3.78E-04 | 1.01E-04 | PKMYT1                        | 9088 .  |
| 204268_at | 0.005324 | 0.002495 | S100A2                        | 6273 .  |
| 204269_at | 9.04E-06 | 8.91E-07 | PIM2                          | 11040 . |
| 204270_at | 6.81E-09 | 6.32E-11 | SKI                           | 6497 .  |
| 204271_s_ | 2.85E-06 | 1.97E-07 | EDNRB                         | 1910 .  |
| 204272_at | 0.003431 | 0.001475 | LGALS4                        | 3960 .  |
| 204273_at | 2.31E-07 | 7.10E-09 | EDNRB                         | 1910 .  |
| 204274_at | 0.009    | 0.004635 | EBAG9                         | 9166 .  |
| 204276_at | 1.94E-08 | 2.50E-10 | TK2                           | 7084 .  |
| 204277_s_ | 1.21E-04 | 2.46E-05 | TK2                           | 7084 .  |
| 204278_s_ | 1.37E-04 | 2.86E-05 | EBAG9                         | 9166 .  |
| 204279_at | 1.18E-05 | 1.26E-06 | PSMB9                         | 5698 .  |
| 204280_at | 0.004321 | 0.001945 | RGS14                         | 10636 . |
| 204281_at | 0.003338 | 0.001428 | TEAD4                         | 7004 .  |
| 204282_s_ | 1.89E-05 | 2.31E-06 | FARS2                         | 10667 . |
| 204283_at | 0.00719  | 0.003567 | FARS2                         | 10667 . |
| 204284_at | 1.56E-08 | 1.89E-10 | PPP1R3C                       | 5507 .  |
| 204285_s_ | 4.75E-07 | 1.85E-08 | PMAIP1                        | 5366 .  |
| 204286_s_ | 1.85E-07 | 5.20E-09 | PMAIP1                        | 5366 .  |
| 204287_at | 0.002683 | 0.001098 | SYNGR1                        | 9145 .  |
| 204288_s_ | 1.37E-05 | 1.53E-06 | SORBS2                        | 8470 .  |
| 204289_at | 0.010886 | 0.005798 | ALDH6A1                       | 4329 .  |
| 204290_s_ | 5.89E-05 | 9.84E-06 | ALDH6A1                       | 4329 .  |
| 204291_at | 0.002974 | 0.00124  | ZNF518A                       | 9849 .  |
| 204292_x_ | 8.63E-04 | 2.79E-04 | STK11                         | 6794 .  |
| 204293_at | 1.56E-07 | 4.16E-09 | SGSH                          | 6448 .  |
| 204294_at | 6.24E-08 | 1.20E-09 | AMT                           | 275 .   |
| 204295_at | 0.003636 | 0.001582 | SURF1 /// VPS3:137492 /// 68. |         |
| 204296_at | 0.015628 | 0.008868 | DCTN1                         | 1639 .  |
| 204297_at | 0.02636  | 0.016322 | PIK3C3                        | 5289 .  |



|           |          |          |          |         |
|-----------|----------|----------|----------|---------|
| 204298_s_ | 2.58E-05 | 3.44E-06 | LOX      | 4015 .  |
| 204299_at | 4.39E-04 | 1.21E-04 | FUSIP1   | 10772 . |
| 204300_at | 0.027282 | 0.016991 | PET112L  | 5188 .  |
| 204302_s_ | 9.58E-06 | 9.62E-07 | KIAA0427 | 9811 .  |
| 204303_s_ | 2.69E-07 | 8.72E-09 | KIAA0427 | 9811 .  |
| 204304_s_ | 1.15E-06 | 5.94E-08 | PROM1    | 8842 .  |
| 204306_s_ | 2.11E-05 | 2.67E-06 | CD151    | 977 .   |
| 204307_at | 1.41E-04 | 2.97E-05 | TECPR2   | 9895 .  |
| 204308_s_ | 5.75E-05 | 9.54E-06 | TECPR2   | 9895 .  |
| 204310_s_ | 0.005508 | 0.002599 | NPR2     | 4882 .  |
| 204312_x_ | 0.029418 | 0.018543 | CREB1    | 1385 .  |
| 204313_s_ | 0.001243 | 4.35E-04 | CREB1    | 1385 .  |
| 204315_s_ | 1.99E-05 | 2.48E-06 | GTSE1    | 51512 . |
| 204316_at | 0.012484 | 0.006813 | RGS10    | 6001 .  |
| 204317_at | 2.64E-04 | 6.48E-05 | GTSE1    | 51512 . |
| 204318_s_ | 1.93E-04 | 4.37E-05 | GTSE1    | 51512 . |
| 204319_s_ | 0.041369 | 0.027536 | RGS10    | 6001 .  |
| 204321_at | 0.015203 | 0.008583 | NEO1     | 4756 .  |
| 204322_at | 1.57E-07 | 4.20E-09 |          | .       |
| 204324_s_ | 2.08E-05 | 2.63E-06 | GOLIM4   | 27333 . |
| 204326_x_ | 0.015629 | 0.008869 | MT1X     | 4501 .  |
| 204327_s_ | 8.08E-06 | 7.62E-07 | ZNF202   | 7753 .  |
| 204328_at | 2.15E-05 | 2.74E-06 | TMC6     | 11322 . |
| 204329_s_ | 2.06E-04 | 4.75E-05 | ZNF202   | 7753 .  |
| 204330_s_ | 7.91E-06 | 7.42E-07 | MRPS12   | 6183 .  |
| 204331_s_ | 0.002879 | 0.001194 | MRPS12   | 6183 .  |
| 204332_s_ | 2.54E-06 | 1.69E-07 | AGA      | 175 .   |
| 204333_s_ | 2.32E-06 | 1.51E-07 | AGA      | 175 .   |
| 204336_s_ | 9.71E-05 | 1.86E-05 | RGS19    | 10287 . |
| 204337_at | 3.40E-06 | 2.48E-07 | RGS4     | 5999 .  |
| 204338_s_ | 3.80E-06 | 2.86E-07 | RGS4     | 5999 .  |
| 204339_s_ | 8.54E-07 | 4.02E-08 | RGS4     | 5999 .  |
| 204340_at | 0.00418  | 0.001867 | TMEM187  | 8269 .  |
| 204341_at | 2.35E-04 | 5.59E-05 | TRIM16   | 10626 . |

|           |          |          |          |         |
|-----------|----------|----------|----------|---------|
| 204342_at | 0.012208 | 0.006632 | SLC25A24 | 29957 . |
| 204344_s_ | 4.30E-05 | 6.60E-06 | SEC23A   | 10484 . |
| 204345_at | 0.001217 | 4.24E-04 | COL16A1  | 1307 .  |
| 204346_s_ | 2.07E-06 | 1.31E-07 | RASSF1   | 11186 . |
| 204347_at | 0.003758 | 0.001646 | AK3L1    | 205 .   |
| 204348_s_ | 0.006137 | 0.002954 | AK3L1    | 205 .   |
| 204352_at | 0.005512 | 0.002602 | TRAF5    | 7188 .  |
| 204353_s_ | 0.016849 | 0.009678 | POT1     | 25913 . |
| 204354_at | 0.03677  | 0.024027 | POT1     | 25913 . |
| 204355_at | 3.71E-05 | 5.44E-06 | DHX30    | 22907 . |
| 204356_at | 0.00131  | 4.64E-04 | LIMK1    | 3984 .  |
| 204358_s_ | 4.41E-04 | 1.22E-04 | FLRT2    | 23768 . |
| 204360_s_ | 4.71E-07 | 1.84E-08 | NAGLU    | 4669 .  |
| 204361_s_ | 0.031119 | 0.0198   | SKAP2    | 8935 .  |
| 204363_at | 1.59E-04 | 3.44E-05 | F3       | 2152 .  |
| 204364_s_ | 0.029266 | 0.018435 | REEP1    | 65055 . |
| 204366_s_ | 7.71E-05 | 1.39E-05 | GTF3C2   | 2976 .  |
| 204367_at | 0.040016 | 0.026495 | SP2      | 6668 .  |
| 204368_at | 1.56E-05 | 1.82E-06 | SLCO2A1  | 6578 .  |
| 204369_at | 0.004032 | 0.001789 | PIK3CA   | 5290 .  |
| 204371_s_ | 0.039729 | 0.026273 | KHSRP    | 8570 .  |
| 204372_s_ | 0.012059 | 0.006536 | KHSRP    | 8570 .  |
| 204373_s_ | 0.002131 | 8.34E-04 | CEP350   | 9857 .  |
| 204375_at | 0.001158 | 3.99E-04 | CLSTN3   | 9746 .  |
| 204376_at | 4.36E-08 | 7.48E-10 | VPRBP    | 9730 .  |
| 204377_s_ | 7.16E-08 | 1.46E-09 | VPRBP    | 9730 .  |
| 204379_s_ | 3.28E-06 | 2.37E-07 | FGFR3    | 2261 .  |
| 204380_s_ | 8.59E-04 | 2.78E-04 | FGFR3    | 2261 .  |
| 204381_at | 9.89E-04 | 3.29E-04 | LRP3     | 4037 .  |
| 204382_at | 0.041327 | 0.027502 | NAT9     | 26151 . |
| 204383_at | 0.015121 | 0.008528 | DGCR14   | 8220 .  |
| 204384_at | 0.004754 | 0.002183 | GOLGA2   | 2801 .  |
| 204386_s_ | 0.015193 | 0.008576 | MRP63    | 78988 . |
| 204387_x_ | 6.16E-06 | 5.35E-07 | MRP63    | 78988 . |

|           |          |          |                 |
|-----------|----------|----------|-----------------|
| 204390_at | 0.001147 | 3.94E-04 | .               |
| 204391_x_ | 3.19E-08 | 4.96E-10 | TRIM24 8805 .   |
| 204392_at | 0.00469  | 0.002149 | CAMK1 8536 .    |
| 204394_at | 0.013996 | 0.007781 | SLC43A1 8501 .  |
| 204395_s_ | 1.69E-05 | 2.02E-06 | GRK5 2869 .     |
| 204396_s_ | 8.85E-06 | 8.64E-07 | GRK5 2869 .     |
| 204397_at | 0.004694 | 0.002151 | EML2 24139 .    |
| 204400_at | 0.021205 | 0.012681 | EFS 10278 .     |
| 204401_at | 0.003029 | 0.00127  | KCNN4 3783 .    |
| 204403_x_ | 0.00672  | 0.003291 | FAM115A 9747 .  |
| 204406_at | 0.04709  | 0.032026 | FLT1 2321 .     |
| 204407_at | 1.15E-04 | 2.30E-05 | TTF2 8458 .     |
| 204408_at | 0.014964 | 0.008427 | APEX2 27301 .   |
| 204409_s_ | 0.003807 | 0.001672 | EIF1AY 9086 .   |
| 204410_at | 0.006334 | 0.003066 | EIF1AY 9086 .   |
| 204411_at | 0.001985 | 7.65E-04 | KIF21B 23046 .  |
| 204413_at | 9.71E-04 | 3.22E-04 | TRAF2 7186 .    |
| 204414_at | 2.01E-04 | 4.60E-05 | LARGE 9215 .    |
| 204415_at | 6.03E-04 | 1.79E-04 | IFI6 2537 .     |
| 204416_x_ | 2.26E-07 | 6.87E-09 | APOC1 341 .     |
| 204418_x_ | 0.003548 | 0.001536 | GSTM2 2946 .    |
| 204421_s_ | 2.60E-04 | 6.37E-05 | FGF2 2247 .     |
| 204422_s_ | 2.08E-04 | 4.82E-05 | FGF2 2247 .     |
| 204426_at | 0.026003 | 0.016071 | TMED2 10959 .   |
| 204427_s_ | 0.044288 | 0.029826 | TMED2 10959 .   |
| 204428_s_ | 2.05E-04 | 4.71E-05 | LCAT 3931 .     |
| 204429_s_ | 1.19E-04 | 2.40E-05 | SLC2A5 6518 .   |
| 204430_s_ | 0.005803 | 0.002764 | SLC2A5 6518 .   |
| 204434_at | 1.01E-05 | 1.04E-06 | SPATA2 9825 .   |
| 204435_at | 0.004269 | 0.001915 | NUPL1 9818 .    |
| 204436_at | 1.02E-05 | 1.05E-06 | PLEKHO2 80301 . |
| 204437_s_ | 0.004448 | 0.002015 | FOLR1 2348 .    |
| 204440_at | 0.005599 | 0.002651 | CD83 9308 .     |
| 204441_s_ | 5.62E-05 | 9.27E-06 | POLA2 23649 .   |

|           |          |          |           |         |
|-----------|----------|----------|-----------|---------|
| 204443_at | 1.32E-06 | 7.21E-08 | ARSA      | 410 .   |
| 204444_at | 6.02E-05 | 1.01E-05 | KIF11     | 3832 .  |
| 204445_s_ | 2.20E-05 | 2.82E-06 | ALOX5     | 240 .   |
| 204447_at | 0.003496 | 0.001509 | ProSAPiP1 | 9762 .  |
| 204448_s_ | 0.016478 | 0.009434 | PDCL      | 5082 .  |
| 204450_x_ | 2.21E-11 | 3.77E-14 | APOA1     | 335 .   |
| 204451_at | 4.15E-04 | 1.13E-04 | FZD1      | 8321 .  |
| 204452_s_ | 2.65E-04 | 6.50E-05 | FZD1      | 8321 .  |
| 204453_at | 1.36E-04 | 2.83E-05 | ZNF84     | 7637 .  |
| 204455_at | 0.013233 | 0.007294 | DST       | 667 .   |
| 204456_s_ | 1.28E-04 | 2.63E-05 | GAS1      | 2619 .  |
| 204457_s_ | 0.020455 | 0.012142 | GAS1      | 2619 .  |
| 204458_at | 1.65E-04 | 3.60E-05 | PLA2G15   | 23659 . |
| 204459_at | 1.27E-04 | 2.59E-05 | CSTF2     | 1478 .  |
| 204460_s_ | 0.019756 | 0.011657 | RAD1      | 5810 .  |
| 204461_x_ | 0.00272  | 0.001117 | RAD1      | 5810 .  |
| 204462_s_ | 0.002813 | 0.001162 | SLC16A2   | 6567 .  |
| 204463_s_ | 6.09E-04 | 1.81E-04 | EDNRA     | 1909 .  |
| 204464_s_ | 0.011537 | 0.006204 | EDNRA     | 1909 .  |
| 204465_s_ | 0.044825 | 0.030248 | INA       | 9118 .  |
| 204466_s_ | 5.17E-04 | 1.48E-04 | SNCA      | 6622 .  |
| 204469_at | 9.24E-10 | 4.83E-12 | PTPRZ1    | 5803 .  |
| 204470_at | 0.012683 | 0.00694  | CXCL1     | 2919 .  |
| 204471_at | 5.64E-07 | 2.32E-08 | GAP43     | 2596 .  |
| 204472_at | 5.54E-06 | 4.67E-07 | GEM       | 2669 .  |
| 204473_s_ | 0.035872 | 0.023344 | ZNF592    | 9640 .  |
| 204474_at | 0.002368 | 9.45E-04 | ZNF142    | 7701 .  |
| 204475_at | 9.40E-07 | 4.56E-08 | MMP1      | 4312 .  |
| 204476_s_ | 4.90E-04 | 1.39E-04 | PC        | 5091 .  |
| 204477_at | 3.13E-04 | 8.01E-05 | RABIF     | 5877 .  |
| 204478_s_ | 4.74E-05 | 7.48E-06 | RABIF     | 5877 .  |
| 204479_at | 0.002212 | 8.72E-04 | OSTF1     | 26578 . |
| 204481_at | 0.008894 | 0.004572 | BRPF1     | 7862 .  |
| 204482_at | 0.001427 | 5.14E-04 | CLDN5     | 7122 .  |

|           |          |          |           |         |
|-----------|----------|----------|-----------|---------|
| 204483_at | 6.50E-05 | 1.11E-05 | ENO3      | 2027 .  |
| 204484_at | 1.08E-04 | 2.12E-05 | PIK3C2B   | 5287 .  |
| 204485_s_ | 9.27E-04 | 3.05E-04 | TOM1L1    | 10040 . |
| 204486_at | 0.001346 | 4.80E-04 |           | .       |
| 204487_s_ | 1.15E-05 | 1.23E-06 | KCNQ1     | 3784 .  |
| 204488_at | 6.23E-04 | 1.87E-04 | DOLK      | 22845 . |
| 204489_s_ | 0.005851 | 0.002793 | CD44      | 960 .   |
| 204490_s_ | 0.030389 | 0.019267 | CD44      | 960 .   |
| 204492_at | 7.08E-05 | 1.25E-05 | ARHGAP11A | 9824 .  |
| 204493_at | 3.88E-05 | 5.77E-06 | BID       | 637 .   |
| 204497_at | 1.66E-08 | 2.08E-10 | ADCY9     | 115 .   |
| 204498_s_ | 0.00106  | 3.58E-04 | ADCY9     | 115 .   |
| 204499_at | 0.002191 | 8.62E-04 | AGTPBP1   | 23287 . |
| 204500_s_ | 5.00E-05 | 8.01E-06 | AGTPBP1   | 23287 . |
| 204501_at | 2.36E-05 | 3.07E-06 | NOV       | 4856 .  |
| 204503_at | 7.89E-05 | 1.44E-05 | EVPL      | 2125 .  |
| 204504_s_ | 2.84E-05 | 3.89E-06 | HIRIP3    | 8479 .  |
| 204505_s_ | 6.57E-04 | 2.00E-04 | EPB49     | 2039 .  |
| 204506_at | 3.57E-08 | 5.71E-10 | PPP3R1    | 5534 .  |
| 204507_s_ | 4.53E-06 | 3.59E-07 | PPP3R1    | 5534 .  |
| 204508_s_ | 0.001189 | 4.13E-04 | CA12      | 771 .   |
| 204510_at | 9.48E-07 | 4.61E-08 | CDC7      | 8317 .  |
| 204511_at | 0.005518 | 0.002606 | FARP2     | 9855 .  |
| 204513_s_ | 3.02E-06 | 2.12E-07 | ELMO1     | 9844 .  |
| 204514_at | 0.00189  | 7.21E-04 | DPH2      | 1802 .  |
| 204517_at | 0.002284 | 9.06E-04 | PPIC      | 5480 .  |
| 204518_s_ | 7.41E-04 | 2.31E-04 | PPIC      | 5480 .  |
| 204519_s_ | 0.035263 | 0.022876 | PLLP      | 51090 . |
| 204521_at | 3.10E-05 | 4.37E-06 | C12orf24  | 29902 . |
| 204522_at | 0.020078 | 0.011882 | DOM3Z     | 1797 .  |
| 204524_at | 3.91E-04 | 1.05E-04 | PDPK1     | 5170 .  |
| 204525_at | 6.41E-04 | 1.93E-04 | PHF14     | 9678 .  |
| 204526_s_ | 2.49E-04 | 6.01E-05 | TBC1D8    | 11138 . |
| 204527_at | 1.92E-04 | 4.35E-05 | MYO5A     | 4644 .  |

|           |          |          |                          |         |
|-----------|----------|----------|--------------------------|---------|
| 204528_s_ | 1.21E-06 | 6.38E-08 | NAP1L1                   | 4673 .  |
| 204529_s_ | 0.019962 | 0.011801 | TOX                      | 9760 .  |
| 204531_s_ | 1.67E-06 | 9.86E-08 | BRCA1                    | 672 .   |
| 204533_at | 0.011668 | 0.006285 | CXCL10                   | 3627 .  |
| 204534_at | 1.14E-04 | 2.26E-05 | VTN                      | 7448 .  |
| 204535_s_ | 7.42E-04 | 2.32E-04 | REST                     | 5978 .  |
| 204536_s_ | 0.016103 | 0.009186 |                          | .       |
| 204537_s_ | 7.81E-04 | 2.47E-04 | GABRE                    | 2564 .  |
| 204539_s_ | 0.038374 | 0.025246 | CELSR1                   | 9620 .  |
| 204540_at | 0.003275 | 0.001395 | EEF1A2                   | 1917 .  |
| 204541_at | 5.57E-05 | 9.16E-06 | SEC14L2                  | 23541 . |
| 204543_at | 1.41E-04 | 2.96E-05 | RAPGEF1                  | 2889 .  |
| 204544_at | 2.38E-04 | 5.68E-05 | HPS5                     | 11234 . |
| 204546_at | 2.64E-06 | 1.79E-07 | KIAA0513                 | 9764 .  |
| 204547_at | 1.29E-04 | 2.65E-05 | RAB40B                   | 10966 . |
| 204549_at | 0.008433 | 0.004298 | IKBKE                    | 9641 .  |
| 204550_x_ | 0.004038 | 0.001793 | GSTM1                    | 2944 .  |
| 204551_s_ | 0.006105 | 0.002936 | AHSG                     | 197 .   |
| 204552_at | 0.017026 | 0.009794 | INPP4A                   | 3631 .  |
| 204553_x_ | 6.22E-04 | 1.86E-04 | INPP4A                   | 3631 .  |
| 204554_at | 4.06E-07 | 1.51E-08 | PPP1R3D                  | 5509 .  |
| 204555_s_ | 1.88E-04 | 4.24E-05 | PPP1R3D                  | 5509 .  |
| 204556_s_ | 0.029577 | 0.018667 | DZIP1                    | 22873 . |
| 204558_at | 3.54E-07 | 1.26E-08 | RAD54L                   | 8438 .  |
| 204559_s_ | 3.44E-05 | 4.94E-06 | LSM7                     | 51690 . |
| 204561_x_ | 3.61E-05 | 5.26E-06 | APOC2 /// APC344 /// 346 | .       |
| 204564_at | 2.26E-07 | 6.85E-09 | PCGF3                    | 10336 . |
| 204565_at | 0.024866 | 0.015261 | ACOT13                   | 55856 . |
| 204567_s_ | 0.00839  | 0.004273 | ABCG1                    | 9619 .  |
| 204569_at | 0.017918 | 0.0104   | ICK                      | 22858 . |
| 204570_at | 6.04E-14 | 1.87E-17 | COX7A1                   | 1346 .  |
| 204571_x_ | 0.007543 | 0.003774 | PIN4                     | 5303 .  |
| 204572_s_ | 0.003735 | 0.001634 | PIN4                     | 5303 .  |
| 204573_at | 0.002502 | 0.001011 | CROT                     | 54677 . |

|           |          |          |          |         |
|-----------|----------|----------|----------|---------|
| 204574_s_ | 0.015384 | 0.008704 | MMP19    | 4327 .  |
| 204575_s_ | 5.07E-10 | 2.17E-12 | MMP19    | 4327 .  |
| 204576_s_ | 0.034053 | 0.021978 | CLUAP1   | 23059 . |
| 204577_s_ | 0.001976 | 7.61E-04 | CLUAP1   | 23059 . |
| 204578_at | 0.001189 | 4.13E-04 | HISPPD2A | 9677 .  |
| 204579_at | 3.95E-04 | 1.07E-04 | FGFR4    | 2264 .  |
| 204580_at | 0.045731 | 0.030953 | MMP12    | 4321 .  |
| 204581_at | 1.27E-05 | 1.39E-06 | CD22     | 933 .   |
| 204582_s_ | 1.94E-04 | 4.41E-05 | KLK3     | 354 .   |
| 204583_x_ | 2.79E-06 | 1.91E-07 | KLK3     | 354 .   |
| 204584_at | 0.012464 | 0.0068   | L1CAM    | 3897 .  |
| 204585_s_ | 0.001398 | 5.01E-04 | L1CAM    | 3897 .  |
| 204586_at | 0.012904 | 0.007085 | BSN      | 8927 .  |
| 204588_s_ | 5.87E-05 | 9.78E-06 | SLC7A7   | 9056 .  |
| 204591_at | 0.021922 | 0.013187 | CHL1     | 10752 . |
| 204593_s_ | 1.55E-05 | 1.81E-06 | SMCR7L   | 54471 . |
| 204594_s_ | 2.18E-04 | 5.08E-05 | SMCR7L   | 54471 . |
| 204595_s_ | 4.18E-04 | 1.14E-04 | STC1     | 6781 .  |
| 204596_s_ | 4.59E-07 | 1.77E-08 | STC1     | 6781 .  |
| 204597_x_ | 2.09E-04 | 4.84E-05 | STC1     | 6781 .  |
| 204598_at | 0.028676 | 0.018005 | UBOX5    | 22888 . |
| 204599_s_ | 0.001326 | 4.71E-04 | MRPL28   | 10573 . |
| 204600_at | 0.012889 | 0.007075 | EPHB3    | 2049 .  |
| 204602_at | 9.43E-05 | 1.79E-05 | DKK1     | 22943 . |
| 204603_at | 3.00E-05 | 4.17E-06 | EXO1     | 9156 .  |
| 204605_at | 0.020244 | 0.011995 | CGRRF1   | 10668 . |
| 204606_at | 1.50E-04 | 3.20E-05 | CCL21    | 6366 .  |
| 204607_at | 0.026386 | 0.016343 | HMGCS2   | 3158 .  |
| 204608_at | 0.008953 | 0.004608 | ASL      | 435 .   |
| 204609_at | 0.021514 | 0.012891 | CCDC85B  | 11007 . |
| 204610_s_ | 8.97E-04 | 2.93E-04 | CCDC85B  | 11007 . |
| 204611_s_ | 9.13E-04 | 2.99E-04 | PPP2R5B  | 5526 .  |
| 204613_at | 0.028052 | 0.01755  | PLCG2    | 5336 .  |
| 204614_at | 0.006138 | 0.002954 | SERPINB2 | 5055 .  |

|           |          |          |               |         |
|-----------|----------|----------|---------------|---------|
| 204616_at | 0.00421  | 0.001884 | UCHL3         | 7347 .  |
| 204618_s_ | 0.023473 | 0.014266 | GABPB1        | 2553 .  |
| 204619_s_ | 0.01251  | 0.00683  | VCAN          | 1462 .  |
| 204620_s_ | 0.010001 | 0.005248 | VCAN          | 1462 .  |
| 204623_at | 0.013142 | 0.007235 | TFF3          | 7033 .  |
| 204625_s_ | 3.72E-04 | 9.90E-05 | ITGB3         | 3690 .  |
| 204627_s_ | 2.13E-06 | 1.36E-07 | ITGB3         | 3690 .  |
| 204628_s_ | 5.85E-05 | 9.75E-06 | ITGB3         | 3690 .  |
| 204629_at | 0.006678 | 0.003266 | PARVB         | 29780 . |
| 204630_s_ | 0.043088 | 0.028871 | GOSR1         | 9527 .  |
| 204633_s_ | 7.53E-05 | 1.35E-05 | RPS6KA5       | 9252 .  |
| 204634_at | 0.001486 | 5.40E-04 | NEK4          | 6787 .  |
| 204635_at | 7.97E-04 | 2.53E-04 | RPS6KA5       | 9252 .  |
| 204636_at | 0.01081  | 0.005751 | COL17A1       | 1308 .  |
| 204640_s_ | 7.00E-06 | 6.32E-07 | SPOP          | 8405 .  |
| 204641_at | 1.20E-06 | 6.32E-08 | NEK2          | 4751 .  |
| 204642_at | 0.025066 | 0.015404 | S1PR1         | 1901 .  |
| 204643_s_ | 0.022307 | 0.013453 | ENOX2         | 10495 . |
| 204645_at | 0.022462 | 0.013556 | CCNT2         | 905 .   |
| 204646_at | 3.12E-04 | 7.99E-05 | DPYD          | 1806 .  |
| 204647_at | 9.96E-04 | 3.32E-04 | HOMER3        | 9454 .  |
| 204648_at | 1.24E-05 | 1.34E-06 | NPR1          | 4881 .  |
| 204649_at | 1.12E-04 | 2.23E-05 | TROAP         | 10024 . |
| 204650_s_ | 0.013223 | 0.007287 | APBB3         | 10307 . |
| 204651_at | 6.44E-05 | 1.10E-05 | NRF1          | 4899 .  |
| 204652_s_ | 5.17E-04 | 1.48E-04 | NRF1          | 4899 .  |
| 204654_s_ | 0.00898  | 0.004623 | TFAP2A        | 7020 .  |
| 204657_s_ | 0.033359 | 0.021469 | SHB           | 6461 .  |
| 204658_at | 0.00618  | 0.002978 | TRA2A         | 29896 . |
| 204660_at | 1.32E-05 | 1.46E-06 | GFER          | 2671 .  |
| 204661_at | 1.76E-05 | 2.12E-06 | CD52          | 1043 .  |
| 204662_at | 1.96E-07 | 5.60E-09 | CP110         | 9738 .  |
| 204663_at | 0.00907  | 0.004677 | ME3           | 10873 . |
| 204665_at | 0.002949 | 0.001228 | RP5-1000E10.4 | 80143 . |



|           |          |          |               |         |
|-----------|----------|----------|---------------|---------|
| 204666_s_ | 0.010067 | 0.005287 | RP5-1000E10.4 | 80143 . |
| 204667_at | 0.017039 | 0.009803 | FOXA1         | 3169 .  |
| 204669_s_ | 0.012266 | 0.006673 | RNF24         | 11237 . |
| 204671_s_ | 0.022044 | 0.013271 | ANKRD6        | 22881 . |
| 204673_at | 5.58E-04 | 1.63E-04 | MUC2          | 4583 .  |
| 204674_at | 0.048586 | 0.0332   | LRMP          | 4033 .  |
| 204676_at | 9.41E-04 | 3.10E-04 | TMEM186       | 25880 . |
| 204678_s_ | 0.031608 | 0.020154 | KCNK1         | 3775 .  |
| 204679_at | 0.013279 | 0.007323 | KCNK1         | 3775 .  |
| 204680_s_ | 0.027885 | 0.017427 | RAPGEF5       | 9771 .  |
| 204681_s_ | 9.33E-06 | 9.29E-07 | RAPGEF5       | 9771 .  |
| 204682_at | 4.33E-09 | 3.58E-11 | LTBP2         | 4053 .  |
| 204685_s_ | 0.026596 | 0.016494 | ATP2B2        | 491 .   |
| 204686_at | 0.006962 | 0.003435 | IRS1          | 3667 .  |
| 204688_at | 0.001136 | 3.90E-04 | SGCE          | 8910 .  |
| 204689_at | 9.44E-05 | 1.79E-05 | HHEX          | 3087 .  |
| 204690_at | 0.009042 | 0.004659 | STX8          | 9482 .  |
| 204691_x_ | 0.001362 | 4.86E-04 | PLA2G6        | 8398 .  |
| 204692_at | 4.57E-04 | 1.28E-04 | LRCH4         | 4034 .  |
| 204693_at | 6.95E-05 | 1.22E-05 | CDC42EP1      | 11135 . |
| 204694_at | 1.13E-04 | 2.24E-05 | AFP           | 174 .   |
| 204695_at | 4.31E-07 | 1.64E-08 | CDC25A        | 993 .   |
| 204696_s_ | 4.94E-04 | 1.40E-04 | CDC25A        | 993 .   |
| 204697_s_ | 1.35E-06 | 7.44E-08 | CHGA          | 1113 .  |
| 204699_s_ | 0.001457 | 5.27E-04 | C1orf107      | 27042 . |
| 204700_x_ | 1.39E-05 | 1.57E-06 | C1orf107      | 27042 . |
| 204701_s_ | 8.73E-04 | 2.84E-04 | STOML1        | 9399 .  |
| 204702_s_ | 7.23E-05 | 1.28E-05 | NFE2L3        | 9603 .  |
| 204703_at | 0.005765 | 0.002743 | IFT88         | 8100 .  |
| 204706_at | 6.93E-04 | 2.13E-04 | INPP5E        | 56623 . |
| 204709_s_ | 0.001849 | 7.02E-04 | KIF23         | 9493 .  |
| 204710_s_ | 0.001503 | 5.47E-04 | WIPI2         | 26100 . |
| 204711_at | 1.56E-05 | 1.82E-06 | KIAA0753      | 9851 .  |
| 204713_s_ | 0.010975 | 0.005852 | F5            | 2153 .  |

|           |          |          |                            |         |
|-----------|----------|----------|----------------------------|---------|
| 204715_at | 7.60E-06 | 7.04E-07 | PANX1                      | 24145 . |
| 204716_at | 0.003363 | 0.001441 | CCDC6                      | 8030 .  |
| 204717_s_ | 0.003017 | 0.001264 | SLC29A2                    | 3177 .  |
| 204718_at | 3.27E-05 | 4.65E-06 | EPHB6                      | 2051 .  |
| 204719_at | 9.02E-05 | 1.69E-05 | ABCA8                      | 10351 . |
| 204723_at | 0.033338 | 0.021449 | SCN3B                      | 55800 . |
| 204724_s_ | 1.19E-06 | 6.24E-08 | COL9A3                     | 1299 .  |
| 204726_at | 0.003212 | 0.001364 | CDH13                      | 1012 .  |
| 204727_at | 1.15E-05 | 1.22E-06 | WDHD1                      | 11169 . |
| 204728_s_ | 2.43E-05 | 3.21E-06 | WDHD1                      | 11169 . |
| 204730_at | 0.003572 | 0.001548 | RIMS3                      | 9783 .  |
| 204731_at | 1.89E-04 | 4.28E-05 | TGFBR3                     | 7049 .  |
| 204733_at | 1.03E-05 | 1.05E-06 | KLK6                       | 5653 .  |
| 204735_at | 4.36E-08 | 7.51E-10 | PDE4A                      | 5141 .  |
| 204736_s_ | 7.53E-05 | 1.35E-05 | CSPG4                      | 1464 .  |
| 204737_s_ | 2.52E-05 | 3.36E-06 | MYH6 /// MYH4624 /// 4624  | 889 .   |
| 204738_s_ | 0.028654 | 0.017987 | KRIT1                      | 889 .   |
| 204739_at | 0.004096 | 0.001823 | CENPC1                     | 1060 .  |
| 204740_at | 1.32E-07 | 3.34E-09 | CNKSR1                     | 10256 . |
| 204741_at | 8.25E-05 | 1.52E-05 | BICD1                      | 636 .   |
| 204742_s_ | 0.00174  | 6.52E-04 | PDS5B                      | 23047 . |
| 204743_at | 1.28E-04 | 2.63E-05 | TAGLN3                     | 29114 . |
| 204746_s_ | 5.57E-05 | 9.16E-06 | PICK1                      | 9463 .  |
| 204747_at | 2.03E-04 | 4.67E-05 | IFIT3                      | 3437 .  |
| 204749_at | 1.15E-04 | 2.28E-05 | NAP1L3                     | 4675 .  |
| 204750_s_ | 5.07E-07 | 2.01E-08 | DSC2                       | 1824 .  |
| 204751_x_ | 3.84E-09 | 3.05E-11 | DSC2                       | 1824 .  |
| 204752_x_ | 6.76E-07 | 2.95E-08 | PARP2                      | 10038 . |
| 204757_s_ | 0.003212 | 0.001363 | C2CD2L                     | 9854 .  |
| 204758_s_ | 0.00671  | 0.003285 | C2CD2L                     | 9854 .  |
| 204759_at | 0.001403 | 5.04E-04 | RCBTB2                     | 1102 .  |
| 204760_s_ | 1.26E-06 | 6.78E-08 | NR1D1 /// THR7067 /// 9574 | 9712 .  |
| 204761_at | 8.96E-04 | 2.92E-04 | USP6NL                     | 9712 .  |
| 204764_at | 1.21E-04 | 2.45E-05 | FNTB                       | 2342 .  |

|           |          |          |        |         |
|-----------|----------|----------|--------|---------|
| 204766_s_ | 0.001793 | 6.76E-04 | NUDT1  | 4521 .  |
| 204767_s_ | 4.45E-06 | 3.51E-07 | FEN1   | 2237 .  |
| 204768_s_ | 4.49E-05 | 6.98E-06 | FEN1   | 2237 .  |
| 204769_s_ | 4.72E-05 | 7.45E-06 | TAP2   | 6891 .  |
| 204770_at | 0.002811 | 0.001161 | TAP2   | 6891 .  |
| 204771_s_ | 3.38E-09 | 2.50E-11 | TTF1   | 7270 .  |
| 204772_s_ | 3.38E-05 | 4.84E-06 | TTF1   | 7270 .  |
| 204773_at | 7.05E-08 | 1.42E-09 | IL11RA | 3590 .  |
| 204775_at | 1.10E-04 | 2.16E-05 | CHAF1B | 8208 .  |
| 204776_at | 2.63E-04 | 6.44E-05 | THBS4  | 7060 .  |
| 204778_x_ | 1.45E-07 | 3.76E-09 | HOXB7  | 3217 .  |
| 204779_s_ | 4.86E-06 | 3.93E-07 | HOXB7  | 3217 .  |
| 204780_s_ | 9.55E-06 | 9.58E-07 | FAS    | 355 .   |
| 204781_s_ | 2.31E-05 | 2.99E-06 | FAS    | 355 .   |
| 204783_at | 0.005225 | 0.002442 | MLF1   | 4291 .  |
| 204784_s_ | 0.002801 | 0.001157 | MLF1   | 4291 .  |
| 204786_s_ | 1.01E-04 | 1.94E-05 | IFNAR2 | 3455 .  |
| 204787_at | 0.002216 | 8.74E-04 | VSIG4  | 11326 . |
| 204788_s_ | 2.84E-05 | 3.89E-06 | PPOX   | 5498 .  |
| 204789_at | 0.001882 | 7.17E-04 | FMNL1  | 752 .   |
| 204790_at | 3.17E-06 | 2.26E-07 | SMAD7  | 4092 .  |
| 204791_at | 0.008708 | 0.00446  | NR2C1  | 7181 .  |
| 204792_s_ | 0.009209 | 0.004765 | IFT140 | 9742 .  |
| 204794_at | 2.23E-04 | 5.25E-05 | DUSP2  | 1844 .  |
| 204795_at | 2.90E-07 | 9.67E-09 | PRR3   | 80742 . |
| 204796_at | 0.030154 | 0.019094 | EML1   | 2009 .  |
| 204798_at | 0.00215  | 8.42E-04 | MYB    | 4602 .  |
| 204799_at | 0.01702  | 0.00979  | ZBED4  | 9889 .  |
| 204800_s_ | 0.001792 | 6.75E-04 | DHRS12 | 79758 . |
| 204801_s_ | 2.90E-05 | 4.00E-06 | DHRS12 | 79758 . |
| 204803_s_ | 0.004282 | 0.001923 | RRAD   | 6236 .  |
| 204805_s_ | 0.002694 | 0.001104 | H1FX   | 8971 .  |
| 204806_x_ | 2.65E-04 | 6.51E-05 | HLA-F  | 3134 .  |
| 204807_at | 1.75E-05 | 2.10E-06 | TMEM5  | 10329 . |

|           |          |          |                            |         |
|-----------|----------|----------|----------------------------|---------|
| 204808_s_ | 2.59E-05 | 3.46E-06 | TMEM5                      | 10329 . |
| 204809_at | 0.00376  | 0.001647 | CLPX                       | 10845 . |
| 204811_s_ | 9.20E-04 | 3.02E-04 | CACNA2D2                   | 9254 .  |
| 204812_at | 0.013298 | 0.007335 | ZW10                       | 9183 .  |
| 204813_at | 9.90E-05 | 1.91E-05 | MAPK10                     | 5602 .  |
| 204814_at | 1.43E-04 | 3.02E-05 | CADPS                      | 8618 .  |
| 204815_s_ | 0.034394 | 0.022229 | DHX34                      | 9704 .  |
| 204817_at | 1.20E-06 | 6.32E-08 | ESPL1                      | 9700 .  |
| 204818_at | 0.035293 | 0.0229   | HSD17B2                    | 3294 .  |
| 204820_s_ | 4.14E-09 | 3.37E-11 | BTN3A2 /// BT10384 /// 11: |         |
| 204821_at | 6.65E-08 | 1.32E-09 | BTN3A3                     | 10384 . |
| 204822_at | 5.60E-06 | 4.73E-07 | TTK                        | 7272 .  |
| 204823_at | 8.37E-04 | 2.69E-04 | NAV3                       | 89795 . |
| 204824_at | 6.87E-05 | 1.20E-05 | ENDOG                      | 2021 .  |
| 204825_at | 1.17E-04 | 2.34E-05 | MELK                       | 9833 .  |
| 204826_at | 8.29E-04 | 2.66E-04 | CCNF                       | 899 .   |
| 204827_s_ | 0.002577 | 0.001047 | CCNF                       | 899 .   |
| 204828_at | 2.38E-07 | 7.38E-09 | RAD9A                      | 5883 .  |
| 204829_s_ | 9.57E-05 | 1.82E-05 | FOLR2                      | 2350 .  |
| 204830_x_ | 2.64E-08 | 3.86E-10 | PSG5                       | 5673 .  |
| 204832_s_ | 1.50E-05 | 1.73E-06 | BMPR1A                     | 657 .   |
| 204835_at | 9.97E-07 | 4.92E-08 | POLA1                      | 5422 .  |
| 204836_at | 7.50E-06 | 6.92E-07 | GLDC                       | 2731 .  |
| 204837_at | 0.001414 | 5.08E-04 | MTMR9                      | 66036 . |
| 204839_at | 3.38E-04 | 8.81E-05 | POP5                       | 51367 . |
| 204841_s_ | 1.33E-05 | 1.48E-06 | EEA1                       | 8411 .  |
| 204842_x_ | 4.87E-05 | 7.76E-06 | PRKAR2A                    | 5576 .  |
| 204843_s_ | 0.006034 | 0.002897 | PRKAR2A                    | 5576 .  |
| 204846_at | 2.51E-06 | 1.67E-07 | CP                         | 1356 .  |
| 204847_at | 0.003361 | 0.00144  | ZBTB11                     | 27107 . |
| 204849_at | 9.35E-05 | 1.77E-05 | TCFL5                      | 10732 . |
| 204853_at | 3.02E-05 | 4.21E-06 | ORC2L                      | 4999 .  |
| 204854_at | 4.69E-06 | 3.75E-07 | LEPREL2                    | 10536 . |
| 204856_at | 6.18E-04 | 1.85E-04 | B3GNT3                     | 10331 . |

|           |          |          |         |         |
|-----------|----------|----------|---------|---------|
| 204857_at | 0.039111 | 0.025806 | MAD1L1  | 8379 .  |
| 204859_s_ | 0.020675 | 0.012303 | APAF1   | 317 .   |
| 204860_s_ | 1.54E-07 | 4.09E-09 | NAIP    | 4671 .  |
| 204861_s_ | 1.25E-05 | 1.37E-06 | NAIP    | 4671 .  |
| 204863_s_ | 0.001303 | 4.60E-04 | IL6ST   | 3572 .  |
| 204864_s_ | 8.44E-08 | 1.82E-09 | IL6ST   | 3572 .  |
| 204866_at | 5.41E-07 | 2.18E-08 | PHF16   | 9767 .  |
| 204867_at | 1.43E-05 | 1.62E-06 | GCHFR   | 2644 .  |
| 204868_at | 2.34E-05 | 3.04E-06 | ICT1    | 3396 .  |
| 204869_at | 0.03096  | 0.019681 | PCSK2   | 5126 .  |
| 204871_at | 5.22E-04 | 1.50E-04 | MTERF   | 7978 .  |
| 204873_at | 0.004362 | 0.001967 | PEX1    | 5189 .  |
| 204874_x_ | 7.26E-05 | 1.29E-05 | BAIAP3  | 8938 .  |
| 204876_at | 9.90E-04 | 3.29E-04 | ZNF646  | 9726 .  |
| 204877_s_ | 0.013872 | 0.007703 | TAOK2   | 9344 .  |
| 204878_s_ | 5.42E-05 | 8.85E-06 | TAOK2   | 9344 .  |
| 204879_at | 0.026318 | 0.016291 | PDPN    | 10630 . |
| 204881_s_ | 1.73E-05 | 2.07E-06 | UGCG    | 7357 .  |
| 204883_s_ | 0.007615 | 0.003815 | HUS1    | 3364 .  |
| 204885_s_ | 1.50E-04 | 3.20E-05 | MSLN    | 10232 . |
| 204886_at | 8.90E-06 | 8.71E-07 | PLK4    | 10733 . |
| 204887_s_ | 5.66E-05 | 9.35E-06 | PLK4    | 10733 . |
| 204889_s_ | 0.024065 | 0.014686 | NEURL   | 9148 .  |
| 204890_s_ | 1.48E-06 | 8.39E-08 | LCK     | 3932 .  |
| 204891_s_ | 9.49E-08 | 2.14E-09 | LCK     | 3932 .  |
| 204892_x_ | 0.001501 | 5.46E-04 | EEF1A1  | 1915 .  |
| 204896_s_ | 0.009135 | 0.004718 | PTGER4  | 5734 .  |
| 204897_at | 0.012301 | 0.006693 | PTGER4  | 5734 .  |
| 204898_at | 2.83E-04 | 7.07E-05 | SAP30   | 8819 .  |
| 204900_x_ | 0.021131 | 0.01263  | SAP30   | 8819 .  |
| 204904_at | 2.74E-07 | 8.95E-09 | GJA4    | 2701 .  |
| 204905_s_ | 0.003149 | 0.001331 | EEF1E1  | 9521 .  |
| 204906_at | 0.001528 | 5.58E-04 | RPS6KA2 | 6196 .  |
| 204907_s_ | 0.001406 | 5.05E-04 | BCL3    | 602 .   |

|           |          |          |           |         |
|-----------|----------|----------|-----------|---------|
| 204908_s_ | 2.05E-06 | 1.29E-07 | BCL3      | 602 .   |
| 204909_at | 0.00673  | 0.003297 | DDX6      | 1656 .  |
| 204910_s_ | 0.007887 | 0.003978 | TRIM3     | 10612 . |
| 204911_s_ | 7.00E-04 | 2.16E-04 | TRIM3     | 10612 . |
| 204913_s_ | 0.005869 | 0.002803 | SOX11     | 6664 .  |
| 204914_s_ | 0.013162 | 0.00725  | SOX11     | 6664 .  |
| 204915_s_ | 0.014422 | 0.008063 | SOX11     | 6664 .  |
| 204916_at | 0.001659 | 6.15E-04 | RAMP1     | 10267 . |
| 204917_s_ | 0.02155  | 0.012918 | MLLT3     | 4300 .  |
| 204918_s_ | 0.00126  | 4.42E-04 | MLLT3     | 4300 .  |
| 204919_at | 0.038638 | 0.025445 | PRR4      | 11272 . |
| 204922_at | 0.003632 | 0.00158  | C11orf80  | 79703 . |
| 204923_at | 4.31E-06 | 3.37E-07 | SASH3     | 54440 . |
| 204925_at | 0.003188 | 0.001351 | CTNS      | 1497 .  |
| 204926_at | 1.04E-05 | 1.07E-06 | INHBA     | 3624 .  |
| 204927_at | 2.67E-05 | 3.60E-06 | RASSF7    | 8045 .  |
| 204928_s_ | 3.22E-05 | 4.58E-06 | SLC10A3   | 8273 .  |
| 204929_s_ | 5.58E-04 | 1.63E-04 | VAMP5     | 10791 . |
| 204930_s_ | 0.006022 | 0.00289  | BNIP1     | 662 .   |
| 204932_at | 4.10E-05 | 6.18E-06 | TNFRSF11B | 4982 .  |
| 204933_s_ | 6.94E-05 | 1.22E-05 | TNFRSF11B | 4982 .  |
| 204934_s_ | 3.63E-05 | 5.30E-06 | HPN       | 3249 .  |
| 204939_s_ | 0.041504 | 0.027644 | PLN       | 5350 .  |
| 204942_s_ | 0.046013 | 0.031176 | ALDH3B2   | 222 .   |
| 204943_at | 0.008226 | 0.004174 | ADAM12    | 8038 .  |
| 204944_at | 0.002278 | 9.04E-04 | PTPRG     | 5793 .  |
| 204945_at | 0.039847 | 0.026366 | PTPRN     | 5798 .  |
| 204946_s_ | 0.005744 | 0.002731 | TOP3A     | 7156 .  |
| 204947_at | 5.48E-05 | 8.98E-06 | E2F1      | 1869 .  |
| 204948_s_ | 5.09E-07 | 2.02E-08 | FST       | 10468 . |
| 204952_at | 0.008664 | 0.004433 | LYPD3     | 27076 . |
| 204954_s_ | 3.49E-05 | 5.05E-06 | DYRK1B    | 9149 .  |
| 204955_at | 4.93E-05 | 7.86E-06 | SRPX      | 8406 .  |
| 204957_at | 6.77E-04 | 2.07E-04 | ORC5L     | 5001 .  |

|           |          |          |          |         |
|-----------|----------|----------|----------|---------|
| 204958_at | 5.86E-04 | 1.73E-04 | PLK3     | 1263 .  |
| 204960_at | 8.40E-06 | 8.04E-07 | PTPRCAP  | 5790 .  |
| 204962_s_ | 1.19E-04 | 2.38E-05 | CENPA    | 1058 .  |
| 204963_at | 2.85E-05 | 3.90E-06 | SSPN     | 8082 .  |
| 204964_s_ | 0.001114 | 3.81E-04 | SSPN     | 8082 .  |
| 204968_at | 0.004298 | 0.001932 | C6orf47  | 57827 . |
| 204970_s_ | 9.31E-04 | 3.06E-04 | MAFG     | 4097 .  |
| 204971_at | 0.011369 | 0.006099 | CSTA     | 1475 .  |
| 204972_at | 0.004047 | 0.001797 | OAS2     | 4939 .  |
| 204973_at | 0.001604 | 5.91E-04 | GJB1     | 2705 .  |
| 204974_at | 0.015386 | 0.008706 | RAB3A    | 5864 .  |
| 204975_at | 7.62E-04 | 2.40E-04 | EMP2     | 2013 .  |
| 204976_s_ | 0.045356 | 0.030658 | AMMECR1  | 9949 .  |
| 204977_at | 4.92E-06 | 3.99E-07 | DDX10    | 1662 .  |
| 204978_at | 0.001227 | 4.28E-04 | SFRS16   | 11129 . |
| 204979_s_ | 0.009779 | 0.005112 | SH3BGR   | 6450 .  |
| 204980_at | 0.006732 | 0.003298 | CLOCK    | 9575 .  |
| 204981_at | 0.002624 | 0.00107  | SLC22A18 | 5002 .  |
| 204982_at | 0.030692 | 0.01949  | GIT2     | 9815 .  |
| 204983_s_ | 7.37E-04 | 2.30E-04 | GPC4     | 2239 .  |
| 204984_at | 2.00E-04 | 4.57E-05 | GPC4     | 2239 .  |
| 204985_s_ | 0.023989 | 0.014631 | TRAPPC6A | 79090 . |
| 204988_at | 0.002183 | 8.58E-04 | FGB      | 2244 .  |
| 204989_s_ | 0.03297  | 0.021182 | ITGB4    | 3691 .  |
| 204991_s_ | 0.026412 | 0.016364 | NF2      | 4771 .  |
| 204995_at | 0.003631 | 0.00158  | CDK5R1   | 8851 .  |
| 204996_s_ | 1.31E-04 | 2.69E-05 | CDK5R1   | 8851 .  |
| 204997_at | 7.59E-04 | 2.38E-04 | GPD1     | 2819 .  |
| 204998_s_ | 2.03E-04 | 4.66E-05 | ATF5     | 22809 . |
| 204999_s_ | 0.00311  | 0.001311 | ATF5     | 22809 . |
| 205000_at | 0.003521 | 0.001522 | DDX3Y    | 8653 .  |
| 205001_s_ | 0.025117 | 0.01544  | DDX3Y    | 8653 .  |
| 205002_at | 0.026251 | 0.016243 | AHDC1    | 27245 . |
| 205004_at | 3.31E-06 | 2.39E-07 | NKRF     | 55922 . |

|           |          |          |         |         |
|-----------|----------|----------|---------|---------|
| 205005_s_ | 6.95E-05 | 1.22E-05 | NMT2    | 9397 .  |
| 205006_s_ | 1.80E-07 | 5.03E-09 | NMT2    | 9397 .  |
| 205007_s_ | 0.00184  | 6.97E-04 | CIB2    | 10518 . |
| 205008_s_ | 1.34E-06 | 7.35E-08 | CIB2    | 10518 . |
| 205009_at | 3.44E-11 | 6.73E-14 | TFF1    | 7031 .  |
| 205010_at | 8.54E-04 | 2.76E-04 | GNL3L   | 54552 . |
| 205011_at | 9.54E-04 | 3.15E-04 | VWA5A   | 4013 .  |
| 205012_s_ | 5.50E-04 | 1.60E-04 | HAGH    | 3029 .  |
| 205013_s_ | 2.86E-05 | 3.92E-06 | ADORA2A | 135 .   |
| 205014_at | 6.07E-04 | 1.80E-04 | FGFBP1  | 9982 .  |
| 205015_s_ | 0.013106 | 0.007211 | TGFA    | 7039 .  |
| 205017_s_ | 4.40E-06 | 3.47E-07 | MBNL2   | 10150 . |
| 205018_s_ | 1.12E-06 | 5.69E-08 | MBNL2   | 10150 . |
| 205019_s_ | 8.76E-05 | 1.63E-05 | VIPR1   | 7433 .  |
| 205020_s_ | 0.005953 | 0.002851 | ARL4A   | 10124 . |
| 205021_s_ | 2.10E-07 | 6.11E-09 | FOXN3   | 1112 .  |
| 205023_at | 5.53E-05 | 9.08E-06 | RAD51   | 5888 .  |
| 205024_s_ | 1.79E-04 | 3.99E-05 | RAD51   | 5888 .  |
| 205025_at | 4.07E-05 | 6.12E-06 | ZBTB48  | 3104 .  |
| 205026_at | 1.15E-04 | 2.28E-05 | STAT5B  | 6777 .  |
| 205027_s_ | 0.002237 | 8.83E-04 | MAP3K8  | 1326 .  |
| 205028_at | 0.001269 | 4.46E-04 | TRO     | 7216 .  |
| 205029_s_ | 2.26E-07 | 6.86E-09 | FABP7   | 2173 .  |
| 205030_at | 8.01E-09 | 7.96E-11 | FABP7   | 2173 .  |
| 205032_at | 0.047891 | 0.032645 | ITGA2   | 3673 .  |
| 205034_at | 2.71E-05 | 3.66E-06 | CCNE2   | 9134 .  |
| 205035_at | 6.73E-04 | 2.06E-04 | CTDP1   | 9150 .  |
| 205036_at | 4.22E-05 | 6.44E-06 | LSM6    | 11157 . |
| 205037_at | 0.00754  | 0.003773 | RABL4   | 11020 . |
| 205039_s_ | 0.021421 | 0.012826 | IKZF1   | 10320 . |
| 205040_at | 0.020089 | 0.011889 | ORM1    | 5004 .  |
| 205042_at | 6.46E-07 | 2.76E-08 | GNE     | 10020 . |
| 205043_at | 0.006842 | 0.003363 | CFTR    | 1080 .  |
| 205044_at | 0.024714 | 0.015148 | GABRP   | 2568 .  |



|           |          |          |          |         |
|-----------|----------|----------|----------|---------|
| 205046_at | 6.61E-07 | 2.85E-08 | CENPE    | 1062 .  |
| 205049_s_ | 5.26E-04 | 1.51E-04 | CD79A    | 973 .   |
| 205050_s_ | 5.77E-04 | 1.70E-04 | MAPK8IP2 | 23542 . |
| 205051_s_ | 0.024302 | 0.014851 | KIT      | 3815 .  |
| 205052_at | 1.34E-05 | 1.50E-06 | AUH      | 549 .   |
| 205053_at | 7.21E-08 | 1.47E-09 | PRIM1    | 5557 .  |
| 205054_at | 5.77E-04 | 1.70E-04 | NEB      | 4703 .  |
| 205055_at | 1.97E-04 | 4.51E-05 | ITGAE    | 3682 .  |
| 205056_s_ | 0.001886 | 7.19E-04 | GPR162   | 27239 . |
| 205057_s_ | 1.24E-04 | 2.53E-05 | IDUA     | 3425 .  |
| 205058_at | 1.10E-04 | 2.18E-05 | SLC26A1  | 10861 . |
| 205059_s_ | 1.53E-05 | 1.78E-06 | IDUA     | 3425 .  |
| 205060_at | 0.005306 | 0.002486 | PARG     | 8505 .  |
| 205061_s_ | 4.82E-05 | 7.65E-06 | EXOSC9   | 5393 .  |
| 205062_x_ | 0.049089 | 0.033601 | ARID4A   | 5926 .  |
| 205063_at | 1.26E-06 | 6.71E-08 | SIP1     | 8487 .  |
| 205064_at | 0.001938 | 7.43E-04 | SPRR1B   | 6699 .  |
| 205065_at | 0.002695 | 0.001104 | ENPP1    | 5167 .  |
| 205066_s_ | 0.033464 | 0.02155  | ENPP1    | 5167 .  |
| 205069_s_ | 0.002959 | 0.001233 | ARHGAP26 | 23092 . |
| 205070_at | 1.43E-04 | 3.01E-05 | ING3     | 54556 . |
| 205074_at | 0.001001 | 3.34E-04 | SLC22A5  | 6584 .  |
| 205075_at | 1.47E-05 | 1.70E-06 | SERPINF2 | 5345 .  |
| 205082_s_ | 1.42E-06 | 7.93E-08 | AOX1     | 316 .   |
| 205083_at | 1.58E-05 | 1.85E-06 | AOX1     | 316 .   |
| 205084_at | 5.26E-06 | 4.34E-07 | BCAP29   | 55973 . |
| 205085_at | 2.50E-06 | 1.66E-07 | ORC1L    | 4998 .  |
| 205086_s_ | 0.017562 | 0.010159 | NCAPH2   | 29781 . |
| 205088_at | 2.56E-04 | 6.23E-05 | MAMLD1   | 10046 . |
| 205089_at | 0.006059 | 0.002911 | ZNF7     | 7553 .  |
| 205090_s_ | 5.61E-04 | 1.64E-04 | NAGPA    | 51172 . |
| 205092_x_ | 2.27E-04 | 5.37E-05 | ZBTB1    | 22890 . |
| 205093_at | 0.031484 | 0.020065 | PLEKHA6  | 22874 . |
| 205095_s_ | 0.004077 | 0.001813 | ATP6V0A1 | 535 .   |

|           |          |          |                              |               |
|-----------|----------|----------|------------------------------|---------------|
| 205097_at | 5.88E-04 | 1.74E-04 | SLC26A2                      | 1836 .        |
| 205099_s_ | 0.002295 | 9.11E-04 | CCR1                         | 1230 .        |
| 205102_at | 1.15E-06 | 5.92E-08 | TMPRSS2                      | 7113 .        |
| 205103_at | 0.019191 | 0.011265 | C1orf61                      | 10485 .       |
| 205104_at | 9.67E-06 | 9.73E-07 | SNPH                         | 9751 .        |
| 205105_at | 1.16E-05 | 1.23E-06 | MAN2A1                       | 4124 .        |
| 205106_at | 0.015    | 0.00845  | LOC100133946                 | 100133946 //. |
| 205108_s_ | 2.87E-04 | 7.17E-05 | APOB                         | 338 .         |
| 205109_s_ | 0.04851  | 0.033133 | ARHGEF4                      | 50649 .       |
| 205110_s_ | 9.75E-05 | 1.87E-05 | FGF13                        | 2258 .        |
| 205111_s_ | 0.002945 | 0.001226 | PLCE1                        | 51196 .       |
| 205112_at | 0.002395 | 9.59E-04 | PLCE1                        | 51196 .       |
| 205113_at | 3.83E-04 | 1.02E-04 | NEFM                         | 4741 .        |
| 205114_s_ | 0.030631 | 0.019442 | CCL3 /// CCL3L 414062 /// 65 |               |
| 205115_s_ | 0.036225 | 0.023615 | RBM19                        | 9904 .        |
| 205116_at | 1.25E-04 | 2.55E-05 | LAMA2                        | 3908 .        |
| 205117_at | 4.32E-04 | 1.19E-04 | FGF1                         | 2246 .        |
| 205118_at | 0.027274 | 0.016985 | FPR1                         | 2357 .        |
| 205119_s_ | 0.00374  | 0.001636 | FPR1                         | 2357 .        |
| 205120_s_ | 6.34E-05 | 1.08E-05 | SGCB                         | 6443 .        |
| 205121_at | 1.43E-07 | 3.70E-09 | SGCB                         | 6443 .        |
| 205122_at | 5.98E-07 | 2.49E-08 | TMEFF1                       | 8577 .        |
| 205123_s_ | 5.62E-06 | 4.76E-07 | TMEFF1                       | 8577 .        |
| 205124_at | 2.76E-04 | 6.85E-05 | LOC729991-MI100271849        | //.           |
| 205125_at | 9.63E-08 | 2.18E-09 | PLCD1                        | 5333 .        |
| 205127_at | 5.40E-09 | 4.78E-11 | PTGS1                        | 5742 .        |
| 205128_x_ | 5.12E-11 | 1.11E-13 | PTGS1                        | 5742 .        |
| 205129_at | 1.88E-04 | 4.25E-05 | NPM3                         | 10360 .       |
| 205130_at | 3.30E-06 | 2.38E-07 | RAGE                         | 5891 .        |
| 205131_x_ | 5.69E-04 | 1.67E-04 | CLEC11A                      | 6320 .        |
| 205132_at | 1.37E-06 | 7.61E-08 | ACTC1                        | 70 .          |
| 205133_s_ | 2.19E-07 | 6.56E-09 | HSPE1                        | 3336 .        |
| 205134_s_ | 4.91E-06 | 3.97E-07 | NUFIP1                       | 26747 .       |
| 205135_s_ | 6.26E-06 | 5.45E-07 | NUFIP1                       | 26747 .       |

|           |          |          |                             |         |
|-----------|----------|----------|-----------------------------|---------|
| 205136_s_ | 3.69E-05 | 5.40E-06 | NUFIP1                      | 26747 . |
| 205137_x_ | 1.49E-05 | 1.72E-06 | USH1C                       | 10083 . |
| 205138_s_ | 0.018871 | 0.01105  | UST                         | 10090 . |
| 205140_at | 0.04329  | 0.029042 | FPGT                        | 8790 .  |
| 205141_at | 0.012808 | 0.007021 | ANG                         | 283 .   |
| 205142_x_ | 0.016357 | 0.009353 | ABCD1                       | 215 .   |
| 205143_at | 0.026733 | 0.016598 | NCAN                        | 1463 .  |
| 205145_s_ | 1.33E-04 | 2.76E-05 | LOC649851 /// 4636 /// 6498 |         |
| 205146_x_ | 0.039976 | 0.026464 | APBA3                       | 9546 .  |
| 205147_x_ | 0.001077 | 3.65E-04 | NCF4                        | 4689 .  |
| 205149_s_ | 0.003024 | 0.001267 | CLCN4                       | 1183 .  |
| 205150_s_ | 0.044673 | 0.030124 | KIAA0644                    | 9865 .  |
| 205151_s_ | 0.01063  | 0.005637 | KIAA0644                    | 9865 .  |
| 205154_at | 9.19E-05 | 1.73E-05 | LRRN2                       | 10446 . |
| 205155_s_ | 6.38E-05 | 1.09E-05 | SPTBN2                      | 6712 .  |
| 205156_s_ | 0.010689 | 0.005673 | ACCN2                       | 41 .    |
| 205158_at | 1.16E-05 | 1.23E-06 | RNASE4                      | 6038 .  |
| 205160_at | 0.001107 | 3.78E-04 | PEX11A                      | 8800 .  |
| 205161_s_ | 4.01E-04 | 1.08E-04 | PEX11A                      | 8800 .  |
| 205163_at | 0.007044 | 0.003482 | MYLPF                       | 29895 . |
| 205164_at | 0.005389 | 0.002532 | GCAT                        | 23464 . |
| 205165_at | 0.001317 | 4.67E-04 | CELSR3                      | 1951 .  |
| 205167_s_ | 2.93E-06 | 2.04E-07 | CDC25C                      | 995 .   |
| 205168_at | 9.43E-08 | 2.11E-09 | DDR2                        | 4921 .  |
| 205169_at | 2.22E-08 | 3.03E-10 | RBBP5                       | 5929 .  |
| 205170_at | 1.12E-04 | 2.22E-05 | STAT2                       | 6773 .  |
| 205171_at | 5.61E-05 | 9.25E-06 | PTPN4                       | 5775 .  |
| 205172_x_ | 0.018237 | 0.010618 | CLTB                        | 1212 .  |
| 205173_x_ | 2.02E-06 | 1.27E-07 | CD58                        | 965 .   |
| 205174_s_ | 0.011456 | 0.006155 | QPCT                        | 25797 . |
| 205176_s_ | 2.82E-05 | 3.85E-06 | ITGB3BP                     | 23421 . |
| 205177_at | 2.49E-05 | 3.31E-06 | TNNI1                       | 7135 .  |
| 205178_s_ | 3.01E-06 | 2.11E-07 | RBBP6                       | 5930 .  |
| 205179_s_ | 0.023513 | 0.014297 | ADAM8                       | 101 .   |

|           |          |          |                             |         |
|-----------|----------|----------|-----------------------------|---------|
| 205180_s_ | 0.003562 | 0.001543 | ADAM8                       | 101 .   |
| 205182_s_ | 0.001454 | 5.26E-04 | ZNF324                      | 25799 . |
| 205184_at | 5.37E-05 | 8.77E-06 | GNG4                        | 2786 .  |
| 205185_at | 1.31E-06 | 7.10E-08 | SPINK5                      | 11005 . |
| 205186_at | 1.59E-07 | 4.27E-09 | DNALI1                      | 7802 .  |
| 205187_at | 0.004341 | 0.001956 | SMAD5                       | 4090 .  |
| 205188_s_ | 0.004853 | 0.002236 | SMAD5                       | 4090 .  |
| 205189_s_ | 6.66E-06 | 5.92E-07 | FANCC                       | 2176 .  |
| 205190_at | 3.82E-09 | 3.00E-11 | PLS1                        | 5357 .  |
| 205191_at | 0.001184 | 4.10E-04 | RP2                         | 6102 .  |
| 205192_at | 0.047509 | 0.032356 | MAP3K14                     | 9020 .  |
| 205195_at | 1.39E-04 | 2.90E-05 | AP1S1                       | 1174 .  |
| 205197_s_ | 0.015312 | 0.008656 | ATP7A /// LOC1538 /// 64475 | 538 .   |
| 205198_s_ | 3.85E-04 | 1.03E-04 | ATP7A                       | 538 .   |
| 205200_at | 1.22E-05 | 1.32E-06 | CLEC3B                      | 7123 .  |
| 205201_at | 0.002977 | 0.001242 | GLI3                        | 2737 .  |
| 205203_at | 1.36E-05 | 1.52E-06 | PLD1                        | 5337 .  |
| 205206_at | 0.001003 | 3.35E-04 | KAL1                        | 3730 .  |
| 205207_at | 0.003055 | 0.001283 | IL6                         | 3569 .  |
| 205210_at | 0.00304  | 0.001276 | TGFBRAP1                    | 9392 .  |
| 205211_s_ | 0.03065  | 0.019458 | RIN1                        | 9610 .  |
| 205212_s_ | 3.75E-05 | 5.52E-06 | ACAP1                       | 9744 .  |
| 205213_at | 6.61E-05 | 1.14E-05 | ACAP1                       | 9744 .  |
| 205214_at | 2.12E-05 | 2.70E-06 | STK17B                      | 9262 .  |
| 205215_at | 0.021159 | 0.012648 | RNF2                        | 6045 .  |
| 205217_at | 0.009373 | 0.004863 | TIMM8A                      | 1678 .  |
| 205219_s_ | 0.006641 | 0.003245 | GALK2                       | 2585 .  |
| 205221_at | 0.001702 | 6.35E-04 | HGD                         | 3081 .  |
| 205222_at | 0.001489 | 5.41E-04 | EHHADH                      | 1962 .  |
| 205223_at | 0.017516 | 0.010127 | DEPDC5                      | 9681 .  |
| 205224_at | 1.56E-04 | 3.38E-05 | SURF2                       | 6835 .  |
| 205228_at | 5.62E-04 | 1.64E-04 | RBMS2                       | 5939 .  |
| 205229_s_ | 6.66E-07 | 2.88E-08 | COCH                        | 1690 .  |
| 205231_s_ | 0.016119 | 0.009196 | EPM2A                       | 7957 .  |

|           |          |          |                             |         |
|-----------|----------|----------|-----------------------------|---------|
| 205232_s_ | 0.004329 | 0.001949 | PAFAH2                      | 5051 .  |
| 205233_s_ | 2.45E-04 | 5.91E-05 | PAFAH2                      | 5051 .  |
| 205234_at | 3.56E-04 | 9.38E-05 | SLC16A4                     | 9122 .  |
| 205235_s_ | 1.24E-06 | 6.57E-08 | KIF20B                      | 9585 .  |
| 205236_x_ | 5.16E-07 | 2.05E-08 | SOD3                        | 6649 .  |
| 205237_at | 1.40E-04 | 2.94E-05 | FCN1                        | 2219 .  |
| 205238_at | 0.023376 | 0.014199 | TRMT2B                      | 79979 . |
| 205240_at | 8.15E-07 | 3.77E-08 | GPSM2                       | 29899 . |
| 205241_at | 3.23E-04 | 8.35E-05 | SCO2                        | 9997 .  |
| 205243_at | 1.70E-04 | 3.74E-05 | SLC13A3                     | 64849 . |
| 205244_s_ | 2.16E-05 | 2.76E-06 | SLC13A3                     | 64849 . |
| 205245_at | 0.001384 | 4.96E-04 | PAR6A                       | 50855 . |
| 205247_at | 0.004298 | 0.001933 | NOTCH4                      | 4855 .  |
| 205248_at | 6.13E-04 | 1.83E-04 | DOPEY2                      | 9980 .  |
| 205251_at | 3.31E-04 | 8.58E-05 | PER2                        | 8864 .  |
| 205252_at | 0.046829 | 0.031823 | ZNF174                      | 7727 .  |
| 205253_at | 5.42E-06 | 4.52E-07 | PBX1                        | 5087 .  |
| 205254_x_ | 0.033691 | 0.021718 | TCF7                        | 6932 .  |
| 205255_x_ | 5.93E-04 | 1.76E-04 | TCF7                        | 6932 .  |
| 205256_at | 7.84E-05 | 1.42E-05 | ZBTB39                      | 9880 .  |
| 205260_s_ | 8.13E-06 | 7.67E-07 | ACYP1                       | 97 .    |
| 205261_at | 5.84E-04 | 1.72E-04 | PGC                         | 5225 .  |
| 205262_at | 0.002732 | 0.001123 | KCNH2                       | 3757 .  |
| 205263_at | 0.017833 | 0.010343 | BCL10                       | 8915 .  |
| 205264_at | 0.010819 | 0.005757 | CD3EAP                      | 10849 . |
| 205265_s_ | 0.015646 | 0.008881 | SPEG                        | 10290 . |
| 205266_at | 0.015316 | 0.00866  | LIF                         | 3976 .  |
| 205268_s_ | 1.02E-04 | 1.98E-05 | ADD2                        | 119 .   |
| 205269_at | 0.004207 | 0.001883 | LCP2                        | 3937 .  |
| 205270_s_ | 0.002158 | 8.47E-04 | LCP2                        | 3937 .  |
| 205271_s_ | 1.58E-04 | 3.42E-05 | CCRK                        | 23552 . |
| 205272_s_ | 1.65E-05 | 1.96E-06 | PRH1 /// PRH2 5554 /// 555! |         |
| 205273_s_ | 2.76E-07 | 9.09E-09 | PITRM1                      | 10531 . |
| 205274_at | 0.004744 | 0.002177 | GTPBP1                      | 9567 .  |

|           |          |          |           |         |
|-----------|----------|----------|-----------|---------|
| 205275_at | 8.15E-05 | 1.50E-05 | GTPBP1    | 9567 .  |
| 205276_s_ | 1.48E-05 | 1.70E-06 | GTPBP1    | 9567 .  |
| 205277_at | 2.65E-04 | 6.50E-05 | PRDM2     | 7799 .  |
| 205278_at | 3.71E-06 | 2.77E-07 | GAD1      | 2571 .  |
| 205279_s_ | 0.002727 | 0.00112  | GLRB      | 2743 .  |
| 205280_at | 0.001076 | 3.65E-04 | GLRB      | 2743 .  |
| 205281_s_ | 0.001022 | 3.42E-04 | PIGA      | 5277 .  |
| 205282_at | 5.08E-07 | 2.01E-08 | LRP8      | 7804 .  |
| 205283_at | 9.57E-07 | 4.67E-08 | FKTN      | 2218 .  |
| 205284_at | 1.36E-04 | 2.85E-05 | URB2      | 9816 .  |
| 205285_s_ | 0.002894 | 0.001201 | FYB       | 2533 .  |
| 205286_at | 2.19E-05 | 2.81E-06 | TFAP2C    | 7022 .  |
| 205287_s_ | 0.01111  | 0.005937 | TFAP2C    | 7022 .  |
| 205288_at | 0.045504 | 0.030773 | CDC14A    | 8556 .  |
| 205289_at | 4.20E-08 | 7.08E-10 | BMP2      | 650 .   |
| 205290_s_ | 1.11E-06 | 5.67E-08 | BMP2      | 650 .   |
| 205292_s_ | 1.65E-06 | 9.71E-08 | HNRNPA2B1 | 3181 .  |
| 205293_x_ | 0.047942 | 0.032682 | BAIAP2    | 10458 . |
| 205294_at | 0.034115 | 0.022022 | BAIAP2    | 10458 . |
| 205295_at | 0.02601  | 0.016076 | CKMT2     | 1160 .  |
| 205296_at | 3.05E-05 | 4.28E-06 | RBL1      | 5933 .  |
| 205297_s_ | 2.49E-04 | 6.03E-05 | CD79B     | 974 .   |
| 205300_s_ | 8.77E-04 | 2.85E-04 | SNRNP35   | 11066 . |
| 205301_s_ | 0.014542 | 0.008142 | OGG1      | 4968 .  |
| 205304_s_ | 0.040108 | 0.026565 | KCNJ8     | 3764 .  |
| 205305_at | 0.003156 | 0.001335 | FGL1      | 2267 .  |
| 205308_at | 0.011343 | 0.006083 | FAM164A   | 51101 . |
| 205309_at | 1.68E-06 | 1.00E-07 | SMPDL3B   | 27293 . |
| 205310_at | 2.61E-06 | 1.76E-07 | FBXO46    | 23403 . |
| 205312_at | 5.57E-07 | 2.28E-08 | SPI1      | 6688 .  |
| 205313_at | 5.17E-10 | 2.24E-12 | HNF1B     | 6928 .  |
| 205314_x_ | 2.35E-04 | 5.60E-05 | SNTB2     | 6645 .  |
| 205315_s_ | 1.04E-07 | 2.39E-09 | SNTB2     | 6645 .  |
| 205316_at | 0.001259 | 4.42E-04 | SLC15A2   | 6565 .  |

|           |          |          |         |         |
|-----------|----------|----------|---------|---------|
| 205318_at | 0.006179 | 0.002977 | KIF5A   | 3798 .  |
| 205319_at | 0.014045 | 0.007814 | PSCA    | 8000 .  |
| 205320_at | 7.28E-05 | 1.29E-05 | APC2    | 10297 . |
| 205323_s_ | 0.016014 | 0.009129 | MTF1    | 4520 .  |
| 205324_s_ | 0.003278 | 0.001397 | FTSJ1   | 24140 . |
| 205325_at | 1.39E-05 | 1.57E-06 | PHYHIP  | 9796 .  |
| 205326_at | 0.011626 | 0.006259 | RAMP3   | 10268 . |
| 205327_s_ | 0.005046 | 0.002343 | ACVR2A  | 92 .    |
| 205328_at | 7.41E-11 | 1.79E-13 | CLDN10  | 9071 .  |
| 205331_s_ | 0.001818 | 6.87E-04 | REEP2   | 51308 . |
| 205332_at | 9.80E-05 | 1.88E-05 | RCE1    | 9986 .  |
| 205333_s_ | 5.93E-05 | 9.92E-06 | RCE1    | 9986 .  |
| 205334_at | 1.98E-06 | 1.23E-07 | S100A1  | 6271 .  |
| 205339_at | 9.88E-06 | 1.00E-06 | STIL    | 6491 .  |
| 205340_at | 2.98E-04 | 7.52E-05 | ZBTB24  | 9841 .  |
| 205341_at | 1.98E-06 | 1.23E-07 | EHD2    | 30846 . |
| 205342_s_ | 0.005869 | 0.002804 | SULT1C2 | 6819 .  |
| 205344_at | 0.01375  | 0.007626 | CSPG5   | 10675 . |
| 205345_at | 0.001183 | 4.10E-04 | BARD1   | 580 .   |
| 205346_at | 0.010036 | 0.005269 | ST3GAL2 | 6483 .  |
| 205347_s_ | 0.002698 | 0.001105 | TMSB15A | 11013 . |
| 205348_s_ | 0.023582 | 0.014346 | DYNC111 | 1780 .  |
| 205349_at | 0.002965 | 0.001236 | GNA15   | 2769 .  |
| 205350_at | 1.34E-06 | 7.35E-08 | CRABP1  | 1381 .  |
| 205351_at | 4.29E-04 | 1.18E-04 | GGCX    | 2677 .  |
| 205353_s_ | 5.36E-04 | 1.55E-04 | PEBP1   | 5037 .  |
| 205356_at | 0.001308 | 4.62E-04 | USP13   | 8975 .  |
| 205357_s_ | 5.71E-05 | 9.47E-06 | AGTR1   | 185 .   |
| 205360_at | 0.008646 | 0.004422 | PFDN4   | 5203 .  |
| 205361_s_ | 6.82E-04 | 2.09E-04 | PFDN4   | 5203 .  |
| 205362_s_ | 0.006812 | 0.003346 | PFDN4   | 5203 .  |
| 205364_at | 2.73E-04 | 6.76E-05 | ACOX2   | 8309 .  |
| 205367_at | 0.009553 | 0.004971 | SH2B2   | 10603 . |
| 205368_at | 0.002845 | 0.001178 | FAM131B | 9715 .  |

|           |          |          |                              |         |
|-----------|----------|----------|------------------------------|---------|
| 205370_x_ | 1.72E-07 | 4.73E-09 | DBT                          | 1629 .  |
| 205371_s_ | 0.012463 | 0.0068   | DBT                          | 1629 .  |
| 205372_at | 0.016097 | 0.009181 | PLAG1                        | 5324 .  |
| 205373_at | 5.89E-04 | 1.74E-04 | CTNNA2                       | 1496 .  |
| 205375_at | 0.010636 | 0.00564  | MDFI                         | 4188 .  |
| 205376_at | 0.001158 | 3.99E-04 | INPP4B                       | 8821 .  |
| 205377_s_ | 9.84E-05 | 1.89E-05 | ACHE                         | 43 .    |
| 205378_s_ | 4.68E-06 | 3.74E-07 | ACHE                         | 43 .    |
| 205379_at | 9.87E-08 | 2.26E-09 | CBR3                         | 874 .   |
| 205380_at | 1.51E-06 | 8.60E-08 | PDZK1                        | 5174 .  |
| 205382_s_ | 0.041874 | 0.027928 | CFD                          | 1675 .  |
| 205383_s_ | 0.012379 | 0.006742 | ZBTB20                       | 26137 . |
| 205384_at | 4.19E-06 | 3.24E-07 | FXVD1                        | 5348 .  |
| 205385_at | 0.003014 | 0.001262 | MDM2                         | 4193 .  |
| 205387_s_ | 0.048617 | 0.033224 | CGB /// CGB5 / 1082 /// 9365 | 1111 .  |
| 205388_at | 0.001345 | 4.79E-04 | TNNC2                        | 7125 .  |
| 205391_x_ | 0.037423 | 0.024524 | ANK1                         | 286 .   |
| 205392_s_ | 0.001344 | 4.79E-04 | CCL14 /// CCL16358 /// 6358  | 1111 .  |
| 205393_s_ | 2.44E-04 | 5.86E-05 | CHEK1                        | 1111 .  |
| 205394_at | 0.004824 | 0.002221 | CHEK1                        | 1111 .  |
| 205395_s_ | 0.016844 | 0.009675 | MRE11A                       | 4361 .  |
| 205396_at | 4.13E-05 | 6.26E-06 | SMAD3                        | 4088 .  |
| 205397_x_ | 0.034368 | 0.022208 | SMAD3                        | 4088 .  |
| 205398_s_ | 4.69E-04 | 1.31E-04 | SMAD3                        | 4088 .  |
| 205399_at | 0.00538  | 0.002526 | DCLK1                        | 9201 .  |
| 205400_at | 0.005497 | 0.002592 | WAS                          | 7454 .  |
| 205401_at | 0.015076 | 0.0085   | AGPS                         | 8540 .  |
| 205402_x_ | 4.19E-07 | 1.58E-08 | PRSS2                        | 5645 .  |
| 205404_at | 0.01268  | 0.006938 | HSD11B1                      | 3290 .  |
| 205405_at | 8.25E-07 | 3.84E-08 | SEMA5A                       | 9037 .  |
| 205406_s_ | 0.006014 | 0.002886 | SPA17                        | 53340 . |
| 205407_at | 1.75E-07 | 4.82E-09 | RECK                         | 8434 .  |
| 205408_at | 1.23E-04 | 2.50E-05 | MLLT10                       | 8028 .  |
| 205409_at | 2.88E-05 | 3.96E-06 | FOSL2                        | 2355 .  |



|           |          |          |         |         |
|-----------|----------|----------|---------|---------|
| 205410_s_ | 1.18E-05 | 1.26E-06 | ATP2B4  | 493 .   |
| 205412_at | 2.22E-07 | 6.68E-09 | ACAT1   | 38 .    |
| 205414_s_ | 0.003752 | 0.001643 | RICH2   | 9912 .  |
| 205417_s_ | 8.24E-04 | 2.64E-04 | DAG1    | 1605 .  |
| 205422_s_ | 2.42E-08 | 3.42E-10 | ITGBL1  | 9358 .  |
| 205424_at | 0.018633 | 0.010889 | TBKBP1  | 9755 .  |
| 205425_at | 0.015902 | 0.009052 | HIP1    | 3092 .  |
| 205428_s_ | 8.02E-04 | 2.55E-04 | CALB2   | 794 .   |
| 205429_s_ | 0.002131 | 8.34E-04 | MPP6    | 51678 . |
| 205430_at | 0.008887 | 0.004567 | BMP5    | 653 .   |
| 205431_s_ | 6.07E-05 | 1.02E-05 | BMP5    | 653 .   |
| 205432_at | 1.33E-04 | 2.76E-05 | OVGP1   | 5016 .  |
| 205436_s_ | 0.011201 | 0.005995 | H2AFX   | 3014 .  |
| 205438_at | 1.88E-04 | 4.25E-05 | PTPN21  | 11099 . |
| 205440_s_ | 0.00142  | 5.11E-04 | NPY1R   | 4886 .  |
| 205442_at | 0.002763 | 0.001138 | MFAP3L  | 9848 .  |
| 205443_at | 0.036958 | 0.024171 | SNAPC1  | 6617 .  |
| 205444_at | 0.00221  | 8.71E-04 | ATP2A1  | 487 .   |
| 205446_s_ | 0.007759 | 0.003901 | ATF2    | 1386 .  |
| 205447_s_ | 0.001115 | 3.81E-04 | MAP3K12 | 7786 .  |
| 205448_s_ | 6.72E-04 | 2.05E-04 | MAP3K12 | 7786 .  |
| 205449_at | 1.16E-06 | 6.03E-08 | SAC3D1  | 29901 . |
| 205451_at | 2.56E-08 | 3.69E-10 | FOXO4   | 4303 .  |
| 205452_at | 3.53E-04 | 9.28E-05 | PIGB    | 9488 .  |
| 205454_at | 6.23E-05 | 1.06E-05 | HPCA    | 3208 .  |
| 205456_at | 1.06E-04 | 2.08E-05 | CD3E    | 916 .   |
| 205458_at | 0.011928 | 0.006452 | MC1R    | 4157 .  |
| 205459_s_ | 0.014007 | 0.007788 | NPAS2   | 4862 .  |
| 205460_at | 0.048457 | 0.03309  | NPAS2   | 4862 .  |
| 205461_at | 0.044505 | 0.029999 | RAB35   | 11021 . |
| 205463_s_ | 0.021219 | 0.01269  | PDGFA   | 5154 .  |
| 205464_at | 7.96E-05 | 1.45E-05 | SCNN1B  | 6338 .  |
| 205465_x_ | 0.01617  | 0.009232 | HS3ST1  | 9957 .  |
| 205466_s_ | 0.03806  | 0.025003 | HS3ST1  | 9957 .  |

|           |          |          |          |         |
|-----------|----------|----------|----------|---------|
| 205467_at | 8.28E-05 | 1.53E-05 | CASP10   | 843 .   |
| 205468_s_ | 0.001018 | 3.41E-04 | IRF5     | 3663 .  |
| 205469_s_ | 0.003178 | 0.001345 | IRF5     | 3663 .  |
| 205471_s_ | 0.045441 | 0.030724 | DACH1    | 1602 .  |
| 205472_s_ | 0.037027 | 0.024228 | DACH1    | 1602 .  |
| 205475_at | 1.01E-08 | 1.08E-10 | SCRG1    | 11341 . |
| 205476_at | 0.036801 | 0.02405  | CCL20    | 6364 .  |
| 205478_at | 0.02473  | 0.015162 | PPP1R1A  | 5502 .  |
| 205479_s_ | 0.014844 | 0.008347 | PLAU     | 5328 .  |
| 205480_s_ | 8.77E-07 | 4.16E-08 | UGP2     | 7360 .  |
| 205484_at | 0.001055 | 3.56E-04 | SIT1     | 27240 . |
| 205486_at | 4.43E-05 | 6.88E-06 | TESK2    | 10420 . |
| 205487_s_ | 0.002539 | 0.001029 | VGLL1    | 51442 . |
| 205489_at | 0.00704  | 0.00348  | CRYM     | 1428 .  |
| 205490_x_ | 7.23E-04 | 2.24E-04 | GJB3     | 2707 .  |
| 205491_s_ | 0.036521 | 0.023837 | GJB3     | 2707 .  |
| 205494_at | 0.011751 | 0.006337 | ZNF821   | 55565 . |
| 205495_s_ | 0.013725 | 0.00761  | GNLY     | 10578 . |
| 205497_at | 0.048574 | 0.033188 | ZNF175   | 7728 .  |
| 205499_at | 4.08E-05 | 6.16E-06 | SRPX2    | 27286 . |
| 205500_at | 0.007336 | 0.003653 | C5       | 727 .   |
| 205502_at | 0.00798  | 0.004031 | CYP17A1  | 1586 .  |
| 205503_at | 4.40E-04 | 1.22E-04 | PTPN14   | 5784 .  |
| 205504_at | 7.69E-05 | 1.39E-05 | BTK      | 695 .   |
| 205505_at | 8.79E-05 | 1.64E-05 | GCNT1    | 2650 .  |
| 205506_at | 4.00E-08 | 6.60E-10 | VIL1     | 7429 .  |
| 205507_at | 6.80E-06 | 6.07E-07 | ARHGEF15 | 22899 . |
| 205508_at | 6.58E-05 | 1.13E-05 | SCN1B    | 6324 .  |
| 205510_s_ | 1.97E-04 | 4.50E-05 | FLJ10038 | 55056 . |
| 205511_at | 1.09E-09 | 5.95E-12 | FLJ10038 | 55056 . |
| 205512_s_ | 7.93E-05 | 1.44E-05 | AIFM1    | 9131 .  |
| 205513_at | 0.028679 | 0.018008 | TCN1     | 6947 .  |
| 205515_at | 5.69E-04 | 1.67E-04 | PRSS12   | 8492 .  |
| 205516_x_ | 0.037056 | 0.024251 | CIZ1     | 25792 . |

|           |          |          |         |         |
|-----------|----------|----------|---------|---------|
| 205517_at | 3.64E-04 | 9.64E-05 | GATA4   | 2626 .  |
| 205518_s_ | 3.50E-05 | 5.06E-06 | CMAH    | 8418 .  |
| 205519_at | 9.20E-05 | 1.74E-05 | WDR76   | 79968 . |
| 205520_at | 0.00965  | 0.005033 | STRN    | 6801 .  |
| 205521_at | 0.016916 | 0.009723 | EXOG    | 9941 .  |
| 205522_at | 7.21E-07 | 3.22E-08 | HOXD4   | 3233 .  |
| 205523_at | 1.19E-04 | 2.39E-05 | HAPLN1  | 1404 .  |
| 205524_s_ | 5.10E-04 | 1.46E-04 | HAPLN1  | 1404 .  |
| 205526_s_ | 0.001988 | 7.66E-04 | KATNA1  | 11104 . |
| 205527_s_ | 3.50E-05 | 5.07E-06 | GEMIN4  | 50628 . |
| 205528_s_ | 0.018367 | 0.010707 | RUNX1T1 | 862 .   |
| 205529_s_ | 0.02244  | 0.013542 | RUNX1T1 | 862 .   |
| 205530_at | 2.76E-05 | 3.75E-06 | ETFDH   | 2110 .  |
| 205531_s_ | 0.003176 | 0.001344 | GLS2    | 27165 . |
| 205537_s_ | 2.74E-06 | 1.87E-07 | VAV2    | 7410 .  |
| 205538_at | 2.45E-08 | 3.49E-10 | CORO2A  | 7464 .  |
| 205539_at | 0.001943 | 7.45E-04 | AVIL    | 10677 . |
| 205540_s_ | 0.001569 | 5.76E-04 | RRAGB   | 10325 . |
| 205541_s_ | 2.82E-04 | 7.02E-05 | GSPT2   | 23708 . |
| 205542_at | 0.016032 | 0.009141 | STEAP1  | 26872 . |
| 205544_s_ | 0.003985 | 0.001764 | CR2     | 1380 .  |
| 205546_s_ | 4.48E-09 | 3.81E-11 | TYK2    | 7297 .  |
| 205547_s_ | 1.72E-06 | 1.03E-07 | TAGLN   | 6876 .  |
| 205549_at | 4.35E-06 | 3.41E-07 | PCP4    | 5121 .  |
| 205553_s_ | 0.00259  | 0.001054 | CSRP3   | 8048 .  |
| 205555_s_ | 0.001582 | 5.82E-04 | MSX2    | 4488 .  |
| 205557_at | 0.04909  | 0.033604 | BPI     | 671 .   |
| 205561_at | 0.002466 | 9.94E-04 | KCTD17  | 79734 . |
| 205562_at | 7.10E-04 | 2.19E-04 | RPP38   | 10557 . |
| 205564_at | 0.014274 | 0.007963 | PAGE4   | 9506 .  |
| 205565_s_ | 0.023583 | 0.014348 | FXN     | 2395 .  |
| 205566_at | 8.78E-04 | 2.85E-04 | ABHD2   | 11057 . |
| 205568_at | 0.001185 | 4.11E-04 | AQP9    | 366 .   |
| 205569_at | 0.010929 | 0.005824 | LAMP3   | 27074 . |

|           |          |          |         |         |
|-----------|----------|----------|---------|---------|
| 205571_at | 4.68E-04 | 1.31E-04 | LIPT1   | 51601 . |
| 205572_at | 2.29E-06 | 1.48E-07 | ANGPT2  | 285 .   |
| 205573_s_ | 0.039257 | 0.025917 | SNX7    | 51375 . |
| 205574_x_ | 8.59E-08 | 1.86E-09 | BMP1    | 649 .   |
| 205575_at | 0.043281 | 0.029034 | C1QL1   | 10882 . |
| 205577_at | 1.32E-06 | 7.24E-08 | PYGM    | 5837 .  |
| 205578_at | 0.003037 | 0.001274 | ROR2    | 4920 .  |
| 205579_at | 1.01E-04 | 1.96E-05 | HRH1    | 3269 .  |
| 205580_s_ | 0.010598 | 0.005616 | HRH1    | 3269 .  |
| 205582_s_ | 0.001575 | 5.79E-04 | GGT5    | 2687 .  |
| 205583_s_ | 7.72E-04 | 2.44E-04 | ALG13   | 79868 . |
| 205584_at | 0.033854 | 0.021836 | ALG13   | 79868 . |
| 205585_at | 0.004056 | 0.001802 | ETV6    | 2120 .  |
| 205589_at | 0.003389 | 0.001454 | MYL3    | 4634 .  |
| 205591_at | 0.028646 | 0.017981 | OLFM1   | 10439 . |
| 205592_at | 2.43E-04 | 5.83E-05 | SLC4A1  | 6521 .  |
| 205593_s_ | 3.26E-04 | 8.43E-05 | PDE9A   | 5152 .  |
| 205594_at | 0.047307 | 0.0322   | ZNF652  | 22834 . |
| 205596_s_ | 9.57E-05 | 1.82E-05 | SMURF2  | 64750 . |
| 205597_at | 3.91E-04 | 1.05E-04 | SLC44A4 | 80736 . |
| 205598_at | 6.79E-05 | 1.18E-05 | TRAIP   | 10293 . |
| 205599_at | 0.01408  | 0.007838 | TRAF1   | 7185 .  |
| 205600_x_ | 0.004117 | 0.001834 | HOXB5   | 3215 .  |
| 205601_s_ | 1.41E-04 | 2.98E-05 | HOXB5   | 3215 .  |
| 205602_x_ | 6.16E-05 | 1.04E-05 | PSG7    | 5676 .  |
| 205603_s_ | 0.001959 | 7.52E-04 | DIAPH2  | 1730 .  |
| 205604_at | 0.001742 | 6.53E-04 | HOXD9   | 3235 .  |
| 205605_at | 2.30E-06 | 1.50E-07 | HOXD9   | 3235 .  |
| 205606_at | 4.42E-05 | 6.85E-06 | LRP6    | 4040 .  |
| 205607_s_ | 0.01459  | 0.008174 | SCYL3   | 57147 . |
| 205608_s_ | 3.08E-05 | 4.32E-06 | ANGPT1  | 284 .   |
| 205609_at | 0.004373 | 0.001974 | ANGPT1  | 284 .   |
| 205611_at | 4.36E-05 | 6.74E-06 | TNFSF12 | 8742 .  |
| 205613_at | 2.44E-04 | 5.86E-05 | SYT17   | 51760 . |

|           |          |          |          |          |
|-----------|----------|----------|----------|----------|
| 205614_x_ | 0.003507 | 0.001515 | MST1     | 4485 .   |
| 205615_at | 0.010239 | 0.005393 | CPA1     | 1357 .   |
| 205616_at | 2.49E-04 | 6.01E-05 | KCNA6    | 3742 .   |
| 205617_at | 0.009178 | 0.004746 | PRRG2    | 5639 .   |
| 205618_at | 0.025527 | 0.015738 | PRRG1    | 5638 .   |
| 205620_at | 1.11E-06 | 5.64E-08 | F10      | 2159 .   |
| 205622_at | 0.005049 | 0.002345 | SMPD2    | 6610 .   |
| 205625_s_ | 1.76E-05 | 2.13E-06 | CALB1    | 793 .    |
| 205626_s_ | 3.28E-05 | 4.67E-06 | CALB1    | 793 .    |
| 205627_at | 9.22E-06 | 9.16E-07 | CDA      | 978 .    |
| 205628_at | 0.033431 | 0.021523 | PRIM2    | 5558 .   |
| 205629_s_ | 5.61E-06 | 4.75E-07 | CRH      | 1392 .   |
| 205631_at | 0.011949 | 0.006464 | KIAA0586 | 9786 .   |
| 205632_s_ | 1.53E-05 | 1.78E-06 | PIP5K1B  | 8395 .   |
| 205634_x_ | 0.032947 | 0.021161 | ZDHHC24  | 254359 . |
| 205636_at | 9.36E-04 | 3.08E-04 | SH3GL3   | 6457 .   |
| 205637_s_ | 0.006478 | 0.00315  | SH3GL3   | 6457 .   |
| 205639_at | 0.002583 | 0.00105  | AOAH     | 313 .    |
| 205640_at | 2.77E-07 | 9.14E-09 | ALDH3B1  | 221 .    |
| 205641_s_ | 6.16E-08 | 1.18E-09 | TRADD    | 8717 .   |
| 205642_at | 7.10E-05 | 1.25E-05 | CEP110   | 11064 .  |
| 205644_s_ | 1.26E-04 | 2.56E-05 | SNRPG    | 6637 .   |
| 205646_s_ | 0.003747 | 0.00164  | PAX6     | 5080 .   |
| 205647_at | 0.041016 | 0.027263 | RAD52    | 5893 .   |
| 205648_at | 1.63E-11 | 2.40E-14 | WNT2     | 7472 .   |
| 205650_s_ | 0.001325 | 4.70E-04 | FGA      | 2243 .   |
| 205652_s_ | 1.72E-05 | 2.05E-06 | TTLL1    | 25809 .  |
| 205653_at | 0.011288 | 0.006049 | CTSG     | 1511 .   |
| 205657_at | 0.004126 | 0.001839 | HAAO     | 23498 .  |
| 205658_s_ | 1.30E-05 | 1.44E-06 | SNAPC4   | 6621 .   |
| 205666_at | 0.005436 | 0.002558 | FMO1     | 2326 .   |
| 205668_at | 0.001528 | 5.58E-04 | LY75     | 4065 .   |
| 205670_at | 1.21E-09 | 6.72E-12 | GAL3ST1  | 9514 .   |
| 205672_at | 4.03E-06 | 3.09E-07 | XPA      | 7507 .   |

|           |          |          |                            |         |
|-----------|----------|----------|----------------------------|---------|
| 205674_x_ | 0.00491  | 0.002267 | FXVD2                      | 486 .   |
| 205676_at | 0.005112 | 0.00238  | CYP27B1                    | 1594 .  |
| 205678_at | 9.10E-10 | 4.69E-12 | AP3B2                      | 8120 .  |
| 205679_x_ | 6.08E-05 | 1.02E-05 | ACAN                       | 176 .   |
| 205680_at | 0.013084 | 0.007196 | MMP10                      | 4319 .  |
| 205682_x_ | 9.93E-04 | 3.31E-04 | APOM                       | 55937 . |
| 205683_x_ | 2.42E-05 | 3.18E-06 | TPSAB1                     | 7177 .  |
| 205686_s_ | 0.008011 | 0.00405  | CD86                       | 942 .   |
| 205688_at | 0.00529  | 0.002477 | TFAP4                      | 7023 .  |
| 205690_s_ | 0.001903 | 7.27E-04 | BUD31                      | 8896 .  |
| 205691_at | 0.00495  | 0.002288 | SYNGR3                     | 9143 .  |
| 205693_at | 0.001982 | 7.63E-04 | TNNT3                      | 7140 .  |
| 205696_s_ | 0.039483 | 0.026088 | GFRA1                      | 2674 .  |
| 205698_s_ | 1.45E-05 | 1.65E-06 | MAP2K6                     | 5608 .  |
| 205699_at | 0.006062 | 0.002913 | MAP2K6                     | 5608 .  |
| 205701_at | 5.00E-06 | 4.07E-07 | IPO8                       | 10526 . |
| 205702_at | 0.031587 | 0.020137 | PHTF1                      | 10745 . |
| 205704_s_ | 0.021529 | 0.012903 | ATP6V0A2                   | 23545 . |
| 205707_at | 0.002003 | 7.73E-04 | IL17RA                     | 23765 . |
| 205709_s_ | 3.43E-04 | 8.96E-05 | CDS1                       | 1040 .  |
| 205710_at | 4.64E-05 | 7.29E-06 | LRP2                       | 4036 .  |
| 205711_x_ | 0.007387 | 0.003682 | ATP5C1                     | 509 .   |
| 205712_at | 4.43E-07 | 1.70E-08 | PTPRD                      | 5789 .  |
| 205713_s_ | 2.35E-04 | 5.59E-05 | COMP                       | 1311 .  |
| 205714_s_ | 4.10E-06 | 3.16E-07 | ZMYND10                    | 51364 . |
| 205715_at | 1.67E-08 | 2.09E-10 | BST1                       | 683 .   |
| 205716_at | 0.006996 | 0.003454 | SLC25A40                   | 55972 . |
| 205717_x_ | 8.53E-06 | 8.20E-07 | PCDHGA1 /// P26025 /// 50% |         |
| 205718_at | 0.001555 | 5.70E-04 | ITGB7                      | 3695 .  |
| 205719_s_ | 0.029955 | 0.018948 | PAH                        | 5053 .  |
| 205720_at | 7.09E-06 | 6.44E-07 | POMC                       | 5443 .  |
| 205723_at | 2.02E-04 | 4.65E-05 | CNTFR                      | 1271 .  |
| 205725_at | 0.01763  | 0.010207 | SCGB1A1                    | 7356 .  |
| 205728_at | 0.01104  | 0.005892 |                            | .       |

|           |          |          |         |         |
|-----------|----------|----------|---------|---------|
| 205729_at | 2.74E-07 | 8.98E-09 | OSMR    | 9180 .  |
| 205730_s_ | 0.018203 | 0.010597 | ABLIM3  | 22885 . |
| 205731_s_ | 1.28E-05 | 1.41E-06 | NCOA2   | 10499 . |
| 205732_s_ | 4.68E-05 | 7.37E-06 | NCOA2   | 10499 . |
| 205733_at | 5.19E-08 | 9.46E-10 | BLM     | 641 .   |
| 205734_s_ | 0.015736 | 0.008938 | AFF3    | 3899 .  |
| 205736_at | 6.24E-04 | 1.87E-04 | PGAM2   | 5224 .  |
| 205738_s_ | 0.012346 | 0.006721 | FABP3   | 2170 .  |
| 205739_x_ | 7.69E-05 | 1.39E-05 | ZNF107  | 51427 . |
| 205740_s_ | 0.01505  | 0.008481 | RBM42   | 79171 . |
| 205741_s_ | 0.043546 | 0.029239 | DTNA    | 1837 .  |
| 205742_at | 0.025152 | 0.015467 | TNNI3   | 7137 .  |
| 205744_at | 0.048088 | 0.032798 | DOC2A   | 8448 .  |
| 205747_at | 1.73E-07 | 4.74E-09 | CBLN1   | 869 .   |
| 205752_s_ | 1.02E-05 | 1.05E-06 | GSTM5   | 2949 .  |
| 205754_at | 2.65E-04 | 6.51E-05 | F2      | 2147 .  |
| 205756_s_ | 0.001252 | 4.39E-04 | F8      | 2157 .  |
| 205757_at | 0.010321 | 0.005444 | ENTPD5  | 957 .   |
| 205758_at | 1.07E-05 | 1.11E-06 | CD8A    | 925 .   |
| 205760_s_ | 2.81E-05 | 3.84E-06 | OGG1    | 4968 .  |
| 205761_s_ | 3.98E-04 | 1.08E-04 | DUS4L   | 11062 . |
| 205763_s_ | 7.41E-05 | 1.32E-05 | DDX18   | 8886 .  |
| 205764_at | 0.027426 | 0.01709  |         | .       |
| 205766_at | 3.38E-04 | 8.81E-05 | TCAP    | 8557 .  |
| 205767_at | 0.010211 | 0.005376 | EREG    | 2069 .  |
| 205768_s_ | 0.044356 | 0.029884 | SLC27A2 | 11001 . |
| 205769_at | 0.048088 | 0.032798 | SLC27A2 | 11001 . |
| 205774_at | 5.67E-05 | 9.36E-06 | F12     | 2161 .  |
| 205775_at | 0.002387 | 9.55E-04 | FAM50B  | 26240 . |
| 205777_at | 0.016335 | 0.00934  | DUSP9   | 1852 .  |
| 205778_at | 8.75E-05 | 1.63E-05 | KLK7    | 5650 .  |
| 205779_at | 0.009133 | 0.004716 | RAMP2   | 10266 . |
| 205780_at | 0.003262 | 0.001388 | BIK     | 638 .   |
| 205781_at | 0.001349 | 4.81E-04 | C16orf7 | 9605 .  |

|           |          |          |          |         |
|-----------|----------|----------|----------|---------|
| 205782_at | 5.58E-05 | 9.17E-06 | FGF7     | 2252 .  |
| 205783_at | 0.001264 | 4.44E-04 | KLK13    | 26085 . |
| 205784_x_ | 8.84E-07 | 4.21E-08 | ARVCF    | 421 .   |
| 205785_at | 0.022476 | 0.013567 | ITGAM    | 3684 .  |
| 205786_s_ | 0.031688 | 0.02021  | ITGAM    | 3684 .  |
| 205788_s_ | 0.004601 | 0.002098 | ZC3H11A  | 9877 .  |
| 205789_at | 6.86E-04 | 2.10E-04 | CD1D     | 912 .   |
| 205792_at | 0.002555 | 0.001037 | WISP2    | 8839 .  |
| 205793_x_ | 3.64E-04 | 9.64E-05 | TNK1     | 8711 .  |
| 205794_s_ | 6.17E-04 | 1.85E-04 | NOVA1    | 4857 .  |
| 205795_at | 0.001894 | 7.23E-04 | NRXN3    | 9369 .  |
| 205796_at | 1.20E-04 | 2.43E-05 | TCP11L1  | 55346 . |
| 205797_s_ | 2.05E-05 | 2.57E-06 | TCP11L1  | 55346 . |
| 205798_at | 0.049277 | 0.033747 | IL7R     | 3575 .  |
| 205804_s_ | 9.56E-04 | 3.16E-04 | TRAF3IP3 | 80342 . |
| 205805_s_ | 2.27E-04 | 5.38E-05 | ROR1     | 4919 .  |
| 205806_at | 1.06E-05 | 1.09E-06 | ROM1     | 6094 .  |
| 205808_at | 8.56E-09 | 8.76E-11 | ASPH     | 444 .   |
| 205809_s_ | 1.85E-05 | 2.26E-06 | WASL     | 8976 .  |
| 205810_s_ | 3.92E-07 | 1.44E-08 | WASL     | 8976 .  |
| 205811_at | 9.51E-08 | 2.15E-09 | POLG2    | 11232 . |
| 205813_s_ | 7.14E-04 | 2.21E-04 | MAT1A    | 4143 .  |
| 205814_at | 2.83E-04 | 7.08E-05 | GRM3     | 2913 .  |
| 205817_at | 1.62E-04 | 3.52E-05 | SIX1     | 6495 .  |
| 205818_at | 0.01908  | 0.011191 | DBC1     | 1620 .  |
| 205820_s_ | 0.033605 | 0.021654 | APOC3    | 345 .   |
| 205822_s_ | 0.012252 | 0.006662 | HMGCS1   | 3157 .  |
| 205824_at | 5.12E-11 | 1.12E-13 | HSPB2    | 3316 .  |
| 205828_at | 5.13E-05 | 8.27E-06 | MMP3     | 4314 .  |
| 205830_at | 0.003822 | 0.001679 | CLGN     | 1047 .  |
| 205831_at | 2.27E-04 | 5.37E-05 | CD2      | 914 .   |
| 205832_at | 0.015562 | 0.008825 | CPA4     | 51200 . |
| 205833_s_ | 2.92E-07 | 9.77E-09 | PART1    | 25859 . |
| 205834_s_ | 1.41E-04 | 2.98E-05 | PART1    | 25859 . |



|           |          |          |                             |         |
|-----------|----------|----------|-----------------------------|---------|
| 205840_x_ | 0.00186  | 7.07E-04 | GH1                         | 2688 .  |
| 205841_at | 1.27E-06 | 6.85E-08 | JAK2                        | 3717 .  |
| 205842_s_ | 1.52E-07 | 4.01E-09 | JAK2                        | 3717 .  |
| 205843_x_ | 2.25E-07 | 6.84E-09 | CRAT                        | 1384 .  |
| 205845_at | 0.002167 | 8.51E-04 | CACNA1H                     | 8912 .  |
| 205846_at | 4.29E-04 | 1.18E-04 | PTPRB                       | 5787 .  |
| 205847_at | 8.37E-04 | 2.69E-04 | PRSS22                      | 64063 . |
| 205850_s_ | 1.04E-06 | 5.18E-08 | GABRB3                      | 2562 .  |
| 205851_at | 1.87E-04 | 4.21E-05 | NME6                        | 10201 . |
| 205852_at | 0.045281 | 0.030601 | CDK5R2                      | 8941 .  |
| 205853_at | 7.25E-06 | 6.62E-07 | ZBTB7B                      | 51043 . |
| 205854_at | 6.08E-05 | 1.02E-05 | TULP3                       | 7289 .  |
| 205856_at | 3.99E-07 | 1.47E-08 | SLC14A1                     | 6563 .  |
| 205859_at | 5.60E-04 | 1.64E-04 | LY86                        | 9450 .  |
| 205861_at | 9.69E-05 | 1.85E-05 | SPIB                        | 6689 .  |
| 205862_at | 1.27E-08 | 1.42E-10 | GREB1                       | 9687 .  |
| 205864_at | 0.009343 | 0.004845 | SLC7A4                      | 6545 .  |
| 205865_at | 5.36E-06 | 4.46E-07 | ARID3A                      | 1820 .  |
| 205867_at | 1.26E-04 | 2.57E-05 | PTPN11                      | 5781 .  |
| 205869_at | 2.90E-05 | 4.00E-06 | PRSS1                       | 5644 .  |
| 205870_at | 6.06E-04 | 1.80E-04 | BDKRB2                      | 624 .   |
| 205871_at | 1.35E-05 | 1.51E-06 | PLGLB1 /// PLC5342 /// 5342 | 5342 .  |
| 205872_x_ | 1.83E-05 | 2.22E-06 | PDE4DIP                     | 9659 .  |
| 205874_at | 0.023273 | 0.014125 | ITPKA                       | 3706 .  |
| 205875_s_ | 0.047483 | 0.032332 | TREX1                       | 11277 . |
| 205876_at | 0.001619 | 5.97E-04 | LIFR                        | 3977 .  |
| 205877_s_ | 0.035374 | 0.022963 | ZC3H7B                      | 23264 . |
| 205878_at | 0.012063 | 0.006538 | POU6F1                      | 5463 .  |
| 205879_x_ | 7.69E-05 | 1.39E-05 | RET                         | 5979 .  |
| 205880_at | 7.44E-04 | 2.33E-04 | PRKD1                       | 5587 .  |
| 205881_at | 8.76E-04 | 2.84E-04 | ZNF74                       | 7625 .  |
| 205882_x_ | 0.010687 | 0.005672 | ADD3                        | 120 .   |
| 205884_at | 8.04E-06 | 7.58E-07 | ITGA4                       | 3676 .  |
| 205885_s_ | 2.99E-05 | 4.15E-06 | ITGA4                       | 3676 .  |

|           |          |          |                             |         |
|-----------|----------|----------|-----------------------------|---------|
| 205886_at | 6.12E-04 | 1.82E-04 | REG1B                       | 5968 .  |
| 205887_x_ | 0.014152 | 0.007885 | MSH3                        | 4437 .  |
| 205891_at | 5.10E-04 | 1.46E-04 | ADORA2B                     | 136 .   |
| 205892_s_ | 0.00505  | 0.002346 | FABP1                       | 2168 .  |
| 205894_at | 3.20E-05 | 4.53E-06 | ARSE                        | 415 .   |
| 205895_s_ | 2.36E-04 | 5.61E-05 | NOLC1                       | 9221 .  |
| 205896_at | 2.55E-05 | 3.39E-06 | SLC22A4                     | 6583 .  |
| 205897_at | 9.87E-05 | 1.90E-05 | NFATC4                      | 4776 .  |
| 205899_at | 2.94E-04 | 7.41E-05 | CCNA1                       | 8900 .  |
| 205900_at | 0.00813  | 0.004119 | KRT1                        | 3848 .  |
| 205904_at | 3.60E-04 | 9.52E-05 | MICA                        | 4276 .  |
| 205905_s_ | 8.70E-05 | 1.62E-05 | MICA /// MICB 4276 /// 4276 | 4276 .  |
| 205906_at | 1.04E-04 | 2.04E-05 | FOXJ1                       | 2302 .  |
| 205907_s_ | 7.19E-05 | 1.27E-05 | OMD                         | 4958 .  |
| 205908_s_ | 7.71E-04 | 2.43E-04 | OMD                         | 4958 .  |
| 205909_at | 3.01E-05 | 4.20E-06 | POLE2                       | 5427 .  |
| 205911_at | 0.041178 | 0.027389 | PTH1R                       | 5745 .  |
| 205913_at | 0.005165 | 0.002409 | PLIN                        | 5346 .  |
| 205914_s_ | 2.10E-04 | 4.87E-05 | GRIN1                       | 2902 .  |
| 205917_at | 0.007935 | 0.004007 | ZNF264                      | 9422 .  |
| 205920_at | 0.003052 | 0.001281 | SLC6A6                      | 6533 .  |
| 205921_s_ | 0.003053 | 0.001282 | SLC6A6                      | 6533 .  |
| 205922_at | 0.023688 | 0.014424 | VNN2                        | 8875 .  |
| 205923_at | 0.011174 | 0.005979 | RELN                        | 5649 .  |
| 205924_at | 0.001365 | 4.88E-04 | RAB3B                       | 5865 .  |
| 205925_s_ | 2.44E-04 | 5.88E-05 | RAB3B                       | 5865 .  |
| 205928_at | 3.61E-05 | 5.27E-06 | ZNF443                      | 10224 . |
| 205929_at | 4.31E-04 | 1.19E-04 | GPA33                       | 10223 . |
| 205930_at | 1.59E-07 | 4.27E-09 | GTF2E1                      | 2960 .  |
| 205932_s_ | 2.27E-04 | 5.35E-05 | MSX1                        | 4487 .  |
| 205933_at | 0.006188 | 0.002983 | SETBP1                      | 26040 . |
| 205936_s_ | 0.001076 | 3.65E-04 | HK3                         | 3101 .  |
| 205937_at | 8.86E-04 | 2.89E-04 | CGREF1                      | 10669 . |
| 205938_at | 0.007168 | 0.003554 | PPM1E                       | 22843 . |

|           |          |          |                             |         |
|-----------|----------|----------|-----------------------------|---------|
| 205939_at | 0.033403 | 0.021501 | CYP3A7                      | 1551 .  |
| 205940_at | 0.028933 | 0.018194 | MYH3                        | 4621 .  |
| 205942_s_ | 0.012043 | 0.006524 | ACSM3                       | 6296 .  |
| 205944_s_ | 2.90E-04 | 7.28E-05 | CLTCL1                      | 8218 .  |
| 205945_at | 8.03E-04 | 2.56E-04 | IL6R                        | 3570 .  |
| 205946_at | 1.65E-04 | 3.60E-05 | VIPR2                       | 7434 .  |
| 205947_s_ | 0.018759 | 0.010975 | VIPR2                       | 7434 .  |
| 205949_at | 0.029716 | 0.018774 | CA1                         | 759 .   |
| 205950_s_ | 3.51E-04 | 9.20E-05 | CA1                         | 759 .   |
| 205953_at | 1.14E-05 | 1.21E-06 | LRIG2                       | 9860 .  |
| 205954_at | 2.13E-05 | 2.71E-06 | RXRG                        | 6258 .  |
| 205955_at | 0.037006 | 0.024212 |                             | .       |
| 205956_x_ | 5.79E-04 | 1.70E-04 | PSMC3IP                     | 29893 . |
| 205957_at | 0.001372 | 4.91E-04 | PLXNB3                      | 5365 .  |
| 205958_x_ | 0.041459 | 0.027609 | CSHL1                       | 1444 .  |
| 205960_at | 0.043674 | 0.029341 | PDK4                        | 5166 .  |
| 205962_at | 7.32E-05 | 1.30E-05 | PAK2                        | 5062 .  |
| 205963_s_ | 0.001354 | 4.83E-04 | DNAJA3                      | 9093 .  |
| 205964_at | 4.76E-04 | 1.34E-04 | ZNF426                      | 79088 . |
| 205965_at | 0.005002 | 0.002317 | BATF                        | 10538 . |
| 205966_at | 0.001103 | 3.76E-04 | TAF13                       | 6884 .  |
| 205967_at | 7.58E-06 | 7.03E-07 | HIST1H4C                    | 8364 .  |
| 205968_at | 0.04769  | 0.032492 | KCNS3                       | 3790 .  |
| 205969_at | 3.96E-05 | 5.92E-06 | AADAC                       | 13 .    |
| 205970_at | 2.75E-04 | 6.80E-05 | MT3                         | 4504 .  |
| 205971_s_ | 3.61E-04 | 9.54E-05 | CTRB1 /// CTRF1504 /// 4403 | .       |
| 205972_at | 5.50E-04 | 1.60E-04 | SLC38A3                     | 10991 . |
| 205973_at | 0.005261 | 0.002461 | FEZ1                        | 9638 .  |
| 205975_s_ | 0.006369 | 0.003087 | HOXD1                       | 3231 .  |
| 205976_at | 7.03E-04 | 2.17E-04 | FASTKD2                     | 22868 . |
| 205977_s_ | 8.66E-13 | 4.44E-16 | EPHA1                       | 2041 .  |
| 205980_s_ | 2.16E-11 | 3.65E-14 | ARHGAP8 /// L23779 /// 553  | .       |
| 205982_x_ | 4.87E-04 | 1.38E-04 | SFTPC                       | 6440 .  |
| 205983_at | 5.28E-05 | 8.57E-06 | DPEP1                       | 1800 .  |

|           |          |          |          |         |
|-----------|----------|----------|----------|---------|
| 205984_at | 0.001326 | 4.71E-04 | CRHBP    | 1393 .  |
| 205985_x_ | 0.007924 | 0.004    | CLCNKB   | 1188 .  |
| 205986_at | 1.20E-04 | 2.43E-05 | AATK     | 9625 .  |
| 205987_at | 3.92E-04 | 1.06E-04 | CD1C     | 911 .   |
| 205988_at | 0.007038 | 0.003479 | CD84     | 8832 .  |
| 205990_s_ | 3.15E-05 | 4.45E-06 | WNT5A    | 7474 .  |
| 205991_s_ | 2.51E-12 | 1.70E-15 | PRRX1    | 5396 .  |
| 205992_s_ | 1.00E-05 | 1.02E-06 | IL15     | 3600 .  |
| 205993_s_ | 7.53E-04 | 2.36E-04 | TBX2     | 6909 .  |
| 205994_at | 0.028061 | 0.017556 | ELK4     | 2005 .  |
| 205995_x_ | 2.55E-04 | 6.22E-05 | IQCB1    | 9657 .  |
| 205996_s_ | 3.53E-07 | 1.25E-08 | AK2      | 204 .   |
| 205997_at | 0.012193 | 0.006623 | ADAM28   | 10863 . |
| 205998_x_ | 3.20E-05 | 4.54E-06 | CYP3A4   | 1576 .  |
| 206000_at | 0.025426 | 0.015666 | MEP1A    | 4224 .  |
| 206002_at | 0.002334 | 9.30E-04 | GPR64    | 10149 . |
| 206003_at | 2.90E-04 | 7.28E-05 | CEP135   | 9662 .  |
| 206005_s_ | 0.013981 | 0.007772 | KIAA1009 | 22832 . |
| 206008_at | 7.37E-05 | 1.31E-05 | TGM1     | 7051 .  |
| 206009_at | 0.001637 | 6.06E-04 | ITGA9    | 3680 .  |
| 206010_at | 1.44E-04 | 3.06E-05 | HABP2    | 3026 .  |
| 206011_at | 7.27E-06 | 6.65E-07 | CASP1    | 834 .   |
| 206012_at | 8.91E-12 | 1.11E-14 | LEFTY2   | 7044 .  |
| 206013_s_ | 2.05E-04 | 4.73E-05 | ACTL6B   | 51412 . |
| 206014_at | 3.45E-04 | 9.02E-05 | ACTL6B   | 51412 . |
| 206016_at | 1.38E-05 | 1.55E-06 | CCDC22   | 28952 . |
| 206018_at | 6.66E-05 | 1.15E-05 | FOXG1    | 2290 .  |
| 206019_at | 0.009855 | 0.005158 | RBM19    | 9904 .  |
| 206020_at | 0.034921 | 0.022617 | SOCS6    | 9306 .  |
| 206021_at | 1.50E-04 | 3.20E-05 | SCAND2   | 54581 . |
| 206023_at | 2.03E-06 | 1.28E-07 | NMU      | 10874 . |
| 206025_s_ | 0.008826 | 0.004531 | TNFAIP6  | 7130 .  |
| 206026_s_ | 0.007878 | 0.003973 | TNFAIP6  | 7130 .  |
| 206027_at | 0.015698 | 0.008913 | S100A3   | 6274 .  |

|           |          |          |                            |         |
|-----------|----------|----------|----------------------------|---------|
| 206028_s_ | 4.87E-05 | 7.76E-06 | MERTK                      | 10461 . |
| 206030_at | 6.94E-04 | 2.14E-04 | ASPA                       | 443 .   |
| 206031_s_ | 5.37E-04 | 1.55E-04 | USP5                       | 8078 .  |
| 206032_at | 0.010995 | 0.005864 | DSC3                       | 1825 .  |
| 206033_s_ | 0.001379 | 4.94E-04 | DSC3                       | 1825 .  |
| 206034_at | 3.55E-05 | 5.14E-06 | SERPINB8                   | 5271 .  |
| 206036_s_ | 6.92E-05 | 1.21E-05 | REL                        | 5966 .  |
| 206037_at | 5.54E-05 | 9.10E-06 | CCBL1                      | 883 .   |
| 206038_s_ | 2.88E-04 | 7.21E-05 | NR2C2                      | 7182 .  |
| 206042_x_ | 0.005485 | 0.002586 | SNRPN /// SNU6638 /// 8926 | 8926 .  |
| 206043_s_ | 3.19E-06 | 2.29E-07 | ATP2C2                     | 9914 .  |
| 206044_s_ | 0.009056 | 0.004668 | BRAF                       | 673 .   |
| 206046_at | 0.033403 | 0.021501 | ADAM23                     | 8745 .  |
| 206047_at | 0.007231 | 0.003591 | GNB3                       | 2784 .  |
| 206048_at | 0.027534 | 0.017169 | OVOL2                      | 58495 . |
| 206049_at | 6.65E-05 | 1.15E-05 | SELP                       | 6403 .  |
| 206050_s_ | 1.80E-08 | 2.31E-10 | RNH1                       | 6050 .  |
| 206052_s_ | 2.62E-06 | 1.76E-07 | SLBP                       | 7884 .  |
| 206055_s_ | 3.90E-06 | 2.96E-07 | SNRPA1                     | 6627 .  |
| 206056_x_ | 2.18E-04 | 5.10E-05 | SPN                        | 6693 .  |
| 206057_x_ | 6.75E-06 | 6.02E-07 | SPN                        | 6693 .  |
| 206059_at | 0.003457 | 0.001488 | ZNF91                      | 7644 .  |
| 206062_at | 2.18E-08 | 2.94E-10 | GUCA1A                     | 2978 .  |
| 206063_x_ | 0.034766 | 0.022501 | PPIL2                      | 23759 . |
| 206064_s_ | 8.59E-04 | 2.78E-04 | PPIL2                      | 23759 . |
| 206066_s_ | 7.18E-06 | 6.55E-07 | RAD51C                     | 5889 .  |
| 206067_s_ | 0.035549 | 0.023098 | WT1                        | 7490 .  |
| 206068_s_ | 0.001495 | 5.44E-04 | ACADL                      | 33 .    |
| 206074_s_ | 0.002101 | 8.19E-04 | HMGA1                      | 3159 .  |
| 206077_at | 7.60E-07 | 3.43E-08 | KEL                        | 3792 .  |
| 206079_at | 0.004153 | 0.001853 | CHML                       | 1122 .  |
| 206080_at | 0.043123 | 0.028899 | PLCH2                      | 9651 .  |
| 206083_at | 0.009379 | 0.004867 | BAI1                       | 575 .   |
| 206085_s_ | 0.001233 | 4.31E-04 | CTH                        | 1491 .  |

|           |          |          |                              |         |
|-----------|----------|----------|------------------------------|---------|
| 206086_x_ | 3.69E-06 | 2.75E-07 | HFE                          | 3077 .  |
| 206087_x_ | 1.19E-05 | 1.28E-06 | HFE                          | 3077 .  |
| 206088_at | 0.040295 | 0.026711 | LRRC37A /// LF374819 /// 47. |         |
| 206090_s_ | 0.031064 | 0.019758 | DISC1                        | 27185 . |
| 206091_at | 7.36E-04 | 2.29E-04 | MATN3                        | 4148 .  |
| 206095_s_ | 0.017153 | 0.009881 | FUSIP1                       | 10772 . |
| 206099_at | 0.006441 | 0.003128 | PRKCH                        | 5583 .  |
| 206100_at | 0.010278 | 0.005418 | CPM                          | 1368 .  |
| 206101_at | 2.83E-05 | 3.86E-06 | ECM2                         | 1842 .  |
| 206102_at | 1.77E-06 | 1.07E-07 | GINS1                        | 9837 .  |
| 206103_at | 6.00E-04 | 1.78E-04 | RAC3                         | 5881 .  |
| 206106_at | 0.006114 | 0.002941 | MAPK12                       | 6300 .  |
| 206107_at | 0.025827 | 0.015947 | RGS11                        | 8786 .  |
| 206109_at | 9.02E-06 | 8.86E-07 | FUT1                         | 2523 .  |
| 206110_at | 0.022907 | 0.013866 |                              | .       |
| 206113_s_ | 1.28E-04 | 2.63E-05 | RAB5A                        | 5868 .  |
| 206116_s_ | 2.20E-04 | 5.15E-05 | TPM1                         | 7168 .  |
| 206117_at | 1.47E-05 | 1.69E-06 | TPM1                         | 7168 .  |
| 206118_at | 0.00572  | 0.002716 | STAT4                        | 6775 .  |
| 206119_at | 0.006215 | 0.002999 | BHMT                         | 635 .   |
| 206122_at | 4.41E-08 | 7.63E-10 | SOX15                        | 6665 .  |
| 206123_at | 5.02E-04 | 1.43E-04 | LLGL1                        | 3996 .  |
| 206125_s_ | 9.34E-05 | 1.77E-05 | KLK8                         | 11202 . |
| 206126_at | 0.029536 | 0.018638 | CXCR5                        | 643 .   |
| 206127_at | 1.43E-06 | 8.00E-08 | ELK3                         | 2004 .  |
| 206128_at | 0.005931 | 0.002838 | ADRA2C                       | 152 .   |
| 206129_s_ | 2.81E-07 | 9.30E-09 | ARSB                         | 411 .   |
| 206130_s_ | 0.002763 | 0.001138 | ASGR2                        | 433 .   |
| 206133_at | 0.013849 | 0.007688 | XAF1                         | 54739 . |
| 206136_at | 1.12E-06 | 5.71E-08 | FZD5                         | 7855 .  |
| 206137_at | 0.00118  | 4.09E-04 | RIMS2                        | 9699 .  |
| 206138_s_ | 7.53E-05 | 1.35E-05 | PI4KB                        | 5298 .  |
| 206139_at | 0.005607 | 0.002655 | PI4KB                        | 5298 .  |
| 206140_at | 4.44E-09 | 3.75E-11 | LHX2                         | 9355 .  |

|           |          |          |         |          |
|-----------|----------|----------|---------|----------|
| 206142_at | 0.035244 | 0.022861 | ZNF135  | 7694 .   |
| 206144_at | 0.009093 | 0.00469  | MAGI1   | 9223 .   |
| 206146_s_ | 0.001614 | 5.96E-04 | RHAG    | 6005 .   |
| 206147_x_ | 8.76E-05 | 1.64E-05 | SCML2   | 10389 .  |
| 206148_at | 0.031548 | 0.020109 | IL3RA   | 3563 .   |
| 206149_at | 0.003198 | 0.001356 | CHP2    | 63928 .  |
| 206150_at | 9.47E-04 | 3.13E-04 | CD27    | 939 .    |
| 206151_x_ | 4.98E-04 | 1.41E-04 | CELA3B  | 23436 .  |
| 206152_at | 9.24E-05 | 1.75E-05 | AGAP2   | 116986 . |
| 206154_at | 0.041889 | 0.027942 | RLBP1   | 6017 .   |
| 206155_at | 0.010343 | 0.005458 | ABCC2   | 1244 .   |
| 206156_at | 0.001719 | 6.43E-04 | GJB5    | 2709 .   |
| 206157_at | 2.19E-07 | 6.56E-09 | PTX3    | 5806 .   |
| 206158_s_ | 8.78E-07 | 4.17E-08 | CNBP    | 7555 .   |
| 206160_at | 1.16E-05 | 1.24E-06 | APOBEC2 | 10930 .  |
| 206161_s_ | 0.004066 | 0.001808 | SYT5    | 6861 .   |
| 206162_x_ | 5.78E-04 | 1.70E-04 | SYT5    | 6861 .   |
| 206163_at | 1.57E-07 | 4.19E-09 | MAB21L1 | 4081 .   |
| 206164_at | 0.003028 | 0.001269 | CLCA2   | 9635 .   |
| 206165_s_ | 4.78E-05 | 7.57E-06 | CLCA2   | 9635 .   |
| 206166_s_ | 3.97E-06 | 3.02E-07 | CLCA2   | 9635 .   |
| 206167_s_ | 0.00268  | 0.001097 | ARHGAP6 | 395 .    |
| 206169_x_ | 8.92E-10 | 4.56E-12 | ZC3H7B  | 23264 .  |
| 206170_at | 0.013614 | 0.007535 | ADRB2   | 154 .    |
| 206171_at | 0.001885 | 7.18E-04 | ADORA3  | 140 .    |
| 206172_at | 8.15E-06 | 7.71E-07 | IL13RA2 | 3598 .   |
| 206173_x_ | 0.00429  | 0.001928 | GABPB1  | 2553 .   |
| 206176_at | 0.009825 | 0.00514  | BMP6    | 654 .    |
| 206179_s_ | 2.42E-04 | 5.81E-05 | TPPP    | 11076 .  |
| 206180_x_ | 0.007989 | 0.004037 | ZNF747  | 65988 .  |
| 206182_at | 1.86E-05 | 2.28E-06 | ZNF134  | 7693 .   |
| 206184_at | 0.015117 | 0.008525 | CRKL    | 1399 .   |
| 206185_at | 5.48E-07 | 2.22E-08 | CRYBB1  | 1414 .   |
| 206187_at | 1.78E-07 | 4.92E-09 | PTGIR   | 5739 .   |

|           |          |          |           |         |
|-----------|----------|----------|-----------|---------|
| 206188_at | 0.00404  | 0.001794 | ZNF623    | 9831 .  |
| 206192_at | 1.16E-06 | 6.00E-08 | CDSN      | 1041 .  |
| 206194_at | 6.83E-05 | 1.19E-05 | HOXC4     | 3221 .  |
| 206195_x_ | 3.65E-05 | 5.33E-06 | GH2       | 2689 .  |
| 206197_at | 0.002813 | 0.001162 | NME5      | 8382 .  |
| 206200_s_ | 5.40E-06 | 4.50E-07 | ANXA11    | 311 .   |
| 206201_s_ | 0.015974 | 0.009102 | MEOX2     | 4223 .  |
| 206203_at | 0.041903 | 0.027953 | RCVRN     | 5957 .  |
| 206204_at | 4.64E-04 | 1.30E-04 | GRB14     | 2888 .  |
| 206207_at | 0.018614 | 0.010875 | CLC       | 1178 .  |
| 206208_at | 0.003816 | 0.001676 | CA4       | 762 .   |
| 206209_s_ | 0.021882 | 0.013159 | CA4       | 762 .   |
| 206210_s_ | 0.030316 | 0.019214 | CETP      | 1071 .  |
| 206212_at | 0.040626 | 0.026968 | CPA2      | 1358 .  |
| 206213_at | 0.026403 | 0.016356 | WNT10B    | 7480 .  |
| 206214_at | 1.20E-05 | 1.29E-06 | PLA2G7    | 7941 .  |
| 206216_at | 6.50E-05 | 1.11E-05 | SRPK3     | 26576 . |
| 206217_at | 0.002005 | 7.74E-04 | EDA       | 1896 .  |
| 206220_s_ | 4.69E-05 | 7.40E-06 | RASA3     | 22821 . |
| 206221_at | 0.002056 | 7.98E-04 | RASA3     | 22821 . |
| 206222_at | 6.36E-04 | 1.91E-04 | TNFRSF10C | 8794 .  |
| 206224_at | 2.13E-10 | 6.99E-13 | CST1      | 1469 .  |
| 206225_at | 2.84E-05 | 3.89E-06 | ZNF507    | 22847 . |
| 206227_at | 3.14E-05 | 4.43E-06 | CILP      | 8483 .  |
| 206229_x_ | 0.031421 | 0.02002  | PAX2      | 5076 .  |
| 206230_at | 5.42E-06 | 4.53E-07 | LHX1      | 3975 .  |
| 206231_at | 0.004518 | 0.002053 | KCNN1     | 3780 .  |
| 206232_s_ | 9.55E-06 | 9.59E-07 | B4GALT6   | 9331 .  |
| 206233_at | 4.54E-06 | 3.60E-07 | B4GALT6   | 9331 .  |
| 206234_s_ | 0.012739 | 0.006978 | MMP17     | 4326 .  |
| 206235_at | 0.004103 | 0.001826 | LIG4      | 3981 .  |
| 206237_s_ | 7.06E-06 | 6.39E-07 | NRG1      | 3084 .  |
| 206238_s_ | 0.010886 | 0.005797 | YAF2      | 10138 . |
| 206239_s_ | 0.01918  | 0.011258 | SPINK1    | 6690 .  |



|           |          |          |                             |         |
|-----------|----------|----------|-----------------------------|---------|
| 206242_at | 3.78E-04 | 1.01E-04 | TM4SF5                      | 9032 .  |
| 206243_at | 0.00507  | 0.002357 | TIMP4                       | 7079 .  |
| 206245_s_ | 1.38E-04 | 2.89E-05 | IVNS1ABP                    | 10625 . |
| 206246_at | 0.03461  | 0.022387 | PFKFB4                      | 5210 .  |
| 206248_at | 0.005166 | 0.002409 | PRKCE                       | 5581 .  |
| 206249_at | 0.001291 | 4.55E-04 | MAP3K13                     | 9175 .  |
| 206252_s_ | 0.005279 | 0.00247  | AVPR1A                      | 552 .   |
| 206254_at | 1.90E-04 | 4.31E-05 | EGF                         | 1950 .  |
| 206255_at | 0.002038 | 7.89E-04 | BLK                         | 640 .   |
| 206256_at | 0.002619 | 0.001068 | CPN1                        | 1369 .  |
| 206257_at | 2.69E-04 | 6.62E-05 | CCDC9                       | 26093 . |
| 206259_at | 6.20E-05 | 1.05E-05 | PROC                        | 5624 .  |
| 206261_at | 0.002985 | 0.001247 | ZNF239                      | 8187 .  |
| 206262_at | 0.016119 | 0.009196 | ADH1C                       | 126 .   |
| 206263_at | 8.89E-04 | 2.90E-04 | FMO4                        | 2329 .  |
| 206265_s_ | 0.011074 | 0.005913 | GPLD1                       | 2822 .  |
| 206266_at | 0.001166 | 4.03E-04 | GPLD1                       | 2822 .  |
| 206267_s_ | 0.001432 | 5.16E-04 | MATK                        | 4145 .  |
| 206268_at | 3.18E-09 | 2.33E-11 | LEFTY1                      | 10637 . |
| 206272_at | 0.036475 | 0.023803 | RAB4A /// SPH.10638 /// 586 | 586 .   |
| 206275_s_ | 7.09E-06 | 6.43E-07 | MICAL2                      | 9645 .  |
| 206276_at | 0.001113 | 3.80E-04 | LY6D                        | 8581 .  |
| 206277_at | 0.002114 | 8.25E-04 | P2RY2                       | 5029 .  |
| 206278_at | 4.00E-04 | 1.08E-04 | PTAFR                       | 5724 .  |
| 206283_s_ | 0.036148 | 0.023556 | TAL1                        | 6886 .  |
| 206284_x_ | 0.006459 | 0.003138 | CLTB                        | 1212 .  |
| 206286_s_ | 8.08E-15 | 7.83E-19 | TDGF1 /// TDG 6997 /// 6998 | 6998 .  |
| 206287_s_ | 0.005007 | 0.00232  | ITIH4                       | 3700 .  |
| 206288_at | 0.035119 | 0.022772 | PGGT1B                      | 5229 .  |
| 206289_at | 4.90E-04 | 1.39E-04 | HOXA4                       | 3201 .  |
| 206291_at | 1.02E-13 | 3.55E-17 | NTS                         | 4922 .  |
| 206296_x_ | 1.19E-05 | 1.28E-06 | MAP4K1                      | 11184 . |
| 206297_at | 0.010928 | 0.005823 | CTRC                        | 11330 . |
| 206298_at | 4.74E-05 | 7.49E-06 | ARHGAP22                    | 58504 . |

|           |          |          |                            |         |
|-----------|----------|----------|----------------------------|---------|
| 206299_at | 0.011901 | 0.006434 | FAM155B                    | 27112 . |
| 206301_at | 0.032378 | 0.020731 | TEC                        | 7006 .  |
| 206302_s_ | 5.84E-05 | 9.71E-06 | NUDT4 /// NUI11163 /// 44( |         |
| 206303_s_ | 3.23E-04 | 8.34E-05 | NUDT4                      | 11163 . |
| 206304_at | 0.009339 | 0.004842 | MYBPH                      | 4608 .  |
| 206305_s_ | 0.042714 | 0.028581 | C8A                        | 731 .   |
| 206306_at | 1.79E-05 | 2.17E-06 | RYR3                       | 6263 .  |
| 206307_s_ | 1.21E-06 | 6.34E-08 | FOXD1                      | 2297 .  |
| 206308_at | 0.00912  | 0.004708 | TRDMT1                     | 1787 .  |
| 206309_at | 3.03E-07 | 1.02E-08 | LECT1                      | 11061 . |
| 206310_at | 3.80E-04 | 1.01E-04 | SPINK2                     | 6691 .  |
| 206312_at | 1.01E-04 | 1.95E-05 | GUCY2C                     | 2984 .  |
| 206313_at | 0.014833 | 0.00834  | HLA-DOA                    | 3111 .  |
| 206316_s_ | 6.26E-08 | 1.21E-09 | KNTC1                      | 9735 .  |
| 206317_s_ | 0.025442 | 0.015678 | ABCB8                      | 11194 . |
| 206319_s_ | 0.043068 | 0.028852 | SPINLW1                    | 57119 . |
| 206322_at | 2.66E-04 | 6.55E-05 | SYN3                       | 8224 .  |
| 206328_at | 0.019955 | 0.011794 | CDH15                      | 1013 .  |
| 206329_at | 6.20E-06 | 5.38E-07 | EXTL1                      | 2134 .  |
| 206330_s_ | 0.011398 | 0.006118 | SHC3                       | 53358 . |
| 206332_s_ | 9.85E-05 | 1.89E-05 | IFI16                      | 3428 .  |
| 206333_at | 1.91E-05 | 2.36E-06 | MSI1                       | 4440 .  |
| 206335_at | 2.09E-05 | 2.63E-06 | GALNS                      | 2588 .  |
| 206337_at | 0.017358 | 0.010019 | CCR7                       | 1236 .  |
| 206338_at | 3.71E-05 | 5.44E-06 | ELAVL3                     | 1995 .  |
| 206342_x_ | 0.011245 | 0.006023 | IDS                        | 3423 .  |
| 206345_s_ | 0.002813 | 0.001162 | PON1                       | 5444 .  |
| 206347_at | 0.005974 | 0.002863 | PDK3                       | 5165 .  |
| 206348_s_ | 1.13E-04 | 2.25E-05 | PDK3                       | 5165 .  |
| 206349_at | 0.007236 | 0.003594 | LGI1                       | 9211 .  |
| 206350_at | 0.033153 | 0.021312 | APCS                       | 325 .   |
| 206352_s_ | 0.004112 | 0.001831 | PEX10                      | 5192 .  |
| 206353_at | 0.001916 | 7.33E-04 | COX6A2                     | 1339 .  |
| 206355_at | 3.38E-06 | 2.46E-07 | GNAL                       | 2774 .  |

|           |          |          |                             |         |
|-----------|----------|----------|-----------------------------|---------|
| 206356_s_ | 6.15E-05 | 1.04E-05 | GNAL                        | 2774 .  |
| 206357_at | 0.004509 | 0.002048 | OPA3                        | 80207 . |
| 206360_s_ | 0.001196 | 4.15E-04 | SOCS3                       | 9021 .  |
| 206362_x_ | 0.004225 | 0.001893 | MAP3K10                     | 4294 .  |
| 206363_at | 0.026813 | 0.016661 | MAF                         | 4094 .  |
| 206364_at | 1.56E-05 | 1.82E-06 | KIF14                       | 9928 .  |
| 206365_at | 0.007615 | 0.003816 | XCL1                        | 6375 .  |
| 206367_at | 0.002032 | 7.87E-04 | REN                         | 5972 .  |
| 206368_at | 1.59E-04 | 3.46E-05 | CPLX2                       | 10814 . |
| 206371_at | 0.012843 | 0.007045 | FOLR3                       | 2352 .  |
| 206372_at | 2.91E-05 | 4.02E-06 | MYF6                        | 4618 .  |
| 206374_at | 0.032899 | 0.021123 | DUSP8                       | 1850 .  |
| 206375_s_ | 3.71E-06 | 2.77E-07 | HSPB3                       | 8988 .  |
| 206377_at | 1.44E-05 | 1.65E-06 | FOXF2                       | 2295 .  |
| 206379_at | 0.030036 | 0.019006 | EYA3                        | 2140 .  |
| 206380_s_ | 0.004032 | 0.001789 | CFP                         | 5199 .  |
| 206382_s_ | 1.88E-04 | 4.25E-05 | BDNF                        | 627 .   |
| 206383_s_ | 5.46E-07 | 2.21E-08 | G3BP2                       | 9908 .  |
| 206384_at | 0.005038 | 0.002338 | CACNG3                      | 10368 . |
| 206385_s_ | 1.49E-04 | 3.19E-05 | ANK3                        | 288 .   |
| 206387_at | 1.43E-04 | 3.03E-05 | CDX2                        | 1045 .  |
| 206388_at | 0.003025 | 0.001268 | PDE3A                       | 5139 .  |
| 206390_x_ | 0.001508 | 5.49E-04 | PF4                         | 5196 .  |
| 206391_at | 6.61E-04 | 2.01E-04 | RARRES1                     | 5918 .  |
| 206392_s_ | 6.40E-05 | 1.09E-05 | RARRES1                     | 5918 .  |
| 206393_at | 4.94E-05 | 7.89E-06 | TNNI2                       | 7136 .  |
| 206396_at | 8.32E-06 | 7.93E-07 | SLC1A1                      | 6505 .  |
| 206398_s_ | 0.002676 | 0.001095 | CD19                        | 930 .   |
| 206399_x_ | 0.039922 | 0.026424 | CACNA1A                     | 773 .   |
| 206400_at | 0.007171 | 0.003556 | LGALS7 /// LGF3963 /// 6534 |         |
| 206403_at | 0.012613 | 0.006895 | ZNF536                      | 9745 .  |
| 206405_x_ | 0.010745 | 0.005709 | USP6                        | 9098 .  |
| 206406_at | 0.002856 | 0.001183 | SMCP                        | 4184 .  |
| 206407_s_ | 0.024038 | 0.014664 | CCL13                       | 6357 .  |

|           |          |          |                              |         |
|-----------|----------|----------|------------------------------|---------|
| 206409_at | 8.38E-04 | 2.70E-04 | TIAM1                        | 7074 .  |
| 206410_at | 0.046423 | 0.031494 | NROB2                        | 8431 .  |
| 206412_at | 0.009649 | 0.005032 | FER                          | 2241 .  |
| 206413_s_ | 0.043132 | 0.028906 | TCL1B /// TCL6 27004 /// 96. |         |
| 206414_s_ | 1.69E-06 | 1.01E-07 | ASAP2                        | 8853 .  |
| 206415_at | 0.0203   | 0.012035 | TLL1                         | 7092 .  |
| 206416_at | 5.63E-04 | 1.65E-04 | ZNF205                       | 7755 .  |
| 206417_at | 5.01E-04 | 1.43E-04 | CNGA1                        | 1259 .  |
| 206419_at | 4.14E-05 | 6.27E-06 | RORC                         | 6097 .  |
| 206421_s_ | 3.03E-07 | 1.02E-08 | SERPINB7                     | 8710 .  |
| 206424_at | 1.52E-11 | 2.17E-14 | CYP26A1                      | 1592 .  |
| 206425_s_ | 0.010353 | 0.005463 | TRPC3                        | 7222 .  |
| 206429_at | 2.27E-07 | 6.90E-09 | F2RL1                        | 2150 .  |
| 206430_at | 8.12E-04 | 2.59E-04 | CDX1                         | 1044 .  |
| 206431_x_ | 2.47E-05 | 3.28E-06 | TBC1D9B                      | 23061 . |
| 206432_at | 5.47E-08 | 1.02E-09 | HAS2                         | 3037 .  |
| 206433_s_ | 0.009742 | 0.005091 | SPOCK3                       | 50859 . |
| 206435_at | 2.78E-04 | 6.90E-05 | B4GALNT1                     | 2583 .  |
| 206436_at | 8.78E-06 | 8.54E-07 | MPPED1                       | 758 .   |
| 206437_at | 4.05E-04 | 1.10E-04 | S1PR4                        | 8698 .  |
| 206438_x_ | 0.007078 | 0.003503 | TCTN2                        | 79867 . |
| 206440_at | 0.009148 | 0.004727 | LIN7A                        | 8825 .  |
| 206442_at | 1.49E-06 | 8.46E-08 | SEMG1                        | 6406 .  |
| 206444_at | 0.003585 | 0.001555 | PDE1B                        | 5153 .  |
| 206445_s_ | 0.001011 | 3.38E-04 | PRMT1                        | 3276 .  |
| 206447_at | 7.12E-04 | 2.20E-04 | CELA2A                       | 63036 . |
| 206448_at | 1.68E-05 | 1.99E-06 | ZNF365                       | 22891 . |
| 206449_s_ | 0.00131  | 4.64E-04 | MASP1                        | 5648 .  |
| 206450_at | 3.35E-05 | 4.79E-06 | DBH                          | 1621 .  |
| 206451_at | 0.010966 | 0.005847 | TBCCD1                       | 55171 . |
| 206452_x_ | 0.024061 | 0.014681 | PPP2R4                       | 5524 .  |
| 206453_s_ | 3.14E-05 | 4.42E-06 | NDRG2                        | 57447 . |
| 206454_s_ | 0.029744 | 0.018794 | RHO                          | 6010 .  |
| 206455_s_ | 0.003434 | 0.001477 | RHO                          | 6010 .  |

|           |          |          |                       |         |
|-----------|----------|----------|-----------------------|---------|
| 206464_at | 0.00583  | 0.002781 | BMX                   | 660 .   |
| 206465_at | 0.014973 | 0.008433 | ACSBG1                | 23205 . |
| 206466_at | 3.91E-05 | 5.82E-06 | ACSBG1                | 23205 . |
| 206468_s_ | 8.42E-04 | 2.71E-04 | METTL13               | 51603 . |
| 206469_x_ | 0.004182 | 0.001869 | AKR7A3                | 22977 . |
| 206470_at | 5.84E-07 | 2.42E-08 | PLXNC1                | 10154 . |
| 206471_s_ | 1.63E-07 | 4.40E-09 | PLXNC1                | 10154 . |
| 206472_s_ | 1.71E-04 | 3.77E-05 | TLE3                  | 7090 .  |
| 206473_at | 1.49E-06 | 8.45E-08 | MBTPS2                | 51360 . |
| 206474_at | 7.05E-05 | 1.24E-05 | PCTK2                 | 5128 .  |
| 206475_x_ | 1.19E-04 | 2.40E-05 | CSH1                  | 1442 .  |
| 206476_s_ | 0.004501 | 0.002044 | NOVA2                 | 4858 .  |
| 206480_at | 4.18E-04 | 1.14E-04 | LTC4S                 | 4056 .  |
| 206481_s_ | 0.039864 | 0.02638  | LDB2                  | 9079 .  |
| 206482_at | 0.017351 | 0.010015 | PTK6                  | 5753 .  |
| 206484_s_ | 0.003311 | 0.001414 | XPNPEP2               | 7512 .  |
| 206485_at | 0.007255 | 0.003606 | CD5                   | 921 .   |
| 206486_at | 0.030083 | 0.019042 | LAG3                  | 3902 .  |
| 206487_at | 7.14E-06 | 6.49E-07 | UNC84A                | 23353 . |
| 206488_s_ | 0.028432 | 0.017819 | CD36                  | 948 .   |
| 206491_s_ | 2.04E-06 | 1.29E-07 | NAPA                  | 8775 .  |
| 206492_at | 0.042139 | 0.028137 | FHIT                  | 2272 .  |
| 206493_at | 0.001735 | 6.50E-04 | ITGA2B                | 3674 .  |
| 206494_s_ | 0.022935 | 0.013888 | ITGA2B                | 3674 .  |
| 206495_s_ | 0.001318 | 4.67E-04 | HINFP                 | 25988 . |
| 206497_at | 2.98E-04 | 7.52E-05 | C7orf44               | 55744 . |
| 206498_at | 0.035095 | 0.022754 | OCA2                  | 4948 .  |
| 206499_s_ | 5.09E-05 | 8.20E-06 | RCC1 /// SNHG1104 /// | 7518 .  |
| 206500_s_ | 3.94E-04 | 1.06E-04 | C14orf106             | 55320 . |
| 206501_x_ | 1.31E-04 | 2.70E-05 | ETV1                  | 2115 .  |
| 206502_s_ | 0.043085 | 0.028867 | INSM1                 | 3642 .  |
| 206503_x_ | 0.034743 | 0.022484 | PML                   | 5371 .  |
| 206506_s_ | 0.04893  | 0.033472 | SUPT3H                | 8464 .  |
| 206508_at | 0.016801 | 0.009648 | CD70                  | 970 .   |

|           |          |          |                               |         |
|-----------|----------|----------|-------------------------------|---------|
| 206509_at | 4.38E-04 | 1.21E-04 | PIP                           | 5304 .  |
| 206510_at | 3.67E-04 | 9.73E-05 | SIX2                          | 10736 . |
| 206511_s_ | 3.61E-05 | 5.27E-06 | SIX2                          | 10736 . |
| 206512_at | 0.009988 | 0.00524  | ZRSR1                         | 7310 .  |
| 206513_at | 5.19E-04 | 1.49E-04 | AIM2                          | 9447 .  |
| 206514_s_ | 0.002712 | 0.001113 | CYP4F2 /// CYF4051 /// 8525   | 10736 . |
| 206516_at | 0.030036 | 0.019007 | AMH                           | 268 .   |
| 206517_at | 0.011808 | 0.006371 | CDH16                         | 1014 .  |
| 206521_s_ | 0.004764 | 0.002189 | GTF2A1                        | 2957 .  |
| 206522_at | 5.26E-08 | 9.70E-10 | LOC642103 /// 642103 /// 8525 | 10736 . |
| 206523_at | 0.002131 | 8.33E-04 | CYTH3                         | 9265 .  |
| 206524_at | 2.26E-06 | 1.46E-07 | T                             | 6862 .  |
| 206527_at | 4.14E-06 | 3.20E-07 | ABAT                          | 18 .    |
| 206528_at | 1.56E-04 | 3.36E-05 | TRPC6                         | 7225 .  |
| 206530_at | 5.31E-04 | 1.53E-04 | RAB30                         | 27314 . |
| 206531_at | 3.58E-05 | 5.21E-06 | DPF1                          | 8193 .  |
| 206532_at | 0.002505 | 0.001013 |                               | .       |
| 206533_at | 4.50E-05 | 7.00E-06 | CHRNA5                        | 1138 .  |
| 206534_at | 4.23E-05 | 6.48E-06 | GRIN2A                        | 2903 .  |
| 206538_at | 9.66E-07 | 4.73E-08 | MRAS                          | 22808 . |
| 206539_s_ | 1.66E-07 | 4.51E-09 | CYP4F12                       | 66002 . |
| 206541_at | 6.98E-07 | 3.08E-08 | KLKB1                         | 3818 .  |
| 206542_s_ | 1.64E-05 | 1.94E-06 | SMARCA2                       | 6595 .  |
| 206543_at | 0.035387 | 0.022974 | SMARCA2                       | 6595 .  |
| 206544_x_ | 1.21E-05 | 1.31E-06 | SMARCA2                       | 6595 .  |
| 206546_at | 0.004162 | 0.001858 | SYCP2                         | 10388 . |
| 206548_at | 0.005146 | 0.002399 |                               | .       |
| 206550_s_ | 1.26E-06 | 6.76E-08 | NUP155                        | 9631 .  |
| 206551_x_ | 1.81E-05 | 2.20E-06 | KLHL24                        | 54800 . |
| 206552_s_ | 0.002177 | 8.55E-04 | TAC1                          | 6863 .  |
| 206554_x_ | 0.017051 | 0.009811 | SETMAR                        | 6419 .  |
| 206555_s_ | 1.28E-04 | 2.62E-05 | THUMPD1                       | 55623 . |
| 206557_at | 0.008013 | 0.004051 | ZNF702P                       | 79986 . |
| 206558_at | 2.20E-04 | 5.17E-05 | SIM2                          | 6493 .  |

|           |          |          |              |               |
|-----------|----------|----------|--------------|---------------|
| 206559_x_ | 0.029574 | 0.018664 | EEF1A1       | 1915 .        |
| 206560_s_ | 0.022    | 0.01324  | MIA          | 8190 .        |
| 206562_s_ | 0.012134 | 0.006583 | CSNK1A1      | 1452 .        |
| 206563_s_ | 0.027227 | 0.016947 | OPRL1        | 4987 .        |
| 206564_at | 6.22E-04 | 1.86E-04 | OPRL1        | 4987 .        |
| 206565_x_ | 0.002142 | 8.39E-04 | SMA4         | 11039 .       |
| 206566_at | 0.0149   | 0.008385 | SLC7A1       | 6541 .        |
| 206567_s_ | 0.001579 | 5.81E-04 | PHF20        | 51230 .       |
| 206568_at | 9.19E-05 | 1.73E-05 | TNP1         | 7141 .        |
| 206572_x_ | 0.015058 | 0.008487 | ZNF85        | 7639 .        |
| 206574_s_ | 0.003074 | 0.001293 | PTP4A3       | 11156 .       |
| 206575_at | 0.020651 | 0.012286 | CDKL5        | 6792 .        |
| 206576_s_ | 0.034014 | 0.02195  | CEACAM1      | 634 .         |
| 206579_at | 0.00118  | 4.08E-04 | ZNF192       | 7745 .        |
| 206580_s_ | 1.28E-08 | 1.43E-10 | EFEMP2       | 30008 .       |
| 206581_at | 0.045934 | 0.031111 | BNC1         | 646 .         |
| 206582_s_ | 3.93E-06 | 2.99E-07 | GPR56        | 9289 .        |
| 206583_at | 2.11E-05 | 2.67E-06 | ZNF673       | 55634 .       |
| 206584_at | 7.45E-08 | 1.55E-09 | LY96         | 23643 .       |
| 206586_at | 3.50E-04 | 9.18E-05 | CNR2         | 1269 .        |
| 206587_at | 0.001722 | 6.44E-04 | CCT6B        | 10693 .       |
| 206588_at | 0.022429 | 0.013534 | DAZL         | 1618 .        |
| 206590_x_ | 0.006453 | 0.003135 | DRD2         | 1813 .        |
| 206593_s_ | 5.23E-04 | 1.50E-04 | MED22        | 6837 .        |
| 206594_at | 0.036273 | 0.023652 | PASK         | 23178 .       |
| 206595_at | 8.87E-06 | 8.66E-07 | CST6         | 1474 .        |
| 206597_at | 2.49E-04 | 6.02E-05 | NRL          | 4901 .        |
| 206598_at | 5.46E-06 | 4.58E-07 | INS          | 3630 .        |
| 206599_at | 1.33E-05 | 1.47E-06 | LOC100133772 | 100133772 //. |
| 206601_s_ | 0.008746 | 0.004481 | HOXD3        | 3232 .        |
| 206604_at | 0.002055 | 7.97E-04 | OVOL1        | 5017 .        |
| 206607_at | 0.0016   | 5.89E-04 | CBL          | 867 .         |
| 206608_s_ | 0.034894 | 0.022595 | RPGRIP1      | 57096 .       |
| 206611_at | 0.005558 | 0.002628 | C2orf27A     | 29798 .       |

|           |          |          |                             |           |
|-----------|----------|----------|-----------------------------|-----------|
| 206613_s_ | 2.84E-05 | 3.89E-06 | TAF1A                       | 9015 .    |
| 206614_at | 2.25E-08 | 3.08E-10 | GDF5                        | 8200 .    |
| 206616_s_ | 4.42E-04 | 1.22E-04 | ADAM22                      | 53616 .   |
| 206617_s_ | 1.04E-06 | 5.20E-08 | RENBP                       | 5973 .    |
| 206619_at | 8.98E-09 | 9.30E-11 | DKK4                        | 27121 .   |
| 206620_at | 7.07E-07 | 3.13E-08 | GRAP                        | 10750 .   |
| 206622_at | 0.002105 | 8.21E-04 | TRH                         | 7200 .    |
| 206623_at | 1.42E-05 | 1.62E-06 | PDE6A                       | 5145 .    |
| 206624_at | 6.42E-04 | 1.94E-04 | USP9Y                       | 8287 .    |
| 206625_at | 0.009874 | 0.00517  | PRPH2                       | 5961 .    |
| 206628_at | 0.002706 | 0.00111  | SLC5A1                      | 6523 .    |
| 206629_at | 1.55E-04 | 3.35E-05 | ADAMTSL2                    | 9719 .    |
| 206630_at | 3.80E-04 | 1.01E-04 | TYR                         | 7299 .    |
| 206631_at | 0.001286 | 4.53E-04 | PTGER2                      | 5732 .    |
| 206635_at | 0.015053 | 0.008484 | CHRN2                       | 1141 .    |
| 206636_at | 0.008105 | 0.004105 | RASA2                       | 5922 .    |
| 206638_at | 7.48E-11 | 1.83E-13 | HTR2B                       | 3357 .    |
| 206641_at | 0.048679 | 0.033271 | TNFRSF17                    | 608 .     |
| 206644_at | 2.67E-04 | 6.58E-05 | NROB1                       | 190 .     |
| 206645_s_ | 0.002524 | 0.001022 | NROB1                       | 190 .     |
| 206646_at | 0.002583 | 0.00105  | GLI1                        | 2735 .    |
| 206647_at | 4.50E-04 | 1.25E-04 | HBZ                         | 3050 .    |
| 206649_s_ | 3.47E-05 | 5.01E-06 | TFE3                        | 7030 .    |
| 206650_at | 0.002051 | 7.95E-04 | IQCC                        | 55721 .   |
| 206652_at | 4.27E-05 | 6.56E-06 | ZMYM5                       | 9205 .    |
| 206653_at | 2.82E-05 | 3.85E-06 | POLR3G                      | 10622 .   |
| 206654_s_ | 4.86E-05 | 7.72E-06 | POLR3G                      | 10622 .   |
| 206655_s_ | 0.00326  | 0.001387 | GP1BB /// SEP 2812 /// 5415 | 57136 .   |
| 206656_s_ | 0.008399 | 0.004279 | C20orf3                     | 4654 .    |
| 206657_s_ | 2.21E-04 | 5.19E-05 | MYOD1                       | 80761 .   |
| 206658_at | 0.0037   | 0.001615 | UPK3B                       | 379E-09 . |
| 206659_at | 1.46E-07 | 3.79E-09 |                             |           |
| 206660_at | 7.55E-05 | 1.36E-05 | IGLL1                       | 3543 .    |
| 206661_at | 1.16E-06 | 6.02E-08 | DBF4B                       | 80174 .   |



|           |          |          |            |                 |
|-----------|----------|----------|------------|-----------------|
| 206662_at | 0.01439  | 0.008042 | GLRX       | 2745 .          |
| 206663_at | 9.97E-04 | 3.33E-04 | SP4        | 6671 .          |
| 206665_s_ | 4.14E-05 | 6.28E-06 | BCL2L1     | 598 .           |
| 206667_s_ | 0.004133 | 0.001843 | SCAMP1     | 9522 .          |
| 206669_at | 8.42E-06 | 8.07E-07 | GAD1       | 2571 .          |
| 206670_s_ | 2.59E-07 | 8.30E-09 | GAD1       | 2571 .          |
| 206671_at | 0.026997 | 0.016784 | SAG        | 6295 .          |
| 206672_at | 0.039173 | 0.025848 | AQP2       | 359 .           |
| 206673_at | 2.66E-04 | 6.54E-05 | GPR176     | 11245 .         |
| 206674_at | 0.011975 | 0.00648  | FLT3       | 2322 .          |
| 206677_at | 7.58E-04 | 2.38E-04 | KRT31      | 3881 .          |
| 206679_at | 0.044263 | 0.029804 | APBA1      | 320 .           |
| 206680_at | 0.015735 | 0.008937 | CD5L       | 922 .           |
| 206682_at | 0.026802 | 0.016652 | CLEC10A    | 10462 .         |
| 206683_at | 1.40E-06 | 7.83E-08 | ZNF165     | 7718 .          |
| 206684_s_ | 0.018368 | 0.010708 | ATF7       | 11016 .         |
| 206686_at | 0.021993 | 0.013235 | PDK1       | 5163 .          |
| 206687_s_ | 6.46E-11 | 1.52E-13 | PTPN6      | 5777 .          |
| 206688_s_ | 0.004762 | 0.002187 | CPSF4      | 10898 .         |
| 206689_x_ | 6.37E-04 | 1.92E-04 | KAT5       | 10524 .         |
| 206692_at | 1.44E-04 | 3.04E-05 | KCNJ10     | 3766 .          |
| 206693_at | 0.019713 | 0.011627 | IL7        | 3574 .          |
| 206694_at | 0.003062 | 0.001287 | PNLIPRP1   | 5407 .          |
| 206695_x_ | 1.10E-05 | 1.16E-06 | ZNF43      | 7594 .          |
| 206696_at | 3.16E-05 | 4.46E-06 | GPR143     | 4935 .          |
| 206697_s_ | 7.51E-06 | 6.93E-07 | HP /// HPR | 3240 /// 3250 . |
| 206698_at | 0.007243 | 0.003598 | XK         | 7504 .          |
| 206699_x_ | 4.88E-05 | 7.78E-06 | NPAS1      | 4861 .          |
| 206700_s_ | 0.001442 | 5.20E-04 | KDM5D      | 8284 .          |
| 206701_x_ | 1.54E-05 | 1.79E-06 | EDNRB      | 1910 .          |
| 206702_at | 0.008692 | 0.00445  | TEK        | 7010 .          |
| 206705_at | 6.02E-06 | 5.21E-07 | TULP1      | 7287 .          |
| 206706_at | 0.024593 | 0.015062 | NTF3       | 4908 .          |
| 206708_at | 2.50E-04 | 6.05E-05 | FOXN2      | 3344 .          |

|           |          |          |                             |         |
|-----------|----------|----------|-----------------------------|---------|
| 206709_x_ | 0.010742 | 0.005707 | GPT                         | 2875 .  |
| 206710_s_ | 0.006909 | 0.003402 | EPB41L3                     | 23136 . |
| 206712_at | 0.014448 | 0.008079 | GRTP1                       | 79774 . |
| 206714_at | 0.00172  | 6.43E-04 | ALOX15B                     | 247 .   |
| 206715_at | 0.022671 | 0.013703 | TFEC                        | 22797 . |
| 206716_at | 0.006731 | 0.003297 | UMOD                        | 7369 .  |
| 206717_at | 0.002275 | 9.02E-04 | MYH8                        | 4626 .  |
| 206718_at | 0.001317 | 4.67E-04 | LMO1                        | 4004 .  |
| 206719_at | 0.00152  | 5.55E-04 | SYNGR4                      | 23546 . |
| 206721_at | 0.019748 | 0.011652 | C1orf114                    | 57821 . |
| 206722_s_ | 2.16E-05 | 2.76E-06 | LPAR2                       | 9170 .  |
| 206723_s_ | 4.10E-05 | 6.18E-06 | LPAR2                       | 9170 .  |
| 206725_x_ | 5.96E-08 | 1.13E-09 | BMP1                        | 649 .   |
| 206726_at | 0.003284 | 0.0014   | PGDS                        | 27306 . |
| 206728_at | 0.04218  | 0.028171 | ECE2                        | 9718 .  |
| 206729_at | 0.008783 | 0.004504 | TNFRSF8                     | 943 .   |
| 206730_at | 4.99E-08 | 9.04E-10 | GRIA3                       | 2892 .  |
| 206732_at | 9.86E-04 | 3.28E-04 | SLITRK3                     | 22865 . |
| 206733_at | 0.011255 | 0.006029 | TULP2                       | 7288 .  |
| 206734_at | 0.029482 | 0.018597 | JRKL                        | 8690 .  |
| 206735_at | 0.009445 | 0.004907 | CHRNA4                      | 1137 .  |
| 206738_at | 4.11E-04 | 1.12E-04 | APOC4                       | 346 .   |
| 206741_at | 0.027819 | 0.01738  | C3orf32                     | 51066 . |
| 206743_s_ | 0.007614 | 0.003815 | ASGR1                       | 432 .   |
| 206745_at | 0.048516 | 0.033138 | HOXC11                      | 3227 .  |
| 206747_at | 0.005032 | 0.002334 | GPRIN2                      | 9721 .  |
| 206748_s_ | 2.06E-04 | 4.76E-05 | SPAG9                       | 9043 .  |
| 206749_at | 0.021882 | 0.013159 | CD1B                        | 910 .   |
| 206751_s_ | 1.24E-05 | 1.35E-06 | PCYT1B                      | 9468 .  |
| 206752_s_ | 1.85E-06 | 1.14E-07 | DFFB                        | 1677 .  |
| 206753_at | 0.006709 | 0.003284 | RDH16                       | 8608 .  |
| 206754_s_ | 0.006374 | 0.003089 | CYP2B6 /// CYF1555 /// 1556 | 1555 .  |
| 206755_at | 4.44E-04 | 1.23E-04 | CYP2B6                      | 1555 .  |
| 206757_at | 4.39E-06 | 3.45E-07 | PDE5A                       | 8654 .  |

|           |          |          |                            |         |
|-----------|----------|----------|----------------------------|---------|
| 206759_at | 9.59E-05 | 1.83E-05 | FCER2                      | 2208 .  |
| 206762_at | 7.23E-06 | 6.60E-07 | KCNA5                      | 3741 .  |
| 206763_at | 3.08E-04 | 7.87E-05 | FKBP6                      | 8468 .  |
| 206764_x_ | 3.07E-04 | 7.83E-05 | MPPE1                      | 65258 . |
| 206766_at | 0.00481  | 0.002214 | ITGA10                     | 8515 .  |
| 206767_at | 0.002164 | 8.49E-04 | RBMS3                      | 27303 . |
| 206768_at | 0.024576 | 0.015051 | RPL3L                      | 6123 .  |
| 206769_at | 6.58E-05 | 1.13E-05 | TMSB4Y                     | 9087 .  |
| 206770_s_ | 0.002135 | 8.35E-04 | SLC35A3                    | 23443 . |
| 206771_at | 3.27E-05 | 4.65E-06 | UPK3A                      | 7380 .  |
| 206776_x_ | 0.026023 | 0.016084 | ACRV1                      | 56 .    |
| 206777_s_ | 0.002923 | 0.001215 | CRYBB2 /// CR' 1415 ///    | 1416 .  |
| 206778_at | 7.86E-05 | 1.43E-05 | CRYBB2                     | 1415 .  |
| 206779_s_ | 0.018696 | 0.010932 | ASMT                       | 438 .   |
| 206781_at | 0.001509 | 5.50E-04 | DNAJC4                     | 3338 .  |
| 206783_at | 4.31E-07 | 1.64E-08 | FGF4                       | 2249 .  |
| 206784_at | 0.003002 | 0.001256 | AQP8                       | 343 .   |
| 206787_at | 0.004675 | 0.00214  | BRDT                       | 676 .   |
| 206788_s_ | 0.001639 | 6.07E-04 | CBFB                       | 865 .   |
| 206789_s_ | 9.43E-09 | 9.91E-11 | POU2F1                     | 5451 .  |
| 206792_x_ | 2.95E-06 | 2.06E-07 | PDE4C                      | 5143 .  |
| 206793_at | 0.015232 | 0.008603 | PNMT                       | 5409 .  |
| 206794_at | 4.46E-09 | 3.77E-11 | ERBB4                      | 2066 .  |
| 206795_at | 5.58E-05 | 9.17E-06 | F2RL2                      | 2151 .  |
| 206798_x_ | 4.44E-07 | 1.71E-08 | DLEC1                      | 9940 .  |
| 206800_at | 0.010178 | 0.005353 | MTHFR                      | 4524 .  |
| 206801_at | 5.84E-06 | 5.00E-07 | NPPB                       | 4879 .  |
| 206802_at | 4.85E-05 | 7.71E-06 | PAX5                       | 5079 .  |
| 206805_at | 1.24E-05 | 1.35E-06 | SEMA3A                     | 10371 . |
| 206806_at | 3.97E-05 | 5.93E-06 | DGKI                       | 9162 .  |
| 206807_s_ | 2.99E-04 | 7.58E-05 | ADD2                       | 119 .   |
| 206809_s_ | 6.86E-05 | 1.20E-05 | HNRNPA3 /// F 10151 ///    | 226 .   |
| 206810_at | 0.004811 | 0.002214 | ZNF44                      | 51710 . |
| 206811_at | 2.65E-06 | 1.79E-07 | ADCY8 /// LOC 100134077 // |         |

|           |          |          |                            |         |
|-----------|----------|----------|----------------------------|---------|
| 206813_at | 3.09E-11 | 5.93E-14 | CTF1                       | 1489 .  |
| 206814_at | 1.39E-04 | 2.93E-05 | NGF                        | 4803 .  |
| 206815_at | 0.001523 | 5.56E-04 | SPAG8                      | 26206 . |
| 206816_s_ | 0.02402  | 0.014652 | SPAG8                      | 26206 . |
| 206817_x_ | 4.63E-04 | 1.29E-04 | TNRC4                      | 11189 . |
| 206818_s_ | 8.24E-04 | 2.64E-04 | CNNM2                      | 54805 . |
| 206820_at | 7.26E-06 | 6.64E-07 | AGFG2                      | 3268 .  |
| 206821_x_ | 2.26E-04 | 5.32E-05 | AGFG2                      | 3268 .  |
| 206823_at | 0.001254 | 4.40E-04 | L3MBTL                     | 26013 . |
| 206824_at | 4.18E-06 | 3.23E-07 | CES4                       | 51716 . |
| 206825_at | 6.01E-04 | 1.79E-04 | OXTR                       | 5021 .  |
| 206827_s_ | 0.002398 | 9.61E-04 | TRPV6                      | 55503 . |
| 206829_x_ | 0.015577 | 0.008835 | ZNF430                     | 80264 . |
| 206831_s_ | 0.002193 | 8.63E-04 | ARSD                       | 414 .   |
| 206832_s_ | 1.71E-04 | 3.76E-05 | SEMA3F                     | 6405 .  |
| 206833_s_ | 1.88E-04 | 4.26E-05 | ACYP2                      | 98 .    |
| 206834_at | 1.21E-04 | 2.44E-05 | HBD                        | 3045 .  |
| 206837_at | 0.038512 | 0.025354 | ALX1                       | 8092 .  |
| 206839_at | 0.003102 | 0.001307 | C22orf31                   | 25770 . |
| 206843_at | 5.10E-04 | 1.46E-04 | CRYBA4                     | 1413 .  |
| 206844_at | 4.58E-04 | 1.28E-04 | FBP2                       | 8789 .  |
| 206847_s_ | 0.001271 | 4.47E-04 | HOXA7                      | 3204 .  |
| 206848_at | 7.74E-06 | 7.23E-07 | FAM36A /// HC116228 /// 3. |         |
| 206849_at | 0.024965 | 0.015332 | GABRG2                     | 2566 .  |
| 206850_at | 6.00E-05 | 1.01E-05 | RASL10A                    | 10633 . |
| 206851_at | 0.001782 | 6.71E-04 | RNASE3                     | 6037 .  |
| 206852_at | 0.007686 | 0.003858 | EPHA7                      | 2045 .  |
| 206855_s_ | 0.006034 | 0.002897 | HYAL2                      | 8692 .  |
| 206856_at | 0.02918  | 0.018375 | LILRB5                     | 10990 . |
| 206857_s_ | 0.001316 | 4.66E-04 | FKBP1B                     | 2281 .  |
| 206858_s_ | 1.29E-06 | 6.98E-08 | HOXC6                      | 3223 .  |
| 206860_s_ | 5.33E-05 | 8.67E-06 | MIOS                       | 54468 . |
| 206861_s_ | 0.01407  | 0.007832 | CGGBP1                     | 8545 .  |
| 206862_at | 1.24E-05 | 1.35E-06 | ZNF254                     | 9534 .  |

|           |          |          |                  |
|-----------|----------|----------|------------------|
| 206863_x_ | 2.13E-05 | 2.71E-06 | .                |
| 206864_s_ | 0.001932 | 7.40E-04 | HRK 8739 .       |
| 206865_at | 0.001158 | 3.99E-04 | HRK 8739 .       |
| 206866_at | 0.033329 | 0.021442 | CDH4 1002 .      |
| 206867_at | 4.00E-05 | 5.99E-06 | GCKR 2646 .      |
| 206868_at | 0.045775 | 0.030988 | STARD8 9754 .    |
| 206869_at | 1.73E-04 | 3.84E-05 | CHAD 1101 .      |
| 206871_at | 0.024112 | 0.014717 | ELANE 1991 .     |
| 206872_at | 3.76E-05 | 5.55E-06 | SLC17A1 6568 .   |
| 206874_s_ | 0.011437 | 0.006143 | .                |
| 206876_at | 2.91E-04 | 7.29E-05 | SIM1 6492 .      |
| 206877_at | 0.009361 | 0.004856 | MXD1 4084 .      |
| 206878_at | 0.01726  | 0.009953 | DAO 1610 .       |
| 206879_s_ | 0.013321 | 0.00735  | NRG2 9542 .      |
| 206881_s_ | 0.004785 | 0.0022   | LILRA3 11026 .   |
| 206882_at | 0.010601 | 0.005619 | SLC1A6 6511 .    |
| 206884_s_ | 6.70E-07 | 2.91E-08 | SCEL 8796 .      |
| 206885_x_ | 0.006097 | 0.002932 | GH1 2688 .       |
| 206887_at | 0.034014 | 0.021949 | CCBP2 1238 .     |
| 206888_s_ | 0.008655 | 0.004427 | ARHGDIG 398 .    |
| 206889_at | 3.51E-05 | 5.08E-06 | PDIA2 64714 .    |
| 206890_at | 4.63E-05 | 7.27E-06 | IL12RB1 3594 .   |
| 206891_at | 1.53E-05 | 1.78E-06 | ACTN3 89 .       |
| 206892_at | 9.56E-05 | 1.82E-05 | AMHR2 269 .      |
| 206893_at | 3.89E-05 | 5.79E-06 | SALL1 6299 .     |
| 206894_at | 9.99E-06 | 1.02E-06 | APOA4 337 .      |
| 206895_at | 0.014118 | 0.007861 | PPP1R3A 5506 .   |
| 206896_s_ | 3.70E-04 | 9.83E-05 | GNG7 2788 .      |
| 206900_x_ | 3.19E-07 | 1.10E-08 | ZNF253 56242 .   |
| 206901_at | 0.01988  | 0.011742 | C19orf57 79173 . |
| 206902_s_ | 2.94E-04 | 7.40E-05 | EXOG 9941 .      |
| 206903_at | 0.003379 | 0.00145  | EXOG 9941 .      |
| 206904_at | 0.00319  | 0.001352 | MATN1 4146 .     |
| 206905_s_ | 0.0086   | 0.004395 | MATN1 4146 .     |

|           |          |          |          |         |
|-----------|----------|----------|----------|---------|
| 206906_at | 0.016836 | 0.00967  | ICAM5    | 7087 .  |
| 206907_at | 0.022795 | 0.013789 | TNFSF9   | 8744 .  |
| 206908_s_ | 0.001329 | 4.72E-04 | CLDN11   | 5010 .  |
| 206909_at | 2.27E-05 | 2.93E-06 |          | .       |
| 206910_x_ | 0.022043 | 0.01327  | CFHR2    | 3080 .  |
| 206911_at | 0.001452 | 5.25E-04 | TRIM25   | 7706 .  |
| 206913_at | 1.38E-04 | 2.89E-05 | BAAT     | 570 .   |
| 206914_at | 0.03897  | 0.025696 | CRTAM    | 56253 . |
| 206915_at | 0.019109 | 0.011211 | NKX2-2   | 4821 .  |
| 206916_x_ | 0.002937 | 0.001222 | TAT      | 6898 .  |
| 206917_at | 1.68E-05 | 2.00E-06 | GNA13    | 10672 . |
| 206918_s_ | 6.87E-04 | 2.11E-04 | CPNE1    | 8904 .  |
| 206919_at | 6.98E-04 | 2.15E-04 | ELK4     | 2005 .  |
| 206923_at | 0.006409 | 0.003111 | PRKCA    | 5578 .  |
| 206924_at | 0.042266 | 0.028237 | IL11     | 3589 .  |
| 206925_at | 1.65E-04 | 3.61E-05 | ST8SIA4  | 7903 .  |
| 206926_s_ | 6.84E-07 | 2.99E-08 | IL11     | 3589 .  |
| 206928_at | 2.96E-04 | 7.47E-05 | ZNF124   | 7678 .  |
| 206929_s_ | 7.20E-04 | 2.23E-04 | NFIC     | 4782 .  |
| 206931_at | 2.09E-04 | 4.85E-05 | ZNF141   | 7700 .  |
| 206932_at | 0.015806 | 0.008986 | CH25H    | 9023 .  |
| 206933_s_ | 1.81E-05 | 2.19E-06 | H6PD     | 9563 .  |
| 206935_at | 0.001239 | 4.34E-04 | PCDH8    | 5100 .  |
| 206936_x_ | 4.94E-04 | 1.40E-04 |          | .       |
| 206938_at | 0.030436 | 0.019302 | SRD5A2   | 6716 .  |
| 206939_at | 0.013392 | 0.007394 | DCC      | 1630 .  |
| 206942_s_ | 2.09E-05 | 2.64E-06 | PMCH     | 5367 .  |
| 206943_at | 8.38E-06 | 8.02E-07 | TGFBR1   | 7046 .  |
| 206944_at | 0.005584 | 0.002642 | HTR6     | 3362 .  |
| 206945_at | 0.003477 | 0.001499 | LCT      | 3938 .  |
| 206946_at | 0.004968 | 0.002298 | HCN4     | 10021 . |
| 206948_at | 0.004327 | 0.001948 | NEU3     | 10825 . |
| 206950_at | 0.008997 | 0.004633 | SCN9A    | 6335 .  |
| 206951_at | 0.003171 | 0.001342 | HIST1H4B | 8366 .  |

|           |          |          |                             |         |
|-----------|----------|----------|-----------------------------|---------|
| 206955_at | 0.001022 | 3.43E-04 | AQP7                        | 364 .   |
| 206961_s_ | 1.50E-04 | 3.22E-05 | MED20                       | 9477 .  |
| 206962_x_ | 0.004197 | 0.001877 |                             | .       |
| 206963_s_ | 3.56E-04 | 9.38E-05 | NAT8 /// NAT8 51471 /// 902 | .       |
| 206967_at | 0.004272 | 0.001917 | CCNT1                       | 904 .   |
| 206968_s_ | 0.013895 | 0.007718 | NFRKB                       | 4798 .  |
| 206969_at | 1.34E-05 | 1.50E-06 | KRT34                       | 3885 .  |
| 206971_at | 0.001698 | 6.33E-04 | GPR161                      | 23432 . |
| 206972_s_ | 0.049504 | 0.033925 | GPR161                      | 23432 . |
| 206973_at | 0.021638 | 0.012982 | PPFIA2                      | 8499 .  |
| 206974_at | 4.40E-06 | 3.47E-07 | CXCR6                       | 10663 . |
| 206975_at | 1.72E-04 | 3.79E-05 | LTA                         | 4049 .  |
| 206976_s_ | 3.16E-05 | 4.46E-06 | HSPH1                       | 10808 . |
| 206979_at | 1.89E-05 | 2.33E-06 | C8B                         | 732 .   |
| 206980_s_ | 9.17E-05 | 1.73E-05 | FLT3LG                      | 2323 .  |
| 206981_at | 7.09E-05 | 1.25E-05 | SCN4A                       | 6329 .  |
| 206982_at | 0.025749 | 0.015889 | CRYBA1                      | 1411 .  |
| 206983_at | 2.94E-04 | 7.39E-05 | CCR6                        | 1235 .  |
| 206984_s_ | 4.87E-04 | 1.37E-04 | RIT2                        | 6014 .  |
| 206986_at | 1.62E-04 | 3.54E-05 | FGF18                       | 8817 .  |
| 206988_at | 5.24E-04 | 1.51E-04 | CCL25                       | 6370 .  |
| 206990_at | 0.034447 | 0.022267 | TNR                         | 7143 .  |
| 206991_s_ | 2.26E-04 | 5.32E-05 | CCR5                        | 1234 .  |
| 206993_at | 7.38E-06 | 6.77E-07 | ATP5S                       | 27109 . |
| 206994_at | 8.14E-14 | 2.68E-17 | CST4                        | 1472 .  |
| 206997_s_ | 0.004056 | 0.001802 | HS6ST1                      | 9394 .  |
| 206998_x_ | 3.08E-06 | 2.18E-07 | PRB3                        | 5544 .  |
| 206999_at | 0.021251 | 0.012712 | IL12RB2                     | 3595 .  |
| 207000_s_ | 1.05E-04 | 2.05E-05 | PPP3CC                      | 5533 .  |
| 207001_x_ | 0.017849 | 0.010355 | TSC22D3                     | 1831 .  |
| 207002_s_ | 0.003455 | 0.001487 | PLAGL1                      | 5325 .  |
| 207003_at | 1.40E-07 | 3.58E-09 | GUCA2A                      | 2980 .  |
| 207004_at | 1.51E-04 | 3.24E-05 | BCL2                        | 596 .   |
| 207005_s_ | 9.25E-05 | 1.75E-05 | BCL2                        | 596 .   |

|           |          |          |              |                        |
|-----------|----------|----------|--------------|------------------------|
| 207007_at | 0.027996 | 0.017506 | NR1I3        | 9970 .                 |
| 207008_at | 0.012897 | 0.00708  | IL8RB        | 3579 .                 |
| 207012_at | 0.001263 | 4.44E-04 | MMP16        | 4325 .                 |
| 207013_s_ | 5.62E-05 | 9.26E-06 | MMP16        | 4325 .                 |
| 207014_at | 0.016109 | 0.009189 | GABRA2       | 2555 .                 |
| 207015_s_ | 0.004334 | 0.001952 | ALDH1A2      | 8854 .                 |
| 207017_at | 0.017638 | 0.010214 | RAB27B       | 5874 .                 |
| 207019_s_ | 3.04E-04 | 7.73E-05 | AKAP4        | 8852 .                 |
| 207020_at | 0.019383 | 0.011403 | HSF2BP       | 11077 .                |
| 207022_s_ | 0.042013 | 0.028038 | LDHC         | 3948 .                 |
| 207023_x_ | 1.73E-04 | 3.82E-05 | KRT10        | 3858 .                 |
| 207024_at | 0.003166 | 0.001339 | CHRND        | 1144 .                 |
| 207025_at | 7.26E-05 | 1.29E-05 | GJC2         | 57165 .                |
| 207026_s_ | 0.010803 | 0.005747 | ATP2B3       | 492 .                  |
| 207027_at | 0.004207 | 0.001883 | HGFAC        | 3083 .                 |
| 207028_at | 0.003783 | 0.00166  | LOC100129296 | 100129296 //.          |
| 207029_at | 7.36E-08 | 1.52E-09 | KITLG        | 4254 .                 |
| 207030_s_ | 6.34E-06 | 5.54E-07 | CSRP2        | 1466 .                 |
| 207032_s_ | 0.009285 | 0.00481  | CRISP1       | 167 .                  |
| 207036_x_ | 0.001629 | 6.02E-04 | GRIN2D       | 2906 .                 |
| 207037_at | 0.002617 | 0.001067 | TNFRSF11A    | 8792 .                 |
| 207038_at | 8.36E-04 | 2.69E-04 | SLC16A6      | 9120 .                 |
| 207039_at | 0.045254 | 0.03058  | CDKN2A       | 1029 .                 |
| 207041_at | 4.92E-04 | 1.39E-04 | MASP2        | 10747 .                |
| 207043_s_ | 8.40E-05 | 1.56E-05 | SLC6A9       | 6536 .                 |
| 207044_at | 0.001203 | 4.18E-04 | THRB         | 7068 .                 |
| 207047_s_ | 5.60E-06 | 4.73E-07 | CLCNKA       | /// CLC1187 /// 1188 . |
| 207048_at | 7.45E-04 | 2.33E-04 | SLC6A11      | 6538 .                 |
| 207049_at | 0.002251 | 8.91E-04 | SCN8A        | 6334 .                 |
| 207050_at | 1.50E-07 | 3.94E-09 | CACNA2D1     | 781 .                  |
| 207051_at | 0.015297 | 0.008647 | SLC17A4      | 10050 .                |
| 207053_at | 3.27E-04 | 8.45E-05 | SLC8A1       | 6546 .                 |
| 207055_at | 9.38E-04 | 3.09E-04 | GPR37L1      | 9283 .                 |
| 207056_s_ | 0.0115   | 0.00618  | SLC4A8       | 9498 .                 |



|           |          |          |         |         |
|-----------|----------|----------|---------|---------|
| 207057_at | 4.17E-04 | 1.14E-04 | SLC16A7 | 9194 .  |
| 207058_s_ | 2.72E-05 | 3.70E-06 | PARK2   | 5071 .  |
| 207059_at | 0.005994 | 0.002874 | PAX9    | 5083 .  |
| 207060_at | 0.002131 | 8.34E-04 | EN2     | 2020 .  |
| 207061_at | 2.96E-05 | 4.10E-06 | ERN1    | 2081 .  |
| 207064_s_ | 0.001207 | 4.20E-04 | AOC2    | 314 .   |
| 207066_at | 1.29E-04 | 2.66E-05 | HRC     | 3270 .  |
| 207067_s_ | 2.28E-04 | 5.40E-05 | HDC     | 3067 .  |
| 207069_s_ | 0.031807 | 0.020301 | SMAD6   | 4091 .  |
| 207070_at | 1.35E-06 | 7.42E-08 | RGR     | 5995 .  |
| 207071_s_ | 9.36E-04 | 3.08E-04 | ACO1    | 48 .    |
| 207072_at | 0.002661 | 0.001087 | IL18RAP | 8807 .  |
| 207073_at | 0.003299 | 0.001408 | CDKL2   | 8999 .  |
| 207074_s_ | 0.001143 | 3.93E-04 | SLC18A1 | 6570 .  |
| 207077_at | 2.40E-05 | 3.16E-06 | CELA2B  | 51032 . |
| 207078_at | 4.74E-04 | 1.33E-04 | MED6    | 10001 . |
| 207081_s_ | 7.35E-06 | 6.74E-07 | PI4KA   | 5297 .  |
| 207090_x_ | 0.017914 | 0.010397 | ZFP30   | 22835 . |
| 207093_s_ | 1.79E-04 | 4.00E-05 | OMG     | 4974 .  |
| 207094_at | 8.39E-04 | 2.70E-04 | IL8RA   | 3577 .  |
| 207095_at | 0.010707 | 0.005685 | SLC10A2 | 6555 .  |
| 207097_s_ | 0.023698 | 0.01443  | SLC17A2 | 10246 . |
| 207099_s_ | 5.74E-04 | 1.69E-04 | CHM     | 1121 .  |
| 207101_at | 0.017507 | 0.01012  | VAMP1   | 6843 .  |
| 207102_at | 0.003116 | 0.001314 | AKR1D1  | 6718 .  |
| 207103_at | 0.003431 | 0.001476 | KCND2   | 3751 .  |
| 207104_x_ | 5.47E-05 | 8.96E-06 | LILRB1  | 10859 . |
| 207105_s_ | 0.002821 | 0.001166 | PIK3R2  | 5296 .  |
| 207106_s_ | 0.005926 | 0.002835 | LTK     | 4058 .  |
| 207108_s_ | 0.042233 | 0.02821  | NIPBL   | 25836 . |
| 207110_at | 0.021084 | 0.012596 | KCNJ12  | 3768 .  |
| 207112_s_ | 0.005347 | 0.002508 | GAB1    | 2549 .  |
| 207114_at | 6.50E-04 | 1.97E-04 | LY6G6C  | 80740 . |
| 207115_x_ | 4.26E-04 | 1.17E-04 | MBTD1   | 54799 . |

|           |          |          |           |         |
|-----------|----------|----------|-----------|---------|
| 207116_s_ | 0.034861 | 0.022571 | GAPDHS    | 26330 . |
| 207119_at | 1.79E-09 | 1.15E-11 | PRKG1     | 5592 .  |
| 207121_s_ | 4.80E-05 | 7.61E-06 | MAPK6     | 5597 .  |
| 207122_x_ | 0.012669 | 0.006931 | SULT1A2   | 6799 .  |
| 207123_s_ | 0.001848 | 7.02E-04 | MATN4     | 8785 .  |
| 207124_s_ | 5.04E-04 | 1.44E-04 | GNB5      | 10681 . |
| 207127_s_ | 1.90E-07 | 5.36E-09 | HNRNPH3   | 3189 .  |
| 207129_at | 0.002396 | 9.60E-04 | CA5B      | 11238 . |
| 207130_at | 8.26E-04 | 2.65E-04 | ZMYND8    | 23613 . |
| 207131_x_ | 1.93E-06 | 1.19E-07 | GGT1      | 2678 .  |
| 207132_x_ | 0.0282   | 0.017655 | PFDN5     | 5204 .  |
| 207133_x_ | 9.40E-05 | 1.78E-05 | ALPK1     | 80216 . |
| 207134_x_ | 0.011429 | 0.006138 | TPSB2     | 64499 . |
| 207136_at | 0.001667 | 6.19E-04 | ARR3      | 407 .   |
| 207137_at | 0.002003 | 7.73E-04 | NFKBIL2   | 4796 .  |
| 207138_at | 0.002002 | 7.73E-04 | PHF2      | 5253 .  |
| 207139_at | 0.004689 | 0.002148 | ATP4A     | 495 .   |
| 207141_s_ | 0.001761 | 6.61E-04 | KCNJ3     | 3760 .  |
| 207143_at | 0.008233 | 0.004179 | CDK6      | 1021 .  |
| 207144_s_ | 0.004528 | 0.002058 | CITED1    | 4435 .  |
| 207147_at | 4.56E-04 | 1.27E-04 | DLX2      | 1746 .  |
| 207150_at | 2.77E-06 | 1.90E-07 | SLC18A3   | 6572 .  |
| 207151_at | 0.032302 | 0.020677 | ADCYAP1R1 | 117 .   |
| 207152_at | 0.019243 | 0.011303 | NTRK2     | 4915 .  |
| 207153_s_ | 6.86E-04 | 2.10E-04 | GLMN      | 11146 . |
| 207154_at | 1.60E-08 | 1.97E-10 | DIO3      | 1735 .  |
| 207155_at | 1.39E-05 | 1.58E-06 | TBX5      | 6910 .  |
| 207156_at | 0.001096 | 3.73E-04 | HIST1H2AG | 8969 .  |
| 207158_at | 0.00417  | 0.001862 | APOBEC1   | 339 .   |
| 207159_x_ | 0.001022 | 3.42E-04 | CRTC1     | 23373 . |
| 207162_s_ | 0.001561 | 5.72E-04 | CACNA1B   | 774 .   |
| 207163_s_ | 0.009071 | 0.004677 | AKT1      | 207 .   |
| 207165_at | 3.29E-05 | 4.68E-06 | HMMR      | 3161 .  |
| 207167_at | 0.021644 | 0.012987 | IGSF2     | 9398 .  |

|           |          |          |          |         |
|-----------|----------|----------|----------|---------|
| 207168_s_ | 2.29E-04 | 5.43E-05 | H2AFY    | 9555 .  |
| 207169_x_ | 2.37E-05 | 3.09E-06 | DDR1     | 780 .   |
| 207170_s_ | 0.048766 | 0.033341 | LETMD1   | 25875 . |
| 207172_s_ | 4.62E-06 | 3.68E-07 | CDH11    | 1009 .  |
| 207173_x_ | 7.91E-04 | 2.51E-04 | CDH11    | 1009 .  |
| 207175_at | 0.006522 | 0.003175 | ADIPOQ   | 9370 .  |
| 207176_s_ | 0.00169  | 6.29E-04 | CD80     | 941 .   |
| 207177_at | 3.50E-05 | 5.06E-06 | PTGFR    | 5737 .  |
| 207178_s_ | 0.013611 | 0.007533 | FRK      | 2444 .  |
| 207181_s_ | 1.18E-07 | 2.85E-09 | CASP7    | 840 .   |
| 207183_at | 5.14E-10 | 2.21E-12 | GPR19    | 2842 .  |
| 207184_at | 1.72E-06 | 1.03E-07 | SLC6A13  | 6540 .  |
| 207185_at | 0.024309 | 0.014857 | SLC10A1  | 6554 .  |
| 207186_s_ | 7.04E-06 | 6.36E-07 | BPTF     | 2186 .  |
| 207188_at | 8.30E-04 | 2.66E-04 | CDK3     | 1018 .  |
| 207189_s_ | 0.02734  | 0.017032 | ZZEF1    | 23140 . |
| 207190_at | 0.02973  | 0.018784 | ZZEF1    | 23140 . |
| 207191_s_ | 9.48E-10 | 5.01E-12 | ISLR     | 3671 .  |
| 207192_at | 0.03447  | 0.022284 | DNASE1L2 | 1775 .  |
| 207193_at | 0.035619 | 0.023156 | AGRP     | 181 .   |
| 207195_at | 0.004668 | 0.002136 | CNTN6    | 27255 . |
| 207196_s_ | 0.005827 | 0.00278  | TNIP1    | 10318 . |
| 207197_at | 8.78E-09 | 9.02E-11 | ZIC3     | 7547 .  |
| 207198_s_ | 5.28E-07 | 2.11E-08 | LIMS1    | 3987 .  |
| 207199_at | 0.011129 | 0.00595  | TERT     | 7015 .  |
| 207200_at | 0.009112 | 0.004703 | OTC      | 5009 .  |
| 207201_s_ | 0.00689  | 0.003392 | SLC22A1  | 6580 .  |
| 207202_s_ | 8.64E-06 | 8.34E-07 | NR1I2    | 8856 .  |
| 207203_s_ | 4.19E-06 | 3.24E-07 | NR1I2    | 8856 .  |
| 207206_s_ | 0.023102 | 0.014    | ALOX12   | 239 .   |
| 207207_at | 0.001287 | 4.53E-04 | RBMXL2   | 27288 . |
| 207209_at | 8.44E-07 | 3.96E-08 | CETN1    | 1068 .  |
| 207212_at | 0.045117 | 0.030471 | SLC9A3   | 6550 .  |
| 207213_s_ | 0.042104 | 0.028112 | USP2     | 9099 .  |

|           |          |          |             |                 |
|-----------|----------|----------|-------------|-----------------|
| 207214_at | 1.15E-05 | 1.22E-06 | SPINK4      | 27290 .         |
| 207215_at | 0.001171 | 4.05E-04 | GSTTP1      | 25774 .         |
| 207216_at | 1.39E-04 | 2.92E-05 | TNFSF8      | 944 .           |
| 207217_s_ | 0.001606 | 5.92E-04 | NOX1        | 27035 .         |
| 207219_at | 7.65E-06 | 7.11E-07 | ZNF643      | 65243 .         |
| 207222_at | 8.99E-06 | 8.83E-07 | PLA2G10     | 8399 .          |
| 207223_s_ | 0.002288 | 9.08E-04 | ROD1        | 9991 .          |
| 207224_s_ | 0.028676 | 0.018005 | SIGLEC7     | 27036 .         |
| 207227_x_ | 2.72E-05 | 3.68E-06 | RFPL2       | 10739 .         |
| 207228_at | 0.012877 | 0.007066 | PRKACG      | 5568 .          |
| 207229_at | 0.007662 | 0.003844 | KLRA1       | 10748 .         |
| 207230_at | 0.00832  | 0.004231 | CDON        | 50937 .         |
| 207231_at | 0.011148 | 0.005962 | DZIP3       | 9666 .          |
| 207232_s_ | 3.31E-05 | 4.72E-06 | DZIP3       | 9666 .          |
| 207233_s_ | 8.60E-05 | 1.60E-05 | MITF        | 4286 .          |
| 207235_s_ | 1.17E-04 | 2.33E-05 | GRM5        | 2915 .          |
| 207237_at | 8.17E-04 | 2.61E-04 | KCNA3       | 3738 .          |
| 207238_s_ | 0.001397 | 5.01E-04 | PTPRC       | 5788 .          |
| 207242_s_ | 0.003603 | 0.001565 | GRIK1       | 2897 .          |
| 207243_s_ | 0.011841 | 0.006393 | CALM2       | 805 .           |
| 207244_x_ | 0.001123 | 3.84E-04 | CYP2A6      | 1548 .          |
| 207246_at | 5.67E-04 | 1.66E-04 | ZFY         | 7544 .          |
| 207247_s_ | 1.56E-04 | 3.37E-05 | ZFX /// ZFY | 7543 /// 7544 . |
| 207250_at | 8.44E-04 | 2.72E-04 | SIX6        | 4990 .          |
| 207251_at | 0.002097 | 8.17E-04 | MEP1B       | 4225 .          |
| 207252_at | 0.002731 | 0.001122 | INE1        | 8552 .          |
| 207254_at | 0.00792  | 0.003997 | SLC15A1     | 6564 .          |
| 207257_at | 2.11E-04 | 4.88E-05 | EPO         | 2056 .          |
| 207259_at | 8.68E-04 | 2.81E-04 | C17orf73    | 55018 .         |
| 207263_x_ | 0.003546 | 0.001535 | VEZT        | 55591 .         |
| 207264_at | 2.59E-06 | 1.73E-07 | KDEL3       | 11015 .         |
| 207265_s_ | 2.11E-08 | 2.81E-10 | KDEL3       | 11015 .         |
| 207267_s_ | 7.30E-05 | 1.30E-05 | DSCR6       | 53820 .         |
| 207268_x_ | 0.008513 | 0.004344 | ABI2        | 10152 .         |

|           |          |          |                              |         |
|-----------|----------|----------|------------------------------|---------|
| 207269_at | 5.01E-04 | 1.42E-04 | DEFA4                        | 1669 .  |
| 207271_x_ | 2.27E-04 | 5.35E-05 | SPAG11B                      | 10407 . |
| 207273_at | 1.89E-06 | 1.16E-07 |                              | .       |
| 207274_at | 6.05E-05 | 1.02E-05 | CHRNE                        | 1145 .  |
| 207275_s_ | 3.58E-05 | 5.21E-06 | ACSL1                        | 2180 .  |
| 207276_at | 7.87E-04 | 2.49E-04 | CDR1                         | 1038 .  |
| 207277_at | 9.93E-04 | 3.31E-04 | CD209                        | 30835 . |
| 207278_s_ | 1.07E-05 | 1.11E-06 | CD209                        | 30835 . |
| 207279_s_ | 8.59E-05 | 1.60E-05 | NEBL                         | 10529 . |
| 207280_at | 8.25E-05 | 1.52E-05 | RNF185                       | 91445 . |
| 207281_x_ | 0.004565 | 0.002078 | VCX2                         | 51480 . |
| 207282_s_ | 6.54E-05 | 1.12E-05 | MYOG                         | 4656 .  |
| 207283_at | 1.32E-04 | 2.74E-05 | RPL23AP32                    | 56969 . |
| 207285_x_ | 0.045662 | 0.030901 | CSHL1                        | 1444 .  |
| 207286_at | 2.51E-04 | 6.09E-05 | CEP135                       | 9662 .  |
| 207287_at | 0.027456 | 0.017112 | FLJ14107                     | 80094 . |
| 207288_at | 0.018413 | 0.01074  | NCRNA00105                   | 80161 . |
| 207289_at | 2.49E-08 | 3.56E-10 | MMP25                        | 64386 . |
| 207291_at | 0.031472 | 0.020056 | PRRG4                        | 79056 . |
| 207292_s_ | 0.008156 | 0.004134 | MAPK7                        | 5598 .  |
| 207296_at | 0.017469 | 0.010094 | ZNF343                       | 79175 . |
| 207300_s_ | 6.43E-04 | 1.94E-04 | F7                           | 2155 .  |
| 207303_at | 1.79E-05 | 2.16E-06 | PDE1C                        | 5137 .  |
| 207306_at | 0.001316 | 4.66E-04 | TCF15                        | 6939 .  |
| 207307_at | 0.001229 | 4.30E-04 | HTR2C                        | 3358 .  |
| 207308_at | 0.002752 | 0.001132 | SLCO1A2                      | 6579 .  |
| 207309_at | 0.004925 | 0.002275 | NOS1                         | 4842 .  |
| 207310_s_ | 0.011328 | 0.006073 | NOS1                         | 4842 .  |
| 207311_at | 4.02E-04 | 1.09E-04 | DOC2B                        | 8447 .  |
| 207312_at | 2.51E-04 | 6.08E-05 | PHKG1                        | 5260 .  |
| 207313_x_ | 0.041095 | 0.027326 | KIR3DL2 /// LO3812 /// 7277. |         |
| 207314_x_ | 5.04E-05 | 8.10E-06 | KIR3DL2 /// LO3812 /// 7277. |         |
| 207316_at | 4.55E-05 | 7.10E-06 | HAS1                         | 3036 .  |
| 207317_s_ | 1.88E-05 | 2.31E-06 | CASQ2                        | 845 .   |

|           |          |          |         |         |
|-----------|----------|----------|---------|---------|
| 207320_x_ | 0.002157 | 8.46E-04 | STAU1   | 6780 .  |
| 207321_s_ | 2.57E-04 | 6.27E-05 | ABCB9   | 23457 . |
| 207323_s_ | 6.37E-06 | 5.58E-07 | MBP     | 4155 .  |
| 207324_s_ | 0.003839 | 0.001688 | DSC1    | 1823 .  |
| 207325_x_ | 0.037626 | 0.024675 | MAGEA1  | 4100 .  |
| 207327_at | 0.007366 | 0.00367  | EYA4    | 2070 .  |
| 207330_at | 0.002978 | 0.001243 | PZP     | 5858 .  |
| 207331_at | 1.14E-05 | 1.20E-06 |         | .       |
| 207332_s_ | 5.44E-04 | 1.58E-04 | TFRC    | 7037 .  |
| 207334_s_ | 3.81E-08 | 6.20E-10 | TGFBR2  | 7048 .  |
| 207335_x_ | 0.009707 | 0.005068 | ATP5I   | 521 .   |
| 207336_at | 0.004588 | 0.002091 | SOX5    | 6660 .  |
| 207338_s_ | 0.019862 | 0.011729 | ZNF200  | 7752 .  |
| 207341_at | 0.031882 | 0.020359 | PRTN3   | 5657 .  |
| 207343_at | 0.046205 | 0.031325 | LYZL6   | 57151 . |
| 207344_at | 0.018599 | 0.010865 | AKAP3   | 10566 . |
| 207345_at | 4.97E-08 | 8.96E-10 | FST     | 10468 . |
| 207347_at | 1.24E-04 | 2.53E-05 | ERCC6   | 2074 .  |
| 207348_s_ | 4.64E-05 | 7.30E-06 | LIG3    | 3980 .  |
| 207350_s_ | 6.30E-06 | 5.49E-07 | VAMP4   | 8674 .  |
| 207352_s_ | 1.75E-04 | 3.87E-05 | GABRB2  | 2561 .  |
| 207353_s_ | 3.67E-04 | 9.72E-05 | HMX1    | 3166 .  |
| 207355_at | 1.25E-04 | 2.55E-05 | SLC1A7  | 6512 .  |
| 207357_s_ | 6.87E-10 | 3.29E-12 | GALNT10 | 55568 . |
| 207359_at | 3.86E-04 | 1.04E-04 | CAMKK2  | 10645 . |
| 207361_at | 0.040591 | 0.026939 | HBP1    | 26959 . |
| 207362_at | 2.99E-04 | 7.58E-05 | SLC30A4 | 7782 .  |
| 207363_at | 0.002156 | 8.45E-04 | RS1     | 6247 .  |
| 207365_x_ | 1.14E-05 | 1.21E-06 | USP34   | 9736 .  |
| 207366_at | 0.036562 | 0.023869 | KCNS1   | 3787 .  |
| 207367_at | 6.38E-08 | 1.24E-09 | ATP12A  | 479 .   |
| 207369_at | 0.017985 | 0.010447 | BRS3    | 680 .   |
| 207372_s_ | 2.32E-06 | 1.51E-07 | ENTPD2  | 954 .   |
| 207374_at | 0.041016 | 0.027263 | PLSCR2  | 57047 . |

|           |          |          |          |         |
|-----------|----------|----------|----------|---------|
| 207375_s_ | 0.030738 | 0.019523 | IL15RA   | 3601 .  |
| 207376_at | 0.001913 | 7.31E-04 | VENTX    | 27287 . |
| 207377_at | 0.01075  | 0.005712 | PPP1R2P9 | 80316 . |
| 207378_at | 7.60E-04 | 2.39E-04 | TREH     | 11181 . |
| 207379_at | 6.18E-07 | 2.60E-08 | EDIL3    | 10085 . |
| 207383_s_ | 0.037143 | 0.024319 | RHBDL1   | 9028 .  |
| 207384_at | 0.017956 | 0.010427 | PGLYRP1  | 8993 .  |
| 207385_at | 4.17E-04 | 1.14E-04 | TFDP3    | 51270 . |
| 207386_at | 5.23E-04 | 1.50E-04 | CYP7B1   | 9420 .  |
| 207387_s_ | 1.32E-05 | 1.47E-06 | GK       | 2710 .  |
| 207388_s_ | 0.001349 | 4.81E-04 | PTGES    | 9536 .  |
| 207390_s_ | 4.75E-05 | 7.50E-06 | SMTN     | 6525 .  |
| 207391_s_ | 0.015421 | 0.008731 | PIP5K1A  | 8394 .  |
| 207393_at | 0.003523 | 0.001523 | HCRTR2   | 3062 .  |
| 207397_s_ | 0.005535 | 0.002615 | HOXD13   | 3239 .  |
| 207399_at | 0.012798 | 0.007015 | BFSP2    | 8419 .  |
| 207400_at | 4.66E-04 | 1.30E-04 | NPY5R    | 4889 .  |
| 207402_at | 5.73E-06 | 4.88E-07 | ZNF132   | 7691 .  |
| 207403_at | 0.014179 | 0.007902 | IRS4     | 8471 .  |
| 207404_s_ | 0.023612 | 0.01437  | HTR1E    | 3354 .  |
| 207405_s_ | 0.016619 | 0.009526 | RAD17    | 5884 .  |
| 207408_at | 6.96E-04 | 2.14E-04 | SLC22A14 | 9389 .  |
| 207409_at | 0.009452 | 0.004912 | LECT2    | 3950 .  |
| 207412_x_ | 4.51E-05 | 7.03E-06 | CELP     | 1057 .  |
| 207413_s_ | 0.004184 | 0.00187  | SCN5A    | 6331 .  |
| 207414_s_ | 0.004676 | 0.00214  | PCSK6    | 5046 .  |
| 207415_at | 9.65E-06 | 9.70E-07 | PLA2R1   | 22925 . |
| 207416_s_ | 0.005074 | 0.00236  | NFATC3   | 4775 .  |
| 207417_s_ | 0.012264 | 0.006671 | ZNF177   | 7730 .  |
| 207418_s_ | 0.009587 | 0.004992 | DDO      | 8528 .  |
| 207419_s_ | 0.002892 | 0.0012   | RAC2     | 5880 .  |
| 207420_at | 0.005132 | 0.002391 | COLEC10  | 10584 . |
| 207422_at | 7.57E-04 | 2.38E-04 | ADAM20   | 8748 .  |
| 207424_at | 0.001499 | 5.46E-04 | MYF5     | 4617 .  |

|           |          |          |                             |         |
|-----------|----------|----------|-----------------------------|---------|
| 207426_s_ | 2.50E-05 | 3.32E-06 | TNFSF4                      | 7292 .  |
| 207427_at | 0.008397 | 0.004277 | ACR /// LOC64:49 /// 645525 |         |
| 207429_at | 0.048467 | 0.033099 | SLC22A2                     | 6582 .  |
| 207430_s_ | 5.81E-05 | 9.65E-06 | MSMB                        | 4477 .  |
| 207431_s_ | 1.90E-04 | 4.31E-05 | DEGS1                       | 8560 .  |
| 207432_at | 0.007244 | 0.003598 | BEST2                       | 54831 . |
| 207434_s_ | 1.99E-06 | 1.24E-07 | FXVD2                       | 486 .   |
| 207435_s_ | 7.27E-05 | 1.29E-05 | SRRM2                       | 23524 . |
| 207436_x_ | 2.31E-06 | 1.50E-07 | KIAA0894                    | 22833 . |
| 207437_at | 0.016862 | 0.009687 | NOVA1                       | 4857 .  |
| 207438_s_ | 0.017086 | 0.009836 | SNUPN                       | 10073 . |
| 207439_s_ | 5.54E-04 | 1.62E-04 | SLC35A2                     | 7355 .  |
| 207440_at | 8.78E-06 | 8.53E-07 | SLC35A2                     | 7355 .  |
| 207444_at | 0.012346 | 0.00672  | SLC22A13                    | 9390 .  |
| 207446_at | 2.60E-04 | 6.37E-05 | TLR6                        | 10333 . |
| 207447_s_ | 1.37E-05 | 1.54E-06 | MGAT4C                      | 25834 . |
| 207448_at | 9.01E-05 | 1.69E-05 | POFUT2                      | 23275 . |
| 207450_s_ | 0.043324 | 0.029068 | LOC100134410(100134410 //.  |         |
| 207451_at | 1.15E-04 | 2.28E-05 | NKX2-8                      | 26257 . |
| 207453_s_ | 1.99E-04 | 4.55E-05 | DNAJB5                      | 25822 . |
| 207457_s_ | 4.64E-05 | 7.29E-06 | LY6G6D                      | 58530 . |
| 207459_x_ | 2.47E-07 | 7.77E-09 | GYPB                        | 2994 .  |
| 207462_at | 2.49E-05 | 3.30E-06 | GLRA2                       | 2742 .  |
| 207466_at | 9.98E-04 | 3.33E-04 | GAL                         | 51083 . |
| 207467_x_ | 4.60E-05 | 7.21E-06 | CAST                        | 831 .   |
| 207468_s_ | 2.88E-04 | 7.22E-05 | SFRP5                       | 6425 .  |
| 207469_s_ | 5.33E-04 | 1.54E-04 | PIR                         | 8544 .  |
| 207472_at | 0.030838 | 0.019593 | RARS2                       | 57038 . |
| 207473_at | 0.009457 | 0.004915 | MLN                         | 4295 .  |
| 207474_at | 0.017633 | 0.01021  | SNRK                        | 54861 . |
| 207475_at | 1.36E-04 | 2.84E-05 | FABP2                       | 2169 .  |
| 207476_at | 1.25E-04 | 2.56E-05 |                             | .       |
| 207482_at | 2.90E-06 | 2.01E-07 | TP53TG5                     | 27296 . |
| 207483_s_ | 0.017821 | 0.010334 | CAND1                       | 55832 . |



|           |          |          |         |         |
|-----------|----------|----------|---------|---------|
| 207485_x_ | 0.018559 | 0.010839 | BTN3A1  | 11119 . |
| 207488_at | 5.16E-05 | 8.34E-06 |         | .       |
| 207489_at | 0.036835 | 0.024076 | RPS2P45 | 80052 . |
| 207490_at | 0.027833 | 0.01739  | TUBA4B  | 80086 . |
| 207491_at | 9.68E-04 | 3.21E-04 | MOGAT2  | 80168 . |
| 207492_at | 5.34E-06 | 4.45E-07 | NGLY1   | 55768 . |
| 207494_s_ | 0.029275 | 0.018442 | ZNF76   | 7629 .  |
| 207498_s_ | 0.015313 | 0.008657 | CYP2D6  | 1565 .  |
| 207499_x_ | 0.029165 | 0.018362 | UNC45A  | 55898 . |
| 207501_s_ | 0.00243  | 9.76E-04 | FGF12   | 2257 .  |
| 207502_at | 0.026124 | 0.016155 | GUCA2B  | 2981 .  |
| 207504_at | 3.97E-04 | 1.07E-04 | CA7     | 766 .   |
| 207505_at | 1.40E-04 | 2.95E-05 | PRKG2   | 5593 .  |
| 207507_s_ | 0.00118  | 4.08E-04 | ATP5G3  | 518 .   |
| 207508_at | 8.88E-04 | 2.89E-04 | ATP5G3  | 518 .   |
| 207510_at | 0.001818 | 6.87E-04 | BDKRB1  | 623 .   |
| 207514_s_ | 0.012618 | 0.006899 | GNAT1   | 2779 .  |
| 207515_s_ | 0.001223 | 4.27E-04 | POLR1C  | 9533 .  |
| 207519_at | 2.88E-04 | 7.23E-05 | SLC6A4  | 6532 .  |
| 207524_at | 7.37E-05 | 1.31E-05 | ST7     | 7982 .  |
| 207525_s_ | 6.52E-04 | 1.98E-04 | GIPC1   | 10755 . |
| 207526_s_ | 0.034393 | 0.022228 | IL1RL1  | 9173 .  |
| 207527_at | 0.01399  | 0.007777 | KCNJ9   | 3765 .  |
| 207528_s_ | 0.020138 | 0.011922 | SLC7A11 | 23657 . |
| 207530_s_ | 1.64E-04 | 3.58E-05 | CDKN2B  | 1030 .  |
| 207531_at | 6.44E-04 | 1.95E-04 | CRYGC   | 1420 .  |
| 207532_at | 0.022606 | 0.013655 | CRYGD   | 1421 .  |
| 207534_at | 0.024421 | 0.014938 | MAGEB1  | 4112 .  |
| 207535_s_ | 0.045693 | 0.030925 | NFKB2   | 4791 .  |
| 207537_at | 7.48E-05 | 1.34E-05 | PFKFB1  | 5207 .  |
| 207538_at | 0.010587 | 0.005609 | IL4     | 3565 .  |
| 207539_s_ | 0.003449 | 0.001485 | IL4     | 3565 .  |
| 207541_s_ | 2.07E-04 | 4.77E-05 | EXOSC10 | 5394 .  |
| 207542_s_ | 0.005956 | 0.002853 | AQP1    | 358 .   |

|           |          |          |           |          |
|-----------|----------|----------|-----------|----------|
| 207543_s_ | 0.00421  | 0.001885 | P4HA1     | 5033 .   |
| 207549_x_ | 4.62E-07 | 1.79E-08 | CD46      | 4179 .   |
| 207551_s_ | 2.01E-05 | 2.52E-06 | MSL3      | 10943 .  |
| 207553_at | 0.001035 | 3.48E-04 | OPRK1     | 4986 .   |
| 207554_x_ | 0.012617 | 0.006898 | TBXA2R    | 6915 .   |
| 207555_s_ | 1.19E-04 | 2.39E-05 | TBXA2R    | 6915 .   |
| 207559_s_ | 1.16E-04 | 2.33E-05 | ZMYM3     | 9203 .   |
| 207560_at | 4.24E-06 | 3.30E-07 | SLC28A1   | 9154 .   |
| 207565_s_ | 1.41E-10 | 3.99E-13 | MR1       | 3140 .   |
| 207566_at | 1.81E-06 | 1.10E-07 | MR1       | 3140 .   |
| 207567_at | 0.033471 | 0.021556 | SLC13A2   | 9058 .   |
| 207568_at | 0.004182 | 0.001869 | CHRNA6    | 8973 .   |
| 207570_at | 0.002877 | 0.001193 | SHOX      | 6473 .   |
| 207573_x_ | 2.14E-04 | 4.98E-05 | ATP5L     | 10632 .  |
| 207574_s_ | 4.88E-04 | 1.38E-04 | GADD45B   | 4616 .   |
| 207575_at | 4.46E-04 | 1.24E-04 | GOLGA6    | 342096 . |
| 207576_x_ | 0.001869 | 7.11E-04 | OXT       | 5020 .   |
| 207578_s_ | 2.11E-04 | 4.89E-05 | HTR4      | 3360 .   |
| 207579_at | 0.013187 | 0.007265 | MAGEB3    | 4114 .   |
| 207582_at | 0.025037 | 0.015382 | PIN1L     | 5301 .   |
| 207586_at | 0.005696 | 0.002703 | SHH       | 6469 .   |
| 207587_at | 0.031644 | 0.020179 | CRYGA     | 1418 .   |
| 207589_at | 0.003914 | 0.001728 | ADRA1B    | 147 .    |
| 207590_s_ | 0.007894 | 0.003982 | CENPI     | 2491 .   |
| 207591_s_ | 8.31E-05 | 1.53E-05 | ARID1A    | 8289 .   |
| 207594_s_ | 4.27E-04 | 1.17E-04 | SYNJ1     | 8867 .   |
| 207595_s_ | 2.24E-07 | 6.79E-09 | BMP1      | 649 .    |
| 207598_x_ | 1.36E-06 | 7.53E-08 | XRCC2     | 7516 .   |
| 207600_at | 6.29E-05 | 1.07E-05 | KCNC3     | 3748 .   |
| 207602_at | 0.00526  | 0.00246  | TMPRSS11D | 9407 .   |
| 207603_at | 0.017003 | 0.009778 | SLC4A7    | 9497 .   |
| 207604_s_ | 0.045813 | 0.031016 | SLC4A7    | 9497 .   |
| 207605_x_ | 0.021031 | 0.012559 | ZNF117    | 51351 .  |
| 207606_s_ | 0.009528 | 0.004956 | ARHGAP12  | 94134 .  |

|           |          |          |                             |          |
|-----------|----------|----------|-----------------------------|----------|
| 207608_x_ | 2.75E-04 | 6.80E-05 | CYP1A2                      | 1544 .   |
| 207609_s_ | 0.010451 | 0.005523 | CYP1A2                      | 1544 .   |
| 207611_at | 0.003467 | 0.001494 | HIST1H2BL /// 440686 /// 8: |          |
| 207613_s_ | 0.001164 | 4.02E-04 | CAMK2A                      | 815 .    |
| 207614_s_ | 0.004145 | 0.001849 | CUL1                        | 8454 .   |
| 207615_s_ | 0.001027 | 3.45E-04 | C16orf3                     | 750 .    |
| 207616_s_ | 4.04E-05 | 6.07E-06 | TANK                        | 10010 .  |
| 207617_at | 1.27E-04 | 2.59E-05 | DDX3X                       | 1654 .   |
| 207618_s_ | 8.44E-06 | 8.11E-07 | BCS1L                       | 617 .    |
| 207619_at | 0.005747 | 0.002732 | HCRTR1                      | 3061 .   |
| 207620_s_ | 0.017094 | 0.009841 | CASK                        | 8573 .   |
| 207622_s_ | 0.00238  | 9.51E-04 | ABCF2                       | 10061 .  |
| 207623_at | 5.35E-07 | 2.15E-08 | ABCF2                       | 10061 .  |
| 207624_s_ | 0.00133  | 4.72E-04 | RPGR                        | 6103 .   |
| 207627_s_ | 3.07E-04 | 7.82E-05 | TFCP2                       | 7024 .   |
| 207628_s_ | 0.004857 | 0.002238 | WBSCR22                     | 114049 . |
| 207629_s_ | 0.004305 | 0.001936 | ARHGEF2                     | 9181 .   |
| 207631_at | 0.010819 | 0.005757 | NBR2                        | 10230 .  |
| 207632_at | 0.008387 | 0.00427  | MUSK                        | 4593 .   |
| 207634_at | 0.007767 | 0.003906 | PDCD1                       | 5133 .   |
| 207635_s_ | 0.005631 | 0.002667 | KCNH1                       | 3756 .   |
| 207636_at | 0.031769 | 0.020271 | SERPINI2                    | 5276 .   |
| 207637_at | 3.33E-04 | 8.65E-05 | LOC100129448&100129448 //.  |          |
| 207640_x_ | 7.71E-04 | 2.43E-04 | NTN3                        | 4917 .   |
| 207641_at | 0.007332 | 0.00365  | TNFRSF13B                   | 23495 .  |
| 207642_at | 0.015421 | 0.008731 | HCRT                        | 3060 .   |
| 207643_s_ | 1.12E-07 | 2.67E-09 | TNFRSF1A                    | 7132 .   |
| 207644_at | 6.76E-07 | 2.95E-08 | FOXH1                       | 8928 .   |
| 207648_at | 0.007842 | 0.003952 | DRP2                        | 1821 .   |
| 207649_at | 0.001028 | 3.45E-04 | KRT37                       | 8688 .   |
| 207650_x_ | 0.00319  | 0.001352 | PTGER1                      | 5731 .   |
| 207652_s_ | 2.08E-04 | 4.82E-05 | CMKLR1                      | 1240 .   |
| 207653_at | 0.015713 | 0.008923 | FOXD2                       | 2306 .   |
| 207657_x_ | 0.004109 | 0.001829 | TNPO1                       | 3842 .   |

|           |          |          |                            |         |
|-----------|----------|----------|----------------------------|---------|
| 207658_s_ | 0.043775 | 0.029421 | FOXG1                      | 2290 .  |
| 207659_s_ | 2.85E-04 | 7.13E-05 | MOBP                       | 4336 .  |
| 207661_s_ | 5.50E-04 | 1.60E-04 | SH3PXD2A                   | 9644 .  |
| 207665_at | 0.005565 | 0.002632 | ADAM21 /// AI145241 /// 8. |         |
| 207669_at | 0.01226  | 0.006668 | KRT83                      | 3889 .  |
| 207670_at | 0.001133 | 3.88E-04 | KRT85                      | 3891 .  |
| 207671_s_ | 1.36E-05 | 1.53E-06 | BEST1                      | 7439 .  |
| 207673_at | 7.77E-04 | 2.46E-04 | NPHS1                      | 4868 .  |
| 207675_x_ | 0.021778 | 0.013082 | ARTN                       | 9048 .  |
| 207676_at | 9.55E-05 | 1.82E-05 | ONECUT2                    | 9480 .  |
| 207677_s_ | 9.63E-04 | 3.19E-04 | NCF4                       | 4689 .  |
| 207681_at | 1.18E-05 | 1.27E-06 | CXCR3                      | 2833 .  |
| 207683_at | 0.002517 | 0.001019 | FOXN1                      | 8456 .  |
| 207684_at | 6.79E-04 | 2.08E-04 | TBX6                       | 6911 .  |
| 207685_at | 7.13E-05 | 1.26E-05 | CRYBB3                     | 1417 .  |
| 207686_s_ | 1.32E-05 | 1.46E-06 | CASP8                      | 841 .   |
| 207687_at | 0.003833 | 0.001685 | INHBC                      | 3626 .  |
| 207688_s_ | 7.87E-07 | 3.59E-08 |                            | .       |
| 207691_x_ | 0.017218 | 0.009924 | ENTPD1                     | 953 .   |
| 207692_s_ | 9.37E-05 | 1.78E-05 | ACAN                       | 176 .   |
| 207693_at | 0.011004 | 0.00587  | CACNB4                     | 785 .   |
| 207694_at | 0.002472 | 9.97E-04 | POU3F4                     | 5456 .  |
| 207695_s_ | 2.25E-04 | 5.31E-05 | IGSF1                      | 3547 .  |
| 207697_x_ | 0.022443 | 0.013544 | LILRB2                     | 10288 . |
| 207698_at | 0.049992 | 0.03433  | C6orf123                   | 26238 . |
| 207699_at | 8.45E-04 | 2.72E-04 | ZFHX2                      | 85446 . |
| 207700_s_ | 0.018623 | 0.010882 | NCOA3                      | 8202 .  |
| 207701_at | 0.008098 | 0.004101 | C22orf24                   | 25775 . |
| 207702_s_ | 0.013607 | 0.00753  | MAGI2                      | 9863 .  |
| 207703_at | 1.49E-04 | 3.17E-05 | NLGN4Y                     | 22829 . |
| 207704_s_ | 3.92E-05 | 5.84E-06 | GAS7                       | 8522 .  |
| 207705_s_ | 1.16E-04 | 2.32E-05 | NINL                       | 22981 . |
| 207707_s_ | 7.93E-06 | 7.45E-07 | SEC13                      | 6396 .  |
| 207708_at | 0.004072 | 0.00181  | ALOXE3                     | 59344 . |

|           |          |          |           |          |
|-----------|----------|----------|-----------|----------|
| 207711_at | 0.001149 | 3.95E-04 | C20orf117 | 140710 . |
| 207713_s_ | 1.19E-05 | 1.28E-06 | RBCK1     | 10616 .  |
| 207714_s_ | 3.21E-04 | 8.26E-05 | SERPINH1  | 871 .    |
| 207715_at | 0.002048 | 7.94E-04 | CRYGB     | 1419 .   |
| 207716_at | 0.002648 | 0.001082 | KRT38     | 8687 .   |
| 207717_s_ | 3.24E-07 | 1.13E-08 | PKP2      | 5318 .   |
| 207718_x_ | 7.77E-04 | 2.46E-04 | CYP2A7    | 1549 .   |
| 207720_at | 0.004488 | 0.002036 | LOR       | 4014 .   |
| 207721_x_ | 0.001163 | 4.01E-04 | HINT1     | 3094 .   |
| 207722_s_ | 1.78E-04 | 3.96E-05 | BTBD2     | 55643 .  |
| 207723_s_ | 0.034237 | 0.022109 | KLRC3     | 3823 .   |
| 207724_s_ | 0.015438 | 0.008744 | SPAST     | 6683 .   |
| 207726_at | 0.014217 | 0.007926 | ESRRB     | 2103 .   |
| 207727_s_ | 3.08E-05 | 4.32E-06 | MUTYH     | 4595 .   |
| 207728_at | 0.005189 | 0.002422 | ATF7IP    | 55729 .  |
| 207730_x_ | 4.19E-06 | 3.24E-07 |           | .        |
| 207732_s_ | 4.12E-05 | 6.24E-06 | DLG3      | 1741 .   |
| 207733_x_ | 2.29E-05 | 2.97E-06 | PSG9      | 5678 .   |
| 207735_at | 6.76E-06 | 6.03E-07 | RNF125    | 54941 .  |
| 207736_s_ | 0.021308 | 0.012751 | TNP2      | 7142 .   |
| 207738_s_ | 0.009937 | 0.00521  | NCKAP1    | 10787 .  |
| 207740_s_ | 0.004772 | 0.002193 | NUP62     | 23636 .  |
| 207741_x_ | 0.033961 | 0.021908 | TPSAB1    | 7177 .   |
| 207742_s_ | 3.13E-07 | 1.07E-08 | NR6A1     | 2649 .   |
| 207745_at | 6.34E-05 | 1.08E-05 | CABP2     | 51475 .  |
| 207746_at | 9.54E-07 | 4.65E-08 | POLQ      | 10721 .  |
| 207747_s_ | 0.021173 | 0.012657 | DOK4      | 55715 .  |
| 207749_s_ | 6.32E-08 | 1.22E-09 | PPP2R3A   | 5523 .   |
| 207752_x_ | 1.69E-08 | 2.13E-10 | PRB1      | 5542 .   |
| 207753_at | 0.027165 | 0.016902 | ZNF304    | 57343 .  |
| 207754_at | 0.002071 | 8.05E-04 | RASSF8    | 11228 .  |
| 207755_at | 0.003487 | 0.001504 |           | .        |
| 207756_at | 0.018324 | 0.010679 |           | .        |
| 207757_at | 0.023237 | 0.014099 | ZFP2      | 80108 .  |

|           |          |          |                  |
|-----------|----------|----------|------------------|
| 207758_at | 0.002871 | 0.00119  | .                |
| 207759_s_ | 0.002188 | 8.60E-04 | DISC1 27185 .    |
| 207760_s_ | 2.19E-04 | 5.11E-05 | NCOR2 9612 .     |
| 207761_s_ | 0.011716 | 0.006315 | METTTL7A 25840 . |
| 207763_at | 6.90E-04 | 2.12E-04 | S100A5 6276 .    |
| 207764_s_ | 1.31E-04 | 2.71E-05 | HIPK3 10114 .    |
| 207765_s_ | 4.46E-07 | 1.71E-08 | KIAA1539 80256 . |
| 207767_s_ | 0.020667 | 0.012298 | EGR4 1961 .      |
| 207769_s_ | 1.89E-05 | 2.33E-06 | PQBP1 10084 .    |
| 207770_x_ | 0.001857 | 7.06E-04 | CSH2 1443 .      |
| 207771_at | 1.11E-04 | 2.18E-05 | SLC5A2 6524 .    |
| 207772_s_ | 7.07E-05 | 1.25E-05 | PRMT8 56341 .    |
| 207776_s_ | 0.01265  | 0.006919 | CACNB2 783 .     |
| 207778_at | 0.029266 | 0.018435 | REG1P 5969 .     |
| 207781_s_ | 0.001432 | 5.16E-04 | ZNF711 7552 .    |
| 207782_s_ | 1.08E-05 | 1.12E-06 | PSEN1 5663 .     |
| 207783_x_ | 0.021887 | 0.013163 | HUWE1 10075 .    |
| 207784_at | 8.76E-05 | 1.63E-05 | ARSD 414 .       |
| 207785_s_ | 0.043324 | 0.029068 | RBPJ 3516 .      |
| 207786_at | 1.49E-04 | 3.19E-05 | CYP2R1 120227 .  |
| 207787_at | 0.011869 | 0.006411 | KRT33B 3884 .    |
| 207788_s_ | 1.02E-04 | 1.98E-05 | SORBS3 10174 .   |
| 207789_s_ | 0.009574 | 0.004984 | DPP6 1804 .      |
| 207791_s_ | 1.49E-04 | 3.17E-05 | RAB1A 5861 .     |
| 207792_at | 1.21E-04 | 2.45E-05 | OPRD1 4985 .     |
| 207794_at | 0.002073 | 8.06E-04 | CCR2 729230 .    |
| 207795_s_ | 1.98E-04 | 4.54E-05 | KLRD1 3824 .     |
| 207796_x_ | 0.048006 | 0.032734 | KLRD1 3824 .     |
| 207800_at | 0.005281 | 0.002471 | AKAP5 9495 .     |
| 207802_at | 0.013117 | 0.007219 | CRISP3 10321 .   |
| 207803_s_ | 0.004595 | 0.002095 | CSN3 1448 .      |
| 207804_s_ | 0.002953 | 0.00123  | FCN2 2220 .      |
| 207805_s_ | 5.01E-05 | 8.03E-06 | PSMD9 5715 .     |
| 207808_s_ | 0.016744 | 0.009611 | PROS1 5627 .     |

|           |          |          |                             |         |
|-----------|----------|----------|-----------------------------|---------|
| 207809_s_ | 0.012314 | 0.006701 | ATP6AP1                     | 537 .   |
| 207812_s_ | 6.42E-04 | 1.94E-04 | GORASP2                     | 26003 . |
| 207814_at | 3.02E-08 | 4.63E-10 | DEFA6                       | 1671 .  |
| 207815_at | 0.004207 | 0.001882 | PF4V1                       | 5197 .  |
| 207816_at | 1.30E-06 | 7.09E-08 | LALBA                       | 3906 .  |
| 207817_at | 9.34E-06 | 9.30E-07 | IFNW1                       | 3467 .  |
| 207818_s_ | 7.69E-05 | 1.39E-05 | HTR7                        | 3363 .  |
| 207819_s_ | 3.55E-04 | 9.33E-05 | ABCB4                       | 5244 .  |
| 207822_at | 1.47E-04 | 3.11E-05 | FGFR1                       | 2260 .  |
| 207823_s_ | 0.008392 | 0.004274 | AIF1                        | 199 .   |
| 207824_s_ | 0.017059 | 0.009818 | MAZ                         | 4150 .  |
| 207825_s_ | 0.001088 | 3.70E-04 | GHRHR                       | 2692 .  |
| 207826_s_ | 0.007576 | 0.003793 | ID3                         | 3399 .  |
| 207827_x_ | 0.001136 | 3.90E-04 | SNCA                        | 6622 .  |
| 207828_s_ | 1.70E-06 | 1.01E-07 | CENPF                       | 1063 .  |
| 207829_s_ | 0.003764 | 0.00165  | BNIP1                       | 662 .   |
| 207830_s_ | 0.010951 | 0.005838 | PPP1R8                      | 5511 .  |
| 207832_at | 2.08E-04 | 4.81E-05 | BAIAP2                      | 10458 . |
| 207833_s_ | 3.36E-04 | 8.73E-05 | HLCS                        | 3141 .  |
| 207834_at | 0.001828 | 6.92E-04 | FBLN1                       | 2192 .  |
| 207835_at | 4.62E-07 | 1.79E-08 | FBLN1                       | 2192 .  |
| 207836_s_ | 3.11E-08 | 4.81E-10 | RBPMS                       | 11030 . |
| 207837_at | 1.94E-06 | 1.20E-07 | RBPMS                       | 11030 . |
| 207838_x_ | 9.51E-05 | 1.81E-05 | PBXIP1                      | 57326 . |
| 207841_at | 6.23E-05 | 1.06E-05 | SPIN2A                      | 54466 . |
| 207842_s_ | 1.08E-05 | 1.12E-06 | CASC3                       | 22794 . |
| 207844_at | 8.60E-04 | 2.78E-04 | IL13                        | 3596 .  |
| 207847_s_ | 0.042591 | 0.028483 | MUC1                        | 4582 .  |
| 207848_at | 0.001102 | 3.76E-04 | AVP                         | 551 .   |
| 207851_s_ | 0.002897 | 0.001203 | INSR                        | 3643 .  |
| 207853_s_ | 0.048763 | 0.033337 | SNCB                        | 6620 .  |
| 207854_at | 7.91E-04 | 2.51E-04 | GYPE                        | 2996 .  |
| 207856_s_ | 6.59E-06 | 5.82E-07 | LOC150776 /// 150776 /// 5! |         |
| 207858_s_ | 1.09E-04 | 2.15E-05 | PKLR                        | 5313 .  |

|           |          |          |                             |        |   |
|-----------|----------|----------|-----------------------------|--------|---|
| 207860_at | 7.69E-04 | 2.42E-04 | NCR1                        | 9437   | . |
| 207861_at | 1.08E-06 | 5.41E-08 | CCL22                       | 6367   | . |
| 207863_at | 1.15E-05 | 1.22E-06 | ADPRH                       | 141    | . |
| 207866_at | 0.047837 | 0.032602 | BMP8A                       | 353500 | . |
| 207868_at | 2.68E-06 | 1.82E-07 | CHRNA2                      | 1135   | . |
| 207871_s_ | 7.14E-06 | 6.49E-07 | ST7                         | 7982   | . |
| 207872_s_ | 4.19E-04 | 1.14E-04 | LILRA1                      | 11024  | . |
| 207873_x_ | 3.24E-04 | 8.38E-05 | SEZ6L                       | 23544  | . |
| 207874_s_ | 5.05E-05 | 8.12E-06 | CFHR4                       | 10877  | . |
| 207876_s_ | 0.001185 | 4.11E-04 | FLNC                        | 2318   | . |
| 207877_s_ | 1.30E-06 | 7.09E-08 | NVL                         | 4931   | . |
| 207880_at | 0.002223 | 8.77E-04 | ADAM11                      | 4185   | . |
| 207882_at | 0.010544 | 0.00558  |                             |        | . |
| 207883_s_ | 0.003089 | 0.0013   | TFR2                        | 7036   | . |
| 207884_at | 0.022757 | 0.013762 | GUCY2D                      | 3000   | . |
| 207886_s_ | 1.36E-06 | 7.53E-08 | CALCR                       | 799    | . |
| 207887_s_ | 8.60E-05 | 1.60E-05 | CALCR                       | 799    | . |
| 207890_s_ | 0.002465 | 9.93E-04 | MMP25                       | 64386  | . |
| 207891_s_ | 7.17E-06 | 6.53E-07 | HAUS7 /// TRE:11219 /// 55! |        | . |
| 207892_at | 0.008164 | 0.004138 | CD40LG                      | 959    | . |
| 207893_at | 1.46E-06 | 8.26E-08 | SRY                         | 6736   | . |
| 207894_s_ | 4.21E-04 | 1.15E-04 | TCL6                        | 27004  | . |
| 207895_at | 1.09E-06 | 5.49E-08 | NAALADL1                    | 10004  | . |
| 207896_s_ | 9.34E-05 | 1.77E-05 | DLEC1                       | 9940   | . |
| 207899_at | 0.00135  | 4.81E-04 | GIP                         | 2695   | . |
| 207900_at | 6.38E-04 | 1.92E-04 | CCL17                       | 6361   | . |
| 207902_at | 0.023087 | 0.013989 | IL5RA                       | 3568   | . |
| 207904_s_ | 0.001854 | 7.04E-04 | LNPEP                       | 4012   | . |
| 207906_at | 0.037084 | 0.024274 | IL3                         | 3562   | . |
| 207907_at | 3.41E-05 | 4.90E-06 | TNFSF14                     | 8740   | . |
| 207911_s_ | 4.39E-04 | 1.21E-04 | TGM5                        | 9333   | . |
| 207914_x_ | 0.001317 | 4.66E-04 | EVX1                        | 2128   | . |
| 207915_at | 0.00691  | 0.003404 |                             |        | . |
| 207917_at | 0.013016 | 0.007155 |                             |        | . |



|           |          |          |                            |         |
|-----------|----------|----------|----------------------------|---------|
| 207919_at | 4.79E-06 | 3.85E-07 | ART1                       | 417 .   |
| 207920_x_ | 2.78E-05 | 3.79E-06 | ZFX                        | 7543 .  |
| 207921_x_ | 0.047233 | 0.032141 | PAX8                       | 7849 .  |
| 207922_s_ | 0.001267 | 4.45E-04 | MAEA                       | 10296 . |
| 207925_at | 1.37E-06 | 7.61E-08 | CST5                       | 1473 .  |
| 207926_at | 0.001443 | 5.21E-04 | GP5                        | 2814 .  |
| 207927_at | 4.30E-04 | 1.18E-04 | HTR7                       | 3363 .  |
| 207929_at | 5.48E-07 | 2.23E-08 | GRPR                       | 2925 .  |
| 207931_s_ | 0.011066 | 0.005908 | PFKFB2                     | 5208 .  |
| 207935_s_ | 0.046936 | 0.031905 | KRT13                      | 3860 .  |
| 207936_x_ | 2.67E-04 | 6.58E-05 | RFPL3                      | 10738 . |
| 207938_at | 0.024261 | 0.014821 | PI15                       | 51050 . |
| 207939_x_ | 5.28E-06 | 4.37E-07 | RNPS1                      | 10921 . |
| 207940_x_ | 0.013294 | 0.007333 | CNR1                       | 1268 .  |
| 207941_s_ | 4.58E-05 | 7.18E-06 | RBM39                      | 9584 .  |
| 207943_x_ | 0.003126 | 0.00132  | PLAGL1                     | 5325 .  |
| 207945_s_ | 2.21E-04 | 5.17E-05 | CSNK1D                     | 1453 .  |
| 207946_at | 0.003893 | 0.001716 | MAML3                      | 55534 . |
| 207949_s_ | 4.82E-05 | 7.65E-06 | ICA1                       | 3382 .  |
| 207950_s_ | 1.66E-05 | 1.96E-06 | ANK3                       | 288 .   |
| 207952_at | 1.08E-04 | 2.11E-05 | IL5                        | 3567 .  |
| 207953_at | 6.32E-06 | 5.52E-07 | RP5-886K2.1                | 27308 . |
| 207954_at | 0.003373 | 0.001446 | GATA2                      | 2624 .  |
| 207955_at | 0.006244 | 0.003016 | CCL27                      | 10850 . |
| 207956_x_ | 9.31E-04 | 3.06E-04 | PDS5B                      | 23047 . |
| 207958_at | 0.015956 | 0.009088 | UGT2A1 /// UC10941 /// 574 |         |
| 207959_s_ | 3.80E-04 | 1.02E-04 | DNAH9                      | 1770 .  |
| 207960_at | 0.0116   | 0.006244 |                            | .       |
| 207961_x_ | 1.72E-06 | 1.03E-07 | MYH11                      | 4629 .  |
| 207962_at | 0.001053 | 3.55E-04 | CAPN11                     | 11131 . |
| 207964_x_ | 0.01198  | 0.006483 | IFNA4                      | 3441 .  |
| 207965_at | 0.007313 | 0.00364  | NEUROG3                    | 50674 . |
| 207967_at | 1.24E-04 | 2.53E-05 | VPS45                      | 11311 . |
| 207969_x_ | 0.012371 | 0.006736 | ACRV1                      | 56 .    |

|           |          |          |                            |         |
|-----------|----------|----------|----------------------------|---------|
| 207972_at | 0.03172  | 0.020233 | GLRA1                      | 2741 .  |
| 207977_s_ | 3.21E-04 | 8.27E-05 | DPT                        | 1805 .  |
| 207978_s_ | 5.83E-07 | 2.41E-08 | NR4A3                      | 8013 .  |
| 207979_s_ | 1.68E-05 | 2.00E-06 | CD8B                       | 926 .   |
| 207980_s_ | 6.74E-05 | 1.17E-05 | CITED2                     | 10370 . |
| 207981_s_ | 1.42E-10 | 4.05E-13 | ESRRG                      | 2104 .  |
| 207982_at | 0.011557 | 0.006217 | HIST1H1T                   | 3010 .  |
| 207983_s_ | 0.002146 | 8.41E-04 | STAG2                      | 10735 . |
| 207984_s_ | 0.006619 | 0.003231 | MPP2                       | 4355 .  |
| 207985_at | 0.00302  | 0.001266 |                            | .       |
| 207988_s_ | 0.001058 | 3.57E-04 | ARPC2                      | 10109 . |
| 207989_at | 0.035531 | 0.023084 | OPRM1                      | 4988 .  |
| 207992_s_ | 0.007818 | 0.003937 | AMPD3                      | 272 .   |
| 207993_s_ | 2.98E-04 | 7.52E-05 | CHP                        | 11261 . |
| 207994_s_ | 0.027298 | 0.017003 | OPRM1                      | 4988 .  |
| 207998_s_ | 0.004431 | 0.002006 | CACNA1D                    | 776 .   |
| 207999_s_ | 7.69E-07 | 3.49E-08 | ADARB1                     | 104 .   |
| 208000_at | 0.002303 | 9.15E-04 | GML                        | 2765 .  |
| 208002_s_ | 6.46E-04 | 1.95E-04 | ACOT7                      | 11332 . |
| 208003_s_ | 8.24E-04 | 2.64E-04 | NFAT5                      | 10725 . |
| 208007_at | 1.66E-04 | 3.63E-05 |                            | .       |
| 208008_at | 8.38E-04 | 2.70E-04 | TBC1D29                    | 26083 . |
| 208009_s_ | 3.02E-05 | 4.21E-06 | ARHGEF16                   | 27237 . |
| 208010_s_ | 0.00895  | 0.004606 | PTPN22                     | 26191 . |
| 208012_x_ | 6.31E-09 | 5.76E-11 | SP110                      | 3431 .  |
| 208013_s_ | 7.25E-04 | 2.25E-04 | ACRV1                      | 56 .    |
| 208015_at | 0.004642 | 0.002121 | SMAD1                      | 4086 .  |
| 208016_s_ | 3.89E-04 | 1.04E-04 | AGTR1                      | 185 .   |
| 208020_s_ | 1.44E-04 | 3.06E-05 | CACNA1C                    | 775 .   |
| 208021_s_ | 9.73E-04 | 3.23E-04 | RFC1                       | 5981 .  |
| 208022_s_ | 0.00691  | 0.003404 | CDC14B                     | 8555 .  |
| 208024_s_ | 0.046432 | 0.031501 | DGCR6 /// DG(8214 /// 853! | .       |
| 208025_s_ | 1.35E-04 | 2.81E-05 | HMGA2                      | 8091 .  |
| 208029_s_ | 1.49E-09 | 9.07E-12 | LAPTM4B                    | 55353 . |

|           |          |          |                             |         |
|-----------|----------|----------|-----------------------------|---------|
| 208030_s_ | 3.88E-05 | 5.76E-06 | ADD1                        | 118 .   |
| 208031_s_ | 2.75E-06 | 1.88E-07 | RFX2                        | 5990 .  |
| 208032_s_ | 2.55E-04 | 6.20E-05 | GRIA3                       | 2892 .  |
| 208033_s_ | 1.15E-04 | 2.29E-05 | ZFHX3                       | 463 .   |
| 208035_at | 0.014018 | 0.007795 | GRM6                        | 2916 .  |
| 208037_s_ | 1.20E-04 | 2.43E-05 | MADCAM1                     | 8174 .  |
| 208038_at | 8.66E-04 | 2.81E-04 | IL1RL2                      | 8808 .  |
| 208039_at | 0.011724 | 0.00632  |                             | .       |
| 208040_s_ | 2.65E-07 | 8.52E-09 | MYBPC3                      | 4607 .  |
| 208041_at | 1.73E-04 | 3.83E-05 | GRK1                        | 6011 .  |
| 208043_at | 0.001973 | 7.59E-04 |                             | .       |
| 208044_s_ | 8.93E-05 | 1.67E-05 | PPARD                       | 5467 .  |
| 208047_s_ | 0.009618 | 0.005011 | NAB1                        | 4664 .  |
| 208048_at | 0.004786 | 0.002201 | TACR1                       | 6869 .  |
| 208049_s_ | 0.013626 | 0.007544 | TACR1                       | 6869 .  |
| 208050_s_ | 1.20E-04 | 2.42E-05 | CASP2                       | 835 .   |
| 208051_s_ | 7.51E-05 | 1.35E-05 | PAIP1                       | 10605 . |
| 208052_x_ | 6.89E-07 | 3.02E-08 | CEACAM3                     | 1084 .  |
| 208053_at | 0.03451  | 0.022314 | GUCY2F                      | 2986 .  |
| 208054_at | 1.95E-07 | 5.58E-09 | HERC4                       | 26091 . |
| 208055_s_ | 2.26E-05 | 2.91E-06 | HERC4                       | 26091 . |
| 208057_s_ | 6.67E-05 | 1.15E-05 | GLI2                        | 2736 .  |
| 208058_s_ | 3.59E-04 | 9.48E-05 | MGAT3                       | 4248 .  |
| 208059_at | 0.028512 | 0.017879 | CCR8                        | 1237 .  |
| 208061_at | 5.27E-09 | 4.61E-11 |                             | .       |
| 208062_s_ | 1.35E-04 | 2.81E-05 | NRG2                        | 9542 .  |
| 208063_s_ | 0.036982 | 0.024194 | CAPN9                       | 10753 . |
| 208064_s_ | 0.042888 | 0.02871  | ST8SIA3                     | 51046 . |
| 208065_at | 1.30E-04 | 2.69E-05 | ST8SIA3                     | 51046 . |
| 208067_x_ | 2.15E-05 | 2.73E-06 | UTY                         | 7404 .  |
| 208068_x_ | 1.07E-05 | 1.10E-06 | CSH1 /// CSH2 1442 /// 1443 | .       |
| 208069_x_ | 0.010849 | 0.005775 | CSH1 /// CSH2 1442 /// 1443 | .       |
| 208070_s_ | 1.55E-06 | 8.89E-08 | REV3L                       | 5980 .  |
| 208071_s_ | 1.00E-05 | 1.02E-06 | LAIR1                       | 3903 .  |

|           |          |          |          |          |
|-----------|----------|----------|----------|----------|
| 208072_s_ | 9.17E-09 | 9.54E-11 | DGKD     | 8527 .   |
| 208073_x_ | 0.013614 | 0.007535 | TTC3     | 7267 .   |
| 208074_s_ | 0.039884 | 0.026397 | AP2S1    | 1175 .   |
| 208075_s_ | 0.019383 | 0.011403 | CCL7     | 6354 .   |
| 208078_s_ | 0.036972 | 0.024187 | SIK1     | 150094 . |
| 208079_s_ | 1.85E-05 | 2.26E-06 | AURKA    | 6790 .   |
| 208081_s_ | 0.034777 | 0.02251  | ZNF442   | 79973 .  |
| 208082_x_ | 6.40E-06 | 5.62E-07 | MKRN1    | 23608 .  |
| 208085_s_ | 0.033352 | 0.021463 | ARHGAP6  | 395 .    |
| 208086_s_ | 1.14E-06 | 5.89E-08 | DMD      | 1756 .   |
| 208087_s_ | 0.014315 | 0.007994 | ZBP1     | 81030 .  |
| 208089_s_ | 0.011869 | 0.006411 | TDRD3    | 81550 .  |
| 208090_s_ | 8.43E-04 | 2.71E-04 | AIRE     | 326 .    |
| 208091_s_ | 0.014406 | 0.008052 | ECOP     | 81552 .  |
| 208093_s_ | 2.91E-04 | 7.30E-05 | NDEL1    | 81565 .  |
| 208094_s_ | 0.010138 | 0.005329 | CCDC130  | 81576 .  |
| 208095_s_ | 9.23E-04 | 3.03E-04 | SRP72    | 6731 .   |
| 208097_s_ | 0.044666 | 0.030118 | TMX1     | 81542 .  |
| 208099_x_ | 0.006948 | 0.003427 | TTLL5    | 23093 .  |
| 208100_x_ | 0.001053 | 3.55E-04 | SEMA6C   | 10500 .  |
| 208101_s_ | 0.001736 | 6.50E-04 | URM1     | 81605 .  |
| 208102_s_ | 0.005313 | 0.00249  | PSD      | 5662 .   |
| 208103_s_ | 1.58E-04 | 3.41E-05 | ANP32E   | 81611 .  |
| 208104_s_ | 0.00421  | 0.001884 | TSC22D4  | 81628 .  |
| 208106_x_ | 1.67E-06 | 9.89E-08 | PSG6     | 5675 .   |
| 208107_s_ | 1.49E-06 | 8.43E-08 | LOC81691 | 81691 .  |
| 208108_s_ | 0.002242 | 8.86E-04 | AVPR2    | 554 .    |
| 208109_s_ | 0.006613 | 0.003228 | C15orf5  | 81698 .  |
| 208111_at | 2.65E-05 | 3.57E-06 | AVPR2    | 554 .    |
| 208112_x_ | 2.27E-06 | 1.47E-07 | EHD1     | 10938 .  |
| 208113_x_ | 0.001977 | 7.61E-04 | PABPC3   | 5042 .   |
| 208114_s_ | 1.63E-05 | 1.92E-06 | ISG20L2  | 81875 .  |
| 208116_s_ | 3.36E-08 | 5.28E-10 | MAN1A1   | 4121 .   |
| 208117_s_ | 5.09E-07 | 2.02E-08 | LAS1L    | 81887 .  |

|           |          |          |                               |          |
|-----------|----------|----------|-------------------------------|----------|
| 208118_x_ | 0.007092 | 0.00351  | IMAA /// LOC1 100271836 //.   |          |
| 208119_s_ | 1.02E-04 | 1.98E-05 | ZNF93                         | 81931 .  |
| 208120_x_ | 4.89E-04 | 1.38E-04 | FKSG49                        | 400949 . |
| 208122_x_ | 6.08E-05 | 1.02E-05 | KIR2DS3                       | 3808 .   |
| 208124_s_ | 1.04E-04 | 2.03E-05 | SEMA4F                        | 10505 .  |
| 208127_s_ | 1.66E-07 | 4.50E-09 | SOCS5                         | 9655 .   |
| 208128_x_ | 0.017496 | 0.010112 | KIF25                         | 3834 .   |
| 208129_x_ | 5.16E-04 | 1.48E-04 | RUNX1                         | 861 .    |
| 208131_s_ | 9.63E-08 | 2.18E-09 | PTGIS                         | 5740 .   |
| 208134_x_ | 4.34E-06 | 3.40E-07 | PSG2                          | 5670 .   |
| 208135_at | 9.18E-04 | 3.01E-04 | HNF1B                         | 6928 .   |
| 208137_x_ | 1.89E-06 | 1.16E-07 | ZNF611                        | 81856 .  |
| 208138_at | 0.009453 | 0.004912 | GAST                          | 2520 .   |
| 208139_s_ | 6.51E-04 | 1.97E-04 |                               | .        |
| 208141_s_ | 0.001008 | 3.37E-04 | DOHH                          | 83475 .  |
| 208144_s_ | 0.004453 | 0.002018 |                               | .        |
| 208146_s_ | 4.07E-07 | 1.52E-08 | CPVL                          | 54504 .  |
| 208149_x_ | 1.28E-07 | 3.18E-09 | DDX11                         | 1663 .   |
| 208151_x_ | 0.006953 | 0.00343  | DDX17                         | 10521 .  |
| 208152_s_ | 3.99E-07 | 1.48E-08 | DDX21                         | 9188 .   |
| 208154_at | 1.62E-05 | 1.90E-06 |                               | .        |
| 208156_x_ | 0.022652 | 0.01369  | EPPK1                         | 83481 .  |
| 208159_x_ | 2.50E-06 | 1.66E-07 | DDX11                         | 1663 .   |
| 208160_at | 0.005033 | 0.002335 |                               | .        |
| 208161_s_ | 7.59E-04 | 2.38E-04 | ABCC3                         | 8714 .   |
| 208164_s_ | 5.59E-05 | 9.21E-06 | IL9R /// IL9RP3 3581 /// 7294 |          |
| 208165_s_ | 7.00E-04 | 2.16E-04 | PRSS16                        | 10279 .  |
| 208167_s_ | 0.003595 | 0.001561 | MMP16                         | 4325 .   |
| 208168_s_ | 0.003291 | 0.001404 | CHIT1                         | 1118 .   |
| 208173_at | 0.006489 | 0.003157 | IFNB1                         | 3456 .   |
| 208176_at | 2.00E-05 | 2.48E-06 | DUX1                          | 26584 .  |
| 208178_x_ | 0.017294 | 0.009978 | TRIO                          | 7204 .   |
| 208180_s_ | 0.020837 | 0.012423 | HIST1H4B                      | 8366 .   |
| 208183_at | 0.001335 | 4.75E-04 | TACR3                         | 6870 .   |

|           |          |          |                            |         |
|-----------|----------|----------|----------------------------|---------|
| 208184_s_ | 6.24E-05 | 1.06E-05 | TRAPPC10                   | 7109 .  |
| 208185_x_ | 0.035961 | 0.023412 |                            | .       |
| 208186_s_ | 4.52E-05 | 7.05E-06 | LIPE                       | 3991 .  |
| 208188_at | 0.002159 | 8.47E-04 | KRT9                       | 3857 .  |
| 208189_s_ | 0.006278 | 0.003035 | MYO7A                      | 4647 .  |
| 208190_s_ | 6.41E-06 | 5.62E-07 | LSR                        | 51599 . |
| 208191_x_ | 1.46E-04 | 3.11E-05 | PSG4                       | 5672 .  |
| 208194_s_ | 0.006066 | 0.002915 | STAM2                      | 10254 . |
| 208195_at | 1.53E-05 | 1.78E-06 | TTN                        | 7273 .  |
| 208196_x_ | 1.49E-04 | 3.18E-05 | NFATC1                     | 4772 .  |
| 208198_x_ | 2.36E-04 | 5.63E-05 | KIR2DS1                    | 3806 .  |
| 208200_at | 0.033267 | 0.021399 | IL1A                       | 3552 .  |
| 208201_at | 1.18E-04 | 2.37E-05 | ASMTL /// DUx100133977 //. |         |
| 208202_s_ | 0.002035 | 7.88E-04 | PHF15                      | 23338 . |
| 208203_x_ | 1.43E-04 | 3.03E-05 | KIR2DS5                    | 3810 .  |
| 208204_s_ | 0.025598 | 0.015784 | CAV3                       | 859 .   |
| 208205_at | 0.017833 | 0.010342 | PCDHA9                     | 9752 .  |
| 208207_at | 0.030968 | 0.019688 |                            | .       |
| 208208_at | 0.001417 | 5.10E-04 | MYH13                      | 8735 .  |
| 208209_s_ | 1.69E-05 | 2.02E-06 | C4BPB                      | 725 .   |
| 208210_at | 0.010506 | 0.005556 | MAS1                       | 4142 .  |
| 208211_s_ | 0.028778 | 0.018085 | ALK                        | 238 .   |
| 208212_s_ | 0.004124 | 0.001838 | ALK                        | 238 .   |
| 208213_s_ | 1.27E-04 | 2.60E-05 | KCNAB1                     | 7881 .  |
| 208216_at | 1.90E-04 | 4.31E-05 | DLX4                       | 1748 .  |
| 208217_at | 0.01976  | 0.01166  | GABRR2                     | 2570 .  |
| 208220_x_ | 0.025384 | 0.015638 | AMELY                      | 266 .   |
| 208221_s_ | 6.24E-04 | 1.87E-04 | SLIT1                      | 6585 .  |
| 208222_at | 0.001518 | 5.54E-04 | ACVR1B                     | 91 .    |
| 208224_at | 1.60E-04 | 3.48E-05 | HOXB1                      | 3211 .  |
| 208228_s_ | 3.28E-06 | 2.37E-07 | FGFR2                      | 2263 .  |
| 208230_s_ | 6.23E-05 | 1.06E-05 | NRG1                       | 3084 .  |
| 208231_at | 0.005274 | 0.002468 | NRG1                       | 3084 .  |
| 208232_x_ | 4.39E-06 | 3.45E-07 | NRG1                       | 3084 .  |

|           |          |          |                             |          |
|-----------|----------|----------|-----------------------------|----------|
| 208233_at | 0.002339 | 9.32E-04 | PDPN                        | 10630 .  |
| 208234_x_ | 6.86E-06 | 6.14E-07 | FGFR2                       | 2263 .   |
| 208238_x_ | 6.74E-05 | 1.17E-05 |                             | .        |
| 208239_at | 2.58E-04 | 6.31E-05 | FOXE1                       | 2304 .   |
| 208240_s_ | 4.08E-05 | 6.15E-06 | FGF1                        | 2246 .   |
| 208243_s_ | 6.73E-04 | 2.06E-04 | CNR1                        | 1268 .   |
| 208244_at | 1.25E-04 | 2.55E-05 | BMP3                        | 651 .    |
| 208246_x_ | 1.51E-07 | 3.96E-09 |                             | .        |
| 208247_at | 0.019962 | 0.011801 | C3orf51                     | 711 .    |
| 208248_x_ | 0.045614 | 0.030857 | APLP2                       | 334 .    |
| 208249_s_ | 2.78E-04 | 6.90E-05 | TGDS                        | 23483 .  |
| 208250_s_ | 0.021502 | 0.01288  | DMBT1                       | 1755 .   |
| 208251_at | 0.01209  | 0.006558 | KCNC4                       | 3749 .   |
| 208252_s_ | 9.69E-04 | 3.21E-04 | CHST3                       | 9469 .   |
| 208255_s_ | 1.86E-04 | 4.18E-05 | FKBP8                       | 23770 .  |
| 208256_at | 0.00165  | 6.12E-04 | EFNA2                       | 1943 .   |
| 208257_x_ | 3.78E-05 | 5.58E-06 | PSG1                        | 5669 .   |
| 208258_s_ | 7.18E-04 | 2.22E-04 | GAS2L1                      | 10634 .  |
| 208259_x_ | 2.49E-04 | 6.02E-05 | IFNA7                       | 3444 .   |
| 208260_at | 0.002275 | 9.02E-04 | AVPR1B                      | 553 .    |
| 208262_x_ | 0.001076 | 3.65E-04 | MEFV                        | 4210 .   |
| 208264_s_ | 2.64E-04 | 6.49E-05 | EIF3J                       | 8669 .   |
| 208265_at | 0.005992 | 0.002873 | C2orf83                     | 56918 .  |
| 208266_at | 0.009187 | 0.004752 | C8orf17                     | 56988 .  |
| 208267_at | 5.43E-05 | 8.88E-06 | TRPV5                       | 56302 .  |
| 208269_s_ | 1.94E-05 | 2.41E-06 | ADAM28                      | 10863 .  |
| 208270_s_ | 9.05E-04 | 2.96E-04 | RNPEP                       | 6051 .   |
| 208272_at | 3.28E-06 | 2.36E-07 | RANBP3                      | 8498 .   |
| 208273_at | 1.43E-04 | 3.02E-05 | ZNF695                      | 57116 .  |
| 208275_x_ | 0.00444  | 0.002011 | UTF1                        | 8433 .   |
| 208277_at | 4.65E-05 | 7.32E-06 | PITX3                       | 5309 .   |
| 208278_s_ | 0.001247 | 4.37E-04 |                             | .        |
| 208279_s_ | 0.031064 | 0.019757 | CDRT1                       | 374286 . |
| 208281_x_ | 0.018943 | 0.011099 | DAZ1 /// DAZ2 1617 /// 5705 | .        |

|           |          |          |                            |         |
|-----------|----------|----------|----------------------------|---------|
| 208284_x_ | 2.45E-08 | 3.47E-10 | GGT1                       | 2678 .  |
| 208285_at | 0.003041 | 0.001276 | OR7A5                      | 26659 . |
| 208286_x_ | 5.78E-11 | 1.30E-13 | POU5F1 /// PO5460 /// 5461 | 26659 . |
| 208290_s_ | 0.017051 | 0.009811 | EIF5                       | 1983 .  |
| 208292_at | 0.002008 | 7.76E-04 | BMP10                      | 27302 . |
| 208293_x_ | 0.002423 | 9.73E-04 | CSHL1                      | 1444 .  |
| 208294_x_ | 6.90E-04 | 2.12E-04 | CSHL1                      | 1444 .  |
| 208295_x_ | 8.55E-04 | 2.76E-04 | CSHL1                      | 1444 .  |
| 208296_x_ | 0.002971 | 0.001239 | TNFAIP8                    | 25816 . |
| 208298_at | 0.009921 | 0.0052   | EVI5                       | 7813 .  |
| 208299_at | 8.33E-05 | 1.54E-05 | CACNA1I                    | 8911 .  |
| 208302_at | 8.46E-04 | 2.73E-04 | HMHB1                      | 57824 . |
| 208304_at | 7.78E-04 | 2.46E-04 | CCR3                       | 1232 .  |
| 208307_at | 5.92E-04 | 1.75E-04 | RBM1A1 /// F159163 /// 37  | 1232 .  |
| 208312_s_ | 0.020958 | 0.012507 | PRAMEF1 /// P400736 /// 65 | 1232 .  |
| 208313_s_ | 4.91E-06 | 3.97E-07 | SF1                        | 7536 .  |
| 208314_at | 0.002272 | 9.01E-04 | RRH                        | 10692 . |
| 208315_x_ | 0.001141 | 3.92E-04 | TRAF3                      | 7187 .  |
| 208316_s_ | 0.026646 | 0.016528 | OCRL                       | 4952 .  |
| 208319_s_ | 0.047541 | 0.03238  | RBM3                       | 5935 .  |
| 208321_s_ | 0.001993 | 7.69E-04 | CABP1                      | 9478 .  |
| 208322_s_ | 6.43E-04 | 1.94E-04 | ST3GAL1                    | 6482 .  |
| 208323_s_ | 0.00306  | 0.001286 | ANXA13                     | 312 .   |
| 208324_at | 0.046977 | 0.031935 |                            | .       |
| 208325_s_ | 3.15E-05 | 4.45E-06 | AKAP13                     | 11214 . |
| 208327_at | 8.64E-05 | 1.61E-05 | CYP2A13                    | 1553 .  |
| 208328_s_ | 1.69E-06 | 1.00E-07 | MEF2A                      | 4205 .  |
| 208330_at | 0.002774 | 0.001144 | ALX4                       | 60529 . |
| 208331_at | 0.015508 | 0.008788 | BPY2                       | 9083 .  |
| 208332_at | 8.83E-06 | 8.60E-07 | PRY                        | 9081 .  |
| 208333_at | 0.001182 | 4.09E-04 | LHX5                       | 64211 . |
| 208335_s_ | 1.03E-04 | 2.00E-05 | DARC                       | 2532 .  |
| 208337_s_ | 0.011219 | 0.006006 | NR5A2                      | 2494 .  |
| 208338_at | 0.012245 | 0.006658 | P2RX3                      | 5024 .  |



|           |          |          |                               |         |
|-----------|----------|----------|-------------------------------|---------|
| 208341_x_ | 1.74E-04 | 3.85E-05 | CSH2                          | 1443 .  |
| 208342_x_ | 0.041775 | 0.027851 | CSH2                          | 1443 .  |
| 208343_s_ | 0.00267  | 0.001091 | NR5A2                         | 2494 .  |
| 208344_x_ | 5.46E-07 | 2.21E-08 | IFNA1 /// IFNA 3439 /// 3447. |         |
| 208346_at | 0.009611 | 0.005006 | PPBPL2                        | 10895 . |
| 208351_s_ | 6.45E-05 | 1.10E-05 | MAPK1                         | 5594 .  |
| 208356_x_ | 0.047568 | 0.032402 | CSH1                          | 1442 .  |
| 208358_s_ | 0.019253 | 0.01131  | UGT8                          | 7368 .  |
| 208360_s_ | 0.009167 | 0.004739 |                               | .       |
| 208363_s_ | 0.043143 | 0.028915 | INPP4A                        | 3631 .  |
| 208365_s_ | 0.034151 | 0.022049 | GRK4                          | 2868 .  |
| 208366_at | 0.002361 | 9.42E-04 | PCDH11X                       | 27328 . |
| 208367_x_ | 0.0152   | 0.008581 | CYP3A4                        | 1576 .  |
| 208368_s_ | 0.001511 | 5.51E-04 | BRCA2                         | 675 .   |
| 208369_s_ | 0.001635 | 6.05E-04 | GCDH                          | 2639 .  |
| 208370_s_ | 4.26E-06 | 3.32E-07 | RCAN1                         | 1827 .  |
| 208371_s_ | 0.012796 | 0.007014 | RING1                         | 6015 .  |
| 208372_s_ | 0.006625 | 0.003236 | LIMK1                         | 3984 .  |
| 208373_s_ | 0.00353  | 0.001527 | P2RY6                         | 5031 .  |
| 208374_s_ | 3.33E-05 | 4.75E-06 | CAPZA1                        | 829 .   |
| 208377_s_ | 5.14E-05 | 8.29E-06 | CACNA1F                       | 778 .   |
| 208378_x_ | 5.55E-06 | 4.68E-07 | FGF5                          | 2250 .  |
| 208379_x_ | 8.70E-06 | 8.42E-07 | NPY2R                         | 4887 .  |
| 208380_at | 0.004201 | 0.001879 | LBX1                          | 10660 . |
| 208381_s_ | 0.002116 | 8.27E-04 | SGPL1                         | 8879 .  |
| 208382_s_ | 0.002194 | 8.64E-04 | DMC1                          | 11144 . |
| 208384_s_ | 0.013309 | 0.007342 | MID2                          | 11043 . |
| 208385_at | 0.001361 | 4.86E-04 | NR2E3                         | 10002 . |
| 208387_s_ | 5.15E-04 | 1.47E-04 | MMP24                         | 10893 . |
| 208389_s_ | 0.003117 | 0.001315 | SLC1A2                        | 6506 .  |
| 208390_s_ | 5.67E-05 | 9.36E-06 | GLP1R                         | 2740 .  |
| 208391_s_ | 0.006034 | 0.002897 | GLP1R                         | 2740 .  |
| 208392_x_ | 1.35E-06 | 7.47E-08 | SP110                         | 3431 .  |
| 208394_x_ | 0.013033 | 0.007165 | ESM1                          | 11082 . |

|           |          |          |              |             |
|-----------|----------|----------|--------------|-------------|
| 208395_s_ | 0.008087 | 0.004095 | URB1         | 9875 .      |
| 208397_x_ | 3.20E-04 | 8.23E-05 | KCNJ5        | 3762 .      |
| 208398_s_ | 0.002119 | 8.28E-04 | TBPL1        | 9519 .      |
| 208400_at | 7.16E-06 | 6.51E-07 | GLP1R        | 2740 .      |
| 208401_s_ | 2.17E-06 | 1.39E-07 | GLP1R        | 2740 .      |
| 208403_x_ | 0.002672 | 0.001093 | MAX          | 4149 .      |
| 208404_x_ | 4.37E-04 | 1.21E-04 | KCNJ5        | 3762 .      |
| 208405_s_ | 2.97E-04 | 7.49E-05 | CD164        | 8763 .      |
| 208406_s_ | 8.82E-04 | 2.87E-04 | GRAP2        | 9402 .      |
| 208408_at | 0.011435 | 0.006142 | PTN          | 5764 .      |
| 208409_at | 0.034936 | 0.02263  | SLC14A2      | 8170 .      |
| 208412_s_ | 1.03E-06 | 5.14E-08 | RARB         | 5915 .      |
| 208413_at | 0.015266 | 0.008627 | LOC100130354 | 100130354 . |
| 208414_s_ | 1.87E-04 | 4.20E-05 | HOXB3        | 3213 .      |
| 208415_x_ | 0.001459 | 5.28E-04 | ING1         | 3621 .      |
| 208417_at | 0.011542 | 0.006207 | FGF6         | 2251 .      |
| 208420_x_ | 1.35E-04 | 2.81E-05 | SUPT6H       | 6830 .      |
| 208423_s_ | 0.02367  | 0.01441  | MSR1         | 4481 .      |
| 208424_s_ | 7.67E-04 | 2.42E-04 | CIAPIN1      | 57019 .     |
| 208427_s_ | 0.029135 | 0.01834  | ELAVL2       | 1993 .      |
| 208429_x_ | 1.71E-04 | 3.78E-05 | HNF4A        | 3172 .      |
| 208430_s_ | 4.46E-04 | 1.24E-04 | DTNA         | 1837 .      |
| 208431_s_ | 0.001417 | 5.10E-04 | TUB          | 7275 .      |
| 208432_s_ | 2.04E-04 | 4.69E-05 | CACNA1E      | 777 .       |
| 208433_s_ | 1.74E-07 | 4.78E-09 | LRP8         | 7804 .      |
| 208435_s_ | 1.09E-04 | 2.15E-05 | AQP6         | 363 .       |
| 208437_at | 7.81E-04 | 2.47E-04 | CLCN1        | 1180 .      |
| 208438_s_ | 0.00784  | 0.00395  | FGR          | 2268 .      |
| 208439_s_ | 1.43E-05 | 1.63E-06 | FCN2         | 2220 .      |
| 208440_at | 0.013199 | 0.007272 | C3orf27      | 23434 .     |
| 208441_at | 4.35E-05 | 6.71E-06 | IGF1R        | 3480 .      |
| 208442_s_ | 3.07E-04 | 7.82E-05 | ATM          | 472 .       |
| 208443_x_ | 7.91E-06 | 7.42E-07 | SHOX2        | 6474 .      |
| 208445_s_ | 9.75E-06 | 9.84E-07 | BAZ1B        | 9031 .      |

|           |          |          |            |                 |
|-----------|----------|----------|------------|-----------------|
| 208449_s_ | 1.39E-04 | 2.92E-05 | FGF8       | 2253 .          |
| 208450_at | 0.002739 | 0.001127 | LGALS2     | 3957 .          |
| 208452_x_ | 5.59E-06 | 4.72E-07 | MYO9B      | 4650 .          |
| 208453_s_ | 0.033119 | 0.021289 | XPNPEP1    | 7511 .          |
| 208454_s_ | 8.78E-06 | 8.54E-07 | PGCP       | 10404 .         |
| 208455_at | 2.42E-04 | 5.80E-05 | PVRL1      | 5818 .          |
| 208456_s_ | 0.007244 | 0.003599 | RRAS2      | 22800 .         |
| 208457_at | 0.040008 | 0.026487 | GABRD      | 2563 .          |
| 208458_at | 0.006168 | 0.002971 | SCNN1D     | 6339 .          |
| 208459_s_ | 0.009597 | 0.004997 | XPO7       | 23039 .         |
| 208460_at | 0.033143 | 0.021306 | GJC1       | 10052 .         |
| 208461_at | 1.45E-04 | 3.06E-05 | HIC1       | 3090 .          |
| 208464_at | 0.043375 | 0.029106 | GRIA4      | 2893 .          |
| 208465_at | 0.037026 | 0.024226 | GRM2       | 2912 .          |
| 208466_at | 2.51E-04 | 6.10E-05 | RAB3D      | 9545 .          |
| 208467_at | 0.007285 | 0.003623 | KLF12      | 11278 .         |
| 208468_at | 4.64E-06 | 3.71E-07 | SOX21      | 11166 .         |
| 208470_s_ | 2.64E-05 | 3.54E-06 | HP /// HPR | 3240 /// 3250 . |
| 208472_at | 0.003619 | 0.001573 | IKZF4      | 64375 .         |
| 208473_s_ | 0.013396 | 0.007397 | GP2        | 2813 .          |
| 208474_at | 9.76E-10 | 5.20E-12 | CLDN6      | 9074 .          |
| 208475_at | 0.011003 | 0.005869 | FRMD4A     | 55691 .         |
| 208476_s_ | 0.009704 | 0.005067 | FRMD4A     | 55691 .         |
| 208480_s_ | 0.012754 | 0.006988 | ABCC6      | 368 .           |
| 208482_at | 1.45E-05 | 1.67E-06 | SSTR1      | 6751 .          |
| 208483_x_ | 0.003477 | 0.001499 | KRT33A     | 3883 .          |
| 208485_x_ | 8.20E-07 | 3.81E-08 | CFLAR      | 8837 .          |
| 208486_at | 0.002214 | 8.73E-04 | DRD5       | 1816 .          |
| 208487_at | 8.86E-05 | 1.66E-05 | LMX1B      | 4010 .          |
| 208488_s_ | 6.93E-04 | 2.13E-04 | CR1        | 1378 .          |
| 208489_at | 1.33E-04 | 2.75E-05 | GJA8       | 2703 .          |
| 208490_x_ | 0.006517 | 0.003173 | HIST1H2BF  | 8343 .          |
| 208491_s_ | 0.035784 | 0.023281 | PGM5       | 5239 .          |
| 208493_at | 3.82E-04 | 1.02E-04 | HOXA11     | 3207 .          |

|           |          |          |                              |          |
|-----------|----------|----------|------------------------------|----------|
| 208494_at | 0.00244  | 9.82E-04 | SLC6A7                       | 6534 .   |
| 208495_at | 0.002847 | 0.001178 | TLX3                         | 30012 .  |
| 208496_x_ | 3.79E-05 | 5.59E-06 | HIST1H3G                     | 8355 .   |
| 208497_x_ | 1.04E-05 | 1.07E-06 | NEUROG1                      | 4762 .   |
| 208499_s_ | 0.048184 | 0.032874 | DNAJC3                       | 5611 .   |
| 208504_x_ | 2.20E-07 | 6.59E-09 | PCDHB11                      | 56125 .  |
| 208505_s_ | 6.38E-05 | 1.09E-05 | FUT2                         | 2524 .   |
| 208506_at | 0.025911 | 0.016007 | HIST1H3F                     | 8968 .   |
| 208510_s_ | 0.004166 | 0.00186  | PPARG                        | 5468 .   |
| 208511_at | 9.06E-06 | 8.92E-07 | PTTG3                        | 26255 .  |
| 208512_s_ | 2.66E-04 | 6.54E-05 | MLLT4                        | 4301 .   |
| 208514_at | 0.007057 | 0.00349  | KCNE1                        | 3753 .   |
| 208515_at | 0.0015   | 5.46E-04 | HIST1H2BM                    | 8342 .   |
| 208518_s_ | 0.005009 | 0.002321 | PER2                         | 8864 .   |
| 208519_x_ | 4.52E-04 | 1.26E-04 | GNRH2                        | 2797 .   |
| 208522_s_ | 6.64E-04 | 2.02E-04 | PTCH1                        | 5727 .   |
| 208524_at | 0.001154 | 3.97E-04 | GPR15                        | 2838 .   |
| 208526_at | 0.002407 | 9.65E-04 | OR2F1                        | 26211 .  |
| 208530_s_ | 0.02515  | 0.015465 | RARB                         | 5915 .   |
| 208532_x_ | 9.54E-05 | 1.82E-05 | KRTAP5-8                     | 57830 .  |
| 208533_at | 0.029176 | 0.018372 | SOX1                         | 6656 .   |
| 208534_s_ | 0.00379  | 0.001663 | RASA4 /// RAS, 10156 /// 40: |          |
| 208536_s_ | 1.73E-04 | 3.82E-05 | BCL2L11                      | 10018 .  |
| 208538_at | 1.87E-04 | 4.21E-05 | ANP32C                       | 23520 .  |
| 208540_x_ | 1.66E-07 | 4.49E-09 | S100A11 /// S16282 /// 7296: |          |
| 208541_x_ | 1.31E-06 | 7.10E-08 | TFAM                         | 7019 .   |
| 208543_at | 0.037868 | 0.024864 | OR10H2                       | 26538 .  |
| 208544_at | 0.007844 | 0.003954 | ADRA2B                       | 151 .    |
| 208545_x_ | 0.001622 | 5.99E-04 | TAF4                         | 6874 .   |
| 208546_x_ | 0.006299 | 0.003046 | HIST1H2BH                    | 8345 .   |
| 208549_x_ | 3.21E-06 | 2.30E-07 | PTMAP7                       | 326626 . |
| 208550_x_ | 0.002839 | 0.001175 | KCNG2                        | 26251 .  |
| 208552_at | 0.044268 | 0.029808 | GRIK4                        | 2900 .   |
| 208553_at | 0.012521 | 0.006837 | HIST1H1E                     | 3008 .   |

|           |          |          |                             |             |
|-----------|----------|----------|-----------------------------|-------------|
| 208554_at | 0.016878 | 0.009698 | POU4F3                      | 5459 .      |
| 208555_x_ | 6.50E-13 | 3.15E-16 | CST2                        | 1470 .      |
| 208558_at | 0.009112 | 0.004702 | OR10H1                      | 26539 .     |
| 208559_at | 2.90E-05 | 3.99E-06 | PDX1                        | 3651 .      |
| 208560_at | 1.32E-04 | 2.72E-05 | KCNA10                      | 3744 .      |
| 208561_at | 2.61E-05 | 3.50E-06 | ABCC9                       | 10060 .     |
| 208562_s_ | 0.001992 | 7.68E-04 | ABCC9                       | 10060 .     |
| 208563_x_ | 0.04407  | 0.029654 | POU3F3                      | 5455 .      |
| 208564_at | 8.52E-04 | 2.75E-04 | KCNA2                       | 3737 .      |
| 208565_at | 0.009638 | 0.005024 | MC5R                        | 4161 .      |
| 208566_at | 0.007566 | 0.003787 | LOC100131509                | 100131509 . |
| 208568_at | 0.006122 | 0.002946 | MC2R                        | 4158 .      |
| 208569_at | 0.017892 | 0.010382 | HIST1H2AB                   | 8335 .      |
| 208571_at | 0.028998 | 0.018243 | ANP32A /// AN100128146 //   |             |
| 208573_s_ | 0.025047 | 0.01539  | OR2H2                       | 7932 .      |
| 208574_at | 0.015736 | 0.008938 | SOX14                       | 8403 .      |
| 208575_at | 0.007505 | 0.003752 | HIST1H3A                    | 8350 .      |
| 208576_s_ | 3.85E-04 | 1.03E-04 | HIST1H3B                    | 8358 .      |
| 208577_at | 2.61E-04 | 6.38E-05 | HIST1H3C                    | 8352 .      |
| 208578_at | 0.005023 | 0.002329 | SCN10A                      | 6336 .      |
| 208580_x_ | 4.44E-04 | 1.23E-04 | HIST1H4J /// H121504 /// 83 |             |
| 208582_s_ | 0.018017 | 0.010469 | DUX1 /// DUX326581 /// 265  |             |
| 208583_x_ | 0.021515 | 0.012893 | HIST1H2AJ                   | 8331 .      |
| 208584_at | 5.21E-04 | 1.50E-04 | SNCG                        | 6623 .      |
| 208585_at | 3.03E-04 | 7.70E-05 | BTN2A3                      | 54718 .     |
| 208587_s_ | 0.003354 | 0.001436 | OR1E1 /// OR18387 /// 8388  |             |
| 208590_x_ | 1.78E-04 | 3.98E-05 | GJA3                        | 2700 .      |
| 208591_s_ | 0.006203 | 0.002992 | PDE3B                       | 5140 .      |
| 208592_s_ | 2.65E-05 | 3.57E-06 | CD1E                        | 913 .       |
| 208594_x_ | 8.00E-05 | 1.46E-05 | LILRA6                      | 79168 .     |
| 208595_s_ | 0.001069 | 3.62E-04 | MBD1                        | 4152 .      |
| 208598_s_ | 0.00308  | 0.001296 | HUWE1                       | 10075 .     |
| 208599_at | 0.018113 | 0.010534 | HUWE1                       | 10075 .     |
| 208600_s_ | 0.011388 | 0.006111 | GPR39                       | 2863 .      |

|           |          |          |          |         |
|-----------|----------|----------|----------|---------|
| 208601_s_ | 8.05E-04 | 2.57E-04 | TUBB1    | 81027 . |
| 208602_x_ | 0.001583 | 5.82E-04 | CD6      | 923 .   |
| 208603_s_ | 0.002194 | 8.63E-04 | MAPK8IP2 | 23542 . |
| 208604_s_ | 2.86E-07 | 9.51E-09 | HOXA3    | 3200 .  |
| 208605_s_ | 0.030394 | 0.019271 | NTRK1    | 4914 .  |
| 208606_s_ | 0.016263 | 0.009291 | WNT4     | 54361 . |
| 208608_s_ | 1.79E-04 | 3.99E-05 | SNTB1    | 6641 .  |
| 208610_s_ | 6.32E-04 | 1.90E-04 | SRRM2    | 23524 . |
| 208611_s_ | 3.21E-08 | 4.99E-10 | SPTAN1   | 6709 .  |
| 208613_s_ | 4.12E-05 | 6.23E-06 | FLNB     | 2317 .  |
| 208614_s_ | 1.35E-04 | 2.80E-05 | FLNB     | 2317 .  |
| 208615_s_ | 2.91E-05 | 4.01E-06 | PTP4A2   | 8073 .  |
| 208616_s_ | 9.32E-05 | 1.76E-05 | PTP4A2   | 8073 .  |
| 208617_s_ | 4.19E-05 | 6.39E-06 | PTP4A2   | 8073 .  |
| 208620_at | 0.002084 | 8.11E-04 | PCBP1    | 5093 .  |
| 208621_s_ | 6.37E-04 | 1.92E-04 | EZR      | 7430 .  |
| 208622_s_ | 1.82E-06 | 1.11E-07 | EZR      | 7430 .  |
| 208623_s_ | 4.74E-06 | 3.80E-07 | EZR      | 7430 .  |
| 208625_s_ | 0.031095 | 0.019781 | EIF4G1   | 1981 .  |
| 208626_s_ | 0.003182 | 0.001347 | VAT1     | 10493 . |
| 208629_s_ | 0.042407 | 0.028346 | HADHA    | 3030 .  |
| 208630_at | 0.02421  | 0.014788 | HADHA    | 3030 .  |
| 208632_at | 5.67E-04 | 1.66E-04 | RNF10    | 9921 .  |
| 208634_s_ | 0.042659 | 0.028536 | MACF1    | 23499 . |
| 208635_x_ | 0.002384 | 9.53E-04 | NACA     | 4666 .  |
| 208636_at | 0.001511 | 5.51E-04 | ACTN1    | 87 .    |
| 208637_x_ | 0.004375 | 0.001975 | ACTN1    | 87 .    |
| 208640_at | 0.001296 | 4.57E-04 | RAC1     | 5879 .  |
| 208641_s_ | 2.12E-04 | 4.92E-05 | RAC1     | 5879 .  |
| 208642_s_ | 1.00E-05 | 1.02E-06 | XRCC5    | 7520 .  |
| 208643_s_ | 2.64E-04 | 6.47E-05 | XRCC5    | 7520 .  |
| 208644_at | 4.88E-07 | 1.92E-08 | PARP1    | 142 .   |
| 208647_at | 0.039029 | 0.025743 | FDFT1    | 2222 .  |
| 208648_at | 0.007278 | 0.003619 | VCP      | 7415 .  |

|           |          |          |         |             |
|-----------|----------|----------|---------|-------------|
| 208649_s_ | 4.71E-05 | 7.43E-06 | VCP     | 7415 .      |
| 208650_s_ | 1.01E-08 | 1.07E-10 | CD24    | 100133941 . |
| 208651_x_ | 5.29E-08 | 9.76E-10 | CD24    | 100133941 . |
| 208652_at | 0.001464 | 5.30E-04 | PPP2CA  | 5515 .      |
| 208653_s_ | 7.15E-08 | 1.45E-09 | CD164   | 8763 .      |
| 208654_s_ | 4.21E-05 | 6.43E-06 | CD164   | 8763 .      |
| 208655_at | 0.01089  | 0.005801 |         | .           |
| 208660_at | 0.005497 | 0.002593 | CS      | 1431 .      |
| 208661_s_ | 0.035559 | 0.023108 | TTC3    | 7267 .      |
| 208662_s_ | 0.04713  | 0.032058 | TTC3    | 7267 .      |
| 208663_s_ | 0.01848  | 0.010785 | TTC3    | 7267 .      |
| 208664_s_ | 0.023436 | 0.01424  | TTC3    | 7267 .      |
| 208668_x_ | 0.001648 | 6.11E-04 | HMG2N2  | 3151 .      |
| 208669_s_ | 2.78E-04 | 6.91E-05 | EID1    | 23741 .     |
| 208670_s_ | 1.07E-04 | 2.09E-05 | EID1    | 23741 .     |
| 208671_at | 7.08E-05 | 1.25E-05 | SERINC1 | 57515 .     |
| 208672_s_ | 1.42E-04 | 3.00E-05 | SFRS3   | 6428 .      |
| 208673_s_ | 4.95E-04 | 1.40E-04 | SFRS3   | 6428 .      |
| 208674_x_ | 0.012774 | 0.007    | DDOST   | 1650 .      |
| 208676_s_ | 0.001163 | 4.01E-04 | PA2G4   | 5036 .      |
| 208677_s_ | 0.010714 | 0.005689 | BSG     | 682 .       |
| 208680_at | 6.90E-07 | 3.03E-08 | PRDX1   | 5052 .      |
| 208682_s_ | 2.45E-04 | 5.89E-05 | MAGED2  | 10916 .     |
| 208683_at | 3.06E-08 | 4.71E-10 | CAPN2   | 824 .       |
| 208684_at | 0.003078 | 0.001295 | COPA    | 1314 .      |
| 208685_x_ | 1.02E-04 | 1.97E-05 | BRD2    | 6046 .      |
| 208686_s_ | 0.00759  | 0.003801 | BRD2    | 6046 .      |
| 208687_x_ | 0.002228 | 8.80E-04 | HSPA8   | 3312 .      |
| 208688_x_ | 4.04E-06 | 3.10E-07 | EIF3B   | 8662 .      |
| 208690_s_ | 0.019214 | 0.011282 | PDLIM1  | 9124 .      |
| 208691_at | 0.008668 | 0.004435 | TFRC    | 7037 .      |
| 208692_at | 3.63E-04 | 9.62E-05 | RPS3    | 6188 .      |
| 208693_s_ | 0.010866 | 0.005785 | GARS    | 2617 .      |
| 208694_at | 5.05E-06 | 4.12E-07 | PRKDC   | 5591 .      |

|           |          |          |          |         |
|-----------|----------|----------|----------|---------|
| 208695_s_ | 9.22E-04 | 3.03E-04 | RPL39    | 6170 .  |
| 208696_at | 7.97E-04 | 2.53E-04 | CCT5     | 22948 . |
| 208697_s_ | 5.29E-04 | 1.52E-04 | EIF3E    | 3646 .  |
| 208698_s_ | 0.002618 | 0.001067 | NONO     | 4841 .  |
| 208699_x_ | 0.018326 | 0.01068  | TKT      | 7086 .  |
| 208700_s_ | 0.010619 | 0.00563  | TKT      | 7086 .  |
| 208701_at | 4.15E-04 | 1.13E-04 | APLP2    | 334 .   |
| 208702_x_ | 3.42E-04 | 8.93E-05 | APLP2    | 334 .   |
| 208703_s_ | 0.006926 | 0.003413 | APLP2    | 334 .   |
| 208705_s_ | 0.002456 | 9.89E-04 | EIF5     | 1983 .  |
| 208706_s_ | 0.001818 | 6.87E-04 | EIF5     | 1983 .  |
| 208707_at | 1.35E-07 | 3.42E-09 | EIF5     | 1983 .  |
| 208708_x_ | 1.83E-04 | 4.10E-05 | EIF5     | 1983 .  |
| 208710_s_ | 1.22E-07 | 2.96E-09 | AP3D1    | 8943 .  |
| 208713_at | 0.007385 | 0.003681 | HNRNPUL1 | 11100 . |
| 208714_at | 0.00311  | 0.001311 | NDUFV1   | 4723 .  |
| 208715_at | 0.001063 | 3.59E-04 | TMCO1    | 54499 . |
| 208716_s_ | 0.00164  | 6.07E-04 | TMCO1    | 54499 . |
| 208717_at | 0.020557 | 0.012218 | OXA1L    | 5018 .  |
| 208718_at | 0.01355  | 0.007493 | DDX17    | 10521 . |
| 208719_s_ | 0.043041 | 0.028827 | DDX17    | 10521 . |
| 208720_s_ | 1.22E-06 | 6.45E-08 | RBM39    | 9584 .  |
| 208722_s_ | 7.15E-04 | 2.21E-04 | ANAPC5   | 51433 . |
| 208723_at | 0.004611 | 0.002104 | USP11    | 8237 .  |
| 208724_s_ | 2.93E-05 | 4.06E-06 | RAB1A    | 5861 .  |
| 208725_at | 3.55E-05 | 5.15E-06 | EIF2S2   | 8894 .  |
| 208727_s_ | 0.013309 | 0.007342 | CDC42    | 998 .   |
| 208728_s_ | 7.04E-04 | 2.17E-04 | CDC42    | 998 .   |
| 208729_x_ | 2.30E-04 | 5.45E-05 | HLA-B    | 3106 .  |
| 208730_x_ | 2.02E-04 | 4.63E-05 | RAB2A    | 5862 .  |
| 208731_at | 1.00E-05 | 1.02E-06 | RAB2A    | 5862 .  |
| 208732_at | 4.16E-05 | 6.32E-06 | RAB2A    | 5862 .  |
| 208733_at | 0.00452  | 0.002054 | RAB2A    | 5862 .  |
| 208734_x_ | 9.68E-05 | 1.85E-05 | RAB2A    | 5862 .  |



|           |          |          |                              |         |
|-----------|----------|----------|------------------------------|---------|
| 208735_s_ | 0.009335 | 0.004839 | CTDSP2                       | 10106 . |
| 208736_at | 6.37E-04 | 1.92E-04 | ARPC3                        | 10094 . |
| 208737_at | 0.023481 | 0.014273 | ATP6V1G1                     | 9550 .  |
| 208738_x_ | 5.80E-05 | 9.64E-06 | LOC100127918&100127918 //.   |         |
| 208739_x_ | 0.012633 | 0.006908 | SUMO2                        | 6613 .  |
| 208740_at | 0.011966 | 0.006474 | SAP18                        | 10284 . |
| 208741_at | 0.001399 | 5.02E-04 | SAP18                        | 10284 . |
| 208744_x_ | 3.20E-04 | 8.24E-05 | HSPH1                        | 10808 . |
| 208746_x_ | 1.50E-04 | 3.22E-05 | ATP5L                        | 10632 . |
| 208747_s_ | 3.51E-06 | 2.58E-07 | C1S                          | 716 .   |
| 208748_s_ | 0.001824 | 6.90E-04 | FLOT1                        | 10211 . |
| 208750_s_ | 0.015313 | 0.008657 | ARF1                         | 375 .   |
| 208751_at | 6.76E-07 | 2.94E-08 | NAPA                         | 8775 .  |
| 208752_x_ | 1.55E-06 | 8.94E-08 | NAP1L1                       | 4673 .  |
| 208753_s_ | 1.94E-04 | 4.40E-05 | NAP1L1                       | 4673 .  |
| 208754_s_ | 1.20E-07 | 2.90E-09 | NAP1L1                       | 4673 .  |
| 208755_x_ | 6.61E-05 | 1.14E-05 | H3F3A /// H3F:3020 /// 302:. |         |
| 208756_at | 0.02937  | 0.01851  | EIF3I                        | 8668 .  |
| 208758_at | 3.73E-06 | 2.80E-07 | ATIC                         | 471 .   |
| 208759_at | 1.16E-07 | 2.77E-09 | NCSTN                        | 23385 . |
| 208761_s_ | 0.020885 | 0.012458 | SUMO1                        | 7341 .  |
| 208762_at | 0.003723 | 0.001627 | SUMO1                        | 7341 .  |
| 208763_s_ | 3.91E-04 | 1.05E-04 | TSC22D3                      | 1831 .  |
| 208765_s_ | 5.14E-08 | 9.36E-10 | HNRNPR                       | 10236 . |
| 208766_s_ | 4.05E-06 | 3.11E-07 | HNRNPR                       | 10236 . |
| 208767_s_ | 4.69E-06 | 3.75E-07 | LAPTM4B                      | 55353 . |
| 208768_x_ | 8.64E-06 | 8.34E-07 | RPL22                        | 6146 .  |
| 208769_at | 2.45E-04 | 5.91E-05 | EIF4EBP2                     | 1979 .  |
| 208770_s_ | 0.001102 | 3.76E-04 | EIF4EBP2                     | 1979 .  |
| 208771_s_ | 6.91E-04 | 2.12E-04 | LTA4H                        | 4048 .  |
| 208772_at | 3.42E-09 | 2.55E-11 | ANKHD1 /// AN404734 /// 5:.  |         |
| 208773_s_ | 3.86E-06 | 2.91E-07 | ANKHD1 /// AN404734 /// 5:.  |         |
| 208774_at | 3.97E-04 | 1.07E-04 | CSNK1D                       | 1453 .  |
| 208775_at | 2.11E-05 | 2.68E-06 | XPO1                         | 7514 .  |

|           |          |          |                              |          |
|-----------|----------|----------|------------------------------|----------|
| 208776_at | 1.47E-05 | 1.69E-06 | PSMD11                       | 5717 .   |
| 208777_s_ | 0.003431 | 0.001475 | PSMD11                       | 5717 .   |
| 208778_s_ | 1.21E-05 | 1.31E-06 | TCP1                         | 6950 .   |
| 208779_x_ | 6.09E-05 | 1.03E-05 | DDR1                         | 780 .    |
| 208781_x_ | 0.009173 | 0.004743 | SNX3                         | 8724 .   |
| 208782_at | 9.69E-05 | 1.85E-05 | FSTL1                        | 11167 .  |
| 208783_s_ | 0.005362 | 0.002517 | CD46                         | 4179 .   |
| 208784_s_ | 7.58E-06 | 7.03E-07 | KLHDC3                       | 116138 . |
| 208785_s_ | 0.020274 | 0.012015 | MAP1LC3B                     | 81631 .  |
| 208786_s_ | 3.24E-07 | 1.13E-08 | MAP1LC3B                     | 81631 .  |
| 208787_at | 4.46E-04 | 1.24E-04 | MRPL3                        | 11222 .  |
| 208789_at | 7.59E-07 | 3.42E-08 | PTRF                         | 284119 . |
| 208790_s_ | 5.26E-07 | 2.10E-08 | PTRF                         | 284119 . |
| 208791_at | 1.29E-04 | 2.64E-05 | CLU                          | 1191 .   |
| 208792_s_ | 2.18E-04 | 5.10E-05 | CLU                          | 1191 .   |
| 208793_x_ | 7.13E-05 | 1.26E-05 | SMARCA4                      | 6597 .   |
| 208794_s_ | 9.93E-10 | 5.31E-12 | SMARCA4                      | 6597 .   |
| 208795_s_ | 1.29E-06 | 6.98E-08 | MCM7                         | 4176 .   |
| 208796_s_ | 1.48E-06 | 8.36E-08 | CCNG1                        | 900 .    |
| 208798_x_ | 0.001717 | 6.41E-04 | GOLGA8A                      | 23015 .  |
| 208799_at | 0.003993 | 0.001768 | PSMB5                        | 5693 .   |
| 208800_at | 0.023872 | 0.014549 | SRP72                        | 6731 .   |
| 208801_at | 0.028008 | 0.017517 | SRP72                        | 6731 .   |
| 208804_s_ | 2.43E-07 | 7.62E-09 | SFRS6                        | 6431 .   |
| 208805_at | 3.40E-05 | 4.88E-06 | KIAA0391 /// P 5687 /// 9692 |          |
| 208806_at | 2.94E-04 | 7.40E-05 | CHD3                         | 1107 .   |
| 208807_s_ | 1.52E-07 | 4.01E-09 | CHD3                         | 1107 .   |
| 208808_s_ | 1.92E-05 | 2.37E-06 | HMGB2                        | 3148 .   |
| 208812_x_ | 7.30E-05 | 1.30E-05 | HLA-C                        | 3107 .   |
| 208814_at | 0.001217 | 4.24E-04 | HSPA4                        | 3308 .   |
| 208815_x_ | 9.54E-04 | 3.15E-04 | HSPA4                        | 3308 .   |
| 208816_x_ | 5.26E-04 | 1.51E-04 | ANXA2P2                      | 304 .    |
| 208817_at | 4.59E-08 | 8.07E-10 | COMT                         | 1312 .   |
| 208818_s_ | 2.10E-08 | 2.76E-10 | COMT                         | 1312 .   |

|           |          |          |         |         |
|-----------|----------|----------|---------|---------|
| 208820_at | 0.003389 | 0.001455 | PTK2    | 5747 .  |
| 208821_at | 4.70E-04 | 1.32E-04 | SNRPB   | 6628 .  |
| 208822_s_ | 0.024751 | 0.015177 | DAP3    | 7818 .  |
| 208823_s_ | 0.015969 | 0.009098 | PCTK1   | 5127 .  |
| 208826_x_ | 2.79E-04 | 6.95E-05 | HINT1   | 3094 .  |
| 208827_at | 1.63E-04 | 3.54E-05 | PSMB6   | 5694 .  |
| 208828_at | 3.38E-04 | 8.80E-05 | POLE3   | 54107 . |
| 208829_at | 2.83E-05 | 3.87E-06 | TAPBP   | 6892 .  |
| 208830_s_ | 6.93E-05 | 1.21E-05 | SUPT6H  | 6830 .  |
| 208831_x_ | 2.49E-04 | 6.03E-05 | SUPT6H  | 6830 .  |
| 208832_at | 0.042958 | 0.028762 | ATXN10  | 25814 . |
| 208834_x_ | 0.040114 | 0.02657  | RPL23A  | 6147 .  |
| 208835_s_ | 1.16E-06 | 5.98E-08 | CROP    | 51747 . |
| 208837_at | 1.26E-04 | 2.57E-05 | TMED3   | 23423 . |
| 208838_at | 0.006704 | 0.003281 | CAND1   | 55832 . |
| 208840_s_ | 2.79E-06 | 1.91E-07 | G3BP2   | 9908 .  |
| 208841_s_ | 2.95E-05 | 4.09E-06 | G3BP2   | 9908 .  |
| 208842_s_ | 9.96E-05 | 1.92E-05 | GORASP2 | 26003 . |
| 208844_at | 7.37E-04 | 2.30E-04 | VDAC3   | 7419 .  |
| 208845_at | 0.025972 | 0.016048 | VDAC3   | 7419 .  |
| 208846_s_ | 0.009252 | 0.004791 | VDAC3   | 7419 .  |
| 208847_s_ | 1.76E-09 | 1.13E-11 | ADH5    | 128 .   |
| 208848_at | 1.02E-05 | 1.04E-06 | ADH5    | 128 .   |
| 208849_at | 0.034348 | 0.022192 |         | .       |
| 208850_s_ | 1.79E-05 | 2.17E-06 | THY1    | 7070 .  |
| 208851_s_ | 6.50E-06 | 5.72E-07 | THY1    | 7070 .  |
| 208853_s_ | 0.008767 | 0.004495 | CANX    | 821 .   |
| 208857_s_ | 0.014136 | 0.007873 | PCMT1   | 5110 .  |
| 208858_s_ | 0.001861 | 7.07E-04 | FAM62A  | 23344 . |
| 208862_s_ | 3.26E-06 | 2.34E-07 | CTNND1  | 1500 .  |
| 208863_s_ | 5.92E-05 | 9.89E-06 | SFRS1   | 6426 .  |
| 208864_s_ | 1.77E-05 | 2.14E-06 | TXN     | 7295 .  |
| 208865_at | 0.001139 | 3.91E-04 | CSNK1A1 | 1452 .  |
| 208867_s_ | 0.008299 | 0.004218 | CSNK1A1 | 1452 .  |

|           |          |          |           |         |
|-----------|----------|----------|-----------|---------|
| 208868_s_ | 0.005291 | 0.002478 | GABARAPL1 | 23710 . |
| 208869_s_ | 0.001933 | 7.41E-04 | GABARAPL1 | 23710 . |
| 208870_x_ | 0.002433 | 9.78E-04 | ATP5C1    | 509 .   |
| 208871_at | 0.001746 | 6.55E-04 | ATN1      | 1822 .  |
| 208873_s_ | 0.011665 | 0.006283 | REEP5     | 7905 .  |
| 208874_x_ | 4.52E-04 | 1.26E-04 | PPP2R4    | 5524 .  |
| 208876_s_ | 0.005976 | 0.002864 | PAK2      | 5062 .  |
| 208877_at | 7.77E-05 | 1.41E-05 | PAK2      | 5062 .  |
| 208878_s_ | 1.91E-04 | 4.32E-05 | PAK2      | 5062 .  |
| 208879_x_ | 2.53E-07 | 8.03E-09 | PRPF6     | 24148 . |
| 208880_s_ | 8.19E-05 | 1.50E-05 | PRPF6     | 24148 . |
| 208882_s_ | 0.012452 | 0.00679  | UBR5      | 51366 . |
| 208883_at | 0.001008 | 3.37E-04 | UBR5      | 51366 . |
| 208885_at | 0.009479 | 0.004928 | LCP1      | 3936 .  |
| 208888_s_ | 0.003152 | 0.001332 | NCOR2     | 9612 .  |
| 208889_s_ | 3.35E-05 | 4.79E-06 | NCOR2     | 9612 .  |
| 208890_s_ | 1.32E-08 | 1.49E-10 | PLXNB2    | 23654 . |
| 208891_at | 0.006743 | 0.003305 | DUSP6     | 1848 .  |
| 208892_s_ | 0.010563 | 0.005594 | DUSP6     | 1848 .  |
| 208893_s_ | 0.006168 | 0.002971 | DUSP6     | 1848 .  |
| 208895_s_ | 2.00E-07 | 5.76E-09 | DDX18     | 8886 .  |
| 208896_at | 3.96E-06 | 3.01E-07 | DDX18     | 8886 .  |
| 208897_s_ | 0.010897 | 0.005805 | DDX18     | 8886 .  |
| 208898_at | 0.04644  | 0.031507 | ATP6V1D   | 51382 . |
| 208899_x_ | 0.027805 | 0.017369 | ATP6V1D   | 51382 . |
| 208900_s_ | 8.26E-06 | 7.85E-07 | TOP1      | 7150 .  |
| 208901_s_ | 8.09E-09 | 8.07E-11 | TOP1      | 7150 .  |
| 208902_s_ | 0.006407 | 0.00311  | RPS28     | 6234 .  |
| 208903_at | 0.001308 | 4.62E-04 | RPS28     | 6234 .  |
| 208904_s_ | 0.004    | 0.001772 | RPS28     | 6234 .  |
| 208905_at | 2.96E-04 | 7.47E-05 | CYCS      | 54205 . |
| 208906_at | 0.038351 | 0.025229 | BSCL2     | 26580 . |
| 208907_s_ | 9.81E-06 | 9.93E-07 | MRPS18B   | 28973 . |
| 208908_s_ | 2.41E-04 | 5.79E-05 | CAST      | 831 .   |

|           |          |          |         |         |
|-----------|----------|----------|---------|---------|
| 208910_s_ | 4.24E-04 | 1.16E-04 | C1QBP   | 708 .   |
| 208911_s_ | 3.40E-04 | 8.86E-05 | PDHB    | 5162 .  |
| 208912_s_ | 9.05E-06 | 8.92E-07 | CNP     | 1267 .  |
| 208913_at | 3.78E-05 | 5.57E-06 | GGA2    | 23062 . |
| 208914_at | 2.53E-07 | 8.03E-09 | GGA2    | 23062 . |
| 208915_s_ | 9.88E-05 | 1.90E-05 | GGA2    | 23062 . |
| 208916_at | 6.92E-04 | 2.13E-04 | SLC1A5  | 6510 .  |
| 208918_s_ | 0.012146 | 0.006592 | NADK    | 65220 . |
| 208919_s_ | 2.16E-04 | 5.05E-05 | NADK    | 65220 . |
| 208920_at | 1.58E-04 | 3.42E-05 | SRI     | 6717 .  |
| 208921_s_ | 0.026593 | 0.016489 | SRI     | 6717 .  |
| 208922_s_ | 0.008649 | 0.004424 | NXF1    | 10482 . |
| 208924_at | 0.004598 | 0.002097 | RNF11   | 26994 . |
| 208925_at | 0.01208  | 0.006551 | CLDND1  | 56650 . |
| 208927_at | 3.38E-05 | 4.85E-06 | SPOP    | 8405 .  |
| 208930_s_ | 3.20E-05 | 4.52E-06 | ILF3    | 3609 .  |
| 208931_s_ | 1.11E-05 | 1.17E-06 | ILF3    | 3609 .  |
| 208932_at | 2.19E-04 | 5.13E-05 | PPP4C   | 5531 .  |
| 208933_s_ | 6.87E-10 | 3.31E-12 | LGALS8  | 3964 .  |
| 208934_s_ | 2.42E-05 | 3.19E-06 | LGALS8  | 3964 .  |
| 208935_s_ | 3.10E-07 | 1.06E-08 | LGALS8  | 3964 .  |
| 208936_x_ | 2.05E-08 | 2.68E-10 | LGALS8  | 3964 .  |
| 208937_s_ | 3.70E-04 | 9.80E-05 | ID1     | 3397 .  |
| 208938_at | 0.014252 | 0.007948 | PRCC    | 5546 .  |
| 208939_at | 6.40E-07 | 2.73E-08 | SEPHS1  | 22929 . |
| 208940_at | 1.87E-05 | 2.28E-06 | SEPHS1  | 22929 . |
| 208941_s_ | 2.35E-06 | 1.54E-07 | SEPHS1  | 22929 . |
| 208943_s_ | 0.002883 | 0.001196 | SEC62   | 7095 .  |
| 208944_at | 1.16E-06 | 6.03E-08 | TGFBR2  | 7048 .  |
| 208945_s_ | 0.005461 | 0.002572 | BECN1   | 8678 .  |
| 208946_s_ | 0.002767 | 0.00114  | BECN1   | 8678 .  |
| 208948_s_ | 0.001    | 3.34E-04 | STAU1   | 6780 .  |
| 208949_s_ | 0.004008 | 0.001777 | LGALS3  | 3958 .  |
| 208950_s_ | 0.002256 | 8.93E-04 | ALDH7A1 | 501 .   |

|           |          |          |         |         |
|-----------|----------|----------|---------|---------|
| 208951_at | 7.93E-04 | 2.52E-04 | ALDH7A1 | 501 .   |
| 208954_s_ | 8.57E-05 | 1.59E-05 | LARP5   | 23185 . |
| 208955_at | 2.97E-04 | 7.51E-05 | DUT     | 1854 .  |
| 208956_x_ | 5.89E-04 | 1.74E-04 | DUT     | 1854 .  |
| 208958_at | 0.017271 | 0.009962 | ERP44   | 23071 . |
| 208959_s_ | 0.010729 | 0.005698 | ERP44   | 23071 . |
| 208960_s_ | 0.025729 | 0.015876 | KLF6    | 1316 .  |
| 208961_s_ | 0.01153  | 0.006199 | KLF6    | 1316 .  |
| 208963_x_ | 0.027419 | 0.017084 | FADS1   | 3992 .  |
| 208965_s_ | 3.48E-07 | 1.24E-08 | IFI16   | 3428 .  |
| 208966_x_ | 3.86E-05 | 5.73E-06 | IFI16   | 3428 .  |
| 208967_s_ | 0.017584 | 0.010175 | AK2     | 204 .   |
| 208968_s_ | 7.07E-05 | 1.24E-05 | CIAPIN1 | 57019 . |
| 208969_at | 3.45E-04 | 9.02E-05 | NDUFA9  | 4704 .  |
| 208972_s_ | 6.46E-04 | 1.96E-04 | ATP5G1  | 516 .   |
| 208973_at | 9.99E-05 | 1.93E-05 | ERI3    | 79033 . |
| 208974_x_ | 1.34E-05 | 1.49E-06 | KPNB1   | 3837 .  |
| 208975_s_ | 0.02028  | 0.01202  | KPNB1   | 3837 .  |
| 208977_x_ | 0.0047   | 0.002154 | TUBB2C  | 10383 . |
| 208978_at | 4.84E-04 | 1.37E-04 | CRIP2   | 1397 .  |
| 208979_at | 9.39E-07 | 4.55E-08 | NCOA6   | 23054 . |
| 208980_s_ | 4.10E-05 | 6.21E-06 | UBC     | 7316 .  |
| 208984_x_ | 2.79E-07 | 9.22E-09 | RBM10   | 8241 .  |
| 208985_s_ | 3.00E-04 | 7.59E-05 | EIF3J   | 8669 .  |
| 208986_at | 0.025228 | 0.015528 | TCF12   | 6938 .  |
| 208987_s_ | 0.005572 | 0.002636 | KDM2A   | 22992 . |
| 208988_at | 6.30E-04 | 1.89E-04 | KDM2A   | 22992 . |
| 208989_s_ | 3.43E-05 | 4.94E-06 | KDM2A   | 22992 . |
| 208990_s_ | 1.02E-05 | 1.05E-06 | HNRNPH3 | 3189 .  |
| 208991_at | 4.78E-08 | 8.47E-10 | STAT3   | 6774 .  |
| 208992_s_ | 0.003978 | 0.00176  | STAT3   | 6774 .  |
| 208993_s_ | 5.32E-06 | 4.41E-07 | PPIG    | 9360 .  |
| 208994_s_ | 2.29E-07 | 7.00E-09 | PPIG    | 9360 .  |
| 208995_s_ | 1.04E-05 | 1.07E-06 | PPIG    | 9360 .  |

|           |          |          |          |         |
|-----------|----------|----------|----------|---------|
| 208997_s_ | 1.82E-04 | 4.07E-05 | UCP2     | 7351 .  |
| 208998_at | 1.57E-06 | 9.10E-08 | UCP2     | 7351 .  |
| 208999_at | 0.021325 | 0.012763 | 8-Sep    | 23176 . |
| 209000_s_ | 0.001671 | 6.21E-04 | 8-Sep    | 23176 . |
| 209001_s_ | 0.001562 | 5.73E-04 | ANAPC13  | 25847 . |
| 209002_s_ | 8.94E-08 | 1.97E-09 | CALCOCO1 | 57658 . |
| 209003_at | 0.001013 | 3.39E-04 | SLC25A11 | 8402 .  |
| 209004_s_ | 0.011112 | 0.005939 | FBXL5    | 26234 . |
| 209005_at | 0.03191  | 0.020381 | FBXL5    | 26234 . |
| 209006_s_ | 2.71E-05 | 3.67E-06 | C1orf63  | 57035 . |
| 209007_s_ | 0.007751 | 0.003895 | C1orf63  | 57035 . |
| 209008_x_ | 1.27E-07 | 3.12E-09 | KRT8     | 3856 .  |
| 209010_s_ | 0.040601 | 0.026948 | TRIO     | 7204 .  |
| 209011_at | 0.003611 | 0.001569 | TRIO     | 7204 .  |
| 209012_at | 4.45E-04 | 1.23E-04 | TRIO     | 7204 .  |
| 209013_x_ | 0.036223 | 0.023612 | TRIO     | 7204 .  |
| 209014_at | 0.001692 | 6.30E-04 | MAGED1   | 9500 .  |
| 209015_s_ | 0.03877  | 0.025543 | DNAJB6   | 10049 . |
| 209016_s_ | 0.036475 | 0.023804 | KRT7     | 3855 .  |
| 209017_s_ | 0.003324 | 0.001421 | LONP1    | 9361 .  |
| 209018_s_ | 4.42E-05 | 6.84E-06 | PINK1    | 65018 . |
| 209019_s_ | 4.95E-06 | 4.02E-07 | PINK1    | 65018 . |
| 209021_x_ | 5.48E-05 | 8.96E-06 | KIAA0652 | 9776 .  |
| 209022_at | 0.02035  | 0.012071 | STAG2    | 10735 . |
| 209023_s_ | 0.003038 | 0.001275 | STAG2    | 10735 . |
| 209024_s_ | 7.35E-05 | 1.31E-05 | SYNCRIP  | 10492 . |
| 209025_s_ | 3.05E-04 | 7.76E-05 | SYNCRIP  | 10492 . |
| 209027_s_ | 0.009564 | 0.004978 | ABI1     | 10006 . |
| 209029_at | 2.31E-05 | 2.99E-06 | COPS7A   | 50813 . |
| 209030_s_ | 1.45E-04 | 3.06E-05 | CADM1    | 23705 . |
| 209031_at | 1.40E-05 | 1.59E-06 | CADM1    | 23705 . |
| 209032_s_ | 2.67E-04 | 6.57E-05 | CADM1    | 23705 . |
| 209034_at | 0.001504 | 5.48E-04 | PNRC1    | 10957 . |
| 209035_at | 0.002031 | 7.86E-04 | MDK      | 4192 .  |

|           |          |          |                            |         |
|-----------|----------|----------|----------------------------|---------|
| 209036_s_ | 0.002429 | 9.76E-04 | MDH2                       | 4191 .  |
| 209037_s_ | 1.38E-06 | 7.64E-08 | EHD1                       | 10938 . |
| 209038_s_ | 6.17E-04 | 1.85E-04 | EHD1                       | 10938 . |
| 209039_x_ | 1.03E-05 | 1.06E-06 | EHD1                       | 10938 . |
| 209040_s_ | 0.001329 | 4.72E-04 | PSMB8                      | 5696 .  |
| 209042_s_ | 4.22E-06 | 3.28E-07 | UBE2G2                     | 7327 .  |
| 209043_at | 1.09E-04 | 2.16E-05 | PAPSS1                     | 9061 .  |
| 209045_at | 0.016878 | 0.009699 | XPNPEP1                    | 7511 .  |
| 209047_at | 0.016644 | 0.009542 | AQP1                       | 358 .   |
| 209048_s_ | 4.56E-06 | 3.63E-07 | ZMYND8                     | 23613 . |
| 209049_s_ | 8.89E-07 | 4.24E-08 | ZMYND8                     | 23613 . |
| 209050_s_ | 0.009571 | 0.004982 | RALGDS                     | 5900 .  |
| 209053_s_ | 2.82E-05 | 3.86E-06 | WHSC1                      | 7468 .  |
| 209054_s_ | 1.24E-05 | 1.36E-06 | WHSC1                      | 7468 .  |
| 209056_s_ | 2.29E-05 | 2.96E-06 | CDC5L                      | 988 .   |
| 209057_x_ | 0.001487 | 5.41E-04 | CDC5L                      | 988 .   |
| 209058_at | 0.008833 | 0.004535 | EDF1                       | 8721 .  |
| 209059_s_ | 5.96E-05 | 9.98E-06 | EDF1                       | 8721 .  |
| 209062_x_ | 0.015086 | 0.008506 | NCOA3                      | 8202 .  |
| 209064_x_ | 3.37E-05 | 4.83E-06 | PAIP1                      | 10605 . |
| 209065_at | 0.00831  | 0.004224 | UQCRB                      | 7381 .  |
| 209066_x_ | 0.01798  | 0.010443 | UQCRB                      | 7381 .  |
| 209067_s_ | 2.89E-07 | 9.62E-09 | HNRPDL                     | 9987 .  |
| 209068_at | 0.001873 | 7.13E-04 | HNRPDL                     | 9987 .  |
| 209069_s_ | 0.003343 | 0.001431 | H3F3B                      | 3021 .  |
| 209070_s_ | 3.99E-07 | 1.47E-08 | RGS5                       | 8490 .  |
| 209071_s_ | 6.98E-08 | 1.40E-09 | RGS5                       | 8490 .  |
| 209073_s_ | 0.022625 | 0.013669 | NUMB                       | 8650 .  |
| 209075_s_ | 4.83E-04 | 1.36E-04 | ISCU                       | 23479 . |
| 209077_at | 0.019291 | 0.011338 | TXN2                       | 25828 . |
| 209079_x_ | 4.53E-06 | 3.59E-07 | PCDHGA1 /// P26025 /// 50% |         |
| 209080_x_ | 0.035753 | 0.023257 | GLRX3                      | 10539 . |
| 209081_s_ | 2.26E-05 | 2.91E-06 | COL18A1                    | 80781 . |
| 209082_s_ | 8.91E-05 | 1.67E-05 | COL18A1                    | 80781 . |



|           |          |          |                            |         |
|-----------|----------|----------|----------------------------|---------|
| 209085_x_ | 0.009793 | 0.005121 | RFC1                       | 5981 .  |
| 209086_x_ | 0.001581 | 5.81E-04 | MCAM                       | 4162 .  |
| 209087_x_ | 2.60E-04 | 6.37E-05 | MCAM                       | 4162 .  |
| 209088_s_ | 7.67E-04 | 2.42E-04 | UBN1                       | 29855 . |
| 209089_at | 1.15E-05 | 1.22E-06 | RAB5A                      | 5868 .  |
| 209090_s_ | 0.015461 | 0.008759 | SH3GLB1                    | 51100 . |
| 209091_s_ | 0.001209 | 4.21E-04 | SH3GLB1                    | 51100 . |
| 209092_s_ | 5.61E-04 | 1.64E-04 | GLOD4                      | 51031 . |
| 209093_s_ | 1.06E-04 | 2.07E-05 | GBA /// GBAP 2629 /// 2630 | 2629 .  |
| 209094_at | 2.24E-04 | 5.28E-05 | DDAH1                      | 23576 . |
| 209097_s_ | 5.26E-04 | 1.51E-04 | JAG1                       | 182 .   |
| 209098_s_ | 1.15E-04 | 2.28E-05 | JAG1                       | 182 .   |
| 209099_x_ | 0.021747 | 0.013059 | JAG1                       | 182 .   |
| 209100_at | 0.001302 | 4.60E-04 | IFRD2                      | 7866 .  |
| 209101_at | 0.006936 | 0.003419 | CTGF                       | 1490 .  |
| 209102_s_ | 0.002213 | 8.73E-04 | HBP1                       | 26959 . |
| 209103_s_ | 0.016844 | 0.009675 | UFD1L                      | 7353 .  |
| 209104_s_ | 4.20E-05 | 6.41E-06 | NHP2                       | 55651 . |
| 209105_at | 0.008023 | 0.004058 | NCOA1                      | 8648 .  |
| 209106_at | 0.023909 | 0.014574 | NCOA1                      | 8648 .  |
| 209108_at | 1.94E-05 | 2.41E-06 | TSPAN6                     | 7105 .  |
| 209109_s_ | 6.07E-07 | 2.54E-08 | TSPAN6                     | 7105 .  |
| 209111_at | 0.048448 | 0.033083 | RNF5                       | 6048 .  |
| 209114_at | 0.025224 | 0.015523 | TSPAN1                     | 10103 . |
| 209115_at | 0.017278 | 0.009966 | UBA3                       | 9039 .  |
| 209118_s_ | 0.001621 | 5.99E-04 | TUBA1A                     | 7846 .  |
| 209119_x_ | 0.039047 | 0.025759 | NR2F2                      | 7026 .  |
| 209120_at | 0.006711 | 0.003286 | NR2F2                      | 7026 .  |
| 209121_x_ | 0.004193 | 0.001875 | NR2F2                      | 7026 .  |
| 209124_at | 3.90E-04 | 1.05E-04 | MYD88                      | 4615 .  |
| 209125_at | 0.019819 | 0.011698 | KRT6A                      | 3853 .  |
| 209126_x_ | 5.12E-05 | 8.25E-06 | KRT6B                      | 3854 .  |
| 209127_s_ | 2.73E-05 | 3.71E-06 | SART3                      | 9733 .  |
| 209128_s_ | 1.41E-05 | 1.61E-06 | SART3                      | 9733 .  |

|           |          |          |         |         |
|-----------|----------|----------|---------|---------|
| 209129_at | 0.032895 | 0.02112  | TRIP6   | 7205 .  |
| 209131_s_ | 9.04E-04 | 2.96E-04 | SNAP23  | 8773 .  |
| 209134_s_ | 0.021754 | 0.013065 | RPS6    | 6194 .  |
| 209135_at | 0.002617 | 0.001067 | ASPH    | 444 .   |
| 209137_s_ | 3.25E-04 | 8.40E-05 | USP10   | 9100 .  |
| 209138_x_ | 0.022935 | 0.013888 | IGL@    | 3535 .  |
| 209139_s_ | 0.028462 | 0.017841 | PRKRA   | 8575 .  |
| 209140_x_ | 2.73E-05 | 3.70E-06 | HLA-B   | 3106 .  |
| 209141_at | 0.00174  | 6.52E-04 | UBE2G1  | 7326 .  |
| 209142_s_ | 0.011208 | 0.006    | UBE2G1  | 7326 .  |
| 209143_s_ | 6.71E-05 | 1.16E-05 | CLNS1A  | 1207 .  |
| 209146_at | 0.009692 | 0.00506  | SC4MOL  | 6307 .  |
| 209147_s_ | 2.41E-05 | 3.18E-06 | PPAP2A  | 8611 .  |
| 209148_at | 2.48E-04 | 5.99E-05 | RXRБ    | 6257 .  |
| 209149_s_ | 4.08E-07 | 1.52E-08 | TM9SF1  | 10548 . |
| 209150_s_ | 4.17E-06 | 3.23E-07 | TM9SF1  | 10548 . |
| 209152_s_ | 0.001809 | 6.83E-04 | TCF3    | 6929 .  |
| 209153_s_ | 1.90E-05 | 2.34E-06 | TCF3    | 6929 .  |
| 209154_at | 8.56E-07 | 4.03E-08 | TAX1BP3 | 30851 . |
| 209156_s_ | 1.72E-06 | 1.03E-07 | COL6A2  | 1292 .  |
| 209158_s_ | 0.014045 | 0.007814 | CYTH2   | 9266 .  |
| 209159_s_ | 0.001201 | 4.17E-04 | NDRG4   | 65009 . |
| 209160_at | 0.004745 | 0.002178 | AKR1C3  | 8644 .  |
| 209161_at | 2.69E-05 | 3.63E-06 | PRPF4   | 9128 .  |
| 209165_at | 1.45E-04 | 3.08E-05 | AATF    | 26574 . |
| 209167_at | 0.001012 | 3.39E-04 | GPM6B   | 2824 .  |
| 209168_at | 9.28E-06 | 9.22E-07 | GPM6B   | 2824 .  |
| 209169_at | 1.48E-05 | 1.71E-06 | GPM6B   | 2824 .  |
| 209170_s_ | 7.04E-04 | 2.17E-04 | GPM6B   | 2824 .  |
| 209171_at | 0.002927 | 0.001217 | ITPA    | 3704 .  |
| 209172_s_ | 1.04E-06 | 5.18E-08 | CENPF   | 1063 .  |
| 209174_s_ | 0.004737 | 0.002173 | QRICH1  | 54870 . |
| 209177_at | 3.14E-06 | 2.23E-07 | NDUFAF3 | 25915 . |
| 209180_at | 2.14E-04 | 4.97E-05 | RABGGTB | 5876 .  |

|           |          |          |          |         |
|-----------|----------|----------|----------|---------|
| 209181_s_ | 0.001331 | 4.73E-04 | RABGGTB  | 5876 .  |
| 209182_s_ | 2.76E-06 | 1.89E-07 | C10orf10 | 11067 . |
| 209183_s_ | 7.38E-05 | 1.32E-05 | C10orf10 | 11067 . |
| 209186_at | 0.003574 | 0.001549 | ATP2A2   | 488 .   |
| 209187_at | 0.014794 | 0.008314 | DR1      | 1810 .  |
| 209189_at | 4.70E-04 | 1.32E-04 | FOS      | 2353 .  |
| 209190_s_ | 0.001354 | 4.83E-04 | DIAPH1   | 1729 .  |
| 209191_at | 0.004764 | 0.002188 | TUBB6    | 84617 . |
| 209192_x_ | 8.01E-05 | 1.46E-05 | KAT5     | 10524 . |
| 209193_at | 3.67E-04 | 9.72E-05 | PIM1     | 5292 .  |
| 209194_at | 0.002394 | 9.59E-04 | CETN2    | 1069 .  |
| 209196_at | 0.003917 | 0.00173  | WDR46    | 9277 .  |
| 209197_at | 0.005655 | 0.00268  | SYT11    | 23208 . |
| 209198_s_ | 5.16E-04 | 1.48E-04 | SYT11    | 23208 . |
| 209199_s_ | 0.025165 | 0.015477 | MEF2C    | 4208 .  |
| 209201_x_ | 1.57E-06 | 9.09E-08 | CXCR4    | 7852 .  |
| 209203_s_ | 3.39E-07 | 1.20E-08 | BICD2    | 23299 . |
| 209204_at | 0.006079 | 0.002923 | LMO4     | 8543 .  |
| 209206_at | 1.56E-06 | 8.98E-08 | SEC22B   | 9554 .  |
| 209207_s_ | 1.43E-06 | 8.02E-08 | SEC22B   | 9554 .  |
| 209209_s_ | 1.02E-04 | 1.98E-05 | FERMT2   | 10979 . |
| 209210_s_ | 0.002032 | 7.87E-04 | FERMT2   | 10979 . |
| 209211_at | 8.10E-04 | 2.59E-04 | KLF5     | 688 .   |
| 209212_s_ | 0.001893 | 7.23E-04 | KLF5     | 688 .   |
| 209213_at | 0.002817 | 0.001164 | CBR1     | 873 .   |
| 209214_s_ | 3.56E-06 | 2.63E-07 | EWSR1    | 2130 .  |
| 209216_at | 7.23E-04 | 2.25E-04 | WDR45    | 11152 . |
| 209217_s_ | 5.73E-04 | 1.68E-04 | WDR45    | 11152 . |
| 209220_at | 3.65E-10 | 1.43E-12 | GPC3     | 2719 .  |
| 209221_s_ | 0.007935 | 0.004007 | OSBPL2   | 9885 .  |
| 209222_s_ | 0.037151 | 0.024326 | OSBPL2   | 9885 .  |
| 209224_s_ | 2.53E-04 | 6.14E-05 | NDUFA2   | 4695 .  |
| 209225_x_ | 0.009497 | 0.004938 | TNPO1    | 3842 .  |
| 209226_s_ | 0.008048 | 0.004073 | TNPO1    | 3842 .  |

|           |          |          |         |         |
|-----------|----------|----------|---------|---------|
| 209227_at | 0.001235 | 4.32E-04 | TUSC3   | 7991 .  |
| 209228_x_ | 0.034506 | 0.022311 | TUSC3   | 7991 .  |
| 209229_s_ | 0.003583 | 0.001554 | SAPS1   | 22870 . |
| 209230_s_ | 1.69E-04 | 3.72E-05 | NUPR1   | 26471 . |
| 209231_s_ | 0.035929 | 0.023387 | DCTN5   | 84516 . |
| 209232_s_ | 0.033173 | 0.021328 | DCTN5   | 84516 . |
| 209233_at | 1.05E-04 | 2.05E-05 | EMG1    | 10436 . |
| 209234_at | 1.77E-05 | 2.14E-06 | KIF1B   | 23095 . |
| 209235_at | 0.004719 | 0.002163 | CLCN7   | 1186 .  |
| 209236_at | 1.62E-05 | 1.91E-06 | SLC23A2 | 9962 .  |
| 209238_at | 1.41E-05 | 1.59E-06 | STX3    | 6809 .  |
| 209239_at | 1.42E-06 | 7.99E-08 | NFKB1   | 4790 .  |
| 209240_at | 0.002299 | 9.14E-04 | OGT     | 8473 .  |
| 209241_x_ | 9.32E-04 | 3.07E-04 | MINK1   | 50488 . |
| 209244_s_ | 0.004705 | 0.002156 | KIF1C   | 10749 . |
| 209246_at | 2.07E-04 | 4.77E-05 | ABCF2   | 10061 . |
| 209247_s_ | 0.014881 | 0.008372 | ABCF2   | 10061 . |
| 209248_at | 0.035749 | 0.023254 | GHITM   | 27069 . |
| 209250_at | 2.27E-04 | 5.34E-05 | DEGS1   | 8560 .  |
| 209252_at | 9.10E-07 | 4.38E-08 | HARS2   | 23438 . |
| 209253_at | 7.35E-05 | 1.31E-05 | SORBS3  | 10174 . |
| 209255_at | 7.37E-04 | 2.30E-04 | KLHDC10 | 23008 . |
| 209256_s_ | 3.72E-04 | 9.88E-05 | KLHDC10 | 23008 . |
| 209257_s_ | 2.05E-06 | 1.29E-07 | SMC3    | 9126 .  |
| 209258_s_ | 1.50E-08 | 1.77E-10 | SMC3    | 9126 .  |
| 209259_s_ | 8.97E-06 | 8.81E-07 | SMC3    | 9126 .  |
| 209260_at | 0.001126 | 3.86E-04 | SFN     | 2810 .  |
| 209261_s_ | 9.89E-05 | 1.90E-05 | NR2F6   | 2063 .  |
| 209262_s_ | 0.003796 | 0.001666 | NR2F6   | 2063 .  |
| 209263_x_ | 2.45E-04 | 5.90E-05 | TSPAN4  | 7106 .  |
| 209264_s_ | 4.47E-04 | 1.24E-04 | TSPAN4  | 7106 .  |
| 209265_s_ | 3.68E-04 | 9.76E-05 | METTL3  | 56339 . |
| 209266_s_ | 2.33E-04 | 5.53E-05 | SLC39A8 | 64116 . |
| 209267_s_ | 0.00143  | 5.15E-04 | SLC39A8 | 64116 . |

|           |          |          |          |         |
|-----------|----------|----------|----------|---------|
| 209268_at | 2.53E-05 | 3.37E-06 | VPS45    | 11311 . |
| 209269_s_ | 0.016236 | 0.009275 | SYK      | 6850 .  |
| 209273_s_ | 0.02948  | 0.018594 | ISCA1    | 81689 . |
| 209276_s_ | 0.020396 | 0.012099 | GLRX     | 2745 .  |
| 209279_s_ | 0.045621 | 0.030865 | NSDHL    | 50814 . |
| 209280_at | 1.08E-04 | 2.12E-05 | MRC2     | 9902 .  |
| 209282_at | 0.003706 | 0.001618 | PRKD2    | 25865 . |
| 209283_at | 6.75E-11 | 1.61E-13 | CRYAB    | 1410 .  |
| 209286_at | 8.22E-04 | 2.63E-04 | CDC42EP3 | 10602 . |
| 209287_s_ | 1.60E-04 | 3.46E-05 | CDC42EP3 | 10602 . |
| 209288_s_ | 0.00179  | 6.74E-04 | CDC42EP3 | 10602 . |
| 209289_at | 0.027887 | 0.017429 | NFIB     | 4781 .  |
| 209291_at | 1.37E-04 | 2.87E-05 | ID4      | 3400 .  |
| 209292_at | 4.96E-04 | 1.41E-04 | ID4      | 3400 .  |
| 209293_x_ | 1.31E-04 | 2.71E-05 | ID4      | 3400 .  |
| 209296_at | 1.78E-05 | 2.16E-06 | PPM1B    | 5495 .  |
| 209297_at | 6.47E-04 | 1.96E-04 | ITSN1    | 6453 .  |
| 209298_s_ | 0.009844 | 0.005151 | ITSN1    | 6453 .  |
| 209300_s_ | 0.026733 | 0.016597 | NECAP1   | 25977 . |
| 209301_at | 4.43E-06 | 3.50E-07 | CA2      | 760 .   |
| 209302_at | 1.06E-05 | 1.09E-06 | POLR2H   | 5437 .  |
| 209304_x_ | 2.06E-04 | 4.76E-05 | GADD45B  | 4616 .  |
| 209305_s_ | 0.004223 | 0.001891 | GADD45B  | 4616 .  |
| 209306_s_ | 0.00436  | 0.001966 | SWAP70   | 23075 . |
| 209307_at | 0.019027 | 0.011156 | SWAP70   | 23075 . |
| 209308_s_ | 0.028977 | 0.018227 | BNIP2    | 663 .   |
| 209310_s_ | 1.20E-08 | 1.33E-10 | CASP4    | 837 .   |
| 209311_at | 9.09E-07 | 4.38E-08 | BCL2L2   | 599 .   |
| 209313_at | 7.30E-05 | 1.30E-05 | GPN1     | 11321 . |
| 209315_at | 2.27E-04 | 5.36E-05 | HBS1L    | 10767 . |
| 209317_at | 6.01E-04 | 1.78E-04 | POLR1C   | 9533 .  |
| 209318_x_ | 0.001325 | 4.70E-04 | PLAGL1   | 5325 .  |
| 209320_at | 3.14E-04 | 8.04E-05 | ADCY3    | 109 .   |
| 209321_s_ | 5.48E-07 | 2.22E-08 | ADCY3    | 109 .   |

|           |          |          |          |         |
|-----------|----------|----------|----------|---------|
| 209322_s_ | 0.009071 | 0.004678 | SH2B1    | 25970 . |
| 209323_at | 1.25E-05 | 1.36E-06 | PRKRIR   | 5612 .  |
| 209324_s_ | 3.16E-04 | 8.10E-05 | RGS16    | 6004 .  |
| 209325_s_ | 0.013552 | 0.007494 | RGS16    | 6004 .  |
| 209330_s_ | 2.71E-05 | 3.67E-06 | HNRNPD   | 3184 .  |
| 209332_s_ | 3.27E-04 | 8.47E-05 | MAX      | 4149 .  |
| 209333_at | 0.027088 | 0.01685  | ULK1     | 8408 .  |
| 209334_s_ | 1.22E-04 | 2.47E-05 | PSMD9    | 5715 .  |
| 209335_at | 3.08E-09 | 2.22E-11 | DCN      | 1634 .  |
| 209336_at | 1.06E-07 | 2.48E-09 | PWP2     | 5822 .  |
| 209338_at | 0.017891 | 0.010382 | TFCP2    | 7024 .  |
| 209340_at | 3.24E-04 | 8.35E-05 | UAP1     | 6675 .  |
| 209341_s_ | 6.03E-08 | 1.14E-09 | IKBKB    | 3551 .  |
| 209342_s_ | 5.35E-05 | 8.71E-06 | IKBKB    | 3551 .  |
| 209344_at | 8.63E-05 | 1.61E-05 | TPM4     | 7171 .  |
| 209345_s_ | 0.001241 | 4.34E-04 | PI4K2A   | 55361 . |
| 209346_s_ | 3.04E-05 | 4.25E-06 | PI4K2A   | 55361 . |
| 209347_s_ | 0.035341 | 0.022935 | MAF      | 4094 .  |
| 209348_s_ | 0.016284 | 0.009306 | MAF      | 4094 .  |
| 209349_at | 1.38E-04 | 2.90E-05 | RAD50    | 10111 . |
| 209351_at | 0.018373 | 0.010711 | KRT14    | 3861 .  |
| 209352_s_ | 0.048529 | 0.03315  | SIN3B    | 23309 . |
| 209353_s_ | 0.006344 | 0.003072 |          | .       |
| 209354_at | 0.0015   | 5.46E-04 | TNFRSF14 | 8764 .  |
| 209355_s_ | 1.25E-05 | 1.36E-06 | PPAP2B   | 8613 .  |
| 209356_x_ | 7.16E-09 | 6.79E-11 | EFEMP2   | 30008 . |
| 209357_at | 3.71E-04 | 9.87E-05 | CITED2   | 10370 . |
| 209358_at | 4.01E-04 | 1.08E-04 | TAF11    | 6882 .  |
| 209359_x_ | 0.003194 | 0.001354 | RUNX1    | 861 .   |
| 209360_s_ | 1.12E-04 | 2.23E-05 | RUNX1    | 861 .   |
| 209362_at | 0.001816 | 6.86E-04 | MED21    | 9412 .  |
| 209364_at | 1.34E-04 | 2.79E-05 | BAD      | 572 .   |
| 209365_s_ | 1.53E-07 | 4.06E-09 | ECM1     | 1893 .  |
| 209367_at | 3.53E-06 | 2.59E-07 | STXBP2   | 6813 .  |

|           |          |          |                             |         |
|-----------|----------|----------|-----------------------------|---------|
| 209369_at | 4.23E-04 | 1.16E-04 | ANXA3                       | 306 .   |
| 209370_s_ | 6.81E-04 | 2.08E-04 | SH3BP2                      | 6452 .  |
| 209371_s_ | 0.020138 | 0.011923 | SH3BP2                      | 6452 .  |
| 209372_x_ | 1.17E-05 | 1.25E-06 | TUBB2A /// TU 347733 /// 7. |         |
| 209373_at | 0.002167 | 8.51E-04 | MALL                        | 7851 .  |
| 209374_s_ | 0.00481  | 0.002214 | IGHM                        | 3507 .  |
| 209375_at | 9.07E-05 | 1.70E-05 | XPC                         | 7508 .  |
| 209376_x_ | 4.42E-04 | 1.22E-04 | SFRS2IP                     | 9169 .  |
| 209377_s_ | 4.00E-04 | 1.08E-04 | HMG3                        | 9324 .  |
| 209378_s_ | 3.47E-05 | 5.00E-06 | KIAA1128                    | 54462 . |
| 209379_s_ | 0.001875 | 7.14E-04 | KIAA1128                    | 54462 . |
| 209380_s_ | 5.96E-04 | 1.77E-04 | ABCC5                       | 10057 . |
| 209382_at | 1.13E-04 | 2.25E-05 | POLR3C                      | 10623 . |
| 209386_at | 0.010196 | 0.005365 | TM4SF1                      | 4071 .  |
| 209387_s_ | 0.002437 | 9.80E-04 | TM4SF1                      | 4071 .  |
| 209388_at | 0.036835 | 0.024076 | PAPOLA                      | 10914 . |
| 209390_at | 0.01311  | 0.007214 | TSC1                        | 7248 .  |
| 209392_at | 0.001932 | 7.40E-04 | ENPP2                       | 5168 .  |
| 209393_s_ | 0.002223 | 8.77E-04 | EIF4E2                      | 9470 .  |
| 209395_at | 0.016553 | 0.009483 | CHI3L1                      | 1116 .  |
| 209396_s_ | 0.044058 | 0.029644 | CHI3L1                      | 1116 .  |
| 209397_at | 0.044115 | 0.029689 | ME2                         | 4200 .  |
| 209398_at | 0.007781 | 0.003914 | HIST1H1C                    | 3006 .  |
| 209399_at | 0.002599 | 0.001058 | HLCS                        | 3141 .  |
| 209401_s_ | 5.72E-06 | 4.86E-07 | SLC12A4                     | 6560 .  |
| 209402_s_ | 1.11E-07 | 2.63E-09 | SLC12A4                     | 6560 .  |
| 209403_at | 0.021091 | 0.012601 | LOC653498 /// 414060 /// 6. |         |
| 209404_s_ | 0.002734 | 0.001124 | TMED7                       | 51014 . |
| 209405_s_ | 0.001157 | 3.99E-04 | FAM3A                       | 60343 . |
| 209406_at | 5.13E-04 | 1.47E-04 | BAG2                        | 9532 .  |
| 209407_s_ | 0.006066 | 0.002915 | DEAF1                       | 10522 . |
| 209408_at | 6.29E-05 | 1.07E-05 | KIF2C                       | 11004 . |
| 209411_s_ | 1.55E-04 | 3.33E-05 | GGA3                        | 23163 . |
| 209412_at | 2.81E-04 | 7.01E-05 | TRAPPC10                    | 7109 .  |

|           |          |          |                             |          |
|-----------|----------|----------|-----------------------------|----------|
| 209413_at | 0.027572 | 0.017196 | B4GALT2                     | 8704 .   |
| 209414_at | 0.011508 | 0.006186 | FZR1                        | 51343 .  |
| 209415_at | 0.001161 | 4.01E-04 | FZR1                        | 51343 .  |
| 209416_s_ | 0.002472 | 9.97E-04 | FZR1                        | 51343 .  |
| 209417_s_ | 0.001824 | 6.90E-04 | IFI35                       | 3430 .   |
| 209418_s_ | 6.08E-04 | 1.81E-04 | THOC5                       | 8563 .   |
| 209419_at | 2.97E-04 | 7.51E-05 | THOC5                       | 8563 .   |
| 209420_s_ | 6.95E-08 | 1.39E-09 | SMPD1                       | 6609 .   |
| 209421_at | 1.10E-07 | 2.60E-09 | MSH2                        | 4436 .   |
| 209423_s_ | 1.35E-05 | 1.51E-06 | PHF20                       | 51230 .  |
| 209424_s_ | 0.002938 | 0.001223 | AMACR /// C1(114899) /// 2: |          |
| 209425_at | 0.009442 | 0.004905 | C1QTNF3                     | 114899 . |
| 209426_s_ | 0.002363 | 9.43E-04 | AMACR /// C1(114899) /// 2: |          |
| 209427_at | 3.77E-05 | 5.56E-06 | SMTN                        | 6525 .   |
| 209428_s_ | 0.004188 | 0.001872 | ZFPL1                       | 7542 .   |
| 209430_at | 0.003332 | 0.001425 | BTAF1                       | 9044 .   |
| 209431_s_ | 2.88E-08 | 4.37E-10 | PATZ1                       | 23598 .  |
| 209432_s_ | 0.001496 | 5.45E-04 | CREB3                       | 10488 .  |
| 209433_s_ | 4.05E-12 | 3.49E-15 | PPAT                        | 5471 .   |
| 209434_s_ | 2.15E-09 | 1.43E-11 | PPAT                        | 5471 .   |
| 209435_s_ | 0.001464 | 5.30E-04 | ARHGEF2                     | 9181 .   |
| 209436_at | 9.19E-06 | 9.10E-07 | SPON1                       | 10418 .  |
| 209437_s_ | 1.75E-04 | 3.87E-05 | SPON1                       | 10418 .  |
| 209439_s_ | 3.98E-06 | 3.04E-07 | PHKA2                       | 5256 .   |
| 209440_at | 0.002475 | 9.98E-04 | PRPS1                       | 5631 .   |
| 209441_at | 8.16E-04 | 2.61E-04 | RHOBTB2                     | 23221 .  |
| 209442_x_ | 0.001002 | 3.34E-04 | ANK3                        | 288 .    |
| 209444_at | 2.80E-05 | 3.81E-06 | RAP1GDS1                    | 5910 .   |
| 209445_x_ | 8.89E-06 | 8.69E-07 | C7orf44                     | 55744 .  |
| 209446_s_ | 7.10E-06 | 6.45E-07 | C7orf44                     | 55744 .  |
| 209447_at | 1.56E-07 | 4.16E-09 | SYNE1                       | 23345 .  |
| 209449_at | 1.61E-05 | 1.90E-06 | LSM2                        | 57819 .  |
| 209450_at | 0.00164  | 6.07E-04 | OSGEP                       | 55644 .  |
| 209451_at | 9.32E-04 | 3.07E-04 | TANK                        | 10010 .  |



|           |          |          |                             |          |
|-----------|----------|----------|-----------------------------|----------|
| 209452_s_ | 0.001007 | 3.36E-04 | VTI1B                       | 10490 .  |
| 209453_at | 5.06E-05 | 8.13E-06 | SLC9A1                      | 6548 .   |
| 209454_s_ | 1.07E-04 | 2.10E-05 | TEAD3                       | 7005 .   |
| 209455_at | 0.034544 | 0.02234  | FBXW11                      | 23291 .  |
| 209456_s_ | 6.25E-06 | 5.43E-07 | FBXW11                      | 23291 .  |
| 209457_at | 0.024183 | 0.014768 | DUSP5                       | 1847 .   |
| 209458_x_ | 2.33E-04 | 5.53E-05 | HBA1 /// HBA2 3039 /// 3040 |          |
| 209462_at | 0.003851 | 0.001694 | APLP1                       | 333 .    |
| 209464_at | 2.48E-05 | 3.28E-06 | AURKB                       | 9212 .   |
| 209467_s_ | 1.35E-04 | 2.80E-05 | MKNK1                       | 8569 .   |
| 209468_at | 0.046221 | 0.031338 | LRP5                        | 4041 .   |
| 209469_at | 0.043757 | 0.029406 | GPM6A                       | 2823 .   |
| 209470_s_ | 0.028104 | 0.017587 | GPM6A                       | 2823 .   |
| 209473_at | 0.037151 | 0.024325 | ENTPD1                      | 953 .    |
| 209474_s_ | 0.005751 | 0.002734 | ENTPD1                      | 953 .    |
| 209475_at | 0.016158 | 0.009223 | USP15                       | 9958 .   |
| 209476_at | 0.045242 | 0.030571 | TMX1                        | 81542 .  |
| 209477_at | 8.35E-06 | 7.97E-07 | EMD                         | 2010 .   |
| 209478_at | 1.47E-05 | 1.70E-06 | STRA13                      | 201254 . |
| 209479_at | 0.013885 | 0.007712 | CCDC28A                     | 25901 .  |
| 209482_at | 1.85E-05 | 2.25E-06 | POP7                        | 10248 .  |
| 209484_s_ | 0.001979 | 7.62E-04 | NSL1                        | 25936 .  |
| 209486_at | 0.021682 | 0.013014 | UTP3                        | 57050 .  |
| 209487_at | 0.001476 | 5.35E-04 | RBPMS                       | 11030 .  |
| 209488_s_ | 6.17E-05 | 1.04E-05 | RBPMS                       | 11030 .  |
| 209489_at | 3.12E-07 | 1.07E-08 | CUGBP1                      | 10658 .  |
| 209490_s_ | 0.024841 | 0.015243 | PPT2                        | 9374 .   |
| 209491_s_ | 6.65E-04 | 2.02E-04 | AMPD3                       | 272 .    |
| 209492_x_ | 0.005637 | 0.002671 | ATP5I                       | 521 .    |
| 209494_s_ | 0.003307 | 0.001412 | PATZ1                       | 23598 .  |
| 209495_at | 0.001221 | 4.26E-04 | CEP250                      | 11190 .  |
| 209496_at | 1.89E-04 | 4.28E-05 | RARRES2                     | 5919 .   |
| 209497_s_ | 5.16E-04 | 1.48E-04 | RBM4B                       | 83759 .  |
| 209502_s_ | 0.016424 | 0.009397 | BAIAP2                      | 10458 .  |

|           |          |          |         |         |
|-----------|----------|----------|---------|---------|
| 209503_s_ | 6.89E-04 | 2.12E-04 | PSMC5   | 5705 .  |
| 209504_s_ | 3.89E-05 | 5.78E-06 | PLEKHB1 | 58473 . |
| 209507_at | 5.17E-06 | 4.25E-07 | RPA3    | 6119 .  |
| 209508_x_ | 5.15E-05 | 8.32E-06 | CFLAR   | 8837 .  |
| 209509_s_ | 0.014596 | 0.008178 | DPAGT1  | 1798 .  |
| 209511_at | 4.26E-04 | 1.17E-04 | POLR2F  | 5435 .  |
| 209512_at | 9.88E-05 | 1.90E-05 | HSDL2   | 84263 . |
| 209513_s_ | 5.05E-04 | 1.44E-04 | HSDL2   | 84263 . |
| 209514_s_ | 0.005351 | 0.00251  | RAB27A  | 5873 .  |
| 209515_s_ | 5.60E-04 | 1.63E-04 | RAB27A  | 5873 .  |
| 209516_at | 0.008711 | 0.004462 | SMYD5   | 10322 . |
| 209517_s_ | 9.75E-07 | 4.79E-08 | ASH2L   | 9070 .  |
| 209518_at | 0.001367 | 4.88E-04 | SMARCD1 | 6602 .  |
| 209519_at | 0.012338 | 0.006716 | NCBP1   | 4686 .  |
| 209520_s_ | 0.027997 | 0.017507 | NCBP1   | 4686 .  |
| 209522_s_ | 8.79E-08 | 1.92E-09 | CRAT    | 1384 .  |
| 209523_at | 0.001371 | 4.90E-04 | TAF2    | 6873 .  |
| 209524_at | 0.011383 | 0.006107 | HDGFRP3 | 50810 . |
| 209525_at | 0.033431 | 0.021523 | HDGFRP3 | 50810 . |
| 209526_s_ | 0.014025 | 0.0078   | HDGFRP3 | 50810 . |
| 209527_at | 9.20E-06 | 9.11E-07 | EXOSC2  | 23404 . |
| 209528_s_ | 0.009937 | 0.00521  | TELO2   | 9894 .  |
| 209529_at | 0.010139 | 0.00533  | PPAP2C  | 8612 .  |
| 209531_at | 0.004346 | 0.001958 | GSTZ1   | 2954 .  |
| 209534_x_ | 0.007038 | 0.003479 | AKAP13  | 11214 . |
| 209538_at | 5.60E-06 | 4.73E-07 | ZNF32   | 7580 .  |
| 209539_at | 0.004244 | 0.001903 | ARHGEF6 | 9459 .  |
| 209542_x_ | 0.001983 | 7.64E-04 | IGF1    | 3479 .  |
| 209543_s_ | 0.002909 | 0.001208 | CD34    | 947 .   |
| 209549_s_ | 0.001429 | 5.15E-04 | DGUOK   | 1716 .  |
| 209550_at | 0.018252 | 0.010629 | NDN     | 4692 .  |
| 209551_at | 0.003273 | 0.001394 | YIPF4   | 84272 . |
| 209552_at | 5.19E-05 | 8.41E-06 | PAX8    | 7849 .  |
| 209554_at | 7.49E-04 | 2.34E-04 | CD36    | 948 .   |

|           |          |          |          |         |
|-----------|----------|----------|----------|---------|
| 209555_s_ | 0.041847 | 0.027905 | CD36     | 948 .   |
| 209557_s_ | 0.001933 | 7.41E-04 | NCDN     | 23154 . |
| 209558_s_ | 0.024783 | 0.015201 | HIP1R    | 9026 .  |
| 209559_at | 0.001667 | 6.19E-04 | HIP1R    | 9026 .  |
| 209560_s_ | 1.69E-08 | 2.13E-10 | DLK1     | 8788 .  |
| 209561_at | 6.85E-04 | 2.10E-04 | THBS3    | 7059 .  |
| 209563_x_ | 0.025853 | 0.015965 | CALM1    | 801 .   |
| 209565_at | 6.97E-04 | 2.14E-04 | RNF113A  | 7737 .  |
| 209566_at | 0.045482 | 0.030755 | INSIG2   | 51141 . |
| 209567_at | 0.001313 | 4.65E-04 | RRS1     | 23212 . |
| 209568_s_ | 0.002114 | 8.25E-04 | RGL1     | 23179 . |
| 209569_x_ | 0.001019 | 3.42E-04 | D4S234E  | 27065 . |
| 209570_s_ | 0.011751 | 0.006337 | D4S234E  | 27065 . |
| 209572_s_ | 5.61E-05 | 9.25E-06 | EED      | 8726 .  |
| 209573_s_ | 5.54E-06 | 4.67E-07 | C18orf1  | 753 .   |
| 209574_s_ | 0.011094 | 0.005927 | C18orf1  | 753 .   |
| 209575_at | 3.33E-10 | 1.27E-12 | IL10RB   | 3588 .  |
| 209578_s_ | 2.68E-04 | 6.60E-05 | POFUT2   | 23275 . |
| 209579_s_ | 5.40E-04 | 1.56E-04 | MBD4     | 8930 .  |
| 209581_at | 0.00429  | 0.001928 | PLA2G16  | 11145 . |
| 209582_s_ | 8.26E-11 | 2.05E-13 | CD200    | 4345 .  |
| 209583_s_ | 2.07E-13 | 8.01E-17 | CD200    | 4345 .  |
| 209584_x_ | 1.05E-05 | 1.08E-06 | APOBEC3C | 27350 . |
| 209586_s_ | 3.85E-05 | 5.71E-06 | PRUNE    | 58497 . |
| 209589_s_ | 0.010037 | 0.00527  | EPHB2    | 2048 .  |
| 209591_s_ | 0.013578 | 0.007512 | BMP7     | 655 .   |
| 209592_s_ | 0.005398 | 0.002536 | WDR68    | 10238 . |
| 209593_s_ | 2.82E-06 | 1.94E-07 | TOR1B    | 27348 . |
| 209594_x_ | 1.02E-06 | 5.04E-08 | PSG9     | 5678 .  |
| 209596_at | 2.13E-04 | 4.96E-05 | MXRA5    | 25878 . |
| 209597_s_ | 0.044447 | 0.029954 | PNMA2    | 10687 . |
| 209600_s_ | 0.016351 | 0.00935  | ACOX1    | 51 .    |
| 209604_s_ | 8.89E-04 | 2.90E-04 | GATA3    | 2625 .  |
| 209605_at | 0.011818 | 0.006379 | TST      | 7263 .  |

|           |          |          |                              |         |
|-----------|----------|----------|------------------------------|---------|
| 209607_x_ | 0.010062 | 0.005284 | SULT1A3 /// SL445329 /// 68. |         |
| 209608_s_ | 0.02727  | 0.016981 | ACAT2                        | 39 .    |
| 209609_s_ | 0.00101  | 3.38E-04 | MRPL9                        | 65005 . |
| 209610_s_ | 3.54E-07 | 1.26E-08 | SLC1A4                       | 6509 .  |
| 209611_s_ | 3.90E-04 | 1.05E-04 | SLC1A4                       | 6509 .  |
| 209612_s_ | 8.66E-13 | 4.70E-16 | ADH1B                        | 125 .   |
| 209613_s_ | 2.61E-12 | 1.88E-15 | ADH1B                        | 125 .   |
| 209614_at | 9.02E-04 | 2.95E-04 | ADH1B                        | 125 .   |
| 209615_s_ | 4.16E-07 | 1.56E-08 | PAK1                         | 5058 .  |
| 209617_s_ | 0.001545 | 5.65E-04 | CTNND2                       | 1501 .  |
| 209618_at | 0.012906 | 0.007086 | CTNND2                       | 1501 .  |
| 209619_at | 1.16E-04 | 2.31E-05 | CD74                         | 972 .   |
| 209620_s_ | 2.56E-07 | 8.14E-09 | ABCB7                        | 22 .    |
| 209621_s_ | 4.15E-05 | 6.30E-06 | PDLIM3                       | 27295 . |
| 209622_at | 3.88E-04 | 1.04E-04 | STK16                        | 8576 .  |
| 209625_at | 1.14E-07 | 2.72E-09 | PIGH                         | 5283 .  |
| 209626_s_ | 5.69E-05 | 9.42E-06 | OSBPL3                       | 26031 . |
| 209627_s_ | 0.001646 | 6.10E-04 | OSBPL3                       | 26031 . |
| 209629_s_ | 1.02E-04 | 1.98E-05 | NXT2                         | 55916 . |
| 209631_s_ | 3.32E-06 | 2.41E-07 | GPR37                        | 2861 .  |
| 209632_at | 9.60E-05 | 1.83E-05 | PPP2R3A                      | 5523 .  |
| 209633_at | 3.52E-04 | 9.24E-05 | PPP2R3A                      | 5523 .  |
| 209635_at | 6.40E-07 | 2.72E-08 | AP1S1                        | 1174 .  |
| 209636_at | 0.039071 | 0.025776 | NFKB2                        | 4791 .  |
| 209638_x_ | 0.010571 | 0.005599 | RGS12                        | 6002 .  |
| 209639_s_ | 0.025199 | 0.015505 | RGS12                        | 6002 .  |
| 209640_at | 1.21E-04 | 2.45E-05 | PML                          | 5371 .  |
| 209641_s_ | 0.001887 | 7.19E-04 | ABCC3                        | 8714 .  |
| 209642_at | 2.62E-06 | 1.76E-07 | BUB1                         | 699 .   |
| 209643_s_ | 3.67E-05 | 5.36E-06 | PLD2                         | 5338 .  |
| 209645_s_ | 1.05E-04 | 2.05E-05 | ALDH1B1                      | 219 .   |
| 209646_x_ | 1.78E-05 | 2.15E-06 | ALDH1B1                      | 219 .   |
| 209647_s_ | 8.80E-08 | 1.93E-09 | SOCS5                        | 9655 .  |
| 209648_x_ | 2.54E-08 | 3.65E-10 | SOCS5                        | 9655 .  |

|           |          |          |                            |         |
|-----------|----------|----------|----------------------------|---------|
| 209649_at | 5.04E-05 | 8.09E-06 | STAM2                      | 10254 . |
| 209650_s_ | 0.022745 | 0.013753 | TBC1D22A                   | 25771 . |
| 209651_at | 2.87E-05 | 3.94E-06 | TGFB1I1                    | 7041 .  |
| 209652_s_ | 0.022554 | 0.013618 | PGF                        | 5228 .  |
| 209653_at | 2.91E-04 | 7.32E-05 | KPNA4                      | 3840 .  |
| 209654_at | 0.047191 | 0.032108 | KIAA0947                   | 23379 . |
| 209655_s_ | 6.28E-06 | 5.47E-07 | TMEM47                     | 83604 . |
| 209656_s_ | 2.27E-04 | 5.37E-05 | TMEM47                     | 83604 . |
| 209657_s_ | 0.01208  | 0.006551 | HSF2                       | 3298 .  |
| 209658_at | 9.44E-04 | 3.12E-04 | CDC16                      | 8881 .  |
| 209659_s_ | 0.008488 | 0.004329 | CDC16                      | 8881 .  |
| 209660_at | 0.002638 | 0.001077 | TTR                        | 7276 .  |
| 209661_at | 0.006687 | 0.003272 | KIFC3                      | 3801 .  |
| 209662_at | 2.47E-04 | 5.97E-05 | CETN3                      | 1070 .  |
| 209663_s_ | 6.87E-05 | 1.20E-05 | ITGA7                      | 3679 .  |
| 209665_at | 2.37E-04 | 5.66E-05 | CYB561D2                   | 11068 . |
| 209666_s_ | 0.020352 | 0.012072 | CHUK                       | 1147 .  |
| 209667_at | 4.29E-06 | 3.35E-07 | CES2                       | 8824 .  |
| 209668_x_ | 0.00241  | 9.67E-04 | CES2                       | 8824 .  |
| 209669_s_ | 2.44E-06 | 1.61E-07 | SERBP1                     | 26135 . |
| 209670_at | 0.001243 | 4.35E-04 | TRAC                       | 28755 . |
| 209671_x_ | 0.001022 | 3.43E-04 | TRA@ /// TRAC28755 /// 695 |         |
| 209672_s_ | 0.034769 | 0.022503 | MIOS                       | 54468 . |
| 209674_at | 0.018017 | 0.010469 | CRY1                       | 1407 .  |
| 209676_at | 1.70E-05 | 2.03E-06 | TFPI                       | 7035 .  |
| 209677_at | 0.002775 | 0.001144 | PRKCI                      | 5584 .  |
| 209678_s_ | 0.004724 | 0.002166 | PRKCI                      | 5584 .  |
| 209680_s_ | 4.50E-04 | 1.25E-04 | KIFC1                      | 3833 .  |
| 209681_at | 0.001481 | 5.38E-04 | SLC19A2                    | 10560 . |
| 209682_at | 0.003555 | 0.00154  | CBLB                       | 868 .   |
| 209684_at | 4.54E-04 | 1.27E-04 | RIN2                       | 54453 . |
| 209687_at | 3.64E-09 | 2.80E-11 | CXCL12                     | 6387 .  |
| 209688_s_ | 0.002392 | 9.57E-04 | CCDC93                     | 54520 . |
| 209689_at | 0.004698 | 0.002153 | CCDC93                     | 54520 . |

|           |          |          |          |         |
|-----------|----------|----------|----------|---------|
| 209690_s_ | 0.002346 | 9.35E-04 | DOK4     | 55715 . |
| 209692_at | 0.01182  | 0.00638  | EYA2     | 2139 .  |
| 209694_at | 7.90E-05 | 1.44E-05 | PTS      | 5805 .  |
| 209696_at | 3.44E-05 | 4.95E-06 | FBP1     | 2203 .  |
| 209697_at | 1.00E-05 | 1.02E-06 |          | .       |
| 209698_at | 5.51E-04 | 1.60E-04 | CCHCR1   | 54535 . |
| 209699_x_ | 2.04E-05 | 2.56E-06 | AKR1C2   | 1646 .  |
| 209700_x_ | 5.79E-06 | 4.95E-07 | PDE4DIP  | 9659 .  |
| 209701_at | 0.019783 | 0.011675 | ERAP1    | 51752 . |
| 209702_at | 0.007213 | 0.00358  | FTO      | 79068 . |
| 209704_at | 3.09E-08 | 4.76E-10 | MTF2     | 22823 . |
| 209705_at | 2.48E-06 | 1.65E-07 | MTF2     | 22823 . |
| 209706_at | 0.008294 | 0.004215 | NKX3-1   | 4824 .  |
| 209707_at | 0.003488 | 0.001505 | PIGK     | 10026 . |
| 209708_at | 4.99E-06 | 4.06E-07 | MOXD1    | 26002 . |
| 209709_s_ | 5.36E-05 | 8.74E-06 | HMMR     | 3161 .  |
| 209711_at | 1.52E-05 | 1.77E-06 | SLC35D1  | 23169 . |
| 209712_at | 1.53E-04 | 3.30E-05 | SLC35D1  | 23169 . |
| 209713_s_ | 1.54E-06 | 8.84E-08 | SLC35D1  | 23169 . |
| 209714_s_ | 2.49E-04 | 6.01E-05 | CDKN3    | 1033 .  |
| 209715_at | 0.0055   | 0.002594 | CBX5     | 23468 . |
| 209716_at | 0.005556 | 0.002627 | CSF1     | 1435 .  |
| 209717_at | 4.29E-04 | 1.18E-04 | EVI5     | 7813 .  |
| 209718_at | 0.021228 | 0.012697 | NCAPH2   | 29781 . |
| 209719_x_ | 0.021444 | 0.012842 | SERPINB3 | 6317 .  |
| 209721_s_ | 5.25E-08 | 9.67E-10 | IFFO1    | 25900 . |
| 209722_s_ | 2.33E-11 | 4.14E-14 | SERPINB9 | 5272 .  |
| 209723_at | 1.34E-05 | 1.49E-06 | SERPINB9 | 5272 .  |
| 209725_at | 9.74E-06 | 9.83E-07 | UTP20    | 27340 . |
| 209726_at | 2.18E-05 | 2.80E-06 | CA11     | 770 .   |
| 209727_at | 7.69E-05 | 1.39E-05 | GM2A     | 2760 .  |
| 209728_at | 0.003306 | 0.001411 | HLA-DRB4 | 3126 .  |
| 209729_at | 4.83E-05 | 7.67E-06 | GAS2L1   | 10634 . |
| 209730_at | 0.00932  | 0.00483  | SEMA3F   | 6405 .  |

|           |          |          |                             |             |
|-----------|----------|----------|-----------------------------|-------------|
| 209731_at | 1.10E-04 | 2.17E-05 | NTHL1                       | 4913 .      |
| 209732_at | 1.76E-04 | 3.91E-05 | CLEC2B                      | 9976 .      |
| 209735_at | 2.31E-07 | 7.08E-09 | ABCG2                       | 9429 .      |
| 209736_at | 7.19E-07 | 3.20E-08 | SOX13                       | 9580 .      |
| 209737_at | 0.005713 | 0.002712 | MAGI2                       | 9863 .      |
| 209738_x_ | 3.32E-06 | 2.41E-07 | PSG6                        | 5675 .      |
| 209739_s_ | 8.69E-04 | 2.82E-04 | PNPLA4                      | 8228 .      |
| 209740_s_ | 2.25E-04 | 5.30E-05 | PNPLA4                      | 8228 .      |
| 209741_x_ | 0.018068 | 0.010505 | SCAPER                      | 49855 .     |
| 209744_x_ | 2.10E-04 | 4.86E-05 | ITCH                        | 83737 .     |
| 209745_at | 0.023013 | 0.013939 | COQ7                        | 10229 .     |
| 209747_at | 0.001993 | 7.68E-04 | TGFB3                       | 7043 .      |
| 209749_s_ | 0.00114  | 3.92E-04 | ACE                         | 1636 .      |
| 209750_at | 0.003474 | 0.001498 | NR1D2                       | 9975 .      |
| 209752_at | 0.01597  | 0.009099 | REG1A                       | 5967 .      |
| 209753_s_ | 0.029055 | 0.018284 | TMPO                        | 7112 .      |
| 209754_s_ | 0.004282 | 0.001923 | TMPO                        | 7112 .      |
| 209756_s_ | 0.004617 | 0.002107 | MYCN                        | 4613 .      |
| 209757_s_ | 4.42E-09 | 3.70E-11 | MYCN                        | 4613 .      |
| 209758_s_ | 1.06E-04 | 2.08E-05 | MFAP5                       | 8076 .      |
| 209761_s_ | 2.76E-07 | 9.08E-09 | SP110                       | 3431 .      |
| 209762_x_ | 1.33E-09 | 7.87E-12 | SP110                       | 3431 .      |
| 209764_at | 0.012871 | 0.007062 | MGAT3                       | 4248 .      |
| 209765_at | 0.014951 | 0.008418 | ADAM19                      | 8728 .      |
| 209766_at | 0.001397 | 5.01E-04 | PRDX3                       | 10935 .     |
| 209768_s_ | 0.001835 | 6.95E-04 | GP1BB /// SEP 2812 /// 5413 | 2812 .      |
| 209769_s_ | 2.83E-05 | 3.88E-06 | GP1BB                       | 2812 .      |
| 209770_at | 2.13E-06 | 1.36E-07 | BTN3A1                      | 11119 .     |
| 209771_x_ | 2.50E-07 | 7.90E-09 | CD24                        | 100133941 . |
| 209772_s_ | 5.29E-08 | 9.79E-10 | CD24                        | 100133941 . |
| 209773_s_ | 0.016101 | 0.009184 | RRM2                        | 6241 .      |
| 209775_x_ | 0.003499 | 0.00151  | SLC19A1                     | 6573 .      |
| 209777_s_ | 0.005626 | 0.002665 | SLC19A1                     | 6573 .      |
| 209778_at | 4.41E-05 | 6.82E-06 | TRIP11                      | 9321 .      |

|           |          |          |                             |          |
|-----------|----------|----------|-----------------------------|----------|
| 209780_at | 1.69E-04 | 3.70E-05 | PHTF2                       | 57157 .  |
| 209783_at | 4.67E-04 | 1.31E-04 | DBP                         | 1628 .   |
| 209784_s_ | 1.97E-04 | 4.51E-05 | JAG2                        | 3714 .   |
| 209786_at | 0.043992 | 0.029597 | HMGNA4                      | 10473 .  |
| 209787_s_ | 0.034334 | 0.022182 | HMGNA4                      | 10473 .  |
| 209788_s_ | 0.025665 | 0.015831 | ERAP1                       | 51752 .  |
| 209789_at | 0.004646 | 0.002124 | CORO2B                      | 10391 .  |
| 209792_s_ | 0.008849 | 0.004544 | KLK10                       | 5655 .   |
| 209793_at | 4.56E-07 | 1.76E-08 | GRIA1                       | 2890 .   |
| 209794_at | 8.85E-04 | 2.88E-04 | SRGAP3                      | 9901 .   |
| 209796_s_ | 0.019461 | 0.011455 | CNPY2                       | 10330 .  |
| 209797_at | 1.30E-07 | 3.24E-09 | CNPY2                       | 10330 .  |
| 209798_at | 0.036331 | 0.023695 | NPAT                        | 4863 .   |
| 209799_at | 0.010902 | 0.005808 | PRKAA1                      | 5562 .   |
| 209800_at | 3.53E-06 | 2.59E-07 | KRT16                       | 3868 .   |
| 209802_at | 5.88E-04 | 1.74E-04 | PHLDA2                      | 7262 .   |
| 209803_s_ | 0.005541 | 0.002619 | PHLDA2                      | 7262 .   |
| 209804_at | 1.03E-06 | 5.13E-08 | DCLRE1A                     | 9937 .   |
| 209805_at | 1.22E-06 | 6.42E-08 | PMS2 /// PMS2:441194 /// 5: |          |
| 209806_at | 0.001481 | 5.38E-04 | HIST1H2BK                   | 85236 .  |
| 209807_s_ | 3.33E-04 | 8.65E-05 | NFIX                        | 4784 .   |
| 209808_x_ | 1.20E-05 | 1.29E-06 | ING1                        | 3621 .   |
| 209810_at | 0.003309 | 0.001413 | SFTP8                       | 6439 .   |
| 209811_at | 9.95E-06 | 1.01E-06 | CASP2                       | 835 .    |
| 209813_x_ | 0.004126 | 0.00184  | TARP                        | 445347 . |
| 209815_at | 8.13E-04 | 2.60E-04 | PTCH1                       | 5727 .   |
| 209817_at | 2.43E-06 | 1.60E-07 | PPP3CB                      | 5532 .   |
| 209818_s_ | 0.002978 | 0.001243 | HABP4                       | 22927 .  |
| 209819_at | 0.016223 | 0.009266 | HABP4                       | 22927 .  |
| 209820_s_ | 0.030974 | 0.019695 | TBL3                        | 10607 .  |
| 209821_at | 0.012711 | 0.006959 | IL33                        | 90865 .  |
| 209822_s_ | 0.003523 | 0.001523 | VLDLR                       | 7436 .   |
| 209825_s_ | 0.001332 | 4.74E-04 | UCK2                        | 7371 .   |
| 209826_at | 0.044352 | 0.029881 | PPT2                        | 9374 .   |



|           |          |          |                             |          |
|-----------|----------|----------|-----------------------------|----------|
| 209827_s_ | 9.19E-06 | 9.10E-07 | IL16                        | 3603 .   |
| 209828_s_ | 4.60E-04 | 1.29E-04 | IL16                        | 3603 .   |
| 209829_at | 0.002751 | 0.001132 | FAM65B                      | 9750 .   |
| 209830_s_ | 0.010582 | 0.005606 | SLC9A3R2                    | 9351 .   |
| 209832_s_ | 1.15E-05 | 1.23E-06 | CDT1                        | 81620 .  |
| 209833_at | 0.019279 | 0.011329 | CRADD                       | 8738 .   |
| 209834_at | 1.67E-06 | 9.90E-08 | CHST3                       | 9469 .   |
| 209835_x_ | 0.036813 | 0.024059 | CD44                        | 960 .    |
| 209836_x_ | 4.00E-04 | 1.08E-04 | BOLA2 /// BOL 552900 /// 6! |          |
| 209837_at | 0.005001 | 0.002316 | AP4M1                       | 9179 .   |
| 209842_at | 9.40E-08 | 2.10E-09 | SOX10                       | 6663 .   |
| 209843_s_ | 1.22E-05 | 1.33E-06 | SOX10                       | 6663 .   |
| 209846_s_ | 1.15E-05 | 1.22E-06 | BTN3A2                      | 11118 .  |
| 209847_at | 0.042481 | 0.028401 | CDH17                       | 1015 .   |
| 209848_s_ | 1.95E-10 | 6.23E-13 | SILV                        | 6490 .   |
| 209849_s_ | 2.52E-04 | 6.13E-05 | RAD51C                      | 5889 .   |
| 209850_s_ | 0.001028 | 3.45E-04 | CDC42EP2                    | 10435 .  |
| 209851_at | 0.019498 | 0.011481 | ZC3H13                      | 23091 .  |
| 209852_x_ | 3.31E-04 | 8.58E-05 | PSME3                       | 10197 .  |
| 209855_s_ | 1.38E-04 | 2.89E-05 | KLK2                        | 3817 .   |
| 209856_x_ | 0.006431 | 0.003123 | ABI2                        | 10152 .  |
| 209858_x_ | 5.97E-04 | 1.77E-04 | MPPE1                       | 65258 .  |
| 209859_at | 0.003014 | 0.001262 | TRIM9                       | 114088 . |
| 209860_s_ | 0.00449  | 0.002038 | ANXA7                       | 310 .    |
| 209861_s_ | 0.002095 | 8.16E-04 | METAP2                      | 10988 .  |
| 209862_s_ | 1.78E-04 | 3.97E-05 | CEP57                       | 9702 .   |
| 209864_at | 2.96E-07 | 9.92E-09 | FRAT2                       | 23401 .  |
| 209865_at | 7.24E-04 | 2.25E-04 | SLC35A3                     | 23443 .  |
| 209866_s_ | 9.37E-06 | 9.35E-07 | LPHN3                       | 23284 .  |
| 209867_s_ | 6.03E-06 | 5.22E-07 | LPHN3                       | 23284 .  |
| 209869_at | 0.007466 | 0.003729 | ADRA2A                      | 150 .    |
| 209872_s_ | 8.35E-04 | 2.68E-04 | PKP3                        | 11187 .  |
| 209873_s_ | 0.049206 | 0.033691 | PKP3                        | 11187 .  |
| 209874_x_ | 6.48E-04 | 1.96E-04 | CNNM2                       | 54805 .  |

|           |          |          |                             |         |
|-----------|----------|----------|-----------------------------|---------|
| 209875_s_ | 9.36E-12 | 1.26E-14 | SPP1                        | 6696 .  |
| 209876_at | 5.77E-04 | 1.70E-04 | GIT2                        | 9815 .  |
| 209878_s_ | 0.002541 | 0.00103  | RELA                        | 5970 .  |
| 209879_at | 9.20E-04 | 3.02E-04 | SELPLG                      | 6404 .  |
| 209880_s_ | 4.41E-05 | 6.83E-06 | SELPLG                      | 6404 .  |
| 209881_s_ | 0.002816 | 0.001164 | LAT /// SPNS1 27040 /// 835 |         |
| 209884_s_ | 0.028878 | 0.018157 | SLC4A7                      | 9497 .  |
| 209885_at | 0.005114 | 0.002381 | RHOD                        | 29984 . |
| 209886_s_ | 3.95E-05 | 5.90E-06 | SMAD6                       | 4091 .  |
| 209889_at | 0.043704 | 0.029367 | SEC31B                      | 25956 . |
| 209890_at | 0.002357 | 9.40E-04 | TSPAN5                      | 10098 . |
| 209891_at | 1.91E-04 | 4.33E-05 | SPC25                       | 57405 . |
| 209893_s_ | 0.00928  | 0.004807 | FUT4                        | 2526 .  |
| 209894_at | 0.00605  | 0.002906 | LEPR                        | 3953 .  |
| 209895_at | 0.003329 | 0.001424 | PTPN11                      | 5781 .  |
| 209897_s_ | 3.23E-04 | 8.34E-05 | SLIT2                       | 9353 .  |
| 209898_x_ | 0.001132 | 3.88E-04 | ITSN2                       | 50618 . |
| 209899_s_ | 2.76E-05 | 3.75E-06 | PUF60                       | 22827 . |
| 209900_s_ | 7.56E-11 | 1.86E-13 | SLC16A1                     | 6566 .  |
| 209901_x_ | 0.00495  | 0.002288 | AIF1                        | 199 .   |
| 209902_at | 1.78E-07 | 4.93E-09 | ATR                         | 545 .   |
| 209903_s_ | 6.04E-05 | 1.01E-05 | ATR                         | 545 .   |
| 209904_at | 5.43E-05 | 8.87E-06 | TNNC1                       | 7134 .  |
| 209905_at | 0.010159 | 0.005342 | HOXA9                       | 3205 .  |
| 209906_at | 0.00444  | 0.002011 | C3AR1                       | 719 .   |
| 209907_s_ | 4.90E-04 | 1.39E-04 | ITSN2                       | 50618 . |
| 209908_s_ | 1.66E-05 | 1.97E-06 | TGFB2                       | 7042 .  |
| 209909_s_ | 1.30E-04 | 2.66E-05 | TGFB2                       | 7042 .  |
| 209912_s_ | 2.75E-04 | 6.81E-05 | KIAA0415                    | 9907 .  |
| 209913_x_ | 9.73E-04 | 3.23E-04 | KIAA0415                    | 9907 .  |
| 209914_s_ | 1.18E-06 | 6.17E-08 | NRXN1                       | 9378 .  |
| 209916_at | 2.00E-05 | 2.49E-06 | DHTKD1                      | 55526 . |
| 209917_s_ | 4.26E-04 | 1.17E-04 | TP53TG1                     | 11257 . |
| 209918_at | 2.08E-05 | 2.62E-06 | GGTLC2                      | 91227 . |

|           |          |          |           |          |
|-----------|----------|----------|-----------|----------|
| 209919_x_ | 2.49E-07 | 7.87E-09 | GGT1      | 2678 .   |
| 209920_at | 0.002101 | 8.19E-04 | BMP2R     | 659 .    |
| 209923_s_ | 0.007751 | 0.003895 | BRAP      | 8315 .   |
| 209925_at | 8.07E-08 | 1.72E-09 | OCLN      | 4950 .   |
| 209926_at | 0.004785 | 0.0022   | LOC729991 | 729991 . |
| 209927_s_ | 9.61E-06 | 9.66E-07 | C1orf77   | 26097 .  |
| 209929_s_ | 1.26E-04 | 2.57E-05 | IKBKG     | 8517 .   |
| 209930_s_ | 0.010778 | 0.00573  | NFE2      | 4778 .   |
| 209931_s_ | 8.02E-07 | 3.69E-08 | FKBP1B    | 2281 .   |
| 209932_s_ | 0.002306 | 9.17E-04 | DUT       | 1854 .   |
| 209934_s_ | 1.73E-04 | 3.83E-05 | ATP2C1    | 27032 .  |
| 209938_at | 0.034971 | 0.022656 | TADA2L    | 6871 .   |
| 209939_x_ | 2.29E-05 | 2.96E-06 | CFLAR     | 8837 .   |
| 209940_at | 9.31E-08 | 2.07E-09 | PARP3     | 10039 .  |
| 209941_at | 8.39E-04 | 2.70E-04 | RIPK1     | 8737 .   |
| 209943_at | 0.001153 | 3.97E-04 | FBXL4     | 26235 .  |
| 209944_at | 2.01E-05 | 2.51E-06 | ZNF410    | 57862 .  |
| 209945_s_ | 0.00169  | 6.29E-04 | GSK3B     | 2932 .   |
| 209946_at | 4.68E-06 | 3.74E-07 | VEGFC     | 7424 .   |
| 209948_at | 4.22E-08 | 7.14E-10 | KCNMB1    | 3779 .   |
| 209954_x_ | 2.49E-04 | 6.03E-05 | SS18      | 6760 .   |
| 209955_s_ | 3.62E-09 | 2.74E-11 | FAP       | 2191 .   |
| 209957_s_ | 3.63E-06 | 2.69E-07 | NPPA      | 4878 .   |
| 209958_s_ | 0.00532  | 0.002493 | BBS9      | 27241 .  |
| 209959_at | 0.00271  | 0.001112 | NR4A3     | 8013 .   |
| 209961_s_ | 0.035609 | 0.023149 | HGF       | 3082 .   |
| 209962_at | 0.019783 | 0.011674 | EPOR      | 2057 .   |
| 209963_s_ | 1.09E-04 | 2.15E-05 | EPOR      | 2057 .   |
| 209966_x_ | 3.77E-05 | 5.57E-06 | ESRRG     | 2104 .   |
| 209967_s_ | 0.047545 | 0.032384 | CREM      | 1390 .   |
| 209969_s_ | 1.31E-06 | 7.16E-08 | STAT1     | 6772 .   |
| 209970_x_ | 2.27E-04 | 5.38E-05 | CASP1     | 834 .    |
| 209971_x_ | 2.67E-04 | 6.59E-05 | JTV1      | 7965 .   |
| 209972_s_ | 2.19E-06 | 1.40E-07 | JTV1      | 7965 .   |

|           |          |          |                              |         |
|-----------|----------|----------|------------------------------|---------|
| 209973_at | 0.013261 | 0.007311 | NFKBIL1                      | 4795 .  |
| 209974_s_ | 8.44E-04 | 2.72E-04 | BUB3                         | 9184 .  |
| 209979_at | 1.16E-04 | 2.33E-05 | ADARB1                       | 104 .   |
| 209980_s_ | 0.003643 | 0.001586 | SHMT1                        | 6470 .  |
| 209981_at | 5.65E-04 | 1.66E-04 | CSDC2                        | 27254 . |
| 209983_s_ | 0.009067 | 0.004675 | NRXN2                        | 9379 .  |
| 209985_s_ | 8.36E-05 | 1.55E-05 | ASCL1                        | 429 .   |
| 209986_at | 0.01306  | 0.007181 | ASCL1                        | 429 .   |
| 209989_at | 0.003372 | 0.001446 | ZNF268                       | 10795 . |
| 209991_x_ | 0.016857 | 0.009684 | GABBR2                       | 9568 .  |
| 209992_at | 0.001527 | 5.58E-04 | PFKFB2                       | 5208 .  |
| 209994_s_ | 0.019825 | 0.011703 | ABCB1 /// ABC 5243 /// 5244  | 5244 .  |
| 209995_s_ | 0.02108  | 0.012592 | TCL1A                        | 8115 .  |
| 210002_at | 1.43E-04 | 3.01E-05 | GATA6                        | 2627 .  |
| 210005_at | 1.16E-05 | 1.23E-06 | GART                         | 2618 .  |
| 210006_at | 3.51E-05 | 5.08E-06 | ABHD14A                      | 25864 . |
| 210008_s_ | 0.02049  | 0.012168 | MRPS12                       | 6183 .  |
| 210011_s_ | 4.19E-04 | 1.15E-04 | EWSR1                        | 2130 .  |
| 210012_s_ | 0.012832 | 0.007037 | EWSR1                        | 2130 .  |
| 210013_at | 2.24E-06 | 1.45E-07 | HPX                          | 3263 .  |
| 210014_x_ | 0.042606 | 0.028494 | IDH3B                        | 3420 .  |
| 210020_x_ | 1.49E-04 | 3.18E-05 | CALML3                       | 810 .   |
| 210021_s_ | 4.97E-06 | 4.04E-07 | CCNO                         | 10309 . |
| 210022_at | 5.69E-05 | 9.41E-06 | PCGF1                        | 84759 . |
| 210023_s_ | 8.07E-08 | 1.73E-09 | PCGF1                        | 84759 . |
| 210025_s_ | 4.39E-06 | 3.46E-07 | CARD10                       | 29775 . |
| 210026_s_ | 0.032702 | 0.020972 | CARD10                       | 29775 . |
| 210027_s_ | 0.003046 | 0.001279 | APEX1                        | 328 .   |
| 210028_s_ | 3.83E-05 | 5.66E-06 | ORC3L                        | 23595 . |
| 210029_at | 0.001338 | 4.76E-04 | IDO1                         | 3620 .  |
| 210030_at | 0.012782 | 0.007005 |                              | .       |
| 210031_at | 0.044666 | 0.030118 | CD247                        | 919 .   |
| 210032_s_ | 0.012819 | 0.007028 | SPAG6                        | 9576 .  |
| 210034_s_ | 1.49E-05 | 1.71E-06 | RPL5 /// RPL5P 388907 /// 61 | 61 .    |

|           |          |          |                              |         |
|-----------|----------|----------|------------------------------|---------|
| 210035_s_ | 4.36E-05 | 6.73E-06 | RPL5 /// RPL5P26782 /// 388. |         |
| 210037_s_ | 0.001395 | 5.00E-04 | NOS2                         | 4843 .  |
| 210038_at | 7.96E-06 | 7.48E-07 | PRKCQ                        | 5588 .  |
| 210039_s_ | 1.32E-06 | 7.23E-08 | PRKCQ                        | 5588 .  |
| 210041_s_ | 1.11E-04 | 2.19E-05 | PGM3                         | 5238 .  |
| 210044_s_ | 0.027916 | 0.017449 | LYL1                         | 4066 .  |
| 210045_at | 3.27E-06 | 2.35E-07 | IDH2                         | 3418 .  |
| 210049_at | 0.030128 | 0.019074 | SERPINC1                     | 462 .   |
| 210050_at | 0.001509 | 5.50E-04 | TPI1                         | 7167 .  |
| 210051_at | 0.017208 | 0.009917 | RAPGEF3                      | 10411 . |
| 210052_s_ | 9.01E-04 | 2.95E-04 | TPX2                         | 22974 . |
| 210053_at | 1.76E-08 | 2.25E-10 | TAF5                         | 6877 .  |
| 210054_at | 1.58E-05 | 1.85E-06 | HAUS3                        | 79441 . |
| 210056_at | 2.96E-04 | 7.48E-05 | RND1                         | 27289 . |
| 210057_at | 1.34E-05 | 1.50E-06 | SMG1                         | 23049 . |
| 210058_at | 0.014297 | 0.00798  | MAPK13                       | 5603 .  |
| 210060_at | 1.03E-06 | 5.13E-08 | PDE6G                        | 5148 .  |
| 210061_at | 0.004743 | 0.002176 | ZNF589                       | 51385 . |
| 210062_s_ | 7.24E-05 | 1.28E-05 | ZNF589                       | 51385 . |
| 210063_at | 1.16E-04 | 2.31E-05 | SARDH                        | 1757 .  |
| 210064_s_ | 5.48E-05 | 8.97E-06 | UPK1B                        | 7348 .  |
| 210065_s_ | 4.95E-04 | 1.40E-04 | UPK1B                        | 7348 .  |
| 210069_at | 0.001894 | 7.23E-04 | CHKB /// CPT1 1120 /// 137!  |         |
| 210070_s_ | 7.72E-04 | 2.44E-04 | CHKB /// CPT1 1120 /// 137!  |         |
| 210072_at | 0.001138 | 3.90E-04 | CCL19                        | 6363 .  |
| 210074_at | 4.42E-10 | 1.85E-12 | CTSL2                        | 1515 .  |
| 210075_at | 0.007285 | 0.003624 | 2-Mar                        | 51257 . |
| 210076_x_ | 0.011996 | 0.006493 | SERBP1                       | 26135 . |
| 210079_x_ | 3.05E-04 | 7.74E-05 | KCNAB1                       | 7881 .  |
| 210080_x_ | 0.024768 | 0.01519  | CELA3A                       | 10136 . |
| 210081_at | 2.08E-04 | 4.81E-05 | AGER                         | 177 .   |
| 210083_at | 7.71E-04 | 2.43E-04 | SEMA7A                       | 8482 .  |
| 210084_x_ | 8.41E-06 | 8.05E-07 | TPSAB1                       | 7177 .  |
| 210085_s_ | 1.50E-04 | 3.22E-05 | ANXA9                        | 8416 .  |

|           |          |          |                            |         |
|-----------|----------|----------|----------------------------|---------|
| 210086_at | 1.95E-04 | 4.44E-05 | HR                         | 55806 . |
| 210087_s_ | 2.76E-07 | 9.07E-09 | MPZL1                      | 9019 .  |
| 210088_x_ | 1.04E-04 | 2.02E-05 | MYL4                       | 4635 .  |
| 210089_s_ | 4.86E-04 | 1.37E-04 | LAMA4                      | 3910 .  |
| 210091_s_ | 0.020578 | 0.012233 | DTNA                       | 1837 .  |
| 210092_at | 7.95E-05 | 1.45E-05 | MAGOH                      | 4116 .  |
| 210093_s_ | 1.37E-04 | 2.85E-05 | MAGOH                      | 4116 .  |
| 210094_s_ | 3.89E-08 | 6.36E-10 | PARD3                      | 56288 . |
| 210095_s_ | 2.99E-05 | 4.15E-06 | IGFBP3                     | 3486 .  |
| 210097_s_ | 0.001184 | 4.10E-04 | NOL7                       | 51406 . |
| 210098_s_ | 1.25E-04 | 2.54E-05 |                            | .       |
| 210099_at | 4.41E-04 | 1.22E-04 | ABCA2                      | 20 .    |
| 210100_s_ | 2.03E-04 | 4.67E-05 | ABCA2                      | 20 .    |
| 210101_x_ | 0.001975 | 7.60E-04 | SH3GLB1                    | 51100 . |
| 210102_at | 0.002294 | 9.11E-04 | VWA5A                      | 4013 .  |
| 210103_s_ | 1.02E-04 | 1.98E-05 | FOXA2                      | 3170 .  |
| 210105_s_ | 0.019166 | 0.011247 | FYN                        | 2534 .  |
| 210106_at | 6.06E-07 | 2.53E-08 | RDH5                       | 5959 .  |
| 210107_at | 0.015791 | 0.008975 | CLCA1                      | 1179 .  |
| 210109_at | 2.17E-05 | 2.77E-06 | C7orf54                    | 27099 . |
| 210110_x_ | 4.28E-06 | 3.34E-07 | HNRNPH3                    | 3189 .  |
| 210111_s_ | 0.00105  | 3.54E-04 | KLHDC10                    | 23008 . |
| 210113_s_ | 0.019051 | 0.011172 | NLRP1                      | 22861 . |
| 210114_at | 2.78E-04 | 6.92E-05 | INVS                       | 27130 . |
| 210121_at | 0.016868 | 0.009691 | B3GALT2                    | 8707 .  |
| 210122_at | 0.001294 | 4.56E-04 | PRM2                       | 5620 .  |
| 210123_s_ | 8.37E-04 | 2.69E-04 | CHRFAM7A /// 1139 /// 7324 | .       |
| 210125_s_ | 7.25E-06 | 6.62E-07 | BANF1                      | 8815 .  |
| 210126_at | 1.16E-06 | 6.04E-08 | PSG9                       | 5678 .  |
| 210128_s_ | 0.022692 | 0.013718 | LTB4R                      | 1241 .  |
| 210129_s_ | 0.011387 | 0.00611  | TTLL3                      | 26140 . |
| 210130_s_ | 0.005733 | 0.002724 | TM7SF2                     | 7108 .  |
| 210132_at | 5.90E-04 | 1.74E-04 | EFNA3                      | 1944 .  |
| 210134_x_ | 0.010312 | 0.005439 | SHOX2                      | 6474 .  |

|           |          |          |          |         |
|-----------|----------|----------|----------|---------|
| 210135_s_ | 5.58E-06 | 4.71E-07 | SHOX2    | 6474 .  |
| 210136_at | 0.003714 | 0.001622 | MBP      | 4155 .  |
| 210137_s_ | 0.00356  | 0.001542 | DCTD     | 1635 .  |
| 210138_at | 0.02046  | 0.012145 | RGS20    | 8601 .  |
| 210139_s_ | 0.010976 | 0.005853 | PMP22    | 5376 .  |
| 210141_s_ | 0.045209 | 0.030547 | INHA     | 3623 .  |
| 210143_at | 0.00735  | 0.003661 | ANXA10   | 11199 . |
| 210144_at | 4.20E-05 | 6.40E-06 | TBC1D22A | 25771 . |
| 210145_at | 0.039098 | 0.025794 | PLA2G4A  | 5321 .  |
| 210148_at | 1.99E-04 | 4.55E-05 | HIPK3    | 10114 . |
| 210150_s_ | 3.55E-04 | 9.33E-05 | LAMA5    | 3911 .  |
| 210151_s_ | 5.00E-04 | 1.42E-04 | DYRK3    | 8444 .  |
| 210152_at | 0.002314 | 9.21E-04 | LILRB4   | 11006 . |
| 210158_at | 0.031607 | 0.020153 | ERCC4    | 2072 .  |
| 210161_at | 3.03E-06 | 2.14E-07 |          | .       |
| 210162_s_ | 0.009247 | 0.004787 | NFATC1   | 4772 .  |
| 210163_at | 0.001829 | 6.93E-04 | CXCL11   | 6373 .  |
| 210165_at | 0.009081 | 0.004683 | DNASE1   | 1773 .  |
| 210167_s_ | 0.002215 | 8.73E-04 | TEF      | 7008 .  |
| 210169_at | 0.020242 | 0.011994 | SEC14L5  | 9717 .  |
| 210170_at | 1.25E-04 | 2.56E-05 | PDLIM3   | 27295 . |
| 210171_s_ | 0.003698 | 0.001614 | CREM     | 1390 .  |
| 210172_at | 7.87E-05 | 1.43E-05 | SF1      | 7536 .  |
| 210173_at | 0.005298 | 0.002481 | PTPRJ    | 5795 .  |
| 210174_at | 0.037341 | 0.024468 | NR5A2    | 2494 .  |
| 210175_at | 1.78E-04 | 3.97E-05 | C2orf3   | 6936 .  |
| 210176_at | 0.040434 | 0.026813 | TLR1     | 7096 .  |
| 210177_at | 0.005388 | 0.002531 | TRIM15   | 89870 . |
| 210179_at | 2.33E-06 | 1.52E-07 | KCNJ13   | 3769 .  |
| 210180_s_ | 3.45E-05 | 4.97E-06 | TRA2B    | 6434 .  |
| 210183_x_ | 0.01674  | 0.009608 | PNN      | 5411 .  |
| 210184_at | 0.044642 | 0.0301   | ITGAX    | 3687 .  |
| 210185_at | 3.02E-04 | 7.66E-05 | CACNB1   | 782 .   |
| 210188_at | 3.35E-05 | 4.80E-06 | GABPA    | 2551 .  |

|           |          |          |          |             |
|-----------|----------|----------|----------|-------------|
| 210190_at | 0.001977 | 7.61E-04 | STX11    | 8676 .      |
| 210192_at | 0.013298 | 0.007335 | ATP8A1   | 10396 .     |
| 210193_at | 0.010161 | 0.005343 | MOBP     | 4336 .      |
| 210194_at | 1.22E-04 | 2.48E-05 | PLA2R1   | 22925 .     |
| 210195_s_ | 4.24E-07 | 1.61E-08 | PSG1     | 5669 .      |
| 210196_s_ | 6.10E-05 | 1.03E-05 | PSG1     | 5669 .      |
| 210198_s_ | 4.13E-13 | 1.76E-16 | PLP1     | 5354 .      |
| 210199_at | 6.27E-06 | 5.46E-07 | CRYAA    | 1409 .      |
| 210201_x_ | 0.001078 | 3.66E-04 | BIN1     | 274 .       |
| 210204_s_ | 0.01546  | 0.008758 | CNOT4    | 4850 .      |
| 210205_at | 0.005777 | 0.002749 | B3GALT4  | 8705 .      |
| 210206_s_ | 0.003106 | 0.001309 | DDX11    | 1663 .      |
| 210208_x_ | 0.027462 | 0.017117 | BAT3     | 7917 .      |
| 210210_at | 0.01338  | 0.007386 | MPZL1    | 9019 .      |
| 210211_s_ | 0.001096 | 3.73E-04 | HSP90AA1 | 3320 .      |
| 210212_x_ | 2.18E-05 | 2.80E-06 | MTCP1NB  | 100272147 . |
| 210214_s_ | 2.85E-05 | 3.91E-06 | BMPR2    | 659 .       |
| 210215_at | 0.001856 | 7.05E-04 | TFR2     | 7036 .      |
| 210216_x_ | 0.010506 | 0.005556 | RAD1     | 5810 .      |
| 210218_s_ | 4.03E-06 | 3.09E-07 | SP100    | 6672 .      |
| 210219_at | 5.10E-04 | 1.46E-04 | SP100    | 6672 .      |
| 210220_at | 0.011593 | 0.006239 | FZD2     | 2535 .      |
| 210221_at | 0.001447 | 5.23E-04 | CHRNA3   | 1136 .      |
| 210223_s_ | 2.32E-10 | 8.00E-13 | MR1      | 3140 .      |
| 210224_at | 8.69E-08 | 1.89E-09 | MR1      | 3140 .      |
| 210225_x_ | 1.74E-05 | 2.09E-06 | LILRB3   | 11025 .     |
| 210226_at | 4.84E-04 | 1.37E-04 | NR4A1    | 3164 .      |
| 210228_at | 0.004487 | 0.002036 | CSF2     | 1437 .      |
| 210230_at | 0.001593 | 5.87E-04 |          | .           |
| 210231_x_ | 2.46E-04 | 5.93E-05 | SET      | 6418 .      |
| 210232_at | 3.95E-04 | 1.07E-04 | CDC42    | 998 .       |
| 210234_at | 0.00118  | 4.09E-04 | GRM4     | 2914 .      |
| 210236_at | 2.24E-04 | 5.26E-05 | PPFIA1   | 8500 .      |
| 210237_at | 0.012002 | 0.006497 | ARTN     | 9048 .      |



|           |          |          |          |          |
|-----------|----------|----------|----------|----------|
| 210239_at | 0.003195 | 0.001354 | IRX5     | 10265 .  |
| 210241_s_ | 3.72E-05 | 5.47E-06 | TP53TG1  | 11257 .  |
| 210243_s_ | 2.52E-04 | 6.13E-05 | B4GALT3  | 8703 .   |
| 210244_at | 0.027123 | 0.016874 | CAMP     | 820 .    |
| 210245_at | 1.31E-04 | 2.71E-05 | ABCC8    | 6833 .   |
| 210247_at | 5.56E-04 | 1.62E-04 | SYN2     | 6854 .   |
| 210248_at | 0.02062  | 0.012262 | WNT7A    | 7476 .   |
| 210250_x_ | 0.001021 | 3.42E-04 | ADSL     | 158 .    |
| 210252_s_ | 1.38E-05 | 1.56E-06 | MADD     | 8567 .   |
| 210255_at | 0.00128  | 4.51E-04 | RAD51L1  | 5890 .   |
| 210256_s_ | 0.002562 | 0.00104  | PIP5K1A  | 8394 .   |
| 210257_x_ | 0.003335 | 0.001426 | CUL4B    | 8450 .   |
| 210260_s_ | 2.79E-04 | 6.95E-05 | TNFAIP8  | 25816 .  |
| 210261_at | 1.10E-07 | 2.59E-09 | KCNK2    | 3776 .   |
| 210263_at | 2.91E-05 | 4.01E-06 | KCNF1    | 3754 .   |
| 210265_x_ | 2.33E-11 | 4.16E-14 | POU5F1P3 | 642559 . |
| 210266_s_ | 8.97E-07 | 4.29E-08 | TRIM33   | 51592 .  |
| 210268_at | 1.40E-07 | 3.58E-09 | NFX1     | 4799 .   |
| 210269_s_ | 0.027607 | 0.017222 | SFRS17A  | 8227 .   |
| 210270_at | 0.007338 | 0.003654 | RGS6     | 9628 .   |
| 210271_at | 0.001589 | 5.85E-04 | NEUROD2  | 4761 .   |
| 210272_at | 4.62E-04 | 1.29E-04 | CYP2B7P1 | 1556 .   |
| 210273_at | 0.006158 | 0.002965 | PCDH7    | 5099 .   |
| 210275_s_ | 0.004358 | 0.001965 | ZFAND5   | 7763 .   |
| 210276_s_ | 1.05E-06 | 5.23E-08 | TRIOBP   | 11078 .  |
| 210280_at | 0.00195  | 7.48E-04 | MPZ      | 4359 .   |
| 210281_s_ | 0.021094 | 0.012603 | ZMYM2    | 7750 .   |
| 210282_at | 2.19E-04 | 5.13E-05 | ZMYM2    | 7750 .   |
| 210285_x_ | 0.026446 | 0.016388 | WTAP     | 9589 .   |
| 210286_s_ | 4.00E-04 | 1.08E-04 | SLC4A7   | 9497 .   |
| 210287_s_ | 2.89E-04 | 7.26E-05 | FLT1     | 2321 .   |
| 210288_at | 0.024874 | 0.015266 | KLRG1    | 10219 .  |
| 210289_at | 0.003375 | 0.001448 | NAT8     | 9027 .   |
| 210290_at | 0.002272 | 9.00E-04 | ZNF174   | 7727 .   |

|           |          |          |                             |             |
|-----------|----------|----------|-----------------------------|-------------|
| 210292_s_ | 3.93E-04 | 1.06E-04 | PCDH11X /// P 27328 /// 83. |             |
| 210293_s_ | 0.025905 | 0.016003 | SEC23B                      | 10483 .     |
| 210296_s_ | 0.007002 | 0.003458 | PXMP3                       | 5828 .      |
| 210297_s_ | 1.16E-08 | 1.27E-10 | MSMB                        | 4477 .      |
| 210298_x_ | 9.89E-05 | 1.90E-05 | FHL1                        | 2273 .      |
| 210299_s_ | 1.22E-06 | 6.47E-08 | FHL1                        | 2273 .      |
| 210300_at | 1.38E-05 | 1.55E-06 | REM1                        | 28954 .     |
| 210301_at | 4.72E-07 | 1.84E-08 | XDH                         | 7498 .      |
| 210303_at | 0.003431 | 0.001475 | MAB21L2                     | 10586 .     |
| 210305_at | 3.60E-05 | 5.24E-06 | PDE4DIP                     | 9659 .      |
| 210309_at | 0.01672  | 0.009594 | RECQL5                      | 9400 .      |
| 210310_s_ | 6.45E-05 | 1.10E-05 | FGF5                        | 2250 .      |
| 210311_at | 2.07E-06 | 1.31E-07 | FGF5                        | 2250 .      |
| 210312_s_ | 0.001191 | 4.13E-04 | IFT20                       | 90410 .     |
| 210313_at | 0.001146 | 3.94E-04 | LILRA4                      | 23547 .     |
| 210314_x_ | 0.006163 | 0.002968 | TNFSF13                     | 8741 .      |
| 210315_at | 0.012808 | 0.007021 | SYN2                        | 6854 .      |
| 210317_s_ | 3.97E-05 | 5.92E-06 | YWHAE                       | 7531 .      |
| 210318_at | 2.18E-04 | 5.09E-05 | RBP3                        | 5949 .      |
| 210321_at | 0.001573 | 5.78E-04 | GZMH                        | 2999 .      |
| 210322_x_ | 8.92E-06 | 8.74E-07 | UTY                         | 7404 .      |
| 210329_s_ | 7.20E-05 | 1.27E-05 | SGCD                        | 6444 .      |
| 210330_at | 7.66E-07 | 3.47E-08 | SGCD                        | 6444 .      |
| 210332_at | 2.86E-04 | 7.16E-05 | LOC100134498                | 100134498 . |
| 210334_x_ | 6.17E-04 | 1.84E-04 | BIRC5                       | 332 .       |
| 210335_at | 2.04E-06 | 1.29E-07 | RASSF9                      | 9182 .      |
| 210339_s_ | 0.008271 | 0.004201 | KLK2                        | 3817 .      |
| 210340_s_ | 0.002074 | 8.07E-04 | CSF2RA /// LOC100133516 //. |             |
| 210343_s_ | 1.23E-04 | 2.50E-05 | SLC22A6                     | 9356 .      |
| 210344_at | 0.01956  | 0.011522 | OSBPL7                      | 114881 .    |
| 210346_s_ | 0.003591 | 0.001558 | CLK4                        | 57396 .     |
| 210347_s_ | 0.001941 | 7.45E-04 | BCL11A                      | 53335 .     |
| 210350_x_ | 0.003177 | 0.001345 | ING1                        | 3621 .      |
| 210354_at | 0.023348 | 0.014176 | IFNG                        | 3458 .      |

|           |          |          |                               |         |
|-----------|----------|----------|-------------------------------|---------|
| 210356_x_ | 0.008488 | 0.004329 | MS4A1                         | 931 .   |
| 210357_s_ | 8.37E-04 | 2.69E-04 | SMOX                          | 54498 . |
| 210359_at | 0.00442  | 0.002    | MTSS1                         | 9788 .  |
| 210360_s_ | 0.006545 | 0.003188 | MTSS1                         | 9788 .  |
| 210361_s_ | 0.002387 | 9.55E-04 | ELF2                          | 1998 .  |
| 210362_x_ | 0.002244 | 8.87E-04 | PML                           | 5371 .  |
| 210363_s_ | 0.001157 | 3.98E-04 | SCN2B                         | 6327 .  |
| 210364_at | 1.73E-04 | 3.83E-05 | SCN2B                         | 6327 .  |
| 210365_at | 3.88E-04 | 1.04E-04 | RUNX1                         | 861 .   |
| 210367_s_ | 0.005355 | 0.002513 | PTGES                         | 9536 .  |
| 210368_at | 0.002238 | 8.84E-04 | PCDHGA8                       | 9708 .  |
| 210369_at | 0.005186 | 0.00242  | SWAP70                        | 23075 . |
| 210370_s_ | 0.007849 | 0.003956 | LY9                           | 4063 .  |
| 210371_s_ | 2.37E-08 | 3.29E-10 | RBBP4                         | 5928 .  |
| 210372_s_ | 0.011761 | 0.006344 | TPD52L1                       | 7164 .  |
| 210373_at | 2.80E-05 | 3.82E-06 | TUSC4                         | 10641 . |
| 210378_s_ | 0.001767 | 6.64E-04 | SSNA1                         | 8636 .  |
| 210379_s_ | 0.010211 | 0.005375 | TLK1                          | 9874 .  |
| 210381_s_ | 1.03E-10 | 2.68E-13 | CCKBR                         | 887 .   |
| 210382_at | 8.64E-06 | 8.33E-07 | SCTR                          | 6344 .  |
| 210385_s_ | 0.002432 | 9.78E-04 | ERAP1                         | 51752 . |
| 210386_s_ | 1.63E-04 | 3.57E-05 | MTX1                          | 4580 .  |
| 210387_at | 0.035264 | 0.022877 | HIST1H2BG                     | 8339 .  |
| 210388_at | 1.87E-04 | 4.22E-05 | PLCB2                         | 5330 .  |
| 210389_x_ | 9.35E-05 | 1.77E-05 | TUBD1                         | 51174 . |
| 210391_at | 3.55E-05 | 5.15E-06 | NR6A1                         | 2649 .  |
| 210392_x_ | 1.41E-07 | 3.62E-09 | NR6A1                         | 2649 .  |
| 210393_at | 1.95E-10 | 6.25E-13 | LGR5                          | 8549 .  |
| 210394_x_ | 0.011573 | 0.006227 | SSX4 /// SSX4B 548313 /// 67. |         |
| 210395_x_ | 4.15E-05 | 6.31E-06 | MYL4                          | 4635 .  |
| 210398_x_ | 0.005776 | 0.002749 | FUT6                          | 2528 .  |
| 210399_x_ | 2.71E-09 | 1.91E-11 | FUT6                          | 2528 .  |
| 210401_at | 0.022076 | 0.013295 | P2RX1                         | 5023 .  |
| 210402_at | 0.01164  | 0.006268 | KCNJ1                         | 3758 .  |

|           |          |          |                             |         |
|-----------|----------|----------|-----------------------------|---------|
| 210406_s_ | 0.025282 | 0.015565 | RAB6A /// RAB 5870 /// 8408 | .       |
| 210408_s_ | 0.02319  | 0.014063 | CPNE6                       | 9362 .  |
| 210410_s_ | 3.33E-05 | 4.76E-06 | C6orf26 /// MS401251 /// 44 | .       |
| 210415_s_ | 1.42E-06 | 7.98E-08 | ODF2                        | 4957 .  |
| 210416_s_ | 1.32E-06 | 7.23E-08 | CHEK2                       | 11200 . |
| 210417_s_ | 0.002095 | 8.16E-04 | PI4KB                       | 5298 .  |
| 210419_at | 1.07E-05 | 1.11E-06 | BARX2                       | 8538 .  |
| 210420_at | 0.014623 | 0.008197 | SLC24A1                     | 9187 .  |
| 210421_s_ | 0.020931 | 0.012488 | SLC24A1                     | 9187 .  |
| 210422_x_ | 2.08E-05 | 2.62E-06 | SLC11A1                     | 6556 .  |
| 210423_s_ | 0.026733 | 0.016596 | SLC11A1                     | 6556 .  |
| 210427_x_ | 1.81E-04 | 4.06E-05 | ANXA2                       | 302 .   |
| 210428_s_ | 0.009647 | 0.00503  | HGS                         | 9146 .  |
| 210430_x_ | 0.015883 | 0.009038 | RHD                         | 6007 .  |
| 210431_at | 1.17E-04 | 2.34E-05 | ALPPL2                      | 251 .   |
| 210434_x_ | 7.02E-06 | 6.33E-07 | JTB                         | 10899 . |
| 210436_at | 0.034141 | 0.022041 | CCT8                        | 10694 . |
| 210438_x_ | 0.001799 | 6.78E-04 | TROVE2                      | 6738 .  |
| 210439_at | 0.037891 | 0.02488  | ICOS                        | 29851 . |
| 210440_s_ | 3.44E-05 | 4.95E-06 | CDC14A                      | 8556 .  |
| 210441_at | 7.45E-04 | 2.33E-04 | CDC14A                      | 8556 .  |
| 210442_at | 2.31E-04 | 5.48E-05 | IL1RL1                      | 9173 .  |
| 210443_x_ | 0.038392 | 0.025259 | OGFR                        | 11054 . |
| 210444_at | 0.001009 | 3.37E-04 | NPY6R                       | 4888 .  |
| 210445_at | 0.008383 | 0.004268 | FABP6                       | 2172 .  |
| 210446_at | 0.006935 | 0.003418 | GATA1                       | 2623 .  |
| 210447_at | 0.041497 | 0.027637 | GLUD2                       | 2747 .  |
| 210448_s_ | 0.020138 | 0.011922 | P2RX5                       | 5026 .  |
| 210449_x_ | 0.003211 | 0.001363 | MAPK14                      | 1432 .  |
| 210451_at | 0.001266 | 4.45E-04 | PKLR                        | 5313 .  |
| 210452_x_ | 0.008227 | 0.004175 | CYP4F2                      | 8529 .  |
| 210453_x_ | 6.50E-05 | 1.11E-05 | ATP5L                       | 10632 . |
| 210454_s_ | 0.0043   | 0.001934 | KCNJ6                       | 3763 .  |
| 210455_at | 2.76E-04 | 6.86E-05 | C10orf28                    | 27291 . |

|           |          |          |                            |          |
|-----------|----------|----------|----------------------------|----------|
| 210456_at | 1.04E-04 | 2.02E-05 | PCYT1B                     | 9468 .   |
| 210457_x_ | 0.019251 | 0.011308 | HMGA1                      | 3159 .   |
| 210458_s_ | 7.80E-05 | 1.41E-05 | TANK                       | 10010 .  |
| 210459_at | 0.030186 | 0.019118 | PSMD4                      | 5710 .   |
| 210460_s_ | 8.88E-05 | 1.66E-05 | PSMD4                      | 5710 .   |
| 210461_s_ | 2.07E-04 | 4.78E-05 | ABLIM1                     | 3983 .   |
| 210463_x_ | 0.022476 | 0.013567 | TRMT1                      | 55621 .  |
| 210466_s_ | 7.98E-05 | 1.46E-05 | SERBP1                     | 26135 .  |
| 210469_at | 0.027805 | 0.017368 | DLG5                       | 9231 .   |
| 210470_x_ | 0.001021 | 3.42E-04 | NONO                       | 4841 .   |
| 210473_s_ | 7.41E-05 | 1.32E-05 | GPR125                     | 166647 . |
| 210475_at | 0.001058 | 3.57E-04 | POU3F1                     | 5453 .   |
| 210476_s_ | 0.037843 | 0.024844 | PRLR                       | 5618 .   |
| 210480_s_ | 3.18E-04 | 8.16E-05 | MYO6                       | 4646 .   |
| 210481_s_ | 0.00608  | 0.002923 | CLEC4M                     | 10332 .  |
| 210482_x_ | 0.015323 | 0.008664 | MAP2K5                     | 5607 .   |
| 210483_at | 2.09E-07 | 6.06E-09 | MGC31957 /// 254896 /// 8: |          |
| 210484_s_ | 0.006023 | 0.002891 | MGC31957 /// 254896 /// 8: |          |
| 210487_at | 0.001053 | 3.55E-04 | DNTT                       | 1791 .   |
| 210491_at | 0.045627 | 0.03087  |                            | .        |
| 210492_at | 9.75E-04 | 3.24E-04 | MFAP3L                     | 9848 .   |
| 210493_s_ | 5.98E-04 | 1.77E-04 | MFAP3L                     | 9848 .   |
| 210495_x_ | 1.08E-04 | 2.11E-05 | FN1                        | 2335 .   |
| 210499_s_ | 0.019579 | 0.011535 | PQBP1                      | 10084 .  |
| 210501_x_ | 0.004838 | 0.002228 | EIF3K                      | 27335 .  |
| 210502_s_ | 0.00636  | 0.003081 | PPIE                       | 10450 .  |
| 210505_at | 0.006461 | 0.00314  | ADH7                       | 131 .    |
| 210507_s_ | 9.16E-04 | 3.00E-04 | AVIL                       | 10677 .  |
| 210508_s_ | 0.002208 | 8.70E-04 | KCNQ2                      | 3785 .   |
| 210510_s_ | 2.65E-06 | 1.80E-07 | NRP1                       | 8829 .   |
| 210511_s_ | 2.64E-05 | 3.55E-06 | INHBA                      | 3624 .   |
| 210512_s_ | 0.014962 | 0.008425 | VEGFA                      | 7422 .   |
| 210513_s_ | 0.004188 | 0.001872 | VEGFA                      | 7422 .   |
| 210514_x_ | 7.35E-04 | 2.29E-04 | HLA-G                      | 3135 .   |

|           |          |          |                             |         |
|-----------|----------|----------|-----------------------------|---------|
| 210515_at | 0.002955 | 0.001231 | HNF1A                       | 6927 .  |
| 210516_at | 5.24E-04 | 1.50E-04 | FAM120A                     | 23196 . |
| 210518_at | 0.001114 | 3.81E-04 | CDH8                        | 1006 .  |
| 210519_s_ | 9.92E-04 | 3.30E-04 | NQO1                        | 1728 .  |
| 210524_x_ | 4.76E-04 | 1.34E-04 |                             | .       |
| 210528_at | 0.003341 | 0.00143  | MR1                         | 3140 .  |
| 210529_s_ | 0.004534 | 0.002062 | FAM115A /// F653199 /// 97. |         |
| 210530_s_ | 2.24E-07 | 6.80E-09 | NR2C1                       | 7181 .  |
| 210531_at | 1.15E-04 | 2.29E-05 | NR2C1                       | 7181 .  |
| 210535_at | 0.018408 | 0.010736 | B9D1                        | 27077 . |
| 210536_s_ | 0.001225 | 4.28E-04 | SPAM1                       | 6677 .  |
| 210538_s_ | 0.001038 | 3.49E-04 | BIRC3                       | 330 .   |
| 210539_at | 7.89E-04 | 2.50E-04 | TTLL5                       | 23093 . |
| 210540_s_ | 0.001074 | 3.64E-04 | B4GALT4                     | 8702 .  |
| 210543_s_ | 0.003044 | 0.001278 | PRKDC                       | 5591 .  |
| 210544_s_ | 2.39E-05 | 3.13E-06 | ALDH3A2                     | 224 .   |
| 210545_at | 4.03E-05 | 6.04E-06 | ITSN2                       | 50618 . |
| 210547_x_ | 1.25E-04 | 2.53E-05 | ICA1                        | 3382 .  |
| 210551_s_ | 2.14E-04 | 4.99E-05 | ASMT                        | 438 .   |
| 210552_s_ | 3.89E-05 | 5.77E-06 | RALGPS1                     | 9649 .  |
| 210554_s_ | 0.012144 | 0.006591 | CTBP2                       | 1488 .  |
| 210555_s_ | 0.00169  | 6.29E-04 | NFATC3                      | 4775 .  |
| 210556_at | 0.003898 | 0.001719 | NFATC3                      | 4775 .  |
| 210557_x_ | 2.97E-04 | 7.48E-05 | CSF1                        | 1435 .  |
| 210558_at | 0.039035 | 0.025749 | AKR1C4                      | 1109 .  |
| 210559_s_ | 6.54E-06 | 5.77E-07 | CDC2                        | 983 .   |
| 210560_at | 0.017914 | 0.010397 | GBX2                        | 2637 .  |
| 210563_x_ | 4.89E-05 | 7.79E-06 | CFLAR                       | 8837 .  |
| 210564_x_ | 5.19E-07 | 2.07E-08 | CFLAR                       | 8837 .  |
| 210565_at | 3.81E-04 | 1.02E-04 | GCGR                        | 2642 .  |
| 210567_s_ | 2.01E-05 | 2.51E-06 | SKP2                        | 6502 .  |
| 210569_s_ | 0.003537 | 0.00153  | SIGLEC9                     | 27180 . |
| 210571_s_ | 1.67E-04 | 3.66E-05 | CMAH                        | 8418 .  |
| 210573_s_ | 0.006436 | 0.003126 | POLR3C                      | 10623 . |

|           |          |          |                             |         |
|-----------|----------|----------|-----------------------------|---------|
| 210574_s_ | 4.38E-08 | 7.56E-10 | NUDC                        | 10726 . |
| 210576_at | 5.51E-05 | 9.04E-06 | CYP4F8                      | 11283 . |
| 210577_at | 0.008258 | 0.004193 | CASR                        | 846 .   |
| 210580_x_ | 0.001182 | 4.09E-04 | SULT1A3 /// SL445329 /// 68 |         |
| 210581_x_ | 8.21E-04 | 2.63E-04 | PATZ1                       | 23598 . |
| 210582_s_ | 0.004438 | 0.002009 | LIMK2                       | 3985 .  |
| 210583_at | 0.043143 | 0.028916 | POLDIP3                     | 84271 . |
| 210588_x_ | 9.76E-06 | 9.86E-07 | HNRNPH3                     | 3189 .  |
| 210589_s_ | 0.001077 | 3.65E-04 | GBAP                        | 2630 .  |
| 210593_at | 0.003133 | 0.001323 | KIAA0913 /// S23053 /// 630 |         |
| 210594_x_ | 2.07E-05 | 2.61E-06 | MPZL1                       | 9019 .  |
| 210596_at | 0.030302 | 0.019204 | LOC100129513 100129513 .    |         |
| 210597_x_ | 3.74E-05 | 5.50E-06 | PRB1                        | 5542 .  |
| 210598_at | 0.006339 | 0.003069 |                             | .       |
| 210599_at | 0.034968 | 0.022654 | ZNF614                      | 80110 . |
| 210601_at | 8.75E-06 | 8.48E-07 | CDH6                        | 1004 .  |
| 210602_s_ | 7.43E-06 | 6.84E-07 | CDH6                        | 1004 .  |
| 210605_s_ | 8.14E-07 | 3.76E-08 | MFGES                       | 4240 .  |
| 210606_x_ | 0.001762 | 6.62E-04 | KLRD1                       | 3824 .  |
| 210607_at | 1.38E-04 | 2.90E-05 | FLT3LG                      | 2323 .  |
| 210608_s_ | 3.48E-05 | 5.02E-06 | FUT2                        | 2524 .  |
| 210609_s_ | 2.47E-04 | 5.97E-05 | TP53I3                      | 9540 .  |
| 210611_s_ | 6.90E-04 | 2.12E-04 | DTNA                        | 1837 .  |
| 210612_s_ | 1.55E-05 | 1.80E-06 | SYNJ2                       | 8871 .  |
| 210613_s_ | 2.64E-04 | 6.48E-05 | SYNGR1                      | 9145 .  |
| 210614_at | 0.014027 | 0.007802 | TTPA                        | 7274 .  |
| 210615_at | 0.001161 | 4.01E-04 | NRP1                        | 8829 .  |
| 210616_s_ | 2.26E-05 | 2.92E-06 | SEC31A                      | 22872 . |
| 210618_at | 0.001061 | 3.58E-04 | RAP1GAP                     | 5909 .  |
| 210620_s_ | 0.014741 | 0.008275 | GTF3C2                      | 2976 .  |
| 210621_s_ | 4.10E-04 | 1.11E-04 | RASA1                       | 5921 .  |
| 210623_at | 0.001426 | 5.14E-04 | UBXN1                       | 51035 . |
| 210625_s_ | 2.12E-05 | 2.70E-06 | AKAP1                       | 8165 .  |
| 210626_at | 0.017939 | 0.010414 | AKAP1                       | 8165 .  |

|           |          |          |                                |          |
|-----------|----------|----------|--------------------------------|----------|
| 210628_x_ | 0.001446 | 5.22E-04 | LTBP4                          | 8425 .   |
| 210632_s_ | 0.002235 | 8.82E-04 | SGCA                           | 6442 .   |
| 210633_x_ | 4.60E-04 | 1.28E-04 | KRT10                          | 3858 .   |
| 210635_s_ | 7.40E-05 | 1.32E-05 | KLHL20                         | 27252 .  |
| 210636_at | 7.23E-04 | 2.25E-04 | PPARD                          | 5467 .   |
| 210637_at | 3.01E-07 | 1.01E-08 | TACR1                          | 6869 .   |
| 210638_s_ | 1.08E-04 | 2.13E-05 | FBXO9                          | 26268 .  |
| 210640_s_ | 1.74E-05 | 2.08E-06 | GPER                           | 2852 .   |
| 210641_at | 0.031314 | 0.019938 | CAPN9                          | 10753 .  |
| 210642_at | 4.15E-07 | 1.56E-08 | CCIN                           | 881 .    |
| 210643_at | 0.04214  | 0.028139 | TNFSF11                        | 8600 .   |
| 210644_s_ | 4.55E-05 | 7.10E-06 | LAIR1                          | 3903 .   |
| 210645_s_ | 0.010565 | 0.005596 | TTC3                           | 7267 .   |
| 210646_x_ | 0.002319 | 9.23E-04 | RPL13A                         | 23521 .  |
| 210647_x_ | 2.06E-04 | 4.74E-05 | PLA2G6                         | 8398 .   |
| 210648_x_ | 0.001733 | 6.49E-04 | SNX3                           | 8724 .   |
| 210649_s_ | 5.42E-04 | 1.57E-04 | ARID1A                         | 8289 .   |
| 210650_s_ | 0.031967 | 0.020425 | PCLO                           | 27445 .  |
| 210651_s_ | 0.011103 | 0.005932 | EPHB2                          | 2048 .   |
| 210652_s_ | 0.002837 | 0.001173 | TTC39A                         | 22996 .  |
| 210654_at | 2.47E-04 | 5.95E-05 | TNFRSF10D                      | 8793 .   |
| 210655_s_ | 0.019844 | 0.011716 | FOXO3 /// FOX2309 /// 2310     | 2310 .   |
| 210656_at | 0.022066 | 0.013287 | EED                            | 8726 .   |
| 210657_s_ | 0.016989 | 0.009769 | 4-Sep                          | 5414 .   |
| 210658_s_ | 3.45E-05 | 4.97E-06 | GGA2                           | 23062 .  |
| 210659_at | 0.006287 | 0.00304  | CMKLR1                         | 1240 .   |
| 210664_s_ | 0.0276   | 0.017217 | TFPI                           | 7035 .   |
| 210669_at | 0.00798  | 0.004032 | TFAP2A                         | 7020 .   |
| 210672_s_ | 0.01372  | 0.007606 | C16orf35                       | 8131 .   |
| 210673_x_ | 4.18E-05 | 6.35E-06 | NKX2-1                         | 7080 .   |
| 210674_s_ | 6.54E-07 | 2.81E-08 | PCDHA1 /// PC56134 /// 56134   | 56134 .  |
| 210675_s_ | 0.00444  | 0.00201  | PTPRR                          | 5801 .   |
| 210676_x_ | 0.001755 | 6.59E-04 | RGPD5 /// RGP727851 /// 727851 | 727851 . |
| 210677_at | 0.047331 | 0.032219 | SOAT2                          | 8435 .   |



|           |          |          |                  |
|-----------|----------|----------|------------------|
| 210679_x_ | 1.07E-07 | 2.49E-09 | .                |
| 210680_s_ | 7.60E-04 | 2.39E-04 | MASP1 5648 .     |
| 210681_s_ | 0.048808 | 0.033377 | USP15 9958 .     |
| 210682_at | 0.006896 | 0.003395 | LPO 4025 .       |
| 210683_at | 0.049829 | 0.034198 | NRTN 4902 .      |
| 210684_s_ | 4.12E-04 | 1.12E-04 | DLG4 1742 .      |
| 210685_s_ | 0.043186 | 0.028951 | UBE4B 10277 .    |
| 210686_x_ | 1.33E-04 | 2.77E-05 | SLC25A16 8034 .  |
| 210687_at | 1.16E-04 | 2.31E-05 | CPT1A 1374 .     |
| 210688_s_ | 7.40E-06 | 6.80E-07 | CPT1A 1374 .     |
| 210689_at | 0.001808 | 6.83E-04 | CLDN14 23562 .   |
| 210691_s_ | 1.71E-05 | 2.05E-06 | CACYBP 27101 .   |
| 210694_s_ | 0.004427 | 0.002003 | MID1 4281 .      |
| 210695_s_ | 3.50E-04 | 9.17E-05 | WVOX 51741 .     |
| 210698_at | 0.024753 | 0.015179 | .                |
| 210699_at | 0.016213 | 0.00926  | .                |
| 210701_at | 1.50E-04 | 3.20E-05 | CFDP1 10428 .    |
| 210702_s_ | 2.81E-06 | 1.93E-07 | PTGIS 5740 .     |
| 210708_x_ | 2.38E-04 | 5.70E-05 | CASP10 843 .     |
| 210710_at | 0.012906 | 0.007086 | AGGF1 55109 .    |
| 210711_at | 0.014548 | 0.008146 | C1orf217 84719 . |
| 210714_at | 0.00937  | 0.004861 | R3HDM1 23518 .   |
| 210715_s_ | 4.45E-14 | 9.53E-18 | SPINT2 10653 .   |
| 210716_s_ | 0.003147 | 0.001329 | CLIP1 6249 .     |
| 210723_x_ | 5.01E-05 | 8.03E-06 | .                |
| 210724_at | 0.003149 | 0.00133  | EMR3 84658 .     |
| 210727_at | 0.032972 | 0.021184 | CALCA 796 .      |
| 210731_s_ | 5.11E-05 | 8.24E-06 | LGALS8 3964 .    |
| 210732_s_ | 1.77E-05 | 2.15E-06 | LGALS8 3964 .    |
| 210733_at | 1.61E-04 | 3.51E-05 | TRAM1 23471 .    |
| 210734_x_ | 0.004685 | 0.002145 | MAX 4149 .       |
| 210735_s_ | 2.15E-04 | 5.02E-05 | CA12 771 .       |
| 210736_x_ | 2.64E-04 | 6.47E-05 | DTNA 1837 .      |
| 210737_at | 3.90E-04 | 1.05E-04 | TUB 7275 .       |

|           |          |          |                               |          |
|-----------|----------|----------|-------------------------------|----------|
| 210738_s_ | 1.79E-04 | 3.98E-05 | SLC4A4                        | 8671 .   |
| 210739_x_ | 3.30E-04 | 8.55E-05 | SLC4A4                        | 8671 .   |
| 210743_s_ | 0.013384 | 0.007389 | CDC14A                        | 8556 .   |
| 210747_at | 8.02E-04 | 2.55E-04 | HLA-DQB1                      | 3119 .   |
| 210749_x_ | 5.81E-06 | 4.97E-07 | DDR1                          | 780 .    |
| 210750_s_ | 0.002731 | 0.001123 | DLGAP1                        | 9229 .   |
| 210751_s_ | 8.77E-08 | 1.92E-09 | RGN                           | 9104 .   |
| 210752_s_ | 1.22E-05 | 1.32E-06 | MLX                           | 6945 .   |
| 210754_s_ | 0.026451 | 0.016392 | LYN                           | 4067 .   |
| 210756_s_ | 0.003885 | 0.001712 | NOTCH2                        | 4853 .   |
| 210757_x_ | 2.04E-06 | 1.28E-07 | DAB2                          | 1601 .   |
| 210759_s_ | 0.005849 | 0.002792 | PSMA1                         | 5682 .   |
| 210761_s_ | 5.22E-09 | 4.55E-11 | GRB7                          | 2886 .   |
| 210762_s_ | 4.81E-06 | 3.88E-07 | DLC1                          | 10395 .  |
| 210763_x_ | 0.001084 | 3.68E-04 | NCR3                          | 259197 . |
| 210764_s_ | 0.010643 | 0.005644 | CYR61                         | 3491 .   |
| 210765_at | 9.25E-06 | 9.19E-07 | CSE1L                         | 1434 .   |
| 210766_s_ | 2.01E-07 | 5.79E-09 | CSE1L                         | 1434 .   |
| 210767_at | 0.001337 | 4.76E-04 | NF2                           | 4771 .   |
| 210768_x_ | 0.003749 | 0.001641 | TMCO1                         | 54499 .  |
| 210769_at | 1.21E-04 | 2.45E-05 | CNGB1                         | 1258 .   |
| 210771_at | 0.014576 | 0.008165 | PPARA                         | 5465 .   |
| 210772_at | 0.007702 | 0.003867 | FPR2                          | 2358 .   |
| 210773_s_ | 0.003896 | 0.001717 | FPR2                          | 2358 .   |
| 210774_s_ | 0.004174 | 0.001865 | NCOA4                         | 8031 .   |
| 210775_x_ | 0.002348 | 9.36E-04 | CASP9                         | 842 .    |
| 210776_x_ | 1.96E-05 | 2.44E-06 | TCF3                          | 6929 .   |
| 210778_s_ | 1.53E-05 | 1.78E-06 | MXD4                          | 10608 .  |
| 210779_x_ | 2.49E-05 | 3.30E-06 | SIP1                          | 8487 .   |
| 210780_at | 8.14E-05 | 1.49E-05 | ESR2                          | 2100 .   |
| 210782_x_ | 8.93E-06 | 8.75E-07 | GRIN1                         | 2902 .   |
| 210783_x_ | 0.001637 | 6.06E-04 | CLEC11A                       | 6320 .   |
| 210784_x_ | 6.67E-07 | 2.89E-08 | LILRA6 /// LILR 11025 /// 79: |          |
| 210788_s_ | 0.004489 | 0.002037 | DHRS7                         | 51635 .  |

|           |          |          |              |             |
|-----------|----------|----------|--------------|-------------|
| 210789_x_ | 0.003231 | 0.001373 | CEACAM3      | 1084 .      |
| 210790_s_ | 2.51E-05 | 3.34E-06 | SAR1A        | 56681 .     |
| 210791_s_ | 1.84E-04 | 4.13E-05 | RICS         | 9743 .      |
| 210792_x_ | 0.007271 | 0.003615 | SIVA1        | 10572 .     |
| 210793_s_ | 3.09E-07 | 1.05E-08 | NUP98        | 4928 .      |
| 210794_s_ | 3.50E-04 | 9.20E-05 | MEG3         | 55384 .     |
| 210795_s_ | 1.98E-04 | 4.51E-05 | LOC100130955 | 100130955 . |
| 210796_x_ | 1.40E-04 | 2.94E-05 | SIGLEC6      | 946 .       |
| 210798_x_ | 0.025985 | 0.016058 | MASP2        | 10747 .     |
| 210799_at | 6.83E-04 | 2.09E-04 | HTR1B        | 3351 .      |
| 210800_at | 0.004616 | 0.002106 | TIMM8A       | 1678 .      |
| 210801_at | 8.09E-04 | 2.58E-04 | DIMT1L       | 27292 .     |
| 210804_x_ | 1.24E-06 | 6.57E-08 | SLC8A1       | 6546 .      |
| 210805_x_ | 3.78E-05 | 5.57E-06 | RUNX1        | 861 .       |
| 210806_at | 0.003844 | 0.00169  | TTLL5        | 23093 .     |
| 210807_s_ | 9.84E-05 | 1.89E-05 | SLC16A7      | 9194 .      |
| 210808_s_ | 0.017509 | 0.010121 | NOX1         | 27035 .     |
| 210809_s_ | 4.12E-05 | 6.24E-06 | POSTN        | 10631 .     |
| 210811_s_ | 8.21E-07 | 3.81E-08 | DDX49        | 54555 .     |
| 210814_at | 0.00985  | 0.005155 | TRPC3        | 7222 .      |
| 210816_s_ | 0.047161 | 0.032081 | CYB561       | 1534 .      |
| 210817_s_ | 1.10E-05 | 1.15E-06 | CALCOCO2     | 10241 .     |
| 210818_s_ | 0.00416  | 0.001856 | BACH1        | 571 .       |
| 210820_x_ | 0.022671 | 0.013703 | COQ7         | 10229 .     |
| 210821_x_ | 1.32E-05 | 1.46E-06 | CENPA        | 1058 .      |
| 210822_at | 0.007208 | 0.003577 | RPL13P5      | 283345 .    |
| 210823_s_ | 0.028181 | 0.017642 | PTPRS        | 5802 .      |
| 210824_at | 6.83E-04 | 2.09E-04 |              | .           |
| 210825_s_ | 1.39E-05 | 1.57E-06 | PEBP1        | 5037 .      |
| 210826_x_ | 4.49E-04 | 1.25E-04 | RAD17        | 5884 .      |
| 210827_s_ | 0.001154 | 3.97E-04 | ELF3         | 1999 .      |
| 210828_s_ | 0.001263 | 4.44E-04 | ARNT         | 405 .       |
| 210829_s_ | 0.017103 | 0.009848 | SSBP2        | 23635 .     |
| 210830_s_ | 0.013463 | 0.00744  | PON2         | 5445 .      |

|           |          |          |           |          |
|-----------|----------|----------|-----------|----------|
| 210835_s_ | 0.001513 | 5.52E-04 | CTBP2     | 1488 .   |
| 210836_x_ | 0.004897 | 0.00226  | PDE4D     | 5144 .   |
| 210838_s_ | 5.13E-05 | 8.28E-06 | ACVRL1    | 94 .     |
| 210839_s_ | 3.88E-04 | 1.04E-04 | ENPP2     | 5168 .   |
| 210840_s_ | 0.030634 | 0.019445 | IQGAP1    | 8826 .   |
| 210841_s_ | 0.002064 | 8.02E-04 | NRP2      | 8828 .   |
| 210843_s_ | 0.005941 | 0.002844 | MFAP3L    | 9848 .   |
| 210845_s_ | 3.18E-04 | 8.18E-05 | PLAUR     | 5329 .   |
| 210849_s_ | 0.00121  | 4.21E-04 | VPS41     | 27072 .  |
| 210850_s_ | 7.35E-05 | 1.31E-05 | ELK1      | 2002 .   |
| 210852_s_ | 0.003325 | 0.001421 | AASS      | 10157 .  |
| 210854_x_ | 0.007279 | 0.00362  | SLC6A8    | 6535 .   |
| 210855_at | 0.04959  | 0.033999 | GREB1     | 9687 .   |
| 210858_x_ | 9.34E-05 | 1.77E-05 | ATM       | 472 .    |
| 210862_s_ | 0.021146 | 0.01264  | SARDH     | 1757 .   |
| 210864_x_ | 2.03E-05 | 2.54E-06 | HFE       | 3077 .   |
| 210865_at | 0.007751 | 0.003895 | FASLG     | 356 .    |
| 210866_s_ | 5.74E-05 | 9.53E-06 | CNOT4     | 4850 .   |
| 210867_at | 0.001136 | 3.90E-04 | CNOT4     | 4850 .   |
| 210868_s_ | 0.016114 | 0.009193 | ELOVL6    | 79071 .  |
| 210869_s_ | 3.21E-04 | 8.27E-05 | MCAM      | 4162 .   |
| 210870_s_ | 0.023244 | 0.014104 | EPM2A     | 7957 .   |
| 210871_x_ | 7.38E-04 | 2.30E-04 | SSX2IP    | 117178 . |
| 210873_x_ | 0.042217 | 0.028198 | APOBEC3A  | 200315 . |
| 210875_s_ | 9.42E-06 | 9.40E-07 | ZEB1      | 6935 .   |
| 210876_at | 1.13E-04 | 2.25E-05 | ANXA2P1   | 303 .    |
| 210878_s_ | 1.48E-05 | 1.70E-06 | KDM3B     | 51780 .  |
| 210879_s_ | 1.98E-06 | 1.23E-07 | RAB11FIP5 | 26056 .  |
| 210882_s_ | 0.035689 | 0.023207 | TRO       | 7216 .   |
| 210884_s_ | 0.006878 | 0.003383 | SPAG11A   | 653423 . |
| 210885_s_ | 6.74E-04 | 2.06E-04 | TRIM15    | 89870 .  |
| 210886_x_ | 7.41E-05 | 1.32E-05 | TP53TG1   | 11257 .  |
| 210887_s_ | 9.54E-05 | 1.82E-05 | EVC       | 2121 .   |
| 210888_s_ | 0.031984 | 0.020439 | ITIH1     | 3697 .   |

|           |          |          |              |             |
|-----------|----------|----------|--------------|-------------|
| 210890_x_ | 0.010186 | 0.005359 | KIR2DL1      | 3802 .      |
| 210892_s_ | 0.009482 | 0.00493  | GTF2I        | 2969 .      |
| 210894_s_ | 0.003189 | 0.001351 | CEP250       | 11190 .     |
| 210896_s_ | 0.001785 | 6.72E-04 | ASPH         | 444 .       |
| 210904_s_ | 1.69E-06 | 1.01E-07 | IL13RA1      | 3597 .      |
| 210905_x_ | 6.04E-11 | 1.39E-13 | POU5F1P4     | 645682 .    |
| 210907_s_ | 0.02948  | 0.018595 | PDCD10       | 11235 .     |
| 210911_at | 0.020864 | 0.012444 | ID2B         | 84099 .     |
| 210912_x_ | 0.003504 | 0.001513 | GSTM4        | 2948 .      |
| 210915_x_ | 5.01E-04 | 1.42E-04 | TRBC1        | 28639 .     |
| 210916_s_ | 0.00278  | 0.001147 | CD44         | 960 .       |
| 210920_x_ | 6.58E-05 | 1.13E-05 |              | .           |
| 210921_at | 0.001281 | 4.51E-04 |              | .           |
| 210923_at | 0.003118 | 0.001315 | SLC1A7       | 6512 .      |
| 210924_at | 0.001184 | 4.10E-04 | OLFM1        | 10439 .     |
| 210925_at | 0.001069 | 3.62E-04 | CIITA        | 4261 .      |
| 210926_at | 0.016377 | 0.009366 | ACTBL3       | 440915 .    |
| 210927_x_ | 6.54E-06 | 5.77E-07 | JTB          | 10899 .     |
| 210928_at | 0.00807  | 0.004085 | LOC100131613 | 100131613 . |
| 210930_s_ | 0.037915 | 0.024898 | ERBB2        | 2064 .      |
| 210932_s_ | 3.72E-06 | 2.78E-07 | RNF6         | 6049 .      |
| 210933_s_ | 6.76E-05 | 1.17E-05 | FSCN1        | 6624 .      |
| 210934_at | 0.025983 | 0.016056 | BLK          | 640 .       |
| 210935_s_ | 1.07E-04 | 2.09E-05 | WDR1         | 9948 .      |
| 210936_at | 5.60E-05 | 9.21E-06 | WDR1         | 9948 .      |
| 210937_s_ | 2.39E-05 | 3.13E-06 | PDX1         | 3651 .      |
| 210938_at | 3.82E-04 | 1.02E-04 | PDX1         | 3651 .      |
| 210939_s_ | 0.011111 | 0.005938 | GRM1         | 2911 .      |
| 210940_s_ | 0.001038 | 3.49E-04 | GRM1         | 2911 .      |
| 210942_s_ | 3.54E-04 | 9.30E-05 | ST3GAL6      | 10402 .     |
| 210944_s_ | 0.003562 | 0.001544 | CAPN3        | 825 .       |
| 210945_at | 4.68E-06 | 3.74E-07 | COL4A6       | 1288 .      |
| 210946_at | 0.002411 | 9.67E-04 | PPAP2A       | 8611 .      |
| 210950_s_ | 0.001021 | 3.42E-04 | FDFT1        | 2222 .      |

|           |          |          |                             |          |
|-----------|----------|----------|-----------------------------|----------|
| 210951_x_ | 0.004238 | 0.001899 | RAB27A                      | 5873 .   |
| 210952_at | 3.70E-04 | 9.81E-05 | AP4S1                       | 11154 .  |
| 210955_at | 0.00136  | 4.86E-04 | CASP10                      | 843 .    |
| 210956_at | 0.015827 | 0.009001 | PPYR1                       | 5540 .   |
| 210957_s_ | 0.034008 | 0.021944 | AFF2                        | 2334 .   |
| 210958_s_ | 0.006507 | 0.003166 | MAST4                       | 375449 . |
| 210960_at | 0.028743 | 0.018058 | ADRA1D                      | 146 .    |
| 210962_s_ | 0.026676 | 0.01655  | AKAP9                       | 10142 .  |
| 210963_s_ | 0.009709 | 0.00507  | GYG2                        | 8908 .   |
| 210964_s_ | 0.001314 | 4.65E-04 | GYG2                        | 8908 .   |
| 210965_x_ | 2.49E-04 | 6.03E-05 | CDC2L5                      | 8621 .   |
| 210966_x_ | 0.001271 | 4.47E-04 | LARP1                       | 23367 .  |
| 210967_x_ | 0.007571 | 0.00379  | CACNB1                      | 782 .    |
| 210968_s_ | 0.001067 | 3.61E-04 | RTN4                        | 57142 .  |
| 210969_at | 0.019793 | 0.011681 | PKN2                        | 5586 .   |
| 210971_s_ | 9.62E-04 | 3.18E-04 | ARNTL                       | 406 .    |
| 210972_x_ | 0.006071 | 0.002918 | TRA@ /// TRAC28663 /// 287. |          |
| 210973_s_ | 2.71E-04 | 6.68E-05 | FGFR1                       | 2260 .   |
| 210974_s_ | 3.57E-04 | 9.40E-05 | AP3D1                       | 8943 .   |
| 210975_x_ | 1.86E-04 | 4.18E-05 | FASTK                       | 10922 .  |
| 210976_s_ | 0.011721 | 0.006318 | PFKM                        | 5213 .   |
| 210977_s_ | 7.02E-04 | 2.16E-04 | HSF4                        | 3299 .   |
| 210978_s_ | 0.005787 | 0.002755 | TAGLN2                      | 8407 .   |
| 210979_at | 0.021568 | 0.01293  | ASAH1                       | 427 .    |
| 210980_s_ | 0.001022 | 3.43E-04 | ASAH1                       | 427 .    |
| 210983_s_ | 2.37E-05 | 3.09E-06 | MCM7                        | 4176 .   |
| 210984_x_ | 1.99E-06 | 1.25E-07 | EGFR                        | 1956 .   |
| 210985_s_ | 3.67E-04 | 9.73E-05 | SP100                       | 6672 .   |
| 210986_s_ | 3.70E-04 | 9.83E-05 | TPM1                        | 7168 .   |
| 210987_x_ | 1.51E-04 | 3.25E-05 | TPM1                        | 7168 .   |
| 210988_s_ | 3.58E-04 | 9.45E-05 | PRUNE                       | 58497 .  |
| 210989_at | 0.005339 | 0.002504 | LAMA4                       | 3910 .   |
| 210990_s_ | 2.75E-06 | 1.87E-07 | LAMA4                       | 3910 .   |
| 210991_s_ | 2.32E-04 | 5.51E-05 | RIMS3                       | 9783 .   |

|           |          |          |                            |          |
|-----------|----------|----------|----------------------------|----------|
| 210992_x_ | 1.50E-05 | 1.73E-06 | FCGR2C                     | 9103 .   |
| 210993_s_ | 6.36E-04 | 1.92E-04 | SMAD1                      | 4086 .   |
| 210994_x_ | 7.25E-04 | 2.25E-04 | TRIM23                     | 373 .    |
| 210995_s_ | 0.002294 | 9.11E-04 | TRIM23                     | 373 .    |
| 210996_s_ | 0.00241  | 9.67E-04 | YWHAE                      | 7531 .   |
| 210999_s_ | 0.04858  | 0.033193 | GRB10                      | 2887 .   |
| 211000_s_ | 1.18E-04 | 2.37E-05 | IL6ST                      | 3572 .   |
| 211002_s_ | 0.004279 | 0.001921 | TRIM29                     | 23650 .  |
| 211003_x_ | 0.008631 | 0.004413 | TGM2                       | 7052 .   |
| 211004_s_ | 1.39E-05 | 1.57E-06 | ALDH3B1                    | 221 .    |
| 211005_at | 0.004497 | 0.002041 | LAT /// SPNS1 27040 /// 83 | 95 .     |
| 211008_s_ | 1.08E-04 | 2.13E-05 | UBE2I                      | 7329 .   |
| 211009_s_ | 0.001161 | 4.00E-04 | ZNF271                     | 10778 .  |
| 211010_s_ | 0.001205 | 4.19E-04 | NCR3                       | 259197 . |
| 211011_at | 0.048301 | 0.03297  | COL19A1                    | 1310 .   |
| 211012_s_ | 0.00149  | 5.42E-04 | LOC161527 /// 161527 /// 5 | 95 .     |
| 211013_x_ | 0.020547 | 0.01221  | PML                        | 5371 .   |
| 211014_s_ | 8.19E-05 | 1.51E-05 | LOC161527 /// 161527 /// 5 | 95 .     |
| 211015_s_ | 0.00404  | 0.001794 | HSPA4                      | 3308 .   |
| 211016_x_ | 6.26E-05 | 1.06E-05 | HSPA4                      | 3308 .   |
| 211017_s_ | 0.003352 | 0.001435 | NF2                        | 4771 .   |
| 211019_s_ | 0.008207 | 0.004163 | LSS                        | 4047 .   |
| 211020_at | 8.74E-07 | 4.15E-08 | GCNT2                      | 2651 .   |
| 211021_s_ | 0.001065 | 3.60E-04 | RGS14                      | 10636 .  |
| 211023_at | 0.001876 | 7.14E-04 | PDHB                       | 5162 .   |
| 211025_x_ | 0.003386 | 0.001453 | COX5B                      | 1329 .   |
| 211026_s_ | 1.26E-06 | 6.77E-08 | MGLL                       | 11343 .  |
| 211027_s_ | 0.003445 | 0.001483 | IKBKB                      | 3551 .   |
| 211028_s_ | 0.001539 | 5.63E-04 | KHK                        | 3795 .   |
| 211030_s_ | 0.005005 | 0.002318 | SLC6A6                     | 6533 .   |
| 211031_s_ | 0.027816 | 0.017377 | CLIP2                      | 7461 .   |
| 211036_x_ | 1.63E-04 | 3.56E-05 | ANAPC5                     | 51433 .  |
| 211037_s_ | 0.020708 | 0.012328 | MBOAT7                     | 79143 .  |
| 211038_s_ | 9.20E-04 | 3.02E-04 | CROCCL1                    | 84809 .  |

|           |          |          |                             |         |
|-----------|----------|----------|-----------------------------|---------|
| 211040_x_ | 2.58E-06 | 1.73E-07 | GTSE1                       | 51512 . |
| 211042_x_ | 0.007038 | 0.003478 | MCAM                        | 4162 .  |
| 211043_s_ | 8.05E-04 | 2.57E-04 | CLTB                        | 1212 .  |
| 211044_at | 4.41E-06 | 3.47E-07 | TRIM14                      | 9830 .  |
| 211045_s_ | 0.015987 | 0.009112 | KCNH6                       | 81033 . |
| 211047_x_ | 0.038348 | 0.025226 | AP2S1                       | 1175 .  |
| 211049_at | 6.58E-04 | 2.00E-04 | TLX2                        | 3196 .  |
| 211050_x_ | 0.003273 | 0.001394 | DKFZP434B201642780 /// 64.  |         |
| 211051_s_ | 0.003571 | 0.001548 | EXTL3                       | 2137 .  |
| 211052_s_ | 0.0088   | 0.004515 | TBCD                        | 6904 .  |
| 211053_at | 0.002307 | 9.18E-04 | KCNG1                       | 3755 .  |
| 211055_s_ | 4.39E-04 | 1.21E-04 | INVS                        | 27130 . |
| 211056_s_ | 0.04844  | 0.033076 | SRD5A1                      | 6715 .  |
| 211057_at | 0.019097 | 0.011203 | ROR1                        | 4919 .  |
| 211058_x_ | 0.040239 | 0.026669 | TUBA1B                      | 10376 . |
| 211059_s_ | 7.41E-04 | 2.32E-04 | GOLGA2                      | 2801 .  |
| 211060_x_ | 6.66E-06 | 5.91E-07 | GPAA1                       | 8733 .  |
| 211061_s_ | 4.59E-06 | 3.65E-07 | MGAT2                       | 4247 .  |
| 211062_s_ | 6.99E-05 | 1.23E-05 | CPZ                         | 8532 .  |
| 211065_x_ | 1.22E-05 | 1.32E-06 | PFKL                        | 5211 .  |
| 211066_x_ | 5.33E-06 | 4.42E-07 | PCDHGA1 /// P 26025 /// 50. |         |
| 211068_x_ | 0.001263 | 4.44E-04 | FAM21C /// FA 253725 /// 6. |         |
| 211069_s_ | 6.58E-04 | 2.00E-04 | SUMO1                       | 7341 .  |
| 211071_s_ | 0.003218 | 0.001366 | MLLT11                      | 10962 . |
| 211072_x_ | 0.028973 | 0.018223 | TUBA1B                      | 10376 . |
| 211073_x_ | 0.010049 | 0.005277 | RPL3                        | 6122 .  |
| 211075_s_ | 1.08E-05 | 1.12E-06 | CD47                        | 961 .   |
| 211076_x_ | 0.009111 | 0.004701 | ATN1                        | 1822 .  |
| 211078_s_ | 4.80E-05 | 7.61E-06 | STK3                        | 6788 .  |
| 211079_s_ | 0.013028 | 0.007162 | DYRK1A                      | 1859 .  |
| 211080_s_ | 4.95E-04 | 1.40E-04 | NEK2                        | 4751 .  |
| 211081_s_ | 5.04E-04 | 1.44E-04 | MAP4K5                      | 11183 . |
| 211083_s_ | 0.009851 | 0.005156 | MAP3K13                     | 9175 .  |
| 211084_x_ | 0.040454 | 0.026831 | PRKD3                       | 23683 . |



|           |          |          |                               |             |
|-----------|----------|----------|-------------------------------|-------------|
| 211085_s_ | 3.13E-10 | 1.16E-12 | STK4                          | 6789 .      |
| 211087_x_ | 0.006874 | 0.003381 | MAPK14                        | 1432 .      |
| 211088_s_ | 0.026119 | 0.01615  | PLK4                          | 10733 .     |
| 211090_s_ | 0.0437   | 0.029363 | PRPF4B                        | 8899 .      |
| 211091_s_ | 0.011567 | 0.006223 | NF2                           | 4771 .      |
| 211096_at | 1.22E-08 | 1.34E-10 | PBX2                          | 5089 .      |
| 211100_x_ | 8.46E-04 | 2.73E-04 | LILRA2                        | 11027 .     |
| 211101_x_ | 5.79E-05 | 9.63E-06 | LILRA2                        | 11027 .     |
| 211102_s_ | 2.31E-04 | 5.48E-05 | LILRA2                        | 11027 .     |
| 211103_at | 1.75E-05 | 2.11E-06 | MYO7A                         | 4647 .      |
| 211104_s_ | 5.93E-04 | 1.76E-04 | MYO7A                         | 4647 .      |
| 211107_s_ | 5.90E-04 | 1.75E-04 | AURKC                         | 6795 .      |
| 211108_s_ | 0.028907 | 0.018177 | JAK3                          | 3718 .      |
| 211109_at | 1.51E-04 | 3.23E-05 | JAK3                          | 3718 .      |
| 211111_at | 1.00E-05 | 1.02E-06 | HGC6.3                        | 100128124 . |
| 211112_at | 0.044114 | 0.029688 | SLC12A4                       | 6560 .      |
| 211113_s_ | 0.043228 | 0.028988 | ABCG1                         | 9619 .      |
| 211114_x_ | 1.99E-06 | 1.24E-07 | SIP1                          | 8487 .      |
| 211115_x_ | 6.29E-07 | 2.66E-08 | SIP1                          | 8487 .      |
| 211116_at | 0.001097 | 3.74E-04 | SLC9A2                        | 6549 .      |
| 211117_x_ | 0.002694 | 0.001103 | ESR2                          | 2100 .      |
| 211118_x_ | 0.014149 | 0.007882 | ESR2                          | 2100 .      |
| 211120_x_ | 0.001361 | 4.86E-04 | ESR2                          | 2100 .      |
| 211121_s_ | 6.52E-06 | 5.75E-07 | DOK1                          | 1796 .      |
| 211122_s_ | 0.031314 | 0.019938 | CXCL11                        | 6373 .      |
| 211123_at | 1.19E-05 | 1.28E-06 | SLC5A5                        | 6528 .      |
| 211124_s_ | 5.48E-07 | 2.22E-08 | KITLG                         | 4254 .      |
| 211125_x_ | 1.75E-04 | 3.88E-05 | GRIN1                         | 2902 .      |
| 211126_s_ | 8.28E-06 | 7.88E-07 | CSRP2                         | 1466 .      |
| 211128_at | 0.046514 | 0.031565 | EDA                           | 1896 .      |
| 211130_x_ | 0.018131 | 0.010546 | EDA                           | 1896 .      |
| 211132_at | 7.45E-05 | 1.33E-05 | INTS3                         | 65123 .     |
| 211133_x_ | 7.00E-06 | 6.31E-07 | LILRA6 /// LILR 11025 /// 79: |             |
| 211135_x_ | 5.60E-07 | 2.29E-08 | LILRB3                        | 11025 .     |

|           |          |          |                             |          |
|-----------|----------|----------|-----------------------------|----------|
| 211136_s_ | 0.003404 | 0.001462 | CLPTM1                      | 1209 .   |
| 211141_s_ | 0.021352 | 0.012782 | CNOT3                       | 4849 .   |
| 211142_x_ | 8.97E-04 | 2.93E-04 | HLA-DOA                     | 3111 .   |
| 211144_x_ | 0.012935 | 0.007104 | TARP /// TRGC 445347 /// 65 |          |
| 211145_x_ | 1.68E-04 | 3.69E-05 | IFNA21                      | 3452 .   |
| 211146_at | 0.001508 | 5.49E-04 | HLA-C                       | 3107 .   |
| 211147_s_ | 0.001147 | 3.94E-04 | P2RX6                       | 9127 .   |
| 211148_s_ | 5.20E-08 | 9.49E-10 | ANGPT2                      | 285 .    |
| 211150_s_ | 0.017007 | 0.009781 | DLAT                        | 1737 .   |
| 211151_x_ | 7.82E-06 | 7.32E-07 | GH1                         | 2688 .   |
| 211152_s_ | 2.46E-06 | 1.63E-07 | HTRA2                       | 27429 .  |
| 211153_s_ | 7.55E-04 | 2.37E-04 | TNFSF11                     | 8600 .   |
| 211156_at | 0.00423  | 0.001895 | CDKN2A                      | 1029 .   |
| 211157_at | 0.004391 | 0.001983 | SEMA4F                      | 10505 .  |
| 211160_x_ | 0.006066 | 0.002915 | ACTN1                       | 87 .     |
| 211161_s_ | 0.016531 | 0.009469 | COL3A1                      | 1281 .   |
| 211162_x_ | 0.002007 | 7.75E-04 | SCD                         | 6319 .   |
| 211163_s_ | 1.09E-05 | 1.14E-06 | TNFRSF10C                   | 8794 .   |
| 211166_at | 0.004669 | 0.002136 | FAM153A                     | 285596 . |
| 211167_s_ | 3.10E-04 | 7.93E-05 | GCK                         | 2645 .   |
| 211168_s_ | 0.003972 | 0.001757 | UPF1                        | 5976 .   |
| 211170_s_ | 0.020219 | 0.011977 | PDE10A                      | 10846 .  |
| 211172_x_ | 0.002141 | 8.38E-04 | AKAP7                       | 9465 .   |
| 211176_s_ | 0.010467 | 0.005533 | PAX4                        | 5078 .   |
| 211178_s_ | 6.37E-04 | 1.92E-04 | PSTPIP1                     | 9051 .   |
| 211180_x_ | 0.001494 | 5.43E-04 | RUNX1                       | 861 .    |
| 211181_x_ | 0.004333 | 0.001951 | RUNX1                       | 861 .    |
| 211182_x_ | 5.38E-04 | 1.56E-04 | RUNX1                       | 861 .    |
| 211184_s_ | 8.29E-05 | 1.53E-05 | USH1C                       | 10083 .  |
| 211185_s_ | 2.86E-05 | 3.92E-06 | SF3B1                       | 23451 .  |
| 211188_at | 0.001292 | 4.56E-04 | CD84                        | 8832 .   |
| 211191_at | 5.31E-04 | 1.53E-04 | CD84                        | 8832 .   |
| 211193_at | 0.001823 | 6.90E-04 |                             | .        |
| 211195_s_ | 5.01E-04 | 1.43E-04 | TP63                        | 8626 .   |

|           |          |          |         |          |
|-----------|----------|----------|---------|----------|
| 211196_at | 0.015631 | 0.008871 | DBT     | 1629 .   |
| 211199_s_ | 0.020528 | 0.012196 | ICOSLG  | 23308 .  |
| 211201_at | 1.11E-05 | 1.17E-06 | FSHR    | 2492 .   |
| 211202_s_ | 1.73E-05 | 2.08E-06 | KDM5B   | 10765 .  |
| 211203_s_ | 3.93E-04 | 1.06E-04 | CNTN1   | 1272 .   |
| 211204_at | 1.60E-09 | 1.00E-11 | ME1     | 4199 .   |
| 211205_x_ | 0.003603 | 0.001564 | PIP5K1A | 8394 .   |
| 211209_x_ | 5.19E-06 | 4.26E-07 | SH2D1A  | 4068 .   |
| 211210_x_ | 4.41E-04 | 1.22E-04 | SH2D1A  | 4068 .   |
| 211211_x_ | 7.32E-06 | 6.71E-07 | SH2D1A  | 4068 .   |
| 211213_at | 0.038088 | 0.025029 | ORC5L   | 5001 .   |
| 211217_s_ | 7.70E-04 | 2.43E-04 | KCNQ1   | 3784 .   |
| 211219_s_ | 3.65E-04 | 9.65E-05 | LHX2    | 9355 .   |
| 211223_at | 3.86E-04 | 1.04E-04 | PROP1   | 5626 .   |
| 211224_s_ | 0.021541 | 0.012911 | ABCB11  | 8647 .   |
| 211225_at | 4.68E-05 | 7.37E-06 | FUT5    | 2527 .   |
| 211226_at | 1.02E-04 | 1.99E-05 | GALR2   | 8811 .   |
| 211228_s_ | 0.025829 | 0.015949 | RAD17   | 5884 .   |
| 211230_s_ | 7.93E-04 | 2.52E-04 | PIK3CD  | 5293 .   |
| 211231_x_ | 1.09E-04 | 2.15E-05 | CYP4A11 | 1579 .   |
| 211232_x_ | 7.69E-07 | 3.48E-08 | GLP1R   | 2740 .   |
| 211233_x_ | 9.21E-06 | 9.13E-07 | ESR1    | 2099 .   |
| 211234_x_ | 0.018429 | 0.01075  | ESR1    | 2099 .   |
| 211235_s_ | 0.027588 | 0.017208 | ESR1    | 2099 .   |
| 211237_s_ | 4.36E-04 | 1.20E-04 | FGFR4   | 2264 .   |
| 211240_x_ | 2.13E-07 | 6.30E-09 | CTNND1  | 1500 .   |
| 211241_at | 4.06E-04 | 1.10E-04 | ANXA2P3 | 305 .    |
| 211242_x_ | 0.008095 | 0.004099 | KIR2DL4 | 3805 .   |
| 211248_s_ | 4.36E-05 | 6.72E-06 | CHRD    | 8646 .   |
| 211250_s_ | 1.89E-05 | 2.32E-06 | SH3BP2  | 6452 .   |
| 211252_x_ | 1.35E-05 | 1.50E-06 | PTCRA   | 171558 . |
| 211254_x_ | 0.028289 | 0.017719 | RHAG    | 6005 .   |
| 211255_x_ | 0.0228   | 0.013793 | DEDD    | 9191 .   |
| 211256_x_ | 4.30E-04 | 1.18E-04 | BTN2A1  | 11120 .  |

|           |          |          |                             |          |
|-----------|----------|----------|-----------------------------|----------|
| 211257_x_ | 2.10E-06 | 1.33E-07 | ZNF638                      | 27332 .  |
| 211258_s_ | 0.009401 | 0.00488  | TGFA                        | 7039 .   |
| 211261_at | 8.77E-06 | 8.51E-07 | NUP214                      | 8021 .   |
| 211262_at | 0.029675 | 0.018737 | PCSK6                       | 5046 .   |
| 211263_s_ | 0.012656 | 0.006922 | PCSK6                       | 5046 .   |
| 211266_s_ | 2.61E-04 | 6.38E-05 | GPR4                        | 2828 .   |
| 211267_at | 8.56E-06 | 8.24E-07 | HESX1                       | 8820 .   |
| 211269_s_ | 6.61E-04 | 2.01E-04 | IL2RA                       | 3559 .   |
| 211270_x_ | 4.57E-05 | 7.15E-06 | PTBP1                       | 5725 .   |
| 211271_x_ | 3.73E-05 | 5.49E-06 | PTBP1                       | 5725 .   |
| 211272_s_ | 2.42E-07 | 7.57E-09 | DGKA                        | 1606 .   |
| 211273_s_ | 0.019305 | 0.011348 | TBX1                        | 6899 .   |
| 211274_at | 0.001733 | 6.48E-04 | TBX1                        | 6899 .   |
| 211275_s_ | 9.04E-04 | 2.96E-04 | GYG1                        | 2992 .   |
| 211276_at | 0.002315 | 9.21E-04 | TCEAL2                      | 140597 . |
| 211277_x_ | 0.018845 | 0.011033 | APP                         | 351 .    |
| 211279_at | 5.19E-04 | 1.49E-04 | NRF1                        | 4899 .   |
| 211284_s_ | 5.74E-06 | 4.89E-07 | GRN                         | 2896 .   |
| 211285_s_ | 8.36E-04 | 2.69E-04 | UBE3A                       | 7337 .   |
| 211286_x_ | 0.005941 | 0.002844 | CSF2RA                      | 1438 .   |
| 211289_x_ | 0.003864 | 0.001701 | CDC2L1 /// CD1728642 /// 98 |          |
| 211295_x_ | 5.21E-05 | 8.44E-06 | CYP2A6                      | 1548 .   |
| 211296_x_ | 1.44E-04 | 3.05E-05 | UBC                         | 7316 .   |
| 211299_s_ | 2.96E-04 | 7.48E-05 | FLOT2                       | 2319 .   |
| 211302_s_ | 4.61E-04 | 1.29E-04 | PDE4B                       | 5142 .   |
| 211304_x_ | 0.018924 | 0.011086 | KCNJ5                       | 3762 .   |
| 211306_s_ | 0.001171 | 4.05E-04 | FCAR                        | 2204 .   |
| 211310_at | 4.98E-04 | 1.41E-04 | EZH1                        | 2145 .   |
| 211312_s_ | 0.006088 | 0.002928 | WISP1                       | 8840 .   |
| 211313_s_ | 0.005336 | 0.002502 | BAZ1B                       | 9031 .   |
| 211314_at | 0.003961 | 0.001751 | CACNA1G                     | 8913 .   |
| 211315_s_ | 9.73E-04 | 3.23E-04 | CACNA1G                     | 8913 .   |
| 211316_x_ | 2.37E-04 | 5.65E-05 | CFLAR                       | 8837 .   |
| 211317_s_ | 6.36E-07 | 2.70E-08 | CFLAR                       | 8837 .   |

|           |          |          |           |          |
|-----------|----------|----------|-----------|----------|
| 211318_s_ | 1.74E-06 | 1.04E-07 | RAE1      | 8480 .   |
| 211319_at | 0.008423 | 0.004292 | RAE1      | 8480 .   |
| 211320_s_ | 0.00174  | 6.52E-04 | PTPRU     | 10076 .  |
| 211322_s_ | 0.002804 | 0.001158 | SARDH     | 1757 .   |
| 211323_s_ | 0.020146 | 0.011927 | ITPR1     | 3708 .   |
| 211325_x_ | 0.004364 | 0.001968 | LOC171220 | 171220 . |
| 211326_x_ | 1.06E-05 | 1.10E-06 | HFE       | 3077 .   |
| 211327_x_ | 2.29E-05 | 2.95E-06 | HFE       | 3077 .   |
| 211328_x_ | 1.15E-05 | 1.21E-06 | HFE       | 3077 .   |
| 211329_x_ | 1.97E-04 | 4.50E-05 | HFE       | 3077 .   |
| 211330_s_ | 1.74E-06 | 1.05E-07 | HFE       | 3077 .   |
| 211331_x_ | 3.90E-04 | 1.05E-04 | HFE       | 3077 .   |
| 211332_x_ | 2.68E-04 | 6.62E-05 | HFE       | 3077 .   |
| 211336_x_ | 1.28E-05 | 1.41E-06 | LILRB1    | 10859 .  |
| 211337_s_ | 5.90E-05 | 9.85E-06 | TUBGCP4   | 27229 .  |
| 211338_at | 4.96E-05 | 7.93E-06 | IFNA2     | 3440 .   |
| 211339_s_ | 0.006776 | 0.003323 | ITK       | 3702 .   |
| 211340_s_ | 3.27E-04 | 8.48E-05 | MCAM      | 4162 .   |
| 211345_x_ | 0.01713  | 0.009865 | EEF1G     | 1937 .   |
| 211347_at | 0.007703 | 0.003868 | CDC14B    | 8555 .   |
| 211348_s_ | 0.001836 | 6.96E-04 | CDC14B    | 8555 .   |
| 211350_s_ | 0.001317 | 4.67E-04 | C6orf54   | 26236 .  |
| 211351_at | 0.00451  | 0.002048 | C6orf54   | 26236 .  |
| 211353_at | 0.015934 | 0.009074 | LRIT1     | 26103 .  |
| 211354_s_ | 3.26E-06 | 2.35E-07 | LEPR      | 3953 .   |
| 211355_x_ | 8.72E-06 | 8.45E-07 | LEPR      | 3953 .   |
| 211356_x_ | 7.58E-06 | 7.02E-07 | LEPR      | 3953 .   |
| 211359_s_ | 0.028784 | 0.01809  | OPRM1     | 4988 .   |
| 211360_s_ | 4.18E-04 | 1.14E-04 | ITPR2     | 3709 .   |
| 211362_s_ | 0.004367 | 0.00197  | SERPINB13 | 5275 .   |
| 211365_s_ | 0.004671 | 0.002138 | PCDHA2    | 56146 .  |
| 211366_x_ | 0.001752 | 6.57E-04 | CASP1     | 834 .    |
| 211367_s_ | 3.13E-04 | 8.01E-05 | CASP1     | 834 .    |
| 211368_s_ | 4.07E-04 | 1.11E-04 | CASP1     | 834 .    |

|           |          |          |          |         |
|-----------|----------|----------|----------|---------|
| 211370_s_ | 0.002384 | 9.53E-04 | MAP2K5   | 5607 .  |
| 211372_s_ | 0.007616 | 0.003817 | IL1R2    | 7850 .  |
| 211374_x_ | 9.81E-06 | 9.92E-07 |          | .       |
| 211375_s_ | 1.12E-04 | 2.22E-05 | ILF3     | 3609 .  |
| 211376_s_ | 2.55E-04 | 6.20E-05 | NSMCE4A  | 54780 . |
| 211377_x_ | 7.67E-04 | 2.42E-04 | MYCN     | 4613 .  |
| 211380_s_ | 0.002159 | 8.47E-04 | PRKG1    | 5592 .  |
| 211381_x_ | 8.07E-04 | 2.57E-04 | SPAG11B  | 10407 . |
| 211383_s_ | 0.001121 | 3.84E-04 | WDR37    | 22884 . |
| 211385_x_ | 0.009027 | 0.004651 | SULT1A2  | 6799 .  |
| 211386_at | 2.94E-06 | 2.05E-07 | MGC12488 | 84786 . |
| 211387_x_ | 0.007337 | 0.003653 | RNGTT    | 8732 .  |
| 211388_s_ | 0.001712 | 6.39E-04 |          | .       |
| 211390_at | 0.035826 | 0.023309 | N4BP2L1  | 90634 . |
| 211391_s_ | 1.37E-05 | 1.53E-06 | PATZ1    | 23598 . |
| 211392_s_ | 0.006285 | 0.003039 | PATZ1    | 23598 . |
| 211393_at | 8.79E-04 | 2.86E-04 | PATZ1    | 23598 . |
| 211395_x_ | 0.001875 | 7.14E-04 | FCGR2C   | 9103 .  |
| 211396_at | 1.04E-04 | 2.02E-05 | FCGR2C   | 9103 .  |
| 211397_x_ | 0.004968 | 0.002297 | KIR2DL2  | 3803 .  |
| 211398_at | 1.76E-05 | 2.12E-06 | FGFR2    | 2263 .  |
| 211399_at | 1.62E-04 | 3.53E-05 | FGFR2    | 2263 .  |
| 211400_at | 0.001364 | 4.87E-04 | FGFR2    | 2263 .  |
| 211401_s_ | 1.28E-06 | 6.91E-08 | FGFR2    | 2263 .  |
| 211402_x_ | 1.94E-08 | 2.52E-10 | NR6A1    | 2649 .  |
| 211403_x_ | 0.046977 | 0.031934 | VCX2     | 51480 . |
| 211404_s_ | 0.001956 | 7.51E-04 | APLP2    | 334 .   |
| 211405_x_ | 3.09E-04 | 7.88E-05 | IFNA17   | 3451 .  |
| 211406_at | 9.06E-04 | 2.97E-04 | IER3IP1  | 51124 . |
| 211407_at | 0.018772 | 0.010983 | NDUFB7   | 4713 .  |
| 211410_x_ | 0.024568 | 0.015044 | KIR2DL5A | 57292 . |
| 211413_s_ | 0.02633  | 0.016301 | PADI4    | 23569 . |
| 211414_at | 2.36E-04 | 5.61E-05 | GLS      | 2744 .  |
| 211416_x_ | 9.88E-05 | 1.90E-05 | GGTLC1   | 92086 . |

|           |          |          |                               |          |
|-----------|----------|----------|-------------------------------|----------|
| 211417_x_ | 8.30E-09 | 8.33E-11 | GGT1                          | 2678 .   |
| 211419_s_ | 0.039755 | 0.026295 | CHN2                          | 1124 .   |
| 211422_at | 0.011562 | 0.006219 | TRPM3                         | 80036 .  |
| 211423_s_ | 0.00138  | 4.94E-04 | SC5DL                         | 6309 .   |
| 211425_x_ | 0.008936 | 0.004597 | SSX4 /// SSX4B 548313 /// 67. |          |
| 211426_x_ | 1.96E-07 | 5.59E-09 | GNAQ                          | 2776 .   |
| 211427_s_ | 8.97E-05 | 1.68E-05 | KCNJ13                        | 3769 .   |
| 211429_s_ | 0.031423 | 0.020022 | SERPINA1                      | 5265 .   |
| 211430_s_ | 1.21E-05 | 1.30E-06 | IGH@ /// IGHG28396 /// 349.   |          |
| 211431_s_ | 2.01E-06 | 1.26E-07 | TYRO3                         | 7301 .   |
| 211432_s_ | 1.23E-05 | 1.34E-06 | TYRO3                         | 7301 .   |
| 211433_x_ | 5.22E-07 | 2.08E-08 | KIAA1539                      | 80256 .  |
| 211434_s_ | 0.014821 | 0.008332 | CCRL2                         | 9034 .   |
| 211436_at | 8.15E-04 | 2.60E-04 | LOC100131298 100131298 .      |          |
| 211438_at | 1.55E-04 | 3.35E-05 | TRHR                          | 7201 .   |
| 211439_at | 0.013139 | 0.007233 | SFRS7                         | 6432 .   |
| 211440_x_ | 0.001075 | 3.64E-04 | CYP3A43                       | 64816 .  |
| 211442_x_ | 0.032105 | 0.020532 | CYP3A43                       | 64816 .  |
| 211445_x_ | 0.001479 | 5.37E-04 | NACAP1                        | 83955 .  |
| 211447_s_ | 0.038036 | 0.024985 | PDE4A                         | 5141 .   |
| 211448_s_ | 0.001928 | 7.39E-04 | RGS6                          | 9628 .   |
| 211450_s_ | 3.05E-05 | 4.27E-06 | MSH6                          | 2956 .   |
| 211451_s_ | 0.021002 | 0.012537 | KCNJ4                         | 3761 .   |
| 211452_x_ | 5.41E-06 | 4.51E-07 | LRRFIP1                       | 9208 .   |
| 211453_s_ | 0.013944 | 0.007748 | AKT2                          | 208 .    |
| 211454_x_ | 2.89E-04 | 7.25E-05 | FKSG49                        | 400949 . |
| 211457_at | 0.034573 | 0.022361 | GABARAPL3                     | 23766 .  |
| 211458_s_ | 0.008605 | 0.004398 | GABARAPL1 //,23710 /// 237.   |          |
| 211461_at | 3.28E-05 | 4.68E-06 | CSPG4LYP1 /// 114758 /// 84.  |          |
| 211462_s_ | 6.16E-04 | 1.84E-04 | TBL1Y                         | 90665 .  |
| 211465_x_ | 7.72E-08 | 1.62E-09 | FUT6                          | 2528 .   |
| 211466_at | 6.35E-04 | 1.91E-04 | NFIB                          | 4781 .   |
| 211468_s_ | 0.005842 | 0.002788 | RECQL5                        | 9400 .   |
| 211469_s_ | 0.017939 | 0.010414 | CXCR6                         | 10663 .  |

|           |          |          |          |         |
|-----------|----------|----------|----------|---------|
| 211470_s_ | 0.004072 | 0.00181  | SULT1C2  | 6819 .  |
| 211473_s_ | 6.35E-07 | 2.69E-08 | COL4A6   | 1288 .  |
| 211474_s_ | 0.028815 | 0.018113 | SERPINB6 | 5269 .  |
| 211475_s_ | 2.31E-06 | 1.51E-07 | BAG1     | 573 .   |
| 211478_s_ | 3.84E-09 | 3.04E-11 | DPP4     | 1803 .  |
| 211480_s_ | 0.020708 | 0.012329 | SLCO1A2  | 6579 .  |
| 211484_s_ | 3.60E-05 | 5.24E-06 | DSCAM    | 1826 .  |
| 211486_s_ | 1.32E-05 | 1.47E-06 | KCNQ2    | 3785 .  |
| 211487_x_ | 2.43E-04 | 5.85E-05 | RPS17    | 6218 .  |
| 211488_s_ | 0.020129 | 0.011915 | ITGB8    | 3696 .  |
| 211490_at | 0.007271 | 0.003615 | ADRA1A   | 148 .   |
| 211491_at | 0.008533 | 0.004356 | ADRA1A   | 148 .   |
| 211492_s_ | 0.003031 | 0.001271 | ADRA1A   | 148 .   |
| 211493_x_ | 7.61E-06 | 7.06E-07 | DTNA     | 1837 .  |
| 211494_s_ | 0.002683 | 0.001098 | SLC4A4   | 8671 .  |
| 211497_x_ | 4.97E-04 | 1.41E-04 | NKX3-1   | 4824 .  |
| 211498_s_ | 1.99E-05 | 2.48E-06 | NKX3-1   | 4824 .  |
| 211499_s_ | 0.001459 | 5.28E-04 | MAPK11   | 5600 .  |
| 211501_s_ | 3.91E-06 | 2.97E-07 | EIF3B    | 8662 .  |
| 211503_s_ | 4.76E-05 | 7.53E-06 | RAB14    | 51552 . |
| 211504_x_ | 3.22E-06 | 2.31E-07 | ROCK2    | 9475 .  |
| 211507_s_ | 0.006793 | 0.003334 | MTMR3    | 8897 .  |
| 211508_s_ | 0.007278 | 0.00362  | GH2      | 2689 .  |
| 211509_s_ | 9.06E-04 | 2.96E-04 | RTN4     | 57142 . |
| 211510_s_ | 0.035302 | 0.022906 | CRHR2    | 1395 .  |
| 211512_s_ | 0.014788 | 0.00831  | OGFR     | 11054 . |
| 211514_at | 0.002248 | 8.89E-04 | DSTYK    | 25778 . |
| 211515_s_ | 7.90E-05 | 1.44E-05 | DSTYK    | 25778 . |
| 211516_at | 0.017885 | 0.010378 | IL5RA    | 3568 .  |
| 211517_s_ | 0.046772 | 0.031775 | IL5RA    | 3568 .  |
| 211518_s_ | 0.034328 | 0.022176 | BMP4     | 652 .   |
| 211519_s_ | 3.54E-05 | 5.12E-06 | KIF2C    | 11004 . |
| 211520_s_ | 3.47E-05 | 5.01E-06 | GRIA1    | 2890 .  |
| 211526_s_ | 0.019032 | 0.01116  | RTEL1    | 51750 . |



|           |          |          |                              |         |
|-----------|----------|----------|------------------------------|---------|
| 211527_x_ | 0.025652 | 0.015821 | VEGFA                        | 7422 .  |
| 211528_x_ | 1.92E-04 | 4.36E-05 | HLA-G                        | 3135 .  |
| 211529_x_ | 4.10E-05 | 6.19E-06 | HLA-G                        | 3135 .  |
| 211530_x_ | 2.30E-04 | 5.46E-05 | HLA-G                        | 3135 .  |
| 211531_x_ | 1.13E-07 | 2.68E-09 | PRB1                         | 5542 .  |
| 211532_x_ | 0.001019 | 3.42E-04 | KIR2DS1 /// KIF100132285 //. |         |
| 211535_s_ | 0.002269 | 8.99E-04 | FGFR1                        | 2260 .  |
| 211536_x_ | 0.014487 | 0.008106 | MAP3K7                       | 6885 .  |
| 211538_s_ | 0.007177 | 0.00356  | HSPA2                        | 3306 .  |
| 211540_s_ | 4.26E-04 | 1.17E-04 | RB1                          | 5925 .  |
| 211541_s_ | 2.71E-05 | 3.66E-06 | DYRK1A                       | 1859 .  |
| 211542_x_ | 0.001022 | 3.43E-04 | RPS10                        | 6204 .  |
| 211545_at | 0.009464 | 0.004919 | GHRHR                        | 2692 .  |
| 211546_x_ | 0.012421 | 0.00677  | SNCA                         | 6622 .  |
| 211547_s_ | 4.35E-05 | 6.69E-06 | PAFAH1B1                     | 5048 .  |
| 211548_s_ | 5.91E-05 | 9.87E-06 | HPGD                         | 3248 .  |
| 211549_s_ | 4.11E-05 | 6.22E-06 | HPGD                         | 3248 .  |
| 211551_at | 0.025384 | 0.015638 | EGFR                         | 1956 .  |
| 211552_s_ | 2.07E-05 | 2.61E-06 | ALDH4A1                      | 8659 .  |
| 211553_x_ | 8.92E-04 | 2.91E-04 | APAF1                        | 317 .   |
| 211554_s_ | 0.0017   | 6.34E-04 | APAF1                        | 317 .   |
| 211555_s_ | 2.31E-05 | 3.00E-06 | GUCY1B3                      | 2983 .  |
| 211556_at | 0.010703 | 0.005682 | MAPRE2                       | 10982 . |
| 211557_x_ | 8.65E-05 | 1.61E-05 | SLCO2B1                      | 11309 . |
| 211559_s_ | 6.43E-05 | 1.10E-05 | CCNG2                        | 901 .   |
| 211561_x_ | 0.010123 | 0.00532  | MAPK14                       | 1432 .  |
| 211562_s_ | 7.16E-07 | 3.18E-08 | LMOD1                        | 25802 . |
| 211563_s_ | 0.02412  | 0.014722 | C19orf2                      | 8725 .  |
| 211564_s_ | 0.001636 | 6.05E-04 | PDLIM4                       | 8572 .  |
| 211571_s_ | 1.66E-04 | 3.63E-05 | VCAN                         | 1462 .  |
| 211572_s_ | 0.026816 | 0.016663 | SLC23A2                      | 9962 .  |
| 211573_x_ | 0.014796 | 0.008316 | TGM2                         | 7052 .  |
| 211574_s_ | 1.13E-05 | 1.19E-06 | CD46                         | 4179 .  |
| 211575_s_ | 0.012214 | 0.006636 | UBE3A                        | 7337 .  |

|           |          |          |                               |          |
|-----------|----------|----------|-------------------------------|----------|
| 211576_s_ | 2.77E-04 | 6.89E-05 | SLC19A1                       | 6573 .   |
| 211577_s_ | 0.00101  | 3.38E-04 | IGF1                          | 3479 .   |
| 211578_s_ | 0.006805 | 0.003342 | RPS6KB1                       | 6198 .   |
| 211579_at | 9.90E-04 | 3.30E-04 | ITGB3                         | 3690 .   |
| 211581_x_ | 0.018677 | 0.010919 | LST1                          | 7940 .   |
| 211583_x_ | 0.047846 | 0.032609 | NCR3                          | 259197 . |
| 211584_s_ | 2.53E-05 | 3.36E-06 | NPAT                          | 4863 .   |
| 211586_s_ | 4.17E-05 | 6.35E-06 | ATP2B2 /// LOC100134286 //.   |          |
| 211587_x_ | 7.30E-06 | 6.69E-07 | CHRNA3                        | 1136 .   |
| 211588_s_ | 3.07E-05 | 4.30E-06 | LOC652346 /// 5371 /// 652346 |          |
| 211589_at | 0.002786 | 0.001149 | PML                           | 5371 .   |
| 211590_x_ | 0.00118  | 4.08E-04 | TBXA2R                        | 6915 .   |
| 211591_s_ | 2.00E-05 | 2.50E-06 | PDE4A                         | 5141 .   |
| 211592_s_ | 6.83E-08 | 1.36E-09 | CACNA1C                       | 775 .    |
| 211593_s_ | 0.02113  | 0.012629 | MAST2                         | 23139 .  |
| 211594_s_ | 2.78E-04 | 6.92E-05 | MRPL9                         | 65005 .  |
| 211595_s_ | 1.30E-04 | 2.67E-05 | MRPS11                        | 64963 .  |
| 211598_x_ | 8.72E-04 | 2.83E-04 | VIPR2                         | 7434 .   |
| 211599_x_ | 2.02E-04 | 4.64E-05 | MET                           | 4233 .   |
| 211600_at | 0.004375 | 0.001975 | PTPRO                         | 5800 .   |
| 211602_s_ | 0.006898 | 0.003397 | TRPC1                         | 7220 .   |
| 211603_s_ | 1.28E-04 | 2.61E-05 | ETV4                          | 2118 .   |
| 211605_s_ | 0.005721 | 0.002716 | RARA                          | 5914 .   |
| 211607_x_ | 5.98E-06 | 5.16E-07 | EGFR                          | 1956 .   |
| 211608_at | 0.009295 | 0.004816 | TRBV10-2                      | 28584 .  |
| 211609_x_ | 2.36E-05 | 3.08E-06 | PSMD4                         | 5710 .   |
| 211610_at | 0.008682 | 0.004443 | KLF6                          | 1316 .   |
| 211611_s_ | 3.08E-04 | 7.87E-05 | ATF6B /// TNXI1388 /// 7148   |          |
| 211612_s_ | 1.16E-07 | 2.79E-09 | IL13RA1                       | 3597 .   |
| 211613_s_ | 2.79E-04 | 6.96E-05 | GPD2                          | 2820 .   |
| 211614_at | 0.012089 | 0.006557 |                               | .        |
| 211615_s_ | 4.12E-06 | 3.18E-07 | LRPPRC                        | 10128 .  |
| 211616_s_ | 0.021847 | 0.013132 | HTR2A                         | 3356 .   |
| 211617_at | 5.87E-04 | 1.73E-04 | ALDOAP2                       | 228 .    |

|           |          |          |                            |         |
|-----------|----------|----------|----------------------------|---------|
| 211618_s_ | 1.27E-04 | 2.61E-05 | ALPI                       | 248 .   |
| 211619_s_ | 0.010018 | 0.005258 | ALPP /// ALPPL250 ///      | 251 .   |
| 211621_at | 0.008793 | 0.004509 | AR                         | 367 .   |
| 211622_s_ | 9.33E-04 | 3.07E-04 | ARF3                       | 377 .   |
| 211623_s_ | 1.67E-06 | 9.86E-08 | FBL                        | 2091 .  |
| 211624_s_ | 0.011398 | 0.006117 | DRD2                       | 1813 .  |
| 211625_s_ | 0.017214 | 0.009921 | DRD3                       | 1814 .  |
| 211628_x_ | 2.33E-05 | 3.03E-06 | FTHP1                      | 2509 .  |
| 211630_s_ | 0.003864 | 0.001701 | GSS                        | 2937 .  |
| 211631_x_ | 2.80E-05 | 3.82E-06 | B4GALT1                    | 2683 .  |
| 211632_at | 0.002374 | 9.48E-04 | IGHD /// IGHM3495 ///      | 3507 .  |
| 211633_x_ | 0.002177 | 8.56E-04 | IGHG1                      | 3500 .  |
| 211634_x_ | 0.008702 | 0.004457 | IGHM /// LOC1100133862 //  | .       |
| 211635_x_ | 0.002008 | 7.76E-04 | IGH@ /// IGHA28378 ///     | 2837 .  |
| 211637_x_ | 3.39E-04 | 8.85E-05 | IGH@ /// IGHA100126583 //  | .       |
| 211638_at | 9.23E-04 | 3.03E-04 | IGH@ /// IGHA100126583 //  | .       |
| 211639_x_ | 6.92E-05 | 1.21E-05 | IGH@ /// IGHA100126583 //  | .       |
| 211641_x_ | 4.07E-04 | 1.11E-04 | IGH@ /// IGHA28396 ///     | 2839 .  |
| 211642_at | 0.018663 | 0.010908 | C12orf32 /// IC3500 ///    | 8365 .  |
| 211643_x_ | 0.005662 | 0.002684 | IGK@ /// IGKV:28875 ///    | 2887 .  |
| 211644_x_ | 9.05E-05 | 1.70E-05 | IGK@ /// IGKC 28875 ///    | 2887 .  |
| 211647_x_ | 0.031999 | 0.020451 | IGHA1 /// IGHG100133862 // | .       |
| 211649_x_ | 0.002551 | 0.001035 | IGH@ /// IGHA3492 ///      | 3492 .  |
| 211650_x_ | 0.00743  | 0.003709 | IGHA1 /// IGHG100126583 // | .       |
| 211653_x_ | 1.21E-05 | 1.30E-06 | AKR1C2                     | 1646 .  |
| 211658_at | 0.005476 | 0.002581 | PRDX2                      | 7001 .  |
| 211659_at | 1.39E-04 | 2.92E-05 | GPR135                     | 64582 . |
| 211660_at | 0.006398 | 0.003104 | POU2F2                     | 5452 .  |
| 211661_x_ | 2.00E-06 | 1.25E-07 | PTAFR                      | 5724 .  |
| 211662_s_ | 1.17E-04 | 2.34E-05 | VDAC2                      | 7417 .  |
| 211663_x_ | 3.68E-06 | 2.74E-07 | PTGDS                      | 5730 .  |
| 211665_s_ | 7.35E-04 | 2.29E-04 | SOS2                       | 6655 .  |
| 211666_x_ | 0.010799 | 0.005744 | RPL3                       | 6122 .  |
| 211667_x_ | 0.001229 | 4.29E-04 |                            | .       |

|           |          |          |                              |         |
|-----------|----------|----------|------------------------------|---------|
| 211668_s_ | 0.048838 | 0.033405 | PLAU                         | 5328 .  |
| 211671_s_ | 8.09E-04 | 2.58E-04 | NR3C1                        | 2908 .  |
| 211675_s_ | 9.32E-04 | 3.07E-04 | MDFIC                        | 29969 . |
| 211676_s_ | 0.004528 | 0.002058 | IFNGR1                       | 3459 .  |
| 211677_x_ | 2.97E-10 | 1.07E-12 | CADM3                        | 57863 . |
| 211678_s_ | 2.01E-05 | 2.51E-06 | RNF114                       | 55905 . |
| 211679_x_ | 0.031795 | 0.020292 | GABBR2                       | 9568 .  |
| 211680_at | 0.010258 | 0.005406 | PDLIM5                       | 10611 . |
| 211681_s_ | 8.43E-07 | 3.95E-08 | PDLIM5                       | 10611 . |
| 211682_x_ | 1.01E-04 | 1.96E-05 | UGT2B28                      | 54490 . |
| 211686_s_ | 9.37E-04 | 3.09E-04 | MAK16                        | 84549 . |
| 211687_x_ | 0.020156 | 0.011934 | KIR3DL1                      | 3811 .  |
| 211688_x_ | 1.18E-04 | 2.37E-05 | KIR3DL2 /// LO3812 /// 7271  | . .     |
| 211689_s_ | 1.43E-05 | 1.63E-06 | TMPRSS2                      | 7113 .  |
| 211692_s_ | 5.72E-06 | 4.86E-07 | BBC3                         | 27113 . |
| 211693_at | 1.67E-06 | 9.94E-08 | IGHG1                        | 3500 .  |
| 211694_at | 0.002396 | 9.60E-04 | TSSK1B                       | 83942 . |
| 211698_at | 0.009538 | 0.004963 | EID1                         | 23741 . |
| 211699_x_ | 0.001243 | 4.35E-04 | HBA1 /// HBA23039 /// 3040   | . .     |
| 211700_s_ | 0.021737 | 0.013052 | TRO                          | 7216 .  |
| 211701_s_ | 0.006623 | 0.003234 | TRO                          | 7216 .  |
| 211703_s_ | 0.01649  | 0.009441 | TM2D1                        | 83941 . |
| 211704_s_ | 3.65E-05 | 5.33E-06 | SPIN2A /// SPII474343 /// 54 | . .     |
| 211705_s_ | 4.15E-05 | 6.29E-06 | SORBS1                       | 10580 . |
| 211706_s_ | 0.034683 | 0.022439 | CDC2L6                       | 23097 . |
| 211707_s_ | 2.93E-05 | 4.06E-06 | IQCB1                        | 9657 .  |
| 211708_s_ | 0.002842 | 0.001176 | SCD                          | 6319 .  |
| 211709_s_ | 9.87E-04 | 3.28E-04 | CLEC11A                      | 6320 .  |
| 211711_s_ | 3.46E-04 | 9.07E-05 | PTEN                         | 5728 .  |
| 211712_s_ | 0.002343 | 9.34E-04 | ANXA9                        | 8416 .  |
| 211713_x_ | 6.38E-04 | 1.92E-04 | KIAA0101                     | 9768 .  |
| 211715_s_ | 8.63E-04 | 2.79E-04 | BDH1                         | 622 .   |
| 211716_x_ | 0.004759 | 0.002185 | ARHGDI1                      | 396 .   |
| 211717_at | 0.010506 | 0.005557 | ANKRD40                      | 91369 . |

|           |          |          |                             |          |
|-----------|----------|----------|-----------------------------|----------|
| 211719_x_ | 1.11E-04 | 2.20E-05 | FN1                         | 2335 .   |
| 211721_s_ | 9.16E-05 | 1.73E-05 | ZNF551                      | 90233 .  |
| 211722_s_ | 0.026813 | 0.016661 | HDAC6                       | 10013 .  |
| 211724_x_ | 1.28E-04 | 2.62E-05 | MIOS                        | 54468 .  |
| 211725_s_ | 6.69E-05 | 1.16E-05 | BID                         | 637 .    |
| 211727_s_ | 0.00287  | 0.00119  | COX11                       | 1353 .   |
| 211729_x_ | 0.002283 | 9.06E-04 | BLVRA                       | 644 .    |
| 211730_s_ | 4.84E-04 | 1.37E-04 | POLR2L                      | 5441 .   |
| 211732_x_ | 0.002109 | 8.23E-04 | HNMT                        | 3176 .   |
| 211733_x_ | 0.00849  | 0.004331 | SCP2                        | 6342 .   |
| 211735_x_ | 0.013452 | 0.007432 | SFTPC                       | 6440 .   |
| 211738_x_ | 0.0012   | 4.17E-04 | CELA3A                      | 10136 .  |
| 211739_x_ | 0.02311  | 0.014005 | CSH1                        | 1442 .   |
| 211741_x_ | 2.83E-06 | 1.95E-07 | PSG3                        | 5671 .   |
| 211743_s_ | 0.005918 | 0.002831 | PRG2                        | 5553 .   |
| 211744_s_ | 9.25E-06 | 9.19E-07 | CD58                        | 965 .    |
| 211745_x_ | 5.68E-04 | 1.66E-04 | HBA1 /// HBA2 3039 /// 3040 |          |
| 211746_x_ | 0.009423 | 0.004894 | PSMA1                       | 5682 .   |
| 211747_s_ | 5.98E-06 | 5.16E-07 | LSM5                        | 23658 .  |
| 211748_x_ | 2.75E-06 | 1.87E-07 | PTGDS                       | 5730 .   |
| 211749_s_ | 6.83E-08 | 1.36E-09 | VAMP3                       | 9341 .   |
| 211752_s_ | 5.10E-04 | 1.45E-04 | NDUFS7                      | 374291 . |
| 211753_s_ | 0.005171 | 0.002412 | RLN1                        | 6013 .   |
| 211754_s_ | 0.00144  | 5.19E-04 | SLC25A17                    | 10478 .  |
| 211755_s_ | 6.04E-05 | 1.02E-05 | ATP5F1                      | 515 .    |
| 211758_x_ | 0.003255 | 0.001384 | TXNDC9                      | 10190 .  |
| 211760_s_ | 2.71E-06 | 1.84E-07 | VAMP4                       | 8674 .   |
| 211761_s_ | 9.12E-07 | 4.40E-08 | CACYBP                      | 27101 .  |
| 211762_s_ | 1.01E-04 | 1.95E-05 | KPNA2                       | 3838 .   |
| 211763_s_ | 3.93E-04 | 1.06E-04 | UBE2B                       | 7320 .   |
| 211764_s_ | 0.045318 | 0.03063  | UBE2D1                      | 7321 .   |
| 211767_at | 0.001093 | 3.72E-04 | GINS4                       | 84296 .  |
| 211769_x_ | 0.006624 | 0.003235 | SERINC3                     | 10955 .  |
| 211771_s_ | 0.002869 | 0.001189 | POU2F2                      | 5452 .   |

|           |          |          |                               |         |
|-----------|----------|----------|-------------------------------|---------|
| 211772_x_ | 4.40E-04 | 1.22E-04 | CHRNA3                        | 1136 .  |
| 211776_s_ | 0.006763 | 0.003316 | EPB41L3                       | 23136 . |
| 211778_s_ | 1.16E-08 | 1.27E-10 | OVOL2                         | 58495 . |
| 211780_x_ | 2.27E-04 | 5.36E-05 | DCTN1                         | 1639 .  |
| 211781_x_ | 7.76E-12 | 9.02E-15 |                               | .       |
| 211782_at | 0.003992 | 0.001768 | IDS                           | 3423 .  |
| 211783_s_ | 0.0462   | 0.031321 | MTA1                          | 9112 .  |
| 211784_s_ | 1.09E-06 | 5.54E-08 | SFRS1                         | 6426 .  |
| 211787_s_ | 0.005771 | 0.002746 | EIF4A1                        | 1973 .  |
| 211788_s_ | 3.78E-04 | 1.01E-04 | TREX2                         | 11219 . |
| 211792_s_ | 0.02902  | 0.01826  | CDKN2C                        | 1031 .  |
| 211793_s_ | 0.009441 | 0.004904 | ABI2                          | 10152 . |
| 211794_at | 0.005518 | 0.002606 | FYB                           | 2533 .  |
| 211796_s_ | 0.019783 | 0.011674 | TRBC1 /// TRBC28638 /// 28638 | 28638 . |
| 211798_x_ | 2.86E-05 | 3.92E-06 | IGLJ3                         | 28831 . |
| 211799_x_ | 4.83E-04 | 1.36E-04 | HLA-C                         | 3107 .  |
| 211800_s_ | 2.92E-04 | 7.33E-05 | USP4                          | 7375 .  |
| 211801_x_ | 0.005179 | 0.002416 | MFN1                          | 55669 . |
| 211802_x_ | 7.70E-04 | 2.43E-04 | CACNA1G                       | 8913 .  |
| 211805_s_ | 3.26E-04 | 8.44E-05 | SLC8A1                        | 6546 .  |
| 211807_x_ | 0.011834 | 0.006389 | PCDHGB5                       | 56101 . |
| 211808_s_ | 0.00908  | 0.004682 | CREBBP                        | 1387 .  |
| 211810_s_ | 7.11E-05 | 1.25E-05 | GALC                          | 2581 .  |
| 211813_x_ | 5.45E-10 | 2.42E-12 | DCN                           | 1634 .  |
| 211815_s_ | 0.00557  | 0.002635 | GGA3                          | 23163 . |
| 211816_x_ | 0.002635 | 0.001076 | FCAR                          | 2204 .  |
| 211817_s_ | 5.73E-04 | 1.68E-04 | KCNJ5                         | 3762 .  |
| 211818_s_ | 0.002615 | 0.001066 | PDE4C                         | 5143 .  |
| 211819_s_ | 2.66E-04 | 6.54E-05 | SORBS1                        | 10580 . |
| 211820_x_ | 7.29E-05 | 1.30E-05 | GYPA                          | 2993 .  |
| 211821_x_ | 6.49E-06 | 5.71E-07 | GYPA                          | 2993 .  |
| 211822_s_ | 0.04718  | 0.032098 | NLRP1                         | 22861 . |
| 211823_s_ | 0.016781 | 0.009636 | PXN                           | 5829 .  |
| 211824_x_ | 0.010746 | 0.00571  | NLRP1                         | 22861 . |

|           |          |          |                             |          |
|-----------|----------|----------|-----------------------------|----------|
| 211825_s_ | 0.003155 | 0.001333 | EWSR1 /// FLI12130 /// 2315 | .        |
| 211828_s_ | 0.013913 | 0.007729 | TNIK                        | 23043 .  |
| 211829_s_ | 5.27E-05 | 8.54E-06 | GPGR                        | 2852 .   |
| 211830_s_ | 5.82E-04 | 1.72E-04 | CACNA1I                     | 8911 .   |
| 211831_s_ | 9.76E-04 | 3.24E-04 | THPO                        | 7066 .   |
| 211832_s_ | 0.032622 | 0.02091  | MDM2                        | 4193 .   |
| 211835_at | 0.002107 | 8.22E-04 | IGH@ /// IGHA100126583 //   | .        |
| 211837_s_ | 3.28E-07 | 1.15E-08 | PTCRA                       | 171558 . |
| 211838_x_ | 0.002254 | 8.92E-04 | PCDHA5                      | 56143 .  |
| 211839_s_ | 0.010432 | 0.005512 | CSF1                        | 1435 .   |
| 211840_s_ | 0.018876 | 0.011053 | PDE4D                       | 5144 .   |
| 211841_s_ | 0.04396  | 0.029569 | TNFRSF25                    | 8718 .   |
| 211842_s_ | 0.043939 | 0.029551 | SLC24A1                     | 9187 .   |
| 211843_x_ | 0.046522 | 0.031573 | CYP3A7                      | 1551 .   |
| 211844_s_ | 8.05E-04 | 2.57E-04 | NRP2                        | 8828 .   |
| 211845_at | 4.05E-05 | 6.10E-06 | PVRL1                       | 5818 .   |
| 211846_s_ | 0.0081   | 0.004102 | PVRL1                       | 5818 .   |
| 211851_x_ | 3.13E-04 | 8.00E-05 | BRCA1                       | 672 .    |
| 211852_s_ | 0.030253 | 0.019169 | ATRN                        | 8455 .   |
| 211862_x_ | 2.34E-06 | 1.53E-07 | CFLAR                       | 8837 .   |
| 211863_x_ | 5.96E-08 | 1.13E-09 | HFE                         | 3077 .   |
| 211864_s_ | 4.16E-04 | 1.14E-04 | MYOF                        | 26509 .  |
| 211865_s_ | 0.010994 | 0.005864 | FZR1                        | 51343 .  |
| 211866_x_ | 2.04E-05 | 2.55E-06 | HFE                         | 3077 .   |
| 211867_s_ | 3.70E-04 | 9.81E-05 | PCDHA10                     | 56139 .  |
| 211868_x_ | 3.11E-05 | 4.37E-06 | IGH@ /// IGHA28396 /// 284  | .        |
| 211869_at | 2.31E-05 | 3.00E-06 |                             | .        |
| 211870_s_ | 4.72E-04 | 1.32E-04 | PCDHA3                      | 56145 .  |
| 211871_x_ | 0.005787 | 0.002756 | GNB5                        | 10681 .  |
| 211875_x_ | 0.002859 | 0.001185 | PCDHGA10                    | 56106 .  |
| 211876_x_ | 3.11E-04 | 7.95E-05 | PCDHGA10 /// 26025 /// 56   | .        |
| 211877_s_ | 0.034174 | 0.022064 | PCDHGA11                    | 56105 .  |
| 211878_at | 0.011245 | 0.006023 | IGHG1                       | 3500 .   |
| 211879_x_ | 1.12E-04 | 2.21E-05 | PCDHGA3                     | 56112 .  |

|           |          |          |         |         |
|-----------|----------|----------|---------|---------|
| 211880_x_ | 4.78E-04 | 1.34E-04 | PCDHGA1 | 56114 . |
| 211881_x_ | 0.008364 | 0.004256 | IGLJ3   | 28831 . |
| 211882_x_ | 0.045482 | 0.030756 | FUT6    | 2528 .  |
| 211884_s_ | 0.0021   | 8.19E-04 | CIITA   | 4261 .  |
| 211885_x_ | 0.041913 | 0.027962 | FUT6    | 2528 .  |
| 211886_s_ | 4.91E-05 | 7.84E-06 | TBX5    | 6910 .  |
| 211887_x_ | 0.001658 | 6.15E-04 | MSR1    | 4481 .  |
| 211888_x_ | 0.003475 | 0.001498 | CASP10  | 843 .   |
| 211890_x_ | 2.27E-04 | 5.37E-05 | CAPN3   | 825 .   |
| 211891_s_ | 1.07E-04 | 2.09E-05 | ARHGEF4 | 50649 . |
| 211892_s_ | 7.02E-06 | 6.35E-07 | PTGIS   | 5740 .  |
| 211893_x_ | 2.36E-04 | 5.62E-05 | CD6     | 923 .   |
| 211894_x_ | 3.05E-04 | 7.74E-05 | SEZ6L   | 23544 . |
| 211896_s_ | 1.63E-08 | 2.03E-10 | DCN     | 1634 .  |
| 211897_s_ | 0.04233  | 0.028286 | CRHR1   | 1394 .  |
| 211900_x_ | 1.56E-04 | 3.36E-05 | CD6     | 923 .   |
| 211901_s_ | 6.95E-05 | 1.22E-05 | PDE4A   | 5141 .  |
| 211902_x_ | 0.00332  | 0.001419 | TRA@    | 6955 .  |
| 211903_s_ | 4.67E-04 | 1.31E-04 | MPL     | 4352 .  |
| 211904_x_ | 0.001971 | 7.58E-04 | RAD52   | 5893 .  |
| 211905_s_ | 0.003827 | 0.001682 | ITGB4   | 3691 .  |
| 211908_x_ | 0.001258 | 4.42E-04 | IGHG1   | 3500 .  |
| 211909_x_ | 6.53E-04 | 1.98E-04 | PTGER3  | 5733 .  |
| 211910_at | 6.83E-08 | 1.36E-09 |         | .       |
| 211911_x_ | 1.34E-04 | 2.79E-05 | HLA-B   | 3106 .  |
| 211912_at | 0.00634  | 0.00307  | MERTK   | 10461 . |
| 211913_s_ | 1.95E-04 | 4.45E-05 | MERTK   | 10461 . |
| 211915_s_ | 3.98E-04 | 1.08E-04 | TUBB4Q  | 56604 . |
| 211916_s_ | 0.043614 | 0.029291 | MYO1A   | 4640 .  |
| 211918_x_ | 0.001475 | 5.35E-04 | PAPPA2  | 60676 . |
| 211919_s_ | 1.07E-07 | 2.50E-09 | CXCR4   | 7852 .  |
| 211920_at | 9.57E-05 | 1.83E-05 | CFB     | 629 .   |
| 211921_x_ | 2.13E-07 | 6.26E-09 | PTMA    | 5757 .  |
| 211922_s_ | 5.27E-09 | 4.62E-11 | CAT     | 847 .   |



|           |          |          |                                 |          |
|-----------|----------|----------|---------------------------------|----------|
| 211923_s_ | 0.032994 | 0.021201 | ZNF471                          | 57573 .  |
| 211924_s_ | 0.002535 | 0.001027 | PLAUR                           | 5329 .   |
| 211926_s_ | 1.08E-06 | 5.44E-08 | MYH9                            | 4627 .   |
| 211929_at | 1.63E-05 | 1.93E-06 | HNRNPA3                         | 220988 . |
| 211930_at | 5.95E-07 | 2.47E-08 | HNRNPA3                         | 220988 . |
| 211931_s_ | 1.95E-07 | 5.57E-09 | HNRNPA3 /// H10151 /// 220988 . |          |
| 211932_at | 1.54E-06 | 8.82E-08 | HNRNPA3                         | 220988 . |
| 211933_s_ | 2.28E-07 | 6.95E-09 | HNRNPA3 /// H10151 /// 220988 . |          |
| 211935_at | 3.01E-07 | 1.01E-08 | ARL6IP1                         | 23204 .  |
| 211937_at | 0.004145 | 0.001849 | EIF4B                           | 1975 .   |
| 211938_at | 0.03485  | 0.022562 | EIF4B                           | 1975 .   |
| 211940_x_ | 8.47E-04 | 2.73E-04 | H3F3A /// H3F33020 /// 3020 .   |          |
| 211941_s_ | 0.009441 | 0.004904 | PEBP1                           | 5037 .   |
| 211943_x_ | 0.025444 | 0.01568  | TPT1                            | 7178 .   |
| 211944_at | 1.12E-06 | 5.76E-08 | BAT2D1                          | 23215 .  |
| 211945_s_ | 1.28E-04 | 2.61E-05 | ITGB1                           | 3688 .   |
| 211946_s_ | 3.28E-04 | 8.50E-05 | BAT2D1                          | 23215 .  |
| 211947_s_ | 9.36E-05 | 1.78E-05 | BAT2D1                          | 23215 .  |
| 211948_x_ | 6.86E-07 | 3.01E-08 | BAT2D1                          | 23215 .  |
| 211949_s_ | 0.027261 | 0.016972 | NOLC1                           | 9221 .   |
| 211950_at | 8.72E-04 | 2.83E-04 | UBR4                            | 23352 .  |
| 211951_at | 2.08E-08 | 2.74E-10 | NOLC1                           | 9221 .   |
| 211952_at | 0.031606 | 0.020151 | IPO5                            | 3843 .   |
| 211955_at | 0.004805 | 0.002211 | IPO5                            | 3843 .   |
| 211956_s_ | 0.01597  | 0.009099 | EIF1                            | 10209 .  |
| 211958_at | 0.004283 | 0.001923 | IGFBP5                          | 3488 .   |
| 211959_at | 0.008812 | 0.004522 | IGFBP5                          | 3488 .   |
| 211960_s_ | 0.019902 | 0.011758 | RAB7A                           | 7879 .   |
| 211961_s_ | 0.001084 | 3.68E-04 | RAB7A                           | 7879 .   |
| 211962_s_ | 0.002115 | 8.26E-04 | ZFP36L1                         | 677 .    |
| 211963_s_ | 2.64E-05 | 3.55E-06 | ARPC5                           | 10092 .  |
| 211964_at | 0.006616 | 0.00323  | COL4A2                          | 1284 .   |
| 211965_at | 0.018755 | 0.010972 | ZFP36L1                         | 677 .    |
| 211966_at | 0.001025 | 3.44E-04 | COL4A2                          | 1284 .   |

|           |          |          |                           |          |
|-----------|----------|----------|---------------------------|----------|
| 211967_at | 0.002774 | 0.001144 | TMEM123                   | 114908 . |
| 211968_s_ | 0.003554 | 0.001539 | HSP90AA1                  | 3320 .   |
| 211969_at | 3.87E-04 | 1.04E-04 | HSP90AA1                  | 3320 .   |
| 211970_x_ | 0.001297 | 4.58E-04 | ACTG1                     | 71 .     |
| 211971_s_ | 4.53E-06 | 3.59E-07 | LRPPRC                    | 10128 .  |
| 211974_x_ | 0.014073 | 0.007834 | RBPJ                      | 3516 .   |
| 211976_at | 0.034305 | 0.022159 |                           | .        |
| 211977_at | 0.043254 | 0.029014 | GPR107                    | 57720 .  |
| 211979_at | 0.023813 | 0.014508 | GPR107                    | 57720 .  |
| 211980_at | 0.007376 | 0.003676 | COL4A1                    | 1282 .   |
| 211981_at | 2.41E-04 | 5.78E-05 | COL4A1                    | 1282 .   |
| 211982_x_ | 2.57E-05 | 3.44E-06 | XPO6                      | 23214 .  |
| 211983_x_ | 2.28E-04 | 5.40E-05 | ACTG1                     | 71 .     |
| 211984_at | 0.006278 | 0.003035 | CALM1                     | 801 .    |
| 211986_at | 0.002634 | 0.001075 | AHNAK                     | 79026 .  |
| 211987_at | 0.002713 | 0.001113 | TOP2B                     | 7155 .   |
| 211989_at | 0.030771 | 0.019546 | SMARCE1                   | 6605 .   |
| 211993_at | 5.82E-04 | 1.72E-04 | WNK1                      | 65125 .  |
| 211995_x_ | 1.66E-04 | 3.63E-05 | ACTG1                     | 71 .     |
| 211996_s_ | 2.12E-08 | 2.83E-10 | LOC100132247100132247 //. |          |
| 211997_x_ | 0.001525 | 5.57E-04 | H3F3B                     | 3021 .   |
| 211998_at | 0.004101 | 0.001825 | H3F3B                     | 3021 .   |
| 211999_at | 5.07E-05 | 8.16E-06 | H3F3B                     | 3021 .   |
| 212000_at | 9.60E-08 | 2.17E-09 | SFRS14                    | 10147 .  |
| 212001_at | 1.68E-07 | 4.60E-09 | SFRS14                    | 10147 .  |
| 212004_at | 0.036077 | 0.0235   | C1orf144                  | 26099 .  |
| 212006_at | 0.00744  | 0.003715 | UBXN4                     | 23190 .  |
| 212007_at | 3.95E-05 | 5.89E-06 | UBXN4                     | 23190 .  |
| 212008_at | 1.31E-04 | 2.70E-05 | UBXN4                     | 23190 .  |
| 212010_s_ | 0.031973 | 0.02043  | CDV3                      | 55573 .  |
| 212012_at | 0.003058 | 0.001285 | PXDN                      | 7837 .   |
| 212013_at | 0.015801 | 0.008982 | PXDN                      | 7837 .   |
| 212014_x_ | 0.044935 | 0.030333 | CD44                      | 960 .    |
| 212015_x_ | 2.93E-05 | 4.06E-06 | PTBP1                     | 5725 .   |

|           |          |          |          |          |
|-----------|----------|----------|----------|----------|
| 212016_s_ | 8.50E-04 | 2.74E-04 | PTBP1    | 5725 .   |
| 212017_at | 8.40E-05 | 1.55E-05 | FAM168B  | 130074 . |
| 212018_s_ | 0.006372 | 0.003088 | RSL1D1   | 26156 .  |
| 212019_at | 1.12E-04 | 2.22E-05 | RSL1D1   | 26156 .  |
| 212020_s_ | 1.16E-04 | 2.32E-05 | MKI67    | 4288 .   |
| 212021_s_ | 0.002418 | 9.71E-04 | MKI67    | 4288 .   |
| 212022_s_ | 1.87E-04 | 4.22E-05 | MKI67    | 4288 .   |
| 212023_s_ | 8.80E-06 | 8.57E-07 | MKI67    | 4288 .   |
| 212026_s_ | 0.005055 | 0.002349 | EXOC7    | 23265 .  |
| 212027_at | 2.10E-04 | 4.87E-05 | RBM25    | 58517 .  |
| 212028_at | 3.90E-05 | 5.80E-06 | RBM25    | 58517 .  |
| 212029_s_ | 1.49E-04 | 3.17E-05 |          | .        |
| 212030_at | 9.99E-04 | 3.33E-04 | RBM25    | 58517 .  |
| 212031_at | 0.001058 | 3.57E-04 | RBM25    | 58517 .  |
| 212033_at | 0.00208  | 8.09E-04 | RBM25    | 58517 .  |
| 212034_s_ | 0.001072 | 3.63E-04 | EXOC7    | 23265 .  |
| 212035_s_ | 0.012245 | 0.006658 | EXOC7    | 23265 .  |
| 212036_s_ | 2.05E-06 | 1.30E-07 | PNN      | 5411 .   |
| 212037_at | 5.99E-04 | 1.78E-04 | PNN      | 5411 .   |
| 212040_at | 1.78E-06 | 1.08E-07 | TGOLN2   | 10618 .  |
| 212041_at | 0.002451 | 9.87E-04 | ATP6VOD1 | 9114 .   |
| 212042_x_ | 1.21E-06 | 6.40E-08 | RPL7     | 6129 .   |
| 212043_at | 3.80E-05 | 5.61E-06 | TGOLN2   | 10618 .  |
| 212046_x_ | 2.66E-06 | 1.80E-07 | MAPK3    | 5595 .   |
| 212047_s_ | 0.024496 | 0.01499  | RNF167   | 26001 .  |
| 212049_at | 5.78E-04 | 1.70E-04 | WIPF2    | 147179 . |
| 212050_at | 3.77E-05 | 5.55E-06 | WIPF2    | 147179 . |
| 212051_at | 7.73E-05 | 1.40E-05 | WIPF2    | 147179 . |
| 212052_s_ | 1.11E-05 | 1.17E-06 | TBC1D9B  | 23061 .  |
| 212054_x_ | 1.33E-05 | 1.48E-06 | TBC1D9B  | 23061 .  |
| 212055_at | 0.019461 | 0.011455 | C18orf10 | 25941 .  |
| 212056_at | 0.021804 | 0.0131   | KIAA0182 | 23199 .  |
| 212057_at | 0.001203 | 4.18E-04 | KIAA0182 | 23199 .  |
| 212058_at | 1.09E-05 | 1.14E-06 | SR140    | 23350 .  |

|           |          |          |                             |          |
|-----------|----------|----------|-----------------------------|----------|
| 212059_s_ | 1.67E-04 | 3.67E-05 | TRPC4AP                     | 26133 .  |
| 212060_at | 0.007139 | 0.003537 | SR140                       | 23350 .  |
| 212061_at | 3.03E-07 | 1.02E-08 | SR140                       | 23350 .  |
| 212062_at | 8.13E-04 | 2.60E-04 | ATP9A                       | 10079 .  |
| 212063_at | 0.00436  | 0.001966 | CD44                        | 960 .    |
| 212064_x_ | 6.53E-04 | 1.98E-04 | MAZ                         | 4150 .   |
| 212065_s_ | 0.001207 | 4.20E-04 | USP34                       | 9736 .   |
| 212067_s_ | 2.95E-06 | 2.06E-07 | C1R                         | 715 .    |
| 212068_s_ | 0.026418 | 0.016368 | BAT2L                       | 84726 .  |
| 212072_s_ | 0.001974 | 7.60E-04 | CSNK2A1                     | 1457 .   |
| 212073_at | 0.00131  | 4.63E-04 | CSNK2A1 /// C:1457 /// 283: |          |
| 212074_at | 0.001652 | 6.12E-04 | UNC84A                      | 23353 .  |
| 212076_at | 8.44E-06 | 8.11E-07 | MLL                         | 4297 .   |
| 212077_at | 1.42E-04 | 2.99E-05 | CALD1                       | 800 .    |
| 212078_s_ | 3.68E-07 | 1.33E-08 | MLL                         | 4297 .   |
| 212079_s_ | 1.30E-06 | 7.03E-08 | MLL                         | 4297 .   |
| 212080_at | 0.009827 | 0.005141 | MLL                         | 4297 .   |
| 212082_s_ | 4.50E-04 | 1.25E-04 | MYL6                        | 4637 .   |
| 212083_at | 1.08E-07 | 2.52E-09 | TEX261                      | 113419 . |
| 212084_at | 1.06E-04 | 2.06E-05 | TEX261                      | 113419 . |
| 212086_x_ | 1.48E-05 | 1.70E-06 | LMNA                        | 4000 .   |
| 212087_s_ | 0.012038 | 0.006521 | ERAL1                       | 26284 .  |
| 212088_at | 0.00148  | 5.37E-04 | PMPCA                       | 23203 .  |
| 212089_at | 3.27E-04 | 8.46E-05 | LMNA                        | 4000 .   |
| 212090_at | 0.015287 | 0.00864  | GRINA                       | 2907 .   |
| 212091_s_ | 1.57E-07 | 4.17E-09 | COL6A1                      | 1291 .   |
| 212092_at | 7.86E-07 | 3.59E-08 | PEG10                       | 23089 .  |
| 212094_at | 2.96E-05 | 4.10E-06 | PEG10                       | 23089 .  |
| 212096_s_ | 0.004546 | 0.002068 | MTUS1                       | 57509 .  |
| 212097_at | 4.42E-05 | 6.85E-06 | CAV1                        | 857 .    |
| 212098_at | 0.002437 | 9.80E-04 | LOC151162 /// 151162 /// 4: |          |
| 212099_at | 4.14E-06 | 3.19E-07 | RHOB                        | 388 .    |
| 212100_s_ | 0.00473  | 0.002169 | POLDIP3                     | 84271 .  |
| 212101_at | 8.11E-04 | 2.59E-04 | KPNA6                       | 23633 .  |

|           |          |          |           |          |
|-----------|----------|----------|-----------|----------|
| 212102_s_ | 0.048567 | 0.033182 | KPNA6     | 23633 .  |
| 212103_at | 3.85E-04 | 1.03E-04 | KPNA6     | 23633 .  |
| 212107_s_ | 0.017415 | 0.010057 | DHX9      | 1660 .   |
| 212108_at | 0.00538  | 0.002526 | FAF2      | 23197 .  |
| 212109_at | 1.74E-06 | 1.04E-07 | HN1L      | 90861 .  |
| 212111_at | 8.49E-05 | 1.57E-05 | STX12     | 23673 .  |
| 212112_s_ | 1.08E-05 | 1.13E-06 | STX12     | 23673 .  |
| 212113_at | 0.046687 | 0.031706 | LOC552889 | 552889 . |
| 212115_at | 2.71E-08 | 4.02E-10 | HN1L      | 90861 .  |
| 212116_at | 0.030631 | 0.019442 | TRIM27    | 5987 .   |
| 212117_at | 7.28E-05 | 1.29E-05 | RHOQ      | 23433 .  |
| 212118_at | 7.05E-04 | 2.17E-04 | TRIM27    | 5987 .   |
| 212119_at | 1.18E-05 | 1.26E-06 | RHOQ      | 23433 .  |
| 212120_at | 5.34E-06 | 4.45E-07 | RHOQ      | 23433 .  |
| 212121_at | 0.001358 | 4.85E-04 | TCTN3     | 26123 .  |
| 212122_at | 1.18E-04 | 2.38E-05 | RHOQ      | 23433 .  |
| 212124_at | 0.006271 | 0.003031 | ZMIZ1     | 57178 .  |
| 212126_at | 0.001329 | 4.72E-04 | CBX5      | 23468 .  |
| 212128_s_ | 0.002734 | 0.001124 | DAG1      | 1605 .   |
| 212131_at | 1.88E-05 | 2.31E-06 | LSM14A    | 26065 .  |
| 212134_at | 9.66E-06 | 9.72E-07 | PHLDB1    | 23187 .  |
| 212135_s_ | 8.20E-07 | 3.80E-08 | ATP2B4    | 493 .    |
| 212136_at | 1.48E-05 | 1.70E-06 | ATP2B4    | 493 .    |
| 212137_at | 1.49E-04 | 3.18E-05 | LARP1     | 23367 .  |
| 212139_at | 2.11E-08 | 2.80E-10 | GCN1L1    | 10985 .  |
| 212140_at | 0.002367 | 9.45E-04 | PDS5A     | 23244 .  |
| 212141_at | 5.94E-06 | 5.12E-07 | MCM4      | 4173 .   |
| 212142_at | 0.038903 | 0.025646 | MCM4      | 4173 .   |
| 212143_s_ | 1.24E-05 | 1.35E-06 | IGFBP3    | 3486 .   |
| 212144_at | 1.04E-07 | 2.40E-09 | UNC84B    | 25777 .  |
| 212146_at | 9.88E-05 | 1.90E-05 | PLEKHM2   | 23207 .  |
| 212147_at | 3.43E-06 | 2.50E-07 | SMG5      | 23381 .  |
| 212148_at | 3.19E-04 | 8.20E-05 | PBX1      | 5087 .   |
| 212149_at | 0.029555 | 0.018652 | EFR3A     | 23167 .  |

|           |          |          |                            |          |
|-----------|----------|----------|----------------------------|----------|
| 212151_at | 9.87E-04 | 3.28E-04 | PBX1                       | 5087 .   |
| 212152_x_ | 1.33E-04 | 2.77E-05 | ARID1A                     | 8289 .   |
| 212153_at | 0.001464 | 5.30E-04 | POGZ                       | 23126 .  |
| 212154_at | 0.037745 | 0.024767 | SDC2                       | 6383 .   |
| 212155_at | 0.001113 | 3.80E-04 | RNF187                     | 149603 . |
| 212156_at | 0.001087 | 3.70E-04 | VPS39                      | 23339 .  |
| 212157_at | 0.022775 | 0.013775 | SDC2                       | 6383 .   |
| 212162_at | 0.020841 | 0.012426 | KIDINS220                  | 57498 .  |
| 212163_at | 0.0252   | 0.015507 | KIDINS220                  | 57498 .  |
| 212164_at | 0.009625 | 0.005016 | TMEM183A                   | 92703 .  |
| 212165_at | 1.36E-04 | 2.83E-05 | TMEM183A /// 653659 /// 9. |          |
| 212166_at | 0.00149  | 5.42E-04 | XPO7                       | 23039 .  |
| 212167_s_ | 0.002217 | 8.74E-04 | SMARCB1                    | 6598 .   |
| 212168_at | 2.35E-05 | 3.07E-06 | RBM12                      | 10137 .  |
| 212169_at | 1.27E-07 | 3.14E-09 | FKBP9                      | 11328 .  |
| 212170_at | 2.19E-04 | 5.12E-05 | RBM12                      | 10137 .  |
| 212171_x_ | 0.022618 | 0.013663 | VEGFA                      | 7422 .   |
| 212172_at | 1.52E-05 | 1.77E-06 | AK2                        | 204 .    |
| 212173_at | 2.77E-05 | 3.77E-06 | AK2                        | 204 .    |
| 212174_at | 3.37E-09 | 2.49E-11 | AK2                        | 204 .    |
| 212175_s_ | 1.09E-05 | 1.14E-06 | AK2                        | 204 .    |
| 212176_at | 2.11E-05 | 2.67E-06 | SFRS18                     | 25957 .  |
| 212177_at | 9.90E-04 | 3.30E-04 | SFRS18                     | 25957 .  |
| 212178_s_ | 4.65E-05 | 7.32E-06 | POM121 /// PC100101267 //. |          |
| 212179_at | 0.001315 | 4.66E-04 | SFRS18                     | 25957 .  |
| 212180_at | 4.04E-07 | 1.50E-08 | CRKL                       | 1399 .   |
| 212181_s_ | 0.002728 | 0.001121 | NUDT4 /// NUI11163 /// 44. |          |
| 212183_at | 0.001306 | 4.62E-04 | NUDT4                      | 11163 .  |
| 212186_at | 2.13E-04 | 4.96E-05 | ACACA                      | 31 .     |
| 212187_x_ | 1.40E-06 | 7.80E-08 | PTGDS                      | 5730 .   |
| 212188_at | 3.71E-05 | 5.45E-06 | KCTD12                     | 115207 . |
| 212190_at | 8.30E-06 | 7.90E-07 | SERPINE2                   | 5270 .   |
| 212192_at | 2.49E-04 | 6.02E-05 | KCTD12                     | 115207 . |
| 212193_s_ | 0.006569 | 0.003202 | LARP1                      | 23367 .  |

|           |          |          |         |          |
|-----------|----------|----------|---------|----------|
| 212194_s_ | 0.001735 | 6.50E-04 | TM9SF4  | 9777 .   |
| 212195_at | 9.96E-04 | 3.32E-04 | IL6ST   | 3572 .   |
| 212196_at | 1.92E-05 | 2.38E-06 | IL6ST   | 3572 .   |
| 212197_x_ | 0.003365 | 0.001442 | MPRIP   | 23164 .  |
| 212198_s_ | 0.004868 | 0.002244 | TM9SF4  | 9777 .   |
| 212200_at | 8.31E-04 | 2.67E-04 | ANKLE2  | 23141 .  |
| 212202_s_ | 0.010513 | 0.005562 | TMEM87A | 25963 .  |
| 212203_x_ | 0.002707 | 0.001111 | IFITM3  | 10410 .  |
| 212204_at | 0.001816 | 6.86E-04 | TMEM87A | 25963 .  |
| 212205_at | 1.27E-05 | 1.39E-06 | H2AFV   | 94239 .  |
| 212206_s_ | 1.13E-04 | 2.25E-05 | H2AFV   | 94239 .  |
| 212207_at | 0.040518 | 0.026883 | MED13L  | 23389 .  |
| 212208_at | 0.003002 | 0.001255 | MED13L  | 23389 .  |
| 212210_at | 6.85E-07 | 3.00E-08 | INTS1   | 26173 .  |
| 212211_at | 0.004375 | 0.001975 | ANKRD17 | 26057 .  |
| 212212_s_ | 3.90E-04 | 1.05E-04 | INTS1   | 26173 .  |
| 212213_x_ | 0.024839 | 0.015241 | OPA1    | 4976 .   |
| 212215_at | 0.021309 | 0.012752 | PREPL   | 9581 .   |
| 212216_at | 1.29E-05 | 1.42E-06 | PREPL   | 9581 .   |
| 212217_at | 0.023261 | 0.014117 | PREPL   | 9581 .   |
| 212219_at | 4.30E-04 | 1.18E-04 | PSME4   | 23198 .  |
| 212220_at | 0.019493 | 0.011477 | PSME4   | 23198 .  |
| 212221_x_ | 0.017948 | 0.010421 | IDS     | 3423 .   |
| 212222_at | 0.022653 | 0.013691 | PSME4   | 23198 .  |
| 212224_at | 2.93E-05 | 4.05E-06 | ALDH1A1 | 216 .    |
| 212226_s_ | 3.84E-05 | 5.69E-06 | PPAP2B  | 8613 .   |
| 212228_s_ | 1.57E-05 | 1.84E-06 | COQ9    | 57017 .  |
| 212229_s_ | 0.015056 | 0.008486 | FBXO21  | 23014 .  |
| 212230_at | 6.71E-06 | 5.97E-07 | PPAP2B  | 8613 .   |
| 212231_at | 0.004219 | 0.001889 | FBXO21  | 23014 .  |
| 212232_at | 3.57E-06 | 2.63E-07 | FNBP4   | 23360 .  |
| 212233_at | 0.006583 | 0.00321  | MAP1B   | 4131 .   |
| 212234_at | 1.36E-06 | 7.54E-08 | ASXL1   | 171023 . |
| 212235_at | 1.62E-04 | 3.53E-05 | PLXND1  | 23129 .  |

|           |          |          |                            |          |
|-----------|----------|----------|----------------------------|----------|
| 212236_x_ | 0.042614 | 0.028502 | KRT17                      | 3872 .   |
| 212237_at | 3.11E-06 | 2.20E-07 | ASXL1                      | 171023 . |
| 212238_at | 1.81E-04 | 4.06E-05 | ASXL1                      | 171023 . |
| 212239_at | 0.010601 | 0.005618 | PIK3R1                     | 5295 .   |
| 212240_s_ | 0.004774 | 0.002194 | PIK3R1                     | 5295 .   |
| 212242_at | 0.020756 | 0.012363 | TUBA4A                     | 7277 .   |
| 212244_at | 0.010893 | 0.005802 | GCOM1 /// GR 145781 /// 8: |          |
| 212245_at | 9.76E-04 | 3.24E-04 | MCFD2                      | 90411 .  |
| 212246_at | 0.001154 | 3.97E-04 | MCFD2                      | 90411 .  |
| 212247_at | 6.51E-07 | 2.79E-08 | NUP205                     | 23165 .  |
| 212248_at | 7.62E-09 | 7.40E-11 | MTDH                       | 92140 .  |
| 212249_at | 6.30E-04 | 1.89E-04 | PIK3R1                     | 5295 .   |
| 212250_at | 5.14E-05 | 8.30E-06 | MTDH                       | 92140 .  |
| 212251_at | 6.36E-07 | 2.70E-08 | MTDH                       | 92140 .  |
| 212253_x_ | 0.01918  | 0.011257 | DST                        | 667 .    |
| 212256_at | 3.33E-10 | 1.25E-12 | GALNT10                    | 55568 .  |
| 212257_s_ | 3.87E-06 | 2.92E-07 | SMARCA2                    | 6595 .   |
| 212258_s_ | 8.99E-04 | 2.94E-04 | SMARCA2                    | 6595 .   |
| 212259_s_ | 0.001962 | 7.54E-04 | PBXIP1                     | 57326 .  |
| 212260_at | 0.017985 | 0.010447 | GIGYF2                     | 26058 .  |
| 212263_at | 0.004863 | 0.002242 | QKI                        | 9444 .   |
| 212264_s_ | 0.014621 | 0.008195 | WAPAL                      | 23063 .  |
| 212265_at | 0.002767 | 0.00114  | QKI                        | 9444 .   |
| 212267_at | 0.003291 | 0.001404 | WAPAL                      | 23063 .  |
| 212269_s_ | 9.13E-08 | 2.03E-09 | MCM3AP                     | 8888 .   |
| 212270_x_ | 0.028726 | 0.018047 | RPL17                      | 6139 .   |
| 212271_at | 3.72E-06 | 2.78E-07 | MAPK1                      | 5594 .   |
| 212272_at | 0.005442 | 0.002561 | LPIN1                      | 23175 .  |
| 212274_at | 0.011809 | 0.006372 | LPIN1                      | 23175 .  |
| 212275_s_ | 0.008511 | 0.004343 | SRCAP                      | 10847 .  |
| 212276_at | 7.39E-04 | 2.31E-04 | LPIN1                      | 23175 .  |
| 212277_at | 4.98E-05 | 7.97E-06 | MTMR4                      | 9110 .   |
| 212278_x_ | 0.032748 | 0.021008 | UBE3A                      | 7337 .   |
| 212279_at | 6.02E-05 | 1.01E-05 | TMEM97                     | 27346 .  |



|           |          |          |          |          |
|-----------|----------|----------|----------|----------|
| 212281_s_ | 1.88E-05 | 2.31E-06 | TMEM97   | 27346 .  |
| 212282_at | 1.09E-05 | 1.14E-06 | TMEM97   | 27346 .  |
| 212284_x_ | 0.010256 | 0.005404 | TPT1     | 7178 .   |
| 212286_at | 9.18E-05 | 1.73E-05 | ANKRD12  | 23253 .  |
| 212287_at | 7.14E-04 | 2.21E-04 | SUZ12    | 23512 .  |
| 212288_at | 5.53E-04 | 1.61E-04 | FBNP1    | 23048 .  |
| 212289_at | 0.006035 | 0.002898 | ANKRD12  | 23253 .  |
| 212290_at | 0.008193 | 0.004155 | SLC7A1   | 6541 .   |
| 212291_at | 0.005011 | 0.002322 | HIPK1    | 204851 . |
| 212294_at | 1.97E-06 | 1.22E-07 | GNG12    | 55970 .  |
| 212295_s_ | 0.005984 | 0.002869 | SLC7A1   | 6541 .   |
| 212296_at | 1.23E-04 | 2.50E-05 | PSMD14   | 10213 .  |
| 212297_at | 0.019711 | 0.011625 | ATP13A3  | 79572 .  |
| 212298_at | 2.68E-05 | 3.62E-06 | NRP1     | 8829 .   |
| 212299_at | 0.031119 | 0.0198   | NEK9     | 91754 .  |
| 212300_at | 3.12E-07 | 1.07E-08 | TXLNA    | 200081 . |
| 212303_x_ | 0.01111  | 0.005937 | KHSRP    | 8570 .   |
| 212306_at | 0.0039   | 0.00172  | CLASP2   | 23122 .  |
| 212308_at | 0.00559  | 0.002645 | CLASP2   | 23122 .  |
| 212309_at | 2.43E-04 | 5.85E-05 | CLASP2   | 23122 .  |
| 212310_at | 9.88E-05 | 1.90E-05 | MIA3     | 375056 . |
| 212311_at | 0.007615 | 0.003816 | KIAA0746 | 23231 .  |
| 212313_at | 0.003728 | 0.00163  | CHMP7    | 91782 .  |
| 212314_at | 0.017833 | 0.010343 | KIAA0746 | 23231 .  |
| 212315_s_ | 3.54E-07 | 1.26E-08 | NUP210   | 23225 .  |
| 212316_at | 1.80E-06 | 1.09E-07 | NUP210   | 23225 .  |
| 212317_at | 3.88E-04 | 1.04E-04 | TNPO3    | 23534 .  |
| 212318_at | 2.59E-04 | 6.33E-05 | TNPO3    | 23534 .  |
| 212319_at | 9.13E-04 | 2.99E-04 | SGSM2    | 9905 .   |
| 212320_at | 0.040036 | 0.026512 | TUBB     | 203068 . |
| 212321_at | 0.001493 | 5.43E-04 | SGPL1    | 8879 .   |
| 212324_s_ | 0.007262 | 0.003609 | VPS13D   | 55187 .  |
| 212325_at | 0.03017  | 0.019106 | LIMCH1   | 22998 .  |
| 212326_at | 0.035722 | 0.023233 | VPS13D   | 55187 .  |

|           |          |          |          |          |
|-----------|----------|----------|----------|----------|
| 212328_at | 0.035275 | 0.022886 | LIMCH1   | 22998 .  |
| 212329_at | 0.002253 | 8.92E-04 | SCAP     | 22937 .  |
| 212330_at | 3.57E-04 | 9.39E-05 | TFDP1    | 7027 .   |
| 212331_at | 0.001068 | 3.61E-04 | RBL2     | 5934 .   |
| 212332_at | 0.044284 | 0.029823 | RBL2     | 5934 .   |
| 212333_at | 0.006807 | 0.003343 | FAM98A   | 25940 .  |
| 212334_at | 2.30E-04 | 5.45E-05 | GNS      | 2799 .   |
| 212335_at | 4.78E-05 | 7.56E-06 | GNS      | 2799 .   |
| 212336_at | 0.001158 | 3.99E-04 | EPB41L1  | 2036 .   |
| 212337_at | 0.007634 | 0.003828 | TUG1     | 55000 .  |
| 212338_at | 8.84E-04 | 2.88E-04 | MYO1D    | 4642 .   |
| 212341_at | 0.014119 | 0.007863 | YIPF6    | 286451 . |
| 212343_at | 0.040261 | 0.026684 | YIPF6    | 286451 . |
| 212344_at | 4.17E-06 | 3.22E-07 | SULF1    | 23213 .  |
| 212345_s_ | 0.012571 | 0.00687  | CREB3L2  | 64764 .  |
| 212346_s_ | 3.42E-05 | 4.91E-06 | MXD4     | 10608 .  |
| 212347_x_ | 1.29E-05 | 1.43E-06 | MXD4     | 10608 .  |
| 212348_s_ | 1.89E-05 | 2.32E-06 | KDM1     | 23028 .  |
| 212349_at | 2.20E-05 | 2.82E-06 | POFUT1   | 23509 .  |
| 212351_at | 3.13E-07 | 1.07E-08 | EIF2B5   | 8893 .   |
| 212352_s_ | 4.13E-05 | 6.26E-06 | TMED10   | 10972 .  |
| 212353_at | 1.03E-06 | 5.13E-08 | SULF1    | 23213 .  |
| 212354_at | 8.65E-07 | 4.09E-08 | SULF1    | 23213 .  |
| 212355_at | 1.47E-05 | 1.69E-06 | KIAA0323 | 23351 .  |
| 212356_at | 0.01582  | 0.008995 | KIAA0323 | 23351 .  |
| 212357_at | 0.001574 | 5.78E-04 | FAM168A  | 23201 .  |
| 212358_at | 1.00E-06 | 4.95E-08 | CLIP3    | 25999 .  |
| 212359_s_ | 0.001323 | 4.69E-04 | KIAA0913 | 23053 .  |
| 212360_at | 7.74E-05 | 1.40E-05 | AMPD2    | 271 .    |
| 212361_s_ | 0.002673 | 0.001093 | ATP2A2   | 488 .    |
| 212362_at | 0.001152 | 3.96E-04 | ATP2A2   | 488 .    |
| 212363_x_ | 3.38E-05 | 4.85E-06 | ACTG1    | 71 .     |
| 212364_at | 0.015135 | 0.008537 | MYO1B    | 4430 .   |
| 212365_at | 0.003361 | 0.00144  | MYO1B    | 4430 .   |

|           |          |          |                              |          |
|-----------|----------|----------|------------------------------|----------|
| 212367_at | 0.014864 | 0.008362 | FEM1B                        | 10116 .  |
| 212368_at | 4.50E-04 | 1.25E-04 | ZNF292                       | 23036 .  |
| 212369_at | 0.03101  | 0.019721 | ZNF384                       | 171017 . |
| 212370_x_ | 7.50E-04 | 2.35E-04 | FAM21A /// FA253725 /// 3f.  |          |
| 212371_at | 0.018262 | 0.010636 | PPPDE1                       | 51029 .  |
| 212372_at | 0.01316  | 0.007248 | MYH10                        | 4628 .   |
| 212375_at | 5.95E-05 | 9.96E-06 | EP400                        | 57634 .  |
| 212376_s_ | 3.48E-07 | 1.24E-08 | EP400                        | 57634 .  |
| 212377_s_ | 1.09E-05 | 1.13E-06 | NOTCH2                       | 4853 .   |
| 212378_at | 5.92E-05 | 9.90E-06 | GART                         | 2618 .   |
| 212379_at | 0.043478 | 0.029186 | GART                         | 2618 .   |
| 212380_at | 6.94E-05 | 1.22E-05 | FTSJD2                       | 23070 .  |
| 212381_at | 0.002602 | 0.00106  | USP24                        | 23358 .  |
| 212383_at | 0.005115 | 0.002382 | ATP6VOA1                     | 535 .    |
| 212384_at | 6.92E-05 | 1.21E-05 | BAT1                         | 7919 .   |
| 212386_at | 0.037267 | 0.024412 | TCF4                         | 6925 .   |
| 212388_at | 1.37E-04 | 2.86E-05 | USP24                        | 23358 .  |
| 212389_at | 5.99E-04 | 1.78E-04 | SBF1                         | 6305 .   |
| 212390_at | 3.01E-09 | 2.16E-11 | LOC727893 /// 727893 /// 9f. |          |
| 212391_x_ | 0.002883 | 0.001196 | RPS3A                        | 6189 .   |
| 212392_s_ | 1.11E-04 | 2.20E-05 | LOC652526 /// 652526 /// 9f. |          |
| 212393_at | 0.024457 | 0.014963 | SBF1                         | 6305 .   |
| 212394_at | 1.96E-05 | 2.44E-06 | KIAA0090                     | 23065 .  |
| 212395_s_ | 1.37E-04 | 2.85E-05 | KIAA0090                     | 23065 .  |
| 212396_s_ | 5.63E-04 | 1.65E-04 | KIAA0090                     | 23065 .  |
| 212400_at | 0.016304 | 0.009319 | FAM102A                      | 399665 . |
| 212401_s_ | 5.34E-04 | 1.54E-04 | CDC2L2                       | 728642 . |
| 212403_at | 1.46E-05 | 1.68E-06 | UBE3B                        | 89910 .  |
| 212404_s_ | 1.02E-04 | 1.97E-05 | UBE3B                        | 89910 .  |
| 212405_s_ | 0.005398 | 0.002536 | METTL13                      | 51603 .  |
| 212406_s_ | 0.001078 | 3.66E-04 | PCMTD2                       | 55251 .  |
| 212407_at | 0.007285 | 0.003624 | METTL13                      | 51603 .  |
| 212408_at | 3.63E-04 | 9.60E-05 | TOR1AIP1                     | 26092 .  |
| 212409_s_ | 1.19E-05 | 1.28E-06 | TOR1AIP1                     | 26092 .  |

|           |          |          |                             |          |
|-----------|----------|----------|-----------------------------|----------|
| 212411_at | 6.52E-04 | 1.98E-04 | IMP4                        | 92856 .  |
| 212412_at | 8.65E-07 | 4.09E-08 | PDLIM5                      | 10611 .  |
| 212413_at | 7.62E-04 | 2.40E-04 | 6-Sep                       | 23157 .  |
| 212414_s_ | 7.60E-04 | 2.39E-04 | N-PAC /// SEPT23157 /// 846 |          |
| 212415_at | 0.008551 | 0.004366 | 6-Sep                       | 23157 .  |
| 212419_at | 5.76E-07 | 2.38E-08 | ZCCHC24                     | 219654 . |
| 212420_at | 0.001575 | 5.79E-04 | ELF1                        | 1997 .   |
| 212421_at | 0.020412 | 0.01211  | C22orf9                     | 23313 .  |
| 212422_at | 3.45E-06 | 2.53E-07 | PDCD11                      | 22984 .  |
| 212423_at | 1.88E-08 | 2.42E-10 | ZCCHC24                     | 219654 . |
| 212424_at | 2.72E-07 | 8.86E-09 | PDCD11                      | 22984 .  |
| 212425_at | 3.26E-04 | 8.42E-05 | SCAMP1                      | 9522 .   |
| 212427_at | 7.02E-04 | 2.16E-04 | KIAA0368                    | 23392 .  |
| 212429_s_ | 1.49E-04 | 3.19E-05 | GTF3C2                      | 2976 .   |
| 212430_at | 7.36E-08 | 1.52E-09 | RBM38                       | 55544 .  |
| 212431_at | 0.016127 | 0.009202 | HMGXB3                      | 22993 .  |
| 212432_at | 0.004232 | 0.001896 | GRPEL1                      | 80273 .  |
| 212433_x_ | 0.006633 | 0.00324  | RPS2                        | 6187 .   |
| 212434_at | 4.02E-05 | 6.02E-06 | GRPEL1                      | 80273 .  |
| 212435_at | 2.51E-04 | 6.10E-05 | TRIM33                      | 51592 .  |
| 212436_at | 0.018986 | 0.011127 | TRIM33                      | 51592 .  |
| 212437_at | 0.002313 | 9.20E-04 | CENPB                       | 1059 .   |
| 212442_s_ | 2.97E-05 | 4.13E-06 | LASS6                       | 253782 . |
| 212443_at | 2.54E-05 | 3.39E-06 | NBEAL2                      | 23218 .  |
| 212445_s_ | 4.94E-05 | 7.90E-06 | NEDD4L                      | 23327 .  |
| 212446_s_ | 1.52E-04 | 3.27E-05 | LASS6                       | 253782 . |
| 212447_at | 0.01909  | 0.011198 | KBTBD2                      | 25948 .  |
| 212448_at | 4.30E-07 | 1.63E-08 | NEDD4L                      | 23327 .  |
| 212449_s_ | 5.00E-05 | 8.01E-06 | LYPLA1                      | 10434 .  |
| 212453_at | 6.46E-04 | 1.95E-04 | KIAA1279                    | 26128 .  |
| 212455_at | 5.71E-06 | 4.85E-07 | YTHDC1                      | 91746 .  |
| 212456_at | 4.83E-06 | 3.90E-07 | KIAA0664                    | 23277 .  |
| 212457_at | 4.21E-06 | 3.27E-07 | TFE3                        | 7030 .   |
| 212458_at | 1.67E-04 | 3.66E-05 | SPRED2                      | 200734 . |

|           |          |          |           |          |
|-----------|----------|----------|-----------|----------|
| 212460_at | 0.018038 | 0.010485 | C14orf147 | 171546 . |
| 212461_at | 7.50E-08 | 1.56E-09 | AZIN1     | 51582 .  |
| 212462_at | 6.48E-04 | 1.96E-04 | MYST4     | 23522 .  |
| 212463_at | 2.84E-04 | 7.09E-05 | CD59      | 966 .    |
| 212464_s_ | 6.78E-05 | 1.18E-05 | FN1       | 2335 .   |
| 212466_at | 0.005502 | 0.002595 | SPRED2    | 200734 . |
| 212467_at | 1.68E-05 | 2.00E-06 | DNAJC13   | 23317 .  |
| 212469_at | 5.45E-04 | 1.58E-04 | NIPBL     | 25836 .  |
| 212472_at | 8.26E-06 | 7.85E-07 | MICAL2    | 9645 .   |
| 212473_s_ | 2.56E-04 | 6.23E-05 | MICAL2    | 9645 .   |
| 212474_at | 2.28E-04 | 5.39E-05 | AVL9      | 23080 .  |
| 212476_at | 0.03764  | 0.024687 | ACAP2     | 23527 .  |
| 212477_at | 0.023099 | 0.013996 | ACAP2     | 23527 .  |
| 212478_at | 2.99E-05 | 4.16E-06 | RMND5A    | 64795 .  |
| 212479_s_ | 2.42E-05 | 3.18E-06 | RMND5A    | 64795 .  |
| 212480_at | 0.011373 | 0.006101 | CYTSA     | 23384 .  |
| 212481_s_ | 6.15E-05 | 1.04E-05 | TPM4      | 7171 .   |
| 212482_at | 7.30E-08 | 1.50E-09 | RMND5A    | 64795 .  |
| 212483_at | 0.002146 | 8.41E-04 | NIPBL     | 25836 .  |
| 212484_at | 2.65E-07 | 8.53E-09 | FAM89B    | 23625 .  |
| 212485_at | 0.003948 | 0.001745 | GPATCH8   | 23131 .  |
| 212486_s_ | 0.007126 | 0.003529 | FYN       | 2534 .   |
| 212487_at | 6.86E-04 | 2.11E-04 | GPATCH8   | 23131 .  |
| 212488_at | 3.14E-05 | 4.42E-06 | COL5A1    | 1289 .   |
| 212489_at | 6.34E-06 | 5.55E-07 | COL5A1    | 1289 .   |
| 212494_at | 4.75E-04 | 1.33E-04 | TENC1     | 23371 .  |
| 212497_at | 9.80E-04 | 3.26E-04 | MAPK1IP1L | 93487 .  |
| 212501_at | 4.11E-05 | 6.22E-06 | CEBPB     | 1051 .   |
| 212503_s_ | 1.56E-06 | 8.96E-08 | DIP2C     | 22982 .  |
| 212504_at | 1.37E-05 | 1.54E-06 | DIP2C     | 22982 .  |
| 212505_s_ | 7.75E-04 | 2.45E-04 | KIAA0892  | 23383 .  |
| 212506_at | 9.24E-05 | 1.74E-05 | PICALM    | 8301 .   |
| 212507_at | 3.52E-04 | 9.26E-05 | TMEM131   | 23505 .  |
| 212508_at | 0.049519 | 0.033938 | MOAP1     | 64112 .  |

|           |          |          |          |          |
|-----------|----------|----------|----------|----------|
| 212509_s_ | 1.22E-05 | 1.32E-06 | MXRA7    | 439921 . |
| 212510_at | 2.04E-07 | 5.89E-09 | GPD1L    | 23171 .  |
| 212511_at | 0.02155  | 0.012917 | PICALM   | 8301 .   |
| 212513_s_ | 0.00991  | 0.005192 | USP33    | 23032 .  |
| 212514_x_ | 3.03E-05 | 4.23E-06 | DDX3X    | 1654 .   |
| 212516_at | 4.07E-06 | 3.13E-07 | ARAP1    | 116985 . |
| 212517_at | 0.007774 | 0.00391  | ATRN     | 8455 .   |
| 212518_at | 8.36E-07 | 3.90E-08 | PIP5K1C  | 23396 .  |
| 212519_at | 0.010373 | 0.005475 | UBE2E1   | 7324 .   |
| 212520_s_ | 7.00E-06 | 6.31E-07 | SMARCA4  | 6597 .   |
| 212521_s_ | 8.38E-04 | 2.70E-04 | PDE8A    | 5151 .   |
| 212522_at | 4.36E-08 | 7.49E-10 | PDE8A    | 5151 .   |
| 212523_s_ | 0.003317 | 0.001417 | KIAA0146 | 23514 .  |
| 212524_x_ | 0.00184  | 6.98E-04 | H2AFX    | 3014 .   |
| 212526_at | 0.038181 | 0.025096 | SPG20    | 23111 .  |
| 212527_at | 0.001977 | 7.61E-04 | PPPDE2   | 27351 .  |
| 212528_at | 0.001403 | 5.04E-04 |          | .        |
| 212530_at | 8.21E-06 | 7.77E-07 | NEK7     | 140609 . |
| 212532_s_ | 0.019697 | 0.011614 | LSM12    | 124801 . |
| 212533_at | 3.88E-07 | 1.41E-08 | WEE1     | 7465 .   |
| 212534_at | 0.001001 | 3.34E-04 | ZNF24    | 7572 .   |
| 212535_at | 0.001632 | 6.03E-04 | MEF2A    | 4205 .   |
| 212536_at | 0.009243 | 0.004785 | ATP11B   | 23200 .  |
| 212537_x_ | 0.018564 | 0.010842 | RPL17    | 6139 .   |
| 212539_at | 2.07E-04 | 4.77E-05 | CHD1L    | 9557 .   |
| 212540_at | 0.001733 | 6.49E-04 | CDC34    | 997 .    |
| 212541_at | 0.004211 | 0.001885 | FLAD1    | 80308 .  |
| 212542_s_ | 1.64E-06 | 9.62E-08 | PHIP     | 55023 .  |
| 212543_at | 0.030738 | 0.019523 | AIM1     | 202 .    |
| 212544_at | 0.001753 | 6.58E-04 | ZNHIT3   | 9326 .   |
| 212545_s_ | 2.25E-05 | 2.89E-06 | ZHX3     | 23051 .  |
| 212547_at | 4.39E-05 | 6.78E-06 | BRD3     | 8019 .   |
| 212551_at | 0.018889 | 0.011064 | CAP2     | 10486 .  |
| 212552_at | 1.81E-04 | 4.03E-05 | HPCAL1   | 3241 .   |

|           |          |          |                             |          |
|-----------|----------|----------|-----------------------------|----------|
| 212554_at | 0.047023 | 0.031973 | CAP2                        | 10486 .  |
| 212555_at | 4.13E-04 | 1.13E-04 | LOC729623 /// 5575 /// 7296 | 10486 .  |
| 212556_at | 1.12E-07 | 2.67E-09 | SCRIB                       | 23513 .  |
| 212557_at | 7.20E-04 | 2.23E-04 | ZNF451                      | 26036 .  |
| 212558_at | 5.40E-04 | 1.56E-04 | SPRY1                       | 10252 .  |
| 212559_at | 0.002725 | 0.00112  | LOC729623 /// 5575 /// 7296 | 10486 .  |
| 212560_at | 5.28E-07 | 2.11E-08 | SORL1                       | 6653 .   |
| 212562_s_ | 0.00736  | 0.003666 | CTSZ                        | 1522 .   |
| 212563_at | 5.98E-04 | 1.78E-04 | BOP1                        | 23246 .  |
| 212564_at | 0.012255 | 0.006665 | KCTD2                       | 23510 .  |
| 212565_at | 4.19E-04 | 1.14E-04 | STK38L                      | 23012 .  |
| 212566_at | 2.24E-06 | 1.45E-07 | MAP4                        | 4134 .   |
| 212567_s_ | 1.27E-04 | 2.59E-05 | MAP4                        | 4134 .   |
| 212568_s_ | 0.007522 | 0.003762 | DLAT                        | 1737 .   |
| 212570_at | 0.002864 | 0.001187 | ENDOD1                      | 23052 .  |
| 212571_at | 6.53E-04 | 1.98E-04 | CHD8                        | 57680 .  |
| 212572_at | 2.75E-06 | 1.87E-07 | STK38L                      | 23012 .  |
| 212573_at | 1.19E-04 | 2.40E-05 | ENDOD1                      | 23052 .  |
| 212576_at | 0.009749 | 0.005095 | MGRN1                       | 23295 .  |
| 212578_x_ | 1.72E-04 | 3.79E-05 | RPS17                       | 6218 .   |
| 212579_at | 0.007029 | 0.003473 | SMCHD1                      | 23347 .  |
| 212580_at | 1.97E-04 | 4.49E-05 | ERAP1                       | 51752 .  |
| 212581_x_ | 0.03281  | 0.021053 | GAPDH                       | 2597 .   |
| 212582_at | 0.002416 | 9.70E-04 | OSBPL8                      | 114882 . |
| 212583_at | 0.036368 | 0.023723 | AQR                         | 9716 .   |
| 212584_at | 0.002358 | 9.41E-04 | AQR                         | 9716 .   |
| 212586_at | 1.16E-05 | 1.23E-06 | CAST                        | 831 .    |
| 212587_s_ | 0.02707  | 0.016838 | PTPRC                       | 5788 .   |
| 212588_at | 0.015293 | 0.008644 | PTPRC                       | 5788 .   |
| 212589_at | 1.31E-04 | 2.70E-05 | RRAS2                       | 22800 .  |
| 212590_at | 5.93E-04 | 1.76E-04 | RRAS2                       | 22800 .  |
| 212591_at | 0.005514 | 0.002603 | RBM34                       | 23029 .  |
| 212592_at | 0.031796 | 0.020293 | IGJ                         | 3512 .   |
| 212593_s_ | 0.014067 | 0.00783  | PDCD4                       | 27250 .  |

|           |          |          |          |          |
|-----------|----------|----------|----------|----------|
| 212594_at | 0.020858 | 0.01244  | PDCD4    | 27250 .  |
| 212595_s_ | 4.54E-04 | 1.26E-04 | DAZAP2   | 9802 .   |
| 212596_s_ | 1.93E-04 | 4.37E-05 | HMGXB4   | 10042 .  |
| 212597_s_ | 0.001977 | 7.61E-04 | HMGXB4   | 10042 .  |
| 212598_at | 5.15E-05 | 8.31E-06 | WDFY3    | 23001 .  |
| 212599_at | 0.026783 | 0.016639 | AUTS2    | 26053 .  |
| 212600_s_ | 0.029129 | 0.018336 | UQCRC2   | 7385 .   |
| 212601_at | 6.30E-06 | 5.49E-07 | ZZEF1    | 23140 .  |
| 212602_at | 0.017055 | 0.009814 | WDFY3    | 23001 .  |
| 212603_at | 2.45E-06 | 1.62E-07 | MRPS31   | 10240 .  |
| 212604_at | 6.55E-07 | 2.82E-08 | MRPS31   | 10240 .  |
| 212605_s_ | 9.02E-05 | 1.69E-05 |          | .        |
| 212607_at | 0.001678 | 6.24E-04 | AKT3     | 10000 .  |
| 212608_s_ | 0.001102 | 3.76E-04 |          | .        |
| 212611_at | 0.006311 | 0.003053 | DTX4     | 23220 .  |
| 212613_at | 5.26E-04 | 1.51E-04 | BTN3A2   | 11118 .  |
| 212614_at | 7.84E-08 | 1.65E-09 | ARID5B   | 84159 .  |
| 212618_at | 0.025978 | 0.016053 | ZNF609   | 23060 .  |
| 212619_at | 0.040376 | 0.02677  | TMEM194A | 23306 .  |
| 212620_at | 6.07E-07 | 2.54E-08 | ZNF609   | 23060 .  |
| 212621_at | 2.57E-07 | 8.19E-09 | TMEM194A | 23306 .  |
| 212624_s_ | 5.01E-05 | 8.02E-06 | CHN1     | 1123 .   |
| 212625_at | 1.37E-04 | 2.85E-05 | STX10    | 8677 .   |
| 212626_x_ | 1.95E-06 | 1.21E-07 | HNRNPC   | 3183 .   |
| 212627_s_ | 0.004181 | 0.001868 | EXOSC7   | 23016 .  |
| 212628_at | 0.020522 | 0.01219  | PKN2     | 5586 .   |
| 212629_s_ | 9.19E-06 | 9.11E-07 | PKN2     | 5586 .   |
| 212630_at | 0.04308  | 0.028862 | EXOC3    | 11336 .  |
| 212631_at | 4.57E-05 | 7.15E-06 | STX7     | 8417 .   |
| 212632_at | 0.014128 | 0.007868 | STX7     | 8417 .   |
| 212637_s_ | 0.03096  | 0.019681 | WWP1     | 11059 .  |
| 212638_s_ | 2.75E-04 | 6.82E-05 | WWP1     | 11059 .  |
| 212640_at | 0.002597 | 0.001057 | PTPLB    | 201562 . |
| 212642_s_ | 0.011277 | 0.006042 | HIVEP2   | 3097 .   |



|           |          |          |                             |         |
|-----------|----------|----------|-----------------------------|---------|
| 212643_at | 0.019083 | 0.011193 | MAPK1IP1L                   | 93487 . |
| 212644_s_ | 0.037321 | 0.024452 | MAPK1IP1L                   | 93487 . |
| 212646_at | 6.47E-06 | 5.69E-07 | RFTN1                       | 23180 . |
| 212647_at | 3.84E-07 | 1.40E-08 | RRAS                        | 6237 .  |
| 212649_at | 0.019935 | 0.01178  | DHX29                       | 54505 . |
| 212650_at | 4.36E-05 | 6.73E-06 | EHBP1                       | 23301 . |
| 212651_at | 0.010413 | 0.005499 | RHOBTB1                     | 9886 .  |
| 212653_s_ | 3.83E-05 | 5.67E-06 | EHBP1                       | 23301 . |
| 212654_at | 6.88E-04 | 2.11E-04 | TPM2                        | 7169 .  |
| 212655_at | 0.002308 | 9.18E-04 | ZCCHC14                     | 23174 . |
| 212656_at | 3.01E-05 | 4.19E-06 | TSFM                        | 10102 . |
| 212657_s_ | 3.73E-04 | 9.93E-05 | IL1RN                       | 3557 .  |
| 212659_s_ | 0.00248  | 0.001001 | IL1RN                       | 3557 .  |
| 212662_at | 0.00131  | 4.64E-04 | PVR                         | 5817 .  |
| 212663_at | 2.55E-07 | 8.12E-09 | FKBP15                      | 23307 . |
| 212664_at | 0.002967 | 0.001237 | TUBB4                       | 10382 . |
| 212665_at | 0.009017 | 0.004644 | TIPARP                      | 25976 . |
| 212666_at | 0.028225 | 0.017675 | SMURF1                      | 57154 . |
| 212667_at | 7.02E-06 | 6.33E-07 | SPARC                       | 6678 .  |
| 212668_at | 0.043478 | 0.029187 | SMURF1                      | 57154 . |
| 212669_at | 0.041131 | 0.027356 | CAMK2G                      | 818 .   |
| 212670_at | 1.10E-05 | 1.15E-06 | ELN                         | 2006 .  |
| 212671_s_ | 0.027261 | 0.016972 | HLA-DQA1 ///  3117 /// 3118 |         |
| 212672_at | 0.004355 | 0.001963 | ATM                         | 472 .   |
| 212673_at | 0.03188  | 0.020357 | METAP1                      | 23173 . |
| 212674_s_ | 5.33E-06 | 4.43E-07 | DHX30                       | 22907 . |
| 212675_s_ | 0.005484 | 0.002585 | CEP68                       | 23177 . |
| 212677_s_ | 0.005855 | 0.002795 | CEP68                       | 23177 . |
| 212680_x_ | 0.001746 | 6.55E-04 | PPP1R14B                    | 26472 . |
| 212681_at | 0.011909 | 0.006439 | EPB41L3                     | 23136 . |
| 212682_s_ | 0.001108 | 3.78E-04 | LMF2                        | 91289 . |
| 212684_at | 0.001297 | 4.58E-04 | ZNF3                        | 7551 .  |
| 212685_s_ | 6.71E-04 | 2.05E-04 | TBL2                        | 26608 . |
| 212686_at | 4.04E-04 | 1.10E-04 | PPM1H                       | 57460 . |

|           |          |          |              |               |
|-----------|----------|----------|--------------|---------------|
| 212687_at | 1.77E-05 | 2.14E-06 | LIMS1        | 3987 .        |
| 212688_at | 6.84E-04 | 2.10E-04 | PIK3CB       | 5291 .        |
| 212690_at | 0.003896 | 0.001717 | DDHD2        | 23259 .       |
| 212691_at | 0.003636 | 0.001583 | NUP188       | 23511 .       |
| 212692_s_ | 6.85E-05 | 1.20E-05 | LRBA         | 987 .         |
| 212693_at | 2.58E-06 | 1.73E-07 | MDN1         | 23195 .       |
| 212694_s_ | 0.007393 | 0.003686 | PCCB         | 5096 .        |
| 212696_s_ | 6.42E-04 | 1.94E-04 | RNF4         | 6047 .        |
| 212698_s_ | 5.86E-07 | 2.44E-08 | 10-Sep       | 151011 .      |
| 212699_at | 0.005406 | 0.002541 | SCAMP5       | 192683 .      |
| 212700_x_ | 0.024403 | 0.014925 | PLEKHM1      | 9842 .        |
| 212702_s_ | 8.53E-09 | 8.71E-11 | BICD2        | 23299 .       |
| 212704_at | 0.001077 | 3.66E-04 | ZCCHC11      | 23318 .       |
| 212705_x_ | 8.55E-05 | 1.59E-05 | PNPLA2       | 57104 .       |
| 212707_s_ | 8.37E-07 | 3.92E-08 | LOC100133005 | 100133005 //. |
| 212708_at | 0.001775 | 6.67E-04 | MSL1         | 339287 .      |
| 212709_at | 1.61E-06 | 9.40E-08 | NUP160       | 23279 .       |
| 212710_at | 2.23E-04 | 5.24E-05 | CAMSAP1      | 157922 .      |
| 212711_at | 4.21E-04 | 1.15E-04 | CAMSAP1      | 157922 .      |
| 212712_at | 1.99E-06 | 1.25E-07 | CAMSAP1      | 157922 .      |
| 212713_at | 2.11E-07 | 6.17E-09 | MFAP4        | 4239 .        |
| 212714_at | 0.001541 | 5.63E-04 | LARP4        | 113251 .      |
| 212715_s_ | 1.72E-10 | 5.01E-13 | MICAL3       | 57553 .       |
| 212716_s_ | 0.003294 | 0.001405 | EIF3K        | 27335 .       |
| 212717_at | 6.86E-08 | 1.37E-09 | PLEKHM1      | 9842 .        |
| 212718_at | 0.004517 | 0.002052 | PAPOLA       | 10914 .       |
| 212719_at | 1.59E-07 | 4.24E-09 | PHLPP        | 23239 .       |
| 212720_at | 6.70E-04 | 2.04E-04 | PAPOLA       | 10914 .       |
| 212721_at | 1.69E-05 | 2.01E-06 | SFRS12       | 140890 .      |
| 212722_s_ | 9.44E-07 | 4.58E-08 | JMJD6        | 23210 .       |
| 212723_at | 5.90E-06 | 5.06E-07 | JMJD6        | 23210 .       |
| 212724_at | 4.66E-04 | 1.30E-04 | RND3         | 390 .         |
| 212725_s_ | 8.25E-05 | 1.52E-05 | TUG1         | 55000 .       |
| 212726_at | 6.60E-05 | 1.14E-05 | PHF2         | 5253 .        |

|           |          |          |           |          |
|-----------|----------|----------|-----------|----------|
| 212727_at | 0.014786 | 0.008307 | DLG3      | 1741 .   |
| 212728_at | 7.45E-05 | 1.33E-05 | DLG3      | 1741 .   |
| 212729_at | 8.69E-06 | 8.40E-07 | DLG3      | 1741 .   |
| 212730_at | 2.54E-05 | 3.39E-06 | SYNM      | 23336 .  |
| 212731_at | 0.021126 | 0.012626 | ANKRD46   | 157567 . |
| 212733_at | 8.46E-07 | 3.97E-08 | KIAA0226  | 9711 .   |
| 212735_at | 0.001807 | 6.82E-04 | KIAA0226  | 9711 .   |
| 212736_at | 0.001216 | 4.24E-04 | C16orf45  | 89927 .  |
| 212737_at | 0.014001 | 0.007784 | GM2A      | 2760 .   |
| 212738_at | 2.34E-07 | 7.23E-09 | ARHGAP19  | 84986 .  |
| 212740_at | 0.008592 | 0.00439  | PIK3R4    | 30849 .  |
| 212742_at | 4.01E-04 | 1.08E-04 | RNF115    | 27246 .  |
| 212747_at | 5.71E-05 | 9.47E-06 | ANKS1A    | 23294 .  |
| 212748_at | 3.67E-05 | 5.38E-06 | MKL1      | 57591 .  |
| 212749_s_ | 0.00725  | 0.003603 | RCHY1     | 25898 .  |
| 212750_at | 1.16E-04 | 2.33E-05 | PPP1R16B  | 26051 .  |
| 212751_at | 0.030105 | 0.019056 | UBE2N     | 7334 .   |
| 212752_at | 0.014029 | 0.007803 | CLASP1    | 23332 .  |
| 212754_s_ | 0.031986 | 0.020441 | MON2      | 23041 .  |
| 212755_at | 0.02961  | 0.018691 | MON2      | 23041 .  |
| 212756_s_ | 0.03691  | 0.024131 | UBR2      | 23304 .  |
| 212757_s_ | 0.003134 | 0.001323 | CAMK2G    | 818 .    |
| 212758_s_ | 5.12E-05 | 8.25E-06 | ZEB1      | 6935 .   |
| 212759_s_ | 7.73E-05 | 1.40E-05 | TCF7L2    | 6934 .   |
| 212760_at | 0.049951 | 0.034294 | UBR2      | 23304 .  |
| 212762_s_ | 0.001131 | 3.88E-04 | TCF7L2    | 6934 .   |
| 212763_at | 1.62E-06 | 9.47E-08 | CAMSAP1L1 | 23271 .  |
| 212764_at | 1.40E-05 | 1.59E-06 | ZEB1      | 6935 .   |
| 212765_at | 0.006495 | 0.00316  | CAMSAP1L1 | 23271 .  |
| 212766_s_ | 2.06E-04 | 4.75E-05 | ISG20L2   | 81875 .  |
| 212769_at | 1.81E-06 | 1.10E-07 | TLE3      | 7090 .   |
| 212770_at | 1.87E-05 | 2.29E-06 | TLE3      | 7090 .   |
| 212771_at | 7.61E-04 | 2.39E-04 | FAM171A1  | 221061 . |
| 212772_s_ | 2.44E-05 | 3.22E-06 | ABCA2     | 20 .     |

|           |          |          |          |          |
|-----------|----------|----------|----------|----------|
| 212773_s_ | 0.046146 | 0.031277 | TOMM20   | 9804 .   |
| 212777_at | 0.00305  | 0.001281 | SOS1     | 6654 .   |
| 212778_at | 5.46E-04 | 1.59E-04 | PACS2    | 23241 .  |
| 212780_at | 5.07E-04 | 1.45E-04 | SOS1     | 6654 .   |
| 212781_at | 0.010283 | 0.005421 | RBBP6    | 5930 .   |
| 212783_at | 9.00E-07 | 4.31E-08 | RBBP6    | 5930 .   |
| 212784_at | 0.015506 | 0.008787 | CIC      | 23152 .  |
| 212785_s_ | 0.007102 | 0.003516 | LARP7    | 51574 .  |
| 212786_at | 8.18E-05 | 1.50E-05 | CLEC16A  | 23274 .  |
| 212787_at | 0.00729  | 0.003627 | YLPM1    | 56252 .  |
| 212788_x_ | 7.65E-04 | 2.41E-04 | FTL      | 2512 .   |
| 212789_at | 3.63E-05 | 5.29E-06 | NCAPD3   | 23310 .  |
| 212790_x_ | 0.015954 | 0.009087 | RPL13A   | 23521 .  |
| 212791_at | 1.80E-07 | 5.00E-09 | C1orf216 | 127703 . |
| 212792_at | 2.92E-04 | 7.33E-05 | DPY19L1  | 23333 .  |
| 212793_at | 1.94E-06 | 1.20E-07 | DAAM2    | 23500 .  |
| 212794_s_ | 0.003102 | 0.001307 | KIAA1033 | 23325 .  |
| 212795_at | 1.19E-04 | 2.40E-05 | KIAA1033 | 23325 .  |
| 212796_s_ | 1.33E-08 | 1.50E-10 | TBC1D2B  | 23102 .  |
| 212797_at | 0.001043 | 3.51E-04 | SORT1    | 6272 .   |
| 212799_at | 0.030335 | 0.019227 | STX6     | 10228 .  |
| 212801_at | 0.001262 | 4.43E-04 | CIT      | 11113 .  |
| 212802_s_ | 1.22E-06 | 6.45E-08 | GAPVD1   | 26130 .  |
| 212803_at | 2.51E-04 | 6.08E-05 | NAB2     | 4665 .   |
| 212804_s_ | 2.43E-04 | 5.83E-05 | GAPVD1   | 26130 .  |
| 212805_at | 0.003902 | 0.001722 | PRUNE2   | 158471 . |
| 212806_at | 2.01E-05 | 2.50E-06 | PRUNE2   | 158471 . |
| 212807_s_ | 0.013423 | 0.007413 | SORT1    | 6272 .   |
| 212808_at | 1.83E-04 | 4.12E-05 | NFATC2IP | 84901 .  |
| 212809_at | 0.005795 | 0.002761 | NFATC2IP | 84901 .  |
| 212810_s_ | 1.02E-07 | 2.35E-09 | SLC1A4   | 6509 .   |
| 212811_x_ | 4.37E-06 | 3.44E-07 | SLC1A4   | 6509 .   |
| 212812_at | 1.28E-06 | 6.91E-08 |          | .        |
| 212814_at | 0.043797 | 0.029441 | AHCYL2   | 23382 .  |

|           |          |          |          |             |
|-----------|----------|----------|----------|-------------|
| 212815_at | 0.002316 | 9.22E-04 | ASCC3    | 10973 .     |
| 212816_s_ | 0.020643 | 0.012279 | CBS      | 875 .       |
| 212817_at | 2.75E-04 | 6.83E-05 | DNAJB5   | 25822 .     |
| 212818_s_ | 0.001387 | 4.97E-04 | ASB1     | 51665 .     |
| 212819_at | 0.001912 | 7.31E-04 | ASB1     | 51665 .     |
| 212820_at | 3.68E-04 | 9.76E-05 | DMXL2    | 23312 .     |
| 212821_at | 5.85E-04 | 1.73E-04 | PLEKHG3  | 26030 .     |
| 212822_at | 6.73E-05 | 1.17E-05 | HEG1     | 57493 .     |
| 212823_s_ | 2.37E-04 | 5.66E-05 | PLEKHG3  | 26030 .     |
| 212825_at | 1.37E-05 | 1.54E-06 | PAXIP1   | 22976 .     |
| 212828_at | 8.64E-06 | 8.35E-07 | SYNJ2    | 8871 .      |
| 212830_at | 3.85E-06 | 2.90E-07 | MEGF9    | 1955 .      |
| 212832_s_ | 2.85E-06 | 1.97E-07 | CKAP5    | 9793 .      |
| 212833_at | 0.001154 | 3.97E-04 | SLC25A46 | 91137 .     |
| 212834_at | 0.040232 | 0.026662 | DDX52    | 11056 .     |
| 212836_at | 2.43E-05 | 3.21E-06 | POLD3    | 10714 .     |
| 212839_s_ | 5.83E-04 | 1.72E-04 | TROVE2   | 6738 .      |
| 212843_at | 0.012039 | 0.006522 | NCAM1    | 4684 .      |
| 212844_at | 0.001435 | 5.17E-04 | RRP1B    | 23076 .     |
| 212845_at | 0.01344  | 0.007424 | SAMD4A   | 23034 .     |
| 212846_at | 8.85E-06 | 8.64E-07 | RRP1B    | 23076 .     |
| 212847_at | 7.58E-06 | 7.03E-07 | FUBP1    | 8880 .      |
| 212848_s_ | 1.02E-04 | 1.98E-05 | C9orf3   | 84909 .     |
| 212850_s_ | 0.001146 | 3.94E-04 | LRP4     | 4038 .      |
| 212851_at | 0.004384 | 0.00198  | DCUN1D4  | 23142 .     |
| 212852_s_ | 0.001164 | 4.02E-04 | TROVE2   | 6738 .      |
| 212853_at | 0.01522  | 0.008595 | DCUN1D4  | 23142 .     |
| 212854_x_ | 6.75E-06 | 6.01E-07 | NBPF10   | 100132406 . |
| 212857_x_ | 1.22E-04 | 2.47E-05 | SUB1     | 10923 .     |
| 212858_at | 6.98E-07 | 3.07E-08 | PAQR4    | 124222 .    |
| 212860_at | 0.001749 | 6.56E-04 | ZDHHC18  | 84243 .     |
| 212861_at | 6.29E-08 | 1.21E-09 | MFSD5    | 84975 .     |
| 212863_x_ | 0.042256 | 0.02823  | CTBP1    | 1487 .      |
| 212865_s_ | 0.036509 | 0.023828 | COL14A1  | 7373 .      |

|           |          |          |              |                      |
|-----------|----------|----------|--------------|----------------------|
| 212866_at | 2.65E-04 | 6.52E-05 | R3HCC1       | 203069 .             |
| 212869_x_ | 0.015974 | 0.009102 | TPT1         | 7178 .               |
| 212870_at | 0.036814 | 0.024061 | SOS2         | 6655 .               |
| 212871_at | 1.87E-04 | 4.21E-05 | MAPKAPK5     | 8550 .               |
| 212872_s_ | 0.035914 | 0.023376 | MED20        | 9477 .               |
| 212873_at | 7.44E-04 | 2.32E-04 | HMHA1        | 23526 .              |
| 212874_at | 2.23E-04 | 5.24E-05 | LOC100129500 | 100129500 .          |
| 212875_s_ | 5.47E-04 | 1.59E-04 | C2CD2        | 25966 .              |
| 212876_at | 1.11E-04 | 2.20E-05 | B4GALT4      | 8702 .               |
| 212878_s_ | 5.75E-04 | 1.69E-04 | KLC1         | 3831 .               |
| 212879_x_ | 0.01923  | 0.011293 | LOC100134427 | 100134427 //.        |
| 212880_at | 0.027042 | 0.016817 | WDR7         | 23335 .              |
| 212881_at | 5.08E-05 | 8.18E-06 | PIAS4        | 51588 .              |
| 212883_at | 1.82E-05 | 2.20E-06 | LOC100129500 | 100129500 .          |
| 212884_x_ | 9.06E-12 | 1.19E-14 | APOE         | 348 .                |
| 212885_at | 2.19E-06 | 1.40E-07 | MPHOSPH10    | 10199 .              |
| 212887_at | 3.49E-04 | 9.15E-05 | SEC23A       | 10484 .              |
| 212888_at | 0.01453  | 0.008132 | DICER1       | 23405 .              |
| 212890_at | 4.03E-09 | 3.23E-11 | SLC38A10     | 124565 .             |
| 212891_s_ | 9.28E-04 | 3.05E-04 | GADD45GIP1   | 90480 .              |
| 212894_at | 5.71E-06 | 4.85E-07 | SUPV3L1      | 6832 .               |
| 212895_s_ | 3.65E-06 | 2.72E-07 | ABR          | 29 .                 |
| 212896_at | 1.63E-05 | 1.92E-06 | SKIV2L2      | 23517 .              |
| 212897_at | 0.006346 | 0.003074 | CDC2L6       | 23097 .              |
| 212898_at | 0.001015 | 3.40E-04 | KIAA0406     | 9675 .               |
| 212899_at | 0.001187 | 4.12E-04 | CDC2L6       | 23097 .              |
| 212901_s_ | 0.034761 | 0.022497 | CSTF2T       | 23283 .              |
| 212904_at | 7.73E-05 | 1.40E-05 | LRRC47       | 57470 .              |
| 212908_at | 3.83E-04 | 1.02E-04 | DNAJC16      | 23341 .              |
| 212909_at | 4.02E-05 | 6.02E-06 | LYPD1        | 116372 .             |
| 212910_at | 0.012151 | 0.006595 | THAP11       | 57215 .              |
| 212911_at | 0.00636  | 0.003081 | DNAJC16      | 23341 .              |
| 212912_at | 1.87E-04 | 4.22E-05 | RPS6KA2      | 6196 .               |
| 212913_at | 3.64E-07 | 1.31E-08 | C6orf26      | /// MS401251 /// 4/. |

|           |          |          |                            |          |
|-----------|----------|----------|----------------------------|----------|
| 212914_at | 6.11E-04 | 1.82E-04 | CBX7                       | 23492 .  |
| 212915_at | 1.86E-04 | 4.19E-05 | PDZRN3                     | 23024 .  |
| 212916_at | 0.002996 | 0.001253 | PHF8                       | 23133 .  |
| 212919_at | 1.74E-09 | 1.11E-11 | DCP2                       | 167227 . |
| 212920_at | 0.00112  | 3.83E-04 |                            | .        |
| 212921_at | 1.24E-06 | 6.57E-08 | SMYD2                      | 56950 .  |
| 212922_s_ | 6.35E-06 | 5.56E-07 | SMYD2                      | 56950 .  |
| 212923_s_ | 2.66E-05 | 3.58E-06 | C6orf145                   | 221749 . |
| 212924_s_ | 0.042253 | 0.028226 | LSM4                       | 25804 .  |
| 212925_at | 6.21E-05 | 1.05E-05 | C19orf21                   | 126353 . |
| 212927_at | 0.00426  | 0.00191  | SMC5                       | 23137 .  |
| 212929_s_ | 0.032926 | 0.021144 | FAM21A /// FA253725 /// 38 | .        |
| 212931_at | 9.36E-06 | 9.33E-07 | TCF20                      | 6942 .   |
| 212932_at | 6.71E-05 | 1.16E-05 | RAB3GAP1                   | 22930 .  |
| 212935_at | 8.78E-05 | 1.64E-05 | MCF2L                      | 23263 .  |
| 212936_at | 3.82E-04 | 1.02E-04 | FAM172A                    | 83989 .  |
| 212937_s_ | 5.98E-07 | 2.49E-08 | COL6A1                     | 1291 .   |
| 212938_at | 2.54E-06 | 1.70E-07 | COL6A1                     | 1291 .   |
| 212940_at | 2.52E-04 | 6.11E-05 | COL6A1                     | 1291 .   |
| 212942_s_ | 8.83E-11 | 2.21E-13 | KIAA1199                   | 57214 .  |
| 212943_at | 4.27E-05 | 6.55E-06 | KIAA0528                   | 9847 .   |
| 212944_at | 0.025664 | 0.01583  | SLC5A3                     | 6526 .   |
| 212945_s_ | 1.97E-05 | 2.45E-06 | MGA                        | 23269 .  |
| 212946_at | 0.005023 | 0.002328 | KIAA0564                   | 23078 .  |
| 212947_at | 2.68E-05 | 3.61E-06 | SLC9A8                     | 23315 .  |
| 212948_at | 1.08E-05 | 1.12E-06 | CAMTA2                     | 23125 .  |
| 212949_at | 6.52E-06 | 5.75E-07 | NCAPH                      | 23397 .  |
| 212952_at | 0.005389 | 0.002532 |                            | .        |
| 212954_at | 0.017241 | 0.00994  | DYRK4                      | 8798 .   |
| 212955_s_ | 1.82E-05 | 2.21E-06 | POLR2I                     | 5438 .   |
| 212956_at | 7.13E-04 | 2.21E-04 | TBC1D9                     | 23158 .  |
| 212957_s_ | 0.003203 | 0.001359 | LOC92249                   | 92249 .  |
| 212958_x_ | 1.42E-06 | 7.93E-08 | PAM                        | 5066 .   |
| 212961_x_ | 1.52E-06 | 8.72E-08 | CXorf40B                   | 541578 . |

|           |          |          |         |          |
|-----------|----------|----------|---------|----------|
| 212962_at | 6.47E-04 | 1.96E-04 | SYDE1   | 85360 .  |
| 212963_at | 0.014781 | 0.008304 | TM2D1   | 83941 .  |
| 212964_at | 5.12E-11 | 1.11E-13 | HIC2    | 23119 .  |
| 212965_at | 3.91E-07 | 1.43E-08 | HIC2    | 23119 .  |
| 212966_at | 8.43E-09 | 8.53E-11 | HIC2    | 23119 .  |
| 212967_x_ | 2.19E-04 | 5.14E-05 | NAP1L1  | 4673 .   |
| 212968_at | 0.008433 | 0.004299 | RFNG    | 5986 .   |
| 212969_x_ | 8.69E-05 | 1.62E-05 | EML3    | 256364 . |
| 212970_at | 0.00882  | 0.004527 | APBB2   | 323 .    |
| 212971_at | 0.018187 | 0.010585 | CARS    | 833 .    |
| 212973_at | 3.44E-06 | 2.52E-07 | RPIA    | 22934 .  |
| 212975_at | 1.32E-06 | 7.22E-08 | DENND3  | 22898 .  |
| 212976_at | 9.23E-04 | 3.03E-04 | LRRC8B  | 23507 .  |
| 212977_at | 0.025677 | 0.01584  | CXCR7   | 57007 .  |
| 212978_at | 2.57E-05 | 3.44E-06 | LRRC8B  | 23507 .  |
| 212980_at | 0.0082   | 0.004159 | USP34   | 9736 .   |
| 212981_s_ | 0.035994 | 0.023437 | FAM115A | 9747 .   |
| 212983_at | 3.05E-04 | 7.77E-05 | HRAS    | 3265 .   |
| 212987_at | 3.69E-06 | 2.75E-07 | FBXO9   | 26268 .  |
| 212988_x_ | 0.001147 | 3.94E-04 | ACTG1   | 71 .     |
| 212989_at | 6.86E-04 | 2.10E-04 | SGMS1   | 259230 . |
| 212990_at | 0.019206 | 0.011276 | SYNJ1   | 8867 .   |
| 212991_at | 2.83E-07 | 9.39E-09 | FBXO9   | 26268 .  |
| 212992_at | 6.94E-05 | 1.22E-05 | AHNAK2  | 113146 . |
| 212993_at | 1.39E-05 | 1.57E-06 | NACC2   | 138151 . |
| 212994_at | 5.48E-07 | 2.23E-08 | THOC2   | 57187 .  |
| 212995_x_ | 7.40E-04 | 2.31E-04 | FAM128B | 80097 .  |
| 212996_s_ | 3.05E-05 | 4.28E-06 | URB1    | 9875 .   |
| 213001_at | 7.71E-06 | 7.18E-07 | ANGPTL2 | 23452 .  |
| 213002_at | 0.01716  | 0.009886 | MARCKS  | 4082 .   |
| 213003_s_ | 0.003217 | 0.001366 | CEBPD   | 1052 .   |
| 213004_at | 9.68E-07 | 4.74E-08 | ANGPTL2 | 23452 .  |
| 213006_at | 1.60E-04 | 3.47E-05 | CEBPD   | 1052 .   |
| 213007_at | 4.42E-07 | 1.70E-08 | FANCI   | 55215 .  |



|           |          |          |                             |          |
|-----------|----------|----------|-----------------------------|----------|
| 213008_at | 1.93E-07 | 5.50E-09 | FANCI                       | 55215 .  |
| 213010_at | 2.51E-04 | 6.09E-05 | PRKCDBP                     | 112464 . |
| 213011_s_ | 0.003985 | 0.001764 | TPI1                        | 7167 .   |
| 213012_at | 1.50E-06 | 8.51E-08 | NEDD4                       | 4734 .   |
| 213013_at | 0.012243 | 0.006656 | LOC644172 /// 644172 /// 94 | .        |
| 213014_at | 0.00554  | 0.002618 | MAPK8IP1                    | 9479 .   |
| 213015_at | 0.010615 | 0.005627 | BBX                         | 56987 .  |
| 213017_at | 0.003649 | 0.001589 | ABHD3                       | 171586 . |
| 213018_at | 0.031321 | 0.019944 | GATAD1                      | 57798 .  |
| 213022_s_ | 3.11E-04 | 7.94E-05 | UTRN                        | 7402 .   |
| 213023_at | 1.92E-06 | 1.18E-07 | UTRN                        | 7402 .   |
| 213024_at | 0.003856 | 0.001697 | TMF1                        | 7110 .   |
| 213025_at | 0.00698  | 0.003445 | THUMPD1                     | 55623 .  |
| 213026_at | 0.001574 | 5.78E-04 | ATG12                       | 9140 .   |
| 213027_at | 0.013685 | 0.007582 | TROVE2                      | 6738 .   |
| 213028_at | 7.76E-04 | 2.45E-04 | NFRKB                       | 4798 .   |
| 213029_at | 0.020303 | 0.012038 | NFIB                        | 4781 .   |
| 213030_s_ | 0.012708 | 0.006958 | PLXNA2                      | 5362 .   |
| 213031_s_ | 1.87E-07 | 5.28E-09 | WDR73                       | 84942 .  |
| 213032_at | 8.16E-04 | 2.61E-04 | NFIB                        | 4781 .   |
| 213033_s_ | 0.005754 | 0.002736 | NFIB                        | 4781 .   |
| 213034_at | 0.024842 | 0.015244 | KIAA0999                    | 23387 .  |
| 213035_at | 3.11E-05 | 4.38E-06 | ANKRD28                     | 23243 .  |
| 213037_x_ | 0.002697 | 0.001105 | STAU1                       | 6780 .   |
| 213038_at | 0.002713 | 0.001113 | RNF19B                      | 127544 . |
| 213042_s_ | 0.006188 | 0.002982 | ATP2A3                      | 489 .    |
| 213043_s_ | 0.010005 | 0.00525  | MED24                       | 9862 .   |
| 213044_at | 0.011404 | 0.006122 | ROCK1                       | 6093 .   |
| 213045_at | 0.003427 | 0.001474 | MAST3                       | 23031 .  |
| 213046_at | 0.001842 | 6.99E-04 | PABPN1                      | 8106 .   |
| 213047_x_ | 5.92E-06 | 5.09E-07 | SET                         | 6418 .   |
| 213048_s_ | 7.03E-09 | 6.63E-11 |                             | .        |
| 213049_at | 0.023987 | 0.01463  | GARNL1                      | 253959 . |
| 213050_at | 8.32E-07 | 3.88E-08 | COBL                        | 23242 .  |

|           |          |          |              |             |
|-----------|----------|----------|--------------|-------------|
| 213053_at | 0.001811 | 6.84E-04 | HAUS5        | 23354 .     |
| 213054_at | 4.29E-05 | 6.58E-06 | HAUS5        | 23354 .     |
| 213055_at | 9.76E-04 | 3.24E-04 | CD47         | 961 .       |
| 213056_at | 9.69E-04 | 3.21E-04 | FRMD4B       | 23150 .     |
| 213058_at | 1.49E-04 | 3.17E-05 | TTC28        | 23331 .     |
| 213059_at | 8.16E-07 | 3.78E-08 | CREB3L1      | 90993 .     |
| 213061_s_ | 0.004857 | 0.002238 | NTAN1        | 123803 .    |
| 213062_at | 0.002873 | 0.001191 | NTAN1        | 123803 .    |
| 213063_at | 0.012297 | 0.00669  | ZC3H14       | 79882 .     |
| 213064_at | 0.002169 | 8.51E-04 | ZC3H14       | 79882 .     |
| 213065_at | 0.022878 | 0.013845 | ZFC3H1       | 196441 .    |
| 213066_at | 4.40E-04 | 1.21E-04 | RUSC2        | 9853 .      |
| 213067_at | 0.004914 | 0.002269 | MYH10        | 4628 .      |
| 213068_at | 1.35E-05 | 1.51E-06 | DPT          | 1805 .      |
| 213069_at | 9.18E-05 | 1.73E-05 | HEG1         | 57493 .     |
| 213070_at | 0.0031   | 0.001306 | PIK3C2A      | 5286 .      |
| 213071_at | 2.43E-04 | 5.84E-05 | DPT          | 1805 .      |
| 213074_at | 1.06E-05 | 1.09E-06 | PHIP         | 55023 .     |
| 213075_at | 3.91E-04 | 1.05E-04 | OLFML2A      | 169611 .    |
| 213076_at | 9.48E-05 | 1.80E-05 | ITPKC        | 80271 .     |
| 213077_at | 0.001894 | 7.23E-04 | YTHDC2       | 64848 .     |
| 213079_at | 0.024655 | 0.015107 | TSR2         | 90121 .     |
| 213080_x_ | 0.003566 | 0.001545 | RPL5         | 6125 .      |
| 213081_at | 0.01739  | 0.010039 | ZBTB22       | 9278 .      |
| 213085_s_ | 1.58E-06 | 9.15E-08 | WWC1         | 23286 .     |
| 213086_s_ | 1.87E-04 | 4.21E-05 | CSNK1A1      | 1452 .      |
| 213088_s_ | 1.27E-05 | 1.39E-06 | DNAJC9       | 23234 .     |
| 213089_at | 3.93E-06 | 2.98E-07 | LOC100272216 | 100272216 . |
| 213090_s_ | 4.32E-07 | 1.65E-08 | TAF4         | 6874 .      |
| 213091_at | 4.45E-04 | 1.23E-04 | CRTC1        | 23373 .     |
| 213092_x_ | 5.33E-04 | 1.54E-04 | DNAJC9       | 23234 .     |
| 213093_at | 1.61E-06 | 9.39E-08 | PRKCA        | 5578 .      |
| 213095_x_ | 6.30E-04 | 1.89E-04 | AIF1         | 199 .       |
| 213097_s_ | 2.61E-06 | 1.75E-07 | DNAJC2       | 27000 .     |

|           |          |          |           |          |
|-----------|----------|----------|-----------|----------|
| 213100_at | 0.00297  | 0.001239 | UNC5B     | 219699 . |
| 213101_s_ | 2.87E-04 | 7.17E-05 | ACTR3     | 10096 .  |
| 213102_at | 1.73E-04 | 3.83E-05 | ACTR3     | 10096 .  |
| 213103_at | 1.27E-06 | 6.84E-08 | STARD13   | 90627 .  |
| 213105_s_ | 0.003652 | 0.001591 | C16orf42  | 115939 . |
| 213106_at | 4.43E-05 | 6.87E-06 | ATP8A1    | 10396 .  |
| 213107_at | 0.012002 | 0.006497 | TNIK      | 23043 .  |
| 213108_at | 3.21E-07 | 1.12E-08 | CAMK2A    | 815 .    |
| 213109_at | 0.040039 | 0.026514 | TNIK      | 23043 .  |
| 213110_s_ | 0.002381 | 9.52E-04 | COL4A5    | 1287 .   |
| 213112_s_ | 9.04E-05 | 1.70E-05 | SQSTM1    | 8878 .   |
| 213113_s_ | 0.047503 | 0.03235  | SLC43A3   | 29015 .  |
| 213114_at | 0.002658 | 0.001086 |           | .        |
| 213115_at | 1.40E-04 | 2.94E-05 | ATG4A     | 115201 . |
| 213116_at | 0.001097 | 3.74E-04 | NEK3      | 4752 .   |
| 213119_at | 0.015731 | 0.008934 | SLC36A1   | 206358 . |
| 213120_at | 0.027469 | 0.017122 | UHRF1BP1L | 23074 .  |
| 213122_at | 0.003404 | 0.001462 | TSPYL5    | 85453 .  |
| 213123_at | 0.002494 | 0.001007 | MFAP3     | 4238 .   |
| 213124_at | 1.38E-04 | 2.89E-05 | ZNF473    | 25888 .  |
| 213125_at | 0.003159 | 0.001336 | OLFML2B   | 25903 .  |
| 213126_at | 0.001615 | 5.96E-04 | MED8      | 112950 . |
| 213127_s_ | 3.60E-04 | 9.49E-05 | MED8      | 112950 . |
| 213129_s_ | 6.43E-05 | 1.10E-05 | GCSH      | 2653 .   |
| 213130_at | 3.81E-06 | 2.87E-07 | ZNF473    | 25888 .  |
| 213131_at | 0.013717 | 0.007604 | OLFM1     | 10439 .  |
| 213132_s_ | 1.37E-04 | 2.87E-05 | MCAT      | 27349 .  |
| 213133_s_ | 8.80E-05 | 1.64E-05 | GCSH      | 2653 .   |
| 213135_at | 0.001815 | 6.86E-04 | TIAM1     | 7074 .   |
| 213136_at | 0.006071 | 0.002918 | PTPN2     | 5771 .   |
| 213137_s_ | 0.00887  | 0.004557 | PTPN2     | 5771 .   |
| 213138_at | 0.001336 | 4.75E-04 | ARID5A    | 10865 .  |
| 213139_at | 7.81E-05 | 1.42E-05 | SNAI2     | 6591 .   |
| 213140_s_ | 2.94E-05 | 4.08E-06 | SS18L1    | 26039 .  |

|           |          |          |          |          |
|-----------|----------|----------|----------|----------|
| 213141_at | 4.17E-05 | 6.34E-06 | PSKH1    | 5681 .   |
| 213143_at | 0.01331  | 0.007343 | C2orf72  | 257407 . |
| 213144_at | 1.12E-06 | 5.74E-08 | GOSR2    | 9570 .   |
| 213145_at | 1.59E-04 | 3.45E-05 | FBXL14   | 144699 . |
| 213146_at | 0.038442 | 0.025297 | KDM6B    | 23135 .  |
| 213147_at | 3.54E-05 | 5.12E-06 | HOXA10   | 3206 .   |
| 213148_at | 0.001847 | 7.01E-04 | C2orf72  | 257407 . |
| 213149_at | 0.006346 | 0.003074 | DLAT     | 1737 .   |
| 213150_at | 1.25E-06 | 6.70E-08 | HOXA10   | 3206 .   |
| 213151_s_ | 0.01316  | 0.007248 | 7-Sep    | 989 .    |
| 213152_s_ | 2.31E-04 | 5.47E-05 | SFRS2B   | 10929 .  |
| 213153_at | 0.008669 | 0.004436 | SETD1B   | 23067 .  |
| 213154_s_ | 1.09E-04 | 2.14E-05 | BICD2    | 23299 .  |
| 213155_at | 0.001037 | 3.49E-04 | WSCD1    | 23302 .  |
| 213156_at | 6.65E-04 | 2.02E-04 |          | .        |
| 213157_s_ | 1.88E-04 | 4.24E-05 | WSCD1    | 23302 .  |
| 213158_at | 0.00225  | 8.90E-04 |          | .        |
| 213161_at | 0.001793 | 6.76E-04 | C9orf97  | 158427 . |
| 213162_at | 0.012452 | 0.006789 | DYNC1LI2 | 1783 .   |
| 213166_x_ | 8.04E-04 | 2.56E-04 | FAM128A  | 653784 . |
| 213167_s_ | 0.001946 | 7.47E-04 | SLC5A3   | 6526 .   |
| 213169_at | 3.08E-07 | 1.05E-08 | SEMA5A   | 9037 .   |
| 213170_at | 0.002285 | 9.07E-04 | GPX7     | 2882 .   |
| 213171_s_ | 9.60E-05 | 1.83E-05 | MMP24    | 10893 .  |
| 213172_at | 2.12E-08 | 2.84E-10 | TTC9     | 23508 .  |
| 213173_at | 0.016498 | 0.009447 | PCNX     | 22990 .  |
| 213174_at | 1.20E-05 | 1.30E-06 | TTC9     | 23508 .  |
| 213175_s_ | 8.12E-04 | 2.59E-04 | SNRPB    | 6628 .   |
| 213176_s_ | 0.002236 | 8.83E-04 | LTBP4    | 8425 .   |
| 213177_at | 2.29E-06 | 1.48E-07 | MAPK8IP3 | 23162 .  |
| 213179_at | 5.96E-06 | 5.14E-07 | RQCD1    | 9125 .   |
| 213180_s_ | 0.003815 | 0.001675 | GOSR2    | 9570 .   |
| 213182_x_ | 0.013303 | 0.007338 | CDKN1C   | 1028 .   |
| 213183_s_ | 0.019962 | 0.0118   | CDKN1C   | 1028 .   |

|           |          |          |                              |          |
|-----------|----------|----------|------------------------------|----------|
| 213184_at | 7.97E-04 | 2.53E-04 | SENP5                        | 205564 . |
| 213185_at | 0.025044 | 0.015387 | KIAA0556                     | 23247 .  |
| 213186_at | 5.55E-04 | 1.62E-04 | DZIP3                        | 9666 .   |
| 213187_x_ | 5.67E-04 | 1.66E-04 | FTL                          | 2512 .   |
| 213188_s_ | 4.32E-06 | 3.38E-07 | MINA                         | 84864 .  |
| 213189_at | 2.70E-06 | 1.83E-07 | MINA                         | 84864 .  |
| 213190_at | 0.003239 | 0.001376 | COG7                         | 91949 .  |
| 213191_at | 1.09E-05 | 1.14E-06 | TICAM1                       | 148022 . |
| 213192_at | 0.047623 | 0.032443 | THAP3                        | 90326 .  |
| 213193_x_ | 3.08E-04 | 7.88E-05 | TRBC1                        | 28639 .  |
| 213196_at | 0.018519 | 0.010812 | ZNF629                       | 23361 .  |
| 213199_at | 1.64E-06 | 9.66E-08 | C2CD3                        | 26005 .  |
| 213200_at | 3.60E-04 | 9.50E-05 | SYP                          | 6855 .   |
| 213201_s_ | 4.41E-05 | 6.82E-06 | TNNT1                        | 7138 .   |
| 213205_s_ | 0.001404 | 5.04E-04 | RAD54L2                      | 23132 .  |
| 213206_at | 6.03E-04 | 1.79E-04 | GOSR2                        | 9570 .   |
| 213207_s_ | 6.37E-05 | 1.09E-05 | GOSR2                        | 9570 .   |
| 213212_x_ | 1.15E-05 | 1.22E-06 | FLJ40113 /// LC374650 /// 4. |          |
| 213213_at | 3.13E-06 | 2.23E-07 | DIDO1                        | 11083 .  |
| 213214_x_ | 8.78E-05 | 1.64E-05 | ACTG1                        | 71 .     |
| 213215_at | 0.011286 | 0.006047 | AP3S2                        | 10239 .  |
| 213216_at | 2.64E-07 | 8.49E-09 | OTUD3                        | 23252 .  |
| 213217_at | 1.19E-07 | 2.87E-09 | ADCY2 /// LOC 100133953 //.  |          |
| 213218_at | 0.003679 | 0.001604 | ZNF187                       | 7741 .   |
| 213221_s_ | 7.58E-05 | 1.36E-05 | SIK2                         | 23235 .  |
| 213223_at | 0.007133 | 0.003533 | RPL28                        | 6158 .   |
| 213224_s_ | 0.046813 | 0.031807 | NCRNA00081                   | 92482 .  |
| 213225_at | 0.006827 | 0.003354 | PPM1B                        | 5495 .   |
| 213226_at | 1.76E-06 | 1.06E-07 | CCNA2                        | 890 .    |
| 213227_at | 0.001524 | 5.56E-04 | PGRMC2                       | 10424 .  |
| 213228_at | 0.007124 | 0.003528 | PDE8B                        | 8622 .   |
| 213229_at | 0.031609 | 0.020155 | DICER1                       | 23405 .  |
| 213230_at | 3.70E-04 | 9.82E-05 | CDR2L                        | 30850 .  |
| 213231_at | 0.011248 | 0.006025 | DMWD                         | 1762 .   |

|           |          |          |                             |          |
|-----------|----------|----------|-----------------------------|----------|
| 213232_at | 0.027038 | 0.016813 | KIAA1467                    | 57613 .  |
| 213234_at | 0.004353 | 0.001962 | KIAA1467                    | 57613 .  |
| 213235_at | 6.79E-07 | 2.97E-08 | C16orf88                    | 400506 . |
| 213236_at | 1.80E-05 | 2.18E-06 | SASH1                       | 23328 .  |
| 213237_at | 8.74E-07 | 4.15E-08 | C16orf88                    | 400506 . |
| 213238_at | 2.29E-06 | 1.48E-07 | ATP10D                      | 57205 .  |
| 213239_at | 0.002378 | 9.50E-04 | PIBF1                       | 10464 .  |
| 213241_at | 4.29E-06 | 3.35E-07 | PLXNC1                      | 10154 .  |
| 213243_at | 1.76E-05 | 2.12E-06 | VPS13B                      | 157680 . |
| 213246_at | 0.015922 | 0.009066 | C14orf109                   | 26175 .  |
| 213247_at | 0.002368 | 9.46E-04 | SVEP1                       | 79987 .  |
| 213248_at | 3.90E-04 | 1.05E-04 | LOC730101                   | 730101 . |
| 213249_at | 2.50E-05 | 3.32E-06 | FBXL7                       | 23194 .  |
| 213250_at | 3.39E-04 | 8.85E-05 | CCDC85B                     | 11007 .  |
| 213251_at | 8.92E-05 | 1.67E-05 | SMARCA5                     | 8467 .   |
| 213252_at | 5.90E-05 | 9.85E-06 | SH3PXD2A                    | 9644 .   |
| 213253_at | 2.98E-06 | 2.08E-07 | SMC2                        | 10592 .  |
| 213254_at | 0.002287 | 9.07E-04 | TNRC6B                      | 23112 .  |
| 213258_at | 0.003155 | 0.001333 | TFPI                        | 7035 .   |
| 213260_at | 0.001111 | 3.79E-04 | FOXC1                       | 2296 .   |
| 213261_at | 1.15E-04 | 2.28E-05 | LBA1                        | 9881 .   |
| 213263_s_ | 1.85E-04 | 4.16E-05 | PCBP2                       | 5094 .   |
| 213264_at | 0.017771 | 0.0103   | PCBP2                       | 5094 .   |
| 213265_at | 1.09E-05 | 1.14E-06 | PGA3 /// PGA4 5222 /// 6438 | 5094 .   |
| 213267_at | 8.54E-04 | 2.76E-04 | DOPEY1                      | 23033 .  |
| 213268_at | 2.18E-07 | 6.53E-09 | CAMTA1                      | 23261 .  |
| 213269_at | 4.79E-04 | 1.35E-04 | ZNF248                      | 57209 .  |
| 213270_at | 0.003914 | 0.001728 | MPP2                        | 4355 .   |
| 213273_at | 7.81E-04 | 2.47E-04 | ODZ4                        | 26011 .  |
| 213274_s_ | 1.12E-05 | 1.18E-06 | CTSB                        | 1508 .   |
| 213275_x_ | 1.72E-04 | 3.78E-05 | CTSB                        | 1508 .   |
| 213277_at | 0.008913 | 0.004584 | ZFP36L1                     | 677 .    |
| 213279_at | 6.62E-05 | 1.14E-05 | DHRS1                       | 115817 . |
| 213280_at | 0.002237 | 8.84E-04 | GARNL4                      | 23108 .  |

|           |          |          |          |          |
|-----------|----------|----------|----------|----------|
| 213282_at | 0.009798 | 0.005124 | APOOL    | 139322 . |
| 213283_s_ | 6.32E-08 | 1.22E-09 | SALL2    | 6297 .   |
| 213284_at | 0.012543 | 0.006852 | ZFP36L1  | 677 .    |
| 213285_at | 4.22E-07 | 1.59E-08 | TMEM30B  | 161291 . |
| 213287_s_ | 0.002894 | 0.001202 | KRT10    | 3858 .   |
| 213289_at | 0.007413 | 0.003698 | APOOL    | 139322 . |
| 213290_at | 3.67E-06 | 2.73E-07 | COL6A2   | 1292 .   |
| 213291_s_ | 0.048811 | 0.03338  | UBE3A    | 7337 .   |
| 213292_s_ | 0.00101  | 3.38E-04 | SNX13    | 23161 .  |
| 213293_s_ | 3.93E-07 | 1.44E-08 | TRIM22   | 10346 .  |
| 213295_at | 0.017286 | 0.009972 | CYLD     | 1540 .   |
| 213296_at | 2.76E-05 | 3.75E-06 | RER1     | 11079 .  |
| 213298_at | 9.97E-07 | 4.92E-08 | NFIC     | 4782 .   |
| 213299_at | 0.016383 | 0.00937  | ZBTB7A   | 51341 .  |
| 213300_at | 0.015161 | 0.008555 | ATG2A    | 23130 .  |
| 213301_x_ | 2.82E-08 | 4.25E-10 | TRIM24   | 8805 .   |
| 213302_at | 1.84E-05 | 2.25E-06 | PFAS     | 5198 .   |
| 213303_x_ | 0.016775 | 0.009631 | ZBTB7A   | 51341 .  |
| 213304_at | 0.006176 | 0.002975 | FAM179B  | 23116 .  |
| 213307_at | 0.001084 | 3.68E-04 | SHANK2   | 22941 .  |
| 213308_at | 6.94E-05 | 1.22E-05 | SHANK2   | 22941 .  |
| 213310_at | 0.001548 | 5.66E-04 | EIF2C2   | 27161 .  |
| 213311_s_ | 1.05E-06 | 5.26E-08 | TCF25    | 22980 .  |
| 213312_at | 0.043082 | 0.028864 | C6orf162 | 57150 .  |
| 213313_at | 1.23E-05 | 1.33E-06 | RABGAP1  | 23637 .  |
| 213315_x_ | 1.26E-06 | 6.75E-08 | CXorf40A | 91966 .  |
| 213316_at | 0.027754 | 0.017331 | KIAA1462 | 57608 .  |
| 213318_s_ | 0.024215 | 0.014791 | BAT3     | 7917 .   |
| 213319_s_ | 1.39E-05 | 1.58E-06 | CSDA     | 8531 .   |
| 213320_at | 5.29E-04 | 1.52E-04 | PRMT3    | 10196 .  |
| 213322_at | 3.65E-04 | 9.66E-05 | C6orf130 | 221443 . |
| 213325_at | 0.021864 | 0.013145 | PVRL3    | 25945 .  |
| 213326_at | 0.003462 | 0.001491 | VAMP1    | 6843 .   |
| 213329_at | 0.00341  | 0.001465 | SRGAP2   | 23380 .  |

|           |          |          |                            |          |
|-----------|----------|----------|----------------------------|----------|
| 213330_s_ | 0.00412  | 0.001835 | STIP1                      | 10963 .  |
| 213333_at | 6.80E-05 | 1.18E-05 | MDH2                       | 4191 .   |
| 213334_x_ | 1.10E-05 | 1.16E-06 | HAUS7                      | 55559 .  |
| 213338_at | 0.034266 | 0.02213  | TMEM158                    | 25907 .  |
| 213341_at | 9.40E-04 | 3.10E-04 | FEM1C                      | 56929 .  |
| 213342_at | 0.001766 | 6.64E-04 | YAP1                       | 10413 .  |
| 213344_s_ | 3.46E-04 | 9.05E-05 | H2AFX                      | 3014 .   |
| 213345_at | 1.17E-05 | 1.25E-06 | NFATC4                     | 4776 .   |
| 213346_at | 1.81E-05 | 2.19E-06 | C13orf27                   | 93081 .  |
| 213347_x_ | 5.61E-04 | 1.64E-04 | RPS4X                      | 6191 .   |
| 213348_at | 0.010246 | 0.005398 | CDKN1C                     | 1028 .   |
| 213349_at | 0.011994 | 0.006491 | TMCC1                      | 23023 .  |
| 213353_at | 6.26E-05 | 1.06E-05 | ABCA5                      | 23461 .  |
| 213355_at | 0.001423 | 5.12E-04 | ST3GAL6                    | 10402 .  |
| 213356_x_ | 3.17E-05 | 4.47E-06 | HNRNPA1 /// F100128836 //. |          |
| 213357_at | 3.22E-05 | 4.57E-06 | GTF2H5                     | 404672 . |
| 213359_at | 6.52E-05 | 1.12E-05 | HNRNPD                     | 3184 .   |
| 213360_s_ | 1.79E-04 | 3.99E-05 | POM121 /// P100101267 //.  |          |
| 213361_at | 1.05E-04 | 2.05E-05 | TDRD7                      | 23424 .  |
| 213362_at | 7.68E-07 | 3.48E-08 | PTPRD                      | 5789 .   |
| 213363_at | 4.59E-05 | 7.19E-06 | CA5BP                      | 340591 . |
| 213364_s_ | 6.53E-05 | 1.12E-05 | SNX1                       | 6642 .   |
| 213365_at | 5.55E-04 | 1.62E-04 | ERI2                       | 112479 . |
| 213366_x_ | 0.001984 | 7.64E-04 | ATP5C1                     | 509 .    |
| 213368_x_ | 0.002888 | 0.001198 | PPFIA3                     | 8541 .   |
| 213369_at | 0.021508 | 0.012885 | PCDH21                     | 92211 .  |
| 213370_s_ | 0.002636 | 0.001076 | SFMBT1                     | 51460 .  |
| 213372_at | 0.008662 | 0.004431 | PAQR3                      | 152559 . |
| 213373_s_ | 0.030468 | 0.019326 | CASP8                      | 841 .    |
| 213374_x_ | 0.005478 | 0.002582 | HIBCH                      | 26275 .  |
| 213378_s_ | 7.58E-05 | 1.36E-05 | DDX11 /// DDX1663 /// 4400 |          |
| 213380_x_ | 0.017527 | 0.010135 | MSTP9                      | 11223 .  |
| 213381_at | 7.30E-05 | 1.30E-05 | C10orf72                   | 196740 . |
| 213383_at | 8.36E-04 | 2.68E-04 |                            | .        |



|           |          |          |                              |          |
|-----------|----------|----------|------------------------------|----------|
| 213384_x_ | 0.025322 | 0.015593 | PLCB3                        | 5331 .   |
| 213385_at | 0.039224 | 0.02589  | CHN2                         | 1124 .   |
| 213387_at | 0.006744 | 0.003305 | ATAD2B                       | 54454 .  |
| 213388_at | 0.003411 | 0.001466 | PDE4DIP                      | 9659 .   |
| 213389_at | 0.001586 | 5.83E-04 | ZNF592                       | 9640 .   |
| 213391_at | 4.58E-05 | 7.17E-06 | DPY19L4                      | 286148 . |
| 213394_at | 2.49E-04 | 6.04E-05 | MAPKBP1                      | 23005 .  |
| 213397_x_ | 6.80E-05 | 1.19E-05 | RNASE4                       | 6038 .   |
| 213398_s_ | 6.42E-04 | 1.94E-04 | SDR39U1                      | 56948 .  |
| 213402_at | 0.010004 | 0.00525  | ZNF787                       | 126208 . |
| 213403_at | 0.04965  | 0.034046 | MFSD9                        | 84804 .  |
| 213405_at | 1.77E-05 | 2.14E-06 | RAB22A                       | 57403 .  |
| 213408_s_ | 0.024802 | 0.015215 | PI4KA /// PI4K/375133 /// 5: |          |
| 213410_at | 3.62E-06 | 2.68E-07 | C10orf137                    | 26098 .  |
| 213411_at | 6.47E-04 | 1.96E-04 |                              | .        |
| 213412_at | 5.73E-09 | 5.14E-11 | TJP3                         | 27134 .  |
| 213415_at | 0.001223 | 4.27E-04 | CLIC2                        | 1193 .   |
| 213416_at | 5.01E-04 | 1.43E-04 | ITGA4                        | 3676 .   |
| 213417_at | 0.006288 | 0.003041 | TBX2                         | 6909 .   |
| 213419_at | 0.046829 | 0.031823 | APBB2                        | 323 .    |
| 213420_at | 1.55E-04 | 3.35E-05 | DHX57                        | 90957 .  |
| 213422_s_ | 1.03E-06 | 5.12E-08 | MXRA8                        | 54587 .  |
| 213423_x_ | 0.008626 | 0.00441  | TUSC3                        | 7991 .   |
| 213424_at | 0.00932  | 0.00483  | KIAA0895                     | 23366 .  |
| 213425_at | 7.50E-05 | 1.34E-05 | WNT5A                        | 7474 .   |
| 213427_at | 1.26E-04 | 2.57E-05 | RPP40                        | 10799 .  |
| 213428_s_ | 7.18E-04 | 2.22E-04 | COL6A1                       | 1291 .   |
| 213429_at | 1.82E-07 | 5.08E-09 |                              | .        |
| 213430_at | 0.003251 | 0.001382 | RUFY3                        | 22902 .  |
| 213431_x_ | 1.67E-04 | 3.67E-05 | SFI1                         | 9814 .   |
| 213434_at | 0.003281 | 0.001398 | STX2                         | 2054 .   |
| 213435_at | 0.004324 | 0.001947 | SATB2                        | 23314 .  |
| 213437_at | 0.014357 | 0.008021 | RUFY3                        | 22902 .  |
| 213438_at | 6.81E-09 | 6.30E-11 | NFASC                        | 23114 .  |

|           |          |          |                             |          |
|-----------|----------|----------|-----------------------------|----------|
| 213440_at | 0.007073 | 0.003499 | RAB1A                       | 5861 .   |
| 213441_x_ | 2.11E-04 | 4.89E-05 | SPDEF                       | 25803 .  |
| 213442_x_ | 5.81E-04 | 1.71E-04 | SPDEF                       | 25803 .  |
| 213443_at | 0.022671 | 0.013703 | TRADD                       | 8717 .   |
| 213444_at | 0.021541 | 0.012911 | ZNF862                      | 643641 . |
| 213447_at | 1.60E-05 | 1.88E-06 | IPW                         | 3653 .   |
| 213448_at | 1.10E-05 | 1.15E-06 |                             | .        |
| 213449_at | 1.35E-05 | 1.50E-06 | POP1                        | 10940 .  |
| 213451_x_ | 0.019449 | 0.011446 | TNXA /// TNXB 7146 /// 7148 | .        |
| 213452_at | 0.049753 | 0.034128 | ZNF184                      | 7738 .   |
| 213453_x_ | 0.042549 | 0.028453 | GAPDH                       | 2597 .   |
| 213454_at | 2.19E-04 | 5.12E-05 | APITD1                      | 378708 . |
| 213455_at | 1.28E-04 | 2.62E-05 | FAM114A1                    | 92689 .  |
| 213459_at | 2.57E-05 | 3.43E-06 | RPL37A                      | 6168 .   |
| 213460_x_ | 6.75E-05 | 1.17E-05 | NSUN5C                      | 260294 . |
| 213461_at | 0.015208 | 0.008588 | NUDT21                      | 11051 .  |
| 213462_at | 0.004534 | 0.002062 | NPAS2                       | 4862 .   |
| 213463_s_ | 6.81E-06 | 6.08E-07 | FAM149B1                    | 317662 . |
| 213464_at | 3.97E-05 | 5.93E-06 | SHC2                        | 25759 .  |
| 213465_s_ | 0.001216 | 4.24E-04 | PPP1R7                      | 5510 .   |
| 213466_at | 2.23E-04 | 5.23E-05 | RAB40C                      | 57799 .  |
| 213467_at | 6.57E-08 | 1.29E-09 | RND2                        | 8153 .   |
| 213468_at | 4.79E-07 | 1.87E-08 | ERCC2                       | 2068 .   |
| 213471_at | 0.001842 | 6.99E-04 | NPHP4                       | 261734 . |
| 213472_at | 0.039794 | 0.026325 | HNRNPH1                     | 3187 .   |
| 213473_at | 1.50E-05 | 1.74E-06 | BRAP                        | 8315 .   |
| 213474_at | 0.003934 | 0.001738 | KCTD7                       | 154881 . |
| 213475_s_ | 0.002871 | 0.00119  | ITGAL                       | 3683 .   |
| 213476_x_ | 0.00136  | 4.86E-04 | TUBB3                       | 10381 .  |
| 213477_x_ | 1.13E-04 | 2.24E-05 | EEF1A1                      | 1915 .   |
| 213479_at | 0.020315 | 0.012047 | NPTX2                       | 4885 .   |
| 213480_at | 7.99E-05 | 1.46E-05 | VAMP4                       | 8674 .   |
| 213483_at | 1.55E-04 | 3.34E-05 | PPWD1                       | 23398 .  |
| 213484_at | 5.73E-04 | 1.68E-04 |                             | .        |

|           |          |          |           |          |
|-----------|----------|----------|-----------|----------|
| 213487_at | 0.024819 | 0.015227 | MAP2K2    | 5605 .   |
| 213488_at | 2.05E-04 | 4.72E-05 | SNED1     | 25992 .  |
| 213489_at | 0.009674 | 0.005048 | MAPRE2    | 10982 .  |
| 213491_x_ | 0.040565 | 0.02692  | RPN2      | 6185 .   |
| 213492_at | 0.003231 | 0.001373 | COL2A1    | 1280 .   |
| 213493_at | 2.27E-04 | 5.37E-05 | SNED1     | 25992 .  |
| 213496_at | 9.27E-05 | 1.75E-05 | LPPR4     | 9890 .   |
| 213497_at | 0.02947  | 0.018585 | ABTB2     | 25841 .  |
| 213498_at | 4.03E-05 | 6.05E-06 | CREB3L1   | 90993 .  |
| 213499_at | 0.006856 | 0.003371 | CLCN2     | 1181 .   |
| 213500_at | 0.00212  | 8.28E-04 |           | .        |
| 213503_x_ | 1.24E-04 | 2.52E-05 | ANXA2     | 302 .    |
| 213504_at | 4.66E-04 | 1.30E-04 | COPS6     | 10980 .  |
| 213505_s_ | 5.67E-06 | 4.81E-07 | SFRS14    | 10147 .  |
| 213506_at | 2.94E-05 | 4.06E-06 | F2RL1     | 2150 .   |
| 213507_s_ | 9.53E-04 | 3.15E-04 | KPNB1     | 3837 .   |
| 213508_at | 8.34E-04 | 2.68E-04 | C14orf147 | 171546 . |
| 213509_x_ | 0.001083 | 3.68E-04 | CES2      | 8824 .   |
| 213510_x_ | 4.84E-04 | 1.36E-04 | LOC220594 | 220594 . |
| 213511_s_ | 7.90E-06 | 7.40E-07 | MTMR1     | 8776 .   |
| 213512_at | 0.001003 | 3.35E-04 | C14orf79  | 122616 . |
| 213513_x_ | 5.46E-04 | 1.59E-04 | ARPC2     | 10109 .  |
| 213514_s_ | 0.002186 | 8.60E-04 | DIAPH1    | 1729 .   |
| 213517_at | 1.49E-05 | 1.71E-06 | PCBP2     | 5094 .   |
| 213518_at | 0.002486 | 0.001004 | PRKCI     | 5584 .   |
| 213519_s_ | 1.65E-04 | 3.62E-05 | LAMA2     | 3908 .   |
| 213520_at | 7.46E-06 | 6.88E-07 | RECQL4    | 9401 .   |
| 213521_at | 2.84E-04 | 7.09E-05 | PTPN18    | 26469 .  |
| 213523_at | 1.59E-06 | 9.26E-08 | CCNE1     | 898 .    |
| 213525_at | 2.47E-04 | 5.96E-05 |           | .        |
| 213526_s_ | 2.26E-04 | 5.34E-05 | LIN37     | 55957 .  |
| 213527_s_ | 1.38E-04 | 2.88E-05 | ZNF688    | 146542 . |
| 213528_at | 5.45E-04 | 1.58E-04 | C1orf156  | 92342 .  |
| 213529_at | 7.85E-05 | 1.43E-05 | ZNF688    | 146542 . |

|           |          |          |               |          |
|-----------|----------|----------|---------------|----------|
| 213530_at | 0.001857 | 7.06E-04 | RAB3GAP1      | 22930 .  |
| 213531_s_ | 1.09E-05 | 1.13E-06 | RAB3GAP1      | 22930 .  |
| 213533_at | 0.010562 | 0.005593 | D4S234E       | 27065 .  |
| 213534_s_ | 3.05E-06 | 2.15E-07 | PASK          | 23178 .  |
| 213535_s_ | 7.63E-05 | 1.37E-05 | UBE2I         | 7329 .   |
| 213538_at | 1.67E-04 | 3.67E-05 | SON           | 6651 .   |
| 213540_at | 0.026759 | 0.016618 | HSD17B8       | 7923 .   |
| 213542_at | 0.003005 | 0.001257 | ZNF710        | 374655 . |
| 213543_at | 1.12E-04 | 2.22E-05 | SGCD          | 6444 .   |
| 213545_x_ | 0.001363 | 4.87E-04 | SNX3          | 8724 .   |
| 213546_at | 2.58E-06 | 1.73E-07 | DKFZP586I142I | 222161 . |
| 213547_at | 0.012186 | 0.006618 | CAND2         | 23066 .  |
| 213548_s_ | 4.27E-05 | 6.56E-06 | CDV3          | 55573 .  |
| 213551_x_ | 0.012864 | 0.007058 | PCGF2         | 7703 .   |
| 213552_at | 2.20E-05 | 2.82E-06 | GLCE          | 26035 .  |
| 213553_x_ | 7.51E-08 | 1.56E-09 | APOC1         | 341 .    |
| 213555_at | 0.006839 | 0.003361 | RWDD2A        | 112611 . |
| 213556_at | 1.01E-04 | 1.94E-05 | LOC390940     | 390940 . |
| 213557_at | 0.046487 | 0.031545 | CRKRS         | 51755 .  |
| 213558_at | 0.003715 | 0.001623 | PCLO          | 27445 .  |
| 213559_s_ | 0.005803 | 0.002765 | ZNF467        | 168544 . |
| 213560_at | 0.044486 | 0.029983 | GADD45B       | 4616 .   |
| 213561_at | 0.00105  | 3.54E-04 | ASF1A         | 25842 .  |
| 213563_s_ | 4.40E-04 | 1.22E-04 | TUBGCP2       | 10844 .  |
| 213564_x_ | 5.23E-06 | 4.31E-07 | LDHB          | 3945 .   |
| 213565_s_ | 2.34E-07 | 7.21E-09 | SMAD6         | 4091 .   |
| 213566_at | 0.046678 | 0.031699 | RNASE6        | 6039 .   |
| 213568_at | 1.63E-08 | 2.04E-10 | OSR2          | 116039 . |
| 213569_at | 0.017404 | 0.010049 | ANGEL1        | 23357 .  |
| 213570_at | 7.29E-05 | 1.29E-05 | EIF4E2        | 9470 .   |
| 213571_s_ | 0.003242 | 0.001378 | EIF4E2        | 9470 .   |
| 213573_at | 0.014051 | 0.007818 |               | .        |
| 213574_s_ | 1.06E-06 | 5.30E-08 |               | .        |
| 213575_at | 0.00118  | 4.08E-04 | TRA2A         | 29896 .  |

|           |          |          |                             |          |
|-----------|----------|----------|-----------------------------|----------|
| 213578_at | 3.73E-04 | 9.93E-05 | BMPR1A                      | 657 .    |
| 213579_s_ | 0.003703 | 0.001617 | EP300                       | 2033 .   |
| 213581_at | 8.98E-06 | 8.82E-07 | PDCD2                       | 5134 .   |
| 213582_at | 2.64E-04 | 6.47E-05 | ATP11A                      | 23250 .  |
| 213583_x_ | 9.27E-04 | 3.05E-04 | EEF1A1 /// EEF100130211 //  | .        |
| 213586_at | 0.004638 | 0.002118 | CDKN2D                      | 1032 .   |
| 213587_s_ | 0.001567 | 5.75E-04 | ATP6V0E2                    | 155066 . |
| 213589_s_ | 0.007721 | 0.003878 | B3GNTL1                     | 146712 . |
| 213590_at | 0.014201 | 0.007916 | LOC100133772100133772 //    | .        |
| 213591_at | 0.005811 | 0.00277  | ALDH7A1                     | 501 .    |
| 213592_at | 2.12E-07 | 6.24E-09 | APLNR                       | 187 .    |
| 213593_s_ | 1.02E-04 | 1.98E-05 | TRA2A                       | 29896 .  |
| 213594_x_ | 0.001298 | 4.58E-04 | FUSIP1 /// LOC10772 /// 647 | .        |
| 213595_s_ | 2.28E-04 | 5.40E-05 | CDC42BPA                    | 8476 .   |
| 213596_at | 8.34E-05 | 1.54E-05 | CASP4                       | 837 .    |
| 213597_s_ | 0.003482 | 0.001502 | CTDSPL                      | 10217 .  |
| 213598_at | 0.001047 | 3.53E-04 |                             | .        |
| 213599_at | 3.46E-06 | 2.54E-07 | OIP5                        | 11339 .  |
| 213601_at | 0.012683 | 0.006941 | SLIT1                       | 6585 .   |
| 213602_s_ | 0.011557 | 0.006216 | MMP11                       | 4320 .   |
| 213603_s_ | 0.002843 | 0.001176 | RAC2                        | 5880 .   |
| 213604_at | 2.42E-05 | 3.18E-06 | TCEB3                       | 6924 .   |
| 213605_s_ | 4.13E-05 | 6.25E-06 | LOC100134401100134401 //    | .        |
| 213609_s_ | 6.09E-04 | 1.82E-04 | SEZ6L                       | 23544 .  |
| 213610_s_ | 3.18E-08 | 4.94E-10 | KLHL23                      | 151230 . |
| 213611_at | 0.001343 | 4.78E-04 | AQP5                        | 362 .    |
| 213612_x_ | 7.87E-05 | 1.43E-05 | NBPF10 /// NB100132406 //   | .        |
| 213613_s_ | 1.42E-04 | 2.99E-05 | NADK                        | 65220 .  |
| 213614_x_ | 5.60E-06 | 4.73E-07 | EEF1A1                      | 1915 .   |
| 213615_at | 0.026688 | 0.016563 | LPCAT3                      | 10162 .  |
| 213616_at | 5.43E-04 | 1.58E-04 | C18orf10                    | 25941 .  |
| 213617_s_ | 0.014088 | 0.007843 | C18orf10                    | 25941 .  |
| 213619_at | 4.93E-06 | 4.00E-07 | HNRNPH1                     | 3187 .   |
| 213620_s_ | 0.046208 | 0.031328 | ICAM2                       | 3384 .   |

|           |          |          |                            |          |
|-----------|----------|----------|----------------------------|----------|
| 213621_s_ | 0.00246  | 9.91E-04 | GUK1                       | 2987 .   |
| 213622_at | 4.31E-07 | 1.64E-08 | COL9A2                     | 1298 .   |
| 213623_at | 7.98E-05 | 1.46E-05 | KIF3A                      | 11127 .  |
| 213624_at | 1.20E-04 | 2.41E-05 | SMPDL3A                    | 10924 .  |
| 213626_at | 5.05E-05 | 8.12E-06 | CBR4                       | 84869 .  |
| 213627_at | 3.18E-04 | 8.17E-05 | MAGED2                     | 10916 .  |
| 213628_at | 4.63E-05 | 7.27E-06 | CLCC1                      | 23155 .  |
| 213629_x_ | 0.005015 | 0.002324 | MT1F                       | 4494 .   |
| 213630_at | 0.019004 | 0.011139 | NACAD                      | 23148 .  |
| 213631_x_ | 7.19E-05 | 1.27E-05 | DHODH                      | 1723 .   |
| 213632_at | 3.00E-05 | 4.17E-06 | DHODH                      | 1723 .   |
| 213633_at | 0.002496 | 0.001008 | SH3BP1                     | 23616 .  |
| 213634_s_ | 0.015607 | 0.008855 | TRMU                       | 55687 .  |
| 213635_s_ | 6.23E-06 | 5.41E-07 | SAFB                       | 6294 .   |
| 213636_at | 7.71E-04 | 2.43E-04 | KIAA1045                   | 23349 .  |
| 213637_at | 1.42E-05 | 1.61E-06 |                            | .        |
| 213639_s_ | 0.031752 | 0.020258 | ZNF500                     | 26048 .  |
| 213640_s_ | 1.31E-06 | 7.11E-08 | LOX                        | 4015 .   |
| 213641_at | 0.030267 | 0.01918  | ZNF500                     | 26048 .  |
| 213644_at | 0.002405 | 9.64E-04 | CCDC46                     | 201134 . |
| 213647_at | 1.32E-07 | 3.31E-09 | DNA2                       | 1763 .   |
| 213648_at | 0.038208 | 0.025117 | EXOSC7                     | 23016 .  |
| 213649_at | 4.70E-08 | 8.30E-10 | SFRS7                      | 6432 .   |
| 213650_at | 3.34E-04 | 8.68E-05 | GOLGA8A /// C23015 /// 440 | .        |
| 213651_at | 0.006933 | 0.003417 | INPP5J                     | 27124 .  |
| 213652_at | 0.005302 | 0.002483 | PCSK5                      | 5125 .   |
| 213653_at | 3.77E-07 | 1.37E-08 | METTL3                     | 56339 .  |
| 213654_at | 0.007945 | 0.004012 | TAF5L                      | 27097 .  |
| 213656_s_ | 0.039019 | 0.025735 | KLC1                       | 3831 .   |
| 213659_at | 0.002473 | 9.97E-04 | ZNF75D                     | 7626 .   |
| 213660_s_ | 0.029901 | 0.018908 | TOP3B                      | 8940 .   |
| 213661_at | 7.43E-12 | 8.35E-15 | PAMR1                      | 25891 .  |
| 213662_at | 0.010428 | 0.005509 |                            | .        |
| 213664_at | 7.57E-04 | 2.38E-04 | SLC1A1                     | 6505 .   |

|           |          |          |           |        |   |
|-----------|----------|----------|-----------|--------|---|
| 213665_at | 0.023196 | 0.014069 | SOX4      | 6659   | . |
| 213666_at | 0.016609 | 0.009519 | 6-Sep     | 23157  | . |
| 213668_s_ | 0.002452 | 9.87E-04 | SOX4      | 6659   | . |
| 213669_at | 0.002992 | 0.001251 | FCHO1     | 23149  | . |
| 213670_x_ | 7.24E-05 | 1.28E-05 | NSUN5B    | 155400 | . |
| 213671_s_ | 8.59E-04 | 2.78E-04 | MARS      | 4141   | . |
| 213672_at | 2.41E-04 | 5.77E-05 | MARS      | 4141   | . |
| 213674_x_ | 0.023437 | 0.014241 | IGHD      | 3495   | . |
| 213675_at | 1.42E-06 | 7.97E-08 |           |        | . |
| 213677_s_ | 8.35E-06 | 7.98E-07 | PMS1      | 5378   | . |
| 213678_at | 2.24E-05 | 2.88E-06 | TMEM151B  | 441151 | . |
| 213682_at | 0.001878 | 7.15E-04 | NUP50     | 10762  | . |
| 213684_s_ | 2.66E-05 | 3.58E-06 | PDLIM5    | 10611  | . |
| 213685_at | 0.044486 | 0.029983 |           |        | . |
| 213687_s_ | 5.21E-04 | 1.50E-04 | RPL35A    | 6165   | . |
| 213688_at | 0.003358 | 0.001438 | CALM1     | 801    | . |
| 213689_x_ | 1.23E-06 | 6.54E-08 | FAM69A    | 388650 | . |
| 213690_s_ | 1.12E-06 | 5.76E-08 |           |        | . |
| 213691_at | 0.002286 | 9.07E-04 |           |        | . |
| 213692_s_ | 0.003996 | 0.00177  | VDR       | 7421   | . |
| 213693_s_ | 3.01E-04 | 7.62E-05 | MUC1      | 4582   | . |
| 213694_at | 0.029955 | 0.018948 | RSBN1     | 54665  | . |
| 213696_s_ | 0.001654 | 6.14E-04 | MED8      | 112950 | . |
| 213697_at | 0.003122 | 0.001317 | HIPK3     | 10114  | . |
| 213698_at | 7.26E-04 | 2.26E-04 | ZMYM6     | 9204   | . |
| 213700_s_ | 0.002193 | 8.63E-04 |           |        | . |
| 213701_at | 4.22E-05 | 6.45E-06 | C12orf29  | 91298  | . |
| 213702_x_ | 2.48E-04 | 6.00E-05 | ASAH1     | 427    | . |
| 213703_at | 1.14E-04 | 2.27E-05 | LOC150759 | 150759 | . |
| 213704_at | 0.017897 | 0.010386 | RABGGTB   | 5876   | . |
| 213706_at | 0.001404 | 5.04E-04 | GPD1      | 2819   | . |
| 213708_s_ | 0.004671 | 0.002138 | MLX       | 6945   | . |
| 213709_at | 7.66E-06 | 7.13E-07 | BHLHB9    | 80823  | . |
| 213710_s_ | 3.88E-04 | 1.04E-04 |           |        | . |

|           |          |          |              |             |
|-----------|----------|----------|--------------|-------------|
| 213712_at | 0.005372 | 0.002522 | ELOVL2       | 54898 .     |
| 213713_s_ | 0.002332 | 9.29E-04 | GLB1L2       | 89944 .     |
| 213714_at | 1.19E-05 | 1.28E-06 | CACNB2       | 783 .       |
| 213716_s_ | 6.90E-06 | 6.20E-07 | SECTM1       | 6398 .      |
| 213717_at | 4.65E-05 | 7.32E-06 | LDB3         | 11155 .     |
| 213718_at | 7.76E-06 | 7.25E-07 | RBM4         | 5936 .      |
| 213719_s_ | 0.039334 | 0.025973 | SMARCA4      | 6597 .      |
| 213720_s_ | 1.57E-07 | 4.19E-09 | SMARCA4      | 6597 .      |
| 213721_at | 2.00E-08 | 2.61E-10 | SOX2         | 6657 .      |
| 213722_at | 5.57E-06 | 4.70E-07 | SOX2         | 6657 .      |
| 213723_s_ | 1.98E-04 | 4.53E-05 | IDUA         | 3425 .      |
| 213724_s_ | 0.035733 | 0.023242 | PDK2         | 5164 .      |
| 213725_x_ | 9.64E-05 | 1.84E-05 | XYLT1        | 64131 .     |
| 213726_x_ | 0.014018 | 0.007795 | TUBB2C       | 10383 .     |
| 213727_x_ | 0.003275 | 0.001395 | MPPE1        | 65258 .     |
| 213728_at | 3.24E-04 | 8.36E-05 | LAMP1        | 3916 .      |
| 213729_at | 1.21E-05 | 1.31E-06 | PRPF40A      | 55660 .     |
| 213730_x_ | 3.74E-05 | 5.50E-06 | TCF3         | 6929 .      |
| 213731_s_ | 2.87E-04 | 7.18E-05 | TCF3         | 6929 .      |
| 213732_at | 0.014638 | 0.008208 | TCF3         | 6929 .      |
| 213733_at | 0.025185 | 0.015494 | MYO1F        | 4542 .      |
| 213734_at | 7.31E-05 | 1.30E-05 | WSB2         | 55884 .     |
| 213735_s_ | 0.004497 | 0.002042 | COX5B        | 1329 .      |
| 213737_x_ | 5.46E-04 | 1.59E-04 | GOLGA9P      | 283796 .    |
| 213738_s_ | 2.60E-04 | 6.36E-05 | ATP5A1       | 498 .       |
| 213740_s_ | 7.21E-05 | 1.28E-05 | LOC399904    | 399904 .    |
| 213742_at | 0.009105 | 0.004698 | SFRS11       | 9295 .      |
| 213743_at | 0.00555  | 0.002623 | CCNT2        | 905 .       |
| 213746_s_ | 0.007435 | 0.003712 | FLNA         | 2316 .      |
| 213747_at | 0.023919 | 0.014582 | LOC100134128 | 100134128 . |
| 213748_at | 8.27E-04 | 2.65E-04 | TRIM66       | 9866 .      |
| 213749_at | 2.68E-06 | 1.81E-07 | MASP1        | 5648 .      |
| 213750_at | 8.06E-04 | 2.57E-04 | RSL1D1       | 26156 .     |
| 213755_s_ | 8.30E-05 | 1.53E-05 |              | .           |



|           |          |          |                               |
|-----------|----------|----------|-------------------------------|
| 213757_at | 0.017562 | 0.010158 | .                             |
| 213758_at | 6.79E-04 | 2.08E-04 | COX4I1 1327 .                 |
| 213762_x_ | 3.93E-07 | 1.44E-08 | RBMX 27316 .                  |
| 213763_at | 5.79E-04 | 1.70E-04 | HIPK2 28996 .                 |
| 213764_s_ | 5.40E-05 | 8.81E-06 | MFAP5 8076 .                  |
| 213765_at | 3.88E-05 | 5.75E-06 | MFAP5 8076 .                  |
| 213766_x_ | 2.02E-08 | 2.64E-10 | GNA11 2767 .                  |
| 213767_at | 0.011173 | 0.005978 | KSR1 8844 .                   |
| 213769_at | 4.88E-05 | 7.78E-06 | KSR1 8844 .                   |
| 213771_at | 3.34E-04 | 8.69E-05 | IRF2BP1 26145 .               |
| 213772_s_ | 1.66E-07 | 4.50E-09 | GGA2 23062 .                  |
| 213773_x_ | 5.92E-04 | 1.75E-04 | NSUN5 55695 .                 |
| 213774_s_ | 0.002624 | 0.001071 | PPP1R2 5504 .                 |
| 213775_x_ | 7.29E-06 | 6.68E-07 | ZNF638 27332 .                |
| 213778_x_ | 0.021835 | 0.013123 | ZNF276 92822 .                |
| 213779_at | 2.36E-05 | 3.07E-06 | EMID1 129080 .                |
| 213780_at | 0.043011 | 0.028803 | TCHH 7062 .                   |
| 213783_at | 0.03471  | 0.022459 | MFNG 4242 .                   |
| 213784_at | 0.021181 | 0.012663 | RABL4 11020 .                 |
| 213785_at | 8.41E-06 | 8.05E-07 | IPO9 55705 .                  |
| 213787_s_ | 0.04836  | 0.033016 | EBP 10682 .                   |
| 213788_s_ | 1.23E-04 | 2.50E-05 | NCRNA00094 266655 .           |
| 213789_at | 0.032039 | 0.020482 | .                             |
| 213790_at | 1.31E-04 | 2.71E-05 | ADAM12 8038 .                 |
| 213791_at | 0.003069 | 0.00129  | PENK 5179 .                   |
| 213792_s_ | 0.0108   | 0.005744 | INSR 3643 .                   |
| 213793_s_ | 8.55E-07 | 4.03E-08 | HOMER1 9456 .                 |
| 213794_s_ | 1.40E-07 | 3.60E-09 | NGDN 25983 .                  |
| 213796_at | 0.036671 | 0.023951 | SPRR1A 6698 .                 |
| 213798_s_ | 0.007921 | 0.003997 | CAP1 10487 .                  |
| 213800_at | 3.04E-04 | 7.72E-05 | CFH 3075 .                    |
| 213801_x_ | 0.009824 | 0.005139 | RPSA /// RPSA1388524 /// 35 . |
| 213802_at | 0.001339 | 4.77E-04 | .                             |
| 213803_at | 2.84E-05 | 3.88E-06 | .                             |

|           |          |          |                             |             |
|-----------|----------|----------|-----------------------------|-------------|
| 213804_at | 0.004334 | 0.001952 | INPP5B                      | 3633 .      |
| 213805_at | 0.001008 | 3.37E-04 | ABHD5                       | 51099 .     |
| 213806_at | 0.021508 | 0.012884 | PURA                        | 5813 .      |
| 213807_x_ | 1.32E-05 | 1.46E-06 | MET                         | 4233 .      |
| 213809_x_ | 0.038903 | 0.025646 | TCF3                        | 6929 .      |
| 213810_s_ | 0.0206   | 0.012248 | AKIRIN2                     | 55122 .     |
| 213811_x_ | 1.50E-05 | 1.74E-06 | TCF3                        | 6929 .      |
| 213813_x_ | 5.77E-05 | 9.58E-06 |                             | .           |
| 213816_s_ | 5.34E-06 | 4.45E-07 | MET                         | 4233 .      |
| 213817_at | 3.49E-04 | 9.14E-05 | IRAK3                       | 11213 .     |
| 213818_x_ | 0.00115  | 3.96E-04 |                             | .           |
| 213819_s_ | 2.77E-04 | 6.87E-05 | FLOT1                       | 10211 .     |
| 213820_s_ | 8.78E-07 | 4.17E-08 | STARD5                      | 80765 .     |
| 213821_s_ | 0.042256 | 0.028229 |                             | .           |
| 213822_s_ | 0.019479 | 0.011468 | UBE3B                       | 89910 .     |
| 213823_at | 5.82E-04 | 1.71E-04 | HOXA11                      | 3207 .      |
| 213826_s_ | 0.006936 | 0.003419 | LOC100133109                | 100133109 . |
| 213827_at | 8.64E-04 | 2.80E-04 | SNX26                       | 115703 .    |
| 213828_x_ | 9.89E-05 | 1.90E-05 | H3F3A /// H3F:3020 /// 302: | .           |
| 213830_at | 0.016231 | 0.009272 | TRD@                        | 6964 .      |
| 213831_at | 0.025012 | 0.015365 | HLA-DQA1                    | 3117 .      |
| 213832_at | 0.007146 | 0.003541 | KCND3                       | 3752 .      |
| 213834_at | 8.09E-05 | 1.48E-05 | IQSEC3                      | 440073 .    |
| 213835_x_ | 0.001131 | 3.88E-04 | GTPBP3                      | 84705 .     |
| 213836_s_ | 6.46E-05 | 1.11E-05 | WIPI1                       | 55062 .     |
| 213838_at | 1.60E-06 | 9.29E-08 | NOL7                        | 51406 .     |
| 213839_at | 4.79E-05 | 7.58E-06 | CLMN                        | 79789 .     |
| 213841_at | 8.45E-04 | 2.72E-04 |                             | .           |
| 213842_x_ | 5.80E-04 | 1.71E-04 | NSUN5C                      | 260294 .    |
| 213843_x_ | 0.016623 | 0.009529 | SLC6A8                      | 6535 .      |
| 213844_at | 0.002489 | 0.001005 | HOXA5                       | 3202 .      |
| 213845_at | 0.043201 | 0.028963 | GRIK2                       | 2898 .      |
| 213846_at | 2.42E-04 | 5.82E-05 | COX7C                       | 1350 .      |
| 213848_at | 2.24E-04 | 5.27E-05 |                             | .           |

|           |          |          |          |          |
|-----------|----------|----------|----------|----------|
| 213849_s_ | 0.001233 | 4.31E-04 | PPP2R2B  | 5521 .   |
| 213850_s_ | 0.001075 | 3.64E-04 | SFRS2IP  | 9169 .   |
| 213851_at | 0.002719 | 0.001117 | TMEM110  | 375346 . |
| 213852_at | 2.61E-06 | 1.75E-07 | RBM8A    | 9939 .   |
| 213855_s_ | 0.005422 | 0.00255  | LIPE     | 3991 .   |
| 213857_s_ | 4.20E-04 | 1.15E-04 | CD47     | 961 .    |
| 213859_x_ | 1.49E-04 | 3.17E-05 | SMARCA5  | 8467 .   |
| 213860_x_ | 2.52E-04 | 6.12E-05 | CSNK1A1  | 1452 .   |
| 213861_s_ | 8.46E-05 | 1.57E-05 | FAM119B  | 25895 .  |
| 213862_at | 2.61E-05 | 3.49E-06 | PNPLA2   | 57104 .  |
| 213864_s_ | 1.34E-04 | 2.78E-05 | NAP1L1   | 4673 .   |
| 213865_at | 0.017501 | 0.010115 | DCBLD2   | 131566 . |
| 213867_x_ | 0.012389 | 0.006748 | ACTB     | 60 .     |
| 213868_s_ | 0.001016 | 3.40E-04 | DHRS7    | 51635 .  |
| 213869_x_ | 1.26E-05 | 1.38E-06 | THY1     | 7070 .   |
| 213871_s_ | 8.58E-04 | 2.77E-04 | C6orf108 | 10591 .  |
| 213872_at | 0.001126 | 3.86E-04 | C6orf62  | 81688 .  |
| 213874_at | 1.61E-06 | 9.41E-08 | SERPINA4 | 5267 .   |
| 213877_x_ | 0.030575 | 0.019404 | TCEB2    | 6923 .   |
| 213878_at | 1.56E-04 | 3.37E-05 | PYROXD1  | 79912 .  |
| 213879_at | 8.46E-05 | 1.57E-05 |          | .        |
| 213880_at | 2.64E-09 | 1.86E-11 | LGR5     | 8549 .   |
| 213881_x_ | 9.57E-05 | 1.83E-05 | SUMO2    | 6613 .   |
| 213882_at | 0.016892 | 0.009708 | TM2D1    | 83941 .  |
| 213883_s_ | 0.018109 | 0.010531 | TM2D1    | 83941 .  |
| 213884_s_ | 0.011271 | 0.006038 | TRIM3    | 10612 .  |
| 213885_at | 6.17E-05 | 1.04E-05 | TRIM3    | 10612 .  |
| 213895_at | 7.90E-05 | 1.44E-05 | EMP1     | 2012 .   |
| 213897_s_ | 0.028208 | 0.017662 | MRPL23   | 6150 .   |
| 213898_at | 4.96E-04 | 1.41E-04 | RBM9     | 23543 .  |
| 213899_at | 5.44E-04 | 1.58E-04 | METAP2   | 10988 .  |
| 213900_at | 9.32E-04 | 3.07E-04 | C9orf61  | 9413 .   |
| 213905_x_ | 1.42E-04 | 2.99E-05 | BGN      | 633 .    |
| 213906_at | 1.47E-05 | 1.69E-06 | MYBL1    | 4603 .   |

|           |          |          |                           |          |
|-----------|----------|----------|---------------------------|----------|
| 213907_at | 0.004615 | 0.002106 | EEF1E1                    | 9521 .   |
| 213908_at | 2.49E-04 | 6.04E-05 | WHAMML1 /// 339005 /// 4. |          |
| 213909_at | 0.007868 | 0.003967 | LRR15                     | 131578 . |
| 213910_at | 0.001187 | 4.12E-04 | IGFBP7                    | 3490 .   |
| 213911_s_ | 6.44E-06 | 5.65E-07 | H2AFZ                     | 3015 .   |
| 213914_s_ | 0.001868 | 7.11E-04 | SPTBN1                    | 6711 .   |
| 213915_at | 0.013515 | 0.007473 | NKG7                      | 4818 .   |
| 213916_at | 2.43E-05 | 3.21E-06 | ZNF20                     | 7568 .   |
| 213917_at | 0.015969 | 0.009098 | PAX8                      | 7849 .   |
| 213918_s_ | 8.94E-04 | 2.92E-04 | NIPBL                     | 25836 .  |
| 213919_at | 0.034743 | 0.022484 | DNAJC4                    | 3338 .   |
| 213920_at | 0.049042 | 0.03356  | CUX2                      | 23316 .  |
| 213921_at | 0.017458 | 0.010086 | SST                       | 6750 .   |
| 213922_at | 8.21E-05 | 1.51E-05 | TTBK2                     | 146057 . |
| 213923_at | 0.007114 | 0.003522 | RAP2B                     | 5912 .   |
| 213924_at | 2.40E-05 | 3.16E-06 | MPPE1                     | 65258 .  |
| 213926_s_ | 3.27E-04 | 8.48E-05 | AGFG1                     | 3267 .   |
| 213927_at | 8.92E-07 | 4.26E-08 | MAP3K9                    | 4293 .   |
| 213928_s_ | 1.75E-04 | 3.87E-05 | AGFG1                     | 3267 .   |
| 213930_at | 0.001927 | 7.38E-04 |                           | .        |
| 213932_x_ | 3.88E-06 | 2.93E-07 | HLA-A                     | 3105 .   |
| 213934_s_ | 0.005058 | 0.002351 | ZNF23                     | 7571 .   |
| 213936_x_ | 0.013895 | 0.007718 | SFTP8                     | 6439 .   |
| 213937_s_ | 7.21E-04 | 2.23E-04 | FTSJ1                     | 24140 .  |
| 213938_at | 4.36E-05 | 6.73E-06 | ERC2                      | 26059 .  |
| 213940_s_ | 5.63E-04 | 1.65E-04 | FNBP1                     | 23048 .  |
| 213941_x_ | 0.002144 | 8.40E-04 | RPS7                      | 6201 .   |
| 213942_at | 2.78E-06 | 1.90E-07 | MEGF6                     | 1953 .   |
| 213943_at | 0.003403 | 0.001462 | TWIST1                    | 7291 .   |
| 213944_x_ | 3.63E-07 | 1.31E-08 | GNA11                     | 2767 .   |
| 213945_s_ | 3.73E-05 | 5.48E-06 | NUP210                    | 23225 .  |
| 213947_s_ | 2.69E-08 | 3.98E-10 | NUP210                    | 23225 .  |
| 213949_s_ | 3.89E-05 | 5.79E-06 | DOHH                      | 83475 .  |
| 213950_s_ | 0.001997 | 7.70E-04 | PPP3CC                    | 5533 .   |

|           |          |          |                             |          |
|-----------|----------|----------|-----------------------------|----------|
| 213951_s_ | 2.83E-04 | 7.08E-05 | PSMC3IP                     | 29893 .  |
| 213952_s_ | 0.020844 | 0.012428 | ALOX5                       | 240 .    |
| 213954_at | 1.27E-09 | 7.27E-12 | FAM169A                     | 26049 .  |
| 213955_at | 0.001297 | 4.58E-04 | MYOZ3                       | 91977 .  |
| 213956_at | 0.001309 | 4.63E-04 | CEP350                      | 9857 .   |
| 213958_at | 0.040633 | 0.026974 | CD6                         | 923 .    |
| 213959_s_ | 0.002416 | 9.70E-04 | RPGRIP1L                    | 23322 .  |
| 213961_s_ | 0.001511 | 5.51E-04 |                             | .        |
| 213962_s_ | 0.028576 | 0.017928 | ANKLE2                      | 23141 .  |
| 213965_s_ | 0.002538 | 0.001028 | CHD5                        | 26038 .  |
| 213967_at | 6.54E-05 | 1.12E-05 | RALYL                       | 138046 . |
| 213968_at | 5.96E-04 | 1.77E-04 |                             | .        |
| 213970_at | 0.044741 | 0.03018  | RABL3                       | 285282 . |
| 213971_s_ | 8.28E-06 | 7.87E-07 | SUZ12 /// SUZ123512 /// 44( |          |
| 213972_at | 0.010954 | 0.00584  | FOXD1                       | 2297 .   |
| 213976_at | 0.001876 | 7.14E-04 | CIZ1                        | 25792 .  |
| 213977_s_ | 0.017322 | 0.009996 | CIZ1                        | 25792 .  |
| 213978_at | 5.98E-04 | 1.77E-04 | MTSS1L                      | 92154 .  |
| 213979_s_ | 1.09E-05 | 1.13E-06 |                             | .        |
| 213981_at | 2.97E-05 | 4.12E-06 | COMT                        | 1312 .   |
| 213982_s_ | 0.001318 | 4.67E-04 | RABGAP1L                    | 9910 .   |
| 213984_at | 6.46E-04 | 1.96E-04 | PDS5A                       | 23244 .  |
| 213985_s_ | 1.03E-05 | 1.06E-06 | C19orf6                     | 91304 .  |
| 213987_s_ | 1.79E-04 | 3.98E-05 | CDC2L5                      | 8621 .   |
| 213989_x_ | 4.63E-05 | 7.28E-06 | SETD4                       | 54093 .  |
| 213990_s_ | 0.001041 | 3.50E-04 | PAK7                        | 57144 .  |
| 213992_at | 4.19E-11 | 8.37E-14 | COL4A6                      | 1288 .   |
| 213993_at | 0.007635 | 0.003828 | SPON1                       | 10418 .  |
| 213994_s_ | 2.81E-05 | 3.84E-06 | SPON1                       | 10418 .  |
| 213995_at | 0.023688 | 0.014422 | ATP5S                       | 27109 .  |
| 213996_at | 0.01215  | 0.006594 | YPEL1                       | 29799 .  |
| 213997_at | 0.03386  | 0.02184  | KIAA0574                    | 23359 .  |
| 213998_s_ | 0.014185 | 0.007906 | DDX17                       | 10521 .  |
| 213999_at | 9.80E-04 | 3.25E-04 | YIPF4                       | 84272 .  |

|           |          |          |                            |          |
|-----------|----------|----------|----------------------------|----------|
| 214002_at | 8.11E-05 | 1.49E-05 |                            | .        |
| 214005_at | 5.67E-04 | 1.66E-04 | GGCX                       | 2677 .   |
| 214007_s_ | 9.94E-07 | 4.90E-08 | TWF1                       | 5756 .   |
| 214008_at | 2.89E-05 | 3.99E-06 | TWF1                       | 5756 .   |
| 214009_at | 0.047234 | 0.032144 | MSL3                       | 10943 .  |
| 214010_s_ | 4.90E-04 | 1.39E-04 | ATP9B                      | 374868 . |
| 214011_s_ | 2.53E-04 | 6.14E-05 | NOP16                      | 51491 .  |
| 214012_at | 0.013796 | 0.007654 | ERAP1                      | 51752 .  |
| 214013_s_ | 8.85E-04 | 2.88E-04 | TBC1D1                     | 23216 .  |
| 214014_at | 0.007605 | 0.00381  | CDC42EP2                   | 10435 .  |
| 214016_s_ | 6.20E-05 | 1.05E-05 | SFPQ                       | 6421 .   |
| 214017_s_ | 0.009521 | 0.004952 | DHX34                      | 9704 .   |
| 214018_at | 0.001477 | 5.36E-04 | GRIP1                      | 23426 .  |
| 214020_x_ | 0.017286 | 0.009972 | ITGB5                      | 3693 .   |
| 214022_s_ | 9.63E-05 | 1.84E-05 | IFITM1                     | 8519 .   |
| 214023_x_ | 3.01E-09 | 2.16E-11 | TUBB2B                     | 347733 . |
| 214024_s_ | 0.006773 | 0.003322 | DGCR6L                     | 85359 .  |
| 214027_x_ | 7.30E-05 | 1.30E-05 | DES /// FAM481674 /// 5557 | .        |
| 214028_x_ | 4.07E-04 | 1.10E-04 | TDRD3                      | 81550 .  |
| 214030_at | 4.38E-05 | 6.77E-06 | CRYBG3                     | 131544 . |
| 214031_s_ | 0.014956 | 0.008422 | KRT7                       | 3855 .   |
| 214032_at | 2.98E-08 | 4.54E-10 | ZAP70                      | 7535 .   |
| 214033_at | 0.03485  | 0.022561 | ABCC6                      | 368 .    |
| 214036_at | 3.20E-04 | 8.25E-05 | EFNA5                      | 1946 .   |
| 214037_s_ | 8.38E-05 | 1.55E-05 | CCDC22                     | 28952 .  |
| 214038_at | 6.64E-04 | 2.02E-04 | CCL8                       | 6355 .   |
| 214039_s_ | 1.56E-08 | 1.90E-10 | LAPTM4B                    | 55353 .  |
| 214040_s_ | 9.98E-06 | 1.01E-06 | GSN                        | 2934 .   |
| 214043_at | 5.59E-04 | 1.63E-04 | PTPRD                      | 5789 .   |
| 214044_at | 0.045511 | 0.03078  | RYR2                       | 6262 .   |
| 214045_at | 6.44E-08 | 1.26E-09 | LIAS                       | 11019 .  |
| 214048_at | 0.004907 | 0.002265 | MBD4                       | 8930 .   |
| 214049_x_ | 9.38E-04 | 3.09E-04 | CD7                        | 924 .    |
| 214050_at | 0.012539 | 0.006849 |                            | .        |

|           |          |          |                            |          |
|-----------|----------|----------|----------------------------|----------|
| 214052_x_ | 3.07E-04 | 7.81E-05 | BAT2D1                     | 23215 .  |
| 214053_at | 6.72E-08 | 1.34E-09 | ERBB4                      | 2066 .   |
| 214054_at | 1.92E-04 | 4.35E-05 | DOK2                       | 9046 .   |
| 214055_x_ | 1.45E-07 | 3.78E-09 | BAT2D1                     | 23215 .  |
| 214058_at | 1.00E-05 | 1.02E-06 | MYCL1                      | 4610 .   |
| 214060_at | 3.70E-04 | 9.83E-05 | SSBP1                      | 6742 .   |
| 214061_at | 1.29E-06 | 6.95E-08 | WDR67                      | 93594 .  |
| 214062_x_ | 0.038856 | 0.025608 | NFKBIB                     | 4793 .   |
| 214064_at | 4.40E-04 | 1.22E-04 | TF                         | 7018 .   |
| 214066_x_ | 0.002288 | 9.08E-04 | NPR2                       | 4882 .   |
| 214067_at | 0.001041 | 3.50E-04 | C16orf42                   | 115939 . |
| 214069_at | 0.039236 | 0.025898 | ACSM2A /// AC123876 /// 34 |          |
| 214070_s_ | 0.002527 | 0.001023 | ATP10B                     | 23120 .  |
| 214071_at | 0.001158 | 3.99E-04 | GNAL                       | 2774 .   |
| 214072_x_ | 0.00377  | 0.001653 | NENF                       | 29937 .  |
| 214073_at | 0.024153 | 0.014745 | CTTN                       | 2017 .   |
| 214075_at | 8.95E-08 | 1.98E-09 | NENF                       | 29937 .  |
| 214077_x_ | 0.008285 | 0.00421  | MEIS3P1                    | 4213 .   |
| 214080_x_ | 2.48E-06 | 1.64E-07 | PRKCSH                     | 5589 .   |
| 214081_at | 7.43E-04 | 2.32E-04 | PLXDC1                     | 57125 .  |
| 214082_at | 0.021237 | 0.012703 | CA5B                       | 11238 .  |
| 214084_x_ | 1.65E-05 | 1.95E-06 | LOC648998                  | 648998 . |
| 214085_x_ | 1.35E-06 | 7.46E-08 | GLIPR1                     | 11010 .  |
| 214086_s_ | 4.96E-07 | 1.95E-08 | PARP2                      | 10038 .  |
| 214088_s_ | 0.007751 | 0.003894 | FUT3                       | 2525 .   |
| 214090_at | 0.006022 | 0.002891 | LOC100133105 100133105     |          |
| 214091_s_ | 3.73E-04 | 9.92E-05 | GPX3                       | 2878 .   |
| 214092_x_ | 1.49E-05 | 1.72E-06 | SFRS14                     | 10147 .  |
| 214093_s_ | 3.31E-07 | 1.16E-08 | FUBP1                      | 8880 .   |
| 214095_at | 0.008948 | 0.004604 | SHMT2                      | 6472 .   |
| 214097_at | 4.20E-04 | 1.15E-04 | RPS21                      | 6227 .   |
| 214099_s_ | 0.003663 | 0.001596 | PDE4DIP                    | 9659 .   |
| 214100_x_ | 9.83E-05 | 1.89E-05 | NSUN5B                     | 155400 . |
| 214102_at | 2.64E-06 | 1.78E-07 | ARAP2                      | 116984 . |

|           |          |          |                              |         |
|-----------|----------|----------|------------------------------|---------|
| 214103_s_ | 0.014655 | 0.008218 | RAP2A                        | 5911 .  |
| 214105_at | 2.96E-04 | 7.47E-05 | SOCS3                        | 9021 .  |
| 214109_at | 8.35E-04 | 2.68E-04 | LRBA                         | 987 .   |
| 214110_s_ | 1.27E-07 | 3.12E-09 |                              | .       |
| 214112_s_ | 1.82E-06 | 1.11E-07 | CXorf40A /// C 541578 /// 9: | .       |
| 214113_s_ | 0.003478 | 0.0015   | RBM8A                        | 9939 .  |
| 214114_x_ | 1.87E-04 | 4.20E-05 | FASTK                        | 10922 . |
| 214116_at | 0.001763 | 6.62E-04 | BTD                          | 686 .   |
| 214117_s_ | 0.003729 | 0.00163  | BTD                          | 686 .   |
| 214118_x_ | 7.48E-04 | 2.34E-04 | PCM1                         | 5108 .  |
| 214120_at | 0.045205 | 0.030543 | RFPL1S                       | 10740 . |
| 214121_x_ | 3.93E-06 | 2.98E-07 | PDLIM7                       | 9260 .  |
| 214122_at | 4.96E-04 | 1.41E-04 | PDLIM7                       | 9260 .  |
| 214124_x_ | 7.44E-05 | 1.33E-05 |                              | .       |
| 214125_s_ | 4.47E-05 | 6.95E-06 | NENF                         | 29937 . |
| 214126_at | 5.78E-08 | 1.08E-09 |                              | .       |
| 214127_s_ | 0.026673 | 0.016548 | SRRT                         | 51593 . |
| 214128_at | 0.006207 | 0.002994 | DAGLA                        | 747 .   |
| 214129_at | 1.35E-04 | 2.80E-05 | PDE4DIP                      | 9659 .  |
| 214130_s_ | 9.07E-05 | 1.70E-05 | PDE4DIP                      | 9659 .  |
| 214131_at | 0.039312 | 0.025956 | CYorf15B                     | 84663 . |
| 214132_at | 3.37E-05 | 4.83E-06 | ATP5C1                       | 509 .   |
| 214133_at | 0.001477 | 5.36E-04 | LOC100133432100133432 //.    | .       |
| 214135_at | 1.28E-05 | 1.40E-06 | CLDN18                       | 51208 . |
| 214136_at | 0.017743 | 0.010282 | NUDT13                       | 25961 . |
| 214137_at | 0.023159 | 0.014039 | PTPRJ                        | 5795 .  |
| 214141_x_ | 2.93E-06 | 2.03E-07 | SFRS7                        | 6432 .  |
| 214143_x_ | 0.042357 | 0.028307 | RPL24                        | 6152 .  |
| 214144_at | 1.43E-04 | 3.02E-05 | POLR2D                       | 5433 .  |
| 214145_s_ | 0.002148 | 8.42E-04 | SPTB                         | 6710 .  |
| 214149_s_ | 5.62E-05 | 9.27E-06 | ATP6V0E1                     | 8992 .  |
| 214150_x_ | 7.86E-05 | 1.43E-05 | ATP6V0E1                     | 8992 .  |
| 214151_s_ | 2.32E-04 | 5.51E-05 | CCPG1                        | 9236 .  |
| 214152_at | 0.001064 | 3.60E-04 | CCPG1                        | 9236 .  |



|           |          |          |              |             |
|-----------|----------|----------|--------------|-------------|
| 214153_at | 0.001751 | 6.57E-04 | ELOVL5       | 60481 .     |
| 214154_s_ | 3.83E-07 | 1.40E-08 | PKP2         | 5318 .      |
| 214156_at | 3.88E-04 | 1.04E-04 | MYRIP        | 25924 .     |
| 214157_at | 0.010606 | 0.005622 | GNAS         | 2778 .      |
| 214158_s_ | 1.30E-04 | 2.68E-05 | PRDM10       | 56980 .     |
| 214161_at | 0.023376 | 0.014198 | OSGIN2       | 734 .       |
| 214163_at | 0.009105 | 0.004698 | HSPB11       | 51668 .     |
| 214164_x_ | 8.10E-04 | 2.59E-04 | CA12         | 771 .       |
| 214165_s_ | 3.72E-04 | 9.87E-05 | HS6ST1       | 9394 .      |
| 214166_at | 7.24E-04 | 2.25E-04 | SDHB         | 6390 .      |
| 214168_s_ | 0.010235 | 0.00539  | TJP1         | 7082 .      |
| 214169_at | 9.59E-05 | 1.83E-05 | UNC84A       | 23353 .     |
| 214170_x_ | 0.036004 | 0.023447 | FH           | 2271 .      |
| 214171_s_ | 7.23E-05 | 1.28E-05 | U2AF2        | 11338 .     |
| 214174_s_ | 1.81E-07 | 5.07E-09 | PDLIM4       | 8572 .      |
| 214175_x_ | 0.00109  | 3.71E-04 | PDLIM4       | 8572 .      |
| 214176_s_ | 1.50E-04 | 3.20E-05 |              | .           |
| 214177_s_ | 5.38E-04 | 1.56E-04 | PBXIP1       | 57326 .     |
| 214178_s_ | 0.018056 | 0.010498 | SOX2         | 6657 .      |
| 214179_s_ | 0.003421 | 0.001471 | NFE2L1       | 4779 .      |
| 214182_at | 2.24E-06 | 1.45E-07 | LOC100132430 | 100132430 . |
| 214184_at | 8.84E-06 | 8.62E-07 | NPFF         | 8620 .      |
| 214186_s_ | 5.34E-06 | 4.44E-07 | HCG26        | 352961 .    |
| 214187_x_ | 7.05E-04 | 2.17E-04 | CTDSPL       | 10217 .     |
| 214188_at | 0.001065 | 3.60E-04 |              | .           |
| 214190_x_ | 0.004357 | 0.001964 | GGA2         | 23062 .     |
| 214192_at | 0.004758 | 0.002185 | NUP88        | 4927 .      |
| 214193_s_ | 3.74E-04 | 9.95E-05 | C1orf107     | 27042 .     |
| 214194_at | 1.94E-04 | 4.40E-05 | DIS3         | 22894 .     |
| 214195_at | 0.013044 | 0.007171 | TPP1         | 1200 .      |
| 214196_s_ | 5.60E-05 | 9.21E-06 | TPP1         | 1200 .      |
| 214197_s_ | 0.043393 | 0.02912  | SETDB1       | 9869 .      |
| 214199_at | 0.007705 | 0.003869 | SFTPD        | 6441 .      |
| 214201_x_ | 0.003003 | 0.001256 | BAT2         | 7916 .      |

|           |          |          |                                |
|-----------|----------|----------|--------------------------------|
| 214202_at | 0.02922  | 0.018404 | .                              |
| 214203_s_ | 3.37E-07 | 1.18E-08 | PRODH 5625 .                   |
| 214204_at | 0.035131 | 0.022781 | PACRG 135138 .                 |
| 214206_at | 4.85E-04 | 1.37E-04 | PPIL6 285755 .                 |
| 214207_s_ | 0.00225  | 8.90E-04 | CARD10 29775 .                 |
| 214208_at | 8.60E-04 | 2.78E-04 | KLHL35 283212 .                |
| 214209_s_ | 1.46E-04 | 3.09E-05 | ABCB9 23457 .                  |
| 214210_at | 0.046188 | 0.031309 | SLC25A17 10478 .               |
| 214211_at | 3.29E-04 | 8.53E-05 | FTH1 2495 .                    |
| 214213_x_ | 1.72E-05 | 2.06E-06 | LMNA 4000 .                    |
| 214214_s_ | 6.73E-04 | 2.06E-04 | C1QBP 708 .                    |
| 214215_s_ | 4.39E-04 | 1.21E-04 | LARP5 23185 .                  |
| 214217_at | 0.027103 | 0.016861 | GRM5 2915 .                    |
| 214219_x_ | 3.42E-06 | 2.49E-07 | MAP4K1 11184 .                 |
| 214220_s_ | 9.69E-05 | 1.85E-05 | ALMS1 7840 .                   |
| 214221_at | 0.001397 | 5.01E-04 | ALMS1 7840 .                   |
| 214223_at | 5.89E-07 | 2.45E-08 | .                              |
| 214224_s_ | 0.01126  | 0.006032 | PIN4 5303 .                    |
| 214225_at | 8.91E-06 | 8.72E-07 | PIN4 5303 .                    |
| 214226_at | 1.99E-04 | 4.55E-05 | POL3S 339105 .                 |
| 214227_at | 6.83E-05 | 1.19E-05 | .                              |
| 214228_x_ | 0.037303 | 0.024438 | TNFRSF4 7293 .                 |
| 214229_at | 0.014588 | 0.008172 | DNAH17 8632 .                  |
| 214230_at | 0.001869 | 7.11E-04 | CDC42 998 .                    |
| 214231_s_ | 0.002253 | 8.92E-04 | KIAA0564 23078 .               |
| 214233_at | 2.43E-04 | 5.83E-05 | GGA2 23062 .                   |
| 214237_x_ | 8.40E-06 | 8.04E-07 | PAWR 5074 .                    |
| 214239_x_ | 0.033719 | 0.021739 | PCGF2 7703 .                   |
| 214240_at | 1.69E-06 | 1.01E-07 | GAL 51083 .                    |
| 214241_at | 3.91E-04 | 1.05E-04 | NDUFB8 4714 .                  |
| 214242_at | 0.009638 | 0.005024 | MAN1A2 10905 .                 |
| 214243_s_ | 1.68E-05 | 1.99E-06 | SERHL /// SERH 253190 /// 94 . |
| 214244_s_ | 0.001643 | 6.09E-04 | ATP6VOE1 8992 .                |
| 214245_at | 0.002698 | 0.001106 | RPS14 6208 .                   |

|           |          |          |           |          |
|-----------|----------|----------|-----------|----------|
| 214246_x_ | 0.004096 | 0.001823 | MINK1     | 50488 .  |
| 214247_s_ | 0.009158 | 0.004733 | DKK3      | 27122 .  |
| 214248_s_ | 1.30E-05 | 1.44E-06 | TRIM2     | 23321 .  |
| 214249_at | 0.035836 | 0.023317 | TRIM2     | 23321 .  |
| 214252_s_ | 1.61E-05 | 1.89E-06 | CLN5      | 1203 .   |
| 214253_s_ | 6.84E-04 | 2.10E-04 | DTNB      | 1838 .   |
| 214255_at | 5.19E-06 | 4.26E-07 | ATP10A    | 57194 .  |
| 214256_at | 0.010665 | 0.005658 | ATP10A    | 57194 .  |
| 214257_s_ | 6.68E-12 | 6.60E-15 |           | .        |
| 214258_x_ | 0.004587 | 0.00209  | KAT5      | 10524 .  |
| 214259_s_ | 0.002052 | 7.96E-04 | AKR7A2    | 8574 .   |
| 214260_at | 0.001806 | 6.81E-04 | COPS8     | 10920 .  |
| 214261_s_ | 5.68E-04 | 1.66E-04 | ADH6      | 130 .    |
| 214262_at | 0.006609 | 0.003226 | TRIP6     | 7205 .   |
| 214263_x_ | 0.005249 | 0.002454 | POLR2C    | 5432 .   |
| 214264_s_ | 0.002376 | 9.49E-04 | C14orf143 | 90141 .  |
| 214265_at | 0.002256 | 8.93E-04 | ITGA8     | 8516 .   |
| 214266_s_ | 3.26E-04 | 8.44E-05 | PDLIM7    | 9260 .   |
| 214267_s_ | 2.57E-05 | 3.43E-06 | CADM4     | 199731 . |
| 214268_s_ | 3.78E-04 | 1.01E-04 | MTMR4     | 9110 .   |
| 214269_at | 2.49E-04 | 6.03E-05 | MFSD7     | 84179 .  |
| 214270_s_ | 0.002262 | 8.96E-04 | MAPRE3    | 22924 .  |
| 214272_at | 1.85E-04 | 4.17E-05 | CYLD      | 1540 .   |
| 214273_x_ | 0.042519 | 0.028431 | C16orf35  | 8131 .   |
| 214274_s_ | 7.64E-06 | 7.09E-07 | ACAA1     | 30 .     |
| 214276_at | 2.40E-04 | 5.75E-05 | KLF12     | 11278 .  |
| 214277_at | 0.014638 | 0.008207 | COX11     | 1353 .   |
| 214278_s_ | 0.001428 | 5.14E-04 | NDRG2     | 57447 .  |
| 214279_s_ | 3.10E-07 | 1.05E-08 | NDRG2     | 57447 .  |
| 214280_x_ | 5.79E-07 | 2.39E-08 | HNRNPA1   | 3178 .   |
| 214281_s_ | 0.038236 | 0.025143 | RCHY1     | 25898 .  |
| 214283_at | 5.34E-05 | 8.70E-06 | TMEM97    | 27346 .  |
| 214285_at | 0.041116 | 0.027346 | FABP3     | 2170 .   |
| 214287_s_ | 0.026549 | 0.016459 | CDC2L5    | 8621 .   |

|           |          |          |                             |        |   |
|-----------|----------|----------|-----------------------------|--------|---|
| 214288_s_ | 8.55E-05 | 1.59E-05 | PSMB1                       | 5689   | . |
| 214289_at | 4.72E-05 | 7.45E-06 | PSMB1                       | 5689   | . |
| 214290_s_ | 0.042935 | 0.028745 | HIST2H2AA3 //723790 /// 8:  |        | . |
| 214291_at | 0.002164 | 8.49E-04 | LOC729046 /// 100129657 //. |        | . |
| 214292_at | 0.007412 | 0.003697 | ITGB4                       | 3691   | . |
| 214293_at | 1.11E-10 | 3.01E-13 | 11-Sep                      | 55752  | . |
| 214294_at | 3.78E-04 | 1.01E-04 | KIAA0485                    | 57235  | . |
| 214295_at | 0.003738 | 0.001635 | KIAA0485                    | 57235  | . |
| 214296_x_ | 1.40E-04 | 2.93E-05 | C19orf36                    | 113177 | . |
| 214297_at | 9.61E-05 | 1.83E-05 | CSPG4                       | 1464   | . |
| 214298_x_ | 6.04E-04 | 1.79E-04 | 6-Sep                       | 23157  | . |
| 214299_at | 0.044129 | 0.029702 | TOP3A                       | 7156   | . |
| 214301_s_ | 0.007729 | 0.003882 | DPYSL4                      | 10570  | . |
| 214303_x_ | 0.002378 | 9.50E-04 | MUC5AC                      | 4586   | . |
| 214304_x_ | 4.40E-04 | 1.22E-04 | SYNM                        | 23336  | . |
| 214305_s_ | 0.016762 | 0.009623 | SF3B1                       | 23451  | . |
| 214306_at | 0.016617 | 0.009524 | OPA1                        | 4976   | . |
| 214308_s_ | 0.004063 | 0.001806 | HGD                         | 3081   | . |
| 214309_s_ | 0.011194 | 0.005991 |                             |        | . |
| 214310_s_ | 0.018538 | 0.010826 | ZFPL1                       | 7542   | . |
| 214311_at | 9.92E-05 | 1.91E-05 | ZFPL1                       | 7542   | . |
| 214312_at | 0.007755 | 0.003899 | FOXA2                       | 3170   | . |
| 214313_s_ | 4.57E-05 | 7.15E-06 | EIF5B                       | 9669   | . |
| 214314_s_ | 5.71E-04 | 1.68E-04 | EIF5B                       | 9669   | . |
| 214316_x_ | 1.77E-04 | 3.93E-05 |                             |        | . |
| 214321_at | 5.92E-04 | 1.75E-04 | NOV                         | 4856   | . |
| 214322_at | 0.002996 | 0.001253 | CAMK2G                      | 818    | . |
| 214324_at | 4.32E-04 | 1.19E-04 | GP2                         | 2813   | . |
| 214325_at | 0.008274 | 0.004203 | GP2                         | 2813   | . |
| 214326_x_ | 5.24E-04 | 1.50E-04 | JUND                        | 3727   | . |
| 214328_s_ | 9.63E-04 | 3.19E-04 | HSP90AA1                    | 3320   | . |
| 214329_x_ | 0.038204 | 0.025114 | TNFSF10                     | 8743   | . |
| 214331_at | 0.005686 | 0.002697 | TSFM                        | 10102  | . |
| 214332_s_ | 0.005505 | 0.002597 | TSFM                        | 10102  | . |

|           |          |          |                             |         |
|-----------|----------|----------|-----------------------------|---------|
| 214333_x_ | 0.007376 | 0.003676 | IDH3G                       | 3421 .  |
| 214334_x_ | 0.00109  | 3.71E-04 | DAZAP2                      | 9802 .  |
| 214335_at | 0.005846 | 0.002791 | RPL18                       | 6141 .  |
| 214336_s_ | 3.49E-04 | 9.16E-05 | COPA                        | 1314 .  |
| 214337_at | 0.004211 | 0.001885 | COPA                        | 1314 .  |
| 214338_at | 0.006999 | 0.003456 | DNAJB12                     | 54788 . |
| 214339_s_ | 1.07E-05 | 1.10E-06 | MAP4K1                      | 11184 . |
| 214340_at | 0.001171 | 4.05E-04 | ALOX12P2                    | 245 .   |
| 214341_at | 1.38E-04 | 2.89E-05 | THTPA                       | 79178 . |
| 214344_at | 0.004619 | 0.002109 | LOC92973                    | 92973 . |
| 214345_at | 7.05E-04 | 2.17E-04 |                             | .       |
| 214346_at | 0.004499 | 0.002043 | C1QL1                       | 10882 . |
| 214347_s_ | 0.001018 | 3.41E-04 | DDC                         | 1644 .  |
| 214348_at | 0.00403  | 0.001788 | TACR2                       | 6865 .  |
| 214349_at | 9.66E-04 | 3.20E-04 |                             | .       |
| 214350_at | 0.014185 | 0.007906 | SNTB2                       | 6645 .  |
| 214351_x_ | 0.014858 | 0.008356 | RPL13                       | 6137 .  |
| 214352_s_ | 5.08E-05 | 8.18E-06 | KRAS                        | 3845 .  |
| 214353_at | 0.013015 | 0.007154 |                             | .       |
| 214354_x_ | 1.95E-10 | 6.13E-13 | SFTPB                       | 6439 .  |
| 214355_x_ | 4.72E-05 | 7.46E-06 | CTAGE4 /// LO:100128553 //. |         |
| 214357_at | 6.57E-04 | 2.00E-04 | C1orf105                    | 92346 . |
| 214358_at | 0.02123  | 0.012698 | ACACA                       | 31 .    |
| 214359_s_ | 0.003209 | 0.001362 | HSP90AB1                    | 3326 .  |
| 214362_at | 2.54E-04 | 6.17E-05 | RGS12                       | 6002 .  |
| 214363_s_ | 4.83E-06 | 3.89E-07 | MATR3                       | 9782 .  |
| 214365_at | 3.21E-05 | 4.56E-06 | TPM3                        | 7170 .  |
| 214366_s_ | 0.005704 | 0.002707 | ALOX5                       | 240 .   |
| 214367_at | 0.004665 | 0.002134 | RASGRP2                     | 10235 . |
| 214368_at | 0.003589 | 0.001557 | RASGRP2                     | 10235 . |
| 214371_at | 0.042069 | 0.028083 | TSSK2                       | 23617 . |
| 214372_x_ | 0.009301 | 0.00482  | ERN2                        | 10595 . |
| 214373_at | 0.001154 | 3.97E-04 |                             | .       |
| 214374_s_ | 0.008925 | 0.004591 | PPFIBP1                     | 8496 .  |

|           |          |          |                               |          |
|-----------|----------|----------|-------------------------------|----------|
| 214375_at | 0.004734 | 0.002171 | LOC729222 /// 729222 /// 84.  |          |
| 214376_at | 0.004672 | 0.002138 |                               |          |
| 214377_s_ | 0.031876 | 0.020353 | CTRL                          | 1506 .   |
| 214378_at | 0.005979 | 0.002866 | TFPI                          | 7035 .   |
| 214379_at | 0.027454 | 0.01711  | HNRPDL                        | 9987 .   |
| 214380_at | 7.32E-05 | 1.30E-05 | PRPF31                        | 26121 .  |
| 214381_at | 0.013643 | 0.007555 | LOC441601                     | 441601 . |
| 214382_at | 3.99E-07 | 1.48E-08 | UNC93A                        | 54346 .  |
| 214383_x_ | 8.51E-05 | 1.58E-05 | KLHDC3                        | 116138 . |
| 214384_s_ | 3.00E-05 | 4.18E-06 | DCTN2                         | 10540 .  |
| 214385_s_ | 0.00103  | 3.46E-04 | MUC5AC                        | 4586 .   |
| 214386_at | 4.98E-04 | 1.41E-04 | HMX1                          | 3166 .   |
| 214387_x_ | 1.06E-04 | 2.09E-05 | SFTPC                         | 6440 .   |
| 214390_s_ | 0.012236 | 0.006651 | BCAT1                         | 586 .    |
| 214391_x_ | 0.004763 | 0.002188 | PTGER1                        | 5731 .   |
| 214392_at | 4.02E-04 | 1.09E-04 | IRGC                          | 56269 .  |
| 214393_at | 0.00495  | 0.002288 | RND2                          | 8153 .   |
| 214394_x_ | 0.013142 | 0.007236 | EEF1D                         | 1936 .   |
| 214396_s_ | 8.08E-15 | 7.30E-19 | MBD2                          | 8932 .   |
| 214397_at | 8.11E-15 | 9.43E-19 | MBD2                          | 8932 .   |
| 214400_at | 9.21E-06 | 9.14E-07 | INSL3                         | 3640 .   |
| 214402_s_ | 0.003462 | 0.001491 | SFI1                          | 9814 .   |
| 214403_x_ | 1.32E-06 | 7.23E-08 | SPDEF                         | 25803 .  |
| 214404_x_ | 1.90E-05 | 2.34E-06 | SPDEF                         | 25803 .  |
| 214407_x_ | 3.10E-07 | 1.06E-08 | GYPB                          | 2994 .   |
| 214408_s_ | 0.008322 | 0.004232 | RFPL1S /// RFP 10737 /// 107. |          |
| 214409_at | 0.010186 | 0.005359 | RFPL3S                        | 10737 .  |
| 214411_x_ | 2.88E-04 | 7.22E-05 | CTRB2                         | 440387 . |
| 214414_x_ | 0.003451 | 0.001486 | HBA1 /// HBA2 3039 /// 3040.  |          |
| 214415_at | 7.28E-06 | 6.66E-07 | PLGLB1 /// PLC 5342 /// 5343. |          |
| 214417_s_ | 0.047957 | 0.032694 | FETUB                         | 26998 .  |
| 214418_at | 0.00121  | 4.21E-04 | LOC196993                     | 196993 . |
| 214419_s_ | 0.006657 | 0.003254 | CYP2C9                        | 1559 .   |
| 214420_s_ | 0.00128  | 4.51E-04 | CYP2C9                        | 1559 .   |

|           |          |          |                             |          |
|-----------|----------|----------|-----------------------------|----------|
| 214421_x_ | 0.008759 | 0.00449  | CYP2C9                      | 1559 .   |
| 214422_at | 0.008002 | 0.004045 | LOC131185 /// 131185 /// 58 |          |
| 214424_s_ | 0.029695 | 0.018755 | ALDOB                       | 229 .    |
| 214425_at | 0.020033 | 0.011851 | AMBP                        | 259 .    |
| 214426_x_ | 5.67E-05 | 9.37E-06 | CHAF1A                      | 10036 .  |
| 214427_at | 6.32E-06 | 5.52E-07 | NOP2                        | 4839 .   |
| 214429_at | 2.72E-05 | 3.68E-06 | MTMR6                       | 9107 .   |
| 214430_at | 0.00374  | 0.001636 | GLA                         | 2717 .   |
| 214431_at | 2.29E-08 | 3.13E-10 | GMPS                        | 8833 .   |
| 214432_at | 2.04E-04 | 4.69E-05 | ATP1A3                      | 478 .    |
| 214433_s_ | 0.001602 | 5.91E-04 | SELENBP1                    | 8991 .   |
| 214434_at | 0.0378   | 0.024808 | HSPA12A                     | 259217 . |
| 214436_at | 0.012789 | 0.007009 | FBXL2                       | 25827 .  |
| 214439_x_ | 0.010328 | 0.005449 | BIN1                        | 274 .    |
| 214440_at | 0.009204 | 0.004761 | NAT1                        | 9 .      |
| 214443_at | 4.76E-04 | 1.34E-04 | PVR                         | 5817 .   |
| 214444_s_ | 7.42E-04 | 2.32E-04 | PVR                         | 5817 .   |
| 214445_at | 4.56E-05 | 7.12E-06 | ELL2                        | 22936 .  |
| 214446_at | 1.66E-05 | 1.96E-06 | ELL2                        | 22936 .  |
| 214447_at | 0.009727 | 0.005081 | ETS1                        | 2113 .   |
| 214449_s_ | 5.43E-05 | 8.86E-06 | RHOQ                        | 23433 .  |
| 214450_at | 0.008808 | 0.00452  | CTSW                        | 1521 .   |
| 214452_at | 0.03776  | 0.024778 | BCAT1                       | 586 .    |
| 214453_s_ | 1.97E-04 | 4.49E-05 | IFI44                       | 10561 .  |
| 214454_at | 1.83E-10 | 5.44E-13 | ADAMTS2                     | 9509 .   |
| 214458_at | 0.032287 | 0.020666 | TRAF3IP1                    | 26146 .  |
| 214459_x_ | 7.88E-05 | 1.43E-05 | HLA-C                       | 3107 .   |
| 214462_at | 2.54E-06 | 1.69E-07 | SOCS6                       | 9306 .   |
| 214463_x_ | 0.001667 | 6.19E-04 | HIST1H4J                    | 8363 .   |
| 214464_at | 6.07E-04 | 1.81E-04 | CDC42BPA                    | 8476 .   |
| 214465_at | 8.41E-05 | 1.56E-05 | ORM1 /// ORN 5004 /// 5005  |          |
| 214466_at | 4.58E-05 | 7.17E-06 | GJA5                        | 2702 .   |
| 214467_at | 0.039273 | 0.025928 | GPR65                       | 8477 .   |
| 214473_x_ | 0.020069 | 0.011875 | PMS2L3                      | 5387 .   |

|           |          |          |                             |         |
|-----------|----------|----------|-----------------------------|---------|
| 214475_x_ | 0.004289 | 0.001927 | CAPN3                       | 825 .   |
| 214476_at | 0.001308 | 4.62E-04 | TFF2                        | 7032 .  |
| 214477_at | 0.014416 | 0.008059 | MLLT1                       | 4298 .  |
| 214478_at | 4.54E-04 | 1.26E-04 | SPP2                        | 6694 .  |
| 214479_at | 0.005402 | 0.002539 | GFRA3                       | 2676 .  |
| 214481_at | 3.65E-04 | 9.66E-05 | HIST1H2AM                   | 8336 .  |
| 214483_s_ | 1.06E-04 | 2.08E-05 | ARFIP1                      | 27236 . |
| 214486_x_ | 9.12E-06 | 9.02E-07 | CFLAR                       | 8837 .  |
| 214487_s_ | 2.32E-04 | 5.51E-05 | RAP2A /// RAP 5911 /// 5911 | 2488 .  |
| 214489_at | 1.21E-05 | 1.30E-06 | FSHB                        | 416 .   |
| 214490_at | 2.01E-05 | 2.51E-06 | ARSF                        | 6753 .  |
| 214491_at | 1.81E-04 | 4.04E-05 | SSTR3                       | 6444 .  |
| 214492_at | 1.43E-05 | 1.63E-06 | SGCD                        | 10207 . |
| 214493_s_ | 0.001969 | 7.57E-04 | INADL                       | 10369 . |
| 214495_at | 1.25E-05 | 1.37E-06 | CACNG2                      | 4808 .  |
| 214497_s_ | 0.016716 | 0.009591 | NHLH2                       | 434 .   |
| 214498_at | 4.88E-04 | 1.38E-04 | ASIP                        | 9774 .  |
| 214499_s_ | 6.64E-04 | 2.02E-04 | BCLAF1                      | 9555 .  |
| 214500_at | 2.32E-05 | 3.01E-06 | H2AFY                       | 9555 .  |
| 214501_s_ | 1.97E-06 | 1.22E-07 | H2AFY                       | 8970 .  |
| 214502_at | 0.013458 | 0.007436 | HIST1H2BJ                   | 28 .    |
| 214504_at | 0.001794 | 6.76E-04 | ABO                         | 2273 .  |
| 214505_s_ | 7.67E-05 | 1.38E-05 | FHL1                        | 11318 . |
| 214506_at | 1.37E-04 | 2.85E-05 | GPR182                      | 23404 . |
| 214507_s_ | 8.54E-04 | 2.76E-04 | EXOSC2                      | 8354 .  |
| 214509_at | 0.001002 | 3.34E-04 | HIST1H3I                    | 10923 . |
| 214512_s_ | 0.016715 | 0.009589 | SUB1                        | 1385 .  |
| 214513_s_ | 0.027239 | 0.016955 | CREB1                       | 8366 .  |
| 214516_at | 0.006249 | 0.003018 | HIST1H4B                    | 6019 .  |
| 214519_s_ | 1.21E-04 | 2.45E-05 | RLN2                        | 2303 .  |
| 214520_at | 0.001483 | 5.39E-04 | FOXC2                       | 54626 . |
| 214521_at | 3.55E-04 | 9.32E-05 | HES2                        | 1053 .  |
| 214523_at | 2.29E-04 | 5.42E-05 | CEBPE                       | 2691 .  |
| 214524_at | 0.021839 | 0.013126 | GHRH                        |         |



|           |          |          |                         |         |
|-----------|----------|----------|-------------------------|---------|
| 214527_s_ | 1.65E-04 | 3.60E-05 | PQBP1                   | 10084 . |
| 214529_at | 0.045936 | 0.031114 | TSHB                    | 7252 .  |
| 214531_s_ | 3.06E-08 | 4.71E-10 | SNX1                    | 6642 .  |
| 214532_x_ | 9.06E-12 | 1.18E-14 | POU5F1B                 | 5462 .  |
| 214533_at | 0.002767 | 0.00114  | CMA1                    | 1215 .  |
| 214534_at | 0.005291 | 0.002477 | HIST1H1B                | 3009 .  |
| 214535_s_ | 8.48E-08 | 1.83E-09 | ADAMTS2                 | 9509 .  |
| 214536_at | 6.64E-05 | 1.15E-05 | SLURP1                  | 57152 . |
| 214537_at | 0.006176 | 0.002975 | HIST1H1D                | 3007 .  |
| 214538_x_ | 5.92E-05 | 9.90E-06 | RGS6                    | 9628 .  |
| 214539_at | 0.004124 | 0.001838 | SERPINB10               | 5273 .  |
| 214540_at | 0.010023 | 0.005261 | HIST1H2BO               | 8348 .  |
| 214541_s_ | 0.007774 | 0.00391  | QKI                     | 9444 .  |
| 214544_s_ | 9.33E-04 | 3.07E-04 | SNAP23                  | 8773 .  |
| 214545_s_ | 0.048006 | 0.032732 | PROSC                   | 11212 . |
| 214546_s_ | 0.00492  | 0.002273 | P2RY11                  | 5032 .  |
| 214549_x_ | 0.001609 | 5.93E-04 | SPRR1A                  | 6698 .  |
| 214550_s_ | 0.007027 | 0.003472 | TNPO3                   | 23534 . |
| 214551_s_ | 0.002419 | 9.71E-04 | CD7                     | 924 .   |
| 214553_s_ | 0.017836 | 0.010345 | ARPP19                  | 10776 . |
| 214555_at | 0.00204  | 7.91E-04 | SSTR5                   | 6755 .  |
| 214557_at | 0.032468 | 0.020795 | PTTG2                   | 10744 . |
| 214558_at | 0.002861 | 0.001185 | GPR12                   | 2835 .  |
| 214559_at | 0.004655 | 0.002128 | DRD3                    | 1814 .  |
| 214561_at | 0.023254 | 0.014112 | LILRP2                  | 79166 . |
| 214564_s_ | 7.91E-04 | 2.51E-04 | PCDHGC3                 | 5098 .  |
| 214565_s_ | 0.025098 | 0.015426 | SMR3A /// SMI10879 ///  | 265 .   |
| 214568_at | 0.016728 | 0.0096   | TPSD1                   | 23430 . |
| 214570_x_ | 5.10E-04 | 1.46E-04 | LOC728093 /// 25812 /// | 266 .   |
| 214571_at | 0.033611 | 0.021659 | FGF3                    | 2248 .  |
| 214572_s_ | 0.001448 | 5.23E-04 | INSL3                   | 3640 .  |
| 214575_s_ | 0.009223 | 0.004773 | AZU1                    | 566 .   |
| 214577_at | 9.97E-04 | 3.32E-04 | MAP1B                   | 4131 .  |
| 214578_s_ | 0.001819 | 6.88E-04 | ROCK1                   | 6093 .  |

|           |          |          |          |         |
|-----------|----------|----------|----------|---------|
| 214579_at | 9.41E-05 | 1.79E-05 | NIPAL3   | 57185 . |
| 214581_x_ | 3.96E-05 | 5.92E-06 | TNFRSF21 | 27242 . |
| 214586_at | 2.50E-07 | 7.93E-09 | GPR37    | 2861 .  |
| 214587_at | 3.61E-08 | 5.81E-10 | COL8A1   | 1295 .  |
| 214588_s_ | 6.54E-04 | 1.99E-04 | MFAP3    | 4238 .  |
| 214589_at | 0.004357 | 0.001964 | FGF12    | 2257 .  |
| 214590_s_ | 0.003322 | 0.00142  | UBE2D1   | 7321 .  |
| 214591_at | 0.003417 | 0.001469 | KLHL4    | 56062 . |
| 214592_s_ | 0.016757 | 0.009619 | SNAPC5   | 10302 . |
| 214593_at | 0.019851 | 0.011721 | PIAS2    | 9063 .  |
| 214594_x_ | 0.007244 | 0.003599 | ATP8B1   | 5205 .  |
| 214595_at | 0.015193 | 0.008576 | KCNG1    | 3755 .  |
| 214598_at | 0.045938 | 0.031116 | CLDN8    | 9073 .  |
| 214599_at | 0.025394 | 0.015646 | IVL      | 3713 .  |
| 214600_at | 7.01E-05 | 1.23E-05 | TEAD1    | 7003 .  |
| 214601_at | 0.00138  | 4.94E-04 | TPH1     | 7166 .  |
| 214605_x_ | 7.93E-08 | 1.68E-09 | GPR1     | 2825 .  |
| 214606_at | 4.33E-04 | 1.19E-04 | TSPAN2   | 10100 . |
| 214607_at | 0.025041 | 0.015385 | PAK3     | 5063 .  |
| 214609_at | 4.57E-04 | 1.27E-04 | PHOX2A   | 401 .   |
| 214611_at | 0.023572 | 0.014339 | GRIK1    | 2897 .  |
| 214613_at | 0.023374 | 0.014197 | GPR3     | 2827 .  |
| 214614_at | 0.003931 | 0.001736 | MNX1     | 3110 .  |
| 214616_at | 0.001207 | 4.20E-04 | HIST1H3E | 8353 .  |
| 214617_at | 0.004671 | 0.002137 | PRF1     | 5551 .  |
| 214619_at | 1.99E-06 | 1.24E-07 | CRHR1    | 1394 .  |
| 214620_x_ | 4.38E-07 | 1.68E-08 | PAM      | 5066 .  |
| 214622_at | 0.024911 | 0.015293 | CYP21A2  | 1589 .  |
| 214623_at | 5.63E-04 | 1.65E-04 | FBXW4P1  | 26226 . |
| 214625_s_ | 0.00869  | 0.004449 | MINK1    | 50488 . |
| 214627_at | 0.006881 | 0.003386 | EPX      | 8288 .  |
| 214628_at | 0.009582 | 0.004989 | NHLH1    | 4807 .  |
| 214629_x_ | 0.002767 | 0.00114  | RTN4     | 57142 . |
| 214630_at | 9.61E-04 | 3.18E-04 | CYP11B2  | 1585 .  |

|           |          |          |            |          |
|-----------|----------|----------|------------|----------|
| 214631_at | 0.010416 | 0.005501 | ZBTB33     | 10009 .  |
| 214632_at | 6.43E-04 | 1.94E-04 | NRP2       | 8828 .   |
| 214633_at | 2.09E-09 | 1.38E-11 | SOX3       | 6658 .   |
| 214634_at | 6.90E-05 | 1.21E-05 | HIST1H4B   | 8366 .   |
| 214635_at | 3.89E-05 | 5.78E-06 | CLDN9      | 9080 .   |
| 214637_at | 0.006002 | 0.002879 | OSM        | 5008 .   |
| 214638_s_ | 3.57E-06 | 2.64E-07 | CCNT2      | 905 .    |
| 214642_x_ | 0.047445 | 0.032304 | MAGEA5     | 4104 .   |
| 214643_x_ | 0.015021 | 0.008463 | BIN1       | 274 .    |
| 214644_at | 0.010275 | 0.005416 | HIST1H2AK  | 8330 .   |
| 214647_s_ | 6.42E-08 | 1.25E-09 | HFE        | 3077 .   |
| 214649_s_ | 9.24E-04 | 3.04E-04 | MTMR2      | 8898 .   |
| 214650_x_ | 1.65E-06 | 9.73E-08 | MOG        | 4340 .   |
| 214651_s_ | 3.56E-05 | 5.16E-06 | HOXA9      | 3205 .   |
| 214652_at | 0.019915 | 0.011767 | DRD1       | 1812 .   |
| 214656_x_ | 6.66E-05 | 1.15E-05 | MYO1C      | 4641 .   |
| 214657_s_ | 5.02E-04 | 1.43E-04 | NCRNA00084 | 283131 . |
| 214659_x_ | 2.79E-04 | 6.96E-05 | YLPM1      | 56252 .  |
| 214660_at | 0.00299  | 0.001249 | PELO       | 53918 .  |
| 214661_s_ | 3.93E-06 | 2.99E-07 | NOP14      | 8602 .   |
| 214662_at | 1.73E-04 | 3.82E-05 | WDR43      | 23160 .  |
| 214663_at | 3.03E-06 | 2.13E-07 | DSTYK      | 25778 .  |
| 214664_at | 0.001793 | 6.76E-04 | PAICS      | 10606 .  |
| 214666_x_ | 2.21E-04 | 5.18E-05 | IREB2      | 3658 .   |
| 214667_s_ | 0.024839 | 0.01524  | TP53I11    | 9537 .   |
| 214669_x_ | 6.66E-06 | 5.91E-07 | IGKC       | 3514 .   |
| 214670_at | 1.87E-04 | 4.22E-05 | ZKSCAN1    | 7586 .   |
| 214671_s_ | 0.037509 | 0.024588 | ABR        | 29 .     |
| 214674_at | 8.35E-04 | 2.68E-04 | USP19      | 10869 .  |
| 214675_at | 0.04994  | 0.034281 | NUP188     | 23511 .  |
| 214676_x_ | 1.66E-05 | 1.96E-06 | MUC3A      | 4584 .   |
| 214677_x_ | 0.043115 | 0.028892 | IGL@       | 3535 .   |
| 214679_x_ | 3.67E-06 | 2.73E-07 | GNA11      | 2767 .   |
| 214680_at | 0.009732 | 0.005084 | NTRK2      | 4915 .   |

|           |          |          |           |          |
|-----------|----------|----------|-----------|----------|
| 214681_at | 0.015066 | 0.008493 | GK        | 2710 .   |
| 214682_at | 0.018832 | 0.011024 | LOC399491 | 399491 . |
| 214683_s_ | 0.030224 | 0.019149 | CLK1      | 1195 .   |
| 214684_at | 0.006479 | 0.00315  | MEF2A     | 4205 .   |
| 214686_at | 7.53E-04 | 2.36E-04 | ZNF266    | 10781 .  |
| 214687_x_ | 0.020777 | 0.012378 | ALDOA     | 226 .    |
| 214688_at | 0.012717 | 0.006963 | TLE4      | 7091 .   |
| 214689_at | 8.97E-05 | 1.68E-05 | PAPPA2    | 60676 .  |
| 214690_at | 0.023191 | 0.014064 | TAF1B     | 9014 .   |
| 214691_x_ | 2.51E-04 | 6.08E-05 | FAM63B    | 54629 .  |
| 214692_s_ | 0.025246 | 0.015539 | JRK       | 8629 .   |
| 214695_at | 0.002001 | 7.72E-04 | UBAP2L    | 9898 .   |
| 214696_at | 9.10E-05 | 1.71E-05 | C17orf91  | 84981 .  |
| 214697_s_ | 0.012243 | 0.006656 | ROD1      | 9991 .   |
| 214698_at | 7.57E-07 | 3.41E-08 | ROD1      | 9991 .   |
| 214699_x_ | 4.88E-04 | 1.38E-04 | WIPI2     | 26100 .  |
| 214700_x_ | 0.013556 | 0.007497 | RIF1      | 55183 .  |
| 214701_s_ | 2.23E-10 | 7.53E-13 | FN1       | 2335 .   |
| 214702_at | 2.38E-08 | 3.33E-10 | FN1       | 2335 .   |
| 214703_s_ | 6.16E-08 | 1.18E-09 | MAN2B2    | 23324 .  |
| 214705_at | 0.002745 | 0.001129 | INADL     | 10207 .  |
| 214706_at | 8.73E-04 | 2.84E-04 | ZNF200    | 7752 .   |
| 214707_x_ | 4.06E-06 | 3.12E-07 | ALMS1     | 7840 .   |
| 214708_at | 0.004831 | 0.002225 | SNTB1     | 6641 .   |
| 214709_s_ | 0.006937 | 0.00342  | KTN1      | 3895 .   |
| 214710_s_ | 5.23E-04 | 1.50E-04 | CCNB1     | 891 .    |
| 214714_at | 0.044863 | 0.030278 | ZNF394    | 84124 .  |
| 214715_x_ | 5.69E-05 | 9.42E-06 | ZNF160    | 90338 .  |
| 214716_at | 5.01E-04 | 1.42E-04 | BMP2K     | 55589 .  |
| 214718_at | 0.008013 | 0.004051 | GATAD1    | 57798 .  |
| 214719_at | 0.00142  | 5.11E-04 | SLC46A3   | 283537 . |
| 214720_x_ | 5.00E-06 | 4.07E-07 | 10-Sep    | 151011 . |
| 214722_at | 0.039856 | 0.026372 | NOTCH2NL  | 388677 . |
| 214723_x_ | 4.61E-07 | 1.78E-08 | ANKRD36   | 375248 . |

|           |          |          |                            |          |
|-----------|----------|----------|----------------------------|----------|
| 214724_at | 5.50E-05 | 9.00E-06 | DIXDC1                     | 85458 .  |
| 214726_x_ | 8.87E-06 | 8.66E-07 | ADD1                       | 118 .    |
| 214727_at | 6.05E-06 | 5.24E-07 | BRCA2                      | 675 .    |
| 214728_x_ | 3.15E-09 | 2.29E-11 | SMARCA4                    | 6597 .   |
| 214729_at | 0.007502 | 0.003749 | TWISTNB                    | 221830 . |
| 214731_at | 6.19E-04 | 1.85E-04 | CTTNBP2NL                  | 55917 .  |
| 214732_at | 2.70E-06 | 1.83E-07 | SP1                        | 6667 .   |
| 214733_s_ | 0.014686 | 0.00824  | YIPF1                      | 54432 .  |
| 214734_at | 0.04169  | 0.027785 | EXPH5                      | 23086 .  |
| 214735_at | 0.001188 | 4.12E-04 | IPCEF1                     | 26034 .  |
| 214736_s_ | 2.15E-04 | 5.00E-05 | ADD1                       | 118 .    |
| 214737_x_ | 8.20E-07 | 3.80E-08 | HNRNPC                     | 3183 .   |
| 214738_s_ | 3.64E-07 | 1.31E-08 | NEK9                       | 91754 .  |
| 214739_at | 0.002978 | 0.001243 | LRCH3                      | 84859 .  |
| 214740_at | 0.015203 | 0.008584 | LOC100134053;100134053 //. |          |
| 214742_at | 2.15E-06 | 1.37E-07 | AZI1                       | 22994 .  |
| 214743_at | 8.69E-05 | 1.62E-05 | CUX1                       | 1523 .   |
| 214744_s_ | 0.035925 | 0.023383 | RPL23                      | 9349 .   |
| 214745_at | 3.02E-05 | 4.21E-06 | PLCH1                      | 23007 .  |
| 214747_at | 5.81E-05 | 9.66E-06 | ZBED4                      | 9889 .   |
| 214748_at | 3.43E-04 | 8.97E-05 | N4BP2L2                    | 10443 .  |
| 214750_at | 1.45E-05 | 1.66E-06 | PLAC4                      | 191585 . |
| 214751_at | 0.018198 | 0.010593 | ZNF468                     | 90333 .  |
| 214752_x_ | 4.62E-04 | 1.29E-04 | FLNA                       | 2316 .   |
| 214753_at | 0.027171 | 0.016906 | N4BP2L2                    | 10443 .  |
| 214755_at | 1.71E-04 | 3.78E-05 | UAP1L1                     | 91373 .  |
| 214757_at | 0.007246 | 0.0036   | PMS2L2                     | 5380 .   |
| 214758_at | 0.00952  | 0.004952 | WDR21A                     | 26094 .  |
| 214759_at | 2.18E-04 | 5.10E-05 | WTAP                       | 9589 .   |
| 214760_at | 0.030209 | 0.019135 | ZNF337                     | 26152 .  |
| 214761_at | 0.003318 | 0.001418 | ZNF423                     | 23090 .  |
| 214763_at | 0.015259 | 0.008621 | ACOT11                     | 26027 .  |
| 214764_at | 3.81E-06 | 2.87E-07 | RRP15                      | 51018 .  |
| 214765_s_ | 0.004627 | 0.002112 | NAAA                       | 27163 .  |

|           |          |          |          |          |
|-----------|----------|----------|----------|----------|
| 214766_s_ | 9.02E-04 | 2.95E-04 | AHCTF1   | 25909 .  |
| 214767_s_ | 1.38E-05 | 1.56E-06 | HSPB6    | 126393 . |
| 214768_x_ | 0.001936 | 7.42E-04 | FAM20B   | 9917 .   |
| 214770_at | 0.001963 | 7.54E-04 | MSR1     | 4481 .   |
| 214771_x_ | 0.007002 | 0.003458 | MPRIP    | 23164 .  |
| 214772_at | 1.11E-04 | 2.19E-05 | C11orf41 | 25758 .  |
| 214773_x_ | 1.44E-05 | 1.64E-06 | TIPRL    | 261726 . |
| 214774_x_ | 6.81E-06 | 6.09E-07 | TOX3     | 27324 .  |
| 214775_at | 1.81E-07 | 5.05E-09 | N4BP3    | 23138 .  |
| 214776_x_ | 6.59E-04 | 2.00E-04 | XYLB     | 9942 .   |
| 214777_at | 0.001312 | 4.64E-04 | IGKV4-1  | 28908 .  |
| 214778_at | 0.008114 | 0.00411  | MEGF8    | 1954 .   |
| 214780_s_ | 8.90E-04 | 2.90E-04 | MYO9B    | 4650 .   |
| 214781_at | 0.001279 | 4.50E-04 |          | .        |
| 214782_at | 5.31E-08 | 9.85E-10 | CTTN     | 2017 .   |
| 214783_s_ | 1.09E-05 | 1.14E-06 | ANXA11   | 311 .    |
| 214784_x_ | 2.36E-05 | 3.08E-06 | XPO6     | 23214 .  |
| 214785_at | 0.005015 | 0.002325 | VPS13A   | 23230 .  |
| 214786_at | 0.023026 | 0.013947 | MAP3K1   | 4214 .   |
| 214787_at | 3.15E-08 | 4.88E-10 | DENND4A  | 10260 .  |
| 214789_x_ | 0.006703 | 0.00328  | SFRS2B   | 10929 .  |
| 214791_at | 4.23E-04 | 1.16E-04 | SP140L   | 93349 .  |
| 214792_x_ | 0.001174 | 4.06E-04 | VAMP2    | 6844 .   |
| 214794_at | 4.52E-04 | 1.26E-04 | PA2G4    | 5036 .   |
| 214795_at | 0.001545 | 5.65E-04 | ZMYND8   | 23613 .  |
| 214797_s_ | 2.83E-06 | 1.95E-07 | PCTK3    | 5129 .   |
| 214798_at | 0.00243  | 9.76E-04 | ATP2C2   | 9914 .   |
| 214799_at | 3.44E-04 | 8.99E-05 | NFASC    | 23114 .  |
| 214800_x_ | 0.035554 | 0.023103 | BTF3     | 689 .    |
| 214803_at | 0.006403 | 0.003107 |          | .        |
| 214804_at | 0.026683 | 0.016558 | CENPI    | 2491 .   |
| 214805_at | 1.28E-06 | 6.92E-08 | EIF4A1   | 1973 .   |
| 214806_at | 5.47E-06 | 4.60E-07 | BICD1    | 636 .    |
| 214808_at | 5.37E-09 | 4.74E-11 |          | .        |

|           |          |          |              |             |
|-----------|----------|----------|--------------|-------------|
| 214812_s_ | 4.78E-04 | 1.34E-04 | MOBKL1B      | 55233 .     |
| 214813_at | 4.25E-04 | 1.17E-04 | ZNF75D       | 7626 .      |
| 214815_at | 5.59E-09 | 5.00E-11 | TRIM33       | 51592 .     |
| 214816_x_ | 2.94E-06 | 2.05E-07 | C19orf40     | 91442 .     |
| 214817_at | 3.82E-04 | 1.02E-04 | UNC13A       | 23025 .     |
| 214818_at | 0.001374 | 4.92E-04 | CCDC57       | 284001 .    |
| 214819_at | 2.99E-06 | 2.10E-07 | IQSEC2       | 23096 .     |
| 214820_at | 0.013061 | 0.007182 | BRWD1        | 54014 .     |
| 214821_at | 0.043283 | 0.029035 |              | .           |
| 214823_at | 7.95E-07 | 3.65E-08 | ZNF204       | 7754 .      |
| 214829_at | 0.002195 | 8.64E-04 | AASS         | 10157 .     |
| 214830_at | 2.61E-08 | 3.81E-10 | SLC38A6      | 145389 .    |
| 214831_at | 6.50E-04 | 1.97E-04 | MED28        | 80306 .     |
| 214832_at | 0.012221 | 0.006641 | HNF4A        | 3172 .      |
| 214833_at | 0.002604 | 0.001061 | TMEM63A      | 9725 .      |
| 214834_at | 2.03E-05 | 2.54E-06 | PAR5         | 8123 .      |
| 214835_s_ | 0.024379 | 0.014909 | SUCLG2       | 8801 .      |
| 214836_x_ | 0.0081   | 0.004102 | IGKC         | 3514 .      |
| 214838_at | 2.30E-04 | 5.45E-05 | SFT2D2       | 375035 .    |
| 214839_at | 0.043269 | 0.029024 | LOC157627    | 157627 .    |
| 214840_at | 2.97E-04 | 7.51E-05 | TOM1L2       | 146691 .    |
| 214841_at | 0.024307 | 0.014855 | CNIH3        | 149111 .    |
| 214842_s_ | 0.032827 | 0.021068 |              | .           |
| 214844_s_ | 0.048568 | 0.033183 | DOK5         | 55816 .     |
| 214845_s_ | 9.61E-07 | 4.70E-08 | CALU         | 813 .       |
| 214846_s_ | 5.55E-09 | 4.96E-11 | ALPK3        | 57538 .     |
| 214847_s_ | 0.035507 | 0.023064 | GPSM3        | 63940 .     |
| 214848_at | 2.32E-05 | 3.01E-06 |              | .           |
| 214849_at | 6.71E-06 | 5.98E-07 | KCTD20       | 222658 .    |
| 214850_at | 1.69E-04 | 3.71E-05 | LOC100170939 | 100170939 . |
| 214851_at | 5.83E-04 | 1.72E-04 | HNF4A        | 3172 .      |
| 214853_s_ | 0.022438 | 0.01354  | SHC1         | 6464 .      |
| 214854_at | 0.029581 | 0.01867  |              | .           |
| 214855_s_ | 0.005619 | 0.002661 | GARNL1       | 253959 .    |

|           |          |          |                             |        |   |
|-----------|----------|----------|-----------------------------|--------|---|
| 214856_at | 0.048023 | 0.032748 | SPTBN1                      | 6711   | . |
| 214857_at | 1.69E-04 | 3.71E-05 |                             |        | . |
| 214859_at | 0.002789 | 0.001151 | FSTL4                       | 23105  | . |
| 214860_at | 0.012071 | 0.006544 | SLC9A7                      | 84679  | . |
| 214862_x_ | 0.0096   | 0.005    |                             |        | . |
| 214864_s_ | 0.00348  | 0.001501 | GRHPR                       | 9380   | . |
| 214866_at | 3.57E-05 | 5.19E-06 | PLAUR                       | 5329   | . |
| 214867_at | 0.042006 | 0.028033 |                             |        | . |
| 214869_x_ | 5.03E-05 | 8.06E-06 | GAPVD1                      | 26130  | . |
| 214874_at | 2.88E-04 | 7.22E-05 | PKP4                        | 8502   | . |
| 214875_x_ | 3.09E-04 | 7.89E-05 | APLP2                       | 334    | . |
| 214877_at | 0.046345 | 0.03143  | CDKAL1                      | 54901  | . |
| 214878_at | 3.47E-04 | 9.10E-05 | ZNF37A /// ZNI100129482 //. |        | . |
| 214879_x_ | 1.48E-04 | 3.16E-05 | USF2                        | 7392   | . |
| 214880_x_ | 1.09E-06 | 5.52E-08 | CALD1                       | 800    | . |
| 214882_s_ | 2.63E-04 | 6.45E-05 | SFRS2                       | 6427   | . |
| 214883_at | 1.38E-04 | 2.88E-05 | THRA                        | 7067   | . |
| 214886_s_ | 0.007843 | 0.003953 | N4BP2L1                     | 90634  | . |
| 214891_at | 0.019851 | 0.011721 | FBXO21                      | 23014  | . |
| 214893_x_ | 0.002519 | 0.001019 | HCN2                        | 610    | . |
| 214895_s_ | 5.03E-05 | 8.08E-06 | ADAM10                      | 102    | . |
| 214898_x_ | 9.48E-04 | 3.13E-04 | MUC3B                       | 57876  | . |
| 214901_at | 2.73E-04 | 6.75E-05 | ZNF8                        | 7554   | . |
| 214902_x_ | 3.00E-04 | 7.60E-05 |                             |        | . |
| 214903_at | 1.29E-05 | 1.43E-06 | SYT2                        | 127833 | . |
| 214904_at | 0.014448 | 0.008079 | ZNF41                       | 7592   | . |
| 214905_at | 0.02518  | 0.01549  | RASGRF1                     | 5923   | . |
| 214906_x_ | 0.0165   | 0.009449 | N4BP2L1                     | 90634  | . |
| 214909_s_ | 0.006593 | 0.003216 | DDAH2                       | 23564  | . |
| 214910_s_ | 0.020635 | 0.012273 | APOM                        | 55937  | . |
| 214911_s_ | 4.01E-05 | 6.01E-06 | BRD2                        | 6046   | . |
| 214912_at | 0.001487 | 5.40E-04 |                             |        | . |
| 214915_at | 0.026084 | 0.016126 | ZNF362                      | 149076 | . |
| 214916_x_ | 1.36E-04 | 2.85E-05 | IGH@ /// IGHA100126583 //.  |        | . |



|           |          |          |                               |          |
|-----------|----------|----------|-------------------------------|----------|
| 214917_at | 5.44E-04 | 1.58E-04 | PRKAA1                        | 5562 .   |
| 214918_at | 9.06E-04 | 2.97E-04 | HNRNPM                        | 4670 .   |
| 214922_at | 0.009631 | 0.005019 | ZNF484                        | 83744 .  |
| 214927_at | 5.51E-08 | 1.03E-09 | ITGBL1                        | 9358 .   |
| 214929_s_ | 0.001344 | 4.78E-04 | KIAA1109                      | 84162 .  |
| 214930_at | 0.003516 | 0.00152  | SLITRK5                       | 26050 .  |
| 214934_at | 0.042864 | 0.028692 | ATP9B                         | 374868 . |
| 214935_at | 0.00251  | 0.001015 | IL4I1 /// NUP6;23636 /// 259  | .        |
| 214936_at | 0.013133 | 0.00723  | LRCH1                         | 23143 .  |
| 214937_x_ | 0.001753 | 6.58E-04 | PCM1                          | 5108 .   |
| 214938_x_ | 1.32E-05 | 1.46E-06 | HMGB1                         | 3146 .   |
| 214939_x_ | 2.50E-07 | 7.88E-09 | MLLT4                         | 4301 .   |
| 214941_s_ | 0.002632 | 0.001074 | PRPF40A                       | 55660 .  |
| 214942_at | 0.018882 | 0.011058 | RBM34                         | 23029 .  |
| 214944_at | 0.012584 | 0.006878 | PHLPPL                        | 23035 .  |
| 214946_x_ | 0.001017 | 3.41E-04 | FAM21A /// FA 253725 /// 38   | .        |
| 214948_s_ | 9.26E-06 | 9.20E-07 | TMF1                          | 7110 .   |
| 214949_at | 0.003735 | 0.001634 |                               | .        |
| 214950_at | 4.44E-05 | 6.90E-06 | IL9R /// IL9RP3 3581 /// 7294 | .        |
| 214952_at | 0.009361 | 0.004856 | NCAM1                         | 4684 .   |
| 214953_s_ | 0.035435 | 0.023008 | APP                           | 351 .    |
| 214957_at | 0.034692 | 0.022446 | ACTL8                         | 81569 .  |
| 214958_s_ | 1.00E-04 | 1.93E-05 | TMC6                          | 11322 .  |
| 214959_s_ | 0.002154 | 8.45E-04 | API5                          | 8539 .   |
| 214960_at | 3.41E-06 | 2.49E-07 | API5                          | 8539 .   |
| 214962_s_ | 0.048203 | 0.032889 | NUP160                        | 23279 .  |
| 214963_at | 5.44E-05 | 8.90E-06 | NUP160                        | 23279 .  |
| 214964_at | 0.009687 | 0.005056 |                               | .        |
| 214966_at | 9.68E-06 | 9.74E-07 | GRIK5                         | 2901 .   |
| 214967_at | 0.001687 | 6.28E-04 |                               | .        |
| 214968_at | 0.031931 | 0.020397 | DDX51                         | 317781 . |
| 214969_at | 0.002985 | 0.001247 | MAP3K9                        | 4293 .   |
| 214970_s_ | 1.08E-05 | 1.12E-06 | ST6GAL1                       | 6480 .   |
| 214971_s_ | 1.05E-04 | 2.05E-05 | ST6GAL1                       | 6480 .   |

|           |          |          |                              |          |
|-----------|----------|----------|------------------------------|----------|
| 214973_x_ | 0.004224 | 0.001892 | IGHD                         | 3495 .   |
| 214974_x_ | 0.003624 | 0.001576 | CXCL5                        | 6374 .   |
| 214975_s_ | 0.017273 | 0.009963 | MTMR1                        | 8776 .   |
| 214976_at | 3.37E-05 | 4.82E-06 | RPL13                        | 6137 .   |
| 214977_at | 0.00315  | 0.001331 |                              | .        |
| 214980_at | 0.001734 | 6.49E-04 | UBE3A                        | 7337 .   |
| 214982_at | 4.68E-04 | 1.31E-04 | SNRNP200                     | 23020 .  |
| 214983_at | 0.002154 | 8.45E-04 | TTY15                        | 64595 .  |
| 214985_at | 0.007777 | 0.003912 | EXT1                         | 2131 .   |
| 214987_at | 0.009065 | 0.004673 | GAB1                         | 2549 .   |
| 214988_s_ | 0.004293 | 0.001929 | SON                          | 6651 .   |
| 214989_x_ | 1.26E-06 | 6.72E-08 |                              | .        |
| 214990_at | 8.42E-05 | 1.56E-05 | PIGO                         | 84720 .  |
| 214992_s_ | 0.009084 | 0.004685 | DNASE2                       | 1777 .   |
| 214994_at | 8.90E-07 | 4.25E-08 | APOBEC3F                     | 200316 . |
| 214995_s_ | 8.84E-06 | 8.62E-07 | APOBEC3F /// ,200316 /// 6(. |          |
| 214997_at | 0.008892 | 0.004571 | C9orf126                     | 286205 . |
| 215000_s_ | 5.25E-04 | 1.51E-04 | FEZ2                         | 9637 .   |
| 215001_s_ | 0.002327 | 9.27E-04 | GLUL                         | 2752 .   |
| 215002_at | 7.61E-04 | 2.39E-04 | LOC100132247100132247 //.    |          |
| 215003_at | 0.007347 | 0.003659 | DGCR9                        | 25787 .  |
| 215004_s_ | 0.047058 | 0.031999 | SF4                          | 57794 .  |
| 215005_at | 0.003589 | 0.001557 | NECAB2                       | 54550 .  |
| 215006_at | 8.11E-04 | 2.59E-04 |                              | .        |
| 215009_s_ | 0.001442 | 5.20E-04 | SEC31A                       | 22872 .  |
| 215011_at | 6.78E-06 | 6.05E-07 | SNHG3                        | 8420 .   |
| 215012_at | 0.001179 | 4.08E-04 | ZNF451                       | 26036 .  |
| 215013_s_ | 2.46E-04 | 5.93E-05 | USP34                        | 9736 .   |
| 215014_at | 0.019262 | 0.011317 | KCND3                        | 3752 .   |
| 215015_at | 2.56E-05 | 3.41E-06 | CCDC64                       | 92558 .  |
| 215017_s_ | 3.09E-04 | 7.89E-05 | FNBP1L                       | 54874 .  |
| 215018_at | 9.06E-06 | 8.93E-07 | KIAA1731                     | 85459 .  |
| 215019_x_ | 8.48E-05 | 1.57E-05 | ZNF528                       | 84436 .  |
| 215020_at | 0.017457 | 0.010085 | NRXN3                        | 9369 .   |

|           |          |          |                             |          |
|-----------|----------|----------|-----------------------------|----------|
| 215021_s_ | 1.81E-04 | 4.05E-05 | NRXN3                       | 9369 .   |
| 215022_x_ | 0.001102 | 3.76E-04 | ZNF33B                      | 7582 .   |
| 215023_s_ | 0.012762 | 0.006993 | PEX1                        | 5189 .   |
| 215024_at | 1.58E-05 | 1.86E-06 | C7orf28B                    | 221960 . |
| 215025_at | 0.018157 | 0.010566 | NTRK3                       | 4916 .   |
| 215026_x_ | 2.51E-05 | 3.34E-06 | SCNN1A                      | 6337 .   |
| 215027_at | 0.040918 | 0.027191 | RAPGEF3                     | 10411 .  |
| 215028_at | 2.16E-11 | 3.63E-14 | SEMA6A                      | 57556 .  |
| 215029_at | 8.99E-06 | 8.82E-07 |                             | .        |
| 215030_at | 0.005742 | 0.002729 | GRSF1                       | 2926 .   |
| 215031_x_ | 6.96E-04 | 2.14E-04 | RNF126                      | 55658 .  |
| 215032_at | 0.003637 | 0.001583 | RREB1                       | 6239 .   |
| 215034_s_ | 0.00239  | 9.56E-04 | TM4SF1                      | 4071 .   |
| 215036_at | 8.40E-06 | 8.03E-07 |                             | .        |
| 215037_s_ | 4.89E-04 | 1.38E-04 | BCL2L1                      | 598 .    |
| 215038_s_ | 0.045269 | 0.030591 | SETD2                       | 29072 .  |
| 215040_at | 0.004085 | 0.001817 | RNASEH2B                    | 79621 .  |
| 215042_at | 0.001246 | 4.36E-04 | BMP6                        | 654 .    |
| 215043_s_ | 0.016914 | 0.009721 | LOC653188 /// 11039 /// 110 | .        |
| 215044_s_ | 1.62E-04 | 3.52E-05 | STAM2                       | 10254 .  |
| 215045_at | 6.66E-04 | 2.03E-04 | TNRC4                       | 11189 .  |
| 215046_at | 0.044376 | 0.0299   | C2orf67                     | 151050 . |
| 215047_at | 3.21E-04 | 8.28E-05 | TRIM58                      | 25893 .  |
| 215048_at | 1.52E-05 | 1.77E-06 | ZNF280B                     | 140883 . |
| 215050_x_ | 1.08E-04 | 2.13E-05 | MAPKAPK2                    | 9261 .   |
| 215051_x_ | 0.001806 | 6.82E-04 | AIF1                        | 199 .    |
| 215052_at | 0.004805 | 0.002211 | FRMPD4                      | 9758 .   |
| 215054_at | 0.004533 | 0.002061 | EPOR                        | 2057 .   |
| 215055_at | 0.003777 | 0.001657 | B3GNTL1                     | 146712 . |
| 215056_at | 0.029329 | 0.01848  |                             | .        |
| 215057_at | 0.001605 | 5.92E-04 | LOC100272228 100272228      | .        |
| 215059_at | 0.002772 | 0.001142 |                             | .        |
| 215061_at | 8.63E-04 | 2.79E-04 | METTL10                     | 399818 . |
| 215062_at | 3.79E-07 | 1.37E-08 |                             | .        |

|           |          |          |           |             |
|-----------|----------|----------|-----------|-------------|
| 215063_x_ | 3.64E-06 | 2.70E-07 | LRRC40    | 55631 .     |
| 215064_at | 1.76E-05 | 2.12E-06 | SC5DL     | 6309 .      |
| 215066_at | 0.005683 | 0.002696 | PTPRF     | 5792 .      |
| 215067_x_ | 4.38E-08 | 7.56E-10 | PRDX2     | 7001 .      |
| 215069_at | 0.012979 | 0.007133 | NMT2      | 9397 .      |
| 215070_x_ | 0.019941 | 0.011784 | RABGAP1   | 23637 .     |
| 215071_s_ | 0.001209 | 4.21E-04 | HIST1H2AC | 8334 .      |
| 215073_s_ | 0.002408 | 9.66E-04 | NR2F2     | 7026 .      |
| 215074_at | 0.001426 | 5.13E-04 | MYO1B     | 4430 .      |
| 215075_s_ | 7.25E-05 | 1.29E-05 | GRB2      | 2885 .      |
| 215077_at | 1.98E-05 | 2.47E-06 |           | .           |
| 215078_at | 0.011741 | 0.006331 | SOD2      | 6648 .      |
| 215079_at | 0.002115 | 8.26E-04 |           | .           |
| 215080_s_ | 0.017086 | 0.009836 | AGAP2     | 116986 .    |
| 215082_at | 0.00795  | 0.004015 | ELOVL5    | 60481 .     |
| 215083_at | 5.25E-06 | 4.33E-07 |           | .           |
| 215085_x_ | 1.96E-05 | 2.43E-06 | DLEC1     | 9940 .      |
| 215086_at | 0.029155 | 0.018356 | IBTK      | 25998 .     |
| 215087_at | 0.014725 | 0.008264 | C15orf39  | 56905 .     |
| 215089_s_ | 2.78E-06 | 1.90E-07 | RBM10     | 8241 .      |
| 215091_s_ | 0.005076 | 0.002361 | GTF3A     | 2971 .      |
| 215092_s_ | 0.041051 | 0.02729  | NFAT5     | 10725 .     |
| 215093_at | 0.001562 | 5.73E-04 | NSDHL     | 50814 .     |
| 215095_at | 3.55E-05 | 5.15E-06 |           | .           |
| 215096_s_ | 0.038498 | 0.025342 | ESD       | 2098 .      |
| 215097_at | 0.02506  | 0.015399 | CAPZB     | 832 .       |
| 215098_at | 0.012483 | 0.006812 | RXRB      | 6257 .      |
| 215099_s_ | 0.024899 | 0.015284 | RXRB      | 6257 .      |
| 215100_at | 7.35E-04 | 2.29E-04 | C6orf105  | 84830 .     |
| 215101_s_ | 0.010429 | 0.00551  | CXCL5     | 6374 .      |
| 215102_at | 9.64E-04 | 3.19E-04 | DPY19L1P1 | 100129460 . |
| 215104_at | 0.019019 | 0.011151 | NRIP2     | 83714 .     |
| 215105_at | 4.15E-05 | 6.30E-06 | CG030     | 116828 .    |
| 215106_at | 5.38E-04 | 1.56E-04 | TTC22     | 55001 .     |

|           |          |          |                              |          |
|-----------|----------|----------|------------------------------|----------|
| 215107_s_ | 0.002841 | 0.001175 | TTC22                        | 55001 .  |
| 215108_x_ | 1.14E-05 | 1.20E-06 | TOX3                         | 27324 .  |
| 215110_at | 0.003264 | 0.001389 | MBL1P1                       | 8512 .   |
| 215114_at | 3.80E-07 | 1.38E-08 | SENP3                        | 26168 .  |
| 215116_s_ | 0.002888 | 0.001198 | DNM1                         | 1759 .   |
| 215118_s_ | 0.007472 | 0.003733 | IGHG1                        | 3500 .   |
| 215120_s_ | 0.001478 | 5.36E-04 | SAMD4A                       | 23034 .  |
| 215121_x_ | 3.13E-04 | 8.03E-05 | IGL@                         | 3535 .   |
| 215123_at | 4.07E-05 | 6.13E-06 | LOC642778 /// 23117 /// 647. |          |
| 215125_s_ | 0.048211 | 0.032896 | UGT1A1 /// UC54575 /// 545.  |          |
| 215126_at | 0.007898 | 0.003985 |                              | .        |
| 215127_s_ | 2.62E-04 | 6.42E-05 | RBMS1                        | 5937 .   |
| 215128_at | 9.12E-05 | 1.72E-05 |                              | .        |
| 215130_s_ | 0.013663 | 0.007568 | IQCK                         | 124152 . |
| 215132_at | 0.00837  | 0.00426  |                              | .        |
| 215134_at | 2.45E-04 | 5.91E-05 | PI4K2A                       | 55361 .  |
| 215136_s_ | 5.84E-06 | 5.01E-07 | EXOSC8                       | 11340 .  |
| 215137_at | 0.008564 | 0.004374 |                              | .        |
| 215139_at | 0.001102 | 3.76E-04 | ARHGEF10                     | 9639 .   |
| 215140_at | 2.04E-05 | 2.56E-06 | LOC100128570 100128570       | .        |
| 215141_at | 0.003593 | 0.00156  | C4orf10                      | 317648 . |
| 215143_at | 7.01E-07 | 3.10E-08 | DPY19L2P2                    | 349152 . |
| 215144_at | 0.002504 | 0.001012 |                              | .        |
| 215145_s_ | 9.75E-06 | 9.85E-07 | CNTNAP2                      | 26047 .  |
| 215146_s_ | 0.003251 | 0.001383 | TTC28                        | 23331 .  |
| 215147_at | 0.044775 | 0.030211 |                              | .        |
| 215150_at | 0.032552 | 0.020859 | YOD1                         | 55432 .  |
| 215152_at | 0.040529 | 0.026892 | MYB                          | 4602 .   |
| 215156_at | 1.27E-04 | 2.60E-05 | WDR61                        | 80349 .  |
| 215157_x_ | 8.58E-06 | 8.27E-07 | PABPC1                       | 26986 .  |
| 215158_s_ | 0.022554 | 0.013619 | DEDD                         | 9191 .   |
| 215159_s_ | 0.046395 | 0.03147  | NADK                         | 65220 .  |
| 215160_x_ | 0.022071 | 0.01329  | LOC642236                    | 642236 . |
| 215162_at | 9.51E-04 | 3.14E-04 | GARNL1                       | 253959 . |

|           |          |          |                               |
|-----------|----------|----------|-------------------------------|
| 215163_at | 0.008602 | 0.004397 | .                             |
| 215165_x_ | 8.23E-06 | 7.80E-07 | UMPS 7372 .                   |
| 215166_at | 0.005152 | 0.002402 | IGSF9B 22997 .                |
| 215169_at | 1.13E-05 | 1.20E-06 | SLC35E2 9906 .                |
| 215170_s_ | 3.69E-06 | 2.75E-07 | CEP152 22995 .                |
| 215171_s_ | 1.84E-05 | 2.24E-06 | TIMM17A 10440 .               |
| 215173_at | 9.24E-04 | 3.03E-04 | LRRC50 123872 .               |
| 215174_at | 0.045367 | 0.030666 | FMO6P 388714 .                |
| 215175_at | 0.01375  | 0.007626 | PCNX 22990 .                  |
| 215177_s_ | 2.18E-04 | 5.11E-05 | ITGA6 3655 .                  |
| 215178_x_ | 6.33E-07 | 2.68E-08 | NAAA 27163 .                  |
| 215179_x_ | 2.13E-06 | 1.35E-07 | PGF 5228 .                    |
| 215180_at | 1.19E-05 | 1.28E-06 | .                             |
| 215181_at | 5.01E-04 | 1.43E-04 | CDH22 64405 .                 |
| 215182_x_ | 0.014484 | 0.008103 | .                             |
| 215183_at | 7.29E-06 | 6.68E-07 | .                             |
| 215185_at | 2.92E-05 | 4.03E-06 | .                             |
| 215186_at | 0.012906 | 0.007086 | FLJ41278 400046 .             |
| 215188_at | 0.008602 | 0.004396 | STK24 8428 .                  |
| 215190_at | 1.35E-04 | 2.81E-05 | EIF3M 10480 .                 |
| 215191_at | 0.002852 | 0.001181 | .                             |
| 215192_at | 0.014398 | 0.008047 | PMS2L4 5382 .                 |
| 215194_at | 0.002131 | 8.34E-04 | PRKCA 5578 .                  |
| 215195_at | 5.01E-04 | 1.43E-04 | PRKCA 5578 .                  |
| 215200_x_ | 6.50E-06 | 5.72E-07 | .                             |
| 215201_at | 0.008264 | 0.004196 | REPS1 85021 .                 |
| 215202_at | 1.64E-06 | 9.64E-08 | LOC91316 91316 .              |
| 215203_at | 0.012691 | 0.006946 | GOLGA4 2803 .                 |
| 215204_at | 2.47E-05 | 3.28E-06 | .                             |
| 215205_x_ | 3.43E-04 | 8.98E-05 | NCOR2 9612 .                  |
| 215206_at | 0.002486 | 0.001004 | .                             |
| 215207_x_ | 0.03575  | 0.023255 | LOC646208 /// 11049 /// 116 . |
| 215208_x_ | 1.98E-06 | 1.23E-07 | RPL35A 6165 .                 |
| 215210_s_ | 0.001895 | 7.23E-04 | DLST /// DLSTP 1743 /// 174 . |

|           |          |          |                    |
|-----------|----------|----------|--------------------|
| 215212_at | 0.022858 | 0.013831 | .                  |
| 215214_at | 0.014964 | 0.008427 | IGL@ 3535 .        |
| 215215_s_ | 4.89E-06 | 3.96E-07 | LOC81691 81691 .   |
| 215217_at | 3.67E-05 | 5.37E-06 | .                  |
| 215218_s_ | 0.005822 | 0.002776 | WDR62 284403 .     |
| 215219_at | 9.90E-04 | 3.30E-04 | DOPEY2 9980 .      |
| 215223_s_ | 0.001261 | 4.43E-04 | SOD2 6648 .        |
| 215224_at | 1.47E-07 | 3.85E-09 | SNORA21 619505 .   |
| 215225_s_ | 0.012772 | 0.006999 | GPR17 2840 .       |
| 215226_at | 0.006587 | 0.003213 | EXPH5 23086 .      |
| 215228_at | 0.023953 | 0.014607 | NHLH2 4808 .       |
| 215230_x_ | 0.006855 | 0.00337  | EIF3C 8663 .       |
| 215231_at | 0.001511 | 5.51E-04 | PRKAG2 51422 .     |
| 215233_at | 5.59E-05 | 9.20E-06 | JMJD6 23210 .      |
| 215235_at | 2.06E-05 | 2.59E-06 | SPTAN1 6709 .      |
| 215236_s_ | 7.28E-05 | 1.29E-05 | PICALM 8301 .      |
| 215238_s_ | 9.29E-04 | 3.05E-04 | DOCK9 23348 .      |
| 215239_x_ | 1.92E-05 | 2.37E-06 | ZNF273 10793 .     |
| 215242_at | 0.017927 | 0.010406 | PIGC 5279 .        |
| 215243_s_ | 1.32E-04 | 2.74E-05 | GJB3 2707 .        |
| 215244_at | 3.17E-04 | 8.15E-05 | DGCR5 26220 .      |
| 215245_x_ | 0.003421 | 0.001471 | FMR1 2332 .        |
| 215246_at | 4.07E-05 | 6.13E-06 | LARP7 51574 .      |
| 215247_at | 0.001249 | 4.38E-04 | LOC440895 440895 . |
| 215248_at | 0.001867 | 7.10E-04 | GRB10 2887 .       |
| 215249_at | 0.033375 | 0.02148  | RPL35A 6165 .      |
| 215250_at | 9.91E-04 | 3.30E-04 | TMEM111 55831 .    |
| 215251_at | 0.013184 | 0.007263 | .                  |
| 215252_at | 0.003669 | 0.0016   | .                  |
| 215253_s_ | 1.36E-05 | 1.52E-06 | RCAN1 1827 .       |
| 215254_at | 0.040717 | 0.027036 | RCAN1 1827 .       |
| 215255_at | 0.005991 | 0.002873 | IGSF9B 22997 .     |
| 215256_x_ | 5.33E-07 | 2.14E-08 | SNX26 115703 .     |
| 215258_at | 0.00138  | 4.94E-04 | CADM4 199731 .     |

|           |          |          |           |        |   |
|-----------|----------|----------|-----------|--------|---|
| 215260_s_ | 0.010945 | 0.005834 | TCF3      | 6929   | . |
| 215261_at | 6.43E-05 | 1.10E-05 |           |        | . |
| 215262_at | 6.71E-05 | 1.16E-05 |           |        | . |
| 215264_at | 8.75E-05 | 1.63E-05 | EMX1      | 2016   | . |
| 215265_at | 3.26E-05 | 4.63E-06 | EMX1      | 2016   | . |
| 215266_at | 0.00351  | 0.001517 | DNAH3     | 55567  | . |
| 215267_s_ | 0.016883 | 0.009702 | SLC8A2    | 6543   | . |
| 215268_at | 0.008748 | 0.004483 | KIAA0754  | 643314 | . |
| 215269_at | 7.51E-05 | 1.35E-05 | TRAPPC10  | 7109   | . |
| 215270_at | 2.43E-04 | 5.84E-05 | LFNG      | 3955   | . |
| 215273_s_ | 7.76E-06 | 7.26E-07 | TADA3L    | 10474  | . |
| 215274_at | 0.006037 | 0.002899 | SLC12A3   | 6559   | . |
| 215276_at | 9.48E-06 | 9.47E-07 | WFDC8     | 90199  | . |
| 215277_at | 6.63E-04 | 2.02E-04 | PCDH1     | 5097   | . |
| 215279_at | 0.010188 | 0.005361 |           |        | . |
| 215280_s_ | 0.004286 | 0.001925 | PPFIA3    | 8541   | . |
| 215281_x_ | 2.28E-05 | 2.94E-06 | POGZ      | 23126  | . |
| 215283_at | 0.007124 | 0.003528 | LOC339290 | 339290 | . |
| 215284_at | 0.002502 | 0.001011 |           |        | . |
| 215285_s_ | 0.031515 | 0.020087 | PHTF1     | 10745  | . |
| 215287_at | 5.42E-06 | 4.53E-07 |           |        | . |
| 215288_at | 0.015571 | 0.008831 | TRPC2     | 7221   | . |
| 215290_at | 0.035154 | 0.022798 |           |        | . |
| 215291_at | 0.001908 | 7.29E-04 | MKL1      | 57591  | . |
| 215292_s_ | 0.003071 | 0.001291 | MKL1      | 57591  | . |
| 215294_s_ | 0.048912 | 0.033459 | SMARCA1   | 6594   | . |
| 215296_at | 0.01274  | 0.006979 | CDC42BPA  | 8476   | . |
| 215298_at | 0.00692  | 0.003409 |           |        | . |
| 215299_x_ | 0.003599 | 0.001563 | SULT1A1   | 6817   | . |
| 215302_at | 0.048043 | 0.032765 | LOC257152 | 257152 | . |
| 215304_at | 0.003445 | 0.001483 |           |        | . |
| 215305_at | 0.013777 | 0.007644 | PDGFRA    | 5156   | . |
| 215306_at | 0.033785 | 0.021788 |           |        | . |
| 215307_at | 0.028816 | 0.018113 | ZNF529    | 57711  | . |



|           |          |          |             |          |
|-----------|----------|----------|-------------|----------|
| 215310_at | 0.001402 | 5.03E-04 | APC         | 324 .    |
| 215313_x_ | 4.99E-06 | 4.06E-07 | HLA-A       | 3105 .   |
| 215316_at | 0.004415 | 0.001997 |             | .        |
| 215319_at | 2.38E-05 | 3.12E-06 | ATP8B3      | 148229 . |
| 215320_at | 0.009633 | 0.005021 | LOC645961   | 645961 . |
| 215322_at | 0.005294 | 0.002479 |             | .        |
| 215323_at | 0.003464 | 0.001493 | LUZP2       | 338645 . |
| 215324_at | 0.002172 | 8.53E-04 | SEMA3D      | 223117 . |
| 215325_x_ | 7.20E-07 | 3.21E-08 | C19orf26    | 255057 . |
| 215327_at | 0.029941 | 0.018937 |             | .        |
| 215328_at | 0.001184 | 4.10E-04 | EFR3B       | 22979 .  |
| 215330_at | 0.03435  | 0.022194 |             | .        |
| 215331_at | 6.13E-04 | 1.83E-04 | MYH15       | 22989 .  |
| 215333_x_ | 0.036181 | 0.023581 | GSTM1       | 2944 .   |
| 215334_at | 5.53E-04 | 1.61E-04 | EFR3B       | 22979 .  |
| 215335_at | 0.017322 | 0.009996 |             | .        |
| 215336_at | 0.002357 | 9.41E-04 | AKAP11      | 11215 .  |
| 215337_at | 0.001245 | 4.36E-04 | MED24       | 9862 .   |
| 215338_s_ | 8.33E-06 | 7.95E-07 | NKTR        | 4820 .   |
| 215341_at | 1.78E-05 | 2.16E-06 | DNAH6       | 1768 .   |
| 215342_s_ | 0.002973 | 0.00124  | RABGAP1L    | 9910 .   |
| 215343_at | 0.001088 | 3.70E-04 | CCDC88C     | 440193 . |
| 215348_at | 4.63E-05 | 7.28E-06 | ADCY1       | 107 .    |
| 215349_at | 3.72E-05 | 5.47E-06 | hCG_1730474 | 643376 . |
| 215351_at | 0.029481 | 0.018596 | RTCD1       | 8634 .   |
| 215353_at | 3.66E-05 | 5.35E-06 |             | .        |
| 215354_s_ | 4.45E-05 | 6.91E-06 | PELP1       | 27043 .  |
| 215356_at | 5.40E-04 | 1.56E-04 | TDRD12      | 91646 .  |
| 215359_x_ | 8.29E-05 | 1.53E-05 | ZNF44       | 51710 .  |
| 215364_s_ | 0.001308 | 4.63E-04 | KIAA0467    | 23334 .  |
| 215366_at | 0.002193 | 8.63E-04 | SNX13       | 23161 .  |
| 215367_at | 0.022181 | 0.013367 | KIAA1614    | 57710 .  |
| 215368_at | 6.42E-04 | 1.94E-04 | NEB         | 4703 .   |
| 215371_at | 0.003148 | 0.00133  | MED27       | 9442 .   |

|           |          |          |                               |
|-----------|----------|----------|-------------------------------|
| 215372_x_ | 0.046598 | 0.03163  | .                             |
| 215373_x_ | 6.97E-07 | 3.07E-08 | .                             |
| 215374_at | 0.016423 | 0.009396 | PAPOLA 10914 .                |
| 215375_x_ | 1.35E-04 | 2.80E-05 | LRRFIP1 9208 .                |
| 215377_at | 0.001185 | 4.11E-04 | CTBP2 1488 .                  |
| 215378_at | 0.003198 | 0.001356 | .                             |
| 215379_x_ | 0.001146 | 3.94E-04 | IGL@ 3535 .                   |
| 215380_s_ | 2.73E-04 | 6.74E-05 | GGCT 79017 .                  |
| 215382_x_ | 9.71E-04 | 3.22E-04 | TPSAB1 7177 .                 |
| 215383_x_ | 2.31E-06 | 1.50E-07 | SPG21 51324 .                 |
| 215384_s_ | 8.07E-07 | 3.72E-08 | MAP1A 4130 .                  |
| 215385_at | 0.001634 | 6.04E-04 | .                             |
| 215386_at | 0.00105  | 3.54E-04 | .                             |
| 215387_x_ | 9.86E-05 | 1.90E-05 | .                             |
| 215388_s_ | 1.76E-05 | 2.12E-06 | CFH /// CFHR1 3075 /// 3078 . |
| 215390_at | 0.031114 | 0.019794 | .                             |
| 215391_at | 0.015342 | 0.008677 | MAP1A 4130 .                  |
| 215392_at | 0.005057 | 0.00235  | .                             |
| 215397_x_ | 0.01926  | 0.011315 | .                             |
| 215398_at | 0.003591 | 0.001559 | .                             |
| 215399_s_ | 6.71E-07 | 2.91E-08 | OS9 10956 .                   |
| 215401_at | 9.46E-04 | 3.12E-04 | .                             |
| 215402_at | 0.026355 | 0.016318 | APPBP2 10513 .                |
| 215404_x_ | 2.21E-09 | 1.48E-11 | FGFR1 2260 .                  |
| 215409_at | 0.015748 | 0.008947 | LPCAT4 254531 .               |
| 215410_at | 0.002524 | 0.001022 | LOC100132832 100132832 //.    |
| 215411_s_ | 0.017062 | 0.00982  | TRAF3IP2 10758 .              |
| 215412_x_ | 0.010557 | 0.00559  | PMS2L2 5380 .                 |
| 215413_at | 0.016915 | 0.009722 | EXOC7 23265 .                 |
| 215415_s_ | 0.035563 | 0.023113 | LYST 1130 .                   |
| 215417_at | 0.039996 | 0.026478 | EXOC6B 23233 .                |
| 215419_at | 0.026783 | 0.016638 | ZFR2 23217 .                  |
| 215420_at | 5.85E-09 | 5.27E-11 | IHH 3549 .                    |
| 215425_at | 1.23E-04 | 2.49E-05 | BTG3 10950 .                  |

|           |          |          |                             |          |
|-----------|----------|----------|-----------------------------|----------|
| 215426_at | 8.11E-06 | 7.66E-07 | ZCCHC14                     | 23174 .  |
| 215427_s_ | 1.47E-04 | 3.13E-05 | ZCCHC14                     | 23174 .  |
| 215429_s_ | 0.012741 | 0.00698  | ZNF428                      | 126299 . |
| 215431_at | 0.011107 | 0.005935 | SNTB1                       | 6641 .   |
| 215432_at | 0.023372 | 0.014194 | ACSM1                       | 116285 . |
| 215435_at | 2.40E-04 | 5.75E-05 |                             | .        |
| 215436_at | 0.001636 | 6.05E-04 | HSDL2                       | 84263 .  |
| 215437_x_ | 0.010421 | 0.005504 | BAZ2A                       | 11176 .  |
| 215438_x_ | 0.012252 | 0.006663 | GSPT1                       | 2935 .   |
| 215439_x_ | 0.012498 | 0.006822 |                             | .        |
| 215440_s_ | 6.87E-10 | 3.30E-12 | BEX4                        | 56271 .  |
| 215441_at | 0.007162 | 0.003551 |                             | .        |
| 215442_s_ | 0.006319 | 0.003058 | TSHR                        | 7253 .   |
| 215445_x_ | 1.94E-04 | 4.41E-05 |                             | .        |
| 215446_s_ | 1.93E-04 | 4.37E-05 | LOX                         | 4015 .   |
| 215448_at | 0.006801 | 0.003339 |                             | .        |
| 215449_at | 4.01E-04 | 1.09E-04 | BZRPL1                      | 222642 . |
| 215450_at | 6.27E-06 | 5.46E-07 |                             | .        |
| 215451_s_ | 1.59E-04 | 3.44E-05 | AFF1                        | 4299 .   |
| 215452_x_ | 1.52E-04 | 3.27E-05 | SUMO2 /// SUI387082 /// 6t. |          |
| 215454_x_ | 1.43E-05 | 1.64E-06 | SFTPC                       | 6440 .   |
| 215455_at | 0.007516 | 0.003758 | TIMELESS                    | 8914 .   |
| 215457_at | 0.001303 | 4.60E-04 |                             | .        |
| 215458_s_ | 0.002764 | 0.001138 | SMURF1                      | 57154 .  |
| 215461_at | 0.003457 | 0.001488 | ZNRF4                       | 148066 . |
| 215462_at | 4.56E-04 | 1.27E-04 | PLK3                        | 1263 .   |
| 215464_s_ | 4.71E-06 | 3.78E-07 | TAX1BP3                     | 30851 .  |
| 215466_at | 2.89E-04 | 7.26E-05 |                             | .        |
| 215467_x_ | 4.35E-04 | 1.20E-04 | LOC647070                   | 647070 . |
| 215469_at | 0.00461  | 0.002103 |                             | .        |
| 215470_at | 7.82E-05 | 1.42E-05 | GTF2H2B                     | 653238 . |
| 215471_s_ | 1.45E-08 | 1.69E-10 | MAP7                        | 9053 .   |
| 215472_at | 6.41E-04 | 1.93E-04 | PACRG                       | 135138 . |
| 215474_at | 1.51E-04 | 3.25E-05 |                             | .        |

|           |          |          |                  |
|-----------|----------|----------|------------------|
| 215479_at | 4.52E-07 | 1.74E-08 | .                |
| 215480_at | 3.91E-06 | 2.96E-07 | KIAA0509 57242 . |
| 215481_s_ | 0.006599 | 0.00322  | PEX5 5830 .      |
| 215483_at | 0.002052 | 7.96E-04 | AKAP9 10142 .    |
| 215484_at | 6.18E-05 | 1.05E-05 | .                |
| 215486_at | 0.023039 | 0.013955 | PRPS1L1 221823 . |
| 215487_x_ | 0.024253 | 0.014815 | FAM182B 728882 . |
| 215488_at | 2.09E-05 | 2.65E-06 | .                |
| 215489_x_ | 0.019454 | 0.01145  | HOMER3 9454 .    |
| 215490_at | 1.79E-04 | 3.99E-05 | C1orf69 200205 . |
| 215491_at | 1.80E-07 | 5.00E-09 | MYCL1 4610 .     |
| 215492_x_ | 1.68E-07 | 4.59E-09 | PTCRA 171558 .   |
| 215493_x_ | 2.39E-05 | 3.14E-06 | BTN2A1 11120 .   |
| 215495_s_ | 9.37E-04 | 3.09E-04 | SAMD4A 23034 .   |
| 215497_s_ | 6.78E-04 | 2.07E-04 | WDTC1 23038 .    |
| 215498_s_ | 0.045182 | 0.030522 | MAP2K3 5606 .    |
| 215499_at | 6.15E-05 | 1.04E-05 | MAP2K3 5606 .    |
| 215501_s_ | 0.005002 | 0.002317 | DUSP10 11221 .   |
| 215502_at | 6.69E-05 | 1.16E-05 | .                |
| 215503_at | 0.040899 | 0.027176 | SPINT3 10816 .   |
| 215504_x_ | 1.24E-04 | 2.53E-05 | .                |
| 215505_s_ | 0.001731 | 6.48E-04 | STRN3 29966 .    |
| 215506_s_ | 5.23E-06 | 4.31E-07 | DIRAS3 9077 .    |
| 215507_x_ | 0.001816 | 6.86E-04 | .                |
| 215508_at | 3.61E-06 | 2.67E-07 | BUB1 699 .       |
| 215509_s_ | 6.72E-05 | 1.16E-05 | BUB1 699 .       |
| 215511_at | 6.11E-05 | 1.03E-05 | TCF20 6942 .     |
| 215512_at | 0.02104  | 0.012565 | 6-Mar 10299 .    |
| 215513_at | 0.030645 | 0.019455 | HYMAI 57061 .    |
| 215515_at | 1.61E-04 | 3.50E-05 | .                |
| 215517_at | 1.33E-04 | 2.75E-05 | PYGO1 26108 .    |
| 215519_x_ | 0.041876 | 0.027932 | SGSM3 27352 .    |
| 215521_at | 0.046555 | 0.0316   | PHC3 80012 .     |
| 215525_at | 0.002875 | 0.001192 | .                |

|           |          |          |                               |
|-----------|----------|----------|-------------------------------|
| 215526_at | 0.005086 | 0.002366 | .                             |
| 215527_at | 0.045064 | 0.030431 | KHDRBS2 202559 .              |
| 215528_at | 1.65E-04 | 3.61E-05 | .                             |
| 215529_x_ | 4.56E-07 | 1.76E-08 | DIP2A 23181 .                 |
| 215530_at | 0.044394 | 0.029912 | FANCA 2175 .                  |
| 215533_s_ | 0.011858 | 0.006403 | UBE4B 10277 .                 |
| 215536_at | 0.006883 | 0.003387 | HLA-DQB2 3120 .               |
| 215537_x_ | 0.003256 | 0.001385 | DDAH2 23564 .                 |
| 215538_at | 2.53E-08 | 3.63E-10 | LARGE 9215 .                  |
| 215541_s_ | 0.01162  | 0.006255 | DIAPH1 1729 .                 |
| 215542_at | 9.92E-07 | 4.89E-08 | .                             |
| 215543_s_ | 4.80E-04 | 1.35E-04 | LARGE 9215 .                  |
| 215545_at | 1.18E-06 | 6.16E-08 | .                             |
| 215547_at | 0.015656 | 0.008887 | TSC22D2 9819 .                |
| 215548_s_ | 0.005469 | 0.002577 | SCFD1 23256 .                 |
| 215549_x_ | 2.24E-05 | 2.88E-06 | CTAGE4 100128553 .            |
| 215550_at | 0.019823 | 0.011701 | SRGAP3 9901 .                 |
| 215551_at | 1.76E-04 | 3.91E-05 | ESR1 2099 .                   |
| 215552_s_ | 0.024572 | 0.015048 | ESR1 2099 .                   |
| 215553_x_ | 8.28E-05 | 1.53E-05 | .                             |
| 215554_at | 0.002239 | 8.85E-04 | GPLD1 2822 .                  |
| 215555_at | 0.009552 | 0.004971 | .                             |
| 215557_at | 0.008399 | 0.004279 | .                             |
| 215558_at | 0.00151  | 5.50E-04 | UBR2 23304 .                  |
| 215560_x_ | 1.67E-06 | 9.95E-08 | MTRF1L 54516 .                |
| 215561_s_ | 2.99E-11 | 5.50E-14 | IL1R1 3554 .                  |
| 215562_at | 0.017629 | 0.010206 | TTC39A 22996 .                |
| 215563_s_ | 5.17E-04 | 1.48E-04 | MSTP9 11223 .                 |
| 215566_x_ | 0.00902  | 0.004646 | LYPLA2 11313 .                |
| 215567_at | 2.05E-05 | 2.58E-06 | FCF1 51077 .                  |
| 215568_x_ | 0.015395 | 0.008712 | hCG_2003956 11313 /// 388 .   |
| 215569_at | 0.002508 | 0.001014 | GTF2IRD2 /// C100133748 // .  |
| 215570_s_ | 4.22E-06 | 3.28E-07 | ZNF780A /// Z1163131 /// 28 . |
| 215573_at | 9.96E-05 | 1.92E-05 | CAT 847 .                     |

|           |          |          |                            |           |   |
|-----------|----------|----------|----------------------------|-----------|---|
| 215575_at | 0.018481 | 0.010785 | PDE4DIP                    | 9659      | . |
| 215576_at | 0.00237  | 9.46E-04 |                            |           | . |
| 215577_at | 8.70E-04 | 2.82E-04 |                            |           | . |
| 215578_at | 0.002033 | 7.87E-04 |                            |           | . |
| 215579_at | 6.80E-05 | 1.18E-05 | APOBEC3G                   | 60489     | . |
| 215580_at | 0.016434 | 0.009404 | MCM3AP                     | 8888      | . |
| 215583_at | 0.018691 | 0.010928 | TMEM63A                    | 9725      | . |
| 215584_at | 8.69E-04 | 2.82E-04 | HECW1                      | 23072     | . |
| 215585_at | 0.010464 | 0.005531 | KIAA0174                   | 9798      | . |
| 215586_at | 0.015203 | 0.008584 |                            |           | . |
| 215587_x_ | 8.65E-07 | 4.09E-08 |                            |           | . |
| 215588_x_ | 5.53E-07 | 2.25E-08 | RIOK3                      | 8780      | . |
| 215589_at | 2.75E-04 | 6.80E-05 |                            |           | . |
| 215590_x_ | 2.07E-04 | 4.78E-05 | LOC100128640               | 100128640 | . |
| 215591_at | 0.001132 | 3.88E-04 | SATB2                      | 23314     | . |
| 215592_at | 7.80E-06 | 7.30E-07 |                            |           | . |
| 215593_at | 0.002003 | 7.73E-04 |                            |           | . |
| 215594_at | 0.004066 | 0.001808 |                            |           | . |
| 215595_x_ | 3.38E-05 | 4.86E-06 |                            |           | . |
| 215597_x_ | 1.99E-06 | 1.25E-07 |                            |           | . |
| 215599_at | 2.11E-05 | 2.68E-06 | LOC653188                  | 653188    | . |
| 215600_x_ | 1.09E-04 | 2.15E-05 | FBXW12                     | 285231    | . |
| 215603_x_ | 9.28E-07 | 4.48E-08 | GGT1 /// GGT22678 /// 2678 |           | . |
| 215604_x_ | 3.48E-07 | 1.23E-08 |                            |           | . |
| 215606_s_ | 1.54E-04 | 3.31E-05 | ERC1                       | 23085     | . |
| 215607_x_ | 0.002961 | 0.001234 |                            |           | . |
| 215608_at | 0.008304 | 0.004221 |                            |           | . |
| 215609_at | 2.64E-04 | 6.48E-05 |                            |           | . |
| 215610_at | 1.75E-04 | 3.88E-05 |                            |           | . |
| 215611_at | 1.50E-05 | 1.73E-06 | TCF12                      | 6938      | . |
| 215612_at | 0.021159 | 0.012649 |                            |           | . |
| 215615_x_ | 1.97E-04 | 4.51E-05 |                            |           | . |
| 215616_s_ | 0.005915 | 0.002829 | KDM4B                      | 23030     | . |
| 215617_at | 1.62E-06 | 9.50E-08 | LOC26010                   | 26010     | . |

|           |          |          |                             |        |   |
|-----------|----------|----------|-----------------------------|--------|---|
| 215620_at | 0.03486  | 0.02257  | RREB1                       | 6239   | . |
| 215621_s_ | 0.013941 | 0.007746 | IGHD                        | 3495   | . |
| 215623_x_ | 4.82E-08 | 8.58E-10 | SMC4                        | 10051  | . |
| 215624_at | 0.015331 | 0.00867  | TSC2                        | 7249   | . |
| 215625_at | 0.002311 | 9.19E-04 | LOC644450                   | 644450 | . |
| 215626_at | 0.04903  | 0.033549 |                             |        | . |
| 215628_x_ | 3.62E-06 | 2.69E-07 |                             |        | . |
| 215629_s_ | 3.87E-05 | 5.74E-06 | DLEU2 /// DLE179469 /// 884 |        | . |
| 215630_at | 0.003755 | 0.001645 |                             |        | . |
| 215631_s_ | 0.00445  | 0.002016 | BRMS1                       | 25855  | . |
| 215634_at | 4.79E-05 | 7.59E-06 |                             |        | . |
| 215635_at | 1.20E-09 | 6.66E-12 |                             |        | . |
| 215636_at | 0.00148  | 5.37E-04 | UBR4                        | 23352  | . |
| 215640_at | 0.026084 | 0.016126 | TBC1D2B                     | 23102  | . |
| 215641_at | 0.049541 | 0.033961 | SEC24D                      | 9871   | . |
| 215644_at | 0.001563 | 5.73E-04 | ZNF518A                     | 9849   | . |
| 215646_s_ | 2.24E-04 | 5.28E-05 | VCAN                        | 1462   | . |
| 215648_at | 7.36E-12 | 7.70E-15 |                             |        | . |
| 215649_s_ | 0.03822  | 0.025127 | MVK                         | 4598   | . |
| 215650_at | 4.37E-04 | 1.21E-04 |                             |        | . |
| 215651_at | 0.009166 | 0.004738 |                             |        | . |
| 215654_at | 0.001165 | 4.02E-04 | BCAT2                       | 587    | . |
| 215660_s_ | 0.047974 | 0.032708 | MAST2                       | 23139  | . |
| 215661_at | 1.61E-04 | 3.50E-05 | MAST2                       | 23139  | . |
| 215662_at | 6.48E-04 | 1.96E-04 |                             |        | . |
| 215667_x_ | 0.012403 | 0.006759 | LOC730324                   | 730324 | . |
| 215668_s_ | 1.05E-04 | 2.04E-05 | PLXNB1                      | 5364   | . |
| 215669_at | 0.0222   | 0.013381 | HLA-DRB4                    | 3126   | . |
| 215672_s_ | 0.030966 | 0.019687 | AHCYL2                      | 23382  | . |
| 215675_at | 0.001845 | 7.00E-04 |                             |        | . |
| 215676_at | 1.82E-04 | 4.08E-05 | BRF1                        | 2972   | . |
| 215677_s_ | 2.75E-04 | 6.83E-05 | BRF1                        | 2972   | . |
| 215678_at | 8.95E-04 | 2.92E-04 | LOC440792                   | 440792 | . |
| 215680_at | 0.004947 | 0.002286 | KIAA1654                    | 85368  | . |

|           |          |          |                              |               |
|-----------|----------|----------|------------------------------|---------------|
| 215681_at | 0.009796 | 0.005123 | KIAA1654                     | 85368 .       |
| 215682_at | 0.011817 | 0.006378 | LOC440792                    | 440792 .      |
| 215684_s_ | 1.53E-04 | 3.28E-05 | ASCC2                        | 84164 .       |
| 215685_s_ | 2.64E-07 | 8.51E-09 | DLX2                         | 1746 .        |
| 215687_x_ | 1.91E-04 | 4.33E-05 | PLCB1                        | 23236 .       |
| 215689_s_ | 0.001569 | 5.76E-04 | SHBG                         | 6462 .        |
| 215690_x_ | 5.97E-06 | 5.15E-07 | GPAA1                        | 8733 .        |
| 215691_x_ | 0.001913 | 7.32E-04 | HSPB11                       | 51668 .       |
| 215692_s_ | 0.003087 | 0.001299 | MPPED2                       | 744 .         |
| 215693_x_ | 2.37E-05 | 3.10E-06 | DDX27                        | 55661 .       |
| 215694_at | 4.91E-06 | 3.98E-07 | SPATA5L1                     | 79029 .       |
| 215695_s_ | 0.015829 | 0.009002 | GYG2                         | 8908 .        |
| 215696_s_ | 1.53E-05 | 1.78E-06 | SEC16A                       | 9919 .        |
| 215697_at | 0.003495 | 0.001509 |                              | .             |
| 215699_x_ | 6.04E-05 | 1.01E-05 | SFI1                         | 9814 .        |
| 215700_x_ | 4.66E-06 | 3.72E-07 | CPNE6                        | 9362 .        |
| 215701_at | 2.10E-04 | 4.88E-05 |                              | .             |
| 215702_s_ | 3.65E-04 | 9.67E-05 | CFTR                         | 1080 .        |
| 215704_at | 1.32E-07 | 3.30E-09 | FLG                          | 2312 .        |
| 215706_x_ | 1.75E-06 | 1.06E-07 | ZYX                          | 7791 .        |
| 215707_s_ | 8.77E-06 | 8.52E-07 | PRNP                         | 5621 .        |
| 215708_s_ | 0.003005 | 0.001258 | PRIM2                        | 5558 .        |
| 215709_at | 0.021312 | 0.012754 | LOC100134355                 | 100134355 //. |
| 215710_at | 0.0335   | 0.021578 | ST3GAL4                      | 6484 .        |
| 215711_s_ | 4.60E-06 | 3.66E-07 | WEE1                         | 7465 .        |
| 215712_s_ | 5.41E-05 | 8.83E-06 | IGFALS                       | 3483 .        |
| 215714_s_ | 8.07E-08 | 1.73E-09 | SMARCA4                      | 6597 .        |
| 215715_at | 0.045273 | 0.030595 | SLC6A2                       | 6530 .        |
| 215717_s_ | 0.019771 | 0.011666 | FBN2                         | 2201 .        |
| 215719_x_ | 1.59E-05 | 1.87E-06 | FAS                          | 355 .         |
| 215721_at | 0.014678 | 0.008234 | IGHG1 /// LOC!3500 /// 9097. |               |
| 215722_s_ | 2.90E-08 | 4.42E-10 | SNRPA1                       | 6627 .        |
| 215723_s_ | 3.80E-06 | 2.86E-07 | PLD1                         | 5337 .        |
| 215724_at | 0.022623 | 0.013667 | PLD1                         | 5337 .        |



|           |          |          |                            |        |   |
|-----------|----------|----------|----------------------------|--------|---|
| 215725_at | 0.001276 | 4.49E-04 | DGCR11                     | 25786  | . |
| 215730_at | 0.024012 | 0.014646 | VGLL1                      | 51442  | . |
| 215731_s_ | 2.22E-07 | 6.69E-09 | MPHOSPH9                   | 10198  | . |
| 215732_s_ | 0.011115 | 0.005942 | DTX2 /// LOC100134197 //   |        | . |
| 215735_s_ | 0.001939 | 7.44E-04 | TSC2                       | 7249   | . |
| 215736_at | 0.004116 | 0.001833 |                            |        | . |
| 215737_x_ | 0.004998 | 0.002315 | USF2                       | 7392   | . |
| 215740_at | 0.006693 | 0.003275 | LOC100130741 100130741     |        | . |
| 215741_x_ | 0.006747 | 0.003307 | AKAP8L                     | 26993  | . |
| 215742_at | 0.003619 | 0.001573 |                            |        | . |
| 215743_at | 0.010548 | 0.005583 | NMT2                       | 9397   | . |
| 215744_at | 0.019672 | 0.011597 | FUS                        | 2521   | . |
| 215745_at | 2.91E-04 | 7.31E-05 |                            |        | . |
| 215747_s_ | 0.016265 | 0.009293 | RCC1 /// SNHG1104 /// 7518 |        | . |
| 215748_at | 0.003318 | 0.001418 | KLHL35                     | 283212 | . |
| 215749_s_ | 8.44E-06 | 8.10E-07 | GORASP1                    | 64689  | . |
| 215750_at | 0.007993 | 0.00404  | KIAA1659                   | 85373  | . |
| 215753_at | 0.010434 | 0.005513 |                            |        | . |
| 215755_at | 0.003346 | 0.001432 |                            |        | . |
| 215756_at | 0.003126 | 0.00132  | LOC730227                  | 730227 | . |
| 215757_at | 3.37E-07 | 1.19E-08 | PRKDC                      | 5591   | . |
| 215758_x_ | 6.28E-07 | 2.66E-08 | ZNF93                      | 81931  | . |
| 215759_at | 2.26E-04 | 5.32E-05 | ANKRD53                    | 79998  | . |
| 215760_s_ | 0.008271 | 0.004201 | SBNO2                      | 22904  | . |
| 215761_at | 8.29E-05 | 1.53E-05 | DMXL2                      | 23312  | . |
| 215764_x_ | 0.006005 | 0.002881 | AP2A2                      | 161    | . |
| 215765_at | 0.011757 | 0.006341 | LRRRC41                    | 10489  | . |
| 215768_at | 3.43E-04 | 8.95E-05 |                            |        | . |
| 215769_at | 0.006689 | 0.003273 | TRD@                       | 6964   | . |
| 215771_x_ | 2.15E-06 | 1.37E-07 | RET                        | 5979   | . |
| 215772_x_ | 0.044971 | 0.03036  | SUCLG2                     | 8801   | . |
| 215773_x_ | 2.24E-06 | 1.45E-07 | PARP2                      | 10038  | . |
| 215774_s_ | 2.26E-04 | 5.33E-05 |                            |        | . |
| 215775_at | 2.07E-04 | 4.77E-05 | THBS1                      | 7057   | . |

|           |          |          |                             |          |
|-----------|----------|----------|-----------------------------|----------|
| 215776_at | 0.001733 | 6.49E-04 | INSRR                       | 3645 .   |
| 215777_at | 0.007224 | 0.003586 | IGLV4-60                    | 28785 .  |
| 215778_x  | 3.43E-06 | 2.51E-07 | HAB1                        | 55547 .  |
| 215779_s  | 0.023103 | 0.014001 | HIST1H2BG                   | 8339 .   |
| 215780_s  | 5.69E-05 | 9.41E-06 | hCG_1644608_6418 /// 6428   | 6418 .   |
| 215782_at | 0.012705 | 0.006955 | RAB40AL                     | 282808 . |
| 215783_s  | 0.010734 | 0.005701 | ALPL                        | 249 .    |
| 215785_s  | 6.69E-04 | 2.04E-04 | CYFIP2                      | 26999 .  |
| 215786_at | 0.021514 | 0.01289  |                             | .        |
| 215788_at | 1.18E-04 | 2.37E-05 | C1orf222                    | 339457 . |
| 215791_at | 0.004395 | 0.001986 |                             | .        |
| 215797_at | 0.009924 | 0.005202 | TRAV8-3                     | 28683 .  |
| 215799_at | 4.01E-04 | 1.09E-04 |                             | .        |
| 215800_at | 0.005093 | 0.00237  | DUOX1                       | 53905 .  |
| 215802_at | 0.025764 | 0.015899 |                             | .        |
| 215807_s  | 7.32E-04 | 2.28E-04 | PLXNB1                      | 5364 .   |
| 215809_at | 0.001621 | 5.98E-04 | CYP2D6                      | 1565 .   |
| 215810_x  | 0.00235  | 9.37E-04 |                             | .        |
| 215811_at | 0.00152  | 5.55E-04 |                             | .        |
| 215812_s  | 0.003848 | 0.001693 | LOC653562 /// 386757 /// 65 | 65 .     |
| 215813_s  | 5.77E-10 | 2.57E-12 | PTGS1                       | 5742 .   |
| 215815_at | 0.033041 | 0.021233 | BUD31                       | 8896 .   |
| 215816_at | 0.002021 | 7.82E-04 | LOC91316                    | 91316 .  |
| 215817_at | 0.044411 | 0.029926 | SERPINB13                   | 5275 .   |
| 215818_at | 6.55E-04 | 1.99E-04 | NUDT7                       | 283927 . |
| 215820_x  | 7.99E-05 | 1.46E-05 | SNX13                       | 23161 .  |
| 215821_x  | 2.40E-06 | 1.58E-07 | PSG3                        | 5671 .   |
| 215822_x  | 0.006623 | 0.003234 | MYT1                        | 4661 .   |
| 215823_x  | 8.71E-05 | 1.62E-05 | LOC652607 /// 26986 /// 34  | 34 .     |
| 215825_at | 0.024736 | 0.015166 |                             | .        |
| 215826_x  | 0.049615 | 0.034019 | ZNF835                      | 90485 .  |
| 215827_x  | 0.002569 | 0.001043 | CROCCL2                     | 114819 . |
| 215828_at | 0.003376 | 0.001448 |                             | .        |
| 215829_at | 2.96E-04 | 7.48E-05 | SHANK2                      | 22941 .  |

|           |          |          |                            |          |
|-----------|----------|----------|----------------------------|----------|
| 215830_at | 0.04903  | 0.03355  | SHANK2                     | 22941 .  |
| 215832_x_ | 0.015814 | 0.008992 | PICALM                     | 8301 .   |
| 215833_s_ | 0.001492 | 5.43E-04 | SPPL2B                     | 56928 .  |
| 215836_s_ | 8.78E-06 | 8.53E-07 | PCDHGA1 /// P26025 /// 50% |          |
| 215839_at | 0.003671 | 0.0016   | LILRA5                     | 353514 . |
| 215842_s_ | 2.02E-05 | 2.53E-06 | ATP11A                     | 23250 .  |
| 215844_at | 5.09E-04 | 1.45E-04 | TNPO2                      | 30000 .  |
| 215845_x_ | 0.002027 | 7.84E-04 |                            | .        |
| 215846_at | 0.027061 | 0.016832 |                            | .        |
| 215848_at | 0.019341 | 0.011373 | SCAPER                     | 49855 .  |
| 215849_x_ | 0.02199  | 0.013233 | TTC18                      | 118491 . |
| 215852_x_ | 3.52E-07 | 1.25E-08 | C20orf117                  | 140710 . |
| 215854_at | 0.042233 | 0.02821  |                            | .        |
| 215857_at | 1.40E-05 | 1.59E-06 | NCLN                       | 56926 .  |
| 215858_at | 7.50E-04 | 2.35E-04 |                            | .        |
| 215859_at | 0.004533 | 0.002061 | NCLN                       | 56926 .  |
| 215860_at | 3.57E-04 | 9.42E-05 | SYT12                      | 91683 .  |
| 215861_at | 0.048272 | 0.032944 |                            | .        |
| 215863_at | 5.45E-04 | 1.58E-04 | TFR2                       | 7036 .   |
| 215865_at | 0.01521  | 0.008589 | SYT12                      | 91683 .  |
| 215867_x_ | 0.001024 | 3.43E-04 | CA12                       | 771 .    |
| 215868_x_ | 0.029467 | 0.018581 |                            | .        |
| 215869_at | 9.27E-05 | 1.75E-05 |                            | .        |
| 215871_at | 2.90E-05 | 3.99E-06 | PLA2G5                     | 5322 .   |
| 215872_at | 0.007046 | 0.003484 |                            | .        |
| 215873_x_ | 0.006864 | 0.003375 | ABCC10                     | 89845 .  |
| 215875_at | 3.79E-04 | 1.01E-04 |                            | .        |
| 215876_at | 2.49E-04 | 6.04E-05 |                            | .        |
| 215877_at | 0.029426 | 0.01855  | C14orf56                   | 89919 .  |
| 215880_at | 7.01E-04 | 2.16E-04 | NAGLU                      | 4669 .   |
| 215882_at | 2.20E-05 | 2.83E-06 | CEP152                     | 22995 .  |
| 215887_at | 2.58E-04 | 6.29E-05 | ZNF277                     | 11179 .  |
| 215888_at | 0.007387 | 0.003682 | PDS5B                      | 23047 .  |
| 215889_at | 8.12E-04 | 2.59E-04 | SKIL                       | 6498 .   |

|           |          |          |                            |          |
|-----------|----------|----------|----------------------------|----------|
| 215891_s_ | 0.00271  | 0.001111 | GM2A                       | 2760 .   |
| 215892_at | 5.67E-04 | 1.66E-04 | ZNF440                     | 126070 . |
| 215893_x_ | 0.027042 | 0.016817 |                            | .        |
| 215894_at | 4.28E-05 | 6.58E-06 | PTGDR                      | 5729 .   |
| 215895_x_ | 0.001065 | 3.60E-04 | ADFP                       | 123 .    |
| 215898_at | 5.46E-06 | 4.58E-07 | TTLL5                      | 23093 .  |
| 215899_at | 0.014531 | 0.008133 |                            | .        |
| 215900_at | 0.00122  | 4.26E-04 |                            | .        |
| 215902_at | 1.61E-04 | 3.51E-05 |                            | .        |
| 215903_s_ | 7.29E-04 | 2.27E-04 | MAST2                      | 23139 .  |
| 215904_at | 0.015175 | 0.008565 | MLLT4                      | 4301 .   |
| 215905_s_ | 5.62E-06 | 4.76E-07 | SNRNP40                    | 9410 .   |
| 215906_at | 0.026406 | 0.016359 |                            | .        |
| 215907_at | 3.54E-04 | 9.31E-05 |                            | .        |
| 215908_at | 0.00193  | 7.39E-04 |                            | .        |
| 215909_x_ | 4.26E-05 | 6.53E-06 | MINK1                      | 50488 .  |
| 215910_s_ | 5.71E-07 | 2.35E-08 | FNDC3A                     | 22862 .  |
| 215911_x_ | 0.00378  | 0.001658 | ATP2B3                     | 492 .    |
| 215912_at | 6.59E-04 | 2.00E-04 | GNAO1                      | 2775 .   |
| 215913_s_ | 1.22E-05 | 1.33E-06 | GULP1                      | 51454 .  |
| 215914_at | 0.017581 | 0.010172 |                            | .        |
| 215916_at | 0.022787 | 0.013784 | CHRNE                      | 1145 .   |
| 215918_s_ | 5.43E-06 | 4.54E-07 | SPTBN1                     | 6711 .   |
| 215919_s_ | 7.79E-09 | 7.67E-11 | MRPS11                     | 64963 .  |
| 215921_at | 2.65E-04 | 6.52E-05 | NPIPL1                     | 440350 . |
| 215923_s_ | 0.002395 | 9.59E-04 | PSD4                       | 23550 .  |
| 215926_x_ | 0.001422 | 5.12E-04 | SNAPC4                     | 6621 .   |
| 215927_at | 0.00232  | 9.23E-04 | ARFGEF2                    | 10564 .  |
| 215928_at | 5.05E-04 | 1.44E-04 |                            | .        |
| 215932_at | 0.04905  | 0.033567 | MAGEC2                     | 51438 .  |
| 215933_s_ | 2.01E-05 | 2.51E-06 | HHEX                       | 3087 .   |
| 215935_at | 0.025378 | 0.015634 | FAM75A1 /// F26165 /// 64. | .        |
| 215936_s_ | 1.79E-04 | 4.01E-05 | KIAA1033                   | 23325 .  |
| 215938_s_ | 0.01051  | 0.00556  | PLA2G6                     | 8398 .   |

|           |          |          |                            |          |
|-----------|----------|----------|----------------------------|----------|
| 215941_at | 0.018856 | 0.01104  |                            | .        |
| 215942_s_ | 2.36E-04 | 5.62E-05 | GTSE1                      | 51512 .  |
| 215943_at | 3.08E-06 | 2.18E-07 | KIAA1661                   | 85375 .  |
| 215945_s_ | 0.011873 | 0.006414 | TRIM2                      | 23321 .  |
| 215946_x_ | 4.01E-04 | 1.09E-04 | IGLL3                      | 91353 .  |
| 215947_s_ | 3.18E-06 | 2.28E-07 | FAM136A                    | 84908 .  |
| 215948_x_ | 0.021282 | 0.012735 | ZMYM5                      | 9205 .   |
| 215949_x_ | 7.30E-04 | 2.27E-04 | IGHM /// LOC63507 /// 6524 | .        |
| 215951_at | 0.049295 | 0.033762 | TBC1D2B                    | 23102 .  |
| 215952_s_ | 0.00732  | 0.003644 | OAZ1                       | 4946 .   |
| 215956_at | 0.003327 | 0.001422 |                            | .        |
| 215959_at | 0.008251 | 0.004189 |                            | .        |
| 215960_at | 0.026558 | 0.016465 | SLC5A4                     | 6527 .   |
| 215963_x_ | 0.010142 | 0.005332 | RPL3P7                     | 642741 . |
| 215965_at | 0.019949 | 0.01179  |                            | .        |
| 215966_x_ | 0.011685 | 0.006296 | GK3P                       | 2713 .   |
| 215967_s_ | 2.15E-05 | 2.75E-06 | LY9                        | 4063 .   |
| 215968_at | 0.008486 | 0.004328 |                            | .        |
| 215970_at | 2.82E-04 | 7.04E-05 | LOC100130331 100130331     | .        |
| 215972_at | 5.35E-05 | 8.72E-06 |                            | .        |
| 215975_x_ | 6.80E-04 | 2.08E-04 | GK                         | 2710 .   |
| 215977_x_ | 0.001845 | 7.00E-04 | GK                         | 2710 .   |
| 215978_x_ | 4.37E-09 | 3.63E-11 | LOC152719                  | 152719 . |
| 215979_s_ | 0.012507 | 0.006828 | SLC7A1                     | 6541 .   |
| 215980_s_ | 0.020623 | 0.012264 | IGHMBP2                    | 3508 .   |
| 215982_s_ | 7.48E-04 | 2.34E-04 | DOM3Z                      | 1797 .   |
| 215983_s_ | 6.70E-04 | 2.04E-04 | UBXN8                      | 7993 .   |
| 215984_s_ | 0.04557  | 0.030824 | ARFRP1                     | 10139 .  |
| 215985_at | 0.00201  | 7.76E-04 | NCRNA00171                 | 80862 .  |
| 215986_at | 0.019748 | 0.011651 |                            | .        |
| 215987_at | 0.042804 | 0.028649 | RAPGEF2                    | 9693 .   |
| 215988_s_ | 7.09E-04 | 2.19E-04 | DLG1                       | 1739 .   |
| 215989_at | 0.003767 | 0.001652 | CBX2                       | 84733 .  |
| 215990_s_ | 1.49E-04 | 3.17E-05 | BCL6                       | 604 .    |

|           |          |          |              |           |     |
|-----------|----------|----------|--------------|-----------|-----|
| 215991_s_ | 0.010081 | 0.005295 | KIAA0090     | 23065     | .   |
| 215992_s_ | 0.008577 | 0.004381 | RAPGEF2      | 9693      | .   |
| 215994_x_ | 3.77E-06 | 2.83E-07 | TBC1D9B      | 23061     | .   |
| 215996_at | 0.014514 | 0.008123 |              |           | .   |
| 215997_s_ | 0.001682 | 6.26E-04 | CUL4B        | 8450      | .   |
| 215999_at | 0.01134  | 0.006081 | CDRT1        | 374286    | .   |
| 216000_at | 0.001191 | 4.13E-04 |              |           | .   |
| 216001_at | 0.032398 | 0.020747 | PRAMEF12     | 390999    | .   |
| 216003_at | 0.011884 | 0.006422 | COX10        | 1352      | .   |
| 216004_s_ | 3.42E-04 | 8.94E-05 | PKNOX1       | 5316      | .   |
| 216006_at | 6.57E-04 | 2.00E-04 |              |           | .   |
| 216008_s_ | 0.006714 | 0.003288 | ARIH2        | 10425     | .   |
| 216010_x_ | 2.08E-04 | 4.81E-05 | FUT3         | 2525      | .   |
| 216011_at | 0.045196 | 0.030534 | SLC39A9      | 55334     | .   |
| 216013_at | 7.52E-04 | 2.36E-04 | ZXDB         | 158586    | .   |
| 216017_s_ | 6.82E-04 | 2.09E-04 | NAB2         | 4665      | .   |
| 216018_at | 5.31E-08 | 9.84E-10 | RNF5         | 6048      | .   |
| 216019_x_ | 0.00469  | 0.002148 | PHLDB1       | 23187     | .   |
| 216020_at | 5.30E-04 | 1.53E-04 | IFIH1        | 64135     | .   |
| 216021_s_ | 0.002873 | 0.001191 | GLRA3        | 8001      | .   |
| 216023_at | 2.96E-04 | 7.46E-05 | KDM4B        | 23030     | .   |
| 216024_at | 0.011201 | 0.005995 | DNM2         | 1785      | .   |
| 216025_x_ | 0.018147 | 0.010558 | CYP2C9       | 1559      | .   |
| 216026_s_ | 1.55E-06 | 8.92E-08 | POLE         | 5426      | .   |
| 216027_at | 0.015913 | 0.009059 | TMX4         | 56255     | .   |
| 216028_at | 0.021057 | 0.012577 |              |           | .   |
| 216032_s_ | 0.022972 | 0.013911 | ERGIC3       | 51614     | .   |
| 216033_s_ | 5.85E-05 | 9.75E-06 | FYN          | 2534      | .   |
| 216035_x_ | 0.002051 | 7.95E-04 | TCF7L2       | 6934      | .   |
| 216036_x_ | 3.74E-05 | 5.50E-06 | WDTC1        | 23038     | .   |
| 216037_x_ | 3.10E-04 | 7.92E-05 | TCF7L2       | 6934      | .   |
| 216038_x_ | 0.040467 | 0.02684  | DAXX         | 1616      | .   |
| 216039_at | 0.007393 | 0.003686 | LOC100132832 | 100132832 | //. |
| 216040_x_ | 0.038182 | 0.025098 |              |           | .   |

|           |          |          |          |             |
|-----------|----------|----------|----------|-------------|
| 216041_x_ | 2.13E-05 | 2.71E-06 | GRN      | 2896 .      |
| 216042_at | 1.88E-04 | 4.23E-05 | TNFRSF25 | 8718 .      |
| 216044_x_ | 1.16E-06 | 6.00E-08 | FAM69A   | 388650 .    |
| 216046_at | 0.002013 | 7.78E-04 |          | .           |
| 216047_x_ | 3.52E-05 | 5.10E-06 | SEZ6L    | 23544 .     |
| 216048_s_ | 9.41E-04 | 3.10E-04 | RHOBTB3  | 22836 .     |
| 216049_at | 0.026074 | 0.016118 | RHOBTB3  | 22836 .     |
| 216051_x_ | 0.018907 | 0.011076 | PRINS    | 100169750 . |
| 216052_x_ | 0.011417 | 0.00613  | ARTN     | 9048 .      |
| 216053_x_ | 2.28E-05 | 2.94E-06 | FAM182A  | 284800 .    |
| 216054_x_ | 1.67E-05 | 1.99E-06 | MYL4     | 4635 .      |
| 216055_at | 0.008381 | 0.004267 | PDGFB    | 5155 .      |
| 216056_at | 0.007023 | 0.00347  | CD44     | 960 .       |
| 216058_s_ | 0.046924 | 0.031893 | CYP2C19  | 1557 .      |
| 216060_s_ | 0.010489 | 0.005547 | DAAM1    | 23002 .     |
| 216061_x_ | 1.74E-05 | 2.09E-06 | PDGFB    | 5155 .      |
| 216063_at | 0.004805 | 0.002211 | HBBP1    | 3044 .      |
| 216064_s_ | 6.55E-06 | 5.78E-07 | AGA      | 175 .       |
| 216066_at | 0.003289 | 0.001403 | ABCA1    | 19 .        |
| 216072_at | 7.49E-04 | 2.34E-04 |          | .           |
| 216074_x_ | 5.33E-07 | 2.14E-08 | WWC1     | 23286 .     |
| 216076_at | 4.57E-05 | 7.14E-06 | L3MBTL   | 26013 .     |
| 216077_s_ | 0.001999 | 7.71E-04 | L3MBTL   | 26013 .     |
| 216079_at | 2.55E-05 | 3.40E-06 | EPM2A    | 7957 .      |
| 216080_s_ | 1.87E-05 | 2.28E-06 | FADS3    | 3995 .      |
| 216081_at | 0.045933 | 0.031109 | LAMA4    | 3910 .      |
| 216082_at | 1.86E-04 | 4.18E-05 | NEU3     | 10825 .     |
| 216083_s_ | 1.50E-04 | 3.22E-05 | NEU3     | 10825 .     |
| 216086_at | 0.021672 | 0.013006 | SV2C     | 22987 .     |
| 216088_s_ | 1.26E-05 | 1.38E-06 | PSMA7    | 5688 .      |
| 216090_x_ | 0.039347 | 0.025983 |          | .           |
| 216091_s_ | 0.0041   | 0.001825 | BTRC     | 8945 .      |
| 216092_s_ | 0.00519  | 0.002422 | SLC7A8   | 23428 .     |
| 216094_at | 8.66E-05 | 1.61E-05 |          | .           |

|           |          |          |                             |           |   |
|-----------|----------|----------|-----------------------------|-----------|---|
| 216095_x_ | 2.04E-05 | 2.56E-06 | MTMR1                       | 8776      | . |
| 216096_s_ | 0.014735 | 0.008271 | NRXN1                       | 9378      | . |
| 216098_s_ | 0.011505 | 0.006184 | HTR7 /// HTR7 3363 /// 9316 |           | . |
| 216099_at | 5.17E-04 | 1.48E-04 | HTR7P                       | 93164     | . |
| 216100_s_ | 7.54E-05 | 1.35E-05 | TOR1AIP1                    | 26092     | . |
| 216101_at | 2.77E-04 | 6.89E-05 |                             |           | . |
| 216102_at | 6.63E-05 | 1.14E-05 | PHLDB1                      | 23187     | . |
| 216103_at | 3.32E-04 | 8.61E-05 | ACOT11                      | 26027     | . |
| 216105_x_ | 0.009732 | 0.005084 | PPP2R4                      | 5524      | . |
| 216106_at | 5.57E-04 | 1.62E-04 | LOC145678                   | 145678    | . |
| 216107_at | 9.64E-04 | 3.19E-04 | LOC100129503                | 100129503 | . |
| 216110_x_ | 0.001222 | 4.26E-04 |                             |           | . |
| 216112_at | 4.85E-04 | 1.37E-04 |                             |           | . |
| 216113_at | 6.07E-05 | 1.02E-05 | ABI2                        | 10152     | . |
| 216114_at | 0.029173 | 0.018368 | NCKIPSD                     | 51517     | . |
| 216115_at | 8.76E-04 | 2.84E-04 | NF1                         | 4763      | . |
| 216119_s_ | 1.20E-04 | 2.42E-05 | SPEF1                       | 25876     | . |
| 216120_s_ | 0.006202 | 0.002991 | ATP2B2                      | 491       | . |
| 216121_at | 0.006198 | 0.002988 |                             |           | . |
| 216122_at | 1.32E-05 | 1.46E-06 |                             |           | . |
| 216123_x_ | 0.021255 | 0.012715 |                             |           | . |
| 216126_at | 0.002962 | 0.001234 |                             |           | . |
| 216127_at | 5.36E-07 | 2.16E-08 | PDIA2                       | 64714     | . |
| 216128_at | 0.009569 | 0.004981 | TBCD                        | 6904      | . |
| 216129_at | 0.037821 | 0.024825 | ATP9A                       | 10079     | . |
| 216130_at | 0.002573 | 0.001045 |                             |           | . |
| 216131_at | 0.025284 | 0.015567 | FRMD4B                      | 23150     | . |
| 216133_at | 0.042104 | 0.028111 | TRD@                        | 6964      | . |
| 216134_at | 0.012997 | 0.007143 | FRMD4B                      | 23150     | . |
| 216135_at | 4.57E-05 | 7.16E-06 | IQCK                        | 124152    | . |
| 216137_s_ | 0.001664 | 6.18E-04 | MAPK8IP3                    | 23162     | . |
| 216138_at | 1.75E-04 | 3.88E-05 |                             |           | . |
| 216139_s_ | 2.89E-04 | 7.25E-05 | MAPK8IP3                    | 23162     | . |
| 216142_at | 0.002272 | 9.01E-04 |                             |           | . |



|           |          |          |                    |
|-----------|----------|----------|--------------------|
| 216143_at | 4.11E-04 | 1.12E-04 | .                  |
| 216144_at | 0.009679 | 0.005051 | .                  |
| 216145_at | 0.014038 | 0.007809 | .                  |
| 216146_at | 0.043958 | 0.029566 | .                  |
| 216149_at | 0.004777 | 0.002196 | LRRC37B2 147172 .  |
| 216150_at | 0.006889 | 0.003391 | .                  |
| 216152_at | 9.01E-04 | 2.95E-04 | .                  |
| 216153_x_ | 0.00478  | 0.002197 | RECK 8434 .        |
| 216157_at | 0.006202 | 0.002991 | .                  |
| 216159_s_ | 0.002212 | 8.72E-04 | .                  |
| 216160_at | 0.04944  | 0.033873 | .                  |
| 216161_at | 0.004805 | 0.002211 | SBNO1 55206 .      |
| 216163_at | 0.031358 | 0.019973 | .                  |
| 216164_at | 0.001823 | 6.90E-04 | LRRN2 10446 .      |
| 216165_at | 0.020167 | 0.011943 | GARNL3 84253 .     |
| 216170_at | 1.22E-07 | 2.96E-09 | .                  |
| 216173_at | 6.21E-12 | 6.01E-15 | .                  |
| 216174_at | 0.010224 | 0.005383 | HCRP1 387535 .     |
| 216175_at | 6.84E-05 | 1.19E-05 | .                  |
| 216176_at | 8.59E-05 | 1.60E-05 | HCRP1 387535 .     |
| 216178_x_ | 1.82E-06 | 1.11E-07 | ITGB1 3688 .       |
| 216180_s_ | 5.22E-06 | 4.29E-07 | SYNJ2 8871 .       |
| 216184_s_ | 2.57E-05 | 3.43E-06 | RIMS1 22999 .      |
| 216186_at | 7.34E-05 | 1.31E-05 | .                  |
| 216187_x_ | 7.95E-08 | 1.69E-09 | .                  |
| 216188_at | 1.93E-05 | 2.38E-06 | MYCNOS 10408 .     |
| 216190_x_ | 0.028762 | 0.018074 | ITGB1 3688 .       |
| 216193_at | 0.005224 | 0.002441 | LOC440366 440366 . |
| 216195_at | 0.009954 | 0.00522  | ANK2 287 .         |
| 216197_at | 4.87E-04 | 1.38E-04 | ATF7IP 55729 .     |
| 216198_at | 0.002247 | 8.89E-04 | ATF7IP 55729 .     |
| 216199_s_ | 0.001072 | 3.63E-04 | MAP3K4 4216 .      |
| 216200_at | 0.002266 | 8.98E-04 | PLEKHM1 9842 .     |
| 216202_s_ | 0.01489  | 0.008378 | SPTLC2 9517 .      |

|           |          |          |                               |         |
|-----------|----------|----------|-------------------------------|---------|
| 216206_x_ | 5.70E-05 | 9.45E-06 | MAP2K7                        | 5609 .  |
| 216207_x_ | 1.69E-04 | 3.71E-05 | IGKC /// IGKV1 100130100 //.  |         |
| 216208_s_ | 0.001062 | 3.59E-04 | ATF6B                         | 1388 .  |
| 216210_x_ | 1.66E-05 | 1.96E-06 | TRIOBP                        | 11078 . |
| 216211_at | 2.26E-06 | 1.46E-07 |                               | .       |
| 216212_s_ | 5.79E-07 | 2.39E-08 | DKC1                          | 1736 .  |
| 216217_at | 0.044067 | 0.029651 | PLCL2                         | 23228 . |
| 216218_s_ | 0.010206 | 0.005372 | PLCL2                         | 23228 . |
| 216219_at | 4.89E-04 | 1.38E-04 | AQP6                          | 363 .   |
| 216220_s_ | 4.24E-05 | 6.50E-06 | ADORA1                        | 134 .   |
| 216222_s_ | 3.58E-05 | 5.21E-06 | MYO10                         | 4651 .  |
| 216223_at | 0.010182 | 0.005356 | CPN2                          | 1370 .  |
| 216224_s_ | 0.031246 | 0.019887 | HDAC6                         | 10013 . |
| 216226_at | 0.001096 | 3.73E-04 | TAF4B                         | 6875 .  |
| 216228_s_ | 3.90E-05 | 5.80E-06 | WDHD1                         | 11169 . |
| 216229_x_ | 7.42E-09 | 7.08E-11 | HCG2P7                        | 80867 . |
| 216230_x_ | 5.00E-06 | 4.07E-07 | SMPD1                         | 6609 .  |
| 216231_s_ | 1.23E-09 | 6.89E-12 | B2M                           | 567 .   |
| 216232_s_ | 0.001174 | 4.06E-04 | GCN1L1                        | 10985 . |
| 216234_s_ | 0.033112 | 0.021283 | PRKACA                        | 5566 .  |
| 216235_s_ | 5.95E-05 | 9.95E-06 | EDNRA                         | 1909 .  |
| 216236_s_ | 9.12E-10 | 4.72E-12 | SLC2A14 /// SL 144195 /// 65. |         |
| 216237_s_ | 1.28E-04 | 2.64E-05 | MCM5                          | 4174 .  |
| 216238_s_ | 0.034308 | 0.022161 | FGB                           | 2244 .  |
| 216243_s_ | 9.27E-05 | 1.75E-05 | IL1RN                         | 3557 .  |
| 216250_s_ | 6.39E-04 | 1.93E-04 | LPXN                          | 9404 .  |
| 216251_s_ | 0.005897 | 0.002819 | TTLL12                        | 23170 . |
| 216252_x_ | 1.35E-05 | 1.50E-06 | FAS                           | 355 .   |
| 216253_s_ | 0.001695 | 6.32E-04 | PARVB                         | 29780 . |
| 216254_at | 0.002933 | 0.00122  | PARVB                         | 29780 . |
| 216257_at | 0.004055 | 0.001801 | SERPINB13                     | 5275 .  |
| 216260_at | 4.50E-05 | 7.00E-06 | DICER1                        | 23405 . |
| 216262_s_ | 7.04E-06 | 6.37E-07 | TGIF2                         | 60436 . |
| 216264_s_ | 1.69E-06 | 1.00E-07 | LAMB2                         | 3913 .  |

|           |          |          |                                         |          |
|-----------|----------|----------|-----------------------------------------|----------|
| 216266_s_ | 3.43E-04 | 8.97E-05 | ARFGEF1                                 | 10565 .  |
| 216267_s_ | 1.99E-06 | 1.24E-07 | TMEM115                                 | 11070 .  |
| 216268_s_ | 0.015738 | 0.00894  | JAG1                                    | 182 .    |
| 216269_s_ | 5.01E-04 | 1.43E-04 | ELN                                     | 2006 .   |
| 216270_at | 6.29E-05 | 1.07E-05 | ILVBL                                   | 10994 .  |
| 216272_x_ | 1.85E-04 | 4.16E-05 | SYDE1                                   | 85360 .  |
| 216273_at | 0.00789  | 0.00398  | ZNF460                                  | 10794 .  |
| 216274_s_ | 0.048739 | 0.033318 | SEC11A                                  | 23478 .  |
| 216275_at | 0.008513 | 0.004345 | BUB1                                    | 699 .    |
| 216282_x_ | 0.022111 | 0.013321 | POLR2C                                  | 5432 .   |
| 216283_s_ | 0.046362 | 0.031443 | PVR                                     | 5817 .   |
| 216285_at | 0.002105 | 8.21E-04 | DGCR14                                  | 8220 .   |
| 216286_at | 0.002126 | 8.31E-04 |                                         | .        |
| 216289_at | 3.86E-04 | 1.04E-04 | GPR144                                  | 347088 . |
| 216290_x_ | 7.33E-04 | 2.28E-04 |                                         | .        |
| 216291_at | 0.020748 | 0.012357 | ZNF440                                  | 126070 . |
| 216293_at | 2.16E-07 | 6.43E-09 | CLTA                                    | 1211 .   |
| 216294_s_ | 4.10E-04 | 1.11E-04 | KIAA1109                                | 84162 .  |
| 216296_at | 0.023329 | 0.014164 | CLTA                                    | 1211 .   |
| 216299_s_ | 0.00113  | 3.88E-04 | XRCC3                                   | 7517 .   |
| 216300_x_ | 3.20E-05 | 4.53E-06 | RARA                                    | 5914 .   |
| 216302_at | 0.01232  | 0.006705 | HNRNPC /// H <sup>1</sup> 3183 /// 343( |          |
| 216305_s_ | 2.68E-06 | 1.81E-07 | C2orf3                                  | 6936 .   |
| 216306_x_ | 2.18E-05 | 2.80E-06 | PTBP1                                   | 5725 .   |
| 216307_at | 0.002951 | 0.001229 | DGKB                                    | 1607 .   |
| 216308_x_ | 0.001947 | 7.47E-04 | GRHPR                                   | 9380 .   |
| 216309_x_ | 0.02108  | 0.012593 | JRK                                     | 8629 .   |
| 216310_at | 2.71E-04 | 6.69E-05 | TAOK1                                   | 57551 .  |
| 216311_at | 0.015751 | 0.00895  | LOC728361                               | 728361 . |
| 216316_x_ | 0.003828 | 0.001682 | GK /// GK3P 2710 /// 2715               |          |
| 216318_at | 3.05E-07 | 1.03E-08 | IGHG1                                   | 3500 .   |
| 216319_at | 4.43E-06 | 3.50E-07 |                                         | .        |
| 216320_x_ | 0.003572 | 0.001548 | MST1                                    | 4485 .   |
| 216321_s_ | 6.04E-04 | 1.80E-04 | NR3C1                                   | 2908 .   |

|           |          |          |                             |        |   |
|-----------|----------|----------|-----------------------------|--------|---|
| 216322_at | 0.037193 | 0.024355 | CD58                        | 965    | . |
| 216324_at | 0.001757 | 6.60E-04 |                             |        | . |
| 216325_x_ | 0.00411  | 0.00183  | RTEL1                       | 51750  | . |
| 216326_s_ | 0.049432 | 0.033867 | HDAC3                       | 8841   | . |
| 216327_s_ | 1.33E-04 | 2.76E-05 | SIGLEC8                     | 27181  | . |
| 216328_at | 8.97E-04 | 2.93E-04 | SIGLEC8                     | 27181  | . |
| 216329_at | 8.61E-04 | 2.79E-04 |                             |        | . |
| 216330_s_ | 0.043056 | 0.028842 | POU6F1                      | 5463   | . |
| 216331_at | 1.92E-06 | 1.18E-07 | ITGA7                       | 3679   | . |
| 216332_at | 9.90E-04 | 3.30E-04 | POU6F1                      | 5463   | . |
| 216334_s_ | 0.001078 | 3.66E-04 | CYP2A7P1                    | 1550   | . |
| 216337_at | 0.001651 | 6.12E-04 |                             |        | . |
| 216338_s_ | 7.08E-08 | 1.43E-09 | YIPF3                       | 25844  | . |
| 216339_s_ | 0.013662 | 0.007567 | TNXA /// TNXB 7146 /// 7148 |        | . |
| 216340_s_ | 0.047508 | 0.032355 | CYP2A7P1                    | 1550   | . |
| 216341_s_ | 3.39E-04 | 8.85E-05 | GNRHR                       | 2798   | . |
| 216342_x_ | 0.004429 | 0.002005 | RPS4P13 /// RF100128140 //  |        | . |
| 216344_at | 1.02E-04 | 1.97E-05 | NPHP4                       | 261734 | . |
| 216345_at | 2.64E-05 | 3.55E-06 | KIAA0913                    | 23053  | . |
| 216347_s_ | 0.001001 | 3.34E-04 | PPP1R13B                    | 23368  | . |
| 216348_at | 1.89E-05 | 2.32E-06 | RPS17P5                     | 442216 | . |
| 216351_x_ | 0.029011 | 0.018253 | DAZ1 /// DAZ2 1617 /// 5708 |        | . |
| 216352_x_ | 1.61E-04 | 3.51E-05 | PCDHGA3                     | 56112  | . |
| 216355_at | 3.43E-04 | 8.97E-05 |                             |        | . |
| 216356_x_ | 7.83E-07 | 3.57E-08 | BAIAP3                      | 8938   | . |
| 216357_at | 0.002    | 7.72E-04 | SNX1                        | 6642   | . |
| 216358_at | 5.91E-04 | 1.75E-04 |                             |        | . |
| 216359_at | 0.012752 | 0.006986 | LOC100129410 100129410      |        | . |
| 216360_x_ | 0.00101  | 3.38E-04 | RRP12                       | 23223  | . |
| 216362_at | 0.005941 | 0.002844 |                             |        | . |
| 216365_x_ | 0.006921 | 0.00341  | IGL@ /// IGL3 28797 /// 355 |        | . |
| 216366_x_ | 5.65E-05 | 9.32E-06 |                             |        | . |
| 216369_at | 5.62E-04 | 1.64E-04 |                             |        | . |
| 216371_at | 5.77E-04 | 1.70E-04 |                             |        | . |

|           |          |          |                             |             |
|-----------|----------|----------|-----------------------------|-------------|
| 216372_at | 0.028684 | 0.018013 |                             | .           |
| 216374_at | 0.005445 | 0.002563 | LOC728395 /// 728137 /// 72 | .           |
| 216376_x_ | 3.95E-05 | 5.90E-06 |                             | .           |
| 216377_x_ | 0.00384  | 0.001688 | ALPPL2                      | 251 .       |
| 216378_at | 0.006164 | 0.002969 |                             | .           |
| 216379_x_ | 1.67E-07 | 4.56E-09 | CD24                        | 100133941 . |
| 216380_x_ | 0.002474 | 9.97E-04 | RPS28P6                     | 728453 .    |
| 216381_x_ | 0.020215 | 0.011975 | AKR7A3                      | 22977 .     |
| 216382_s_ | 5.69E-05 | 9.41E-06 | MLL2                        | 8085 .      |
| 216383_at | 0.011873 | 0.006414 | RPL18A /// RPL285053 /// 35 | .           |
| 216384_x_ | 2.46E-07 | 7.75E-09 | LOC643287                   | 643287 .    |
| 216385_at | 0.002191 | 8.62E-04 | LOC220077                   | 220077 .    |
| 216386_at | 0.01528  | 0.008635 | LOC220077                   | 220077 .    |
| 216387_x_ | 0.001063 | 3.59E-04 | LOC100130233;100130233 //   | .           |
| 216388_s_ | 0.005864 | 0.002801 | LTB4R                       | 1241 .      |
| 216389_s_ | 4.03E-04 | 1.09E-04 | WDR23                       | 80344 .     |
| 216391_s_ | 0.048582 | 0.033197 | KLHL1                       | 57626 .     |
| 216394_x_ | 0.002412 | 9.68E-04 |                             | .           |
| 216395_at | 0.007436 | 0.003713 | FBXL18                      | 80028 .     |
| 216396_s_ | 0.015838 | 0.009009 | EI24                        | 9538 .      |
| 216397_s_ | 0.005044 | 0.002342 | BOP1                        | 23246 .     |
| 216398_at | 9.44E-04 | 3.11E-04 | GYPB                        | 2994 .      |
| 216400_at | 7.27E-04 | 2.26E-04 | GBA /// GBAP 2629 /// 2630  | .           |
| 216401_x_ | 0.013468 | 0.007443 | LOC652493                   | 652493 .    |
| 216402_at | 7.41E-05 | 1.32E-05 | SEC14L4                     | 284904 .    |
| 216403_at | 0.013157 | 0.007246 | SP3P                        | 160824 .    |
| 216404_at | 8.39E-06 | 8.02E-07 | ATXN8OS                     | 6315 .      |
| 216405_at | 4.37E-07 | 1.67E-08 |                             | .           |
| 216407_at | 0.007165 | 0.003553 | VAC14                       | 55697 .     |
| 216408_at | 0.037044 | 0.024241 | OR2B2                       | 81697 .     |
| 216409_at | 0.012481 | 0.006811 | ACSL6                       | 23305 .     |
| 216411_s_ | 0.029649 | 0.018717 | GALK2                       | 2585 .      |
| 216413_at | 0.002186 | 8.60E-04 |                             | .           |
| 216417_x_ | 0.006623 | 0.003234 | HOXB9                       | 3219 .      |

|           |          |          |                             |          |
|-----------|----------|----------|-----------------------------|----------|
| 216418_at | 5.74E-06 | 4.88E-07 | ABCD1 /// LOC 215 /// 64885 | .        |
| 216419_at | 0.003996 | 0.00177  | CROCC                       | 9696 .   |
| 216422_at | 0.001739 | 6.52E-04 | PA2G4 /// PA2 5036 /// 6470 | .        |
| 216425_at | 0.014062 | 0.007826 |                             | .        |
| 216426_at | 0.0036   | 0.001563 | TCEB1P3                     | 644540 . |
| 216427_at | 0.003862 | 0.0017   |                             | .        |
| 216428_x_ | 0.00103  | 3.46E-04 | KIR3DX1                     | 90011 .  |
| 216429_at | 0.013573 | 0.007509 |                             | .        |
| 216430_x_ | 2.19E-04 | 5.11E-05 | IGL@                        | 3535 .   |
| 216431_at | 5.34E-04 | 1.54E-04 |                             | .        |
| 216433_s_ | 0.006254 | 0.00302  | PRDM2                       | 7799 .   |
| 216434_at | 6.80E-04 | 2.08E-04 | TTC38                       | 55020 .  |
| 216436_at | 0.002517 | 0.001018 | PIK3R4                      | 30849 .  |
| 216437_at | 0.043626 | 0.029302 |                             | .        |
| 216439_at | 0.005599 | 0.00265  | TNK2                        | 10188 .  |
| 216442_x_ | 7.26E-05 | 1.29E-05 | FN1                         | 2335 .   |
| 216445_at | 0.003434 | 0.001477 | PRDM2                       | 7799 .   |
| 216448_at | 0.020704 | 0.012325 |                             | .        |
| 216449_x_ | 1.16E-04 | 2.33E-05 | HSP90B1                     | 7184 .   |
| 216450_x_ | 6.18E-04 | 1.85E-04 | HSP90B1                     | 7184 .   |
| 216451_at | 6.98E-05 | 1.23E-05 | STK38                       | 11329 .  |
| 216457_s_ | 1.92E-04 | 4.34E-05 | SF3A1                       | 10291 .  |
| 216458_at | 0.025631 | 0.015806 | PQLC3                       | 130814 . |
| 216459_x_ | 1.21E-05 | 1.31E-06 | TIGD1L                      | 414771 . |
| 216460_at | 2.66E-04 | 6.54E-05 | FLJ00049                    | 645372 . |
| 216461_at | 0.017731 | 0.010273 |                             | .        |
| 216464_x_ | 8.51E-04 | 2.75E-04 | GPR44                       | 11251 .  |
| 216465_at | 9.90E-04 | 3.30E-04 |                             | .        |
| 216466_at | 0.003285 | 0.001401 | NAV3                        | 89795 .  |
| 216467_s_ | 0.006888 | 0.00339  |                             | .        |
| 216468_s_ | 0.010889 | 0.0058   | ZNF682                      | 91120 .  |
| 216470_x_ | 0.001775 | 6.67E-04 | PRSS1                       | 5644 .   |
| 216472_at | 0.008098 | 0.004101 |                             | .        |
| 216473_x_ | 8.02E-05 | 1.47E-05 | DUX4 /// LOC6 22947 /// 655 | .        |

|           |          |          |                              |          |
|-----------|----------|----------|------------------------------|----------|
| 216474_x_ | 9.69E-06 | 9.76E-07 | TPSAB1 /// TPS64499 /// 711. |          |
| 216475_at | 1.05E-05 | 1.08E-06 |                              | .        |
| 216476_at | 0.005008 | 0.002321 | LOC100133572 100133572 //    |          |
| 216479_at | 0.004497 | 0.002042 | LOC100133773 100129141 //    |          |
| 216480_x_ | 3.18E-04 | 8.18E-05 | MLLT10                       | 8028 .   |
| 216481_at | 2.51E-04 | 6.11E-05 | GRIP2                        | 80852 .  |
| 216483_s_ | 7.76E-05 | 1.40E-05 | C19orf10                     | 56005 .  |
| 216484_x_ | 0.010278 | 0.005418 | HDGF                         | 3068 .   |
| 216485_s_ | 4.10E-05 | 6.20E-06 | TPSAB1                       | 7177 .   |
| 216488_s_ | 5.64E-04 | 1.65E-04 | ATP11A                       | 23250 .  |
| 216491_x_ | 1.97E-04 | 4.48E-05 | IGHM                         | 3507 .   |
| 216492_at | 0.001388 | 4.98E-04 | KIR3DX1                      | 90011 .  |
| 216493_s_ | 1.19E-07 | 2.87E-09 | IGF2BP3 /// LO10643 /// 645. |          |
| 216495_x_ | 0.005459 | 0.002571 | IVD                          | 3712 .   |
| 216496_s_ | 0.002208 | 8.70E-04 |                              | .        |
| 216497_at | 0.018789 | 0.010995 | HNRNPA1 /// F100128701 //    |          |
| 216499_at | 0.003358 | 0.001438 |                              | .        |
| 216500_at | 3.74E-07 | 1.35E-08 |                              | .        |
| 216503_s_ | 1.77E-04 | 3.93E-05 | MLLT10                       | 8028 .   |
| 216504_s_ | 6.34E-04 | 1.91E-04 | SLC39A8                      | 64116 .  |
| 216506_x_ | 8.02E-04 | 2.56E-04 | MLLT10                       | 8028 .   |
| 216507_at | 8.19E-05 | 1.51E-05 | TAPT1                        | 202018 . |
| 216508_x_ | 5.28E-05 | 8.58E-06 | CTCF1 /// HMG100130561 //    |          |
| 216509_x_ | 1.30E-04 | 2.66E-05 | MLLT10                       | 8028 .   |
| 216510_x_ | 0.006405 | 0.003108 | IGHA1 /// IGH128396 /// 284. |          |
| 216511_s_ | 1.97E-04 | 4.50E-05 | TCF7L2                       | 6934 .   |
| 216514_at | 0.010552 | 0.005586 |                              | .        |
| 216515_x_ | 3.75E-08 | 6.08E-10 | LOC643287 /// 5757 /// 6432. |          |
| 216517_at | 0.013497 | 0.007461 | IGKC /// IGKV1 100130100 //  |          |
| 216520_s_ | 0.007289 | 0.003626 | TPT1                         | 7178 .   |
| 216524_x_ | 2.98E-06 | 2.08E-07 |                              | .        |
| 216525_x_ | 0.007378 | 0.003677 | PMS2L3                       | 5387 .   |
| 216526_x_ | 2.38E-04 | 5.68E-05 | HLA-C                        | 3107 .   |
| 216527_at | 1.37E-10 | 3.83E-13 |                              | .        |

|           |          |          |                             |          |
|-----------|----------|----------|-----------------------------|----------|
| 216529_at | 6.37E-04 | 1.92E-04 |                             | .        |
| 216530_at | 0.049519 | 0.033939 |                             | .        |
| 216531_at | 0.036969 | 0.024182 | YY2                         | 404281 . |
| 216535_at | 2.18E-05 | 2.79E-06 | CADM3                       | 57863 .  |
| 216536_at | 8.00E-04 | 2.54E-04 | OR7E19P                     | 26651 .  |
| 216537_s_ | 4.17E-05 | 6.34E-06 | SIGLEC7                     | 27036 .  |
| 216538_at | 0.04291  | 0.028726 |                             | .        |
| 216542_x_ | 0.002597 | 0.001057 | IGHA1 /// IGHG28442 /// 345 | .        |
| 216545_at | 7.82E-04 | 2.48E-04 |                             | .        |
| 216547_at | 7.94E-05 | 1.45E-05 |                             | .        |
| 216548_x_ | 2.82E-06 | 1.94E-07 | HMGB3L1                     | 128872 . |
| 216549_s_ | 0.026475 | 0.01641  | TBC1D22B                    | 55633 .  |
| 216550_x_ | 0.004382 | 0.001979 | ANKRD12                     | 23253 .  |
| 216552_x_ | 0.029508 | 0.018616 | KIR2DS4                     | 3809 .   |
| 216553_x_ | 0.036109 | 0.023525 |                             | .        |
| 216554_s_ | 0.004352 | 0.001961 |                             | .        |
| 216555_at | 7.76E-04 | 2.45E-04 | C22orf30                    | 253143 . |
| 216556_x_ | 0.018704 | 0.010938 |                             | .        |
| 216557_x_ | 0.008983 | 0.004625 | IGH@ /// IGHA28396 /// 284  | .        |
| 216559_x_ | 6.38E-08 | 1.24E-09 | HNRNPA1 /// F100128836 //   | .        |
| 216560_x_ | 6.95E-04 | 2.14E-04 | IGL@                        | 3535 .   |
| 216563_at | 1.01E-04 | 1.95E-05 | ANKRD12                     | 23253 .  |
| 216564_at | 0.023688 | 0.014423 |                             | .        |
| 216565_x_ | 7.19E-04 | 2.23E-04 |                             | .        |
| 216567_at | 0.002453 | 9.88E-04 |                             | .        |
| 216568_x_ | 1.50E-05 | 1.73E-06 |                             | .        |
| 216571_at | 1.25E-05 | 1.37E-06 |                             | .        |
| 216572_at | 0.001343 | 4.78E-04 | FOXL1                       | 2300 .   |
| 216573_at | 6.50E-04 | 1.97E-04 | IGL@                        | 3535 .   |
| 216577_at | 0.018856 | 0.011041 |                             | .        |
| 216579_at | 2.85E-04 | 7.13E-05 | GJB4                        | 127534 . |
| 216581_at | 0.024128 | 0.014729 |                             | .        |
| 216582_at | 0.023066 | 0.013974 | POM121L2                    | 94026 .  |
| 216583_x_ | 0.006348 | 0.003075 | NHP2                        | 55651 .  |



|           |          |          |              |          |
|-----------|----------|----------|--------------|----------|
| 216584_at | 7.99E-04 | 2.54E-04 |              | .        |
| 216589_at | 0.027209 | 0.016935 | LOC390998    | 390998 . |
| 216593_s_ | 0.008897 | 0.004574 | PIGC         | 5279 .   |
| 216594_x_ | 1.82E-05 | 2.21E-06 | AKR1C1       | 1645 .   |
| 216595_at | 0.003777 | 0.001657 | FAM186A      | 121006 . |
| 216596_at | 0.029529 | 0.018634 | DKFZP434L187 | 26082 .  |
| 216599_x_ | 0.004494 | 0.00204  | SLC22A6      | 9356 .   |
| 216600_x_ | 0.013607 | 0.00753  | ALDOB        | 229 .    |
| 216601_at | 1.39E-06 | 7.74E-08 | LOC90586     | 90586 .  |
| 216603_at | 5.68E-05 | 9.38E-06 | SLC7A8       | 23428 .  |
| 216604_s_ | 5.95E-05 | 9.95E-06 | SLC7A8       | 23428 .  |
| 216606_x_ | 0.030852 | 0.019604 | LYPLA2P1     | 653639 . |
| 216607_s_ | 2.07E-04 | 4.79E-05 | CYP51A1      | 1595 .   |
| 216608_at | 0.00156  | 5.72E-04 | LOC26102     | 26102 .  |
| 216609_at | 0.023943 | 0.0146   | TXN          | 7295 .   |
| 216611_s_ | 6.15E-04 | 1.84E-04 | SLC6A2       | 6530 .   |
| 216612_x_ | 0.017002 | 0.009777 |              | .        |
| 216614_at | 1.20E-04 | 2.43E-05 |              | .        |
| 216615_s_ | 4.42E-06 | 3.48E-07 | HTR3A        | 3359 .   |
| 216616_at | 0.033277 | 0.021407 |              | .        |
| 216617_s_ | 1.39E-05 | 1.57E-06 | MAG          | 4099 .   |
| 216620_s_ | 0.040017 | 0.026496 | ARHGEF10     | 9639 .   |
| 216621_at | 0.011348 | 0.006086 |              | .        |
| 216622_at | 0.019392 | 0.011411 | LAMB4        | 22798 .  |
| 216623_x_ | 6.57E-06 | 5.81E-07 | TOX3         | 27324 .  |
| 216624_s_ | 0.005541 | 0.002619 | MLL          | 4297 .   |
| 216627_s_ | 2.98E-06 | 2.09E-07 | B4GALT1      | 2683 .   |
| 216628_at | 0.022215 | 0.013391 |              | .        |
| 216630_at | 1.03E-04 | 2.01E-05 |              | .        |
| 216631_s_ | 1.66E-04 | 3.64E-05 |              | .        |
| 216633_s_ | 0.001897 | 7.24E-04 | PLCH1        | 23007 .  |
| 216635_at | 0.009957 | 0.005221 |              | .        |
| 216637_at | 4.41E-05 | 6.83E-06 |              | .        |
| 216641_s_ | 7.93E-08 | 1.68E-09 | LAD1         | 3898 .   |

|           |          |          |                             |
|-----------|----------|----------|-----------------------------|
| 216642_at | 0.041283 | 0.027469 | .                           |
| 216644_at | 0.038656 | 0.025459 | .                           |
| 216645_at | 1.94E-05 | 2.40E-06 | .                           |
| 216646_at | 0.011889 | 0.006426 | DSCC1 79075 .               |
| 216647_at | 0.003726 | 0.001629 | TCF3 6929 .                 |
| 216648_s_ | 0.015869 | 0.009028 | RREB1 6239 .                |
| 216649_at | 0.010555 | 0.005589 | RREB1 6239 .                |
| 216650_at | 1.59E-04 | 3.45E-05 | .                           |
| 216654_at | 0.042622 | 0.028509 | TNXB 7148 .                 |
| 216655_s_ | 1.18E-05 | 1.26E-06 | .                           |
| 216656_at | 1.59E-04 | 3.44E-05 | .                           |
| 216658_at | 1.46E-05 | 1.68E-06 | .                           |
| 216661_x_ | 6.04E-04 | 1.80E-04 | MUTYH 4595 .                |
| 216662_at | 0.005748 | 0.002733 | MYO7B 4648 .                |
| 216663_s_ | 3.30E-06 | 2.39E-07 | ZMYND10 51364 .             |
| 216664_at | 0.001673 | 6.22E-04 | .                           |
| 216668_at | 5.53E-04 | 1.61E-04 | .                           |
| 216670_at | 5.00E-06 | 4.07E-07 | KLK13 26085 .               |
| 216671_x_ | 3.45E-07 | 1.22E-08 | MUC8 4590 .                 |
| 216673_at | 0.027544 | 0.017176 | LOC100101111(100101116 //). |
| 216674_at | 0.014683 | 0.008238 | HES2 54626 .                |
| 216677_at | 3.32E-04 | 8.63E-05 | ZNF154 7710 .               |
| 216678_at | 0.001158 | 3.99E-04 | IFT122 55764 .              |
| 216679_at | 1.66E-05 | 1.96E-06 | TIGD1L 414771 .             |
| 216680_s_ | 0.001535 | 5.61E-04 | EPHB4 2050 .                |
| 216682_s_ | 0.042827 | 0.028666 | FAM48A 55578 .              |
| 216683_at | 0.006876 | 0.003382 | .                           |
| 216684_s_ | 3.79E-04 | 1.01E-04 | SS18 6760 .                 |
| 216688_at | 0.027201 | 0.016929 | LOC728564 728564 .          |
| 216689_x_ | 1.15E-05 | 1.22E-06 | ARHGAP1 392 .               |
| 216691_at | 9.14E-04 | 2.99E-04 | .                           |
| 216692_at | 0.028967 | 0.018218 | .                           |
| 216693_x_ | 0.002784 | 0.001148 | HDGFRP3 50810 .             |
| 216694_at | 2.11E-05 | 2.67E-06 | .                           |

|           |          |          |                             |           |   |
|-----------|----------|----------|-----------------------------|-----------|---|
| 216696_s_ | 0.009336 | 0.004839 | PRODH2                      | 58510     | . |
| 216697_at | 0.002098 | 8.17E-04 | TRIO                        | 7204      | . |
| 216698_x_ | 0.009575 | 0.004985 | LOC441453 /// 26628 /// 266 |           | . |
| 216699_s_ | 0.039369 | 0.026002 | KLK1                        | 3816      | . |
| 216700_at | 0.007754 | 0.003898 | TRIO                        | 7204      | . |
| 216701_at | 1.98E-04 | 4.51E-05 | C1orf68                     | 100129271 | . |
| 216702_x_ | 0.003593 | 0.001559 |                             |           | . |
| 216706_x_ | 1.16E-05 | 1.23E-06 | IGH@ /// IGHA28396 /// 284  |           | . |
| 216707_at | 3.60E-06 | 2.66E-07 |                             |           | . |
| 216708_x_ | 0.036622 | 0.023915 | IGL@                        | 3535      | . |
| 216711_s_ | 0.033175 | 0.021331 | TAF1                        | 6872      | . |
| 216713_at | 0.042141 | 0.028142 | KRIT1                       | 889       | . |
| 216716_at | 0.002383 | 9.53E-04 | ABO                         | 28        | . |
| 216717_at | 0.023354 | 0.014182 | FAM48A                      | 55578     | . |
| 216719_s_ | 0.004739 | 0.002175 |                             |           | . |
| 216721_at | 0.002424 | 9.74E-04 | SLC25A30                    | 253512    | . |
| 216726_at | 0.015932 | 0.009073 | VENTXP1                     | 139538    | . |
| 216727_at | 4.48E-05 | 6.96E-06 | STK38                       | 11329     | . |
| 216729_at | 2.89E-04 | 7.23E-05 |                             |           | . |
| 216730_at | 9.17E-06 | 9.07E-07 |                             |           | . |
| 216731_s_ | 0.013725 | 0.00761  |                             |           | . |
| 216732_at | 2.99E-04 | 7.58E-05 |                             |           | . |
| 216733_s_ | 1.48E-07 | 3.87E-09 | GATM                        | 2628      | . |
| 216734_s_ | 0.002297 | 9.12E-04 | CXCR5                       | 643       | . |
| 216735_x_ | 3.42E-04 | 8.94E-05 |                             |           | . |
| 216736_at | 1.20E-06 | 6.28E-08 | TM6SF2                      | 53345     | . |
| 216738_at | 1.34E-04 | 2.78E-05 |                             |           | . |
| 216739_at | 0.034282 | 0.022142 |                             |           | . |
| 216741_at | 0.002945 | 0.001226 |                             |           | . |
| 216742_at | 0.019712 | 0.011626 |                             |           | . |
| 216744_at | 7.51E-06 | 6.93E-07 |                             |           | . |
| 216745_x_ | 3.87E-05 | 5.75E-06 |                             |           | . |
| 216747_at | 2.35E-05 | 3.06E-06 | APBB2                       | 323       | . |
| 216749_at | 4.65E-04 | 1.30E-04 |                             |           | . |

|           |          |          |                              |          |
|-----------|----------|----------|------------------------------|----------|
| 216751_at | 0.022016 | 0.013252 |                              | .        |
| 216754_at | 0.002666 | 0.00109  |                              | .        |
| 216756_at | 0.001005 | 3.36E-04 |                              | .        |
| 216757_at | 0.002605 | 0.001061 |                              | .        |
| 216759_at | 1.72E-05 | 2.05E-06 | HRASLS2                      | 54979 .  |
| 216760_at | 4.95E-04 | 1.40E-04 | HRASLS2                      | 54979 .  |
| 216764_at | 0.004019 | 0.001783 |                              | .        |
| 216765_at | 2.99E-11 | 5.49E-14 | MAP2K5                       | 5607 .   |
| 216766_at | 0.039632 | 0.026201 |                              | .        |
| 216768_x_ | 1.64E-06 | 9.62E-08 | TTC38                        | 55020 .  |
| 216770_at | 0.002114 | 8.26E-04 |                              | .        |
| 216771_at | 0.012507 | 0.006828 |                              | .        |
| 216774_at | 0.002592 | 0.001055 |                              | .        |
| 216780_at | 0.00293  | 0.001219 |                              | .        |
| 216784_at | 6.73E-06 | 5.99E-07 |                              | .        |
| 216786_at | 0.029086 | 0.018305 | LOC159110                    | 159110 . |
| 216791_at | 0.001685 | 6.27E-04 | TMEM92                       | 162461 . |
| 216792_at | 0.020157 | 0.011936 |                              | .        |
| 216797_at | 3.08E-05 | 4.32E-06 |                              | .        |
| 216798_at | 0.014462 | 0.008088 | FLJ23519 /// R16050 /// 8426 | .        |
| 216801_at | 5.22E-04 | 1.50E-04 |                              | .        |
| 216804_s_ | 6.55E-07 | 2.81E-08 | PDLIM5                       | 10611 .  |
| 216805_at | 2.10E-04 | 4.85E-05 |                              | .        |
| 216806_at | 4.55E-04 | 1.27E-04 |                              | .        |
| 216808_at | 0.010172 | 0.00535  |                              | .        |
| 216814_at | 0.005045 | 0.002343 |                              | .        |
| 216816_at | 0.046995 | 0.03195  |                              | .        |
| 216817_s_ | 0.022846 | 0.013822 | OR2H1                        | 26716 .  |
| 216818_s_ | 0.025859 | 0.015971 | OR2J2                        | 26707 .  |
| 216820_at | 1.36E-05 | 1.52E-06 |                              | .        |
| 216821_at | 1.09E-05 | 1.14E-06 | KRT8 /// KRT8F149501 /// 38  | .        |
| 216822_x_ | 0.003049 | 0.00128  |                              | .        |
| 216823_at | 7.27E-04 | 2.26E-04 | RPS3A /// RPS3146053 /// 40  | .        |
| 216824_at | 0.035568 | 0.023118 |                              | .        |

|           |          |          |                              |           |   |
|-----------|----------|----------|------------------------------|-----------|---|
| 216825_s_ | 2.99E-04 | 7.56E-05 | MPL                          | 4352      | . |
| 216826_at | 0.007402 | 0.003691 |                              |           | . |
| 216827_at | 0.002012 | 7.77E-04 |                              |           | . |
| 216830_at | 0.01888  | 0.011056 | LOC390561 /// 390561 /// 7:  |           | . |
| 216831_s_ | 0.011056 | 0.005903 | RUNX1T1                      | 862       | . |
| 216832_at | 2.60E-06 | 1.74E-07 | RUNX1T1                      | 862       | . |
| 216833_x_ | 5.71E-07 | 2.35E-08 | GYPB /// GYPE 2994 /// 2994: |           | . |
| 216835_s_ | 5.95E-07 | 2.48E-08 | DOK1                         | 1796      | . |
| 216836_s_ | 1.24E-06 | 6.58E-08 | ERBB2                        | 2064      | . |
| 216838_at | 3.86E-04 | 1.03E-04 | LOC92249                     | 92249     | . |
| 216840_s_ | 1.21E-04 | 2.46E-05 | LAMA2                        | 3908      | . |
| 216841_s_ | 3.10E-04 | 7.92E-05 | SOD2                         | 6648      | . |
| 216842_x_ | 0.005408 | 0.002543 | RBM /// RBMY 159163 /// 3:   |           | . |
| 216844_at | 0.003636 | 0.001583 | ZC3H7B                       | 23264     | . |
| 216845_x_ | 0.006095 | 0.002931 | MLL2                         | 8085      | . |
| 216846_at | 0.03877  | 0.025542 | IGL@ /// IGLV228797 /// 28:  |           | . |
| 216849_at | 8.83E-06 | 8.60E-07 |                              |           | . |
| 216850_at | 1.42E-06 | 7.99E-08 | SNRPN                        | 6638      | . |
| 216852_x_ | 0.026188 | 0.016201 | IGL@                         | 3535      | . |
| 216853_x_ | 1.59E-06 | 9.27E-08 | IGLV3-19                     | 28797     | . |
| 216854_at | 0.001382 | 4.95E-04 | GDF11                        | 10220     | . |
| 216855_s_ | 2.61E-04 | 6.39E-05 | HNRNPU                       | 3192      | . |
| 216858_x_ | 6.14E-08 | 1.17E-09 |                              |           | . |
| 216859_x_ | 8.12E-07 | 3.75E-08 |                              |           | . |
| 216861_at | 0.001725 | 6.45E-04 |                              |           | . |
| 216862_s_ | 1.51E-04 | 3.23E-05 | MTCP1NB                      | 100272147 | . |
| 216863_s_ | 4.49E-05 | 6.99E-06 | MORC2                        | 22880     | . |
| 216865_at | 0.027691 | 0.017289 | COL14A1                      | 7373      | . |
| 216866_s_ | 0.021273 | 0.012728 | COL14A1                      | 7373      | . |
| 216869_at | 5.45E-04 | 1.58E-04 | PDE1C                        | 5137      | . |
| 216870_x_ | 1.56E-04 | 3.36E-05 | DLEU2                        | 8847      | . |
| 216872_at | 0.008904 | 0.004578 | HR44                         | 27251     | . |
| 216873_s_ | 0.00257  | 0.001044 | ATP8B2                       | 57198     | . |
| 216875_x_ | 0.009224 | 0.004774 | HAB1                         | 55547     | . |

|           |          |          |                              |          |
|-----------|----------|----------|------------------------------|----------|
| 216878_x_ | 2.32E-04 | 5.50E-05 | HAB1                         | 55547 .  |
| 216879_at | 0.049222 | 0.033704 | HR44                         | 27251 .  |
| 216881_x_ | 3.77E-06 | 2.83E-07 | PRB4                         | 5545 .   |
| 216882_s_ | 0.006812 | 0.003346 | NEBL                         | 10529 .  |
| 216884_at | 9.69E-05 | 1.85E-05 | PTPN12                       | 5782 .   |
| 216885_s_ | 0.011688 | 0.006298 | WDR42A                       | 50717 .  |
| 216886_at | 0.005725 | 0.002719 | CHRNA4                       | 1137 .   |
| 216888_at | 6.83E-05 | 1.19E-05 | LDB3                         | 11155 .  |
| 216889_s_ | 3.89E-04 | 1.04E-04 | HNF4A                        | 3172 .   |
| 216890_at | 4.32E-07 | 1.65E-08 |                              | .        |
| 216891_at | 5.73E-04 | 1.68E-04 |                              | .        |
| 216892_at | 0.001921 | 7.35E-04 | IGHG1                        | 3500 .   |
| 216894_x_ | 0.016306 | 0.00932  | CDKN1C                       | 1028 .   |
| 216901_s_ | 6.03E-06 | 5.21E-07 | IKZF1                        | 10320 .  |
| 216903_s_ | 4.56E-05 | 7.13E-06 | CBARA1                       | 10367 .  |
| 216904_at | 0.02594  | 0.016027 | COL6A1                       | 1291 .   |
| 216905_s_ | 4.53E-08 | 7.92E-10 | ST14                         | 6768 .   |
| 216906_at | 0.003155 | 0.001334 | ST14                         | 6768 .   |
| 216907_x_ | 3.91E-04 | 1.05E-04 | KIR3DL2 /// LO3812 /// 7277. |          |
| 216908_x_ | 0.008342 | 0.004244 | LOC730092                    | 730092 . |
| 216909_at | 0.002053 | 7.97E-04 | RRP12                        | 23223 .  |
| 216910_at | 2.11E-04 | 4.88E-05 | XPNPEP2                      | 7512 .   |
| 216911_s_ | 3.14E-04 | 8.05E-05 | HIC2                         | 23119 .  |
| 216913_s_ | 0.001382 | 4.95E-04 | RRP12                        | 23223 .  |
| 216914_at | 2.06E-04 | 4.74E-05 | CDC25C                       | 995 .    |
| 216915_s_ | 1.15E-04 | 2.29E-05 | PTPN12                       | 5782 .   |
| 216916_s_ | 0.018621 | 0.01088  | DLGAP2                       | 9228 .   |
| 216918_s_ | 0.02017  | 0.011944 | DST                          | 667 .    |
| 216919_at | 4.22E-06 | 3.27E-07 | TP53I11                      | 9537 .   |
| 216923_at | 0.002538 | 0.001028 | CDKL5                        | 6792 .   |
| 216924_s_ | 0.002476 | 9.99E-04 | DRD2                         | 1813 .   |
| 216925_s_ | 0.022973 | 0.013913 | TAL1                         | 6886 .   |
| 216928_at | 6.29E-05 | 1.07E-05 | TAL1                         | 6886 .   |
| 216929_x_ | 0.001567 | 5.75E-04 | ABO                          | 28 .     |

|           |          |          |                             |       |   |
|-----------|----------|----------|-----------------------------|-------|---|
| 216930_at | 0.002517 | 0.001019 | HNF1A                       | 6927  | . |
| 216932_at | 0.002878 | 0.001194 |                             |       | . |
| 216933_x_ | 0.002327 | 9.26E-04 | APC                         | 324   | . |
| 216936_at | 0.010731 | 0.0057   |                             |       | . |
| 216937_s_ | 0.001619 | 5.98E-04 | RS1                         | 6247  | . |
| 216938_x_ | 0.015361 | 0.00869  | DRD2                        | 1813  | . |
| 216940_x_ | 6.37E-05 | 1.08E-05 | YBX1 /// YBX1F4904 /// 646! |       | . |
| 216942_s_ | 9.11E-06 | 8.99E-07 | CD58                        | 965   | . |
| 216943_at | 0.035836 | 0.023317 |                             |       | . |
| 216944_s_ | 1.32E-04 | 2.72E-05 | ITPR1                       | 3708  | . |
| 216945_x_ | 1.37E-07 | 3.49E-09 | PASK                        | 23178 | . |
| 216946_at | 0.008854 | 0.004547 | HLA-DOA                     | 3111  | . |
| 216948_at | 0.031102 | 0.019785 |                             |       | . |
| 216949_s_ | 1.15E-04 | 2.29E-05 | PKD1                        | 5310  | . |
| 216950_s_ | 0.004281 | 0.001922 | FCGR1A /// FC(100132417 //  |       | . |
| 216952_s_ | 3.88E-05 | 5.77E-06 | LMNB2                       | 84823 | . |
| 216954_x_ | 9.06E-04 | 2.96E-04 | ATP5O                       | 539   | . |
| 216955_at | 0.002762 | 0.001137 | TAF1                        | 6872  | . |
| 216956_s_ | 0.005385 | 0.002529 | ITGA2B                      | 3674  | . |
| 216957_at | 8.84E-08 | 1.94E-09 | USP22                       | 23326 | . |
| 216959_x_ | 2.57E-05 | 3.43E-06 | NRCAM                       | 4897  | . |
| 216962_at | 5.68E-04 | 1.67E-04 | RPAIN                       | 84268 | . |
| 216963_s_ | 2.60E-11 | 4.69E-14 | GAP43                       | 2596  | . |
| 216964_at | 0.004337 | 0.001954 | USP22                       | 23326 | . |
| 216965_x_ | 0.026654 | 0.016534 | SPG20                       | 23111 | . |
| 216966_at | 2.70E-04 | 6.65E-05 | ITGA2B                      | 3674  | . |
| 216967_at | 0.009969 | 0.005229 | GAP43                       | 2596  | . |
| 216969_s_ | 0.004018 | 0.001782 | KIF22                       | 3835  | . |
| 216970_at | 0.002954 | 0.001231 | RGS7                        | 6000  | . |
| 216971_s_ | 5.86E-04 | 1.73E-04 | PLEC1                       | 5339  | . |
| 216973_s_ | 3.23E-06 | 2.32E-07 | HOXB7                       | 3217  | . |
| 216975_x_ | 1.21E-04 | 2.43E-05 | NPAS1                       | 4861  | . |
| 216977_x_ | 2.34E-07 | 7.22E-09 | SNRPA1                      | 6627  | . |
| 216980_s_ | 0.002925 | 0.001216 | SPN                         | 6693  | . |

|           |          |          |                              |          |
|-----------|----------|----------|------------------------------|----------|
| 216981_x_ | 2.38E-04 | 5.68E-05 | SPN                          | 6693 .   |
| 216982_x_ | 3.95E-05 | 5.89E-06 |                              | .        |
| 216983_s_ | 0.021572 | 0.012933 | ZNF224                       | 7767 .   |
| 216984_x_ | 1.92E-04 | 4.36E-05 | IGLV2-11 /// IG28813 /// 288 | .        |
| 216985_s_ | 2.86E-07 | 9.52E-09 | STX3                         | 6809 .   |
| 216986_s_ | 0.035024 | 0.022697 | IRF4                         | 3662 .   |
| 216990_at | 0.005682 | 0.002695 | GART                         | 2618 .   |
| 216991_at | 0.006739 | 0.003302 | ZNF224                       | 7767 .   |
| 216993_s_ | 3.93E-05 | 5.85E-06 | COL11A2                      | 1302 .   |
| 216994_s_ | 2.15E-04 | 5.00E-05 | RUNX2                        | 860 .    |
| 216995_x_ | 0.022776 | 0.013776 | MKRN2                        | 23609 .  |
| 216996_s_ | 0.004046 | 0.001797 | FASTKD2                      | 22868 .  |
| 216997_x_ | 0.023906 | 0.014572 | TLE4                         | 7091 .   |
| 216998_s_ | 3.20E-04 | 8.25E-05 | ADAM5P                       | 255926 . |
| 217000_at | 1.36E-05 | 1.53E-06 | KRT18P50                     | 442236 . |
| 217001_x_ | 4.41E-04 | 1.22E-04 | HLA-DOA                      | 3111 .   |
| 217002_s_ | 0.015266 | 0.008626 | HTR3A                        | 3359 .   |
| 217003_s_ | 0.036948 | 0.024163 | ADAM5P                       | 255926 . |
| 217006_x_ | 1.39E-04 | 2.91E-05 | FASN                         | 2194 .   |
| 217007_s_ | 0.032087 | 0.020519 | ADAM15                       | 8751 .   |
| 217009_at | 4.34E-06 | 3.41E-07 | PGK2                         | 5232 .   |
| 217010_s_ | 0.030658 | 0.019464 | CDC25C                       | 995 .    |
| 217013_at | 5.15E-04 | 1.47E-04 | AZGP1P1                      | 646282 . |
| 217014_s_ | 3.56E-04 | 9.39E-05 | AZGP1 /// AZG 563 /// 64628  | .        |
| 217016_x_ | 0.025696 | 0.015854 | FLJ23172                     | 389177 . |
| 217017_at | 0.002483 | 0.001002 | OSBPL10                      | 114884 . |
| 217020_at | 0.012172 | 0.006609 | RARB                         | 5915 .   |
| 217021_at | 0.039959 | 0.026449 | CYB5A                        | 1528 .   |
| 217022_s_ | 0.003793 | 0.001665 | IGH@ /// IGHA100126583 //    | .        |
| 217023_x_ | 9.02E-07 | 4.33E-08 | TPSAB1 /// TPS64499 /// 717  | .        |
| 217024_x_ | 2.12E-04 | 4.92E-05 | SIRPA                        | 140885 . |
| 217025_s_ | 0.020305 | 0.01204  | DBN1                         | 1627 .   |
| 217027_x_ | 6.89E-04 | 2.12E-04 | KPNB1                        | 3837 .   |
| 217028_at | 3.55E-06 | 2.62E-07 | CXCR4                        | 7852 .   |



|           |          |          |                                |
|-----------|----------|----------|--------------------------------|
| 217029_at | 1.23E-05 | 1.34E-06 | .                              |
| 217030_at | 4.19E-07 | 1.58E-08 | .                              |
| 217031_at | 0.00892  | 0.004589 | KRT84 3890 .                   |
| 217034_at | 7.94E-04 | 2.52E-04 | NTN3 4917 .                    |
| 217035_at | 1.05E-04 | 2.04E-05 | C12orf32 /// L(642131 /// 8: . |
| 217037_at | 5.04E-04 | 1.44E-04 | .                              |
| 217040_x_ | 2.08E-05 | 2.62E-06 | SOX15 6665 .                   |
| 217041_at | 3.46E-04 | 9.05E-05 | NPTXR 23467 .                  |
| 217043_s_ | 0.013119 | 0.00722  | MFN1 55669 .                   |
| 217044_s_ | 0.002382 | 9.52E-04 | PLEKHG3 26030 .                |
| 217045_x_ | 9.99E-06 | 1.02E-06 | NCR2 9436 .                    |
| 217046_s_ | 8.69E-04 | 2.82E-04 | AGER 177 .                     |
| 217049_x_ | 1.49E-04 | 3.19E-05 | PCDH11Y 83259 .                |
| 217051_s_ | 1.45E-05 | 1.66E-06 | SS18 6760 .                    |
| 217053_x_ | 0.00124  | 4.34E-04 | ETV1 2115 .                    |
| 217054_at | 8.17E-06 | 7.73E-07 | .                              |
| 217055_x_ | 1.39E-04 | 2.92E-05 | .                              |
| 217057_s_ | 5.34E-04 | 1.54E-04 | GNAS 2778 .                    |
| 217058_at | 1.74E-05 | 2.10E-06 | GNAS 2778 .                    |
| 217060_at | 0.011196 | 0.005992 | .                              |
| 217061_s_ | 0.007636 | 0.003829 | ETV1 2115 .                    |
| 217062_at | 1.09E-05 | 1.14E-06 | DMPK 1760 .                    |
| 217066_s_ | 8.60E-06 | 8.29E-07 | DMPK 1760 .                    |
| 217067_s_ | 0.006379 | 0.003093 | DMP1 1758 .                    |
| 217068_at | 2.09E-04 | 4.84E-05 | .                              |
| 217069_at | 7.84E-05 | 1.42E-05 | MLL4 9757 .                    |
| 217070_at | 0.037838 | 0.024839 | MTHFR 4524 .                   |
| 217071_s_ | 0.039031 | 0.025746 | MTHFR 4524 .                   |
| 217073_x_ | 4.84E-11 | 1.03E-13 | APOA1 335 .                    |
| 217074_at | 1.83E-04 | 4.11E-05 | SMOX 54498 .                   |
| 217078_s_ | 0.046478 | 0.031538 | CD300A 11314 .                 |
| 217079_at | 9.72E-05 | 1.86E-05 | .                              |
| 217080_s_ | 0.002564 | 0.001041 | HOMER2 9455 .                  |
| 217081_at | 3.56E-04 | 9.39E-05 | OR2H2 7932 .                   |

|           |          |          |              |           |   |
|-----------|----------|----------|--------------|-----------|---|
| 217087_at | 0.002435 | 9.79E-04 | C1orf68      | 100129271 | . |
| 217088_s_ | 6.09E-04 | 1.81E-04 | NCR1         | 9437      | . |
| 217094_s_ | 0.001764 | 6.62E-04 | ITCH         | 83737     | . |
| 217095_x_ | 3.48E-04 | 9.12E-05 | NCR1         | 9437      | . |
| 217096_at | 0.027678 | 0.017279 | PCLO         | 27445     | . |
| 217097_s_ | 9.30E-07 | 4.50E-08 | PHTF2        | 57157     | . |
| 217098_s_ | 8.49E-04 | 2.74E-04 | ZSCAN12      | 9753      | . |
| 217099_s_ | 0.035305 | 0.022908 | GEMIN4       | 50628     | . |
| 217100_s_ | 0.006595 | 0.003218 | UBXN7        | 26043     | . |
| 217101_at | 6.13E-04 | 1.83E-04 | TTC39A       | 22996     | . |
| 217102_at | 0.001892 | 7.22E-04 |              |           | . |
| 217103_at | 8.08E-05 | 1.48E-05 | LDLR         | 3949      | . |
| 217108_at | 0.017531 | 0.010139 |              |           | . |
| 217109_at | 0.038342 | 0.025221 | MUC4         | 4585      | . |
| 217111_at | 0.00482  | 0.002219 | AMACR        | 23600     | . |
| 217112_at | 0.001843 | 6.99E-04 | PDGFB        | 5155      | . |
| 217113_at | 0.011542 | 0.006207 | AMACR        | 23600     | . |
| 217114_at | 1.35E-08 | 1.53E-10 | LOC652147    | 652147    | . |
| 217115_at | 2.28E-04 | 5.41E-05 | LOC100240726 | 100240726 | . |
| 217117_x_ | 9.04E-06 | 8.90E-07 | MUC3A        | 4584      | . |
| 217118_s_ | 0.002035 | 7.88E-04 | C22orf9      | 23313     | . |
| 217119_s_ | 1.06E-04 | 2.07E-05 | CXCR3        | 2833      | . |
| 217120_s_ | 4.42E-04 | 1.22E-04 | MED14        | 9282      | . |
| 217122_s_ | 0.00905  | 0.004664 | RP11-345P4.4 | 728661    | . |
| 217125_at | 7.89E-04 | 2.50E-04 |              |           | . |
| 217126_at | 0.032712 | 0.02098  |              |           | . |
| 217127_at | 7.41E-04 | 2.31E-04 | CTH          | 1491      | . |
| 217129_at | 0.001983 | 7.64E-04 |              |           | . |
| 217133_x_ | 0.004411 | 0.001994 | CYP2B6       | 1555      | . |
| 217134_at | 0.048197 | 0.032884 | MTAP         | 4507      | . |
| 217135_x_ | 0.004464 | 0.002024 |              |           | . |
| 217137_x_ | 7.30E-05 | 1.30E-05 |              |           | . |
| 217138_x_ | 4.64E-04 | 1.30E-04 | IGL@         | 3535      | . |
| 217139_at | 0.001114 | 3.81E-04 | LOC100133724 | 100133724 | . |

|           |          |          |                             |       |   |
|-----------|----------|----------|-----------------------------|-------|---|
| 217141_at | 0.009373 | 0.004863 | BTBD7                       | 55727 | . |
| 217142_at | 3.15E-05 | 4.44E-06 |                             |       | . |
| 217144_at | 0.004639 | 0.002119 | LOC648390 /// 648390 /// 7: |       | . |
| 217146_at | 4.23E-07 | 1.60E-08 | JRK                         | 8629  | . |
| 217148_x_ | 1.08E-05 | 1.12E-06 | IGL@                        | 3535  | . |
| 217149_x_ | 0.001177 | 4.07E-04 | TNK1                        | 8711  | . |
| 217150_s_ | 0.001348 | 4.80E-04 | NF2                         | 4771  | . |
| 217151_at | 0.005237 | 0.002448 |                             |       | . |
| 217152_at | 2.08E-05 | 2.63E-06 |                             |       | . |
| 217153_at | 2.46E-04 | 5.93E-05 | ARHGAP1                     | 392   | . |
| 217155_at | 0.020547 | 0.012211 |                             |       | . |
| 217156_at | 1.36E-05 | 1.53E-06 | HADHA                       | 3030  | . |
| 217157_x_ | 0.00691  | 0.003403 | IGK@ /// IGKC 3514 /// 508( |       | . |
| 217158_at | 0.012669 | 0.006931 | LOC442421 /// 442421 /// 7: |       | . |
| 217159_x_ | 2.35E-04 | 5.58E-05 | SIGLEC7                     | 27036 | . |
| 217160_at | 0.019018 | 0.01115  | TSPY1                       | 7258  | . |
| 217161_x_ | 2.31E-06 | 1.50E-07 | ACAN                        | 176   | . |
| 217162_at | 3.61E-04 | 9.53E-05 |                             |       | . |
| 217164_at | 1.02E-05 | 1.05E-06 |                             |       | . |
| 217166_at | 2.58E-05 | 3.45E-06 |                             |       | . |
| 217167_x_ | 0.005554 | 0.002626 | GK                          | 2710  | . |
| 217168_s_ | 0.001713 | 6.40E-04 | HERPUD1                     | 9709  | . |
| 217170_at | 0.010381 | 0.00548  |                             |       | . |
| 217171_at | 0.008291 | 0.004214 | SMPD1                       | 6609  | . |
| 217176_s_ | 1.07E-04 | 2.10E-05 | ZFX                         | 7543  | . |
| 217178_at | 0.041227 | 0.027428 | RARG                        | 5916  | . |
| 217179_x_ | 7.40E-07 | 3.32E-08 |                             |       | . |
| 217180_at | 0.013885 | 0.007712 |                             |       | . |
| 217181_at | 0.014256 | 0.007952 |                             |       | . |
| 217182_at | 3.71E-06 | 2.77E-07 | MUC5AC                      | 4586  | . |
| 217183_at | 0.001603 | 5.91E-04 | LDLR                        | 3949  | . |
| 217185_s_ | 0.008319 | 0.00423  | ZNF259 /// ZNI442240 /// 8: |       | . |
| 217187_at | 7.86E-04 | 2.49E-04 | MUC5AC                      | 4586  | . |
| 217188_s_ | 0.015277 | 0.008633 | C14orf1                     | 11161 | . |

|           |          |          |                               |       |   |
|-----------|----------|----------|-------------------------------|-------|---|
| 217190_x_ | 2.01E-07 | 5.80E-09 | ESR1                          | 2099  | . |
| 217191_x_ | 0.002609 | 0.001063 |                               |       | . |
| 217192_s_ | 2.11E-04 | 4.91E-05 | PRDM1                         | 639   | . |
| 217193_x_ | 2.24E-05 | 2.89E-06 | IGL@                          | 3535  | . |
| 217195_at | 0.021529 | 0.012903 |                               |       | . |
| 217198_x_ | 0.039778 | 0.026313 | IGH@ /// IGHD100126583 //     |       | . |
| 217199_s_ | 2.39E-05 | 3.14E-06 | STAT2                         | 6773  | . |
| 217201_at | 7.98E-06 | 7.51E-07 | RASAL2                        | 9462  | . |
| 217202_s_ | 1.00E-05 | 1.02E-06 | GLUL                          | 2752  | . |
| 217203_at | 4.68E-05 | 7.37E-06 | GLUL                          | 2752  | . |
| 217205_at | 0.048455 | 0.033088 |                               |       | . |
| 217207_s_ | 0.00106  | 3.58E-04 | BTNL3                         | 10917 | . |
| 217210_at | 0.029833 | 0.018858 |                               |       | . |
| 217211_at | 4.86E-05 | 7.73E-06 |                               |       | . |
| 217212_s_ | 7.13E-04 | 2.21E-04 | IL9R /// IL9RP3 3581 /// 7294 |       | . |
| 217217_at | 0.007538 | 0.003771 | IGH@ /// IGHA100126583 //     |       | . |
| 217218_at | 0.013671 | 0.007574 | WAPAL                         | 23063 | . |
| 217219_at | 7.95E-07 | 3.65E-08 | LOC26102                      | 26102 | . |
| 217220_at | 8.43E-09 | 8.55E-11 |                               |       | . |
| 217221_x_ | 8.31E-07 | 3.88E-08 | RBM10                         | 8241  | . |
| 217223_s_ | 1.96E-04 | 4.46E-05 | BCR                           | 613   | . |
| 217225_x_ | 0.030214 | 0.01914  | NOMO1 /// NC23420 /// 285     |       | . |
| 217226_s_ | 4.06E-07 | 1.51E-08 | SFXN3                         | 81855 | . |
| 217230_at | 0.001449 | 5.23E-04 | EZR                           | 7430  | . |
| 217231_s_ | 0.004569 | 0.002081 | MAST1                         | 22983 | . |
| 217232_x_ | 2.25E-04 | 5.29E-05 | HBB                           | 3043  | . |
| 217233_at | 0.011817 | 0.006377 |                               |       | . |
| 217234_s_ | 7.95E-06 | 7.47E-07 | EZR                           | 7430  | . |
| 217235_x_ | 2.54E-04 | 6.18E-05 | IGL@ /// IGLC128813 /// 288   |       | . |
| 217237_at | 3.58E-04 | 9.43E-05 |                               |       | . |
| 217238_s_ | 0.018054 | 0.010496 | ALDOB                         | 229   | . |
| 217240_at | 0.029974 | 0.018962 | LOC654056 /// 10326 /// 654   |       | . |
| 217242_at | 5.44E-04 | 1.58E-04 | ZNF154                        | 7710  | . |
| 217246_s_ | 0.001043 | 3.51E-04 | DIAPH2                        | 1730  | . |

|           |          |          |                              |             |
|-----------|----------|----------|------------------------------|-------------|
| 217248_s_ | 0.020611 | 0.012255 | SLC7A8                       | 23428 .     |
| 217249_x_ | 0.003626 | 0.001577 | COX7A2                       | 1347 .      |
| 217251_x_ | 4.96E-04 | 1.40E-04 | IVD                          | 3712 .      |
| 217252_at | 2.96E-04 | 7.48E-05 | SQSTM1                       | 8878 .      |
| 217253_at | 0.012312 | 0.0067   | SH3BP2                       | 6452 .      |
| 217254_s_ | 1.72E-04 | 3.81E-05 | EPO                          | 2056 .      |
| 217255_at | 5.69E-04 | 1.67E-04 | SQSTM1                       | 8878 .      |
| 217256_x_ | 7.69E-05 | 1.39E-05 | RPL36A /// RPL6173 /// 649i. |             |
| 217257_at | 0.004016 | 0.001781 | SH3BP2                       | 6452 .      |
| 217258_x_ | 0.002674 | 0.001094 | IGL@                         | 3535 .      |
| 217259_at | 4.09E-04 | 1.11E-04 |                              | .           |
| 217264_s_ | 5.28E-06 | 4.37E-07 | SCNN1A                       | 6337 .      |
| 217265_at | 0.007229 | 0.003589 | PLLP                         | 51090 .     |
| 217266_at | 8.14E-05 | 1.49E-05 | RPL15P22                     | 100130624 . |
| 217269_s_ | 0.007792 | 0.003921 | PRSS7                        | 5651 .      |
| 217270_s_ | 5.01E-04 | 1.43E-04 | DYRK1B                       | 9149 .      |
| 217271_at | 5.97E-04 | 1.77E-04 | GNA11                        | 2767 .      |
| 217273_at | 0.025542 | 0.015748 | PRAMEF10                     | 343071 .    |
| 217274_x_ | 5.44E-05 | 8.90E-06 | MYL4                         | 4635 .      |
| 217275_at | 3.37E-04 | 8.78E-05 | TSSK2                        | 23617 .     |
| 217276_x_ | 2.59E-06 | 1.73E-07 | SERHL2                       | 253190 .    |
| 217277_at | 2.80E-04 | 6.97E-05 |                              | .           |
| 217278_x_ | 7.82E-04 | 2.48E-04 |                              | .           |
| 217279_x_ | 6.16E-05 | 1.04E-05 | MMP14                        | 4323 .      |
| 217280_x_ | 0.038716 | 0.025502 | GABRA5                       | 2558 .      |
| 217281_x_ | 9.31E-06 | 9.26E-07 | IGH@ /// IGHA100126583 //.   |             |
| 217282_at | 0.002114 | 8.25E-04 | MAN1A2                       | 10905 .     |
| 217283_at | 0.003615 | 0.001571 |                              | .           |
| 217284_x_ | 8.45E-07 | 3.97E-08 | SERHL2                       | 253190 .    |
| 217286_s_ | 0.011495 | 0.006177 | NDRG3                        | 57446 .     |
| 217287_s_ | 4.23E-04 | 1.16E-04 | TRPC6                        | 7225 .      |
| 217289_s_ | 0.046008 | 0.031171 | SLC37A4                      | 2542 .      |
| 217291_at | 2.50E-04 | 6.06E-05 | CEACAM5                      | 1048 .      |
| 217293_at | 0.006934 | 0.003418 |                              | .           |

|           |          |          |                             |        |   |
|-----------|----------|----------|-----------------------------|--------|---|
| 217297_s_ | 0.002478 | 1.00E-03 | MYO9B                       | 4650   | . |
| 217300_at | 0.007408 | 0.003694 |                             |        | . |
| 217301_x_ | 6.96E-04 | 2.14E-04 | RBBP4                       | 5928   | . |
| 217303_s_ | 0.011631 | 0.006262 | ADRB3                       | 155    | . |
| 217307_at | 1.87E-06 | 1.15E-07 | ACO2                        | 50     | . |
| 217309_s_ | 5.22E-05 | 8.46E-06 | DSCR3                       | 10311  | . |
| 217311_at | 0.004181 | 0.001868 |                             |        | . |
| 217312_s_ | 9.16E-04 | 3.00E-04 | COL7A1                      | 1294   | . |
| 217313_at | 0.04903  | 0.033551 |                             |        | . |
| 217314_at | 5.13E-05 | 8.28E-06 |                             |        | . |
| 217315_s_ | 4.34E-04 | 1.20E-04 | KLK13                       | 26085  | . |
| 217317_s_ | 2.77E-04 | 6.88E-05 | HERC2P2 /// H 283755 /// 40 |        | . |
| 217318_x_ | 1.64E-06 | 9.63E-08 | KIR2DL1 /// KIF100132285 // |        | . |
| 217322_x_ | 1.63E-06 | 9.57E-08 |                             |        | . |
| 217323_at | 1.06E-04 | 2.08E-05 | HLA-DRB6                    | 3128   | . |
| 217324_at | 4.63E-05 | 7.28E-06 |                             |        | . |
| 217325_at | 5.74E-04 | 1.69E-04 | KRT3                        | 3850   | . |
| 217326_x_ | 5.49E-04 | 1.60E-04 | TRBC1 /// TRBC28590 /// 285 |        | . |
| 217328_at | 1.38E-04 | 2.90E-05 | LOC100134017 100134017      |        | . |
| 217329_x_ | 5.61E-05 | 9.25E-06 |                             |        | . |
| 217331_at | 9.09E-06 | 8.96E-07 |                             |        | . |
| 217332_at | 0.00697  | 0.003439 | RP11-159J2.1                | 647288 | . |
| 217333_at | 0.001581 | 5.81E-04 | KRT18P44                    | 139748 | . |
| 217336_at | 0.001447 | 5.23E-04 | RPS10 /// RPS1158104 /// 37 |        | . |
| 217338_at | 0.012353 | 0.006725 | KRT19P2                     | 160313 | . |
| 217341_at | 3.27E-04 | 8.47E-05 |                             |        | . |
| 217342_x_ | 0.003667 | 0.001598 | FLJ11292                    | 55338  | . |
| 217347_at | 0.001217 | 4.24E-04 |                             |        | . |
| 217348_x_ | 0.011869 | 0.006412 | ARHGEF15                    | 22899  | . |
| 217349_s_ | 7.54E-04 | 2.36E-04 | PRICKLE3                    | 4007   | . |
| 217350_at | 0.002869 | 0.001189 | KRT19P2                     | 160313 | . |
| 217351_at | 0.002706 | 0.001109 |                             |        | . |
| 217353_at | 0.003698 | 0.001613 | HNRNPA1 /// H 100128836 //  |        | . |
| 217354_s_ | 0.001211 | 4.22E-04 | HPS1                        | 3257   | . |

|           |          |          |                             |          |
|-----------|----------|----------|-----------------------------|----------|
| 217357_at | 9.62E-04 | 3.18E-04 |                             | .        |
| 217358_at | 2.99E-04 | 7.57E-05 | DNAJC16                     | 23341 .  |
| 217360_x_ | 0.002545 | 0.001032 | IGHA1 /// IGHG3493 /// 3500 | .        |
| 217361_at | 0.002855 | 0.001182 |                             | .        |
| 217363_x_ | 0.02358  | 0.014345 |                             | .        |
| 217364_x_ | 0.002636 | 0.001076 | EIF3J                       | 8669 .   |
| 217365_at | 0.005404 | 0.00254  | PRAMEF11                    | 440560 . |
| 217366_at | 5.58E-04 | 1.63E-04 | CTNNA1                      | 1495 .   |
| 217367_s_ | 1.59E-09 | 9.87E-12 | ZHX3                        | 23051 .  |
| 217369_at | 3.87E-06 | 2.92E-07 | IGHG1 /// LOC:100132941 //  | .        |
| 217370_x_ | 0.009428 | 0.004897 | NR1H3                       | 10062 .  |
| 217371_s_ | 1.60E-06 | 9.29E-08 | IL15                        | 3600 .   |
| 217373_x_ | 2.72E-05 | 3.69E-06 | MDM2                        | 4193 .   |
| 217375_at | 0.033479 | 0.021562 |                             | .        |
| 217377_x_ | 0.029695 | 0.018756 | NTRK3                       | 4916 .   |
| 217378_x_ | 0.003246 | 0.00138  | LOC100130100 100130100      | .        |
| 217379_at | 0.021079 | 0.012591 | RPL10                       | 6134 .   |
| 217380_s_ | 0.012191 | 0.006621 | XPNPPEP1                    | 7511 .   |
| 217381_s_ | 0.001035 | 3.48E-04 | TRGV5                       | 6978 .   |
| 217383_at | 0.012657 | 0.006924 | PGK1                        | 5230 .   |
| 217384_x_ | 0.002666 | 0.00109  | IGHV3OR16-6 ,100132941 //   | .        |
| 217385_at | 2.83E-04 | 7.08E-05 |                             | .        |
| 217387_at | 0.040467 | 0.026841 | CAPN6                       | 827 .    |
| 217389_s_ | 2.29E-04 | 5.43E-05 | ATF5                        | 22809 .  |
| 217390_x_ | 2.03E-05 | 2.55E-06 |                             | .        |
| 217393_x_ | 3.71E-04 | 9.85E-05 | UBE2NL                      | 389898 . |
| 217395_at | 3.55E-04 | 9.35E-05 | MT4                         | 84560 .  |
| 217396_at | 6.96E-06 | 6.27E-07 |                             | .        |
| 217397_at | 0.004698 | 0.002153 | TRD@                        | 6964 .   |
| 217398_x_ | 0.009617 | 0.005011 | GAPDH                       | 2597 .   |
| 217399_s_ | 4.15E-05 | 6.30E-06 | FOXO3 /// FOX2309 /// 2310  | .        |
| 217400_at | 0.009146 | 0.004726 | PCNA                        | 5111 .   |
| 217402_at | 0.01893  | 0.011091 |                             | .        |
| 217403_s_ | 0.001929 | 7.39E-04 | ZNF227                      | 7770 .   |

|           |          |          |                              |        |   |
|-----------|----------|----------|------------------------------|--------|---|
| 217405_x_ | 0.010961 | 0.005844 | GPLD1                        | 2822   | . |
| 217406_at | 2.02E-05 | 2.53E-06 |                              |        | . |
| 217408_at | 7.34E-07 | 3.29E-08 | MRPS18B                      | 28973  | . |
| 217410_at | 1.23E-04 | 2.50E-05 | AGRN                         | 375790 | . |
| 217411_s_ | 1.57E-04 | 3.39E-05 | RREB1                        | 6239   | . |
| 217413_s_ | 2.13E-04 | 4.96E-05 | TNXB                         | 7148   | . |
| 217414_x_ | 0.001634 | 6.04E-04 | HBA1 /// HBA2 3039 /// 3040  |        | . |
| 217416_x_ | 0.046995 | 0.031951 |                              |        | . |
| 217418_x_ | 0.008909 | 0.004581 | MS4A1                        | 931    | . |
| 217419_x_ | 0.003603 | 0.001565 | AGRN                         | 375790 | . |
| 217421_at | 0.007756 | 0.003899 | PIWIL2                       | 55124  | . |
| 217422_s_ | 2.16E-05 | 2.76E-06 | CD22                         | 933    | . |
| 217425_at | 3.29E-04 | 8.52E-05 | MC2R                         | 4158   | . |
| 217426_at | 0.019499 | 0.011482 |                              |        | . |
| 217427_s_ | 0.010812 | 0.005752 | HIRA                         | 7290   | . |
| 217430_x_ | 7.07E-07 | 3.13E-08 | COL1A1                       | 1277   | . |
| 217432_s_ | 9.61E-04 | 3.18E-04 | IDS                          | 3423   | . |
| 217435_x_ | 9.01E-05 | 1.69E-05 |                              |        | . |
| 217436_x_ | 3.58E-04 | 9.45E-05 | HLA-A /// HLA- 3105 /// 3106 |        | . |
| 217437_s_ | 0.001524 | 5.56E-04 | TACC1                        | 6867   | . |
| 217441_at | 2.89E-04 | 7.25E-05 | USP33                        | 23032  | . |
| 217444_at | 0.002316 | 9.22E-04 |                              |        | . |
| 217445_s_ | 0.008147 | 0.004129 | GART                         | 2618   | . |
| 217446_x_ | 1.27E-05 | 1.40E-06 |                              |        | . |
| 217447_at | 0.004988 | 0.002309 | MAG                          | 4099   | . |
| 217448_s_ | 0.001458 | 5.27E-04 | LOC285412 /// 285412 /// 98  |        | . |
| 217451_at | 0.040528 | 0.026891 | COX5A                        | 9377   | . |
| 217452_s_ | 0.01104  | 0.005892 | B3GALT2                      | 8707   | . |
| 217453_at | 0.001067 | 3.61E-04 |                              |        | . |
| 217454_at | 1.09E-04 | 2.16E-05 | HMGB3 /// LOC203510 /// 31   |        | . |
| 217455_s_ | 0.031844 | 0.020328 | SSTR2                        | 6752   | . |
| 217456_x_ | 5.63E-06 | 4.77E-07 | HLA-E                        | 3133   | . |
| 217457_s_ | 2.26E-04 | 5.31E-05 | RAP1GDS1                     | 5910   | . |
| 217458_at | 4.54E-04 | 1.26E-04 |                              |        | . |



|           |          |          |                             |
|-----------|----------|----------|-----------------------------|
| 217459_at | 8.76E-04 | 2.85E-04 | .                           |
| 217460_at | 0.012965 | 0.007124 | TNP2 7142 .                 |
| 217462_at | 2.88E-04 | 7.22E-05 | C11orf9 745 .               |
| 217463_s_ | 0.03186  | 0.020341 | C11orf9 745 .               |
| 217465_at | 8.79E-04 | 2.86E-04 | NCKAP1 10787 .              |
| 217466_x_ | 3.94E-04 | 1.06E-04 | RPS2 6187 .                 |
| 217468_at | 0.001692 | 6.30E-04 | CYP2D6 1565 .               |
| 217469_at | 0.007019 | 0.003467 | IGHG1 3500 .                |
| 217472_at | 0.010529 | 0.005571 | .                           |
| 217473_x_ | 9.21E-04 | 3.02E-04 | SLC11A1 6556 .              |
| 217475_s_ | 0.002209 | 8.70E-04 | LIMK2 3985 .                |
| 217476_at | 2.72E-04 | 6.72E-05 | NR1D1 /// THR7067 /// 957.  |
| 217482_at | 1.87E-05 | 2.28E-06 | .                           |
| 217484_at | 2.68E-04 | 6.59E-05 | CR1 1378 .                  |
| 217486_s_ | 0.033534 | 0.021603 | ZDHHC17 23390 .             |
| 217490_at | 0.044411 | 0.029926 | .                           |
| 217491_x_ | 4.66E-07 | 1.81E-08 | COX7C 1350 .                |
| 217492_s_ | 0.005201 | 0.002428 | PTEN /// PTENI11191 /// 57. |
| 217493_x_ | 1.92E-05 | 2.37E-06 | NCR2 9436 .                 |
| 217494_s_ | 0.004447 | 0.002014 | PTENP1 11191 .              |
| 217495_x_ | 0.001151 | 3.96E-04 | CALCA 796 .                 |
| 217497_at | 0.019633 | 0.01157  | TYMP 1890 .                 |
| 217499_x_ | 5.07E-06 | 4.15E-07 | OR7E37P 26636 .             |
| 217500_at | 0.003358 | 0.001438 | TIAL1 7073 .                |
| 217501_at | 4.66E-04 | 1.30E-04 | CIAO1 9391 .                |
| 217502_at | 0.004571 | 0.002082 | IFIT2 3433 .                |
| 217503_at | 1.76E-04 | 3.90E-05 | STK17B 9262 .               |
| 217504_at | 1.49E-04 | 3.17E-05 | ABCA6 23460 .               |
| 217509_x_ | 1.24E-09 | 7.03E-12 | GRIK5 2901 .                |
| 217510_at | 4.16E-06 | 3.22E-07 | CRX 1406 .                  |
| 217512_at | 0.014036 | 0.007808 | KNG1 3827 .                 |
| 217513_at | 0.007376 | 0.003676 | C17orf60 284021 .           |
| 217514_at | 6.32E-04 | 1.90E-04 | .                           |
| 217515_s_ | 0.001263 | 4.43E-04 | CACNA1S 779 .               |

|           |          |          |              |             |
|-----------|----------|----------|--------------|-------------|
| 217516_x_ | 1.41E-06 | 7.85E-08 | ARVCF        | 421 .       |
| 217517_x_ | 0.007099 | 0.003514 | SRPK2        | 6733 .      |
| 217518_at | 0.038026 | 0.024976 | MYOF         | 26509 .     |
| 217520_x_ | 1.49E-05 | 1.71E-06 | LOC731884    | 731884 .    |
| 217522_at | 0.023654 | 0.014398 | KCNV2        | 169522 .    |
| 217523_at | 0.029836 | 0.018861 | CD44         | 960 .       |
| 217525_at | 5.20E-05 | 8.41E-06 | OLFML1       | 283298 .    |
| 217526_at | 8.33E-06 | 7.95E-07 | NFATC2IP     | 84901 .     |
| 217527_s_ | 6.31E-04 | 1.90E-04 | NFATC2IP     | 84901 .     |
| 217528_at | 0.009356 | 0.004853 | CLCA2        | 9635 .      |
| 217529_at | 4.75E-09 | 4.06E-11 | ORAI2        | 80228 .     |
| 217530_at | 0.001044 | 3.52E-04 | SLC34A1      | 6569 .      |
| 217535_at | 0.002667 | 0.00109  | FAM49B       | 51571 .     |
| 217536_x_ | 0.007615 | 0.003815 |              | . .         |
| 217538_at | 0.005795 | 0.00276  | SGSM2        | 9905 .      |
| 217539_at | 0.009873 | 0.005169 | C18orf25     | 147339 .    |
| 217540_at | 8.40E-06 | 8.04E-07 | FAM55C       | 91775 .     |
| 217543_s_ | 8.08E-06 | 7.62E-07 | MBTPS1       | 8720 .      |
| 217544_at | 0.026596 | 0.016491 | LOC729806    | 729806 .    |
| 217545_at | 0.002876 | 0.001193 | MYH14        | 79784 .     |
| 217547_x_ | 6.34E-06 | 5.54E-07 | ZNF675       | 171392 .    |
| 217548_at | 4.73E-08 | 8.38E-10 | LOC100129502 | 100129502 . |
| 217551_at | 0.011593 | 0.006238 | LOC441453    | 441453 .    |
| 217554_at | 0.026125 | 0.016157 |              | . .         |
| 217556_at | 0.010711 | 0.005687 | CLCN4        | 1183 .      |
| 217557_s_ | 0.00891  | 0.004582 | CPM          | 1368 .      |
| 217560_at | 0.001278 | 4.50E-04 | GGA1         | 26088 .     |
| 217563_at | 0.002566 | 0.001042 | CLOCK        | 9575 .      |
| 217565_at | 0.014599 | 0.008181 | GRIA3        | 2892 .      |
| 217567_at | 4.40E-04 | 1.21E-04 | TGM4         | 7047 .      |
| 217569_x_ | 1.98E-04 | 4.53E-05 |              | . .         |
| 217570_x_ | 0.045388 | 0.030682 |              | . .         |
| 217572_at | 0.036212 | 0.023605 |              | . .         |
| 217573_at | 0.002279 | 9.04E-04 | GRIN2C       | 2905 .      |

|           |          |          |                              |        |   |
|-----------|----------|----------|------------------------------|--------|---|
| 217576_x_ | 0.001288 | 4.54E-04 | SOS2                         | 6655   | . |
| 217579_x_ | 4.09E-05 | 6.18E-06 |                              |        | . |
| 217580_x_ | 0.036604 | 0.023901 |                              |        | . |
| 217581_at | 0.018364 | 0.010705 |                              |        | . |
| 217585_at | 0.001817 | 6.87E-04 | NEBL                         | 10529  | . |
| 217586_x_ | 1.82E-04 | 4.07E-05 |                              |        | . |
| 217587_at | 0.023914 | 0.014577 |                              |        | . |
| 217588_at | 0.0032   | 0.001357 | CATSPER2 /// (117155 /// 4.  |        | . |
| 217589_at | 0.035767 | 0.023267 | RAB40A                       | 142684 | . |
| 217591_at | 0.002446 | 9.84E-04 | SKIL                         | 6498   | . |
| 217594_at | 0.006193 | 0.002985 | ZCCHC11                      | 23318  | . |
| 217595_at | 0.013468 | 0.007443 | GSPT1                        | 2935   | . |
| 217596_at | 0.001237 | 4.33E-04 | UPF3A                        | 65110  | . |
| 217597_x_ | 5.17E-04 | 1.48E-04 | RAB40B                       | 10966  | . |
| 217598_at | 0.005518 | 0.002606 |                              |        | . |
| 217599_s_ | 5.82E-08 | 1.09E-09 | MDFIC                        | 29969  | . |
| 217600_at | 2.15E-04 | 5.02E-05 | SCUBE3                       | 222663 | . |
| 217603_at | 7.87E-07 | 3.59E-08 | ATP6V0A2                     | 23545  | . |
| 217604_at | 4.57E-07 | 1.76E-08 |                              |        | . |
| 217605_at | 0.008672 | 0.004438 | USP27X                       | 389856 | . |
| 217606_at | 0.041903 | 0.027953 |                              |        | . |
| 217610_at | 3.49E-05 | 5.04E-06 |                              |        | . |
| 217615_at | 0.023223 | 0.014089 |                              |        | . |
| 217617_at | 0.019216 | 0.011283 |                              |        | . |
| 217618_x_ | 0.035367 | 0.022957 | HUS1                         | 3364   | . |
| 217619_x_ | 2.68E-04 | 6.61E-05 |                              |        | . |
| 217623_at | 4.43E-04 | 1.23E-04 | MYLK3                        | 91807  | . |
| 217624_at | 8.64E-06 | 8.35E-07 | PDAP1                        | 11333  | . |
| 217625_x_ | 1.72E-05 | 2.06E-06 |                              |        | . |
| 217626_at | 1.01E-04 | 1.96E-05 | AKR1C1                       | 1645   | . |
| 217627_at | 0.029677 | 0.01874  | ZNF573                       | 126231 | . |
| 217628_at | 0.029525 | 0.018628 | CLIC5                        | 53405  | . |
| 217630_at | 0.006853 | 0.003369 | ANGEL2                       | 90806  | . |
| 217631_at | 0.004406 | 0.001991 | GTPBP4 /// IDI 23560 /// 91. |        | . |

|           |          |          |           |        |   |
|-----------|----------|----------|-----------|--------|---|
| 217632_at | 0.009876 | 0.005172 | GNL3L     | 54552  | . |
| 217633_at | 0.011298 | 0.006055 | URB1      | 9875   | . |
| 217635_s_ | 0.031886 | 0.020362 | POLG      | 5428   | . |
| 217636_at | 0.014794 | 0.008314 | POLG      | 5428   | . |
| 217637_at | 0.018435 | 0.010754 |           |        | . |
| 217638_at | 0.004987 | 0.002308 |           |        | . |
| 217639_at | 0.028041 | 0.017542 |           |        | . |
| 217640_x_ | 3.62E-04 | 9.58E-05 | C18orf24  | 220134 | . |
| 217641_at | 0.001127 | 3.86E-04 | GPR135    | 64582  | . |
| 217642_at | 0.048023 | 0.03275  | RNF40     | 9810   | . |
| 217643_x_ | 0.012353 | 0.006725 |           |        | . |
| 217646_at | 6.18E-04 | 1.85E-04 | SURF1     | 6834   | . |
| 217647_at | 2.12E-04 | 4.93E-05 |           |        | . |
| 217650_x_ | 0.028923 | 0.018187 | ST3GAL2   | 6483   | . |
| 217651_at | 1.26E-04 | 2.58E-05 |           |        | . |
| 217652_at | 0.049236 | 0.033714 | KIAA0892  | 23383  | . |
| 217653_x_ | 3.88E-04 | 1.04E-04 |           |        | . |
| 217656_at | 2.06E-05 | 2.59E-06 |           |        | . |
| 217658_at | 0.013748 | 0.007625 | THAP3     | 90326  | . |
| 217659_at | 0.002157 | 8.46E-04 |           |        | . |
| 217660_at | 1.81E-04 | 4.04E-05 | MYH14     | 79784  | . |
| 217661_x_ | 0.013219 | 0.007285 | SIX5      | 147912 | . |
| 217662_x_ | 0.040021 | 0.026499 |           |        | . |
| 217663_at | 0.001049 | 3.53E-04 | ZNF234    | 10780  | . |
| 217664_at | 0.003059 | 0.001285 |           |        | . |
| 217665_at | 0.004018 | 0.001782 |           |        | . |
| 217667_at | 3.93E-06 | 2.98E-07 | LOC729799 | 729799 | . |
| 217668_at | 0.010163 | 0.005344 | C22orf36  | 388886 | . |
| 217669_s_ | 0.002248 | 8.89E-04 | AKAP6     | 9472   | . |
| 217670_at | 0.023361 | 0.014187 | RPLP2     | 6181   | . |
| 217671_at | 0.001734 | 6.49E-04 |           |        | . |
| 217673_x_ | 2.90E-09 | 2.07E-11 | GNAS      | 2778   | . |
| 217674_at | 3.26E-06 | 2.34E-07 |           |        | . |
| 217676_at | 4.14E-09 | 3.37E-11 |           |        | . |

|           |          |          |           |        |   |
|-----------|----------|----------|-----------|--------|---|
| 217677_at | 0.008327 | 0.004236 | PLEKHA2   | 59339  | . |
| 217679_x_ | 4.21E-09 | 3.44E-11 |           |        | . |
| 217683_at | 0.029374 | 0.018513 | HBE1      | 3046   | . |
| 217685_at | 6.52E-06 | 5.74E-07 | SLC16A3   | 9123   | . |
| 217686_at | 2.55E-04 | 6.23E-05 | PTPN1     | 5770   | . |
| 217687_at | 2.82E-06 | 1.94E-07 | ADCY2     | 108    | . |
| 217688_at | 0.001094 | 3.72E-04 |           |        | . |
| 217689_at | 0.001622 | 5.99E-04 | PTPN1     | 5770   | . |
| 217691_x_ | 0.001525 | 5.57E-04 | SLC16A3   | 9123   | . |
| 217692_at | 0.019327 | 0.011363 | MAGOH2    | 548332 | . |
| 217693_x_ | 0.007424 | 0.003705 | MAGOH2    | 548332 | . |
| 217696_at | 3.63E-05 | 5.31E-06 | FUT7      | 2529   | . |
| 217700_at | 6.24E-04 | 1.87E-04 | CNPY4     | 245812 | . |
| 217701_x_ | 8.28E-06 | 7.87E-07 |           |        | . |
| 217702_at | 7.04E-04 | 2.17E-04 | IL27RA    | 9466   | . |
| 217703_x_ | 5.36E-07 | 2.15E-08 |           |        | . |
| 217704_x_ | 2.10E-05 | 2.65E-06 | SUZ12P    | 440423 | . |
| 217706_at | 3.96E-04 | 1.07E-04 |           |        | . |
| 217707_x_ | 1.51E-04 | 3.24E-05 | SMARCA2   | 6595   | . |
| 217708_x_ | 0.001305 | 4.61E-04 |           |        | . |
| 217710_x_ | 2.81E-06 | 1.93E-07 | ITPK1     | 3705   | . |
| 217711_at | 3.57E-07 | 1.28E-08 | TEK       | 7010   | . |
| 217712_at | 9.63E-04 | 3.19E-04 | LOC389906 | 389906 | . |
| 217713_x_ | 1.84E-04 | 4.13E-05 |           |        | . |
| 217714_x_ | 0.012145 | 0.006591 | STMN1     | 3925   | . |
| 217715_x_ | 7.08E-06 | 6.41E-07 |           |        | . |
| 217716_s_ | 2.24E-04 | 5.28E-05 | SEC61A1   | 29927  | . |
| 217717_s_ | 1.73E-04 | 3.84E-05 | YWHAB     | 7529   | . |
| 217719_at | 0.019729 | 0.011638 | EIF3L     | 51386  | . |
| 217720_at | 1.42E-05 | 1.61E-06 | CHCHD2    | 51142  | . |
| 217721_at | 0.012655 | 0.006922 |           |        | . |
| 217723_x_ | 1.27E-06 | 6.79E-08 |           |        | . |
| 217724_at | 4.70E-06 | 3.77E-07 | SERBP1    | 26135  | . |
| 217725_x_ | 9.17E-04 | 3.01E-04 | SERBP1    | 26135  | . |

|           |          |          |                             |          |
|-----------|----------|----------|-----------------------------|----------|
| 217728_at | 9.23E-05 | 1.74E-05 | S100A6                      | 6277 .   |
| 217729_s_ | 0.004065 | 0.001807 | AES                         | 166 .    |
| 217730_at | 1.94E-05 | 2.40E-06 | TMBIM1                      | 64114 .  |
| 217731_s_ | 0.035349 | 0.022941 | ITM2B                       | 9445 .   |
| 217732_s_ | 0.001982 | 7.63E-04 | ITM2B                       | 9445 .   |
| 217733_s_ | 6.09E-04 | 1.82E-04 | TMSB10                      | 9168 .   |
| 217734_s_ | 9.71E-06 | 9.78E-07 | WDR6                        | 11180 .  |
| 217735_s_ | 1.02E-05 | 1.05E-06 | EIF2AK1                     | 27102 .  |
| 217736_s_ | 1.92E-04 | 4.34E-05 | EIF2AK1                     | 27102 .  |
| 217737_x_ | 2.76E-06 | 1.89E-07 | C20orf43                    | 51507 .  |
| 217738_at | 0.001544 | 5.65E-04 | NAMPT                       | 10135 .  |
| 217739_s_ | 0.004987 | 0.002309 | NAMPT                       | 10135 .  |
| 217740_x_ | 0.006664 | 0.003258 | RPL7A                       | 6130 .   |
| 217741_s_ | 9.54E-06 | 9.56E-07 | ZFAND5                      | 7763 .   |
| 217742_s_ | 0.003845 | 0.001691 | WAC                         | 51322 .  |
| 217743_s_ | 0.003007 | 0.001258 | TMEM30A                     | 55754 .  |
| 217744_s_ | 0.001825 | 6.91E-04 | PERP                        | 64065 .  |
| 217746_s_ | 1.84E-05 | 2.24E-06 | PDCC6IP                     | 10015 .  |
| 217747_s_ | 8.25E-04 | 2.64E-04 | RPS9                        | 6203 .   |
| 217749_at | 0.030974 | 0.019695 | COPG                        | 22820 .  |
| 217750_s_ | 0.00378  | 0.001658 | UBE2Z                       | 65264 .  |
| 217751_at | 6.66E-06 | 5.91E-07 | GSTK1                       | 373156 . |
| 217752_s_ | 0.00816  | 0.004136 | CNDP2                       | 55748 .  |
| 217753_s_ | 6.58E-05 | 1.13E-05 | RPS26                       | 6231 .   |
| 217754_at | 1.34E-04 | 2.78E-05 | DDX56                       | 54606 .  |
| 217755_at | 0.00606  | 0.002912 | HN1                         | 51155 .  |
| 217756_x_ | 0.028971 | 0.018221 | HYPK /// SERF210169 /// 257 | 2 .      |
| 217757_at | 0.02491  | 0.015292 | A2M                         | 2 .      |
| 217758_s_ | 0.009187 | 0.004751 | TM9SF3                      | 56889 .  |
| 217759_at | 7.08E-04 | 2.19E-04 | TRIM44                      | 54765 .  |
| 217760_at | 6.90E-06 | 6.19E-07 | TRIM44                      | 54765 .  |
| 217761_at | 0.004862 | 0.002241 | ADI1                        | 55256 .  |
| 217765_at | 0.007709 | 0.003871 | NRBP1                       | 29959 .  |
| 217766_s_ | 0.005695 | 0.002702 | TMEM50A                     | 23585 .  |

|           |          |          |                                        |         |
|-----------|----------|----------|----------------------------------------|---------|
| 217768_at | 0.043471 | 0.02918  | C14orf166                              | 51637 . |
| 217770_at | 7.04E-05 | 1.24E-05 | PIGT                                   | 51604 . |
| 217773_s_ | 0.004545 | 0.002067 | NDUFA4                                 | 4697 .  |
| 217774_s_ | 9.53E-04 | 3.15E-04 | HSPC152                                | 51504 . |
| 217777_s_ | 0.016199 | 0.009251 | PTPLAD1                                | 51495 . |
| 217778_at | 0.001596 | 5.88E-04 | SLC39A1                                | 27173 . |
| 217779_s_ | 0.046907 | 0.031881 | LOC100132235 <sup>5</sup> 100132235 // | .       |
| 217781_s_ | 0.010886 | 0.005797 | ZFP106                                 | 64397 . |
| 217782_s_ | 0.004006 | 0.001775 | GPS1                                   | 2873 .  |
| 217783_s_ | 7.83E-05 | 1.42E-05 | YPEL5                                  | 51646 . |
| 217784_at | 0.032954 | 0.021168 | YKT6                                   | 10652 . |
| 217786_at | 7.16E-04 | 2.22E-04 | PRMT5                                  | 10419 . |
| 217787_s_ | 3.12E-04 | 8.00E-05 | GALNT2                                 | 2590 .  |
| 217788_s_ | 2.23E-07 | 6.75E-09 | GALNT2                                 | 2590 .  |
| 217789_at | 2.04E-04 | 4.71E-05 | SNX6                                   | 58533 . |
| 217791_s_ | 8.48E-04 | 2.74E-04 | ALDH18A1                               | 5832 .  |
| 217792_at | 0.003367 | 0.001444 | SNX5                                   | 27131 . |
| 217793_at | 4.40E-04 | 1.21E-04 | RAB11B                                 | 9230 .  |
| 217795_s_ | 2.73E-07 | 8.90E-09 | TMEM43                                 | 79188 . |
| 217796_s_ | 0.00449  | 0.002038 | NPLOC4                                 | 55666 . |
| 217797_at | 0.001474 | 5.34E-04 | UFC1                                   | 51506 . |
| 217800_s_ | 0.002451 | 9.87E-04 | NDFIP1                                 | 80762 . |
| 217801_at | 4.46E-05 | 6.92E-06 | ATP5E                                  | 514 .   |
| 217802_s_ | 8.26E-05 | 1.52E-05 | NUCKS1                                 | 64710 . |
| 217804_s_ | 0.003436 | 0.001478 | ILF3                                   | 3609 .  |
| 217805_at | 1.74E-05 | 2.08E-06 | ILF3                                   | 3609 .  |
| 217806_s_ | 0.018806 | 0.011008 | POLDIP2                                | 26073 . |
| 217809_at | 0.00326  | 0.001387 | BZW2                                   | 28969 . |
| 217810_x_ | 0.03221  | 0.020611 | LARS                                   | 51520 . |
| 217812_at | 0.00563  | 0.002667 | YTHDF2                                 | 51441 . |
| 217815_at | 7.80E-05 | 1.41E-05 | SUPT16H                                | 11198 . |
| 217816_s_ | 0.001808 | 6.83E-04 | PCNP                                   | 57092 . |
| 217818_s_ | 0.002684 | 0.001099 | ARPC4                                  | 10093 . |
| 217819_at | 0.004887 | 0.002255 | GOLGA7                                 | 51125 . |

|           |          |          |                             |         |
|-----------|----------|----------|-----------------------------|---------|
| 217821_s_ | 0.002619 | 0.001068 | WBP11                       | 51729 . |
| 217822_at | 3.81E-05 | 5.63E-06 | WBP11                       | 51729 . |
| 217823_s_ | 0.001896 | 7.24E-04 | UBE2J1                      | 51465 . |
| 217824_at | 1.97E-04 | 4.50E-05 | UBE2J1                      | 51465 . |
| 217825_s_ | 0.018699 | 0.010935 | UBE2J1                      | 51465 . |
| 217826_s_ | 8.82E-04 | 2.87E-04 | UBE2J1                      | 51465 . |
| 217827_s_ | 1.21E-05 | 1.31E-06 | SPG21                       | 51324 . |
| 217828_at | 5.14E-04 | 1.47E-04 | SLTM                        | 79811 . |
| 217829_s_ | 3.34E-06 | 2.43E-07 | USP39                       | 10713 . |
| 217830_s_ | 0.03947  | 0.026078 | NSFL1C                      | 55968 . |
| 217832_at | 0.036148 | 0.023557 | SYNCRIP                     | 10492 . |
| 217833_at | 0.002998 | 0.001254 | SYNCRIP                     | 10492 . |
| 217836_s_ | 0.026396 | 0.016351 | YY1AP1                      | 55249 . |
| 217837_s_ | 6.38E-11 | 1.48E-13 | VPS24                       | 51652 . |
| 217839_at | 0.023504 | 0.014289 | TFG                         | 10342 . |
| 217840_at | 8.94E-04 | 2.92E-04 | DDX41                       | 51428 . |
| 217841_s_ | 0.005738 | 0.002727 | PPME1                       | 51400 . |
| 217842_at | 0.001736 | 6.50E-04 | LUC7L2                      | 51631 . |
| 217843_s_ | 0.033045 | 0.021237 | MED4                        | 29079 . |
| 217844_at | 4.90E-08 | 8.77E-10 | CTDSP1                      | 58190 . |
| 217845_x_ | 0.033458 | 0.021545 | HIGD1A                      | 25994 . |
| 217847_s_ | 0.043776 | 0.029422 | THRAP3                      | 9967 .  |
| 217848_s_ | 2.18E-04 | 5.11E-05 | PPA1                        | 5464 .  |
| 217850_at | 2.58E-07 | 8.25E-09 | GNL3                        | 26354 . |
| 217851_s_ | 3.35E-05 | 4.79E-06 | SLMO2                       | 51012 . |
| 217852_s_ | 1.33E-04 | 2.77E-05 | ARL8B                       | 55207 . |
| 217853_at | 0.039218 | 0.025884 | TNS3                        | 64759 . |
| 217855_x_ | 1.45E-06 | 8.15E-08 | SDF4                        | 51150 . |
| 217856_at | 1.54E-05 | 1.79E-06 | RBM8A                       | 9939 .  |
| 217857_s_ | 0.00593  | 0.002838 | RBM8A                       | 9939 .  |
| 217858_s_ | 8.51E-04 | 2.74E-04 | ARMCX3                      | 51566 . |
| 217859_s_ | 3.45E-05 | 4.96E-06 | SLC39A9                     | 55334 . |
| 217860_at | 0.017633 | 0.010209 | LOC732160 /// 4705 /// 7321 | 10113 . |
| 217861_s_ | 1.63E-05 | 1.93E-06 | PREB                        | 10113 . |



|           |          |          |           |         |
|-----------|----------|----------|-----------|---------|
| 217862_at | 3.89E-04 | 1.04E-04 | PIAS1     | 8554 .  |
| 217864_s_ | 1.97E-04 | 4.50E-05 | PIAS1     | 8554 .  |
| 217865_at | 0.007281 | 0.003621 | RNF130    | 55819 . |
| 217866_at | 0.001933 | 7.41E-04 | CPSF7     | 79869 . |
| 217870_s_ | 1.47E-05 | 1.68E-06 | CMPK1     | 51727 . |
| 217871_s_ | 7.54E-05 | 1.35E-05 | MIF       | 4282 .  |
| 217872_at | 0.007138 | 0.003536 | PIH1D1    | 55011 . |
| 217873_at | 0.001685 | 6.27E-04 | CAB39     | 51719 . |
| 217874_at | 1.85E-05 | 2.26E-06 | SUCLG1    | 8802 .  |
| 217876_at | 0.003582 | 0.001554 | GTF3C5    | 9328 .  |
| 217877_s_ | 0.001441 | 5.20E-04 | GPBP1L1   | 60313 . |
| 217878_s_ | 0.013092 | 0.007202 | CDC27     | 996 .   |
| 217879_at | 0.002149 | 8.42E-04 | CDC27     | 996 .   |
| 217880_at | 0.005079 | 0.002362 | CDC27     | 996 .   |
| 217882_at | 1.13E-05 | 1.19E-06 | TMEM111   | 55831 . |
| 217884_at | 2.07E-06 | 1.31E-07 | NAT10     | 55226 . |
| 217885_at | 2.18E-04 | 5.10E-05 | IPO9      | 55705 . |
| 217888_s_ | 0.001172 | 4.05E-04 | ARFGAP1   | 55738 . |
| 217889_s_ | 2.40E-10 | 8.41E-13 | CYBRD1    | 79901 . |
| 217890_s_ | 1.63E-08 | 2.02E-10 | PARVA     | 55742 . |
| 217891_at | 2.30E-05 | 2.97E-06 | C16orf58  | 64755 . |
| 217892_s_ | 6.84E-07 | 3.00E-08 | LIMA1     | 51474 . |
| 217893_s_ | 1.39E-04 | 2.91E-05 | AKIRIN1   | 79647 . |
| 217894_at | 0.005693 | 0.002701 | KCTD3     | 51133 . |
| 217895_at | 1.09E-06 | 5.49E-08 | PTCD3     | 55037 . |
| 217897_at | 6.72E-04 | 2.05E-04 | FXVD6     | 53826 . |
| 217898_at | 1.08E-05 | 1.12E-06 | C15orf24  | 56851 . |
| 217899_at | 7.25E-07 | 3.24E-08 | TMEM214   | 54867 . |
| 217900_at | 7.54E-05 | 1.36E-05 | IARS2     | 55699 . |
| 217901_at | 6.38E-07 | 2.72E-08 | DSG2      | 1829 .  |
| 217902_s_ | 0.003011 | 0.00126  | HERC2     | 8924 .  |
| 217903_at | 0.003691 | 0.00161  | STRN4     | 29888 . |
| 217904_s_ | 2.31E-06 | 1.50E-07 | BACE1     | 23621 . |
| 217905_at | 0.002816 | 0.001164 | C10orf119 | 79892 . |

|           |          |          |         |          |
|-----------|----------|----------|---------|----------|
| 217906_at | 0.017159 | 0.009885 | KLHDC2  | 23588 .  |
| 217907_at | 0.003552 | 0.001538 | MRPL18  | 29074 .  |
| 217908_s_ | 5.25E-06 | 4.33E-07 | IQWD1   | 55827 .  |
| 217910_x_ | 6.43E-04 | 1.94E-04 | MLX     | 6945 .   |
| 217911_s_ | 7.28E-05 | 1.29E-05 | BAG3    | 9531 .   |
| 217912_at | 5.15E-05 | 8.32E-06 | DUS1L   | 64118 .  |
| 217913_at | 5.62E-05 | 9.27E-06 | VPS4A   | 27183 .  |
| 217914_at | 0.013433 | 0.00742  | TPCN1   | 53373 .  |
| 217916_s_ | 1.83E-06 | 1.12E-07 | FAM49B  | 51571 .  |
| 217917_s_ | 0.011195 | 0.005991 | DYNLRB1 | 83658 .  |
| 217918_at | 0.001912 | 7.31E-04 | DYNLRB1 | 83658 .  |
| 217919_s_ | 0.002375 | 9.49E-04 | MRPL42  | 28977 .  |
| 217920_at | 1.02E-05 | 1.04E-06 | MAN1A2  | 10905 .  |
| 217921_at | 5.67E-05 | 9.36E-06 | MAN1A2  | 10905 .  |
| 217922_at | 0.028448 | 0.01783  |         | .        |
| 217923_at | 0.004907 | 0.002265 | PEF1    | 553115 . |
| 217928_s_ | 8.09E-04 | 2.58E-04 | SAPS3   | 55291 .  |
| 217930_s_ | 6.97E-04 | 2.14E-04 | TOLLIP  | 54472 .  |
| 217932_at | 1.29E-06 | 6.94E-08 | MRPS7   | 51081 .  |
| 217934_x_ | 0.036569 | 0.023877 | STUB1   | 10273 .  |
| 217937_s_ | 3.12E-04 | 7.99E-05 | HDAC7   | 51564 .  |
| 217938_s_ | 8.67E-06 | 8.38E-07 | KCMF1   | 56888 .  |
| 217940_s_ | 5.34E-04 | 1.54E-04 | CARKD   | 55739 .  |
| 217941_s_ | 7.29E-06 | 6.68E-07 | ERBB2IP | 55914 .  |
| 217942_at | 6.71E-05 | 1.16E-05 | MRPS35  | 60488 .  |
| 217943_s_ | 1.33E-05 | 1.47E-06 | MAP7D1  | 55700 .  |
| 217944_at | 0.0016   | 5.90E-04 | POMGNT1 | 55624 .  |
| 217945_at | 7.66E-05 | 1.38E-05 | BTBD1   | 53339 .  |
| 217946_s_ | 0.001478 | 5.36E-04 | SAE1    | 10055 .  |
| 217947_at | 0.048552 | 0.033169 | CMTM6   | 54918 .  |
| 217948_at | 0.021525 | 0.0129   | FAM127B | 26071 .  |
| 217949_s_ | 6.95E-05 | 1.22E-05 | VKORC1  | 79001 .  |
| 217950_at | 2.09E-04 | 4.84E-05 | NOSIP   | 51070 .  |
| 217951_s_ | 4.37E-06 | 3.43E-07 | PHF3    | 23469 .  |

|           |          |          |          |          |
|-----------|----------|----------|----------|----------|
| 217952_x_ | 0.007634 | 0.003827 | PHF3     | 23469 .  |
| 217953_at | 0.026087 | 0.016129 | PHF3     | 23469 .  |
| 217955_at | 4.58E-05 | 7.18E-06 | BCL2L13  | 23786 .  |
| 217956_s_ | 3.99E-05 | 5.96E-06 | ENOPH1   | 58478 .  |
| 217957_at | 4.10E-05 | 6.18E-06 | C16orf80 | 29105 .  |
| 217958_at | 9.48E-04 | 3.13E-04 | TRAPPC4  | 51399 .  |
| 217959_s_ | 0.004043 | 0.001795 | TRAPPC4  | 51399 .  |
| 217960_s_ | 0.005674 | 0.002691 | TOMM22   | 56993 .  |
| 217961_at | 0.002111 | 8.24E-04 | SLC25A38 | 54977 .  |
| 217963_s_ | 0.007312 | 0.003639 | NGFRAP1  | 27018 .  |
| 217964_at | 6.02E-07 | 2.52E-08 | TTC19    | 54902 .  |
| 217966_s_ | 0.018042 | 0.010488 | FAM129A  | 116496 . |
| 217967_s_ | 0.007398 | 0.003689 | FAM129A  | 116496 . |
| 217968_at | 1.86E-04 | 4.19E-05 | TSSC1    | 7260 .   |
| 217970_s_ | 2.21E-04 | 5.18E-05 | CNOT6    | 57472 .  |
| 217971_at | 0.006806 | 0.003342 | MAPKSP1  | 8649 .   |
| 217972_at | 3.93E-04 | 1.06E-04 | CHCHD3   | 54927 .  |
| 217973_at | 0.015201 | 0.008581 | DCXR     | 51181 .  |
| 217974_at | 3.44E-04 | 8.99E-05 | TM7SF3   | 51768 .  |
| 217975_at | 4.95E-07 | 1.95E-08 | WBP5     | 51186 .  |
| 217979_at | 0.014661 | 0.008222 | TSPAN13  | 27075 .  |
| 217980_s_ | 0.029021 | 0.018261 | MRPL16   | 54948 .  |
| 217981_s_ | 5.33E-04 | 1.54E-04 | FXC1     | 26515 .  |
| 217982_s_ | 0.008318 | 0.004229 | MORF4L1  | 10933 .  |
| 217983_s_ | 0.022168 | 0.013357 | RNASET2  | 8635 .   |
| 217984_at | 0.042318 | 0.028277 | RNASET2  | 8635 .   |
| 217985_s_ | 3.94E-05 | 5.87E-06 | BAZ1A    | 11177 .  |
| 217986_s_ | 7.80E-05 | 1.41E-05 | BAZ1A    | 11177 .  |
| 217987_at | 0.038951 | 0.025682 | ASNSD1   | 54529 .  |
| 217988_at | 4.36E-06 | 3.42E-07 | CCNB1IP1 | 57820 .  |
| 217989_at | 0.003685 | 0.001607 | HSD17B11 | 51170 .  |
| 217990_at | 0.00674  | 0.003303 | GMPR2    | 51292 .  |
| 217991_x_ | 0.002372 | 9.47E-04 | SSBP3    | 23648 .  |
| 217992_s_ | 0.003573 | 0.001549 | EFHD2    | 79180 .  |

|           |          |          |                             |          |
|-----------|----------|----------|-----------------------------|----------|
| 217993_s_ | 0.00173  | 6.47E-04 | MAT2B                       | 27430 .  |
| 217994_x_ | 3.81E-04 | 1.02E-04 | CPSF3L                      | 54973 .  |
| 217995_at | 2.46E-06 | 1.63E-07 | SQRDL                       | 58472 .  |
| 217998_at | 0.001229 | 4.29E-04 | LOC652993 /// 22822 /// 65. |          |
| 217999_s_ | 0.019352 | 0.01138  | PHLDA1                      | 22822 .  |
| 218000_s_ | 0.006724 | 0.003293 | PHLDA1                      | 22822 .  |
| 218001_at | 2.35E-04 | 5.61E-05 | MRPS2                       | 51116 .  |
| 218003_s_ | 1.94E-04 | 4.41E-05 | FKBP3                       | 2287 .   |
| 218005_at | 0.00155  | 5.67E-04 | ZNF22                       | 7570 .   |
| 218006_s_ | 3.01E-04 | 7.63E-05 | ZNF22                       | 7570 .   |
| 218007_s_ | 4.68E-06 | 3.74E-07 | RPS27L                      | 51065 .  |
| 218008_at | 0.010223 | 0.005383 | C7orf42                     | 55069 .  |
| 218009_s_ | 2.76E-05 | 3.75E-06 | PRC1                        | 9055 .   |
| 218010_x_ | 0.042385 | 0.02833  | C20orf149                   | 79144 .  |
| 218013_x_ | 0.00697  | 0.00344  | DCTN4                       | 51164 .  |
| 218014_at | 1.99E-06 | 1.24E-07 | NUP85                       | 79902 .  |
| 218016_s_ | 2.05E-05 | 2.57E-06 | POLR3E                      | 55718 .  |
| 218017_s_ | 3.82E-08 | 6.23E-10 | HGSNAT                      | 138050 . |
| 218018_at | 1.62E-04 | 3.53E-05 | PDXK                        | 8566 .   |
| 218019_s_ | 0.007073 | 0.003499 | PDXK                        | 8566 .   |
| 218021_at | 1.97E-04 | 4.50E-05 | DHRS4 /// DHR10901 /// 31.  |          |
| 218023_s_ | 0.013014 | 0.007153 | FAM53C                      | 51307 .  |
| 218024_at | 2.34E-07 | 7.22E-09 | BRP44L                      | 51660 .  |
| 218025_s_ | 0.01913  | 0.011225 | PECI                        | 10455 .  |
| 218026_at | 0.007792 | 0.003921 | CCDC56                      | 28958 .  |
| 218027_at | 0.010667 | 0.005659 | MRPL15                      | 29088 .  |
| 218028_at | 4.16E-04 | 1.14E-04 | ELOVL1                      | 64834 .  |
| 218029_at | 4.76E-04 | 1.34E-04 | FAM65A                      | 79567 .  |
| 218030_at | 0.002919 | 0.001213 | GIT1                        | 28964 .  |
| 218031_s_ | 0.017507 | 0.010119 | FOXN3                       | 1112 .   |
| 218032_at | 0.001791 | 6.74E-04 | SNN                         | 8303 .   |
| 218034_at | 3.21E-05 | 4.56E-06 | FIS1                        | 51024 .  |
| 218035_s_ | 5.40E-07 | 2.18E-08 | RBM47                       | 54502 .  |
| 218036_x_ | 0.002689 | 0.001101 | NMD3                        | 51068 .  |

|           |          |          |          |          |
|-----------|----------|----------|----------|----------|
| 218037_at | 0.008655 | 0.004427 | FAM134A  | 79137 .  |
| 218038_at | 3.56E-04 | 9.37E-05 | ATP5SL   | 55101 .  |
| 218039_at | 1.30E-04 | 2.67E-05 | NUSAP1   | 51203 .  |
| 218040_at | 0.001382 | 4.95E-04 | PRPF38B  | 55119 .  |
| 218041_x_ | 2.18E-06 | 1.40E-07 | SLC38A2  | 54407 .  |
| 218042_at | 0.003156 | 0.001334 | COPS4    | 51138 .  |
| 218043_s_ | 2.00E-04 | 4.59E-05 | AZI2     | 64343 .  |
| 218044_x_ | 3.60E-04 | 9.52E-05 | PTMS     | 5763 .   |
| 218045_x_ | 9.65E-04 | 3.20E-04 | PTMS     | 5763 .   |
| 218047_at | 0.0343   | 0.022155 | OSBPL9   | 114883 . |
| 218048_at | 8.71E-09 | 8.93E-11 | COMMD3   | 23412 .  |
| 218049_s_ | 0.00504  | 0.002339 | MRPL13   | 28998 .  |
| 218051_s_ | 0.00387  | 0.001704 | NT5DC2   | 64943 .  |
| 218053_at | 2.29E-05 | 2.95E-06 | PRPF40A  | 55660 .  |
| 218054_s_ | 0.03768  | 0.024718 |          | .        |
| 218057_x_ | 0.020075 | 0.011879 | COX4NB   | 10328 .  |
| 218059_at | 2.83E-04 | 7.07E-05 | ZNF706   | 51123 .  |
| 218060_s_ | 0.027644 | 0.017254 | C16orf57 | 79650 .  |
| 218063_s_ | 0.036851 | 0.024089 | CDC42EP4 | 23580 .  |
| 218064_s_ | 1.36E-04 | 2.84E-05 | AKAP8L   | 26993 .  |
| 218065_s_ | 8.89E-05 | 1.66E-05 | TMEM9B   | 56674 .  |
| 218066_at | 0.009447 | 0.004908 | SLC12A7  | 10723 .  |
| 218067_s_ | 4.20E-05 | 6.40E-06 | ARGLU1   | 55082 .  |
| 218069_at | 0.010312 | 0.005438 | DCTPP1   | 79077 .  |
| 218070_s_ | 6.77E-04 | 2.07E-04 | GMPPA    | 29926 .  |
| 218071_s_ | 1.37E-04 | 2.85E-05 | MKRN2    | 23609 .  |
| 218072_at | 2.73E-04 | 6.77E-05 | COMMD9   | 29099 .  |
| 218073_s_ | 3.86E-05 | 5.72E-06 | TMEM48   | 55706 .  |
| 218074_at | 0.001479 | 5.37E-04 | FAM96B   | 51647 .  |
| 218075_at | 2.72E-05 | 3.69E-06 | AAAS     | 8086 .   |
| 218076_s_ | 2.72E-05 | 3.68E-06 | ARHGAP17 | 55114 .  |
| 218078_s_ | 0.006898 | 0.003397 | ZDHHC3   | 51304 .  |
| 218080_x_ | 8.41E-06 | 8.06E-07 | FAF1     | 11124 .  |
| 218083_at | 0.012304 | 0.006695 | PTGES2   | 80142 .  |

|           |          |          |                            |          |
|-----------|----------|----------|----------------------------|----------|
| 218084_x_ | 0.027998 | 0.017509 | FXVD5                      | 53827 .  |
| 218087_s_ | 1.42E-05 | 1.61E-06 | SORBS1                     | 10580 .  |
| 218088_s_ | 5.42E-05 | 8.85E-06 | RRAGC                      | 64121 .  |
| 218091_at | 2.09E-05 | 2.65E-06 | AGFG1                      | 3267 .   |
| 218093_s_ | 8.00E-05 | 1.46E-05 | ANKRD10                    | 55608 .  |
| 218094_s_ | 2.04E-04 | 4.70E-05 | DBNDD2 /// SY55861 /// 767 | 55608 .  |
| 218095_s_ | 0.001428 | 5.14E-04 | TMEM165                    | 55858 .  |
| 218096_at | 9.80E-06 | 9.91E-07 | AGPAT5                     | 55326 .  |
| 218097_s_ | 9.18E-04 | 3.01E-04 | CUEDC2                     | 79004 .  |
| 218098_at | 4.12E-04 | 1.12E-04 | ARFGEF2                    | 10564 .  |
| 218099_at | 5.43E-05 | 8.88E-06 | TEX2                       | 55852 .  |
| 218100_s_ | 0.001877 | 7.15E-04 | IFT57                      | 55081 .  |
| 218101_s_ | 0.0283   | 0.017726 | NDUFC2                     | 4718 .   |
| 218103_at | 0.001111 | 3.80E-04 | FTSJ3                      | 117246 . |
| 218104_at | 1.63E-04 | 3.56E-05 | TEX10                      | 54881 .  |
| 218106_s_ | 1.31E-04 | 2.69E-05 | MRPS10                     | 55173 .  |
| 218107_at | 0.002256 | 8.93E-04 | WDR26                      | 80232 .  |
| 218108_at | 0.006173 | 0.002974 | UBR7                       | 55148 .  |
| 218109_s_ | 7.16E-07 | 3.18E-08 | MFSD1                      | 64747 .  |
| 218111_s_ | 6.91E-04 | 2.13E-04 | CMAS                       | 55907 .  |
| 218112_at | 4.14E-05 | 6.27E-06 | MRPS34                     | 65993 .  |
| 218113_at | 0.015883 | 0.009039 | TMEM2                      | 23670 .  |
| 218114_at | 0.027624 | 0.017234 | GGA1                       | 26088 .  |
| 218115_at | 2.51E-04 | 6.08E-05 | ASF1B                      | 55723 .  |
| 218116_at | 6.44E-05 | 1.10E-05 | C9orf78                    | 51759 .  |
| 218120_s_ | 0.002427 | 9.75E-04 | HMOX2                      | 3163 .   |
| 218121_at | 0.002995 | 0.001252 | HMOX2                      | 3163 .   |
| 218122_s_ | 0.001523 | 5.56E-04 | SENP2                      | 59343 .  |
| 218123_at | 2.72E-07 | 8.88E-09 | C21orf59                   | 56683 .  |
| 218124_at | 1.28E-05 | 1.41E-06 | RETSAT                     | 54884 .  |
| 218125_s_ | 0.024965 | 0.015332 | CCDC25                     | 55246 .  |
| 218126_at | 0.00107  | 3.62E-04 | FAM82A2                    | 55177 .  |
| 218127_at | 0.006649 | 0.003249 | NFYB                       | 4801 .   |
| 218129_s_ | 0.009362 | 0.004857 | NFYB                       | 4801 .   |

|           |          |          |          |         |
|-----------|----------|----------|----------|---------|
| 218130_at | 0.001046 | 3.52E-04 | C17orf62 | 79415 . |
| 218131_s_ | 2.65E-04 | 6.51E-05 | GATAD2A  | 54815 . |
| 218132_s_ | 1.73E-05 | 2.06E-06 | TSEN34   | 79042 . |
| 218133_s_ | 1.00E-06 | 4.94E-08 | NIF3L1   | 60491 . |
| 218134_s_ | 9.06E-04 | 2.96E-04 | RBM22    | 55696 . |
| 218135_at | 0.002185 | 8.59E-04 | ERGIC2   | 51290 . |
| 218138_at | 2.86E-05 | 3.93E-06 | MKKS     | 8195 .  |
| 218140_x_ | 1.80E-05 | 2.18E-06 | SRPRB    | 58477 . |
| 218141_at | 1.76E-08 | 2.24E-10 | UBE2O    | 63893 . |
| 218142_s_ | 0.00446  | 0.002022 | CRBN     | 51185 . |
| 218143_s_ | 0.003353 | 0.001436 | SCAMP2   | 10066 . |
| 218144_s_ | 1.03E-06 | 5.14E-08 | INF2     | 64423 . |
| 218145_at | 3.67E-04 | 9.71E-05 | TRIB3    | 57761 . |
| 218146_at | 3.48E-05 | 5.02E-06 | GLT8D1   | 55830 . |
| 218147_s_ | 1.87E-05 | 2.29E-06 | GLT8D1   | 55830 . |
| 218148_at | 0.00936  | 0.004855 | CENPT    | 80152 . |
| 218149_s_ | 3.77E-04 | 1.01E-04 | ZNF395   | 55893 . |
| 218150_at | 9.08E-04 | 2.97E-04 | ARL5A    | 26225 . |
| 218151_x_ | 0.023585 | 0.01435  | GPR172A  | 79581 . |
| 218152_at | 8.85E-04 | 2.88E-04 | HMG20A   | 10363 . |
| 218153_at | 8.20E-05 | 1.51E-05 | CARS2    | 79587 . |
| 218154_at | 0.001319 | 4.68E-04 | GSDMD    | 79792 . |
| 218155_x_ | 1.28E-07 | 3.18E-09 | TSR1     | 55720 . |
| 218156_s_ | 5.89E-05 | 9.83E-06 | TSR1     | 55720 . |
| 218157_x_ | 0.013105 | 0.00721  | CDC42SE1 | 56882 . |
| 218159_at | 0.003019 | 0.001265 | DDRGK1   | 65992 . |
| 218160_at | 3.07E-05 | 4.31E-06 | NDUFA8   | 4702 .  |
| 218161_s_ | 0.001105 | 3.77E-04 | CLN6     | 54982 . |
| 218162_at | 1.47E-06 | 8.32E-08 | OLFML3   | 56944 . |
| 218163_at | 0.004047 | 0.001797 | MCTS1    | 28985 . |
| 218164_at | 7.35E-04 | 2.29E-04 | SPATA20  | 64847 . |
| 218165_at | 0.002157 | 8.46E-04 | C1orf149 | 64769 . |
| 218166_s_ | 0.003902 | 0.001721 | RSF1     | 51773 . |
| 218168_s_ | 1.03E-04 | 1.99E-05 | CABC1    | 56997 . |

|           |          |          |                            |         |
|-----------|----------|----------|----------------------------|---------|
| 218169_at | 2.76E-04 | 6.84E-05 | VAC14                      | 55697 . |
| 218170_at | 2.54E-04 | 6.17E-05 | ISOC1                      | 51015 . |
| 218174_s_ | 4.20E-05 | 6.40E-06 | C10orf57                   | 80195 . |
| 218175_at | 1.31E-07 | 3.26E-09 | CCDC92                     | 80212 . |
| 218176_at | 0.001378 | 4.93E-04 | MAGEF1                     | 64110 . |
| 218177_at | 1.25E-05 | 1.36E-06 | CHMP1B                     | 57132 . |
| 218178_s_ | 0.010744 | 0.005709 | CHMP1B                     | 57132 . |
| 218180_s_ | 0.009002 | 0.004636 | EPS8L2                     | 64787 . |
| 218183_at | 0.034183 | 0.022071 | C16orf5                    | 29965 . |
| 218186_at | 5.97E-12 | 5.61E-15 | RAB25                      | 57111 . |
| 218187_s_ | 7.26E-04 | 2.26E-04 | C8orf33                    | 65265 . |
| 218188_s_ | 2.40E-04 | 5.75E-05 | TIMM13                     | 26517 . |
| 218189_s_ | 0.036143 | 0.02355  | NANS                       | 54187 . |
| 218190_s_ | 0.001651 | 6.12E-04 | UCRC                       | 29796 . |
| 218192_at | 0.04175  | 0.027828 | IP6K2                      | 51447 . |
| 218194_at | 1.79E-05 | 2.17E-06 | REXO2                      | 25996 . |
| 218195_at | 5.49E-04 | 1.60E-04 | C6orf211                   | 79624 . |
| 218196_at | 0.005253 | 0.002456 | OSTM1                      | 28962 . |
| 218197_s_ | 0.003297 | 0.001407 | OXR1                       | 55074 . |
| 218198_at | 0.004556 | 0.002074 | DHX32                      | 55760 . |
| 218199_s_ | 0.006158 | 0.002965 | NOL6                       | 65083 . |
| 218200_s_ | 2.04E-04 | 4.68E-05 | NDUFB2                     | 4708 .  |
| 218201_at | 0.005209 | 0.002433 | NDUFB2                     | 4708 .  |
| 218203_at | 1.85E-07 | 5.22E-09 | ALG5                       | 29880 . |
| 218204_s_ | 2.40E-06 | 1.58E-07 | FYCO1                      | 79443 . |
| 218207_s_ | 0.017785 | 0.01031  | STMN3                      | 50861 . |
| 218208_at | 8.81E-07 | 4.19E-08 | LOC100131178&100131178 //. |         |
| 218209_s_ | 0.001694 | 6.31E-04 | RPRD1A                     | 55197 . |
| 218210_at | 0.02627  | 0.016255 | FN3KRP                     | 79672 . |
| 218211_s_ | 0.03522  | 0.022843 | MLPH                       | 79083 . |
| 218212_s_ | 3.87E-05 | 5.73E-06 | MOCS2                      | 4338 .  |
| 218213_s_ | 0.04049  | 0.02686  | C11orf10                   | 746 .   |
| 218214_at | 0.006887 | 0.00339  | C12orf44                   | 60673 . |
| 218215_s_ | 1.14E-04 | 2.27E-05 | NR1H2                      | 7376 .  |



|           |          |          |                             |         |
|-----------|----------|----------|-----------------------------|---------|
| 218216_x_ | 0.001618 | 5.97E-04 | ARL6IP4                     | 51329 . |
| 218217_at | 0.001541 | 5.64E-04 | SCPEP1                      | 59342 . |
| 218218_at | 1.28E-09 | 7.36E-12 | APPL2                       | 55198 . |
| 218219_s_ | 0.001805 | 6.81E-04 | LANCL2                      | 55915 . |
| 218220_at | 0.013669 | 0.007572 | C12orf10                    | 60314 . |
| 218221_at | 0.014794 | 0.008314 | ARNT                        | 405 .   |
| 218222_x_ | 2.16E-05 | 2.75E-06 | ARNT                        | 405 .   |
| 218223_s_ | 0.0076   | 0.003807 | PLEKHO1                     | 51177 . |
| 218225_at | 0.009847 | 0.005153 | ECSIT                       | 51295 . |
| 218227_at | 0.007562 | 0.003785 | NUBP2                       | 10101 . |
| 218229_s_ | 0.00558  | 0.00264  | POGK                        | 57645 . |
| 218231_at | 1.16E-05 | 1.24E-06 | NAGK                        | 55577 . |
| 218232_at | 3.49E-04 | 9.16E-05 | C1QA                        | 712 .   |
| 218233_s_ | 0.00661  | 0.003227 | PRICKLE4 /// T100188893 //. |         |
| 218234_at | 0.001788 | 6.74E-04 | ING4                        | 51147 . |
| 218235_s_ | 0.00126  | 4.42E-04 | UTP11L                      | 51118 . |
| 218236_s_ | 0.004764 | 0.002188 | PRKD3                       | 23683 . |
| 218238_at | 1.11E-06 | 5.63E-08 | GTPBP4                      | 23560 . |
| 218239_s_ | 0.002446 | 9.84E-04 | GTPBP4                      | 23560 . |
| 218240_at | 6.41E-04 | 1.93E-04 | NKIRAS2                     | 28511 . |
| 218241_at | 0.00128  | 4.51E-04 | GOLGA5                      | 9950 .  |
| 218242_s_ | 1.15E-04 | 2.30E-05 | SUV420H1                    | 51111 . |
| 218243_at | 1.22E-04 | 2.48E-05 | RUFY1                       | 80230 . |
| 218244_at | 1.66E-07 | 4.50E-09 | NOL8                        | 55035 . |
| 218245_at | 0.018037 | 0.010484 | TSKU                        | 25987 . |
| 218247_s_ | 4.52E-04 | 1.26E-04 | MEX3C                       | 51320 . |
| 218248_at | 3.22E-07 | 1.12E-08 | FAM111A                     | 63901 . |
| 218249_at | 2.90E-04 | 7.29E-05 | ZDHHC6                      | 64429 . |
| 218250_s_ | 2.06E-04 | 4.74E-05 | CNOT7                       | 29883 . |
| 218252_at | 0.00346  | 0.00149  | CKAP2                       | 26586 . |
| 218254_s_ | 0.004312 | 0.00194  | SAR1B                       | 51128 . |
| 218255_s_ | 9.53E-04 | 3.15E-04 | FBRS                        | 64319 . |
| 218256_s_ | 5.31E-05 | 8.63E-06 | NUP54                       | 53371 . |
| 218258_at | 7.32E-05 | 1.30E-05 | POLR1D                      | 51082 . |

|           |          |          |                             |         |
|-----------|----------|----------|-----------------------------|---------|
| 218260_at | 0.037755 | 0.024774 | DDA1                        | 79016 . |
| 218261_at | 2.40E-05 | 3.15E-06 | AP1M2                       | 10053 . |
| 218262_at | 0.04484  | 0.030259 | RMND5B                      | 64777 . |
| 218263_s_ | 0.005087 | 0.002367 | ZBED5                       | 58486 . |
| 218264_at | 1.01E-04 | 1.96E-05 | BCCIP                       | 56647 . |
| 218265_at | 9.06E-06 | 8.93E-07 | SECISBP2                    | 79048 . |
| 218268_at | 0.003655 | 0.001593 | TBC1D15                     | 64786 . |
| 218269_at | 0.001502 | 5.47E-04 | RNASEN                      | 29102 . |
| 218270_at | 3.14E-04 | 8.04E-05 | MRPL24                      | 79590 . |
| 218271_s_ | 0.009652 | 0.005034 | PARL                        | 55486 . |
| 218274_s_ | 6.90E-04 | 2.12E-04 | ANKZF1                      | 55139 . |
| 218275_at | 6.85E-04 | 2.10E-04 | SLC25A10                    | 1468 .  |
| 218277_s_ | 0.004356 | 0.001964 | DHX40                       | 79665 . |
| 218278_at | 0.015233 | 0.008604 | LOC649169 /// 54663 /// 649 | 8337 .  |
| 218279_s_ | 0.003227 | 0.001371 | HIST2H2AA3                  | 8337 .  |
| 218281_at | 3.30E-06 | 2.39E-07 | MRPL48                      | 51642 . |
| 218283_at | 5.42E-04 | 1.57E-04 | SS18L2                      | 51188 . |
| 218284_at | 2.14E-05 | 2.73E-06 | SMAD3                       | 4088 .  |
| 218285_s_ | 0.00432  | 0.001944 | BDH2                        | 56898 . |
| 218286_s_ | 0.017389 | 0.010038 | RNF7                        | 9616 .  |
| 218289_s_ | 0.003014 | 0.001262 | UBA5                        | 79876 . |
| 218290_at | 0.006231 | 0.003008 | PLEKHJ1                     | 55111 . |
| 218292_s_ | 9.74E-04 | 3.23E-04 | PRKAG2                      | 51422 . |
| 218293_x_ | 0.018951 | 0.011105 | NUP50                       | 10762 . |
| 218294_s_ | 3.22E-04 | 8.29E-05 | NUP50                       | 10762 . |
| 218295_s_ | 0.012848 | 0.007047 | NUP50                       | 10762 . |
| 218296_x_ | 0.011082 | 0.005919 | MSTO1 /// MS' 100129405 //  | 80013 . |
| 218297_at | 3.00E-04 | 7.60E-05 | C10orf97                    | 80013 . |
| 218299_at | 8.00E-06 | 7.53E-07 | C11orf24                    | 53838 . |
| 218300_at | 2.25E-04 | 5.31E-05 | C16orf53                    | 79447 . |
| 218301_at | 0.009905 | 0.005189 | RNPEPL1                     | 57140 . |
| 218303_x_ | 1.75E-04 | 3.87E-05 | KRCC1                       | 51315 . |
| 218305_at | 4.70E-04 | 1.32E-04 | IPO4                        | 79711 . |
| 218306_s_ | 0.005367 | 0.002519 | HERC1                       | 8925 .  |

|           |          |          |                             |         |
|-----------|----------|----------|-----------------------------|---------|
| 218307_at | 1.35E-07 | 3.43E-09 | RSAD1                       | 55316 . |
| 218308_at | 2.57E-04 | 6.26E-05 | TACC3                       | 10460 . |
| 218309_at | 0.001042 | 3.51E-04 | CAMK2N1                     | 55450 . |
| 218310_at | 8.26E-06 | 7.85E-07 | RABGEF1                     | 27342 . |
| 218313_s_ | 2.71E-06 | 1.84E-07 | GALNT7                      | 51809 . |
| 218314_s_ | 0.007881 | 0.003975 | C11orf57                    | 55216 . |
| 218315_s_ | 9.32E-08 | 2.08E-09 | CDK5RAP1                    | 51654 . |
| 218316_at | 0.043677 | 0.029344 | TIMM9                       | 26520 . |
| 218317_x_ | 2.38E-04 | 5.69E-05 | GIYD1 /// GIYD548593 /// 75 |         |
| 218318_s_ | 2.38E-05 | 3.11E-06 | NLK                         | 51701 . |
| 218319_at | 4.28E-08 | 7.28E-10 | PELI1                       | 57162 . |
| 218320_s_ | 8.20E-05 | 1.51E-05 | NDUFB11                     | 54539 . |
| 218324_s_ | 1.63E-04 | 3.56E-05 | SPATS2                      | 65244 . |
| 218325_s_ | 0.002386 | 9.54E-04 | DIDO1                       | 11083 . |
| 218326_s_ | 0.001727 | 6.46E-04 | LGR4                        | 55366 . |
| 218327_s_ | 1.56E-05 | 1.83E-06 | SNAP29                      | 9342 .  |
| 218328_at | 0.011919 | 0.006446 | COQ4                        | 51117 . |
| 218329_at | 2.63E-06 | 1.78E-07 | PRDM4                       | 11108 . |
| 218331_s_ | 0.001097 | 3.74E-04 | C10orf18                    | 54906 . |
| 218332_at | 5.76E-04 | 1.69E-04 | BEX1                        | 55859 . |
| 218333_at | 2.29E-04 | 5.43E-05 | DERL2                       | 51009 . |
| 218335_x_ | 0.036962 | 0.024176 | TNIP2                       | 79155 . |
| 218336_at | 1.29E-07 | 3.20E-09 | PFDN2                       | 5202 .  |
| 218337_at | 0.003602 | 0.001564 | FAM160B2                    | 64760 . |
| 218338_at | 1.63E-08 | 2.03E-10 | PHC1 /// PHC1 1911 /// 6534 |         |
| 218339_at | 1.66E-05 | 1.96E-06 | MRPL22                      | 29093 . |
| 218341_at | 0.003784 | 0.00166  | PPCS                        | 79717 . |
| 218342_s_ | 1.98E-04 | 4.52E-05 | ERMP1                       | 79956 . |
| 218343_s_ | 9.29E-04 | 3.05E-04 | GTF3C3                      | 9330 .  |
| 218345_at | 5.66E-04 | 1.66E-04 | TMEM176A                    | 55365 . |
| 218346_s_ | 0.001029 | 3.46E-04 | SESN1                       | 27244 . |
| 218347_at | 0.001202 | 4.18E-04 | TYW1                        | 55253 . |
| 218348_s_ | 0.015598 | 0.008848 | ZC3H7A                      | 29066 . |
| 218349_s_ | 0.003044 | 0.001277 | ZWILCH                      | 55055 . |

|           |          |          |                             |         |
|-----------|----------|----------|-----------------------------|---------|
| 218350_s_ | 4.17E-06 | 3.22E-07 | GMNN                        | 51053 . |
| 218351_at | 3.22E-04 | 8.30E-05 | COMMD8                      | 54951 . |
| 218352_at | 0.043805 | 0.029448 | RCBTB1                      | 55213 . |
| 218353_at | 4.36E-05 | 6.73E-06 | RGS5                        | 8490 .  |
| 218355_at | 8.85E-06 | 8.64E-07 | KIF4A                       | 24137 . |
| 218356_at | 0.003045 | 0.001278 | FTSJ2                       | 29960 . |
| 218357_s_ | 0.001394 | 5.00E-04 | TIMM8B                      | 26521 . |
| 218358_at | 0.029955 | 0.018947 | CRELD2                      | 79174 . |
| 218359_at | 1.52E-04 | 3.27E-05 | NRSN2                       | 80023 . |
| 218360_at | 1.03E-06 | 5.09E-08 | RAB22A                      | 57403 . |
| 218362_s_ | 4.08E-05 | 6.14E-06 | DIS3                        | 22894 . |
| 218363_at | 4.65E-04 | 1.30E-04 | EXD2                        | 55218 . |
| 218364_at | 1.28E-08 | 1.43E-10 | LRRFIP2                     | 9209 .  |
| 218365_s_ | 3.11E-04 | 7.94E-05 | DARS2                       | 55157 . |
| 218366_x_ | 3.21E-05 | 4.56E-06 | LOC731602 /// 64745 /// 73: |         |
| 218368_s_ | 0.005123 | 0.002386 | TNFRSF12A                   | 51330 . |
| 218373_at | 0.001352 | 4.82E-04 | AKTIP                       | 64400 . |
| 218374_s_ | 1.26E-05 | 1.38E-06 | C12orf4                     | 57102 . |
| 218375_at | 0.015563 | 0.008825 | NUDT9                       | 53343 . |
| 218376_s_ | 0.033641 | 0.021682 | MICAL1                      | 64780 . |
| 218377_s_ | 2.41E-08 | 3.40E-10 | RWDD2B                      | 10069 . |
| 218378_s_ | 1.34E-04 | 2.78E-05 | PRKRIP1                     | 79706 . |
| 218379_at | 4.92E-04 | 1.39E-04 | RBM7                        | 10179 . |
| 218380_at | 0.034856 | 0.022567 | NLRP1                       | 22861 . |
| 218381_s_ | 0.020933 | 0.01249  | U2AF2                       | 11338 . |
| 218383_at | 5.77E-04 | 1.70E-04 | HAUS4                       | 54930 . |
| 218384_at | 3.04E-04 | 7.71E-05 | CARHSP1                     | 23589 . |
| 218386_x_ | 2.69E-05 | 3.63E-06 | USP16                       | 10600 . |
| 218387_s_ | 0.003696 | 0.001613 | PGLS                        | 25796 . |
| 218389_s_ | 3.90E-06 | 2.96E-07 | APH1A                       | 51107 . |
| 218390_s_ | 0.011817 | 0.006378 | C10orf84                    | 63877 . |
| 218392_x_ | 4.20E-05 | 6.40E-06 | SFXN1                       | 94081 . |
| 218393_s_ | 0.035557 | 0.023106 | SMU1                        | 55234 . |
| 218394_at | 2.26E-04 | 5.31E-05 | ROGDI                       | 79641 . |

|           |          |          |          |         |
|-----------|----------|----------|----------|---------|
| 218395_at | 0.002162 | 8.48E-04 | ACTR6    | 64431 . |
| 218396_at | 0.002393 | 9.58E-04 | VPS13C   | 54832 . |
| 218397_at | 1.48E-07 | 3.88E-09 | FANCL    | 55120 . |
| 218398_at | 5.18E-05 | 8.39E-06 | MRPS30   | 10884 . |
| 218399_s_ | 5.75E-05 | 9.55E-06 | CDCA4    | 55038 . |
| 218400_at | 2.01E-05 | 2.51E-06 | OAS3     | 4940 .  |
| 218401_s_ | 0.032057 | 0.020497 | ZNF281   | 23528 . |
| 218402_s_ | 0.001544 | 5.65E-04 | HPS4     | 89781 . |
| 218403_at | 8.91E-05 | 1.67E-05 | TRIAP1   | 51499 . |
| 218404_at | 1.03E-07 | 2.37E-09 | SNX10    | 29887 . |
| 218405_at | 4.86E-04 | 1.37E-04 | ABT1     | 29777 . |
| 218406_x_ | 0.012016 | 0.006506 | NENF     | 29937 . |
| 218407_x_ | 6.07E-07 | 2.54E-08 | NENF     | 29937 . |
| 218408_at | 0.022927 | 0.01388  | TIMM10   | 26519 . |
| 218409_s_ | 0.048814 | 0.033384 | DNAJC1   | 64215 . |
| 218412_s_ | 0.013261 | 0.007311 | GTF2IRD1 | 9569 .  |
| 218414_s_ | 0.007992 | 0.004039 | NDE1     | 54820 . |
| 218415_at | 0.016664 | 0.009556 | VPS33B   | 26276 . |
| 218417_s_ | 1.11E-04 | 2.19E-05 | SLC48A1  | 55652 . |
| 218418_s_ | 8.53E-09 | 8.69E-11 | KANK2    | 25959 . |
| 218419_s_ | 5.54E-04 | 1.62E-04 | TMUB2    | 79089 . |
| 218420_s_ | 1.16E-06 | 6.00E-08 | C13orf23 | 80209 . |
| 218421_at | 0.022019 | 0.013254 | CERK     | 64781 . |
| 218422_s_ | 2.94E-05 | 4.06E-06 | RBM26    | 64062 . |
| 218424_s_ | 7.72E-04 | 2.44E-04 | STEAP3   | 55240 . |
| 218425_at | 4.16E-07 | 1.56E-08 | RNF216   | 54476 . |
| 218426_s_ | 0.005041 | 0.00234  | RNF216   | 54476 . |
| 218427_at | 4.46E-08 | 7.75E-10 | SDCCAG3  | 10807 . |
| 218428_s_ | 0.001549 | 5.67E-04 | REV1     | 51455 . |
| 218432_at | 9.88E-05 | 1.90E-05 | FBXO3    | 26273 . |
| 218435_at | 0.047263 | 0.032167 | DNAJC15  | 29103 . |
| 218436_at | 1.62E-04 | 3.52E-05 | SIL1     | 64374 . |
| 218437_s_ | 0.007283 | 0.003622 | LZTFL1   | 54585 . |
| 218438_s_ | 0.001092 | 3.72E-04 | MED28    | 80306 . |

|           |          |          |          |          |
|-----------|----------|----------|----------|----------|
| 218439_s_ | 0.004791 | 0.002204 | COMMD10  | 51397 .  |
| 218440_at | 0.002633 | 0.001075 | MCCC1    | 56922 .  |
| 218441_s_ | 0.00593  | 0.002838 | RPAP1    | 26015 .  |
| 218442_at | 1.15E-05 | 1.22E-06 | TTC4     | 7268 .   |
| 218443_s_ | 4.22E-05 | 6.44E-06 | DAZAP1   | 26528 .  |
| 218444_at | 0.00375  | 0.001642 | ALG12    | 79087 .  |
| 218445_at | 6.07E-04 | 1.81E-04 | H2AFY2   | 55506 .  |
| 218447_at | 0.004585 | 0.00209  | C16orf61 | 56942 .  |
| 218448_at | 0.00142  | 5.11E-04 | C20orf11 | 54994 .  |
| 218450_at | 5.76E-05 | 9.56E-06 | HEBP1    | 50865 .  |
| 218452_at | 0.006287 | 0.00304  | SMARCAL1 | 50485 .  |
| 218453_s_ | 0.041654 | 0.02776  | C6orf35  | 729515 . |
| 218454_at | 0.045579 | 0.030832 | PLBD1    | 79887 .  |
| 218455_at | 1.35E-07 | 3.43E-09 | NFS1     | 9054 .   |
| 218457_s_ | 4.88E-04 | 1.38E-04 | DNMT3A   | 1788 .   |
| 218458_at | 0.003824 | 0.00168  | GMCL1    | 64395 .  |
| 218459_at | 4.40E-05 | 6.81E-06 | TOR3A    | 64222 .  |
| 218460_at | 1.00E-05 | 1.02E-06 | HEATR2   | 54919 .  |
| 218461_at | 4.40E-04 | 1.22E-04 | GPN3     | 51184 .  |
| 218462_at | 3.03E-07 | 1.02E-08 | BXDC5    | 80135 .  |
| 218463_s_ | 2.19E-04 | 5.13E-05 | MUS81    | 80198 .  |
| 218464_s_ | 1.21E-05 | 1.31E-06 | C17orf63 | 55731 .  |
| 218466_at | 2.16E-05 | 2.76E-06 | TBC1D17  | 79735 .  |
| 218468_s_ | 4.04E-06 | 3.10E-07 | GREM1    | 26585 .  |
| 218469_at | 4.04E-06 | 3.10E-07 | GREM1    | 26585 .  |
| 218470_at | 0.005257 | 0.002458 | YARS2    | 51067 .  |
| 218471_s_ | 2.36E-04 | 5.64E-05 | BBS1     | 582 .    |
| 218472_s_ | 0.011208 | 0.006    | PELO     | 53918 .  |
| 218473_s_ | 0.004693 | 0.00215  | GLT25D1  | 79709 .  |
| 218474_s_ | 0.004013 | 0.001779 | KCTD5    | 54442 .  |
| 218476_at | 0.001217 | 4.24E-04 | POMT1    | 10585 .  |
| 218477_at | 0.001648 | 6.11E-04 | TMEM14A  | 28978 .  |
| 218478_s_ | 0.003753 | 0.001644 | ZCCHC8   | 55596 .  |
| 218479_s_ | 2.26E-04 | 5.33E-05 | XPO4     | 64328 .  |

|           |          |          |              |          |
|-----------|----------|----------|--------------|----------|
| 218480_at | 4.15E-05 | 6.30E-06 | AGBL5        | 60509 .  |
| 218481_at | 3.10E-05 | 4.36E-06 | EXOSC5       | 56915 .  |
| 218482_at | 6.14E-05 | 1.04E-05 | ENY2         | 56943 .  |
| 218483_s_ | 6.91E-04 | 2.12E-04 | C11orf60     | 56912 .  |
| 218484_at | 3.96E-04 | 1.07E-04 | NDUFA4L2     | 56901 .  |
| 218485_s_ | 9.53E-05 | 1.81E-05 | SLC35C1      | 55343 .  |
| 218487_at | 1.50E-04 | 3.21E-05 | ALAD         | 210 .    |
| 218488_at | 0.002133 | 8.35E-04 | EIF2B3       | 8891 .   |
| 218489_s_ | 2.35E-04 | 5.60E-05 | ALAD         | 210 .    |
| 218491_s_ | 0.001963 | 7.54E-04 | THYN1        | 29087 .  |
| 218492_s_ | 0.001638 | 6.06E-04 | THAP7        | 80764 .  |
| 218493_at | 0.008526 | 0.004353 | SNRNP25      | 79622 .  |
| 218495_at | 0.016033 | 0.009142 | UXT          | 8409 .   |
| 218496_at | 0.009919 | 0.005198 | RNASEH1      | 246243 . |
| 218497_s_ | 0.013444 | 0.007427 | RNASEH1      | 246243 . |
| 218498_s_ | 0.021634 | 0.012978 | ERO1L        | 30001 .  |
| 218499_at | 2.24E-04 | 5.25E-05 | RP6-213H19.1 | 51765 .  |
| 218500_at | 2.79E-04 | 6.93E-05 | C8orf55      | 51337 .  |
| 218501_at | 4.00E-05 | 6.00E-06 | ARHGEF3      | 50650 .  |
| 218502_s_ | 0.014599 | 0.008181 | TRPS1        | 7227 .   |
| 218503_at | 0.014756 | 0.008285 | KIAA1797     | 54914 .  |
| 218505_at | 3.00E-05 | 4.17E-06 | WDR59        | 79726 .  |
| 218509_at | 4.20E-04 | 1.15E-04 | LPPR2        | 64748 .  |
| 218510_x_ | 1.01E-04 | 1.96E-05 | FAM134B      | 54463 .  |
| 218511_s_ | 4.85E-04 | 1.37E-04 | PNPO         | 55163 .  |
| 218512_at | 6.16E-05 | 1.04E-05 | WDR12        | 55759 .  |
| 218513_at | 0.019333 | 0.011367 | C4orf43      | 55319 .  |
| 218514_at | 0.001784 | 6.71E-04 | C17orf71     | 55181 .  |
| 218515_at | 1.40E-05 | 1.58E-06 | C21orf66     | 94104 .  |
| 218516_s_ | 5.00E-06 | 4.07E-07 | IMPAD1       | 54928 .  |
| 218517_at | 7.73E-04 | 2.44E-04 | PHF17        | 79960 .  |
| 218518_at | 0.009531 | 0.004958 | FAM13B       | 51306 .  |
| 218519_at | 0.006927 | 0.003413 | SLC35A5      | 55032 .  |
| 218521_s_ | 1.23E-05 | 1.34E-06 | UBE2W        | 55284 .  |

|           |          |          |                             |          |
|-----------|----------|----------|-----------------------------|----------|
| 218522_s_ | 0.012871 | 0.007063 | MAP1S                       | 55201 .  |
| 218523_at | 8.37E-05 | 1.55E-05 | LHPP                        | 64077 .  |
| 218524_at | 1.15E-06 | 5.93E-08 | E4F1                        | 1877 .   |
| 218526_s_ | 0.001372 | 4.91E-04 | RANGRF                      | 29098 .  |
| 218528_s_ | 0.00167  | 6.21E-04 | RNF38                       | 152006 . |
| 218529_at | 1.28E-04 | 2.62E-05 | CD320                       | 51293 .  |
| 218530_at | 0.01114  | 0.005957 | FHOD1                       | 29109 .  |
| 218531_at | 0.00523  | 0.002444 | TMEM134                     | 80194 .  |
| 218532_s_ | 1.71E-04 | 3.76E-05 | FAM134B                     | 54463 .  |
| 218533_s_ | 0.001204 | 4.19E-04 | UCKL1                       | 54963 .  |
| 218535_s_ | 0.036555 | 0.023864 | RIOK2                       | 55781 .  |
| 218536_at | 5.38E-08 | 9.98E-10 | MRS2                        | 57380 .  |
| 218537_at | 0.028115 | 0.017596 | HCFC1R1                     | 54985 .  |
| 218538_s_ | 3.34E-07 | 1.17E-08 | MRS2                        | 57380 .  |
| 218540_at | 0.019437 | 0.011439 | THTPA                       | 79178 .  |
| 218541_s_ | 0.001573 | 5.78E-04 | C8orf4                      | 56892 .  |
| 218542_at | 0.002101 | 8.19E-04 | CEP55                       | 55165 .  |
| 218543_s_ | 0.001069 | 3.62E-04 | PARP12                      | 64761 .  |
| 218544_s_ | 0.001431 | 5.16E-04 | RCL1                        | 10171 .  |
| 218547_at | 0.003728 | 0.00163  | DHDDS                       | 79947 .  |
| 218548_x_ | 4.38E-09 | 3.65E-11 | TEX264                      | 51368 .  |
| 218550_s_ | 0.007834 | 0.003947 | LRRC20                      | 55222 .  |
| 218551_at | 4.26E-04 | 1.17E-04 | MIIP                        | 60672 .  |
| 218553_s_ | 0.007748 | 0.003892 | KCTD15                      | 79047 .  |
| 218555_at | 0.002431 | 9.77E-04 | ANAPC2                      | 29882 .  |
| 218558_s_ | 0.00202  | 7.81E-04 | MRPL39                      | 54148 .  |
| 218560_s_ | 0.001846 | 7.00E-04 | JMJD4                       | 65094 .  |
| 218561_s_ | 0.004506 | 0.002046 | LYRM4                       | 57128 .  |
| 218563_at | 0.002354 | 9.39E-04 | NDUFA3                      | 4696 .   |
| 218564_at | 2.17E-06 | 1.39E-07 | RFWD3                       | 55159 .  |
| 218566_s_ | 0.006003 | 0.00288  | CHORDC1                     | 26973 .  |
| 218568_at | 1.08E-05 | 1.12E-06 | AGK                         | 55750 .  |
| 218569_s_ | 0.001346 | 4.80E-04 | KBTBD4                      | 55709 .  |
| 218570_at | 6.37E-05 | 1.09E-05 | KBTBD4 /// PTI114971 /// 55 | 55709 .  |



|           |          |          |          |         |
|-----------|----------|----------|----------|---------|
| 218571_s_ | 0.018669 | 0.010912 | CHMP4A   | 29082 . |
| 218572_at | 0.007253 | 0.003605 | CHMP4A   | 29082 . |
| 218573_at | 0.009999 | 0.005246 | MAGEH1   | 28986 . |
| 218574_s_ | 0.013061 | 0.007183 | LMCD1    | 29995 . |
| 218575_at | 4.39E-04 | 1.21E-04 | ANAPC1   | 64682 . |
| 218576_s_ | 1.94E-05 | 2.40E-06 | DUSP12   | 11266 . |
| 218577_at | 4.88E-04 | 1.38E-04 | LRRC40   | 55631 . |
| 218579_s_ | 2.12E-07 | 6.18E-09 | DHX35    | 60625 . |
| 218580_x_ | 0.035549 | 0.023099 | AURKAIP1 | 54998 . |
| 218581_at | 1.05E-06 | 5.25E-08 | ABHD4    | 63874 . |
| 218582_at | 4.23E-05 | 6.46E-06 | 5-Mar    | 54708 . |
| 218584_at | 1.70E-05 | 2.03E-06 | TCTN1    | 79600 . |
| 218585_s_ | 1.96E-06 | 1.21E-07 | DTL      | 51514 . |
| 218586_at | 1.43E-07 | 3.72E-09 | C20orf20 | 55257 . |
| 218587_s_ | 0.001658 | 6.15E-04 | KTELC1   | 56983 . |
| 218588_s_ | 0.009414 | 0.004888 | FAM114A2 | 10827 . |
| 218589_at | 1.56E-06 | 8.99E-08 | P2RY5    | 10161 . |
| 218590_at | 1.97E-06 | 1.22E-07 | C10orf2  | 56652 . |
| 218591_s_ | 8.33E-05 | 1.54E-05 | NOL10    | 79954 . |
| 218592_s_ | 0.001028 | 3.45E-04 | CECR5    | 27440 . |
| 218593_at | 7.69E-05 | 1.39E-05 | RBM28    | 55131 . |
| 218595_s_ | 0.045997 | 0.031161 | HEATR1   | 55127 . |
| 218597_s_ | 1.13E-04 | 2.24E-05 | CISD1    | 55847 . |
| 218599_at | 2.32E-07 | 7.13E-09 | REC8     | 9985 .  |
| 218600_at | 1.64E-04 | 3.59E-05 | LIMD2    | 80774 . |
| 218601_at | 6.07E-04 | 1.81E-04 | URG4     | 55665 . |
| 218602_s_ | 2.12E-07 | 6.24E-09 | HAUS6    | 54801 . |
| 218603_at | 0.014924 | 0.0084   | HECA     | 51696 . |
| 218605_at | 0.002763 | 0.001137 | TFB2M    | 64216 . |
| 218606_at | 2.72E-05 | 3.68E-06 | ZDHHC7   | 55625 . |
| 218608_at | 9.58E-05 | 1.83E-05 | ATP13A2  | 23400 . |
| 218609_s_ | 0.002148 | 8.42E-04 | NUDT2    | 318 .   |
| 218610_s_ | 0.005518 | 0.002606 | CPPED1   | 55313 . |
| 218611_at | 0.012298 | 0.006691 | IER5     | 51278 . |

|           |          |          |           |         |
|-----------|----------|----------|-----------|---------|
| 218612_s_ | 0.005105 | 0.002377 | TSSC4     | 10078 . |
| 218613_at | 0.008164 | 0.004138 | PSD3      | 23362 . |
| 218614_at | 3.09E-09 | 2.24E-11 | C12orf35  | 55196 . |
| 218616_at | 1.41E-05 | 1.60E-06 | INTS12    | 57117 . |
| 218617_at | 5.50E-05 | 9.01E-06 | TRIT1     | 54802 . |
| 218618_s_ | 6.95E-06 | 6.25E-07 | FNDC3B    | 64778 . |
| 218619_s_ | 5.40E-04 | 1.56E-04 | SUV39H1   | 6839 .  |
| 218620_s_ | 0.002709 | 0.001111 | HEMK1     | 51409 . |
| 218622_at | 3.66E-05 | 5.36E-06 | NUP37     | 79023 . |
| 218623_at | 3.61E-06 | 2.67E-07 | HMP19     | 51617 . |
| 218624_s_ | 0.002743 | 0.001128 | MGC2752   | 65996 . |
| 218625_at | 0.001198 | 4.16E-04 | NRN1      | 51299 . |
| 218626_at | 0.016849 | 0.009679 | EIF4ENIF1 | 56478 . |
| 218627_at | 9.61E-05 | 1.83E-05 | DRAM      | 55332 . |
| 218628_at | 1.19E-06 | 6.26E-08 | CCDC53    | 51019 . |
| 218629_at | 0.013947 | 0.007749 | SMO       | 6608 .  |
| 218630_at | 4.21E-05 | 6.44E-06 | MKS1      | 54903 . |
| 218631_at | 1.94E-04 | 4.40E-05 | AVPI1     | 60370 . |
| 218632_at | 0.002411 | 9.67E-04 | HECTD3    | 79654 . |
| 218634_at | 2.13E-07 | 6.33E-09 | PHLDA3    | 23612 . |
| 218636_s_ | 6.39E-05 | 1.09E-05 | MAN1B1    | 11253 . |
| 218638_s_ | 5.96E-07 | 2.49E-08 | SPON2     | 10417 . |
| 218639_s_ | 3.16E-04 | 8.10E-05 | ZXDC      | 79364 . |
| 218643_s_ | 0.002139 | 8.37E-04 | CRIP1     | 9419 .  |
| 218647_s_ | 1.83E-05 | 2.23E-06 | YRDC      | 79693 . |
| 218648_at | 5.60E-07 | 2.29E-08 | CRTC3     | 64784 . |
| 218651_s_ | 6.89E-06 | 6.19E-07 | LARP6     | 55323 . |
| 218652_s_ | 0.002076 | 8.08E-04 | PIGG      | 54872 . |
| 218653_at | 8.64E-08 | 1.87E-09 | SLC25A15  | 10166 . |
| 218654_s_ | 0.037776 | 0.024791 | MRPS33    | 51650 . |
| 218655_s_ | 0.002492 | 0.001006 | CCDC49    | 54883 . |
| 218656_s_ | 1.51E-06 | 8.60E-08 | LHFP      | 10186 . |
| 218657_at | 0.007655 | 0.00384  | RAPGEFL1  | 51195 . |
| 218658_s_ | 0.014551 | 0.008148 | ACTR8     | 93973 . |

|           |          |          |          |         |
|-----------|----------|----------|----------|---------|
| 218659_at | 0.005123 | 0.002386 | ASXL2    | 55252 . |
| 218661_at | 0.033386 | 0.021488 | NAT15    | 79903 . |
| 218662_s_ | 5.18E-05 | 8.38E-06 | NCAPG    | 64151 . |
| 218663_at | 4.16E-04 | 1.13E-04 | NCAPG    | 64151 . |
| 218666_s_ | 0.005726 | 0.00272  | STX17    | 55014 . |
| 218668_s_ | 0.024273 | 0.01483  | RAP2C    | 57826 . |
| 218670_at | 2.94E-05 | 4.07E-06 | PUS1     | 80324 . |
| 218671_s_ | 0.016514 | 0.009458 | ATPIF1   | 93974 . |
| 218672_at | 3.06E-04 | 7.79E-05 | SCNM1    | 79005 . |
| 218673_s_ | 0.004826 | 0.002222 | ATG7     | 10533 . |
| 218675_at | 0.014229 | 0.007935 | SLC22A17 | 51310 . |
| 218676_s_ | 2.89E-04 | 7.24E-05 | PCTP     | 58488 . |
| 218677_at | 3.19E-07 | 1.10E-08 | S100A14  | 57402 . |
| 218678_at | 0.001691 | 6.30E-04 | NES      | 10763 . |
| 218679_s_ | 0.001181 | 4.09E-04 | VPS28    | 51160 . |
| 218680_x_ | 8.15E-06 | 7.71E-07 | HYPK     | 25764 . |
| 218681_s_ | 0.002471 | 9.96E-04 | SDF2L1   | 23753 . |
| 218682_s_ | 1.30E-04 | 2.66E-05 | SLC4A1AP | 22950 . |
| 218683_at | 1.34E-04 | 2.80E-05 | PTBP2    | 58155 . |
| 218684_at | 1.93E-04 | 4.38E-05 | LRRRC8D  | 55144 . |
| 218686_s_ | 7.53E-05 | 1.35E-05 | RHBDF1   | 64285 . |
| 218687_s_ | 1.27E-05 | 1.39E-06 | MUC13    | 56667 . |
| 218688_at | 0.039247 | 0.025908 | DAK      | 26007 . |
| 218690_at | 0.004047 | 0.001797 | PDLIM4   | 8572 .  |
| 218691_s_ | 7.18E-04 | 2.22E-04 | PDLIM4   | 8572 .  |
| 218692_at | 0.019961 | 0.011798 | GOLSYN   | 55638 . |
| 218694_at | 0.002398 | 9.61E-04 | ARMCX1   | 51309 . |
| 218695_at | 1.83E-07 | 5.11E-09 | EXOSC4   | 54512 . |
| 218698_at | 0.008914 | 0.004585 | APIP     | 51074 . |
| 218699_at | 2.93E-07 | 9.80E-09 | RAB7L1   | 8934 .  |
| 218700_s_ | 2.61E-08 | 3.79E-10 | RAB7L1   | 8934 .  |
| 218701_at | 0.040732 | 0.027048 | LACTB2   | 51110 . |
| 218703_at | 4.12E-04 | 1.12E-04 | SEC22A   | 26984 . |
| 218704_at | 1.59E-05 | 1.87E-06 | RNF43    | 54894 . |

|           |          |          |                              |         |
|-----------|----------|----------|------------------------------|---------|
| 218705_s_ | 0.017232 | 0.009933 | SNX24                        | 28966 . |
| 218706_s_ | 2.62E-05 | 3.52E-06 | GRAMD3                       | 65983 . |
| 218707_at | 0.020486 | 0.012165 | ZNF444                       | 55311 . |
| 218708_at | 9.37E-06 | 9.34E-07 | NXT1                         | 29107 . |
| 218709_s_ | 0.026775 | 0.016631 | IFT52                        | 51098 . |
| 218712_at | 0.004942 | 0.002284 | C1orf109                     | 54955 . |
| 218713_at | 0.001072 | 3.63E-04 | NARG2                        | 79664 . |
| 218714_at | 1.03E-04 | 2.01E-05 | PRR14                        | 78994 . |
| 218715_at | 0.005436 | 0.002558 | UTP6                         | 55813 . |
| 218717_s_ | 2.06E-04 | 4.76E-05 | LEPREL1                      | 55214 . |
| 218719_s_ | 4.64E-05 | 7.29E-06 | GINS3                        | 64785 . |
| 218720_x_ | 0.015227 | 0.0086   | LOC652900 /// 26470 /// 657. |         |
| 218721_s_ | 1.86E-04 | 4.19E-05 | C1orf27                      | 54953 . |
| 218722_s_ | 4.82E-04 | 1.36E-04 | CCDC51                       | 79714 . |
| 218723_s_ | 4.34E-04 | 1.19E-04 | C13orf15                     | 28984 . |
| 218724_s_ | 1.54E-05 | 1.79E-06 | TGIF2                        | 60436 . |
| 218726_at | 1.57E-05 | 1.83E-06 | HJURP                        | 55355 . |
| 218728_s_ | 0.001232 | 4.30E-04 | CNIH4                        | 29097 . |
| 218729_at | 4.53E-08 | 7.91E-10 | LXN                          | 56925 . |
| 218730_s_ | 2.87E-06 | 1.99E-07 | OGN                          | 4969 .  |
| 218731_s_ | 0.012065 | 0.00654  | LOC727901 /// 64856 /// 727. |         |
| 218732_at | 1.81E-06 | 1.11E-07 | PTRH2                        | 51651 . |
| 218733_at | 2.50E-06 | 1.66E-07 | MSL2                         | 55167 . |
| 218734_at | 0.001187 | 4.12E-04 | NAT11                        | 79829 . |
| 218737_at | 2.34E-06 | 1.53E-07 | SBNO1                        | 55206 . |
| 218738_s_ | 4.41E-08 | 7.63E-10 | RNF138                       | 51444 . |
| 218739_at | 9.50E-05 | 1.81E-05 | ABHD5                        | 51099 . |
| 218740_s_ | 3.31E-04 | 8.58E-05 | CDK5RAP3                     | 80279 . |
| 218741_at | 2.84E-05 | 3.90E-06 | CENPM                        | 79019 . |
| 218742_at | 0.002047 | 7.93E-04 | NARFL                        | 64428 . |
| 218743_at | 1.08E-06 | 5.47E-08 | CHMP6                        | 79643 . |
| 218744_s_ | 0.024516 | 0.015006 | PACSIN3                      | 29763 . |
| 218746_at | 2.62E-06 | 1.77E-07 | TAPBPL                       | 55080 . |
| 218747_s_ | 6.35E-06 | 5.56E-07 | TAPBPL                       | 55080 . |

|           |          |          |          |         |
|-----------|----------|----------|----------|---------|
| 218748_s_ | 8.22E-07 | 3.82E-08 | EXOC5    | 10640 . |
| 218749_s_ | 0.006558 | 0.003196 | SLC24A6  | 80024 . |
| 218750_at | 2.20E-05 | 2.82E-06 | TAF1D    | 79101 . |
| 218751_s_ | 0.005464 | 0.002574 | FBXW7    | 55294 . |
| 218753_at | 5.36E-04 | 1.55E-04 | XKR8     | 55113 . |
| 218754_at | 1.38E-05 | 1.56E-06 | NOL9     | 79707 . |
| 218755_at | 0.001077 | 3.65E-04 | KIF20A   | 10112 . |
| 218756_s_ | 2.67E-05 | 3.60E-06 | DHRS11   | 79154 . |
| 218757_s_ | 7.41E-05 | 1.32E-05 | UPF3B    | 65109 . |
| 218758_s_ | 2.28E-04 | 5.39E-05 | RRP1     | 8568 .  |
| 218760_at | 4.63E-04 | 1.29E-04 | COQ6     | 51004 . |
| 218761_at | 0.003462 | 0.001492 | RNF111   | 54778 . |
| 218762_at | 0.004804 | 0.00221  | ZNF574   | 64763 . |
| 218763_at | 0.005994 | 0.002875 | STX18    | 53407 . |
| 218765_at | 1.54E-06 | 8.81E-08 | SIDT2    | 51092 . |
| 218767_at | 2.25E-04 | 5.29E-05 | REXO4    | 57109 . |
| 218768_at | 4.42E-08 | 7.67E-10 | NUP107   | 57122 . |
| 218770_s_ | 4.30E-05 | 6.61E-06 | TMEM39B  | 55116 . |
| 218771_at | 8.17E-05 | 1.50E-05 | PANK4    | 55229 . |
| 218773_s_ | 4.49E-05 | 6.99E-06 | MSRB2    | 22921 . |
| 218774_at | 0.032599 | 0.020894 | DCPS     | 28960 . |
| 218775_s_ | 0.022512 | 0.01359  | WWC2     | 80014 . |
| 218776_s_ | 0.006101 | 0.002934 | TMEM62   | 80021 . |
| 218777_at | 0.001053 | 3.55E-04 | REEP4    | 80346 . |
| 218778_x_ | 1.89E-04 | 4.28E-05 | EPS8L1   | 54869 . |
| 218779_x_ | 1.75E-04 | 3.88E-05 | EPS8L1   | 54869 . |
| 218781_at | 0.007421 | 0.003703 | SMC6     | 79677 . |
| 218782_s_ | 2.86E-06 | 1.98E-07 | ATAD2    | 29028 . |
| 218783_at | 1.15E-04 | 2.29E-05 | INTS7    | 25896 . |
| 218784_s_ | 0.002044 | 7.92E-04 | C6orf64  | 55776 . |
| 218785_s_ | 2.75E-04 | 6.83E-05 | RABL5    | 64792 . |
| 218786_at | 0.012063 | 0.006539 | NT5DC3   | 51559 . |
| 218789_s_ | 0.006484 | 0.003153 | C11orf71 | 54494 . |
| 218792_s_ | 2.44E-07 | 7.66E-09 | BSPRY    | 54836 . |

|           |          |          |                              |         |
|-----------|----------|----------|------------------------------|---------|
| 218793_s_ | 2.53E-06 | 1.69E-07 | SCML1                        | 6322 .  |
| 218794_s_ | 3.61E-06 | 2.67E-07 | TXNL4B                       | 54957 . |
| 218795_at | 4.38E-05 | 6.77E-06 | ACP6                         | 51205 . |
| 218796_at | 0.0391   | 0.025796 | FERMT1                       | 55612 . |
| 218797_s_ | 0.034086 | 0.022001 | SIRT7                        | 51547 . |
| 218798_at | 1.38E-04 | 2.90E-05 | KRI1                         | 65095 . |
| 218801_at | 0.00374  | 0.001637 | UGCGL2                       | 55757 . |
| 218802_at | 0.029469 | 0.018583 | CCDC109B                     | 55013 . |
| 218805_at | 5.00E-05 | 8.01E-06 | GIMAP5                       | 55340 . |
| 218806_s_ | 0.009877 | 0.005172 | VAV3                         | 10451 . |
| 218807_at | 0.006856 | 0.003371 | VAV3                         | 10451 . |
| 218808_at | 0.046624 | 0.031653 | DALRD3                       | 55152 . |
| 218811_at | 0.024568 | 0.015045 | ORAI2                        | 80228 . |
| 218813_s_ | 5.41E-04 | 1.57E-04 | SH3GLB2                      | 56904 . |
| 218815_s_ | 1.00E-05 | 1.02E-06 | TMEM51                       | 55092 . |
| 218817_at | 6.98E-04 | 2.15E-04 | SPCS3                        | 60559 . |
| 218818_at | 3.73E-06 | 2.79E-07 | FHL3                         | 2275 .  |
| 218819_at | 6.48E-04 | 1.96E-04 | INTS6                        | 26512 . |
| 218820_at | 0.001813 | 6.85E-04 | C14orf132                    | 56967 . |
| 218823_s_ | 0.00201  | 7.77E-04 | KCTD9                        | 54793 . |
| 218824_at | 0.020007 | 0.011832 | PNMAL1                       | 55228 . |
| 218826_at | 1.98E-07 | 5.67E-09 | SLC35F2                      | 54733 . |
| 218827_s_ | 7.13E-04 | 2.21E-04 | CEP192                       | 55125 . |
| 218828_at | 3.82E-07 | 1.39E-08 | PLSCR3                       | 57048 . |
| 218829_s_ | 1.01E-08 | 1.07E-10 | CHD7                         | 55636 . |
| 218830_at | 0.006658 | 0.003255 | RPL26L1                      | 51121 . |
| 218831_s_ | 0.036679 | 0.023957 | FCGRT                        | 2217 .  |
| 218833_at | 7.29E-04 | 2.27E-04 | ZAK                          | 51776 . |
| 218835_at | 0.004279 | 0.00192  | SFTPA2 /// SFT 6436 /// 7297 |         |
| 218836_at | 1.97E-06 | 1.22E-07 | RPP21 /// TRIM 202658 /// 75 |         |
| 218837_s_ | 6.29E-05 | 1.07E-05 | UBE2D4                       | 51619 . |
| 218838_s_ | 0.047656 | 0.032467 | TTC31                        | 64427 . |
| 218839_at | 0.02776  | 0.017337 | HEY1                         | 23462 . |
| 218840_s_ | 8.81E-07 | 4.19E-08 | NADSYN1                      | 55191 . |

|           |          |          |            |          |
|-----------|----------|----------|------------|----------|
| 218841_at | 9.55E-06 | 9.58E-07 | ASB8       | 140461 . |
| 218842_at | 0.002584 | 0.00105  | RPAP3      | 79657 .  |
| 218843_at | 2.03E-05 | 2.54E-06 | FNDC4      | 64838 .  |
| 218847_at | 2.41E-05 | 3.16E-06 | IGF2BP2    | 10644 .  |
| 218848_at | 4.94E-05 | 7.89E-06 | THOC6      | 79228 .  |
| 218849_s_ | 4.04E-05 | 6.06E-06 | PPP1R13L   | 10848 .  |
| 218852_at | 0.02871  | 0.018035 | PPP2R3C    | 55012 .  |
| 218854_at | 0.003753 | 0.001644 | DSE        | 29940 .  |
| 218855_at | 8.04E-04 | 2.56E-04 | GPR175     | 131601 . |
| 218856_at | 6.28E-05 | 1.07E-05 | TNFRSF21   | 27242 .  |
| 218857_s_ | 7.21E-07 | 3.22E-08 | ASRGL1     | 80150 .  |
| 218859_s_ | 8.90E-07 | 4.25E-08 | ESF1       | 51575 .  |
| 218860_at | 3.95E-05 | 5.89E-06 | NOC4L      | 79050 .  |
| 218861_at | 1.81E-04 | 4.05E-05 | RNF25      | 64320 .  |
| 218862_at | 0.014657 | 0.008219 | ASB13      | 79754 .  |
| 218863_s_ | 2.37E-05 | 3.10E-06 | TNS1       | 7145 .   |
| 218864_at | 1.09E-07 | 2.56E-09 | TNS1       | 7145 .   |
| 218865_at | 2.07E-04 | 4.77E-05 | MOSC1      | 64757 .  |
| 218866_s_ | 8.06E-06 | 7.59E-07 | POLR3K     | 51728 .  |
| 218867_s_ | 0.023103 | 0.014001 | C12orf49   | 79794 .  |
| 218868_at | 7.66E-04 | 2.41E-04 | ACTR3B     | 57180 .  |
| 218871_x_ | 7.74E-05 | 1.40E-05 | CSGALNACT2 | 55454 .  |
| 218873_at | 0.005975 | 0.002863 | GON4L      | 54856 .  |
| 218875_s_ | 2.56E-06 | 1.71E-07 | FBXO5      | 26271 .  |
| 218877_s_ | 0.006391 | 0.0031   | TRMT11     | 60487 .  |
| 218878_s_ | 8.95E-07 | 4.28E-08 | SIRT1      | 23411 .  |
| 218880_at | 2.97E-04 | 7.50E-05 | FOSL2      | 2355 .   |
| 218881_s_ | 6.60E-06 | 5.84E-07 | FOSL2      | 2355 .   |
| 218882_s_ | 8.62E-07 | 4.06E-08 | WDR3       | 10885 .  |
| 218883_s_ | 7.28E-06 | 6.66E-07 | MLF1IP     | 79682 .  |
| 218885_s_ | 0.032031 | 0.020475 | GALNT12    | 79695 .  |
| 218886_at | 1.93E-05 | 2.38E-06 | PAK1IP1    | 55003 .  |
| 218888_s_ | 7.78E-06 | 7.28E-07 | NETO2      | 81831 .  |
| 218889_at | 1.27E-04 | 2.60E-05 | NOC3L      | 64318 .  |

|           |          |          |          |         |
|-----------|----------|----------|----------|---------|
| 218890_x_ | 1.73E-05 | 2.07E-06 | MRPL35   | 51318 . |
| 218891_at | 0.00181  | 6.84E-04 | C10orf76 | 79591 . |
| 218892_at | 0.009742 | 0.005091 | DCHS1    | 8642 .  |
| 218893_at | 0.03217  | 0.02058  | ISOC2    | 79763 . |
| 218894_s_ | 1.33E-04 | 2.77E-05 | MAGOHB   | 55110 . |
| 218896_s_ | 1.60E-04 | 3.46E-05 | C17orf85 | 55421 . |
| 218897_at | 9.19E-05 | 1.73E-05 | TMEM177  | 80775 . |
| 218898_at | 2.41E-08 | 3.39E-10 | FAM57A   | 79850 . |
| 218899_s_ | 9.01E-04 | 2.94E-04 | BAALC    | 79870 . |
| 218900_at | 0.006488 | 0.003156 | CNNM4    | 26504 . |
| 218901_at | 3.37E-04 | 8.77E-05 | PLSCR4   | 57088 . |
| 218902_at | 0.048309 | 0.032976 | NOTCH1   | 4851 .  |
| 218905_at | 2.94E-05 | 4.07E-06 | INTS8    | 55656 . |
| 218906_x_ | 0.003575 | 0.00155  | KLC2     | 64837 . |
| 218907_s_ | 0.036914 | 0.024135 | LRRRC61  | 65999 . |
| 218910_at | 1.96E-07 | 5.62E-09 | ANO10    | 55129 . |
| 218911_at | 1.87E-04 | 4.23E-05 | YEATS4   | 8089 .  |
| 218912_at | 0.002542 | 0.00103  | GCC1     | 79571 . |
| 218913_s_ | 0.047127 | 0.032055 | GMIP     | 51291 . |
| 218915_at | 1.85E-04 | 4.17E-05 | NF2      | 4771 .  |
| 218917_s_ | 2.35E-04 | 5.60E-05 | ARID1A   | 8289 .  |
| 218919_at | 0.041394 | 0.02756  | ZFAND1   | 79752 . |
| 218920_at | 0.010828 | 0.005763 | FLJ10404 | 54540 . |
| 218922_s_ | 1.49E-04 | 3.16E-05 | LASS4    | 79603 . |
| 218923_at | 0.003341 | 0.00143  | CTBS     | 1486 .  |
| 218924_s_ | 9.65E-04 | 3.20E-04 | CTBS     | 1486 .  |
| 218927_s_ | 3.91E-04 | 1.05E-04 | CHST12   | 55501 . |
| 218928_s_ | 0.001057 | 3.57E-04 | SLC37A1  | 54020 . |
| 218930_s_ | 0.012618 | 0.006899 | TMEM106B | 54664 . |
| 218931_at | 8.71E-07 | 4.13E-08 | RAB17    | 64284 . |
| 218932_at | 2.94E-05 | 4.07E-06 | ZNHIT6   | 54680 . |
| 218933_at | 0.001956 | 7.51E-04 | SPATA5L1 | 79029 . |
| 218934_s_ | 3.10E-06 | 2.19E-07 | HSPB7    | 27129 . |
| 218935_at | 6.31E-06 | 5.50E-07 | EHD3     | 30845 . |



|           |          |          |                            |         |
|-----------|----------|----------|----------------------------|---------|
| 218936_s_ | 7.91E-04 | 2.51E-04 | CCDC59                     | 29080 . |
| 218938_at | 0.001928 | 7.38E-04 | FBXL15                     | 79176 . |
| 218939_at | 0.022904 | 0.013863 | LETM1                      | 3954 .  |
| 218941_at | 3.14E-04 | 8.05E-05 | FBXW2                      | 26190 . |
| 218945_at | 4.31E-04 | 1.18E-04 | C16orf68                   | 79091 . |
| 218947_s_ | 4.81E-07 | 1.88E-08 | MTPAP                      | 55149 . |
| 218948_at | 0.032232 | 0.020628 | QRSL1                      | 55278 . |
| 218949_s_ | 2.31E-05 | 2.99E-06 | QRSL1                      | 55278 . |
| 218951_s_ | 2.66E-05 | 3.58E-06 | PLCXD1                     | 55344 . |
| 218954_s_ | 0.007074 | 0.0035   | BRF2                       | 55290 . |
| 218955_at | 0.007159 | 0.003549 | BRF2                       | 55290 . |
| 218956_s_ | 0.034465 | 0.02228  | PTCD1                      | 26024 . |
| 218959_at | 5.53E-09 | 4.91E-11 | HOXC10                     | 3226 .  |
| 218960_at | 0.002799 | 0.001156 | TMPRSS4                    | 56649 . |
| 218962_s_ | 0.02146  | 0.012852 | TMEM168                    | 64418 . |
| 218964_at | 4.64E-11 | 9.54E-14 | ARID3B                     | 10620 . |
| 218965_s_ | 2.39E-04 | 5.71E-05 | TUT1                       | 64852 . |
| 218966_at | 8.37E-05 | 1.55E-05 | MYO5C                      | 55930 . |
| 218968_s_ | 0.019719 | 0.011632 | ZFP64                      | 55734 . |
| 218969_at | 0.002102 | 8.20E-04 | Magmas                     | 51025 . |
| 218970_s_ | 0.002954 | 0.001231 | CUTC                       | 51076 . |
| 218972_at | 1.06E-04 | 2.07E-05 | TTC17                      | 55761 . |
| 218973_at | 0.015461 | 0.008759 | EFTUD1                     | 79631 . |
| 218974_at | 0.0096   | 0.005    | SOBP                       | 55084 . |
| 218975_at | 1.77E-06 | 1.07E-07 | COL5A3                     | 50509 . |
| 218978_s_ | 0.010833 | 0.005766 | SLC25A37                   | 51312 . |
| 218979_at | 3.85E-04 | 1.03E-04 | RMI1                       | 80010 . |
| 218980_at | 3.97E-05 | 5.92E-06 | FHOD3                      | 80206 . |
| 218981_at | 0.007277 | 0.003618 | ACN9                       | 57001 . |
| 218982_s_ | 0.028438 | 0.017823 | MRPS17 /// ZN349075 /// 5: |         |
| 218983_at | 0.001109 | 3.79E-04 | C1RL                       | 51279 . |
| 218984_at | 1.88E-05 | 2.30E-06 | PUS7                       | 54517 . |
| 218985_at | 0.035386 | 0.022972 | SLC2A8                     | 29988 . |
| 218986_s_ | 0.005984 | 0.002869 | DDX60                      | 55601 . |

|           |          |          |          |          |
|-----------|----------|----------|----------|----------|
| 218988_at | 0.044224 | 0.029775 | SLC35E3  | 55508 .  |
| 218990_s_ | 9.36E-12 | 1.27E-14 | SPRR3    | 6707 .   |
| 218991_at | 9.61E-04 | 3.18E-04 | HEATR6   | 63897 .  |
| 218993_at | 1.01E-04 | 1.95E-05 | RNMTL1   | 55178 .  |
| 218994_s_ | 0.021032 | 0.012559 | STAG3L4  | 64940 .  |
| 218996_at | 8.66E-05 | 1.61E-05 | TFPT     | 29844 .  |
| 218997_at | 2.49E-04 | 6.03E-05 | POLR1E   | 64425 .  |
| 218998_at | 3.38E-04 | 8.79E-05 | C9orf6   | 54942 .  |
| 218999_at | 0.002396 | 9.60E-04 | TMEM140  | 55281 .  |
| 219000_s_ | 4.39E-06 | 3.45E-07 | DSCC1    | 79075 .  |
| 219001_s_ | 2.60E-04 | 6.34E-05 | WDR32    | 79269 .  |
| 219002_at | 1.89E-05 | 2.31E-06 | FASTKD1  | 79675 .  |
| 219003_s_ | 3.09E-05 | 4.34E-06 | MANEA    | 79694 .  |
| 219004_s_ | 1.71E-05 | 2.04E-06 | C21orf45 | 54069 .  |
| 219005_at | 1.26E-04 | 2.56E-05 | TMEM59L  | 25789 .  |
| 219006_at | 1.11E-04 | 2.18E-05 | NDUFAF4  | 29078 .  |
| 219007_at | 1.56E-07 | 4.14E-09 | NUP43    | 348995 . |
| 219010_at | 8.37E-05 | 1.55E-05 | C1orf106 | 55765 .  |
| 219011_at | 3.71E-04 | 9.86E-05 | PLEKHA4  | 57664 .  |
| 219012_s_ | 0.013486 | 0.007454 | C11orf30 | 56946 .  |
| 219015_s_ | 2.72E-04 | 6.71E-05 | ALG13    | 79868 .  |
| 219016_at | 0.016311 | 0.009324 | FASTKD5  | 60493 .  |
| 219019_at | 0.001252 | 4.39E-04 | LRDD     | 55367 .  |
| 219020_at | 0.001009 | 3.37E-04 | HS1BP3   | 64342 .  |
| 219021_at | 1.98E-04 | 4.53E-05 | RNF121   | 55298 .  |
| 219023_at | 0.011519 | 0.006193 | C4orf16  | 55435 .  |
| 219024_at | 0.00676  | 0.003314 | PLEKHA1  | 59338 .  |
| 219025_at | 2.59E-09 | 1.81E-11 | CD248    | 57124 .  |
| 219026_s_ | 0.009846 | 0.005152 | RASAL2   | 9462 .   |
| 219028_at | 4.05E-04 | 1.10E-04 | HIPK2    | 28996 .  |
| 219029_at | 3.04E-04 | 7.72E-05 | C5orf28  | 64417 .  |
| 219030_at | 2.66E-04 | 6.55E-05 | TPRKB    | 51002 .  |
| 219033_at | 0.004583 | 0.002088 | PARP8    | 79668 .  |
| 219034_at | 1.27E-04 | 2.60E-05 | PARP16   | 54956 .  |

|           |          |          |                             |         |
|-----------|----------|----------|-----------------------------|---------|
| 219035_s_ | 0.03173  | 0.02024  | RNF34                       | 80196 . |
| 219036_at | 0.014861 | 0.008359 | CEP70                       | 80321 . |
| 219037_at | 7.44E-04 | 2.33E-04 | RRP15                       | 51018 . |
| 219038_at | 7.37E-06 | 6.77E-07 | MORC4                       | 79710 . |
| 219039_at | 2.76E-04 | 6.84E-05 | SEMA4C                      | 54910 . |
| 219041_s_ | 0.005311 | 0.002488 | REPIN1                      | 29803 . |
| 219043_s_ | 1.10E-04 | 2.18E-05 | LOC285359 /// 285359 /// 75 | .       |
| 219045_at | 0.023102 | 0.013999 | RHOF                        | 54509 . |
| 219046_s_ | 0.002877 | 0.001193 | PKNOX2                      | 63876 . |
| 219047_s_ | 1.93E-05 | 2.38E-06 | ZNF668                      | 79759 . |
| 219048_at | 0.030988 | 0.019706 | PIGN                        | 23556 . |
| 219049_at | 0.020233 | 0.011987 | CSGALNACT1                  | 55790 . |
| 219050_s_ | 0.032019 | 0.020465 | ZNHIT2                      | 741 .   |
| 219052_at | 0.022239 | 0.013407 | HPS6                        | 79803 . |
| 219054_at | 4.59E-05 | 7.19E-06 | C5orf23                     | 79614 . |
| 219055_at | 0.041829 | 0.027892 | SRBD1                       | 55133 . |
| 219056_at | 1.05E-04 | 2.04E-05 | RNASEH2B                    | 79621 . |
| 219057_at | 0.001061 | 3.59E-04 | LOC100133585 100133585 //   | .       |
| 219058_x_ | 2.16E-04 | 5.03E-05 | TINAGL1                     | 64129 . |
| 219059_s_ | 1.49E-04 | 3.17E-05 | LYVE1                       | 10894 . |
| 219060_at | 0.00206  | 8.00E-04 | WDYHV1                      | 55093 . |
| 219061_s_ | 5.83E-06 | 5.00E-07 | LAGE3                       | 8270 .  |
| 219062_s_ | 3.22E-04 | 8.31E-05 | ZCCHC2                      | 54877 . |
| 219063_at | 9.89E-06 | 1.00E-06 | C1orf35                     | 79169 . |
| 219064_at | 0.006402 | 0.003107 | ITIH5                       | 80760 . |
| 219066_at | 0.047957 | 0.032693 | PPCDC                       | 60490 . |
| 219067_s_ | 3.01E-06 | 2.11E-07 | NSMCE4A                     | 54780 . |
| 219069_at | 0.001015 | 3.40E-04 | ANKRD49                     | 54851 . |
| 219070_s_ | 8.58E-06 | 8.27E-07 | MOSPD3                      | 64598 . |
| 219072_at | 0.00259  | 0.001054 | BCL7C                       | 9274 .  |
| 219074_at | 1.13E-04 | 2.25E-05 | TMEM184C                    | 55751 . |
| 219075_at | 2.29E-04 | 5.43E-05 | YIPF2                       | 78992 . |
| 219076_s_ | 2.61E-06 | 1.75E-07 | PXMP2                       | 5827 .  |
| 219077_s_ | 0.02734  | 0.017032 | WVOX                        | 51741 . |

|           |          |          |                             |         |
|-----------|----------|----------|-----------------------------|---------|
| 219079_at | 7.15E-04 | 2.21E-04 | CYB5R4                      | 51167 . |
| 219080_s_ | 7.97E-04 | 2.53E-04 | CTPS2                       | 56474 . |
| 219081_at | 5.84E-05 | 9.72E-06 | ANKHD1                      | 54882 . |
| 219084_at | 0.006975 | 0.003443 | NSD1                        | 64324 . |
| 219085_s_ | 1.82E-04 | 4.08E-05 | GEMIN7                      | 79760 . |
| 219087_at | 1.47E-08 | 1.72E-10 | ASPN                        | 54829 . |
| 219088_s_ | 1.16E-04 | 2.33E-05 | ZNF576                      | 79177 . |
| 219091_s_ | 0.04586  | 0.031051 | MMRN2                       | 79812 . |
| 219092_s_ | 5.52E-06 | 4.65E-07 | IPPK                        | 64768 . |
| 219093_at | 5.16E-04 | 1.48E-04 | PID1                        | 55022 . |
| 219094_at | 6.35E-04 | 1.91E-04 | ARMC8                       | 25852 . |
| 219096_at | 0.017821 | 0.010334 | ARMC7                       | 79637 . |
| 219097_x_ | 9.71E-05 | 1.86E-05 | C19orf42                    | 79086 . |
| 219098_at | 2.31E-04 | 5.48E-05 | MYBBP1A                     | 10514 . |
| 219099_at | 0.015986 | 0.009111 | C12orf5                     | 57103 . |
| 219101_x_ | 0.001715 | 6.41E-04 | ABHD8                       | 79575 . |
| 219102_at | 4.10E-09 | 3.32E-11 | RCN3                        | 57333 . |
| 219104_at | 0.027643 | 0.017253 | RNF141                      | 50862 . |
| 219105_x_ | 3.90E-08 | 6.38E-10 | ORC6L                       | 23594 . |
| 219107_at | 0.035352 | 0.022945 | BCAN                        | 63827 . |
| 219108_x_ | 1.10E-06 | 5.57E-08 | DDX27 /// SS1{55661 /// 67{ |         |
| 219110_at | 3.55E-04 | 9.34E-05 | GAR1                        | 54433 . |
| 219111_s_ | 6.23E-06 | 5.41E-07 | DDX54                       | 79039 . |
| 219112_at | 0.004295 | 0.00193  | RAPGEF6                     | 51735 . |
| 219113_x_ | 1.01E-04 | 1.96E-05 | HSD17B14                    | 51171 . |
| 219114_at | 3.44E-04 | 9.01E-05 | C3orf18                     | 51161 . |
| 219116_s_ | 3.72E-04 | 9.88E-05 | DCUN1D2                     | 55208 . |
| 219117_s_ | 0.015801 | 0.008982 | FKBP11                      | 51303 . |
| 219119_at | 0.013488 | 0.007455 | LSM8                        | 51691 . |
| 219120_at | 1.33E-05 | 1.47E-06 | C2orf44                     | 80304 . |
| 219121_s_ | 4.45E-14 | 1.03E-17 | ESRP1                       | 54845 . |
| 219122_s_ | 0.003921 | 0.001732 | THG1L                       | 54974 . |
| 219123_at | 3.92E-05 | 5.83E-06 | ZNF232                      | 7775 .  |
| 219124_at | 0.002732 | 0.001123 | C8orf41                     | 80185 . |

|           |          |          |           |          |
|-----------|----------|----------|-----------|----------|
| 219126_at | 2.27E-04 | 5.37E-05 | PHF10     | 55274 .  |
| 219128_at | 4.71E-07 | 1.83E-08 | C2orf42   | 54980 .  |
| 219129_s_ | 0.014891 | 0.008379 | SAP30L    | 79685 .  |
| 219130_at | 3.00E-04 | 7.60E-05 | CCDC76    | 54482 .  |
| 219131_at | 0.008373 | 0.004261 | UBIAD1    | 29914 .  |
| 219133_at | 8.01E-07 | 3.68E-08 | OXSM      | 54995 .  |
| 219134_at | 8.57E-12 | 1.05E-14 | ELTD1     | 64123 .  |
| 219135_s_ | 9.52E-06 | 9.54E-07 | LMF1      | 64788 .  |
| 219136_s_ | 0.007636 | 0.003829 | LMF1      | 64788 .  |
| 219137_s_ | 1.47E-04 | 3.13E-05 | MFF       | 56947 .  |
| 219139_s_ | 0.003249 | 0.001381 | CROCCL2   | 114819 . |
| 219141_s_ | 0.001025 | 3.44E-04 | AMBRA1    | 55626 .  |
| 219142_at | 1.01E-05 | 1.03E-06 | RASL11B   | 65997 .  |
| 219143_s_ | 0.030276 | 0.019186 | RPP25     | 54913 .  |
| 219145_at | 3.85E-06 | 2.91E-07 | LPHN1     | 22859 .  |
| 219146_at | 0.007668 | 0.003848 | C17orf42  | 79736 .  |
| 219147_s_ | 7.59E-04 | 2.38E-04 | C9orf95   | 54981 .  |
| 219148_at | 1.35E-04 | 2.82E-05 | PBK       | 55872 .  |
| 219149_x_ | 0.002837 | 0.001173 | DBR1      | 51163 .  |
| 219150_s_ | 0.008517 | 0.004347 | ADAP1     | 11033 .  |
| 219152_at | 2.61E-04 | 6.40E-05 | PODXL2    | 50512 .  |
| 219153_s_ | 0.024722 | 0.015155 | THSD4     | 79875 .  |
| 219154_at | 5.26E-04 | 1.51E-04 | TMEM120B  | 144404 . |
| 219155_at | 2.50E-04 | 6.06E-05 | PITPNC1   | 26207 .  |
| 219157_at | 0.020777 | 0.012378 | KLHL2     | 11275 .  |
| 219158_s_ | 1.22E-06 | 6.44E-08 | NARG1     | 80155 .  |
| 219159_s_ | 0.001939 | 7.44E-04 | SLAMF7    | 57823 .  |
| 219160_s_ | 0.034194 | 0.02208  | PAPOLG    | 64895 .  |
| 219161_s_ | 1.36E-05 | 1.53E-06 | CKLF      | 51192 .  |
| 219162_s_ | 0.004658 | 0.00213  | MRPL11    | 65003 .  |
| 219163_at | 2.41E-08 | 3.39E-10 | ZNF562    | 54811 .  |
| 219164_s_ | 6.97E-05 | 1.22E-05 | ATG2B     | 55102 .  |
| 219165_at | 2.84E-04 | 7.10E-05 | PDLIM2    | 64236 .  |
| 219166_at | 2.74E-05 | 3.72E-06 | C14orf104 | 55172 .  |

|           |          |          |         |         |
|-----------|----------|----------|---------|---------|
| 219167_at | 0.036666 | 0.023947 | RASL12  | 51285 . |
| 219168_s_ | 0.008197 | 0.004158 | PRR5    | 55615 . |
| 219169_s_ | 1.93E-04 | 4.37E-05 | TFB1M   | 51106 . |
| 219170_at | 0.04143  | 0.027587 | FSD1    | 79187 . |
| 219172_at | 0.006564 | 0.003199 | UBTD1   | 80019 . |
| 219173_at | 2.07E-04 | 4.79E-05 | MYO15B  | 80022 . |
| 219174_at | 0.049546 | 0.033965 | IFT74   | 80173 . |
| 219175_s_ | 6.15E-04 | 1.84E-04 | SLC41A3 | 54946 . |
| 219176_at | 2.63E-04 | 6.44E-05 | C2orf47 | 79568 . |
| 219177_at | 2.90E-04 | 7.27E-05 | BXDC2   | 55299 . |
| 219178_at | 1.53E-04 | 3.30E-05 | QTRTD1  | 79691 . |
| 219179_at | 1.42E-04 | 2.99E-05 | DACT1   | 51339 . |
| 219180_s_ | 0.001606 | 5.92E-04 | PEX26   | 55670 . |
| 219181_at | 0.004184 | 0.00187  | LIPG    | 9388 .  |
| 219183_s_ | 1.63E-04 | 3.55E-05 | CYTH4   | 27128 . |
| 219186_at | 1.53E-05 | 1.78E-06 | ZBTB7A  | 51341 . |
| 219188_s_ | 0.003064 | 0.001288 | MACROD1 | 28992 . |
| 219191_s_ | 0.005255 | 0.002457 | BIN2    | 51411 . |
| 219192_at | 6.01E-05 | 1.01E-05 | UBAP2   | 55833 . |
| 219193_at | 0.005421 | 0.00255  | WDR70   | 55100 . |
| 219194_at | 0.0023   | 9.14E-04 | SEMA4G  | 57715 . |
| 219196_at | 9.42E-10 | 4.95E-12 | SCG3    | 29106 . |
| 219197_s_ | 1.83E-06 | 1.12E-07 | SCUBE2  | 57758 . |
| 219198_at | 0.008057 | 0.004078 | GTF3C4  | 9329 .  |
| 219199_at | 6.42E-05 | 1.10E-05 | AFF4    | 27125 . |
| 219200_at | 2.10E-04 | 4.88E-05 | FASTKD3 | 79072 . |
| 219201_s_ | 1.69E-08 | 2.14E-10 | TWSG1   | 57045 . |
| 219202_at | 0.010924 | 0.005821 | RHBDF2  | 79651 . |
| 219203_at | 1.06E-04 | 2.06E-05 | FAM158A | 51016 . |
| 219204_s_ | 3.53E-04 | 9.28E-05 | SRR     | 63826 . |
| 219205_at | 1.22E-04 | 2.46E-05 | SRR     | 63826 . |
| 219206_x_ | 7.53E-04 | 2.36E-04 | TMBIM4  | 51643 . |
| 219208_at | 0.001165 | 4.02E-04 | FBXO11  | 80204 . |
| 219209_at | 1.09E-05 | 1.13E-06 | IFIH1   | 64135 . |

|           |          |          |                           |          |
|-----------|----------|----------|---------------------------|----------|
| 219210_s_ | 8.78E-04 | 2.85E-04 | RAB8B                     | 51762 .  |
| 219211_at | 3.75E-04 | 9.99E-05 | USP18                     | 11274 .  |
| 219212_at | 2.89E-05 | 3.98E-06 | HSPA14                    | 51182 .  |
| 219215_s_ | 1.62E-04 | 3.52E-05 | SLC39A4                   | 55630 .  |
| 219217_at | 5.65E-05 | 9.32E-06 | NARS2                     | 79731 .  |
| 219219_at | 1.12E-06 | 5.70E-08 | TMEM160                   | 54958 .  |
| 219220_x_ | 0.001123 | 3.84E-04 | MRPS22                    | 56945 .  |
| 219221_at | 6.27E-04 | 1.88E-04 | ZBTB38                    | 253461 . |
| 219223_at | 3.70E-04 | 9.81E-05 | C9orf7                    | 11094 .  |
| 219225_at | 4.38E-04 | 1.21E-04 | LOC100134440(100134440 // | .        |
| 219226_at | 8.83E-07 | 4.20E-08 | CRKRS                     | 51755 .  |
| 219227_at | 7.31E-04 | 2.28E-04 | CCNJL                     | 79616 .  |
| 219228_at | 0.002416 | 9.70E-04 | ZNF331                    | 55422 .  |
| 219230_at | 0.004006 | 0.001775 | TMEM100                   | 55273 .  |
| 219231_at | 6.68E-04 | 2.03E-04 | TGS1                      | 96764 .  |
| 219232_s_ | 1.21E-04 | 2.46E-05 | EGLN3                     | 112399 . |
| 219234_x_ | 5.76E-06 | 4.91E-07 | SCRN3                     | 79634 .  |
| 219235_s_ | 0.008834 | 0.004536 | PHACTR4                   | 65979 .  |
| 219236_at | 7.86E-04 | 2.49E-04 | PAQR6                     | 79957 .  |
| 219238_at | 0.002817 | 0.001164 | PIGV                      | 55650 .  |
| 219240_s_ | 0.005667 | 0.002687 | C10orf88                  | 80007 .  |
| 219241_x_ | 4.79E-04 | 1.35E-04 | SSH3                      | 54961 .  |
| 219242_at | 0.005887 | 0.002814 | CEP63                     | 80254 .  |
| 219244_s_ | 5.33E-05 | 8.68E-06 | MRPL46                    | 26589 .  |
| 219247_s_ | 0.018321 | 0.010676 | ZDHHC14                   | 79683 .  |
| 219248_at | 2.58E-05 | 3.45E-06 | THUMPD2                   | 80745 .  |
| 219249_s_ | 0.035562 | 0.023111 | FKBP10                    | 60681 .  |
| 219250_s_ | 2.03E-04 | 4.65E-05 | FLRT3                     | 23767 .  |
| 219252_s_ | 0.005262 | 0.002461 | GEMIN8                    | 54960 .  |
| 219253_at | 1.26E-05 | 1.37E-06 | TMEM185B                  | 79134 .  |
| 219254_at | 3.51E-04 | 9.21E-05 | C17orf101                 | 79701 .  |
| 219255_x_ | 0.001053 | 3.55E-04 | IL17RB                    | 55540 .  |
| 219257_s_ | 2.06E-04 | 4.76E-05 | SPHK1                     | 8877 .   |
| 219258_at | 4.46E-05 | 6.92E-06 | TIPIN                     | 54962 .  |

|           |          |          |              |               |
|-----------|----------|----------|--------------|---------------|
| 219259_at | 0.001882 | 7.17E-04 | SEMA4A       | 64218 .       |
| 219261_at | 0.00817  | 0.004141 | C7orf26      | 79034 .       |
| 219262_at | 2.20E-05 | 2.82E-06 | SUV39H2      | 79723 .       |
| 219264_s_ | 0.004998 | 0.002314 | LOC100134089 | 100134089 //. |
| 219265_at | 5.14E-07 | 2.04E-08 | MOBK2B       | 79817 .       |
| 219266_at | 0.037601 | 0.024655 | ZNF350       | 59348 .       |
| 219267_at | 5.42E-04 | 1.57E-04 | GLTP         | 51228 .       |
| 219268_at | 0.017833 | 0.010343 | ETNK2        | 55224 .       |
| 219270_at | 2.49E-04 | 6.02E-05 | CHAC1        | 79094 .       |
| 219272_at | 0.001172 | 4.05E-04 | TRIM62       | 55223 .       |
| 219274_at | 2.13E-07 | 6.29E-09 | TSPAN12      | 23554 .       |
| 219275_at | 8.38E-06 | 8.02E-07 | PDCD5        | 9141 .        |
| 219276_x_ | 0.002023 | 7.83E-04 | C9orf82      | 79886 .       |
| 219277_s_ | 0.001016 | 3.40E-04 | OGDHL        | 55753 .       |
| 219278_at | 6.89E-06 | 6.18E-07 | MAP3K6       | 9064 .        |
| 219279_at | 3.26E-06 | 2.34E-07 | DOCK10       | 55619 .       |
| 219280_at | 0.004104 | 0.001827 | BRWD1        | 54014 .       |
| 219281_at | 0.01725  | 0.009946 | MSRA         | 4482 .        |
| 219282_s_ | 0.010326 | 0.005447 | TRPV2        | 51393 .       |
| 219283_at | 8.04E-05 | 1.47E-05 | C1GALT1C1    | 29071 .       |
| 219284_at | 6.52E-05 | 1.12E-05 | HSPBAP1      | 79663 .       |
| 219285_s_ | 8.41E-04 | 2.71E-04 | NIN          | 51199 .       |
| 219286_s_ | 1.99E-06 | 1.24E-07 | RBM15        | 64783 .       |
| 219287_at | 8.14E-06 | 7.69E-07 | KCNMB4       | 27345 .       |
| 219289_at | 0.002986 | 0.001248 | HEATR3       | 55027 .       |
| 219290_x_ | 3.03E-05 | 4.24E-06 | DAPP1        | 27071 .       |
| 219291_at | 3.99E-04 | 1.08E-04 | DTWD1        | 56986 .       |
| 219292_at | 0.026708 | 0.016576 | THAP1        | 55145 .       |
| 219293_s_ | 4.19E-06 | 3.25E-07 | OLA1         | 29789 .       |
| 219294_at | 2.73E-04 | 6.75E-05 | CENPQ        | 55166 .       |
| 219296_at | 0.001127 | 3.86E-04 | ZDHHC13      | 54503 .       |
| 219297_at | 0.004316 | 0.001942 | WDR44        | 54521 .       |
| 219299_at | 7.76E-04 | 2.46E-04 | TRMT12       | 55039 .       |
| 219300_s_ | 3.44E-06 | 2.52E-07 | CNTNAP2      | 26047 .       |



|           |          |          |                             |         |
|-----------|----------|----------|-----------------------------|---------|
| 219301_s_ | 2.08E-07 | 6.05E-09 | CNTNAP2                     | 26047 . |
| 219302_s_ | 1.28E-07 | 3.19E-09 | CNTNAP2                     | 26047 . |
| 219303_at | 0.001278 | 4.50E-04 | RNF219                      | 79596 . |
| 219304_s_ | 5.08E-04 | 1.45E-04 | PDGFD                       | 80310 . |
| 219305_x_ | 1.19E-06 | 6.24E-08 | FBXO2                       | 26232 . |
| 219306_at | 1.49E-05 | 1.71E-06 | KIF15                       | 56992 . |
| 219307_at | 0.001115 | 3.81E-04 | PDSS2                       | 57107 . |
| 219308_s_ | 2.30E-04 | 5.45E-05 | AK5                         | 26289 . |
| 219311_at | 0.001783 | 6.71E-04 | CEP76                       | 79959 . |
| 219312_s_ | 4.32E-04 | 1.19E-04 | ZBTB10                      | 65986 . |
| 219314_s_ | 0.001976 | 7.60E-04 | ZNF219                      | 51222 . |
| 219315_s_ | 1.85E-05 | 2.26E-06 | TMEM204                     | 79652 . |
| 219316_s_ | 0.00656  | 0.003197 | FLVCR2                      | 55640 . |
| 219318_x_ | 0.03526  | 0.022874 | MED31                       | 51003 . |
| 219319_at | 9.09E-07 | 4.37E-08 | HIF3A                       | 64344 . |
| 219320_at | 3.01E-04 | 7.62E-05 | MYO19                       | 80179 . |
| 219322_s_ | 4.78E-08 | 8.48E-10 | WDR8                        | 49856 . |
| 219323_s_ | 4.41E-05 | 6.83E-06 | IL18BP                      | 10068 . |
| 219324_at | 4.00E-04 | 1.08E-04 | NOL12 /// TRIC 11078 /// 79 | 79      |
| 219325_s_ | 6.92E-05 | 1.21E-05 | ELAC1                       | 55520 . |
| 219326_s_ | 1.54E-08 | 1.85E-10 | B3GNT2                      | 10678 . |
| 219327_s_ | 2.18E-04 | 5.09E-05 | GPRC5C                      | 55890 . |
| 219328_at | 3.95E-06 | 3.01E-07 | DDX31                       | 64794 . |
| 219329_s_ | 0.032688 | 0.020961 | C2orf28                     | 51374 . |
| 219330_at | 0.005957 | 0.002853 | VANGL1                      | 81839 . |
| 219331_s_ | 4.05E-05 | 6.09E-06 | KLHDC8A                     | 55220 . |
| 219332_at | 0.013507 | 0.007468 | MICALL2                     | 79778 . |
| 219334_s_ | 9.62E-05 | 1.84E-05 | OBFC2A                      | 64859 . |
| 219338_s_ | 0.018311 | 0.01067  | LRRC49                      | 54839 . |
| 219339_s_ | 0.046445 | 0.031511 | EHMT1                       | 79813 . |
| 219340_s_ | 0.041957 | 0.027993 | CLN8                        | 2055 .  |
| 219341_at | 0.016789 | 0.00964  | CLN8                        | 2055 .  |
| 219342_at | 0.015109 | 0.008521 | CASD1                       | 64921 . |
| 219345_at | 2.37E-05 | 3.09E-06 | BOLA1                       | 51027 . |

|           |          |          |          |          |
|-----------|----------|----------|----------|----------|
| 219346_at | 0.003359 | 0.001439 | LRFN3    | 79414 .  |
| 219347_at | 5.90E-06 | 5.07E-07 | NUDT15   | 55270 .  |
| 219348_at | 1.76E-04 | 3.92E-05 | USE1     | 55850 .  |
| 219350_s_ | 0.036989 | 0.0242   | DIABLO   | 56616 .  |
| 219351_at | 6.65E-04 | 2.02E-04 | TRAPPC2  | 6399 .   |
| 219352_at | 0.020466 | 0.01215  | HERC6    | 55008 .  |
| 219353_at | 2.10E-05 | 2.66E-06 | NHLRC2   | 374354 . |
| 219355_at | 0.008206 | 0.004162 | CXorf57  | 55086 .  |
| 219357_at | 9.61E-04 | 3.18E-04 | GTPBP1   | 9567 .   |
| 219361_s_ | 2.31E-04 | 5.49E-05 | AEN      | 64782 .  |
| 219363_s_ | 1.55E-04 | 3.35E-05 | MTERFD1  | 51001 .  |
| 219364_at | 0.008741 | 0.004478 | DHX58    | 79132 .  |
| 219365_s_ | 6.29E-05 | 1.07E-05 | CAMKV    | 79012 .  |
| 219366_at | 3.27E-06 | 2.35E-07 | AVEN     | 57099 .  |
| 219367_s_ | 1.14E-05 | 1.20E-06 |          | .        |
| 219368_at | 2.37E-04 | 5.67E-05 | NAP1L2   | 4674 .   |
| 219370_at | 0.00334  | 0.001429 | RPRM     | 56475 .  |
| 219371_s_ | 1.40E-06 | 7.83E-08 | KLF2     | 10365 .  |
| 219372_at | 0.030475 | 0.019332 | IFT81    | 28981 .  |
| 219373_at | 4.63E-04 | 1.29E-04 | DPM3     | 54344 .  |
| 219375_at | 0.005179 | 0.002416 | CEPT1    | 10390 .  |
| 219377_at | 0.016057 | 0.009156 | FAM59A   | 64762 .  |
| 219378_at | 2.84E-04 | 7.09E-05 | NARG1L   | 79612 .  |
| 219379_x_ | 0.021514 | 0.01289  | ZNF358   | 140467 . |
| 219380_x_ | 1.01E-05 | 1.04E-06 | POLH     | 5429 .   |
| 219382_at | 0.045338 | 0.030645 | SERTAD3  | 29946 .  |
| 219383_at | 0.001736 | 6.50E-04 | FLJ14213 | 79899 .  |
| 219384_s_ | 0.002062 | 8.01E-04 | ADAT1    | 23536 .  |
| 219385_at | 0.036371 | 0.023726 | SLAMF8   | 56833 .  |
| 219386_s_ | 0.011091 | 0.005924 | SLAMF8   | 56833 .  |
| 219387_at | 6.81E-09 | 6.33E-11 | CCDC88A  | 55704 .  |
| 219388_at | 1.52E-07 | 3.99E-09 | GRHL2    | 79977 .  |
| 219390_at | 4.03E-08 | 6.66E-10 | FKBP14   | 55033 .  |
| 219392_x_ | 4.22E-08 | 7.12E-10 | PRR11    | 55771 .  |

|           |          |          |          |          |
|-----------|----------|----------|----------|----------|
| 219393_s_ | 9.87E-08 | 2.26E-09 | AKT3     | 10000 .  |
| 219394_at | 1.02E-05 | 1.05E-06 | PGS1     | 9489 .   |
| 219395_at | 2.82E-15 | 1.64E-19 | ESRP2    | 80004 .  |
| 219397_at | 0.0017   | 6.34E-04 | COQ10B   | 80219 .  |
| 219398_at | 9.64E-04 | 3.19E-04 | CIDEC    | 63924 .  |
| 219400_at | 3.56E-04 | 9.39E-05 | CNTNAP1  | 8506 .   |
| 219401_at | 0.004644 | 0.002122 | XYLT2    | 64132 .  |
| 219402_s_ | 0.038503 | 0.025347 | DERL1    | 79139 .  |
| 219403_s_ | 0.045182 | 0.03052  | HPSE     | 10855 .  |
| 219405_at | 0.039246 | 0.025907 | TRIM68   | 55128 .  |
| 219407_s_ | 0.029471 | 0.018586 | LAMC3    | 10319 .  |
| 219409_at | 3.87E-04 | 1.04E-04 | SNIP1    | 79753 .  |
| 219410_at | 0.001076 | 3.65E-04 | TMEM45A  | 55076 .  |
| 219411_at | 4.07E-07 | 1.52E-08 | ELMO3    | 79767 .  |
| 219412_at | 1.45E-05 | 1.65E-06 | RAB38    | 23682 .  |
| 219413_at | 0.002847 | 0.001178 | ACBD4    | 79777 .  |
| 219415_at | 0.022885 | 0.013851 | TTYH1    | 57348 .  |
| 219416_at | 1.22E-04 | 2.46E-05 | SCARA3   | 51435 .  |
| 219417_s_ | 0.005467 | 0.002576 | C17orf59 | 54785 .  |
| 219418_at | 0.004026 | 0.001786 | NHEJ1    | 79840 .  |
| 219419_at | 7.50E-04 | 2.35E-04 | C18orf22 | 79863 .  |
| 219420_s_ | 4.43E-04 | 1.23E-04 | C1orf163 | 65260 .  |
| 219422_at | 0.001735 | 6.50E-04 | TNFRSF25 | 8718 .   |
| 219425_at | 0.0022   | 8.66E-04 | SULT4A1  | 25830 .  |
| 219426_at | 0.006005 | 0.002881 | EIF2C3   | 192669 . |
| 219427_at | 0.016276 | 0.009301 | FAT4     | 79633 .  |
| 219429_at | 0.041967 | 0.028004 | FA2H     | 79152 .  |
| 219430_at | 0.014935 | 0.008407 | GPR137   | 56834 .  |
| 219432_at | 1.43E-07 | 3.72E-09 | EVC      | 2121 .   |
| 219433_at | 2.02E-04 | 4.62E-05 | BCOR     | 54880 .  |
| 219435_at | 0.005104 | 0.002376 | C17orf68 | 80169 .  |
| 219436_s_ | 0.030378 | 0.019258 | EMCN     | 51705 .  |
| 219437_s_ | 5.88E-05 | 9.80E-06 | ANKRD11  | 29123 .  |
| 219438_at | 1.94E-04 | 4.41E-05 | NKAIN1   | 79570 .  |

|           |          |          |           |          |
|-----------|----------|----------|-----------|----------|
| 219439_at | 4.82E-05 | 7.65E-06 | C1GALT1   | 56913 .  |
| 219441_s_ | 1.09E-04 | 2.16E-05 | LRRK1     | 79705 .  |
| 219445_at | 0.031731 | 0.020242 | GLTSCR1   | 29998 .  |
| 219446_at | 0.029467 | 0.018582 | RIC8B     | 55188 .  |
| 219448_at | 0.001653 | 6.13E-04 | TMEM70    | 54968 .  |
| 219449_s_ | 0.0046   | 0.002098 | TMEM70    | 54968 .  |
| 219454_at | 1.04E-04 | 2.02E-05 | EGFL6     | 25975 .  |
| 219455_at | 0.029152 | 0.018353 | C7orf63   | 79846 .  |
| 219456_s_ | 1.30E-04 | 2.66E-05 | RIN3      | 79890 .  |
| 219457_s_ | 0.003409 | 0.001464 | RIN3      | 79890 .  |
| 219459_at | 2.70E-05 | 3.65E-06 | POLR3B    | 55703 .  |
| 219460_s_ | 2.31E-07 | 7.07E-09 | TMEM127   | 55654 .  |
| 219461_at | 1.53E-05 | 1.77E-06 | PAK6      | 56924 .  |
| 219463_at | 0.003057 | 0.001284 | C20orf103 | 24141 .  |
| 219464_at | 3.19E-08 | 4.96E-10 | CA14      | 23632 .  |
| 219465_at | 1.26E-07 | 3.10E-09 | APOA2     | 336 .    |
| 219466_s_ | 2.08E-08 | 2.73E-10 | APOA2     | 336 .    |
| 219468_s_ | 1.19E-07 | 2.87E-09 | CUEDC1    | 404093 . |
| 219469_at | 0.04302  | 0.028811 | DYNC2H1   | 79659 .  |
| 219470_x_ | 6.54E-07 | 2.81E-08 | CCNJ      | 54619 .  |
| 219472_at | 0.007086 | 0.003507 | CENPO     | 79172 .  |
| 219475_at | 3.72E-05 | 5.47E-06 | OSGIN1    | 29948 .  |
| 219476_at | 0.004852 | 0.002235 | C1orf116  | 79098 .  |
| 219478_at | 8.23E-06 | 7.81E-07 | WFDC1     | 58189 .  |
| 219480_at | 5.94E-05 | 9.93E-06 | SNAI1     | 6615 .   |
| 219481_at | 1.49E-04 | 3.17E-05 | TTC13     | 79573 .  |
| 219482_at | 2.98E-04 | 7.53E-05 | SETD4     | 54093 .  |
| 219483_s_ | 0.001383 | 4.95E-04 | PORCN     | 64840 .  |
| 219484_at | 2.93E-09 | 2.10E-11 | HCFC2     | 29915 .  |
| 219488_at | 0.001033 | 3.47E-04 | A4GALT    | 53947 .  |
| 219490_s_ | 0.013283 | 0.007326 | DCLRE1B   | 64858 .  |
| 219492_at | 0.029139 | 0.018343 | CHIC2     | 26511 .  |
| 219493_at | 0.010218 | 0.00538  | SHCBP1    | 79801 .  |
| 219494_at | 2.54E-06 | 1.70E-07 | RAD54B    | 25788 .  |

|           |          |          |           |         |
|-----------|----------|----------|-----------|---------|
| 219495_s_ | 3.79E-04 | 1.01E-04 | ZNF180    | 7733 .  |
| 219497_s_ | 7.68E-05 | 1.39E-05 | BCL11A    | 53335 . |
| 219498_s_ | 2.00E-04 | 4.57E-05 | BCL11A    | 53335 . |
| 219499_at | 8.20E-06 | 7.76E-07 | SEC61A2   | 55176 . |
| 219500_at | 9.98E-06 | 1.01E-06 | CLCF1     | 23529 . |
| 219501_at | 6.06E-04 | 1.80E-04 | ENOX1     | 55068 . |
| 219502_at | 5.04E-04 | 1.44E-04 | NEIL3     | 55247 . |
| 219505_at | 2.87E-07 | 9.56E-09 | CECR1     | 51816 . |
| 219506_at | 9.32E-08 | 2.08E-09 | C1orf54   | 79630 . |
| 219507_at | 2.72E-07 | 8.88E-09 | RSRC1     | 51319 . |
| 219509_at | 3.73E-06 | 2.80E-07 | MYOZ1     | 58529 . |
| 219510_at | 7.16E-07 | 3.18E-08 | POLQ      | 10721 . |
| 219511_s_ | 0.020747 | 0.012356 | SNCAIP    | 9627 .  |
| 219512_at | 1.61E-04 | 3.51E-05 | DSN1      | 79980 . |
| 219513_s_ | 0.004805 | 0.002211 | SH2D3A    | 10045 . |
| 219514_at | 1.07E-09 | 5.82E-12 | ANGPTL2   | 23452 . |
| 219515_at | 6.98E-05 | 1.23E-05 | PRDM10    | 56980 . |
| 219516_at | 3.50E-05 | 5.06E-06 | TRPV4     | 59341 . |
| 219519_s_ | 0.049501 | 0.033923 | SIGLEC1   | 6614 .  |
| 219521_at | 3.30E-04 | 8.55E-05 | B3GAT1    | 27087 . |
| 219522_at | 8.19E-04 | 2.62E-04 | FJX1      | 24147 . |
| 219526_at | 0.00648  | 0.003151 | C14orf169 | 79697 . |
| 219529_at | 1.92E-05 | 2.36E-06 | CLIC3     | 9022 .  |
| 219530_at | 5.04E-06 | 4.12E-07 | PALB2     | 79728 . |
| 219531_at | 1.19E-08 | 1.30E-10 | CEP72     | 55722 . |
| 219533_at | 0.008784 | 0.004505 | CDKN1C    | 1028 .  |
| 219534_x_ | 0.019855 | 0.011724 | CDKN1C    | 1028 .  |
| 219535_at | 9.66E-09 | 1.02E-10 | HUNK      | 30811 . |
| 219536_s_ | 0.002986 | 0.001248 | ZFP64     | 55734 . |
| 219537_x_ | 0.003321 | 0.001419 | DLL3      | 10683 . |
| 219538_at | 8.24E-04 | 2.64E-04 | WDR5B     | 54554 . |
| 219539_at | 3.33E-04 | 8.64E-05 | GEMIN6    | 79833 . |
| 219540_at | 1.30E-04 | 2.69E-05 | ZNF267    | 10308 . |
| 219542_at | 5.15E-05 | 8.32E-06 | NEK11     | 79858 . |

|           |          |          |                            |         |
|-----------|----------|----------|----------------------------|---------|
| 219543_at | 6.97E-07 | 3.06E-08 | PBLD                       | 64081 . |
| 219544_at | 1.57E-06 | 9.07E-08 | C13orf34                   | 79866 . |
| 219545_at | 0.018785 | 0.010992 | KCTD14                     | 65987 . |
| 219546_at | 5.05E-04 | 1.44E-04 | BMP2K                      | 55589 . |
| 219551_at | 0.001843 | 6.99E-04 | EAF2                       | 55840 . |
| 219552_at | 8.68E-05 | 1.62E-05 | SVEP1                      | 79987 . |
| 219553_at | 1.19E-04 | 2.40E-05 | NME7                       | 29922 . |
| 219554_at | 0.001261 | 4.43E-04 | RHCG                       | 51458 . |
| 219555_s_ | 1.61E-04 | 3.51E-05 | CENPN                      | 55839 . |
| 219556_at | 5.57E-04 | 1.62E-04 | C16orf59                   | 80178 . |
| 219557_s_ | 0.034954 | 0.022643 | NRIP3                      | 56675 . |
| 219558_at | 7.90E-05 | 1.44E-05 | ATP13A3                    | 79572 . |
| 219559_at | 0.032036 | 0.020479 | SLC17A9                    | 63910 . |
| 219560_at | 0.044916 | 0.030317 | C22orf29                   | 79680 . |
| 219561_at | 2.41E-07 | 7.50E-09 | COPZ2                      | 51226 . |
| 219563_at | 5.08E-05 | 8.17E-06 | C14orf139                  | 79686 . |
| 219564_at | 1.70E-04 | 3.73E-05 | KCNJ16                     | 3773 .  |
| 219565_at | 1.19E-04 | 2.39E-05 | CYP20A1                    | 57404 . |
| 219566_at | 0.001713 | 6.40E-04 | PLEKHF1                    | 79156 . |
| 219567_s_ | 5.85E-04 | 1.73E-04 | DEM1                       | 64789 . |
| 219573_at | 0.033546 | 0.021613 | LRRC16A                    | 55604 . |
| 219575_s_ | 0.015327 | 0.008667 | COG8 /// PDF 64146 /// 84: |         |
| 219576_at | 5.88E-05 | 9.81E-06 | MAP7D3                     | 79649 . |
| 219577_s_ | 0.00695  | 0.003428 | ABCA7                      | 10347 . |
| 219579_at | 2.29E-08 | 3.15E-10 | RAB3IL1                    | 5866 .  |
| 219580_s_ | 9.93E-07 | 4.89E-08 | TMC5                       | 79838 . |
| 219581_at | 6.32E-06 | 5.51E-07 | TSEN2                      | 80746 . |
| 219583_s_ | 0.00584  | 0.002787 | SPATA7                     | 55812 . |
| 219584_at | 0.026433 | 0.01638  | PLA1A                      | 51365 . |
| 219587_at | 0.020305 | 0.01204  | TTC12                      | 54970 . |
| 219588_s_ | 4.51E-04 | 1.25E-04 | NCAPG2                     | 54892 . |
| 219590_x_ | 0.005785 | 0.002754 | DPH5                       | 51611 . |
| 219591_at | 0.008227 | 0.004175 | CEND1                      | 51286 . |
| 219593_at | 0.00181  | 6.84E-04 | SLC15A3                    | 51296 . |

|           |          |          |          |         |
|-----------|----------|----------|----------|---------|
| 219594_at | 0.001928 | 7.38E-04 | NINJ2    | 4815 .  |
| 219595_at | 8.75E-05 | 1.63E-05 | ZNF26    | 7574 .  |
| 219596_at | 0.005031 | 0.002334 | THAP10   | 56906 . |
| 219598_s_ | 2.20E-04 | 5.14E-05 | RWDD1    | 51389 . |
| 219600_s_ | 5.14E-04 | 1.47E-04 | TMEM50B  | 757 .   |
| 219603_s_ | 0.013715 | 0.007602 | ZNF226   | 7769 .  |
| 219605_at | 0.001735 | 6.50E-04 | ZNF3     | 7551 .  |
| 219606_at | 0.001691 | 6.30E-04 | PHF20L1  | 51105 . |
| 219608_s_ | 1.19E-04 | 2.39E-05 | FBXO38   | 81545 . |
| 219609_at | 0.002758 | 0.001135 | WDR25    | 79446 . |
| 219611_s_ | 1.58E-05 | 1.85E-06 | CCDC21   | 64793 . |
| 219613_s_ | 0.024692 | 0.015129 | SIRT6    | 51548 . |
| 219615_s_ | 1.16E-04 | 2.31E-05 | KCNK5    | 8645 .  |
| 219616_at | 4.70E-04 | 1.32E-04 | ACSS3    | 79611 . |
| 219617_at | 2.27E-04 | 5.37E-05 | C2orf34  | 79823 . |
| 219618_at | 9.53E-04 | 3.15E-04 | IRAK4    | 51135 . |
| 219621_at | 2.94E-04 | 7.40E-05 | CLSPN    | 63967 . |
| 219622_at | 0.009228 | 0.004777 | RAB20    | 55647 . |
| 219623_at | 1.21E-08 | 1.34E-10 | ACTR5    | 79913 . |
| 219625_s_ | 0.009829 | 0.005143 | COL4A3BP | 10087 . |
| 219626_at | 0.00375  | 0.001642 | MAP7D3   | 79649 . |
| 219627_at | 3.36E-05 | 4.81E-06 | ZNF767   | 79970 . |
| 219628_at | 8.16E-06 | 7.72E-07 | ZMAT3    | 64393 . |
| 219631_at | 8.88E-04 | 2.89E-04 | LRP12    | 29967 . |
| 219632_s_ | 0.014844 | 0.008347 | TRPV1    | 7442 .  |
| 219633_at | 0.021562 | 0.012926 | TTPAL    | 79183 . |
| 219636_s_ | 7.71E-06 | 7.18E-07 | ARMC9    | 80210 . |
| 219637_at | 1.59E-05 | 1.86E-06 | ARMC9    | 80210 . |
| 219640_at | 0.002503 | 0.001011 | CLDN15   | 24146 . |
| 219641_at | 5.55E-04 | 1.62E-04 | DET1     | 55070 . |
| 219642_s_ | 0.016684 | 0.00957  | PEX5L    | 51555 . |
| 219644_at | 5.67E-06 | 4.81E-07 | CCDC41   | 51134 . |
| 219645_at | 0.005763 | 0.002741 | CASQ1    | 844 .   |
| 219646_at | 6.73E-05 | 1.17E-05 | DEF8     | 54849 . |

|           |          |          |           |          |
|-----------|----------|----------|-----------|----------|
| 219647_at | 5.56E-04 | 1.62E-04 | POPDC2    | 64091 .  |
| 219648_at | 1.60E-04 | 3.46E-05 | MREG      | 55686 .  |
| 219649_at | 0.003252 | 0.001383 | ALG6      | 29929 .  |
| 219650_at | 6.60E-05 | 1.14E-05 | ERCC6L    | 54821 .  |
| 219651_at | 4.23E-13 | 1.88E-16 | DPPA4     | 55211 .  |
| 219652_s_ | 1.64E-05 | 1.93E-06 | CXorf36   | 79742 .  |
| 219654_at | 0.011557 | 0.006217 | PTPLA     | 9200 .   |
| 219655_at | 6.07E-07 | 2.55E-08 | C7orf10   | 79783 .  |
| 219656_at | 0.002775 | 0.001144 | PCDH12    | 51294 .  |
| 219658_at | 0.031973 | 0.02043  | PTCD2     | 79810 .  |
| 219662_at | 0.027265 | 0.016975 | C2orf49   | 79074 .  |
| 219664_s_ | 0.004472 | 0.002028 | DECR2     | 26063 .  |
| 219665_at | 1.78E-04 | 3.97E-05 | NUDT18    | 79873 .  |
| 219666_at | 0.001558 | 5.71E-04 | MS4A6A    | 64231 .  |
| 219668_at | 5.34E-06 | 4.45E-07 | GDAP1L1   | 78997 .  |
| 219669_at | 7.62E-09 | 7.35E-11 | CD177     | 57126 .  |
| 219673_at | 0.040838 | 0.027128 | MCM9      | 254394 . |
| 219674_s_ | 1.52E-08 | 1.80E-10 | HDLBP     | 3069 .   |
| 219675_s_ | 0.005677 | 0.002692 | UXS1      | 80146 .  |
| 219677_at | 0.006765 | 0.003317 | SPSB1     | 80176 .  |
| 219678_x_ | 1.27E-07 | 3.12E-09 | DCLRE1C   | 64421 .  |
| 219679_s_ | 0.032672 | 0.020947 | WAC       | 51322 .  |
| 219680_at | 0.005776 | 0.002749 | NLRX1     | 79671 .  |
| 219681_s_ | 0.003743 | 0.001638 | RAB11FIP1 | 80223 .  |
| 219682_s_ | 6.10E-05 | 1.03E-05 | TBX3      | 6926 .   |
| 219683_at | 1.98E-05 | 2.47E-06 | FZD3      | 7976 .   |
| 219684_at | 5.44E-04 | 1.58E-04 | RTP4      | 64108 .  |
| 219685_at | 5.85E-04 | 1.73E-04 | TMEM35    | 59353 .  |
| 219686_at | 0.005765 | 0.002743 | STK32B    | 55351 .  |
| 219687_at | 0.035732 | 0.02324  | HHAT      | 55733 .  |
| 219688_at | 1.02E-04 | 1.97E-05 | BBS7      | 55212 .  |
| 219689_at | 0.002269 | 8.99E-04 | SEMA3G    | 56920 .  |
| 219691_at | 8.85E-06 | 8.63E-07 | SAMD9     | 54809 .  |
| 219692_at | 0.011832 | 0.006387 | KREMEN2   | 79412 .  |



|           |          |          |             |         |
|-----------|----------|----------|-------------|---------|
| 219693_at | 0.009647 | 0.00503  | AGPAT4      | 56895 . |
| 219697_at | 2.95E-04 | 7.44E-05 | HS3ST2      | 9956 .  |
| 219699_at | 0.004266 | 0.001914 | LGI2        | 55203 . |
| 219700_at | 0.002558 | 0.001038 | PLXDC1      | 57125 . |
| 219703_at | 8.02E-04 | 2.55E-04 | MNS1        | 55329 . |
| 219704_at | 5.40E-05 | 8.82E-06 | YBX2        | 51087 . |
| 219705_at | 1.98E-04 | 4.52E-05 | QSER1       | 79832 . |
| 219706_at | 1.16E-05 | 1.23E-06 | C20orf29    | 55317 . |
| 219708_at | 0.039593 | 0.026173 | NT5M        | 56953 . |
| 219709_x_ | 1.52E-04 | 3.26E-05 | FAM173A     | 65990 . |
| 219711_at | 7.89E-04 | 2.50E-04 | ZNF586      | 54807 . |
| 219713_at | 0.018266 | 0.010638 | SHPK        | 23729 . |
| 219715_s_ | 7.11E-04 | 2.20E-04 | TDP1        | 55775 . |
| 219716_at | 1.93E-04 | 4.39E-05 | APOL6       | 80830 . |
| 219717_at | 1.23E-06 | 6.52E-08 | C4orf30     | 54876 . |
| 219719_at | 0.002156 | 8.46E-04 | HIGD1B      | 51751 . |
| 219720_s_ | 0.045933 | 0.031108 | C14orf118   | 55668 . |
| 219722_s_ | 0.015153 | 0.008549 | GDPD3       | 79153 . |
| 219723_x_ | 0.001019 | 3.41E-04 | AGPAT3      | 56894 . |
| 219724_s_ | 0.001002 | 3.34E-04 | KIAA0748    | 9840 .  |
| 219725_at | 0.009863 | 0.005163 | TREM2       | 54209 . |
| 219726_at | 9.32E-04 | 3.07E-04 | NLGN3       | 54413 . |
| 219729_at | 1.18E-05 | 1.26E-06 | PRRX2       | 51450 . |
| 219730_at | 0.010885 | 0.005797 | MED18       | 54797 . |
| 219731_at | 0.009724 | 0.005079 |             | .       |
| 219732_at | 1.46E-04 | 3.10E-05 | RP11-35N6.1 | 54886 . |
| 219733_s_ | 0.029529 | 0.018632 | SLC27A5     | 10998 . |
| 219735_s_ | 8.51E-05 | 1.58E-05 | TFCP2L1     | 29842 . |
| 219736_at | 6.79E-05 | 1.18E-05 | TRIM36      | 55521 . |
| 219739_at | 0.001508 | 5.49E-04 | RNF186      | 54546 . |
| 219740_at | 2.17E-04 | 5.07E-05 | VASH2       | 79805 . |
| 219741_x_ | 0.002643 | 0.00108  | ZNF552      | 79818 . |
| 219742_at | 0.006601 | 0.003221 | PRR7        | 80758 . |
| 219743_at | 1.60E-08 | 1.98E-10 | HEY2        | 23493 . |

|           |          |          |                             |         |
|-----------|----------|----------|-----------------------------|---------|
| 219748_at | 0.007751 | 0.003894 | TREML2                      | 79865 . |
| 219749_at | 0.002981 | 0.001245 | SH2D4A                      | 63898 . |
| 219750_at | 0.012264 | 0.006671 | TMEM144                     | 55314 . |
| 219752_at | 0.014348 | 0.008014 | RASAL1                      | 8437 .  |
| 219754_at | 4.63E-07 | 1.80E-08 | RBM41                       | 55285 . |
| 219755_at | 0.009392 | 0.004874 | CBX8                        | 57332 . |
| 219756_s_ | 0.014381 | 0.008037 | POF1B                       | 79983 . |
| 219757_s_ | 0.02087  | 0.012448 | C14orf101                   | 54916 . |
| 219760_at | 6.87E-04 | 2.11E-04 | LIN7B                       | 64130 . |
| 219762_s_ | 0.036681 | 0.02396  | RPL36                       | 25873 . |
| 219763_at | 0.005421 | 0.00255  | DENND1A                     | 57706 . |
| 219766_at | 4.32E-04 | 1.19E-04 | B9D2                        | 80776 . |
| 219767_s_ | 0.011368 | 0.006097 | CRYZL1                      | 9946 .  |
| 219771_at | 2.72E-07 | 8.84E-09 | TBC1D8B                     | 54885 . |
| 219773_at | 0.033649 | 0.021688 | NOX4                        | 50507 . |
| 219774_at | 0.006538 | 0.003185 | CCDC93                      | 54520 . |
| 219775_s_ | 7.78E-05 | 1.41E-05 | CPLX3 /// LMA 594855 /// 7! | .       |
| 219776_s_ | 2.64E-04 | 6.49E-05 |                             | .       |
| 219779_at | 4.73E-04 | 1.33E-04 | ZFHX4                       | 79776 . |
| 219780_at | 0.002928 | 0.001218 | ZNF771                      | 51333 . |
| 219785_s_ | 7.17E-05 | 1.27E-05 | FBXO31                      | 79791 . |
| 219786_at | 3.63E-08 | 5.88E-10 | MTL5                        | 9633 .  |
| 219787_s_ | 3.74E-05 | 5.49E-06 | ECT2                        | 1894 .  |
| 219788_at | 9.75E-04 | 3.24E-04 | PILRA                       | 29992 . |
| 219789_at | 5.35E-05 | 8.73E-06 | NPR3                        | 4883 .  |
| 219790_s_ | 1.38E-07 | 3.51E-09 | NPR3                        | 4883 .  |
| 219791_s_ | 0.019014 | 0.011146 | NBLA00301                   | 79804 . |
| 219793_at | 0.006799 | 0.003337 | SNX16                       | 64089 . |
| 219796_s_ | 3.08E-04 | 7.85E-05 | MUPCDH                      | 53841 . |
| 219802_at | 0.001611 | 5.94E-04 | PYROXD1                     | 79912 . |
| 219803_at | 0.003111 | 0.001312 | ANGPTL3                     | 27329 . |
| 219805_at | 4.73E-04 | 1.33E-04 | CXorf56                     | 63932 . |
| 219807_x_ | 1.06E-04 | 2.06E-05 | RAB4B                       | 53916 . |
| 219808_at | 0.001158 | 3.99E-04 | SCLY                        | 51540 . |

|           |          |          |           |          |
|-----------|----------|----------|-----------|----------|
| 219809_at | 0.012841 | 0.007043 | WDR55     | 54853 .  |
| 219811_at | 0.012957 | 0.00712  | DGCR8     | 54487 .  |
| 219814_at | 0.00185  | 7.03E-04 | MBNL3     | 55796 .  |
| 219815_at | 0.00647  | 0.003145 | GAL3ST4   | 79690 .  |
| 219817_at | 5.60E-04 | 1.63E-04 | C12orf47  | 51275 .  |
| 219818_s_ | 1.23E-06 | 6.54E-08 | GPATCH1   | 55094 .  |
| 219819_s_ | 5.61E-04 | 1.64E-04 | MRPS28    | 28957 .  |
| 219821_s_ | 0.005733 | 0.002724 | GFOD1     | 54438 .  |
| 219822_at | 1.69E-05 | 2.01E-06 | MTRF1     | 9617 .   |
| 219823_at | 3.91E-10 | 1.54E-12 | LIN28     | 79727 .  |
| 219824_at | 1.19E-04 | 2.39E-05 | SLC13A4   | 26266 .  |
| 219825_at | 0.04614  | 0.031272 | CYP26B1   | 56603 .  |
| 219827_at | 0.00185  | 7.02E-04 | UCP3      | 7352 .   |
| 219828_at | 0.011833 | 0.006388 | C9orf86   | 55684 .  |
| 219830_at | 1.39E-05 | 1.57E-06 | RAI1      | 10743 .  |
| 219832_s_ | 1.33E-04 | 2.77E-05 | HOXC13    | 3229 .   |
| 219833_s_ | 0.00148  | 5.37E-04 | EFHC1     | 114327 . |
| 219834_at | 0.002049 | 7.94E-04 | ALS2CR8   | 79800 .  |
| 219835_at | 5.04E-05 | 8.09E-06 | PRDM8     | 56978 .  |
| 219836_at | 0.030476 | 0.019333 | ZBED2     | 79413 .  |
| 219843_at | 0.001456 | 5.27E-04 | IPP       | 3652 .   |
| 219844_at | 9.86E-04 | 3.28E-04 | C10orf118 | 55088 .  |
| 219846_at | 1.63E-05 | 1.92E-06 | GON4L     | 54856 .  |
| 219847_at | 1.56E-07 | 4.14E-09 | HDAC11    | 79885 .  |
| 219849_at | 6.74E-04 | 2.06E-04 | ZNF671    | 79891 .  |
| 219852_s_ | 9.51E-06 | 9.52E-07 | MORN1     | 79906 .  |
| 219853_at | 0.008783 | 0.004504 | FKRP      | 79147 .  |
| 219856_at | 7.75E-04 | 2.45E-04 | C1orf116  | 79098 .  |
| 219858_s_ | 0.004872 | 0.002246 | MFSD6     | 54842 .  |
| 219859_at | 0.018092 | 0.010521 | CLEC4E    | 26253 .  |
| 219860_at | 1.05E-04 | 2.05E-05 | LY6G5C    | 80741 .  |
| 219861_at | 1.12E-05 | 1.18E-06 | DNAJC17   | 55192 .  |
| 219862_s_ | 9.29E-04 | 3.06E-04 | NARF      | 26502 .  |
| 219863_at | 1.27E-07 | 3.15E-09 | HERC5     | 51191 .  |

|           |          |          |                             |          |
|-----------|----------|----------|-----------------------------|----------|
| 219864_s_ | 5.65E-05 | 9.33E-06 | RCAN3                       | 11123 .  |
| 219865_at | 0.0019   | 7.26E-04 | HSPC157 /// LC100128919 //. |          |
| 219866_at | 0.002207 | 8.69E-04 | CLIC5                       | 53405 .  |
| 219867_at | 1.13E-05 | 1.19E-06 | CHODL                       | 140578 . |
| 219868_s_ | 8.28E-05 | 1.53E-05 | ANKFY1                      | 51479 .  |
| 219869_s_ | 1.41E-04 | 2.98E-05 | SLC39A8                     | 64116 .  |
| 219870_at | 0.02433  | 0.014873 | ATF7IP2                     | 80063 .  |
| 219872_at | 1.56E-07 | 4.14E-09 | C4orf18                     | 51313 .  |
| 219875_s_ | 7.02E-04 | 2.16E-04 | PPPDE1                      | 51029 .  |
| 219876_s_ | 9.84E-04 | 3.27E-04 | GOLGA2L1                    | 55592 .  |
| 219877_at | 0.004554 | 0.002073 | ZMAT4                       | 79698 .  |
| 219878_s_ | 0.028012 | 0.01752  | KLF13                       | 51621 .  |
| 219879_s_ | 0.001239 | 4.34E-04 | C17orf53                    | 78995 .  |
| 219880_at | 5.16E-04 | 1.48E-04 |                             | .        |
| 219881_s_ | 0.005573 | 0.002636 |                             | .        |
| 219884_at | 0.006799 | 0.003337 | LHX6                        | 26468 .  |
| 219885_at | 0.02228  | 0.013435 | SLFN12                      | 55106 .  |
| 219891_at | 0.001865 | 7.09E-04 | PGPEP1                      | 54858 .  |
| 219894_at | 7.07E-05 | 1.25E-05 | MAGEL2                      | 54551 .  |
| 219896_at | 0.007761 | 0.003902 | CALY                        | 50632 .  |
| 219897_at | 0.005469 | 0.002577 | RNF122                      | 79845 .  |
| 219899_x_ | 5.86E-04 | 1.73E-04 | NDOR1                       | 27158 .  |
| 219900_s_ | 0.023651 | 0.014396 | ZNF446                      | 55663 .  |
| 219901_at | 8.28E-05 | 1.53E-05 | FGD6                        | 55785 .  |
| 219902_at | 0.003654 | 0.001592 | BHMT2                       | 23743 .  |
| 219905_at | 1.59E-04 | 3.45E-05 | ERMAP                       | 114625 . |
| 219906_at | 4.92E-04 | 1.39E-04 | FLJ10213                    | 55096 .  |
| 219908_at | 0.04758  | 0.032411 | DKK2                        | 27123 .  |
| 219909_at | 4.19E-05 | 6.38E-06 | MMP28                       | 79148 .  |
| 219910_at | 0.003119 | 0.001316 | FICD                        | 11153 .  |
| 219911_s_ | 0.004115 | 0.001832 | LOC100134295 100134295 //.  |          |
| 219912_s_ | 9.21E-04 | 3.02E-04 |                             | .        |
| 219914_at | 8.47E-04 | 2.73E-04 | ECEL1                       | 9427 .   |
| 219915_s_ | 0.001617 | 5.97E-04 | SLC16A10                    | 117247 . |

|           |          |          |          |          |
|-----------|----------|----------|----------|----------|
| 219916_s_ | 0.015515 | 0.008794 | RNF39    | 80352 .  |
| 219917_at | 0.003156 | 0.001334 | ZCCHC4   | 29063 .  |
| 219918_s_ | 1.69E-04 | 3.72E-05 | ASPM     | 259266 . |
| 219919_s_ | 0.007629 | 0.003825 | SSH3     | 54961 .  |
| 219920_s_ | 0.006805 | 0.003342 | GMPPB    | 29925 .  |
| 219921_s_ | 5.87E-05 | 9.78E-06 | DOCK5    | 80005 .  |
| 219922_s_ | 6.41E-06 | 5.63E-07 | LTBP3    | 4054 .   |
| 219923_at | 0.019211 | 0.01128  | TRIM45   | 80263 .  |
| 219924_s_ | 0.002234 | 8.82E-04 | ZMYM6    | 9204 .   |
| 219925_at | 1.57E-04 | 3.39E-05 | ZMYM6    | 9204 .   |
| 219926_at | 2.72E-05 | 3.69E-06 | POPDC3   | 64208 .  |
| 219927_at | 1.51E-04 | 3.23E-05 | FCF1     | 51077 .  |
| 219928_s_ | 0.024336 | 0.014879 | CABYR    | 26256 .  |
| 219929_s_ | 0.003423 | 0.001471 | ZFYVE21  | 79038 .  |
| 219930_at | 1.18E-06 | 6.12E-08 | KLF8     | 11279 .  |
| 219931_s_ | 8.46E-04 | 2.73E-04 | KLHL12   | 59349 .  |
| 219932_at | 0.003468 | 0.001494 | SLC27A6  | 28965 .  |
| 219933_at | 3.19E-07 | 1.10E-08 | GLRX2    | 51022 .  |
| 219935_at | 6.55E-04 | 1.99E-04 | ADAMTS5  | 11096 .  |
| 219936_s_ | 0.025228 | 0.015527 | GPR87    | 53836 .  |
| 219937_at | 0.003256 | 0.001385 | TRHDE    | 29953 .  |
| 219938_s_ | 0.012334 | 0.006714 | PSTPIP2  | 9050 .   |
| 219940_s_ | 1.39E-04 | 2.93E-05 | PCID2    | 55795 .  |
| 219941_at | 0.014485 | 0.008103 | TMEM19   | 55266 .  |
| 219942_at | 6.30E-09 | 5.73E-11 | MYL7     | 58498 .  |
| 219943_s_ | 4.69E-05 | 7.39E-06 | USP46    | 64854 .  |
| 219944_at | 5.86E-05 | 9.75E-06 | CLIP4    | 79745 .  |
| 219945_at | 0.012362 | 0.006731 | DDX25    | 29118 .  |
| 219946_x_ | 2.13E-07 | 6.28E-09 | MYH14    | 79784 .  |
| 219949_at | 0.004641 | 0.00212  | LRRC2    | 79442 .  |
| 219951_s_ | 0.002518 | 0.001019 | C20orf12 | 55184 .  |
| 219953_s_ | 4.35E-04 | 1.20E-04 | C11orf17 | 56672 .  |
| 219954_s_ | 0.029867 | 0.018884 | GBA3     | 57733 .  |
| 219955_at | 6.32E-10 | 2.91E-12 | L1TD1    | 54596 .  |

|           |          |          |                             |         |
|-----------|----------|----------|-----------------------------|---------|
| 219957_at | 2.61E-06 | 1.76E-07 | RUFY2                       | 55680 . |
| 219958_at | 0.007149 | 0.003544 | C20orf46                    | 55321 . |
| 219960_s_ | 8.59E-05 | 1.60E-05 | UCHL5                       | 51377 . |
| 219961_s_ | 0.002926 | 0.001217 | NCRNA00153                  | 55857 . |
| 219962_at | 2.75E-10 | 9.75E-13 | ACE2                        | 59272 . |
| 219963_at | 6.14E-05 | 1.04E-05 | DUSP13                      | 51207 . |
| 219964_at | 0.001928 | 7.38E-04 | ST7L                        | 54879 . |
| 219965_s_ | 7.22E-04 | 2.24E-04 | MAGIX                       | 79917 . |
| 219966_x_ | 5.77E-04 | 1.70E-04 | BANP                        | 54971 . |
| 219968_at | 2.07E-05 | 2.61E-06 | ZNF589                      | 51385 . |
| 219969_at | 0.011888 | 0.006425 | CXorf15                     | 55787 . |
| 219971_at | 0.008977 | 0.004621 | IL21R                       | 50615 . |
| 219972_s_ | 0.049727 | 0.034109 | C14orf135                   | 64430 . |
| 219973_at | 7.13E-07 | 3.16E-08 | ARSJ                        | 79642 . |
| 219977_at | 1.09E-04 | 2.16E-05 | AIPL1                       | 23746 . |
| 219978_s_ | 4.69E-06 | 3.75E-07 | NUSAP1                      | 51203 . |
| 219981_x_ | 2.76E-04 | 6.86E-05 | ZNF587                      | 84914 . |
| 219982_s_ | 3.34E-04 | 8.70E-05 | SERF1A /// SER728492 /// 8. |         |
| 219983_at | 0.001336 | 4.75E-04 | HRASLS                      | 57110 . |
| 219984_s_ | 0.001834 | 6.95E-04 | HRASLS                      | 57110 . |
| 219987_at | 0.010272 | 0.005413 |                             | .       |
| 219988_s_ | 0.043312 | 0.029058 | RNF220                      | 55182 . |
| 219989_s_ | 8.21E-04 | 2.63E-04 | ANKS1B                      | 56899 . |
| 219990_at | 1.49E-05 | 1.72E-06 | E2F8                        | 79733 . |
| 219991_at | 0.005811 | 0.00277  | SLC2A9                      | 56606 . |
| 219992_at | 1.31E-04 | 2.70E-05 | TAC3                        | 6866 .  |
| 219993_at | 4.18E-07 | 1.57E-08 | SOX17                       | 64321 . |
| 219994_at | 2.60E-06 | 1.75E-07 | APBB1IP                     | 54518 . |
| 219997_s_ | 0.003878 | 0.001708 | COPS7B                      | 64708 . |
| 219998_at | 2.81E-06 | 1.93E-07 | HSPC159                     | 29094 . |
| 219999_at | 0.021198 | 0.012675 | MAN2A2                      | 4122 .  |
| 220000_at | 6.33E-07 | 2.68E-08 | SIGLEC5                     | 8778 .  |
| 220001_at | 0.003242 | 0.001378 | PADI4                       | 23569 . |
| 220002_at | 0.012833 | 0.007038 | KIF26B                      | 55083 . |

|           |          |          |          |         |
|-----------|----------|----------|----------|---------|
| 220005_at | 0.047218 | 0.032128 | P2RY13   | 53829 . |
| 220007_at | 0.014461 | 0.008087 | METTL8   | 79828 . |
| 220008_at | 3.36E-08 | 5.29E-10 | SGK269   | 79834 . |
| 220009_at | 1.76E-04 | 3.90E-05 | LONRF3   | 79836 . |
| 220010_at | 0.039645 | 0.026211 | KCNE1L   | 23630 . |
| 220011_at | 6.54E-08 | 1.29E-09 | C1orf135 | 79000 . |
| 220013_at | 5.81E-11 | 1.32E-13 | EPHX3    | 79852 . |
| 220014_at | 1.98E-08 | 2.57E-10 | PRR16    | 51334 . |
| 220016_at | 0.001225 | 4.28E-04 | AHNAK    | 79026 . |
| 220017_x_ | 7.28E-05 | 1.29E-05 | CYP2C9   | 1559 .  |
| 220018_at | 0.007784 | 0.003916 | CBLL1    | 79872 . |
| 220020_at | 0.04507  | 0.030436 | XPNPEP3  | 63929 . |
| 220021_at | 1.34E-04 | 2.78E-05 | TMC7     | 79905 . |
| 220022_at | 4.96E-06 | 4.03E-07 | ZNF334   | 55713 . |
| 220024_s_ | 4.12E-04 | 1.12E-04 | PRX      | 57716 . |
| 220025_at | 0.024043 | 0.014667 | TBR1     | 10716 . |
| 220027_s_ | 0.007421 | 0.003703 | RASIP1   | 54922 . |
| 220028_at | 8.46E-08 | 1.83E-09 | ACVR2B   | 93 .    |
| 220029_at | 0.00226  | 8.95E-04 | ELOVL2   | 54898 . |
| 220032_at | 5.68E-05 | 9.40E-06 | C7orf58  | 79974 . |
| 220033_at | 8.79E-04 | 2.86E-04 |          | .       |
| 220034_at | 0.021339 | 0.012773 | IRAK3    | 11213 . |
| 220035_at | 1.46E-06 | 8.22E-08 | NUP210   | 23225 . |
| 220041_at | 2.55E-04 | 6.21E-05 | PIGZ     | 80235 . |
| 220044_x_ | 7.25E-06 | 6.63E-07 | CROP     | 51747 . |
| 220045_at | 0.007491 | 0.003743 | NEUROD6  | 63974 . |
| 220046_s_ | 0.021596 | 0.01295  | CCNL1    | 57018 . |
| 220049_s_ | 2.88E-06 | 1.99E-07 | PDCD1LG2 | 80380 . |
| 220050_at | 0.001168 | 4.03E-04 | C9orf9   | 11092 . |
| 220052_s_ | 3.69E-06 | 2.75E-07 | TINF2    | 26277 . |
| 220053_at | 2.73E-10 | 9.63E-13 | GDF3     | 9573 .  |
| 220054_at | 9.72E-05 | 1.86E-05 | IL23A    | 51561 . |
| 220056_at | 0.049981 | 0.034319 | IL22RA1  | 58985 . |
| 220060_s_ | 2.40E-04 | 5.74E-05 | C12orf48 | 55010 . |

|           |          |          |          |         |
|-----------|----------|----------|----------|---------|
| 220063_at | 0.002254 | 8.92E-04 | GSTCD    | 79807 . |
| 220065_at | 3.03E-04 | 7.69E-05 | TNMD     | 64102 . |
| 220067_at | 0.002923 | 0.001215 | SPTBN5   | 51332 . |
| 220068_at | 4.15E-05 | 6.30E-06 | VPREB3   | 29802 . |
| 220069_at | 0.001564 | 5.74E-04 | TUBA8    | 51807 . |
| 220071_x_ | 2.34E-07 | 7.22E-09 | HAUS2    | 55142 . |
| 220072_at | 8.15E-06 | 7.70E-07 | CSPP1    | 79848 . |
| 220073_s_ | 9.43E-09 | 9.92E-11 | PLEKHG6  | 55200 . |
| 220075_s_ | 0.003715 | 0.001623 | MUPCDH   | 53841 . |
| 220076_at | 0.003874 | 0.001706 | ANKH     | 56172 . |
| 220077_at | 2.67E-04 | 6.57E-05 | CCDC134  | 79879 . |
| 220078_at | 1.51E-04 | 3.25E-05 | USP48    | 84196 . |
| 220080_at | 0.049051 | 0.033569 | FBXL8    | 55336 . |
| 220081_x_ | 9.71E-06 | 9.79E-07 | HSD17B7  | 51478 . |
| 220082_at | 0.004041 | 0.001794 | PPP1R14D | 54866 . |
| 220083_x_ | 5.43E-05 | 8.87E-06 | UCHL5    | 51377 . |
| 220085_at | 2.03E-09 | 1.34E-11 | HELLS    | 3070 .  |
| 220086_at | 0.001952 | 7.49E-04 | IKZF5    | 64376 . |
| 220089_at | 2.19E-06 | 1.40E-07 | L2HGDH   | 79944 . |
| 220090_at | 0.021891 | 0.013166 | CRNN     | 49860 . |
| 220092_s_ | 1.81E-06 | 1.10E-07 | ANTXR1   | 84168 . |
| 220094_s_ | 3.04E-05 | 4.25E-06 | CCDC90A  | 63933 . |
| 220096_at | 0.003098 | 0.001305 | RNASET2  | 8635 .  |
| 220097_s_ | 0.005734 | 0.002725 | TMEM104  | 54868 . |
| 220098_at | 0.020239 | 0.011991 | HYDIN    | 54768 . |
| 220099_s_ | 0.001333 | 4.74E-04 | LUC7L2   | 51631 . |
| 220100_at | 0.00473  | 0.002169 | SLC22A11 | 55867 . |
| 220101_x_ | 0.002772 | 0.001142 |          | .       |
| 220102_at | 0.009291 | 0.004813 | FOXL2    | 668 .   |
| 220104_at | 0.024972 | 0.015338 | ZC3HAV1  | 56829 . |
| 220110_s_ | 0.025578 | 0.015771 | NXF3     | 56000 . |
| 220112_at | 1.90E-08 | 2.45E-10 | ANKRD55  | 79722 . |
| 220113_x_ | 7.83E-09 | 7.73E-11 | POLR1B   | 84172 . |
| 220114_s_ | 0.013611 | 0.007533 | STAB2    | 55576 . |



|           |          |          |                              |         |
|-----------|----------|----------|------------------------------|---------|
| 220116_at | 3.60E-05 | 5.25E-06 | KCNN2                        | 3781 .  |
| 220119_at | 0.003298 | 0.001407 | EPB41L4A                     | 64097 . |
| 220120_s_ | 0.001618 | 5.97E-04 | EPB41L4A                     | 64097 . |
| 220121_at | 0.011137 | 0.005955 | LINS1                        | 55180 . |
| 220125_at | 0.004312 | 0.00194  | DNAI1                        | 27019 . |
| 220126_at | 0.002597 | 0.001057 | TSP50                        | 29122 . |
| 220128_s_ | 7.38E-08 | 1.53E-09 | NIPAL2                       | 79815 . |
| 220129_at | 3.30E-07 | 1.15E-08 | SOHLH2                       | 54937 . |
| 220130_x_ | 2.43E-04 | 5.83E-05 | LTB4R2                       | 56413 . |
| 220131_at | 4.74E-04 | 1.33E-04 | FXVD7                        | 53822 . |
| 220134_x_ | 3.57E-06 | 2.63E-07 | FAM176B                      | 55194 . |
| 220135_s_ | 0.023452 | 0.014252 | SLC7A9                       | 11136 . |
| 220137_at | 0.005116 | 0.002383 | FLJ20674                     | 54621 . |
| 220138_at | 7.03E-05 | 1.24E-05 | HAND1                        | 9421 .  |
| 220139_at | 1.13E-07 | 2.70E-09 | DNMT3L                       | 29947 . |
| 220140_s_ | 0.00174  | 6.52E-04 | SNX11                        | 29916 . |
| 220141_at | 2.34E-05 | 3.05E-06 | C11orf63                     | 79864 . |
| 220143_x_ | 2.80E-07 | 9.26E-09 | LUC7L                        | 55692 . |
| 220144_s_ | 0.002492 | 0.001006 | ANKRD5                       | 63926 . |
| 220145_at | 0.005196 | 0.002426 | MAP9                         | 79884 . |
| 220147_s_ | 4.27E-12 | 3.89E-15 | FAM60A                       | 58516 . |
| 220148_at | 0.048998 | 0.033524 | ALDH8A1                      | 64577 . |
| 220149_at | 8.62E-06 | 8.31E-07 | C2orf54                      | 79919 . |
| 220150_s_ | 2.92E-06 | 2.03E-07 | FAM184A                      | 79632 . |
| 220151_at | 0.022525 | 0.013599 | C19orf73                     | 55150 . |
| 220152_at | 7.83E-04 | 2.48E-04 | C10orf95                     | 79946 . |
| 220153_at | 7.36E-06 | 6.75E-07 | ENTPD7                       | 57089 . |
| 220155_s_ | 1.14E-04 | 2.28E-05 | BRD9                         | 65980 . |
| 220157_x_ | 6.17E-04 | 1.84E-04 | PLEKHA8 /// PI51054 /// 847. |         |
| 220158_at | 1.09E-04 | 2.15E-05 | LGALS14                      | 56891 . |
| 220161_s_ | 5.25E-06 | 4.33E-07 | EPB41L4B                     | 54566 . |
| 220162_s_ | 6.49E-04 | 1.97E-04 | CARD9                        | 64170 . |
| 220163_s_ | 3.95E-04 | 1.06E-04 | HR                           | 55806 . |
| 220164_s_ | 0.020759 | 0.012366 | FBXO40                       | 51725 . |

|           |          |          |                            |          |
|-----------|----------|----------|----------------------------|----------|
| 220168_at | 0.017507 | 0.01012  | CASC1                      | 55259 .  |
| 220173_at | 2.59E-07 | 8.29E-09 | C14orf45                   | 80127 .  |
| 220175_s_ | 0.021885 | 0.013161 | CBWD1 /// CB\150472 /// 2: |          |
| 220178_at | 0.042692 | 0.028565 | C19orf28                   | 126321 . |
| 220179_at | 6.39E-04 | 1.93E-04 | DPEP3                      | 64180 .  |
| 220181_x_ | 0.042804 | 0.028647 | SLC30A5                    | 64924 .  |
| 220183_s_ | 0.013791 | 0.007651 | NUDT6                      | 11162 .  |
| 220184_at | 3.09E-13 | 1.26E-16 | NANOG                      | 79923 .  |
| 220186_s_ | 0.005039 | 0.002339 | PCDH24                     | 54825 .  |
| 220188_at | 0.002683 | 0.001098 | JPH3                       | 57338 .  |
| 220189_s_ | 0.019985 | 0.011817 | MGAT4B                     | 11282 .  |
| 220191_at | 0.00106  | 3.58E-04 | GKN1                       | 56287 .  |
| 220192_x_ | 1.18E-05 | 1.27E-06 | SPDEF                      | 25803 .  |
| 220193_at | 1.19E-05 | 1.28E-06 | C1orf113                   | 79729 .  |
| 220194_at | 7.09E-05 | 1.25E-05 | NSUN7                      | 79730 .  |
| 220197_at | 7.74E-05 | 1.40E-05 | ATP6V0A4                   | 50617 .  |
| 220198_s_ | 6.58E-04 | 2.00E-04 | EIF5A2                     | 56648 .  |
| 220199_s_ | 0.003255 | 0.001384 | AIDA                       | 64853 .  |
| 220203_at | 5.24E-04 | 1.50E-04 | BMP8A                      | 353500 . |
| 220204_s_ | 1.44E-05 | 1.65E-06 | BMP8A                      | 353500 . |
| 220206_at | 9.48E-05 | 1.80E-05 | ZMYM1                      | 79830 .  |
| 220207_at | 0.002237 | 8.84E-04 | YIF1B                      | 90522 .  |
| 220208_at | 6.70E-05 | 1.16E-05 | ADAMTS13                   | 11093 .  |
| 220209_at | 1.49E-06 | 8.48E-08 | PYY2                       | 23615 .  |
| 220211_at | 0.027426 | 0.01709  | FLJ13224                   | 79857 .  |
| 220212_s_ | 1.45E-04 | 3.07E-05 | THADA                      | 63892 .  |
| 220213_at | 0.001825 | 6.91E-04 | TSHZ2                      | 128553 . |
| 220214_at | 0.003802 | 0.001669 | ZNF215                     | 7762 .   |
| 220215_at | 0.006482 | 0.003152 | ZNF669                     | 79862 .  |
| 220216_at | 6.08E-04 | 1.81E-04 | C8orf44                    | 56260 .  |
| 220218_at | 1.40E-05 | 1.58E-06 | C9orf68                    | 55064 .  |
| 220221_at | 4.82E-04 | 1.36E-04 | VPS13D                     | 55187 .  |
| 220222_at | 0.009851 | 0.005156 | C8orf39                    | 55472 .  |
| 220223_at | 0.001178 | 4.07E-04 | ATAD5                      | 79915 .  |

|           |          |          |          |          |
|-----------|----------|----------|----------|----------|
| 220229_s_ | 0.041548 | 0.027677 | AP4E1    | 23431 .  |
| 220231_at | 0.043783 | 0.02943  | C7orf16  | 10842 .  |
| 220232_at | 0.01725  | 0.009947 | SCD5     | 79966 .  |
| 220234_at | 0.024335 | 0.014877 | CA8      | 767 .    |
| 220235_s_ | 0.001384 | 4.96E-04 | C1orf103 | 55791 .  |
| 220237_at | 2.37E-04 | 5.66E-05 | ATG3     | 64422 .  |
| 220238_s_ | 5.79E-04 | 1.70E-04 | KLHL7    | 55975 .  |
| 220239_at | 2.50E-06 | 1.66E-07 | KLHL7    | 55975 .  |
| 220240_s_ | 2.07E-05 | 2.61E-06 | TMCO3    | 55002 .  |
| 220241_at | 1.42E-04 | 2.99E-05 | TMCO3    | 55002 .  |
| 220242_x_ | 0.001092 | 3.72E-04 | ZNF701   | 55762 .  |
| 220243_at | 1.75E-04 | 3.89E-05 | ZBTB44   | 29068 .  |
| 220245_at | 6.14E-05 | 1.04E-05 | SLC45A2  | 51151 .  |
| 220246_at | 1.32E-04 | 2.73E-05 | CAMK1D   | 57118 .  |
| 220249_at | 0.001835 | 6.95E-04 | HYAL4    | 23553 .  |
| 220250_at | 0.012534 | 0.006846 | ZNF286A  | 57335 .  |
| 220251_at | 0.002345 | 9.35E-04 | C1orf107 | 27042 .  |
| 220252_x_ | 0.002056 | 7.98E-04 | CXorf21  | 80231 .  |
| 220253_s_ | 0.001474 | 5.34E-04 | LRP12    | 29967 .  |
| 220254_at | 5.62E-04 | 1.64E-04 | LRP12    | 29967 .  |
| 220255_at | 5.58E-04 | 1.63E-04 | FANCE    | 2178 .   |
| 220256_s_ | 0.016248 | 0.009282 | OXCT2    | 64064 .  |
| 220258_s_ | 0.001541 | 5.64E-04 | WRAP53   | 55135 .  |
| 220260_at | 7.88E-05 | 1.43E-05 | TBC1D19  | 55296 .  |
| 220262_s_ | 0.026321 | 0.016293 | DLK2     | 65989 .  |
| 220263_at | 0.008019 | 0.004055 | SMAD5OS  | 9597 .   |
| 220264_s_ | 0.008685 | 0.004446 | GPR107   | 57720 .  |
| 220265_at | 2.90E-06 | 2.01E-07 | GPR107   | 57720 .  |
| 220266_s_ | 0.001188 | 4.12E-04 | KLF4     | 9314 .   |
| 220267_at | 0.020013 | 0.011837 | KRT24    | 192666 . |
| 220268_at | 0.010793 | 0.00574  | C11orf67 | 28971 .  |
| 220269_at | 0.006657 | 0.003253 | ZBBX     | 79740 .  |
| 220273_at | 1.20E-04 | 2.42E-05 | IL17B    | 27190 .  |
| 220274_at | 0.010041 | 0.005273 | IQCA1    | 79781 .  |

|           |          |          |                             |          |
|-----------|----------|----------|-----------------------------|----------|
| 220275_at | 0.026467 | 0.016404 | CUZD1                       | 50624 .  |
| 220277_at | 0.018755 | 0.010972 | CXXC4                       | 80319 .  |
| 220278_at | 2.60E-04 | 6.35E-05 | KDM4D                       | 55693 .  |
| 220279_at | 0.012691 | 0.006946 | TRIM17                      | 51127 .  |
| 220282_at | 6.72E-05 | 1.16E-05 | RIC3                        | 79608 .  |
| 220284_at | 0.001263 | 4.44E-04 | DKKL1                       | 27120 .  |
| 220285_at | 2.62E-06 | 1.76E-07 | FAM108B1                    | 51104 .  |
| 220289_s_ | 1.75E-05 | 2.10E-06 | AIM1L                       | 55057 .  |
| 220290_at | 0.04972  | 0.034102 | AIM1L                       | 55057 .  |
| 220291_at | 1.92E-05 | 2.37E-06 | GDPD2                       | 54857 .  |
| 220292_at | 7.00E-07 | 3.09E-08 | ZNF434                      | 54925 .  |
| 220295_x_ | 2.92E-07 | 9.78E-09 | DEPDC1                      | 55635 .  |
| 220296_at | 2.71E-05 | 3.67E-06 | GALNT10                     | 55568 .  |
| 220298_s_ | 6.47E-05 | 1.11E-05 | SPATA6                      | 54558 .  |
| 220299_at | 1.16E-04 | 2.30E-05 | SPATA6                      | 54558 .  |
| 220301_at | 0.020643 | 0.012279 | CCDC102B                    | 79839 .  |
| 220302_at | 0.038807 | 0.025571 | MAK                         | 4117 .   |
| 220304_s_ | 0.001674 | 6.22E-04 | CNGB3                       | 54714 .  |
| 220306_at | 0.002379 | 9.51E-04 | FAM46C                      | 54855 .  |
| 220307_at | 0.002559 | 0.001038 | CD244                       | 51744 .  |
| 220309_at | 0.001655 | 6.14E-04 | TTC22                       | 55001 .  |
| 220311_at | 2.49E-06 | 1.65E-07 | N6AMT1                      | 29104 .  |
| 220312_at | 0.040452 | 0.026827 | FAM83E                      | 54854 .  |
| 220314_at | 0.003606 | 0.001566 | HSFX1 /// HSF>100130086 //. |          |
| 220317_at | 8.91E-06 | 8.72E-07 | LRAT                        | 9227 .   |
| 220318_at | 0.005361 | 0.002517 | EPN3                        | 55040 .  |
| 220319_s_ | 0.028518 | 0.017885 | MYLIP                       | 29116 .  |
| 220322_at | 0.042384 | 0.028328 | IL1F9                       | 56300 .  |
| 220323_at | 5.31E-07 | 2.13E-08 | CNTD2                       | 79935 .  |
| 220326_s_ | 0.014783 | 0.008305 | FLJ10357                    | 55701 .  |
| 220327_at | 5.50E-11 | 1.23E-13 | VGLL3                       | 389136 . |
| 220328_at | 0.014301 | 0.007984 | PHC3                        | 80012 .  |
| 220331_at | 2.17E-04 | 5.06E-05 | CYP46A1                     | 10858 .  |
| 220332_at | 0.010371 | 0.005474 | CLDN16                      | 10686 .  |

|           |          |          |          |          |
|-----------|----------|----------|----------|----------|
| 220333_at | 0.007143 | 0.00354  | PAQR5    | 54852 .  |
| 220334_at | 0.001631 | 6.03E-04 | RGS17    | 26575 .  |
| 220335_x_ | 1.49E-04 | 3.19E-05 | CES3     | 23491 .  |
| 220337_at | 3.44E-06 | 2.51E-07 | NGB      | 58157 .  |
| 220338_at | 0.012692 | 0.006947 | RALGPS2  | 55103 .  |
| 220339_s_ | 0.001479 | 5.37E-04 | TPSG1    | 25823 .  |
| 220341_s_ | 1.19E-04 | 2.40E-05 | C5orf45  | 51149 .  |
| 220342_x_ | 0.030438 | 0.019304 | EDEM3    | 80267 .  |
| 220343_at | 7.29E-06 | 6.67E-07 | PDE7B    | 27115 .  |
| 220344_at | 9.30E-05 | 1.76E-05 | C11orf16 | 56673 .  |
| 220345_at | 4.84E-06 | 3.91E-07 | LRRTM4   | 80059 .  |
| 220346_at | 0.003315 | 0.001416 | MTHFD2L  | 441024 . |
| 220347_at | 0.047079 | 0.032016 | SMG6     | 23293 .  |
| 220349_s_ | 0.00152  | 5.55E-04 | ENGASE   | 64772 .  |
| 220351_at | 4.45E-14 | 1.03E-17 | CCRL1    | 51554 .  |
| 220352_x_ | 1.23E-04 | 2.50E-05 | FLJ42627 | 645644 . |
| 220353_at | 0.001526 | 5.57E-04 | FAM86C   | 55199 .  |
| 220355_s_ | 0.014295 | 0.007979 | PBRM1    | 55193 .  |
| 220357_s_ | 0.005928 | 0.002837 | SGK2     | 10110 .  |
| 220358_at | 1.12E-06 | 5.76E-08 | BATF3    | 55509 .  |
| 220360_at | 4.35E-05 | 6.70E-06 | THAP9    | 79725 .  |
| 220361_at | 0.004016 | 0.001781 | IQCH     | 64799 .  |
| 220363_s_ | 4.67E-05 | 7.35E-06 | ELMO2    | 63916 .  |
| 220364_at | 0.005928 | 0.002836 | FLJ11235 | 54508 .  |
| 220365_at | 7.31E-05 | 1.30E-05 | ALLC     | 55821 .  |
| 220366_at | 0.009413 | 0.004887 | ELSPBP1  | 64100 .  |
| 220367_s_ | 1.94E-04 | 4.42E-05 | SAP130   | 79595 .  |
| 220368_s_ | 0.016273 | 0.009298 | SMEK1    | 55671 .  |
| 220370_s_ | 2.11E-07 | 6.16E-09 | USP36    | 57602 .  |
| 220371_s_ | 0.015586 | 0.008841 | SLC12A9  | 56996 .  |
| 220373_at | 0.014679 | 0.008235 | DCHS2    | 54798 .  |
| 220374_at | 0.014004 | 0.007787 | KLHL28   | 54813 .  |
| 220377_at | 3.90E-04 | 1.05E-04 | FAM30A   | 29064 .  |
| 220379_at | 0.001479 | 5.37E-04 | FSCN3    | 29999 .  |

|           |          |          |            |          |
|-----------|----------|----------|------------|----------|
| 220381_at | 1.54E-09 | 9.45E-12 | ARHGAP28   | 79822 .  |
| 220382_s_ | 2.98E-06 | 2.08E-07 | ARHGAP28   | 79822 .  |
| 220383_at | 0.004494 | 0.00204  | ABCG5      | 64240 .  |
| 220386_s_ | 0.003509 | 0.001516 | EML4       | 27436 .  |
| 220387_s_ | 6.98E-05 | 1.23E-05 | HHLA3      | 11147 .  |
| 220388_at | 0.010936 | 0.005827 | FER1L4     | 80307 .  |
| 220389_at | 5.81E-08 | 1.09E-09 | CCDC81     | 60494 .  |
| 220391_at | 0.002696 | 0.001105 | ZBTB3      | 79842 .  |
| 220392_at | 0.00437  | 0.001972 | EBF2       | 64641 .  |
| 220395_at | 1.54E-05 | 1.80E-06 | DNAJA4     | 55466 .  |
| 220396_at | 0.012144 | 0.00659  |            | .        |
| 220397_at | 4.52E-05 | 7.04E-06 | MDM1       | 56890 .  |
| 220398_at | 0.010151 | 0.005337 | GNPTAB     | 79158 .  |
| 220399_at | 2.75E-04 | 6.81E-05 | NCRNA00115 | 79854 .  |
| 220400_at | 0.001227 | 4.29E-04 | VPS13B     | 157680 . |
| 220401_at | 0.018928 | 0.01109  | FLJ21369   | 79860 .  |
| 220403_s_ | 0.00149  | 5.42E-04 | TP53AIP1   | 63970 .  |
| 220406_at | 2.04E-04 | 4.69E-05 | TGFB2      | 7042 .   |
| 220407_s_ | 4.25E-04 | 1.17E-04 | TGFB2      | 7042 .   |
| 220408_x_ | 0.002769 | 0.001141 | FAM48A     | 55578 .  |
| 220409_at | 0.006386 | 0.003096 | CAMSAP1    | 157922 . |
| 220410_s_ | 5.54E-04 | 1.62E-04 | CAMSAP1    | 157922 . |
| 220411_x_ | 0.001071 | 3.63E-04 | PODNL1     | 79883 .  |
| 220412_x_ | 4.83E-04 | 1.36E-04 | KCNK7      | 10089 .  |
| 220413_at | 0.001443 | 5.21E-04 | SLC39A2    | 29986 .  |
| 220414_at | 2.09E-04 | 4.85E-05 | CALML5     | 51806 .  |
| 220416_at | 1.03E-07 | 2.37E-09 | ATP8B4     | 79895 .  |
| 220417_s_ | 7.74E-04 | 2.44E-04 | THAP4      | 51078 .  |
| 220418_at | 8.49E-04 | 2.74E-04 | UBASH3A    | 53347 .  |
| 220420_at | 6.57E-04 | 2.00E-04 | LMAN1L     | 79748 .  |
| 220421_at | 2.77E-04 | 6.89E-05 | BTNL8      | 79908 .  |
| 220423_at | 9.08E-04 | 2.97E-04 | PLA2G2D    | 26279 .  |
| 220424_at | 0.032244 | 0.020636 | NPHS2      | 7827 .   |
| 220425_x_ | 4.35E-06 | 3.41E-07 | ROPN1B     | 152015 . |

|           |          |          |                             |          |
|-----------|----------|----------|-----------------------------|----------|
| 220426_at | 0.004072 | 0.00181  | C2orf195                    | 79025 .  |
| 220427_at | 0.003302 | 0.001409 | OBSCN                       | 84033 .  |
| 220428_at | 0.006886 | 0.003389 | CD207                       | 50489 .  |
| 220430_at | 5.23E-04 | 1.50E-04 | GRRP1                       | 79927 .  |
| 220431_at | 5.35E-09 | 4.70E-11 | TMPRSS11E ///,28983 /// 729 | .        |
| 220433_at | 1.35E-04 | 2.81E-05 | PRRG3                       | 79057 .  |
| 220437_at | 0.002385 | 9.54E-04 | LOC55908                    | 55908 .  |
| 220439_at | 0.009298 | 0.004818 | RIN3                        | 79890 .  |
| 220440_at | 0.022259 | 0.013421 | LGALS13                     | 29124 .  |
| 220441_at | 2.51E-06 | 1.67E-07 | DNAJC22                     | 79962 .  |
| 220442_at | 0.001965 | 7.55E-04 | GALNT4 /// WI282809 /// 86  | .        |
| 220444_at | 0.005439 | 0.00256  | ZNF557                      | 79230 .  |
| 220446_s_ | 2.89E-04 | 7.23E-05 | CHST4                       | 10164 .  |
| 220447_at | 4.71E-05 | 7.44E-06 | HRH3                        | 11255 .  |
| 220448_at | 7.62E-09 | 7.38E-11 | KCNK12                      | 56660 .  |
| 220450_at | 5.33E-04 | 1.54E-04 |                             | .        |
| 220451_s_ | 2.47E-05 | 3.27E-06 | BIRC7                       | 79444 .  |
| 220452_x_ | 0.008534 | 0.004357 |                             | .        |
| 220453_at | 0.006726 | 0.003295 | PQLC2                       | 54896 .  |
| 220454_s_ | 9.06E-12 | 1.17E-14 | SEMA6A                      | 57556 .  |
| 220455_at | 6.84E-05 | 1.19E-05 | SLC16A8                     | 23539 .  |
| 220456_at | 0.038192 | 0.025105 | SPTLC3                      | 55304 .  |
| 220457_at | 4.14E-05 | 6.28E-06 | SAMD4B                      | 55095 .  |
| 220458_at | 2.73E-06 | 1.86E-07 |                             | .        |
| 220459_at | 1.45E-07 | 3.77E-09 | MCM3APAS                    | 114044 . |
| 220463_at | 4.33E-04 | 1.19E-04 | TRPM3                       | 80036 .  |
| 220464_at | 0.003763 | 0.001649 | MCF2L                       | 23263 .  |
| 220465_at | 2.84E-06 | 1.96E-07 | LOC80054                    | 80054 .  |
| 220466_at | 9.31E-07 | 4.50E-08 | CCDC15                      | 80071 .  |
| 220467_at | 0.031124 | 0.019803 |                             | .        |
| 220470_at | 0.016025 | 0.009136 | BET1L                       | 51272 .  |
| 220471_s_ | 3.64E-09 | 2.79E-11 | MYCT1                       | 80177 .  |
| 220472_at | 0.004673 | 0.002139 | ZCCHC4                      | 29063 .  |
| 220473_s_ | 0.002107 | 8.22E-04 | ZCCHC4                      | 29063 .  |

|           |          |          |                             |          |
|-----------|----------|----------|-----------------------------|----------|
| 220474_at | 0.020645 | 0.012281 | SLC25A21                    | 89874 .  |
| 220475_at | 3.18E-05 | 4.50E-06 | SLC28A3                     | 64078 .  |
| 220476_s_ | 0.003108 | 0.00131  | C1orf183                    | 55924 .  |
| 220477_s_ | 0.005132 | 0.002391 | C20orf30                    | 29058 .  |
| 220478_at | 0.009222 | 0.004772 | APOL5                       | 80831 .  |
| 220480_at | 0.025323 | 0.015595 | HAND2                       | 9464 .   |
| 220482_s_ | 8.77E-04 | 2.85E-04 | SERGEF                      | 26297 .  |
| 220483_s_ | 0.007999 | 0.004043 | RNF19A                      | 25897 .  |
| 220486_x_ | 0.006156 | 0.002964 | LOC100130886(100130886 //.  |          |
| 220487_at | 0.014667 | 0.008227 | SNTG2                       | 54221 .  |
| 220488_s_ | 0.006061 | 0.002913 | BCAS3                       | 54828 .  |
| 220489_s_ | 3.47E-05 | 5.01E-06 |                             | .        |
| 220490_at | 0.001288 | 4.54E-04 |                             | .        |
| 220491_at | 1.08E-05 | 1.13E-06 | HAMP                        | 57817 .  |
| 220494_s_ | 3.68E-07 | 1.33E-08 |                             | .        |
| 220495_s_ | 6.39E-05 | 1.09E-05 | TXNDC15                     | 79770 .  |
| 220496_at | 0.003437 | 0.001479 | CLEC1B                      | 51266 .  |
| 220498_at | 2.31E-05 | 3.00E-06 | ACTL7B                      | 10880 .  |
| 220499_at | 0.006831 | 0.003357 | FNDC8                       | 54752 .  |
| 220500_s_ | 1.32E-04 | 2.73E-05 | RABL2A /// RAI11158 /// 11. |          |
| 220501_at | 0.001828 | 6.92E-04 | ACTL7A                      | 10881 .  |
| 220505_at | 0.005912 | 0.002827 | C9orf53                     | 51198 .  |
| 220506_at | 0.002736 | 0.001125 | GUCY1B2                     | 2974 .   |
| 220507_s_ | 0.030963 | 0.019684 | UPB1                        | 51733 .  |
| 220508_at | 0.007887 | 0.003978 | CCT8L2                      | 150160 . |
| 220509_at | 0.009282 | 0.004808 | RBM26                       | 64062 .  |
| 220510_at | 5.23E-04 | 1.50E-04 | RHBG                        | 57127 .  |
| 220511_s_ | 0.023435 | 0.014238 | DLC1                        | 10395 .  |
| 220514_at | 0.030637 | 0.019448 |                             | .        |
| 220515_at | 9.59E-04 | 3.17E-04 | DUSP21                      | 63904 .  |
| 220518_at | 0.007596 | 0.003805 | ABI3BP                      | 25890 .  |
| 220524_at | 0.028518 | 0.017884 | EPB41L4B                    | 54566 .  |
| 220525_s_ | 3.58E-05 | 5.21E-06 | AUP1                        | 550 .    |
| 220526_s_ | 6.85E-05 | 1.20E-05 | MRPL20                      | 55052 .  |



|           |          |          |              |          |
|-----------|----------|----------|--------------|----------|
| 220527_at | 0.001203 | 4.18E-04 | MRPL20       | 55052 .  |
| 220528_at | 0.006681 | 0.003268 | VNN3         | 55350 .  |
| 220529_at | 0.027675 | 0.017277 | FLJ11710     | 79904 .  |
| 220531_at | 0.025116 | 0.015439 |              | .        |
| 220532_s_ | 3.38E-07 | 1.19E-08 | TMEM176B     | 28959 .  |
| 220536_at | 3.90E-08 | 6.38E-10 | C14orf115    | 55237 .  |
| 220538_at | 2.52E-05 | 3.36E-06 | ADM2         | 79924 .  |
| 220539_at | 0.048301 | 0.032969 | C10orf92     | 54777 .  |
| 220541_at | 0.010513 | 0.005561 | MMP26        | 56547 .  |
| 220542_s_ | 0.003173 | 0.001343 | PLUNC        | 51297 .  |
| 220544_at | 0.030358 | 0.019242 | TSKS         | 60385 .  |
| 220545_s_ | 7.78E-04 | 2.46E-04 | TSKS         | 60385 .  |
| 220546_at | 0.001735 | 6.50E-04 | MLL          | 4297 .   |
| 220547_s_ | 0.011877 | 0.006418 | FAM35A       | 54537 .  |
| 220549_at | 5.55E-04 | 1.62E-04 | RAD54B       | 25788 .  |
| 220550_at | 0.004639 | 0.002119 | FBXO4        | 26272 .  |
| 220553_s_ | 0.001034 | 3.47E-04 | PRPF39       | 55015 .  |
| 220554_at | 8.48E-07 | 3.99E-08 | SLC22A7      | 10864 .  |
| 220555_s_ | 0.019551 | 0.011516 | PDZD7        | 79955 .  |
| 220556_at | 0.043439 | 0.029155 | ATP1B4       | 23439 .  |
| 220557_s_ | 4.05E-04 | 1.10E-04 | PACS1        | 55690 .  |
| 220561_at | 1.86E-05 | 2.28E-06 | IGF2AS       | 51214 .  |
| 220562_at | 2.73E-08 | 4.07E-10 | CYP2W1       | 54905 .  |
| 220564_at | 1.26E-04 | 2.57E-05 | RNLS         | 55328 .  |
| 220566_at | 6.61E-09 | 6.09E-11 | PIK3R5       | 23533 .  |
| 220569_at | 2.22E-04 | 5.21E-05 |              | .        |
| 220570_at | 0.042909 | 0.028725 | RETN         | 56729 .  |
| 220571_at | 0.009501 | 0.004941 | PRDM11       | 56981 .  |
| 220572_at | 3.12E-05 | 4.40E-06 | DKFZp547G183 | 55525 .  |
| 220573_at | 1.37E-04 | 2.88E-05 | KLK14        | 43847 .  |
| 220575_at | 2.64E-08 | 3.87E-10 | FAM106A      | 80039 .  |
| 220576_at | 1.17E-04 | 2.35E-05 | PGAP1        | 80055 .  |
| 220577_at | 0.033622 | 0.021667 | GVIN1        | 387751 . |
| 220579_at | 0.001894 | 7.23E-04 | FLJ14100     | 80093 .  |

|           |          |          |                             |          |
|-----------|----------|----------|-----------------------------|----------|
| 220580_at | 3.27E-05 | 4.65E-06 | BICC1                       | 80114 .  |
| 220581_at | 8.62E-04 | 2.79E-04 | C6orf97                     | 80129 .  |
| 220582_at | 0.046169 | 0.031294 |                             | .        |
| 220583_at | 6.75E-04 | 2.06E-04 |                             | .        |
| 220584_at | 0.00148  | 5.37E-04 | FLJ22184                    | 80164 .  |
| 220585_at | 8.54E-04 | 2.76E-04 | HKDC1                       | 80201 .  |
| 220586_at | 0.046627 | 0.031658 | CHD9                        | 80205 .  |
| 220587_s_ | 0.013607 | 0.00753  | GBL                         | 64223 .  |
| 220592_at | 0.028606 | 0.017952 | CCDC40                      | 55036 .  |
| 220593_s_ | 4.04E-04 | 1.10E-04 | CCDC40                      | 55036 .  |
| 220596_at | 0.006787 | 0.003331 | GPATCH4                     | 54865 .  |
| 220597_s_ | 1.30E-05 | 1.44E-06 | ARL6IP4                     | 51329 .  |
| 220598_at | 2.15E-04 | 5.01E-05 | CARD14                      | 79092 .  |
| 220599_s_ | 0.00208  | 8.09E-04 | CARD14                      | 79092 .  |
| 220600_at | 0.007376 | 0.003676 | C3orf75                     | 54859 .  |
| 220601_at | 0.01831  | 0.010669 | C16orf70                    | 80262 .  |
| 220602_s_ | 3.68E-05 | 5.39E-06 | LOC388152 /// 388152 /// 7. |          |
| 220604_x_ | 1.76E-06 | 1.06E-07 | FTCD                        | 10841 .  |
| 220605_s_ | 1.27E-06 | 6.80E-08 | SIRT2                       | 22933 .  |
| 220606_s_ | 0.049623 | 0.034025 | C17orf48                    | 56985 .  |
| 220607_x_ | 8.26E-07 | 3.85E-08 | TH1L                        | 51497 .  |
| 220608_s_ | 0.008152 | 0.004131 | ZNF770                      | 54989 .  |
| 220609_at | 1.07E-07 | 2.51E-09 | LOC202181                   | 202181 . |
| 220610_s_ | 1.16E-05 | 1.23E-06 | LRRFIP2                     | 9209 .   |
| 220612_at | 0.022001 | 0.013241 |                             | .        |
| 220613_s_ | 9.73E-06 | 9.81E-07 | SYTL2                       | 54843 .  |
| 220616_at | 0.006657 | 0.003253 | ZNF384                      | 171017 . |
| 220617_s_ | 0.047313 | 0.032206 | ZNF532                      | 55205 .  |
| 220618_s_ | 0.045203 | 0.030541 | ZCWPW1                      | 55063 .  |
| 220620_at | 0.0462   | 0.03132  | CRCT1                       | 54544 .  |
| 220622_at | 0.00531  | 0.002488 | LRR31                       | 79782 .  |
| 220624_s_ | 3.08E-04 | 7.87E-05 | ELF5                        | 2001 .   |
| 220626_at | 0.013744 | 0.007622 | SERPINA10                   | 51156 .  |
| 220627_at | 0.027353 | 0.017041 | CST8                        | 10047 .  |

|           |          |          |                             |          |
|-----------|----------|----------|-----------------------------|----------|
| 220628_s_ | 1.49E-04 | 3.18E-05 | SDK2                        | 54549 .  |
| 220629_at | 7.53E-06 | 6.95E-07 | KCNQ1DN                     | 55539 .  |
| 220630_s_ | 0.010619 | 0.005629 | CHIA                        | 27159 .  |
| 220631_at | 0.01802  | 0.010472 | OSGEPL1                     | 64172 .  |
| 220632_s_ | 0.012916 | 0.007093 | POMT2                       | 29954 .  |
| 220633_s_ | 0.005509 | 0.0026   | HP1BP3                      | 50809 .  |
| 220634_at | 0.004339 | 0.001955 | TBX4                        | 9496 .   |
| 220635_at | 2.88E-05 | 3.96E-06 | PSORS1C2                    | 170680 . |
| 220636_at | 0.008581 | 0.004383 | DNAI2                       | 64446 .  |
| 220637_at | 8.31E-04 | 2.67E-04 | FAM124B                     | 79843 .  |
| 220638_s_ | 2.35E-06 | 1.54E-07 | CBLC                        | 23624 .  |
| 220640_at | 3.48E-04 | 9.11E-05 | CSNK1G1                     | 53944 .  |
| 220641_at | 2.93E-06 | 2.04E-07 | NOX5                        | 79400 .  |
| 220642_x_ | 0.042308 | 0.02827  | GPR89A /// GP 51463 /// 65: |          |
| 220645_at | 0.003003 | 0.001256 | FAM55D                      | 54827 .  |
| 220646_s_ | 0.001531 | 5.60E-04 | KLRF1                       | 51348 .  |
| 220647_s_ | 3.72E-04 | 9.90E-05 | CHCHD8                      | 51287 .  |
| 220648_at | 0.036651 | 0.023936 | ADARB2                      | 105 .    |
| 220651_s_ | 1.21E-05 | 1.30E-06 | MCM10                       | 55388 .  |
| 220652_at | 1.53E-04 | 3.30E-05 | KIF24                       | 347240 . |
| 220654_at | 0.034367 | 0.022206 | PPY2                        | 23614 .  |
| 220657_at | 1.31E-04 | 2.69E-05 | KLHL11                      | 55175 .  |
| 220661_s_ | 5.03E-05 | 8.08E-06 | ZNF692                      | 55657 .  |
| 220662_s_ | 0.012096 | 0.006561 | HEYL                        | 26508 .  |
| 220665_at | 2.94E-04 | 7.39E-05 | LUZP4                       | 51213 .  |
| 220666_at | 0.008233 | 0.004179 |                             | .        |
| 220667_at | 0.025322 | 0.015593 | USP49                       | 25862 .  |
| 220668_s_ | 2.36E-10 | 8.23E-13 | DNMT3B                      | 1789 .   |
| 220669_at | 0.01581  | 0.008988 | OTUD4                       | 54726 .  |
| 220671_at | 0.004452 | 0.002017 | CCRN4L                      | 25819 .  |
| 220674_at | 2.77E-04 | 6.89E-05 | CD22                        | 933 .    |
| 220676_at | 0.001016 | 3.40E-04 | ADAMTS8                     | 11095 .  |
| 220678_at | 0.003094 | 0.001303 | FLJ20712                    | 55025 .  |
| 220679_s_ | 0.008177 | 0.004146 | CDH7                        | 1005 .   |

|           |          |          |                             |        |   |
|-----------|----------|----------|-----------------------------|--------|---|
| 220681_at | 0.007534 | 0.003769 | C22orf26                    | 55267  | . |
| 220682_s_ | 2.56E-04 | 6.23E-05 |                             |        | . |
| 220683_at | 7.02E-04 | 2.17E-04 | RDH8                        | 50700  | . |
| 220684_at | 6.03E-04 | 1.79E-04 | TBX21                       | 30009  | . |
| 220685_at | 4.60E-05 | 7.21E-06 | FAM120C                     | 54954  | . |
| 220686_s_ | 0.039408 | 0.026032 | PIWIL2                      | 55124  | . |
| 220687_at | 9.27E-05 | 1.75E-05 |                             |        | . |
| 220688_s_ | 9.04E-06 | 8.89E-07 | MRTO4                       | 51154  | . |
| 220689_at | 2.07E-04 | 4.77E-05 |                             |        | . |
| 220691_at | 0.006873 | 0.00338  |                             |        | . |
| 220693_at | 2.53E-06 | 1.69E-07 | CCDC82                      | 79780  | . |
| 220694_at | 2.68E-05 | 3.61E-06 | DDEF1IT1                    | 29065  | . |
| 220695_at | 0.003064 | 0.001288 |                             |        | . |
| 220698_at | 0.025199 | 0.015505 | MGC4294                     | 79160  | . |
| 220702_at | 1.43E-06 | 8.05E-08 |                             |        | . |
| 220703_at | 1.79E-04 | 3.99E-05 | C10orf110                   | 55853  | . |
| 220705_s_ | 2.88E-04 | 7.22E-05 | ADAMTS7                     | 11173  | . |
| 220708_at | 0.004815 | 0.002217 |                             |        | . |
| 220710_at | 4.95E-04 | 1.40E-04 | C15orf28                    | 80035  | . |
| 220711_at | 0.001128 | 3.86E-04 |                             |        | . |
| 220712_at | 0.028249 | 0.017691 | C8orf60                     | 619426 | . |
| 220713_at | 0.012567 | 0.006867 |                             |        | . |
| 220714_at | 7.19E-06 | 6.55E-07 | PRDM14                      | 63978  | . |
| 220716_at | 9.44E-05 | 1.79E-05 | GNL3LP                      | 80060  | . |
| 220719_at | 2.87E-05 | 3.94E-06 |                             |        | . |
| 220720_x_ | 3.30E-07 | 1.16E-08 | FAM128B                     | 80097  | . |
| 220721_at | 2.24E-07 | 6.79E-09 | ZNF614                      | 80110  | . |
| 220725_x_ | 0.032107 | 0.020534 | DNAH3                       | 55567  | . |
| 220727_at | 2.35E-05 | 3.07E-06 | KCNK10                      | 54207  | . |
| 220728_at | 9.11E-06 | 8.99E-07 |                             |        | . |
| 220730_at | 0.002559 | 0.001039 | ZNF778                      | 197320 | . |
| 220731_s_ | 6.18E-06 | 5.36E-07 | NECAP2                      | 55707  | . |
| 220733_at | 8.60E-05 | 1.60E-05 | SLC26A1                     | 10861  | . |
| 220734_s_ | 5.72E-04 | 1.68E-04 | GLTPD1 /// LOC727825 /// 8C |        | . |

|           |          |          |          |          |
|-----------|----------|----------|----------|----------|
| 220735_s_ | 1.67E-04 | 3.65E-05 | SENP7    | 57337 .  |
| 220736_at | 4.51E-05 | 7.03E-06 | SLC19A3  | 80704 .  |
| 220737_at | 6.00E-04 | 1.78E-04 | RPS6KA6  | 27330 .  |
| 220739_s_ | 3.25E-06 | 2.34E-07 | CNNM3    | 26505 .  |
| 220740_s_ | 0.001148 | 3.95E-04 | SLC12A6  | 9990 .   |
| 220742_s_ | 0.022404 | 0.013516 | NGLY1    | 55768 .  |
| 220743_at | 4.10E-04 | 1.11E-04 |          | .        |
| 220746_s_ | 3.90E-06 | 2.96E-07 | UIMC1    | 51720 .  |
| 220747_at | 5.05E-04 | 1.44E-04 | HSPC072  | 29075 .  |
| 220748_s_ | 3.67E-04 | 9.71E-05 | ZNF580   | 51157 .  |
| 220749_at | 0.001743 | 6.53E-04 | C10orf68 | 79741 .  |
| 220750_s_ | 9.86E-08 | 2.25E-09 | LEPRE1   | 64175 .  |
| 220751_s_ | 8.43E-06 | 8.09E-07 | C5orf4   | 10826 .  |
| 220753_s_ | 0.005695 | 0.002702 | CRYL1    | 51084 .  |
| 220754_at | 0.030968 | 0.01969  | ARMC9    | 80210 .  |
| 220756_s_ | 0.006056 | 0.002909 | GPR172B  | 55065 .  |
| 220757_s_ | 1.19E-06 | 6.20E-08 | UBXN6    | 80700 .  |
| 220758_s_ | 0.001316 | 4.66E-04 | ROBO4    | 54538 .  |
| 220760_x_ | 0.001673 | 6.22E-04 | ZNF665   | 79788 .  |
| 220761_s_ | 2.90E-04 | 7.27E-05 | TAOK3    | 51347 .  |
| 220763_at | 0.022647 | 0.013685 | HSPA12A  | 259217 . |
| 220765_s_ | 4.25E-07 | 1.61E-08 | LIMS2    | 55679 .  |
| 220766_at | 0.003061 | 0.001286 | BTG4     | 54766 .  |
| 220769_s_ | 0.002338 | 9.31E-04 | WDR78    | 79819 .  |
| 220770_s_ | 0.00204  | 7.90E-04 | C5orf54  | 63920 .  |
| 220774_at | 7.80E-05 | 1.41E-05 | DYM      | 54808 .  |
| 220775_s_ | 3.62E-09 | 2.75E-11 | UEVLD    | 55293 .  |
| 220778_x_ | 3.13E-04 | 8.03E-05 | SEMA6B   | 10501 .  |
| 220780_at | 4.14E-04 | 1.13E-04 | PLA2G3   | 50487 .  |
| 220782_x_ | 1.64E-05 | 1.94E-06 | KLK12    | 43849 .  |
| 220783_at | 1.93E-06 | 1.19E-07 | MMP27    | 64066 .  |
| 220786_s_ | 1.59E-04 | 3.43E-05 | SLC38A4  | 55089 .  |
| 220789_s_ | 2.24E-04 | 5.27E-05 | TBRG4    | 9238 .   |
| 220790_s_ | 0.046625 | 0.031654 | MS4A5    | 64232 .  |

|           |          |          |          |          |
|-----------|----------|----------|----------|----------|
| 220792_at | 8.51E-05 | 1.58E-05 | PRDM5    | 11107 .  |
| 220794_at | 1.89E-04 | 4.28E-05 | GREM2    | 64388 .  |
| 220796_x_ | 2.79E-06 | 1.91E-07 | SLC35E1  | 79939 .  |
| 220798_x_ | 0.003082 | 0.001297 | PRG2     | 79948 .  |
| 220800_s_ | 1.74E-04 | 3.84E-05 | TMOD3    | 29766 .  |
| 220801_s_ | 0.005008 | 0.00232  | HAO2     | 51179 .  |
| 220802_at | 4.24E-07 | 1.61E-08 | KCNH4    | 23415 .  |
| 220804_s_ | 0.015918 | 0.009063 | TP73     | 7161 .   |
| 220805_at | 0.01753  | 0.010138 | HRH2     | 3274 .   |
| 220808_at | 0.004422 | 0.002001 | THEG     | 51298 .  |
| 220809_at | 0.039264 | 0.025922 |          | .        |
| 220812_s_ | 0.002074 | 8.06E-04 | HHLA2    | 11148 .  |
| 220813_at | 0.009223 | 0.004773 | CYSLTR2  | 57105 .  |
| 220814_at | 0.005638 | 0.002671 |          | .        |
| 220815_at | 3.99E-05 | 5.97E-06 | CTNNA3   | 29119 .  |
| 220817_at | 0.013579 | 0.007513 | TRPC4    | 7223 .   |
| 220818_s_ | 3.45E-06 | 2.52E-07 | TRPC4    | 7223 .   |
| 220819_at | 0.030495 | 0.019346 | FRMD1    | 79981 .  |
| 220820_at | 0.00636  | 0.003081 |          | .        |
| 220822_at | 6.79E-11 | 1.63E-13 |          | .        |
| 220824_at | 3.09E-04 | 7.88E-05 |          | .        |
| 220825_s_ | 0.035664 | 0.023189 | KIRREL   | 55243 .  |
| 220826_at | 0.004231 | 0.001896 | TCP10L   | 140290 . |
| 220827_at | 0.047891 | 0.032646 |          | .        |
| 220828_s_ | 1.10E-05 | 1.15E-06 | FLJ11292 | 55338 .  |
| 220829_s_ | 0.028513 | 0.01788  | B3GALT1  | 8708 .   |
| 220830_at | 0.008648 | 0.004423 | IMPG2    | 50939 .  |
| 220831_at | 0.046693 | 0.031712 | GCNT4    | 51301 .  |
| 220832_at | 0.004866 | 0.002243 | TLR8     | 51311 .  |
| 220833_at | 0.031839 | 0.020324 |          | .        |
| 220834_at | 0.028442 | 0.017826 | MS4A12   | 54860 .  |
| 220836_at | 9.97E-05 | 1.92E-05 | ZNF407   | 55628 .  |
| 220838_at | 0.013643 | 0.007554 | EXD3     | 54932 .  |
| 220840_s_ | 4.71E-07 | 1.83E-08 | C1orf112 | 55732 .  |

|           |          |          |           |         |
|-----------|----------|----------|-----------|---------|
| 220841_s_ | 0.040319 | 0.026728 | AHI1      | 54806 . |
| 220842_at | 0.016311 | 0.009324 | AHI1      | 54806 . |
| 220843_s_ | 4.37E-07 | 1.67E-08 | WDSOF1    | 25879 . |
| 220844_at | 4.55E-04 | 1.27E-04 | TCEB3B    | 51224 . |
| 220846_s_ | 0.019915 | 0.011767 |           | .       |
| 220848_x_ | 0.034368 | 0.022208 | OBP2A     | 29991 . |
| 220849_at | 2.48E-04 | 5.99E-05 | LOC79999  | 79999 . |
| 220852_at | 5.22E-04 | 1.50E-04 | PRO1768   | 29018 . |
| 220853_at | 0.018208 | 0.0106   | GTDC1     | 79712 . |
| 220854_at | 0.002864 | 0.001187 |           | .       |
| 220855_at | 6.90E-04 | 2.12E-04 |           | .       |
| 220863_at | 0.005638 | 0.002672 | MIP       | 4284 .  |
| 220864_s_ | 0.002568 | 0.001043 | NDUFA13   | 51079 . |
| 220865_s_ | 1.44E-05 | 1.64E-06 | PDSS1     | 23590 . |
| 220866_at | 0.001514 | 5.52E-04 | ADAMTS6   | 11174 . |
| 220867_s_ | 0.017116 | 0.009856 | SLC24A2   | 25769 . |
| 220868_s_ | 0.021757 | 0.013068 | SLC7A10   | 56301 . |
| 220870_at | 0.003442 | 0.001481 |           | .       |
| 220873_at | 0.009115 | 0.004704 |           | .       |
| 220875_at | 7.01E-04 | 2.16E-04 |           | .       |
| 220876_at | 0.034323 | 0.022173 |           | .       |
| 220879_at | 0.041019 | 0.027266 |           | .       |
| 220881_at | 2.07E-04 | 4.78E-05 |           | .       |
| 220882_at | 0.011597 | 0.006242 |           | .       |
| 220883_at | 3.72E-04 | 9.87E-05 | PRO2012   | 55478 . |
| 220885_s_ | 0.003439 | 0.001479 | CENPJ     | 55835 . |
| 220887_at | 2.10E-05 | 2.66E-06 | C14orf162 | 56936 . |
| 220888_s_ | 8.79E-04 | 2.86E-04 | CASS4     | 57091 . |
| 220890_s_ | 1.28E-05 | 1.41E-06 | DDX47     | 51202 . |
| 220892_s_ | 0.018233 | 0.010615 | PSAT1     | 29968 . |
| 220894_x_ | 3.16E-04 | 8.10E-05 | PRDM12    | 59335 . |
| 220896_at | 0.00319  | 0.001352 | FBXL18    | 80028 . |
| 220902_at | 0.002894 | 0.001201 |           | .       |
| 220904_at | 0.049816 | 0.034187 | C6orf208  | 80069 . |

|           |          |          |                             |          |
|-----------|----------|----------|-----------------------------|----------|
| 220905_at | 1.57E-08 | 1.91E-10 |                             | .        |
| 220907_at | 0.031169 | 0.019833 | GPR110                      | 266977 . |
| 220908_at | 0.002622 | 0.001069 | CCDC33                      | 80125 .  |
| 220909_at | 0.002987 | 0.001248 | TRIM46                      | 80128 .  |
| 220910_at | 9.75E-05 | 1.87E-05 | FRAS1                       | 80144 .  |
| 220911_s_ | 0.00133  | 4.72E-04 | KIAA1305                    | 57523 .  |
| 220912_at | 0.025444 | 0.01568  |                             | .        |
| 220913_at | 2.10E-04 | 4.87E-05 |                             | .        |
| 220917_s_ | 9.88E-04 | 3.29E-04 | WDR19                       | 57728 .  |
| 220918_at | 0.037224 | 0.02438  | C21orf96                    | 80215 .  |
| 220920_at | 2.33E-04 | 5.54E-05 | ATP10B                      | 23120 .  |
| 220923_s_ | 2.56E-06 | 1.71E-07 | PNMA3                       | 29944 .  |
| 220924_s_ | 3.09E-06 | 2.18E-07 | SLC38A2                     | 54407 .  |
| 220925_at | 7.03E-05 | 1.24E-05 | MAK10                       | 60560 .  |
| 220926_s_ | 0.011615 | 0.006252 | EDEM3                       | 80267 .  |
| 220927_s_ | 0.002766 | 0.001139 | HPSE2 /// LOC:100133895 //. |          |
| 220929_at | 0.004952 | 0.002289 | GALNT8                      | 26290 .  |
| 220932_at | 0.004209 | 0.001884 |                             | .        |
| 220933_s_ | 0.029098 | 0.018315 | ZCCHC6                      | 79670 .  |
| 220934_s_ | 0.023608 | 0.014367 | TMEM223                     | 79064 .  |
| 220935_s_ | 0.021575 | 0.012935 | CDK5RAP2                    | 55755 .  |
| 220937_s_ | 0.006233 | 0.003009 | ST6GALNAC4                  | 27090 .  |
| 220938_s_ | 0.00302  | 0.001265 | GMEB1                       | 10691 .  |
| 220939_s_ | 0.013948 | 0.007751 | DPP8                        | 54878 .  |
| 220940_at | 7.71E-06 | 7.18E-07 | ANKRD36B                    | 57730 .  |
| 220941_s_ | 0.004061 | 0.001805 | C21orf91                    | 54149 .  |
| 220942_x_ | 3.11E-04 | 7.96E-05 | FAM162A                     | 26355 .  |
| 220943_s_ | 1.08E-04 | 2.12E-05 | C2orf56                     | 55471 .  |
| 220944_at | 4.18E-05 | 6.37E-06 | PGLYRP4                     | 57115 .  |
| 220946_s_ | 4.76E-04 | 1.34E-04 | SETD2                       | 29072 .  |
| 220948_s_ | 0.00124  | 4.34E-04 | ATP1A1                      | 476 .    |
| 220950_s_ | 0.018798 | 0.011002 | KIAA1310                    | 55683 .  |
| 220951_s_ | 0.004196 | 0.001876 | A1CF                        | 29974 .  |
| 220953_s_ | 0.009586 | 0.004991 | MTMR12                      | 54545 .  |



|           |          |          |                              |          |
|-----------|----------|----------|------------------------------|----------|
| 220954_s_ | 2.70E-04 | 6.66E-05 | PILRB                        | 29990 .  |
| 220955_x_ | 7.26E-06 | 6.64E-07 | RAB23                        | 51715 .  |
| 220959_s_ | 0.020526 | 0.012194 | OBP2A /// OBF 29989 /// 299  |          |
| 220960_x_ | 2.16E-04 | 5.04E-05 | RPL22                        | 6146 .   |
| 220961_s_ | 0.010414 | 0.005499 | TBRG4                        | 9238 .   |
| 220962_s_ | 0.002103 | 8.20E-04 | PADI1                        | 29943 .  |
| 220963_s_ | 6.21E-05 | 1.05E-05 | C1orf89                      | 79363 .  |
| 220964_s_ | 1.13E-04 | 2.24E-05 | RAB1B                        | 81876 .  |
| 220965_s_ | 0.001593 | 5.86E-04 | RSHL1                        | 81492 .  |
| 220966_x_ | 0.00621  | 0.002996 | ARPC5L                       | 81873 .  |
| 220967_s_ | 7.21E-08 | 1.47E-09 | ZNF696                       | 79943 .  |
| 220968_s_ | 0.016868 | 0.009691 | TSPAN9                       | 10867 .  |
| 220969_s_ | 1.30E-05 | 1.44E-06 |                              | .        |
| 220971_at | 0.018737 | 0.01096  | IL25                         | 64806 .  |
| 220974_x_ | 2.12E-08 | 2.82E-10 | SFXN3                        | 81855 .  |
| 220975_s_ | 0.002073 | 8.06E-04 | C1QTNF1                      | 114897 . |
| 220976_s_ | 9.73E-07 | 4.77E-08 | KRTAP1-1                     | 81851 .  |
| 220977_x_ | 0.002241 | 8.86E-04 | EPB41L5                      | 57669 .  |
| 220979_s_ | 0.047691 | 0.032493 | ST6GALNAC5                   | 81849 .  |
| 220980_s_ | 0.012134 | 0.006584 | ADPGK                        | 83440 .  |
| 220982_s_ | 0.005009 | 0.002321 | SPACA1                       | 81833 .  |
| 220984_s_ | 0.030217 | 0.019144 | SLCO5A1                      | 81796 .  |
| 220985_s_ | 0.002808 | 0.00116  | RNF170                       | 81790 .  |
| 220986_s_ | 0.011667 | 0.006284 | TIGD6                        | 81789 .  |
| 220987_s_ | 3.63E-05 | 5.30E-06 | C11orf17 /// N 56672 /// 817 |          |
| 220989_s_ | 3.21E-06 | 2.30E-07 | AMN                          | 81693 .  |
| 220991_s_ | 0.01939  | 0.01141  | RNF32                        | 140545 . |
| 220994_s_ | 0.021096 | 0.012604 | STXBP6                       | 29091 .  |
| 220995_at | 9.16E-04 | 3.00E-04 | STXBP6                       | 29091 .  |
| 220996_s_ | 0.001055 | 3.56E-04 | C1orf14                      | 81626 .  |
| 220997_s_ | 0.01793  | 0.010408 | DIAPH3                       | 81624 .  |
| 220998_s_ | 0.036357 | 0.023715 | UNC93B1                      | 81622 .  |
| 220999_s_ | 0.019179 | 0.011256 | CYFIP2                       | 26999 .  |
| 221000_s_ | 0.015411 | 0.008723 | KAZALD1                      | 81621 .  |

|           |          |          |                              |         |
|-----------|----------|----------|------------------------------|---------|
| 221001_at | 2.29E-04 | 5.41E-05 | C15orf49                     | 63969 . |
| 221002_s_ | 0.021965 | 0.013217 | TSPAN14                      | 81619 . |
| 221003_s_ | 0.014254 | 0.00795  | CAB39L                       | 81617 . |
| 221004_s_ | 0.035084 | 0.022744 | ITM2C                        | 81618 . |
| 221007_s_ | 7.29E-04 | 2.27E-04 | FIP1L1                       | 81608 . |
| 221012_s_ | 2.29E-06 | 1.49E-07 | TRIM8                        | 81603 . |
| 221013_s_ | 7.21E-04 | 2.24E-04 | APOL2                        | 23780 . |
| 221015_s_ | 0.007366 | 0.00367  | CDADC1                       | 81602 . |
| 221016_s_ | 0.00185  | 7.02E-04 | TCF7L1                       | 83439 . |
| 221017_s_ | 3.06E-04 | 7.78E-05 | LRRC3                        | 81543 . |
| 221019_s_ | 1.07E-05 | 1.11E-06 | COLEC12                      | 81035 . |
| 221020_s_ | 6.03E-04 | 1.79E-04 | SLC25A32                     | 81034 . |
| 221022_s_ | 0.002282 | 9.05E-04 | PMFBP1                       | 83449 . |
| 221024_s_ | 1.35E-04 | 2.80E-05 | SLC2A10                      | 81031 . |
| 221027_s_ | 0.004983 | 0.002306 | PLA2G12A                     | 81579 . |
| 221028_s_ | 0.014899 | 0.008384 | GFOD2                        | 81577 . |
| 221029_s_ | 2.20E-07 | 6.61E-09 | WNT5B                        | 81029 . |
| 221030_s_ | 3.59E-04 | 9.47E-05 | ARHGAP24                     | 83478 . |
| 221031_s_ | 0.001547 | 5.66E-04 | APOLD1                       | 81575 . |
| 221035_s_ | 0.001665 | 6.18E-04 | TEX14                        | 56155 . |
| 221036_s_ | 4.12E-08 | 6.88E-10 | APH1B                        | 83464 . |
| 221039_s_ | 3.20E-06 | 2.29E-07 | ASAP1                        | 50807 . |
| 221041_s_ | 2.15E-04 | 5.01E-05 | SLC17A5                      | 26503 . |
| 221042_s_ | 0.007827 | 0.003943 | CLMN                         | 79789 . |
| 221044_s_ | 4.89E-04 | 1.38E-04 | TRIM34 /// TRI 445372 /// 5: |         |
| 221045_s_ | 0.049917 | 0.034261 | PER3                         | 8863 .  |
| 221046_s_ | 0.001053 | 3.55E-04 | GTPBP8                       | 29083 . |
| 221047_s_ | 0.027935 | 0.017464 | MARK1                        | 4139 .  |
| 221048_x_ | 0.018721 | 0.010949 | C17orf80                     | 55028 . |
| 221049_s_ | 0.017963 | 0.010432 | POLL                         | 27343 . |
| 221050_s_ | 4.09E-04 | 1.11E-04 | GTPBP2                       | 54676 . |
| 221051_s_ | 2.82E-09 | 2.00E-11 | ITGB1BP3                     | 27231 . |
| 221053_s_ | 0.010131 | 0.005324 | TDRKH                        | 11022 . |
| 221054_s_ | 0.035374 | 0.022963 | TCL6                         | 27004 . |

|           |          |          |                            |         |
|-----------|----------|----------|----------------------------|---------|
| 221056_x_ | 0.005002 | 0.002316 | EPS15L1                    | 58513 . |
| 221058_s_ | 9.56E-06 | 9.59E-07 | CKLF                       | 51192 . |
| 221059_s_ | 0.02689  | 0.016712 | COTL1                      | 23406 . |
| 221060_s_ | 3.05E-05 | 4.27E-06 | TLR4                       | 7099 .  |
| 221061_at | 0.00915  | 0.004728 | PKD2L1                     | 9033 .  |
| 221063_x_ | 0.022677 | 0.013708 | RNF123                     | 63891 . |
| 221064_s_ | 0.017657 | 0.010226 | UNKL                       | 64718 . |
| 221065_s_ | 8.28E-05 | 1.53E-05 | CHST8                      | 64377 . |
| 221067_s_ | 0.021908 | 0.013178 | C12orf39                   | 80763 . |
| 221068_at | 6.67E-05 | 1.15E-05 | KANK2                      | 25959 . |
| 221069_s_ | 6.59E-07 | 2.84E-08 | CCDC44                     | 51204 . |
| 221070_s_ | 0.011695 | 0.006303 | KIAA1967                   | 57805 . |
| 221071_at | 1.68E-06 | 9.99E-08 |                            | .       |
| 221072_at | 0.046488 | 0.031547 | C9orf31                    | 57000 . |
| 221074_at | 0.008701 | 0.004455 | NCR2                       | 9436 .  |
| 221075_s_ | 4.31E-07 | 1.64E-08 | NCR2                       | 9436 .  |
| 221077_at | 9.41E-04 | 3.10E-04 | ARMC4                      | 55130 . |
| 221078_s_ | 0.003356 | 0.001437 | CCDC88A                    | 55704 . |
| 221079_s_ | 0.003125 | 0.001319 | METTL2A /// M339175 /// 5! |         |
| 221080_s_ | 3.48E-05 | 5.03E-06 | DENND1C                    | 79958 . |
| 221081_s_ | 9.92E-06 | 1.00E-06 | DENND2D                    | 79961 . |
| 221083_at | 0.001365 | 4.88E-04 | KCNQ4                      | 9132 .  |
| 221084_at | 3.19E-05 | 4.51E-06 | HTR3B                      | 9177 .  |
| 221087_s_ | 3.84E-05 | 5.69E-06 | APOL3                      | 80833 . |
| 221088_s_ | 0.0043   | 0.001933 | PPP1R9A                    | 55607 . |
| 221091_at | 0.003019 | 0.001265 | INSL5                      | 10022 . |
| 221093_at | 0.001299 | 4.59E-04 | BRD7P3                     | 23629 . |
| 221094_s_ | 0.003738 | 0.001635 | ELP3                       | 55140 . |
| 221096_s_ | 2.71E-04 | 6.69E-05 | TMCO6                      | 55374 . |
| 221097_s_ | 0.001792 | 6.75E-04 | KCNMB2                     | 10242 . |
| 221099_at | 1.86E-04 | 4.18E-05 |                            | .       |
| 221100_at | 5.59E-05 | 9.20E-06 | C6orf15                    | 29113 . |
| 221103_s_ | 0.033802 | 0.0218   | WDR52                      | 55779 . |
| 221104_s_ | 0.005288 | 0.002475 | NIPSNAP3B                  | 55335 . |

|           |          |          |          |         |
|-----------|----------|----------|----------|---------|
| 221106_at | 1.15E-06 | 5.96E-08 | SLC22A17 | 51310 . |
| 221108_at | 0.00638  | 0.003093 | C22orf43 | 51233 . |
| 221110_x_ | 4.30E-04 | 1.18E-04 | PDE11A   | 50940 . |
| 221111_at | 0.006731 | 0.003298 | IL26     | 55801 . |
| 221112_at | 0.002451 | 9.87E-04 | IL1RAPL2 | 26280 . |
| 221113_s_ | 0.020956 | 0.012506 | WNT16    | 51384 . |
| 221115_s_ | 0.010615 | 0.005627 | LENEP    | 55891 . |
| 221116_at | 0.047963 | 0.032699 |          | .       |
| 221118_at | 0.017675 | 0.010237 | PKD2L2   | 27039 . |
| 221120_at | 0.01133  | 0.006074 |          | .       |
| 221122_at | 8.32E-04 | 2.67E-04 | HRASLS2  | 54979 . |
| 221123_x_ | 4.36E-04 | 1.20E-04 | ZNF395   | 55893 . |
| 221124_s_ | 0.00195  | 7.49E-04 | VSX1     | 30813 . |
| 221127_s_ | 0.004395 | 0.001985 | DKK3     | 27122 . |
| 221128_at | 0.001557 | 5.71E-04 | ADAM19   | 8728 .  |
| 221129_at | 0.00426  | 0.00191  | C17orf88 | 23591 . |
| 221133_s_ | 0.008581 | 0.004384 | CLDN18   | 51208 . |
| 221134_at | 6.90E-05 | 1.21E-05 | ANGPT4   | 51378 . |
| 221136_at | 1.06E-04 | 2.08E-05 | GDF2     | 2658 .  |
| 221137_at | 0.007122 | 0.003527 |          | .       |
| 221139_s_ | 0.001606 | 5.92E-04 | CSAD     | 51380 . |
| 221141_x_ | 3.03E-05 | 4.23E-06 | EPN1     | 29924 . |
| 221142_s_ | 0.044183 | 0.029743 | PECR     | 55825 . |
| 221143_at | 0.002027 | 7.84E-04 | RPA4     | 29935 . |
| 221147_x_ | 5.74E-06 | 4.89E-07 | WVOX     | 51741 . |
| 221149_at | 0.030865 | 0.019613 | GPR77    | 27202 . |
| 221155_x_ | 1.12E-04 | 2.22E-05 |          | .       |
| 221156_x_ | 0.030167 | 0.019103 | CCPG1    | 9236 .  |
| 221157_s_ | 4.94E-05 | 7.88E-06 | FBXO24   | 26261 . |
| 221158_at | 4.03E-05 | 6.06E-06 | C21orf66 | 94104 . |
| 221160_s_ | 0.014053 | 0.00782  | CABP5    | 56344 . |
| 221161_at | 1.07E-04 | 2.10E-05 | ASCL3    | 56676 . |
| 221162_at | 2.20E-05 | 2.83E-06 | HHLA1    | 10086 . |
| 221163_s_ | 1.44E-04 | 3.04E-05 | MLXIPL   | 51085 . |

|           |          |          |                             |           |   |
|-----------|----------|----------|-----------------------------|-----------|---|
| 221165_s_ | 0.020486 | 0.012165 | IL22                        | 50616     | . |
| 221167_s_ | 1.51E-05 | 1.75E-06 | CCDC70                      | 83446     | . |
| 221168_at | 0.009537 | 0.004961 | PRDM13                      | 59336     | . |
| 221173_at | 1.89E-06 | 1.16E-07 | USH1C                       | 10083     | . |
| 221176_x_ | 8.29E-04 | 2.66E-04 | WBSCR23                     | 80112     | . |
| 221178_at | 7.78E-04 | 2.46E-04 | BAIAP2L2                    | 80115     | . |
| 221179_at | 0.009153 | 0.004731 |                             |           | . |
| 221180_at | 2.44E-04 | 5.88E-05 | YSK4                        | 80122     | . |
| 221181_at | 0.001277 | 4.50E-04 |                             |           | . |
| 221182_at | 0.031246 | 0.019887 | C1orf129                    | 80133     | . |
| 221183_at | 0.023615 | 0.014372 |                             |           | . |
| 221186_at | 4.95E-05 | 7.91E-06 | LOC100131532                | 100131532 | . |
| 221188_s_ | 1.56E-06 | 9.01E-08 | CIDEB                       | 27141     | . |
| 221189_s_ | 6.02E-05 | 1.01E-05 | TARS2                       | 80222     | . |
| 221190_s_ | 6.37E-06 | 5.58E-07 | C18orf8                     | 29919     | . |
| 221191_at | 7.13E-04 | 2.21E-04 | STAG3L1                     | 54441     | . |
| 221192_x_ | 3.15E-05 | 4.44E-06 | MFSD11                      | 79157     | . |
| 221193_s_ | 0.002093 | 8.15E-04 | ZCCHC10                     | 54819     | . |
| 221194_s_ | 0.047371 | 0.032249 | RNFT1                       | 51136     | . |
| 221196_x_ | 3.92E-04 | 1.05E-04 | BRCC3                       | 79184     | . |
| 221198_at | 1.33E-06 | 7.28E-08 | SCT                         | 6343      | . |
| 221199_at | 0.00134  | 4.77E-04 | GFRA4                       | 64096     | . |
| 221201_s_ | 0.009516 | 0.004949 | ZNF155                      | 7711      | . |
| 221202_at | 0.010742 | 0.005707 |                             |           | . |
| 221203_s_ | 9.07E-04 | 2.97E-04 | YEATS2                      | 55689     | . |
| 221204_s_ | 0.017973 | 0.010438 | CRTAC1                      | 55118     | . |
| 221205_at | 0.007585 | 0.003798 |                             |           | . |
| 221206_at | 6.27E-09 | 5.68E-11 | PMS2 /// PMS2:441194 /// 5: |           | . |
| 221207_s_ | 0.008068 | 0.004084 | NBEA                        | 26960     | . |
| 221208_s_ | 1.65E-04 | 3.60E-05 | C11orf61                    | 79684     | . |
| 221209_s_ | 4.99E-06 | 4.06E-07 | OTOR                        | 56914     | . |
| 221211_s_ | 3.12E-04 | 7.99E-05 | C21orf7                     | 56911     | . |
| 221213_s_ | 6.59E-06 | 5.82E-07 | ZNF280D                     | 54816     | . |
| 221215_s_ | 0.049342 | 0.033797 | RIPK4                       | 54101     | . |

|           |          |          |                            |          |
|-----------|----------|----------|----------------------------|----------|
| 221216_s_ | 1.38E-07 | 3.51E-09 | SCMH1                      | 22955 .  |
| 221217_s_ | 0.027634 | 0.017244 | A2BP1                      | 54715 .  |
| 221219_s_ | 1.06E-04 | 2.07E-05 | KLHDC4                     | 54758 .  |
| 221220_s_ | 8.95E-07 | 4.28E-08 | SCYL2                      | 55681 .  |
| 221221_s_ | 0.00228  | 9.04E-04 | KLHL3                      | 26249 .  |
| 221223_x_ | 6.79E-04 | 2.08E-04 | CISH                       | 1154 .   |
| 221224_s_ | 0.024932 | 0.015307 | DCAKD                      | 79877 .  |
| 221225_at | 0.007708 | 0.003871 | DCAKD                      | 79877 .  |
| 221226_s_ | 8.10E-05 | 1.48E-05 | ACCN4                      | 55515 .  |
| 221227_x_ | 1.33E-04 | 2.76E-05 | COQ3                       | 51805 .  |
| 221229_s_ | 0.005386 | 0.00253  | TRMT61B                    | 55006 .  |
| 221232_s_ | 7.24E-06 | 6.61E-07 | ANKRD2                     | 26287 .  |
| 221235_s_ | 6.07E-04 | 1.80E-04 | LOC644617                  | 644617 . |
| 221240_s_ | 0.003185 | 0.001349 | B3GNT4                     | 79369 .  |
| 221241_s_ | 2.16E-08 | 2.90E-10 | BCL2L14                    | 79370 .  |
| 221242_at | 0.001846 | 7.01E-04 |                            | .        |
| 221243_s_ | 0.018526 | 0.010816 |                            | .        |
| 221244_s_ | 0.012607 | 0.006891 | PDPK1                      | 5170 .   |
| 221245_s_ | 5.33E-10 | 2.35E-12 | FZD5                       | 7855 .   |
| 221246_x_ | 1.13E-06 | 5.83E-08 | TNS1                       | 7145 .   |
| 221247_s_ | 0.037603 | 0.024658 | WBSCR16                    | 81554 .  |
| 221249_s_ | 1.24E-04 | 2.52E-05 | FAM117A                    | 81558 .  |
| 221250_s_ | 0.027422 | 0.017087 | MXD3                       | 83463 .  |
| 221251_x_ | 4.54E-04 | 1.26E-04 | INO80B                     | 83444 .  |
| 221253_s_ | 1.37E-07 | 3.49E-09 | TXNDC5                     | 81567 .  |
| 221254_s_ | 0.03964  | 0.026207 | PITPNM3                    | 83394 .  |
| 221255_s_ | 0.046753 | 0.031757 | TMEM93                     | 83460 .  |
| 221258_s_ | 3.32E-04 | 8.62E-05 | KIF18A                     | 81930 .  |
| 221259_s_ | 1.73E-05 | 2.07E-06 | TEX11                      | 56159 .  |
| 221260_s_ | 0.004577 | 0.002085 | CSRNP2                     | 81566 .  |
| 221261_x_ | 0.046631 | 0.031661 | MAGED4 /// M728239 /// 8'. |          |
| 221262_s_ | 2.74E-06 | 1.86E-07 | SLC2A11                    | 66035 .  |
| 221263_s_ | 0.03297  | 0.021182 | SF3B5                      | 83443 .  |
| 221264_s_ | 1.16E-06 | 5.99E-08 | LOC100128223;100128223 //. |          |

|           |          |          |                            |          |
|-----------|----------|----------|----------------------------|----------|
| 221265_s_ | 2.33E-04 | 5.53E-05 | C15orf44                   | 81556 .  |
| 221266_s_ | 6.52E-04 | 1.98E-04 | TM7SF4                     | 81501 .  |
| 221267_s_ | 0.032966 | 0.021178 | FAM108A1                   | 81926 .  |
| 221268_s_ | 4.24E-04 | 1.16E-04 | SGPP1                      | 81537 .  |
| 221269_s_ | 3.63E-05 | 5.31E-06 | SH3BGRL3                   | 83442 .  |
| 221273_s_ | 4.23E-06 | 3.29E-07 | RNF208                     | 727800 . |
| 221275_s_ | 0.001213 | 4.23E-04 |                            | .        |
| 221276_s_ | 1.07E-08 | 1.15E-10 | SYNC                       | 81493 .  |
| 221277_s_ | 3.68E-04 | 9.77E-05 | PUS3                       | 83480 .  |
| 221279_at | 0.006793 | 0.003334 | GDAP1                      | 54332 .  |
| 221280_s_ | 0.004877 | 0.002249 | PARD3                      | 56288 .  |
| 221281_at | 1.12E-05 | 1.17E-06 | SRC                        | 6714 .   |
| 221282_x_ | 0.020502 | 0.012176 | RUNX2                      | 860 .    |
| 221283_at | 1.87E-05 | 2.30E-06 | RUNX2                      | 860 .    |
| 221284_s_ | 2.26E-04 | 5.33E-05 | SRC                        | 6714 .   |
| 221286_s_ | 2.79E-06 | 1.91E-07 | MGC29506                   | 51237 .  |
| 221287_at | 4.02E-04 | 1.09E-04 | RNASEL                     | 6041 .   |
| 221288_at | 0.02475  | 0.015176 | GPR22                      | 2845 .   |
| 221290_s_ | 0.002589 | 0.001053 | MUM1                       | 84939 .  |
| 221291_at | 0.002881 | 0.001195 | ULBP2                      | 80328 .  |
| 221293_s_ | 2.63E-04 | 6.45E-05 | DEF6                       | 50619 .  |
| 221295_at | 0.002572 | 0.001045 | CIDEA                      | 1149 .   |
| 221297_at | 9.55E-05 | 1.82E-05 | GPRC5D                     | 55507 .  |
| 221298_s_ | 0.009656 | 0.005037 | SLC22A8                    | 9376 .   |
| 221299_at | 8.68E-04 | 2.81E-04 | GPR173                     | 54328 .  |
| 221300_at | 0.004713 | 0.00216  | C15orf2                    | 23742 .  |
| 221301_at | 0.03182  | 0.020311 | C6orf27                    | 80737 .  |
| 221302_at | 2.84E-05 | 3.88E-06 | KLF15                      | 28999 .  |
| 221303_at | 0.044215 | 0.029768 | PCDHB1                     | 29930 .  |
| 221304_at | 0.001331 | 4.73E-04 | UGT1A10 /// U54575 /// 54! | .        |
| 221306_at | 1.10E-05 | 1.15E-06 | GPR27                      | 2850 .   |
| 221307_at | 0.0287   | 0.018025 | KCNIP1                     | 30820 .  |
| 221308_at | 1.93E-05 | 2.38E-06 | FRS2                       | 10818 .  |
| 221309_at | 1.01E-06 | 5.03E-08 | RBM17                      | 84991 .  |

|           |          |          |                            |          |
|-----------|----------|----------|----------------------------|----------|
| 221311_x_ | 2.43E-05 | 3.20E-06 | LYRM2                      | 57226 .  |
| 221313_at | 0.002947 | 0.001227 | GPR52                      | 9293 .   |
| 221314_at | 0.012368 | 0.006734 | GDF9                       | 2661 .   |
| 221316_at | 0.0328   | 0.021045 | C19orf15                   | 57828 .  |
| 221317_x_ | 6.87E-06 | 6.16E-07 | PCDHB6                     | 56130 .  |
| 221319_at | 0.049412 | 0.033851 | PCDHB8                     | 56128 .  |
| 221320_at | 0.037233 | 0.024387 | BCL2L10                    | 10017 .  |
| 221321_s_ | 6.75E-04 | 2.06E-04 | KCNIP2                     | 30819 .  |
| 221326_s_ | 0.018925 | 0.011087 | TUBD1                      | 51174 .  |
| 221327_s_ | 0.011914 | 0.006442 | OPN1LW /// O 2652 /// 5956 |          |
| 221328_at | 9.06E-06 | 8.93E-07 | CLDN17                     | 26285 .  |
| 221329_at | 4.49E-06 | 3.56E-07 | OR52A1                     | 23538 .  |
| 221332_at | 0.044347 | 0.029875 | BMP15                      | 9210 .   |
| 221333_at | 7.23E-05 | 1.28E-05 | FOXP3                      | 50943 .  |
| 221334_s_ | 3.78E-04 | 1.01E-04 | FOXP3                      | 50943 .  |
| 221335_x_ | 0.048797 | 0.033368 | C19orf61                   | 56006 .  |
| 221336_at | 5.41E-04 | 1.57E-04 | ATOH1                      | 474 .    |
| 221338_at | 0.004534 | 0.002062 | LY6G6E                     | 79136 .  |
| 221339_at | 0.002654 | 0.001084 | OR10C1                     | 442194 . |
| 221340_at | 8.36E-04 | 2.68E-04 | CDX4                       | 1046 .   |
| 221341_s_ | 0.01415  | 0.007883 | OR1D4 /// OR18385 /// 8386 |          |
| 221342_at | 0.007657 | 0.003842 | C6orf25                    | 80739 .  |
| 221344_at | 0.008421 | 0.004291 | OR12D2                     | 26529 .  |
| 221346_at | 1.66E-04 | 3.64E-05 | OR10J1                     | 26476 .  |
| 221351_at | 0.001455 | 5.26E-04 | HTR1A                      | 3350 .   |
| 221355_at | 0.01778  | 0.010307 | CHRNA                      | 1146 .   |
| 221356_x_ | 0.001334 | 4.74E-04 | P2RX2                      | 22953 .  |
| 221357_at | 0.004646 | 0.002123 | CHRM4                      | 1132 .   |
| 221359_at | 0.012221 | 0.006641 | GDNF                       | 2668 .   |
| 221360_s_ | 3.36E-04 | 8.76E-05 | GHSR                       | 2693 .   |
| 221362_at | 0.007648 | 0.003836 | HTR5A                      | 3361 .   |
| 221363_x_ | 0.001504 | 5.48E-04 | GPR25                      | 2848 .   |
| 221364_at | 0.048836 | 0.033401 | GRID2                      | 2895 .   |
| 221366_at | 0.003884 | 0.001711 | NKX6-1                     | 4825 .   |



|           |          |          |                             |       |   |
|-----------|----------|----------|-----------------------------|-------|---|
| 221368_at | 0.028681 | 0.01801  | NEU2                        | 4759  | . |
| 221369_at | 0.016875 | 0.009696 | MTNR1A                      | 4543  | . |
| 221371_at | 0.01486  | 0.008358 | TNFSF18                     | 8995  | . |
| 221372_s_ | 0.043695 | 0.029357 | P2RX2                       | 22953 | . |
| 221373_x_ | 0.003726 | 0.001629 | PSPN                        | 5623  | . |
| 221374_at | 0.017596 | 0.010183 | FGF16                       | 8823  | . |
| 221375_at | 0.009124 | 0.00471  | OR1G1                       | 8390  | . |
| 221376_at | 6.32E-10 | 2.91E-12 | FGF17                       | 8822  | . |
| 221377_s_ | 0.040055 | 0.026527 | RBPJL                       | 11317 | . |
| 221378_at | 6.81E-09 | 6.33E-11 | CER1                        | 9350  | . |
| 221379_at | 5.69E-05 | 9.41E-06 |                             |       | . |
| 221381_s_ | 0.001004 | 3.35E-04 | MORF4 /// MC10933 /// 109   |       | . |
| 221382_at | 0.032186 | 0.020592 |                             |       | . |
| 221384_at | 3.15E-05 | 4.45E-06 | UCP1                        | 7350  | . |
| 221386_at | 0.007843 | 0.003953 | OR3A2                       | 4995  | . |
| 221387_at | 0.010022 | 0.00526  | NPFFR1                      | 64106 | . |
| 221389_at | 0.001555 | 5.70E-04 | PLA2G2E                     | 30814 | . |
| 221390_s_ | 1.73E-05 | 2.06E-06 | MTMR8                       | 55613 | . |
| 221394_at | 0.001835 | 6.95E-04 | TAAR2                       | 9287  | . |
| 221399_at | 3.15E-06 | 2.24E-07 | EDA2R                       | 60401 | . |
| 221400_at | 0.042287 | 0.028255 | MYO3A                       | 53904 | . |
| 221401_at | 0.005406 | 0.002541 | CACNG5                      | 27091 | . |
| 221404_at | 2.16E-05 | 2.77E-06 | IL1F6                       | 27179 | . |
| 221406_s_ | 6.91E-04 | 2.12E-04 | C6orf26 /// MS401251 /// 40 |       | . |
| 221407_at | 1.42E-04 | 3.00E-05 | GJD2                        | 57369 | . |
| 221408_x_ | 6.62E-08 | 1.31E-09 | PCDHB12                     | 56124 | . |
| 221409_at | 0.010811 | 0.005751 | OR2S2                       | 56656 | . |
| 221410_x_ | 4.07E-08 | 6.77E-10 | PCDHB3                      | 56132 | . |
| 221411_at | 0.0136   | 0.007526 | HOXD12                      | 3238  | . |
| 221414_s_ | 0.00605  | 0.002906 | DEFB126                     | 81623 | . |
| 221418_s_ | 0.007792 | 0.003922 | MED16                       | 10025 | . |
| 221419_s_ | 5.04E-05 | 8.09E-06 |                             |       | . |
| 221421_s_ | 4.04E-05 | 6.07E-06 | ADAMTS12                    | 81792 | . |
| 221422_s_ | 9.67E-06 | 9.73E-07 | C9orf45                     | 81571 | . |

|           |          |          |           |         |
|-----------|----------|----------|-----------|---------|
| 221423_s_ | 0.001532 | 5.60E-04 | YIPF5     | 81555 . |
| 221424_s_ | 0.015579 | 0.008837 | OR51E2    | 81285 . |
| 221426_s_ | 0.009675 | 0.005049 | OR3A3     | 8392 .  |
| 221427_s_ | 0.008728 | 0.004471 | CCNL2     | 81669 . |
| 221429_x_ | 1.40E-04 | 2.94E-05 | TEX13A    | 56157 . |
| 221430_s_ | 0.019953 | 0.011793 | RNF146    | 81847 . |
| 221431_s_ | 0.001823 | 6.89E-04 | OR12D3    | 81797 . |
| 221432_s_ | 4.98E-04 | 1.42E-04 | SLC25A28  | 81894 . |
| 221433_at | 7.07E-05 | 1.24E-05 | FGF21     | 26291 . |
| 221434_s_ | 7.11E-05 | 1.25E-05 | C14orf156 | 81892 . |
| 221436_s_ | 0.003025 | 0.001268 | CDCA3     | 83461 . |
| 221437_s_ | 0.035587 | 0.023131 | MRPS15    | 64960 . |
| 221438_s_ | 5.10E-05 | 8.22E-06 | TEX12     | 56158 . |
| 221439_at | 1.21E-10 | 3.30E-13 | RBBP9     | 10741 . |
| 221440_s_ | 0.001785 | 6.72E-04 | RBBP9     | 10741 . |
| 221441_at | 0.008048 | 0.004073 | GSC2      | 2928 .  |
| 221443_x_ | 0.023519 | 0.014302 | PRLH      | 51052 . |
| 221445_at | 0.047855 | 0.032618 | OR1A2     | 26189 . |
| 221447_s_ | 3.18E-06 | 2.27E-07 | GLT8D2    | 83468 . |
| 221448_s_ | 0.039876 | 0.026391 | TEX15     | 56154 . |
| 221449_s_ | 1.56E-06 | 9.01E-08 | ITFG1     | 81533 . |
| 221450_x_ | 2.27E-05 | 2.94E-06 | PCDHB13   | 56123 . |
| 221452_s_ | 0.00404  | 0.001794 | TMEM14B   | 81853 . |
| 221453_at | 0.001943 | 7.46E-04 | G6PC2     | 57818 . |
| 221454_at | 6.56E-05 | 1.13E-05 | BOK       | 666 .   |
| 221455_s_ | 0.031356 | 0.019971 | WNT3      | 7473 .  |
| 221456_at | 0.022769 | 0.01377  | TAS2R3    | 50831 . |
| 221457_s_ | 5.93E-04 | 1.75E-04 | BTNL2     | 56244 . |
| 221462_x_ | 4.06E-04 | 1.10E-04 | KLK15     | 55554 . |
| 221463_at | 0.003632 | 0.001581 | CCL24     | 6369 .  |
| 221465_at | 1.20E-04 | 2.43E-05 | OR6A2     | 8590 .  |
| 221466_at | 6.92E-04 | 2.13E-04 | P2RY4     | 5030 .  |
| 221468_at | 7.87E-04 | 2.50E-04 | XCR1      | 2829 .  |
| 221469_at | 0.009115 | 0.004704 | GPR32     | 2854 .  |

|           |          |          |                             |          |
|-----------|----------|----------|-----------------------------|----------|
| 221471_at | 0.006517 | 0.003173 | SERINC3                     | 10955 .  |
| 221472_at | 0.010604 | 0.005621 | SERINC3                     | 10955 .  |
| 221473_x_ | 0.003756 | 0.001645 | SERINC3                     | 10955 .  |
| 221474_at | 0.011428 | 0.006136 | MYL12B                      | 103910 . |
| 221475_s_ | 0.001351 | 4.82E-04 | RPL15                       | 6138 .   |
| 221476_s_ | 1.13E-04 | 2.25E-05 | RPL15                       | 6138 .   |
| 221477_s_ | 5.44E-05 | 8.90E-06 | SOD2                        | 6648 .   |
| 221478_at | 7.87E-04 | 2.50E-04 | BNIP3L                      | 665 .    |
| 221479_s_ | 0.007422 | 0.003704 | BNIP3L                      | 665 .    |
| 221480_at | 2.38E-04 | 5.69E-05 | HNRNPD                      | 3184 .   |
| 221481_x_ | 1.62E-04 | 3.53E-05 | HNRNPD                      | 3184 .   |
| 221482_s_ | 0.003049 | 0.00128  | ARPP19                      | 10776 .  |
| 221483_s_ | 9.36E-05 | 1.78E-05 | ARPP19                      | 10776 .  |
| 221484_at | 0.008308 | 0.004223 | B4GALT5                     | 9334 .   |
| 221488_s_ | 0.00529  | 0.002477 | CUTA                        | 51596 .  |
| 221489_s_ | 0.002258 | 8.94E-04 | SPRY4                       | 81848 .  |
| 221490_at | 0.029875 | 0.01889  | UBAP1                       | 51271 .  |
| 221494_x_ | 0.00326  | 0.001387 | EIF3K                       | 27335 .  |
| 221495_s_ | 2.00E-08 | 2.61E-10 | TCF25                       | 22980 .  |
| 221497_x_ | 0.0116   | 0.006243 | EGLN1                       | 54583 .  |
| 221498_at | 7.96E-04 | 2.53E-04 | SNX27                       | 81609 .  |
| 221500_s_ | 7.19E-04 | 2.23E-04 | STX16                       | 8675 .   |
| 221504_s_ | 0.049447 | 0.033879 | ATP6V1H                     | 51606 .  |
| 221505_at | 3.55E-06 | 2.62E-07 | ANP32E                      | 81611 .  |
| 221506_s_ | 3.28E-05 | 4.66E-06 | TNPO2                       | 30000 .  |
| 221507_at | 6.98E-04 | 2.15E-04 | TNPO2                       | 30000 .  |
| 221508_at | 0.014575 | 0.008164 | TAOK3                       | 51347 .  |
| 221509_at | 0.008397 | 0.004277 | DENR                        | 8562 .   |
| 221511_x_ | 7.87E-04 | 2.49E-04 | CCPG1                       | 9236 .   |
| 221512_at | 7.94E-08 | 1.68E-09 | TMEM222                     | 84065 .  |
| 221513_s_ | 7.61E-04 | 2.39E-04 | UTP14A /// UT 10813 /// 97. |          |
| 221514_at | 7.24E-05 | 1.28E-05 | UTP14A                      | 10813 .  |
| 221515_s_ | 7.73E-04 | 2.44E-04 | LCMT1                       | 51451 .  |
| 221516_s_ | 1.11E-04 | 2.19E-05 | SMCR7L                      | 54471 .  |

|           |          |          |                             |         |
|-----------|----------|----------|-----------------------------|---------|
| 221518_s_ | 1.54E-06 | 8.86E-08 | USP47                       | 55031 . |
| 221519_at | 0.009125 | 0.004711 | FBXW4                       | 6468 .  |
| 221520_s_ | 6.51E-04 | 1.97E-04 | CDCA8                       | 55143 . |
| 221521_s_ | 4.15E-05 | 6.30E-06 | GINS2                       | 51659 . |
| 221522_at | 1.08E-04 | 2.13E-05 | ANKRD27                     | 84079 . |
| 221523_s_ | 2.61E-05 | 3.49E-06 | RRAGD                       | 58528 . |
| 221524_s_ | 3.99E-06 | 3.05E-07 | RRAGD                       | 58528 . |
| 221525_at | 0.010998 | 0.005866 | ZMIZ2                       | 83637 . |
| 221526_x_ | 4.20E-08 | 7.06E-10 | PARD3                       | 56288 . |
| 221527_s_ | 0.011662 | 0.006281 | PARD3                       | 56288 . |
| 221528_s_ | 0.003925 | 0.001734 | ELMO2                       | 63916 . |
| 221529_s_ | 0.005947 | 0.002848 | PLVAP                       | 83483 . |
| 221530_s_ | 4.47E-04 | 1.24E-04 | BHLHE41                     | 79365 . |
| 221532_s_ | 9.27E-04 | 3.05E-04 | WDR61                       | 80349 . |
| 221534_at | 6.81E-05 | 1.19E-05 | C11orf68                    | 83638 . |
| 221535_at | 5.92E-04 | 1.75E-04 | LSG1                        | 55341 . |
| 221536_s_ | 1.01E-04 | 1.96E-05 | LSG1                        | 55341 . |
| 221537_at | 0.030105 | 0.019057 | PLXNA1                      | 5361 .  |
| 221538_s_ | 0.002123 | 8.30E-04 | PLXNA1                      | 5361 .  |
| 221540_x_ | 0.020722 | 0.012338 | GTF2H2 /// GT 2966 /// 6532 |         |
| 221541_at | 4.83E-04 | 1.36E-04 | CRISPLD2                    | 83716 . |
| 221544_s_ | 5.45E-04 | 1.58E-04 | MED16                       | 10025 . |
| 221546_at | 0.001098 | 3.74E-04 | PRPF18                      | 8559 .  |
| 221547_at | 0.011391 | 0.006113 | PRPF18                      | 8559 .  |
| 221548_s_ | 3.99E-07 | 1.48E-08 | ILKAP                       | 80895 . |
| 221549_at | 0.039972 | 0.02646  | GRWD1                       | 83743 . |
| 221551_x_ | 0.010765 | 0.005722 | ST6GALNAC4                  | 27090 . |
| 221555_x_ | 0.012883 | 0.007071 | CDC14B                      | 8555 .  |
| 221556_at | 5.08E-04 | 1.45E-04 | CDC14B                      | 8555 .  |
| 221557_s_ | 0.018132 | 0.010547 | LEF1                        | 51176 . |
| 221559_s_ | 4.53E-04 | 1.26E-04 | MIS12                       | 79003 . |
| 221560_at | 0.003414 | 0.001467 | MARK4                       | 57787 . |
| 221561_at | 3.13E-04 | 8.03E-05 | SOAT1                       | 6646 .  |
| 221564_at | 3.26E-07 | 1.14E-08 | PRMT2                       | 3275 .  |

|           |          |          |                               |         |
|-----------|----------|----------|-------------------------------|---------|
| 221565_s_ | 3.24E-07 | 1.13E-08 | CALHM2                        | 51063 . |
| 221566_s_ | 0.036962 | 0.024175 | NOL3                          | 8996 .  |
| 221567_at | 6.91E-04 | 2.12E-04 | NOL3                          | 8996 .  |
| 221569_at | 3.45E-05 | 4.97E-06 | AHI1                          | 54806 . |
| 221570_s_ | 0.029968 | 0.018957 | METT5                         | 29081 . |
| 221571_at | 2.47E-08 | 3.52E-10 | TRAF3                         | 7187 .  |
| 221572_s_ | 0.007387 | 0.003682 | CELSR3 /// SLC 1951 /// 650'. |         |
| 221573_at | 2.14E-06 | 1.36E-07 | C7orf25                       | 79020 . |
| 221575_at | 1.18E-04 | 2.37E-05 | SCLY                          | 51540 . |
| 221577_x_ | 0.006336 | 0.003067 | GDF15                         | 9518 .  |
| 221578_at | 5.36E-04 | 1.55E-04 | RASSF4                        | 83937 . |
| 221579_s_ | 5.75E-04 | 1.69E-04 | NUDT3                         | 11165 . |
| 221580_s_ | 7.89E-04 | 2.50E-04 | TAF1D                         | 79101 . |
| 221581_s_ | 0.014701 | 0.00825  | LAT2                          | 7462 .  |
| 221582_at | 0.011404 | 0.006122 | HIST3H2A                      | 92815 . |
| 221583_s_ | 4.67E-05 | 7.35E-06 | KCNMA1                        | 3778 .  |
| 221584_s_ | 2.38E-06 | 1.56E-07 | KCNMA1                        | 3778 .  |
| 221586_s_ | 7.91E-06 | 7.42E-07 | E2F5                          | 1875 .  |
| 221587_s_ | 9.31E-04 | 3.06E-04 | C19orf24                      | 55009 . |
| 221588_x_ | 3.20E-05 | 4.53E-06 | ALDH6A1                       | 4329 .  |
| 221590_s_ | 0.005546 | 0.002621 |                               | .       |
| 221591_s_ | 7.26E-04 | 2.26E-04 | FAM64A                        | 54478 . |
| 221592_at | 7.08E-04 | 2.19E-04 | TBC1D8                        | 11138 . |
| 221594_at | 0.014398 | 0.008047 | C7orf64                       | 84060 . |
| 221595_at | 6.54E-07 | 2.81E-08 |                               | .       |
| 221596_s_ | 0.029589 | 0.018677 | C7orf64                       | 84060 . |
| 221598_s_ | 0.001174 | 4.06E-04 | LOC100131612100131612 //.     |         |
| 221599_at | 0.012047 | 0.006527 | C11orf67                      | 28971 . |
| 221600_s_ | 0.001163 | 4.02E-04 | C11orf67                      | 28971 . |
| 221601_s_ | 1.39E-04 | 2.91E-05 | FAIM3                         | 9214 .  |
| 221602_s_ | 0.001907 | 7.29E-04 | FAIM3                         | 9214 .  |
| 221605_s_ | 3.80E-05 | 5.62E-06 | PIPOX                         | 51268 . |
| 221607_x_ | 8.12E-04 | 2.59E-04 | ACTG1                         | 71 .    |
| 221608_at | 0.012558 | 0.006861 | WNT6                          | 7475 .  |

|           |          |          |                             |             |
|-----------|----------|----------|-----------------------------|-------------|
| 221609_s_ | 0.026406 | 0.016359 | WNT6                        | 7475 .      |
| 221611_s_ | 0.002537 | 0.001028 | PHF7                        | 51533 .     |
| 221613_s_ | 0.041081 | 0.027315 | ZFAND6                      | 54469 .     |
| 221618_s_ | 3.26E-04 | 8.42E-05 | TAF9B                       | 51616 .     |
| 221620_s_ | 4.83E-06 | 3.90E-07 | APOO                        | 79135 .     |
| 221621_at | 1.57E-08 | 1.91E-10 | C17orf86                    | 654434 .    |
| 221624_at | 2.39E-05 | 3.13E-06 | TCL6                        | 27004 .     |
| 221625_at | 0.00354  | 0.001532 |                             | .           |
| 221627_at | 0.001793 | 6.76E-04 | TRIM10                      | 10107 .     |
| 221628_s_ | 0.027825 | 0.017385 | N-PAC                       | 84656 .     |
| 221630_s_ | 0.017458 | 0.010087 | DDX4                        | 54514 .     |
| 221633_at | 0.00166  | 6.16E-04 | NCAPH2                      | 29781 .     |
| 221634_at | 0.018026 | 0.010476 | RPL23AP7                    | 118433 .    |
| 221637_s_ | 0.005379 | 0.002526 | C11orf48                    | 79081 .     |
| 221638_s_ | 5.04E-04 | 1.44E-04 | STX16                       | 8675 .      |
| 221639_x_ | 0.007629 | 0.003824 | LOC100129656                | 100129656 . |
| 221640_s_ | 0.004745 | 0.002178 | LRDD                        | 55367 .     |
| 221641_s_ | 0.007945 | 0.004012 | ACOT9                       | 23597 .     |
| 221642_at | 0.034519 | 0.022321 |                             | .           |
| 221643_s_ | 0.034506 | 0.022312 | RERE                        | 473 .       |
| 221644_s_ | 0.004031 | 0.001789 | SLC45A2                     | 51151 .     |
| 221646_s_ | 0.038232 | 0.025139 | ZDHHC11                     | 79844 .     |
| 221647_s_ | 7.77E-04 | 2.46E-04 | RIC8A                       | 60626 .     |
| 221649_s_ | 8.25E-05 | 1.52E-05 | PPAN                        | 56342 .     |
| 221651_x_ | 5.53E-05 | 9.07E-06 | IGK@ /// IGKC 3514 /// 508( |             |
| 221652_s_ | 0.003646 | 0.001587 | C12orf11                    | 55726 .     |
| 221653_x_ | 1.18E-06 | 6.16E-08 | APOL2                       | 23780 .     |
| 221654_s_ | 0.001451 | 5.24E-04 | USP3                        | 9960 .      |
| 221655_x_ | 3.54E-05 | 5.14E-06 | EPS8L1                      | 54869 .     |
| 221656_s_ | 0.015048 | 0.00848  | ARHGEF10L                   | 55160 .     |
| 221657_s_ | 3.40E-05 | 4.89E-06 | ASB6                        | 140459 .    |
| 221658_s_ | 0.028026 | 0.017531 | IL21R                       | 50615 .     |
| 221660_at | 3.59E-05 | 5.23E-06 | MYL10                       | 93408 .     |
| 221661_at | 0.002251 | 8.91E-04 | SLC22A7                     | 10864 .     |

|           |          |          |                             |         |
|-----------|----------|----------|-----------------------------|---------|
| 221662_s_ | 0.004641 | 0.00212  | SLC22A7                     | 10864 . |
| 221663_x_ | 0.028189 | 0.017647 | HRH3                        | 11255 . |
| 221664_s_ | 4.24E-10 | 1.72E-12 | F11R                        | 50848 . |
| 221665_s_ | 6.13E-04 | 1.83E-04 | EPS8L1                      | 54869 . |
| 221667_s_ | 0.048272 | 0.032945 | HSPB8                       | 26353 . |
| 221668_s_ | 0.03291  | 0.021133 | DNAI2                       | 64446 . |
| 221669_s_ | 0.022124 | 0.013329 | ACAD8                       | 27034 . |
| 221670_s_ | 4.86E-04 | 1.37E-04 | LHX3                        | 8022 .  |
| 221671_x_ | 1.67E-05 | 1.98E-06 | IGK@ /// IGKC 3514 /// 508( |         |
| 221672_s_ | 5.09E-05 | 8.20E-06 | TRAPPC9                     | 83696 . |
| 221674_s_ | 0.018591 | 0.01086  | CHRD                        | 8646 .  |
| 221675_s_ | 3.57E-05 | 5.19E-06 | CHPT1                       | 56994 . |
| 221676_s_ | 9.21E-06 | 9.13E-07 | CORO1C                      | 23603 . |
| 221677_s_ | 4.83E-05 | 7.66E-06 | DONSON                      | 29980 . |
| 221678_at | 0.009406 | 0.004884 | ABHD6                       | 57406 . |
| 221680_s_ | 3.88E-05 | 5.76E-06 | ETV7                        | 51513 . |
| 221681_s_ | 0.040102 | 0.02656  | DSPP                        | 1834 .  |
| 221683_s_ | 0.002211 | 8.71E-04 | CEP290                      | 80184 . |
| 221684_s_ | 9.16E-05 | 1.73E-05 | NYX                         | 60506 . |
| 221687_s_ | 0.024174 | 0.014761 | FAM125B                     | 89853 . |
| 221689_s_ | 0.006269 | 0.00303  | PIGP                        | 51227 . |
| 221690_s_ | 0.002781 | 0.001147 | NLRP2                       | 55655 . |
| 221691_x_ | 1.50E-04 | 3.20E-05 | NPM1                        | 4869 .  |
| 221692_s_ | 5.37E-04 | 1.55E-04 | MRPL34                      | 64981 . |
| 221695_s_ | 1.92E-04 | 4.34E-05 | MAP3K2                      | 10746 . |
| 221696_s_ | 0.004763 | 0.002188 | STYK1                       | 55359 . |
| 221702_s_ | 6.47E-04 | 1.96E-04 | TM2D3                       | 80213 . |
| 221704_s_ | 0.001353 | 4.82E-04 | VPS37B                      | 79720 . |
| 221706_s_ | 8.81E-04 | 2.87E-04 | USE1                        | 55850 . |
| 221708_s_ | 0.002919 | 0.001213 | UNC45A                      | 55898 . |
| 221709_s_ | 0.044733 | 0.030173 | ZNF839                      | 55778 . |
| 221710_x_ | 7.68E-06 | 7.15E-07 | FAM176B /// L 100133999 //. |         |
| 221712_s_ | 1.87E-05 | 2.29E-06 | WDR74                       | 54663 . |
| 221713_s_ | 0.005554 | 0.002626 | MAP6D1                      | 79929 . |

|           |          |          |                      |
|-----------|----------|----------|----------------------|
| 221717_at | 0.003991 | 0.001767 | .                    |
| 221719_s_ | 6.75E-05 | 1.17E-05 | LZTS1 11178 .        |
| 221721_s_ | 0.002533 | 0.001026 | LZTS1 11178 .        |
| 221723_s_ | 0.042065 | 0.028078 | SLC4A5 57835 .       |
| 221725_at | 0.011906 | 0.006437 | .                    |
| 221727_at | 0.005842 | 0.002789 | SUB1 10923 .         |
| 221731_x_ | 0.011116 | 0.005943 | VCAN 1462 .          |
| 221732_at | 0.001053 | 3.55E-04 | CANT1 124583 .       |
| 221733_s_ | 0.00428  | 0.001921 | GPATCH4 54865 .      |
| 221734_at | 0.025495 | 0.015715 | PRRC1 133619 .       |
| 221736_at | 0.03143  | 0.020027 | KIAA1219 57148 .     |
| 221737_at | 0.002457 | 9.90E-04 | GNA12 2768 .         |
| 221738_at | 0.024108 | 0.014714 | KIAA1219 57148 .     |
| 221739_at | 5.28E-06 | 4.37E-07 | C19orf10 56005 .     |
| 221740_x_ | 9.54E-04 | 3.15E-04 | LRRRC37A2 474170 .   |
| 221741_s_ | 8.89E-04 | 2.90E-04 | YTHDF1 54915 .       |
| 221742_at | 2.32E-04 | 5.50E-05 | CUGBP1 10658 .       |
| 221743_at | 1.09E-06 | 5.54E-08 | CUGBP1 10658 .       |
| 221744_at | 0.005342 | 0.002505 | WDR68 10238 .        |
| 221745_at | 0.001225 | 4.28E-04 | WDR68 10238 .        |
| 221746_at | 7.70E-06 | 7.17E-07 | UBL4A 8266 .         |
| 221747_at | 1.18E-08 | 1.29E-10 | TNS1 7145 .          |
| 221748_s_ | 4.08E-07 | 1.53E-08 | TNS1 7145 .          |
| 221750_at | 0.008333 | 0.004239 | HMGCS1 3157 .        |
| 221751_at | 0.002553 | 0.001036 | SLC2A3P1 100128062 . |
| 221752_at | 3.48E-05 | 5.02E-06 | SSH1 54434 .         |
| 221753_at | 6.87E-05 | 1.20E-05 | SSH1 54434 .         |
| 221754_s_ | 0.001641 | 6.08E-04 | CORO1B 57175 .       |
| 221755_at | 1.77E-05 | 2.14E-06 | EHBP1L1 254102 .     |
| 221756_at | 3.71E-05 | 5.43E-06 | PIK3IP1 113791 .     |
| 221757_at | 3.37E-05 | 4.84E-06 | PIK3IP1 113791 .     |
| 221758_at | 0.003293 | 0.001405 | ARMC6 93436 .        |
| 221759_at | 2.07E-05 | 2.60E-06 | G6PC3 92579 .        |
| 221760_at | 0.003182 | 0.001347 | MAN1A1 4121 .        |



|           |          |          |                            |          |
|-----------|----------|----------|----------------------------|----------|
| 221762_s_ | 1.59E-06 | 9.27E-08 | PCIF1                      | 63935 .  |
| 221763_at | 2.33E-05 | 3.03E-06 | JMJD1C                     | 221037 . |
| 221764_at | 0.032124 | 0.020547 | C19orf22                   | 91300 .  |
| 221765_at | 0.022291 | 0.013442 | UGCG                       | 7357 .   |
| 221766_s_ | 0.021463 | 0.012855 | FAM46A                     | 55603 .  |
| 221767_x_ | 1.13E-05 | 1.19E-06 | HDLBP                      | 3069 .   |
| 221768_at | 1.32E-04 | 2.74E-05 | SFPQ                       | 6421 .   |
| 221770_at | 0.00423  | 0.001895 | RPE                        | 6120 .   |
| 221771_s_ | 6.62E-05 | 1.14E-05 | MPHOSPH8                   | 54737 .  |
| 221772_s_ | 0.004768 | 0.002191 | PPP2R2D                    | 55844 .  |
| 221773_at | 3.18E-06 | 2.27E-07 | ELK3                       | 2004 .   |
| 221774_x_ | 7.23E-04 | 2.25E-04 | FAM48A                     | 55578 .  |
| 221775_x_ | 3.35E-05 | 4.80E-06 | RPL22                      | 6146 .   |
| 221776_s_ | 2.15E-05 | 2.75E-06 | BRD7                       | 29117 .  |
| 221777_at | 0.033822 | 0.021815 | C12orf52                   | 84934 .  |
| 221780_s_ | 6.20E-08 | 1.19E-09 | DDX27                      | 55661 .  |
| 221781_s_ | 0.002353 | 9.38E-04 | DNAJC10                    | 54431 .  |
| 221782_at | 0.017757 | 0.010291 | DNAJC10                    | 54431 .  |
| 221783_at | 0.003484 | 0.001503 | WIZ                        | 58525 .  |
| 221785_at | 0.003174 | 0.001343 | WIZ                        | 58525 .  |
| 221786_at | 4.34E-06 | 3.40E-07 | C6orf120                   | 387263 . |
| 221787_at | 1.23E-05 | 1.33E-06 | C6orf120                   | 387263 . |
| 221788_at | 0.001358 | 4.85E-04 |                            | .        |
| 221789_x_ | 0.042497 | 0.028413 | RHOT2                      | 89941 .  |
| 221790_s_ | 3.33E-04 | 8.66E-05 | LDLRAP1                    | 26119 .  |
| 221793_at | 0.021774 | 0.013079 | DOCK6                      | 57572 .  |
| 221797_at | 0.016775 | 0.00963  | C17orf90                   | 339229 . |
| 221799_at | 7.06E-06 | 6.38E-07 | CSGLCA-T                   | 54480 .  |
| 221800_s_ | 5.49E-06 | 4.61E-07 | C17orf70                   | 80233 .  |
| 221801_x_ | 0.029066 | 0.018292 | NEFL                       | 4747 .   |
| 221802_s_ | 4.10E-09 | 3.32E-11 | KIAA1598                   | 57698 .  |
| 221803_s_ | 6.90E-05 | 1.21E-05 | NRBF2                      | 29982 .  |
| 221804_s_ | 2.52E-04 | 6.13E-05 | FAM45A /// FA404636 /// 5! |          |
| 221805_at | 2.41E-04 | 5.78E-05 | NEFL                       | 4747 .   |

|           |          |          |                            |             |
|-----------|----------|----------|----------------------------|-------------|
| 221806_s_ | 0.03231  | 0.020684 | SETD5                      | 55209 .     |
| 221807_s_ | 0.010183 | 0.005357 | TRABD                      | 80305 .     |
| 221808_at | 0.002477 | 9.99E-04 | RAB9A                      | 9367 .      |
| 221809_at | 4.27E-04 | 1.17E-04 | RANBP10                    | 57610 .     |
| 221810_at | 0.003583 | 0.001554 | RAB15                      | 376267 .    |
| 221811_at | 0.00364  | 0.001584 | PERLD1                     | 93210 .     |
| 221814_at | 2.01E-06 | 1.26E-07 | GPR124                     | 25960 .     |
| 221815_at | 7.42E-06 | 6.83E-07 | ABHD2                      | 11057 .     |
| 221816_s_ | 0.015292 | 0.008644 | PHF11                      | 51131 .     |
| 221817_at | 8.99E-06 | 8.83E-07 | DOLPP1                     | 57171 .     |
| 221818_at | 0.012033 | 0.006517 | INTS5                      | 80789 .     |
| 221819_at | 0.01362  | 0.00754  | RAB35                      | 11021 .     |
| 221821_s_ | 1.43E-04 | 3.03E-05 | C12orf41                   | 54934 .     |
| 221822_at | 0.002834 | 0.001172 | CCDC101                    | 112869 .    |
| 221824_s_ | 0.009121 | 0.004708 | 8-Mar                      | 220972 .    |
| 221825_at | 0.001708 | 6.37E-04 | ANGEL2                     | 90806 .     |
| 221827_at | 9.31E-04 | 3.06E-04 | RBCK1                      | 10616 .     |
| 221830_at | 0.004436 | 0.002008 | RAP2A                      | 5911 .      |
| 221831_at | 5.47E-04 | 1.59E-04 | LUZP1                      | 7798 .      |
| 221833_at | 2.38E-05 | 3.11E-06 | LONP2                      | 83752 .     |
| 221834_at | 4.94E-05 | 7.90E-06 | LONP2                      | 83752 .     |
| 221835_at | 0.003772 | 0.001654 | DTX3                       | 196403 .    |
| 221837_at | 0.00355  | 0.001537 | KLHL22                     | 84861 .     |
| 221838_at | 5.10E-05 | 8.22E-06 | KLHL22                     | 84861 .     |
| 221839_s_ | 0.002403 | 9.63E-04 | UBAP2                      | 55833 .     |
| 221841_s_ | 9.73E-04 | 3.23E-04 | KLF4                       | 9314 .      |
| 221842_s_ | 0.007882 | 0.003975 | ZNF131                     | 7690 .      |
| 221843_s_ | 0.014747 | 0.008279 | KIAA1609                   | 57707 .     |
| 221844_x_ | 0.022076 | 0.013295 | SPCS3                      | 60559 .     |
| 221845_s_ | 0.006711 | 0.003286 | CLPB                       | 81570 .     |
| 221847_at | 0.001243 | 4.35E-04 | LOC100129361               | 100129361 . |
| 221848_at | 0.01316  | 0.007248 | ZGPAT                      | 84619 .     |
| 221849_s_ | 1.14E-05 | 1.20E-06 | C19orf72                   | 90379 .     |
| 221850_x_ | 2.39E-05 | 3.14E-06 | AGAP11 /// AG119016 /// 1: |             |

|           |          |          |          |        |   |
|-----------|----------|----------|----------|--------|---|
| 221851_at | 6.62E-05 | 1.14E-05 | C19orf72 | 90379  | . |
| 221852_at | 0.0067   | 0.003279 |          |        | . |
| 221856_s_ | 0.001724 | 6.45E-04 | FAM63A   | 55793  | . |
| 221858_at | 0.016423 | 0.009396 | TBC1D12  | 23232  | . |
| 221859_at | 5.76E-04 | 1.69E-04 | SYT13    | 57586  | . |
| 221860_at | 4.28E-05 | 6.57E-06 | HNRNPL   | 3191   | . |
| 221861_at | 4.46E-04 | 1.24E-04 |          |        | . |
| 221863_at | 5.63E-05 | 9.29E-06 | MIER2    | 54531  | . |
| 221864_at | 2.89E-04 | 7.25E-05 | ORAI3    | 93129  | . |
| 221865_at | 1.13E-04 | 2.25E-05 | C9orf91  | 203197 | . |
| 221866_at | 0.004128 | 0.001841 | TFEB     | 7942   | . |
| 221867_at | 9.22E-04 | 3.03E-04 | N4BP1    | 9683   | . |
| 221868_at | 3.34E-06 | 2.42E-07 | PAIP2B   | 400961 | . |
| 221869_at | 0.003995 | 0.001769 | ZNF512B  | 57473  | . |
| 221870_at | 1.53E-05 | 1.77E-06 | EHD2     | 30846  | . |
| 221871_s_ | 2.47E-06 | 1.63E-07 | TFG      | 10342  | . |
| 221872_at | 5.44E-05 | 8.89E-06 | RARRES1  | 5918   | . |
| 221873_at | 0.011589 | 0.006236 | ZNF143   | 7702   | . |
| 221875_x_ | 6.67E-05 | 1.15E-05 | HLA-F    | 3134   | . |
| 221877_at | 0.039806 | 0.026335 | IRGQ     | 126298 | . |
| 221878_at | 0.010976 | 0.005853 | C2orf68  | 388969 | . |
| 221879_at | 3.85E-06 | 2.90E-07 | CALML4   | 91860  | . |
| 221880_s_ | 3.90E-04 | 1.05E-04 | FAM174B  | 400451 | . |
| 221881_s_ | 5.06E-06 | 4.14E-07 | CLIC4    | 25932  | . |
| 221882_s_ | 3.08E-04 | 7.85E-05 | TMEM8    | 58986  | . |
| 221883_at | 1.83E-04 | 4.12E-05 | PKNOX1   | 5316   | . |
| 221886_at | 7.84E-04 | 2.48E-04 | DENND2A  | 27147  | . |
| 221888_at | 0.038901 | 0.025643 | CC2D1A   | 54862  | . |
| 221889_at | 4.36E-04 | 1.20E-04 | KCTD13   | 253980 | . |
| 221890_at | 0.014506 | 0.008117 | ZNF335   | 63925  | . |
| 221891_x_ | 0.008408 | 0.004283 | HSPA8    | 3312   | . |
| 221892_at | 1.81E-05 | 2.20E-06 | H6PD     | 9563   | . |
| 221893_s_ | 6.72E-04 | 2.05E-04 | ADCK2    | 90956  | . |
| 221895_at | 0.031597 | 0.020144 | MOSPD2   | 158747 | . |

|           |          |          |                            |          |
|-----------|----------|----------|----------------------------|----------|
| 221896_s_ | 0.031091 | 0.019777 | HIGD1A                     | 25994 .  |
| 221897_at | 6.99E-08 | 1.41E-09 | TRIM52                     | 84851 .  |
| 221898_at | 0.035559 | 0.023108 | PDPN                       | 10630 .  |
| 221899_at | 0.001784 | 6.71E-04 | N4BP2L2                    | 10443 .  |
| 221900_at | 1.58E-05 | 1.85E-06 | COL8A2                     | 1296 .   |
| 221901_at | 0.017578 | 0.010169 | KIAA1644                   | 85352 .  |
| 221902_at | 0.01377  | 0.007638 | GPR153                     | 387509 . |
| 221903_s_ | 8.89E-05 | 1.66E-05 | CYLD                       | 1540 .   |
| 221906_at | 0.001222 | 4.27E-04 | TXNRD3                     | 114112 . |
| 221908_at | 9.74E-05 | 1.86E-05 | RNFT2                      | 84900 .  |
| 221909_at | 4.48E-06 | 3.55E-07 | RNFT2                      | 84900 .  |
| 221910_at | 0.033809 | 0.021805 | ETV1                       | 2115 .   |
| 221911_at | 1.27E-04 | 2.61E-05 | ETV1                       | 2115 .   |
| 221912_s_ | 0.038856 | 0.025607 | CCDC28B                    | 79140 .  |
| 221913_at | 0.037626 | 0.024675 | SIRT3                      | 23410 .  |
| 221914_at | 1.05E-04 | 2.05E-05 | SYN1                       | 6853 .   |
| 221915_s_ | 3.49E-04 | 9.14E-05 | RANBP1                     | 5902 .   |
| 221916_at | 8.46E-04 | 2.73E-04 | NEFL                       | 4747 .   |
| 221917_s_ | 9.94E-04 | 3.31E-04 | GRSF1                      | 2926 .   |
| 221919_at | 5.71E-06 | 4.85E-07 | HNRNPA1 /// L3178 /// 7288 | .        |
| 221920_s_ | 7.77E-04 | 2.46E-04 | SLC25A37                   | 51312 .  |
| 221921_s_ | 1.53E-07 | 4.06E-09 | CADM3                      | 57863 .  |
| 221922_at | 1.76E-06 | 1.06E-07 | GPSM2                      | 29899 .  |
| 221923_s_ | 4.70E-04 | 1.32E-04 | NPM1                       | 4869 .   |
| 221925_s_ | 0.001084 | 3.68E-04 | CSPP1                      | 79848 .  |
| 221926_s_ | 3.74E-05 | 5.50E-06 | IL17RC                     | 84818 .  |
| 221927_s_ | 0.002392 | 9.57E-04 | ABHD11                     | 83451 .  |
| 221929_at | 0.001139 | 3.91E-04 | RBM12B                     | 389677 . |
| 221930_at | 0.032676 | 0.020953 |                            | .        |
| 221931_s_ | 0.019051 | 0.011172 | SEH1L                      | 81929 .  |
| 221932_s_ | 0.023481 | 0.014273 | GLRX5                      | 51218 .  |
| 221933_at | 6.18E-04 | 1.85E-04 | NLGN4X                     | 57502 .  |
| 221936_x_ | 0.035321 | 0.022921 | LOC100129015 100129015     | .        |
| 221938_x_ | 0.015872 | 0.009031 | MED16                      | 10025 .  |

|           |          |          |                            |          |
|-----------|----------|----------|----------------------------|----------|
| 221940_at | 0.04698  | 0.031938 | RPUSD2                     | 27079 .  |
| 221941_at | 1.69E-04 | 3.71E-05 | PAOX                       | 196743 . |
| 221944_at | 0.002725 | 0.001119 | FLJ42627                   | 645644 . |
| 221945_at | 0.007751 | 0.003894 | FBXO41                     | 150726 . |
| 221947_at | 0.001819 | 6.88E-04 |                            | .        |
| 221948_s_ | 0.003832 | 0.001684 | KLHL22                     | 84861 .  |
| 221949_at | 2.51E-04 | 6.08E-05 | LOC222070                  | 222070 . |
| 221950_at | 5.19E-06 | 4.26E-07 | EMX2                       | 2018 .   |
| 221951_at | 1.28E-04 | 2.63E-05 | TMEM80                     | 283232 . |
| 221952_x_ | 0.001765 | 6.63E-04 | TRMT5                      | 57570 .  |
| 221953_s_ | 2.80E-04 | 6.96E-05 | EDEM2                      | 55741 .  |
| 221954_at | 0.006388 | 0.003098 | C20orf111                  | 51526 .  |
| 221956_at | 1.81E-06 | 1.11E-07 | LRCH4                      | 4034 .   |
| 221957_at | 6.41E-04 | 1.93E-04 | PDK3                       | 5165 .   |
| 221959_at | 0.00108  | 3.67E-04 | FAM110B                    | 90362 .  |
| 221960_s_ | 0.002505 | 0.001013 | RAB2A                      | 5862 .   |
| 221961_at | 5.15E-05 | 8.32E-06 | CLCN7                      | 1186 .   |
| 221962_s_ | 0.005492 | 0.002589 | UBE2H                      | 7328 .   |
| 221963_x_ | 0.015037 | 0.008473 |                            | .        |
| 221964_at | 0.02517  | 0.015481 | TULP3                      | 7289 .   |
| 221965_at | 1.74E-07 | 4.80E-09 | MPHOSPH9                   | 10198 .  |
| 221966_at | 0.005113 | 0.002381 | GPR137                     | 56834 .  |
| 221967_at | 0.015334 | 0.008672 | NXPH4                      | 11247 .  |
| 221968_s_ | 5.50E-04 | 1.60E-04 | ZNF771                     | 51333 .  |
| 221969_at | 0.001325 | 4.70E-04 |                            | .        |
| 221970_s_ | 5.03E-08 | 9.12E-10 | NOL11                      | 25926 .  |
| 221971_x_ | 1.61E-06 | 9.37E-08 | AGAP10 /// AG119016 /// 35 | .        |
| 221972_s_ | 2.63E-07 | 8.45E-09 | SDF4                       | 51150 .  |
| 221973_at | 0.010526 | 0.005569 |                            | .        |
| 221974_at | 5.48E-04 | 1.59E-04 | IPW                        | 3653 .   |
| 221975_s_ | 0.006759 | 0.003314 | C21orf2                    | 755 .    |
| 221976_s_ | 0.012739 | 0.006978 | HDGFRP3                    | 50810 .  |
| 221977_at | 3.30E-04 | 8.56E-05 | TBX2                       | 6909 .   |
| 221980_at | 0.004352 | 0.001961 | EMILIN2                    | 84034 .  |

|           |          |          |                             |          |
|-----------|----------|----------|-----------------------------|----------|
| 221981_s_ | 0.006396 | 0.003103 | WDR59                       | 79726 .  |
| 221983_at | 8.67E-07 | 4.11E-08 | FAM134A                     | 79137 .  |
| 221987_s_ | 1.15E-04 | 2.30E-05 | TSR1                        | 55720 .  |
| 221988_at | 0.001593 | 5.86E-04 | C19orf42                    | 79086 .  |
| 221989_at | 9.52E-05 | 1.81E-05 | RPL10                       | 6134 .   |
| 221990_at | 0.0037   | 0.001615 | PAX8                        | 7849 .   |
| 221991_at | 5.15E-06 | 4.23E-07 | NXPH3                       | 11248 .  |
| 221992_at | 0.021964 | 0.013216 | PDXDC2                      | 283970 . |
| 221993_s_ | 4.87E-04 | 1.38E-04 | C16orf42                    | 115939 . |
| 221994_at | 1.16E-07 | 2.79E-09 | PDLIM5                      | 10611 .  |
| 221995_s_ | 0.010432 | 0.005512 |                             | .        |
| 221996_s_ | 0.036145 | 0.023554 | CLTB                        | 1212 .   |
| 221997_s_ | 0.027819 | 0.017379 | MRPL52                      | 122704 . |
| 222000_at | 0.003643 | 0.001586 | C1orf174                    | 339448 . |
| 222001_x_ | 9.43E-08 | 2.12E-09 | LOC728855                   | 728855 . |
| 222003_s_ | 0.026783 | 0.016638 | DOCK6                       | 57572 .  |
| 222004_s_ | 4.50E-05 | 7.02E-06 | DOCK6                       | 57572 .  |
| 222005_s_ | 2.87E-05 | 3.94E-06 | GNG3                        | 2785 .   |
| 222006_at | 4.08E-04 | 1.11E-04 | LETM1                       | 3954 .   |
| 222008_at | 5.52E-06 | 4.65E-07 | COL9A1                      | 1297 .   |
| 222009_at | 3.54E-05 | 5.13E-06 | CEMP1                       | 752014 . |
| 222010_at | 4.85E-05 | 7.72E-06 | TCP1                        | 6950 .   |
| 222011_s_ | 0.001355 | 4.84E-04 | TCP1                        | 6950 .   |
| 222012_at | 6.30E-05 | 1.07E-05 | C19orf72                    | 90379 .  |
| 222015_at | 0.004503 | 0.002045 | CSNK1E                      | 1454 .   |
| 222016_s_ | 0.045907 | 0.031088 | ZNF323                      | 64288 .  |
| 222017_x_ | 1.02E-04 | 1.97E-05 | LRCH4                       | 4034 .   |
| 222018_at | 5.87E-06 | 5.03E-07 | NACA /// NAC# 342538 /// 46 | .        |
| 222019_at | 4.57E-05 | 7.14E-06 | PFDN6                       | 10471 .  |
| 222020_s_ | 0.006196 | 0.002987 | NTM                         | 50863 .  |
| 222021_x_ | 6.20E-04 | 1.86E-04 | SDHALP1                     | 255812 . |
| 222022_at | 6.72E-05 | 1.16E-05 | DTX3                        | 196403 . |
| 222023_at | 0.009784 | 0.005115 | AKAP13                      | 11214 .  |
| 222024_s_ | 3.06E-04 | 7.79E-05 | AKAP13                      | 11214 .  |

|           |          |          |                             |          |
|-----------|----------|----------|-----------------------------|----------|
| 222026_at | 1.04E-06 | 5.22E-08 | RBM3                        | 5935 .   |
| 222029_x_ | 1.10E-05 | 1.15E-06 | PFDN6                       | 10471 .  |
| 222031_at | 0.003195 | 0.001355 | LOC286434 /// 286434 /// 38 | .        |
| 222034_at | 1.54E-06 | 8.82E-08 | GNB2L1                      | 10399 .  |
| 222036_s_ | 8.08E-07 | 3.73E-08 | MCM4                        | 4173 .   |
| 222037_at | 1.48E-05 | 1.70E-06 | MCM4                        | 4173 .   |
| 222038_s_ | 0.00424  | 0.001901 | UTP18                       | 51096 .  |
| 222039_at | 3.20E-05 | 4.53E-06 | KIF18B                      | 146909 . |
| 222040_at | 2.88E-12 | 2.35E-15 | HNRNPA1 /// L3178 /// 7288  | .        |
| 222041_at | 6.39E-04 | 1.92E-04 | DPH1 /// OVCA124641 /// 18  | .        |
| 222042_x_ | 0.002379 | 9.51E-04 | MEX3D                       | 399664 . |
| 222043_at | 1.52E-04 | 3.27E-05 | CLU                         | 1191 .   |
| 222044_at | 8.92E-05 | 1.67E-05 | PCIF1                       | 63935 .  |
| 222046_at | 0.02351  | 0.014295 | SRRT                        | 51593 .  |
| 222047_s_ | 3.99E-05 | 5.96E-06 | SRRT                        | 51593 .  |
| 222050_at | 0.004745 | 0.002178 | FXR2                        | 9513 .   |
| 222051_s_ | 3.76E-05 | 5.53E-06 | LOC100131637 100131637      | .        |
| 222053_at | 0.002654 | 0.001084 | TAF6L                       | 10629 .  |
| 222054_at | 0.004508 | 0.002047 | LOC728448                   | 728448 . |
| 222056_s_ | 0.033267 | 0.021399 | FAHD2A                      | 51011 .  |
| 222057_at | 0.024943 | 0.015316 | NOL12                       | 79159 .  |
| 222059_at | 4.96E-04 | 1.41E-04 | ZNF335                      | 63925 .  |
| 222060_at | 0.020075 | 0.01188  | KRT8P12                     | 90133 .  |
| 222061_at | 5.65E-05 | 9.33E-06 | CD58                        | 965 .    |
| 222064_s_ | 7.37E-04 | 2.30E-04 | AARSD1                      | 80755 .  |
| 222066_at | 0.026783 | 0.016638 | EPB41L1                     | 2036 .   |
| 222068_s_ | 0.00384  | 0.001689 | LRRC50                      | 123872 . |
| 222069_s_ | 0.001867 | 7.10E-04 |                             | .        |
| 222071_s_ | 4.51E-05 | 7.03E-06 | SLCO4C1                     | 353189 . |
| 222074_at | 0.002631 | 0.001073 | UROD                        | 7389 .   |
| 222077_s_ | 1.15E-04 | 2.30E-05 | RACGAP1                     | 29127 .  |
| 222078_at | 6.41E-04 | 1.93E-04 | PKLR                        | 5313 .   |
| 222080_s_ | 2.42E-04 | 5.81E-05 | SIRT5                       | 23408 .  |
| 222081_at | 0.033571 | 0.02163  | SIRT5                       | 23408 .  |

|           |          |          |                              |          |
|-----------|----------|----------|------------------------------|----------|
| 222082_at | 0.021181 | 0.012663 | ZBTB7A                       | 51341 .  |
| 222083_at | 0.0223   | 0.013449 | GLYAT                        | 10249 .  |
| 222084_s_ | 0.006155 | 0.002964 | SBF1                         | 6305 .   |
| 222085_at | 0.001776 | 6.68E-04 | FAM174B                      | 400451 . |
| 222088_s_ | 6.38E-08 | 1.24E-09 | SLC2A14 /// SL 144195 /// 65 | .        |
| 222089_s_ | 0.002303 | 9.15E-04 | C16orf71                     | 146562 . |
| 222091_at | 0.046236 | 0.03135  | HPCAL4                       | 51440 .  |
| 222092_at | 0.007751 | 0.003895 | PTPN21                       | 11099 .  |
| 222093_s_ | 3.21E-04 | 8.28E-05 | INO80B                       | 83444 .  |
| 222096_x_ | 0.01357  | 0.007507 |                              | .        |
| 222097_at | 0.005696 | 0.002703 |                              | .        |
| 222099_s_ | 0.008859 | 0.00455  | LSM14A                       | 26065 .  |
| 222100_at | 0.006458 | 0.003138 | CYP2E1                       | 1571 .   |
| 222101_s_ | 2.93E-05 | 4.06E-06 | DCHS1                        | 8642 .   |
| 222102_at | 0.003216 | 0.001365 | GSTA3                        | 2940 .   |
| 222103_at | 0.031951 | 0.020413 | ATF1                         | 466 .    |
| 222104_x_ | 1.18E-05 | 1.27E-06 | GTF2H3                       | 2967 .   |
| 222105_s_ | 7.11E-04 | 2.20E-04 | NKIRAS2                      | 28511 .  |
| 222106_at | 0.038188 | 0.025102 | PRND                         | 23627 .  |
| 222107_x_ | 0.003439 | 0.00148  | LZTS1                        | 11178 .  |
| 222108_at | 2.56E-04 | 6.25E-05 | AMIGO2                       | 347902 . |
| 222109_at | 1.09E-06 | 5.49E-08 | GNL3L                        | 54552 .  |
| 222110_at | 0.022088 | 0.013303 | SENP5                        | 205564 . |
| 222112_at | 0.022627 | 0.01367  | EPS15L1                      | 58513 .  |
| 222113_s_ | 2.33E-05 | 3.03E-06 | EPS15L1                      | 58513 .  |
| 222115_x_ | 0.041636 | 0.027743 | N-PAC                        | 84656 .  |
| 222120_at | 0.010432 | 0.005512 | ZNF764                       | 92595 .  |
| 222121_at | 0.04214  | 0.028139 | SGEF                         | 26084 .  |
| 222122_s_ | 5.45E-06 | 4.57E-07 | THOC2                        | 57187 .  |
| 222123_s_ | 0.021949 | 0.013206 | HIF3A                        | 64344 .  |
| 222124_at | 2.95E-06 | 2.06E-07 | HIF3A                        | 64344 .  |
| 222125_s_ | 0.027484 | 0.017133 | P4HTM                        | 54681 .  |
| 222126_at | 0.013106 | 0.007212 | AGFG2                        | 3268 .   |
| 222127_s_ | 0.012389 | 0.006749 | EXOC1                        | 55763 .  |



|           |          |          |                             |          |
|-----------|----------|----------|-----------------------------|----------|
| 222128_at | 7.88E-07 | 3.60E-08 | NSUN6                       | 221078 . |
| 222129_at | 1.72E-09 | 1.09E-11 | FAM134A                     | 79137 .  |
| 222130_s_ | 6.48E-05 | 1.11E-05 | FTSJ2                       | 29960 .  |
| 222131_x_ | 0.03777  | 0.024786 | RHOT2                       | 89941 .  |
| 222133_s_ | 0.007461 | 0.003727 | PHF20L1                     | 51105 .  |
| 222136_x_ | 3.45E-04 | 9.03E-05 | ZNF43                       | 7594 .   |
| 222137_at | 0.016439 | 0.009409 | CC2D1A                      | 54862 .  |
| 222138_s_ | 1.51E-05 | 1.75E-06 | WDR13                       | 64743 .  |
| 222140_s_ | 0.008685 | 0.004446 | GPR89A /// GP 51463 /// 65: |          |
| 222141_at | 0.002507 | 0.001014 | KLHL22                      | 84861 .  |
| 222142_at | 0.029316 | 0.01847  | CYLD                        | 1540 .   |
| 222144_at | 0.006101 | 0.002935 | KIF17                       | 57576 .  |
| 222147_s_ | 1.51E-06 | 8.62E-08 | ACTR5                       | 79913 .  |
| 222149_x_ | 9.64E-04 | 3.19E-04 | GOLGA8C /// C 100132565 //. |          |
| 222152_at | 4.27E-05 | 6.55E-06 | PDCD6                       | 10016 .  |
| 222156_x_ | 4.39E-04 | 1.21E-04 | CCPG1                       | 9236 .   |
| 222157_s_ | 0.022505 | 0.013586 | WDR48                       | 57599 .  |
| 222158_s_ | 0.007138 | 0.003536 | PPPDE1                      | 51029 .  |
| 222159_at | 0.028338 | 0.017752 |                             | .        |
| 222161_at | 0.003278 | 0.001397 | NAALAD2                     | 10003 .  |
| 222162_s_ | 5.26E-04 | 1.52E-04 | ADAMTS1                     | 9510 .   |
| 222163_s_ | 5.76E-06 | 4.91E-07 | SPATA5L1                    | 79029 .  |
| 222164_at | 4.30E-05 | 6.60E-06 | FGFR1                       | 2260 .   |
| 222165_x_ | 0.001543 | 5.64E-04 | C9orf16                     | 79095 .  |
| 222173_s_ | 3.15E-09 | 2.28E-11 | TBC1D2                      | 55357 .  |
| 222174_at | 0.029399 | 0.01853  |                             | .        |
| 222175_s_ | 0.012211 | 0.006634 | MED15                       | 51586 .  |
| 222179_at | 0.042695 | 0.028567 | CDC5L                       | 988 .    |
| 222180_at | 0.00846  | 0.004313 |                             | .        |
| 222184_at | 0.043355 | 0.02909  |                             | .        |
| 222185_at | 3.78E-06 | 2.84E-07 | PKNOX2                      | 63876 .  |
| 222186_at | 0.001411 | 5.07E-04 | ZFAND6                      | 54469 .  |
| 222187_x_ | 0.018526 | 0.010817 | G3BP1                       | 10146 .  |
| 222190_s_ | 1.27E-04 | 2.59E-05 | C16orf58                    | 64755 .  |

|           |          |          |              |             |
|-----------|----------|----------|--------------|-------------|
| 222191_s_ | 0.005804 | 0.002766 | B4GALT7      | 11285 .     |
| 222192_s_ | 0.00802  | 0.004056 | C2orf43      | 60526 .     |
| 222193_at | 2.06E-04 | 4.76E-05 | C2orf43      | 60526 .     |
| 222195_s_ | 0.004272 | 0.001917 | C9orf156     | 51531 .     |
| 222196_at | 0.001936 | 7.42E-04 | LOC286434    | 286434 .    |
| 222197_s_ | 6.50E-06 | 5.73E-07 | LOC100128008 | 100128008 . |
| 222198_at | 0.006161 | 0.002967 |              | .           |
| 222199_s_ | 0.001029 | 3.45E-04 | BIN3         | 55909 .     |
| 222200_s_ | 0.015927 | 0.009069 | BSDC1        | 55108 .     |
| 222201_s_ | 2.17E-04 | 5.08E-05 | CASP8AP2     | 9994 .      |
| 222204_s_ | 0.035084 | 0.022744 | RRN3         | 54700 .     |
| 222207_x_ | 1.06E-06 | 5.29E-08 | LOC441258    | 441258 .    |
| 222208_s_ | 7.06E-05 | 1.24E-05 | POLR2J4      | 84820 .     |
| 222209_s_ | 2.85E-04 | 7.11E-05 | TMEM135      | 65084 .     |
| 222210_at | 0.006511 | 0.003169 | KIAA0195     | 9772 .      |
| 222211_x_ | 8.29E-04 | 2.66E-04 | SCAND2       | 54581 .     |
| 222212_s_ | 1.64E-04 | 3.58E-05 | LASS2        | 29956 .     |
| 222214_at | 2.96E-04 | 7.46E-05 |              | .           |
| 222217_s_ | 0.004167 | 0.00186  | SLC27A3      | 11000 .     |
| 222219_s_ | 3.12E-04 | 8.00E-05 | TLE6         | 79816 .     |
| 222221_x_ | 1.25E-05 | 1.37E-06 | EHD1         | 10938 .     |
| 222222_s_ | 0.012033 | 0.006517 | HOMER3       | 9454 .      |
| 222223_s_ | 4.20E-04 | 1.15E-04 | IL1F5        | 26525 .     |
| 222224_at | 0.041497 | 0.027636 | NACA2        | 342538 .    |
| 222225_at | 0.025821 | 0.015939 | RPL23AP53    | 644128 .    |
| 222226_at | 2.60E-06 | 1.75E-07 | SAA3P        | 6290 .      |
| 222228_s_ | 0.008301 | 0.004219 | ALKBH4       | 54784 .     |
| 222229_x_ | 0.003088 | 0.0013   | RPL26P37     | 441533 .    |
| 222230_s_ | 6.42E-04 | 1.94E-04 | ACTR10       | 55860 .     |
| 222231_s_ | 0.033352 | 0.021463 | LRRRC59      | 55379 .     |
| 222233_s_ | 2.25E-04 | 5.29E-05 | DCLRE1C      | 64421 .     |
| 222234_s_ | 0.005115 | 0.002382 | DBNDD1       | 79007 .     |
| 222235_s_ | 1.01E-05 | 1.03E-06 | CSGALNACT2   | 55454 .     |
| 222237_s_ | 0.001867 | 7.10E-04 | ZFP112       | 7771 .      |

|           |          |          |                           |        |   |
|-----------|----------|----------|---------------------------|--------|---|
| 222239_s_ | 6.86E-04 | 2.11E-04 | INTS6                     | 26512  | . |
| 222240_s_ | 6.10E-06 | 5.28E-07 | ISYNA1                    | 51477  | . |
| 222241_at | 2.50E-05 | 3.31E-06 | FAM125B                   | 89853  | . |
| 222243_s_ | 0.024877 | 0.015269 | TOB2                      | 10766  | . |
| 222244_s_ | 3.64E-04 | 9.63E-05 | TUG1                      | 55000  | . |
| 222247_at | 0.00333  | 0.001424 | DXS542                    | 57825  | . |
| 222249_at | 0.006488 | 0.003157 |                           |        | . |
| 222250_s_ | 0.019053 | 0.011174 | INTS7                     | 25896  | . |
| 222251_s_ | 1.28E-07 | 3.18E-09 | GMEB2                     | 26205  | . |
| 222252_x_ | 0.001943 | 7.45E-04 | UBQLN4                    | 56893  | . |
| 222257_s_ | 1.61E-10 | 4.61E-13 | ACE2                      | 59272  | . |
| 222258_s_ | 0.022731 | 0.013744 | SH3BP4                    | 23677  | . |
| 222260_at | 3.56E-07 | 1.27E-08 |                           |        | . |
| 222263_at | 7.34E-05 | 1.31E-05 | SLC35E1                   | 79939  | . |
| 222264_at | 0.007246 | 0.0036   | HNRNPUL2                  | 221092 | . |
| 222265_at | 6.39E-06 | 5.60E-07 | TNS4                      | 84951  | . |
| 222266_at | 1.17E-04 | 2.35E-05 | C19orf2                   | 8725   | . |
| 222268_x_ | 0.004965 | 0.002296 | MUC5AC /// M4586 /// 7278 |        | . |
| 222269_at | 0.001162 | 4.01E-04 | APOOL                     | 139322 | . |
| 222270_at | 8.86E-05 | 1.66E-05 | SMEK2                     | 57223  | . |
| 222271_at | 7.93E-06 | 7.45E-07 |                           |        | . |
| 222273_at | 1.87E-04 | 4.20E-05 | PAPOLG                    | 64895  | . |
| 222274_at | 0.042381 | 0.028324 | ZDHHC8P                   | 150244 | . |
| 222275_at | 7.62E-04 | 2.39E-04 |                           |        | . |
| 222276_at | 8.95E-08 | 1.98E-09 |                           |        | . |
| 222278_at | 0.024122 | 0.014724 |                           |        | . |
| 222279_at | 0.041612 | 0.027724 | RP3-377H14.5              | 285830 | . |
| 222280_at | 3.30E-04 | 8.55E-05 |                           |        | . |
| 222282_at | 3.62E-04 | 9.58E-05 |                           |        | . |
| 222283_at | 0.005062 | 0.002353 | ZNF480                    | 147657 | . |
| 222284_at | 0.008047 | 0.004072 |                           |        | . |
| 222288_at | 3.20E-05 | 4.53E-06 |                           |        | . |
| 222289_at | 0.003857 | 0.001697 | KCNC2                     | 3747   | . |
| 222294_s_ | 0.005956 | 0.002853 |                           |        | . |

|           |          |          |           |             |
|-----------|----------|----------|-----------|-------------|
| 222296_at | 0.002796 | 0.001154 |           | .           |
| 222297_x_ | 0.015086 | 0.008507 | RPL18P11  | 390612 .    |
| 222302_at | 0.001924 | 7.36E-04 |           | .           |
| 222303_at | 0.013736 | 0.007617 |           | .           |
| 222305_at | 0.019346 | 0.011376 | HK2       | 3099 .      |
| 222308_x_ | 2.93E-05 | 4.04E-06 |           | .           |
| 222309_at | 2.60E-04 | 6.37E-05 | C6orf62   | 81688 .     |
| 222310_at | 2.59E-05 | 3.47E-06 | SFRS15    | 57466 .     |
| 222311_s_ | 1.57E-06 | 9.06E-08 | SFRS15    | 57466 .     |
| 222313_at | 1.99E-05 | 2.48E-06 |           | .           |
| 222314_x_ | 0.004295 | 0.001931 | EGO       | 100126791 . |
| 222315_at | 0.049944 | 0.034287 |           | .           |
| 222316_at | 0.033099 | 0.021274 |           | .           |
| 222319_at | 0.014256 | 0.007952 |           | .           |
| 222320_at | 0.041291 | 0.027477 |           | .           |
| 222321_at | 0.026333 | 0.016303 | AGTR2     | 186 .       |
| 222323_at | 1.52E-05 | 1.76E-06 |           | .           |
| 222324_at | 0.033175 | 0.02133  |           | .           |
| 222325_at | 2.69E-08 | 3.98E-10 |           | .           |
| 222328_x_ | 2.76E-04 | 6.85E-05 | MEG3      | 55384 .     |
| 222329_x_ | 7.67E-04 | 2.42E-04 |           | .           |
| 222331_at | 0.004537 | 0.002064 |           | .           |
| 222333_at | 1.55E-04 | 3.35E-05 | ALS2CL    | 259173 .    |
| 222334_at | 0.00174  | 6.52E-04 |           | .           |
| 222337_at | 2.96E-05 | 4.10E-06 |           | .           |
| 222338_x_ | 8.44E-07 | 3.96E-08 | LOC646808 | 646808 .    |
| 222339_x_ | 0.006262 | 0.003025 |           | .           |
| 222340_at | 0.013347 | 0.007366 |           | .           |
| 222343_at | 0.032025 | 0.020471 | BCL2L11   | 10018 .     |
| 222344_at | 0.003459 | 0.00149  |           | .           |
| 222345_at | 0.024695 | 0.015132 |           | .           |
| 222346_at | 5.58E-04 | 1.63E-04 | LAMA1     | 284217 .    |
| 222347_at | 0.008904 | 0.004578 | LOC644450 | 644450 .    |
| 222348_at | 0.042497 | 0.028413 | MAST4     | 375449 .    |

|           |          |          |                             |             |
|-----------|----------|----------|-----------------------------|-------------|
| 222350_at | 0.009869 | 0.005167 |                             | .           |
| 222352_at | 4.36E-05 | 6.72E-06 |                             | .           |
| 222354_at | 7.42E-06 | 6.83E-07 | F11R                        | 50848 .     |
| 222355_at | 0.017184 | 0.009902 |                             | .           |
| 222356_at | 2.00E-06 | 1.25E-07 |                             | .           |
| 222358_x_ | 8.60E-05 | 1.60E-05 |                             | .           |
| 222360_at | 0.013318 | 0.007348 | DPH5                        | 51611 .     |
| 222363_at | 2.70E-07 | 8.78E-09 |                             | .           |
| 222365_at | 0.015647 | 0.008882 |                             | .           |
| 222366_at | 2.46E-07 | 7.73E-09 |                             | .           |
| 222367_at | 0.007782 | 0.003914 | WHAMM /// W123720 /// 3:    | .           |
| 222368_at | 2.58E-04 | 6.30E-05 |                             | .           |
| 222369_at | 2.29E-04 | 5.44E-05 | NAT11                       | 79829 .     |
| 222370_x_ | 0.014758 | 0.008288 |                             | .           |
| 222371_at | 9.03E-05 | 1.69E-05 |                             | .           |
| 222375_at | 0.001758 | 6.60E-04 |                             | .           |
| 222376_at | 0.007792 | 0.003921 |                             | .           |
| 222377_at | 2.40E-06 | 1.58E-07 | TBX10                       | 347853 .    |
| 222378_at | 0.001323 | 4.69E-04 |                             | .           |
| 222379_at | 1.39E-04 | 2.93E-05 | KCNE4                       | 23704 .     |
| 222380_s_ | 1.09E-05 | 1.14E-06 | PDCD6                       | 10016 .     |
| 222381_at | 3.92E-04 | 1.05E-04 | PDCD6                       | 10016 .     |
| 222382_x_ | 1.43E-04 | 3.02E-05 | NUP205                      | 23165 .     |
| 222384_at | 0.017734 | 0.010276 | DKFZP564C196                | 284649 .    |
| 243_g_at  | 0.003187 | 0.00135  | MAP4                        | 4134 .      |
| 266_s_at  | 9.66E-08 | 2.19E-09 | CD24                        | 100133941 . |
| 31637_s_a | 1.59E-07 | 4.25E-09 | NR1D1 /// THR 7067 /// 957: | .           |
| 31799_at  | 0.001569 | 5.76E-04 |                             | .           |
| 31807_at  | 5.25E-05 | 8.52E-06 | DDX49                       | 54555 .     |
| 31826_at  | 3.18E-09 | 2.32E-11 | FKBP15                      | 23307 .     |
| 31835_at  | 4.21E-04 | 1.15E-04 | HRG                         | 3273 .      |
| 31837_at  | 6.79E-04 | 2.08E-04 | LMF2                        | 91289 .     |
| 31845_at  | 1.53E-07 | 4.05E-09 | ELF4                        | 2000 .      |
| 31846_at  | 1.38E-05 | 1.56E-06 | RHOD                        | 29984 .     |

|            |          |          |          |          |
|------------|----------|----------|----------|----------|
| 31861_at   | 0.002933 | 0.00122  | IGHMBP2  | 3508 .   |
| 31874_at   | 3.83E-06 | 2.89E-07 | GAS2L1   | 10634 .  |
| 32032_at   | 0.017527 | 0.010136 | DGCR14   | 8220 .   |
| 32042_at   | 0.028797 | 0.018099 | ENOX2    | 10495 .  |
| 32062_at   | 9.89E-04 | 3.29E-04 | LRRC14   | 9684 .   |
| 32088_at   | 0.001819 | 6.88E-04 | BLZF1    | 8548 .   |
| 32094_at   | 2.12E-07 | 6.23E-09 | CHST3    | 9469 .   |
| 32099_at   | 2.43E-04 | 5.84E-05 | SAFB2    | 9667 .   |
| 320_at     | 0.005986 | 0.00287  | PEX6     | 5190 .   |
| 32137_at   | 2.85E-05 | 3.91E-06 | JAG2     | 3714 .   |
| 32209_at   | 4.05E-06 | 3.11E-07 | FAM89B   | 23625 .  |
| 32259_at   | 0.020274 | 0.012016 | EZH1     | 2145 .   |
| 32502_at   | 0.021997 | 0.013238 | GDPD5    | 81544 .  |
| 32540_at   | 7.66E-04 | 2.41E-04 | PPP3CC   | 5533 .   |
| 32541_at   | 1.75E-04 | 3.87E-05 | PPP3CC   | 5533 .   |
| 32625_at   | 9.89E-06 | 1.00E-06 | NPR1     | 4881 .   |
| 32699_s_a  | 0.001894 | 7.23E-04 | PVR      | 5817 .   |
| 32723_at   | 3.76E-05 | 5.55E-06 | CSTF1    | 1477 .   |
| 32811_at   | 4.38E-04 | 1.21E-04 | MYO1C    | 4641 .   |
| 33322_i_at | 1.03E-04 | 2.01E-05 | SFN      | 2810 .   |
| 33323_r_at | 0.001452 | 5.25E-04 | SFN      | 2810 .   |
| 33494_at   | 1.48E-04 | 3.15E-05 | ETFDH    | 2110 .   |
| 33579_i_at | 2.00E-05 | 2.49E-06 | GALR3    | 8484 .   |
| 33646_g_a  | 3.90E-04 | 1.05E-04 | GM2A     | 2760 .   |
| 336_at     | 0.022231 | 0.013402 | TBXA2R   | 6915 .   |
| 33736_at   | 2.41E-05 | 3.17E-06 | STOML1   | 9399 .   |
| 33768_at   | 3.84E-06 | 2.90E-07 | DMWD     | 1762 .   |
| 33778_at   | 0.001044 | 3.52E-04 | TBC1D22A | 25771 .  |
| 33814_at   | 1.77E-06 | 1.07E-07 | PAK4     | 10298 .  |
| 33850_at   | 9.57E-05 | 1.82E-05 | MAP4     | 4134 .   |
| 34031_i_at | 0.001997 | 7.70E-04 | KRIT1    | 889 .    |
| 34187_at   | 2.96E-06 | 2.07E-07 | RBMS2    | 5939 .   |
| 34206_at   | 6.16E-05 | 1.04E-05 | ARAP1    | 116985 . |
| 34210_at   | 6.61E-05 | 1.14E-05 | CD52     | 1043 .   |

|          |          |          |        |          |
|----------|----------|----------|--------|----------|
| 34221_at | 0.001109 | 3.79E-04 | HMGXB3 | 22993 .  |
| 34225_at | 1.54E-06 | 8.83E-08 | WHSC2  | 7469 .   |
| 34260_at | 0.002314 | 9.21E-04 | TELO2  | 9894 .   |
| 34406_at | 1.15E-04 | 2.29E-05 | PACS2  | 23241 .  |
| 34408_at | 0.001179 | 4.08E-04 | RTN2   | 6253 .   |
| 34449_at | 0.001724 | 6.45E-04 | CASP2  | 835 .    |
| 34478_at | 0.014533 | 0.008135 | RAB11B | 9230 .   |
| 34689_at | 0.01609  | 0.009176 | TREX1  | 11277 .  |
| 34697_at | 1.20E-04 | 2.41E-05 | LRP6   | 4040 .   |
| 34764_at | 0.00299  | 0.00125  | LARS2  | 23395 .  |
| 34846_at | 8.55E-06 | 8.23E-07 | CAMK2B | 816 .    |
| 34858_at | 7.41E-04 | 2.31E-04 | KCTD2  | 23510 .  |
| 34868_at | 5.47E-04 | 1.59E-04 | SMG5   | 23381 .  |
| 35147_at | 5.63E-04 | 1.65E-04 | MCF2L  | 23263 .  |
| 35148_at | 3.74E-09 | 2.89E-11 | TJP3   | 27134 .  |
| 35150_at | 0.008798 | 0.004513 | CD40   | 958 .    |
| 35156_at | 5.16E-04 | 1.48E-04 | R3HCC1 | 203069 . |
| 35179_at | 0.018645 | 0.010896 | B3GAT3 | 26229 .  |
| 35201_at | 4.39E-04 | 1.21E-04 | HNRNPL | 3191 .   |
| 35265_at | 0.001966 | 7.56E-04 | FXR2   | 9513 .   |
| 35436_at | 4.69E-04 | 1.31E-04 | GOLGA2 | 2801 .   |
| 35617_at | 0.02851  | 0.017877 | MAPK7  | 5598 .   |
| 35626_at | 1.34E-07 | 3.40E-09 | SGSH   | 6448 .   |
| 35666_at | 0.033285 | 0.021413 | SEMA3F | 6405 .   |
| 35671_at | 2.63E-04 | 6.46E-05 | GTF3C1 | 2975 .   |
| 35685_at | 0.005171 | 0.002412 | RING1  | 6015 .   |
| 35820_at | 0.006704 | 0.003281 | GM2A   | 2760 .   |
| 35846_at | 0.00336  | 0.001439 | THRA   | 7067 .   |
| 36004_at | 0.013005 | 0.007148 | IKBKG  | 8517 .   |
| 36019_at | 0.03336  | 0.021469 | STK19  | 8859 .   |
| 36030_at | 7.79E-09 | 7.66E-11 | IFFO1  | 25900 .  |
| 36084_at | 2.42E-05 | 3.18E-06 | CUL7   | 9820 .   |
| 36129_at | 1.27E-04 | 2.61E-05 | SGSM2  | 9905 .   |
| 36499_at | 6.82E-05 | 1.19E-05 | CELSR2 | 1952 .   |

|            |          |          |                             |          |
|------------|----------|----------|-----------------------------|----------|
| 36545_s_a  | 1.91E-07 | 5.42E-09 | SFI1                        | 9814 .   |
| 36552_at   | 3.72E-06 | 2.78E-07 | C2CD3                       | 26005 .  |
| 36564_at   | 8.25E-06 | 7.83E-07 | RNF19B                      | 127544 . |
| 36566_at   | 0.004005 | 0.001775 | CTNS                        | 1497 .   |
| 36612_at   | 0.001162 | 4.01E-04 | FAM168A                     | 23201 .  |
| 36711_at   | 0.026374 | 0.016332 | MAFF                        | 23764 .  |
| 36742_at   | 1.21E-04 | 2.45E-05 | TRIM15                      | 89870 .  |
| 36829_at   | 6.86E-04 | 2.10E-04 | PER1                        | 5187 .   |
| 36888_at   | 4.02E-05 | 6.03E-06 | HAUS5                       | 23354 .  |
| 36907_at   | 6.80E-05 | 1.18E-05 | MVK                         | 4598 .   |
| 36936_at   | 0.004427 | 0.002004 | TSTA3                       | 7264 .   |
| 36994_at   | 6.98E-04 | 2.15E-04 | ATP6VOC                     | 527 .    |
| 37005_at   | 1.29E-06 | 6.99E-08 | NBL1                        | 4681 .   |
| 37012_at   | 5.53E-04 | 1.61E-04 | CAPZB                       | 832 .    |
| 37020_at   | 0.026721 | 0.016586 | CRP                         | 1401 .   |
| 37022_at   | 2.25E-06 | 1.46E-07 | PRELP                       | 5549 .   |
| 37028_at   | 0.027524 | 0.017161 | PPP1R15A                    | 23645 .  |
| 37079_at   | 0.014    | 0.007783 | YDD19                       | 11049 .  |
| 37117_at   | 5.37E-11 | 1.19E-13 | ARHGAP8 /// L 23779 /// 55: |          |
| 37152_at   | 2.44E-06 | 1.61E-07 | PPARD                       | 5467 .   |
| 37170_at   | 0.001069 | 3.62E-04 | BMP2K                       | 55589 .  |
| 37226_at   | 0.003462 | 0.001491 | BNIP1                       | 662 .    |
| 37232_at   | 0.042665 | 0.028542 | KIAA0586                    | 9786 .   |
| 37254_at   | 0.010819 | 0.005757 | ZNF133                      | 7692 .   |
| 37278_at   | 5.07E-05 | 8.15E-06 | TAZ                         | 6901 .   |
| 37384_at   | 5.47E-04 | 1.59E-04 | PPM1F                       | 9647 .   |
| 37408_at   | 2.27E-05 | 2.92E-06 | MRC2                        | 9902 .   |
| 37424_at   | 9.52E-04 | 3.15E-04 | CCHCR1                      | 54535 .  |
| 37433_at   | 9.21E-04 | 3.02E-04 | PIAS2                       | 9063 .   |
| 37462_i_at | 0.034333 | 0.022181 | SF3A2                       | 8175 .   |
| 37566_at   | 0.00146  | 5.29E-04 | KIAA1045                    | 23349 .  |
| 37577_at   | 1.33E-07 | 3.35E-09 | ARHGAP19                    | 84986 .  |
| 37586_at   | 3.16E-04 | 8.10E-05 | ZNF142                      | 7701 .   |
| 37793_r_at | 0.004322 | 0.001945 | RAD51L3                     | 5892 .   |



|           |          |          |          |         |
|-----------|----------|----------|----------|---------|
| 37796_at  | 6.72E-05 | 1.16E-05 | LRCH4    | 4034 .  |
| 37860_at  | 0.001057 | 3.57E-04 | ZNF337   | 26152 . |
| 37950_at  | 4.87E-04 | 1.37E-04 | PREP     | 5550 .  |
| 37953_s_a | 0.018791 | 0.010997 | ACCN2    | 41 .    |
| 37965_at  | 0.001102 | 3.76E-04 | PARVB    | 29780 . |
| 37966_at  | 0.023877 | 0.014553 | PARVB    | 29780 . |
| 37986_at  | 0.009362 | 0.004856 | EPOR     | 2057 .  |
| 37996_s_a | 4.07E-07 | 1.52E-08 | DMPK     | 1760 .  |
| 38037_at  | 0.005204 | 0.00243  | HBEGF    | 1839 .  |
| 38043_at  | 0.005238 | 0.002448 | FAM3A    | 60343 . |
| 38149_at  | 0.003905 | 0.001723 | ARHGAP25 | 9938 .  |
| 38157_at  | 9.32E-05 | 1.76E-05 | DOM3Z    | 1797 .  |
| 38158_at  | 1.43E-06 | 8.06E-08 | ESPL1    | 9700 .  |
| 38241_at  | 5.36E-07 | 2.16E-08 | BTN3A3   | 10384 . |
| 38269_at  | 0.002575 | 0.001046 | PRKD2    | 25865 . |
| 38290_at  | 0.042074 | 0.028087 | RGS14    | 10636 . |
| 38340_at  | 0.011074 | 0.005913 | HIP1R    | 9026 .  |
| 38398_at  | 0.00404  | 0.001793 | MADD     | 8567 .  |
| 38447_at  | 1.41E-06 | 7.85E-08 | ADRBK1   | 156 .   |
| 38487_at  | 2.30E-05 | 2.97E-06 | STAB1    | 23166 . |
| 38521_at  | 0.001418 | 5.10E-04 | CD22     | 933 .   |
| 38671_at  | 1.81E-04 | 4.04E-05 | PLXND1   | 23129 . |
| 38691_s_a | 0.005272 | 0.002466 | SFTPC    | 6440 .  |
| 38703_at  | 0.00221  | 8.71E-04 | DNPEP    | 23549 . |
| 38707_r_a | 1.52E-07 | 4.01E-09 | E2F4     | 1874 .  |
| 38710_at  | 0.019961 | 0.011799 | OTUB1    | 55611 . |
| 38766_at  | 6.36E-04 | 1.91E-04 | SRCAP    | 10847 . |
| 38918_at  | 1.32E-05 | 1.46E-06 | SOX13    | 9580 .  |
| 38964_r_a | 1.08E-05 | 1.12E-06 | WAS      | 7454 .  |
| 39249_at  | 0.007168 | 0.003554 | AQP3     | 360 .   |
| 39313_at  | 1.81E-07 | 5.07E-09 | WNK1     | 65125 . |
| 39548_at  | 0.002067 | 8.03E-04 | NPAS2    | 4862 .  |
| 39549_at  | 8.26E-04 | 2.65E-04 | NPAS2    | 4862 .  |
| 39582_at  | 0.005721 | 0.002717 | CYLD     | 1540 .  |

|            |          |          |         |          |
|------------|----------|----------|---------|----------|
| 39650_s_a  | 0.014825 | 0.008334 | PCNXL2  | 80003 .  |
| 396_f_at   | 1.76E-08 | 2.25E-10 | EPOR    | 2057 .   |
| 39729_at   | 0.035722 | 0.023234 | PRDX2   | 7001 .   |
| 39763_at   | 1.50E-04 | 3.22E-05 | HPX     | 3263 .   |
| 39835_at   | 0.008606 | 0.004399 | SBF1    | 6305 .   |
| 39854_r_at | 7.16E-08 | 1.46E-09 | PNPLA2  | 57104 .  |
| 39891_at   | 2.96E-04 | 7.46E-05 | ZNF710  | 374655 . |
| 39966_at   | 4.22E-05 | 6.45E-06 | CSPG5   | 10675 .  |
| 40016_g_a  | 0.004973 | 0.002301 | MAST4   | 375449 . |
| 40020_at   | 2.12E-04 | 4.93E-05 | CELSR3  | 1951 .   |
| 40093_at   | 2.04E-05 | 2.57E-06 | BCAM    | 4059 .   |
| 40148_at   | 0.045656 | 0.030896 | APBB2   | 323 .    |
| 40149_at   | 3.17E-04 | 8.13E-05 | SH2B1   | 25970 .  |
| 40189_at   | 4.71E-06 | 3.78E-07 | SET     | 6418 .   |
| 40255_at   | 0.001441 | 5.20E-04 | DDX28   | 55794 .  |
| 40284_at   | 5.88E-05 | 9.80E-06 | FOXA2   | 3170 .   |
| 40359_at   | 9.20E-05 | 1.74E-05 | RASSF7  | 8045 .   |
| 40420_at   | 0.00362  | 0.001574 | STK10   | 6793 .   |
| 40446_at   | 0.001107 | 3.78E-04 | PHF1    | 5252 .   |
| 40472_at   | 0.038005 | 0.024962 | LPCAT4  | 254531 . |
| 40489_at   | 0.00782  | 0.003938 | ATN1    | 1822 .   |
| 40524_at   | 1.09E-04 | 2.14E-05 | PTPN21  | 11099 .  |
| 40560_at   | 3.76E-04 | 1.00E-04 | TBX2    | 6909 .   |
| 40562_at   | 1.18E-06 | 6.13E-08 | GNA11   | 2767 .   |
| 40640_at   | 0.019916 | 0.011768 | NCAPH2  | 29781 .  |
| 40687_at   | 4.66E-11 | 9.66E-14 | GJA4    | 2701 .   |
| 40829_at   | 9.11E-06 | 8.99E-07 | WDTC1   | 23038 .  |
| 40850_at   | 1.16E-04 | 2.33E-05 | FKBP8   | 23770 .  |
| 41037_at   | 0.005215 | 0.002436 | TEAD4   | 7004 .   |
| 41047_at   | 0.009738 | 0.005088 | C9orf16 | 79095 .  |
| 41113_at   | 0.006801 | 0.003339 | ZNF500  | 26048 .  |
| 41160_at   | 0.015018 | 0.00846  | MBD3    | 53615 .  |
| 41220_at   | 7.44E-04 | 2.33E-04 | 9-Sep   | 10801 .  |
| 41329_at   | 0.002837 | 0.001173 | SCYL3   | 57147 .  |

|            |          |          |           |          |
|------------|----------|----------|-----------|----------|
| 41386_i_at | 0.003386 | 0.001453 | KDM6B     | 23135 .  |
| 41387_r_at | 0.012557 | 0.00686  | KDM6B     | 23135 .  |
| 41397_at   | 0.046007 | 0.03117  | ZNF821    | 55565 .  |
| 41512_at   | 5.81E-06 | 4.97E-07 | BRAP      | 8315 .   |
| 41553_at   | 3.93E-05 | 5.85E-06 | OSGIN2    | 734 .    |
| 41577_at   | 0.003373 | 0.001447 | PPP1R16B  | 26051 .  |
| 41644_at   | 1.50E-05 | 1.73E-06 | SASH1     | 23328 .  |
| 41660_at   | 0.00133  | 4.72E-04 | CELSR1    | 9620 .   |
| 41856_at   | 0.001095 | 3.73E-04 | UNC5B     | 219699 . |
| 42361_g_a  | 8.66E-04 | 2.81E-04 | CCHCR1    | 54535 .  |
| 43511_s_a  | 9.46E-04 | 3.12E-04 |           | .        |
| 43544_at   | 0.01936  | 0.011387 | MED16     | 10025 .  |
| 43934_at   | 0.001864 | 7.09E-04 | GPR137    | 56834 .  |
| 44040_at   | 6.02E-07 | 2.52E-08 | FBXO41    | 150726 . |
| 44065_at   | 1.22E-06 | 6.47E-08 | C12orf52  | 84934 .  |
| 44120_at   | 0.004208 | 0.001883 | ADCK2     | 90956 .  |
| 44146_at   | 1.83E-06 | 1.12E-07 | GMEB2     | 26205 .  |
| 44563_at   | 1.94E-05 | 2.39E-06 | WRAP53    | 55135 .  |
| 44617_at   | 0.004596 | 0.002096 | OGFOD2    | 79676 .  |
| 44654_at   | 0.031667 | 0.020195 | G6PC3     | 92579 .  |
| 44669_at   | 0.041612 | 0.027725 | LOC644096 | 644096 . |
| 44673_at   | 2.82E-04 | 7.04E-05 | SIGLEC1   | 6614 .   |
| 44696_at   | 0.022552 | 0.013616 | TBC1D13   | 54662 .  |
| 44702_at   | 1.30E-04 | 2.68E-05 | SYDE1     | 85360 .  |
| 44783_s_a  | 0.007053 | 0.003488 | HEY1      | 23462 .  |
| 45297_at   | 1.30E-06 | 7.04E-08 | EHD2      | 30846 .  |
| 45633_at   | 5.83E-06 | 4.99E-07 | GINS3     | 64785 .  |
| 45687_at   | 2.72E-06 | 1.85E-07 | PRR14     | 78994 .  |
| 45749_at   | 8.61E-05 | 1.60E-05 | FAM65A    | 79567 .  |
| 45828_at   | 7.90E-05 | 1.44E-05 | ATP5SL    | 55101 .  |
| 46142_at   | 5.33E-06 | 4.42E-07 | LMF1      | 64788 .  |
| 46167_at   | 6.85E-06 | 6.14E-07 | TTC4      | 7268 .   |
| 46256_at   | 0.029651 | 0.018719 | SPSB3     | 90864 .  |
| 46323_at   | 7.86E-04 | 2.49E-04 | CANT1     | 124583 . |

|            |          |          |                          |          |
|------------|----------|----------|--------------------------|----------|
| 46665_at   | 4.58E-04 | 1.28E-04 | SEMA4C                   | 54910 .  |
| 46947_at   | 4.74E-06 | 3.81E-07 | GNL3L                    | 54552 .  |
| 47069_at   | 0.029862 | 0.01888  | PRR5                     | 55615 .  |
| 47083_at   | 3.88E-04 | 1.04E-04 | C7orf26                  | 79034 .  |
| 47105_at   | 0.028385 | 0.017784 | DUS2L                    | 54920 .  |
| 47550_at   | 0.016274 | 0.009299 | LZTS1                    | 11178 .  |
| 47553_at   | 0.009822 | 0.005137 | DFNB31                   | 25861 .  |
| 47560_at   | 3.30E-06 | 2.38E-07 | LPHN1                    | 22859 .  |
| 47571_at   | 0.001049 | 3.54E-04 | ZNF236                   | 7776 .   |
| 48030_i_at | 4.75E-10 | 2.01E-12 | C5orf4                   | 10826 .  |
| 48031_r_at | 6.66E-04 | 2.03E-04 | C5orf4                   | 10826 .  |
| 48106_at   | 1.47E-05 | 1.68E-06 | SLC48A1                  | 55652 .  |
| 48531_at   | 0.015605 | 0.008852 | TNIP2                    | 79155 .  |
| 48580_at   | 0.032302 | 0.020677 | CXXC1                    | 30827 .  |
| 48612_at   | 6.75E-07 | 2.94E-08 | N4BP1                    | 9683 .   |
| 48659_at   | 6.12E-05 | 1.03E-05 | MIIP                     | 60672 .  |
| 48808_at   | 1.56E-05 | 1.83E-06 | DHFR                     | 1719 .   |
| 48825_at   | 0.007128 | 0.00353  | ING4                     | 51147 .  |
| 49049_at   | 8.44E-04 | 2.72E-04 | DTX3                     | 196403 . |
| 49051_g_a  | 0.005027 | 0.002331 | DTX3                     | 196403 . |
| 49077_at   | 0.020313 | 0.012045 | PPME1                    | 51400 .  |
| 49111_at   | 5.00E-04 | 1.42E-04 |                          | .        |
| 49327_at   | 3.89E-05 | 5.78E-06 | SIRT3                    | 23410 .  |
| 49329_at   | 9.83E-06 | 9.95E-07 | KLHL22                   | 84861 .  |
| 49485_at   | 2.41E-07 | 7.52E-09 | PRDM4                    | 11108 .  |
| 49679_s_a  | 0.002138 | 8.37E-04 | EDEM2                    | 55741 .  |
| 50221_at   | 1.28E-04 | 2.63E-05 | TFEB                     | 7942 .   |
| 50374_at   | 0.011893 | 0.006428 | C17orf90                 | 339229 . |
| 50400_at   | 0.002029 | 7.85E-04 | PAOX                     | 196743 . |
| 50965_at   | 0.037634 | 0.024682 | RAB26                    | 25837 .  |
| 51146_at   | 0.009045 | 0.004661 | PIGV                     | 55650 .  |
| 51158_at   | 7.84E-05 | 1.42E-05 | FAM174B                  | 400451 . |
| 51176_at   | 0.012286 | 0.006684 | LOC100131612100131612 // | .        |
| 51192_at   | 0.003353 | 0.001436 | SSH3                     | 54961 .  |

|           |          |          |           |          |
|-----------|----------|----------|-----------|----------|
| 51228_at  | 5.69E-05 | 9.42E-06 | RBM12B    | 389677 . |
| 51774_s_a | 5.93E-04 | 1.75E-04 | LOC222070 | 222070 . |
| 52005_at  | 0.03437  | 0.022211 | WIZ       | 58525 .  |
| 52078_at  | 1.65E-04 | 3.61E-05 | TMEM222   | 84065 .  |
| 52159_at  | 0.010292 | 0.005426 | HEMK1     | 51409 .  |
| 52164_at  | 1.21E-06 | 6.35E-08 | C11orf24  | 53838 .  |
| 52255_s_a | 6.32E-06 | 5.52E-07 | COL5A3    | 50509 .  |
| 52651_at  | 2.55E-04 | 6.22E-05 | COL8A2    | 1296 .   |
| 52731_at  | 0.011736 | 0.006327 | AMBRA1    | 55626 .  |
| 52741_at  | 0.004806 | 0.002212 | TRMT61A   | 115708 . |
| 53071_s_a | 6.87E-06 | 6.15E-07 | C17orf101 | 79701 .  |
| 53076_at  | 1.23E-04 | 2.49E-05 | B4GALT7   | 11285 .  |
| 53202_at  | 1.26E-04 | 2.57E-05 | C7orf25   | 79020 .  |
| 53720_at  | 0.016794 | 0.009643 | C19orf66  | 55337 .  |
| 53912_at  | 0.00522  | 0.002438 | SNX11     | 29916 .  |
| 53968_at  | 0.001601 | 5.90E-04 | INTS5     | 80789 .  |
| 53987_at  | 0.024307 | 0.014855 | RANBP10   | 57610 .  |
| 53991_at  | 0.019379 | 0.011399 | DENND2A   | 27147 .  |
| 54051_at  | 7.59E-04 | 2.38E-04 | PKNOX1    | 5316 .   |
| 54632_at  | 7.95E-05 | 1.45E-05 | THADA     | 63892 .  |
| 55065_at  | 0.002244 | 8.87E-04 | MARK4     | 57787 .  |
| 55081_at  | 0.024565 | 0.015041 | MICALL1   | 85377 .  |
| 55093_at  | 3.64E-06 | 2.71E-07 | CSGLCA-T  | 54480 .  |
| 55662_at  | 2.15E-05 | 2.75E-06 | C10orf76  | 79591 .  |
| 55692_at  | 0.001726 | 6.46E-04 | ELMO2     | 63916 .  |
| 55705_at  | 7.38E-05 | 1.32E-05 | C19orf22  | 91300 .  |
| 55872_at  | 4.20E-04 | 1.15E-04 | ZNF512B   | 57473 .  |
| 56197_at  | 1.32E-09 | 7.65E-12 | PLSCR3    | 57048 .  |
| 56256_at  | 3.60E-05 | 5.23E-06 | SIDT2     | 51092 .  |
| 564_at    | 5.77E-06 | 4.92E-07 | GNA11     | 2767 .   |
| 56748_at  | 0.023239 | 0.0141   | TRIM10    | 10107 .  |
| 56821_at  | 0.02473  | 0.015161 | SLC38A7   | 55238 .  |
| 56829_at  | 0.010594 | 0.005614 | TRAPPC9   | 83696 .  |
| 57082_at  | 0.005232 | 0.002446 | LDLRAP1   | 26119 .  |

|            |          |          |                             |          |
|------------|----------|----------|-----------------------------|----------|
| 57163_at   | 1.01E-05 | 1.04E-06 | ELOVL1                      | 64834 .  |
| 57516_at   | 0.005251 | 0.002455 | ZNF764                      | 92595 .  |
| 57532_at   | 0.00375  | 0.001642 | DVL2                        | 1856 .   |
| 57539_at   | 0.026733 | 0.016598 | ZGPAT                       | 84619 .  |
| 57703_at   | 0.030475 | 0.019331 | SENP5                       | 205564 . |
| 57715_at   | 1.04E-07 | 2.39E-09 | CALHM2                      | 51063 .  |
| 58308_at   | 1.22E-04 | 2.48E-05 | TRIM62                      | 55223 .  |
| 58696_at   | 1.47E-07 | 3.83E-09 | EXOSC4                      | 54512 .  |
| 58780_s_a  | 0.012333 | 0.006713 | FLJ10357                    | 55701 .  |
| 58900_at   | 0.001982 | 7.63E-04 | LOC222070                   | 222070 . |
| 58916_at   | 0.010428 | 0.005509 | KCTD14                      | 65987 .  |
| 58994_at   | 0.015139 | 0.00854  | CC2D1A                      | 54862 .  |
| 59375_at   | 0.001392 | 4.99E-04 | MYO15B                      | 80022 .  |
| 59433_at   | 0.003002 | 0.001256 | LOC286434 /// 286434 /// 38 |          |
| 59625_at   | 1.51E-04 | 3.24E-05 | NOL3                        | 8996 .   |
| 59631_at   | 3.79E-04 | 1.01E-04 | TXNRD3                      | 114112 . |
| 59644_at   | 0.002194 | 8.63E-04 | BMP2K                       | 55589 .  |
| 59697_at   | 0.004406 | 0.001992 | RAB15                       | 376267 . |
| 59705_at   | 0.001167 | 4.03E-04 | SCLY                        | 51540 .  |
| 59999_at   | 0.020801 | 0.012395 | HIF1AN                      | 55662 .  |
| 60084_at   | 5.25E-04 | 1.51E-04 | CYLD                        | 1540 .   |
| 60471_at   | 0.00401  | 0.001777 | RIN3                        | 79890 .  |
| 60474_at   | 0.007904 | 0.003988 | FERMT1                      | 55612 .  |
| 60528_at   | 1.93E-05 | 2.38E-06 | JMJD7-PLA2G4 100137049 //   |          |
| 60815_at   | 2.82E-08 | 4.27E-10 | POLR2J4                     | 84820 .  |
| 61732_r_at | 0.041074 | 0.02731  | IFT74                       | 80173 .  |
| 61734_at   | 1.33E-08 | 1.51E-10 | RCN3                        | 57333 .  |
| 61874_at   | 0.001654 | 6.13E-04 | C9orf7                      | 11094 .  |
| 62987_r_at | 1.95E-07 | 5.58E-09 | CACNG4                      | 27092 .  |
| 632_at     | 5.56E-04 | 1.62E-04 | GSK3A                       | 2931 .   |
| 635_s_at   | 0.004384 | 0.00198  | PPP2R5B                     | 5526 .   |
| 63825_at   | 1.32E-09 | 7.73E-12 | ABHD2                       | 11057 .  |
| 64064_at   | 0.001386 | 4.96E-04 | GIMAP5                      | 55340 .  |
| 64371_at   | 7.11E-08 | 1.44E-09 | SFRS14                      | 10147 .  |

|            |          |          |              |               |
|------------|----------|----------|--------------|---------------|
| 64408_s_a  | 3.54E-04 | 9.29E-05 | CALML4       | 91860 .       |
| 64432_at   | 9.89E-04 | 3.29E-04 | C12orf47     | 51275 .       |
| 64438_at   | 0.010936 | 0.005828 | C17orf101    | 79701 .       |
| 64440_at   | 7.56E-06 | 6.99E-07 | IL17RC       | 84818 .       |
| 64488_at   | 0.023277 | 0.014129 | IRGQ         | 126298 .      |
| 64883_at   | 0.005088 | 0.002367 | MOSPD2       | 158747 .      |
| 64899_at   | 0.001632 | 6.03E-04 | LPPR2        | 64748 .       |
| 64900_at   | 0.009869 | 0.005167 | FLJ22167     | 79583 .       |
| 64942_at   | 0.012127 | 0.006579 | GPR153       | 387509 .      |
| 65086_at   | 1.64E-04 | 3.57E-05 | YIPF2        | 78992 .       |
| 65133_i_at | 0.002217 | 8.74E-04 | INO80B       | 83444 .       |
| 65438_at   | 0.004382 | 0.001979 | KIAA1609     | 57707 .       |
| 65472_at   | 0.004399 | 0.001988 | C2orf68      | 388969 .      |
| 65493_at   | 0.001933 | 7.41E-04 | HEATR6       | 63897 .       |
| 65517_at   | 1.34E-04 | 2.79E-05 | AP1M2        | 10053 .       |
| 65521_at   | 0.00101  | 3.38E-04 | UBE2D4       | 51619 .       |
| 65585_at   | 0.043284 | 0.029037 | FAM86B1      | 85002 .       |
| 65588_at   | 4.12E-06 | 3.18E-07 | LOC388796    | 388796 .      |
| 65591_at   | 2.02E-04 | 4.63E-05 | WDR48        | 57599 .       |
| 65630_at   | 1.63E-04 | 3.54E-05 | TMEM80       | 283232 .      |
| 65635_at   | 2.44E-04 | 5.87E-05 | ENGASE       | 64772 .       |
| 65718_at   | 2.85E-05 | 3.91E-06 | GPR124       | 25960 .       |
| 65770_at   | 0.045137 | 0.030489 | RHOT2        | 89941 .       |
| 65884_at   | 9.11E-06 | 8.99E-07 | MAN1B1       | 11253 .       |
| 71933_at   | 7.11E-04 | 2.20E-04 | WNT6         | 7475 .        |
| 74694_s_a  | 2.16E-07 | 6.42E-09 | LOC100133585 | 100133585 //. |
| 76897_s_a  | 0.020671 | 0.0123   | FKBP15       | 23307 .       |
| 77508_r_a  | 6.38E-08 | 1.24E-09 | LOC100133585 | 100133585 //. |
| 78047_s_a  | 8.07E-08 | 1.72E-09 | LOC729580    | 729580 .      |
| 78330_at   | 0.012079 | 0.006549 | ZNF335       | 63925 .       |
| 78495_at   | 0.010274 | 0.005415 | ZNF783       | 155060 .      |
| 79005_at   | 0.04575  | 0.030969 | SLC35E1      | 79939 .       |
| 81811_at   | 4.44E-05 | 6.88E-06 |              | .             |
| 87100_at   | 2.68E-04 | 6.61E-05 | ABHD2        | 11057 .       |

|            |          |          |          |          |
|------------|----------|----------|----------|----------|
| 89476_r_at | 9.90E-04 | 3.30E-04 | NPEPL1   | 79716 .  |
| 89948_at   | 0.013443 | 0.007427 | PCIF1    | 63935 .  |
| 90265_at   | 0.032813 | 0.021056 | ADAP1    | 11033 .  |
| 91617_at   | 2.17E-04 | 5.07E-05 | DGCR8    | 54487 .  |
| 91684_g_a  | 1.10E-07 | 2.60E-09 | EXOSC4   | 54512 .  |
| 91703_at   | 7.09E-06 | 6.44E-07 | EHBP1L1  | 254102 . |
| 91826_at   | 0.001327 | 4.71E-04 | EPS8L1   | 54869 .  |
| 91920_at   | 7.42E-07 | 3.33E-08 | BCAN     | 63827 .  |
| 91952_at   | 6.66E-06 | 5.92E-07 | C19orf72 | 90379 .  |
| 222385_x_  | 6.75E-06 | 6.02E-07 | SEC61A1  | 29927 .  |
| 222386_s_  | 0.001942 | 7.45E-04 | COPZ1    | 22818 .  |
| 222387_s_  | 0.030588 | 0.019412 | VPS35    | 55737 .  |
| 222388_s_  | 0.00606  | 0.002912 | VPS35    | 55737 .  |
| 222389_s_  | 0.010041 | 0.005273 | WAC      | 51322 .  |
| 222390_at  | 0.014004 | 0.007786 | WAC      | 51322 .  |
| 222391_at  | 0.009338 | 0.004841 | TMEM30A  | 55754 .  |
| 222393_s_  | 0.022934 | 0.013886 | NAT13    | 80218 .  |
| 222395_s_  | 8.21E-04 | 2.63E-04 | UBE2Z    | 65264 .  |
| 222396_at  | 1.94E-04 | 4.40E-05 | HN1      | 51155 .  |
| 222397_at  | 0.042149 | 0.028147 | EFTUD2   | 9343 .   |
| 222398_s_  | 2.47E-04 | 5.95E-05 | EFTUD2   | 9343 .   |
| 222399_s_  | 1.64E-04 | 3.59E-05 | TM9SF3   | 56889 .  |
| 222400_s_  | 0.001076 | 3.65E-04 | ADI1     | 55256 .  |
| 222401_s_  | 2.55E-04 | 6.20E-05 | TMEM50A  | 23585 .  |
| 222402_at  | 4.08E-04 | 1.11E-04 | POMP     | 51371 .  |
| 222403_at  | 4.19E-07 | 1.57E-08 | MTCH2    | 23788 .  |
| 222404_x_  | 7.98E-05 | 1.46E-05 | PTPLAD1  | 51495 .  |
| 222405_at  | 2.14E-05 | 2.72E-06 | PTPLAD1  | 51495 .  |
| 222408_s_  | 1.25E-04 | 2.55E-05 | YPEL5    | 51646 .  |
| 222409_at  | 3.38E-04 | 8.80E-05 | CORO1C   | 23603 .  |
| 222410_s_  | 7.93E-06 | 7.45E-07 | SNX6     | 58533 .  |
| 222412_s_  | 0.007009 | 0.003462 | SSR3     | 6747 .   |
| 222413_s_  | 6.36E-04 | 1.91E-04 | MLL3     | 58508 .  |
| 222414_at  | 0.043749 | 0.0294   | MLL3     | 58508 .  |



|           |          |          |         |         |
|-----------|----------|----------|---------|---------|
| 222417_s_ | 0.0142   | 0.007915 | SNX5    | 27131 . |
| 222418_s_ | 8.26E-04 | 2.65E-04 | TMEM43  | 79188 . |
| 222419_x_ | 7.16E-04 | 2.22E-04 | UBE2H   | 7328 .  |
| 222421_at | 0.011707 | 0.006309 | UBE2H   | 7328 .  |
| 222422_s_ | 3.29E-04 | 8.53E-05 | NDFIP1  | 80762 . |
| 222424_s_ | 0.015404 | 0.008718 | NUCKS1  | 64710 . |
| 222426_at | 0.010168 | 0.005347 | MAPKAP1 | 79109 . |
| 222427_s_ | 4.23E-04 | 1.16E-04 | LARS    | 51520 . |
| 222428_s_ | 0.001719 | 6.42E-04 | LARS    | 51520 . |
| 222429_at | 5.73E-04 | 1.68E-04 | DBNL    | 28988 . |
| 222430_s_ | 0.002301 | 9.15E-04 | YTHDF2  | 51441 . |
| 222433_at | 5.67E-05 | 9.37E-06 | ENAH    | 55740 . |
| 222434_at | 2.99E-04 | 7.57E-05 | ENAH    | 55740 . |
| 222435_s_ | 1.86E-04 | 4.18E-05 | UBE2J1  | 51465 . |
| 222436_s_ | 1.66E-07 | 4.53E-09 | VPS24   | 51652 . |
| 222437_s_ | 9.36E-12 | 1.29E-14 | VPS24   | 51652 . |
| 222439_s_ | 0.006226 | 0.003005 | THRAP3  | 9967 .  |
| 222441_x_ | 9.85E-04 | 3.28E-04 | SLMO2   | 51012 . |
| 222442_s_ | 8.16E-06 | 7.72E-07 | ARL8B   | 55207 . |
| 222443_s_ | 8.20E-05 | 1.51E-05 | RBM8A   | 9939 .  |
| 222444_at | 0.002114 | 8.26E-04 | ARMCX3  | 51566 . |
| 222447_at | 0.043237 | 0.028996 | METTL9  | 51108 . |
| 222448_s_ | 1.51E-04 | 3.23E-05 | CMPK1   | 51727 . |
| 222449_at | 0.032715 | 0.020982 | PMEPA1  | 56937 . |
| 222451_s_ | 0.00692  | 0.003409 | ZDHHC9  | 51114 . |
| 222452_s_ | 0.00696  | 0.003434 | GPBP1L1 | 60313 . |
| 222453_at | 9.33E-09 | 9.75E-11 | CYBRD1  | 79901 . |
| 222454_s_ | 2.38E-05 | 3.12E-06 | PARVA   | 55742 . |
| 222455_s_ | 1.86E-07 | 5.25E-09 | PARVA   | 55742 . |
| 222456_s_ | 0.006049 | 0.002905 | LIMA1   | 51474 . |
| 222457_s_ | 1.46E-07 | 3.80E-09 | LIMA1   | 51474 . |
| 222458_s_ | 0.006252 | 0.003019 | AKIRIN1 | 79647 . |
| 222459_at | 2.08E-04 | 4.82E-05 | AKIRIN1 | 79647 . |
| 222461_s_ | 0.032655 | 0.020936 | HERC2   | 8924 .  |

|           |          |          |           |          |
|-----------|----------|----------|-----------|----------|
| 222462_s_ | 1.08E-04 | 2.12E-05 | BACE1     | 23621 .  |
| 222463_s_ | 5.92E-04 | 1.75E-04 | BACE1     | 23621 .  |
| 222464_s_ | 0.00126  | 4.42E-04 | C10orf119 | 79892 .  |
| 222466_s_ | 2.33E-05 | 3.03E-06 | MRPL42    | 28977 .  |
| 222467_s_ | 0.003101 | 0.001306 | SAPS3     | 55291 .  |
| 222468_at | 0.006571 | 0.003203 | KIAA0319L | 79932 .  |
| 222469_s_ | 7.90E-05 | 1.44E-05 | TOLLIP    | 54472 .  |
| 222471_s_ | 0.005742 | 0.002729 | KCMF1     | 56888 .  |
| 222472_at | 0.010119 | 0.005318 | AFTPH     | 54812 .  |
| 222473_s_ | 9.34E-06 | 9.30E-07 | ERBB2IP   | 55914 .  |
| 222474_s_ | 0.001125 | 3.85E-04 | TOMM22    | 56993 .  |
| 222475_at | 0.03625  | 0.023634 | SAP30BP   | 29115 .  |
| 222476_at | 3.44E-04 | 8.99E-05 | CNOT6     | 57472 .  |
| 222477_s_ | 9.05E-04 | 2.96E-04 | TM7SF3    | 51768 .  |
| 222478_at | 0.013166 | 0.007252 | VPS36     | 51028 .  |
| 222479_s_ | 2.31E-04 | 5.48E-05 | DYNC1LI1  | 51143 .  |
| 222480_at | 0.033194 | 0.021346 | UBE2Q1    | 55585 .  |
| 222481_at | 4.29E-04 | 1.18E-04 | FXC1      | 26515 .  |
| 222483_at | 0.006648 | 0.003248 | EFHD2     | 79180 .  |
| 222484_s_ | 0.020708 | 0.012329 | CXCL14    | 9547 .   |
| 222485_at | 6.46E-06 | 5.68E-07 | FKBP3     | 2287 .   |
| 222486_s_ | 1.22E-06 | 6.46E-08 | ADAMTS1   | 9510 .   |
| 222487_s_ | 5.00E-04 | 1.42E-04 | RPS27L    | 51065 .  |
| 222489_s_ | 9.75E-07 | 4.78E-08 | WRNIP1    | 56897 .  |
| 222490_at | 7.76E-04 | 2.45E-04 | POLR3E    | 55718 .  |
| 222491_at | 2.93E-06 | 2.04E-07 | HGSNAT    | 138050 . |
| 222492_at | 0.0287   | 0.018026 | PDXK      | 8566 .   |
| 222495_at | 0.018012 | 0.010465 | TMEM167B  | 56900 .  |
| 222496_s_ | 5.37E-09 | 4.73E-11 | RBM47     | 54502 .  |
| 222498_at | 3.01E-05 | 4.20E-06 | AZI2      | 64343 .  |
| 222500_at | 1.95E-05 | 2.42E-06 | PPIL1     | 51645 .  |
| 222501_s_ | 0.007158 | 0.003548 | REPIN1    | 29803 .  |
| 222502_s_ | 1.04E-04 | 2.02E-05 | UFM1      | 51569 .  |
| 222503_s_ | 0.00211  | 8.23E-04 | WDR41     | 55255 .  |

|           |          |          |          |          |
|-----------|----------|----------|----------|----------|
| 222504_s_ | 0.003878 | 0.001708 | COX4NB   | 10328 .  |
| 222507_s_ | 1.39E-04 | 2.90E-05 | TMEM9B   | 56674 .  |
| 222508_s_ | 0.002717 | 0.001115 | ARGLU1   | 55082 .  |
| 222509_s_ | 0.00756  | 0.003784 | ZNF672   | 79894 .  |
| 222510_s_ | 0.001524 | 5.56E-04 | MKRN2    | 23609 .  |
| 222511_x_ | 0.001624 | 6.00E-04 | FAF1     | 11124 .  |
| 222512_at | 0.003625 | 0.001577 | NUB1     | 51667 .  |
| 222513_s_ | 4.60E-05 | 7.22E-06 | SORBS1   | 10580 .  |
| 222514_at | 2.98E-05 | 4.14E-06 | RRAGC    | 64121 .  |
| 222515_x_ | 0.002029 | 7.85E-04 | TMEM165  | 55858 .  |
| 222516_at | 0.024536 | 0.015022 | AP3M1    | 26985 .  |
| 222517_at | 6.26E-08 | 1.20E-09 | AP3M1    | 26985 .  |
| 222518_at | 0.002015 | 7.79E-04 | ARFGEF2  | 10564 .  |
| 222519_s_ | 0.001548 | 5.67E-04 | IFT57    | 55081 .  |
| 222520_s_ | 0.049245 | 0.033721 | IFT57    | 55081 .  |
| 222521_x_ | 6.66E-05 | 1.15E-05 | NDUFC2   | 4718 .   |
| 222523_at | 0.012174 | 0.00661  | SENP2    | 59343 .  |
| 222524_s_ | 1.35E-05 | 1.51E-06 | ASB6     | 140459 . |
| 222526_at | 0.00207  | 8.04E-04 | GATAD2A  | 54815 .  |
| 222528_s_ | 5.29E-04 | 1.52E-04 | SLC25A37 | 51312 .  |
| 222529_at | 0.001881 | 7.17E-04 | SLC25A37 | 51312 .  |
| 222530_s_ | 0.005917 | 0.00283  | MKKS     | 8195 .   |
| 222531_s_ | 0.001842 | 6.99E-04 | MUDENG   | 55745 .  |
| 222532_at | 3.73E-04 | 9.93E-05 | SRPRB    | 58477 .  |
| 222533_at | 7.31E-04 | 2.28E-04 | CRBN     | 51185 .  |
| 222538_s_ | 8.05E-04 | 2.57E-04 | APPL1    | 26060 .  |
| 222539_at | 4.66E-04 | 1.30E-04 | CLN6     | 54982 .  |
| 222540_s_ | 2.12E-05 | 2.70E-06 | RSF1     | 51773 .  |
| 222541_at | 0.011158 | 0.005969 | RSF1     | 51773 .  |
| 222543_at | 0.029752 | 0.018801 | DERL1    | 79139 .  |
| 222544_s_ | 0.004681 | 0.002144 | WHSC1L1  | 54904 .  |
| 222545_s_ | 1.41E-05 | 1.60E-06 | C10orf57 | 80195 .  |
| 222546_s_ | 5.31E-05 | 8.65E-06 | EPS8L2   | 64787 .  |
| 222549_at | 0.014227 | 0.007933 | CLDN1    | 9076 .   |

|           |          |          |            |          |
|-----------|----------|----------|------------|----------|
| 222550_at | 0.014947 | 0.008416 | ARMC1      | 55156 .  |
| 222551_s_ | 0.013669 | 0.007571 | C8orf33    | 65265 .  |
| 222555_s_ | 0.003278 | 0.001397 | MRPL44     | 65080 .  |
| 222556_at | 0.020301 | 0.012036 | ALG5       | 29880 .  |
| 222558_at | 5.06E-04 | 1.44E-04 | RPRD1A     | 55197 .  |
| 222559_s_ | 6.75E-04 | 2.06E-04 | RPRD1A     | 55197 .  |
| 222560_at | 1.59E-04 | 3.43E-05 | LANCL2     | 55915 .  |
| 222561_at | 0.031602 | 0.020148 | LANCL2     | 55915 .  |
| 222562_s_ | 0.008778 | 0.004501 | TNKS2      | 80351 .  |
| 222563_s_ | 5.69E-04 | 1.67E-04 | TNKS2      | 80351 .  |
| 222566_at | 2.89E-04 | 7.24E-05 | SUV420H1   | 51111 .  |
| 222567_s_ | 5.43E-06 | 4.54E-07 | MEX3C      | 51320 .  |
| 222569_at | 0.010548 | 0.005583 | UGCGL1     | 56886 .  |
| 222571_at | 4.80E-05 | 7.60E-06 | ST6GALNAC6 | 30815 .  |
| 222575_at | 1.39E-04 | 2.91E-05 | SETD5      | 55209 .  |
| 222577_at | 2.15E-04 | 5.00E-05 | CCDC90B    | 60492 .  |
| 222578_s_ | 0.009065 | 0.004673 | UBA5       | 79876 .  |
| 222579_at | 0.040861 | 0.027145 | UBA5       | 79876 .  |
| 222580_at | 0.003726 | 0.001629 | ZNF644     | 84146 .  |
| 222581_at | 0.009324 | 0.004833 | XPR1       | 9213 .   |
| 222582_at | 0.006799 | 0.003338 | PRKAG2     | 51422 .  |
| 222583_s_ | 2.30E-04 | 5.46E-05 | NUP50      | 10762 .  |
| 222584_at | 0.001593 | 5.87E-04 | MSTO1      | 55154 .  |
| 222585_x_ | 0.002194 | 8.63E-04 | KRCC1      | 51315 .  |
| 222586_s_ | 0.016469 | 0.009428 | OSBPL11    | 114885 . |
| 222587_s_ | 1.63E-05 | 1.91E-06 | GALNT7     | 51809 .  |
| 222588_s_ | 0.003285 | 0.001401 | C11orf57   | 55216 .  |
| 222589_at | 1.16E-04 | 2.31E-05 | NLK        | 51701 .  |
| 222590_s_ | 9.37E-04 | 3.09E-04 | NLK        | 51701 .  |
| 222593_s_ | 3.16E-04 | 8.11E-05 | SPATS2     | 65244 .  |
| 222594_s_ | 0.03414  | 0.02204  | SPATS2     | 65244 .  |
| 222596_s_ | 8.14E-05 | 1.49E-05 | LGR4       | 55366 .  |
| 222597_at | 1.40E-07 | 3.58E-09 | SNAP29     | 9342 .   |
| 222598_s_ | 0.048128 | 0.032831 | NAV2       | 89797 .  |

|           |          |          |          |          |
|-----------|----------|----------|----------|----------|
| 222599_s_ | 0.044129 | 0.029702 | NAV2     | 89797 .  |
| 222603_at | 7.33E-04 | 2.28E-04 | ERMP1    | 79956 .  |
| 222604_at | 0.001576 | 5.79E-04 | GTF3C3   | 9330 .   |
| 222606_at | 1.22E-04 | 2.48E-05 | ZWILCH   | 55055 .  |
| 222607_s_ | 3.43E-04 | 8.97E-05 | DIS3     | 22894 .  |
| 222608_s_ | 0.006074 | 0.00292  | ANLN     | 54443 .  |
| 222609_s_ | 8.77E-04 | 2.85E-04 | EXOSC1   | 51013 .  |
| 222610_s_ | 1.58E-04 | 3.42E-05 | S100PBP  | 64766 .  |
| 222611_s_ | 0.017322 | 0.009995 | PSPC1    | 55269 .  |
| 222612_at | 2.05E-05 | 2.58E-06 | PSPC1    | 55269 .  |
| 222613_at | 4.98E-06 | 4.05E-07 | C12orf4  | 57102 .  |
| 222614_at | 2.22E-07 | 6.68E-09 | RWDD2B   | 10069 .  |
| 222616_s_ | 5.53E-07 | 2.25E-08 | USP16    | 10600 .  |
| 222617_s_ | 5.47E-04 | 1.59E-04 | C10orf84 | 63877 .  |
| 222619_at | 7.87E-04 | 2.49E-04 | ZNF281   | 23528 .  |
| 222621_at | 0.0085   | 0.004337 | DNAJC1   | 64215 .  |
| 222622_at | 0.001336 | 4.75E-04 | PGP      | 283871 . |
| 222623_s_ | 0.003897 | 0.001718 | ZNF639   | 51193 .  |
| 222624_s_ | 0.034465 | 0.02228  | ZNF639   | 51193 .  |
| 222626_at | 6.87E-04 | 2.11E-04 | RBM26    | 64062 .  |
| 222628_s_ | 2.14E-04 | 4.97E-05 | REV1     | 51455 .  |
| 222629_at | 9.48E-06 | 9.48E-07 | REV1     | 51455 .  |
| 222630_at | 0.003165 | 0.001339 | RFX7     | 64864 .  |
| 222631_at | 0.015579 | 0.008836 | PI4K2B   | 55300 .  |
| 222632_s_ | 5.18E-04 | 1.48E-04 | LZTFL1   | 54585 .  |
| 222635_s_ | 5.47E-04 | 1.59E-04 | MED28    | 80306 .  |
| 222636_at | 9.04E-05 | 1.70E-05 | MED28    | 80306 .  |
| 222637_at | 0.010559 | 0.005591 | COMMD10  | 51397 .  |
| 222638_s_ | 0.005638 | 0.002672 | C6orf35  | 729515 . |
| 222639_s_ | 0.002047 | 7.94E-04 | PLBD1    | 79887 .  |
| 222640_at | 2.39E-04 | 5.72E-05 | DNMT3A   | 1788 .   |
| 222641_s_ | 1.66E-07 | 4.48E-09 | C17orf63 | 55731 .  |
| 222643_s_ | 0.007824 | 0.003941 | BBS1     | 582 .    |
| 222644_s_ | 3.00E-04 | 7.59E-05 | GLT25D1  | 79709 .  |

|           |          |          |                              |          |
|-----------|----------|----------|------------------------------|----------|
| 222645_s_ | 0.019093 | 0.0112   | KCTD5                        | 54442 .  |
| 222647_at | 0.001339 | 4.76E-04 | SLC35C1                      | 55343 .  |
| 222648_at | 6.54E-06 | 5.77E-07 | TBC1D16                      | 125058 . |
| 222649_at | 1.12E-05 | 1.18E-06 | XPO4                         | 64328 .  |
| 222650_s_ | 0.044347 | 0.029875 | SLC2A4RG                     | 56731 .  |
| 222651_s_ | 0.021107 | 0.012612 | TRPS1                        | 7227 .   |
| 222653_at | 0.007062 | 0.003493 | PNPO                         | 55163 .  |
| 222654_at | 3.42E-05 | 4.92E-06 | IMPAD1                       | 54928 .  |
| 222655_s_ | 0.002661 | 0.001087 | IMPAD1                       | 54928 .  |
| 222657_s_ | 0.041895 | 0.027946 | UBE2W                        | 55284 .  |
| 222658_s_ | 0.00897  | 0.004617 | APTX                         | 54840 .  |
| 222659_at | 0.0051   | 0.002374 | IPO11                        | 51194 .  |
| 222661_at | 0.041874 | 0.027929 | AGGF1                        | 55109 .  |
| 222662_at | 1.20E-04 | 2.41E-05 | PPP1R3B                      | 79660 .  |
| 222663_at | 0.004178 | 0.001866 | RIOK2                        | 55781 .  |
| 222664_at | 0.015387 | 0.008707 | KCTD15                       | 79047 .  |
| 222665_at | 4.00E-04 | 1.08E-04 | FAM82B                       | 51115 .  |
| 222666_s_ | 1.83E-04 | 4.11E-05 | RCL1                         | 10171 .  |
| 222667_s_ | 0.00143  | 5.16E-04 | ASH1L                        | 55870 .  |
| 222668_at | 0.005473 | 0.002579 | KCTD15                       | 79047 .  |
| 222669_s_ | 2.14E-04 | 4.97E-05 | SBDS /// SBDSF 155370 /// 5' |          |
| 222671_s_ | 0.04688  | 0.031861 | JMJD4                        | 65094 .  |
| 222673_x_ | 3.05E-04 | 7.77E-05 | FAM122B                      | 159090 . |
| 222674_at | 1.71E-04 | 3.76E-05 | C9orf114                     | 51490 .  |
| 222675_s_ | 0.009211 | 0.004766 | BAIAP2L1                     | 55971 .  |
| 222677_x_ | 0.010516 | 0.005564 |                              | .        |
| 222679_s_ | 0.002298 | 9.13E-04 | DCUN1D1                      | 54165 .  |
| 222680_s_ | 8.32E-05 | 1.54E-05 | DTL                          | 51514 .  |
| 222681_at | 0.003248 | 0.001381 | KTELC1                       | 56983 .  |
| 222682_s_ | 2.13E-04 | 4.95E-05 | FAM114A2                     | 10827 .  |
| 222683_at | 0.033677 | 0.021707 | RNF20                        | 56254 .  |
| 222684_s_ | 0.002437 | 9.80E-04 | NOL10                        | 79954 .  |
| 222685_at | 1.30E-06 | 7.02E-08 | HAUS6                        | 54801 .  |
| 222686_s_ | 0.043535 | 0.029229 | CPPED1                       | 55313 .  |

|           |          |          |           |          |
|-----------|----------|----------|-----------|----------|
| 222687_s_ | 7.30E-04 | 2.27E-04 | ACER3     | 55331 .  |
| 222688_at | 0.00373  | 0.001631 | ACER3     | 55331 .  |
| 222691_at | 9.26E-07 | 4.47E-08 | SLC35B3   | 51000 .  |
| 222692_s_ | 2.98E-05 | 4.14E-06 | FNDC3B    | 64778 .  |
| 222693_at | 3.35E-05 | 4.79E-06 | FNDC3B    | 64778 .  |
| 222694_at | 3.72E-04 | 9.90E-05 | MGC2752   | 65996 .  |
| 222695_s_ | 0.010427 | 0.005508 | AXIN2     | 8313 .   |
| 222696_at | 4.82E-06 | 3.89E-07 | AXIN2     | 8313 .   |
| 222698_s_ | 0.016382 | 0.009369 | IMPACT    | 55364 .  |
| 222699_s_ | 0.026374 | 0.016332 | PLEKHF2   | 79666 .  |
| 222700_at | 1.80E-07 | 5.01E-09 | ATL2      | 64225 .  |
| 222702_x_ | 0.007792 | 0.003922 | CRIP1     | 9419 .   |
| 222703_s_ | 0.007436 | 0.003713 | YRDC      | 79693 .  |
| 222705_s_ | 0.018882 | 0.011058 | SLC25A15  | 10166 .  |
| 222706_at | 8.46E-05 | 1.57E-05 | CCDC49    | 54883 .  |
| 222707_s_ | 5.17E-04 | 1.48E-04 | ACTR8     | 93973 .  |
| 222709_at | 0.013504 | 0.007465 | ATG7      | 10533 .  |
| 222711_s_ | 0.00348  | 0.001501 | RHBDF1    | 64285 .  |
| 222712_s_ | 1.09E-04 | 2.14E-05 | MUC13     | 56667 .  |
| 222716_s_ | 0.002063 | 8.01E-04 | SNX24     | 28966 .  |
| 222717_at | 0.027269 | 0.01698  | SDPR      | 8436 .   |
| 222718_at | 0.006387 | 0.003097 | TMEM8     | 58986 .  |
| 222719_s_ | 6.97E-04 | 2.15E-04 | PDGFC     | 56034 .  |
| 222720_x_ | 0.049655 | 0.034051 | C1orf27   | 54953 .  |
| 222721_at | 0.034993 | 0.022673 | DOCK5     | 80005 .  |
| 222722_at | 1.87E-06 | 1.14E-07 | OGN       | 4969 .   |
| 222723_at | 0.020635 | 0.012273 | LOC727901 | 727901 . |
| 222724_at | 0.03834  | 0.025219 | VWA1      | 64856 .  |
| 222726_s_ | 0.003802 | 0.001669 | EXOC5     | 10640 .  |
| 222727_s_ | 5.68E-04 | 1.67E-04 | SLC24A6   | 80024 .  |
| 222728_s_ | 8.65E-06 | 8.36E-07 | TAF1D     | 79101 .  |
| 222729_at | 2.15E-04 | 5.01E-05 | FBXW7     | 55294 .  |
| 222731_at | 0.007126 | 0.003529 | ZDHHC2    | 51201 .  |
| 222732_at | 0.003539 | 0.001531 | TRIM39    | 56658 .  |

|           |          |          |          |         |
|-----------|----------|----------|----------|---------|
| 222733_x_ | 0.004874 | 0.002248 | RRP1     | 8568 .  |
| 222734_at | 9.64E-04 | 3.19E-04 | WARS2    | 10352 . |
| 222735_at | 0.011131 | 0.005951 | TMEM38B  | 55151 . |
| 222736_s_ | 0.039764 | 0.026304 | TMEM38B  | 55151 . |
| 222737_s_ | 3.34E-05 | 4.78E-06 | BRD7     | 29117 . |
| 222740_at | 3.87E-06 | 2.93E-07 | ATAD2    | 29028 . |
| 222741_s_ | 0.018993 | 0.011131 | C6orf64  | 55776 . |
| 222742_s_ | 6.80E-04 | 2.08E-04 | RABL5    | 64792 . |
| 222743_s_ | 0.036183 | 0.023584 | C11orf71 | 54494 . |
| 222744_s_ | 0.004677 | 0.002141 | TMLHE    | 55217 . |
| 222746_s_ | 8.53E-09 | 8.69E-11 | BSPRY    | 54836 . |
| 222747_s_ | 1.57E-06 | 9.10E-08 | SCML1    | 6322 .  |
| 222748_s_ | 0.01966  | 0.011588 | TXNL4B   | 54957 . |
| 222749_at | 3.65E-04 | 9.68E-05 | SUFU     | 51684 . |
| 222752_s_ | 1.22E-06 | 6.45E-08 | TMEM206  | 55248 . |
| 222753_s_ | 6.78E-04 | 2.07E-04 | SPCS3    | 60559 . |
| 222754_at | 0.035121 | 0.022774 | TRNT1    | 51095 . |
| 222755_s_ | 2.94E-06 | 2.05E-07 | CHD7     | 55636 . |
| 222757_s_ | 3.54E-07 | 1.26E-08 | ZAK      | 51776 . |
| 222759_at | 9.76E-07 | 4.79E-08 | SUV420H1 | 51111 . |
| 222760_at | 9.85E-05 | 1.89E-05 | ZNF703   | 80139 . |
| 222761_at | 9.06E-08 | 2.01E-09 | BIVM     | 54841 . |
| 222762_x_ | 0.00522  | 0.002439 | LIMD1    | 8994 .  |
| 222764_at | 4.77E-05 | 7.56E-06 | ASRGL1   | 80150 . |
| 222765_x_ | 4.19E-05 | 6.39E-06 | ESF1     | 51575 . |
| 222766_at | 3.02E-04 | 7.65E-05 | POLR3K   | 51728 . |
| 222767_s_ | 8.08E-04 | 2.58E-04 | C12orf49 | 79794 . |
| 222768_s_ | 2.37E-06 | 1.56E-07 | TRMT6    | 51605 . |
| 222770_s_ | 0.001062 | 3.59E-04 | GUF1     | 60558 . |
| 222771_s_ | 1.36E-05 | 1.52E-06 | MYEF2    | 50804 . |
| 222772_at | 6.43E-06 | 5.65E-07 | MYEF2    | 50804 . |
| 222773_s_ | 0.002197 | 8.65E-04 | GALNT12  | 79695 . |
| 222774_s_ | 3.01E-04 | 7.63E-05 | NETO2    | 81831 . |
| 222775_s_ | 0.011157 | 0.005968 | MRPL35   | 51318 . |



|           |          |          |          |          |
|-----------|----------|----------|----------|----------|
| 222776_at | 0.014067 | 0.00783  | MAGOHB   | 55110 .  |
| 222777_s_ | 0.006538 | 0.003185 | WHSC1    | 7468 .   |
| 222779_s_ | 0.00258  | 0.001048 | C17orf85 | 55421 .  |
| 222780_s_ | 3.86E-04 | 1.03E-04 | BAALC    | 79870 .  |
| 222782_s_ | 0.020265 | 0.012009 | GMIP     | 51291 .  |
| 222784_at | 0.001843 | 6.99E-04 | SMOC1    | 64093 .  |
| 222785_x_ | 0.003722 | 0.001627 | C11orf1  | 64776 .  |
| 222786_at | 0.007921 | 0.003998 | CHST12   | 55501 .  |
| 222788_s_ | 8.36E-07 | 3.90E-08 | RSBN1    | 54665 .  |
| 222792_s_ | 2.16E-07 | 6.43E-09 | CCDC59   | 29080 .  |
| 222793_at | 0.018555 | 0.010835 | DDX58    | 23586 .  |
| 222794_x_ | 5.73E-06 | 4.87E-07 | MTPAP    | 55149 .  |
| 222795_s_ | 9.32E-05 | 1.76E-05 | PLCXD1   | 55344 .  |
| 222796_at | 1.16E-05 | 1.24E-06 | PTCD1    | 26024 .  |
| 222797_at | 0.007227 | 0.003588 | DPYSL5   | 56896 .  |
| 222798_at | 0.001406 | 5.05E-04 | PTER     | 9317 .   |
| 222804_x_ | 3.25E-04 | 8.39E-05 | WDR32    | 79269 .  |
| 222805_at | 0.019018 | 0.011151 | MANEA    | 79694 .  |
| 222806_s_ | 1.51E-04 | 3.23E-05 | C11orf30 | 56946 .  |
| 222807_at | 0.044111 | 0.029684 | C11orf30 | 56946 .  |
| 222808_at | 1.14E-04 | 2.26E-05 | ALG13    | 79868 .  |
| 222809_x_ | 1.70E-06 | 1.01E-07 | CCDC85C  | 317762 . |
| 222810_s_ | 0.003173 | 0.001343 | RASAL2   | 9462 .   |
| 222812_s_ | 0.00681  | 0.003344 | RHOF     | 54509 .  |
| 222813_at | 0.038681 | 0.025478 | ZNF668   | 79759 .  |
| 222814_s_ | 0.040818 | 0.027112 | ZNHIT2   | 741 .    |
| 222815_at | 0.006188 | 0.002982 | RLIM     | 51132 .  |
| 222816_s_ | 0.001868 | 7.11E-04 | ZCCHC2   | 54877 .  |
| 222817_at | 7.72E-09 | 7.55E-11 | HSD3B7   | 80270 .  |
| 222818_at | 0.002823 | 0.001167 | OSBPL10  | 114884 . |
| 222819_at | 3.71E-06 | 2.77E-07 | CTPS2    | 56474 .  |
| 222820_at | 0.043179 | 0.028946 | TNRC6C   | 57690 .  |
| 222822_s_ | 0.001253 | 4.39E-04 | MMRN2    | 79812 .  |
| 222823_at | 0.002139 | 8.37E-04 | IPPK     | 64768 .  |

|           |          |          |                 |
|-----------|----------|----------|-----------------|
| 222824_at | 1.67E-06 | 9.84E-08 | .               |
| 222825_at | 1.32E-04 | 2.74E-05 | OTUD6B 51633 .  |
| 222826_at | 0.013085 | 0.007197 | PLDN 26258 .    |
| 222827_s_ | 0.003413 | 0.001467 | KBTBD10 10324 . |
| 222831_at | 9.81E-05 | 1.88E-05 | SAP30L 79685 .  |
| 222833_at | 7.61E-04 | 2.39E-04 | LPCAT2 54947 .  |
| 222834_s_ | 7.58E-05 | 1.36E-05 | GNG12 55970 .   |
| 222835_at | 8.21E-04 | 2.63E-04 | THSD4 79875 .   |
| 222836_at | 1.60E-04 | 3.46E-05 | NARG1 80155 .   |
| 222837_s_ | 2.31E-05 | 2.99E-06 | NARG1 80155 .   |
| 222838_at | 0.034568 | 0.022357 | SLAMF7 57823 .  |
| 222840_at | 4.51E-06 | 3.57E-07 | ATG2B 55102 .   |
| 222843_at | 2.63E-05 | 3.53E-06 | FIGNL1 63979 .  |
| 222844_s_ | 5.45E-04 | 1.58E-04 | SRR 63826 .     |
| 222845_x_ | 8.25E-05 | 1.52E-05 | TMBIM4 51643 .  |
| 222846_at | 2.47E-06 | 1.64E-07 | RAB8B 51762 .   |
| 222847_s_ | 4.41E-05 | 6.82E-06 | EGLN3 112399 .  |
| 222848_at | 9.44E-06 | 9.42E-07 | CENPK 64105 .   |
| 222849_s_ | 0.004723 | 0.002166 | SCRN3 79634 .   |
| 222850_s_ | 0.020624 | 0.012265 | DNAJB14 79982 . |
| 222851_at | 2.79E-04 | 6.96E-05 | ZNF654 55279 .  |
| 222853_at | 1.23E-04 | 2.51E-05 | FLRT3 23767 .   |
| 222854_s_ | 0.036367 | 0.023722 | GEMIN8 54960 .  |
| 222855_s_ | 3.47E-04 | 9.10E-05 | TRPV2 51393 .   |
| 222857_s_ | 2.39E-06 | 1.57E-07 | KCNMB4 27345 .  |
| 222860_s_ | 3.50E-08 | 5.56E-10 | PDGFD 80310 .   |
| 222861_x_ | 5.19E-06 | 4.26E-07 | FBXO44 93611 .  |
| 222862_s_ | 2.89E-04 | 7.25E-05 | AK5 26289 .     |
| 222863_at | 0.034819 | 0.022541 | ZBTB10 65986 .  |
| 222864_s_ | 0.022582 | 0.01364  | ZNF219 51222 .  |
| 222865_x_ | 0.004348 | 0.001959 | TMEM204 79652 . |
| 222866_s_ | 1.32E-08 | 1.49E-10 | FLVCR2 55640 .  |
| 222867_s_ | 1.87E-06 | 1.14E-07 | MED31 51003 .   |
| 222868_s_ | 0.009896 | 0.005184 | IL18BP 10068 .  |

|           |          |          |          |         |
|-----------|----------|----------|----------|---------|
| 222869_s_ | 1.59E-04 | 3.44E-05 | ELAC1    | 55520 . |
| 222870_s_ | 7.61E-08 | 1.59E-09 | B3GNT2   | 10678 . |
| 222871_at | 1.17E-05 | 1.25E-06 | KLHDC8A  | 55220 . |
| 222872_x_ | 4.60E-06 | 3.66E-07 | OBFC2A   | 64859 . |
| 222873_s_ | 0.004616 | 0.002107 | EHMT1    | 79813 . |
| 222874_s_ | 0.001135 | 3.89E-04 | CLN8     | 2055 .  |
| 222875_at | 8.05E-04 | 2.57E-04 | DHX33    | 56919 . |
| 222876_s_ | 0.003038 | 0.001274 | ADAP2    | 55803 . |
| 222877_at | 6.06E-04 | 1.80E-04 |          | .       |
| 222878_s_ | 0.012748 | 0.006984 | OTUB2    | 78990 . |
| 222879_s_ | 4.36E-06 | 3.43E-07 | POLH     | 5429 .  |
| 222880_at | 7.25E-07 | 3.24E-08 | AKT3     | 10000 . |
| 222881_at | 0.003352 | 0.001435 | HPSE     | 10855 . |
| 222882_s_ | 1.62E-04 | 3.52E-05 | C17orf59 | 54785 . |
| 222883_at | 0.007427 | 0.003707 | C1orf163 | 65260 . |
| 222887_s_ | 2.58E-05 | 3.44E-06 | TMEM127  | 55654 . |
| 222888_at | 0.011959 | 0.00647  | CCNJ     | 54619 . |
| 222889_at | 1.29E-05 | 1.42E-06 | DCLRE1B  | 64858 . |
| 222891_s_ | 2.21E-04 | 5.18E-05 | BCL11A   | 53335 . |
| 222893_s_ | 0.034761 | 0.022497 | RPAP2    | 79871 . |
| 222894_x_ | 5.01E-07 | 1.98E-08 | C20orf7  | 79133 . |
| 222898_s_ | 8.64E-07 | 4.08E-08 | DLL3     | 10683 . |
| 222899_at | 4.64E-07 | 1.80E-08 | ITGA11   | 22801 . |
| 222902_s_ | 0.002881 | 0.001195 | DEM1     | 64789 . |
| 222904_s_ | 0.005442 | 0.002562 | TMC5     | 79838 . |
| 222906_at | 1.17E-08 | 1.28E-10 | FLVCR1   | 28982 . |
| 222907_x_ | 1.61E-04 | 3.49E-05 | TMEM50B  | 757 .   |
| 222910_s_ | 0.020908 | 0.012473 | PEX5L    | 51555 . |
| 222911_s_ | 0.017236 | 0.009936 | CXorf36  | 79742 . |
| 222912_at | 0.047184 | 0.032101 | ARRB1    | 408 .   |
| 222914_s_ | 0.001268 | 4.46E-04 | TMEM121  | 80757 . |
| 222915_s_ | 8.12E-07 | 3.76E-08 | BANK1    | 55024 . |
| 222917_s_ | 1.50E-05 | 1.73E-06 | TBX3     | 6926 .  |
| 222918_at | 0.00784  | 0.003951 | RAB9B    | 51209 . |

|           |          |          |                             |          |
|-----------|----------|----------|-----------------------------|----------|
| 222919_at | 0.00264  | 0.001078 | TRDN                        | 10345 .  |
| 222921_s_ | 5.42E-08 | 1.01E-09 | HEY2                        | 23493 .  |
| 222926_at | 0.032851 | 0.021086 | DCDC2                       | 51473 .  |
| 222927_s_ | 0.013078 | 0.007193 | CPLX3 /// LMA 594855 /// 7! |          |
| 222928_s_ | 1.54E-06 | 8.84E-08 | FAM160B2                    | 64760 .  |
| 222933_at | 4.31E-04 | 1.19E-04 | MORN1                       | 79906 .  |
| 222935_x_ | 0.004179 | 0.001867 | SLC39A8                     | 64116 .  |
| 222937_s_ | 0.01488  | 0.008372 | MMP28                       | 79148 .  |
| 222939_s_ | 2.58E-05 | 3.45E-06 | SLC16A10                    | 117247 . |
| 222941_at | 2.80E-05 | 3.82E-06 | USP46                       | 64854 .  |
| 222943_at | 6.61E-04 | 2.01E-04 | GBA3                        | 57733 .  |
| 222944_s_ | 0.013094 | 0.007203 | MAGIX                       | 79917 .  |
| 222946_s_ | 1.98E-04 | 4.52E-05 | C1orf135                    | 79000 .  |
| 222948_s_ | 0.014267 | 0.007958 | MRPS18C                     | 51023 .  |
| 222951_s_ | 2.24E-04 | 5.26E-05 | ANKRD5                      | 63926 .  |
| 222952_s_ | 1.53E-04 | 3.29E-05 | TLR7                        | 51284 .  |
| 222953_at | 1.30E-05 | 1.44E-06 | GPR83                       | 10888 .  |
| 222954_at | 0.004191 | 0.001874 | FBXO40                      | 51725 .  |
| 222955_s_ | 0.035092 | 0.02275  | FAM45A /// FA404636 /// 5!  |          |
| 222957_at | 0.002618 | 0.001067 | NEU4                        | 129807 . |
| 222958_s_ | 1.07E-04 | 2.10E-05 | DEPDC1                      | 55635 .  |
| 222960_at | 6.66E-06 | 5.91E-07 | CACNA1H                     | 8912 .   |
| 222961_at | 2.53E-04 | 6.16E-05 |                             | .        |
| 222962_s_ | 4.09E-07 | 1.53E-08 | MCM10                       | 55388 .  |
| 222963_s_ | 0.016587 | 0.009504 | IL1RAPL1                    | 11141 .  |
| 222965_at | 1.15E-05 | 1.23E-06 | PRO2214                     | 55387 .  |
| 222969_at | 2.56E-04 | 6.25E-05 | B3GALT1                     | 8708 .   |
| 222973_at | 2.38E-05 | 3.12E-06 |                             | .        |
| 222977_at | 0.030837 | 0.019592 | SURF4                       | 6836 .   |
| 222978_at | 5.62E-04 | 1.64E-04 | SURF4                       | 6836 .   |
| 222979_s_ | 0.001587 | 5.84E-04 | SURF4                       | 6836 .   |
| 222980_at | 0.017659 | 0.010227 | RAB10                       | 10890 .  |
| 222981_s_ | 6.32E-06 | 5.51E-07 | RAB10                       | 10890 .  |
| 222982_x_ | 9.53E-06 | 9.55E-07 | SLC38A2                     | 54407 .  |

|           |          |          |         |          |
|-----------|----------|----------|---------|----------|
| 222983_s_ | 6.72E-05 | 1.17E-05 | PAIP2   | 51247 .  |
| 222984_at | 4.36E-08 | 7.47E-10 | PAIP2   | 51247 .  |
| 222985_at | 0.032554 | 0.020861 | YWHAG   | 7532 .   |
| 222986_s_ | 9.48E-05 | 1.80E-05 | SHISA5  | 51246 .  |
| 222988_s_ | 0.027577 | 0.017199 | TMEM9   | 252839 . |
| 222989_s_ | 0.009245 | 0.004786 | UBQLN1  | 29979 .  |
| 222990_at | 0.010669 | 0.005661 | UBQLN1  | 29979 .  |
| 222992_s_ | 2.53E-09 | 1.76E-11 | NDUFB9  | 4715 .   |
| 222993_at | 0.004395 | 0.001985 | MRPL37  | 51253 .  |
| 222994_at | 0.001789 | 6.74E-04 | PRDX5   | 25824 .  |
| 222996_s_ | 8.59E-04 | 2.78E-04 | CXXC5   | 51523 .  |
| 222997_s_ | 0.002472 | 9.96E-04 | MRPS21  | 54460 .  |
| 222999_s_ | 1.15E-04 | 2.29E-05 | CCNL2   | 81669 .  |
| 223000_s_ | 1.40E-07 | 3.60E-09 | F11R    | 50848 .  |
| 223001_at | 6.68E-04 | 2.04E-04 | OSTC    | 58505 .  |
| 223002_s_ | 0.0327   | 0.02097  | XRN2    | 22803 .  |
| 223004_s_ | 6.36E-04 | 1.92E-04 | C3orf1  | 51300 .  |
| 223006_s_ | 0.014044 | 0.007813 | C9orf5  | 23731 .  |
| 223007_s_ | 0.032706 | 0.020975 | C9orf5  | 23731 .  |
| 223008_s_ | 0.016715 | 0.00959  | C9orf5  | 23731 .  |
| 223011_s_ | 0.032506 | 0.020822 | OCIAD1  | 54940 .  |
| 223012_at | 2.75E-08 | 4.11E-10 | UBXN6   | 80700 .  |
| 223016_x_ | 0.031211 | 0.019862 | ZRANB2  | 9406 .   |
| 223017_at | 0.019589 | 0.011542 | TXNDC12 | 51060 .  |
| 223018_at | 0.01665  | 0.009546 | NOB1    | 28987 .  |
| 223019_at | 4.39E-06 | 3.46E-07 | FAM129B | 64855 .  |
| 223020_at | 1.47E-04 | 3.12E-05 | CLPTM1L | 81037 .  |
| 223023_at | 0.001708 | 6.37E-04 | BET1L   | 51272 .  |
| 223024_at | 4.53E-05 | 7.07E-06 | AP1M1   | 8907 .   |
| 223027_at | 3.50E-05 | 5.06E-06 | SNX9    | 51429 .  |
| 223028_s_ | 0.002151 | 8.43E-04 | SNX9    | 51429 .  |
| 223029_s_ | 8.87E-04 | 2.89E-04 | TRAF7   | 84231 .  |
| 223030_at | 0.01216  | 0.006601 | TRAF7   | 84231 .  |
| 223032_x_ | 0.009187 | 0.004752 | PRELID1 | 27166 .  |

|           |          |          |           |         |
|-----------|----------|----------|-----------|---------|
| 223033_s_ | 0.016129 | 0.009203 | SCYL1     | 57410 . |
| 223034_s_ | 2.49E-04 | 6.01E-05 | C1orf43   | 25912 . |
| 223035_s_ | 5.54E-04 | 1.61E-04 | FARSB     | 10056 . |
| 223036_at | 0.012187 | 0.006619 | FARSB     | 10056 . |
| 223037_at | 1.81E-05 | 2.20E-06 | PDZD11    | 51248 . |
| 223038_s_ | 9.17E-09 | 9.56E-11 | FAM60A    | 58516 . |
| 223039_at | 2.12E-04 | 4.92E-05 | C22orf13  | 83606 . |
| 223040_at | 5.76E-05 | 9.56E-06 | NAT5      | 51126 . |
| 223041_at | 4.44E-09 | 3.73E-11 | CD99L2    | 83692 . |
| 223042_s_ | 0.007409 | 0.003695 | FUNDC2    | 65991 . |
| 223045_at | 0.004288 | 0.001926 | EGLN1     | 54583 . |
| 223046_at | 0.001718 | 6.42E-04 | EGLN1     | 54583 . |
| 223047_at | 0.043224 | 0.028984 | CMTM6     | 54918 . |
| 223048_at | 0.002049 | 7.95E-04 | C11orf79  | 54949 . |
| 223049_at | 0.025527 | 0.015737 | GRB2      | 2885 .  |
| 223050_s_ | 2.64E-06 | 1.79E-07 | FBXW5     | 54461 . |
| 223051_at | 0.011044 | 0.005895 | SSU72     | 29101 . |
| 223055_s_ | 4.68E-04 | 1.31E-04 | XPO5      | 57510 . |
| 223056_s_ | 1.35E-05 | 1.51E-06 | XPO5      | 57510 . |
| 223057_s_ | 0.001065 | 3.60E-04 | XPO5      | 57510 . |
| 223060_at | 0.021904 | 0.013175 | C14orf119 | 55017 . |
| 223061_at | 0.007819 | 0.003937 | CHID1     | 66005 . |
| 223063_at | 5.25E-07 | 2.10E-08 | C1orf198  | 84886 . |
| 223066_at | 5.50E-05 | 9.01E-06 | SNAPIN    | 23557 . |
| 223067_at | 0.007014 | 0.003464 | CWC15     | 51503 . |
| 223069_s_ | 4.78E-04 | 1.34E-04 | EML4      | 27436 . |
| 223071_at | 3.18E-04 | 8.16E-05 | IER3IP1   | 51124 . |
| 223072_s_ | 9.51E-05 | 1.81E-05 | WBP1      | 23559 . |
| 223074_s_ | 0.008688 | 0.004448 | AIF1L     | 83543 . |
| 223075_s_ | 9.67E-07 | 4.74E-08 | AIF1L     | 83543 . |
| 223076_s_ | 0.003192 | 0.001353 | NSUN2     | 54888 . |
| 223077_at | 0.001449 | 5.24E-04 | TMOD3     | 29766 . |
| 223078_s_ | 0.02144  | 0.012839 | TMOD3     | 29766 . |
| 223079_s_ | 5.48E-07 | 2.23E-08 | GLS       | 2744 .  |

|           |          |          |          |          |
|-----------|----------|----------|----------|----------|
| 223080_at | 0.001141 | 3.92E-04 | GLS      | 2744 .   |
| 223082_at | 9.86E-04 | 3.28E-04 | SH3KBP1  | 30011 .  |
| 223083_s_ | 0.018802 | 0.011005 | EGLN2    | 112398 . |
| 223084_s_ | 0.009086 | 0.004686 | CCNDBP1  | 23582 .  |
| 223085_at | 0.002008 | 7.76E-04 | RNF19A   | 25897 .  |
| 223086_x_ | 1.35E-04 | 2.83E-05 | MRPL51   | 51258 .  |
| 223091_x_ | 1.25E-04 | 2.54E-05 | MFF      | 56947 .  |
| 223092_at | 4.80E-06 | 3.86E-07 | ANKH     | 56172 .  |
| 223093_at | 4.02E-05 | 6.04E-06 | ANKH     | 56172 .  |
| 223094_s_ | 2.03E-05 | 2.54E-06 | ANKH     | 56172 .  |
| 223095_at | 5.68E-05 | 9.38E-06 | MARVELD1 | 83742 .  |
| 223096_at | 1.43E-07 | 3.69E-09 | NOP58    | 51602 .  |
| 223097_at | 1.65E-05 | 1.95E-06 | ADPRHL2  | 54936 .  |
| 223098_s_ | 9.04E-06 | 8.89E-07 | LONP2    | 83752 .  |
| 223099_s_ | 4.68E-06 | 3.75E-07 | LONP2    | 83752 .  |
| 223100_s_ | 0.001609 | 5.93E-04 | NUDT5    | 11164 .  |
| 223101_s_ | 4.91E-04 | 1.39E-04 | ARPC5L   | 81873 .  |
| 223103_at | 0.020849 | 0.012433 | STARD10  | 10809 .  |
| 223104_at | 0.001029 | 3.46E-04 | JAGN1    | 84522 .  |
| 223107_s_ | 0.007524 | 0.003763 | ZCCHC17  | 51538 .  |
| 223108_s_ | 0.012063 | 0.006538 | ZCCHC17  | 51538 .  |
| 223109_at | 1.08E-05 | 1.12E-06 | TRUB2    | 26995 .  |
| 223110_at | 0.041726 | 0.027811 | KIAA1429 | 25962 .  |
| 223111_x_ | 5.58E-04 | 1.63E-04 | ARID4B   | 51742 .  |
| 223113_at | 7.69E-07 | 3.48E-08 | TMEM138  | 51524 .  |
| 223114_at | 0.009015 | 0.004643 | COQ5     | 84274 .  |
| 223115_at | 2.55E-04 | 6.22E-05 | MED17    | 9440 .   |
| 223116_at | 0.004139 | 0.001846 | BCAR1    | 9564 .   |
| 223117_s_ | 0.001905 | 7.28E-04 | USP47    | 55031 .  |
| 223118_s_ | 1.62E-04 | 3.53E-05 | USP47    | 55031 .  |
| 223121_s_ | 4.28E-04 | 1.17E-04 | SFRP2    | 6423 .   |
| 223122_s_ | 4.37E-04 | 1.20E-04 | SFRP2    | 6423 .   |
| 223124_s_ | 9.23E-05 | 1.74E-05 | C1orf128 | 57095 .  |
| 223128_at | 9.22E-06 | 9.15E-07 | FOXRED1  | 55572 .  |

|           |          |          |          |          |
|-----------|----------|----------|----------|----------|
| 223129_x_ | 0.020809 | 0.0124   | MYLIP    | 29116 .  |
| 223130_s_ | 0.002563 | 0.00104  | MYLIP    | 29116 .  |
| 223131_s_ | 0.010218 | 0.005379 | TRIM8    | 81603 .  |
| 223132_s_ | 8.72E-04 | 2.83E-04 | TRIM8    | 81603 .  |
| 223133_at | 0.001829 | 6.92E-04 | TMEM14B  | 81853 .  |
| 223134_at | 0.025444 | 0.015681 | BBX      | 56987 .  |
| 223135_s_ | 6.31E-04 | 1.90E-04 | BBX      | 56987 .  |
| 223137_at | 8.38E-06 | 8.01E-07 | ZDHHC4   | 55146 .  |
| 223138_s_ | 1.87E-04 | 4.23E-05 | DHX36    | 170506 . |
| 223139_s_ | 8.90E-06 | 8.71E-07 | DHX36    | 170506 . |
| 223140_s_ | 2.47E-06 | 1.64E-07 | DHX36    | 170506 . |
| 223143_s_ | 2.76E-04 | 6.85E-05 | AKIRIN2  | 55122 .  |
| 223144_s_ | 8.46E-04 | 2.73E-04 | AKIRIN2  | 55122 .  |
| 223145_s_ | 0.049414 | 0.033853 | AKIRIN2  | 55122 .  |
| 223146_at | 0.0059   | 0.00282  | WDR33    | 55339 .  |
| 223147_s_ | 6.66E-04 | 2.03E-04 | WDR33    | 55339 .  |
| 223148_at | 4.79E-04 | 1.35E-04 | PIGS     | 94005 .  |
| 223149_s_ | 0.003268 | 0.001391 | PTPN23   | 25930 .  |
| 223151_at | 5.36E-05 | 8.75E-06 | DCUN1D5  | 84259 .  |
| 223152_at | 0.04951  | 0.03393  | PPP1R12C | 54776 .  |
| 223154_at | 1.81E-04 | 4.05E-05 | MRPL1    | 65008 .  |
| 223155_at | 0.009544 | 0.004966 | HDHD2    | 84064 .  |
| 223156_at | 7.62E-07 | 3.44E-08 | MRPS23   | 51649 .  |
| 223157_at | 0.002868 | 0.001188 | C4orf14  | 84273 .  |
| 223158_s_ | 0.0014   | 5.02E-04 | NEK6     | 10783 .  |
| 223159_s_ | 3.49E-05 | 5.04E-06 | NEK6     | 10783 .  |
| 223160_s_ | 7.14E-04 | 2.21E-04 | SMEK1    | 55671 .  |
| 223162_s_ | 3.29E-04 | 8.52E-05 | KIAA1147 | 57189 .  |
| 223163_s_ | 2.07E-04 | 4.78E-05 | ZC3HC1   | 51530 .  |
| 223164_at | 8.23E-06 | 7.81E-07 | CCM2     | 83605 .  |
| 223165_s_ | 3.04E-04 | 7.72E-05 | IP6K2    | 51447 .  |
| 223166_x_ | 1.74E-05 | 2.09E-06 | C9orf86  | 55684 .  |
| 223168_at | 0.002758 | 0.001135 | RHOU     | 58480 .  |
| 223169_s_ | 0.037467 | 0.024557 | RHOU     | 58480 .  |



|           |          |          |                             |          |
|-----------|----------|----------|-----------------------------|----------|
| 223170_at | 0.00354  | 0.001532 | TMEM98                      | 26022 .  |
| 223172_s_ | 3.92E-08 | 6.44E-10 | MTP18                       | 51537 .  |
| 223174_at | 0.001441 | 5.20E-04 | BTBD10                      | 84280 .  |
| 223175_s_ | 1.87E-05 | 2.29E-06 | FEM1A                       | 55527 .  |
| 223176_at | 6.18E-07 | 2.60E-08 | KCTD20                      | 222658 . |
| 223178_s_ | 0.003776 | 0.001656 | NT5DC1                      | 221294 . |
| 223179_at | 2.42E-04 | 5.81E-05 | YPEL3                       | 83719 .  |
| 223181_at | 0.001465 | 5.31E-04 | C18orf55                    | 29090 .  |
| 223182_s_ | 1.67E-08 | 2.10E-10 | AGPAT3                      | 56894 .  |
| 223183_at | 3.57E-07 | 1.28E-08 | AGPAT3                      | 56894 .  |
| 223184_s_ | 6.94E-09 | 6.51E-11 | AGPAT3                      | 56894 .  |
| 223185_s_ | 0.00865  | 0.004425 | BHLHE41                     | 79365 .  |
| 223186_at | 3.04E-04 | 7.71E-05 | TMEM189 /// 1387521 /// 7:  |          |
| 223187_s_ | 1.02E-04 | 1.99E-05 | ORMDL1                      | 94101 .  |
| 223190_s_ | 0.009213 | 0.004767 | MLL5                        | 55904 .  |
| 223192_at | 8.71E-07 | 4.13E-08 | SLC25A28                    | 81894 .  |
| 223193_x_ | 0.001038 | 3.49E-04 | FAM162A                     | 26355 .  |
| 223195_s_ | 8.24E-04 | 2.64E-04 | SESN2                       | 83667 .  |
| 223196_s_ | 0.004565 | 0.002079 | SESN2                       | 83667 .  |
| 223197_s_ | 1.02E-04 | 1.98E-05 | SMARCAD1                    | 56916 .  |
| 223198_x_ | 0.028676 | 0.018004 | COMMD5                      | 28991 .  |
| 223200_s_ | 3.17E-06 | 2.26E-07 | LSG1                        | 55341 .  |
| 223201_s_ | 9.89E-04 | 3.29E-04 | LOC100130886 100130886 //.  |          |
| 223202_s_ | 0.006626 | 0.003236 | LOC100130886 100130886 //.  |          |
| 223203_at | 0.003476 | 0.001499 | FAM156A /// F 29057 /// 72: |          |
| 223204_at | 0.004026 | 0.001786 | C4orf18                     | 51313 .  |
| 223207_x_ | 0.001036 | 3.48E-04 | PHPT1                       | 29085 .  |
| 223208_at | 4.86E-08 | 8.67E-10 | KCTD10                      | 83892 .  |
| 223209_s_ | 0.008427 | 0.004295 | SELS                        | 55829 .  |
| 223210_at | 0.026912 | 0.016728 | CHURC1                      | 91612 .  |
| 223211_at | 0.00674  | 0.003303 | HACL1                       | 26061 .  |
| 223213_s_ | 1.36E-04 | 2.84E-05 | ZHX1                        | 11244 .  |
| 223214_s_ | 2.99E-06 | 2.10E-07 | ZHX1                        | 11244 .  |
| 223215_s_ | 5.97E-04 | 1.77E-04 | C14orf100                   | 51528 .  |

|           |          |          |           |          |
|-----------|----------|----------|-----------|----------|
| 223216_x_ | 7.44E-04 | 2.33E-04 | ZNF395    | 55893 .  |
| 223218_s_ | 0.015474 | 0.008767 | NFKBIZ    | 64332 .  |
| 223219_s_ | 4.97E-05 | 7.95E-06 | CNOT10    | 25904 .  |
| 223220_s_ | 3.26E-04 | 8.43E-05 | PARP9     | 83666 .  |
| 223221_at | 0.002492 | 0.001007 | SCO1      | 6341 .   |
| 223222_at | 1.65E-08 | 2.07E-10 | SLC25A19  | 60386 .  |
| 223223_at | 0.018271 | 0.010642 | ARV1      | 64801 .  |
| 223226_x_ | 2.06E-06 | 1.30E-07 | SSBP4     | 170463 . |
| 223228_at | 1.47E-06 | 8.31E-08 | LDOC1L    | 84247 .  |
| 223229_at | 1.47E-05 | 1.69E-06 | UBE2T     | 29089 .  |
| 223230_at | 2.18E-08 | 2.95E-10 | PRPF38A   | 84950 .  |
| 223231_at | 1.75E-04 | 3.87E-05 | TATDN1    | 83940 .  |
| 223232_s_ | 8.90E-05 | 1.67E-05 | CGN       | 57530 .  |
| 223233_s_ | 4.50E-04 | 1.25E-04 | CGN       | 57530 .  |
| 223234_at | 1.89E-05 | 2.32E-06 | MAD2L2    | 10459 .  |
| 223237_x_ | 7.79E-05 | 1.41E-05 | AP2A1     | 160 .    |
| 223239_at | 0.004291 | 0.001928 | C14orf129 | 51527 .  |
| 223240_at | 0.032285 | 0.020665 | FBXO8     | 26269 .  |
| 223241_at | 0.025812 | 0.015931 | SNX8      | 29886 .  |
| 223243_s_ | 0.003987 | 0.001765 | EDEM3     | 80267 .  |
| 223244_s_ | 4.11E-04 | 1.12E-04 | NDUFA12   | 55967 .  |
| 223245_at | 2.65E-04 | 6.52E-05 | STRBP     | 55342 .  |
| 223246_s_ | 9.13E-04 | 2.99E-04 | STRBP     | 55342 .  |
| 223247_at | 2.50E-05 | 3.32E-06 | MED10     | 84246 .  |
| 223248_at | 3.24E-04 | 8.37E-05 | HSDL1     | 83693 .  |
| 223249_at | 0.006606 | 0.003224 | CLDN12    | 9069 .   |
| 223250_at | 9.89E-04 | 3.29E-04 | KLHL7     | 55975 .  |
| 223251_s_ | 4.55E-07 | 1.75E-08 | ANKRD10   | 55608 .  |
| 223253_at | 1.06E-04 | 2.08E-05 | EPDR1     | 54749 .  |
| 223254_s_ | 0.005512 | 0.002602 | G2E3      | 55632 .  |
| 223255_at | 3.82E-05 | 5.66E-06 | G2E3      | 55632 .  |
| 223256_at | 4.05E-05 | 6.09E-06 | G2E3      | 55632 .  |
| 223257_at | 4.90E-04 | 1.39E-04 | G2E3      | 55632 .  |
| 223258_s_ | 4.72E-04 | 1.32E-04 | G2E3      | 55632 .  |

|           |          |          |            |         |
|-----------|----------|----------|------------|---------|
| 223259_at | 3.18E-07 | 1.09E-08 | ORMDL3     | 94103 . |
| 223260_s_ | 2.80E-04 | 6.97E-05 | POLK       | 51426 . |
| 223261_at | 0.003275 | 0.001395 | POLK       | 51426 . |
| 223264_at | 1.31E-04 | 2.69E-05 | MESDC1     | 59274 . |
| 223265_at | 0.006839 | 0.003361 | SH3BP5L    | 80851 . |
| 223267_at | 0.01413  | 0.007869 | RG9MTD1    | 54931 . |
| 223268_at | 0.001798 | 6.78E-04 | C11orf54   | 28970 . |
| 223269_at | 1.13E-04 | 2.24E-05 | POLR3GL    | 84265 . |
| 223270_at | 0.011729 | 0.006323 | CTDSPL2    | 51496 . |
| 223271_s_ | 0.008731 | 0.004473 | CTDSPL2    | 51496 . |
| 223273_at | 2.15E-04 | 5.01E-05 | C14orf142  | 84520 . |
| 223274_at | 0.005194 | 0.002425 | TCF19      | 6941 .  |
| 223275_at | 0.017786 | 0.010311 | PRMT6      | 55170 . |
| 223276_at | 4.86E-05 | 7.72E-06 | MST150     | 85027 . |
| 223277_at | 0.046666 | 0.031687 | C3orf75    | 54859 . |
| 223279_s_ | 9.57E-05 | 1.82E-05 | UACA       | 55075 . |
| 223280_x_ | 0.019593 | 0.011544 | MS4A6A     | 64231 . |
| 223282_at | 2.49E-07 | 7.86E-09 | TSHZ1      | 10194 . |
| 223283_s_ | 1.77E-07 | 4.89E-09 | TSHZ1      | 10194 . |
| 223284_at | 0.004926 | 0.002276 | NAT14      | 57106 . |
| 223285_s_ | 0.034915 | 0.022612 | ST6GALNAC4 | 27090 . |
| 223286_at | 0.026679 | 0.016554 | C17orf81   | 23587 . |
| 223287_s_ | 4.54E-06 | 3.61E-07 | FOXP1      | 27086 . |
| 223289_s_ | 0.007025 | 0.003471 | USP38      | 84640 . |
| 223290_at | 5.45E-04 | 1.58E-04 | PDXP       | 57026 . |
| 223291_at | 6.19E-04 | 1.85E-04 | MRPS15     | 64960 . |
| 223292_s_ | 0.004201 | 0.001879 | MRPS15     | 64960 . |
| 223294_at | 2.95E-04 | 7.44E-05 | CXorf26    | 51260 . |
| 223295_s_ | 5.48E-07 | 2.23E-08 | LUC7L      | 55692 . |
| 223296_at | 8.35E-06 | 7.98E-07 | SLC25A33   | 84275 . |
| 223297_at | 0.012006 | 0.0065   | AMMECR1L   | 83607 . |
| 223298_s_ | 3.43E-04 | 8.94E-05 | NT5C3      | 51251 . |
| 223299_at | 8.93E-04 | 2.92E-04 | SEC11C     | 90701 . |
| 223302_s_ | 1.82E-04 | 4.08E-05 | ZNF655     | 79027 . |

|           |          |          |                             |         |
|-----------|----------|----------|-----------------------------|---------|
| 223307_at | 9.88E-04 | 3.29E-04 | CDCA3                       | 83461 . |
| 223308_s_ | 0.002109 | 8.23E-04 | WDR5                        | 11091 . |
| 223311_s_ | 1.22E-07 | 2.98E-09 | MTA3                        | 57504 . |
| 223312_at | 5.71E-04 | 1.68E-04 | C2orf7                      | 84279 . |
| 223313_s_ | 0.039353 | 0.02599  | MAGED4 /// M728239 /// 8:   |         |
| 223315_at | 4.06E-07 | 1.51E-08 | NTN4                        | 59277 . |
| 223316_at | 0.006897 | 0.003396 | CCDC3                       | 83643 . |
| 223317_at | 6.46E-05 | 1.11E-05 | ALKBH7                      | 84266 . |
| 223320_s_ | 0.016144 | 0.009214 | ABCB10                      | 23456 . |
| 223321_s_ | 0.001181 | 4.09E-04 | FGFRL1                      | 53834 . |
| 223322_at | 1.31E-04 | 2.69E-05 | RASSF5                      | 83593 . |
| 223323_x_ | 2.10E-05 | 2.66E-06 | TRPM7                       | 54822 . |
| 223325_at | 0.004225 | 0.001893 | TXNDC11                     | 51061 . |
| 223326_s_ | 2.13E-05 | 2.70E-06 | LOC727751 /// 727751 /// 7: |         |
| 223327_x_ | 6.51E-07 | 2.79E-08 | LOC727751 /// 727751 /// 7: |         |
| 223329_x_ | 0.008054 | 0.004076 | SUGT1                       | 10910 . |
| 223330_s_ | 0.032778 | 0.02103  | SUGT1                       | 10910 . |
| 223331_s_ | 0.002462 | 9.92E-04 | DDX20                       | 11218 . |
| 223332_x_ | 4.33E-04 | 1.19E-04 | RNF126                      | 55658 . |
| 223334_at | 5.58E-04 | 1.63E-04 | TMEM126A                    | 84233 . |
| 223335_at | 0.003052 | 0.001281 | TMEM69                      | 51249 . |
| 223336_s_ | 0.002074 | 8.07E-04 | RAB18                       | 22931 . |
| 223337_at | 0.001908 | 7.29E-04 | SDCCAG10                    | 10283 . |
| 223338_s_ | 0.020649 | 0.012284 | ATPIF1                      | 93974 . |
| 223339_at | 0.006267 | 0.003028 | ATPIF1                      | 93974 . |
| 223340_at | 0.001759 | 6.60E-04 | ATL1                        | 51062 . |
| 223341_s_ | 0.010442 | 0.005518 | SCOC                        | 60592 . |
| 223342_at | 0.043816 | 0.029457 | RRM2B                       | 50484 . |
| 223344_s_ | 0.002385 | 9.54E-04 | MS4A7                       | 58475 . |
| 223345_at | 0.005803 | 0.002765 | HDAC8                       | 55869 . |
| 223349_s_ | 0.031314 | 0.019938 | BOK                         | 666 .   |
| 223351_at | 1.87E-05 | 2.29E-06 | C17orf80                    | 55028 . |
| 223352_s_ | 0.00215  | 8.42E-04 | C17orf80                    | 55028 . |
| 223353_at | 6.29E-05 | 1.07E-05 | HCCA2                       | 81532 . |

|           |          |          |           |          |
|-----------|----------|----------|-----------|----------|
| 223354_x_ | 4.64E-04 | 1.30E-04 | MFF       | 56947 .  |
| 223356_s_ | 5.32E-04 | 1.54E-04 | MTIF3     | 219402 . |
| 223358_s_ | 3.25E-07 | 1.13E-08 | PDE7A     | 5150 .   |
| 223359_s_ | 0.007752 | 0.003896 | PDE7A     | 5150 .   |
| 223361_at | 5.36E-04 | 1.55E-04 | C6orf115  | 58527 .  |
| 223362_s_ | 1.77E-04 | 3.93E-05 | 3-Sep     | 55964 .  |
| 223363_at | 9.97E-07 | 4.92E-08 | PSMG3     | 84262 .  |
| 223364_s_ | 3.73E-04 | 9.91E-05 | DHX37     | 57647 .  |
| 223365_at | 0.013716 | 0.007604 | DHX37     | 57647 .  |
| 223367_at | 5.81E-06 | 4.97E-07 | DNAJC30   | 84277 .  |
| 223368_s_ | 9.19E-04 | 3.01E-04 | METTLL11A | 28989 .  |
| 223369_at | 0.003193 | 0.001354 | METTLL11A | 28989 .  |
| 223370_at | 9.55E-04 | 3.16E-04 | PLEKHA3   | 65977 .  |
| 223371_s_ | 0.007518 | 0.003759 | DNAJC4    | 3338 .   |
| 223372_at | 2.04E-06 | 1.28E-07 | DNAJC4    | 3338 .   |
| 223373_s_ | 8.24E-04 | 2.64E-04 | PLA2G12A  | 81579 .  |
| 223376_s_ | 1.01E-04 | 1.96E-05 | BRI3      | 25798 .  |
| 223377_x_ | 4.55E-04 | 1.27E-04 | CISH      | 1154 .   |
| 223378_at | 0.00298  | 0.001244 | GLIS2     | 84662 .  |
| 223379_s_ | 6.92E-05 | 1.21E-05 | LATS2     | 26524 .  |
| 223380_s_ | 1.88E-04 | 4.25E-05 | LATS2     | 26524 .  |
| 223381_at | 9.71E-06 | 9.78E-07 | NUF2      | 83540 .  |
| 223382_s_ | 0.040673 | 0.027004 | ZNRF1     | 84937 .  |
| 223383_at | 0.044274 | 0.029813 | ZNRF1     | 84937 .  |
| 223384_s_ | 4.22E-10 | 1.71E-12 | TRIM4     | 89122 .  |
| 223385_at | 5.25E-08 | 9.67E-10 | CYP2S1    | 29785 .  |
| 223386_at | 0.029426 | 0.018549 | FAM118B   | 79607 .  |
| 223387_at | 4.74E-05 | 7.49E-06 | ZFYVE1    | 53349 .  |
| 223388_s_ | 1.72E-06 | 1.03E-07 | ZFYVE1    | 53349 .  |
| 223389_s_ | 0.004208 | 0.001883 | ZNF581    | 51545 .  |
| 223392_s_ | 0.002988 | 0.001248 | TSHZ3     | 57616 .  |
| 223393_s_ | 0.005754 | 0.002736 | TSHZ3     | 57616 .  |
| 223394_at | 1.10E-04 | 2.18E-05 | SERTAD1   | 29950 .  |
| 223395_at | 1.03E-10 | 2.70E-13 | ABI3BP    | 25890 .  |

|           |          |          |                            |         |
|-----------|----------|----------|----------------------------|---------|
| 223397_s_ | 0.020679 | 0.012306 | NIP7                       | 51388 . |
| 223398_at | 0.020578 | 0.012232 | C9orf89                    | 84270 . |
| 223403_s_ | 1.18E-05 | 1.27E-06 | POLR1B                     | 84172 . |
| 223404_s_ | 0.029435 | 0.018559 | C1orf25                    | 81627 . |
| 223407_at | 1.18E-06 | 6.16E-08 | C16orf48                   | 84080 . |
| 223408_s_ | 0.017407 | 0.010052 |                            | .       |
| 223409_at | 0.002468 | 9.94E-04 |                            | .       |
| 223411_at | 0.002336 | 9.31E-04 | MIF4GD                     | 57409 . |
| 223412_at | 0.01101  | 0.005874 | KBTBD7                     | 84078 . |
| 223413_s_ | 3.62E-06 | 2.68E-07 | LYAR                       | 55646 . |
| 223414_s_ | 3.88E-05 | 5.75E-06 | LYAR                       | 55646 . |
| 223415_at | 0.049769 | 0.034143 | RPP25                      | 54913 . |
| 223416_at | 0.036831 | 0.024073 | SF3B14                     | 51639 . |
| 223418_x_ | 0.016507 | 0.009454 | ANKRD13C                   | 81573 . |
| 223419_at | 0.002701 | 0.001107 | FBXW9                      | 84261 . |
| 223421_at | 5.84E-04 | 1.72E-04 | CYHR1                      | 50626 . |
| 223422_s_ | 1.31E-05 | 1.45E-06 | ARHGAP24                   | 83478 . |
| 223423_at | 4.87E-07 | 1.91E-08 | GPR160                     | 26996 . |
| 223424_s_ | 0.002608 | 0.001063 | ZSCAN21                    | 7589 .  |
| 223426_s_ | 0.001455 | 5.26E-04 | EPB41L4B                   | 54566 . |
| 223427_s_ | 3.54E-05 | 5.12E-06 | EPB41L4B                   | 54566 . |
| 223428_s_ | 3.08E-06 | 2.18E-07 | ISY1                       | 57461 . |
| 223429_x_ | 3.14E-07 | 1.08E-08 | ISY1                       | 57461 . |
| 223430_at | 0.023353 | 0.01418  | SIK2                       | 23235 . |
| 223433_at | 0.009632 | 0.00502  | C7orf36                    | 57002 . |
| 223434_at | 4.47E-05 | 6.94E-06 | GBP3                       | 2635 .  |
| 223435_s_ | 7.55E-08 | 1.57E-09 | PCDHA1 /// PC56134 /// 56: | .       |
| 223437_at | 5.95E-06 | 5.13E-07 | PPARA                      | 5465 .  |
| 223438_s_ | 6.58E-05 | 1.13E-05 | PPARA                      | 5465 .  |
| 223439_at | 0.024478 | 0.014977 | NKAP                       | 79576 . |
| 223441_at | 0.001881 | 7.16E-04 | SLC17A5                    | 26503 . |
| 223445_at | 1.62E-05 | 1.91E-06 | DTNBP1                     | 84062 . |
| 223446_s_ | 8.78E-06 | 8.53E-07 | DTNBP1                     | 84062 . |
| 223448_x_ | 7.98E-05 | 1.45E-05 | MRPS22                     | 56945 . |

|           |          |          |                             |          |
|-----------|----------|----------|-----------------------------|----------|
| 223449_at | 4.62E-11 | 9.39E-14 | SEMA6A                      | 57556 .  |
| 223451_s_ | 5.75E-07 | 2.37E-08 | CKLF                        | 51192 .  |
| 223452_s_ | 0.015501 | 0.008783 | ATL3                        | 25923 .  |
| 223453_s_ | 1.53E-06 | 8.72E-08 | ATL3                        | 25923 .  |
| 223455_at | 6.49E-05 | 1.11E-05 | TCHP                        | 84260 .  |
| 223457_at | 0.004266 | 0.001914 | COPG2                       | 26958 .  |
| 223458_at | 1.21E-04 | 2.45E-05 | LOC652900 /// 26470 /// 65% |          |
| 223459_s_ | 7.04E-04 | 2.17E-04 | C1orf56                     | 54964 .  |
| 223461_at | 0.046699 | 0.031717 | TBC1D7                      | 51256 .  |
| 223462_at | 4.20E-05 | 6.41E-06 | TMEM175                     | 84286 .  |
| 223463_at | 1.28E-05 | 1.41E-06 | RAB23                       | 51715 .  |
| 223464_at | 2.96E-04 | 7.45E-05 | OSBPL5                      | 114879 . |
| 223466_x_ | 0.005803 | 0.002765 | COL4A3BP                    | 10087 .  |
| 223467_at | 0.035106 | 0.022762 | RASD1                       | 51655 .  |
| 223468_s_ | 8.37E-06 | 7.99E-07 | RGMA                        | 56963 .  |
| 223470_at | 3.33E-04 | 8.66E-05 | PIGM                        | 93183 .  |
| 223471_at | 3.32E-06 | 2.40E-07 | RAB3IP                      | 117177 . |
| 223472_at | 6.29E-04 | 1.89E-04 | WHSC1                       | 7468 .   |
| 223475_at | 0.001956 | 7.51E-04 | CRISPLD1                    | 83690 .  |
| 223476_s_ | 1.43E-07 | 3.70E-09 | C12orf65                    | 91574 .  |
| 223477_s_ | 1.25E-04 | 2.55E-05 | C12orf65                    | 91574 .  |
| 223478_at | 0.004992 | 0.002311 | TIMM8B                      | 26521 .  |
| 223480_s_ | 0.001796 | 6.77E-04 | MRPL47                      | 57129 .  |
| 223482_at | 7.83E-05 | 1.42E-05 | TMEM120A                    | 83862 .  |
| 223487_x_ | 9.76E-04 | 3.24E-04 | GNB4                        | 59345 .  |
| 223488_s_ | 9.19E-06 | 9.10E-07 | GNB4                        | 59345 .  |
| 223489_x_ | 0.024325 | 0.014869 | EXOSC3                      | 51010 .  |
| 223490_s_ | 3.81E-04 | 1.02E-04 | EXOSC3                      | 51010 .  |
| 223492_s_ | 0.027432 | 0.017095 | LRRFIP1                     | 9208 .   |
| 223493_at | 1.24E-07 | 3.04E-09 | FBXO4                       | 26272 .  |
| 223494_at | 0.032611 | 0.020903 | MGEA5                       | 10724 .  |
| 223495_at | 0.017144 | 0.009875 | CCDC8                       | 83987 .  |
| 223497_at | 0.038141 | 0.025068 | FAM135A                     | 57579 .  |
| 223499_at | 1.54E-08 | 1.84E-10 | C1QTNF5 /// N 114902 /// 8% |          |

|           |          |          |                             |         |
|-----------|----------|----------|-----------------------------|---------|
| 223504_at | 0.005613 | 0.002658 | DNAJC27                     | 51277 . |
| 223506_at | 8.28E-05 | 1.53E-05 | ZC3H8                       | 84524 . |
| 223507_at | 0.001737 | 6.51E-04 | CLPX                        | 10845 . |
| 223508_at | 0.005171 | 0.002412 | NOTCH1                      | 4851 .  |
| 223509_at | 0.026275 | 0.016259 | CLDN2                       | 9075 .  |
| 223510_at | 5.83E-06 | 4.99E-07 | NRP2                        | 8828 .  |
| 223511_at | 0.02159  | 0.012945 | C1orf124                    | 83932 . |
| 223512_at | 0.006536 | 0.003184 | SAR1B                       | 51128 . |
| 223513_at | 4.07E-08 | 6.76E-10 | CENPJ                       | 55835 . |
| 223514_at | 0.001513 | 5.52E-04 | CARD11                      | 84433 . |
| 223515_s_ | 2.84E-05 | 3.88E-06 | COQ3                        | 51805 . |
| 223516_s_ | 0.010548 | 0.005583 | PRICKLE4 /// T100188893 //. |         |
| 223517_at | 1.48E-06 | 8.36E-08 | FBXO44                      | 93611 . |
| 223518_at | 0.003274 | 0.001395 | DFFA                        | 1676 .  |
| 223519_at | 5.39E-09 | 4.76E-11 | ZAK                         | 51776 . |
| 223520_s_ | 0.039705 | 0.026255 | KIF13A                      | 63971 . |
| 223522_at | 8.85E-04 | 2.88E-04 | C9orf45                     | 81571 . |
| 223524_s_ | 0.014298 | 0.007981 | TMEM108                     | 66000 . |
| 223525_at | 1.32E-05 | 1.47E-06 | DLL4                        | 54567 . |
| 223526_at | 0.003081 | 0.001296 | C18orf21                    | 83608 . |
| 223527_s_ | 0.012385 | 0.006745 | CDADC1                      | 81602 . |
| 223528_s_ | 7.40E-06 | 6.81E-07 | LOC731602 /// 64745 /// 73: |         |
| 223529_at | 0.001325 | 4.70E-04 | SYT4                        | 6860 .  |
| 223530_at | 3.42E-05 | 4.91E-06 | TDRKH                       | 11022 . |
| 223532_at | 8.75E-06 | 8.49E-07 | ANKRD39                     | 51239 . |
| 223533_at | 0.012401 | 0.006758 | LRRC8C                      | 84230 . |
| 223536_at | 6.21E-04 | 1.86E-04 | PSD2                        | 84249 . |
| 223537_s_ | 8.69E-05 | 1.62E-05 | WNT5B                       | 81029 . |
| 223538_at | 1.16E-04 | 2.31E-05 | SERF1A                      | 8293 .  |
| 223539_s_ | 3.88E-06 | 2.93E-07 | SERF1A /// SER728492 /// 8: |         |
| 223540_at | 0.028982 | 0.01823  | PVRL4                       | 81607 . |
| 223541_at | 0.009135 | 0.004718 | HAS3                        | 3038 .  |
| 223542_at | 6.43E-07 | 2.75E-08 | ANKRD32                     | 84250 . |
| 223543_at | 0.001541 | 5.63E-04 | PDZD4                       | 57595 . |



|           |          |          |           |          |
|-----------|----------|----------|-----------|----------|
| 223544_at | 0.012661 | 0.006927 | TMEM79    | 84283 .  |
| 223545_at | 1.37E-07 | 3.49E-09 | FANCD2    | 2177 .   |
| 223546_x  | 4.46E-07 | 1.71E-08 | LUC7L     | 55692 .  |
| 223548_at | 0.015446 | 0.008749 | C1orf26   | 54823 .  |
| 223549_s  | 7.59E-04 | 2.38E-04 | ESPN      | 83715 .  |
| 223550_s  | 0.002237 | 8.83E-04 | CA10      | 56934 .  |
| 223551_at | 2.43E-04 | 5.84E-05 | PKIB      | 5570 .   |
| 223552_at | 0.001061 | 3.58E-04 | LRRC4     | 64101 .  |
| 223553_s  | 0.035173 | 0.022811 | DOK3      | 79930 .  |
| 223554_s  | 0.012009 | 0.006502 | RANGRF    | 29098 .  |
| 223556_at | 9.19E-06 | 9.11E-07 | HELLS     | 3070 .   |
| 223558_at | 0.003578 | 0.001552 | C9orf80   | 58493 .  |
| 223559_s  | 0.001921 | 7.35E-04 | C9orf80   | 58493 .  |
| 223560_s  | 5.96E-06 | 5.14E-07 | C2orf56   | 55471 .  |
| 223562_at | 0.002583 | 0.00105  | PARVG     | 64098 .  |
| 223563_at | 0.00259  | 0.001054 | GNB1L     | 54584 .  |
| 223565_at | 6.50E-05 | 1.12E-05 | MGC29506  | 51237 .  |
| 223566_s  | 7.37E-04 | 2.30E-04 | BCOR      | 54880 .  |
| 223567_at | 0.001137 | 3.90E-04 | SEMA6B    | 10501 .  |
| 223570_at | 1.53E-06 | 8.73E-08 | MCM10     | 55388 .  |
| 223571_at | 0.039405 | 0.026029 | C1QTNF6   | 114904 . |
| 223572_at | 0.004553 | 0.002072 | HHATL     | 57467 .  |
| 223573_s  | 0.045655 | 0.030894 | PPP2R2C   | 5522 .   |
| 223575_at | 4.33E-05 | 6.67E-06 | KIAA1549  | 57670 .  |
| 223576_at | 0.002788 | 0.00115  | C6orf203  | 51250 .  |
| 223581_at | 9.81E-06 | 9.93E-07 | ZNF577    | 84765 .  |
| 223582_at | 3.55E-10 | 1.39E-12 | GPR98     | 84059 .  |
| 223583_at | 0.003606 | 0.001566 | TNFAIP8L2 | 79626 .  |
| 223585_x  | 1.16E-05 | 1.24E-06 | KBTBD2    | 25948 .  |
| 223586_at | 0.002967 | 0.001237 | ARNTL2    | 56938 .  |
| 223587_s  | 0.006389 | 0.003099 | AMN       | 81693 .  |
| 223590_at | 1.33E-04 | 2.77E-05 | ZNF700    | 90592 .  |
| 223592_s  | 0.031918 | 0.020387 | RNF135    | 84282 .  |
| 223594_at | 3.14E-05 | 4.42E-06 | TMEM117   | 84216 .  |

|           |          |          |          |          |
|-----------|----------|----------|----------|----------|
| 223595_at | 4.11E-04 | 1.12E-04 | TMEM133  | 83935 .  |
| 223598_at | 0.020229 | 0.011984 | RAD23B   | 5887 .   |
| 223599_at | 0.009193 | 0.004755 | TRIM6    | 117854 . |
| 223600_s_ | 0.001739 | 6.52E-04 | KIAA1683 | 80726 .  |
| 223601_at | 1.59E-06 | 9.27E-08 | OLFM2    | 93145 .  |
| 223603_at | 0.024441 | 0.014952 | RNF112   | 7732 .   |
| 223604_at | 0.004375 | 0.001975 | GARNL3   | 84253 .  |
| 223605_at | 5.26E-04 | 1.51E-04 | SLC25A18 | 83733 .  |
| 223606_x_ | 9.04E-06 | 8.90E-07 | KIAA1704 | 55425 .  |
| 223610_at | 0.006672 | 0.003263 | SEMA5B   | 54437 .  |
| 223613_at | 0.004307 | 0.001937 | UQCR     | 10975 .  |
| 223616_at | 6.55E-06 | 5.78E-07 | ZNF649   | 65251 .  |
| 223618_at | 6.43E-04 | 1.94E-04 | FMN2     | 56776 .  |
| 223619_x_ | 3.32E-04 | 8.63E-05 | PECR     | 55825 .  |
| 223621_at | 0.003973 | 0.001757 | PNMA3    | 29944 .  |
| 223625_at | 0.003548 | 0.001536 | FAM126A  | 84668 .  |
| 223626_x_ | 4.40E-10 | 1.83E-12 | IFI27L2  | 83982 .  |
| 223629_at | 0.004272 | 0.001917 | PCDHB5   | 26167 .  |
| 223631_s_ | 1.31E-04 | 2.71E-05 | C19orf33 | 64073 .  |
| 223633_s_ | 0.043973 | 0.02958  | BCAN     | 63827 .  |
| 223634_at | 0.005274 | 0.002467 | RASD2    | 23551 .  |
| 223635_s_ | 1.74E-04 | 3.85E-05 | SSBP3    | 23648 .  |
| 223637_s_ | 0.009868 | 0.005166 | FAM160A2 | 84067 .  |
| 223638_at | 1.95E-07 | 5.55E-09 | NBPF3    | 84224 .  |
| 223639_s_ | 1.11E-05 | 1.17E-06 | ZNRD1    | 30834 .  |
| 223640_at | 0.025485 | 0.015708 | HCST     | 10870 .  |
| 223641_at | 0.001555 | 5.69E-04 |          | .        |
| 223642_at | 1.42E-14 | 2.19E-18 | ZIC2     | 7546 .   |
| 223643_at | 0.037321 | 0.024453 | CRYGS    | 1427 .   |
| 223645_s_ | 7.64E-04 | 2.40E-04 | CYorf15B | 84663 .  |
| 223646_s_ | 0.00975  | 0.005096 | CYorf15B | 84663 .  |
| 223647_x_ | 0.005081 | 0.002364 | HSCB     | 150274 . |
| 223648_s_ | 2.64E-04 | 6.49E-05 | FGFRL1   | 53834 .  |
| 223649_s_ | 0.032676 | 0.020953 | SLC25A39 | 51629 .  |

|           |          |          |                              |          |
|-----------|----------|----------|------------------------------|----------|
| 223650_s_ | 3.64E-04 | 9.63E-05 | NRBF2                        | 29982 .  |
| 223651_x_ | 5.65E-06 | 4.79E-07 | CDC23                        | 8697 .   |
| 223652_at | 0.006828 | 0.003355 | AS3MT                        | 57412 .  |
| 223653_x_ | 8.43E-04 | 2.71E-04 | BRUNOL4                      | 56853 .  |
| 223654_s_ | 2.65E-04 | 6.50E-05 | BRUNOL4                      | 56853 .  |
| 223656_s_ | 3.34E-05 | 4.77E-06 | C1orf91                      | 56063 .  |
| 223657_at | 6.50E-04 | 1.97E-04 | FAM167B                      | 84734 .  |
| 223659_at | 3.06E-04 | 7.78E-05 | TMPRSS13                     | 84000 .  |
| 223660_at | 0.030863 | 0.019611 | ADORA3                       | 140 .    |
| 223661_at | 0.002204 | 8.68E-04 | NUCKS1                       | 64710 .  |
| 223662_x_ | 1.07E-06 | 5.35E-08 | DDX59                        | 83479 .  |
| 223663_at | 9.44E-06 | 9.43E-07 | CCDC88B                      | 283234 . |
| 223665_at | 0.002983 | 0.001246 | ARPM1                        | 84517 .  |
| 223666_at | 4.18E-06 | 3.23E-07 | SNX5                         | 27131 .  |
| 223667_at | 4.89E-08 | 8.75E-10 | FKBP7                        | 51661 .  |
| 223668_at | 0.008854 | 0.004547 | CBLC                         | 23624 .  |
| 223671_x_ | 0.002786 | 0.001149 | DPH5                         | 51611 .  |
| 223672_at | 2.01E-06 | 1.26E-07 | SGIP1                        | 84251 .  |
| 223674_s_ | 0.025185 | 0.015494 | CDC42SE1                     | 56882 .  |
| 223676_at | 0.019976 | 0.01181  | C1orf91                      | 56063 .  |
| 223677_at | 0.00319  | 0.001352 | ATG10                        | 83734 .  |
| 223678_s_ | 0.002101 | 8.19E-04 | SFTPA1 /// SFT 6435 /// 6436 | 6436 .   |
| 223679_at | 0.030369 | 0.019252 | CTNNB1                       | 1499 .   |
| 223680_at | 0.001117 | 3.82E-04 | ZNF607                       | 84775 .  |
| 223681_s_ | 1.74E-04 | 3.86E-05 | INADL                        | 10207 .  |
| 223682_s_ | 3.28E-05 | 4.67E-06 | EIF1AD                       | 84285 .  |
| 223683_at | 0.006049 | 0.002905 | ZMYND15                      | 84225 .  |
| 223684_s_ | 0.014542 | 0.008143 | SMUG1                        | 23583 .  |
| 223685_s_ | 9.35E-04 | 3.08E-04 | PRPF18                       | 8559 .   |
| 223689_at | 2.55E-04 | 6.19E-05 | IGF2BP1                      | 10642 .  |
| 223690_at | 8.04E-09 | 8.01E-11 | LTBP2                        | 4053 .   |
| 223692_at | 1.44E-04 | 3.06E-05 | NMNAT1                       | 64802 .  |
| 223694_at | 5.43E-06 | 4.55E-07 | TRIM7                        | 81786 .  |
| 223695_s_ | 9.60E-04 | 3.17E-04 | ARSD                         | 414 .    |

|           |          |          |                             |          |
|-----------|----------|----------|-----------------------------|----------|
| 223696_at | 3.92E-04 | 1.05E-04 | ARSD                        | 414 .    |
| 223697_x_ | 1.59E-04 | 3.43E-05 | C9orf64                     | 84267 .  |
| 223699_at | 0.004849 | 0.002234 | CNDP1                       | 84735 .  |
| 223700_at | 1.66E-07 | 4.48E-09 | MND1                        | 84057 .  |
| 223701_s_ | 0.036123 | 0.023536 | USP47                       | 55031 .  |
| 223702_x_ | 1.54E-04 | 3.31E-05 | FTCD                        | 10841 .  |
| 223705_s_ | 1.09E-05 | 1.13E-06 | GPBP1                       | 65056 .  |
| 223711_s_ | 0.002305 | 9.16E-04 | THYN1                       | 29087 .  |
| 223712_at | 5.05E-04 | 1.44E-04 | PCBD2                       | 84105 .  |
| 223713_at | 0.014973 | 0.008434 | RSPH3                       | 83861 .  |
| 223714_at | 0.001072 | 3.63E-04 | ZNF256                      | 10172 .  |
| 223716_s_ | 8.47E-04 | 2.73E-04 | ZRANB2                      | 9406 .   |
| 223717_s_ | 0.019226 | 0.01129  | ACRBP                       | 84519 .  |
| 223718_at | 6.11E-04 | 1.82E-04 | ACRBP                       | 84519 .  |
| 223719_s_ | 0.001069 | 3.62E-04 | RTBDN                       | 83546 .  |
| 223724_s_ | 5.40E-08 | 1.00E-09 | LOC100134711100134711 //.   |          |
| 223727_at | 4.53E-08 | 7.93E-10 | KCNIP2                      | 30819 .  |
| 223729_at | 3.54E-07 | 1.26E-08 | CECR2                       | 27443 .  |
| 223730_at | 0.005508 | 0.002599 | GPC6                        | 10082 .  |
| 223731_at | 7.34E-04 | 2.29E-04 | MYCBPAP                     | 84073 .  |
| 223732_at | 0.004578 | 0.002086 | SLC23A1                     | 9963 .   |
| 223733_s_ | 0.015925 | 0.009068 | PPP4R1L                     | 55370 .  |
| 223734_at | 0.00299  | 0.00125  | C4orf49                     | 84709 .  |
| 223737_x_ | 3.49E-08 | 5.53E-10 | CHST9                       | 83539 .  |
| 223739_at | 0.04739  | 0.032264 | PADI1                       | 29943 .  |
| 223740_at | 2.49E-04 | 6.04E-05 | C6orf59                     | 79992 .  |
| 223742_at | 5.19E-06 | 4.26E-07 | MRPL4                       | 51073 .  |
| 223744_s_ | 5.75E-05 | 9.54E-06 | SIAE                        | 54414 .  |
| 223746_at | 2.06E-10 | 6.70E-13 | STK4                        | 6789 .   |
| 223747_x_ | 2.00E-04 | 4.59E-05 | WWOX                        | 51741 .  |
| 223748_at | 0.011443 | 0.006147 | SLC4A11                     | 83959 .  |
| 223749_at | 0.00183  | 6.93E-04 | C1QTNF2                     | 114898 . |
| 223752_at | 0.002239 | 8.84E-04 | CFC1                        | 55997 .  |
| 223753_s_ | 1.37E-07 | 3.49E-09 | CFC1 /// CFC1E55997 /// 65: |          |

|           |          |          |                            |             |
|-----------|----------|----------|----------------------------|-------------|
| 223754_at | 0.004751 | 0.002181 | C2orf88                    | 84281 .     |
| 223756_at | 6.14E-04 | 1.83E-04 | KIAA1310                   | 55683 .     |
| 223757_at | 0.001742 | 6.53E-04 | DIO3OS                     | 64150 .     |
| 223759_s_ | 5.50E-04 | 1.60E-04 | GSG2                       | 83903 .     |
| 223761_at | 7.02E-06 | 6.35E-07 | FGF19                      | 9965 .      |
| 223763_at | 0.001255 | 4.40E-04 | DTNBP1                     | 84062 .     |
| 223764_x_ | 0.002288 | 9.08E-04 | NIPSNAP3B                  | 55335 .     |
| 223765_s_ | 0.001526 | 5.57E-04 | KBTBD4                     | 55709 .     |
| 223766_at | 0.049695 | 0.034082 | LOC100133130               | 100133130 . |
| 223767_at | 1.96E-04 | 4.45E-05 | GPR84                      | 53831 .     |
| 223768_at | 0.001134 | 3.89E-04 | C21orf122                  | 728039 .    |
| 223769_x_ | 0.034188 | 0.022075 | HYI                        | 81888 .     |
| 223771_at | 9.77E-05 | 1.87E-05 | TMEM87A                    | 25963 .     |
| 223772_s_ | 2.91E-05 | 4.02E-06 | TMEM87A                    | 25963 .     |
| 223773_s_ | 5.07E-07 | 2.01E-08 | SNHG12                     | 85028 .     |
| 223774_at | 6.24E-06 | 5.42E-07 | SNHG12                     | 85028 .     |
| 223776_x_ | 4.38E-04 | 1.21E-04 | TINF2                      | 26277 .     |
| 223778_at | 0.001416 | 5.09E-04 | KIF9                       | 64147 .     |
| 223779_at | 6.66E-04 | 2.03E-04 | LOC84740                   | 84740 .     |
| 223780_s_ | 0.025141 | 0.015458 | MED13                      | 9969 .      |
| 223781_x_ | 0.004705 | 0.002156 | ADH4                       | 127 .       |
| 223782_s_ | 0.040189 | 0.026628 | TINAG                      | 27283 .     |
| 223784_at | 8.70E-10 | 4.37E-12 | TMEM27                     | 57393 .     |
| 223785_at | 0.003499 | 0.001511 | FANCI                      | 55215 .     |
| 223786_at | 1.69E-04 | 3.70E-05 | CHST6                      | 4166 .      |
| 223788_at | 3.96E-04 | 1.07E-04 |                            | .           |
| 223789_s_ | 2.47E-04 | 5.97E-05 | GTPBP2                     | 54676 .     |
| 223790_at | 0.005879 | 0.002809 | KATNAL1                    | 84056 .     |
| 223791_at | 0.019709 | 0.011623 | FAM27A /// FA 100132948 // | .           |
| 223792_at | 0.025857 | 0.015969 | ZNF2                       | 7549 .      |
| 223795_at | 2.24E-09 | 1.51E-11 | TSPAN10                    | 83882 .     |
| 223797_at | 0.042069 | 0.028083 | PRO2852                    | 114224 .    |
| 223798_at | 4.09E-05 | 6.18E-06 | SLC41A2                    | 84102 .     |
| 223799_at | 2.19E-04 | 5.11E-05 | KIAA1826                   | 84437 .     |

|           |          |          |          |         |
|-----------|----------|----------|----------|---------|
| 223800_s_ | 5.81E-05 | 9.67E-06 | LIMS3    | 96626 . |
| 223801_s_ | 1.76E-04 | 3.90E-05 | APOL4    | 80832 . |
| 223802_s_ | 9.08E-05 | 1.71E-05 | RBBP6    | 5930 .  |
| 223803_s_ | 5.43E-06 | 4.54E-07 | ZCCHC10  | 54819 . |
| 223806_s_ | 0.010183 | 0.005357 | NAPSA    | 9476 .  |
| 223807_at | 3.27E-04 | 8.45E-05 | IGSF1    | 3547 .  |
| 223811_s_ | 7.09E-06 | 6.44E-07 | C7orf20  | 51608 . |
| 223812_at | 4.73E-04 | 1.33E-04 | FAM178B  | 51252 . |
| 223814_at | 9.97E-05 | 1.92E-05 | TRNT1    | 51095 . |
| 223815_at | 6.09E-04 | 1.81E-04 | CCDC45   | 90799 . |
| 223816_at | 1.18E-04 | 2.38E-05 | SLC46A2  | 57864 . |
| 223818_s_ | 1.40E-04 | 2.95E-05 | RSF1     | 51773 . |
| 223819_x_ | 0.006387 | 0.003097 | COMMD5   | 28991 . |
| 223820_at | 5.00E-04 | 1.42E-04 | RBP5     | 83758 . |
| 223823_at | 0.031802 | 0.020298 | KCNMB2   | 10242 . |
| 223824_at | 6.41E-04 | 1.94E-04 | RNLS     | 55328 . |
| 223826_s_ | 1.30E-05 | 1.44E-06 | KIAA1432 | 57589 . |
| 223827_at | 1.25E-09 | 7.17E-12 | TNFRSF19 | 55504 . |
| 223828_s_ | 4.17E-08 | 6.97E-10 | LGALS12  | 85329 . |
| 223830_s_ | 0.035367 | 0.022956 | TRIM5    | 85363 . |
| 223831_x_ | 2.69E-07 | 8.69E-09 | ISY1     | 57461 . |
| 223834_at | 9.50E-05 | 1.81E-05 | CD274    | 29126 . |
| 223837_at | 1.75E-06 | 1.06E-07 | GULP1    | 51454 . |
| 223840_s_ | 0.001954 | 7.50E-04 | SPATA9   | 83890 . |
| 223842_s_ | 0.009924 | 0.005202 | SCARA3   | 51435 . |
| 223843_at | 7.62E-04 | 2.40E-04 | SCARA3   | 51435 . |
| 223845_at | 0.028132 | 0.017607 | FLJ20674 | 54621 . |
| 223847_s_ | 0.001857 | 7.06E-04 | ERGIC1   | 57222 . |
| 223849_s_ | 4.43E-04 | 1.23E-04 | MOV10    | 4343 .  |
| 223850_at | 0.027472 | 0.017124 |          | .       |
| 223851_s_ | 0.002242 | 8.86E-04 | TNFRSF18 | 8784 .  |
| 223852_s_ | 5.33E-04 | 1.54E-04 | STK40    | 83931 . |
| 223853_at | 5.28E-06 | 4.37E-07 | BVES     | 11149 . |
| 223855_s_ | 0.003039 | 0.001275 | MCHR1    | 2847 .  |

|           |          |          |              |             |
|-----------|----------|----------|--------------|-------------|
| 223856_at | 9.35E-07 | 4.53E-08 | AKR1CL2      | 83592 .     |
| 223859_at | 0.001002 | 3.35E-04 | EPB41L4B     | 54566 .     |
| 223862_at | 5.06E-04 | 1.44E-04 | GHRL         | 51738 .     |
| 223867_at | 0.004676 | 0.002141 | TEKT3        | 64518 .     |
| 223868_s_ | 0.025386 | 0.015641 | WVOX         | 51741 .     |
| 223870_at | 7.12E-05 | 1.26E-05 | FBXW10       | 10517 .     |
| 223872_at | 0.005042 | 0.002341 | LOC100132178 | 100132178 . |
| 223875_s_ | 2.88E-04 | 7.23E-05 | EPC1         | 80314 .     |
| 223876_at | 0.006268 | 0.003029 | SPATA16      | 83893 .     |
| 223877_at | 2.96E-04 | 7.45E-05 | C1QTNF7      | 114905 .    |
| 223881_at | 0.012938 | 0.007107 | ICA1L        | 130026 .    |
| 223883_s_ | 0.044119 | 0.029693 | STK31        | 56164 .     |
| 223884_at | 0.005933 | 0.00284  | OPTC         | 26254 .     |
| 223885_at | 0.002111 | 8.24E-04 | CALN1        | 83698 .     |
| 223886_s_ | 0.025173 | 0.015484 | RNF146       | 81847 .     |
| 223887_at | 3.81E-06 | 2.87E-07 | GPR132       | 29933 .     |
| 223888_s_ | 0.008921 | 0.004589 | LARS         | 51520 .     |
| 223889_at | 0.014843 | 0.008345 |              | .           |
| 223892_s_ | 1.39E-04 | 2.91E-05 | TMBIM4       | 51643 .     |
| 223893_at | 0.001557 | 5.70E-04 | ENAM         | 10117 .     |
| 223895_s_ | 5.98E-05 | 1.00E-05 | EPN3         | 55040 .     |
| 223898_at | 3.39E-04 | 8.83E-05 | ZNF670       | 93474 .     |
| 223899_at | 2.89E-04 | 7.23E-05 | PBRM1        | 55193 .     |
| 223904_at | 0.031913 | 0.020383 | PRKAG3       | 53632 .     |
| 223905_at | 9.25E-05 | 1.75E-05 | CCDC135      | 84229 .     |
| 223906_s_ | 2.41E-05 | 3.17E-06 | TEX101       | 83639 .     |
| 223907_s_ | 0.005451 | 0.002567 | PINX1        | 54984 .     |
| 223908_at | 2.66E-04 | 6.56E-05 | HDAC8        | 55869 .     |
| 223910_at | 1.23E-05 | 1.34E-06 | ERN2         | 10595 .     |
| 223912_s_ | 5.71E-04 | 1.68E-04 | CLN8         | 2055 .      |
| 223915_at | 1.10E-04 | 2.18E-05 | BCOR         | 54880 .     |
| 223916_s_ | 0.02779  | 0.017357 | BCOR         | 54880 .     |
| 223917_s_ | 0.017449 | 0.01008  | SLC39A3      | 29985 .     |
| 223919_at | 0.020175 | 0.011948 | TP53AIP1     | 63970 .     |

|           |          |          |           |          |
|-----------|----------|----------|-----------|----------|
| 223920_s_ | 0.005915 | 0.002829 | TP53AIP1  | 63970 .  |
| 223921_s_ | 3.58E-05 | 5.20E-06 | GBA2      | 57704 .  |
| 223922_x_ | 5.44E-06 | 4.56E-07 | MS4A6A    | 64231 .  |
| 223926_at | 0.049992 | 0.034327 | KIF2B     | 84643 .  |
| 223927_at | 0.004093 | 0.001821 | PCDHB9    | 56127 .  |
| 223929_s_ | 0.007767 | 0.003906 |           | .        |
| 223930_at | 1.34E-06 | 7.37E-08 |           | .        |
| 223931_s_ | 0.001292 | 4.56E-04 | CHFR      | 55743 .  |
| 223932_at | 0.03579  | 0.023285 |           | .        |
| 223934_at | 0.021362 | 0.012789 | SP140L    | 93349 .  |
| 223935_at | 1.48E-05 | 1.70E-06 | TRPM5     | 29850 .  |
| 223936_s_ | 1.50E-04 | 3.22E-05 | FOXP1     | 27086 .  |
| 223937_at | 3.07E-05 | 4.31E-06 | FOXP1     | 27086 .  |
| 223938_at | 5.98E-06 | 5.16E-07 | C1orf49   | 84066 .  |
| 223939_at | 0.009783 | 0.005115 | SUCNR1    | 56670 .  |
| 223941_at | 0.011733 | 0.006326 | FBXO24    | 26261 .  |
| 223942_x_ | 0.014667 | 0.008226 | CHST5     | 23563 .  |
| 223943_s_ | 0.040902 | 0.027179 | GNG2      | 54331 .  |
| 223944_at | 6.63E-06 | 5.87E-07 | NLRP12    | 91662 .  |
| 223945_x_ | 4.22E-04 | 1.15E-04 | RP9P      | 441212 . |
| 223946_at | 0.005402 | 0.002539 | MED23     | 9439 .   |
| 223950_s_ | 0.001113 | 3.81E-04 | FLYWCH1   | 84256 .  |
| 223951_at | 0.007798 | 0.003925 | C21orf116 | 378820 . |
| 223952_x_ | 0.012304 | 0.006695 | DHRS9     | 10170 .  |
| 223954_x_ | 0.005279 | 0.00247  | NECAB3    | 63941 .  |
| 223956_at | 2.40E-07 | 7.49E-09 | TMPRSS13  | 84000 .  |
| 223957_at | 0.024181 | 0.014766 |           | .        |
| 223959_at | 0.017374 | 0.010029 | DNAL1     | 83544 .  |
| 223960_s_ | 2.40E-04 | 5.75E-05 | C16orf5   | 29965 .  |
| 223961_s_ | 0.026596 | 0.016492 | CISH      | 1154 .   |
| 223962_at | 2.48E-06 | 1.64E-07 | TTC29     | 83894 .  |
| 223963_s_ | 0.04133  | 0.027507 | IGF2BP2   | 10644 .  |
| 223964_x_ | 2.46E-06 | 1.62E-07 |           | .        |
| 223965_at | 0.010668 | 0.00566  | TRNAU1AP  | 54952 .  |



|           |          |          |                            |          |
|-----------|----------|----------|----------------------------|----------|
| 223967_at | 0.009936 | 0.005209 | ANGPTL6                    | 83854 .  |
| 223968_at | 0.00658  | 0.003208 | ZNF44                      | 51710 .  |
| 223970_at | 0.036145 | 0.023554 | RETNLB                     | 84666 .  |
| 223973_at | 5.60E-05 | 9.23E-06 | C19orf30                   | 284424 . |
| 223974_at | 0.023046 | 0.013961 | MGC11082                   | 84777 .  |
| 223975_at | 0.011109 | 0.005936 | SPRYD5                     | 84767 .  |
| 223976_at | 4.47E-04 | 1.24E-04 | FUT10                      | 84750 .  |
| 223979_x  | 4.31E-05 | 6.64E-06 | FTCD                       | 10841 .  |
| 223980_s  | 1.19E-05 | 1.27E-06 | SP110                      | 3431 .   |
| 223981_at | 0.015422 | 0.008732 | NIN                        | 51199 .  |
| 223983_s  | 0.010939 | 0.00583  | C19orf12                   | 83636 .  |
| 223984_s  | 0.034934 | 0.022627 | NUPL1                      | 9818 .   |
| 223987_at | 6.75E-05 | 1.17E-05 | CHRD2                      | 25884 .  |
| 223988_x  | 8.29E-06 | 7.89E-07 | LOC731602 /// 64745 /// 73 | .        |
| 223989_s  | 2.38E-04 | 5.70E-05 | REXO2                      | 25996 .  |
| 223990_at | 2.49E-05 | 3.31E-06 | C4orf17                    | 84103 .  |
| 223991_s  | 2.47E-05 | 3.28E-06 | GALNT2 /// LO 100132910 // | .        |
| 223992_x  | 0.040189 | 0.02663  | ZCWPW1                     | 55063 .  |
| 223993_s  | 8.45E-04 | 2.72E-04 | CNIH4                      | 29097 .  |
| 223994_s  | 0.010768 | 0.005723 | SLC12A9                    | 56996 .  |
| 223996_s  | 0.040158 | 0.026606 | MRPL30                     | 51263 .  |
| 223997_at | 0.048357 | 0.033013 | FNIP1                      | 96459 .  |
| 224000_at | 6.23E-04 | 1.87E-04 | C2orf16                    | 84226 .  |
| 224001_at | 0.013859 | 0.007695 | FAM135B                    | 51059 .  |
| 224002_s  | 4.63E-05 | 7.27E-06 | FKBP7                      | 51661 .  |
| 224003_at | 1.04E-04 | 2.02E-05 | TTY14                      | 83869 .  |
| 224004_at | 7.01E-04 | 2.16E-04 | ZNF226                     | 7769 .   |
| 224005_at | 0.007194 | 0.003569 |                            | .        |
| 224008_s  | 1.53E-04 | 3.28E-05 | KCNK7                      | 10089 .  |
| 224009_x  | 0.01415  | 0.007883 | DHRS9                      | 10170 .  |
| 224011_at | 0.001468 | 5.32E-04 |                            | .        |
| 224014_at | 0.003264 | 0.001389 | ZNF160                     | 90338 .  |
| 224015_s  | 5.85E-04 | 1.73E-04 | MRPS25                     | 64432 .  |
| 224016_at | 5.21E-04 | 1.49E-04 | HIPK2                      | 28996 .  |

|           |          |          |                             |             |
|-----------|----------|----------|-----------------------------|-------------|
| 224018_s_ | 9.55E-04 | 3.16E-04 | SCD5                        | 79966 .     |
| 224019_at | 6.57E-04 | 1.99E-04 | SCD5                        | 79966 .     |
| 224025_s_ | 0.014564 | 0.008157 | ATG7                        | 10533 .     |
| 224027_at | 0.024442 | 0.014952 | CCL28                       | 56477 .     |
| 224035_s_ | 6.95E-06 | 6.25E-07 | BCL2L13                     | 23786 .     |
| 224037_at | 4.21E-05 | 6.44E-06 | LOC100129865                | 100129865 . |
| 224038_at | 0.002354 | 9.39E-04 | TIMM23                      | 10431 .     |
| 224039_at | 4.22E-05 | 6.44E-06 | FAM186B                     | 84070 .     |
| 224040_at | 0.005841 | 0.002788 | TTY5                        | 83863 .     |
| 224041_at | 8.64E-07 | 4.08E-08 | TTY6                        | 84672 .     |
| 224045_x_ | 0.013813 | 0.007667 | C18orf2                     | 56651 .     |
| 224046_s_ | 5.53E-07 | 2.25E-08 | PDE7A                       | 5150 .      |
| 224048_at | 1.98E-11 | 3.19E-14 | USP44                       | 84101 .     |
| 224049_at | 1.68E-05 | 1.99E-06 | KCNK17                      | 89822 .     |
| 224052_at | 0.038221 | 0.025128 | HSFY1 /// HSFY159119 /// 86 | 86 .        |
| 224053_s_ | 4.31E-05 | 6.63E-06 | SLC4A9                      | 83697 .     |
| 224054_at | 8.59E-04 | 2.78E-04 |                             | .           |
| 224055_x_ | 0.007808 | 0.003931 | KCNK7                       | 10089 .     |
| 224056_at | 0.005724 | 0.002719 |                             | .           |
| 224057_s_ | 7.13E-04 | 2.21E-04 | THAP4                       | 51078 .     |
| 224058_s_ | 0.036145 | 0.023554 | HSD17B7P2                   | 158160 .    |
| 224060_s_ | 0.048906 | 0.033454 | DPH5                        | 51611 .     |
| 224062_x_ | 6.05E-06 | 5.23E-07 | KLK4                        | 9622 .      |
| 224063_at | 0.005222 | 0.00244  | NLN                         | 57486 .     |
| 224065_at | 0.003963 | 0.001752 | HIPK2                       | 28996 .     |
| 224066_s_ | 0.005087 | 0.002367 | HIPK2                       | 28996 .     |
| 224068_x_ | 0.019942 | 0.011785 | RBM22                       | 55696 .     |
| 224069_x_ | 0.001207 | 4.20E-04 | P2RX2                       | 22953 .     |
| 224070_at | 0.001799 | 6.78E-04 | tAKR                        | 389932 .    |
| 224071_at | 2.32E-05 | 3.01E-06 | IL20                        | 50604 .     |
| 224072_s_ | 0.022985 | 0.01392  | KCNK9                       | 51305 .     |
| 224076_s_ | 0.012705 | 0.006955 | WHSC1L1                     | 54904 .     |
| 224077_at | 8.27E-04 | 2.65E-04 | WHSC1L1                     | 54904 .     |
| 224078_at | 0.025472 | 0.015698 | HIATL2                      | 84278 .     |

|           |          |          |                           |           |   |
|-----------|----------|----------|---------------------------|-----------|---|
| 224079_at | 0.001777 | 6.68E-04 | IL17C                     | 27189     | . |
| 224082_at | 0.026385 | 0.016342 |                           |           | . |
| 224085_at | 0.019172 | 0.011251 |                           |           | . |
| 224087_at | 1.37E-07 | 3.49E-09 |                           |           | . |
| 224088_at | 0.00387  | 0.001704 | NMUR2                     | 56923     | . |
| 224089_at | 0.015524 | 0.008799 | LOC100128663              | 100128663 | . |
| 224090_s_ | 4.30E-06 | 3.36E-07 | TNFRSF19                  | 55504     | . |
| 224091_at | 0.009021 | 0.004647 |                           |           | . |
| 224092_at | 1.26E-04 | 2.58E-05 | BARHL1                    | 56751     | . |
| 224096_at | 0.001788 | 6.73E-04 | LOC100130797              | 100130797 | . |
| 224097_s_ | 3.35E-10 | 1.29E-12 | F11R                      | 50848     | . |
| 224098_at | 1.17E-04 | 2.35E-05 |                           |           | . |
| 224099_at | 0.041828 | 0.02789  | KCNH7                     | 90134     | . |
| 224100_s_ | 0.035952 | 0.023405 | DPYSL5                    | 56896     | . |
| 224101_x_ | 0.001544 | 5.65E-04 | MRS2                      | 57380     | . |
| 224105_x_ | 2.01E-05 | 2.51E-06 |                           |           | . |
| 224106_at | 0.011176 | 0.00598  |                           |           | . |
| 224108_at | 0.018776 | 0.010986 |                           |           | . |
| 224111_x_ | 2.55E-04 | 6.20E-05 | KLF16                     | 83855     | . |
| 224113_at | 0.005173 | 0.002413 | CARD14                    | 79092     | . |
| 224117_at | 7.72E-04 | 2.44E-04 | LOC284912                 | 284912    | . |
| 224118_at | 0.006267 | 0.003029 | UBE2B                     | 7320      | . |
| 224121_x_ | 0.030968 | 0.01969  | PLEKHB2                   | 55041     | . |
| 224125_at | 1.15E-04 | 2.30E-05 | PLEKHN1                   | 84069     | . |
| 224128_at | 0.001827 | 6.92E-04 | C20orf43                  | 51507     | . |
| 224129_s_ | 2.30E-05 | 2.98E-06 | DPY30                     | 84661     | . |
| 224130_s_ | 0.003583 | 0.001554 | SRA1                      | 10011     | . |
| 224133_at | 4.12E-05 | 6.23E-06 |                           |           | . |
| 224134_at | 1.50E-04 | 3.22E-05 | MGC10814                  | 84757     | . |
| 224135_at | 0.002535 | 0.001027 | WDR87                     | 83889     | . |
| 224137_at | 0.012948 | 0.007113 | CACNG7                    | 59284     | . |
| 224138_at | 0.011208 | 0.006    | CBX2                      | 84733     | . |
| 224140_at | 0.005936 | 0.002841 | NPCDR1                    | 246734    | . |
| 224142_s_ | 0.004416 | 0.001997 | LOC100101111&100101118 // |           | . |

|           |          |          |                              |          |
|-----------|----------|----------|------------------------------|----------|
| 224143_at | 0.002273 | 9.01E-04 | LOC100101111&100101118 //.   |          |
| 224144_at | 0.003471 | 0.001496 | SPTBN4                       | 57731 .  |
| 224145_s_ | 1.91E-04 | 4.34E-05 | SPTBN4                       | 57731 .  |
| 224146_s_ | 1.83E-05 | 2.23E-06 | ABCC11                       | 85320 .  |
| 224147_at | 0.003901 | 0.001721 | C12orf48                     | 55010 .  |
| 224149_x_ | 1.66E-05 | 1.96E-06 | SLMAP                        | 7871 .   |
| 224150_s_ | 0.001113 | 3.81E-04 | CEP70                        | 80321 .  |
| 224151_s_ | 0.041648 | 0.027754 | AK3                          | 50808 .  |
| 224152_s_ | 0.008394 | 0.004275 | PBRM1                        | 55193 .  |
| 224156_x_ | 8.55E-04 | 2.76E-04 | IL17RB                       | 55540 .  |
| 224157_at | 0.013281 | 0.007325 | KAAG1                        | 353219 . |
| 224159_x_ | 0.00156  | 5.72E-04 | TRIM4                        | 89122 .  |
| 224160_s_ | 5.16E-05 | 8.34E-06 | ACAD9                        | 28976 .  |
| 224162_s_ | 1.14E-07 | 2.74E-09 | FBXO31                       | 79791 .  |
| 224163_s_ | 0.003367 | 0.001444 | DMAP1                        | 55929 .  |
| 224164_at | 3.81E-04 | 1.02E-04 | TPM3                         | 7170 .   |
| 224168_at | 0.010328 | 0.005449 | TXNDC2                       | 84203 .  |
| 224169_at | 3.24E-07 | 1.13E-08 | NPFFR2                       | 10886 .  |
| 224170_s_ | 6.62E-08 | 1.31E-09 | TULP4                        | 56995 .  |
| 224171_at | 0.013246 | 0.007302 | LSM14B                       | 149986 . |
| 224172_at | 0.005582 | 0.002641 |                              | .        |
| 224173_s_ | 0.001998 | 7.71E-04 | MRPL30                       | 51263 .  |
| 224174_at | 0.00255  | 0.001034 | TTY11                        | 83866 .  |
| 224175_s_ | 1.94E-04 | 4.41E-05 | TRIM34 /// TRI 445372 /// 5: |          |
| 224176_s_ | 7.88E-04 | 2.50E-04 | AXIN2                        | 8313 .   |
| 224177_s_ | 9.90E-05 | 1.91E-05 | CXorf26                      | 51260 .  |
| 224178_s_ | 0.003508 | 0.001515 | SOX6                         | 55553 .  |
| 224179_s_ | 0.003087 | 0.001299 | MIOX                         | 55586 .  |
| 224181_at | 6.71E-04 | 2.05E-04 | C18orf2                      | 56651 .  |
| 224182_x_ | 0.022579 | 0.013637 | SEMA6B                       | 10501 .  |
| 224183_at | 0.031854 | 0.020336 | C6orf50                      | 57052 .  |
| 224184_s_ | 0.011874 | 0.006416 | BOC                          | 91653 .  |
| 224185_at | 6.54E-05 | 1.12E-05 |                              | .        |
| 224186_s_ | 0.003395 | 0.001457 | RNF123                       | 63891 .  |

|           |          |          |                                 |          |
|-----------|----------|----------|---------------------------------|----------|
| 224187_x_ | 0.009115 | 0.004705 | HSPA8                           | 3312 .   |
| 224191_x_ | 0.001032 | 3.47E-04 | ROPN1                           | 54763 .  |
| 224192_at | 0.04503  | 0.030404 | FCRL2                           | 79368 .  |
| 224194_at | 0.008828 | 0.004532 | FCRL2                           | 79368 .  |
| 224196_x_ | 0.003107 | 0.00131  | DPH5                            | 51611 .  |
| 224197_s_ | 1.81E-04 | 4.06E-05 | C1QTNF1                         | 114897 . |
| 224198_at | 0.002893 | 0.001201 | CELA1                           | 1990 .   |
| 224202_at | 0.001163 | 4.01E-04 | SUFU                            | 51684 .  |
| 224203_at | 0.005324 | 0.002495 | SUFU                            | 51684 .  |
| 224207_x_ | 4.78E-06 | 3.84E-07 | MMP28                           | 79148 .  |
| 224210_s_ | 0.001257 | 4.41E-04 | PXMP4                           | 11264 .  |
| 224212_s_ | 8.04E-07 | 3.71E-08 | PCDHA1 /// PC56134 /// 56134    | . . .    |
| 224216_at | 0.00385  | 0.001693 |                                 | . . .    |
| 224217_s_ | 3.10E-07 | 1.06E-08 | FAF1                            | 11124 .  |
| 224219_s_ | 3.71E-04 | 9.84E-05 | TRPC4                           | 7223 .   |
| 224220_x_ | 2.75E-08 | 4.11E-10 | TRPC4                           | 7223 .   |
| 224221_s_ | 0.03437  | 0.02221  | VAV3                            | 10451 .  |
| 224223_s_ | 3.22E-05 | 4.58E-06 | PDE11A                          | 50940 .  |
| 224227_s_ | 0.035437 | 0.02301  | BDP1                            | 55814 .  |
| 224229_s_ | 3.38E-05 | 4.85E-06 | AKT3                            | 10000 .  |
| 224231_at | 0.032972 | 0.021184 | PRO0471                         | 28994 .  |
| 224232_s_ | 9.88E-04 | 3.29E-04 | PRELID1                         | 27166 .  |
| 224233_s_ | 0.040638 | 0.026978 | MSTO1 /// MS100129405 //        | . . .    |
| 224239_at | 3.48E-05 | 5.02E-06 | DEFB103A /// I414325 /// 514325 | . . .    |
| 224240_s_ | 0.0499   | 0.034248 | CCL28                           | 56477 .  |
| 224242_at | 0.032414 | 0.020758 | GALP                            | 85569 .  |
| 224243_at | 1.66E-04 | 3.63E-05 | APOA5                           | 116519 . |
| 224247_s_ | 0.043602 | 0.029279 | MRPS10                          | 55173 .  |
| 224249_at | 0.012867 | 0.007059 |                                 | . . .    |
| 224250_s_ | 4.47E-05 | 6.94E-06 | SECISBP2                        | 79048 .  |
| 224252_s_ | 0.047234 | 0.032143 | FXD5                            | 53827 .  |
| 224254_x_ | 6.93E-09 | 6.49E-11 |                                 | . . .    |
| 224256_at | 0.005031 | 0.002334 | LOC100129449 100129449          | . . .    |
| 224259_at | 2.27E-04 | 5.35E-05 | WNT8A                           | 7478 .   |

|           |          |                                      |             |
|-----------|----------|--------------------------------------|-------------|
| 224260_at | 0.017821 | 0.010334                             | .           |
| 224261_at | 1.75E-04 | 3.90E-05                             | .           |
| 224263_x_ | 5.51E-04 | 1.60E-04 ZAN                         | 7455 .      |
| 224264_x_ | 4.23E-05 | 6.47E-06 ZAN                         | 7455 .      |
| 224267_x_ | 7.10E-04 | 2.20E-04 ZAN                         | 7455 .      |
| 224268_x_ | 1.33E-04 | 2.77E-05 ZAN                         | 7455 .      |
| 224269_at | 0.011248 | 0.006025 KRTAP4-12                   | 83755 .     |
| 224270_at | 0.039976 | 0.026463 OCR1                        | 100128298 . |
| 224271_x_ | 2.57E-04 | 6.28E-05 FKSG43 /// FRM83786 /// 835 | .           |
| 224273_at | 3.98E-04 | 1.08E-04 C3orf20                     | 84077 .     |
| 224275_at | 0.001891 | 7.22E-04 GPR98                       | 84059 .     |
| 224276_at | 0.041112 | 0.02734 ZNF33A                       | 7581 .      |
| 224280_s_ | 5.94E-06 | 5.12E-07 FAM54B                      | 56181 .     |
| 224282_s_ | 0.001065 | 3.60E-04 AGPAT3                      | 56894 .     |
| 224284_x_ | 0.0404   | 0.026789 FKSG49                      | 400949 .    |
| 224286_at | 0.003159 | 0.001336 C1QTNF5 /// N114902 /// 85  | .           |
| 224287_at | 8.35E-05 | 1.54E-05                             | .           |
| 224288_x_ | 6.55E-04 | 1.99E-04 FKSG49                      | 400949 .    |
| 224294_at | 3.03E-05 | 4.24E-06 LOC100128185                | 100128185 . |
| 224297_s_ | 1.08E-06 | 5.45E-08 SPTBN4                      | 57731 .     |
| 224299_x_ | 7.83E-04 | 2.48E-04 FTCD                        | 10841 .     |
| 224300_x_ | 2.76E-06 | 1.89E-07 FTCD                        | 10841 .     |
| 224301_x_ | 0.008197 | 0.004157 H2AFJ                       | 55766 .     |
| 224302_s_ | 0.007992 | 0.004039 MRPS36                      | 92259 .     |
| 224304_x_ | 0.044136 | 0.029708 NIN                         | 51199 .     |
| 224305_s_ | 5.74E-04 | 1.69E-04 NPC1L1                      | 29881 .     |
| 224306_at | 5.11E-05 | 8.24E-06 NPC1L1                      | 29881 .     |
| 224308_s_ | 5.70E-05 | 9.45E-06 INTS2                       | 57508 .     |
| 224309_s_ | 0.004887 | 0.002254 SUGT1                       | 10910 .     |
| 224311_s_ | 0.005092 | 0.002369 CAB39                       | 51719 .     |
| 224315_at | 0.039758 | 0.026298 DDX20                       | 11218 .     |
| 224318_s_ | 3.72E-05 | 5.46E-06 KIAA1310                    | 55683 .     |
| 224319_s_ | 6.16E-04 | 1.84E-04 SMCR7L                      | 54471 .     |
| 224320_s_ | 3.25E-05 | 4.62E-06 MCM8                        | 84515 .     |

|           |          |          |                             |          |
|-----------|----------|----------|-----------------------------|----------|
| 224321_at | 0.043431 | 0.029148 | TMEFF2                      | 23671 .  |
| 224323_s_ | 0.011339 | 0.00608  | MRO                         | 83876 .  |
| 224326_s_ | 2.54E-04 | 6.19E-05 | PCGF6                       | 84108 .  |
| 224330_s_ | 0.001851 | 7.03E-04 | MRPL27                      | 51264 .  |
| 224331_s_ | 9.97E-04 | 3.33E-04 | MRPL36                      | 64979 .  |
| 224333_s_ | 6.26E-08 | 1.21E-09 | MRPS5                       | 64969 .  |
| 224334_s_ | 0.001905 | 7.28E-04 | MRPL51 /// SP 10558 /// 517 | .        |
| 224335_s_ | 0.003434 | 0.001477 | BACE1                       | 23621 .  |
| 224336_s_ | 1.15E-05 | 1.22E-06 | DUSP16                      | 80824 .  |
| 224337_s_ | 3.24E-04 | 8.37E-05 | FZD4                        | 8322 .   |
| 224338_s_ | 0.006461 | 0.00314  | RNF26                       | 79102 .  |
| 224339_s_ | 0.001698 | 6.33E-04 | ANGPTL1                     | 9068 .   |
| 224341_x_ | 2.46E-05 | 3.26E-06 | TLR4                        | 7099 .   |
| 224342_x_ | 4.05E-05 | 6.09E-06 | IGL@ /// LOC9 3535 /// 966  | .        |
| 224343_x_ | 0.011162 | 0.005971 | KIFC3 /// TRD@ 3801 /// 696 | .        |
| 224344_at | 4.19E-07 | 1.58E-08 | COX6A1                      | 1337 .   |
| 224345_x_ | 0.001078 | 3.66E-04 | FAM162A                     | 26355 .  |
| 224347_x_ | 2.57E-05 | 3.42E-06 | UBE2J2                      | 118424 . |
| 224348_s_ | 0.020335 | 0.01206  |                             | .        |
| 224349_at | 0.047083 | 0.03202  |                             | .        |
| 224352_s_ | 8.33E-06 | 7.95E-07 | CFL2                        | 1073 .   |
| 224354_at | 1.15E-05 | 1.22E-06 |                             | .        |
| 224356_x_ | 6.23E-04 | 1.86E-04 | MS4A6A                      | 64231 .  |
| 224357_s_ | 7.85E-04 | 2.49E-04 | MS4A4A                      | 51338 .  |
| 224359_s_ | 4.17E-04 | 1.14E-04 | HOOK3                       | 84376 .  |
| 224360_s_ | 5.13E-05 | 8.27E-06 | PACSIN1                     | 29993 .  |
| 224361_s_ | 9.04E-04 | 2.96E-04 | IL17RB                      | 55540 .  |
| 224365_s_ | 0.014799 | 0.008318 | TIGD7                       | 91151 .  |
| 224366_s_ | 2.44E-05 | 3.23E-06 | REPS1                       | 85021 .  |
| 224367_at | 1.27E-07 | 3.12E-09 | BEX2                        | 84707 .  |
| 224368_s_ | 0.035961 | 0.023412 | NDRG3                       | 57446 .  |
| 224371_at | 0.001907 | 7.29E-04 | ADAMTSL1                    | 92949 .  |
| 224374_s_ | 7.92E-04 | 2.51E-04 | EMILIN2                     | 84034 .  |
| 224377_s_ | 2.00E-06 | 1.25E-07 | RAB18                       | 22931 .  |

|           |          |          |              |          |
|-----------|----------|----------|--------------|----------|
| 224378_x_ | 0.001686 | 6.28E-04 | MAP1LC3A     | 84557 .  |
| 224387_at | 0.033637 | 0.021678 | COMMD5       | 28991 .  |
| 224389_s_ | 0.036967 | 0.02418  | COL25A1      | 84570 .  |
| 224390_s_ | 5.11E-04 | 1.46E-04 | RGS8         | 85397 .  |
| 224391_s_ | 4.64E-05 | 7.29E-06 | SIAE         | 54414 .  |
| 224393_s_ | 7.31E-07 | 3.27E-08 | CECR6        | 27439 .  |
| 224394_at | 2.92E-04 | 7.36E-05 | RNF7         | 9616 .   |
| 224395_s_ | 0.002175 | 8.55E-04 | RNF7         | 9616 .   |
| 224396_s_ | 8.75E-06 | 8.49E-07 | ASPN         | 54829 .  |
| 224397_s_ | 0.030289 | 0.019195 | TMTC1        | 83857 .  |
| 224398_at | 0.004378 | 0.001977 |              | .        |
| 224399_at | 2.75E-06 | 1.88E-07 | PDCD1LG2     | 80380 .  |
| 224400_s_ | 4.25E-10 | 1.75E-12 | CHST9        | 83539 .  |
| 224404_s_ | 0.002444 | 9.83E-04 | FCRL5        | 83416 .  |
| 224406_s_ | 3.39E-05 | 4.86E-06 | FCRL5        | 83416 .  |
| 224407_s_ | 8.97E-07 | 4.29E-08 | RP6-213H19.1 | 51765 .  |
| 224408_at | 0.00831  | 0.004225 | MCHR2        | 84539 .  |
| 224409_s_ | 1.46E-05 | 1.68E-06 | TSSK6        | 83983 .  |
| 224411_at | 0.001462 | 5.29E-04 | PLA2G12B     | 84647 .  |
| 224412_s_ | 0.044863 | 0.030277 | TRPM6        | 140803 . |
| 224413_s_ | 0.010463 | 0.00553  | TM2D2        | 83877 .  |
| 224414_s_ | 3.41E-05 | 4.90E-06 | CARD6        | 84674 .  |
| 224415_s_ | 0.032756 | 0.021014 | HINT2        | 84681 .  |
| 224416_s_ | 5.58E-04 | 1.63E-04 | MED28        | 80306 .  |
| 224418_x_ | 0.020175 | 0.011948 | PMCHL1       | 5369 .   |
| 224419_x_ | 0.018585 | 0.010854 | PMCHL1       | 5369 .   |
| 224424_x_ | 5.48E-05 | 8.98E-06 | LOC440888    | 440888 . |
| 224425_x_ | 9.77E-05 | 1.87E-05 | LOC440888    | 440888 . |
| 224426_s_ | 3.81E-04 | 1.02E-04 | LOC440888    | 440888 . |
| 224427_s_ | 0.003745 | 0.001639 | PAPOLG       | 64895 .  |
| 224428_s_ | 1.36E-09 | 8.14E-12 | CDCA7        | 83879 .  |
| 224429_x_ | 2.64E-04 | 6.48E-05 |              | .        |
| 224431_s_ | 3.62E-06 | 2.68E-07 | SUV420H2     | 84787 .  |
| 224435_at | 7.22E-04 | 2.24E-04 | C10orf58     | 84293 .  |



|           |          |          |           |         |
|-----------|----------|----------|-----------|---------|
| 224436_s_ | 0.003259 | 0.001386 | NIPSNAP3A | 25934 . |
| 224438_at | 0.005178 | 0.002415 |           | .       |
| 224439_x_ | 0.005751 | 0.002735 | RNF7      | 9616 .  |
| 224445_s_ | 2.65E-04 | 6.50E-05 | ZFYVE21   | 79038 . |
| 224446_at | 0.003176 | 0.001345 | LLPH      | 84298 . |
| 224447_s_ | 0.008508 | 0.004342 | C17orf37  | 84299 . |
| 224449_at | 0.017796 | 0.010317 | DDI2      | 84301 . |
| 224450_s_ | 1.67E-06 | 9.88E-08 | RIOK1     | 83732 . |
| 224454_at | 0.001297 | 4.58E-04 | ETNK1     | 55500 . |
| 224456_s_ | 0.004548 | 0.002069 | MGC12982  | 84793 . |
| 224457_at | 0.007954 | 0.004017 | MGC12982  | 84793 . |
| 224459_at | 0.01637  | 0.009362 | L2HGDH    | 79944 . |
| 224460_s_ | 1.13E-04 | 2.24E-05 | L2HGDH    | 79944 . |
| 224461_s_ | 5.98E-05 | 1.00E-05 | AIFM2     | 84883 . |
| 224462_s_ | 1.78E-04 | 3.95E-05 | CHCHD6    | 84303 . |
| 224463_s_ | 6.24E-08 | 1.20E-09 | C11orf70  | 85016 . |
| 224464_s_ | 0.049942 | 0.034284 | NUDT22    | 84304 . |
| 224465_s_ | 0.002975 | 0.001241 | WIBG      | 84305 . |
| 224466_s_ | 1.92E-04 | 4.36E-05 | MAFG      | 4097 .  |
| 224467_s_ | 2.10E-08 | 2.76E-10 | PDCD2L    | 84306 . |
| 224468_s_ | 1.62E-04 | 3.53E-05 | C19orf48  | 84798 . |
| 224471_s_ | 0.035345 | 0.022938 | BTRC      | 8945 .  |
| 224472_x_ | 3.78E-07 | 1.37E-08 | SDF4      | 51150 . |
| 224473_x_ | 0.002983 | 0.001246 | LZTS2     | 84445 . |
| 224474_x_ | 1.99E-04 | 4.55E-05 | SMEK2     | 57223 . |
| 224475_at | 1.37E-04 | 2.87E-05 |           | .       |
| 224476_s_ | 5.81E-06 | 4.97E-07 | MESP1     | 55897 . |
| 224477_s_ | 0.018441 | 0.010758 | NUDT16L1  | 84309 . |
| 224478_s_ | 9.06E-05 | 1.70E-05 | C7orf50   | 84310 . |
| 224479_s_ | 0.002858 | 0.001184 | MRPL45    | 84311 . |
| 224480_s_ | 0.00361  | 0.001568 | AGPAT9    | 84803 . |
| 224481_s_ | 0.013582 | 0.007515 | HECTD1    | 25831 . |
| 224482_s_ | 1.61E-05 | 1.90E-06 | RAB11FIP4 | 84440 . |
| 224484_s_ | 0.04037  | 0.026763 | BRMS1L    | 84312 . |

|           |          |          |              |               |
|-----------|----------|----------|--------------|---------------|
| 224485_s_ | 5.27E-04 | 1.52E-04 | SLC30A2      | 7780 .        |
| 224490_s_ | 0.007141 | 0.003539 | KIAA1267     | 284058 .      |
| 224492_s_ | 0.048835 | 0.033399 | ZNF627       | 199692 .      |
| 224494_x_ | 4.13E-05 | 6.26E-06 | HSD17B14     | 51171 .       |
| 224495_at | 0.040812 | 0.027106 | TMEM107      | 84314 .       |
| 224496_s_ | 0.010257 | 0.005405 | TMEM107      | 84314 .       |
| 224497_x_ | 5.13E-05 | 8.28E-06 | HSD17B14     | 51171 .       |
| 224498_x_ | 0.003553 | 0.001539 | AXIN2        | 8313 .        |
| 224500_s_ | 0.001365 | 4.88E-04 | MON1A        | 84315 .       |
| 224501_at | 4.24E-06 | 3.30E-07 | C1orf170     | 84808 .       |
| 224504_s_ | 8.58E-06 | 8.27E-07 | BUD13        | 84811 .       |
| 224505_s_ | 0.019851 | 0.011721 | PLCD4        | 84812 .       |
| 224506_s_ | 0.003748 | 0.001641 | PPAPDC3      | 84814 .       |
| 224509_s_ | 3.33E-05 | 4.76E-06 | RTN4IP1      | 84816 .       |
| 224510_s_ | 1.19E-04 | 2.39E-05 | CLPB         | 81570 .       |
| 224511_s_ | 0.013806 | 0.007661 | TXNDC17      | 84817 .       |
| 224512_s_ | 8.37E-07 | 3.92E-08 | LSMD1        | 84316 .       |
| 224513_s_ | 1.41E-04 | 2.98E-05 | UBQLN4       | 56893 .       |
| 224514_x_ | 4.17E-05 | 6.34E-06 | IL17RC       | 84818 .       |
| 224515_at | 0.015109 | 0.00852  |              | .             |
| 224516_s_ | 2.13E-04 | 4.95E-05 | CXXC5        | 51523 .       |
| 224517_at | 3.46E-07 | 1.22E-08 | POLR2J4      | 84820 .       |
| 224519_at | 4.97E-05 | 7.94E-06 | LOC100132167 | 100132167 //. |
| 224521_s_ | 3.13E-05 | 4.41E-06 | CCDC77       | 84318 .       |
| 224523_s_ | 5.87E-06 | 5.03E-07 | C3orf26      | 84319 .       |
| 224524_s_ | 0.004833 | 0.002226 | ASB3         | 51130 .       |
| 224525_s_ | 0.00886  | 0.004551 | OLA1         | 29789 .       |
| 224526_at | 0.003071 | 0.001291 | LOC100132319 | 100132319 .   |
| 224534_at | 1.60E-04 | 3.46E-05 | KREMEN1      | 83999 .       |
| 224535_s_ | 0.009206 | 0.004763 | MRP63        | 78988 .       |
| 224536_s_ | 5.94E-04 | 1.76E-04 | PCDHGC5      | 56097 .       |
| 224537_at | 0.027261 | 0.016972 | PCDHGC5      | 56097 .       |
| 224538_s_ | 3.71E-05 | 5.44E-06 | PARD6G       | 84552 .       |
| 224539_s_ | 2.74E-05 | 3.72E-06 | PCDHAC2      | 56134 .       |

|           |          |          |            |          |
|-----------|----------|----------|------------|----------|
| 224540_at | 2.94E-04 | 7.40E-05 | LACRT      | 90070 .  |
| 224542_s_ | 0.001562 | 5.73E-04 | NFATC2     | 4773 .   |
| 224543_at | 2.72E-07 | 8.88E-09 | SVEP1      | 79987 .  |
| 224545_at | 0.011219 | 0.006007 |            | .        |
| 224546_at | 0.00883  | 0.004533 |            | .        |
| 224547_at | 0.038086 | 0.025026 |            | .        |
| 224549_x_ | 0.003121 | 0.001317 |            | .        |
| 224550_s_ | 6.66E-06 | 5.91E-07 | MRVI1      | 10335 .  |
| 224551_s_ | 4.17E-04 | 1.14E-04 | SPTBN4     | 57731 .  |
| 224556_s_ | 0.014295 | 0.007979 | LHX6       | 26468 .  |
| 224557_x_ | 0.001641 | 6.08E-04 | P2RX2      | 22953 .  |
| 224560_at | 3.82E-07 | 1.39E-08 | TIMP2      | 7077 .   |
| 224561_s_ | 0.010499 | 0.005552 | MORF4L1    | 10933 .  |
| 224563_at | 8.24E-10 | 4.10E-12 | WASF2      | 10163 .  |
| 224564_s_ | 0.037211 | 0.024369 | RTN3       | 10313 .  |
| 224565_at | 8.40E-04 | 2.70E-04 | NCRNA00084 | 283131 . |
| 224566_at | 2.40E-04 | 5.74E-05 | NCRNA00084 | 283131 . |
| 224567_x_ | 0.030984 | 0.019702 | MALAT1     | 378938 . |
| 224570_s_ | 0.048743 | 0.033322 | IRF2BP2    | 359948 . |
| 224571_at | 0.04308  | 0.028862 | IRF2BP2    | 359948 . |
| 224572_s_ | 0.001268 | 4.46E-04 | IRF2BP2    | 359948 . |
| 224573_at | 2.14E-05 | 2.73E-06 | RNASEK     | 440400 . |
| 224575_at | 0.004985 | 0.002307 | C3orf10    | 55845 .  |
| 224576_at | 1.36E-05 | 1.52E-06 | ERGIC1     | 57222 .  |
| 224577_at | 1.16E-04 | 2.31E-05 | ERGIC1     | 57222 .  |
| 224578_at | 8.92E-06 | 8.74E-07 | RCC2       | 55920 .  |
| 224579_at | 0.003276 | 0.001396 | SLC38A1    | 81539 .  |
| 224580_at | 1.71E-04 | 3.77E-05 | SLC38A1    | 81539 .  |
| 224581_s_ | 2.64E-05 | 3.54E-06 | NUCKS1     | 64710 .  |
| 224582_s_ | 0.015536 | 0.008807 | NUCKS1     | 64710 .  |
| 224584_at | 0.001177 | 4.07E-04 | C20orf30   | 29058 .  |
| 224585_x_ | 4.06E-04 | 1.10E-04 | ACTG1      | 71 .     |
| 224586_x_ | 3.53E-05 | 5.11E-06 | SUB1       | 10923 .  |
| 224591_at | 1.64E-06 | 9.60E-08 | HP1BP3     | 50809 .  |

|           |          |          |                             |          |
|-----------|----------|----------|-----------------------------|----------|
| 224592_x_ | 3.20E-04 | 8.23E-05 | HP1BP3                      | 50809 .  |
| 224593_at | 0.015174 | 0.008564 | ZNF664                      | 144348 . |
| 224594_x_ | 0.011515 | 0.006191 | ACTB                        | 60 .     |
| 224595_at | 1.29E-04 | 2.66E-05 | SLC44A1                     | 23446 .  |
| 224596_at | 0.003094 | 0.001303 | SLC44A1                     | 23446 .  |
| 224598_at | 8.02E-06 | 7.56E-07 | MGAT4B                      | 11282 .  |
| 224600_at | 4.05E-05 | 6.10E-06 | CGGBP1                      | 8545 .   |
| 224602_at | 0.006369 | 0.003087 | C4orf3                      | 401152 . |
| 224603_at | 0.016918 | 0.009725 |                             | .        |
| 224604_at | 7.61E-06 | 7.06E-07 | C4orf3                      | 401152 . |
| 224605_at | 1.92E-06 | 1.18E-07 | C4orf3                      | 401152 . |
| 224606_at | 0.027187 | 0.016918 | KLF6                        | 1316 .   |
| 224607_s_ | 0.022565 | 0.013627 | SRP68                       | 6730 .   |
| 224608_s_ | 0.002919 | 0.001213 | VPS25                       | 84313 .  |
| 224609_at | 6.62E-04 | 2.01E-04 | SLC44A2                     | 57153 .  |
| 224610_at | 1.84E-10 | 5.59E-13 | SNHG1                       | 23642 .  |
| 224611_s_ | 7.95E-07 | 3.65E-08 | DNAJC5                      | 80331 .  |
| 224612_s_ | 6.82E-06 | 6.10E-07 | DNAJC5                      | 80331 .  |
| 224613_s_ | 5.93E-04 | 1.76E-04 | DNAJC5                      | 80331 .  |
| 224614_at | 0.001548 | 5.67E-04 | DYNC1LI2                    | 1783 .   |
| 224615_x_ | 0.002649 | 0.001082 | HM13                        | 81502 .  |
| 224616_at | 0.015791 | 0.008976 | DYNC1LI2                    | 1783 .   |
| 224617_at | 2.54E-07 | 8.09E-09 | ROD1                        | 9991 .   |
| 224618_at | 1.65E-04 | 3.62E-05 | ROD1                        | 9991 .   |
| 224619_at | 6.89E-05 | 1.20E-05 | CASC4                       | 113201 . |
| 224620_at | 0.001065 | 3.60E-04 | MAPK1                       | 5594 .   |
| 224621_at | 9.18E-04 | 3.01E-04 | MAPK1                       | 5594 .   |
| 224622_at | 1.04E-04 | 2.03E-05 | TBC1D14                     | 57533 .  |
| 224623_at | 6.35E-06 | 5.55E-07 | LOC728554 /// 728554 /// 84 | .        |
| 224624_at | 0.002485 | 0.001003 | LRRRC8A                     | 56262 .  |
| 224625_x_ | 0.009474 | 0.004925 | HYPK /// SERP210169 /// 257 | .        |
| 224627_at | 1.03E-04 | 2.00E-05 | GBA2                        | 57704 .  |
| 224628_at | 1.58E-04 | 3.43E-05 | C2orf30                     | 27248 .  |
| 224629_at | 0.013511 | 0.00747  | LMAN1                       | 3998 .   |

|           |          |          |              |           |   |
|-----------|----------|----------|--------------|-----------|---|
| 224630_at | 1.07E-04 | 2.09E-05 | C2orf30      | 27248     | . |
| 224631_at | 1.99E-09 | 1.30E-11 | ZFP91        | 80829     | . |
| 224632_at | 1.62E-04 | 3.52E-05 | GPATCH4      | 54865     | . |
| 224633_s_ | 9.81E-04 | 3.26E-04 | GPATCH4      | 54865     | . |
| 224634_at | 3.20E-04 | 8.23E-05 | GPATCH4      | 54865     | . |
| 224636_at | 1.16E-08 | 1.27E-10 | ZFP91        | 80829     | . |
| 224637_at | 3.68E-05 | 5.39E-06 | LOC100128731 | 100128731 | . |
| 224639_at | 0.023846 | 0.014531 | UNQ1887      | 121665    | . |
| 224641_at | 9.62E-05 | 1.84E-05 | FYTTD1       | 84248     | . |
| 224642_at | 6.44E-06 | 5.66E-07 | FYTTD1       | 84248     | . |
| 224644_at | 0.008518 | 0.004348 |              |           | . |
| 224647_at | 1.79E-04 | 3.99E-05 | CCNY         | 219771    | . |
| 224648_at | 5.62E-04 | 1.64E-04 | GPBP1        | 65056     | . |
| 224650_at | 2.82E-15 | 1.45E-19 | MAL2         | 114569    | . |
| 224651_at | 1.09E-05 | 1.14E-06 | CCNY         | 219771    | . |
| 224652_at | 1.10E-04 | 2.17E-05 | CCNY         | 219771    | . |
| 224654_at | 1.15E-05 | 1.23E-06 | DDX21        | 9188      | . |
| 224655_at | 0.008248 | 0.004187 | AK3          | 50808     | . |
| 224657_at | 0.021261 | 0.01272  | ERRFI1       | 54206     | . |
| 224658_x_ | 1.34E-05 | 1.49E-06 | PACS1        | 55690     | . |
| 224659_at | 0.007318 | 0.003642 | SEPN1        | 57190     | . |
| 224660_at | 2.31E-05 | 2.99E-06 | PIGY         | 84992     | . |
| 224661_at | 0.005342 | 0.002505 | PIGY         | 84992     | . |
| 224663_s_ | 9.11E-08 | 2.02E-09 | CFL2         | 1073      | . |
| 224664_at | 0.04724  | 0.032149 | C10orf104    | 119504    | . |
| 224665_at | 0.041772 | 0.027848 | C10orf104    | 119504    | . |
| 224666_at | 0.001058 | 3.57E-04 | NSMCE1       | 197370    | . |
| 224667_x_ | 2.37E-06 | 1.56E-07 | C10orf104    | 119504    | . |
| 224668_at | 0.02784  | 0.017396 | SYS1         | 90196     | . |
| 224671_at | 0.003552 | 0.001538 | MRPL10       | 124995    | . |
| 224672_x_ | 0.036044 | 0.023478 | MESDC2       | 23184     | . |
| 224677_x_ | 0.001217 | 4.24E-04 | C11orf31     | 280636    | . |
| 224679_at | 0.007815 | 0.003935 | MESDC2       | 23184     | . |
| 224680_at | 8.19E-04 | 2.62E-04 | TMED4        | 222068    | . |

|           |          |          |           |          |
|-----------|----------|----------|-----------|----------|
| 224681_at | 0.003305 | 0.001411 | GNA12     | 2768 .   |
| 224682_at | 1.73E-05 | 2.06E-06 | ANKIB1    | 54467 .  |
| 224683_at | 1.01E-04 | 1.96E-05 | FBXO18    | 84893 .  |
| 224684_at | 3.07E-04 | 7.82E-05 | SNX12     | 29934 .  |
| 224685_at | 2.27E-09 | 1.54E-11 | MLLT4     | 4301 .   |
| 224686_x_ | 0.008244 | 0.004185 | LRR37A2   | 474170 . |
| 224687_at | 9.81E-06 | 9.93E-07 | ANKIB1    | 54467 .  |
| 224688_at | 1.58E-04 | 3.43E-05 | C7orf42   | 55069 .  |
| 224690_at | 5.06E-08 | 9.20E-10 | C20orf108 | 116151 . |
| 224691_at | 1.84E-05 | 2.24E-06 |           | .        |
| 224692_at | 0.0203   | 0.012035 | PPP1R15B  | 84919 .  |
| 224693_at | 5.38E-08 | 9.99E-10 | C20orf108 | 116151 . |
| 224694_at | 1.30E-06 | 7.08E-08 | ANTXR1    | 84168 .  |
| 224695_at | 2.27E-06 | 1.47E-07 | C2orf29   | 55571 .  |
| 224698_at | 0.001217 | 4.24E-04 | FAM62B    | 57488 .  |
| 224699_s_ | 0.001675 | 6.23E-04 | FAM62B    | 57488 .  |
| 224701_at | 0.029976 | 0.018965 | PARP14    | 54625 .  |
| 224702_at | 0.010681 | 0.005668 | TMEM167A  | 153339 . |
| 224704_at | 5.69E-04 | 1.67E-04 | TNRC6A    | 27327 .  |
| 224705_s_ | 0.006143 | 0.002958 | TNRC6A    | 27327 .  |
| 224708_at | 6.31E-05 | 1.07E-05 | KIAA2013  | 90231 .  |
| 224709_s_ | 0.003137 | 0.001325 | CDC42SE2  | 56990 .  |
| 224710_at | 6.42E-04 | 1.94E-04 | RAB34     | 83871 .  |
| 224711_at | 3.21E-04 | 8.27E-05 | YY1       | 7528 .   |
| 224712_x_ | 0.030073 | 0.019035 | C19orf42  | 79086 .  |
| 224713_at | 6.82E-04 | 2.09E-04 | MKI67IP   | 84365 .  |
| 224714_at | 2.20E-05 | 2.83E-06 | MKI67IP   | 84365 .  |
| 224715_at | 1.14E-05 | 1.20E-06 | WDR34     | 89891 .  |
| 224716_at | 0.006948 | 0.003426 | SLC35B2   | 347734 . |
| 224717_s_ | 1.27E-05 | 1.40E-06 | C19orf42  | 79086 .  |
| 224718_at | 2.14E-04 | 4.97E-05 | YY1       | 7528 .   |
| 224719_s_ | 0.005096 | 0.002371 | C12orf57  | 113246 . |
| 224721_at | 1.99E-06 | 1.24E-07 | WDR75     | 84128 .  |
| 224722_at | 0.036281 | 0.023658 | MIB1      | 57534 .  |

|           |          |          |          |          |
|-----------|----------|----------|----------|----------|
| 224726_at | 4.10E-05 | 6.19E-06 | MIB1     | 57534 .  |
| 224727_at | 0.024768 | 0.01519  | C19orf63 | 284361 . |
| 224728_at | 6.93E-07 | 3.05E-08 | ATPAF1   | 64756 .  |
| 224730_at | 4.75E-04 | 1.33E-04 | WDR68    | 10238 .  |
| 224731_at | 1.38E-04 | 2.89E-05 | HMGB1    | 3146 .   |
| 224734_at | 1.65E-04 | 3.61E-05 | HMGB1    | 3146 .   |
| 224735_at | 6.94E-06 | 6.24E-07 | CYBASC3  | 220002 . |
| 224736_at | 2.56E-05 | 3.41E-06 | CCAR1    | 55749 .  |
| 224737_x_ | 0.014906 | 0.008389 | CCAR1    | 55749 .  |
| 224738_x_ | 0.001437 | 5.19E-04 | RPL7L1   | 285855 . |
| 224739_at | 2.46E-04 | 5.94E-05 | PIM3     | 415116 . |
| 224740_at | 0.002623 | 0.00107  | C5orf43  | 643155 . |
| 224744_at | 1.96E-04 | 4.47E-05 | IMPAD1   | 54928 .  |
| 224745_x_ | 0.003864 | 0.001701 | OTUD5    | 55593 .  |
| 224746_at | 2.37E-06 | 1.55E-07 | KIAA1522 | 57648 .  |
| 224747_at | 0.002586 | 0.001052 | UBE2Q2   | 92912 .  |
| 224749_at | 1.42E-04 | 2.99E-05 | ITFG3    | 83986 .  |
| 224750_at | 1.12E-06 | 5.72E-08 | RNF185   | 91445 .  |
| 224753_at | 2.84E-06 | 1.96E-07 | CDCA5    | 113130 . |
| 224754_at | 0.002038 | 7.90E-04 | SP1      | 6667 .   |
| 224758_at | 0.035969 | 0.023419 | PL-5283  | 647087 . |
| 224759_s_ | 2.20E-04 | 5.17E-05 | C12orf23 | 90488 .  |
| 224760_at | 0.001262 | 4.43E-04 | SP1      | 6667 .   |
| 224762_at | 9.29E-04 | 3.06E-04 | SERINC2  | 347735 . |
| 224764_at | 3.82E-05 | 5.65E-06 | ARHGAP21 | 57584 .  |
| 224765_at | 0.023486 | 0.014277 | MSL1     | 339287 . |
| 224766_at | 7.45E-06 | 6.86E-07 | RPL37    | 6167 .   |
| 224768_at | 1.11E-05 | 1.17E-06 | IWS1     | 55677 .  |
| 224770_s_ | 3.11E-04 | 7.96E-05 | NAV1     | 89796 .  |
| 224771_at | 6.07E-04 | 1.81E-04 | NAV1     | 89796 .  |
| 224772_at | 4.82E-05 | 7.64E-06 | NAV1     | 89796 .  |
| 224773_at | 1.03E-06 | 5.10E-08 | NAV1     | 89796 .  |
| 224774_s_ | 2.39E-05 | 3.14E-06 | NAV1     | 89796 .  |
| 224777_s_ | 0.00596  | 0.002855 | PAFAH1B2 | 5049 .   |

|           |          |          |                             |          |
|-----------|----------|----------|-----------------------------|----------|
| 224779_s_ | 3.50E-05 | 5.06E-06 | FAM96A                      | 84191 .  |
| 224780_at | 2.31E-04 | 5.49E-05 | RBM17                       | 84991 .  |
| 224781_s_ | 4.76E-06 | 3.83E-07 | RBM17                       | 84991 .  |
| 224782_at | 0.036566 | 0.023874 | ZMAT2                       | 153527 . |
| 224783_at | 1.21E-04 | 2.45E-05 | FAM100B                     | 283991 . |
| 224784_at | 0.009476 | 0.004926 | MLLT6                       | 4302 .   |
| 224787_s_ | 2.16E-06 | 1.38E-07 | RAB18                       | 22931 .  |
| 224788_at | 0.001641 | 6.08E-04 | ARF6                        | 382 .    |
| 224790_at | 5.33E-06 | 4.42E-07 | ASAP1                       | 50807 .  |
| 224791_at | 3.21E-07 | 1.11E-08 | ASAP1                       | 50807 .  |
| 224792_at | 3.37E-06 | 2.45E-07 | TNKS1BP1                    | 85456 .  |
| 224794_s_ | 6.79E-12 | 6.84E-15 | CERCAM                      | 51148 .  |
| 224795_x_ | 1.22E-05 | 1.32E-06 | IGK@ /// IGKC 3514 /// 508( |          |
| 224796_at | 2.58E-08 | 3.74E-10 | ASAP1                       | 50807 .  |
| 224798_s_ | 8.04E-05 | 1.47E-05 | C15orf17                    | 57184 .  |
| 224799_at | 5.04E-05 | 8.09E-06 | NDFIP2                      | 54602 .  |
| 224802_at | 0.021825 | 0.013115 | NDFIP2                      | 54602 .  |
| 224803_s_ | 0.043207 | 0.028968 | LOC642393 /// 55052 /// 64: |          |
| 224805_s_ | 1.17E-04 | 2.34E-05 | C15orf17                    | 57184 .  |
| 224806_at | 1.43E-09 | 8.64E-12 | TRIM25                      | 7706 .   |
| 224807_at | 0.003031 | 0.001271 | GRAMD1A                     | 57655 .  |
| 224808_s_ | 0.003523 | 0.001523 | C7orf20                     | 51608 .  |
| 224809_x_ | 1.35E-04 | 2.82E-05 | TINF2                       | 26277 .  |
| 224810_s_ | 1.11E-05 | 1.16E-06 | ANKRD13A                    | 88455 .  |
| 224812_at | 0.014967 | 0.00843  | HIBADH                      | 11112 .  |
| 224814_at | 1.11E-07 | 2.63E-09 | DPP7                        | 29952 .  |
| 224816_at | 4.96E-04 | 1.41E-04 | C7orf20                     | 51608 .  |
| 224817_at | 5.92E-08 | 1.12E-09 | SH3PXD2A                    | 9644 .   |
| 224819_at | 4.09E-05 | 6.17E-06 | TCEAL8                      | 90843 .  |
| 224820_at | 3.93E-04 | 1.06E-04 | FAM36A                      | 116228 . |
| 224821_at | 8.63E-07 | 4.07E-08 | ABHD14B                     | 84836 .  |
| 224822_at | 2.90E-06 | 2.01E-07 | DLC1                        | 10395 .  |
| 224823_at | 3.63E-06 | 2.69E-07 | MYLK                        | 4638 .   |
| 224825_at | 8.86E-04 | 2.89E-04 | DNTTIP1                     | 116092 . |



|           |          |          |              |          |
|-----------|----------|----------|--------------|----------|
| 224826_at | 9.71E-04 | 3.22E-04 | RP5-1022P6.2 | 56261 .  |
| 224830_at | 9.04E-07 | 4.35E-08 | NUDT21       | 11051 .  |
| 224832_at | 2.03E-06 | 1.28E-07 | DUSP16       | 80824 .  |
| 224834_at | 2.43E-05 | 3.21E-06 | UBTD2        | 92181 .  |
| 224835_at | 0.042792 | 0.028638 | RP5-1022P6.2 | 56261 .  |
| 224837_at | 8.52E-07 | 4.01E-08 | FOXP1        | 27086 .  |
| 224838_at | 6.06E-07 | 2.54E-08 | FOXP1        | 27086 .  |
| 224839_s_ | 2.62E-05 | 3.51E-06 | GPT2         | 84706 .  |
| 224840_at | 0.002451 | 9.87E-04 | FKBP5        | 2289 .   |
| 224842_at | 1.85E-05 | 2.25E-06 | SMG1         | 23049 .  |
| 224844_at | 0.001388 | 4.97E-04 | SLAIN2       | 57606 .  |
| 224845_s_ | 1.55E-06 | 8.92E-08 | SLAIN2       | 57606 .  |
| 224846_at | 0.010138 | 0.005329 | SHKBP1       | 92799 .  |
| 224847_at | 0.036252 | 0.023637 | CDK6         | 1021 .   |
| 224849_at | 0.025882 | 0.015989 | TTC17        | 55761 .  |
| 224851_at | 0.001922 | 7.35E-04 | CDK6         | 1021 .   |
| 224852_at | 0.0039   | 0.00172  | TTC17        | 55761 .  |
| 224853_at | 0.005069 | 0.002357 | SLAIN2       | 57606 .  |
| 224854_s_ | 1.07E-05 | 1.11E-06 | SLAIN2       | 57606 .  |
| 224855_at | 0.002164 | 8.49E-04 | PYCR2        | 29920 .  |
| 224856_at | 0.01295  | 0.007115 | FKBP5        | 2289 .   |
| 224858_at | 0.023896 | 0.014565 | ZDHHC5       | 25921 .  |
| 224859_at | 0.043664 | 0.029333 | CD276        | 80381 .  |
| 224860_at | 0.022807 | 0.013797 | C9orf123     | 90871 .  |
| 224863_at | 0.009142 | 0.004723 | GNAQ         | 2776 .   |
| 224864_at | 0.005593 | 0.002647 | SRA1         | 10011 .  |
| 224865_at | 1.87E-04 | 4.22E-05 | FAR1         | 84188 .  |
| 224867_at | 7.60E-04 | 2.39E-04 | C1orf151     | 440574 . |
| 224868_at | 0.015423 | 0.008733 | ZDHHC5       | 25921 .  |
| 224870_at | 2.95E-06 | 2.06E-07 | KIAA0114     | 57291 .  |
| 224871_at | 5.34E-07 | 2.14E-08 | TPRG1L       | 127262 . |
| 224873_s_ | 4.86E-06 | 3.92E-07 | MRPS25       | 64432 .  |
| 224874_at | 0.037203 | 0.024363 | POLR1D       | 51082 .  |
| 224875_at | 8.78E-04 | 2.85E-04 | C5orf24      | 134553 . |

|           |          |          |          |          |
|-----------|----------|----------|----------|----------|
| 224876_at | 6.79E-04 | 2.08E-04 | C5orf24  | 134553 . |
| 224877_s_ | 3.72E-09 | 2.87E-11 | MRPS5    | 64969 .  |
| 224878_at | 0.021362 | 0.012788 | UBFD1    | 56061 .  |
| 224880_at | 0.034055 | 0.02198  | RALA     | 5898 .   |
| 224881_at | 0.001542 | 5.64E-04 | VKORC1L1 | 154807 . |
| 224882_at | 0.009912 | 0.005194 | ACSS1    | 84532 .  |
| 224884_at | 0.005408 | 0.002543 | AKAP13   | 11214 .  |
| 224885_s_ | 0.043603 | 0.029281 | KRTCAP2  | 200185 . |
| 224886_at | 0.009745 | 0.005093 | JMJD8    | 339123 . |
| 224887_at | 2.76E-08 | 4.13E-10 | GNPTG    | 84572 .  |
| 224888_at | 6.65E-08 | 1.32E-09 | SELI     | 85465 .  |
| 224889_at | 0.015447 | 0.008749 | FOXO3    | 2309 .   |
| 224890_s_ | 3.55E-05 | 5.14E-06 | C7orf59  | 389541 . |
| 224893_at | 1.83E-08 | 2.35E-10 | ATL3     | 25923 .  |
| 224894_at | 0.042586 | 0.028479 | YAP1     | 10413 .  |
| 224895_at | 0.011151 | 0.005964 | YAP1     | 10413 .  |
| 224896_s_ | 0.003252 | 0.001383 | TTL      | 150465 . |
| 224898_at | 0.004018 | 0.001782 | WDR26    | 80232 .  |
| 224899_s_ | 0.005063 | 0.002354 | MAGT1    | 84061 .  |
| 224900_at | 2.65E-05 | 3.56E-06 | ANKFY1   | 51479 .  |
| 224901_at | 0.00533  | 0.002499 | SCD5     | 79966 .  |
| 224903_at | 2.37E-05 | 3.10E-06 | CIRH1A   | 84916 .  |
| 224905_at | 0.029746 | 0.018797 | WDR26    | 80232 .  |
| 224906_at | 0.013568 | 0.007506 | ANO6     | 196527 . |
| 224907_s_ | 0.047325 | 0.032215 | SH3GLB2  | 56904 .  |
| 224909_s_ | 0.007262 | 0.003609 | PREX1    | 57580 .  |
| 224910_at | 0.002056 | 7.98E-04 | CARHSP1  | 23589 .  |
| 224911_s_ | 0.004533 | 0.002061 | DCBLD2   | 131566 . |
| 224912_at | 0.003165 | 0.001339 | TTC7A    | 57217 .  |
| 224913_s_ | 1.67E-05 | 1.98E-06 | TIMM50   | 92609 .  |
| 224914_s_ | 0.003462 | 0.001491 | SARNP    | 84324 .  |
| 224916_at | 6.81E-09 | 6.28E-11 | TMEM173  | 340061 . |
| 224917_at | 0.03856  | 0.025389 | MIR21    | 406991 . |
| 224919_at | 0.002604 | 0.00106  | MRPS6    | 64968 .  |

|           |          |          |          |          |
|-----------|----------|----------|----------|----------|
| 224920_x_ | 8.53E-04 | 2.76E-04 | MYADM    | 91663 .  |
| 224921_at | 0.001882 | 7.17E-04 | SCAMP2   | 10066 .  |
| 224922_at | 2.00E-04 | 4.58E-05 | CSNK2A2  | 1459 .   |
| 224923_at | 6.78E-06 | 6.05E-07 | TTC7A    | 57217 .  |
| 224924_at | 0.003945 | 0.001744 | TTC7A    | 57217 .  |
| 224925_at | 0.012252 | 0.006663 | PREX1    | 57580 .  |
| 224927_at | 7.42E-05 | 1.33E-05 | KIAA1949 | 170954 . |
| 224928_at | 8.08E-07 | 3.73E-08 | SETD7    | 80854 .  |
| 224929_at | 1.18E-09 | 6.54E-12 | TMEM173  | 340061 . |
| 224930_x_ | 0.004352 | 0.001961 | RPL7A    | 6130 .   |
| 224931_at | 0.011712 | 0.006312 | SLC41A3  | 54946 .  |
| 224933_s_ | 8.07E-06 | 7.61E-07 | JMJD1C   | 221037 . |
| 224934_at | 1.81E-04 | 4.06E-05 | YIPF5    | 81555 .  |
| 224937_at | 0.003324 | 0.001421 | PTGFRN   | 5738 .   |
| 224939_at | 0.020002 | 0.011829 | NUFIP2   | 57532 .  |
| 224940_s_ | 2.89E-04 | 7.26E-05 | PAPPA    | 5069 .   |
| 224941_at | 7.55E-05 | 1.36E-05 | PAPPA    | 5069 .   |
| 224942_at | 6.83E-04 | 2.09E-04 | PAPPA    | 5069 .   |
| 224943_at | 0.023396 | 0.014213 | BTBD7    | 55727 .  |
| 224944_at | 1.31E-06 | 7.11E-08 | TMPO     | 7112 .   |
| 224946_s_ | 2.90E-05 | 4.00E-06 | CCDC115  | 84317 .  |
| 224948_at | 5.04E-04 | 1.43E-04 | MRPS24   | 64951 .  |
| 224949_at | 9.72E-05 | 1.86E-05 | YIPF5    | 81555 .  |
| 224951_at | 2.13E-04 | 4.95E-05 | LASS5    | 91012 .  |
| 224952_at | 0.001972 | 7.58E-04 | TANC2    | 26115 .  |
| 224953_at | 0.001652 | 6.12E-04 | YIPF5    | 81555 .  |
| 224954_at | 0.006395 | 0.003102 | SHMT1    | 6470 .   |
| 224955_at | 0.00189  | 7.21E-04 | TEAD1    | 7003 .   |
| 224956_at | 0.007777 | 0.003911 | NUFIP2   | 57532 .  |
| 224959_at | 0.002067 | 8.03E-04 | SLC26A2  | 1836 .   |
| 224962_at | 0.00131  | 4.63E-04 | C9orf69  | 90120 .  |
| 224963_at | 0.001118 | 3.83E-04 | SLC26A2  | 1836 .   |
| 224964_s_ | 0.00243  | 9.76E-04 | GNG2     | 54331 .  |
| 224965_at | 3.46E-08 | 5.46E-10 | GNG2     | 54331 .  |

|           |          |          |         |          |
|-----------|----------|----------|---------|----------|
| 224966_s_ | 0.010132 | 0.005325 | DUS3L   | 56931 .  |
| 224967_at | 0.011384 | 0.006108 | UGCG    | 7357 .   |
| 224968_at | 9.68E-04 | 3.21E-04 | CCDC104 | 112942 . |
| 224971_at | 7.14E-05 | 1.26E-05 | MRPL30  | 51263 .  |
| 224972_at | 3.04E-04 | 7.72E-05 | ROMO1   | 140823 . |
| 224973_at | 0.010636 | 0.00564  | FAM46A  | 55603 .  |
| 224974_at | 0.006787 | 0.00333  | SUDS3   | 64426 .  |
| 224975_at | 0.018573 | 0.010848 | NFIA    | 4774 .   |
| 224976_at | 0.026645 | 0.016526 | NFIA    | 4774 .   |
| 224977_at | 1.63E-08 | 2.03E-10 | C6orf89 | 221477 . |
| 224979_s_ | 9.08E-05 | 1.71E-05 | USP36   | 57602 .  |
| 224981_at | 0.031408 | 0.020009 | TMEM219 | 124446 . |
| 224983_at | 2.07E-04 | 4.77E-05 | SCARB2  | 950 .    |
| 224985_at | 1.04E-04 | 2.03E-05 | NRAS    | 4893 .   |
| 224987_at | 1.63E-08 | 2.01E-10 | C6orf89 | 221477 . |
| 224988_at | 1.97E-07 | 5.64E-09 | C6orf89 | 221477 . |
| 224989_at | 7.95E-05 | 1.45E-05 |         | .        |
| 224990_at | 2.05E-05 | 2.58E-06 | C4orf34 | 201895 . |
| 224992_s_ | 0.034933 | 0.022626 | CMIP    | 80790 .  |
| 224993_at | 7.07E-06 | 6.40E-07 | MLLT1   | 4298 .   |
| 224994_at | 6.35E-04 | 1.91E-04 | CAMK2D  | 817 .    |
| 224995_at | 1.21E-04 | 2.45E-05 | SPIRE1  | 56907 .  |
| 224996_at | 1.37E-05 | 1.53E-06 | ASPH    | 444 .    |
| 224997_x_ | 0.011915 | 0.006444 | H19     | 283120 . |
| 224999_at | 2.57E-04 | 6.26E-05 |         | .        |
| 225000_at | 2.38E-04 | 5.69E-05 | PRKAR2A | 5576 .   |
| 225001_at | 0.032101 | 0.020528 | RAB3D   | 9545 .   |
| 225002_s_ | 0.002547 | 0.001033 | SUMF2   | 25870 .  |
| 225003_at | 0.003751 | 0.001642 | TMEM205 | 374882 . |
| 225004_at | 0.039423 | 0.026043 | TMEM101 | 84336 .  |
| 225005_at | 0.010939 | 0.00583  | PHF13   | 148479 . |
| 225006_x_ | 1.22E-06 | 6.46E-08 | TH1L    | 51497 .  |
| 225007_at | 6.84E-07 | 3.00E-08 | G3BP1   | 10146 .  |
| 225008_at | 3.68E-06 | 2.74E-07 | ASPH    | 444 .    |

|           |          |          |                             |          |
|-----------|----------|----------|-----------------------------|----------|
| 225009_at | 0.002998 | 0.001254 | CMTM4                       | 146223 . |
| 225010_at | 0.001271 | 4.47E-04 | CCDC6                       | 8030 .   |
| 225011_at | 0.001192 | 4.14E-04 | PRKAR2A                     | 5576 .   |
| 225012_at | 0.043922 | 0.029538 | HDLBP                       | 3069 .   |
| 225013_at | 0.003375 | 0.001447 | LZTS2                       | 84445 .  |
| 225015_s_ | 2.14E-04 | 4.98E-05 | STK40                       | 83931 .  |
| 225016_at | 2.73E-05 | 3.70E-06 | APCDD1                      | 147495 . |
| 225017_at | 0.003197 | 0.001356 | CCDC14                      | 64770 .  |
| 225018_at | 7.18E-07 | 3.19E-08 | SPIRE1                      | 56907 .  |
| 225019_at | 4.77E-04 | 1.34E-04 | CAMK2D                      | 817 .    |
| 225022_at | 1.53E-04 | 3.30E-05 | GOPC                        | 57120 .  |
| 225023_at | 5.06E-06 | 4.13E-07 | GOPC                        | 57120 .  |
| 225024_at | 0.002354 | 9.39E-04 | RPRD1B                      | 58490 .  |
| 225025_at | 2.98E-04 | 7.52E-05 | IGSF8                       | 93185 .  |
| 225026_at | 0.004496 | 0.002041 | CHD6                        | 84181 .  |
| 225030_at | 0.036004 | 0.023447 | BOD1                        | 91272 .  |
| 225031_at | 9.62E-04 | 3.18E-04 | CHD6                        | 84181 .  |
| 225032_at | 4.30E-04 | 1.18E-04 | FNDC3B                      | 64778 .  |
| 225033_at | 1.09E-04 | 2.14E-05 | ST3GAL1                     | 6482 .   |
| 225034_at | 0.001846 | 7.01E-04 | ST3GAL1                     | 6482 .   |
| 225035_x_ | 5.37E-06 | 4.47E-07 | WASH1 /// WA 374666 /// 37. |          |
| 225036_at | 0.004646 | 0.002123 | SHB /// TOMM401505 /// 64.  |          |
| 225037_at | 2.88E-05 | 3.96E-06 | SLC35C2                     | 51006 .  |
| 225038_s_ | 6.15E-05 | 1.04E-05 | SURF6                       | 6838 .   |
| 225041_at | 4.35E-06 | 3.41E-07 | MPHOSPH8                    | 54737 .  |
| 225042_s_ | 0.002647 | 0.001081 | CSRNP2                      | 81566 .  |
| 225043_at | 6.32E-04 | 1.90E-04 | SLC15A4                     | 121260 . |
| 225044_at | 1.82E-04 | 4.08E-05 | NT5C3L                      | 115024 . |
| 225047_at | 0.017103 | 0.009848 | NUPL1                       | 9818 .   |
| 225049_at | 0.011817 | 0.006377 | BLOC1S2                     | 282991 . |
| 225050_at | 2.83E-04 | 7.08E-05 | ZNF512                      | 84450 .  |
| 225051_at | 2.56E-04 | 6.23E-05 | EPB41                       | 2035 .   |
| 225052_at | 0.010768 | 0.005724 | TMEM203                     | 94107 .  |
| 225053_at | 0.02147  | 0.012859 | CNOT7                       | 29883 .  |

|           |          |          |           |          |
|-----------|----------|----------|-----------|----------|
| 225054_x_ | 0.01025  | 0.0054   | LOC651250 | 651250 . |
| 225055_at | 4.60E-04 | 1.28E-04 | LOC651250 | 651250 . |
| 225056_at | 7.09E-06 | 6.44E-07 | SIPA1L2   | 57568 .  |
| 225057_at | 0.018926 | 0.011088 | SLC15A4   | 121260 . |
| 225058_at | 2.81E-04 | 7.00E-05 | GPR108    | 56927 .  |
| 225060_at | 4.69E-05 | 7.39E-06 | LRP11     | 84918 .  |
| 225061_at | 0.049501 | 0.033923 | DNAJA4    | 55466 .  |
| 225064_at | 6.78E-04 | 2.07E-04 | RABEP1    | 9135 .   |
| 225066_at | 0.00143  | 5.15E-04 |           | .        |
| 225067_at | 1.82E-04 | 4.09E-05 | ULK3      | 25989 .  |
| 225068_at | 0.015244 | 0.008612 | KLHL12    | 59349 .  |
| 225069_at | 2.30E-05 | 2.98E-06 | PCYT1A    | 5130 .   |
| 225070_at | 0.044894 | 0.030302 | NUS1      | 116150 . |
| 225072_at | 1.67E-06 | 9.89E-08 | ZCCHC3    | 85364 .  |
| 225075_at | 1.43E-05 | 1.63E-06 | PDRG1     | 81572 .  |
| 225076_s_ | 9.43E-07 | 4.57E-08 | ZNFX1     | 57169 .  |
| 225078_at | 6.89E-04 | 2.12E-04 | EMP2      | 2013 .   |
| 225079_at | 7.54E-05 | 1.35E-05 | EMP2      | 2013 .   |
| 225080_at | 3.22E-06 | 2.31E-07 | MYO1C     | 4641 .   |
| 225081_s_ | 3.22E-04 | 8.32E-05 | CDCA7L    | 55536 .  |
| 225082_at | 0.001706 | 6.36E-04 | CPSF3     | 51692 .  |
| 225083_at | 0.039524 | 0.026118 | GTF3C6    | 112495 . |
| 225085_at | 7.67E-06 | 7.14E-07 | USP40     | 55230 .  |
| 225086_at | 0.029008 | 0.01825  | FAM98B    | 283742 . |
| 225088_at | 0.031691 | 0.020213 | C16orf63  | 123811 . |
| 225089_at | 3.62E-06 | 2.68E-07 | USP40     | 55230 .  |
| 225090_at | 0.034333 | 0.022181 | SYVN1     | 84447 .  |
| 225091_at | 0.001399 | 5.02E-04 | ZCCHC3    | 85364 .  |
| 225092_at | 0.016491 | 0.009443 | RABEP1    | 9135 .   |
| 225094_at | 8.64E-06 | 8.34E-07 | SETD8     | 387893 . |
| 225096_at | 8.65E-05 | 1.61E-05 | C17orf79  | 55352 .  |
| 225098_at | 8.31E-07 | 3.87E-08 | ABI2      | 10152 .  |
| 225099_at | 1.83E-10 | 5.46E-13 | FBXO45    | 200933 . |
| 225100_at | 1.02E-07 | 2.33E-09 | FBXO45    | 200933 . |

|           |          |          |           |          |
|-----------|----------|----------|-----------|----------|
| 225101_s_ | 0.002336 | 9.30E-04 | SNX14     | 57231 .  |
| 225102_at | 7.02E-06 | 6.35E-07 | MGLL      | 11343 .  |
| 225104_at | 1.95E-05 | 2.42E-06 | ZNF598    | 90850 .  |
| 225105_at | 8.12E-07 | 3.75E-08 | C12orf75  | 387882 . |
| 225107_at | 1.93E-05 | 2.39E-06 | HNRNPA2B1 | 3181 .   |
| 225108_at | 2.13E-07 | 6.32E-09 | AGPS      | 8540 .   |
| 225111_s_ | 0.02121  | 0.012685 | NAPB      | 63908 .  |
| 225112_at | 6.86E-05 | 1.20E-05 | ABI2      | 10152 .  |
| 225113_at | 0.023162 | 0.014041 | AGPS      | 8540 .   |
| 225115_at | 0.011872 | 0.006413 | HIPK2     | 28996 .  |
| 225117_at | 0.010773 | 0.005727 | KIAA1267  | 284058 . |
| 225118_at | 2.69E-04 | 6.65E-05 | SETD8     | 387893 . |
| 225120_at | 0.002294 | 9.11E-04 | PURB      | 5814 .   |
| 225121_at | 3.69E-05 | 5.41E-06 | TBC1D23   | 55773 .  |
| 225122_at | 4.10E-05 | 6.19E-06 | RNF31     | 55072 .  |
| 225124_at | 0.014275 | 0.007964 | PPP1R9B   | 84687 .  |
| 225125_at | 0.017607 | 0.010191 | MMGT1     | 93380 .  |
| 225126_at | 0.002852 | 0.001181 | MRRF      | 92399 .  |
| 225127_at | 1.03E-05 | 1.06E-06 | TMEM181   | 57583 .  |
| 225128_at | 1.73E-04 | 3.82E-05 | KDELC2    | 143888 . |
| 225129_at | 4.24E-04 | 1.16E-04 | CPNE2     | 221184 . |
| 225132_at | 7.73E-06 | 7.21E-07 | FBXL3     | 26224 .  |
| 225134_at | 8.95E-07 | 4.28E-08 | SPRYD3    | 84926 .  |
| 225135_at | 0.002107 | 8.22E-04 | SIN3A     | 25942 .  |
| 225136_at | 1.48E-05 | 1.71E-06 | PLEKHA2   | 59339 .  |
| 225137_at | 7.72E-06 | 7.19E-07 |           | .        |
| 225139_at | 0.001734 | 6.49E-04 |           | .        |
| 225140_at | 2.17E-04 | 5.07E-05 | KLF3      | 51274 .  |
| 225141_at | 0.002075 | 8.07E-04 |           | .        |
| 225143_at | 7.24E-05 | 1.28E-05 | SFXN4     | 119559 . |
| 225144_at | 1.09E-05 | 1.13E-06 | BMPR2     | 659 .    |
| 225145_at | 8.21E-06 | 7.78E-07 | NCOA5     | 57727 .  |
| 225147_at | 2.80E-08 | 4.20E-10 | CYTH3     | 9265 .   |
| 225148_at | 0.001228 | 4.29E-04 | RPS19BP1  | 91582 .  |

|           |          |          |                               |        |   |
|-----------|----------|----------|-------------------------------|--------|---|
| 225149_at | 2.46E-04 | 5.93E-05 | PCID2                         | 55795  | . |
| 225150_s_ | 1.64E-05 | 1.93E-06 | RTKN                          | 6242   | . |
| 225151_at | 1.64E-04 | 3.58E-05 | RTKN                          | 6242   | . |
| 225153_at | 0.001278 | 4.50E-04 | GFM1                          | 85476  | . |
| 225157_at | 2.21E-07 | 6.64E-09 | MLXIP                         | 22877  | . |
| 225159_s_ | 7.92E-05 | 1.44E-05 |                               |        | . |
| 225161_at | 0.030022 | 0.018997 | GFM1                          | 85476  | . |
| 225163_at | 0.002398 | 9.61E-04 | FRMD4A                        | 55691  | . |
| 225165_at | 0.01468  | 0.008236 | PPP1R1B                       | 84152  | . |
| 225166_at | 8.64E-06 | 8.34E-07 | ARHGAP18                      | 93663  | . |
| 225168_at | 0.014881 | 0.008373 | FRMD4A                        | 55691  | . |
| 225169_at | 4.07E-05 | 6.14E-06 | INTS4                         | 92105  | . |
| 225170_at | 4.19E-07 | 1.58E-08 | WDR5                          | 11091  | . |
| 225171_at | 6.38E-06 | 5.59E-07 | ARHGAP18                      | 93663  | . |
| 225172_at | 0.022921 | 0.013876 | CRAMP1L                       | 57585  | . |
| 225173_at | 1.37E-05 | 1.53E-06 | ARHGAP18                      | 93663  | . |
| 225175_s_ | 3.27E-04 | 8.47E-05 | SLC44A2                       | 57153  | . |
| 225176_at | 3.29E-05 | 4.68E-06 |                               |        | . |
| 225177_at | 2.26E-04 | 5.32E-05 | RAB11FIP1                     | 80223  | . |
| 225178_at | 1.20E-04 | 2.41E-05 | TTC14                         | 151613 | . |
| 225179_at | 2.98E-05 | 4.14E-06 | UBE2K                         | 3093   | . |
| 225180_at | 0.002056 | 7.98E-04 | TTC14                         | 151613 | . |
| 225181_at | 0.010133 | 0.005326 | ARID1B /// LOC(57492) /// 725 |        | . |
| 225182_at | 1.15E-06 | 5.95E-08 | TMEM50B                       | 757    | . |
| 225184_at | 0.031302 | 0.019927 | ARID1B /// LOC(57492) /// 725 |        | . |
| 225185_at | 1.65E-06 | 9.74E-08 | MRAS                          | 22808  | . |
| 225186_at | 5.85E-05 | 9.73E-06 | RAPH1                         | 65059  | . |
| 225187_at | 0.001026 | 3.44E-04 | KIAA1967                      | 57805  | . |
| 225188_at | 4.98E-04 | 1.41E-04 | RAPH1                         | 65059  | . |
| 225189_s_ | 5.28E-05 | 8.57E-06 | RAPH1                         | 65059  | . |
| 225190_x_ | 6.28E-04 | 1.88E-04 | RPL35A                        | 6165   | . |
| 225191_at | 0.003052 | 0.001282 | CIRBP                         | 1153   | . |
| 225192_at | 0.007638 | 0.00383  | C10orf46                      | 143384 | . |
| 225193_at | 8.41E-06 | 8.06E-07 |                               |        | . |



|           |          |          |              |           |   |
|-----------|----------|----------|--------------|-----------|---|
| 225196_s_ | 1.98E-06 | 1.23E-07 | MRPS26       | 64949     | . |
| 225197_at | 0.033986 | 0.021926 |              |           | . |
| 225199_at | 0.001632 | 6.03E-04 |              |           | . |
| 225200_at | 6.83E-05 | 1.19E-05 | DPH3         | 285381    | . |
| 225201_s_ | 4.08E-05 | 6.15E-06 | MRPL14       | 64928     | . |
| 225202_at | 1.31E-04 | 2.69E-05 | RHOBTB3      | 22836     | . |
| 225204_at | 0.01726  | 0.009954 | PPTC7        | 160760    | . |
| 225205_at | 3.61E-06 | 2.67E-07 | KIF3B        | 9371      | . |
| 225206_s_ | 2.60E-04 | 6.35E-05 | MTRF1L       | 54516     | . |
| 225208_s_ | 0.001717 | 6.42E-04 | FAM103A1     | 83640     | . |
| 225209_s_ | 4.16E-05 | 6.33E-06 | UBE2J2       | 118424    | . |
| 225210_s_ | 4.94E-04 | 1.40E-04 | FAM103A1     | 83640     | . |
| 225211_at | 1.25E-04 | 2.54E-05 | PVRL1        | 5818      | . |
| 225213_at | 2.43E-04 | 5.86E-05 | PPTC7        | 160760    | . |
| 225214_at | 6.40E-07 | 2.73E-08 | LOC100129034 | 100129034 | . |
| 225215_s_ | 0.004375 | 0.001975 | MTRF1L       | 54516     | . |
| 225216_at | 0.021667 | 0.013002 | CXorf39      | 139231    | . |
| 225218_at | 0.001215 | 4.23E-04 | ZFYVE27      | 118813    | . |
| 225219_at | 0.003188 | 0.001351 | SMAD5        | 4090      | . |
| 225221_at | 4.20E-04 | 1.15E-04 |              |           | . |
| 225223_at | 0.001267 | 4.45E-04 | SMAD5        | 4090      | . |
| 225225_at | 0.020759 | 0.012365 | LOC729082    | 729082    | . |
| 225226_at | 0.012457 | 0.006795 | FAM40A       | 85369     | . |
| 225227_at | 3.02E-05 | 4.21E-06 |              |           | . |
| 225231_at | 1.32E-05 | 1.47E-06 | CBL          | 867       | . |
| 225232_at | 0.010023 | 0.005261 | MTMR12       | 54545     | . |
| 225233_at | 0.001594 | 5.87E-04 | MSI2         | 124540    | . |
| 225234_at | 0.003887 | 0.001713 | CBL          | 867       | . |
| 225236_at | 0.007628 | 0.003823 | RBM18        | 92400     | . |
| 225237_s_ | 5.85E-04 | 1.73E-04 | MSI2         | 124540    | . |
| 225238_at | 0.004952 | 0.00229  | MSI2         | 124540    | . |
| 225240_s_ | 2.07E-05 | 2.61E-06 | MSI2         | 124540    | . |
| 225241_at | 6.37E-07 | 2.71E-08 | CCDC80       | 151887    | . |
| 225242_s_ | 1.67E-05 | 1.98E-06 | CCDC80       | 151887    | . |

|           |          |          |                            |          |
|-----------|----------|----------|----------------------------|----------|
| 225244_at | 3.12E-04 | 7.99E-05 | SNAP47                     | 116841 . |
| 225245_x_ | 0.020542 | 0.012207 | H2AFJ                      | 55766 .  |
| 225247_at | 0.002114 | 8.26E-04 | C19orf6                    | 91304 .  |
| 225248_at | 1.41E-08 | 1.62E-10 | SPPL2B                     | 56928 .  |
| 225249_at | 8.39E-04 | 2.70E-04 | SPPL2B                     | 56928 .  |
| 225250_at | 0.016393 | 0.009377 | STIM2                      | 57620 .  |
| 225251_at | 3.05E-06 | 2.15E-07 | RAB24                      | 53917 .  |
| 225252_at | 0.001162 | 4.01E-04 | SRXN1                      | 140809 . |
| 225253_s_ | 7.46E-05 | 1.34E-05 | METTL2A /// N339175 /// 5! |          |
| 225254_at | 0.004985 | 0.002307 | CCDC97                     | 90324 .  |
| 225255_at | 2.74E-06 | 1.87E-07 | MRPL35                     | 51318 .  |
| 225258_at | 7.84E-07 | 3.57E-08 | FBLIM1                     | 54751 .  |
| 225259_at | 0.029426 | 0.01855  | RAB6B                      | 51560 .  |
| 225260_s_ | 2.96E-04 | 7.45E-05 | MRPL32                     | 64983 .  |
| 225261_x_ | 3.60E-07 | 1.29E-08 | TH1L                       | 51497 .  |
| 225262_at | 3.23E-04 | 8.35E-05 | FOSL2                      | 2355 .   |
| 225265_at | 0.005421 | 0.002549 | RBMS1                      | 5937 .   |
| 225267_at | 0.020598 | 0.012246 | KPNA4                      | 3840 .   |
| 225269_s_ | 0.017773 | 0.010301 | RBMS1                      | 5937 .   |
| 225270_at | 0.012646 | 0.006916 | NEO1                       | 4756 .   |
| 225271_at | 0.024513 | 0.015004 | TMEM63B                    | 55362 .  |
| 225274_at | 7.22E-06 | 6.59E-07 | PCYOX1                     | 51449 .  |
| 225275_at | 0.01436  | 0.008023 | EDIL3                      | 10085 .  |
| 225276_at | 5.70E-04 | 1.67E-04 | GSPT1                      | 2935 .   |
| 225277_at | 1.55E-08 | 1.86E-10 | SLC39A13                   | 91252 .  |
| 225279_s_ | 0.010239 | 0.005393 | C3orf17                    | 25871 .  |
| 225280_x_ | 1.15E-04 | 2.29E-05 | ARSD                       | 414 .    |
| 225281_at | 0.009267 | 0.0048   | C3orf17                    | 25871 .  |
| 225282_at | 4.06E-07 | 1.51E-08 | SMAP2                      | 64744 .  |
| 225283_at | 2.01E-04 | 4.61E-05 | ARRDC4                     | 91947 .  |
| 225284_at | 0.01392  | 0.007733 | DNAJC3                     | 5611 .   |
| 225285_at | 0.03546  | 0.023028 | BCAT1                      | 586 .    |
| 225286_at | 3.51E-04 | 9.21E-05 | ARSD                       | 414 .    |
| 225288_at | 0.001049 | 3.53E-04 | COL27A1                    | 85301 .  |

|           |          |          |           |          |
|-----------|----------|----------|-----------|----------|
| 225289_at | 5.10E-04 | 1.46E-04 | STAT3     | 6774 .   |
| 225290_at | 3.09E-05 | 4.35E-06 | ETNK1     | 55500 .  |
| 225291_at | 6.11E-06 | 5.30E-07 | PNPT1     | 87178 .  |
| 225292_at | 0.005926 | 0.002835 | COL27A1   | 85301 .  |
| 225293_at | 4.18E-05 | 6.36E-06 | COL27A1   | 85301 .  |
| 225294_s_ | 2.74E-07 | 8.94E-09 | TRAPPC1   | 58485 .  |
| 225295_at | 1.19E-06 | 6.23E-08 | SLC39A10  | 57181 .  |
| 225296_at | 0.002496 | 0.001008 | ZNF317    | 57693 .  |
| 225297_at | 2.32E-06 | 1.52E-07 | HAUS1     | 115106 . |
| 225298_at | 0.001685 | 6.27E-04 | PNKD      | 25953 .  |
| 225300_at | 9.31E-05 | 1.76E-05 | C15orf23  | 90417 .  |
| 225301_s_ | 7.48E-04 | 2.34E-04 | MYO5B     | 4645 .   |
| 225302_at | 2.87E-06 | 1.99E-07 | TMX3      | 54495 .  |
| 225303_at | 7.06E-06 | 6.38E-07 | KIRREL    | 55243 .  |
| 225305_at | 5.84E-05 | 9.72E-06 | SLC25A29  | 123096 . |
| 225306_s_ | 3.46E-05 | 4.99E-06 | SLC25A29  | 123096 . |
| 225307_at | 0.006538 | 0.003185 | ZNF511    | 118472 . |
| 225308_s_ | 1.88E-04 | 4.25E-05 | TANC1     | 85461 .  |
| 225309_at | 1.77E-04 | 3.93E-05 | PHF5A     | 84844 .  |
| 225310_at | 6.90E-06 | 6.19E-07 | RBMX      | 27316 .  |
| 225311_at | 0.004617 | 0.002107 | IVD       | 3712 .   |
| 225313_at | 0.009718 | 0.005076 | C20orf177 | 63939 .  |
| 225315_at | 3.11E-04 | 7.94E-05 | MRPL21    | 219927 . |
| 225316_at | 0.015869 | 0.009028 | MFSD2     | 84879 .  |
| 225317_at | 0.004643 | 0.002121 | ACBD6     | 84320 .  |
| 225318_at | 0.001022 | 3.42E-04 |           | .        |
| 225319_s_ | 0.002314 | 9.21E-04 | FAM104A   | 84923 .  |
| 225321_s_ | 1.50E-05 | 1.74E-06 | PILRB     | 29990 .  |
| 225322_s_ | 0.034628 | 0.022399 | C17orf70  | 80233 .  |
| 225323_at | 0.045985 | 0.031152 | CC2D1B    | 200014 . |
| 225325_at | 0.012221 | 0.006641 | MFSD6     | 54842 .  |
| 225326_at | 2.76E-07 | 9.08E-09 | RBM27     | 54439 .  |
| 225327_at | 0.012772 | 0.006999 | KIAA1370  | 56204 .  |
| 225328_at | 0.04049  | 0.02686  |           | .        |

|           |          |          |           |          |
|-----------|----------|----------|-----------|----------|
| 225329_at | 3.31E-05 | 4.72E-06 | LOC348262 | 348262 . |
| 225330_at | 0.001786 | 6.72E-04 | IGF1R     | 3480 .   |
| 225331_at | 0.002131 | 8.34E-04 | CCDC50    | 152137 . |
| 225332_at | 0.006717 | 0.003289 | LOC729082 | 729082 . |
| 225333_at | 0.016088 | 0.009175 | ZNF496    | 84838 .  |
| 225334_at | 2.41E-06 | 1.58E-07 | C10orf32  | 119032 . |
| 225335_at | 5.78E-04 | 1.70E-04 | ZNF496    | 84838 .  |
| 225337_at | 8.37E-07 | 3.91E-08 | ABHD2     | 11057 .  |
| 225338_at | 0.002428 | 9.75E-04 | ZYG11B    | 79699 .  |
| 225340_s_ | 0.013818 | 0.007669 | CAPRIN1   | 4076 .   |
| 225341_at | 5.88E-05 | 9.81E-06 | MTERFD3   | 80298 .  |
| 225342_at | 0.002577 | 0.001047 | AK3L1     | 205 .    |
| 225343_at | 0.00255  | 0.001034 | TMED8     | 283578 . |
| 225344_at | 2.93E-05 | 4.04E-06 | NCOA7     | 135112 . |
| 225346_at | 0.001    | 3.34E-04 | MTERFD3   | 80298 .  |
| 225348_at | 5.12E-04 | 1.47E-04 | FUSIP1    | 10772 .  |
| 225349_at | 0.015426 | 0.008736 | ZNF496    | 84838 .  |
| 225350_s_ | 0.013162 | 0.007249 | ZYG11B    | 79699 .  |
| 225351_at | 0.003804 | 0.00167  | FAM45A    | 404636 . |
| 225352_at | 1.81E-04 | 4.06E-05 | SEC62     | 7095 .   |
| 225353_s_ | 5.27E-04 | 1.52E-04 | C1QC      | 714 .    |
| 225354_s_ | 0.046624 | 0.031653 | SH3BGRL2  | 83699 .  |
| 225355_at | 0.013248 | 0.007303 | NEURL1B   | 54492 .  |
| 225356_at | 9.85E-04 | 3.28E-04 |           | .        |
| 225357_s_ | 1.71E-04 | 3.78E-05 | INO80     | 54617 .  |
| 225358_at | 0.013209 | 0.007279 | DNAJC19   | 131118 . |
| 225359_at | 6.75E-04 | 2.06E-04 | DNAJC19   | 131118 . |
| 225361_x_ | 1.37E-04 | 2.88E-05 | FAM122B   | 159090 . |
| 225362_at | 0.003396 | 0.001458 | FAM122B   | 159090 . |
| 225364_at | 7.96E-09 | 7.86E-11 | STK4      | 6789 .   |
| 225365_at | 6.60E-04 | 2.01E-04 | ZDHHC20   | 253832 . |
| 225366_at | 0.047379 | 0.032255 | PGM2      | 55276 .  |
| 225370_at | 0.01398  | 0.00777  | PYGO2     | 90780 .  |
| 225371_at | 1.14E-06 | 5.85E-08 | GLE1      | 2733 .   |

|           |          |          |           |          |
|-----------|----------|----------|-----------|----------|
| 225372_at | 1.27E-04 | 2.60E-05 | C10orf54  | 64115 .  |
| 225373_at | 1.63E-08 | 2.02E-10 | C10orf54  | 64115 .  |
| 225374_at | 0.016742 | 0.00961  | TMEM199   | 147007 . |
| 225375_at | 0.045509 | 0.030777 | TMEM199   | 147007 . |
| 225376_at | 0.043466 | 0.029176 | C20orf11  | 54994 .  |
| 225377_at | 0.002289 | 9.09E-04 | C9orf86   | 55684 .  |
| 225378_at | 0.042734 | 0.028596 | VPS37A    | 137492 . |
| 225380_at | 0.005636 | 0.00267  | SGK493    | 91461 .  |
| 225381_at | 3.25E-05 | 4.61E-06 | LOC399959 | 399959 . |
| 225382_at | 5.00E-04 | 1.42E-04 | ZNF275    | 10838 .  |
| 225383_at | 1.67E-05 | 1.99E-06 | ZNF275    | 10838 .  |
| 225384_at | 5.02E-04 | 1.43E-04 | DOCK7     | 85440 .  |
| 225386_s_ | 0.04441  | 0.029924 | HNRPLL    | 92906 .  |
| 225387_at | 7.80E-04 | 2.47E-04 | TSPAN5    | 10098 .  |
| 225388_at | 1.71E-04 | 3.78E-05 | TSPAN5    | 10098 .  |
| 225389_at | 2.37E-08 | 3.31E-10 | BTBD6     | 90135 .  |
| 225390_s_ | 0.039101 | 0.025798 | KLF13     | 51621 .  |
| 225391_at | 4.01E-04 | 1.08E-04 | LOC93622  | 93622 .  |
| 225392_at | 0.005811 | 0.002771 | GFM2      | 84340 .  |
| 225393_at | 3.47E-04 | 9.10E-05 | GATAD2B   | 57459 .  |
| 225395_s_ | 0.008375 | 0.004263 | FAM120AOS | 158293 . |
| 225396_at | 2.04E-07 | 5.90E-09 | RBBP4     | 5928 .   |
| 225397_at | 6.84E-04 | 2.10E-04 | C15orf57  | 90416 .  |
| 225399_at | 0.00606  | 0.002911 | TSEN15    | 116461 . |
| 225401_at | 0.01251  | 0.006831 | C1orf85   | 112770 . |
| 225402_at | 0.009471 | 0.004922 | TP53RK    | 112858 . |
| 225405_at | 0.019158 | 0.011242 |           | .        |
| 225406_at | 2.12E-05 | 2.70E-06 | TWSG1     | 57045 .  |
| 225407_at | 9.05E-06 | 8.91E-07 | MBP       | 4155 .   |
| 225409_at | 0.008022 | 0.004057 | C2orf64   | 493753 . |
| 225411_at | 2.91E-04 | 7.32E-05 | TMEM87B   | 84910 .  |
| 225412_at | 6.16E-05 | 1.04E-05 | TMEM87B   | 84910 .  |
| 225413_at | 0.007437 | 0.003713 | USMG5     | 84833 .  |
| 225414_at | 0.002592 | 0.001055 | RNF149    | 284996 . |

|           |          |          |          |          |
|-----------|----------|----------|----------|----------|
| 225415_at | 0.00353  | 0.001527 | DTX3L    | 151636 . |
| 225416_at | 8.66E-04 | 2.81E-04 | RLIM     | 51132 .  |
| 225418_at | 6.73E-04 | 2.05E-04 | PVRL2    | 5819 .   |
| 225419_at | 0.021125 | 0.012626 | C7orf11  | 136647 . |
| 225420_at | 0.02635  | 0.016314 | GPAM     | 57678 .  |
| 225421_at | 1.32E-07 | 3.31E-09 | PM20D2   | 135293 . |
| 225425_s_ | 0.001434 | 5.17E-04 | MRPL41   | 64975 .  |
| 225428_s_ | 7.50E-04 | 2.35E-04 | DDX54    | 79039 .  |
| 225430_at | 4.19E-05 | 6.39E-06 | GATC     | 283459 . |
| 225431_x_ | 1.22E-05 | 1.32E-06 | PM20D2   | 135293 . |
| 225436_at | 0.009126 | 0.004712 | FAM108C1 | 58489 .  |
| 225437_s_ | 0.021933 | 0.013195 | C7orf27  | 221927 . |
| 225438_at | 0.013736 | 0.007617 | NUDCD1   | 84955 .  |
| 225439_at | 3.43E-06 | 2.51E-07 | NUDCD1   | 84955 .  |
| 225440_at | 3.62E-05 | 5.28E-06 | AGPAT3   | 56894 .  |
| 225441_x_ | 6.32E-06 | 5.51E-07 | LSMD1    | 84316 .  |
| 225442_at | 8.92E-10 | 4.53E-12 | DDR2     | 4921 .   |
| 225443_at | 0.032496 | 0.020814 | DCP1A    | 55802 .  |
| 225444_at | 5.00E-05 | 8.02E-06 | UBN2     | 254048 . |
| 225445_at | 5.15E-04 | 1.47E-04 | UBN2     | 254048 . |
| 225446_at | 0.015538 | 0.008808 | BRWD1    | 54014 .  |
| 225449_at | 0.008105 | 0.004105 | RDH13    | 112724 . |
| 225450_at | 0.018974 | 0.011119 | AMOTL1   | 154810 . |
| 225451_at | 2.77E-04 | 6.89E-05 | GRIPAP1  | 56850 .  |
| 225452_at | 9.98E-06 | 1.01E-06 | MED1     | 5469 .   |
| 225454_at | 0.049261 | 0.033733 | CCDC124  | 115098 . |
| 225455_at | 1.34E-06 | 7.33E-08 | TADA1L   | 117143 . |
| 225456_at | 1.39E-05 | 1.57E-06 | MED1     | 5469 .   |
| 225457_s_ | 6.21E-05 | 1.05E-05 | LOC25845 | 25845 .  |
| 225458_at | 0.0196   | 0.011549 | LOC25845 | 25845 .  |
| 225459_at | 0.008479 | 0.004324 | AMOTL1   | 154810 . |
| 225460_at | 0.002047 | 7.93E-04 | SEC22C   | 9117 .   |
| 225461_at | 6.78E-05 | 1.18E-05 | EHMT1    | 79813 .  |
| 225464_at | 6.34E-06 | 5.55E-07 | FRMD6    | 122786 . |

|           |          |          |           |          |
|-----------|----------|----------|-----------|----------|
| 225466_at | 9.02E-07 | 4.33E-08 | PATL1     | 219988 . |
| 225468_at | 0.001107 | 3.78E-04 | PATL1     | 219988 . |
| 225469_at | 0.001417 | 5.10E-04 | LYRM5     | 144363 . |
| 225470_at | 5.50E-06 | 4.63E-07 | NUP35     | 129401 . |
| 225473_at | 0.028612 | 0.017957 | C20orf117 | 140710 . |
| 225474_at | 0.028844 | 0.018133 | MAGI1     | 9223 .   |
| 225476_at | 1.53E-05 | 1.77E-06 | BAT4      | 7918 .   |
| 225478_at | 6.57E-05 | 1.13E-05 | MFHAS1    | 9258 .   |
| 225479_at | 5.06E-06 | 4.14E-07 | LRRC58    | 116064 . |
| 225480_at | 3.48E-05 | 5.01E-06 | C1orf122  | 127687 . |
| 225481_at | 2.95E-05 | 4.09E-06 | FRMD6     | 122786 . |
| 225482_at | 9.19E-05 | 1.73E-05 | KIF1A     | 547 .    |
| 225483_at | 8.84E-06 | 8.62E-07 | VPS26B    | 112936 . |
| 225486_at | 3.08E-04 | 7.85E-05 | ARID2     | 196528 . |
| 225487_at | 0.005883 | 0.002811 | TMEM18    | 129787 . |
| 225488_at | 8.91E-04 | 2.91E-04 | DERL1     | 79139 .  |
| 225489_at | 1.02E-04 | 1.97E-05 | TMEM18    | 129787 . |
| 225490_at | 8.71E-06 | 8.43E-07 | ARID2     | 196528 . |
| 225491_at | 1.22E-04 | 2.47E-05 | SLC1A2    | 6506 .   |
| 225492_at | 2.12E-07 | 6.21E-09 | TMEM33    | 55161 .  |
| 225493_at | 1.85E-05 | 2.26E-06 | LOC144438 | 144438 . |
| 225494_at | 6.00E-04 | 1.78E-04 | DYNLL2    | 140735 . |
| 225496_s_ | 3.28E-04 | 8.51E-05 | SYTL2     | 54843 .  |
| 225497_at | 0.01207  | 0.006543 | ATE1      | 11101 .  |
| 225498_at | 0.012183 | 0.006616 | CHMP4B    | 128866 . |
| 225499_at | 0.040454 | 0.026831 |           | .        |
| 225500_x_ | 8.55E-05 | 1.59E-05 | SCAF1     | 58506 .  |
| 225501_at | 1.37E-05 | 1.55E-06 | PHF6      | 84295 .  |
| 225502_at | 1.92E-07 | 5.44E-09 | DOCK8     | 81704 .  |
| 225504_at | 0.02973  | 0.018784 |           | .        |
| 225505_s_ | 0.00693  | 0.003415 | FAM113A   | 64773 .  |
| 225507_at | 2.77E-06 | 1.90E-07 | SFRS18    | 25957 .  |
| 225509_at | 6.72E-05 | 1.16E-05 | SAP30L    | 79685 .  |
| 225510_at | 0.003189 | 0.001351 | OAF       | 220323 . |

|           |          |          |                              |          |
|-----------|----------|----------|------------------------------|----------|
| 225511_at | 2.66E-04 | 6.55E-05 | GPRC5B                       | 51704 .  |
| 225512_at | 2.74E-04 | 6.79E-05 | ZBTB38                       | 253461 . |
| 225513_at | 2.91E-04 | 7.31E-05 | SCRN2                        | 90507 .  |
| 225515_s_ | 0.014194 | 0.007911 | LOC220906 /// 220906 /// 28. |          |
| 225516_at | 0.001387 | 4.97E-04 | SLC7A2                       | 6542 .   |
| 225517_at | 3.55E-05 | 5.14E-06 | ZNF770                       | 54989 .  |
| 225518_x_ | 0.002398 | 9.60E-04 |                              | .        |
| 225519_at | 0.001573 | 5.78E-04 | PPP4R2                       | 151987 . |
| 225521_at | 2.28E-07 | 6.96E-09 | ANAPC7                       | 51434 .  |
| 225523_at | 6.27E-06 | 5.46E-07 | MRPL53                       | 116540 . |
| 225524_at | 4.52E-06 | 3.58E-07 | ANTXR2                       | 118429 . |
| 225525_at | 1.30E-06 | 7.08E-08 | CTA-221G9.4                  | 85379 .  |
| 225526_at | 0.004179 | 0.001867 | MKLN1                        | 4289 .   |
| 225527_at | 0.005041 | 0.00234  | CEBPG                        | 1054 .   |
| 225528_at | 2.10E-06 | 1.34E-07 | IPO8                         | 10526 .  |
| 225529_at | 0.023608 | 0.014367 | ACAP3                        | 116983 . |
| 225530_at | 1.68E-05 | 1.99E-06 | MOBKL2A                      | 126308 . |
| 225533_at | 0.001992 | 7.68E-04 | PHF19                        | 26147 .  |
| 225535_s_ | 0.037661 | 0.024702 | TIMM23                       | 10431 .  |
| 225538_at | 0.032987 | 0.021194 | ZCCHC9                       | 84240 .  |
| 225539_at | 0.005132 | 0.002391 | ZNF295                       | 49854 .  |
| 225543_at | 3.97E-04 | 1.07E-04 |                              | .        |
| 225544_at | 1.41E-06 | 7.88E-08 | TBX3                         | 6926 .   |
| 225545_at | 1.34E-04 | 2.77E-05 | EEF2K                        | 29904 .  |
| 225546_at | 1.32E-04 | 2.73E-05 | EEF2K                        | 29904 .  |
| 225547_at | 1.08E-04 | 2.11E-05 | SNHG6                        | 641638 . |
| 225548_at | 0.00447  | 0.002027 | SHROOM3                      | 57619 .  |
| 225550_at | 6.92E-05 | 1.21E-05 | C1orf71                      | 163882 . |
| 225551_at | 1.08E-04 | 2.11E-05 | C1orf71                      | 163882 . |
| 225552_x_ | 0.046551 | 0.031596 | AURKAIP1                     | 54998 .  |
| 225554_s_ | 1.00E-05 | 1.03E-06 | ANAPC7                       | 51434 .  |
| 225555_x_ | 0.043461 | 0.02917  | AURKAIP1                     | 54998 .  |
| 225556_at | 0.009418 | 0.00489  | VMA21                        | 203547 . |
| 225558_at | 2.42E-09 | 1.66E-11 | GIT2                         | 9815 .   |



|           |          |          |          |          |
|-----------|----------|----------|----------|----------|
| 225559_at | 0.029716 | 0.018774 | C3orf19  | 51244 .  |
| 225560_at | 0.005181 | 0.002417 | POMT2    | 29954 .  |
| 225562_at | 1.26E-06 | 6.74E-08 | RASA3    | 22821 .  |
| 225563_at | 0.002877 | 0.001193 | PAN3     | 255967 . |
| 225564_at | 0.015424 | 0.008734 | SPATA13  | 221178 . |
| 225565_at | 8.54E-04 | 2.76E-04 | CREB1    | 1385 .   |
| 225566_at | 0.001994 | 7.69E-04 | NRP2     | 8828 .   |
| 225567_at | 1.23E-04 | 2.51E-05 |          | .        |
| 225568_at | 0.013868 | 0.0077   | TMEM141  | 85014 .  |
| 225569_at | 4.85E-05 | 7.72E-06 | EIF2C2   | 27161 .  |
| 225570_at | 1.98E-04 | 4.52E-05 | SLC41A1  | 254428 . |
| 225571_at | 1.49E-04 | 3.18E-05 | LIFR     | 3977 .   |
| 225572_at | 0.042938 | 0.028748 | CREB1    | 1385 .   |
| 225573_at | 0.001102 | 3.76E-04 | ACAD11   | 84129 .  |
| 225574_at | 0.038503 | 0.025347 | RWDD4A   | 201965 . |
| 225575_at | 8.40E-05 | 1.55E-05 | LIFR     | 3977 .   |
| 225576_at | 1.75E-05 | 2.11E-06 | C6orf72  | 116254 . |
| 225577_at | 0.031565 | 0.020121 | HCG18    | 414777 . |
| 225578_at | 6.73E-07 | 2.93E-08 | C13orf37 | 440145 . |
| 225579_at | 6.17E-04 | 1.84E-04 | PQLC3    | 130814 . |
| 225580_at | 0.012058 | 0.006535 | MRPL50   | 54534 .  |
| 225581_s_ | 0.012878 | 0.007068 | MRPL50   | 54534 .  |
| 225582_at | 6.13E-04 | 1.83E-04 | ITPRIP   | 85450 .  |
| 225584_at | 0.001293 | 4.56E-04 | HCG18    | 414777 . |
| 225586_at | 4.42E-07 | 1.70E-08 | WDR85    | 92715 .  |
| 225587_at | 0.005824 | 0.002778 | TMEM129  | 92305 .  |
| 225588_s_ | 0.025484 | 0.015707 | TMEM129  | 92305 .  |
| 225589_at | 0.00517  | 0.002411 | SH3RF1   | 57630 .  |
| 225590_at | 8.51E-04 | 2.75E-04 | SH3RF1   | 57630 .  |
| 225591_at | 0.015363 | 0.008692 | FBXO25   | 26260 .  |
| 225592_at | 0.021619 | 0.012968 | NRM      | 11270 .  |
| 225593_at | 4.85E-04 | 1.37E-04 | LSM10    | 84967 .  |
| 225594_at | 4.83E-05 | 7.66E-06 | CREBZF   | 58487 .  |
| 225595_at | 9.85E-05 | 1.89E-05 | CREBZF   | 58487 .  |

|           |          |          |           |          |
|-----------|----------|----------|-----------|----------|
| 225596_at | 5.24E-04 | 1.51E-04 | KLC4      | 89953 .  |
| 225597_at | 0.020826 | 0.012411 | SLC45A4   | 57210 .  |
| 225598_at | 2.35E-04 | 5.59E-05 | SLC45A4   | 57210 .  |
| 225599_s_ | 0.012878 | 0.007067 | C8orf83   | 286144 . |
| 225600_at | 0.001896 | 7.24E-04 | C8orf83   | 286144 . |
| 225601_at | 6.87E-08 | 1.38E-09 | HMGB3     | 3149 .   |
| 225602_at | 6.42E-05 | 1.10E-05 | GLIPR2    | 152007 . |
| 225604_s_ | 3.95E-04 | 1.07E-04 | GLIPR2    | 152007 . |
| 225605_at | 7.65E-04 | 2.41E-04 | TP53I13   | 90313 .  |
| 225607_at | 0.002243 | 8.87E-04 | CCDC43    | 124808 . |
| 225608_at | 5.25E-04 | 1.51E-04 | SNX29     | 92017 .  |
| 225609_at | 0.001398 | 5.02E-04 | GSR       | 2936 .   |
| 225611_at | 0.021681 | 0.013013 | MAST4     | 375449 . |
| 225614_at | 3.78E-04 | 1.01E-04 | SAAL1     | 113174 . |
| 225615_at | 0.007185 | 0.003564 | IFFO2     | 126917 . |
| 225617_at | 6.55E-07 | 2.82E-08 | ODF2      | 4957 .   |
| 225618_at | 0.002774 | 0.001144 | ARHGAP27  | 201176 . |
| 225619_at | 0.004096 | 0.001823 | SLAIN1    | 122060 . |
| 225621_at | 0.008818 | 0.004526 | ALG2      | 85365 .  |
| 225622_at | 0.002384 | 9.54E-04 | PAG1      | 55824 .  |
| 225623_at | 5.84E-05 | 9.72E-06 | KIAA1737  | 85457 .  |
| 225624_at | 8.72E-06 | 8.44E-07 | SNX29     | 92017 .  |
| 225625_at | 1.49E-05 | 1.72E-06 | ALKBH2    | 121642 . |
| 225626_at | 0.00902  | 0.004646 | PAG1      | 55824 .  |
| 225627_s_ | 0.001061 | 3.59E-04 | CACHD1    | 57685 .  |
| 225629_s_ | 2.13E-07 | 6.27E-09 | ZBTB4     | 57659 .  |
| 225630_at | 0.028041 | 0.017543 | EEPD1     | 80820 .  |
| 225632_s_ | 0.001832 | 6.94E-04 | RAB43     | 339122 . |
| 225636_at | 4.82E-06 | 3.89E-07 | STAT2     | 6773 .   |
| 225638_at | 0.017946 | 0.010419 | C1orf31   | 388753 . |
| 225639_at | 0.011722 | 0.006318 | SKAP2     | 8935 .   |
| 225640_at | 0.049681 | 0.034071 | LOC401504 | 401504 . |
| 225641_at | 0.044351 | 0.029879 | MEF2D     | 4209 .   |
| 225642_at | 1.96E-05 | 2.44E-06 | KTI12     | 112970 . |

|           |          |          |           |        |   |
|-----------|----------|----------|-----------|--------|---|
| 225644_at | 2.72E-04 | 6.72E-05 | CCDC117   | 150275 | . |
| 225646_at | 3.55E-04 | 9.35E-05 | CTSC      | 1075   | . |
| 225647_s_ | 7.48E-05 | 1.34E-05 | CTSC      | 1075   | . |
| 225648_at | 3.93E-04 | 1.06E-04 | STK35     | 140901 | . |
| 225649_s_ | 0.009632 | 0.005021 | STK35     | 140901 | . |
| 225652_at | 8.30E-05 | 1.53E-05 |           |        | . |
| 225653_at | 0.023465 | 0.014261 |           |        | . |
| 225654_at | 0.00612  | 0.002945 | NSD1      | 64324  | . |
| 225655_at | 4.63E-05 | 7.26E-06 | UHRF1     | 29128  | . |
| 225656_at | 0.001194 | 4.14E-04 | EFHC1     | 114327 | . |
| 225657_at | 0.001319 | 4.67E-04 | LOC152217 | 152217 | . |
| 225659_at | 0.024769 | 0.015191 | SPOPL     | 339745 | . |
| 225660_at | 1.71E-11 | 2.68E-14 | SEMA6A    | 57556  | . |
| 225661_at | 2.29E-08 | 3.13E-10 | IFNAR1    | 3454   | . |
| 225662_at | 7.62E-09 | 7.40E-11 | ZAK       | 51776  | . |
| 225663_at | 0.026296 | 0.016273 | ACBD5     | 91452  | . |
| 225664_at | 5.33E-06 | 4.43E-07 | COL12A1   | 1303   | . |
| 225665_at | 1.92E-10 | 5.92E-13 | ZAK       | 51776  | . |
| 225666_at | 8.88E-04 | 2.90E-04 | TMTC4     | 84899  | . |
| 225668_at | 5.44E-04 | 1.58E-04 | FAM173B   | 134145 | . |
| 225669_at | 7.50E-08 | 1.56E-09 | IFNAR1    | 3454   | . |
| 225670_at | 1.89E-05 | 2.32E-06 | FAM173B   | 134145 | . |
| 225672_at | 0.004401 | 0.001989 | GOLGA2    | 2801   | . |
| 225673_at | 4.18E-04 | 1.14E-04 | MYADM     | 91663  | . |
| 225674_at | 6.57E-05 | 1.13E-05 | BCAP29    | 55973  | . |
| 225676_s_ | 2.68E-04 | 6.60E-05 | WDSOF1    | 25879  | . |
| 225677_at | 2.79E-04 | 6.96E-05 | BCAP29    | 55973  | . |
| 225678_at | 0.024736 | 0.015167 | POLR3H    | 171568 | . |
| 225680_at | 0.00548  | 0.002583 | LRWD1     | 222229 | . |
| 225681_at | 0.001409 | 5.06E-04 | CTHRC1    | 115908 | . |
| 225682_s_ | 1.14E-04 | 2.26E-05 | POLR3H    | 171568 | . |
| 225683_x_ | 1.06E-04 | 2.08E-05 | PHPT1     | 29085  | . |
| 225684_at | 8.00E-04 | 2.55E-04 | FAM33A    | 348235 | . |
| 225685_at | 0.001052 | 3.55E-04 |           |        | . |

|           |          |          |          |          |
|-----------|----------|----------|----------|----------|
| 225686_at | 0.002851 | 0.00118  | FAM33A   | 348235 . |
| 225687_at | 2.50E-04 | 6.05E-05 | FAM83D   | 81610 .  |
| 225688_s_ | 0.009322 | 0.004831 | PHLDB2   | 90102 .  |
| 225689_at | 0.005186 | 0.00242  | C3orf39  | 84892 .  |
| 225690_at | 0.014228 | 0.007934 | CRKRS    | 51755 .  |
| 225691_at | 5.19E-04 | 1.49E-04 | CRKRS    | 51755 .  |
| 225694_at | 6.24E-05 | 1.06E-05 | CRKRS    | 51755 .  |
| 225695_at | 0.005506 | 0.002598 | C2orf18  | 54978 .  |
| 225697_at | 3.50E-08 | 5.57E-10 | CRKRS    | 51755 .  |
| 225699_at | 3.84E-09 | 3.05E-11 | C7orf40  | 285958 . |
| 225700_at | 0.018905 | 0.011074 | GLCCI1   | 113263 . |
| 225702_at | 2.63E-05 | 3.53E-06 | C8orf76  | 84933 .  |
| 225703_at | 1.95E-06 | 1.21E-07 | FBRSL1   | 57666 .  |
| 225704_at | 0.001894 | 7.23E-04 | FBRSL1   | 57666 .  |
| 225705_at | 9.30E-05 | 1.76E-05 | CCDC45   | 90799 .  |
| 225706_at | 1.49E-04 | 3.18E-05 | GLCCI1   | 113263 . |
| 225707_at | 3.07E-05 | 4.31E-06 | ARL6IP6  | 151188 . |
| 225708_at | 0.002474 | 9.98E-04 | MED29    | 55588 .  |
| 225709_at | 0.009474 | 0.004925 | ARL6IP6  | 151188 . |
| 225711_at | 2.00E-04 | 4.59E-05 | ARL6IP6  | 151188 . |
| 225712_at | 4.85E-05 | 7.70E-06 | GEMIN5   | 25929 .  |
| 225713_at | 0.003606 | 0.001566 | STK11IP  | 114790 . |
| 225716_at | 2.28E-06 | 1.48E-07 |          | .        |
| 225717_at | 2.24E-04 | 5.28E-05 | KIAA1715 | 80856 .  |
| 225718_at | 4.39E-04 | 1.21E-04 | KIAA1715 | 80856 .  |
| 225719_s_ | 6.66E-06 | 5.91E-07 | MRPL55   | 128308 . |
| 225720_at | 4.92E-05 | 7.86E-06 | SYNPO2   | 171024 . |
| 225721_at | 3.03E-06 | 2.13E-07 | SYNPO2   | 171024 . |
| 225722_at | 0.002157 | 8.46E-04 |          | .        |
| 225723_at | 8.93E-06 | 8.75E-07 | C6orf129 | 154467 . |
| 225724_at | 4.51E-04 | 1.25E-04 | FLJ31306 | 379025 . |
| 225725_at | 0.00103  | 3.46E-04 |          | .        |
| 225726_s_ | 7.16E-06 | 6.52E-07 | PLEKHH1  | 57475 .  |
| 225727_at | 2.53E-08 | 3.63E-10 | PLEKHH1  | 57475 .  |

|           |          |          |           |          |
|-----------|----------|----------|-----------|----------|
| 225728_at | 2.35E-04 | 5.58E-05 | SORBS2    | 8470 .   |
| 225729_at | 4.30E-09 | 3.53E-11 | C6orf89   | 221477 . |
| 225730_s_ | 2.50E-05 | 3.31E-06 | THUMPD3   | 25917 .  |
| 225731_at | 0.046627 | 0.031656 | ANKRD50   | 57182 .  |
| 225732_at | 0.002686 | 0.0011   | KLHDC5    | 57542 .  |
| 225733_at | 3.19E-06 | 2.28E-07 | B3GALT6   | 126792 . |
| 225738_at | 0.013813 | 0.007666 | RAPGEF1   | 2889 .   |
| 225739_at | 1.42E-06 | 7.96E-08 | RAB11FIP4 | 84440 .  |
| 225740_x_ | 8.70E-07 | 4.12E-08 | MDM4      | 4194 .   |
| 225742_at | 8.69E-04 | 2.82E-04 | MDM4      | 4194 .   |
| 225744_at | 0.001429 | 5.15E-04 | ZDHHC8    | 29801 .  |
| 225745_at | 0.004805 | 0.002211 | LRP6      | 4040 .   |
| 225746_at | 0.003267 | 0.001391 | RAB11FIP4 | 84440 .  |
| 225747_at | 0.007994 | 0.004041 | COQ10A    | 93058 .  |
| 225748_at | 0.002201 | 8.67E-04 | LTV1      | 84946 .  |
| 225749_at | 4.25E-05 | 6.50E-06 | C16orf91  | 283951 . |
| 225750_at | 0.040486 | 0.026856 |           | .        |
| 225751_at | 0.002222 | 8.77E-04 | RBM17     | 84991 .  |
| 225752_at | 0.002748 | 0.001131 | NIPA1     | 123606 . |
| 225754_at | 8.12E-04 | 2.59E-04 | AP1G1     | 164 .    |
| 225755_at | 0.005026 | 0.00233  | KLHDC8B   | 200942 . |
| 225758_s_ | 1.29E-04 | 2.64E-05 | TUBGCP6   | 85378 .  |
| 225759_x_ | 5.15E-04 | 1.47E-04 | CLMN      | 79789 .  |
| 225760_at | 0.001844 | 6.99E-04 | MYSM1     | 114803 . |
| 225762_x_ | 0.006472 | 0.003146 | LOC284801 | 284801 . |
| 225764_at | 0.003542 | 0.001533 | ETV6      | 2120 .   |
| 225769_at | 0.006911 | 0.003404 | COG6      | 57511 .  |
| 225770_at | 0.012212 | 0.006635 | RSPRY1    | 89970 .  |
| 225771_at | 4.09E-04 | 1.11E-04 | AP1G1     | 164 .    |
| 225772_s_ | 3.10E-06 | 2.20E-07 | C12orf62  | 84987 .  |
| 225773_at | 0.009657 | 0.005037 | RSPRY1    | 89970 .  |
| 225775_at | 0.002853 | 0.001181 | TSPAN33   | 340348 . |
| 225776_at | 0.004805 | 0.002211 | RBMS2     | 5939 .   |
| 225777_at | 5.73E-07 | 2.36E-08 | C9orf140  | 89958 .  |

|           |          |          |                             |          |
|-----------|----------|----------|-----------------------------|----------|
| 225778_at | 8.08E-06 | 7.62E-07 | RBMS2                       | 5939 .   |
| 225779_at | 0.015416 | 0.008726 | SLC27A4                     | 10999 .  |
| 225780_at | 6.77E-05 | 1.18E-05 | RSC1A1                      | 6248 .   |
| 225781_at | 0.003473 | 0.001497 | MAPK9                       | 5601 .   |
| 225782_at | 1.38E-08 | 1.59E-10 | MSRB3                       | 253827 . |
| 225783_at | 6.14E-05 | 1.04E-05 | UBE2F                       | 140739 . |
| 225785_at | 4.99E-04 | 1.42E-04 | REEP3                       | 221035 . |
| 225786_at | 2.59E-04 | 6.33E-05 | C1orf199                    | 284702 . |
| 225787_at | 0.010416 | 0.005501 | UBE2F                       | 140739 . |
| 225789_at | 0.009622 | 0.005014 | AGAP3                       | 116988 . |
| 225790_at | 9.00E-10 | 4.62E-12 | MSRB3                       | 253827 . |
| 225791_at | 0.049753 | 0.034129 | UBE2F                       | 140739 . |
| 225792_at | 0.005669 | 0.002688 | HOOK1                       | 51361 .  |
| 225793_at | 1.75E-07 | 4.82E-09 | LIX1L                       | 128077 . |
| 225794_s_ | 4.01E-05 | 6.01E-06 | C22orf32                    | 91689 .  |
| 225795_at | 0.001176 | 4.07E-04 | C22orf32                    | 91689 .  |
| 225796_at | 7.11E-08 | 1.44E-09 | PXK                         | 54899 .  |
| 225797_at | 0.001819 | 6.88E-04 | MRPL54                      | 116541 . |
| 225798_at | 9.87E-05 | 1.90E-05 | JAZF1                       | 221895 . |
| 225799_at | 0.006953 | 0.00343  | LOC541471 /// 112597 /// 54 | .        |
| 225800_at | 4.43E-05 | 6.86E-06 | JAZF1                       | 221895 . |
| 225802_at | 2.15E-04 | 5.02E-05 | TOP1MT                      | 116447 . |
| 225803_at | 0.028359 | 0.017766 | FBXO32                      | 114907 . |
| 225804_at | 1.56E-05 | 1.83E-06 | CYB5D2                      | 124936 . |
| 225805_at | 0.001846 | 7.01E-04 | HNRNPU                      | 3192 .   |
| 225806_at | 0.043797 | 0.029441 | JUB                         | 84962 .  |
| 225807_at | 3.46E-04 | 9.05E-05 | JUB                         | 84962 .  |
| 225812_at | 0.002107 | 8.22E-04 | C6orf225                    | 619208 . |
| 225814_at | 0.026733 | 0.016598 | XRN1                        | 54464 .  |
| 225815_at | 1.76E-05 | 2.12E-06 | CPLX2                       | 10814 .  |
| 225816_at | 0.003504 | 0.001513 | PHF17                       | 79960 .  |
| 225817_at | 2.27E-04 | 5.37E-05 | CGNL1                       | 84952 .  |
| 225818_s_ | 0.004536 | 0.002063 | TBRG1                       | 84897 .  |
| 225820_at | 1.95E-04 | 4.43E-05 | PHF17                       | 79960 .  |

|           |          |          |                            |          |
|-----------|----------|----------|----------------------------|----------|
| 225822_at | 1.67E-11 | 2.52E-14 | TMEM125                    | 128218 . |
| 225823_at | 6.93E-07 | 3.04E-08 | C19orf70                   | 125988 . |
| 225825_at | 0.003487 | 0.001504 | C20orf194                  | 25943 .  |
| 225826_at | 0.013806 | 0.00766  | MMAB                       | 326625 . |
| 225827_at | 6.33E-04 | 1.90E-04 | EIF2C2                     | 27161 .  |
| 225828_at | 0.020954 | 0.012504 | DAGLB                      | 221955 . |
| 225831_at | 0.018399 | 0.010729 | LUZP1                      | 7798 .   |
| 225832_s_ | 0.012167 | 0.006606 | DAGLB                      | 221955 . |
| 225834_at | 1.53E-08 | 1.82E-10 | FAM72A /// FA653820 /// 7. |          |
| 225835_at | 0.035549 | 0.023099 | SLC12A2                    | 6558 .   |
| 225836_s_ | 0.029661 | 0.018727 | C12orf32                   | 83695 .  |
| 225837_at | 0.002037 | 7.89E-04 | C12orf32                   | 83695 .  |
| 225839_at | 0.003844 | 0.001691 | RBM33                      | 155435 . |
| 225840_at | 7.63E-04 | 2.40E-04 | TEF                        | 7008 .   |
| 225843_at | 1.81E-04 | 4.05E-05 | ZFYVE19                    | 84936 .  |
| 225844_at | 7.92E-05 | 1.44E-05 | POLE4                      | 56655 .  |
| 225845_at | 5.53E-04 | 1.61E-04 | ZBTB44                     | 29068 .  |
| 225846_at | 3.87E-12 | 3.22E-15 | ESRP1                      | 54845 .  |
| 225847_at | 0.011661 | 0.00628  | AADACL1                    | 57552 .  |
| 225848_at | 0.003728 | 0.00163  | ZNF746                     | 155061 . |
| 225852_at | 1.93E-05 | 2.38E-06 | ANKRD17                    | 26057 .  |
| 225853_at | 0.013367 | 0.007378 | GNPNAT1                    | 64841 .  |
| 225854_x_ | 0.00658  | 0.003208 | LOC729397                  | 729397 . |
| 225855_at | 0.001782 | 6.70E-04 | EPB41L5                    | 57669 .  |
| 225856_at | 1.58E-05 | 1.85E-06 |                            | .        |
| 225857_s_ | 1.99E-06 | 1.24E-07 | LOC388796                  | 388796 . |
| 225858_s_ | 0.010692 | 0.005675 | XIAP                       | 331 .    |
| 225860_at | 9.05E-06 | 8.91E-07 | LOC729580                  | 729580 . |
| 225861_at | 5.18E-04 | 1.48E-04 | C16orf14                   | 84331 .  |
| 225862_at | 0.006889 | 0.003391 | SLC25A26                   | 115286 . |
| 225863_s_ | 0.012705 | 0.006955 | C19orf12                   | 83636 .  |
| 225864_at | 4.08E-07 | 1.52E-08 | FAM84B                     | 157638 . |
| 225865_x_ | 1.28E-06 | 6.92E-08 | TH1L                       | 51497 .  |
| 225866_at | 5.47E-06 | 4.60E-07 | BXDC1                      | 84154 .  |

|           |          |          |                              |          |
|-----------|----------|----------|------------------------------|----------|
| 225867_at | 1.42E-05 | 1.62E-06 | VASN                         | 114990 . |
| 225868_at | 0.028752 | 0.018066 | TRIM47                       | 91107 .  |
| 225869_s_ | 0.001292 | 4.56E-04 | UNC93B1                      | 81622 .  |
| 225870_s_ | 0.005754 | 0.002737 | TRAPPC5                      | 126003 . |
| 225872_at | 4.85E-05 | 7.72E-06 | SLC35F5                      | 80255 .  |
| 225873_at | 0.002064 | 8.02E-04 | TYSND1                       | 219743 . |
| 225874_at | 0.010573 | 0.005601 | FAM100A                      | 124402 . |
| 225875_s_ | 2.05E-05 | 2.57E-06 | NIPAL3                       | 57185 .  |
| 225876_at | 1.89E-04 | 4.26E-05 | NIPAL3                       | 57185 .  |
| 225877_at | 0.003363 | 0.001441 | TYSND1                       | 219743 . |
| 225879_at | 2.58E-07 | 8.24E-09 | TSEN54                       | 283989 . |
| 225880_at | 0.001801 | 6.79E-04 |                              | .        |
| 225882_at | 8.60E-05 | 1.60E-05 | SLC35B4                      | 84912 .  |
| 225884_s_ | 0.003874 | 0.001706 | GZF1                         | 64412 .  |
| 225885_at | 0.024702 | 0.015139 | EEA1                         | 8411 .   |
| 225887_at | 3.19E-06 | 2.28E-07 | C13orf23                     | 80209 .  |
| 225888_at | 5.36E-07 | 2.15E-08 | C12orf30                     | 80018 .  |
| 225890_at | 2.13E-07 | 6.26E-09 | C20orf72                     | 92667 .  |
| 225892_at | 6.52E-04 | 1.98E-04 | IREB2                        | 3658 .   |
| 225894_at | 1.21E-04 | 2.43E-05 | SYNPO2                       | 171024 . |
| 225895_at | 4.85E-06 | 3.92E-07 | SYNPO2                       | 171024 . |
| 225897_at | 0.033689 | 0.021716 | MARCKS                       | 4082 .   |
| 225899_x_ | 1.08E-04 | 2.13E-05 | FLJ45445 /// LC399844 /// 4( |          |
| 225903_at | 7.74E-08 | 1.63E-09 | PIGU                         | 128869 . |
| 225904_at | 0.001523 | 5.56E-04 | C1orf96                      | 126731 . |
| 225906_at | 0.010036 | 0.005269 |                              | .        |
| 225908_at | 3.75E-09 | 2.92E-11 | IAH1                         | 285148 . |
| 225909_at | 0.024408 | 0.014929 | tcag7.1196                   | 728743 . |
| 225910_at | 3.95E-04 | 1.06E-04 | HELZ                         | 9931 .   |
| 225911_at | 0.004603 | 0.002099 | NPNT                         | 255743 . |
| 225912_at | 0.008898 | 0.004575 | TP53INP1                     | 94241 .  |
| 225913_at | 5.18E-07 | 2.06E-08 | SGK269                       | 79834 .  |
| 225914_s_ | 0.012569 | 0.006868 | CAB39L                       | 81617 .  |
| 225915_at | 0.020502 | 0.012175 | CAB39L                       | 81617 .  |



|           |          |          |                             |        |   |
|-----------|----------|----------|-----------------------------|--------|---|
| 225916_at | 0.00681  | 0.003345 | ZNF131                      | 7690   | . |
| 225917_at | 0.020831 | 0.012416 |                             |        | . |
| 225918_at | 0.04669  | 0.031709 | GLG1                        | 2734   | . |
| 225919_s_ | 2.33E-05 | 3.02E-06 | C9orf72                     | 203228 | . |
| 225920_at | 0.008758 | 0.004489 | LOC148413                   | 148413 | . |
| 225921_at | 0.001597 | 5.88E-04 | NIN                         | 51199  | . |
| 225923_at | 1.08E-04 | 2.13E-05 |                             |        | . |
| 225924_at | 0.020615 | 0.012258 | FNIP2                       | 57600  | . |
| 225925_s_ | 0.004329 | 0.001949 | USP48                       | 84196  | . |
| 225926_at | 0.020268 | 0.012011 | VTI1B                       | 10490  | . |
| 225927_at | 9.27E-04 | 3.05E-04 | MAP3K1                      | 4214   | . |
| 225928_at | 0.002096 | 8.16E-04 | VTI1B                       | 10490  | . |
| 225929_s_ | 4.43E-04 | 1.23E-04 | RNF213                      | 57674  | . |
| 225930_at | 2.14E-05 | 2.73E-06 | NKIRAS1                     | 28512  | . |
| 225931_s_ | 0.024793 | 0.015208 | RNF213                      | 57674  | . |
| 225932_s_ | 6.85E-06 | 6.13E-07 | HNRNPA2B1                   | 3181   | . |
| 225933_at | 4.26E-05 | 6.54E-06 | CCDC137                     | 339230 | . |
| 225934_at | 5.21E-05 | 8.44E-06 | LOC148413                   | 148413 | . |
| 225935_at | 0.006528 | 0.003179 |                             |        | . |
| 225937_at | 1.52E-07 | 3.99E-09 |                             |        | . |
| 225939_at | 0.002547 | 0.001033 | EIF4E3                      | 317649 | . |
| 225940_at | 0.001099 | 3.75E-04 | EIF4E3                      | 317649 | . |
| 225942_at | 8.10E-04 | 2.58E-04 | NLN                         | 57486  | . |
| 225943_at | 0.002798 | 0.001155 | NLN                         | 57486  | . |
| 225944_at | 6.80E-05 | 1.18E-05 | NLN                         | 57486  | . |
| 225945_at | 0.021204 | 0.01268  | ZNF655                      | 79027  | . |
| 225946_at | 0.011002 | 0.005868 | RASSF8                      | 11228  | . |
| 225947_at | 1.99E-06 | 1.24E-07 | MYO19                       | 80179  | . |
| 225948_at | 0.013155 | 0.007244 | C14orf153                   | 84334  | . |
| 225949_at | 0.003273 | 0.001394 | NRBP2                       | 340371 | . |
| 225950_at | 0.009474 | 0.004925 |                             |        | . |
| 225952_at | 4.89E-04 | 1.38E-04 | FLYWCH1                     | 84256  | . |
| 225953_at | 9.76E-06 | 9.86E-07 | RPRD1A                      | 55197  | . |
| 225955_at | 1.26E-05 | 1.38E-06 | LOC653506 /// 284207 /// 65 |        | . |

|           |          |          |                              |          |
|-----------|----------|----------|------------------------------|----------|
| 225956_at | 0.025928 | 0.016019 | C5orf41                      | 153222 . |
| 225957_at | 0.035076 | 0.022736 | C5orf41                      | 153222 . |
| 225958_at | 1.38E-07 | 3.52E-09 | PHC1                         | 1911 .   |
| 225961_at | 0.02899  | 0.018237 | KLHDC5                       | 57542 .  |
| 225963_at | 2.47E-05 | 3.27E-06 | KLHDC5                       | 57542 .  |
| 225965_at | 0.003104 | 0.001308 | DDHD1                        | 80821 .  |
| 225966_at | 1.94E-06 | 1.20E-07 | C17orf89 /// LC100133328 //. |          |
| 225967_s_ | 1.08E-06 | 5.41E-08 | C17orf89                     | 284184 . |
| 225968_at | 4.03E-04 | 1.09E-04 | PRICKLE2                     | 166336 . |
| 225969_at | 0.030691 | 0.019488 | ALKBH6                       | 84964 .  |
| 225970_at | 1.13E-04 | 2.25E-05 | DDHD1                        | 80821 .  |
| 225971_at | 9.77E-05 | 1.87E-05 | DDHD1                        | 80821 .  |
| 225972_at | 0.037707 | 0.024738 | TMEM64                       | 169200 . |
| 225973_at | 9.89E-07 | 4.87E-08 | TAP2                         | 6891 .   |
| 225974_at | 0.001278 | 4.50E-04 | TMEM64                       | 169200 . |
| 225975_at | 0.001272 | 4.47E-04 | PCDH18                       | 54510 .  |
| 225976_at | 0.005978 | 0.002865 | BTF3L4                       | 91408 .  |
| 225977_at | 5.04E-07 | 1.99E-08 | PCDH18                       | 54510 .  |
| 225978_at | 0.001416 | 5.09E-04 | RIMKLB                       | 57494 .  |
| 225979_at | 0.029836 | 0.018861 | PLEKHG2                      | 64857 .  |
| 225980_at | 2.12E-06 | 1.35E-07 | C14orf43                     | 91748 .  |
| 225981_at | 3.55E-08 | 5.66E-10 | C17orf28                     | 283987 . |
| 225982_at | 0.04219  | 0.028179 | UBTF                         | 7343 .   |
| 225984_at | 2.41E-04 | 5.77E-05 | PRKAA1                       | 5562 .   |
| 225985_at | 1.28E-06 | 6.87E-08 | PRKAA1                       | 5562 .   |
| 225986_x_ | 0.002188 | 8.61E-04 | CPSF2                        | 53981 .  |
| 225987_at | 0.007786 | 0.003918 | STEAP4                       | 79689 .  |
| 225988_at | 6.07E-05 | 1.02E-05 | HERC4                        | 26091 .  |
| 225989_at | 2.19E-05 | 2.80E-06 | HERC4                        | 26091 .  |
| 225990_at | 0.031314 | 0.019935 | BOC                          | 91653 .  |
| 225991_at | 2.54E-05 | 3.39E-06 | TMEM41A                      | 90407 .  |
| 225992_at | 1.74E-06 | 1.05E-07 | MLLT10                       | 8028 .   |
| 225995_x_ | 0.002483 | 0.001002 | WASH1 /// WA375260 /// 37.   |          |
| 225996_at | 3.45E-04 | 9.04E-05 | LONRF2                       | 164832 . |

|           |          |          |                         |             |
|-----------|----------|----------|-------------------------|-------------|
| 225998_at | 0.036924 | 0.024142 | GAB1                    | 2549 .      |
| 225999_at | 8.65E-05 | 1.61E-05 | RIMKLB                  | 57494 .     |
| 226000_at | 2.45E-05 | 3.25E-06 | CTTNBP2NL               | 55917 .     |
| 226001_at | 3.50E-04 | 9.18E-05 | KLHL5                   | 51088 .     |
| 226003_at | 2.72E-07 | 8.87E-09 | KIF21A                  | 55605 .     |
| 226004_at | 8.48E-05 | 1.57E-05 | CABLES2                 | 81928 .     |
| 226005_at | 1.07E-05 | 1.11E-06 | UBE2G1                  | 7326 .      |
| 226006_at | 0.002319 | 9.23E-04 | LOC100131801            | 100131801 . |
| 226007_at | 0.046969 | 0.031928 | ISCA2                   | 122961 .    |
| 226009_at | 0.010781 | 0.005732 | RP11-529110.4           | 25911 .     |
| 226011_at | 4.78E-05 | 7.56E-06 | CCDC12                  | 151903 .    |
| 226012_at | 0.005914 | 0.002829 | ANKRD11                 | 29123 .     |
| 226013_at | 0.002368 | 9.46E-04 | TRAK1                   | 22906 .     |
| 226016_at | 3.76E-04 | 1.00E-04 | CD47                    | 961 .       |
| 226019_at | 0.008304 | 0.004221 | OMA1                    | 115209 .    |
| 226020_s_ | 0.009638 | 0.005025 | DAB1 /// OMA 115209 /// | 115209 .    |
| 226021_at | 9.71E-04 | 3.22E-04 | RDH10                   | 157506 .    |
| 226022_at | 2.16E-04 | 5.05E-05 | SASH1                   | 23328 .     |
| 226023_at | 9.99E-07 | 4.94E-08 | MAP2K7                  | 5609 .      |
| 226024_at | 4.02E-05 | 6.02E-06 | COMMD1                  | 150684 .    |
| 226025_at | 0.012389 | 0.006749 | ANKRD28                 | 23243 .     |
| 226026_at | 0.006946 | 0.003425 | DIRC2                   | 84925 .     |
| 226027_at | 0.028747 | 0.018061 | C9orf119                | 375757 .    |
| 226029_at | 8.02E-08 | 1.71E-09 | VANGL2                  | 57216 .     |
| 226030_at | 0.0143   | 0.007983 | ACADSB                  | 36 .        |
| 226031_at | 1.41E-05 | 1.60E-06 | CCDC132                 | 55610 .     |
| 226032_at | 0.005732 | 0.002724 | CASP2                   | 835 .       |
| 226033_at | 2.06E-05 | 2.59E-06 | USP31                   | 57478 .     |
| 226034_at | 0.00118  | 4.08E-04 |                         | . .         |
| 226035_at | 2.71E-04 | 6.70E-05 | USP31                   | 57478 .     |
| 226036_x_ | 0.016875 | 0.009696 | CASP2                   | 835 .       |
| 226037_s_ | 0.00206  | 8.00E-04 | TAF9B                   | 51616 .     |
| 226039_at | 0.004801 | 0.002208 | MGAT4A                  | 11320 .     |
| 226040_at | 7.93E-07 | 3.64E-08 |                         | . .         |

|           |          |          |           |          |
|-----------|----------|----------|-----------|----------|
| 226041_at | 4.68E-04 | 1.31E-04 | NAPEPLD   | 222236 . |
| 226043_at | 1.40E-05 | 1.58E-06 | GPSM1     | 26086 .  |
| 226044_at | 0.004084 | 0.001816 | TDP1      | 55775 .  |
| 226047_at | 1.37E-10 | 3.85E-13 | MRVI1     | 10335 .  |
| 226048_at | 4.74E-04 | 1.33E-04 | MAPK8     | 5599 .   |
| 226049_at | 0.012733 | 0.006974 | ERC1      | 23085 .  |
| 226050_at | 5.08E-05 | 8.18E-06 | TMCO3     | 55002 .  |
| 226051_at | 4.97E-06 | 4.04E-07 | SELM      | 140606 . |
| 226054_at | 6.22E-10 | 2.84E-12 | BRD4      | 23476 .  |
| 226055_at | 0.04802  | 0.032745 | ARRDC2    | 27106 .  |
| 226056_at | 3.06E-05 | 4.28E-06 | CDGAP     | 57514 .  |
| 226057_at | 3.50E-04 | 9.19E-05 | CDGAP     | 57514 .  |
| 226058_at | 2.77E-07 | 9.14E-09 | B3GNT9    | 84752 .  |
| 226059_at | 5.51E-06 | 4.64E-07 | TOMM40L   | 84134 .  |
| 226060_at | 0.003552 | 0.001538 | RFT1      | 91869 .  |
| 226061_s_ | 0.027629 | 0.017239 | NUDT3     | 11165 .  |
| 226062_x_ | 7.47E-07 | 3.35E-08 | FAM63A    | 55793 .  |
| 226063_at | 0.005336 | 0.002502 | VAV2      | 7410 .   |
| 226064_s_ | 0.038662 | 0.025463 | DGAT2     | 84649 .  |
| 226066_at | 9.28E-05 | 1.75E-05 | MITF      | 4286 .   |
| 226067_at | 9.35E-05 | 1.77E-05 | C20orf114 | 92747 .  |
| 226070_at | 0.014493 | 0.008109 | C9orf142  | 286257 . |
| 226071_at | 0.00116  | 4.00E-04 | ADAMTSL4  | 54507 .  |
| 226072_at | 0.005662 | 0.002684 | FUK       | 197258 . |
| 226073_at | 1.79E-04 | 4.00E-05 | TMEM218   | 219854 . |
| 226074_at | 3.10E-07 | 1.06E-08 | PPM1M     | 132160 . |
| 226075_at | 0.001904 | 7.27E-04 | SPSB1     | 80176 .  |
| 226077_at | 0.006971 | 0.00344  | RNF145    | 153830 . |
| 226078_at | 0.001788 | 6.73E-04 | RPUSD1    | 113000 . |
| 226080_at | 0.043463 | 0.029172 | SSH2      | 85464 .  |
| 226081_at | 0.019461 | 0.011456 | LZIC      | 84328 .  |
| 226082_s_ | 2.12E-07 | 6.24E-09 | SFRS15    | 57466 .  |
| 226084_at | 2.73E-04 | 6.77E-05 | MAP1B     | 4131 .   |
| 226085_at | 0.037673 | 0.024712 | CBX5      | 23468 .  |

|           |          |          |          |          |
|-----------|----------|----------|----------|----------|
| 226086_at | 7.52E-05 | 1.35E-05 | SYT13    | 57586 .  |
| 226087_at | 7.56E-06 | 6.99E-07 | LZIC     | 84328 .  |
| 226088_at | 0.026967 | 0.016763 | ZDHHC12  | 84885 .  |
| 226089_at | 0.008686 | 0.004446 | RABL3    | 285282 . |
| 226090_x_ | 0.008189 | 0.004153 | RABL3    | 285282 . |
| 226093_at | 0.013127 | 0.007226 | DCP1B    | 196513 . |
| 226094_at | 0.006801 | 0.003339 | PIK3C2A  | 5286 .   |
| 226095_s_ | 0.011185 | 0.005985 | ATXN1L   | 342371 . |
| 226096_at | 0.043695 | 0.029358 | FNDC5    | 252995 . |
| 226097_at | 0.001032 | 3.47E-04 | FNDC5    | 252995 . |
| 226098_at | 0.017624 | 0.010203 | IFT80    | 57560 .  |
| 226099_at | 0.008231 | 0.004178 | ELL2     | 22936 .  |
| 226101_at | 1.35E-05 | 1.50E-06 | PRKCE    | 5581 .   |
| 226103_at | 9.54E-06 | 9.56E-07 | NEXN     | 91624 .  |
| 226105_at | 2.96E-04 | 7.47E-05 |          | .        |
| 226107_at | 0.005015 | 0.002324 |          | .        |
| 226109_at | 0.023357 | 0.014184 | C21orf91 | 54149 .  |
| 226111_s_ | 0.001472 | 5.33E-04 | ZNF385A  | 25946 .  |
| 226112_at | 0.005018 | 0.002326 | SGCB     | 6443 .   |
| 226113_at | 6.19E-05 | 1.05E-05 | ZNF436   | 80818 .  |
| 226114_at | 1.76E-05 | 2.12E-06 | ZNF436   | 80818 .  |
| 226115_at | 0.001151 | 3.96E-04 | AHCTF1   | 25909 .  |
| 226116_at | 1.21E-07 | 2.93E-09 |          | .        |
| 226117_at | 4.88E-09 | 4.19E-11 | TIFA     | 92610 .  |
| 226118_at | 0.015988 | 0.009113 | CENPO    | 79172 .  |
| 226120_at | 1.21E-04 | 2.46E-05 | TTC8     | 123016 . |
| 226121_at | 4.37E-04 | 1.20E-04 | DHRS13   | 147015 . |
| 226122_at | 0.008637 | 0.004416 | PLEKHG1  | 57480 .  |
| 226123_at | 2.41E-08 | 3.38E-10 | CHD7     | 55636 .  |
| 226124_at | 0.015168 | 0.008559 | ZFP90    | 146198 . |
| 226126_at | 1.08E-06 | 5.43E-08 | TBCKL    | 93627 .  |
| 226127_at | 7.09E-06 | 6.43E-07 | ALKBH3   | 221120 . |
| 226128_at | 0.014714 | 0.008258 |          | .        |
| 226129_at | 0.038698 | 0.02549  | FAM83H   | 286077 . |

|           |          |          |                             |          |
|-----------|----------|----------|-----------------------------|----------|
| 226130_at | 1.42E-05 | 1.62E-06 | RPS16 /// RPS1441876 /// 62 | .        |
| 226131_s_ | 0.012047 | 0.006527 | RPS16                       | 6217 .   |
| 226132_s_ | 4.00E-04 | 1.08E-04 | MANEAL                      | 149175 . |
| 226133_s_ | 5.16E-04 | 1.48E-04 | TBC1D10A                    | 83874 .  |
| 226134_s_ | 1.73E-04 | 3.83E-05 |                             | .        |
| 226135_at | 1.89E-05 | 2.33E-06 | UHRF1BP1                    | 54887 .  |
| 226136_at | 7.56E-06 | 7.00E-07 | GLIPR1                      | 11010 .  |
| 226137_at | 0.004219 | 0.001889 | ZFH3                        | 463 .    |
| 226138_s_ | 0.001523 | 5.56E-04 |                             | .        |
| 226139_at | 0.003984 | 0.001763 |                             | .        |
| 226141_at | 4.22E-06 | 3.28E-07 | CCDC149                     | 91050 .  |
| 226142_at | 2.34E-07 | 7.19E-09 | GLIPR1                      | 11010 .  |
| 226145_s_ | 6.77E-04 | 2.07E-04 | FRAS1                       | 80144 .  |
| 226146_at | 0.00437  | 0.001972 |                             | .        |
| 226148_at | 6.31E-04 | 1.89E-04 | ZBTB44                      | 29068 .  |
| 226151_x_ | 0.002062 | 8.01E-04 | CRYZL1                      | 9946 .   |
| 226152_at | 0.045318 | 0.03063  | TTC7B                       | 145567 . |
| 226154_at | 0.003112 | 0.001312 | DNM1L                       | 10059 .  |
| 226155_at | 3.80E-05 | 5.61E-06 | FAM160B1                    | 57700 .  |
| 226156_at | 2.48E-05 | 3.29E-06 | AKT2                        | 208 .    |
| 226157_at | 0.041208 | 0.027412 | TFDP2                       | 7029 .   |
| 226160_at | 7.21E-07 | 3.22E-08 | H6PD                        | 9563 .   |
| 226162_at | 0.001448 | 5.23E-04 | SLC30A6                     | 55676 .  |
| 226163_at | 0.033389 | 0.021491 | SYNGAP1 /// Z1221504 /// 88 | .        |
| 226164_x_ | 3.81E-04 | 1.02E-04 | RIMKLB                      | 57494 .  |
| 226165_at | 0.001407 | 5.05E-04 | C8orf59                     | 401466 . |
| 226166_x_ | 3.72E-05 | 5.47E-06 | STK36                       | 27148 .  |
| 226168_at | 1.66E-05 | 1.96E-06 | ZFAND2B                     | 130617 . |
| 226169_at | 0.001143 | 3.93E-04 | SBF2                        | 81846 .  |
| 226170_at | 0.002614 | 0.001065 | EYA3                        | 2140 .   |
| 226174_at | 0.006623 | 0.003235 | USP42                       | 84132 .  |
| 226175_at | 0.032182 | 0.020589 | TTC9C                       | 283237 . |
| 226176_s_ | 2.15E-07 | 6.38E-09 | USP42                       | 84132 .  |
| 226177_at | 5.23E-06 | 4.31E-07 | GLTP                        | 51228 .  |

|           |          |          |           |          |
|-----------|----------|----------|-----------|----------|
| 226179_at | 0.003991 | 0.001767 | SLC25A37  | 51312 .  |
| 226180_at | 9.34E-06 | 9.29E-07 | WDR36     | 134430 . |
| 226181_at | 0.002484 | 0.001003 | TUBE1     | 51175 .  |
| 226182_s_ | 0.014584 | 0.00817  | WISP3     | 8838 .   |
| 226183_at | 0.001348 | 4.81E-04 | GSK3B     | 2932 .   |
| 226184_at | 0.003304 | 0.00141  | FMNL2     | 114793 . |
| 226185_at | 8.10E-04 | 2.58E-04 | CDS1      | 1040 .   |
| 226186_at | 0.008867 | 0.004556 | TMOD2     | 29767 .  |
| 226187_at | 3.45E-05 | 4.97E-06 | CDS1      | 1040 .   |
| 226188_at | 0.006326 | 0.003062 | HSPC159   | 29094 .  |
| 226189_at | 0.023449 | 0.01425  | ITGB8     | 3696 .   |
| 226192_at | 0.030657 | 0.019464 |           | .        |
| 226195_at | 1.90E-04 | 4.29E-05 | C14orf179 | 112752 . |
| 226196_s_ | 9.53E-06 | 9.55E-07 | C14orf179 | 112752 . |
| 226197_at | 0.021539 | 0.01291  |           | .        |
| 226198_at | 0.002623 | 0.00107  | TOM1L2    | 146691 . |
| 226200_at | 1.83E-04 | 4.12E-05 | VAR52     | 57176 .  |
| 226201_at | 0.037949 | 0.024922 | DOT1L     | 84444 .  |
| 226202_at | 0.002122 | 8.29E-04 | ZNF398    | 57541 .  |
| 226203_at | 0.009599 | 0.004999 |           | .        |
| 226204_at | 7.23E-04 | 2.24E-04 | C22orf29  | 79680 .  |
| 226205_at | 0.007661 | 0.003844 | ANKRD13D  | 338692 . |
| 226206_at | 0.003011 | 0.00126  | MAFK      | 7975 .   |
| 226208_at | 0.02057  | 0.012226 | ZSWIM6    | 57688 .  |
| 226209_at | 0.003678 | 0.001604 | NDUFV3    | 4731 .   |
| 226210_s_ | 0.047292 | 0.032189 | MEG3      | 55384 .  |
| 226211_at | 0.01246  | 0.006797 | MEG3      | 55384 .  |
| 226212_s_ | 0.001174 | 4.06E-04 | INSR      | 3643 .   |
| 226213_at | 1.11E-06 | 5.64E-08 | ERBB3     | 2065 .   |
| 226215_s_ | 1.24E-06 | 6.61E-08 | KDM2B     | 84678 .  |
| 226216_at | 1.96E-04 | 4.46E-05 | INSR      | 3643 .   |
| 226217_at | 0.004694 | 0.002151 | SLC30A7   | 148867 . |
| 226218_at | 0.003668 | 0.001599 | IL7R      | 3575 .   |
| 226221_at | 0.001766 | 6.64E-04 | KIAA1432  | 57589 .  |

|           |          |          |           |        |   |
|-----------|----------|----------|-----------|--------|---|
| 226222_at | 0.001493 | 5.43E-04 | KIAA1432  | 57589  | . |
| 226223_at | 7.41E-05 | 1.32E-05 |           |        | . |
| 226224_at | 8.28E-05 | 1.53E-05 | FOXK2     | 3607   | . |
| 226225_at | 0.045573 | 0.030827 | MCC       | 4163   | . |
| 226226_at | 0.026802 | 0.016652 | TMEM45B   | 120224 | . |
| 226228_at | 7.38E-12 | 7.88E-15 | AQP4      | 361    | . |
| 226230_at | 0.007122 | 0.003527 | SMEK2     | 57223  | . |
| 226231_at | 1.21E-05 | 1.30E-06 |           |        | . |
| 226233_at | 0.006346 | 0.003074 | B3GALNT2  | 148789 | . |
| 226235_at | 1.70E-04 | 3.75E-05 | LOC339290 | 339290 | . |
| 226237_at | 4.36E-06 | 3.42E-07 |           |        | . |
| 226238_at | 0.01102  | 0.00588  | MCEE      | 84693  | . |
| 226239_at | 6.01E-05 | 1.01E-05 | TMEM150   | 129303 | . |
| 226241_s_ | 0.002846 | 0.001178 | MRPL52    | 122704 | . |
| 226242_at | 0.038477 | 0.025322 | C1orf131  | 128061 | . |
| 226244_at | 1.34E-05 | 1.49E-06 | CLEC14A   | 161198 | . |
| 226245_at | 0.041194 | 0.027401 | KCTD1     | 284252 | . |
| 226246_at | 0.011512 | 0.006188 | KCTD1     | 284252 | . |
| 226248_s_ | 0.014528 | 0.008131 | KIAA1324  | 57535  | . |
| 226251_at | 0.001259 | 4.42E-04 | ASXL2     | 55252  | . |
| 226252_at | 0.036    | 0.023442 |           |        | . |
| 226253_at | 6.17E-05 | 1.04E-05 | LRRC45    | 201255 | . |
| 226254_s_ | 0.031847 | 0.020331 | KIAA1430  | 57587  | . |
| 226255_at | 7.39E-04 | 2.31E-04 | ZBTB33    | 10009  | . |
| 226257_x_ | 6.16E-04 | 1.84E-04 | MRPS22    | 56945  | . |
| 226259_at | 5.37E-04 | 1.55E-04 | EXOC6     | 54536  | . |
| 226260_x_ | 8.30E-04 | 2.66E-04 | ZNF358    | 140467 | . |
| 226261_at | 0.005062 | 0.002353 | ZNRF2     | 223082 | . |
| 226262_at | 1.98E-06 | 1.23E-07 |           |        | . |
| 226263_at | 6.61E-05 | 1.14E-05 | SNRNP48   | 154007 | . |
| 226264_at | 7.65E-06 | 7.11E-07 | SUSD1     | 64420  | . |
| 226265_at | 6.67E-06 | 5.94E-07 | QSER1     | 79832  | . |
| 226266_at | 0.004967 | 0.002297 | PGS1      | 9489   | . |
| 226267_at | 3.40E-04 | 8.87E-05 | JDP2      | 122953 | . |



|           |          |          |          |          |
|-----------|----------|----------|----------|----------|
| 226269_at | 0.004888 | 0.002255 | GDAP1    | 54332 .  |
| 226270_at | 0.024931 | 0.015306 | EXOC2    | 55770 .  |
| 226271_at | 0.004432 | 0.002006 | GDAP1    | 54332 .  |
| 226272_at | 0.012254 | 0.006664 | RCAN3    | 11123 .  |
| 226273_at | 0.038076 | 0.025016 | CLCN5    | 1184 .   |
| 226274_at | 0.013959 | 0.007758 | CLCN5    | 1184 .   |
| 226277_at | 0.010375 | 0.005476 | COL4A3BP | 10087 .  |
| 226278_at | 0.023551 | 0.014322 | SVIP     | 258010 . |
| 226279_at | 7.57E-04 | 2.38E-04 | PRSS23   | 11098 .  |
| 226280_at | 0.001136 | 3.90E-04 | BNIP2    | 663 .    |
| 226281_at | 0.018956 | 0.011108 | DNER     | 92737 .  |
| 226282_at | 0.023449 | 0.014249 |          | .        |
| 226284_at | 1.81E-05 | 2.20E-06 | ZBTB2    | 57621 .  |
| 226285_at | 0.004493 | 0.002039 | CAPRIN1  | 4076 .   |
| 226286_at | 9.17E-05 | 1.73E-05 | ELMOD3   | 84173 .  |
| 226287_at | 2.77E-06 | 1.89E-07 | CCDC34   | 91057 .  |
| 226290_at | 0.003366 | 0.001443 | BDP1     | 55814 .  |
| 226293_at | 3.70E-04 | 9.82E-05 | MED19    | 219541 . |
| 226294_x_ | 8.32E-04 | 2.67E-04 | FAM91A1  | 157769 . |
| 226295_at | 1.98E-04 | 4.52E-05 | ITFG2    | 55846 .  |
| 226296_s_ | 0.003562 | 0.001543 | MRPS15   | 64960 .  |
| 226298_at | 5.97E-06 | 5.15E-07 | RUNDC1   | 146923 . |
| 226299_at | 3.05E-07 | 1.03E-08 | PKN3     | 29941 .  |
| 226300_at | 5.30E-05 | 8.61E-06 | MED19    | 219541 . |
| 226301_at | 0.003    | 0.001255 | C6orf192 | 116843 . |
| 226302_at | 3.11E-06 | 2.21E-07 | ATP8B1   | 5205 .   |
| 226303_at | 0.008377 | 0.004264 | PGM5     | 5239 .   |
| 226304_at | 3.62E-07 | 1.30E-08 | HSPB6    | 126393 . |
| 226305_at | 0.004986 | 0.002308 | LYNX1    | 66004 .  |
| 226306_at | 1.96E-04 | 4.47E-05 | C6orf1   | 221491 . |
| 226307_at | 0.002093 | 8.15E-04 | CRTC2    | 200186 . |
| 226308_at | 2.35E-08 | 3.26E-10 | HAUS8    | 93323 .  |
| 226311_at | 2.21E-07 | 6.64E-09 |          | .        |
| 226313_at | 6.46E-07 | 2.76E-08 | C10orf35 | 219738 . |

|           |          |          |                             |          |
|-----------|----------|----------|-----------------------------|----------|
| 226314_at | 5.27E-04 | 1.52E-04 | CHST14                      | 113189 . |
| 226315_at | 0.023589 | 0.014354 | ZNF830                      | 91603 .  |
| 226316_at | 8.46E-07 | 3.97E-08 |                             | .        |
| 226318_at | 0.003159 | 0.001336 | TBRG1                       | 84897 .  |
| 226319_s_ | 1.04E-05 | 1.07E-06 | THOC4                       | 10189 .  |
| 226320_at | 1.06E-07 | 2.46E-09 | THOC4                       | 10189 .  |
| 226321_at | 0.042996 | 0.028791 | LYSMD3                      | 116068 . |
| 226323_at | 0.032901 | 0.021126 | ZNF830                      | 91603 .  |
| 226324_s_ | 1.65E-04 | 3.62E-05 | IFT172                      | 26160 .  |
| 226326_at | 3.28E-08 | 5.12E-10 | PCGF5                       | 84333 .  |
| 226327_at | 1.80E-06 | 1.10E-07 | ZNF507                      | 22847 .  |
| 226328_at | 0.003523 | 0.001523 | KLF16                       | 83855 .  |
| 226329_s_ | 0.002174 | 8.54E-04 | MITD1                       | 129531 . |
| 226330_s_ | 1.99E-04 | 4.57E-05 | FAM48A                      | 55578 .  |
| 226332_at | 8.33E-07 | 3.89E-08 | FAM133B /// L 257415 /// 7. |          |
| 226333_at | 2.95E-04 | 7.42E-05 | IL6R                        | 3570 .   |
| 226335_at | 4.75E-05 | 7.52E-06 | RPS6KA3                     | 6197 .   |
| 226336_at | 0.02673  | 0.016593 | PPIA                        | 5478 .   |
| 226337_at | 0.00319  | 0.001352 | GORAB                       | 92344 .  |
| 226338_at | 0.006556 | 0.003195 | TMEM55A                     | 55529 .  |
| 226340_x_ | 2.10E-06 | 1.33E-07 | WASH2P /// W 374666 /// 3.  |          |
| 226342_at | 2.43E-07 | 7.60E-09 | SPTBN1                      | 6711 .   |
| 226343_at | 4.65E-04 | 1.30E-04 |                             | .        |
| 226345_at | 2.86E-07 | 9.51E-09 |                             | .        |
| 226346_at | 8.25E-05 | 1.52E-05 | MEX3A                       | 92312 .  |
| 226347_at | 2.18E-05 | 2.79E-06 |                             | .        |
| 226348_at | 5.21E-05 | 8.45E-06 |                             | .        |
| 226349_at | 1.00E-05 | 1.02E-06 | C12orf45                    | 121053 . |
| 226350_at | 3.80E-04 | 1.02E-04 | CHML                        | 1122 .   |
| 226351_at | 0.018495 | 0.010795 | NSUN4                       | 387338 . |
| 226353_at | 3.20E-05 | 4.53E-06 | SPPL2A                      | 84888 .  |
| 226354_at | 0.009277 | 0.004805 | LACTB                       | 114294 . |
| 226355_at | 0.003914 | 0.001728 | WDR51A                      | 25886 .  |
| 226356_at | 0.003757 | 0.001646 | FAM73B                      | 84895 .  |

|           |          |          |                          |        |   |
|-----------|----------|----------|--------------------------|--------|---|
| 226357_at | 1.05E-04 | 2.06E-05 | USP19                    | 10869  | . |
| 226358_at | 1.43E-04 | 3.03E-05 | APH1B                    | 83464  | . |
| 226359_at | 1.59E-04 | 3.45E-05 | GTPBP1                   | 9567   | . |
| 226360_at | 2.66E-04 | 6.55E-05 | ZNRF3                    | 84133  | . |
| 226361_at | 0.001777 | 6.68E-04 | TMEM42                   | 131616 | . |
| 226362_at | 6.40E-04 | 1.93E-04 |                          |        | . |
| 226363_at | 9.77E-05 | 1.87E-05 | ABCC5                    | 10057  | . |
| 226365_at | 2.43E-06 | 1.60E-07 |                          |        | . |
| 226366_at | 0.005841 | 0.002788 | SHPRH                    | 257218 | . |
| 226367_at | 0.003729 | 0.001631 | KDM5A                    | 5927   | . |
| 226368_at | 0.023168 | 0.014046 | CHST11                   | 50515  | . |
| 226369_at | 8.50E-06 | 8.17E-07 | LOC338799                | 338799 | . |
| 226370_at | 7.70E-04 | 2.43E-04 | KLHL15                   | 80311  | . |
| 226372_at | 0.018108 | 0.010531 | CHST11                   | 50515  | . |
| 226374_at | 2.08E-11 | 3.42E-14 |                          |        | . |
| 226375_at | 1.12E-04 | 2.21E-05 |                          |        | . |
| 226376_at | 0.002773 | 0.001143 | UNK                      | 85451  | . |
| 226377_at | 1.88E-09 | 1.23E-11 |                          |        | . |
| 226380_at | 2.27E-04 | 5.35E-05 | PTPN21                   | 11099  | . |
| 226381_at | 0.01096  | 0.005843 | PS1TP4                   | 414327 | . |
| 226382_at | 8.18E-04 | 2.61E-04 | LOC283070                | 283070 | . |
| 226386_at | 0.018117 | 0.010537 | C7orf30                  | 115416 | . |
| 226387_at | 0.001555 | 5.70E-04 | RSBN1L                   | 222194 | . |
| 226388_at | 0.008207 | 0.004163 | TCEA3                    | 6920   | . |
| 226390_at | 0.005389 | 0.002532 | STARD4                   | 134429 | . |
| 226392_at | 0.001517 | 5.53E-04 |                          |        | . |
| 226393_at | 5.54E-04 | 1.61E-04 | CYP2U1                   | 113612 | . |
| 226395_at | 0.01758  | 0.010171 | HOOK3                    | 84376  | . |
| 226396_at | 4.44E-05 | 6.89E-06 | CDK3 /// LOC100134934 // |        | . |
| 226397_s_ | 0.037467 | 0.024557 |                          |        | . |
| 226398_s_ | 0.023217 | 0.014083 | C10orf4                  | 118924 | . |
| 226400_at | 3.52E-08 | 5.60E-10 | CDC42                    | 998    | . |
| 226401_at | 0.016684 | 0.009569 | PARP10                   | 84875  | . |
| 226402_at | 3.53E-06 | 2.60E-07 | CYP2U1                   | 113612 | . |

|           |          |          |              |           |   |
|-----------|----------|----------|--------------|-----------|---|
| 226403_at | 6.59E-05 | 1.14E-05 | TMC4         | 147798    | . |
| 226404_at | 0.002113 | 8.25E-04 | RBM39        | 9584      | . |
| 226407_at | 2.64E-04 | 6.49E-05 | LOC100190939 | 100190939 | . |
| 226408_at | 0.012387 | 0.006747 | TEAD2        | 8463      | . |
| 226409_at | 8.22E-06 | 7.79E-07 | TBC1D20      | 128637    | . |
| 226410_at | 0.023587 | 0.014353 | C16orf84     | 348180    | . |
| 226411_at | 4.70E-05 | 7.42E-06 | EVI5L        | 115704    | . |
| 226412_at | 2.12E-07 | 6.21E-09 | SFRS18       | 25957     | . |
| 226415_at | 5.42E-04 | 1.57E-04 | VAT1L        | 57687     | . |
| 226416_at | 0.038779 | 0.02555  | ERI1         | 90459     | . |
| 226417_at | 3.08E-04 | 7.86E-05 | RHOB         | 388       | . |
| 226418_at | 0.001083 | 3.68E-04 | ERGIC2       | 51290     | . |
| 226419_s_ | 0.001808 | 6.83E-04 | FLJ44342     | 645460    | . |
| 226420_at | 0.040872 | 0.027156 | EVI1         | 2122      | . |
| 226421_at | 0.047094 | 0.032029 | AMMECR1      | 9949      | . |
| 226422_at | 3.55E-04 | 9.35E-05 | ERGIC2       | 51290     | . |
| 226423_at | 0.002974 | 0.001241 | PAQR8        | 85315     | . |
| 226424_at | 0.01135  | 0.006088 | CAPS         | 828       | . |
| 226425_at | 7.72E-08 | 1.62E-09 | CLIP4        | 79745     | . |
| 226426_at | 2.15E-05 | 2.74E-06 | ADNP         | 23394     | . |
| 226427_s_ | 1.70E-04 | 3.73E-05 | B3GALT6      | 126792    | . |
| 226429_at | 1.85E-04 | 4.15E-05 | KIAA1704     | 55425     | . |
| 226431_at | 2.49E-05 | 3.30E-06 | FAM117B      | 150864    | . |
| 226432_at | 1.79E-04 | 3.98E-05 | ETNK1        | 55500     | . |
| 226433_at | 0.007495 | 0.003745 | RNF157       | 114804    | . |
| 226434_at | 6.54E-04 | 1.98E-04 | C7orf47      | 221908    | . |
| 226437_at | 1.32E-04 | 2.72E-05 | YIF1B        | 90522     | . |
| 226439_s_ | 0.011108 | 0.005935 | NBEA         | 26960     | . |
| 226441_at | 0.010669 | 0.00566  | MAP3K2       | 10746     | . |
| 226442_at | 5.33E-04 | 1.54E-04 | ABTB1        | 80325     | . |
| 226444_at | 3.07E-05 | 4.31E-06 |              |           | . |
| 226445_s_ | 0.009259 | 0.004795 | TRIM41       | 90933     | . |
| 226446_at | 1.51E-04 | 3.23E-05 | HES6         | 55502     | . |
| 226447_at | 0.008004 | 0.004046 | ASH1L        | 55870     | . |

|           |          |          |              |             |
|-----------|----------|----------|--------------|-------------|
| 226448_at | 0.009048 | 0.004663 | FAM89A       | 375061 .    |
| 226450_at | 0.012233 | 0.006649 | INSR         | 3643 .      |
| 226451_at | 0.022168 | 0.013358 | FDX1L        | 112812 .    |
| 226452_at | 0.01406  | 0.007824 | PDK1         | 5163 .      |
| 226453_at | 6.41E-04 | 1.93E-04 | RNASEH2C     | 84153 .     |
| 226454_at | 0.01266  | 0.006926 | 9-Mar        | 92979 .     |
| 226455_at | 1.62E-06 | 9.49E-08 | CREB3L4      | 148327 .    |
| 226456_at | 2.24E-05 | 2.88E-06 | C16orf75     | 116028 .    |
| 226457_at | 0.049027 | 0.033546 |              | .           |
| 226458_at | 2.89E-04 | 7.24E-05 |              | .           |
| 226459_at | 0.004214 | 0.001887 | PIK3AP1      | 118788 .    |
| 226460_at | 0.005954 | 0.002851 | FNIP2        | 57600 .     |
| 226461_at | 0.009137 | 0.00472  | HOXB9        | 3219 .      |
| 226462_at | 0.019815 | 0.011696 | STXBP6       | 29091 .     |
| 226463_at | 9.44E-04 | 3.12E-04 | ATP6V1C1     | 528 .       |
| 226464_at | 0.009159 | 0.004734 | C3orf58      | 205428 .    |
| 226465_s_ | 2.98E-05 | 4.15E-06 | SON          | 6651 .      |
| 226466_s_ | 7.57E-05 | 1.36E-05 | FAM58A       | 92002 .     |
| 226468_at | 0.004577 | 0.002085 |              | .           |
| 226470_at | 0.027254 | 0.016966 | GGT7         | 2686 .      |
| 226471_at | 0.023682 | 0.014418 | GGT7         | 2686 .      |
| 226473_at | 1.76E-09 | 1.13E-11 | CBX2         | 84733 .     |
| 226474_at | 2.58E-04 | 6.31E-05 | NLRC5        | 84166 .     |
| 226475_at | 2.61E-04 | 6.39E-05 | FAM118A      | 55007 .     |
| 226476_s_ | 6.35E-05 | 1.08E-05 | VPRBP        | 9730 .      |
| 226477_at | 3.93E-06 | 2.99E-07 | VPRBP        | 9730 .      |
| 226478_at | 0.038905 | 0.025649 | TM7SF3       | 51768 .     |
| 226479_at | 2.13E-05 | 2.71E-06 | KBTBD6       | 89890 .     |
| 226480_at | 3.16E-06 | 2.25E-07 |              | .           |
| 226481_at | 3.77E-04 | 1.00E-04 | VPRBP        | 9730 .      |
| 226482_s_ | 2.88E-12 | 2.31E-15 | RP11-544M22. | 100131187 . |
| 226484_at | 6.85E-10 | 3.22E-12 | ZBTB47       | 92999 .     |
| 226485_at | 1.02E-05 | 1.04E-06 | FLJ20674     | 54621 .     |
| 226486_at | 0.027438 | 0.017099 | MTERFD2      | 130916 .    |

|           |          |          |          |          |
|-----------|----------|----------|----------|----------|
| 226487_at | 0.012941 | 0.007108 | C12orf34 | 84915 .  |
| 226488_at | 6.34E-04 | 1.91E-04 | RCCD1    | 91433 .  |
| 226489_at | 0.004696 | 0.002152 | TMCC3    | 57458 .  |
| 226490_at | 0.021117 | 0.012619 | NHSL1    | 57224 .  |
| 226491_x_ | 1.01E-04 | 1.94E-05 | PTBP1    | 5725 .   |
| 226493_at | 2.17E-05 | 2.78E-06 | KCTD18   | 130535 . |
| 226494_at | 1.32E-04 | 2.74E-05 | KIAA1543 | 57662 .  |
| 226496_at | 0.016154 | 0.009221 | ZCCHC7   | 84186 .  |
| 226497_s_ | 1.96E-04 | 4.46E-05 |          | .        |
| 226498_at | 0.001245 | 4.36E-04 |          | .        |
| 226499_at | 0.001088 | 3.70E-04 | NRARP    | 441478 . |
| 226500_at | 4.42E-07 | 1.69E-08 | ZBTB47   | 92999 .  |
| 226503_at | 4.69E-04 | 1.32E-04 | RIF1     | 55183 .  |
| 226504_at | 5.13E-06 | 4.20E-07 | FAM109B  | 150368 . |
| 226505_x_ | 0.0176   | 0.010187 | USP32    | 84669 .  |
| 226506_at | 1.23E-04 | 2.50E-05 | THSD4    | 79875 .  |
| 226507_at | 9.21E-06 | 9.14E-07 | PAK1     | 5058 .   |
| 226508_at | 0.00441  | 0.001993 | PHC3     | 80012 .  |
| 226510_at | 1.14E-04 | 2.26E-05 | HEATR5A  | 25938 .  |
| 226511_at | 0.005007 | 0.00232  | WDR32    | 79269 .  |
| 226512_at | 2.70E-05 | 3.64E-06 | ZMYM2    | 7750 .   |
| 226513_at | 2.24E-04 | 5.26E-05 | ASB7     | 140460 . |
| 226516_at | 0.001308 | 4.62E-04 | C19orf28 | 126321 . |
| 226517_at | 0.026063 | 0.01611  | BCAT1    | 586 .    |
| 226518_at | 3.07E-06 | 2.17E-07 | KCTD10   | 83892 .  |
| 226519_s_ | 0.003077 | 0.001294 | AGXT2L2  | 85007 .  |
| 226520_at | 7.35E-04 | 2.29E-04 |          | .        |
| 226522_at | 1.20E-07 | 2.91E-09 | PODN     | 127435 . |
| 226523_at | 3.55E-10 | 1.38E-12 | TAGLN    | 6876 .   |
| 226524_at | 9.65E-08 | 2.19E-09 | C3orf38  | 285237 . |
| 226525_at | 2.11E-05 | 2.68E-06 | STK17B   | 9262 .   |
| 226528_at | 0.005505 | 0.002597 | MTX3     | 345778 . |
| 226530_at | 0.001351 | 4.82E-04 | BMF      | 90427 .  |
| 226532_at | 3.58E-05 | 5.21E-06 |          | .        |

|           |          |          |              |             |
|-----------|----------|----------|--------------|-------------|
| 226533_at | 0.006055 | 0.002909 | HINT3        | 135114 .    |
| 226534_at | 6.79E-05 | 1.18E-05 | KITLG        | 4254 .      |
| 226536_at | 0.049613 | 0.034017 | NSMCE2       | 286053 .    |
| 226538_at | 1.41E-04 | 2.96E-05 | MAN2A1       | 4124 .      |
| 226539_s_ | 0.003474 | 0.001498 | LOC387885    | 387885 .    |
| 226540_at | 5.73E-04 | 1.68E-04 | LOC387885    | 387885 .    |
| 226542_at | 0.014934 | 0.008407 |              | .           |
| 226543_at | 0.036333 | 0.023698 | MUTED        | 63915 .     |
| 226544_x_ | 0.00294  | 0.001224 | MUTED        | 63915 .     |
| 226545_at | 1.27E-06 | 6.83E-08 | CD109        | 135228 .    |
| 226546_at | 1.93E-05 | 2.38E-06 |              | .           |
| 226547_at | 0.00112  | 3.83E-04 | MYST3        | 7994 .      |
| 226548_at | 2.20E-04 | 5.17E-05 | SBK1         | 388228 .    |
| 226549_at | 6.47E-06 | 5.69E-07 | SBK1         | 388228 .    |
| 226550_at | 0.019733 | 0.011641 |              | .           |
| 226551_at | 0.026465 | 0.016402 | RIPK1        | 8737 .      |
| 226552_at | 0.010326 | 0.005447 | IER5L        | 389792 .    |
| 226553_at | 1.83E-06 | 1.12E-07 | TMPRSS2      | 7113 .      |
| 226554_at | 1.15E-08 | 1.25E-10 | ZBTB7A       | 51341 .     |
| 226555_at | 1.42E-06 | 7.96E-08 | INO80D       | 54891 .     |
| 226558_at | 3.86E-09 | 3.08E-11 | LOC389834    | 389834 .    |
| 226559_at | 0.004899 | 0.002261 | IER5L        | 389792 .    |
| 226561_at | 0.006034 | 0.002897 | AGFG1        | 3267 .      |
| 226562_at | 2.23E-04 | 5.24E-05 | ZSCAN29      | 146050 .    |
| 226566_at | 1.44E-07 | 3.74E-09 | TRIM11       | 81559 .     |
| 226567_at | 0.014059 | 0.007823 | USP14        | 9097 .      |
| 226568_at | 0.018373 | 0.010713 | FAM102B      | 284611 .    |
| 226569_s_ | 2.24E-07 | 6.79E-09 | CHTF18       | 63922 .     |
| 226572_at | 1.09E-04 | 2.15E-05 | SOCS7        | 30837 .     |
| 226573_at | 0.048122 | 0.032826 | DIRAS1       | 148252 .    |
| 226574_at | 0.002982 | 0.001245 | PSPC1        | 55269 .     |
| 226575_at | 3.91E-08 | 6.41E-10 | ZNF462       | 58499 .     |
| 226576_at | 2.98E-05 | 4.14E-06 | ARHGAP26     | 23092 .     |
| 226578_s_ | 3.78E-06 | 2.85E-07 | LOC100129026 | 100129026 . |

|           |          |          |                              |
|-----------|----------|----------|------------------------------|
| 226579_at | 0.020448 | 0.012137 | .                            |
| 226581_at | 0.012491 | 0.006818 | ZFYVE20 64145 .              |
| 226582_at | 9.32E-04 | 3.07E-04 | LOC400043 400043 .           |
| 226583_at | 0.001994 | 7.69E-04 | C12orf76 400073 .            |
| 226587_at | 7.00E-06 | 6.31E-07 | SNRPN 6638 .                 |
| 226588_at | 0.002272 | 9.01E-04 | CWC22 57703 .                |
| 226589_at | 5.93E-04 | 1.76E-04 | TMEM192 201931 .             |
| 226591_at | 1.69E-07 | 4.64E-09 | SNRPN 6638 .                 |
| 226592_at | 0.003623 | 0.001575 | ZNF618 114991 .              |
| 226594_at | 6.38E-04 | 1.92E-04 | .                            |
| 226595_at | 0.002061 | 8.00E-04 | SNX21 90203 .                |
| 226598_s_ | 5.46E-04 | 1.59E-04 | GTPBP5 26164 .               |
| 226599_at | 3.46E-04 | 9.07E-05 | FHDC1 85462 .                |
| 226600_at | 0.020966 | 0.012513 | TMTC3 160418 .               |
| 226601_at | 0.028899 | 0.018171 | SLC30A7 148867 .             |
| 226602_s_ | 1.20E-04 | 2.41E-05 | BCR /// FLJ429 100133163 //. |
| 226603_at | 2.47E-07 | 7.78E-09 | SAMD9L 219285 .              |
| 226604_at | 0.0404   | 0.026788 | TMTC3 160418 .               |
| 226605_at | 9.56E-05 | 1.82E-05 | DGKQ 1609 .                  |
| 226607_at | 0.001662 | 6.17E-04 | C20orf194 25943 .            |
| 226608_at | 3.04E-04 | 7.73E-05 | C16orf87 388272 .            |
| 226609_at | 6.00E-05 | 1.01E-05 | DCBLD1 285761 .              |
| 226610_at | 9.58E-06 | 9.62E-07 | CENPV 201161 .               |
| 226611_s_ | 1.19E-04 | 2.40E-05 | CENPV 201161 .               |
| 226613_at | 2.01E-07 | 5.80E-09 | GATSL3 652968 .              |
| 226615_at | 0.005794 | 0.00276  | XPR1 9213 .                  |
| 226616_s_ | 0.042986 | 0.028782 | NDUFV3 4731 .                |
| 226617_at | 0.026355 | 0.016319 | ARL5A 26225 .                |
| 226619_at | 0.007161 | 0.00355  | SENP1 29843 .                |
| 226620_x_ | 7.45E-05 | 1.33E-05 | DAZAP1 26528 .               |
| 226621_at | 8.67E-08 | 1.88E-09 | .                            |
| 226625_at | 1.16E-04 | 2.31E-05 | TGFBR3 7049 .                |
| 226626_at | 1.48E-06 | 8.40E-08 | THOC2 57187 .                |
| 226628_at | 2.53E-05 | 3.37E-06 | THOC2 57187 .                |



|           |          |          |           |          |
|-----------|----------|----------|-----------|----------|
| 226629_at | 6.75E-04 | 2.06E-04 | SLC43A2   | 124935 . |
| 226630_at | 4.78E-04 | 1.34E-04 | C14orf106 | 55320 .  |
| 226632_at | 0.004766 | 0.00219  | CYGB      | 114757 . |
| 226633_at | 0.029426 | 0.018552 | RAB8B     | 51762 .  |
| 226634_at | 0.002532 | 0.001025 | METTL10   | 399818 . |
| 226636_at | 6.77E-05 | 1.18E-05 | PLD1      | 5337 .   |
| 226638_at | 6.87E-10 | 3.25E-12 | ARHGAP23  | 57636 .  |
| 226640_at | 2.78E-05 | 3.78E-06 | DAGLB     | 221955 . |
| 226641_at | 0.016042 | 0.009147 |           | .        |
| 226642_s_ | 1.12E-05 | 1.18E-06 | NUDCD2    | 134492 . |
| 226643_s_ | 9.09E-05 | 1.71E-05 | NUDCD2    | 134492 . |
| 226645_at | 8.08E-04 | 2.58E-04 | KLF2      | 10365 .  |
| 226646_at | 0.016623 | 0.009529 | KLF2      | 10365 .  |
| 226649_at | 0.002883 | 0.001196 | PANK1     | 53354 .  |
| 226650_at | 0.001688 | 6.28E-04 | ZFAND2A   | 90637 .  |
| 226651_at | 1.06E-07 | 2.47E-09 | HOMER1    | 9456 .   |
| 226652_at | 1.33E-04 | 2.76E-05 | USP3      | 9960 .   |
| 226654_at | 0.029472 | 0.018588 | MUC12     | 10071 .  |
| 226655_at | 0.001127 | 3.86E-04 | STX17     | 55014 .  |
| 226656_at | 2.54E-04 | 6.18E-05 | CRTAP     | 10491 .  |
| 226657_at | 0.002935 | 0.001221 | C17orf103 | 256302 . |
| 226658_at | 0.004116 | 0.001833 | PDPN      | 10630 .  |
| 226659_at | 0.001319 | 4.68E-04 | DEF6      | 50619 .  |
| 226660_at | 0.002135 | 8.36E-04 | RPS6KB1   | 6198 .   |
| 226661_at | 0.00108  | 3.66E-04 | CDCA2     | 157313 . |
| 226662_at | 0.018262 | 0.010636 | STX17     | 55014 .  |
| 226663_at | 2.01E-09 | 1.32E-11 | ANKRD10   | 55608 .  |
| 226664_at | 1.08E-04 | 2.13E-05 | TBC1D20   | 128637 . |
| 226665_at | 0.017558 | 0.010155 | AHSA2     | 130872 . |
| 226666_at | 0.016193 | 0.009246 | DAAM1     | 23002 .  |
| 226667_x_ | 4.91E-05 | 7.83E-06 | EPN1      | 29924 .  |
| 226668_at | 0.043774 | 0.029418 | WDSUB1    | 151525 . |
| 226669_at | 2.03E-05 | 2.53E-06 | USP42     | 84132 .  |
| 226670_s_ | 4.78E-06 | 3.84E-07 | PABPC1L   | 80336 .  |

|           |          |          |                               |          |
|-----------|----------|----------|-------------------------------|----------|
| 226671_at | 0.005356 | 0.002513 | LAMP2                         | 3920 .   |
| 226672_s_ | 0.00965  | 0.005032 | HDAC10                        | 83933 .  |
| 226673_at | 0.008417 | 0.004289 | SH2D3C                        | 10044 .  |
| 226674_at | 6.67E-05 | 1.15E-05 | SHISA4                        | 149345 . |
| 226676_at | 1.69E-05 | 2.01E-06 | ZNF521                        | 25925 .  |
| 226677_at | 2.08E-05 | 2.63E-06 | ZNF521                        | 25925 .  |
| 226678_at | 4.12E-06 | 3.18E-07 | UNC13D                        | 201294 . |
| 226680_at | 0.021596 | 0.01295  | IKZF5                         | 64376 .  |
| 226681_at | 0.026619 | 0.016509 |                               | .        |
| 226683_at | 3.98E-04 | 1.08E-04 | SNX18                         | 112574 . |
| 226684_at | 0.012771 | 0.006998 | ATG2B                         | 55102 .  |
| 226685_at | 2.97E-10 | 1.07E-12 | SNTB2                         | 6645 .   |
| 226687_at | 3.03E-07 | 1.02E-08 | PRPF40A                       | 55660 .  |
| 226688_at | 3.36E-04 | 8.75E-05 | C3orf23                       | 285343 . |
| 226689_at | 0.021691 | 0.013021 | CISD2                         | 493856 . |
| 226691_at | 2.72E-05 | 3.69E-06 | TNRC18                        | 84629 .  |
| 226692_at | 2.10E-05 | 2.65E-06 | HYPK /// SERF2 10169 /// 257. |          |
| 226694_at | 8.56E-04 | 2.77E-04 | AKAP2 /// PALI11217 /// 114.  |          |
| 226695_at | 8.01E-09 | 7.95E-11 | PRRX1                         | 5396 .   |
| 226696_at | 0.00112  | 3.83E-04 | RBBP9                         | 10741 .  |
| 226697_at | 2.67E-04 | 6.58E-05 | FAM114A1                      | 92689 .  |
| 226698_at | 3.93E-06 | 2.98E-07 | FCHSD1                        | 89848 .  |
| 226700_at | 0.017734 | 0.010275 | U2AF1L4                       | 199746 . |
| 226701_at | 9.12E-09 | 9.47E-11 | GJA5                          | 2702 .   |
| 226702_at | 0.00237  | 9.47E-04 | CMPK2                         | 129607 . |
| 226703_at | 0.005818 | 0.002774 | NEURL4                        | 84461 .  |
| 226704_at | 0.004392 | 0.001984 | UBE2J2                        | 118424 . |
| 226705_at | 0.030461 | 0.019321 | FGFR1                         | 2260 .   |
| 226706_at | 2.58E-05 | 3.44E-06 | FLJ23867 /// Q 200058 /// 57. |          |
| 226708_at | 0.039013 | 0.02573  | LOC100131144 100131144 .      |          |
| 226709_at | 0.030061 | 0.019025 | ROBO2                         | 6092 .   |
| 226710_at | 0.011094 | 0.005927 | C8orf82                       | 414919 . |
| 226712_at | 0.003927 | 0.001735 | SSR1                          | 6745 .   |
| 226714_at | 0.016936 | 0.009736 | SAMD4B                        | 55095 .  |

|           |          |          |           |          |
|-----------|----------|----------|-----------|----------|
| 226715_at | 6.13E-07 | 2.58E-08 | FOXK1     | 221937 . |
| 226720_at | 3.71E-05 | 5.44E-06 | PWWP2A    | 114825 . |
| 226721_at | 0.041104 | 0.027334 | DPY19L4   | 286148 . |
| 226722_at | 0.016762 | 0.009623 | FAM20C    | 56975 .  |
| 226724_s_ | 0.015169 | 0.008561 | PSPC1     | 55269 .  |
| 226725_at | 1.64E-06 | 9.66E-08 |           | .        |
| 226726_at | 3.61E-06 | 2.67E-07 | MBOAT2    | 129642 . |
| 226727_at | 1.37E-04 | 2.86E-05 | CISD3     | 284106 . |
| 226728_at | 1.35E-04 | 2.80E-05 | SLC27A1   | 376497 . |
| 226729_at | 2.41E-07 | 7.52E-09 | USP37     | 57695 .  |
| 226730_s_ | 4.88E-07 | 1.91E-08 | USP37     | 57695 .  |
| 226731_at | 0.038872 | 0.025622 | PELO      | 53918 .  |
| 226732_at | 7.15E-06 | 6.50E-07 | RBM33     | 155435 . |
| 226735_at | 0.02866  | 0.017992 | TAPT1     | 202018 . |
| 226736_at | 3.34E-05 | 4.78E-06 | CHURC1    | 91612 .  |
| 226738_at | 0.011856 | 0.006402 | WDR81     | 124997 . |
| 226739_at | 0.001162 | 4.01E-04 | RNF169    | 254225 . |
| 226740_x_ | 3.75E-05 | 5.52E-06 | NBPF1     | 55672 .  |
| 226742_at | 2.50E-04 | 6.05E-05 |           | .        |
| 226743_at | 1.13E-07 | 2.68E-09 | SLFN11    | 91607 .  |
| 226744_at | 5.87E-06 | 5.04E-07 | METT10D   | 79066 .  |
| 226745_at | 0.00719  | 0.003567 | CYP4V2    | 285440 . |
| 226748_at | 3.39E-04 | 8.85E-05 | LYSMD2    | 256586 . |
| 226749_at | 3.90E-06 | 2.95E-07 | MRPS9     | 64965 .  |
| 226750_at | 2.06E-06 | 1.30E-07 | LARP2     | 55132 .  |
| 226751_at | 3.02E-11 | 5.68E-14 | CNRIP1    | 25927 .  |
| 226752_at | 0.048561 | 0.033176 | FAM174A   | 345757 . |
| 226753_at | 7.75E-04 | 2.45E-04 | FAM76B    | 143684 . |
| 226754_at | 4.37E-05 | 6.74E-06 | ZNF251    | 90987 .  |
| 226755_at | 2.21E-04 | 5.17E-05 | LOC642587 | 642587 . |
| 226756_at | 0.001891 | 7.21E-04 |           | .        |
| 226757_at | 0.003845 | 0.001691 | IFIT2     | 3433 .   |
| 226758_at | 5.23E-04 | 1.50E-04 | LUC7L2    | 51631 .  |
| 226760_at | 9.38E-06 | 9.35E-07 | MBTPS2    | 51360 .  |

|           |          |          |          |          |
|-----------|----------|----------|----------|----------|
| 226762_at | 1.53E-04 | 3.30E-05 | PURB     | 5814 .   |
| 226766_at | 0.034786 | 0.022517 | ROBO2    | 6092 .   |
| 226767_s_ | 0.024532 | 0.015019 | FAHD1    | 81889 .  |
| 226768_at | 9.55E-06 | 9.57E-07 | GIGYF1   | 64599 .  |
| 226769_at | 0.00917  | 0.004741 | FIBIN    | 387758 . |
| 226771_at | 0.001369 | 4.89E-04 | ATP8B2   | 57198 .  |
| 226772_s_ | 0.029769 | 0.018814 | SAP30L   | 79685 .  |
| 226774_at | 1.32E-07 | 3.31E-09 | FAM120B  | 84498 .  |
| 226775_at | 4.28E-04 | 1.17E-04 | ENY2     | 56943 .  |
| 226776_at | 0.001572 | 5.77E-04 | ENY2     | 56943 .  |
| 226777_at | 1.26E-05 | 1.38E-06 |          | .        |
| 226778_at | 8.60E-06 | 8.29E-07 | C8orf42  | 157695 . |
| 226779_at | 0.021031 | 0.012558 |          | .        |
| 226780_s_ | 3.27E-04 | 8.48E-05 | C7orf55  | 154791 . |
| 226781_at | 6.90E-06 | 6.20E-07 | C7orf55  | 154791 . |
| 226782_at | 0.010768 | 0.005723 | SLC25A30 | 253512 . |
| 226783_at | 6.76E-07 | 2.95E-08 | AGXT2L2  | 85007 .  |
| 226784_at | 0.002727 | 0.00112  | TWISTNB  | 221830 . |
| 226788_at | 1.57E-04 | 3.40E-05 | THAP11   | 57215 .  |
| 226789_at | 0.015416 | 0.008726 | EMB      | 133418 . |
| 226790_at | 1.06E-05 | 1.10E-06 | MORN2    | 729967 . |
| 226794_at | 1.02E-07 | 2.34E-09 | STXBP5   | 134957 . |
| 226795_at | 1.11E-04 | 2.19E-05 |          | .        |
| 226796_at | 6.76E-05 | 1.17E-05 | ABHD15   | 116236 . |
| 226797_at | 7.02E-07 | 3.10E-08 | MBTD1    | 54799 .  |
| 226799_at | 0.002586 | 0.001052 | FGD6     | 55785 .  |
| 226800_at | 0.008376 | 0.004263 | EFCAB7   | 84455 .  |
| 226801_s_ | 0.007903 | 0.003988 | AIDA     | 64853 .  |
| 226802_s_ | 0.001391 | 4.99E-04 | LOC96610 | 96610 .  |
| 226803_at | 5.06E-05 | 8.13E-06 | CHMP4C   | 92421 .  |
| 226804_at | 3.86E-05 | 5.72E-06 | FAM20A   | 54757 .  |
| 226805_at | 2.65E-08 | 3.90E-10 |          | .        |
| 226806_s_ | 0.011693 | 0.006301 | NFIA     | 4774 .   |
| 226807_at | 0.005422 | 0.00255  | ZFP1     | 162239 . |

|           |          |          |              |           |   |
|-----------|----------|----------|--------------|-----------|---|
| 226808_at | 0.00848  | 0.004325 | ZNF862       | 643641    | . |
| 226809_at | 0.037295 | 0.024432 | LOC100216479 | 100216479 | . |
| 226810_at | 1.18E-04 | 2.36E-05 | OGFRL1       | 79627     | . |
| 226811_at | 0.003508 | 0.001516 | FAM46C       | 54855     | . |
| 226812_at | 0.015513 | 0.008792 |              |           | . |
| 226814_at | 0.046631 | 0.031662 | ADAMTS9      | 56999     | . |
| 226817_at | 1.79E-07 | 4.98E-09 | DSC2         | 1824      | . |
| 226819_at | 8.25E-05 | 1.52E-05 |              |           | . |
| 226821_at | 2.64E-06 | 1.78E-07 |              |           | . |
| 226822_at | 6.58E-05 | 1.13E-05 | STOX2        | 56977     | . |
| 226823_at | 0.002748 | 0.001131 | PHACTR4      | 65979     | . |
| 226824_at | 3.32E-04 | 8.63E-05 | CPXM2        | 119587    | . |
| 226825_s_ | 9.35E-04 | 3.08E-04 | TMEM165      | 55858     | . |
| 226826_at | 1.90E-04 | 4.29E-05 |              |           | . |
| 226827_at | 0.006454 | 0.003135 | TMEM165      | 55858     | . |
| 226831_at | 6.72E-05 | 1.17E-05 | SLC25A46     | 91137     | . |
| 226832_at | 0.001075 | 3.64E-04 |              |           | . |
| 226834_at | 1.36E-05 | 1.52E-06 |              |           | . |
| 226837_at | 0.006926 | 0.003413 | SPRED1       | 161742    | . |
| 226838_at | 2.09E-04 | 4.84E-05 | TTC32        | 130502    | . |
| 226839_at | 2.28E-05 | 2.95E-06 | NR2C2AP      | 126382    | . |
| 226840_at | 2.00E-06 | 1.25E-07 | H2AFY        | 9555      | . |
| 226842_at | 0.024478 | 0.014977 | LOC90110     | 90110     | . |
| 226843_s_ | 1.56E-08 | 1.89E-10 | PAPD5        | 64282     | . |
| 226844_at | 2.05E-05 | 2.58E-06 | MOBKL2B      | 79817     | . |
| 226845_s_ | 0.019678 | 0.011601 | MYEOV2       | 150678    | . |
| 226846_at | 2.60E-05 | 3.48E-06 | PHYHD1       | 254295    | . |
| 226847_at | 8.71E-06 | 8.44E-07 | FST          | 10468     | . |
| 226848_at | 3.74E-06 | 2.81E-07 |              |           | . |
| 226850_at | 6.23E-07 | 2.63E-08 | SUMF1        | 285362    | . |
| 226851_at | 0.028858 | 0.018143 | LYPLAL1      | 127018    | . |
| 226853_at | 4.46E-06 | 3.52E-07 | BMP2K        | 55589     | . |
| 226854_at | 6.83E-06 | 6.11E-07 |              |           | . |
| 226856_at | 2.81E-04 | 6.99E-05 | MUSTN1       | 389125    | . |

|           |          |          |              |             |
|-----------|----------|----------|--------------|-------------|
| 226860_at | 0.005527 | 0.002611 | TMEM19       | 55266 .     |
| 226861_at | 2.10E-06 | 1.33E-07 | ASB8         | 140461 .    |
| 226863_at | 4.61E-05 | 7.23E-06 | FAM110C      | 642273 .    |
| 226866_at | 3.66E-05 | 5.35E-06 | ESCO1        | 114799 .    |
| 226868_at | 0.004854 | 0.002237 | GLT8D3       | 283464 .    |
| 226869_at | 7.33E-04 | 2.28E-04 | MEGF6        | 1953 .      |
| 226870_at | 0.020101 | 0.011898 | COMTD1       | 118881 .    |
| 226871_s_ | 1.45E-05 | 1.66E-06 | ATG4D        | 84971 .     |
| 226872_at | 6.76E-06 | 6.03E-07 | RFX2         | 5990 .      |
| 226874_at | 3.16E-05 | 4.46E-06 | KLHL8        | 57563 .     |
| 226876_at | 0.023504 | 0.014289 | FAM101B      | 359845 .    |
| 226877_at | 5.65E-06 | 4.79E-07 | RPL32P3      | 132241 .    |
| 226878_at | 5.16E-09 | 4.47E-11 | HLA-DOA      | 3111 .      |
| 226879_at | 2.91E-05 | 4.01E-06 | HVCN1        | 84329 .     |
| 226880_at | 1.95E-04 | 4.44E-05 | NUCKS1       | 64710 .     |
| 226881_at | 0.003473 | 0.001497 | GRPEL2       | 134266 .    |
| 226882_x_ | 7.42E-04 | 2.32E-04 | WDR4         | 10785 .     |
| 226883_at | 0.003536 | 0.00153  |              | .           |
| 226884_at | 1.35E-07 | 3.43E-09 | LRRN1        | 57633 .     |
| 226886_at | 0.006802 | 0.00334  | GFPT1        | 2673 .      |
| 226887_at | 9.65E-05 | 1.84E-05 | HSPA14       | 51182 .     |
| 226888_at | 0.004737 | 0.002173 | CSNK1G1      | 53944 .     |
| 226889_at | 8.47E-05 | 1.57E-05 | WDR35        | 57539 .     |
| 226891_at | 0.033175 | 0.02133  | C3orf21      | 152002 .    |
| 226892_at | 0.002107 | 8.22E-04 | C10orf12     | 26148 .     |
| 226893_at | 0.006317 | 0.003056 | ABL2         | 27 .        |
| 226894_at | 0.005758 | 0.002738 | SLC35A3      | 23443 .     |
| 226895_at | 7.38E-12 | 8.15E-15 | NFIC         | 4782 .      |
| 226896_at | 2.36E-04 | 5.62E-05 | CHCHD1       | 118487 .    |
| 226897_s_ | 0.017516 | 0.010127 | ZC3H7A       | 29066 .     |
| 226898_s_ | 0.004598 | 0.002096 | SFPQ         | 6421 .      |
| 226899_at | 0.002682 | 0.001098 | UNC5B        | 219699 .    |
| 226900_at | 0.020925 | 0.012485 | LOC100129387 | 100129387 . |
| 226901_at | 0.01522  | 0.008596 | C17orf58     | 284018 .    |

|           |          |          |                             |          |
|-----------|----------|----------|-----------------------------|----------|
| 226902_at | 0.002358 | 9.41E-04 | USP13                       | 8975 .   |
| 226903_s_ | 0.001513 | 5.52E-04 | SLC6A10P /// S386757 /// 6! |          |
| 226904_at | 8.58E-04 | 2.78E-04 | SLC6A10P /// S386757 /// 6! |          |
| 226905_at | 0.042385 | 0.028329 | FAM101B                     | 359845 . |
| 226906_s_ | 0.007841 | 0.003951 | ARHGAP9                     | 64333 .  |
| 226907_at | 0.001112 | 3.80E-04 | PPP1R14C                    | 81706 .  |
| 226908_at | 9.33E-04 | 3.07E-04 | LRIG3                       | 121227 . |
| 226912_at | 2.97E-06 | 2.08E-07 | ZDHHC23                     | 254887 . |
| 226913_s_ | 0.016156 | 0.009222 | SOX8                        | 30812 .  |
| 226914_at | 7.79E-05 | 1.41E-05 | ARPC5L                      | 81873 .  |
| 226915_s_ | 0.009666 | 0.005043 | ARPC5L                      | 81873 .  |
| 226917_s_ | 0.03351  | 0.021586 | ANAPC4                      | 29945 .  |
| 226918_at | 0.027907 | 0.017443 | JPH4                        | 84502 .  |
| 226919_at | 6.67E-10 | 3.10E-12 | LYRM2                       | 57226 .  |
| 226920_at | 8.91E-04 | 2.91E-04 | CSNK1A1                     | 1452 .   |
| 226922_at | 0.004812 | 0.002215 | RANBP2                      | 5903 .   |
| 226923_at | 9.27E-04 | 3.05E-04 | SCFD2                       | 152579 . |
| 226924_at | 0.038861 | 0.025614 | LOC400657                   | 400657 . |
| 226925_at | 3.45E-04 | 9.02E-05 | ACPL2                       | 92370 .  |
| 226926_at | 6.06E-06 | 5.24E-07 | DMKN                        | 93099 .  |
| 226928_x_ | 9.30E-05 | 1.76E-05 | SLC25A37                    | 51312 .  |
| 226929_at | 8.58E-04 | 2.77E-04 | MTHFR                       | 4524 .   |
| 226930_at | 6.38E-04 | 1.92E-04 | FNDC1                       | 84624 .  |
| 226932_at | 2.25E-07 | 6.82E-09 | SSPN                        | 8082 .   |
| 226933_s_ | 0.001557 | 5.70E-04 | ID4                         | 3400 .   |
| 226934_at | 1.03E-07 | 2.37E-09 | CPSF6                       | 11052 .  |
| 226935_s_ | 1.01E-04 | 1.94E-05 | CLPTM1L                     | 81037 .  |
| 226936_at | 1.52E-05 | 1.76E-06 | C6orf173                    | 387103 . |
| 226938_at | 0.001567 | 5.75E-04 | WDR21A                      | 26094 .  |
| 226939_at | 0.024084 | 0.014699 | CPEB2                       | 132864 . |
| 226940_at | 0.024189 | 0.014772 | FAM69B                      | 138311 . |
| 226941_at | 0.033603 | 0.021652 |                             | .        |
| 226942_at | 1.33E-04 | 2.76E-05 | PHF20L1                     | 51105 .  |
| 226943_at | 0.003857 | 0.001697 | C12orf73                    | 728568 . |

|           |          |          |                             |          |
|-----------|----------|----------|-----------------------------|----------|
| 226944_at | 0.010205 | 0.005371 | HTRA3                       | 94031 .  |
| 226945_at | 0.004559 | 0.002076 | RHBDD1                      | 84236 .  |
| 226946_at | 0.002605 | 0.001061 | C5orf33                     | 133686 . |
| 226947_at | 7.88E-08 | 1.66E-09 | GUSBL2 /// LOC375513 /// 7. |          |
| 226948_at | 6.11E-04 | 1.82E-04 | RHBDD1                      | 84236 .  |
| 226949_at | 5.11E-04 | 1.46E-04 | GOLGA3                      | 2802 .   |
| 226950_at | 8.92E-10 | 4.56E-12 | ACVRL1                      | 94 .     |
| 226951_at | 5.07E-04 | 1.45E-04 | C2orf49                     | 79074 .  |
| 226952_at | 0.001097 | 3.74E-04 | EAF1                        | 85403 .  |
| 226953_at | 0.030136 | 0.01908  | DARC                        | 2532 .   |
| 226956_at | 0.026792 | 0.016645 | MTMR3                       | 8897 .   |
| 226957_x_ | 0.009133 | 0.004716 | RALBP1                      | 10928 .  |
| 226959_at | 2.10E-04 | 4.88E-05 | LOC283070                   | 283070 . |
| 226960_at | 2.98E-04 | 7.52E-05 | CXCL17                      | 284340 . |
| 226961_at | 7.20E-05 | 1.28E-05 | PRR15                       | 222171 . |
| 226962_at | 0.028479 | 0.017855 | ZBTB41                      | 360023 . |
| 226963_at | 0.003995 | 0.001769 | BTF3L4                      | 91408 .  |
| 226964_at | 5.57E-05 | 9.16E-06 |                             | .        |
| 226965_at | 0.007215 | 0.003581 | FAM116A                     | 201627 . |
| 226967_at | 1.92E-06 | 1.18E-07 | FIZ1                        | 84922 .  |
| 226968_at | 0.010687 | 0.005671 | KIF1B                       | 23095 .  |
| 226969_at | 0.007935 | 0.004006 | MTR                         | 4548 .   |
| 226972_s_ | 0.043827 | 0.029465 | CCDC136                     | 64753 .  |
| 226974_at | 3.99E-07 | 1.47E-08 | NEDD4L                      | 23327 .  |
| 226975_at | 5.32E-04 | 1.54E-04 | RNPC3                       | 55599 .  |
| 226977_at | 9.23E-05 | 1.74E-05 | C5orf53                     | 492311 . |
| 226978_at | 3.37E-06 | 2.45E-07 | PPARA                       | 5465 .   |
| 226979_at | 0.014767 | 0.008294 | MAP3K2                      | 10746 .  |
| 226980_at | 6.81E-07 | 2.98E-08 | DEPDC1B                     | 55789 .  |
| 226981_at | 1.71E-04 | 3.76E-05 | MLL                         | 4297 .   |
| 226984_at | 9.05E-05 | 1.70E-05 | FGD5                        | 152273 . |
| 226985_at | 0.014693 | 0.008244 | FGD5                        | 152273 . |
| 226986_at | 0.009455 | 0.004913 | WIPI2                       | 26100 .  |
| 226988_s_ | 0.004143 | 0.001848 | MYH14                       | 79784 .  |



|           |          |          |                             |           |   |
|-----------|----------|----------|-----------------------------|-----------|---|
| 226989_at | 1.15E-04 | 2.28E-05 | RGMB                        | 285704    | . |
| 226990_at | 6.19E-04 | 1.85E-04 | CAPRIN1                     | 4076      | . |
| 226993_at | 1.25E-05 | 1.36E-06 |                             |           | . |
| 226994_at | 1.03E-04 | 2.01E-05 | DNAJA2                      | 10294     | . |
| 226996_at | 0.002005 | 7.74E-04 | LCLAT1                      | 253558    | . |
| 226997_at | 1.66E-04 | 3.65E-05 | ADAMTS12                    | 81792     | . |
| 226998_at | 4.53E-06 | 3.60E-07 | NARG1                       | 80155     | . |
| 226999_at | 9.84E-04 | 3.27E-04 | RNPC3                       | 55599     | . |
| 227001_at | 2.31E-10 | 7.88E-13 | NIPAL2                      | 79815     | . |
| 227002_at | 0.049541 | 0.03396  | FAM78A                      | 286336    | . |
| 227004_at | 1.11E-04 | 2.19E-05 |                             |           | . |
| 227005_at | 2.19E-04 | 5.11E-05 | RPP14                       | 11102     | . |
| 227006_at | 2.63E-04 | 6.44E-05 | PPP1R14A                    | 94274     | . |
| 227007_at | 0.009138 | 0.00472  | TMCO4                       | 255104    | . |
| 227009_at | 0.002488 | 0.001005 |                             |           | . |
| 227010_at | 0.001295 | 4.57E-04 |                             |           | . |
| 227011_at | 0.005518 | 0.002606 | LOC100130262                | 100130262 | . |
| 227013_at | 2.19E-04 | 5.12E-05 | LATS2                       | 26524     | . |
| 227018_at | 0.00962  | 0.005013 | DPP8                        | 54878     | . |
| 227019_at | 0.002888 | 0.001198 | C1orf226                    | 400793    | . |
| 227021_at | 0.00121  | 4.21E-04 | AOF1                        | 221656    | . |
| 227022_at | 6.09E-08 | 1.16E-09 | GNPDA2                      | 132789    | . |
| 227023_at | 5.69E-05 | 9.41E-06 | GLI4 /// ZFP41 2738 /// 286 |           | . |
| 227024_s_ | 0.005355 | 0.002513 | MRPL55                      | 128308    | . |
| 227025_at | 0.010182 | 0.005356 | PPHLN1                      | 51535     | . |
| 227026_at | 1.56E-05 | 1.82E-06 | MPHOSPH8                    | 54737     | . |
| 227027_at | 0.001324 | 4.70E-04 | GFPT1                       | 2673      | . |
| 227028_s_ | 0.003824 | 0.00168  | DGCR2                       | 9993      | . |
| 227029_at | 0.024815 | 0.015224 | FAM177A1                    | 283635    | . |
| 227031_at | 0.017494 | 0.01011  | SNX13                       | 23161     | . |
| 227035_x_ | 9.38E-04 | 3.09E-04 | RP9P                        | 441212    | . |
| 227037_at | 0.002139 | 8.37E-04 | PLD6                        | 201164    | . |
| 227038_at | 8.85E-06 | 8.64E-07 | SGMS2                       | 166929    | . |
| 227039_at | 5.95E-05 | 9.96E-06 | AKAP13                      | 11214     | . |

|           |          |          |                                 |          |
|-----------|----------|----------|---------------------------------|----------|
| 227042_at | 8.99E-04 | 2.94E-04 | YDJC                            | 150223 . |
| 227043_at | 0.011737 | 0.006328 | hCG_29977                       | 126075 . |
| 227044_at | 1.18E-06 | 6.15E-08 |                                 | .        |
| 227045_at | 0.010393 | 0.005487 | ZNF614                          | 80110 .  |
| 227047_x_ | 0.003991 | 0.001767 | ZBTB4                           | 57659 .  |
| 227048_at | 6.15E-05 | 1.04E-05 | LAMA1                           | 284217 . |
| 227049_at | 1.25E-07 | 3.06E-09 | ZADH2                           | 284273 . |
| 227050_at | 0.005913 | 0.002828 | ODZ3                            | 55714 .  |
| 227051_at | 0.001129 | 3.87E-04 |                                 | .        |
| 227052_at | 9.31E-05 | 1.76E-05 |                                 | .        |
| 227053_at | 3.35E-07 | 1.18E-08 | PACSIN1                         | 29993 .  |
| 227054_at | 0.004488 | 0.002036 | N6AMT2                          | 221143 . |
| 227055_at | 0.043114 | 0.02889  | METTL7B                         | 196410 . |
| 227056_at | 0.003362 | 0.001441 | KIAA0141                        | 9812 .   |
| 227058_at | 2.08E-11 | 3.43E-14 | C13orf33                        | 84935 .  |
| 227060_at | 0.022673 | 0.013706 | RELT                            | 84957 .  |
| 227061_at | 7.62E-09 | 7.35E-11 |                                 | .        |
| 227063_at | 0.016655 | 0.00955  | C17orf61                        | 254863 . |
| 227065_at | 2.63E-09 | 1.85E-11 | RNF216                          | 54476 .  |
| 227066_at | 1.14E-04 | 2.28E-05 | MOBKL2C                         | 148932 . |
| 227067_x_ | 4.23E-04 | 1.16E-04 | NOTCH2NL                        | 388677 . |
| 227070_at | 9.86E-06 | 9.98E-07 | GLT8D2                          | 83468 .  |
| 227071_at | 0.00711  | 0.00352  | ZNF414                          | 84330 .  |
| 227072_at | 6.27E-04 | 1.88E-04 | RTTN                            | 25914 .  |
| 227073_at | 0.029392 | 0.018525 | MAP3K2                          | 10746 .  |
| 227075_at | 0.01028  | 0.005419 | ELP3                            | 55140 .  |
| 227077_at | 7.72E-04 | 2.44E-04 | ZNF286A /// ZNF57335 /// ZNF729 | .        |
| 227079_at | 5.05E-05 | 8.11E-06 | DHX8                            | 1659 .   |
| 227081_at | 4.46E-04 | 1.23E-04 | DNALI1                          | 7802 .   |
| 227082_at | 0.006183 | 0.00298  |                                 | .        |
| 227083_at | 0.003934 | 0.001738 | B3GALTL                         | 145173 . |
| 227084_at | 0.011615 | 0.006252 | DTNA                            | 1837 .   |
| 227085_at | 7.77E-06 | 7.27E-07 | H2AFV                           | 94239 .  |
| 227086_at | 0.015616 | 0.00886  | C22orf39                        | 128977 . |

|           |          |          |              |           |     |
|-----------|----------|----------|--------------|-----------|-----|
| 227088_at | 9.14E-05 | 1.72E-05 | PDE5A        | 8654      | .   |
| 227089_at | 1.74E-04 | 3.86E-05 |              |           | .   |
| 227090_at | 6.18E-04 | 1.85E-04 | PHF21A       | 51317     | .   |
| 227091_at | 9.69E-04 | 3.21E-04 | CCDC146      | 57639     | .   |
| 227092_at | 3.34E-04 | 8.70E-05 |              |           | .   |
| 227093_at | 4.10E-09 | 3.29E-11 | USP36        | 57602     | .   |
| 227094_at | 1.51E-06 | 8.58E-08 | DHTKD1       | 55526     | .   |
| 227095_at | 0.001911 | 7.30E-04 |              |           | .   |
| 227096_at | 7.04E-05 | 1.24E-05 | JOSD2        | 126119    | .   |
| 227097_at | 2.97E-05 | 4.13E-06 |              |           | .   |
| 227098_at | 1.65E-04 | 3.62E-05 | DUSP18       | 150290    | .   |
| 227099_s_ | 0.009507 | 0.004944 | LOC387763    | 387763    | .   |
| 227100_at | 0.007275 | 0.003617 | B3GALTL      | 145173    | .   |
| 227101_at | 3.56E-09 | 2.68E-11 | ZNF800       | 168850    | .   |
| 227102_at | 0.016802 | 0.009649 | TRIM35       | 23087     | .   |
| 227104_x_ | 0.001189 | 4.13E-04 | ZNF800       | 168850    | .   |
| 227105_at | 1.24E-04 | 2.52E-05 | CSPP1        | 79848     | .   |
| 227106_at | 6.64E-06 | 5.88E-07 | LOC100133666 | 100133666 | //. |
| 227107_at | 4.77E-04 | 1.34E-04 |              |           | .   |
| 227108_at | 0.001457 | 5.27E-04 | STARD9       | 57519     | .   |
| 227109_at | 1.58E-04 | 3.42E-05 | CYP2R1       | 120227    | .   |
| 227110_at | 9.55E-08 | 2.16E-09 | HNRNPC       | 3183      | .   |
| 227111_at | 0.002216 | 8.74E-04 | ZBTB34       | 403341    | .   |
| 227113_at | 2.36E-04 | 5.64E-05 | ADHFE1       | 137872    | .   |
| 227116_at | 0.013558 | 0.007498 |              |           | .   |
| 227117_at | 0.022034 | 0.013264 |              |           | .   |
| 227118_s_ | 0.018385 | 0.01072  | MRPS26       | 64949     | .   |
| 227120_at | 0.034361 | 0.022202 | FOXP4        | 116113    | .   |
| 227121_at | 0.013433 | 0.007419 |              |           | .   |
| 227122_at | 0.046386 | 0.031461 | ZNF791       | 163049    | .   |
| 227123_at | 6.96E-06 | 6.27E-07 | RAB3B        | 5865      | .   |
| 227124_at | 3.06E-07 | 1.04E-08 | LOC221710    | 221710    | .   |
| 227125_at | 3.38E-05 | 4.85E-06 |              |           | .   |
| 227126_at | 0.029528 | 0.01863  |              |           | .   |

|           |          |          |           |           |   |
|-----------|----------|----------|-----------|-----------|---|
| 227127_at | 0.001106 | 3.77E-04 | TMEM110   | 375346    | . |
| 227129_x_ | 1.19E-04 | 2.38E-05 | tcag7.907 | 402483    | . |
| 227130_s_ | 0.030371 | 0.019253 | TLE1      | 7088      | . |
| 227132_at | 0.007715 | 0.003875 | ZNF706    | 51123     | . |
| 227134_at | 7.63E-08 | 1.59E-09 | SYTL1     | 84958     | . |
| 227135_at | 6.98E-04 | 2.15E-04 | NAAA      | 27163     | . |
| 227138_at | 0.001682 | 6.26E-04 | CRTAP     | 10491     | . |
| 227140_at | 4.86E-05 | 7.73E-06 |           |           | . |
| 227141_at | 0.021602 | 0.012956 | TYW3      | 127253    | . |
| 227142_at | 1.95E-05 | 2.43E-06 | PLEKHG5   | 57449     | . |
| 227143_s_ | 1.15E-06 | 5.90E-08 | BID       | 637       | . |
| 227144_at | 0.012485 | 0.006814 | C22orf9   | 23313     | . |
| 227145_at | 3.21E-07 | 1.11E-08 | LOXL4     | 84171     | . |
| 227146_at | 5.26E-08 | 9.70E-10 | QSOX2     | 169714    | . |
| 227147_s_ | 0.002279 | 9.04E-04 | EGLN2     | 112398    | . |
| 227150_at | 2.09E-04 | 4.83E-05 | MTF1      | 4520      | . |
| 227151_at | 1.33E-04 | 2.75E-05 | SNX33     | 257364    | . |
| 227152_at | 1.28E-07 | 3.16E-09 | C12orf35  | 55196     | . |
| 227154_at | 0.038984 | 0.025708 | IGSF21    | 84966     | . |
| 227157_at | 9.75E-04 | 3.24E-04 | CCDC111   | 201973    | . |
| 227158_at | 0.001162 | 4.01E-04 | C14orf126 | 112487    | . |
| 227159_at | 5.86E-04 | 1.73E-04 | GHDC      | 84514     | . |
| 227160_s_ | 1.38E-07 | 3.54E-09 | C20orf7   | 79133     | . |
| 227161_at | 0.002156 | 8.46E-04 | NOM1      | 64434     | . |
| 227162_at | 0.037556 | 0.024625 | ZBTB26    | 57684     | . |
| 227163_at | 2.07E-05 | 2.60E-06 | GSTO2     | 119391    | . |
| 227164_at | 1.01E-04 | 1.95E-05 | SFRS1     | 6426      | . |
| 227165_at | 4.07E-05 | 6.13E-06 | C13orf3   | 221150    | . |
| 227166_at | 0.025812 | 0.015931 | DNAJC18   | 202052    | . |
| 227167_s_ | 0.020013 | 0.011837 |           |           | . |
| 227168_at | 5.13E-05 | 8.28E-06 | MIAT      | 440823    | . |
| 227169_at | 0.034395 | 0.02223  | DNAJC18   | 202052    | . |
| 227170_at | 0.019891 | 0.011751 | ZNF316    | 100131017 | . |
| 227171_at | 0.003094 | 0.001302 | CCT4      | 10575     | . |

|           |          |          |              |           |   |
|-----------|----------|----------|--------------|-----------|---|
| 227174_at | 8.26E-05 | 1.52E-05 | WDR72        | 256764    | . |
| 227175_at | 2.07E-04 | 4.77E-05 | LOC100131311 | 100131311 | . |
| 227177_at | 6.36E-07 | 2.70E-08 | CORO2A       | 7464      | . |
| 227178_at | 0.001246 | 4.37E-04 | CUGBP2       | 10659     | . |
| 227179_at | 0.046087 | 0.031232 | STAU2        | 27067     | . |
| 227180_at | 5.50E-06 | 4.62E-07 | ELOVL7       | 79993     | . |
| 227181_at | 1.40E-04 | 2.93E-05 | LNP1         | 348801    | . |
| 227182_at | 0.014639 | 0.008208 | SUSD3        | 203328    | . |
| 227183_at | 3.04E-04 | 7.70E-05 | LOC728264    | 728264    | . |
| 227184_at | 8.22E-05 | 1.51E-05 |              |           | . |
| 227185_at | 0.002308 | 9.18E-04 | LOC643988    | 643988    | . |
| 227190_at | 0.005893 | 0.002816 | TMEM37       | 140738    | . |
| 227191_at | 0.001151 | 3.96E-04 |              |           | . |
| 227192_at | 0.049763 | 0.034138 | PRRT2        | 112476    | . |
| 227193_at | 3.17E-05 | 4.48E-06 |              |           | . |
| 227194_at | 2.32E-04 | 5.52E-05 | FAM3B        | 54097     | . |
| 227195_at | 0.021204 | 0.01268  | ZNF503       | 84858     | . |
| 227196_at | 3.29E-09 | 2.41E-11 | RHPN2        | 85415     | . |
| 227197_at | 0.001424 | 5.13E-04 | SGEF         | 26084     | . |
| 227198_at | 0.002026 | 7.84E-04 | AFF3         | 3899      | . |
| 227199_at | 4.50E-05 | 7.02E-06 | DIP2A        | 23181     | . |
| 227200_at | 0.007216 | 0.003582 |              |           | . |
| 227201_at | 0.032083 | 0.020515 | LOC643837    | 643837    | . |
| 227203_at | 9.16E-04 | 3.00E-04 | FBXL17       | 64839     | . |
| 227204_at | 0.015448 | 0.00875  | PAR6G        | 84552     | . |
| 227205_at | 9.04E-04 | 2.96E-04 | TAF1         | 6872      | . |
| 227207_x_ | 0.00695  | 0.003428 | ZNF213       | 7760      | . |
| 227208_at | 7.68E-06 | 7.15E-07 | CCDC84       | 338657    | . |
| 227209_at | 0.034689 | 0.022443 | CNTN1        | 1272      | . |
| 227211_at | 3.43E-04 | 8.97E-05 | PHF19        | 26147     | . |
| 227212_s_ | 0.004105 | 0.001828 | PHF19        | 26147     | . |
| 227213_at | 6.84E-05 | 1.19E-05 | ADAT2        | 134637    | . |
| 227214_at | 3.12E-06 | 2.22E-07 | GOPC         | 57120     | . |
| 227215_at | 1.21E-05 | 1.30E-06 | GOPC         | 57120     | . |

|           |          |          |              |             |
|-----------|----------|----------|--------------|-------------|
| 227216_at | 0.002409 | 9.67E-04 | RLTPR        | 146206 .    |
| 227217_at | 3.40E-05 | 4.89E-06 | WNK2         | 65268 .     |
| 227218_at | 1.45E-05 | 1.66E-06 | RLTPR        | 146206 .    |
| 227219_x_ | 0.005053 | 0.002347 | MAP1LC3A     | 84557 .     |
| 227220_at | 0.002986 | 0.001247 | NFXL1        | 152518 .    |
| 227221_at | 1.28E-05 | 1.41E-06 |              | .           |
| 227222_at | 0.006191 | 0.002985 | FBXO10       | 26267 .     |
| 227223_at | 0.001662 | 6.17E-04 | RBM39        | 9584 .      |
| 227224_at | 0.002539 | 0.001029 | RALGPS2      | 55103 .     |
| 227225_at | 0.020867 | 0.012446 |              | 439985 .    |
| 227226_at | 0.002093 | 8.15E-04 | MRAP2        | 112609 .    |
| 227227_at | 0.002152 | 8.43E-04 |              | .           |
| 227228_s_ | 3.02E-05 | 4.21E-06 | CCDC88C      | 440193 .    |
| 227229_at | 7.91E-05 | 1.44E-05 | VPS53        | 55275 .     |
| 227230_s_ | 1.14E-05 | 1.20E-06 | KIAA1211     | 57482 .     |
| 227231_at | 0.001098 | 3.74E-04 | KIAA1211     | 57482 .     |
| 227232_at | 0.01196  | 0.006471 | EVL          | 51466 .     |
| 227233_at | 0.017398 | 0.010044 | TSPAN2       | 10100 .     |
| 227234_at | 0.026907 | 0.016724 | LOC100132815 | 100132815 . |
| 227236_at | 0.011106 | 0.005934 | TSPAN2       | 10100 .     |
| 227239_at | 0.003171 | 0.001342 | FAM126A      | 84668 .     |
| 227240_at | 0.038143 | 0.02507  | NGEF         | 25791 .     |
| 227243_s_ | 0.014292 | 0.007975 | EBF3         | 253738 .    |
| 227245_at | 0.001752 | 6.57E-04 | C12orf30     | 80018 .     |
| 227246_at | 0.03231  | 0.020684 | PLRG1        | 5356 .      |
| 227247_at | 2.43E-05 | 3.20E-06 | PLEKHA8      | 84725 .     |
| 227249_at | 3.71E-07 | 1.34E-08 | NDE1         | 54820 .     |
| 227250_at | 5.19E-04 | 1.49E-04 | KREMEN1      | 83999 .     |
| 227251_at | 0.039    | 0.02572  | WDR22        | 8816 .      |
| 227252_at | 6.85E-05 | 1.20E-05 |              | .           |
| 227254_at | 1.52E-07 | 3.99E-09 | POU2F1       | 5451 .      |
| 227255_at | 1.04E-04 | 2.03E-05 | PDIK1L       | 149420 .    |
| 227256_at | 1.08E-05 | 1.13E-06 | USP31        | 57478 .     |
| 227257_s_ | 0.001012 | 3.39E-04 | C10orf46     | 143384 .    |

|           |          |          |                              |        |   |
|-----------|----------|----------|------------------------------|--------|---|
| 227258_at | 0.003347 | 0.001433 | C10orf46                     | 143384 | . |
| 227259_at | 2.42E-04 | 5.80E-05 | CD47                         | 961    | . |
| 227260_at | 0.015907 | 0.009056 | ANKRD10                      | 55608  | . |
| 227262_at | 0.016533 | 0.00947  | HAPLN3                       | 145864 | . |
| 227263_at | 0.04976  | 0.034135 | C8orf58                      | 541565 | . |
| 227264_at | 0.025677 | 0.01584  |                              |        | . |
| 227267_at | 1.70E-06 | 1.02E-07 | C5orf37                      | 134359 | . |
| 227270_at | 0.004461 | 0.002022 | LOC285550                    | 285550 | . |
| 227271_at | 0.031697 | 0.020217 | FGF11                        | 2256   | . |
| 227272_at | 5.40E-06 | 4.50E-07 | C15orf52                     | 388115 | . |
| 227273_at | 5.31E-04 | 1.53E-04 |                              |        | . |
| 227275_at | 0.005695 | 0.002702 | MEX3C                        | 51320  | . |
| 227276_at | 0.011074 | 0.005913 | PLXDC2                       | 84898  | . |
| 227277_at | 2.64E-08 | 3.86E-10 | MTDH                         | 92140  | . |
| 227279_at | 8.19E-08 | 1.76E-09 | TCEAL3                       | 85012  | . |
| 227280_s_ | 0.022153 | 0.013348 | CCNYL1                       | 151195 | . |
| 227282_at | 0.006143 | 0.002957 | PCDH19                       | 57526  | . |
| 227283_at | 0.001845 | 7.00E-04 | EFR3B                        | 22979  | . |
| 227284_at | 1.46E-04 | 3.10E-05 | ZNF766                       | 90321  | . |
| 227285_at | 2.68E-05 | 3.61E-06 | C1orf51                      | 148523 | . |
| 227287_at | 0.001193 | 4.14E-04 | CITED2                       | 10370  | . |
| 227291_s_ | 0.016644 | 0.009543 | BOLA3                        | 388962 | . |
| 227292_at | 0.005488 | 0.002587 | C11orf84                     | 144097 | . |
| 227293_at | 0.048432 | 0.033069 |                              |        | . |
| 227294_at | 0.002503 | 0.001012 | ZNF689                       | 115509 | . |
| 227295_at | 8.93E-05 | 1.67E-05 | IKIP                         | 121457 | . |
| 227296_at | 0.034991 | 0.022672 | MFSD3                        | 113655 | . |
| 227297_at | 1.58E-05 | 1.86E-06 | ITGA9                        | 3680   | . |
| 227298_at | 0.008172 | 0.004143 | FLJ37798                     | 401264 | . |
| 227300_at | 3.95E-05 | 5.90E-06 | TMEM119                      | 338773 | . |
| 227301_at | 2.16E-05 | 2.76E-06 | CCT6P1 /// LOC643180 /// 64  |        | . |
| 227302_s_ | 0.037113 | 0.024298 | FLII /// LLGL1 2314 /// 3996 |        | . |
| 227303_at | 0.005406 | 0.002541 | ANKS3                        | 124401 | . |
| 227306_at | 0.004202 | 0.001879 |                              |        | . |

|           |          |          |              |               |
|-----------|----------|----------|--------------|---------------|
| 227308_x_ | 8.89E-04 | 2.90E-04 | LTBP3        | 4054 .        |
| 227309_at | 0.002776 | 0.001144 | YOD1         | 55432 .       |
| 227312_at | 4.04E-11 | 7.98E-14 | SNTB2        | 6645 .        |
| 227313_at | 8.14E-05 | 1.49E-05 | CNPY4        | 245812 .      |
| 227314_at | 0.004947 | 0.002286 | ITGA2        | 3673 .        |
| 227315_x_ | 0.008505 | 0.00434  | PROSC        | 11212 .       |
| 227317_at | 0.002434 | 9.78E-04 | LMCD1        | 29995 .       |
| 227319_at | 6.37E-04 | 1.92E-04 |              | .             |
| 227320_at | 1.18E-05 | 1.26E-06 | FAM101A      | 144347 .      |
| 227322_s_ | 0.0019   | 7.26E-04 | BCCIP        | 56647 .       |
| 227324_at | 6.47E-05 | 1.11E-05 | ADCK4        | 79934 .       |
| 227325_at | 6.65E-04 | 2.02E-04 | LOC255783    | 255783 .      |
| 227326_at | 2.42E-08 | 3.42E-10 | MXRA7        | 439921 .      |
| 227327_at | 0.003698 | 0.001614 | MEGF8        | 1954 .        |
| 227328_at | 6.89E-06 | 6.19E-07 | CAMTA1       | 23261 .       |
| 227329_at | 6.32E-05 | 1.08E-05 | ZBTB46       | 140685 .      |
| 227330_x_ | 0.017873 | 0.01037  | LOC100132288 | 100132288 //. |
| 227332_at | 2.45E-07 | 7.70E-09 | LOC100129022 | 100129022 .   |
| 227333_at | 1.56E-04 | 3.36E-05 |              | .             |
| 227334_at | 7.78E-06 | 7.28E-07 | USP54        | 159195 .      |
| 227335_at | 2.41E-05 | 3.17E-06 | DIDO1        | 11083 .       |
| 227337_at | 0.004351 | 0.001961 | ANKRD37      | 353322 .      |
| 227338_at | 1.64E-06 | 9.69E-08 | LOC440983    | 440983 .      |
| 227339_at | 7.02E-06 | 6.35E-07 | RGMB         | 285704 .      |
| 227340_s_ | 1.42E-05 | 1.62E-06 | RGMB         | 285704 .      |
| 227342_s_ | 0.00267  | 0.001092 | MYEOV        | 26579 .       |
| 227343_at | 2.20E-04 | 5.14E-05 |              | .             |
| 227345_at | 0.046188 | 0.031309 | TNFRSF10D    | 8793 .        |
| 227347_x_ | 0.034101 | 0.022012 | HES4         | 57801 .       |
| 227348_at | 0.001873 | 7.13E-04 | PARS2        | 25973 .       |
| 227349_at | 6.99E-07 | 3.08E-08 | HELLS        | 3070 .        |
| 227350_at | 1.71E-09 | 1.08E-11 | HELLS        | 3070 .        |
| 227351_at | 7.65E-04 | 2.41E-04 | C16orf52     | 730094 .      |
| 227352_at | 0.028536 | 0.017897 | C19orf39     | 126074 .      |



|           |          |          |           |          |
|-----------|----------|----------|-----------|----------|
| 227353_at | 0.021779 | 0.013083 | TMC8      | 147138 . |
| 227354_at | 0.001478 | 5.36E-04 | PAG1      | 55824 .  |
| 227355_at | 0.033725 | 0.021744 | RBM26     | 64062 .  |
| 227356_at | 0.001092 | 3.71E-04 |           | .        |
| 227358_at | 6.54E-05 | 1.12E-05 | ZBTB46    | 140685 . |
| 227359_at | 0.012642 | 0.006914 | C1orf102  | 127700 . |
| 227360_at | 7.07E-04 | 2.18E-04 | RDH13     | 112724 . |
| 227361_at | 0.019029 | 0.011158 | HS3ST3B1  | 9953 .   |
| 227362_at | 0.016949 | 0.009745 | SLC2A4RG  | 56731 .  |
| 227363_s_ | 0.003198 | 0.001356 | COX4NB    | 10328 .  |
| 227364_at | 6.09E-08 | 1.16E-09 |           | .        |
| 227365_at | 4.22E-06 | 3.28E-07 | ATCAY     | 85300 .  |
| 227369_at | 2.25E-06 | 1.46E-07 | SERBP1    | 26135 .  |
| 227370_at | 0.011838 | 0.006391 | FAM171B   | 165215 . |
| 227371_at | 9.71E-04 | 3.22E-04 | BAIAP2L1  | 55971 .  |
| 227372_s_ | 6.66E-04 | 2.03E-04 | BAIAP2L1  | 55971 .  |
| 227374_at | 4.37E-04 | 1.21E-04 | EARS2     | 124454 . |
| 227375_at | 0.013953 | 0.007754 | ANKRD13C  | 81573 .  |
| 227376_at | 7.08E-05 | 1.25E-05 | GLI3      | 2737 .   |
| 227377_at | 9.42E-06 | 9.40E-07 | IGF2BP1   | 10642 .  |
| 227379_at | 0.001486 | 5.40E-04 | MBOAT1    | 154141 . |
| 227380_x_ | 0.005421 | 0.002549 | C16orf13  | 84326 .  |
| 227381_at | 3.12E-04 | 7.97E-05 | CERCAM    | 51148 .  |
| 227383_at | 2.01E-06 | 1.27E-07 | LOC727820 | 727820 . |
| 227384_s_ | 2.65E-07 | 8.56E-09 | LOC727820 | 727820 . |
| 227386_s_ | 0.013669 | 0.007572 | TMEM200B  | 399474 . |
| 227388_at | 4.92E-06 | 3.98E-07 | TUSC1     | 286319 . |
| 227389_x_ | 1.08E-04 | 2.13E-05 | LOC729397 | 729397 . |
| 227390_at | 0.005895 | 0.002818 | MEG3      | 55384 .  |
| 227391_x_ | 3.06E-04 | 7.78E-05 | LRRFIP1   | 9208 .   |
| 227392_at | 0.00469  | 0.002148 | NISCH     | 11188 .  |
| 227393_at | 0.003397 | 0.001458 | ANO9      | 338440 . |
| 227394_at | 0.014542 | 0.008142 | NCAM1     | 4684 .   |
| 227395_at | 5.76E-04 | 1.69E-04 | TBCEL     | 219899 . |

|           |          |          |              |             |
|-----------|----------|----------|--------------|-------------|
| 227396_at | 6.86E-04 | 2.10E-04 | PTPRJ        | 5795 .      |
| 227397_at | 0.003806 | 0.001671 | TPM2         | 7169 .      |
| 227398_s_ | 0.002157 | 8.46E-04 | MIDN         | 90007 .     |
| 227399_at | 8.79E-06 | 8.55E-07 | VGLL3        | 389136 .    |
| 227400_at | 1.14E-05 | 1.21E-06 | NFIX         | 4784 .      |
| 227401_at | 0.022383 | 0.013501 | IL17D        | 53342 .     |
| 227402_s_ | 6.07E-07 | 2.55E-08 | UTP23        | 84294 .     |
| 227404_s_ | 7.22E-04 | 2.24E-04 | EGR1         | 1958 .      |
| 227406_at | 3.59E-06 | 2.65E-07 | LOC100129387 | 100129387 . |
| 227407_at | 8.12E-04 | 2.59E-04 | TAPT1        | 202018 .    |
| 227408_s_ | 3.13E-04 | 8.03E-05 | SNX25        | 83891 .     |
| 227409_at | 5.58E-04 | 1.63E-04 | PPP1R3E      | 90673 .     |
| 227410_at | 0.003123 | 0.001318 | FAM43A       | 131583 .    |
| 227411_at | 9.61E-05 | 1.83E-05 | WTIP         | 126374 .    |
| 227412_at | 0.017309 | 0.009987 | PPP1R3E      | 90673 .     |
| 227414_at | 7.57E-04 | 2.37E-04 | RHBDD1       | 84236 .     |
| 227415_at | 8.02E-07 | 3.69E-08 | LOC283508    | 283508 .    |
| 227418_at | 0.003118 | 0.001315 | KIAA1826     | 84437 .     |
| 227419_x_ | 8.35E-09 | 8.41E-11 | PLAC9        | 219348 .    |
| 227420_at | 0.002616 | 0.001066 | TNFAIP8L1    | 126282 .    |
| 227422_at | 2.30E-05 | 2.98E-06 |              | .           |
| 227423_at | 5.70E-05 | 9.44E-06 | LRRC28       | 123355 .    |
| 227424_x_ | 1.43E-05 | 1.63E-06 | C21orf119    | 84996 .     |
| 227426_at | 0.0263   | 0.016276 | SOS1         | 6654 .      |
| 227429_at | 0.020023 | 0.011845 | EFCAB4A      | 283229 .    |
| 227431_at | 2.61E-04 | 6.38E-05 |              | .           |
| 227432_s_ | 3.53E-05 | 5.11E-06 |              | .           |
| 227433_at | 0.001257 | 4.41E-04 | KIAA2018     | 205717 .    |
| 227434_at | 8.43E-04 | 2.71E-04 | WBSCR17      | 64409 .     |
| 227435_at | 0.013827 | 0.007675 | KIAA2018     | 205717 .    |
| 227437_at | 0.018369 | 0.010709 |              | .           |
| 227438_at | 2.58E-04 | 6.30E-05 | ALPK1        | 80216 .     |
| 227439_at | 0.003531 | 0.001527 | ANKS1B       | 56899 .     |
| 227440_at | 5.43E-04 | 1.58E-04 | ANKS1B       | 56899 .     |

|           |          |          |           |          |
|-----------|----------|----------|-----------|----------|
| 227441_s_ | 2.31E-08 | 3.19E-10 | ANKS1B    | 56899 .  |
| 227443_at | 3.79E-05 | 5.59E-06 | C9orf150  | 286343 . |
| 227445_at | 0.011909 | 0.006439 | ZNF689    | 115509 . |
| 227446_s_ | 0.00181  | 6.84E-04 | C14orf167 | 55449 .  |
| 227447_at | 3.16E-04 | 8.12E-05 | SKIV2L2   | 23517 .  |
| 227448_at | 0.048337 | 0.032998 | ARGLU1    | 55082 .  |
| 227449_at | 0.036734 | 0.024    | EPHA4     | 2043 .   |
| 227450_at | 0.045134 | 0.030486 | ERP27     | 121506 . |
| 227451_s_ | 0.004603 | 0.002099 | CCDC90A   | 63933 .  |
| 227453_at | 3.23E-04 | 8.34E-05 | UNC13A    | 23025 .  |
| 227454_at | 0.025823 | 0.015942 | TAOK1     | 57551 .  |
| 227455_at | 3.04E-04 | 7.71E-05 | C6orf136  | 221545 . |
| 227456_s_ | 5.94E-06 | 5.12E-07 | C6orf136  | 221545 . |
| 227457_at | 0.005947 | 0.002848 | DDA1      | 79016 .  |
| 227458_at | 0.002264 | 8.97E-04 |           | .        |
| 227461_at | 9.94E-04 | 3.31E-04 | STON2     | 85439 .  |
| 227462_at | 0.021726 | 0.013044 | ERAP2     | 64167 .  |
| 227463_at | 0.03428  | 0.02214  | ACE       | 1636 .   |
| 227464_at | 0.011029 | 0.005885 | ACSF3     | 197322 . |
| 227465_at | 0.001382 | 4.95E-04 | KIAA0892  | 23383 .  |
| 227466_at | 9.43E-04 | 3.11E-04 | LOC285550 | 285550 . |
| 227467_at | 0.014788 | 0.00831  | RDH10     | 157506 . |
| 227469_at | 8.17E-04 | 2.61E-04 | PTEN      | 5728 .   |
| 227470_at | 4.98E-06 | 4.04E-07 | ZNF48     | 197407 . |
| 227473_at | 7.36E-08 | 1.52E-09 |           | .        |
| 227474_at | 0.007678 | 0.003853 | LOC654433 | 654433 . |
| 227475_at | 6.05E-05 | 1.02E-05 | FOXQ1     | 94234 .  |
| 227476_at | 1.65E-05 | 1.95E-06 | LPGAT1    | 9926 .   |
| 227477_at | 4.19E-07 | 1.58E-08 | ZMYND19   | 116225 . |
| 227478_at | 0.011332 | 0.006076 | SETBP1    | 26040 .  |
| 227481_at | 8.30E-04 | 2.66E-04 | CNKSR3    | 154043 . |
| 227483_s_ | 5.72E-06 | 4.86E-07 |           | .        |
| 227484_at | 6.30E-05 | 1.07E-05 | SRGAP1    | 57522 .  |
| 227485_at | 0.002704 | 0.001109 | DDX26B    | 203522 . |

|           |          |          |                             |          |
|-----------|----------|----------|-----------------------------|----------|
| 227486_at | 3.05E-04 | 7.76E-05 | NT5E                        | 4907 .   |
| 227487_s_ | 7.61E-04 | 2.39E-04 | SERPINE2                    | 5270 .   |
| 227488_at | 1.83E-04 | 4.12E-05 | MGC16121                    | 84848 .  |
| 227489_at | 8.32E-04 | 2.67E-04 | SMURF2                      | 64750 .  |
| 227491_at | 0.001468 | 5.32E-04 | ELOVL6                      | 79071 .  |
| 227492_at | 7.10E-09 | 6.72E-11 |                             | .        |
| 227493_s_ | 0.001626 | 6.01E-04 | KIAA1143                    | 57456 .  |
| 227494_at | 7.66E-10 | 3.74E-12 | NR6A1                       | 2649 .   |
| 227496_at | 1.37E-07 | 3.48E-09 | LOC253842 /// 253842 /// 26 | .        |
| 227499_at | 0.001174 | 4.06E-04 |                             | .        |
| 227500_at | 3.61E-04 | 9.53E-05 | FBXL18                      | 80028 .  |
| 227502_at | 0.015514 | 0.008793 | KIAA1147                    | 57189 .  |
| 227504_s_ | 0.02745  | 0.017107 |                             | .        |
| 227505_at | 0.008702 | 0.004457 |                             | .        |
| 227506_at | 1.79E-04 | 4.01E-05 | SLC16A9                     | 220963 . |
| 227507_at | 0.023666 | 0.014407 | ZNF592                      | 9640 .   |
| 227508_at | 1.42E-04 | 2.99E-05 |                             | .        |
| 227509_x_ | 3.86E-04 | 1.03E-04 |                             | .        |
| 227510_x_ | 0.001445 | 5.22E-04 | MALAT1                      | 378938 . |
| 227511_at | 4.10E-05 | 6.19E-06 | SAMD4B                      | 55095 .  |
| 227512_at | 2.17E-04 | 5.07E-05 | MEX3A                       | 92312 .  |
| 227513_s_ | 0.024163 | 0.014753 | LRRFIP1                     | 9208 .   |
| 227514_at | 3.56E-07 | 1.27E-08 | ITPRIPL2                    | 162073 . |
| 227515_at | 0.014568 | 0.008159 | STAMPB                      | 10617 .  |
| 227516_at | 1.44E-06 | 8.13E-08 | SF3A1                       | 10291 .  |
| 227517_s_ | 2.19E-08 | 2.97E-10 | GAS5                        | 60674 .  |
| 227518_at | 7.67E-06 | 7.13E-07 | SLC35E1                     | 79939 .  |
| 227519_at | 0.020831 | 0.012416 | PLAC4                       | 191585 . |
| 227520_at | 4.88E-07 | 1.92E-08 | CXorf15                     | 55787 .  |
| 227521_at | 0.023221 | 0.014087 | FBXO33                      | 254170 . |
| 227523_s_ | 1.48E-06 | 8.36E-08 | PHF20L1                     | 51105 .  |
| 227524_at | 1.21E-04 | 2.44E-05 |                             | .        |
| 227525_at | 8.44E-04 | 2.72E-04 | GLCCI1                      | 113263 . |
| 227526_at | 0.014818 | 0.00833  | CDON                        | 50937 .  |

|           |          |          |           |             |
|-----------|----------|----------|-----------|-------------|
| 227527_at | 0.004793 | 0.002205 | MLL2      | 8085 .      |
| 227528_s_ | 0.00276  | 0.001136 | MLL2      | 8085 .      |
| 227531_at | 0.005864 | 0.0028   |           | .           |
| 227534_at | 4.09E-06 | 3.14E-07 | C9orf21   | 195827 .    |
| 227535_at | 0.027847 | 0.017401 | C15orf24  | 56851 .     |
| 227536_at | 0.021824 | 0.013114 | ZC3H13    | 23091 .     |
| 227537_s_ | 3.07E-05 | 4.31E-06 | SP3       | 6670 .      |
| 227538_at | 4.89E-04 | 1.38E-04 | MED26     | 9441 .      |
| 227540_at | 0.013806 | 0.007661 | EEFSEC    | 60678 .     |
| 227541_at | 0.043223 | 0.028983 | WDR20     | 91833 .     |
| 227542_at | 0.010949 | 0.005836 | SOCS6     | 9306 .      |
| 227543_at | 1.20E-04 | 2.43E-05 | RNASEH2C  | 84153 .     |
| 227544_at | 0.014538 | 0.008139 | C14orf83  | 161145 .    |
| 227545_at | 1.05E-04 | 2.05E-05 |           | .           |
| 227546_x_ | 6.89E-04 | 2.12E-04 | AURKAIP1  | 54998 .     |
| 227547_at | 2.58E-05 | 3.44E-06 |           | .           |
| 227549_x_ | 0.003335 | 0.001427 | ZDHHC24   | 254359 .    |
| 227551_at | 1.18E-05 | 1.27E-06 | FAM108B1  | 51104 .     |
| 227552_at | 1.49E-04 | 3.19E-05 | 1-Sep     | 1731 .      |
| 227553_at | 6.38E-05 | 1.09E-05 | NDEL1     | 81565 .     |
| 227554_at | 9.97E-06 | 1.01E-06 |           | .           |
| 227556_at | 6.72E-07 | 2.93E-08 | NME7      | 29922 .     |
| 227557_at | 1.10E-05 | 1.15E-06 | SCARF2    | 91179 .     |
| 227558_at | 5.25E-06 | 4.33E-07 | CBX4      | 8535 .      |
| 227560_at | 1.77E-04 | 3.93E-05 | SFXN2     | 118980 .    |
| 227561_at | 7.63E-09 | 7.44E-11 | DDR2      | 4921 .      |
| 227562_at | 0.00437  | 0.001972 | MAPKSP1   | 8649 .      |
| 227563_at | 0.003707 | 0.001619 | FAM27E3   | 100131997 . |
| 227564_at | 2.41E-04 | 5.77E-05 | HGSNAT    | 138050 .    |
| 227565_at | 1.91E-04 | 4.32E-05 |           | .           |
| 227566_at | 0.004685 | 0.002145 | NTM       | 50863 .     |
| 227567_at | 8.03E-05 | 1.47E-05 | LOC651250 | 651250 .    |
| 227570_at | 0.045338 | 0.030644 | TMEM86A   | 144110 .    |
| 227573_s_ | 6.75E-04 | 2.06E-04 | OBSL1     | 23363 .     |

|           |          |          |              |           |   |
|-----------|----------|----------|--------------|-----------|---|
| 227574_at | 0.004451 | 0.002017 | OBSL1        | 23363     | . |
| 227575_s_ | 0.004785 | 0.0022   | C14orf102    | 55051     | . |
| 227576_at | 0.001809 | 6.83E-04 |              |           | . |
| 227577_at | 0.015988 | 0.009112 | EXOC8        | 149371    | . |
| 227578_at | 0.017434 | 0.010069 | LOC100128191 | 100128191 | . |
| 227579_at | 0.004329 | 0.001949 |              |           | . |
| 227580_s_ | 1.94E-04 | 4.41E-05 | TECPR1       | 25851     | . |
| 227581_at | 0.019018 | 0.01115  | TECPR1       | 25851     | . |
| 227582_at | 4.36E-06 | 3.42E-07 | KLHDC9       | 126823    | . |
| 227584_at | 7.49E-06 | 6.90E-07 | NAV1         | 89796     | . |
| 227586_at | 4.60E-05 | 7.21E-06 | TMEM170A     | 124491    | . |
| 227587_at | 3.46E-06 | 2.54E-07 | KRI1         | 65095     | . |
| 227588_s_ | 0.003524 | 0.001524 | C7orf20      | 51608     | . |
| 227589_at | 0.004281 | 0.001922 | PITPNC1      | 26207     | . |
| 227593_at | 1.16E-05 | 1.23E-06 | hCG_2008140  | 729614    | . |
| 227594_at | 0.043842 | 0.029479 | ZMYM6        | 9204      | . |
| 227596_at | 0.006476 | 0.003149 | hCG_2008140  | 729614    | . |
| 227597_at | 2.70E-04 | 6.67E-05 | DIS3L2       | 129563    | . |
| 227599_at | 0.023328 | 0.014162 | C3orf59      | 151963    | . |
| 227600_at | 0.004237 | 0.001899 |              |           | . |
| 227601_at | 0.007942 | 0.00401  | METTL14      | 57721     | . |
| 227602_at | 5.90E-05 | 9.86E-06 | RAB7A        | 7879      | . |
| 227604_at | 5.58E-04 | 1.63E-04 | LOC151146    | 151146    | . |
| 227606_s_ | 1.29E-04 | 2.65E-05 | STAMBPL1     | 57559     | . |
| 227607_at | 5.23E-06 | 4.31E-07 | STAMBPL1     | 57559     | . |
| 227608_at | 0.006242 | 0.003014 |              |           | . |
| 227609_at | 0.001989 | 7.67E-04 | EPSTI1       | 94240     | . |
| 227611_at | 0.009501 | 0.004941 | TARSL2       | 123283    | . |
| 227615_at | 0.00365  | 0.00159  |              |           | . |
| 227616_at | 1.37E-04 | 2.85E-05 | BCL9L        | 283149    | . |
| 227617_at | 6.57E-04 | 2.00E-04 | TMEM201      | 199953    | . |
| 227619_at | 0.002224 | 8.78E-04 | WRNIP1       | 56897     | . |
| 227620_at | 0.013713 | 0.007601 | SLC44A1      | 23446     | . |
| 227621_at | 5.85E-09 | 5.27E-11 |              |           | . |

|           |          |          |                             |
|-----------|----------|----------|-----------------------------|
| 227623_at | 0.045224 | 0.030558 | .                           |
| 227624_at | 0.021885 | 0.013161 | TET2 54790 .                |
| 227625_s_ | 0.005503 | 0.002596 | STUB1 10273 .               |
| 227626_at | 0.003223 | 0.001369 | PAQR8 85315 .               |
| 227628_at | 7.79E-07 | 3.55E-08 | GPX8 493869 .               |
| 227631_at | 9.02E-04 | 2.95E-04 | .                           |
| 227632_at | 2.64E-06 | 1.78E-07 | TBC1D24 57465 .             |
| 227633_at | 0.031575 | 0.020129 | RHEB 6009 .                 |
| 227635_at | 0.003149 | 0.001331 | RBBP6 5930 .                |
| 227636_at | 0.035531 | 0.023084 | THAP5 168451 .              |
| 227638_at | 1.89E-05 | 2.32E-06 | KIAA1632 57724 .            |
| 227639_at | 6.58E-05 | 1.13E-05 | PIGK 10026 .                |
| 227640_s_ | 2.35E-04 | 5.59E-05 | RP9 /// RP9P 441212 /// 6:. |
| 227641_at | 0.003573 | 0.001549 | FBXL16 146330 .             |
| 227642_at | 0.015946 | 0.009082 | TFCP2L1 29842 .             |
| 227643_at | 0.014441 | 0.008074 | TPPP 11076 .                |
| 227644_at | 0.013276 | 0.007321 | RIMS4 140730 .              |
| 227645_at | 1.71E-05 | 2.04E-06 | PIK3R5 23533 .              |
| 227646_at | 0.006396 | 0.003103 | EBF1 1879 .                 |
| 227649_s_ | 6.08E-07 | 2.56E-08 | SRGAP2 23380 .              |
| 227650_at | 0.007552 | 0.003779 | HSPA14 51182 .              |
| 227651_at | 0.040189 | 0.02663  | NACC1 112939 .              |
| 227652_at | 0.027257 | 0.016969 | FAM69B 138311 .             |
| 227653_at | 0.002905 | 0.001206 | TRMT5 57570 .               |
| 227654_at | 0.001058 | 3.57E-04 | FAM65C 140876 .             |
| 227656_at | 0.001046 | 3.52E-04 | C6orf70 55780 .             |
| 227657_at | 0.015505 | 0.008786 | RNF150 57484 .              |
| 227660_at | 2.19E-06 | 1.40E-07 | ANTXR1 84168 .              |
| 227661_at | 0.001765 | 6.63E-04 | .                           |
| 227662_at | 0.013088 | 0.007199 | SYNPO2 171024 .             |
| 227663_at | 2.49E-04 | 6.02E-05 | .                           |
| 227664_at | 0.020447 | 0.012135 | hCG_2008140 729614 .        |
| 227665_at | 2.62E-07 | 8.42E-09 | .                           |
| 227667_at | 1.50E-06 | 8.53E-08 | CUEDC1 404093 .             |

|           |          |          |                            |          |
|-----------|----------|----------|----------------------------|----------|
| 227668_at | 0.008111 | 0.004108 | C17orf56                   | 146705 . |
| 227669_at | 4.60E-05 | 7.22E-06 | BRP44                      | 25874 .  |
| 227670_at | 8.84E-05 | 1.65E-05 | ZNF75A                     | 7627 .   |
| 227675_at | 0.005935 | 0.002841 | LRSAM1                     | 90678 .  |
| 227676_at | 6.87E-06 | 6.15E-07 | FAM3D                      | 131177 . |
| 227678_at | 1.49E-04 | 3.17E-05 | XRCC6BP1                   | 91419 .  |
| 227679_at | 7.95E-04 | 2.52E-04 | HDAC11                     | 79885 .  |
| 227680_at | 0.001647 | 6.10E-04 | ZNF326                     | 284695 . |
| 227681_at | 0.011142 | 0.005958 | ZFP36L2                    | 678 .    |
| 227683_x_ | 2.43E-04 | 5.85E-05 | NUDT4                      | 11163 .  |
| 227684_at | 0.009377 | 0.004865 | S1PR2                      | 9294 .   |
| 227686_at | 2.50E-05 | 3.32E-06 | OXNAD1                     | 92106 .  |
| 227688_at | 0.008605 | 0.004398 | LRCH2                      | 57631 .  |
| 227689_at | 0.004529 | 0.002059 | ZNF227                     | 7770 .   |
| 227690_at | 1.24E-09 | 7.03E-12 | GABRB3                     | 2562 .   |
| 227691_at | 0.030401 | 0.019277 | AKAP8L                     | 26993 .  |
| 227695_at | 6.40E-05 | 1.09E-05 | GLYATL1                    | 92292 .  |
| 227696_at | 0.002175 | 8.54E-04 | EXOSC6                     | 118460 . |
| 227697_at | 0.006592 | 0.003216 | SOCS3                      | 9021 .   |
| 227699_at | 2.60E-05 | 3.49E-06 | C14orf149                  | 112849 . |
| 227700_x_ | 0.015153 | 0.008549 | ATAD3A                     | 55210 .  |
| 227702_at | 0.027975 | 0.017492 | CYP4X1                     | 260293 . |
| 227703_s_ | 3.21E-05 | 4.55E-06 | SYTL4                      | 94121 .  |
| 227704_at | 6.03E-04 | 1.79E-04 | C19orf12                   | 83636 .  |
| 227705_at | 1.44E-08 | 1.68E-10 | TCEAL7                     | 56849 .  |
| 227712_at | 6.38E-09 | 5.85E-11 | LYRM2                      | 57226 .  |
| 227713_at | 0.001325 | 4.70E-04 | KATNAL1                    | 84056 .  |
| 227714_s_ | 0.004134 | 0.001843 |                            | .        |
| 227715_at | 0.0049   | 0.002262 | LOC100132288&100132288 //. |          |
| 227716_at | 5.42E-07 | 2.19E-08 | UBXN11                     | 91544 .  |
| 227718_at | 0.008796 | 0.004512 | PURB                       | 5814 .   |
| 227721_at | 7.84E-04 | 2.48E-04 | CPAMD8                     | 27151 .  |
| 227722_at | 5.37E-04 | 1.55E-04 | RPS23                      | 6228 .   |
| 227724_at | 3.80E-04 | 1.01E-04 |                            | .        |



|           |          |          |                              |        |   |
|-----------|----------|----------|------------------------------|--------|---|
| 227725_at | 0.042612 | 0.0285   | ST6GALNAC1                   | 55808  | . |
| 227726_at | 0.011336 | 0.006078 | RNF166                       | 115992 | . |
| 227727_at | 4.01E-06 | 3.07E-07 | MRGPRF                       | 116535 | . |
| 227729_at | 8.92E-06 | 8.73E-07 |                              |        | . |
| 227731_at | 0.017939 | 0.010415 | CNBP                         | 7555   | . |
| 227732_at | 1.08E-04 | 2.12E-05 | ATXN7L1                      | 222255 | . |
| 227733_at | 0.007413 | 0.003698 | TMEM63C                      | 57156  | . |
| 227735_s_ | 0.002915 | 0.001211 | C10orf99 /// U 387695 /// 56 |        | . |
| 227736_at | 0.049525 | 0.033944 | C10orf99                     | 387695 | . |
| 227737_at | 0.001701 | 6.35E-04 | SRPRB                        | 58477  | . |
| 227738_s_ | 7.80E-05 | 1.41E-05 | ARMC5                        | 79798  | . |
| 227739_at | 0.03371  | 0.021732 | NDOR1                        | 27158  | . |
| 227740_at | 0.002091 | 8.14E-04 | UHMK1                        | 127933 | . |
| 227741_at | 0.003862 | 0.0017   | PTPLB                        | 201562 | . |
| 227743_at | 0.002765 | 0.001139 | MYO15B                       | 80022  | . |
| 227745_at | 0.001408 | 5.06E-04 |                              |        | . |
| 227746_at | 0.006726 | 0.003294 | ELAVL1                       | 1994   | . |
| 227747_at | 0.043474 | 0.029182 | MPZL3                        | 196264 | . |
| 227748_at | 0.004617 | 0.002107 | CCBL2                        | 56267  | . |
| 227749_at | 0.047215 | 0.032125 |                              |        | . |
| 227751_at | 1.07E-05 | 1.11E-06 | PDCD5                        | 9141   | . |
| 227752_at | 0.03552  | 0.023076 | SPTLC3                       | 55304  | . |
| 227754_at | 1.09E-04 | 2.15E-05 |                              |        | . |
| 227755_at | 0.024839 | 0.01524  |                              |        | . |
| 227757_at | 0.017003 | 0.009778 | CUL4A                        | 8451   | . |
| 227758_at | 0.02608  | 0.016123 | RERG                         | 85004  | . |
| 227759_at | 3.96E-04 | 1.07E-04 | PCSK9                        | 255738 | . |
| 227760_at | 2.30E-06 | 1.50E-07 | IGFBPL1                      | 347252 | . |
| 227765_at | 0.003502 | 0.001512 |                              |        | . |
| 227768_at | 8.02E-04 | 2.55E-04 | ZNF407                       | 55628  | . |
| 227769_at | 6.95E-05 | 1.22E-05 |                              |        | . |
| 227771_at | 2.63E-04 | 6.45E-05 | LIFR                         | 3977   | . |
| 227772_at | 0.015901 | 0.009051 |                              |        | . |
| 227773_at | 0.008781 | 0.004502 | SAMD10                       | 140700 | . |

|           |          |          |          |          |
|-----------|----------|----------|----------|----------|
| 227776_at | 0.004786 | 0.002201 | ACER3    | 55331 .  |
| 227777_at | 0.004951 | 0.002289 | C10orf18 | 54906 .  |
| 227778_at | 5.86E-04 | 1.73E-04 | HEATR7A  | 727957 . |
| 227781_x_ | 4.56E-06 | 3.62E-07 | FAM57B   | 83723 .  |
| 227782_at | 0.004223 | 0.001891 | ZBTB7C   | 201501 . |
| 227784_s_ | 9.11E-05 | 1.71E-05 | COG1     | 9382 .   |
| 227785_at | 0.012642 | 0.006913 | SDCCAG8  | 10806 .  |
| 227786_at | 0.001262 | 4.43E-04 | MED30    | 90390 .  |
| 227787_s_ | 0.006658 | 0.003255 | MED30    | 90390 .  |
| 227789_at | 0.001916 | 7.33E-04 | MRS2     | 57380 .  |
| 227790_at | 8.86E-05 | 1.66E-05 | UBE2CBP  | 90025 .  |
| 227791_at | 4.54E-06 | 3.60E-07 | SLC9A9   | 285195 . |
| 227792_at | 5.13E-05 | 8.27E-06 | ITPRIPL2 | 162073 . |
| 227793_at | 0.001008 | 3.37E-04 |          | .        |
| 227794_at | 2.76E-04 | 6.84E-05 | GLYATL1  | 92292 .  |
| 227795_at | 1.54E-05 | 1.80E-06 | NDUFV1   | 4723 .   |
| 227796_at | 0.001304 | 4.61E-04 | ZFP62    | 643836 . |
| 227798_at | 0.010697 | 0.005679 | SMAD1    | 4086 .   |
| 227799_at | 0.004421 | 0.002    | MYO1G    | 64005 .  |
| 227800_at | 1.62E-04 | 3.53E-05 | FAM110B  | 90362 .  |
| 227803_at | 3.31E-06 | 2.39E-07 | ENPP5    | 59084 .  |
| 227804_at | 0.035609 | 0.023149 | TLCD1    | 116238 . |
| 227805_at | 1.19E-04 | 2.38E-05 |          | .        |
| 227807_at | 0.011061 | 0.005905 | PARP9    | 83666 .  |
| 227808_at | 0.002996 | 0.001253 | DNAJC15  | 29103 .  |
| 227812_at | 0.02383  | 0.01452  | TNFRSF19 | 55504 .  |
| 227813_at | 6.95E-04 | 2.14E-04 | THAP6    | 152815 . |
| 227815_at | 0.005103 | 0.002376 |          | .        |
| 227816_at | 2.07E-06 | 1.31E-07 | NTN1     | 9423 .   |
| 227818_at | 4.36E-07 | 1.66E-08 | CCDC21   | 64793 .  |
| 227819_at | 0.001526 | 5.57E-04 | LGR6     | 59352 .  |
| 227820_at | 1.18E-05 | 1.26E-06 | TBC1D25  | 4943 .   |
| 227821_at | 0.017466 | 0.010092 | LGI4     | 163175 . |
| 227822_at | 9.09E-04 | 2.98E-04 | ZNF605   | 90462 .  |

|           |          |          |           |          |
|-----------|----------|----------|-----------|----------|
| 227823_at | 0.009134 | 0.004717 | RGAG4     | 340526 . |
| 227825_at | 5.31E-06 | 4.40E-07 | NAIF1     | 203245 . |
| 227827_at | 0.008476 | 0.004322 |           | .        |
| 227828_s_ | 5.77E-06 | 4.92E-07 | FAM176A   | 84141 .  |
| 227829_at | 0.005456 | 0.002569 | GYLTL1B   | 120071 . |
| 227830_at | 2.19E-08 | 2.96E-10 | GABRB3    | 2562 .   |
| 227832_at | 0.02851  | 0.017877 | MBD6      | 114785 . |
| 227833_s_ | 0.003622 | 0.001575 | MBD6      | 114785 . |
| 227836_at | 0.006339 | 0.003069 | UTP23     | 84294 .  |
| 227837_at | 0.00449  | 0.002038 | LOC729570 | 729570 . |
| 227839_at | 0.003034 | 0.001272 | MBD5      | 55777 .  |
| 227840_at | 5.61E-05 | 9.25E-06 | C2orf76   | 130355 . |
| 227842_at | 1.31E-04 | 2.72E-05 | RAB30     | 27314 .  |
| 227843_at | 0.001567 | 5.75E-04 | NDE1      | 54820 .  |
| 227844_at | 0.01823  | 0.010613 | FMNL3     | 91010 .  |
| 227845_s_ | 1.67E-04 | 3.67E-05 | SHD       | 56961 .  |
| 227846_at | 0.004532 | 0.00206  | GPR176    | 11245 .  |
| 227847_at | 6.92E-05 | 1.21E-05 | EPM2AIP1  | 9852 .   |
| 227849_at | 1.42E-04 | 2.99E-05 | RP9       | 6100 .   |
| 227850_x_ | 1.06E-04 | 2.06E-05 | CDC42EP5  | 148170 . |
| 227852_at | 3.24E-04 | 8.38E-05 | RP9       | 6100 .   |
| 227853_at | 2.57E-08 | 3.72E-10 |           | .        |
| 227856_at | 2.82E-06 | 1.94E-07 | C4orf32   | 132720 . |
| 227857_at | 2.48E-04 | 5.99E-05 |           | .        |
| 227859_at | 9.17E-05 | 1.73E-05 | DNAJC27   | 51277 .  |
| 227860_at | 0.005986 | 0.00287  | CPXM1     | 56265 .  |
| 227861_at | 2.19E-04 | 5.11E-05 | TMEM161B  | 153396 . |
| 227862_at | 4.36E-05 | 6.74E-06 | TRNP1     | 388610 . |
| 227863_at | 3.84E-09 | 3.03E-11 | CTSD      | 1509 .   |
| 227865_at | 7.92E-04 | 2.51E-04 | C9orf103  | 414328 . |
| 227868_at | 0.01988  | 0.011743 | LOC154761 | 154761 . |
| 227869_at | 2.27E-04 | 5.36E-05 | FAM104B   | 90736 .  |
| 227870_at | 0.008041 | 0.004068 | IGDCC4    | 57722 .  |
| 227871_at | 0.005353 | 0.002512 | CHM       | 1121 .   |

|           |          |          |              |               |
|-----------|----------|----------|--------------|---------------|
| 227872_at | 0.001859 | 7.06E-04 | POLR3A       | 11128 .       |
| 227873_at | 2.17E-05 | 2.77E-06 | TXNDC15      | 79770 .       |
| 227876_at | 0.031898 | 0.020371 | KIAA1688     | 80728 .       |
| 227877_at | 0.016101 | 0.009184 | C5orf39      | 389289 .      |
| 227878_s_ | 0.015907 | 0.009055 | ALKBH7       | 84266 .       |
| 227880_s_ | 0.03053  | 0.019372 | LOC100132969 | 100132969 //. |
| 227881_s_ | 0.038111 | 0.025045 |              | .             |
| 227882_at | 0.003489 | 0.001506 | FKRP         | 79147 .       |
| 227883_at | 0.032831 | 0.021072 | FLJ36031     | 168455 .      |
| 227884_at | 7.27E-05 | 1.29E-05 | TAF15        | 8148 .        |
| 227885_at | 9.05E-05 | 1.70E-05 | LOC400236    | 400236 .      |
| 227886_at | 9.28E-05 | 1.75E-05 | CTSD         | 1509 .        |
| 227887_at | 0.025676 | 0.015839 | LOC400236    | 400236 .      |
| 227888_at | 0.007557 | 0.003782 | RRBP1        | 6238 .        |
| 227889_at | 5.22E-04 | 1.50E-04 | LPCAT2       | 54947 .       |
| 227891_s_ | 1.04E-06 | 5.17E-08 | TAF15        | 8148 .        |
| 227892_at | 6.68E-04 | 2.04E-04 | PRKAA2       | 5563 .        |
| 227894_at | 1.74E-06 | 1.05E-07 | WDR90        | 197335 .      |
| 227895_at | 0.019428 | 0.011433 | FAM120B      | 84498 .       |
| 227896_at | 6.37E-06 | 5.58E-07 | BCCIP        | 56647 .       |
| 227897_at | 8.72E-08 | 1.90E-09 |              | .             |
| 227899_at | 0.036864 | 0.024099 | VIT          | 5212 .        |
| 227900_at | 4.86E-04 | 1.37E-04 | CBLB         | 868 .         |
| 227903_x_ | 0.003062 | 0.001287 | C19orf20     | 91978 .       |
| 227905_s_ | 0.003797 | 0.001667 | AZI2         | 64343 .       |
| 227907_at | 6.63E-05 | 1.15E-05 |              | .             |
| 227908_at | 1.22E-07 | 2.98E-09 | TBC1D24      | 57465 .       |
| 227910_at | 0.015867 | 0.009026 | XPNPEP3      | 63929 .       |
| 227912_s_ | 0.003864 | 0.001701 | EXOSC3       | 51010 .       |
| 227913_at | 0.002035 | 7.88E-04 | EXOSC3       | 51010 .       |
| 227914_s_ | 0.029642 | 0.018712 | UBE3B        | 89910 .       |
| 227915_at | 0.028972 | 0.018222 | ASB2         | 51676 .       |
| 227916_x_ | 5.28E-04 | 1.52E-04 | EXOSC3       | 51010 .       |
| 227918_s_ | 0.012087 | 0.006556 | ZYG11B       | 79699 .       |

|           |          |          |                             |        |   |
|-----------|----------|----------|-----------------------------|--------|---|
| 227920_at | 3.12E-07 | 1.07E-08 | BEND3                       | 57673  | . |
| 227921_at | 1.31E-07 | 3.28E-09 |                             |        | . |
| 227922_x  | 2.62E-04 | 6.42E-05 | LOC441124                   | 441124 | . |
| 227924_at | 5.70E-05 | 9.45E-06 | INO80D                      | 54891  | . |
| 227925_at | 0.001851 | 7.03E-04 | FLJ39051                    | 399972 | . |
| 227926_s  | 1.97E-04 | 4.48E-05 | NBPF11 /// RP:200030 /// 7: |        | . |
| 227927_at | 0.001297 | 4.58E-04 |                             |        | . |
| 227928_at | 2.33E-06 | 1.52E-07 | C12orf48                    | 55010  | . |
| 227931_at | 2.14E-06 | 1.37E-07 | INO80D                      | 54891  | . |
| 227932_at | 5.51E-04 | 1.61E-04 | ARIH2                       | 10425  | . |
| 227933_at | 0.03874  | 0.02552  | LINGO1                      | 84894  | . |
| 227935_s  | 0.01218  | 0.006614 | PCGF5                       | 84333  | . |
| 227936_at | 8.64E-04 | 2.80E-04 | TMEM68                      | 137695 | . |
| 227937_at | 0.012289 | 0.006686 | MYPOP                       | 339344 | . |
| 227938_s  | 0.011443 | 0.006147 | DLL1                        | 28514  | . |
| 227940_at | 0.009147 | 0.004727 | LOC339803                   | 339803 | . |
| 227941_at | 0.040279 | 0.026698 | LOC339803                   | 339803 | . |
| 227942_s  | 0.018246 | 0.010625 | CRIP1                       | 9419   | . |
| 227943_at | 0.00792  | 0.003997 |                             |        | . |
| 227944_at | 2.33E-05 | 3.03E-06 | PTPN3                       | 5774   | . |
| 227947_at | 0.024952 | 0.015322 | PHACTR2                     | 9749   | . |
| 227948_at | 6.76E-04 | 2.07E-04 | FGD4                        | 121512 | . |
| 227950_at | 0.015485 | 0.008774 | UBE2H                       | 7328   | . |
| 227951_s  | 0.002253 | 8.92E-04 | FAM98C                      | 147965 | . |
| 227954_at | 5.52E-05 | 9.06E-06 | ITPRIPL2                    | 162073 | . |
| 227955_s  | 8.33E-04 | 2.67E-04 | EFNA5                       | 1946   | . |
| 227956_at | 6.82E-04 | 2.09E-04 | ITPRIPL2                    | 162073 | . |
| 227957_at | 0.038233 | 0.02514  | GSN                         | 2934   | . |
| 227960_s  | 7.71E-04 | 2.43E-04 | FAHD1                       | 81889  | . |
| 227961_at | 2.17E-05 | 2.78E-06 | CTSB                        | 1508   | . |
| 227962_at | 0.028636 | 0.017974 | ACOX1                       | 51     | . |
| 227964_at | 0.004559 | 0.002075 | FRMD8                       | 83786  | . |
| 227965_at | 2.34E-04 | 5.56E-05 |                             |        | . |
| 227967_at | 0.006576 | 0.003206 | TUBGCP5                     | 114791 | . |

|           |          |          |            |          |
|-----------|----------|----------|------------|----------|
| 227968_at | 4.79E-05 | 7.59E-06 | PDDC1      | 347862 . |
| 227969_at | 0.008749 | 0.004483 | LOC400960  | 400960 . |
| 227971_at | 0.002513 | 0.001017 | NRK        | 203447 . |
| 227972_at | 0.002971 | 0.001239 | TOR2A      | 27433 .  |
| 227973_at | 0.030636 | 0.019447 | C2orf69    | 205327 . |
| 227975_at | 3.05E-04 | 7.75E-05 | GPRIN1     | 114787 . |
| 227976_at | 0.004327 | 0.001948 | LOC644538  | 644538 . |
| 227977_at | 4.36E-08 | 7.51E-10 | ZADH2      | 284273 . |
| 227978_s_ | 3.03E-07 | 1.02E-08 | ZADH2      | 284273 . |
| 227979_at | 0.001009 | 3.37E-04 |            | .        |
| 227980_at | 0.0015   | 5.46E-04 | ZNF322A    | 79692 .  |
| 227981_at | 3.99E-05 | 5.97E-06 | CYB561D1   | 284613 . |
| 227982_at | 0.041064 | 0.027301 | SEPSECS    | 51091 .  |
| 227983_at | 1.21E-06 | 6.37E-08 | RILPL2     | 196383 . |
| 227985_at | 1.11E-06 | 5.66E-08 |            | .        |
| 227986_at | 0.003985 | 0.001763 | ZNF343     | 79175 .  |
| 227990_at | 0.005446 | 0.002564 | SLU7       | 10569 .  |
| 227992_s_ | 0.006233 | 0.00301  | NCRNA00085 | 147650 . |
| 227993_at | 0.015981 | 0.009108 | METAP2     | 10988 .  |
| 227994_x_ | 0.015196 | 0.008578 | C2orf149   | 79144 .  |
| 227996_at | 0.006829 | 0.003356 | FARP1      | 10160 .  |
| 227997_at | 6.48E-04 | 1.96E-04 | IL17RD     | 54756 .  |
| 227998_at | 0.001356 | 4.84E-04 | S100A16    | 140576 . |
| 227999_at | 0.016982 | 0.009764 | PWWP2B     | 170394 . |
| 228000_at | 0.002017 | 7.80E-04 | ADC        | 113451 . |
| 228001_at | 0.025021 | 0.015371 | TMEM50B    | 757 .    |
| 228002_at | 1.33E-04 | 2.75E-05 | IDI2       | 91734 .  |
| 228003_at | 8.71E-06 | 8.43E-07 | RAB30      | 27314 .  |
| 228004_at | 2.74E-04 | 6.80E-05 | C2orf56    | 140828 . |
| 228006_at | 0.00366  | 0.001595 |            | .        |
| 228008_at | 1.21E-05 | 1.30E-06 |            | .        |
| 228009_x_ | 3.78E-05 | 5.57E-06 | ZNRD1      | 30834 .  |
| 228010_at | 0.017746 | 0.010284 | PPP2R2C    | 5522 .   |
| 228011_at | 7.55E-04 | 2.37E-04 | FAM92A1    | 137392 . |

|           |          |          |           |           |   |
|-----------|----------|----------|-----------|-----------|---|
| 228012_at | 0.001452 | 5.25E-04 | MATR3     | 9782      | . |
| 228013_at | 0.010835 | 0.005767 |           |           | . |
| 228014_at | 6.23E-04 | 1.86E-04 | PTRH1     | 138428    | . |
| 228015_s_ | 1.67E-05 | 1.98E-06 | TRIM8     | 81603     | . |
| 228016_s_ | 2.02E-04 | 4.63E-05 | EDEM2     | 55741     | . |
| 228017_s_ | 9.17E-06 | 9.07E-07 | NKAIN4    | 128414    | . |
| 228018_at | 9.67E-05 | 1.85E-05 | NKAIN4    | 128414    | . |
| 228019_s_ | 6.30E-04 | 1.89E-04 | MRPS18C   | 51023     | . |
| 228020_at | 4.21E-05 | 6.42E-06 | PTCD3     | 55037     | . |
| 228023_x_ | 6.13E-05 | 1.03E-05 | AMY2B     | 280       | . |
| 228028_at | 0.005742 | 0.002729 | FAM59B    | 150946    | . |
| 228029_at | 5.21E-04 | 1.50E-04 | ZNF721    | 170960    | . |
| 228031_at | 6.69E-05 | 1.16E-05 | TTPAL     | 79183     | . |
| 228033_at | 1.54E-04 | 3.32E-05 | E2F7      | 144455    | . |
| 228034_x_ | 0.002028 | 7.85E-04 | ALKBH5    | 54890     | . |
| 228035_at | 1.65E-04 | 3.62E-05 | STK33     | 65975     | . |
| 228036_s_ | 4.82E-04 | 1.36E-04 | FBXO2     | 26232     | . |
| 228038_at | 1.66E-07 | 4.53E-09 | SOX2      | 6657      | . |
| 228039_at | 1.25E-06 | 6.66E-08 | DDX46     | 9879      | . |
| 228040_at | 0.024065 | 0.014685 | MGC21881  | 389741    | . |
| 228041_at | 0.024525 | 0.015013 | AASDH     | 132949    | . |
| 228042_at | 0.003622 | 0.001575 | ADPRH     | 141       | . |
| 228043_at | 0.024235 | 0.014804 | UTP15     | 84135     | . |
| 228044_at | 4.55E-05 | 7.10E-06 | SERP2     | 387923    | . |
| 228045_at | 4.86E-04 | 1.37E-04 |           |           | . |
| 228047_at | 3.22E-07 | 1.12E-08 | SNORA72   | 26775     | . |
| 228048_at | 2.48E-04 | 6.00E-05 | C10orf41  | 100131213 | . |
| 228049_x_ | 0.024819 | 0.015227 |           |           | . |
| 228050_at | 0.013434 | 0.007421 | UTP15     | 84135     | . |
| 228051_at | 0.001109 | 3.79E-04 | LOC202451 | 202451    | . |
| 228052_x_ | 7.97E-05 | 1.45E-05 | TCF3      | 6929      | . |
| 228053_s_ | 0.003422 | 0.001471 | TOMM5     | 401505    | . |
| 228054_at | 4.47E-04 | 1.24E-04 | TMEM44    | 93109     | . |
| 228056_s_ | 0.012852 | 0.00705  | NAPSB     | 256236    | . |

|           |          |          |          |             |
|-----------|----------|----------|----------|-------------|
| 228057_at | 0.002841 | 0.001175 | DDIT4L   | 115265 .    |
| 228059_x_ | 5.08E-04 | 1.45E-04 | MRPS22   | 56945 .     |
| 228060_at | 1.14E-04 | 2.28E-05 | SLC35F1  | 222553 .    |
| 228062_at | 0.005092 | 0.002369 | NAP1L5   | 266812 .    |
| 228063_s_ | 0.003046 | 0.001278 | NAP1L5   | 266812 .    |
| 228064_at | 0.033254 | 0.021388 | C22orf36 | 388886 .    |
| 228065_at | 2.58E-05 | 3.45E-06 | BCL9L    | 283149 .    |
| 228066_at | 0.005487 | 0.002587 | C17orf96 | 100170841 . |
| 228068_at | 0.007877 | 0.003972 | GOLGA7B  | 401647 .    |
| 228069_at | 4.97E-06 | 4.04E-07 | FAM54A   | 113115 .    |
| 228072_at | 1.06E-04 | 2.06E-05 | SYT12    | 91683 .     |
| 228073_at | 4.71E-04 | 1.32E-04 | NANP     | 140838 .    |
| 228074_at | 0.025298 | 0.015576 | ITPRIPL2 | 162073 .    |
| 228075_x_ | 7.35E-04 | 2.29E-04 | TFB1M    | 51106 .     |
| 228076_s_ | 0.001551 | 5.68E-04 | NOL6     | 65083 .     |
| 228077_at | 7.30E-05 | 1.30E-05 | MRI1     | 84245 .     |
| 228079_at | 0.001692 | 6.30E-04 | C3orf58  | 205428 .    |
| 228080_at | 3.03E-07 | 1.02E-08 | LAYN     | 143903 .    |
| 228082_at | 1.38E-06 | 7.66E-08 | ASAM     | 79827 .     |
| 228083_at | 3.83E-05 | 5.67E-06 | CACNA2D4 | 93589 .     |
| 228084_at | 0.048465 | 0.033097 | PLA2G12A | 81579 .     |
| 228089_x_ | 9.83E-05 | 1.89E-05 | TMEM179B | 374395 .    |
| 228091_at | 0.036102 | 0.023519 | STX17    | 55014 .     |
| 228092_at | 0.001336 | 4.75E-04 | CREM     | 1390 .      |
| 228093_at | 0.04747  | 0.032322 | ZNF599   | 148103 .    |
| 228094_at | 6.13E-05 | 1.03E-05 | AMICA1   | 120425 .    |
| 228095_at | 0.001172 | 4.05E-04 | PHF14    | 9678 .      |
| 228096_at | 0.003441 | 0.00148  | C1orf151 | 440574 .    |
| 228097_at | 7.26E-04 | 2.26E-04 | MYLIP    | 29116 .     |
| 228098_s_ | 0.001578 | 5.80E-04 | MYLIP    | 29116 .     |
| 228099_at | 0.01712  | 0.009859 | ZNF550   | 162972 .    |
| 228100_at | 1.68E-07 | 4.61E-09 | C1orf88  | 128344 .    |
| 228101_at | 1.87E-05 | 2.29E-06 | APBA1    | 320 .       |
| 228103_s_ | 0.002661 | 0.001087 | NRP2     | 8828 .      |



|           |          |          |              |           |   |
|-----------|----------|----------|--------------|-----------|---|
| 228104_at | 0.002193 | 8.63E-04 | PLXNA4       | 91584     | . |
| 228105_at | 3.43E-04 | 8.95E-05 |              |           | . |
| 228106_at | 2.71E-04 | 6.68E-05 | C4orf30      | 54876     | . |
| 228108_at | 0.039353 | 0.025989 |              |           | . |
| 228112_at | 0.001086 | 3.69E-04 | DNAH1        | 25981     | . |
| 228113_at | 3.05E-05 | 4.27E-06 | RAB37        | 326624    | . |
| 228114_x_ | 0.039044 | 0.025756 | C16orf13     | 84326     | . |
| 228116_at | 2.67E-08 | 3.94E-10 |              |           | . |
| 228117_at | 0.005811 | 0.00277  | LOC100132273 | 100132273 | . |
| 228118_x_ | 0.026577 | 0.016478 | C16orf13     | 84326     | . |
| 228119_at | 1.71E-05 | 2.04E-06 | LRCH3        | 84859     | . |
| 228120_at | 1.92E-07 | 5.46E-09 |              |           | . |
| 228121_at | 5.45E-04 | 1.58E-04 | TGFB2        | 7042      | . |
| 228122_at | 0.041817 | 0.027882 | CCDC66       | 285331    | . |
| 228124_at | 6.28E-04 | 1.88E-04 | ABHD12       | 26090     | . |
| 228125_at | 0.001962 | 7.54E-04 | ZNF397OS     | 100101467 | . |
| 228126_x_ | 0.005232 | 0.002445 | CTXN1        | 404217    | . |
| 228127_at | 0.010601 | 0.005619 | KCNK3        | 3777      | . |
| 228128_x_ | 0.00102  | 3.42E-04 | PAPPA        | 5069      | . |
| 228129_at | 1.35E-05 | 1.51E-06 | SERBP1       | 26135     | . |
| 228130_at | 0.001862 | 7.08E-04 | ZNF397OS     | 100101467 | . |
| 228131_at | 7.90E-06 | 7.41E-07 | ERCC1        | 2067      | . |
| 228132_at | 0.022928 | 0.013881 | ABLIM2       | 84448     | . |
| 228133_s_ | 1.39E-04 | 2.92E-05 | MYH11        | 4629      | . |
| 228134_at | 1.08E-04 | 2.12E-05 | MYH11        | 4629      | . |
| 228136_s_ | 1.75E-04 | 3.89E-05 | C17orf70     | 80233     | . |
| 228137_s_ | 0.001998 | 7.71E-04 | PPP2R2C      | 5522      | . |
| 228138_at | 0.002404 | 9.64E-04 | ZNF498       | 221785    | . |
| 228139_at | 8.98E-07 | 4.30E-08 | RIPK3        | 11035     | . |
| 228140_s_ | 7.20E-05 | 1.27E-05 | PPP2R2C      | 5522      | . |
| 228141_at | 8.42E-06 | 8.07E-07 | GPX8         | 493869    | . |
| 228142_at | 2.80E-04 | 6.98E-05 | UCRC         | 29796     | . |
| 228145_s_ | 0.004101 | 0.001825 | ZNF398       | 57541     | . |
| 228146_at | 0.00976  | 0.005102 | C17orf51     | 339263    | . |

|           |          |                                      |          |
|-----------|----------|--------------------------------------|----------|
| 228147_at | 0.001156 | 3.98E-04                             | .        |
| 228148_at | 7.62E-06 | 7.07E-07 ZNF584                      | 201514 . |
| 228149_at | 0.004777 | 0.002196 C7orf60                     | 154743 . |
| 228150_at | 3.42E-06 | 2.49E-07 SEC16B                      | 89866 .  |
| 228152_s_ | 1.20E-04 | 2.43E-05 DDX60L                      | 91351 .  |
| 228154_at | 0.008374 | 0.004262 C19orf44                    | 84167 .  |
| 228155_at | 0.002234 | 8.82E-04 C10orf58                    | 84293 .  |
| 228156_at | 0.002725 | 0.00112                              | .        |
| 228157_at | 0.008907 | 0.00458 ZNF207                       | 7756 .   |
| 228158_at | 1.70E-05 | 2.03E-06 LOC645166 /// 645166 /// 65 | .        |
| 228159_at | 0.002301 | 9.14E-04                             | .        |
| 228160_at | 0.0398   | 0.02633 LOC339290                    | 339290 . |
| 228161_at | 2.65E-04 | 6.52E-05 RAB32                       | 10981 .  |
| 228162_at | 1.66E-04 | 3.64E-05 ESD                         | 2098 .   |
| 228163_at | 1.35E-04 | 2.80E-05 ST6GALNAC4                  | 27090 .  |
| 228164_at | 2.68E-04 | 6.60E-05 AP4E1                       | 23431 .  |
| 228165_at | 0.01362  | 0.007539 C12orf53                    | 196500 . |
| 228167_at | 0.020651 | 0.012286 KLHL6                       | 89857 .  |
| 228168_at | 0.005691 | 0.0027 ATP5G3                        | 518 .    |
| 228171_s_ | 1.77E-05 | 2.15E-06 PLEKHG4                     | 25894 .  |
| 228173_at | 8.65E-07 | 4.09E-08 GNAS                        | 2778 .   |
| 228174_at | 7.71E-04 | 2.43E-04 C9orf126                    | 286205 . |
| 228175_at | 2.85E-06 | 1.97E-07                             | .        |
| 228176_at | 0.005349 | 0.002509 S1PR3                       | 1903 .   |
| 228177_at | 0.001563 | 5.73E-04 CREBBP                      | 1387 .   |
| 228178_s_ | 3.13E-06 | 2.23E-07                             | .        |
| 228180_at | 0.001981 | 7.63E-04                             | .        |
| 228182_at | 0.009206 | 0.004763 ADCY5                       | 111 .    |
| 228183_s_ | 4.15E-07 | 1.56E-08 RPAIN                       | 84268 .  |
| 228185_at | 5.93E-04 | 1.76E-04 ZNF25                       | 219749 . |
| 228186_s_ | 2.96E-06 | 2.07E-07 RSPO3                       | 84870 .  |
| 228187_at | 0.00479  | 0.002203                             | .        |
| 228188_at | 1.83E-04 | 4.11E-05 FOSL2                       | 2355 .   |
| 228190_at | 0.003496 | 0.001509 ATG4C /// CTR: 84938 /// 96 | .        |

|           |          |          |                          |
|-----------|----------|----------|--------------------------|
| 228191_at | 4.39E-09 | 3.68E-11 | .                        |
| 228192_at | 2.58E-04 | 6.31E-05 | C6orf125 84300 .         |
| 228194_s_ | 1.37E-05 | 1.54E-06 | SORCS1 114815 .          |
| 228195_at | 0.027683 | 0.017284 | C2orf88 84281 .          |
| 228196_s_ | 1.36E-04 | 2.83E-05 | .                        |
| 228197_at | 0.001979 | 7.62E-04 | C1orf86 199990 .         |
| 228199_at | 0.010822 | 0.005759 | LOC729234 729234 .       |
| 228200_at | 0.007585 | 0.003799 | ZNF252 286101 .          |
| 228201_at | 0.019264 | 0.011318 | ARL13B 200894 .          |
| 228203_at | 0.004731 | 0.00217  | LOC100128074 100128074 . |
| 228205_at | 1.35E-05 | 1.50E-06 | TKT 7086 .               |
| 228207_at | 1.56E-09 | 9.59E-12 | .                        |
| 228208_x_ | 0.003031 | 0.001271 | ZNF354C 30832 .          |
| 228209_at | 3.63E-04 | 9.61E-05 | .                        |
| 228210_at | 3.35E-05 | 4.80E-06 | NXPH3 11248 .            |
| 228211_at | 0.001779 | 6.69E-04 | C9orf102 375748 .        |
| 228213_at | 0.029488 | 0.018602 | H2AFJ 55766 .            |
| 228215_at | 6.97E-04 | 2.15E-04 | .                        |
| 228216_at | 7.69E-05 | 1.39E-05 | .                        |
| 228217_s_ | 0.018611 | 0.010873 | PSMG4 389362 .           |
| 228219_s_ | 0.001152 | 3.96E-04 | UPB1 51733 .             |
| 228220_at | 0.033266 | 0.021397 | FCHO2 115548 .           |
| 228222_at | 2.62E-07 | 8.40E-09 | .                        |
| 228224_at | 2.24E-09 | 1.52E-11 | PRELP 5549 .             |
| 228226_s_ | 0.011305 | 0.006059 | ZNF775 285971 .          |
| 228227_at | 0.007655 | 0.00384  | ITGB1BP1 9270 .          |
| 228228_at | 5.50E-05 | 9.01E-06 | DACT3 147906 .           |
| 228230_at | 0.020681 | 0.012309 | PRIC285 85441 .          |
| 228231_at | 0.021106 | 0.012611 | .                        |
| 228233_at | 5.70E-06 | 4.84E-07 | FREM1 158326 .           |
| 228234_at | 5.99E-04 | 1.78E-04 | TICAM2 353376 .          |
| 228235_at | 9.34E-04 | 3.08E-04 | MGC16121 84848 .         |
| 228236_at | 1.73E-04 | 3.84E-05 | C20orf54 113278 .        |
| 228238_at | 3.21E-06 | 2.30E-07 | GAS5 60674 .             |

|           |          |          |                             |           |   |
|-----------|----------|----------|-----------------------------|-----------|---|
| 228239_at | 0.011379 | 0.006105 | FAM165B                     | 54065     | . |
| 228240_at | 1.12E-04 | 2.22E-05 |                             |           | . |
| 228242_at | 3.39E-04 | 8.85E-05 | N4BP2                       | 55728     | . |
| 228243_at | 1.69E-04 | 3.71E-05 |                             |           | . |
| 228244_at | 3.13E-05 | 4.41E-06 | BLOC1S3                     | 388552    | . |
| 228245_s_ | 4.03E-08 | 6.65E-10 | LOC728715 /// 144203 /// 4( |           | . |
| 228246_s_ | 1.81E-04 | 4.04E-05 | SPTBN1                      | 6711      | . |
| 228247_at | 7.03E-06 | 6.36E-07 | LOC283788                   | 283788    | . |
| 228250_at | 8.97E-04 | 2.93E-04 | FNIP1                       | 96459     | . |
| 228251_at | 6.59E-05 | 1.13E-05 | LOC100130930                | 100130930 | . |
| 228252_at | 2.98E-04 | 7.52E-05 | PIF1                        | 80119     | . |
| 228253_at | 2.46E-05 | 3.25E-06 | LOXL3                       | 84695     | . |
| 228254_at | 2.37E-06 | 1.55E-07 | STAM2                       | 10254     | . |
| 228255_at | 0.003162 | 0.001337 | ALS2CR4                     | 65062     | . |
| 228256_s_ | 3.08E-04 | 7.87E-05 | EPB41L4A                    | 64097     | . |
| 228257_at | 9.05E-05 | 1.70E-05 | ANKRD52                     | 283373    | . |
| 228258_at | 0.006139 | 0.002955 | TBC1D10C                    | 374403    | . |
| 228259_s_ | 7.24E-05 | 1.28E-05 | EPB41L4A                    | 64097     | . |
| 228260_at | 0.005732 | 0.002723 | ELAVL2                      | 1993      | . |
| 228262_at | 0.03054  | 0.019379 | MAP7D2                      | 256714    | . |
| 228263_at | 0.030922 | 0.019652 | GRASP                       | 160622    | . |
| 228264_at | 0.022652 | 0.013689 | ACCS                        | 84680     | . |
| 228266_s_ | 0.014635 | 0.008205 | HDGFRP3                     | 50810     | . |
| 228267_at | 0.012105 | 0.006566 | TRIM11                      | 81559     | . |
| 228269_x_ | 0.002835 | 0.001172 | KCNIP3                      | 30818     | . |
| 228271_at | 4.51E-05 | 7.03E-06 |                             |           | . |
| 228273_at | 3.04E-04 | 7.72E-05 |                             |           | . |
| 228274_at | 9.38E-05 | 1.78E-05 | SDSL                        | 113675    | . |
| 228275_at | 5.10E-04 | 1.46E-04 |                             |           | . |
| 228276_at | 6.51E-05 | 1.12E-05 | SAMD1                       | 90378     | . |
| 228277_at | 0.011882 | 0.006421 | FBXL19                      | 54620     | . |
| 228278_at | 0.001475 | 5.35E-04 | NFIX                        | 4784      | . |
| 228279_s_ | 5.04E-05 | 8.09E-06 |                             |           | . |
| 228280_at | 1.37E-05 | 1.53E-06 | ZC3HAV1L                    | 92092     | . |

|           |          |          |            |          |
|-----------|----------|----------|------------|----------|
| 228281_at | 2.82E-05 | 3.85E-06 | C11orf82   | 220042 . |
| 228282_at | 0.026459 | 0.016398 | MFSD8      | 256471 . |
| 228284_at | 0.020709 | 0.01233  | TLE1       | 7088 .   |
| 228286_at | 1.61E-04 | 3.49E-05 | GEN1       | 348654 . |
| 228287_at | 1.54E-04 | 3.31E-05 | ING5       | 84289 .  |
| 228289_at | 0.028574 | 0.017925 |            | .        |
| 228290_at | 0.008324 | 0.004233 | NCRNA00153 | 55857 .  |
| 228291_s_ | 0.019185 | 0.011261 | NCRNA00153 | 55857 .  |
| 228294_s_ | 3.68E-05 | 5.39E-06 | tcag7.1196 | 728743 . |
| 228297_at | 4.87E-05 | 7.75E-06 |            | .        |
| 228298_at | 0.033345 | 0.021455 | FAM113B    | 91523 .  |
| 228299_at | 2.06E-10 | 6.69E-13 | KCTD20     | 222658 . |
| 228300_at | 0.016811 | 0.009655 | CCDC103    | 388389 . |
| 228302_x_ | 0.034605 | 0.022383 | CAMK2N1    | 55450 .  |
| 228304_at | 9.01E-05 | 1.69E-05 | RBM43      | 375287 . |
| 228305_at | 0.002172 | 8.53E-04 | ZNF565     | 147929 . |
| 228306_at | 0.008866 | 0.004555 | CNIH4      | 29097 .  |
| 228307_at | 1.53E-04 | 3.31E-05 | EMILIN3    | 90187 .  |
| 228308_at | 0.002188 | 8.61E-04 | FKBP11     | 51303 .  |
| 228310_at | 4.01E-06 | 3.07E-07 | ENAH       | 55740 .  |
| 228311_at | 0.01913  | 0.011224 | BCL6B      | 255877 . |
| 228312_at | 2.10E-04 | 4.86E-05 | PI16       | 221476 . |
| 228313_at | 6.83E-05 | 1.19E-05 | GPRC5B     | 51704 .  |
| 228314_at | 8.75E-05 | 1.63E-05 | LRRC8C     | 84230 .  |
| 228315_at | 0.003763 | 0.001649 |            | .        |
| 228316_at | 0.04133  | 0.027506 | C2orf63    | 130162 . |
| 228317_at | 0.015244 | 0.008612 | ZFAND5     | 7763 .   |
| 228319_at | 1.39E-05 | 1.57E-06 | FAM84A     | 151354 . |
| 228320_x_ | 0.001864 | 7.09E-04 | CCDC64     | 92558 .  |
| 228322_at | 1.23E-05 | 1.33E-06 | NAT12      | 122830 . |
| 228323_at | 7.80E-05 | 1.41E-05 | CASC5      | 57082 .  |
| 228325_at | 1.37E-04 | 2.87E-05 | KIAA0146   | 23514 .  |
| 228326_at | 7.59E-04 | 2.38E-04 | WDR27      | 253769 . |
| 228327_x_ | 0.001476 | 5.35E-04 | MEIS3      | 56917 .  |

|           |          |          |           |          |
|-----------|----------|----------|-----------|----------|
| 228329_at | 0.028678 | 0.018007 | DAB1      | 1600 .   |
| 228330_at | 0.048143 | 0.032843 | ZUFSP     | 221302 . |
| 228331_at | 2.64E-04 | 6.48E-05 | C11orf31  | 280636 . |
| 228332_s_ | 0.005794 | 0.002759 | C11orf31  | 280636 . |
| 228333_at | 0.017449 | 0.010079 |           | .        |
| 228334_x_ | 0.005608 | 0.002655 | KIAA1712  | 80817 .  |
| 228335_at | 0.003473 | 0.001497 | CLDN11    | 5010 .   |
| 228337_at | 8.41E-05 | 1.56E-05 | PWWP2A    | 114825 . |
| 228338_at | 0.014395 | 0.008045 | LOC120376 | 120376 . |
| 228340_at | 6.86E-05 | 1.20E-05 | TLE3      | 7090 .   |
| 228342_s_ | 1.11E-08 | 1.19E-10 | ALPK3     | 57538 .  |
| 228344_s_ | 0.007012 | 0.003464 | TBX3      | 6926 .   |
| 228347_at | 2.94E-05 | 4.08E-06 | SIX1      | 6495 .   |
| 228348_at | 0.029696 | 0.018758 | LINS1     | 55180 .  |
| 228349_at | 0.001447 | 5.23E-04 |           | .        |
| 228350_at | 1.16E-04 | 2.31E-05 | UNC13D    | 201294 . |
| 228351_at | 3.81E-05 | 5.64E-06 | HEATR1    | 55127 .  |
| 228352_at | 0.002966 | 0.001237 | UNC13D    | 201294 . |
| 228353_x_ | 0.00207  | 8.04E-04 | UBASH3B   | 84959 .  |
| 228354_at | 0.008315 | 0.004228 | MORN4     | 118812 . |
| 228355_s_ | 4.55E-05 | 7.11E-06 | NDUFAF2   | 91942 .  |
| 228356_at | 3.06E-04 | 7.78E-05 | ANKRD11   | 29123 .  |
| 228357_at | 0.016512 | 0.009457 | UNK       | 85451 .  |
| 228359_at | 0.035699 | 0.023216 | UBASH3B   | 84959 .  |
| 228360_at | 7.84E-05 | 1.42E-05 | LYPD6B    | 130576 . |
| 228361_at | 1.24E-06 | 6.61E-08 | E2F2      | 1870 .   |
| 228363_at | 0.039489 | 0.026093 | XIAP      | 331 .    |
| 228365_at | 0.00513  | 0.00239  | CPNE8     | 144402 . |
| 228367_at | 1.07E-04 | 2.10E-05 | ALPK2     | 115701 . |
| 228368_at | 0.001841 | 6.98E-04 | ARHGAP20  | 57569 .  |
| 228369_at | 2.40E-04 | 5.75E-05 | CNPY3     | 10695 .  |
| 228370_at | 0.001966 | 7.56E-04 | SNRPN     | 6638 .   |
| 228371_s_ | 0.012525 | 0.00684  |           | .        |
| 228374_at | 0.004075 | 0.001812 | C10orf28  | 27291 .  |

|           |          |          |           |          |
|-----------|----------|----------|-----------|----------|
| 228375_at | 0.005033 | 0.002336 | IGSF11    | 152404 . |
| 228377_at | 1.49E-04 | 3.18E-05 | KLHL14    | 57565 .  |
| 228380_at | 0.028962 | 0.018214 |           | .        |
| 228381_at | 0.001515 | 5.53E-04 | ATF7IP2   | 80063 .  |
| 228384_s_ | 0.001637 | 6.06E-04 | PYROXD2   | 84795 .  |
| 228387_at | 9.92E-05 | 1.91E-05 |           | .        |
| 228388_at | 0.020158 | 0.011936 | NFKBIB    | 4793 .   |
| 228390_at | 8.85E-04 | 2.88E-04 |           | .        |
| 228391_at | 0.001528 | 5.58E-04 | CYP4V2    | 285440 . |
| 228393_s_ | 0.020537 | 0.012202 | ZNF302    | 55900 .  |
| 228394_at | 0.008013 | 0.004052 | STK10     | 6793 .   |
| 228395_at | 8.44E-06 | 8.10E-07 | GLT8D1    | 55830 .  |
| 228396_at | 2.98E-05 | 4.13E-06 | PRKG1     | 5592 .   |
| 228397_at | 8.23E-04 | 2.64E-04 | TUG1      | 55000 .  |
| 228399_at | 1.81E-05 | 2.20E-06 | OSR1      | 130497 . |
| 228400_at | 0.017057 | 0.009816 | SHROOM3   | 57619 .  |
| 228401_at | 8.68E-07 | 4.11E-08 | ATAD2     | 29028 .  |
| 228402_at | 0.013133 | 0.00723  | ZBED3     | 84327 .  |
| 228405_at | 7.64E-06 | 7.10E-07 | RHPN1     | 114822 . |
| 228407_at | 1.14E-05 | 1.21E-06 | SCUBE3    | 222663 . |
| 228408_s_ | 3.91E-06 | 2.97E-07 | SDAD1     | 55153 .  |
| 228409_at | 1.70E-06 | 1.01E-07 | KIAA1881  | 729359 . |
| 228411_at | 2.64E-04 | 6.47E-05 | PARD3B    | 117583 . |
| 228413_s_ | 0.001431 | 5.16E-04 | SFRP1     | 6422 .   |
| 228414_at | 0.022885 | 0.01385  | KCNMA1    | 3778 .   |
| 228415_at | 8.70E-10 | 4.38E-12 | AP1S2     | 8905 .   |
| 228417_at | 0.006299 | 0.003046 | ISYNA1    | 51477 .  |
| 228419_at | 0.003757 | 0.001646 | METRN     | 79006 .  |
| 228420_at | 0.007654 | 0.003839 | PDCD2     | 5134 .   |
| 228421_s_ | 0.005338 | 0.002503 | EFEMP1    | 2202 .   |
| 228422_at | 3.09E-04 | 7.90E-05 | LHFPL4    | 375323 . |
| 228424_at | 2.76E-07 | 9.10E-09 | NAALADL1  | 10004 .  |
| 228425_at | 0.018731 | 0.010956 | LOC654433 | 654433 . |
| 228427_at | 0.002078 | 8.08E-04 | FBXO16    | 157574 . |

|           |          |          |              |           |   |
|-----------|----------|----------|--------------|-----------|---|
| 228428_at | 4.36E-08 | 7.49E-10 | FAM102A      | 399665    | . |
| 228429_x_ | 6.45E-06 | 5.67E-07 | KIF9         | 64147     | . |
| 228431_at | 0.04743  | 0.032292 | NFYA         | 4800      | . |
| 228432_at | 0.009562 | 0.004977 | RAB3IP       | 117177    | . |
| 228436_at | 0.002357 | 9.40E-04 | KCNC4        | 3749      | . |
| 228438_at | 3.18E-05 | 4.50E-06 | LOC100132891 | 100132891 | . |
| 228440_at | 7.55E-04 | 2.37E-04 |              |           | . |
| 228441_s_ | 9.09E-06 | 8.97E-07 |              |           | . |
| 228443_s_ | 1.89E-05 | 2.32E-06 |              |           | . |
| 228444_at | 0.007048 | 0.003485 |              |           | . |
| 228445_at | 7.16E-05 | 1.27E-05 | AIFM2        | 84883     | . |
| 228447_at | 2.21E-04 | 5.19E-05 | SFRS17A      | 8227      | . |
| 228449_at | 0.011307 | 0.006061 |              |           | . |
| 228450_at | 0.005254 | 0.002456 | PLEKHA7      | 144100    | . |
| 228453_at | 3.30E-06 | 2.39E-07 | KIAA1632     | 57724     | . |
| 228454_at | 0.005097 | 0.002372 | LCOR         | 84458     | . |
| 228455_at | 2.99E-07 | 1.00E-08 | RBM15        | 64783     | . |
| 228456_s_ | 0.008867 | 0.004555 | LOC149832    | 149832    | . |
| 228459_at | 0.0242   | 0.01478  | FAM84A       | 151354    | . |
| 228460_at | 0.010714 | 0.00569  | ZNF319       | 57567     | . |
| 228461_at | 0.002023 | 7.82E-04 | SH3RF3       | 344558    | . |
| 228462_at | 0.001407 | 5.05E-04 | IRX2         | 153572    | . |
| 228463_at | 2.51E-06 | 1.67E-07 | FOXA3        | 3171      | . |
| 228464_at | 4.09E-04 | 1.11E-04 |              |           | . |
| 228465_at | 0.001339 | 4.76E-04 |              |           | . |
| 228466_at | 6.07E-07 | 2.54E-08 |              |           | . |
| 228467_at | 2.05E-04 | 4.71E-05 | PURB         | 5814      | . |
| 228468_at | 2.29E-06 | 1.49E-07 | MASTL        | 84930     | . |
| 228469_at | 7.41E-04 | 2.31E-04 | PPID         | 5481      | . |
| 228470_at | 0.005782 | 0.002752 | LOC731109    | 731109    | . |
| 228471_at | 8.65E-04 | 2.80E-04 |              |           | . |
| 228473_at | 0.017119 | 0.009858 | MSX1         | 4487      | . |
| 228474_s_ | 1.91E-05 | 2.35E-06 | KLF9         | 687       | . |
| 228476_at | 0.024327 | 0.014871 | KIAA1407     | 57577     | . |



|           |          |          |                            |          |
|-----------|----------|----------|----------------------------|----------|
| 228477_at | 0.001269 | 4.46E-04 | ARGLU1                     | 55082 .  |
| 228478_at | 0.007304 | 0.003634 |                            | .        |
| 228479_at | 9.60E-07 | 4.69E-08 |                            | .        |
| 228480_at | 0.001557 | 5.70E-04 | VAPA                       | 9218 .   |
| 228481_at | 6.78E-05 | 1.18E-05 |                            | .        |
| 228482_at | 0.044611 | 0.030075 | CDRT4                      | 284040 . |
| 228483_s_ | 0.041612 | 0.027724 | TAF9B                      | 51616 .  |
| 228484_s_ | 0.019667 | 0.011594 | FOXO1                      | 2308 .   |
| 228485_s_ | 2.02E-05 | 2.53E-06 | SLC44A1                    | 23446 .  |
| 228487_s_ | 0.028251 | 0.017693 |                            | .        |
| 228489_at | 0.006504 | 0.003165 | TM4SF18                    | 116441 . |
| 228490_at | 1.32E-04 | 2.74E-05 | ABHD2                      | 11057 .  |
| 228491_at | 0.00788  | 0.003974 | KRT19                      | 3880 .   |
| 228492_at | 0.004163 | 0.001858 | USP9Y                      | 8287 .   |
| 228494_at | 0.002746 | 0.00113  | PPP1R9A                    | 55607 .  |
| 228495_at | 4.07E-06 | 3.13E-07 | CCDC75                     | 253635 . |
| 228496_s_ | 1.87E-06 | 1.15E-07 | CRIM1                      | 51232 .  |
| 228498_at | 1.48E-07 | 3.87E-09 |                            | .        |
| 228500_at | 0.009956 | 0.005221 | THAP8                      | 199745 . |
| 228501_at | 0.001112 | 3.80E-04 | GALNTL2                    | 117248 . |
| 228503_at | 4.40E-04 | 1.21E-04 |                            | .        |
| 228505_s_ | 0.017796 | 0.010318 | TMEM170A                   | 124491 . |
| 228506_at | 3.51E-06 | 2.58E-07 | NSMCE4A                    | 54780 .  |
| 228508_at | 3.00E-05 | 4.18E-06 | MAML3                      | 55534 .  |
| 228510_at | 0.031305 | 0.019929 | C6orf134                   | 79969 .  |
| 228511_s_ | 1.31E-04 | 2.70E-05 | ZNF219                     | 51222 .  |
| 228512_at | 1.05E-05 | 1.09E-06 | PTCD3                      | 55037 .  |
| 228513_at | 0.003192 | 0.001353 | TMEM219                    | 124446 . |
| 228515_at | 2.57E-04 | 6.26E-05 | LOC90784                   | 90784 .  |
| 228516_at | 3.89E-04 | 1.04E-04 | CDAN1                      | 146059 . |
| 228517_at | 0.003068 | 0.00129  | C1orf149                   | 64769 .  |
| 228518_at | 2.49E-04 | 6.02E-05 | IGH@ /// IGHG3492 /// 350( |          |
| 228521_s_ | 0.001719 | 6.43E-04 | RAB4B                      | 53916 .  |
| 228523_at | 0.008932 | 0.004595 | NANOS1                     | 340719 . |

|           |          |          |           |        |   |
|-----------|----------|----------|-----------|--------|---|
| 228526_at | 0.015035 | 0.008472 | NANOS1    | 340719 | . |
| 228527_s_ | 0.006739 | 0.003302 | SLC25A37  | 51312  | . |
| 228528_at | 1.76E-05 | 2.13E-06 |           |        | . |
| 228530_at | 0.00217  | 8.52E-04 | C13orf37  | 440145 | . |
| 228531_at | 4.75E-07 | 1.85E-08 | SAMD9     | 54809  | . |
| 228535_at | 1.30E-04 | 2.68E-05 | RAD1      | 5810   | . |
| 228539_at | 5.26E-06 | 4.35E-07 |           |        | . |
| 228541_x_ | 0.025125 | 0.015446 |           |        | . |
| 228543_at | 0.002672 | 0.001093 | CSRP2BP   | 57325  | . |
| 228544_s_ | 0.032954 | 0.021168 | CSRP2BP   | 57325  | . |
| 228545_at | 1.40E-04 | 2.95E-05 | ZNF148    | 7707   | . |
| 228547_at | 0.003402 | 0.001461 | NRXN1     | 9378   | . |
| 228548_at | 1.18E-05 | 1.27E-06 |           |        | . |
| 228549_at | 1.48E-04 | 3.15E-05 | TMEM63A   | 9725   | . |
| 228550_at | 1.60E-04 | 3.47E-05 | RTN4R     | 65078  | . |
| 228552_s_ | 0.044427 | 0.029939 | ISYNA1    | 51477  | . |
| 228553_at | 0.00447  | 0.002027 | ENAH      | 55740  | . |
| 228555_at | 4.41E-05 | 6.82E-06 | CAMK2D    | 817    | . |
| 228556_at | 0.005552 | 0.002624 | YTHDC1    | 91746  | . |
| 228557_at | 0.001265 | 4.44E-04 | L3MBTL4   | 91133  | . |
| 228558_at | 0.005446 | 0.002564 | C14orf80  | 283643 | . |
| 228560_at | 1.21E-04 | 2.46E-05 |           |        | . |
| 228562_at | 0.006436 | 0.003125 |           |        | . |
| 228563_at | 0.003117 | 0.001314 | GJC1      | 10052  | . |
| 228564_at | 1.77E-05 | 2.14E-06 | LOC375295 | 375295 | . |
| 228565_at | 2.04E-05 | 2.56E-06 | KIAA1804  | 84451  | . |
| 228566_at | 5.28E-06 | 4.37E-07 | RPRD1A    | 55197  | . |
| 228567_at | 5.25E-04 | 1.51E-04 |           |        | . |
| 228571_at | 0.011162 | 0.005971 | RBAK      | 57786  | . |
| 228572_at | 0.004535 | 0.002062 | GRB2      | 2885   | . |
| 228573_at | 3.40E-06 | 2.48E-07 | ANTXR2    | 118429 | . |
| 228576_s_ | 0.01218  | 0.006614 | MXRA8     | 54587  | . |
| 228578_at | 2.71E-04 | 6.69E-05 | RBM45     | 129831 | . |
| 228581_at | 0.036482 | 0.023809 | KCNJ10    | 3766   | . |

|           |          |          |              |           |   |
|-----------|----------|----------|--------------|-----------|---|
| 228583_at | 6.66E-04 | 2.03E-04 | LIN52        | 91750     | . |
| 228584_at | 1.16E-05 | 1.23E-06 | SGCB         | 6443      | . |
| 228587_at | 0.00164  | 6.07E-04 | FAM83G       | 644815    | . |
| 228588_s_ | 4.05E-05 | 6.09E-06 | UBE2B        | 7320      | . |
| 228589_at | 2.21E-04 | 5.18E-05 |              |           | . |
| 228590_at | 1.36E-04 | 2.83E-05 | PTCD3        | 55037     | . |
| 228591_at | 0.039158 | 0.025837 | LOC100131096 | 100131096 | . |
| 228592_at | 0.042141 | 0.028141 | MS4A1        | 931       | . |
| 228593_at | 4.08E-04 | 1.11E-04 | LOC339483    | 339483    | . |
| 228596_at | 4.07E-05 | 6.14E-06 | LOC728377    | 728377    | . |
| 228597_at | 6.02E-07 | 2.51E-08 | C21orf45     | 54069     | . |
| 228598_at | 4.44E-06 | 3.51E-07 | DPP10        | 57628     | . |
| 228599_at | 0.01208  | 0.006551 | MS4A1        | 931       | . |
| 228600_x_ | 0.006198 | 0.002988 | C7orf46      | 340277    | . |
| 228601_at | 6.63E-06 | 5.87E-07 | LOC401022    | 401022    | . |
| 228602_at | 2.74E-04 | 6.77E-05 | SGCD         | 6444      | . |
| 228603_at | 0.003558 | 0.001541 |              |           | . |
| 228608_at | 9.42E-05 | 1.79E-05 | NALCN        | 259232    | . |
| 228609_at | 1.19E-05 | 1.28E-06 |              |           | . |
| 228610_at | 7.95E-06 | 7.48E-07 | TM9SF3       | 56889     | . |
| 228611_s_ | 0.041441 | 0.027596 |              |           | . |
| 228612_at | 8.88E-04 | 2.90E-04 |              |           | . |
| 228613_at | 7.18E-06 | 6.55E-07 | RAB11FIP3    | 9727      | . |
| 228614_at | 0.001476 | 5.35E-04 | NCRNA00116   | 205251    | . |
| 228616_at | 0.002843 | 0.001177 |              |           | . |
| 228617_at | 0.001654 | 6.14E-04 | XAF1         | 54739     | . |
| 228618_at | 5.94E-06 | 5.12E-07 | PEAR1        | 375033    | . |
| 228619_x_ | 0.002407 | 9.65E-04 | TIPRL        | 261726    | . |
| 228621_at | 5.85E-04 | 1.73E-04 | HFE2         | 148738    | . |
| 228622_s_ | 0.011569 | 0.006224 | DNAJC4       | 3338      | . |
| 228623_at | 0.006263 | 0.003026 |              |           | . |
| 228624_at | 0.004394 | 0.001985 | TMEM144      | 55314     | . |
| 228626_at | 1.77E-04 | 3.93E-05 |              |           | . |
| 228627_at | 0.004646 | 0.002123 | TLK2         | 11011     | . |

|           |          |          |                             |           |   |
|-----------|----------|----------|-----------------------------|-----------|---|
| 228628_at | 2.12E-07 | 6.20E-09 | SRGAP2P1                    | 653464    | . |
| 228629_s_ | 0.039573 | 0.026157 | LOC100128025                | 100128025 | . |
| 228630_at | 0.025326 | 0.015597 | ZNF84                       | 7637      | . |
| 228632_at | 0.015352 | 0.008684 |                             |           | . |
| 228635_at | 2.57E-04 | 6.28E-05 | PCDH10                      | 57575     | . |
| 228636_at | 0.012399 | 0.006756 | BHLHE22                     | 27319     | . |
| 228637_at | 5.43E-05 | 8.87E-06 | ZDHHC1                      | 29800     | . |
| 228638_at | 0.001457 | 5.27E-04 | FAM76A                      | 199870    | . |
| 228639_at | 8.28E-06 | 7.87E-07 |                             |           | . |
| 228640_at | 0.007675 | 0.003852 | PCDH7                       | 5099      | . |
| 228642_at | 0.022444 | 0.013545 |                             |           | . |
| 228643_at | 1.00E-04 | 1.93E-05 |                             |           | . |
| 228644_s_ | 0.004349 | 0.00196  | SLC12A4                     | 6560      | . |
| 228646_at | 3.62E-05 | 5.27E-06 | PPP1R1C                     | 151242    | . |
| 228647_at | 0.049089 | 0.033603 | LOC100049716                | 100049716 | . |
| 228648_at | 0.002385 | 9.54E-04 | LRG1                        | 116844    | . |
| 228650_at | 1.73E-04 | 3.83E-05 |                             |           | . |
| 228651_at | 0.009423 | 0.004893 | LOC727901 /// 64856 /// 727 |           | . |
| 228654_at | 0.00169  | 6.30E-04 | SPIN4                       | 139886    | . |
| 228655_at | 1.28E-05 | 1.40E-06 |                             |           | . |
| 228658_at | 2.07E-05 | 2.60E-06 | MIAT                        | 440823    | . |
| 228659_at | 0.002158 | 8.47E-04 |                             |           | . |
| 228661_s_ | 7.56E-04 | 2.37E-04 |                             |           | . |
| 228662_at | 6.08E-05 | 1.02E-05 | SOCS7                       | 30837     | . |
| 228663_x_ | 5.42E-04 | 1.57E-04 | FIZ1                        | 84922     | . |
| 228664_at | 0.001942 | 7.45E-04 |                             |           | . |
| 228665_at | 0.00561  | 0.002657 | CYYR1                       | 116159    | . |
| 228666_at | 0.042065 | 0.028078 | C15orf38                    | 348110    | . |
| 228668_x_ | 5.64E-04 | 1.65E-04 | FLJ36031                    | 168455    | . |
| 228669_x_ | 9.11E-05 | 1.71E-05 | PARP10                      | 84875     | . |
| 228670_at | 0.00725  | 0.003602 | TEP1                        | 7011      | . |
| 228671_at | 4.36E-06 | 3.42E-07 | TMEM201                     | 199953    | . |
| 228672_at | 0.0184   | 0.01073  | ING5                        | 84289     | . |
| 228673_s_ | 0.011564 | 0.006221 | EML4                        | 27436     | . |

|           |          |          |              |           |   |
|-----------|----------|----------|--------------|-----------|---|
| 228674_s_ | 1.84E-04 | 4.12E-05 | EML4         | 27436     | . |
| 228675_at | 0.007654 | 0.003839 | LOC100131733 | 100131733 | . |
| 228676_at | 1.69E-04 | 3.71E-05 | ORAOV1       | 220064    | . |
| 228677_s_ | 0.003443 | 0.001482 | RASAL3       | 64926     | . |
| 228678_at | 0.004086 | 0.001818 | FAM116B      | 414918    | . |
| 228681_x_ | 0.009661 | 0.00504  | DAPK3        | 1613      | . |
| 228682_at | 0.001302 | 4.60E-04 |              |           | . |
| 228683_s_ | 0.005497 | 0.002592 | KCTD15       | 79047     | . |
| 228684_at | 0.002078 | 8.08E-04 | ZNF503       | 84858     | . |
| 228685_at | 0.009    | 0.004635 |              |           | . |
| 228686_at | 9.49E-06 | 9.50E-07 | FLJ33630     | 644873    | . |
| 228687_at | 4.70E-05 | 7.42E-06 | ZNF777       | 27153     | . |
| 228688_at | 1.17E-05 | 1.24E-06 | LOC283922    | 283922    | . |
| 228689_at | 0.016878 | 0.009698 | NDUFA11      | 126328    | . |
| 228690_s_ | 0.013877 | 0.007706 | NDUFA11      | 126328    | . |
| 228691_at | 5.72E-07 | 2.36E-08 | BICD1        | 636       | . |
| 228692_at | 1.55E-06 | 8.91E-08 |              |           | . |
| 228693_at | 6.24E-04 | 1.87E-04 | CCDC50       | 152137    | . |
| 228694_at | 8.41E-04 | 2.71E-04 |              |           | . |
| 228696_at | 0.00558  | 0.00264  | SLC45A3      | 85414     | . |
| 228700_at | 5.14E-04 | 1.47E-04 |              |           | . |
| 228702_at | 5.70E-04 | 1.67E-04 | FLJ43663     | 378805    | . |
| 228703_at | 3.34E-09 | 2.46E-11 | P4HA3        | 283208    | . |
| 228705_at | 4.07E-08 | 6.75E-10 | CAPN12       | 147968    | . |
| 228706_s_ | 0.038366 | 0.02524  | CLDN23       | 137075    | . |
| 228707_at | 0.034551 | 0.022345 | CLDN23       | 137075    | . |
| 228710_at | 2.23E-06 | 1.44E-07 |              |           | . |
| 228711_at | 1.28E-09 | 7.40E-12 | ZNF37A       | 7587      | . |
| 228713_s_ | 1.80E-05 | 2.18E-06 | HSD17B14     | 51171     | . |
| 228714_at | 2.99E-07 | 1.00E-08 |              |           | . |
| 228716_at | 0.001719 | 6.43E-04 | THRB         | 7068      | . |
| 228718_at | 0.025282 | 0.015565 | ZNF44        | 51710     | . |
| 228719_at | 0.002555 | 0.001036 | ZSWIM7       | 125150    | . |
| 228720_at | 1.70E-04 | 3.74E-05 | SORCS2       | 57537     | . |

|           |          |          |                             |        |   |
|-----------|----------|----------|-----------------------------|--------|---|
| 228722_at | 0.02098  | 0.012523 | PRMT2                       | 3275   | . |
| 228723_at | 0.003914 | 0.001728 |                             |        | . |
| 228725_x_ | 4.06E-04 | 1.10E-04 | PRMT2                       | 3275   | . |
| 228727_at | 0.002192 | 8.62E-04 | ANXA11                      | 311    | . |
| 228728_at | 0.00103  | 3.46E-04 | C7orf58                     | 79974  | . |
| 228729_at | 1.22E-04 | 2.47E-05 | CCNB1                       | 891    | . |
| 228733_at | 0.002007 | 7.75E-04 | PUSL1                       | 126789 | . |
| 228736_at | 2.93E-05 | 4.06E-06 | HELQ                        | 113510 | . |
| 228737_at | 1.90E-05 | 2.33E-06 | TOX2                        | 84969  | . |
| 228739_at | 0.003009 | 0.001259 | CYS1                        | 192668 | . |
| 228741_s_ | 0.012489 | 0.006817 | HCN3                        | 57657  | . |
| 228742_at | 0.031654 | 0.020186 |                             |        | . |
| 228743_at | 9.77E-05 | 1.87E-05 | TXNDC17                     | 84817  | . |
| 228745_at | 0.004298 | 0.001932 | SGTB                        | 54557  | . |
| 228746_s_ | 0.01302  | 0.007157 | CDV3                        | 55573  | . |
| 228747_at | 0.02487  | 0.015264 | SEC61A2                     | 55176  | . |
| 228748_at | 2.93E-06 | 2.03E-07 | CD59                        | 966    | . |
| 228751_at | 5.76E-04 | 1.69E-04 | CLK4                        | 57396  | . |
| 228752_at | 0.004969 | 0.002298 | BCORL1                      | 63035  | . |
| 228754_at | 0.020837 | 0.012422 | SLC6A6                      | 6533   | . |
| 228755_at | 1.08E-05 | 1.12E-06 | GIGYF1                      | 64599  | . |
| 228760_at | 6.08E-04 | 1.81E-04 | SFRS2B                      | 10929  | . |
| 228765_at | 1.23E-06 | 6.50E-08 | GTF2IRD2                    | 84163  | . |
| 228768_at | 7.68E-04 | 2.42E-04 | FNIP1                       | 96459  | . |
| 228770_at | 0.002502 | 0.001011 | GPR146                      | 115330 | . |
| 228771_at | 4.36E-05 | 6.72E-06 | ADRBK2                      | 157    | . |
| 228772_at | 2.24E-04 | 5.27E-05 | HNMT                        | 3176   | . |
| 228773_at | 0.006763 | 0.003316 |                             |        | . |
| 228774_at | 4.53E-04 | 1.26E-04 | CEP78                       | 84131  | . |
| 228775_at | 7.81E-04 | 2.47E-04 |                             |        | . |
| 228776_at | 0.028361 | 0.017768 | GJC1                        | 10052  | . |
| 228777_at | 8.37E-04 | 2.69E-04 | KBTBD3                      | 143879 | . |
| 228778_at | 0.009073 | 0.004678 |                             |        | . |
| 228779_at | 0.038282 | 0.025176 | LOC146880 /// 146880 /// 44 |        | . |

|           |          |          |              |           |   |
|-----------|----------|----------|--------------|-----------|---|
| 228781_at | 0.040414 | 0.026799 | OBFC1        | 79991     | . |
| 228782_at | 3.13E-07 | 1.07E-08 | SCGB3A2      | 117156    | . |
| 228783_at | 0.01171  | 0.006311 | BVES         | 11149     | . |
| 228784_at | 1.60E-04 | 3.47E-05 | ST3GAL2      | 6483      | . |
| 228786_at | 4.23E-07 | 1.60E-08 | LOC387647    | 387647    | . |
| 228789_at | 5.42E-04 | 1.57E-04 | MTMR6        | 9107      | . |
| 228790_at | 0.008652 | 0.004426 | FAM110B      | 90362     | . |
| 228791_at | 2.73E-04 | 6.74E-05 | LOC100129502 | 100129502 | . |
| 228792_at | 0.017645 | 0.010218 |              |           | . |
| 228793_at | 0.00271  | 0.001112 | JMJD1C       | 221037    | . |
| 228797_at | 5.14E-05 | 8.30E-06 |              |           | . |
| 228798_x_ | 0.001349 | 4.81E-04 | MAZ          | 4150      | . |
| 228799_at | 0.007073 | 0.003499 |              |           | . |
| 228800_x_ | 0.01237  | 0.006736 | AURKAIP1     | 54998     | . |
| 228801_at | 8.34E-08 | 1.80E-09 | ORMDL1       | 94101     | . |
| 228802_at | 4.13E-07 | 1.55E-08 | RBPMS2       | 348093    | . |
| 228803_at | 6.86E-05 | 1.20E-05 | LOC100129592 | 100129592 | . |
| 228804_at | 2.83E-04 | 7.07E-05 | DGCR5        | 26220     | . |
| 228805_at | 6.54E-07 | 2.81E-08 | C5orf25      | 375484    | . |
| 228806_at | 0.005677 | 0.002692 | RORC         | 6097      | . |
| 228807_at | 0.041959 | 0.027997 |              |           | . |
| 228808_s_ | 0.013777 | 0.007643 | LOXL2        | 4017      | . |
| 228812_at | 1.32E-05 | 1.46E-06 |              |           | . |
| 228813_at | 8.22E-04 | 2.63E-04 | HDAC4        | 9759      | . |
| 228815_s_ | 6.87E-04 | 2.11E-04 | REPIN1       | 29803     | . |
| 228817_at | 6.48E-04 | 1.96E-04 | ALG9         | 79796     | . |
| 228818_at | 6.50E-04 | 1.97E-04 |              |           | . |
| 228820_at | 1.73E-05 | 2.07E-06 | XPNPEP3      | 63929     | . |
| 228821_at | 0.003071 | 0.001291 | ST6GAL2      | 84620     | . |
| 228822_s_ | 4.23E-05 | 6.47E-06 | USP16        | 10600     | . |
| 228823_at | 0.001098 | 3.74E-04 | POLR2J2      | 246721    | . |
| 228824_s_ | 1.07E-05 | 1.11E-06 | PTGR1        | 22949     | . |
| 228825_at | 1.67E-06 | 9.89E-08 | PTGR1        | 22949     | . |
| 228826_at | 1.45E-04 | 3.06E-05 |              |           | . |

|           |          |                                      |          |
|-----------|----------|--------------------------------------|----------|
| 228827_at | 0.029872 | 0.018888                             | .        |
| 228828_at | 5.48E-07 | 2.22E-08                             | .        |
| 228829_at | 1.00E-05 | 1.02E-06 ATF7                        | 11016 .  |
| 228830_s_ | 0.003445 | 0.001483 ATF7                        | 11016 .  |
| 228832_at | 0.016676 | 0.009564 FLJ20021                    | 90024 .  |
| 228834_at | 3.27E-05 | 4.66E-06 TOB1                        | 10140 .  |
| 228835_at | 0.021693 | 0.013022                             | .        |
| 228836_at | 0.044944 | 0.03034 SLC25A35                     | 399512 . |
| 228837_at | 0.027898 | 0.017436 TCF4                        | 6925 .   |
| 228839_s_ | 8.09E-05 | 1.48E-05 LOC439994 /// 439994 /// 64 | .        |
| 228841_at | 1.22E-04 | 2.46E-05 LYRM7                       | 90624 .  |
| 228842_at | 0.004679 | 0.002142                             | .        |
| 228845_at | 1.37E-06 | 7.55E-08 PLBD2                       | 196463 . |
| 228847_at | 0.005442 | 0.002561 EXOC3                       | 11336 .  |
| 228848_at | 0.007154 | 0.003546 ABTB1                       | 80325 .  |
| 228850_s_ | 4.55E-04 | 1.27E-04                             | .        |
| 228852_at | 0.037963 | 0.024933 ENSA                        | 2029 .   |
| 228855_at | 0.001249 | 4.38E-04 NUDT7                       | 283927 . |
| 228857_at | 1.22E-05 | 1.32E-06 GNL1 /// LOC2.2794 /// 2858 | .        |
| 228859_at | 3.75E-08 | 6.08E-10 LOC91431                    | 91431 .  |
| 228860_at | 2.91E-05 | 4.02E-06 UBE3B                       | 89910 .  |
| 228862_at | 0.028524 | 0.017889 TSNARE1                     | 203062 . |
| 228865_at | 0.02807  | 0.017564 C1orf116                    | 79098 .  |
| 228866_at | 4.50E-07 | 1.73E-08                             | .        |
| 228867_at | 0.023726 | 0.01445 TATDN3                       | 128387 . |
| 228868_x_ | 4.32E-05 | 6.65E-06 CDT1                        | 81620 .  |
| 228869_at | 2.36E-04 | 5.64E-05                             | .        |
| 228870_at | 6.22E-07 | 2.62E-08 FAM84B                      | 157638 . |
| 228872_at | 3.90E-06 | 2.95E-07 FAM108B1                    | 51104 .  |
| 228874_at | 0.009177 | 0.004745 PHLDB3                      | 653583 . |
| 228875_at | 0.005096 | 0.002372 FAM162B                     | 221303 . |
| 228876_at | 0.016693 | 0.009576 BAIAP2L2                    | 80115 .  |
| 228877_at | 6.45E-05 | 1.10E-05 RGL3                        | 57139 .  |
| 228878_s_ | 0.015342 | 0.008677 CFC1B                       | 653275 . |



|           |          |          |                             |           |   |
|-----------|----------|----------|-----------------------------|-----------|---|
| 228879_at | 3.15E-09 | 2.29E-11 | SNORD104                    | 692227    | . |
| 228880_at | 2.07E-04 | 4.80E-05 |                             |           | . |
| 228881_at | 5.32E-04 | 1.53E-04 | PARL                        | 55486     | . |
| 228883_at | 3.25E-04 | 8.40E-05 | TUB                         | 7275      | . |
| 228884_at | 3.04E-04 | 7.73E-05 | LRRC27                      | 80313     | . |
| 228885_at | 0.018665 | 0.01091  | MAMDC2                      | 256691    | . |
| 228886_at | 2.18E-05 | 2.79E-06 | LRRC27                      | 80313     | . |
| 228887_x_ | 0.002274 | 9.02E-04 | CCDC61                      | 729440    | . |
| 228888_at | 1.39E-05 | 1.57E-06 | STAC2                       | 342667    | . |
| 228889_at | 0.009573 | 0.004983 | C14orf128                   | 84837     | . |
| 228890_at | 6.80E-06 | 6.08E-07 | ATOH8                       | 84913     | . |
| 228891_at | 0.001557 | 5.71E-04 | SEMA4D                      | 10507     | . |
| 228892_at | 1.45E-06 | 8.18E-08 | SH3RF2                      | 153769    | . |
| 228893_at | 0.004878 | 0.00225  |                             |           | . |
| 228894_at | 2.22E-08 | 3.01E-10 | LOC253842 /// 253842 /// 26 |           | . |
| 228895_s_ | 0.026449 | 0.01639  | ASB1                        | 51665     | . |
| 228896_at | 0.001644 | 6.09E-04 |                             |           | . |
| 228897_at | 0.014944 | 0.008413 | DERL3                       | 91319     | . |
| 228898_s_ | 5.03E-06 | 4.11E-07 | SMARCB1                     | 6598      | . |
| 228899_at | 0.008891 | 0.00457  | LOC100132884                | 100132884 | . |
| 228901_at | 0.024375 | 0.014905 | CDK9                        | 1025      | . |
| 228902_at | 2.21E-04 | 5.19E-05 | NUP214                      | 8021      | . |
| 228903_at | 3.02E-05 | 4.21E-06 | CES8                        | 283848    | . |
| 228904_at | 0.015053 | 0.008484 | HOXB3                       | 3213      | . |
| 228905_at | 8.68E-04 | 2.81E-04 | PCM1                        | 5108      | . |
| 228906_at | 1.69E-08 | 2.13E-10 | TET1                        | 80312     | . |
| 228907_at | 0.001374 | 4.91E-04 |                             |           | . |
| 228908_s_ | 0.009281 | 0.004807 | LOC642852                   | 642852    | . |
| 228909_at | 0.02811  | 0.017591 | LOC642852                   | 642852    | . |
| 228910_at | 0.012154 | 0.006597 |                             |           | . |
| 228911_at | 1.83E-07 | 5.13E-09 | ADAMTS7                     | 11173     | . |
| 228912_at | 5.96E-08 | 1.13E-09 | VIL1                        | 7429      | . |
| 228913_at | 0.009671 | 0.005046 | LOC100190939                | 100190939 | . |
| 228914_at | 6.65E-05 | 1.15E-05 |                             |           | . |

|           |          |          |          |          |
|-----------|----------|----------|----------|----------|
| 228915_at | 0.026542 | 0.016454 | DACH1    | 1602 .   |
| 228916_at | 0.001717 | 6.41E-04 | CWF19L2  | 143884 . |
| 228917_at | 7.16E-04 | 2.22E-04 |          | .        |
| 228919_at | 1.04E-04 | 2.04E-05 |          | .        |
| 228920_at | 0.0462   | 0.031318 | ZNF260   | 339324 . |
| 228921_at | 0.003031 | 0.001271 | SLC25A42 | 284439 . |
| 228922_at | 0.045043 | 0.030415 | SHF      | 90525 .  |
| 228923_at | 8.70E-04 | 2.82E-04 | S100A6   | 6277 .   |
| 228924_s_ | 0.034894 | 0.022595 | UBE2J1   | 51465 .  |
| 228925_at | 8.19E-05 | 1.50E-05 |          | .        |
| 228926_s_ | 0.005162 | 0.002407 | SMARCA2  | 6595 .   |
| 228927_at | 0.012975 | 0.00713  | ZNF397   | 84307 .  |
| 228928_x_ | 0.002681 | 0.001097 | BANP     | 54971 .  |
| 228929_at | 0.002543 | 0.001031 | DNASE1   | 1773 .   |
| 228930_at | 1.23E-07 | 3.01E-09 | SCARNA15 | 677778 . |
| 228931_at | 1.60E-06 | 9.30E-08 | COQ4     | 51117 .  |
| 228932_at | 5.10E-04 | 1.46E-04 |          | .        |
| 228933_at | 0.020406 | 0.012106 | NHS      | 4810 .   |
| 228934_x_ | 0.001415 | 5.09E-04 |          | .        |
| 228935_at | 5.85E-04 | 1.73E-04 | SLC4A8   | 9498 .   |
| 228937_at | 0.002294 | 9.11E-04 | C13orf31 | 144811 . |
| 228939_at | 0.024508 | 0.014999 | OAF      | 220323 . |
| 228941_at | 0.012162 | 0.006602 | ALG10B   | 144245 . |
| 228942_s_ | 0.001696 | 6.32E-04 | DAB2IP   | 153090 . |
| 228943_at | 1.28E-06 | 6.93E-08 | MAP6     | 4135 .   |
| 228944_at | 0.007298 | 0.003631 |          | .        |
| 228945_s_ | 7.85E-04 | 2.49E-04 | SLC39A8  | 64116 .  |
| 228947_x_ | 9.10E-05 | 1.71E-05 | TMEM204  | 79652 .  |
| 228948_at | 0.024058 | 0.014679 | EPHA4    | 2043 .   |
| 228949_at | 0.030877 | 0.019622 | GPR177   | 79971 .  |
| 228951_at | 0.006948 | 0.003426 |          | .        |
| 228952_at | 0.005597 | 0.002649 | ENPP1    | 5167 .   |
| 228953_at | 1.23E-05 | 1.33E-06 | WHAMM    | 123720 . |
| 228955_at | 2.34E-05 | 3.05E-06 |          | .        |

|           |          |          |            |          |
|-----------|----------|----------|------------|----------|
| 228956_at | 0.004828 | 0.002223 | UGT8       | 7368 .   |
| 228957_at | 0.019878 | 0.01174  | ZNF362     | 149076 . |
| 228958_at | 0.005898 | 0.002819 | ZNF19      | 7567 .   |
| 228959_at | 6.99E-05 | 1.23E-05 |            | .        |
| 228961_at | 0.015553 | 0.008819 | MIER3      | 166968 . |
| 228963_at | 0.005399 | 0.002537 | RSBN1L     | 222194 . |
| 228964_at | 1.17E-06 | 6.10E-08 | PRDM1      | 639 .    |
| 228966_at | 0.012452 | 0.006791 | PANK2      | 80025 .  |
| 228969_at | 0.009924 | 0.005202 | AGR2       | 10551 .  |
| 228970_at | 0.011771 | 0.00635  | ZBTB8OS    | 339487 . |
| 228971_at | 6.92E-04 | 2.13E-04 |            | .        |
| 228972_at | 0.001127 | 3.86E-04 |            | .        |
| 228975_at | 0.029529 | 0.018633 | SP6        | 80320 .  |
| 228980_at | 0.029201 | 0.01839  | RFFL       | 117584 . |
| 228982_s_ | 0.042768 | 0.028621 | USP42      | 84132 .  |
| 228983_at | 7.99E-06 | 7.52E-07 |            | .        |
| 228984_at | 0.002642 | 0.001079 | ATPGD1     | 57571 .  |
| 228985_at | 6.59E-05 | 1.14E-05 |            | .        |
| 228987_at | 3.06E-07 | 1.04E-08 |            | .        |
| 228988_at | 0.00412  | 0.001835 | ZNF711     | 7552 .   |
| 228989_at | 0.023162 | 0.014041 | C18orf56   | 494514 . |
| 228990_at | 3.11E-06 | 2.21E-07 | SNHG12     | 85028 .  |
| 228992_at | 4.11E-05 | 6.22E-06 | MED28      | 80306 .  |
| 228993_s_ | 3.43E-06 | 2.50E-07 | NCRNA00081 | 92482 .  |
| 228994_at | 0.018238 | 0.010619 | CCDC24     | 149473 . |
| 228995_at | 0.001778 | 6.69E-04 | CAMSAP1    | 157922 . |
| 228996_at | 0.018408 | 0.010737 | RC3H1      | 149041 . |
| 228997_at | 0.005943 | 0.002845 | TRNAU1AP   | 54952 .  |
| 228998_at | 3.72E-06 | 2.79E-07 | TNRC6B     | 23112 .  |
| 228999_at | 9.32E-04 | 3.07E-04 | CHD2       | 1106 .   |
| 229000_at | 8.09E-05 | 1.48E-05 | ZNF77      | 58492 .  |
| 229001_at | 7.37E-05 | 1.31E-05 | PPP1R3E    | 90673 .  |
| 229002_at | 1.38E-04 | 2.90E-05 | FAM69B     | 138311 . |
| 229003_x_ | 0.004498 | 0.002042 | FAM69B     | 138311 . |

|           |          |          |              |           |   |
|-----------|----------|----------|--------------|-----------|---|
| 229007_at | 4.22E-06 | 3.28E-07 | LOC283788    | 283788    | . |
| 229009_at | 0.003055 | 0.001283 | SIX5         | 147912    | . |
| 229010_at | 1.17E-04 | 2.35E-05 | CBL          | 867       | . |
| 229011_at | 0.00294  | 0.001224 |              |           | . |
| 229012_at | 0.042921 | 0.028735 | C9orf24      | 84688     | . |
| 229014_at | 0.00311  | 0.001311 | FLJ42709     | 441094    | . |
| 229015_at | 4.62E-04 | 1.29E-04 | LOC286367    | 286367    | . |
| 229016_s  | 0.009484 | 0.004931 | TRERF1       | 55809     | . |
| 229017_s  | 1.19E-06 | 6.22E-08 | DSTYK        | 25778     | . |
| 229018_at | 0.043776 | 0.029423 | C12orf26     | 84190     | . |
| 229019_at | 0.001223 | 4.27E-04 | ZNF385B      | 151126    | . |
| 229020_x  | 2.66E-04 | 6.56E-05 | EPS8L2       | 64787     | . |
| 229022_at | 2.78E-05 | 3.79E-06 | ZFX          | 7543      | . |
| 229023_at | 1.60E-08 | 1.98E-10 | SFT2D3       | 84826     | . |
| 229024_at | 0.004173 | 0.001864 |              |           | . |
| 229025_s  | 8.24E-06 | 7.82E-07 | IMMP1L       | 196294    | . |
| 229026_at | 0.001883 | 7.18E-04 |              |           | . |
| 229028_s  | 0.002505 | 0.001012 | ARL17        | 641522    | . |
| 229029_at | 0.028418 | 0.017808 |              |           | . |
| 229030_at | 0.001597 | 5.88E-04 | CAPN8        | 388743    | . |
| 229032_at | 0.001094 | 3.73E-04 | WSCD2        | 9671      | . |
| 229033_s  | 0.005271 | 0.002466 | MUM1         | 84939     | . |
| 229034_at | 0.035388 | 0.022975 | SOBP         | 55084     | . |
| 229035_s  | 1.34E-05 | 1.49E-06 | LOC100129637 | 100129637 | . |
| 229036_at | 0.004064 | 0.001806 | TNRC6B       | 23112     | . |
| 229037_at | 0.002972 | 0.00124  | TRIM69       | 140691    | . |
| 229038_at | 0.003679 | 0.001604 | CWF19L1      | 55280     | . |
| 229041_s  | 0.040958 | 0.027221 |              |           | . |
| 229043_at | 6.43E-04 | 1.94E-04 | PAPD5        | 64282     | . |
| 229044_at | 0.001951 | 7.49E-04 | NUDT17       | 200035    | . |
| 229045_at | 0.002959 | 0.001233 | SNX20        | 124460    | . |
| 229046_s  | 2.74E-06 | 1.86E-07 | PLEKHB1      | 58473     | . |
| 229047_at | 3.26E-04 | 8.42E-05 | PLEKHB1      | 58473     | . |
| 229050_s  | 0.001825 | 6.91E-04 | SNHG7        | 84973     | . |

|           |          |          |                              |          |
|-----------|----------|----------|------------------------------|----------|
| 229053_at | 1.49E-04 | 3.17E-05 | SYT17                        | 51760 .  |
| 229054_at | 0.013881 | 0.007709 | C14orf181                    | 400223 . |
| 229055_at | 0.007751 | 0.003895 | GPR68                        | 8111 .   |
| 229056_at | 0.001819 | 6.88E-04 | TP53I13                      | 90313 .  |
| 229058_at | 0.003209 | 0.001362 | ANKRD16                      | 54522 .  |
| 229059_at | 1.15E-04 | 2.29E-05 | C9orf109 /// C:100128385 //. |          |
| 229061_s_ | 5.76E-06 | 4.91E-07 | SLC25A13                     | 10165 .  |
| 229063_s_ | 2.67E-05 | 3.60E-06 | CCDC107                      | 203260 . |
| 229064_s_ | 0.013644 | 0.007556 | RCAN3                        | 11123 .  |
| 229065_at | 0.021    | 0.012535 | SLC35F3                      | 148641 . |
| 229066_at | 6.78E-05 | 1.18E-05 |                              | .        |
| 229067_at | 1.38E-04 | 2.90E-05 | SRGAP2P1                     | 653464 . |
| 229068_at | 2.42E-04 | 5.82E-05 | CCT5                         | 22948 .  |
| 229070_at | 0.036    | 0.023443 | C6orf105                     | 84830 .  |
| 229071_at | 0.001493 | 5.43E-04 | C17orf100                    | 388327 . |
| 229072_at | 5.77E-05 | 9.59E-06 |                              | .        |
| 229073_at | 7.52E-07 | 3.38E-08 | PRTG                         | 283659 . |
| 229074_at | 2.72E-04 | 6.73E-05 |                              | .        |
| 229075_at | 1.51E-04 | 3.25E-05 | SPATA5                       | 166378 . |
| 229076_s_ | 2.31E-04 | 5.48E-05 |                              | .        |
| 229077_at | 0.00653  | 0.00318  | KATNB1                       | 10300 .  |
| 229078_s_ | 8.83E-04 | 2.87E-04 | KIAA1704                     | 55425 .  |
| 229079_at | 9.47E-04 | 3.13E-04 | EHMT2                        | 10919 .  |
| 229080_at | 6.43E-08 | 1.26E-09 | EMID2                        | 136227 . |
| 229081_at | 6.08E-04 | 1.81E-04 | SLC25A13                     | 10165 .  |
| 229082_at | 0.040532 | 0.026895 | CCDC125                      | 202243 . |
| 229085_at | 0.002667 | 0.00109  | LRRC3B                       | 116135 . |
| 229086_at | 0.011079 | 0.005917 | C1orf213                     | 148898 . |
| 229089_at | 1.19E-04 | 2.40E-05 | ZNF509                       | 166793 . |
| 229091_s_ | 5.96E-06 | 5.14E-07 | CCNJ                         | 54619 .  |
| 229093_at | 0.022279 | 0.013433 | NOS3                         | 4846 .   |
| 229095_s_ | 6.01E-05 | 1.01E-05 | LIMS3-LOC440:100271835 //.   |          |
| 229096_at | 3.98E-05 | 5.96E-06 | LIMS3-LOC440:100271835 //.   |          |
| 229097_at | 0.001751 | 6.57E-04 | DIAPH3                       | 81624 .  |

|           |          |          |              |           |   |
|-----------|----------|----------|--------------|-----------|---|
| 229098_s_ | 5.82E-04 | 1.71E-04 | DDX46        | 9879      | . |
| 229099_at | 3.88E-05 | 5.76E-06 | C11orf83     | 790955    | . |
| 229101_at | 5.80E-05 | 9.64E-06 | LOC150166    | 150166    | . |
| 229102_at | 1.74E-04 | 3.86E-05 | HTATIP2      | 10553     | . |
| 229103_at | 0.012393 | 0.006752 | WNT3         | 7473      | . |
| 229104_s_ | 5.77E-06 | 4.93E-07 | GPR39        | 2863      | . |
| 229105_at | 0.009247 | 0.004787 | GPR39        | 2863      | . |
| 229106_at | 0.035266 | 0.02288  | DYNLL2       | 140735    | . |
| 229110_at | 0.008387 | 0.00427  | LOC100128844 | 100128844 | . |
| 229111_at | 7.60E-04 | 2.39E-04 |              |           | . |
| 229112_at | 0.015446 | 0.008748 | SIRT5        | 23408     | . |
| 229116_at | 0.022354 | 0.013483 | CNKSR2       | 22866     | . |
| 229118_at | 4.15E-04 | 1.13E-04 |              |           | . |
| 229120_s_ | 0.045657 | 0.030897 | CDC42SE1     | 56882     | . |
| 229122_x_ | 9.95E-06 | 1.01E-06 | C16orf35     | 8131      | . |
| 229123_at | 0.014507 | 0.008118 |              |           | . |
| 229126_at | 0.001007 | 3.37E-04 | TMEM19       | 55266     | . |
| 229127_at | 0.016455 | 0.009418 | JAM2         | 58494     | . |
| 229129_at | 3.25E-04 | 8.41E-05 |              |           | . |
| 229132_at | 3.46E-04 | 9.07E-05 | MINA         | 84864     | . |
| 229133_s_ | 3.88E-04 | 1.04E-04 | ZNF397       | 84307     | . |
| 229134_at | 0.046042 | 0.031196 | VANGL1       | 81839     | . |
| 229135_at | 0.011455 | 0.006154 | FASTKD2      | 22868     | . |
| 229137_at | 6.66E-04 | 2.03E-04 | FUCA1        | 2517      | . |
| 229139_at | 3.01E-06 | 2.12E-07 | JPH1         | 56704     | . |
| 229141_at | 0.002618 | 0.001067 | WDR33        | 55339     | . |
| 229142_s_ | 1.12E-04 | 2.21E-05 | BBS1         | 582       | . |
| 229143_at | 0.003247 | 0.00138  | CNOT3        | 4849      | . |
| 229145_at | 0.007036 | 0.003477 | C10orf104    | 119504    | . |
| 229146_at | 0.003185 | 0.001349 | C7orf31      | 136895    | . |
| 229147_at | 2.86E-07 | 9.53E-09 |              |           | . |
| 229148_at | 0.006416 | 0.003115 |              |           | . |
| 229149_at | 0.005823 | 0.002777 |              |           | . |
| 229151_at | 7.10E-05 | 1.25E-05 | SLC14A1      | 6563      | . |

|           |          |          |           |          |
|-----------|----------|----------|-----------|----------|
| 229153_at | 0.004884 | 0.002253 | SLC7A6OS  | 84138 .  |
| 229154_at | 0.003403 | 0.001461 | WNT10A    | 80326 .  |
| 229155_at | 9.34E-05 | 1.77E-05 |           | .        |
| 229156_s_ | 7.24E-04 | 2.25E-04 |           | .        |
| 229157_at | 3.07E-04 | 7.83E-05 |           | .        |
| 229160_at | 0.013584 | 0.007517 | MUM1L1    | 139221 . |
| 229161_at | 1.52E-04 | 3.26E-05 | IQCG      | 84223 .  |
| 229163_at | 0.001406 | 5.05E-04 | CAMK2N1   | 55450 .  |
| 229164_s_ | 2.98E-04 | 7.52E-05 | ABTB1     | 80325 .  |
| 229165_at | 0.020088 | 0.011888 | MRPL12    | 6182 .   |
| 229166_s_ | 5.15E-05 | 8.32E-06 | GATAD2A   | 54815 .  |
| 229167_at | 3.04E-04 | 7.73E-05 |           | .        |
| 229171_at | 0.020801 | 0.012394 | MGC16385  | 92806 .  |
| 229173_at | 6.88E-04 | 2.11E-04 | KIAA1715  | 80856 .  |
| 229174_at | 0.023915 | 0.014579 | C3orf38   | 285237 . |
| 229175_at | 5.13E-05 | 8.27E-06 | SMYD4     | 114826 . |
| 229176_at | 0.004417 | 0.001998 | ANKH      | 56172 .  |
| 229177_at | 7.59E-04 | 2.38E-04 | C16orf89  | 146556 . |
| 229178_at | 2.01E-07 | 5.79E-09 | PRTG      | 283659 . |
| 229179_at | 0.040562 | 0.026917 | RUFY1     | 80230 .  |
| 229181_s_ | 0.020683 | 0.01231  | HAUS2     | 55142 .  |
| 229182_at | 0.004662 | 0.002132 |           | .        |
| 229183_at | 0.001211 | 4.22E-04 | KCTD1     | 284252 . |
| 229185_at | 0.002735 | 0.001124 |           | .        |
| 229187_at | 0.006071 | 0.002918 | LOC283788 | 283788 . |
| 229188_s_ | 0.003065 | 0.001288 |           | .        |
| 229189_s_ | 0.017852 | 0.010357 |           | .        |
| 229191_at | 6.83E-05 | 1.19E-05 | TBCD      | 6904 .   |
| 229192_s_ | 0.030015 | 0.018992 | TBCD      | 6904 .   |
| 229193_at | 5.92E-06 | 5.09E-07 |           | .        |
| 229194_at | 1.75E-06 | 1.05E-07 | PCGF5     | 84333 .  |
| 229195_at | 0.003176 | 0.001344 | MESP1     | 55897 .  |
| 229196_at | 0.024499 | 0.014993 | FAM111A   | 63901 .  |
| 229198_at | 0.028606 | 0.017951 | USP35     | 57558 .  |

|           |          |          |           |          |
|-----------|----------|----------|-----------|----------|
| 229199_at | 0.002234 | 8.82E-04 | SCN9A     | 6335 .   |
| 229200_at | 0.029712 | 0.018771 | LOC729810 | 729810 . |
| 229203_at | 5.09E-04 | 1.45E-04 | B4GALNT3  | 283358 . |
| 229204_at | 7.71E-04 | 2.43E-04 | HP1BP3    | 50809 .  |
| 229205_at | 0.023201 | 0.014072 |           | .        |
| 229206_at | 2.36E-06 | 1.54E-07 |           | .        |
| 229207_x_ | 1.18E-05 | 1.26E-06 | RNF187    | 149603 . |
| 229208_at | 1.59E-04 | 3.45E-05 | HAUS2     | 55142 .  |
| 229209_at | 0.00557  | 0.002635 | SNHG10    | 283596 . |
| 229210_at | 2.45E-04 | 5.91E-05 | RNASEH2B  | 79621 .  |
| 229211_at | 2.69E-06 | 1.83E-07 | DUSP28    | 285193 . |
| 229212_at | 0.00689  | 0.003392 |           | .        |
| 229213_at | 0.006553 | 0.003193 | DIRC2     | 84925 .  |
| 229214_at | 0.00166  | 6.16E-04 |           | .        |
| 229215_at | 0.014226 | 0.007932 | ASCL2     | 430 .    |
| 229217_at | 8.20E-04 | 2.62E-04 | SP3       | 6670 .   |
| 229218_at | 2.42E-04 | 5.82E-05 | COL1A2    | 1278 .   |
| 229219_s_ | 4.46E-05 | 6.93E-06 |           | .        |
| 229220_x_ | 1.22E-05 | 1.32E-06 | NOM1      | 64434 .  |
| 229221_at | 0.013543 | 0.007489 | CD44      | 960 .    |
| 229222_at | 0.020441 | 0.01213  | ACSS3     | 79611 .  |
| 229223_at | 4.14E-09 | 3.36E-11 |           | .        |
| 229224_x_ | 0.002253 | 8.92E-04 | LOC643085 | 643085 . |
| 229225_at | 0.011508 | 0.006186 | NRP2      | 8828 .   |
| 229227_at | 0.001363 | 4.87E-04 | FLJ45244  | 400242 . |
| 229230_at | 0.007792 | 0.003922 | OSTalpha  | 200931 . |
| 229232_at | 0.048236 | 0.032918 | LRRC57    | 255252 . |
| 229233_at | 7.44E-05 | 1.33E-05 | NRG3      | 10718 .  |
| 229235_at | 1.19E-04 | 2.39E-05 | ZCCHC11   | 23318 .  |
| 229236_s_ | 3.21E-05 | 4.54E-06 | SFXN4     | 119559 . |
| 229237_s_ | 3.08E-05 | 4.33E-06 | FOXN3     | 1112 .   |
| 229238_at | 0.001344 | 4.79E-04 | C17orf97  | 400566 . |
| 229239_x_ | 0.007571 | 0.00379  | SLCO4A1   | 28231 .  |
| 229241_at | 2.51E-04 | 6.09E-05 | LDHD      | 197257 . |



|           |          |          |                               |
|-----------|----------|----------|-------------------------------|
| 229243_at | 1.37E-05 | 1.54E-06 | .                             |
| 229246_at | 0.009383 | 0.004869 | FLJ44342 645460 .             |
| 229247_at | 3.57E-05 | 5.18E-06 | FBLN7 129804 .                |
| 229248_at | 2.61E-04 | 6.39E-05 | .                             |
| 229255_x_ | 0.001209 | 4.21E-04 | .                             |
| 229258_at | 3.89E-04 | 1.05E-04 | KIF12 113220 .                |
| 229259_at | 0.048279 | 0.032952 | GFAP 2670 .                   |
| 229260_at | 7.50E-04 | 2.35E-04 | C5orf15 56951 .               |
| 229261_at | 0.01836  | 0.010702 | .                             |
| 229262_at | 0.012703 | 0.006953 | LRRC68 284352 .               |
| 229263_at | 0.002927 | 0.001217 | IL17RD 54756 .                |
| 229264_at | 4.71E-04 | 1.32E-04 | PARP8 79668 .                 |
| 229267_at | 0.002936 | 0.001222 | .                             |
| 229268_at | 0.011114 | 0.005941 | FAM105B 90268 .               |
| 229269_x_ | 7.79E-08 | 1.64E-09 | LOC646044 /// 170463 /// 64 . |
| 229270_x_ | 0.001603 | 5.91E-04 | LOC646044 /// 170463 /// 64 . |
| 229272_at | 0.008084 | 0.004093 | FNBP4 23360 .                 |
| 229273_at | 3.23E-06 | 2.32E-07 | SALL1 6299 .                  |
| 229274_at | 0.010144 | 0.005333 | GNAS 2778 .                   |
| 229275_at | 0.03649  | 0.023815 | IGFN1 91156 .                 |
| 229279_at | 0.040078 | 0.026543 | .                             |
| 229280_s_ | 1.00E-04 | 1.93E-05 | FLJ22536 401237 .             |
| 229282_at | 2.96E-04 | 7.47E-05 | GATA6 2627 .                  |
| 229284_at | 7.27E-05 | 1.29E-05 | .                             |
| 229285_at | 3.10E-06 | 2.19E-07 | RNASEL 6041 .                 |
| 229286_at | 0.049773 | 0.034151 | MAGEE1 57692 .                |
| 229287_at | 0.043857 | 0.029491 | PCNX 22990 .                  |
| 229288_at | 1.53E-04 | 3.30E-05 | EPHA7 2045 .                  |
| 229289_at | 0.029988 | 0.018974 | FAM71E1 112703 .              |
| 229290_at | 0.0023   | 9.14E-04 | DAPL1 92196 .                 |
| 229291_at | 0.019857 | 0.011725 | .                             |
| 229292_at | 7.66E-12 | 8.75E-15 | EPB41L5 57669 .               |
| 229293_at | 0.004591 | 0.002092 | .                             |
| 229294_at | 1.63E-05 | 1.91E-06 | JPH3 57338 .                  |

|           |          |          |              |           |   |
|-----------|----------|----------|--------------|-----------|---|
| 229295_at | 0.039725 | 0.02627  | LOC150166    | 150166    | . |
| 229296_at | 5.89E-05 | 9.82E-06 | LOC100128501 | 100128501 | . |
| 229297_at | 0.005464 | 0.002574 |              |           | . |
| 229298_at | 0.036174 | 0.023576 | KBTBD7       | 84078     | . |
| 229299_at | 0.004787 | 0.002202 | C5orf33      | 133686    | . |
| 229300_at | 0.006774 | 0.003322 |              |           | . |
| 229301_at | 0.012508 | 0.006829 |              |           | . |
| 229302_at | 0.003164 | 0.001338 | TMEM178      | 130733    | . |
| 229303_at | 0.001154 | 3.97E-04 |              |           | . |
| 229304_s_ | 3.19E-04 | 8.20E-05 | MLF1IP       | 79682     | . |
| 229305_at | 5.24E-04 | 1.51E-04 | MLF1IP       | 79682     | . |
| 229307_at | 1.30E-04 | 2.68E-05 | ANKRD28      | 23243     | . |
| 229308_at | 0.007413 | 0.003698 |              |           | . |
| 229310_at | 0.011093 | 0.005925 | KLHL29       | 114818    | . |
| 229311_at | 0.001032 | 3.47E-04 | GKAP1        | 80318     | . |
| 229312_s_ | 5.23E-06 | 4.31E-07 | GKAP1        | 80318     | . |
| 229315_at | 2.69E-05 | 3.63E-06 |              |           | . |
| 229316_at | 0.008273 | 0.004202 |              |           | . |
| 229318_at | 0.006301 | 0.003048 |              |           | . |
| 229319_at | 0.040202 | 0.026641 |              |           | . |
| 229320_at | 7.94E-06 | 7.46E-07 | C2orf55      | 343990    | . |
| 229323_at | 0.001576 | 5.80E-04 | LOC387723    | 387723    | . |
| 229324_x_ | 3.57E-05 | 5.19E-06 | ISYNA1       | 51477     | . |
| 229325_at | 0.012323 | 0.006707 | ZZZ3         | 26009     | . |
| 229326_at | 9.93E-04 | 3.31E-04 | TNFSF13      | 8741      | . |
| 229327_s_ | 0.028456 | 0.017837 |              |           | . |
| 229328_at | 0.044345 | 0.029873 | ZNF540       | 163255    | . |
| 229330_at | 0.047191 | 0.032108 |              |           | . |
| 229331_at | 9.44E-07 | 4.58E-08 | SPATA18      | 132671    | . |
| 229332_at | 0.001009 | 3.37E-04 | HPDL         | 84842     | . |
| 229333_at | 0.001047 | 3.52E-04 |              |           | . |
| 229334_at | 0.001215 | 4.23E-04 | RUFY3        | 22902     | . |
| 229337_at | 5.49E-04 | 1.60E-04 | USP2         | 9099      | . |
| 229338_at | 0.043544 | 0.029236 |              |           | . |

|           |          |          |          |        |   |
|-----------|----------|----------|----------|--------|---|
| 229340_at | 5.36E-07 | 2.16E-08 | NKAPL    | 222698 | . |
| 229342_at | 0.001064 | 3.60E-04 |          |        | . |
| 229343_at | 4.75E-04 | 1.33E-04 | GTSE1    | 51512  | . |
| 229344_x_ | 7.96E-05 | 1.45E-05 | RIMKLB   | 57494  | . |
| 229345_at | 1.09E-06 | 5.51E-08 | RTN4RL2  | 349667 | . |
| 229348_at | 2.80E-04 | 6.97E-05 | UBIAD1   | 29914  | . |
| 229349_at | 4.91E-06 | 3.97E-07 | LIN28B   | 389421 | . |
| 229350_x_ | 0.016651 | 0.009548 | PARP10   | 84875  | . |
| 229351_at | 1.78E-04 | 3.96E-05 |          |        | . |
| 229353_s_ | 6.55E-07 | 2.82E-08 | NUCKS1   | 64710  | . |
| 229354_at | 4.29E-04 | 1.18E-04 | AHRR     | 57491  | . |
| 229355_at | 1.04E-04 | 2.02E-05 |          |        | . |
| 229356_x_ | 0.001958 | 7.52E-04 | INO80    | 54617  | . |
| 229357_at | 2.44E-04 | 5.88E-05 | ADAMTS5  | 11096  | . |
| 229358_at | 1.05E-06 | 5.28E-08 | IHH      | 3549   | . |
| 229359_at | 5.70E-05 | 9.43E-06 |          |        | . |
| 229360_at | 8.28E-06 | 7.87E-07 | ZNF280B  | 140883 | . |
| 229362_at | 5.24E-04 | 1.50E-04 | PUS10    | 150962 | . |
| 229365_at | 0.023311 | 0.014151 | PPP1R3F  | 89801  | . |
| 229366_at | 6.90E-06 | 6.19E-07 |          |        | . |
| 229368_s_ | 0.015031 | 0.008469 | ZFAND5   | 7763   | . |
| 229369_at | 0.010767 | 0.005723 | VSIG2    | 23584  | . |
| 229371_at | 0.008383 | 0.004268 |          |        | . |
| 229372_at | 0.004013 | 0.001779 | GOLT1A   | 127845 | . |
| 229374_at | 0.01399  | 0.007777 | EPHA4    | 2043   | . |
| 229377_at | 1.20E-04 | 2.42E-05 | GRTP1    | 79774  | . |
| 229378_at | 0.003873 | 0.001706 | STOX1    | 219736 | . |
| 229379_at | 1.35E-04 | 2.81E-05 | AHDC1    | 27245  | . |
| 229381_at | 1.16E-05 | 1.23E-06 | C1orf64  | 149563 | . |
| 229382_at | 0.001603 | 5.91E-04 | C1orf183 | 55924  | . |
| 229384_at | 0.001288 | 4.54E-04 |          |        | . |
| 229386_at | 0.001977 | 7.61E-04 | ID4      | 3400   | . |
| 229388_at | 6.24E-07 | 2.63E-08 |          |        | . |
| 229389_at | 6.93E-04 | 2.13E-04 | ATG16L2  | 89849  | . |

|           |          |          |              |             |
|-----------|----------|----------|--------------|-------------|
| 229390_at | 0.004762 | 0.002187 | FAM26F       | 441168 .    |
| 229391_s_ | 0.018721 | 0.010949 | FAM26F       | 441168 .    |
| 229394_s_ | 9.08E-06 | 8.95E-07 | GRLF1        | 2909 .      |
| 229396_at | 8.87E-05 | 1.66E-05 | OVOL1        | 5017 .      |
| 229397_s_ | 0.022057 | 0.01328  | GRLF1        | 2909 .      |
| 229398_at | 0.010693 | 0.005676 | RAB18        | 22931 .     |
| 229400_at | 0.036647 | 0.023933 | HOXD10       | 3236 .      |
| 229401_at | 0.001415 | 5.09E-04 | IL17RE       | 132014 .    |
| 229402_at | 0.002528 | 0.001024 | SAMD13       | 148418 .    |
| 229403_at | 0.017512 | 0.010124 | B4GALT1      | 2683 .      |
| 229404_at | 1.50E-06 | 8.51E-08 | TWIST2       | 117581 .    |
| 229405_at | 4.18E-04 | 1.14E-04 | KIF7         | 374654 .    |
| 229409_s_ | 5.48E-05 | 8.98E-06 | ADO          | 84890 .     |
| 229410_at | 3.72E-05 | 5.46E-06 | SLC35E1      | 79939 .     |
| 229413_s_ | 0.030753 | 0.019533 |              | .           |
| 229415_at | 0.00572  | 0.002716 | CYCS         | 54205 .     |
| 229418_at | 2.50E-07 | 7.94E-09 | C17orf63     | 55731 .     |
| 229422_at | 0.001357 | 4.84E-04 | NRD1         | 4898 .      |
| 229423_at | 0.043635 | 0.029311 |              | .           |
| 229424_s_ | 3.92E-06 | 2.97E-07 | ARHGAP27     | 201176 .    |
| 229425_at | 2.40E-04 | 5.74E-05 |              | .           |
| 229426_at | 0.003033 | 0.001272 | COX5A        | 9377 .      |
| 229427_at | 2.64E-06 | 1.78E-07 | SEMA5A       | 9037 .      |
| 229428_at | 0.001753 | 6.58E-04 | LOC100132418 | 100132418 . |
| 229429_x_ | 4.06E-07 | 1.51E-08 | LOC728855    | 728855 .    |
| 229431_at | 0.006584 | 0.00321  | RFXAP        | 5994 .      |
| 229433_at | 3.31E-04 | 8.60E-05 | RBM26        | 64062 .     |
| 229434_at | 3.12E-07 | 1.07E-08 |              | .           |
| 229435_at | 0.003985 | 0.001764 | GLIS3        | 169792 .    |
| 229436_x_ | 4.35E-04 | 1.20E-04 | BRCC3        | 79184 .     |
| 229439_s_ | 0.002262 | 8.96E-04 | RBM47        | 54502 .     |
| 229440_at | 3.62E-08 | 5.85E-10 | RBM47        | 54502 .     |
| 229441_at | 1.35E-05 | 1.50E-06 | PRSS23       | 11098 .     |
| 229442_at | 2.74E-06 | 1.87E-07 | C18orf54     | 162681 .    |

|           |          |          |                             |        |   |
|-----------|----------|----------|-----------------------------|--------|---|
| 229444_at | 0.015854 | 0.009018 | LOC729776                   | 729776 | . |
| 229445_at | 0.001089 | 3.70E-04 | CYBA                        | 1535   | . |
| 229447_x_ | 1.99E-04 | 4.55E-05 | NBPF10 /// NB 100132406 //  |        | . |
| 229449_at | 0.02402  | 0.014652 |                             |        | . |
| 229450_at | 3.72E-06 | 2.78E-07 | IFIT3                       | 3437   | . |
| 229451_at | 6.78E-06 | 6.05E-07 | GALNT9 /// LO 100133441 //  |        | . |
| 229452_at | 0.009433 | 0.0049   | TMEM88                      | 92162  | . |
| 229454_at | 0.008347 | 0.004247 | BCLAF1                      | 9774   | . |
| 229455_at | 2.71E-06 | 1.84E-07 |                             |        | . |
| 229456_s_ | 4.99E-08 | 9.02E-10 | DDAH1                       | 23576  | . |
| 229457_at | 1.26E-06 | 6.77E-08 | ANKHD1                      | 54882  | . |
| 229458_s_ | 2.22E-05 | 2.85E-06 | GALK1                       | 2584   | . |
| 229460_at | 0.022575 | 0.013634 | FAM126B                     | 285172 | . |
| 229461_x_ | 1.57E-09 | 9.68E-12 | NEGR1                       | 257194 | . |
| 229464_at | 7.14E-06 | 6.49E-07 | MYEF2                       | 50804  | . |
| 229465_s_ | 3.15E-06 | 2.24E-07 | PTPRS                       | 5802   | . |
| 229466_at | 0.014964 | 0.008427 | TRIM66                      | 9866   | . |
| 229467_at | 2.58E-05 | 3.44E-06 | PCBP2                       | 5094   | . |
| 229468_at | 0.001672 | 6.21E-04 | CDK3                        | 1018   | . |
| 229469_at | 0.003945 | 0.001744 | XAGE2 /// XAG 728242 /// 95 |        | . |
| 229470_at | 3.34E-05 | 4.77E-06 |                             |        | . |
| 229471_s_ | 0.003627 | 0.001578 | SFRS2B                      | 10929  | . |
| 229473_at | 0.025647 | 0.015817 | MAMDC4                      | 158056 | . |
| 229474_at | 0.002717 | 0.001115 | MICAL3                      | 57553  | . |
| 229479_at | 4.84E-11 | 1.01E-13 |                             |        | . |
| 229480_at | 2.43E-08 | 3.44E-10 |                             |        | . |
| 229481_at | 6.52E-04 | 1.98E-04 | LOC283859                   | 283859 | . |
| 229482_at | 3.11E-05 | 4.37E-06 | DDX51                       | 317781 | . |
| 229483_at | 0.001834 | 6.95E-04 |                             |        | . |
| 229484_at | 0.001843 | 6.99E-04 | PPM1J                       | 333926 | . |
| 229485_x_ | 0.011003 | 0.00587  | SHISA3                      | 152573 | . |
| 229486_s_ | 8.97E-05 | 1.68E-05 | TMEM132A                    | 54972  | . |
| 229487_at | 0.004219 | 0.001889 | EBF1                        | 1879   | . |
| 229489_at | 0.002339 | 9.32E-04 |                             |        | . |

|           |          |          |           |          |
|-----------|----------|----------|-----------|----------|
| 229491_at | 3.06E-07 | 1.04E-08 | NHEDC2    | 133308 . |
| 229492_at | 2.98E-05 | 4.13E-06 | VANGL1    | 81839 .  |
| 229493_at | 3.62E-09 | 2.75E-11 |           | .        |
| 229494_s_ | 0.022868 | 0.013837 | PHLDA2    | 7262 .   |
| 229496_at | 0.001564 | 5.74E-04 | CLP1      | 10978 .  |
| 229497_at | 0.007158 | 0.003548 | ANKDD1A   | 348094 . |
| 229499_at | 1.27E-06 | 6.79E-08 | CAPN13    | 92291 .  |
| 229502_at | 3.17E-04 | 8.14E-05 | CHDH      | 55349 .  |
| 229503_at | 2.92E-04 | 7.35E-05 | SLC15A4   | 121260 . |
| 229504_at | 4.19E-04 | 1.14E-04 |           | .        |
| 229506_at | 0.028552 | 0.01791  |           | .        |
| 229507_at | 0.002711 | 0.001112 | C3orf54   | 389119 . |
| 229508_at | 0.001523 | 5.56E-04 | U2AF2     | 11338 .  |
| 229510_at | 0.025665 | 0.015831 | MS4A14    | 84689 .  |
| 229512_at | 4.56E-05 | 7.13E-06 | FAM120C   | 54954 .  |
| 229513_at | 5.37E-07 | 2.16E-08 | STRBP     | 55342 .  |
| 229514_at | 3.29E-04 | 8.53E-05 | C14orf118 | 55668 .  |
| 229515_at | 3.09E-05 | 4.34E-06 | PAWR      | 5074 .   |
| 229516_at | 0.016479 | 0.009435 | WDR31     | 114987 . |
| 229517_at | 0.001432 | 5.16E-04 | PTPDC1    | 138639 . |
| 229518_at | 4.29E-04 | 1.18E-04 | FAM46B    | 115572 . |
| 229519_at | 0.012485 | 0.006814 | FXR1      | 8087 .   |
| 229520_s_ | 4.75E-04 | 1.33E-04 | C14orf118 | 55668 .  |
| 229521_at | 0.038033 | 0.024981 | FLJ36031  | 168455 . |
| 229522_at | 0.005015 | 0.002324 | SDR42E1   | 93517 .  |
| 229523_at | 0.002409 | 9.66E-04 | TTMA      | 645369 . |
| 229524_at | 0.001116 | 3.82E-04 | KIAA0494  | 9813 .   |
| 229525_at | 0.001209 | 4.21E-04 |           | .        |
| 229527_s_ | 0.043836 | 0.029474 | OSBPL11   | 114885 . |
| 229528_at | 0.00259  | 0.001053 | LOC283378 | 283378 . |
| 229531_at | 4.82E-06 | 3.89E-07 |           | .        |
| 229533_x_ | 0.022479 | 0.01357  | ZNF680    | 340252 . |
| 229536_at | 0.005519 | 0.002607 | REC8      | 9985 .   |
| 229538_s_ | 0.030472 | 0.019329 | IQGAP3    | 128239 . |

|           |          |          |                            |        |   |
|-----------|----------|----------|----------------------------|--------|---|
| 229540_at | 0.043064 | 0.028848 | RBPJ                       | 3516   | . |
| 229541_at | 1.40E-04 | 2.94E-05 |                            |        | . |
| 229543_at | 6.94E-04 | 2.14E-04 | FAM26F                     | 441168 | . |
| 229545_at | 0.045679 | 0.030914 | FERMT1                     | 55612  | . |
| 229547_s_ | 5.37E-04 | 1.55E-04 | WNK2                       | 65268  | . |
| 229548_at | 0.002399 | 9.61E-04 |                            |        | . |
| 229549_at | 0.032966 | 0.021177 |                            |        | . |
| 229550_at | 3.06E-07 | 1.04E-08 | KIAA1409                   | 57578  | . |
| 229551_x_ | 5.27E-05 | 8.56E-06 | ZNF367                     | 195828 | . |
| 229552_at | 2.52E-05 | 3.35E-06 | LOC283454                  | 283454 | . |
| 229553_at | 0.044891 | 0.030299 | PGM2L1                     | 283209 | . |
| 229554_at | 2.92E-04 | 7.35E-05 |                            |        | . |
| 229555_at | 6.59E-08 | 1.30E-09 | GALNT5                     | 11227  | . |
| 229556_at | 0.04662  | 0.031647 | TTC15                      | 51112  | . |
| 229557_at | 0.007034 | 0.003476 | MEG3                       | 55384  | . |
| 229558_at | 1.24E-06 | 6.57E-08 |                            |        | . |
| 229559_at | 0.018353 | 0.010697 | FLJ40125                   | 147699 | . |
| 229561_at | 6.43E-08 | 1.26E-09 | LRRK16B                    | 90668  | . |
| 229562_at | 7.64E-04 | 2.40E-04 | RPL10A /// RPL100128936 // |        | . |
| 229565_x_ | 0.049957 | 0.0343   | TBX3                       | 6926   | . |
| 229567_at | 0.0088   | 0.004515 | FITM1                      | 161247 | . |
| 229568_at | 3.42E-04 | 8.94E-05 | MOBKL2B                    | 79817  | . |
| 229569_at | 1.06E-04 | 2.07E-05 |                            |        | . |
| 229571_at | 1.03E-10 | 2.73E-13 |                            |        | . |
| 229572_at | 2.21E-07 | 6.65E-09 |                            |        | . |
| 229574_at | 1.08E-04 | 2.13E-05 | TRA2A                      | 29896  | . |
| 229575_at | 4.39E-04 | 1.21E-04 |                            |        | . |
| 229576_s_ | 3.02E-05 | 4.22E-06 | TBX3                       | 6926   | . |
| 229577_at | 0.032751 | 0.02101  | AGPAT6                     | 137964 | . |
| 229579_s_ | 0.004319 | 0.001944 | DISP2                      | 85455  | . |
| 229581_at | 0.045646 | 0.030885 | ELFN1                      | 392617 | . |
| 229582_at | 3.97E-06 | 3.03E-07 | INO80C                     | 125476 | . |
| 229583_at | 3.07E-04 | 7.81E-05 |                            |        | . |
| 229584_at | 6.96E-07 | 3.06E-08 | LRRK2                      | 120892 | . |

|           |          |          |           |        |   |
|-----------|----------|----------|-----------|--------|---|
| 229585_at | 1.40E-05 | 1.59E-06 | ADAMTSL1  | 92949  | . |
| 229586_at | 3.95E-05 | 5.89E-06 | CHD9      | 80205  | . |
| 229587_at | 2.39E-05 | 3.13E-06 | UBA2      | 10054  | . |
| 229589_x_ | 8.69E-06 | 8.41E-07 | BIVM      | 54841  | . |
| 229593_at | 5.00E-05 | 8.00E-06 |           |        | . |
| 229595_at | 6.48E-04 | 1.96E-04 | CHCHD4    | 131474 | . |
| 229597_s_ | 0.001342 | 4.78E-04 | WDFY4     | 57705  | . |
| 229599_at | 0.018355 | 0.010698 | LOC440335 | 440335 | . |
| 229601_at | 0.003035 | 0.001273 | SCYL1     | 57410  | . |
| 229602_at | 0.001158 | 3.99E-04 |           |        | . |
| 229603_at | 6.81E-05 | 1.19E-05 | BBS12     | 166379 | . |
| 229604_at | 0.003118 | 0.001315 | CMAH      | 8418   | . |
| 229605_at | 0.020801 | 0.012394 | CYB5RL    | 606495 | . |
| 229606_at | 7.38E-12 | 8.03E-15 |           |        | . |
| 229607_at | 5.53E-05 | 9.08E-06 |           |        | . |
| 229608_at | 7.93E-06 | 7.44E-07 | C1orf183  | 55924  | . |
| 229610_at | 1.54E-04 | 3.33E-05 | CKAP2L    | 150468 | . |
| 229612_at | 9.48E-06 | 9.47E-07 |           |        | . |
| 229613_at | 6.02E-04 | 1.79E-04 |           |        | . |
| 229615_at | 3.25E-05 | 4.62E-06 |           |        | . |
| 229617_x_ | 9.60E-05 | 1.83E-05 | AP2A1     | 160    | . |
| 229618_at | 0.014487 | 0.008106 | SNX16     | 64089  | . |
| 229619_at | 0.001056 | 3.56E-04 | FOLR2     | 2350   | . |
| 229621_x_ | 0.021802 | 0.013099 |           |        | . |
| 229622_at | 0.00289  | 0.001199 | FAM132B   | 151176 | . |
| 229623_at | 4.22E-04 | 1.16E-04 | FLJ12993  | 441027 | . |
| 229630_s_ | 0.032136 | 0.020557 | WTAP      | 9589   | . |
| 229632_s_ | 1.02E-05 | 1.05E-06 | INTS10    | 55174  | . |
| 229633_at | 2.74E-04 | 6.77E-05 | INTS10    | 55174  | . |
| 229635_at | 4.31E-06 | 3.37E-07 |           |        | . |
| 229637_at | 0.004412 | 0.001995 | RIC8B     | 55188  | . |
| 229638_at | 4.51E-04 | 1.25E-04 | IRX3      | 79191  | . |
| 229640_x_ | 0.044798 | 0.030228 |           |        | . |
| 229641_at | 2.50E-07 | 7.92E-09 |           |        | . |



|           |          |          |           |             |
|-----------|----------|----------|-----------|-------------|
| 229642_at | 0.021687 | 0.013017 | ARHGEF7   | 8874 .      |
| 229644_at | 0.002964 | 0.001235 | PREP      | 5550 .      |
| 229647_at | 6.86E-05 | 1.20E-05 |           | .           |
| 229648_at | 4.79E-04 | 1.35E-04 | RICS      | 9743 .      |
| 229649_at | 4.12E-05 | 6.24E-06 | NRXN3     | 9369 .      |
| 229651_at | 0.005778 | 0.00275  | SEZ6      | 124925 .    |
| 229652_s_ | 0.032131 | 0.020552 | LOC400236 | 400236 .    |
| 229653_at | 4.62E-05 | 7.26E-06 | VPS53     | 55275 .     |
| 229656_s_ | 8.06E-04 | 2.57E-04 | EML6      | 400954 .    |
| 229657_at | 7.09E-04 | 2.19E-04 | THRB      | 7068 .      |
| 229659_s_ | 9.15E-04 | 3.00E-04 |           | .           |
| 229660_at | 0.018405 | 0.010734 | C16orf55  | 124045 .    |
| 229661_at | 1.33E-08 | 1.51E-10 | SALL4     | 57167 .     |
| 229662_at | 4.17E-05 | 6.34E-06 | MSH3      | 4437 .      |
| 229663_at | 2.67E-08 | 3.93E-10 | LONP2     | 83752 .     |
| 229664_at | 0.002181 | 8.57E-04 | MAPK8     | 5599 .      |
| 229665_at | 9.04E-06 | 8.90E-07 | CSTF3     | 1479 .      |
| 229666_s_ | 1.96E-05 | 2.44E-06 | CSTF3     | 1479 .      |
| 229667_s_ | 0.005201 | 0.002429 | HOXB8     | 3218 .      |
| 229668_at | 1.47E-04 | 3.12E-05 |           | .           |
| 229671_s_ | 0.003052 | 0.001282 | C21orf45  | 54069 .     |
| 229672_at | 1.41E-06 | 7.88E-08 | UQCC      | 55245 .     |
| 229675_at | 0.00102  | 3.42E-04 | MINA      | 84864 .     |
| 229676_at | 0.042048 | 0.028065 | MTPAP     | 55149 .     |
| 229677_at | 7.66E-04 | 2.41E-04 | SLC39A3   | 29985 .     |
| 229678_at | 0.001382 | 4.95E-04 | LOC728431 | 728431 .    |
| 229680_at | 0.006878 | 0.003383 | CCDC44    | 51204 .     |
| 229681_at | 7.14E-04 | 2.21E-04 |           | .           |
| 229682_at | 0.024715 | 0.01515  | MAPRE3    | 22924 .     |
| 229687_s_ | 0.021611 | 0.012962 |           | .           |
| 229688_at | 3.55E-04 | 9.34E-05 |           | .           |
| 229689_s_ | 0.023804 | 0.014501 | DLG5      | 9231 .      |
| 229690_at | 9.59E-04 | 3.17E-04 | FAM109A   | 144717 .    |
| 229691_at | 0.046517 | 0.031569 | ZBTB42    | 100128927 . |

|           |          |          |              |             |
|-----------|----------|----------|--------------|-------------|
| 229692_at | 1.49E-05 | 1.72E-06 |              | .           |
| 229693_at | 0.010287 | 0.005423 | TMEM220      | 388335 .    |
| 229694_at | 0.004777 | 0.002195 | BRWD2        | 55717 .     |
| 229696_at | 0.004614 | 0.002105 | FECH         | 2235 .      |
| 229697_at | 0.008337 | 0.004241 | HIRIP3       | 8479 .      |
| 229698_at | 0.005777 | 0.002749 |              | .           |
| 229699_at | 0.019298 | 0.011342 | LOC100129550 | 100129550 . |
| 229700_at | 0.032653 | 0.020934 | ZNF738       | 148203 .    |
| 229701_at | 0.026191 | 0.016203 | DNAJC9       | 23234 .     |
| 229702_at | 0.003137 | 0.001325 | CSNK1G3      | 1456 .      |
| 229704_at | 0.014306 | 0.007988 |              | .           |
| 229705_at | 1.86E-04 | 4.17E-05 |              | .           |
| 229706_at | 0.001814 | 6.86E-04 | TCERG1       | 10915 .     |
| 229707_at | 5.14E-04 | 1.47E-04 | ZNF606       | 80095 .     |
| 229708_at | 0.009209 | 0.004765 | C9orf167     | 54863 .     |
| 229709_at | 0.02163  | 0.012975 | ATP1B3       | 483 .       |
| 229710_at | 0.006933 | 0.003417 |              | .           |
| 229713_at | 1.27E-04 | 2.61E-05 |              | .           |
| 229714_at | 5.75E-05 | 9.55E-06 | HS6ST3       | 266722 .    |
| 229715_at | 8.11E-04 | 2.59E-04 | DKFZp686O24  | 374383 .    |
| 229718_at | 3.08E-04 | 7.84E-05 | N4BP2L1      | 90634 .     |
| 229719_s  | 3.10E-04 | 7.91E-05 | DERL3        | 91319 .     |
| 229720_at | 0.00258  | 0.001049 | BAG1         | 573 .       |
| 229721_x  | 3.23E-05 | 4.58E-06 | DERL3        | 91319 .     |
| 229724_at | 2.30E-08 | 3.17E-10 | GABRB3       | 2562 .      |
| 229725_at | 0.048871 | 0.033429 | ACSL6        | 23305 .     |
| 229727_x  | 4.08E-06 | 3.14E-07 | FAM148B      | 388125 .    |
| 229728_at | 8.14E-05 | 1.49E-05 |              | .           |
| 229730_at | 0.013693 | 0.007588 | SMTNL2       | 342527 .    |
| 229731_at | 0.021929 | 0.013192 | FOXS1        | 2307 .      |
| 229732_at | 0.011804 | 0.006368 | ZNF823       | 55552 .     |
| 229733_s  | 5.33E-10 | 2.35E-12 |              | .           |
| 229734_at | 0.020022 | 0.011843 | LOC283174    | 283174 .    |
| 229735_s  | 5.22E-05 | 8.46E-06 |              | .           |

|           |          |          |              |             |
|-----------|----------|----------|--------------|-------------|
| 229736_at | 5.50E-04 | 1.60E-04 | TMEM86B      | 255043 .    |
| 229739_s_ | 0.011443 | 0.006147 | FAM116B      | 414918 .    |
| 229740_at | 0.001477 | 5.36E-04 | LOC643008    | 643008 .    |
| 229741_at | 4.00E-05 | 5.98E-06 | MAVS         | 57506 .     |
| 229742_at | 4.79E-06 | 3.85E-07 | C15orf61     | 145853 .    |
| 229743_at | 5.81E-04 | 1.71E-04 | ZNF438       | 220929 .    |
| 229744_at | 0.009154 | 0.004731 | SSFA2        | 6744 .      |
| 229745_x_ | 4.10E-05 | 6.19E-06 | DACT3        | 147906 .    |
| 229747_x_ | 2.30E-05 | 2.98E-06 | LOC146880    | 146880 .    |
| 229748_x_ | 0.012455 | 0.006792 | LOC100132288 | 100132288 . |
| 229749_at | 6.86E-05 | 1.20E-05 | ANO4         | 121601 .    |
| 229750_at | 0.001377 | 4.92E-04 | POU2F2       | 5452 .      |
| 229753_at | 0.005723 | 0.002718 | POU2F1       | 5451 .      |
| 229755_x_ | 7.61E-04 | 2.39E-04 | DLL3         | 10683 .     |
| 229756_at | 0.012989 | 0.007138 |              | .           |
| 229757_at | 0.015846 | 0.009013 | NAF1         | 92345 .     |
| 229758_at | 0.006213 | 0.002998 | TIGD5        | 84948 .     |
| 229759_s_ | 2.50E-08 | 3.57E-10 | VEPH1        | 79674 .     |
| 229760_at | 9.18E-06 | 9.08E-07 | VEPH1        | 79674 .     |
| 229761_at | 7.21E-04 | 2.24E-04 | LOC440173    | 440173 .    |
| 229762_at | 1.35E-05 | 1.50E-06 | C7orf38      | 221786 .    |
| 229765_at | 3.78E-05 | 5.58E-06 | ZNF207       | 7756 .      |
| 229767_at | 0.001885 | 7.19E-04 | TBCD         | 6904 .      |
| 229768_at | 0.009157 | 0.004733 | OR51E1       | 143503 .    |
| 229769_at | 6.37E-04 | 1.92E-04 |              | .           |
| 229770_at | 6.97E-08 | 1.40E-09 | GLT1D1       | 144423 .    |
| 229773_at | 0.024756 | 0.015182 | SNAP23       | 8773 .      |
| 229775_s_ | 0.023566 | 0.014333 | MLLT4        | 4301 .      |
| 229778_at | 0.00783  | 0.003944 | C12orf39     | 80763 .     |
| 229780_at | 4.69E-05 | 7.40E-06 |              | .           |
| 229781_at | 5.54E-04 | 1.61E-04 |              | .           |
| 229782_at | 2.45E-14 | 4.27E-18 | RMST         | 196475 .    |
| 229783_at | 2.03E-05 | 2.54E-06 | LOC728163    | 728163 .    |
| 229784_at | 0.001067 | 3.61E-04 | MGC16121     | 84848 .     |

|           |          |          |           |        |   |
|-----------|----------|----------|-----------|--------|---|
| 229785_at | 8.32E-04 | 2.67E-04 | KRIT1     | 889    | . |
| 229786_at | 1.16E-05 | 1.23E-06 |           |        | . |
| 229787_s_ | 0.017188 | 0.009904 | OGT       | 8473   | . |
| 229788_s_ | 1.64E-04 | 3.57E-05 |           |        | . |
| 229790_at | 0.002729 | 0.001121 | TERF2     | 7014   | . |
| 229791_at | 0.002114 | 8.25E-04 | LPCAT2    | 54947  | . |
| 229792_at | 3.49E-08 | 5.54E-10 | KLHL17    | 339451 | . |
| 229793_at | 0.001647 | 6.10E-04 | ASAH2B    | 653308 | . |
| 229798_s_ | 0.009866 | 0.005165 |           |        | . |
| 229799_s_ | 0.027582 | 0.017204 | NCAM1     | 4684   | . |
| 229801_at | 0.002813 | 0.001162 | C10orf47  | 254427 | . |
| 229805_at | 0.008545 | 0.004363 | ZDHHC22   | 283576 | . |
| 229808_at | 0.032057 | 0.020496 | CHAF1A    | 10036  | . |
| 229809_at | 0.036202 | 0.023597 | POU6F1    | 5463   | . |
| 229810_at | 4.18E-05 | 6.37E-06 |           |        | . |
| 229811_at | 0.031782 | 0.020282 |           |        | . |
| 229812_at | 0.002475 | 9.98E-04 | USP48     | 84196  | . |
| 229813_x_ | 3.26E-05 | 4.64E-06 | DAZAP1    | 26528  | . |
| 229816_at | 0.00126  | 4.42E-04 | WDR78     | 79819  | . |
| 229817_at | 0.001241 | 4.34E-04 | ZNF608    | 57507  | . |
| 229821_at | 0.025431 | 0.015671 |           |        | . |
| 229823_at | 2.43E-04 | 5.83E-05 |           |        | . |
| 229824_at | 1.20E-04 | 2.42E-05 |           |        | . |
| 229825_at | 0.028073 | 0.017567 | PLK3      | 1263   | . |
| 229826_at | 0.002689 | 0.001101 | LOC440957 | 440957 | . |
| 229829_at | 0.017478 | 0.0101   | C18orf18  | 147525 | . |
| 229830_at | 2.02E-05 | 2.52E-06 |           |        | . |
| 229831_at | 1.33E-09 | 7.86E-12 | CNTN3     | 5067   | . |
| 229832_x_ | 2.94E-04 | 7.39E-05 | SH3TC1    | 54436  | . |
| 229833_at | 0.016499 | 0.009448 |           |        | . |
| 229834_at | 0.007096 | 0.003512 | NFIX      | 4784   | . |
| 229835_s_ | 0.001344 | 4.79E-04 |           |        | . |
| 229836_s_ | 2.86E-04 | 7.16E-05 | NUDT4P1   | 440672 | . |
| 229837_s_ | 5.49E-05 | 8.99E-06 | PRO0461   | 652276 | . |

|           |          |          |              |           |   |
|-----------|----------|----------|--------------|-----------|---|
| 229838_at | 1.27E-05 | 1.40E-06 | NUCB2        | 4925      | . |
| 229840_at | 2.40E-04 | 5.75E-05 | IQSEC2       | 23096     | . |
| 229841_at | 0.008479 | 0.004324 |              |           | . |
| 229842_at | 0.011269 | 0.006037 | ELF3         | 1999      | . |
| 229843_at | 0.022076 | 0.013296 | FAM82B       | 51115     | . |
| 229844_at | 7.73E-08 | 1.62E-09 |              |           | . |
| 229845_at | 0.003312 | 0.001415 | MAPKAP1      | 79109     | . |
| 229846_s_ | 0.033962 | 0.02191  | MAPKAP1      | 79109     | . |
| 229847_at | 8.60E-04 | 2.78E-04 | MAPK1        | 5594      | . |
| 229848_at | 3.21E-04 | 8.27E-05 | ZNF10        | 7556      | . |
| 229849_at | 4.78E-04 | 1.35E-04 | WIPF3        | 644150    | . |
| 229850_at | 8.65E-05 | 1.61E-05 | KDSR         | 2531      | . |
| 229851_s_ | 5.99E-04 | 1.78E-04 | C11orf54     | 28970     | . |
| 229852_at | 7.54E-04 | 2.36E-04 | NMNAT1       | 64802     | . |
| 229854_at | 0.014758 | 0.008288 | OBSCN        | 84033     | . |
| 229855_at | 0.001072 | 3.63E-04 | RNF34        | 80196     | . |
| 229858_at | 8.53E-06 | 8.20E-07 |              |           | . |
| 229860_x_ | 2.12E-04 | 4.91E-05 | C4orf48      | 401115    | . |
| 229861_at | 0.003118 | 0.001315 |              |           | . |
| 229862_x_ | 0.006745 | 0.003306 | ZBTB45       | 84878     | . |
| 229863_s_ | 0.032453 | 0.020785 | C3orf75      | 54859     | . |
| 229864_at | 0.012199 | 0.006627 | C3orf75      | 54859     | . |
| 229865_at | 0.002218 | 8.75E-04 | FNDC3B       | 64778     | . |
| 229868_s_ | 0.005057 | 0.00235  | GDF15        | 9518      | . |
| 229869_at | 1.48E-06 | 8.39E-08 |              |           | . |
| 229870_at | 9.33E-05 | 1.77E-05 | LOC644656    | 644656    | . |
| 229871_at | 9.01E-04 | 2.95E-04 | SAMD4B       | 55095     | . |
| 229872_s_ | 8.33E-06 | 7.95E-07 | LOC100132999 | 100132999 | . |
| 229873_at | 8.20E-07 | 3.80E-08 | KCTD21       | 283219    | . |
| 229874_x_ | 3.62E-04 | 9.56E-05 |              |           | . |
| 229875_at | 3.90E-04 | 1.05E-04 | ZDHHC22      | 283576    | . |
| 229876_at | 5.20E-05 | 8.42E-06 | PHKA1        | 5255      | . |
| 229878_at | 9.30E-07 | 4.50E-08 | KIAA1731     | 85459     | . |
| 229879_at | 1.56E-04 | 3.37E-05 |              |           | . |

|           |          |          |           |          |
|-----------|----------|----------|-----------|----------|
| 229881_at | 0.002122 | 8.30E-04 | KLF12     | 11278 .  |
| 229882_at | 6.88E-07 | 3.02E-08 | RPS15A    | 6210 .   |
| 229884_s_ | 0.037618 | 0.024669 | MRPL2     | 51069 .  |
| 229885_at | 3.72E-04 | 9.90E-05 |           | .        |
| 229886_at | 2.67E-05 | 3.60E-06 | C5orf34   | 375444 . |
| 229887_at | 2.96E-04 | 7.47E-05 | ALS2CL    | 259173 . |
| 229888_at | 0.004375 | 0.001974 | C12orf60  | 144608 . |
| 229890_at | 0.009388 | 0.004872 | PRRT1     | 80863 .  |
| 229891_x_ | 2.44E-05 | 3.22E-06 | KIAA1704  | 55425 .  |
| 229892_at | 6.56E-07 | 2.83E-08 | EP400NL   | 347918 . |
| 229894_s_ | 0.030949 | 0.019672 | RAB43     | 339122 . |
| 229895_s_ | 1.50E-05 | 1.73E-06 | NCK1      | 4690 .   |
| 229896_at | 9.23E-04 | 3.03E-04 |           | .        |
| 229898_at | 0.005036 | 0.002337 |           | .        |
| 229899_s_ | 1.90E-07 | 5.40E-09 | C20orf199 | 441951 . |
| 229900_at | 2.66E-04 | 6.53E-05 | CD109     | 135228 . |
| 229901_at | 0.024503 | 0.014996 | ZNF488    | 118738 . |
| 229903_x_ | 0.0029   | 0.001204 | RNPC3     | 55599 .  |
| 229904_at | 0.002644 | 0.00108  |           | .        |
| 229905_at | 5.91E-11 | 1.35E-13 | RAP1GDS1  | 5910 .   |
| 229907_at | 0.024296 | 0.014846 |           | .        |
| 229908_s_ | 0.002955 | 0.001231 | UNKL      | 64718 .  |
| 229909_at | 0.001884 | 7.18E-04 | B4GALNT3  | 283358 . |
| 229911_at | 0.037084 | 0.024275 | TPM2      | 7169 .   |
| 229913_at | 0.021845 | 0.013131 | C7orf61   | 402573 . |
| 229915_at | 3.16E-04 | 8.11E-05 | FAM26F    | 441168 . |
| 229918_at | 3.93E-04 | 1.06E-04 | CCDC40    | 55036 .  |
| 229919_at | 0.040054 | 0.026526 |           | .        |
| 229921_at | 1.75E-06 | 1.06E-07 |           | .        |
| 229922_at | 2.36E-04 | 5.62E-05 | GPRIN1    | 114787 . |
| 229924_s_ | 7.69E-04 | 2.43E-04 |           | .        |
| 229925_at | 1.59E-04 | 3.44E-05 | SLC6A17   | 388662 . |
| 229926_at | 0.044858 | 0.030273 |           | .        |
| 229928_at | 0.004487 | 0.002036 |           | .        |

|           |          |          |              |           |   |
|-----------|----------|----------|--------------|-----------|---|
| 229929_at | 3.99E-07 | 1.48E-08 | SPSB4        | 92369     | . |
| 229930_at | 1.43E-04 | 3.02E-05 | LOC100134361 | 100134361 | . |
| 229931_at | 8.09E-05 | 1.48E-05 | tcag7.1196   | 728743    | . |
| 229932_at | 0.022055 | 0.013278 | RNF181       | 51255     | . |
| 229933_at | 0.010799 | 0.005743 | C1orf74      | 148304    | . |
| 229934_at | 0.02453  | 0.015017 |              |           | . |
| 229935_s_ | 0.012393 | 0.006752 | MLL          | 4297      | . |
| 229936_at | 0.027629 | 0.017239 | GFRA3        | 2676      | . |
| 229937_x_ | 0.038442 | 0.025297 | LILRB1       | 10859     | . |
| 229938_at | 4.14E-04 | 1.13E-04 | LOC388564    | 388564    | . |
| 229939_at | 3.59E-04 | 9.46E-05 |              |           | . |
| 229940_at | 0.001781 | 6.70E-04 | SETD3        | 84193     | . |
| 229943_at | 0.001375 | 4.92E-04 | TRIM13       | 10206     | . |
| 229944_at | 0.011233 | 0.006015 | OPRK1        | 4986      | . |
| 229945_at | 0.002323 | 9.25E-04 | CYHR1        | 50626     | . |
| 229946_at | 0.002607 | 0.001062 | FAM168B      | 130074    | . |
| 229949_at | 2.64E-06 | 1.79E-07 |              |           | . |
| 229950_s_ | 0.012957 | 0.007119 |              |           | . |
| 229951_x_ | 0.012016 | 0.006506 |              |           | . |
| 229952_at | 0.011417 | 0.006129 |              |           | . |
| 229954_at | 0.006019 | 0.002889 | CHDH         | 55349     | . |
| 229955_at | 0.00475  | 0.002181 | FBXO3        | 26273     | . |
| 229956_at | 0.0096   | 0.005    | NR2C1        | 7181      | . |
| 229958_at | 0.034239 | 0.022112 | CLN8         | 2055      | . |
| 229959_at | 0.006454 | 0.003136 | KLKB1        | 3818      | . |
| 229961_x_ | 0.043832 | 0.02947  | YJEFN3       | 374887    | . |
| 229962_at | 0.005711 | 0.002711 | LRRC37A3     | 374819    | . |
| 229963_at | 0.002827 | 0.001169 | BEX5         | 340542    | . |
| 229966_at | 6.09E-05 | 1.03E-05 | EWSR1        | 2130      | . |
| 229967_at | 0.020439 | 0.012129 | CMTM2        | 146225    | . |
| 229969_at | 0.022431 | 0.013535 | SEC63        | 11231     | . |
| 229971_at | 1.96E-05 | 2.44E-06 | GPR114       | 221188    | . |
| 229974_at | 0.003834 | 0.001685 | EVC2         | 132884    | . |
| 229975_at | 0.035106 | 0.022762 | BMPR1B       | 658       | . |

|           |          |          |              |          |
|-----------|----------|----------|--------------|----------|
| 229977_at | 7.82E-05 | 1.42E-05 | RTDR1        | 27156 .  |
| 229978_at | 0.004668 | 0.002136 | LOC729993    | 729993 . |
| 229980_s_ | 0.002301 | 9.14E-04 | SNX5         | 27131 .  |
| 229981_at | 8.94E-06 | 8.77E-07 | SNX5         | 27131 .  |
| 229982_at | 0.007405 | 0.003693 | QSER1        | 79832 .  |
| 229984_at | 0.0012   | 4.17E-04 | DTWD1        | 56986 .  |
| 229986_at | 0.017663 | 0.01023  |              | .        |
| 229987_at | 0.008728 | 0.004471 |              | .        |
| 229988_at | 0.00334  | 0.001429 |              | .        |
| 229990_at | 1.06E-04 | 2.08E-05 | LOC641467    | 641467 . |
| 229991_s_ | 0.008022 | 0.004057 | SYTL4        | 94121 .  |
| 229992_at | 7.00E-06 | 6.31E-07 | RP5-1022P6.6 | 149837 . |
| 229993_at | 3.32E-04 | 8.63E-05 | ZCCHC3       | 85364 .  |
| 229994_at | 0.002599 | 0.001058 | NFIA         | 4774 .   |
| 229997_at | 6.99E-04 | 2.15E-04 | VANGL1       | 81839 .  |
| 229998_x_ | 1.26E-06 | 6.73E-08 | FAM176B      | 55194 .  |
| 230002_at | 1.14E-06 | 5.84E-08 | CLCC1        | 23155 .  |
| 230003_at | 1.51E-04 | 3.23E-05 |              | .        |
| 230004_at | 6.29E-05 | 1.07E-05 | USP24        | 23358 .  |
| 230007_at | 7.14E-05 | 1.26E-05 | JMJD1C       | 221037 . |
| 230010_at | 0.002326 | 9.26E-04 | KIAA1853     | 84530 .  |
| 230011_at | 0.006324 | 0.00306  | MEI1         | 150365 . |
| 230013_s_ | 0.008753 | 0.004486 | ARHGAP23     | 57636 .  |
| 230016_at | 0.001351 | 4.82E-04 | C8orf38      | 137682 . |
| 230019_s_ | 7.07E-04 | 2.18E-04 | PTCHD2       | 57540 .  |
| 230021_at | 5.26E-06 | 4.35E-07 | C15orf42     | 90381 .  |
| 230022_at | 0.016177 | 0.009236 | CLEC18A      | 348174 . |
| 230023_at | 0.013854 | 0.007691 | NSUN4        | 387338 . |
| 230025_at | 4.31E-06 | 3.37E-07 | GJD3         | 125111 . |
| 230026_at | 0.016333 | 0.009338 | MRPL43       | 84545 .  |
| 230027_s_ | 0.005254 | 0.002456 | MRPL43       | 84545 .  |
| 230028_at | 6.64E-06 | 5.89E-07 | KIAA0907     | 22889 .  |
| 230029_x_ | 0.009813 | 0.005132 | UBR3         | 130507 . |
| 230030_at | 1.04E-04 | 2.03E-05 | HS6ST2       | 90161 .  |



|           |          |          |                             |           |   |
|-----------|----------|----------|-----------------------------|-----------|---|
| 230031_at | 0.002618 | 0.001067 | HSPA5                       | 3309      | . |
| 230032_at | 1.45E-04 | 3.07E-05 | OSGEPL1                     | 64172     | . |
| 230036_at | 7.21E-08 | 1.48E-09 | SAMD9L                      | 219285    | . |
| 230037_at | 0.02727  | 0.016982 | LOC100133898                | 100133898 | . |
| 230040_at | 0.015136 | 0.008538 | ADAMTS18                    | 170692    | . |
| 230041_at | 8.11E-04 | 2.59E-04 |                             |           | . |
| 230043_at | 0.001584 | 5.83E-04 | MUC20                       | 200958    | . |
| 230044_at | 0.004028 | 0.001787 | NPB                         | 256933    | . |
| 230045_at | 0.030691 | 0.019489 | CNTN2                       | 6900      | . |
| 230046_at | 2.81E-04 | 7.01E-05 |                             |           | . |
| 230047_at | 0.001095 | 3.73E-04 | FLJ32810                    | 143872    | . |
| 230048_at | 0.03473  | 0.022473 |                             |           | . |
| 230049_at | 1.18E-04 | 2.38E-05 | TAF6L                       | 10629     | . |
| 230050_at | 0.016015 | 0.009129 | NACC2                       | 138151    | . |
| 230051_at | 0.042101 | 0.028108 | C10orf47                    | 254427    | . |
| 230052_s_ | 2.27E-04 | 5.36E-05 | NFKBID                      | 84807     | . |
| 230053_at | 0.003344 | 0.001431 |                             |           | . |
| 230056_at | 0.023249 | 0.014108 | BPTF                        | 2186      | . |
| 230057_at | 0.037472 | 0.024562 | LOC285178                   | 285178    | . |
| 230058_at | 3.02E-06 | 2.12E-07 | LOC646891 /// 10807 /// 646 |           | . |
| 230060_at | 1.23E-06 | 6.53E-08 | CDCA7                       | 83879     | . |
| 230063_at | 0.014469 | 0.008093 | ZNF264                      | 9422      | . |
| 230064_at | 0.001539 | 5.62E-04 |                             |           | . |
| 230066_at | 0.021087 | 0.012598 | SNX25                       | 83891     | . |
| 230067_at | 3.75E-04 | 9.99E-05 | FAM124A                     | 220108    | . |
| 230069_at | 2.14E-05 | 2.73E-06 | SFXN1                       | 94081     | . |
| 230071_at | 8.64E-07 | 4.08E-08 | 11-Sep                      | 55752     | . |
| 230073_at | 7.73E-06 | 7.22E-07 | LOC100131564                | 100131564 | . |
| 230074_s_ | 4.96E-04 | 1.41E-04 |                             |           | . |
| 230075_at | 0.001146 | 3.94E-04 | RAB39B                      | 116442    | . |
| 230077_at | 8.97E-04 | 2.93E-04 | LOC220729 /// 220729 /// 29 |           | . |
| 230078_at | 1.58E-04 | 3.43E-05 | RAPGEF6                     | 51735     | . |
| 230079_at | 1.75E-06 | 1.05E-07 | ST7L                        | 54879     | . |
| 230080_at | 0.004379 | 0.001977 | LOC285943                   | 285943    | . |

|           |          |          |             |          |
|-----------|----------|----------|-------------|----------|
| 230083_at | 0.002782 | 0.001148 | USP53       | 54532 .  |
| 230084_at | 5.33E-05 | 8.67E-06 | SLC30A2     | 7780 .   |
| 230085_at | 0.006224 | 0.003004 |             | .        |
| 230086_at | 0.019357 | 0.011383 | FNBP1       | 23048 .  |
| 230087_at | 6.60E-06 | 5.84E-07 | PRIMA1      | 145270 . |
| 230090_at | 0.001184 | 4.10E-04 | GDNF        | 2668 .   |
| 230092_at | 4.29E-04 | 1.18E-04 | UBXN10      | 127733 . |
| 230096_at | 5.41E-04 | 1.57E-04 |             | .        |
| 230097_at | 9.67E-06 | 9.74E-07 | GART        | 2618 .   |
| 230098_at | 1.04E-06 | 5.20E-08 | PHF20L1     | 51105 .  |
| 230099_at | 0.014294 | 0.007978 |             | .        |
| 230100_x_ | 3.48E-05 | 5.03E-06 | PAK1        | 5058 .   |
| 230101_at | 0.001953 | 7.50E-04 | CXCL2       | 2920 .   |
| 230102_at | 0.023501 | 0.014287 | ETV5        | 2119 .   |
| 230103_at | 2.43E-05 | 3.20E-06 | C10orf72    | 196740 . |
| 230104_s_ | 0.004974 | 0.002302 | TPPP        | 11076 .  |
| 230105_at | 0.004719 | 0.002163 | HOXB13      | 10481 .  |
| 230107_at | 0.017404 | 0.010049 |             | .        |
| 230108_at | 4.24E-10 | 1.73E-12 | ERCC6       | 2074 .   |
| 230109_at | 9.02E-05 | 1.69E-05 | PDE7B       | 27115 .  |
| 230110_at | 6.65E-05 | 1.15E-05 | MCOLN2      | 255231 . |
| 230111_at | 3.37E-05 | 4.83E-06 |             | .        |
| 230112_at | 0.001981 | 7.63E-04 | 4-Mar       | 57574 .  |
| 230114_at | 8.04E-04 | 2.56E-04 | HOXB8       | 3218 .   |
| 230115_at | 4.63E-05 | 7.27E-06 | DKFZp779M06 | 374387 . |
| 230116_at | 1.70E-06 | 1.01E-07 | KRT8P12     | 90133 .  |
| 230118_at | 0.004533 | 0.002061 |             | .        |
| 230120_s_ | 9.37E-04 | 3.09E-04 | PLGLB2      | 5342 .   |
| 230122_at | 0.003675 | 0.001602 | MLLT10      | 8028 .   |
| 230123_at | 5.57E-07 | 2.27E-08 | NECAP2      | 55707 .  |
| 230124_at | 0.010873 | 0.005789 | TMEM30B     | 161291 . |
| 230125_at | 4.43E-05 | 6.86E-06 | GUSB        | 2990 .   |
| 230127_at | 6.93E-04 | 2.13E-04 |             | .        |
| 230129_at | 7.40E-06 | 6.79E-07 | PSTK        | 118672 . |

|           |          |          |                    |
|-----------|----------|----------|--------------------|
| 230130_at | 1.13E-06 | 5.79E-08 | .                  |
| 230131_x_ | 0.001104 | 3.77E-04 | ARSD 414 .         |
| 230132_at | 0.003502 | 0.001512 | ATP5SL 55101 .     |
| 230135_at | 0.046042 | 0.031197 | .                  |
| 230139_at | 4.55E-05 | 7.10E-06 | .                  |
| 230140_at | 0.01537  | 0.008696 | PTPN9 5780 .       |
| 230144_at | 9.68E-08 | 2.20E-09 | GRIA3 2892 .       |
| 230147_at | 1.75E-05 | 2.10E-06 | F2RL2 2151 .       |
| 230149_at | 6.36E-04 | 1.91E-04 | .                  |
| 230150_at | 1.42E-04 | 2.98E-05 | BCAP29 55973 .     |
| 230151_at | 0.049064 | 0.03358  | C13orf1 57213 .    |
| 230152_at | 0.010506 | 0.005557 | WDR52 55779 .      |
| 230153_at | 1.39E-05 | 1.57E-06 | NEK9 91754 .       |
| 230155_x_ | 1.62E-06 | 9.50E-08 | MSL1 339287 .      |
| 230158_at | 0.036525 | 0.023841 | DPY19L2 283417 .   |
| 230159_at | 0.021871 | 0.013151 | C1orf115 79762 .   |
| 230160_x_ | 6.12E-06 | 5.31E-07 | hCG_20426 441869 . |
| 230161_at | 0.003333 | 0.001425 | .                  |
| 230162_s_ | 4.81E-04 | 1.35E-04 | MAPK8IP3 23162 .   |
| 230165_at | 1.05E-05 | 1.08E-06 | SGOL2 151246 .     |
| 230166_at | 1.79E-07 | 4.96E-09 | KIAA1958 158405 .  |
| 230167_at | 7.87E-04 | 2.50E-04 | ADAMTS14 140766 .  |
| 230168_at | 6.81E-05 | 1.19E-05 | .                  |
| 230170_at | 2.07E-04 | 4.79E-05 | OSM 5008 .         |
| 230171_at | 0.001474 | 5.34E-04 | .                  |
| 230173_at | 0.001054 | 3.56E-04 | TRIM4 89122 .      |
| 230175_s_ | 3.62E-07 | 1.30E-08 | .                  |
| 230176_at | 3.89E-09 | 3.11E-11 | .                  |
| 230177_at | 0.006587 | 0.003213 | .                  |
| 230178_s_ | 0.011202 | 0.005996 | .                  |
| 230179_at | 0.007033 | 0.003475 | LOC285812 285812 . |
| 230180_at | 0.003116 | 0.001314 | .                  |
| 230181_at | 4.44E-06 | 3.50E-07 | PQLC1 80148 .      |
| 230182_at | 0.0032   | 0.001357 | PDCD7 10081 .      |

|           |          |          |              |           |   |
|-----------|----------|----------|--------------|-----------|---|
| 230183_at | 0.014512 | 0.008121 | EXT1         | 2131      | . |
| 230185_at | 4.11E-08 | 6.85E-10 | THAP9        | 79725     | . |
| 230187_s_ | 2.73E-04 | 6.77E-05 |              |           | . |
| 230189_x_ | 1.90E-05 | 2.34E-06 | NELF         | 26012     | . |
| 230190_at | 0.023568 | 0.014336 | NDFIP2       | 54602     | . |
| 230191_at | 8.31E-05 | 1.53E-05 | TTBK1        | 84630     | . |
| 230192_at | 0.048977 | 0.033507 | TRIM13       | 10206     | . |
| 230194_at | 0.011426 | 0.006135 | LRPPRC       | 10128     | . |
| 230195_at | 8.72E-13 | 4.90E-16 | LOC100131138 | 100131138 | . |
| 230196_x_ | 7.64E-04 | 2.40E-04 | ARHGAP23     | 57636     | . |
| 230198_at | 1.26E-05 | 1.37E-06 | LOC100130837 | 100130837 | . |
| 230199_at | 0.002993 | 0.001251 |              |           | . |
| 230200_at | 2.78E-12 | 2.10E-15 | NSUN6        | 221078    | . |
| 230201_at | 0.001218 | 4.25E-04 |              |           | . |
| 230202_at | 0.012416 | 0.006767 | RELA         | 5970      | . |
| 230203_at | 0.029675 | 0.018738 | FLJ46875     | 440918    | . |
| 230204_at | 1.09E-04 | 2.14E-05 | HAPLN1       | 1404      | . |
| 230205_at | 1.50E-06 | 8.51E-08 | ZNF561       | 93134     | . |
| 230206_at | 2.12E-08 | 2.82E-10 | DOCK5        | 80005     | . |
| 230207_s_ | 1.14E-04 | 2.26E-05 | DOCK5        | 80005     | . |
| 230208_at | 1.37E-05 | 1.53E-06 | HCN4         | 10021     | . |
| 230209_at | 0.009859 | 0.005161 | ZXDC         | 79364     | . |
| 230210_at | 1.42E-05 | 1.62E-06 | UNC84A       | 23353     | . |
| 230211_at | 9.75E-04 | 3.24E-04 |              |           | . |
| 230212_at | 0.017918 | 0.0104   | LOC729345    | 729345    | . |
| 230213_at | 5.53E-04 | 1.61E-04 | C19orf43     | 79002     | . |
| 230214_at | 1.95E-10 | 6.16E-13 | MRVI1        | 10335     | . |
| 230215_at | 0.004617 | 0.002107 | SEC61A2      | 55176     | . |
| 230218_at | 4.69E-06 | 3.76E-07 | HIC1         | 3090      | . |
| 230221_at | 6.09E-05 | 1.03E-05 | BAT5         | 7920      | . |
| 230222_at | 0.01208  | 0.00655  |              |           | . |
| 230227_at | 2.81E-05 | 3.82E-06 |              |           | . |
| 230228_at | 1.19E-06 | 6.26E-08 | LOC284297    | 284297    | . |
| 230229_at | 3.28E-05 | 4.68E-06 | DLG1         | 1739      | . |

|           |          |          |           |          |
|-----------|----------|----------|-----------|----------|
| 230230_at | 0.017337 | 0.010006 |           | .        |
| 230232_at | 0.004106 | 0.001828 | KIAA0746  | 23231 .  |
| 230233_at | 3.71E-06 | 2.77E-07 |           | .        |
| 230235_at | 9.45E-07 | 4.59E-08 | MCTS1     | 28985 .  |
| 230236_at | 0.003685 | 0.001607 | TDRG1     | 732253 . |
| 230239_at | 1.82E-06 | 1.11E-07 | ROCK1     | 6093 .   |
| 230240_at | 0.003318 | 0.001418 |           | .        |
| 230241_at | 0.001204 | 4.18E-04 |           | .        |
| 230242_at | 2.15E-08 | 2.89E-10 | NFASC     | 23114 .  |
| 230246_at | 2.81E-05 | 3.83E-06 | PLAC9     | 219348 . |
| 230247_at | 7.64E-04 | 2.40E-04 |           | .        |
| 230248_x_ | 0.020833 | 0.012418 |           | .        |
| 230250_at | 0.019276 | 0.011327 | PTPRB     | 5787 .   |
| 230253_at | 3.58E-05 | 5.21E-06 | SCUBE3    | 222663 . |
| 230254_at | 7.79E-07 | 3.55E-08 |           | .        |
| 230256_at | 1.82E-04 | 4.07E-05 | C1orf104  | 284618 . |
| 230258_at | 0.049277 | 0.033746 | GLIS3     | 169792 . |
| 230261_at | 5.98E-07 | 2.49E-08 | ST8SIA4   | 7903 .   |
| 230262_at | 7.78E-04 | 2.46E-04 | ST8SIA3   | 51046 .  |
| 230263_s_ | 3.53E-05 | 5.12E-06 | DOCK5     | 80005 .  |
| 230265_at | 8.52E-05 | 1.58E-05 | SEL1L     | 6400 .   |
| 230266_at | 5.55E-09 | 4.96E-11 | RAB7B     | 338382 . |
| 230267_at | 0.005537 | 0.002616 |           | .        |
| 230268_at | 0.046292 | 0.031391 |           | .        |
| 230269_at | 2.79E-06 | 1.92E-07 |           | .        |
| 230270_at | 5.62E-06 | 4.76E-07 | PRPF38B   | 55119 .  |
| 230272_at | 1.99E-06 | 1.25E-07 | LOC645323 | 645323 . |
| 230273_at | 1.35E-04 | 2.80E-05 | C6orf165  | 154313 . |
| 230275_at | 3.03E-04 | 7.69E-05 | ARSI      | 340075 . |
| 230278_at | 0.026683 | 0.016559 |           | .        |
| 230279_at | 6.87E-05 | 1.20E-05 |           | .        |
| 230284_at | 7.60E-06 | 7.05E-07 | MYOM3     | 127294 . |
| 230285_at | 0.007786 | 0.003917 | SVIP      | 258010 . |
| 230286_at | 0.019948 | 0.011789 |           | .        |

|           |          |          |                                |           |   |
|-----------|----------|----------|--------------------------------|-----------|---|
| 230287_at | 2.38E-04 | 5.69E-05 | SGSM1                          | 129049    | . |
| 230290_at | 1.67E-07 | 4.54E-09 | SCUBE3                         | 222663    | . |
| 230291_s_ | 0.009383 | 0.004869 | NFIB                           | 4781      | . |
| 230295_at | 0.007053 | 0.003488 | SOLH                           | 6650      | . |
| 230296_at | 0.002582 | 0.00105  | C16orf52                       | 730094    | . |
| 230297_x_ | 0.028458 | 0.017839 | SYNGAP1                        | 8831      | . |
| 230298_at | 0.001932 | 7.40E-04 | MBLAC2                         | 153364    | . |
| 230299_s_ | 0.013566 | 0.007504 |                                |           | . |
| 230300_at | 0.005311 | 0.002488 |                                |           | . |
| 230302_at | 0.009717 | 0.005075 |                                |           | . |
| 230304_at | 8.96E-06 | 8.80E-07 |                                |           | . |
| 230305_at | 5.90E-04 | 1.74E-04 |                                |           | . |
| 230306_at | 0.004655 | 0.002128 | VPS26B                         | 112936    | . |
| 230308_at | 4.98E-06 | 4.05E-07 | FAM120AOS                      | 158293    | . |
| 230309_at | 0.010702 | 0.005682 |                                |           | . |
| 230312_at | 4.33E-05 | 6.67E-06 |                                |           | . |
| 230313_at | 3.06E-10 | 1.12E-12 |                                |           | . |
| 230316_at | 1.59E-06 | 9.27E-08 | SEC14L2                        | 23541     | . |
| 230318_at | 7.37E-04 | 2.30E-04 | SERPINA1                       | 5265      | . |
| 230320_at | 9.80E-06 | 9.91E-07 | TBRG1                          | 84897     | . |
| 230322_at | 3.82E-04 | 1.02E-04 | NFAM1                          | 150372    | . |
| 230324_at | 0.003206 | 0.00136  |                                |           | . |
| 230325_at | 0.021295 | 0.012743 | LOC100133985                   | 100133985 | . |
| 230326_s_ | 0.0125   | 0.006824 | C11orf73                       | 51501     | . |
| 230327_at | 0.001408 | 5.06E-04 | LOC730098                      | 730098    | . |
| 230328_at | 1.51E-05 | 1.75E-06 | LOC653390 /// 54700 /// 653390 |           | . |
| 230329_s_ | 0.001719 | 6.42E-04 | NUDT6                          | 11162     | . |
| 230330_at | 0.033535 | 0.021605 |                                |           | . |
| 230332_at | 1.28E-04 | 2.64E-05 | ZCCHC7                         | 84186     | . |
| 230335_at | 9.17E-04 | 3.01E-04 | C9orf50                        | 375759    | . |
| 230336_at | 8.47E-04 | 2.73E-04 |                                |           | . |
| 230337_at | 4.01E-04 | 1.09E-04 | SOS1                           | 6654      | . |
| 230338_x_ | 4.51E-04 | 1.25E-04 | GSX2                           | 170825    | . |
| 230339_at | 0.001475 | 5.35E-04 | CCDC138                        | 165055    | . |

|           |          |          |           |          |
|-----------|----------|----------|-----------|----------|
| 230340_s_ | 0.020326 | 0.012055 | WASL      | 8976 .   |
| 230341_x_ | 2.10E-05 | 2.65E-06 | ADAMTS10  | 81794 .  |
| 230342_at | 3.36E-04 | 8.75E-05 | FO XK1    | 221937 . |
| 230343_at | 0.031735 | 0.020246 |           | . .      |
| 230345_at | 2.12E-05 | 2.69E-06 | SEMA7A    | 8482 .   |
| 230346_x_ | 0.046229 | 0.031344 |           | . .      |
| 230347_at | 4.70E-06 | 3.77E-07 | ORAI2     | 80228 .  |
| 230348_at | 0.010466 | 0.005532 | LATS2     | 26524 .  |
| 230349_at | 0.02319  | 0.014063 | XKR X     | 402415 . |
| 230350_at | 0.00207  | 8.04E-04 |           | . .      |
| 230353_at | 0.008562 | 0.004373 | LOC284112 | 284112 . |
| 230355_at | 1.04E-05 | 1.07E-06 | 13-Sep    | 641977 . |
| 230356_at | 8.02E-07 | 3.69E-08 |           | . .      |
| 230357_at | 0.020298 | 0.012033 |           | . .      |
| 230358_at | 0.024181 | 0.014765 | ZER1      | 10444 .  |
| 230359_at | 1.81E-04 | 4.04E-05 | KNDC1     | 85442 .  |
| 230360_at | 0.002185 | 8.59E-04 | GLDN      | 342035 . |
| 230361_at | 0.001344 | 4.79E-04 | HEATR7A   | 727957 . |
| 230364_at | 8.38E-07 | 3.92E-08 | CHPT1     | 56994 .  |
| 230367_at | 1.78E-05 | 2.15E-06 | SMTNL1    | 219537 . |
| 230369_at | 0.011065 | 0.005907 | GPR161    | 23432 .  |
| 230371_at | 1.78E-04 | 3.97E-05 | HPS6      | 79803 .  |
| 230372_at | 3.46E-08 | 5.47E-10 | HAS2      | 3037 .   |
| 230374_at | 0.004786 | 0.002201 | PPP1R14B  | 26472 .  |
| 230375_at | 3.77E-06 | 2.83E-07 | SFRS18    | 25957 .  |
| 230376_at | 5.89E-04 | 1.74E-04 | GTF2A2    | 2958 .   |
| 230377_s_ | 4.71E-04 | 1.32E-04 | TBC1D2B   | 23102 .  |
| 230378_at | 1.80E-04 | 4.01E-05 | SCGB3A1   | 92304 .  |
| 230379_x_ | 0.002186 | 8.60E-04 | C2orf56   | 55471 .  |
| 230380_at | 4.35E-05 | 6.70E-06 | THAP2     | 83591 .  |
| 230381_at | 0.005609 | 0.002656 | C1orf186  | 440712 . |
| 230382_at | 9.69E-05 | 1.85E-05 | SLC11A1   | 6556 .   |
| 230383_x_ | 1.44E-06 | 8.09E-08 |           | . .      |
| 230384_at | 0.031777 | 0.020277 | ANKRD23   | 200539 . |

|           |          |          |           |        |   |
|-----------|----------|----------|-----------|--------|---|
| 230385_at | 0.024282 | 0.014837 | 3-Mar     | 115123 | . |
| 230386_at | 0.016311 | 0.009324 |           |        | . |
| 230387_at | 0.012724 | 0.006968 |           |        | . |
| 230388_s_ | 0.002012 | 7.78E-04 | LOC644246 | 644246 | . |
| 230389_at | 4.82E-04 | 1.36E-04 | FNBP1     | 23048  | . |
| 230390_at | 0.045117 | 0.03047  |           |        | . |
| 230392_at | 1.47E-04 | 3.13E-05 |           |        | . |
| 230393_at | 4.09E-04 | 1.11E-04 | CUL5      | 8065   | . |
| 230396_at | 0.033999 | 0.021935 | SAMM50    | 25813  | . |
| 230397_at | 2.73E-04 | 6.74E-05 |           |        | . |
| 230398_at | 2.16E-07 | 6.45E-09 | TNS4      | 84951  | . |
| 230399_at | 1.29E-05 | 1.42E-06 |           |        | . |
| 230401_at | 6.10E-06 | 5.28E-07 |           |        | . |
| 230402_at | 0.026731 | 0.016594 | DUSP15    | 128853 | . |
| 230403_at | 0.014759 | 0.008289 |           |        | . |
| 230404_at | 5.42E-06 | 4.53E-07 | FLJ44606  | 401207 | . |
| 230405_at | 0.026157 | 0.016179 | C5orf56   | 441108 | . |
| 230407_at | 4.16E-04 | 1.13E-04 |           |        | . |
| 230408_at | 0.023165 | 0.014044 |           |        | . |
| 230410_at | 5.83E-04 | 1.72E-04 | NRP2      | 8828   | . |
| 230411_at | 0.009625 | 0.005016 |           |        | . |
| 230414_s_ | 0.044931 | 0.030328 | TMEM170A  | 124491 | . |
| 230416_at | 7.00E-06 | 6.31E-07 |           |        | . |
| 230417_at | 7.43E-04 | 2.32E-04 | GALNTL1   | 57452  | . |
| 230418_s_ | 4.15E-04 | 1.13E-04 | GALNTL1   | 57452  | . |
| 230420_at | 8.02E-04 | 2.55E-04 | CASZ1     | 54897  | . |
| 230422_at | 8.03E-04 | 2.56E-04 | FPR3      | 2359   | . |
| 230423_at | 2.72E-05 | 3.68E-06 |           |        | . |
| 230426_at | 7.03E-04 | 2.17E-04 | DLD       | 1738   | . |
| 230427_s_ | 0.002238 | 8.84E-04 | BAG5      | 9529   | . |
| 230428_at | 6.92E-04 | 2.13E-04 |           |        | . |
| 230430_at | 5.03E-04 | 1.43E-04 | ENTPD2    | 954    | . |
| 230431_at | 0.001836 | 6.96E-04 |           |        | . |
| 230435_at | 6.74E-04 | 2.06E-04 | LOC375190 | 375190 | . |



|           |          |          |                             |        |   |
|-----------|----------|----------|-----------------------------|--------|---|
| 230437_s_ | 4.54E-04 | 1.27E-04 | PRKCB                       | 5579   | . |
| 230438_at | 0.028751 | 0.018065 | TBX15                       | 6913   | . |
| 230439_at | 7.69E-04 | 2.42E-04 | LOC389458                   | 389458 | . |
| 230440_at | 3.67E-07 | 1.33E-08 | ZNF469                      | 84627  | . |
| 230441_at | 8.78E-04 | 2.85E-04 | PLEKHG4B                    | 153478 | . |
| 230442_at | 2.06E-04 | 4.74E-05 | MTHFSD                      | 64779  | . |
| 230443_at | 0.005758 | 0.002738 | NHP2L1                      | 4809   | . |
| 230444_at | 2.42E-05 | 3.18E-06 |                             |        | . |
| 230445_at | 0.018776 | 0.010986 | BTBD17                      | 388419 | . |
| 230446_at | 5.64E-04 | 1.65E-04 |                             |        | . |
| 230447_at | 0.028685 | 0.018015 | C6orf168                    | 84553  | . |
| 230448_at | 7.66E-04 | 2.41E-04 | SLC38A10                    | 124565 | . |
| 230450_at | 0.03137  | 0.019983 |                             |        | . |
| 230452_at | 0.001942 | 7.45E-04 | FLJ42351 /// LC100131455 // |        | . |
| 230453_s_ | 0.004189 | 0.001872 | ATP2A3                      | 489    | . |
| 230454_at | 0.003198 | 0.001356 | ICA1L                       | 130026 | . |
| 230455_at | 0.002304 | 9.16E-04 | PPP1R9B                     | 84687  | . |
| 230456_at | 0.003834 | 0.001685 |                             |        | . |
| 230458_at | 0.011662 | 0.006281 | SLC45A1                     | 50651  | . |
| 230459_s_ | 0.015143 | 0.008543 | SHB                         | 6461   | . |
| 230461_s_ | 0.005836 | 0.002785 |                             |        | . |
| 230462_at | 0.003911 | 0.001726 | NUMB                        | 8650   | . |
| 230463_at | 0.030529 | 0.019371 |                             |        | . |
| 230465_at | 5.26E-04 | 1.51E-04 | HS2ST1                      | 9653   | . |
| 230466_s_ | 6.17E-08 | 1.18E-09 |                             |        | . |
| 230467_at | 0.029707 | 0.018767 | TMEM52                      | 339456 | . |
| 230471_at | 0.004005 | 0.001774 | TMEM30B                     | 161291 | . |
| 230473_s_ | 0.040841 | 0.027131 | HMGB4                       | 127540 | . |
| 230474_at | 7.38E-04 | 2.30E-04 | UBIAD1                      | 29914  | . |
| 230476_at | 3.89E-07 | 1.42E-08 |                             |        | . |
| 230477_at | 0.001019 | 3.41E-04 | LOC100130522 100130522      |        | . |
| 230479_at | 0.006375 | 0.00309  |                             |        | . |
| 230481_at | 1.00E-04 | 1.93E-05 | ACY3                        | 91703  | . |
| 230483_at | 0.001865 | 7.09E-04 |                             |        | . |

|           |          |          |                               |           |   |
|-----------|----------|----------|-------------------------------|-----------|---|
| 230484_at | 1.21E-04 | 2.45E-05 | CHDH                          | 55349     | . |
| 230485_at | 0.007849 | 0.003956 | LOC644844                     | 644844    | . |
| 230486_at | 0.003017 | 0.001264 | PCBP3                         | 54039     | . |
| 230489_at | 3.22E-04 | 8.29E-05 | CD5                           | 921       | . |
| 230490_x_ | 0.005957 | 0.002854 | RSU1                          | 6251      | . |
| 230492_s_ | 0.0013   | 4.59E-04 | RP5-1022P6.2                  | 56261     | . |
| 230493_at | 6.65E-04 | 2.03E-04 | SHISA2                        | 387914    | . |
| 230494_at | 0.00591  | 0.002826 | SLC20A1                       | 6574      | . |
| 230498_at | 0.014469 | 0.008093 | MCHR1                         | 2847      | . |
| 230499_at | 0.018518 | 0.010811 |                               |           | . |
| 230500_at | 0.002193 | 8.63E-04 | PDE7A                         | 5150      | . |
| 230504_at | 7.76E-04 | 2.45E-04 | CEACAM19                      | 56971     | . |
| 230505_at | 4.26E-04 | 1.17E-04 | LOC145474                     | 145474    | . |
| 230506_at | 0.010637 | 0.005641 | C6orf164                      | 63914     | . |
| 230507_at | 3.08E-04 | 7.87E-05 | LOC100130360                  | 100130360 | . |
| 230508_at | 0.045134 | 0.030485 | DKK3                          | 27122     | . |
| 230509_at | 0.038265 | 0.025164 | SNX22                         | 79856     | . |
| 230510_at | 6.79E-04 | 2.08E-04 | HSPB9                         | 94086     | . |
| 230512_x_ | 0.014431 | 0.008068 | TMEM165                       | 55858     | . |
| 230513_at | 6.80E-05 | 1.18E-05 | BAT3                          | 7917      | . |
| 230514_s_ | 2.76E-04 | 6.86E-05 | LYZL1 /// LYZL2 119180 /// 84 |           | . |
| 230515_at | 2.51E-04 | 6.10E-05 |                               |           | . |
| 230516_at | 5.80E-06 | 4.96E-07 | C7orf30                       | 115416    | . |
| 230517_at | 0.011585 | 0.006233 | tcag7.1196                    | 728743    | . |
| 230519_at | 2.45E-05 | 3.23E-06 | FAM124A                       | 220108    | . |
| 230521_at | 3.13E-04 | 8.03E-05 | C9orf100                      | 84904     | . |
| 230522_s_ | 0.002683 | 0.001098 | C9orf100                      | 84904     | . |
| 230523_at | 7.35E-05 | 1.31E-05 |                               |           | . |
| 230525_at | 2.67E-05 | 3.60E-06 | LOC283875                     | 283875    | . |
| 230528_s_ | 3.15E-04 | 8.07E-05 | MGC2752                       | 65996     | . |
| 230529_at | 0.009094 | 0.004691 | HECA                          | 51696     | . |
| 230530_at | 4.37E-04 | 1.21E-04 |                               |           | . |
| 230531_at | 1.23E-05 | 1.34E-06 | KCNC3                         | 3748      | . |
| 230532_at | 0.006942 | 0.003423 | CXorf38                       | 159013    | . |

|           |          |          |              |           |   |
|-----------|----------|----------|--------------|-----------|---|
| 230533_at | 0.013924 | 0.007735 | ZMYND8       | 23613     | . |
| 230534_at | 8.76E-06 | 8.50E-07 | ZNF678       | 339500    | . |
| 230535_s_ | 2.63E-06 | 1.78E-07 |              |           | . |
| 230539_at | 0.007373 | 0.003674 | FAM182A      | 284800    | . |
| 230543_at | 0.00249  | 0.001006 |              |           | . |
| 230544_at | 2.48E-05 | 3.28E-06 | RPS6KA4      | 8986      | . |
| 230545_at | 0.017513 | 0.010124 |              |           | . |
| 230548_at | 4.71E-07 | 1.83E-08 |              |           | . |
| 230549_at | 2.96E-05 | 4.11E-06 | ELK4         | 2005      | . |
| 230553_at | 8.66E-04 | 2.81E-04 |              |           | . |
| 230556_at | 0.001777 | 6.68E-04 | IMMP1L       | 196294    | . |
| 230558_at | 3.39E-04 | 8.84E-05 | KNDC1        | 85442     | . |
| 230559_x_ | 0.002805 | 0.001159 | FGD4         | 121512    | . |
| 230560_at | 0.012059 | 0.006536 | STXBP6       | 29091     | . |
| 230562_at | 3.34E-06 | 2.43E-07 | LOC100131112 | 100131112 | . |
| 230563_at | 6.07E-04 | 1.80E-04 | RASGEF1A     | 221002    | . |
| 230564_at | 1.09E-04 | 2.16E-05 | SIPA1L3      | 23094     | . |
| 230566_at | 1.37E-04 | 2.87E-05 | C22orf27     | 150291    | . |
| 230568_x_ | 3.32E-06 | 2.41E-07 | DLL3         | 10683     | . |
| 230569_at | 0.002054 | 7.97E-04 | KIAA1430     | 57587     | . |
| 230570_at | 5.17E-04 | 1.48E-04 |              |           | . |
| 230574_at | 0.030709 | 0.019502 | LOC100130938 | 100130938 | . |
| 230576_at | 7.45E-05 | 1.33E-05 | BLOC1S3      | 388552    | . |
| 230578_at | 0.002027 | 7.84E-04 |              |           | . |
| 230579_at | 0.005933 | 0.00284  | LOC728705    | 728705    | . |
| 230580_at | 1.26E-06 | 6.71E-08 |              |           | . |
| 230581_at | 0.005851 | 0.002793 |              |           | . |
| 230583_s_ | 0.001676 | 6.23E-04 |              |           | . |
| 230584_at | 2.28E-04 | 5.41E-05 |              |           | . |
| 230586_s_ | 8.53E-06 | 8.21E-07 | ZNF703       | 80139     | . |
| 230587_at | 0.009825 | 0.00514  | STGC3        | 474171    | . |
| 230588_s_ | 0.006344 | 0.003072 | LOC285074    | 285074    | . |
| 230589_at | 0.04645  | 0.031516 |              |           | . |
| 230590_at | 4.45E-04 | 1.23E-04 |              |           | . |

|           |          |          |           |        |   |
|-----------|----------|----------|-----------|--------|---|
| 230591_at | 0.012691 | 0.006946 | LOC729887 | 729887 | . |
| 230592_at | 0.003011 | 0.00126  | NSL1      | 25936  | . |
| 230597_at | 1.45E-06 | 8.15E-08 | SLC7A3    | 84889  | . |
| 230598_at | 0.014447 | 0.008078 |           |        | . |
| 230599_at | 0.034713 | 0.022461 |           |        | . |
| 230600_at | 0.007231 | 0.003591 | LRRC46    | 90506  | . |
| 230603_at | 0.025275 | 0.015559 | COL27A1   | 85301  | . |
| 230605_at | 0.004593 | 0.002094 |           |        | . |
| 230606_at | 0.035012 | 0.022688 |           |        | . |
| 230607_at | 0.043832 | 0.02947  |           |        | . |
| 230608_at | 0.006898 | 0.003397 | C1orf182  | 128229 | . |
| 230611_at | 0.008297 | 0.004217 | SYPL2     | 284612 | . |
| 230614_at | 0.001328 | 4.71E-04 |           |        | . |
| 230615_at | 9.43E-06 | 9.42E-07 | DUOXA2    | 405753 | . |
| 230617_at | 1.23E-04 | 2.49E-05 |           |        | . |
| 230621_at | 8.80E-05 | 1.65E-05 | IAH1      | 285148 | . |
| 230622_at | 0.023642 | 0.01439  | MLLT4     | 4301   | . |
| 230623_x_ | 2.90E-06 | 2.02E-07 | USP28     | 57646  | . |
| 230625_s_ | 2.82E-06 | 1.94E-07 | TSPAN12   | 23554  | . |
| 230626_at | 2.10E-04 | 4.86E-05 | TSPAN12   | 23554  | . |
| 230627_at | 0.002486 | 0.001004 |           |        | . |
| 230628_at | 5.02E-05 | 8.05E-06 | EP400     | 57634  | . |
| 230629_s_ | 1.12E-06 | 5.73E-08 | EP400     | 57634  | . |
| 230630_at | 0.005197 | 0.002426 | AK3L1     | 205    | . |
| 230632_at | 0.002536 | 0.001027 |           |        | . |
| 230635_at | 1.87E-04 | 4.23E-05 | TUG1      | 55000  | . |
| 230636_s_ | 6.32E-07 | 2.68E-08 | KLF9      | 687    | . |
| 230637_at | 2.18E-05 | 2.80E-06 | SFXN4     | 119559 | . |
| 230638_at | 4.20E-04 | 1.15E-04 |           |        | . |
| 230639_at | 0.028899 | 0.018171 | ICA1      | 3382   | . |
| 230640_at | 3.45E-05 | 4.96E-06 |           |        | . |
| 230642_at | 3.74E-05 | 5.51E-06 |           |        | . |
| 230644_at | 0.032726 | 0.020991 | LRFN5     | 145581 | . |
| 230646_at | 4.09E-06 | 3.15E-07 | FNDC5     | 252995 | . |

|           |          |          |              |           |     |
|-----------|----------|----------|--------------|-----------|-----|
| 230648_at | 1.63E-06 | 9.57E-08 | LOC283663    | 283663    | .   |
| 230650_at | 0.002846 | 0.001178 |              |           | .   |
| 230651_at | 6.22E-07 | 2.62E-08 |              |           | .   |
| 230652_at | 3.01E-05 | 4.19E-06 | ARAF         | 369       | .   |
| 230653_at | 0.0026   | 0.001059 | LOC100132218 | 100132218 | //. |
| 230655_at | 2.83E-04 | 7.08E-05 |              |           | .   |
| 230656_s_ | 3.46E-04 | 9.05E-05 | CIRH1A       | 84916     | .   |
| 230657_at | 0.001374 | 4.91E-04 |              |           | .   |
| 230658_at | 0.004551 | 0.002071 | SLC7A2       | 6542      | .   |
| 230659_at | 1.67E-04 | 3.67E-05 |              |           | .   |
| 230660_at | 0.045932 | 0.031107 | SERTAD4      | 56256     | .   |
| 230661_at | 0.046817 | 0.031812 | C8orf84      | 157869    | .   |
| 230663_at | 9.41E-05 | 1.79E-05 |              |           | .   |
| 230666_at | 0.001846 | 7.01E-04 | HOXA11AS     | 221883    | .   |
| 230668_at | 1.49E-05 | 1.72E-06 | NKAIN4       | 128414    | .   |
| 230670_at | 0.001069 | 3.62E-04 | IGSF10       | 285313    | .   |
| 230671_at | 0.015957 | 0.009089 |              |           | .   |
| 230672_at | 2.81E-04 | 6.99E-05 |              |           | .   |
| 230674_at | 0.006373 | 0.003089 | LGR4         | 55366     | .   |
| 230675_at | 0.01687  | 0.009692 |              |           | .   |
| 230677_at | 0.028385 | 0.017785 | C14orf73     | 91828     | .   |
| 230678_at | 0.001605 | 5.92E-04 | RGS5         | 8490      | .   |
| 230679_at | 0.007527 | 0.003765 | WDR32        | 79269     | .   |
| 230681_at | 0.012724 | 0.006968 | TBRG1        | 84897     | .   |
| 230682_x_ | 0.002712 | 0.001113 | ABCC3        | 8714      | .   |
| 230684_at | 0.005783 | 0.002753 |              |           | .   |
| 230685_at | 0.006117 | 0.002943 | FLJ33630     | 644873    | .   |
| 230687_at | 0.025863 | 0.015975 | SLC13A3      | 64849     | .   |
| 230688_at | 0.021509 | 0.012886 |              |           | .   |
| 230690_at | 0.005168 | 0.00241  | TUBB1        | 81027     | .   |
| 230691_at | 1.64E-04 | 3.57E-05 | STX1B        | 112755    | .   |
| 230693_at | 0.006964 | 0.003436 | ATP2A1       | 487       | .   |
| 230694_at | 1.74E-05 | 2.08E-06 |              |           | .   |
| 230695_s_ | 0.001033 | 3.47E-04 | RSPH9        | 221421    | .   |

|           |          |          |                             |             |
|-----------|----------|----------|-----------------------------|-------------|
| 230696_at | 4.44E-05 | 6.88E-06 |                             | .           |
| 230697_at | 0.008758 | 0.004489 | BBS5                        | 129880 .    |
| 230698_at | 0.004282 | 0.001923 | CALN1                       | 83698 .     |
| 230700_at | 0.046544 | 0.031589 | RTN4RL1                     | 146760 .    |
| 230703_at | 0.001427 | 5.14E-04 |                             | .           |
| 230704_s_ | 0.003866 | 0.001702 | ITGB4                       | 3691 .      |
| 230705_at | 0.002086 | 8.12E-04 | SLC2A5                      | 6518 .      |
| 230706_s_ | 0.001278 | 4.50E-04 | CAMK2N2                     | 94032 .     |
| 230707_at | 0.002575 | 0.001046 | SORL1                       | 6653 .      |
| 230709_x_ | 0.037532 | 0.024608 | ZBTB7A                      | 51341 .     |
| 230712_at | 0.001083 | 3.68E-04 | NBPF1 /// NBP 55672 /// 728 | .           |
| 230713_at | 5.88E-04 | 1.74E-04 |                             | .           |
| 230714_s_ | 5.72E-05 | 9.48E-06 |                             | .           |
| 230717_at | 0.001649 | 6.11E-04 | LCN12                       | 286256 .    |
| 230718_at | 0.018691 | 0.010928 | HSF5                        | 124535 .    |
| 230719_at | 0.001478 | 5.36E-04 |                             | .           |
| 230721_at | 1.59E-04 | 3.46E-05 | C16orf52                    | 730094 .    |
| 230723_at | 4.51E-10 | 1.91E-12 | SPATA18                     | 132671 .    |
| 230724_s_ | 6.52E-07 | 2.80E-08 | C11orf57                    | 55216 .     |
| 230725_at | 6.19E-04 | 1.85E-04 | LOC100133781                | 100133781 . |
| 230727_at | 0.001448 | 5.23E-04 | CISD3                       | 284106 .    |
| 230728_at | 1.99E-06 | 1.24E-07 |                             | .           |
| 230729_at | 1.47E-05 | 1.69E-06 |                             | .           |
| 230730_at | 2.11E-05 | 2.67E-06 | SGCD                        | 6444 .      |
| 230731_x_ | 0.035712 | 0.023225 | ZDHHC8                      | 29801 .     |
| 230732_s_ | 0.002347 | 9.36E-04 | MAPK4                       | 5596 .      |
| 230733_at | 0.036447 | 0.023783 |                             | .           |
| 230735_at | 3.58E-08 | 5.74E-10 |                             | .           |
| 230736_at | 2.45E-04 | 5.91E-05 | LOC387647                   | 387647 .    |
| 230737_s_ | 1.27E-07 | 3.15E-09 | LOC387647                   | 387647 .    |
| 230738_at | 0.004264 | 0.001913 | LOC730631                   | 730631 .    |
| 230739_at | 2.68E-04 | 6.62E-05 | C18orf19                    | 125228 .    |
| 230740_at | 4.62E-07 | 1.79E-08 |                             | .           |
| 230741_at | 0.016081 | 0.009171 |                             | .           |

|           |          |          |              |        |   |
|-----------|----------|----------|--------------|--------|---|
| 230742_at | 1.16E-04 | 2.33E-05 | RBM6         | 10180  | . |
| 230744_at | 3.99E-05 | 5.96E-06 |              |        | . |
| 230745_s_ | 0.001093 | 3.72E-04 | TOX3         | 27324  | . |
| 230746_s_ | 8.56E-06 | 8.25E-07 |              |        | . |
| 230747_s_ | 7.22E-04 | 2.24E-04 | TTC39C       | 125488 | . |
| 230748_at | 0.001773 | 6.66E-04 | SLC16A6      | 9120   | . |
| 230749_s_ | 1.31E-05 | 1.45E-06 | CAMK2D       | 817    | . |
| 230750_at | 1.08E-07 | 2.52E-09 |              |        | . |
| 230751_at | 6.09E-04 | 1.81E-04 | WNT4         | 54361  | . |
| 230752_at | 0.012719 | 0.006965 |              |        | . |
| 230754_at | 0.038336 | 0.025215 | ZBTB38       | 253461 | . |
| 230755_at | 0.003225 | 0.00137  | RHBDL3       | 162494 | . |
| 230756_at | 5.43E-06 | 4.55E-07 | ZNF683       | 257101 | . |
| 230758_at | 0.034775 | 0.022509 | GEMIN8       | 54960  | . |
| 230759_at | 0.013802 | 0.007658 | SNX14        | 57231  | . |
| 230760_at | 0.010244 | 0.005396 | ZFY          | 7544   | . |
| 230761_at | 2.71E-04 | 6.70E-05 |              |        | . |
| 230764_at | 0.028133 | 0.017608 |              |        | . |
| 230766_at | 0.002916 | 0.001211 |              |        | . |
| 230768_at | 0.001307 | 4.62E-04 |              |        | . |
| 230770_at | 0.005221 | 0.002439 |              |        | . |
| 230771_at | 0.001214 | 4.23E-04 | NKAIN4       | 128414 | . |
| 230772_at | 1.50E-04 | 3.20E-05 |              |        | . |
| 230773_at | 0.012004 | 0.006498 |              |        | . |
| 230775_s_ | 0.007064 | 0.003494 | RP11-251J8.3 | 646871 | . |
| 230777_s_ | 1.48E-06 | 8.40E-08 | PRDM15       | 63977  | . |
| 230778_at | 1.35E-04 | 2.82E-05 |              |        | . |
| 230779_at | 0.00248  | 0.001    | TNRC6B       | 23112  | . |
| 230780_at | 0.048763 | 0.033338 | LOC730091    | 730091 | . |
| 230782_at | 0.012804 | 0.007019 | SORD         | 6652   | . |
| 230785_at | 0.003192 | 0.001353 |              |        | . |
| 230786_at | 0.002452 | 9.87E-04 |              |        | . |
| 230787_at | 0.010986 | 0.005859 |              |        | . |
| 230788_at | 3.42E-09 | 2.56E-11 | GCNT2        | 2651   | . |

|           |          |          |              |           |   |
|-----------|----------|----------|--------------|-----------|---|
| 230789_at | 3.10E-06 | 2.20E-07 | ZNF280B      | 140883    | . |
| 230791_at | 0.001043 | 3.51E-04 |              |           | . |
| 230792_at | 2.10E-07 | 6.10E-09 | FAAH2        | 158584    | . |
| 230793_at | 1.99E-06 | 1.24E-07 | LRRRC16A     | 55604     | . |
| 230795_at | 1.86E-04 | 4.19E-05 |              |           | . |
| 230796_at | 2.95E-04 | 7.44E-05 | LOC440900    | 440900    | . |
| 230797_s_ | 0.005591 | 0.002646 | LOC440900    | 440900    | . |
| 230798_at | 0.023305 | 0.014146 |              |           | . |
| 230799_at | 5.69E-07 | 2.34E-08 | LOC100134259 | 100134259 | . |
| 230800_at | 1.75E-06 | 1.06E-07 | ADCY4        | 196883    | . |
| 230801_at | 0.001212 | 4.22E-04 | RPRD1B       | 58490     | . |
| 230802_at | 8.68E-05 | 1.62E-05 | ARHGAP24     | 83478     | . |
| 230803_s_ | 2.95E-06 | 2.06E-07 | ARHGAP24     | 83478     | . |
| 230805_at | 2.36E-04 | 5.62E-05 |              |           | . |
| 230806_s_ | 0.004504 | 0.002045 | FAM65A       | 79567     | . |
| 230807_at | 3.71E-04 | 9.86E-05 | CCDC151      | 115948    | . |
| 230808_at | 0.019444 | 0.011443 | FNTA         | 2339      | . |
| 230811_at | 0.024521 | 0.01501  | C16orf55     | 124045    | . |
| 230812_at | 3.58E-05 | 5.20E-06 |              |           | . |
| 230813_at | 4.16E-05 | 6.31E-06 | LEPREL1      | 55214     | . |
| 230814_at | 0.001125 | 3.85E-04 | LOC342918    | 342918    | . |
| 230815_at | 0.00259  | 0.001054 | LOC389765    | 389765    | . |
| 230817_at | 0.03948  | 0.026085 | FAM84B       | 157638    | . |
| 230818_at | 0.028061 | 0.017557 |              |           | . |
| 230819_at | 0.005043 | 0.002341 | FAM148C      | 126567    | . |
| 230820_at | 7.32E-04 | 2.28E-04 |              |           | . |
| 230821_at | 0.025857 | 0.015968 | ZNF148       | 7707      | . |
| 230824_at | 0.005039 | 0.002339 | 10-Mar       | 162333    | . |
| 230826_at | 0.002428 | 9.75E-04 | MMD2         | 221938    | . |
| 230827_at | 0.002129 | 8.33E-04 |              |           | . |
| 230828_at | 0.013095 | 0.007204 |              |           | . |
| 230829_at | 0.002837 | 0.001173 | CST9L        | 128821    | . |
| 230833_at | 0.00612  | 0.002945 | ACRBP        | 84519     | . |
| 230835_at | 8.05E-04 | 2.57E-04 | KRTDAP       | 388533    | . |



|           |          |          |              |          |
|-----------|----------|----------|--------------|----------|
| 230836_at | 9.36E-06 | 9.33E-07 | ST8SIA4      | 7903 .   |
| 230839_at | 9.85E-05 | 1.89E-05 | PRMT8        | 56341 .  |
| 230840_at | 0.002529 | 0.001024 | LOC388588    | 388588 . |
| 230841_at | 8.26E-04 | 2.65E-04 |              | .        |
| 230842_at | 0.002013 | 7.78E-04 |              | .        |
| 230843_at | 0.033341 | 0.021451 |              | .        |
| 230844_at | 8.90E-04 | 2.90E-04 | LOC440934    | 440934 . |
| 230846_at | 1.73E-04 | 3.84E-05 | AKAP5        | 9495 .   |
| 230847_at | 0.003044 | 0.001277 | WRNIP1       | 56897 .  |
| 230848_s_ | 2.72E-06 | 1.85E-07 | MGA          | 23269 .  |
| 230850_at | 1.97E-04 | 4.49E-05 |              | .        |
| 230851_x_ | 0.005538 | 0.002617 | C16orf13     | 84326 .  |
| 230852_at | 0.001744 | 6.54E-04 | STAC3        | 246329 . |
| 230853_at | 5.59E-04 | 1.63E-04 |              | .        |
| 230855_at | 0.019083 | 0.011193 | GATA4        | 2626 .   |
| 230856_at | 0.026318 | 0.016291 |              | .        |
| 230859_at | 0.049309 | 0.033774 |              | .        |
| 230860_at | 8.63E-04 | 2.80E-04 | C3orf34      | 84984 .  |
| 230861_at | 4.07E-05 | 6.12E-06 | DKFZP434L187 | 26082 .  |
| 230863_at | 2.73E-04 | 6.75E-05 | LRP2         | 4036 .   |
| 230864_at | 8.12E-05 | 1.49E-05 | MGC42105     | 167359 . |
| 230865_at | 0.003544 | 0.001534 | LIX1         | 167410 . |
| 230866_at | 0.014572 | 0.008162 | CYSLTR1      | 10800 .  |
| 230867_at | 0.027721 | 0.017309 | COL6A6       | 131873 . |
| 230868_at | 0.002674 | 0.001094 |              | .        |
| 230870_at | 1.63E-04 | 3.56E-05 | MUS81        | 80198 .  |
| 230871_at | 0.023151 | 0.014033 | DHX30        | 22907 .  |
| 230872_s_ | 1.81E-04 | 4.06E-05 | TTLL3        | 26140 .  |
| 230873_at | 0.010344 | 0.005458 | TTLL3        | 26140 .  |
| 230875_s_ | 0.027627 | 0.017238 | ATP11A       | 23250 .  |
| 230877_at | 0.003029 | 0.00127  | IGHD         | 3495 .   |
| 230879_at | 1.30E-04 | 2.69E-05 | BAG2         | 9532 .   |
| 230881_at | 0.038992 | 0.025714 | CCDC42       | 146849 . |
| 230883_at | 0.001415 | 5.09E-04 | NXP2         | 11249 .  |

|           |          |          |             |        |   |
|-----------|----------|----------|-------------|--------|---|
| 230885_at | 2.11E-09 | 1.40E-11 | SPG7        | 6687   | . |
| 230887_at | 1.41E-05 | 1.60E-06 | CDC14B      | 8555   | . |
| 230889_at | 0.001029 | 3.45E-04 |             |        | . |
| 230892_at | 0.001427 | 5.14E-04 |             |        | . |
| 230894_s_ | 0.029761 | 0.018809 |             |        | . |
| 230895_at | 0.003558 | 0.001541 | HAPLN1      | 1404   | . |
| 230896_at | 2.99E-04 | 7.58E-05 | BEND4       | 389206 | . |
| 230897_at | 0.043365 | 0.029098 | RP4-692D3.1 | 728621 | . |
| 230898_at | 0.01038  | 0.005479 |             |        | . |
| 230901_x_ | 0.00127  | 4.47E-04 | PCSK4       | 54760  | . |
| 230902_at | 0.001593 | 5.87E-04 | LOC645323   | 645323 | . |
| 230903_s_ | 1.10E-05 | 1.15E-06 | C8orf42     | 157695 | . |
| 230904_at | 3.27E-04 | 8.47E-05 | FSD1L       | 83856  | . |
| 230905_at | 0.006111 | 0.00294  | ZDHHC4      | 55146  | . |
| 230906_at | 2.76E-04 | 6.86E-05 | GALNT10     | 55568  | . |
| 230907_at | 2.70E-04 | 6.66E-05 | GPRC5C      | 55890  | . |
| 230908_at | 5.30E-05 | 8.62E-06 | TACR1       | 6869   | . |
| 230909_at | 0.025872 | 0.015982 | COX18       | 285521 | . |
| 230911_at | 9.61E-04 | 3.18E-04 | SIX1        | 6495   | . |
| 230912_at | 6.33E-05 | 1.08E-05 | ASPDH       | 554235 | . |
| 230913_at | 0.030154 | 0.019093 |             |        | . |
| 230914_at | 4.36E-07 | 1.66E-08 | HNF4A       | 3172   | . |
| 230915_at | 0.023509 | 0.014293 | DHRS7C      | 201140 | . |
| 230916_at | 2.54E-08 | 3.65E-10 | NODAL       | 4838   | . |
| 230918_at | 0.001298 | 4.58E-04 |             |        | . |
| 230919_at | 0.001945 | 7.46E-04 | ZNF233      | 353355 | . |
| 230920_at | 0.012433 | 0.006778 | LOC284542   | 284542 | . |
| 230921_s_ | 1.32E-05 | 1.45E-06 |             |        | . |
| 230922_x_ | 0.016419 | 0.009393 |             |        | . |
| 230925_at | 2.61E-12 | 1.92E-15 | APBB1P      | 54518  | . |
| 230927_at | 0.028327 | 0.017744 |             |        | . |
| 230929_s_ | 8.85E-06 | 8.63E-07 |             |        | . |
| 230930_at | 0.032204 | 0.020605 | LOC338620   | 338620 | . |
| 230932_at | 5.91E-04 | 1.75E-04 |             |        | . |

|           |          |          |              |           |   |
|-----------|----------|----------|--------------|-----------|---|
| 230933_at | 0.003316 | 0.001417 | DSTN         | 11034     | . |
| 230934_at | 0.039821 | 0.026346 | STK32C       | 282974    | . |
| 230937_at | 0.019743 | 0.011647 | LOC285835    | 285835    | . |
| 230938_x_ | 1.83E-04 | 4.11E-05 | ATF5         | 22809     | . |
| 230940_at | 0.002208 | 8.70E-04 | LOC100131088 | 100131088 | . |
| 230942_at | 0.002409 | 9.66E-04 | CMTM5        | 116173    | . |
| 230943_at | 3.46E-06 | 2.54E-07 | SOX17        | 64321     | . |
| 230944_at | 0.003187 | 0.00135  |              |           | . |
| 230945_at | 0.040294 | 0.02671  |              |           | . |
| 230946_at | 1.79E-04 | 4.00E-05 | FMN2         | 56776     | . |
| 230947_at | 8.43E-05 | 1.56E-05 | 12-Sep       | 124404    | . |
| 230948_at | 0.011953 | 0.006466 | TAF1B        | 9014      | . |
| 230949_at | 0.00506  | 0.002352 | SLC23A3      | 151295    | . |
| 230950_at | 0.023221 | 0.014087 |              |           | . |
| 230951_at | 3.45E-07 | 1.22E-08 |              |           | . |
| 230952_at | 0.010247 | 0.005399 | LOC730092    | 730092    | . |
| 230953_at | 7.52E-04 | 2.36E-04 |              |           | . |
| 230954_at | 0.003921 | 0.001732 | C20orf112    | 140688    | . |
| 230957_at | 0.001235 | 4.32E-04 | PCDHB19P     | 84054     | . |
| 230958_s_ | 0.008063 | 0.004081 |              |           | . |
| 230959_at | 0.003077 | 0.001294 |              |           | . |
| 230960_at | 1.87E-08 | 2.40E-10 | IGDCC3       | 9543      | . |
| 230961_at | 9.80E-05 | 1.88E-05 |              |           | . |
| 230963_at | 1.48E-06 | 8.39E-08 | EMX2OS       | 196047    | . |
| 230964_at | 2.08E-07 | 6.03E-09 | FREM2        | 341640    | . |
| 230965_at | 2.92E-05 | 4.03E-06 | USP2         | 9099      | . |
| 230967_s_ | 9.78E-04 | 3.25E-04 |              |           | . |
| 230969_at | 0.01392  | 0.007733 | C1orf223     | 374973    | . |
| 230970_at | 5.52E-06 | 4.65E-07 |              |           | . |
| 230971_x_ | 0.007862 | 0.003963 | GLTPD2       | 388323    | . |
| 230972_at | 0.04122  | 0.027422 | ANKRD9       | 122416    | . |
| 230976_at | 2.99E-05 | 4.15E-06 | C9orf98      | 158067    | . |
| 230977_at | 0.002949 | 0.001228 | NPM2         | 10361     | . |
| 230979_at | 5.99E-05 | 1.00E-05 |              |           | . |

|           |          |                       |             |
|-----------|----------|-----------------------|-------------|
| 230980_x_ | 0.002353 | 9.38E-04              | .           |
| 230981_at | 0.026396 | 0.016351 CATSPER3     | 347732 .    |
| 230982_at | 0.00891  | 0.004582 SOX1         | 6656 .      |
| 230985_at | 0.004664 | 0.002133 C9orf131     | 138724 .    |
| 230986_at | 3.93E-06 | 2.98E-07 KLF8         | 11279 .     |
| 230988_at | 0.001388 | 4.97E-04              | .           |
| 230989_s_ | 4.86E-05 | 7.72E-06 TSSK6        | 83983 .     |
| 230991_at | 0.014279 | 0.007967              | .           |
| 230994_at | 1.90E-04 | 4.29E-05 FAM181B      | 220382 .    |
| 230998_at | 1.67E-06 | 9.93E-08              | .           |
| 230999_at | 0.030781 | 0.019553 FLJ39051     | 399972 .    |
| 231001_at | 0.009053 | 0.004666 FIBIN        | 387758 .    |
| 231003_at | 0.049142 | 0.033645 SLC35B3      | 51000 .     |
| 231005_at | 9.25E-05 | 1.75E-05              | .           |
| 231006_at | 2.04E-04 | 4.70E-05 SPATA8       | 145946 .    |
| 231008_at | 1.87E-05 | 2.29E-06 UNC5CL       | 222643 .    |
| 231009_at | 2.22E-08 | 3.02E-10 PLA2G12B     | 84647 .     |
| 231011_at | 0.004743 | 0.002176 LARP2        | 55132 .     |
| 231012_at | 4.70E-06 | 3.77E-07 TMEM20       | 159371 .    |
| 231015_at | 0.027627 | 0.017237 KLF15        | 28999 .     |
| 231016_s_ | 0.002421 | 9.72E-04              | .           |
| 231017_at | 0.006263 | 0.003026 STK11        | 6794 .      |
| 231018_at | 0.006774 | 0.003323 PALM3        | 342979 .    |
| 231019_x_ | 2.29E-07 | 7.00E-09 STK11        | 6794 .      |
| 231020_at | 1.41E-04 | 2.96E-05 ARX          | 170302 .    |
| 231022_at | 1.74E-08 | 2.21E-10              | .           |
| 231026_at | 7.66E-04 | 2.41E-04 EFHC1        | 114327 .    |
| 231030_at | 3.75E-04 | 9.99E-05 LOC100132618 | 100132618 . |
| 231031_at | 0.001244 | 4.36E-04 KGFLP2       | 654466 .    |
| 231032_at | 0.040646 | 0.026985 LOC286071    | 286071 .    |
| 231034_s_ | 0.034693 | 0.022447              | .           |
| 231036_at | 0.014945 | 0.008413              | .           |
| 231038_s_ | 0.008012 | 0.00405               | .           |
| 231039_at | 0.015422 | 0.008732              | .           |

|           |          |          |              |           |   |
|-----------|----------|----------|--------------|-----------|---|
| 231041_at | 0.026686 | 0.016562 | POLR1E       | 64425     | . |
| 231042_s_ | 1.30E-04 | 2.68E-05 |              |           | . |
| 231043_at | 0.001457 | 5.27E-04 | hCG_17324    | 200373    | . |
| 231044_at | 8.38E-05 | 1.55E-05 | C1orf194     | 127003    | . |
| 231045_x_ | 0.009637 | 0.005024 | C11orf31     | 280636    | . |
| 231046_at | 0.003722 | 0.001627 |              |           | . |
| 231047_at | 0.035599 | 0.02314  |              |           | . |
| 231050_at | 1.79E-06 | 1.09E-07 | HRASLS5      | 117245    | . |
| 231053_at | 0.028506 | 0.017873 |              |           | . |
| 231054_at | 2.91E-05 | 4.01E-06 | SPACA4       | 171169    | . |
| 231055_at | 0.002974 | 0.001241 |              |           | . |
| 231056_at | 0.03474  | 0.02248  | LOC339352    | 339352    | . |
| 231057_at | 1.52E-04 | 3.26E-05 |              |           | . |
| 231058_at | 0.007752 | 0.003897 | FXVD4        | 53828     | . |
| 231061_at | 1.66E-11 | 2.47E-14 |              |           | . |
| 231062_at | 0.002375 | 9.49E-04 | LOC100129122 | 100129122 | . |
| 231064_s_ | 3.58E-04 | 9.44E-05 |              |           | . |
| 231067_s_ | 0.005347 | 0.002508 |              |           | . |
| 231069_at | 8.20E-04 | 2.62E-04 |              |           | . |
| 231072_at | 0.005312 | 0.002489 | MIDN         | 90007     | . |
| 231073_at | 0.00304  | 0.001276 | C1orf168     | 199920    | . |
| 231074_at | 0.00579  | 0.002757 |              |           | . |
| 231075_x_ | 8.23E-05 | 1.51E-05 | RAPH1        | 65059     | . |
| 231078_at | 0.004036 | 0.001791 |              |           | . |
| 231079_at | 2.22E-11 | 3.83E-14 |              |           | . |
| 231080_at | 7.49E-05 | 1.34E-05 | CDAN1        | 146059    | . |
| 231081_at | 0.007511 | 0.003755 | C2orf73      | 129852    | . |
| 231086_at | 3.03E-04 | 7.69E-05 |              |           | . |
| 231087_at | 8.01E-04 | 2.55E-04 |              |           | . |
| 231089_at | 6.43E-04 | 1.94E-04 |              |           | . |
| 231090_s_ | 6.60E-06 | 5.84E-07 | ARID2        | 196528    | . |
| 231092_s_ | 0.017485 | 0.010105 | ZNRF1        | 84937     | . |
| 231098_at | 2.05E-08 | 2.69E-10 |              |           | . |
| 231099_at | 9.32E-05 | 1.76E-05 |              |           | . |

|           |          |          |              |             |
|-----------|----------|----------|--------------|-------------|
| 231101_at | 0.009099 | 0.004694 |              | .           |
| 231102_at | 0.042113 | 0.028118 | CROT         | 54677 .     |
| 231103_at | 0.00446  | 0.002021 |              | .           |
| 231104_at | 0.00917  | 0.004741 | TDRD5        | 163589 .    |
| 231108_at | 4.07E-07 | 1.52E-08 | FUS          | 2521 .      |
| 231109_at | 0.032052 | 0.020492 |              | .           |
| 231110_at | 3.08E-04 | 7.85E-05 |              | .           |
| 231111_at | 0.005914 | 0.002829 |              | .           |
| 231112_at | 0.01415  | 0.007883 | SNRPE        | 6635 .      |
| 231113_at | 0.009128 | 0.004713 |              | .           |
| 231115_at | 7.09E-04 | 2.19E-04 | POLH         | 5429 .      |
| 231118_at | 2.74E-08 | 4.08E-10 | ANKRD35      | 148741 .    |
| 231120_x_ | 0.001576 | 5.79E-04 | PKIB         | 5570 .      |
| 231121_at | 1.13E-04 | 2.25E-05 | HPS3         | 84343 .     |
| 231122_x_ | 0.016166 | 0.009228 | ZDHHC19      | 131540 .    |
| 231123_at | 4.76E-04 | 1.34E-04 | TRIM36       | 55521 .     |
| 231124_x_ | 0.033171 | 0.021326 | LY9          | 4063 .      |
| 231129_at | 6.59E-06 | 5.83E-07 | LOC728012    | 728012 .    |
| 231130_at | 6.11E-05 | 1.03E-05 | FKBP7        | 51661 .     |
| 231132_at | 3.19E-04 | 8.20E-05 | LOC348120    | 348120 .    |
| 231133_at | 7.89E-05 | 1.44E-05 | C2orf39      | 92749 .     |
| 231135_at | 0.002731 | 0.001122 | LOC151174    | 151174 .    |
| 231137_at | 0.00104  | 3.50E-04 |              | .           |
| 231140_at | 7.93E-04 | 2.52E-04 | TPPP2        | 122664 .    |
| 231141_at | 0.001233 | 4.31E-04 |              | .           |
| 231143_at | 0.035507 | 0.023064 | LOC100129514 | 100129514 . |
| 231144_at | 2.33E-05 | 3.04E-06 | SMARCD3      | 6604 .      |
| 231145_at | 0.00358  | 0.001553 |              | .           |
| 231146_at | 0.031048 | 0.019747 | FAM24B       | 196792 .    |
| 231148_at | 0.004485 | 0.002035 | IGFL2        | 147920 .    |
| 231149_s_ | 0.005306 | 0.002485 | ULK4         | 54986 .     |
| 231150_at | 5.78E-04 | 1.70E-04 |              | .           |
| 231151_at | 0.001665 | 6.18E-04 | DLGAP3       | 58512 .     |
| 231153_at | 8.77E-06 | 8.52E-07 | C16orf86     | 388284 .    |

|           |          |          |              |           |   |
|-----------|----------|----------|--------------|-----------|---|
| 231155_at | 0.002292 | 9.10E-04 | DEFB119      | 245932    | . |
| 231157_at | 6.75E-06 | 6.02E-07 | TTLL11       | 158135    | . |
| 231158_x_ | 6.86E-08 | 1.37E-09 | PTBP1        | 5725      | . |
| 231159_at | 0.021045 | 0.012568 | CXorf51      | 100129239 | . |
| 231161_x_ | 2.18E-06 | 1.40E-07 |              |           | . |
| 231163_at | 3.75E-05 | 5.52E-06 | C1orf111     | 284680    | . |
| 231164_at | 0.00651  | 0.003168 | ABCA17P      | 650655    | . |
| 231165_at | 1.35E-06 | 7.45E-08 |              |           | . |
| 231166_at | 0.011641 | 0.006269 | GPR155       | 151556    | . |
| 231168_at | 0.001084 | 3.68E-04 |              |           | . |
| 231169_at | 6.72E-06 | 5.98E-07 |              |           | . |
| 231171_at | 0.032665 | 0.020943 |              |           | . |
| 231175_at | 1.16E-04 | 2.31E-05 | BEND6        | 221336    | . |
| 231184_at | 5.35E-05 | 8.71E-06 | DHX8         | 1659      | . |
| 231185_at | 2.09E-04 | 4.84E-05 | KIAA1161     | 57462     | . |
| 231187_at | 0.003504 | 0.001513 | SLC28A1      | 9154      | . |
| 231188_at | 0.008084 | 0.004093 | ZSCAN2       | 54993     | . |
| 231189_at | 6.25E-05 | 1.06E-05 |              |           | . |
| 231190_at | 3.32E-05 | 4.73E-06 | POM121L10P   | 646074    | . |
| 231191_at | 6.77E-04 | 2.07E-04 |              |           | . |
| 231194_at | 0.029693 | 0.018752 | SNX32        | 254122    | . |
| 231195_at | 1.96E-04 | 4.46E-05 | KLRG2        | 346689    | . |
| 231196_x_ | 1.12E-06 | 5.76E-08 | C10orf51     | 387644    | . |
| 231197_at | 0.005396 | 0.002535 | PPP1R3F      | 89801     | . |
| 231198_at | 8.07E-04 | 2.57E-04 | CDK6         | 1021      | . |
| 231199_at | 7.52E-07 | 3.38E-08 |              |           | . |
| 231200_at | 0.009805 | 0.005128 | LSM14B       | 149986    | . |
| 231201_at | 1.86E-04 | 4.19E-05 | PTGER1       | 5731      | . |
| 231202_at | 7.09E-06 | 6.44E-07 | ALDH1L2      | 160428    | . |
| 231203_at | 1.39E-05 | 1.58E-06 | LOC100129633 | 100129633 | . |
| 231204_at | 0.008669 | 0.004436 | C4orf21      | 55345     | . |
| 231205_at | 2.59E-04 | 6.32E-05 |              |           | . |
| 231206_at | 0.004739 | 0.002175 |              |           | . |
| 231207_at | 0.004391 | 0.001983 |              |           | . |

|           |          |          |              |           |   |
|-----------|----------|----------|--------------|-----------|---|
| 231209_at | 4.36E-05 | 6.72E-06 | C14orf73     | 91828     | . |
| 231210_at | 8.47E-04 | 2.73E-04 | C11orf85     | 283129    | . |
| 231211_s_ | 1.28E-05 | 1.40E-06 | YIF1B        | 90522     | . |
| 231212_x_ | 0.004639 | 0.002119 |              |           | . |
| 231214_at | 4.85E-05 | 7.70E-06 |              |           | . |
| 231217_at | 0.046677 | 0.031696 |              |           | . |
| 231221_at | 1.24E-04 | 2.53E-05 | CLEC16A      | 23274     | . |
| 231223_at | 1.40E-06 | 7.83E-08 | CSMD1        | 64478     | . |
| 231224_x_ | 3.31E-07 | 1.16E-08 | PRKAG2       | 51422     | . |
| 231225_at | 0.041104 | 0.027334 |              |           | . |
| 231226_at | 1.44E-05 | 1.64E-06 | LOC728142    | 728142    | . |
| 231227_at | 1.67E-06 | 9.93E-08 |              |           | . |
| 231229_at | 1.05E-05 | 1.08E-06 | HILS1        | 373861    | . |
| 231233_at | 0.008917 | 0.004586 |              |           | . |
| 231234_at | 1.74E-05 | 2.09E-06 | CTSC         | 1075      | . |
| 231236_at | 0.011388 | 0.006111 | ZFP57        | 346171    | . |
| 231237_x_ | 0.018586 | 0.010856 | LOC100131637 | 100131637 | . |
| 231238_at | 0.012452 | 0.00679  |              |           | . |
| 231240_at | 0.001416 | 5.09E-04 | DIO2         | 1734      | . |
| 231242_at | 2.12E-04 | 4.93E-05 | BHLHE41      | 79365     | . |
| 231243_s_ | 3.85E-04 | 1.03E-04 | BHLHE41      | 79365     | . |
| 231245_s_ | 0.018952 | 0.011105 |              |           | . |
| 231246_at | 0.004037 | 0.001792 |              |           | . |
| 231247_s_ | 1.10E-05 | 1.15E-06 | LOC727820    | 727820    | . |
| 231248_at | 0.016169 | 0.009231 | CST6         | 1474      | . |
| 231250_at | 0.005705 | 0.002708 |              |           | . |
| 231253_at | 5.93E-04 | 1.76E-04 | IMP5         | 162540    | . |
| 231255_at | 0.00221  | 8.71E-04 | MPRIP        | 23164     | . |
| 231256_at | 5.97E-04 | 1.77E-04 | LOC727944    | 727944    | . |
| 231258_at | 0.022645 | 0.013682 |              |           | . |
| 231259_s_ | 7.79E-05 | 1.41E-05 |              |           | . |
| 231260_at | 0.03734  | 0.024466 | BC036928     | 386758    | . |
| 231261_at | 0.001805 | 6.81E-04 | C19orf15     | 57828     | . |
| 231266_at | 0.00431  | 0.001938 | LYPD4        | 147719    | . |



|           |          |          |                             |           |     |
|-----------|----------|----------|-----------------------------|-----------|-----|
| 231267_at | 1.67E-05 | 1.98E-06 | FAM163A                     | 148753    | .   |
| 231268_at | 4.35E-05 | 6.70E-06 | LOC645895 /// 4603 /// 6458 |           | .   |
| 231269_at | 0.010707 | 0.005685 | ASCC3                       | 10973     | .   |
| 231270_at | 0.015202 | 0.008583 | CA13                        | 377677    | .   |
| 231273_x_ | 7.29E-06 | 6.68E-07 | FRZB                        | 2487      | .   |
| 231274_s_ | 0.002739 | 0.001126 |                             |           | .   |
| 231275_at | 6.39E-06 | 5.60E-07 | LOC100129346                | 100129346 | .   |
| 231276_at | 2.28E-04 | 5.39E-05 | PDE3B                       | 5140      | .   |
| 231277_x_ | 1.43E-07 | 3.71E-09 | DTWD2                       | 285605    | .   |
| 231278_at | 1.89E-04 | 4.26E-05 |                             |           | .   |
| 231279_at | 0.012323 | 0.006707 | PATE1                       | 160065    | .   |
| 231281_at | 3.99E-04 | 1.08E-04 |                             |           | .   |
| 231284_at | 3.19E-04 | 8.19E-05 |                             |           | .   |
| 231285_at | 0.001083 | 3.68E-04 |                             |           | .   |
| 231286_at | 0.025228 | 0.015527 | C9orf47                     | 286223    | .   |
| 231288_at | 7.37E-05 | 1.32E-05 | CCDC88C                     | 440193    | .   |
| 231289_at | 1.76E-05 | 2.12E-06 | NCOA1                       | 8648      | .   |
| 231291_at | 2.81E-04 | 7.01E-05 |                             |           | .   |
| 231293_at | 0.014667 | 0.008227 |                             |           | .   |
| 231295_at | 0.001209 | 4.21E-04 | ME3                         | 10873     | .   |
| 231297_at | 4.45E-04 | 1.23E-04 | DOT1L                       | 84444     | .   |
| 231298_at | 1.24E-04 | 2.51E-05 |                             |           | .   |
| 231302_at | 0.008737 | 0.004476 |                             |           | .   |
| 231303_at | 0.002328 | 9.27E-04 | NCRNA00158                  | 54072     | .   |
| 231304_at | 0.013932 | 0.00774  | PPP3R2                      | 5535      | .   |
| 231305_at | 1.15E-05 | 1.22E-06 |                             |           | .   |
| 231307_at | 0.032819 | 0.021062 | LOC100130725                | 100130725 | //. |
| 231309_at | 0.019078 | 0.011189 | GNA12                       | 2768      | .   |
| 231310_at | 1.19E-11 | 1.69E-14 |                             |           | .   |
| 231311_at | 4.18E-06 | 3.23E-07 |                             |           | .   |
| 231313_at | 0.015568 | 0.008829 | FLJ27354                    | 400761    | .   |
| 231316_at | 0.011497 | 0.006179 |                             |           | .   |
| 231319_x_ | 7.68E-06 | 7.15E-07 | KIF9                        | 64147     | .   |
| 231322_at | 5.11E-04 | 1.46E-04 |                             |           | .   |

|           |          |          |              |           |   |
|-----------|----------|----------|--------------|-----------|---|
| 231323_at | 0.041602 | 0.027715 | PSMB2        | 5690      | . |
| 231325_at | 1.05E-05 | 1.08E-06 | UNC5D        | 137970    | . |
| 231327_at | 0.010095 | 0.005304 |              |           | . |
| 231328_s_ | 2.90E-05 | 4.00E-06 | RASGRP4      | 115727    | . |
| 231329_at | 0.010391 | 0.005486 |              |           | . |
| 231330_at | 0.005754 | 0.002737 |              |           | . |
| 231331_at | 0.036522 | 0.023839 |              |           | . |
| 231332_at | 1.43E-04 | 3.01E-05 |              |           | . |
| 231333_at | 0.001773 | 6.67E-04 |              |           | . |
| 231338_at | 8.63E-04 | 2.79E-04 | C15orf55     | 256646    | . |
| 231341_at | 0.019017 | 0.011148 | SLC35D3      | 340146    | . |
| 231342_at | 0.001867 | 7.10E-04 | LOC646778    | 646778    | . |
| 231344_at | 0.003623 | 0.001575 |              |           | . |
| 231346_s_ | 1.43E-04 | 3.03E-05 |              |           | . |
| 231347_at | 0.001743 | 6.54E-04 |              |           | . |
| 231349_at | 0.046816 | 0.03181  | GPR150       | 285601    | . |
| 231350_at | 0.005048 | 0.002345 |              |           | . |
| 231352_at | 2.35E-04 | 5.58E-05 | SLC22A8      | 9376      | . |
| 231353_at | 6.17E-04 | 1.85E-04 |              |           | . |
| 231354_at | 0.011383 | 0.006107 | LOC780529    | 780529    | . |
| 231355_at | 0.026837 | 0.016677 |              |           | . |
| 231356_at | 0.013718 | 0.007605 | LOC100131014 | 100131014 | . |
| 231359_at | 1.08E-05 | 1.12E-06 | APOH         | 350       | . |
| 231360_at | 5.05E-06 | 4.12E-07 | C20orf141    | 128653    | . |
| 231363_at | 0.0017   | 6.34E-04 | LLEP1        | 149018    | . |
| 231369_at | 0.004913 | 0.002269 | ZNF333       | 84449     | . |
| 231370_at | 6.77E-04 | 2.07E-04 |              |           | . |
| 231373_at | 2.01E-04 | 4.60E-05 | RNF133       | 168433    | . |
| 231374_at | 8.66E-05 | 1.61E-05 |              |           | . |
| 231375_at | 1.36E-05 | 1.52E-06 | LOC202181    | 202181    | . |
| 231377_at | 0.003707 | 0.001619 | CXorf65      | 158830    | . |
| 231378_at | 1.29E-05 | 1.43E-06 |              |           | . |
| 231379_at | 0.028941 | 0.0182   |              |           | . |
| 231380_at | 8.83E-05 | 1.65E-05 | C8orf34      | 116328    | . |

|           |          |          |              |           |   |
|-----------|----------|----------|--------------|-----------|---|
| 231381_at | 1.72E-13 | 6.33E-17 | HESRG        | 790952    | . |
| 231385_at | 4.95E-08 | 8.92E-10 | DPPA3        | 359787    | . |
| 231386_at | 0.003949 | 0.001746 | C2orf84      | 653140    | . |
| 231387_at | 4.46E-04 | 1.24E-04 | C6orf145     | 221749    | . |
| 231389_at | 0.029702 | 0.018763 | CXorf41      | 139212    | . |
| 231390_at | 0.007479 | 0.003737 |              |           | . |
| 231392_at | 0.045928 | 0.031103 |              |           | . |
| 231394_at | 3.64E-04 | 9.62E-05 |              |           | . |
| 231395_at | 0.022727 | 0.013741 | ATP8A2       | 51761     | . |
| 231396_s_ | 0.016145 | 0.009215 | FAM126A      | 84668     | . |
| 231399_at | 0.010574 | 0.005601 | RAB3IP       | 117177    | . |
| 231401_s_ | 1.82E-04 | 4.06E-05 |              |           | . |
| 231402_at | 0.006491 | 0.003158 | LOC100129105 | 100129105 | . |
| 231403_at | 7.81E-05 | 1.42E-05 | TRIO         | 7204      | . |
| 231405_at | 0.001824 | 6.90E-04 | C13orf28     | 122258    | . |
| 231406_at | 2.53E-07 | 8.02E-09 | ORAI2        | 80228     | . |
| 231407_s_ | 2.30E-10 | 7.79E-13 | FOXH1        | 8928      | . |
| 231408_at | 0.028582 | 0.017932 | TMEM92       | 162461    | . |
| 231409_at | 6.05E-05 | 1.02E-05 |              |           | . |
| 231411_at | 1.74E-05 | 2.09E-06 | LHFP         | 10186     | . |
| 231413_at | 4.95E-04 | 1.40E-04 |              |           | . |
| 231414_at | 2.39E-05 | 3.13E-06 |              |           | . |
| 231415_at | 0.00187  | 7.12E-04 | WBSCR22      | 114049    | . |
| 231416_at | 6.20E-05 | 1.05E-05 | DHDH         | 27294     | . |
| 231417_at | 0.004214 | 0.001887 |              |           | . |
| 231419_at | 5.86E-05 | 9.76E-06 |              |           | . |
| 231420_at | 0.020345 | 0.012067 | GGN          | 199720    | . |
| 231422_x_ | 0.013111 | 0.007215 | TYSND1       | 219743    | . |
| 231424_at | 0.039029 | 0.025742 | SLC5A12      | 159963    | . |
| 231426_at | 0.040152 | 0.0266   |              |           | . |
| 231427_at | 0.044756 | 0.030196 | LOC284648    | 284648    | . |
| 231431_s_ | 0.001966 | 7.56E-04 |              |           | . |
| 231436_at | 0.002368 | 9.45E-04 |              |           | . |
| 231444_at | 0.00811  | 0.004108 |              |           | . |

|           |          |          |              |             |
|-----------|----------|----------|--------------|-------------|
| 231445_at | 0.020522 | 0.012191 |              | .           |
| 231447_at | 0.00126  | 4.42E-04 | MGC44328     | 440757 .    |
| 231448_at | 0.005597 | 0.002649 | ADAD1        | 132612 .    |
| 231449_at | 0.035563 | 0.023113 |              | .           |
| 231451_s_ | 0.019708 | 0.011622 |              | .           |
| 231452_at | 5.83E-07 | 2.41E-08 | HRASLS5      | 117245 .    |
| 231458_at | 7.69E-04 | 2.43E-04 |              | .           |
| 231459_at | 3.12E-06 | 2.22E-07 |              | .           |
| 231460_at | 7.38E-06 | 6.78E-07 |              | .           |
| 231462_at | 0.001455 | 5.26E-04 | TMEM114      | 283953 .    |
| 231463_at | 0.021327 | 0.012765 | CNTD1        | 124817 .    |
| 231465_at | 0.019152 | 0.011238 |              | .           |
| 231466_at | 1.13E-04 | 2.25E-05 | FAM71F1      | 84691 .     |
| 231467_at | 0.020656 | 0.01229  |              | .           |
| 231469_at | 0.001025 | 3.44E-04 | LOC283738    | 283738 .    |
| 231470_at | 2.31E-05 | 2.99E-06 |              | .           |
| 231474_at | 0.010773 | 0.005727 | C6orf221     | 154288 .    |
| 231476_at | 0.005328 | 0.002498 |              | .           |
| 231477_at | 8.90E-04 | 2.90E-04 |              | .           |
| 231480_at | 1.96E-04 | 4.46E-05 | SLC6A19      | 340024 .    |
| 231482_at | 0.004485 | 0.002034 |              | .           |
| 231485_at | 1.51E-04 | 3.25E-05 |              | .           |
| 231488_at | 0.040274 | 0.026694 | OTP          | 23440 .     |
| 231489_x_ | 0.001249 | 4.38E-04 |              | .           |
| 231490_at | 7.50E-06 | 6.92E-07 |              | .           |
| 231492_at | 9.75E-04 | 3.24E-04 |              | .           |
| 231495_at | 1.49E-06 | 8.46E-08 |              | .           |
| 231497_at | 0.030506 | 0.019353 | LOC100131117 | 100131117 . |
| 231500_s_ | 0.035514 | 0.023071 | BOLA2        | 552900 .    |
| 231501_at | 0.003337 | 0.001428 |              | .           |
| 231502_at | 3.61E-06 | 2.67E-07 |              | .           |
| 231505_s_ | 0.025133 | 0.015452 | SFXN4        | 119559 .    |
| 231507_at | 1.97E-04 | 4.50E-05 |              | .           |
| 231509_at | 0.005857 | 0.002797 | C7orf16      | 10842 .     |

|           |          |          |             |           |   |
|-----------|----------|----------|-------------|-----------|---|
| 231511_at | 0.021453 | 0.012848 | FRAS1       | 80144     | . |
| 231512_at | 5.40E-06 | 4.50E-07 |             |           | . |
| 231513_at | 0.003135 | 0.001323 |             |           | . |
| 231514_at | 0.001243 | 4.35E-04 | C1orf94     | 84970     | . |
| 231515_at | 0.002117 | 8.27E-04 |             |           | . |
| 231516_at | 8.62E-04 | 2.79E-04 |             |           | . |
| 231517_at | 2.42E-04 | 5.80E-05 | ZYG11A      | 440590    | . |
| 231519_at | 0.018286 | 0.010653 |             |           | . |
| 231520_at | 1.32E-04 | 2.74E-05 | SLC35F3     | 148641    | . |
| 231525_at | 1.96E-04 | 4.45E-05 | IQCF5       | 389124    | . |
| 231526_at | 0.001556 | 5.70E-04 |             |           | . |
| 231527_at | 0.002031 | 7.86E-04 | FLJ36840    | 645524    | . |
| 231528_at | 6.97E-04 | 2.15E-04 |             |           | . |
| 231530_s_ | 0.008865 | 0.004554 | C11orf1     | 64776     | . |
| 231531_at | 1.13E-05 | 1.19E-06 | C3orf24     | 115795    | . |
| 231532_at | 0.030214 | 0.019141 | NCAM1       | 4684      | . |
| 231534_at | 4.56E-04 | 1.27E-04 | CDC2        | 983       | . |
| 231535_x_ | 0.041362 | 0.027531 | ROPN1       | 54763     | . |
| 231537_at | 4.34E-06 | 3.40E-07 |             |           | . |
| 231539_at | 0.043409 | 0.029133 | C3orf67     | 200844    | . |
| 231540_at | 0.011371 | 0.0061   | hCG_1817306 | 100130691 | . |
| 231541_s_ | 1.96E-04 | 4.48E-05 |             |           | . |
| 231543_at | 0.036156 | 0.023563 | PLEKHA8     | 84725     | . |
| 231545_at | 0.027208 | 0.016933 |             |           | . |
| 231548_at | 0.011075 | 0.005914 | FOXO3       | 2309      | . |
| 231549_at | 0.001482 | 5.38E-04 | C1orf158    | 93190     | . |
| 231550_at | 2.03E-05 | 2.54E-06 |             |           | . |
| 231552_at | 0.001235 | 4.32E-04 |             |           | . |
| 231553_s_ | 7.25E-04 | 2.25E-04 | MICAL3      | 57553     | . |
| 231554_at | 5.91E-04 | 1.75E-04 | TPD52L3     | 89882     | . |
| 231556_at | 0.001386 | 4.96E-04 | GPSN2       | 9524      | . |
| 231557_at | 0.040239 | 0.026668 |             |           | . |
| 231558_at | 0.004367 | 0.00197  |             |           | . |
| 231559_at | 4.05E-05 | 6.08E-06 | NNMT        | 4837      | . |

|           |          |          |                             |          |
|-----------|----------|----------|-----------------------------|----------|
| 231560_at | 0.011185 | 0.005985 |                             | .        |
| 231561_s_ | 5.03E-06 | 4.11E-07 | APOC2                       | 344 .    |
| 231563_at | 0.007359 | 0.003666 |                             | .        |
| 231564_at | 0.001189 | 4.13E-04 | MANEAL                      | 149175 . |
| 231565_at | 0.005029 | 0.002332 | C4orf22                     | 255119 . |
| 231567_s_ | 0.005925 | 0.002834 | CCDC62                      | 84660 .  |
| 231568_at | 0.003055 | 0.001283 | CT47A1 /// CT4255313 /// 6! | .        |
| 231569_at | 1.58E-05 | 1.86E-06 | TMEM31                      | 203562 . |
| 231570_at | 0.00294  | 0.001223 | FAM154A                     | 158297 . |
| 231571_at | 0.008741 | 0.004479 | LOC285827                   | 285827 . |
| 231575_at | 1.59E-04 | 3.45E-05 | EGR4                        | 1961 .   |
| 231576_at | 0.014337 | 0.008007 |                             | .        |
| 231577_s_ | 8.95E-08 | 1.98E-09 | GBP1                        | 2633 .   |
| 231579_s_ | 4.06E-07 | 1.51E-08 | TIMP2                       | 7077 .   |
| 231580_at | 2.82E-04 | 7.05E-05 |                             | .        |
| 231581_at | 0.017222 | 0.009927 |                             | .        |
| 231584_s_ | 8.69E-04 | 2.82E-04 |                             | .        |
| 231588_at | 0.008082 | 0.004092 | PRCP                        | 5547 .   |
| 231589_at | 0.001158 | 3.99E-04 | LOC100133153 100133153      | .        |
| 231590_at | 0.001987 | 7.66E-04 | GATM                        | 2628 .   |
| 231594_at | 1.64E-09 | 1.03E-11 |                             | .        |
| 231596_at | 0.00311  | 0.001311 |                             | .        |
| 231597_x_ | 0.008209 | 0.004164 |                             | .        |
| 231599_x_ | 0.048599 | 0.03321  | DPF1                        | 8193 .   |
| 231601_at | 0.012637 | 0.00691  |                             | .        |
| 231602_at | 0.00274  | 0.001127 |                             | .        |
| 231605_at | 0.018763 | 0.010978 |                             | .        |
| 231607_at | 0.015975 | 0.009103 |                             | .        |
| 231608_at | 3.86E-06 | 2.91E-07 |                             | .        |
| 231609_at | 3.16E-10 | 1.18E-12 | C10orf82                    | 143379 . |
| 231610_at | 0.015538 | 0.008809 | TTBK2                       | 146057 . |
| 231611_at | 0.036418 | 0.023762 |                             | .        |
| 231618_s_ | 0.035884 | 0.023353 | SUNC1                       | 256979 . |
| 231623_at | 0.008518 | 0.004348 | TMEM174                     | 134288 . |

|           |          |          |              |           |   |
|-----------|----------|----------|--------------|-----------|---|
| 231625_at | 0.00405  | 0.001799 | SLC22A9      | 114571    | . |
| 231628_s_ | 1.74E-05 | 2.09E-06 |              |           | . |
| 231629_x_ | 1.24E-05 | 1.34E-06 | KLK3         | 354       | . |
| 231634_at | 6.13E-04 | 1.83E-04 | SLC12A3      | 6559      | . |
| 231635_x_ | 0.014558 | 0.008153 | RNF31        | 55072     | . |
| 231636_s_ | 0.007928 | 0.004002 |              |           | . |
| 231642_at | 0.009104 | 0.004697 | C6orf201     | 404220    | . |
| 231643_s_ | 7.36E-04 | 2.29E-04 |              |           | . |
| 231644_at | 2.19E-05 | 2.82E-06 |              |           | . |
| 231646_at | 0.004208 | 0.001884 | DPCR1        | 135656    | . |
| 231648_at | 0.028416 | 0.017806 |              |           | . |
| 231650_s_ | 0.008284 | 0.004209 | SEZ6L        | 23544     | . |
| 231651_at | 6.04E-04 | 1.80E-04 |              |           | . |
| 231652_at | 1.88E-04 | 4.24E-05 |              |           | . |
| 231653_at | 0.045396 | 0.030691 | CCDC129      | 223075    | . |
| 231654_s_ | 0.032628 | 0.020916 |              |           | . |
| 231655_x_ | 3.56E-04 | 9.36E-05 |              |           | . |
| 231656_x_ | 0.007992 | 0.004039 | OSBPL10      | 114884    | . |
| 231657_s_ | 6.18E-04 | 1.85E-04 | CCDC74B      | 91409     | . |
| 231658_x_ | 0.012871 | 0.007063 |              |           | . |
| 231659_at | 1.19E-04 | 2.38E-05 | ST3GAL3      | 6487      | . |
| 231661_at | 5.10E-04 | 1.46E-04 | REG3G        | 130120    | . |
| 231662_at | 0.004168 | 0.001861 | ARG1         | 383       | . |
| 231663_s_ | 0.013552 | 0.007494 | ARG1         | 383       | . |
| 231664_at | 1.39E-05 | 1.57E-06 | SLC25A29     | 123096    | . |
| 231666_at | 0.003835 | 0.001686 | PAX3         | 5077      | . |
| 231667_at | 0.002156 | 8.45E-04 | SLC39A5      | 283375    | . |
| 231669_at | 0.020635 | 0.012273 | SEPP1        | 6414      | . |
| 231670_at | 1.41E-05 | 1.60E-06 |              |           | . |
| 231671_at | 0.019989 | 0.01182  | LOC100129857 | 100129857 | . |
| 231673_at | 0.007471 | 0.003732 |              |           | . |
| 231675_s_ | 0.004331 | 0.00195  | ADH4         | 127       | . |
| 231676_s_ | 0.035841 | 0.023321 |              |           | . |
| 231679_at | 1.31E-04 | 2.71E-05 |              |           | . |

|           |          |          |                   |
|-----------|----------|----------|-------------------|
| 231682_at | 7.74E-06 | 7.22E-07 | .                 |
| 231685_at | 0.011424 | 0.006134 | .                 |
| 231686_at | 2.01E-04 | 4.61E-05 | GATM 2628 .       |
| 231687_at | 0.032961 | 0.021173 | .                 |
| 231688_at | 0.028177 | 0.017637 | MMP8 4317 .       |
| 231689_at | 0.007062 | 0.003493 | TRPM7 54822 .     |
| 231690_at | 1.11E-04 | 2.20E-05 | .                 |
| 231691_at | 0.009617 | 0.00501  | C3P1 388503 .     |
| 231692_at | 7.14E-06 | 6.49E-07 | PIGG 54872 .      |
| 231694_at | 1.84E-05 | 2.24E-06 | APOA1 335 .       |
| 231696_x_ | 9.47E-08 | 2.13E-09 | .                 |
| 231698_at | 1.25E-05 | 1.36E-06 | FLJ36848 647115 . |
| 231699_at | 0.014092 | 0.007846 | .                 |
| 231700_at | 0.02209  | 0.013305 | GUCA1A 2978 .     |
| 231705_at | 0.001606 | 5.92E-04 | HRSP12 10247 .    |
| 231706_s_ | 0.033561 | 0.021623 | EVX1 2128 .       |
| 231707_at | 0.048552 | 0.033167 | .                 |
| 231708_at | 0.018279 | 0.010647 | C2CD3 26005 .     |
| 231710_at | 4.05E-05 | 6.10E-06 | CAPS 828 .        |
| 231712_at | 0.003461 | 0.001491 | .                 |
| 231713_s_ | 0.019616 | 0.01156  | ELP2 55250 .      |
| 231714_s_ | 4.75E-05 | 7.51E-06 | AP4B1 10717 .     |
| 231716_at | 0.023322 | 0.014158 | RC3H2 54542 .     |
| 231718_at | 6.15E-04 | 1.83E-04 | SLU7 10569 .      |
| 231719_at | 3.85E-05 | 5.70E-06 | IFRG15 64163 .    |
| 231720_s_ | 0.001237 | 4.33E-04 | JAM3 83700 .      |
| 231721_at | 3.59E-04 | 9.46E-05 | JAM3 83700 .      |
| 231722_at | 0.002733 | 0.001124 | CASP14 23581 .    |
| 231725_at | 7.48E-05 | 1.34E-05 | PCDHB2 56133 .    |
| 231728_at | 3.49E-05 | 5.03E-06 | CAPS 828 .        |
| 231729_s_ | 9.11E-05 | 1.71E-05 | CAPS 828 .        |
| 231730_at | 0.007512 | 0.003756 | SEPSECS 51091 .   |
| 231731_at | 2.65E-05 | 3.57E-06 | OTX2 5015 .       |
| 231732_at | 3.76E-05 | 5.55E-06 | SMPD3 55512 .     |



|           |          |          |           |         |
|-----------|----------|----------|-----------|---------|
| 231734_at | 2.69E-04 | 6.63E-05 | RBP2      | 5948 .  |
| 231737_at | 0.028194 | 0.017651 | CACNG4    | 27092 . |
| 231739_at | 0.017229 | 0.009931 | PRRT1     | 80863 . |
| 231741_at | 4.32E-07 | 1.65E-08 | S1PR3     | 1903 .  |
| 231742_at | 4.56E-05 | 7.12E-06 | CRX       | 1406 .  |
| 231743_at | 0.005454 | 0.002568 | WNT3      | 7473 .  |
| 231744_at | 0.020892 | 0.012463 | BRUNOL5   | 60680 . |
| 231745_at | 0.001175 | 4.06E-04 | GPR55     | 9290 .  |
| 231746_at | 4.28E-08 | 7.26E-10 | MIXL1     | 83881 . |
| 231748_at | 0.027401 | 0.017072 | ULBP3     | 79465 . |
| 231749_at | 1.04E-04 | 2.04E-05 | TIMM13    | 26517 . |
| 231751_at | 0.020983 | 0.012525 | ABCG8     | 64241 . |
| 231752_at | 0.009053 | 0.004666 | NPBWR1    | 2831 .  |
| 231753_s_ | 0.040884 | 0.027165 | PCDHGC4   | 56098 . |
| 231757_at | 0.047746 | 0.032535 | TAS2R5    | 54429 . |
| 231758_at | 0.001487 | 5.41E-04 | PRM3      | 58531 . |
| 231759_at | 1.58E-04 | 3.42E-05 | TAL2      | 6887 .  |
| 231761_at | 4.17E-06 | 3.22E-07 | FFAR1     | 2864 .  |
| 231762_at | 5.36E-04 | 1.55E-04 | FGF10     | 2255 .  |
| 231763_at | 5.17E-04 | 1.48E-04 | POLR3A    | 11128 . |
| 231764_at | 4.43E-05 | 6.86E-06 | CHRAC1    | 54108 . |
| 231765_at | 0.00133  | 4.72E-04 | ZFYVE20   | 64145 . |
| 231766_s_ | 2.13E-07 | 6.30E-09 | COL12A1   | 1303 .  |
| 231768_at | 8.27E-04 | 2.65E-04 | USF1      | 7391 .  |
| 231769_at | 0.00181  | 6.84E-04 | FBXO6     | 26270 . |
| 231770_x_ | 0.004452 | 0.002017 | C2orf86   | 51057 . |
| 231772_x_ | 4.32E-07 | 1.65E-08 | CENPH     | 64946 . |
| 231773_at | 0.001118 | 3.82E-04 | ANGPTL1   | 9068 .  |
| 231774_at | 7.87E-05 | 1.43E-05 | KCNIP3    | 30818 . |
| 231775_at | 4.92E-07 | 1.94E-08 | TNFRSF10A | 8797 .  |
| 231776_at | 1.51E-07 | 3.97E-09 | EOMES     | 8320 .  |
| 231777_at | 4.13E-04 | 1.13E-04 | LY6G5B    | 58496 . |
| 231779_at | 0.002445 | 9.84E-04 | IRAK2     | 3656 .  |
| 231782_s_ | 1.02E-05 | 1.05E-06 | KLK4      | 9622 .  |

|           |          |          |           |          |
|-----------|----------|----------|-----------|----------|
| 231784_s_ | 0.002118 | 8.27E-04 | WDSOF1    | 25879 .  |
| 231785_at | 7.62E-04 | 2.39E-04 | NTF4      | 4909 .   |
| 231786_at | 7.23E-04 | 2.24E-04 | HOXA13    | 3209 .   |
| 231788_at | 0.029529 | 0.018631 | LPAR5     | 57121 .  |
| 231790_at | 0.003512 | 0.001518 | DMGDH     | 29958 .  |
| 231791_at | 0.009658 | 0.005038 | ASAH2B    | 653308 . |
| 231792_at | 1.82E-04 | 4.08E-05 | MYLK2     | 85366 .  |
| 231793_s_ | 8.88E-05 | 1.66E-05 | CAMK2D    | 817 .    |
| 231794_at | 1.49E-04 | 3.18E-05 | CTLA4     | 1493 .   |
| 231795_at | 8.40E-06 | 8.04E-07 | STON1     | 11037 .  |
| 231796_at | 0.003182 | 0.001347 | EPHA8     | 2046 .   |
| 231798_at | 0.020578 | 0.012232 | NOG       | 9241 .   |
| 231802_at | 1.94E-04 | 4.41E-05 | CLEC3A    | 10143 .  |
| 231803_at | 0.001549 | 5.67E-04 | FGF11     | 2256 .   |
| 231804_at | 0.047075 | 0.032013 | RXFP1     | 59350 .  |
| 231806_s_ | 2.03E-04 | 4.67E-05 | STK36     | 27148 .  |
| 231808_at | 2.34E-07 | 7.19E-09 | LOC729082 | 729082 . |
| 231809_x_ | 2.10E-08 | 2.78E-10 | PDCD7     | 10081 .  |
| 231810_at | 1.31E-06 | 7.10E-08 | BRI3BP    | 140707 . |
| 231813_s_ | 0.043775 | 0.02942  | COG1      | 9382 .   |
| 231814_at | 0.049449 | 0.033881 | MUC12     | 10071 .  |
| 231817_at | 9.33E-04 | 3.07E-04 | USP53     | 54532 .  |
| 231818_x_ | 0.006665 | 0.003259 |           | .        |
| 231820_x_ | 0.036003 | 0.023445 | ZNF587    | 84914 .  |
| 231822_at | 9.16E-05 | 1.72E-05 | CTTNBP2NL | 55917 .  |
| 231823_s_ | 0.025835 | 0.015953 | SH3PXD2B  | 285590 . |
| 231824_at | 5.89E-05 | 9.83E-06 | LARP2     | 55132 .  |
| 231825_x_ | 1.27E-05 | 1.40E-06 | ATF7IP    | 55729 .  |
| 231826_at | 0.006572 | 0.003204 | C20orf74  | 57186 .  |
| 231827_at | 0.003655 | 0.001592 |           | .        |
| 231830_x_ | 1.10E-04 | 2.18E-05 | RAB11FIP1 | 80223 .  |
| 231831_at | 9.83E-04 | 3.27E-04 | COX19     | 90639 .  |
| 231832_at | 0.004251 | 0.001906 | GALNT4    | 8693 .   |
| 231833_at | 0.021201 | 0.012677 | RBM33     | 155435 . |

|           |          |          |           |          |
|-----------|----------|----------|-----------|----------|
| 231834_at | 1.26E-04 | 2.57E-05 | RBM33     | 155435 . |
| 231836_at | 0.00645  | 0.003133 | HKR1      | 284459 . |
| 231837_at | 3.65E-07 | 1.32E-08 | USP28     | 57646 .  |
| 231838_at | 0.012789 | 0.007009 | PABPC1L   | 80336 .  |
| 231840_x_ | 0.001745 | 6.54E-04 | LYRM7     | 90624 .  |
| 231841_s_ | 0.021084 | 0.012595 | KIAA1462  | 57608 .  |
| 231842_at | 0.016651 | 0.009548 | KIAA1462  | 57608 .  |
| 231843_at | 5.29E-08 | 9.78E-10 | DDX55     | 57696 .  |
| 231844_at | 1.33E-06 | 7.28E-08 | MGC27345  | 157247 . |
| 231845_at | 1.01E-05 | 1.03E-06 | AARS2     | 57505 .  |
| 231847_at | 2.28E-05 | 2.95E-06 | ANKRD54   | 129138 . |
| 231848_x_ | 0.001547 | 5.66E-04 | ZNF207    | 7756 .   |
| 231849_at | 0.001706 | 6.37E-04 | KRT80     | 144501 . |
| 231850_x_ | 0.015139 | 0.00854  | KIAA1712  | 80817 .  |
| 231851_at | 0.010102 | 0.005308 | RAVER2    | 55225 .  |
| 231852_at | 0.007351 | 0.003662 | ERI1      | 90459 .  |
| 231853_at | 4.16E-05 | 6.32E-06 | TUBD1     | 51174 .  |
| 231855_at | 8.41E-06 | 8.05E-07 | KIAA1524  | 57650 .  |
| 231856_at | 0.003902 | 0.001722 | KIAA1244  | 57221 .  |
| 231859_at | 0.001612 | 5.94E-04 | C14orf132 | 56967 .  |
| 231860_at | 4.54E-04 | 1.26E-04 | BRWD1     | 54014 .  |
| 231861_at | 1.52E-04 | 3.25E-05 | LRP10     | 26020 .  |
| 231863_at | 7.96E-04 | 2.53E-04 | ING3      | 54556 .  |
| 231864_at | 4.36E-04 | 1.20E-04 | ZNF33A    | 7581 .   |
| 231865_at | 7.88E-05 | 1.43E-05 | KIAA1602  | 57701 .  |
| 231866_at | 3.13E-05 | 4.41E-06 | LNPEP     | 4012 .   |
| 231867_at | 0.001678 | 6.24E-04 | ODZ2      | 57451 .  |
| 231869_at | 0.003816 | 0.001676 | KIAA1586  | 57691 .  |
| 231871_at | 0.040054 | 0.026525 | GPR180    | 160897 . |
| 231872_at | 0.040682 | 0.027011 | LRRCC1    | 85444 .  |
| 231873_at | 1.33E-08 | 1.51E-10 | BMPR2     | 659 .    |
| 231875_at | 1.23E-05 | 1.33E-06 | KIF21A    | 55605 .  |
| 231876_at | 7.70E-07 | 3.50E-08 | TRIM56    | 81844 .  |
| 231879_at | 2.37E-08 | 3.31E-10 | COL12A1   | 1303 .   |

|           |          |          |                              |          |
|-----------|----------|----------|------------------------------|----------|
| 231880_at | 0.013167 | 0.007253 | FAM40B                       | 57464 .  |
| 231882_at | 3.38E-11 | 6.55E-14 | FLJ39632 /// LC100131139 //. |          |
| 231884_at | 0.001176 | 4.07E-04 | CNTROB                       | 116840 . |
| 231886_at | 0.005015 | 0.002325 | DKFZP434B201                 | 642780 . |
| 231887_s_ | 0.001167 | 4.03E-04 | KIAA1274                     | 27143 .  |
| 231888_at | 0.003674 | 0.001602 |                              | .        |
| 231889_at | 0.033483 | 0.021566 | UBR4                         | 23352 .  |
| 231890_at | 0.003709 | 0.00162  |                              | .        |
| 231892_at | 0.006218 | 0.003    | C9orf100                     | 84904 .  |
| 231893_at | 1.19E-04 | 2.39E-05 | KIAA1755                     | 85449 .  |
| 231894_at | 1.20E-07 | 2.91E-09 |                              | .        |
| 231895_at | 5.60E-07 | 2.29E-08 | SASS6                        | 163786 . |
| 231896_s_ | 6.29E-05 | 1.07E-05 | DENR                         | 8562 .   |
| 231897_at | 7.52E-06 | 6.94E-07 | PTGR1                        | 22949 .  |
| 231898_x_ | 0.028861 | 0.018145 | SOX2OT                       | 347689 . |
| 231899_at | 5.60E-04 | 1.63E-04 | ZC3H12C                      | 85463 .  |
| 231901_at | 0.008433 | 0.004299 | C19orf52                     | 90580 .  |
| 231903_x_ | 3.77E-04 | 1.00E-04 | ARHGAP23                     | 57636 .  |
| 231904_at | 2.09E-05 | 2.63E-06 | U2AF1                        | 7307 .   |
| 231906_at | 2.37E-04 | 5.66E-05 | HOXD8                        | 3234 .   |
| 231907_at | 3.14E-04 | 8.05E-05 | ABL2                         | 27 .     |
| 231908_at | 8.85E-04 | 2.88E-04 | ZDHHC18                      | 84243 .  |
| 231909_x_ | 0.04972  | 0.034103 | ODF2L                        | 57489 .  |
| 231910_at | 0.019552 | 0.011517 | NUDT14                       | 256281 . |
| 231911_at | 1.64E-04 | 3.58E-05 | ERMN                         | 57471 .  |
| 231912_s_ | 6.45E-05 | 1.10E-05 | TECPR1                       | 25851 .  |
| 231913_s_ | 8.14E-04 | 2.60E-04 | BRCC3                        | 79184 .  |
| 231915_at | 0.019281 | 0.01133  | ZSWIM4                       | 65249 .  |
| 231917_at | 0.023568 | 0.014336 | GFM2                         | 84340 .  |
| 231919_at | 0.03549  | 0.023051 | DBT                          | 1629 .   |
| 231920_s_ | 9.21E-04 | 3.02E-04 | CSNK1G1                      | 53944 .  |
| 231921_at | 0.010799 | 0.005744 | C2orf37                      | 80067 .  |
| 231922_at | 0.006633 | 0.00324  | ZNF276                       | 92822 .  |
| 231923_at | 5.06E-07 | 2.00E-08 | FLJ12993                     | 441027 . |

|           |          |          |              |          |
|-----------|----------|----------|--------------|----------|
| 231925_at | 0.001346 | 4.79E-04 |              | .        |
| 231926_at | 8.89E-06 | 8.69E-07 | EPS15L1      | 58513 .  |
| 231928_at | 6.32E-04 | 1.90E-04 | HES2         | 54626 .  |
| 231930_at | 0.0368   | 0.024049 | ELMOD1       | 55531 .  |
| 231931_at | 3.33E-05 | 4.76E-06 | PRDM15       | 63977 .  |
| 231932_at | 8.14E-05 | 1.49E-05 | TRAF3IP3     | 80342 .  |
| 231933_at | 5.02E-06 | 4.10E-07 | 8-Mar        | 220972 . |
| 231936_at | 1.90E-06 | 1.17E-07 | HOXC9        | 3225 .   |
| 231938_at | 1.21E-04 | 2.44E-05 | SGOL1        | 151648 . |
| 231939_s_ | 1.47E-05 | 1.70E-06 | BDP1         | 55814 .  |
| 231941_s_ | 0.013756 | 0.00763  | MUC20        | 200958 . |
| 231942_at | 0.00226  | 8.95E-04 | LOC643837    | 643837 . |
| 231943_at | 0.002725 | 0.001119 | ZFP28        | 140612 . |
| 231945_at | 7.51E-06 | 6.93E-07 | FILIP1       | 27145 .  |
| 231946_at | 0.002832 | 0.001171 | ZFHX2        | 85446 .  |
| 231947_at | 2.13E-10 | 7.06E-13 | MYCT1        | 80177 .  |
| 231948_s_ | 1.60E-04 | 3.47E-05 | UBE2F        | 140739 . |
| 231950_at | 0.028518 | 0.017885 | ZNF658       | 26149 .  |
| 231951_at | 0.003904 | 0.001723 | GNAO1        | 2775 .   |
| 231952_at | 2.32E-04 | 5.50E-05 |              | .        |
| 231953_at | 6.14E-07 | 2.58E-08 | BPTF         | 2186 .   |
| 231954_at | 0.002431 | 9.77E-04 | DKFZP434I071 | 54553 .  |
| 231955_s_ | 0.014786 | 0.008307 | HIBADH       | 11112 .  |
| 231956_at | 0.035071 | 0.022732 | KIAA1618     | 57714 .  |
| 231958_at | 0.038667 | 0.025468 | C3orf31      | 132001 . |
| 231959_at | 0.002511 | 0.001016 | LIN52        | 91750 .  |
| 231960_at | 3.09E-04 | 7.88E-05 | BRWD1        | 54014 .  |
| 231961_at | 4.58E-05 | 7.17E-06 | RBPMS        | 11030 .  |
| 231962_at | 0.002732 | 0.001123 | AP4B1        | 10717 .  |
| 231966_at | 0.045197 | 0.030536 | PPP1R9A      | 55607 .  |
| 231967_at | 0.018592 | 0.010861 | PHF20L1      | 51105 .  |
| 231968_at | 0.024715 | 0.01515  | UGCGL1       | 56886 .  |
| 231969_at | 3.78E-04 | 1.01E-04 | STOX2        | 56977 .  |
| 231970_at | 0.011858 | 0.006404 | C14orf118    | 55668 .  |

|           |          |          |           |          |
|-----------|----------|----------|-----------|----------|
| 231971_at | 0.005988 | 0.002871 | FANCM     | 57697 .  |
| 231972_at | 7.43E-04 | 2.32E-04 |           | .        |
| 231973_s_ | 0.004638 | 0.002118 | ANAPC1    | 64682 .  |
| 231974_at | 2.23E-06 | 1.44E-07 | MLL2      | 8085 .   |
| 231975_s_ | 0.015187 | 0.008573 | MIER3     | 166968 . |
| 231979_at | 6.17E-05 | 1.04E-05 |           | .        |
| 231982_at | 0.002472 | 9.96E-04 | LOC284422 | 284422 . |
| 231983_at | 0.001017 | 3.41E-04 | C1orf69   | 200205 . |
| 231984_at | 0.031091 | 0.019777 | MTAP      | 4507 .   |
| 231985_at | 5.89E-04 | 1.74E-04 | MICAL3    | 57553 .  |
| 231986_at | 0.001488 | 5.41E-04 | RIMS1     | 22999 .  |
| 231987_at | 0.010087 | 0.005299 | LOC728264 | 728264 . |
| 231988_x_ | 1.22E-04 | 2.48E-05 | ZNF490    | 57474 .  |
| 231990_at | 0.029214 | 0.0184   | USP15     | 9958 .   |
| 231991_at | 0.015323 | 0.008664 | C20orf160 | 140706 . |
| 231992_x_ | 7.58E-05 | 1.36E-05 | LOC493754 | 493754 . |
| 231993_at | 1.03E-08 | 1.10E-10 | ITGBL1    | 9358 .   |
| 231994_at | 0.00907  | 0.004676 | CHDH      | 55349 .  |
| 231996_at | 2.44E-05 | 3.23E-06 | N4BP2     | 55728 .  |
| 231997_at | 4.00E-07 | 1.48E-08 | TBCEL     | 219899 . |
| 231998_at | 8.27E-04 | 2.65E-04 |           | .        |
| 231999_at | 6.14E-08 | 1.17E-09 | ANKRD11   | 29123 .  |
| 232001_at | 1.66E-04 | 3.65E-05 | LOC439949 | 439949 . |
| 232002_at | 1.17E-05 | 1.25E-06 |           | .        |
| 232003_at | 2.07E-04 | 4.77E-05 | PNMAL2    | 57469 .  |
| 232007_at | 8.31E-06 | 7.92E-07 | AGPAT5    | 55326 .  |
| 232009_at | 0.009252 | 0.00479  | EMR2      | 30817 .  |
| 232011_s_ | 0.007694 | 0.003862 | MAP1LC3A  | 84557 .  |
| 232012_at | 4.22E-08 | 7.12E-10 | CAPN1     | 823 .    |
| 232014_at | 0.048797 | 0.033368 | ZNF30     | 90075 .  |
| 232018_at | 5.36E-06 | 4.46E-07 | LENG1     | 79165 .  |
| 232019_at | 1.53E-04 | 3.30E-05 | ZKSCAN2   | 342357 . |
| 232020_at | 4.22E-04 | 1.16E-04 | SMURF2    | 64750 .  |
| 232021_at | 0.017713 | 0.010261 | GLT8D3    | 283464 . |

|           |          |          |                    |
|-----------|----------|----------|--------------------|
| 232022_at | 2.01E-04 | 4.61E-05 | .                  |
| 232023_at | 0.003316 | 0.001417 | TMEM67 91147 .     |
| 232024_at | 0.001845 | 7.00E-04 | GIMAP2 26157 .     |
| 232025_at | 2.02E-04 | 4.63E-05 | SYT7 9066 .        |
| 232026_at | 0.022286 | 0.013438 | HERC4 26091 .      |
| 232028_at | 1.05E-04 | 2.04E-05 | ZNF678 339500 .    |
| 232030_at | 8.47E-04 | 2.73E-04 | KIAA1632 57724 .   |
| 232031_s  | 0.007138 | 0.003537 | KIAA1632 57724 .   |
| 232032_x  | 1.89E-06 | 1.16E-07 | SDF4 51150 .       |
| 232033_at | 2.79E-06 | 1.91E-07 | USP37 57695 .      |
| 232034_at | 2.38E-08 | 3.33E-10 | LOC203274 203274 . |
| 232037_at | 2.32E-10 | 8.04E-13 | IGDCC3 9543 .      |
| 232040_at | 2.31E-04 | 5.49E-05 | LOC157860 157860 . |
| 232041_at | 0.011893 | 0.006429 | INADL 10207 .      |
| 232042_at | 3.03E-04 | 7.68E-05 | TTYH2 94015 .      |
| 232044_at | 0.00795  | 0.004015 | RBBP6 5930 .       |
| 232045_at | 5.49E-04 | 1.60E-04 | PHACTR1 221692 .   |
| 232046_at | 0.043375 | 0.029106 | KIAA1217 56243 .   |
| 232049_at | 0.013122 | 0.007223 | .                  |
| 232050_at | 2.84E-06 | 1.96E-07 | FLJ42627 645644 .  |
| 232051_at | 3.10E-04 | 7.92E-05 | CCDC102A 92922 .   |
| 232052_at | 0.002639 | 0.001077 | LOC440944 440944 . |
| 232053_x  | 0.007432 | 0.00371  | RHBDD2 57414 .     |
| 232055_at | 4.48E-09 | 3.80E-11 | SFXN1 94081 .      |
| 232056_at | 7.94E-04 | 2.52E-04 | SCEL 8796 .        |
| 232058_at | 7.64E-04 | 2.41E-04 | .                  |
| 232060_at | 0.009825 | 0.00514  | ROR1 4919 .        |
| 232061_at | 1.38E-06 | 7.69E-08 | SDK2 54549 .       |
| 232062_at | 0.003539 | 0.001531 | ADCY1 107 .        |
| 232063_x  | 3.99E-08 | 6.57E-10 | FARSB 10056 .      |
| 232064_at | 6.54E-06 | 5.77E-07 | .                  |
| 232065_x  | 5.23E-06 | 4.32E-07 | CENPL 91687 .      |
| 232066_x  | 0.021581 | 0.012939 | C4orf42 92070 .    |
| 232067_at | 7.67E-04 | 2.42E-04 | C6orf168 84553 .   |

|           |          |          |              |             |
|-----------|----------|----------|--------------|-------------|
| 232068_s_ | 0.003198 | 0.001356 | TLR4         | 7099 .      |
| 232069_at | 0.006703 | 0.003281 | KIF26A       | 26153 .     |
| 232072_at | 0.001309 | 4.63E-04 |              | .           |
| 232073_at | 0.005998 | 0.002877 | PPFIA2       | 8499 .      |
| 232074_at | 0.001104 | 3.77E-04 | PRSS27       | 83886 .     |
| 232075_at | 0.003545 | 0.001534 | WDR61        | 80349 .     |
| 232076_at | 0.029536 | 0.018639 | ZNF707       | 286075 .    |
| 232077_s_ | 0.009859 | 0.005161 | YPEL3        | 83719 .     |
| 232078_at | 2.22E-05 | 2.85E-06 | PVRL2        | 5819 .      |
| 232079_s_ | 7.55E-05 | 1.36E-05 | PVRL2        | 5819 .      |
| 232080_at | 0.012134 | 0.006584 | HECW2        | 57520 .     |
| 232082_x_ | 0.0094   | 0.004879 | SPRR3        | 6707 .      |
| 232083_at | 7.61E-05 | 1.37E-05 | KIF16B       | 55614 .     |
| 232084_at | 0.015485 | 0.008774 | SGTB         | 54557 .     |
| 232085_at | 9.11E-05 | 1.72E-05 | MAPK8IP3     | 23162 .     |
| 232086_at | 0.006237 | 0.003011 |              | .           |
| 232087_at | 0.001265 | 4.44E-04 | CXorf23      | 256643 .    |
| 232088_x_ | 0.004926 | 0.002276 | hCG_2039027  | 100271722 . |
| 232090_at | 1.57E-04 | 3.39E-05 | LOC100128178 | 100128178 . |
| 232091_s_ | 0.015169 | 0.00856  | ZDHHC24      | 254359 .    |
| 232094_at | 0.001561 | 5.72E-04 | C15orf29     | 79768 .     |
| 232095_at | 7.93E-07 | 3.64E-08 |              | .           |
| 232096_x_ | 1.97E-04 | 4.49E-05 |              | .           |
| 232100_at | 0.02633  | 0.016301 |              | .           |
| 232101_s_ | 0.00842  | 0.00429  | PIGN         | 23556 .     |
| 232103_at | 9.32E-05 | 1.76E-05 | BPNT1        | 10380 .     |
| 232104_at | 2.36E-05 | 3.09E-06 | C1orf95      | 375057 .    |
| 232105_at | 0.013184 | 0.007263 |              | .           |
| 232107_at | 1.98E-04 | 4.54E-05 |              | .           |
| 232109_at | 0.049061 | 0.033577 | UBXN10       | 127733 .    |
| 232110_at | 0.002446 | 9.85E-04 |              | .           |
| 232111_at | 3.34E-10 | 1.28E-12 | LOC730125    | 730125 .    |
| 232112_at | 1.47E-04 | 3.13E-05 | RALGPS2      | 55103 .     |
| 232113_at | 0.002384 | 9.53E-04 |              | .           |



|           |          |          |              |           |   |
|-----------|----------|----------|--------------|-----------|---|
| 232114_at | 0.005097 | 0.002372 | MED12L       | 116931    | . |
| 232115_at | 0.030154 | 0.019094 | SLC39A3      | 29985     | . |
| 232116_at | 8.86E-04 | 2.89E-04 | GRHL3        | 57822     | . |
| 232117_at | 0.007139 | 0.003537 | ZNF471       | 57573     | . |
| 232118_at | 0.004058 | 0.001803 |              |           | . |
| 232119_at | 0.004008 | 0.001776 | SYNPO2       | 171024    | . |
| 232120_at | 0.002441 | 9.82E-04 |              |           | . |
| 232121_at | 0.020664 | 0.012296 | TRDMT1       | 1787      | . |
| 232122_s_ | 3.97E-10 | 1.59E-12 | VEPH1        | 79674     | . |
| 232123_at | 4.27E-05 | 6.54E-06 | LOC283174    | 283174    | . |
| 232125_at | 5.46E-04 | 1.59E-04 |              |           | . |
| 232126_at | 0.035694 | 0.023211 |              |           | . |
| 232127_at | 0.001312 | 4.65E-04 | CLCN5        | 1184      | . |
| 232128_s_ | 0.036549 | 0.023859 | CLCN5        | 1184      | . |
| 232129_s_ | 0.001682 | 6.26E-04 | LZTS2        | 84445     | . |
| 232130_at | 0.043546 | 0.029239 |              |           | . |
| 232132_at | 0.033466 | 0.021552 | PARD6G       | 84552     | . |
| 232133_at | 5.75E-04 | 1.69E-04 | ADAMTS10     | 81794     | . |
| 232134_at | 7.74E-07 | 3.52E-08 |              |           | . |
| 232135_at | 5.79E-05 | 9.62E-06 | SAP30L       | 79685     | . |
| 232136_s_ | 0.012688 | 0.006944 | CTTNBP2      | 83992     | . |
| 232137_at | 0.009888 | 0.005179 | ZNF616       | 90317     | . |
| 232138_at | 0.022345 | 0.013478 | MBNL2        | 10150     | . |
| 232139_s_ | 0.001004 | 3.35E-04 | KIAA1919     | 91749     | . |
| 232140_at | 8.44E-07 | 3.96E-08 | LOC100132352 | 100132352 | . |
| 232141_at | 3.93E-07 | 1.44E-08 | U2AF1        | 7307      | . |
| 232142_at | 0.029771 | 0.018816 | ISY1         | 57461     | . |
| 232145_at | 2.62E-04 | 6.42E-05 | C2orf68      | 388969    | . |
| 232146_at | 0.003569 | 0.001547 | NDUFC1       | 4717      | . |
| 232148_at | 3.61E-04 | 9.54E-05 | NSMAF        | 8439      | . |
| 232149_s_ | 3.14E-04 | 8.05E-05 | NSMAF        | 8439      | . |
| 232150_at | 4.22E-06 | 3.28E-07 |              |           | . |
| 232151_at | 1.36E-05 | 1.52E-06 | MACC1        | 346389    | . |
| 232153_at | 1.15E-04 | 2.29E-05 | SPEG         | 10290     | . |

|           |          |          |              |           |     |
|-----------|----------|----------|--------------|-----------|-----|
| 232154_at | 1.19E-04 | 2.39E-05 | LOC199800    | 199800    | .   |
| 232155_at | 5.09E-06 | 4.17E-07 | KIAA1618     | 57714     | .   |
| 232158_x_ | 4.88E-07 | 1.91E-08 | NIPAL1       | 152519    | .   |
| 232159_at | 0.001627 | 6.01E-04 |              |           | .   |
| 232161_x_ | 0.023742 | 0.01446  |              |           | .   |
| 232162_at | 1.27E-05 | 1.39E-06 | ZNF696       | 79943     | .   |
| 232164_s_ | 1.16E-05 | 1.23E-06 | EPPK1        | 83481     | .   |
| 232165_at | 4.23E-05 | 6.48E-06 | EPPK1        | 83481     | .   |
| 232166_at | 0.001668 | 6.20E-04 | KIAA1377     | 57562     | .   |
| 232168_x_ | 5.92E-06 | 5.09E-07 | MACF1        | 23499     | .   |
| 232169_x_ | 7.34E-08 | 1.51E-09 | NDUFS8       | 4728      | .   |
| 232171_x_ | 5.21E-05 | 8.44E-06 | LOC100129637 | 100129637 | .   |
| 232173_at | 1.06E-04 | 2.07E-05 | CLEC2L       | 154790    | .   |
| 232174_at | 1.93E-04 | 4.38E-05 |              |           | .   |
| 232175_at | 5.88E-04 | 1.74E-04 | ARF1         | 375       | .   |
| 232177_at | 0.044743 | 0.030184 |              |           | .   |
| 232178_at | 0.003904 | 0.001723 | ZNF503       | 84858     | .   |
| 232179_at | 0.001676 | 6.23E-04 |              |           | .   |
| 232180_at | 6.07E-05 | 1.02E-05 | UGP2         | 7360      | .   |
| 232181_at | 2.30E-07 | 7.06E-09 | LOC153346    | 153346    | .   |
| 232183_at | 0.005348 | 0.002509 | SERAC1       | 84947     | .   |
| 232185_at | 0.003752 | 0.001643 | C20orf132    | 140699    | .   |
| 232186_at | 0.00196  | 7.53E-04 |              |           | .   |
| 232190_x_ | 0.005285 | 0.002474 | LOC100133445 | 100133445 | //. |
| 232191_at | 7.65E-06 | 7.10E-07 | C21orf105    | 90625     | .   |
| 232192_at | 0.003236 | 0.001375 | LOC153811    | 153811    | .   |
| 232196_at | 0.014589 | 0.008173 | LCA5L        | 150082    | .   |
| 232197_x_ | 4.71E-04 | 1.32E-04 | ARSB         | 411       | .   |
| 232198_at | 2.35E-04 | 5.59E-05 |              |           | .   |
| 232199_at | 0.020448 | 0.012136 |              |           | .   |
| 232202_at | 4.95E-05 | 7.91E-06 |              |           | .   |
| 232203_at | 7.40E-06 | 6.81E-07 |              |           | .   |
| 232204_at | 4.54E-04 | 1.26E-04 | EBF1         | 1879      | .   |
| 232205_at | 1.16E-04 | 2.31E-05 |              |           | .   |

|           |          |          |             |          |
|-----------|----------|----------|-------------|----------|
| 232207_at | 0.027    | 0.016787 | GUSBL2      | 375513 . |
| 232209_x_ | 5.42E-04 | 1.57E-04 | HM13        | 81502 .  |
| 232210_at | 8.58E-06 | 8.27E-07 |             | .        |
| 232211_at | 6.79E-05 | 1.18E-05 | PPP1R3F     | 89801 .  |
| 232213_at | 0.001077 | 3.66E-04 | PELI1       | 57162 .  |
| 232214_x_ | 3.89E-04 | 1.04E-04 | ZNF554      | 115196 . |
| 232215_x_ | 2.10E-08 | 2.78E-10 | PRR11       | 55771 .  |
| 232216_at | 4.61E-05 | 7.23E-06 | YME1L1      | 10730 .  |
| 232217_at | 7.60E-09 | 7.30E-11 | FAM26E      | 254228 . |
| 232218_at | 0.005509 | 0.0026   |             | .        |
| 232219_x_ | 0.047009 | 0.031961 | USP21       | 27005 .  |
| 232220_at | 0.00834  | 0.004243 | S100A7A     | 338324 . |
| 232221_x_ | 2.43E-05 | 3.20E-06 | RSBN1L      | 222194 . |
| 232223_at | 0.001426 | 5.14E-04 |             | .        |
| 232224_at | 4.23E-12 | 3.77E-15 | MASP1       | 5648 .   |
| 232227_at | 0.002978 | 0.001243 |             | .        |
| 232228_at | 0.010274 | 0.005415 | ZNF530      | 348327 . |
| 232229_at | 0.017963 | 0.010431 | SETX        | 23064 .  |
| 232230_at | 0.025238 | 0.015534 | C10orf75    | 90271 .  |
| 232231_at | 0.002577 | 0.001047 | RUNX2       | 860 .    |
| 232233_at | 7.01E-04 | 2.16E-04 | SLC22A16    | 85413 .  |
| 232234_at | 0.002336 | 9.31E-04 | SLA2        | 84174 .  |
| 232235_at | 0.017611 | 0.010194 | DSEL        | 92126 .  |
| 232236_at | 1.57E-04 | 3.40E-05 |             | .        |
| 232238_at | 5.89E-04 | 1.74E-04 | ASPM        | 259266 . |
| 232239_at | 0.001983 | 7.64E-04 | hCG_2024094 | 643529 . |
| 232240_at | 0.003002 | 0.001256 | DNHD1       | 144132 . |
| 232241_at | 0.006591 | 0.003214 |             | .        |
| 232242_at | 0.028225 | 0.017674 |             | .        |
| 232244_at | 2.83E-04 | 7.05E-05 | KIAA1161    | 57462 .  |
| 232248_at | 3.73E-04 | 9.94E-05 | PCSK7       | 9159 .   |
| 232249_at | 0.030253 | 0.019168 | FMNL3       | 91010 .  |
| 232251_at | 4.05E-04 | 1.10E-04 | NUDT16P     | 152195 . |
| 232253_at | 0.015175 | 0.008565 | LOC441108   | 441108 . |

|           |          |          |                            |             |
|-----------|----------|----------|----------------------------|-------------|
| 232254_at | 6.24E-05 | 1.06E-05 |                            | .           |
| 232255_at | 0.016578 | 0.009498 |                            | .           |
| 232257_s_ | 5.38E-04 | 1.56E-04 |                            | .           |
| 232258_at | 0.012063 | 0.006539 | TCTE3                      | 6991 .      |
| 232259_s_ | 6.86E-04 | 2.10E-04 | LOC100009676               | 100009676 . |
| 232263_at | 0.001252 | 4.39E-04 | SLC6A15                    | 55117 .     |
| 232264_at | 7.04E-07 | 3.12E-08 |                            | .           |
| 232265_at | 4.71E-04 | 1.32E-04 | ATXN7L1                    | 222255 .    |
| 232266_x_ | 4.15E-07 | 1.55E-08 | CDC2L5                     | 8621 .      |
| 232267_at | 5.20E-08 | 9.55E-10 | GPR133                     | 283383 .    |
| 232270_at | 7.42E-06 | 6.82E-07 | C9orf3                     | 84909 .     |
| 232271_at | 0.029224 | 0.018407 | HNF4G                      | 3174 .      |
| 232273_at | 3.27E-05 | 4.65E-06 |                            | .           |
| 232274_at | 0.01335  | 0.007368 | CCNL2                      | 81669 .     |
| 232276_at | 1.39E-05 | 1.57E-06 | HS6ST3                     | 266722 .    |
| 232277_at | 0.003327 | 0.001422 |                            | .           |
| 232278_s_ | 0.001288 | 4.54E-04 | DEPDC1                     | 55635 .     |
| 232279_at | 0.018884 | 0.01106  | PHF15                      | 23338 .     |
| 232280_at | 2.36E-04 | 5.63E-05 | SLC25A29                   | 123096 .    |
| 232281_at | 0.046316 | 0.031408 | LOC148189                  | 148189 .    |
| 232282_at | 1.10E-05 | 1.15E-06 | WNK3                       | 65267 .     |
| 232285_at | 0.010784 | 0.005734 |                            | .           |
| 232287_at | 1.93E-05 | 2.38E-06 | PGBD3                      | 267004 .    |
| 232288_at | 0.001803 | 6.80E-04 | PDXDC1 /// PD23042 /// 283 | .           |
| 232291_at | 2.29E-09 | 1.56E-11 | MIRHG1                     | 407975 .    |
| 232294_at | 0.026166 | 0.016185 | LOC219347                  | 219347 .    |
| 232295_at | 3.77E-04 | 1.01E-04 | GFM1                       | 85476 .     |
| 232296_s_ | 0.038493 | 0.025337 | GFM1                       | 85476 .     |
| 232297_at | 3.98E-04 | 1.08E-04 |                            | .           |
| 232298_at | 1.09E-07 | 2.57E-09 | hCG_1806964                | 401093 .    |
| 232299_at | 0.013673 | 0.007575 | C2orf82                    | 389084 .    |
| 232302_at | 0.003766 | 0.001651 | PDLIM2                     | 64236 .     |
| 232303_at | 0.022908 | 0.013867 | ZNF608                     | 57507 .     |
| 232304_at | 3.72E-05 | 5.46E-06 | PELI1                      | 57162 .     |

|           |          |          |              |           |   |
|-----------|----------|----------|--------------|-----------|---|
| 232306_at | 0.003996 | 0.00177  | CDH26        | 60437     | . |
| 232307_at | 3.06E-04 | 7.78E-05 |              |           | . |
| 232308_at | 0.038362 | 0.025236 | TTC21A       | 199223    | . |
| 232309_at | 0.007985 | 0.004034 | LOC202181    | 202181    | . |
| 232310_at | 0.018172 | 0.010575 | LOC100129936 | 100129936 | . |
| 232311_at | 7.13E-06 | 6.48E-07 | B2M          | 567       | . |
| 232312_at | 8.05E-05 | 1.47E-05 | SAPS3        | 55291     | . |
| 232313_at | 6.59E-07 | 2.85E-08 | TMEM132C     | 92293     | . |
| 232315_at | 0.043223 | 0.028983 | LOC400713    | 400713    | . |
| 232316_at | 1.30E-05 | 1.44E-06 | C14orf174    | 161394    | . |
| 232319_at | 0.00897  | 0.004617 |              |           | . |
| 232323_s_ | 7.78E-04 | 2.46E-04 | TTC17        | 55761     | . |
| 232328_at | 2.38E-04 | 5.68E-05 | ZNF552       | 79818     | . |
| 232329_at | 5.01E-04 | 1.42E-04 | RANBP10      | 57610     | . |
| 232336_at | 0.012705 | 0.006956 | ZSWIM5       | 57643     | . |
| 232340_at | 0.002846 | 0.001178 | LOC388889    | 388889    | . |
| 232341_x_ | 0.005804 | 0.002766 | HABP4        | 22927     | . |
| 232342_at | 0.001196 | 4.15E-04 | MTMR14       | 64419     | . |
| 232344_at | 0.01726  | 0.009953 |              |           | . |
| 232346_at | 1.70E-04 | 3.75E-05 | LOC388692    | 388692    | . |
| 232347_x_ | 1.76E-05 | 2.13E-06 |              |           | . |
| 232349_x_ | 9.35E-06 | 9.31E-07 | IQWD1        | 55827     | . |
| 232350_x_ | 0.001639 | 6.07E-04 | GPR161       | 23432     | . |
| 232351_at | 1.83E-04 | 4.11E-05 |              |           | . |
| 232352_at | 0.003747 | 0.00164  | ISL2         | 64843     | . |
| 232353_s_ | 0.045388 | 0.030681 | STYXL1       | 51657     | . |
| 232354_at | 0.027531 | 0.017167 |              |           | . |
| 232356_at | 0.001916 | 7.33E-04 |              |           | . |
| 232357_at | 0.013945 | 0.007748 | TTLL9        | 164395    | . |
| 232358_at | 0.009495 | 0.004937 | KIAA1328     | 57536     | . |
| 232362_at | 4.09E-04 | 1.11E-04 | CCDC18       | 343099    | . |
| 232363_at | 0.019549 | 0.011514 |              |           | . |
| 232365_at | 2.56E-04 | 6.25E-05 | SIAH1        | 6477      | . |
| 232366_at | 0.043974 | 0.029583 | KIAA0232     | 9778      | . |

|           |          |          |           |          |
|-----------|----------|----------|-----------|----------|
| 232367_x_ | 4.28E-05 | 6.58E-06 | ZNF598    | 90850 .  |
| 232369_at | 0.005442 | 0.002562 |           | .        |
| 232370_at | 0.036128 | 0.02354  | LOC254057 | 254057 . |
| 232371_at | 2.06E-04 | 4.75E-05 | 7-Mar     | 64844 .  |
| 232372_at | 1.63E-06 | 9.59E-08 |           | .        |
| 232373_at | 0.001045 | 3.52E-04 | NOXA1     | 10811 .  |
| 232374_s_ | 1.74E-05 | 2.08E-06 |           | .        |
| 232375_at | 0.043512 | 0.029212 |           | .        |
| 232376_at | 0.003614 | 0.00157  | PCCA      | 5095 .   |
| 232378_at | 1.44E-08 | 1.68E-10 | SLC5A9    | 200010 . |
| 232379_at | 0.003502 | 0.001512 | SKIL      | 6498 .   |
| 232382_s_ | 1.72E-04 | 3.79E-05 | PCMTD1    | 115294 . |
| 232384_s_ | 0.022563 | 0.013625 |           | .        |
| 232387_at | 0.005447 | 0.002564 | AP1GBP1   | 11276 .  |
| 232388_at | 0.005835 | 0.002784 | CNTNAP4   | 85445 .  |
| 232389_at | 1.94E-05 | 2.41E-06 | WIPF3     | 644150 . |
| 232391_at | 0.002639 | 0.001078 | ZNF461    | 92283 .  |
| 232392_at | 1.92E-04 | 4.34E-05 | SFRS3     | 6428 .   |
| 232394_at | 2.90E-05 | 4.00E-06 |           | .        |
| 232395_x_ | 7.18E-04 | 2.22E-04 | AGBL3     | 340351 . |
| 232396_at | 4.92E-05 | 7.85E-06 |           | .        |
| 232398_at | 2.79E-06 | 1.91E-07 | CCDC150   | 284992 . |
| 232399_at | 0.007777 | 0.003912 | DCLK3     | 85443 .  |
| 232401_at | 5.52E-04 | 1.61E-04 | KCNS2     | 3788 .   |
| 232402_at | 3.31E-05 | 4.72E-06 | LOC642346 | 642346 . |
| 232404_at | 0.002282 | 9.05E-04 | SHROOM4   | 57477 .  |
| 232407_at | 0.028497 | 0.017867 | MUC17     | 140453 . |
| 232408_at | 0.007291 | 0.003628 | ZFYVE28   | 57732 .  |
| 232409_x_ | 0.00383  | 0.001683 | FBXL16    | 146330 . |
| 232410_at | 0.012316 | 0.006703 |           | .        |
| 232412_at | 0.024161 | 0.014751 | FBXL20    | 84961 .  |
| 232413_at | 6.85E-04 | 2.10E-04 |           | .        |
| 232420_x_ | 1.47E-04 | 3.13E-05 | LOC286260 | 286260 . |
| 232421_at | 1.35E-06 | 7.40E-08 | SCARB1    | 949 .    |

|           |          |          |                              |        |   |
|-----------|----------|----------|------------------------------|--------|---|
| 232422_at | 0.002172 | 8.53E-04 | A2LD1                        | 87769  | . |
| 232423_at | 1.90E-04 | 4.29E-05 | ARSD                         | 414    | . |
| 232424_at | 0.015821 | 0.008997 | PRDM16                       | 63976  | . |
| 232425_at | 0.006967 | 0.003438 | SNX25                        | 83891  | . |
| 232427_at | 7.08E-05 | 1.25E-05 | ZNF224                       | 7767   | . |
| 232428_at | 0.010335 | 0.005453 | MOGAT2                       | 80168  | . |
| 232429_at | 5.17E-04 | 1.48E-04 |                              |        | . |
| 232430_at | 0.017624 | 0.010203 | LOC148696                    | 148696 | . |
| 232431_at | 0.024853 | 0.015251 |                              |        | . |
| 232432_s_ | 0.015059 | 0.008488 | SLC30A5                      | 64924  | . |
| 232433_at | 0.017449 | 0.01008  | KIAA1683                     | 80726  | . |
| 232434_at | 1.31E-06 | 7.16E-08 | DIRC3                        | 729582 | . |
| 232436_at | 0.017031 | 0.009798 | ZNF274                       | 10782  | . |
| 232437_at | 0.009093 | 0.00469  | CPSF3L                       | 54973  | . |
| 232438_at | 0.001281 | 4.51E-04 | EPS15L1                      | 58513  | . |
| 232440_at | 9.14E-05 | 1.72E-05 | ZDHHC13                      | 54503  | . |
| 232441_at | 1.27E-06 | 6.80E-08 | KRR1                         | 11103  | . |
| 232445_at | 1.33E-04 | 2.76E-05 | SYT9                         | 143425 | . |
| 232446_at | 0.040133 | 0.026586 | MGC45800                     | 90768  | . |
| 232447_at | 0.002622 | 0.001069 |                              |        | . |
| 232449_at | 0.004441 | 0.002011 | BCO2                         | 83875  | . |
| 232450_at | 0.005558 | 0.002628 | LOC149351                    | 149351 | . |
| 232451_at | 0.021904 | 0.013175 |                              |        | . |
| 232453_at | 0.019995 | 0.011824 |                              |        | . |
| 232454_at | 0.016957 | 0.00975  |                              |        | . |
| 232455_x_ | 6.81E-06 | 6.09E-07 | LOC340085                    | 340085 | . |
| 232456_at | 0.002811 | 0.001162 | C10orf71 /// LOC100130757 // |        | . |
| 232458_at | 0.012877 | 0.007067 | COL3A1                       | 1281   | . |
| 232459_at | 1.58E-06 | 9.13E-08 |                              |        | . |
| 232461_at | 0.001173 | 4.06E-04 | AHI1                         | 54806  | . |
| 232462_s_ | 0.007529 | 0.003766 | FLJ23569                     | 503538 | . |
| 232463_at | 0.007176 | 0.003559 | NCRNA00107                   | 283981 | . |
| 232465_at | 0.004575 | 0.002084 |                              |        | . |
| 232466_at | 0.01246  | 0.006797 | CUL4A                        | 8451   | . |

|           |          |          |                           |        |   |
|-----------|----------|----------|---------------------------|--------|---|
| 232467_at | 9.00E-04 | 2.94E-04 | KIRREL                    | 55243  | . |
| 232469_x_ | 5.06E-06 | 4.14E-07 | chromosome 1 open reading |        | . |
| 232470_at | 5.32E-05 | 8.67E-06 | SIK1                      | 150094 | . |
| 232473_at | 0.005795 | 0.002761 | PRPF18                    | 8559   | . |
| 232474_at | 2.05E-04 | 4.71E-05 |                           |        | . |
| 232475_at | 0.021117 | 0.012619 | C15orf42                  | 90381  | . |
| 232476_at | 0.00144  | 5.20E-04 |                           |        | . |
| 232480_at | 0.027141 | 0.016886 | LOC400931                 | 400931 | . |
| 232482_at | 0.028875 | 0.018155 | OR51E2                    | 81285  | . |
| 232483_at | 2.96E-04 | 7.46E-05 | MED17                     | 9440   | . |
| 232484_at | 3.27E-04 | 8.47E-05 |                           |        | . |
| 232485_at | 9.35E-04 | 3.08E-04 | RUNDC2A                   | 84127  | . |
| 232486_at | 0.00518  | 0.002417 | LRFN1                     | 57622  | . |
| 232487_at | 1.16E-04 | 2.33E-05 | SFT2D1                    | 113402 | . |
| 232488_at | 2.81E-04 | 7.01E-05 | AGXT2L2                   | 85007  | . |
| 232489_at | 5.20E-08 | 9.51E-10 | CCDC76                    | 54482  | . |
| 232490_s_ | 0.004973 | 0.002301 | PRUNE                     | 58497  | . |
| 232491_at | 4.21E-05 | 6.42E-06 |                           |        | . |
| 232492_at | 0.03342  | 0.021515 | C6orf112                  | 154442 | . |
| 232493_at | 0.006313 | 0.003054 |                           |        | . |
| 232494_at | 0.019968 | 0.011805 | CYP8B1                    | 1582   | . |
| 232495_x_ | 3.81E-04 | 1.02E-04 |                           |        | . |
| 232496_at | 1.55E-05 | 1.81E-06 |                           |        | . |
| 232497_at | 0.001486 | 5.40E-04 | ZNF3                      | 7551   | . |
| 232500_at | 1.75E-04 | 3.89E-05 | C20orf74                  | 57186  | . |
| 232501_at | 8.62E-04 | 2.79E-04 |                           |        | . |
| 232503_at | 2.62E-06 | 1.77E-07 |                           |        | . |
| 232504_at | 0.007788 | 0.003919 | LOC285628                 | 285628 | . |
| 232506_s_ | 3.26E-04 | 8.43E-05 | C15orf41                  | 84529  | . |
| 232509_at | 0.02802  | 0.017526 | PDE4DIP                   | 9659   | . |
| 232511_at | 0.001179 | 4.08E-04 |                           |        | . |
| 232513_x_ | 0.029471 | 0.018587 | C20orf107                 | 388799 | . |
| 232514_at | 0.027634 | 0.017244 | KIF27                     | 55582  | . |
| 232515_at | 0.018693 | 0.01093  |                           |        | . |



|           |          |          |           |          |
|-----------|----------|----------|-----------|----------|
| 232516_x_ | 1.33E-05 | 1.47E-06 |           | .        |
| 232517_s_ | 0.004013 | 0.001779 | PRIC285   | 85441 .  |
| 232518_at | 3.94E-05 | 5.87E-06 | PRIC285   | 85441 .  |
| 232519_at | 0.029841 | 0.018865 | NSFL1C    | 55968 .  |
| 232520_s_ | 0.033446 | 0.021535 | NSFL1C    | 55968 .  |
| 232521_at | 1.39E-04 | 2.93E-05 | PCSK7     | 9159 .   |
| 232522_at | 0.003098 | 0.001304 |           | .        |
| 232523_at | 4.98E-04 | 1.41E-04 | MEGF10    | 84466 .  |
| 232524_x_ | 0.008958 | 0.004611 | ANAPC4    | 29945 .  |
| 232525_at | 1.31E-04 | 2.71E-05 |           | .        |
| 232528_at | 0.041427 | 0.027584 |           | .        |
| 232529_at | 8.76E-05 | 1.64E-05 | SP3       | 6670 .   |
| 232530_at | 1.64E-04 | 3.58E-05 | PLD1      | 5337 .   |
| 232531_at | 1.17E-06 | 6.10E-08 | EMX2OS    | 196047 . |
| 232532_at | 0.004855 | 0.002237 | QRICH2    | 84074 .  |
| 232533_at | 4.00E-04 | 1.08E-04 | METTL8    | 79828 .  |
| 232534_at | 8.77E-06 | 8.51E-07 | LIN37     | 55957 .  |
| 232536_at | 9.24E-04 | 3.04E-04 | C21orf30  | 54083 .  |
| 232538_at | 0.032395 | 0.020744 |           | .        |
| 232541_at | 0.003726 | 0.001629 |           | .        |
| 232542_at | 3.53E-04 | 9.28E-05 | COL9A2    | 1298 .   |
| 232544_at | 0.007389 | 0.003684 |           | .        |
| 232545_at | 0.002189 | 8.61E-04 | LRRC29    | 26231 .  |
| 232548_at | 0.010429 | 0.00551  | GALNTL1   | 57452 .  |
| 232550_at | 8.97E-05 | 1.68E-05 | ABHD1     | 84696 .  |
| 232551_at | 0.046119 | 0.031256 | SLC26A6   | 65010 .  |
| 232553_at | 2.99E-06 | 2.09E-07 | PCYT1B    | 9468 .   |
| 232555_at | 0.011889 | 0.006425 | CREB5     | 9586 .   |
| 232557_at | 0.002695 | 0.001104 | LOC390595 | 390595 . |
| 232559_at | 0.008975 | 0.00462  |           | .        |
| 232561_at | 0.001201 | 4.17E-04 | ZNF771    | 51333 .  |
| 232565_at | 0.003308 | 0.001413 |           | .        |
| 232566_at | 0.004367 | 0.00197  | NOL6      | 65083 .  |
| 232567_at | 4.19E-07 | 1.58E-08 | ARHGAP8   | 23779 .  |

|           |          |          |              |               |
|-----------|----------|----------|--------------|---------------|
| 232569_at | 9.87E-08 | 2.26E-09 |              | .             |
| 232570_s_ | 3.28E-08 | 5.13E-10 | ADAM33       | 80332 .       |
| 232571_at | 4.03E-08 | 6.68E-10 |              | .             |
| 232574_at | 3.76E-04 | 1.00E-04 | XYLT1        | 64131 .       |
| 232577_at | 0.001049 | 3.53E-04 | LOC145945    | 145945 .      |
| 232580_x_ | 2.35E-05 | 3.07E-06 |              | .             |
| 232581_x_ | 0.007172 | 0.003556 | HIVEP3       | 59269 .       |
| 232583_at | 5.11E-04 | 1.46E-04 |              | .             |
| 232585_at | 0.007215 | 0.003581 | LOC100128729 | 100128729 //. |
| 232586_x_ | 0.001321 | 4.68E-04 | LOC100133315 | 100133315 .   |
| 232587_at | 0.045762 | 0.030978 | EML4         | 27436 .       |
| 232589_at | 0.007258 | 0.003607 |              | .             |
| 232590_at | 0.006023 | 0.002891 |              | .             |
| 232591_s_ | 1.74E-07 | 4.79E-09 | TMEM30A      | 55754 .       |
| 232593_at | 0.006619 | 0.003231 | NEURL3       | 93082 .       |
| 232595_at | 0.013362 | 0.007375 |              | .             |
| 232596_at | 0.001381 | 4.94E-04 | DIAPH3       | 81624 .       |
| 232597_x_ | 1.09E-04 | 2.16E-05 | SFRS2IP      | 9169 .        |
| 232599_at | 0.002662 | 0.001088 | EXOC6        | 54536 .       |
| 232600_at | 0.044742 | 0.030183 |              | .             |
| 232601_at | 9.74E-06 | 9.83E-07 |              | .             |
| 232605_s_ | 0.014007 | 0.007788 | RP11-251J8.3 | 646871 .      |
| 232606_at | 9.46E-05 | 1.80E-05 | ANK2         | 287 .         |
| 232607_at | 0.035596 | 0.023138 |              | .             |
| 232608_x_ | 0.030691 | 0.019488 | CARD14       | 79092 .       |
| 232609_at | 4.93E-08 | 8.86E-10 | CRB3         | 92359 .       |
| 232610_at | 0.004122 | 0.001837 | PARP14       | 54625 .       |
| 232611_at | 0.001227 | 4.28E-04 | GOLGA2L1     | 55592 .       |
| 232612_s_ | 0.004807 | 0.002212 | ATG16L1      | 55054 .       |
| 232614_at | 0.039764 | 0.026304 |              | .             |
| 232615_at | 3.28E-05 | 4.67E-06 |              | .             |
| 232616_at | 1.94E-05 | 2.40E-06 | LOC100129935 | 100129935 .   |
| 232617_at | 0.009267 | 0.0048   | CTSS         | 1520 .        |
| 232618_at | 0.014422 | 0.008062 | CYorf15A     | 246126 .      |

|           |          |          |              |           |   |
|-----------|----------|----------|--------------|-----------|---|
| 232619_at | 9.56E-07 | 4.66E-08 | C20orf134    | 170487    | . |
| 232620_at | 0.002088 | 8.13E-04 | WDR93        | 56964     | . |
| 232621_at | 5.25E-04 | 1.51E-04 | USP48        | 84196     | . |
| 232622_at | 2.46E-04 | 5.93E-05 |              |           | . |
| 232623_at | 0.009338 | 0.004841 | LOC100128751 | 100128751 | . |
| 232624_at | 6.16E-05 | 1.04E-05 | ABTB2        | 25841     | . |
| 232625_at | 0.028576 | 0.017927 | TLN2         | 83660     | . |
| 232626_at | 8.19E-08 | 1.76E-09 |              |           | . |
| 232627_at | 0.011277 | 0.006042 |              |           | . |
| 232628_at | 0.015168 | 0.008559 |              |           | . |
| 232630_at | 0.002983 | 0.001246 | APIP         | 51074     | . |
| 232632_at | 2.36E-05 | 3.09E-06 |              |           | . |
| 232633_at | 4.82E-06 | 3.88E-07 | XRCC5        | 7520      | . |
| 232634_at | 0.001085 | 3.69E-04 | DKFZp566F094 | 94023     | . |
| 232636_at | 0.04156  | 0.027686 | SLITRK4      | 139065    | . |
| 232637_at | 0.048122 | 0.032826 | 2-Sep        | 4735      | . |
| 232641_at | 0.016407 | 0.009385 | ZNF596       | 169270    | . |
| 232642_at | 7.06E-08 | 1.43E-09 | VWA5B2       | 90113     | . |
| 232644_x_ | 1.96E-05 | 2.43E-06 | OCIAD1       | 54940     | . |
| 232645_at | 0.00312  | 0.001316 | LOC153684    | 153684    | . |
| 232647_at | 0.004635 | 0.002117 | PROCA1       | 147011    | . |
| 232648_at | 4.37E-04 | 1.20E-04 | PSMA3        | 5684      | . |
| 232649_at | 0.01507  | 0.008496 | GLDN         | 342035    | . |
| 232650_at | 0.042189 | 0.028177 | C12orf65     | 91574     | . |
| 232653_at | 0.026123 | 0.016154 |              |           | . |
| 232654_s_ | 0.040126 | 0.026581 | UGT1A6       | 54578     | . |
| 232656_at | 1.09E-06 | 5.49E-08 |              |           | . |
| 232657_at | 5.70E-04 | 1.67E-04 |              |           | . |
| 232658_at | 0.027626 | 0.017235 |              |           | . |
| 232660_at | 0.004204 | 0.001881 | BAD          | 572       | . |
| 232662_x_ | 0.021258 | 0.012718 | C10orf58     | 84293     | . |
| 232663_s_ | 3.52E-04 | 9.26E-05 | LOC390595    | 390595    | . |
| 232664_at | 0.035291 | 0.022897 | FLJ12334     | 400946    | . |
| 232665_x_ | 2.84E-05 | 3.89E-06 |              |           | . |

|           |          |          |                             |           |   |
|-----------|----------|----------|-----------------------------|-----------|---|
| 232666_at | 0.002624 | 0.00107  | OAS3                        | 4940      | . |
| 232667_at | 0.001829 | 6.92E-04 |                             |           | . |
| 232669_at | 0.003591 | 0.001558 | HIF3A                       | 64344     | . |
| 232670_at | 0.001304 | 4.61E-04 |                             |           | . |
| 232674_at | 1.07E-04 | 2.10E-05 | UCN2                        | 90226     | . |
| 232675_s_ | 0.023221 | 0.014087 | UCKL1                       | 54963     | . |
| 232676_x_ | 1.63E-05 | 1.92E-06 | MYEF2                       | 50804     | . |
| 232678_at | 0.001863 | 7.08E-04 | SLC2A9                      | 56606     | . |
| 232680_at | 4.64E-04 | 1.30E-04 | HDGFL1                      | 154150    | . |
| 232682_at | 0.002689 | 0.001101 | MREG                        | 55686     | . |
| 232685_at | 0.048991 | 0.033518 |                             |           | . |
| 232687_at | 0.041757 | 0.027835 |                             |           | . |
| 232693_s_ | 0.005037 | 0.002338 | FBXO16 /// ZN 157574 /// 5! |           | . |
| 232694_at | 0.011514 | 0.00619  | ZNF395                      | 55893     | . |
| 232696_at | 4.32E-07 | 1.65E-08 | LOC648556                   | 648556    | . |
| 232697_at | 3.26E-05 | 4.64E-06 | LRFN2                       | 57497     | . |
| 232698_at | 0.001115 | 3.81E-04 | BPIL1                       | 80341     | . |
| 232700_at | 0.002769 | 0.001141 |                             |           | . |
| 232702_at | 6.37E-05 | 1.09E-05 | RABGAP1L                    | 9910      | . |
| 232706_s_ | 0.005554 | 0.002626 | TRABD                       | 80305     | . |
| 232708_at | 0.010304 | 0.005434 | GALT                        | 2592      | . |
| 232710_at | 5.50E-09 | 4.88E-11 |                             |           | . |
| 232713_at | 0.014088 | 0.007844 |                             |           | . |
| 232714_at | 0.038901 | 0.025644 |                             |           | . |
| 232719_at | 2.66E-05 | 3.58E-06 | BRUNOL4                     | 56853     | . |
| 232722_at | 0.012399 | 0.006756 | RNASET2                     | 8635      | . |
| 232724_at | 0.042464 | 0.028388 | MS4A6A                      | 64231     | . |
| 232726_at | 0.004064 | 0.001806 |                             |           | . |
| 232727_at | 0.01948  | 0.011468 | UCKL1                       | 54963     | . |
| 232731_x_ | 3.62E-05 | 5.28E-06 | LOC100190938                | 100190938 | . |
| 232732_at | 0.045183 | 0.030523 |                             |           | . |
| 232733_s_ | 0.005784 | 0.002754 | COL20A1                     | 57642     | . |
| 232734_at | 3.16E-04 | 8.11E-05 | TTC23                       | 64927     | . |
| 232735_at | 0.001351 | 4.82E-04 | ANKRD34A                    | 284615    | . |

|           |          |          |           |          |
|-----------|----------|----------|-----------|----------|
| 232736_s_ | 0.006783 | 0.003328 | POM121L9P | 29774 .  |
| 232739_at | 0.004616 | 0.002107 | SPIB      | 6689 .   |
| 232740_at | 5.89E-07 | 2.45E-08 | MCM3APAS  | 114044 . |
| 232744_x_ | 6.04E-04 | 1.79E-04 |           | .        |
| 232745_x_ | 0.004669 | 0.002136 | SPEF2     | 79925 .  |
| 232746_at | 0.006105 | 0.002936 | CXCR7     | 57007 .  |
| 232747_at | 0.026329 | 0.016299 |           | .        |
| 232748_at | 0.025018 | 0.015369 | PAPPA     | 5069 .   |
| 232751_at | 5.50E-04 | 1.60E-04 | RBBP9     | 10741 .  |
| 232752_at | 0.01939  | 0.011409 |           | .        |
| 232753_at | 0.003007 | 0.001258 | ZNF346    | 23567 .  |
| 232754_at | 1.42E-04 | 2.99E-05 |           | .        |
| 232755_at | 0.011434 | 0.006141 | UBE2G2    | 7327 .   |
| 232757_at | 0.030506 | 0.019354 |           | .        |
| 232758_s_ | 1.87E-05 | 2.29E-06 |           | .        |
| 232759_at | 6.37E-05 | 1.08E-05 |           | .        |
| 232760_at | 0.029178 | 0.018374 | TEX15     | 56154 .  |
| 232761_at | 2.08E-05 | 2.63E-06 | COX4I2    | 84701 .  |
| 232764_at | 0.003902 | 0.001721 | CCNB2     | 9133 .   |
| 232765_x_ | 0.013039 | 0.007169 | LOC146429 | 146429 . |
| 232768_at | 0.01368  | 0.007579 | CCNB2     | 9133 .   |
| 232771_at | 0.00691  | 0.003403 | NRK       | 203447 . |
| 232772_at | 0.022607 | 0.013656 | LOC221272 | 221272 . |
| 232773_at | 9.83E-07 | 4.83E-08 |           | .        |
| 232774_x_ | 0.00109  | 3.70E-04 | ZIK1      | 284307 . |
| 232775_at | 7.50E-06 | 6.92E-07 |           | .        |
| 232778_at | 1.46E-07 | 3.80E-09 |           | .        |
| 232779_at | 2.51E-06 | 1.67E-07 |           | .        |
| 232784_at | 2.41E-05 | 3.16E-06 |           | .        |
| 232785_at | 0.024702 | 0.015138 | RGAG1     | 57529 .  |
| 232786_at | 3.99E-04 | 1.08E-04 | COG6      | 57511 .  |
| 232788_at | 0.00661  | 0.003226 |           | .        |
| 232790_at | 0.001158 | 3.99E-04 |           | .        |
| 232791_at | 4.96E-04 | 1.41E-04 |           | .        |

|           |          |          |              |        |   |
|-----------|----------|----------|--------------|--------|---|
| 232792_at | 0.015433 | 0.00874  | TRIM69       | 140691 | . |
| 232793_at | 0.012254 | 0.006664 |              |        | . |
| 232794_at | 0.013263 | 0.007313 |              |        | . |
| 232795_at | 8.27E-04 | 2.65E-04 |              |        | . |
| 232796_at | 0.007679 | 0.003854 |              |        | . |
| 232798_at | 0.00412  | 0.001835 | DNAJC5B      | 85479  | . |
| 232800_at | 0.005361 | 0.002516 |              |        | . |
| 232802_at | 0.001917 | 7.33E-04 | SYT8         | 90019  | . |
| 232804_at | 0.017856 | 0.01036  |              |        | . |
| 232807_at | 0.030196 | 0.019126 | FAM131A      | 131408 | . |
| 232809_s_ | 0.0088   | 0.004514 | FLT1         | 2321   | . |
| 232811_x_ | 0.001488 | 5.41E-04 | PRICKLE1     | 144165 | . |
| 232814_x_ | 7.93E-08 | 1.68E-09 | KLC1         | 3831   | . |
| 232815_at | 0.010171 | 0.005349 | FBXO3        | 26273  | . |
| 232816_s_ | 9.87E-04 | 3.29E-04 | DDX11        | 1663   | . |
| 232819_s_ | 1.23E-04 | 2.50E-05 | LTBR         | 4055   | . |
| 232820_s_ | 3.60E-05 | 5.24E-06 | GTSF1L       | 149699 | . |
| 232821_at | 0.009921 | 0.0052   | GTSF1L       | 149699 | . |
| 232822_x_ | 0.023876 | 0.014552 |              |        | . |
| 232824_at | 0.002983 | 0.001246 |              |        | . |
| 232825_s_ | 5.81E-07 | 2.40E-08 | DSEL         | 92126  | . |
| 232826_at | 5.64E-04 | 1.65E-04 |              |        | . |
| 232828_at | 1.43E-05 | 1.63E-06 |              |        | . |
| 232829_at | 0.008028 | 0.004061 | OR52K3P      | 390035 | . |
| 232830_at | 0.037846 | 0.024848 | RNF32        | 140545 | . |
| 232832_at | 0.022911 | 0.013869 | DKFZp434J022 | 93429  | . |
| 232833_at | 0.037318 | 0.024449 |              |        | . |
| 232834_at | 0.001336 | 4.75E-04 |              |        | . |
| 232835_at | 1.92E-04 | 4.35E-05 |              |        | . |
| 232837_at | 0.003331 | 0.001424 | KIF13A       | 63971  | . |
| 232838_at | 0.007683 | 0.003856 | ASXL3        | 80816  | . |
| 232839_at | 0.049357 | 0.033811 |              |        | . |
| 232841_at | 0.011896 | 0.006431 |              |        | . |
| 232843_s_ | 7.86E-07 | 3.58E-08 | DOCK8        | 81704  | . |

|           |          |          |              |              |        |
|-----------|----------|----------|--------------|--------------|--------|
| 232847_at | 0.026374 | 0.016333 | SALL3        | 27164        | .      |
| 232849_at | 0.003987 | 0.001765 | LOC100128988 | 100128988    | .      |
| 232854_at | 0.031391 | 0.019998 | DIRAS1       | 148252       | .      |
| 232855_at | 6.75E-05 | 1.17E-05 |              |              | .      |
| 232857_at | 0.0287   | 0.018025 | POLR3H       | 171568       | .      |
| 232858_at | 7.45E-08 | 1.54E-09 |              |              | .      |
| 232859_s_ | 0.003623 | 0.001576 | MAGI1        | 9223         | .      |
| 232860_x_ | 0.035065 | 0.022727 | RBM41        | 55285        | .      |
| 232863_at | 5.70E-05 | 9.45E-06 | hCG_1786132  | 401303       | /// 6. |
| 232865_at | 0.004569 | 0.002081 | AFF4         | 27125        | .      |
| 232869_at | 3.80E-05 | 5.61E-06 | SRGAP3       | 9901         | .      |
| 232870_at | 0.014113 | 0.007859 | HDAC10       | 83933        | .      |
| 232872_at | 1.19E-05 | 1.29E-06 |              |              | .      |
| 232876_at | 5.59E-06 | 4.72E-07 |              |              | .      |
| 232879_at | 1.75E-06 | 1.06E-07 | CRTC3        | 64784        | .      |
| 232880_at | 0.008888 | 0.004568 |              |              | .      |
| 232882_at | 2.66E-04 | 6.53E-05 |              |              | .      |
| 232883_at | 1.94E-04 | 4.42E-05 |              |              | .      |
| 232884_s_ | 0.00561  | 0.002657 | ZNF853       | 54753        | .      |
| 232885_at | 0.021222 | 0.012693 | NCRNA00081   | 92482        | .      |
| 232886_at | 0.002897 | 0.001203 |              |              | .      |
| 232887_at | 0.020542 | 0.012206 | hCG_1776018  | 644139       | .      |
| 232888_at | 0.014743 | 0.008277 | ISM1         | 140862       | .      |
| 232889_at | 2.45E-05 | 3.25E-06 |              |              | .      |
| 232890_at | 1.52E-04 | 3.25E-05 |              |              | .      |
| 232891_at | 0.005326 | 0.002496 | SIRPD        | 128646       | .      |
| 232892_at | 1.25E-04 | 2.54E-05 | C20orf166    | 128826       | .      |
| 232893_at | 1.53E-08 | 1.83E-10 | LMBRD2       | 92255        | .      |
| 232895_s_ | 0.04139  | 0.027554 |              |              | .      |
| 232896_at | 9.10E-05 | 1.71E-05 | ERBB2IP      | 55914        | .      |
| 232897_at | 0.003741 | 0.001637 | FLJ20444     | 403323       | .      |
| 232898_at | 0.013685 | 0.007583 | DAB2         | 1601         | .      |
| 232899_at | 0.002837 | 0.001174 | FAM41C       | /// RP118433 | /// 2. |
| 232901_at | 0.021671 | 0.013005 | RARS2        | 57038        | .      |

|           |          |          |                              |
|-----------|----------|----------|------------------------------|
| 232903_at | 4.41E-04 | 1.22E-04 | .                            |
| 232905_at | 1.05E-05 | 1.09E-06 | GTF2H5 404672 .              |
| 232906_at | 0.01646  | 0.009422 | .                            |
| 232907_at | 0.03142  | 0.020018 | UBR4 23352 .                 |
| 232909_s_ | 0.002243 | 8.86E-04 | BPTF 2186 .                  |
| 232912_at | 0.005125 | 0.002387 | GPR180 160897 .              |
| 232913_at | 0.012002 | 0.006497 | TMED8 283578 .               |
| 232914_s_ | 3.13E-04 | 8.01E-05 | SYTL2 54843 .                |
| 232916_at | 9.96E-04 | 3.32E-04 | .                            |
| 232918_at | 0.007621 | 0.00382  | LOC541471 541471 .           |
| 232919_at | 5.27E-05 | 8.55E-06 | AFG3L2 10939 .               |
| 232920_at | 0.006878 | 0.003384 | CCDC157 550631 .             |
| 232921_at | 0.032363 | 0.02072  | KIAA1549 57670 .             |
| 232922_s_ | 0.003315 | 0.001416 | SLC17A9 63910 .              |
| 232923_at | 7.41E-06 | 6.82E-07 | .                            |
| 232925_at | 0.001108 | 3.78E-04 | .                            |
| 232931_at | 5.96E-06 | 5.14E-07 | SNRNP200 23020 .             |
| 232933_at | 0.006077 | 0.002922 | KIAA1656 85371 .             |
| 232934_at | 0.043695 | 0.029359 | .                            |
| 232936_at | 0.003517 | 0.00152  | KCNA7 3743 .                 |
| 232937_at | 0.031041 | 0.019741 | .                            |
| 232940_s_ | 7.01E-09 | 6.58E-11 | MLL3 58508 .                 |
| 232941_at | 6.74E-05 | 1.17E-05 | TMPRSS6 164656 .             |
| 232944_at | 0.006594 | 0.003217 | .                            |
| 232945_at | 5.16E-04 | 1.48E-04 | PUS10 150962 .               |
| 232946_s_ | 5.00E-06 | 4.08E-07 | NADSYN1 55191 .              |
| 232950_s_ | 0.005978 | 0.002865 | PITPNM2 57605 .              |
| 232953_at | 0.001325 | 4.70E-04 | C20orf69 /// D 140849 /// 5! |
| 232954_at | 2.31E-04 | 5.47E-05 | .                            |
| 232955_at | 0.003088 | 0.0013   | FLJ41170 440200 .            |
| 232957_x_ | 0.041286 | 0.027472 | .                            |
| 232958_at | 0.001928 | 7.38E-04 | .                            |
| 232959_at | 1.69E-04 | 3.72E-05 | .                            |
| 232960_at | 0.024202 | 0.014782 | NUP62CL 54830 .              |



|           |          |          |                             |
|-----------|----------|----------|-----------------------------|
| 232962_x_ | 7.74E-05 | 1.40E-05 | .                           |
| 232963_at | 0.001033 | 3.47E-04 | .                           |
| 232964_at | 0.049963 | 0.034306 | SPDYE1 285955 .             |
| 232966_at | 4.50E-04 | 1.25E-04 | LPIN3 64900 .               |
| 232967_at | 0.003004 | 0.001257 | XPA 7507 .                  |
| 232968_at | 0.001065 | 3.60E-04 | FANK1 92565 .               |
| 232970_at | 5.31E-05 | 8.63E-06 | .                           |
| 232972_at | 1.01E-04 | 1.95E-05 | C17orf72 92340 .            |
| 232973_at | 0.006145 | 0.002958 | DOCK1 1793 .                |
| 232974_at | 0.001629 | 6.02E-04 | .                           |
| 232975_at | 1.17E-04 | 2.35E-05 | HCG18 414777 .              |
| 232976_at | 2.31E-05 | 2.99E-06 | SNORD116@ 692236 .          |
| 232977_x_ | 0.001635 | 6.05E-04 | MYH14 79784 .               |
| 232978_at | 7.41E-05 | 1.32E-05 | .                           |
| 232981_s_ | 0.025655 | 0.015823 | AP1GBP1 11276 .             |
| 232983_s_ | 0.001012 | 3.38E-04 | SERGEF 26297 .              |
| 232984_at | 2.71E-04 | 6.69E-05 | HYDIN /// LOC:100133820 //. |
| 232985_s_ | 1.31E-12 | 7.62E-16 | DPPA4 55211 .               |
| 232987_at | 0.026321 | 0.016294 | ARL17 641522 .              |
| 232990_at | 0.003988 | 0.001766 | FAM104B 90736 .             |
| 232991_at | 0.00691  | 0.003403 | ARL17 641522 .              |
| 232992_at | 0.002006 | 7.75E-04 | LOC100131031 100131031 .    |
| 232994_s_ | 0.00688  | 0.003385 | RGNEF 64283 .               |
| 232995_at | 8.47E-04 | 2.73E-04 | .                           |
| 232997_at | 8.69E-04 | 2.82E-04 | .                           |
| 232998_at | 0.002027 | 7.85E-04 | .                           |
| 233001_at | 0.018297 | 0.01066  | SAMD10 140700 .             |
| 233003_at | 0.003341 | 0.00143  | .                           |
| 233004_x_ | 1.04E-04 | 2.01E-05 | .                           |
| 233005_at | 1.87E-05 | 2.29E-06 | .                           |
| 233007_at | 5.35E-05 | 8.71E-06 | .                           |
| 233011_at | 0.005181 | 0.002417 | ANXA1 301 .                 |
| 233013_x_ | 9.90E-07 | 4.87E-08 | LOC220906 220906 .          |
| 233014_at | 1.33E-05 | 1.48E-06 | .                           |

|           |          |          |           |        |   |
|-----------|----------|----------|-----------|--------|---|
| 233015_at | 0.003953 | 0.001747 | MBNL1     | 4154   | . |
| 233017_x_ | 9.73E-06 | 9.82E-07 |           |        | . |
| 233018_at | 3.76E-05 | 5.53E-06 | TMEM134   | 80194  | . |
| 233019_at | 1.74E-04 | 3.86E-05 | CNOT7     | 29883  | . |
| 233020_at | 7.00E-06 | 6.32E-07 |           |        | . |
| 233022_at | 6.23E-05 | 1.06E-05 | TRPM3     | 80036  | . |
| 233027_at | 0.00283  | 0.00117  |           |        | . |
| 233028_at | 2.46E-04 | 5.92E-05 | C10orf119 | 79892  | . |
| 233031_at | 0.019901 | 0.011757 | ZEB2      | 9839   | . |
| 233034_at | 0.028065 | 0.01756  |           |        | . |
| 233035_at | 0.002357 | 9.40E-04 |           |        | . |
| 233037_at | 4.63E-05 | 7.28E-06 |           |        | . |
| 233038_at | 7.03E-07 | 3.11E-08 |           |        | . |
| 233039_at | 0.00269  | 0.001102 |           |        | . |
| 233041_x_ | 1.48E-06 | 8.42E-08 |           |        | . |
| 233044_at | 0.007971 | 0.004026 |           |        | . |
| 233047_at | 0.014924 | 0.0084   | FRMD7     | 90167  | . |
| 233048_at | 1.96E-04 | 4.45E-05 | FAM35A    | 54537  | . |
| 233049_x_ | 0.014175 | 0.007899 | STUB1     | 10273  | . |
| 233052_at | 2.70E-04 | 6.67E-05 | DNAH8     | 1769   | . |
| 233055_at | 5.45E-05 | 8.91E-06 |           |        | . |
| 233056_x_ | 2.37E-04 | 5.65E-05 | DLGAP4    | 22839  | . |
| 233058_at | 8.85E-06 | 8.64E-07 |           |        | . |
| 233059_at | 0.005264 | 0.002462 |           |        | . |
| 233060_at | 0.003479 | 0.001501 | ZMIZ1     | 57178  | . |
| 233062_at | 0.029798 | 0.018835 |           |        | . |
| 233063_s_ | 1.11E-04 | 2.20E-05 |           |        | . |
| 233064_at | 0.002391 | 9.57E-04 | ZFR2      | 23217  | . |
| 233067_at | 0.004537 | 0.002064 |           |        | . |
| 233068_at | 0.043243 | 0.029003 |           |        | . |
| 233072_at | 0.012474 | 0.006806 | NTNG2     | 84628  | . |
| 233074_at | 2.15E-05 | 2.74E-06 |           |        | . |
| 233076_at | 0.032551 | 0.020857 | JAKMIP3   | 282973 | . |
| 233077_at | 0.001093 | 3.72E-04 | FLJ13439  | 399876 | . |

|           |          |          |                              |        |   |
|-----------|----------|----------|------------------------------|--------|---|
| 233078_at | 1.10E-05 | 1.15E-06 | API5                         | 8539   | . |
| 233079_at | 0.043201 | 0.028963 | MERTK                        | 10461  | . |
| 233080_s_ | 1.95E-06 | 1.21E-07 | PRPF40A                      | 55660  | . |
| 233085_s_ | 2.79E-05 | 3.80E-06 | OBFC2A                       | 64859  | . |
| 233086_at | 0.018373 | 0.010712 | C20orf106 /// (200232 /// 38 |        | . |
| 233087_at | 0.007412 | 0.003697 | FBXL17                       | 64839  | . |
| 233088_at | 0.038887 | 0.025632 |                              |        | . |
| 233089_at | 2.16E-04 | 5.03E-05 | QRSL1                        | 55278  | . |
| 233090_at | 0.017984 | 0.010445 |                              |        | . |
| 233094_at | 0.008489 | 0.00433  |                              |        | . |
| 233099_at | 0.013385 | 0.007389 |                              |        | . |
| 233101_at | 3.34E-04 | 8.68E-05 | MTMR9                        | 66036  | . |
| 233105_at | 1.72E-04 | 3.80E-05 |                              |        | . |
| 233106_at | 4.70E-04 | 1.32E-04 | C14orf82                     | 145438 | . |
| 233108_at | 0.007807 | 0.00393  |                              |        | . |
| 233109_at | 0.010553 | 0.005587 | COL12A1                      | 1303   | . |
| 233110_s_ | 8.30E-06 | 7.90E-07 | BCL2L12                      | 83596  | . |
| 233115_at | 1.35E-04 | 2.82E-05 | DEPDC1B                      | 55789  | . |
| 233119_at | 3.08E-05 | 4.32E-06 | FLJ14213                     | 79899  | . |
| 233122_at | 5.87E-06 | 5.03E-07 | KRTCAP2                      | 200185 | . |
| 233125_at | 0.032866 | 0.021098 |                              |        | . |
| 233126_s_ | 0.012235 | 0.00665  | OLAH                         | 55301  | . |
| 233128_at | 3.97E-05 | 5.93E-06 |                              |        | . |
| 233129_at | 1.94E-06 | 1.20E-07 |                              |        | . |
| 233131_at | 8.72E-04 | 2.83E-04 | CCDC147                      | 159686 | . |
| 233132_at | 0.001457 | 5.27E-04 | LOC96610                     | 96610  | . |
| 233133_at | 0.001429 | 5.15E-04 |                              |        | . |
| 233135_at | 4.73E-06 | 3.79E-07 |                              |        | . |
| 233136_at | 0.004119 | 0.001835 | PABPC5                       | 140886 | . |
| 233137_at | 9.50E-09 | 1.00E-10 |                              |        | . |
| 233138_at | 0.003504 | 0.001514 | C18orf1                      | 753    | . |
| 233140_s_ | 7.98E-06 | 7.50E-07 | C14orf133                    | 63894  | . |
| 233141_s_ | 2.69E-05 | 3.63E-06 | ST7L                         | 54879  | . |
| 233142_at | 1.67E-06 | 9.87E-08 |                              |        | . |

|           |          |          |              |        |   |
|-----------|----------|----------|--------------|--------|---|
| 233145_at | 0.014817 | 0.008329 | CSMD2        | 114784 | . |
| 233147_at | 0.013545 | 0.00749  |              |        | . |
| 233148_at | 9.95E-04 | 3.32E-04 | PODN         | 127435 | . |
| 233150_at | 0.011115 | 0.005963 | GALNTL5      | 168391 | . |
| 233151_s_ | 0.014268 | 0.007959 | TTY7         | 246122 | . |
| 233152_x_ | 4.84E-11 | 1.02E-13 |              |        | . |
| 233154_at | 0.035897 | 0.023363 |              |        | . |
| 233157_x_ | 1.20E-04 | 2.42E-05 | CCDC114      | 93233  | . |
| 233158_at | 5.89E-04 | 1.74E-04 | KRT82        | 3888   | . |
| 233161_at | 0.023759 | 0.014472 |              |        | . |
| 233162_at | 0.002794 | 0.001153 |              |        | . |
| 233163_at | 1.28E-05 | 1.41E-06 | LOC731157    | 731157 | . |
| 233164_x_ | 6.36E-04 | 1.92E-04 | RHBDD1       | 84236  | . |
| 233165_at | 0.004646 | 0.002123 | NCKIPSD      | 51517  | . |
| 233167_at | 5.31E-06 | 4.40E-07 | RP3-402G11.5 | 83642  | . |
| 233168_s_ | 1.63E-04 | 3.55E-05 | RP3-402G11.5 | 83642  | . |
| 233169_at | 0.03594  | 0.023396 | ZNF350       | 59348  | . |
| 233170_at | 0.002051 | 7.96E-04 |              |        | . |
| 233171_at | 2.52E-04 | 6.11E-05 | GRIN3A       | 116443 | . |
| 233173_x_ | 3.82E-04 | 1.02E-04 | GTF3C5       | 9328   | . |
| 233174_at | 0.026958 | 0.016757 |              |        | . |
| 233176_at | 4.87E-04 | 1.38E-04 |              |        | . |
| 233177_s_ | 0.023555 | 0.014325 | PNKD         | 25953  | . |
| 233179_x_ | 2.37E-05 | 3.09E-06 | SIRT6        | 51548  | . |
| 233180_at | 0.006657 | 0.003253 |              |        | . |
| 233181_at | 0.003055 | 0.001283 |              |        | . |
| 233182_x_ | 2.22E-04 | 5.22E-05 | ATXN3        | 4287   | . |
| 233186_s_ | 0.002927 | 0.001217 | BANP         | 54971  | . |
| 233187_s_ | 0.003031 | 0.001271 |              |        | . |
| 233189_at | 4.21E-04 | 1.15E-04 |              |        | . |
| 233191_at | 0.020681 | 0.012308 | RUFY2        | 55680  | . |
| 233192_s_ | 0.002486 | 0.001004 | RUFY2        | 55680  | . |
| 233193_x_ | 3.56E-06 | 2.62E-07 | INTS4        | 92105  | . |
| 233194_at | 0.024636 | 0.015091 |              |        | . |

|           |          |          |            |        |   |
|-----------|----------|----------|------------|--------|---|
| 233195_at | 0.015406 | 0.00872  | DNAI1      | 27019  | . |
| 233198_at | 6.00E-04 | 1.78E-04 | GOLGA2L1   | 55592  | . |
| 233200_at | 6.07E-04 | 1.81E-04 |            |        | . |
| 233202_at | 0.009116 | 0.004705 | CNTNAP3    | 79937  | . |
| 233203_at | 0.01828  | 0.010648 | ROPN1      | 54763  | . |
| 233204_at | 3.40E-04 | 8.86E-05 | LOC728153  | 728153 | . |
| 233205_at | 0.012922 | 0.007096 |            |        | . |
| 233206_at | 0.031874 | 0.020351 | SLC22A23   | 63027  | . |
| 233212_at | 0.002174 | 8.54E-04 |            |        | . |
| 233214_at | 1.57E-04 | 3.39E-05 |            |        | . |
| 233217_at | 0.041618 | 0.027729 |            |        | . |
| 233219_at | 0.00297  | 0.001238 |            |        | . |
| 233221_at | 2.59E-04 | 6.32E-05 | DEFB118    | 117285 | . |
| 233224_at | 7.33E-04 | 2.28E-04 |            |        | . |
| 233225_at | 0.005268 | 0.002464 |            |        | . |
| 233226_at | 0.047745 | 0.032533 | PTPN9      | 5780   | . |
| 233228_at | 0.001665 | 6.18E-04 |            |        | . |
| 233229_at | 5.85E-08 | 1.10E-09 | SCFD1      | 23256  | . |
| 233230_s_ | 1.81E-06 | 1.10E-07 | SLAIN2     | 57606  | . |
| 233231_at | 0.003976 | 0.001759 | MCCC2      | 64087  | . |
| 233233_at | 2.21E-05 | 2.85E-06 |            |        | . |
| 233234_at | 2.36E-06 | 1.55E-07 | KCTD16     | 57528  | . |
| 233235_x_ | 0.007672 | 0.00385  |            |        | . |
| 233236_at | 0.043857 | 0.029491 | TSPAN16    | 26526  | . |
| 233241_at | 0.028673 | 0.018001 | NCRNA00153 | 55857  | . |
| 233242_at | 9.77E-05 | 1.87E-05 | WDR73      | 84942  | . |
| 233243_at | 5.03E-06 | 4.11E-07 |            |        | . |
| 233245_at | 0.01003  | 0.005265 | UHRF1BP1   | 54887  | . |
| 233246_at | 0.017726 | 0.010269 |            |        | . |
| 233248_at | 0.003537 | 0.00153  |            |        | . |
| 233251_at | 0.002002 | 7.73E-04 | STRBP      | 55342  | . |
| 233252_s_ | 5.54E-05 | 9.09E-06 | STRBP      | 55342  | . |
| 233255_s_ | 1.31E-07 | 3.29E-09 | BIVM       | 54841  | . |
| 233256_at | 0.007792 | 0.003922 |            |        | . |

|           |          |          |                            |          |
|-----------|----------|----------|----------------------------|----------|
| 233257_at | 0.006592 | 0.003216 |                            | .        |
| 233261_at | 0.038081 | 0.025021 | EBF1                       | 1879 .   |
| 233262_at | 1.84E-04 | 4.13E-05 |                            | .        |
| 233263_at | 8.74E-05 | 1.63E-05 |                            | .        |
| 233264_at | 0.009595 | 0.004996 |                            | .        |
| 233265_at | 0.003453 | 0.001487 |                            | .        |
| 233266_at | 0.02486  | 0.015257 |                            | .        |
| 233267_at | 0.010482 | 0.005542 | SELENBP1                   | 8991 .   |
| 233270_x_ | 1.20E-05 | 1.29E-06 |                            | .        |
| 233271_at | 1.40E-06 | 7.77E-08 |                            | .        |
| 233273_at | 0.01362  | 0.00754  |                            | .        |
| 233274_at | 7.11E-04 | 2.20E-04 |                            | .        |
| 233276_at | 0.014357 | 0.008021 |                            | .        |
| 233278_at | 0.006715 | 0.003288 | MPRIP                      | 23164 .  |
| 233280_at | 0.010472 | 0.005536 |                            | .        |
| 233281_at | 9.18E-04 | 3.01E-04 |                            | .        |
| 233284_at | 0.002353 | 9.39E-04 |                            | .        |
| 233286_at | 8.83E-04 | 2.87E-04 |                            | .        |
| 233287_at | 5.03E-05 | 8.07E-06 | SLC6A17                    | 388662 . |
| 233288_at | 0.019923 | 0.011772 | ATR                        | 545 .    |
| 233289_at | 5.78E-04 | 1.70E-04 |                            | .        |
| 233290_at | 5.72E-05 | 9.49E-06 |                            | .        |
| 233292_s_ | 0.024785 | 0.015203 | ANKHD1 /// AN404734 /// 54 | .        |
| 233293_at | 0.01782  | 0.010333 |                            | .        |
| 233296_x_ | 9.49E-06 | 9.50E-07 |                            | .        |
| 233297_s_ | 3.57E-05 | 5.19E-06 | C13orf38                   | 728591 . |
| 233299_at | 0.004972 | 0.0023   | RIMS4                      | 140730 . |
| 233300_at | 0.005781 | 0.002752 |                            | .        |
| 233303_at | 0.00351  | 0.001517 |                            | .        |
| 233304_at | 0.012673 | 0.006935 | NFIB                       | 4781 .   |
| 233305_at | 0.047874 | 0.032632 | NECAB1                     | 64168 .  |
| 233307_x_ | 0.006776 | 0.003324 |                            | .        |
| 233309_at | 0.029322 | 0.018475 |                            | .        |
| 233310_at | 9.91E-05 | 1.91E-05 |                            | .        |

|           |          |          |                               |          |
|-----------|----------|----------|-------------------------------|----------|
| 233313_at | 0.002057 | 7.99E-04 |                               | .        |
| 233315_at | 0.01001  | 0.005253 |                               | .        |
| 233316_at | 0.034004 | 0.021941 |                               | .        |
| 233319_x_ | 1.08E-07 | 2.53E-09 |                               | .        |
| 233321_x_ | 0.002336 | 9.31E-04 | LOC90834                      | 90834 .  |
| 233322_at | 0.006368 | 0.003086 | CD9                           | 928 .    |
| 233323_at | 0.005142 | 0.002396 |                               | .        |
| 233324_at | 0.002915 | 0.001211 | TRERF1                        | 55809 .  |
| 233325_at | 0.003544 | 0.001534 | SLC35D2                       | 11046 .  |
| 233328_x_ | 5.30E-04 | 1.53E-04 | SLC17A9                       | 63910 .  |
| 233329_s_ | 3.81E-04 | 1.02E-04 | KRCC1                         | 51315 .  |
| 233331_at | 0.005536 | 0.002616 |                               | .        |
| 233334_x_ | 8.87E-04 | 2.89E-04 | GIYD1 /// GIYD445329 /// 54.  | .        |
| 233337_s_ | 0.017677 | 0.010239 | LOC652900 /// 26470 /// 657.  | .        |
| 233338_at | 0.008331 | 0.004238 | FLJ26056 /// LC284861 /// 37. | .        |
| 233339_s_ | 4.91E-06 | 3.97E-07 | ARID1B                        | 57492 .  |
| 233341_s_ | 6.43E-07 | 2.75E-08 | POLR1B                        | 84172 .  |
| 233342_at | 0.020995 | 0.012532 | LOC100134040 100134040        | .        |
| 233344_x_ | 0.020563 | 0.012222 | KIAA1875                      | 340390 . |
| 233345_at | 1.53E-04 | 3.30E-05 | EFCAB6                        | 64800 .  |
| 233350_s_ | 9.61E-07 | 4.70E-08 | TEX264                        | 51368 .  |
| 233355_at | 4.93E-04 | 1.40E-04 | PRR17                         | 284739 . |
| 233356_at | 0.005068 | 0.002356 | EEF1DP3                       | 196549 . |
| 233357_at | 0.001627 | 6.01E-04 | TRIM67                        | 440730 . |
| 233359_at | 4.20E-06 | 3.26E-07 |                               | .        |
| 233360_at | 1.00E-05 | 1.02E-06 | UBE2I                         | 7329 .   |
| 233361_at | 0.001617 | 5.97E-04 | ANKRD44                       | 91526 .  |
| 233364_s_ | 0.001345 | 4.79E-04 |                               | .        |
| 233365_at | 0.032391 | 0.02074  |                               | .        |
| 233367_at | 0.048122 | 0.032826 |                               | .        |
| 233370_at | 0.038953 | 0.025684 |                               | .        |
| 233371_at | 0.009192 | 0.004755 | ABCC13                        | 150000 . |
| 233376_at | 0.006259 | 0.003023 |                               | .        |
| 233378_at | 0.002082 | 8.10E-04 |                               | .        |

|           |          |          |           |        |   |
|-----------|----------|----------|-----------|--------|---|
| 233379_at | 0.028751 | 0.018064 | FLJ14213  | 79899  | . |
| 233380_s_ | 6.66E-04 | 2.03E-04 | RUFY1     | 80230  | . |
| 233381_at | 1.12E-05 | 1.17E-06 | RUFY1     | 80230  | . |
| 233382_at | 0.004102 | 0.001826 | LOC145845 | 145845 | . |
| 233383_at | 0.028033 | 0.017536 |           |        | . |
| 233384_at | 6.43E-05 | 1.10E-05 |           |        | . |
| 233385_x_ | 4.13E-04 | 1.13E-04 | RAB4B     | 53916  | . |
| 233387_s_ | 0.027176 | 0.01691  | PCNT      | 5116   | . |
| 233389_at | 1.56E-04 | 3.37E-05 | C20orf26  | 26074  | . |
| 233391_at | 0.041499 | 0.027639 | CDH26     | 60437  | . |
| 233393_at | 0.004288 | 0.001926 |           |        | . |
| 233395_at | 0.001059 | 3.58E-04 |           |        | . |
| 233396_s_ | 0.03594  | 0.023395 | CSRP2BP   | 57325  | . |
| 233398_at | 0.038111 | 0.025044 |           |        | . |
| 233399_x_ | 3.19E-04 | 8.19E-05 | ZNF252    | 286101 | . |
| 233400_at | 5.34E-06 | 4.44E-07 |           |        | . |
| 233402_at | 0.003827 | 0.001682 |           |        | . |
| 233403_x_ | 9.12E-07 | 4.39E-08 | TM6SF2    | 53345  | . |
| 233404_at | 0.01726  | 0.009954 |           |        | . |
| 233405_at | 4.47E-07 | 1.72E-08 |           |        | . |
| 233408_at | 1.52E-04 | 3.27E-05 | PREX2     | 80243  | . |
| 233411_at | 0.004262 | 0.001911 |           |        | . |
| 233413_at | 4.59E-05 | 7.19E-06 |           |        | . |
| 233415_at | 8.02E-04 | 2.55E-04 |           |        | . |
| 233416_at | 0.04168  | 0.027778 |           |        | . |
| 233417_at | 0.002782 | 0.001147 |           |        | . |
| 233418_at | 0.016407 | 0.009385 | LOC91450  | 91450  | . |
| 233419_at | 0.005354 | 0.002512 |           |        | . |
| 233421_s_ | 0.001252 | 4.39E-04 | NUP133    | 55746  | . |
| 233424_at | 1.34E-06 | 7.33E-08 |           |        | . |
| 233427_x_ | 7.04E-04 | 2.17E-04 |           |        | . |
| 233430_at | 0.024696 | 0.015133 | TBC1D22B  | 55633  | . |
| 233431_x_ | 0.006845 | 0.003365 |           |        | . |
| 233432_at | 1.96E-05 | 2.44E-06 | LOC646982 | 646982 | . |



|           |          |          |           |        |   |
|-----------|----------|----------|-----------|--------|---|
| 233436_at | 6.72E-07 | 2.92E-08 | MTBP      | 27085  | . |
| 233438_at | 0.001307 | 4.62E-04 | C6orf162  | 57150  | . |
| 233440_at | 0.001069 | 3.62E-04 |           |        | . |
| 233443_at | 7.15E-05 | 1.26E-05 | PSMG4     | 389362 | . |
| 233444_at | 0.002405 | 9.64E-04 |           |        | . |
| 233445_at | 9.98E-06 | 1.01E-06 |           |        | . |
| 233447_at | 0.00532  | 0.002493 | PSMG4     | 389362 | . |
| 233448_s_ | 0.038457 | 0.025308 |           |        | . |
| 233449_at | 0.001014 | 3.39E-04 |           |        | . |
| 233450_at | 0.018005 | 0.01046  |           |        | . |
| 233451_at | 0.03491  | 0.022608 | C20orf54  | 113278 | . |
| 233453_at | 0.004125 | 0.001838 |           |        | . |
| 233454_at | 0.001788 | 6.73E-04 | POLN      | 353497 | . |
| 233458_at | 0.015069 | 0.008495 | POLR3E    | 55718  | . |
| 233462_at | 7.35E-04 | 2.29E-04 | TBC1D28   | 254272 | . |
| 233463_at | 3.11E-04 | 7.95E-05 | RASSF6    | 166824 | . |
| 233465_at | 5.95E-04 | 1.76E-04 |           |        | . |
| 233466_at | 0.002607 | 0.001062 |           |        | . |
| 233467_s_ | 0.003914 | 0.001728 | TSPAN32   | 10077  | . |
| 233470_at | 6.59E-05 | 1.14E-05 | PTPN5     | 84867  | . |
| 233471_at | 2.65E-05 | 3.57E-06 | PTPN5     | 84867  | . |
| 233472_at | 0.013969 | 0.007764 | TCP11L1   | 55346  | . |
| 233473_x_ | 1.84E-07 | 5.17E-09 |           |        | . |
| 233475_at | 0.001229 | 4.30E-04 |           |        | . |
| 233476_at | 8.86E-05 | 1.66E-05 |           |        | . |
| 233477_at | 0.04979  | 0.034167 | KLK15     | 55554  | . |
| 233479_at | 0.00146  | 5.28E-04 |           |        | . |
| 233480_at | 3.26E-04 | 8.43E-05 | TMEM43    | 79188  | . |
| 233481_at | 0.027917 | 0.01745  |           |        | . |
| 233483_at | 0.003651 | 0.00159  | TBC1D27   | 96597  | . |
| 233484_at | 1.38E-05 | 1.55E-06 |           |        | . |
| 233485_at | 0.001154 | 3.97E-04 |           |        | . |
| 233486_at | 1.56E-05 | 1.82E-06 | LOC729940 | 729940 | . |
| 233487_s_ | 0.012878 | 0.007068 | LRRRC8A   | 56262  | . |

|           |          |          |                             |        |   |
|-----------|----------|----------|-----------------------------|--------|---|
| 233488_at | 0.02112  | 0.012622 | RNASE7                      | 84659  | . |
| 233489_at | 4.66E-04 | 1.30E-04 | TMEM43                      | 79188  | . |
| 233490_at | 5.10E-04 | 1.46E-04 | DCTN4                       | 51164  | . |
| 233492_s_ | 0.037233 | 0.024386 | LOC728377 /// 401427 /// 7. |        |   |
| 233494_at | 0.022091 | 0.013306 | ERBB4                       | 2066   | . |
| 233495_at | 9.41E-04 | 3.10E-04 | EXOSC3 /// SHI51010 /// 64. |        |   |
| 233496_s_ | 1.91E-07 | 5.42E-09 | CFL2                        | 1073   | . |
| 233506_at | 1.30E-04 | 2.68E-05 |                             |        | . |
| 233507_at | 0.008229 | 0.004176 |                             |        | . |
| 233509_at | 0.025815 | 0.015934 | HERC4                       | 26091  | . |
| 233511_at | 6.34E-04 | 1.91E-04 |                             |        | . |
| 233514_x_ | 9.38E-04 | 3.09E-04 | TEX11                       | 56159  | . |
| 233515_at | 1.73E-04 | 3.82E-05 |                             |        | . |
| 233517_s_ | 0.002074 | 8.07E-04 | HIF3A                       | 64344  | . |
| 233518_at | 4.65E-08 | 8.20E-10 |                             |        | . |
| 233520_s_ | 1.26E-05 | 1.37E-06 | CMYA5                       | 202333 | . |
| 233521_at | 0.010113 | 0.005314 |                             |        | . |
| 233523_at | 0.005843 | 0.002789 | C20orf186                   | 149954 | . |
| 233524_at | 0.001034 | 3.47E-04 | C9orf44                     | 158314 | . |
| 233525_s_ | 3.64E-04 | 9.62E-05 | C9orf44                     | 158314 | . |
| 233528_s_ | 7.31E-05 | 1.30E-05 | GATSL3                      | 652968 | . |
| 233531_at | 0.004537 | 0.002063 | SLC46A1                     | 113235 | . |
| 233533_at | 1.49E-08 | 1.76E-10 | KRTAP1-5                    | 83895  | . |
| 233535_at | 0.01769  | 0.010247 | ATP13A4                     | 84239  | . |
| 233537_at | 0.016974 | 0.009759 | KRTAP3-1                    | 83896  | . |
| 233538_s_ | 2.22E-04 | 5.21E-05 | CYBB                        | 1536   | . |
| 233540_s_ | 0.00106  | 3.58E-04 | CDK5RAP2                    | 55755  | . |
| 233541_at | 5.50E-04 | 1.60E-04 | LOC644714                   | 644714 | . |
| 233542_at | 0.020837 | 0.012422 |                             |        | . |
| 233543_s_ | 0.035853 | 0.02333  | FAM175A                     | 84142  | . |
| 233544_at | 0.032388 | 0.020738 | GNL1                        | 2794   | . |
| 233545_at | 0.00699  | 0.003451 | INPP5D                      | 3635   | . |
| 233546_at | 6.20E-04 | 1.85E-04 |                             |        | . |
| 233550_s_ | 0.010866 | 0.005785 | SLC4A11                     | 83959  | . |

|           |          |          |                      |
|-----------|----------|----------|----------------------|
| 233552_at | 0.039725 | 0.02627  | .                    |
| 233554_at | 1.24E-05 | 1.35E-06 | .                    |
| 233555_s_ | 0.018139 | 0.010552 | SULF2 55959 .        |
| 233556_at | 7.16E-04 | 2.22E-04 | CRYBB2P1 1416 .      |
| 233558_s_ | 0.031967 | 0.020425 | C4orf41 60684 .      |
| 233560_x_ | 0.008016 | 0.004054 | MCM8 84515 .         |
| 233562_at | 5.68E-04 | 1.67E-04 | LOC84856 84856 .     |
| 233564_s_ | 0.004074 | 0.001812 | CDADC1 81602 .       |
| 233565_s_ | 0.045738 | 0.030959 | SDCBP2 27111 .       |
| 233566_at | 0.032929 | 0.021148 | LOC84856 84856 .     |
| 233567_at | 0.001009 | 3.37E-04 | NAV1 89796 .         |
| 233568_x_ | 0.00112  | 3.84E-04 | CWF19L1 55280 .      |
| 233569_at | 0.028007 | 0.017516 | COPG2 26958 .        |
| 233570_at | 0.003591 | 0.001559 | .                    |
| 233571_x_ | 0.049624 | 0.034027 | C20orf149 79144 .    |
| 233574_at | 0.002548 | 0.001033 | BCORL1 63035 .       |
| 233575_s_ | 0.030258 | 0.019173 | TLE4 7091 .          |
| 233579_at | 0.009259 | 0.004795 | .                    |
| 233580_at | 0.015751 | 0.008949 | .                    |
| 233582_at | 7.53E-05 | 1.35E-05 | .                    |
| 233583_at | 2.08E-04 | 4.82E-05 | .                    |
| 233585_at | 0.001017 | 3.41E-04 | SDK2 54549 .         |
| 233586_s_ | 0.015421 | 0.00873  | KLK12 43849 .        |
| 233587_s_ | 1.54E-04 | 3.32E-05 | SIPA1L2 57568 .      |
| 233588_x_ | 9.75E-06 | 9.84E-07 | PFDN6 10471 .        |
| 233589_x_ | 0.031111 | 0.019792 | C9orf167 54863 .     |
| 233590_at | 1.27E-04 | 2.60E-05 | .                    |
| 233593_at | 0.040189 | 0.026631 | .                    |
| 233594_at | 0.036378 | 0.023732 | .                    |
| 233595_at | 6.86E-04 | 2.10E-04 | USP34 9736 .         |
| 233597_at | 2.91E-04 | 7.30E-05 | PNPLA5 150379 .      |
| 233598_at | 0.003083 | 0.001298 | C20orf187 728434 .   |
| 233599_at | 0.008856 | 0.004548 | hCG_2003663 728061 . |
| 233600_at | 0.006948 | 0.003427 | EFCAB6 64800 .       |

|           |          |          |                              |
|-----------|----------|----------|------------------------------|
| 233601_at | 0.003895 | 0.001717 | .                            |
| 233605_x_ | 9.55E-05 | 1.82E-05 | HNRNPM 4670 .                |
| 233606_at | 0.044277 | 0.029817 | .                            |
| 233607_at | 0.003076 | 0.001294 | .                            |
| 233612_at | 1.33E-04 | 2.76E-05 | .                            |
| 233615_at | 5.62E-04 | 1.64E-04 | CGA 1081 .                   |
| 233617_at | 0.030177 | 0.019112 | TSPYL3 128854 .              |
| 233624_at | 1.66E-04 | 3.64E-05 | .                            |
| 233625_x_ | 0.023586 | 0.014351 | CPSF3L 54973 .               |
| 233626_at | 0.030914 | 0.019647 | .                            |
| 233627_at | 3.93E-04 | 1.06E-04 | .                            |
| 233630_at | 0.008178 | 0.004147 | CDS2 8760 .                  |
| 233632_s_ | 0.006575 | 0.003205 | XRN1 54464 .                 |
| 233634_at | 1.11E-08 | 1.19E-10 | MARVELD3 91862 .             |
| 233635_at | 0.004736 | 0.002173 | .                            |
| 233637_at | 0.046807 | 0.031801 | WDR42A 50717 .               |
| 233638_s_ | 0.005033 | 0.002335 | POMGNT1 55624 .              |
| 233640_x_ | 0.003365 | 0.001442 | KRTAP9-4 85280 .             |
| 233641_s_ | 0.025978 | 0.016053 | FAM167A 83648 .              |
| 233642_s_ | 0.002417 | 9.70E-04 | HEATR5B 54497 .              |
| 233643_at | 0.018045 | 0.01049  | FAM90A1 /// F 286042 /// 4 . |
| 233645_s_ | 5.73E-04 | 1.68E-04 | C1RL 51279 .                 |
| 233647_s_ | 0.005478 | 0.002582 | CDADC1 81602 .               |
| 233648_at | 2.18E-05 | 2.79E-06 | .                            |
| 233654_at | 3.90E-04 | 1.05E-04 | PIGG 54872 .                 |
| 233655_s_ | 1.46E-05 | 1.67E-06 | HAUS6 54801 .                |
| 233658_at | 5.80E-06 | 4.96E-07 | .                            |
| 233660_at | 6.58E-04 | 2.00E-04 | EHD4 30844 .                 |
| 233665_x_ | 0.02749  | 0.017137 | MTO1 25821 .                 |
| 233669_s_ | 0.013425 | 0.007415 | TRIM54 57159 .               |
| 233670_at | 0.033763 | 0.021771 | .                            |
| 233672_s_ | 0.029426 | 0.018551 | .                            |
| 233674_at | 4.17E-05 | 6.35E-06 | .                            |
| 233678_at | 3.21E-05 | 4.55E-06 | .                            |

|           |          |          |               |               |   |
|-----------|----------|----------|---------------|---------------|---|
| 233679_at | 8.07E-06 | 7.61E-07 | MAP3K7IP1     | 10454         | . |
| 233686_at | 1.61E-04 | 3.50E-05 | ASXL3         | 80816         | . |
| 233687_s_ | 7.61E-05 | 1.37E-05 | KLK8 /// KLK9 | 11202 /// 284 | . |
| 233689_at | 0.002719 | 0.001116 |               |               | . |
| 233692_at | 1.68E-05 | 2.00E-06 |               |               | . |
| 233693_at | 0.012036 | 0.00652  | C1orf201      | 90529         | . |
| 233694_at | 2.97E-04 | 7.49E-05 | HSPA1L        | 3305          | . |
| 233695_s_ | 0.001178 | 4.08E-04 | CECR2         | 27443         | . |
| 233698_at | 0.027791 | 0.017358 |               |               | . |
| 233699_at | 9.63E-06 | 9.68E-07 |               |               | . |
| 233700_at | 1.35E-06 | 7.46E-08 |               |               | . |
| 233701_at | 1.42E-08 | 1.64E-10 |               |               | . |
| 233702_x_ | 1.26E-06 | 6.72E-08 |               |               | . |
| 233705_at | 0.025517 | 0.01573  |               |               | . |
| 233706_at | 3.18E-04 | 8.17E-05 |               |               | . |
| 233707_at | 0.001838 | 6.97E-04 |               |               | . |
| 233709_at | 0.001809 | 6.83E-04 |               |               | . |
| 233712_at | 0.015458 | 0.008756 | ZNF44         | 51710         | . |
| 233713_at | 3.71E-05 | 5.44E-06 |               |               | . |
| 233721_x_ | 0.002589 | 0.001053 |               |               | . |
| 233723_at | 0.001291 | 4.55E-04 |               |               | . |
| 233724_at | 0.038896 | 0.025639 | ARNT          | 405           | . |
| 233725_at | 0.026676 | 0.016551 |               |               | . |
| 233726_at | 0.002473 | 9.97E-04 |               |               | . |
| 233727_at | 0.010374 | 0.005476 |               |               | . |
| 233728_at | 2.85E-07 | 9.46E-09 |               |               | . |
| 233729_at | 0.008645 | 0.004421 |               |               | . |
| 233730_at | 6.04E-05 | 1.01E-05 | FAM135A       | 57579         | . |
| 233731_at | 0.008948 | 0.004605 |               |               | . |
| 233732_at | 0.023672 | 0.014411 | LOC401320     | 401320        | . |
| 233733_at | 0.045442 | 0.030725 |               |               | . |
| 233734_s_ | 2.01E-04 | 4.62E-05 | OSBPL5        | 114879        | . |
| 233738_at | 0.002116 | 8.27E-04 |               |               | . |
| 233739_at | 0.044575 | 0.03005  |               |               | . |

|           |          |          |          |        |   |
|-----------|----------|----------|----------|--------|---|
| 233741_at | 0.010524 | 0.005568 | FTCD     | 10841  | . |
| 233744_at | 0.017562 | 0.010158 |          |        | . |
| 233745_at | 0.049944 | 0.034288 |          |        | . |
| 233746_x_ | 6.65E-06 | 5.90E-07 | HYPK     | 25764  | . |
| 233747_at | 0.025997 | 0.016066 |          |        | . |
| 233748_x_ | 0.008209 | 0.004165 | PRKAG2   | 51422  | . |
| 233750_s_ | 0.012056 | 0.006533 | C1orf25  | 81627  | . |
| 233752_s_ | 0.021181 | 0.012662 | ZFHX3    | 463    | . |
| 233753_at | 0.016427 | 0.0094   | SFRS15   | 57466  | . |
| 233754_x_ | 0.002707 | 0.001111 | ZNF71    | 58491  | . |
| 233756_at | 1.23E-04 | 2.49E-05 |          |        | . |
| 233757_x_ | 0.022929 | 0.013882 |          |        | . |
| 233761_at | 2.72E-04 | 6.73E-05 |          |        | . |
| 233762_at | 8.05E-04 | 2.57E-04 |          |        | . |
| 233763_at | 0.01773  | 0.010271 | LYRM2    | 57226  | . |
| 233764_s_ | 0.01295  | 0.007114 | LARP2    | 55132  | . |
| 233765_at | 0.002068 | 8.03E-04 |          |        | . |
| 233767_at | 9.76E-04 | 3.24E-04 | HHLA1    | 10086  | . |
| 233768_at | 5.98E-04 | 1.77E-04 |          |        | . |
| 233770_at | 0.035468 | 0.023034 |          |        | . |
| 233771_at | 0.003803 | 0.00167  |          |        | . |
| 233774_at | 0.002386 | 9.54E-04 |          |        | . |
| 233775_x_ | 3.98E-07 | 1.47E-08 |          |        | . |
| 233776_at | 0.009175 | 0.004744 | PTPRA    | 5786   | . |
| 233777_at | 9.16E-05 | 1.73E-05 |          |        | . |
| 233779_x_ | 4.92E-04 | 1.39E-04 |          |        | . |
| 233780_at | 2.67E-06 | 1.81E-07 | RIF1     | 55183  | . |
| 233781_s_ | 0.00168  | 6.25E-04 | RIF1     | 55183  | . |
| 233782_at | 0.038539 | 0.025374 | WDR68    | 10238  | . |
| 233783_at | 0.034588 | 0.022371 |          |        | . |
| 233784_at | 0.03696  | 0.024173 |          |        | . |
| 233787_at | 1.44E-04 | 3.05E-05 | C6orf163 | 206412 | . |
| 233788_at | 0.00371  | 0.00162  |          |        | . |
| 233790_at | 0.001805 | 6.81E-04 |          |        | . |

|           |          |          |                          |
|-----------|----------|----------|--------------------------|
| 233796_at | 7.02E-05 | 1.23E-05 | .                        |
| 233797_s_ | 2.31E-04 | 5.47E-05 | CST11 140880 .           |
| 233800_at | 0.001633 | 6.04E-04 | .                        |
| 233801_s_ | 0.002313 | 9.20E-04 | SEMA6D 80031 .           |
| 233802_at | 0.006278 | 0.003035 | .                        |
| 233803_s_ | 5.29E-04 | 1.52E-04 | MYBBP1A 10514 .          |
| 233804_at | 5.88E-04 | 1.74E-04 | LOC440131 440131 .       |
| 233807_at | 1.35E-04 | 2.80E-05 | ASB7 140460 .            |
| 233808_at | 3.19E-04 | 8.20E-05 | .                        |
| 233810_x_ | 8.66E-05 | 1.61E-05 | .                        |
| 233812_at | 3.82E-04 | 1.02E-04 | NCRNA00028 140875 .      |
| 233814_at | 0.039573 | 0.026158 | EFNA5 1946 .             |
| 233815_at | 4.46E-04 | 1.24E-04 | NAALAD2 10003 .          |
| 233817_at | 0.005546 | 0.002621 | .                        |
| 233819_s_ | 0.004427 | 0.002004 | RNF160 26046 .           |
| 233820_at | 0.001697 | 6.33E-04 | .                        |
| 233822_x_ | 3.09E-11 | 5.86E-14 | .                        |
| 233824_at | 0.001209 | 4.21E-04 | .                        |
| 233825_s_ | 6.10E-08 | 1.16E-09 | CD99L2 83692 .           |
| 233827_s_ | 0.002219 | 8.75E-04 | SUPT16H 11198 .          |
| 233828_at | 0.001385 | 4.96E-04 | .                        |
| 233829_at | 0.011052 | 0.005899 | C20orf118 140711 .       |
| 233830_at | 0.00145  | 5.24E-04 | LOC90246 90246 .         |
| 233832_at | 6.67E-04 | 2.03E-04 | .                        |
| 233833_at | 2.14E-04 | 4.99E-05 | .                        |
| 233836_at | 2.91E-04 | 7.31E-05 | TNRC6A 27327 .           |
| 233837_at | 0.03342  | 0.021514 | GGT1 2678 .              |
| 233839_at | 2.66E-05 | 3.59E-06 | EFCAB6 64800 .           |
| 233840_at | 0.033205 | 0.021354 | LOC100130950 100130950 . |
| 233841_s_ | 0.018133 | 0.010548 | SUDS3 64426 .            |
| 233842_x_ | 2.40E-06 | 1.57E-07 | C20orf43 51507 .         |
| 233844_at | 0.011405 | 0.006122 | CD99L2 83692 .           |
| 233846_at | 2.89E-05 | 3.97E-06 | CCDC85A 114800 .         |
| 233847_x_ | 1.95E-05 | 2.41E-06 | .                        |

|           |          |          |                             |           |   |
|-----------|----------|----------|-----------------------------|-----------|---|
| 233848_x_ | 0.04143  | 0.027586 | ZNF221                      | 7638      | . |
| 233850_s_ | 0.01142  | 0.006131 | EBF4                        | 57593     | . |
| 233852_at | 1.67E-06 | 9.85E-08 | POLH                        | 5429      | . |
| 233853_at | 6.08E-04 | 1.81E-04 |                             |           | . |
| 233854_x_ | 4.99E-08 | 9.03E-10 | KLK4                        | 9622      | . |
| 233855_at | 0.035678 | 0.023199 | LOC100130950                | 100130950 | . |
| 233856_at | 0.020542 | 0.012205 |                             |           | . |
| 233857_s_ | 0.018028 | 0.010477 | ASB2                        | 51676     | . |
| 233859_at | 0.038125 | 0.025056 | C14orf145                   | 145508    | . |
| 233860_s_ | 0.005079 | 0.002362 | OBP2A /// OBF 29989 /// 299 |           | . |
| 233863_at | 0.015514 | 0.008793 | CASZ1                       | 54897     | . |
| 233866_at | 7.09E-04 | 2.19E-04 | KLHL5                       | 51088     | . |
| 233867_at | 6.04E-05 | 1.01E-05 |                             |           | . |
| 233868_x_ | 5.85E-08 | 1.10E-09 | ADAM33                      | 80332     | . |
| 233869_x_ | 2.22E-07 | 6.69E-09 |                             |           | . |
| 233870_at | 0.043673 | 0.02934  | NAV1                        | 89796     | . |
| 233871_at | 0.026736 | 0.016601 |                             |           | . |
| 233873_x_ | 4.53E-08 | 7.94E-10 | MTPAP                       | 55149     | . |
| 233874_at | 0.040956 | 0.027219 | SLAIN2                      | 57606     | . |
| 233876_at | 5.23E-07 | 2.09E-08 |                             |           | . |
| 233877_at | 0.0055   | 0.002594 |                             |           | . |
| 233878_s_ | 0.028548 | 0.017907 | XRN2                        | 22803     | . |
| 233880_at | 0.022768 | 0.013769 | RNF213                      | 57674     | . |
| 233881_s_ | 1.07E-06 | 5.37E-08 | TOLLIP                      | 54472     | . |
| 233883_at | 0.002514 | 0.001017 | SNX24                       | 28966     | . |
| 233885_at | 0.001294 | 4.57E-04 | SNX26                       | 115703    | . |
| 233888_s_ | 7.01E-06 | 6.32E-07 | SRGAP1                      | 57522     | . |
| 233889_at | 2.15E-04 | 5.02E-05 | TBX18                       | 9096      | . |
| 233891_at | 0.001068 | 3.61E-04 | LOC100133790                | 100133790 | . |
| 233893_s_ | 0.011677 | 0.006292 | KIAA1530                    | 57654     | . |
| 233894_x_ | 3.61E-08 | 5.80E-10 | EMID2                       | 136227    | . |
| 233895_at | 0.001371 | 4.90E-04 | ANKRD24                     | 170961    | . |
| 233896_s_ | 1.03E-04 | 2.00E-05 | PAPLN                       | 89932     | . |
| 233898_s_ | 0.005155 | 0.002403 | FGFR1OP2                    | 26127     | . |



|           |          |          |            |        |   |
|-----------|----------|----------|------------|--------|---|
| 233899_x_ | 0.002744 | 0.001129 | ZBTB10     | 65986  | . |
| 233900_at | 1.96E-04 | 4.46E-05 |            |        | . |
| 233901_at | 0.006713 | 0.003287 |            |        | . |
| 233903_s_ | 0.017199 | 0.009911 | SGEF       | 26084  | . |
| 233907_s_ | 0.044098 | 0.029674 | SERTAD4    | 56256  | . |
| 233911_s_ | 6.28E-04 | 1.89E-04 | PPM1H      | 57460  | . |
| 233912_x_ | 0.01844  | 0.010757 |            |        | . |
| 233914_s_ | 9.85E-05 | 1.89E-05 | SBF2       | 81846  | . |
| 233915_at | 2.41E-04 | 5.79E-05 | C5orf36    | 285600 | . |
| 233916_at | 0.04479  | 0.030222 | KIAA1486   | 57624  | . |
| 233917_s_ | 0.022686 | 0.013714 | MOV10      | 4343   | . |
| 233919_s_ | 0.036929 | 0.024146 | HABP4      | 22927  | . |
| 233921_s_ | 1.39E-04 | 2.91E-05 |            |        | . |
| 233922_at | 0.006672 | 0.003263 |            |        | . |
| 233923_at | 5.13E-04 | 1.47E-04 | FLJ32810   | 143872 | . |
| 233925_at | 0.002029 | 7.86E-04 |            |        | . |
| 233926_at | 0.002904 | 0.001206 |            |        | . |
| 233928_at | 0.008635 | 0.004416 |            |        | . |
| 233929_x_ | 1.75E-06 | 1.06E-07 | WASH3P     | 374666 | . |
| 233935_at | 0.004973 | 0.0023   |            |        | . |
| 233936_s_ | 0.003346 | 0.001432 | GGNBP2     | 79893  | . |
| 233937_at | 0.011729 | 0.006323 | GGNBP2     | 79893  | . |
| 233938_at | 4.32E-08 | 7.35E-10 | C11orf86   | 254439 | . |
| 233939_at | 1.67E-08 | 2.11E-10 | REXO1      | 57455  | . |
| 233940_at | 0.005275 | 0.002468 |            |        | . |
| 233941_at | 0.002416 | 9.69E-04 | C14orf166B | 145497 | . |
| 233943_x_ | 8.34E-04 | 2.68E-04 | PLEKHA8    | 84725  | . |
| 233945_at | 2.62E-05 | 3.51E-06 | UGCGL2     | 55757  | . |
| 233947_s_ | 4.45E-14 | 1.18E-17 | LOC255480  | 255480 | . |
| 233949_s_ | 0.013351 | 0.007368 | MYH7B      | 57644  | . |
| 233950_at | 4.19E-08 | 7.03E-10 | CADPS      | 8618   | . |
| 233952_s_ | 0.027948 | 0.017473 | ZNF295     | 49854  | . |
| 233955_x_ | 0.002766 | 0.001139 | CXXC5      | 51523  | . |
| 233956_at | 0.004468 | 0.002026 |            |        | . |

|           |          |          |                             |          |
|-----------|----------|----------|-----------------------------|----------|
| 233958_at | 0.045064 | 0.030431 |                             | .        |
| 233959_at | 0.002503 | 0.001011 | LOC221442                   | 221442 . |
| 233960_s_ | 2.50E-05 | 3.32E-06 | LOC115110                   | 115110 . |
| 233961_at | 1.28E-04 | 2.63E-05 |                             | .        |
| 233963_at | 0.011243 | 0.006022 | H2BFXP /// LO1644328 /// 76 | .        |
| 233964_at | 4.52E-05 | 7.05E-06 |                             | .        |
| 233965_at | 0.00422  | 0.00189  | LOC255480                   | 255480 . |
| 233966_at | 0.02606  | 0.016108 |                             | .        |
| 233967_at | 0.010255 | 0.005404 |                             | .        |
| 233970_s_ | 6.82E-05 | 1.19E-05 | TRMT6                       | 51605 .  |
| 233974_s_ | 4.25E-06 | 3.32E-07 | FAM129B                     | 64855 .  |
| 233976_at | 5.20E-05 | 8.42E-06 |                             | .        |
| 233978_at | 0.034866 | 0.022575 | PTPRE                       | 5791 .   |
| 233979_s_ | 2.55E-05 | 3.40E-06 | ESPN                        | 83715 .  |
| 233980_s_ | 3.63E-07 | 1.31E-08 | VWF                         | 7450 .   |
| 233985_x_ | 0.04979  | 0.034166 | PPP1R9A                     | 55607 .  |
| 233986_s_ | 0.013016 | 0.007155 | PLEKHG2                     | 64857 .  |
| 233988_x_ | 1.69E-04 | 3.71E-05 | SCUBE1                      | 80274 .  |
| 233989_at | 0.002093 | 8.15E-04 |                             | .        |
| 233990_at | 0.037213 | 0.024371 | C19orf61                    | 56006 .  |
| 233991_at | 2.22E-05 | 2.85E-06 |                             | .        |
| 233992_x_ | 0.001842 | 6.99E-04 | ZNF445                      | 353274 . |
| 233995_at | 2.83E-04 | 7.07E-05 |                             | .        |
| 233997_at | 5.93E-05 | 9.91E-06 |                             | .        |
| 234000_s_ | 6.39E-05 | 1.09E-05 | PTPLAD1                     | 51495 .  |
| 234002_at | 0.005865 | 0.002801 | C20orf135                   | 140701 . |
| 234003_at | 1.90E-05 | 2.34E-06 | ENOX2                       | 10495 .  |
| 234004_at | 0.028361 | 0.017768 | TTC28                       | 23331 .  |
| 234005_x_ | 1.90E-04 | 4.31E-05 | STK36                       | 27148 .  |
| 234006_s_ | 8.90E-04 | 2.90E-04 | C1orf91                     | 56063 .  |
| 234009_at | 0.007195 | 0.00357  |                             | .        |
| 234010_at | 0.001188 | 4.12E-04 |                             | .        |
| 234011_at | 0.001973 | 7.59E-04 | MGC16384                    | 114130 . |
| 234013_at | 0.010864 | 0.005784 | TRD@                        | 6964 .   |

|           |          |          |             |          |
|-----------|----------|----------|-------------|----------|
| 234015_at | 0.027896 | 0.017435 |             | .        |
| 234018_s_ | 0.002219 | 8.76E-04 | SEL1L2      | 80343 .  |
| 234019_at | 0.019685 | 0.011606 |             | .        |
| 234020_x_ | 0.011229 | 0.006013 |             | .        |
| 234021_at | 2.29E-05 | 2.97E-06 | EML2        | 24139 .  |
| 234023_s_ | 0.005035 | 0.002336 | CENPJ       | 55835 .  |
| 234024_at | 2.20E-04 | 5.16E-05 | CBLN4       | 140689 . |
| 234026_at | 5.74E-07 | 2.37E-08 | EML2        | 24139 .  |
| 234027_at | 4.96E-04 | 1.41E-04 | CCDC129     | 223075 . |
| 234029_at | 0.033352 | 0.021463 | PCDHGB8P    | 56120 .  |
| 234030_at | 0.002533 | 0.001026 |             | .        |
| 234032_at | 9.51E-05 | 1.81E-05 |             | .        |
| 234033_at | 0.010749 | 0.005711 |             | .        |
| 234034_at | 1.59E-07 | 4.26E-09 |             | .        |
| 234037_s_ | 0.002509 | 0.001015 |             | .        |
| 234039_at | 0.009911 | 0.005193 | TANC1       | 85461 .  |
| 234040_at | 0.002432 | 9.77E-04 | HELLS       | 3070 .   |
| 234041_at | 0.042087 | 0.028096 |             | .        |
| 234042_at | 0.01721  | 0.009918 | TAS2R45     | 259291 . |
| 234043_at | 1.51E-05 | 1.75E-06 |             | .        |
| 234047_at | 0.004329 | 0.001949 |             | .        |
| 234048_s_ | 0.037086 | 0.024277 | KIAA1632    | 57724 .  |
| 234051_at | 0.017291 | 0.009976 |             | .        |
| 234052_at | 0.007544 | 0.003775 |             | .        |
| 234053_at | 0.013557 | 0.007498 | hCG_1795091 | 728327 . |
| 234054_at | 4.86E-05 | 7.73E-06 | LOC143188   | 143188 . |
| 234056_at | 0.010022 | 0.00526  |             | .        |
| 234059_at | 0.005346 | 0.002507 |             | .        |
| 234061_at | 0.003283 | 0.001399 |             | .        |
| 234062_at | 0.020542 | 0.012207 |             | .        |
| 234063_at | 0.013491 | 0.007457 |             | .        |
| 234066_at | 6.42E-05 | 1.10E-05 | IL1RL1      | 9173 .   |
| 234067_at | 0.031951 | 0.020411 |             | .        |
| 234068_s_ | 0.002883 | 0.001196 | AP2A1       | 160 .    |

|           |          |          |            |          |
|-----------|----------|----------|------------|----------|
| 234070_at | 0.001359 | 4.85E-04 |            | .        |
| 234072_at | 0.011251 | 0.006027 | SEMA4A     | 64218 .  |
| 234074_at | 0.031681 | 0.020204 |            | .        |
| 234076_at | 0.010041 | 0.005273 |            | .        |
| 234077_at | 0.008275 | 0.004204 |            | .        |
| 234079_at | 0.001691 | 6.30E-04 |            | .        |
| 234082_at | 0.014855 | 0.008354 |            | .        |
| 234083_at | 0.001711 | 6.39E-04 |            | .        |
| 234084_x_ | 2.07E-06 | 1.31E-07 |            | .        |
| 234085_at | 0.020647 | 0.012283 | C13orf38   | 728591 . |
| 234086_at | 0.049541 | 0.033961 |            | .        |
| 234092_s_ | 6.00E-05 | 1.01E-05 | TM6SF2     | 53345 .  |
| 234093_at | 0.035353 | 0.022946 | ZNF326     | 284695 . |
| 234098_at | 0.014864 | 0.008361 | SOBP       | 55084 .  |
| 234100_at | 0.014787 | 0.008308 |            | .        |
| 234103_at | 0.0015   | 5.46E-04 | KCNT2      | 343450 . |
| 234104_at | 1.34E-06 | 7.33E-08 |            | .        |
| 234106_s_ | 0.00903  | 0.004652 | FLYWCH1    | 84256 .  |
| 234108_at | 0.015858 | 0.009021 | TAS2R45    | 259291 . |
| 234109_x_ | 0.001545 | 5.65E-04 | ONECUT3    | 390874 . |
| 234110_at | 1.88E-04 | 4.25E-05 |            | .        |
| 234111_at | 0.006535 | 0.003182 |            | .        |
| 234113_at | 6.80E-05 | 1.19E-05 |            | .        |
| 234114_at | 0.033456 | 0.021543 | NCRNA00171 | 80862 .  |
| 234116_at | 4.84E-07 | 1.89E-08 | GJD4       | 219770 . |
| 234119_at | 0.002559 | 0.001038 |            | .        |
| 234120_at | 3.40E-04 | 8.89E-05 |            | .        |
| 234128_at | 3.03E-05 | 4.24E-06 |            | .        |
| 234129_at | 1.59E-04 | 3.44E-05 | ARHGEF12   | 23365 .  |
| 234130_at | 0.012262 | 0.00667  | LDB3       | 11155 .  |
| 234131_at | 0.005417 | 0.002547 |            | .        |
| 234132_at | 0.014597 | 0.008179 |            | .        |
| 234133_s_ | 1.20E-04 | 2.42E-05 | LOC728543  | 728543 . |
| 234137_s_ | 0.004126 | 0.00184  |            | .        |

|           |          |          |           |          |
|-----------|----------|----------|-----------|----------|
| 234142_at | 4.80E-04 | 1.35E-04 |           | .        |
| 234144_at | 0.009239 | 0.004782 |           | .        |
| 234145_at | 0.015544 | 0.008813 | PBX3      | 5090 .   |
| 234148_at | 4.34E-08 | 7.42E-10 |           | .        |
| 234149_at | 0.02194  | 0.013201 |           | .        |
| 234150_at | 0.00601  | 0.002884 |           | .        |
| 234151_at | 0.027223 | 0.016944 |           | .        |
| 234152_at | 4.61E-04 | 1.29E-04 |           | .        |
| 234156_at | 0.017982 | 0.010444 |           | .        |
| 234157_at | 0.004201 | 0.001879 |           | .        |
| 234159_at | 6.07E-04 | 1.81E-04 |           | .        |
| 234169_at | 1.86E-04 | 4.20E-05 |           | .        |
| 234170_at | 0.033349 | 0.021458 |           | .        |
| 234171_at | 0.020831 | 0.012417 |           | .        |
| 234172_at | 0.00321  | 0.001362 |           | .        |
| 234174_at | 0.015858 | 0.009021 |           | .        |
| 234175_at | 3.34E-05 | 4.78E-06 |           | .        |
| 234176_at | 0.003688 | 0.001609 |           | .        |
| 234182_at | 0.00645  | 0.003133 |           | .        |
| 234183_at | 0.002038 | 7.90E-04 |           | .        |
| 234186_at | 0.006777 | 0.003324 |           | .        |
| 234187_at | 2.51E-04 | 6.10E-05 |           | .        |
| 234189_at | 0.003186 | 0.001349 |           | .        |
| 234190_at | 0.040201 | 0.026639 |           | .        |
| 234192_s_ | 5.56E-05 | 9.13E-06 | GKAP1     | 80318 .  |
| 234193_at | 5.41E-04 | 1.57E-04 |           | .        |
| 234195_at | 1.49E-06 | 8.45E-08 | TNFRSF10C | 8794 .   |
| 234197_at | 0.015875 | 0.009033 | ACSM1     | 116285 . |
| 234198_at | 2.40E-04 | 5.73E-05 | KCNIP3    | 30818 .  |
| 234200_at | 3.04E-05 | 4.26E-06 |           | .        |
| 234201_x_ | 0.037156 | 0.024329 |           | .        |
| 234205_at | 0.032085 | 0.020517 |           | .        |
| 234206_at | 5.15E-05 | 8.32E-06 |           | .        |
| 234208_at | 0.018633 | 0.010888 |           | .        |

|           |          |          |           |        |   |
|-----------|----------|----------|-----------|--------|---|
| 234210_x_ | 6.39E-06 | 5.60E-07 | ACTR2     | 10097  | . |
| 234211_at | 0.025143 | 0.01546  |           |        | . |
| 234213_at | 4.85E-04 | 1.37E-04 |           |        | . |
| 234214_at | 0.003025 | 0.001268 |           |        | . |
| 234216_at | 2.09E-04 | 4.85E-05 | FLJ21408  | 400512 | . |
| 234217_at | 0.024613 | 0.015076 |           |        | . |
| 234219_at | 0.025092 | 0.015422 |           |        | . |
| 234220_at | 1.51E-04 | 3.24E-05 | CADPS     | 8618   | . |
| 234222_at | 0.003914 | 0.001728 |           |        | . |
| 234226_at | 0.002624 | 0.001071 | OPN4      | 94233  | . |
| 234227_at | 9.43E-05 | 1.79E-05 |           |        | . |
| 234228_at | 0.001037 | 3.49E-04 |           |        | . |
| 234229_at | 0.005572 | 0.002635 |           |        | . |
| 234230_at | 0.008227 | 0.004175 |           |        | . |
| 234231_at | 0.039447 | 0.026061 | LOC197350 | 197350 | . |
| 234232_at | 0.002905 | 0.001207 |           |        | . |
| 234233_s_ | 2.03E-04 | 4.66E-05 |           |        | . |
| 234236_at | 0.005438 | 0.002559 | AMBRA1    | 55626  | . |
| 234238_at | 3.99E-05 | 5.96E-06 | MAP1LC3B2 | 643246 | . |
| 234239_at | 0.014342 | 0.008011 |           |        | . |
| 234241_at | 0.036035 | 0.023471 | SCAMP5    | 192683 | . |
| 234243_at | 4.92E-04 | 1.39E-04 | BXDC5     | 80135  | . |
| 234245_at | 0.008068 | 0.004084 |           |        | . |
| 234246_at | 0.00145  | 5.24E-04 |           |        | . |
| 234247_at | 0.039667 | 0.026228 |           |        | . |
| 234250_at | 2.60E-04 | 6.36E-05 |           |        | . |
| 234253_at | 0.005402 | 0.002539 |           |        | . |
| 234254_at | 0.004756 | 0.002184 | RPL7AP59  | 441642 | . |
| 234255_at | 1.22E-05 | 1.31E-06 |           |        | . |
| 234256_at | 0.018145 | 0.010556 | SEBOX     | 645832 | . |
| 234258_at | 0.044502 | 0.029995 |           |        | . |
| 234259_at | 0.023804 | 0.014502 |           |        | . |
| 234260_at | 0.011893 | 0.006429 |           |        | . |
| 234262_at | 0.017204 | 0.009914 |           |        | . |

|           |          |          |                             |        |   |
|-----------|----------|----------|-----------------------------|--------|---|
| 234263_at | 3.78E-04 | 1.01E-04 | LOC728678                   | 728678 | . |
| 234264_at | 2.33E-04 | 5.55E-05 |                             |        | . |
| 234265_at | 0.001897 | 7.24E-04 | PPP1R12C                    | 54776  | . |
| 234268_at | 0.021819 | 0.01311  | SLC2A13                     | 114134 | . |
| 234270_at | 0.030198 | 0.019128 |                             |        | . |
| 234271_at | 3.57E-04 | 9.42E-05 | OTOP2                       | 92736  | . |
| 234272_at | 3.44E-04 | 9.00E-05 |                             |        | . |
| 234274_at | 0.009605 | 0.005003 |                             |        | . |
| 234275_at | 0.003037 | 0.001274 |                             |        | . |
| 234276_at | 1.24E-04 | 2.53E-05 |                             |        | . |
| 234278_at | 0.001125 | 3.85E-04 |                             |        | . |
| 234280_at | 7.31E-04 | 2.28E-04 | REG3A /// REG 130120 /// 5( |        | . |
| 234283_at | 0.00169  | 6.29E-04 | C22orf28                    | 51493  | . |
| 234284_at | 6.01E-05 | 1.01E-05 | GNG8                        | 94235  | . |
| 234285_at | 8.18E-04 | 2.61E-04 | SYNGAP1                     | 8831   | . |
| 234286_at | 3.40E-04 | 8.86E-05 | PPP1R12C                    | 54776  | . |
| 234287_at | 8.78E-04 | 2.85E-04 |                             |        | . |
| 234288_at | 0.041383 | 0.027548 |                             |        | . |
| 234289_x_ | 0.002005 | 7.74E-04 |                             |        | . |
| 234290_x_ | 0.002365 | 9.44E-04 | MYH14                       | 79784  | . |
| 234291_s_ | 0.002149 | 8.42E-04 | SLC6A20                     | 54716  | . |
| 234292_s_ | 4.28E-05 | 6.57E-06 | ZNF167                      | 55888  | . |
| 234293_x_ | 4.93E-05 | 7.86E-06 |                             |        | . |
| 234294_x_ | 4.85E-04 | 1.37E-04 | GATAD2A                     | 54815  | . |
| 234295_at | 0.011676 | 0.00629  | DBR1                        | 51163  | . |
| 234299_s_ | 1.44E-04 | 3.05E-05 | NIN                         | 51199  | . |
| 234300_s_ | 0.003078 | 0.001295 | ZFP28                       | 140612 | . |
| 234301_s_ | 0.016276 | 0.009301 |                             |        | . |
| 234303_s_ | 0.030111 | 0.019061 | GPR85                       | 54329  | . |
| 234305_s_ | 0.010555 | 0.005589 | GSDMC                       | 56169  | . |
| 234306_s_ | 1.57E-05 | 1.83E-06 | SLAMF7                      | 57823  | . |
| 234307_s_ | 0.002054 | 7.97E-04 | KIF26A                      | 26153  | . |
| 234310_s_ | 0.001211 | 4.22E-04 | SUSD2                       | 56241  | . |
| 234311_s_ | 8.67E-04 | 2.81E-04 | GTPBP10                     | 85865  | . |

|           |          |          |                             |        |   |
|-----------|----------|----------|-----------------------------|--------|---|
| 234314_at | 0.036757 | 0.024017 | C20orf74                    | 57186  | . |
| 234316_x_ | 0.010573 | 0.0056   | KLK12                       | 43849  | . |
| 234317_s_ | 7.96E-06 | 7.49E-07 | STOX2                       | 56977  | . |
| 234318_x_ | 6.01E-04 | 1.78E-04 | NDOR1                       | 27158  | . |
| 234319_at | 0.029975 | 0.018964 | STOX2                       | 56977  | . |
| 234320_at | 0.014874 | 0.008368 | CD244                       | 51744  | . |
| 234321_x_ | 0.010585 | 0.005608 | NHSL1                       | 57224  | . |
| 234322_at | 3.66E-04 | 9.69E-05 |                             |        | . |
| 234324_at | 7.40E-04 | 2.31E-04 | NHSL1                       | 57224  | . |
| 234326_at | 0.007231 | 0.003591 |                             |        | . |
| 234327_at | 4.36E-05 | 6.74E-06 |                             |        | . |
| 234328_at | 0.031549 | 0.020111 |                             |        | . |
| 234329_at | 0.006307 | 0.003051 | CLIC5                       | 53405  | . |
| 234330_at | 1.57E-04 | 3.39E-05 |                             |        | . |
| 234332_at | 0.016279 | 0.009303 | NUB1                        | 51667  | . |
| 234334_s_ | 0.014351 | 0.008016 | LAMB4                       | 22798  | . |
| 234336_s_ | 0.001019 | 3.42E-04 | TTLL9                       | 164395 | . |
| 234337_at | 2.10E-06 | 1.33E-07 | TTLL9                       | 164395 | . |
| 234338_s_ | 2.73E-04 | 6.75E-05 | ZBTB47                      | 92999  | . |
| 234340_at | 2.61E-06 | 1.75E-07 |                             |        | . |
| 234341_x_ | 1.18E-06 | 6.17E-08 | LOC91548                    | 91548  | . |
| 234342_at | 5.32E-05 | 8.66E-06 |                             |        | . |
| 234345_at | 1.16E-06 | 6.05E-08 |                             |        | . |
| 234346_x_ | 9.90E-04 | 3.30E-04 |                             |        | . |
| 234347_s_ | 0.022212 | 0.013389 |                             |        | . |
| 234349_at | 0.007788 | 0.003919 | SSPO                        | 23145  | . |
| 234350_at | 7.97E-04 | 2.53E-04 | IGL@ /// IGLC128796 /// 288 |        | . |
| 234351_x_ | 0.020707 | 0.012327 | TRPS1                       | 7227   | . |
| 234353_at | 0.007615 | 0.003815 | C19orf15                    | 57828  | . |
| 234354_x_ | 9.40E-04 | 3.10E-04 | ERBB2                       | 2064   | . |
| 234355_s_ | 2.98E-04 | 7.52E-05 | PTCHD2                      | 57540  | . |
| 234356_at | 0.002003 | 7.73E-04 | DKFZP434K028                | 26070  | . |
| 234357_at | 0.016113 | 0.009192 |                             |        | . |
| 234359_at | 3.35E-04 | 8.72E-05 |                             |        | . |



|           |          |          |                               |
|-----------|----------|----------|-------------------------------|
| 234360_at | 0.002053 | 7.96E-04 | .                             |
| 234361_at | 0.010435 | 0.005514 | CREB3L3 84699 .               |
| 234365_at | 8.73E-04 | 2.84E-04 | .                             |
| 234366_x_ | 6.16E-05 | 1.04E-05 | IGL@ 3535 .                   |
| 234367_x_ | 6.45E-04 | 1.95E-04 | TMPRSS6 164656 .              |
| 234369_at | 0.002067 | 8.03E-04 | OR4F16 /// OR 26683 /// 44: . |
| 234370_at | 0.038938 | 0.025673 | VSIG1 340547 .                |
| 234371_at | 0.001213 | 4.23E-04 | .                             |
| 234372_at | 0.00118  | 4.08E-04 | .                             |
| 234373_x_ | 3.57E-04 | 9.40E-05 | IGHE 3497 .                   |
| 234375_x_ | 9.12E-05 | 1.72E-05 | .                             |
| 234376_at | 0.001984 | 7.64E-04 | MYCN 4613 .                   |
| 234377_at | 0.00783  | 0.003945 | TRBV7-8 28590 .               |
| 234378_at | 0.009021 | 0.004647 | .                             |
| 234379_at | 2.75E-04 | 6.83E-05 | FLT4 2324 .                   |
| 234380_x_ | 2.30E-06 | 1.50E-07 | LOC728649 /// 728649 /// 7: . |
| 234381_at | 0.001876 | 7.14E-04 | IGLV4-3 28786 .               |
| 234382_x_ | 1.12E-04 | 2.22E-05 | .                             |
| 234385_at | 0.048279 | 0.032951 | .                             |
| 234386_s_ | 0.0021   | 8.19E-04 | C15orf49 63969 .              |
| 234388_at | 0.009019 | 0.004645 | .                             |
| 234393_at | 0.004002 | 0.001773 | HDAC9 9734 .                  |
| 234394_at | 0.044345 | 0.029871 | ZNF124 7678 .                 |
| 234395_at | 0.008702 | 0.004456 | .                             |
| 234397_at | 0.004276 | 0.001919 | .                             |
| 234399_at | 0.030132 | 0.019078 | .                             |
| 234400_at | 6.42E-04 | 1.94E-04 | .                             |
| 234401_at | 0.001172 | 4.05E-04 | .                             |
| 234402_at | 0.002733 | 0.001123 | TRD@ 6964 .                   |
| 234403_at | 4.14E-05 | 6.27E-06 | OR111 126370 .                |
| 234406_at | 7.61E-04 | 2.39E-04 | RGMA 56963 .                  |
| 234408_at | 8.20E-05 | 1.51E-05 | IL17F 112744 .                |
| 234411_x_ | 0.013882 | 0.00771  | CD44 960 .                    |
| 234412_at | 0.007237 | 0.003594 | .                             |

|           |          |          |                            |           |   |
|-----------|----------|----------|----------------------------|-----------|---|
| 234414_at | 2.09E-04 | 4.83E-05 | FAM22F                     | 54754     | . |
| 234415_x_ | 0.020833 | 0.012419 |                            |           | . |
| 234416_at | 0.002519 | 0.00102  |                            |           | . |
| 234417_at | 0.005255 | 0.002457 |                            |           | . |
| 234419_x_ | 0.003333 | 0.001426 | IGH@ /// IGHA28396 /// 284 |           | . |
| 234421_s_ | 2.12E-04 | 4.93E-05 | EVC                        | 2121      | . |
| 234423_x_ | 5.08E-06 | 4.16E-07 |                            |           | . |
| 234424_at | 1.42E-04 | 3.00E-05 |                            |           | . |
| 234425_at | 1.24E-04 | 2.53E-05 |                            |           | . |
| 234427_at | 5.31E-04 | 1.53E-04 | TRAJ17                     | 28738     | . |
| 234429_at | 2.18E-05 | 2.80E-06 | C9orf130                   | 100128782 | . |
| 234430_at | 0.01418  | 0.007903 | ANTXR1                     | 84168     | . |
| 234432_at | 1.69E-11 | 2.63E-14 |                            |           | . |
| 234438_at | 2.60E-05 | 3.48E-06 |                            |           | . |
| 234442_at | 0.00203  | 7.86E-04 |                            |           | . |
| 234445_at | 0.001215 | 4.23E-04 | NCRNA00171                 | 80862     | . |
| 234446_at | 0.001268 | 4.46E-04 |                            |           | . |
| 234449_at | 9.77E-05 | 1.87E-05 |                            |           | . |
| 234450_at | 0.007617 | 0.003817 | PROKR2                     | 128674    | . |
| 234451_at | 0.040508 | 0.026874 |                            |           | . |
| 234453_s_ | 0.030674 | 0.019476 | C14orf166B                 | 145497    | . |
| 234454_at | 0.010727 | 0.005697 | C14orf166B                 | 145497    | . |
| 234456_at | 0.002484 | 0.001003 | TRAPPC4                    | 51399     | . |
| 234458_at | 5.65E-05 | 9.34E-06 | ANPEP                      | 290       | . |
| 234459_at | 0.00124  | 4.34E-04 | PPHLN1                     | 51535     | . |
| 234461_at | 0.005459 | 0.002571 | RNF215                     | 200312    | . |
| 234462_at | 6.53E-04 | 1.98E-04 |                            |           | . |
| 234463_at | 0.003842 | 0.001689 | LOC341912                  | 341912    | . |
| 234464_s_ | 1.18E-05 | 1.27E-06 | EME1                       | 146956    | . |
| 234465_at | 2.80E-06 | 1.93E-07 | EME1                       | 146956    | . |
| 234466_at | 8.86E-07 | 4.22E-08 |                            |           | . |
| 234468_at | 0.004423 | 0.002001 |                            |           | . |
| 234470_at | 7.28E-04 | 2.26E-04 | hCG_1651160                | 136157    | . |
| 234472_at | 0.001194 | 4.15E-04 | GALNT13                    | 114805    | . |

|           |          |          |                           |        |   |
|-----------|----------|----------|---------------------------|--------|---|
| 234478_at | 2.39E-05 | 3.13E-06 | LOC440863                 | 440863 | . |
| 234481_at | 2.06E-04 | 4.76E-05 |                           |        | . |
| 234482_at | 0.019274 | 0.011325 |                           |        | . |
| 234484_s_ | 2.70E-04 | 6.65E-05 | ACSS1                     | 84532  | . |
| 234486_at | 0.005032 | 0.002334 | OR51B2                    | 79345  | . |
| 234487_at | 0.001951 | 7.49E-04 |                           |        | . |
| 234488_s_ | 0.015244 | 0.008612 | GMCL1 /// GM64395 /// 643 |        | . |
| 234489_at | 2.88E-05 | 3.96E-06 |                           |        | . |
| 234491_s_ | 0.007146 | 0.003541 | SAV1                      | 60485  | . |
| 234492_at | 0.002074 | 8.06E-04 |                           |        | . |
| 234493_at | 0.0074   | 0.00369  | LOC116437                 | 116437 | . |
| 234494_x_ | 2.14E-04 | 4.98E-05 |                           |        | . |
| 234495_at | 1.74E-05 | 2.09E-06 | KLK15                     | 55554  | . |
| 234496_x_ | 4.91E-07 | 1.93E-08 | NYX                       | 60506  | . |
| 234497_s_ | 0.037805 | 0.024813 |                           |        | . |
| 234498_at | 3.08E-04 | 7.85E-05 | C2orf65                   | 130951 | . |
| 234499_at | 0.009546 | 0.004967 |                           |        | . |
| 234500_at | 0.006755 | 0.003311 |                           |        | . |
| 234504_at | 5.78E-04 | 1.70E-04 | SPAG4L                    | 140732 | . |
| 234505_at | 3.69E-05 | 5.41E-06 |                           |        | . |
| 234506_at | 0.005638 | 0.002671 |                           |        | . |
| 234507_at | 0.022555 | 0.013619 |                           |        | . |
| 234508_at | 0.003946 | 0.001744 |                           |        | . |
| 234511_at | 2.13E-04 | 4.95E-05 | ANKRD60                   | 140731 | . |
| 234512_x_ | 0.013842 | 0.007683 | RPL7AP36                  | 728179 | . |
| 234514_at | 0.049289 | 0.033757 | SRMS                      | 6725   | . |
| 234518_at | 0.008055 | 0.004077 |                           |        | . |
| 234519_at | 0.027265 | 0.016976 | NOBOX                     | 135935 | . |
| 234520_at | 0.004225 | 0.001893 |                           |        | . |
| 234521_at | 0.032936 | 0.021153 | OR51I2                    | 390064 | . |
| 234526_at | 0.020554 | 0.012216 | OR51B6                    | 390058 | . |
| 234530_s_ | 0.015737 | 0.008939 | NCRNA00171                | 80862  | . |
| 234531_at | 0.011919 | 0.006447 |                           |        | . |
| 234534_at | 0.021803 | 0.013099 |                           |        | . |

|           |          |          |           |        |   |
|-----------|----------|----------|-----------|--------|---|
| 234536_at | 1.84E-05 | 2.24E-06 | SARDH     | 1757   | . |
| 234537_at | 0.003502 | 0.001512 |           |        | . |
| 234539_at | 3.07E-04 | 7.84E-05 | ADARB1    | 104    | . |
| 234540_at | 7.06E-04 | 2.18E-04 | GCNT7     | 140687 | . |
| 234543_at | 0.006454 | 0.003135 |           |        | . |
| 234552_at | 2.09E-04 | 4.83E-05 |           |        | . |
| 234553_at | 0.019219 | 0.011285 |           |        | . |
| 234554_at | 0.018518 | 0.010811 | KCNK16    | 83795  | . |
| 234555_at | 4.93E-05 | 7.88E-06 |           |        | . |
| 234557_at | 0.023396 | 0.014212 |           |        | . |
| 234562_x_ | 7.69E-10 | 3.77E-12 | LOC728678 | 728678 | . |
| 234565_x_ | 1.51E-06 | 8.61E-08 |           |        | . |
| 234568_at | 3.97E-04 | 1.07E-04 | SCAMP5    | 192683 | . |
| 234570_at | 0.011593 | 0.006239 | ZNF71     | 58491  | . |
| 234571_at | 0.03668  | 0.023959 |           |        | . |
| 234572_at | 2.60E-04 | 6.35E-05 |           |        | . |
| 234573_at | 0.001555 | 5.70E-04 |           |        | . |
| 234575_at | 2.63E-05 | 3.53E-06 | ZNF71     | 58491  | . |
| 234576_at | 0.004897 | 0.00226  | ANPEP     | 290    | . |
| 234578_at | 5.24E-04 | 1.50E-04 |           |        | . |
| 234580_at | 0.001165 | 4.02E-04 | TMEM106A  | 113277 | . |
| 234584_s_ | 1.32E-05 | 1.46E-06 | ATE1      | 11101  | . |
| 234586_at | 2.84E-05 | 3.89E-06 | SARDH     | 1757   | . |
| 234589_at | 0.006576 | 0.003206 | TMEM106A  | 113277 | . |
| 234594_at | 0.001146 | 3.94E-04 | C14orf85  | 319085 | . |
| 234596_at | 0.001092 | 3.72E-04 |           |        | . |
| 234597_at | 2.36E-05 | 3.08E-06 |           |        | . |
| 234598_at | 0.005199 | 0.002427 |           |        | . |
| 234599_at | 0.025721 | 0.015871 |           |        | . |
| 234604_at | 0.014637 | 0.008206 |           |        | . |
| 234605_at | 4.11E-04 | 1.12E-04 | CDC14B    | 8555   | . |
| 234607_at | 0.016435 | 0.009406 | ARRDC1    | 92714  | . |
| 234608_at | 0.009094 | 0.004691 | LAMA3     | 3909   | . |
| 234610_at | 0.006743 | 0.003304 | HSPA12B   | 116835 | . |

|           |          |          |           |             |
|-----------|----------|----------|-----------|-------------|
| 234611_at | 0.001538 | 5.62E-04 |           | .           |
| 234614_at | 0.039551 | 0.026138 |           | .           |
| 234620_at | 0.006609 | 0.003226 | TPM3      | 7170 .      |
| 234623_x_ | 5.20E-08 | 9.55E-10 |           | .           |
| 234628_at | 0.020756 | 0.012362 |           | .           |
| 234634_at | 0.015405 | 0.008718 |           | .           |
| 234637_at | 1.26E-05 | 1.38E-06 | KRTAP4-5  | 85289 .     |
| 234638_at | 0.034956 | 0.022645 |           | .           |
| 234639_x_ | 0.007388 | 0.003683 | KRTAP9-8  | 83901 .     |
| 234640_x_ | 0.041004 | 0.027253 |           | .           |
| 234642_at | 5.93E-05 | 9.92E-06 |           | .           |
| 234643_x_ | 0.008489 | 0.004331 |           | .           |
| 234644_x_ | 0.011305 | 0.00606  | TNFRSF10C | 8794 .      |
| 234649_at | 7.34E-09 | 6.98E-11 |           | .           |
| 234650_at | 3.95E-05 | 5.90E-06 |           | .           |
| 234651_at | 7.47E-04 | 2.34E-04 |           | .           |
| 234654_at | 7.42E-07 | 3.33E-08 |           | .           |
| 234664_at | 0.001428 | 5.15E-04 | LOC284701 | 284701 .    |
| 234665_x_ | 4.08E-08 | 6.79E-10 | HHLA3     | 11147 .     |
| 234666_at | 0.005072 | 0.002359 |           | .           |
| 234668_at | 1.90E-05 | 2.34E-06 |           | .           |
| 234669_x_ | 7.83E-04 | 2.48E-04 | C11orf30  | 56946 .     |
| 234670_at | 0.001494 | 5.43E-04 |           | .           |
| 234671_at | 0.014878 | 0.00837  | KRTAP4-2  | 85291 .     |
| 234672_s_ | 3.68E-08 | 5.95E-10 | TMEM48    | 55706 .     |
| 234674_at | 2.80E-04 | 6.98E-05 |           | .           |
| 234675_x_ | 0.009398 | 0.004878 |           | .           |
| 234676_s_ | 0.002306 | 9.17E-04 | N6AMT1    | 29104 .     |
| 234677_at | 7.11E-04 | 2.20E-04 |           | .           |
| 234678_at | 0.049532 | 0.033949 | KRTAP4-3  | 85290 .     |
| 234679_at | 0.008477 | 0.004323 | KRTAP9-3  | 83900 .     |
| 234681_s_ | 0.017103 | 0.009847 | CHD6      | 84181 .     |
| 234682_at | 0.032188 | 0.020594 | BTBD9     | 114781 .    |
| 234685_x_ | 0.028998 | 0.018243 | KRTAP4-9  | 100132386 . |

|           |          |          |                            |          |
|-----------|----------|----------|----------------------------|----------|
| 234686_at | 9.17E-05 | 1.73E-05 | SUGT1 /// SUG10910 /// 44: | .        |
| 234687_x_ | 0.016503 | 0.009451 | LIMD1                      | 8994 .   |
| 234688_x_ | 0.044236 | 0.029784 | CNTROB                     | 116840 . |
| 234689_at | 0.022973 | 0.013912 | C6orf138                   | 442213 . |
| 234691_at | 0.002943 | 0.001225 | KRTAP2-1                   | 81872 .  |
| 234693_at | 2.67E-05 | 3.60E-06 |                            | .        |
| 234694_at | 1.38E-04 | 2.90E-05 | CNTROB                     | 116840 . |
| 234695_x_ | 0.002997 | 0.001253 | FAM22B                     | 729262 . |
| 234696_at | 0.017465 | 0.010091 | LOC138652                  | 138652 . |
| 234697_x_ | 0.001718 | 6.42E-04 | C3orf31                    | 132001 . |
| 234698_at | 0.002212 | 8.72E-04 | N6AMT1                     | 29104 .  |
| 234701_at | 7.38E-07 | 3.31E-08 | ANKRD11                    | 29123 .  |
| 234704_at | 0.04397  | 0.029577 |                            | .        |
| 234705_at | 6.36E-05 | 1.08E-05 |                            | .        |
| 234707_x_ | 2.98E-04 | 7.54E-05 | IGLV1-44                   | 28823 .  |
| 234711_s_ | 0.039215 | 0.025879 | BCORL1                     | 63035 .  |
| 234712_at | 0.047355 | 0.032237 | C18orf2                    | 56651 .  |
| 234713_x_ | 6.10E-05 | 1.03E-05 |                            | .        |
| 234714_x_ | 0.028067 | 0.017561 | ATP2B2                     | 491 .    |
| 234715_at | 4.52E-04 | 1.26E-04 | GOLGA2LY1 //,401634 /// 8: | .        |
| 234716_at | 5.42E-04 | 1.57E-04 | LOC100132739 100132739 //. | .        |
| 234718_at | 0.003265 | 0.00139  | ANO2                       | 57101 .  |
| 234720_s_ | 2.84E-05 | 3.88E-06 | TOB2                       | 10766 .  |
| 234721_s_ | 3.35E-04 | 8.72E-05 | CYP26B1                    | 56603 .  |
| 234723_x_ | 1.77E-08 | 2.26E-10 |                            | .        |
| 234724_x_ | 1.99E-07 | 5.71E-09 | PCDHB18                    | 54660 .  |
| 234726_s_ | 0.001102 | 3.76E-04 | TMEM168                    | 64418 .  |
| 234727_at | 0.00498  | 0.002304 | DNAH7                      | 56171 .  |
| 234728_s_ | 0.006976 | 0.003443 | DHX35                      | 60625 .  |
| 234730_s_ | 3.02E-05 | 4.21E-06 | RIPK4                      | 54101 .  |
| 234731_at | 1.96E-06 | 1.22E-07 |                            | .        |
| 234733_s_ | 4.95E-06 | 4.01E-07 | FANCM                      | 57697 .  |
| 234734_s_ | 0.012747 | 0.006983 | TNRC6A                     | 27327 .  |
| 234736_at | 2.93E-04 | 7.36E-05 | JPH3                       | 57338 .  |

|           |          |          |                             |           |   |
|-----------|----------|----------|-----------------------------|-----------|---|
| 234738_s_ | 0.003447 | 0.001484 | LOC100129637                | 100129637 | . |
| 234740_at | 2.50E-04 | 6.06E-05 | CDC14B                      | 8555      | . |
| 234741_at | 0.004238 | 0.0019   | ATP2B2                      | 491       | . |
| 234743_at | 0.01847  | 0.010778 | LOC100130135                | 100130135 | . |
| 234744_x_ | 0.028642 | 0.017978 |                             |           | . |
| 234745_at | 3.78E-04 | 1.01E-04 |                             |           | . |
| 234746_at | 0.005722 | 0.002717 |                             |           | . |
| 234748_x_ | 0.01634  | 0.009342 |                             |           | . |
| 234749_s_ | 0.001069 | 3.62E-04 | WDR51A                      | 25886     | . |
| 234750_at | 5.11E-04 | 1.46E-04 | CACNG8                      | 59283     | . |
| 234751_s_ | 0.001085 | 3.69E-04 | NLGN3                       | 54413     | . |
| 234753_x_ | 8.01E-04 | 2.55E-04 |                             |           | . |
| 234754_at | 0.035128 | 0.022779 | SLC37A1                     | 54020     | . |
| 234756_at | 1.03E-04 | 2.01E-05 | CACNG8                      | 59283     | . |
| 234757_at | 0.002221 | 8.76E-04 | LOC100129884                | 100129884 | . |
| 234758_at | 0.004433 | 0.002007 |                             |           | . |
| 234761_at | 0.031532 | 0.020098 |                             |           | . |
| 234762_x_ | 7.72E-08 | 1.62E-09 | NLN                         | 57486     | . |
| 234764_x_ | 5.96E-04 | 1.77E-04 | IGL@ /// IGLV128823 /// 288 |           | . |
| 234766_at | 0.001335 | 4.74E-04 | OR8D2                       | 283160    | . |
| 234767_at | 0.00426  | 0.00191  | FAR1                        | 84188     | . |
| 234769_at | 4.12E-05 | 6.24E-06 | DKFZp547J222                | 84237     | . |
| 234770_at | 0.039567 | 0.026151 |                             |           | . |
| 234771_at | 0.003299 | 0.001408 | DKFZp547J222                | 84237     | . |
| 234772_s_ | 1.73E-04 | 3.83E-05 | KAP2.1B /// KR728279 /// 85 |           | . |
| 234773_x_ | 4.41E-04 | 1.22E-04 |                             |           | . |
| 234774_at | 0.002986 | 0.001247 | R3HDML                      | 140902    | . |
| 234775_at | 0.006594 | 0.003217 | OR51B5                      | 282763    | . |
| 234777_at | 3.27E-04 | 8.45E-05 | OR51M1                      | 390059    | . |
| 234781_at | 4.39E-04 | 1.21E-04 |                             |           | . |
| 234782_at | 4.68E-05 | 7.37E-06 | KLHL31                      | 401265    | . |
| 234783_at | 3.19E-06 | 2.28E-07 |                             |           | . |
| 234784_at | 1.12E-06 | 5.73E-08 |                             |           | . |
| 234788_x_ | 4.92E-08 | 8.82E-10 |                             |           | . |

|           |          |          |                             |          |
|-----------|----------|----------|-----------------------------|----------|
| 234790_at | 7.26E-04 | 2.26E-04 |                             | .        |
| 234791_at | 0.001736 | 6.50E-04 | GSX1                        | 219409 . |
| 234792_x_ | 5.00E-04 | 1.42E-04 | IGHA1 /// IGH\100131845 //. |          |
| 234795_at | 6.28E-04 | 1.88E-04 |                             | .        |
| 234796_at | 0.00605  | 0.002906 | CABP7                       | 164633 . |
| 234797_at | 1.67E-04 | 3.66E-05 |                             | .        |
| 234798_x_ | 0.022557 | 0.013621 |                             | .        |
| 234799_at | 2.80E-04 | 6.98E-05 | ADARB1                      | 104 .    |
| 234800_at | 0.032318 | 0.020691 |                             | .        |
| 234801_s_ | 9.24E-04 | 3.03E-04 | ACSS1                       | 84532 .  |
| 234802_at | 8.98E-04 | 2.93E-04 |                             | .        |
| 234803_at | 0.038442 | 0.025295 | CSTL1                       | 128817 . |
| 234807_x_ | 0.011541 | 0.006206 |                             | .        |
| 234809_at | 0.006894 | 0.003394 | ZC4H2                       | 55906 .  |
| 234810_at | 6.03E-04 | 1.79E-04 | ZFP1                        | 162239 . |
| 234813_at | 4.30E-04 | 1.18E-04 | TMEM108                     | 66000 .  |
| 234814_at | 0.00164  | 6.07E-04 |                             | .        |
| 234816_at | 0.005493 | 0.00259  | C14orf48                    | 256369 . |
| 234819_at | 0.002817 | 0.001165 |                             | .        |
| 234820_at | 0.029651 | 0.01872  | MAS1L                       | 116511 . |
| 234822_at | 0.044188 | 0.029748 |                             | .        |
| 234828_at | 0.004729 | 0.002168 |                             | .        |
| 234829_at | 9.40E-04 | 3.10E-04 | C20orf57                    | 83747 .  |
| 234832_at | 0.001093 | 3.72E-04 | ANTXR1                      | 84168 .  |
| 234834_at | 0.001227 | 4.29E-04 |                             | .        |
| 234835_at | 0.04103  | 0.027275 |                             | .        |
| 234840_s_ | 0.01362  | 0.007541 | OR5V1                       | 81696 .  |
| 234841_x_ | 0.006295 | 0.003044 | OBP2A                       | 29991 .  |
| 234842_at | 0.018907 | 0.011076 |                             | .        |
| 234843_s_ | 0.002684 | 0.001099 | KREMEN1                     | 83999 .  |
| 234845_at | 1.24E-04 | 2.52E-05 | DKFZp761P021                | 284187 . |
| 234846_at | 3.17E-05 | 4.48E-06 | DKFZp761P021                | 284187 . |
| 234855_at | 0.001007 | 3.37E-04 | ORF1                        | 55354 .  |
| 234856_at | 0.015621 | 0.008864 |                             | .        |



|           |          |          |                      |
|-----------|----------|----------|----------------------|
| 234857_at | 3.77E-05 | 5.55E-06 | .                    |
| 234858_at | 2.15E-04 | 5.00E-05 | .                    |
| 234862_at | 0.002892 | 0.0012   | .                    |
| 234863_x_ | 2.76E-04 | 6.85E-05 | FBXO5 26271 .        |
| 234864_s_ | 3.53E-04 | 9.27E-05 | TRPM6 140803 .       |
| 234868_s_ | 7.69E-04 | 2.42E-04 | GFRA4 64096 .        |
| 234870_at | 0.004802 | 0.002209 | TANC1 85461 .        |
| 234874_at | 0.032511 | 0.020826 | ATE1 11101 .         |
| 234876_at | 0.022065 | 0.013285 | COX6A1 1337 .        |
| 234877_x_ | 0.001513 | 5.52E-04 | .                    |
| 234879_at | 0.001717 | 6.41E-04 | .                    |
| 234880_x_ | 6.73E-04 | 2.06E-04 | KRTAP1-3 81850 .     |
| 234881_at | 5.86E-07 | 2.43E-08 | .                    |
| 234882_at | 1.33E-07 | 3.35E-09 | .                    |
| 234884_x_ | 0.001562 | 5.73E-04 | IGL@ 3535 .          |
| 234885_at | 0.020881 | 0.012456 | .                    |
| 234886_at | 2.13E-04 | 4.95E-05 | TRBV24-1 28563 .     |
| 234887_at | 0.004075 | 0.001812 | .                    |
| 234888_at | 1.67E-05 | 1.98E-06 | CACHD1 57685 .       |
| 234890_at | 0.014548 | 0.008147 | .                    |
| 234891_at | 0.004587 | 0.002091 | .                    |
| 234893_s_ | 0.034047 | 0.021974 | DNAH6 1768 .         |
| 234894_at | 0.013314 | 0.007345 | ITIH5L 347365 .      |
| 234895_at | 0.006095 | 0.002931 | CTLA4 1493 .         |
| 234896_at | 2.52E-04 | 6.14E-05 | .                    |
| 234897_s_ | 9.87E-04 | 3.28E-04 | LY6G6F 259215 .      |
| 234898_at | 0.004093 | 0.001821 | .                    |
| 234899_at | 5.00E-05 | 8.00E-06 | H2BFM 286436 .       |
| 234900_at | 0.009556 | 0.004973 | .                    |
| 234905_at | 0.011916 | 0.006444 | DKFZP434H168 26077 . |
| 234907_x_ | 8.44E-04 | 2.72E-04 | .                    |
| 234908_s_ | 0.003946 | 0.001744 | DSCAML1 57453 .      |
| 234909_at | 5.43E-04 | 1.57E-04 | .                    |
| 234910_at | 2.83E-04 | 7.06E-05 | RASAL2 9462 .        |

|           |          |          |                             |          |
|-----------|----------|----------|-----------------------------|----------|
| 234911_at | 1.87E-06 | 1.14E-07 |                             | .        |
| 234912_at | 0.019678 | 0.011601 | DKFZP547L112                | 81787 .  |
| 234914_at | 0.049558 | 0.033976 | ZNF7                        | 7553 .   |
| 234915_s_ | 0.005283 | 0.002472 | DENR                        | 8562 .   |
| 234916_at | 5.70E-04 | 1.67E-04 | DBH                         | 1621 .   |
| 234917_at | 0.008775 | 0.004499 | MARVELD1                    | 83742 .  |
| 234918_at | 2.23E-05 | 2.87E-06 | GLTSCR2                     | 29997 .  |
| 234919_s_ | 0.004187 | 0.001872 | SNTG1                       | 54212 .  |
| 234920_at | 1.22E-05 | 1.31E-06 | ZNF7                        | 7553 .   |
| 234922_s_ | 1.81E-06 | 1.10E-07 | NHSL1                       | 57224 .  |
| 234923_at | 0.006476 | 0.003149 | GARNL1                      | 253959 . |
| 234925_at | 1.43E-04 | 3.02E-05 | LOC732275                   | 732275 . |
| 234926_s_ | 3.66E-07 | 1.32E-08 | C20orf43                    | 51507 .  |
| 234928_x_ | 0.001057 | 3.57E-04 | RUNX3                       | 864 .    |
| 234929_s_ | 0.002139 | 8.37E-04 | SPATA7                      | 55812 .  |
| 234930_at | 0.001256 | 4.41E-04 |                             | .        |
| 234931_at | 3.34E-05 | 4.78E-06 |                             | .        |
| 234934_at | 0.019829 | 0.011706 |                             | .        |
| 234935_at | 9.95E-06 | 1.01E-06 | NDOR1                       | 27158 .  |
| 234936_s_ | 0.036241 | 0.023626 | CC2D2A                      | 57545 .  |
| 234937_x_ | 4.66E-04 | 1.30E-04 | ZFP28                       | 140612 . |
| 234938_at | 5.20E-04 | 1.49E-04 | BACH1                       | 571 .    |
| 234939_s_ | 0.009692 | 0.005059 | PHF12                       | 57649 .  |
| 234940_s_ | 9.47E-04 | 3.13E-04 | VEPH1                       | 79674 .  |
| 234941_s_ | 0.031749 | 0.020255 | GPHN                        | 10243 .  |
| 234942_s_ | 0.008863 | 0.004553 | DNTTIP1                     | 116092 . |
| 234943_at | 2.05E-04 | 4.73E-05 | CSNK1E /// LOC1454 /// 3875 | .        |
| 234944_s_ | 2.07E-05 | 2.60E-06 | FAM54A                      | 113115 . |
| 234945_at | 0.014294 | 0.007977 | FAM54A                      | 113115 . |
| 234946_at | 6.55E-04 | 1.99E-04 | ENTPD6                      | 955 .    |
| 234947_s_ | 1.39E-05 | 1.57E-06 | C10orf84                    | 63877 .  |
| 234948_at | 0.001456 | 5.26E-04 | SLC27A5                     | 10998 .  |
| 234949_at | 0.026676 | 0.016552 | LOC283788                   | 283788 . |
| 234951_s_ | 1.76E-05 | 2.11E-06 | COL12A1                     | 1303 .   |

|           |          |          |          |          |
|-----------|----------|----------|----------|----------|
| 234952_s_ | 7.67E-05 | 1.38E-05 | PHRF1    | 57661 .  |
| 234953_x_ | 1.27E-04 | 2.59E-05 | ZNF19    | 7567 .   |
| 234954_at | 0.012625 | 0.006903 |          | .        |
| 234955_at | 3.35E-05 | 4.79E-06 | AZGP1P1  | 646282 . |
| 234956_at | 1.74E-05 | 2.09E-06 | LOC93444 | 93444 .  |
| 234958_at | 0.001539 | 5.63E-04 |          | .        |
| 234960_at | 0.015572 | 0.008832 | HIST1H4B | 8366 .   |
| 234962_at | 0.014932 | 0.008405 |          | .        |
| 234965_at | 0.001575 | 5.79E-04 |          | .        |
| 234966_at | 8.66E-05 | 1.61E-05 | KLK15    | 55554 .  |
| 234968_at | 0.010552 | 0.005586 | DENND4C  | 55667 .  |
| 234970_at | 4.23E-06 | 3.30E-07 | TC2N     | 123036 . |
| 234971_x_ | 7.59E-04 | 2.38E-04 | PLCD3    | 113026 . |
| 234975_at | 0.022419 | 0.013527 | GSPT1    | 2935 .   |
| 234977_at | 1.42E-08 | 1.64E-10 | ZADH2    | 284273 . |
| 234979_at | 2.25E-08 | 3.06E-10 | BCDIN3D  | 144233 . |
| 234981_x_ | 1.89E-07 | 5.34E-09 | CMBL     | 134147 . |
| 234982_at | 0.013392 | 0.007394 | UBR3     | 130507 . |
| 234983_at | 6.41E-04 | 1.94E-04 |          | .        |
| 234984_at | 0.046677 | 0.031697 | NEDD1    | 121441 . |
| 234985_at | 3.59E-06 | 2.65E-07 | LDLRAD3  | 143458 . |
| 234986_at | 2.17E-04 | 5.06E-05 |          | .        |
| 234987_at | 0.013364 | 0.007376 |          | .        |
| 234991_at | 5.31E-06 | 4.40E-07 | ZXDC     | 79364 .  |
| 234992_x_ | 0.004657 | 0.00213  | ECT2     | 1894 .   |
| 234993_at | 0.014535 | 0.008136 | ABHD13   | 84945 .  |
| 234994_at | 2.26E-07 | 6.87E-09 | TMEM200A | 114801 . |
| 234995_at | 5.53E-04 | 1.61E-04 | CCDC52   | 152185 . |
| 234997_x_ | 1.71E-04 | 3.78E-05 |          | .        |
| 234999_at | 0.00201  | 7.77E-04 | C19orf47 | 126526 . |
| 235000_at | 1.16E-06 | 6.03E-08 |          | .        |
| 235002_at | 5.77E-04 | 1.70E-04 | NUDT16   | 131870 . |
| 235003_at | 0.004414 | 0.001996 | UHMK1    | 127933 . |
| 235004_at | 0.03198  | 0.020436 | RBM24    | 221662 . |

|           |          |          |            |          |
|-----------|----------|----------|------------|----------|
| 235006_at | 5.74E-04 | 1.69E-04 | CDKN2AIPNL | 91368 .  |
| 235007_at | 0.032815 | 0.021058 | BBS7       | 55212 .  |
| 235008_at | 8.19E-04 | 2.62E-04 |            | .        |
| 235009_at | 0.034983 | 0.022665 | BOD1L      | 259282 . |
| 235010_at | 1.39E-06 | 7.72E-08 | LOC729013  | 729013 . |
| 235011_at | 0.010765 | 0.005721 | MAP3K2     | 10746 .  |
| 235012_at | 0.031762 | 0.020265 | LRCH1      | 23143 .  |
| 235014_at | 3.38E-07 | 1.19E-08 | LOC147727  | 147727 . |
| 235015_at | 0.003726 | 0.001629 |            | .        |
| 235016_at | 2.32E-10 | 7.95E-13 | REEP3      | 221035 . |
| 235020_at | 3.44E-07 | 1.22E-08 | TAF4B      | 6875 .   |
| 235022_at | 0.008722 | 0.004468 | C18orf19   | 125228 . |
| 235023_at | 5.72E-06 | 4.87E-07 | VPS13C     | 54832 .  |
| 235024_at | 2.74E-05 | 3.72E-06 | PHF17      | 79960 .  |
| 235025_at | 5.36E-04 | 1.55E-04 | WDR89      | 112840 . |
| 235028_at | 0.001452 | 5.25E-04 |            | .        |
| 235029_at | 5.04E-04 | 1.44E-04 | GIN54      | 84296 .  |
| 235030_at | 9.16E-04 | 3.00E-04 | FAM55C     | 91775 .  |
| 235031_at | 1.22E-04 | 2.46E-05 |            | .        |
| 235034_at | 0.038856 | 0.02561  | VTI1A      | 143187 . |
| 235035_at | 0.006523 | 0.003176 | SLC35E1    | 79939 .  |
| 235036_at | 2.04E-04 | 4.69E-05 | LIX1L      | 128077 . |
| 235039_x_ | 1.49E-06 | 8.50E-08 | LIN9       | 286826 . |
| 235041_at | 0.015086 | 0.008506 | GOSR2      | 9570 .   |
| 235042_at | 0.005427 | 0.002553 | XIRP1      | 165904 . |
| 235043_at | 1.31E-04 | 2.69E-05 | FAM122A    | 116224 . |
| 235044_at | 0.001984 | 7.64E-04 | CYYR1      | 116159 . |
| 235046_at | 1.97E-04 | 4.50E-05 |            | .        |
| 235047_x_ | 6.61E-05 | 1.14E-05 | NACC1      | 112939 . |
| 235048_at | 8.27E-12 | 9.78E-15 | FAM169A    | 26049 .  |
| 235050_at | 7.99E-04 | 2.54E-04 | SLC2A12    | 154091 . |
| 235051_at | 0.005526 | 0.00261  | CCDC50     | 152137 . |
| 235052_at | 0.003646 | 0.001588 | ZNF792     | 126375 . |
| 235053_at | 1.96E-04 | 4.46E-05 |            | .        |

|           |          |          |              |           |   |
|-----------|----------|----------|--------------|-----------|---|
| 235055_x_ | 1.73E-05 | 2.08E-06 | MUC4         | 4585      | . |
| 235056_at | 4.37E-04 | 1.20E-04 | ETV6         | 2120      | . |
| 235057_at | 0.003582 | 0.001554 | ITCH         | 83737     | . |
| 235058_at | 3.43E-04 | 8.95E-05 |              |           | . |
| 235059_at | 1.23E-09 | 6.87E-12 | RAB12        | 201475    | . |
| 235060_at | 0.001933 | 7.41E-04 | LOC100190986 | 100190986 | . |
| 235062_at | 0.029975 | 0.018964 | PIH1D2       | 120379    | . |
| 235068_at | 0.024636 | 0.015091 | ZDHHC21      | 340481    | . |
| 235070_at | 2.05E-04 | 4.71E-05 | A2BP1        | 54715     | . |
| 235072_s_ | 1.91E-05 | 2.35E-06 |              |           | . |
| 235073_at | 0.006376 | 0.003091 | SCAMP4       | 113178    | . |
| 235074_at | 0.010186 | 0.005359 | SPRED1       | 161742    | . |
| 235076_at | 1.79E-04 | 4.01E-05 | CALCOCO2     | 10241     | . |
| 235077_at | 0.037168 | 0.024338 | MEG3         | 55384     | . |
| 235078_at | 1.27E-04 | 2.61E-05 |              |           | . |
| 235079_at | 0.035365 | 0.022955 |              |           | . |
| 235082_at | 0.001998 | 7.71E-04 | PCNX         | 22990     | . |
| 235084_x_ | 1.46E-04 | 3.10E-05 |              |           | . |
| 235085_at | 6.50E-06 | 5.72E-07 | PRAGMIN      | 157285    | . |
| 235086_at | 2.80E-08 | 4.21E-10 | THBS1        | 7057      | . |
| 235087_at | 1.35E-04 | 2.80E-05 | UNKL         | 64718     | . |
| 235088_at | 0.021865 | 0.013146 | C4orf46      | 201725    | . |
| 235091_at | 0.003876 | 0.001707 | PDE12        | 201626    | . |
| 235092_at | 0.007518 | 0.00376  |              |           | . |
| 235094_at | 0.031782 | 0.020282 |              |           | . |
| 235095_at | 0.006687 | 0.003272 | CCDC64B      | 146439    | . |
| 235096_at | 0.002803 | 0.001157 | LEO1         | 123169    | . |
| 235099_at | 4.27E-05 | 6.56E-06 | CMTM8        | 152189    | . |
| 235100_at | 9.71E-04 | 3.22E-04 |              |           | . |
| 235101_at | 0.002253 | 8.92E-04 | FNBP4        | 23360     | . |
| 235102_x_ | 0.001532 | 5.60E-04 |              |           | . |
| 235103_at | 1.56E-05 | 1.82E-06 | MAN2A1       | 4124      | . |
| 235105_at | 0.046079 | 0.031225 |              |           | . |
| 235106_at | 2.96E-08 | 4.51E-10 | MAML2        | 84441     | . |

|           |          |          |                    |
|-----------|----------|----------|--------------------|
| 235107_at | 1.37E-05 | 1.53E-06 | .                  |
| 235108_at | 0.038935 | 0.02567  | .                  |
| 235109_at | 0.00892  | 0.004588 | .                  |
| 235112_at | 4.95E-08 | 8.91E-10 | .                  |
| 235113_at | 0.002711 | 0.001112 | PPIL5 122769 .     |
| 235114_x_ | 1.22E-04 | 2.48E-05 | HOOK3 84376 .      |
| 235116_at | 0.009839 | 0.005148 | TRAF1 7185 .       |
| 235117_at | 0.005954 | 0.002852 | CHAC2 494143 .     |
| 235119_at | 4.39E-04 | 1.21E-04 | TAF3 83860 .       |
| 235120_at | 4.43E-04 | 1.23E-04 | SEC22C 9117 .      |
| 235121_at | 0.007946 | 0.004013 | ZNF542 147947 .    |
| 235122_at | 5.27E-04 | 1.52E-04 | HIVEP3 59269 .     |
| 235123_at | 5.52E-05 | 9.06E-06 | .                  |
| 235124_at | 0.016781 | 0.009636 | LOC645212 645212 . |
| 235125_x_ | 0.015774 | 0.008964 | FAM73A 374986 .    |
| 235126_at | 3.55E-04 | 9.35E-05 | LQK1 642946 .      |
| 235128_at | 3.57E-05 | 5.18E-06 | SYNPO 11346 .      |
| 235130_at | 0.018669 | 0.010913 | PANK2 80025 .      |
| 235131_at | 7.70E-07 | 3.49E-08 | RHOJ 57381 .       |
| 235132_at | 8.75E-06 | 8.49E-07 | LOC254128 254128 . |
| 235133_at | 2.97E-04 | 7.50E-05 | .                  |
| 235134_at | 0.01223  | 0.006647 | .                  |
| 235136_at | 1.57E-04 | 3.38E-05 | ORMDL3 94103 .     |
| 235138_at | 6.14E-04 | 1.83E-04 | .                  |
| 235140_at | 1.65E-05 | 1.95E-06 | SHROOM1 134549 .   |
| 235141_at | 9.20E-06 | 9.12E-07 | MARVELD2 153562 .  |
| 235145_at | 2.88E-05 | 3.96E-06 | ZBTB7B 51043 .     |
| 235146_at | 0.034541 | 0.022337 | TMCC3 57458 .      |
| 235147_at | 0.0038   | 0.001668 | FLJ32063 150538 .  |
| 235148_at | 3.41E-09 | 2.54E-11 | KRTCAP3 200634 .   |
| 235150_at | 4.72E-04 | 1.32E-04 | .                  |
| 235151_at | 0.00843  | 0.004297 | LOC283357 283357 . |
| 235152_at | 1.47E-04 | 3.13E-05 | .                  |
| 235153_at | 0.002603 | 0.00106  | RNF183 138065 .    |

|           |          |          |              |           |   |
|-----------|----------|----------|--------------|-----------|---|
| 235154_at | 6.16E-04 | 1.84E-04 | TAF3         | 83860     | . |
| 235155_at | 0.004868 | 0.002244 | BDH2         | 56898     | . |
| 235156_at | 0.007378 | 0.003678 |              |           | . |
| 235157_at | 3.40E-04 | 8.89E-05 |              |           | . |
| 235158_at | 3.03E-04 | 7.69E-05 | TMEM209      | 84928     | . |
| 235159_at | 0.004404 | 0.00199  |              |           | . |
| 235160_at | 3.18E-06 | 2.28E-07 | ATF7         | 11016     | . |
| 235161_at | 0.020063 | 0.01187  |              |           | . |
| 235163_at | 2.40E-06 | 1.57E-07 | MOBKL2A      | 126308    | . |
| 235164_at | 2.34E-06 | 1.53E-07 | ZNF25        | 219749    | . |
| 235165_at | 2.78E-09 | 1.97E-11 | PARD6B       | 84612     | . |
| 235166_at | 0.00267  | 0.001092 | ZNF148       | 7707      | . |
| 235168_at | 1.96E-06 | 1.21E-07 | PIGM         | 93183     | . |
| 235169_at | 8.46E-06 | 8.12E-07 | FBXO27       | 126433    | . |
| 235170_at | 1.35E-06 | 7.42E-08 | ZNF92        | 168374    | . |
| 235171_at | 0.006088 | 0.002927 |              |           | . |
| 235172_at | 2.01E-05 | 2.50E-06 |              |           | . |
| 235173_at | 2.17E-08 | 2.92E-10 | hCG_1806964  | 401093    | . |
| 235174_s_ | 0.025821 | 0.01594  | LOC100128822 | 100128822 | . |
| 235175_at | 0.01726  | 0.009953 | GBP4         | 115361    | . |
| 235177_at | 1.30E-07 | 3.25E-09 | FAM119A      | 151194    | . |
| 235178_x_ | 0.00151  | 5.50E-04 | ESCO2        | 157570    | . |
| 235181_at | 0.046843 | 0.031834 | C2orf60      | 129450    | . |
| 235184_at | 0.025734 | 0.01588  | AEBP2        | 121536    | . |
| 235186_at | 4.56E-07 | 1.76E-08 | LOC388692    | 388692    | . |
| 235188_at | 0.005835 | 0.002784 |              |           | . |
| 235190_at | 6.99E-04 | 2.15E-04 |              |           | . |
| 235192_at | 5.69E-04 | 1.67E-04 | TP53RK       | 112858    | . |
| 235193_at | 4.94E-04 | 1.40E-04 |              |           | . |
| 235195_at | 2.96E-04 | 7.46E-05 | FBXW2        | 26190     | . |
| 235197_s_ | 0.005791 | 0.002758 | OSTM1        | 28962     | . |
| 235198_at | 0.004632 | 0.002115 | OSTM1        | 28962     | . |
| 235199_at | 5.92E-06 | 5.09E-07 | RNF125       | 54941     | . |
| 235200_at | 0.002086 | 8.12E-04 | ZNF561       | 93134     | . |

|           |          |          |              |           |     |
|-----------|----------|----------|--------------|-----------|-----|
| 235202_x_ | 5.09E-05 | 8.19E-06 | IKIP         | 121457    | .   |
| 235203_at | 6.36E-05 | 1.08E-05 |              |           | .   |
| 235205_at | 0.001244 | 4.36E-04 | LOC100128259 | 100128259 | //. |
| 235206_at | 0.042804 | 0.028648 | SCAND1       | 51282     | .   |
| 235207_at | 4.03E-06 | 3.09E-07 |              |           | .   |
| 235208_at | 0.0074   | 0.00369  | CCDC112      | 153733    | .   |
| 235209_at | 0.007939 | 0.004008 | C8orf84      | 157869    | .   |
| 235210_s_ | 0.028816 | 0.018114 | C8orf84      | 157869    | .   |
| 235212_at | 0.001414 | 5.08E-04 | C14orf102    | 55051     | .   |
| 235213_at | 0.001992 | 7.68E-04 |              |           | .   |
| 235215_at | 7.05E-05 | 1.24E-05 | ERCC4        | 2072      | .   |
| 235216_at | 0.001185 | 4.11E-04 | ESCO1        | 114799    | .   |
| 235217_at | 0.011645 | 0.006271 | LOC100216546 | 100216546 | .   |
| 235218_x_ | 0.00165  | 6.12E-04 | THAP6        | 152815    | .   |
| 235219_at | 8.44E-04 | 2.72E-04 | C5orf55      | 116349    | .   |
| 235220_at | 3.26E-04 | 8.44E-05 |              |           | .   |
| 235221_at | 2.60E-08 | 3.77E-10 | CBLN3        | 643866    | .   |
| 235223_at | 8.68E-04 | 2.81E-04 | C6orf153     | 88745     | .   |
| 235224_s_ | 1.60E-05 | 1.88E-06 |              |           | .   |
| 235226_at | 1.82E-04 | 4.08E-05 | CDC2L6       | 23097     | .   |
| 235227_at | 4.25E-05 | 6.51E-06 |              |           | .   |
| 235230_at | 2.81E-05 | 3.82E-06 | PLCXD2       | 257068    | .   |
| 235231_at | 9.34E-05 | 1.77E-05 | ZNF789       | 285989    | .   |
| 235233_s_ | 0.00776  | 0.003902 | GMEB1        | 10691     | .   |
| 235234_at | 0.001996 | 7.70E-04 | PATL1        | 219988    | .   |
| 235235_s_ | 0.009763 | 0.005104 | PATL1        | 219988    | .   |
| 235236_at | 1.80E-04 | 4.03E-05 | LOC100131897 | 100131897 | .   |
| 235239_at | 0.010015 | 0.005256 | QSOX2        | 169714    | .   |
| 235242_at | 1.90E-06 | 1.17E-07 |              |           | .   |
| 235243_at | 0.001958 | 7.52E-04 | CLIP3        | 25999     | .   |
| 235244_at | 0.001981 | 7.63E-04 | CCDC58       | 131076    | .   |
| 235245_at | 2.04E-06 | 1.28E-07 | TMEM92       | 162461    | .   |
| 235246_at | 2.77E-06 | 1.89E-07 |              |           | .   |
| 235247_at | 0.010555 | 0.005588 |              |           | .   |



|           |          |          |                           |          |
|-----------|----------|----------|---------------------------|----------|
| 235249_at | 2.12E-06 | 1.35E-07 | RDH13                     | 112724 . |
| 235252_at | 0.00308  | 0.001296 | KSR1                      | 8844 .   |
| 235254_at | 0.035769 | 0.023269 | MAP3K2                    | 10746 .  |
| 235255_at | 0.047658 | 0.032469 | ATP6VOA2                  | 23545 .  |
| 235257_at | 3.53E-04 | 9.26E-05 | ODF3B                     | 440836 . |
| 235258_at | 2.47E-08 | 3.51E-10 | DCP2                      | 167227 . |
| 235259_at | 4.59E-06 | 3.65E-07 | PACRGL                    | 133015 . |
| 235260_s_ | 0.022647 | 0.013684 | PACRGL                    | 133015 . |
| 235263_at | 0.007417 | 0.003701 | LOC100134711100134711 //. |          |
| 235264_at | 2.10E-05 | 2.65E-06 | HCFC2                     | 29915 .  |
| 235265_at | 0.00892  | 0.004588 | UBR3                      | 130507 . |
| 235266_at | 3.01E-08 | 4.61E-10 | ATAD2                     | 29028 .  |
| 235267_at | 1.99E-06 | 1.25E-07 |                           | .        |
| 235268_at | 6.00E-06 | 5.19E-07 |                           | .        |
| 235269_at | 6.69E-07 | 2.90E-08 | FAM83F                    | 113828 . |
| 235271_s_ | 0.004126 | 0.001839 | ZNF397                    | 84307 .  |
| 235274_at | 8.78E-05 | 1.64E-05 |                           | .        |
| 235275_at | 0.002447 | 9.85E-04 | BMP8B                     | 656 .    |
| 235276_at | 0.028493 | 0.017864 | EPSTI1                    | 94240 .  |
| 235277_at | 0.00346  | 0.00149  | AMOTL1                    | 154810 . |
| 235279_at | 2.78E-05 | 3.79E-06 |                           | .        |
| 235280_at | 3.64E-05 | 5.31E-06 |                           | .        |
| 235281_x_ | 4.55E-05 | 7.11E-06 | AHNAK                     | 79026 .  |
| 235282_at | 0.040836 | 0.027125 |                           | .        |
| 235283_at | 0.008664 | 0.004433 | INTS6                     | 26512 .  |
| 235286_at | 3.38E-07 | 1.19E-08 |                           | .        |
| 235287_at | 0.006881 | 0.003386 | CDK6                      | 1021 .   |
| 235288_at | 0.023085 | 0.013987 |                           | .        |
| 235289_at | 4.00E-05 | 5.99E-06 | EIF5A2                    | 56648 .  |
| 235290_at | 0.006526 | 0.003178 | ZNF782                    | 158431 . |
| 235291_s_ | 0.007774 | 0.00391  | FLJ32255                  | 643977 . |
| 235292_at | 0.038976 | 0.025701 | FLJ32255                  | 643977 . |
| 235293_at | 3.78E-06 | 2.84E-07 |                           | .        |
| 235294_at | 1.50E-04 | 3.22E-05 | RP5-1000E10.4             | 80143 .  |

|           |          |          |                            |
|-----------|----------|----------|----------------------------|
| 235295_at | 0.01522  | 0.008595 | .                          |
| 235296_at | 6.02E-06 | 5.20E-07 | EIF5A2 56648 .             |
| 235297_at | 5.33E-04 | 1.54E-04 | CUGBP1 10658 .             |
| 235299_at | 7.50E-05 | 1.35E-05 | SLC41A2 84102 .            |
| 235301_at | 4.37E-06 | 3.44E-07 | KIAA1324L 222223 .         |
| 235303_at | 5.52E-06 | 4.65E-07 | RG9MTD3 158234 .           |
| 235308_at | 0.003439 | 0.00148  | ZBTB20 26137 .             |
| 235309_at | 0.016578 | 0.009498 | RPS15A 6210 .              |
| 235311_at | 1.99E-07 | 5.71E-09 | FKBP14 55033 .             |
| 235312_s_ | 0.012431 | 0.006776 | NRAP 4892 .                |
| 235313_at | 0.003908 | 0.001725 | NRAP 4892 .                |
| 235314_at | 0.001071 | 3.63E-04 | RPL32P3 132241 .           |
| 235316_at | 8.49E-04 | 2.74E-04 | NAT8L 339983 .             |
| 235317_at | 7.60E-05 | 1.37E-05 | LOC284454 284454 .         |
| 235318_at | 2.76E-07 | 9.09E-09 | FBN1 2200 .                |
| 235319_at | 0.001708 | 6.37E-04 | LOC100216546 100216546 .   |
| 235321_at | 1.60E-05 | 1.87E-06 | .                          |
| 235322_at | 0.004326 | 0.001948 | LOC100131141 100131141 .   |
| 235323_at | 0.007468 | 0.003731 | .                          |
| 235324_at | 9.42E-04 | 3.11E-04 | SFRS3 6428 .               |
| 235327_x_ | 2.05E-06 | 1.29E-07 | UBXN2A 165324 .            |
| 235328_at | 3.93E-04 | 1.06E-04 | PLXNC1 10154 .             |
| 235329_at | 1.16E-04 | 2.32E-05 | NOXO1 124056 .             |
| 235330_at | 1.95E-05 | 2.41E-06 | CCDC117 150275 .           |
| 235331_x_ | 1.11E-07 | 2.63E-09 | PCGF5 84333 .              |
| 235332_at | 0.011533 | 0.006201 | FAM22A /// FA283008 /// 7. |
| 235333_at | 4.48E-04 | 1.24E-04 | B4GALT6 9331 .             |
| 235334_at | 0.00169  | 6.29E-04 | ST6GALNAC3 256435 .        |
| 235335_at | 5.76E-06 | 4.91E-07 | ABCA9 10350 .              |
| 235337_at | 0.045856 | 0.031048 | .                          |
| 235339_at | 0.017746 | 0.010284 | SETDB2 83852 .             |
| 235340_at | 2.29E-05 | 2.97E-06 | GANC 2595 .                |
| 235341_at | 4.97E-06 | 4.04E-07 | DNAJC3 5611 .              |
| 235342_at | 0.014955 | 0.008421 | SPOCK3 50859 .             |

|           |          |          |            |        |   |
|-----------|----------|----------|------------|--------|---|
| 235343_at | 3.33E-06 | 2.41E-07 | VASH2      | 79805  | . |
| 235345_at | 0.001676 | 6.23E-04 | RUFY2      | 55680  | . |
| 235346_at | 0.007604 | 0.003809 | FUNDC1     | 139341 | . |
| 235347_at | 3.73E-06 | 2.79E-07 | LRCH3      | 84859  | . |
| 235349_at | 6.32E-04 | 1.90E-04 | FAM82A1    | 151393 | . |
| 235352_at | 5.42E-06 | 4.53E-07 |            |        | . |
| 235354_s_ | 0.001157 | 3.98E-04 | RSRC1      | 51319  | . |
| 235358_at | 6.62E-07 | 2.86E-08 | LOC728485  | 728485 | . |
| 235360_at | 0.043157 | 0.028928 | PLEKHM3    | 389072 | . |
| 235363_at | 0.004738 | 0.002174 |            |        | . |
| 235366_at | 0.025618 | 0.015797 | ZNF10      | 7556   | . |
| 235367_at | 0.009628 | 0.005017 | MYPN       | 84665  | . |
| 235368_at | 3.77E-05 | 5.55E-06 | ADAMTS5    | 11096  | . |
| 235369_at | 0.01477  | 0.008296 | C14orf28   | 122525 | . |
| 235371_at | 7.90E-05 | 1.44E-05 | GLT8D4     | 727936 | . |
| 235372_at | 0.002165 | 8.50E-04 | FCRLA      | 84824  | . |
| 235373_at | 0.040721 | 0.02704  |            |        | . |
| 235374_at | 8.56E-05 | 1.59E-05 | MDH1       | 4190   | . |
| 235375_x_ | 4.23E-04 | 1.16E-04 | TTC9B      | 148014 | . |
| 235376_at | 8.32E-06 | 7.94E-07 |            |        | . |
| 235378_at | 5.40E-05 | 8.82E-06 |            |        | . |
| 235381_at | 0.001851 | 7.03E-04 |            |        | . |
| 235383_at | 5.59E-04 | 1.63E-04 | MYO7B      | 4648   | . |
| 235384_at | 1.31E-09 | 7.61E-12 | NUDT19     | 390916 | . |
| 235386_at | 1.26E-04 | 2.58E-05 |            |        | . |
| 235387_at | 0.002091 | 8.14E-04 | GSTCD      | 79807  | . |
| 235388_at | 6.42E-05 | 1.10E-05 | CHD9       | 80205  | . |
| 235389_at | 1.26E-05 | 1.38E-06 | PHF20      | 51230  | . |
| 235391_at | 4.66E-04 | 1.30E-04 | FAM92A1    | 137392 | . |
| 235392_at | 7.48E-04 | 2.34E-04 | IRS1       | 3667   | . |
| 235395_at | 8.40E-04 | 2.70E-04 | SEC63      | 11231  | . |
| 235396_at | 1.36E-05 | 1.52E-06 | C22orf25   | 128989 | . |
| 235397_at | 0.024015 | 0.014648 | NCRNA00174 | 285908 | . |
| 235401_s_ | 0.006645 | 0.003247 | FCRLA      | 84824  | . |

|           |          |          |           |        |   |
|-----------|----------|----------|-----------|--------|---|
| 235402_at | 9.35E-04 | 3.08E-04 | C11orf66  | 220004 | . |
| 235404_at | 0.008185 | 0.00415  | ARID5B    | 84159  | . |
| 235405_at | 0.017031 | 0.009798 | GSTA4     | 2941   | . |
| 235406_x_ | 0.011866 | 0.006409 |           |        | . |
| 235407_at | 4.25E-05 | 6.52E-06 |           |        | . |
| 235409_at | 2.99E-06 | 2.10E-07 | MGA       | 23269  | . |
| 235410_at | 2.79E-04 | 6.95E-05 | NPHP3     | 27031  | . |
| 235411_at | 0.002469 | 9.95E-04 | PGBD1     | 84547  | . |
| 235412_at | 6.25E-05 | 1.06E-05 | ARHGEF7   | 8874   | . |
| 235413_at | 0.002057 | 7.99E-04 | GGCX      | 2677   | . |
| 235414_at | 0.038232 | 0.025138 | ZNF383    | 163087 | . |
| 235415_at | 0.033458 | 0.021546 | RPRD2     | 23248  | . |
| 235416_at | 0.015744 | 0.008945 | LOC643201 | 643201 | . |
| 235417_at | 4.93E-06 | 4.00E-07 | SPOCD1    | 90853  | . |
| 235420_at | 0.040121 | 0.026576 | HAPLN4    | 404037 | . |
| 235421_at | 0.025022 | 0.015373 | MAP3K8    | 1326   | . |
| 235422_at | 0.011874 | 0.006415 |           |        | . |
| 235423_at | 9.57E-09 | 1.01E-10 |           |        | . |
| 235424_at | 0.00372  | 0.001625 |           |        | . |
| 235425_at | 3.35E-07 | 1.18E-08 | SGOL2     | 151246 | . |
| 235426_at | 0.003993 | 0.001768 | GATM      | 2628   | . |
| 235427_at | 2.38E-07 | 7.40E-09 |           |        | . |
| 235428_at | 1.56E-05 | 1.82E-06 |           |        | . |
| 235429_at | 3.49E-04 | 9.14E-05 |           |        | . |
| 235431_s_ | 0.014196 | 0.007913 | PELI3     | 246330 | . |
| 235432_at | 1.98E-04 | 4.53E-05 | NPHP3     | 27031  | . |
| 235433_at | 1.74E-04 | 3.86E-05 | APOOL     | 139322 | . |
| 235434_at | 5.18E-04 | 1.48E-04 |           |        | . |
| 235435_at | 6.54E-05 | 1.12E-05 | AASDH     | 132949 | . |
| 235436_at | 0.00288  | 0.001195 | DDX31     | 64794  | . |
| 235438_at | 2.47E-08 | 3.52E-10 |           |        | . |
| 235439_at | 2.19E-06 | 1.40E-07 | RBMS2     | 5939   | . |
| 235440_at | 0.014344 | 0.008012 | SPTY2D1   | 144108 | . |
| 235441_at | 0.001128 | 3.87E-04 |           |        | . |

|           |          |          |                             |           |   |
|-----------|----------|----------|-----------------------------|-----------|---|
| 235443_at | 0.002312 | 9.20E-04 | LOC100131067                | 100131067 | . |
| 235444_at | 0.014212 | 0.007923 | FOXP1                       | 27086     | . |
| 235446_at | 0.032564 | 0.020868 |                             |           | . |
| 235447_at | 3.89E-05 | 5.78E-06 | TRUB1                       | 142940    | . |
| 235448_at | 5.70E-05 | 9.46E-06 | ZXDC                        | 79364     | . |
| 235449_at | 0.002506 | 0.001013 | LRSAM1                      | 90678     | . |
| 235451_at | 0.015153 | 0.008549 | SMAD5                       | 4090      | . |
| 235452_at | 0.001191 | 4.14E-04 |                             |           | . |
| 235453_at | 0.001617 | 5.97E-04 | TOR1AIP2                    | 163590    | . |
| 235455_at | 1.74E-04 | 3.85E-05 | FAM131C                     | 348487    | . |
| 235457_at | 0.003975 | 0.001758 | MAML2                       | 84441     | . |
| 235459_at | 1.74E-05 | 2.09E-06 |                             |           | . |
| 235460_at | 1.36E-04 | 2.83E-05 | SNX22                       | 79856     | . |
| 235461_at | 0.01406  | 0.007824 | TET2                        | 54790     | . |
| 235463_s_ | 0.023797 | 0.014497 | LASS6                       | 253782    | . |
| 235464_at | 0.03036  | 0.019245 |                             |           | . |
| 235466_s_ | 1.02E-05 | 1.04E-06 | DISP1                       | 84976     | . |
| 235469_at | 1.41E-04 | 2.97E-05 | FAM133B /// L 257415 /// 7. |           | . |
| 235470_at | 0.024726 | 0.015158 |                             |           | . |
| 235471_at | 2.45E-09 | 1.69E-11 | C10orf72                    | 196740    | . |
| 235472_at | 0.046078 | 0.031223 | FUT10                       | 84750     | . |
| 235474_at | 7.33E-04 | 2.28E-04 |                             |           | . |
| 235477_at | 0.003511 | 0.001517 |                             |           | . |
| 235478_at | 2.75E-05 | 3.74E-06 | DCLRE1C                     | 64421     | . |
| 235479_at | 2.44E-05 | 3.23E-06 | CPEB2                       | 132864    | . |
| 235480_at | 0.0228   | 0.013793 | MAP3K7IP1                   | 10454     | . |
| 235482_at | 1.55E-08 | 1.87E-10 | LOC400960                   | 400960    | . |
| 235483_at | 3.07E-04 | 7.83E-05 |                             |           | . |
| 235484_at | 0.006371 | 0.003088 | PTAR1                       | 375743    | . |
| 235485_at | 2.70E-05 | 3.64E-06 | WDR44                       | 54521     | . |
| 235486_at | 1.58E-04 | 3.42E-05 | C11orf41                    | 25758     | . |
| 235487_at | 0.044962 | 0.030353 |                             |           | . |
| 235489_at | 5.69E-07 | 2.34E-08 | RHOJ                        | 57381     | . |
| 235491_at | 3.18E-05 | 4.49E-06 | ZBTB10                      | 65986     | . |

|           |          |          |                             |        |   |
|-----------|----------|----------|-----------------------------|--------|---|
| 235492_at | 6.62E-06 | 5.86E-07 | RNF217                      | 154214 | . |
| 235493_at | 7.88E-04 | 2.50E-04 |                             |        | . |
| 235496_at | 0.008036 | 0.004065 | HRCT1                       | 646962 | . |
| 235497_at | 0.002374 | 9.48E-04 | LOC643837                   | 643837 | . |
| 235499_at | 1.07E-05 | 1.10E-06 | tcag7.1196                  | 728743 | . |
| 235500_at | 0.031931 | 0.020397 | HNRNPC                      | 3183   | . |
| 235503_at | 0.044733 | 0.030172 | ASB5                        | 140458 | . |
| 235504_at | 0.01504  | 0.008475 | GREM2                       | 64388  | . |
| 235506_at | 1.10E-05 | 1.15E-06 |                             |        | . |
| 235507_at | 5.77E-05 | 9.58E-06 | PCMTD1                      | 115294 | . |
| 235509_at | 1.26E-05 | 1.38E-06 | C8orf38                     | 137682 | . |
| 235510_at | 0.010662 | 0.005655 | USHBP1                      | 83878  | . |
| 235511_at | 4.54E-05 | 7.09E-06 |                             |        | . |
| 235512_at | 0.010811 | 0.005752 | CDKL1                       | 8814   | . |
| 235513_at | 6.62E-04 | 2.01E-04 |                             |        | . |
| 235514_at | 0.001151 | 3.96E-04 | ASPRV1                      | 151516 | . |
| 235515_at | 3.84E-04 | 1.03E-04 | C19orf46                    | 163183 | . |
| 235518_at | 3.63E-06 | 2.69E-07 | SLC8A1                      | 6546   | . |
| 235519_at | 0.00453  | 0.002059 | FOXK1                       | 221937 | . |
| 235520_at | 5.70E-04 | 1.67E-04 | ZNF280C                     | 55609  | . |
| 235521_at | 0.017329 | 0.01     | HOXA3                       | 3200   | . |
| 235524_at | 1.28E-06 | 6.93E-08 | GARNL1                      | 253959 | . |
| 235525_at | 1.90E-04 | 4.29E-05 |                             |        | . |
| 235526_at | 0.010664 | 0.005657 | SOX6                        | 55553  | . |
| 235527_at | 0.018804 | 0.011006 | DLGAP1 /// LO 284214 /// 9: |        | . |
| 235529_x_ | 0.025107 | 0.015433 |                             |        | . |
| 235530_at | 0.003766 | 0.001651 |                             |        | . |
| 235531_at | 3.15E-05 | 4.45E-06 |                             |        | . |
| 235532_at | 1.35E-06 | 7.41E-08 | PIGM                        | 93183  | . |
| 235534_at | 7.14E-05 | 1.26E-05 |                             |        | . |
| 235535_x_ | 7.58E-05 | 1.36E-05 | FRG1 /// FRG1 100134091 //  |        | . |
| 235536_at | 2.66E-04 | 6.54E-05 | SNORD89                     | 692205 | . |
| 235537_at | 0.0405   | 0.026867 | OCIAD1                      | 54940  | . |
| 235538_at | 3.52E-04 | 9.25E-05 |                             |        | . |

|           |          |          |           |          |
|-----------|----------|----------|-----------|----------|
| 235540_at | 0.004462 | 0.002023 | GNRH1     | 2796 .   |
| 235541_at | 3.03E-04 | 7.69E-05 | LAS1L     | 81887 .  |
| 235542_at | 0.005338 | 0.002503 | TET3      | 200424 . |
| 235544_x_ | 4.03E-05 | 6.06E-06 | FAM171A2  | 284069 . |
| 235545_at | 1.26E-06 | 6.73E-08 | DEPDC1    | 55635 .  |
| 235546_at | 1.23E-06 | 6.50E-08 | SPINT1    | 6692 .   |
| 235547_at | 0.038056 | 0.024999 | N4BP2L2   | 10443 .  |
| 235548_at | 1.22E-05 | 1.32E-06 | APCDD1L   | 164284 . |
| 235551_at | 0.003334 | 0.001426 | WDR4      | 10785 .  |
| 235553_at | 1.25E-04 | 2.55E-05 | GAPVD1    | 26130 .  |
| 235554_x_ | 0.012921 | 0.007095 | PACRGL    | 133015 . |
| 235555_at | 1.88E-04 | 4.24E-05 |           | .        |
| 235557_at | 0.007586 | 0.003799 | LOC150763 | 150763 . |
| 235558_at | 4.75E-07 | 1.85E-08 | RBMS2     | 5939 .   |
| 235559_at | 0.011086 | 0.005921 | C7orf67   | 84182 .  |
| 235560_at | 0.008625 | 0.00441  |           | .        |
| 235561_at | 0.045433 | 0.030717 |           | .        |
| 235562_at | 0.044766 | 0.030204 | C3orf70   | 285382 . |
| 235563_at | 0.026424 | 0.016373 |           | .        |
| 235565_at | 0.043658 | 0.029327 | ZNF786    | 136051 . |
| 235566_at | 0.001394 | 5.00E-04 | TMF1      | 7110 .   |
| 235570_at | 8.32E-04 | 2.67E-04 |           | .        |
| 235572_at | 2.71E-05 | 3.67E-06 | SPC24     | 147841 . |
| 235573_at | 2.37E-05 | 3.09E-06 |           | .        |
| 235574_at | 0.049098 | 0.033611 | GBP4      | 115361 . |
| 235575_at | 1.70E-04 | 3.73E-05 |           | .        |
| 235578_at | 0.006455 | 0.003136 | ABCC9     | 10060 .  |
| 235579_at | 6.72E-04 | 2.05E-04 | SFRS2IP   | 9169 .   |
| 235580_at | 4.11E-04 | 1.12E-04 | ZNF141    | 7700 .   |
| 235581_at | 3.02E-04 | 7.66E-05 |           | .        |
| 235583_at | 0.007984 | 0.004034 | ILDR1     | 286676 . |
| 235584_at | 0.040613 | 0.026957 | LOC285033 | 285033 . |
| 235586_at | 2.48E-06 | 1.65E-07 |           | .        |
| 235587_at | 0.007979 | 0.004031 | LOC202781 | 202781 . |

|           |          |          |                            |        |   |
|-----------|----------|----------|----------------------------|--------|---|
| 235588_at | 0.016238 | 0.009276 | ESCO2                      | 157570 | . |
| 235589_s_ | 0.029997 | 0.01898  |                            |        | . |
| 235590_at | 1.66E-05 | 1.96E-06 | FAM178A                    | 55719  | . |
| 235591_at | 1.83E-12 | 1.14E-15 | SSTR1                      | 6751   | . |
| 235592_at | 0.045618 | 0.030862 |                            |        | . |
| 235593_at | 0.008889 | 0.004568 | ZEB2                       | 9839   | . |
| 235594_at | 0.0011   | 3.75E-04 | SCYE1                      | 9255   | . |
| 235595_at | 0.014374 | 0.008032 | ARHGEF2                    | 9181   | . |
| 235596_at | 0.031609 | 0.020156 |                            |        | . |
| 235597_s_ | 4.89E-05 | 7.79E-06 | RGPD1 /// RGP400966 /// 7. |        | . |
| 235598_at | 0.030991 | 0.019708 | SMAD2                      | 4087   | . |
| 235599_at | 0.023931 | 0.01459  | LOC339535                  | 339535 | . |
| 235600_at | 2.30E-06 | 1.50E-07 |                            |        | . |
| 235601_at | 2.43E-04 | 5.83E-05 |                            |        | . |
| 235603_at | 0.002646 | 0.001081 | HNRNPU                     | 3192   | . |
| 235604_x_ | 0.001167 | 4.03E-04 | ZNF493                     | 284443 | . |
| 235605_at | 0.006622 | 0.003233 | CASZ1                      | 54897  | . |
| 235606_at | 3.10E-04 | 7.92E-05 | LOC344595                  | 344595 | . |
| 235607_at | 1.74E-06 | 1.05E-07 |                            |        | . |
| 235608_at | 0.002173 | 8.54E-04 |                            |        | . |
| 235609_at | 0.001466 | 5.31E-04 |                            |        | . |
| 235610_at | 6.17E-05 | 1.04E-05 | ALKBH8                     | 91801  | . |
| 235611_at | 4.34E-05 | 6.68E-06 |                            |        | . |
| 235612_at | 6.66E-06 | 5.92E-07 |                            |        | . |
| 235614_at | 8.71E-04 | 2.83E-04 | TMEM151A                   | 256472 | . |
| 235615_at | 0.004683 | 0.002145 | PGGT1B                     | 5229   | . |
| 235618_at | 0.0288   | 0.018102 | ZNF507                     | 22847  | . |
| 235619_at | 1.36E-04 | 2.83E-05 | LOC285986                  | 285986 | . |
| 235620_x_ | 0.003707 | 0.001618 | ZMYM5                      | 9205   | . |
| 235623_at | 2.49E-04 | 6.04E-05 | ELP2                       | 55250  | . |
| 235624_at | 0.008251 | 0.004189 | HDLBP                      | 3069   | . |
| 235625_at | 0.007458 | 0.003725 | VPS41                      | 27072  | . |
| 235626_at | 5.43E-05 | 8.88E-06 | CAMK1D                     | 57118  | . |
| 235628_x_ | 6.80E-05 | 1.18E-05 |                            |        | . |



|           |          |          |                    |
|-----------|----------|----------|--------------------|
| 235629_at | 8.90E-04 | 2.90E-04 | .                  |
| 235630_at | 7.10E-06 | 6.45E-07 | .                  |
| 235631_at | 4.27E-09 | 3.50E-11 | DDR2 4921 .        |
| 235632_at | 7.21E-07 | 3.21E-08 | .                  |
| 235633_at | 1.74E-04 | 3.86E-05 | .                  |
| 235638_at | 8.00E-05 | 1.46E-05 | RASSF6 166824 .    |
| 235639_at | 0.030043 | 0.019013 | .                  |
| 235640_at | 0.001835 | 6.96E-04 | .                  |
| 235641_at | 0.015688 | 0.008907 | TRIB1 10221 .      |
| 235643_at | 0.0023   | 9.14E-04 | SAMD9L 219285 .    |
| 235644_at | 2.49E-06 | 1.66E-07 | CCDC138 165055 .   |
| 235645_at | 5.64E-05 | 9.31E-06 | ESCO1 114799 .     |
| 235646_at | 7.26E-06 | 6.64E-07 | .                  |
| 235648_at | 0.001704 | 6.35E-04 | ZNF567 163081 .    |
| 235649_at | 0.021601 | 0.012955 | ADAMTS8 11095 .    |
| 235652_at | 1.14E-08 | 1.23E-10 | .                  |
| 235653_s_ | 0.01447  | 0.008094 | THAP6 152815 .     |
| 235654_at | 8.25E-05 | 1.52E-05 | .                  |
| 235655_at | 3.18E-04 | 8.17E-05 | .                  |
| 235656_s_ | 0.01222  | 0.00664  | .                  |
| 235658_at | 0.00915  | 0.004728 | .                  |
| 235659_at | 2.29E-04 | 5.41E-05 | .                  |
| 235660_at | 0.013291 | 0.007331 | .                  |
| 235662_at | 0.002927 | 0.001217 | .                  |
| 235663_at | 7.53E-04 | 2.36E-04 | .                  |
| 235665_at | 0.021593 | 0.012948 | PTOV1 53635 .      |
| 235666_at | 0.003702 | 0.001616 | .                  |
| 235667_at | 0.01461  | 0.008188 | LOC643783 643783 . |
| 235668_at | 1.52E-06 | 8.70E-08 | PRDM1 639 .        |
| 235670_at | 0.007206 | 0.003576 | STX11 8676 .       |
| 235671_at | 6.85E-05 | 1.20E-05 | .                  |
| 235673_at | 0.023176 | 0.014053 | TAF1B 9014 .       |
| 235675_at | 0.011404 | 0.006121 | DHFRL1 200895 .    |
| 235676_at | 0.001609 | 5.93E-04 | .                  |

|           |          |          |           |        |   |
|-----------|----------|----------|-----------|--------|---|
| 235677_at | 6.36E-07 | 2.70E-08 | SRR       | 63826  | . |
| 235679_at | 1.25E-05 | 1.37E-06 |           |        | . |
| 235682_s_ | 2.18E-04 | 5.10E-05 | HSPB7     | 27129  | . |
| 235685_at | 3.27E-05 | 4.64E-06 |           |        | . |
| 235686_at | 0.001747 | 6.55E-04 | C2orf60   | 129450 | . |
| 235687_at | 1.72E-04 | 3.80E-05 | ZNF626    | 199777 | . |
| 235688_s_ | 1.98E-04 | 4.54E-05 | TRAF4     | 9618   | . |
| 235689_at | 0.003828 | 0.001682 | MTFMT     | 123263 | . |
| 235690_at | 0.045471 | 0.030747 | ZNF594    | 84622  | . |
| 235692_at | 4.55E-04 | 1.27E-04 | SH3KBP1   | 30011  | . |
| 235693_at | 1.74E-05 | 2.09E-06 |           |        | . |
| 235694_at | 1.83E-05 | 2.22E-06 | TCFL5     | 10732  | . |
| 235696_at | 0.00664  | 0.003244 |           |        | . |
| 235698_at | 0.037198 | 0.024359 | ZFP90     | 146198 | . |
| 235699_at | 3.69E-04 | 9.79E-05 | REM2      | 161253 | . |
| 235701_at | 8.31E-12 | 9.98E-15 |           |        | . |
| 235702_at | 0.002193 | 8.63E-04 |           |        | . |
| 235703_at | 3.66E-05 | 5.35E-06 | PLB1      | 151056 | . |
| 235704_at | 0.029867 | 0.018883 | DAZAP2    | 9802   | . |
| 235705_at | 0.021072 | 0.012586 |           |        | . |
| 235707_at | 0.001868 | 7.11E-04 | LOC221710 | 221710 | . |
| 235710_at | 2.88E-04 | 7.22E-05 | VPS53     | 55275  | . |
| 235712_at | 0.00294  | 0.001224 | GAS5      | 60674  | . |
| 235715_at | 0.046893 | 0.03187  | FLJ44653  | 399833 | . |
| 235716_at | 2.37E-05 | 3.10E-06 |           |        | . |
| 235717_at | 0.019978 | 0.011812 | ZNF229    | 7772   | . |
| 235718_at | 2.82E-05 | 3.84E-06 | SRL       | 6345   | . |
| 235720_at | 1.73E-05 | 2.06E-06 | CRIP3     | 401262 | . |
| 235722_at | 2.49E-04 | 6.04E-05 | SYNJ2BP   | 55333  | . |
| 235724_at | 7.38E-07 | 3.30E-08 |           |        | . |
| 235725_at | 0.046362 | 0.031444 | SMAD4     | 4089   | . |
| 235727_at | 0.022081 | 0.013299 | KLHL28    | 54813  | . |
| 235728_at | 0.00101  | 3.38E-04 | ZFP3      | 124961 | . |
| 235729_at | 0.001281 | 4.51E-04 | ZNF514    | 84874  | . |

|           |          |          |                  |
|-----------|----------|----------|------------------|
| 235730_at | 6.02E-09 | 5.45E-11 | .                |
| 235731_at | 0.015066 | 0.008493 | AIPL1 23746 .    |
| 235733_at | 1.30E-05 | 1.44E-06 | .                |
| 235734_at | 8.77E-06 | 8.52E-07 | PACSIN3 29763 .  |
| 235736_at | 8.18E-05 | 1.50E-05 | .                |
| 235738_at | 0.013395 | 0.007396 | .                |
| 235739_at | 0.048189 | 0.032878 | .                |
| 235740_at | 0.048707 | 0.033293 | .                |
| 235741_at | 2.94E-06 | 2.05E-07 | PPIA 5478 .      |
| 235742_at | 0.020464 | 0.012148 | RHOC 389 .       |
| 235743_at | 0.003275 | 0.001395 | .                |
| 235746_s_ | 8.68E-06 | 8.39E-07 | PLA2R1 22925 .   |
| 235747_at | 1.49E-04 | 3.16E-05 | SLC25A16 8034 .  |
| 235749_at | 0.046547 | 0.031592 | UGCGL2 55757 .   |
| 235750_at | 0.004673 | 0.002139 | .                |
| 235753_at | 5.38E-04 | 1.56E-04 | HOXA7 3204 .     |
| 235754_at | 4.69E-07 | 1.82E-08 | HFE 3077 .       |
| 235755_at | 0.01251  | 0.006831 | TNRC18 84629 .   |
| 235756_at | 0.005918 | 0.002831 | .                |
| 235757_at | 3.61E-08 | 5.82E-10 | .                |
| 235759_at | 0.036562 | 0.02387  | .                |
| 235762_at | 7.49E-05 | 1.34E-05 | TAS2R14 50840 .  |
| 235765_at | 0.011799 | 0.006366 | TLE4 7091 .      |
| 235766_x_ | 2.36E-04 | 5.63E-05 | .                |
| 235768_at | 0.0307   | 0.019496 | SH3RF2 153769 .  |
| 235770_at | 2.11E-07 | 6.15E-09 | MASP1 5648 .     |
| 235772_at | 0.008758 | 0.004489 | .                |
| 235773_at | 0.019291 | 0.011337 | ZIK1 284307 .    |
| 235776_x_ | 1.16E-06 | 6.00E-08 | C9orf44 158314 . |
| 235777_at | 0.031088 | 0.019774 | ANKRD44 91526 .  |
| 235778_s_ | 0.001529 | 5.59E-04 | ANKRD44 91526 .  |
| 235781_at | 0.032952 | 0.021165 | CACNA1B 774 .    |
| 235782_at | 0.004205 | 0.001881 | .                |
| 235783_at | 7.48E-07 | 3.36E-08 | MRTO4 51154 .    |

|           |          |          |              |             |
|-----------|----------|----------|--------------|-------------|
| 235785_at | 0.002201 | 8.67E-04 |              | .           |
| 235786_at | 5.21E-07 | 2.08E-08 |              | .           |
| 235788_at | 0.005795 | 0.00276  |              | .           |
| 235789_at | 0.004864 | 0.002242 | KDM4B        | 23030 .     |
| 235790_at | 1.94E-06 | 1.20E-07 | LOC100131081 | 100131081 . |
| 235791_x_ | 2.62E-05 | 3.52E-06 | CHD1         | 1105 .      |
| 235792_x_ | 0.014526 | 0.00813  | PIK3C2A      | 5286 .      |
| 235794_at | 1.42E-04 | 2.98E-05 | MOBP         | 4336 .      |
| 235795_at | 0.001315 | 4.66E-04 | PAX6         | 5080 .      |
| 235796_at | 7.07E-05 | 1.24E-05 |              | .           |
| 235797_x_ | 1.31E-04 | 2.69E-05 | HMCN2        | 256158 .    |
| 235798_at | 5.03E-05 | 8.07E-06 | TMEM170B     | 100113407 . |
| 235799_at | 0.003078 | 0.001295 | NSL1         | 25936 .     |
| 235802_at | 0.003855 | 0.001696 | PLD4         | 122618 .    |
| 235803_at | 0.001184 | 4.10E-04 |              | .           |
| 235804_at | 0.001318 | 4.67E-04 |              | .           |
| 235805_at | 1.16E-04 | 2.31E-05 |              | .           |
| 235806_at | 7.32E-04 | 2.28E-04 | ARAP3        | 64411 .     |
| 235807_at | 0.002941 | 0.001224 |              | .           |
| 235808_at | 1.53E-04 | 3.30E-05 |              | .           |
| 235809_at | 1.60E-06 | 9.30E-08 | LIN54        | 132660 .    |
| 235810_at | 1.60E-05 | 1.88E-06 | ZNF182       | 7569 .      |
| 235811_at | 1.77E-08 | 2.26E-10 |              | .           |
| 235812_at | 6.85E-06 | 6.13E-07 | TMEM188      | 255919 .    |
| 235815_at | 0.001278 | 4.50E-04 | TSHZ2        | 128553 .    |
| 235816_s_ | 0.015784 | 0.008971 | RGL4         | 266747 .    |
| 235817_at | 8.18E-04 | 2.61E-04 | TMEM184A     | 202915 .    |
| 235818_at | 0.039405 | 0.026028 | VSTM1        | 284415 .    |
| 235819_at | 5.72E-04 | 1.68E-04 |              | .           |
| 235820_at | 0.010834 | 0.005767 | LOC100130219 | 100130219 . |
| 235822_at | 0.00499  | 0.00231  | COQ9         | 57017 .     |
| 235823_at | 6.88E-04 | 2.11E-04 |              | .           |
| 235824_at | 4.51E-04 | 1.25E-04 |              | .           |
| 235826_at | 8.23E-05 | 1.51E-05 |              | .           |

|           |          |          |           |        |   |
|-----------|----------|----------|-----------|--------|---|
| 235828_at | 0.004973 | 0.0023   | PRELID2   | 153768 | . |
| 235835_at | 0.001524 | 5.57E-04 |           |        | . |
| 235836_at | 2.81E-08 | 4.23E-10 | MXRA7     | 439921 | . |
| 235838_at | 0.046769 | 0.031771 | NLGN2     | 57555  | . |
| 235839_at | 2.29E-04 | 5.43E-05 | C22orf34  | 348645 | . |
| 235840_at | 0.035775 | 0.023274 |           |        | . |
| 235841_at | 0.02021  | 0.011971 |           |        | . |
| 235842_at | 0.001425 | 5.13E-04 |           |        | . |
| 235844_at | 0.009876 | 0.005172 | PHTF1     | 10745  | . |
| 235845_at | 3.01E-08 | 4.60E-10 | SP5       | 389058 | . |
| 235846_at | 9.01E-04 | 2.95E-04 |           |        | . |
| 235847_at | 5.00E-05 | 8.00E-06 |           |        | . |
| 235848_x_ | 9.85E-05 | 1.89E-05 | ATL2      | 64225  | . |
| 235849_at | 0.005309 | 0.002487 | SCARA5    | 286133 | . |
| 235850_at | 0.002268 | 8.99E-04 | WDR5B     | 54554  | . |
| 235851_s_ | 0.004604 | 0.0021   | GNAS      | 2778   | . |
| 235854_x_ | 0.008364 | 0.004256 | ROCK1     | 6093   | . |
| 235855_at | 3.98E-06 | 3.04E-07 | COX15     | 1355   | . |
| 235856_at | 0.02793  | 0.01746  |           |        | . |
| 235857_at | 4.81E-08 | 8.54E-10 | KCTD11    | 147040 | . |
| 235858_at | 4.29E-04 | 1.18E-04 | CREBBP    | 1387   | . |
| 235859_at | 0.020734 | 0.012347 |           |        | . |
| 235860_at | 0.002792 | 0.001152 |           |        | . |
| 235861_at | 0.020722 | 0.012339 |           |        | . |
| 235863_at | 4.31E-07 | 1.64E-08 | JSRP1     | 126306 | . |
| 235865_at | 9.74E-05 | 1.86E-05 | CUGBP1    | 10658  | . |
| 235866_at | 1.81E-04 | 4.06E-05 | C9orf85   | 138241 | . |
| 235867_at | 9.28E-04 | 3.05E-04 | GSTM3     | 2947   | . |
| 235868_at | 5.76E-04 | 1.69E-04 | MGEA5     | 10724  | . |
| 235870_at | 0.01175  | 0.006336 | LOC339524 | 339524 | . |
| 235871_at | 0.008561 | 0.004372 | LIPH      | 200879 | . |
| 235873_at | 1.79E-04 | 4.00E-05 |           |        | . |
| 235874_at | 0.019111 | 0.011213 | PRSS35    | 167681 | . |
| 235879_at | 0.009405 | 0.004883 | MBNL1     | 4154   | . |

|           |          |          |              |           |   |
|-----------|----------|----------|--------------|-----------|---|
| 235881_at | 0.020844 | 0.012428 | FMNL2        | 114793    | . |
| 235882_at | 3.22E-07 | 1.12E-08 | VPS53        | 55275     | . |
| 235884_at | 1.22E-04 | 2.46E-05 | LOC644794    | 644794    | . |
| 235886_at | 0.025074 | 0.015409 |              |           | . |
| 235887_at | 0.001719 | 6.42E-04 |              |           | . |
| 235889_at | 1.11E-05 | 1.17E-06 |              |           | . |
| 235890_at | 0.03283  | 0.02107  |              |           | . |
| 235891_at | 0.011866 | 0.006409 | LOC100128178 | 100128178 | . |
| 235893_at | 3.20E-05 | 4.52E-06 |              |           | . |
| 235894_at | 3.28E-04 | 8.49E-05 |              |           | . |
| 235895_at | 0.002769 | 0.001141 |              |           | . |
| 235897_at | 3.19E-06 | 2.28E-07 | COPZ2        | 51226     | . |
| 235899_at | 0.005643 | 0.002675 | CA13         | 377677    | . |
| 235900_at | 0.004719 | 0.002163 | SPNS3        | 201305    | . |
| 235901_at | 8.28E-04 | 2.66E-04 |              |           | . |
| 235903_at | 2.05E-04 | 4.71E-05 | ANKS6        | 203286    | . |
| 235906_at | 0.007429 | 0.003708 | TAF10        | 6881      | . |
| 235907_at | 4.74E-04 | 1.33E-04 | TMEM33       | 55161     | . |
| 235908_at | 1.29E-04 | 2.66E-05 | MMP11        | 4320      | . |
| 235909_at | 0.039876 | 0.02639  | ASPRV1       | 151516    | . |
| 235910_x_ | 5.82E-04 | 1.71E-04 | ZNF316       | 100131017 | . |
| 235912_at | 0.041652 | 0.027757 |              |           | . |
| 235915_at | 0.004122 | 0.001837 |              |           | . |
| 235917_at | 4.20E-04 | 1.15E-04 |              |           | . |
| 235918_x_ | 0.009834 | 0.005145 | CEP97        | 79598     | . |
| 235919_at | 0.007743 | 0.003889 |              |           | . |
| 235920_at | 0.007565 | 0.003787 |              |           | . |
| 235923_at | 0.003948 | 0.001745 | VTI1A        | 143187    | . |
| 235925_at | 5.30E-04 | 1.53E-04 | TCF12        | 6938      | . |
| 235926_at | 1.52E-04 | 3.26E-05 |              |           | . |
| 235927_at | 9.37E-06 | 9.34E-07 | XPO1         | 7514      | . |
| 235929_s_ | 0.024729 | 0.01516  |              |           | . |
| 235930_at | 9.37E-08 | 2.09E-09 |              |           | . |
| 235931_at | 1.88E-04 | 4.24E-05 | FAM119A      | 151194    | . |

|           |          |          |                             |        |   |
|-----------|----------|----------|-----------------------------|--------|---|
| 235932_x_ | 7.56E-04 | 2.37E-04 | HMCN2                       | 256158 | . |
| 235934_at | 8.77E-04 | 2.85E-04 |                             |        | . |
| 235936_at | 5.41E-04 | 1.57E-04 | LOC254559                   | 254559 | . |
| 235937_at | 0.001284 | 4.52E-04 |                             |        | . |
| 235938_at | 5.29E-05 | 8.59E-06 |                             |        | . |
| 235940_at | 0.01921  | 0.011279 | C9orf64                     | 84267  | . |
| 235941_s_ | 0.003081 | 0.001296 | LOC159110 /// 159110 /// 40 |        | . |
| 235945_at | 0.021936 | 0.013198 | SRD5A2                      | 6716   | . |
| 235947_at | 4.87E-05 | 7.75E-06 |                             |        | . |
| 235948_at | 0.009979 | 0.005235 | RIMKLA                      | 284716 | . |
| 235949_at | 6.47E-05 | 1.11E-05 |                             |        | . |
| 235951_s_ | 3.46E-04 | 9.06E-05 | ZNF688                      | 146542 | . |
| 235952_at | 1.97E-04 | 4.50E-05 |                             |        | . |
| 235954_at | 3.78E-06 | 2.84E-07 |                             |        | . |
| 235955_at | 3.96E-06 | 3.02E-07 | MARVELD2                    | 153562 | . |
| 235956_at | 2.51E-04 | 6.11E-05 | KIAA1377                    | 57562  | . |
| 235957_at | 0.001803 | 6.80E-04 | GRIP1                       | 23426  | . |
| 235958_at | 2.96E-04 | 7.47E-05 | PLA2G4F                     | 255189 | . |
| 235960_at | 1.28E-04 | 2.61E-05 |                             |        | . |
| 235961_at | 0.00506  | 0.002352 | GPR161                      | 23432  | . |
| 235962_at | 5.48E-05 | 8.96E-06 |                             |        | . |
| 235963_at | 0.041876 | 0.027932 | LOC100130349 100130349      |        | . |
| 235964_x_ | 0.037896 | 0.024884 |                             |        | . |
| 235966_at | 6.43E-08 | 1.26E-09 | DAB2IP                      | 153090 | . |
| 235968_at | 0.023873 | 0.014549 | AGAP1                       | 116987 | . |
| 235969_at | 5.58E-05 | 9.18E-06 | FLJ33996                    | 283401 | . |
| 235970_at | 0.018636 | 0.010891 | LCORL                       | 254251 | . |
| 235971_at | 6.83E-04 | 2.09E-04 |                             |        | . |
| 235972_at | 0.001416 | 5.09E-04 | TMEM131                     | 23505  | . |
| 235977_at | 0.002393 | 9.58E-04 | LONRF2                      | 164832 | . |
| 235983_at | 8.47E-04 | 2.73E-04 |                             |        | . |
| 235984_at | 6.22E-10 | 2.81E-12 |                             |        | . |
| 235985_at | 1.11E-06 | 5.65E-08 |                             |        | . |
| 235986_at | 0.001052 | 3.54E-04 |                             |        | . |

|           |          |          |              |           |   |
|-----------|----------|----------|--------------|-----------|---|
| 235987_at | 0.02522  | 0.01552  | PRKXP1       | 441733    | . |
| 235989_at | 0.007009 | 0.003462 |              |           | . |
| 235990_at | 5.16E-08 | 9.40E-10 | LOC100130987 | 100130987 | . |
| 235994_s_ | 0.004097 | 0.001823 | PLAC2        | 257000    | . |
| 235995_at | 0.002275 | 9.02E-04 | PUM2         | 23369     | . |
| 235996_at | 9.03E-08 | 2.00E-09 | RASSF8       | 11228     | . |
| 235997_at | 0.007644 | 0.003834 | ZNF74        | 7625      | . |
| 235998_at | 5.30E-05 | 8.61E-06 | RHPN1        | 114822    | . |
| 235999_at | 8.30E-06 | 7.90E-07 |              |           | . |
| 236000_s_ | 3.15E-06 | 2.25E-07 |              |           | . |
| 236001_at | 0.001174 | 4.06E-04 | LOC400573    | 400573    | . |
| 236003_x_ | 3.38E-04 | 8.80E-05 |              |           | . |
| 236007_at | 6.38E-04 | 1.92E-04 | AKAP10       | 11216     | . |
| 236008_at | 0.018088 | 0.010518 | LOC100128909 | 100128909 | . |
| 236011_at | 0.015208 | 0.008587 | FOXK1        | 221937    | . |
| 236013_at | 3.27E-08 | 5.10E-10 | CACNA1E      | 777       | . |
| 236014_at | 8.45E-04 | 2.72E-04 | MKX          | 283078    | . |
| 236015_at | 0.041547 | 0.027675 |              |           | . |
| 236016_at | 0.048665 | 0.033261 |              |           | . |
| 236017_at | 0.003931 | 0.001737 | CDKL3        | 51265     | . |
| 236018_at | 2.79E-04 | 6.95E-05 |              |           | . |
| 236019_at | 5.56E-05 | 9.14E-06 | RAB12        | 201475    | . |
| 236020_s_ | 0.007743 | 0.00389  | TRUB1        | 142940    | . |
| 236021_at | 4.11E-06 | 3.17E-07 |              |           | . |
| 236022_at | 1.12E-06 | 5.76E-08 | MYO19        | 80179     | . |
| 236024_at | 0.00542  | 0.002549 | GPM6A        | 2823      | . |
| 236026_at | 2.06E-04 | 4.75E-05 | GPATCH2      | 55105     | . |
| 236027_at | 0.030042 | 0.019012 | C10orf78     | 119392    | . |
| 236030_at | 0.001503 | 5.48E-04 | RCOR2        | 283248    | . |
| 236031_x_ | 1.37E-05 | 1.54E-06 |              |           | . |
| 236032_at | 0.00292  | 0.001214 |              |           | . |
| 236033_at | 2.77E-05 | 3.76E-06 | ASB12        | 142689    | . |
| 236034_at | 0.006416 | 0.003115 | ANGPT2       | 285       | . |
| 236036_at | 0.003552 | 0.001538 |              |           | . |



|           |          |          |              |             |
|-----------|----------|----------|--------------|-------------|
| 236038_at | 0.004135 | 0.001844 |              | .           |
| 236039_at | 5.24E-05 | 8.50E-06 | LYPD5        | 284348 .    |
| 236040_at | 0.003017 | 0.001264 | XAGE3        | 170626 .    |
| 236041_at | 3.08E-05 | 4.32E-06 |              | .           |
| 236042_at | 0.031999 | 0.020451 | LOC100130219 | 100130219 . |
| 236043_at | 0.01709  | 0.009839 | LOC100130175 | 100130175 . |
| 236044_at | 4.33E-04 | 1.19E-04 | PPAPDC1A     | 196051 .    |
| 236045_x  | 0.031877 | 0.020355 |              | .           |
| 236046_at | 2.70E-04 | 6.67E-05 | FLJ44896     | 401166 .    |
| 236048_at | 0.002784 | 0.001148 | LHFPL1       | 340596 .    |
| 236049_at | 0.002641 | 0.001078 | WDR90        | 197335 .    |
| 236050_at | 7.75E-04 | 2.45E-04 | C11orf35     | 256329 .    |
| 236052_at | 3.61E-05 | 5.26E-06 | TRNP1        | 388610 .    |
| 236053_at | 0.00305  | 0.00128  | LOC100128653 | 100128653 . |
| 236055_at | 0.04718  | 0.032097 | DQX1         | 165545 .    |
| 236057_at | 0.001146 | 3.94E-04 | KCTD1        | 284252 .    |
| 236058_at | 3.91E-06 | 2.97E-07 | C1orf172     | 126695 .    |
| 236059_at | 0.00639  | 0.003099 | UNQ565       | 100130428 . |
| 236060_at | 0.005363 | 0.002518 |              | .           |
| 236062_at | 1.62E-06 | 9.48E-08 |              | .           |
| 236063_at | 1.40E-05 | 1.59E-06 |              | .           |
| 236066_at | 0.032821 | 0.021063 |              | .           |
| 236067_at | 0.006541 | 0.003186 |              | .           |
| 236070_at | 6.97E-07 | 3.07E-08 | C2orf81      | 388963 .    |
| 236072_at | 0.030168 | 0.019104 |              | .           |
| 236073_at | 0.003567 | 0.001546 | EPHA10       | 284656 .    |
| 236074_at | 5.27E-04 | 1.52E-04 | LOC100129673 | 100129673 . |
| 236075_s  | 7.63E-04 | 2.40E-04 | LOC100129673 | 100129673 . |
| 236076_at | 0.015251 | 0.008617 | LOC257396    | 257396 .    |
| 236077_at | 0.009611 | 0.005006 | GANC         | 2595 .      |
| 236078_at | 0.001442 | 5.21E-04 | KIAA1609     | 57707 .     |
| 236082_at | 0.001569 | 5.76E-04 | PHLDB3       | 653583 .    |
| 236083_at | 0.007127 | 0.00353  | BCL2L15      | 440603 .    |
| 236084_at | 3.19E-07 | 1.10E-08 |              | .           |

|           |          |          |              |               |
|-----------|----------|----------|--------------|---------------|
| 236086_at | 0.011812 | 0.006374 |              | .             |
| 236087_at | 1.20E-06 | 6.28E-08 | ABLIM2       | 84448 .       |
| 236090_at | 2.48E-04 | 5.99E-05 |              | .             |
| 236091_at | 3.03E-04 | 7.68E-05 | HMGB2        | 3148 .        |
| 236092_at | 0.005074 | 0.00236  |              | .             |
| 236093_at | 3.63E-07 | 1.30E-08 |              | .             |
| 236096_at | 0.019285 | 0.011333 | SIPA1L3      | 23094 .       |
| 236098_at | 2.24E-04 | 5.26E-05 | hCG_1643808  | 100130933 .   |
| 236099_at | 6.79E-05 | 1.18E-05 |              | .             |
| 236104_at | 0.017527 | 0.010135 | HNRPLL       | 92906 .       |
| 236105_at | 0.012648 | 0.006918 |              | .             |
| 236106_at | 0.002774 | 0.001143 |              | .             |
| 236107_at | 0.032039 | 0.020482 | UBE2Z        | 65264 .       |
| 236108_at | 3.23E-05 | 4.58E-06 | KIAA1632     | 57724 .       |
| 236109_at | 0.004966 | 0.002296 | RPUSD4       | 84881 .       |
| 236114_at | 0.008041 | 0.004068 |              | .             |
| 236115_at | 7.17E-05 | 1.27E-05 | HTR7P        | 93164 .       |
| 236118_at | 1.33E-09 | 7.83E-12 | LOC100128893 | 100128893 //. |
| 236119_s_ | 2.58E-06 | 1.72E-07 | SPRR2G       | 6706 .        |
| 236122_at | 0.001046 | 3.52E-04 |              | .             |
| 236124_at | 0.005723 | 0.002718 | LOC153546    | 153546 .      |
| 236125_at | 0.008275 | 0.004205 |              | .             |
| 236126_at | 1.87E-09 | 1.21E-11 | ACVR2B       | 93 .          |
| 236127_at | 0.028508 | 0.017875 | ZBTB17       | 7709 .        |
| 236128_at | 3.62E-04 | 9.56E-05 | ZNF91        | 7644 .        |
| 236129_at | 1.17E-08 | 1.27E-10 | GALNT5       | 11227 .       |
| 236130_at | 0.027537 | 0.017171 | SNORA37      | 677819 .      |
| 236133_x_ | 0.001432 | 5.16E-04 | ZNF254       | 9534 .        |
| 236134_at | 4.06E-06 | 3.12E-07 | WDR68        | 10238 .       |
| 236136_at | 0.00234  | 9.32E-04 | CYTH3        | 9265 .        |
| 236137_at | 0.001324 | 4.70E-04 |              | .             |
| 236139_at | 1.64E-06 | 9.67E-08 |              | .             |
| 236140_at | 0.015233 | 0.008605 | GCLM         | 2730 .        |
| 236141_at | 1.86E-05 | 2.27E-06 | NBLA00301    | 79804 .       |

|           |          |          |              |           |   |
|-----------|----------|----------|--------------|-----------|---|
| 236144_at | 1.43E-04 | 3.01E-05 | CPXM2        | 119587    | . |
| 236145_at | 0.004825 | 0.002222 | LOC100129803 | 100129803 | . |
| 236146_at | 0.005132 | 0.002391 | SYNCRIP      | 10492     | . |
| 236148_at | 0.0085   | 0.004337 |              |           | . |
| 236149_at | 1.15E-06 | 5.95E-08 |              |           | . |
| 236151_at | 0.026736 | 0.0166   | KIAA1853     | 84530     | . |
| 236153_at | 4.60E-04 | 1.28E-04 |              |           | . |
| 236155_at | 1.08E-07 | 2.53E-09 | ZCCHC6       | 79670     | . |
| 236157_at | 0.004065 | 0.001807 | RBM4         | 5936      | . |
| 236160_at | 2.66E-04 | 6.54E-05 | TRIP11       | 9321      | . |
| 236162_at | 0.001447 | 5.23E-04 |              |           | . |
| 236163_at | 1.27E-04 | 2.59E-05 | LIX1         | 167410    | . |
| 236164_at | 0.003453 | 0.001487 | FLJ10038     | 55056     | . |
| 236165_at | 6.57E-05 | 1.13E-05 | MSL3         | 10943     | . |
| 236166_at | 0.029067 | 0.018293 | LOC285147    | 285147    | . |
| 236168_at | 7.20E-04 | 2.23E-04 |              |           | . |
| 236170_x  | 0.022124 | 0.013329 | HERPUD2      | 64224     | . |
| 236171_at | 0.003288 | 0.001402 | ATP2C2       | 9914      | . |
| 236172_at | 0.014275 | 0.007964 | LTB4R        | 1241      | . |
| 236173_s  | 0.020528 | 0.012196 | LRIG1        | 26018     | . |
| 236174_at | 0.003265 | 0.00139  |              |           | . |
| 236176_at | 0.033059 | 0.021246 | LOC645757    | 645757    | . |
| 236177_s  | 0.007268 | 0.003613 |              |           | . |
| 236179_at | 0.002129 | 8.33E-04 | CDH11        | 1009      | . |
| 236180_at | 0.016465 | 0.009425 |              |           | . |
| 236181_at | 0.019462 | 0.011457 | LOC100132181 | 100132181 | . |
| 236182_at | 0.034031 | 0.021962 | FAM185A      | 222234    | . |
| 236183_at | 0.015729 | 0.008932 | DYNC1H1      | 1778      | . |
| 236184_at | 3.50E-04 | 9.17E-05 |              |           | . |
| 236186_x  | 0.005127 | 0.002389 | IL17RE       | 132014    | . |
| 236189_at | 5.43E-04 | 1.58E-04 | ANKRD50      | 57182     | . |
| 236192_at | 0.001917 | 7.33E-04 | HOOK3        | 84376     | . |
| 236194_at | 0.014664 | 0.008224 |              |           | . |
| 236196_at | 3.89E-04 | 1.05E-04 |              |           | . |

|           |          |          |                          |
|-----------|----------|----------|--------------------------|
| 236197_at | 0.024714 | 0.015148 | .                        |
| 236199_at | 0.020768 | 0.012372 | .                        |
| 236200_at | 1.56E-04 | 3.37E-05 | .                        |
| 236204_at | 8.09E-05 | 1.48E-05 | .                        |
| 236206_at | 7.70E-04 | 2.43E-04 | FAM53A 152877 .          |
| 236207_at | 4.37E-05 | 6.75E-06 | SSFA2 6744 .             |
| 236208_at | 0.013288 | 0.007329 | MOCS2 4338 .             |
| 236210_at | 2.16E-08 | 2.91E-10 | .                        |
| 236211_at | 0.020443 | 0.012132 | .                        |
| 236212_at | 3.08E-05 | 4.32E-06 | .                        |
| 236213_at | 0.023954 | 0.014607 | .                        |
| 236214_at | 3.96E-06 | 3.02E-07 | FAM71F1 84691 .          |
| 236215_at | 0.012756 | 0.006989 | .                        |
| 236216_at | 4.70E-05 | 7.42E-06 | .                        |
| 236217_at | 5.32E-04 | 1.53E-04 | SLC31A1 1317 .           |
| 236219_at | 2.24E-04 | 5.27E-05 | .                        |
| 236220_at | 0.025337 | 0.015606 | .                        |
| 236222_at | 0.007326 | 0.003647 | C3orf15 89876 .          |
| 236223_s_ | 2.81E-04 | 7.00E-05 | RIT1 6016 .              |
| 236224_at | 4.85E-05 | 7.70E-06 | RIT1 6016 .              |
| 236226_at | 0.036417 | 0.023761 | BTLA 151888 .            |
| 236228_at | 0.001339 | 4.77E-04 | LOC100130744 100130744 . |
| 236229_at | 1.38E-05 | 1.56E-06 | .                        |
| 236231_at | 4.89E-05 | 7.78E-06 | ZNF271 10778 .           |
| 236232_at | 0.028455 | 0.017835 | STX4 6810 .              |
| 236233_at | 8.49E-06 | 8.16E-07 | TRIM32 22954 .           |
| 236235_at | 6.64E-06 | 5.88E-07 | ITCH 83737 .             |
| 236236_at | 2.08E-05 | 2.63E-06 | .                        |
| 236237_at | 0.020841 | 0.012426 | .                        |
| 236239_at | 0.045741 | 0.030962 | XPNPEP1 7511 .           |
| 236240_at | 0.009296 | 0.004817 | C4orf29 80167 .          |
| 236241_at | 2.62E-05 | 3.51E-06 | MED31 51003 .            |
| 236247_at | 0.001829 | 6.92E-04 | NSUN4 387338 .           |
| 236248_x_ | 1.84E-04 | 4.14E-05 | TADA2B 93624 .           |

|           |          |          |              |           |   |
|-----------|----------|----------|--------------|-----------|---|
| 236249_at | 0.001237 | 4.33E-04 | IKIP         | 121457    | . |
| 236250_at | 1.01E-05 | 1.03E-06 | AFG3L1       | 172       | . |
| 236252_at | 3.92E-04 | 1.05E-04 |              |           | . |
| 236253_at | 0.014175 | 0.007899 |              |           | . |
| 236255_at | 0.011994 | 0.006491 | PLEKHG4B     | 153478    | . |
| 236257_at | 5.35E-05 | 8.71E-06 | CD2AP        | 23607     | . |
| 236258_at | 1.32E-05 | 1.45E-06 | C20orf151    | 140893    | . |
| 236259_at | 5.28E-04 | 1.52E-04 | STK4         | 6789      | . |
| 236262_at | 0.026775 | 0.01663  | MMRN2        | 79812     | . |
| 236263_at | 4.26E-04 | 1.17E-04 | SHH          | 6469      | . |
| 236264_at | 0.013207 | 0.007277 | LPHN3        | 23284     | . |
| 236265_at | 8.71E-07 | 4.13E-08 | SP4          | 6671      | . |
| 236267_at | 8.80E-06 | 8.57E-07 | ZNF346       | 23567     | . |
| 236268_at | 3.74E-05 | 5.50E-06 | SEC22C       | 9117      | . |
| 236269_at | 0.009697 | 0.005062 | ZNF628       | 89887     | . |
| 236270_at | 3.62E-08 | 5.85E-10 | NFATC4       | 4776      | . |
| 236271_at | 8.83E-04 | 2.87E-04 | LOC100131721 | 100131721 | . |
| 236272_at | 0.034979 | 0.022662 | LOC100129444 | 100129444 | . |
| 236274_at | 3.97E-06 | 3.03E-07 | EIF3B        | 8662      | . |
| 236275_at | 0.013562 | 0.007501 | KRBA1        | 84626     | . |
| 236279_at | 9.50E-10 | 5.05E-12 |              |           | . |
| 236281_x_ | 1.31E-04 | 2.71E-05 | HTR7         | 3363      | . |
| 236283_x_ | 2.36E-04 | 5.62E-05 | LOC646214    | 646214    | . |
| 236286_at | 0.002008 | 7.76E-04 | PROCA1       | 147011    | . |
| 236288_at | 5.15E-06 | 4.23E-07 | RNF34        | 80196     | . |
| 236289_at | 0.003595 | 0.00156  |              |           | . |
| 236292_at | 3.04E-05 | 4.24E-06 | RNF130       | 55819     | . |
| 236294_at | 2.34E-06 | 1.53E-07 | HUWE1        | 10075     | . |
| 236296_x_ | 0.028544 | 0.017903 | C8orf58      | 541565    | . |
| 236302_at | 1.74E-07 | 4.80E-09 | PPM1E        | 22843     | . |
| 236305_at | 0.016275 | 0.0093   | RFESD        | 317671    | . |
| 236308_at | 0.04849  | 0.033117 | VSTM2A       | 222008    | . |
| 236310_at | 9.15E-04 | 3.00E-04 |              |           | . |
| 236311_at | 0.017773 | 0.010302 | LOH12CR2     | 503693    | . |

|           |          |          |                              |          |
|-----------|----------|----------|------------------------------|----------|
| 236312_at | 5.72E-08 | 1.07E-09 |                              | .        |
| 236313_at | 2.81E-04 | 6.99E-05 | CDKN2B                       | 1030 .   |
| 236314_at | 0.001948 | 7.48E-04 | EPM2AIP1                     | 9852 .   |
| 236315_at | 0.01563  | 0.00887  |                              | .        |
| 236316_at | 0.04518  | 0.030518 | FAM3C                        | 10447 .  |
| 236317_at | 0.048043 | 0.032764 |                              | .        |
| 236318_x_ | 4.84E-04 | 1.37E-04 |                              | .        |
| 236320_at | 0.010959 | 0.005842 | CCDC17                       | 149483 . |
| 236322_at | 1.68E-05 | 2.00E-06 |                              | .        |
| 236323_at | 9.17E-05 | 1.73E-05 |                              | .        |
| 236324_at | 0.020851 | 0.012434 | MBP                          | 4155 .   |
| 236325_at | 0.001245 | 4.36E-04 | KIAA1377                     | 57562 .  |
| 236326_at | 1.21E-06 | 6.37E-08 | HDAC7                        | 51564 .  |
| 236329_at | 0.004435 | 0.002008 | FLJ33996 /// LC100127971 //. | .        |
| 236332_at | 0.048272 | 0.032946 | DHRS7                        | 51635 .  |
| 236333_at | 0.002967 | 0.001237 |                              | .        |
| 236341_at | 0.017526 | 0.010134 | CTLA4                        | 1493 .   |
| 236342_at | 0.018017 | 0.010469 |                              | .        |
| 236343_at | 2.13E-05 | 2.70E-06 |                              | .        |
| 236344_at | 6.81E-04 | 2.09E-04 | PDE1C                        | 5137 .   |
| 236346_at | 7.15E-05 | 1.26E-05 |                              | .        |
| 236347_at | 3.08E-06 | 2.17E-07 | MMAA                         | 166785 . |
| 236348_at | 1.52E-04 | 3.27E-05 | TMEM176B                     | 28959 .  |
| 236351_at | 8.50E-09 | 8.63E-11 | LOC389023                    | 389023 . |
| 236352_at | 4.01E-04 | 1.09E-04 | VGLL2                        | 245806 . |
| 236353_at | 2.36E-05 | 3.07E-06 |                              | .        |
| 236354_at | 6.63E-06 | 5.87E-07 |                              | .        |
| 236355_s_ | 0.018408 | 0.010737 |                              | .        |
| 236356_at | 1.30E-04 | 2.67E-05 | NDUFS1                       | 4719 .   |
| 236358_at | 0.020681 | 0.012309 |                              | .        |
| 236361_at | 2.96E-05 | 4.10E-06 | GALNTL2                      | 117248 . |
| 236362_at | 3.83E-06 | 2.88E-07 |                              | .        |
| 236364_at | 8.79E-08 | 1.92E-09 |                              | .        |
| 236367_at | 1.46E-05 | 1.67E-06 | SMG7                         | 9887 .   |

|           |          |          |              |           |   |
|-----------|----------|----------|--------------|-----------|---|
| 236368_at | 1.25E-05 | 1.36E-06 | KIAA0368     | 23392     | . |
| 236370_at | 0.001778 | 6.69E-04 |              |           | . |
| 236372_at | 5.48E-06 | 4.61E-07 |              |           | . |
| 236374_at | 2.60E-04 | 6.36E-05 | CTXN3        | 613212    | . |
| 236375_at | 5.60E-07 | 2.30E-08 |              |           | . |
| 236376_at | 0.001496 | 5.45E-04 | RIMKLA       | 284716    | . |
| 236377_at | 0.005562 | 0.00263  | TMEM132D     | 121256    | . |
| 236379_at | 1.32E-04 | 2.72E-05 |              |           | . |
| 236380_at | 0.003064 | 0.001288 |              |           | . |
| 236381_s_ | 4.23E-05 | 6.46E-06 | WDR8         | 49856     | . |
| 236382_at | 0.00118  | 4.09E-04 | WDR8         | 49856     | . |
| 236383_at | 0.006645 | 0.003247 |              |           | . |
| 236384_at | 0.008015 | 0.004053 |              |           | . |
| 236385_at | 0.006673 | 0.003264 |              |           | . |
| 236386_at | 0.02457  | 0.015046 | SUZ12P       | 440423    | . |
| 236387_at | 0.012138 | 0.006586 | LOC100129961 | 100129961 | . |
| 236389_x_ | 0.001288 | 4.54E-04 |              |           | . |
| 236390_at | 1.69E-06 | 1.00E-07 | C20orf94     | 128710    | . |
| 236391_at | 0.003968 | 0.001755 |              |           | . |
| 236392_at | 0.00445  | 0.002016 | CUL9         | 23113     | . |
| 236394_at | 0.001643 | 6.09E-04 |              |           | . |
| 236396_at | 9.37E-04 | 3.09E-04 |              |           | . |
| 236397_at | 0.00597  | 0.002861 |              |           | . |
| 236399_at | 0.001216 | 4.24E-04 |              |           | . |
| 236404_at | 5.33E-06 | 4.43E-07 |              |           | . |
| 236406_at | 5.16E-04 | 1.48E-04 | ZNF324B      | 388569    | . |
| 236408_at | 7.25E-06 | 6.62E-07 |              |           | . |
| 236410_x_ | 0.035626 | 0.023161 |              |           | . |
| 236411_at | 0.001921 | 7.35E-04 |              |           | . |
| 236413_at | 0.028673 | 0.018001 |              |           | . |
| 236414_at | 8.12E-04 | 2.59E-04 |              |           | . |
| 236415_at | 2.48E-04 | 5.99E-05 | DENND5B      | 160518    | . |
| 236417_at | 1.80E-04 | 4.02E-05 |              |           | . |
| 236418_at | 0.049173 | 0.033668 | TTLL10       | 254173    | . |

|           |          |          |          |           |   |
|-----------|----------|----------|----------|-----------|---|
| 236420_s_ | 0.001167 | 4.03E-04 | ANO4     | 121601    | . |
| 236423_at | 0.003396 | 0.001458 |          |           | . |
| 236426_at | 5.10E-04 | 1.46E-04 | KIF19    | 124602    | . |
| 236427_at | 0.002751 | 0.001132 |          |           | . |
| 236428_at | 0.002128 | 8.32E-04 |          |           | . |
| 236429_at | 6.08E-05 | 1.02E-05 | ZNF83    | 55769     | . |
| 236431_at | 9.60E-07 | 4.69E-08 | SR140    | 23350     | . |
| 236432_at | 0.001664 | 6.18E-04 |          |           | . |
| 236433_at | 2.02E-04 | 4.64E-05 |          |           | . |
| 236435_at | 0.003153 | 0.001333 |          |           | . |
| 236436_at | 0.003504 | 0.001513 | SLC25A45 | 283130    | . |
| 236437_at | 5.10E-04 | 1.46E-04 |          |           | . |
| 236438_at | 3.58E-04 | 9.46E-05 |          |           | . |
| 236441_at | 0.001955 | 7.51E-04 |          |           | . |
| 236442_at | 0.001494 | 5.44E-04 | DPF3     | 8110      | . |
| 236443_at | 0.003783 | 0.00166  |          |           | . |
| 236445_at | 0.006166 | 0.00297  |          |           | . |
| 236446_at | 0.004556 | 0.002074 |          |           | . |
| 236447_at | 0.002174 | 8.54E-04 |          |           | . |
| 236449_at | 0.007078 | 0.003503 |          |           | . |
| 236451_at | 1.01E-06 | 4.98E-08 |          |           | . |
| 236452_at | 9.35E-05 | 1.77E-05 |          |           | . |
| 236453_at | 0.009294 | 0.004815 | RPL7AP45 | 100132678 | . |
| 236455_at | 0.01535  | 0.008682 |          |           | . |
| 236456_at | 5.20E-10 | 2.26E-12 | PTPN5    | 84867     | . |
| 236457_at | 0.004945 | 0.002285 |          |           | . |
| 236458_at | 0.034786 | 0.022517 |          |           | . |
| 236459_at | 0.046598 | 0.031631 | PRKCE    | 5581      | . |
| 236460_at | 0.013155 | 0.007244 |          |           | . |
| 236461_at | 0.004579 | 0.002087 | ABHD1    | 84696     | . |
| 236462_at | 1.38E-04 | 2.88E-05 |          |           | . |
| 236463_at | 0.002908 | 0.001208 | ADAD2    | 161931    | . |
| 236464_at | 0.005638 | 0.002672 |          |           | . |
| 236465_at | 0.046729 | 0.031738 | RNF175   | 285533    | . |



|           |          |          |                             |          |
|-----------|----------|----------|-----------------------------|----------|
| 236467_at | 0.023274 | 0.014126 | ERICH1 /// FLJ157697 /// 44 | .        |
| 236468_at | 0.006794 | 0.003334 |                             | .        |
| 236470_at | 7.65E-04 | 2.41E-04 |                             | .        |
| 236471_at | 0.003153 | 0.001332 | NFE2L3                      | 9603 .   |
| 236472_at | 0.019291 | 0.011337 |                             | .        |
| 236474_at | 0.001643 | 6.09E-04 |                             | .        |
| 236475_at | 0.019796 | 0.011683 | MICAL2                      | 9645 .   |
| 236476_at | 5.31E-05 | 8.63E-06 |                             | .        |
| 236477_at | 0.001427 | 5.14E-04 | PRPF40A                     | 55660 .  |
| 236479_at | 1.66E-05 | 1.96E-06 |                             | .        |
| 236481_at | 4.80E-05 | 7.61E-06 | FAH                         | 2184 .   |
| 236483_at | 8.53E-04 | 2.75E-04 |                             | .        |
| 236484_at | 4.14E-05 | 6.28E-06 |                             | .        |
| 236485_at | 0.005053 | 0.002347 | LOC100129837 100129837      | .        |
| 236486_at | 0.001163 | 4.02E-04 |                             | .        |
| 236487_at | 0.008796 | 0.004512 | SCLT1                       | 132320 . |
| 236488_s_ | 2.93E-05 | 4.05E-06 |                             | .        |
| 236490_at | 4.94E-04 | 1.40E-04 |                             | .        |
| 236492_at | 3.49E-05 | 5.04E-06 | PPP2R2A                     | 5520 .   |
| 236494_x_ | 1.84E-04 | 4.12E-05 |                             | .        |
| 236495_at | 0.029143 | 0.018347 |                             | .        |
| 236496_at | 5.54E-08 | 1.04E-09 | DEGS2                       | 123099 . |
| 236498_s_ | 0.005638 | 0.002671 | C1orf86                     | 199990 . |
| 236499_at | 1.69E-05 | 2.02E-06 | C1orf86                     | 199990 . |
| 236500_at | 5.62E-04 | 1.64E-04 |                             | .        |
| 236501_at | 2.41E-05 | 3.17E-06 | SALL4                       | 57167 .  |
| 236502_at | 0.001345 | 4.79E-04 |                             | .        |
| 236503_at | 0.013419 | 0.007411 |                             | .        |
| 236505_at | 0.007817 | 0.003936 | NUP62                       | 23636 .  |
| 236506_at | 0.005115 | 0.002382 |                             | .        |
| 236507_at | 0.015019 | 0.008461 | ZDHHC3                      | 51304 .  |
| 236508_at | 0.006798 | 0.003337 |                             | .        |
| 236513_at | 0.015358 | 0.008688 |                             | .        |
| 236514_at | 6.75E-04 | 2.06E-04 | ACOT8                       | 10005 .  |

|           |          |          |           |          |
|-----------|----------|----------|-----------|----------|
| 236515_at | 0.008047 | 0.004072 |           | .        |
| 236516_at | 4.99E-06 | 4.06E-07 |           | .        |
| 236517_at | 0.014708 | 0.008254 | MEGF10    | 84466 .  |
| 236518_at | 0.004487 | 0.002035 | KIAA1984  | 84960 .  |
| 236519_at | 2.34E-05 | 3.05E-06 | C9orf135  | 138255 . |
| 236520_at | 0.001999 | 7.71E-04 |           | .        |
| 236522_at | 0.001187 | 4.12E-04 |           | .        |
| 236524_at | 5.06E-07 | 2.00E-08 |           | .        |
| 236525_at | 0.007054 | 0.003489 | FBXO36    | 130888 . |
| 236526_x_ | 0.002344 | 9.34E-04 | C5orf44   | 80006 .  |
| 236527_at | 4.22E-04 | 1.16E-04 |           | .        |
| 236529_at | 5.68E-05 | 9.40E-06 | SRCRB4D   | 136853 . |
| 236531_at | 8.32E-06 | 7.93E-07 |           | .        |
| 236533_at | 4.37E-05 | 6.74E-06 | ASAP1     | 50807 .  |
| 236534_at | 0.011996 | 0.006493 | BNIP1     | 149428 . |
| 236536_at | 3.22E-04 | 8.30E-05 | GALNT13   | 114805 . |
| 236540_at | 0.008363 | 0.004256 |           | .        |
| 236541_at | 0.015421 | 0.008731 | ARSA      | 410 .    |
| 236542_at | 0.009955 | 0.00522  |           | .        |
| 236545_at | 0.040036 | 0.026511 |           | .        |
| 236549_x_ | 4.54E-04 | 1.26E-04 |           | .        |
| 236551_at | 9.51E-04 | 3.14E-04 | ZNF311    | 282890 . |
| 236552_at | 1.15E-06 | 5.93E-08 |           | .        |
| 236557_at | 7.19E-05 | 1.27E-05 | ZBTB38    | 253461 . |
| 236562_at | 0.028603 | 0.017948 | ZNF439    | 90594 .  |
| 236563_at | 0.023074 | 0.01398  | RD3       | 343035 . |
| 236564_at | 0.031344 | 0.01996  |           | .        |
| 236565_s_ | 3.91E-05 | 5.81E-06 | LARP6     | 55323 .  |
| 236566_at | 0.030519 | 0.019364 |           | .        |
| 236568_at | 0.015553 | 0.008819 |           | .        |
| 236570_at | 2.56E-04 | 6.23E-05 | ZNF366    | 167465 . |
| 236571_at | 0.002039 | 7.90E-04 |           | .        |
| 236574_at | 0.001058 | 3.57E-04 | LOC284373 | 284373 . |
| 236576_at | 0.002427 | 9.75E-04 |           | .        |

|           |          |          |                            |             |
|-----------|----------|----------|----------------------------|-------------|
| 236579_at | 0.002712 | 0.001113 |                            | .           |
| 236581_at | 0.003962 | 0.001752 |                            | .           |
| 236583_at | 0.002153 | 8.44E-04 |                            | .           |
| 236585_at | 0.00305  | 0.001281 |                            | .           |
| 236586_at | 0.040013 | 0.026492 |                            | .           |
| 236588_at | 0.002923 | 0.001215 | CFDP1                      | 10428 .     |
| 236590_at | 3.95E-05 | 5.89E-06 |                            | .           |
| 236592_at | 0.023973 | 0.01462  |                            | .           |
| 236593_at | 0.021867 | 0.013147 | LOC100131303               | 100131303 . |
| 236594_at | 0.02448  | 0.014979 | LLGL1                      | 3996 .      |
| 236595_at | 0.015791 | 0.008975 |                            | .           |
| 236596_at | 0.001139 | 3.91E-04 |                            | .           |
| 236597_at | 0.046778 | 0.03178  | UGT3A1                     | 133688 .    |
| 236598_at | 1.02E-06 | 5.07E-08 |                            | .           |
| 236601_at | 6.93E-04 | 2.13E-04 | LOC100133474               | 100133474 . |
| 236602_at | 0.043157 | 0.028928 |                            | .           |
| 236603_at | 1.60E-04 | 3.48E-05 |                            | .           |
| 236604_at | 7.12E-05 | 1.26E-05 | BAHCC1                     | 57597 .     |
| 236605_at | 0.016679 | 0.009566 | EIF3K                      | 27335 .     |
| 236607_at | 2.34E-07 | 7.24E-09 |                            | .           |
| 236609_at | 3.22E-07 | 1.12E-08 | LOC100129592               | 100129592 . |
| 236610_at | 0.005467 | 0.002575 |                            | .           |
| 236611_at | 0.009977 | 0.005234 | LOC100129673               | 100129673 . |
| 236615_at | 1.88E-04 | 4.26E-05 |                            | .           |
| 236616_at | 1.34E-05 | 1.49E-06 |                            | .           |
| 236617_at | 3.32E-04 | 8.63E-05 |                            | .           |
| 236619_at | 2.99E-04 | 7.55E-05 |                            | .           |
| 236620_at | 6.59E-05 | 1.13E-05 | RIF1                       | 55183 .     |
| 236621_at | 2.13E-07 | 6.27E-09 | RPS27 /// RPS2100130070 // | .           |
| 236622_at | 3.97E-06 | 3.03E-07 | PIGM                       | 93183 .     |
| 236624_at | 0.007405 | 0.003693 | LOC643837                  | 643837 .    |
| 236625_at | 6.29E-05 | 1.07E-05 |                            | .           |
| 236628_at | 0.034144 | 0.022044 |                            | .           |
| 236630_at | 1.86E-05 | 2.28E-06 | AQP2                       | 359 .       |

|           |          |          |              |           |   |
|-----------|----------|----------|--------------|-----------|---|
| 236631_at | 0.01912  | 0.011218 | C21orf125    | 284836    | . |
| 236634_at | 1.93E-05 | 2.38E-06 | C8orf48      | 157773    | . |
| 236636_at | 0.049937 | 0.034276 |              |           | . |
| 236637_at | 0.047716 | 0.032512 |              |           | . |
| 236640_at | 2.07E-12 | 1.34E-15 | LOC399959    | 399959    | . |
| 236641_at | 5.52E-06 | 4.65E-07 | KIF14        | 9928      | . |
| 236643_s_ | 0.001572 | 5.77E-04 |              |           | . |
| 236645_at | 0.00789  | 0.00398  | HBP1         | 26959     | . |
| 236647_at | 0.023515 | 0.014298 |              |           | . |
| 236648_at | 0.009094 | 0.004691 |              |           | . |
| 236649_at | 0.0478   | 0.032574 | DTWD1        | 56986     | . |
| 236650_at | 6.56E-05 | 1.13E-05 |              |           | . |
| 236652_at | 0.005331 | 0.002499 | LOC149703    | 149703    | . |
| 236653_at | 0.028404 | 0.017798 | LOC148189    | 148189    | . |
| 236655_at | 2.23E-06 | 1.43E-07 | TPD52        | 7163      | . |
| 236656_s_ | 8.26E-05 | 1.52E-05 | LOC100130506 | 100130506 | . |
| 236657_at | 4.03E-05 | 6.05E-06 | LOC100130506 | 100130506 | . |
| 236658_at | 0.004286 | 0.001925 |              |           | . |
| 236659_x_ | 0.008553 | 0.004368 |              |           | . |
| 236660_at | 0.003431 | 0.001476 |              |           | . |
| 236661_at | 2.64E-04 | 6.49E-05 | IQCF6        | 440956    | . |
| 236663_at | 0.034899 | 0.022599 |              |           | . |
| 236665_at | 2.45E-08 | 3.47E-10 | CCDC18       | 343099    | . |
| 236667_at | 0.0156   | 0.00885  | TMEM120B     | 144404    | . |
| 236668_at | 0.004302 | 0.001935 |              |           | . |
| 236671_at | 0.001029 | 3.45E-04 |              |           | . |
| 236673_at | 0.001185 | 4.11E-04 | TIFAB        | 497189    | . |
| 236675_at | 7.66E-04 | 2.41E-04 | RPA1         | 6117      | . |
| 236676_at | 0.044303 | 0.029838 |              |           | . |
| 236679_x_ | 9.68E-05 | 1.85E-05 |              |           | . |
| 236680_at | 0.039551 | 0.026137 |              |           | . |
| 236681_at | 4.96E-04 | 1.41E-04 | HOXD13       | 3239      | . |
| 236682_at | 1.70E-04 | 3.73E-05 |              |           | . |
| 236683_at | 0.00744  | 0.003716 |              |           | . |

|           |          |          |              |           |   |
|-----------|----------|----------|--------------|-----------|---|
| 236684_at | 0.006231 | 0.003008 | RQCD1        | 9125      | . |
| 236687_at | 0.012457 | 0.006795 |              |           | . |
| 236688_at | 0.03264  | 0.020925 | FRMPD3       | 84443     | . |
| 236689_at | 6.52E-04 | 1.98E-04 | RNF151       | 146310    | . |
| 236691_at | 0.012024 | 0.006511 |              |           | . |
| 236692_at | 0.045308 | 0.030621 | LOC729839    | 729839    | . |
| 236693_at | 6.40E-05 | 1.09E-05 | LOC100130155 | 100130155 | . |
| 236696_at | 8.05E-05 | 1.47E-05 | SR140        | 23350     | . |
| 236699_at | 0.014788 | 0.00831  |              |           | . |
| 236700_at | 1.45E-08 | 1.69E-10 | EIF3C        | 8663      | . |
| 236702_at | 3.62E-06 | 2.68E-07 | C20orf43     | 51507     | . |
| 236703_at | 0.011116 | 0.005943 | NT5C2        | 22978     | . |
| 236704_at | 2.57E-04 | 6.27E-05 |              |           | . |
| 236707_at | 0.014201 | 0.007917 | DAPP1        | 27071     | . |
| 236708_at | 0.035464 | 0.023031 |              |           | . |
| 236709_at | 0.004013 | 0.001779 |              |           | . |
| 236711_at | 0.040376 | 0.026769 | ZIC4         | 84107     | . |
| 236714_at | 0.023586 | 0.014351 |              |           | . |
| 236715_x_ | 9.81E-04 | 3.26E-04 | UACA         | 55075     | . |
| 236716_at | 0.023933 | 0.014593 |              |           | . |
| 236718_at | 0.007082 | 0.003504 | MYO10        | 4651      | . |
| 236720_at | 6.49E-04 | 1.97E-04 |              |           | . |
| 236722_at | 0.006768 | 0.003319 | LOC100129380 | 100129380 | . |
| 236723_at | 0.003205 | 0.00136  |              |           | . |
| 236724_at | 0.002427 | 9.75E-04 | CFC1         | 55997     | . |
| 236725_at | 1.78E-05 | 2.15E-06 | WWC1         | 23286     | . |
| 236729_at | 0.010603 | 0.00562  | CASP3        | 836       | . |
| 236730_at | 0.005805 | 0.002767 | GIPC3        | 126326    | . |
| 236733_at | 8.91E-08 | 1.96E-09 |              |           | . |
| 236736_at | 1.66E-06 | 9.81E-08 |              |           | . |
| 236737_at | 6.64E-06 | 5.89E-07 | C17orf56     | 146705    | . |
| 236738_at | 0.003625 | 0.001577 | LOC401097    | 401097    | . |
| 236741_at | 0.018845 | 0.011033 | WDR72        | 256764    | . |
| 236742_at | 0.0025   | 0.00101  |              |           | . |

|           |          |          |              |           |   |
|-----------|----------|----------|--------------|-----------|---|
| 236743_at | 2.00E-04 | 4.57E-05 | AGPAT6       | 137964    | . |
| 236744_at | 2.89E-04 | 7.25E-05 | PHPT1        | 29085     | . |
| 236746_at | 9.57E-09 | 1.01E-10 | GALNT1       | 2589      | . |
| 236747_at | 1.79E-04 | 3.98E-05 |              |           | . |
| 236749_at | 5.36E-04 | 1.55E-04 | MNT          | 4335      | . |
| 236750_at | 0.006234 | 0.00301  |              |           | . |
| 236751_at | 0.022906 | 0.013865 |              |           | . |
| 236752_at | 4.09E-06 | 3.15E-07 |              |           | . |
| 236753_at | 6.40E-04 | 1.93E-04 | LOC154822    | 154822    | . |
| 236754_at | 1.34E-05 | 1.49E-06 |              |           | . |
| 236756_at | 4.36E-05 | 6.72E-06 | LOC389857    | 389857    | . |
| 236757_at | 0.039183 | 0.025856 |              |           | . |
| 236758_at | 3.41E-04 | 8.90E-05 | LOC100129407 | 100129407 | . |
| 236759_at | 0.009732 | 0.005085 |              |           | . |
| 236760_at | 7.64E-05 | 1.38E-05 | AMMECR1      | 9949      | . |
| 236762_at | 6.72E-04 | 2.05E-04 | ATP9B        | 374868    | . |
| 236763_at | 0.002946 | 0.001227 |              |           | . |
| 236764_at | 0.015281 | 0.008636 |              |           | . |
| 236765_at | 3.76E-04 | 1.00E-04 |              |           | . |
| 236766_at | 0.004988 | 0.002309 |              |           | . |
| 236768_at | 0.003123 | 0.001318 | LOC100128139 | 100128139 | . |
| 236769_at | 0.012157 | 0.006599 | LOC158402    | 158402    | . |
| 236770_at | 0.030912 | 0.019645 | SUGT1L1      | 283507    | . |
| 236771_at | 0.033089 | 0.021267 | RIPPLY2      | 134701    | . |
| 236775_s_ | 1.21E-04 | 2.45E-05 |              |           | . |
| 236776_at | 2.35E-06 | 1.54E-07 |              |           | . |
| 236778_at | 0.013987 | 0.007775 |              |           | . |
| 236779_at | 0.009359 | 0.004854 | MRPS5        | 64969     | . |
| 236780_at | 0.002008 | 7.76E-04 |              |           | . |
| 236781_at | 2.29E-07 | 7.00E-09 |              |           | . |
| 236782_at | 0.003373 | 0.001447 | SAMD3        | 154075    | . |
| 236784_s_ | 5.05E-04 | 1.44E-04 |              |           | . |
| 236785_at | 0.007305 | 0.003635 |              |           | . |
| 236786_at | 0.001882 | 7.17E-04 | FAM135B      | 51059     | . |

|           |          |          |              |             |
|-----------|----------|----------|--------------|-------------|
| 236787_at | 2.39E-04 | 5.71E-05 |              | .           |
| 236788_at | 0.00341  | 0.001465 |              | .           |
| 236789_at | 0.037045 | 0.024242 |              | .           |
| 236790_s_ | 7.60E-04 | 2.39E-04 |              | .           |
| 236794_at | 0.025686 | 0.015847 |              | .           |
| 236797_at | 3.57E-04 | 9.41E-05 |              | .           |
| 236798_at | 3.43E-04 | 8.97E-05 |              | .           |
| 236800_at | 0.001266 | 4.45E-04 | UCMA         | 221044 .    |
| 236801_at | 2.34E-05 | 3.05E-06 |              | .           |
| 236806_at | 0.005223 | 0.00244  |              | .           |
| 236807_at | 9.64E-05 | 1.84E-05 |              | .           |
| 236809_at | 7.95E-05 | 1.45E-05 |              | .           |
| 236812_at | 0.038073 | 0.025013 | STMN4        | 81551 .     |
| 236814_at | 1.05E-04 | 2.05E-05 | MDM4         | 4194 .      |
| 236815_at | 4.62E-07 | 1.79E-08 |              | .           |
| 236816_at | 0.01385  | 0.007689 | C12orf30     | 80018 .     |
| 236817_at | 1.78E-04 | 3.97E-05 | ADAT2        | 134637 .    |
| 236819_at | 1.75E-04 | 3.87E-05 | PTBP1        | 5725 .      |
| 236820_at | 6.45E-04 | 1.95E-04 |              | .           |
| 236821_at | 0.008159 | 0.004135 |              | .           |
| 236824_at | 0.007751 | 0.003894 | TMEM132B     | 114795 .    |
| 236825_at | 1.77E-04 | 3.94E-05 |              | .           |
| 236827_at | 0.006894 | 0.003394 |              | .           |
| 236828_at | 0.022186 | 0.013371 |              | .           |
| 236830_at | 0.008624 | 0.004409 |              | .           |
| 236831_at | 0.001037 | 3.48E-04 | CCDC50       | 152137 .    |
| 236833_at | 1.33E-04 | 2.77E-05 | TTC16        | 158248 .    |
| 236834_at | 2.76E-04 | 6.83E-05 | SCFD2        | 152579 .    |
| 236836_at | 5.58E-06 | 4.71E-07 |              | .           |
| 236837_x_ | 5.38E-04 | 1.56E-04 | LOC650794    | 650794 .    |
| 236839_at | 0.00469  | 0.002148 |              | .           |
| 236841_at | 3.67E-06 | 2.73E-07 | LOC100133859 | 100133859 . |
| 236842_at | 0.00525  | 0.002454 |              | .           |
| 236844_at | 5.96E-07 | 2.48E-08 | DHX30        | 22907 .     |

|           |          |          |           |        |   |
|-----------|----------|----------|-----------|--------|---|
| 236845_at | 1.47E-04 | 3.13E-05 | TRIM62    | 55223  | . |
| 236847_at | 0.001246 | 4.37E-04 | C19orf18  | 147685 | . |
| 236848_s  | 0.007531 | 0.003767 | TEX13A    | 56157  | . |
| 236849_at | 1.81E-04 | 4.04E-05 | VTI1A     | 143187 | . |
| 236850_at | 0.048006 | 0.032734 | CAPRIN1   | 4076   | . |
| 236851_x  | 3.93E-05 | 5.86E-06 |           |        | . |
| 236852_at | 0.002962 | 0.001234 | FBXO43    | 286151 | . |
| 236853_at | 2.47E-06 | 1.63E-07 | C13orf16  | 121793 | . |
| 236856_x  | 0.014854 | 0.008353 |           |        | . |
| 236857_at | 5.50E-05 | 9.01E-06 |           |        | . |
| 236861_at | 0.010201 | 0.005369 |           |        | . |
| 236862_at | 0.003433 | 0.001476 | GOPC      | 57120  | . |
| 236863_at | 0.007448 | 0.00372  | C17orf67  | 339210 | . |
| 236865_at | 2.14E-05 | 2.72E-06 |           |        | . |
| 236868_at | 0.004037 | 0.001792 |           |        | . |
| 236869_at | 1.68E-07 | 4.60E-09 |           |        | . |
| 236871_s  | 8.61E-06 | 8.30E-07 | IQCF3     | 401067 | . |
| 236872_at | 0.012452 | 0.00679  | RBM22     | 55696  | . |
| 236876_at | 6.36E-04 | 1.91E-04 | H1FNT     | 341567 | . |
| 236880_at | 0.001539 | 5.63E-04 | RAD52     | 5893   | . |
| 236881_at | 1.22E-07 | 2.95E-09 |           |        | . |
| 236883_at | 0.012387 | 0.006746 |           |        | . |
| 236885_at | 0.011961 | 0.006472 | MEX3A     | 92312  | . |
| 236887_at | 0.006787 | 0.00333  | KIN       | 22944  | . |
| 236889_at | 3.55E-08 | 5.66E-10 |           |        | . |
| 236890_at | 6.91E-06 | 6.21E-07 | GTPBP5    | 26164  | . |
| 236894_at | 3.48E-07 | 1.24E-08 | L1TD1     | 54596  | . |
| 236897_at | 2.16E-04 | 5.03E-05 |           |        | . |
| 236898_at | 0.003405 | 0.001462 |           |        | . |
| 236899_at | 0.013061 | 0.007182 | LOC729397 | 729397 | . |
| 236900_x  | 0.019302 | 0.011346 | LOC126661 | 126661 | . |
| 236901_at | 4.86E-07 | 1.90E-08 |           |        | . |
| 236904_x  | 0.018225 | 0.01061  | TECTA     | 7007   | . |
| 236905_at | 8.26E-05 | 1.52E-05 | LOC731139 | 731139 | . |



|           |          |          |                            |           |   |
|-----------|----------|----------|----------------------------|-----------|---|
| 236906_x_ | 2.10E-04 | 4.88E-05 | IPO5                       | 3843      | . |
| 236907_at | 2.43E-07 | 7.62E-09 |                            |           | . |
| 236908_at | 0.001202 | 4.18E-04 |                            |           | . |
| 236909_at | 0.023868 | 0.014546 | C2orf77                    | 129881    | . |
| 236911_at | 0.013106 | 0.007212 | RIMKLB                     | 57494     | . |
| 236913_at | 0.0024   | 9.62E-04 |                            |           | . |
| 236914_at | 0.032012 | 0.02046  | LOC100130389               | 100130389 | . |
| 236917_at | 7.85E-05 | 1.42E-05 | LRRC34                     | 151827    | . |
| 236918_s_ | 0.040936 | 0.027204 | LRRC34                     | 151827    | . |
| 236919_at | 0.041959 | 0.027996 |                            |           | . |
| 236920_at | 0.016409 | 0.009387 | RHOXF2 /// RH727940 /// 84 |           | . |
| 236921_at | 0.001734 | 6.49E-04 |                            |           | . |
| 236923_x_ | 0.006278 | 0.003035 |                            |           | . |
| 236924_at | 3.62E-04 | 9.57E-05 | GLMN                       | 11146     | . |
| 236925_at | 6.37E-05 | 1.09E-05 | LOC728288                  | 728288    | . |
| 236930_at | 0.001788 | 6.73E-04 | NUMB                       | 8650      | . |
| 236931_at | 0.003149 | 0.00133  |                            |           | . |
| 236933_at | 0.041468 | 0.027616 | EVPLL                      | 645027    | . |
| 236934_at | 4.61E-06 | 3.67E-07 |                            |           | . |
| 236936_at | 0.030519 | 0.019363 |                            |           | . |
| 236937_at | 8.98E-04 | 2.93E-04 | VPS8                       | 23355     | . |
| 236938_at | 0.00217  | 8.52E-04 |                            |           | . |
| 236941_at | 2.38E-04 | 5.68E-05 | C22orf30                   | 253143    | . |
| 236942_at | 0.044526 | 0.030015 |                            |           | . |
| 236943_at | 0.032524 | 0.020836 |                            |           | . |
| 236946_at | 0.024481 | 0.01498  |                            |           | . |
| 236948_x_ | 0.036844 | 0.024084 | SFRS11                     | 9295      | . |
| 236949_at | 1.49E-04 | 3.17E-05 |                            |           | . |
| 236951_at | 3.18E-04 | 8.17E-05 | NSFL1C                     | 55968     | . |
| 236952_at | 0.036851 | 0.024089 |                            |           | . |
| 236953_s_ | 1.52E-05 | 1.76E-06 | NHLRC3                     | 387921    | . |
| 236954_at | 0.016323 | 0.009332 | BOLL                       | 66037     | . |
| 236956_at | 0.003902 | 0.001722 |                            |           | . |
| 236957_at | 0.003403 | 0.001461 | CDCA2                      | 157313    | . |

|           |          |          |           |             |
|-----------|----------|----------|-----------|-------------|
| 236958_at | 1.43E-04 | 3.03E-05 |           | .           |
| 236959_s_ | 8.45E-04 | 2.72E-04 |           | .           |
| 236961_at | 7.85E-05 | 1.43E-05 |           | .           |
| 236964_at | 0.020093 | 0.011892 |           | .           |
| 236966_at | 1.18E-08 | 1.29E-10 | ARMC8     | 25852 .     |
| 236969_at | 8.30E-09 | 8.35E-11 |           | .           |
| 236970_s_ | 0.001312 | 4.64E-04 | BCAP29    | 55973 .     |
| 236971_at | 3.30E-06 | 2.39E-07 |           | .           |
| 236972_at | 0.015825 | 0.008999 | TRIM63    | 84676 .     |
| 236974_at | 0.043487 | 0.029194 |           | .           |
| 236975_at | 0.003048 | 0.001279 |           | .           |
| 236976_at | 3.61E-05 | 5.26E-06 | FANCA     | 2175 .      |
| 236978_at | 1.88E-05 | 2.31E-06 |           | .           |
| 236980_at | 0.048836 | 0.033402 |           | .           |
| 236981_at | 6.22E-05 | 1.05E-05 | C17orf99  | 100141515 . |
| 236983_at | 0.011429 | 0.006137 | TMC5      | 79838 .     |
| 236985_at | 0.043144 | 0.028917 |           | .           |
| 236986_at | 4.53E-04 | 1.26E-04 |           | .           |
| 236988_x_ | 0.004736 | 0.002173 | ITGB2     | 3689 .      |
| 236991_at | 6.15E-05 | 1.04E-05 |           | .           |
| 236992_at | 0.016628 | 0.009532 |           | .           |
| 236993_at | 0.012207 | 0.006631 |           | .           |
| 236994_at | 0.004341 | 0.001956 | FBXL4     | 26235 .     |
| 236996_at | 0.001219 | 4.25E-04 |           | .           |
| 236998_at | 3.20E-05 | 4.52E-06 | CCDC56    | 28958 .     |
| 236999_at | 1.26E-05 | 1.38E-06 |           | .           |
| 237000_at | 0.007804 | 0.003929 |           | .           |
| 237001_at | 3.73E-06 | 2.79E-07 |           | .           |
| 237002_at | 0.017434 | 0.01007  | NCDN      | 23154 .     |
| 237003_at | 0.00217  | 8.52E-04 | BEST3     | 144453 .    |
| 237004_at | 5.30E-04 | 1.53E-04 |           | .           |
| 237005_at | 4.28E-08 | 7.27E-10 | LOC442075 | 442075 .    |
| 237010_at | 0.001961 | 7.54E-04 |           | .           |
| 237012_at | 2.31E-04 | 5.48E-05 |           | .           |

|           |          |          |                    |
|-----------|----------|----------|--------------------|
| 237013_at | 0.003776 | 0.001656 | .                  |
| 237014_at | 7.07E-06 | 6.40E-07 | MYBL1 4603 .       |
| 237016_at | 0.009913 | 0.005194 | TMEM217 221468 .   |
| 237018_at | 0.002473 | 9.97E-04 | .                  |
| 237020_at | 0.002244 | 8.87E-04 | TMEM146 257062 .   |
| 237021_at | 0.036305 | 0.023676 | LOC144486 144486 . |
| 237022_at | 0.03844  | 0.025293 | .                  |
| 237026_at | 0.006202 | 0.00299  | .                  |
| 237027_at | 0.024334 | 0.014876 | .                  |
| 237029_at | 3.78E-04 | 1.01E-04 | HGD 3081 .         |
| 237030_at | 0.018789 | 0.010996 | ACPP 55 .          |
| 237032_x_ | 0.01245  | 0.006788 | LOC283567 283567 . |
| 237033_at | 7.53E-06 | 6.96E-07 | FAM159A 348378 .   |
| 237035_at | 0.00727  | 0.003614 | .                  |
| 237036_at | 2.02E-04 | 4.62E-05 | FBXO10 26267 .     |
| 237038_at | 0.009969 | 0.005228 | CXCL14 9547 .      |
| 237039_at | 0.011622 | 0.006257 | .                  |
| 237040_at | 4.69E-05 | 7.39E-06 | CWF19L2 143884 .   |
| 237041_x_ | 0.04322  | 0.028979 | RCOR1 23186 .      |
| 237046_x_ | 1.34E-04 | 2.79E-05 | IL34 146433 .      |
| 237048_at | 0.006349 | 0.003075 | .                  |
| 237049_at | 0.043098 | 0.028879 | .                  |
| 237051_at | 0.002393 | 9.58E-04 | .                  |
| 237053_at | 0.017409 | 0.010053 | TMEM90A 646658 .   |
| 237054_at | 9.94E-06 | 1.01E-06 | ENPP5 59084 .      |
| 237055_at | 0.002658 | 0.001086 | .                  |
| 237057_at | 0.003504 | 0.001513 | .                  |
| 237060_at | 4.14E-04 | 1.13E-04 | .                  |
| 237063_at | 0.027665 | 0.017269 | .                  |
| 237064_x_ | 0.023099 | 0.013997 | .                  |
| 237067_at | 0.001666 | 6.19E-04 | .                  |
| 237070_at | 0.025246 | 0.01554  | TRPM1 4308 .       |
| 237072_at | 0.03083  | 0.019587 | .                  |
| 237073_at | 1.01E-04 | 1.96E-05 | .                  |

|           |          |          |                               |
|-----------|----------|----------|-------------------------------|
| 237075_at | 0.013669 | 0.007573 | .                             |
| 237077_at | 1.01E-04 | 1.94E-05 | .                             |
| 237078_at | 0.001663 | 6.17E-04 | .                             |
| 237079_at | 0.0088   | 0.004515 | .                             |
| 237080_at | 8.89E-05 | 1.66E-05 | .                             |
| 237085_x_ | 0.003502 | 0.001512 | LOC100132357100132357 //.     |
| 237086_at | 0.028575 | 0.017926 | FOXA1 3169 .                  |
| 237087_at | 0.004649 | 0.002125 | .                             |
| 237088_at | 0.007262 | 0.003609 | .                             |
| 237090_at | 1.38E-04 | 2.89E-05 | .                             |
| 237091_at | 0.024364 | 0.014898 | .                             |
| 237092_at | 2.59E-05 | 3.46E-06 | .                             |
| 237095_at | 0.009027 | 0.00465  | ASXL2 55252 .                 |
| 237096_at | 2.11E-04 | 4.89E-05 | .                             |
| 237097_at | 3.24E-04 | 8.37E-05 | .                             |
| 237099_at | 0.008808 | 0.00452  | C20orf70 140683 .             |
| 237102_at | 0.012499 | 0.006823 | .                             |
| 237103_at | 1.36E-05 | 1.52E-06 | .                             |
| 237104_at | 7.68E-04 | 2.42E-04 | .                             |
| 237106_at | 3.54E-07 | 1.26E-08 | SLC11A2 4891 .                |
| 237107_at | 0.020518 | 0.012187 | PRKRA /// PRK1731716 /// 85 . |
| 237109_at | 1.42E-04 | 3.00E-05 | TOM1L2 146691 .               |
| 237110_at | 0.020089 | 0.011889 | .                             |
| 237112_at | 0.022394 | 0.013509 | .                             |
| 237113_at | 0.019194 | 0.011268 | .                             |
| 237117_at | 0.021643 | 0.012985 | .                             |
| 237118_at | 4.44E-04 | 1.23E-04 | .                             |
| 237119_at | 1.53E-08 | 1.81E-10 | .                             |
| 237121_at | 0.011836 | 0.00639  | .                             |
| 237125_at | 6.97E-04 | 2.15E-04 | .                             |
| 237127_at | 0.012133 | 0.006582 | .                             |
| 237130_at | 7.87E-04 | 2.49E-04 | .                             |
| 237133_at | 1.74E-06 | 1.05E-07 | .                             |
| 237137_at | 0.007811 | 0.003933 | SCARNA2 677766 .              |

|           |          |          |                    |
|-----------|----------|----------|--------------------|
| 237140_x_ | 2.52E-05 | 3.36E-06 | .                  |
| 237141_x_ | 0.007742 | 0.003889 | AGTPBP1 23287 .    |
| 237143_at | 2.58E-04 | 6.29E-05 | .                  |
| 237144_at | 0.001477 | 5.36E-04 | LTBP3 4054 .       |
| 237147_at | 0.010104 | 0.005309 | .                  |
| 237148_at | 0.023963 | 0.014614 | .                  |
| 237153_at | 0.037376 | 0.024492 | .                  |
| 237158_s_ | 0.033726 | 0.021745 | MPHOSPH9 10198 .   |
| 237159_x_ | 0.003652 | 0.001591 | AP1S3 130340 .     |
| 237162_at | 0.044437 | 0.029946 | KANK1 23189 .      |
| 237163_x_ | 0.008257 | 0.004192 | LOC390705 390705 . |
| 237165_at | 0.00826  | 0.004194 | .                  |
| 237167_at | 0.021575 | 0.012936 | KIAA1217 56243 .   |
| 237170_at | 2.19E-06 | 1.40E-07 | .                  |
| 237171_at | 2.89E-04 | 7.24E-05 | .                  |
| 237172_at | 0.001316 | 4.66E-04 | .                  |
| 237173_at | 0.004017 | 0.001781 | .                  |
| 237174_at | 0.002789 | 0.001151 | .                  |
| 237175_at | 0.027916 | 0.017449 | .                  |
| 237179_at | 0.031415 | 0.020014 | PCMTD2 55251 .     |
| 237180_at | 2.03E-05 | 2.55E-06 | PSME4 23198 .      |
| 237183_at | 0.004507 | 0.002047 | GALNT5 11227 .     |
| 237184_at | 8.22E-07 | 3.82E-08 | .                  |
| 237186_at | 0.009472 | 0.004923 | .                  |
| 237187_at | 2.79E-04 | 6.95E-05 | .                  |
| 237188_x_ | 2.71E-05 | 3.66E-06 | SPAG4L 140732 .    |
| 237189_at | 0.029176 | 0.018371 | .                  |
| 237191_x_ | 0.008415 | 0.004287 | .                  |
| 237192_at | 4.28E-08 | 7.25E-10 | .                  |
| 237193_s_ | 2.61E-08 | 3.80E-10 | .                  |
| 237194_at | 0.036475 | 0.023802 | .                  |
| 237195_at | 0.002724 | 0.001119 | .                  |
| 237197_at | 7.64E-04 | 2.40E-04 | .                  |
| 237198_at | 3.66E-06 | 2.72E-07 | .                  |

|           |          |          |                    |
|-----------|----------|----------|--------------------|
| 237199_at | 0.009451 | 0.004911 | .                  |
| 237200_at | 0.049652 | 0.034048 | .                  |
| 237203_at | 9.11E-05 | 1.71E-05 | .                  |
| 237206_at | 0.040861 | 0.027146 | MYOCD 93649 .      |
| 237207_at | 7.61E-04 | 2.39E-04 | .                  |
| 237208_at | 3.31E-06 | 2.40E-07 | WDR61 80349 .      |
| 237209_s_ | 1.73E-04 | 3.82E-05 | NFRKB 4798 .       |
| 237210_at | 0.012441 | 0.006783 | NFRKB 4798 .       |
| 237212_at | 0.005607 | 0.002655 | .                  |
| 237214_at | 0.02729  | 0.016998 | TFRC 7037 .        |
| 237215_s_ | 2.74E-05 | 3.71E-06 | TFRC 7037 .        |
| 237217_at | 0.003122 | 0.001317 | ADAMTSL1 92949 .   |
| 237220_at | 0.010964 | 0.005846 | .                  |
| 237224_at | 0.001834 | 6.95E-04 | .                  |
| 237226_at | 3.58E-06 | 2.64E-07 | .                  |
| 237227_at | 2.07E-05 | 2.60E-06 | NEK10 152110 .     |
| 237228_at | 9.27E-04 | 3.05E-04 | ZDHHC1 29800 .     |
| 237230_at | 9.64E-05 | 1.84E-05 | GPHA2 170589 .     |
| 237231_at | 0.026676 | 0.016551 | .                  |
| 237232_at | 0.007242 | 0.003597 | .                  |
| 237234_at | 0.004764 | 0.002189 | CYTH2 9266 .       |
| 237236_x_ | 0.003122 | 0.001317 | LOC731789 731789 . |
| 237238_at | 2.80E-05 | 3.81E-06 | WWC1 23286 .       |
| 237242_at | 0.030399 | 0.019274 | LOC126536 126536 . |
| 237244_at | 1.52E-05 | 1.76E-06 | .                  |
| 237245_at | 7.81E-04 | 2.47E-04 | .                  |
| 237246_at | 1.77E-06 | 1.07E-07 | .                  |
| 237247_at | 0.04823  | 0.032912 | USP51 158880 .     |
| 237250_at | 0.027461 | 0.017116 | .                  |
| 237251_at | 1.76E-04 | 3.90E-05 | C1orf92 149499 .   |
| 237254_at | 0.002537 | 0.001028 | SLC5A11 115584 .   |
| 237255_at | 4.00E-05 | 5.99E-06 | .                  |
| 237257_at | 1.55E-05 | 1.81E-06 | RAB4B 53916 .      |
| 237262_at | 0.012525 | 0.00684  | .                  |

|           |          |          |              |             |
|-----------|----------|----------|--------------|-------------|
| 237263_at | 0.042868 | 0.028696 |              | .           |
| 237265_at | 0.008896 | 0.004573 | C16orf73     | 254528 .    |
| 237266_at | 1.06E-04 | 2.08E-05 | LOC100133686 | 100133686 . |
| 237268_at | 0.040592 | 0.026941 | DSCAM        | 1826 .      |
| 237270_at | 0.020408 | 0.012107 |              | .           |
| 237273_at | 0.010001 | 0.005248 | KCNU1        | 157855 .    |
| 237274_at | 3.70E-05 | 5.42E-06 |              | .           |
| 237275_at | 4.34E-08 | 7.40E-10 |              | .           |
| 237278_x_ | 0.012081 | 0.006552 |              | .           |
| 237279_at | 4.53E-04 | 1.26E-04 |              | .           |
| 237283_at | 2.34E-04 | 5.56E-05 |              | .           |
| 237284_at | 4.65E-05 | 7.32E-06 | DNAJB8       | 165721 .    |
| 237285_at | 3.34E-04 | 8.68E-05 | SORBS2       | 8470 .      |
| 237286_at | 0.005347 | 0.002508 | INTS9        | 55756 .     |
| 237287_at | 4.58E-05 | 7.16E-06 | WDR34        | 89891 .     |
| 237288_at | 2.10E-04 | 4.87E-05 | TGM7         | 116179 .    |
| 237292_at | 0.007851 | 0.003958 |              | .           |
| 237293_at | 1.09E-04 | 2.15E-05 |              | .           |
| 237297_at | 0.040187 | 0.026627 | FAM53B       | 9679 .      |
| 237298_at | 0.014073 | 0.007834 | FLJ26850     | 400710 .    |
| 237300_at | 0.007038 | 0.003478 | PSMA3        | 5684 .      |
| 237302_at | 0.011325 | 0.006071 |              | .           |
| 237303_at | 2.24E-04 | 5.25E-05 |              | .           |
| 237307_at | 3.83E-05 | 5.68E-06 |              | .           |
| 237308_at | 0.010506 | 0.005557 |              | .           |
| 237310_at | 0.017031 | 0.009798 |              | .           |
| 237311_at | 0.038856 | 0.025609 |              | .           |
| 237312_at | 0.025871 | 0.01598  | LOC731477    | 731477 .    |
| 237313_at | 0.010081 | 0.005296 |              | .           |
| 237314_at | 0.002769 | 0.001141 | ENKUR        | 219670 .    |
| 237317_at | 4.79E-04 | 1.35E-04 |              | .           |
| 237319_at | 0.021537 | 0.012908 | C2orf53      | 339779 .    |
| 237320_at | 0.007251 | 0.003603 | FAM71F2      | 346653 .    |
| 237323_at | 0.003094 | 0.001303 | HKDC1        | 80201 .     |

|           |          |          |              |           |   |
|-----------|----------|----------|--------------|-----------|---|
| 237324_s_ | 3.51E-06 | 2.58E-07 | HKDC1        | 80201     | . |
| 237329_at | 3.94E-04 | 1.06E-04 |              |           | . |
| 237331_s_ | 6.45E-04 | 1.95E-04 | LOC100128977 | 100128977 | . |
| 237333_at | 9.17E-07 | 4.42E-08 | RBBP4        | 5928      | . |
| 237336_at | 3.10E-06 | 2.19E-07 | ADD2         | 119       | . |
| 237337_at | 0.036786 | 0.024039 |              |           | . |
| 237338_at | 2.10E-06 | 1.34E-07 | B3GNT8       | 374907    | . |
| 237339_at | 0.024311 | 0.014859 | hCG_25653    | 646360    | . |
| 237340_at | 0.021864 | 0.013145 | SLC26A8      | 116369    | . |
| 237342_at | 0.001015 | 3.40E-04 | TOLLIP       | 54472     | . |
| 237343_at | 0.016393 | 0.009377 |              |           | . |
| 237344_at | 3.56E-04 | 9.37E-05 |              |           | . |
| 237345_at | 2.02E-05 | 2.52E-06 |              |           | . |
| 237349_at | 4.75E-05 | 7.50E-06 | TSHR         | 7253      | . |
| 237351_at | 0.012259 | 0.006667 |              |           | . |
| 237353_at | 0.028768 | 0.018078 |              |           | . |
| 237355_at | 0.022665 | 0.013698 |              |           | . |
| 237356_at | 0.01971  | 0.011624 |              |           | . |
| 237357_at | 0.001207 | 4.20E-04 |              |           | . |
| 237359_at | 0.001933 | 7.41E-04 |              |           | . |
| 237360_at | 0.033143 | 0.021305 | ACTRT2       | 140625    | . |
| 237364_at | 0.005991 | 0.002873 |              |           | . |
| 237366_at | 7.21E-04 | 2.23E-04 |              |           | . |
| 237367_x_ | 0.004143 | 0.001848 | CFLAR        | 8837      | . |
| 237369_at | 0.002393 | 9.58E-04 |              |           | . |
| 237370_at | 2.49E-06 | 1.65E-07 |              |           | . |
| 237371_at | 0.019397 | 0.011415 |              |           | . |
| 237372_at | 9.73E-05 | 1.86E-05 |              |           | . |
| 237373_at | 6.84E-06 | 6.12E-07 | RAB20        | 55647     | . |
| 237377_at | 3.91E-04 | 1.05E-04 |              |           | . |
| 237378_at | 0.004087 | 0.001818 | FLJ46321     | 389763    | . |
| 237379_at | 0.004207 | 0.001882 | PHRF1        | 57661     | . |
| 237382_at | 0.015812 | 0.00899  | GLT25D2      | 23127     | . |
| 237383_at | 1.21E-04 | 2.44E-05 |              |           | . |



|           |          |          |                          |
|-----------|----------|----------|--------------------------|
| 237384_x_ | 0.010071 | 0.00529  | .                        |
| 237386_at | 0.00538  | 0.002526 | .                        |
| 237387_at | 4.71E-08 | 8.34E-10 | .                        |
| 237388_at | 2.03E-05 | 2.54E-06 | GLMN 11146 .             |
| 237389_at | 0.023744 | 0.014462 | .                        |
| 237392_at | 0.048789 | 0.033358 | LOC283480 283480 .       |
| 237396_at | 0.005957 | 0.002853 | .                        |
| 237397_at | 4.38E-04 | 1.21E-04 | .                        |
| 237398_at | 0.003551 | 0.001538 | .                        |
| 237400_at | 3.59E-04 | 9.47E-05 | .                        |
| 237401_at | 0.004415 | 0.001997 | ACTN1 87 .               |
| 237403_at | 0.006809 | 0.003344 | GFI1B 8328 .             |
| 237404_at | 0.021754 | 0.013065 | .                        |
| 237406_at | 0.005161 | 0.002407 | NEK6 10783 .             |
| 237408_at | 0.022157 | 0.013351 | .                        |
| 237409_at | 0.019876 | 0.011738 | .                        |
| 237410_x_ | 0.004122 | 0.001837 | .                        |
| 237411_at | 4.56E-07 | 1.76E-08 | ADAMTS6 11174 .          |
| 237413_at | 1.21E-04 | 2.45E-05 | .                        |
| 237414_at | 1.01E-06 | 4.98E-08 | F7 2155 .                |
| 237418_at | 0.002064 | 8.02E-04 | CDK5RAP2 55755 .         |
| 237425_at | 0.001351 | 4.82E-04 | LOC474358 474358 .       |
| 237426_at | 2.04E-06 | 1.28E-07 | SP100 6672 .             |
| 237427_at | 0.029437 | 0.018561 | .                        |
| 237430_at | 0.003765 | 0.00165  | .                        |
| 237431_at | 0.001412 | 5.08E-04 | USP32 84669 .            |
| 237435_at | 2.77E-07 | 9.14E-09 | .                        |
| 237436_at | 0.02161  | 0.012961 | LOC100129656 100129656 . |
| 237437_s_ | 0.0179   | 0.010388 | ADARB2 105 .             |
| 237438_at | 0.01596  | 0.009091 | .                        |
| 237439_at | 0.003719 | 0.001625 | USP43 124739 .           |
| 237444_at | 7.54E-05 | 1.36E-05 | .                        |
| 237446_at | 6.00E-04 | 1.78E-04 | .                        |
| 237449_at | 8.35E-10 | 4.17E-12 | SP8 221833 .             |

|           |          |          |              |           |     |
|-----------|----------|----------|--------------|-----------|-----|
| 237450_at | 3.87E-04 | 1.04E-04 | LOC389332    | 389332    | .   |
| 237451_x_ | 0.039873 | 0.026388 |              |           | .   |
| 237452_at | 4.98E-05 | 7.97E-06 |              |           | .   |
| 237454_at | 3.20E-05 | 4.53E-06 |              |           | .   |
| 237455_at | 0.035435 | 0.023008 |              |           | .   |
| 237456_at | 0.004694 | 0.002151 |              |           | .   |
| 237457_at | 0.001376 | 4.92E-04 | EIF3B        | 8662      | .   |
| 237459_at | 0.02375  | 0.014466 |              |           | .   |
| 237460_x_ | 0.032863 | 0.021096 | C14orf182    | 283551    | .   |
| 237461_at | 1.82E-04 | 4.09E-05 | NLRP7        | 199713    | .   |
| 237463_at | 0.002095 | 8.16E-04 | ZFPM1        | 161882    | .   |
| 237464_at | 2.91E-04 | 7.30E-05 |              |           | .   |
| 237466_s_ | 0.01961  | 0.011556 | HHIP         | 64399     | .   |
| 237469_at | 7.53E-06 | 6.95E-07 | TOP2A        | 7153      | .   |
| 237473_at | 0.006268 | 0.003029 | LOC100130494 | 100130494 | //. |
| 237475_x_ | 1.31E-05 | 1.45E-06 | CCDC152      | 100129792 | .   |
| 237478_at | 5.35E-04 | 1.55E-04 | LOC399900    | 399900    | .   |
| 237479_at | 1.94E-05 | 2.41E-06 |              |           | .   |
| 237480_at | 0.00115  | 3.96E-04 |              |           | .   |
| 237483_at | 0.025774 | 0.015906 |              |           | .   |
| 237484_at | 3.38E-04 | 8.81E-05 | C12orf69     | 440087    | .   |
| 237486_at | 3.04E-04 | 7.72E-05 |              |           | .   |
| 237487_at | 0.009343 | 0.004846 |              |           | .   |
| 237491_at | 1.86E-04 | 4.20E-05 |              |           | .   |
| 237492_at | 8.44E-04 | 2.72E-04 |              |           | .   |
| 237494_at | 0.013948 | 0.007751 |              |           | .   |
| 237495_at | 0.003803 | 0.00167  | MPP7         | 143098    | .   |
| 237498_at | 0.029948 | 0.018942 |              |           | .   |
| 237500_at | 0.00557  | 0.002634 |              |           | .   |
| 237502_at | 0.001233 | 4.31E-04 | CRLS1        | 54675     | .   |
| 237503_at | 0.004513 | 0.00205  | SLC5A8       | 160728    | .   |
| 237504_at | 7.13E-06 | 6.48E-07 | INTS10       | 55174     | .   |
| 237505_at | 0.007502 | 0.003749 |              |           | .   |
| 237506_at | 0.005281 | 0.002471 | TMEM177      | 80775     | .   |

|           |          |          |              |           |   |
|-----------|----------|----------|--------------|-----------|---|
| 237507_at | 0.012461 | 0.006798 | KRT73        | 319101    | . |
| 237508_at | 0.001913 | 7.31E-04 |              |           | . |
| 237511_at | 0.038048 | 0.024993 |              |           | . |
| 237512_at | 0.002303 | 9.15E-04 |              |           | . |
| 237513_at | 0.00544  | 0.00256  | TRYX3        | 136541    | . |
| 237515_at | 0.030781 | 0.019554 | TMEM56       | 148534    | . |
| 237517_at | 7.43E-04 | 2.32E-04 |              |           | . |
| 237518_at | 0.001892 | 7.22E-04 |              |           | . |
| 237519_at | 7.26E-05 | 1.29E-05 |              |           | . |
| 237523_at | 1.37E-06 | 7.58E-08 |              |           | . |
| 237524_at | 8.62E-04 | 2.79E-04 |              |           | . |
| 237529_at | 3.43E-04 | 8.96E-05 |              |           | . |
| 237533_at | 0.004557 | 0.002074 |              |           | . |
| 237534_at | 1.28E-05 | 1.41E-06 |              |           | . |
| 237535_x_ | 6.52E-06 | 5.74E-07 | NRXN1        | 9378      | . |
| 237536_at | 6.41E-05 | 1.09E-05 | LOC100128977 | 100128977 | . |
| 237542_at | 0.004281 | 0.001922 |              |           | . |
| 237545_at | 0.013644 | 0.007556 |              |           | . |
| 237547_at | 0.001717 | 6.42E-04 |              |           | . |
| 237549_at | 0.026425 | 0.016374 |              |           | . |
| 237550_at | 1.68E-06 | 9.99E-08 |              |           | . |
| 237553_at | 0.013155 | 0.007244 |              |           | . |
| 237554_at | 7.01E-08 | 1.41E-09 |              |           | . |
| 237559_at | 4.93E-05 | 7.86E-06 | GPR55        | 9290      | . |
| 237560_at | 8.77E-08 | 1.92E-09 | MRPS5        | 64969     | . |
| 237561_x_ | 0.019665 | 0.011592 |              |           | . |
| 237562_at | 0.032105 | 0.020532 |              |           | . |
| 237564_at | 5.31E-04 | 1.53E-04 | LOC440731    | 440731    | . |
| 237567_at | 7.98E-05 | 1.46E-05 | STAB2        | 55576     | . |
| 237568_at | 1.52E-05 | 1.77E-06 |              |           | . |
| 237569_at | 0.020553 | 0.012214 |              |           | . |
| 237570_x_ | 8.20E-05 | 1.51E-05 |              |           | . |
| 237571_at | 0.049349 | 0.033804 |              |           | . |
| 237574_at | 3.43E-04 | 8.97E-05 |              |           | . |

|           |          |          |             |            |          |
|-----------|----------|----------|-------------|------------|----------|
| 237576_x_ | 0.047803 | 0.032577 | LOC339240   | /// 339240 | /// 71.  |
| 237577_at | 0.004197 | 0.001877 | LOC729298   | /// 57092  | /// 72.  |
| 237583_at | 8.96E-06 | 8.80E-07 |             |            | .        |
| 237584_at | 0.005783 | 0.002753 |             |            | .        |
| 237585_at | 0.024957 | 0.015326 | C4orf47     |            | 441054 . |
| 237588_at | 0.020191 | 0.011959 |             |            | .        |
| 237594_at | 3.34E-05 | 4.77E-06 |             |            | .        |
| 237595_at | 7.74E-05 | 1.40E-05 | LMX1A       |            | 4009 .   |
| 237596_at | 0.013202 | 0.007274 |             |            | .        |
| 237599_at | 8.96E-04 | 2.93E-04 |             |            | .        |
| 237600_at | 0.007242 | 0.003597 |             |            | .        |
| 237601_at | 0.022413 | 0.013522 |             |            | .        |
| 237604_at | 8.59E-05 | 1.60E-05 | LOC415056   |            | 415056 . |
| 237607_at | 1.07E-04 | 2.09E-05 |             |            | .        |
| 237609_at | 0.007003 | 0.003458 |             |            | .        |
| 237611_at | 0.001815 | 6.86E-04 |             |            | .        |
| 237612_at | 0.041394 | 0.02756  |             |            | .        |
| 237616_at | 0.036112 | 0.023528 |             |            | .        |
| 237620_at | 0.026776 | 0.016632 | ODF3L2      |            | 284451 . |
| 237622_at | 0.021201 | 0.012677 |             |            | .        |
| 237626_at | 0.003631 | 0.00158  |             |            | .        |
| 237627_at | 0.004829 | 0.002224 |             |            | .        |
| 237629_at | 0.012856 | 0.007053 |             |            | .        |
| 237630_s_ | 0.00592  | 0.002832 | hCG_1990547 |            | 286042 . |
| 237631_at | 0.019359 | 0.011385 |             |            | .        |
| 237632_at | 9.31E-08 | 2.07E-09 |             |            | .        |
| 237633_at | 0.014306 | 0.007987 |             |            | .        |
| 237638_at | 0.002805 | 0.001159 |             |            | .        |
| 237641_at | 6.87E-05 | 1.20E-05 |             |            | .        |
| 237642_at | 2.87E-04 | 7.18E-05 | C4orf42     |            | 92070 .  |
| 237643_at | 0.015834 | 0.009006 |             |            | .        |
| 237644_at | 3.01E-05 | 4.19E-06 |             |            | .        |
| 237646_x_ | 1.52E-04 | 3.26E-05 | PLEKHG5     |            | 57449 .  |
| 237647_at | 0.005406 | 0.002541 | GHRL        |            | 51738 .  |

|           |          |          |           |          |
|-----------|----------|----------|-----------|----------|
| 237653_at | 0.001177 | 4.07E-04 |           | .        |
| 237654_at | 0.042938 | 0.028749 | C14orf50  | 145376 . |
| 237655_at | 3.34E-04 | 8.67E-05 |           | .        |
| 237656_at | 0.001092 | 3.71E-04 | WWC2      | 80014 .  |
| 237659_at | 0.020831 | 0.012416 | FLJ40288  | 286023 . |
| 237661_at | 0.023176 | 0.014052 |           | .        |
| 237662_at | 0.039861 | 0.026377 | LOC646522 | 646522 . |
| 237663_at | 3.02E-05 | 4.22E-06 |           | .        |
| 237665_at | 0.012657 | 0.006924 |           | .        |
| 237666_at | 0.002257 | 8.94E-04 | XRRA1     | 143570 . |
| 237671_at | 2.41E-04 | 5.79E-05 |           | .        |
| 237674_at | 0.004701 | 0.002154 |           | .        |
| 237675_at | 0.002392 | 9.57E-04 |           | .        |
| 237677_at | 0.015736 | 0.008938 |           | .        |
| 237678_at | 0.014759 | 0.008289 |           | .        |
| 237683_s_ | 7.69E-05 | 1.39E-05 |           | .        |
| 237685_at | 0.035939 | 0.023394 | LOC339760 | 339760 . |
| 237686_at | 0.001629 | 6.02E-04 | RNF219    | 79596 .  |
| 237689_at | 0.010023 | 0.005261 | SARS      | 6301 .   |
| 237691_x_ | 0.011898 | 0.006432 | ENO3      | 2027 .   |
| 237692_at | 0.005588 | 0.002644 |           | .        |
| 237693_at | 0.010244 | 0.005396 |           | .        |
| 237694_at | 0.024449 | 0.014957 |           | .        |
| 237695_at | 0.027303 | 0.017007 |           | .        |
| 237696_at | 0.001604 | 5.91E-04 |           | .        |
| 237697_at | 8.22E-04 | 2.63E-04 |           | .        |
| 237698_at | 0.00305  | 0.001281 |           | .        |
| 237701_at | 0.006593 | 0.003216 | C12orf54  | 121273 . |
| 237703_at | 3.13E-05 | 4.40E-06 |           | .        |
| 237704_at | 0.004785 | 0.0022   |           | .        |
| 237706_at | 0.002867 | 0.001188 | STXBP4    | 252983 . |
| 237708_at | 1.25E-04 | 2.54E-05 |           | .        |
| 237710_at | 0.003694 | 0.001612 |           | .        |
| 237712_at | 1.06E-04 | 2.07E-05 |           | .        |

|           |          |          |              |             |
|-----------|----------|----------|--------------|-------------|
| 237714_at | 0.026683 | 0.016559 |              | .           |
| 237715_at | 4.75E-07 | 1.85E-08 | AKNA         | 80709 .     |
| 237716_at | 6.87E-10 | 3.28E-12 |              | .           |
| 237718_at | 0.004335 | 0.001953 | EIF4E        | 1977 .      |
| 237724_at | 0.002698 | 0.001106 |              | .           |
| 237725_x_ | 0.002509 | 0.001015 | SMC5         | 23137 .     |
| 237726_at | 3.15E-04 | 8.08E-05 |              | .           |
| 237730_at | 0.003393 | 0.001457 | LOC100130700 | 100130700 . |
| 237731_at | 0.010418 | 0.005502 | LOC154092    | 154092 .    |
| 237735_at | 0.032599 | 0.020894 |              | .           |
| 237736_at | 0.04172  | 0.027806 |              | .           |
| 237737_at | 0.02861  | 0.017955 | LOC727770    | 727770 .    |
| 237739_at | 1.76E-06 | 1.06E-07 |              | .           |
| 237740_at | 0.003764 | 0.00165  |              | .           |
| 237744_at | 7.89E-06 | 7.39E-07 |              | .           |
| 237745_at | 0.008614 | 0.004404 | LOC641467    | 641467 .    |
| 237746_at | 0.018006 | 0.010461 | SFRS11       | 9295 .      |
| 237748_at | 0.001644 | 6.09E-04 | SCGBL        | 284402 .    |
| 237750_at | 7.27E-06 | 6.65E-07 | XPNPEP3      | 63929 .     |
| 237752_at | 0.00505  | 0.002346 |              | .           |
| 237754_at | 0.032992 | 0.021199 |              | .           |
| 237756_at | 0.004749 | 0.00218  | KLHL23       | 151230 .    |
| 237757_at | 6.13E-04 | 1.83E-04 |              | .           |
| 237759_at | 0.005199 | 0.002427 | CD48         | 962 .       |
| 237760_at | 0.004492 | 0.002039 |              | .           |
| 237764_at | 0.023318 | 0.014156 |              | .           |
| 237765_at | 1.53E-05 | 1.78E-06 | C14orf68     | 283600 .    |
| 237766_at | 0.001308 | 4.62E-04 | ATP9B        | 374868 .    |
| 237767_at | 0.010562 | 0.005594 | FARP1        | 10160 .     |
| 237768_x_ | 1.09E-05 | 1.14E-06 |              | .           |
| 237769_at | 0.007448 | 0.00372  |              | .           |
| 237771_s_ | 0.04269  | 0.028562 |              | .           |
| 237773_at | 1.06E-04 | 2.09E-05 |              | .           |
| 237774_at | 2.97E-04 | 7.51E-05 |              | .           |

|           |          |          |                             |               |
|-----------|----------|----------|-----------------------------|---------------|
| 237775_x_ | 0.027833 | 0.01739  |                             | .             |
| 237778_at | 0.006874 | 0.003381 |                             | .             |
| 237779_at | 4.15E-05 | 6.29E-06 |                             | .             |
| 237783_at | 0.003723 | 0.001627 | PLAC8L1                     | 153770 .      |
| 237785_at | 0.003307 | 0.001412 | ASB14                       | 142686 .      |
| 237786_at | 8.92E-04 | 2.91E-04 | MAGI2                       | 9863 .        |
| 237787_at | 0.016326 | 0.009333 |                             | .             |
| 237789_at | 4.02E-04 | 1.09E-04 |                             | .             |
| 237790_at | 8.24E-04 | 2.64E-04 | LOC100127971                | 100127971 .   |
| 237791_at | 0.026766 | 0.016624 |                             | .             |
| 237792_at | 0.0033   | 0.001408 |                             | .             |
| 237793_at | 0.029668 | 0.018732 | LOC100128496                | 100128496 //. |
| 237796_at | 0.035233 | 0.022854 |                             | .             |
| 237798_at | 0.04233  | 0.028287 |                             | .             |
| 237800_at | 7.29E-04 | 2.27E-04 |                             | .             |
| 237801_at | 0.02522  | 0.01552  |                             | .             |
| 237803_x_ | 0.006253 | 0.00302  |                             | .             |
| 237805_at | 9.55E-06 | 9.57E-07 | LOC729296                   | 729296 .      |
| 237806_s_ | 0.017047 | 0.009808 | LOC729296                   | 729296 .      |
| 237809_at | 8.83E-06 | 8.60E-07 |                             | .             |
| 237810_at | 1.42E-14 | 1.96E-18 | CLDN6                       | 9074 .        |
| 237811_at | 0.001041 | 3.50E-04 |                             | .             |
| 237813_at | 0.003147 | 0.001329 | PCBP2 /// PCBI286157 /// 5( | .             |
| 237815_at | 0.001222 | 4.27E-04 |                             | .             |
| 237816_at | 0.024325 | 0.014868 |                             | .             |
| 237817_at | 0.019504 | 0.011485 | SSR3                        | 6747 .        |
| 237818_at | 0.011884 | 0.006422 |                             | .             |
| 237819_at | 6.40E-04 | 1.93E-04 | CREB3L2                     | 64764 .       |
| 237820_at | 0.00598  | 0.002866 |                             | .             |
| 237821_at | 5.00E-05 | 8.00E-06 |                             | .             |
| 237824_at | 7.31E-04 | 2.28E-04 |                             | .             |
| 237825_x_ | 7.27E-04 | 2.26E-04 |                             | .             |
| 237827_at | 0.025364 | 0.015623 | LOC100129969                | 100129969 .   |
| 237832_at | 0.00636  | 0.003081 |                             | .             |

|           |          |          |            |          |
|-----------|----------|----------|------------|----------|
| 237835_at | 0.004448 | 0.002014 |            | .        |
| 237840_at | 0.002026 | 7.84E-04 | LOC388948  | 388948 . |
| 237843_at | 0.005841 | 0.002788 |            | .        |
| 237844_at | 0.03728  | 0.024421 | ZNF131     | 7690 .   |
| 237845_at | 9.73E-06 | 9.81E-07 |            | .        |
| 237847_at | 3.16E-04 | 8.11E-05 | NTN1       | 9423 .   |
| 237848_at | 0.020736 | 0.012349 |            | .        |
| 237851_at | 5.35E-05 | 8.72E-06 |            | .        |
| 237852_at | 0.003279 | 0.001397 |            | .        |
| 237853_x_ | 4.47E-06 | 3.53E-07 | KRTAP10-12 | 386685 . |
| 237855_at | 4.02E-05 | 6.03E-06 | ZNF777     | 27153 .  |
| 237856_at | 2.28E-04 | 5.40E-05 | RAP1GDS1   | 5910 .   |
| 237857_at | 0.029789 | 0.018828 |            | .        |
| 237859_at | 0.037446 | 0.024541 |            | .        |
| 237860_at | 8.81E-09 | 9.06E-11 |            | .        |
| 237861_at | 1.93E-04 | 4.37E-05 | LOC729556  | 729556 . |
| 237862_at | 7.96E-05 | 1.45E-05 |            | .        |
| 237864_at | 3.20E-04 | 8.26E-05 |            | .        |
| 237867_s_ | 5.10E-04 | 1.46E-04 | PID1       | 55022 .  |
| 237868_x_ | 7.17E-06 | 6.53E-07 |            | .        |
| 237869_at | 0.003517 | 0.00152  | A2LD1      | 87769 .  |
| 237872_at | 0.001328 | 4.72E-04 |            | .        |
| 237878_at | 0.015124 | 0.00853  |            | .        |
| 237880_at | 0.025783 | 0.015912 | LOC729285  | 729285 . |
| 237881_at | 1.96E-04 | 4.47E-05 |            | .        |
| 237882_at | 0.002119 | 8.28E-04 |            | .        |
| 237884_x_ | 6.66E-05 | 1.15E-05 | TRPM7      | 54822 .  |
| 237885_at | 0.00729  | 0.003627 |            | .        |
| 237887_at | 0.00169  | 6.29E-04 |            | .        |
| 237888_at | 0.032371 | 0.020726 | LOC553137  | 553137 . |
| 237890_at | 0.002242 | 8.86E-04 |            | .        |
| 237892_at | 0.040746 | 0.02706  |            | .        |
| 237894_at | 0.002916 | 0.001212 | C3orf22    | 152065 . |
| 237895_at | 3.74E-05 | 5.49E-06 |            | .        |



|           |          |          |              |           |   |
|-----------|----------|----------|--------------|-----------|---|
| 237896_at | 2.91E-06 | 2.02E-07 | NODAL        | 4838      | . |
| 237897_at | 0.001096 | 3.73E-04 | ADAM17       | 6868      | . |
| 237899_at | 1.70E-04 | 3.74E-05 | LOC729994    | 729994    | . |
| 237900_at | 0.009183 | 0.004749 | KLHDC4       | 54758     | . |
| 237901_at | 0.0032   | 0.001357 |              |           | . |
| 237908_at | 0.015878 | 0.009035 |              |           | . |
| 237909_at | 0.010786 | 0.005735 | ADAM6        | 8755      | . |
| 237911_at | 6.81E-09 | 6.35E-11 |              |           | . |
| 237913_at | 0.002525 | 0.001022 |              |           | . |
| 237917_at | 1.24E-04 | 2.52E-05 | NBPF8        | 728841    | . |
| 237919_at | 0.019651 | 0.011581 | RFFL         | 117584    | . |
| 237922_at | 5.21E-04 | 1.50E-04 |              |           | . |
| 237923_at | 8.85E-04 | 2.88E-04 |              |           | . |
| 237924_at | 0.028115 | 0.017596 |              |           | . |
| 237925_at | 0.011677 | 0.006292 |              |           | . |
| 237926_s_ | 3.88E-04 | 1.04E-04 |              |           | . |
| 237929_at | 0.003879 | 0.001709 | C17orf50     | 146853    | . |
| 237930_at | 0.01095  | 0.005837 |              |           | . |
| 237931_at | 1.64E-05 | 1.94E-06 |              |           | . |
| 237932_at | 0.010323 | 0.005445 |              |           | . |
| 237933_at | 0.00279  | 0.001151 |              |           | . |
| 237934_at | 5.08E-04 | 1.45E-04 |              |           | . |
| 237935_at | 0.041959 | 0.027997 |              |           | . |
| 237940_s_ | 0.007283 | 0.003622 |              |           | . |
| 237941_at | 1.75E-05 | 2.11E-06 |              |           | . |
| 237943_at | 2.99E-07 | 1.00E-08 | LOC100129701 | 100129701 | . |
| 237944_at | 0.004298 | 0.001932 | LRRFIP1      | 9208      | . |
| 237945_at | 0.001157 | 3.98E-04 |              |           | . |
| 237953_at | 0.004465 | 0.002024 |              |           | . |
| 237954_x_ | 2.72E-05 | 3.69E-06 |              |           | . |
| 237955_at | 0.007703 | 0.003867 | LOC133874    | 133874    | . |
| 237959_at | 0.002252 | 8.91E-04 |              |           | . |
| 237960_at | 0.007831 | 0.003945 |              |           | . |
| 237964_at | 1.43E-05 | 1.62E-06 |              |           | . |

|           |          |          |              |             |
|-----------|----------|----------|--------------|-------------|
| 237965_at | 0.004171 | 0.001863 |              | .           |
| 237966_at | 0.013567 | 0.007505 |              | .           |
| 237968_at | 8.11E-06 | 7.66E-07 | ATL2         | 64225 .     |
| 237969_at | 0.006745 | 0.003306 |              | .           |
| 237970_at | 1.13E-05 | 1.20E-06 |              | .           |
| 237974_at | 1.21E-05 | 1.31E-06 | ABHD12B      | 145447 .    |
| 237975_at | 5.48E-06 | 4.60E-07 |              | .           |
| 237977_at | 1.28E-04 | 2.63E-05 |              | .           |
| 237979_at | 0.002916 | 0.001212 |              | .           |
| 237983_at | 0.04948  | 0.033905 |              | .           |
| 237985_at | 0.003904 | 0.001723 |              | .           |
| 237986_at | 5.43E-05 | 8.88E-06 |              | .           |
| 237989_at | 0.005831 | 0.002782 | IGFBP1       | 3484 .      |
| 237990_x_ | 0.03778  | 0.024793 | C19orf29     | 58509 .     |
| 237993_at | 4.66E-04 | 1.30E-04 | CHCHD5       | 84269 .     |
| 237994_at | 0.009444 | 0.004906 |              | .           |
| 237997_s_ | 0.041291 | 0.027476 |              | .           |
| 237998_at | 0.022849 | 0.013825 |              | .           |
| 237999_at | 0.024062 | 0.014682 |              | .           |
| 238000_at | 9.84E-07 | 4.84E-08 |              | .           |
| 238001_at | 1.76E-04 | 3.90E-05 | KCTD6        | 200845 .    |
| 238003_at | 0.001183 | 4.10E-04 | HEPACAM      | 220296 .    |
| 238004_at | 8.69E-04 | 2.82E-04 | PGBD2        | 267002 .    |
| 238006_at | 0.00371  | 0.00162  | SIN3A        | 25942 .     |
| 238007_at | 0.014555 | 0.008151 | ZNF271       | 10778 .     |
| 238009_at | 0.014928 | 0.008403 |              | .           |
| 238010_at | 0.00172  | 6.43E-04 | C1orf174     | 339448 .    |
| 238012_at | 0.007786 | 0.003917 | DPP7         | 29952 .     |
| 238013_at | 3.29E-04 | 8.54E-05 | PLEKHA2      | 59339 .     |
| 238015_at | 0.004166 | 0.001859 | C4orf46      | 201725 .    |
| 238016_s_ | 0.00244  | 9.82E-04 | LOC100129105 | 100129105 . |
| 238018_at | 0.031484 | 0.020066 | FAM150B      | 285016 .    |
| 238019_at | 6.37E-04 | 1.92E-04 | LSDP5        | 440503 .    |
| 238020_at | 6.79E-04 | 2.08E-04 | PSMC2        | 5701 .      |

|           |          |          |              |           |   |
|-----------|----------|----------|--------------|-----------|---|
| 238021_s_ | 0.011485 | 0.006171 | hCG_1815491  | 643911    | . |
| 238022_at | 7.55E-04 | 2.37E-04 | hCG_1815491  | 643911    | . |
| 238023_at | 0.002006 | 7.75E-04 |              |           | . |
| 238025_at | 1.58E-06 | 9.12E-08 | MLKL         | 197259    | . |
| 238026_at | 0.005507 | 0.002598 | RPL35A       | 6165      | . |
| 238028_at | 9.04E-06 | 8.90E-07 | LOC100128918 | 100128918 | . |
| 238030_at | 0.002636 | 0.001076 |              |           | . |
| 238035_at | 1.13E-04 | 2.25E-05 | SP3          | 6670      | . |
| 238036_at | 7.94E-05 | 1.45E-05 | SHE          | 126669    | . |
| 238038_at | 3.70E-04 | 9.83E-05 |              |           | . |
| 238039_at | 0.020603 | 0.01225  | LOC728769    | 728769    | . |
| 238041_at | 4.91E-05 | 7.84E-06 |              |           | . |
| 238043_at | 2.89E-05 | 3.98E-06 | LOC729446    | 729446    | . |
| 238044_at | 0.014278 | 0.007966 |              |           | . |
| 238045_at | 0.007989 | 0.004037 | TMEM65       | 157378    | . |
| 238046_x_ | 0.006586 | 0.003212 | PWWP2B       | 170394    | . |
| 238048_at | 0.032025 | 0.020471 | CLASP2       | 23122     | . |
| 238049_at | 0.043947 | 0.029558 | GRAMD3       | 65983     | . |
| 238050_at | 4.74E-05 | 7.49E-06 | ANTXR2       | 118429    | . |
| 238051_x_ | 1.17E-05 | 1.25E-06 | PWWP2B       | 170394    | . |
| 238055_at | 0.001511 | 5.51E-04 | ATP8B1       | 5205      | . |
| 238057_at | 0.048619 | 0.033225 | USP45        | 85015     | . |
| 238058_at | 1.15E-11 | 1.60E-14 | LOC150381    | 150381    | . |
| 238059_at | 9.30E-04 | 3.06E-04 |              |           | . |
| 238060_s_ | 4.07E-06 | 3.12E-07 | B4GALNT4     | 338707    | . |
| 238062_at | 0.001956 | 7.51E-04 | GPIHBP1      | 338328    | . |
| 238064_at | 0.018279 | 0.010647 |              |           | . |
| 238065_at | 2.84E-04 | 7.10E-05 | TPM3         | 7170      | . |
| 238066_at | 0.001459 | 5.28E-04 | RBP7         | 116362    | . |
| 238067_at | 7.52E-09 | 7.18E-11 | TBC1D8B      | 54885     | . |
| 238068_at | 0.016202 | 0.009253 | ARIH2        | 10425     | . |
| 238069_at | 0.006142 | 0.002957 |              |           | . |
| 238070_at | 7.22E-06 | 6.59E-07 | CHD1L        | 9557      | . |
| 238071_at | 0.006944 | 0.003424 | LCN10        | 414332    | . |

|           |          |          |              |             |
|-----------|----------|----------|--------------|-------------|
| 238072_at | 0.01282  | 0.007029 |              | .           |
| 238075_at | 1.42E-04 | 3.00E-05 | CHEK1        | 1111 .      |
| 238076_at | 4.96E-07 | 1.95E-08 | GATAD2B      | 57459 .     |
| 238077_at | 8.22E-06 | 7.78E-07 | KCTD6        | 200845 .    |
| 238078_at | 4.34E-04 | 1.19E-04 | SEC22A       | 26984 .     |
| 238079_at | 7.94E-05 | 1.45E-05 | TPM3         | 7170 .      |
| 238080_at | 1.55E-04 | 3.35E-05 | B4GALNT4     | 338707 .    |
| 238081_at | 0.008246 | 0.004186 | C4orf12      | 404201 .    |
| 238083_at | 2.86E-05 | 3.92E-06 | PARP10       | 84875 .     |
| 238084_at | 0.024647 | 0.0151   | PCGF3        | 10336 .     |
| 238085_at | 3.28E-06 | 2.37E-07 |              | .           |
| 238086_at | 0.035024 | 0.022698 | LOC100129617 | 100129617 . |
| 238088_at | 0.003994 | 0.001769 | LOC100129194 | 100129194 . |
| 238090_at | 0.028971 | 0.018221 | HGSNAT       | 138050 .    |
| 238092_at | 4.20E-05 | 6.41E-06 |              | .           |
| 238093_at | 7.09E-04 | 2.19E-04 | LOC100129722 | 100129722 . |
| 238095_at | 0.017052 | 0.009812 | GATA5        | 140628 .    |
| 238096_at | 0.030985 | 0.019704 | LOC284023    | 284023 .    |
| 238097_at | 9.94E-04 | 3.31E-04 | LOC100134226 | 100134226 . |
| 238098_at | 4.43E-05 | 6.87E-06 |              | .           |
| 238101_at | 4.45E-04 | 1.23E-04 | BEND4        | 389206 .    |
| 238105_x  | 2.16E-04 | 5.03E-05 | WNT7B        | 7477 .      |
| 238106_at | 0.002226 | 8.79E-04 |              | .           |
| 238107_at | 0.007579 | 0.003795 |              | .           |
| 238108_at | 0.004423 | 0.002001 |              | .           |
| 238109_at | 2.59E-04 | 6.34E-05 |              | .           |
| 238110_at | 3.60E-05 | 5.25E-06 | SAPS2        | 9701 .      |
| 238111_at | 0.028203 | 0.017658 | SDCCAG3      | 10807 .     |
| 238112_at | 6.11E-04 | 1.82E-04 | LOC283177    | 283177 .    |
| 238115_at | 0.022014 | 0.01325  |              | .           |
| 238119_at | 0.018712 | 0.010943 |              | .           |
| 238121_at | 8.38E-04 | 2.69E-04 | GK5          | 256356 .    |
| 238122_at | 0.001564 | 5.74E-04 | RBM12B       | 389677 .    |
| 238124_at | 0.032628 | 0.020915 | MYOM3        | 127294 .    |

|           |          |          |              |           |   |
|-----------|----------|----------|--------------|-----------|---|
| 238125_at | 4.92E-04 | 1.39E-04 | ADAMTS16     | 170690    | . |
| 238126_at | 0.002903 | 0.001205 |              |           | . |
| 238128_at | 8.42E-04 | 2.71E-04 | TTMA         | 645369    | . |
| 238129_s_ | 2.16E-04 | 5.03E-05 |              |           | . |
| 238130_at | 3.99E-05 | 5.98E-06 | NFATC2IP     | 84901     | . |
| 238132_at | 0.008891 | 0.00457  | WBSCR16      | 81554     | . |
| 238134_at | 0.017533 | 0.01014  |              |           | . |
| 238136_at | 0.035095 | 0.022753 | hCG_2039146  | 729956    | . |
| 238138_at | 0.003651 | 0.00159  | CBY3         | 646019    | . |
| 238139_at | 8.00E-04 | 2.55E-04 |              |           | . |
| 238140_at | 0.003227 | 0.001371 | ARV1         | 64801     | . |
| 238142_at | 2.22E-06 | 1.43E-07 |              |           | . |
| 238143_at | 0.001589 | 5.85E-04 | LOC646627    | 646627    | . |
| 238144_s_ | 8.28E-04 | 2.66E-04 |              |           | . |
| 238145_at | 2.20E-06 | 1.41E-07 | ZNF496       | 84838     | . |
| 238146_at | 0.033744 | 0.021758 |              |           | . |
| 238147_at | 0.00473  | 0.002169 | TRIM46       | 80128     | . |
| 238150_at | 1.23E-04 | 2.51E-05 |              |           | . |
| 238151_at | 1.53E-05 | 1.77E-06 |              |           | . |
| 238152_at | 0.001126 | 3.86E-04 | LOC65998     | 65998     | . |
| 238153_at | 2.10E-05 | 2.66E-06 | PDE6B        | 5158      | . |
| 238156_at | 1.36E-08 | 1.56E-10 |              |           | . |
| 238163_at | 0.001782 | 6.70E-04 | LOC100133229 | 100133229 | . |
| 238164_at | 0.044278 | 0.029818 | USP6NL       | 9712      | . |
| 238165_at | 2.47E-07 | 7.79E-09 | LOC100129282 | 100129282 | . |
| 238166_s_ | 0.001507 | 5.49E-04 | C17orf51     | 339263    | . |
| 238167_at | 3.57E-04 | 9.41E-05 | C17orf51     | 339263    | . |
| 238169_at | 8.52E-04 | 2.75E-04 |              |           | . |
| 238170_at | 0.001569 | 5.76E-04 |              |           | . |
| 238171_at | 0.032081 | 0.020513 | SLC25A30     | 253512    | . |
| 238172_at | 5.28E-05 | 8.58E-06 |              |           | . |
| 238173_at | 2.00E-05 | 2.50E-06 | TCEA2        | 6919      | . |
| 238177_at | 1.07E-06 | 5.36E-08 | SLC6A19      | 340024    | . |
| 238178_at | 9.90E-05 | 1.91E-05 |              |           | . |

|           |          |          |              |             |
|-----------|----------|----------|--------------|-------------|
| 238180_at | 0.00398  | 0.001761 |              | .           |
| 238182_at | 0.024512 | 0.015003 |              | .           |
| 238186_at | 0.020415 | 0.012113 |              | .           |
| 238187_at | 0.024067 | 0.014687 | C2orf57      | 165100 .    |
| 238190_at | 0.001083 | 3.68E-04 | TUFM         | 7284 .      |
| 238192_at | 0.038326 | 0.025206 |              | .           |
| 238193_at | 8.19E-04 | 2.62E-04 |              | .           |
| 238194_at | 1.93E-06 | 1.19E-07 |              | .           |
| 238196_at | 9.19E-04 | 3.02E-04 | LOC285095    | 285095 .    |
| 238197_at | 0.037074 | 0.024265 | GATA5        | 140628 .    |
| 238199_x_ | 0.001755 | 6.59E-04 | LOC440552    | 440552 .    |
| 238200_at | 0.003621 | 0.001574 |              | .           |
| 238201_at | 0.002138 | 8.37E-04 |              | .           |
| 238202_at | 0.008973 | 0.004619 |              | .           |
| 238204_at | 0.001431 | 5.16E-04 |              | .           |
| 238207_at | 0.007413 | 0.003698 | LOC440957    | 440957 .    |
| 238208_at | 1.67E-06 | 9.85E-08 |              | .           |
| 238209_at | 0.023432 | 0.014236 |              | .           |
| 238214_at | 7.28E-04 | 2.26E-04 | LRR69        | 100130742 . |
| 238215_at | 1.16E-04 | 2.33E-05 | SLC6A18      | 348932 .    |
| 238216_at | 0.040924 | 0.027195 | LOC100129386 | 100129386 . |
| 238217_at | 0.016011 | 0.009127 |              | .           |
| 238220_at | 0.020457 | 0.012144 | KDM6A        | 7403 .      |
| 238221_at | 0.030823 | 0.019582 |              | .           |
| 238222_at | 0.007751 | 0.003894 | GKN2         | 200504 .    |
| 238223_at | 0.001825 | 6.91E-04 |              | .           |
| 238224_at | 0.011618 | 0.006254 | CLASP2       | 23122 .     |
| 238225_at | 4.17E-05 | 6.34E-06 |              | .           |
| 238227_at | 3.01E-05 | 4.20E-06 | GARNL3       | 84253 .     |
| 238228_at | 0.047488 | 0.032338 |              | .           |
| 238230_x_ | 0.001565 | 5.74E-04 | MAN2C1       | 4123 .      |
| 238231_at | 4.24E-05 | 6.50E-06 | NFYC         | 4802 .      |
| 238232_at | 0.015065 | 0.008491 |              | .           |
| 238238_at | 1.65E-04 | 3.62E-05 |              | .           |

|           |          |          |                              |             |
|-----------|----------|----------|------------------------------|-------------|
| 238240_at | 4.18E-04 | 1.14E-04 |                              | .           |
| 238242_at | 1.53E-05 | 1.77E-06 |                              | .           |
| 238245_at | 0.001335 | 4.75E-04 | ENPP7                        | 339221 .    |
| 238246_at | 0.01181  | 0.006373 | MTL5                         | 9633 .      |
| 238247_at | 0.00798  | 0.004032 |                              | .           |
| 238248_at | 0.003468 | 0.001495 | UMOD                         | 7369 .      |
| 238250_at | 0.032717 | 0.020984 | LOC100133236                 | 100133236 . |
| 238251_at | 0.017247 | 0.009944 |                              | .           |
| 238252_at | 6.45E-04 | 1.95E-04 |                              | .           |
| 238255_at | 1.37E-05 | 1.53E-06 |                              | .           |
| 238256_at | 0.024647 | 0.015099 |                              | .           |
| 238258_at | 0.011205 | 0.005997 | WBSCR28                      | 135886 .    |
| 238259_at | 2.47E-05 | 3.28E-06 | ADSSL1                       | 122622 .    |
| 238260_at | 4.86E-04 | 1.37E-04 |                              | .           |
| 238261_at | 8.02E-04 | 2.55E-04 |                              | .           |
| 238263_at | 5.22E-07 | 2.08E-08 | LOC285965                    | 285965 .    |
| 238265_x_ | 0.001131 | 3.88E-04 |                              | .           |
| 238266_at | 0.00104  | 3.50E-04 |                              | .           |
| 238267_s_ | 3.63E-05 | 5.30E-06 |                              | .           |
| 238268_at | 0.024199 | 0.014779 |                              | .           |
| 238270_x_ | 3.50E-04 | 9.18E-05 |                              | .           |
| 238271_x_ | 3.06E-04 | 7.77E-05 |                              | .           |
| 238273_at | 5.83E-04 | 1.72E-04 | PL-5283 /// SL(26266 /// 647 | .           |
| 238276_at | 0.031877 | 0.020354 |                              | .           |
| 238277_at | 0.024931 | 0.015306 |                              | .           |
| 238279_x_ | 6.67E-07 | 2.89E-08 |                              | .           |
| 238284_at | 0.024619 | 0.01508  |                              | .           |
| 238285_at | 0.004152 | 0.001852 | SOX5                         | 6660 .      |
| 238286_at | 0.04927  | 0.03374  | SPG7                         | 6687 .      |
| 238289_at | 0.017063 | 0.009821 |                              | .           |
| 238291_at | 0.005464 | 0.002574 | KIAA0776                     | 23376 .     |
| 238293_at | 0.006226 | 0.003005 |                              | .           |
| 238294_at | 0.004167 | 0.00186  |                              | .           |
| 238295_at | 0.00629  | 0.003042 | C17orf42                     | 79736 .     |

|           |          |          |              |           |   |
|-----------|----------|----------|--------------|-----------|---|
| 238296_at | 7.36E-05 | 1.31E-05 | GLIPR1L1     | 256710    | . |
| 238299_at | 2.88E-04 | 7.22E-05 |              |           | . |
| 238300_s_ | 8.38E-04 | 2.69E-04 | DAZAP2       | 9802      | . |
| 238303_at | 0.004613 | 0.002105 | STT3B        | 201595    | . |
| 238304_at | 0.001876 | 7.14E-04 |              |           | . |
| 238305_at | 0.002577 | 0.001047 |              |           | . |
| 238308_at | 5.25E-05 | 8.51E-06 | LOC100133236 | 100133236 | . |
| 238312_s_ | 0.010581 | 0.005605 | B4GALT3      | 8703      | . |
| 238313_at | 5.24E-04 | 1.51E-04 |              |           | . |
| 238315_s_ | 0.026127 | 0.016159 | ZNF567       | 163081    | . |
| 238317_x_ | 0.001649 | 6.11E-04 |              |           | . |
| 238318_at | 0.009141 | 0.004722 |              |           | . |
| 238319_at | 5.30E-04 | 1.53E-04 | LOC644090    | 644090    | . |
| 238320_at | 0.004448 | 0.002015 | NCRNA00084   | 283131    | . |
| 238322_s_ | 3.01E-05 | 4.19E-06 | TEAD2        | 8463      | . |
| 238323_at | 7.38E-04 | 2.30E-04 | TEAD2        | 8463      | . |
| 238324_at | 0.013121 | 0.007222 | GATAD2A      | 54815     | . |
| 238325_s_ | 1.49E-04 | 3.19E-05 | ODF3B        | 440836    | . |
| 238326_at | 1.55E-05 | 1.81E-06 | ODF3B        | 440836    | . |
| 238328_at | 0.005171 | 0.002412 | MPRIP        | 23164     | . |
| 238329_at | 5.00E-04 | 1.42E-04 | MPRIP        | 23164     | . |
| 238330_s_ | 0.027008 | 0.016792 | MPRIP        | 23164     | . |
| 238331_at | 0.002545 | 0.001032 | SPRN         | 503542    | . |
| 238332_at | 0.004238 | 0.0019   | ANKRD29      | 147463    | . |
| 238333_s_ | 0.002138 | 8.37E-04 | MTG1         | 92170     | . |
| 238334_at | 5.88E-04 | 1.74E-04 | MTG1         | 92170     | . |
| 238335_at | 6.20E-04 | 1.85E-04 | DNAJC21      | 134218    | . |
| 238337_s_ | 0.002353 | 9.38E-04 | DNAJC21      | 134218    | . |
| 238338_at | 5.63E-06 | 4.77E-07 |              |           | . |
| 238339_x_ | 9.28E-04 | 3.05E-04 | LRIG1        | 26018     | . |
| 238340_at | 2.22E-04 | 5.22E-05 | WDR42A       | 50717     | . |
| 238341_at | 0.011214 | 0.006003 |              |           | . |
| 238344_at | 2.55E-04 | 6.22E-05 |              |           | . |
| 238345_at | 9.28E-05 | 1.76E-05 | SLC38A10     | 124565    | . |



|           |          |          |          |        |   |
|-----------|----------|----------|----------|--------|---|
| 238346_s_ | 8.41E-06 | 8.06E-07 | TGS1     | 96764  | . |
| 238347_at | 0.001459 | 5.28E-04 | SLC38A10 | 124565 | . |
| 238349_at | 1.31E-04 | 2.70E-05 | UBN2     | 254048 | . |
| 238350_at | 5.98E-05 | 1.00E-05 | UBN2     | 254048 | . |
| 238351_x_ | 6.51E-05 | 1.12E-05 |          |        | . |
| 238352_s_ | 0.005304 | 0.002485 |          |        | . |
| 238356_at | 0.001737 | 6.51E-04 | DOCK11   | 139818 | . |
| 238359_at | 1.17E-05 | 1.25E-06 |          |        | . |
| 238363_at | 5.01E-06 | 4.09E-07 |          |        | . |
| 238365_s_ | 1.52E-04 | 3.26E-05 | C1orf228 | 339541 | . |
| 238366_at | 0.003586 | 0.001555 | C1orf228 | 339541 | . |
| 238367_s_ | 0.006014 | 0.002886 | C1orf228 | 339541 | . |
| 238368_at | 0.024276 | 0.014832 |          |        | . |
| 238371_s_ | 0.040119 | 0.026574 |          |        | . |
| 238372_s_ | 0.032889 | 0.021115 |          |        | . |
| 238373_at | 4.87E-05 | 7.76E-06 | H1FNT    | 341567 | . |
| 238374_at | 5.79E-04 | 1.71E-04 | H1FNT    | 341567 | . |
| 238377_s_ | 1.04E-05 | 1.07E-06 |          |        | . |
| 238378_at | 0.041055 | 0.027294 |          |        | . |
| 238380_s_ | 0.001942 | 7.45E-04 |          |        | . |
| 238381_x_ | 0.002096 | 8.17E-04 |          |        | . |
| 238386_x_ | 0.025335 | 0.015604 |          |        | . |
| 238387_s_ | 0.031515 | 0.020087 |          |        | . |
| 238388_x_ | 1.89E-05 | 2.32E-06 |          |        | . |
| 238389_s_ | 0.005146 | 0.002398 |          |        | . |
| 238395_at | 2.20E-04 | 5.16E-05 |          |        | . |
| 238396_at | 0.005052 | 0.002347 |          |        | . |
| 238397_at | 0.02169  | 0.013019 |          |        | . |
| 238400_at | 0.006428 | 0.003121 | FLJ35220 | 284131 | . |
| 238401_at | 0.00111  | 3.79E-04 | FLJ35220 | 284131 | . |
| 238402_s_ | 0.002435 | 9.79E-04 | FLJ35220 | 284131 | . |
| 238403_at | 4.28E-04 | 1.17E-04 |          |        | . |
| 238404_x_ | 1.75E-04 | 3.87E-05 | SEZ6L2   | 26470  | . |
| 238405_at | 4.83E-04 | 1.36E-04 |          |        | . |

|           |          |          |           |          |
|-----------|----------|----------|-----------|----------|
| 238406_x_ | 8.29E-06 | 7.89E-07 | SEZ6L2    | 26470 .  |
| 238407_at | 0.030176 | 0.019111 |           | .        |
| 238414_at | 0.015735 | 0.008936 |           | .        |
| 238415_at | 2.37E-04 | 5.66E-05 |           | .        |
| 238416_x_ | 0.002107 | 8.22E-04 | ZC3H18    | 124245 . |
| 238417_at | 0.043243 | 0.029003 | PGM2L1    | 283209 . |
| 238419_at | 2.20E-04 | 5.17E-05 | PHLDB2    | 90102 .  |
| 238420_at | 3.08E-04 | 7.86E-05 |           | .        |
| 238421_at | 0.001832 | 6.94E-04 | RC3H2     | 54542 .  |
| 238424_at | 3.36E-05 | 4.82E-06 | ADAL      | 161823 . |
| 238425_at | 9.51E-06 | 9.52E-07 |           | .        |
| 238427_at | 7.21E-04 | 2.24E-04 | GRPEL2    | 134266 . |
| 238430_x_ | 4.91E-04 | 1.39E-04 | SLFN5     | 162394 . |
| 238431_at | 4.96E-05 | 7.92E-06 |           | .        |
| 238432_at | 8.19E-04 | 2.62E-04 | FLJ35776  | 649446 . |
| 238433_at | 0.006121 | 0.002946 | SNX5      | 27131 .  |
| 238434_at | 0.02443  | 0.014944 | SMCR8     | 140775 . |
| 238435_at | 0.043041 | 0.028828 | CA5BP     | 340591 . |
| 238440_at | 5.85E-05 | 9.75E-06 | CLYBL     | 171425 . |
| 238441_at | 0.019321 | 0.011358 | PRKAA2    | 5563 .   |
| 238442_at | 0.040591 | 0.02694  |           | .        |
| 238443_at | 4.52E-05 | 7.04E-06 |           | .        |
| 238444_at | 0.016122 | 0.009198 | ZNF618    | 114991 . |
| 238445_x_ | 0.00133  | 4.72E-04 | MGAT5B    | 146664 . |
| 238446_at | 0.027104 | 0.016862 | SMA4      | 11039 .  |
| 238447_at | 0.00214  | 8.38E-04 | RBMS3     | 27303 .  |
| 238449_at | 0.001701 | 6.34E-04 | LOC595101 | 595101 . |
| 238451_at | 3.22E-04 | 8.30E-05 | MPP7      | 143098 . |
| 238453_at | 1.01E-09 | 5.44E-12 | FGFBP3    | 143282 . |
| 238456_at | 7.32E-04 | 2.28E-04 |           | .        |
| 238457_at | 6.84E-04 | 2.10E-04 | DGKE      | 8526 .   |
| 238458_at | 0.047554 | 0.032392 | EFHA2     | 286097 . |
| 238459_x_ | 6.59E-05 | 1.14E-05 | SPATA6    | 54558 .  |
| 238461_at | 9.31E-08 | 2.07E-09 | EIF4E3    | 317649 . |

|           |          |          |              |           |   |
|-----------|----------|----------|--------------|-----------|---|
| 238462_at | 0.004854 | 0.002237 | UBASH3B      | 84959     | . |
| 238463_at | 3.12E-05 | 4.40E-06 |              |           | . |
| 238464_at | 0.001445 | 5.22E-04 | LOC100134365 | 100134365 | . |
| 238467_at | 0.00852  | 0.004349 |              |           | . |
| 238468_at | 0.001298 | 4.58E-04 | TNRC6B       | 23112     | . |
| 238469_at | 4.56E-04 | 1.27E-04 | OGFRL1       | 79627     | . |
| 238470_at | 1.25E-08 | 1.39E-10 | SYS1         | 90196     | . |
| 238472_at | 5.73E-05 | 9.51E-06 | FBXO9        | 26268     | . |
| 238473_at | 0.007019 | 0.003467 | LOC100216545 | 100216545 | . |
| 238475_at | 0.001586 | 5.83E-04 | ALG10B       | 144245    | . |
| 238476_at | 0.006487 | 0.003155 | C5orf41      | 153222    | . |
| 238477_at | 0.035609 | 0.023147 |              |           | . |
| 238480_at | 4.85E-05 | 7.71E-06 | TTC39C       | 125488    | . |
| 238482_at | 0.001083 | 3.68E-04 | KLF7         | 8609      | . |
| 238486_at | 6.03E-05 | 1.01E-05 | FRS2         | 10818     | . |
| 238488_at | 0.048942 | 0.033481 | LRRC70       | 100130733 | . |
| 238489_at | 0.003138 | 0.001325 | PRKAA2       | 5563      | . |
| 238490_at | 0.003943 | 0.001742 | KIAA2026     | 158358    | . |
| 238492_at | 0.002505 | 0.001013 |              |           | . |
| 238494_at | 4.23E-05 | 6.46E-06 | TRAF3IP1     | 26146     | . |
| 238495_at | 0.037084 | 0.024274 |              |           | . |
| 238496_at | 0.003685 | 0.001607 |              |           | . |
| 238498_at | 1.42E-04 | 3.00E-05 |              |           | . |
| 238499_at | 4.20E-04 | 1.15E-04 | SLC45A3      | 85414     | . |
| 238500_at | 3.07E-05 | 4.31E-06 | EMP2         | 2013      | . |
| 238501_at | 0.002674 | 0.001094 |              |           | . |
| 238505_at | 1.54E-04 | 3.31E-05 | ADPRH        | 141       | . |
| 238506_at | 2.59E-07 | 8.29E-09 | LRRC58       | 116064    | . |
| 238507_at | 6.91E-05 | 1.21E-05 |              |           | . |
| 238508_at | 1.77E-04 | 3.94E-05 | DBF4B        | 80174     | . |
| 238509_at | 0.034104 | 0.022015 | CUL1         | 8454      | . |
| 238511_at | 0.004208 | 0.001883 | LOC440288    | 440288    | . |
| 238514_at | 0.007704 | 0.003868 | TMEM25       | 84866     | . |
| 238516_at | 2.88E-04 | 7.21E-05 | BMPR2        | 659       | . |

|           |          |          |                             |          |
|-----------|----------|----------|-----------------------------|----------|
| 238517_at | 1.06E-05 | 1.09E-06 |                             | .        |
| 238518_x_ | 0.039731 | 0.026276 | GLYCTK                      | 132158 . |
| 238519_at | 1.94E-04 | 4.41E-05 | RSC1A1                      | 6248 .   |
| 238520_at | 3.12E-05 | 4.39E-06 | TRERF1                      | 55809 .  |
| 238521_at | 0.002569 | 0.001043 |                             | .        |
| 238522_at | 0.004288 | 0.001926 | USP54                       | 159195 . |
| 238523_at | 0.001148 | 3.95E-04 | KLHL36                      | 79786 .  |
| 238524_at | 0.005156 | 0.002404 |                             | .        |
| 238525_at | 0.004377 | 0.001976 | DDX56                       | 54606 .  |
| 238526_at | 4.44E-04 | 1.23E-04 | RAB3IP                      | 117177 . |
| 238528_at | 6.21E-05 | 1.05E-05 | UBR1                        | 197131 . |
| 238529_at | 4.41E-04 | 1.22E-04 | LOC730631                   | 730631 . |
| 238530_at | 9.21E-06 | 9.13E-07 | NNT                         | 23530 .  |
| 238531_x_ | 0.03205  | 0.02049  |                             | .        |
| 238532_at | 4.43E-05 | 6.87E-06 | DPF3                        | 8110 .   |
| 238533_at | 4.23E-04 | 1.16E-04 | EPHA7                       | 2045 .   |
| 238534_at | 1.68E-04 | 3.70E-05 | LRRFIP1                     | 9208 .   |
| 238535_at | 4.75E-05 | 7.51E-06 | CEP152                      | 22995 .  |
| 238536_at | 0.005186 | 0.002421 |                             | .        |
| 238538_at | 0.030059 | 0.019024 | ANKRD11                     | 29123 .  |
| 238539_at | 6.16E-05 | 1.04E-05 | HPS3                        | 84343 .  |
| 238540_at | 0.010976 | 0.005853 | LOC401320                   | 401320 . |
| 238541_at | 1.12E-06 | 5.71E-08 | C21orf58                    | 54058 .  |
| 238542_at | 2.76E-07 | 9.04E-09 | ULBP2                       | 80328 .  |
| 238543_x_ | 8.89E-07 | 4.24E-08 | MDGA1                       | 266727 . |
| 238544_at | 2.67E-04 | 6.57E-05 |                             | .        |
| 238546_at | 5.60E-05 | 9.23E-06 | SLC8A1                      | 6546 .   |
| 238547_at | 0.017699 | 0.010253 | HEXIM2                      | 124790 . |
| 238548_at | 1.49E-04 | 3.19E-05 |                             | .        |
| 238549_at | 4.12E-04 | 1.12E-04 | CBFA2T2                     | 9139 .   |
| 238551_at | 0.001271 | 4.47E-04 | FUT11                       | 170384 . |
| 238552_at | 0.003412 | 0.001466 |                             | .        |
| 238553_at | 0.019384 | 0.011405 | AGAP10 /// AG119016 /// 35. |          |
| 238557_at | 0.030214 | 0.019141 | LOC100144603 100144603 .    |          |

|           |          |          |                  |
|-----------|----------|----------|------------------|
| 238558_at | 6.56E-05 | 1.13E-05 | .                |
| 238561_s_ | 0.033038 | 0.021231 | UTP23 84294 .    |
| 238562_at | 0.005221 | 0.002439 | UTP23 84294 .    |
| 238564_at | 0.040361 | 0.026757 | FAM171B 165215 . |
| 238565_at | 0.0019   | 7.26E-04 | .                |
| 238566_at | 9.43E-04 | 3.11E-04 | .                |
| 238567_at | 0.030336 | 0.019228 | SGPP2 130367 .   |
| 238569_at | 2.32E-05 | 3.01E-06 | GABBR1 2550 .    |
| 238570_at | 1.04E-04 | 2.03E-05 | .                |
| 238571_at | 0.008513 | 0.004345 | .                |
| 238572_at | 0.005878 | 0.002809 | STK16 8576 .     |
| 238573_at | 0.006821 | 0.003351 | .                |
| 238574_at | 1.88E-07 | 5.31E-09 | MCART1 92014 .   |
| 238577_s_ | 0.017183 | 0.009901 | TSHZ2 128553 .   |
| 238579_at | 1.72E-04 | 3.81E-05 | C9orf85 138241 . |
| 238580_at | 2.90E-06 | 2.01E-07 | .                |
| 238582_at | 7.53E-05 | 1.35E-05 | C21orf2 755 .    |
| 238583_at | 1.23E-07 | 3.00E-09 | MSRB3 253827 .   |
| 238585_at | 2.55E-04 | 6.20E-05 | GTDC1 79712 .    |
| 238587_at | 0.018209 | 0.010601 | UBASH3B 84959 .  |
| 238589_s_ | 6.01E-07 | 2.51E-08 | .                |
| 238590_x_ | 0.004883 | 0.002252 | TMEM107 84314 .  |
| 238592_at | 7.76E-04 | 2.45E-04 | PDLIM3 27295 .   |
| 238593_at | 0.001153 | 3.97E-04 | C11orf80 79703 . |
| 238594_x_ | 3.98E-07 | 1.47E-08 | DUSP8 1850 .     |
| 238596_at | 3.38E-05 | 4.85E-06 | C10orf4 118924 . |
| 238597_at | 0.003567 | 0.001546 | ANKRD13C 81573 . |
| 238600_at | 1.11E-07 | 2.63E-09 | JAKMIP1 152789 . |
| 238602_at | 9.22E-07 | 4.45E-08 | DIS3L2 129563 .  |
| 238604_at | 1.60E-04 | 3.46E-05 | .                |
| 238607_at | 9.92E-04 | 3.31E-04 | ZNF296 162979 .  |
| 238609_at | 0.00852  | 0.00435  | C7orf38 221786 . |
| 238610_s_ | 0.001661 | 6.16E-04 | .                |
| 238611_at | 0.002736 | 0.001125 | .                |

|           |          |          |                    |
|-----------|----------|----------|--------------------|
| 238612_at | 1.13E-04 | 2.23E-05 | .                  |
| 238613_at | 1.35E-08 | 1.54E-10 | ZAK 51776 .        |
| 238614_x  | 0.037423 | 0.024524 | ZNF430 80264 .     |
| 238615_at | 0.017458 | 0.010086 | ERLIN2 11160 .     |
| 238617_at | 0.004018 | 0.001782 | .                  |
| 238618_at | 8.91E-05 | 1.67E-05 | NF2 4771 .         |
| 238619_at | 1.91E-04 | 4.34E-05 | .                  |
| 238620_at | 0.001344 | 4.79E-04 | .                  |
| 238622_at | 5.70E-04 | 1.67E-04 | RAP2B 5912 .       |
| 238624_at | 0.035224 | 0.022846 | .                  |
| 238627_at | 0.04138  | 0.027544 | TRAPPC2L 51693 .   |
| 238628_s  | 0.0027   | 0.001107 | TRAPPC2L 51693 .   |
| 238629_x  | 3.54E-04 | 9.30E-05 | .                  |
| 238630_at | 0.022095 | 0.013309 | OPA3 80207 .       |
| 238632_at | 2.42E-04 | 5.80E-05 | .                  |
| 238633_at | 9.55E-05 | 1.82E-05 | EPC1 80314 .       |
| 238634_x  | 0.005228 | 0.002443 | .                  |
| 238636_at | 8.04E-05 | 1.47E-05 | CACNA1C 775 .      |
| 238637_at | 0.004224 | 0.001892 | .                  |
| 238638_at | 8.10E-05 | 1.48E-05 | SLC37A2 219855 .   |
| 238639_x  | 0.0027   | 0.001107 | LOC730496 730496 . |
| 238641_at | 0.019579 | 0.011535 | C1orf126 200197 .  |
| 238642_at | 3.02E-05 | 4.21E-06 | ANKRD13D 338692 .  |
| 238644_at | 1.83E-07 | 5.13E-09 | MYSM1 114803 .     |
| 238645_at | 0.003362 | 0.001441 | .                  |
| 238646_at | 0.002361 | 9.42E-04 | .                  |
| 238647_at | 9.47E-04 | 3.13E-04 | C14orf28 122525 .  |
| 238648_at | 6.57E-06 | 5.80E-07 | FLJ42291 346547 .  |
| 238649_at | 2.06E-04 | 4.76E-05 | PITPNC1 26207 .    |
| 238650_x  | 0.004606 | 0.002101 | WDR89 112840 .     |
| 238651_at | 2.18E-07 | 6.50E-09 | .                  |
| 238653_at | 0.014595 | 0.008178 | LRIG2 9860 .       |
| 238656_at | 4.75E-05 | 7.50E-06 | .                  |
| 238658_at | 0.008186 | 0.004151 | .                  |

|           |          |          |                              |        |   |
|-----------|----------|----------|------------------------------|--------|---|
| 238662_at | 0.006598 | 0.003219 | ATPBD4                       | 89978  | . |
| 238663_x_ | 0.013749 | 0.007626 | GRIA4                        | 2893   | . |
| 238664_s_ | 0.013806 | 0.007661 | MGC12916                     | 84815  | . |
| 238666_at | 0.018785 | 0.010992 |                              |        | . |
| 238669_at | 1.25E-09 | 7.13E-12 | PTGS1                        | 5742   | . |
| 238670_at | 1.35E-04 | 2.81E-05 |                              |        | . |
| 238672_at | 1.84E-05 | 2.24E-06 |                              |        | . |
| 238673_at | 2.12E-05 | 2.69E-06 | SAMD12                       | 401474 | . |
| 238674_at | 0.048297 | 0.032965 |                              |        | . |
| 238676_at | 0.003354 | 0.001436 |                              |        | . |
| 238677_at | 1.74E-04 | 3.85E-05 | WDR36                        | 134430 | . |
| 238678_at | 0.010412 | 0.005498 | tcag7.907                    | 402483 | . |
| 238679_at | 0.041858 | 0.027915 | MESDC2                       | 23184  | . |
| 238680_at | 0.018503 | 0.010801 | METTLL12 /// SI692158 /// 7! |        | . |
| 238681_at | 0.04668  | 0.031701 | GDPD1                        | 284161 | . |
| 238682_at | 1.65E-04 | 3.60E-05 | CCDC96                       | 257236 | . |
| 238683_at | 6.68E-05 | 1.16E-05 | ZNF524                       | 147807 | . |
| 238684_at | 0.010125 | 0.005321 |                              |        | . |
| 238686_at | 7.92E-04 | 2.51E-04 | FBXO3                        | 26273  | . |
| 238688_at | 0.04136  | 0.027529 | TPM1                         | 7168   | . |
| 238690_at | 0.006263 | 0.003026 |                              |        | . |
| 238691_at | 4.19E-05 | 6.38E-06 | SNHG10                       | 283596 | . |
| 238693_at | 0.003015 | 0.001263 | PHC3                         | 80012  | . |
| 238694_at | 5.07E-07 | 2.00E-08 | DGKE                         | 8526   | . |
| 238695_s_ | 0.001642 | 6.08E-04 | RAB39B                       | 116442 | . |
| 238697_at | 1.20E-05 | 1.29E-06 | NCRNA00086                   | 399668 | . |
| 238699_s_ | 0.005105 | 0.002377 | CASK                         | 8573   | . |
| 238701_x_ | 0.016619 | 0.009526 | C11orf92                     | 399948 | . |
| 238702_at | 0.006787 | 0.00333  | C3orf57 /// LO 100129285 //. |        | . |
| 238703_at | 2.18E-05 | 2.79E-06 | C21orf70 /// LC729535 /// 8! |        | . |
| 238704_at | 0.002048 | 7.94E-04 |                              |        | . |
| 238705_at | 1.29E-04 | 2.65E-05 |                              |        | . |
| 238707_at | 0.003923 | 0.001733 |                              |        | . |
| 238708_at | 0.039215 | 0.025881 | BC036928                     | 386758 | . |

|           |          |          |                    |
|-----------|----------|----------|--------------------|
| 238709_at | 2.14E-06 | 1.36E-07 | .                  |
| 238711_s_ | 0.009724 | 0.005079 | ZNF148 7707 .      |
| 238712_at | 0.001892 | 7.22E-04 | .                  |
| 238713_at | 0.029243 | 0.01842  | .                  |
| 238714_at | 0.00237  | 9.46E-04 | .                  |
| 238715_at | 0.018176 | 0.010578 | LOC646014 646014 . |
| 238716_at | 0.013142 | 0.007236 | FAM85A 619423 .    |
| 238717_at | 0.019549 | 0.011514 | .                  |
| 238722_x_ | 1.36E-05 | 1.51E-06 | NAPEPLD 222236 .   |
| 238724_at | 0.03414  | 0.02204  | BPGM 669 .         |
| 238725_at | 5.82E-04 | 1.72E-04 | IRF1 3659 .        |
| 238726_at | 0.006086 | 0.002926 | .                  |
| 238728_at | 0.020023 | 0.011845 | .                  |
| 238729_x_ | 0.007691 | 0.003861 | .                  |
| 238730_at | 4.10E-05 | 6.20E-06 | .                  |
| 238731_at | 0.002076 | 8.07E-04 | SETDB2 83852 .     |
| 238733_at | 6.18E-06 | 5.36E-07 | .                  |
| 238734_at | 0.028179 | 0.017639 | .                  |
| 238735_at | 0.001    | 3.34E-04 | .                  |
| 238736_at | 5.57E-07 | 2.27E-08 | REV3L 5980 .       |
| 238737_at | 0.04178  | 0.027856 | C1orf83 127428 .   |
| 238738_at | 5.31E-06 | 4.39E-07 | PSMD7 5713 .       |
| 238739_at | 0.047106 | 0.03204  | .                  |
| 238740_at | 0.014815 | 0.008327 | AARSD1 80755 .     |
| 238741_at | 0.043894 | 0.029518 | FAM83A 84985 .     |
| 238742_x_ | 7.80E-06 | 7.30E-07 | .                  |
| 238743_at | 4.30E-04 | 1.18E-04 | .                  |
| 238744_at | 7.08E-05 | 1.25E-05 | .                  |
| 238746_at | 0.004745 | 0.002178 | PXMP4 11264 .      |
| 238749_at | 5.98E-04 | 1.77E-04 | .                  |
| 238750_at | 0.017936 | 0.010412 | .                  |
| 238753_at | 0.005494 | 0.002591 | FREQ 23413 .       |
| 238754_at | 2.65E-05 | 3.57E-06 | .                  |
| 238755_at | 4.21E-06 | 3.26E-07 | .                  |



|           |          |          |              |           |   |
|-----------|----------|----------|--------------|-----------|---|
| 238756_at | 0.002183 | 8.58E-04 | GAS2L3       | 283431    | . |
| 238758_at | 0.001398 | 5.02E-04 |              |           | . |
| 238759_at | 4.49E-06 | 3.55E-07 | CCDC88A      | 55704     | . |
| 238760_at | 0.004283 | 0.001923 | YARS         | 8565      | . |
| 238761_at | 0.004677 | 0.002141 |              |           | . |
| 238762_at | 2.42E-04 | 5.81E-05 | MTHFD2L      | 441024    | . |
| 238763_at | 0.022847 | 0.013823 | RBM20        | 282996    | . |
| 238765_at | 0.037527 | 0.024602 | ATP6V1G1     | 9550      | . |
| 238766_at | 3.60E-04 | 9.52E-05 |              |           | . |
| 238768_at | 2.42E-05 | 3.19E-06 | C2orf68      | 388969    | . |
| 238769_at | 0.001348 | 4.80E-04 |              |           | . |
| 238770_at | 0.01091  | 0.005813 | C8orf79      | 57604     | . |
| 238771_at | 0.001388 | 4.97E-04 | LOC100129899 | 100129899 | . |
| 238772_at | 1.78E-04 | 3.95E-05 | ZNF207       | 7756      | . |
| 238773_at | 0.003194 | 0.001354 | METT5D1      | 196074    | . |
| 238774_at | 0.021806 | 0.013102 |              |           | . |
| 238775_at | 0.020119 | 0.011908 |              |           | . |
| 238776_x  | 0.002473 | 9.97E-04 | OBSL1        | 23363     | . |
| 238777_x  | 4.66E-04 | 1.30E-04 | ATMIN        | 23300     | . |
| 238778_at | 0.007485 | 0.00374  | MPP7         | 143098    | . |
| 238779_at | 1.07E-05 | 1.11E-06 | DCP2         | 167227    | . |
| 238781_at | 0.006485 | 0.003154 |              |           | . |
| 238782_at | 5.88E-05 | 9.80E-06 |              |           | . |
| 238783_at | 4.05E-05 | 6.09E-06 | TMEM161B     | 153396    | . |
| 238784_at | 0.041985 | 0.028018 | DPY19L2      | 283417    | . |
| 238785_at | 3.84E-04 | 1.03E-04 |              |           | . |
| 238788_at | 1.18E-07 | 2.85E-09 | LOC494150    | 494150    | . |
| 238789_at | 7.35E-04 | 2.29E-04 | KANK1        | 23189     | . |
| 238790_at | 0.013112 | 0.007216 | LOC374443    | 374443    | . |
| 238791_at | 0.010853 | 0.005778 | ZNF100       | 163227    | . |
| 238794_at | 0.006207 | 0.002994 | C10orf78     | 119392    | . |
| 238795_at | 2.61E-05 | 3.49E-06 | C10orf18     | 54906     | . |
| 238796_at | 0.007086 | 0.003507 |              |           | . |
| 238797_at | 1.80E-09 | 1.16E-11 | TRIM11       | 81559     | . |

|           |          |          |              |           |   |
|-----------|----------|----------|--------------|-----------|---|
| 238799_at | 0.016053 | 0.009154 | ATP5S        | 27109     | . |
| 238801_at | 2.05E-04 | 4.73E-05 | RBM33        | 155435    | . |
| 238803_at | 2.16E-04 | 5.02E-05 | HECTD2       | 143279    | . |
| 238804_at | 0.028625 | 0.017966 | LOC100131701 | 100131701 | . |
| 238805_at | 0.001418 | 5.10E-04 | C11orf52     | 91894     | . |
| 238806_at | 0.011461 | 0.006158 |              |           | . |
| 238807_at | 6.43E-07 | 2.74E-08 | GAPDHL7      | 100128961 | . |
| 238808_at | 3.50E-04 | 9.18E-05 |              |           | . |
| 238810_at | 3.48E-04 | 9.12E-05 | RFX3         | 5991      | . |
| 238811_at | 4.52E-06 | 3.58E-07 | ATP11B       | 23200     | . |
| 238812_at | 2.20E-05 | 2.82E-06 |              |           | . |
| 238813_at | 7.21E-04 | 2.24E-04 | ALAS2        | 212       | . |
| 238814_at | 0.048519 | 0.033141 | SLC35C2      | 51006     | . |
| 238815_at | 0.014305 | 0.007986 | LRRTM1       | 347730    | . |
| 238816_at | 2.25E-04 | 5.30E-05 | PSEN1        | 5663      | . |
| 238818_at | 5.82E-06 | 4.98E-07 | KIAA1429     | 25962     | . |
| 238820_at | 4.19E-04 | 1.15E-04 | C14orf83     | 161145    | . |
| 238821_at | 6.01E-04 | 1.79E-04 | CSTF2        | 1478      | . |
| 238822_at | 0.005027 | 0.002331 |              |           | . |
| 238823_at | 3.39E-05 | 4.86E-06 | FMNL3        | 91010     | . |
| 238827_at | 0.007848 | 0.003955 |              |           | . |
| 238829_at | 5.67E-06 | 4.81E-07 |              |           | . |
| 238830_at | 0.010916 | 0.005816 | SOS2         | 6655      | . |
| 238831_at | 0.001544 | 5.65E-04 | TMEM33       | 55161     | . |
| 238833_at | 9.63E-04 | 3.19E-04 | LOC729088    | 729088    | . |
| 238834_at | 3.17E-04 | 8.15E-05 | MYLK3        | 91807     | . |
| 238836_at | 0.001322 | 4.69E-04 |              |           | . |
| 238837_at | 3.97E-04 | 1.07E-04 | PHF8         | 23133     | . |
| 238839_at | 4.15E-05 | 6.30E-06 | OTX1         | 5013      | . |
| 238840_at | 0.001267 | 4.45E-04 | LRRFIP1      | 9208      | . |
| 238841_at | 2.86E-04 | 7.16E-05 | PTPDC1       | 138639    | . |
| 238842_at | 3.66E-04 | 9.69E-05 |              |           | . |
| 238843_at | 0.005215 | 0.002436 | NPHP1        | 4867      | . |
| 238844_s_ | 0.005193 | 0.002424 | NPHP1        | 4867      | . |

|           |          |          |              |           |   |
|-----------|----------|----------|--------------|-----------|---|
| 238845_at | 0.043175 | 0.028942 | SLC30A4      | 7782      | . |
| 238846_at | 0.00501  | 0.002322 | TNFRSF11A    | 8792      | . |
| 238849_at | 1.58E-06 | 9.20E-08 | ACY1         | 95        | . |
| 238850_at | 3.28E-06 | 2.36E-07 | LOC645323    | 645323    | . |
| 238851_at | 0.040083 | 0.026547 | ANKRD13A     | 88455     | . |
| 238852_at | 9.40E-07 | 4.56E-08 |              |           | . |
| 238853_at | 0.007073 | 0.003499 | RAB3IP       | 117177    | . |
| 238854_at | 2.85E-06 | 1.97E-07 |              |           | . |
| 238855_at | 1.65E-04 | 3.62E-05 | AHNAK        | 79026     | . |
| 238856_s_ | 0.033784 | 0.021786 | PANK2        | 80025     | . |
| 238857_at | 0.032929 | 0.021148 | ATE1         | 11101     | . |
| 238858_at | 0.00575  | 0.002734 | TIFA         | 92610     | . |
| 238860_at | 5.46E-07 | 2.21E-08 | C6orf130     | 221443    | . |
| 238861_at | 0.036706 | 0.023979 |              |           | . |
| 238862_at | 0.049958 | 0.034301 | MFSD4        | 148808    | . |
| 238863_x_ | 0.004024 | 0.001785 |              |           | . |
| 238864_at | 1.30E-06 | 7.05E-08 | VWA3A        | 146177    | . |
| 238866_at | 4.63E-04 | 1.29E-04 | C19orf68     | 374920    | . |
| 238868_at | 2.26E-04 | 5.34E-05 | UACA         | 55075     | . |
| 238872_at | 7.11E-04 | 2.20E-04 | LOC100128239 | 100128239 | . |
| 238877_at | 0.0377   | 0.024732 | EYA4         | 2070      | . |
| 238880_at | 3.12E-05 | 4.39E-06 | GTF3A        | 2971      | . |
| 238881_at | 7.23E-05 | 1.28E-05 |              |           | . |
| 238882_at | 4.89E-04 | 1.38E-04 |              |           | . |
| 238883_at | 0.010418 | 0.005502 |              |           | . |
| 238884_at | 0.001333 | 4.74E-04 |              |           | . |
| 238885_at | 0.019985 | 0.011817 | KIAA1549     | 57670     | . |
| 238886_at | 4.46E-04 | 1.24E-04 | TMED10       | 10972     | . |
| 238887_at | 0.001005 | 3.36E-04 |              |           | . |
| 238889_at | 1.88E-05 | 2.31E-06 | AGBL5        | 60509     | . |
| 238890_at | 0.002197 | 8.65E-04 | PSMG1        | 8624      | . |
| 238891_at | 2.20E-05 | 2.82E-06 |              |           | . |
| 238892_at | 0.009874 | 0.00517  |              |           | . |
| 238894_at | 9.11E-06 | 9.00E-07 |              |           | . |

|           |          |          |                    |
|-----------|----------|----------|--------------------|
| 238895_at | 6.66E-05 | 1.15E-05 | .                  |
| 238898_at | 1.72E-04 | 3.79E-05 | .                  |
| 238901_at | 0.006677 | 0.003266 | .                  |
| 238903_at | 0.014379 | 0.008035 | UBXN2B 137886 .    |
| 238904_at | 4.40E-06 | 3.46E-07 | .                  |
| 238905_at | 9.62E-06 | 9.67E-07 | RHOJ 57381 .       |
| 238906_s_ | 2.37E-05 | 3.10E-06 | RHOJ 57381 .       |
| 238907_at | 0.03348  | 0.021564 | ZNF780A 284323 .   |
| 238912_x_ | 8.01E-04 | 2.55E-04 | C9orf85 138241 .   |
| 238913_at | 7.09E-04 | 2.19E-04 | .                  |
| 238916_at | 2.64E-06 | 1.78E-07 | LOC400027 400027 . |
| 238917_s_ | 0.006392 | 0.003101 | DENND5B 160518 .   |
| 238918_at | 0.015639 | 0.008876 | .                  |
| 238920_at | 2.61E-04 | 6.38E-05 | .                  |
| 238921_at | 0.030145 | 0.019087 | LOC644794 644794 . |
| 238923_at | 9.01E-04 | 2.94E-04 | SPOP 8405 .        |
| 238926_at | 6.79E-04 | 2.08E-04 | .                  |
| 238928_at | 3.68E-04 | 9.76E-05 | .                  |
| 238929_at | 5.06E-06 | 4.15E-07 | SFRS2B 10929 .     |
| 238930_at | 8.21E-05 | 1.51E-05 | FLJ40125 147699 .  |
| 238932_at | 0.00174  | 6.52E-04 | .                  |
| 238933_at | 0.001025 | 3.44E-04 | IRS1 3667 .        |
| 238935_at | 2.84E-06 | 1.96E-07 | RPS27L 51065 .     |
| 238938_at | 0.007306 | 0.003636 | .                  |
| 238940_at | 0.018474 | 0.010781 | KLF12 11278 .      |
| 238941_at | 4.30E-06 | 3.36E-07 | TRIM50 135892 .    |
| 238942_at | 0.002142 | 8.39E-04 | .                  |
| 238943_at | 5.60E-07 | 2.29E-08 | FIBCD1 84929 .     |
| 238946_at | 0.025287 | 0.015569 | .                  |
| 238947_at | 3.80E-05 | 5.62E-06 | MFSD3 113655 .     |
| 238948_at | 1.30E-04 | 2.68E-05 | TM9SF1 10548 .     |
| 238949_at | 3.01E-06 | 2.12E-07 | RNF145 153830 .    |
| 238951_at | 2.98E-04 | 7.52E-05 | .                  |
| 238953_at | 8.45E-05 | 1.57E-05 | .                  |

|           |          |          |                   |
|-----------|----------|----------|-------------------|
| 238954_at | 2.45E-04 | 5.89E-05 | .                 |
| 238955_at | 5.48E-05 | 8.97E-06 | RFTN2 130132 .    |
| 238956_at | 6.87E-05 | 1.20E-05 | .                 |
| 238958_at | 1.99E-04 | 4.55E-05 | UBE2E1 7324 .     |
| 238962_at | 0.030598 | 0.019419 | ZNF681 148213 .   |
| 238963_at | 1.20E-06 | 6.30E-08 | .                 |
| 238964_at | 0.00429  | 0.001927 | FIGN 55137 .      |
| 238966_at | 1.26E-05 | 1.38E-06 | BRUNOL4 56853 .   |
| 238968_at | 0.005015 | 0.002325 | .                 |
| 238969_at | 2.99E-08 | 4.56E-10 | C3orf55 152078 .  |
| 238970_at | 2.02E-05 | 2.52E-06 | .                 |
| 238971_at | 0.004052 | 0.0018   | .                 |
| 238974_at | 0.009605 | 0.005003 | C2orf69 205327 .  |
| 238976_at | 0.004955 | 0.002291 | .                 |
| 238977_at | 2.28E-04 | 5.39E-05 | MCM6 4175 .       |
| 238979_at | 4.85E-04 | 1.37E-04 | .                 |
| 238980_x_ | 0.001509 | 5.50E-04 | C17orf56 146705 . |
| 238982_at | 7.75E-05 | 1.40E-05 | DENR 8562 .       |
| 238983_at | 7.09E-06 | 6.43E-07 | NSUN7 79730 .     |
| 238984_at | 0.032818 | 0.02106  | REG4 83998 .      |
| 238988_at | 8.91E-06 | 8.73E-07 | .                 |
| 238989_at | 2.04E-04 | 4.70E-05 | C1GALT1C1 29071 . |
| 238991_at | 2.94E-05 | 4.08E-06 | .                 |
| 238993_at | 0.004123 | 0.001837 | MATR3 9782 .      |
| 238994_at | 0.001572 | 5.77E-04 | OTUD7B 56957 .    |
| 238995_at | 0.00361  | 0.001568 | SULT1A1 6817 .    |
| 238996_x_ | 0.007162 | 0.003551 | ALDOA 226 .       |
| 238999_at | 0.001469 | 5.32E-04 | .                 |
| 239000_at | 0.00118  | 4.09E-04 | BRD4 23476 .      |
| 239002_at | 1.30E-06 | 7.07E-08 | ASPM 259266 .     |
| 239004_at | 0.025828 | 0.015947 | SQSTM1 8878 .     |
| 239005_at | 1.29E-06 | 6.97E-08 | .                 |
| 239007_at | 0.001565 | 5.74E-04 | ZNF616 90317 .    |
| 239009_at | 0.00261  | 0.001063 | KIAA0754 643314 . |

|           |          |          |              |           |   |
|-----------|----------|----------|--------------|-----------|---|
| 239010_at | 4.10E-09 | 3.31E-11 | FLJ39632     | 642477    | . |
| 239011_at | 0.001897 | 7.24E-04 |              |           | . |
| 239012_at | 0.005063 | 0.002354 | RNF144B      | 255488    | . |
| 239014_at | 7.39E-04 | 2.31E-04 | CCAR1        | 55749     | . |
| 239016_at | 0.015943 | 0.00908  |              |           | . |
| 239017_at | 0.014201 | 0.007917 |              |           | . |
| 239018_at | 0.010859 | 0.005781 | DNAJC30      | 84277     | . |
| 239019_at | 5.95E-04 | 1.76E-04 | KLF12        | 11278     | . |
| 239022_at | 5.23E-05 | 8.48E-06 |              |           | . |
| 239024_at | 6.24E-04 | 1.87E-04 | ZNF148       | 7707      | . |
| 239027_at | 3.64E-04 | 9.62E-05 | DOCK8        | 81704     | . |
| 239029_at | 0.045532 | 0.030796 | LOC100129701 | 100129701 | . |
| 239030_at | 3.62E-05 | 5.28E-06 |              |           | . |
| 239032_at | 0.002551 | 0.001035 |              |           | . |
| 239033_at | 9.88E-08 | 2.26E-09 |              |           | . |
| 239034_at | 1.34E-04 | 2.78E-05 | CXorf24      | 203414    | . |
| 239035_at | 0.018122 | 0.01054  | MTHFR        | 4524      | . |
| 239036_at | 0.001704 | 6.36E-04 |              |           | . |
| 239038_at | 0.009047 | 0.004662 | C1orf52      | 148423    | . |
| 239039_at | 2.55E-05 | 3.40E-06 |              |           | . |
| 239040_at | 1.82E-04 | 4.07E-05 | HNRNPD       | 3184      | . |
| 239042_at | 7.25E-08 | 1.49E-09 | TSR1         | 55720     | . |
| 239044_at | 0.022314 | 0.013458 | ITFG1        | 81533     | . |
| 239046_at | 3.94E-04 | 1.06E-04 |              |           | . |
| 239048_at | 0.008084 | 0.004093 |              |           | . |
| 239050_s_ | 0.04379  | 0.029435 |              |           | . |
| 239051_at | 0.022473 | 0.013564 | FLJ31813     | 326332    | . |
| 239053_at | 2.77E-04 | 6.88E-05 | CIAO1        | 9391      | . |
| 239055_at | 8.22E-04 | 2.63E-04 |              |           | . |
| 239056_at | 0.001668 | 6.20E-04 | SEC22C       | 9117      | . |
| 239057_at | 0.002563 | 0.00104  | LMOD2        | 442721    | . |
| 239058_at | 5.21E-05 | 8.44E-06 |              |           | . |
| 239059_at | 0.02171  | 0.013033 | DNAH1        | 25981     | . |
| 239060_at | 0.010878 | 0.005792 |              |           | . |

|           |          |          |                     |           |   |
|-----------|----------|----------|---------------------|-----------|---|
| 239061_at | 0.011534 | 0.006202 | TPRXL               | 348825    | . |
| 239062_at | 0.020964 | 0.012511 | LOC100131096        | 100131096 | . |
| 239065_at | 0.009344 | 0.004846 |                     |           | . |
| 239067_s_ | 0.041497 | 0.027637 | PANX2               | 56666     | . |
| 239068_at | 0.002856 | 0.001183 | GNL1                | 2794      | . |
| 239069_s_ | 2.54E-05 | 3.38E-06 |                     |           | . |
| 239071_at | 1.85E-06 | 1.13E-07 | RBBP4               | 5928      | . |
| 239072_at | 0.01795  | 0.010423 | EMB /// LOC64133418 | /// 64    | . |
| 239074_at | 0.004598 | 0.002096 | LOC400581           | 400581    | . |
| 239076_at | 0.035892 | 0.023359 | 13-Sep              | 641977    | . |
| 239077_at | 1.32E-09 | 7.68E-12 | CSGALNACT2          | 55454     | . |
| 239079_at | 0.002096 | 8.17E-04 | ADAM7               | 8756      | . |
| 239081_at | 8.14E-06 | 7.69E-07 |                     |           | . |
| 239082_at | 7.24E-05 | 1.28E-05 |                     |           | . |
| 239083_at | 0.00189  | 7.21E-04 | ZNF786              | 136051    | . |
| 239084_at | 2.21E-06 | 1.42E-07 | SNAP29              | 9342      | . |
| 239085_at | 0.002911 | 0.001209 | JDP2                | 122953    | . |
| 239086_at | 0.006459 | 0.003139 |                     |           | . |
| 239087_at | 0.00821  | 0.004165 | ANKS4B              | 257629    | . |
| 239088_at | 0.006461 | 0.00314  |                     |           | . |
| 239089_at | 1.30E-04 | 2.67E-05 |                     |           | . |
| 239090_at | 1.76E-06 | 1.06E-07 | FAM161A             | 84140     | . |
| 239091_at | 2.42E-06 | 1.60E-07 |                     |           | . |
| 239096_at | 2.16E-04 | 5.04E-05 |                     |           | . |
| 239097_at | 0.009987 | 0.005239 | C9orf4              | 23732     | . |
| 239100_x_ | 3.17E-04 | 8.14E-05 | PCNX                | 22990     | . |
| 239101_at | 1.49E-04 | 3.19E-05 | ITCH                | 83737     | . |
| 239102_s_ | 8.29E-05 | 1.53E-05 |                     |           | . |
| 239105_at | 1.93E-04 | 4.37E-05 |                     |           | . |
| 239106_at | 0.009926 | 0.005204 | CA5BP               | 340591    | . |
| 239107_at | 0.033662 | 0.021697 | ZNF280D             | 54816     | . |
| 239109_at | 0.007108 | 0.003519 | LOC728190           | 728190    | . |
| 239110_s_ | 0.040916 | 0.027188 | LOC728190           | 728190    | . |
| 239111_at | 1.95E-05 | 2.41E-06 | PRDM8               | 56978     | . |

|           |          |          |              |             |
|-----------|----------|----------|--------------|-------------|
| 239112_at | 0.001562 | 5.73E-04 |              | .           |
| 239113_at | 0.007662 | 0.003844 |              | .           |
| 239115_at | 0.001203 | 4.18E-04 |              | .           |
| 239120_at | 0.00217  | 8.52E-04 | C1orf126     | 200197 .    |
| 239121_at | 1.76E-06 | 1.07E-07 |              | .           |
| 239124_at | 2.72E-07 | 8.88E-09 |              | .           |
| 239125_at | 4.65E-05 | 7.31E-06 |              | .           |
| 239126_at | 8.94E-04 | 2.92E-04 | C19orf23     | 148046 .    |
| 239127_at | 3.09E-06 | 2.18E-07 |              | .           |
| 239129_at | 0.004292 | 0.001929 |              | .           |
| 239130_at | 0.014861 | 0.00836  |              | .           |
| 239131_at | 0.021845 | 0.01313  |              | .           |
| 239133_at | 0.002421 | 9.72E-04 |              | .           |
| 239134_at | 2.62E-04 | 6.42E-05 |              | .           |
| 239135_at | 0.014719 | 0.008261 | CPPED1       | 55313 .     |
| 239137_x_ | 1.32E-06 | 7.20E-08 | C6orf223     | 221416 .    |
| 239138_at | 1.10E-05 | 1.16E-06 |              | .           |
| 239139_at | 1.85E-04 | 4.14E-05 | CPNE9        | 151835 .    |
| 239140_at | 0.006084 | 0.002925 |              | .           |
| 239141_at | 5.85E-04 | 1.73E-04 | LOC100126784 | 100126784 . |
| 239142_at | 0.049937 | 0.034276 | RFESD        | 317671 .    |
| 239143_x_ | 1.90E-06 | 1.17E-07 | RNF138       | 51444 .     |
| 239144_at | 0.022779 | 0.013778 | B3GAT2       | 135152 .    |
| 239145_at | 1.26E-04 | 2.57E-05 | ZNF414       | 84330 .     |
| 239146_at | 2.86E-04 | 7.14E-05 | CLDND1       | 56650 .     |
| 239148_at | 1.86E-10 | 5.70E-13 | MARVELD3     | 91862 .     |
| 239149_at | 0.006927 | 0.003414 |              | .           |
| 239151_at | 0.005025 | 0.00233  | RP11-144G6.7 | 399753 .    |
| 239152_at | 0.004843 | 0.002231 |              | .           |
| 239153_at | 0.00133  | 4.73E-04 | HOTAIR       | 100124700 . |
| 239154_at | 4.60E-05 | 7.22E-06 |              | .           |
| 239155_at | 2.58E-08 | 3.74E-10 | CXADRP1      | 653108 .    |
| 239157_at | 5.92E-04 | 1.75E-04 | ZSCAN12L1    | 221584 .    |
| 239160_at | 4.42E-04 | 1.22E-04 |              | .           |



|           |          |          |              |               |   |
|-----------|----------|----------|--------------|---------------|---|
| 239161_at | 0.010106 | 0.005311 | FDX1         | 2230          | . |
| 239162_at | 0.007637 | 0.003829 |              |               | . |
| 239163_at | 4.03E-07 | 1.49E-08 | UBE2B        | 7320          | . |
| 239164_at | 0.01417  | 0.007895 |              |               | . |
| 239165_at | 0.005506 | 0.002598 |              |               | . |
| 239166_at | 0.002099 | 8.18E-04 |              |               | . |
| 239167_at | 0.001377 | 4.93E-04 |              |               | . |
| 239168_at | 5.46E-04 | 1.59E-04 | LOC150622    | 150622        | . |
| 239169_at | 0.004398 | 0.001987 | RDM1         | 201299        | . |
| 239170_at | 0.011675 | 0.006289 |              |               | . |
| 239171_at | 0.008513 | 0.004345 |              |               | . |
| 239172_x_ | 8.59E-04 | 2.78E-04 | MDFIC        | 29969         | . |
| 239175_at | 2.39E-05 | 3.14E-06 |              |               | . |
| 239179_at | 0.001891 | 7.21E-04 |              |               | . |
| 239180_at | 3.38E-04 | 8.81E-05 |              |               | . |
| 239181_at | 0.013713 | 0.007601 |              |               | . |
| 239183_at | 0.021913 | 0.013181 | ANGPTL1      | 9068          | . |
| 239184_at | 5.36E-05 | 8.75E-06 |              |               | . |
| 239185_at | 0.03096  | 0.019681 | ABCA9        | 10350         | . |
| 239187_at | 0.032513 | 0.020829 | C4orf30      | 54876         | . |
| 239188_at | 0.001307 | 4.62E-04 | PPP2R3C      | 55012         | . |
| 239190_at | 0.004867 | 0.002243 | VRK3         | 51231         | . |
| 239193_at | 2.28E-04 | 5.38E-05 | FUBP3        | 8939          | . |
| 239194_at | 0.012842 | 0.007043 | DNAJC30      | 84277         | . |
| 239199_at | 4.41E-04 | 1.22E-04 |              |               | . |
| 239201_at | 0.001206 | 4.19E-04 | PFTK2        | 65061         | . |
| 239202_at | 0.018331 | 0.010684 |              |               | . |
| 239205_s_ | 5.94E-09 | 5.36E-11 | CR1 /// CR1L | 1378 /// 1379 | . |
| 239206_at | 2.80E-10 | 9.96E-13 | CR1L         | 1379          | . |
| 239207_at | 0.01194  | 0.006458 | KDM5C        | 8242          | . |
| 239208_s_ | 0.048494 | 0.033121 | C21orf57     | 54059         | . |
| 239209_at | 2.13E-05 | 2.71E-06 |              |               | . |
| 239212_at | 6.11E-07 | 2.57E-08 | LTV1         | 84946         | . |
| 239215_at | 0.002024 | 7.83E-04 |              |               | . |

|           |          |          |           |        |   |
|-----------|----------|----------|-----------|--------|---|
| 239217_x_ | 2.11E-05 | 2.67E-06 | ABCC3     | 8714   | . |
| 239218_at | 8.33E-04 | 2.68E-04 | PDE1C     | 5137   | . |
| 239219_at | 1.10E-06 | 5.60E-08 | AURKB     | 9212   | . |
| 239222_at | 0.036972 | 0.024186 | C9orf9    | 11092  | . |
| 239226_at | 4.07E-04 | 1.10E-04 | RTKN      | 6242   | . |
| 239227_at | 0.011597 | 0.006241 |           |        | . |
| 239228_at | 3.49E-04 | 9.15E-05 |           |        | . |
| 239231_at | 5.20E-07 | 2.07E-08 |           |        | . |
| 239232_at | 2.07E-06 | 1.31E-07 | MSI2      | 124540 | . |
| 239233_at | 1.03E-04 | 2.01E-05 | CCDC88A   | 55704  | . |
| 239234_at | 1.26E-07 | 3.11E-09 |           |        | . |
| 239236_at | 1.13E-04 | 2.25E-05 |           |        | . |
| 239237_at | 4.35E-09 | 3.61E-11 |           |        | . |
| 239238_at | 6.56E-04 | 1.99E-04 |           |        | . |
| 239241_at | 0.011485 | 0.006172 | LOC727869 | 727869 | . |
| 239242_at | 0.032626 | 0.020914 |           |        | . |
| 239243_at | 1.08E-04 | 2.12E-05 | ZNF638    | 27332  | . |
| 239246_at | 9.76E-04 | 3.24E-04 | FARP1     | 10160  | . |
| 239249_at | 1.18E-05 | 1.26E-06 |           |        | . |
| 239251_at | 0.001062 | 3.59E-04 |           |        | . |
| 239252_at | 6.68E-05 | 1.16E-05 |           |        | . |
| 239253_at | 3.51E-05 | 5.08E-06 |           |        | . |
| 239254_at | 5.77E-04 | 1.70E-04 | CCDC40    | 55036  | . |
| 239257_at | 0.007323 | 0.003645 | MOV10L1   | 54456  | . |
| 239258_at | 0.001547 | 5.66E-04 |           |        | . |
| 239260_at | 0.017596 | 0.010182 | CORIN     | 10699  | . |
| 239261_s_ | 0.021123 | 0.012624 | CORIN     | 10699  | . |
| 239263_at | 0.024141 | 0.014738 |           |        | . |
| 239264_at | 7.03E-04 | 2.17E-04 |           |        | . |
| 239265_at | 0.004452 | 0.002017 | TMEM20    | 159371 | . |
| 239266_at | 2.17E-05 | 2.77E-06 |           |        | . |
| 239268_at | 0.020133 | 0.011918 |           |        | . |
| 239273_s_ | 0.001382 | 4.95E-04 | MMP28     | 79148  | . |
| 239274_at | 9.76E-06 | 9.86E-07 |           |        | . |

|           |          |          |                             |             |
|-----------|----------|----------|-----------------------------|-------------|
| 239275_at | 0.033455 | 0.021541 | FRMPD2 /// FR143162 /// 71. |             |
| 239277_at | 1.43E-06 | 8.03E-08 |                             | .           |
| 239279_at | 0.037865 | 0.024861 | LOC730102                   | 730102 .    |
| 239280_at | 0.019667 | 0.011593 |                             | .           |
| 239282_at | 0.031353 | 0.019969 | CCDC41                      | 51134 .     |
| 239283_at | 0.00358  | 0.001552 | TMED5                       | 50999 .     |
| 239284_at | 1.24E-04 | 2.53E-05 |                             | .           |
| 239286_at | 3.21E-07 | 1.12E-08 | CDH11                       | 1009 .      |
| 239287_at | 0.020288 | 0.012026 |                             | .           |
| 239292_at | 0.027288 | 0.016996 |                             | .           |
| 239295_at | 0.004223 | 0.001891 | SRrp35                      | 135295 .    |
| 239300_at | 8.82E-04 | 2.87E-04 |                             | .           |
| 239301_at | 4.66E-05 | 7.34E-06 |                             | .           |
| 239303_at | 0.001326 | 4.71E-04 |                             | .           |
| 239304_at | 5.35E-05 | 8.71E-06 | MFSD4                       | 148808 .    |
| 239305_at | 0.014845 | 0.008348 |                             | .           |
| 239306_at | 6.82E-06 | 6.10E-07 |                             | .           |
| 239307_at | 0.004915 | 0.00227  |                             | .           |
| 239308_at | 0.001296 | 4.57E-04 | LOC100128484                | 100128484 . |
| 239309_at | 0.006311 | 0.003053 | DLX6                        | 1750 .      |
| 239310_at | 0.043632 | 0.029307 |                             | .           |
| 239311_at | 7.87E-07 | 3.60E-08 |                             | .           |
| 239312_at | 0.002287 | 9.08E-04 |                             | .           |
| 239313_at | 2.05E-04 | 4.73E-05 | LOC401320                   | 401320 .    |
| 239315_at | 3.90E-04 | 1.05E-04 | FAM115C                     | 285966 .    |
| 239318_at | 0.035487 | 0.023048 | FAM118B                     | 79607 .     |
| 239319_at | 4.31E-05 | 6.63E-06 | LOC728342                   | 728342 .    |
| 239320_at | 0.020069 | 0.011875 | LRRc4B                      | 94030 .     |
| 239322_at | 0.028873 | 0.018153 |                             | .           |
| 239323_at | 4.36E-05 | 6.72E-06 |                             | .           |
| 239324_at | 0.004793 | 0.002205 |                             | .           |
| 239326_at | 0.035637 | 0.02317  |                             | .           |
| 239328_at | 0.009062 | 0.004671 |                             | .           |
| 239331_at | 1.07E-05 | 1.11E-06 |                             | .           |

|           |          |          |              |             |
|-----------|----------|----------|--------------|-------------|
| 239333_x_ | 5.60E-05 | 9.22E-06 |              | .           |
| 239334_at | 3.22E-06 | 2.31E-07 | FAM62B       | 57488 .     |
| 239335_at | 7.90E-06 | 7.40E-07 | ZNF710       | 374655 .    |
| 239336_at | 5.97E-12 | 5.67E-15 | THBS1        | 7057 .      |
| 239337_at | 7.13E-05 | 1.26E-05 | LOC400768    | 400768 .    |
| 239338_x_ | 0.004927 | 0.002276 |              | .           |
| 239339_at | 0.035232 | 0.022852 |              | .           |
| 239341_at | 9.80E-06 | 9.91E-07 |              | .           |
| 239342_at | 0.046839 | 0.03183  | DGKZ         | 8525 .      |
| 239343_at | 9.69E-06 | 9.76E-07 | LOC728705    | 728705 .    |
| 239344_at | 0.004282 | 0.001923 |              | .           |
| 239345_at | 0.019325 | 0.011361 | SLC19A3      | 80704 .     |
| 239347_at | 0.042442 | 0.028372 |              | .           |
| 239348_at | 2.16E-05 | 2.75E-06 |              | .           |
| 239349_at | 0.003484 | 0.001503 | C1QTNF7      | 114905 .    |
| 239350_at | 1.06E-10 | 2.84E-13 | MARVELD3     | 91862 .     |
| 239351_at | 6.99E-05 | 1.23E-05 |              | .           |
| 239353_at | 0.003098 | 0.001304 |              | .           |
| 239355_at | 3.00E-04 | 7.60E-05 |              | .           |
| 239356_at | 1.00E-04 | 1.93E-05 | LOC100129122 | 100129122 . |
| 239359_at | 3.27E-08 | 5.10E-10 | 11-Mar       | 441061 .    |
| 239360_at | 0.010199 | 0.005368 |              | .           |
| 239361_at | 0.003761 | 0.001648 |              | .           |
| 239362_at | 6.12E-04 | 1.83E-04 | NAPA         | 8775 .      |
| 239363_at | 8.32E-04 | 2.67E-04 |              | .           |
| 239364_at | 2.31E-08 | 3.19E-10 |              | .           |
| 239367_at | 4.63E-05 | 7.26E-06 | BDNF         | 627 .       |
| 239368_at | 5.60E-04 | 1.63E-04 |              | .           |
| 239369_at | 0.002917 | 0.001212 | LCN8         | 138307 .    |
| 239370_at | 9.04E-05 | 1.70E-05 |              | .           |
| 239373_at | 0.020699 | 0.012321 |              | .           |
| 239374_at | 0.005772 | 0.002746 | TRIM65       | 201292 .    |
| 239375_at | 0.037443 | 0.024539 |              | .           |
| 239377_at | 0.001305 | 4.61E-04 | EIF1AD       | 84285 .     |

|           |          |          |          |        |   |
|-----------|----------|----------|----------|--------|---|
| 239379_at | 6.42E-08 | 1.25E-09 | LRRFIP1  | 9208   | . |
| 239383_at | 1.18E-05 | 1.26E-06 |          |        | . |
| 239384_at | 0.035429 | 0.023002 | FLJ44342 | 645460 | . |
| 239386_at | 0.006916 | 0.003407 |          |        | . |
| 239387_at | 1.01E-06 | 5.03E-08 |          |        | . |
| 239388_at | 0.007346 | 0.003659 |          |        | . |
| 239389_at | 0.005962 | 0.002856 |          |        | . |
| 239392_s_ | 7.30E-08 | 1.50E-09 | POGK     | 57645  | . |
| 239393_at | 3.62E-09 | 2.76E-11 |          |        | . |
| 239396_at | 1.68E-06 | 9.99E-08 |          |        | . |
| 239397_at | 7.24E-04 | 2.25E-04 | ARHGEF7  | 8874   | . |
| 239399_at | 0.037219 | 0.024376 |          |        | . |
| 239401_at | 0.001221 | 4.26E-04 | S1PR1    | 1901   | . |
| 239402_at | 0.045196 | 0.030534 |          |        | . |
| 239403_at | 0.041202 | 0.027407 | CCDC120  | 90060  | . |
| 239404_at | 6.15E-04 | 1.84E-04 |          |        | . |
| 239405_at | 2.16E-05 | 2.76E-06 |          |        | . |
| 239409_at | 4.09E-05 | 6.17E-06 |          |        | . |
| 239410_at | 0.01939  | 0.011409 |          |        | . |
| 239411_at | 0.003487 | 0.001504 |          |        | . |
| 239412_at | 0.045635 | 0.030877 | IRF5     | 3663   | . |
| 239413_at | 7.48E-07 | 3.36E-08 | CEP152   | 22995  | . |
| 239416_at | 6.20E-04 | 1.85E-04 | FBXL6    | 26233  | . |
| 239418_x_ | 1.89E-05 | 2.33E-06 |          |        | . |
| 239419_at | 1.31E-04 | 2.71E-05 | PTPRA    | 5786   | . |
| 239422_at | 0.00752  | 0.003761 | GPC2     | 221914 | . |
| 239423_at | 3.08E-04 | 7.85E-05 |          |        | . |
| 239424_at | 0.002978 | 0.001243 |          |        | . |
| 239425_at | 0.00411  | 0.00183  |          |        | . |
| 239428_at | 0.014252 | 0.007949 | RAB1A    | 5861   | . |
| 239430_at | 9.90E-04 | 3.30E-04 | IGFL1    | 374918 | . |
| 239431_at | 4.02E-05 | 6.02E-06 | TICAM2   | 353376 | . |
| 239432_at | 0.001481 | 5.38E-04 | FLJ31306 | 379025 | . |
| 239434_at | 7.35E-04 | 2.29E-04 |          |        | . |

|           |          |          |           |          |
|-----------|----------|----------|-----------|----------|
| 239435_x_ | 0.024315 | 0.014861 | SHROOM1   | 134549 . |
| 239436_at | 0.013694 | 0.007589 | CHORDC1   | 26973 .  |
| 239438_at | 0.001511 | 5.51E-04 | RAPGEF6   | 51735 .  |
| 239439_at | 0.001852 | 7.03E-04 | AFF4      | 27125 .  |
| 239440_at | 1.92E-04 | 4.36E-05 |           | .        |
| 239442_at | 6.14E-04 | 1.83E-04 | CEP68     | 23177 .  |
| 239446_x_ | 2.23E-06 | 1.44E-07 | DCBLD2    | 131566 . |
| 239447_at | 4.28E-04 | 1.17E-04 | TRA2B     | 6434 .   |
| 239448_at | 2.28E-04 | 5.39E-05 |           | .        |
| 239450_at | 0.018141 | 0.010553 |           | .        |
| 239451_at | 3.45E-05 | 4.96E-06 |           | .        |
| 239452_at | 7.80E-04 | 2.47E-04 |           | .        |
| 239453_at | 0.015832 | 0.009004 |           | .        |
| 239454_at | 0.001619 | 5.97E-04 | SCARF2    | 91179 .  |
| 239457_at | 0.025821 | 0.01594  | ATP8B3    | 148229 . |
| 239458_at | 0.012233 | 0.006649 | ALS2CR12  | 130540 . |
| 239461_at | 0.021753 | 0.013064 | GALNTL2   | 117248 . |
| 239463_at | 0.042171 | 0.028164 |           | .        |
| 239464_at | 0.001302 | 4.60E-04 |           | .        |
| 239465_at | 7.14E-05 | 1.26E-05 |           | .        |
| 239466_at | 0.001248 | 4.37E-04 | LOC344595 | 344595 . |
| 239468_at | 0.003769 | 0.001653 | MKX       | 283078 . |
| 239469_at | 2.37E-09 | 1.62E-11 |           | .        |
| 239473_x_ | 1.70E-05 | 2.03E-06 | MAP6D1    | 79929 .  |
| 239474_at | 0.022069 | 0.013289 |           | .        |
| 239475_at | 1.03E-04 | 2.01E-05 | ACPL2     | 92370 .  |
| 239478_x_ | 0.017766 | 0.010297 |           | .        |
| 239482_x_ | 2.05E-05 | 2.57E-06 | ZNF708    | 7562 .   |
| 239483_at | 0.021482 | 0.012867 | FLJ37035  | 399821 . |
| 239484_at | 5.69E-04 | 1.67E-04 |           | .        |
| 239485_at | 0.003627 | 0.001578 | CDH4      | 1002 .   |
| 239486_at | 2.76E-07 | 9.11E-09 |           | .        |
| 239487_at | 0.006166 | 0.00297  | FAM98A    | 25940 .  |
| 239489_at | 1.19E-05 | 1.28E-06 |           | .        |

|           |          |          |           |           |   |
|-----------|----------|----------|-----------|-----------|---|
| 239490_at | 0.003767 | 0.001651 | C7orf44   | 55744     | . |
| 239491_at | 0.003577 | 0.001551 | LASS5     | 91012     | . |
| 239493_at | 0.019509 | 0.011489 | RPL7      | 6129      | . |
| 239495_at | 6.15E-06 | 5.33E-07 |           |           | . |
| 239497_at | 7.48E-05 | 1.34E-05 |           |           | . |
| 239498_at | 0.038423 | 0.025281 |           |           | . |
| 239501_at | 0.003668 | 0.001599 |           |           | . |
| 239502_at | 0.009673 | 0.005047 |           |           | . |
| 239503_at | 3.08E-04 | 7.86E-05 |           |           | . |
| 239504_at | 0.019516 | 0.011493 |           |           | . |
| 239506_s_ | 0.001853 | 7.04E-04 | LOC151300 | 151300    | . |
| 239507_at | 0.001622 | 5.99E-04 | LOC151300 | 151300    | . |
| 239508_x_ | 0.001447 | 5.23E-04 | CCDC108   | 255101    | . |
| 239509_at | 0.010822 | 0.005759 | FLJ16779  | 100192386 | . |
| 239510_at | 0.010293 | 0.005428 | C1orf212  | 113444    | . |
| 239514_at | 2.57E-04 | 6.26E-05 |           |           | . |
| 239515_at | 0.005671 | 0.002689 |           |           | . |
| 239516_at | 1.21E-04 | 2.44E-05 |           |           | . |
| 239517_at | 5.25E-04 | 1.51E-04 | ITGB6     | 3694      | . |
| 239518_at | 0.006885 | 0.003388 |           |           | . |
| 239519_at | 0.04628  | 0.03138  |           |           | . |
| 239522_at | 0.002017 | 7.80E-04 | IL12RB1   | 3594      | . |
| 239523_at | 1.90E-04 | 4.31E-05 | TUSC5     | 286753    | . |
| 239525_at | 0.01758  | 0.010171 | CTTNBP2NL | 55917     | . |
| 239527_at | 0.011034 | 0.005888 | RAB3GAP1  | 22930     | . |
| 239528_at | 2.97E-06 | 2.08E-07 | PROM2     | 150696    | . |
| 239530_at | 0.019379 | 0.011399 |           |           | . |
| 239531_at | 8.87E-06 | 8.68E-07 |           |           | . |
| 239532_at | 1.65E-04 | 3.61E-05 |           |           | . |
| 239534_at | 0.029237 | 0.018416 |           |           | . |
| 239536_at | 0.011504 | 0.006184 |           |           | . |
| 239538_at | 0.005812 | 0.002771 | ZRANB3    | 84083     | . |
| 239539_at | 0.016499 | 0.009448 |           |           | . |
| 239540_at | 0.004598 | 0.002096 |           |           | . |

|           |          |          |                             |             |
|-----------|----------|----------|-----------------------------|-------------|
| 239541_at | 1.32E-04 | 2.73E-05 |                             | .           |
| 239543_s_ | 1.30E-04 | 2.68E-05 |                             | .           |
| 239544_at | 0.004567 | 0.00208  |                             | .           |
| 239545_at | 2.19E-04 | 5.13E-05 |                             | .           |
| 239548_at | 0.007109 | 0.003519 | NEGR1                       | 257194 .    |
| 239550_at | 0.036212 | 0.023604 | RORA                        | 6095 .      |
| 239551_at | 0.001887 | 7.20E-04 |                             | .           |
| 239552_at | 1.02E-05 | 1.04E-06 | VWDE                        | 221806 .    |
| 239553_at | 1.36E-06 | 7.49E-08 | FLJ35379                    | 729420 .    |
| 239554_at | 0.013774 | 0.007641 |                             | .           |
| 239555_at | 0.006706 | 0.003282 |                             | .           |
| 239557_at | 0.038786 | 0.025555 |                             | .           |
| 239559_at | 0.009187 | 0.004751 |                             | .           |
| 239561_at | 0.046739 | 0.031746 |                             | .           |
| 239562_at | 1.15E-05 | 1.21E-06 | MTHFD2L                     | 441024 .    |
| 239564_at | 0.010689 | 0.005673 | LOC100128198                | 100128198 . |
| 239565_at | 0.043375 | 0.029105 | LOC100128292                | 100128292 . |
| 239567_at | 0.009207 | 0.004764 |                             | .           |
| 239568_at | 0.005293 | 0.002478 | PLEKHH2                     | 130271 .    |
| 239569_at | 0.0099   | 0.005186 | FLJ31485                    | 440119 .    |
| 239571_at | 1.64E-04 | 3.58E-05 |                             | .           |
| 239572_at | 7.07E-05 | 1.24E-05 | GJA3                        | 2700 .      |
| 239573_at | 0.013219 | 0.007285 |                             | .           |
| 239577_at | 0.009141 | 0.004722 |                             | .           |
| 239579_at | 0.00136  | 4.86E-04 | EPHX4                       | 253152 .    |
| 239581_at | 0.013438 | 0.007423 |                             | .           |
| 239582_at | 9.76E-04 | 3.24E-04 | PML                         | 5371 .      |
| 239583_x_ | 0.004892 | 0.002257 | PSG5                        | 5673 .      |
| 239585_at | 0.02795  | 0.017475 | KAT2B                       | 8850 .      |
| 239590_x_ | 1.90E-04 | 4.30E-05 | FAM95B1 /// L 100132340 //. |             |
| 239592_at | 0.008303 | 0.00422  |                             | .           |
| 239593_at | 0.038828 | 0.025586 | TMEM213                     | 155006 .    |
| 239594_at | 0.016198 | 0.00925  | LOC145837                   | 145837 .    |
| 239595_at | 0.002683 | 0.001098 | GPX2                        | 2877 .      |



|           |          |          |           |           |   |
|-----------|----------|----------|-----------|-----------|---|
| 239596_at | 0.005329 | 0.002498 | SLC30A7   | 148867    | . |
| 239597_at | 4.63E-06 | 3.70E-07 |           |           | . |
| 239599_at | 0.001843 | 6.99E-04 |           |           | . |
| 239600_at | 0.003021 | 0.001266 |           |           | . |
| 239601_at | 4.75E-04 | 1.33E-04 |           |           | . |
| 239603_x_ | 0.004189 | 0.001873 |           |           | . |
| 239605_x_ | 0.025087 | 0.015418 |           |           | . |
| 239607_at | 0.005903 | 0.002822 | GPR156    | 165829    | . |
| 239609_s_ | 9.80E-05 | 1.88E-05 | LPCAT4    | 254531    | . |
| 239610_at | 0.012055 | 0.006532 |           |           | . |
| 239613_at | 1.48E-04 | 3.15E-05 |           |           | . |
| 239614_x_ | 0.032852 | 0.021087 |           |           | . |
| 239615_at | 0.009405 | 0.004882 | SLC22A5   | 6584      | . |
| 239616_at | 0.003223 | 0.001368 | REXO2     | 25996     | . |
| 239617_at | 0.001017 | 3.41E-04 | GHRLOS    | 100126793 | . |
| 239619_at | 0.003953 | 0.001747 |           |           | . |
| 239620_at | 0.002843 | 0.001176 | TTC23L    | 153657    | . |
| 239621_at | 7.31E-04 | 2.27E-04 |           |           | . |
| 239623_at | 0.005899 | 0.00282  | FLJ44606  | 401207    | . |
| 239626_x_ | 5.67E-05 | 9.36E-06 | TM9SF3    | 56889     | . |
| 239627_at | 0.006874 | 0.003381 | TMED9     | 54732     | . |
| 239628_at | 3.01E-07 | 1.01E-08 |           |           | . |
| 239629_at | 5.80E-06 | 4.95E-07 | CFLAR     | 8837      | . |
| 239630_at | 6.11E-04 | 1.82E-04 |           |           | . |
| 239634_at | 5.89E-05 | 9.83E-06 |           |           | . |
| 239635_at | 0.022933 | 0.013885 | RBM14     | 10432     | . |
| 239636_at | 0.019522 | 0.011497 | MCF2L     | 23263     | . |
| 239637_at | 0.005463 | 0.002573 |           |           | . |
| 239638_at | 2.33E-04 | 5.55E-05 |           |           | . |
| 239639_at | 0.002997 | 0.001253 |           |           | . |
| 239640_at | 0.048563 | 0.033178 | LOC401320 | 401320    | . |
| 239641_at | 0.001521 | 5.55E-04 |           |           | . |
| 239643_at | 0.003824 | 0.00168  |           |           | . |
| 239644_at | 7.41E-07 | 3.32E-08 |           |           | . |

|           |          |          |              |             |
|-----------|----------|----------|--------------|-------------|
| 239646_at | 8.90E-05 | 1.67E-05 |              | .           |
| 239648_at | 2.79E-04 | 6.95E-05 | DCUN1D3      | 123879 .    |
| 239649_at | 4.29E-13 | 2.00E-16 |              | .           |
| 239650_at | 9.92E-04 | 3.31E-04 | NAP5         | 344148 .    |
| 239651_at | 1.56E-05 | 1.82E-06 | ANAPC5       | 51433 .     |
| 239652_at | 0.02724  | 0.016957 |              | .           |
| 239653_at | 0.014472 | 0.008095 |              | .           |
| 239654_at | 0.001695 | 6.32E-04 | CHD9         | 80205 .     |
| 239655_at | 3.65E-05 | 5.33E-06 |              | .           |
| 239656_at | 2.31E-04 | 5.49E-05 | LOC723809    | 723809 .    |
| 239660_at | 6.26E-04 | 1.88E-04 | C20orf74     | 57186 .     |
| 239661_at | 0.00428  | 0.001921 |              | .           |
| 239662_x_ | 3.08E-06 | 2.18E-07 | LOC100129701 | 100129701 . |
| 239663_x_ | 0.020577 | 0.012231 | LARP1        | 23367 .     |
| 239666_at | 4.30E-09 | 3.54E-11 | PYGO2        | 90780 .     |
| 239668_at | 0.007226 | 0.003588 |              | .           |
| 239670_at | 0.004781 | 0.002198 |              | .           |
| 239672_at | 1.31E-04 | 2.70E-05 |              | .           |
| 239676_x_ | 0.001127 | 3.86E-04 | LOC642031    | 642031 .    |
| 239677_at | 0.030461 | 0.01932  |              | .           |
| 239678_at | 1.65E-08 | 2.07E-10 |              | .           |
| 239679_at | 0.005622 | 0.002663 |              | .           |
| 239680_at | 3.38E-06 | 2.46E-07 |              | .           |
| 239681_at | 0.002301 | 9.15E-04 | C17orf56     | 146705 .    |
| 239686_at | 1.08E-04 | 2.11E-05 |              | .           |
| 239687_at | 2.16E-04 | 5.05E-05 | BTBD12       | 84464 .     |
| 239688_at | 2.53E-04 | 6.15E-05 | SMC1A        | 8243 .      |
| 239689_at | 0.001205 | 4.19E-04 |              | .           |
| 239692_at | 2.77E-04 | 6.88E-05 |              | .           |
| 239693_at | 0.008324 | 0.004233 | SNX24        | 28966 .     |
| 239695_at | 0.041383 | 0.027547 | JAK1         | 3716 .      |
| 239696_at | 0.015872 | 0.00903  |              | .           |
| 239700_at | 6.02E-05 | 1.01E-05 | ZNF710       | 374655 .    |
| 239706_x_ | 5.70E-05 | 9.44E-06 |              | .           |

|           |          |          |           |           |   |
|-----------|----------|----------|-----------|-----------|---|
| 239707_at | 8.33E-04 | 2.68E-04 | SLC5A10   | 125206    | . |
| 239709_at | 3.42E-05 | 4.92E-06 |           |           | . |
| 239710_at | 0.00229  | 9.09E-04 | FIGN      | 55137     | . |
| 239711_at | 0.027929 | 0.017459 | ADAL      | 161823    | . |
| 239716_at | 0.001701 | 6.34E-04 |           |           | . |
| 239718_at | 4.05E-07 | 1.50E-08 |           |           | . |
| 239719_at | 9.54E-07 | 4.65E-08 | CD109     | 135228    | . |
| 239720_at | 3.90E-04 | 1.05E-04 | GLP-1     | 100125288 | . |
| 239721_at | 0.004057 | 0.001803 |           |           | . |
| 239724_at | 6.60E-07 | 2.85E-08 |           |           | . |
| 239725_at | 0.040435 | 0.026816 | PGAP1     | 80055     | . |
| 239726_at | 0.046405 | 0.031479 |           |           | . |
| 239727_at | 1.29E-06 | 6.95E-08 | DIO3OS    | 64150     | . |
| 239728_at | 0.002939 | 0.001223 |           |           | . |
| 239731_at | 1.14E-04 | 2.27E-05 |           |           | . |
| 239734_at | 0.00504  | 0.00234  |           |           | . |
| 239735_at | 1.04E-04 | 2.03E-05 |           |           | . |
| 239738_at | 0.045936 | 0.031113 | DACH2     | 117154    | . |
| 239741_at | 9.71E-05 | 1.86E-05 | LOC283658 | 283658    | . |
| 239742_at | 0.006366 | 0.003085 | TULP4     | 56995     | . |
| 239743_at | 9.32E-05 | 1.77E-05 | SP8       | 221833    | . |
| 239744_at | 0.004492 | 0.002039 |           |           | . |
| 239748_x_ | 8.25E-06 | 7.83E-07 | OCIAD1    | 54940     | . |
| 239749_at | 0.032417 | 0.020761 | FAF1      | 11124     | . |
| 239750_x_ | 0.035012 | 0.022688 | VAPA      | 9218      | . |
| 239752_at | 2.00E-07 | 5.74E-09 |           |           | . |
| 239753_at | 2.79E-04 | 6.96E-05 | LOC441383 | 441383    | . |
| 239755_at | 0.001437 | 5.18E-04 |           |           | . |
| 239756_at | 0.011093 | 0.005926 |           |           | . |
| 239757_at | 6.33E-08 | 1.23E-09 | ZFAND6    | 54469     | . |
| 239758_at | 8.17E-08 | 1.75E-09 |           |           | . |
| 239760_at | 6.25E-04 | 1.87E-04 |           |           | . |
| 239761_at | 1.06E-04 | 2.08E-05 | GCNT1     | 2650      | . |
| 239762_at | 1.11E-05 | 1.17E-06 | LOC286437 | 286437    | . |

|           |          |          |              |           |     |
|-----------|----------|----------|--------------|-----------|-----|
| 239763_at | 0.009786 | 0.005117 | LOC100129965 | 100129965 | //. |
| 239764_at | 0.003553 | 0.001539 |              |           | .   |
| 239767_at | 0.001098 | 3.74E-04 |              |           | .   |
| 239768_x_ | 3.99E-05 | 5.97E-06 |              |           | .   |
| 239769_at | 0.010227 | 0.005385 | CDH11        | 1009      | .   |
| 239771_at | 0.001753 | 6.58E-04 | CAND1        | 55832     | .   |
| 239772_x_ | 4.95E-04 | 1.40E-04 | DHX30        | 22907     | .   |
| 239774_at | 5.95E-05 | 9.97E-06 |              |           | .   |
| 239775_at | 2.71E-04 | 6.69E-05 | LOC100131512 | 100131512 | .   |
| 239776_at | 2.56E-05 | 3.42E-06 | FLJ43080     | 642987    | .   |
| 239777_at | 3.15E-04 | 8.07E-05 | C14orf182    | 283551    | .   |
| 239779_at | 0.006591 | 0.003215 |              |           | .   |
| 239780_at | 7.18E-05 | 1.27E-05 |              |           | .   |
| 239781_at | 8.97E-05 | 1.68E-05 | hCG_1815504  | 440132    | .   |
| 239783_at | 0.008891 | 0.004569 |              |           | .   |
| 239784_at | 2.58E-04 | 6.31E-05 |              |           | .   |
| 239785_at | 8.65E-04 | 2.80E-04 | DZIP1L       | 199221    | .   |
| 239786_at | 0.001613 | 5.95E-04 |              |           | .   |
| 239788_at | 5.39E-06 | 4.49E-07 |              |           | .   |
| 239789_at | 0.016587 | 0.009504 | C11orf49     | 79096     | .   |
| 239790_s_ | 5.48E-06 | 4.60E-07 |              |           | .   |
| 239792_at | 4.54E-04 | 1.26E-04 | LOC440288    | 440288    | .   |
| 239793_at | 0.010454 | 0.005525 |              |           | .   |
| 239794_at | 4.41E-04 | 1.22E-04 |              |           | .   |
| 239796_x_ | 0.001133 | 3.89E-04 | TIRAP        | 114609    | .   |
| 239797_at | 1.51E-05 | 1.74E-06 |              |           | .   |
| 239798_at | 0.002447 | 9.85E-04 |              |           | .   |
| 239799_at | 0.041911 | 0.027959 | C9orf130     | 100128782 | .   |
| 239800_at | 0.014945 | 0.008414 |              |           | .   |
| 239804_at | 0.010895 | 0.005804 |              |           | .   |
| 239807_at | 0.001021 | 3.42E-04 | LOC728842    | 728842    | .   |
| 239808_at | 3.66E-04 | 9.71E-05 |              |           | .   |
| 239810_at | 4.15E-05 | 6.30E-06 | VASH1        | 22846     | .   |
| 239811_at | 2.91E-07 | 9.72E-09 |              |           | .   |

|           |          |          |          |          |
|-----------|----------|----------|----------|----------|
| 239814_at | 0.006139 | 0.002955 |          | .        |
| 239815_at | 6.27E-06 | 5.46E-07 |          | .        |
| 239816_at | 0.041646 | 0.027752 | 374408   | .        |
| 239817_at | 9.83E-05 | 1.89E-05 |          | .        |
| 239819_at | 0.010299 | 0.005431 |          | .        |
| 239821_at | 6.17E-04 | 1.84E-04 | FLJ30064 | 644975 . |
| 239824_s_ | 9.95E-04 | 3.32E-04 | TMEM107  | 84314 .  |
| 239825_at | 0.013316 | 0.007346 |          | .        |
| 239828_at | 0.010445 | 0.00552  | C6orf224 | 222521 . |
| 239830_at | 1.40E-06 | 7.78E-08 |          | .        |
| 239831_at | 1.32E-04 | 2.73E-05 | TMEM106C | 79022 .  |
| 239832_at | 1.44E-04 | 3.04E-05 |          | .        |
| 239833_at | 2.90E-05 | 4.00E-06 |          | .        |
| 239834_at | 1.71E-04 | 3.76E-05 |          | .        |
| 239835_at | 1.92E-05 | 2.37E-06 | KBTBD8   | 84541 .  |
| 239836_at | 0.002597 | 0.001057 | ECHDC2   | 55268 .  |
| 239837_at | 0.006025 | 0.002892 | ADAM11   | 4185 .   |
| 239839_at | 0.009182 | 0.004748 | ZNF555   | 148254 . |
| 239840_at | 8.02E-04 | 2.56E-04 |          | .        |
| 239841_at | 1.67E-05 | 1.99E-06 |          | .        |
| 239842_x_ | 0.00207  | 8.04E-04 |          | .        |
| 239844_x_ | 1.45E-05 | 1.66E-06 | C1orf228 | 339541 . |
| 239845_at | 8.01E-04 | 2.55E-04 |          | .        |
| 239846_at | 0.005578 | 0.002639 | MTHFD1   | 4522 .   |
| 239848_at | 1.53E-05 | 1.78E-06 |          | .        |
| 239850_at | 3.98E-04 | 1.08E-04 |          | .        |
| 239851_at | 1.58E-05 | 1.85E-06 |          | .        |
| 239853_at | 2.72E-05 | 3.68E-06 | KLC3     | 147700 . |
| 239855_at | 0.003878 | 0.001708 | PPM1L    | 151742 . |
| 239856_at | 0.005422 | 0.00255  |          | .        |
| 239858_at | 1.50E-04 | 3.20E-05 |          | .        |
| 239859_x_ | 8.03E-04 | 2.56E-04 |          | .        |
| 239861_at | 1.25E-04 | 2.54E-05 |          | .        |
| 239862_at | 0.003962 | 0.001752 |          | .        |

|           |          |          |                             |
|-----------|----------|----------|-----------------------------|
| 239863_at | 0.001621 | 5.99E-04 | .                           |
| 239865_at | 0.007038 | 0.003479 | .                           |
| 239866_at | 0.001864 | 7.09E-04 | .                           |
| 239867_at | 1.49E-05 | 1.72E-06 | .                           |
| 239868_at | 4.53E-08 | 7.91E-10 | .                           |
| 239869_at | 1.67E-05 | 1.98E-06 | .                           |
| 239870_at | 9.69E-04 | 3.21E-04 | SPATS1 /// TM 221409 /// 4. |
| 239871_at | 3.20E-04 | 8.24E-05 | CLTC 1213 .                 |
| 239872_at | 0.016229 | 0.00927  | .                           |
| 239873_at | 6.37E-05 | 1.09E-05 | .                           |
| 239875_at | 0.010246 | 0.005398 | NAB1 4664 .                 |
| 239876_at | 0.015906 | 0.009054 | .                           |
| 239878_at | 0.005804 | 0.002766 | IPMK 253430 .               |
| 239881_at | 0.01744  | 0.010073 | .                           |
| 239886_at | 6.95E-06 | 6.26E-07 | .                           |
| 239889_at | 0.025942 | 0.016029 | SERP2 387923 .              |
| 239890_s_ | 0.019874 | 0.011736 | SERP2 387923 .              |
| 239891_x_ | 0.007504 | 0.003751 | RAB12 201475 .              |
| 239892_at | 8.04E-05 | 1.47E-05 | .                           |
| 239894_at | 4.09E-04 | 1.11E-04 | LOC100128511 100128511 .    |
| 239896_at | 0.03292  | 0.02114  | .                           |
| 239897_at | 0.001847 | 7.01E-04 | BCLAF1 9774 .               |
| 239898_x_ | 0.004762 | 0.002187 | ZNF286A 57335 .             |
| 239899_at | 0.002408 | 9.66E-04 | RNF145 153830 .             |
| 239900_x_ | 0.039508 | 0.026106 | .                           |
| 239901_at | 0.003647 | 0.001588 | .                           |
| 239903_at | 0.00248  | 0.001    | .                           |
| 239905_at | 4.07E-04 | 1.11E-04 | YTHDC1 91746 .              |
| 239907_at | 0.015548 | 0.008815 | .                           |
| 239909_at | 9.13E-06 | 9.02E-07 | ADAMTSL1 92949 .            |
| 239913_at | 0.001363 | 4.87E-04 | SLC10A4 201780 .            |
| 239914_at | 0.037729 | 0.024755 | .                           |
| 239916_at | 0.004918 | 0.002271 | WDR16 146845 .              |
| 239917_at | 1.23E-04 | 2.50E-05 | VPS8 23355 .                |

|           |          |          |                    |
|-----------|----------|----------|--------------------|
| 239918_at | 0.048226 | 0.032908 | .                  |
| 239919_at | 1.68E-09 | 1.05E-11 | LOC255480 255480 . |
| 239920_at | 3.97E-06 | 3.02E-07 | UBTF 7343 .        |
| 239922_at | 9.86E-07 | 4.85E-08 | CCDC142 84865 .    |
| 239923_at | 5.68E-04 | 1.67E-04 | .                  |
| 239924_at | 5.61E-05 | 9.25E-06 | LOC91316 91316 .   |
| 239925_at | 6.77E-07 | 2.96E-08 | .                  |
| 239926_at | 2.79E-06 | 1.91E-07 | .                  |
| 239927_at | 0.040176 | 0.026618 | .                  |
| 239928_at | 4.78E-05 | 7.57E-06 | TCTN2 79867 .      |
| 239929_at | 0.001502 | 5.47E-04 | PM20D1 148811 .    |
| 239930_at | 2.80E-06 | 1.93E-07 | GALNT2 2590 .      |
| 239931_at | 7.53E-06 | 6.96E-07 | .                  |
| 239932_at | 0.02966  | 0.018726 | .                  |
| 239933_x_ | 1.53E-04 | 3.28E-05 | C14orf45 80127 .   |
| 239934_x_ | 0.001081 | 3.67E-04 | .                  |
| 239936_at | 0.028661 | 0.017993 | DLEU2 8847 .       |
| 239937_at | 9.48E-04 | 3.13E-04 | ZNF207 7756 .      |
| 239940_at | 8.58E-04 | 2.77E-04 | .                  |
| 239942_at | 1.51E-05 | 1.74E-06 | .                  |
| 239944_at | 0.047621 | 0.032441 | .                  |
| 239946_at | 7.09E-04 | 2.19E-04 | .                  |
| 239947_at | 1.54E-04 | 3.32E-05 | .                  |
| 239948_at | 4.93E-08 | 8.85E-10 | NUP153 9972 .      |
| 239950_at | 0.028811 | 0.01811  | HOXA11AS 221883 .  |
| 239951_at | 6.36E-04 | 1.91E-04 | .                  |
| 239952_at | 0.005065 | 0.002355 | ZEB1 6935 .        |
| 239956_at | 3.79E-05 | 5.60E-06 | .                  |
| 239958_at | 5.28E-05 | 8.57E-06 | LOC253039 253039 . |
| 239959_x_ | 0.016419 | 0.009394 | .                  |
| 239960_x_ | 2.86E-06 | 1.97E-07 | LYRM7 90624 .      |
| 239961_at | 7.17E-07 | 3.19E-08 | .                  |
| 239965_at | 0.008588 | 0.004388 | LOC151878 151878 . |
| 239967_at | 0.036972 | 0.024186 | .                  |

|           |          |          |                             |          |
|-----------|----------|----------|-----------------------------|----------|
| 239969_at | 0.004252 | 0.001906 |                             | .        |
| 239970_at | 0.025197 | 0.015502 |                             | .        |
| 239971_at | 4.05E-04 | 1.10E-04 |                             | .        |
| 239972_at | 0.022107 | 0.013318 |                             | .        |
| 239974_at | 0.01596  | 0.009091 |                             | .        |
| 239975_at | 3.36E-06 | 2.45E-07 | HLA-DPB2                    | 3116 .   |
| 239976_at | 3.70E-04 | 9.80E-05 | ACAD9                       | 28976 .  |
| 239977_at | 9.14E-04 | 2.99E-04 | C12orf42                    | 374470 . |
| 239978_at | 6.43E-08 | 1.26E-09 |                             | .        |
| 239980_at | 3.08E-04 | 7.86E-05 | C22orf28                    | 51493 .  |
| 239981_x_ | 0.012739 | 0.006977 | LOC728902                   | 728902 . |
| 239982_at | 0.002365 | 9.44E-04 |                             | .        |
| 239986_at | 0.045873 | 0.031062 |                             | .        |
| 239988_at | 0.001312 | 4.65E-04 |                             | .        |
| 239990_at | 0.009751 | 0.005096 |                             | .        |
| 239991_at | 0.005747 | 0.002732 |                             | .        |
| 239992_at | 6.04E-05 | 1.01E-05 |                             | .        |
| 239993_at | 7.12E-04 | 2.20E-04 |                             | .        |
| 239994_at | 3.99E-06 | 3.05E-07 |                             | .        |
| 239996_x_ | 6.54E-07 | 2.81E-08 | ATP2A2                      | 488 .    |
| 239998_at | 2.23E-05 | 2.87E-06 | C10orf53                    | 282966 . |
| 239999_at | 0.045122 | 0.030476 | C21orf34                    | 388815 . |
| 240000_at | 0.00229  | 9.09E-04 |                             | .        |
| 240002_at | 0.005146 | 0.002398 | FAM93B /// LC 344729 /// 38 | .        |
| 240003_at | 2.97E-05 | 4.12E-06 |                             | .        |
| 240004_at | 0.005032 | 0.002334 |                             | .        |
| 240008_at | 8.25E-06 | 7.84E-07 |                             | .        |
| 240009_at | 0.015918 | 0.009063 |                             | .        |
| 240010_at | 3.32E-04 | 8.62E-05 |                             | .        |
| 240011_at | 0.00805  | 0.004074 | TTBK2                       | 146057 . |
| 240012_at | 3.76E-05 | 5.53E-06 |                             | .        |
| 240013_at | 7.83E-04 | 2.48E-04 |                             | .        |
| 240015_at | 0.024343 | 0.014884 |                             | .        |
| 240016_at | 0.001476 | 5.35E-04 |                             | .        |



|           |          |          |           |        |   |
|-----------|----------|----------|-----------|--------|---|
| 240017_at | 0.003551 | 0.001537 | ASPRV1    | 151516 | . |
| 240020_at | 4.50E-04 | 1.25E-04 |           |        | . |
| 240024_at | 0.01059  | 0.005611 | SEC14L2   | 23541  | . |
| 240025_x_ | 0.018649 | 0.0109   |           |        | . |
| 240029_at | 2.49E-04 | 6.01E-05 | LOC143678 | 143678 | . |
| 240030_at | 0.00352  | 0.001522 | COMMD6    | 170622 | . |
| 240031_at | 5.95E-04 | 1.76E-04 | MSRA      | 4482   | . |
| 240033_at | 0.002145 | 8.40E-04 | PLG       | 5340   | . |
| 240034_at | 0.021745 | 0.013058 |           |        | . |
| 240036_at | 1.99E-06 | 1.24E-07 | SEC14L1   | 6397   | . |
| 240037_at | 0.002261 | 8.96E-04 | ITPRIPL1  | 150771 | . |
| 240039_at | 0.001561 | 5.72E-04 | PLA2R1    | 22925  | . |
| 240040_at | 0.049481 | 0.033907 | PSTK      | 118672 | . |
| 240044_x_ | 1.99E-09 | 1.30E-11 | TNRC6B    | 23112  | . |
| 240045_at | 8.10E-04 | 2.59E-04 |           |        | . |
| 240051_at | 1.74E-05 | 2.09E-06 | TPD52L3   | 89882  | . |
| 240052_at | 1.75E-06 | 1.05E-07 | ITPR1     | 3708   | . |
| 240054_at | 0.00468  | 0.002143 |           |        | . |
| 240055_at | 1.43E-04 | 3.03E-05 |           |        | . |
| 240056_at | 7.09E-04 | 2.19E-04 | NSMAF     | 8439   | . |
| 240057_at | 0.001831 | 6.93E-04 |           |        | . |
| 240060_at | 6.84E-05 | 1.19E-05 |           |        | . |
| 240064_at | 0.004713 | 0.00216  |           |        | . |
| 240066_at | 1.03E-05 | 1.06E-06 |           |        | . |
| 240069_at | 0.032205 | 0.020607 |           |        | . |
| 240071_at | 0.026515 | 0.016436 |           |        | . |
| 240072_at | 1.11E-05 | 1.16E-06 | ASXL2     | 55252  | . |
| 240077_at | 5.04E-04 | 1.44E-04 |           |        | . |
| 240078_at | 0.004652 | 0.002126 | SFRS8     | 6433   | . |
| 240079_at | 0.013647 | 0.007559 | ZNF81     | 347344 | . |
| 240080_at | 2.09E-05 | 2.65E-06 |           |        | . |
| 240081_at | 0.02156  | 0.012924 |           |        | . |
| 240083_at | 0.02551  | 0.015725 |           |        | . |
| 240084_at | 0.008669 | 0.004436 | CBX2      | 84733  | . |

|           |          |          |         |          |
|-----------|----------|----------|---------|----------|
| 240085_at | 1.14E-04 | 2.26E-05 |         | .        |
| 240086_at | 0.002095 | 8.16E-04 | VPS36   | 51028 .  |
| 240089_at | 0.002472 | 9.96E-04 |         | .        |
| 240090_at | 8.75E-05 | 1.63E-05 |         | .        |
| 240092_at | 0.020815 | 0.012404 |         | .        |
| 240094_at | 0.002964 | 0.001235 |         | .        |
| 240095_at | 1.15E-04 | 2.29E-05 |         | .        |
| 240096_at | 0.006684 | 0.00327  |         | .        |
| 240097_at | 0.010664 | 0.005657 |         | .        |
| 240098_at | 0.003175 | 0.001344 | RIF1    | 55183 .  |
| 240099_at | 7.56E-06 | 6.99E-07 |         | .        |
| 240104_at | 3.78E-05 | 5.57E-06 |         | .        |
| 240105_at | 5.01E-04 | 1.43E-04 |         | .        |
| 240108_at | 1.58E-08 | 1.93E-10 |         | .        |
| 240110_at | 3.78E-04 | 1.01E-04 | HMGCS2  | 3158 .   |
| 240111_at | 5.27E-05 | 8.55E-06 | RHOBTB3 | 22836 .  |
| 240114_s_ | 9.48E-06 | 9.48E-07 | TMEM174 | 134288 . |
| 240115_at | 0.003487 | 0.001505 |         | .        |
| 240116_at | 6.39E-06 | 5.60E-07 |         | .        |
| 240117_at | 1.10E-06 | 5.60E-08 | FBN3    | 84467 .  |
| 240119_at | 0.004601 | 0.002098 | TEPP    | 374739 . |
| 240120_at | 0.006312 | 0.003054 |         | .        |
| 240121_x_ | 3.46E-07 | 1.23E-08 |         | .        |
| 240123_at | 0.008605 | 0.004399 |         | .        |
| 240125_at | 0.016416 | 0.009391 |         | .        |
| 240127_at | 7.15E-05 | 1.26E-05 |         | .        |
| 240128_at | 1.12E-05 | 1.18E-06 |         | .        |
| 240129_at | 0.002497 | 0.001009 |         | .        |
| 240134_at | 7.43E-04 | 2.32E-04 |         | .        |
| 240138_at | 1.00E-03 | 3.34E-04 |         | .        |
| 240139_at | 1.24E-09 | 6.94E-12 |         | .        |
| 240140_s_ | 1.21E-04 | 2.43E-05 | LRIG1   | 26018 .  |
| 240141_at | 6.00E-05 | 1.00E-05 |         | .        |
| 240143_at | 0.029735 | 0.018788 |         | .        |

|           |          |          |             |        |   |
|-----------|----------|----------|-------------|--------|---|
| 240144_at | 2.49E-04 | 6.04E-05 | DNASE1      | 1773   | . |
| 240145_at | 4.03E-05 | 6.04E-06 |             |        | . |
| 240146_at | 8.02E-04 | 2.55E-04 |             |        | . |
| 240147_at | 5.48E-05 | 8.98E-06 | C7orf50     | 84310  | . |
| 240148_at | 0.015834 | 0.009006 | MSH6        | 2956   | . |
| 240150_at | 0.002398 | 9.61E-04 |             |        | . |
| 240152_at | 0.006513 | 0.00317  |             |        | . |
| 240156_at | 0.003552 | 0.001538 |             |        | . |
| 240157_at | 0.001654 | 6.14E-04 |             |        | . |
| 240163_at | 7.31E-05 | 1.30E-05 | RORA        | 6095   | . |
| 240165_at | 0.005465 | 0.002574 |             |        | . |
| 240166_x_ | 3.46E-04 | 9.04E-05 | RG9MTD3     | 158234 | . |
| 240167_at | 0.00159  | 5.85E-04 | LOC152742   | 152742 | . |
| 240168_at | 1.70E-05 | 2.02E-06 | XPO7        | 23039  | . |
| 240169_at | 0.008156 | 0.004133 |             |        | . |
| 240170_at | 7.40E-06 | 6.79E-07 |             |        | . |
| 240171_at | 1.07E-07 | 2.49E-09 |             |        | . |
| 240172_at | 9.54E-05 | 1.82E-05 | ERGIC2      | 51290  | . |
| 240174_at | 4.30E-07 | 1.63E-08 |             |        | . |
| 240175_at | 0.020966 | 0.012513 |             |        | . |
| 240176_at | 0.002584 | 0.00105  |             |        | . |
| 240180_at | 3.36E-04 | 8.75E-05 |             |        | . |
| 240181_at | 0.007686 | 0.003858 |             |        | . |
| 240183_at | 1.18E-04 | 2.37E-05 |             |        | . |
| 240184_at | 1.03E-05 | 1.06E-06 |             |        | . |
| 240186_at | 0.022182 | 0.013369 |             |        | . |
| 240187_at | 0.008224 | 0.004173 | PPP1R3C     | 5507   | . |
| 240188_at | 9.09E-05 | 1.71E-05 |             |        | . |
| 240189_at | 4.34E-06 | 3.40E-07 | ACOXL       | 55289  | . |
| 240190_at | 2.53E-04 | 6.14E-05 |             |        | . |
| 240192_at | 0.002582 | 0.001049 | FLJ45983    | 399717 | . |
| 240193_at | 0.005521 | 0.002607 |             |        | . |
| 240194_at | 0.044502 | 0.029996 | hCG_2009921 | 441204 | . |
| 240197_at | 1.02E-04 | 1.99E-05 | SYN2        | 6854   | . |

|           |          |          |           |          |
|-----------|----------|----------|-----------|----------|
| 240198_at | 0.039318 | 0.025961 |           | .        |
| 240199_x_ | 1.09E-05 | 1.14E-06 | ZNF345    | 25850 .  |
| 240200_at | 0.006489 | 0.003157 | SULT1C2   | 6819 .   |
| 240201_at | 0.001819 | 6.88E-04 |           | .        |
| 240202_x_ | 1.86E-04 | 4.19E-05 | PFKP      | 5214 .   |
| 240203_at | 0.001185 | 4.11E-04 |           | .        |
| 240205_x_ | 3.22E-05 | 4.57E-06 |           | .        |
| 240209_at | 6.95E-04 | 2.14E-04 | C16orf78  | 123970 . |
| 240210_at | 0.001355 | 4.83E-04 | ATAD3C    | 219293 . |
| 240212_at | 0.012853 | 0.007051 |           | .        |
| 240213_at | 0.010425 | 0.005507 |           | .        |
| 240214_at | 8.46E-05 | 1.57E-05 |           | .        |
| 240219_at | 3.30E-06 | 2.38E-07 |           | .        |
| 240220_at | 4.98E-04 | 1.42E-04 |           | .        |
| 240221_at | 6.61E-05 | 1.14E-05 | CSNK1A1   | 1452 .   |
| 240222_at | 0.028771 | 0.01808  |           | .        |
| 240223_at | 1.42E-04 | 2.99E-05 | SLC2A9    | 56606 .  |
| 240225_at | 0.01117  | 0.005976 |           | .        |
| 240226_at | 5.25E-04 | 1.51E-04 |           | .        |
| 240230_s_ | 1.41E-06 | 7.90E-08 | LOC642826 | 642826 . |
| 240231_at | 7.36E-08 | 1.52E-09 |           | .        |
| 240234_at | 0.005985 | 0.00287  |           | .        |
| 240238_at | 0.006841 | 0.003362 |           | .        |
| 240240_at | 3.70E-04 | 9.81E-05 |           | .        |
| 240241_at | 0.002315 | 9.21E-04 |           | .        |
| 240242_at | 3.18E-05 | 4.49E-06 |           | .        |
| 240244_at | 0.043928 | 0.029542 |           | .        |
| 240246_at | 0.001836 | 6.96E-04 |           | .        |
| 240247_at | 3.56E-06 | 2.63E-07 |           | .        |
| 240248_at | 1.78E-05 | 2.16E-06 |           | .        |
| 240249_at | 0.028115 | 0.017596 |           | .        |
| 240250_at | 0.011811 | 0.006373 |           | .        |
| 240251_at | 0.00332  | 0.001419 | IFT80     | 57560 .  |
| 240252_at | 0.014329 | 0.008003 |           | .        |

|           |          |          |              |               |
|-----------|----------|----------|--------------|---------------|
| 240256_at | 0.001006 | 3.36E-04 |              | .             |
| 240257_at | 4.73E-04 | 1.33E-04 | SYNJ2        | 8871 .        |
| 240259_at | 0.037059 | 0.024253 | FLRT2        | 23768 .       |
| 240260_at | 7.61E-04 | 2.39E-04 |              | .             |
| 240261_at | 5.19E-07 | 2.06E-08 | TOM1L1       | 10040 .       |
| 240262_at | 0.005967 | 0.002859 |              | .             |
| 240263_at | 3.93E-05 | 5.85E-06 |              | .             |
| 240264_at | 0.005028 | 0.002332 |              | .             |
| 240265_at | 0.002846 | 0.001178 | LOC100133233 | 100133233 //. |
| 240268_at | 0.00433  | 0.00195  | LOC440117    | 440117 .      |
| 240270_x_ | 0.008482 | 0.004326 |              | .             |
| 240271_at | 0.001021 | 3.42E-04 |              | .             |
| 240273_at | 2.99E-04 | 7.56E-05 |              | .             |
| 240274_at | 1.91E-04 | 4.31E-05 |              | .             |
| 240275_at | 0.032989 | 0.021196 | ARMC3        | 219681 .      |
| 240277_at | 5.05E-05 | 8.11E-06 |              | .             |
| 240279_at | 0.002134 | 8.35E-04 |              | .             |
| 240280_at | 0.001832 | 6.94E-04 | UFSP1        | 402682 .      |
| 240281_at | 0.00341  | 0.001465 |              | .             |
| 240283_at | 0.022569 | 0.01363  | LOC100132971 | 100132971 .   |
| 240284_x_ | 7.22E-07 | 3.22E-08 | EMG1         | 10436 .       |
| 240285_at | 0.006484 | 0.003153 | AQP2         | 359 .         |
| 240287_at | 0.001273 | 4.48E-04 | IRG1         | 730249 .      |
| 240289_at | 7.48E-04 | 2.34E-04 | LOC100131683 | 100131683 .   |
| 240291_at | 0.005181 | 0.002418 |              | .             |
| 240293_at | 0.00452  | 0.002054 | CCDC153      | 283152 .      |
| 240294_at | 0.003024 | 0.001267 | HIPK2        | 28996 .       |
| 240296_at | 0.004669 | 0.002136 |              | .             |
| 240300_at | 8.02E-04 | 2.55E-04 | TK2          | 7084 .        |
| 240301_at | 7.60E-09 | 7.28E-11 | DPPA2        | 151871 .      |
| 240302_at | 8.86E-04 | 2.89E-04 |              | .             |
| 240303_at | 2.53E-05 | 3.37E-06 | TMC5         | 79838 .       |
| 240304_s_ | 7.72E-09 | 7.57E-11 | TMC5         | 79838 .       |
| 240305_at | 6.05E-05 | 1.02E-05 |              | .             |

|           |          |          |              |             |
|-----------|----------|----------|--------------|-------------|
| 240306_at | 0.001499 | 5.45E-04 |              | .           |
| 240307_at | 1.18E-04 | 2.37E-05 |              | .           |
| 240310_at | 0.002064 | 8.02E-04 | TOR1AIP1     | 26092 .     |
| 240311_at | 0.001997 | 7.70E-04 | NANOS3       | 342977 .    |
| 240312_at | 0.02871  | 0.018035 | LOC389895    | 389895 .    |
| 240313_at | 0.007358 | 0.003665 | DMRTB1       | 63948 .     |
| 240314_at | 7.97E-04 | 2.53E-04 |              | .           |
| 240315_at | 6.69E-05 | 1.16E-05 |              | .           |
| 240318_at | 0.002555 | 0.001037 | AFMID        | 125061 .    |
| 240320_at | 7.10E-06 | 6.45E-07 | LOC100131781 | 100131781 . |
| 240323_at | 0.020635 | 0.012273 |              | .           |
| 240325_x_ | 2.18E-04 | 5.11E-05 | LOC442142    | 442142 .    |
| 240326_at | 4.24E-06 | 3.30E-07 |              | .           |
| 240327_at | 0.017786 | 0.010311 |              | .           |
| 240328_at | 0.035283 | 0.022892 |              | .           |
| 240329_at | 0.045943 | 0.031121 | LOC100131904 | 100131904 . |
| 240331_at | 0.005512 | 0.002601 |              | .           |
| 240333_at | 9.66E-04 | 3.20E-04 |              | .           |
| 240334_at | 0.022194 | 0.013377 |              | .           |
| 240335_at | 0.032739 | 0.021    | SLC35F5      | 80255 .     |
| 240336_at | 0.009711 | 0.005071 | HBM          | 3042 .      |
| 240338_at | 3.47E-04 | 9.10E-05 |              | .           |
| 240339_at | 1.01E-04 | 1.96E-05 |              | .           |
| 240340_at | 0.010203 | 0.00537  | SPATA3       | 130560 .    |
| 240343_at | 0.03225  | 0.020641 |              | .           |
| 240344_x_ | 2.30E-04 | 5.45E-05 | LYRM7        | 90624 .     |
| 240345_x_ | 2.73E-04 | 6.76E-05 |              | .           |
| 240346_at | 0.027546 | 0.017178 | LOC644222    | 644222 .    |
| 240349_at | 0.020681 | 0.012308 | PRKAA2       | 5563 .      |
| 240350_at | 0.002725 | 0.001119 |              | .           |
| 240351_at | 0.023551 | 0.014323 |              | .           |
| 240352_at | 0.004786 | 0.0022   |              | .           |
| 240353_s_ | 4.13E-04 | 1.13E-04 | C12orf54     | 121273 .    |
| 240359_at | 0.020125 | 0.011913 | C20orf71     | 128861 .    |

|           |          |          |                                 |           |   |
|-----------|----------|----------|---------------------------------|-----------|---|
| 240363_at | 5.69E-04 | 1.67E-04 | ANK1                            | 286       | . |
| 240365_at | 0.044345 | 0.029873 | LOC647946                       | 647946    | . |
| 240367_at | 4.99E-04 | 1.42E-04 |                                 |           | . |
| 240368_at | 9.20E-05 | 1.74E-05 |                                 |           | . |
| 240370_at | 0.031546 | 0.020108 |                                 |           | . |
| 240371_at | 6.79E-05 | 1.18E-05 | LOC647109                       | 647109    | . |
| 240372_at | 8.01E-04 | 2.55E-04 |                                 |           | . |
| 240373_at | 9.02E-04 | 2.95E-04 | C19orf29                        | 58509     | . |
| 240374_at | 0.00732  | 0.003644 |                                 |           | . |
| 240375_at | 0.001772 | 6.66E-04 | PIGV                            | 55650     | . |
| 240376_s_ | 1.29E-05 | 1.43E-06 | LOC339047 /// 339044 /// 339044 |           | . |
| 240378_at | 0.039856 | 0.026373 |                                 |           | . |
| 240380_at | 0.011813 | 0.006375 |                                 |           | . |
| 240381_at | 0.001112 | 3.80E-04 | ZBED5                           | 58486     | . |
| 240382_at | 3.92E-06 | 2.97E-07 | LOC100131914                    | 100131914 | . |
| 240383_at | 0.001919 | 7.35E-04 | UBE2D3                          | 7323      | . |
| 240385_at | 5.32E-04 | 1.54E-04 |                                 |           | . |
| 240387_at | 0.003231 | 0.001373 | UBASH3B                         | 84959     | . |
| 240391_at | 4.74E-04 | 1.33E-04 | NDUFB2                          | 4708      | . |
| 240393_at | 0.011074 | 0.005913 |                                 |           | . |
| 240394_at | 0.047048 | 0.031991 |                                 |           | . |
| 240395_at | 0.002235 | 8.83E-04 | LOC100128727                    | 100128727 | . |
| 240396_at | 0.001232 | 4.31E-04 | IL20RA                          | 53832     | . |
| 240397_x_ | 2.36E-06 | 1.55E-07 |                                 |           | . |
| 240398_at | 4.00E-05 | 5.99E-06 |                                 |           | . |
| 240399_at | 0.013881 | 0.007709 |                                 |           | . |
| 240400_at | 1.57E-07 | 4.21E-09 |                                 |           | . |
| 240402_at | 0.012832 | 0.007036 | KIRREL3                         | 84623     | . |
| 240403_at | 1.05E-04 | 2.05E-05 |                                 |           | . |
| 240404_at | 0.004576 | 0.002085 |                                 |           | . |
| 240405_at | 0.013254 | 0.007307 |                                 |           | . |
| 240406_at | 0.001843 | 6.99E-04 |                                 |           | . |
| 240408_at | 0.019384 | 0.011405 | LOC100134937                    | 100134937 | . |
| 240409_at | 0.014486 | 0.008104 | SUGT1L1                         | 283507    | . |

|           |          |          |             |               |
|-----------|----------|----------|-------------|---------------|
| 240410_at | 0.001471 | 5.33E-04 |             | .             |
| 240412_s_ | 0.001785 | 6.72E-04 | HEATR7B2    | 133558 .      |
| 240416_at | 0.004244 | 0.001903 |             | .             |
| 240417_at | 1.16E-05 | 1.23E-06 |             | .             |
| 240418_at | 0.004923 | 0.002274 |             | .             |
| 240419_at | 0.003168 | 0.00134  | SLC6A15     | 55117 .       |
| 240421_x_ | 4.69E-05 | 7.39E-06 |             | .             |
| 240424_s_ | 0.019056 | 0.011176 | hCG_2009921 | 100134569 //. |
| 240429_at | 0.006365 | 0.003084 | ZNF546      | 339327 .      |
| 240430_at | 0.021887 | 0.013163 | KCMF1       | 56888 .       |
| 240432_x_ | 0.002448 | 9.85E-04 |             | .             |
| 240434_at | 0.014067 | 0.007829 |             | .             |
| 240435_at | 0.011234 | 0.006016 |             | .             |
| 240436_at | 0.03424  | 0.022113 | LOC650794   | 650794 .      |
| 240437_at | 6.47E-04 | 1.96E-04 | CASP9       | 842 .         |
| 240439_at | 0.04074  | 0.027055 |             | .             |
| 240440_at | 2.42E-04 | 5.80E-05 | NPL         | 80896 .       |
| 240441_at | 6.49E-04 | 1.96E-04 |             | .             |
| 240442_at | 0.006623 | 0.003234 |             | .             |
| 240443_at | 3.08E-04 | 7.86E-05 |             | .             |
| 240444_x_ | 0.006451 | 0.003133 | CLIP1       | 6249 .        |
| 240445_at | 0.023373 | 0.014196 |             | .             |
| 240446_at | 1.42E-04 | 3.00E-05 |             | .             |
| 240448_at | 0.007055 | 0.00349  | KIAA0802    | 23255 .       |
| 240449_at | 7.48E-05 | 1.34E-05 | ZNF341      | 84905 .       |
| 240451_at | 9.63E-08 | 2.18E-09 |             | .             |
| 240452_at | 1.15E-05 | 1.22E-06 | GSPT1       | 2935 .        |
| 240455_at | 0.004471 | 0.002027 |             | .             |
| 240458_at | 0.004523 | 0.002055 |             | .             |
| 240460_at | 0.0176   | 0.010186 |             | .             |
| 240461_at | 0.047813 | 0.032585 |             | .             |
| 240464_at | 0.004907 | 0.002265 |             | .             |
| 240467_at | 9.96E-05 | 1.92E-05 |             | .             |
| 240468_at | 0.019379 | 0.0114   |             | .             |



|           |          |          |                    |
|-----------|----------|----------|--------------------|
| 240471_at | 2.78E-04 | 6.90E-05 | .                  |
| 240473_at | 2.65E-04 | 6.51E-05 | .                  |
| 240476_at | 0.015551 | 0.008817 | .                  |
| 240477_at | 0.02179  | 0.013091 | .                  |
| 240478_at | 2.90E-07 | 9.67E-09 | .                  |
| 240479_at | 4.18E-04 | 1.14E-04 | HS3ST5 222537 .    |
| 240482_at | 0.045879 | 0.031067 | .                  |
| 240484_at | 0.020646 | 0.012281 | .                  |
| 240485_at | 5.25E-04 | 1.51E-04 | .                  |
| 240488_at | 0.014256 | 0.007952 | .                  |
| 240489_at | 0.020687 | 0.012313 | .                  |
| 240491_at | 0.001065 | 3.60E-04 | .                  |
| 240494_at | 0.015262 | 0.008624 | .                  |
| 240495_at | 0.013162 | 0.007249 | .                  |
| 240496_at | 0.002404 | 9.64E-04 | .                  |
| 240499_at | 0.002507 | 0.001014 | .                  |
| 240503_at | 8.25E-05 | 1.52E-05 | .                  |
| 240505_at | 1.36E-04 | 2.83E-05 | .                  |
| 240507_at | 5.07E-05 | 8.16E-06 | .                  |
| 240508_at | 0.001088 | 3.70E-04 | .                  |
| 240511_at | 9.16E-04 | 3.00E-04 | .                  |
| 240512_x_ | 0.0386   | 0.025418 | KCTD4 386618 .     |
| 240513_at | 0.025857 | 0.015969 | EIF3M 10480 .      |
| 240514_at | 0.001327 | 4.71E-04 | PGA3 643834 .      |
| 240515_at | 0.003401 | 0.00146  | .                  |
| 240517_at | 0.001204 | 4.18E-04 | CBS 875 .          |
| 240518_at | 4.77E-04 | 1.34E-04 | LOC729291 729291 . |
| 240521_at | 1.19E-04 | 2.39E-05 | .                  |
| 240522_at | 0.008393 | 0.004274 | .                  |
| 240526_at | 0.006821 | 0.003351 | .                  |
| 240529_at | 1.63E-05 | 1.92E-06 | .                  |
| 240530_at | 0.011694 | 0.006302 | .                  |
| 240531_at | 7.45E-06 | 6.86E-07 | .                  |
| 240534_at | 0.019288 | 0.011335 | .                  |

|           |          |          |                              |          |
|-----------|----------|----------|------------------------------|----------|
| 240538_at | 1.90E-04 | 4.31E-05 |                              | .        |
| 240539_at | 0.048796 | 0.033366 |                              | .        |
| 240540_at | 4.65E-04 | 1.30E-04 |                              | .        |
| 240541_at | 1.38E-05 | 1.55E-06 |                              | .        |
| 240542_at | 7.05E-04 | 2.18E-04 |                              | .        |
| 240544_at | 0.006328 | 0.003063 |                              | .        |
| 240545_at | 5.37E-05 | 8.76E-06 | LOC286382                    | 286382 . |
| 240546_at | 0.005085 | 0.002366 | LOC389043                    | 389043 . |
| 240549_at | 2.48E-04 | 6.00E-05 |                              | .        |
| 240551_at | 0.0059   | 0.002821 | ZBTB45                       | 84878 .  |
| 240552_at | 1.51E-04 | 3.24E-05 |                              | .        |
| 240553_at | 0.012532 | 0.006844 | TESC                         | 54997 .  |
| 240554_at | 2.77E-05 | 3.76E-06 | AKAP8L                       | 26993 .  |
| 240555_at | 0.001511 | 5.51E-04 |                              | .        |
| 240556_at | 1.80E-04 | 4.02E-05 | DCN                          | 1634 .   |
| 240557_at | 0.024268 | 0.014826 |                              | .        |
| 240560_at | 2.77E-04 | 6.87E-05 |                              | .        |
| 240565_at | 0.035349 | 0.022942 | ZFP28                        | 140612 . |
| 240566_at | 0.021028 | 0.012555 |                              | .        |
| 240570_at | 0.001235 | 4.32E-04 | INADL                        | 10207 .  |
| 240571_at | 3.88E-04 | 1.04E-04 |                              | .        |
| 240572_s_ | 0.014667 | 0.008227 | LOC374443                    | 374443 . |
| 240574_at | 0.013643 | 0.007555 |                              | .        |
| 240576_at | 2.00E-04 | 4.58E-05 | TBC1D26 /// ZI353149 /// 57. | .        |
| 240577_at | 4.45E-04 | 1.23E-04 | LOC643749                    | 643749 . |
| 240582_x_ | 1.02E-04 | 1.99E-05 |                              | .        |
| 240584_at | 7.83E-05 | 1.42E-05 |                              | .        |
| 240589_at | 0.004286 | 0.001925 | C21orf84                     | 114038 . |
| 240590_at | 5.22E-04 | 1.50E-04 | LOC348761                    | 348761 . |
| 240592_at | 0.034652 | 0.022417 | LCORL                        | 254251 . |
| 240594_at | 0.002978 | 0.001243 |                              | .        |
| 240595_at | 0.00578  | 0.002751 |                              | .        |
| 240598_at | 1.41E-04 | 2.98E-05 |                              | .        |
| 240600_at | 4.16E-06 | 3.21E-07 |                              | .        |

|           |          |          |              |             |
|-----------|----------|----------|--------------|-------------|
| 240601_at | 9.46E-11 | 2.40E-13 |              | .           |
| 240602_at | 9.62E-06 | 9.67E-07 | HBS1L        | 10767 .     |
| 240606_at | 5.43E-06 | 4.54E-07 |              | .           |
| 240607_at | 2.77E-04 | 6.87E-05 | MIAT         | 440823 .    |
| 240609_at | 3.94E-04 | 1.06E-04 |              | .           |
| 240611_at | 0.01961  | 0.011555 |              | .           |
| 240612_at | 0.040838 | 0.027127 |              | .           |
| 240614_at | 7.17E-06 | 6.53E-07 | KCNC2        | 3747 .      |
| 240615_at | 0.003251 | 0.001382 |              | .           |
| 240616_at | 0.002234 | 8.82E-04 | LOC100131110 | 100131110 . |
| 240617_at | 9.23E-07 | 4.46E-08 |              | .           |
| 240622_at | 0.004928 | 0.002277 |              | .           |
| 240624_x_ | 1.58E-05 | 1.86E-06 | LOC100134685 | 100134685 . |
| 240625_at | 1.31E-04 | 2.71E-05 |              | .           |
| 240627_x_ | 7.99E-04 | 2.54E-04 |              | .           |
| 240629_at | 0.021107 | 0.012612 |              | .           |
| 240632_at | 0.036388 | 0.023739 |              | .           |
| 240634_x_ | 8.56E-05 | 1.59E-05 | PDZK1P1      | 728939 .    |
| 240636_at | 0.006407 | 0.003109 |              | .           |
| 240637_at | 3.94E-06 | 3.00E-07 | WDR41        | 55255 .     |
| 240638_at | 0.005291 | 0.002477 |              | .           |
| 240639_at | 0.022587 | 0.013643 | ARMC9        | 80210 .     |
| 240640_at | 0.001222 | 4.26E-04 |              | .           |
| 240643_at | 0.024069 | 0.014689 | TTBK1        | 84630 .     |
| 240644_at | 3.94E-07 | 1.45E-08 |              | .           |
| 240645_at | 0.003929 | 0.001736 |              | .           |
| 240648_at | 9.76E-04 | 3.24E-04 |              | .           |
| 240650_at | 0.001122 | 3.84E-04 | CACNA1E      | 777 .       |
| 240654_at | 0.013725 | 0.00761  |              | .           |
| 240659_x_ | 0.023821 | 0.014514 |              | .           |
| 240660_at | 0.011895 | 0.00643  |              | .           |
| 240661_at | 7.09E-04 | 2.19E-04 | LOC284475    | 284475 .    |
| 240664_at | 5.84E-05 | 9.72E-06 |              | .           |
| 240669_at | 1.90E-05 | 2.34E-06 |              | .           |

|           |          |          |              |             |
|-----------|----------|----------|--------------|-------------|
| 240670_at | 0.001039 | 3.49E-04 |              | .           |
| 240671_at | 0.013184 | 0.007263 |              | .           |
| 240672_at | 0.001061 | 3.58E-04 |              | .           |
| 240673_at | 4.48E-04 | 1.24E-04 |              | .           |
| 240674_at | 0.013854 | 0.007691 | JARID2       | 3720 .      |
| 240675_at | 2.83E-05 | 3.87E-06 |              | .           |
| 240676_at | 0.011993 | 0.00649  |              | .           |
| 240679_at | 0.021643 | 0.012985 |              | .           |
| 240680_at | 0.005027 | 0.002331 |              | .           |
| 240681_at | 4.05E-12 | 3.53E-15 |              | .           |
| 240683_at | 0.035447 | 0.023018 |              | .           |
| 240685_at | 0.012827 | 0.007033 |              | .           |
| 240686_x_ | 1.57E-06 | 9.11E-08 | TFRC         | 7037 .      |
| 240689_at | 0.018506 | 0.010803 | C15orf60     | 283677 .    |
| 240690_at | 2.40E-04 | 5.75E-05 |              | .           |
| 240692_at | 4.87E-04 | 1.37E-04 | MGC34796     | 414927 .    |
| 240693_at | 0.027796 | 0.017361 |              | .           |
| 240694_at | 0.036417 | 0.02376  | LOC100128974 | 100128974 . |
| 240696_at | 0.001799 | 6.78E-04 |              | .           |
| 240698_s_ | 0.001069 | 3.62E-04 |              | .           |
| 240699_at | 0.023237 | 0.014098 | SEC14L3      | 266629 .    |
| 240700_at | 1.35E-04 | 2.80E-05 | TOR1AIP2     | 163590 .    |
| 240701_at | 0.012037 | 0.00652  | GSDMB        | 55876 .     |
| 240703_s_ | 0.002681 | 0.001097 | HERC1        | 8925 .      |
| 240705_at | 4.77E-04 | 1.34E-04 | CYP19A1      | 1588 .      |
| 240706_at | 0.004281 | 0.001922 |              | .           |
| 240709_at | 0.010947 | 0.005835 | SEZ6L        | 23544 .     |
| 240715_at | 6.60E-06 | 5.84E-07 | TBX5         | 6910 .      |
| 240716_at | 0.001666 | 6.19E-04 | TTC23        | 64927 .     |
| 240720_at | 0.006337 | 0.003068 |              | .           |
| 240721_at | 1.75E-04 | 3.88E-05 |              | .           |
| 240722_at | 0.00251  | 0.001015 |              | .           |
| 240728_at | 0.037001 | 0.024208 | PLCB4        | 5332 .      |
| 240731_at | 0.002342 | 9.33E-04 |              | .           |

|           |          |          |              |             |
|-----------|----------|----------|--------------|-------------|
| 240733_at | 6.22E-10 | 2.82E-12 |              | .           |
| 240735_at | 7.52E-04 | 2.35E-04 | CDC42BPA     | 8476 .      |
| 240736_at | 0.0013   | 4.59E-04 |              | .           |
| 240738_at | 0.017516 | 0.010127 |              | .           |
| 240740_at | 6.37E-04 | 1.92E-04 |              | .           |
| 240741_x_ | 0.009138 | 0.00472  |              | .           |
| 240744_at | 0.01248  | 0.00681  | CPA5         | 93979 .     |
| 240748_at | 0.008119 | 0.004113 |              | .           |
| 240752_at | 0.003354 | 0.001436 | PCGF2        | 7703 .      |
| 240754_at | 4.94E-04 | 1.40E-04 | LOC284933    | 284933 .    |
| 240755_at | 0.040859 | 0.027144 |              | .           |
| 240756_at | 0.036972 | 0.024186 |              | .           |
| 240757_at | 1.81E-04 | 4.04E-05 | CLASP1       | 23332 .     |
| 240758_at | 0.044356 | 0.029885 |              | .           |
| 240759_at | 1.34E-06 | 7.36E-08 |              | .           |
| 240760_at | 1.92E-05 | 2.38E-06 | CDRT15       | 146822 .    |
| 240761_at | 0.00664  | 0.003244 |              | .           |
| 240762_at | 0.03602  | 0.02346  |              | .           |
| 240763_at | 0.008474 | 0.004321 |              | .           |
| 240764_at | 4.88E-04 | 1.38E-04 |              | .           |
| 240765_at | 0.001301 | 4.59E-04 |              | .           |
| 240766_at | 0.001284 | 4.52E-04 | IL23A        | 51561 .     |
| 240767_x_ | 0.001077 | 3.65E-04 | RP11-470P4.2 | 100130426 . |
| 240768_x_ | 0.009971 | 0.00523  |              | .           |
| 240769_at | 0.001484 | 5.39E-04 |              | .           |
| 240772_at | 0.00651  | 0.003168 |              | .           |
| 240773_at | 1.10E-06 | 5.60E-08 |              | .           |
| 240774_at | 0.004963 | 0.002295 |              | .           |
| 240775_at | 0.008582 | 0.004385 |              | .           |
| 240778_at | 0.003167 | 0.00134  | GINS4        | 84296 .     |
| 240779_at | 0.009908 | 0.005191 |              | .           |
| 240780_at | 1.27E-04 | 2.59E-05 |              | .           |
| 240786_at | 3.10E-04 | 7.92E-05 | NOTCH4       | 4855 .      |
| 240787_at | 0.002713 | 0.001114 |              | .           |

|           |          |          |           |          |
|-----------|----------|----------|-----------|----------|
| 240788_at | 0.035992 | 0.023435 | .         | .        |
| 240789_at | 5.59E-06 | 4.73E-07 | .         | .        |
| 240790_at | 0.03611  | 0.023526 | .         | .        |
| 240792_at | 0.015663 | 0.008891 | .         | .        |
| 240796_at | 6.27E-04 | 1.88E-04 | .         | .        |
| 240797_at | 0.001655 | 6.14E-04 | PERP      | 64065 .  |
| 240798_at | 7.24E-05 | 1.28E-05 | .         | .        |
| 240800_x_ | 1.39E-07 | 3.55E-09 | .         | .        |
| 240801_at | 0.029091 | 0.018309 | C21orf37  | 54076 .  |
| 240803_at | 0.021726 | 0.013045 | .         | .        |
| 240804_at | 2.41E-04 | 5.78E-05 | .         | .        |
| 240807_at | 0.021524 | 0.012898 | .         | .        |
| 240808_at | 0.01669  | 0.009574 | ESD       | 2098 .   |
| 240809_at | 4.83E-04 | 1.36E-04 | C21orf121 | 150142 . |
| 240813_at | 1.45E-04 | 3.07E-05 | .         | .        |
| 240816_at | 2.85E-04 | 7.12E-05 | .         | .        |
| 240817_at | 6.06E-04 | 1.80E-04 | .         | .        |
| 240818_at | 0.00606  | 0.002912 | .         | .        |
| 240819_at | 3.12E-04 | 8.00E-05 | .         | .        |
| 240823_at | 0.002036 | 7.88E-04 | .         | .        |
| 240825_at | 0.001661 | 6.17E-04 | .         | .        |
| 240826_at | 0.001932 | 7.40E-04 | .         | .        |
| 240827_at | 1.74E-05 | 2.09E-06 | FLJ45983  | 399717 . |
| 240828_at | 0.004766 | 0.00219  | .         | .        |
| 240830_at | 0.008581 | 0.004384 | SCARNA17  | 677769 . |
| 240831_at | 9.99E-05 | 1.93E-05 | .         | .        |
| 240834_at | 0.001129 | 3.87E-04 | FAM105B   | 90268 .  |
| 240837_at | 0.004204 | 0.001881 | FNDC7     | 163479 . |
| 240838_s_ | 4.82E-05 | 7.66E-06 | LOC145837 | 145837 . |
| 240839_at | 0.001137 | 3.90E-04 | .         | .        |
| 240840_s_ | 0.047172 | 0.03209  | C5orf35   | 133383 . |
| 240842_at | 0.014127 | 0.007867 | .         | .        |
| 240843_at | 6.72E-07 | 2.92E-08 | .         | .        |
| 240844_at | 0.007082 | 0.003505 | .         | .        |

|           |          |          |           |          |
|-----------|----------|----------|-----------|----------|
| 240845_at | 1.82E-04 | 4.06E-05 |           | .        |
| 240846_at | 2.32E-04 | 5.52E-05 | PCBD2     | 84105 .  |
| 240849_at | 1.49E-04 | 3.17E-05 |           | .        |
| 240850_at | 5.84E-04 | 1.72E-04 |           | .        |
| 240853_at | 3.20E-05 | 4.52E-06 |           | .        |
| 240854_x_ | 8.17E-04 | 2.61E-04 |           | .        |
| 240855_at | 0.033735 | 0.021751 |           | .        |
| 240859_at | 6.69E-07 | 2.90E-08 | ZFYVE16   | 9765 .   |
| 240860_at | 0.004934 | 0.00228  |           | .        |
| 240866_at | 0.006403 | 0.003107 |           | .        |
| 240870_at | 0.003575 | 0.00155  |           | .        |
| 240871_at | 0.037781 | 0.024795 | C9orf128  | 392307 . |
| 240872_at | 0.007864 | 0.003965 |           | .        |
| 240873_x_ | 4.06E-05 | 6.11E-06 | DAB2      | 1601 .   |
| 240874_at | 0.005297 | 0.002481 |           | .        |
| 240875_at | 0.015354 | 0.008685 | C17orf68  | 80169 .  |
| 240877_x_ | 5.39E-04 | 1.56E-04 |           | .        |
| 240878_at | 0.02028  | 0.01202  | SPEM1     | 374768 . |
| 240882_at | 0.030637 | 0.019448 |           | .        |
| 240885_at | 0.018038 | 0.010486 |           | .        |
| 240886_at | 1.48E-04 | 3.15E-05 | CASR      | 846 .    |
| 240887_at | 7.98E-05 | 1.46E-05 |           | .        |
| 240888_at | 0.006948 | 0.003426 |           | .        |
| 240889_at | 8.44E-04 | 2.72E-04 | CDRT15L2  | 256223 . |
| 240890_at | 0.00287  | 0.00119  | LOC643733 | 643733 . |
| 240891_at | 0.029053 | 0.018282 | FSTL1     | 11167 .  |
| 240892_at | 1.67E-05 | 1.99E-06 |           | .        |
| 240894_at | 0.014818 | 0.00833  |           | .        |
| 240897_at | 5.20E-05 | 8.41E-06 |           | .        |
| 240899_at | 0.00756  | 0.003784 |           | .        |
| 240900_at | 0.001311 | 4.64E-04 | C7orf50   | 84310 .  |
| 240901_at | 6.65E-04 | 2.02E-04 |           | .        |
| 240906_at | 1.23E-05 | 1.34E-06 |           | .        |
| 240907_at | 0.004448 | 0.002015 |           | .        |

|           |          |          |              |             |
|-----------|----------|----------|--------------|-------------|
| 240908_at | 8.13E-05 | 1.49E-05 |              | .           |
| 240910_at | 0.00573  | 0.002722 |              | .           |
| 240916_x_ | 0.012642 | 0.006913 |              | .           |
| 240919_at | 1.12E-05 | 1.18E-06 |              | .           |
| 240920_at | 0.007053 | 0.003488 |              | .           |
| 240921_at | 0.012526 | 0.006841 |              | .           |
| 240922_at | 6.29E-04 | 1.89E-04 |              | .           |
| 240925_at | 0.006438 | 0.003127 |              | .           |
| 240926_at | 3.62E-04 | 9.56E-05 | LRCH3        | 84859 .     |
| 240928_at | 6.53E-04 | 1.98E-04 | FCF1         | 51077 .     |
| 240929_at | 0.035435 | 0.023007 |              | .           |
| 240931_s_ | 0.0011   | 3.75E-04 | LOC728613    | 728613 .    |
| 240933_at | 0.017079 | 0.009831 |              | .           |
| 240934_at | 0.019384 | 0.011405 |              | .           |
| 240935_at | 0.001279 | 4.50E-04 |              | .           |
| 240937_at | 3.82E-05 | 5.66E-06 | LOC389662    | 389662 .    |
| 240938_at | 0.00358  | 0.001552 |              | .           |
| 240939_x_ | 5.67E-04 | 1.66E-04 |              | .           |
| 240941_at | 0.013497 | 0.007461 | ITSN2        | 50618 .     |
| 240943_at | 0.007414 | 0.003699 |              | .           |
| 240944_at | 3.05E-07 | 1.03E-08 |              | .           |
| 240945_at | 1.13E-04 | 2.24E-05 |              | .           |
| 240946_at | 0.021515 | 0.012893 |              | .           |
| 240947_at | 0.001339 | 4.77E-04 | ANO6         | 196527 .    |
| 240948_at | 1.45E-04 | 3.07E-05 |              | .           |
| 240949_x_ | 0.002851 | 0.00118  |              | .           |
| 240957_at | 0.004732 | 0.00217  |              | .           |
| 240958_at | 0.004815 | 0.002217 | UNC5C        | 8633 .      |
| 240960_at | 4.17E-08 | 6.98E-10 |              | .           |
| 240963_x_ | 7.73E-04 | 2.44E-04 | LOC100131347 | 100131347 . |
| 240964_at | 0.003069 | 0.00129  |              | .           |
| 240967_at | 0.003463 | 0.001492 | KRTAP19-3    | 337970 .    |
| 240968_at | 1.94E-04 | 4.41E-05 |              | .           |
| 240971_x_ | 1.94E-10 | 6.03E-13 |              | .           |



|           |          |          |                              |          |
|-----------|----------|----------|------------------------------|----------|
| 240974_at | 0.003203 | 0.001359 |                              | .        |
| 240975_x_ | 0.006111 | 0.00294  | hCG_1776007                  | 146713 . |
| 240976_at | 0.003623 | 0.001576 |                              | .        |
| 240979_at | 0.018669 | 0.010913 | LOC284100                    | 284100 . |
| 240981_at | 0.044271 | 0.029811 |                              | .        |
| 240984_at | 0.010703 | 0.005683 |                              | .        |
| 240986_at | 0.004598 | 0.002097 |                              | .        |
| 240987_at | 5.34E-06 | 4.43E-07 |                              | .        |
| 240988_x_ | 1.71E-05 | 2.04E-06 |                              | .        |
| 240990_at | 2.84E-05 | 3.89E-06 | RAB5A                        | 5868 .   |
| 240992_at | 0.0064   | 0.003105 |                              | .        |
| 240993_at | 2.19E-04 | 5.12E-05 |                              | .        |
| 240996_at | 1.16E-04 | 2.31E-05 |                              | .        |
| 240998_at | 0.01563  | 0.00887  |                              | .        |
| 241000_at | 6.34E-04 | 1.91E-04 |                              | .        |
| 241002_at | 3.90E-06 | 2.95E-07 |                              | .        |
| 241004_at | 0.003264 | 0.001389 |                              | .        |
| 241005_at | 4.40E-04 | 1.21E-04 |                              | .        |
| 241006_at | 0.003319 | 0.001419 |                              | .        |
| 241007_at | 0.04994  | 0.034281 |                              | .        |
| 241008_at | 0.042446 | 0.028375 |                              | .        |
| 241009_at | 0.030409 | 0.019282 | FOXN4                        | 121643 . |
| 241010_x_ | 1.40E-04 | 2.93E-05 |                              | .        |
| 241012_at | 0.032859 | 0.021093 |                              | .        |
| 241013_at | 0.004337 | 0.001954 | FAM124A                      | 220108 . |
| 241017_at | 0.04905  | 0.033568 | TBC1D8                       | 11138 .  |
| 241018_at | 0.001172 | 4.05E-04 | TMEM59                       | 9528 .   |
| 241019_at | 0.025091 | 0.01542  |                              | .        |
| 241021_at | 0.001685 | 6.27E-04 |                              | .        |
| 241024_at | 3.71E-05 | 5.44E-06 | C6orf147 /// KI387097 /// 8( | .        |
| 241027_at | 0.006807 | 0.003343 | OPA1                         | 4976 .   |
| 241028_at | 0.037129 | 0.024309 | RPGRIP1L                     | 23322 .  |
| 241031_at | 3.31E-06 | 2.40E-07 | FAM148A                      | 145741 . |
| 241033_at | 7.44E-04 | 2.32E-04 |                              | .        |

|           |          |          |             |          |
|-----------|----------|----------|-------------|----------|
| 241036_at | 1.60E-05 | 1.88E-06 |             | .        |
| 241037_at | 0.046828 | 0.03182  |             | .        |
| 241038_at | 0.013647 | 0.007559 |             | .        |
| 241043_at | 0.002429 | 9.76E-04 |             | .        |
| 241045_at | 1.78E-05 | 2.16E-06 | JMJD5       | 79831 .  |
| 241046_at | 3.93E-07 | 1.44E-08 |             | .        |
| 241047_at | 0.034    | 0.021937 | FLJ22536    | 401237 . |
| 241048_at | 3.34E-04 | 8.70E-05 |             | .        |
| 241050_at | 0.017059 | 0.009817 |             | .        |
| 241051_at | 0.004635 | 0.002116 |             | .        |
| 241054_at | 1.67E-05 | 1.99E-06 |             | .        |
| 241055_at | 0.008704 | 0.004458 | EPAS1       | 2034 .   |
| 241056_at | 0.030544 | 0.019382 | ZC3H3       | 23144 .  |
| 241059_at | 0.012389 | 0.006749 |             | .        |
| 241060_x_ | 5.31E-04 | 1.53E-04 |             | .        |
| 241064_at | 5.31E-04 | 1.53E-04 | hCG_1776047 | 727961 . |
| 241065_x_ | 3.12E-05 | 4.39E-06 | CMAS        | 55907 .  |
| 241070_at | 0.002465 | 9.93E-04 |             | .        |
| 241071_at | 0.008228 | 0.004176 |             | .        |
| 241073_at | 0.019663 | 0.01159  |             | .        |
| 241076_at | 0.00421  | 0.001885 |             | .        |
| 241078_at | 0.003129 | 0.001321 | SLC35E4     | 339665 . |
| 241079_at | 0.015586 | 0.008841 |             | .        |
| 241081_at | 0.001575 | 5.79E-04 |             | .        |
| 241082_at | 2.74E-04 | 6.77E-05 | ASNS        | 440 .    |
| 241085_at | 0.00661  | 0.003226 |             | .        |
| 241087_at | 2.77E-06 | 1.89E-07 |             | .        |
| 241090_at | 0.005906 | 0.002824 |             | .        |
| 241091_at | 1.76E-06 | 1.07E-07 |             | .        |
| 241096_at | 0.023933 | 0.014592 |             | .        |
| 241100_at | 8.71E-04 | 2.83E-04 |             | .        |
| 241102_at | 0.001309 | 4.63E-04 |             | .        |
| 241104_at | 4.68E-04 | 1.31E-04 |             | .        |
| 241106_at | 0.011782 | 0.006356 |             | .        |

|           |          |          |              |             |
|-----------|----------|----------|--------------|-------------|
| 241112_at | 0.025336 | 0.015604 |              | .           |
| 241114_s_ | 0.025137 | 0.015455 |              | .           |
| 241115_at | 0.02768  | 0.017281 |              | .           |
| 241117_at | 0.006385 | 0.003096 | LOXHD1       | 125336 .    |
| 241121_at | 6.24E-04 | 1.87E-04 |              | .           |
| 241123_at | 0.028059 | 0.017554 |              | .           |
| 241125_at | 1.77E-04 | 3.94E-05 |              | .           |
| 241126_at | 0.015406 | 0.00872  |              | .           |
| 241127_at | 0.026239 | 0.016235 |              | .           |
| 241128_at | 9.15E-04 | 3.00E-04 |              | .           |
| 241131_at | 0.016017 | 0.009131 |              | .           |
| 241134_at | 0.001548 | 5.66E-04 |              | .           |
| 241136_at | 0.03973  | 0.026275 |              | .           |
| 241138_at | 0.001964 | 7.55E-04 |              | .           |
| 241139_at | 0.02078  | 0.01238  |              | .           |
| 241141_at | 0.020594 | 0.012244 | BMP6         | 654 .       |
| 241143_at | 0.002074 | 8.06E-04 |              | .           |
| 241148_at | 0.011088 | 0.005922 | ACTG2        | 72 .        |
| 241149_at | 5.82E-04 | 1.72E-04 |              | .           |
| 241152_at | 0.008246 | 0.004186 |              | .           |
| 241154_x_ | 0.0198   | 0.011686 |              | .           |
| 241155_at | 0.001239 | 4.34E-04 |              | .           |
| 241158_at | 7.57E-04 | 2.37E-04 |              | .           |
| 241159_x_ | 0.024781 | 0.0152   |              | .           |
| 241161_at | 9.24E-04 | 3.04E-04 |              | .           |
| 241162_at | 0.004623 | 0.002111 |              | .           |
| 241164_at | 0.003431 | 0.001476 |              | .           |
| 241166_at | 5.43E-04 | 1.57E-04 |              | .           |
| 241167_at | 0.003418 | 0.001469 | ITIH4        | 3700 .      |
| 241171_at | 0.002588 | 0.001052 |              | .           |
| 241174_at | 7.71E-06 | 7.18E-07 | AP4E1        | 23431 .     |
| 241180_at | 0.005539 | 0.002617 | LOC100129112 | 100129112 . |
| 241181_x_ | 3.58E-04 | 9.45E-05 |              | .           |
| 241185_at | 0.021852 | 0.013136 | SAE1         | 10055 .     |

|           |          |          |           |          |
|-----------|----------|----------|-----------|----------|
| 241187_at | 1.07E-06 | 5.37E-08 |           | .        |
| 241189_at | 1.76E-05 | 2.13E-06 |           | .        |
| 241193_at | 0.02188  | 0.013157 | ETS2      | 2114 .   |
| 241195_at | 0.004894 | 0.002258 |           | .        |
| 241196_at | 0.00472  | 0.002164 | LOC728777 | 728777 . |
| 241198_s_ | 1.77E-06 | 1.07E-07 | C11orf70  | 85016 .  |
| 241199_x_ | 1.55E-08 | 1.86E-10 | DPPA4     | 55211 .  |
| 241201_at | 0.010381 | 0.00548  | KIAA1530  | 57654 .  |
| 241202_at | 0.022005 | 0.013244 |           | .        |
| 241211_at | 9.19E-05 | 1.73E-05 |           | .        |
| 241212_at | 0.001285 | 4.53E-04 |           | .        |
| 241213_x_ | 8.77E-06 | 8.52E-07 |           | .        |
| 241216_at | 1.10E-04 | 2.17E-05 |           | .        |
| 241218_at | 0.024608 | 0.015072 |           | .        |
| 241221_at | 0.036241 | 0.023626 | SEC14L3   | 266629 . |
| 241222_at | 0.008669 | 0.004436 |           | .        |
| 241223_x_ | 6.85E-05 | 1.20E-05 |           | .        |
| 241226_at | 1.29E-06 | 7.00E-08 |           | .        |
| 241227_at | 3.19E-06 | 2.28E-07 |           | .        |
| 241229_at | 0.048184 | 0.032873 |           | .        |
| 241230_at | 3.07E-06 | 2.17E-07 |           | .        |
| 241231_at | 1.48E-04 | 3.15E-05 |           | .        |
| 241232_x_ | 0.03133  | 0.01995  |           | .        |
| 241233_x_ | 0.013438 | 0.007423 | C21orf81  | 391267 . |
| 241240_at | 1.16E-06 | 6.02E-08 |           | .        |
| 241242_at | 8.24E-10 | 4.10E-12 |           | .        |
| 241243_at | 0.032506 | 0.020822 |           | .        |
| 241245_at | 0.00276  | 0.001136 | SFRS4     | 6429 .   |
| 241246_at | 2.15E-04 | 5.02E-05 |           | .        |
| 241247_at | 0.041252 | 0.027446 |           | .        |
| 241249_at | 0.001806 | 6.81E-04 | LOC253039 | 253039 . |
| 241251_at | 0.027838 | 0.017394 |           | .        |
| 241254_at | 0.008882 | 0.004564 |           | .        |
| 241255_at | 0.008477 | 0.004322 |           | .        |

|           |          |          |              |           |     |
|-----------|----------|----------|--------------|-----------|-----|
| 241256_at | 4.36E-05 | 6.72E-06 | LOC100131283 | 100131283 | .   |
| 241261_x_ | 1.34E-05 | 1.49E-06 |              |           | .   |
| 241264_at | 0.003223 | 0.001368 |              |           | .   |
| 241268_x_ | 0.001098 | 3.74E-04 |              |           | .   |
| 241269_at | 0.009724 | 0.005079 |              |           | .   |
| 241270_at | 0.006727 | 0.003295 |              |           | .   |
| 241273_at | 4.44E-04 | 1.23E-04 |              |           | .   |
| 241277_x_ | 0.011783 | 0.006356 | ZNF837       | 116412    | .   |
| 241279_at | 0.009598 | 0.004998 |              |           | .   |
| 241281_at | 8.82E-04 | 2.87E-04 |              |           | .   |
| 241282_at | 0.001041 | 3.50E-04 |              |           | .   |
| 241284_at | 0.005347 | 0.002508 |              |           | .   |
| 241285_at | 9.25E-05 | 1.75E-05 |              |           | .   |
| 241286_at | 0.001117 | 3.82E-04 |              |           | .   |
| 241292_at | 0.03563  | 0.023164 |              |           | .   |
| 241293_x_ | 0.00704  | 0.00348  |              |           | .   |
| 241294_at | 3.79E-04 | 1.01E-04 |              |           | .   |
| 241298_x_ | 0.024082 | 0.014697 |              |           | .   |
| 241300_at | 3.80E-04 | 1.02E-04 |              |           | .   |
| 241302_at | 0.02638  | 0.016337 |              |           | .   |
| 241303_x_ | 2.77E-04 | 6.89E-05 |              |           | .   |
| 241307_at | 0.013279 | 0.007323 |              |           | .   |
| 241309_at | 0.024888 | 0.015277 |              |           | .   |
| 241311_at | 0.026739 | 0.016604 |              |           | .   |
| 241316_at | 0.04755  | 0.032388 |              |           | .   |
| 241317_at | 0.009441 | 0.004904 | LOC100132634 | 100132634 | //. |
| 241320_at | 0.016674 | 0.009563 |              |           | .   |
| 241321_at | 2.03E-04 | 4.66E-05 |              |           | .   |
| 241322_at | 4.13E-05 | 6.25E-06 |              |           | .   |
| 241324_at | 0.007975 | 0.004028 |              |           | .   |
| 241326_at | 0.009877 | 0.005173 | AK7          | 122481    | .   |
| 241327_at | 2.99E-04 | 7.58E-05 |              |           | .   |
| 241329_s_ | 0.018016 | 0.010468 |              |           | .   |
| 241333_x_ | 0.019604 | 0.011552 |              |           | .   |

|           |          |          |                          |
|-----------|----------|----------|--------------------------|
| 241336_at | 0.027034 | 0.01681  | .                        |
| 241337_at | 2.16E-04 | 5.05E-05 | .                        |
| 241338_at | 0.032177 | 0.020585 | .                        |
| 241341_at | 0.001563 | 5.73E-04 | .                        |
| 241342_at | 2.25E-04 | 5.30E-05 | TMEM65 157378 .          |
| 241343_at | 5.52E-04 | 1.61E-04 | RNASEH1 246243 .         |
| 241345_at | 0.035341 | 0.022935 | ZRANB2 9406 .            |
| 241346_at | 3.26E-06 | 2.34E-07 | ARHGAP30 257106 .        |
| 241348_at | 0.028797 | 0.018099 | ZNF654 55279 .           |
| 241349_at | 0.005732 | 0.002723 | .                        |
| 241350_at | 2.36E-05 | 3.09E-06 | FBXL22 283807 .          |
| 241351_at | 2.27E-04 | 5.36E-05 | .                        |
| 241353_s_ | 0.041138 | 0.027361 | LOC100129105 100129105 . |
| 241354_at | 3.19E-04 | 8.20E-05 | NCRNA00105 80161 .       |
| 241355_at | 0.004534 | 0.002061 | HR 55806 .               |
| 241357_at | 0.003299 | 0.001408 | MAPK15 225689 .          |
| 241358_at | 9.86E-04 | 3.28E-04 | WFIKKN2 124857 .         |
| 241359_at | 7.11E-06 | 6.46E-07 | .                        |
| 241360_at | 2.46E-07 | 7.73E-09 | CCDC15 80071 .           |
| 241363_at | 0.038998 | 0.025718 | EXD3 54932 .             |
| 241364_at | 0.018846 | 0.011034 | TMEM57 55219 .           |
| 241367_at | 0.014901 | 0.008386 | TEX19 400629 .           |
| 241370_at | 3.22E-06 | 2.31E-07 | LOC286052 286052 .       |
| 241371_at | 8.73E-04 | 2.84E-04 | .                        |
| 241373_at | 2.40E-04 | 5.73E-05 | .                        |
| 241376_at | 0.002006 | 7.74E-04 | LOC100130097 100130097 . |
| 241377_s_ | 5.41E-04 | 1.57E-04 | MIB2 142678 .            |
| 241378_at | 3.28E-05 | 4.67E-06 | MIB2 142678 .            |
| 241379_at | 0.002809 | 0.001161 | APLF 200558 .            |
| 241380_at | 2.53E-06 | 1.69E-07 | FLJ41603 389337 .        |
| 241381_at | 2.96E-04 | 7.48E-05 | CXorf36 79742 .          |
| 241383_at | 0.023629 | 0.014381 | ZNF385C 201181 .         |
| 241384_x_ | 0.009278 | 0.004805 | GK5 256356 .             |
| 241385_at | 0.005006 | 0.002319 | LARP7 51574 .            |

|           |          |          |                    |
|-----------|----------|----------|--------------------|
| 241387_at | 1.18E-05 | 1.26E-06 | .                  |
| 241388_at | 4.23E-05 | 6.46E-06 | .                  |
| 241389_at | 1.60E-07 | 4.30E-09 | CHRNA2 1141 .      |
| 241391_at | 2.41E-04 | 5.77E-05 | .                  |
| 241393_at | 3.38E-04 | 8.82E-05 | IPP 3652 .         |
| 241394_at | 0.028582 | 0.017933 | LOC284120 284120 . |
| 241395_at | 0.001492 | 5.43E-04 | NIT1 4817 .        |
| 241396_at | 1.69E-05 | 2.02E-06 | NEDD4L 23327 .     |
| 241397_at | 0.02619  | 0.016202 | .                  |
| 241401_at | 4.96E-04 | 1.41E-04 | C4orf12 404201 .   |
| 241402_at | 1.22E-04 | 2.48E-05 | TSEN54 283989 .    |
| 241404_at | 0.01936  | 0.011387 | .                  |
| 241405_at | 0.010916 | 0.005816 | LOC400604 400604 . |
| 241407_at | 6.00E-04 | 1.78E-04 | .                  |
| 241408_at | 5.03E-06 | 4.11E-07 | CRIPAK 285464 .    |
| 241410_at | 7.17E-06 | 6.53E-07 | .                  |
| 241413_at | 8.83E-06 | 8.61E-07 | .                  |
| 241414_at | 0.019718 | 0.011631 | ANKRD10 55608 .    |
| 241415_at | 0.043012 | 0.028804 | .                  |
| 241416_at | 0.001268 | 4.46E-04 | .                  |
| 241417_at | 2.40E-06 | 1.57E-07 | .                  |
| 241422_at | 5.29E-04 | 1.52E-04 | .                  |
| 241425_at | 8.29E-06 | 7.88E-07 | NUPL1 9818 .       |
| 241426_at | 0.002277 | 9.03E-04 | KIAA1712 80817 .   |
| 241427_x_ | 2.36E-04 | 5.62E-05 | .                  |
| 241428_x_ | 0.037511 | 0.02459  | TCEA2 6919 .       |
| 241429_at | 0.001007 | 3.36E-04 | .                  |
| 241430_at | 0.036282 | 0.023659 | C2orf51 200523 .   |
| 241433_at | 0.002971 | 0.001239 | RCOR3 55758 .      |
| 241434_at | 0.002215 | 8.74E-04 | .                  |
| 241437_s_ | 0.001218 | 4.25E-04 | EP400NL 347918 .   |
| 241438_at | 1.02E-05 | 1.04E-06 | .                  |
| 241439_at | 2.99E-04 | 7.58E-05 | .                  |
| 241442_at | 1.84E-05 | 2.25E-06 | .                  |

|           |          |          |                  |
|-----------|----------|----------|------------------|
| 241448_at | 7.22E-04 | 2.24E-04 | .                |
| 241451_s_ | 3.48E-05 | 5.03E-06 | .                |
| 241452_at | 0.016231 | 0.009271 | .                |
| 241454_at | 0.023254 | 0.014111 | .                |
| 241455_at | 6.12E-05 | 1.03E-05 | .                |
| 241456_at | 0.042692 | 0.028564 | .                |
| 241457_at | 0.036013 | 0.023454 | .                |
| 241459_at | 0.036088 | 0.023508 | LIMCH1 22998 .   |
| 241460_at | 3.96E-05 | 5.91E-06 | .                |
| 241464_s_ | 1.81E-04 | 4.05E-05 | .                |
| 241465_at | 0.008716 | 0.004464 | C17orf39 79018 . |
| 241466_at | 6.04E-05 | 1.01E-05 | .                |
| 241467_at | 0.005744 | 0.00273  | .                |
| 241468_at | 0.001445 | 5.22E-04 | .                |
| 241475_at | 0.036605 | 0.023903 | BREA2 286076 .   |
| 241476_at | 0.01691  | 0.009719 | .                |
| 241477_at | 3.11E-05 | 4.38E-06 | NEIL1 79661 .    |
| 241478_at | 0.015774 | 0.008964 | MICALL2 79778 .  |
| 241480_at | 0.031466 | 0.02005  | RNF213 57674 .   |
| 241481_at | 0.003007 | 0.001258 | FAM81A 145773 .  |
| 241482_at | 2.91E-05 | 4.01E-06 | .                |
| 241484_x_ | 0.002187 | 8.60E-04 | .                |
| 241486_at | 1.08E-04 | 2.11E-05 | .                |
| 241488_at | 0.028427 | 0.017815 | .                |
| 241489_at | 5.65E-05 | 9.32E-06 | .                |
| 241490_s_ | 0.038073 | 0.025013 | PGBD2 267002 .   |
| 241492_at | 9.01E-04 | 2.95E-04 | .                |
| 241493_at | 1.19E-04 | 2.38E-05 | .                |
| 241494_at | 2.31E-05 | 2.99E-06 | .                |
| 241495_at | 0.001113 | 3.80E-04 | CCNL1 57018 .    |
| 241496_at | 0.001595 | 5.87E-04 | BTNL9 153579 .   |
| 241500_at | 1.25E-04 | 2.56E-05 | .                |
| 241501_at | 8.66E-05 | 1.61E-05 | .                |
| 241504_at | 6.44E-04 | 1.94E-04 | .                |



|           |          |          |           |          |
|-----------|----------|----------|-----------|----------|
| 241505_at | 0.026745 | 0.016608 |           | .        |
| 241507_x_ | 5.85E-04 | 1.73E-04 |           | .        |
| 241508_at | 0.001701 | 6.34E-04 |           | .        |
| 241509_at | 3.85E-04 | 1.03E-04 |           | .        |
| 241510_at | 4.45E-14 | 1.21E-17 | LOC440981 | 440981 . |
| 241511_at | 0.004155 | 0.001854 |           | .        |
| 241512_at | 0.017645 | 0.010218 | SPATC1    | 375686 . |
| 241514_at | 0.001813 | 6.85E-04 |           | .        |
| 241516_at | 0.004366 | 0.00197  |           | .        |
| 241517_at | 0.011897 | 0.006432 |           | .        |
| 241520_x_ | 9.93E-05 | 1.91E-05 |           | .        |
| 241521_at | 0.002475 | 9.98E-04 |           | .        |
| 241522_at | 0.032135 | 0.020556 |           | .        |
| 241523_at | 1.50E-04 | 3.20E-05 |           | .        |
| 241524_at | 0.00569  | 0.002699 |           | .        |
| 241525_at | 0.015311 | 0.008655 | LOC200772 | 200772 . |
| 241526_at | 8.56E-05 | 1.59E-05 | APLF      | 200558 . |
| 241528_at | 1.45E-04 | 3.07E-05 | MAPK15    | 225689 . |
| 241529_at | 1.35E-04 | 2.82E-05 |           | .        |
| 241530_at | 5.79E-10 | 2.59E-12 |           | .        |
| 241531_at | 0.001736 | 6.50E-04 |           | .        |
| 241533_at | 0.023196 | 0.014068 | LOC731656 | 731656 . |
| 241534_at | 0.019352 | 0.01138  |           | .        |
| 241535_at | 0.024428 | 0.014943 |           | .        |
| 241536_at | 0.001675 | 6.23E-04 |           | .        |
| 241538_at | 0.010026 | 0.005263 | CXorf30   | 645090 . |
| 241540_at | 9.03E-08 | 2.00E-09 |           | .        |
| 241541_at | 7.57E-04 | 2.38E-04 | MIB2      | 142678 . |
| 241543_at | 0.006914 | 0.003406 |           | .        |
| 241544_at | 0.008886 | 0.004566 |           | .        |
| 241546_at | 0.00582  | 0.002776 | SPATA5    | 166378 . |
| 241547_at | 0.00697  | 0.00344  |           | .        |
| 241548_at | 0.004411 | 0.001994 |           | .        |
| 241550_at | 0.002702 | 0.001107 | DPPA5     | 340168 . |

|           |          |          |           |          |
|-----------|----------|----------|-----------|----------|
| 241552_at | 0.002593 | 0.001055 |           | .        |
| 241554_at | 0.001098 | 3.74E-04 |           | .        |
| 241555_at | 0.004907 | 0.002265 |           | .        |
| 241558_at | 0.009916 | 0.005196 |           | .        |
| 241559_at | 0.031246 | 0.019886 |           | .        |
| 241561_at | 0.020417 | 0.012114 |           | .        |
| 241563_at | 3.48E-07 | 1.23E-08 |           | .        |
| 241565_at | 9.90E-05 | 1.91E-05 | COL4A4    | 1286 .   |
| 241568_at | 0.003956 | 0.001749 |           | .        |
| 241569_at | 3.32E-08 | 5.21E-10 |           | .        |
| 241570_at | 1.49E-04 | 3.19E-05 |           | .        |
| 241573_at | 0.017633 | 0.01021  |           | .        |
| 241574_s_ | 1.01E-04 | 1.94E-05 | IGF2BP1   | 10642 .  |
| 241575_at | 1.75E-10 | 5.11E-13 |           | .        |
| 241576_at | 0.012068 | 0.006542 |           | .        |
| 241578_x_ | 0.005336 | 0.002501 |           | .        |
| 241580_at | 6.72E-04 | 2.05E-04 | ZNF518B   | 85460 .  |
| 241581_at | 3.36E-04 | 8.75E-05 |           | .        |
| 241583_x_ | 0.016213 | 0.00926  |           | .        |
| 241588_at | 8.74E-04 | 2.84E-04 |           | .        |
| 241590_at | 5.95E-05 | 9.95E-06 |           | .        |
| 241593_x_ | 0.032586 | 0.020884 |           | .        |
| 241594_at | 0.032217 | 0.020618 | LOC643449 | 643449 . |
| 241595_at | 5.79E-05 | 9.63E-06 |           | .        |
| 241596_at | 5.36E-05 | 8.74E-06 | NUDT10    | 170685 . |
| 241597_at | 7.98E-04 | 2.54E-04 |           | .        |
| 241599_at | 0.00713  | 0.003532 | LSM11     | 134353 . |
| 241600_at | 1.10E-04 | 2.17E-05 |           | .        |
| 241601_at | 7.53E-04 | 2.36E-04 | WIPF3     | 644150 . |
| 241603_at | 0.049703 | 0.034088 | ATP11A    | 23250 .  |
| 241606_s_ | 0.015366 | 0.008693 | TRUB1     | 142940 . |
| 241607_at | 9.47E-08 | 2.13E-09 | LOC730102 | 730102 . |
| 241609_at | 0.001614 | 5.95E-04 | FOXD3     | 27022 .  |
| 241610_x_ | 0.002179 | 8.57E-04 |           | .        |

|           |          |          |              |           |     |
|-----------|----------|----------|--------------|-----------|-----|
| 241611_s_ | 0.008396 | 0.004276 | FNDC3A       | 22862     | .   |
| 241612_at | 3.28E-06 | 2.36E-07 | FOXD3        | 27022     | .   |
| 241613_at | 1.69E-04 | 3.72E-05 |              |           | .   |
| 241614_at | 0.003687 | 0.001608 |              |           | .   |
| 241615_x_ | 0.032394 | 0.020743 |              |           | .   |
| 241618_at | 1.66E-04 | 3.63E-05 |              |           | .   |
| 241623_at | 3.13E-04 | 8.02E-05 | PTPN2        | 5771      | .   |
| 241624_at | 7.31E-05 | 1.30E-05 | LOC389834    | 389834    | .   |
| 241627_x_ | 0.001688 | 6.28E-04 | FLJ10357     | 55701     | .   |
| 241629_at | 4.10E-05 | 6.19E-06 |              |           | .   |
| 241630_at | 5.20E-06 | 4.28E-07 |              |           | .   |
| 241632_x_ | 2.93E-04 | 7.37E-05 |              |           | .   |
| 241633_x_ | 1.01E-04 | 1.96E-05 |              |           | .   |
| 241634_at | 0.012648 | 0.006917 | LOC100132345 | 100132345 | .   |
| 241635_at | 0.008273 | 0.004202 |              |           | .   |
| 241636_x_ | 0.045945 | 0.031123 |              |           | .   |
| 241637_at | 0.006013 | 0.002885 |              |           | .   |
| 241640_at | 2.43E-04 | 5.84E-05 | BCAP29       | 55973     | .   |
| 241641_at | 0.014317 | 0.007995 |              |           | .   |
| 241642_x_ | 0.002796 | 0.001154 | LOC100133905 | 100133905 | //. |
| 241644_at | 0.007047 | 0.003484 | BOLA2        | 552900    | .   |
| 241646_s_ | 0.013061 | 0.007183 | BCAP29       | 55973     | .   |
| 241648_at | 0.00584  | 0.002787 |              |           | .   |
| 241649_at | 0.007285 | 0.003624 |              |           | .   |
| 241650_x_ | 4.92E-06 | 3.99E-07 | HMCN2        | 256158    | .   |
| 241651_at | 0.006679 | 0.003267 |              |           | .   |
| 241659_at | 0.005803 | 0.002765 | JMJD1C       | 221037    | .   |
| 241661_at | 0.00384  | 0.001689 | JMJD1C       | 221037    | .   |
| 241664_x_ | 0.00108  | 3.66E-04 |              |           | .   |
| 241665_x_ | 0.031186 | 0.019845 |              |           | .   |
| 241666_at | 0.007818 | 0.003937 | C3orf23      | 285343    | .   |
| 241667_x_ | 1.33E-04 | 2.77E-05 |              |           | .   |
| 241669_x_ | 7.35E-06 | 6.74E-07 | PRKD2        | 25865     | .   |
| 241670_x_ | 7.01E-05 | 1.23E-05 | LOC729177    | 729177    | .   |

|           |          |          |             |        |   |
|-----------|----------|----------|-------------|--------|---|
| 241671_x_ | 3.36E-06 | 2.44E-07 | FLJ22536    | 401237 | . |
| 241677_x_ | 0.003403 | 0.001461 |             |        | . |
| 241680_at | 0.006845 | 0.003364 |             |        | . |
| 241681_at | 0.001095 | 3.73E-04 |             |        | . |
| 241682_at | 8.99E-07 | 4.31E-08 | KLHL23      | 151230 | . |
| 241686_x_ | 5.53E-05 | 9.07E-06 |             |        | . |
| 241687_at | 5.93E-04 | 1.75E-04 |             |        | . |
| 241690_at | 0.001227 | 4.28E-04 | C9orf144    | 389715 | . |
| 241691_at | 0.001409 | 5.06E-04 | SCARF2      | 91179  | . |
| 241692_at | 0.005417 | 0.002547 |             |        | . |
| 241693_at | 0.001128 | 3.87E-04 |             |        | . |
| 241697_at | 1.18E-04 | 2.37E-05 |             |        | . |
| 241698_at | 4.34E-04 | 1.19E-04 | RFTN2       | 130132 | . |
| 241699_at | 0.044329 | 0.029857 |             |        | . |
| 241701_at | 0.001629 | 6.02E-04 | ARHGAP21    | 57584  | . |
| 241702_at | 1.84E-10 | 5.60E-13 |             |        | . |
| 241704_x_ | 0.018799 | 0.011003 | ZNF320      | 162967 | . |
| 241705_at | 0.013396 | 0.007397 | ABCA5       | 23461  | . |
| 241706_at | 0.003735 | 0.001633 | CPNE8       | 144402 | . |
| 241707_at | 6.92E-05 | 1.21E-05 | LOC388630   | 388630 | . |
| 241708_at | 0.046751 | 0.031755 | DOCK1       | 1793   | . |
| 241709_s_ | 0.001589 | 5.85E-04 | DOCK1       | 1793   | . |
| 241710_at | 0.022359 | 0.013487 | hCG_1645220 | 728819 | . |
| 241711_at | 0.020502 | 0.012176 |             |        | . |
| 241712_at | 0.001454 | 5.26E-04 | CBY3        | 646019 | . |
| 241713_s_ | 1.43E-04 | 3.01E-05 | DYX1C1      | 161582 | . |
| 241714_at | 0.018267 | 0.010639 | LOC729143   | 729143 | . |
| 241716_at | 1.06E-04 | 2.06E-05 | HSPD1       | 3329   | . |
| 241717_at | 0.001262 | 4.43E-04 | LOC285281   | 285281 | . |
| 241718_x_ | 0.011738 | 0.006329 |             |        | . |
| 241719_at | 0.010811 | 0.005751 |             |        | . |
| 241720_at | 3.34E-05 | 4.77E-06 | ZNF326      | 284695 | . |
| 241721_at | 4.76E-04 | 1.34E-04 |             |        | . |
| 241722_x_ | 0.001466 | 5.31E-04 |             |        | . |

|           |          |          |          |        |   |
|-----------|----------|----------|----------|--------|---|
| 241723_at | 0.006319 | 0.003058 | IQGAP2   | 10788  | . |
| 241724_x_ | 4.98E-05 | 7.97E-06 |          |        | . |
| 241725_at | 0.008593 | 0.004391 | E2F7     | 144455 | . |
| 241726_at | 4.62E-04 | 1.29E-04 |          |        | . |
| 241727_x_ | 1.06E-05 | 1.09E-06 | DHFRL1   | 200895 | . |
| 241728_at | 0.043842 | 0.029479 |          |        | . |
| 241732_at | 0.00196  | 7.53E-04 |          |        | . |
| 241733_at | 0.026308 | 0.016283 | C18orf54 | 162681 | . |
| 241737_x_ | 5.53E-07 | 2.25E-08 |          |        | . |
| 241738_at | 0.020206 | 0.011969 | ZNF250   | 58500  | . |
| 241739_at | 0.023931 | 0.014591 | OGFOD1   | 55239  | . |
| 241741_at | 0.001411 | 5.07E-04 | CRLS1    | 54675  | . |
| 241745_at | 0.001392 | 4.99E-04 |          |        | . |
| 241748_x_ | 0.003105 | 0.001308 | DGCR14   | 8220   | . |
| 241749_at | 0.001996 | 7.70E-04 | MURC     | 347273 | . |
| 241750_x_ | 2.16E-10 | 7.21E-13 |          |        | . |
| 241751_at | 8.05E-04 | 2.57E-04 | OFD1     | 8481   | . |
| 241752_at | 7.76E-06 | 7.26E-07 | SLC8A1   | 6546   | . |
| 241755_at | 6.46E-07 | 2.76E-08 | UQCRC2   | 7385   | . |
| 241756_at | 1.97E-04 | 4.50E-05 |          |        | . |
| 241757_x_ | 0.001281 | 4.51E-04 | DYNC2LI1 | 51626  | . |
| 241759_at | 0.009316 | 0.004827 | MGC5566  | 79015  | . |
| 241761_at | 0.0057   | 0.002705 |          |        | . |
| 241766_at | 0.010495 | 0.00555  |          |        | . |
| 241767_at | 3.27E-06 | 2.36E-07 |          |        | . |
| 241768_at | 0.048384 | 0.033034 |          |        | . |
| 241769_at | 0.018143 | 0.010554 |          |        | . |
| 241772_at | 0.032743 | 0.021004 |          |        | . |
| 241774_at | 2.61E-06 | 1.75E-07 |          |        | . |
| 241775_at | 0.012243 | 0.006656 |          |        | . |
| 241776_at | 0.046521 | 0.031572 |          |        | . |
| 241777_x_ | 1.90E-05 | 2.34E-06 |          |        | . |
| 241780_at | 0.00238  | 9.51E-04 |          |        | . |
| 241781_at | 2.45E-06 | 1.62E-07 | C9orf41  | 138199 | . |

|           |          |          |              |           |   |
|-----------|----------|----------|--------------|-----------|---|
| 241782_at | 6.22E-05 | 1.05E-05 | NEBL         | 10529     | . |
| 241785_at | 0.002078 | 8.08E-04 |              |           | . |
| 241786_at | 5.29E-04 | 1.53E-04 |              |           | . |
| 241787_at | 4.49E-04 | 1.25E-04 |              |           | . |
| 241789_at | 1.55E-05 | 1.81E-06 |              |           | . |
| 241790_at | 0.014381 | 0.008036 |              |           | . |
| 241791_at | 0.001161 | 4.00E-04 | TTN          | 7273      | . |
| 241792_x_ | 4.14E-07 | 1.55E-08 |              |           | . |
| 241793_at | 2.12E-04 | 4.93E-05 | ZMYND17      | 118490    | . |
| 241795_at | 0.001072 | 3.63E-04 | RHEB         | 6009      | . |
| 241797_at | 0.017335 | 0.010005 |              |           | . |
| 241798_at | 1.00E-04 | 1.93E-05 |              |           | . |
| 241799_x_ | 1.93E-04 | 4.37E-05 |              |           | . |
| 241800_x_ | 3.99E-07 | 1.47E-08 |              |           | . |
| 241803_s_ | 0.005385 | 0.002529 | LOC100130623 | 100130623 | . |
| 241804_at | 1.89E-04 | 4.26E-05 |              |           | . |
| 241809_at | 4.21E-05 | 6.43E-06 | C1orf183     | 55924     | . |
| 241813_at | 0.010032 | 0.005267 | MBD1         | 4152      | . |
| 241816_at | 2.74E-04 | 6.77E-05 | C14orf106    | 55320     | . |
| 241817_at | 0.001406 | 5.05E-04 | C3orf62      | 375341    | . |
| 241818_at | 0.040212 | 0.026648 |              |           | . |
| 241820_at | 0.001238 | 4.33E-04 | RIF1         | 55183     | . |
| 241822_at | 0.005719 | 0.002715 | LOC388553    | 388553    | . |
| 241825_at | 4.03E-04 | 1.09E-04 | C2orf60      | 129450    | . |
| 241826_x_ | 0.001785 | 6.72E-04 | ZNF738       | 148203    | . |
| 241828_x_ | 0.006111 | 0.00294  | LOC339240    | 339240    | . |
| 241829_at | 0.029288 | 0.018452 | FAM124A      | 220108    | . |
| 241832_at | 7.79E-05 | 1.41E-05 | FAM98A       | 25940     | . |
| 241834_at | 2.79E-05 | 3.80E-06 | IPW          | 3653      | . |
| 241835_at | 2.44E-05 | 3.22E-06 |              |           | . |
| 241837_at | 3.87E-06 | 2.93E-07 |              |           | . |
| 241838_at | 5.11E-05 | 8.24E-06 |              |           | . |
| 241839_at | 6.52E-04 | 1.98E-04 |              |           | . |
| 241840_at | 0.002134 | 8.35E-04 |              |           | . |

|           |          |          |          |          |
|-----------|----------|----------|----------|----------|
| 241841_at | 0.022224 | 0.013397 |          | .        |
| 241842_x_ | 6.79E-04 | 2.08E-04 | C19orf45 | 374877 . |
| 241843_at | 1.37E-05 | 1.55E-06 | SNORA28  | 677811 . |
| 241845_at | 2.17E-04 | 5.08E-05 |          | .        |
| 241846_at | 9.88E-05 | 1.90E-05 |          | .        |
| 241847_at | 0.001097 | 3.74E-04 |          | .        |
| 241848_x_ | 8.28E-04 | 2.66E-04 |          | .        |
| 241850_at | 0.039752 | 0.026292 |          | .        |
| 241852_at | 6.23E-04 | 1.87E-04 |          | .        |
| 241854_at | 0.022187 | 0.013373 | DNASE1   | 1773 .   |
| 241857_at | 0.028214 | 0.017666 |          | .        |
| 241859_at | 0.022076 | 0.013295 | PLCL1    | 5334 .   |
| 241860_at | 0.00155  | 5.67E-04 |          | .        |
| 241862_x_ | 0.028634 | 0.017972 | C19orf45 | 374877 . |
| 241863_x_ | 2.28E-04 | 5.39E-05 |          | .        |
| 241864_x_ | 5.97E-04 | 1.77E-04 |          | .        |
| 241865_at | 0.003365 | 0.001443 |          | .        |
| 241866_at | 4.11E-04 | 1.12E-04 | SLC16A7  | 9194 .   |
| 241867_at | 4.20E-04 | 1.15E-04 |          | .        |
| 241869_at | 8.80E-05 | 1.64E-05 | APOL6    | 80830 .  |
| 241872_at | 0.004635 | 0.002117 |          | .        |
| 241874_at | 6.41E-06 | 5.62E-07 | C5orf53  | 492311 . |
| 241876_at | 3.34E-04 | 8.70E-05 | MDM4     | 4194 .   |
| 241877_at | 4.70E-04 | 1.32E-04 |          | .        |
| 241878_at | 0.010703 | 0.005683 |          | .        |
| 241881_at | 0.009638 | 0.005025 | OR2W3    | 343171 . |
| 241884_at | 3.88E-06 | 2.93E-07 |          | .        |
| 241885_at | 1.35E-08 | 1.53E-10 |          | .        |
| 241886_x_ | 0.0257   | 0.015857 |          | .        |
| 241890_at | 0.006232 | 0.003008 |          | .        |
| 241891_at | 0.035493 | 0.023054 |          | .        |
| 241893_at | 8.77E-08 | 1.91E-09 |          | .        |
| 241894_at | 7.79E-05 | 1.41E-05 | VMO1     | 284013 . |
| 241896_at | 0.005056 | 0.00235  | MACF1    | 23499 .  |

|           |          |          |           |          |
|-----------|----------|----------|-----------|----------|
| 241898_at | 0.029382 | 0.018518 |           | .        |
| 241900_at | 0.023819 | 0.014512 |           | .        |
| 241902_at | 7.24E-05 | 1.28E-05 | MKX       | 283078 . |
| 241905_at | 3.89E-04 | 1.04E-04 | PIK3C2A   | 5286 .   |
| 241908_at | 8.47E-04 | 2.73E-04 | C1orf58   | 148362 . |
| 241910_x_ | 0.020916 | 0.012478 | ARL17P1   | 51326 .  |
| 241912_at | 5.69E-05 | 9.43E-06 | ZNF814    | 730051 . |
| 241913_at | 0.0019   | 7.26E-04 |           | .        |
| 241916_at | 0.001726 | 6.46E-04 |           | .        |
| 241917_at | 2.51E-04 | 6.08E-05 |           | .        |
| 241921_x_ | 9.18E-05 | 1.73E-05 |           | .        |
| 241924_at | 7.90E-07 | 3.61E-08 |           | .        |
| 241925_x_ | 3.93E-04 | 1.06E-04 |           | .        |
| 241927_x_ | 3.12E-04 | 7.98E-05 |           | .        |
| 241930_x_ | 0.002672 | 0.001093 | LOC442113 | 442113 . |
| 241932_at | 0.001891 | 7.21E-04 |           | .        |
| 241933_at | 0.003901 | 0.001721 | QRSL1     | 55278 .  |
| 241934_at | 7.49E-04 | 2.34E-04 | NTM       | 50863 .  |
| 241935_at | 0.009893 | 0.005182 | SHROOM1   | 134549 . |
| 241936_x_ | 3.18E-04 | 8.19E-05 |           | .        |
| 241937_s_ | 2.95E-05 | 4.09E-06 | WDR4      | 10785 .  |
| 241939_at | 0.001091 | 3.71E-04 | IQGAP3    | 128239 . |
| 241943_at | 0.007818 | 0.003937 | CCDC58    | 131076 . |
| 241944_x_ | 7.59E-04 | 2.38E-04 |           | .        |
| 241945_at | 0.001339 | 4.76E-04 |           | .        |
| 241948_at | 0.008536 | 0.004358 |           | .        |
| 241950_at | 0.012364 | 0.006732 |           | .        |
| 241952_at | 1.57E-04 | 3.40E-05 | SLC16A11  | 162515 . |
| 241954_at | 0.029937 | 0.018934 | FDFT1     | 2222 .   |
| 241955_at | 8.24E-04 | 2.64E-04 | HECTD1    | 25831 .  |
| 241956_at | 0.035179 | 0.022815 |           | .        |
| 241957_x_ | 5.86E-05 | 9.76E-06 | LIN7B     | 64130 .  |
| 241958_at | 1.65E-04 | 3.59E-05 |           | .        |
| 241960_at | 2.82E-08 | 4.27E-10 | CSMD1     | 64478 .  |



|           |          |          |              |           |   |
|-----------|----------|----------|--------------|-----------|---|
| 241964_at | 0.006307 | 0.003051 | LOC100133142 | 100133142 | . |
| 241965_at | 1.44E-04 | 3.06E-05 |              |           | . |
| 241966_at | 5.08E-06 | 4.16E-07 | MYO5A        | 4644      | . |
| 241968_at | 3.13E-05 | 4.41E-06 |              |           | . |
| 241969_at | 2.12E-07 | 6.20E-09 | ARID5B       | 84159     | . |
| 241972_at | 1.43E-04 | 3.01E-05 | LOC401588    | 401588    | . |
| 241973_x_ | 3.08E-04 | 7.87E-05 | DPP7         | 29952     | . |
| 241976_at | 6.99E-04 | 2.15E-04 | TCEA3        | 6920      | . |
| 241977_s_ | 0.012473 | 0.006806 | RAB3C        | 115827    | . |
| 241978_at | 0.025143 | 0.015459 | AKR1A1       | 10327     | . |
| 241980_at | 0.00172  | 6.43E-04 | MAP6         | 4135      | . |
| 241981_at | 0.005055 | 0.002349 | FAM20A       | 54757     | . |
| 241983_at | 2.42E-05 | 3.19E-06 | PTPN2        | 5771      | . |
| 241984_at | 5.87E-04 | 1.74E-04 | FOXN3        | 1112      | . |
| 241986_at | 0.001321 | 4.69E-04 | BMPER        | 168667    | . |
| 241988_x_ | 0.010086 | 0.005299 |              |           | . |
| 241989_at | 8.46E-05 | 1.57E-05 | GRK4         | 2868      | . |
| 241990_at | 0.001313 | 4.65E-04 | RHOV         | 171177    | . |
| 241991_at | 9.27E-06 | 9.21E-07 |              |           | . |
| 241992_at | 4.47E-06 | 3.53E-07 | DRAM         | 55332     | . |
| 241993_x_ | 6.52E-05 | 1.12E-05 |              |           | . |
| 241995_at | 6.56E-07 | 2.83E-08 | DGUOK        | 1716      | . |
| 241996_at | 0.023685 | 0.01442  |              |           | . |
| 241997_at | 7.79E-08 | 1.64E-09 |              |           | . |
| 241998_at | 0.016059 | 0.009158 | C2orf80      | 389073    | . |
| 241999_at | 0.007542 | 0.003773 | SFXN5        | 94097     | . |
| 242002_at | 0.034029 | 0.02196  | NKAIN2       | 154215    | . |
| 242003_at | 0.01335  | 0.007367 | ERICH1       | 157697    | . |
| 242004_x_ | 2.23E-07 | 6.71E-09 |              |           | . |
| 242005_at | 0.012886 | 0.007073 |              |           | . |
| 242008_at | 6.96E-07 | 3.06E-08 |              |           | . |
| 242010_at | 0.001357 | 4.84E-04 | LOC728475    | 728475    | . |
| 242012_at | 0.010657 | 0.005652 | LOC100132625 | 100132625 | . |
| 242014_at | 1.32E-07 | 3.34E-09 |              |           | . |

|           |          |          |              |           |   |
|-----------|----------|----------|--------------|-----------|---|
| 242015_x_ | 0.002878 | 0.001194 | APEH         | 327       | . |
| 242017_at | 0.001714 | 6.40E-04 |              |           | . |
| 242018_at | 1.63E-05 | 1.92E-06 |              |           | . |
| 242020_s_ | 0.001464 | 5.30E-04 | ZBP1         | 81030     | . |
| 242021_at | 6.52E-05 | 1.12E-05 |              |           | . |
| 242022_at | 0.028192 | 0.017649 |              |           | . |
| 242023_at | 5.73E-04 | 1.68E-04 | ABHD4        | 63874     | . |
| 242024_at | 0.048794 | 0.033363 |              |           | . |
| 242025_at | 0.009534 | 0.00496  |              |           | . |
| 242026_at | 0.002028 | 7.85E-04 | LOC100129296 | 100129296 | . |
| 242027_at | 0.016587 | 0.009505 |              |           | . |
| 242028_at | 0.03348  | 0.021564 | ZNF709       | 163051    | . |
| 242029_at | 0.001354 | 4.83E-04 | FNDC3B       | 64778     | . |
| 242030_at | 0.027088 | 0.01685  | SLC4A1AP     | 22950     | . |
| 242031_at | 0.007323 | 0.003645 |              |           | . |
| 242032_at | 1.43E-04 | 3.03E-05 | KIDINS220    | 57498     | . |
| 242033_at | 0.040153 | 0.026602 | RNF180       | 285671    | . |
| 242034_at | 0.010409 | 0.005496 | FBXL17       | 64839     | . |
| 242037_at | 2.28E-04 | 5.39E-05 | ASPH         | 444       | . |
| 242039_at | 7.20E-05 | 1.27E-05 | ARAP1        | 116985    | . |
| 242040_at | 0.010742 | 0.005707 | GCNT7        | 140687    | . |
| 242041_at | 2.21E-04 | 5.19E-05 | CSPP1        | 79848     | . |
| 242045_at | 0.004888 | 0.002255 | ANKRD18A     | 253650    | . |
| 242050_at | 0.003099 | 0.001305 | LRRC7        | 57554     | . |
| 242051_at | 6.61E-05 | 1.14E-05 |              |           | . |
| 242052_at | 0.00128  | 4.51E-04 |              |           | . |
| 242053_at | 0.001509 | 5.50E-04 |              |           | . |
| 242054_s_ | 0.02101  | 0.012543 |              |           | . |
| 242055_at | 0.008509 | 0.004342 | PSMG4        | 389362    | . |
| 242056_at | 9.68E-04 | 3.21E-04 | TRIM45       | 80263     | . |
| 242058_at | 0.003459 | 0.001489 |              |           | . |
| 242059_at | 0.010959 | 0.005843 |              |           | . |
| 242060_x_ | 0.017677 | 0.010239 | PHF11        | 51131     | . |
| 242062_at | 6.23E-07 | 2.63E-08 | SAMD8        | 142891    | . |

|           |          |          |           |        |   |
|-----------|----------|----------|-----------|--------|---|
| 242064_at | 0.008141 | 0.004125 | SDK2      | 54549  | . |
| 242065_x_ | 1.15E-05 | 1.21E-06 | IDI1      | 3422   | . |
| 242068_at | 4.46E-04 | 1.24E-04 |           |        | . |
| 242069_at | 1.71E-04 | 3.77E-05 | CBX5      | 23468  | . |
| 242070_at | 7.72E-05 | 1.39E-05 | LOC728485 | 728485 | . |
| 242071_x_ | 3.71E-06 | 2.77E-07 | ITGA8     | 8516   | . |
| 242073_at | 9.38E-04 | 3.09E-04 |           |        | . |
| 242074_at | 2.07E-12 | 1.36E-15 |           |        | . |
| 242076_at | 0.004424 | 0.002002 |           |        | . |
| 242077_x_ | 9.04E-07 | 4.35E-08 | C6orf150  | 115004 | . |
| 242079_at | 6.13E-04 | 1.83E-04 | RGS12     | 6002   | . |
| 242080_at | 5.01E-05 | 8.03E-06 |           |        | . |
| 242081_at | 0.001627 | 6.01E-04 | ACAP1     | 9744   | . |
| 242083_at | 0.03191  | 0.02038  | ZNF81     | 347344 | . |
| 242084_at | 0.011363 | 0.006095 | LOC339316 | 339316 | . |
| 242086_at | 0.001887 | 7.20E-04 |           |        | . |
| 242087_x_ | 0.026151 | 0.016175 |           |        | . |
| 242089_at | 0.016947 | 0.009743 |           |        | . |
| 242091_at | 1.11E-05 | 1.17E-06 | ZNF720    | 124411 | . |
| 242092_at | 0.003904 | 0.001723 |           |        | . |
| 242093_at | 0.01473  | 0.008268 | SYTL5     | 94122  | . |
| 242094_at | 0.011396 | 0.006116 |           |        | . |
| 242096_at | 0.035503 | 0.023061 |           |        | . |
| 242097_at | 1.48E-04 | 3.16E-05 |           |        | . |
| 242098_at | 0.002145 | 8.40E-04 | LOC202451 | 202451 | . |
| 242099_at | 0.025647 | 0.015817 |           |        | . |
| 242100_at | 2.93E-06 | 2.03E-07 | CHSY3     | 337876 | . |
| 242104_at | 0.017103 | 0.009848 |           |        | . |
| 242105_at | 6.41E-05 | 1.09E-05 | CCNE1     | 898    | . |
| 242106_at | 4.87E-05 | 7.74E-06 |           |        | . |
| 242107_x_ | 0.014149 | 0.007882 |           |        | . |
| 242109_at | 4.76E-04 | 1.34E-04 | SYTL3     | 94120  | . |
| 242110_at | 0.036722 | 0.023991 |           |        | . |
| 242111_at | 4.85E-06 | 3.92E-07 | METTL3    | 56339  | . |

|           |          |          |          |        |   |
|-----------|----------|----------|----------|--------|---|
| 242112_at | 0.005836 | 0.002785 | LSM11    | 134353 | . |
| 242113_at | 6.35E-04 | 1.91E-04 |          |        | . |
| 242114_at | 6.37E-05 | 1.09E-05 | BOLA2    | 552900 | . |
| 242116_x_ | 0.005359 | 0.002515 |          |        | . |
| 242119_at | 4.81E-06 | 3.88E-07 | PROX1    | 5629   | . |
| 242120_at | 2.47E-04 | 5.95E-05 |          |        | . |
| 242121_at | 2.69E-04 | 6.63E-05 |          |        | . |
| 242123_at | 0.025251 | 0.015544 | PAQR7    | 164091 | . |
| 242124_at | 0.046758 | 0.031761 |          |        | . |
| 242125_at | 2.01E-04 | 4.60E-05 |          |        | . |
| 242126_at | 0.005381 | 0.002527 |          |        | . |
| 242127_at | 0.007178 | 0.00356  |          |        | . |
| 242128_at | 1.03E-05 | 1.06E-06 | OTX2     | 5015   | . |
| 242129_at | 0.040255 | 0.02668  | SIN3B    | 23309  | . |
| 242133_s_ | 2.38E-07 | 7.40E-09 |          |        | . |
| 242134_at | 5.35E-04 | 1.55E-04 |          |        | . |
| 242136_x_ | 5.45E-04 | 1.58E-04 | MGC70870 | 403340 | . |
| 242137_at | 2.34E-07 | 7.20E-09 |          |        | . |
| 242138_at | 3.58E-06 | 2.65E-07 | DLX1     | 1745   | . |
| 242139_s_ | 0.004056 | 0.001802 |          |        | . |
| 242140_at | 0.00417  | 0.001862 |          |        | . |
| 242141_at | 3.91E-04 | 1.05E-04 | HDAC2    | 3066   | . |
| 242142_at | 0.015354 | 0.008685 |          |        | . |
| 242143_at | 0.001961 | 7.54E-04 |          |        | . |
| 242144_at | 0.00923  | 0.004777 |          |        | . |
| 242145_at | 2.50E-05 | 3.31E-06 |          |        | . |
| 242146_at | 6.17E-05 | 1.04E-05 | SNRPA1   | 6627   | . |
| 242147_at | 0.007522 | 0.003762 |          |        | . |
| 242148_at | 9.10E-05 | 1.71E-05 | BCL6B    | 255877 | . |
| 242149_at | 3.52E-04 | 9.24E-05 | C18orf19 | 125228 | . |
| 242150_at | 0.032526 | 0.020838 |          |        | . |
| 242151_at | 0.007804 | 0.003929 |          |        | . |
| 242152_at | 0.003204 | 0.001359 |          |        | . |
| 242154_x_ | 0.030936 | 0.019663 | PPIL5    | 122769 | . |

|           |          |          |                             |             |
|-----------|----------|----------|-----------------------------|-------------|
| 242156_at | 1.29E-05 | 1.43E-06 |                             | .           |
| 242159_at | 5.07E-04 | 1.45E-04 |                             | .           |
| 242160_at | 0.009923 | 0.005201 |                             | .           |
| 242161_at | 0.001628 | 6.02E-04 |                             | .           |
| 242163_at | 7.61E-04 | 2.39E-04 | THRAP3                      | 9967 .      |
| 242164_s_ | 7.76E-04 | 2.45E-04 | LRIG2                       | 9860 .      |
| 242167_at | 1.42E-08 | 1.64E-10 |                             | .           |
| 242168_at | 0.043602 | 0.029279 | NDUFS7                      | 374291 .    |
| 242170_at | 1.98E-05 | 2.46E-06 |                             | .           |
| 242171_at | 0.006604 | 0.003223 |                             | .           |
| 242172_at | 2.81E-04 | 7.02E-05 | MEIS1                       | 4211 .      |
| 242174_at | 4.54E-04 | 1.26E-04 |                             | .           |
| 242175_at | 0.003282 | 0.001399 |                             | .           |
| 242176_at | 0.008942 | 0.004601 | MEF2A                       | 4205 .      |
| 242177_at | 2.65E-04 | 6.52E-05 |                             | .           |
| 242179_s_ | 0.00652  | 0.003174 | TSPAN16                     | 26526 .     |
| 242180_at | 0.006002 | 0.002879 | TSPAN16                     | 26526 .     |
| 242181_at | 0.013713 | 0.007601 |                             | .           |
| 242182_x_ | 4.41E-04 | 1.22E-04 |                             | .           |
| 242184_s_ | 1.20E-04 | 2.43E-05 | SFRS12                      | 140890 .    |
| 242186_x_ | 0.032548 | 0.020855 | LPHN3                       | 23284 .     |
| 242187_s_ | 0.007751 | 0.003895 | TNRC18                      | 84629 .     |
| 242189_at | 4.19E-05 | 6.39E-06 |                             | .           |
| 242190_at | 0.022173 | 0.013362 | SDAD1                       | 55153 .     |
| 242191_at | 7.07E-06 | 6.41E-07 | NBPF10 /// NB 100132406 //. | .           |
| 242192_at | 0.008827 | 0.004531 |                             | .           |
| 242194_at | 5.35E-05 | 8.73E-06 | CUL4A                       | 8451 .      |
| 242195_x_ | 0.001319 | 4.68E-04 | NUMBL                       | 9253 .      |
| 242200_at | 0.04959  | 0.034    | ADAMTSL5                    | 339366 .    |
| 242201_at | 4.00E-05 | 5.99E-06 | PMS2L5                      | 5383 .      |
| 242203_at | 0.010696 | 0.005677 |                             | .           |
| 242207_at | 0.006467 | 0.003144 | LOC100128361                | 100128361 . |
| 242208_at | 1.11E-06 | 5.68E-08 | ZNF37B                      | 100129482 . |
| 242209_at | 0.025821 | 0.01594  | ANKRD33                     | 341405 .    |

|           |          |          |         |        |   |
|-----------|----------|----------|---------|--------|---|
| 242211_x_ | 0.00199  | 7.67E-04 | WDR90   | 197335 | . |
| 242213_at | 5.31E-05 | 8.63E-06 |         |        | . |
| 242214_at | 0.003332 | 0.001425 | RPS27A  | 6233   | . |
| 242215_at | 9.29E-05 | 1.76E-05 | GRIK4   | 2900   | . |
| 242217_s_ | 0.003014 | 0.001262 | FBRS    | 64319  | . |
| 242224_at | 2.90E-04 | 7.29E-05 | GPATCH2 | 55105  | . |
| 242225_at | 6.55E-05 | 1.13E-05 |         |        | . |
| 242226_at | 2.98E-06 | 2.09E-07 |         |        | . |
| 242228_at | 0.003315 | 0.001416 |         |        | . |
| 242229_at | 0.002109 | 8.23E-04 | NAPEPLD | 222236 | . |
| 242230_at | 9.14E-05 | 1.72E-05 | ATXN1   | 6310   | . |
| 242233_at | 1.51E-05 | 1.74E-06 |         |        | . |
| 242235_x_ | 1.80E-04 | 4.03E-05 |         |        | . |
| 242238_at | 0.036378 | 0.023731 |         |        | . |
| 242240_at | 2.16E-04 | 5.05E-05 |         |        | . |
| 242241_x_ | 1.56E-05 | 1.83E-06 |         |        | . |
| 242242_at | 2.52E-05 | 3.35E-06 | USP6    | 9098   | . |
| 242246_x_ | 0.003901 | 0.001721 |         |        | . |
| 242247_at | 6.10E-05 | 1.03E-05 | METT5D1 | 196074 | . |
| 242248_at | 5.18E-04 | 1.48E-04 | PHKB    | 5257   | . |
| 242251_at | 1.93E-04 | 4.39E-05 | SPATA5  | 166378 | . |
| 242253_at | 6.82E-04 | 2.09E-04 |         |        | . |
| 242254_at | 4.62E-04 | 1.29E-04 |         |        | . |
| 242256_x_ | 0.008552 | 0.004367 |         |        | . |
| 242258_at | 0.026196 | 0.016208 |         |        | . |
| 242259_at | 0.031438 | 0.020032 | FAM187B | 148109 | . |
| 242260_at | 2.08E-05 | 2.63E-06 | MATR3   | 9782   | . |
| 242261_at | 2.33E-07 | 7.16E-09 |         |        | . |
| 242263_at | 1.64E-07 | 4.44E-09 | TMED5   | 50999  | . |
| 242264_at | 0.025382 | 0.015636 |         |        | . |
| 242265_at | 2.37E-06 | 1.56E-07 | BRD8    | 10902  | . |
| 242268_at | 0.007176 | 0.003559 | CUGBP2  | 10659  | . |
| 242270_at | 9.61E-07 | 4.70E-08 |         |        | . |
| 242273_at | 0.010663 | 0.005656 |         |        | . |

|           |          |          |              |             |
|-----------|----------|----------|--------------|-------------|
| 242277_at | 2.01E-05 | 2.51E-06 |              | .           |
| 242278_at | 0.018056 | 0.010498 |              | .           |
| 242279_at | 3.67E-05 | 5.36E-06 |              | .           |
| 242280_x_ | 1.46E-05 | 1.67E-06 | CPEB4        | 80315 .     |
| 242281_at | 0.029172 | 0.018367 | GLUL         | 2752 .      |
| 242282_at | 0.00148  | 5.37E-04 | ZFPM1        | 161882 .    |
| 242283_at | 6.59E-07 | 2.85E-08 | DNAH14       | 127602 .    |
| 242284_at | 0.011918 | 0.006445 | LOC199899    | 199899 .    |
| 242287_at | 0.02672  | 0.016584 | CLIP1        | 6249 .      |
| 242288_s_ | 7.28E-04 | 2.26E-04 | EMILIN2      | 84034 .     |
| 242289_at | 0.016779 | 0.009634 |              | .           |
| 242290_at | 0.023556 | 0.014327 | TACC1        | 6867 .      |
| 242294_at | 7.52E-07 | 3.39E-08 | FBXO45       | 200933 .    |
| 242295_at | 0.004777 | 0.002196 | FLJ32955     | 150596 .    |
| 242297_at | 2.25E-07 | 6.83E-09 | RREB1        | 6239 .      |
| 242298_x_ | 5.04E-04 | 1.44E-04 |              | .           |
| 242299_at | 0.031764 | 0.020267 |              | .           |
| 242306_at | 0.024281 | 0.014836 |              | .           |
| 242307_at | 1.37E-05 | 1.53E-06 | ZNF789       | 285989 .    |
| 242308_at | 0.01829  | 0.010656 | MCOLN3       | 55283 .     |
| 242309_at | 0.004314 | 0.001941 |              | .           |
| 242310_at | 2.38E-05 | 3.11E-06 |              | .           |
| 242311_x_ | 1.00E-05 | 1.02E-06 |              | .           |
| 242312_x_ | 0.017948 | 0.010422 |              | .           |
| 242313_at | 0.001639 | 6.07E-04 | LOC728730    | 728730 .    |
| 242314_at | 0.003909 | 0.001725 | TNRC6C       | 57690 .     |
| 242315_at | 1.56E-04 | 3.37E-05 |              | .           |
| 242319_at | 0.004454 | 0.002019 | DGKG         | 1608 .      |
| 242320_at | 0.01251  | 0.006831 |              | .           |
| 242321_at | 0.007149 | 0.003543 |              | .           |
| 242324_x_ | 2.17E-06 | 1.39E-07 | CCBE1        | 147372 .    |
| 242326_at | 6.66E-04 | 2.03E-04 | LOC100134109 | 100134109 . |
| 242327_x_ | 7.42E-05 | 1.33E-05 |              | .           |
| 242328_at | 0.026748 | 0.016611 | RAB3C        | 115827 .    |

|           |          |          |              |           |   |
|-----------|----------|----------|--------------|-----------|---|
| 242331_x_ | 0.002564 | 0.001041 | LOC642236    | 642236    | . |
| 242335_at | 4.84E-04 | 1.36E-04 | SLC25A37     | 51312     | . |
| 242336_at | 0.002224 | 8.78E-04 | GSK3B        | 2932      | . |
| 242337_at | 1.83E-05 | 2.22E-06 |              |           | . |
| 242338_at | 1.01E-06 | 5.01E-08 | TMEM64       | 169200    | . |
| 242339_at | 0.004551 | 0.002071 |              |           | . |
| 242343_x_ | 0.002382 | 9.52E-04 |              |           | . |
| 242346_x_ | 1.27E-06 | 6.84E-08 |              |           | . |
| 242347_at | 1.78E-07 | 4.91E-09 |              |           | . |
| 242348_at | 0.03841  | 0.025272 | FAM19A4      | 151647    | . |
| 242349_at | 2.45E-04 | 5.90E-05 | HECTD1       | 25831     | . |
| 242350_s_ | 0.022908 | 0.013868 | LOC100128098 | 100128098 | . |
| 242352_at | 2.33E-04 | 5.53E-05 | NIPBL        | 25836     | . |
| 242353_at | 0.045698 | 0.03093  |              |           | . |
| 242354_at | 1.13E-06 | 5.83E-08 |              |           | . |
| 242356_at | 0.016715 | 0.00959  | VTI1A        | 143187    | . |
| 242357_x_ | 2.67E-04 | 6.58E-05 |              |           | . |
| 242358_at | 0.002424 | 9.73E-04 |              |           | . |
| 242361_at | 2.24E-06 | 1.45E-07 | IMMT         | 10989     | . |
| 242362_at | 2.65E-05 | 3.56E-06 |              |           | . |
| 242364_x_ | 2.64E-04 | 6.47E-05 | LOC100131096 | 100131096 | . |
| 242367_at | 7.51E-04 | 2.35E-04 | SLC38A1      | 81539     | . |
| 242369_x_ | 1.98E-05 | 2.46E-06 |              |           | . |
| 242371_x_ | 9.29E-05 | 1.76E-05 |              |           | . |
| 242373_at | 8.60E-04 | 2.78E-04 |              |           | . |
| 242374_at | 5.33E-05 | 8.69E-06 |              |           | . |
| 242376_at | 0.013249 | 0.007304 |              |           | . |
| 242377_x_ | 2.86E-05 | 3.92E-06 | THUMPD3      | 25917     | . |
| 242378_at | 4.06E-04 | 1.10E-04 | MYADML2      | 255275    | . |
| 242379_at | 0.009632 | 0.00502  |              |           | . |
| 242380_at | 0.017821 | 0.010334 |              |           | . |
| 242381_x_ | 0.009001 | 0.004635 |              |           | . |
| 242383_at | 0.001029 | 3.45E-04 |              |           | . |
| 242386_x_ | 0.010064 | 0.005286 |              |           | . |



|           |          |          |           |        |   |
|-----------|----------|----------|-----------|--------|---|
| 242387_at | 1.37E-08 | 1.58E-10 | C8orf42   | 157695 | . |
| 242389_at | 5.33E-10 | 2.35E-12 |           |        | . |
| 242390_at | 0.001113 | 3.80E-04 |           |        | . |
| 242397_at | 3.18E-04 | 8.17E-05 |           |        | . |
| 242398_x_ | 3.61E-07 | 1.29E-08 |           |        | . |
| 242399_at | 0.014293 | 0.007976 |           |        | . |
| 242400_at | 0.002446 | 9.84E-04 | ZFP90     | 146198 | . |
| 242402_x_ | 9.97E-06 | 1.01E-06 |           |        | . |
| 242403_at | 2.70E-04 | 6.67E-05 |           |        | . |
| 242407_at | 0.001326 | 4.71E-04 |           |        | . |
| 242409_at | 0.003707 | 0.001619 |           |        | . |
| 242411_at | 2.46E-05 | 3.26E-06 | ARL10     | 285598 | . |
| 242413_at | 6.21E-04 | 1.86E-04 |           |        | . |
| 242414_at | 1.13E-04 | 2.25E-05 | QPRT      | 23475  | . |
| 242415_at | 6.21E-05 | 1.05E-05 | LOC642031 | 642031 | . |
| 242417_at | 0.026475 | 0.016409 | LOC283278 | 283278 | . |
| 242418_at | 0.0086   | 0.004395 | C2orf27A  | 29798  | . |
| 242419_at | 0.006233 | 0.003009 |           |        | . |
| 242420_at | 0.006655 | 0.003252 |           |        | . |
| 242422_at | 2.62E-04 | 6.42E-05 | G3BP1     | 10146  | . |
| 242423_x_ | 2.87E-05 | 3.95E-06 |           |        | . |
| 242424_at | 9.12E-07 | 4.40E-08 |           |        | . |
| 242425_at | 8.27E-06 | 7.86E-07 |           |        | . |
| 242427_at | 1.83E-10 | 5.42E-13 | WAC       | 51322  | . |
| 242428_at | 2.21E-05 | 2.85E-06 | DCUN1D1   | 54165  | . |
| 242429_at | 7.37E-04 | 2.30E-04 | ZNF567    | 163081 | . |
| 242431_at | 6.41E-09 | 5.89E-11 |           |        | . |
| 242433_at | 0.001093 | 3.72E-04 | ZBTB11    | 27107  | . |
| 242434_at | 0.018648 | 0.010898 |           |        | . |
| 242435_at | 6.09E-04 | 1.81E-04 | PDE4A     | 5141   | . |
| 242436_at | 0.032802 | 0.021047 |           |        | . |
| 242437_at | 0.007447 | 0.003719 |           |        | . |
| 242438_at | 1.63E-06 | 9.58E-08 | ASXL1     | 171023 | . |
| 242439_s_ | 5.34E-06 | 4.44E-07 | ASXL1     | 171023 | . |

|           |          |          |              |             |
|-----------|----------|----------|--------------|-------------|
| 242440_at | 0.001684 | 6.27E-04 |              | .           |
| 242441_at | 0.044    | 0.029602 | LOC646548    | 646548 .    |
| 242443_at | 0.001974 | 7.60E-04 | EML5         | 161436 .    |
| 242444_at | 8.21E-04 | 2.63E-04 | C1QTNF6      | 114904 .    |
| 242445_at | 0.007367 | 0.003671 | FGD4         | 121512 .    |
| 242446_at | 6.17E-04 | 1.84E-04 | C6orf163     | 206412 .    |
| 242447_at | 0.048861 | 0.033421 | C3orf70      | 285382 .    |
| 242448_at | 5.52E-05 | 9.05E-06 |              | .           |
| 242449_at | 0.007961 | 0.004021 |              | .           |
| 242450_at | 0.006259 | 0.003024 | RGMB         | 285704 .    |
| 242451_x_ | 0.003993 | 0.001768 | RPS19        | 6223 .      |
| 242452_at | 0.013713 | 0.0076   |              | .           |
| 242453_at | 1.07E-05 | 1.10E-06 |              | .           |
| 242456_at | 1.76E-05 | 2.13E-06 | MRE11A       | 4361 .      |
| 242457_at | 5.63E-04 | 1.65E-04 |              | .           |
| 242458_at | 6.81E-05 | 1.19E-05 | RALGPS2      | 55103 .     |
| 242462_at | 0.026406 | 0.016359 | LOC100131741 | 100131741 . |
| 242463_x_ | 8.34E-04 | 2.68E-04 | ZNF600       | 162966 .    |
| 242464_at | 0.01246  | 0.006797 |              | .           |
| 242467_at | 0.0036   | 0.001563 |              | .           |
| 242469_at | 0.009584 | 0.00499  | LOC120376    | 120376 .    |
| 242470_at | 4.02E-04 | 1.09E-04 | EID2B        | 126272 .    |
| 242471_at | 8.40E-05 | 1.55E-05 |              | .           |
| 242472_x_ | 3.44E-06 | 2.52E-07 | FNBP4        | 23360 .     |
| 242473_at | 0.001912 | 7.31E-04 | TRAF4        | 9618 .      |
| 242474_s_ | 0.017134 | 0.009869 | VMA21        | 203547 .    |
| 242476_at | 0.001819 | 6.88E-04 |              | .           |
| 242478_at | 4.00E-04 | 1.08E-04 | GSTA1        | 2938 .      |
| 242479_s_ | 7.79E-04 | 2.47E-04 |              | .           |
| 242480_at | 0.001809 | 6.83E-04 |              | .           |
| 242484_at | 4.29E-04 | 1.18E-04 | TTC9B        | 148014 .    |
| 242485_at | 0.020952 | 0.012502 |              | .           |
| 242486_at | 0.002376 | 9.49E-04 |              | .           |
| 242487_at | 8.23E-06 | 7.80E-07 | CC2D1B       | 200014 .    |

|           |          |          |                    |
|-----------|----------|----------|--------------------|
| 242489_at | 0.018721 | 0.010949 | .                  |
| 242490_at | 0.009971 | 0.00523  | .                  |
| 242492_at | 6.38E-08 | 1.24E-09 | CLNS1A 1207 .      |
| 242497_at | 1.67E-06 | 9.90E-08 | TRAFD1 10906 .     |
| 242498_x_ | 1.09E-04 | 2.14E-05 | .                  |
| 242503_at | 4.96E-04 | 1.41E-04 | CHST13 166012 .    |
| 242504_at | 0.017064 | 0.009822 | .                  |
| 242506_at | 0.026965 | 0.016762 | .                  |
| 242508_at | 4.90E-04 | 1.39E-04 | KIAA2018 205717 .  |
| 242511_at | 0.021331 | 0.012768 | .                  |
| 242512_at | 0.017939 | 0.010413 | MYO9A 4649 .       |
| 242514_at | 0.002649 | 0.001082 | .                  |
| 242515_x_ | 1.31E-05 | 1.45E-06 | C11orf17 56672 .   |
| 242518_at | 4.01E-04 | 1.09E-04 | .                  |
| 242521_at | 0.022628 | 0.013671 | .                  |
| 242525_at | 0.003604 | 0.001565 | .                  |
| 242529_x_ | 2.74E-07 | 8.99E-09 | .                  |
| 242530_at | 0.043043 | 0.02883  | .                  |
| 242533_at | 0.001268 | 4.46E-04 | .                  |
| 242534_at | 2.79E-04 | 6.95E-05 | EVI5L 115704 .     |
| 242537_at | 0.032112 | 0.020538 | .                  |
| 242538_at | 4.64E-04 | 1.30E-04 | TFDP1 7027 .       |
| 242539_at | 6.94E-05 | 1.22E-05 | LOC731484 731484 . |
| 242540_at | 0.002608 | 0.001063 | DNHD1 144132 .     |
| 242541_at | 0.021644 | 0.012987 | ABCA9 10350 .      |
| 242543_at | 0.003376 | 0.001448 | SH2D6 284948 .     |
| 242545_at | 5.03E-05 | 8.07E-06 | TTLL11 158135 .    |
| 242546_at | 1.56E-11 | 2.27E-14 | FLJ39632 642477 .  |
| 242549_at | 7.17E-06 | 6.53E-07 | PRKD3 23683 .      |
| 242550_at | 1.08E-07 | 2.54E-09 | EIF3B 8662 .       |
| 242552_x_ | 2.00E-06 | 1.25E-07 | ZBED5 58486 .      |
| 242553_at | 0.006564 | 0.003199 | ABCC3 8714 .       |
| 242554_at | 0.017264 | 0.009957 | TPCN2 219931 .     |
| 242555_at | 0.034014 | 0.021949 | C16orf87 388272 .  |

|           |          |          |              |           |   |
|-----------|----------|----------|--------------|-----------|---|
| 242557_at | 0.003052 | 0.001282 | NCRNA00171   | 80862     | . |
| 242558_at | 0.011388 | 0.006111 |              |           | . |
| 242560_at | 1.71E-07 | 4.69E-09 | FANCD2       | 2177      | . |
| 242562_at | 0.03911  | 0.025804 | DNAJC24      | 120526    | . |
| 242563_at | 4.59E-06 | 3.65E-07 |              |           | . |
| 242564_at | 2.27E-04 | 5.36E-05 | ZNF814       | 730051    | . |
| 242565_x_ | 0.008275 | 0.004204 | C21orf57     | 54059     | . |
| 242566_at | 0.001415 | 5.09E-04 | VASH1        | 22846     | . |
| 242567_at | 8.10E-05 | 1.48E-05 | ABTB1        | 80325     | . |
| 242568_s_ | 0.007036 | 0.003477 |              |           | . |
| 242569_at | 1.76E-06 | 1.07E-07 | STAM2        | 10254     | . |
| 242573_at | 2.03E-04 | 4.66E-05 |              |           | . |
| 242574_at | 2.78E-04 | 6.91E-05 | FKBP15       | 23307     | . |
| 242575_at | 0.011037 | 0.00589  |              |           | . |
| 242576_x_ | 1.60E-05 | 1.89E-06 | N4BP2L2      | 10443     | . |
| 242577_at | 8.23E-05 | 1.51E-05 | LOC389834    | 389834    | . |
| 242578_x_ | 8.08E-05 | 1.48E-05 | SLC22A3      | 6581      | . |
| 242579_at | 0.022757 | 0.013762 | BMPR1B       | 658       | . |
| 242584_at | 2.37E-07 | 7.34E-09 | FAM161A      | 84140     | . |
| 242585_at | 5.89E-06 | 5.05E-07 | LOC100131067 | 100131067 | . |
| 242587_at | 6.81E-10 | 3.19E-12 | SLC9A9       | 285195    | . |
| 242588_at | 6.11E-04 | 1.82E-04 |              |           | . |
| 242589_x_ | 0.010238 | 0.005392 |              |           | . |
| 242590_at | 1.18E-04 | 2.36E-05 |              |           | . |
| 242592_at | 0.001144 | 3.93E-04 | GPR137C      | 283554    | . |
| 242595_at | 0.039423 | 0.026044 | TSSK4        | 283629    | . |
| 242596_at | 0.00112  | 3.83E-04 |              |           | . |
| 242597_at | 0.04142  | 0.027578 |              |           | . |
| 242602_x_ | 2.99E-04 | 7.57E-05 | ZNF254       | 9534      | . |
| 242604_at | 0.001666 | 6.19E-04 |              |           | . |
| 242605_at | 1.84E-05 | 2.24E-06 |              |           | . |
| 242607_at | 1.05E-05 | 1.08E-06 |              |           | . |
| 242608_x_ | 3.97E-05 | 5.94E-06 | FAM161B      | 145483    | . |
| 242609_x_ | 6.43E-08 | 1.26E-09 |              |           | . |

|           |          |          |              |             |
|-----------|----------|----------|--------------|-------------|
| 242610_x_ | 0.009538 | 0.004962 |              | .           |
| 242611_at | 9.92E-04 | 3.31E-04 |              | .           |
| 242612_at | 0.004185 | 0.00187  |              | .           |
| 242614_at | 0.001936 | 7.42E-04 |              | .           |
| 242615_at | 0.016384 | 0.009371 | CCDC37       | 348807 .    |
| 242616_at | 0.006239 | 0.003013 |              | .           |
| 242617_at | 0.002121 | 8.29E-04 | TMED8        | 283578 .    |
| 242618_at | 0.037697 | 0.02473  | HCG18        | 414777 .    |
| 242624_at | 0.020837 | 0.012423 | ABLIM2       | 84448 .     |
| 242625_at | 0.040565 | 0.02692  | RSAD2        | 91543 .     |
| 242626_at | 0.026878 | 0.016703 | SAMD5        | 389432 .    |
| 242629_at | 0.001947 | 7.47E-04 |              | .           |
| 242630_at | 2.71E-06 | 1.84E-07 |              | .           |
| 242632_at | 0.004394 | 0.001985 | FGD2         | 221472 .    |
| 242633_x_ | 1.02E-05 | 1.04E-06 | LOC100128510 | 100128510 . |
| 242635_s_ | 0.030118 | 0.019067 | NAPEPLD      | 222236 .    |
| 242636_at | 8.55E-04 | 2.76E-04 |              | .           |
| 242639_at | 2.03E-04 | 4.65E-05 | NARG2        | 79664 .     |
| 242640_at | 0.003496 | 0.001509 | C19orf55     | 148137 .    |
| 242644_at | 1.94E-04 | 4.41E-05 | TMC8         | 147138 .    |
| 242645_at | 3.00E-11 | 5.58E-14 |              | .           |
| 242646_at | 8.62E-04 | 2.79E-04 |              | .           |
| 242647_at | 0.001447 | 5.22E-04 | USP34        | 9736 .      |
| 242648_at | 6.34E-06 | 5.54E-07 | KLHL8        | 57563 .     |
| 242650_at | 0.009964 | 0.005226 |              | .           |
| 242651_at | 2.04E-06 | 1.28E-07 |              | .           |
| 242652_at | 0.00363  | 0.001579 |              | .           |
| 242654_at | 0.003285 | 0.0014   | FANCC        | 2176 .      |
| 242655_at | 0.001791 | 6.75E-04 |              | .           |
| 242656_at | 0.023935 | 0.014595 | GTF2H1       | 2965 .      |
| 242657_at | 4.32E-06 | 3.38E-07 |              | .           |
| 242658_at | 0.001468 | 5.32E-04 |              | .           |
| 242659_at | 6.36E-05 | 1.08E-05 |              | .           |
| 242662_at | 0.001842 | 6.98E-04 | PCSK6        | 5046 .      |

|           |          |          |                            |           |   |
|-----------|----------|----------|----------------------------|-----------|---|
| 242663_at | 0.019182 | 0.01126  | LOC148189                  | 148189    | . |
| 242667_at | 0.038213 | 0.025122 |                            |           | . |
| 242668_x_ | 2.92E-04 | 7.33E-05 | SPAG4L                     | 140732    | . |
| 242670_at | 0.022645 | 0.013683 | LGI4                       | 163175    | . |
| 242672_at | 0.0082   | 0.004159 |                            |           | . |
| 242673_at | 7.89E-04 | 2.50E-04 |                            |           | . |
| 242675_x_ | 7.38E-04 | 2.30E-04 |                            |           | . |
| 242678_at | 0.003088 | 0.0013   |                            |           | . |
| 242679_at | 0.014626 | 0.008199 | LOC100131039               | 100131039 | . |
| 242682_at | 8.56E-04 | 2.76E-04 |                            |           | . |
| 242683_at | 0.024842 | 0.015244 | FLJ38028                   | 400643    | . |
| 242684_at | 1.42E-05 | 1.62E-06 | ZNF425                     | 155054    | . |
| 242685_at | 0.002334 | 9.29E-04 | GTPBP8                     | 29083     | . |
| 242687_at | 0.001823 | 6.90E-04 | FAM160A1                   | 729830    | . |
| 242688_at | 3.94E-06 | 2.99E-07 |                            |           | . |
| 242692_at | 1.54E-04 | 3.33E-05 |                            |           | . |
| 242695_at | 0.012389 | 0.006748 |                            |           | . |
| 242696_at | 5.83E-07 | 2.42E-08 |                            |           | . |
| 242697_at | 0.040294 | 0.026709 | ZNF540                     | 163255    | . |
| 242702_at | 7.88E-05 | 1.43E-05 | MMAA                       | 166785    | . |
| 242709_s_ | 0.017475 | 0.010098 |                            |           | . |
| 242710_at | 0.018026 | 0.010476 |                            |           | . |
| 242711_x_ | 6.44E-05 | 1.10E-05 | FANCM                      | 57697     | . |
| 242712_x_ | 3.30E-05 | 4.70E-06 | RANBP2 /// RG285190 /// 40 |           | . |
| 242713_at | 0.007493 | 0.003744 |                            |           | . |
| 242716_at | 1.00E-05 | 1.02E-06 | SLC30A1                    | 7779      | . |
| 242720_at | 0.003105 | 0.001308 | ITIH4                      | 3700      | . |
| 242722_at | 9.92E-07 | 4.89E-08 | LMO7                       | 4008      | . |
| 242723_at | 1.90E-05 | 2.34E-06 |                            |           | . |
| 242725_at | 0.011677 | 0.006291 |                            |           | . |
| 242726_at | 0.017633 | 0.01021  |                            |           | . |
| 242727_at | 4.25E-05 | 6.51E-06 | ARL5B                      | 221079    | . |
| 242728_at | 1.25E-04 | 2.54E-05 |                            |           | . |
| 242729_at | 0.002528 | 0.001024 |                            |           | . |

|           |          |          |                    |
|-----------|----------|----------|--------------------|
| 242731_x_ | 3.78E-04 | 1.01E-04 | .                  |
| 242733_at | 2.86E-04 | 7.15E-05 | .                  |
| 242735_x_ | 5.24E-04 | 1.50E-04 | ELF2 1998 .        |
| 242736_at | 0.005507 | 0.002599 | .                  |
| 242737_at | 0.009542 | 0.004965 | .                  |
| 242738_s_ | 3.90E-04 | 1.05E-04 | ZFH3 463 .         |
| 242739_at | 0.027176 | 0.016911 | .                  |
| 242740_at | 0.008685 | 0.004446 | .                  |
| 242741_x_ | 1.59E-08 | 1.94E-10 | .                  |
| 242742_at | 6.00E-04 | 1.78E-04 | .                  |
| 242744_s_ | 0.003789 | 0.001663 | CASR 846 .         |
| 242745_at | 0.021003 | 0.012539 | CASR 846 .         |
| 242746_at | 0.032057 | 0.020496 | KLHDC10 23008 .    |
| 242750_at | 2.13E-04 | 4.94E-05 | MMAA 166785 .      |
| 242751_at | 7.76E-05 | 1.40E-05 | .                  |
| 242754_at | 0.002483 | 0.001002 | .                  |
| 242756_at | 0.002074 | 8.06E-04 | .                  |
| 242757_at | 0.003805 | 0.001671 | MDGA1 266727 .     |
| 242759_at | 3.17E-07 | 1.09E-08 | .                  |
| 242760_x_ | 3.91E-04 | 1.05E-04 | PIGB 9488 .        |
| 242763_at | 0.001917 | 7.33E-04 | .                  |
| 242765_at | 1.69E-05 | 2.01E-06 | MOBP 4336 .        |
| 242766_at | 0.042757 | 0.028613 | .                  |
| 242767_at | 0.006014 | 0.002886 | LMCD1 29995 .      |
| 242770_at | 1.46E-05 | 1.67E-06 | LOC642236 642236 . |
| 242772_x_ | 0.015801 | 0.008982 | .                  |
| 242773_at | 0.008755 | 0.004487 | SLC5A1 6523 .      |
| 242774_at | 6.73E-04 | 2.06E-04 | SYNE2 23224 .      |
| 242775_at | 2.88E-04 | 7.20E-05 | PTGR1 22949 .      |
| 242778_at | 0.003817 | 0.001676 | LPXN 9404 .        |
| 242780_at | 0.007934 | 0.004005 | VAPA 9218 .        |
| 242782_x_ | 5.82E-05 | 9.69E-06 | TMEM198 130612 .   |
| 242785_at | 6.09E-04 | 1.82E-04 | EML6 400954 .      |
| 242786_at | 2.07E-04 | 4.79E-05 | .                  |

|           |          |          |           |          |
|-----------|----------|----------|-----------|----------|
| 242787_at | 3.32E-06 | 2.40E-07 |           | .        |
| 242788_at | 0.036102 | 0.023519 | KDM4D     | 55693 .  |
| 242790_at | 0.003444 | 0.001482 | SNF8      | 11267 .  |
| 242791_at | 0.014469 | 0.008093 | FBXO3     | 26273 .  |
| 242792_at | 0.020515 | 0.012185 |           | .        |
| 242793_at | 0.018677 | 0.010918 |           | .        |
| 242794_at | 3.32E-04 | 8.64E-05 | MAML3     | 55534 .  |
| 242797_x_ | 5.24E-07 | 2.09E-08 |           | .        |
| 242798_at | 5.47E-04 | 1.59E-04 |           | .        |
| 242799_at | 1.12E-05 | 1.18E-06 |           | .        |
| 242801_at | 0.004238 | 0.0019   |           | .        |
| 242803_at | 9.43E-04 | 3.11E-04 |           | .        |
| 242804_at | 6.73E-04 | 2.05E-04 | POLN      | 353497 . |
| 242805_at | 7.73E-04 | 2.44E-04 |           | .        |
| 242806_at | 0.029698 | 0.01876  |           | .        |
| 242809_at | 8.97E-04 | 2.93E-04 | IL1RL1    | 9173 .   |
| 242810_x_ | 1.27E-04 | 2.61E-05 |           | .        |
| 242811_x_ | 0.027042 | 0.016816 |           | .        |
| 242812_at | 3.01E-04 | 7.64E-05 | TRIM26    | 7726 .   |
| 242813_at | 7.60E-04 | 2.39E-04 |           | .        |
| 242814_at | 6.40E-10 | 2.96E-12 | SERPINB9  | 5272 .   |
| 242816_at | 4.96E-04 | 1.41E-04 |           | .        |
| 242818_x_ | 1.45E-04 | 3.08E-05 |           | .        |
| 242823_at | 4.11E-04 | 1.12E-04 | ADAMTS18  | 170692 . |
| 242824_at | 2.51E-04 | 6.09E-05 |           | .        |
| 242825_at | 2.42E-04 | 5.81E-05 | PAP2D     | 163404 . |
| 242826_at | 0.002063 | 8.01E-04 |           | .        |
| 242827_x_ | 3.96E-05 | 5.91E-06 |           | .        |
| 242828_at | 4.86E-04 | 1.37E-04 | FIGN      | 55137 .  |
| 242829_x_ | 5.00E-07 | 1.97E-08 | FBXL3     | 26224 .  |
| 242830_at | 0.002237 | 8.84E-04 |           | .        |
| 242832_at | 0.002416 | 9.70E-04 | PER1      | 5187 .   |
| 242833_at | 0.004932 | 0.002279 |           | .        |
| 242835_s_ | 0.027883 | 0.017425 | LOC728730 | 728730 . |



|           |          |          |           |          |
|-----------|----------|----------|-----------|----------|
| 242836_at | 3.83E-05 | 5.66E-06 |           | .        |
| 242837_at | 7.15E-05 | 1.26E-05 | SFRS4     | 6429 .   |
| 242839_at | 2.87E-07 | 9.57E-09 |           | .        |
| 242842_at | 0.008364 | 0.004256 |           | .        |
| 242843_at | 0.049133 | 0.033637 | BCAN      | 63827 .  |
| 242844_at | 1.01E-06 | 4.98E-08 | PGGT1B    | 5229 .   |
| 242845_at | 0.003997 | 0.001771 |           | .        |
| 242846_at | 1.90E-04 | 4.31E-05 |           | .        |
| 242848_x_ | 1.40E-04 | 2.93E-05 |           | .        |
| 242849_at | 0.049279 | 0.033749 |           | .        |
| 242850_at | 8.40E-04 | 2.70E-04 |           | .        |
| 242851_at | 0.029794 | 0.018832 | KIAA1919  | 91749 .  |
| 242855_at | 2.84E-04 | 7.10E-05 | KCP       | 375616 . |
| 242857_at | 0.002401 | 9.62E-04 |           | .        |
| 242859_at | 9.36E-06 | 9.32E-07 |           | .        |
| 242861_at | 0.041848 | 0.027907 |           | .        |
| 242862_x_ | 5.00E-04 | 1.42E-04 |           | .        |
| 242865_at | 0.002599 | 0.001058 |           | .        |
| 242866_x_ | 0.041755 | 0.027832 |           | .        |
| 242869_at | 0.015887 | 0.009042 |           | .        |
| 242870_at | 0.027636 | 0.017246 | RIMKLB    | 57494 .  |
| 242871_at | 0.017838 | 0.010346 | PAQR5     | 54852 .  |
| 242872_at | 0.002437 | 9.80E-04 |           | .        |
| 242874_at | 6.42E-08 | 1.25E-09 |           | .        |
| 242875_at | 0.013849 | 0.007688 |           | .        |
| 242877_at | 0.007958 | 0.004019 |           | .        |
| 242879_x_ | 6.76E-04 | 2.07E-04 |           | .        |
| 242880_at | 3.97E-04 | 1.07E-04 | NALCN     | 259232 . |
| 242881_x_ | 4.60E-11 | 9.26E-14 |           | .        |
| 242884_at | 0.008274 | 0.004203 | LOC440570 | 440570 . |
| 242886_at | 2.31E-04 | 5.49E-05 |           | .        |
| 242887_at | 0.012417 | 0.006767 | KCMF1     | 56888 .  |
| 242888_at | 1.21E-07 | 2.92E-09 |           | .        |
| 242889_x_ | 6.27E-07 | 2.65E-08 | LOC645431 | 645431 . |

|           |          |          |                            |
|-----------|----------|----------|----------------------------|
| 242890_at | 3.76E-09 | 2.93E-11 | .                          |
| 242891_at | 0.003017 | 0.001264 | ADCY5 111 .                |
| 242894_at | 0.011243 | 0.006021 | .                          |
| 242895_x_ | 0.007408 | 0.003695 | .                          |
| 242896_at | 0.009633 | 0.005021 | C2orf21 285175 .           |
| 242898_at | 0.015656 | 0.008887 | EIF2AK2 5610 .             |
| 242902_at | 4.50E-04 | 1.25E-04 | CYMP 643160 .              |
| 242904_x_ | 1.72E-04 | 3.80E-05 | .                          |
| 242905_at | 0.046075 | 0.03122  | PNO1 56902 .               |
| 242906_at | 0.008649 | 0.004423 | .                          |
| 242911_at | 0.016223 | 0.009266 | MED13L 23389 .             |
| 242913_at | 0.012613 | 0.006895 | CLIC6 54102 .              |
| 242915_at | 0.008433 | 0.004299 | ZNF682 91120 .             |
| 242916_at | 1.81E-06 | 1.10E-07 | CEP110 11064 .             |
| 242917_at | 0.003155 | 0.001334 | RASGEF1A 221002 .          |
| 242918_at | 5.04E-08 | 9.16E-10 | NASP 4678 .                |
| 242919_at | 9.17E-06 | 9.08E-07 | ZNF253 56242 .             |
| 242920_at | 0.006962 | 0.003435 | .                          |
| 242922_at | 2.26E-05 | 2.91E-06 | LOC100133864 100133864 //. |
| 242923_at | 3.13E-06 | 2.22E-07 | ZNF678 339500 .            |
| 242924_at | 7.64E-04 | 2.40E-04 | .                          |
| 242927_at | 6.80E-05 | 1.19E-05 | DCLRE1C 64421 .            |
| 242928_at | 4.29E-05 | 6.60E-06 | .                          |
| 242930_at | 0.009832 | 0.005144 | OSGEP 55644 .              |
| 242931_at | 2.37E-08 | 3.30E-10 | LONRF3 79836 .             |
| 242932_at | 4.44E-07 | 1.71E-08 | .                          |
| 242933_at | 6.65E-04 | 2.02E-04 | .                          |
| 242934_at | 0.010188 | 0.00536  | .                          |
| 242935_at | 2.78E-07 | 9.17E-09 | SBF2 81846 .               |
| 242936_at | 0.001907 | 7.29E-04 | .                          |
| 242939_at | 1.57E-06 | 9.06E-08 | TFDP1 7027 .               |
| 242940_x_ | 0.004826 | 0.002222 | DLX6 1750 .                |
| 242941_x_ | 0.001443 | 5.21E-04 | TBX1 6899 .                |
| 242942_at | 5.10E-04 | 1.46E-04 | SLC38A10 124565 .          |

|           |          |          |         |        |   |
|-----------|----------|----------|---------|--------|---|
| 242943_at | 1.28E-05 | 1.41E-06 | ST8SIA4 | 7903   | . |
| 242945_at | 0.00238  | 9.51E-04 | FAM20A  | 54757  | . |
| 242949_x_ | 7.99E-04 | 2.54E-04 | CCDC157 | 550631 | . |
| 242953_at | 0.029937 | 0.018933 | ZNF234  | 10780  | . |
| 242954_at | 0.003897 | 0.001718 |         |        | . |
| 242956_at | 0.00218  | 8.57E-04 | IDH1    | 3417   | . |
| 242959_at | 2.95E-04 | 7.44E-05 |         |        | . |
| 242961_x_ | 0.023261 | 0.014116 | DDX58   | 23586  | . |
| 242962_at | 2.48E-05 | 3.29E-06 |         |        | . |
| 242963_at | 3.38E-07 | 1.19E-08 | SGMS2   | 166929 | . |
| 242965_at | 0.011149 | 0.005962 |         |        | . |
| 242966_x_ | 0.015803 | 0.008984 |         |        | . |
| 242967_at | 2.16E-06 | 1.38E-07 |         |        | . |
| 242968_at | 0.001395 | 5.00E-04 |         |        | . |
| 242969_at | 0.040776 | 0.027081 |         |        | . |
| 242972_at | 0.022941 | 0.013892 |         |        | . |
| 242973_at | 0.001795 | 6.77E-04 | CACNA1C | 775    | . |
| 242974_at | 0.00189  | 7.21E-04 | CD47    | 961    | . |
| 242976_at | 3.79E-04 | 1.01E-04 |         |        | . |
| 242978_x_ | 1.84E-10 | 5.54E-13 |         |        | . |
| 242979_at | 0.016837 | 0.00967  | IRS1    | 3667   | . |
| 242981_at | 9.15E-04 | 3.00E-04 |         |        | . |
| 242983_at | 1.14E-05 | 1.20E-06 |         |        | . |
| 242984_at | 1.41E-05 | 1.60E-06 | MKLN1   | 4289   | . |
| 242986_at | 0.008843 | 0.004541 |         |        | . |
| 242987_x_ | 0.021136 | 0.012634 |         |        | . |
| 242989_at | 1.47E-05 | 1.69E-06 |         |        | . |
| 242990_at | 8.00E-06 | 7.54E-07 |         |        | . |
| 242992_at | 4.79E-05 | 7.59E-06 | ZNF776  | 284309 | . |
| 242993_at | 0.028467 | 0.017845 |         |        | . |
| 242995_at | 0.017575 | 0.010167 |         |        | . |
| 242996_at | 3.05E-05 | 4.27E-06 | MTRF1   | 9617   | . |
| 242998_at | 1.65E-04 | 3.60E-05 | RDH12   | 145226 | . |
| 243000_at | 1.53E-04 | 3.30E-05 | CDK6    | 1021   | . |

|           |          |          |           |        |   |
|-----------|----------|----------|-----------|--------|---|
| 243001_at | 3.16E-04 | 8.13E-05 | C18orf22  | 79863  | . |
| 243002_at | 0.015136 | 0.008537 |           |        | . |
| 243003_at | 1.86E-04 | 4.19E-05 |           |        | . |
| 243004_at | 0.001399 | 5.02E-04 |           |        | . |
| 243005_at | 0.017134 | 0.009868 |           |        | . |
| 243006_at | 0.020916 | 0.012479 |           |        | . |
| 243008_at | 9.69E-05 | 1.85E-05 |           |        | . |
| 243009_at | 0.005739 | 0.002727 | LOC441242 | 441242 | . |
| 243010_at | 1.65E-04 | 3.62E-05 | MSI2      | 124540 | . |
| 243011_at | 6.07E-04 | 1.81E-04 | FAM55C    | 91775  | . |
| 243012_at | 0.005641 | 0.002674 |           |        | . |
| 243013_at | 0.016301 | 0.009316 |           |        | . |
| 243016_at | 0.030423 | 0.019293 |           |        | . |
| 243017_at | 0.021691 | 0.013021 | LOC158572 | 158572 | . |
| 243018_at | 0.048751 | 0.033328 |           |        | . |
| 243021_at | 0.048709 | 0.033297 | LOC730496 | 730496 | . |
| 243023_at | 7.30E-05 | 1.30E-05 |           |        | . |
| 243029_at | 0.001219 | 4.25E-04 | KREMEN1   | 83999  | . |
| 243031_at | 5.96E-04 | 1.77E-04 |           |        | . |
| 243032_at | 0.008793 | 0.00451  |           |        | . |
| 243035_at | 0.001982 | 7.63E-04 |           |        | . |
| 243037_at | 2.80E-06 | 1.92E-07 |           |        | . |
| 243038_at | 0.010506 | 0.005557 | RBM43     | 375287 | . |
| 243041_s_ | 3.28E-05 | 4.68E-06 |           |        | . |
| 243042_at | 0.005869 | 0.002803 | FAM73A    | 374986 | . |
| 243043_at | 0.00155  | 5.68E-04 |           |        | . |
| 243044_at | 0.016704 | 0.009583 |           |        | . |
| 243045_at | 1.50E-04 | 3.22E-05 | SMYD1     | 150572 | . |
| 243046_at | 1.47E-04 | 3.13E-05 |           |        | . |
| 243047_at | 0.002265 | 8.98E-04 | FLJ10404  | 54540  | . |
| 243050_at | 0.024751 | 0.015177 |           |        | . |
| 243051_at | 8.25E-07 | 3.84E-08 | CNIH4     | 29097  | . |
| 243052_at | 1.19E-04 | 2.40E-05 | MOBKL2C   | 148932 | . |
| 243055_at | 0.0191   | 0.011205 |           |        | . |

|           |          |          |          |             |
|-----------|----------|----------|----------|-------------|
| 243058_at | 0.008909 | 0.004581 |          | .           |
| 243060_at | 0.001564 | 5.74E-04 |          | .           |
| 243061_at | 0.010817 | 0.005755 | C14orf23 | 387978 .    |
| 243062_at | 0.00255  | 0.001034 | FLCN     | 201163 .    |
| 243065_at | 0.006277 | 0.003034 |          | .           |
| 243070_at | 1.97E-04 | 4.50E-05 | INO80D   | 54891 .     |
| 243071_at | 1.07E-06 | 5.37E-08 |          | .           |
| 243072_at | 2.24E-05 | 2.89E-06 |          | .           |
| 243074_at | 2.37E-05 | 3.09E-06 |          | .           |
| 243075_at | 0.021508 | 0.012885 | ZNF316   | 100131017 . |
| 243076_x_ | 0.010321 | 0.005444 | GLI4     | 2738 .      |
| 243078_at | 0.024911 | 0.015293 |          | .           |
| 243079_x_ | 2.43E-05 | 3.20E-06 |          | .           |
| 243086_at | 0.002688 | 0.001101 |          | .           |
| 243087_at | 1.11E-06 | 5.66E-08 | WDR63    | 126820 .    |
| 243088_at | 7.46E-04 | 2.33E-04 |          | .           |
| 243089_at | 0.014388 | 0.008041 |          | .           |
| 243090_at | 5.76E-06 | 4.91E-07 |          | .           |
| 243091_at | 0.017214 | 0.009921 |          | .           |
| 243092_at | 4.39E-04 | 1.21E-04 |          | .           |
| 243093_at | 2.90E-06 | 2.01E-07 | C2orf49  | 79074 .     |
| 243095_at | 0.043659 | 0.029328 |          | .           |
| 243097_x_ | 0.004473 | 0.002029 |          | .           |
| 243099_at | 2.33E-05 | 3.02E-06 | NFAM1    | 150372 .    |
| 243101_x_ | 0.012714 | 0.006961 |          | .           |
| 243104_at | 0.038518 | 0.025359 |          | .           |
| 243105_at | 0.002242 | 8.86E-04 |          | .           |
| 243107_at | 2.37E-05 | 3.10E-06 |          | .           |
| 243108_at | 1.60E-04 | 3.48E-05 | RANBP9   | 10048 .     |
| 243111_at | 0.014297 | 0.00798  |          | .           |
| 243115_at | 0.024909 | 0.01529  |          | .           |
| 243116_at | 3.42E-04 | 8.94E-05 | PIP5KL1  | 138429 .    |
| 243117_at | 4.93E-04 | 1.40E-04 |          | .           |
| 243118_at | 1.83E-04 | 4.10E-05 | C6orf182 | 285753 .    |

|           |          |          |           |          |
|-----------|----------|----------|-----------|----------|
| 243119_at | 9.44E-04 | 3.12E-04 |           | .        |
| 243120_at | 1.60E-04 | 3.46E-05 |           | .        |
| 243121_x_ | 0.010799 | 0.005744 |           | .        |
| 243122_at | 0.001483 | 5.38E-04 |           | .        |
| 243124_at | 0.027396 | 0.017068 | LOC653390 | 653390 . |
| 243127_x_ | 0.009472 | 0.004923 | DNASE1    | 1773 .   |
| 243128_at | 0.001843 | 6.99E-04 | ZNF175    | 7728 .   |
| 243131_x_ | 1.31E-07 | 3.26E-09 |           | .        |
| 243133_at | 0.010151 | 0.005337 | TSC22D1   | 8848 .   |
| 243134_at | 0.01246  | 0.006797 |           | .        |
| 243135_x_ | 3.26E-06 | 2.34E-07 |           | .        |
| 243137_at | 1.30E-04 | 2.68E-05 |           | .        |
| 243139_at | 0.031353 | 0.019969 |           | .        |
| 243140_at | 3.67E-05 | 5.38E-06 | ACTA2     | 59 .     |
| 243141_at | 1.48E-09 | 8.98E-12 | SGMS2     | 166929 . |
| 243145_at | 0.001069 | 3.62E-04 |           | .        |
| 243147_x_ | 3.14E-05 | 4.42E-06 |           | .        |
| 243149_at | 6.73E-05 | 1.17E-05 |           | .        |
| 243150_at | 0.048629 | 0.033233 |           | .        |
| 243151_at | 0.002417 | 9.70E-04 | ANKRD42   | 338699 . |
| 243152_at | 0.002796 | 0.001154 | COPS8     | 10920 .  |
| 243153_at | 9.05E-05 | 1.70E-05 | CDK5RAP2  | 55755 .  |
| 243154_at | 0.025801 | 0.015924 |           | .        |
| 243155_at | 0.001682 | 6.26E-04 |           | .        |
| 243156_at | 0.032217 | 0.020617 |           | .        |
| 243157_at | 3.44E-04 | 8.99E-05 |           | .        |
| 243158_at | 0.003056 | 0.001284 |           | .        |
| 243161_x_ | 4.86E-08 | 8.68E-10 | ZFP42     | 132625 . |
| 243162_at | 7.33E-04 | 2.28E-04 |           | .        |
| 243163_at | 0.019962 | 0.011801 |           | .        |
| 243166_at | 0.023844 | 0.014529 | SLC30A5   | 64924 .  |
| 243168_at | 0.001694 | 6.31E-04 |           | .        |
| 243169_at | 0.044167 | 0.029731 |           | .        |
| 243170_at | 0.011139 | 0.005956 |           | .        |

|           |          |          |              |           |   |
|-----------|----------|----------|--------------|-----------|---|
| 243171_at | 9.31E-07 | 4.51E-08 | LOC100134625 | 100134625 | . |
| 243172_at | 8.21E-04 | 2.63E-04 |              |           | . |
| 243174_at | 8.00E-05 | 1.46E-05 |              |           | . |
| 243175_at | 0.002384 | 9.53E-04 | UTS2D        | 257313    | . |
| 243176_at | 0.003305 | 0.001411 |              |           | . |
| 243178_at | 1.11E-04 | 2.20E-05 |              |           | . |
| 243179_at | 1.34E-05 | 1.48E-06 | LOC100130360 | 100130360 | . |
| 243180_at | 0.029612 | 0.018693 |              |           | . |
| 243181_at | 0.006558 | 0.003196 | ANKIB1       | 54467     | . |
| 243184_at | 0.003278 | 0.001397 |              |           | . |
| 243185_at | 0.001862 | 7.08E-04 |              |           | . |
| 243186_at | 1.67E-04 | 3.67E-05 |              |           | . |
| 243187_at | 0.007964 | 0.004023 |              |           | . |
| 243189_at | 5.89E-07 | 2.45E-08 |              |           | . |
| 243192_at | 1.23E-04 | 2.49E-05 |              |           | . |
| 243195_s_ | 0.042099 | 0.028106 | ZNF551       | 90233     | . |
| 243199_at | 4.29E-04 | 1.18E-04 |              |           | . |
| 243200_at | 0.040985 | 0.02724  |              |           | . |
| 243201_at | 0.001922 | 7.36E-04 | HNRNPH2      | 3188      | . |
| 243202_at | 3.72E-04 | 9.87E-05 |              |           | . |
| 243203_at | 6.22E-04 | 1.86E-04 |              |           | . |
| 243205_at | 1.29E-04 | 2.65E-05 |              |           | . |
| 243206_at | 1.02E-05 | 1.05E-06 |              |           | . |
| 243208_x_ | 0.012685 | 0.006942 | MGC33407     | 284382    | . |
| 243209_at | 0.021935 | 0.013197 | KCNQ4        | 9132      | . |
| 243210_at | 7.62E-04 | 2.40E-04 |              |           | . |
| 243211_at | 0.001209 | 4.21E-04 |              |           | . |
| 243212_at | 0.005809 | 0.002769 |              |           | . |
| 243214_at | 0.002634 | 0.001075 | ZBTB46       | 140685    | . |
| 243215_at | 0.038814 | 0.025576 |              |           | . |
| 243216_x_ | 3.63E-07 | 1.31E-08 |              |           | . |
| 243217_at | 0.006317 | 0.003056 |              |           | . |
| 243221_at | 0.007883 | 0.003976 | FAM20A       | 54757     | . |
| 243222_at | 0.0329   | 0.021124 |              |           | . |

|           |          |          |                              |             |
|-----------|----------|----------|------------------------------|-------------|
| 243224_at | 1.48E-06 | 8.38E-08 |                              | .           |
| 243226_at | 0.032676 | 0.020951 |                              | .           |
| 243227_at | 0.004777 | 0.002196 |                              | .           |
| 243228_at | 0.018884 | 0.011061 | GTF3C4                       | 9329 .      |
| 243229_at | 6.62E-05 | 1.14E-05 |                              | .           |
| 243230_at | 0.001881 | 7.16E-04 |                              | .           |
| 243232_at | 0.013626 | 0.007545 |                              | .           |
| 243233_at | 8.97E-09 | 9.28E-11 |                              | .           |
| 243236_at | 1.11E-09 | 6.12E-12 |                              | .           |
| 243237_at | 4.88E-04 | 1.38E-04 |                              | .           |
| 243238_at | 0.003709 | 0.00162  | PYGB                         | 5834 .      |
| 243239_at | 4.79E-04 | 1.35E-04 | SAMM50                       | 25813 .     |
| 243242_at | 0.043555 | 0.029246 |                              | .           |
| 243243_at | 0.002212 | 8.72E-04 | GPC3                         | 2719 .      |
| 243245_at | 0.004056 | 0.001802 |                              | .           |
| 243247_at | 0.031226 | 0.019872 | LOC100129525                 | 100129525 . |
| 243249_at | 0.001985 | 7.65E-04 |                              | .           |
| 243252_at | 8.74E-04 | 2.84E-04 |                              | .           |
| 243253_at | 3.83E-07 | 1.39E-08 |                              | .           |
| 243256_at | 2.36E-07 | 7.31E-09 | MKNK1                        | 8569 .      |
| 243259_at | 0.023987 | 0.01463  | ATXN7                        | 6314 .      |
| 243262_at | 3.18E-06 | 2.28E-07 |                              | .           |
| 243263_at | 4.43E-04 | 1.23E-04 | C17orf55                     | 284185 .    |
| 243264_s_ | 0.001316 | 4.66E-04 | C8orf44 /// SG 23678 /// 567 | .           |
| 243265_at | 9.77E-04 | 3.25E-04 | GAD2                         | 2572 .      |
| 243266_at | 0.003291 | 0.001403 |                              | .           |
| 243267_x_ | 9.59E-05 | 1.83E-05 |                              | .           |
| 243268_at | 0.030793 | 0.019562 | PATE2                        | 399967 .    |
| 243269_s_ | 0.003286 | 0.001401 | C9orf144 /// C!100129969 //  | .           |
| 243270_at | 0.009185 | 0.00475  | C9orf144B                    | 259308 .    |
| 243271_at | 8.27E-04 | 2.65E-04 |                              | .           |
| 243272_at | 0.027044 | 0.016819 |                              | .           |
| 243273_at | 3.93E-04 | 1.06E-04 |                              | .           |
| 243275_at | 0.006568 | 0.003201 |                              | .           |



|           |          |          |           |        |   |
|-----------|----------|----------|-----------|--------|---|
| 243276_at | 0.00109  | 3.71E-04 | ALS2CL    | 259173 | . |
| 243280_at | 2.26E-06 | 1.46E-07 |           |        | . |
| 243282_at | 0.005133 | 0.002392 | CCDC93    | 54520  | . |
| 243284_at | 5.24E-04 | 1.50E-04 | FLJ11506  | 79719  | . |
| 243285_at | 2.32E-05 | 3.01E-06 | LOC283335 | 283335 | . |
| 243286_at | 3.68E-05 | 5.38E-06 |           |        | . |
| 243287_s_ | 5.97E-05 | 1.00E-05 | OSTM1     | 28962  | . |
| 243288_at | 3.34E-06 | 2.43E-07 | SMYD2     | 56950  | . |
| 243290_at | 1.57E-04 | 3.39E-05 |           |        | . |
| 243292_at | 0.001382 | 4.95E-04 | FAM132A   | 388581 | . |
| 243293_at | 9.38E-05 | 1.78E-05 |           |        | . |
| 243294_at | 0.011344 | 0.006083 | ZNF780B   | 163131 | . |
| 243295_at | 9.81E-06 | 9.92E-07 | RBM27     | 54439  | . |
| 243296_at | 0.044733 | 0.030171 | NAMPT     | 10135  | . |
| 243297_at | 7.14E-05 | 1.26E-05 |           |        | . |
| 243303_at | 6.42E-04 | 1.94E-04 |           |        | . |
| 243304_at | 5.24E-04 | 1.51E-04 | LOC286109 | 286109 | . |
| 243305_at | 2.37E-04 | 5.67E-05 |           |        | . |
| 243306_s_ | 0.00355  | 0.001537 | GCC1      | 79571  | . |
| 243308_at | 0.019812 | 0.011693 |           |        | . |
| 243309_at | 0.031353 | 0.019968 | FLJ27352  | 145788 | . |
| 243310_at | 0.014756 | 0.008286 |           |        | . |
| 243312_at | 0.012582 | 0.006876 | ZNF107    | 51427  | . |
| 243313_at | 5.38E-04 | 1.56E-04 | SYNPO2L   | 79933  | . |
| 243314_at | 0.001686 | 6.28E-04 |           |        | . |
| 243315_at | 0.001961 | 7.54E-04 |           |        | . |
| 243316_x_ | 0.002886 | 0.001197 | VPS26A    | 9559   | . |
| 243318_at | 4.69E-04 | 1.31E-04 | WDR42A    | 50717  | . |
| 243321_at | 7.10E-05 | 1.25E-05 |           |        | . |
| 243323_s_ | 0.037843 | 0.024844 | ZFH3      | 463    | . |
| 243324_x_ | 9.83E-04 | 3.27E-04 | TNPO1     | 3842   | . |
| 243325_at | 0.00914  | 0.004722 | GSTK1     | 373156 | . |
| 243326_at | 1.52E-04 | 3.26E-05 |           |        | . |
| 243329_at | 6.48E-04 | 1.96E-04 |           |        | . |

|           |          |          |                        |             |
|-----------|----------|----------|------------------------|-------------|
| 243330_at | 0.015694 | 0.00891  |                        | .           |
| 243332_at | 0.003669 | 0.0016   |                        | .           |
| 243333_at | 0.023893 | 0.014563 |                        | .           |
| 243336_at | 0.006222 | 0.003002 | LOC100132726           | 100132726 . |
| 243338_at | 0.009678 | 0.005051 |                        | .           |
| 243339_at | 6.24E-05 | 1.06E-05 |                        | .           |
| 243341_at | 0.014177 | 0.007901 |                        | .           |
| 243342_at | 0.003959 | 0.00175  |                        | .           |
| 243343_at | 7.19E-04 | 2.23E-04 |                        | .           |
| 243345_at | 0.00225  | 8.90E-04 |                        | .           |
| 243347_at | 3.99E-06 | 3.05E-07 |                        | .           |
| 243349_at | 1.04E-04 | 2.02E-05 | KIAA1324               | 57535 .     |
| 243350_at | 0.002624 | 0.001071 |                        | .           |
| 243356_at | 1.47E-05 | 1.68E-06 | FAM7A3                 | 89837 .     |
| 243357_at | 8.89E-11 | 2.24E-13 | NEGR1                  | 257194 .    |
| 243358_at | 6.42E-05 | 1.10E-05 | IGF1R                  | 3480 .      |
| 243359_at | 0.001425 | 5.13E-04 |                        | .           |
| 243361_at | 2.43E-07 | 7.59E-09 | SFRS12                 | 140890 .    |
| 243364_at | 0.019265 | 0.011319 | AUTS2                  | 26053 .     |
| 243365_s_ | 0.004265 | 0.001913 | AUTS2                  | 26053 .     |
| 243366_s_ | 0.002081 | 8.10E-04 |                        | .           |
| 243367_at | 1.57E-07 | 4.21E-09 |                        | .           |
| 243368_at | 0.001897 | 7.25E-04 |                        | .           |
| 243370_at | 1.06E-05 | 1.09E-06 | CAPRIN1                | 4076 .      |
| 243371_at | 0.010098 | 0.005306 |                        | .           |
| 243372_at | 4.53E-06 | 3.59E-07 | HSPD1 /// HSP 3329 /// | 6447 .      |
| 243374_x_ | 1.42E-06 | 7.98E-08 |                        | .           |
| 243377_at | 0.007327 | 0.003648 |                        | .           |
| 243378_at | 1.76E-04 | 3.90E-05 |                        | .           |
| 243381_at | 0.003979 | 0.001761 |                        | .           |
| 243382_at | 2.56E-05 | 3.42E-06 | CCDC85A                | 114800 .    |
| 243383_at | 0.002214 | 8.73E-04 |                        | .           |
| 243384_at | 3.05E-04 | 7.76E-05 |                        | .           |
| 243386_at | 0.015419 | 0.008728 | CASZ1                  | 54897 .     |

|           |          |          |              |           |   |
|-----------|----------|----------|--------------|-----------|---|
| 243387_at | 0.016455 | 0.009418 | MESP1        | 55897     | . |
| 243390_at | 0.039044 | 0.025756 |              |           | . |
| 243391_x  | 0.036252 | 0.023637 |              |           | . |
| 243392_at | 7.28E-05 | 1.29E-05 | USP49        | 25862     | . |
| 243395_at | 0.030603 | 0.019423 |              |           | . |
| 243396_at | 0.026731 | 0.016594 |              |           | . |
| 243397_at | 0.020786 | 0.012384 |              |           | . |
| 243398_at | 0.00843  | 0.004297 |              |           | . |
| 243400_x  | 0.031847 | 0.020331 | LTBR         | 4055      | . |
| 243401_at | 0.008641 | 0.004419 |              |           | . |
| 243402_at | 2.63E-06 | 1.77E-07 | LOC643406    | 643406    | . |
| 243403_x  | 4.14E-04 | 1.13E-04 | CPM          | 1368      | . |
| 243404_at | 1.52E-04 | 3.27E-05 |              |           | . |
| 243405_at | 0.021188 | 0.012668 |              |           | . |
| 243408_at | 4.13E-04 | 1.12E-04 |              |           | . |
| 243409_at | 0.04677  | 0.031772 | FOX11        | 2300      | . |
| 243410_at | 0.044716 | 0.030157 |              |           | . |
| 243411_at | 0.002393 | 9.58E-04 | POLDIP3      | 84271     | . |
| 243413_at | 0.027492 | 0.017138 | TTC30B       | 150737    | . |
| 243414_at | 0.0044   | 0.001988 | PPIL2        | 23759     | . |
| 243416_at | 2.99E-04 | 7.55E-05 |              |           | . |
| 243417_at | 5.11E-06 | 4.19E-07 |              |           | . |
| 243422_at | 0.041522 | 0.027657 |              |           | . |
| 243425_at | 0.003242 | 0.001378 |              |           | . |
| 243426_at | 0.029093 | 0.018311 | LOC339290    | 339290    | . |
| 243429_at | 7.09E-05 | 1.25E-05 | LOC100130979 | 100130979 | . |
| 243430_at | 5.42E-06 | 4.54E-07 | SEZ6         | 124925    | . |
| 243431_at | 8.84E-04 | 2.88E-04 |              |           | . |
| 243432_at | 2.83E-05 | 3.86E-06 | LOC642891    | 642891    | . |
| 243433_at | 0.006673 | 0.003263 |              |           | . |
| 243435_at | 1.41E-07 | 3.62E-09 | KCNQ1OT1     | 10984     | . |
| 243437_at | 0.006879 | 0.003384 | GCC1         | 79571     | . |
| 243438_at | 3.77E-05 | 5.56E-06 | PDE7B        | 27115     | . |
| 243439_at | 0.040371 | 0.026764 | ZNF418       | 147686    | . |

|           |          |          |           |          |
|-----------|----------|----------|-----------|----------|
| 243442_x_ | 2.70E-07 | 8.74E-09 |           | .        |
| 243447_at | 0.037971 | 0.024939 |           | .        |
| 243448_at | 0.008817 | 0.004525 |           | .        |
| 243450_at | 1.29E-05 | 1.41E-06 |           | .        |
| 243452_at | 5.30E-04 | 1.53E-04 | LOC646778 | 646778 . |
| 243453_at | 4.67E-05 | 7.36E-06 |           | .        |
| 243454_at | 0.00252  | 0.00102  |           | .        |
| 243455_at | 1.78E-06 | 1.08E-07 |           | .        |
| 243457_s_ | 2.40E-05 | 3.16E-06 | ZNF214    | 7761 .   |
| 243458_at | 1.69E-04 | 3.72E-05 |           | .        |
| 243459_x_ | 7.35E-04 | 2.29E-04 |           | .        |
| 243461_at | 3.67E-04 | 9.71E-05 |           | .        |
| 243462_s_ | 3.77E-06 | 2.83E-07 |           | .        |
| 243463_s_ | 0.023218 | 0.014084 | RIT1      | 6016 .   |
| 243467_at | 5.23E-06 | 4.30E-07 |           | .        |
| 243468_at | 5.49E-04 | 1.60E-04 | PATE1     | 160065 . |
| 243469_at | 3.12E-04 | 8.00E-05 |           | .        |
| 243474_at | 5.60E-05 | 9.23E-06 |           | .        |
| 243475_at | 3.56E-04 | 9.38E-05 | CBL       | 867 .    |
| 243476_at | 0.007638 | 0.003831 | NF1       | 4763 .   |
| 243478_at | 0.026673 | 0.016548 |           | .        |
| 243480_at | 2.70E-07 | 8.74E-09 |           | .        |
| 243481_at | 1.32E-07 | 3.32E-09 | RHOJ      | 57381 .  |
| 243482_at | 1.29E-05 | 1.43E-06 |           | .        |
| 243484_x_ | 0.019233 | 0.011297 |           | .        |
| 243486_at | 0.005518 | 0.002606 |           | .        |
| 243487_at | 8.91E-04 | 2.91E-04 | AFF4      | 27125 .  |
| 243489_at | 0.001919 | 7.34E-04 |           | .        |
| 243490_at | 1.94E-05 | 2.40E-06 |           | .        |
| 243493_at | 0.024128 | 0.014729 |           | .        |
| 243496_at | 8.73E-04 | 2.84E-04 | RAB18     | 22931 .  |
| 243497_at | 0.001453 | 5.26E-04 |           | .        |
| 243498_at | 9.75E-07 | 4.79E-08 |           | .        |
| 243501_at | 3.74E-05 | 5.49E-06 |           | .        |

|           |          |          |                             |             |
|-----------|----------|----------|-----------------------------|-------------|
| 243503_at | 0.001141 | 3.92E-04 |                             | .           |
| 243505_at | 0.005459 | 0.002571 | MAP3K3                      | 4215 .      |
| 243506_at | 0.03957  | 0.026155 | LOC642597                   | 642597 .    |
| 243509_at | 0.00181  | 6.84E-04 |                             | .           |
| 243510_at | 0.010247 | 0.005399 |                             | .           |
| 243512_x_ | 6.34E-06 | 5.54E-07 |                             | .           |
| 243514_at | 0.002228 | 8.79E-04 |                             | .           |
| 243515_at | 6.69E-04 | 2.04E-04 |                             | .           |
| 243517_at | 1.40E-04 | 2.94E-05 |                             | .           |
| 243518_at | 2.00E-05 | 2.49E-06 |                             | .           |
| 243519_at | 3.19E-04 | 8.22E-05 | UBE3C                       | 9690 .      |
| 243521_at | 0.013192 | 0.007268 |                             | .           |
| 243522_at | 7.28E-04 | 2.26E-04 |                             | .           |
| 243523_at | 0.001526 | 5.57E-04 | UNQ6487                     | 100128644 . |
| 243524_at | 0.044695 | 0.030141 |                             | .           |
| 243525_at | 5.93E-04 | 1.76E-04 |                             | .           |
| 243526_at | 5.30E-04 | 1.53E-04 | WDR86                       | 349136 .    |
| 243527_at | 1.63E-05 | 1.92E-06 |                             | .           |
| 243528_at | 2.66E-04 | 6.54E-05 |                             | .           |
| 243529_at | 0.001493 | 5.43E-04 | MARS2                       | 92935 .     |
| 243531_at | 1.63E-04 | 3.56E-05 | ORAOV1                      | 220064 .    |
| 243534_at | 0.042344 | 0.028297 | CC2D2B /// LO 100131720 //. | .           |
| 243536_x_ | 0.01516  | 0.008554 | SH3D20                      | 201175 .    |
| 243537_at | 9.62E-05 | 1.84E-05 |                             | .           |
| 243538_at | 0.002383 | 9.53E-04 |                             | .           |
| 243541_at | 0.038232 | 0.025138 | IL31RA                      | 133396 .    |
| 243543_at | 0.002087 | 8.12E-04 |                             | .           |
| 243551_at | 0.002037 | 7.89E-04 |                             | .           |
| 243552_at | 1.47E-04 | 3.13E-05 | MBTD1                       | 54799 .     |
| 243553_x_ | 0.037931 | 0.02491  |                             | .           |
| 243557_at | 0.044971 | 0.03036  |                             | .           |
| 243558_at | 1.63E-05 | 1.92E-06 |                             | .           |
| 243559_at | 2.12E-04 | 4.91E-05 |                             | .           |
| 243561_at | 9.01E-05 | 1.69E-05 |                             | .           |

|           |          |          |              |           |     |
|-----------|----------|----------|--------------|-----------|-----|
| 243564_at | 2.07E-04 | 4.79E-05 | PDE1C        | 5137      | .   |
| 243565_at | 0.001596 | 5.88E-04 | CCDC150      | 284992    | .   |
| 243567_at | 3.04E-04 | 7.72E-05 |              |           | .   |
| 243569_at | 0.003663 | 0.001596 | TMEM174      | 134288    | .   |
| 243571_at | 0.014025 | 0.0078   |              |           | .   |
| 243574_at | 4.59E-04 | 1.28E-04 |              |           | .   |
| 243575_at | 4.56E-04 | 1.27E-04 | LOC100128443 | 100128443 | //. |
| 243576_at | 0.004052 | 0.0018   |              |           | .   |
| 243578_at | 1.35E-04 | 2.80E-05 |              |           | .   |
| 243579_at | 0.013713 | 0.007601 | MSI2         | 124540    | .   |
| 243582_at | 2.53E-04 | 6.15E-05 | SH3RF2       | 153769    | .   |
| 243583_at | 0.002047 | 7.94E-04 |              |           | .   |
| 243585_at | 0.022411 | 0.013521 | ATP13A5      | 344905    | .   |
| 243587_x_ | 2.30E-04 | 5.44E-05 |              |           | .   |
| 243589_at | 2.71E-05 | 3.66E-06 | KIAA1267     | 284058    | .   |
| 243590_at | 0.010051 | 0.005278 |              |           | .   |
| 243591_at | 0.001202 | 4.18E-04 |              |           | .   |
| 243592_at | 0.001163 | 4.01E-04 | REV1         | 51455     | .   |
| 243593_s_ | 9.44E-06 | 9.43E-07 |              |           | .   |
| 243594_x_ | 4.71E-04 | 1.32E-04 | SPIRE2       | 84501     | .   |
| 243597_at | 0.00366  | 0.001595 | FANCB        | 2187      | .   |
| 243600_at | 0.001291 | 4.55E-04 | C19orf20     | 91978     | .   |
| 243603_at | 0.011322 | 0.006069 |              |           | .   |
| 243606_at | 6.01E-05 | 1.01E-05 | FAM55C       | 91775     | .   |
| 243607_at | 0.046462 | 0.031525 |              |           | .   |
| 243608_at | 2.59E-04 | 6.33E-05 | COG2         | 22796     | .   |
| 243610_at | 1.98E-11 | 3.19E-14 | C9orf135     | 138255    | .   |
| 243611_at | 0.014699 | 0.008248 | MICALCL      | 84953     | .   |
| 243612_at | 6.33E-04 | 1.90E-04 | NSD1         | 64324     | .   |
| 243613_at | 0.018895 | 0.011067 | DENND5B      | 160518    | .   |
| 243614_s_ | 5.93E-06 | 5.11E-07 | PRODH2       | 58510     | .   |
| 243615_at | 0.011462 | 0.006159 |              |           | .   |
| 243616_at | 7.65E-06 | 7.11E-07 |              |           | .   |
| 243617_at | 0.001158 | 3.99E-04 | ZNF827       | 152485    | .   |

|           |          |          |                            |           |   |
|-----------|----------|----------|----------------------------|-----------|---|
| 243618_s_ | 6.27E-04 | 1.88E-04 | ZNF827                     | 152485    | . |
| 243619_at | 0.021109 | 0.012614 | FGFR1OP2                   | 26127     | . |
| 243620_at | 0.006467 | 0.003144 |                            |           | . |
| 243621_at | 0.019622 | 0.011564 | SPACA3                     | 124912    | . |
| 243622_at | 0.006329 | 0.003063 | LOC145694                  | 145694    | . |
| 243624_at | 9.16E-04 | 3.00E-04 | PIAS2                      | 9063      | . |
| 243625_at | 0.002214 | 8.73E-04 |                            |           | . |
| 243626_at | 4.57E-06 | 3.63E-07 |                            |           | . |
| 243628_at | 5.92E-04 | 1.75E-04 | COPS7B                     | 64708     | . |
| 243629_x_ | 0.007215 | 0.003581 |                            |           | . |
| 243630_at | 2.61E-05 | 3.50E-06 | NDUFB1                     | 4707      | . |
| 243631_at | 0.027639 | 0.017249 | LOC727815                  | 727815    | . |
| 243633_at | 6.59E-04 | 2.00E-04 |                            |           | . |
| 243634_at | 7.64E-07 | 3.46E-08 |                            |           | . |
| 243637_at | 1.32E-04 | 2.74E-05 |                            |           | . |
| 243638_at | 0.025391 | 0.015644 |                            |           | . |
| 243639_at | 0.029152 | 0.018352 |                            |           | . |
| 243640_x_ | 5.29E-04 | 1.53E-04 |                            |           | . |
| 243641_at | 3.80E-05 | 5.61E-06 |                            |           | . |
| 243642_x_ | 1.55E-05 | 1.80E-06 |                            |           | . |
| 243643_x_ | 0.038856 | 0.025609 | SLC30A6                    | 55676     | . |
| 243644_at | 0.001309 | 4.63E-04 |                            |           | . |
| 243645_at | 2.06E-07 | 5.95E-09 | NFASC                      | 23114     | . |
| 243646_at | 2.70E-07 | 8.74E-09 |                            |           | . |
| 243648_at | 7.31E-05 | 1.30E-05 | LOC100131402               | 100131402 | . |
| 243651_at | 3.16E-04 | 8.13E-05 | CPEB3 /// LOC:100130772 // |           | . |
| 243652_at | 0.00892  | 0.004588 |                            |           | . |
| 243653_at | 1.48E-04 | 3.14E-05 | SHROOM3                    | 57619     | . |
| 243654_at | 0.005039 | 0.002339 |                            |           | . |
| 243655_x_ | 3.92E-05 | 5.83E-06 |                            |           | . |
| 243663_at | 0.011626 | 0.006259 |                            |           | . |
| 243664_at | 5.70E-04 | 1.67E-04 | TXNL1                      | 9352      | . |
| 243666_at | 0.044184 | 0.029744 |                            |           | . |
| 243667_at | 3.53E-06 | 2.60E-07 |                            |           | . |

|           |          |          |          |        |   |
|-----------|----------|----------|----------|--------|---|
| 243669_s_ | 6.00E-05 | 1.01E-05 | PRAP1    | 118471 | . |
| 243670_at | 0.02211  | 0.013319 |          |        | . |
| 243672_at | 3.92E-04 | 1.06E-04 | SALL3    | 27164  | . |
| 243673_at | 0.005296 | 0.00248  |          |        | . |
| 243675_at | 0.001832 | 6.94E-04 |          |        | . |
| 243676_at | 0.011142 | 0.005958 |          |        | . |
| 243680_at | 0.026887 | 0.01671  |          |        | . |
| 243682_at | 0.00175  | 6.57E-04 |          |        | . |
| 243683_at | 1.49E-04 | 3.19E-05 | MORF4L2  | 9643   | . |
| 243690_at | 7.30E-06 | 6.69E-07 | TRIOBP   | 11078  | . |
| 243691_at | 2.27E-04 | 5.35E-05 |          |        | . |
| 243695_at | 0.007638 | 0.003831 |          |        | . |
| 243697_at | 0.001959 | 7.53E-04 | MOXD1    | 26002  | . |
| 243698_at | 1.55E-05 | 1.81E-06 |          |        | . |
| 243699_at | 0.020876 | 0.012452 |          |        | . |
| 243702_at | 4.42E-05 | 6.84E-06 |          |        | . |
| 243703_x_ | 7.17E-04 | 2.22E-04 |          |        | . |
| 243705_at | 0.013133 | 0.007229 | DDHD1    | 80821  | . |
| 243707_at | 7.96E-04 | 2.53E-04 |          |        | . |
| 243710_at | 0.027149 | 0.016892 |          |        | . |
| 243711_at | 1.10E-04 | 2.17E-05 | DDAH1    | 23576  | . |
| 243712_at | 0.004125 | 0.001839 | XIST     | 7503   | . |
| 243715_at | 0.021841 | 0.013127 |          |        | . |
| 243716_at | 9.69E-05 | 1.85E-05 | FLJ43663 | 378805 | . |
| 243718_at | 0.03659  | 0.023892 |          |        | . |
| 243720_at | 0.026652 | 0.016533 | CMIP     | 80790  | . |
| 243721_at | 0.041848 | 0.027907 |          |        | . |
| 243722_at | 1.39E-04 | 2.90E-05 | PYDC1    | 260434 | . |
| 243724_at | 0.047166 | 0.032085 |          |        | . |
| 243726_at | 6.14E-05 | 1.04E-05 |          |        | . |
| 243729_at | 1.02E-05 | 1.05E-06 |          |        | . |
| 243731_at | 0.003884 | 0.001711 |          |        | . |
| 243733_at | 5.16E-04 | 1.48E-04 |          |        | . |
| 243735_at | 0.002426 | 9.74E-04 |          |        | . |



|           |          |          |              |               |
|-----------|----------|----------|--------------|---------------|
| 243736_at | 0.008218 | 0.004169 |              | .             |
| 243738_at | 5.78E-05 | 9.60E-06 | NMNAT3       | 349565 .      |
| 243739_at | 0.026507 | 0.01643  |              | .             |
| 243740_at | 0.001613 | 5.95E-04 |              | .             |
| 243744_at | 0.004408 | 0.001993 | LOC348751    | 348751 .      |
| 243745_at | 6.26E-06 | 5.44E-07 |              | .             |
| 243747_at | 2.83E-04 | 7.06E-05 | ZNF599       | 148103 .      |
| 243749_s_ | 0.003009 | 0.00126  |              | .             |
| 243750_x_ | 9.88E-05 | 1.90E-05 | C21orf70     | 85395 .       |
| 243751_at | 6.78E-08 | 1.35E-09 |              | .             |
| 243752_s_ | 9.71E-04 | 3.22E-04 | CYTH3        | 9265 .        |
| 243754_at | 0.010188 | 0.005361 |              | .             |
| 243755_at | 0.001167 | 4.03E-04 | PRLR         | 5618 .        |
| 243757_at | 0.003526 | 0.001525 | LOC100129006 | 100129006 .   |
| 243758_at | 0.001006 | 3.36E-04 | CCDC37       | 348807 .      |
| 243759_at | 1.13E-04 | 2.24E-05 | SFRS15       | 57466 .       |
| 243760_at | 1.39E-04 | 2.91E-05 | LOC650794    | 650794 .      |
| 243761_at | 0.044753 | 0.030192 | LOC100129289 | 100129289 //. |
| 243763_x_ | 9.40E-05 | 1.78E-05 |              | .             |
| 243766_s_ | 3.73E-06 | 2.79E-07 | TEAD2        | 8463 .        |
| 243767_at | 0.011999 | 0.006495 |              | .             |
| 243768_at | 2.95E-06 | 2.06E-07 |              | .             |
| 243769_at | 0.001903 | 7.27E-04 |              | .             |
| 243770_at | 0.001654 | 6.14E-04 | ZNF483       | 158399 .      |
| 243772_at | 0.042162 | 0.028157 | SDCCAG8      | 10806 .       |
| 243773_at | 0.005695 | 0.002702 | PDCD2        | 5134 .        |
| 243774_at | 3.04E-04 | 7.72E-05 | MUC20        | 200958 .      |
| 243776_at | 3.77E-05 | 5.55E-06 |              | .             |
| 243777_at | 7.66E-04 | 2.41E-04 | RAB7L1       | 8934 .        |
| 243779_at | 4.07E-04 | 1.11E-04 | GALNT13      | 114805 .      |
| 243780_at | 0.002645 | 0.00108  |              | .             |
| 243781_at | 0.005771 | 0.002746 |              | .             |
| 243783_at | 0.005025 | 0.00233  |              | .             |
| 243785_at | 0.017019 | 0.009788 | LOC100272217 | 100272217 .   |

|           |          |          |              |           |   |
|-----------|----------|----------|--------------|-----------|---|
| 243786_at | 0.001435 | 5.17E-04 | ZDHHC20      | 253832    | . |
| 243787_at | 0.005221 | 0.002439 |              |           | . |
| 243791_at | 0.001623 | 6.00E-04 |              |           | . |
| 243793_at | 0.005355 | 0.002513 | AHDC1        | 27245     | . |
| 243801_x_ | 2.88E-05 | 3.97E-06 |              |           | . |
| 243803_at | 0.002674 | 0.001094 | LOC643037    | 643037    | . |
| 243805_at | 6.86E-08 | 1.37E-09 | CCBE1        | 147372    | . |
| 243807_at | 0.00134  | 4.77E-04 | NCOA7        | 135112    | . |
| 243808_at | 9.40E-04 | 3.10E-04 |              |           | . |
| 243811_at | 4.16E-05 | 6.31E-06 |              |           | . |
| 243813_at | 1.11E-09 | 6.07E-12 |              |           | . |
| 243815_at | 0.018172 | 0.010575 | PGBD4        | 161779    | . |
| 243816_at | 2.70E-04 | 6.68E-05 | ZNF70        | 7621      | . |
| 243817_at | 0.007826 | 0.003942 |              |           | . |
| 243818_at | 0.020256 | 0.012003 | SFTA1P       | 207107    | . |
| 243820_at | 5.70E-04 | 1.67E-04 | LOC401463    | 401463    | . |
| 243823_at | 7.76E-05 | 1.40E-05 |              |           | . |
| 243824_at | 0.021347 | 0.012778 |              |           | . |
| 243825_at | 3.74E-04 | 9.95E-05 | BCL6B        | 255877    | . |
| 243826_at | 0.026321 | 0.016294 |              |           | . |
| 243827_at | 3.64E-06 | 2.70E-07 |              |           | . |
| 243829_at | 0.011047 | 0.005897 | BRAF         | 673       | . |
| 243830_at | 0.003816 | 0.001676 | FNDC3B       | 64778     | . |
| 243833_at | 2.73E-04 | 6.77E-05 | UNC5A        | 90249     | . |
| 243834_at | 1.49E-04 | 3.19E-05 | TNRC6A       | 27327     | . |
| 243835_at | 0.025649 | 0.015819 | ZDHHC21      | 340481    | . |
| 243837_x_ | 1.38E-04 | 2.88E-05 | LOC100128500 | 100128500 | . |
| 243840_at | 1.77E-05 | 2.14E-06 |              |           | . |
| 243842_at | 0.005471 | 0.002578 |              |           | . |
| 243845_at | 9.47E-04 | 3.13E-04 | HSPD1        | 3329      | . |
| 243846_x_ | 0.034183 | 0.022072 |              |           | . |
| 243847_at | 7.83E-06 | 7.33E-07 |              |           | . |
| 243849_at | 1.31E-04 | 2.70E-05 | TMEM37       | 140738    | . |
| 243850_at | 4.12E-04 | 1.12E-04 |              |           | . |

|           |          |          |           |        |   |
|-----------|----------|----------|-----------|--------|---|
| 243852_at | 0.010142 | 0.005332 | LUC7L2    | 51631  | . |
| 243853_at | 9.60E-04 | 3.18E-04 |           |        | . |
| 243854_at | 0.001767 | 6.64E-04 |           |        | . |
| 243855_at | 0.002796 | 0.001154 |           |        | . |
| 243856_at | 0.020015 | 0.011839 |           |        | . |
| 243857_at | 3.08E-04 | 7.84E-05 | MORF4L2   | 9643   | . |
| 243858_at | 0.002933 | 0.00122  |           |        | . |
| 243860_at | 0.009257 | 0.004794 |           |        | . |
| 243861_at | 1.09E-05 | 1.13E-06 |           |        | . |
| 243863_at | 5.85E-04 | 1.73E-04 | ZCW PW2   | 152098 | . |
| 243864_at | 9.82E-11 | 2.53E-13 | CCDC80    | 151887 | . |
| 243865_x_ | 0.005972 | 0.002862 |           |        | . |
| 243866_x_ | 3.76E-04 | 1.00E-04 |           |        | . |
| 243868_at | 0.016142 | 0.009212 |           |        | . |
| 243869_at | 0.001516 | 5.53E-04 |           |        | . |
| 243873_at | 0.024062 | 0.014683 |           |        | . |
| 243874_at | 8.14E-05 | 1.49E-05 | LPP       | 4026   | . |
| 243876_at | 1.44E-05 | 1.65E-06 |           |        | . |
| 243878_at | 0.010323 | 0.005445 |           |        | . |
| 243879_at | 0.027711 | 0.017303 |           |        | . |
| 243881_at | 7.63E-04 | 2.40E-04 |           |        | . |
| 243883_at | 0.035894 | 0.02336  | MMP15     | 4324   | . |
| 243884_at | 0.004207 | 0.001883 | C13orf26  | 122046 | . |
| 243887_at | 0.003858 | 0.001698 |           |        | . |
| 243888_at | 0.009169 | 0.00474  |           |        | . |
| 243889_at | 0.0018   | 6.79E-04 |           |        | . |
| 243890_at | 0.010664 | 0.005657 |           |        | . |
| 243894_at | 6.43E-05 | 1.10E-05 | SLC41A2   | 84102  | . |
| 243895_x_ | 0.006878 | 0.003384 |           |        | . |
| 243897_at | 4.88E-05 | 7.78E-06 |           |        | . |
| 243899_at | 8.37E-05 | 1.55E-05 | ARL17P1   | 51326  | . |
| 243903_at | 0.047407 | 0.032276 |           |        | . |
| 243904_at | 7.03E-04 | 2.17E-04 |           |        | . |
| 243905_at | 0.015883 | 0.009039 | LOC387895 | 387895 | . |

|           |          |          |                           |          |
|-----------|----------|----------|---------------------------|----------|
| 243906_at | 6.16E-04 | 1.84E-04 |                           | .        |
| 243908_at | 0.003285 | 0.0014   |                           | .        |
| 243909_x  | 0.002403 | 9.63E-04 | GUSBL2                    | 375513 . |
| 243910_x  | 0.002748 | 0.001131 |                           | .        |
| 243911_at | 4.54E-04 | 1.27E-04 |                           | .        |
| 243912_x  | 1.57E-06 | 9.04E-08 | APOBEC3F                  | 200316 . |
| 243914_at | 0.035482 | 0.023044 |                           | .        |
| 243915_at | 2.47E-04 | 5.95E-05 |                           | .        |
| 243916_x  | 0.022701 | 0.013724 | UBLCP1                    | 134510 . |
| 243917_at | 2.51E-04 | 6.09E-05 | CLIC5                     | 53405 .  |
| 243918_at | 6.99E-05 | 1.23E-05 |                           | .        |
| 243920_x  | 0.001835 | 6.95E-04 |                           | .        |
| 243922_at | 1.44E-05 | 1.65E-06 |                           | .        |
| 243924_at | 4.07E-05 | 6.13E-06 | LOC100127980(100127980 // | .        |
| 243927_x  | 2.70E-05 | 3.65E-06 | KIAA1429                  | 25962 .  |
| 243928_s  | 3.69E-04 | 9.80E-05 | ABCC4                     | 10257 .  |
| 243931_at | 7.36E-12 | 7.59E-15 |                           | .        |
| 243933_at | 0.024933 | 0.015309 |                           | .        |
| 243934_at | 0.010534 | 0.005575 | ODF3B                     | 440836 . |
| 243935_at | 0.027305 | 0.017009 | FRAS1                     | 80144 .  |
| 243940_at | 0.046162 | 0.031289 | TSHZ2                     | 128553 . |
| 243944_at | 1.79E-04 | 4.01E-05 |                           | .        |
| 243945_at | 1.35E-04 | 2.82E-05 | TRIM2                     | 23321 .  |
| 243946_at | 0.011157 | 0.005967 | SMOC2                     | 64094 .  |
| 243948_at | 0.020254 | 0.012002 |                           | .        |
| 243955_at | 0.006178 | 0.002977 |                           | .        |
| 243956_at | 0.019927 | 0.011775 | SUSD3                     | 203328 . |
| 243959_at | 1.58E-04 | 3.43E-05 |                           | .        |
| 243963_at | 0.006695 | 0.003276 | SDCCAG8                   | 10806 .  |
| 243964_at | 2.23E-07 | 6.72E-09 |                           | .        |
| 243965_at | 0.025696 | 0.015853 |                           | .        |
| 243966_at | 4.56E-05 | 7.13E-06 |                           | .        |
| 243967_at | 1.10E-05 | 1.15E-06 | AFF3                      | 3899 .   |
| 243971_x  | 7.07E-04 | 2.18E-04 | LOC731789                 | 731789 . |

|           |          |                    |          |
|-----------|----------|--------------------|----------|
| 243975_at | 0.036333 | 0.023697           | .        |
| 243976_at | 0.002079 | 8.09E-04           | .        |
| 243978_at | 0.003948 | 0.001745 FAM65C    | 140876 . |
| 243980_at | 4.68E-04 | 1.31E-04 ZNF594    | 84622 .  |
| 243981_at | 1.04E-07 | 2.40E-09 STK4      | 6789 .   |
| 243983_at | 7.93E-06 | 7.45E-07           | .        |
| 243985_at | 5.84E-04 | 1.72E-04 GTF2A2    | 2958 .   |
| 243986_at | 0.032851 | 0.021085 LOC144766 | 144766 . |
| 243987_at | 0.004298 | 0.001932           | .        |
| 243988_at | 0.001554 | 5.69E-04           | .        |
| 243989_at | 0.018532 | 0.010821           | .        |
| 243990_at | 0.005438 | 0.002559           | .        |
| 243992_at | 0.006658 | 0.003255           | .        |
| 243993_at | 0.00743  | 0.003709           | .        |
| 243995_at | 0.041629 | 0.027737 PTAR1     | 375743 . |
| 243996_at | 0.008287 | 0.004211           | .        |
| 243997_x_ | 0.001166 | 4.03E-04           | .        |
| 243999_at | 6.61E-05 | 1.14E-05 SLFN5     | 162394 . |
| 244005_at | 0.037272 | 0.024416           | .        |
| 244007_at | 1.03E-05 | 1.06E-06 ZNF462    | 58499 .  |
| 244008_at | 0.04301  | 0.028801           | .        |
| 244010_at | 0.003875 | 0.001707           | .        |
| 244012_x_ | 3.38E-06 | 2.47E-07           | .        |
| 244014_x_ | 0.001002 | 3.35E-04           | .        |
| 244015_at | 4.57E-04 | 1.28E-04           | .        |
| 244017_at | 1.10E-04 | 2.17E-05           | .        |
| 244020_at | 0.044843 | 0.030262           | .        |
| 244024_at | 0.001441 | 5.20E-04 ZNF182    | 7569 .   |
| 244025_at | 0.001223 | 4.27E-04           | .        |
| 244027_at | 6.81E-04 | 2.09E-04           | .        |
| 244030_at | 1.61E-04 | 3.51E-05 STYX      | 6815 .   |
| 244031_at | 3.64E-09 | 2.79E-11           | .        |
| 244032_at | 0.021723 | 0.013042           | .        |
| 244033_at | 5.16E-04 | 1.48E-04 C14orf145 | 145508 . |

|           |          |          |           |           |   |
|-----------|----------|----------|-----------|-----------|---|
| 244034_at | 0.018154 | 0.010563 | ZCCHC2    | 54877     | . |
| 244036_at | 0.048021 | 0.032746 |           |           | . |
| 244037_at | 0.046812 | 0.031806 |           |           | . |
| 244038_at | 0.005841 | 0.002787 | WDR89     | 112840    | . |
| 244041_at | 0.013095 | 0.007204 | STX6      | 10228     | . |
| 244042_x_ | 1.15E-04 | 2.30E-05 |           |           | . |
| 244043_at | 0.003264 | 0.001389 |           |           | . |
| 244046_at | 3.07E-04 | 7.81E-05 | URG4      | 55665     | . |
| 244047_at | 0.020737 | 0.01235  |           |           | . |
| 244049_at | 0.001557 | 5.71E-04 |           |           | . |
| 244050_at | 8.63E-04 | 2.80E-04 | PTPLAD2   | 401494    | . |
| 244052_at | 7.43E-05 | 1.33E-05 | CBR4      | 84869     | . |
| 244053_at | 1.65E-04 | 3.61E-05 |           |           | . |
| 244056_at | 0.009182 | 0.004748 | SFTA2     | 389376    | . |
| 244057_s_ | 4.21E-07 | 1.59E-08 | C10orf72  | 196740    | . |
| 244058_at | 9.36E-07 | 4.53E-08 | C10orf72  | 196740    | . |
| 244059_at | 0.037958 | 0.024929 |           |           | . |
| 244064_at | 0.009617 | 0.005011 |           |           | . |
| 244068_at | 0.002797 | 0.001155 |           |           | . |
| 244069_at | 0.002083 | 8.11E-04 |           |           | . |
| 244070_at | 8.35E-04 | 2.68E-04 | SYNE1     | 23345     | . |
| 244071_at | 0.01338  | 0.007386 | FBLL1     | 345630    | . |
| 244075_at | 1.82E-05 | 2.21E-06 |           |           | . |
| 244077_at | 0.00886  | 0.004551 | C10orf113 | 387638    | . |
| 244078_at | 5.24E-04 | 1.50E-04 |           |           | . |
| 244081_at | 0.003898 | 0.001719 |           |           | . |
| 244082_at | 0.008984 | 0.004626 |           |           | . |
| 244085_at | 1.17E-05 | 1.25E-06 | ZNF653    | 115950    | . |
| 244087_at | 4.11E-04 | 1.12E-04 |           |           | . |
| 244089_at | 0.001668 | 6.20E-04 |           | 100130526 | . |
| 244090_at | 1.21E-04 | 2.44E-05 |           |           | . |
| 244091_at | 0.016592 | 0.009508 |           |           | . |
| 244092_at | 0.001928 | 7.38E-04 | ZRANB3    | 84083     | . |
| 244094_at | 0.031282 | 0.019913 |           |           | . |

|           |          |          |                             |          |
|-----------|----------|----------|-----------------------------|----------|
| 244095_at | 5.31E-05 | 8.64E-06 |                             | .        |
| 244099_at | 0.007366 | 0.00367  |                             | .        |
| 244103_at | 6.46E-04 | 1.95E-04 | C1orf55                     | 163859 . |
| 244104_at | 0.00743  | 0.003709 | MGAT3                       | 4248 .   |
| 244105_at | 0.008689 | 0.004448 | LOC644231 /// 339005 /// 44 | .        |
| 244108_at | 2.15E-05 | 2.75E-06 | SYNPO2                      | 171024 . |
| 244110_at | 8.71E-05 | 1.62E-05 | MLL                         | 4297 .   |
| 244111_at | 0.033236 | 0.021376 | KRT222P                     | 125113 . |
| 244112_x_ | 0.001806 | 6.82E-04 |                             | .        |
| 244113_at | 0.001894 | 7.23E-04 |                             | .        |
| 244114_x_ | 0.015071 | 0.008496 |                             | .        |
| 244115_at | 2.29E-06 | 1.48E-07 | FAM126A                     | 84668 .  |
| 244120_at | 4.57E-04 | 1.27E-04 | LOC340178                   | 340178 . |
| 244124_at | 8.57E-04 | 2.77E-04 | RAB37                       | 326624 . |
| 244126_at | 2.04E-07 | 5.89E-09 | PEX11G                      | 92960 .  |
| 244128_x_ | 0.026646 | 0.016528 | GLIS1                       | 148979 . |
| 244131_at | 0.009857 | 0.005159 | HNRNPA2B1                   | 3181 .   |
| 244132_x_ | 0.021774 | 0.013079 | ZNF518A                     | 9849 .   |
| 244133_at | 6.41E-04 | 1.93E-04 | USP49                       | 25862 .  |
| 244135_at | 0.026305 | 0.016281 |                             | .        |
| 244138_at | 7.59E-04 | 2.38E-04 | LOC728904                   | 728904 . |
| 244139_s_ | 0.020008 | 0.011834 |                             | .        |
| 244140_at | 0.027103 | 0.016861 |                             | .        |
| 244141_at | 0.029278 | 0.018445 |                             | .        |
| 244145_at | 7.63E-07 | 3.45E-08 |                             | .        |
| 244146_at | 2.16E-05 | 2.76E-06 | DTWD1                       | 56986 .  |
| 244147_at | 0.02028  | 0.012021 |                             | .        |
| 244149_at | 4.68E-04 | 1.31E-04 |                             | .        |
| 244150_at | 0.008694 | 0.004451 |                             | .        |
| 244152_at | 0.015771 | 0.008962 |                             | .        |
| 244154_at | 2.12E-04 | 4.93E-05 | DDHD1                       | 80821 .  |
| 244155_x_ | 3.82E-04 | 1.02E-04 | TOR2A                       | 27433 .  |
| 244156_at | 0.002325 | 9.26E-04 |                             | .        |
| 244157_x_ | 4.37E-10 | 1.80E-12 |                             | .        |

|           |          |          |              |             |
|-----------|----------|----------|--------------|-------------|
| 244158_at | 5.37E-05 | 8.76E-06 |              | .           |
| 244162_at | 0.029515 | 0.018621 |              | .           |
| 244163_at | 9.55E-05 | 1.82E-05 | SEMA3A       | 10371 .     |
| 244164_at | 1.02E-04 | 1.99E-05 |              | .           |
| 244165_at | 0.001277 | 4.49E-04 | C10orf18     | 54906 .     |
| 244166_at | 0.016447 | 0.009413 | APLN         | 8862 .      |
| 244167_at | 2.11E-05 | 2.67E-06 |              | .           |
| 244170_at | 6.43E-05 | 1.10E-05 |              | .           |
| 244171_at | 1.58E-04 | 3.41E-05 | MKLN1        | 4289 .      |
| 244172_at | 0.025586 | 0.015776 |              | .           |
| 244174_at | 6.38E-09 | 5.85E-11 |              | .           |
| 244175_at | 0.028714 | 0.018038 | RP3-439I14.1 | 100129852 . |
| 244176_at | 0.002967 | 0.001237 | LOC401913    | 401913 .    |
| 244177_at | 0.005356 | 0.002513 |              | .           |
| 244178_at | 2.41E-05 | 3.16E-06 | COMMD7       | 149951 .    |
| 244180_at | 3.07E-05 | 4.31E-06 | ZNF793       | 390927 .    |
| 244181_at | 3.58E-05 | 5.21E-06 |              | .           |
| 244182_at | 0.002778 | 0.001146 |              | .           |
| 244185_at | 9.02E-06 | 8.87E-07 |              | .           |
| 244186_at | 9.22E-04 | 3.03E-04 |              | .           |
| 244187_at | 8.31E-04 | 2.67E-04 |              | .           |
| 244189_at | 9.46E-08 | 2.13E-09 | LOC284900    | 284900 .    |
| 244191_at | 6.09E-05 | 1.03E-05 | RPLP1        | 6176 .      |
| 244192_x_ | 8.38E-04 | 2.69E-04 | SSNA1        | 8636 .      |
| 244193_at | 0.004493 | 0.002039 | DNAJC22      | 79962 .     |
| 244195_at | 1.11E-04 | 2.20E-05 |              | .           |
| 244196_at | 0.012936 | 0.007106 |              | .           |
| 244197_x_ | 1.02E-05 | 1.05E-06 |              | .           |
| 244198_at | 0.002125 | 8.31E-04 | RANBP17      | 64901 .     |
| 244199_at | 0.00618  | 0.002978 | TWF1         | 5756 .      |
| 244204_at | 0.002244 | 8.87E-04 |              | .           |
| 244205_at | 0.002914 | 0.001211 | ALAS2        | 212 .       |
| 244208_at | 0.006375 | 0.003091 |              | .           |
| 244212_at | 5.26E-04 | 1.51E-04 |              | .           |



|           |          |          |           |          |
|-----------|----------|----------|-----------|----------|
| 244213_at | 0.018691 | 0.010927 |           | .        |
| 244214_at | 0.01702  | 0.009789 | PELI3     | 246330 . |
| 244215_at | 8.40E-05 | 1.55E-05 |           | .        |
| 244216_at | 5.68E-04 | 1.66E-04 |           | .        |
| 244218_at | 0.013469 | 0.007444 |           | .        |
| 244219_at | 0.005882 | 0.002811 |           | .        |
| 244220_at | 0.028998 | 0.018243 |           | .        |
| 244221_at | 0.030575 | 0.019403 |           | .        |
| 244223_at | 0.029886 | 0.018899 |           | .        |
| 244224_x_ | 2.84E-05 | 3.89E-06 | LYNX1     | 66004 .  |
| 244227_at | 0.007565 | 0.003786 | SYT6      | 148281 . |
| 244230_at | 0.004713 | 0.00216  |           | .        |
| 244231_at | 5.86E-04 | 1.73E-04 | LOC149684 | 149684 . |
| 244234_at | 6.79E-04 | 2.08E-04 | FAM62A    | 23344 .  |
| 244236_at | 2.96E-05 | 4.10E-06 |           | .        |
| 244237_at | 0.005302 | 0.002483 | FLJ90680  | 400926 . |
| 244238_at | 0.002064 | 8.02E-04 |           | .        |
| 244240_at | 0.026642 | 0.016524 |           | .        |
| 244241_x_ | 1.09E-04 | 2.15E-05 |           | .        |
| 244242_at | 0.026194 | 0.016206 |           | .        |
| 244243_at | 0.00548  | 0.002583 |           | .        |
| 244244_at | 8.22E-04 | 2.63E-04 |           | .        |
| 244245_at | 5.71E-04 | 1.68E-04 | ANKRD9    | 122416 . |
| 244248_at | 0.039295 | 0.025944 | TTC27     | 55622 .  |
| 244249_at | 5.03E-04 | 1.43E-04 |           | .        |
| 244252_at | 3.57E-04 | 9.40E-05 | LOC399884 | 399884 . |
| 244257_at | 0.011982 | 0.006484 |           | .        |
| 244259_s_ | 3.31E-04 | 8.59E-05 |           | .        |
| 244261_at | 8.07E-04 | 2.57E-04 | IL28RA    | 163702 . |
| 244264_at | 0.00217  | 8.52E-04 | KLRG2     | 346689 . |
| 244265_at | 0.001777 | 6.68E-04 |           | .        |
| 244266_at | 0.006668 | 0.00326  | AKR1C2    | 1646 .   |
| 244268_x_ | 0.018487 | 0.01079  | LOC646214 | 646214 . |
| 244269_at | 0.020315 | 0.012047 |           | .        |

|           |          |          |                      |
|-----------|----------|----------|----------------------|
| 244271_at | 6.40E-04 | 1.93E-04 | .                    |
| 244275_at | 0.001892 | 7.22E-04 | .                    |
| 244279_at | 1.31E-04 | 2.71E-05 | SOBP 55084 .         |
| 244281_at | 9.37E-06 | 9.34E-07 | REXO1 57455 .        |
| 244284_at | 3.59E-05 | 5.22E-06 | .                    |
| 244285_at | 5.30E-04 | 1.53E-04 | .                    |
| 244286_at | 0.003045 | 0.001278 | .                    |
| 244287_at | 2.61E-08 | 3.80E-10 | SFRS12 140890 .      |
| 244289_at | 0.028762 | 0.018073 | LOC134466 134466 .   |
| 244290_at | 1.21E-04 | 2.45E-05 | .                    |
| 244292_at | 7.41E-05 | 1.32E-05 | .                    |
| 244294_at | 1.34E-04 | 2.77E-05 | GTF2H5 404672 .      |
| 244296_at | 0.019464 | 0.011458 | hCG_1776047 727961 . |
| 244297_at | 0.015913 | 0.009059 | ANKRD18A 253650 .    |
| 244298_at | 5.31E-05 | 8.64E-06 | .                    |
| 244302_at | 3.94E-04 | 1.06E-04 | .                    |
| 244304_at | 0.001394 | 5.00E-04 | LOC731484 731484 .   |
| 244305_at | 5.92E-05 | 9.89E-06 | GGN 199720 .         |
| 244307_s_ | 0.04203  | 0.028051 | SYT15 83849 .        |
| 244309_at | 4.67E-06 | 3.73E-07 | .                    |
| 244310_at | 0.001479 | 5.37E-04 | .                    |
| 244312_at | 1.49E-04 | 3.17E-05 | .                    |
| 244316_at | 0.024958 | 0.015327 | C17orf98 388381 .    |
| 244317_at | 1.07E-07 | 2.51E-09 | KIAA1324L 222223 .   |
| 244318_at | 1.52E-04 | 3.25E-05 | .                    |
| 244322_at | 0.011854 | 0.0064   | hCG_2038586 646329 . |
| 244324_at | 6.64E-04 | 2.02E-04 | C18orf54 162681 .    |
| 244326_at | 0.022269 | 0.013427 | .                    |
| 244329_at | 5.64E-04 | 1.65E-04 | .                    |
| 244335_at | 2.42E-04 | 5.79E-05 | .                    |
| 244339_at | 4.91E-04 | 1.39E-04 | .                    |
| 244340_x_ | 4.82E-06 | 3.89E-07 | .                    |
| 244341_at | 1.49E-06 | 8.49E-08 | .                    |
| 244344_at | 0.037567 | 0.024632 | WNK4 65266 .         |

|           |          |          |                             |          |
|-----------|----------|----------|-----------------------------|----------|
| 244346_at | 0.044979 | 0.030367 |                             | .        |
| 244347_at | 2.88E-07 | 9.58E-09 |                             | .        |
| 244348_at | 0.013616 | 0.007537 |                             | .        |
| 244349_at | 0.026518 | 0.016439 |                             | .        |
| 244350_at | 0.001137 | 3.90E-04 | MYO10                       | 4651 .   |
| 244354_at | 6.54E-05 | 1.12E-05 |                             | .        |
| 244355_at | 8.38E-06 | 8.01E-07 | AVL9                        | 23080 .  |
| 244356_at | 2.07E-04 | 4.78E-05 |                             | .        |
| 244357_at | 0.003647 | 0.001588 |                             | .        |
| 244358_at | 1.15E-04 | 2.30E-05 |                             | .        |
| 244359_s_ | 0.005113 | 0.002381 |                             | .        |
| 244361_at | 0.027047 | 0.016822 |                             | .        |
| 244364_at | 3.30E-06 | 2.38E-07 | MYO3A                       | 53904 .  |
| 244365_at | 0.049541 | 0.03396  |                             | .        |
| 244366_at | 0.009696 | 0.005062 |                             | .        |
| 244371_at | 2.46E-04 | 5.93E-05 |                             | .        |
| 244374_at | 0.001476 | 5.35E-04 | PLAC2                       | 257000 . |
| 244376_at | 5.60E-04 | 1.64E-04 |                             | .        |
| 244379_at | 0.014855 | 0.008354 | LOC645634                   | 645634 . |
| 244384_at | 0.039946 | 0.02644  |                             | .        |
| 244385_at | 0.003901 | 0.00172  | KDM4C                       | 23081 .  |
| 244386_at | 0.038611 | 0.025426 |                             | .        |
| 244387_at | 0.006436 | 0.003126 |                             | .        |
| 244388_at | 0.010797 | 0.005742 |                             | .        |
| 244391_at | 0.001201 | 4.17E-04 | TSEN2                       | 80746 .  |
| 244393_x_ | 0.002539 | 0.001029 |                             | .        |
| 244394_at | 0.001335 | 4.74E-04 |                             | .        |
| 244395_at | 0.002154 | 8.44E-04 | FLJ41455                    | 441441 . |
| 244396_at | 0.016016 | 0.00913  | G3BP1                       | 10146 .  |
| 244397_at | 3.10E-07 | 1.05E-08 |                             | .        |
| 244398_x_ | 0.019698 | 0.011615 | ZNF684                      | 127396 . |
| 244400_at | 2.32E-05 | 3.01E-06 | VPS33A                      | 65082 .  |
| 244402_at | 0.042669 | 0.028546 |                             | .        |
| 244406_at | 4.55E-04 | 1.27E-04 | ZNF20 /// ZNF67568 /// 9058 | .        |

|           |          |          |               |           |   |
|-----------|----------|----------|---------------|-----------|---|
| 244409_at | 0.005371 | 0.002522 | CCDC154       | 645811    | . |
| 244410_at | 0.030667 | 0.019471 | PKHD1         | 5314      | . |
| 244411_at | 1.85E-05 | 2.26E-06 |               |           | . |
| 244415_at | 0.015384 | 0.008704 |               |           | . |
| 244416_at | 0.001704 | 6.36E-04 | TTC17         | 55761     | . |
| 244417_at | 0.00376  | 0.001647 |               |           | . |
| 244419_at | 2.72E-05 | 3.69E-06 | FRZB          | 2487      | . |
| 244420_at | 0.040036 | 0.02651  |               |           | . |
| 244425_at | 1.43E-05 | 1.63E-06 |               |           | . |
| 244427_at | 6.43E-07 | 2.75E-08 | KIF23         | 9493      | . |
| 244428_at | 0.022821 | 0.013807 | DNMT3A        | 1788      | . |
| 244429_at | 1.79E-06 | 1.09E-07 |               |           | . |
| 244431_at | 3.07E-05 | 4.30E-06 | KILLIN        | 100144748 | . |
| 244432_at | 0.011644 | 0.006271 |               |           | . |
| 244433_at | 0.003333 | 0.001425 |               |           | . |
| 244439_at | 0.001326 | 4.71E-04 | SPRED1        | 161742    | . |
| 244441_at | 0.00487  | 0.002246 |               |           | . |
| 244443_at | 0.030421 | 0.019291 | CHD2          | 1106      | . |
| 244450_at | 4.16E-04 | 1.13E-04 |               |           | . |
| 244452_at | 0.002494 | 0.001008 | C2orf30       | 27248     | . |
| 244456_at | 0.011661 | 0.00628  |               |           | . |
| 244457_at | 0.02871  | 0.018034 |               |           | . |
| 244458_at | 3.11E-04 | 7.96E-05 |               |           | . |
| 244461_at | 0.003465 | 0.001493 | CYTSB         | 92521     | . |
| 244462_at | 1.23E-04 | 2.50E-05 | ZNF224        | 7767      | . |
| 244464_at | 0.03731  | 0.024443 |               |           | . |
| 244465_at | 0.047584 | 0.032415 | LOC283033     | 283033    | . |
| 244466_at | 0.01971  | 0.011624 | ZNF544        | 27300     | . |
| 244467_at | 0.026403 | 0.016356 | C22:CTA-250D: | 440829    | . |
| 244468_at | 0.007803 | 0.003928 | PDZK1P1       | 728939    | . |
| 244470_at | 1.83E-05 | 2.22E-06 | RLIM          | 51132     | . |
| 244471_x_ | 2.94E-04 | 7.40E-05 | PANX2         | 56666     | . |
| 244472_at | 1.38E-06 | 7.65E-08 | LOC388630     | 388630    | . |
| 244473_at | 1.55E-05 | 1.81E-06 |               |           | . |

|           |          |          |              |             |
|-----------|----------|----------|--------------|-------------|
| 244474_at | 9.66E-06 | 9.72E-07 |              | .           |
| 244475_at | 7.55E-05 | 1.36E-05 |              | .           |
| 244476_at | 0.010164 | 0.005345 |              | .           |
| 244477_at | 2.70E-04 | 6.66E-05 | SLC12A3      | 6559 .      |
| 244479_at | 0.028012 | 0.01752  |              | .           |
| 244480_at | 5.76E-04 | 1.69E-04 |              | .           |
| 244481_at | 0.02506  | 0.015399 | SLC25A24     | 29957 .     |
| 244484_at | 0.034929 | 0.022623 |              | .           |
| 244491_at | 0.001704 | 6.36E-04 |              | .           |
| 244494_at | 3.20E-05 | 4.53E-06 | ZDHHC1       | 29800 .     |
| 244497_at | 0.003905 | 0.001723 | LOC100129907 | 100129907 . |
| 244498_x_ | 0.01203  | 0.006514 | LOC440296    | 440296 .    |
| 244499_at | 1.25E-05 | 1.36E-06 | ZFC3H1       | 196441 .    |
| 244500_s_ | 0.00276  | 0.001136 | EVI5L        | 115704 .    |
| 244501_at | 4.91E-04 | 1.39E-04 | EVI5L        | 115704 .    |
| 244502_at | 0.00504  | 0.00234  |              | .           |
| 244503_at | 0.006201 | 0.00299  |              | .           |
| 244504_x_ | 4.58E-05 | 7.16E-06 | ARF1         | 375 .       |
| 244506_at | 4.57E-04 | 1.27E-04 | TMTC1        | 83857 .     |
| 244509_at | 4.41E-06 | 3.48E-07 | GPR155       | 151556 .    |
| 244511_at | 0.009642 | 0.005027 |              | .           |
| 244515_at | 1.36E-05 | 1.52E-06 | PSMD7        | 5713 .      |
| 244518_at | 0.002247 | 8.88E-04 | LOC100130452 | 100130452 . |
| 244519_at | 1.35E-05 | 1.50E-06 | ASXL1        | 171023 .    |
| 244520_at | 0.038479 | 0.025327 |              | .           |
| 244522_at | 0.001007 | 3.36E-04 | SYVN1        | 84447 .     |
| 244523_at | 4.36E-08 | 7.49E-10 | MMD          | 23531 .     |
| 244525_at | 0.002353 | 9.38E-04 |              | .           |
| 244527_at | 0.001224 | 4.27E-04 | TRIO         | 7204 .      |
| 244528_at | 0.008728 | 0.004471 | ARMC8        | 25852 .     |
| 244530_at | 2.45E-05 | 3.25E-06 |              | .           |
| 244531_at | 0.032019 | 0.020465 | NNT          | 23530 .     |
| 244532_x_ | 0.002378 | 9.50E-04 |              | .           |
| 244533_at | 0.029338 | 0.018487 |              | .           |

|           |          |          |              |             |
|-----------|----------|----------|--------------|-------------|
| 244534_at | 9.00E-04 | 2.94E-04 |              | .           |
| 244536_at | 5.22E-06 | 4.30E-07 |              | .           |
| 244537_at | 0.014665 | 0.008224 |              | .           |
| 244540_at | 0.005512 | 0.002602 | LOC727933    | 727933 .    |
| 244541_x_ | 2.41E-04 | 5.77E-05 |              | .           |
| 244542_at | 0.037839 | 0.02484  | LOC100286844 | 100286844 . |
| 244543_s_ | 8.61E-05 | 1.60E-05 | LOC100286844 | 100286844 . |
| 244544_at | 0.004018 | 0.001782 |              | .           |
| 244545_at | 0.007503 | 0.00375  |              | .           |
| 244546_at | 1.16E-07 | 2.78E-09 | CYCS         | 54205 .     |
| 244547_at | 0.010331 | 0.00545  | FLJ25006     | 124923 .    |
| 244549_at | 0.004098 | 0.001824 | LOC100130212 | 100130212 . |
| 244550_at | 6.34E-06 | 5.55E-07 |              | .           |
| 244554_at | 0.001665 | 6.18E-04 |              | .           |
| 244555_at | 0.002751 | 0.001132 |              | .           |
| 244557_at | 0.017449 | 0.010079 | C11orf55     | 399879 .    |
| 244559_at | 3.45E-05 | 4.97E-06 |              | .           |
| 244561_at | 0.010481 | 0.005541 |              | .           |
| 244563_at | 0.001641 | 6.08E-04 | QSER1        | 79832 .     |
| 244564_at | 0.004148 | 0.00185  | FLJ37638     | 400660 .    |
| 244565_at | 2.65E-05 | 3.57E-06 | HMX2         | 3167 .      |
| 244566_at | 1.09E-05 | 1.13E-06 |              | .           |
| 244570_at | 0.007426 | 0.003706 | LOC100130360 | 100130360 . |
| 244571_s_ | 0.003767 | 0.001652 | TTC12        | 54970 .     |
| 244572_at | 0.001141 | 3.92E-04 | KY           | 339855 .    |
| 244574_at | 5.16E-05 | 8.35E-06 | PTPRG        | 5793 .      |
| 244575_at | 0.002238 | 8.84E-04 | POLA2        | 23649 .     |
| 244576_at | 0.01174  | 0.006331 |              | .           |
| 244577_at | 0.007819 | 0.003938 |              | .           |
| 244579_at | 0.024335 | 0.014877 |              | .           |
| 244580_at | 0.006842 | 0.003363 |              | .           |
| 244581_at | 0.03371  | 0.021733 | ZBTB20       | 26137 .     |
| 244584_at | 7.48E-05 | 1.34E-05 | C11orf41     | 25758 .     |
| 244585_at | 9.81E-04 | 3.26E-04 | IFT140       | 9742 .      |

|           |          |          |              |           |   |
|-----------|----------|----------|--------------|-----------|---|
| 244587_at | 0.01953  | 0.011503 | ATF7         | 11016     | . |
| 244589_at | 0.044042 | 0.029633 |              |           | . |
| 244590_at | 6.72E-04 | 2.05E-04 |              |           | . |
| 244591_x_ | 7.91E-04 | 2.51E-04 | RNF207       | 388591    | . |
| 244593_at | 7.98E-04 | 2.54E-04 | C17orf28     | 283987    | . |
| 244594_x_ | 1.52E-04 | 3.26E-05 |              |           | . |
| 244595_at | 0.014607 | 0.008186 |              |           | . |
| 244596_at | 8.46E-04 | 2.73E-04 |              |           | . |
| 244597_at | 0.04095  | 0.027214 | LOC26010     | 26010     | . |
| 244599_at | 0.039029 | 0.025744 |              |           | . |
| 244600_at | 0.01946  | 0.011455 |              |           | . |
| 244602_at | 2.28E-04 | 5.41E-05 |              |           | . |
| 244603_at | 0.001846 | 7.01E-04 |              |           | . |
| 244605_at | 0.006673 | 0.003263 |              |           | . |
| 244606_at | 2.04E-04 | 4.68E-05 | ATP1A1       | 476       | . |
| 244607_at | 5.33E-04 | 1.54E-04 |              |           | . |
| 244608_at | 0.034538 | 0.022334 |              |           | . |
| 244609_at | 0.004554 | 0.002073 |              |           | . |
| 244610_x_ | 0.004467 | 0.002025 |              |           | . |
| 244611_at | 1.24E-09 | 7.04E-12 | MED13        | 9969      | . |
| 244615_x_ | 0.001841 | 6.98E-04 | TARSL2       | 123283    | . |
| 244616_x_ | 0.003601 | 0.001563 | MDM2         | 4193      | . |
| 244617_at | 2.72E-04 | 6.72E-05 | GPR26        | 2849      | . |
| 244618_at | 0.020415 | 0.012113 |              |           | . |
| 244619_at | 0.04983  | 0.034199 | LOC646626    | 646626    | . |
| 244622_at | 3.56E-04 | 9.38E-05 | BRWD1        | 54014     | . |
| 244623_at | 0.004561 | 0.002077 | KCNQ5        | 56479     | . |
| 244624_at | 0.048977 | 0.033507 | RPS27A       | 6233      | . |
| 244625_at | 1.29E-04 | 2.66E-05 |              |           | . |
| 244626_at | 0.002382 | 9.52E-04 |              |           | . |
| 244629_s_ | 5.06E-04 | 1.44E-04 | LOC100134081 | 100134081 | . |
| 244630_at | 6.66E-05 | 1.15E-05 | LOC100134081 | 100134081 | . |
| 244631_at | 0.001246 | 4.36E-04 | LOC389834    | 389834    | . |
| 244633_at | 6.09E-04 | 1.82E-04 |              |           | . |

|           |          |          |                            |             |
|-----------|----------|----------|----------------------------|-------------|
| 244637_at | 5.76E-04 | 1.69E-04 |                            | .           |
| 244638_at | 0.038078 | 0.025018 |                            | .           |
| 244639_at | 0.018403 | 0.010732 |                            | .           |
| 244640_at | 1.84E-04 | 4.14E-05 | ZNF850P                    | 342892 .    |
| 244641_at | 0.003634 | 0.001582 | C7orf30                    | 115416 .    |
| 244646_at | 6.26E-06 | 5.44E-07 |                            | .           |
| 244647_at | 0.007176 | 0.003559 |                            | .           |
| 244648_at | 0.004119 | 0.001835 |                            | .           |
| 244652_at | 0.005884 | 0.002812 |                            | .           |
| 244654_at | 0.028599 | 0.017945 | MYO1G                      | 64005 .     |
| 244656_at | 3.49E-05 | 5.05E-06 | RASL10B                    | 91608 .     |
| 244659_at | 7.68E-05 | 1.39E-05 | LOC100131015               | 100131015 . |
| 244660_at | 0.029214 | 0.018399 | ELAVL1                     | 1994 .      |
| 244661_at | 2.03E-05 | 2.54E-06 |                            | .           |
| 244664_at | 2.42E-04 | 5.82E-05 |                            | .           |
| 244665_at | 0.007049 | 0.003485 |                            | .           |
| 244668_at | 0.003149 | 0.00133  |                            | .           |
| 244669_at | 5.23E-05 | 8.48E-06 | SNHG5 /// SNC26799 /// 387 | .           |
| 244674_at | 0.009819 | 0.005136 |                            | .           |
| 244679_at | 5.82E-04 | 1.72E-04 |                            | .           |
| 244682_at | 4.02E-04 | 1.09E-04 | CAMSAP1                    | 157922 .    |
| 244683_at | 3.96E-04 | 1.07E-04 |                            | .           |
| 244685_at | 0.014461 | 0.008087 | ANGEL1                     | 23357 .     |
| 244686_at | 0.002626 | 0.001071 | TCOF1                      | 6949 .      |
| 244687_at | 6.70E-05 | 1.16E-05 | DBT                        | 1629 .      |
| 244688_at | 0.034908 | 0.022606 |                            | .           |
| 244689_at | 0.003083 | 0.001297 | PPARA                      | 5465 .      |
| 244690_at | 0.003612 | 0.00157  |                            | .           |
| 244691_at | 6.24E-04 | 1.87E-04 | SETD5                      | 55209 .     |
| 244693_at | 0.01784  | 0.010349 |                            | .           |
| 244694_at | 0.003276 | 0.001396 | IGLON5                     | 402665 .    |
| 244695_at | 5.11E-06 | 4.19E-07 | GHRLOS                     | 100126793 . |
| 244697_at | 0.036556 | 0.023865 |                            | .           |
| 244698_at | 1.17E-04 | 2.35E-05 | CDRT4                      | 284040 .    |



|           |          |          |                              |        |   |
|-----------|----------|----------|------------------------------|--------|---|
| 244699_at | 0.008382 | 0.004267 | AHI1                         | 54806  | . |
| 244700_at | 1.18E-05 | 1.26E-06 | SEC61B                       | 10952  | . |
| 244701_at | 0.005225 | 0.002442 |                              |        | . |
| 244703_x_ | 1.20E-04 | 2.41E-05 | IPO9                         | 55705  | . |
| 244707_at | 8.26E-05 | 1.52E-05 |                              |        | . |
| 244708_at | 7.29E-05 | 1.29E-05 | FLJ33996 /// LC100127971 //. |        | . |
| 244709_at | 7.75E-06 | 7.24E-07 | FAM123C                      | 205147 | . |
| 244711_at | 2.90E-06 | 2.01E-07 |                              |        | . |
| 244712_at | 2.59E-04 | 6.34E-05 | MEX3D                        | 399664 | . |
| 244713_at | 1.13E-04 | 2.24E-05 |                              |        | . |
| 244715_at | 1.83E-05 | 2.23E-06 |                              |        | . |
| 244716_x_ | 7.95E-04 | 2.52E-04 | TMIGD2                       | 126259 | . |
| 244721_at | 7.72E-07 | 3.51E-08 | TP53INP1                     | 94241  | . |
| 244722_at | 0.022647 | 0.013685 |                              |        | . |
| 244725_at | 8.26E-04 | 2.65E-04 | DMRTA1                       | 63951  | . |
| 244727_at | 2.71E-04 | 6.69E-05 | KCNQ1OT1                     | 10984  | . |
| 244728_at | 0.005029 | 0.002332 |                              |        | . |
| 244729_at | 0.044114 | 0.029687 |                              |        | . |
| 244732_at | 3.72E-04 | 9.90E-05 |                              |        | . |
| 244736_at | 0.006225 | 0.003004 |                              |        | . |
| 244737_at | 0.004728 | 0.002168 |                              |        | . |
| 244738_at | 4.63E-05 | 7.26E-06 | BRWD3                        | 254065 | . |
| 244740_at | 0.014415 | 0.008058 | MGC9913                      | 386759 | . |
| 244743_x_ | 2.93E-06 | 2.04E-07 | ZNF138                       | 7697   | . |
| 244745_at | 8.82E-04 | 2.87E-04 | RERG                         | 85004  | . |
| 244746_at | 0.001811 | 6.84E-04 | SEMA6D                       | 80031  | . |
| 244750_at | 0.023846 | 0.01453  |                              |        | . |
| 244751_at | 0.016587 | 0.009504 | PCP2                         | 126006 | . |
| 244752_at | 1.98E-06 | 1.23E-07 | ZNF438                       | 220929 | . |
| 244753_at | 2.24E-04 | 5.27E-05 |                              |        | . |
| 244755_at | 0.001399 | 5.02E-04 | XPR1                         | 9213   | . |
| 244758_at | 2.17E-04 | 5.06E-05 | SCAND3                       | 114821 | . |
| 244759_x_ | 0.002075 | 8.07E-04 | RNF207                       | 388591 | . |
| 244760_at | 4.18E-04 | 1.14E-04 | HERC6                        | 55008  | . |

|           |          |          |                             |           |   |
|-----------|----------|----------|-----------------------------|-----------|---|
| 244761_at | 4.77E-05 | 7.55E-06 | FLJ44606                    | 401207    | . |
| 244763_at | 1.46E-05 | 1.67E-06 | MTRF1                       | 9617      | . |
| 244764_at | 0.008016 | 0.004054 |                             |           | . |
| 244765_at | 0.001935 | 7.42E-04 |                             |           | . |
| 244766_at | 6.43E-07 | 2.74E-08 | LOC440354 /// 23049 /// 440 |           | . |
| 244767_at | 0.016667 | 0.009558 |                             |           | . |
| 244769_at | 1.12E-06 | 5.71E-08 |                             |           | . |
| 244770_at | 0.044333 | 0.029862 |                             |           | . |
| 244772_at | 0.004675 | 0.00214  |                             |           | . |
| 244777_at | 6.73E-05 | 1.17E-05 | DCP2                        | 167227    | . |
| 244778_x_ | 2.39E-05 | 3.13E-06 |                             |           | . |
| 244781_x_ | 0.034495 | 0.022303 |                             |           | . |
| 244784_at | 5.43E-05 | 8.88E-06 | DHX57                       | 90957     | . |
| 244786_at | 0.002199 | 8.66E-04 | SNHG10                      | 283596    | . |
| 244788_at | 5.64E-04 | 1.65E-04 |                             |           | . |
| 244790_at | 1.06E-04 | 2.07E-05 | MTCP1                       | 4515      | . |
| 244791_at | 1.59E-06 | 9.26E-08 |                             |           | . |
| 244796_at | 6.90E-05 | 1.21E-05 |                             |           | . |
| 244797_at | 1.97E-04 | 4.50E-05 | LOC100128552                | 100128552 | . |
| 244798_at | 0.007044 | 0.003482 |                             |           | . |
| 244800_x_ | 5.61E-05 | 9.25E-06 |                             |           | . |
| 244801_at | 2.77E-06 | 1.90E-07 | PSMB7                       | 5695      | . |
| 244803_at | 1.94E-05 | 2.40E-06 |                             |           | . |
| 244804_at | 0.001248 | 4.37E-04 | SQSTM1                      | 8878      | . |
| 244805_at | 0.001574 | 5.78E-04 |                             |           | . |
| 244807_at | 0.017217 | 0.009924 | C17orf45                    | 125144    | . |
| 244808_at | 5.50E-06 | 4.62E-07 | GRAMD1A                     | 57655     | . |
| 244809_at | 2.34E-04 | 5.56E-05 |                             |           | . |
| 244810_at | 4.65E-04 | 1.30E-04 |                             |           | . |
| 244811_at | 2.52E-04 | 6.12E-05 | PHIP                        | 55023     | . |
| 244813_at | 8.00E-05 | 1.46E-05 |                             |           | . |
| 244816_at | 0.03044  | 0.019306 |                             |           | . |
| 244819_x_ | 2.44E-04 | 5.88E-05 | PSPH                        | 5723      | . |
| 244822_at | 1.94E-10 | 6.06E-13 | GART                        | 2618      | . |

|           |          |          |                          |           |   |
|-----------|----------|----------|--------------------------|-----------|---|
| 244823_at | 0.006742 | 0.003304 | LOC100129034             | 100129034 | . |
| 244824_at | 3.95E-05 | 5.90E-06 |                          |           | . |
| 244825_at | 1.04E-04 | 2.02E-05 | SHROOM4                  | 57477     | . |
| 244826_at | 1.23E-07 | 2.99E-09 |                          |           | . |
| 244827_at | 4.17E-04 | 1.14E-04 |                          |           | . |
| 244828_x_ | 0.003255 | 0.001385 | NAF1                     | 92345     | . |
| 244832_at | 0.017596 | 0.010184 |                          |           | . |
| 244833_at | 0.004999 | 0.002315 | CCDC63                   | 160762    | . |
| 244834_at | 3.77E-04 | 1.01E-04 | C1orf134                 | 574037    | . |
| 244835_at | 8.90E-06 | 8.71E-07 | C16orf52                 | 730094    | . |
| 244836_at | 7.61E-05 | 1.37E-05 |                          |           | . |
| 244838_at | 0.001936 | 7.42E-04 |                          |           | . |
| 244839_at | 0.00385  | 0.001694 | TTN                      | 7273      | . |
| 244840_x_ | 0.041063 | 0.0273   | DOCK4                    | 9732      | . |
| 244841_at | 0.02833  | 0.017747 | SEC24A                   | 10802     | . |
| 244842_x_ | 9.14E-07 | 4.41E-08 |                          |           | . |
| 244843_x_ | 0.00136  | 4.86E-04 |                          |           | . |
| 244845_at | 9.99E-04 | 3.33E-04 |                          |           | . |
| 244846_at | 8.00E-04 | 2.55E-04 |                          |           | . |
| 244848_at | 0.001065 | 3.60E-04 | CHD1L                    | 9557      | . |
| 244849_at | 0.001807 | 6.82E-04 | SEMA3A                   | 10371     | . |
| 244852_at | 1.07E-10 | 2.87E-13 | DSEL                     | 92126     | . |
| 244853_at | 9.82E-04 | 3.26E-04 |                          |           | . |
| 244855_at | 0.007411 | 0.003696 |                          |           | . |
| 244856_at | 0.010331 | 0.005451 |                          |           | . |
| 244857_at | 2.69E-05 | 3.62E-06 | HBEGF                    | 1839      | . |
| 244858_at | 0.036413 | 0.023757 | LOC100129041100129041 // |           | . |
| 244860_at | 6.50E-06 | 5.72E-07 |                          |           | . |
| 244861_at | 0.005553 | 0.002625 | ZNF527                   | 84503     | . |
| 244862_at | 4.13E-04 | 1.13E-04 |                          |           | . |
| 244863_at | 0.005436 | 0.002557 |                          |           | . |
| 244865_at | 0.005152 | 0.002402 | HAX1                     | 10456     | . |
| 244866_at | 0.00577  | 0.002745 |                          |           | . |
| 244867_at | 1.31E-10 | 3.61E-13 |                          |           | . |

|           |          |          |            |          |
|-----------|----------|----------|------------|----------|
| 244868_at | 0.001713 | 6.40E-04 |            | .        |
| 244870_at | 0.034033 | 0.021964 | TES        | 26136 .  |
| 244872_at | 1.92E-06 | 1.18E-07 | RBBP4      | 5928 .   |
| 244873_s  | 0.032471 | 0.020797 |            | .        |
| 244874_at | 1.75E-04 | 3.88E-05 |            | .        |
| 244875_at | 1.22E-05 | 1.32E-06 | NCRNA00105 | 80161 .  |
| 244878_at | 0.009128 | 0.004713 |            | .        |
| 244879_at | 0.012887 | 0.007074 |            | .        |
| 244881_at | 8.68E-05 | 1.62E-05 | LMLN       | 89782 .  |
| 244882_at | 1.14E-05 | 1.20E-06 | TNRC18     | 84629 .  |
| 244884_at | 0.007784 | 0.003916 |            | .        |
| 244889_at | 5.49E-04 | 1.60E-04 | LOC388210  | 388210 . |
| 244890_at | 0.002215 | 8.73E-04 |            | .        |
| 1552256_a | 0.001027 | 3.45E-04 | SCARB1     | 949 .    |
| 1552257_a | 0.001158 | 3.99E-04 | TTLL12     | 23170 .  |
| 1553089_a | 0.006799 | 0.003338 | WFDC2      | 10406 .  |
| 1552261_a | 4.67E-06 | 3.73E-07 | WFDC2      | 10406 .  |
| 1552263_a | 0.009511 | 0.004947 | MAPK1      | 5594 .   |
| 1552264_a | 2.88E-05 | 3.97E-06 | MAPK1      | 5594 .   |
| 1552266_a | 0.008241 | 0.004183 | ADAM32     | 203102 . |
| 1552271_a | 1.26E-04 | 2.57E-05 | MGC24975   | 163154 . |
| 1552274_a | 3.82E-07 | 1.39E-08 | PXK        | 54899 .  |
| 1552275_s | 7.01E-09 | 6.60E-11 | PXK        | 54899 .  |
| 1552277_a | 0.001305 | 4.61E-04 | C9orf30    | 91283 .  |
| 1552280_a | 3.32E-04 | 8.62E-05 | TIMD4      | 91937 .  |
| 1552281_a | 7.19E-07 | 3.20E-08 | SLC39A5    | 283375 . |
| 1552287_s | 9.77E-08 | 2.23E-09 | AFG3L1     | 172 .    |
| 1552291_a | 0.009054 | 0.004667 | PIGX       | 54965 .  |
| 1552295_a | 2.22E-06 | 1.42E-07 | SLC39A13   | 91252 .  |
| 1552296_a | 4.41E-04 | 1.22E-04 | BEST4      | 266675 . |
| 1552302_a | 0.029586 | 0.018675 | TMEM106A   | 113277 . |
| 1552303_a | 0.012717 | 0.006963 | TMEM106A   | 113277 . |
| 1552307_a | 2.48E-05 | 3.28E-06 | TTC39C     | 125488 . |
| 1552309_a | 2.16E-05 | 2.77E-06 | NEXN       | 91624 .  |

|           |          |          |          |          |
|-----------|----------|----------|----------|----------|
| 1552310_a | 3.19E-07 | 1.10E-08 | C15orf40 | 123207 . |
| 1552311_a | 0.012133 | 0.006582 | RAX2     | 84839 .  |
| 1552312_a | 0.001368 | 4.89E-04 | MFAP3    | 4238 .   |
| 1552316_a | 2.04E-04 | 4.68E-05 | GIMAP1   | 170575 . |
| 1552319_a | 1.01E-04 | 1.95E-05 | KLK8     | 11202 .  |
| 1552321_a | 0.033509 | 0.021585 | CCDC65   | 85478 .  |
| 1552322_a | 0.026177 | 0.016193 | FAM122C  | 159091 . |
| 1552323_s | 0.001515 | 5.53E-04 | FAM122C  | 159091 . |
| 1552327_a | 0.006784 | 0.003328 | ARMCX4   | 158947 . |
| 1552329_a | 0.00115  | 3.96E-04 | RBBP6    | 5930 .   |
| 1552330_a | 0.001153 | 3.97E-04 | MGC16385 | 92806 .  |
| 1552334_a | 0.001185 | 4.11E-04 | TRIOBP   | 11078 .  |
| 1552337_s | 1.84E-04 | 4.12E-05 | HOXD4    | 3233 .   |
| 1552338_a | 1.38E-07 | 3.53E-09 | GSC      | 145258 . |
| 1552343_s | 5.98E-04 | 1.77E-04 | PDE7A    | 5150 .   |
| 1552348_a | 0.013213 | 0.007282 | PRSS33   | 260429 . |
| 1555044_a | 1.01E-04 | 1.95E-05 | KBTBD5   | 131377 . |
| 1557411_s | 1.37E-05 | 1.55E-06 | SLC25A43 | 203427 . |
| 1552354_a | 2.06E-06 | 1.30E-07 | C19orf26 | 255057 . |
| 1552360_a | 9.40E-05 | 1.78E-05 | TIRAP    | 114609 . |
| 1552362_a | 0.020831 | 0.012417 | LEAP2    | 116842 . |
| 1552364_s | 0.02682  | 0.016666 | MSI2     | 124540 . |
| 1552375_a | 8.09E-04 | 2.58E-04 | ZNF333   | 84449 .  |
| 1552377_s | 1.25E-04 | 2.55E-05 | FAM18B2  | 201158 . |
| 1552381_a | 0.009399 | 0.004879 | SRrp35   | 135295 . |
| 1552383_a | 4.37E-07 | 1.67E-08 | FAM71A   | 149647 . |
| 1552384_a | 0.00112  | 3.83E-04 | FAM71A   | 149647 . |
| 1552391_a | 4.08E-04 | 1.11E-04 | C1orf65  | 164127 . |
| 1552395_a | 0.013263 | 0.007313 | TSSK3    | 81629 .  |
| 1552402_a | 0.008269 | 0.004199 | CALML6   | 163688 . |
| 1555627_s | 0.00445  | 0.002016 | C21orf67 | 84536 .  |
| 1555417_a | 0.019881 | 0.011744 | TAS1R1   | 80835 .  |
| 1552408_a | 0.006556 | 0.003194 | ODF4     | 146852 . |
| 1552409_a | 0.044632 | 0.030091 | ODF4     | 146852 . |

|           |          |          |                              |          |
|-----------|----------|----------|------------------------------|----------|
| 1552411_a | 8.23E-06 | 7.81E-07 | DEFB106A /// I245909 /// 5C. |          |
| 1552414_a | 0.001853 | 7.04E-04 | WFDC9                        | 259240 . |
| 1552417_a | 0.034819 | 0.02254  | NEDD1                        | 121441 . |
| 1552418_a | 0.03874  | 0.025519 | TTLL10                       | 254173 . |
| 1552419_s | 3.64E-05 | 5.31E-06 | TTLL10                       | 254173 . |
| 1552421_a | 0.047259 | 0.032163 | CALR3                        | 125972 . |
| 1552422_a | 0.033    | 0.021206 | C10orf25                     | 220979 . |
| 1552424_a | 0.008111 | 0.004109 | KLHL10                       | 317719 . |
| 1552426_a | 0.003891 | 0.001715 | TM2D3                        | 80213 .  |
| 1552427_a | 0.035143 | 0.02279  | ZNF485                       | 220992 . |
| 1552430_a | 3.52E-04 | 9.24E-05 | WDR17                        | 116966 . |
| 1552432_a | 8.59E-04 | 2.78E-04 | MFSD6L                       | 162387 . |
| 1555404_a | 1.39E-05 | 1.57E-06 | DUOXA1                       | 90527 .  |
| 1552438_a | 0.016144 | 0.009213 | ANKAR                        | 150709 . |
| 1552440_a | 7.09E-04 | 2.19E-04 | GPR182                       | 11318 .  |
| 1560493_a | 6.42E-04 | 1.94E-04 | CPXCR1                       | 53336 .  |
| 1552448_a | 7.11E-04 | 2.20E-04 | C8orf12                      | 83656 .  |
| 1552450_a | 0.005446 | 0.002563 | DNAJC5G                      | 285126 . |
| 1552457_a | 0.004277 | 0.00192  | ADAMTSL1                     | 92949 .  |
| 1554405_a | 0.026303 | 0.016279 | NCRNA00161                   | 118421 . |
| 1552467_a | 0.003706 | 0.001618 | DSCR10                       | 259234 . |
| 1552468_a | 0.015129 | 0.008533 | DSCR10                       | 259234 . |
| 1552476_s | 2.37E-05 | 3.10E-06 | PLCD3                        | 113026 . |
| 1552477_a | 0.001728 | 6.47E-04 | IRF6                         | 3664 .   |
| 1552478_a | 8.64E-04 | 2.80E-04 | IRF6                         | 3664 .   |
| 1552481_s | 8.25E-07 | 3.84E-08 | MAN1A2                       | 10905 .  |
| 1552484_a | 0.006541 | 0.003186 | SMCR8                        | 140775 . |
| 1552485_a | 1.68E-04 | 3.69E-05 | LACTB                        | 114294 . |
| 1552486_s | 0.029694 | 0.018754 | LACTB                        | 114294 . |
| 1552491_a | 1.94E-04 | 4.42E-05 | IDI2                         | 91734 .  |
| 1552494_a | 1.79E-04 | 3.98E-05 | TAF8                         | 129685 . |
| 1552496_a | 4.20E-08 | 7.08E-10 | COBL                         | 23242 .  |
| 1552497_a | 5.64E-04 | 1.65E-04 | SLAMF6                       | 114836 . |
| 1552501_a | 9.83E-05 | 1.89E-05 | GPBAR1                       | 151306 . |

|           |          |          |          |          |
|-----------|----------|----------|----------|----------|
| 1552502_s | 0.002873 | 0.001191 | RHBDL2   | 54933 .  |
| 1552503_a | 5.06E-05 | 8.13E-06 | FRAS1    | 80144 .  |
| 1552504_a | 6.37E-07 | 2.71E-08 | BRSK1    | 84446 .  |
| 1552507_a | 0.003746 | 0.00164  | KCNE4    | 23704 .  |
| 1552508_a | 0.002353 | 9.39E-04 | KCNE4    | 23704 .  |
| 1552509_a | 0.001839 | 6.97E-04 | CD300LG  | 146894 . |
| 1552510_a | 2.17E-05 | 2.78E-06 | SLC34A3  | 142680 . |
| 1552515_a | 0.0024   | 9.62E-04 | HIPK1    | 204851 . |
| 1552516_a | 5.67E-04 | 1.66E-04 | HIPK1    | 204851 . |
| 1552518_s | 9.77E-04 | 3.24E-04 | MTBP     | 27085 .  |
| 1552520_a | 0.010776 | 0.005729 | TMEM74   | 157753 . |
| 1552521_a | 0.001987 | 7.66E-04 | TMEM74   | 157753 . |
| 1552522_a | 0.001354 | 4.83E-04 | TIGD4    | 201798 . |
| 1552523_a | 0.008571 | 0.004378 | TIGD4    | 201798 . |
| 1552524_a | 2.90E-07 | 9.70E-09 | ART5     | 116969 . |
| 1552528_a | 1.32E-04 | 2.74E-05 | C21orf67 | 84536 .  |
| 1555393_s | 0.003165 | 0.001339 | C21orf67 | 84536 .  |
| 1552531_a | 0.03127  | 0.019904 | NLRP11   | 204801 . |
| 1552532_a | 0.043703 | 0.029366 | ATP6V1C2 | 245973 . |
| 1552535_a | 1.39E-07 | 3.55E-09 | CLDN19   | 149461 . |
| 1552538_a | 0.005205 | 0.002431 | KIF6     | 221458 . |
| 1552541_a | 4.48E-05 | 6.96E-06 | TAGAP    | 117289 . |
| 1552546_a | 0.011181 | 0.005983 | LETM2    | 137994 . |
| 1552548_a | 4.03E-05 | 6.06E-06 | BSND     | 7809 .   |
| 1552549_a | 0.001476 | 5.35E-04 | BSND     | 7809 .   |
| 1552555_a | 0.007598 | 0.003806 | PRSS36   | 146547 . |
| 1552558_a | 1.35E-06 | 7.44E-08 | RAI1     | 10743 .  |
| 1552559_a | 6.78E-06 | 6.05E-07 | PFTK2    | 65061 .  |
| 1552563_a | 0.013902 | 0.007722 | C8orf6   | 203081 . |
| 1552564_a | 0.001693 | 6.31E-04 | NUDT9P1  | 119369 . |
| 1552568_a | 0.012959 | 0.007121 | RTP3     | 83597 .  |
| 1552570_a | 0.03955  | 0.026136 | C21orf29 | 54084 .  |
| 1552572_a | 0.027657 | 0.017263 | MIPOL1   | 145282 . |
| 1552573_s | 0.005425 | 0.002552 | MIPOL1   | 145282 . |

|           |          |          |              |               |
|-----------|----------|----------|--------------|---------------|
| 1554486_a | 0.003987 | 0.001765 | C6orf114     | 85411 .       |
| 1552579_a | 0.025827 | 0.015946 | ADAM21       | 8747 .        |
| 1552580_a | 1.07E-06 | 5.38E-08 | TRIML2       | 205860 .      |
| 1552582_a | 0.01758  | 0.010171 | ABCC13       | 150000 .      |
| 1552583_s | 0.002587 | 0.001052 | ABCC13       | 150000 .      |
| 1552586_a | 4.64E-06 | 3.70E-07 | TRPV3        | 162514 .      |
| 1552594_a | 0.001173 | 4.06E-04 | TMEM190      | 147744 .      |
| 1552596_a | 0.006759 | 0.003314 | GAS2L2       | 246176 .      |
| 1552602_a | 0.012957 | 0.00712  | CACNG5       | 27091 .       |
| 1552610_a | 0.001029 | 3.45E-04 | JAK1         | 3716 .        |
| 1552611_a | 1.72E-07 | 4.71E-09 | JAK1         | 3716 .        |
| 1560814_a | 3.62E-06 | 2.69E-07 | C15orf57     | 90416 .       |
| 1552615_a | 9.77E-05 | 1.87E-05 | ACACB        | 32 .          |
| 1552618_a | 0.015348 | 0.008681 | STX6         | 10228 .       |
| 1552619_a | 0.007125 | 0.003529 | ANLN         | 54443 .       |
| 1552620_a | 2.14E-05 | 2.73E-06 | SPRR4        | 163778 .      |
| 1552621_a | 1.37E-04 | 2.85E-05 | POLR2J2      | 246721 .      |
| 1552622_s | 1.58E-05 | 1.84E-06 | LOC100134053 | 100134053 //. |
| 1552628_a | 0.010623 | 0.005632 | HERPUD2      | 64224 .       |
| 1552629_a | 7.52E-05 | 1.35E-05 | JMJD6        | 23210 .       |
| 1552631_a | 0.015705 | 0.008917 | MAP3K6       | 9064 .        |
| 1552632_a | 0.015461 | 0.008759 | ARSG         | 22901 .       |
| 1552633_a | 0.001336 | 4.75E-04 | ZNF101       | 94039 .       |
| 1552634_a | 1.50E-04 | 3.21E-05 | ZNF101       | 94039 .       |
| 1552643_a | 1.64E-06 | 9.65E-08 | ZNF626       | 199777 .      |
| 1552644_a | 2.72E-05 | 3.69E-06 | PHC3         | 80012 .       |
| 1552646_a | 2.88E-05 | 3.96E-06 | IL11RA       | 3590 .        |
| 1552648_a | 5.23E-06 | 4.31E-07 | TNFRSF10A    | 8797 .        |
| 1552649_a | 0.011589 | 0.006236 | RFFL         | 117584 .      |
| 1552651_a | 0.001637 | 6.06E-04 | RFFL         | 117584 .      |
| 1568877_a | 5.05E-04 | 1.44E-04 | ACBD5        | 91452 .       |
| 1552656_s | 0.004362 | 0.001967 | UHMK1        | 127933 .      |
| 1552657_a | 0.004913 | 0.002269 | TXNDC2       | 84203 .       |
| 1552658_a | 1.70E-05 | 2.03E-06 | NAV3         | 89795 .       |



|           |          |          |                              |          |
|-----------|----------|----------|------------------------------|----------|
| 1552660_a | 0.001158 | 3.99E-04 | C5orf22                      | 55322 .  |
| 1552662_a | 0.008155 | 0.004133 | PCDHGB7                      | 56099 .  |
| 1552663_a | 0.027634 | 0.017243 | ERC1                         | 23085 .  |
| 1552666_a | 0.024307 | 0.014855 | LRRC7                        | 57554 .  |
| 1552667_a | 0.001061 | 3.58E-04 | SH2D3C                       | 10044 .  |
| 1552669_a | 2.20E-05 | 2.82E-06 | PPP1R3B                      | 79660 .  |
| 1552670_a | 9.47E-08 | 2.13E-09 | PPP1R3B                      | 79660 .  |
| 1552672_a | 5.00E-04 | 1.42E-04 | IGSF3                        | 3321 .   |
| 1552676_a | 2.56E-04 | 6.23E-05 | UCN3                         | 114131 . |
| 1552678_a | 7.88E-08 | 1.66E-09 | USP28                        | 57646 .  |
| 1552680_a | 1.27E-06 | 6.80E-08 | CASC5                        | 57082 .  |
| 1552682_a | 0.00379  | 0.001663 | CASC5                        | 57082 .  |
| 1561405_s | 0.005531 | 0.002613 | CATSPER2                     | 117155 . |
| 1552686_a | 0.032591 | 0.020888 | C20orf152                    | 140894 . |
| 1552689_a | 0.025058 | 0.015397 | CASKIN1                      | 57524 .  |
| 1552690_a | 0.002462 | 9.92E-04 | CACNA2D4                     | 93589 .  |
| 1552701_a | 0.001494 | 5.43E-04 | CARD16                       | 114769 . |
| 1552703_s | 2.42E-05 | 3.18E-06 | CARD16 /// CA 114769 /// 8:  |          |
| 1552705_a | 0.049084 | 0.033596 | DUSP19                       | 142679 . |
| 1555003_a | 0.035699 | 0.023215 | RBL1                         | 5933 .   |
| 1552713_a | 3.04E-04 | 7.74E-05 | SLC4A1                       | 6521 .   |
| 1552716_a | 0.001873 | 7.13E-04 | SPEF2                        | 79925 .  |
| 1552717_s | 4.19E-05 | 6.39E-06 | CEP170 /// CEF 645455 /// 9: |          |
| 1552718_a | 3.23E-04 | 8.32E-05 | DTD1                         | 92675 .  |
| 1552719_a | 3.95E-04 | 1.06E-04 | CASC4                        | 113201 . |
| 1552721_a | 1.10E-05 | 1.15E-06 | FGF1                         | 2246 .   |
| 1552724_a | 0.016944 | 0.009741 | RHOXF1                       | 158800 . |
| 1552729_a | 0.001017 | 3.40E-04 | SNHG7                        | 84973 .  |
| 1552730_a | 6.21E-04 | 1.86E-04 | DHH                          | 50846 .  |
| 1552731_a | 2.56E-04 | 6.25E-05 | ABRA                         | 137735 . |
| 1552733_a | 9.43E-05 | 1.79E-05 | KLHDC1                       | 122773 . |
| 1552734_a | 0.022253 | 0.013416 | RICTOR                       | 253260 . |
| 1552737_s | 0.043626 | 0.029302 | WWP2                         | 11060 .  |
| 1552739_s | 5.33E-06 | 4.42E-07 | ST7L                         | 54879 .  |

|           |          |          |          |          |
|-----------|----------|----------|----------|----------|
| 1552740_a | 2.01E-05 | 2.50E-06 | C2orf15  | 150590 . |
| 1552742_a | 3.73E-04 | 9.91E-05 | KCNH8    | 131096 . |
| 1552743_a | 0.015363 | 0.008692 | MCF2L    | 23263 .  |
| 1552749_a | 6.98E-05 | 1.23E-05 | KLC3     | 147700 . |
| 1552750_a | 0.024649 | 0.015102 | CIB3     | 117286 . |
| 1552751_a | 2.09E-05 | 2.64E-06 | CIB3     | 117286 . |
| 1552755_a | 0.001013 | 3.39E-04 | C9orf66  | 157983 . |
| 1552757_s | 3.74E-04 | 9.95E-05 | C9orf66  | 157983 . |
| 1552761_a | 1.70E-05 | 2.03E-06 | SLC16A11 | 162515 . |
| 1563646_a | 0.031277 | 0.01991  | TMEM67   | 91147 .  |
| 1552766_a | 0.006517 | 0.003172 | HS6ST2   | 90161 .  |
| 1552767_a | 6.57E-05 | 1.13E-05 | HS6ST2   | 90161 .  |
| 1552768_a | 4.01E-04 | 1.09E-04 | CAMKK1   | 84254 .  |
| 1552771_a | 0.003475 | 0.001498 | LIN9     | 286826 . |
| 1552773_a | 0.001967 | 7.56E-04 | CLEC4D   | 338339 . |
| 1552775_a | 8.56E-04 | 2.77E-04 | GPRC6A   | 222545 . |
| 1564308_a | 1.21E-06 | 6.39E-08 | MPP7     | 143098 . |
| 1552787_a | 6.64E-04 | 2.02E-04 | HELB     | 92797 .  |
| 1552788_a | 2.37E-04 | 5.66E-05 | HELB     | 92797 .  |
| 1552789_a | 9.06E-07 | 4.36E-08 | SEC62    | 7095 .   |
| 1552790_a | 3.13E-06 | 2.22E-07 | SEC62    | 7095 .   |
| 1552791_a | 4.93E-04 | 1.40E-04 | TRDN     | 10345 .  |
| 1552793_a | 0.002062 | 8.01E-04 | C8orf31  | 286122 . |
| 1552794_a | 3.05E-04 | 7.74E-05 | ZNF547   | 284306 . |
| 1552796_a | 5.58E-05 | 9.18E-06 | SIM1     | 6492 .   |
| 1552798_a | 6.98E-08 | 1.40E-09 | TLR4     | 7099 .   |
| 1552800_a | 2.77E-06 | 1.90E-07 | ABHD11   | 83451 .  |
| 1552801_a | 3.20E-04 | 8.24E-05 | CAPN13   | 92291 .  |
| 1552803_a | 0.031471 | 0.020055 | STMN1    | 3925 .   |
| 1552807_a | 1.96E-04 | 4.45E-05 | SIGLEC10 | 89790 .  |
| 1552809_a | 0.003492 | 0.001507 | RFX4     | 5992 .   |
| 1552811_a | 4.46E-06 | 3.52E-07 | WFIKKN1  | 117166 . |
| 1552812_a | 7.74E-04 | 2.44E-04 | SENP1    | 29843 .  |
| 1552813_a | 0.042031 | 0.028052 | KLF14    | 136259 . |

|           |          |          |            |          |
|-----------|----------|----------|------------|----------|
| 1552819_a | 0.001029 | 3.46E-04 | C21orf86   | 257103 . |
| 1554876_a | 1.34E-06 | 7.38E-08 | S100Z      | 170591 . |
| 1552822_a | 1.16E-04 | 2.31E-05 | TMX3       | 54495 .  |
| 1552827_s | 0.003276 | 0.001396 | SLC26A7    | 115111 . |
| 1552828_a | 0.01047  | 0.005535 | SNX18      | 112574 . |
| 1567214_a | 5.86E-08 | 1.10E-09 | PNN        | 5411 .   |
| 1552833_a | 2.42E-04 | 5.79E-05 | B3GNT6     | 192134 . |
| 1552834_a | 0.034385 | 0.022222 | B3GNT6     | 192134 . |
| 1552836_a | 5.12E-04 | 1.47E-04 | ZNF619     | 285267 . |
| 1552842_a | 0.002473 | 9.97E-04 | HS6ST3     | 266722 . |
| 1552843_a | 1.22E-04 | 2.48E-05 | SLC26A1    | 10861 .  |
| 1552845_a | 6.71E-04 | 2.05E-04 | CLDN15     | 24146 .  |
| 1552846_s | 0.043077 | 0.028858 | RAB42      | 115273 . |
| 1552848_a | 0.005154 | 0.002403 | PTCHD1     | 139411 . |
| 1552853_a | 0.016167 | 0.009229 | VWA5B1     | 127731 . |
| 1552854_a | 6.55E-04 | 1.99E-04 | VWA5B1     | 127731 . |
| 1552858_a | 0.004051 | 0.001799 | MAGEB6     | 158809 . |
| 1552860_a | 0.011292 | 0.006052 | TCEB3C     | 162699 . |
| 1552862_a | 1.23E-04 | 2.49E-05 | C1orf104   | 284618 . |
| 1552863_a | 7.70E-07 | 3.50E-08 | CACNG6     | 59285 .  |
| 1552865_a | 4.48E-05 | 6.97E-06 | IFLTD1     | 160492 . |
| 1552867_a | 4.68E-04 | 1.31E-04 |            | .        |
| 1552868_a | 0.002924 | 0.001216 | C19orf23   | 148046 . |
| 1552872_a | 6.59E-04 | 2.00E-04 | NCRNA00105 | 80161 .  |
| 1552873_s | 0.013806 | 0.007662 | NCRNA00105 | 80161 .  |
| 1552880_a | 4.23E-04 | 1.16E-04 | SEC16B     | 89866 .  |
| 1552882_a | 3.41E-04 | 8.90E-05 | FAM123B    | 139285 . |
| 1552884_a | 8.74E-04 | 2.84E-04 | NKX6-3     | 157848 . |
| 1552885_a | 6.13E-04 | 1.83E-04 | NKX6-3     | 157848 . |
| 1552887_a | 0.001883 | 7.18E-04 | C10orf27   | 219793 . |
| 1552889_a | 9.74E-05 | 1.86E-05 | EXOC3L2    | 90332 .  |
| 1552893_a | 0.006259 | 0.003024 | CAMK2N2    | 94032 .  |
| 1552895_a | 6.07E-04 | 1.81E-04 | C21orf99   | 149992 . |
| 1552897_a | 1.57E-05 | 1.83E-06 | KCNG3      | 170850 . |

|           |          |          |           |          |
|-----------|----------|----------|-----------|----------|
| 1552898_a | 0.021618 | 0.012967 | KCNG3     | 170850 . |
| 1552902_a | 0.00119  | 4.13E-04 | FOXP2     | 93986 .  |
| 1552903_a | 9.88E-05 | 1.90E-05 | B4GALNT2  | 124872 . |
| 1552908_a | 5.73E-04 | 1.68E-04 | C1orf150  | 148823 . |
| 1552910_a | 0.002401 | 9.62E-04 | SIGLEC11  | 114132 . |
| 1552911_a | 1.47E-04 | 3.13E-05 | SIGLEC11  | 114132 . |
| 1552914_a | 6.42E-04 | 1.94E-04 | CD276     | 80381 .  |
| 1552915_a | 4.78E-04 | 1.34E-04 | IL28A     | 282616 . |
| 1552917_a | 0.001112 | 3.80E-04 | IL29      | 282618 . |
| 1552919_a | 0.00231  | 9.19E-04 | C4orf36   | 132989 . |
| 1552921_a | 0.027589 | 0.017209 | FIGNL1    | 63979 .  |
| 1552923_a | 5.34E-05 | 8.70E-06 | PITPNM2   | 57605 .  |
| 1552925_a | 1.78E-04 | 3.96E-05 | PCDH10    | 57575 .  |
| 1552927_a | 0.043934 | 0.029548 | MAP3K7IP3 | 257397 . |
| 1552930_a | 0.026414 | 0.016366 | MMEL1     | 79258 .  |
| 1552931_a | 2.31E-04 | 5.48E-05 | PDE8A     | 5151 .   |
| 1552932_a | 8.15E-05 | 1.50E-05 | NLRP6     | 171389 . |
| 1552933_a | 0.01672  | 0.009595 | C1orf62   | 254268 . |
| 1552935_a | 5.12E-04 | 1.46E-04 | ZCCHC5    | 203430 . |
| 1552937_s | 0.038221 | 0.025129 | ATRIP     | 84126 .  |
| 1552938_a | 8.86E-04 | 2.89E-04 | ZIC5      | 85416 .  |
| 1552942_a | 0.014729 | 0.008267 | FLJ30430  | 149373 . |
| 1552944_a | 0.011017 | 0.005878 | PANX2     | 56666 .  |
| 1552946_a | 2.93E-05 | 4.06E-06 | ZNF114    | 163071 . |
| 1552947_x | 1.22E-04 | 2.46E-05 | ZNF114    | 163071 . |
| 1552948_a | 4.69E-06 | 3.75E-07 | CCDC27    | 148870 . |
| 1552950_a | 3.30E-04 | 8.55E-05 | C15orf26  | 161502 . |
| 1552954_a | 3.17E-04 | 8.13E-05 | C5orf17   | 439936 . |
| 1552957_a | 0.004415 | 0.001997 | DNAH6     | 1768 .   |
| 1552961_a | 0.018993 | 0.011132 |           | .        |
| 1555509_a | 0.007875 | 0.003971 | SLC25A41  | 284427 . |
| 1552964_a | 0.007122 | 0.003527 | C10orf93  | 255352 . |
| 1552965_a | 0.001923 | 7.36E-04 | B3GNT7    | 93010 .  |
| 1552967_a | 0.002437 | 9.80E-04 | ZNF645    | 158506 . |

|           |          |          |         |          |
|-----------|----------|----------|---------|----------|
| 1552969_a | 0.009445 | 0.004907 | ZMYM6   | 9204 .   |
| 1552970_s | 2.44E-05 | 3.22E-06 | ZMYM6   | 9204 .   |
| 1552973_a | 0.005861 | 0.002799 | WNT9B   | 7484 .   |
| 1552975_x | 0.003361 | 0.00144  |         | .        |
| 1552976_a | 3.95E-05 | 5.90E-06 |         | .        |
| 1552979_a | 0.038336 | 0.025215 | C2orf52 | 151477 . |
| 1552980_a | 0.001031 | 3.46E-04 | HAS3    | 3038 .   |
| 1552982_a | 7.31E-05 | 1.30E-05 | FGF4    | 2249 .   |
| 1552985_a | 0.035248 | 0.022865 | SLC30A8 | 169026 . |
| 1552995_a | 3.32E-04 | 8.64E-05 | IL27    | 246778 . |
| 1552997_a | 0.003223 | 0.001368 | IQCF1   | 132141 . |
| 1552998_a | 0.020329 | 0.012057 | DEFB125 | 245938 . |
| 1553003_a | 0.004494 | 0.00204  | PKHD1   | 5314 .   |
| 1553006_a | 0.048122 | 0.032824 | GPR112  | 139378 . |
| 1553007_a | 5.47E-04 | 1.59E-04 | ODZ1    | 10178 .  |
| 1553011_a | 8.60E-04 | 2.78E-04 | TAF1L   | 138474 . |
| 1553013_a | 0.002173 | 8.54E-04 | CNTNAP5 | 129684 . |
| 1553015_a | 0.001481 | 5.38E-04 | RECQL4  | 9401 .   |
| 1564591_a | 0.046099 | 0.031241 | TMC1    | 117531 . |
| 1553019_a | 0.002218 | 8.75E-04 | TMC2    | 117532 . |
| 1553021_s | 0.013237 | 0.007296 | BICD2   | 23299 .  |
| 1553027_a | 1.41E-04 | 2.97E-05 | KLHL4   | 56062 .  |
| 1553030_a | 4.58E-04 | 1.28E-04 | SUOX    | 6821 .   |
| 1553031_a | 0.049346 | 0.033801 | GPR115  | 221393 . |
| 1553033_a | 0.001914 | 7.32E-04 | SYTL5   | 94122 .  |
| 1553034_a | 0.0099   | 0.005186 | SDCCAG8 | 10806 .  |
| 1553036_a | 0.014928 | 0.008402 | GPR111  | 222611 . |
| 1553037_a | 0.009336 | 0.00484  | SYN2    | 6854 .   |
| 1553039_a | 5.27E-05 | 8.55E-06 | ASB10   | 136371 . |
| 1564537_a | 0.001627 | 6.01E-04 | ASB10   | 136371 . |
| 1553042_a | 0.001425 | 5.13E-04 | NFKBID  | 84807 .  |
| 1553044_a | 0.001083 | 3.68E-04 | GJA10   | 84694 .  |
| 1553045_a | 0.001249 | 4.38E-04 | WNT9A   | 7483 .   |
| 1553046_s | 0.020952 | 0.012502 | GAL3ST2 | 64090 .  |

|           |          |          |           |          |
|-----------|----------|----------|-----------|----------|
| 1553051_s | 0.012804 | 0.007018 | ODF3      | 113746 . |
| 1553055_a | 1.07E-06 | 5.36E-08 | SLFN5     | 162394 . |
| 1553057_a | 1.33E-04 | 2.76E-05 | SERPINB12 | 89777 .  |
| 1553058_a | 0.023382 | 0.014202 | GIPC3     | 126326 . |
| 1553059_a | 0.004547 | 0.002069 | PGLYRP3   | 114771 . |
| 1553060_a | 7.77E-05 | 1.41E-05 | PSKH2     | 85481 .  |
| 1553061_a | 0.023659 | 0.014402 | OR6W1P    | 89883 .  |
| 1553063_a | 7.43E-04 | 2.32E-04 | GPR78     | 27201 .  |
| 1553064_a | 1.43E-05 | 1.62E-06 | H1FOO     | 132243 . |
| 1553069_a | 0.010312 | 0.005438 | C21orf87  | 257357 . |
| 1553070_a | 0.016816 | 0.009657 | MYOZ3     | 91977 .  |
| 1553071_a | 8.58E-06 | 8.27E-07 | MYOZ3     | 91977 .  |
| 1553074_a | 9.15E-04 | 3.00E-04 | ASB11     | 140456 . |
| 1553078_a | 0.016599 | 0.009512 | OR5P3     | 120066 . |
| 1553079_a | 0.017588 | 0.010177 | TRIM40    | 135644 . |
| 1553081_a | 7.99E-05 | 1.46E-05 | WFDC12    | 128488 . |
| 1553082_a | 6.98E-05 | 1.23E-05 | CRYGN     | 155051 . |
| 1553083_a | 0.004013 | 0.001779 |           | .        |
| 1553088_a | 2.11E-05 | 2.68E-06 | BCL2L11   | 10018 .  |
| 1553094_a | 1.03E-04 | 2.01E-05 | TAC4      | 255061 . |
| 1553096_s | 6.67E-04 | 2.03E-04 | BCL2L11   | 10018 .  |
| 1553530_a | 7.92E-07 | 3.62E-08 | ITGB1     | 3688 .   |
| 1553099_a | 1.18E-06 | 6.18E-08 | TIGD1     | 200765 . |
| 1553103_a | 0.009957 | 0.005222 | NFX1      | 4799 .   |
| 1553105_s | 6.63E-08 | 1.31E-09 | DSG2      | 1829 .   |
| 1553106_a | 1.80E-07 | 5.03E-09 | C5orf24   | 134553 . |
| 1553107_s | 4.44E-08 | 7.72E-10 | C5orf24   | 134553 . |
| 1553108_a | 1.23E-06 | 6.53E-08 | C5orf24   | 134553 . |
| 1553111_a | 9.98E-06 | 1.01E-06 | KBTBD6    | 89890 .  |
| 1553112_s | 0.029421 | 0.018546 | CDK8      | 1024 .   |
| 1553114_a | 0.003623 | 0.001575 | PTK6      | 5753 .   |
| 1553115_a | 1.93E-04 | 4.37E-05 | NKD1      | 85407 .  |
| 1553117_a | 6.00E-05 | 1.01E-05 | STK38     | 11329 .  |
| 1553120_a | 4.98E-04 | 1.41E-04 | CLSPN     | 63967 .  |

|           |          |          |          |          |
|-----------|----------|----------|----------|----------|
| 1553122_s | 0.003473 | 0.001497 | RBAK     | 57786 .  |
| 1553123_a | 3.38E-04 | 8.82E-05 | WDR62    | 284403 . |
| 1553125_x | 0.001438 | 5.19E-04 | WDR62    | 284403 . |
| 1553129_a | 0.016128 | 0.009203 | SVEP1    | 79987 .  |
| 1553130_a | 0.027195 | 0.016924 | PRO0461  | 652276 . |
| 1553131_a | 1.98E-10 | 6.35E-13 | GATA4    | 2626 .   |
| 1553132_a | 1.52E-07 | 4.00E-09 | TC2N     | 123036 . |
| 1553136_a | 0.047978 | 0.032711 | KCTD18   | 130535 . |
| 1553137_s | 3.58E-04 | 9.45E-05 | KLF11    | 8462 .   |
| 1553139_s | 3.04E-04 | 7.73E-05 | PLXNA3   | 55558 .  |
| 1553140_a | 0.01615  | 0.009218 | PELO     | 53918 .  |
| 1553141_a | 3.99E-07 | 1.47E-08 | C13orf31 | 144811 . |
| 1553142_a | 0.002503 | 0.001011 | C13orf31 | 144811 . |
| 1553145_a | 1.23E-05 | 1.34E-06 | FLJ39653 | 202020 . |
| 1553148_a | 0.0021   | 8.19E-04 | SNX13    | 23161 .  |
| 1553150_a | 3.57E-04 | 9.40E-05 | AOF1     | 221656 . |
| 1553151_a | 0.024413 | 0.014932 | ATP6VOD2 | 245972 . |
| 1553153_a | 1.03E-05 | 1.06E-06 | ATP6VOD2 | 245972 . |
| 1553155_x | 5.10E-05 | 8.22E-06 | ATP6VOD2 | 245972 . |
| 1553156_a | 0.048336 | 0.032996 | LHX4     | 89884 .  |
| 1553157_a | 0.043816 | 0.029457 | LHX4     | 89884 .  |
| 1553162_x | 0.044884 | 0.030293 | C19orf55 | 148137 . |
| 1553163_a | 0.003086 | 0.001299 | ADPRHL1  | 113622 . |
| 1553165_a | 0.020288 | 0.012026 | AP1GBP1  | 11276 .  |
| 1553167_a | 3.69E-04 | 9.80E-05 | SEPSECS  | 51091 .  |
| 1553169_a | 3.76E-04 | 1.00E-04 | LRRN4    | 164312 . |
| 1553171_x | 0.001714 | 6.40E-04 | LRRN4    | 164312 . |
| 1553172_a | 0.003312 | 0.001415 | ZNF777   | 27153 .  |
| 1553174_a | 1.74E-05 | 2.09E-06 | JPH2     | 57158 .  |
| 1553175_s | 2.04E-04 | 4.70E-05 | PDE5A    | 8654 .   |
| 1553177_a | 0.008172 | 0.004143 | SH2D1B   | 117157 . |
| 1553178_a | 3.96E-06 | 3.02E-07 | SSTR3    | 6753 .   |
| 1553179_a | 1.32E-09 | 7.75E-12 | ADAMTS19 | 171019 . |
| 1553180_a | 1.22E-05 | 1.32E-06 | ADAMTS19 | 171019 . |

|           |          |          |            |          |
|-----------|----------|----------|------------|----------|
| 1553181_a | 0.041638 | 0.027745 | DDX31      | 64794 .  |
| 1553185_a | 2.59E-06 | 1.73E-07 | RASEF      | 158158 . |
| 1553186_x | 4.70E-06 | 3.76E-07 | RASEF      | 158158 . |
| 1553188_s | 0.016195 | 0.009248 | PARD3B     | 117583 . |
| 1553190_s | 5.32E-06 | 4.41E-07 | PARD3B     | 117583 . |
| 1553191_a | 0.00427  | 0.001916 | DST        | 667 .    |
| 1553192_a | 0.010729 | 0.005698 | ZNF441     | 126068 . |
| 1553193_a | 9.68E-04 | 3.21E-04 | ZNF441     | 126068 . |
| 1553194_a | 1.72E-10 | 5.00E-13 | NEGR1      | 257194 . |
| 1553196_a | 0.003371 | 0.001445 | FCRL3      | 115352 . |
| 1553199_a | 0.018155 | 0.010564 | WDR21C     | 138009 . |
| 1553202_a | 1.62E-04 | 3.53E-05 | STOX1      | 219736 . |
| 1553204_a | 0.015314 | 0.008658 | C20orf200  | 253868 . |
| 1553205_a | 0.001163 | 4.01E-04 | C20orf200  | 253868 . |
| 1553209_a | 0.001222 | 4.26E-04 | RNFT2      | 84900 .  |
| 1553211_a | 0.004934 | 0.00228  | ANKFN1     | 162282 . |
| 1553213_a | 0.020453 | 0.01214  | KRT78      | 196374 . |
| 1553215_s | 0.004458 | 0.00202  | CCDC7      | 221016 . |
| 1553216_a | 0.024361 | 0.014896 | ZNF41      | 7592 .   |
| 1553217_s | 0.038253 | 0.025155 | ZNF41      | 7592 .   |
| 1553219_a | 8.61E-04 | 2.79E-04 | AMMECR1    | 9949 .   |
| 1553220_a | 5.20E-06 | 4.28E-07 | FAM117B    | 150864 . |
| 1553221_a | 1.25E-04 | 2.56E-05 | ZNF583     | 147949 . |
| 1553222_a | 1.73E-04 | 3.84E-05 | OXER1      | 165140 . |
| 1553224_a | 0.001791 | 6.75E-04 | LUZP1      | 7798 .   |
| 1553225_s | 0.002506 | 0.001013 | ZNF75D     | 7626 .   |
| 1553226_a | 0.031399 | 0.020003 | NCRNA00052 | 145978 . |
| 1553227_s | 0.002401 | 9.62E-04 | BRWD1      | 54014 .  |
| 1553228_a | 0.019999 | 0.011827 | CCDC89     | 220388 . |
| 1553232_a | 0.036245 | 0.02363  | FAM82A1    | 151393 . |
| 1553234_a | 0.031724 | 0.020236 | ADAMTS18   | 170692 . |
| 1553238_a | 0.04325  | 0.029009 | HIPK4      | 147746 . |
| 1553239_a | 0.0013   | 4.59E-04 | FAM124A    | 220108 . |
| 1553241_a | 0.006165 | 0.002969 | NKAIN3     | 286183 . |



|           |          |          |          |          |
|-----------|----------|----------|----------|----------|
| 1569481_s | 0.002746 | 0.00113  | SNX22    | 79856 .  |
| 1553244_a | 1.62E-04 | 3.52E-05 | FANCB    | 2187 .   |
| 1553246_a | 0.001635 | 6.05E-04 | SGK196   | 84197 .  |
| 1553248_a | 1.97E-04 | 4.50E-05 | CCDC57   | 284001 . |
| 1553252_a | 0.003462 | 0.001491 | BRWD3    | 254065 . |
| 1553253_a | 5.75E-05 | 9.54E-06 | ASB16    | 92591 .  |
| 1553255_a | 0.008172 | 0.004143 | HERV-V1  | 147664 . |
| 1553257_a | 2.11E-05 | 2.68E-06 | GAL3ST3  | 89792 .  |
| 1553262_a | 1.79E-04 | 3.99E-05 | UTS2R    | 2837 .   |
| 1553263_a | 2.43E-04 | 5.86E-05 | USH1G    | 124590 . |
| 1553264_a | 2.35E-06 | 1.54E-07 | SYN1     | 6853 .   |
| 1553267_a | 6.58E-05 | 1.13E-05 | CNOT6L   | 246175 . |
| 1553271_a | 0.040721 | 0.02704  | DIP2B    | 57609 .  |
| 1553272_a | 1.61E-04 | 3.51E-05 | SLC36A1  | 206358 . |
| 1553274_a | 0.005869 | 0.002804 | SNRNP48  | 154007 . |
| 1553276_a | 0.026097 | 0.016135 | ZNF560   | 147741 . |
| 1553280_a | 0.0033   | 0.001408 | PUS10    | 150962 . |
| 1553281_a | 7.80E-04 | 2.47E-04 | PLCXD2   | 257068 . |
| 1553284_s | 0.01131  | 0.006063 | LMLN     | 89782 .  |
| 1553285_s | 0.001796 | 6.77E-04 | RAD9B    | 144715 . |
| 1553288_a | 0.038518 | 0.025359 | C7orf51  | 222950 . |
| 1553292_s | 1.22E-04 | 2.47E-05 | FLJ25006 | 124923 . |
| 1553297_a | 0.042748 | 0.028605 | CSF3R    | 1441 .   |
| 1553299_a | 0.001225 | 4.28E-04 | DUSP5P   | 574029 . |
| 1553300_a | 0.017584 | 0.010174 | DGKH     | 160851 . |
| 1553303_a | 0.010601 | 0.005618 | C16orf46 | 123775 . |
| 1560142_a | 0.009882 | 0.005176 | GRIK2    | 2898 .   |
| 1553313_s | 0.042275 | 0.028245 | SLC5A3   | 6526 .   |
| 1553315_a | 0.006957 | 0.003432 | SLFNL1   | 200172 . |
| 1553316_a | 0.014985 | 0.008441 | GPR82    | 27197 .  |
| 1553318_a | 0.041263 | 0.027454 | RIBC1    | 158787 . |
| 1553321_a | 0.003218 | 0.001366 | SULT1C4  | 27233 .  |
| 1553322_s | 7.36E-04 | 2.30E-04 | TEAD1    | 7003 .   |
| 1553325_a | 0.026554 | 0.016462 | POU5F2   | 134187 . |

|           |          |          |                             |          |
|-----------|----------|----------|-----------------------------|----------|
| 1553328_a | 0.002723 | 0.001118 | SLC18A2                     | 6571 .   |
| 1553335_x | 0.027607 | 0.017222 | LOC285696                   | 285696 . |
| 1553336_a | 2.64E-05 | 3.54E-06 | MIER3                       | 166968 . |
| 1553340_s | 0.002978 | 0.001243 | AMAC1 /// AM146861 /// 8:   |          |
| 1553341_a | 0.001465 | 5.31E-04 | UROC1                       | 131669 . |
| 1553346_a | 0.004055 | 0.001801 | TNRC6A                      | 27327 .  |
| 1553347_s | 1.35E-06 | 7.42E-08 | KCNA6                       | 3742 .   |
| 1553348_a | 0.001317 | 4.67E-04 | NFX1                        | 4799 .   |
| 1553349_a | 3.16E-04 | 8.09E-05 | ARID2                       | 196528 . |
| 1553350_a | 0.017025 | 0.009793 | FAM123C                     | 205147 . |
| 1553354_a | 4.28E-04 | 1.17E-04 | FLJ31958                    | 143153 . |
| 1553359_a | 2.22E-05 | 2.86E-06 | FBXL18                      | 80028 .  |
| 1553361_x | 4.02E-04 | 1.09E-04 | FBXL18                      | 80028 .  |
| 1553365_a | 0.014759 | 0.008289 | DEPDC4                      | 120863 . |
| 1553366_s | 0.003273 | 0.001394 | ANKRD23                     | 200539 . |
| 1553367_a | 2.35E-07 | 7.28E-09 | COX6B2                      | 125965 . |
| 1553371_a | 0.039873 | 0.026387 | EPHA10                      | 284656 . |
| 1553372_a | 1.74E-06 | 1.04E-07 | FLJ23865                    | 200317 . |
| 1553375_a | 0.013776 | 0.007643 | BTBD9                       | 114781 . |
| 1553385_a | 8.73E-04 | 2.83E-04 | LOC84931                    | 84931 .  |
| 1553387_a | 0.020734 | 0.012347 | ATM                         | 472 .    |
| 1553390_a | 0.001596 | 5.88E-04 | ATG9B                       | 285973 . |
| 1553391_a | 0.001884 | 7.18E-04 | CXorf58                     | 254158 . |
| 1553392_a | 0.001114 | 3.81E-04 | EFCAB3 /// LOC100133744 //. |          |
| 1553395_a | 0.009146 | 0.004725 | CD200R1                     | 131450 . |
| 1553396_a | 3.73E-04 | 9.91E-05 | CCDC13                      | 152206 . |
| 1553397_a | 2.51E-04 | 6.09E-05 | CCDC13                      | 152206 . |
| 1553398_a | 0.016308 | 0.009321 |                             | .        |
| 1553399_a | 2.44E-04 | 5.87E-05 | C17orf69                    | 147081 . |
| 1553400_a | 0.009248 | 0.004788 | C17orf69                    | 147081 . |
| 1553402_a | 3.22E-06 | 2.31E-07 | HFE                         | 3077 .   |
| 1553403_a | 0.001932 | 7.40E-04 | RLN3                        | 117579 . |
| 1553405_a | 2.31E-08 | 3.19E-10 | CSMD1                       | 64478 .  |
| 1553407_a | 0.002582 | 0.001049 | MACF1                       | 23499 .  |

|           |          |          |                             |          |
|-----------|----------|----------|-----------------------------|----------|
| 1553409_a | 0.01983  | 0.011706 | ADAMTS20                    | 80070 .  |
| 1553411_s | 8.11E-04 | 2.59E-04 | SALL3                       | 27164 .  |
| 1553417_a | 0.018963 | 0.011113 | C11orf44                    | 283171 . |
| 1553423_a | 0.006273 | 0.003032 | SLFN13                      | 146857 . |
| 1553424_a | 3.55E-04 | 9.34E-05 | C12orf40                    | 283461 . |
| 1553425_a | 0.00599  | 0.002872 | WDR65                       | 149465 . |
| 1553427_a | 9.54E-04 | 3.15E-04 | ADAMTS15                    | 170689 . |
| 1553428_a | 0.031072 | 0.019763 | RP3-398D13.1                | 285780 . |
| 1553429_a | 0.004836 | 0.002228 | FLJ31713                    | 158263 . |
| 1553432_s | 1.30E-05 | 1.44E-06 | LOC653786 /// 146183 /// 65 | 146183 . |
| 1553435_a | 2.95E-04 | 7.42E-05 | C18orf15                    | 147276 . |
| 1553437_a | 4.78E-04 | 1.35E-04 | KLHDC7A                     | 127707 . |
| 1553438_a | 0.001762 | 6.62E-04 | C11orf72                    | 283135 . |
| 1553442_a | 0.003463 | 0.001492 | CNTNAP4                     | 85445 .  |
| 1553443_a | 0.022175 | 0.013363 | C8orf54                     | 439941 . |
| 1553444_a | 1.88E-04 | 4.25E-05 | C1orf127                    | 148345 . |
| 1553447_a | 0.009628 | 0.005018 | AGBL1                       | 123624 . |
| 1553449_a | 0.021825 | 0.013116 | C16orf81                    | 283860 . |
| 1553450_s | 0.001701 | 6.34E-04 | C16orf81                    | 283860 . |
| 1553451_a | 6.52E-04 | 1.98E-04 | CCDC79                      | 283847 . |
| 1553453_a | 1.81E-04 | 4.05E-05 | ASB14                       | 142686 . |
| 1562211_a | 7.44E-04 | 2.33E-04 | ZNF491                      | 126069 . |
| 1553457_a | 0.002536 | 0.001027 | CXorf62                     | 439943 . |
| 1553458_a | 4.00E-04 | 1.08E-04 | C10orf72                    | 196740 . |
| 1553459_a | 0.001864 | 7.09E-04 | CCDC150                     | 284992 . |
| 1553460_a | 0.028178 | 0.017638 | C2orf61                     | 285051 . |
| 1553464_a | 0.001354 | 4.83E-04 | FLJ40288                    | 286023 . |
| 1553466_a | 0.020466 | 0.01215  | CXorf59                     | 286464 . |
| 1553468_a | 5.91E-04 | 1.75E-04 | HYDIN2                      | 790898 . |
| 1553472_a | 0.002346 | 9.35E-04 | FLJ32955                    | 150596 . |
| 1557016_a | 0.017082 | 0.009833 | C1orf177                    | 163747 . |
| 1553478_a | 6.18E-04 | 1.85E-04 | PRR10                       | 283165 . |
| 1553479_a | 0.018461 | 0.010772 | TMEM145                     | 284339 . |
| 1553483_a | 3.72E-04 | 9.88E-05 | TSGA10IP                    | 254187 . |

|           |          |          |                            |          |
|-----------|----------|----------|----------------------------|----------|
| 1553485_a | 0.002925 | 0.001216 | CCDC140                    | 151278 . |
| 1569886_a | 0.001484 | 5.39E-04 | GLB1L3                     | 112937 . |
| 1553488_a | 0.035319 | 0.022919 | TEKT5                      | 146279 . |
| 1553492_a | 1.47E-08 | 1.72E-10 | PAX1                       | 5075 .   |
| 1553493_a | 6.95E-05 | 1.22E-05 | TDH                        | 157739 . |
| 1555565_s | 0.010905 | 0.005809 | TAPBP                      | 6892 .   |
| 1553498_a | 0.00435  | 0.00196  |                            | .        |
| 1553499_s | 1.52E-06 | 8.68E-08 | SERPINA9                   | 327657 . |
| 1553500_a | 0.02049  | 0.012168 | FBXL21                     | 26223 .  |
| 1553502_a | 0.030254 | 0.01917  | PALM2 /// PAL 114299 /// 4 | .        |
| 1553504_a | 7.28E-06 | 6.66E-07 | MRGPRX4                    | 117196 . |
| 1553505_a | 0.001465 | 5.31E-04 | A2ML1                      | 144568 . |
| 1553506_a | 0.001192 | 4.14E-04 | CPO                        | 130749 . |
| 1553507_a | 0.001976 | 7.61E-04 | GPR6                       | 2830 .   |
| 1553510_s | 0.020445 | 0.012133 | RQCD1                      | 9125 .   |
| 1553511_a | 9.72E-04 | 3.23E-04 | GJD3                       | 125111 . |
| 1553514_a | 0.001371 | 4.90E-04 | VNN3                       | 55350 .  |
| 1553515_a | 0.001823 | 6.89E-04 | MYEOV2                     | 150678 . |
| 1553517_a | 0.036567 | 0.023875 | FERD3L                     | 222894 . |
| 1553521_a | 1.22E-04 | 2.48E-05 | DEFB104A /// I140596 /// 5 | .        |
| 1561306_s | 0.009136 | 0.004718 | STRC                       | 161497 . |
| 1553523_a | 0.009338 | 0.004842 | NLRP14                     | 338323 . |
| 1553524_a | 0.038477 | 0.025322 | DGKB                       | 1607 .   |
| 1553525_a | 0.005703 | 0.002707 | NLRP13                     | 126204 . |
| 1553526_a | 0.020219 | 0.011978 | NLRP8                      | 126205 . |
| 1553528_a | 1.81E-06 | 1.10E-07 | TAF5                       | 6877 .   |
| 1553529_a | 0.012827 | 0.007033 | TAS1R2                     | 80834 .  |
| 1553532_a | 0.008389 | 0.004272 | ZNF341                     | 84905 .  |
| 1553533_a | 9.30E-04 | 3.06E-04 | JPH1                       | 56704 .  |
| 1553536_a | 4.80E-06 | 3.86E-07 | MBNL2                      | 10150 .  |
| 1553538_s | 2.74E-08 | 4.09E-10 | COX1                       | 4512 .   |
| 1553539_a | 4.98E-06 | 4.05E-07 | KRT74                      | 121391 . |
| 1553540_a | 0.01079  | 0.005737 | SLC29A2                    | 3177 .   |
| 1553541_a | 0.001268 | 4.46E-04 | LMX1A                      | 4009 .   |

|           |          |          |                             |             |
|-----------|----------|----------|-----------------------------|-------------|
| 1553544_a | 0.010659 | 0.005654 | GPR101                      | 83550 .     |
| 1553545_a | 5.59E-06 | 4.72E-07 | ILDR1                       | 286676 .    |
| 1553549_a | 0.0374   | 0.024508 | VN1R2                       | 317701 .    |
| 1553552_a | 0.021344 | 0.012776 | TAAR8                       | 83551 .     |
| 1553555_a | 0.00135  | 4.81E-04 | TAS2R38                     | 5726 .      |
| 1553558_a | 0.012019 | 0.006508 | TAS2R41                     | 259287 .    |
| 1553560_a | 0.021667 | 0.013002 | VN1R4                       | 317703 .    |
| 1553562_a | 3.10E-04 | 7.94E-05 | CD8B /// CD8B 652565 /// 9: |             |
| 1553565_s | 6.37E-07 | 2.71E-08 | DDAH1                       | 23576 .     |
| 1553566_a | 5.91E-04 | 1.75E-04 | C12orf53                    | 196500 .    |
| 1553568_a | 0.002949 | 0.001228 | HIST1H1T                    | 3010 .      |
| 1553573_s | 0.006879 | 0.003384 | EFNA2                       | 1943 .      |
| 1553575_a | 4.20E-04 | 1.15E-04 | ND6                         | 4541 .      |
| 1553582_a | 0.017159 | 0.009885 | SPAG11A /// SI10407 /// 65: |             |
| 1553581_s | 0.003306 | 0.001411 | SFRS12IP1                   | 285672 .    |
| 1553583_a | 5.03E-05 | 8.07E-06 | THRSP                       | 7069 .      |
| 1553584_a | 0.003251 | 0.001383 | CXorf36                     | 79742 .     |
| 1553587_a | 1.25E-04 | 2.54E-05 | POLE4                       | 56655 .     |
| 1553590_a | 0.005805 | 0.002767 | FAM27E1 /// F100131997 //   |             |
| 1553591_a | 0.001206 | 4.19E-04 | LOC644165 /// 644165 /// 7: |             |
| 1553592_x | 0.004287 | 0.001925 | LOC644165 /// 644165 /// 7: |             |
| 1553594_a | 1.29E-04 | 2.65E-05 | INSL3                       | 3640 .      |
| 1553603_s | 2.59E-06 | 1.73E-07 | ATL2                        | 64225 .     |
| 1553608_a | 0.029584 | 0.018673 | C21orf109                   | 193629 .    |
| 1553612_a | 0.00204  | 7.90E-04 | ZNF354B                     | 117608 .    |
| 1553613_s | 6.52E-04 | 1.98E-04 | FOXC1                       | 2296 .      |
| 1553614_a | 0.038498 | 0.025342 | FLJ25694                    | 100128202 . |
| 1553629_a | 0.007197 | 0.003571 | FAM71B                      | 153745 .    |
| 1553635_s | 0.002855 | 0.001182 | TCTEX1D1                    | 200132 .    |
| 1553637_s | 0.003558 | 0.001541 | TMCO5A                      | 145942 .    |
| 1553639_a | 9.55E-05 | 1.82E-05 | PPARGC1B                    | 133522 .    |
| 1553640_a | 0.005517 | 0.002605 | XKR6                        | 286046 .    |
| 1553641_a | 0.00139  | 4.98E-04 | TSGA13                      | 114960 .    |
| 1553642_a | 2.42E-06 | 1.60E-07 | C9orf163                    | 158055 .    |

|           |          |          |          |          |
|-----------|----------|----------|----------|----------|
| 1553645_a | 1.35E-05 | 1.50E-06 | CCDC141  | 285025 . |
| 1553646_a | 0.048707 | 0.033294 | HDX      | 139324 . |
| 1553647_a | 0.002108 | 8.23E-04 | CDYL2    | 124359 . |
| 1553651_a | 2.04E-05 | 2.57E-06 | C18orf54 | 162681 . |
| 1553652_a | 3.29E-05 | 4.69E-06 | C18orf54 | 162681 . |
| 1553656_a | 0.002141 | 8.38E-04 | TECTB    | 6975 .   |
| 1553657_a | 1.37E-06 | 7.55E-08 | VWA3A    | 146177 . |
| 1553660_a | 4.87E-05 | 7.74E-06 | HUS1B    | 135458 . |
| 1553666_a | 6.49E-05 | 1.11E-05 | CCDC34   | 91057 .  |
| 1553672_a | 2.22E-04 | 5.22E-05 | ENAH     | 55740 .  |
| 1553677_a | 1.79E-07 | 4.96E-09 | TIPRL    | 261726 . |
| 1553678_a | 5.73E-06 | 4.88E-07 | ITGB1    | 3688 .   |
| 1553679_s | 0.018123 | 0.010541 | VKORC1L1 | 154807 . |
| 1553681_a | 0.001352 | 4.82E-04 | PRF1     | 5551 .   |
| 1553683_s | 0.047308 | 0.032201 | FBXL14   | 144699 . |
| 1553685_s | 0.009923 | 0.005201 | SP1      | 6667 .   |
| 1553686_a | 0.001469 | 5.32E-04 | C18orf25 | 147339 . |
| 1553689_s | 1.71E-04 | 3.77E-05 | METTL6   | 131965 . |
| 1553690_a | 0.036309 | 0.02368  | SGOL1    | 151648 . |
| 1553691_a | 0.001046 | 3.52E-04 | B3GALNT2 | 148789 . |
| 1553693_s | 8.25E-04 | 2.64E-04 | CBR4     | 84869 .  |
| 1553694_a | 1.62E-04 | 3.52E-05 | PIK3C2A  | 5286 .   |
| 1553695_a | 0.008806 | 0.004519 | NLRX1    | 79671 .  |
| 1553696_s | 0.015525 | 0.0088   | ZNF569   | 148266 . |
| 1553701_a | 0.002711 | 0.001112 | DUSP18   | 150290 . |
| 1553702_a | 1.18E-04 | 2.36E-05 | ZNF697   | 90874 .  |
| 1553703_a | 0.001183 | 4.10E-04 | ZNF791   | 163049 . |
| 1553704_x | 8.04E-04 | 2.56E-04 | ZNF791   | 163049 . |
| 1553705_a | 0.001483 | 5.39E-04 | CHRM3    | 1131 .   |
| 1553709_a | 1.14E-04 | 2.26E-05 | PRPF38A  | 84950 .  |
| 1553711_a | 6.73E-04 | 2.05E-04 | C4orf39  | 152756 . |
| 1570253_a | 0.001758 | 6.60E-04 | RHEBL1   | 121268 . |
| 1553713_a | 0.049772 | 0.03415  | RHEBL1   | 121268 . |
| 1553715_s | 7.19E-04 | 2.23E-04 | C16orf14 | 84331 .  |

|           |          |          |           |          |
|-----------|----------|----------|-----------|----------|
| 1564053_a | 6.76E-05 | 1.17E-05 | YTHDF3    | 253943 . |
| 1553717_a | 0.042495 | 0.028411 | KCTD7     | 154881 . |
| 1553718_a | 1.22E-06 | 6.44E-08 | ZNF548    | 147694 . |
| 1553719_s | 0.035539 | 0.02309  | ZNF548    | 147694 . |
| 1553722_s | 0.03036  | 0.019245 | RNF152    | 220441 . |
| 1553725_s | 7.37E-04 | 2.30E-04 | ZNF644    | 84146 .  |
| 1553727_a | 1.68E-04 | 3.70E-05 | B4GALNT3  | 283358 . |
| 1553728_a | 2.72E-07 | 8.82E-09 | LRRC43    | 254050 . |
| 1553730_x | 1.38E-05 | 1.56E-06 | LRRC43    | 254050 . |
| 1563919_a | 0.001255 | 4.40E-04 | CCDC123   | 84902 .  |
| 1553732_s | 0.004077 | 0.001813 | CCDC123   | 84902 .  |
| 1553736_a | 0.046136 | 0.031269 | ZFC3H1    | 196441 . |
| 1566671_a | 0.01457  | 0.008161 | PDXK      | 8566 .   |
| 1553741_a | 4.30E-05 | 6.61E-06 | C1orf211  | 148645 . |
| 1553743_a | 0.008513 | 0.004345 | FAM119A   | 151194 . |
| 1553749_a | 0.02781  | 0.017372 | FAM76B    | 143684 . |
| 1553752_a | 4.31E-04 | 1.19E-04 | C20orf165 | 128497 . |
| 1553756_a | 1.57E-04 | 3.38E-05 | C9orf70   | 84850 .  |
| 1553757_a | 0.016347 | 0.009347 | IQCG      | 84223 .  |
| 1553759_a | 0.009447 | 0.004908 | MCM9      | 254394 . |
| 1553761_a | 0.036693 | 0.023969 | C22orf30  | 253143 . |
| 1553764_a | 0.023602 | 0.014362 | JUB       | 84962 .  |
| 1553768_a | 2.18E-05 | 2.79E-06 | DCBLD1    | 285761 . |
| 1553769_a | 0.001668 | 6.20E-04 | SLAMF9    | 89886 .  |
| 1553770_a | 0.010217 | 0.005379 | SLAMF9    | 89886 .  |
| 1553772_a | 0.006774 | 0.003322 | GK5       | 256356 . |
| 1553775_a | 0.00443  | 0.002005 | FLJ31715  | 152048 . |
| 1553778_a | 3.84E-04 | 1.03E-04 | WBSCR27   | 155368 . |
| 1553780_a | 6.52E-04 | 1.98E-04 | MGC23270  | 196872 . |
| 1553781_a | 0.001711 | 6.39E-04 | ZC3HAV1L  | 92092 .  |
| 1560091_a | 0.02419  | 0.014773 | PHF21B    | 112885 . |
| 1562309_s | 0.001077 | 3.65E-04 | PHF21B    | 112885 . |
| 1562386_s | 0.023861 | 0.014541 | ZNF501    | 115560 . |
| 1553785_a | 0.024854 | 0.015252 | RASGEF1B  | 153020 . |

|           |          |          |           |          |
|-----------|----------|----------|-----------|----------|
| 1553787_a | 0.043011 | 0.028802 | C11orf45  | 219833 . |
| 1553789_a | 2.94E-05 | 4.08E-06 | C21orf58  | 54058 .  |
| 1553793_a | 0.035959 | 0.02341  | KIAA1109  | 84162 .  |
| 1553798_a | 0.003778 | 0.001657 | FBXL13    | 222235 . |
| 1553799_a | 0.006137 | 0.002954 | C15orf33  | 196951 . |
| 1553801_a | 0.041022 | 0.027268 | C14orf126 | 112487 . |
| 1553802_a | 1.58E-06 | 9.15E-08 | SOX3      | 6658 .   |
| 1553803_a | 4.24E-04 | 1.16E-04 | C17orf46  | 124783 . |
| 1553809_a | 3.08E-04 | 7.88E-05 | C9orf71   | 169693 . |
| 1553810_a | 8.56E-05 | 1.59E-05 | KIAA1524  | 57650 .  |
| 1553821_a | 0.003719 | 0.001625 | C12orf51  | 283450 . |
| 1553823_a | 5.45E-06 | 4.57E-07 | RTP1      | 132112 . |
| 1553826_a | 0.001046 | 3.52E-04 | C16orf11  | 146325 . |
| 1553828_a | 0.006072 | 0.002919 | FAM55A    | 120400 . |
| 1553832_a | 1.76E-05 | 2.11E-06 | C21orf93  | 246704 . |
| 1553839_a | 0.012219 | 0.006639 | CCDC149   | 91050 .  |
| 1553843_a | 4.51E-04 | 1.25E-04 | C10orf67  | 256815 . |
| 1553844_a | 0.035967 | 0.023417 | C10orf67  | 256815 . |
| 1553845_x | 4.50E-05 | 7.01E-06 | C10orf67  | 256815 . |
| 1553846_a | 0.003613 | 0.00157  | SPERT     | 220082 . |
| 1553847_a | 7.59E-04 | 2.38E-04 | SPERT     | 220082 . |
| 1553850_a | 1.88E-05 | 2.30E-06 | C21orf88  | 114041 . |
| 1553857_a | 7.03E-04 | 2.17E-04 | IGSF22    | 283284 . |
| 1553858_a | 0.014536 | 0.008137 | ZBTB3     | 79842 .  |
| 1553860_a | 0.002551 | 0.001035 | DCST1     | 149095 . |
| 1553863_a | 0.012567 | 0.006866 | WDFY4     | 57705 .  |
| 1553865_a | 0.008157 | 0.004134 | GPR26     | 2849 .   |
| 1553871_a | 0.001148 | 3.95E-04 | C19orf34  | 255193 . |
| 1553872_a | 2.45E-05 | 3.24E-06 | C17orf103 | 256302 . |
| 1553873_a | 0.006874 | 0.003381 | KLHL34    | 257240 . |
| 1553874_a | 1.21E-07 | 2.92E-09 | ZSCAN10   | 84891 .  |
| 1553875_s | 1.24E-07 | 3.03E-09 | ZSCAN10   | 84891 .  |
| 1553876_a | 0.030305 | 0.019206 | SAMD3     | 154075 . |
| 1553882_a | 5.45E-04 | 1.58E-04 |           | .        |



|           |          |          |                             |             |
|-----------|----------|----------|-----------------------------|-------------|
| 1553889_a | 5.76E-05 | 9.57E-06 | MRGPRX2                     | 117194 .    |
| 1553890_s | 0.001189 | 4.13E-04 | NTN5                        | 126147 .    |
| 1553891_a | 0.002026 | 7.84E-04 | KLF17                       | 128209 .    |
| 1553893_a | 0.014595 | 0.008177 | CCDC105                     | 126402 .    |
| 1553900_s | 0.031921 | 0.02039  | POM121L1P // 25812 /// 297. |             |
| 1553901_x | 0.048789 | 0.033359 | ZNF486                      | 90649 .     |
| 1554953_a | 7.06E-06 | 6.39E-07 | C21orf90                    | 114043 .    |
| 1553906_s | 4.09E-06 | 3.15E-07 | FGD2                        | 221472 .    |
| 1553909_x | 3.56E-04 | 9.39E-05 | FAM178A                     | 55719 .     |
| 1553911_a | 0.002876 | 0.001192 | ZNF663                      | 100130934 . |
| 1553917_a | 4.30E-04 | 1.18E-04 | PIKFYVE                     | 200576 .    |
| 1553918_a | 2.22E-11 | 3.88E-14 | C21orf129                   | 150135 .    |
| 1553919_a | 0.001961 | 7.53E-04 | C9orf62                     | 157927 .    |
| 1564439_a | 0.007025 | 0.003471 | C11orf36                    | 283303 .    |
| 1553923_a | 0.042826 | 0.028664 | SLC22A24                    | 283238 .    |
| 1553927_a | 4.62E-04 | 1.29E-04 | C7orf33                     | 202865 .    |
| 1553928_a | 1.30E-04 | 2.68E-05 | ELMOD2                      | 255520 .    |
| 1553929_a | 0.049541 | 0.03396  | ACER1                       | 125981 .    |
| 1553938_a | 7.42E-04 | 2.32E-04 | STK32A                      | 202374 .    |
| 1553943_a | 0.019527 | 0.011501 | NS3BP                       | 171391 .    |
| 1553945_a | 0.00571  | 0.00271  | GPHB5                       | 122876 .    |
| 1553949_a | 0.005081 | 0.002363 | IQSEC3                      | 440073 .    |
| 1553952_a | 0.003201 | 0.001358 | ZDHHC19                     | 131540 .    |
| 1553954_a | 1.70E-05 | 2.03E-06 | ALG14                       | 199857 .    |
| 1553956_a | 0.010198 | 0.005367 | ALS2CR4                     | 65062 .     |
| 1553959_a | 1.24E-06 | 6.59E-08 | B3GALT6                     | 126792 .    |
| 1553960_a | 3.87E-05 | 5.74E-06 | SNX21                       | 90203 .     |
| 1553961_s | 3.04E-05 | 4.24E-06 | SNX21                       | 90203 .     |
| 1553962_s | 1.62E-04 | 3.54E-05 | RHOB                        | 388 .       |
| 1553965_x | 0.018504 | 0.010802 | RHOB                        | 388 .       |
| 1553967_a | 0.00215  | 8.43E-04 | ADAT3                       | 113179 .    |
| 1553968_a | 7.65E-04 | 2.41E-04 | ADAT3                       | 113179 .    |
| 1553970_s | 0.003271 | 0.001393 | CEL                         | 1056 .      |
| 1553972_a | 0.007087 | 0.003508 | CBS                         | 875 .       |

|           |          |          |               |           |     |
|-----------|----------|----------|---------------|-----------|-----|
| 1553974_a | 2.73E-05 | 3.70E-06 | C22orf39      | 128977    | .   |
| 1553976_a | 0.014412 | 0.008056 | RP11-529I10.4 | 25911     | .   |
| 1553978_a | 0.007989 | 0.004037 | LOC100133072  | 100133072 | //. |
| 1553979_a | 1.50E-08 | 1.77E-10 |               |           | .   |
| 1553982_a | 5.49E-08 | 1.03E-09 | RAB7B         | 338382    | .   |
| 1553983_a | 9.35E-05 | 1.77E-05 | DTYMK         | 1841      | .   |
| 1553984_s | 1.73E-05 | 2.07E-06 | DTYMK         | 1841      | .   |
| 1553987_a | 8.63E-04 | 2.79E-04 | C12orf47      | 51275     | .   |
| 1553990_a | 0.001327 | 4.71E-04 | C16orf79      | 283870    | .   |
| 1553991_s | 0.004607 | 0.002102 | FLJ20674      | 54621     | .   |
| 1553993_s | 8.51E-04 | 2.75E-04 | MED25         | 81857     | .   |
| 1553994_a | 7.28E-08 | 1.49E-09 | NT5E          | 4907      | .   |
| 1553995_a | 2.77E-08 | 4.16E-10 | NT5E          | 4907      | .   |
| 1554001_a | 0.030231 | 0.019153 | TRIM37        | 4591      | .   |
| 1554006_a | 1.56E-06 | 8.97E-08 | LLGL2         | 3993      | .   |
| 1554007_a | 1.80E-05 | 2.18E-06 |               |           | .   |
| 1554008_a | 0.003025 | 0.001268 | OSMR          | 9180      | .   |
| 1554010_a | 3.28E-04 | 8.49E-05 | NDST1         | 3340      | .   |
| 1554014_a | 0.001134 | 3.89E-04 | CHD2          | 1106      | .   |
| 1554018_a | 1.23E-05 | 1.33E-06 | GPNMB         | 10457     | .   |
| 1554019_s | 7.11E-04 | 2.20E-04 | C6orf182      | 285753    | .   |
| 1554020_a | 1.74E-06 | 1.05E-07 | BICD1         | 636       | .   |
| 1554023_s | 5.45E-04 | 1.58E-04 | CCDC13        | 152206    | .   |
| 1554026_a | 0.009426 | 0.004896 | MYO10         | 4651      | .   |
| 1554027_a | 0.006309 | 0.003052 | SLC4A4        | 8671      | .   |
| 1554029_a | 0.002403 | 9.63E-04 | TTC37         | 9652      | .   |
| 1554030_a | 7.64E-04 | 2.41E-04 | ARSB          | 411       | .   |
| 1554033_a | 0.036914 | 0.024134 | FRMD4A        | 55691     | .   |
| 1554036_a | 4.83E-04 | 1.36E-04 | ZBTB24        | 9841      | .   |
| 1554037_a | 0.002103 | 8.20E-04 | ZBTB24        | 9841      | .   |
| 1554039_a | 0.046655 | 0.031679 | C14orf159     | 80017     | .   |
| 1554041_a | 2.94E-04 | 7.39E-05 | C20orf141     | 128653    | .   |
| 1554042_s | 0.004291 | 0.001928 | C20orf141     | 128653    | .   |
| 1554043_a | 0.001764 | 6.62E-04 |               |           | .   |

|           |          |          |                             |          |
|-----------|----------|----------|-----------------------------|----------|
| 1554045_a | 0.001088 | 3.70E-04 | ZNF24                       | 7572 .   |
| 1554047_a | 0.005812 | 0.002771 | TXNDC9                      | 10190 .  |
| 1554050_a | 8.51E-07 | 4.00E-08 | SMPDL3B                     | 27293 .  |
| 1556283_s | 4.98E-08 | 8.99E-10 | FGFR1OP2                    | 26127 .  |
| 1554057_a | 1.50E-04 | 3.22E-05 | LOC645676                   | 645676 . |
| 1554059_a | 0.001872 | 7.12E-04 | SETMAR                      | 6419 .   |
| 1554060_s | 0.001786 | 6.72E-04 | SETMAR                      | 6419 .   |
| 1554062_a | 2.62E-04 | 6.41E-05 | XG                          | 7499 .   |
| 1554063_a | 8.51E-08 | 1.84E-09 | C8orf76                     | 84933 .  |
| 1554067_a | 0.014857 | 0.008356 | C12orf66                    | 144577 . |
| 1554069_a | 0.001496 | 5.44E-04 | EPHA8                       | 2046 .   |
| 1554074_s | 0.007634 | 0.003827 | SLFNL1                      | 200172 . |
| 1554078_s | 0.001014 | 3.39E-04 | DNAJA3                      | 9093 .   |
| 1554079_a | 0.003171 | 0.001342 | GALNTL4                     | 374378 . |
| 1554080_a | 1.85E-05 | 2.25E-06 | RQCD1                       | 9125 .   |
| 1554082_a | 6.21E-04 | 1.86E-04 | NOL9                        | 79707 .  |
| 1554084_a | 0.002212 | 8.72E-04 | NOL9                        | 79707 .  |
| 1554085_a | 9.68E-08 | 2.20E-09 | DDX51                       | 317781 . |
| 1554086_a | 1.44E-04 | 3.06E-05 | TUBGCP3                     | 10426 .  |
| 1554089_s | 0.002398 | 9.61E-04 | SBDS /// SBDSF155370 /// 5: |          |
| 1554091_a | 0.001319 | 4.68E-04 | TIRAP                       | 114609 . |
| 1554095_a | 9.00E-04 | 2.94E-04 | RBM33                       | 155435 . |
| 1554097_a | 0.001515 | 5.53E-04 | LOC554202                   | 554202 . |
| 1554101_a | 2.82E-04 | 7.04E-05 | TMTC4                       | 84899 .  |
| 1554102_a | 2.54E-04 | 6.17E-05 | TMTC4                       | 84899 .  |
| 1554105_a | 0.001971 | 7.58E-04 | TMEM185A                    | 84548 .  |
| 1554106_a | 0.001937 | 7.43E-04 | NBEAL1                      | 65065 .  |
| 1554108_a | 0.017003 | 0.009778 |                             | .        |
| 1554113_a | 1.68E-09 | 1.06E-11 | SLC4A8                      | 9498 .   |
| 1554114_s | 0.002157 | 8.46E-04 | SSH2                        | 85464 .  |
| 1554115_a | 0.018586 | 0.010856 | LOC133874                   | 133874 . |
| 1554116_s | 0.021597 | 0.012951 | PARP11                      | 57097 .  |
| 1554117_a | 5.29E-06 | 4.38E-07 | CCDC60                      | 160777 . |
| 1554119_a | 1.32E-05 | 1.46E-06 | C16orf57                    | 79650 .  |

|           |          |          |                             |          |
|-----------|----------|----------|-----------------------------|----------|
| 1554125_a | 2.18E-04 | 5.10E-05 | NLGN4Y                      | 22829 .  |
| 1554126_a | 6.48E-06 | 5.70E-07 | MSRB3                       | 253827 . |
| 1554127_s | 3.34E-10 | 1.28E-12 | MSRB3                       | 253827 . |
| 1554129_a | 6.21E-08 | 1.19E-09 | ADIG                        | 149685 . |
| 1554141_s | 2.03E-04 | 4.65E-05 | WDR78                       | 79819 .  |
| 1554145_a | 0.004676 | 0.00214  | KLRAQ1                      | 129285 . |
| 1554149_a | 0.019878 | 0.011739 | CLDND1                      | 56650 .  |
| 1554151_a | 7.92E-04 | 2.51E-04 | OGDH                        | 4967 .   |
| 1554153_a | 0.039319 | 0.025962 | PHF21A                      | 51317 .  |
| 1554154_a | 0.004851 | 0.002235 | GDAP2                       | 54834 .  |
| 1554155_a | 0.024706 | 0.015141 | MCPH1                       | 79648 .  |
| 1554157_a | 0.016883 | 0.009702 | WFDC8                       | 90199 .  |
| 1554159_a | 3.12E-06 | 2.22E-07 | ZMYND11                     | 10771 .  |
| 1554161_a | 0.00539  | 0.002532 | SLC25A27                    | 9481 .   |
| 1554163_a | 2.56E-08 | 3.69E-10 | TWIST2                      | 117581 . |
| 1554165_a | 0.001099 | 3.75E-04 | FAM53B                      | 9679 .   |
| 1554168_a | 0.004888 | 0.002255 | SH3KBP1                     | 30011 .  |
| 1554171_a | 0.034636 | 0.022406 | ZMYM3                       | 9203 .   |
| 1554173_a | 8.90E-05 | 1.67E-05 | CD300LB                     | 124599 . |
| 1554175_a | 1.87E-04 | 4.23E-05 | CD300LB                     | 124599 . |
| 1554178_a | 0.034994 | 0.022675 | FAM126B                     | 285172 . |
| 1554475_a | 0.003235 | 0.001375 | C19orf47                    | 126526 . |
| 1554183_s | 2.37E-06 | 1.55E-07 | TRIM73 /// TRI375593 /// 37 |          |
| 1554187_a | 0.00789  | 0.00398  | LOC554206                   | 554206 . |
| 1554188_a | 9.01E-04 | 2.94E-04 | C11orf53                    | 341032 . |
| 1554192_s | 5.44E-04 | 1.58E-04 | C4orf23                     | 152992 . |
| 1554193_s | 2.32E-05 | 3.01E-06 | MANEA                       | 79694 .  |
| 1554194_a | 0.008557 | 0.00437  |                             | .        |
| 1554195_a | 1.20E-04 | 2.42E-05 | C5orf46                     | 389336 . |
| 1554196_a | 0.00105  | 3.54E-04 | IZUMO1                      | 284359 . |
| 1554198_a | 3.61E-07 | 1.29E-08 | SH3YL1                      | 26751 .  |
| 1554201_a | 6.66E-04 | 2.03E-04 | CABP4                       | 57010 .  |
| 1554203_a | 6.39E-04 | 1.93E-04 | NCRNA00110                  | 642976 . |
| 1554205_s | 0.036107 | 0.023523 | ICA1L                       | 130026 . |

|           |          |          |          |          |
|-----------|----------|----------|----------|----------|
| 1554206_a | 0.001614 | 5.96E-04 | TMLHE    | 55217 .  |
| 1554208_a | 4.22E-04 | 1.16E-04 | MEI1     | 150365 . |
| 1554212_s | 2.88E-04 | 7.21E-05 | KCNS2    | 3788 .   |
| 1554213_a | 0.009471 | 0.004923 | ARHGEF10 | 9639 .   |
| 1554214_a | 0.044129 | 0.029702 |          | .        |
| 1554216_a | 0.015671 | 0.008896 | CCDC132  | 55610 .  |
| 1554217_a | 0.001634 | 6.04E-04 | CCDC132  | 55610 .  |
| 1554222_a | 4.67E-07 | 1.82E-08 | MGC45922 | 284365 . |
| 1554224_a | 0.002558 | 0.001038 |          | .        |
| 1554228_a | 7.24E-05 | 1.28E-05 | C8orf56  | 157556 . |
| 1554229_a | 0.025199 | 0.015506 | C5orf41  | 153222 . |
| 1554235_a | 0.019973 | 0.011808 | CTNNA3   | 29119 .  |
| 1554239_s | 1.27E-07 | 3.12E-09 | ZADH2    | 284273 . |
| 1554241_a | 1.84E-07 | 5.18E-09 | COCH     | 1690 .   |
| 1554242_a | 8.23E-06 | 7.80E-07 | COCH     | 1690 .   |
| 1554246_a | 1.08E-09 | 5.87E-12 | C1orf210 | 149466 . |
| 1554248_a | 7.70E-07 | 3.50E-08 | ZNF638   | 27332 .  |
| 1554249_a | 6.26E-04 | 1.88E-04 | ZNF638   | 27332 .  |
| 1554250_s | 0.00449  | 0.002037 | TRIM73   | 375593 . |
| 1554251_a | 2.02E-09 | 1.33E-11 | HP1BP3   | 50809 .  |
| 1554253_a | 0.012393 | 0.006752 | LASS3    | 204219 . |
| 1554256_a | 0.00481  | 0.002214 | PCNXL2   | 80003 .  |
| 1554258_a | 0.00178  | 6.69E-04 | DNAJC5B  | 85479 .  |
| 1554259_a | 0.00166  | 6.16E-04 | GPSM1    | 26086 .  |
| 1554264_a | 2.40E-04 | 5.74E-05 | CKAP2    | 26586 .  |
| 1554266_a | 0.049772 | 0.034148 |          | .        |
| 1554268_a | 0.030358 | 0.019243 | MORN1    | 79906 .  |
| 1554271_a | 0.001344 | 4.79E-04 | CENPL    | 91687 .  |
| 1554273_a | 2.79E-04 | 6.95E-05 | ERAP2    | 64167 .  |
| 1554276_a | 0.021635 | 0.012979 | SART3    | 9733 .   |
| 1554277_s | 0.017403 | 0.010048 | FANCM    | 57697 .  |
| 1554279_a | 0.039174 | 0.025849 | TRMT2B   | 79979 .  |
| 1554283_a | 0.010731 | 0.0057   | CCRN4L   | 25819 .  |
| 1554286_a | 0.022784 | 0.013782 | FLJ25758 | 497049 . |

|           |          |          |                            |             |
|-----------|----------|----------|----------------------------|-------------|
| 1554287_a | 2.69E-08 | 3.96E-10 | TRIM4                      | 89122 .     |
| 1554288_a | 0.012874 | 0.007064 | FAM160B1                   | 57700 .     |
| 1554292_a | 0.001077 | 3.65E-04 | UHRF1BP1L                  | 23074 .     |
| 1554300_a | 0.001271 | 4.47E-04 | SVOPL                      | 136306 .    |
| 1554303_a | 2.06E-04 | 4.74E-05 | HNMT                       | 3176 .      |
| 1554306_a | 2.46E-07 | 7.73E-09 | ITPKB                      | 3707 .      |
| 1554309_a | 0.010227 | 0.005385 | EIF4G3                     | 8672 .      |
| 1554311_a | 0.03706  | 0.024254 | SUPT6H                     | 6830 .      |
| 1554312_a | 0.043142 | 0.028913 | RNF170                     | 81790 .     |
| 1554314_a | 0.001304 | 4.61E-04 | C6orf141                   | 135398 .    |
| 1554316_a | 0.007471 | 0.003732 | PGLS                       | 25796 .     |
| 1554317_s | 0.026123 | 0.016154 | TRMT61A                    | 115708 .    |
| 1554318_a | 4.60E-06 | 3.67E-07 | LOC541473                  | 541473 .    |
| 1554322_a | 0.003477 | 0.001499 | HDAC4                      | 9759 .      |
| 1554324_s | 0.014081 | 0.007839 | DYNC2LI1                   | 51626 .     |
| 1554325_a | 0.028598 | 0.017944 | DOCK2                      | 1794 .      |
| 1554327_a | 3.32E-05 | 4.74E-06 | CANT1                      | 124583 .    |
| 1554328_a | 0.001819 | 6.88E-04 | STXBP4                     | 252983 .    |
| 1554329_x | 0.008887 | 0.004567 | STXBP4                     | 252983 .    |
| 1554332_a | 0.047507 | 0.032354 | hCG_2018279                | 100127888 . |
| 1554334_a | 0.043043 | 0.02883  | DNAJA4                     | 55466 .     |
| 1554335_a | 0.034312 | 0.022165 | CYTH4                      | 27128 .     |
| 1554337_a | 9.05E-04 | 2.96E-04 | FARP2                      | 9855 .      |
| 1554339_a | 1.33E-04 | 2.77E-05 | COG3                       | 83548 .     |
| 1554340_a | 1.03E-04 | 2.01E-05 | C1orf187                   | 374946 .    |
| 1554341_a | 0.016343 | 0.009344 | HELQ                       | 113510 .    |
| 1554344_s | 1.65E-06 | 9.73E-08 | AQP12A /// AC375318 /// 65 |             |
| 1554346_a | 0.002435 | 9.79E-04 | GNB5                       | 10681 .     |
| 1554348_s | 0.005468 | 0.002576 | CDKN2AIPNL                 | 91368 .     |
| 1554351_a | 0.006409 | 0.003111 | TIPRL                      | 261726 .    |
| 1554352_s | 2.53E-09 | 1.75E-11 | DENND4A                    | 10260 .     |
| 1564435_a | 0.012056 | 0.006533 | KRT72                      | 140807 .    |
| 1554360_a | 0.016179 | 0.009237 | FCHSD2                     | 9873 .      |
| 1554367_a | 0.008783 | 0.004504 | CALHM1                     | 255022 .    |

|           |          |          |                            |          |
|-----------|----------|----------|----------------------------|----------|
| 1554371_a | 0.020037 | 0.011854 | PKD1L2                     | 114780 . |
| 1554372_a | 1.02E-04 | 1.97E-05 |                            | .        |
| 1554374_a | 3.81E-04 | 1.02E-04 |                            | .        |
| 1554376_s | 2.11E-07 | 6.15E-09 | PTPLA                      | 9200 .   |
| 1554377_a | 0.016725 | 0.009598 | CNTNAP4                    | 85445 .  |
| 1554378_a | 3.06E-05 | 4.29E-06 | PDE1C                      | 5137 .   |
| 1554379_a | 6.84E-06 | 6.12E-07 | TP73                       | 7161 .   |
| 1554382_a | 0.012245 | 0.006659 | LOC200261                  | 200261 . |
| 1554383_a | 2.08E-05 | 2.62E-06 | TRAM2                      | 9697 .   |
| 1554390_s | 6.53E-04 | 1.98E-04 | ACTR2                      | 10097 .  |
| 1554393_a | 7.66E-06 | 7.12E-07 | ADC                        | 113451 . |
| 1554394_a | 0.001781 | 6.70E-04 | NELL1                      | 4745 .   |
| 1554396_a | 6.09E-04 | 1.81E-04 | UEVLD                      | 55293 .  |
| 1554397_s | 5.49E-05 | 8.99E-06 | UEVLD                      | 55293 .  |
| 1554400_a | 4.91E-07 | 1.93E-08 | TCTE3                      | 6991 .   |
| 1554401_a | 7.31E-04 | 2.28E-04 | TCTE3                      | 6991 .   |
| 1554404_a | 0.023116 | 0.01401  |                            | .        |
| 1555213_a | 1.49E-04 | 3.18E-05 | CLEC7A                     | 64581 .  |
| 1554409_a | 9.40E-04 | 3.10E-04 | WBSCR16                    | 81554 .  |
| 1554410_a | 0.035649 | 0.023179 | WBSCR16                    | 81554 .  |
| 1554413_s | 0.003364 | 0.001442 | RUNDC2B /// F400509 /// 4. |          |
| 1554415_a | 7.98E-06 | 7.51E-07 | TAF5L                      | 27097 .  |
| 1554420_a | 2.79E-04 | 6.94E-05 | ATF3                       | 467 .    |
| 1554980_a | 0.027282 | 0.01699  | ATF3                       | 467 .    |
| 1554428_s | 3.92E-04 | 1.06E-04 | NLGN2                      | 57555 .  |
| 1554429_a | 7.32E-04 | 2.28E-04 | DMWD                       | 1762 .   |
| 1554432_x | 0.034544 | 0.022339 | FAM165B                    | 54065 .  |
| 1554433_a | 0.002436 | 9.80E-04 | ZNF146                     | 7705 .   |
| 1555745_a | 0.011789 | 0.00636  | LYZ                        | 4069 .   |
| 1554438_a | 0.02017  | 0.011945 | KIAA1217                   | 56243 .  |
| 1554441_a | 0.004191 | 0.001874 | WAPAL                      | 23063 .  |
| 1554442_a | 7.23E-04 | 2.24E-04 | BEST1                      | 7439 .   |
| 1554447_a | 2.40E-07 | 7.46E-09 | LOC554203                  | 554203 . |
| 1554448_a | 0.017806 | 0.010324 | LOC554203                  | 554203 . |

|           |          |          |                             |          |
|-----------|----------|----------|-----------------------------|----------|
| 1554449_a | 0.007521 | 0.003761 | MIER3                       | 166968 . |
| 1554450_s | 0.003268 | 0.001391 | MIER3                       | 166968 . |
| 1554452_a | 0.025337 | 0.015606 | C7orf68                     | 29923 .  |
| 1554455_a | 3.57E-05 | 5.19E-06 | LINS1                       | 55180 .  |
| 1554456_a | 7.55E-04 | 2.37E-04 | LINS1                       | 55180 .  |
| 1554462_a | 0.016592 | 0.009508 | DNAJB9                      | 4189 .   |
| 1554464_a | 5.63E-05 | 9.29E-06 | CRTAP                       | 10491 .  |
| 1554465_s | 0.012168 | 0.006607 | ZNF673 /// ZNF55634 /// 64: |          |
| 1554466_a | 0.008004 | 0.004046 | C16orf13                    | 84326 .  |
| 1556131_s | 0.012162 | 0.006602 | FBF1                        | 85302 .  |
| 1554468_s | 0.001577 | 5.80E-04 | FBF1                        | 85302 .  |
| 1554470_s | 0.001049 | 3.53E-04 | ZBTB44                      | 29068 .  |
| 1554471_a | 0.017167 | 0.009891 | ANKRD13C                    | 81573 .  |
| 1554472_a | 1.77E-04 | 3.93E-05 | PHF20L1                     | 51105 .  |
| 1554474_a | 1.60E-07 | 4.29E-09 | MOXD1                       | 26002 .  |
| 1554476_x | 0.001053 | 3.55E-04 | ZNF808                      | 388558 . |
| 1554480_a | 0.006132 | 0.002951 | ARMC10                      | 83787 .  |
| 1554481_a | 0.021495 | 0.012876 | EPB41                       | 2035 .   |
| 1554482_a | 0.016313 | 0.009325 | SAR1B                       | 51128 .  |
| 1554483_a | 3.53E-06 | 2.59E-07 | TMEM37                      | 140738 . |
| 1554485_s | 0.040509 | 0.026875 | TMEM37                      | 140738 . |
| 1554487_a | 0.016775 | 0.009631 | ATF6B                       | 1388 .   |
| 1554488_a | 0.01237  | 0.006736 | CEP70                       | 80321 .  |
| 1554489_a | 5.47E-04 | 1.59E-04 | CEP70                       | 80321 .  |
| 1554491_a | 0.004487 | 0.002035 | SERPINC1                    | 462 .    |
| 1554492_a | 7.44E-05 | 1.33E-05 | THADA                       | 63892 .  |
| 1554494_a | 0.008177 | 0.004146 | MTHFSD                      | 64779 .  |
| 1554501_a | 0.004291 | 0.001928 | TSC22D4                     | 81628 .  |
| 1554509_a | 0.002126 | 8.31E-04 | C10orf97                    | 80013 .  |
| 1554511_a | 0.004171 | 0.001862 | WWC1                        | 23286 .  |
| 1554512_a | 2.48E-04 | 6.00E-05 | CCDC123                     | 84902 .  |
| 1554513_s | 5.12E-04 | 1.46E-04 | CCDC123                     | 84902 .  |
| 1554514_a | 0.00414  | 0.001846 | ACSM5                       | 54988 .  |
| 1554517_x | 0.001791 | 6.75E-04 | LOC203274                   | 203274 . |



|           |          |          |           |          |
|-----------|----------|----------|-----------|----------|
| 1554518_a | 6.80E-05 | 1.19E-05 | GSTCD     | 79807 .  |
| 1554519_a | 4.46E-04 | 1.24E-04 | CD80      | 941 .    |
| 1554520_a | 0.007247 | 0.003601 | LOC283861 | 283861 . |
| 1554522_a | 7.56E-05 | 1.36E-05 | CNNM2     | 54805 .  |
| 1554523_a | 0.006548 | 0.00319  | CNNM2     | 54805 .  |
| 1554531_a | 6.21E-05 | 1.05E-05 | TTC12     | 54970 .  |
| 1554538_a | 7.33E-06 | 6.72E-07 | RHOF      | 54509 .  |
| 1554539_a | 5.78E-04 | 1.70E-04 | RHOF      | 54509 .  |
| 1554541_a | 6.72E-04 | 2.05E-04 | GPRIN2    | 9721 .   |
| 1554542_a | 0.001158 | 3.99E-04 | LOC153328 | 153328 . |
| 1554543_a | 0.00415  | 0.001851 | SPAG9     | 9043 .   |
| 1554544_a | 2.82E-04 | 7.03E-05 | MBP       | 4155 .   |
| 1554553_s | 3.05E-05 | 4.27E-06 | YIF1B     | 90522 .  |
| 1554554_a | 7.52E-04 | 2.36E-04 | CCDC57    | 284001 . |
| 1554556_a | 1.63E-04 | 3.55E-05 | ATP11B    | 23200 .  |
| 1554557_a | 3.38E-04 | 8.81E-05 | ATP11B    | 23200 .  |
| 1554559_a | 0.002499 | 0.00101  | GPR62     | 118442 . |
| 1554564_a | 7.59E-04 | 2.38E-04 | UNQ1887   | 121665 . |
| 1554565_x | 2.76E-07 | 9.08E-09 | UNQ1887   | 121665 . |
| 1554566_a | 1.89E-05 | 2.31E-06 | KCTD17    | 79734 .  |
| 1554569_a | 4.21E-06 | 3.26E-07 | CUGBP2    | 10659 .  |
| 1554572_a | 1.38E-06 | 7.69E-08 | SUV39H2   | 79723 .  |
| 1554574_a | 8.97E-07 | 4.30E-08 | CYB5R3    | 1727 .   |
| 1554576_a | 1.67E-05 | 1.98E-06 | ETV4      | 2118 .   |
| 1554578_a | 2.93E-04 | 7.37E-05 | ZNF70     | 7621 .   |
| 1554580_a | 0.016465 | 0.009425 | WWP2      | 11060 .  |
| 1554582_a | 0.005202 | 0.002429 | C12orf72  | 254013 . |
| 1554584_a | 0.008695 | 0.004452 | LRRC48    | 83450 .  |
| 1554586_a | 0.008468 | 0.004317 | RHOBTB2   | 23221 .  |
| 1554588_a | 0.006202 | 0.002991 | TTC30B    | 150737 . |
| 1554591_a | 1.92E-05 | 2.36E-06 | GDEP      | 118425 . |
| 1554592_a | 0.00352  | 0.001522 | SLC1A6    | 6511 .   |
| 1554593_s | 0.001661 | 6.17E-04 | SLC1A6    | 6511 .   |
| 1554594_a | 0.023477 | 0.01427  | SH3D20    | 201175 . |

|           |          |          |          |        |   |
|-----------|----------|----------|----------|--------|---|
| 1554595_a | 0.001153 | 3.97E-04 | SYMPK    | 8189   | . |
| 1554597_a | 0.001483 | 5.39E-04 |          |        | . |
| 1554599_x | 5.68E-04 | 1.66E-04 |          |        | . |
| 1554600_s | 5.66E-06 | 4.80E-07 | LMNA     | 4000   | . |
| 1554601_a | 0.035552 | 0.023101 | NKAIN2   | 154215 | . |
| 1554602_a | 0.003855 | 0.001696 | RBM8A    | 9939   | . |
| 1554604_a | 0.021602 | 0.012956 | MBTPS2   | 51360  | . |
| 1555294_a | 0.011283 | 0.006045 | ERC1     | 23085  | . |
| 1554606_a | 0.003526 | 0.001525 | CEP120   | 153241 | . |
| 1554608_a | 0.005638 | 0.002672 | TGOLN2   | 10618  | . |
| 1554610_a | 0.002383 | 9.53E-04 | ANKMY1   | 51281  | . |
| 1554612_a | 7.10E-04 | 2.19E-04 | KIAA0226 | 9711   | . |
| 1554613_a | 1.03E-04 | 2.01E-05 | KIAA0226 | 9711   | . |
| 1554614_a | 0.001621 | 5.99E-04 | PTBP2    | 58155  | . |
| 1554615_a | 0.032798 | 0.021043 |          |        | . |
| 1554616_a | 0.003817 | 0.001677 | SERPINB8 | 5271   | . |
| 1554619_a | 1.35E-04 | 2.81E-05 | MBLAC2   | 153364 | . |
| 1554621_a | 0.043377 | 0.029109 | DGKE     | 8526   | . |
| 1554625_a | 2.38E-05 | 3.11E-06 | BCL6B    | 255877 | . |
| 1554627_a | 4.25E-05 | 6.52E-06 | ASCC1    | 51008  | . |
| 1554628_a | 0.008479 | 0.004324 | ZNF57    | 126295 | . |
| 1554629_a | 0.036433 | 0.023773 | EPHA7    | 2045   | . |
| 1554631_a | 7.14E-05 | 1.26E-05 | ATM      | 472    | . |
| 1554635_a | 1.92E-04 | 4.34E-05 | NPAS3    | 64067  | . |
| 1554636_a | 0.001753 | 6.58E-04 |          |        | . |
| 1554638_a | 0.017995 | 0.010453 | ZFYVE16  | 9765   | . |
| 1554640_a | 5.46E-04 | 1.59E-04 | PALM2    | 114299 | . |
| 1554641_a | 9.89E-04 | 3.29E-04 | TET3     | 200424 | . |
| 1554642_a | 0.001404 | 5.04E-04 | RNF32    | 140545 | . |
| 1554646_a | 1.83E-05 | 2.22E-06 | OSBPL1A  | 114876 | . |
| 1554648_a | 8.74E-04 | 2.84E-04 | DUOXA1   | 90527  | . |
| 1554649_a | 2.48E-04 | 5.99E-05 |          |        | . |
| 1554650_a | 0.006276 | 0.003034 |          |        | . |
| 1554652_s | 0.012419 | 0.006769 | MAST4    | 375449 | . |

|           |          |          |              |             |
|-----------|----------|----------|--------------|-------------|
| 1554660_a | 0.026276 | 0.01626  | C1orf71      | 163882 .    |
| 1554662_a | 0.027954 | 0.017478 | C17orf47     | 284083 .    |
| 1554663_a | 0.007081 | 0.003504 | NUMA1        | 4926 .      |
| 1554664_a | 5.42E-05 | 8.86E-06 | NAIF1        | 203245 .    |
| 1554666_a | 0.001677 | 6.24E-04 | LOC100130950 | 100130950 . |
| 1554667_s | 0.027031 | 0.016808 | METTL8       | 79828 .     |
| 1554670_a | 1.41E-06 | 7.84E-08 | GGA1         | 26088 .     |
| 1554671_a | 0.017412 | 0.010055 | SRRM2        | 23524 .     |
| 1554675_a | 7.06E-04 | 2.18E-04 | SYCE1        | 93426 .     |
| 1554676_a | 0.048156 | 0.032853 | SRGN         | 5552 .      |
| 1554677_s | 5.83E-07 | 2.42E-08 | CMTM4        | 146223 .    |
| 1554678_s | 1.41E-05 | 1.61E-06 | HNRPD1       | 9987 .      |
| 1554679_a | 1.45E-04 | 3.08E-05 | LAPTM4B      | 55353 .     |
| 1554680_s | 4.53E-04 | 1.26E-04 | KCNS2        | 3788 .      |
| 1554681_a | 1.04E-04 | 2.03E-05 | MGC50722     | 399693 .    |
| 1554683_a | 3.67E-04 | 9.72E-05 | MGC50722     | 399693 .    |
| 1554685_a | 2.24E-09 | 1.52E-11 | KIAA1199     | 57214 .     |
| 1554686_a | 0.018734 | 0.010958 | STAU2        | 27067 .     |
| 1554689_a | 7.94E-04 | 2.52E-04 | NLGN4X       | 57502 .     |
| 1554690_a | 6.76E-06 | 6.03E-07 | TACC1        | 6867 .      |
| 1554691_a | 1.46E-05 | 1.68E-06 | PACSIN2      | 11252 .     |
| 1554694_a | 0.011342 | 0.006082 | CCNY         | 219771 .    |
| 1554696_s | 0.004505 | 0.002046 | TYMS         | 7298 .      |
| 1554697_a | 6.05E-05 | 1.02E-05 | ADAMTS9      | 56999 .     |
| 1554699_a | 0.042839 | 0.028675 | L3MBTL4      | 91133 .     |
| 1554703_a | 0.001744 | 6.54E-04 | ARHGEF10     | 9639 .      |
| 1554704_a | 0.001176 | 4.07E-04 | ATP8B3       | 148229 .    |
| 1554705_a | 6.72E-04 | 2.05E-04 | SCARA5       | 286133 .    |
| 1554707_a | 3.84E-04 | 1.03E-04 | C9orf68      | 55064 .     |
| 1554708_s | 0.002672 | 0.001093 | C9orf68      | 55064 .     |
| 1554710_a | 0.030269 | 0.019181 | KCNMB1       | 3779 .      |
| 1554711_a | 0.01306  | 0.00718  | CALHM3       | 119395 .    |
| 1554715_a | 0.017154 | 0.009882 | C15orf50     | 414926 .    |
| 1554719_a | 0.002359 | 9.41E-04 | NDUFA10      | 4705 .      |

|           |          |          |                             |          |
|-----------|----------|----------|-----------------------------|----------|
| 1554721_a | 0.002721 | 0.001117 | TAF2                        | 6873 .   |
| 1554726_a | 0.003306 | 0.001412 | ZNF655                      | 79027 .  |
| 1554732_a | 0.006838 | 0.00336  | MGC24125                    | 439935 . |
| 1554735_a | 0.002647 | 0.001082 | TRIM7                       | 81786 .  |
| 1554739_a | 0.003378 | 0.001449 | IPP                         | 3652 .   |
| 1554740_a | 2.60E-04 | 6.37E-05 | IPP                         | 3652 .   |
| 1554741_s | 4.14E-05 | 6.27E-06 | FGF7 /// KGFLF2252 /// 3876 | . .      |
| 1554742_a | 0.003982 | 0.001762 | PMS1                        | 5378 .   |
| 1554743_x | 0.003273 | 0.001394 | PMS1                        | 5378 .   |
| 1554745_a | 0.006171 | 0.002973 | RALGPS1                     | 9649 .   |
| 1554747_a | 2.47E-06 | 1.63E-07 | 2-Sep                       | 4735 .   |
| 1554748_a | 8.74E-05 | 1.63E-05 | CLCNKB                      | 1188 .   |
| 1554749_s | 2.12E-04 | 4.91E-05 | CLCNKB                      | 1188 .   |
| 1554751_a | 8.15E-06 | 7.70E-07 |                             | . .      |
| 1554752_a | 0.00578  | 0.002751 |                             | . .      |
| 1554757_a | 2.74E-05 | 3.72E-06 | INPP5A                      | 3632 .   |
| 1554758_a | 1.79E-05 | 2.16E-06 | CD99L2                      | 83692 .  |
| 1554759_a | 4.05E-04 | 1.10E-04 | SNIP                        | 80725 .  |
| 1554761_a | 0.04577  | 0.030984 | HEATR2                      | 54919 .  |
| 1554765_a | 0.003362 | 0.001441 | C11orf64                    | 283197 . |
| 1554768_a | 8.79E-04 | 2.86E-04 | MAD2L1                      | 4085 .   |
| 1554769_a | 0.002183 | 8.58E-04 | ZNF785                      | 146540 . |
| 1554770_x | 0.003004 | 0.001257 | ZNF785                      | 146540 . |
| 1554771_a | 1.23E-05 | 1.34E-06 |                             | . .      |
| 1554772_a | 0.044238 | 0.029786 | C17orf57                    | 124989 . |
| 1554774_a | 0.009652 | 0.005034 | MINA                        | 84864 .  |
| 1554776_a | 4.36E-08 | 7.49E-10 | ZFP42                       | 132625 . |
| 1554777_a | 2.50E-07 | 7.90E-09 | ZFP42                       | 132625 . |
| 1554782_a | 0.003921 | 0.001732 | C2orf19                     | 394261 . |
| 1554783_s | 0.002403 | 9.63E-04 | ARHGEF2                     | 9181 .   |
| 1554784_a | 0.032105 | 0.020531 | CNTN1                       | 1272 .   |
| 1554787_a | 5.54E-04 | 1.61E-04 | C9orf96                     | 169436 . |
| 1554790_a | 0.020727 | 0.012342 | ZSCAN20                     | 7579 .   |
| 1554791_a | 0.0085   | 0.004337 | C2orf67                     | 151050 . |

|           |          |          |           |          |
|-----------|----------|----------|-----------|----------|
| 1554795_a | 1.19E-05 | 1.28E-06 | FBLIM1    | 54751 .  |
| 1554796_a | 0.041337 | 0.027513 | DPP6      | 1804 .   |
| 1554798_a | 1.48E-04 | 3.14E-05 | SNED1     | 25992 .  |
| 1554800_a | 0.002262 | 8.96E-04 | RAB39     | 54734 .  |
| 1554804_a | 2.42E-09 | 1.67E-11 | CLDN19    | 149461 . |
| 1554805_a | 0.015559 | 0.008823 | CLDN19    | 149461 . |
| 1554806_a | 4.93E-04 | 1.39E-04 | FBXO8     | 26269 .  |
| 1554807_a | 2.24E-05 | 2.88E-06 | SPIRE1    | 56907 .  |
| 1554809_a | 1.00E-05 | 1.02E-06 | LOC389199 | 389199 . |
| 1554810_a | 0.005868 | 0.002803 | PLA2G4C   | 8605 .   |
| 1554814_a | 4.40E-04 | 1.21E-04 | UBE2O     | 63893 .  |
| 1554818_s | 1.34E-06 | 7.32E-08 | C20orf12  | 55184 .  |
| 1554819_a | 9.53E-05 | 1.81E-05 | ITGA11    | 22801 .  |
| 1554821_a | 0.00116  | 4.00E-04 | ZBED1     | 9189 .   |
| 1554822_a | 2.81E-06 | 1.93E-07 | PHTF2     | 57157 .  |
| 1554824_a | 0.040557 | 0.026912 | ZNF585A   | 199704 . |
| 1554827_a | 0.002006 | 7.75E-04 | ADCY7     | 113 .    |
| 1554831_x | 0.017518 | 0.010129 | ALS2CR11  | 151254 . |
| 1558560_s | 0.00793  | 0.004003 | BLZF1     | 8548 .   |
| 1554834_a | 8.15E-05 | 1.50E-05 | RASSF5    | 83593 .  |
| 1554835_a | 1.65E-06 | 9.76E-08 | B3GNT5    | 84002 .  |
| 1554839_a | 7.66E-04 | 2.41E-04 | CIDEC     | 63924 .  |
| 1554841_a | 1.72E-04 | 3.80E-05 | MTHFD2L   | 441024 . |
| 1554842_a | 4.38E-07 | 1.68E-08 | SLC12A1   | 6557 .   |
| 1554847_a | 0.038794 | 0.025561 | ATP6V1B1  | 525 .    |
| 1554850_a | 1.73E-04 | 3.83E-05 | VWA5B2    | 90113 .  |
| 1554852_a | 0.027375 | 0.017055 | KIAA1257  | 57501 .  |
| 1554853_a | 7.56E-06 | 7.00E-07 | CYP2U1    | 113612 . |
| 1554857_a | 0.001529 | 5.59E-04 | ELMO2     | 63916 .  |
| 1554862_a | 4.97E-04 | 1.41E-04 | CMAH      | 8418 .   |
| 1554867_a | 8.24E-10 | 4.10E-12 | PRR16     | 51334 .  |
| 1554868_s | 3.20E-04 | 8.24E-05 | PCNP      | 57092 .  |
| 1554872_a | 0.005985 | 0.002869 | HMGCLL1   | 54511 .  |
| 1554873_a | 8.38E-04 | 2.69E-04 | CSPP1     | 79848 .  |

|           |          |          |           |          |
|-----------|----------|----------|-----------|----------|
| 1554875_a | 0.016716 | 0.009591 | C2orf34   | 79823 .  |
| 1554885_a | 5.40E-04 | 1.57E-04 | PRIM2     | 5558 .   |
| 1554886_a | 0.002166 | 8.50E-04 | MLXIP     | 22877 .  |
| 1554887_a | 8.21E-04 | 2.63E-04 |           | .        |
| 1555716_a | 8.82E-10 | 4.46E-12 | CXADR     | 1525 .   |
| 1554889_a | 0.004438 | 0.002009 | TIA1      | 7072 .   |
| 1554890_a | 6.49E-04 | 1.97E-04 | TIA1      | 7072 .   |
| 1554894_a | 0.011009 | 0.005874 | PCBD2     | 84105 .  |
| 1554895_a | 0.021864 | 0.013145 | RHBDL2    | 54933 .  |
| 1554903_a | 3.76E-04 | 1.00E-04 | FRMD8     | 83786 .  |
| 1554905_x | 0.018009 | 0.010462 | FRMD8     | 83786 .  |
| 1554906_a | 0.029288 | 0.018452 | MPHOSPH6  | 10200 .  |
| 1554910_a | 9.71E-05 | 1.86E-05 | PRKD3     | 23683 .  |
| 1554911_a | 0.00609  | 0.002928 | ABCC11    | 85320 .  |
| 1554912_a | 0.049352 | 0.033807 | FAM62C    | 83850 .  |
| 1554918_a | 0.001417 | 5.10E-04 | ABCC4     | 10257 .  |
| 1554919_s | 9.19E-04 | 3.02E-04 | C7orf63   | 79846 .  |
| 1554921_a | 2.69E-04 | 6.64E-05 | SCEL      | 8796 .   |
| 1554923_a | 0.003001 | 0.001255 | ANKS6     | 203286 . |
| 1554927_a | 0.008143 | 0.004126 | LOC646982 | 646982 . |
| 1554930_a | 0.004419 | 0.001999 | FUT8      | 2530 .   |
| 1554933_a | 0.002736 | 0.001125 | PSIP1     | 11168 .  |
| 1554937_x | 5.01E-04 | 1.43E-04 | EXOC3L    | 283849 . |
| 1554938_a | 7.06E-06 | 6.39E-07 | ACOT11    | 26027 .  |
| 1554940_a | 0.003168 | 0.00134  | LOC388882 | 388882 . |
| 1554943_a | 0.001297 | 4.58E-04 | VIL1      | 7429 .   |
| 1554945_x | 0.00428  | 0.001921 | VIL1      | 7429 .   |
| 1554946_a | 0.009742 | 0.005091 |           | .        |
| 1554949_a | 0.002567 | 0.001042 | LOC554174 | 554174 . |
| 1554950_a | 8.78E-05 | 1.64E-05 | ACAN      | 176 .    |
| 1554952_s | 5.47E-04 | 1.59E-04 | NLRP12    | 91662 .  |
| 1568924_a | 0.009247 | 0.004787 | IQUB      | 154865 . |
| 1554957_a | 0.041808 | 0.027876 |           | .        |
| 1554960_a | 6.28E-04 | 1.89E-04 | C1orf110  | 339512 . |

|           |          |          |             |           |   |
|-----------|----------|----------|-------------|-----------|---|
| 1554962_a | 1.85E-05 | 2.25E-06 | FGFR4       | 2264      | . |
| 1554963_a | 0.020651 | 0.012286 |             |           | . |
| 1554964_x | 0.040741 | 0.027056 |             |           | . |
| 1554965_a | 0.015516 | 0.008795 | FILIP1L     | 11259     | . |
| 1554966_a | 7.55E-07 | 3.40E-08 | FILIP1L     | 11259     | . |
| 1554967_a | 0.045647 | 0.030887 | DIP2A       | 23181     | . |
| 1554972_a | 3.26E-04 | 8.45E-05 |             |           | . |
| 1554973_a | 0.043208 | 0.028969 | ZBTB26      | 57684     | . |
| 1554977_a | 0.002409 | 9.66E-04 | C20orf201   | 198437    | . |
| 1554986_a | 4.75E-05 | 7.52E-06 | SNX19       | 399979    | . |
| 1554987_a | 0.012421 | 0.00677  | GOLGA3      | 2802      | . |
| 1554989_a | 1.72E-04 | 3.79E-05 | KIAA0317    | 9870      | . |
| 1554992_a | 8.67E-05 | 1.61E-05 | RASGRF1     | 5923      | . |
| 1555000_a | 0.043252 | 0.029011 | OK/SW-CL.36 | 100131077 | . |
| 1555006_a | 3.17E-04 | 8.14E-05 | WDR66       | 144406    | . |
| 1555007_s | 0.026806 | 0.016655 | WDR66       | 144406    | . |
| 1555009_a | 0.006672 | 0.003262 | SYNJ2       | 8871      | . |
| 1555014_x | 0.007204 | 0.003575 |             |           | . |
| 1555015_a | 6.74E-04 | 2.06E-04 | ZNF398      | 57541     | . |
| 1555016_a | 1.48E-04 | 3.15E-05 | IL16        | 3603      | . |
| 1555018_a | 0.02166  | 0.012997 | OR2C3       | 81472     | . |
| 1555027_a | 0.005429 | 0.002554 |             |           | . |
| 1555028_a | 0.004655 | 0.002128 | BRD3        | 8019      | . |
| 1555037_a | 1.68E-04 | 3.69E-05 | IDH1        | 3417      | . |
| 1555039_a | 2.62E-05 | 3.51E-06 | ABCC4       | 10257     | . |
| 1555040_a | 4.72E-05 | 7.45E-06 | C12orf33    | 253128    | . |
| 1555041_a | 1.01E-05 | 1.03E-06 | NAGA        | 4668      | . |
| 1555046_a | 0.00184  | 6.97E-04 | CENPI       | 2491      | . |
| 1555049_a | 0.038478 | 0.025324 | C21orf29    | 54084     | . |
| 1555051_a | 0.001028 | 3.45E-04 | C10orf53    | 282966    | . |
| 1555052_a | 4.81E-04 | 1.35E-04 | SYT9        | 143425    | . |
| 1555053_a | 0.00248  | 0.001001 | SYT9        | 143425    | . |
| 1555057_a | 7.51E-04 | 2.35E-04 | NDUFS4      | 4724      | . |
| 1555058_a | 2.43E-05 | 3.21E-06 | LPGAT1      | 9926      | . |

|           |          |          |              |           |   |
|-----------|----------|----------|--------------|-----------|---|
| 1555060_a | 0.009662 | 0.00504  | IKZF2        | 22807     | . |
| 1555062_s | 0.012507 | 0.006828 | GTPBP3       | 84705     | . |
| 1555063_a | 0.011029 | 0.005885 | USP6         | 9098      | . |
| 1555416_a | 0.013696 | 0.007591 | ALOX15B      | 247       | . |
| 1555076_a | 0.001844 | 7.00E-04 | ARHGAP25     | 9938      | . |
| 1555078_a | 1.53E-06 | 8.73E-08 | ZNF843       | 283933    | . |
| 1555082_a | 1.32E-04 | 2.73E-05 | NEK11        | 79858     | . |
| 1555083_a | 4.35E-05 | 6.70E-06 | RPL13AP17    | 399670    | . |
| 1555084_a | 5.57E-06 | 4.70E-07 |              | .         | . |
| 1555088_x | 0.015626 | 0.008867 | STAT5B       | 6777      | . |
| 1555091_a | 7.29E-04 | 2.27E-04 | PPM1F        | 9647      | . |
| 1555092_a | 9.54E-04 | 3.15E-04 | VASH2        | 79805     | . |
| 1555096_a | 1.29E-04 | 2.66E-05 | C4orf37      | 285555    | . |
| 1555097_a | 7.61E-08 | 1.58E-09 | PTGFR        | 5737      | . |
| 1555099_a | 0.017267 | 0.009959 | MPP4         | 58538     | . |
| 1555100_a | 0.023178 | 0.014054 | APLF         | 200558    | . |
| 1555103_s | 4.43E-04 | 1.22E-04 | FGF7         | 2252      | . |
| 1555106_a | 4.46E-04 | 1.24E-04 | CTDSPL2      | 51496     | . |
| 1555108_a | 0.0242   | 0.014781 | SLC10A7      | 84068     | . |
| 1555110_a | 0.025143 | 0.015461 | KLHL3        | 26249     | . |
| 1555112_a | 0.03221  | 0.020612 | C1orf114     | 57821     | . |
| 1555113_a | 0.001467 | 5.31E-04 | PARD3B       | 117583    | . |
| 1555114_a | 0.003789 | 0.001663 | ATP6V0A2     | 23545     | . |
| 1555117_a | 8.11E-06 | 7.66E-07 |              | .         | . |
| 1555118_a | 0.041844 | 0.027902 | ENTPD3       | 956       | . |
| 1555122_a | 0.029913 | 0.018917 | GPR125       | 166647    | . |
| 1555124_a | 0.001891 | 7.21E-04 | LOC100129726 | 100129726 | . |
| 1557119_a | 3.58E-05 | 5.20E-06 | ZNF575       | 284346    | . |
| 1555127_a | 0.023726 | 0.01445  | MOCS1        | 4337      | . |
| 1555129_a | 0.006178 | 0.002977 |              | .         | . |
| 1555131_a | 0.008744 | 0.00448  | PER3         | 8863      | . |
| 1555132_a | 0.001091 | 3.71E-04 |              | .         | . |
| 1555135_a | 0.006948 | 0.003426 |              | .         | . |
| 1555136_a | 0.004513 | 0.00205  | FGD6         | 55785     | . |



|           |          |          |                             |           |   |
|-----------|----------|----------|-----------------------------|-----------|---|
| 1555137_a | 1.27E-04 | 2.59E-05 | FGD6                        | 55785     | . |
| 1555140_a | 3.08E-06 | 2.17E-07 | BCL2L2                      | 599       | . |
| 1555145_a | 0.001038 | 3.49E-04 | C1orf96                     | 126731    | . |
| 1555148_a | 0.006708 | 0.003284 | C2orf65                     | 130951    | . |
| 1555153_s | 0.018486 | 0.010789 | FCHO2                       | 115548    | . |
| 1555155_a | 8.92E-04 | 2.91E-04 | MLLT6                       | 4302      | . |
| 1555157_a | 2.04E-04 | 4.70E-05 |                             |           | . |
| 1557677_a | 0.027608 | 0.017223 | TRIML1                      | 339976    | . |
| 1555162_a | 0.003492 | 0.001507 | LOC553158 /// 553158 /// 5! |           | . |
| 1555163_a | 0.009101 | 0.004695 |                             |           | . |
| 1555165_a | 0.002072 | 8.05E-04 | PGPEP1                      | 54858     | . |
| 1555167_s | 0.019298 | 0.011343 | NAMPT                       | 10135     | . |
| 1555168_a | 1.06E-04 | 2.08E-05 | CALN1                       | 83698     | . |
| 1555171_a | 0.017839 | 0.010347 | ST3GAL3                     | 6487      | . |
| 1555702_a | 9.67E-04 | 3.20E-04 | ST3GAL3                     | 6487      | . |
| 1555175_a | 4.35E-05 | 6.71E-06 | PBLD                        | 64081     | . |
| 1555176_a | 2.37E-04 | 5.65E-05 |                             |           | . |
| 1555179_a | 0.016372 | 0.009363 | IGHV7-81                    | 28378     | . |
| 1555180_a | 0.031892 | 0.020367 | LOC100132686                | 100132686 | . |
| 1555181_a | 1.93E-06 | 1.19E-07 | ST3GAL3                     | 6487      | . |
| 1555188_a | 5.92E-05 | 9.90E-06 | hCG_2020170                 | 728437    | . |
| 1555195_a | 0.004787 | 0.002201 | FBXO36                      | 130888    | . |
| 1555196_a | 9.41E-05 | 1.79E-05 |                             |           | . |
| 1555202_a | 3.95E-04 | 1.07E-04 | RPRD1A                      | 55197     | . |
| 1555205_a | 0.046112 | 0.031251 |                             |           | . |
| 1558612_a | 0.014149 | 0.007881 | ATP1A4                      | 480       | . |
| 1555210_a | 0.012446 | 0.006786 | DTWD1                       | 56986     | . |
| 1555212_a | 0.010589 | 0.00561  | OR8B8                       | 26493     | . |
| 1555215_a | 0.001311 | 4.64E-04 | HRH3                        | 11255     | . |
| 1555216_a | 0.048811 | 0.03338  | LOC645722                   | 645722    | . |
| 1555219_a | 0.010883 | 0.005795 | RGR                         | 5995      | . |
| 1555220_a | 8.71E-05 | 1.62E-05 | AKR1CL2                     | 83592     | . |
| 1555222_a | 7.60E-07 | 3.43E-08 |                             |           | . |
| 1555224_a | 2.76E-04 | 6.83E-05 | LOC554201                   | 554201    | . |

|           |          |          |          |          |
|-----------|----------|----------|----------|----------|
| 1555225_a | 1.69E-04 | 3.72E-05 | C1orf43  | 25912 .  |
| 1555227_a | 4.25E-05 | 6.52E-06 | MANEA    | 79694 .  |
| 1555229_a | 1.68E-09 | 1.06E-11 | C1S      | 716 .    |
| 1555230_a | 0.00114  | 3.91E-04 | KCNIP2   | 30819 .  |
| 1555231_a | 2.70E-04 | 6.67E-05 | C21orf88 | 114041 . |
| 1555233_a | 2.11E-08 | 2.80E-10 | RHOJ     | 57381 .  |
| 1555234_a | 1.62E-07 | 4.37E-09 | RHOJ     | 57381 .  |
| 1555235_s | 3.06E-04 | 7.78E-05 | IQCF3    | 401067 . |
| 1555236_a | 4.01E-06 | 3.07E-07 | PGC      | 5225 .   |
| 1555237_a | 0.002852 | 0.001181 |          | .        |
| 1555238_a | 5.20E-08 | 9.52E-10 | PTH2     | 113091 . |
| 1555240_s | 2.20E-04 | 5.16E-05 | GNG12    | 55970 .  |
| 1555243_x | 0.002122 | 8.29E-04 | C8orf59  | 401466 . |
| 1555247_a | 2.85E-05 | 3.91E-06 | RAPGEF6  | 51735 .  |
| 1555248_a | 3.63E-04 | 9.61E-05 | WNK3     | 65267 .  |
| 1555251_a | 0.019586 | 0.011539 | OTOF     | 9381 .   |
| 1555252_a | 0.002286 | 9.07E-04 | TRPM3    | 80036 .  |
| 1555253_a | 0.013193 | 0.007269 | COL25A1  | 84570 .  |
| 1555259_a | 1.09E-06 | 5.52E-08 | ZAK      | 51776 .  |
| 1555261_a | 0.049771 | 0.034147 |          | .        |
| 1555262_a | 3.86E-04 | 1.03E-04 | MAGI1    | 9223 .   |
| 1555266_a | 3.54E-05 | 5.13E-06 | ASXL2    | 55252 .  |
| 1555268_a | 0.020425 | 0.01212  | GRID1    | 2894 .   |
| 1555269_a | 5.55E-05 | 9.11E-06 | ANO1     | 55107 .  |
| 1555270_a | 0.004874 | 0.002247 | WFS1     | 7466 .   |
| 1555272_a | 0.02947  | 0.018585 | RSPH10B2 | 728194 . |
| 1555274_a | 0.014466 | 0.008091 | SELI     | 85465 .  |
| 1555277_a | 0.00382  | 0.001678 | SLC4A5   | 57835 .  |
| 1555278_a | 9.80E-04 | 3.26E-04 | CKAP5    | 9793 .   |
| 1555279_a | 0.002013 | 7.78E-04 | ARMC8    | 25852 .  |
| 1555281_x | 0.020156 | 0.011934 | ARMC8    | 25852 .  |
| 1555282_a | 4.72E-05 | 7.45E-06 | PPARGC1B | 133522 . |
| 1555284_a | 0.001224 | 4.27E-04 | ALS2     | 57679 .  |
| 1555289_a | 0.002782 | 0.001148 | SEC16B   | 89866 .  |

|           |          |          |         |             |
|-----------|----------|----------|---------|-------------|
| 1555292_a | 0.00436  | 0.001966 | FAM40B  | 57464 .     |
| 1555300_a | 2.09E-05 | 2.64E-06 | MED12L  | 116931 .    |
| 1555298_a | 0.010548 | 0.005583 | VWA3B   | 200403 .    |
| 1555301_a | 9.78E-04 | 3.25E-04 | DIP2A   | 23181 .     |
| 1555303_a | 1.88E-04 | 4.24E-05 |         | .           |
| 1555306_a | 0.006169 | 0.002972 | ECE2    | 9718 .      |
| 1555307_a | 0.003868 | 0.001703 | TTF2    | 8458 .      |
| 1555308_a | 0.014064 | 0.007827 | CARD14  | 79092 .     |
| 1555309_a | 0.001072 | 3.63E-04 | CARD14  | 79092 .     |
| 1555310_a | 3.46E-05 | 4.99E-06 | PAK6    | 56924 .     |
| 1555311_a | 0.004264 | 0.001912 |         | .           |
| 1555319_a | 0.003375 | 0.001447 | STAB1   | 23166 .     |
| 1555322_a | 0.037079 | 0.02427  | PP2672  | 100130249 . |
| 1555323_a | 0.005636 | 0.00267  | ABCB9   | 23457 .     |
| 1555324_a | 0.007497 | 0.003746 | PTK7    | 5754 .      |
| 1555325_s | 7.92E-04 | 2.51E-04 | ZNF26   | 7574 .      |
| 1555326_a | 1.23E-06 | 6.53E-08 | ADAM9   | 8754 .      |
| 1555330_a | 0.016059 | 0.009158 | GCLC    | 2729 .      |
| 1555334_s | 0.005436 | 0.002558 | SLC30A5 | 64924 .     |
| 1555335_a | 0.025484 | 0.015707 | ITGA9   | 3680 .      |
| 1555336_a | 3.27E-04 | 8.47E-05 | ITGA9   | 3680 .      |
| 1555337_a | 3.70E-04 | 9.81E-05 | ZNF317  | 57693 .     |
| 1555343_a | 0.002105 | 8.21E-04 | MEGF10  | 84466 .     |
| 1555345_a | 1.26E-05 | 1.38E-06 | SLC38A4 | 55089 .     |
| 1555348_a | 0.026722 | 0.016587 | TFAP2E  | 339488 .    |
| 1555353_a | 6.80E-04 | 2.08E-04 | LRP1    | 4035 .      |
| 1555355_a | 0.00189  | 7.21E-04 | ETS1    | 2113 .      |
| 1555358_a | 0.013511 | 0.00747  | ENTPD4  | 9583 .      |
| 1555359_a | 0.001072 | 3.63E-04 | PIGQ    | 9091 .      |
| 1555368_x | 0.046478 | 0.031538 | ZNF479  | 90827 .     |
| 1555370_a | 3.41E-08 | 5.37E-10 | CAMTA1  | 23261 .     |
| 1555372_a | 0.004194 | 0.001875 | BCL2L11 | 10018 .     |
| 1555373_a | 0.001915 | 7.32E-04 |         | .           |
| 1555374_a | 0.006352 | 0.003077 |         | .           |

|           |          |          |                              |             |
|-----------|----------|----------|------------------------------|-------------|
| 1555377_a | 0.006167 | 0.002971 | OR4D2                        | 124538 .    |
| 1555379_a | 0.001418 | 5.10E-04 | FAM159A                      | 348378 .    |
| 1555385_a | 0.038931 | 0.025667 | B4GALNT1                     | 2583 .      |
| 1555388_s | 5.47E-04 | 1.59E-04 | SNX25                        | 83891 .     |
| 1555391_a | 0.01239  | 0.00675  | ALS2CR8                      | 79800 .     |
| 1555395_a | 0.038232 | 0.025139 | AKAP12                       | 9590 .      |
| 1555396_s | 0.007144 | 0.00354  | CXorf67                      | 340602 .    |
| 1555399_a | 2.09E-07 | 6.07E-09 | DUSP16                       | 80824 .     |
| 1555401_a | 1.29E-07 | 3.22E-09 | SOHLH2                       | 54937 .     |
| 1555408_a | 0.006061 | 0.002913 | BAGE2 /// BAG85317 /// 85317 | 85317 .     |
| 1555409_a | 0.005954 | 0.002852 | BAGE2 /// BAG58508 /// 85508 | 85508 .     |
| 1555410_a | 7.57E-04 | 2.37E-04 | LOC100131642                 | 100131642 . |
| 1555411_a | 0.037542 | 0.024615 | CCNL1                        | 57018 .     |
| 1555412_a | 0.008708 | 0.00446  | FBXL21                       | 26223 .     |
| 1555415_a | 0.007504 | 0.003751 |                              | .           |
| 1555419_a | 6.04E-08 | 1.15E-09 | ASAH1                        | 427 .       |
| 1555420_a | 0.002711 | 0.001112 | KLF7                         | 8609 .      |
| 1555423_a | 8.26E-04 | 2.65E-04 | SSH2                         | 85464 .     |
| 1555427_s | 1.86E-04 | 4.20E-05 | SYNCRIP                      | 10492 .     |
| 1555434_a | 7.44E-04 | 2.33E-04 | SLC39A14                     | 23516 .     |
| 1555437_a | 0.006486 | 0.003155 | EARS2                        | 124454 .    |
| 1555439_a | 8.10E-09 | 8.10E-11 | GTF3C3                       | 9330 .      |
| 1555441_a | 0.023128 | 0.014018 | UBA6                         | 55236 .     |
| 1555443_a | 4.02E-05 | 6.02E-06 | C10orf96                     | 374355 .    |
| 1555444_a | 0.004735 | 0.002172 | PPP1R12B                     | 4660 .      |
| 1555446_s | 2.16E-10 | 7.24E-13 | TRAPPC10                     | 7109 .      |
| 1555447_a | 7.63E-05 | 1.37E-05 | GPR114                       | 221188 .    |
| 1555450_a | 0.01739  | 0.010039 | NARG1L                       | 79612 .     |
| 1555452_a | 0.024285 | 0.014839 | RALGPS1                      | 9649 .      |
| 1555457_a | 5.05E-04 | 1.44E-04 | DBC1                         | 1620 .      |
| 1555460_a | 6.20E-04 | 1.85E-04 | SLC39A6                      | 25800 .     |
| 1555461_a | 9.90E-04 | 3.30E-04 |                              | .           |
| 1555464_a | 0.014327 | 0.008001 | IFIH1                        | 64135 .     |
| 1555465_a | 0.042612 | 0.028498 | MCOLN2                       | 255231 .    |

|           |          |          |                            |          |
|-----------|----------|----------|----------------------------|----------|
| 1555467_a | 0.001996 | 7.70E-04 | CUGBP1                     | 10658 .  |
| 1555469_a | 0.008043 | 0.004069 | CLASP2                     | 23122 .  |
| 1555470_a | 4.40E-04 | 1.22E-04 | PPM1F                      | 9647 .   |
| 1555471_a | 0.002046 | 7.93E-04 | FMN2                       | 56776 .  |
| 1555472_a | 6.89E-04 | 2.12E-04 | SORBS2                     | 8470 .   |
| 1555474_a | 0.001733 | 6.49E-04 | TTLL3                      | 26140 .  |
| 1555475_x | 0.013395 | 0.007396 | TTLL3                      | 26140 .  |
| 1555476_a | 3.95E-04 | 1.07E-04 | IREB2                      | 3658 .   |
| 1555478_a | 3.77E-04 | 1.00E-04 | C17orf82                   | 388407 . |
| 1555480_a | 7.07E-05 | 1.25E-05 | FBLIM1                     | 54751 .  |
| 1555483_x | 1.64E-04 | 3.57E-05 | FBLIM1                     | 54751 .  |
| 1555486_a | 0.029117 | 0.018328 | FLJ14213                   | 79899 .  |
| 1555487_a | 0.001024 | 3.43E-04 | ACTR3B /// LO100133409 //. |          |
| 1555488_a | 0.004407 | 0.001992 |                            | .        |
| 1555490_s | 2.72E-05 | 3.69E-06 | PDZD3                      | 79849 .  |
| 1555491_a | 0.021674 | 0.013008 | C19orf66                   | 55337 .  |
| 1555495_a | 6.65E-06 | 5.90E-07 | SDCCAG10                   | 10283 .  |
| 1555497_a | 0.001128 | 3.87E-04 | CYP4B1                     | 1580 .   |
| 1555498_a | 0.014053 | 0.007819 |                            | .        |
| 1555499_a | 3.97E-05 | 5.94E-06 | IL28RA                     | 163702 . |
| 1555500_s | 2.40E-05 | 3.15E-06 | SLC2A4RG                   | 56731 .  |
| 1555501_s | 7.53E-06 | 6.97E-07 | RSRC1                      | 51319 .  |
| 1555503_a | 0.008758 | 0.004489 | TMCC2                      | 9911 .   |
| 1555510_a | 0.006488 | 0.003156 | ZNF215                     | 7762 .   |
| 1555514_a | 0.004857 | 0.002238 | PIAS2                      | 9063 .   |
| 1555520_a | 0.030439 | 0.019305 | PTCH1                      | 5727 .   |
| 1555523_a | 3.08E-04 | 7.86E-05 | FYCO1                      | 79443 .  |
| 1555526_a | 0.005053 | 0.002347 | 6-Sep                      | 23157 .  |
| 1555529_a | 0.006982 | 0.003447 | RNH1                       | 6050 .   |
| 1555535_a | 6.37E-04 | 1.92E-04 | BPIL3                      | 128859 . |
| 1555536_a | 2.42E-07 | 7.56E-09 | ANTXR2                     | 118429 . |
| 1555540_a | 0.049469 | 0.033895 | TGFB3                      | 7043 .   |
| 1555545_a | 2.67E-04 | 6.59E-05 | KLK2                       | 3817 .   |
| 1555546_a | 2.07E-05 | 2.61E-06 | POFUT2                     | 23275 .  |

|           |          |          |              |          |
|-----------|----------|----------|--------------|----------|
| 1555548_a | 0.003679 | 0.001604 | NDUFA10      | 4705 .   |
| 1555553_a | 0.028473 | 0.01785  | SLC22A7      | 10864 .  |
| 1555554_a | 1.65E-04 | 3.62E-05 | RP11-49G10.8 | 317716 . |
| 1555557_a | 3.51E-04 | 9.23E-05 | TNK2         | 10188 .  |
| 1555559_s | 3.50E-05 | 5.07E-06 | USP25        | 29761 .  |
| 1555560_a | 0.027012 | 0.016795 | UGCGL2       | 55757 .  |
| 1555568_a | 2.02E-04 | 4.62E-05 | GUSBL1       | 387036 . |
| 1555575_a | 0.009029 | 0.004652 | KDELR1       | 10945 .  |
| 1555578_a | 0.014049 | 0.007816 | PTPRM        | 5797 .   |
| 1555579_s | 0.011873 | 0.006415 | PTPRM        | 5797 .   |
| 1555580_a | 6.31E-04 | 1.89E-04 |              | .        |
| 1555585_a | 0.01988  | 0.011743 | FAM71B       | 153745 . |
| 1555586_a | 0.025177 | 0.015487 | FAM71B       | 153745 . |
| 1555587_a | 0.011767 | 0.006347 | PDZRN3       | 23024 .  |
| 1555590_a | 4.50E-04 | 1.25E-04 | GATA1        | 2623 .   |
| 1555591_a | 0.003098 | 0.001305 | PIF1         | 80119 .  |
| 1555668_a | 0.013813 | 0.007666 | PARK2        | 5071 .   |
| 1555594_a | 2.89E-06 | 2.00E-07 | MBNL1        | 4154 .   |
| 1555595_a | 1.62E-05 | 1.90E-06 | SCRN3        | 79634 .  |
| 1555600_s | 7.75E-05 | 1.40E-05 | APOL4        | 80832 .  |
| 1555603_a | 0.005144 | 0.002397 | BAGE         | 574 .    |
| 1555605_x | 0.017732 | 0.010274 | BAGE         | 574 .    |
| 1555608_a | 9.48E-05 | 1.80E-05 | CAPRN2       | 65981 .  |
| 1555609_a | 2.18E-05 | 2.80E-06 | ZMAT3        | 64393 .  |
| 1555610_a | 0.007935 | 0.004007 | AGK          | 55750 .  |
| 1555611_s | 2.36E-04 | 5.62E-05 | MBD1         | 4152 .   |
| 1555612_s | 3.53E-04 | 9.28E-05 | G6PC         | 2538 .   |
| 1555613_a | 3.95E-05 | 5.90E-06 | ZAP70        | 7535 .   |
| 1555614_a | 0.010839 | 0.00577  | SUGT1P       | 441394 . |
| 1555616_a | 0.005823 | 0.002777 |              | .        |
| 1555618_s | 0.009786 | 0.005117 | SAE1         | 10055 .  |
| 1555620_a | 3.95E-06 | 3.01E-07 | PTGIR        | 5739 .   |
| 1555623_a | 2.85E-05 | 3.90E-06 |              | .        |
| 1555628_a | 0.025969 | 0.016046 | HAVCR2       | 84868 .  |

|           |          |          |          |           |   |
|-----------|----------|----------|----------|-----------|---|
| 1555630_a | 0.001078 | 3.66E-04 | RAB34    | 83871     | . |
| 1555631_a | 4.26E-05 | 6.53E-06 |          |           | . |
| 1555632_a | 0.032131 | 0.020551 | PIK3IP1  | 113791    | . |
| 1555638_a | 0.001276 | 4.49E-04 | SAMSN1   | 64092     | . |
| 1555639_a | 0.004219 | 0.001889 | RBM14    | 10432     | . |
| 1555640_a | 0.032278 | 0.02066  | DAOA     | 267012    | . |
| 1555645_a | 0.003422 | 0.001471 | GAFA2    | 100130322 | . |
| 1555650_a | 1.40E-04 | 2.95E-05 | KLHL17   | 339451    | . |
| 1555653_a | 0.002154 | 8.44E-04 | HNRNPA3  | 220988    | . |
| 1555656_a | 7.50E-04 | 2.35E-04 | CD300LG  | 146894    | . |
| 1555659_a | 0.00258  | 0.001049 | TREML1   | 340205    | . |
| 1555664_a | 0.003695 | 0.001612 |          |           | . |
| 1555665_a | 5.09E-04 | 1.45E-04 |          |           | . |
| 1555666_a | 4.38E-05 | 6.77E-06 | PTPRS    | 5802      | . |
| 1555673_a | 3.05E-04 | 7.77E-05 | KRTAP2-4 | 85294     | . |
| 1555676_s | 0.0043   | 0.001934 | GSX1     | 219409    | . |
| 1555678_a | 0.013458 | 0.007437 | ST3GAL3  | 6487      | . |
| 1555679_a | 3.04E-05 | 4.25E-06 | RTN4IP1  | 84816     | . |
| 1555680_a | 3.81E-07 | 1.38E-08 | SMOX     | 54498     | . |
| 1555681_a | 5.24E-04 | 1.51E-04 |          |           | . |
| 1555682_a | 5.09E-04 | 1.45E-04 | OTUB2    | 78990     | . |
| 1555692_a | 2.83E-04 | 7.06E-05 |          |           | . |
| 1555694_a | 0.009702 | 0.005065 | KCNIP3   | 30818     | . |
| 1555695_a | 7.25E-05 | 1.29E-05 | CLRN1    | 7401      | . |
| 1555697_a | 6.80E-05 | 1.18E-05 | KLK4     | 9622      | . |
| 1555704_a | 3.78E-05 | 5.58E-06 | CMTM3    | 123920    | . |
| 1555707_a | 0.001092 | 3.72E-04 | TNAP     | 445341    | . |
| 1555713_a | 9.37E-09 | 9.82E-11 | PNKD     | 25953     | . |
| 1555715_a | 0.037607 | 0.024661 | HRH3     | 11255     | . |
| 1555722_a | 0.038297 | 0.025186 | SCAMPER  | 286756    | . |
| 1555724_s | 5.22E-06 | 4.30E-07 | TAGLN    | 6876      | . |
| 1555725_a | 4.24E-06 | 3.30E-07 | RGS5     | 8490      | . |
| 1555729_a | 0.003461 | 0.00149  | CD209    | 30835     | . |
| 1555730_a | 0.004126 | 0.001839 | CFL1     | 1072      | . |

|           |          |          |                            |        |   |
|-----------|----------|----------|----------------------------|--------|---|
| 1555738_a | 0.001084 | 3.68E-04 | CMTM1                      | 113540 | . |
| 1555740_a | 0.035858 | 0.023333 | MRAP                       | 56246  | . |
| 1555742_a | 5.33E-06 | 4.42E-07 |                            |        | . |
| 1555746_a | 2.29E-05 | 2.96E-06 | CD79B                      | 974    | . |
| 1555748_x | 3.62E-04 | 9.58E-05 | CD79B                      | 974    | . |
| 1555743_s | 7.90E-05 | 1.44E-05 |                            |        | . |
| 1555753_x | 1.15E-05 | 1.22E-06 |                            |        | . |
| 1555754_s | 0.008187 | 0.004152 | ATN1                       | 1822   | . |
| 1555758_a | 4.18E-05 | 6.37E-06 | CDKN3                      | 1033   | . |
| 1555760_a | 2.67E-07 | 8.61E-09 | RBM15                      | 64783  | . |
| 1555761_x | 2.76E-04 | 6.86E-05 | RBM15                      | 64783  | . |
| 1555762_s | 4.81E-06 | 3.87E-07 | RBM15                      | 64783  | . |
| 1555763_x | 0.002209 | 8.70E-04 | MKL1                       | 57591  | . |
| 1555765_a | 0.002712 | 0.001113 | GNG4                       | 2786   | . |
| 1555766_a | 6.57E-08 | 1.29E-09 | GNG2                       | 54331  | . |
| 1555772_a | 2.04E-05 | 2.56E-06 | CDC25A                     | 993    | . |
| 1555774_a | 0.021774 | 0.013079 | ZAR1                       | 326340 | . |
| 1555777_a | 8.08E-05 | 1.48E-05 | POSTN                      | 10631  | . |
| 1555778_a | 8.87E-06 | 8.67E-07 | POSTN                      | 10631  | . |
| 1555779_a | 0.002647 | 0.001082 | CD79A                      | 973    | . |
| 1555785_a | 0.015988 | 0.009113 | XRN1                       | 54464  | . |
| 1555786_s | 4.10E-05 | 6.19E-06 | C14orf34                   | 645687 | . |
| 1555787_a | 0.02353  | 0.014309 | C11orf63                   | 79864  | . |
| 1555788_a | 0.00269  | 0.001101 | TRIB3                      | 57761  | . |
| 1555790_a | 0.035065 | 0.022727 | TMEM192 /// ;162967 /// 2( |        | . |
| 1555797_a | 4.94E-04 | 1.40E-04 | ARPC5                      | 10092  | . |
| 1555800_a | 1.29E-04 | 2.65E-05 | ZNF385B                    | 151126 | . |
| 1555801_s | 0.001388 | 4.97E-04 | ZNF385B                    | 151126 | . |
| 1555803_a | 0.031314 | 0.019938 | C11orf57                   | 55216  | . |
| 1555807_a | 3.18E-05 | 4.49E-06 | MOG                        | 4340   | . |
| 1555808_a | 2.87E-05 | 3.94E-06 | EXD2                       | 55218  | . |
| 1555809_a | 7.73E-04 | 2.44E-04 | CRISPLD2                   | 83716  | . |
| 1555811_a | 1.29E-04 | 2.65E-05 | ARHGDIB                    | 397    | . |
| 1555814_a | 0.013396 | 0.007397 | RHOA                       | 387    | . |



|           |          |          |                               |
|-----------|----------|----------|-------------------------------|
| 1555817_s | 2.32E-05 | 3.01E-06 | .                             |
| 1555819_s | 9.48E-04 | 3.13E-04 | SAMD14 201191 .               |
| 1555820_a | 0.015323 | 0.008665 | MKS1 54903 .                  |
| 1555821_a | 0.028609 | 0.017954 | AKT1S1 84335 .                |
| 1555823_a | 3.78E-06 | 2.84E-07 | PACS2 23241 .                 |
| 1555824_a | 0.001285 | 4.53E-04 | PACS2 23241 .                 |
| 1555827_a | 0.036528 | 0.023844 | CCNL1 57018 .                 |
| 1555829_a | 0.013504 | 0.007466 | FAM62B 57488 .                |
| 1555830_s | 1.34E-04 | 2.78E-05 | FAM62B 57488 .                |
| 1555831_s | 6.17E-04 | 1.84E-04 | LRRC41 10489 .                |
| 1555832_s | 0.003362 | 0.00144  | KLF6 1316 .                   |
| 1555836_a | 0.003302 | 0.001409 | POLR2B 5431 .                 |
| 1555837_s | 0.009147 | 0.004727 | POLR2B 5431 .                 |
| 1555841_a | 6.32E-05 | 1.08E-05 | C9orf30 91283 .               |
| 1555844_s | 1.49E-04 | 3.18E-05 | HNRNPM 4670 .                 |
| 1555845_a | 0.005722 | 0.002717 | .                             |
| 1555846_a | 0.003292 | 0.001404 | .                             |
| 1555847_a | 0.007338 | 0.003654 | LOC284454 284454 .            |
| 1555848_a | 3.83E-04 | 1.02E-04 | .                             |
| 1555851_s | 1.36E-05 | 1.52E-06 | SEPW1 6415 .                  |
| 1555852_a | 0.006037 | 0.002899 | .                             |
| 1555853_a | 0.006708 | 0.003284 | .                             |
| 1555854_a | 1.23E-06 | 6.52E-08 | .                             |
| 1555856_s | 1.76E-04 | 3.91E-05 | .                             |
| 1555858_a | 0.0261   | 0.016138 | .                             |
| 1555860_x | 0.020688 | 0.012314 | .                             |
| 1555862_s | 0.009538 | 0.004963 | MICALL2 79778 .               |
| 1555864_s | 5.26E-06 | 4.35E-07 | PDHA1 5160 .                  |
| 1555867_a | 0.009688 | 0.005057 | GNG4 2786 .                   |
| 1555868_a | 0.011891 | 0.006427 | LOC729070 729070 .            |
| 1555870_a | 0.003296 | 0.001406 | RNF207 388591 .               |
| 1555872_a | 0.029409 | 0.018537 | LOC728903 /// 389741 /// 71 . |
| 1555874_x | 0.035512 | 0.023069 | MGC21881 389741 .             |
| 1555875_a | 1.47E-06 | 8.32E-08 | SRGAP1 57522 .                |

|           |          |          |             |             |
|-----------|----------|----------|-------------|-------------|
| 1555878_a | 6.76E-06 | 6.03E-07 | RPS24       | 6229 .      |
| 1555880_a | 0.010463 | 0.00553  | HERV-FRD    | 405754 .    |
| 1555881_s | 0.026633 | 0.016518 | LZTS2       | 84445 .     |
| 1555882_a | 0.004448 | 0.002015 | SPIN3       | 169981 .    |
| 1555883_s | 0.021263 | 0.012722 | SPIN3       | 169981 .    |
| 1555888_a | 0.001918 | 7.34E-04 | UBR5        | 51366 .     |
| 1555889_a | 3.23E-05 | 4.59E-06 | CRTAP       | 10491 .     |
| 1555892_s | 1.68E-04 | 3.68E-05 | LOC253039   | 253039 .    |
| 1555894_s | 1.01E-05 | 1.03E-06 | MTSS1L      | 92154 .     |
| 1555895_a | 4.69E-04 | 1.31E-04 | DNM2        | 1785 .      |
| 1555896_a | 0.031467 | 0.020052 | ADAM15      | 8751 .      |
| 1555897_a | 0.013413 | 0.007407 | KDM1        | 23028 .     |
| 1555898_a | 0.008223 | 0.004172 | LOC400986   | 400986 .    |
| 1555900_a | 0.003789 | 0.001662 |             | .           |
| 1555904_a | 0.033581 | 0.021637 |             | .           |
| 1555905_a | 7.01E-06 | 6.32E-07 | C3orf23     | 285343 .    |
| 1555906_s | 2.42E-04 | 5.80E-05 | C3orf23     | 285343 .    |
| 1555907_a | 5.72E-06 | 4.87E-07 | hCG_2014417 | 100130776 . |
| 1555908_a | 0.013444 | 0.007428 | FAM120A     | 23196 .     |
| 1555913_a | 4.59E-04 | 1.28E-04 | GON4L       | 54856 .     |
| 1555914_a | 0.034423 | 0.02225  | EXD3        | 54932 .     |
| 1555920_a | 1.34E-09 | 8.00E-12 | CBX3        | 11335 .     |
| 1555922_a | 5.58E-07 | 2.28E-08 | C10orf114   | 399726 .    |
| 1555923_a | 4.69E-05 | 7.40E-06 | C10orf114   | 399726 .    |
| 1555933_a | 0.013149 | 0.00724  | KIAA2013    | 90231 .     |
| 1555935_s | 0.021262 | 0.012721 | HUNK        | 30811 .     |
| 1555938_x | 0.012032 | 0.006516 | VIM         | 7431 .      |
| 1555942_a | 1.14E-06 | 5.87E-08 | LOC642587   | 642587 .    |
| 1555943_a | 2.92E-04 | 7.34E-05 | PGAM5       | 192111 .    |
| 1555944_a | 0.001476 | 5.35E-04 | FAM120A     | 23196 .     |
| 1555945_s | 8.79E-06 | 8.55E-07 | FAM120A     | 23196 .     |
| 1555947_a | 0.014177 | 0.0079   | FAM120A     | 23196 .     |
| 1555948_s | 7.73E-04 | 2.44E-04 | FAM120A     | 23196 .     |
| 1555950_a | 0.032541 | 0.02085  | CD55        | 1604 .      |

|           |          |          |           |          |
|-----------|----------|----------|-----------|----------|
| 1555952_a | 0.039524 | 0.026117 | SLC19A1   | 6573 .   |
| 1555953_a | 2.16E-04 | 5.04E-05 | SLC19A1   | 6573 .   |
| 1557123_a | 1.31E-06 | 7.11E-08 | CHADL     | 150356 . |
| 1555958_a | 3.42E-05 | 4.91E-06 | CRTAC1    | 55118 .  |
| 1555960_a | 1.41E-05 | 1.60E-06 | HINT1     | 3094 .   |
| 1555961_a | 1.91E-04 | 4.32E-05 | HINT1     | 3094 .   |
| 1555962_a | 3.57E-08 | 5.72E-10 | B3GNT7    | 93010 .  |
| 1555963_x | 7.90E-10 | 3.89E-12 | B3GNT7    | 93010 .  |
| 1555964_a | 0.015751 | 0.00895  | ARL17P1   | 51326 .  |
| 1555970_a | 0.00196  | 7.53E-04 |           | .        |
| 1555971_s | 0.026972 | 0.016767 | FBXO28    | 23219 .  |
| 1555972_s | 3.87E-06 | 2.93E-07 | FBXO28    | 23219 .  |
| 1555973_a | 6.12E-04 | 1.83E-04 |           | .        |
| 1555974_a | 9.77E-05 | 1.87E-05 |           | .        |
| 1555977_a | 0.028427 | 0.017815 |           | .        |
| 1555981_a | 0.022636 | 0.013676 | C17orf65  | 339201 . |
| 1555982_a | 0.004184 | 0.00187  | ZFYVE16   | 9765 .   |
| 1555985_a | 0.012135 | 0.006585 | C17orf64  | 124773 . |
| 1555988_a | 0.004681 | 0.002143 | LOC126536 | 126536 . |
| 1555989_a | 4.13E-04 | 1.13E-04 |           | .        |
| 1555990_a | 1.05E-04 | 2.06E-05 | C22orf42  | 150297 . |
| 1555994_a | 0.003402 | 0.001461 |           | .        |
| 1555996_s | 3.29E-05 | 4.69E-06 | EIF4A2    | 1974 .   |
| 1555997_s | 0.0039   | 0.001719 | IGFBP5    | 3488 .   |
| 1555998_a | 0.033785 | 0.021787 | ATP5H     | 10476 .  |
| 1556000_s | 5.42E-06 | 4.52E-07 | BTBD7     | 55727 .  |
| 1556001_a | 1.20E-06 | 6.31E-08 | LOC284939 | 284939 . |
| 1556006_s | 4.37E-04 | 1.20E-04 | CSNK1A1   | 1452 .   |
| 1556007_s | 2.87E-05 | 3.94E-06 |           | .        |
| 1556009_a | 0.024714 | 0.015148 | PEX13     | 5194 .   |
| 1556012_a | 5.20E-05 | 8.42E-06 | KLHDC7A   | 127707 . |
| 1556014_a | 0.001352 | 4.82E-04 | MESP2     | 145873 . |
| 1556015_a | 1.60E-05 | 1.88E-06 | MESP2     | 145873 . |
| 1556017_a | 0.023933 | 0.014593 | NBEAL2    | 23218 .  |

|           |          |          |                      |
|-----------|----------|----------|----------------------|
| 1556021_a | 0.047062 | 0.032002 | .                    |
| 1556024_a | 0.003542 | 0.001533 | EME2 197342 .        |
| 1556029_s | 0.025071 | 0.015407 | NMNAT2 23057 .       |
| 1556033_a | 9.19E-06 | 9.11E-07 | FLJ39739 388685 .    |
| 1556035_s | 0.014599 | 0.008181 | ZNF207 7756 .        |
| 1556037_s | 0.039899 | 0.026408 | HHIP 64399 .         |
| 1556038_a | 0.018242 | 0.010622 | GPR173 54328 .       |
| 1556042_s | 2.31E-06 | 1.50E-07 | LOC338799 338799 .   |
| 1556046_a | 0.016156 | 0.009222 | LOC157627 157627 .   |
| 1556048_a | 3.54E-04 | 9.32E-05 | .                    |
| 1556049_a | 1.54E-07 | 4.07E-09 | RTN4 57142 .         |
| 1556051_a | 0.005274 | 0.002468 | BICD1 636 .          |
| 1556053_a | 2.43E-05 | 3.21E-06 | DNAJC7 7266 .        |
| 1556054_a | 2.75E-06 | 1.88E-07 | .                    |
| 1556055_a | 0.00252  | 0.00102  | .                    |
| 1556059_s | 1.48E-04 | 3.16E-05 | SPEN 23013 .         |
| 1556060_a | 4.66E-04 | 1.30E-04 | ZNF451 26036 .       |
| 1556061_a | 7.22E-04 | 2.24E-04 | RPP30 10556 .        |
| 1556062_a | 3.03E-05 | 4.23E-06 | RPP30 10556 .        |
| 1556063_s | 1.37E-04 | 2.86E-05 | RPP30 10556 .        |
| 1556064_a | 1.64E-07 | 4.44E-09 | LOC284926 284926 .   |
| 1556067_a | 0.008026 | 0.00406  | KDM6B 23135 .        |
| 1556069_s | 7.28E-05 | 1.29E-05 | HIF3A 64344 .        |
| 1556072_a | 1.68E-04 | 3.69E-05 | C22orf37 200298 .    |
| 1556075_a | 0.033527 | 0.021599 | .                    |
| 1556078_a | 0.011044 | 0.005895 | .                    |
| 1556081_a | 6.85E-04 | 2.10E-04 | .                    |
| 1556082_a | 6.25E-04 | 1.88E-04 | .                    |
| 1556088_a | 1.05E-05 | 1.09E-06 | RPAIN 84268 .        |
| 1556090_a | 7.34E-05 | 1.31E-05 | .                    |
| 1556092_s | 3.76E-04 | 1.00E-04 | .                    |
| 1556099_a | 0.011429 | 0.006138 | hCG_2025798 728081 . |
| 1556105_a | 0.003798 | 0.001667 | .                    |
| 1556110_a | 0.02537  | 0.015628 | .                    |

|           |          |          |              |           |   |
|-----------|----------|----------|--------------|-----------|---|
| 1556121_a | 0.001262 | 4.43E-04 | NAP1L1       | 4673      | . |
| 1556129_a | 0.028288 | 0.017717 | LOC642533    | 642533    | . |
| 1556138_a | 7.40E-07 | 3.32E-08 |              |           | . |
| 1556144_a | 1.72E-06 | 1.03E-07 | DHX30        | 22907     | . |
| 1556145_a | 0.002181 | 8.57E-04 | LOC100131170 | 100131170 | . |
| 1556151_a | 7.85E-04 | 2.49E-04 | ITFG1        | 81533     | . |
| 1556154_a | 1.93E-04 | 4.38E-05 | MGC23284     | 197187    | . |
| 1556163_a | 8.41E-06 | 8.06E-07 | IGSF3        | 3321      | . |
| 1556165_a | 1.63E-05 | 1.91E-06 |              |           | . |
| 1556166_x | 5.49E-04 | 1.60E-04 |              |           | . |
| 1556171_a | 0.00151  | 5.50E-04 |              |           | . |
| 1556175_a | 4.47E-05 | 6.94E-06 | MTSS1L       | 92154     | . |
| 1556176_a | 0.015731 | 0.008934 | TAF8         | 129685    | . |
| 1556178_x | 0.002911 | 0.001209 | TAF8         | 129685    | . |
| 1556180_a | 0.004305 | 0.001936 | LOC729678    | 729678    | . |
| 1556181_a | 8.85E-04 | 2.88E-04 | hCG_20426    | 441869    | . |
| 1556182_x | 1.18E-04 | 2.38E-05 | hCG_20426    | 441869    | . |
| 1556186_s | 5.88E-04 | 1.74E-04 | KIAA0090     | 23065     | . |
| 1556190_s | 1.79E-06 | 1.08E-07 | PRNP         | 5621      | . |
| 1556192_x | 0.011784 | 0.006357 |              |           | . |
| 1556194_a | 0.007412 | 0.003697 |              |           | . |
| 1556195_a | 3.74E-04 | 9.95E-05 |              |           | . |
| 1556202_a | 1.03E-04 | 2.00E-05 | SRGAP2       | 23380     | . |
| 1556203_a | 5.69E-05 | 9.40E-06 | SRGAP2       | 23380     | . |
| 1556204_a | 0.02032  | 0.012051 | ZNF814       | 730051    | . |
| 1556216_s | 0.006263 | 0.003026 |              |           | . |
| 1556222_a | 1.32E-05 | 1.47E-06 | CDC10L       | 285961    | . |
| 1556226_a | 2.91E-06 | 2.02E-07 |              |           | . |
| 1556227_a | 9.22E-04 | 3.03E-04 | VCPIP1       | 80124     | . |
| 1556228_a | 5.53E-05 | 9.08E-06 | VCPIP1       | 80124     | . |
| 1556229_a | 0.002974 | 0.001241 |              |           | . |
| 1556231_a | 0.003386 | 0.001453 |              |           | . |
| 1556235_a | 0.001219 | 4.25E-04 |              |           | . |
| 1556242_a | 0.001858 | 7.06E-04 |              |           | . |

|           |          |          |                              |          |
|-----------|----------|----------|------------------------------|----------|
| 1556247_a | 4.44E-05 | 6.89E-06 |                              | .        |
| 1556249_a | 9.68E-04 | 3.21E-04 | FLJ33065                     | 440952 . |
| 1556255_a | 0.012175 | 0.006611 | LOC400756                    | 400756 . |
| 1556257_a | 0.03489  | 0.022591 | LOC645513                    | 645513 . |
| 1556261_a | 0.038838 | 0.025593 |                              | .        |
| 1556262_a | 0.037023 | 0.024224 | PWRN1                        | 791114 . |
| 1556265_a | 1.34E-05 | 1.50E-06 | LOC400831                    | 400831 . |
| 1556267_a | 2.17E-06 | 1.39E-07 | C12orf28                     | 196446 . |
| 1556271_a | 0.015021 | 0.008463 |                              | .        |
| 1556274_a | 0.004662 | 0.002132 |                              | .        |
| 1556277_a | 5.84E-06 | 5.01E-07 | PAPD4                        | 167153 . |
| 1556281_a | 0.002099 | 8.18E-04 |                              | .        |
| 1556284_a | 0.001347 | 4.80E-04 | PPA2                         | 27068 .  |
| 1556287_a | 0.0216   | 0.012953 |                              | .        |
| 1556291_a | 2.62E-07 | 8.42E-09 | POM121L12                    | 285877 . |
| 1556292_s | 0.004076 | 0.001813 | POM121L12                    | 285877 . |
| 1556296_a | 2.23E-04 | 5.25E-05 |                              | .        |
| 1556299_s | 0.01903  | 0.011159 | C12orf76                     | 400073 . |
| 1556300_s | 1.13E-04 | 2.24E-05 | SIM1                         | 6492 .   |
| 1556301_a | 0.008826 | 0.00453  |                              | .        |
| 1556306_a | 1.15E-06 | 5.94E-08 |                              | .        |
| 1556308_a | 0.003106 | 0.001309 | PRRT3                        | 285368 . |
| 1556309_s | 0.026507 | 0.016431 | C1orf86 /// LO 100128003 //. | .        |
| 1556318_s | 0.012457 | 0.006795 |                              | .        |
| 1556319_a | 7.14E-05 | 1.26E-05 | LOC283270                    | 283270 . |
| 1556320_a | 0.003239 | 0.001376 | STOML1                       | 9399 .   |
| 1556321_a | 2.34E-05 | 3.04E-06 |                              | .        |
| 1556322_a | 1.61E-06 | 9.36E-08 |                              | .        |
| 1556328_a | 2.43E-05 | 3.20E-06 |                              | .        |
| 1556329_a | 3.78E-05 | 5.58E-06 |                              | .        |
| 1556331_a | 0.023442 | 0.014245 |                              | .        |
| 1556333_a | 0.036088 | 0.023509 |                              | .        |
| 1556336_a | 0.029486 | 0.018601 | CCBL2 /// LOC100131735 //.   | .        |
| 1556338_a | 0.003235 | 0.001375 |                              | .        |

|           |          |          |           |          |
|-----------|----------|----------|-----------|----------|
| 1556339_a | 0.005638 | 0.002672 |           | .        |
| 1556340_a | 0.005859 | 0.002797 | MAPK12    | 6300 .   |
| 1556344_a | 3.36E-04 | 8.73E-05 | LOC150051 | 150051 . |
| 1556345_s | 0.002102 | 8.20E-04 |           | .        |
| 1556346_a | 0.00675  | 0.003308 |           | .        |
| 1556347_a | 7.04E-07 | 3.12E-08 |           | .        |
| 1556352_a | 4.69E-05 | 7.39E-06 |           | .        |
| 1556354_s | 0.048508 | 0.033131 | RGL3      | 57139 .  |
| 1556355_x | 3.18E-05 | 4.50E-06 | RGL3      | 57139 .  |
| 1556356_a | 1.79E-04 | 3.98E-05 | ERICH1    | 157697 . |
| 1556359_a | 0.00279  | 0.001151 | C6orf89   | 221477 . |
| 1556361_s | 1.95E-04 | 4.44E-05 | ANKRD13C  | 81573 .  |
| 1556362_a | 0.038113 | 0.025048 |           | .        |
| 1556364_a | 0.01362  | 0.007539 | LOC730057 | 730057 . |
| 1556371_a | 2.84E-04 | 7.10E-05 | OLIG3     | 167826 . |
| 1556373_a | 0.003177 | 0.001345 |           | .        |
| 1556374_s | 0.004023 | 0.001784 |           | .        |
| 1556375_a | 0.006478 | 0.003149 |           | .        |
| 1556378_a | 7.37E-04 | 2.30E-04 | LOC440896 | 440896 . |
| 1556381_a | 0.001124 | 3.85E-04 | NARG1     | 80155 .  |
| 1556382_a | 0.033515 | 0.02159  | NARG1     | 80155 .  |
| 1556385_a | 4.37E-04 | 1.20E-04 |           | .        |
| 1556387_a | 0.002441 | 9.82E-04 |           | .        |
| 1556389_a | 0.001785 | 6.72E-04 | CNPY3     | 10695 .  |
| 1556393_a | 0.01221  | 0.006633 |           | .        |
| 1556397_a | 0.002314 | 9.21E-04 |           | .        |
| 1556398_a | 2.14E-04 | 4.99E-05 |           | .        |
| 1556400_a | 0.022103 | 0.013314 |           | .        |
| 1556401_a | 0.021045 | 0.012569 |           | .        |
| 1556406_a | 0.002875 | 0.001192 | LOC255025 | 255025 . |
| 1556411_s | 1.43E-04 | 3.02E-05 | KY        | 339855 . |
| 1556412_a | 6.54E-05 | 1.12E-05 |           | .        |
| 1556413_a | 0.042248 | 0.028222 |           | .        |
| 1556417_a | 0.003175 | 0.001344 |           | .        |

|           |          |          |              |             |
|-----------|----------|----------|--------------|-------------|
| 1556422_a | 2.63E-04 | 6.45E-05 |              | .           |
| 1556423_a | 0.019237 | 0.011299 | VASH1        | 22846 .     |
| 1556426_a | 0.004325 | 0.001947 | HEXA         | 3073 .      |
| 1556427_s | 1.99E-06 | 1.25E-07 | LRRN4CL      | 221091 .    |
| 1556429_a | 2.02E-07 | 5.84E-09 | WDR67        | 93594 .     |
| 1556432_a | 7.95E-08 | 1.69E-09 |              | .           |
| 1556434_a | 1.02E-04 | 1.98E-05 |              | .           |
| 1556442_x | 1.75E-04 | 3.87E-05 |              | .           |
| 1556444_a | 0.006518 | 0.003173 |              | .           |
| 1556445_a | 3.44E-04 | 8.99E-05 |              | .           |
| 1556449_a | 2.83E-05 | 3.86E-06 |              | .           |
| 1556452_a | 4.64E-04 | 1.30E-04 | LOC283761    | 283761 .    |
| 1556453_a | 8.42E-04 | 2.71E-04 |              | .           |
| 1556460_a | 0.023437 | 0.014241 |              | .           |
| 1556461_a | 0.001627 | 6.01E-04 |              | .           |
| 1556462_a | 2.89E-04 | 7.23E-05 |              | .           |
| 1556464_a | 0.020477 | 0.012158 | C2orf72      | 257407 .    |
| 1556465_a | 5.60E-07 | 2.29E-08 |              | .           |
| 1556468_a | 1.08E-05 | 1.12E-06 |              | .           |
| 1556469_s | 0.001519 | 5.54E-04 |              | .           |
| 1556471_a | 0.002917 | 0.001212 | SCML4        | 256380 .    |
| 1556477_a | 0.005596 | 0.002648 | LOC283485    | 283485 .    |
| 1556479_a | 1.50E-04 | 3.22E-05 |              | .           |
| 1556484_a | 2.89E-04 | 7.24E-05 | LRRC52       | 440699 .    |
| 1556486_a | 0.030036 | 0.019007 |              | .           |
| 1556488_s | 0.004109 | 0.00183  | C3orf15      | 89876 .     |
| 1556492_a | 0.002218 | 8.75E-04 |              | .           |
| 1556494_a | 0.009047 | 0.004662 |              | .           |
| 1556499_s | 0.001625 | 6.00E-04 | COL1A1       | 1277 .      |
| 1556502_a | 0.03261  | 0.020901 |              | .           |
| 1556505_a | 0.001246 | 4.36E-04 | LOC100131366 | 100131366 . |
| 1556507_a | 1.50E-06 | 8.52E-08 |              | .           |
| 1556533_a | 2.73E-04 | 6.76E-05 | C17orf52     | 283994 .    |
| 1556538_a | 0.026406 | 0.01636  | MFI2         | 4241 .      |



|           |          |          |              |             |
|-----------|----------|----------|--------------|-------------|
| 1556540_a | 4.44E-05 | 6.89E-06 |              | .           |
| 1556542_a | 0.005818 | 0.002774 |              | .           |
| 1556543_a | 0.018279 | 0.010648 |              | .           |
| 1556545_a | 0.003738 | 0.001635 |              | .           |
| 1556551_s | 1.01E-04 | 1.95E-05 | SLC39A6      | 25800 .     |
| 1556553_a | 0.044204 | 0.02976  |              | .           |
| 1556555_a | 9.25E-06 | 9.18E-07 | LOC100129461 | 100129461 . |
| 1556558_s | 0.02688  | 0.016705 | FLJ36665     | 285266 .    |
| 1556560_a | 0.014034 | 0.007807 | LOC100128071 | 100128071 . |
| 1556564_a | 0.007637 | 0.003829 | HHIPL1       | 84439 .     |
| 1556567_a | 2.30E-05 | 2.97E-06 | NAP1L4       | 4676 .      |
| 1556568_a | 1.67E-06 | 9.91E-08 |              | .           |
| 1556573_s | 0.022766 | 0.013768 | LOC286178    | 286178 .    |
| 1556579_s | 9.82E-04 | 3.26E-04 | IGSF10       | 285313 .    |
| 1556582_a | 8.83E-04 | 2.87E-04 | PVR          | 5817 .      |
| 1556583_a | 3.40E-04 | 8.87E-05 | SLC8A1       | 6546 .      |
| 1556584_a | 4.46E-05 | 6.93E-06 |              | .           |
| 1556586_x | 0.004062 | 0.001805 |              | .           |
| 1556588_a | 0.001127 | 3.86E-04 | C15orf37     | 283687 .    |
| 1556589_a | 0.011398 | 0.006117 |              | .           |
| 1556595_a | 0.016998 | 0.009774 |              | .           |
| 1556597_a | 3.22E-05 | 4.56E-06 | LOC284513    | 284513 .    |
| 1556602_a | 0.047161 | 0.03208  |              | .           |
| 1556607_a | 0.022479 | 0.01357  | EHD4         | 30844 .     |
| 1556608_a | 0.007638 | 0.00383  | EHD4         | 30844 .     |
| 1556613_s | 7.48E-05 | 1.34E-05 | LOC203107    | 203107 .    |
| 1556616_a | 5.55E-05 | 9.13E-06 | LOC100129637 | 100129637 . |
| 1556619_a | 0.027555 | 0.017184 | LOC729993    | 729993 .    |
| 1556620_a | 0.040625 | 0.026967 |              | .           |
| 1556627_a | 0.005789 | 0.002757 | DRP2         | 1821 .      |
| 1556630_a | 8.81E-04 | 2.87E-04 | CASC2        | 255082 .    |
| 1564372_s | 0.004522 | 0.002055 | CASC2        | 255082 .    |
| 1556636_a | 0.001328 | 4.72E-04 |              | .           |
| 1556641_a | 0.001857 | 7.06E-04 | SLC7A14      | 57709 .     |

|           |          |          |                           |          |
|-----------|----------|----------|---------------------------|----------|
| 1556645_s | 0.004989 | 0.002309 |                           | .        |
| 1556646_a | 0.01988  | 0.011742 |                           | .        |
| 1556649_a | 0.004447 | 0.002014 |                           | .        |
| 1556650_a | 0.002743 | 0.001128 |                           | .        |
| 1556656_a | 3.18E-04 | 8.19E-05 |                           | .        |
| 1556657_a | 0.001252 | 4.39E-04 |                           | .        |
| 1556658_a | 1.31E-05 | 1.45E-06 |                           | .        |
| 1556659_a | 3.05E-04 | 7.76E-05 |                           | .        |
| 1556661_a | 0.012795 | 0.007013 | CN5H6.4                   | 150384 . |
| 1556662_a | 8.61E-05 | 1.60E-05 |                           | .        |
| 1556665_a | 0.008325 | 0.004234 | TTC6                      | 115669 . |
| 1556669_a | 0.031977 | 0.020434 |                           | .        |
| 1556670_a | 0.011999 | 0.006494 |                           | .        |
| 1556672_a | 6.83E-04 | 2.09E-04 | RBM6                      | 10180 .  |
| 1556676_a | 0.008988 | 0.004628 |                           | .        |
| 1556677_a | 0.003766 | 0.001651 |                           | .        |
| 1556678_a | 0.002677 | 0.001095 |                           | .        |
| 1556679_a | 0.009121 | 0.004708 |                           | .        |
| 1556683_x | 0.002588 | 0.001053 |                           | .        |
| 1556687_a | 0.010697 | 0.005678 | CLDN10                    | 9071 .   |
| 1556689_a | 0.001181 | 4.09E-04 | WNT4                      | 54361 .  |
| 1556690_s | 4.77E-05 | 7.55E-06 |                           | .        |
| 1556694_a | 2.15E-06 | 1.37E-07 |                           | .        |
| 1556695_a | 3.90E-07 | 1.42E-08 | FLJ42709                  | 441094 . |
| 1556696_s | 2.07E-04 | 4.80E-05 | FLJ42709                  | 441094 . |
| 1556698_a | 0.003278 | 0.001397 | GPRIN3                    | 285513 . |
| 1556699_a | 1.72E-04 | 3.79E-05 |                           | .        |
| 1556701_a | 0.001787 | 6.73E-04 | DLGAP4                    | 22839 .  |
| 1564277_a | 3.20E-04 | 8.24E-05 | LOC100133920(100133920 // | .        |
| 1556706_a | 0.001135 | 3.90E-04 |                           | .        |
| 1564373_a | 0.014767 | 0.008294 | LOC283887                 | 283887 . |
| 1556709_a | 0.001869 | 7.11E-04 | LOC283887                 | 283887 . |
| 1556715_a | 0.005933 | 0.00284  | PRPSAP1                   | 5635 .   |
| 1556717_a | 0.003229 | 0.001371 |                           | .        |

|           |          |          |              |             |
|-----------|----------|----------|--------------|-------------|
| 1556718_s | 8.19E-05 | 1.50E-05 |              | .           |
| 1556721_a | 5.46E-04 | 1.58E-04 | LOC284805    | 284805 .    |
| 1556722_a | 5.05E-04 | 1.44E-04 | LOC284805    | 284805 .    |
| 1556724_a | 0.010781 | 0.005732 | LOC100128398 | 100128398 . |
| 1556725_a | 0.008326 | 0.004235 | LOC100128398 | 100128398 . |
| 1556727_a | 2.08E-04 | 4.81E-05 | PRCD         | 768206 .    |
| 1556728_a | 4.11E-04 | 1.12E-04 |              | .           |
| 1556735_a | 0.049682 | 0.034073 |              | .           |
| 1556737_a | 0.00106  | 3.58E-04 | LOC388387    | 388387 .    |
| 1556739_a | 0.022999 | 0.013929 | GOLGA9P      | 283796 .    |
| 1556743_a | 0.031353 | 0.019969 |              | .           |
| 1556744_a | 9.15E-04 | 3.00E-04 |              | .           |
| 1556747_a | 5.04E-06 | 4.12E-07 |              | .           |
| 1556748_x | 1.63E-06 | 9.54E-08 |              | .           |
| 1556750_a | 1.34E-06 | 7.38E-08 | LOC153577    | 153577 .    |
| 1556754_a | 0.00169  | 6.29E-04 |              | .           |
| 1556755_s | 0.004655 | 0.002128 | LOC286149    | 286149 .    |
| 1556760_a | 0.020475 | 0.012156 |              | .           |
| 1556771_a | 0.006673 | 0.003263 | LOC415056    | 415056 .    |
| 1556776_a | 6.83E-04 | 2.09E-04 |              | .           |
| 1556777_a | 3.90E-04 | 1.05E-04 |              | .           |
| 1556778_a | 0.009712 | 0.005072 |              | .           |
| 1556779_s | 4.16E-05 | 6.32E-06 |              | .           |
| 1556781_a | 1.52E-04 | 3.26E-05 |              | .           |
| 1556783_a | 0.0447   | 0.030146 |              | .           |
| 1556786_a | 3.18E-04 | 8.16E-05 | PDE5A        | 8654 .      |
| 1563805_a | 2.73E-04 | 6.76E-05 | FAM83C       | 128876 .    |
| 1556796_a | 0.043614 | 0.029292 |              | .           |
| 1556797_a | 0.001365 | 4.88E-04 | LOC386597    | 386597 .    |
| 1556801_a | 1.73E-05 | 2.07E-06 | LOC400794    | 400794 .    |
| 1556804_s | 0.001052 | 3.55E-04 | POLR3B       | 55703 .     |
| 1556805_a | 1.27E-04 | 2.59E-05 |              | .           |
| 1556806_a | 2.50E-04 | 6.06E-05 |              | .           |
| 1556808_a | 0.017426 | 0.010064 |              | .           |

|           |          |          |                          |
|-----------|----------|----------|--------------------------|
| 1556809_a | 2.39E-05 | 3.14E-06 | .                        |
| 1556814_a | 0.044462 | 0.029965 | .                        |
| 1556815_a | 0.003654 | 0.001592 | .                        |
| 1556818_a | 2.13E-07 | 6.28E-09 | .                        |
| 1556820_a | 2.13E-05 | 2.71E-06 | DLEU2 8847 .             |
| 1556821_x | 5.56E-05 | 9.13E-06 | DLEU2 8847 .             |
| 1556822_s | 0.024981 | 0.015344 | ZNF837 116412 .          |
| 1556824_a | 2.13E-10 | 7.05E-13 | .                        |
| 1556826_s | 0.004445 | 0.002013 | C1orf187 374946 .        |
| 1556827_a | 1.44E-04 | 3.04E-05 | LOC339929 339929 .       |
| 1556831_a | 0.005486 | 0.002586 | DYNC1H1 1778 .           |
| 1556834_a | 7.16E-07 | 3.18E-08 | .                        |
| 1556835_s | 0.00691  | 0.003404 | .                        |
| 1556836_a | 0.004898 | 0.002261 | .                        |
| 1556837_a | 0.00352  | 0.001521 | .                        |
| 1556839_s | 0.006406 | 0.003109 | SPTBN5 51332 .           |
| 1556841_a | 4.09E-04 | 1.11E-04 | ALDH1L2 160428 .         |
| 1556842_a | 0.021874 | 0.013153 | LOC286087 286087 .       |
| 1556844_a | 0.009319 | 0.004829 | LOC100132078 100132078 . |
| 1556850_a | 1.28E-04 | 2.64E-05 | CEP290 80184 .           |
| 1556851_a | 0.003242 | 0.001378 | .                        |
| 1556852_a | 0.001205 | 4.19E-04 | .                        |
| 1556854_a | 0.002484 | 0.001003 | LOC283501 283501 .       |
| 1564621_a | 0.001067 | 3.61E-04 | MEI1 150365 .            |
| 1556864_a | 0.023471 | 0.014265 | TCTN1 79600 .            |
| 1556865_a | 6.42E-06 | 5.64E-07 | .                        |
| 1556874_a | 0.033266 | 0.021397 | MEX3C 51320 .            |
| 1556877_a | 1.15E-04 | 2.29E-05 | .                        |
| 1556879_a | 0.012926 | 0.007099 | .                        |
| 1556883_a | 0.003241 | 0.001377 | LOC440896 440896 .       |
| 1556885_a | 0.004476 | 0.00203  | LAYN 143903 .            |
| 1556886_a | 0.013683 | 0.007581 | LAYN 143903 .            |
| 1556887_a | 1.66E-04 | 3.65E-05 | NCRNA00119 348808 .      |
| 1556891_a | 0.034485 | 0.022294 | SORCS1 114815 .          |

|           |          |          |             |        |   |
|-----------|----------|----------|-------------|--------|---|
| 1556894_a | 0.003513 | 0.001518 | NT5DC2      | 64943  | . |
| 1556895_a | 0.001246 | 4.36E-04 | NT5DC2      | 64943  | . |
| 1556899_a | 0.002131 | 8.33E-04 |             |        | . |
| 1556900_a | 3.43E-07 | 1.21E-08 | LOC149773   | 149773 | . |
| 1556905_a | 0.002602 | 0.001059 | ZNF577      | 84765  | . |
| 1556907_a | 1.39E-05 | 1.57E-06 | ZNF474      | 133923 | . |
| 1556909_a | 0.017906 | 0.010392 |             |        | . |
| 1556911_a | 1.34E-04 | 2.79E-05 |             |        | . |
| 1556914_a | 4.02E-04 | 1.09E-04 |             |        | . |
| 1556916_a | 0.038663 | 0.025465 |             |        | . |
| 1556917_a | 0.003617 | 0.001572 |             |        | . |
| 1556923_a | 4.19E-08 | 7.02E-10 |             |        | . |
| 1556924_a | 0.017464 | 0.01009  | ALS2CR10    | 65072  | . |
| 1556925_a | 2.62E-05 | 3.51E-06 | SMC3        | 9126   | . |
| 1556928_a | 3.44E-04 | 8.99E-05 |             |        | . |
| 1556929_a | 0.008845 | 0.004542 | PAPOLG      | 64895  | . |
| 1556932_a | 0.01267  | 0.006933 |             |        | . |
| 1556933_a | 0.00503  | 0.002333 |             |        | . |
| 1556935_a | 0.004866 | 0.002243 |             |        | . |
| 1556936_a | 0.002613 | 0.001065 |             |        | . |
| 1556937_a | 0.035055 | 0.022719 |             |        | . |
| 1556938_a | 1.83E-04 | 4.10E-05 |             |        | . |
| 1556941_a | 5.09E-04 | 1.45E-04 | LOC283484   | 283484 | . |
| 1556942_a | 8.16E-05 | 1.50E-05 |             |        | . |
| 1556950_s | 6.52E-05 | 1.12E-05 | SERPINB6    | 5269   | . |
| 1556951_a | 3.13E-04 | 8.02E-05 |             |        | . |
| 1556952_a | 0.005549 | 0.002623 |             |        | . |
| 1556954_a | 2.52E-04 | 6.12E-05 | LOC283854   | 283854 | . |
| 1556956_a | 0.002427 | 9.75E-04 | KCP         | 375616 | . |
| 1556959_a | 0.003596 | 0.001561 | hCG_2007354 | 647589 | . |
| 1556962_a | 0.001355 | 4.84E-04 |             |        | . |
| 1556963_a | 2.00E-04 | 4.58E-05 |             |        | . |
| 1556967_a | 1.96E-04 | 4.45E-05 | ZDHHC14     | 79683  | . |
| 1556969_a | 0.004181 | 0.001868 | CCDC108     | 255101 | . |

|           |          |          |                          |
|-----------|----------|----------|--------------------------|
| 1556970_a | 0.013744 | 0.007622 | .                        |
| 1556971_a | 0.0287   | 0.018027 | .                        |
| 1556972_a | 6.25E-04 | 1.87E-04 | .                        |
| 1556978_a | 0.011363 | 0.006094 | TAF8 129685 .            |
| 1556985_a | 0.009397 | 0.004877 | .                        |
| 1556987_s | 1.15E-04 | 2.28E-05 | OR2H1 26716 .            |
| 1556988_s | 7.56E-04 | 2.37E-04 | CHD1L 9557 .             |
| 1556989_a | 0.001063 | 3.59E-04 | .                        |
| 1556990_a | 0.038479 | 0.025327 | PERP 64065 .             |
| 1556992_a | 0.002439 | 9.81E-04 | LOC550113 550113 .       |
| 1556994_a | 0.011403 | 0.00612  | .                        |
| 1556999_a | 4.46E-04 | 1.24E-04 | LOC100271832 100271832 . |
| 1557000_a | 2.18E-08 | 2.94E-10 | ESPNL 339768 .           |
| 1557002_x | 2.23E-06 | 1.44E-07 | ESPNL 339768 .           |
| 1557007_a | 1.99E-04 | 4.55E-05 | .                        |
| 1557008_a | 3.42E-06 | 2.50E-07 | LOC340107 340107 .       |
| 1557012_a | 0.001399 | 5.02E-04 | .                        |
| 1557014_a | 0.011489 | 0.006174 | C9orf122 158228 .        |
| 1557021_s | 4.30E-05 | 6.60E-06 | .                        |
| 1557022_a | 0.026043 | 0.016097 | .                        |
| 1557024_a | 1.24E-04 | 2.52E-05 | .                        |
| 1557025_a | 0.001027 | 3.45E-04 | .                        |
| 1557026_a | 0.021515 | 0.012892 | .                        |
| 1557029_a | 0.017402 | 0.010047 | .                        |
| 1557031_a | 3.86E-04 | 1.03E-04 | RNF212 285498 .          |
| 1557036_a | 1.11E-06 | 5.64E-08 | ZBTB1 22890 .            |
| 1557038_s | 0.039418 | 0.026039 | .                        |
| 1557042_a | 0.01227  | 0.006675 | .                        |
| 1557047_a | 0.001986 | 7.65E-04 | YEATS2 55689 .           |
| 1557049_a | 1.04E-07 | 2.40E-09 | LOC149478 149478 .       |
| 1557050_a | 0.013948 | 0.00775  | .                        |
| 1557051_s | 0.022041 | 0.013268 | .                        |
| 1557052_a | 0.023847 | 0.014532 | .                        |
| 1557053_s | 1.84E-06 | 1.12E-07 | UBE2G2 7327 .            |

|           |          |          |              |             |
|-----------|----------|----------|--------------|-------------|
| 1557056_a | 0.031752 | 0.020258 | C5orf47      | 133491 .    |
| 1557062_a | 0.006685 | 0.00327  | LOC100129195 | 100129195 . |
| 1557064_s | 5.20E-06 | 4.28E-07 | HGSNAT       | 138050 .    |
| 1557065_a | 0.018691 | 0.010927 | YLPM1        | 56252 .     |
| 1557067_s | 0.00141  | 5.07E-04 | LUC7L        | 55692 .     |
| 1560503_a | 0.029012 | 0.018254 | LOC100130275 | 100130275 . |
| 1557071_s | 0.004316 | 0.001942 | NUB1         | 51667 .     |
| 1557073_s | 5.24E-04 | 1.50E-04 | TTBK2        | 146057 .    |
| 1557078_a | 1.09E-05 | 1.14E-06 | SLFN5        | 162394 .    |
| 1557079_a | 0.004912 | 0.002268 | ITGBL1       | 9358 .      |
| 1557080_s | 8.01E-09 | 7.93E-11 | ITGBL1       | 9358 .      |
| 1557081_a | 3.83E-05 | 5.67E-06 | RBM25        | 58517 .     |
| 1557085_a | 0.003365 | 0.001443 | PLAC1L       | 219990 .    |
| 1557089_a | 0.001169 | 4.04E-04 | KIF5C        | 3800 .      |
| 1557091_a | 0.001316 | 4.66E-04 | MAMSTR       | 284358 .    |
| 1557098_s | 0.023999 | 0.014638 | HAR1A        | 768096 .    |
| 1557103_a | 4.45E-06 | 3.51E-07 | LMTK3        | 114783 .    |
| 1557104_a | 0.042614 | 0.028502 | ZNF397OS     | 100101467 . |
| 1557105_a | 3.74E-07 | 1.35E-08 | ZNF397OS     | 100101467 . |
| 1557113_a | 0.015288 | 0.008641 | LOC283588    | 283588 .    |
| 1557114_a | 1.19E-05 | 1.27E-06 | LOC284385    | 284385 .    |
| 1557116_a | 0.020205 | 0.011967 | APOL6        | 80830 .     |
| 1557118_a | 7.37E-04 | 2.30E-04 |              | .           |
| 1557121_s | 0.005123 | 0.002386 |              | .           |
| 1557126_a | 0.038547 | 0.02538  | PLD1         | 5337 .      |
| 1557128_a | 0.038592 | 0.025412 | FAM111B      | 374393 .    |
| 1557129_a | 1.35E-04 | 2.81E-05 | FAM111B      | 374393 .    |
| 1557132_a | 8.00E-05 | 1.46E-05 | WDR17        | 116966 .    |
| 1557135_a | 4.30E-04 | 1.18E-04 |              | .           |
| 1557137_a | 3.21E-05 | 4.55E-06 | TMEM17       | 200728 .    |
| 1557141_a | 9.05E-04 | 2.96E-04 | C7orf67      | 84182 .     |
| 1557143_a | 2.46E-05 | 3.26E-06 | CSMD2        | 114784 .    |
| 1557145_a | 0.003615 | 0.001571 | STK38        | 11329 .     |
| 1557146_a | 5.37E-04 | 1.55E-04 | LOC146336    | 146336 .    |

|           |          |          |              |             |
|-----------|----------|----------|--------------|-------------|
| 1557149_a | 0.026175 | 0.016191 |              | .           |
| 1557151_a | 0.011999 | 0.006495 | TRIM31       | 11074 .     |
| 1557155_a | 3.71E-05 | 5.44E-06 | FLJ30375     | 440982 .    |
| 1557161_a | 0.008048 | 0.004073 | LOC100132735 | 100132735 . |
| 1557164_a | 0.002083 | 8.11E-04 |              | .           |
| 1557165_s | 0.013414 | 0.007408 | KLHL18       | 23276 .     |
| 1557167_a | 0.001592 | 5.86E-04 | HCG11        | 493812 .    |
| 1557169_x | 0.003286 | 0.001401 | HCG11        | 493812 .    |
| 1557170_a | 0.019232 | 0.011295 | NEK8         | 284086 .    |
| 1557172_x | 1.18E-04 | 2.36E-05 | NEK8         | 284086 .    |
| 1557179_s | 4.62E-05 | 7.25E-06 | CARS2        | 79587 .     |
| 1557185_a | 8.56E-04 | 2.76E-04 | TPCN1        | 53373 .     |
| 1557189_a | 0.023737 | 0.014457 | DNASE1       | 1773 .      |
| 1557190_a | 0.011866 | 0.006409 |              | .           |
| 1557192_a | 1.36E-05 | 1.52E-06 |              | .           |
| 1557193_a | 5.90E-05 | 9.86E-06 |              | .           |
| 1557194_a | 0.01432  | 0.007997 |              | .           |
| 1557207_s | 2.45E-05 | 3.23E-06 | LOC283177    | 283177 .    |
| 1557212_a | 0.00759  | 0.003802 | FLJ33065     | 440952 .    |
| 1557217_a | 0.001576 | 5.79E-04 | FANCB        | 2187 .      |
| 1557218_s | 9.25E-06 | 9.18E-07 | FANCB        | 2187 .      |
| 1557224_a | 0.00699  | 0.003451 |              | .           |
| 1557225_a | 8.86E-04 | 2.89E-04 | ASPG         | 374569 .    |
| 1557226_a | 4.18E-04 | 1.14E-04 | ASPG         | 374569 .    |
| 1557228_a | 7.11E-04 | 2.20E-04 | EHBP1L1      | 254102 .    |
| 1557235_a | 0.045117 | 0.03047  | LOC100128002 | 100128002 . |
| 1557236_a | 9.80E-07 | 4.81E-08 | APOL6        | 80830 .     |
| 1557238_s | 2.19E-05 | 2.80E-06 |              | .           |
| 1557239_a | 0.037528 | 0.024604 | BBX          | 56987 .     |
| 1557240_a | 0.002982 | 0.001245 |              | .           |
| 1557241_a | 0.001912 | 7.31E-04 |              | .           |
| 1557242_a | 4.87E-05 | 7.75E-06 |              | .           |
| 1557244_a | 0.001687 | 6.28E-04 |              | .           |
| 1557248_a | 5.82E-05 | 9.68E-06 | ZNF587       | 84914 .     |



|           |          |          |                            |                |
|-----------|----------|----------|----------------------------|----------------|
| 1557252_a | 6.97E-05 | 1.22E-05 |                            | .              |
| 1557257_a | 0.001149 | 3.95E-04 | BCL10                      | 8915 .         |
| 1557258_a | 0.028217 | 0.017669 | BCL10                      | 8915 .         |
| 1557261_a | 0.001234 | 4.31E-04 | WHAMML1 /// 339005 /// 4   | .              |
| 1557262_a | 0.00331  | 0.001414 | LOC100131731               | 100131731 .    |
| 1557263_s | 1.49E-04 | 3.16E-05 | LOC100131731               | 100131731 .    |
| 1557265_a | 0.0027   | 0.001107 |                            | .              |
| 1557267_s | 0.047502 | 0.032348 | LOC284952                  | 284952 .       |
| 1557274_a | 0.007552 | 0.003779 |                            | .              |
| 1557276_a | 7.86E-05 | 1.43E-05 |                            | .              |
| 1557278_s | 4.80E-10 | 2.04E-12 | TNPO1                      | 3842 .         |
| 1557280_s | 0.010636 | 0.00564  |                            | .              |
| 1557286_a | 4.87E-08 | 8.70E-10 |                            | .              |
| 1557289_s | 3.72E-06 | 2.78E-07 | GTF2IRD2                   | 84163 .        |
| 1557290_a | 0.016716 | 0.009592 | DPY19L2 /// DI283417 /// 3 | .              |
| 1557295_a | 0.00387  | 0.001704 |                            | .              |
| 1557300_s | 1.69E-05 | 2.02E-06 |                            | .              |
| 1557302_a | 0.003845 | 0.001691 |                            | .              |
| 1557303_a | 0.003519 | 0.001521 | LOC100131349               | 100131349 // . |
| 1557305_a | 0.001642 | 6.08E-04 | TACC1                      | 6867 .         |
| 1557312_a | 4.19E-05 | 6.39E-06 | C12orf61                   | 283416 .       |
| 1557315_a | 0.003016 | 0.001263 |                            | .              |
| 1557319_a | 0.023001 | 0.013931 |                            | .              |
| 1557322_a | 0.017596 | 0.010183 | ZNF230                     | 7773 .         |
| 1557325_a | 5.59E-04 | 1.63E-04 |                            | .              |
| 1557330_a | 0.020613 | 0.012257 |                            | .              |
| 1557331_a | 2.93E-04 | 7.37E-05 | POLR1B                     | 84172 .        |
| 1557334_a | 2.36E-04 | 5.63E-05 | FERMT1                     | 55612 .        |
| 1557336_a | 0.014304 | 0.007986 |                            | .              |
| 1557338_x | 0.006282 | 0.003037 |                            | .              |
| 1557341_x | 0.018147 | 0.010558 |                            | .              |
| 1557343_a | 0.019689 | 0.011608 |                            | .              |
| 1557347_a | 0.010697 | 0.005679 | MCPH1                      | 79648 .        |
| 1557348_a | 0.013558 | 0.007499 |                            | .              |

|           |          |          |                            |          |
|-----------|----------|----------|----------------------------|----------|
| 1557350_a | 9.97E-06 | 1.01E-06 | G3BP1                      | 10146 .  |
| 1557352_a | 0.001801 | 6.79E-04 | SQLE                       | 6713 .   |
| 1557353_a | 7.51E-04 | 2.35E-04 |                            | .        |
| 1557359_a | 0.026361 | 0.016324 | LOC285758                  | 285758 . |
| 1557360_a | 1.47E-09 | 8.88E-12 | LRPPRC                     | 10128 .  |
| 1557362_a | 0.013474 | 0.007446 | PHIP                       | 55023 .  |
| 1557366_a | 0.002723 | 0.001118 | CCDC144A /// 100134159 //. |          |
| 1557369_a | 1.66E-07 | 4.49E-09 | LOC285401                  | 285401 . |
| 1557370_s | 0.007705 | 0.003869 | MYCBP2                     | 23077 .  |
| 1557371_a | 0.00298  | 0.001244 | LOC158376                  | 158376 . |
| 1557373_a | 0.006343 | 0.003072 | LOC339505                  | 339505 . |
| 1557383_a | 0.003926 | 0.001734 |                            | .        |
| 1557384_a | 5.42E-04 | 1.57E-04 | ZNF131                     | 7690 .   |
| 1557385_a | 1.11E-07 | 2.61E-09 | FAM161A                    | 84140 .  |
| 1557388_a | 0.007432 | 0.00371  | RTTN                       | 25914 .  |
| 1557389_a | 0.024647 | 0.015099 |                            | .        |
| 1557403_s | 4.26E-05 | 6.53E-06 |                            | .        |
| 1557404_a | 8.55E-04 | 2.76E-04 |                            | .        |
| 1557405_a | 0.006805 | 0.003341 | LOC283697                  | 283697 . |
| 1557409_a | 0.018321 | 0.010676 |                            | .        |
| 1557418_a | 6.21E-05 | 1.05E-05 |                            | .        |
| 1557419_a | 0.001174 | 4.06E-04 |                            | .        |
| 1557422_a | 0.001469 | 5.32E-04 |                            | .        |
| 1557429_s | 0.006872 | 0.003379 | C15orf33                   | 196951 . |
| 1557431_a | 0.010751 | 0.005713 |                            | .        |
| 1557432_a | 0.011874 | 0.006415 | RASAL2                     | 9462 .   |
| 1557433_a | 7.18E-08 | 1.46E-09 |                            | .        |
| 1557438_a | 0.01524  | 0.008609 |                            | .        |
| 1557444_a | 0.006848 | 0.003367 | TREML3                     | 340206 . |
| 1557446_x | 0.021723 | 0.013042 | TREML3                     | 340206 . |
| 1557450_s | 0.001801 | 6.79E-04 | WHAMML2                    | 440253 . |
| 1557451_a | 0.047484 | 0.032334 | DGCR10                     | 26222 .  |
| 1557453_a | 0.013647 | 0.007558 |                            | .        |
| 1557455_s | 0.001142 | 3.92E-04 | MOSPD1                     | 56180 .  |

|           |          |          |              |          |
|-----------|----------|----------|--------------|----------|
| 1557457_a | 0.014533 | 0.008135 |              | .        |
| 1557465_a | 0.010062 | 0.005284 | RP11-327P2.4 | 283521 . |
| 1557475_a | 5.06E-05 | 8.13E-06 |              | .        |
| 1557478_a | 0.035021 | 0.022695 |              | .        |
| 1557480_a | 1.58E-06 | 9.15E-08 | DYSFIP1      | 116729 . |
| 1557484_a | 0.011562 | 0.006219 |              | .        |
| 1557487_a | 1.93E-06 | 1.19E-07 |              | .        |
| 1557495_a | 0.004412 | 0.001995 |              | .        |
| 1557501_a | 1.05E-07 | 2.45E-09 |              | .        |
| 1557502_a | 0.041639 | 0.027746 | PCCB         | 5096 .   |
| 1557504_a | 6.24E-04 | 1.87E-04 |              | .        |
| 1557505_a | 3.63E-04 | 9.59E-05 |              | .        |
| 1557507_a | 0.02185  | 0.013135 |              | .        |
| 1557527_a | 0.006039 | 0.0029   |              | .        |
| 1557528_a | 0.00938  | 0.004867 | STRADA       | 92335 .  |
| 1557529_a | 8.37E-05 | 1.55E-05 | C12orf51     | 283450 . |
| 1557531_a | 0.024519 | 0.015008 | C10orf55     | 414236 . |
| 1557536_a | 7.51E-04 | 2.35E-04 | WNK2         | 65268 .  |
| 1557538_a | 0.040471 | 0.026844 |              | .        |
| 1557539_a | 2.04E-04 | 4.69E-05 |              | .        |
| 1557540_a | 0.013114 | 0.007217 |              | .        |
| 1557542_a | 0.006341 | 0.003071 |              | .        |
| 1557543_a | 4.50E-04 | 1.25E-04 |              | .        |
| 1562415_a | 2.17E-05 | 2.78E-06 | SPOCD1       | 90853 .  |
| 1557550_a | 6.71E-04 | 2.04E-04 | LOC148145    | 148145 . |
| 1557553_a | 0.01059  | 0.005611 | PPP1R12B     | 4660 .   |
| 1557555_a | 6.71E-04 | 2.04E-04 |              | .        |
| 1557562_a | 0.00994  | 0.005212 | GRIPAP1      | 56850 .  |
| 1557564_a | 6.73E-04 | 2.05E-04 |              | .        |
| 1557570_a | 0.046326 | 0.031417 | LOC285084    | 285084 . |
| 1557575_a | 0.00634  | 0.00307  | STBD1        | 8987 .   |
| 1557576_a | 0.013233 | 0.007293 | PAQR3        | 152559 . |
| 1557580_a | 9.32E-08 | 2.08E-09 |              | .        |
| 1557581_x | 1.48E-04 | 3.14E-05 |              | .        |

|           |          |          |                |              |   |
|-----------|----------|----------|----------------|--------------|---|
| 1557582_a | 0.025848 | 0.015962 | BIN3           | 55909        | . |
| 1557585_a | 0.010488 | 0.005546 | ATP6V1H        | 51606        | . |
| 1557588_a | 0.001981 | 7.63E-04 | LOC100128946   | 100128946    | . |
| 1557590_a | 8.17E-06 | 7.73E-07 | LOC100130522   | 100130522    | . |
| 1557593_a | 2.92E-04 | 7.35E-05 | SPAG17         | 200162       | . |
| 1557595_a | 7.76E-06 | 7.25E-07 | GINS2          | 51659        | . |
| 1557597_a | 0.009897 | 0.005185 |                |              | . |
| 1557601_s | 0.003507 | 0.001515 | KIAA1257 /// L | 100132731 // | . |
| 1557605_a | 1.08E-04 | 2.12E-05 | LOC401312      | 401312       | . |
| 1557608_a | 0.011593 | 0.006239 | LOC284080      | 284080       | . |
| 1557609_s | 0.010381 | 0.00548  | TBC1D12        | 23232        | . |
| 1557613_a | 0.018737 | 0.010961 | FLJ39534       | 285352       | . |
| 1557615_a | 3.05E-04 | 7.75E-05 | SLIT1          | 6585         | . |
| 1557616_a | 0.001697 | 6.32E-04 | ZNF496         | 84838        | . |
| 1557618_a | 0.011124 | 0.005947 | LOC285768      | 285768       | . |
| 1557621_a | 0.008469 | 0.004318 | KCP            | 375616       | . |
| 1557626_a | 0.009065 | 0.004673 |                |              | . |
| 1557628_s | 0.025004 | 0.015359 | LOC283745      | 283745       | . |
| 1557632_a | 0.001759 | 6.61E-04 |                |              | . |
| 1557646_a | 0.004877 | 0.002249 |                |              | . |
| 1561728_a | 0.045889 | 0.031075 | LOC400238      | 400238       | . |
| 1557657_a | 0.010187 | 0.00536  | LOC400238      | 400238       | . |
| 1557656_a | 6.31E-04 | 1.90E-04 | LOC400238      | 400238       | . |
| 1557658_a | 0.006729 | 0.003296 |                |              | . |
| 1557660_s | 0.002052 | 7.96E-04 | LOC728883      | 728883       | . |
| 1557665_a | 1.60E-04 | 3.47E-05 |                |              | . |
| 1557666_s | 0.005876 | 0.002807 | C9orf98        | 158067       | . |
| 1557667_a | 0.00159  | 5.85E-04 |                |              | . |
| 1557669_a | 6.27E-04 | 1.88E-04 | LOC100132005   | 100132005    | . |
| 1557672_s | 0.002745 | 0.001129 | LOC100133308   | 100133308    | . |
| 1557673_a | 0.025323 | 0.015594 |                |              | . |
| 1557675_a | 0.002254 | 8.92E-04 | RAF1           | 5894         | . |
| 1557679_a | 0.002392 | 9.57E-04 | C8orf68        | 619343       | . |
| 1557681_s | 0.029337 | 0.018486 | C14orf174      | 161394       | . |

|           |          |          |              |           |   |
|-----------|----------|----------|--------------|-----------|---|
| 1557684_a | 0.001406 | 5.05E-04 | ZNF286A      | 57335     | . |
| 1557685_a | 3.39E-04 | 8.85E-05 | C4orf38      | 152641    | . |
| 1557688_a | 0.0039   | 0.00172  |              |           | . |
| 1557689_a | 0.023046 | 0.01396  |              |           | . |
| 1557690_x | 0.030845 | 0.019599 |              |           | . |
| 1557693_a | 0.003265 | 0.00139  |              |           | . |
| 1557698_a | 0.01888  | 0.011057 |              |           | . |
| 1557699_x | 0.003237 | 0.001375 |              |           | . |
| 1557700_a | 5.61E-06 | 4.75E-07 | POLH         | 5429      | . |
| 1557701_s | 0.001596 | 5.88E-04 | POLH         | 5429      | . |
| 1557702_a | 1.90E-07 | 5.37E-09 |              |           | . |
| 1557707_a | 1.76E-04 | 3.91E-05 |              |           | . |
| 1557710_a | 0.00841  | 0.004285 |              |           | . |
| 1557712_x | 5.72E-06 | 4.87E-07 |              |           | . |
| 1557713_a | 0.027525 | 0.017163 |              |           | . |
| 1557714_a | 0.002362 | 9.43E-04 | CTBP1        | 1487      | . |
| 1557718_a | 8.22E-05 | 1.51E-05 | PPP2R5C      | 5527      | . |
| 1557719_a | 0.001236 | 4.32E-04 | PIKFYVE      | 200576    | . |
| 1557723_a | 0.001112 | 3.80E-04 | LOC285847    | 285847    | . |
| 1557724_a | 0.004104 | 0.001827 | LOC285847    | 285847    | . |
| 1557727_a | 3.67E-05 | 5.38E-06 | LOC400960    | 400960    | . |
| 1557729_a | 0.018605 | 0.010869 | LOC100131848 | 100131848 | . |
| 1557731_a | 2.40E-04 | 5.76E-05 | LOC400620    | 400620    | . |
| 1557734_s | 7.45E-05 | 1.34E-05 | LOC100130548 | 100130548 | . |
| 1557737_s | 0.002304 | 9.16E-04 | NKTR         | 4820      | . |
| 1557738_a | 9.47E-04 | 3.13E-04 |              |           | . |
| 1557740_a | 3.93E-07 | 1.44E-08 |              |           | . |
| 1557749_a | 0.003188 | 0.001351 | EHBP1L1      | 254102    | . |
| 1557751_a | 1.22E-04 | 2.47E-05 |              |           | . |
| 1557755_a | 0.016261 | 0.00929  | C14orf145    | 145508    | . |
| 1557756_a | 4.69E-06 | 3.75E-07 | C14orf145    | 145508    | . |
| 1557757_a | 0.002407 | 9.65E-04 |              |           | . |
| 1557759_a | 0.004256 | 0.001908 | ATP5SL       | 55101     | . |
| 1557765_a | 0.002589 | 0.001053 | LOC643401    | 643401    | . |

|           |          |          |              |             |
|-----------|----------|----------|--------------|-------------|
| 1557768_a | 0.001291 | 4.55E-04 |              | .           |
| 1557769_a | 0.016735 | 0.009605 |              | .           |
| 1557771_a | 0.00657  | 0.003203 | FHAD1        | 114827 .    |
| 1557776_a | 2.14E-04 | 4.98E-05 |              | .           |
| 1557777_a | 0.004084 | 0.001816 | PDE6B        | 5158 .      |
| 1557780_a | 4.07E-06 | 3.13E-07 |              | .           |
| 1557783_a | 1.26E-05 | 1.38E-06 | LOC100133991 | 100133991 . |
| 1557786_s | 0.017841 | 0.01035  | CHIC1        | 53344 .     |
| 1557788_a | 0.007875 | 0.003971 | C9orf130     | 100128782 . |
| 1557789_a | 0.002255 | 8.93E-04 |              | .           |
| 1557790_a | 2.11E-05 | 2.67E-06 | JRKL         | 8690 .      |
| 1557791_a | 0.002095 | 8.16E-04 | LOC100132051 | 100132051 . |
| 1557795_s | 4.68E-04 | 1.31E-04 | NTRK3        | 4916 .      |
| 1557799_a | 0.014628 | 0.008201 | C11orf31     | 280636 .    |
| 1557801_x | 8.10E-04 | 2.58E-04 | C11orf31     | 280636 .    |
| 1557803_a | 1.33E-04 | 2.77E-05 |              | .           |
| 1557804_a | 5.89E-05 | 9.84E-06 |              | .           |
| 1557805_a | 0.023193 | 0.014066 |              | .           |
| 1557807_a | 1.53E-04 | 3.29E-05 | LOC100132987 | 100132987 . |
| 1557809_a | 1.37E-08 | 1.57E-10 |              | .           |
| 1557810_a | 3.11E-08 | 4.82E-10 |              | .           |
| 1557812_a | 8.07E-08 | 1.73E-09 |              | .           |
| 1557816_a | 3.83E-05 | 5.68E-06 |              | .           |
| 1557817_a | 0.005782 | 0.002753 | LOC100131941 | 100131941 . |
| 1557818_x | 0.005181 | 0.002418 | LOC100131941 | 100131941 . |
| 1557820_a | 0.008833 | 0.004535 | AFG3L2       | 10939 .     |
| 1557827_a | 0.003877 | 0.001708 | C10orf103    | 414245 .    |
| 1557828_a | 0.001483 | 5.39E-04 | C5orf28      | 64417 .     |
| 1557830_a | 0.001204 | 4.19E-04 |              | .           |
| 1557836_a | 0.001619 | 5.98E-04 | ELMOD2       | 255520 .    |
| 1557840_a | 0.023237 | 0.014099 | LOC100130288 | 100130288 . |
| 1557841_a | 6.25E-04 | 1.87E-04 |              | .           |
| 1557848_a | 2.72E-04 | 6.71E-05 |              | .           |
| 1557852_a | 2.47E-04 | 5.95E-05 |              | .           |

|           |          |          |              |           |   |
|-----------|----------|----------|--------------|-----------|---|
| 1557866_a | 0.045864 | 0.031055 | C9orf117     | 286207    | . |
| 1557867_s | 6.22E-04 | 1.86E-04 | C9orf117     | 286207    | . |
| 1557873_a | 0.020296 | 0.012031 |              |           | . |
| 1557875_a | 0.005406 | 0.002541 |              |           | . |
| 1557876_a | 0.025199 | 0.015504 | LOC340094    | 340094    | . |
| 1557879_a | 0.001985 | 7.65E-04 | LOC100129175 | 100129175 | . |
| 1557885_a | 0.009147 | 0.004726 |              |           | . |
| 1557886_a | 0.033457 | 0.021544 | CCDC46       | 201134    | . |
| 1557888_a | 0.009105 | 0.004698 | ZNF787       | 126208    | . |
| 1557889_a | 3.12E-07 | 1.07E-08 |              |           | . |
| 1557892_a | 3.97E-06 | 3.03E-07 | LOC100144597 | 100144597 | . |
| 1557895_a | 6.30E-09 | 5.72E-11 | FLJ35934     | 400579    | . |
| 1557897_a | 3.68E-05 | 5.38E-06 |              |           | . |
| 1557900_a | 0.038085 | 0.025025 | SIM2         | 6493      | . |
| 1557905_s | 0.008349 | 0.004248 | CD44         | 960       | . |
| 1557906_a | 0.005559 | 0.002629 | MUC12        | 10071     | . |
| 1557907_x | 0.043022 | 0.028813 | MUC12        | 10071     | . |
| 1557915_s | 0.034002 | 0.021939 | GSTO1        | 9446      | . |
| 1557918_s | 2.61E-06 | 1.75E-07 | SLC16A1      | 6566      | . |
| 1557919_a | 5.26E-06 | 4.34E-07 | LOC648232    | 648232    | . |
| 1557924_s | 0.010312 | 0.005439 | ALPL         | 249       | . |
| 1557938_s | 1.25E-05 | 1.37E-06 | PTRF         | 284119    | . |
| 1557943_a | 0.010415 | 0.0055   | CNP          | 1267      | . |
| 1557944_s | 1.07E-06 | 5.36E-08 | CTNND1       | 1500      | . |
| 1557945_a | 2.21E-04 | 5.20E-05 | TCTE3        | 6991      | . |
| 1557948_a | 0.037734 | 0.024759 | PHLDB3       | 653583    | . |
| 1557950_a | 6.14E-04 | 1.83E-04 | SDCCAG1      | 9147      | . |
| 1557953_a | 1.54E-07 | 4.09E-09 | ZKSCAN1      | 7586      | . |
| 1557954_a | 1.48E-08 | 1.74E-10 | CXorf15      | 55787     | . |
| 1557965_a | 0.021381 | 0.012801 | MTERFD2      | 130916    | . |
| 1557966_x | 0.012244 | 0.006657 | MTERFD2      | 130916    | . |
| 1557970_s | 0.001736 | 6.50E-04 | RPS6KA2      | 6196      | . |
| 1557985_s | 1.84E-04 | 4.13E-05 | CEP78        | 84131     | . |
| 1557986_s | 0.019202 | 0.011273 | SMCR8        | 140775    | . |

|           |          |          |                          |        |   |
|-----------|----------|----------|--------------------------|--------|---|
| 1557987_a | 2.56E-04 | 6.25E-05 | LOC641298                | 641298 | . |
| 1557993_a | 0.013376 | 0.007383 |                          |        | . |
| 1557994_a | 8.40E-05 | 1.55E-05 | TTN                      | 7273   | . |
| 1557996_a | 5.46E-06 | 4.59E-07 | LOC100132832100132832 // |        | . |
| 1558000_a | 0.005288 | 0.002475 | ARID5B                   | 84159  | . |
| 1558001_s | 0.032569 | 0.020872 | ARID5B                   | 84159  | . |
| 1558002_a | 2.46E-06 | 1.62E-07 | STRAP                    | 11171  | . |
| 1558007_s | 0.014466 | 0.00809  |                          |        | . |
| 1558010_s | 0.002723 | 0.001118 | SLC1A2                   | 6506   | . |
| 1558011_a | 9.43E-04 | 3.11E-04 |                          |        | . |
| 1558014_s | 4.56E-04 | 1.27E-04 | FAR1                     | 84188  | . |
| 1558015_s | 0.006407 | 0.00311  | ACTR2                    | 10097  | . |
| 1558017_s | 0.001343 | 4.78E-04 |                          |        | . |
| 1558019_a | 1.27E-05 | 1.39E-06 |                          |        | . |
| 1558021_a | 1.48E-08 | 1.74E-10 | RABEPK                   | 10244  | . |
| 1558027_s | 0.036413 | 0.023757 | PRKAB2                   | 5565   | . |
| 1558028_x | 0.033336 | 0.021447 | LOC647979                | 647979 | . |
| 1558044_s | 0.009671 | 0.005046 | EXOSC6                   | 118460 | . |
| 1558045_a | 0.002193 | 8.63E-04 | LOC441528                | 441528 | . |
| 1558048_x | 0.049809 | 0.034181 |                          |        | . |
| 1558050_a | 5.32E-04 | 1.54E-04 | EIF2B5                   | 8893   | . |
| 1558052_a | 0.004196 | 0.001876 | TMED4                    | 222068 | . |
| 1558053_s | 0.008945 | 0.004603 | TMED4                    | 222068 | . |
| 1558062_a | 0.001753 | 6.58E-04 | FBXO10                   | 26267  | . |
| 1558076_a | 0.006018 | 0.002888 | ANKRD32                  | 84250  | . |
| 1558078_a | 2.58E-05 | 3.44E-06 |                          |        | . |
| 1558080_s | 7.89E-04 | 2.50E-04 | DNAJC3                   | 5611   | . |
| 1558081_a | 5.84E-04 | 1.72E-04 | SNORA65                  | 26783  | . |
| 1558088_a | 7.68E-06 | 7.15E-07 | UBE2I                    | 7329   | . |
| 1558093_s | 0.036308 | 0.023678 | MATR3                    | 9782   | . |
| 1558094_s | 2.24E-04 | 5.27E-05 | C3orf19                  | 51244  | . |
| 1558097_a | 7.62E-06 | 7.08E-07 | C22orf30                 | 253143 | . |
| 1558102_a | 0.030063 | 0.019027 |                          |        | . |
| 1558103_a | 0.003305 | 0.001411 |                          |        | . |



|           |          |          |                               |
|-----------|----------|----------|-------------------------------|
| 1558105_a | 0.024384 | 0.014913 | .                             |
| 1558107_a | 3.72E-04 | 9.87E-05 | LOC283788 283788 .            |
| 1558109_x | 4.35E-05 | 6.71E-06 | LOC283788 283788 .            |
| 1558111_a | 0.006437 | 0.003126 | MBNL1 4154 .                  |
| 1558113_a | 8.78E-06 | 8.52E-07 | FAM78B 149297 .               |
| 1558115_a | 0.022775 | 0.013774 | RECK 8434 .                   |
| 1558116_x | 0.002694 | 0.001104 | RECK 8434 .                   |
| 1558117_s | 5.04E-04 | 1.44E-04 | USP31 57478 .                 |
| 1558118_a | 0.003166 | 0.001339 | DGCR5 26220 .                 |
| 1558120_a | 0.020055 | 0.011865 | DDX3X 1654 .                  |
| 1558121_a | 0.001183 | 4.10E-04 | .                             |
| 1558124_a | 4.39E-06 | 3.46E-07 | NUDCD2 134492 .               |
| 1558135_a | 0.002125 | 8.31E-04 | TAF11 6882 .                  |
| 1558136_s | 7.19E-04 | 2.23E-04 | TAF11 6882 .                  |
| 1558139_a | 4.09E-05 | 6.17E-06 | FLJ39632 642477 .             |
| 1558140_a | 0.004745 | 0.002178 | PLXNA1 5361 .                 |
| 1558143_a | 1.77E-04 | 3.93E-05 | BCL2L11 10018 .               |
| 1558144_a | 0.016739 | 0.009607 | MEG3 55384 .                  |
| 1558148_x | 0.013486 | 0.007453 | FLJ90757 440465 .             |
| 1558152_a | 2.35E-04 | 5.61E-05 | LOC100131262 100131262 .      |
| 1558154_a | 0.00214  | 8.38E-04 | .                             |
| 1558160_a | 0.04039  | 0.02678  | C9orf93 203238 .              |
| 1558164_s | 6.85E-04 | 2.10E-04 | PEX13 5194 .                  |
| 1558167_a | 9.71E-04 | 3.22E-04 | MGC16275 85001 .              |
| 1558173_a | 0.023218 | 0.014083 | LUZP1 7798 .                  |
| 1558174_a | 4.11E-04 | 1.12E-04 | FAM43A 131583 .               |
| 1558176_a | 7.38E-04 | 2.30E-04 | IGL@ /// IGLV728775 /// 287 . |
| 1558177_a | 6.46E-04 | 1.96E-04 | C14orf83 161145 .             |
| 1558183_a | 0.003984 | 0.001763 | ZNF17 7565 .                  |
| 1558184_s | 0.027699 | 0.017294 | ZNF17 7565 .                  |
| 1558189_a | 2.20E-04 | 5.16E-05 | LOC284570 284570 .            |
| 1558193_a | 0.045273 | 0.030595 | .                             |
| 1558199_a | 0.017263 | 0.009956 | FN1 2335 .                    |
| 1558201_s | 5.51E-04 | 1.60E-04 | SLC4A1AP 22950 .              |

|           |          |          |             |             |
|-----------|----------|----------|-------------|-------------|
| 1558202_a | 0.008357 | 0.004252 | LOC145783   | 145783 .    |
| 1558211_s | 4.66E-04 | 1.30E-04 | SRC         | 6714 .      |
| 1558212_a | 0.001711 | 6.39E-04 | FLJ35024    | 401491 .    |
| 1558214_s | 4.15E-05 | 6.29E-06 | CTNNA1      | 1495 .      |
| 1558216_a | 8.36E-04 | 2.69E-04 | LOC84740    | 84740 .     |
| 1558217_a | 1.70E-05 | 2.03E-06 | SLFN13      | 146857 .    |
| 1558552_s | 3.10E-06 | 2.20E-07 | C3orf55     | 152078 .    |
| 1558230_a | 0.002027 | 7.84E-04 | SF3B2       | 10992 .     |
| 1558233_s | 0.043971 | 0.029578 | ATF1        | 466 .       |
| 1558236_a | 0.001462 | 5.29E-04 |             | .           |
| 1558237_x | 0.041508 | 0.027647 |             | .           |
| 1558250_s | 2.42E-04 | 5.80E-05 |             | .           |
| 1558251_a | 2.53E-12 | 1.76E-15 | ZNF587      | 84914 .     |
| 1558253_x | 1.36E-09 | 8.15E-12 | ZNF587      | 84914 .     |
| 1558275_a | 1.85E-04 | 4.15E-05 |             | .           |
| 1558279_a | 2.25E-05 | 2.90E-06 | KDSR        | 2531 .      |
| 1558280_s | 0.012033 | 0.006516 | ARHGAP29    | 9411 .      |
| 1558281_a | 0.001091 | 3.71E-04 | TMEM184A    | 202915 .    |
| 1558289_a | 0.048521 | 0.033144 | RFT1        | 91869 .     |
| 1558292_s | 0.002843 | 0.001176 | PIGW        | 284098 .    |
| 1558295_a | 0.023701 | 0.014432 | PPFIA2      | 8499 .      |
| 1558299_a | 0.018028 | 0.010478 |             | .           |
| 1558300_a | 1.25E-04 | 2.56E-05 | EFCAB5      | 374786 .    |
| 1558304_s | 1.83E-04 | 4.09E-05 | TSEN54      | 283989 .    |
| 1558306_a | 0.021431 | 0.012833 | THADA       | 63892 .     |
| 1558310_s | 0.005521 | 0.002608 | hCG_2039148 | 100132356 . |
| 1560292_a | 1.58E-04 | 3.42E-05 | TMCO4       | 255104 .    |
| 1558322_a | 5.04E-04 | 1.43E-04 | PAQR9       | 344838 .    |
| 1558324_a | 0.008682 | 0.004443 | TMEM72      | 643236 .    |
| 1558329_a | 0.020272 | 0.012014 | NFKBIL2     | 4796 .      |
| 1558330_x | 0.005016 | 0.002325 | NFKBIL2     | 4796 .      |
| 1558333_a | 0.003825 | 0.001681 | C22orf15    | 150248 .    |
| 1558334_a | 0.015467 | 0.008763 | C22orf15    | 150248 .    |
| 1558345_a | 0.005589 | 0.002645 | LOC439911   | 439911 .    |

|           |          |          |           |          |
|-----------|----------|----------|-----------|----------|
| 1558346_a | 0.001378 | 4.93E-04 | COX17     | 10063 .  |
| 1558348_a | 0.019088 | 0.011197 |           | .        |
| 1558368_s | 0.00327  | 0.001393 | C1orf187  | 374946 . |
| 1558369_a | 3.47E-06 | 2.55E-07 | MPHOSPH9  | 10198 .  |
| 1558381_a | 0.006863 | 0.003375 |           | .        |
| 1558385_a | 6.92E-05 | 1.21E-05 |           | .        |
| 1558390_a | 1.77E-05 | 2.15E-06 | ZNF599    | 148103 . |
| 1558393_a | 1.66E-07 | 4.49E-09 | KRT7      | 3855 .   |
| 1558400_x | 0.002308 | 9.18E-04 | ANKRD24   | 170961 . |
| 1558401_a | 0.043085 | 0.028869 |           | .        |
| 1558402_a | 0.004311 | 0.001939 |           | .        |
| 1558404_a | 0.002506 | 0.001013 | LOC644242 | 644242 . |
| 1558409_a | 3.60E-05 | 5.24E-06 |           | .        |
| 1558410_s | 1.62E-06 | 9.48E-08 |           | .        |
| 1558412_a | 5.64E-04 | 1.65E-04 | LOC113230 | 113230 . |
| 1558418_a | 2.74E-07 | 8.94E-09 |           | .        |
| 1558420_a | 7.80E-05 | 1.41E-05 | C14orf180 | 400258 . |
| 1558421_a | 2.32E-05 | 3.01E-06 | C14orf180 | 400258 . |
| 1558423_a | 0.048395 | 0.033042 | LOC349114 | 349114 . |
| 1558425_x | 1.53E-04 | 3.29E-05 | LOC349114 | 349114 . |
| 1558426_x | 2.22E-04 | 5.21E-05 | ORAI2     | 80228 .  |
| 1558428_a | 0.0179   | 0.010388 | ALS2CR11  | 151254 . |
| 1558430_a | 0.039399 | 0.026023 |           | .        |
| 1558431_a | 3.10E-06 | 2.20E-07 | FLJ36208  | 283948 . |
| 1558436_a | 0.045668 | 0.030906 |           | .        |
| 1558437_a | 0.022314 | 0.013457 | IGHE      | 3497 .   |
| 1558444_a | 0.024341 | 0.014882 |           | .        |
| 1558445_a | 0.04324  | 0.028998 |           | .        |
| 1558449_a | 3.93E-04 | 1.06E-04 |           | .        |
| 1558450_a | 0.014882 | 0.008374 | A2M       | 2 .      |
| 1558451_a | 6.42E-04 | 1.94E-04 | LOC285500 | 285500 . |
| 1558459_s | 0.00189  | 7.21E-04 | LOC401320 | 401320 . |
| 1558460_a | 0.043614 | 0.02929  | ABCC5     | 10057 .  |
| 1558463_s | 0.003976 | 0.001759 | LOC650392 | 650392 . |

|           |          |          |                             |             |
|-----------|----------|----------|-----------------------------|-------------|
| 1558466_a | 2.76E-04 | 6.85E-05 |                             | .           |
| 1558467_a | 0.002682 | 0.001098 |                             | .           |
| 1558470_a | 1.25E-06 | 6.69E-08 | VWA3B                       | 200403 .    |
| 1558473_a | 0.015875 | 0.009033 |                             | .           |
| 1558474_a | 6.04E-04 | 1.79E-04 |                             | .           |
| 1558475_a | 0.043209 | 0.028971 |                             | .           |
| 1558483_a | 0.009643 | 0.005028 | LRRC27                      | 80313 .     |
| 1558484_s | 0.003721 | 0.001626 | LRRC27                      | 80313 .     |
| 1558487_a | 3.12E-07 | 1.07E-08 | TMED4                       | 222068 .    |
| 1558497_a | 0.024968 | 0.015335 |                             | .           |
| 1558504_a | 0.024527 | 0.015015 |                             | .           |
| 1558507_a | 0.005132 | 0.002391 | C1orf53                     | 388722 .    |
| 1558508_a | 1.82E-07 | 5.09E-09 | C1orf53                     | 388722 .    |
| 1558511_s | 0.005895 | 0.002818 | FAM62B                      | 57488 .     |
| 1558512_a | 0.040867 | 0.027152 |                             | .           |
| 1558515_a | 3.30E-04 | 8.56E-05 |                             | .           |
| 1558517_s | 3.57E-04 | 9.40E-05 | LRRC8C                      | 84230 .     |
| 1558523_a | 0.034383 | 0.02222  | FAM184A                     | 79632 .     |
| 1558525_a | 0.007277 | 0.003618 |                             | .           |
| 1558527_a | 0.001072 | 3.63E-04 | LOC100132707                | 100132707 . |
| 1558529_s | 0.044167 | 0.02973  |                             | .           |
| 1558530_a | 0.00421  | 0.001885 | LRTM2                       | 654429 .    |
| 1558533_a | 0.002869 | 0.001189 | KRBA2                       | 124751 .    |
| 1558534_a | 0.00621  | 0.002995 | LOC440354 /// 440354 /// 64 | .           |
| 1558540_s | 0.003106 | 0.001309 | SLC2A11                     | 66035 .     |
| 1558546_a | 0.001113 | 3.80E-04 | DNASE1                      | 1773 .      |
| 1558553_a | 6.61E-04 | 2.01E-04 |                             | .           |
| 1558556_a | 0.021679 | 0.013011 | CAMK1                       | 8536 .      |
| 1558561_a | 5.62E-06 | 4.76E-07 | HM13                        | 81502 .     |
| 1558573_a | 0.014362 | 0.008024 | MCTS1                       | 28985 .     |
| 1558574_a | 0.026632 | 0.016517 |                             | .           |
| 1558577_a | 0.043617 | 0.029294 | LOC148709                   | 148709 .    |
| 1558584_a | 1.81E-05 | 2.20E-06 | UBL4B                       | 164153 .    |
| 1558588_a | 0.019166 | 0.011248 |                             | .           |

|           |          |          |                             |        |
|-----------|----------|----------|-----------------------------|--------|
| 1558590_a | 1.05E-04 | 2.04E-05 | LOC731602 /// 64745 /// 731 |        |
| 1558592_a | 3.04E-04 | 7.72E-05 |                             |        |
| 1558594_a | 3.27E-04 | 8.47E-05 | C14orf176                   | 643382 |
| 1558599_a | 0.005498 | 0.002593 |                             |        |
| 1558600_a | 6.29E-04 | 1.89E-04 |                             |        |
| 1558602_a | 0.044933 | 0.03033  | LOC285194                   | 285194 |
| 1558605_a | 0.019255 | 0.011312 |                             |        |
| 1558607_a | 0.006207 | 0.002994 | PAPPA                       | 5069   |
| 1558608_a | 2.10E-04 | 4.86E-05 | PAPPA                       | 5069   |
| 1558613_a | 2.18E-06 | 1.40E-07 |                             |        |
| 1558619_a | 1.18E-04 | 2.38E-05 | SNORA43                     | 677824 |
| 1558620_a | 4.49E-05 | 6.98E-06 | ZNF621                      | 285268 |
| 1558621_a | 0.049812 | 0.034184 | CABLES1                     | 91768  |
| 1558622_a | 0.007475 | 0.003735 | ZNF548                      | 147694 |
| 1558624_a | 0.009727 | 0.005081 |                             |        |
| 1558631_a | 0.003982 | 0.001762 | PPARA                       | 5465   |
| 1558636_s | 1.46E-08 | 1.70E-10 | ADAMTS5                     | 11096  |
| 1558641_a | 3.30E-09 | 2.43E-11 | LOC202051                   | 202051 |
| 1558643_s | 2.21E-05 | 2.84E-06 | EDIL3                       | 10085  |
| 1558647_a | 1.65E-07 | 4.47E-09 | SH3D19                      | 152503 |
| 1558654_a | 0.002767 | 0.00114  | PPM1H                       | 57460  |
| 1558662_s | 0.02128  | 0.012733 | BANK1                       | 55024  |
| 1558666_a | 1.68E-04 | 3.69E-05 |                             |        |
| 1558680_s | 0.002427 | 9.75E-04 | PDE1A                       | 5136   |
| 1558682_a | 0.022462 | 0.013556 | HMGA2                       | 8091   |
| 1558685_a | 0.004759 | 0.002186 | LOC158960                   | 158960 |
| 1558686_a | 0.007587 | 0.0038   |                             |        |
| 1558688_a | 7.05E-09 | 6.66E-11 | LOC441461                   | 441461 |
| 1558692_a | 0.001432 | 5.16E-04 | C1orf85                     | 112770 |
| 1558693_s | 0.01598  | 0.009106 | C1orf85                     | 112770 |
| 1558695_a | 3.12E-04 | 7.98E-05 |                             |        |
| 1558697_a | 5.98E-04 | 1.78E-04 | KIAA0430                    | 9665   |
| 1558698_a | 0.011854 | 0.006401 | ZNF264                      | 9422   |
| 1558700_s | 0.049939 | 0.034279 | ZNF260                      | 339324 |

|           |          |          |                             |        |   |
|-----------|----------|----------|-----------------------------|--------|---|
| 1564333_a | 1.37E-04 | 2.87E-05 | PSAPL1                      | 768239 | . |
| 1558702_a | 0.035633 | 0.023167 | TEX10                       | 54881  | . |
| 1558705_a | 0.003684 | 0.001607 | ATOH8                       | 84913  | . |
| 1558706_a | 0.010582 | 0.005606 | ATOH8                       | 84913  | . |
| 1558710_a | 0.004041 | 0.001794 |                             |        | . |
| 1558714_a | 0.018305 | 0.010665 |                             |        | . |
| 1558719_s | 0.003889 | 0.001714 |                             |        | . |
| 1558720_a | 3.34E-04 | 8.69E-05 |                             |        | . |
| 1558722_a | 1.07E-04 | 2.09E-05 | LOC441383 /// 286101 /// 4. |        | . |
| 1558723_a | 0.023703 | 0.014434 | LOC284014                   | 284014 | . |
| 1558732_a | 0.003712 | 0.001622 | MAP4K4                      | 9448   | . |
| 1558733_a | 2.89E-05 | 3.98E-06 | ZBTB38                      | 253461 | . |
| 1558738_a | 0.019913 | 0.011764 | NOL3                        | 8996   | . |
| 1558739_a | 4.35E-05 | 6.71E-06 |                             |        | . |
| 1558740_s | 0.001359 | 4.85E-04 |                             |        | . |
| 1558742_a | 2.79E-05 | 3.80E-06 |                             |        | . |
| 1558748_a | 0.027283 | 0.016992 |                             |        | . |
| 1558750_a | 2.06E-07 | 5.96E-09 |                             |        | . |
| 1558758_s | 9.53E-04 | 3.15E-04 |                             |        | . |
| 1558759_s | 2.69E-04 | 6.63E-05 | CLASP2                      | 23122  | . |
| 1558760_a | 0.00688  | 0.003385 |                             |        | . |
| 1558761_a | 3.92E-04 | 1.06E-04 | FAM120AOS                   | 158293 | . |
| 1558766_a | 0.001478 | 5.36E-04 |                             |        | . |
| 1558769_s | 0.004404 | 0.00199  | DNAH1                       | 25981  | . |
| 1558773_s | 0.049944 | 0.034288 | RANBP10                     | 57610  | . |
| 1558775_s | 3.29E-04 | 8.54E-05 | NSMAF                       | 8439   | . |
| 1558777_a | 0.023642 | 0.01439  | MKL2                        | 57496  | . |
| 1558778_s | 0.010739 | 0.005705 | MKL2                        | 57496  | . |
| 1558783_a | 7.10E-07 | 3.14E-08 |                             |        | . |
| 1558784_a | 2.46E-04 | 5.93E-05 |                             |        | . |
| 1558786_a | 0.020972 | 0.012518 |                             |        | . |
| 1558787_a | 0.002917 | 0.001213 |                             |        | . |
| 1558790_s | 0.027666 | 0.01727  | C8orf77                     | 286103 | . |
| 1558792_x | 4.38E-05 | 6.77E-06 | AP2A1                       | 160    | . |

|           |          |          |              |           |   |
|-----------|----------|----------|--------------|-----------|---|
| 1558794_a | 4.33E-04 | 1.19E-04 | LOC728190    | 728190    | . |
| 1558801_a | 1.58E-06 | 9.17E-08 |              |           | . |
| 1558802_a | 9.90E-04 | 3.30E-04 |              |           | . |
| 1558803_a | 2.54E-05 | 3.38E-06 |              |           | . |
| 1558814_s | 1.82E-06 | 1.11E-07 | TMED5        | 50999     | . |
| 1558816_a | 0.004886 | 0.002254 | ZNF664       | 144348    | . |
| 1558819_a | 0.003687 | 0.001608 | LOC100131819 | 100131819 | . |
| 1558820_a | 0.017332 | 0.010003 | C18orf34     | 374864    | . |
| 1558822_a | 0.005759 | 0.002739 |              |           | . |
| 1558825_s | 0.00226  | 8.95E-04 | NBPF3        | 84224     | . |
| 1558828_s | 4.97E-04 | 1.41E-04 | LOC728264    | 728264    | . |
| 1558830_a | 0.003613 | 0.00157  |              |           | . |
| 1558831_x | 5.15E-05 | 8.33E-06 |              |           | . |
| 1558832_a | 0.00267  | 0.001092 | FLJ32224     | 440584    | . |
| 1558834_s | 0.037242 | 0.024394 | C1orf62      | 254268    | . |
| 1558839_a | 0.010827 | 0.005762 | MAPKBP1      | 23005     | . |
| 1558845_a | 0.038651 | 0.025455 |              |           | . |
| 1558847_a | 0.001999 | 7.71E-04 |              |           | . |
| 1558848_a | 3.66E-04 | 9.68E-05 | NUDT22       | 84304     | . |
| 1558849_a | 0.003621 | 0.001574 | LOC284276    | 284276    | . |
| 1558854_a | 3.08E-05 | 4.32E-06 |              |           | . |
| 1558855_a | 0.003316 | 0.001417 | FARP2        | 9855      | . |
| 1558856_a | 0.007655 | 0.00384  | DMRTA2       | 63950     | . |
| 1558859_a | 0.042751 | 0.028608 | LOC222159    | 222159    | . |
| 1558862_a | 0.029529 | 0.018633 | NBPF5        | 284610    | . |
| 1558867_a | 0.010696 | 0.005678 | DSE          | 29940     | . |
| 1558868_a | 0.004375 | 0.001975 | DSE          | 29940     | . |
| 1558871_a | 0.026596 | 0.016494 |              |           | . |
| 1558874_a | 0.012661 | 0.006927 |              |           | . |
| 1558875_a | 0.017167 | 0.00989  | SREBF1       | 6720      | . |
| 1558876_a | 2.37E-05 | 3.09E-06 |              |           | . |
| 1558877_a | 2.45E-05 | 3.24E-06 |              |           | . |
| 1558881_a | 0.029746 | 0.018797 | LOC145820    | 145820    | . |
| 1558882_a | 1.19E-05 | 1.27E-06 | LOC401233    | 401233    | . |

|           |          |          |                             |          |
|-----------|----------|----------|-----------------------------|----------|
| 1558885_a | 0.012478 | 0.006809 |                             | .        |
| 1558887_a | 0.048375 | 0.033027 | ZNF321                      | 399669 . |
| 1558888_x | 0.030204 | 0.019132 | ZNF321                      | 399669 . |
| 1558890_a | 1.03E-04 | 2.01E-05 |                             | .        |
| 1558896_a | 0.006536 | 0.003183 | C1orf69                     | 200205 . |
| 1558897_a | 1.37E-05 | 1.54E-06 | PLK5P                       | 126520 . |
| 1558899_s | 0.003766 | 0.001651 | FLJ35946                    | 503569 . |
| 1558903_a | 0.041948 | 0.027986 | LOC284260                   | 284260 . |
| 1558914_a | 0.008314 | 0.004227 | PPPDE1                      | 51029 .  |
| 1558915_a | 0.028248 | 0.01769  | PEX14                       | 5195 .   |
| 1558919_a | 2.55E-04 | 6.22E-05 |                             | .        |
| 1558922_a | 4.31E-06 | 3.37E-07 |                             | .        |
| 1558931_a | 0.013586 | 0.007518 | LRRC16A                     | 55604 .  |
| 1558934_a | 0.016605 | 0.009517 | GTF2H5                      | 404672 . |
| 1558938_a | 2.19E-04 | 5.13E-05 |                             | .        |
| 1558942_a | 6.67E-04 | 2.03E-04 | ZNF765                      | 91661 .  |
| 1558943_x | 0.003823 | 0.001679 | ZNF765                      | 91661 .  |
| 1558944_a | 0.030684 | 0.019483 | CACNA1A                     | 773 .    |
| 1558947_a | 5.41E-06 | 4.52E-07 |                             | .        |
| 1558948_a | 0.041227 | 0.027428 |                             | .        |
| 1558949_a | 1.99E-04 | 4.56E-05 | TNRC18 /// TN 27320 /// 846 | .        |
| 1558950_a | 0.015736 | 0.008939 |                             | .        |
| 1558953_s | 3.93E-06 | 2.99E-07 | CEP164                      | 22897 .  |
| 1558954_a | 0.004409 | 0.001993 | SNORA78                     | 677844 . |
| 1558956_s | 0.00828  | 0.004207 | IFT80                       | 57560 .  |
| 1558959_a | 0.004322 | 0.001945 | FAM126B                     | 285172 . |
| 1558960_a | 6.46E-04 | 1.95E-04 | MFGE8                       | 4240 .   |
| 1558963_a | 0.003735 | 0.001634 |                             | .        |
| 1558965_a | 8.30E-04 | 2.66E-04 | PHF21A                      | 51317 .  |
| 1558969_a | 0.00183  | 6.93E-04 | RPL32P3                     | 132241 . |
| 1558976_x | 0.003218 | 0.001366 | FAM100A                     | 124402 . |
| 1558983_a | 0.00303  | 0.00127  | LRRC41                      | 10489 .  |
| 1558984_a | 0.004546 | 0.002068 | MAP3K11                     | 4296 .   |
| 1559003_a | 0.049027 | 0.033546 | LOC126661                   | 126661 . |



|           |          |          |           |          |
|-----------|----------|----------|-----------|----------|
| 1559006_a | 3.12E-07 | 1.07E-08 |           | .        |
| 1559007_s | 0.001849 | 7.02E-04 |           | .        |
| 1559020_a | 0.001528 | 5.58E-04 |           | .        |
| 1559022_a | 0.00245  | 9.86E-04 | KIAA0494  | 9813 .   |
| 1559023_a | 0.003186 | 0.001349 | KIAA0494  | 9813 .   |
| 1559025_a | 3.48E-04 | 9.13E-05 | 9-Sep     | 10801 .  |
| 1559026_a | 0.046419 | 0.03149  |           | .        |
| 1559028_a | 0.027456 | 0.017113 | C21orf15  | 54094 .  |
| 1559029_a | 0.019007 | 0.011142 | LOC286154 | 286154 . |
| 1559033_a | 7.83E-05 | 1.42E-05 | LOC255167 | 255167 . |
| 1559037_a | 0.002667 | 0.00109  |           | .        |
| 1559038_a | 0.017222 | 0.009927 | 2-Sep     | 4735 .   |
| 1559039_a | 1.54E-08 | 1.84E-10 | DHX36     | 170506 . |
| 1559042_a | 4.30E-06 | 3.36E-07 | NDUFB6    | 4712 .   |
| 1559044_a | 7.25E-08 | 1.49E-09 | EXOSC1    | 51013 .  |
| 1559048_a | 3.35E-04 | 8.71E-05 |           | .        |
| 1559049_a | 0.036946 | 0.024161 |           | .        |
| 1559050_a | 3.35E-04 | 8.73E-05 | HCG27     | 253018 . |
| 1559051_s | 6.47E-04 | 1.96E-04 | C6orf150  | 115004 . |
| 1559053_a | 3.26E-06 | 2.35E-07 |           | .        |
| 1559054_a | 6.69E-04 | 2.04E-04 |           | .        |
| 1559057_a | 0.005788 | 0.002756 |           | .        |
| 1559059_s | 4.06E-07 | 1.51E-08 | ZNF611    | 81856 .  |
| 1559060_a | 1.79E-04 | 3.99E-05 | FNIP1     | 96459 .  |
| 1559061_a | 0.01592  | 0.009064 | LOC253962 | 253962 . |
| 1559062_a | 2.30E-07 | 7.05E-09 |           | .        |
| 1559064_a | 0.019231 | 0.011294 | NUP153    | 9972 .   |
| 1559066_a | 0.00163  | 6.03E-04 |           | .        |
| 1559067_a | 0.048122 | 0.032825 |           | .        |
| 1560713_a | 2.58E-05 | 3.45E-06 | ELFN2     | 114794 . |
| 1559072_a | 6.67E-07 | 2.89E-08 | ELFN2     | 114794 . |
| 1559078_a | 1.66E-04 | 3.64E-05 | BCL11A    | 53335 .  |
| 1559083_x | 7.70E-05 | 1.39E-05 | LOC284600 | 284600 . |
| 1559086_a | 0.003366 | 0.001443 |           | .        |

|           |          |          |              |           |   |
|-----------|----------|----------|--------------|-----------|---|
| 1559091_s | 0.026585 | 0.016483 | FGD2         | 221472    | . |
| 1559092_a | 9.69E-05 | 1.85E-05 | SLC9A5       | 6553      | . |
| 1559094_a | 1.07E-04 | 2.11E-05 | FBXO9        | 26268     | . |
| 1559096_x | 6.93E-06 | 6.23E-07 | FBXO9        | 26268     | . |
| 1559101_a | 3.07E-05 | 4.30E-06 | FYN          | 2534      | . |
| 1559103_s | 0.043157 | 0.028928 |              |           | . |
| 1559108_a | 0.010465 | 0.005532 |              |           | . |
| 1559109_a | 0.015898 | 0.009049 |              |           | . |
| 1559110_a | 0.029937 | 0.018933 |              |           | . |
| 1559114_a | 3.21E-04 | 8.29E-05 | CXCR7        | 57007     | . |
| 1559119_a | 5.84E-04 | 1.72E-04 |              |           | . |
| 1559121_s | 2.57E-04 | 6.27E-05 | ARIH2        | 10425     | . |
| 1559127_x | 0.047979 | 0.032713 | RRP12        | 23223     | . |
| 1559128_a | 4.25E-06 | 3.31E-07 | HSDL2        | 84263     | . |
| 1559129_a | 0.002965 | 0.001236 | LOC158257    | 158257    | . |
| 1559132_a | 1.48E-04 | 3.15E-05 | TMEM80       | 283232    | . |
| 1559134_a | 0.010277 | 0.005417 |              |           | . |
| 1559136_s | 4.93E-04 | 1.40E-04 | LOC100272228 | 100272228 | . |
| 1559139_a | 4.77E-05 | 7.54E-06 | NOC2L        | 26155     | . |
| 1559141_s | 0.005219 | 0.002438 | FAM87B       | 400728    | . |
| 1559147_a | 0.018825 | 0.01102  |              |           | . |
| 1559149_a | 0.04236  | 0.02831  |              |           | . |
| 1559151_a | 8.04E-04 | 2.56E-04 |              |           | . |
| 1559154_a | 0.004526 | 0.002057 |              |           | . |
| 1559156_a | 0.001084 | 3.68E-04 |              |           | . |
| 1559166_a | 0.001012 | 3.39E-04 |              |           | . |
| 1559167_x | 1.95E-08 | 2.53E-10 | MPV17L       | 255027    | . |
| 1559170_a | 2.27E-04 | 5.35E-05 |              |           | . |
| 1559174_a | 8.40E-05 | 1.55E-05 | RAB6A        | 5870      | . |
| 1566229_a | 0.003655 | 0.001593 |              |           | . |
| 1559188_x | 0.039254 | 0.025914 |              |           | . |
| 1559195_a | 0.015435 | 0.008741 |              |           | . |
| 1562738_a | 0.00945  | 0.00491  | LOC100130855 | 100130855 | . |
| 1559203_s | 0.001751 | 6.57E-04 | KRAS         | 3845      | . |

|           |          |          |                              |        |   |
|-----------|----------|----------|------------------------------|--------|---|
| 1559204_x | 0.004971 | 0.002299 | KRAS                         | 3845   | . |
| 1559205_s | 0.011291 | 0.006051 |                              |        | . |
| 1559208_a | 3.39E-04 | 8.85E-05 | ST7OT4                       | 338069 | . |
| 1559214_a | 0.030572 | 0.019401 |                              |        | . |
| 1559218_s | 6.06E-05 | 1.02E-05 | NFYC                         | 4802   | . |
| 1559221_a | 0.0088   | 0.004515 |                              |        | . |
| 1559224_a | 1.92E-05 | 2.37E-06 | LCE1E                        | 353135 | . |
| 1559226_x | 1.00E-05 | 1.02E-06 | LCE1E                        | 353135 | . |
| 1559227_s | 7.87E-05 | 1.43E-05 | VHL                          | 7428   | . |
| 1559228_a | 6.80E-05 | 1.18E-05 |                              |        | . |
| 1559232_a | 0.009338 | 0.004842 |                              |        | . |
| 1559235_a | 0.004751 | 0.002182 | SOX30                        | 11063  | . |
| 1559237_a | 0.003406 | 0.001463 |                              |        | . |
| 1559240_a | 0.012548 | 0.006855 |                              |        | . |
| 1559245_a | 4.35E-05 | 6.70E-06 |                              |        | . |
| 1559249_a | 0.001638 | 6.06E-04 | ATXN1                        | 6310   | . |
| 1559259_a | 8.32E-05 | 1.54E-05 |                              |        | . |
| 1559261_a | 0.026738 | 0.016603 | PKD1L2                       | 114780 | . |
| 1559263_s | 7.00E-04 | 2.16E-04 | PPIL4 /// ZC3H 340152 /// 8! |        | . |
| 1559265_a | 0.001478 | 5.36E-04 | C10orf140                    | 387640 | . |
| 1559266_s | 2.04E-04 | 4.69E-05 | C10orf140                    | 387640 | . |
| 1559268_a | 3.87E-04 | 1.04E-04 | ADAM23                       | 8745   | . |
| 1559272_a | 4.36E-06 | 3.42E-07 | EXOC3L                       | 283849 | . |
| 1559276_a | 0.009112 | 0.004702 | LOC728606                    | 728606 | . |
| 1559280_a | 5.01E-05 | 8.04E-06 |                              |        | . |
| 1559292_s | 0.005669 | 0.002688 | NCRNA00032                   | 158035 | . |
| 1559293_x | 6.39E-04 | 1.93E-04 | NCRNA00032                   | 158035 | . |
| 1559296_a | 3.73E-05 | 5.49E-06 | LOC730057                    | 730057 | . |
| 1559297_a | 0.036937 | 0.024154 | LOC730092                    | 730092 | . |
| 1559298_a | 1.97E-06 | 1.22E-07 | FLJ42289                     | 388182 | . |
| 1559302_a | 0.039186 | 0.025859 | KIAA1467                     | 57613  | . |
| 1559303_a | 0.006757 | 0.003313 |                              |        | . |
| 1559307_s | 0.002792 | 0.001153 | RBL1                         | 5933   | . |
| 1559309_a | 5.45E-04 | 1.58E-04 | MCFD2                        | 90411  | . |

|           |          |          |           |          |
|-----------|----------|----------|-----------|----------|
| 1559311_a | 0.001311 | 4.64E-04 | FLJ40292  | 643210 . |
| 1559322_a | 1.28E-04 | 2.63E-05 | LOC727916 | 727916 . |
| 1559324_a | 3.26E-04 | 8.42E-05 | LOC220594 | 220594 . |
| 1559326_a | 0.004567 | 0.00208  | DIO3OS    | 64150 .  |
| 1562821_a | 0.001247 | 4.37E-04 |           | .        |
| 1559332_a | 0.028426 | 0.017813 |           | .        |
| 1559344_a | 0.008999 | 0.004634 |           | .        |
| 1559350_a | 1.02E-04 | 1.97E-05 |           | .        |
| 1559351_a | 5.68E-04 | 1.66E-04 |           | .        |
| 1559354_a | 5.76E-05 | 9.58E-06 |           | .        |
| 1559360_a | 3.70E-05 | 5.42E-06 |           | .        |
| 1559361_a | 0.006657 | 0.003254 | MACC1     | 346389 . |
| 1559362_a | 0.001578 | 5.80E-04 |           | .        |
| 1559375_s | 0.00598  | 0.002866 |           | .        |
| 1559382_a | 0.04647  | 0.031531 | C19orf42  | 79086 .  |
| 1559384_a | 0.028168 | 0.017631 |           | .        |
| 1559388_a | 0.002599 | 0.001058 | LYNX1     | 66004 .  |
| 1559391_s | 1.15E-05 | 1.22E-06 |           | .        |
| 1559392_s | 0.005079 | 0.002362 | SYT7      | 9066 .   |
| 1559393_a | 1.51E-05 | 1.75E-06 | ALDH1L2   | 160428 . |
| 1559394_a | 0.019748 | 0.011652 |           | .        |
| 1559397_s | 0.030434 | 0.0193   | PRR14     | 78994 .  |
| 1559399_s | 4.28E-04 | 1.17E-04 | ZCCHC10   | 54819 .  |
| 1559400_s | 0.031892 | 0.020367 | PAPPA     | 5069 .   |
| 1559401_a | 4.48E-05 | 6.97E-06 |           | .        |
| 1559404_a | 6.40E-04 | 1.93E-04 |           | .        |
| 1559405_a | 0.002268 | 8.99E-04 | TRPV6     | 55503 .  |
| 1559406_a | 0.020852 | 0.012435 | ANKRD18A  | 253650 . |
| 1559409_a | 4.07E-04 | 1.11E-04 | CC2D2A    | 57545 .  |
| 1559410_a | 1.11E-06 | 5.66E-08 |           | .        |
| 1559419_a | 0.001032 | 3.47E-04 | CACNB2    | 783 .    |
| 1559420_x | 1.93E-04 | 4.38E-05 | CACNB2    | 783 .    |
| 1559426_a | 0.015217 | 0.008593 |           | .        |
| 1559429_a | 0.004711 | 0.002159 | C3orf43   | 255798 . |

|           |          |          |                    |
|-----------|----------|----------|--------------------|
| 1559436_x | 5.69E-07 | 2.34E-08 | .                  |
| 1559437_a | 2.36E-04 | 5.64E-05 | .                  |
| 1559438_a | 0.044102 | 0.029677 | C21orf58 54058 .   |
| 1559439_s | 0.010211 | 0.005375 | C21orf58 54058 .   |
| 1559444_a | 0.015158 | 0.008553 | .                  |
| 1559449_a | 0.005523 | 0.002609 | ZNF254 9534 .      |
| 1559455_a | 0.023929 | 0.014588 | .                  |
| 1559467_a | 9.66E-04 | 3.20E-04 | .                  |
| 1559469_s | 6.19E-04 | 1.85E-04 | SIPA1L2 57568 .    |
| 1559471_s | 1.41E-05 | 1.60E-06 | D21S2088E 266917 . |
| 1559477_s | 1.07E-04 | 2.11E-05 | MEIS1 4211 .       |
| 1559478_a | 0.017244 | 0.009942 | .                  |
| 1559479_a | 0.037667 | 0.024707 | PI4K2B 55300 .     |
| 1559481_a | 0.00245  | 9.86E-04 | CHIC1 53344 .      |
| 1559485_a | 4.77E-04 | 1.34E-04 | ATG2B 55102 .      |
| 1559488_a | 0.00634  | 0.00307  | LOC257358 257358 . |
| 1559489_a | 0.042018 | 0.028042 | LOC257358 257358 . |
| 1559490_a | 4.54E-04 | 1.26E-04 | LRCH3 84859 .      |
| 1559491_a | 8.42E-09 | 8.50E-11 | .                  |
| 1559494_a | 0.034444 | 0.022264 | .                  |
| 1559495_a | 0.007823 | 0.00394  | .                  |
| 1559501_a | 0.003136 | 0.001324 | .                  |
| 1559502_s | 8.66E-04 | 2.81E-04 | LRRRC25 126364 .   |
| 1559503_a | 0.002387 | 9.55E-04 | LOC441666 441666 . |
| 1559506_x | 0.003312 | 0.001415 | FLJ35409 400765 .  |
| 1559509_a | 1.31E-04 | 2.69E-05 | .                  |
| 1559510_a | 0.039743 | 0.026285 | BHLHB9 80823 .     |
| 1559513_a | 0.017484 | 0.010104 | FANCC 2176 .       |
| 1559515_a | 0.014367 | 0.008027 | .                  |
| 1559517_a | 2.57E-05 | 3.43E-06 | SPIRE1 56907 .     |
| 1559521_a | 0.007923 | 0.003999 | .                  |
| 1559522_a | 0.03602  | 0.023461 | .                  |
| 1559524_a | 0.030401 | 0.019276 | .                  |
| 1559526_a | 3.94E-04 | 1.06E-04 | .                  |

|           |          |          |              |           |   |
|-----------|----------|----------|--------------|-----------|---|
| 1559528_a | 8.19E-05 | 1.50E-05 | LOC100129917 | 100129917 | . |
| 1559529_a | 1.14E-04 | 2.27E-05 | PTK2         | 5747      | . |
| 1559530_a | 1.76E-06 | 1.07E-07 |              |           | . |
| 1559532_a | 0.004662 | 0.002132 | C3orf71      | 646450    | . |
| 1559533_a | 0.006007 | 0.002882 |              |           | . |
| 1559535_s | 0.012836 | 0.00704  |              |           | . |
| 1559537_a | 0.049155 | 0.033655 |              |           | . |
| 1559538_a | 0.01803  | 0.010479 |              |           | . |
| 1559540_a | 9.28E-04 | 3.05E-04 |              |           | . |
| 1559544_s | 0.029688 | 0.018748 |              |           | . |
| 1559545_a | 0.003897 | 0.001718 | SNRPN        | 6638      | . |
| 1559548_a | 1.04E-08 | 1.12E-10 | ACVR2B       | 93        | . |
| 1559550_s | 0.002896 | 0.001202 |              |           | . |
| 1559551_a | 0.023353 | 0.014181 |              |           | . |
| 1559567_a | 0.028603 | 0.017947 |              |           | . |
| 1559568_a | 0.014818 | 0.00833  |              |           | . |
| 1559571_a | 1.21E-04 | 2.45E-05 | ATP13A4      | 84239     | . |
| 1559576_a | 5.88E-04 | 1.74E-04 | WDR78        | 79819     | . |
| 1559577_a | 0.009754 | 0.005098 | FCN2         | 2220      | . |
| 1559578_a | 0.027422 | 0.017086 |              |           | . |
| 1559579_a | 0.003504 | 0.001513 | LOC283688    | 283688    | . |
| 1559580_a | 0.006623 | 0.003234 | LRRC39       | 127495    | . |
| 1559582_a | 0.048982 | 0.033512 | RHOQ         | 23433     | . |
| 1559586_a | 0.003188 | 0.00135  | LOC728868    | 728868    | . |
| 1559589_a | 3.73E-06 | 2.79E-07 |              |           | . |
| 1559590_a | 0.04133  | 0.027506 | CHDH         | 55349     | . |
| 1559591_s | 0.015896 | 0.009048 | CHDH         | 55349     | . |
| 1559593_a | 3.45E-05 | 4.97E-06 | MED26        | 9441      | . |
| 1559598_a | 0.002259 | 8.95E-04 |              |           | . |
| 1559600_a | 0.003555 | 0.00154  |              |           | . |
| 1559601_a | 0.001709 | 6.38E-04 | KIAA2018     | 205717    | . |
| 1559603_a | 0.017382 | 0.010034 | GPR12        | 2835      | . |
| 1559605_a | 0.004873 | 0.002247 | LOC285043    | 285043    | . |
| 1559607_s | 0.028016 | 0.017524 | GBP6         | 163351    | . |

|           |          |          |           |        |   |
|-----------|----------|----------|-----------|--------|---|
| 1566722_a | 1.98E-05 | 2.46E-06 | SVEP1     | 79987  | . |
| 1559614_a | 0.039755 | 0.026295 | FLJ38773  | 284808 | . |
| 1559616_x | 0.002266 | 8.98E-04 | ZNF626    | 199777 | . |
| 1559617_a | 5.60E-04 | 1.64E-04 | LOC732087 | 732087 | . |
| 1559620_a | 7.01E-04 | 2.16E-04 |           |        | . |
| 1559627_a | 0.009885 | 0.005177 | LOC285941 | 285941 | . |
| 1559629_a | 0.033622 | 0.021667 |           |        | . |
| 1559630_a | 0.041394 | 0.027558 | DLGAP3    | 58512  | . |
| 1559633_a | 0.007504 | 0.003751 | CHRM3     | 1131   | . |
| 1559638_a | 0.001668 | 6.20E-04 | C1orf200  | 644997 | . |
| 1559641_a | 0.00702  | 0.003468 |           |        | . |
| 1559642_a | 2.44E-05 | 3.23E-06 |           |        | . |
| 1559645_a | 7.70E-04 | 2.43E-04 |           |        | . |
| 1559646_a | 0.01452  | 0.008126 |           |        | . |
| 1559651_a | 0.004657 | 0.00213  | CSNK1A1P  | 161635 | . |
| 1559652_a | 0.001206 | 4.20E-04 |           |        | . |
| 1559654_s | 0.01144  | 0.006145 |           |        | . |
| 1559658_a | 3.91E-04 | 1.05E-04 | C15orf29  | 79768  | . |
| 1559661_a | 0.005662 | 0.002684 | ODZ3      | 55714  | . |
| 1559663_a | 0.00487  | 0.002245 |           |        | . |
| 1559667_a | 4.47E-05 | 6.94E-06 |           |        | . |
| 1559674_a | 0.005992 | 0.002874 | ZNF333    | 84449  | . |
| 1559675_a | 3.02E-05 | 4.20E-06 |           |        | . |
| 1559679_a | 8.05E-04 | 2.57E-04 |           |        | . |
| 1559680_a | 0.002702 | 0.001108 | TTL       | 150465 | . |
| 1559682_a | 1.33E-06 | 7.27E-08 | TRIM16L   | 147166 | . |
| 1559691_a | 4.19E-05 | 6.38E-06 |           |        | . |
| 1559692_a | 1.34E-05 | 1.48E-06 |           |        | . |
| 1559695_a | 0.012135 | 0.006585 |           |        | . |
| 1559696_a | 0.006212 | 0.002997 |           |        | . |
| 1559697_a | 0.044799 | 0.030229 |           |        | . |
| 1559701_s | 0.018836 | 0.011027 | NDST2     | 8509   | . |
| 1559702_a | 0.002597 | 0.001057 |           |        | . |
| 1559705_s | 0.026724 | 0.016589 | PHKA2     | 5256   | . |

|           |          |          |                             |        |   |
|-----------|----------|----------|-----------------------------|--------|---|
| 1559706_a | 0.005461 | 0.002572 | RGNEF                       | 64283  | . |
| 1559712_a | 0.007752 | 0.003897 | LOC154822                   | 154822 | . |
| 1559713_a | 0.014422 | 0.008063 |                             |        | . |
| 1559714_a | 2.49E-05 | 3.30E-06 | RGR                         | 5995   | . |
| 1559715_a | 0.02305  | 0.013964 |                             |        | . |
| 1559722_a | 6.17E-05 | 1.04E-05 |                             |        | . |
| 1559723_s | 2.35E-04 | 5.59E-05 |                             |        | . |
| 1559724_a | 0.002175 | 8.55E-04 |                             |        | . |
| 1559725_a | 0.032895 | 0.021119 |                             |        | . |
| 1559731_x | 7.39E-05 | 1.32E-05 | MACROD1                     | 28992  | . |
| 1559737_a | 0.014622 | 0.008196 |                             |        | . |
| 1559739_a | 9.24E-10 | 4.81E-12 | CHPT1                       | 56994  | . |
| 1559747_a | 0.008451 | 0.004308 | SPG11                       | 80208  | . |
| 1559748_a | 0.003511 | 0.001517 | ADAMTSL3                    | 57188  | . |
| 1559753_a | 9.48E-05 | 1.80E-05 |                             |        | . |
| 1559755_a | 0.001499 | 5.46E-04 | C21orf49                    | 54067  | . |
| 1559759_a | 0.027195 | 0.016924 | KIFC3                       | 3801   | . |
| 1559765_a | 0.022387 | 0.013504 | LOC286254                   | 286254 | . |
| 1559776_a | 2.31E-04 | 5.49E-05 |                             |        | . |
| 1559777_a | 0.019483 | 0.011471 | LOC731424                   | 731424 | . |
| 1559780_a | 0.033697 | 0.021723 |                             |        | . |
| 1559785_a | 0.026684 | 0.01656  | TPPP2                       | 122664 | . |
| 1559795_a | 1.08E-04 | 2.13E-05 |                             |        | . |
| 1564697_a | 0.004378 | 0.001977 | hCG_1820661                 | 400752 | . |
| 1559806_a | 0.001795 | 6.77E-04 |                             |        | . |
| 1559807_a | 0.007445 | 0.003718 |                             |        | . |
| 1559808_a | 3.28E-05 | 4.68E-06 |                             |        | . |
| 1559812_a | 0.006755 | 0.003311 |                             |        | . |
| 1559814_a | 0.010741 | 0.005706 |                             |        | . |
| 1559820_a | 0.002506 | 0.001013 |                             |        | . |
| 1559821_a | 0.017406 | 0.010051 |                             |        | . |
| 1559822_s | 1.23E-06 | 6.54E-08 | LOC644215 /// 644215 /// 9: |        | . |
| 1559828_a | 1.43E-04 | 3.01E-05 | FAM170B                     | 170370 | . |
| 1559840_s | 4.30E-05 | 6.60E-06 | TBX18                       | 9096   | . |



|           |          |          |                           |             |
|-----------|----------|----------|---------------------------|-------------|
| 1559843_s | 0.042661 | 0.028538 |                           | .           |
| 1559848_a | 0.001434 | 5.17E-04 | NSUN4                     | 387338 .    |
| 1559856_s | 0.025665 | 0.015831 | MLL                       | 4297 .      |
| 1559864_a | 1.96E-04 | 4.48E-05 | LCN6                      | 158062 .    |
| 1559867_a | 1.26E-04 | 2.57E-05 |                           | .           |
| 1561114_a | 0.002435 | 9.79E-04 | DEPDC4                    | 120863 .    |
| 1559870_a | 5.31E-07 | 2.13E-08 | LOC100129129              | 100129129 . |
| 1559871_s | 0.026682 | 0.016557 | LOC100129129              | 100129129 . |
| 1559876_a | 0.004696 | 0.002152 |                           | .           |
| 1559877_a | 0.00417  | 0.001862 |                           | .           |
| 1559882_a | 1.07E-04 | 2.10E-05 | SAMHD1                    | 25939 .     |
| 1559883_s | 0.024047 | 0.01467  | SAMHD1                    | 25939 .     |
| 1559889_a | 0.023583 | 0.014347 |                           | .           |
| 1559893_a | 1.45E-04 | 3.08E-05 | CCDC75                    | 253635 .    |
| 1559902_a | 0.025861 | 0.015973 | MKL1                      | 57591 .     |
| 1559909_a | 0.0088   | 0.004515 | TIMM17B                   | 10245 .     |
| 1559915_a | 0.02457  | 0.015046 |                           | .           |
| 1559916_a | 4.37E-05 | 6.75E-06 |                           | .           |
| 1559920_a | 0.045448 | 0.03073  | CECR4                     | 100130717 . |
| 1559922_a | 0.027227 | 0.016947 |                           | .           |
| 1559924_a | 0.021033 | 0.01256  |                           | .           |
| 1559925_s | 0.020845 | 0.01243  |                           | .           |
| 1559926_a | 1.41E-06 | 7.87E-08 | LOC728353                 | 728353 .    |
| 1559927_a | 0.015389 | 0.008708 | LOC728353                 | 728353 .    |
| 1559932_a | 0.00844  | 0.004302 |                           | .           |
| 1559939_a | 0.001423 | 5.12E-04 | KRT18P33                  | 647162 .    |
| 1559942_a | 0.010547 | 0.005582 | MDFIC                     | 29969 .     |
| 1559945_a | 0.012903 | 0.007084 | RUVBL2                    | 10856 .     |
| 1559946_s | 1.16E-05 | 1.23E-06 | RUVBL2                    | 10856 .     |
| 1559948_a | 0.012053 | 0.006531 |                           | .           |
| 1559949_a | 0.021784 | 0.013087 |                           | .           |
| 1559950_a | 0.014165 | 0.007892 | FAM66C /// FA100132923 // | .           |
| 1559952_x | 0.014504 | 0.008116 | FAM66C /// FA100132923 // | .           |
| 1559953_a | 1.01E-04 | 1.95E-05 | DDX42                     | 11325 .     |

|           |          |          |              |           |   |
|-----------|----------|----------|--------------|-----------|---|
| 1559954_s | 1.41E-04 | 2.98E-05 | DDX42        | 11325     | . |
| 1559956_a | 0.005841 | 0.002788 | SYT7         | 9066      | . |
| 1559957_a | 0.014229 | 0.007934 | LOC642852    | 642852    | . |
| 1559960_x | 0.002115 | 8.26E-04 | LOC100130958 | 100130958 | . |
| 1559964_a | 1.97E-04 | 4.49E-05 | FLJ38717     | 401261    | . |
| 1559965_a | 3.23E-04 | 8.35E-05 | LOC100192378 | 100192378 | . |
| 1559966_a | 1.04E-04 | 2.02E-05 | LOC100192378 | 100192378 | . |
| 1559971_a | 0.005259 | 0.002459 | BSDC1        | 55108     | . |
| 1559976_a | 0.007921 | 0.003998 |              |           | . |
| 1559979_a | 0.017732 | 0.010274 | SYF2         | 25949     | . |
| 1559982_s | 5.54E-07 | 2.26E-08 | AKR1CL2      | 83592     | . |
| 1559987_a | 0.003055 | 0.001283 |              |           | . |
| 1559991_s | 1.98E-04 | 4.53E-05 |              |           | . |
| 1559993_a | 5.16E-09 | 4.48E-11 | SFXN3        | 81855     | . |
| 1559995_a | 4.10E-06 | 3.16E-07 | SAMD14       | 201191    | . |
| 1559997_x | 3.24E-04 | 8.36E-05 | SAMD14       | 201191    | . |
| 1560001_a | 3.89E-04 | 1.04E-04 | LOC100131581 | 100131581 | . |
| 1560010_a | 0.01597  | 0.009099 | FLJ32063     | 150538    | . |
| 1560011_a | 0.001568 | 5.75E-04 | PSCA         | 8000      | . |
| 1560012_a | 0.001227 | 4.29E-04 |              |           | . |
| 1560017_a | 0.002013 | 7.78E-04 | TMTC3        | 160418    | . |
| 1560019_a | 5.40E-04 | 1.56E-04 | MGC11082     | 84777     | . |
| 1560020_a | 1.54E-04 | 3.32E-05 | DNAJC13      | 23317     | . |
| 1560024_a | 0.0026   | 0.001059 |              |           | . |
| 1560026_a | 9.10E-05 | 1.71E-05 |              |           | . |
| 1560028_a | 0.002772 | 0.001142 | C11orf57     | 55216     | . |
| 1560029_a | 1.26E-05 | 1.39E-06 | C11orf57     | 55216     | . |
| 1560030_a | 0.003715 | 0.001623 | LOC283692    | 283692    | . |
| 1560031_a | 0.001997 | 7.70E-04 | FRMD4A       | 55691     | . |
| 1560035_a | 4.35E-04 | 1.20E-04 | C2orf85      | 285093    | . |
| 1560047_s | 2.67E-05 | 3.59E-06 |              |           | . |
| 1560049_a | 0.009173 | 0.004742 |              |           | . |
| 1560058_a | 0.011457 | 0.006156 | LOC399900    | 399900    | . |
| 1560059_a | 0.003384 | 0.001452 | VPS37C       | 55048     | . |

|           |          |          |              |           |   |
|-----------|----------|----------|--------------|-----------|---|
| 1560068_a | 0.00551  | 0.0026   | LOC729870    | 729870    | . |
| 1560071_a | 0.010787 | 0.005736 |              |           | . |
| 1560074_a | 9.24E-05 | 1.74E-05 | PRKCA        | 5578      | . |
| 1560078_a | 0.006659 | 0.003256 | LAMA3        | 3909      | . |
| 1560081_a | 3.47E-04 | 9.10E-05 |              |           | . |
| 1560082_a | 8.61E-06 | 8.30E-07 |              |           | . |
| 1560094_a | 0.007834 | 0.003947 |              |           | . |
| 1560108_a | 0.012607 | 0.006891 |              |           | . |
| 1560112_a | 7.30E-04 | 2.27E-04 | WDFY2        | 115825    | . |
| 1560115_a | 0.028025 | 0.01753  | KIAA1217     | 56243     | . |
| 1560117_a | 0.046758 | 0.031763 |              |           | . |
| 1560119_a | 0.041768 | 0.027844 | LOC389634    | 389634    | . |
| 1560129_a | 0.006659 | 0.003255 |              |           | . |
| 1560131_a | 0.026303 | 0.016279 |              |           | . |
| 1560133_a | 7.10E-04 | 2.19E-04 | GIGYF2       | 26058     | . |
| 1560136_a | 9.16E-04 | 3.00E-04 | ARL5C        | 390790    | . |
| 1560145_a | 1.07E-05 | 1.10E-06 | MKLN1        | 4289      | . |
| 1560147_a | 0.008421 | 0.004291 | LOC100131176 | 100131176 | . |
| 1560149_a | 0.014311 | 0.007991 | SLC29A2      | 3177      | . |
| 1560151_x | 1.81E-04 | 4.05E-05 | SLC29A2      | 3177      | . |
| 1560153_a | 0.027998 | 0.01751  | FRAS1        | 80144     | . |
| 1560161_a | 0.00211  | 8.24E-04 | CCNB2        | 9133      | . |
| 1560162_a | 0.005515 | 0.002604 | FLJ40606     | 643549    | . |
| 1560164_a | 0.012373 | 0.006738 |              |           | . |
| 1560171_a | 8.98E-04 | 2.93E-04 |              |           | . |
| 1560177_a | 0.003033 | 0.001272 | CCDC66       | 285331    | . |
| 1560178_a | 4.40E-04 | 1.22E-04 |              |           | . |
| 1560180_a | 0.011151 | 0.005964 | GALNT14      | 79623     | . |
| 1560198_a | 3.00E-05 | 4.17E-06 | C14orf70     | 283601    | . |
| 1560199_x | 2.08E-05 | 2.62E-06 | LOC728153    | 728153    | . |
| 1560201_a | 2.73E-04 | 6.76E-05 | ZNF713       | 349075    | . |
| 1560204_a | 0.019941 | 0.011784 | NT5DC4       | 284958    | . |
| 1560208_a | 0.044298 | 0.029834 |              |           | . |
| 1560214_a | 8.56E-05 | 1.59E-05 |              |           | . |

|           |          |          |                            |        |   |
|-----------|----------|----------|----------------------------|--------|---|
| 1560220_a | 0.004068 | 0.001809 | CBY1                       | 25776  | . |
| 1560222_a | 3.12E-06 | 2.22E-07 |                            |        | . |
| 1560224_a | 0.001289 | 4.54E-04 | AHCTF1                     | 25909  | . |
| 1560227_a | 6.90E-04 | 2.12E-04 | GDPD1                      | 284161 | . |
| 1560228_a | 4.77E-04 | 1.34E-04 | SNAI3                      | 333929 | . |
| 1560255_a | 0.004791 | 0.002204 | C10orf31                   | 414196 | . |
| 1560257_a | 0.020855 | 0.012438 |                            |        | . |
| 1560259_a | 0.002843 | 0.001176 |                            |        | . |
| 1560262_a | 7.21E-05 | 1.28E-05 |                            |        | . |
| 1560263_a | 0.042502 | 0.028418 |                            |        | . |
| 1560264_a | 2.36E-06 | 1.55E-07 |                            |        | . |
| 1560271_a | 6.79E-04 | 2.08E-04 |                            |        | . |
| 1560277_a | 1.15E-04 | 2.30E-05 | LOC283403                  | 283403 | . |
| 1560278_a | 0.001126 | 3.85E-04 | LOC221122                  | 221122 | . |
| 1560279_a | 0.014768 | 0.008295 | LOC221122                  | 221122 | . |
| 1560281_a | 1.89E-05 | 2.33E-06 | TMEM95                     | 339168 | . |
| 1560285_a | 0.007835 | 0.003948 |                            |        | . |
| 1560286_s | 0.010388 | 0.005484 |                            |        | . |
| 1560295_a | 0.031949 | 0.020409 | CYP19A1                    | 1588   | . |
| 1560296_a | 0.002161 | 8.48E-04 |                            |        | . |
| 1560297_a | 4.89E-06 | 3.95E-07 |                            |        | . |
| 1560300_a | 3.19E-07 | 1.10E-08 | DMRTC1 /// DI63947 /// 728 |        | . |
| 1560303_a | 0.02224  | 0.013408 | FKBP4                      | 2288   | . |
| 1560305_x | 0.031376 | 0.019987 | FKBP4                      | 2288   | . |
| 1560316_s | 0.005874 | 0.002806 | GLCCI1                     | 113263 | . |
| 1560317_s | 0.002954 | 0.001231 | HIP1                       | 3092   | . |
| 1560320_a | 0.013776 | 0.007642 | UNQ2963                    | 283314 | . |
| 1560327_a | 1.12E-04 | 2.21E-05 |                            |        | . |
| 1560339_s | 0.006516 | 0.003171 | NAP1L4                     | 4676   | . |
| 1560340_s | 2.11E-05 | 2.67E-06 | RP9P                       | 441212 | . |
| 1560342_a | 4.07E-04 | 1.11E-04 |                            |        | . |
| 1560346_a | 0.007245 | 0.003599 |                            |        | . |
| 1560349_a | 0.002272 | 9.01E-04 |                            |        | . |
| 1560354_a | 8.21E-04 | 2.63E-04 | CCDC127                    | 133957 | . |

|           |          |          |              |           |   |
|-----------|----------|----------|--------------|-----------|---|
| 1560369_a | 0.001477 | 5.36E-04 | ANKH         | 56172     | . |
| 1560370_x | 7.67E-04 | 2.42E-04 | ANKH         | 56172     | . |
| 1560371_a | 0.001053 | 3.55E-04 | LOC401321    | 401321    | . |
| 1560373_a | 0.002883 | 0.001196 |              |           | . |
| 1560384_a | 1.77E-05 | 2.13E-06 |              |           | . |
| 1560386_a | 0.001362 | 4.87E-04 |              |           | . |
| 1560390_s | 0.03558  | 0.023126 | LOC284440    | 284440    | . |
| 1560396_a | 0.003253 | 0.001384 | KLHL6        | 89857     | . |
| 1560399_a | 0.002964 | 0.001236 | OTUD7A       | 161725    | . |
| 1560402_a | 0.005941 | 0.002844 | GAS5         | 60674     | . |
| 1560407_a | 0.010508 | 0.005559 | MARK1        | 4139      | . |
| 1560410_a | 1.60E-05 | 1.87E-06 |              |           | . |
| 1560430_a | 0.001307 | 4.62E-04 | NKPD1        | 284353    | . |
| 1560439_a | 5.17E-07 | 2.05E-08 | LINGO3       | 645191    | . |
| 1560443_a | 0.001446 | 5.22E-04 |              |           | . |
| 1560445_x | 1.50E-05 | 1.73E-06 | ARHGEF1      | 9138      | . |
| 1560446_a | 0.024695 | 0.015132 | LOC100132815 | 100132815 | . |
| 1560451_a | 0.023474 | 0.014267 |              |           | . |
| 1560453_a | 0.022526 | 0.0136   |              |           | . |
| 1560472_a | 0.002636 | 0.001076 | LOC338588    | 338588    | . |
| 1560474_a | 4.40E-04 | 1.21E-04 |              |           | . |
| 1560480_a | 0.008965 | 0.004614 |              |           | . |
| 1560485_a | 0.003046 | 0.001278 | HIVEP1       | 3096      | . |
| 1560486_a | 0.004889 | 0.002256 | STXBP3       | 6814      | . |
| 1560488_a | 0.005954 | 0.002852 | LCNL1        | 401562    | . |
| 1560489_a | 0.008945 | 0.004602 |              |           | . |
| 1560490_a | 0.018187 | 0.010585 | FAT3         | 120114    | . |
| 1560491_a | 0.044733 | 0.030171 |              |           | . |
| 1560496_a | 1.98E-04 | 4.53E-05 |              |           | . |
| 1560499_a | 1.06E-05 | 1.10E-06 | C14orf64     | 388011    | . |
| 1560507_a | 0.012033 | 0.006517 | AWAT1        | 158833    | . |
| 1560509_a | 1.63E-06 | 9.55E-08 |              |           | . |
| 1560511_a | 0.001583 | 5.82E-04 |              |           | . |
| 1560512_a | 0.005604 | 0.002653 |              |           | . |

|           |          |          |              |           |   |
|-----------|----------|----------|--------------|-----------|---|
| 1560513_a | 3.58E-04 | 9.44E-05 | LOC400568    | 400568    | . |
| 1560514_a | 1.28E-04 | 2.61E-05 | LOC285205    | 285205    | . |
| 1560520_a | 0.00135  | 4.81E-04 | LOC401312    | 401312    | . |
| 1560528_a | 0.003611 | 0.001569 |              |           | . |
| 1560536_a | 0.012731 | 0.006972 |              |           | . |
| 1560537_a | 1.21E-04 | 2.45E-05 | LOC100129662 | 100129662 | . |
| 1560550_a | 0.009099 | 0.004694 |              |           | . |
| 1560553_a | 0.001145 | 3.94E-04 | TIAF1        | 9220      | . |
| 1560556_a | 8.32E-07 | 3.88E-08 | PLEKHA8      | 84725     | . |
| 1560558_a | 0.015742 | 0.008943 | C9orf80      | 58493     | . |
| 1560559_a | 0.020097 | 0.011895 |              |           | . |
| 1560560_a | 0.024568 | 0.015044 |              |           | . |
| 1560563_a | 0.002295 | 9.12E-04 |              |           | . |
| 1560573_a | 0.025709 | 0.015863 | LOC387895    | 387895    | . |
| 1560576_a | 0.03546  | 0.023027 |              |           | . |
| 1560577_a | 0.014294 | 0.007977 |              |           | . |
| 1560579_s | 0.02638  | 0.016338 |              |           | . |
| 1560582_a | 0.003551 | 0.001538 |              |           | . |
| 1560587_s | 0.001135 | 3.89E-04 | PRDX5        | 25824     | . |
| 1560589_a | 1.36E-04 | 2.85E-05 |              |           | . |
| 1560599_a | 0.006947 | 0.003425 | CCDC123      | 84902     | . |
| 1560604_a | 0.002021 | 7.82E-04 |              |           | . |
| 1560609_a | 1.95E-04 | 4.44E-05 | CRYZL1       | 9946      | . |
| 1560610_a | 0.014799 | 0.008318 |              |           | . |
| 1560614_a | 0.041769 | 0.027845 |              |           | . |
| 1560617_a | 0.004994 | 0.002312 |              |           | . |
| 1560618_a | 0.002805 | 0.001158 |              |           | . |
| 1560620_a | 0.023396 | 0.014213 | KCNK15       | 60598     | . |
| 1560621_a | 8.72E-04 | 2.83E-04 |              |           | . |
| 1560622_a | 0.006609 | 0.003225 |              |           | . |
| 1560625_s | 0.010343 | 0.005458 |              |           | . |
| 1560630_a | 0.009997 | 0.005245 |              |           | . |
| 1560631_a | 7.45E-06 | 6.86E-07 | CALCOCO2     | 10241     | . |
| 1560639_a | 1.16E-04 | 2.31E-05 |              |           | . |

|           |          |          |                             |
|-----------|----------|----------|-----------------------------|
| 1560642_a | 0.010155 | 0.00534  | .                           |
| 1560643_x | 0.001207 | 4.20E-04 | .                           |
| 1560648_s | 0.024637 | 0.015093 | TSPYL1 7259 .               |
| 1560652_a | 8.97E-12 | 1.13E-14 | .                           |
| 1560654_a | 0.03508  | 0.022739 | FLJ37201 283011 .           |
| 1560656_a | 0.003372 | 0.001446 | .                           |
| 1560659_a | 5.00E-04 | 1.42E-04 | .                           |
| 1560661_x | 0.034203 | 0.022086 | .                           |
| 1560662_s | 0.005679 | 0.002693 | WHAMML1 /// 339005 /// 4.   |
| 1560671_a | 0.002175 | 8.54E-04 | KIAA1652 85367 .            |
| 1560678_a | 0.031984 | 0.020439 | .                           |
| 1560686_a | 2.75E-05 | 3.74E-06 | ITGAD 3681 .                |
| 1560690_a | 0.009921 | 0.0052   | .                           |
| 1560692_a | 9.24E-05 | 1.75E-05 | LOC285878 285878 .          |
| 1560694_a | 9.75E-06 | 9.84E-07 | SFT2D1 113402 .             |
| 1560697_a | 0.004775 | 0.002194 | LOC283392 283392 .          |
| 1560698_a | 0.002446 | 9.84E-04 | LOC283392 283392 .          |
| 1560720_a | 0.020522 | 0.012191 | MKNK1 8569 .                |
| 1560724_a | 0.019182 | 0.01126  | .                           |
| 1560725_a | 0.001913 | 7.32E-04 | .                           |
| 1560727_a | 0.009312 | 0.004825 | HEATR4 399671 .             |
| 1560734_a | 9.24E-04 | 3.04E-04 | LOC727924 /// 283694 /// 7. |
| 1560738_a | 0.037091 | 0.024281 | .                           |
| 1560739_a | 0.00374  | 0.001636 | .                           |
| 1560741_a | 6.84E-04 | 2.10E-04 | SNRPN 6638 .                |
| 1560744_a | 0.001211 | 4.22E-04 | .                           |
| 1560746_a | 0.018373 | 0.010712 | C1orf118 374987 .           |
| 1560747_a | 2.12E-05 | 2.70E-06 | .                           |
| 1560750_a | 0.00581  | 0.00277  | LOC151121 151121 .          |
| 1560755_a | 0.035095 | 0.022754 | .                           |
| 1560757_a | 0.045833 | 0.031031 | TOP1MT 116447 .             |
| 1560767_a | 2.99E-05 | 4.15E-06 | HCG22 285834 .              |
| 1560772_a | 0.006201 | 0.00299  | .                           |
| 1560774_a | 0.001106 | 3.77E-04 | .                           |

|           |          |          |           |          |
|-----------|----------|----------|-----------|----------|
| 1560775_a | 1.63E-05 | 1.92E-06 |           | .        |
| 1560776_a | 0.003582 | 0.001554 |           | .        |
| 1560782_a | 3.97E-08 | 6.52E-10 |           | .        |
| 1560784_x | 5.52E-04 | 1.61E-04 |           | .        |
| 1560785_a | 0.041757 | 0.027834 | DYRK3     | 8444 .   |
| 1560787_a | 0.002457 | 9.90E-04 | QDPR      | 5860 .   |
| 1560790_a | 4.58E-04 | 1.28E-04 | LOC283685 | 283685 . |
| 1560792_a | 4.39E-05 | 6.78E-06 |           | .        |
| 1560797_s | 0.018839 | 0.011029 |           | .        |
| 1560798_a | 0.001247 | 4.37E-04 |           | .        |
| 1560806_a | 9.32E-05 | 1.76E-05 | LOC150527 | 150527 . |
| 1560810_a | 5.36E-04 | 1.55E-04 |           | .        |
| 1560812_a | 0.002578 | 0.001048 |           | .        |
| 1560817_a | 0.007007 | 0.003461 |           | .        |
| 1560818_a | 7.82E-04 | 2.47E-04 | LOC387895 | 387895 . |
| 1560819_a | 4.83E-04 | 1.36E-04 | LOC387895 | 387895 . |
| 1560821_a | 1.69E-05 | 2.02E-06 | ARHGAP22  | 58504 .  |
| 1563878_a | 1.65E-04 | 3.60E-05 | LOC338963 | 338963 . |
| 1560826_a | 1.39E-05 | 1.57E-06 |           | .        |
| 1560830_a | 1.32E-04 | 2.72E-05 | LOC147646 | 147646 . |
| 1560834_a | 3.64E-09 | 2.80E-11 | RMST      | 196475 . |
| 1560844_a | 3.83E-05 | 5.67E-06 |           | .        |
| 1560853_x | 2.73E-04 | 6.76E-05 | ZNF826    | 664701 . |
| 1560854_s | 0.010636 | 0.00564  | ZNF107    | 51427 .  |
| 1560855_a | 0.009959 | 0.005223 |           | .        |
| 1560862_a | 0.002985 | 0.001247 |           | .        |
| 1560864_a | 0.027023 | 0.016802 |           | .        |
| 1560866_a | 0.00414  | 0.001846 | WNK2      | 65268 .  |
| 1560868_s | 3.50E-04 | 9.18E-05 |           | .        |
| 1560869_a | 0.012455 | 0.006793 |           | .        |
| 1560870_a | 1.19E-04 | 2.39E-05 |           | .        |
| 1560871_a | 0.017518 | 0.010129 |           | .        |
| 1560874_a | 5.60E-05 | 9.21E-06 | EFCAB4B   | 84766 .  |
| 1560877_a | 0.037824 | 0.024828 |           | .        |



|           |          |          |              |           |   |
|-----------|----------|----------|--------------|-----------|---|
| 1560878_a | 4.00E-06 | 3.06E-07 | SYT15        | 83849     | . |
| 1560879_a | 0.026647 | 0.016529 | SYT15        | 83849     | . |
| 1560881_a | 0.028267 | 0.017704 | NCRNA00112   | 54089     | . |
| 1560883_s | 2.32E-04 | 5.51E-05 |              |           | . |
| 1560887_a | 0.009586 | 0.004991 |              |           | . |
| 1560895_a | 0.032225 | 0.020623 | LOC645188    | 645188    | . |
| 1560896_a | 0.010244 | 0.005396 |              |           | . |
| 1560897_a | 9.61E-04 | 3.18E-04 | KRTAP10-11   | 386678    | . |
| 1560900_a | 0.032743 | 0.021004 |              |           | . |
| 1560901_a | 0.005124 | 0.002387 |              |           | . |
| 1560911_a | 6.89E-06 | 6.18E-07 | LOC100133461 | 100133461 | . |
| 1570355_a | 0.010762 | 0.005719 | DPY19L1      | 23333     | . |
| 1560916_a | 0.020512 | 0.012183 | DPY19L1      | 23333     | . |
| 1560917_a | 0.00626  | 0.003024 |              |           | . |
| 1560920_s | 5.62E-04 | 1.64E-04 |              |           | . |
| 1560921_a | 0.029855 | 0.018874 | ZNF169       | 169841    | . |
| 1560924_a | 6.48E-04 | 1.96E-04 |              |           | . |
| 1560926_a | 3.10E-06 | 2.20E-07 |              |           | . |
| 1560928_a | 0.001564 | 5.74E-04 | LOC151657    | 151657    | . |
| 1560935_s | 0.002799 | 0.001156 | LOC284669    | 284669    | . |
| 1560939_a | 2.27E-04 | 5.36E-05 | LOC100129845 | 100129845 | . |
| 1560941_a | 0.036791 | 0.024043 |              |           | . |
| 1560942_a | 0.001244 | 4.35E-04 |              |           | . |
| 1560943_s | 2.25E-04 | 5.30E-05 |              |           | . |
| 1560946_a | 0.02438  | 0.01491  |              |           | . |
| 1560952_a | 2.60E-04 | 6.35E-05 |              |           | . |
| 1560960_a | 0.001123 | 3.85E-04 |              |           | . |
| 1560964_a | 0.038442 | 0.025297 |              |           | . |
| 1560968_a | 0.022148 | 0.013344 |              |           | . |
| 1560973_a | 0.043892 | 0.029516 |              |           | . |
| 1560986_a | 0.005464 | 0.002574 |              |           | . |
| 1560995_s | 0.007656 | 0.003841 |              |           | . |
| 1560996_a | 0.00535  | 0.00251  |              |           | . |
| 1561004_a | 0.006887 | 0.003389 |              |           | . |

|           |          |          |            |        |   |
|-----------|----------|----------|------------|--------|---|
| 1561010_a | 0.001795 | 6.77E-04 | MAOB       | 4129   | . |
| 1561012_a | 0.02019  | 0.011958 |            |        | . |
| 1561014_a | 0.028543 | 0.017902 |            |        | . |
| 1561017_a | 5.01E-04 | 1.42E-04 |            |        | . |
| 1561018_a | 0.019664 | 0.011591 |            |        | . |
| 1561019_a | 3.36E-06 | 2.44E-07 |            |        | . |
| 1561029_a | 0.005834 | 0.002783 |            |        | . |
| 1561034_a | 0.020064 | 0.011872 |            |        | . |
| 1561038_a | 1.52E-04 | 3.26E-05 | ZNF81      | 347344 | . |
| 1561041_a | 0.045557 | 0.030814 | TNRC6C     | 57690  | . |
| 1561044_a | 2.76E-05 | 3.75E-06 |            |        | . |
| 1561045_a | 0.02107  | 0.012585 |            |        | . |
| 1561048_a | 0.004723 | 0.002166 | RARS2      | 57038  | . |
| 1561050_a | 0.039712 | 0.02626  |            |        | . |
| 1561052_s | 4.03E-05 | 6.04E-06 |            |        | . |
| 1561056_a | 0.031186 | 0.019845 |            |        | . |
| 1561061_a | 0.005759 | 0.002739 |            |        | . |
| 1561064_a | 0.011907 | 0.006438 |            |        | . |
| 1561065_a | 0.002103 | 8.20E-04 |            |        | . |
| 1561067_a | 0.006855 | 0.00337  |            |        | . |
| 1561075_a | 4.29E-04 | 1.18E-04 |            |        | . |
| 1561079_a | 0.021696 | 0.013025 | ANKRD28    | 23243  | . |
| 1561082_a | 0.003145 | 0.001328 | NID1       | 4811   | . |
| 1561085_a | 0.002718 | 0.001116 | LOC153910  | 153910 | . |
| 1561086_a | 3.30E-04 | 8.57E-05 |            |        | . |
| 1561091_a | 0.004637 | 0.002118 |            |        | . |
| 1561093_a | 4.35E-05 | 6.71E-06 | SLC22A25   | 387601 | . |
| 1561096_a | 0.014748 | 0.008281 | LOC285419  | 285419 | . |
| 1561097_a | 0.010357 | 0.005466 |            |        | . |
| 1561101_a | 2.04E-05 | 2.55E-06 | LOC153469  | 153469 | . |
| 1561107_a | 7.73E-04 | 2.44E-04 |            |        | . |
| 1561116_a | 0.01462  | 0.008195 | ZNF391     | 346157 | . |
| 1561122_a | 0.024051 | 0.014673 | RAD51L1    | 5890   | . |
| 1561127_a | 9.43E-04 | 3.11E-04 | NCRNA00168 | 642394 | . |

|           |          |          |                             |        |   |
|-----------|----------|----------|-----------------------------|--------|---|
| 1561130_a | 7.46E-04 | 2.33E-04 | C12orf51                    | 283450 | . |
| 1561132_a | 0.008273 | 0.004202 | DHX35                       | 60625  | . |
| 1561133_a | 0.014966 | 0.008429 |                             |        | . |
| 1561139_a | 6.73E-04 | 2.05E-04 |                             |        | . |
| 1561144_a | 0.009343 | 0.004845 |                             |        | . |
| 1561146_a | 0.00776  | 0.003902 | VPS35                       | 55737  | . |
| 1561148_a | 0.005924 | 0.002834 |                             |        | . |
| 1561149_a | 0.037246 | 0.024397 |                             |        | . |
| 1561152_a | 0.001576 | 5.79E-04 |                             |        | . |
| 1561153_a | 0.019786 | 0.011677 |                             |        | . |
| 1561155_a | 2.86E-07 | 9.48E-09 |                             |        | . |
| 1561161_a | 9.75E-07 | 4.79E-08 |                             |        | . |
| 1561165_a | 3.44E-05 | 4.95E-06 | DEFB108B /// I100133128 //. |        | . |
| 1561170_a | 0.016666 | 0.009557 | LOC100132025 100132025      |        | . |
| 1561171_a | 2.87E-08 | 4.36E-10 | LOC100132025 100132025 //.  |        | . |
| 1561175_a | 0.03704  | 0.024238 | LOC283482                   | 283482 | . |
| 1561179_s | 0.027781 | 0.017351 | AMZ1                        | 155185 | . |
| 1561180_a | 4.63E-07 | 1.80E-08 |                             |        | . |
| 1561181_a | 7.40E-05 | 1.32E-05 |                             |        | . |
| 1561185_a | 0.01177  | 0.006349 | TTY7                        | 246122 | . |
| 1561190_a | 0.00436  | 0.001966 | CDKL3                       | 51265  | . |
| 1561192_a | 0.009361 | 0.004855 |                             |        | . |
| 1561194_a | 0.001678 | 6.24E-04 |                             |        | . |
| 1561195_a | 6.65E-05 | 1.15E-05 |                             |        | . |
| 1561197_a | 0.041389 | 0.027553 | LOC442028                   | 442028 | . |
| 1561205_a | 0.004319 | 0.001944 |                             |        | . |
| 1561206_a | 4.43E-04 | 1.22E-04 | KLHL8                       | 57563  | . |
| 1561208_a | 5.34E-04 | 1.54E-04 |                             |        | . |
| 1561212_a | 0.03342  | 0.021513 |                             |        | . |
| 1561214_a | 0.008325 | 0.004234 |                             |        | . |
| 1561217_a | 7.90E-04 | 2.51E-04 |                             |        | . |
| 1561218_s | 0.029755 | 0.018804 | LOC728099                   | 728099 | . |
| 1561223_a | 2.60E-06 | 1.75E-07 |                             |        | . |
| 1561225_a | 0.016667 | 0.009558 | LOC338579                   | 338579 | . |

|           |          |          |              |             |
|-----------|----------|----------|--------------|-------------|
| 1561226_a | 0.018998 | 0.011135 |              | .           |
| 1561228_a | 4.49E-04 | 1.25E-04 |              | .           |
| 1561229_a | 0.003188 | 0.001351 |              | .           |
| 1561232_a | 0.011481 | 0.006169 | LOC100270680 | 100270680 . |
| 1561233_a | 7.71E-05 | 1.39E-05 | LOC283387    | 283387 .    |
| 1561237_a | 4.76E-04 | 1.34E-04 |              | .           |
| 1561238_a | 0.031478 | 0.020061 | PXMP3        | 5828 .      |
| 1561242_a | 0.002572 | 0.001045 |              | .           |
| 1561243_a | 0.024359 | 0.014894 | TMEM105      | 284186 .    |
| 1561249_a | 0.006516 | 0.003172 |              | .           |
| 1561251_a | 0.013345 | 0.007364 | LOC285577    | 285577 .    |
| 1561252_a | 0.020826 | 0.012412 | LOC648691    | 648691 .    |
| 1561257_a | 0.031951 | 0.020412 | LOC286083    | 286083 .    |
| 1561261_a | 3.51E-04 | 9.22E-05 |              | .           |
| 1561266_a | 8.11E-04 | 2.59E-04 |              | .           |
| 1561268_a | 0.006485 | 0.003154 |              | .           |
| 1561274_a | 0.041394 | 0.02756  | CRYBB2P1     | 1416 .      |
| 1561277_a | 0.023703 | 0.014434 | LOC339298    | 339298 .    |
| 1561286_a | 0.003225 | 0.00137  | DIP2A        | 23181 .     |
| 1561292_a | 0.028683 | 0.018011 | LOC100128434 | 100128434 . |
| 1561298_a | 0.004357 | 0.001964 |              | .           |
| 1561304_a | 0.014252 | 0.007949 | PSMG4        | 389362 .    |
| 1561309_x | 0.039561 | 0.026146 |              | .           |
| 1561310_a | 0.014276 | 0.007965 |              | .           |
| 1561314_a | 0.021256 | 0.012716 |              | .           |
| 1561316_a | 7.97E-04 | 2.53E-04 |              | .           |
| 1561318_a | 0.002693 | 0.001103 |              | .           |
| 1561323_a | 0.011374 | 0.006102 | LOC339975    | 339975 .    |
| 1561327_a | 0.010083 | 0.005297 | C6orf122     | 401288 .    |
| 1561332_a | 0.001966 | 7.56E-04 | ATP13A5      | 344905 .    |
| 1561335_a | 7.97E-04 | 2.53E-04 | LOC440602    | 440602 .    |
| 1561336_a | 0.045503 | 0.030771 | DNASE1L3     | 1776 .      |
| 1561341_a | 2.49E-04 | 6.01E-05 |              | .           |
| 1561342_a | 0.019882 | 0.011745 | LOC150005    | 150005 .    |

|           |          |          |              |             |
|-----------|----------|----------|--------------|-------------|
| 1561345_a | 0.033172 | 0.021326 |              | .           |
| 1561346_a | 0.003336 | 0.001427 |              | .           |
| 1561347_a | 0.020547 | 0.01221  |              | .           |
| 1561352_a | 0.026123 | 0.016154 |              | .           |
| 1561355_a | 0.001804 | 6.81E-04 | LOC692247    | 692247 .    |
| 1569452_a | 6.50E-04 | 1.97E-04 | LOC692247    | 692247 .    |
| 1569453_a | 0.003617 | 0.001572 | LOC692247    | 692247 .    |
| 1561360_a | 0.002073 | 8.06E-04 |              | .           |
| 1561365_a | 0.004686 | 0.002146 | NRP1         | 8829 .      |
| 1561371_a | 0.01673  | 0.009601 | FLJ39080     | 441355 .    |
| 1561375_a | 0.009732 | 0.005085 |              | .           |
| 1561384_a | 5.33E-04 | 1.54E-04 | LOC284661    | 284661 .    |
| 1561386_a | 2.19E-04 | 5.12E-05 |              | .           |
| 1561387_a | 0.011829 | 0.006385 | FAM55A       | 120400 .    |
| 1561389_a | 6.08E-04 | 1.81E-04 |              | .           |
| 1561390_a | 0.018453 | 0.010766 | FAM41AY      | 340618 .    |
| 1561391_a | 0.004708 | 0.002158 | LOC100128126 | 100128126 . |
| 1561393_a | 8.42E-06 | 8.08E-07 |              | .           |
| 1561394_s | 0.004591 | 0.002093 | KIAA1755     | 85449 .     |
| 1561400_a | 0.035033 | 0.022705 |              | .           |
| 1561402_a | 3.86E-04 | 1.03E-04 | LOC339894    | 339894 .    |
| 1561403_a | 0.01901  | 0.011144 | SOHLH1       | 402381 .    |
| 1561408_a | 0.003631 | 0.00158  |              | .           |
| 1561411_a | 0.001796 | 6.77E-04 |              | .           |
| 1561413_a | 0.029541 | 0.018642 |              | .           |
| 1561418_a | 5.50E-04 | 1.60E-04 |              | .           |
| 1561419_a | 9.47E-04 | 3.13E-04 |              | .           |
| 1561420_a | 3.00E-04 | 7.58E-05 |              | .           |
| 1561421_a | 0.004332 | 0.001951 |              | .           |
| 1561425_a | 0.045418 | 0.030707 | ZNF568       | 374900 .    |
| 1561427_a | 0.002599 | 0.001058 |              | .           |
| 1561429_a | 0.001327 | 4.71E-04 | C3orf15      | 89876 .     |
| 1561430_s | 3.60E-04 | 9.50E-05 | C3orf15      | 89876 .     |
| 1561439_a | 0.001106 | 3.77E-04 |              | .           |

|           |          |          |           |        |   |
|-----------|----------|----------|-----------|--------|---|
| 1561442_a | 3.85E-05 | 5.70E-06 | LOC283585 | 283585 | . |
| 1561446_a | 0.015708 | 0.008919 |           |        | . |
| 1561448_a | 0.002409 | 9.66E-04 |           |        | . |
| 1561449_a | 0.038336 | 0.025216 | TSPAN18   | 90139  | . |
| 1561451_a | 0.002143 | 8.39E-04 | ADAM29    | 11086  | . |
| 1561453_a | 0.033996 | 0.021933 |           |        | . |
| 1561460_a | 7.24E-04 | 2.25E-04 |           |        | . |
| 1561462_a | 0.027337 | 0.017029 |           |        | . |
| 1561463_a | 0.006815 | 0.003348 |           |        | . |
| 1561469_a | 8.66E-04 | 2.81E-04 |           |        | . |
| 1561474_a | 0.015966 | 0.009095 |           |        | . |
| 1561477_a | 0.001093 | 3.72E-04 | CCDC144A  | 9720   | . |
| 1561481_a | 3.75E-04 | 9.99E-05 |           |        | . |
| 1561484_a | 0.003158 | 0.001335 |           |        | . |
| 1561492_a | 0.004602 | 0.002099 | LOC647107 | 647107 | . |
| 1561500_a | 3.02E-05 | 4.22E-06 | C16orf84  | 348180 | . |
| 1561501_s | 0.002017 | 7.80E-04 | C16orf84  | 348180 | . |
| 1561502_x | 1.30E-04 | 2.67E-05 | C16orf84  | 348180 | . |
| 1561503_a | 0.003117 | 0.001314 | MYLK4     | 340156 | . |
| 1561506_a | 3.08E-04 | 7.85E-05 |           |        | . |
| 1561518_a | 3.06E-04 | 7.79E-05 | LOC283914 | 283914 | . |
| 1561531_a | 6.03E-05 | 1.01E-05 |           |        | . |
| 1561532_a | 0.032541 | 0.02085  |           |        | . |
| 1561534_a | 4.47E-05 | 6.95E-06 |           |        | . |
| 1561537_a | 9.64E-05 | 1.84E-05 | LOC388906 | 388906 | . |
| 1561538_a | 0.005152 | 0.002401 |           |        | . |
| 1561539_a | 0.001112 | 3.80E-04 |           |        | . |
| 1561542_a | 3.59E-04 | 9.47E-05 |           |        | . |
| 1561543_a | 0.014542 | 0.008142 |           |        | . |
| 1561545_a | 0.005615 | 0.002659 |           |        | . |
| 1561546_a | 6.61E-05 | 1.14E-05 |           |        | . |
| 1561726_s | 0.002487 | 0.001004 |           |        | . |
| 1561556_a | 0.001782 | 6.70E-04 |           |        | . |
| 1561561_x | 4.34E-04 | 1.20E-04 |           |        | . |

|           |          |          |              |             |
|-----------|----------|----------|--------------|-------------|
| 1561565_a | 0.004771 | 0.002192 |              | .           |
| 1561567_a | 3.18E-04 | 8.16E-05 |              | .           |
| 1561571_a | 0.005392 | 0.002534 | LOC730139    | 730139 .    |
| 1561572_a | 2.13E-04 | 4.96E-05 |              | .           |
| 1561577_a | 0.004516 | 0.002052 |              | .           |
| 1561579_a | 0.002772 | 0.001142 | LOC728445    | 728445 .    |
| 1561585_a | 0.025814 | 0.015933 | RCBTB2       | 1102 .      |
| 1561589_a | 7.60E-06 | 7.04E-07 | NBEAL1       | 65065 .     |
| 1561595_x | 6.52E-06 | 5.75E-07 |              | .           |
| 1561596_a | 0.039568 | 0.026153 |              | .           |
| 1561597_x | 0.004376 | 0.001975 |              | .           |
| 1561598_a | 4.17E-05 | 6.33E-06 |              | .           |
| 1561600_a | 0.025013 | 0.015365 |              | .           |
| 1561602_a | 0.002051 | 7.96E-04 | LOC100129476 | 100129476 . |
| 1561608_a | 2.40E-04 | 5.75E-05 |              | .           |
| 1561610_a | 0.015676 | 0.008899 |              | .           |
| 1561611_a | 0.00352  | 0.001522 |              | .           |
| 1561616_a | 0.004648 | 0.002125 | DNAH6        | 1768 .      |
| 1561617_a | 3.17E-04 | 8.14E-05 | DNAH6        | 1768 .      |
| 1561618_a | 0.047514 | 0.032361 |              | .           |
| 1561619_a | 0.005417 | 0.002547 |              | .           |
| 1561626_a | 0.006031 | 0.002895 |              | .           |
| 1561635_a | 0.012613 | 0.006896 |              | .           |
| 1561640_a | 3.08E-04 | 7.84E-05 |              | .           |
| 1561644_x | 2.03E-04 | 4.68E-05 |              | .           |
| 1561651_s | 0.011669 | 0.006286 | TAL1         | 6886 .      |
| 1561654_a | 0.044758 | 0.030198 |              | .           |
| 1561657_a | 0.002974 | 0.001241 |              | .           |
| 1561658_a | 0.025202 | 0.015508 |              | .           |
| 1561660_a | 0.001717 | 6.41E-04 | MCART6       | 401612 .    |
| 1561668_a | 7.53E-05 | 1.35E-05 |              | .           |
| 1561671_a | 0.007858 | 0.003961 | LOC286121    | 286121 .    |
| 1561682_a | 0.03447  | 0.022284 |              | .           |
| 1561683_a | 0.019321 | 0.011357 |              | .           |

|           |          |          |           |          |
|-----------|----------|----------|-----------|----------|
| 1561685_a | 0.001217 | 4.24E-04 | LOC441178 | 441178 . |
| 1561688_a | 0.006387 | 0.003097 |           | .        |
| 1561691_a | 0.046863 | 0.031848 | LOC285735 | 285735 . |
| 1561702_a | 3.26E-05 | 4.63E-06 |           | .        |
| 1561707_a | 0.014314 | 0.007993 | LOC150185 | 150185 . |
| 1561710_a | 2.57E-04 | 6.26E-05 | SNX19     | 399979 . |
| 1561714_a | 1.29E-06 | 6.99E-08 | B3GALNT2  | 148789 . |
| 1561718_a | 0.037503 | 0.024584 |           | .        |
| 1561720_a | 2.72E-07 | 8.84E-09 | RECQL5    | 9400 .   |
| 1561723_a | 0.043958 | 0.029567 | LOC339894 | 339894 . |
| 1561732_a | 0.012293 | 0.006688 |           | .        |
| 1561737_a | 3.21E-07 | 1.11E-08 |           | .        |
| 1561738_a | 0.01618  | 0.009238 |           | .        |
| 1561739_a | 0.010032 | 0.005267 |           | .        |
| 1561749_a | 7.78E-04 | 2.46E-04 |           | .        |
| 1561754_a | 0.012936 | 0.007105 |           | .        |
| 1561761_x | 0.043635 | 0.02931  | LOC645513 | 645513 . |
| 1561762_s | 2.30E-04 | 5.44E-05 |           | .        |
| 1561763_a | 1.43E-04 | 3.01E-05 |           | .        |
| 1561775_a | 6.26E-07 | 2.65E-08 |           | .        |
| 1561778_a | 0.001098 | 3.74E-04 |           | .        |
| 1561786_a | 0.024161 | 0.014751 |           | .        |
| 1561806_a | 0.029975 | 0.018963 |           | .        |
| 1561828_a | 0.012886 | 0.007073 |           | .        |
| 1561829_a | 0.00172  | 6.43E-04 |           | .        |
| 1561834_a | 1.39E-04 | 2.93E-05 |           | .        |
| 1561871_a | 7.98E-05 | 1.46E-05 |           | .        |
| 1561883_a | 0.037035 | 0.024234 |           | .        |
| 1561884_a | 0.015229 | 0.008602 | CEPT1     | 10390 .  |
| 1561886_a | 0.010242 | 0.005395 |           | .        |
| 1561887_a | 2.12E-05 | 2.70E-06 |           | .        |
| 1561891_a | 3.19E-04 | 8.21E-05 |           | .        |
| 1561893_a | 0.014859 | 0.008357 |           | .        |
| 1561894_a | 0.002348 | 9.36E-04 | LOC653739 | 653739 . |



|           |          |          |                    |
|-----------|----------|----------|--------------------|
| 1561895_a | 0.017532 | 0.01014  | .                  |
| 1561899_a | 0.002401 | 9.62E-04 | CLECL1 160365 .    |
| 1567107_s | 3.24E-05 | 4.60E-06 | TPM4 7171 .        |
| 1561908_a | 0.002503 | 0.001012 | HS3ST3B1 9953 .    |
| 1561909_a | 0.003702 | 0.001616 | .                  |
| 1561914_a | 0.041095 | 0.027326 | .                  |
| 1561915_a | 0.04979  | 0.034167 | .                  |
| 1561919_a | 0.001346 | 4.79E-04 | .                  |
| 1561923_a | 0.011348 | 0.006086 | SF3B14 51639 .     |
| 1561924_a | 0.017078 | 0.00983  | .                  |
| 1561928_s | 0.026672 | 0.016546 | C3orf16 389161 .   |
| 1561937_x | 1.72E-04 | 3.80E-05 | IGHG1 3500 .       |
| 1561938_a | 0.01733  | 0.010001 | .                  |
| 1561939_a | 9.53E-04 | 3.15E-04 | DYNC2H1 79659 .    |
| 1561940_a | 1.46E-04 | 3.10E-05 | POLE 5426 .        |
| 1563629_a | 5.75E-04 | 1.69E-04 | .                  |
| 1561942_x | 0.005497 | 0.002592 | .                  |
| 1561951_a | 0.031787 | 0.020286 | SLC5A12 159963 .   |
| 1561960_a | 0.012039 | 0.006522 | KIAA1920 114817 .  |
| 1561964_a | 0.037729 | 0.024754 | LOC441245 441245 . |
| 1561965_a | 6.23E-04 | 1.87E-04 | SNRPB2 6629 .      |
| 1561969_a | 0.014675 | 0.008232 | ZPLD1 131368 .     |
| 1561973_a | 7.21E-07 | 3.21E-08 | SMARCC2 6601 .     |
| 1561976_a | 0.024772 | 0.015193 | C1orf167 284498 .  |
| 1561989_a | 0.006536 | 0.003184 | .                  |
| 1561998_a | 0.003662 | 0.001596 | .                  |
| 1562002_a | 6.27E-06 | 5.46E-07 | MYOZ3 91977 .      |
| 1562004_x | 5.85E-04 | 1.73E-04 | MYOZ3 91977 .      |
| 1562007_a | 8.76E-04 | 2.84E-04 | .                  |
| 1562009_a | 0.003777 | 0.001657 | .                  |
| 1562010_x | 0.013881 | 0.007709 | .                  |
| 1562012_a | 6.50E-04 | 1.97E-04 | .                  |
| 1562013_a | 1.01E-05 | 1.03E-06 | .                  |
| 1562016_a | 0.020698 | 0.012321 | .                  |

|           |          |          |              |           |     |
|-----------|----------|----------|--------------|-----------|-----|
| 1562022_s | 4.71E-09 | 4.02E-11 | LOC100130987 | 100130987 | //. |
| 1562026_a | 4.21E-06 | 3.27E-07 | WNK2         | 65268     | .   |
| 1562028_a | 9.89E-05 | 1.90E-05 | CCND3        | 896       | .   |
| 1562029_a | 0.022462 | 0.013557 |              |           | .   |
| 1562031_a | 0.021325 | 0.012763 | JAK2         | 3717      | .   |
| 1562033_a | 4.00E-04 | 1.08E-04 |              |           | .   |
| 1562034_a | 0.008815 | 0.004524 | NCRNA00163   | 727699    | .   |
| 1562035_a | 0.018147 | 0.010559 |              |           | .   |
| 1562036_a | 0.009158 | 0.004734 |              |           | .   |
| 1562044_a | 0.012575 | 0.006872 |              |           | .   |
| 1562045_a | 0.009217 | 0.00477  |              |           | .   |
| 1562055_a | 0.004413 | 0.001996 |              |           | .   |
| 1562056_a | 7.87E-05 | 1.43E-05 |              |           | .   |
| 1562058_a | 3.30E-06 | 2.39E-07 |              |           | .   |
| 1562059_a | 0.0124   | 0.006757 |              |           | .   |
| 1562062_a | 8.83E-06 | 8.60E-07 | KIAA1245     | 100132406 | //. |
| 1562063_x | 2.06E-06 | 1.30E-07 | KIAA1245     | 100132406 | //. |
| 1562065_a | 0.011665 | 0.006283 |              |           | .   |
| 1562066_a | 0.045731 | 0.030953 | C8orf83      | 286144    | .   |
| 1562068_a | 0.002806 | 0.001159 |              |           | .   |
| 1562078_a | 6.53E-04 | 1.98E-04 |              |           | .   |
| 1562083_a | 0.0063   | 0.003047 |              |           | .   |
| 1562084_a | 0.015829 | 0.009002 |              |           | .   |
| 1562086_a | 0.045035 | 0.030408 |              |           | .   |
| 1562091_a | 0.033503 | 0.02158  |              |           | .   |
| 1562098_a | 0.002007 | 7.75E-04 |              |           | .   |
| 1562102_a | 0.001921 | 7.35E-04 | AKR1C1       | 1645      | .   |
| 1562103_a | 0.004142 | 0.001847 | JAK1         | 3716      | .   |
| 1562110_a | 0.008867 | 0.004556 |              |           | .   |
| 1562116_a | 0.003589 | 0.001557 |              |           | .   |
| 1562130_a | 0.023505 | 0.01429  | IQCA1        | 79781     | .   |
| 1562133_x | 2.24E-04 | 5.26E-05 | ZNF90        | 7643      | .   |
| 1562137_a | 0.003024 | 0.001267 |              |           | .   |
| 1562139_a | 0.040692 | 0.027019 | FOXP2        | 93986     | .   |

|           |          |          |           |        |   |
|-----------|----------|----------|-----------|--------|---|
| 1562142_a | 3.23E-04 | 8.35E-05 | SKIV2L2   | 23517  | . |
| 1562157_a | 2.68E-04 | 6.60E-05 |           |        | . |
| 1562162_a | 0.002934 | 0.001221 |           |        | . |
| 1562163_a | 3.16E-04 | 8.12E-05 |           |        | . |
| 1562169_a | 0.029696 | 0.018757 |           |        | . |
| 1562173_a | 0.02911  | 0.018323 |           |        | . |
| 1562187_a | 0.001789 | 6.74E-04 |           |        | . |
| 1562193_a | 0.003672 | 0.001601 |           |        | . |
| 1562201_x | 1.26E-04 | 2.57E-05 |           |        | . |
| 1562209_a | 4.38E-05 | 6.77E-06 | WDR21B    | 285429 | . |
| 1562214_a | 0.003091 | 0.001301 | LOC151171 | 151171 | . |
| 1562217_a | 0.007857 | 0.00396  | FLJ34521  | 646383 | . |
| 1562220_a | 0.034636 | 0.022405 |           |        | . |
| 1562222_a | 0.037646 | 0.024692 |           |        | . |
| 1562226_a | 1.23E-05 | 1.34E-06 | VWDE      | 221806 | . |
| 1562227_a | 7.66E-05 | 1.38E-05 | PDE5A     | 8654   | . |
| 1562228_s | 1.43E-06 | 8.04E-08 | PDE5A     | 8654   | . |
| 1562230_a | 0.044741 | 0.03018  |           |        | . |
| 1562234_a | 1.87E-06 | 1.15E-07 | NAV3      | 89795  | . |
| 1562235_s | 0.033939 | 0.021894 |           |        | . |
| 1562236_a | 0.021366 | 0.012791 | MYST4     | 23522  | . |
| 1562238_a | 1.43E-04 | 3.03E-05 | USPL1     | 10208  | . |
| 1562239_a | 9.53E-06 | 9.54E-07 | SGSM1     | 129049 | . |
| 1562240_a | 8.56E-06 | 8.24E-07 | PLXNA4    | 91584  | . |
| 1562247_a | 0.008675 | 0.00444  | LOC286058 | 286058 | . |
| 1562249_a | 0.042666 | 0.028543 | LOC285965 | 285965 | . |
| 1562254_a | 1.61E-04 | 3.50E-05 |           |        | . |
| 1562256_a | 2.25E-05 | 2.90E-06 | NLRP1     | 22861  | . |
| 1562257_x | 0.002444 | 9.83E-04 | NLRP1     | 22861  | . |
| 1562259_a | 0.017139 | 0.009872 | TEX9      | 374618 | . |
| 1562260_a | 0.017286 | 0.009971 |           |        | . |
| 1562263_a | 0.033181 | 0.021337 |           |        | . |
| 1562264_a | 0.007872 | 0.003969 | LOC339685 | 339685 | . |
| 1562267_s | 0.005223 | 0.002441 | ZNF709    | 163051 | . |

|           |          |          |           |        |   |
|-----------|----------|----------|-----------|--------|---|
| 1562271_x | 0.002159 | 8.47E-04 | ARHGEF7   | 8874   | . |
| 1562272_a | 0.025618 | 0.015798 |           |        | . |
| 1562273_a | 0.036722 | 0.023991 | CNGA4     | 1262   | . |
| 1562275_a | 4.13E-04 | 1.13E-04 |           |        | . |
| 1562280_a | 3.42E-06 | 2.50E-07 |           |        | . |
| 1562281_a | 0.003358 | 0.001438 |           |        | . |
| 1562283_a | 8.29E-04 | 2.66E-04 |           |        | . |
| 1562286_a | 2.04E-04 | 4.70E-05 |           |        | . |
| 1562289_a | 0.011081 | 0.005918 |           |        | . |
| 1562292_a | 2.47E-04 | 5.96E-05 | ANKRD30B  | 374860 | . |
| 1562294_x | 0.006234 | 0.00301  | ANKRD30B  | 374860 | . |
| 1562300_a | 0.001091 | 3.71E-04 |           |        | . |
| 1562303_a | 0.019743 | 0.011648 | ZKSCAN3   | 80317  | . |
| 1562314_a | 0.004146 | 0.001849 |           |        | . |
| 1562316_a | 0.021972 | 0.013222 |           |        | . |
| 1562319_a | 5.30E-04 | 1.53E-04 | FAM169B   | 283777 | . |
| 1562320_a | 0.002733 | 0.001124 | LOC399875 | 399875 | . |
| 1562323_a | 4.33E-05 | 6.67E-06 |           |        | . |
| 1562324_a | 5.26E-05 | 8.53E-06 |           |        | . |
| 1562346_a | 0.001619 | 5.97E-04 |           |        | . |
| 1562348_a | 0.009516 | 0.004949 | LOC400680 | 400680 | . |
| 1562351_a | 9.44E-06 | 9.43E-07 |           |        | . |
| 1562358_a | 0.004308 | 0.001937 |           |        | . |
| 1562365_a | 0.001352 | 4.82E-04 | LOC286177 | 286177 | . |
| 1562367_a | 0.025301 | 0.015579 | C15orf54  | 400360 | . |
| 1562368_a | 0.004575 | 0.002084 | CARD11    | 84433  | . |
| 1562378_s | 4.76E-07 | 1.86E-08 | PROM2     | 150696 | . |
| 1562384_a | 0.024163 | 0.014753 |           |        | . |
| 1562387_a | 0.002594 | 0.001056 | C5orf42   | 65250  | . |
| 1562388_a | 0.001808 | 6.83E-04 | LOC285819 | 285819 | . |
| 1562389_a | 4.79E-04 | 1.35E-04 |           |        | . |
| 1562390_a | 0.02586  | 0.015972 |           |        | . |
| 1562391_a | 2.06E-06 | 1.30E-07 | B3GALNT2  | 148789 | . |
| 1562399_a | 0.018998 | 0.011135 |           |        | . |

|           |          |          |             |          |
|-----------|----------|----------|-------------|----------|
| 1562408_a | 0.015424 | 0.008734 |             | .        |
| 1562409_s | 0.007684 | 0.003857 |             | .        |
| 1562411_a | 5.85E-04 | 1.73E-04 | MYLK3       | 91807 .  |
| 1562412_a | 0.012865 | 0.007058 |             | .        |
| 1562425_a | 0.01029  | 0.005425 | FARP1       | 10160 .  |
| 1562428_a | 0.008618 | 0.004406 | LOC654780   | 654780 . |
| 1562434_a | 0.007432 | 0.00371  | UNK         | 85451 .  |
| 1562439_a | 0.005288 | 0.002475 | NCOA3       | 8202 .   |
| 1562440_a | 2.84E-05 | 3.89E-06 | MAP3K13     | 9175 .   |
| 1562442_a | 5.09E-04 | 1.45E-04 | SSBP1       | 6742 .   |
| 1562443_a | 0.016098 | 0.009182 | RLBP1L2     | 134829 . |
| 1562446_a | 6.48E-04 | 1.96E-04 | ZNF391      | 346157 . |
| 1562449_s | 0.025157 | 0.015472 |             | .        |
| 1562455_a | 2.03E-05 | 2.54E-06 |             | .        |
| 1562458_a | 0.046796 | 0.031793 | UBE2W       | 55284 .  |
| 1562460_a | 0.001308 | 4.62E-04 | CNDP2       | 55748 .  |
| 1562462_a | 1.17E-04 | 2.34E-05 | DNAH10      | 196385 . |
| 1562463_a | 0.023417 | 0.014227 |             | .        |
| 1562464_a | 0.004004 | 0.001774 |             | .        |
| 1562474_a | 2.11E-04 | 4.89E-05 |             | .        |
| 1562475_a | 0.021829 | 0.013119 | DKFZp686O13 | 401014 . |
| 1562477_a | 0.006134 | 0.002952 | EBF2        | 64641 .  |
| 1562478_a | 0.03182  | 0.02031  |             | .        |
| 1562481_a | 0.014485 | 0.008103 |             | .        |
| 1562482_a | 0.003656 | 0.001593 |             | .        |
| 1562487_a | 0.020801 | 0.012395 |             | .        |
| 1562488_a | 0.00101  | 3.38E-04 | FAM38B2     | 284221 . |
| 1562495_a | 0.004181 | 0.001868 | ANKFY1      | 51479 .  |
| 1562497_a | 0.005823 | 0.002778 |             | .        |
| 1562499_a | 0.00436  | 0.001966 |             | .        |
| 1562505_a | 1.14E-04 | 2.26E-05 |             | .        |
| 1562509_a | 0.004606 | 0.002101 |             | .        |
| 1562510_a | 0.017117 | 0.009857 | LOC339442   | 339442 . |
| 1562511_a | 0.004644 | 0.002122 | LYST        | 1130 .   |

|           |          |          |               |             |
|-----------|----------|----------|---------------|-------------|
| 1562516_a | 0.04351  | 0.02921  | WDR60         | 55112 .     |
| 1562527_a | 0.005821 | 0.002776 | LOC283027     | 283027 .    |
| 1562529_s | 0.002246 | 8.88E-04 |               | .           |
| 1562606_a | 0.018427 | 0.010748 | LOC440028     | 440028 .    |
| 1562537_a | 0.024268 | 0.014826 | FCER1A        | 2205 .      |
| 1562540_a | 0.00105  | 3.54E-04 | LOC339978     | 339978 .    |
| 1562543_a | 3.92E-05 | 5.84E-06 |               | .           |
| 1562544_a | 6.25E-06 | 5.43E-07 |               | .           |
| 1562546_a | 0.018586 | 0.010856 |               | .           |
| 1562549_a | 0.005664 | 0.002685 |               | .           |
| 1562557_a | 0.001389 | 4.98E-04 |               | .           |
| 1562563_a | 0.009819 | 0.005135 | HCN1          | 348980 .    |
| 1562572_a | 0.018536 | 0.010824 |               | .           |
| 1562577_a | 6.35E-05 | 1.08E-05 |               | .           |
| 1562581_a | 0.036013 | 0.023455 | LOC254028     | 254028 .    |
| 1562583_s | 0.028548 | 0.017908 | RP11-756A22.3 | 646405 .    |
| 1562585_a | 0.019577 | 0.011532 | LOC284263     | 284263 .    |
| 1562586_a | 1.20E-05 | 1.29E-06 |               | .           |
| 1562590_a | 0.012941 | 0.007109 | PRTG          | 283659 .    |
| 1562591_a | 0.020053 | 0.011864 | OFCC1         | 266553 .    |
| 1562597_a | 0.008672 | 0.004438 |               | .           |
| 1562601_a | 2.27E-04 | 5.37E-05 | UNQ6975       | 400952 .    |
| 1562603_a | 3.18E-04 | 8.19E-05 | RFFL          | 117584 .    |
| 1562604_a | 0.030842 | 0.019596 |               | .           |
| 1562608_a | 0.033699 | 0.021724 |               | .           |
| 1562610_a | 7.15E-05 | 1.26E-05 |               | .           |
| 1562612_a | 0.00684  | 0.003361 |               | .           |
| 1562617_a | 1.17E-04 | 2.35E-05 | LOC340074     | 340074 .    |
| 1562621_a | 0.005805 | 0.002767 |               | .           |
| 1562624_a | 3.31E-05 | 4.73E-06 |               | .           |
| 1562627_a | 6.02E-04 | 1.79E-04 | LOC100130078  | 100130078 . |
| 1562631_a | 9.43E-04 | 3.11E-04 |               | .           |
| 1562632_a | 5.82E-07 | 2.41E-08 | LOC285191     | 285191 .    |
| 1562633_a | 9.78E-04 | 3.25E-04 | RMST          | 196475 .    |

|           |          |          |                             |           |   |
|-----------|----------|----------|-----------------------------|-----------|---|
| 1562641_a | 0.006523 | 0.003176 | FAM122C                     | 159091    | . |
| 1562643_a | 0.039578 | 0.026162 |                             |           | . |
| 1562644_a | 0.002719 | 0.001116 | MTHFD2L                     | 441024    | . |
| 1562645_a | 8.00E-04 | 2.54E-04 | LOC401176                   | 401176    | . |
| 1562648_a | 1.60E-04 | 3.47E-05 | CCDC88A                     | 55704     | . |
| 1562650_a | 0.012244 | 0.006657 | FRYL                        | 285527    | . |
| 1562655_a | 0.025554 | 0.015755 |                             |           | . |
| 1562659_a | 0.006211 | 0.002997 | LOC400548                   | 400548    | . |
| 1562665_a | 0.002245 | 8.88E-04 |                             |           | . |
| 1562673_a | 0.018484 | 0.010788 |                             |           | . |
| 1562675_a | 4.71E-04 | 1.32E-04 | LOC100128003                | 100128003 | . |
| 1562677_a | 6.46E-04 | 1.95E-04 | HMMR                        | 3161      | . |
| 1562678_a | 0.014001 | 0.007784 |                             |           | . |
| 1562689_a | 0.006719 | 0.00329  | LOC151484                   | 151484    | . |
| 1562690_a | 0.005811 | 0.00277  |                             |           | . |
| 1562691_a | 0.011501 | 0.006182 |                             |           | . |
| 1562693_a | 0.009338 | 0.004842 |                             |           | . |
| 1562694_a | 6.00E-04 | 1.78E-04 | C3orf65                     | 646600    | . |
| 1562695_a | 0.002451 | 9.87E-04 | FOXN4                       | 121643    | . |
| 1562698_x | 0.00866  | 0.00443  | LOC339988                   | 339988    | . |
| 1562699_a | 0.00201  | 7.77E-04 |                             |           | . |
| 1562701_a | 2.02E-06 | 1.27E-07 |                             |           | . |
| 1562718_a | 1.10E-04 | 2.18E-05 |                             |           | . |
| 1562720_a | 1.74E-04 | 3.86E-05 |                             |           | . |
| 1562722_a | 0.005496 | 0.002592 | LOC729233 /// 122183 /// 72 |           | . |
| 1562723_a | 3.29E-04 | 8.53E-05 |                             |           | . |
| 1562724_a | 8.53E-04 | 2.75E-04 | LOC286114                   | 286114    | . |
| 1562729_a | 1.41E-04 | 2.98E-05 |                             |           | . |
| 1562731_s | 0.027052 | 0.016826 | MDS2                        | 259283    | . |
| 1562733_a | 0.011739 | 0.00633  | NCRNA00092                  | 100188953 | . |
| 1562739_a | 0.005741 | 0.002728 | LOC285593                   | 285593    | . |
| 1562740_a | 0.014775 | 0.0083   | LOC285224                   | 285224    | . |
| 1562749_a | 0.013869 | 0.007701 | LOC644090                   | 644090    | . |
| 1562751_a | 4.87E-04 | 1.37E-04 |                             |           | . |

|           |          |          |            |        |   |
|-----------|----------|----------|------------|--------|---|
| 1562753_a | 0.027819 | 0.01738  | ST6GALNAC5 | 81849  | . |
| 1562760_a | 0.002293 | 9.10E-04 |            |        | . |
| 1562762_a | 0.001396 | 5.01E-04 | C3orf56    | 285311 | . |
| 1562764_a | 0.005667 | 0.002687 |            |        | . |
| 1562777_a | 0.008146 | 0.004127 |            |        | . |
| 1562778_a | 7.78E-05 | 1.41E-05 | FAM166A    | 401565 | . |
| 1562785_a | 5.15E-05 | 8.33E-06 | HERC6      | 55008  | . |
| 1562787_a | 0.008125 | 0.004116 |            |        | . |
| 1562789_a | 1.50E-04 | 3.21E-05 | ZNF229     | 7772   | . |
| 1562790_a | 0.010309 | 0.005436 | NCALD      | 83988  | . |
| 1562791_a | 0.046001 | 0.031165 | MYCBPAP    | 84073  | . |
| 1562792_a | 0.001625 | 6.00E-04 | NIPAL1     | 152519 | . |
| 1562793_a | 0.031277 | 0.019909 |            |        | . |
| 1562801_a | 0.006303 | 0.003049 |            |        | . |
| 1562805_a | 0.048651 | 0.033249 | LOC349408  | 349408 | . |
| 1562810_a | 0.047713 | 0.032509 |            |        | . |
| 1562815_a | 0.024985 | 0.015347 | EFCAB6     | 64800  | . |
| 1562817_a | 0.049558 | 0.033975 |            |        | . |
| 1562827_a | 9.07E-04 | 2.97E-04 |            |        | . |
| 1562828_a | 7.18E-04 | 2.22E-04 |            |        | . |
| 1562829_a | 0.018307 | 0.010667 | LOC339568  | 339568 | . |
| 1562834_a | 0.007829 | 0.003944 |            |        | . |
| 1562835_a | 0.015939 | 0.009077 |            |        | . |
| 1562841_a | 0.01223  | 0.006646 | LOC339666  | 339666 | . |
| 1562844_a | 0.011974 | 0.006479 | LOC339822  | 339822 | . |
| 1562849_a | 0.008878 | 0.004562 |            |        | . |
| 1562853_x | 0.010494 | 0.005549 |            |        | . |
| 1562861_a | 4.53E-05 | 7.07E-06 |            |        | . |
| 1562864_a | 0.009683 | 0.005054 |            |        | . |
| 1562869_a | 0.001679 | 6.25E-04 |            |        | . |
| 1562871_a | 0.002826 | 0.001168 |            |        | . |
| 1562876_s | 0.004362 | 0.001967 | LOC541471  | 541471 | . |
| 1562885_a | 0.033224 | 0.021367 |            |        | . |
| 1562888_a | 0.018105 | 0.010528 | GLB1L3     | 112937 | . |



|           |          |          |              |             |
|-----------|----------|----------|--------------|-------------|
| 1562893_a | 9.25E-04 | 3.04E-04 |              | .           |
| 1562894_a | 0.016434 | 0.009404 |              | .           |
| 1562895_a | 0.002096 | 8.17E-04 |              | .           |
| 1562896_a | 2.75E-04 | 6.81E-05 | TNRC18       | 84629 .     |
| 1562898_a | 1.50E-04 | 3.21E-05 |              | .           |
| 1562899_a | 0.005869 | 0.002803 |              | .           |
| 1562903_a | 6.28E-04 | 1.88E-04 | hCG_1990547  | 286042 .    |
| 1562906_a | 0.009844 | 0.005151 | FAM170A      | 340069 .    |
| 1562910_a | 0.037453 | 0.024547 | SH3PXD2B     | 285590 .    |
| 1562915_a | 0.001557 | 5.70E-04 |              | .           |
| 1562920_a | 7.05E-04 | 2.17E-04 | LOC441086    | 441086 .    |
| 1562921_a | 2.08E-06 | 1.32E-07 |              | .           |
| 1562922_a | 0.011407 | 0.006124 |              | .           |
| 1562926_a | 0.031951 | 0.020413 |              | .           |
| 1562935_a | 0.034817 | 0.022538 |              | .           |
| 1562938_a | 0.005554 | 0.002625 |              | .           |
| 1562939_a | 0.046081 | 0.031227 | LRRC16A      | 55604 .     |
| 1562940_a | 0.001411 | 5.07E-04 |              | .           |
| 1562942_a | 0.025156 | 0.015471 |              | .           |
| 1562943_a | 7.29E-04 | 2.27E-04 |              | .           |
| 1562945_a | 0.010874 | 0.00579  |              | .           |
| 1562946_a | 2.67E-04 | 6.56E-05 |              | .           |
| 1562947_x | 3.12E-04 | 7.99E-05 |              | .           |
| 1562950_a | 0.001072 | 3.63E-04 |              | .           |
| 1562955_a | 2.93E-05 | 4.04E-06 |              | .           |
| 1562957_a | 6.26E-04 | 1.88E-04 |              | .           |
| 1562961_a | 0.014052 | 0.007818 |              | .           |
| 1562962_a | 0.004159 | 0.001856 |              | .           |
| 1562966_a | 1.85E-04 | 4.17E-05 | KIAA1217     | 56243 .     |
| 1562972_a | 4.25E-04 | 1.16E-04 | LOC503519    | 503519 .    |
| 1562974_a | 0.045391 | 0.030686 | LOC100133899 | 100133899 . |
| 1562976_a | 5.14E-04 | 1.47E-04 |              | .           |
| 1562979_a | 1.22E-04 | 2.48E-05 |              | .           |
| 1562981_a | 8.64E-06 | 8.35E-07 | HBB          | 3043 .      |

|           |          |          |           |             |
|-----------|----------|----------|-----------|-------------|
| 1562984_a | 0.033636 | 0.021677 |           | .           |
| 1562988_a | 0.025102 | 0.01543  | ZNF3970S  | 100101467 . |
| 1562989_a | 0.014023 | 0.007798 |           | .           |
| 1562992_a | 2.68E-04 | 6.61E-05 |           | .           |
| 1563005_a | 0.004349 | 0.00196  |           | .           |
| 1563009_a | 0.002442 | 9.83E-04 | LOC284930 | 284930 .    |
| 1563012_x | 1.41E-05 | 1.60E-06 |           | .           |
| 1563013_a | 0.017238 | 0.009938 | LOC646522 | 646522 .    |
| 1563014_a | 0.001667 | 6.19E-04 | RPS15     | 6209 .      |
| 1563018_a | 4.35E-05 | 6.70E-06 | TBX5      | 6910 .      |
| 1563019_a | 0.00199  | 7.67E-04 |           | .           |
| 1563022_a | 2.40E-05 | 3.15E-06 | LOC347475 | 347475 .    |
| 1563027_a | 0.037426 | 0.024527 |           | .           |
| 1563030_a | 2.48E-05 | 3.29E-06 |           | .           |
| 1563035_x | 0.009224 | 0.004774 | GPD1      | 2819 .      |
| 1563042_a | 0.013972 | 0.007766 | LOC338694 | 338694 .    |
| 1563043_a | 0.048822 | 0.03339  | LOC285375 | 285375 .    |
| 1563045_a | 4.82E-05 | 7.66E-06 |           | .           |
| 1565000_a | 9.16E-04 | 3.00E-04 | TCP11L2   | 255394 .    |
| 1563048_a | 0.004098 | 0.001824 |           | .           |
| 1563051_a | 0.0044   | 0.001988 | OSBP      | 5007 .      |
| 1563052_a | 0.001647 | 6.10E-04 |           | .           |
| 1563057_a | 0.003767 | 0.001651 |           | .           |
| 1563064_a | 0.002766 | 0.00114  |           | .           |
| 1563069_a | 2.62E-04 | 6.42E-05 |           | .           |
| 1563071_a | 0.025783 | 0.015912 |           | .           |
| 1563074_a | 0.001026 | 3.44E-04 | LOC255654 | 255654 .    |
| 1563075_s | 6.07E-04 | 1.81E-04 |           | .           |
| 1563076_x | 6.25E-05 | 1.06E-05 |           | .           |
| 1563077_a | 0.009751 | 0.005096 |           | .           |
| 1563078_a | 0.019864 | 0.01173  |           | .           |
| 1563079_a | 0.002739 | 0.001126 |           | .           |
| 1563081_a | 0.036693 | 0.023969 |           | .           |
| 1563089_a | 5.78E-04 | 1.70E-04 |           | .           |

|           |          |          |           |        |   |
|-----------|----------|----------|-----------|--------|---|
| 1563090_a | 4.72E-04 | 1.32E-04 | CCDC33    | 80125  | . |
| 1563098_a | 0.018498 | 0.010797 | IGFN1     | 91156  | . |
| 1563102_a | 0.004127 | 0.00184  |           |        | . |
| 1563104_a | 9.40E-04 | 3.10E-04 |           |        | . |
| 1563105_a | 0.001063 | 3.59E-04 |           |        | . |
| 1563106_a | 0.0116   | 0.006244 |           |        | . |
| 1563107_a | 0.002475 | 9.98E-04 |           |        | . |
| 1563108_a | 0.001491 | 5.42E-04 | ELFN2     | 114794 | . |
| 1563111_a | 0.012703 | 0.006954 | PIGX      | 54965  | . |
| 1563118_a | 0.039218 | 0.025885 |           |        | . |
| 1563119_a | 0.011263 | 0.006034 | LOC651900 | 651900 | . |
| 1563121_a | 8.65E-04 | 2.80E-04 |           |        | . |
| 1563128_a | 0.023477 | 0.01427  |           |        | . |
| 1563129_a | 8.84E-05 | 1.65E-05 |           |        | . |
| 1563130_a | 1.69E-06 | 1.01E-07 |           |        | . |
| 1563131_a | 3.06E-04 | 7.79E-05 |           |        | . |
| 1563132_a | 0.004319 | 0.001943 |           |        | . |
| 1563137_a | 0.002766 | 0.001139 | MGAT5B    | 146664 | . |
| 1563138_a | 5.03E-04 | 1.43E-04 |           |        | . |
| 1563142_a | 0.001854 | 7.04E-04 |           |        | . |
| 1563143_a | 0.041233 | 0.027433 |           |        | . |
| 1563147_a | 9.48E-06 | 9.49E-07 |           |        | . |
| 1563154_a | 0.048078 | 0.03279  |           |        | . |
| 1563165_a | 5.72E-04 | 1.68E-04 |           |        | . |
| 1563169_a | 0.043727 | 0.029383 |           |        | . |
| 1563171_a | 2.75E-04 | 6.81E-05 |           |        | . |
| 1563173_a | 0.021783 | 0.013086 |           |        | . |
| 1563181_a | 0.00538  | 0.002526 |           |        | . |
| 1563189_a | 0.021664 | 0.013    |           |        | . |
| 1563203_a | 8.37E-05 | 1.55E-05 |           |        | . |
| 1563208_s | 0.035514 | 0.02307  | C3orf65   | 646600 | . |
| 1563222_a | 0.0462   | 0.03132  |           |        | . |
| 1563224_a | 0.031607 | 0.020153 |           |        | . |
| 1563226_a | 0.007562 | 0.003785 | SLC38A10  | 124565 | . |

|           |          |          |           |        |   |
|-----------|----------|----------|-----------|--------|---|
| 1563229_a | 8.72E-04 | 2.83E-04 | DLEU2     | 8847   | . |
| 1563235_a | 0.017135 | 0.009869 |           |        | . |
| 1563243_a | 1.96E-04 | 4.46E-05 |           |        | . |
| 1563245_a | 0.002325 | 9.26E-04 |           |        | . |
| 1563247_a | 0.049078 | 0.033591 |           |        | . |
| 1563250_a | 7.16E-05 | 1.27E-05 |           |        | . |
| 1563252_a | 2.66E-05 | 3.58E-06 | ERBB3     | 2065   | . |
| 1563253_s | 0.013105 | 0.00721  | ERBB3     | 2065   | . |
| 1563255_a | 9.51E-05 | 1.81E-05 | LOC728883 | 728883 | . |
| 1563259_a | 0.006677 | 0.003266 |           |        | . |
| 1563271_a | 0.004172 | 0.001863 |           |        | . |
| 1563272_a | 5.83E-06 | 4.99E-07 | TBC1D8B   | 54885  | . |
| 1563273_a | 0.012901 | 0.007083 |           |        | . |
| 1563279_a | 1.85E-04 | 4.15E-05 |           |        | . |
| 1563283_a | 0.001055 | 3.56E-04 |           |        | . |
| 1563290_a | 0.007755 | 0.003898 | DNAH3     | 55567  | . |
| 1563295_a | 0.003365 | 0.001442 |           |        | . |
| 1563297_s | 7.26E-04 | 2.26E-04 |           |        | . |
| 1563300_a | 4.90E-05 | 7.82E-06 | LOC387826 | 387826 | . |
| 1563302_a | 0.006181 | 0.002979 |           |        | . |
| 1563303_a | 0.007717 | 0.003875 |           |        | . |
| 1563318_s | 1.58E-05 | 1.85E-06 | MAGIX     | 79917  | . |
| 1563320_a | 2.94E-06 | 2.05E-07 |           |        | . |
| 1563321_s | 5.69E-05 | 9.41E-06 | MLLT10    | 8028   | . |
| 1563325_a | 0.036245 | 0.02363  |           |        | . |
| 1563341_a | 5.02E-05 | 8.05E-06 |           |        | . |
| 1563344_a | 3.73E-04 | 9.93E-05 |           |        | . |
| 1563345_a | 0.007439 | 0.003715 |           |        | . |
| 1563346_a | 0.015731 | 0.008934 | D21S2089E | 246312 | . |
| 1563348_a | 4.30E-04 | 1.18E-04 |           |        | . |
| 1563357_a | 2.29E-08 | 3.15E-10 |           |        | . |
| 1563362_a | 3.30E-04 | 8.55E-05 | D21S2090E | 266918 | . |
| 1563364_a | 0.001575 | 5.79E-04 |           |        | . |
| 1563371_a | 0.040582 | 0.026932 |           |        | . |

|           |          |          |              |        |   |
|-----------|----------|----------|--------------|--------|---|
| 1563373_a | 0.001325 | 4.70E-04 | LOC731223    | 731223 | . |
| 1563389_a | 4.12E-05 | 6.23E-06 |              |        | . |
| 1563391_a | 8.84E-04 | 2.88E-04 |              |        | . |
| 1563397_a | 1.08E-05 | 1.12E-06 |              |        | . |
| 1563398_a | 0.039207 | 0.025874 |              |        | . |
| 1563404_a | 0.027731 | 0.017316 |              |        | . |
| 1563425_a | 0.011443 | 0.006147 |              |        | . |
| 1563426_a | 4.75E-05 | 7.52E-06 | LOC644613    | 644613 | . |
| 1563431_x | 7.63E-04 | 2.40E-04 |              |        | . |
| 1563445_x | 4.25E-07 | 1.61E-08 | CTSLL3       | 1518   | . |
| 1563455_a | 1.11E-05 | 1.17E-06 | KIAA0999     | 23387  | . |
| 1563458_a | 0.003439 | 0.00148  | PARVA        | 55742  | . |
| 1563460_a | 0.027811 | 0.017373 |              |        | . |
| 1563461_a | 0.001779 | 6.69E-04 |              |        | . |
| 1563468_a | 3.13E-06 | 2.22E-07 |              |        | . |
| 1563469_a | 7.44E-05 | 1.33E-05 |              |        | . |
| 1563473_a | 4.18E-04 | 1.14E-04 |              |        | . |
| 1563475_s | 0.004547 | 0.002069 | C12orf72     | 254013 | . |
| 1563477_a | 0.046316 | 0.031408 |              |        | . |
| 1563478_a | 0.008388 | 0.004271 | CTA-221G9.4  | 85379  | . |
| 1563482_a | 0.032311 | 0.020685 |              |        | . |
| 1563483_a | 0.022899 | 0.013859 | FAM91A2      | 57234  | . |
| 1563484_a | 0.02882  | 0.018117 |              |        | . |
| 1563485_a | 8.44E-06 | 8.10E-07 |              |        | . |
| 1563487_a | 0.018079 | 0.010512 |              |        | . |
| 1563488_a | 0.005878 | 0.002808 | TMEM132B     | 114795 | . |
| 1563489_a | 0.04551  | 0.030778 | LOC285638    | 285638 | . |
| 1563496_a | 0.003412 | 0.001466 | STL          | 7955   | . |
| 1563497_a | 4.97E-05 | 7.95E-06 | USP25        | 29761  | . |
| 1563498_s | 0.023261 | 0.014118 | SLC25A45     | 283130 | . |
| 1563502_a | 0.046925 | 0.031895 | ZDHHC2       | 51201  | . |
| 1563505_a | 0.001207 | 4.20E-04 | DUSP16       | 80824  | . |
| 1563511_a | 0.028249 | 0.017691 | DKFZp451B082 | 401282 | . |
| 1563513_a | 0.001593 | 5.87E-04 | SYTL4        | 94121  | . |

|           |          |          |             |        |   |
|-----------|----------|----------|-------------|--------|---|
| 1563521_a | 0.030754 | 0.019535 | MOBKL2B     | 79817  | . |
| 1563528_a | 0.005667 | 0.002687 | LOC91149    | 91149  | . |
| 1563531_a | 0.005288 | 0.002476 |             |        | . |
| 1563532_a | 0.025323 | 0.015595 | HMCN2       | 256158 | . |
| 1563549_a | 0.002363 | 9.43E-04 | ANO8        | 57719  | . |
| 1563553_a | 0.026997 | 0.016784 |             |        | . |
| 1563563_a | 7.64E-04 | 2.41E-04 | CCDC40      | 55036  | . |
| 1563569_a | 0.002244 | 8.87E-04 |             |        | . |
| 1563571_a | 1.41E-04 | 2.97E-05 | LOC285463   | 285463 | . |
| 1563573_a | 0.023085 | 0.013987 |             |        | . |
| 1563577_a | 9.06E-04 | 2.97E-04 |             |        | . |
| 1563586_a | 0.014354 | 0.008019 | LOC401324   | 401324 | . |
| 1563587_a | 0.003415 | 0.001468 | CDH4        | 1002   | . |
| 1563590_a | 0.01826  | 0.010634 |             |        | . |
| 1563597_a | 0.021726 | 0.013045 |             |        | . |
| 1563601_a | 0.006529 | 0.003179 |             |        | . |
| 1569105_a | 8.20E-07 | 3.80E-08 | SETD5       | 55209  | . |
| 1569106_s | 0.005804 | 0.002766 | SETD5       | 55209  | . |
| 1563606_a | 0.032511 | 0.020827 | hCG_2045089 | 286359 | . |
| 1563607_x | 0.002049 | 7.95E-04 | hCG_2045089 | 286359 | . |
| 1563614_a | 1.90E-05 | 2.34E-06 | MTBP        | 27085  | . |
| 1563621_a | 1.10E-05 | 1.15E-06 |             |        | . |
| 1563632_a | 0.002154 | 8.44E-04 | LOC220980   | 220980 | . |
| 1563638_a | 0.009132 | 0.004716 | FAM18A      | 780776 | . |
| 1563639_a | 0.001072 | 3.63E-04 | FHAD1       | 114827 | . |
| 1563654_a | 0.018175 | 0.010577 | C8orf66     | 619427 | . |
| 1563655_a | 0.006888 | 0.00339  | TNNT2       | 7139   | . |
| 1563657_a | 0.001943 | 7.46E-04 | PLXND1      | 23129  | . |
| 1563658_a | 1.46E-06 | 8.22E-08 | SYT9        | 143425 | . |
| 1563662_a | 0.007198 | 0.003572 | LOC285778   | 285778 | . |
| 1563674_a | 0.024452 | 0.01496  | FCRL2       | 79368  | . |
| 1563685_a | 9.44E-04 | 3.12E-04 | LOC285422   | 285422 | . |
| 1563687_a | 4.26E-05 | 6.53E-06 | FRYL        | 285527 | . |
| 1563691_a | 0.001369 | 4.90E-04 | LOC285300   | 285300 | . |

|           |          |          |                     |
|-----------|----------|----------|---------------------|
| 1563692_a | 0.004543 | 0.002066 | .                   |
| 1563693_a | 1.01E-04 | 1.94E-05 | .                   |
| 1563704_a | 0.040511 | 0.026878 | .                   |
| 1563706_a | 0.016424 | 0.009398 | .                   |
| 1563707_a | 0.036611 | 0.023907 | .                   |
| 1563715_a | 0.018147 | 0.010558 | .                   |
| 1563721_a | 0.006488 | 0.003156 | .                   |
| 1563724_a | 9.39E-05 | 1.78E-05 | .                   |
| 1563728_a | 0.047846 | 0.03261  | NCRNA00032 158035 . |
| 1563744_a | 0.003937 | 0.00174  | DISC1 27185 .       |
| 1563754_a | 1.72E-06 | 1.03E-07 | GRIK2 2898 .        |
| 1563770_a | 1.27E-04 | 2.59E-05 | ZBTB8B 728116 .     |
| 1563772_a | 0.032177 | 0.020586 | LAMA3 3909 .        |
| 1563781_a | 0.001481 | 5.38E-04 | LOC285949 285949 .  |
| 1563783_a | 0.011322 | 0.006069 | ZNF333 84449 .      |
| 1563794_s | 0.001417 | 5.10E-04 | IFT122 55764 .      |
| 1563800_a | 6.68E-06 | 5.95E-07 | LOC283140 283140 .  |
| 1563808_a | 5.42E-05 | 8.85E-06 | MCF2L 23263 .       |
| 1563816_a | 9.94E-04 | 3.31E-04 | GAB4 128954 .       |
| 1563821_a | 0.006811 | 0.003345 | LOC170425 170425 .  |
| 1563828_a | 0.011053 | 0.0059   | .                   |
| 1563830_a | 0.049726 | 0.034107 | FHAD1 114827 .      |
| 1563840_a | 0.001075 | 3.65E-04 | .                   |
| 1563842_a | 9.79E-06 | 9.89E-07 | PIGG 54872 .        |
| 1563845_a | 0.03221  | 0.02061  | FAM153B 202134 .    |
| 1563849_a | 0.039806 | 0.026334 | SH2D4B 387694 .     |
| 1563853_a | 0.007357 | 0.003665 | LOC283045 283045 .  |
| 1564131_a | 0.026068 | 0.016114 | .                   |
| 1563867_a | 3.92E-04 | 1.06E-04 | LOC283194 283194 .  |
| 1563868_a | 0.001134 | 3.89E-04 | C9orf79 286234 .    |
| 1563872_a | 0.002203 | 8.68E-04 | LOC284395 284395 .  |
| 1563874_a | 7.73E-04 | 2.44E-04 | WDR72 256764 .      |
| 1563881_a | 0.018785 | 0.010992 | .                   |
| 1563884_a | 0.01647  | 0.009429 | .                   |

|           |          |          |              |             |
|-----------|----------|----------|--------------|-------------|
| 1563886_a | 0.011176 | 0.00598  |              | .           |
| 1563903_x | 0.004375 | 0.001975 |              | .           |
| 1563906_a | 0.005957 | 0.002854 | SOBP         | 55084 .     |
| 1563916_a | 0.014092 | 0.007846 | LOC283089    | 283089 .    |
| 1563945_a | 1.38E-05 | 1.55E-06 | LOC284100    | 284100 .    |
| 1563946_a | 0.037094 | 0.024284 |              | .           |
| 1563947_a | 5.98E-06 | 5.16E-07 | ERC1         | 23085 .     |
| 1564635_a | 0.009322 | 0.004831 | FHAD1        | 114827 .    |
| 1563963_a | 0.04747  | 0.032323 |              | .           |
| 1563970_a | 2.29E-04 | 5.42E-05 | LOC100130998 | 100130998 . |
| 1563975_a | 7.43E-06 | 6.84E-07 | RNF130       | 55819 .     |
| 1563978_a | 5.85E-04 | 1.73E-04 | hCG_1647286  | 728690 .    |
| 1563983_a | 5.34E-05 | 8.69E-06 | LOC100190939 | 100190939 . |
| 1563985_a | 0.038855 | 0.025605 |              | .           |
| 1563993_a | 0.001355 | 4.84E-04 |              | .           |
| 1564000_a | 0.021255 | 0.012715 | ANKRD31      | 256006 .    |
| 1564002_a | 0.005527 | 0.002611 | AKD2         | 221264 .    |
| 1564012_a | 1.24E-05 | 1.36E-06 | LOC100132354 | 100132354 . |
| 1564017_a | 0.024281 | 0.014835 | NCRNA00175   | 378832 .    |
| 1564021_a | 0.012603 | 0.006888 | LOC100130456 | 100130456 . |
| 1564029_a | 0.009685 | 0.005055 | USP49        | 25862 .     |
| 1564039_a | 0.020244 | 0.011996 | ZSCAN23      | 222696 .    |
| 1564040_a | 0.01208  | 0.00655  | LOC283999    | 283999 .    |
| 1564044_a | 2.51E-04 | 6.09E-05 | KNCN         | 148930 .    |
| 1564049_a | 0.001935 | 7.42E-04 | LOC339593    | 339593 .    |
| 1564063_a | 0.001237 | 4.33E-04 | ATP11B       | 23200 .     |
| 1564064_a | 4.77E-04 | 1.34E-04 | ATP11B       | 23200 .     |
| 1564066_a | 2.58E-07 | 8.22E-09 | TMEM151B     | 441151 .    |
| 1564067_x | 3.66E-06 | 2.72E-07 | TMEM151B     | 441151 .    |
| 1564069_a | 8.20E-05 | 1.51E-05 |              | .           |
| 1564072_a | 0.006362 | 0.003082 | MYH16        | 84176 .     |
| 1564074_a | 0.005311 | 0.002488 |              | .           |
| 1564093_a | 7.34E-04 | 2.29E-04 | NEK1         | 4750 .      |
| 1564109_a | 0.003271 | 0.001393 | hCG_1820679  | 284865 .    |



|           |          |          |                              |             |
|-----------|----------|----------|------------------------------|-------------|
| 1564112_a | 0.001995 | 7.70E-04 | FAM71A                       | 149647 .    |
| 1564117_a | 5.01E-05 | 8.02E-06 | HMCN2                        | 256158 .    |
| 1564122_a | 5.02E-04 | 1.43E-04 | LOC283875                    | 283875 .    |
| 1564125_a | 3.48E-04 | 9.11E-05 | LOC285857                    | 285857 .    |
| 1564129_a | 8.29E-05 | 1.53E-05 |                              | .           |
| 1564143_a | 3.37E-05 | 4.83E-06 |                              | .           |
| 1564151_a | 0.003493 | 0.001507 |                              | .           |
| 1564154_a | 3.46E-08 | 5.46E-10 |                              | .           |
| 1564155_x | 3.58E-08 | 5.75E-10 |                              | .           |
| 1564157_a | 0.002945 | 0.001226 | FLJ33544                     | 728283 .    |
| 1564166_s | 0.002394 | 9.59E-04 | PRKRIP1                      | 79706 .     |
| 1564175_a | 0.016704 | 0.009583 | LOC401074                    | 401074 .    |
| 1564178_a | 5.71E-04 | 1.68E-04 | LOC283033                    | 283033 .    |
| 1564190_x | 0.008261 | 0.004195 | ZNF519                       | 162655 .    |
| 1564193_a | 0.030958 | 0.019678 | FLJ39061 /// LC165057 /// 3: | .           |
| 1564200_a | 0.005033 | 0.002335 | LOC646324                    | 646324 .    |
| 1564204_a | 0.030878 | 0.019623 | FAM91A2                      | 57234 .     |
| 1569090_x | 0.001089 | 3.70E-04 | FLJ35390                     | 255031 .    |
| 1564207_a | 0.002248 | 8.89E-04 | FLJ35390                     | 255031 .    |
| 1564208_x | 0.017179 | 0.009898 | FLJ35390                     | 255031 .    |
| 1564211_a | 0.002153 | 8.44E-04 | C14orf64                     | 388011 .    |
| 1564215_a | 0.002256 | 8.93E-04 |                              | .           |
| 1564224_x | 0.012154 | 0.006598 | UNQ2963                      | 283314 .    |
| 1564227_a | 0.02979  | 0.018829 |                              | .           |
| 1564229_a | 0.002203 | 8.68E-04 | LOC729173                    | 729173 .    |
| 1564232_a | 0.021029 | 0.012557 | LOC441528                    | 441528 .    |
| 1564237_a | 2.92E-05 | 4.03E-06 |                              | .           |
| 1564240_a | 1.62E-04 | 3.54E-05 | LOC100130856                 | 100130856 . |
| 1564242_a | 6.32E-06 | 5.51E-07 |                              | .           |
| 1564248_a | 5.14E-04 | 1.47E-04 |                              | .           |
| 1564251_a | 0.039663 | 0.026224 | EMID1                        | 129080 .    |
| 1564253_a | 0.001997 | 7.70E-04 | LOC285766                    | 285766 .    |
| 1564254_a | 0.008786 | 0.004506 | KY                           | 339855 .    |
| 1564257_a | 0.001604 | 5.91E-04 | LOC100132116                 | 100132116 . |

|           |          |          |              |             |
|-----------|----------|----------|--------------|-------------|
| 1564263_a | 0.014282 | 0.007969 | LOC144817    | 144817 .    |
| 1564264_a | 0.002058 | 7.99E-04 |              | .           |
| 1564274_a | 7.61E-05 | 1.37E-05 | C9orf47      | 286223 .    |
| 1564281_a | 6.97E-07 | 3.07E-08 | LOC285708    | 285708 .    |
| 1564282_a | 0.007044 | 0.003482 | LOC285708    | 285708 .    |
| 1564287_a | 0.00101  | 3.38E-04 | hCG_2038428  | 144776 .    |
| 1564299_a | 0.023567 | 0.014335 | LOC100127940 | 100127940 . |
| 1564300_a | 0.002087 | 8.13E-04 | LOC100129058 | 100129058 . |
| 1564301_a | 1.67E-04 | 3.68E-05 | RPAIN        | 84268 .     |
| 1564314_a | 0.042282 | 0.02825  | LOC219690    | 219690 .    |
| 1564315_a | 1.02E-04 | 1.98E-05 | C8orf49      | 606553 .    |
| 1564317_a | 0.021476 | 0.012863 |              | .           |
| 1564319_a | 1.53E-06 | 8.74E-08 | FAM71E2      | 284418 .    |
| 1564327_a | 1.34E-05 | 1.49E-06 | hCG_1983896  | 642696 .    |
| 1564331_a | 9.33E-06 | 9.28E-07 | ZNF846       | 162993 .    |
| 1564336_a | 6.59E-05 | 1.13E-05 |              | .           |
| 1564337_a | 0.009771 | 0.005108 |              | .           |
| 1564339_a | 7.17E-05 | 1.27E-05 | CHRM3        | 1131 .      |
| 1564352_a | 0.035867 | 0.02334  | CECR3        | 27442 .     |
| 1564356_a | 0.025426 | 0.015667 | ZNF568       | 374900 .    |
| 1564359_a | 0.033431 | 0.021523 | LOC339260    | 339260 .    |
| 1564362_x | 5.25E-08 | 9.66E-10 | ZNF843       | 283933 .    |
| 1564367_a | 0.009531 | 0.004958 | CXorf25      | 392459 .    |
| 1564377_a | 0.001584 | 5.83E-04 | SHANK2       | 22941 .     |
| 1564378_a | 1.24E-05 | 1.35E-06 |              | .           |
| 1564383_s | 0.013742 | 0.00762  | FLJ35934     | 400579 .    |
| 1564385_a | 2.70E-07 | 8.75E-09 | LOC219688    | 219688 .    |
| 1564391_a | 0.004664 | 0.002134 |              | .           |
| 1564399_a | 4.24E-05 | 6.49E-06 | ARMCX4       | 158947 .    |
| 1564403_a | 0.010833 | 0.005765 | TOPORS       | 10210 .     |
| 1564407_a | 0.023245 | 0.014105 |              | .           |
| 1564413_a | 2.88E-12 | 2.30E-15 | FLJ36116     | 388666 .    |
| 1564423_a | 8.27E-05 | 1.52E-05 | SEC16B       | 89866 .     |
| 1564426_x | 0.008631 | 0.004413 | LOC389634    | 389634 .    |

|           |          |          |              |             |
|-----------|----------|----------|--------------|-------------|
| 1564429_a | 0.003978 | 0.00176  |              | .           |
| 1564438_a | 0.001622 | 5.99E-04 |              | .           |
| 1564444_a | 2.08E-05 | 2.63E-06 | LOC100130264 | 100130264 . |
| 1564446_a | 0.003121 | 0.001317 | LOC284930    | 284930 .    |
| 1564449_a | 0.003868 | 0.001703 | LOC100130353 | 100130353 . |
| 1564451_a | 1.46E-04 | 3.10E-05 |              | .           |
| 1564460_a | 7.72E-04 | 2.44E-04 | LOC286442    | 286442 .    |
| 1564467_a | 2.03E-04 | 4.65E-05 | FAM161A      | 84140 .     |
| 1564474_a | 0.015251 | 0.008617 | LOC728723    | 728723 .    |
| 1564482_a | 0.002965 | 0.001236 | ATP5O        | 539 .       |
| 1564494_s | 3.96E-04 | 1.07E-04 | P4HB         | 5034 .      |
| 1564514_a | 0.007935 | 0.004007 | SNRK         | 54861 .     |
| 1564520_s | 2.27E-04 | 5.36E-05 | PRMT5        | 10419 .     |
| 1564521_x | 3.20E-05 | 4.54E-06 | PRMT5        | 10419 .     |
| 1564525_a | 0.027766 | 0.017341 |              | .           |
| 1564545_a | 0.024955 | 0.015325 |              | .           |
| 1564559_a | 0.005325 | 0.002496 | LOC728073    | 728073 .    |
| 1564561_a | 0.002982 | 0.001245 |              | .           |
| 1564573_a | 1.43E-07 | 3.68E-09 | LOC402778    | 402778 .    |
| 1564603_a | 0.002485 | 0.001003 | C15orf55     | 256646 .    |
| 1564620_a | 0.0029   | 0.001204 |              | .           |
| 1564627_a | 0.001325 | 4.70E-04 | DNAJC13      | 23317 .     |
| 1564632_a | 2.52E-04 | 6.13E-05 |              | .           |
| 1564637_a | 1.01E-05 | 1.04E-06 | FAM98B       | 283742 .    |
| 1564639_a | 0.025934 | 0.016023 | LOC389906    | 389906 .    |
| 1564651_a | 0.005072 | 0.002358 | LOC221710    | 221710 .    |
| 1564654_a | 0.015266 | 0.008627 |              | .           |
| 1564656_a | 0.021853 | 0.013137 |              | .           |
| 1564658_a | 0.001184 | 4.11E-04 | C7orf52      | 375607 .    |
| 1564660_a | 7.07E-04 | 2.18E-04 | LOC100131864 | 100131864 . |
| 1564662_a | 0.04154  | 0.02767  | ZNF852       | 285346 .    |
| 1564674_a | 0.035982 | 0.023428 | CDC20B       | 166979 .    |
| 1564676_a | 0.029962 | 0.018953 |              | .           |
| 1564684_a | 0.035709 | 0.023223 | BTN2A2       | 10385 .     |

|           |          |          |           |          |
|-----------|----------|----------|-----------|----------|
| 1564699_a | 0.003126 | 0.001319 |           | .        |
| 1564701_a | 0.00189  | 7.21E-04 |           | .        |
| 1564706_s | 0.028683 | 0.018012 | GLS2      | 27165 .  |
| 1564709_a | 0.014306 | 0.007988 | LOC286238 | 286238 . |
| 1564713_a | 0.001108 | 3.78E-04 | FOXN4     | 121643 . |
| 1564721_a | 0.037927 | 0.024906 |           | .        |
| 1564729_a | 4.48E-05 | 6.97E-06 |           | .        |
| 1564733_a | 0.039845 | 0.026363 |           | .        |
| 1564746_a | 9.53E-07 | 4.64E-08 | NHEDC2    | 133308 . |
| 1564749_a | 0.012843 | 0.007044 |           | .        |
| 1564753_a | 3.93E-07 | 1.44E-08 |           | .        |
| 1564773_x | 1.55E-05 | 1.80E-06 |           | .        |
| 1564778_a | 1.61E-04 | 3.50E-05 |           | .        |
| 1565027_a | 0.013329 | 0.007355 | OFCC1     | 266553 . |
| 1564783_x | 7.38E-04 | 2.31E-04 | OFCC1     | 266553 . |
| 1564785_a | 0.003701 | 0.001615 | LOC196913 | 196913 . |
| 1564789_a | 1.49E-04 | 3.17E-05 |           | .        |
| 1564796_a | 0.005686 | 0.002697 | EMP1      | 2012 .   |
| 1564798_a | 0.012193 | 0.006623 |           | .        |
| 1564802_a | 0.021845 | 0.01313  |           | .        |
| 1564807_a | 0.0282   | 0.017656 |           | .        |
| 1564816_a | 0.001924 | 7.36E-04 | C14orf178 | 283579 . |
| 1564820_a | 4.04E-05 | 6.07E-06 |           | .        |
| 1564821_a | 0.029437 | 0.01856  |           | .        |
| 1564823_a | 0.031681 | 0.020205 | CDC42BPG  | 55561 .  |
| 1564841_a | 0.020847 | 0.012431 |           | .        |
| 1564851_a | 0.048687 | 0.033278 |           | .        |
| 1564868_a | 0.001148 | 3.95E-04 | FAM117B   | 150864 . |
| 1564876_s | 0.006772 | 0.003321 | FOXP2     | 93986 .  |
| 1564878_a | 0.009033 | 0.004654 |           | .        |
| 1564883_a | 0.006983 | 0.003447 | TAS1R1    | 80835 .  |
| 1564886_a | 2.72E-04 | 6.73E-05 |           | .        |
| 1564887_a | 1.66E-04 | 3.64E-05 |           | .        |
| 1564897_a | 0.004985 | 0.002307 | TNR       | 7143 .   |

|           |          |          |                              |
|-----------|----------|----------|------------------------------|
| 1564905_a | 0.001913 | 7.32E-04 | .                            |
| 1564906_a | 2.33E-04 | 5.54E-05 | SNHG4 724102 .               |
| 1564907_s | 0.007135 | 0.003535 | MATR3 /// SNF 724102 /// 97. |
| 1564911_a | 0.008401 | 0.00428  | SNHG4 724102 .               |
| 1565254_s | 0.005259 | 0.002459 | ELL 8178 .                   |
| 1564921_a | 1.10E-04 | 2.18E-05 | KRTAP13-1 140258 .           |
| 1564945_a | 0.036753 | 0.024014 | TBX20 57057 .                |
| 1564949_a | 0.014353 | 0.008018 | .                            |
| 1564960_a | 0.001156 | 3.98E-04 | KRTAP7-1 337878 .            |
| 1564962_a | 0.002288 | 9.08E-04 | ZNF92 168374 .               |
| 1564963_x | 0.002555 | 0.001037 | ZNF92 168374 .               |
| 1564964_a | 5.29E-04 | 1.52E-04 | .                            |
| 1564970_a | 4.00E-04 | 1.08E-04 | SETDB2 83852 .               |
| 1564974_a | 0.017948 | 0.010421 | KRTAP8-1 337879 .            |
| 1564985_a | 9.21E-04 | 3.02E-04 | SLC8A1 6546 .                |
| 1565034_s | 4.83E-04 | 1.36E-04 | AFF3 /// MLL 3899 /// 4297.  |
| 1565080_a | 0.018502 | 0.0108   | SRC 6714 .                   |
| 1565105_a | 4.76E-07 | 1.86E-08 | .                            |
| 1565107_x | 0.008274 | 0.004203 | .                            |
| 1565130_a | 0.027506 | 0.017148 | MAP3K2 10746 .               |
| 1565149_a | 0.032874 | 0.021104 | DYNC2H1 79659 .              |
| 1565162_s | 0.034298 | 0.022153 | MGST1 4257 .                 |
| 1565265_a | 0.007784 | 0.003916 | .                            |
| 1565282_a | 0.026768 | 0.016625 | .                            |
| 1565306_a | 0.019194 | 0.011268 | SLC8A1 6546 .                |
| 1561615_s | 6.78E-04 | 2.07E-04 | SLC8A1 6546 .                |
| 1565320_a | 5.64E-04 | 1.65E-04 | RBMY3AP 64593 .              |
| 1565338_x | 0.029064 | 0.01829  | DNAH6 1768 .                 |
| 1565346_a | 0.036706 | 0.023979 | ATP1A4 480 .                 |
| 1565347_s | 0.001877 | 7.15E-04 | TFE3 7030 .                  |
| 1565358_a | 0.007903 | 0.003988 | RARA 5914 .                  |
| 1565406_a | 1.60E-04 | 3.47E-05 | LHX9 56956 .                 |
| 1565407_a | 9.53E-04 | 3.15E-04 | LHX9 56956 .                 |
| 1565424_a | 0.004126 | 0.001839 | C8orf8 83647 .               |

|           |          |          |               |        |   |
|-----------|----------|----------|---------------|--------|---|
| 1565436_s | 4.18E-05 | 6.36E-06 | MLL           | 4297   | . |
| 1565454_a | 1.75E-04 | 3.88E-05 | RP11-167P23.2 | 139629 | . |
| 1565495_a | 0.022858 | 0.013831 |               |        | . |
| 1565535_x | 3.57E-04 | 9.41E-05 |               |        | . |
| 1565537_a | 7.67E-05 | 1.38E-05 | NKX1-1        | 54729  | . |
| 1565554_a | 7.29E-05 | 1.30E-05 | LOC127841     | 127841 | . |
| 1565556_a | 0.006932 | 0.003416 | LOC127841     | 127841 | . |
| 1565558_a | 7.75E-04 | 2.45E-04 |               |        | . |
| 1565559_a | 2.26E-04 | 5.34E-05 | MAGIX         | 79917  | . |
| 1565562_a | 2.12E-04 | 4.92E-05 | MAGIX         | 79917  | . |
| 1565576_a | 9.59E-06 | 9.63E-07 |               |        | . |
| 1565577_s | 4.63E-05 | 7.26E-06 |               |        | . |
| 1565581_a | 1.86E-04 | 4.18E-05 |               |        | . |
| 1565582_a | 0.012183 | 0.006616 |               |        | . |
| 1565583_a | 4.67E-04 | 1.31E-04 | ZSCAN5A       | 79149  | . |
| 1565585_a | 0.044719 | 0.03016  |               |        | . |
| 1565587_a | 0.034219 | 0.022098 |               |        | . |
| 1565588_a | 0.004462 | 0.002023 | SP140         | 11262  | . |
| 1565597_a | 9.48E-06 | 9.49E-07 |               |        | . |
| 1565598_a | 3.19E-04 | 8.22E-05 |               |        | . |
| 1565603_a | 7.59E-04 | 2.38E-04 | PWP2          | 5822   | . |
| 1565604_a | 0.001107 | 3.78E-04 | PWP2          | 5822   | . |
| 1565610_a | 0.012476 | 0.006808 |               |        | . |
| 1565611_a | 4.12E-04 | 1.12E-04 | DYNLRB1       | 83658  | . |
| 1565612_a | 1.74E-04 | 3.86E-05 | DYNLRB1       | 83658  | . |
| 1565613_a | 0.019359 | 0.011385 |               |        | . |
| 1565614_a | 0.002044 | 7.92E-04 |               |        | . |
| 1565617_a | 0.0396   | 0.026179 |               |        | . |
| 1565618_a | 0.022107 | 0.013317 | CTA-221G9.4   | 85379  | . |
| 1565620_a | 1.30E-05 | 1.44E-06 | AGAP4         | 119016 | . |
| 1565627_a | 8.41E-04 | 2.71E-04 |               |        | . |
| 1565628_a | 0.046598 | 0.031631 |               |        | . |
| 1565635_a | 0.020879 | 0.012454 |               |        | . |
| 1565638_a | 0.006994 | 0.003453 |               |        | . |

|           |          |          |                   |           |     |
|-----------|----------|----------|-------------------|-----------|-----|
| 1565641_a | 2.16E-04 | 5.05E-05 | C16orf45          | 89927     | .   |
| 1565651_a | 1.64E-05 | 1.94E-06 | ARF1              | 375       | .   |
| 1565659_a | 9.58E-06 | 9.62E-07 | FUT6              | 2528      | .   |
| 1565660_a | 0.002981 | 0.001244 | FUT6              | 2528      | .   |
| 1565661_x | 0.04305  | 0.028837 | FUT6              | 2528      | .   |
| 1565662_a | 0.005427 | 0.002553 |                   |           | .   |
| 1565666_s | 0.03833  | 0.02521  | LOC100133432      | 100133432 | //. |
| 1565668_a | 0.003106 | 0.001309 | TUBA1B            | 10376     | .   |
| 1565669_a | 7.13E-05 | 1.26E-05 |                   |           | .   |
| 1565671_a | 4.90E-05 | 7.81E-06 | LOC391142         | 391142    | .   |
| 1565672_a | 0.004363 | 0.001968 |                   |           | .   |
| 1565681_s | 1.98E-06 | 1.24E-07 | DIP2C             | 22982     | .   |
| 1565689_a | 0.001145 | 3.93E-04 |                   |           | .   |
| 1565690_a | 0.009651 | 0.005033 |                   |           | .   |
| 1565692_a | 0.004598 | 0.002097 |                   |           | .   |
| 1565694_a | 0.002707 | 0.00111  | DTYMK /// LOC1841 | /// 7277  | .   |
| 1565696_a | 0.015765 | 0.008958 |                   |           | .   |
| 1565697_a | 0.002581 | 0.001049 |                   |           | .   |
| 1565701_a | 1.57E-06 | 9.04E-08 |                   |           | .   |
| 1565703_a | 0.005445 | 0.002563 | SMAD4             | 4089      | .   |
| 1565705_x | 0.004995 | 0.002313 |                   |           | .   |
| 1565713_a | 0.005349 | 0.002509 |                   |           | .   |
| 1565714_a | 0.019088 | 0.011197 |                   |           | .   |
| 1565716_a | 1.15E-04 | 2.30E-05 | FUS               | 2521      | .   |
| 1565722_a | 0.002217 | 8.75E-04 |                   |           | .   |
| 1565728_a | 3.62E-04 | 9.58E-05 | LOC284630         | 284630    | .   |
| 1565729_a | 0.004635 | 0.002116 | LOC284630         | 284630    | .   |
| 1565730_a | 0.011721 | 0.006318 |                   |           | .   |
| 1565731_a | 8.65E-07 | 4.09E-08 | ALDH3B1           | 221       | .   |
| 1565733_a | 0.007376 | 0.003676 |                   |           | .   |
| 1565734_a | 0.017289 | 0.009974 |                   |           | .   |
| 1565735_a | 2.27E-05 | 2.93E-06 |                   |           | .   |
| 1565740_a | 9.49E-04 | 3.13E-04 |                   |           | .   |
| 1565746_a | 0.006565 | 0.0032   | LOC100132815      | 100132815 | .   |

|           |          |          |              |           |     |
|-----------|----------|----------|--------------|-----------|-----|
| 1565751_a | 1.08E-04 | 2.12E-05 | FGD2         | 221472    | .   |
| 1565752_a | 5.79E-07 | 2.39E-08 | FGD2         | 221472    | .   |
| 1565754_x | 0.001792 | 6.75E-04 | FGD2         | 221472    | .   |
| 1565756_a | 0.029432 | 0.018556 | MAP1D        | 254042    | .   |
| 1565758_a | 0.001049 | 3.53E-04 | RPL13        | 6137      | .   |
| 1565759_a | 9.40E-05 | 1.78E-05 | RPL13        | 6137      | .   |
| 1565762_a | 0.001356 | 4.84E-04 |              |           | .   |
| 1565763_a | 0.026151 | 0.016175 | C13orf33     | 84935     | .   |
| 1565765_x | 0.00593  | 0.002837 | C13orf33     | 84935     | .   |
| 1565772_a | 2.19E-04 | 5.12E-05 | LOC100134287 | 100134287 | .   |
| 1565776_a | 0.017251 | 0.009947 |              |           | .   |
| 1565777_a | 0.004671 | 0.002138 |              |           | .   |
| 1565778_a | 0.024804 | 0.015217 | ABCA8        | 10351     | .   |
| 1565784_a | 0.015021 | 0.008462 | LOC100128262 | 100128262 | .   |
| 1565786_x | 0.001413 | 5.08E-04 | FLJ45482     | 645566    | .   |
| 1565797_a | 0.04039  | 0.02678  | DUOX1        | 53905     | .   |
| 1565802_a | 0.027854 | 0.017406 |              |           | .   |
| 1565803_a | 0.004575 | 0.002084 |              |           | .   |
| 1565804_a | 0.005147 | 0.002399 |              |           | .   |
| 1565805_a | 0.007253 | 0.003605 | LOC728011    | 728011    | .   |
| 1565807_a | 0.011543 | 0.006208 |              |           | .   |
| 1565809_x | 0.004202 | 0.001879 |              |           | .   |
| 1565810_a | 5.60E-05 | 9.21E-06 |              |           | .   |
| 1565811_a | 0.005967 | 0.002859 |              |           | .   |
| 1565812_a | 0.003912 | 0.001727 | TRIM36       | 55521     | .   |
| 1565814_a | 0.005596 | 0.002648 | LOC100131040 | 100131040 | //. |
| 1565817_a | 0.002174 | 8.54E-04 | IKZF1        | 10320     | .   |
| 1565818_s | 0.037824 | 0.024828 | IKZF1        | 10320     | .   |
| 1565821_a | 0.007626 | 0.003822 |              |           | .   |
| 1565823_a | 0.032134 | 0.020555 |              |           | .   |
| 1565826_a | 4.16E-04 | 1.14E-04 |              |           | .   |
| 1565829_a | 8.16E-05 | 1.50E-05 | KIAA1731     | 85459     | .   |
| 1565830_a | 7.35E-04 | 2.29E-04 |              |           | .   |
| 1565836_a | 6.18E-07 | 2.60E-08 |              |           | .   |



|           |          |          |              |           |   |
|-----------|----------|----------|--------------|-----------|---|
| 1565843_s | 0.004533 | 0.002061 | BRPF3        | 27154     | . |
| 1565844_a | 0.023177 | 0.014053 | BRPF3        | 27154     | . |
| 1565845_a | 0.00131  | 4.64E-04 | PDXDC2       | 283970    | . |
| 1565852_a | 4.05E-04 | 1.10E-04 |              |           | . |
| 1565856_a | 0.012443 | 0.006784 |              |           | . |
| 1565858_a | 3.91E-04 | 1.05E-04 | SNORA71A     | 26777     | . |
| 1565862_a | 0.004414 | 0.001996 |              |           | . |
| 1565866_a | 0.014371 | 0.00803  |              |           | . |
| 1565867_a | 0.001392 | 4.99E-04 | LOC100131402 | 100131402 | . |
| 1565868_a | 0.001769 | 6.65E-04 | CD44         | 960       | . |
| 1565873_a | 0.040815 | 0.027109 |              |           | . |
| 1565875_a | 4.45E-05 | 6.92E-06 |              |           | . |
| 1565876_x | 1.60E-06 | 9.28E-08 |              |           | . |
| 1565877_a | 4.33E-05 | 6.66E-06 |              |           | . |
| 1565879_a | 0.018629 | 0.010885 |              |           | . |
| 1565880_a | 1.22E-06 | 6.41E-08 |              |           | . |
| 1565882_a | 0.004797 | 0.002207 |              |           | . |
| 1565886_a | 1.58E-05 | 1.85E-06 |              |           | . |
| 1565887_a | 3.19E-04 | 8.22E-05 | TRPM7        | 54822     | . |
| 1565889_a | 2.95E-04 | 7.42E-05 |              |           | . |
| 1565892_a | 3.78E-04 | 1.01E-04 |              |           | . |
| 1565896_a | 0.013119 | 0.007221 |              |           | . |
| 1565898_a | 0.00165  | 6.12E-04 | METT5D1      | 196074    | . |
| 1565903_a | 8.25E-05 | 1.52E-05 |              |           | . |
| 1565905_a | 0.03335  | 0.021459 | FLJ46026     | 400627    | . |
| 1565908_a | 7.41E-05 | 1.32E-05 | NADSYN1      | 55191     | . |
| 1565909_a | 0.003114 | 0.001313 |              |           | . |
| 1565911_a | 0.027506 | 0.017148 | LOC648921    | 648921    | . |
| 1565913_a | 0.005086 | 0.002366 |              |           | . |
| 1565917_a | 0.027639 | 0.01725  |              |           | . |
| 1565921_a | 0.009437 | 0.004902 |              |           | . |
| 1565928_a | 4.17E-04 | 1.14E-04 |              |           | . |
| 1565935_a | 2.97E-04 | 7.50E-05 | LOC91431     | 91431     | . |
| 1565949_x | 0.047012 | 0.031964 | CHML         | 1122      | . |

|           |          |          |           |        |   |
|-----------|----------|----------|-----------|--------|---|
| 1565951_s | 1.92E-04 | 4.36E-05 | CHML      | 1122   | . |
| 1565974_a | 0.027995 | 0.017505 |           |        | . |
| 1565975_a | 6.87E-06 | 6.16E-07 |           |        | . |
| 1565999_a | 0.033446 | 0.021534 | LOC286299 | 286299 | . |
| 1566001_a | 3.91E-04 | 1.05E-04 |           |        | . |
| 1566002_a | 1.69E-04 | 3.71E-05 |           |        | . |
| 1566003_x | 1.09E-05 | 1.13E-06 |           |        | . |
| 1566033_a | 0.020524 | 0.012193 |           |        | . |
| 1566038_a | 0.010625 | 0.005633 | DGCR7     | 266621 | . |
| 1566043_a | 0.03231  | 0.020684 |           |        | . |
| 1566046_a | 8.17E-04 | 2.61E-04 |           |        | . |
| 1566079_a | 1.74E-04 | 3.86E-05 | RPS16P5   | 647190 | . |
| 1566084_a | 0.001685 | 6.27E-04 | LOC644215 | 644215 | . |
| 1566086_a | 0.002645 | 0.00108  |           |        | . |
| 1566096_x | 0.023501 | 0.014287 |           |        | . |
| 1566097_a | 3.42E-05 | 4.92E-06 |           |        | . |
| 1566098_a | 1.87E-04 | 4.20E-05 |           |        | . |
| 1566102_a | 0.024335 | 0.014878 | TTLL5     | 23093  | . |
| 1566111_a | 0.029458 | 0.018575 |           |        | . |
| 1566115_a | 3.82E-05 | 5.65E-06 |           |        | . |
| 1566127_a | 0.001879 | 7.16E-04 | LIMS1     | 3987   | . |
| 1566129_a | 0.007555 | 0.003781 | LIMS1     | 3987   | . |
| 1566134_a | 1.12E-08 | 1.21E-10 | CARHSP1   | 23589  | . |
| 1566135_a | 0.003352 | 0.001435 | CARHSP1   | 23589  | . |
| 1566136_a | 0.002719 | 0.001116 |           |        | . |
| 1566137_s | 0.001113 | 3.80E-04 |           |        | . |
| 1566138_a | 0.007273 | 0.003616 |           |        | . |
| 1566140_a | 0.003129 | 0.001321 | HOPX      | 84525  | . |
| 1566144_a | 0.005052 | 0.002347 |           |        | . |
| 1566146_x | 0.002175 | 8.55E-04 |           |        | . |
| 1566147_a | 2.23E-04 | 5.25E-05 | LOC375010 | 375010 | . |
| 1566149_a | 0.008275 | 0.004204 | CALML4    | 91860  | . |
| 1566150_a | 5.90E-05 | 9.86E-06 | CALML4    | 91860  | . |
| 1566151_a | 0.001402 | 5.03E-04 | CLP1      | 10978  | . |

|           |          |          |           |          |
|-----------|----------|----------|-----------|----------|
| 1566156_a | 4.10E-05 | 6.20E-06 |           | .        |
| 1566157_x | 2.33E-04 | 5.53E-05 |           | .        |
| 1566162_x | 0.029272 | 0.01844  |           | .        |
| 1566168_a | 0.006324 | 0.003061 | LOC730340 | 730340 . |
| 1566171_a | 3.93E-04 | 1.06E-04 | RFFL      | 117584 . |
| 1566177_a | 7.89E-05 | 1.43E-05 |           | .        |
| 1566178_x | 4.46E-04 | 1.24E-04 |           | .        |
| 1566181_a | 0.002481 | 0.001001 |           | .        |
| 1566182_a | 0.032768 | 0.021022 |           | .        |
| 1566183_a | 8.61E-04 | 2.78E-04 |           | .        |
| 1566185_a | 1.11E-04 | 2.20E-05 |           | .        |
| 1566191_a | 2.72E-04 | 6.73E-05 | SUZ12     | 23512 .  |
| 1566204_a | 3.15E-04 | 8.07E-05 |           | .        |
| 1566208_a | 5.96E-05 | 9.97E-06 | TCEA1     | 6917 .   |
| 1566209_a | 0.025823 | 0.015942 |           | .        |
| 1566215_a | 0.017785 | 0.01031  |           | .        |
| 1566221_a | 5.76E-04 | 1.69E-04 |           | .        |
| 1566228_a | 0.023046 | 0.013961 |           | .        |
| 1566231_a | 0.003427 | 0.001473 |           | .        |
| 1566235_a | 1.56E-04 | 3.36E-05 | DGCR12    | 25784 .  |
| 1566236_a | 8.67E-04 | 2.81E-04 | DGCR12    | 25784 .  |
| 1566242_a | 1.46E-04 | 3.11E-05 |           | .        |
| 1566243_a | 0.009727 | 0.005081 |           | .        |
| 1566249_a | 0.014027 | 0.007802 |           | .        |
| 1566256_s | 0.002519 | 0.00102  |           | .        |
| 1566257_a | 0.044746 | 0.030187 |           | .        |
| 1566265_a | 5.00E-04 | 1.42E-04 |           | .        |
| 1566276_a | 0.018398 | 0.010728 |           | .        |
| 1566278_a | 0.011862 | 0.006406 |           | .        |
| 1566279_a | 0.010391 | 0.005486 |           | .        |
| 1566284_a | 0.018041 | 0.010488 |           | .        |
| 1566288_a | 0.023577 | 0.014342 | OR2M4     | 26245 .  |
| 1566289_a | 0.008026 | 0.00406  | OR2M4     | 26245 .  |
| 1566301_a | 0.003079 | 0.001295 | PPP1R11   | 6992 .   |

|           |          |          |          |        |   |
|-----------|----------|----------|----------|--------|---|
| 1566302_a | 3.92E-04 | 1.06E-04 | PPP1R11  | 6992   | . |
| 1566303_s | 0.001114 | 3.81E-04 | PPP1R11  | 6992   | . |
| 1566324_a | 0.010918 | 0.005817 | MAF      | 4094   | . |
| 1566339_a | 8.09E-04 | 2.58E-04 | SNORD8   | 319103 | . |
| 1566342_a | 0.001206 | 4.19E-04 | SOD2     | 6648   | . |
| 1566402_a | 0.001377 | 4.93E-04 | SNORA68  | 26780  | . |
| 1566403_a | 7.90E-04 | 2.51E-04 | SNORA68  | 26780  | . |
| 1566419_a | 0.001281 | 4.51E-04 |          | .      | . |
| 1566425_a | 8.66E-04 | 2.81E-04 |          | .      | . |
| 1566426_a | 0.005575 | 0.002637 |          | .      | . |
| 1566427_a | 0.00741  | 0.003696 |          | .      | . |
| 1566432_a | 0.00193  | 7.39E-04 |          | .      | . |
| 1566441_a | 0.010939 | 0.00583  |          | .      | . |
| 1566442_a | 0.005266 | 0.002463 |          | .      | . |
| 1566447_a | 0.044331 | 0.02986  | CD6      | 923    | . |
| 1566452_a | 7.92E-07 | 3.63E-08 |          | .      | . |
| 1566454_a | 0.005203 | 0.00243  |          | .      | . |
| 1566455_a | 0.002099 | 8.18E-04 |          | .      | . |
| 1566456_a | 2.22E-05 | 2.85E-06 |          | .      | . |
| 1566457_a | 9.00E-05 | 1.69E-05 |          | .      | . |
| 1566463_a | 0.003591 | 0.001559 |          | .      | . |
| 1566471_a | 1.80E-06 | 1.09E-07 |          | .      | . |
| 1566472_s | 6.00E-05 | 1.00E-05 | RETSAT   | 54884  | . |
| 1566473_a | 6.24E-04 | 1.87E-04 |          | .      | . |
| 1566474_a | 2.15E-04 | 5.00E-05 |          | .      | . |
| 1566475_a | 0.003038 | 0.001274 |          | .      | . |
| 1566476_a | 0.027948 | 0.017473 |          | .      | . |
| 1566480_x | 5.58E-05 | 9.17E-06 | FLJ35848 | 284071 | . |
| 1566482_a | 6.44E-04 | 1.94E-04 |          | .      | . |
| 1566484_a | 2.09E-06 | 1.32E-07 |          | .      | . |
| 1566491_a | 0.001434 | 5.17E-04 |          | .      | . |
| 1566498_a | 0.004545 | 0.002068 |          | .      | . |
| 1566499_a | 0.023557 | 0.014328 |          | .      | . |
| 1566500_a | 0.00111  | 3.79E-04 |          | .      | . |

|           |          |          |              |             |
|-----------|----------|----------|--------------|-------------|
| 1566502_a | 0.001708 | 6.37E-04 |              | .           |
| 1566503_a | 0.038748 | 0.025526 |              | .           |
| 1566504_a | 0.024382 | 0.014911 |              | .           |
| 1566507_a | 0.005105 | 0.002377 | FBXO9        | 26268 .     |
| 1566509_s | 2.63E-05 | 3.52E-06 | FBXO9        | 26268 .     |
| 1566512_a | 8.13E-05 | 1.49E-05 |              | .           |
| 1566513_a | 7.97E-04 | 2.53E-04 | GNG4         | 2786 .      |
| 1566514_a | 0.020476 | 0.012157 | CWF19L2      | 143884 .    |
| 1566515_a | 0.001269 | 4.46E-04 | CWF19L2      | 143884 .    |
| 1566518_a | 3.09E-04 | 7.88E-05 |              | .           |
| 1566524_a | 0.038113 | 0.025047 |              | .           |
| 1566527_a | 0.001729 | 6.47E-04 |              | .           |
| 1566543_a | 0.008577 | 0.004381 |              | .           |
| 1566544_a | 2.51E-04 | 6.10E-05 |              | .           |
| 1566548_a | 0.001311 | 4.64E-04 |              | .           |
| 1566549_a | 0.001576 | 5.79E-04 |              | .           |
| 1566550_a | 2.04E-04 | 4.70E-05 |              | .           |
| 1566555_a | 0.020302 | 0.012037 | FLJ90757     | 440465 .    |
| 1566557_a | 9.73E-06 | 9.82E-07 | FLJ90757     | 440465 .    |
| 1566558_x | 5.86E-05 | 9.77E-06 | FLJ90757     | 440465 .    |
| 1566576_a | 4.39E-04 | 1.21E-04 |              | .           |
| 1566577_a | 0.001206 | 4.20E-04 |              | .           |
| 1566580_a | 8.46E-04 | 2.73E-04 |              | .           |
| 1566581_a | 0.022173 | 0.013362 |              | .           |
| 1566585_a | 0.001069 | 3.62E-04 |              | .           |
| 1566586_a | 0.014591 | 0.008175 |              | .           |
| 1566602_a | 0.044557 | 0.030037 | RPUSD3       | 285367 .    |
| 1566603_s | 4.37E-05 | 6.75E-06 | RPUSD3       | 285367 .    |
| 1566605_a | 0.045982 | 0.031149 | TEX9         | 374618 .    |
| 1566608_a | 0.034416 | 0.022244 |              | .           |
| 1566609_a | 0.004664 | 0.002133 |              | .           |
| 1566630_a | 0.003748 | 0.001641 | LOC100134089 | 100134089 . |
| 1566631_a | 0.041948 | 0.027986 |              | .           |
| 1566638_a | 5.74E-04 | 1.69E-04 |              | .           |

|           |          |          |           |          |
|-----------|----------|----------|-----------|----------|
| 1566643_a | 0.018364 | 0.010705 |           | .        |
| 1566646_a | 7.25E-04 | 2.25E-04 | LOC149086 | 149086 . |
| 1566670_a | 0.006216 | 0.003    | PDXK      | 8566 .   |
| 1566673_a | 2.40E-04 | 5.73E-05 |           | .        |
| 1566678_a | 2.25E-05 | 2.91E-06 | MMP2      | 4313 .   |
| 1566690_a | 0.02656  | 0.016467 |           | .        |
| 1566697_a | 0.001974 | 7.59E-04 |           | .        |
| 1566698_a | 0.006719 | 0.003291 |           | .        |
| 1566700_a | 8.66E-04 | 2.81E-04 | VRK3      | 51231 .  |
| 1566702_a | 0.027187 | 0.016918 |           | .        |
| 1566721_a | 0.009889 | 0.00518  | SVEP1     | 79987 .  |
| 1566725_a | 0.007824 | 0.003941 |           | .        |
| 1566727_a | 0.039838 | 0.026358 |           | .        |
| 1566734_a | 3.70E-05 | 5.42E-06 | LOC283454 | 283454 . |
| 1566739_a | 0.00897  | 0.004617 | PLCE1     | 51196 .  |
| 1566740_a | 0.031314 | 0.019939 | PLCE1     | 51196 .  |
| 1566764_a | 0.002708 | 0.00111  | MACC1     | 346389 . |
| 1566766_a | 6.28E-07 | 2.65E-08 | MACC1     | 346389 . |
| 1566767_a | 0.005812 | 0.002771 |           | .        |
| 1566768_a | 0.003915 | 0.001729 |           | .        |
| 1566771_a | 0.019455 | 0.011451 |           | .        |
| 1566775_a | 5.74E-05 | 9.52E-06 | DNAH1     | 25981 .  |
| 1566777_a | 2.86E-05 | 3.93E-06 |           | .        |
| 1566780_a | 0.005383 | 0.002528 |           | .        |
| 1566784_a | 0.003459 | 0.001489 | LOC728806 | 728806 . |
| 1566786_a | 1.62E-04 | 3.52E-05 |           | .        |
| 1566787_a | 0.007226 | 0.003587 |           | .        |
| 1566803_a | 5.29E-04 | 1.52E-04 |           | .        |
| 1566814_a | 0.001742 | 6.53E-04 | FGF22     | 27006 .  |
| 1566816_a | 0.002473 | 9.97E-04 | FGF22     | 27006 .  |
| 1566821_a | 0.024798 | 0.015212 |           | .        |
| 1566823_a | 4.71E-04 | 1.32E-04 |           | .        |
| 1566824_a | 3.75E-05 | 5.51E-06 |           | .        |
| 1566830_a | 0.003733 | 0.001633 | LOC440028 | 440028 . |

|           |          |          |              |             |
|-----------|----------|----------|--------------|-------------|
| 1566834_a | 0.013448 | 0.00743  |              | .           |
| 1566839_a | 0.011006 | 0.005871 | LOC283674    | 283674 .    |
| 1566840_a | 0.040486 | 0.026855 | LOC283674    | 283674 .    |
| 1566841_a | 0.004426 | 0.002003 |              | .           |
| 1566844_a | 4.89E-04 | 1.38E-04 | PER4         | 168741 .    |
| 1566866_a | 0.001972 | 7.59E-04 |              | .           |
| 1566870_a | 0.0338   | 0.021798 |              | .           |
| 1566873_a | 2.07E-04 | 4.80E-05 |              | .           |
| 1566874_a | 0.024121 | 0.014724 |              | .           |
| 1566880_a | 0.032809 | 0.021052 |              | .           |
| 1566887_x | 3.56E-05 | 5.17E-06 |              | .           |
| 1566889_a | 3.08E-07 | 1.05E-08 | THADA        | 63892 .     |
| 1566899_a | 0.017985 | 0.010447 |              | .           |
| 1566900_a | 0.011112 | 0.005939 |              | .           |
| 1566901_a | 0.013271 | 0.007318 | TGIF1        | 7050 .      |
| 1566902_a | 0.013575 | 0.00751  |              | .           |
| 1566903_a | 0.026777 | 0.016633 |              | .           |
| 1566906_a | 0.001311 | 4.64E-04 | LOC100129722 | 100129722 . |
| 1566916_a | 0.002291 | 9.10E-04 | HPYR1        | 93668 .     |
| 1566917_a | 0.00526  | 0.00246  | HPYR1        | 93668 .     |
| 1566923_a | 2.61E-04 | 6.38E-05 |              | .           |
| 1566926_a | 1.65E-05 | 1.95E-06 | C21orf104    | 54748 .     |
| 1566927_a | 2.52E-04 | 6.13E-05 | C21orf104    | 54748 .     |
| 1566931_a | 4.99E-04 | 1.42E-04 | TFB2M        | 64216 .     |
| 1566932_x | 0.003647 | 0.001588 | TFB2M        | 64216 .     |
| 1566934_a | 0.014758 | 0.008287 | TYRO3P       | 7302 .      |
| 1566949_a | 4.83E-04 | 1.36E-04 |              | .           |
| 1566950_a | 0.004398 | 0.001987 |              | .           |
| 1566954_a | 3.19E-04 | 8.20E-05 |              | .           |
| 1566955_a | 0.001775 | 6.67E-04 |              | .           |
| 1566956_a | 7.77E-05 | 1.41E-05 | OR7E104P     | 81137 .     |
| 1566957_a | 1.46E-05 | 1.67E-06 |              | .           |
| 1566958_a | 0.003273 | 0.001394 |              | .           |
| 1566967_a | 0.047063 | 0.032004 |              | .           |

|           |          |          |           |             |
|-----------|----------|----------|-----------|-------------|
| 1566968_a | 0.004646 | 0.002124 |           | .           |
| 1566973_a | 3.24E-04 | 8.38E-05 |           | .           |
| 1566974_a | 0.005503 | 0.002596 |           | .           |
| 1566980_a | 0.027865 | 0.017413 |           | .           |
| 1566984_a | 0.022652 | 0.013689 |           | .           |
| 1566986_a | 0.017596 | 0.010183 |           | .           |
| 1566987_s | 7.45E-05 | 1.33E-05 | LOC651250 | 651250 .    |
| 1566989_a | 3.28E-04 | 8.50E-05 | ARID1B    | 57492 .     |
| 1566990_x | 1.33E-05 | 1.47E-06 | ARID1B    | 57492 .     |
| 1566991_a | 0.006513 | 0.00317  | ARID1B    | 57492 .     |
| 1566994_a | 0.038478 | 0.025325 |           | .           |
| 1566999_a | 0.007439 | 0.003714 |           | .           |
| 1567008_a | 0.005864 | 0.0028   |           | .           |
| 1567009_a | 0.023331 | 0.014165 |           | .           |
| 1567010_a | 0.012542 | 0.006851 |           | .           |
| 1567011_a | 0.024602 | 0.015068 |           | .           |
| 1567014_s | 0.002446 | 9.85E-04 | NFE2L2    | 4780 .      |
| 1567015_a | 0.039322 | 0.025965 | NFE2L2    | 4780 .      |
| 1567022_a | 0.016272 | 0.009297 | OR5AK4P   | 219525 .    |
| 1567023_a | 0.030209 | 0.019136 | OR5AK4P   | 219525 .    |
| 1567028_s | 4.66E-05 | 7.33E-06 | SH3GLP2   | 6459 .      |
| 1567032_s | 0.00105  | 3.54E-04 | ZNF160    | 90338 .     |
| 1567035_a | 6.29E-06 | 5.48E-07 |           | .           |
| 1567036_a | 3.93E-04 | 1.06E-04 | C20orf181 | 100128998 . |
| 1567044_s | 1.33E-08 | 1.52E-10 |           | .           |
| 1567045_a | 0.003321 | 0.00142  |           | .           |
| 1567054_a | 0.043614 | 0.029289 | OR1C1     | 26188 .     |
| 1567055_a | 0.010533 | 0.005574 | OR1C1     | 26188 .     |
| 1567056_a | 0.010754 | 0.005715 | OR8G2     | 26492 .     |
| 1567068_a | 0.004036 | 0.001791 | OR4D1     | 26689 .     |
| 1567076_a | 9.94E-05 | 1.91E-05 |           | .           |
| 1567079_a | 1.63E-05 | 1.92E-06 | CLN6      | 54982 .     |
| 1567080_s | 0.002967 | 0.001237 | CLN6      | 54982 .     |
| 1567081_x | 0.014538 | 0.008139 | CLN6      | 54982 .     |



|           |          |                  |          |
|-----------|----------|------------------|----------|
| 1567105_a | 2.58E-05 | 3.44E-06         | .        |
| 1567139_a | 0.0072   | 0.003573         | .        |
| 1567166_a | 4.11E-04 | 1.12E-04         | .        |
| 1567167_a | 1.50E-04 | 3.21E-05         | .        |
| 1567213_a | 7.58E-05 | 1.36E-05 PNN     | 5411 .   |
| 1567219_a | 0.001657 | 6.15E-04         | .        |
| 1567237_a | 0.022057 | 0.013281 OR2L2   | 26246 .  |
| 1567238_a | 0.002949 | 0.001228 OR2L2   | 26246 .  |
| 1567240_x | 0.049066 | 0.033583 OR2L2   | 26246 .  |
| 1567242_a | 0.033389 | 0.02149 OR2L1P   | 26247 .  |
| 1567245_a | 0.021508 | 0.012886 OR5J2   | 282775 . |
| 1567251_a | 0.00149  | 5.42E-04 OR10A3  | 26496 .  |
| 1567252_a | 1.51E-05 | 1.74E-06 OR10D3P | 26497 .  |
| 1567254_a | 0.009482 | 0.00493 OR10D1P  | 26541 .  |
| 1567255_a | 0.019327 | 0.011363 OR10D1P | 26541 .  |
| 1567256_a | 5.33E-04 | 1.54E-04 OR1J2   | 26740 .  |
| 1567257_a | 5.30E-05 | 8.61E-06 OR1J2   | 26740 .  |
| 1567270_a | 8.82E-04 | 2.87E-04         | .        |
| 1567272_a | 0.01784  | 0.010349 OR2K2   | 26248 .  |
| 1567274_a | 0.003611 | 0.001569         | .        |
| 1567277_a | 7.24E-04 | 2.25E-04 CTTN    | 2017 .   |
| 1567282_a | 4.74E-06 | 3.81E-07 OR1J4   | 26219 .  |
| 1567285_a | 0.01027  | 0.005412 OR5L2   | 26338 .  |
| 1567297_a | 3.34E-04 | 8.68E-05 OR13C4  | 138804 . |
| 1567298_a | 4.54E-04 | 1.27E-04 OR13C4  | 138804 . |
| 1567320_a | 0.012389 | 0.006749         | .        |
| 1567357_a | 0.00884  | 0.004539 NAV2    | 89797 .  |
| 1567359_a | 0.025167 | 0.015479 BDNFOS  | 497258 . |
| 1567361_a | 0.015306 | 0.008652 BDNFOS  | 497258 . |
| 1567374_a | 0.036844 | 0.024083         | .        |
| 1567375_a | 2.08E-05 | 2.63E-06         | .        |
| 1567377_a | 1.27E-05 | 1.39E-06 DNAH1   | 25981 .  |
| 1567378_x | 0.003105 | 0.001308 DNAH1   | 25981 .  |
| 1567380_a | 0.005284 | 0.002473         | .        |

|           |          |          |                               |
|-----------|----------|----------|-------------------------------|
| 1567387_a | 6.95E-06 | 6.25E-07 | .                             |
| 1567389_a | 2.49E-04 | 6.01E-05 | .                             |
| 1567410_a | 0.01244  | 0.006782 | ZNF135 7694 .                 |
| 1567440_a | 3.31E-04 | 8.60E-05 | PSEN1 5663 .                  |
| 1567443_x | 0.013495 | 0.00746  | PSEN1 5663 .                  |
| 1567457_a | 0.002545 | 0.001032 | RAC1 5879 .                   |
| 1567527_a | 0.006845 | 0.003365 | .                             |
| 1567539_a | 1.76E-05 | 2.12E-06 | MFGE8 4240 .                  |
| 1567540_a | 5.18E-05 | 8.37E-06 | MFGE8 4240 .                  |
| 1567558_a | 0.001721 | 6.44E-04 | TREML4 285852 .               |
| 1567575_a | 0.021917 | 0.013184 | .                             |
| 1567590_a | 0.001936 | 7.43E-04 | .                             |
| 1567591_a | 1.27E-04 | 2.59E-05 | .                             |
| 1567611_a | 0.01102  | 0.00588  | .                             |
| 1567612_a | 0.002672 | 0.001093 | .                             |
| 1567622_a | 7.76E-05 | 1.40E-05 | ABLIM2 84448 .                |
| 1567623_a | 0.012235 | 0.00665  | ABLIM2 84448 .                |
| 1567627_a | 1.56E-06 | 9.03E-08 | CD74 972 .                    |
| 1567628_a | 0.001707 | 6.37E-04 | CD74 972 .                    |
| 1567682_x | 0.04042  | 0.026804 | SNORA74A 26821 .              |
| 1567686_a | 0.006476 | 0.003148 | CECR9 30847 .                 |
| 1567687_a | 4.18E-04 | 1.14E-04 | CECR9 30847 .                 |
| 1567702_a | 6.50E-05 | 1.11E-05 | .                             |
| 1567703_a | 8.90E-09 | 9.19E-11 | .                             |
| 1567704_a | 0.02331  | 0.01415  | TFE3 7030 .                   |
| 1567706_a | 0.00276  | 0.001136 | .                             |
| 1567860_a | 0.009574 | 0.004984 | .                             |
| 1567906_a | 0.002408 | 9.66E-04 | SOX4 6659 .                   |
| 1567985_a | 1.00E-05 | 1.02E-06 | .                             |
| 1568191_a | 0.001832 | 6.94E-04 | .                             |
| 1568248_x | 0.003993 | 0.001768 | SNORA71B 26776 .              |
| 1568249_a | 3.76E-08 | 6.11E-10 | LOC388796 /// 26776 /// 388 . |
| 1568377_x | 0.0039   | 0.00172  | DEFB124 245937 .              |
| 1568408_x | 7.88E-05 | 1.43E-05 | .                             |

|           |          |          |                             |
|-----------|----------|----------|-----------------------------|
| 1568449_a | 0.006522 | 0.003175 | .                           |
| 1568488_a | 0.007752 | 0.003896 | .                           |
| 1568513_x | 1.51E-09 | 9.19E-12 | IL23A 51561 .               |
| 1568558_x | 0.034486 | 0.022296 | .                           |
| 1568574_x | 0.003348 | 0.001433 | SPP1 6696 .                 |
| 1568592_a | 0.001227 | 4.29E-04 | TRIM69 140691 .             |
| 1568593_a | 4.21E-06 | 3.26E-07 | NUDT16P 152195 .            |
| 1568594_s | 0.003629 | 0.001579 | TRIM52 84851 .              |
| 1568596_a | 8.84E-07 | 4.21E-08 | TROAP 10024 .               |
| 1568597_a | 6.30E-05 | 1.07E-05 | LOC646762 646762 .          |
| 1568600_a | 0.0056   | 0.002651 | CALML4 91860 .              |
| 1568603_a | 0.002838 | 0.001174 | CADPS 8618 .                |
| 1568604_a | 1.10E-04 | 2.17E-05 | CADPS 8618 .                |
| 1568605_a | 1.44E-05 | 1.64E-06 | JRK 8629 .                  |
| 1568606_a | 0.007993 | 0.00404  | C11orf88 399949 .           |
| 1568609_s | 8.20E-04 | 2.62E-04 | FAM91A2 /// F 100286793 //. |
| 1568611_a | 0.002049 | 7.95E-04 | .                           |
| 1568612_a | 0.028327 | 0.017744 | GABRG2 2566 .               |
| 1568613_a | 0.009322 | 0.004832 | RSPH3 83861 .               |
| 1568616_a | 4.13E-04 | 1.13E-04 | .                           |
| 1568617_a | 0.001898 | 7.25E-04 | KIAA1543 57662 .            |
| 1568618_a | 7.80E-04 | 2.47E-04 | GALNT1 2589 .               |
| 1568619_s | 2.00E-05 | 2.50E-06 | ITPRIPL2 162073 .           |
| 1568620_a | 0.045526 | 0.030791 | CSAD 51380 .                |
| 1568623_a | 0.042672 | 0.028549 | SLC35E4 339665 .            |
| 1568627_a | 3.59E-04 | 9.47E-05 | SMEK2 57223 .               |
| 1568629_s | 0.042096 | 0.028103 | PIK3R2 5296 .               |
| 1568640_a | 0.011114 | 0.005941 | ASPRV1 151516 .             |
| 1568646_x | 0.022752 | 0.013758 | ZNF208 7757 .               |
| 1568647_a | 0.018367 | 0.010707 | .                           |
| 1568648_a | 9.27E-04 | 3.05E-04 | .                           |
| 1568649_a | 1.84E-06 | 1.13E-07 | .                           |
| 1568655_a | 0.046397 | 0.031472 | .                           |
| 1568663_a | 1.64E-04 | 3.59E-05 | PWRN2 791115 .              |

|           |          |          |             |        |   |
|-----------|----------|----------|-------------|--------|---|
| 1568667_s | 4.32E-06 | 3.38E-07 | LSDP5       | 440503 | . |
| 1568675_a | 0.002315 | 9.21E-04 | CHRNA10     | 57053  | . |
| 1568680_s | 1.79E-07 | 4.96E-09 | YTHDC2      | 64848  | . |
| 1568683_a | 2.76E-04 | 6.86E-05 | MGC23284    | 197187 | . |
| 1568689_a | 0.02474  | 0.01517  | LOC728853   | 728853 | . |
| 1568691_a | 2.96E-04 | 7.48E-05 |             |        | . |
| 1568698_a | 3.00E-04 | 7.59E-05 | FLJ43080    | 642987 | . |
| 1568702_a | 0.014741 | 0.008275 | PAAF1       | 80227  | . |
| 1568704_a | 2.97E-06 | 2.07E-07 | CHERP       | 10523  | . |
| 1568706_s | 0.041044 | 0.027285 | AVIL        | 10677  | . |
| 1568718_a | 0.010587 | 0.005609 | SLC22A23    | 63027  | . |
| 1568719_s | 7.94E-08 | 1.68E-09 | SLC22A23    | 63027  | . |
| 1568723_a | 0.043118 | 0.028895 | ATP9B       | 374868 | . |
| 1568728_s | 5.66E-04 | 1.66E-04 | RNF207      | 388591 | . |
| 1568732_a | 0.004294 | 0.00193  |             |        | . |
| 1568743_a | 4.64E-04 | 1.30E-04 | ATP10A      | 57194  | . |
| 1568746_a | 7.06E-04 | 2.18E-04 | hCG_1654703 | 646268 | . |
| 1568748_a | 4.26E-04 | 1.17E-04 |             |        | . |
| 1568754_a | 0.03342  | 0.021514 |             |        | . |
| 1568755_a | 0.038739 | 0.025519 |             |        | . |
| 1568765_a | 0.002892 | 0.0012   | SERPINE1    | 5054   | . |
| 1568770_a | 0.049992 | 0.034329 | MYLK        | 4638   | . |
| 1568777_a | 0.040636 | 0.026976 | EML5        | 161436 | . |
| 1568779_a | 0.005768 | 0.002744 | ECM2        | 1842   | . |
| 1568780_a | 1.38E-06 | 7.66E-08 | LOC649305   | 649305 | . |
| 1568783_a | 0.019384 | 0.011405 | SFRS12      | 140890 | . |
| 1568791_s | 0.003426 | 0.001473 |             |        | . |
| 1568794_a | 0.009757 | 0.0051   |             |        | . |
| 1568795_a | 0.001508 | 5.49E-04 |             |        | . |
| 1568799_a | 0.03125  | 0.019891 |             |        | . |
| 1568803_a | 0.025249 | 0.015542 |             |        | . |
| 1568804_a | 0.028758 | 0.01807  |             |        | . |
| 1568813_a | 2.16E-06 | 1.38E-07 |             |        | . |
| 1568815_a | 6.87E-10 | 3.31E-12 | DDX50       | 79009  | . |

|           |          |          |              |                |
|-----------|----------|----------|--------------|----------------|
| 1568817_a | 6.09E-04 | 1.82E-04 |              | .              |
| 1568820_a | 4.31E-04 | 1.18E-04 | BEND6        | 221336 .       |
| 1568821_a | 9.22E-04 | 3.03E-04 | TTC23        | 64927 .        |
| 1568822_a | 3.03E-06 | 2.13E-07 | GTPBP5       | 26164 .        |
| 1568827_a | 0.013262 | 0.007312 | LOC401442    | 401442 .       |
| 1568828_a | 9.73E-04 | 3.23E-04 | LOC730441    | 730441 .       |
| 1568830_a | 0.002769 | 0.001141 | IRAK3        | 11213 .        |
| 1568836_a | 2.06E-07 | 5.96E-09 | CLK4         | 57396 .        |
| 1568838_a | 0.002256 | 8.93E-04 | LOC100132169 | 100132169 .    |
| 1568845_a | 0.001882 | 7.17E-04 |              | .              |
| 1568850_a | 0.007504 | 0.003751 | CCBP2        | 1238 .         |
| 1568854_a | 0.013063 | 0.007184 | C6orf41      | 100133205 .    |
| 1568856_a | 0.017664 | 0.010231 | NBR1         | 4077 .         |
| 1568857_a | 0.037529 | 0.024605 | NBR1         | 4077 .         |
| 1568859_a | 0.001572 | 5.77E-04 | SLC8A3       | 6547 .         |
| 1568865_a | 0.00255  | 0.001034 | FNTB         | 2342 .         |
| 1568869_a | 0.043515 | 0.029215 |              | .              |
| 1568873_a | 4.23E-06 | 3.30E-07 | ZNF519       | 162655 .       |
| 1569796_s | 0.004529 | 0.002059 | ATRNL1       | 26033 .        |
| 1568876_a | 0.018011 | 0.010464 |              | .              |
| 1568887_a | 2.88E-04 | 7.22E-05 |              | .              |
| 1568888_a | 0.005725 | 0.002719 |              | .              |
| 1568889_a | 0.011694 | 0.006302 | FANCD2       | 2177 .         |
| 1568894_a | 0.038572 | 0.025398 |              | .              |
| 1568900_a | 0.02612  | 0.016151 | ZNF568       | 374900 .       |
| 1568906_a | 0.002377 | 9.50E-04 | LOC728196    | 728196 .       |
| 1568908_a | 2.36E-04 | 5.61E-05 |              | .              |
| 1568913_a | 0.001498 | 5.45E-04 | NSUN3        | 63899 .        |
| 1568916_a | 8.71E-04 | 2.83E-04 | SPIRE2       | 84501 .        |
| 1568921_a | 0.001163 | 4.01E-04 |              | .              |
| 1568922_a | 0.033181 | 0.021336 | SLC24A4      | 123041 .       |
| 1568929_a | 2.38E-05 | 3.11E-06 | LOC100128343 | 100128343 .    |
| 1568931_a | 0.046926 | 0.031897 |              | .              |
| 1568949_a | 0.001547 | 5.66E-04 | LOC729822    | 26207 729822 . |

|           |          |          |                              |           |   |
|-----------|----------|----------|------------------------------|-----------|---|
| 1568951_a | 9.09E-04 | 2.98E-04 | ZNF280D                      | 54816     | . |
| 1568954_s | 0.001416 | 5.09E-04 | C16orf72                     | 29035     | . |
| 1568955_a | 2.82E-05 | 3.85E-06 | SRGAP2P1                     | 653464    | . |
| 1568957_x | 1.56E-05 | 1.82E-06 | SRGAP2P1                     | 653464    | . |
| 1568964_x | 1.48E-04 | 3.14E-05 | SPN                          | 6693      | . |
| 1568971_a | 0.006336 | 0.003067 | C14orf135 ///  100130173 //. |           |   |
| 1568974_a | 0.022879 | 0.013846 | NHEG1                        | 100294720 | . |
| 1568978_s | 3.43E-04 | 8.97E-05 | C11orf21                     | 29125     | . |
| 1568981_a | 0.008769 | 0.004496 |                              |           | . |
| 1568983_a | 4.95E-06 | 4.02E-07 |                              |           | . |
| 1568987_a | 0.001185 | 4.11E-04 | MGC57346                     | 401884    | . |
| 1568997_a | 4.08E-05 | 6.15E-06 |                              |           | . |
| 1568999_a | 0.029862 | 0.018879 | PSG4                         | 5672      | . |
| 1569001_a | 0.023139 | 0.014025 | BMP1                         | 649       | . |
| 1569003_a | 7.41E-04 | 2.31E-04 | TMEM49                       | 81671     | . |
| 1569004_a | 0.037628 | 0.024678 |                              |           | . |
| 1569006_a | 5.85E-05 | 9.75E-06 | LOC284379                    | 284379    | . |
| 1569008_a | 0.030638 | 0.019449 | LOC100132947 100132947 //.   |           |   |
| 1569013_s | 1.25E-08 | 1.40E-10 | LOC727914 /// 727914 /// 96. |           |   |
| 1569022_a | 0.012083 | 0.006553 | PIK3C2A                      | 5286      | . |
| 1569023_a | 1.11E-07 | 2.63E-09 |                              |           | . |
| 1569030_s | 0.037073 | 0.024264 | NUB1                         | 51667     | . |
| 1569032_a | 2.97E-04 | 7.49E-05 | LOC642852                    | 642852    | . |
| 1569033_a | 5.34E-06 | 4.45E-07 | IGF2BP3                      | 10643     | . |
| 1569041_a | 0.004894 | 0.002258 |                              |           | . |
| 1569044_a | 2.66E-06 | 1.80E-07 | CDC42BPG                     | 55561     | . |
| 1569048_s | 0.006394 | 0.003102 | LMF1                         | 64788     | . |
| 1569052_a | 4.06E-04 | 1.10E-04 |                              |           | . |
| 1569053_a | 3.42E-05 | 4.92E-06 | AP3M2                        | 10947     | . |
| 1569057_s | 0.004587 | 0.00209  | MIA3                         | 375056    | . |
| 1569061_a | 0.011958 | 0.006469 | IQGAP3                       | 128239    | . |
| 1569062_s | 0.046987 | 0.031944 | IQGAP3                       | 128239    | . |
| 1569063_a | 0.034067 | 0.021988 |                              |           | . |
| 1569064_a | 0.006903 | 0.003399 | C15orf62                     | 643338    | . |

|           |          |          |                             |        |   |
|-----------|----------|----------|-----------------------------|--------|---|
| 1569065_s | 0.006637 | 0.003242 | C15orf62                    | 643338 | . |
| 1569067_a | 2.95E-04 | 7.42E-05 |                             |        | . |
| 1569069_s | 0.048235 | 0.032916 | TDRD3                       | 81550  | . |
| 1569072_s | 0.003713 | 0.001622 | ABCB5                       | 340273 | . |
| 1569073_x | 0.00208  | 8.09E-04 | SMARCA4                     | 6597   | . |
| 1569074_a | 7.21E-04 | 2.24E-04 | FLJ37078                    | 222183 | . |
| 1569077_x | 1.37E-05 | 1.54E-06 | ZNF836                      | 162962 | . |
| 1569078_a | 0.004241 | 0.001901 | RNF213                      | 57674  | . |
| 1569091_a | 0.016545 | 0.009478 |                             |        | . |
| 1569095_a | 0.026805 | 0.016654 | LOC731424                   | 731424 | . |
| 1569098_s | 0.03734  | 0.024466 | TP53BP1                     | 7158   | . |
| 1569099_a | 0.01143  | 0.006138 |                             |        | . |
| 1569102_a | 7.60E-07 | 3.43E-08 | ABCA4                       | 24     | . |
| 1569104_a | 0.01282  | 0.007029 |                             |        | . |
| 1569107_s | 0.034664 | 0.022426 | ZNF642                      | 339559 | . |
| 1569108_a | 1.98E-05 | 2.46E-06 | ZNF589                      | 51385  | . |
| 1568763_s | 9.97E-06 | 1.01E-06 | LOC728613 /// 10016 /// 728 |        | . |
| 1569111_a | 0.001935 | 7.42E-04 | SOX13                       | 9580   | . |
| 1569114_a | 3.84E-04 | 1.03E-04 |                             |        | . |
| 1569121_a | 2.08E-04 | 4.80E-05 | SLC25A24                    | 29957  | . |
| 1569126_a | 1.97E-06 | 1.22E-07 | CCNC                        | 892    | . |
| 1569132_s | 0.025827 | 0.015946 | ARSK                        | 153642 | . |
| 1569133_x | 5.67E-04 | 1.66E-04 | ARSK                        | 153642 | . |
| 1569139_s | 0.009996 | 0.005244 | FAM53A                      | 152877 | . |
| 1569142_a | 2.89E-05 | 3.98E-06 | TRIM13                      | 10206  | . |
| 1569144_a | 0.001054 | 3.55E-04 | C9orf169                    | 375791 | . |
| 1569154_a | 5.31E-04 | 1.53E-04 |                             |        | . |
| 1569156_a | 3.32E-04 | 8.62E-05 | ZNF846                      | 162993 | . |
| 1569157_s | 0.001413 | 5.08E-04 | ZNF846                      | 162993 | . |
| 1569159_a | 5.82E-06 | 4.98E-07 | LZTS1                       | 11178  | . |
| 1569167_a | 0.01553  | 0.008804 |                             |        | . |
| 1569180_a | 8.17E-05 | 1.50E-05 |                             |        | . |
| 1569181_x | 1.87E-04 | 4.22E-05 |                             |        | . |
| 1569189_a | 4.02E-05 | 6.03E-06 | TTC9C                       | 283237 | . |

|           |          |          |              |           |   |
|-----------|----------|----------|--------------|-----------|---|
| 1569190_a | 7.62E-08 | 1.59E-09 | SCLT1        | 132320    | . |
| 1569191_a | 0.03323  | 0.021372 | ZNF826       | 664701    | . |
| 1569193_a | 0.008029 | 0.004062 | LOC149134    | 149134    | . |
| 1569194_a | 0.001755 | 6.59E-04 | ZNF789       | 285989    | . |
| 1569200_a | 4.36E-08 | 7.50E-10 |              |           | . |
| 1569201_a | 0.002821 | 0.001166 |              |           | . |
| 1569202_x | 8.63E-04 | 2.79E-04 |              |           | . |
| 1569203_a | 0.041178 | 0.02739  | CXCL2        | 2920      | . |
| 1569205_a | 0.030722 | 0.019511 |              |           | . |
| 1569206_a | 0.005291 | 0.002477 | TCP11L2      | 255394    | . |
| 1569207_s | 0.047764 | 0.032548 | TCP11L2      | 255394    | . |
| 1569208_a | 0.045388 | 0.030683 |              |           | . |
| 1569225_a | 0.049669 | 0.034062 | SCML4        | 256380    | . |
| 1569234_a | 0.001634 | 6.04E-04 |              |           | . |
| 1569243_a | 0.016434 | 0.009405 |              |           | . |
| 1569245_a | 1.84E-04 | 4.12E-05 | C8orf74      | 203076    | . |
| 1569246_a | 1.15E-05 | 1.22E-06 | C8orf74      | 203076    | . |
| 1569251_a | 0.049541 | 0.033958 | ZNF333       | 84449     | . |
| 1569253_a | 2.39E-05 | 3.14E-06 | INTS4        | 92105     | . |
| 1569257_a | 3.08E-04 | 7.84E-05 | FMNL1        | 752       | . |
| 1569259_a | 0.009805 | 0.005128 |              |           | . |
| 1569262_x | 0.047275 | 0.032176 | UBE2CBP      | 90025     | . |
| 1569263_a | 1.72E-04 | 3.79E-05 |              |           | . |
| 1569268_a | 5.64E-04 | 1.65E-04 | GRIN2C       | 2905      | . |
| 1569269_s | 1.37E-06 | 7.57E-08 | SRGAP1       | 57522     | . |
| 1569270_a | 2.35E-05 | 3.06E-06 | LOC100134368 | 100134368 | . |
| 1569274_a | 0.001824 | 6.90E-04 | C14orf182    | 283551    | . |
| 1569283_a | 0.047777 | 0.032558 | hCG_1646157  | 440122    | . |
| 1569287_a | 1.91E-06 | 1.17E-07 |              |           | . |
| 1569290_s | 9.75E-07 | 4.79E-08 | GRIA3        | 2892      | . |
| 1569291_a | 0.002266 | 8.98E-04 | CROCCL1      | 84809     | . |
| 1569294_a | 6.23E-04 | 1.87E-04 |              |           | . |
| 1569296_a | 0.032534 | 0.020844 | LOC493754    | 493754    | . |
| 1569297_a | 0.006547 | 0.00319  | LOC731779    | 731779    | . |



|           |          |          |              |           |   |
|-----------|----------|----------|--------------|-----------|---|
| 1569300_a | 0.044691 | 0.030138 | MFAP3L       | 9848      | . |
| 1569302_a | 1.57E-06 | 9.11E-08 | KIAA1731     | 85459     | . |
| 1569303_s | 0.027752 | 0.01733  | RGS20        | 8601      | . |
| 1569305_a | 3.95E-04 | 1.07E-04 |              |           | . |
| 1569311_a | 9.48E-06 | 9.47E-07 | LOC554203    | 554203    | . |
| 1569312_a | 0.018454 | 0.010767 |              |           | . |
| 1569316_a | 0.006585 | 0.003211 |              |           | . |
| 1569320_a | 0.022334 | 0.01347  | GPBP1L1      | 60313     | . |
| 1569321_a | 2.36E-04 | 5.62E-05 |              |           | . |
| 1569322_a | 0.044001 | 0.029604 | LOC439990    | 439990    | . |
| 1569325_a | 0.003744 | 0.001639 | ARPC5        | 10092     | . |
| 1569331_a | 9.02E-04 | 2.95E-04 |              |           | . |
| 1569338_a | 2.62E-04 | 6.42E-05 |              |           | . |
| 1569341_a | 1.34E-04 | 2.78E-05 |              |           | . |
| 1569342_a | 0.012927 | 0.0071   | GLI3         | 2737      | . |
| 1569345_a | 5.42E-06 | 4.52E-07 |              |           | . |
| 1569346_a | 0.009291 | 0.004813 |              |           | . |
| 1569349_a | 9.25E-08 | 2.06E-09 | C11orf30     | 56946     | . |
| 1569351_a | 0.01223  | 0.006647 | SOBP         | 55084     | . |
| 1569352_a | 0.005913 | 0.002828 | FNIP2        | 57600     | . |
| 1569354_a | 0.025175 | 0.015485 | NSUN6        | 221078    | . |
| 1569355_a | 0.002025 | 7.83E-04 | KCNIP3       | 30818     | . |
| 1569361_a | 4.84E-04 | 1.36E-04 | LOC100129098 | 100129098 | . |
| 1569365_a | 2.08E-05 | 2.63E-06 | KIAA1656     | 85371     | . |
| 1569368_a | 0.003909 | 0.001725 | LOC283693    | 283693    | . |
| 1569376_s | 0.049771 | 0.034147 |              |           | . |
| 1569377_a | 7.75E-06 | 7.24E-07 | TMEM67       | 91147     | . |
| 1569385_s | 0.003294 | 0.001406 | TET2         | 54790     | . |
| 1569386_a | 3.70E-04 | 9.83E-05 | LOC100133885 | 100133885 | . |
| 1569392_a | 0.018469 | 0.010777 | GPSN2        | 9524      | . |
| 1569396_a | 2.49E-04 | 6.03E-05 | RAB40C       | 57799     | . |
| 1569408_a | 0.005056 | 0.002349 | EIF2C4       | 192670    | . |
| 1569409_x | 1.70E-06 | 1.02E-07 |              |           | . |
| 1569415_a | 6.53E-08 | 1.28E-09 |              |           | . |

|           |          |          |              |               |
|-----------|----------|----------|--------------|---------------|
| 1569416_a | 2.13E-04 | 4.96E-05 |              | .             |
| 1569417_a | 0.002577 | 0.001047 |              | .             |
| 1569418_a | 0.002188 | 8.61E-04 |              | .             |
| 1569419_a | 1.01E-04 | 1.94E-05 |              | .             |
| 1569421_a | 3.52E-05 | 5.09E-06 | CLDN4        | 1364 .        |
| 1569422_a | 0.005048 | 0.002344 | FAM129C      | 199786 .      |
| 1569426_a | 0.009406 | 0.004883 |              | .             |
| 1569428_a | 0.018755 | 0.010972 | LOC100129087 | 100129087 //. |
| 1569433_a | 0.040511 | 0.026878 | SAMD5        | 389432 .      |
| 1569434_a | 4.92E-04 | 1.39E-04 | C14orf105    | 55195 .       |
| 1569436_a | 1.27E-05 | 1.40E-06 | LOC400128    | 400128 .      |
| 1569439_a | 0.004455 | 0.002019 |              | .             |
| 1569443_s | 0.028987 | 0.018234 |              | .             |
| 1569444_a | 2.01E-04 | 4.61E-05 |              | .             |
| 1569449_a | 0.023184 | 0.014059 |              | .             |
| 1569461_a | 0.001966 | 7.56E-04 |              | .             |
| 1569462_x | 3.58E-04 | 9.45E-05 | KCNT1        | 57582 .       |
| 1569466_a | 0.006997 | 0.003455 | C20orf152    | 140894 .      |
| 1569468_a | 0.032877 | 0.021106 | ZNF732       | 642280 .      |
| 1569469_a | 0.019246 | 0.011305 | LHX8         | 431707 .      |
| 1569472_s | 9.63E-04 | 3.19E-04 | TTC3         | 7267 .        |
| 1569473_s | 2.55E-04 | 6.22E-05 | ZNF783       | 155060 .      |
| 1569474_a | 0.006341 | 0.00307  |              | .             |
| 1569476_a | 6.09E-04 | 1.81E-04 | DKFZP434L187 | 26082 .       |
| 1569477_a | 0.003752 | 0.001643 |              | .             |
| 1569478_s | 0.011632 | 0.006263 |              | .             |
| 1569479_a | 0.047101 | 0.032035 | ZNF718       | 255403 .      |
| 1569482_a | 3.01E-06 | 2.11E-07 |              | .             |
| 1569484_s | 1.81E-06 | 1.10E-07 | MDN1         | 23195 .       |
| 1569487_a | 1.37E-05 | 1.54E-06 |              | .             |
| 1569490_a | 5.28E-04 | 1.52E-04 | FNDC3B       | 64778 .       |
| 1569492_a | 0.039249 | 0.02591  |              | .             |
| 1569495_a | 1.39E-04 | 2.92E-05 | SCLT1        | 132320 .      |
| 1569496_s | 3.70E-04 | 9.83E-05 | LOC100130872 | 100130872 .   |

|           |          |          |                             |          |
|-----------|----------|----------|-----------------------------|----------|
| 1569499_a | 0.003712 | 0.001621 |                             | .        |
| 1569500_a | 0.004614 | 0.002105 |                             | .        |
| 1569502_s | 0.006334 | 0.003066 | KIAA0495                    | 57212 .  |
| 1569503_a | 0.004518 | 0.002053 | HEATR5B                     | 54497 .  |
| 1569508_a | 0.032952 | 0.021165 | PRDM5                       | 11107 .  |
| 1569512_a | 6.73E-04 | 2.06E-04 |                             | .        |
| 1569515_a | 0.024535 | 0.015022 |                             | .        |
| 1569516_a | 0.008057 | 0.004078 |                             | .        |
| 1569517_a | 0.033007 | 0.02121  | LOC646482                   | 646482 . |
| 1569518_a | 0.015644 | 0.00888  |                             | .        |
| 1569519_a | 2.17E-07 | 6.49E-09 | KIAA1245 /// N100132406 //. | .        |
| 1569520_a | 0.004956 | 0.002291 |                             | .        |
| 1569522_a | 1.19E-07 | 2.88E-09 | LOC100132767 100132767 .    | .        |
| 1569527_a | 2.89E-04 | 7.25E-05 |                             | .        |
| 1569532_a | 1.73E-05 | 2.07E-06 | LCN15                       | 389812 . |
| 1569536_a | 4.34E-04 | 1.19E-04 | FLVCR2                      | 55640 .  |
| 1569538_a | 2.13E-08 | 2.85E-10 |                             | .        |
| 1569540_a | 0.020826 | 0.012411 |                             | .        |
| 1569542_a | 0.001347 | 4.80E-04 |                             | .        |
| 1569551_a | 0.031832 | 0.020319 |                             | .        |
| 1569552_a | 0.011078 | 0.005916 | PTPN18                      | 26469 .  |
| 1569558_a | 0.008562 | 0.004373 |                             | .        |
| 1569569_x | 1.26E-05 | 1.37E-06 |                             | .        |
| 1569573_a | 0.001405 | 5.05E-04 |                             | .        |
| 1569577_x | 0.00124  | 4.34E-04 |                             | .        |
| 1569578_a | 6.67E-07 | 2.89E-08 |                             | .        |
| 1569579_a | 0.001633 | 6.04E-04 |                             | .        |
| 1569585_a | 0.011924 | 0.006449 |                             | .        |
| 1569594_a | 1.20E-04 | 2.42E-05 | SDCCAG1                     | 9147 .   |
| 1569597_a | 0.00124  | 4.34E-04 |                             | .        |
| 1569600_a | 0.002995 | 0.001252 | DLEU2                       | 8847 .   |
| 1569601_a | 0.001335 | 4.75E-04 |                             | .        |
| 1569602_a | 0.02727  | 0.016982 |                             | .        |
| 1569604_a | 0.001934 | 7.41E-04 | LOC100133612 100133612 .    | .        |

|           |          |          |                           |             |
|-----------|----------|----------|---------------------------|-------------|
| 1569607_s | 4.61E-06 | 3.68E-07 | ANKRD20A1 // 100132733 // | .           |
| 1569608_x | 4.01E-06 | 3.07E-07 | LOC643187                 | 643187 .    |
| 1569614_s | 1.58E-04 | 3.41E-05 | LCN8                      | 138307 .    |
| 1569615_a | 0.022874 | 0.013842 |                           | .           |
| 1569616_a | 0.0056   | 0.002651 | LOC647309                 | 647309 .    |
| 1569631_a | 2.99E-05 | 4.16E-06 | NMNAT1                    | 64802 .     |
| 1569634_a | 0.01102  | 0.005881 | SEPSECS                   | 51091 .     |
| 1569637_a | 0.006193 | 0.002986 | ZNF100                    | 163227 .    |
| 1569640_s | 2.81E-04 | 7.01E-05 | EEPD1                     | 80820 .     |
| 1569641_a | 0.019221 | 0.011287 |                           | .           |
| 1569648_a | 1.68E-11 | 2.57E-14 | DACT2                     | 168002 .    |
| 1569652_a | 0.039353 | 0.025988 | MLLT3                     | 4300 .      |
| 1569660_a | 0.006392 | 0.003101 | PP13439                   | 100128046 . |
| 1569661_a | 7.53E-05 | 1.35E-05 |                           | .           |
| 1569665_a | 7.44E-04 | 2.32E-04 |                           | .           |
| 1569666_s | 2.29E-04 | 5.43E-05 |                           | .           |
| 1569673_a | 0.029009 | 0.018251 |                           | .           |
| 1569679_a | 5.95E-05 | 9.96E-06 | CDH22                     | 64405 .     |
| 1569696_a | 0.01291  | 0.007089 | LOC402779                 | 402779 .    |
| 1569698_s | 0.003634 | 0.001581 |                           | .           |
| 1569700_s | 1.28E-04 | 2.61E-05 | AK7                       | 122481 .    |
| 1569703_a | 0.009912 | 0.005194 |                           | .           |
| 1569713_a | 0.00314  | 0.001326 |                           | .           |
| 1569723_a | 0.005561 | 0.00263  | SPIRE2                    | 84501 .     |
| 1569727_a | 0.015339 | 0.008675 |                           | .           |
| 1569730_a | 1.45E-05 | 1.66E-06 | HEATR7B2                  | 133558 .    |
| 1569732_a | 0.002091 | 8.14E-04 |                           | .           |
| 1569738_a | 0.02537  | 0.015627 |                           | .           |
| 1569739_a | 0.002253 | 8.92E-04 | LOC221946                 | 221946 .    |
| 1569743_a | 0.008769 | 0.004496 |                           | .           |
| 1569748_a | 0.005722 | 0.002717 | PRKCZ                     | 5590 .      |
| 1569758_a | 0.043304 | 0.029052 |                           | .           |
| 1569763_a | 5.69E-05 | 9.41E-06 |                           | .           |
| 1569765_a | 3.13E-04 | 8.01E-05 |                           | .           |

|           |          |          |              |           |   |
|-----------|----------|----------|--------------|-----------|---|
| 1569775_a | 0.018879 | 0.011056 | RNF157       | 114804    | . |
| 1569780_a | 0.022695 | 0.01372  |              |           | . |
| 1569785_a | 0.005953 | 0.002851 |              |           | . |
| 1569787_a | 0.019708 | 0.011621 | RFTN1        | 23180     | . |
| 1569789_a | 6.47E-04 | 1.96E-04 |              |           | . |
| 1569792_a | 6.97E-04 | 2.14E-04 | C12orf72     | 254013    | . |
| 1569793_a | 0.024555 | 0.015035 | SLC25A18     | 83733     | . |
| 1569802_a | 0.045832 | 0.03103  |              |           | . |
| 1569805_a | 0.027668 | 0.017272 |              |           | . |
| 1569806_a | 0.046623 | 0.03165  |              |           | . |
| 1569807_a | 0.017023 | 0.009792 |              |           | . |
| 1569808_a | 0.003796 | 0.001666 |              |           | . |
| 1569816_a | 0.03947  | 0.026078 |              |           | . |
| 1569824_a | 0.04243  | 0.028363 |              |           | . |
| 1569827_a | 6.46E-04 | 1.95E-04 | ATG7         | 10533     | . |
| 1569828_a | 0.010962 | 0.005845 |              |           | . |
| 1569830_a | 0.00942  | 0.004891 | PTPRC        | 5788      | . |
| 1569832_a | 0.001989 | 7.67E-04 | hCG_2045206  | 100131655 | . |
| 1569834_a | 0.011856 | 0.006402 |              |           | . |
| 1569838_a | 0.001313 | 4.65E-04 |              |           | . |
| 1569839_s | 2.78E-04 | 6.91E-05 | C9orf29      | 652972    | . |
| 1569847_a | 0.001068 | 3.61E-04 | CGNL1        | 84952     | . |
| 1569854_a | 0.004892 | 0.002258 |              |           | . |
| 1569857_s | 7.66E-04 | 2.41E-04 | TPP2         | 7174      | . |
| 1569871_a | 1.14E-05 | 1.21E-06 | LOC650392    | 650392    | . |
| 1569876_a | 2.67E-04 | 6.57E-05 | C17orf57     | 124989    | . |
| 1569878_a | 0.013576 | 0.007511 | CCNYL2       | 414194    | . |
| 1569879_a | 0.033284 | 0.021412 | MEGF11       | 84465     | . |
| 1569891_a | 0.00221  | 8.71E-04 | ATP5A1       | 498       | . |
| 1569894_a | 1.19E-05 | 1.27E-06 | PPP2R3C      | 55012     | . |
| 1569895_a | 7.41E-04 | 2.31E-04 | LOC100133612 | 100133612 | . |
| 1569898_a | 0.001313 | 4.65E-04 | LOC100132707 | 100132707 | . |
| 1569904_x | 0.001641 | 6.08E-04 |              |           | . |
| 1569905_a | 0.012078 | 0.006548 | HSD11B1L     | 374875    | . |

|           |          |          |          |        |   |
|-----------|----------|----------|----------|--------|---|
| 1569906_s | 0.019332 | 0.011366 | PHF20    | 51230  | . |
| 1569909_a | 6.50E-04 | 1.97E-04 | KRT79    | 338785 | . |
| 1569910_a | 0.016551 | 0.009482 |          |        | . |
| 1569911_a | 0.006007 | 0.002882 |          |        | . |
| 1569912_a | 3.96E-04 | 1.07E-04 |          |        | . |
| 1569915_a | 8.88E-04 | 2.89E-04 |          |        | . |
| 1569916_a | 0.016552 | 0.009483 |          |        | . |
| 1569925_a | 1.92E-05 | 2.37E-06 |          |        | . |
| 1569927_a | 0.044556 | 0.030036 |          |        | . |
| 1569929_a | 0.011349 | 0.006087 |          |        | . |
| 1569930_a | 0.00832  | 0.004231 |          |        | . |
| 1569931_a | 7.53E-06 | 6.97E-07 |          |        | . |
| 1569932_a | 0.007797 | 0.003924 | NHSL2    | 340527 | . |
| 1569933_a | 0.028605 | 0.01795  |          |        | . |
| 1569935_a | 0.001366 | 4.88E-04 | ZNF664   | 144348 | . |
| 1569937_a | 0.002426 | 9.74E-04 |          |        | . |
| 1569938_a | 9.93E-05 | 1.91E-05 | SIRT5    | 23408  | . |
| 1569940_a | 0.012565 | 0.006865 | SLC6A16  | 28968  | . |
| 1569948_a | 0.002172 | 8.53E-04 |          |        | . |
| 1569949_a | 0.010357 | 0.005466 | GRK5     | 2869   | . |
| 1569952_x | 1.47E-07 | 3.85E-09 |          |        | . |
| 1569953_a | 0.027579 | 0.017201 |          |        | . |
| 1569956_a | 1.32E-04 | 2.73E-05 | MYLK     | 4638   | . |
| 1569961_a | 0.010793 | 0.00574  |          |        | . |
| 1569963_a | 9.42E-05 | 1.79E-05 |          |        | . |
| 1569969_a | 0.032676 | 0.020952 | UNC13C   | 440279 | . |
| 1569975_a | 2.01E-04 | 4.61E-05 |          |        | . |
| 1570537_a | 0.002897 | 0.001203 |          |        | . |
| 1569978_x | 0.020636 | 0.012274 |          |        | . |
| 1569986_x | 2.47E-04 | 5.96E-05 | TNNT3    | 7140   | . |
| 1569987_a | 3.26E-04 | 8.41E-05 |          |        | . |
| 1569991_a | 7.98E-05 | 1.46E-05 | KY       | 339855 | . |
| 1569999_a | 2.70E-04 | 6.66E-05 |          |        | . |
| 1570001_a | 0.045184 | 0.030525 | CASP8AP2 | 9994   | . |

|           |          |          |              |             |
|-----------|----------|----------|--------------|-------------|
| 1570005_a | 0.0251   | 0.015427 |              | .           |
| 1570007_a | 3.19E-04 | 8.22E-05 | LRRC8C       | 84230 .     |
| 1570013_a | 0.003322 | 0.00142  |              | .           |
| 1570021_a | 0.015769 | 0.00896  |              | .           |
| 1570025_a | 0.007046 | 0.003484 | TACC2        | 10579 .     |
| 1570026_a | 0.042404 | 0.028343 | CPXM2        | 119587 .    |
| 1570032_a | 0.002998 | 0.001254 | AP3B2        | 8120 .      |
| 1570033_a | 0.001109 | 3.79E-04 | WIPI2        | 26100 .     |
| 1570040_a | 0.009099 | 0.004695 |              | .           |
| 1570043_a | 0.041959 | 0.027998 |              | .           |
| 1570044_a | 0.003777 | 0.001656 |              | .           |
| 1570048_a | 0.036662 | 0.023944 | DNAJC24      | 120526 .    |
| 1570055_a | 3.85E-04 | 1.03E-04 | DNM1P33      | 554175 .    |
| 1570057_x | 0.037722 | 0.024749 | DNM1P33      | 554175 .    |
| 1570058_a | 0.012925 | 0.007098 | SUV420H2     | 84787 .     |
| 1570065_a | 1.67E-04 | 3.67E-05 |              | .           |
| 1570068_a | 0.001204 | 4.19E-04 |              | .           |
| 1570070_a | 1.23E-05 | 1.34E-06 | C20orf160    | 140706 .    |
| 1570071_a | 0.001749 | 6.56E-04 |              | .           |
| 1570084_a | 0.007087 | 0.003507 |              | .           |
| 1570085_a | 0.006598 | 0.003219 | TTLL1        | 25809 .     |
| 1570090_a | 0.003014 | 0.001262 | LOC100129166 | 100129166 . |
| 1570093_a | 0.005911 | 0.002826 |              | .           |
| 1570100_a | 0.008086 | 0.004094 |              | .           |
| 1570102_a | 0.018193 | 0.010589 |              | .           |
| 1570103_a | 2.32E-08 | 3.21E-10 |              | .           |
| 1570105_a | 0.019994 | 0.011823 |              | .           |
| 1570107_a | 5.03E-09 | 4.33E-11 |              | .           |
| 1570108_a | 0.001211 | 4.22E-04 |              | .           |
| 1570123_a | 0.001839 | 6.97E-04 |              | .           |
| 1570124_a | 0.016465 | 0.009425 |              | .           |
| 1570130_a | 0.00142  | 5.11E-04 | SPATS2       | 65244 .     |
| 1570131_a | 0.001579 | 5.81E-04 | LOC285847    | 285847 .    |
| 1570135_a | 0.002247 | 8.89E-04 | ZNF230       | 7773 .      |

|           |          |          |           |        |   |
|-----------|----------|----------|-----------|--------|---|
| 1570140_a | 0.008385 | 0.004269 | LOC653110 | 653110 | . |
| 1570143_a | 3.93E-05 | 5.86E-06 |           |        | . |
| 1570145_a | 0.027301 | 0.017006 | UCHL5     | 51377  | . |
| 1570152_a | 1.74E-04 | 3.86E-05 |           |        | . |
| 1570153_a | 1.13E-04 | 2.23E-05 | C13orf38  | 728591 | . |
| 1570156_s | 0.00155  | 5.67E-04 | FMN1      | 342184 | . |
| 1570158_a | 0.031782 | 0.020282 |           |        | . |
| 1570160_a | 0.005476 | 0.00258  |           |        | . |
| 1570163_a | 5.33E-10 | 2.34E-12 |           |        | . |
| 1570165_a | 0.015509 | 0.008789 |           |        | . |
| 1570166_a | 0.001919 | 7.34E-04 |           |        | . |
| 1570167_a | 0.003561 | 0.001543 |           |        | . |
| 1570173_a | 1.23E-04 | 2.49E-05 | INTS7     | 25896  | . |
| 1570180_a | 0.020371 | 0.012084 |           |        | . |
| 1570182_a | 0.002353 | 9.38E-04 |           |        | . |
| 1570185_a | 1.40E-04 | 2.93E-05 |           |        | . |
| 1570186_a | 0.004364 | 0.001969 | GRASPOS   | 692159 | . |
| 1570192_a | 0.00295  | 0.001229 |           |        | . |
| 1570197_a | 7.01E-05 | 1.23E-05 |           |        | . |
| 1570198_x | 1.55E-05 | 1.81E-06 |           |        | . |
| 1570200_a | 2.19E-06 | 1.40E-07 | HELB      | 92797  | . |
| 1570210_x | 3.73E-06 | 2.80E-07 | SAPS2     | 9701   | . |
| 1570212_a | 0.011238 | 0.006018 | LOC253724 | 253724 | . |
| 1570215_a | 1.61E-04 | 3.51E-05 |           |        | . |
| 1570219_a | 0.001708 | 6.38E-04 | LOXL4     | 84171  | . |
| 1570224_a | 0.014562 | 0.008156 |           |        | . |
| 1570225_a | 0.005452 | 0.002567 | TMEM224   | 284417 | . |
| 1570226_a | 0.006368 | 0.003086 |           |        | . |
| 1570227_a | 9.00E-06 | 8.85E-07 |           |        | . |
| 1570229_a | 0.018441 | 0.010759 |           |        | . |
| 1570425_s | 0.04858  | 0.033194 | LATS1     | 9113   | . |
| 1570234_a | 1.59E-07 | 4.28E-09 |           |        | . |
| 1570237_a | 0.005742 | 0.002729 |           |        | . |
| 1570238_a | 0.030178 | 0.019113 | ZNF527    | 84503  | . |



|           |          |          |           |        |   |
|-----------|----------|----------|-----------|--------|---|
| 1570241_a | 8.94E-06 | 8.77E-07 | SPATA21   | 374955 | . |
| 1570242_x | 4.27E-05 | 6.54E-06 | SPATA21   | 374955 | . |
| 1570243_a | 0.001721 | 6.43E-04 | LOC440731 | 440731 | . |
| 1570248_a | 0.015763 | 0.008957 |           |        | . |
| 1570249_x | 0.004919 | 0.002272 |           |        | . |
| 1570252_a | 0.025577 | 0.01577  |           |        | . |
| 1570257_x | 0.00444  | 0.00201  |           |        | . |
| 1570259_a | 2.84E-04 | 7.08E-05 | LIMS1     | 3987   | . |
| 1570262_a | 0.023023 | 0.013945 |           |        | . |
| 1570266_x | 7.21E-10 | 3.49E-12 |           |        | . |
| 1570267_a | 1.61E-05 | 1.90E-06 |           |        | . |
| 1570268_a | 2.41E-05 | 3.17E-06 |           |        | . |
| 1570276_a | 4.24E-07 | 1.61E-08 | GATA4     | 2626   | . |
| 1570282_a | 2.23E-06 | 1.43E-07 |           |        | . |
| 1570295_a | 0.002582 | 0.00105  |           |        | . |
| 1570298_a | 0.013038 | 0.007168 |           |        | . |
| 1570314_a | 0.025527 | 0.015738 |           |        | . |
| 1570315_a | 0.001084 | 3.68E-04 | HTA       | 283902 | . |
| 1570320_a | 4.43E-04 | 1.23E-04 |           |        | . |
| 1570328_s | 3.01E-04 | 7.63E-05 | C20orf62  | 140834 | . |
| 1570330_a | 0.002536 | 0.001027 |           |        | . |
| 1570331_a | 4.25E-04 | 1.17E-04 |           |        | . |
| 1570335_a | 6.77E-04 | 2.07E-04 |           |        | . |
| 1570338_a | 0.030941 | 0.019667 |           |        | . |
| 1570344_a | 0.003187 | 0.00135  |           |        | . |
| 1570357_a | 0.045618 | 0.030862 | STX8      | 9482   | . |
| 1570360_s | 8.02E-04 | 2.55E-04 | DDX3Y     | 8653   | . |
| 1570361_a | 2.55E-04 | 6.20E-05 |           |        | . |
| 1570362_a | 0.001752 | 6.57E-04 |           |        | . |
| 1570364_a | 2.13E-04 | 4.95E-05 | ZNF709    | 163051 | . |
| 1570366_x | 5.38E-04 | 1.56E-04 | ZNF709    | 163051 | . |
| 1570371_a | 0.01055  | 0.005585 | SELI      | 85465  | . |
| 1570375_a | 0.00134  | 4.77E-04 |           |        | . |
| 1570376_a | 0.048337 | 0.032998 | LOC154822 | 154822 | . |

|           |          |          |                    |
|-----------|----------|----------|--------------------|
| 1570382_a | 3.81E-09 | 2.98E-11 | .                  |
| 1570388_a | 1.68E-06 | 9.96E-08 | LOC440896 440896 . |
| 1570393_a | 0.036933 | 0.02415  | EML5 161436 .      |
| 1570402_a | 4.30E-04 | 1.18E-04 | KLC3 147700 .      |
| 1570405_a | 6.53E-04 | 1.98E-04 | .                  |
| 1570409_x | 0.005028 | 0.002332 | .                  |
| 1570410_a | 7.43E-04 | 2.32E-04 | CYGB 114757 .      |
| 1570412_a | 0.003774 | 0.001655 | .                  |
| 1570414_x | 0.014758 | 0.008287 | FLJ13197 79667 .   |
| 1570415_a | 0.004096 | 0.001823 | DDX52 11056 .      |
| 1570420_a | 0.003624 | 0.001576 | STXBP2 6813 .      |
| 1570422_a | 0.031228 | 0.019874 | SNTG2 54221 .      |
| 1570439_a | 2.44E-04 | 5.86E-05 | .                  |
| 1570441_a | 6.32E-06 | 5.52E-07 | NAPB 63908 .       |
| 1570445_a | 1.96E-04 | 4.47E-05 | LOC643201 643201 . |
| 1570447_a | 0.011859 | 0.006405 | FLJ44054 643365 .  |
| 1570450_a | 0.027636 | 0.017246 | .                  |
| 1570451_a | 0.034506 | 0.022311 | C1orf61 10485 .    |
| 1570465_a | 0.025488 | 0.01571  | .                  |
| 1570471_a | 0.016936 | 0.009736 | ARHGEF12 23365 .   |
| 1570474_s | 0.010487 | 0.005545 | LOC338579 338579 . |
| 1570476_a | 0.036929 | 0.024147 | .                  |
| 1570479_a | 2.79E-04 | 6.95E-05 | ART1 417 .         |
| 1570484_a | 0.004914 | 0.002269 | .                  |
| 1570486_a | 0.015642 | 0.008878 | SOX6 55553 .       |
| 1570507_a | 0.049954 | 0.034297 | SFRS2IP 9169 .     |
| 1570515_a | 0.013859 | 0.007695 | FILIP1 27145 .     |
| 1570531_a | 0.007192 | 0.003568 | .                  |
| 1570534_a | 0.006861 | 0.003374 | ZNF483 158399 .    |
| 1570541_s | 0.001567 | 5.75E-04 | .                  |
| 1570542_a | 0.013618 | 0.007538 | PMPCB 9512 .       |
| 1570546_a | 0.001142 | 3.92E-04 | TACC2 10579 .      |
| 1570552_a | 1.72E-06 | 1.03E-07 | C18orf50 619463 .  |
| 1570566_a | 0.015139 | 0.00854  | .                  |

|           |          |          |           |          |
|-----------|----------|----------|-----------|----------|
| 1570568_a | 7.86E-04 | 2.49E-04 |           | .        |
| 1570569_a | 9.40E-05 | 1.78E-05 |           | .        |
| 1570571_a | 1.20E-04 | 2.43E-05 | CCDC91    | 55297 .  |
| 1570572_a | 0.011056 | 0.005902 | LOC729291 | 729291 . |
| 1570574_a | 0.032494 | 0.020813 |           | .        |
| 1570575_a | 0.049309 | 0.033772 |           | .        |
| 1570578_a | 4.23E-04 | 1.16E-04 |           | .        |
| 1570587_a | 0.002802 | 0.001157 |           | .        |
| 1570597_a | 0.038634 | 0.025441 |           | .        |
| 1570600_a | 0.030114 | 0.019064 |           | .        |
| 1570601_a | 7.08E-04 | 2.19E-04 |           | .        |
| 1570607_a | 8.53E-06 | 8.21E-07 |           | .        |
| 1570621_a | 0.0216   | 0.012954 |           | .        |
| 1570627_a | 3.81E-05 | 5.63E-06 | TCEB3     | 6924 .   |
| 1570630_a | 0.031369 | 0.019981 |           | .        |
| 1570644_a | 0.004453 | 0.002018 |           | .        |
| 1570651_a | 4.50E-05 | 7.00E-06 | CCBL1     | 883 .    |
