# Supplementary material
Source: PubMed Central journal article supplement (PMC3470785)
Supplement: NIHMS377161-supplement-13.pdf [file NIHMS377161-supplement-13.pdf]

| Probe Set | Fold change | Regulation | Gene Synt.   |
|-----------|-------------|------------|-------------|------------|-------------|------------|-------------|------------|-------------|------------|--------------|
| 1598_g_at | 2.476258    | up         | 3.401182    | up         | 2.429635    | up         | 2.463857    | up         | 1.621111    | up         | GAS6 /// LC. |
| 200701_at | 1.984062    | up         | 1.652204    | up         | 1.931148    | up         | 1.778789    | up         | 1.869315    | up         | NPC2 .       |
| 200878_at | 4.137631    | up         | 21.09583    | up         | 45.85215    | up         | 1.584719    | up         | 3.263159    | up         | EPAS1 .      |
| 200974_at | 6.26507     | up         | 5.86196     | up         | 10.21592    | up         | 2.205689    | up         | 2.562348    | up         | ACTA2 .      |
| 201069_at | 9.936051    | up         | 2.297769    | up         | 2.200647    | up         | 2.654632    | up         | 1.812096    | up         | MMP2 .       |
| 201124_at | 3.324072    | up         | 2.006064    | up         | 4.311418    | up         | 2.970704    | up         | 2.316347    | up         | ITGB5 .      |
| 201566_x_ | 2.107342    | up         | 1.993165    | up         | 8.042139    | up         | 1.562205    | up         | 4.580303    | up         | ID2 .        |
| 202082_s_ | 2.240342    | up         | 1.604082    | up         | 2.653438    | up         | 1.648615    | up         | 3.002114    | up         | SEC14L1 .    |
| 202083_s_ | 3.955909    | up         | 1.67005     | up         | 2.098547    | up         | 1.934481    | up         | 4.517954    | up         | SEC14L1 .    |
| 202084_s_ | 2.690807    | up         | 1.927383    | up         | 2.28969     | up         | 1.822291    | up         | 3.717024    | up         | SEC14L1 .    |
| 202177_at | 3.284663    | up         | 4.723064    | up         | 5.780998    | up         | 3.699479    | up         | 1.936589    | up         | GAS6 /// LC. |
| 202345_s_ | 2.323498    | down       | 5.412044    | down       | 2.271341    | down       | 2.26471     | down       | 2.547446    | down       | FABP5 .      |
| 202387_at | 1.644097    | down       | 1.546639    | down       | 1.574261    | down       | 1.743356    | down       | 1.562864    | down       | BAG1 .       |
| 202388_at | 3.455126    | down       | 14.43142    | down       | 2.454607    | down       | 7.223879    | down       | 3.388371    | down       | RGS2 .       |
| 202435_s_ | 4.047166    | down       | 9.171716    | down       | 15.70702    | down       | 2.142134    | down       | 13.75916    | down       | CYP1B1 .     |
| 202436_s_ | 4.143429    | down       | 7.454073    | down       | 15.80317    | down       | 1.700931    | down       | 18.81332    | down       | CYP1B1 .     |
| 202437_s_ | 4.991074    | down       | 7.974245    | down       | 18.29153    | down       | 1.786015    | down       | 13.21061    | down       | CYP1B1 .     |
| 202625_at | 2.94823     | down       | 3.652596    | down       | 3.030384    | down       | 2.810388    | down       | 2.085095    | down       | LYN .        |
| 202626_s_ | 3.753217    | down       | 3.535651    | down       | 4.459446    | down       | 2.824927    | down       | 2.101105    | down       | LYN .        |
| 202686_s_ | 39.25732    | up         | 5.154155    | up         | 22.07291    | up         | 7.245045    | up         | 10.03762    | up         | AXL .        |
| 202796_at | 6.015094    | up         | 3.512657    | up         | 5.359226    | up         | 1.626566    | up         | 6.771833    | up         | SYNPO .      |
| 203075_at | 1.850429    | up         | 1.528498    | up         | 1.616661    | up         | 1.938318    | up         | 1.79139     | up         | SMAD2 .      |
| 203323_at | 1.89859     | up         | 9.979096    | up         | 28.00272    | up         | 4.301934    | up         | 7.404335    | up         | CAV2 .       |
| 203324_s_ | 2.369979    | up         | 8.770221    | up         | 22.06334    | up         | 2.999654    | up         | 6.749893    | up         | CAV2 .       |
| 203325_s_ | 14.13309    | up         | 4.940327    | up         | 6.689859    | up         | 11.2937     | up         | 12.33847    | up         | COL5A1 .     |
| 203504_s_ | 1.607564    | up         | 7.901974    | up         | 1.596687    | up         | 2.980681    | up         | 2.031131    | up         | ABCA1 .      |
| 203518_at | 2.870176    | up         | 1.787684    | up         | 2.646343    | up         | 1.963283    | up         | 3.054779    | up         | LYST .       |
| 203634_s_ | 3.81752     | down       | 1.956837    | down       | 2.47214     | down       | 3.211414    | down       | 3.023369    | down       | CPT1A .      |
| 203695_s_ | 4.959703    | up         | 2.16972     | up         | 5.196233    | up         | 2.48992     | up         | 1.658376    | up         | DFNA5 .      |
| 204011_at | 1.526825    | down       | 2.171089    | down       | 2.628013    | down       | 1.561206    | down       | 2.405742    | down       | SPRY2 .      |
| 204140_at | 1.721418    | up         | 3.026738    | up         | 3.320871    | up         | 1.506661    | up         | 2.502779    | up         | TPST1 .      |
| 204256_at | 2.287935    | down       | 4.632699    | down       | 4.463172    | down       | 2.587557    | down       | 2.904533    | down       | ELOVL6 .     |
| 204702_s_ | 8.342375    | down       | 2.232008    | down       | 44.87137    | down       | 3.549808    | down       | 1.818566    | down       | NFE2L3 .     |

|           |               |               |               |               |               |              |
|-----------|---------------|---------------|---------------|---------------|---------------|--------------|
| 204717_s_ | 3.140048 down | 1.584836 down | 2.954469 down | 1.565424 down | 10.33388 down | SLC29A2 .    |
| 205204_at | 1.972082 down | 2.305698 down | 3.901297 down | 1.920624 down | 2.308734 down | NMB .        |
| 205500_at | 1.536854 up   | 3.939542 up   | 3.662755 up   | 2.331463 up   | 1.653939 up   | C5 .         |
| 205749_at | 1.910633 down | 9.009127 down | 4.46018 down  | 1.553246 down | 3.510117 down | CYP1A1 .     |
| 206114_at | 2.674236 down | 1.684175 down | 6.56553 down  | 1.76589 down  | 1.720202 down | EPHA4 .      |
| 206653_at | 5.559632 down | 3.652182 down | 7.130704 down | 2.189486 down | 1.763647 down | POLR3G .     |
| 208161_s_ | 1.686159 up   | 2.533715 up   | 3.461284 up   | 1.840622 up   | 2.293321 up   | ABCC3 .      |
| 208286_x_ | 5.147342 down | 2.990485 down | 2.407879 down | 2.09506 down  | 2.550176 down | POU5F1 //, . |
| 208433_s_ | 3.556464 down | 2.010708 down | 3.685791 down | 1.931804 down | 1.669691 down | LRP8 .       |
| 208789_at | 5.954671 up   | 2.609908 up   | 9.906562 up   | 2.048137 up   | 2.952647 up   | PTRF .       |
| 208790_s_ | 7.251101 up   | 3.042892 up   | 14.31653 up   | 2.222387 up   | 4.045184 up   | PTRF .       |
| 208978_at | 1.506691 up   | 2.204486 up   | 3.650921 up   | 7.729727 up   | 1.864364 up   | CRIP2 .      |
| 209018_s_ | 1.981479 up   | 2.193437 up   | 1.641663 up   | 2.14269 up    | 1.752722 up   | PINK1 .      |
| 209101_at | 7.418743 up   | 10.46246 up   | 7.226477 up   | 1.875025 down | 23.55812 up   | CTGF .       |
| 209574_s_ | 1.607659 down | 2.7144 down   | 1.731771 down | 1.764881 down | 1.58161 down  | C18orf1 .    |
| 209610_s_ | 2.896176 up   | 3.589754 up   | 2.264592 up   | 2.329488 up   | 2.142873 up   | SLC1A4 .     |
| 209681_at | 1.576654 down | 1.697925 down | 2.181152 down | 2.267473 down | 1.655538 down | SLC19A2 .    |
| 210089_s_ | 8.235552 down | 3.241894 down | 10.02444 down | 1.916982 down | 2.999303 down | LAMA4 .      |
| 210265_x_ | 8.742022 down | 3.94853 down  | 4.557504 down | 8.329842 down | 4.525188 down | POU5F1P3 .   |
| 210567_s_ | 2.839545 down | 10.99126 down | 5.615191 down | 1.993337 down | 4.388045 down | SKP2 .       |
| 210688_s_ | 4.194234 down | 1.762227 down | 3.920923 down | 1.692986 down | 2.363874 down | CPT1A .      |
| 210754_s_ | 3.403662 down | 2.893142 down | 2.604494 down | 3.50277 down  | 1.975596 down | LYN .        |
| 210854_x_ | 2.817714 down | 5.022841 down | 1.987063 down | 1.611799 down | 3.311368 down | SLC6A8 .     |
| 210868_s_ | 2.130563 down | 4.445955 down | 4.646009 down | 2.283672 down | 2.002181 down | ELOVL6 .     |
| 210905_x_ | 5.967997 down | 4.272274 down | 3.681372 down | 8.303679 down | 5.044441 down | POU5F1P4 .   |
| 211603_s_ | 2.954984 down | 3.99129 down  | 3.407203 down | 9.585633 down | 1.552974 down | ETV4 .       |
| 211708_s_ | 1.744178 down | 1.514336 down | 1.622045 down | 5.049801 down | 3.124805 down | SCD .        |
| 212012_at | 7.966716 up   | 4.177272 up   | 7.038819 up   | 2.022681 up   | 63.61236 up   | PXDN .       |
| 212013_at | 9.419513 up   | 3.729662 up   | 3.958878 up   | 2.715015 up   | 70.58463 up   | PXDN .       |
| 212097_at | 2.517611 up   | 6.19718 up    | 16.34071 up   | 1.58557 up    | 6.858749 up   | CAV1 .       |
| 212135_s_ | 1.799299 up   | 8.47721 up    | 2.518429 up   | 1.809627 up   | 1.563403 up   | ATP2B4 .     |
| 212188_at | 7.489169 down | 2.631965 down | 5.088495 down | 1.974523 down | 1.672721 down | KCTD12 .     |
| 212488_at | 20.48378 up   | 4.387967 up   | 4.752375 up   | 9.659649 up   | 4.266556 up   | COL5A1 .     |
| 212489_at | 12.37044 up   | 4.673307 up   | 6.083585 up   | 5.712344 up   | 9.143495 up   | COL5A1 .     |

|           |               |               |               |               |               |          |   |
|-----------|---------------|---------------|---------------|---------------|---------------|----------|---|
| 212667_at | 7.940271 up   | 3.95418 up    | 31.83026 up   | 2.651713 up   | 9.263402 up   | SPARC    | . |
| 212810_s_ | 1.658667 up   | 3.061158 up   | 1.677132 up   | 2.921353 up   | 2.168856 up   | SLC1A4   | . |
| 212811_x_ | 1.653512 up   | 2.866613 up   | 2.267177 up   | 2.038613 up   | 2.688292 up   | SLC1A4   | . |
| 212890_at | 1.598396 up   | 1.783386 up   | 3.036273 up   | 1.662489 up   | 1.634996 up   | SLC38A10 | . |
| 213069_at | 3.669093 up   | 5.211527 up   | 2.003538 up   | 2.534209 up   | 3.2613 up     | HEG1     | . |
| 213075_at | 9.889246 up   | 2.305764 up   | 18.15929 up   | 7.369148 up   | 3.666853 up   | OLFML2A  | . |
| 213227_at | 1.756328 up   | 3.245121 up   | 1.592862 up   | 1.995919 up   | 1.957186 up   | PGRMC2   | . |
| 213260_at | 1.761994 down | 1.625212 down | 3.535524 down | 1.955327 down | 9.056383 down | FOXC1    | . |
| 213268_at | 2.977027 up   | 2.364288 up   | 2.264764 up   | 2.591022 up   | 1.800039 up   | CAMTA1   | . |
| 213429_at | 3.168496 up   | 1.972995 up   | 2.239075 up   | 6.669273 up   | 26.87166 up   |          | . |
| 213455_at | 3.37343 up    | 4.252312 up   | 7.098657 up   | 1.591103 up   | 1.94561 up    | FAM114A1 | . |
| 213463_s_ | 2.071286 up   | 4.176924 up   | 1.713 up      | 1.931964 up   | 1.588974 up   | FAM149B1 | . |
| 213843_x_ | 2.468055 down | 4.534731 down | 2.136035 down | 1.622788 down | 3.12278 down  | SLC6A8   | . |
| 213865_at | 1.845441 up   | 2.106888 up   | 2.232632 up   | 1.82958 up    | 2.056612 up   | DCBLD2   | . |
| 214240_at | 6.646942 down | 22.54359 down | 13.74774 down | 2.201448 down | 10.2387 down  | GAL      | . |
| 214281_s_ | 1.534794 down | 2.605168 down | 1.654632 down | 2.108679 down | 1.506846 down | RCHY1    | . |
| 214500_at | 4.94927 up    | 2.072569 up   | 1.735307 up   | 1.62902 up    | 3.529248 up   | H2AFY    | . |
| 214532_x_ | 5.180971 down | 4.12916 down  | 3.524515 down | 6.173545 down | 3.237071 down | POU5F1B  | . |
| 214808_at | 2.74931 up    | 1.575206 up   | 1.771425 up   | 2.370121 up   | 1.684084 up   |          | . |
| 217518_at | 2.489676 up   | 1.66229 up    | 5.189297 up   | 1.570982 up   | 1.817481 up   | MYOF     | . |
| 217728_at | 3.575803 up   | 3.535667 up   | 15.52225 up   | 4.281107 up   | 2.022641 up   | S100A6   | . |
| 217853_at | 3.243016 up   | 1.548136 up   | 1.911795 up   | 12.91862 up   | 3.299242 up   | TNS3     | . |
| 218404_at | 3.356715 down | 3.046739 down | 17.41188 down | 3.554824 down | 1.832223 down | SNX10    | . |
| 218501_at | 4.635738 down | 7.329758 down | 7.777146 down | 2.674744 down | 15.04557 down | ARHGEF3  | . |
| 218717_s_ | 3.579591 up   | 48.13388 up   | 2.764136 up   | 1.818428 up   | 18.51431 up   | LEPREL1  | . |
| 219155_at | 2.921629 down | 8.452109 down | 1.729851 down | 3.02546 down  | 2.90921 down  | PITPNC1  | . |
| 221019_s_ | 1.916678 up   | 1.609703 up   | 10.15739 up   | 2.813872 up   | 8.836476 up   | COLEC12  | . |
| 221029_s_ | 3.283367 up   | 18.05558 up   | 1.996831 up   | 2.466949 up   | 2.791832 up   | WNT5B    | . |
| 221435_x_ | 2.409914 up   | 2.020702 up   | 1.790372 up   | 1.692891 up   | 2.110759 up   | HYI      | . |
| 221489_s_ | 4.248363 down | 2.670657 down | 6.621056 down | 11.05772 down | 3.269524 down | SPRY4    | . |
| 221912_s_ | 3.521145 down | 4.428073 down | 2.783944 down | 1.781774 down | 2.01655 down  | CCDC28B  | . |
| 222379_at | 1.577469 down | 7.948101 down | 28.03989 down | 2.598407 down | 13.64008 down | KCNE4    | . |
| 223151_at | 1.783084 down | 2.012017 down | 2.321508 down | 2.497962 down | 1.633526 down | DCUN1D5  | . |
| 223315_at | 4.407357 up   | 28.36367 up   | 41.58144 up   | 10.13922 up   | 2.825544 up   | NTN4     | . |

|           |               |               |               |               |               |           |   |
|-----------|---------------|---------------|---------------|---------------|---------------|-----------|---|
| 223471_at | 2.121564 down | 2.418491 down | 2.852672 down | 1.914095 down | 1.738594 down | RAB3IP    | . |
| 223843_at | 2.539989 up   | 1.561392 up   | 2.690105 up   | 7.53211 up    | 5.095539 up   | SCARA3    | . |
| 224560_at | 4.934008 up   | 2.290927 up   | 4.818491 up   | 8.008272 up   | 4.589417 up   | TIMP2     | . |
| 224762_at | 2.710609 up   | 7.686133 up   | 2.072873 up   | 1.643993 up   | 1.737527 up   | SERINC2   | . |
| 224911_s_ | 2.133697 up   | 1.755685 up   | 1.699164 up   | 2.116971 up   | 1.970539 up   | DCBLD2    | . |
| 225295_at | 2.037624 down | 2.091843 down | 1.80395 down  | 1.518005 down | 1.658881 down | SLC39A10  | . |
| 225602_at | 3.71359 up    | 2.006307 up   | 2.892164 up   | 4.841154 up   | 3.45532 up    | GLIPR2    | . |
| 225604_s_ | 3.288913 up   | 2.627918 up   | 3.02196 up    | 3.368102 up   | 4.00729 up    | GLIPR2    | . |
| 225776_at | 2.753542 up   | 1.746613 up   | 2.985387 up   | 2.215286 up   | 4.963425 up   | RBMS2     | . |
| 225778_at | 1.684825 up   | 1.962528 up   | 1.636427 up   | 1.731571 up   | 2.828544 up   | RBMS2     | . |
| 226050_at | 1.960204 up   | 4.315431 up   | 2.23832 up    | 3.320511 up   | 3.0298 up     | TMCO3     | . |
| 226065_at | 1.836633 down | 3.008458 down | 1.953664 down | 1.622533 down | 10.95816 down | PRICKLE1  | . |
| 226069_at | 1.9232 down   | 2.328466 down | 1.636126 down | 2.054303 down | 6.989604 down | PRICKLE1  | . |
| 226402_at | 1.552389 up   | 1.837747 up   | 2.026383 up   | 1.718614 up   | 2.666346 up   | CYP2U1    | . |
| 226659_at | 4.3675 down   | 2.732159 down | 1.812967 down | 1.657298 down | 2.707341 down | DEF6      | . |
| 226683_at | 1.548998 up   | 1.812497 up   | 2.089358 up   | 2.980795 up   | 1.860335 up   | SNX18     | . |
| 226923_at | 2.566389 down | 1.802181 down | 2.566657 down | 1.702263 down | 1.574974 down | SCFD2     | . |
| 227037_at | 3.934307 down | 1.644291 down | 2.036127 down | 1.985203 down | 1.739048 down | PLD6      | . |
| 227044_at | 2.526406 down | 2.184444 down | 1.539615 down | 1.589997 down | 1.616687 down |           | . |
| 227272_at | 7.66498 up    | 1.846573 up   | 2.425668 up   | 2.451899 up   | 7.661171 up   | C15orf52  | . |
| 227342_s_ | 6.01247 down  | 4.255485 down | 2.037691 down | 20.19177 down | 6.088821 down | MYEOV     | . |
| 227491_at | 1.96222 down  | 3.318785 down | 2.143333 down | 1.555814 down | 2.391412 down | ELOVL6    | . |
| 227757_at | 1.826466 down | 2.333141 down | 1.694306 down | 2.365594 down | 1.929932 down | CUL4A     | . |
| 227948_at | 2.013718 down | 2.397678 down | 1.515467 down | 6.121501 down | 1.926934 down | FGD4      | . |
| 228080_at | 4.423617 up   | 2.706724 up   | 9.600663 up   | 5.622776 up   | 9.819458 up   | LAYN      | . |
| 228205_at | 2.029621 down | 1.916722 down | 2.415491 down | 2.052722 down | 2.744001 down | TKT       | . |
| 228411_at | 2.77682 up    | 4.015655 up   | 3.25785 up    | 1.745888 up   | 1.939864 up   | PARD3B    | . |
| 228531_at | 4.727397 up   | 12.00005 up   | 17.69304 up   | 1.815135 up   | 5.407791 up   | SAMD9     | . |
| 228910_at | 1.687664 up   | 2.839298 up   | 1.592235 up   | 1.950603 up   | 4.653598 up   |           | . |
| 229332_at | 5.149255 down | 13.93957 down | 2.586582 down | 1.679457 down | 1.627423 down | HPDL      | . |
| 229390_at | 1.966871 down | 5.117669 down | 2.906656 down | 8.399735 down | 1.736219 down | FAM26F    | . |
| 229715_at | 2.274657 down | 2.212189 down | 1.585856 down | 5.372181 down | 2.045574 down | DKFZp686C | . |
| 230263_s_ | 2.767397 up   | 3.400734 up   | 9.14216 up    | 1.866943 up   | 4.731325 up   | DOCK5     | . |
| 230272_at | 5.59536 down  | 2.970876 down | 16.52153 down | 9.55943 down  | 11.02781 down | LOC64532  | . |

|           |               |               |               |               |               |             |
|-----------|---------------|---------------|---------------|---------------|---------------|-------------|
| 231223_at | 5.926775 down | 3.603499 down | 25.33597 down | 1.991014 down | 13.26465 down | CSMD1 .     |
| 231297_at | 1.854297 down | 3.033066 down | 2.952415 down | 1.763738 down | 1.866566 down | DOT1L .     |
| 231579_s_ | 5.124619 up   | 2.157681 up   | 4.522469 up   | 9.19637 up    | 4.238812 up   | TIMP2 .     |
| 231775_at | 2.630836 down | 3.177967 down | 2.076292 down | 3.338731 down | 2.463738 down | TNFRSF10A . |
| 231822_at | 1.569547 up   | 1.873332 up   | 2.601776 up   | 1.841185 up   | 1.783988 up   | CTTNBP2N .  |
| 231867_at | 24.43438 up   | 2.000524 up   | 2.958025 up   | 2.844076 up   | 97.12575 up   | ODZ2 .      |
| 232020_at | 1.794649 up   | 3.542602 up   | 2.5711 up     | 1.95444 up    | 2.325786 up   | SMURF2 .    |
| 232434_at | 11.60009 down | 4.71146 down  | 9.813027 down | 14.86466 down | 8.052675 down | DIRC3 .     |
| 235258_at | 1.817538 down | 1.983957 down | 1.657867 down | 2.362945 down | 2.172695 down | DCP2 .      |
| 236046_at | 2.633743 up   | 16.85767 up   | 2.451622 up   | 2.62509 up    | 1.912577 up   | FLJ44896 .  |
| 236249_at | 1.884006 up   | 1.523628 up   | 1.849197 up   | 1.611273 up   | 1.580402 up   | IKIP .      |
| 236471_at | 13.46195 down | 2.929898 down | 24.02848 down | 3.765363 down | 1.922513 down | NFE2L3 .    |
| 238129_s_ | 19.84061 up   | 3.194711 up   | 1.560388 up   | 3.296756 up   | 2.343046 up   | .           |
| 238619_at | 2.041815 up   | 2.593756 up   | 1.931267 up   | 1.516007 up   | 2.683917 up   | .           |
| 238850_at | 4.558186 down | 2.884629 down | 9.291253 down | 3.986922 down | 8.175844 down | LOC645323 . |
| 239277_at | 1.865231 up   | 2.414703 up   | 1.824216 up   | 1.693671 up   | 1.673156 up   | .           |
| 239835_at | 9.746669 down | 8.199166 down | 8.904866 down | 2.9138 down   | 4.371048 down | KBTBD8 .    |
| 240517_at | 1.58299 down  | 2.125071 down | 1.565461 down | 1.633913 down | 2.009351 down | CBS .       |
| 241031_at | 21.03702 down | 4.757914 down | 1.501067 down | 2.586763 down | 9.503926 down | FAM148A .   |
| 241400_at | 1.863673 up   | 2.25737 up    | 3.524697 up   | 1.548305 up   | 2.12811 up    | .           |
| 241457_at | 11.51571 up   | 10.96165 up   | 1.600093 up   | 5.512885 up   | 9.483678 up   | .           |
| 241774_at | 2.162028 up   | 1.930443 up   | 1.574283 up   | 1.614554 up   | 1.732137 up   | .           |
| 241960_at | 2.877613 down | 3.560542 down | 7.049679 down | 3.8941 down   | 6.242373 down | CSMD1 .     |
| 243010_at | 1.569793 down | 2.621794 down | 2.034251 down | 2.548694 down | 1.579222 down | MSI2 .      |
| 243591_at | 1.754612 down | 2.379239 down | 1.53764 down  | 3.490386 down | 2.110355 down | .           |
| 1553405_a | 5.865179 down | 5.322454 down | 13.10166 down | 4.139543 down | 13.4452 down  | CSMD1 .     |
| 1553613_s | 1.895928 down | 2.69759 down  | 6.82167 down  | 11.85989 down | 9.052128 down | FOXC1 .     |
| 1554576_a | 3.254195 down | 2.402228 down | 2.527281 down | 4.36182 down  | 1.897631 down | ETV4 .      |
| 1555370_a | 2.385211 up   | 1.659891 up   | 2.088124 up   | 2.168536 up   | 1.749836 up   | CAMTA1 .    |
| 1556194_a | 1.906827 down | 2.360254 down | 1.960658 down | 3.379904 down | 1.595919 down | .           |
| 1560738_a | 1.622363 down | 1.505175 down | 1.912715 down | 3.074435 down | 4.924702 down | .           |
| 1566115_a | 2.244211 down | 1.657204 down | 3.458072 down | 4.736083 down | 7.590814 down | .           |
| 1566968_a | 2.602327 down | 2.954795 down | 7.412332 down | 2.646442 down | 2.425962 down | .           |
| 1570445_a | 17.36732 down | 15.5561 down  | 1.80913 down  | 6.901501 down | 3.867196 down | LOC643201 . |

| Probe Set | Fold change | Regulation | Gene Symt | Entrez Gen |
|-----------|-------------|------------|-------------|------------|-------------|------------|-------------|------------|-------------|------------|-----------|------------|
| 200974_at | 6.26507     | up         | 5.86196     | up         | 10.21592    | up         | 2.205689    | up         | 2.562348    | up         | ACTA2     | 59         |
| 201124_at | 3.324072    | up         | 2.006064    | up         | 4.311418    | up         | 2.970704    | up         | 2.316347    | up         | ITGB5     | 3693       |
| 202345_s_ | 2.323498    | down       | 5.412044    | down       | 2.271341    | down       | 2.26471     | down       | 2.547446    | down       | FABP5     | 2171       |
| 202388_at | 3.455126    | down       | 14.43142    | down       | 2.454607    | down       | 7.223879    | down       | 3.388371    | down       | RGS2      | 5997       |
| 202435_s_ | 4.047166    | down       | 9.171716    | down       | 15.70702    | down       | 2.142134    | down       | 13.75916    | down       | CYP1B1    | 1545       |
| 202625_at | 2.94823     | down       | 3.652596    | down       | 3.030384    | down       | 2.810388    | down       | 2.085095    | down       | LYN       | 4067       |
| 202626_s_ | 3.753217    | down       | 3.535651    | down       | 4.459446    | down       | 2.824927    | down       | 2.101105    | down       | LYN       | 4067       |
| 202686_s_ | 39.25732    | up         | 5.154155    | up         | 22.07291    | up         | 7.245045    | up         | 10.03762    | up         | AXL       | 558        |
| 203324_s_ | 2.369979    | up         | 8.770221    | up         | 22.06334    | up         | 2.999654    | up         | 6.749893    | up         | CAV2      | 858        |
| 203325_s_ | 14.13309    | up         | 4.940327    | up         | 6.689859    | up         | 11.2937     | up         | 12.33847    | up         | COL5A1    | 1289       |
| 204256_at | 2.287935    | down       | 4.632699    | down       | 4.463172    | down       | 2.587557    | down       | 2.904533    | down       | ELOVL6    | 79071      |
| 208286_x_ | 5.147342    | down       | 2.990485    | down       | 2.407879    | down       | 2.09506     | down       | 2.550176    | down       | POU5F1    | 5460       |
| 208789_at | 5.954671    | up         | 2.609908    | up         | 9.906562    | up         | 2.048137    | up         | 2.952647    | up         | PTRF      | 284119     |
| 208790_s_ | 7.251101    | up         | 3.042892    | up         | 14.31653    | up         | 2.222387    | up         | 4.045184    | up         | PTRF      | 284119     |
| 209610_s_ | 2.896176    | up         | 3.589754    | up         | 2.264592    | up         | 2.329488    | up         | 2.142873    | up         | SLC1A4    | 6509       |
| 210265_x_ | 8.742022    | down       | 3.94853     | down       | 4.557504    | down       | 8.329842    | down       | 4.525188    | down       | POU5F1P3  | 642559     |
| 210868_s_ | 2.130563    | down       | 4.445955    | down       | 4.646009    | down       | 2.283672    | down       | 2.002181    | down       | ELOVL6    | 79071      |
| 210905_x_ | 5.967997    | down       | 4.272274    | down       | 3.681372    | down       | 8.303679    | down       | 5.044441    | down       | POU5F1P4  | 645682     |
| 212012_at | 7.966716    | up         | 4.177272    | up         | 7.038819    | up         | 2.022681    | up         | 63.61236    | up         | PXDN      | 7837       |
| 212013_at | 9.419513    | up         | 3.729662    | up         | 3.958878    | up         | 2.715015    | up         | 70.58463    | up         | PXDN      | 7837       |
| 212488_at | 20.48378    | up         | 4.387967    | up         | 4.752375    | up         | 9.659649    | up         | 4.266556    | up         | COL5A1    | 1289       |
| 212489_at | 12.37044    | up         | 4.673307    | up         | 6.083585    | up         | 5.712344    | up         | 9.143495    | up         | COL5A1    | 1289       |
| 212667_at | 7.940271    | up         | 3.95418     | up         | 31.83026    | up         | 2.651713    | up         | 9.263402    | up         | SPARC     | 6678       |
| 213069_at | 3.669093    | up         | 5.211527    | up         | 2.003538    | up         | 2.534209    | up         | 3.2613      | up         | HEG1      | 57493      |
| 213075_at | 9.889246    | up         | 2.305764    | up         | 18.15929    | up         | 7.369148    | up         | 3.666853    | up         | OLFML2A   | 169611     |
| 214240_at | 6.646942    | down       | 22.54359    | down       | 13.74774    | down       | 2.201448    | down       | 10.2387     | down       | GAL       | 51083      |
| 214532_x_ | 5.180971    | down       | 4.12916     | down       | 3.524515    | down       | 6.173545    | down       | 3.237071    | down       | POU5F1B   | 5462       |
| 217728_at | 3.575803    | up         | 3.535667    | up         | 15.52225    | up         | 4.281107    | up         | 2.022641    | up         | S100A6    | 6277       |
| 218501_at | 4.635738    | down       | 7.329758    | down       | 7.777146    | down       | 2.674744    | down       | 15.04557    | down       | ARHGEF3   | 50650      |
| 221489_s_ | 4.248363    | down       | 2.670657    | down       | 6.621056    | down       | 11.05772    | down       | 3.269524    | down       | SPRY4     | 81848      |
| 223315_at | 4.407357    | up         | 28.36367    | up         | 41.58144    | up         | 10.13922    | up         | 2.825544    | up         | NTN4      | 59277      |
| 224560_at | 4.934008    | up         | 2.290927    | up         | 4.818491    | up         | 8.008272    | up         | 4.589417    | up         | TIMP2     | 7077       |
| 225602_at | 3.71359     | up         | 2.006307    | up         | 2.892164    | up         | 4.841154    | up         | 3.45532     | up         | GLIPR2    | 152007     |

|           |               |               |               |               |               |           |        |
|-----------|---------------|---------------|---------------|---------------|---------------|-----------|--------|
| 225604_s_ | 3.288913 up   | 2.627918 up   | 3.02196 up    | 3.368102 up   | 4.00729 up    | GLIPR2    | 152007 |
| 227342_s_ | 6.01247 down  | 4.255485 down | 2.037691 down | 20.19177 down | 6.088821 down | MYEOV     | 26579  |
| 228080_at | 4.423617 up   | 2.706724 up   | 9.600663 up   | 5.622776 up   | 9.819458 up   | LAYN      | 143903 |
| 230272_at | 5.59536 down  | 2.970876 down | 16.52153 down | 9.55943 down  | 11.02781 down | LOC645323 | 645323 |
| 231579_s_ | 5.124619 up   | 2.157681 up   | 4.522469 up   | 9.19637 up    | 4.238812 up   | TIMP2     | 7077   |
| 231775_at | 2.630836 down | 3.177967 down | 2.076292 down | 3.338731 down | 2.463738 down | TNFRSF10A | 8797   |
| 231867_at | 24.43438 up   | 2.000524 up   | 2.958025 up   | 2.844076 up   | 97.12575 up   | ODZ2      | 57451  |
| 232434_at | 11.60009 down | 4.71146 down  | 9.813027 down | 14.86466 down | 8.052675 down | DIRC3     | 729582 |
| 238850_at | 4.558186 down | 2.884629 down | 9.291253 down | 3.986922 down | 8.175844 down | LOC645323 | 645323 |
| 239835_at | 9.746669 down | 8.199166 down | 8.904866 down | 2.9138 down   | 4.371048 down | KBTBD8    | 84541  |
| 241960_at | 2.877613 down | 3.560542 down | 7.049679 down | 3.8941 down   | 6.242373 down | CSMD1     | 64478  |
| 1553405_a | 5.865179 down | 5.322454 down | 13.10166 down | 4.139543 down | 13.4452 down  | CSMD1     | 64478  |
| 1566968_a | 2.602327 down | 2.954795 down | 7.412332 down | 2.646442 down | 2.425962 down |           |        |
