# Supplementary material
Source: PubMed Central journal article supplement (PMC3470785)
Supplement: NIHMS377161-supplement-14.pdf [file NIHMS377161-supplement-14.pdf]

|           |          |          |          |      |          |      |          |      |          |
|-----------|----------|----------|----------|------|----------|------|----------|------|----------|
| 200003_s_ | 0.004185 | 0.002766 | 1.38194  | down | 1.000377 | down | 1.38142  | up   | RPL28    |
| 200009_at | 7.07E-04 | 2.54E-04 | 1.463364 | up   | 1.390304 | up   | 1.05255  | down | GDI2     |
| 200012_x_ | 0.003462 | 0.00217  | 1.058767 | up   | 1.298569 | up   | 1.226492 | up   | RPL21    |
| 200013_at | 0.001985 | 0.001025 | 1.327385 | up   | 1.483833 | up   | 1.117862 | up   | RPL24    |
| 200014_s_ | 1.95E-05 | 1.94E-06 | 1.940763 | up   | 2.043106 | up   | 1.052733 | up   | HNRNPC   |
| 200015_s_ | 7.64E-04 | 2.83E-04 | 1.627445 | down | 1.366469 | down | 1.190986 | up   | 40788    |
| 200016_x_ | 7.33E-05 | 1.19E-05 | 1.367961 | up   | 1.639272 | up   | 1.198333 | up   | HNRNPA1  |
| 200018_at | 2.63E-04 | 6.67E-05 | 1.055745 | down | 1.161068 | up   | 1.225791 | up   | RPS13    |
| 200020_at | 0.002025 | 0.001055 | 1.601485 | up   | 1.828014 | up   | 1.141449 | up   | TARDBP   |
| 200032_s_ | 0.005737 | 0.004148 | 1.165438 | up   | 1.133304 | up   | 1.028355 | down | RPL9     |
| 200034_s_ | 0.003115 | 0.001883 | 1.193839 | up   | 1.261407 | up   | 1.056598 | up   | RPL6     |
| 200038_s_ | 0.007677 | 0.005982 | 1.099559 | up   | 1.258371 | up   | 1.144432 | up   | RPL17    |
| 200039_s_ | 0.002799 | 0.001632 | 2.08526  | up   | 1.530039 | up   | 1.36288  | down | PSMB2    |
| 200040_at | 4.45E-05 | 6.01E-06 | 1.693794 | up   | 1.661171 | up   | 1.019639 | down | KHDRBS1  |
| 200041_s_ | 5.18E-04 | 1.66E-04 | 2.61698  | up   | 1.978306 | up   | 1.322839 | down | BAT1     |
| 200042_at | 1.12E-05 | 8.83E-07 | 2.04176  | up   | 1.410921 | up   | 1.447112 | down | C22orf28 |
| 200043_at | 9.25E-04 | 3.65E-04 | 1.652971 | up   | 1.843193 | up   | 1.115079 | up   | ERH      |
| 200044_at | 0.004915 | 0.003417 | 1.549859 | up   | 1.392678 | up   | 1.112863 | down | SFRS9    |
| 200045_at | 0.001011 | 4.12E-04 | 1.920313 | up   | 1.339334 | up   | 1.433783 | down | ABCF1    |
| 200046_at | 3.25E-04 | 8.88E-05 | 1.395606 | down | 1.814929 | down | 1.300459 | down | DAD1     |
| 200048_s_ | 6.78E-05 | 1.07E-05 | 1.695971 | down | 1.444956 | down | 1.173719 | up   | JTB      |
| 200049_at | 2.06E-07 | 3.29E-09 | 2.787583 | up   | 2.987595 | up   | 1.071751 | up   | MYST2    |
| 200050_at | 2.05E-04 | 4.74E-05 | 2.057915 | up   | 2.233701 | up   | 1.085419 | up   | ZNF146   |
| 200051_at | 0.003428 | 0.002143 | 1.244877 | up   | 1.512936 | down | 1.88342  | down | SART1    |
| 200052_s_ | 2.09E-04 | 4.87E-05 | 2.690424 | up   | 2.426399 | up   | 1.108814 | down | ILF2     |
| 200053_at | 0.015177 | 0.013404 | 1.374394 | up   | 1.096514 | up   | 1.253422 | down | SPAG7    |
| 200054_at | 0.001724 | 8.48E-04 | 1.535807 | up   | 1.34251  | down | 2.061836 | down | ZNF259   |
| 200057_s_ | 7.96E-06 | 5.59E-07 | 1.799807 | up   | 1.673558 | up   | 1.075437 | down | NONO     |
| 200058_s_ | 1.26E-05 | 1.06E-06 | 2.799717 | up   | 2.212078 | up   | 1.26565  | down | SNRNP200 |
| 200059_s_ | 6.07E-05 | 9.18E-06 | 1.479795 | down | 1.55893  | down | 1.053477 | down | RHOA     |
| 200060_s_ | 7.47E-06 | 5.12E-07 | 2.355341 | up   | 1.949977 | up   | 1.207881 | down | RNPS1    |
| 200063_s_ | 3.50E-04 | 9.81E-05 | 1.472725 | up   | 1.449808 | up   | 1.015807 | down | NPM1     |
| 200064_at | 1.00E-04 | 1.81E-05 | 2.394049 | up   | 2.10913  | up   | 1.135088 | down | HSP90AB1 |
| 200069_at | 4.07E-04 | 1.20E-04 | 2.865958 | up   | 3.820734 | up   | 1.333144 | up   | SART3    |

|           |          |          |               |               |               |           |
|-----------|----------|----------|---------------|---------------|---------------|-----------|
| 200072_s_ | 0.001235 | 5.41E-04 | 2.615929 up   | 2.36507 up    | 1.106068 down | HNRNPM    |
| 200073_s_ | 6.28E-04 | 2.15E-04 | 2.136061 up   | 2.038206 up   | 1.04801 down  | HNRNPD    |
| 200075_s_ | 4.65E-04 | 1.43E-04 | 1.863297 down | 3.304808 down | 1.773635 down | GUK1      |
| 200077_s_ | 0.001397 | 6.40E-04 | 1.291884 down | 1.257276 down | 1.027526 up   | OAZ1      |
| 200079_s_ | 5.75E-05 | 8.53E-06 | 2.015187 up   | 1.278094 up   | 1.576713 down | KARS      |
|           |          |          |               |               |               | H3F3A /// |
|           |          |          |               |               |               | H3F3B /// |
| 200080_s_ | 1.08E-04 | 1.99E-05 | 1.424919 up   | 1.744057 up   | 1.22397 up    | LOC440926 |
| 200089_s_ | 5.61E-04 | 1.85E-04 | 1.220272 up   | 1.235043 up   | 1.012105 up   | RPL4      |
| 200095_x_ | 0.001485 | 6.94E-04 | 1.168889 up   | 1.136803 up   | 1.028225 down | RPS10     |
| 200096_s_ | 1.95E-04 | 4.42E-05 | 2.437132 down | 2.027244 down | 1.20219 up    | ATP6V0E1  |
| 200097_s_ | 0.002924 | 0.001729 | 1.47887 up    | 1.589933 up   | 1.0751 up     | HNRNPK    |
| 200099_s_ | 0.007718 | 0.006021 | 1.126929 up   | 1.213657 up   | 1.07696 up    | RPS3A     |
| 200593_s_ | 7.06E-04 | 2.53E-04 | 3.130397 up   | 2.362599 up   | 1.324981 down | HNRNPU    |
| 200594_x_ | 6.33E-05 | 9.71E-06 | 2.141337 up   | 2.068777 up   | 1.035074 down | HNRNPU    |
| 200596_s_ | 5.96E-04 | 2.01E-04 | 2.207164 up   | 1.170756 up   | 1.885248 down | EIF3A     |
| 200597_at | 7.54E-04 | 2.77E-04 | 1.940596 up   | 2.139983 up   | 1.102745 up   | EIF3A     |
| 200600_at | 0.001763 | 8.74E-04 | 1.970292 down | 2.556637 down | 1.297593 down | MSN       |
| 200601_at | 0.008596 | 0.006858 | 2.070975 down | 2.888019 down | 1.394522 down | ACTN4     |
| 200602_at | 0.001474 | 6.87E-04 | 2.224997 down | 1.619907 up   | 3.604289 up   | APP       |
| 200603_at | 0.022057 | 0.020446 | 2.220693 down | 1.333613 down | 1.66517 up    | PRKAR1A   |
| 200605_s_ | 0.008304 | 0.00658  | 2.261101 down | 1.477393 down | 1.530467 up   | PRKAR1A   |
| 200606_at | 0.001509 | 7.09E-04 | 10.5585 up    | 1.627784 down | 17.18696 down | DSP       |
| 200608_s_ | 0.002104 | 0.001109 | 1.162411 up   | 2.012769 up   | 1.731546 up   | RAD21     |
| 200609_s_ | 1.45E-04 | 2.99E-05 | 1.539172 down | 2.81875 down  | 1.831343 down | WDR1      |
| 200610_s_ | 4.02E-05 | 5.28E-06 | 2.002042 up   | 1.909028 up   | 1.048723 down | NCL       |
| 200617_at | 0.012679 | 0.010878 | 1.734124 up   | 1.509007 up   | 1.149182 down | MLEC      |
| 200619_at | 6.39E-05 | 9.88E-06 | 1.722122 up   | 1.246477 up   | 1.381591 down | SF3B2     |
| 200620_at | 0.001807 | 9.03E-04 | 2.76148 down  | 2.009524 down | 1.374196 up   | TMEM59    |
| 200621_at | 3.73E-07 | 7.36E-09 | 12.4752 down  | 60.95385 down | 4.886005 down | CSRP1     |
| 200624_s_ | 0.002194 | 0.001174 | 1.711673 up   | 2.428342 up   | 1.418695 up   | MATR3     |
| 200625_s_ | 0.002299 | 0.001255 | 1.311472 down | 2.32029 down  | 1.769226 down | CAP1      |
| 200626_s_ | 4.76E-04 | 1.47E-04 | 1.466534 up   | 2.393524 up   | 1.632095 up   | MATR3     |
| 200627_at | 2.81E-05 | 3.22E-06 | 2.109773 up   | 2.247269 up   | 1.065171 up   | PTGES3    |

|           |          |          |               |               |               |          |
|-----------|----------|----------|---------------|---------------|---------------|----------|
| 200631_s_ | 1.26E-05 | 1.05E-06 | 2.662818 up   | 2.719464 up   | 1.021273 up   | SET      |
| 200632_s_ | 0.001038 | 4.26E-04 | 4.045388 down | 5.60016 down  | 1.384332 down | NDRG1    |
| 200633_at | 0.012502 | 0.010705 | 1.088445 up   | 1.374073 up   | 1.262418 up   | UBB      |
| 200635_s_ | 0.003078 | 0.001854 | 3.823642 up   | 2.385401 up   | 1.602935 down | PTPRF    |
| 200636_s_ | 4.96E-04 | 1.55E-04 | 3.361241 up   | 2.119847 up   | 1.585606 down | PTPRF    |
| 200637_s_ | 0.018216 | 0.016492 | 3.866935 up   | 2.178238 up   | 1.775259 down | PTPRF    |
| 200643_at | 1.24E-04 | 2.40E-05 | 1.392154 down | 2.281491 down | 1.638821 down | HDLBP    |
| 200644_at | 3.54E-04 | 9.97E-05 | 6.648286 up   | 4.406404 up   | 1.508778 down | MARCKSL1 |
| 200645_at | 6.16E-04 | 2.10E-04 | 2.24949 down  | 1.743863 down | 1.289946 up   | GABARAP  |
| 200648_s_ | 9.32E-05 | 1.63E-05 | 1.189038 down | 4.27502 up    | 5.083159 up   | GLUL     |
| 200649_at | 5.94E-04 | 2.00E-04 | 2.179759 down | 2.501638 down | 1.147667 down | NUCB1    |
| 200650_s_ | 0.013287 | 0.011488 | 1.445479 down | 1.941506 down | 1.343158 down | LDHA     |
| 200652_at | 0.001778 | 8.85E-04 | 1.72538 down  | 1.815125 down | 1.052015 down | SSR2     |
| 200654_at | 4.23E-04 | 1.26E-04 | 1.813315 down | 2.159106 down | 1.190695 down | P4HB     |
| 200657_at | 1.63E-04 | 3.51E-05 | 2.160771 up   | 1.549232 up   | 1.394737 down | SLC25A5  |
| 200658_s_ | 9.10E-04 | 3.56E-04 | 2.397203 up   | 1.619757 up   | 1.479977 down | PHB      |
| 200659_s_ | 2.51E-04 | 6.27E-05 | 2.226781 up   | 1.543974 up   | 1.44224 down  | PHB      |
| 200660_at | 5.17E-04 | 1.65E-04 | 3.462162 down | 3.908648 down | 1.128962 down | S100A11  |
| 200661_at | 1.08E-06 | 3.26E-08 | 7.755778 down | 5.231514 down | 1.482511 up   | CTSA     |
| 200662_s_ | 2.20E-04 | 5.24E-05 | 2.036705 up   | 1.871243 up   | 1.088423 down | TOMM20   |
| 200663_at | 9.21E-06 | 6.80E-07 | 2.738047 down | 2.273449 down | 1.204358 up   | CD63     |
| 200665_s_ | 1.17E-05 | 9.45E-07 | 4.099935 down | 5.275405 down | 1.286705 down | SPARC    |
| 200667_at | 0.018094 | 0.016362 | 1.000156 up   | 1.282236 up   | 1.282036 up   | UBE2D3   |
| 200673_at | 2.23E-04 | 5.32E-05 | 1.701731 down | 1.251504 down | 1.359748 up   | LAPTM4A  |
| 200675_at | 4.49E-05 | 6.12E-06 | 3.811398 down | 2.097418 down | 1.817186 up   | CD81     |
| 200676_s_ | 0.020303 | 0.01863  | 1.602125 down | 1.381568 down | 1.159642 up   | UBE2L3   |
| 200677_at | 2.64E-04 | 6.70E-05 | 1.750798 down | 2.294592 down | 1.310598 down | PTTG1IP  |
| 200678_x_ | 2.18E-05 | 2.26E-06 | 3.529208 down | 2.305935 down | 1.530489 up   | GRN      |
| 200679_x_ | 0.004443 | 0.002997 | 2.515444 up   | 2.965049 up   | 1.178738 up   | HMGB1    |
| 200680_x_ | 1.60E-04 | 3.43E-05 | 1.813367 up   | 2.409299 up   | 1.328633 up   | HMGB1    |
| 200681_at | 1.38E-04 | 2.79E-05 | 1.927366 up   | 1.590443 up   | 1.211842 down | GLO1     |
| 200686_s_ | 0.002035 | 0.001062 | 1.33066 up    | 2.200928 up   | 1.654013 up   | SFRS11   |
| 200687_s_ | 0.001101 | 4.62E-04 | 2.00674 up    | 1.527151 up   | 1.314042 down | SF3B3    |
| 200696_s_ | 6.82E-04 | 2.41E-04 | 5.138673 down | 4.592622 down | 1.118897 up   | GSN      |



|           |          |          |               |               |               |         |
|-----------|----------|----------|---------------|---------------|---------------|---------|
| 200697_at | 0.001116 | 4.71E-04 | 1.542635 up   | 1.306327 down | 2.015186 down | HK1     |
| 200698_at | 6.37E-05 | 9.81E-06 | 2.872703 down | 2.819588 down | 1.018838 up   | KDEL2   |
| 200699_at | 1.45E-04 | 2.98E-05 | 3.790888 down | 3.439755 down | 1.102081 up   | KDEL2   |
| 200700_s_ | 2.33E-04 | 5.67E-05 | 2.184552 down | 3.290075 down | 1.506064 down | KDEL2   |
| 200708_at | 0.001452 | 6.73E-04 | 2.293226 up   | 1.639352 up   | 1.398862 down | GOT2    |
| 200713_s_ | 3.52E-04 | 9.90E-05 | 1.623748 up   | 1.126046 up   | 1.441991 down | MAPRE1  |
| 200714_x_ | 0.0013   | 5.81E-04 | 1.9955 down   | 1.504749 down | 1.326135 up   | OS9     |
| 200715_x_ | 0.003649 | 0.002318 | 1.058325 down | 1.325972 up   | 1.403308 up   | RPL13A  |
| 200717_x_ | 6.01E-04 | 2.03E-04 | 1.053164 up   | 1.185181 up   | 1.125352 up   | RPL7    |
| 200719_at | 5.24E-04 | 1.68E-04 | 2.126047 up   | 1.616237 up   | 1.31543 down  | SKP1    |
| 200725_x_ | 0.011567 | 0.009768 | 1.272732 down | 1.09987 down  | 1.157166 up   | RPL10   |
| 200726_at | 1.20E-06 | 3.81E-08 | 1.814725 up   | 3.205273 up   | 1.766258 up   | PPP1CC  |
| 200728_at | 3.18E-05 | 3.83E-06 | 1.608429 down | 2.088627 down | 1.298551 down | ACTR2   |
| 200729_s_ | 1.62E-04 | 3.49E-05 | 2.222702 down | 2.221644 down | 1.000477 up   | ACTR2   |
| 200732_s_ | 0.013226 | 0.011431 | 1.199857 up   | 1.73612 down  | 2.083095 down | PTP4A1  |
| 200735_x_ | 0.003104 | 0.001875 | 1.267006 up   | 1.408598 up   | 1.111754 up   | NACA    |
| 200736_s_ | 0.014237 | 0.012446 | 1.602245 down | 1.119792 down | 1.430841 up   | GPX1    |
| 200740_s_ | 0.004874 | 0.003381 | 1.699205 down | 1.066018 down | 1.593975 up   | SUMO3   |
| 200741_s_ | 0.001204 | 5.23E-04 | 1.104999 down | 1.298569 up   | 1.434917 up   | RPS27   |
| 200742_s_ | 8.37E-06 | 5.99E-07 | 8.979046 down | 4.849382 down | 1.851586 up   | TPP1    |
| 200743_s_ | 0.002364 | 0.001302 | 3.710631 down | 2.008902 down | 1.847095 up   | TPP1    |
| 200748_s_ | 1.29E-04 | 2.53E-05 | 2.40802 down  | 1.915517 down | 1.257113 up   | FTH1    |
| 200750_s_ | 5.95E-04 | 2.00E-04 | 2.823036 up   | 1.966338 up   | 1.435682 down | RAN     |
| 200751_s_ | 0.022707 | 0.02112  | 1.617634 up   | 3.337511 up   | 2.063206 up   | HNRNPC  |
| 200754_x_ | 9.37E-05 | 1.65E-05 | 2.3139 up     | 2.197541 up   | 1.05295 down  | SFRS2   |
| 200755_s_ | 4.05E-04 | 1.19E-04 | 3.40736 down  | 3.140926 down | 1.084827 up   | CALU    |
| 200756_x_ | 7.99E-04 | 3.01E-04 | 4.992512 down | 4.148739 down | 1.203381 up   | CALU    |
| 200757_s_ | 3.73E-05 | 4.70E-06 | 2.983678 down | 2.864766 down | 1.041508 up   | CALU    |
| 200760_s_ | 5.84E-05 | 8.73E-06 | 4.865625 down | 3.520652 down | 1.382024 up   | ARL6IP5 |
| 200761_s_ | 3.07E-04 | 8.21E-05 | 3.761482 down | 3.784725 down | 1.006179 down | ARL6IP5 |
| 200762_at | 0.005827 | 0.00423  | 1.879831 down | 1.345237 down | 1.397398 up   | DPYSL2  |
| 200765_x_ | 0.005061 | 0.003548 | 1.188141 up   | 1.098058 down | 1.304647 down | CTNNA1  |
| 200766_at | 1.23E-04 | 2.39E-05 | 3.086528 down | 4.49314 down  | 1.455727 down | CTSD    |
| 200767_s_ | 0.001496 | 7.01E-04 | 2.255585 down | 1.767743 down | 1.275969 up   | FAM120A |

|           |          |          |          |      |          |      |          |      |           |
|-----------|----------|----------|----------|------|----------|------|----------|------|-----------|
| 200770_s_ | 3.43E-07 | 6.46E-09 | 2.430839 | down | 4.825508 | down | 1.985121 | down | LAMC1     |
| 200771_at | 9.96E-06 | 7.52E-07 | 2.299508 | down | 3.070936 | down | 1.335475 | down | LAMC1     |
| 200772_x_ | 7.42E-06 | 5.07E-07 | 2.871453 | up   | 3.859587 | up   | 1.344124 | up   | PTMA      |
| 200773_x_ | 1.37E-04 | 2.76E-05 | 1.803896 | up   | 2.215933 | up   | 1.228415 | up   | PTMA      |
| 200774_at | 6.29E-04 | 2.16E-04 | 2.591131 | down | 2.266147 | down | 1.143408 | up   | FAM120A   |
| 200775_s_ | 1.02E-05 | 7.77E-07 | 1.509092 | up   | 1.758995 | up   | 1.165598 | up   | HNRNPK    |
| 200782_at | 4.38E-06 | 2.38E-07 | 2.795528 | down | 2.43067  | down | 1.150106 | up   | ANXA5     |
|           |          |          |          |      |          |      |          |      | LOC100134 |
|           |          |          |          |      |          |      |          |      | 190 ///   |
| 200784_s_ | 0.005396 | 0.003843 | 2.402186 | down | 2.651098 | down | 1.103619 | down | LRP1      |
|           |          |          |          |      |          |      |          |      | LOC100134 |
|           |          |          |          |      |          |      |          |      | 190 ///   |
| 200785_s_ | 7.28E-04 | 2.64E-04 | 3.055018 | down | 3.60692  | down | 1.180654 | down | LRP1      |
| 200787_s_ | 0.002847 | 0.001669 | 3.986637 | down | 4.987764 | down | 1.251121 | down | PEA15     |
| 200788_s_ | 1.47E-06 | 5.05E-08 | 4.758524 | down | 5.44026  | down | 1.143267 | down | PEA15     |
| 200790_at | 4.74E-05 | 6.54E-06 | 6.197574 | up   | 1.849543 | up   | 3.350868 | down | ODC1      |
| 200791_s_ | 0.00129  | 5.75E-04 | 1.219592 | down | 1.784776 | down | 1.463421 | down | IQGAP1    |
| 200792_at | 9.90E-05 | 1.78E-05 | 1.886208 | up   | 1.636046 | up   | 1.152906 | down | XRCC6     |
| 200793_s_ | 0.001535 | 7.25E-04 | 1.316125 | up   | 1.090076 | down | 1.434676 | down | ACO2      |
| 200797_s_ | 0.00668  | 0.005033 | 1.444011 | up   | 1.356709 | up   | 1.064349 | down | MCL1      |
| 200799_at | 0.003115 | 0.001884 | 2.773848 | down | 2.260387 | down | 1.227156 | up   | HSPA1A    |
| 200802_at | 0.001743 | 8.61E-04 | 1.478968 | down | 2.153025 | down | 1.455762 | down | SARS      |
| 200805_at | 0.003077 | 0.001852 | 1.140967 | down | 1.585646 | down | 1.389739 | down | LMAN2     |
| 200806_s_ | 0.010823 | 0.009029 | 3.14874  | up   | 4.393248 | up   | 1.39524  | up   | HSPD1     |
| 200807_s_ | 3.70E-06 | 1.87E-07 | 2.709274 | up   | 2.513598 | up   | 1.077847 | down | HSPD1     |
| 200812_at | 0.003444 | 0.002156 | 1.926783 | up   | 1.230938 | up   | 1.565296 | down | CCT7      |
| 200814_at | 7.22E-05 | 1.17E-05 | 2.345537 | down | 1.569871 | down | 1.494095 | up   | PSME1     |
| 200815_s_ | 0.007168 | 0.005498 | 1.767144 | up   | 1.06053  | down | 1.87411  | down | PAFAH1B1  |
| 200816_s_ | 0.002124 | 0.001124 | 1.781324 | down | 2.031413 | down | 1.140395 | down | PAFAH1B1  |
| 200817_x_ | 0.002174 | 0.00116  | 1.196116 | up   | 1.277163 | up   | 1.067758 | up   | RPS10     |
| 200818_at | 3.26E-04 | 8.94E-05 | 1.6804   | up   | 1.506172 | up   | 1.115676 | down | ATP5O     |
| 200821_at | 0.002288 | 0.001248 | 5.087884 | down | 2.508685 | down | 2.028108 | up   | LAMP2     |
| 200824_at | 0.010799 | 0.009005 | 1.964648 | up   | 2.169217 | up   | 1.104125 | up   | GSTP1     |
| 200825_s_ | 0.022322 | 0.020727 | 2.085894 | up   | 1.344769 | up   | 1.551117 | down | HYOU1     |

|           |          |          |               |               |               |           |
|-----------|----------|----------|---------------|---------------|---------------|-----------|
| 200826_at | 0.019353 | 0.017649 | 1.613269 up   | 1.810244 up   | 1.122097 up   | SNRPD2    |
| 200827_at | 2.62E-05 | 2.90E-06 | 3.352225 down | 5.492629 down | 1.638503 down | PLOD1     |
| 200828_s_ | 0.002474 | 0.001384 | 1.597011 up   | 1.988076 up   | 1.244873 up   | ZNF207    |
| 200829_x_ | 6.70E-05 | 1.05E-05 | 1.812099 up   | 1.641781 up   | 1.10374 down  | ZNF207    |
| 200831_s_ | 0.034741 | 0.033445 | 1.272021 up   | 2.558648 up   | 2.011482 up   | SCD       |
|           |          |          |               |               |               | hCG_17573 |
|           |          |          |               |               |               | 35 ///    |
| 200833_s_ | 0.003299 | 0.002035 | 1.780379 down | 2.033082 down | 1.141938 down | RAP1B     |
| 200837_at | 6.40E-04 | 2.21E-04 | 1.015731 up   | 1.5686 down   | 1.593275 down | BCAP31    |
| 200838_at | 4.02E-06 | 2.11E-07 | 11.09344 down | 9.316038 down | 1.19079 up    | CTSB      |
| 200839_s_ | 1.76E-05 | 1.70E-06 | 11.67828 down | 8.697105 down | 1.342778 up   | CTSB      |
| 200840_at | 0.002368 | 0.001305 | 1.442083 up   | 1.406906 up   | 1.025004 down | KARS      |
| 200843_s_ | 0.004512 | 0.003063 | 1.588874 up   | 1.3919 down   | 2.211554 down | EPRS      |
| 200851_s_ | 3.53E-04 | 9.92E-05 | 1.63053 up    | 1.678511 up   | 1.029427 up   | KIAA0174  |
| 200853_at | 2.61E-04 | 6.62E-05 | 2.109702 up   | 2.216438 up   | 1.050593 up   | H2AFZ     |
| 200854_at | 0.004263 | 0.002835 | 1.072507 up   | 1.468887 down | 1.575391 down | NCOR1     |
| 200860_s_ | 7.38E-07 | 1.91E-08 | 2.418814 up   | 2.05736 up    | 1.175688 down | CNOT1     |
| 200861_at | 6.62E-05 | 1.04E-05 | 2.563383 up   | 2.416452 up   | 1.060805 down | CNOT1     |
| 200865_at | 0.001055 | 4.37E-04 | 1.020968 down | 1.329211 down | 1.301912 down | EIF3F     |
| 200866_s_ | 0.001634 | 7.91E-04 | 2.598507 down | 1.319197 down | 1.969764 up   | PSAP      |
| 200868_s_ | 0.001771 | 8.79E-04 | 1.214925 up   | 1.512873 up   | 1.245239 up   | RNF114    |
| 200870_at | 0.001091 | 4.57E-04 | 1.5089 up     | 1.342113 up   | 1.124272 down | STRAP     |
| 200871_s_ | 0.00156  | 7.43E-04 | 2.224952 down | 1.653089 down | 1.345937 up   | PSAP      |
| 200872_at | 0.007049 | 0.005385 | 1.862263 down | 1.978563 down | 1.062451 down | S100A10   |
| 200873_s_ | 1.03E-05 | 7.92E-07 | 2.216937 up   | 1.562262 up   | 1.419055 down | CCT8      |
| 200875_s_ | 8.36E-04 | 3.18E-04 | 4.120955 up   | 3.309667 up   | 1.245127 down | NOP56     |
| 200876_s_ | 7.38E-05 | 1.20E-05 | 1.546989 up   | 1.330372 up   | 1.162824 down | PSMB1     |
| 200877_at | 1.95E-05 | 1.94E-06 | 2.023762 up   | 1.69115 up    | 1.196678 down | CCT4      |
| 200878_at | 0.00174  | 8.60E-04 | 14.05912 down | 12.4611 down  | 1.128241 up   | EPAS1     |
| 200879_s_ | 8.50E-04 | 3.25E-04 | 4.818092 down | 5.434447 down | 1.127925 down | EPAS1     |
| 200881_s_ | 0.004565 | 0.003112 | 1.360462 up   | 1.647553 up   | 1.211025 up   | DNAJA1    |
| 200882_s_ | 0.001114 | 4.70E-04 | 1.968559 up   | 1.196842 up   | 1.644794 down | PSMD4     |
| 200884_at | 1.95E-05 | 1.93E-06 | 6.549498 up   | 8.717699 up   | 1.331049 up   | CKB       |
| 200885_at | 1.16E-05 | 9.31E-07 | 4.873752 down | 6.300947 down | 1.292833 down | RHOC      |

|           |          |          |          |      |          |      |          |      |           |
|-----------|----------|----------|----------|------|----------|------|----------|------|-----------|
| 200887_s_ | 1.95E-05 | 1.93E-06 | 5.69471  | down | 5.075275 | down | 1.12205  | up   | STAT1     |
| 200889_s_ | 0.014874 | 0.013095 | 1.685096 | down | 2.057151 | down | 1.220792 | down | SSR1      |
| 200890_s_ | 0.005328 | 0.003784 | 1.707401 | down | 2.303359 | down | 1.349044 | down | SSR1      |
| 200892_s_ | 0.001339 | 6.05E-04 | 2.269464 | up   | 2.450982 | up   | 1.079983 | up   | TRA2B     |
| 200893_at | 0.001462 | 6.79E-04 | 2.00126  | up   | 1.999011 | up   | 1.001125 | down | TRA2B     |
| 200894_s_ | 9.72E-05 | 1.73E-05 | 7.136179 | up   | 5.238509 | up   | 1.362254 | down | FKBP4     |
| 200895_s_ | 1.73E-06 | 6.38E-08 | 6.494413 | up   | 3.731338 | up   | 1.740506 | down | FKBP4     |
| 200897_s_ | 3.01E-05 | 3.54E-06 | 5.612316 | down | 6.784621 | down | 1.208881 | down | PALLD     |
| 200898_s_ | 0.005476 | 0.003915 | 1.903211 | up   | 1.46874  | up   | 1.295812 | down | MGEA5     |
| 200899_s_ | 0.001167 | 5.01E-04 | 1.883761 | up   | 1.98452  | up   | 1.053488 | up   | MGEA5     |
| 200903_s_ | 5.89E-04 | 1.97E-04 | 2.677581 | up   | 2.049706 | up   | 1.306325 | down | AHCY      |
| 200904_at | 2.58E-05 | 2.84E-06 | 7.184567 | down | 4.515233 | down | 1.591184 | up   | HLA-E     |
| 200905_x_ | 3.25E-06 | 1.57E-07 | 5.861836 | down | 3.865525 | down | 1.51644  | up   | HLA-E     |
| 200906_s_ | 3.84E-06 | 1.96E-07 | 3.967796 | down | 7.184226 | down | 1.810634 | down | PALLD     |
| 200907_s_ | 2.34E-06 | 9.81E-08 | 5.433815 | down | 7.08208  | down | 1.303335 | down | PALLD     |
| 200910_at | 1.41E-05 | 1.24E-06 | 3.010126 | up   | 1.744843 | up   | 1.725156 | down | CCT3      |
| 200911_s_ | 2.60E-04 | 6.58E-05 | 3.622222 | down | 4.541573 | down | 1.253808 | down | TACC1     |
| 200912_s_ | 0.002239 | 0.001211 | 1.120547 | up   | 1.61922  | up   | 1.445027 | up   | EIF4A2    |
| 200913_at | 0.001929 | 9.87E-04 | 2.848245 | up   | 1.834077 | up   | 1.552958 | down | PPM1G     |
| 200914_x_ | 0.002504 | 0.001407 | 1.74368  | up   | 1.844046 | up   | 1.05756  | up   | KTN1      |
| 200916_at | 0.004984 | 0.003478 | 2.761735 | down | 3.063206 | down | 1.10916  | down | TAGLN2    |
| 200917_s_ | 0.011273 | 0.00948  | 3.000913 | down | 3.174966 | down | 1.058    | down | SRPR      |
| 200918_s_ | 7.51E-05 | 1.23E-05 | 2.191168 | down | 2.747262 | down | 1.253789 | down | SRPR      |
| 200919_at | 2.08E-05 | 2.12E-06 | 3.737246 | down | 4.062915 | down | 1.087141 | down | PHC2      |
|           |          |          |          |      |          |      |          |      | LGALS3BP  |
|           |          |          |          |      |          |      |          |      | ///       |
|           |          |          |          |      |          |      |          |      | LOC100133 |
| 200923_at | 2.97E-05 | 3.48E-06 | 3.224108 | down | 7.245538 | down | 2.2473   | down | 842       |
| 200925_at | 4.86E-04 | 1.51E-04 | 1.721402 | up   | 1.165505 | up   | 1.476958 | down | COX6A1    |
| 200929_at | 1.37E-04 | 2.75E-05 | 2.105987 | down | 2.222269 | down | 1.055215 | down | TMED10    |
| 200934_at | 6.56E-04 | 2.29E-04 | 1.499101 | up   | 2.989815 | up   | 1.994405 | up   | DEK       |
| 200937_s_ | 0.007941 | 0.00623  | 1.186898 | up   | 1.317921 | up   | 1.110391 | up   | RPL5      |
| 200938_s_ | 0.014795 | 0.013021 | 1.78121  | up   | 1.049176 | up   | 1.697724 | down | RERE      |
| 200940_s_ | 0.001168 | 5.01E-04 | 1.552503 | up   | 1.163692 | up   | 1.334119 | down | RERE      |

|           |          |          |               |               |               |          |
|-----------|----------|----------|---------------|---------------|---------------|----------|
| 200943_at | 4.20E-05 | 5.60E-06 | 2.162865 up   | 1.721425 up   | 1.256439 down | HMGN1    |
| 200944_s_ | 1.88E-04 | 4.24E-05 | 1.975124 up   | 1.833937 up   | 1.076986 down | HMGN1    |
| 200945_s_ | 2.71E-05 | 3.06E-06 | 2.361741 down | 2.177224 down | 1.084749 up   | SEC31A   |
| 200949_x_ | 0.047939 | 0.04676  | 1.237036 up   | 1.581345 up   | 1.278333 up   | RPS20    |
| 200951_s_ | 2.15E-04 | 5.06E-05 | 5.98364 up    | 10.74843 up   | 1.796303 up   | CCND2    |
| 200953_s_ | 3.07E-05 | 3.64E-06 | 9.653789 up   | 75.2043 up    | 7.790132 up   | CCND2    |
| 200955_at | 9.96E-05 | 1.79E-05 | 1.991042 up   | 1.407292 up   | 1.414803 down | IMMT     |
| 200956_s_ | 0.001121 | 4.74E-04 | 3.256317 up   | 2.992893 up   | 1.088017 down | SSRP1    |
| 200957_s_ | 3.56E-06 | 1.77E-07 | 3.254427 up   | 2.60535 up    | 1.249132 down | SSRP1    |
| 200958_s_ | 0.006266 | 0.004649 | 1.939946 down | 1.48364 down  | 1.307558 up   | SDCBP    |
| 200965_s_ | 0.002578 | 0.001462 | 4.503349 up   | 5.547643 up   | 1.231893 up   | ABLIM1   |
| 200967_at | 2.23E-04 | 5.33E-05 | 2.903076 down | 2.475928 down | 1.17252 up    | PPIB     |
| 200968_s_ | 0.001089 | 4.56E-04 | 2.725888 down | 2.789633 down | 1.023385 down | PPIB     |
| 200972_at | 4.76E-04 | 1.47E-04 | 1.881442 down | 1.75784 down  | 1.070315 up   | TSPAN3   |
| 200973_s_ | 0.002862 | 0.001681 | 2.151782 down | 1.841887 down | 1.168249 up   | TSPAN3   |
| 200974_at | 2.54E-06 | 1.11E-07 | 17.35094 down | 68.65608 down | 3.956908 down | ACTA2    |
| 200975_at | 0.001642 | 7.96E-04 | 1.953811 up   | 2.155931 up   | 1.103449 up   | PPT1     |
| 200978_at | 0.001623 | 7.83E-04 | 1.755358 up   | 1.63024 up    | 1.076749 down | MDH1     |
| 200980_s_ | 3.21E-04 | 8.75E-05 | 2.091502 up   | 1.655841 up   | 1.263106 down | PDHA1    |
| 200982_s_ | 0.002136 | 0.001132 | 2.681394 down | 4.141138 down | 1.544397 down | ANXA6    |
| 200983_x_ | 8.47E-07 | 2.35E-08 | 9.652194 down | 9.523989 down | 1.013461 up   | CD59     |
| 200984_s_ | 7.34E-07 | 1.89E-08 | 9.393765 down | 8.71558 down  | 1.077813 up   | CD59     |
| 200985_s_ | 7.12E-07 | 1.81E-08 | 9.088069 down | 10.59226 down | 1.165512 down | CD59     |
| 200986_at | 0.017654 | 0.015913 | 4.049556 down | 1.179258 down | 3.433987 up   | SERPING1 |
| 200989_at | 0.005254 | 0.003719 | 1.556484 down | 1.747001 down | 1.122403 down | HIF1A    |
| 200990_at | 0.003064 | 0.001842 | 3.591127 up   | 3.347189 up   | 1.072879 down | TRIM28   |
| 200991_s_ | 5.36E-06 | 3.15E-07 | 2.041898 down | 2.165582 down | 1.060574 down | SNX17    |
| 200992_at | 0.002322 | 0.001273 | 1.421111 up   | 1.52845 up    | 1.075532 up   | IPO7     |
| 200993_at | 0.001453 | 6.74E-04 | 1.626848 up   | 1.617882 up   | 1.005542 down | IPO7     |
| 200994_at | 0.005    | 0.003493 | 1.511598 up   | 1.672742 up   | 1.106606 up   | IPO7     |
| 200995_at | 2.64E-04 | 6.71E-05 | 2.713036 up   | 2.306219 up   | 1.1764 down   | IPO7     |
| 200996_at | 0.003414 | 0.00213  | 1.70876 down  | 1.71853 down  | 1.005717 down | ACTR3    |
| 200998_s_ | 0.002206 | 0.001182 | 1.796307 down | 2.829779 down | 1.575332 down | CKAP4    |
| 200999_s_ | 0.001039 | 4.27E-04 | 2.969879 down | 3.278933 down | 1.104063 down | CKAP4    |

|           |          |          |               |               |               |                                                                             |
|-----------|----------|----------|---------------|---------------|---------------|-----------------------------------------------------------------------------|
| 201000_at | 9.61E-04 | 3.84E-04 | 1.820743 up   | 1.465095 up   | 1.242747 down | AARS<br>RNPEP ///<br>TMEM189<br>///<br>TMEM189-<br>UBE2V1 ///<br>UBE2V1 /// |
| 201003_x_ | 0.001347 | 6.10E-04 | 1.499219 down | 1.637242 down | 1.092064 down | UBE2V1P2                                                                    |
| 201005_at | 5.92E-04 | 1.99E-04 | 1.512428 up   | 5.055317 up   | 3.342517 up   | CD9                                                                         |
| 201007_at | 1.29E-05 | 1.10E-06 | 1.879489 down | 1.82864 down  | 1.027807 up   | HADHB                                                                       |
| 201008_s_ | 0.011798 | 0.009993 | 11.01681 down | 1.658405 down | 6.643013 up   | TXNIP                                                                       |
| 201009_s_ | 0.019214 | 0.017508 | 6.703238 down | 1.311111 down | 5.112639 up   | TXNIP                                                                       |
| 201010_s_ | 0.024437 | 0.022866 | 9.192261 down | 1.885251 down | 4.87588 up    | TXNIP                                                                       |
| 201013_s_ | 5.62E-05 | 8.24E-06 | 3.827196 up   | 3.738354 up   | 1.023765 down | PAICS                                                                       |
| 201014_s_ | 1.52E-04 | 3.19E-05 | 5.153372 up   | 3.827981 up   | 1.346237 down | PAICS                                                                       |
| 201015_s_ | 6.98E-05 | 1.11E-05 | 5.508124 up   | 3.630338 up   | 1.517248 down | JUP                                                                         |
| 201017_at | 5.79E-04 | 1.92E-04 | 2.257364 up   | 1.896094 up   | 1.190533 down | EIF1AX                                                                      |
| 201018_at | 6.59E-04 | 2.30E-04 | 2.008666 up   | 2.488791 up   | 1.239026 up   | EIF1AX                                                                      |
| 201021_s_ | 6.66E-06 | 4.27E-07 | 2.210882 down | 2.454119 down | 1.110018 down | DSTN                                                                        |
| 201022_s_ | 3.13E-06 | 1.48E-07 | 2.047132 down | 2.547147 down | 1.244252 down | DSTN                                                                        |
| 201027_s_ | 0.002224 | 0.001197 | 1.782164 up   | 1.426069 up   | 1.249704 down | EIF5B                                                                       |
| 201028_s_ | 2.99E-04 | 7.93E-05 | 6.265632 down | 3.729911 down | 1.679834 up   | CD99                                                                        |
| 201029_s_ | 4.64E-05 | 6.36E-06 | 5.713843 down | 4.311088 down | 1.325383 up   | CD99                                                                        |
| 201030_x_ | 4.28E-05 | 5.73E-06 | 2.07748 up    | 1.962881 up   | 1.058383 down | LDHB                                                                        |
| 201031_s_ | 0.002025 | 0.001054 | 1.655876 up   | 2.429099 up   | 1.466958 up   | HNRNPH1                                                                     |
| 201037_at | 8.75E-04 | 3.38E-04 | 2.558424 up   | 1.800112 down | 4.605448 down | PFKP                                                                        |
| 201038_s_ | 3.46E-05 | 4.28E-06 | 3.333438 up   | 2.315802 up   | 1.439432 down | ANP32A                                                                      |
| 201041_s_ | 2.35E-05 | 2.50E-06 | 1.472753 down | 6.088573 down | 4.134144 down | DUSP1                                                                       |
| 201042_at | 2.38E-05 | 2.54E-06 | 5.84151 down  | 24.75626 down | 4.237991 down | TGM2                                                                        |
|           |          |          |               |               |               | ANP32A ///<br>LOC100128                                                     |
| 201043_s_ | 0.004921 | 0.003422 | 2.728502 up   | 3.909069 up   | 1.432679 up   | 146                                                                         |
| 201047_x_ | 0.004578 | 0.003124 | 1.365078 down | 1.825603 down | 1.337362 down | RAB6A                                                                       |

|           |          |          |          |      |          |      |          |      |             |
|-----------|----------|----------|----------|------|----------|------|----------|------|-------------|
| 201048_x_ | 0.048783 | 0.047621 | 2.073749 | down | 1.691699 | down | 1.225838 | up   | RAB6A       |
| 201051_at | 5.99E-06 | 3.66E-07 | 3.119537 | up   | 2.82843  | up   | 1.102922 | down | ANP32A      |
| 201053_s_ | 0.003288 | 0.002026 | 2.225912 | down | 1.180383 | down | 1.885754 | up   | PSMF1       |
| 201054_at | 0.001575 | 7.53E-04 | 1.632874 | up   | 1.377841 | up   | 1.185096 | down | HNRNPA0     |
| 201055_s_ | 0.004971 | 0.003467 | 1.953252 | up   | 1.154996 | up   | 1.691134 | down | HNRNPA0     |
| 201058_s_ | 4.61E-04 | 1.41E-04 | 7.391539 | down | 16.51905 | down | 2.23486  | down | MYL9        |
| 201060_x_ | 0.006922 | 0.005263 | 3.194032 | down | 1.58264  | down | 2.018168 | up   | STOM        |
| 201063_at | 0.005617 | 0.004038 | 2.153715 | down | 1.993537 | down | 1.080349 | up   | RCN1        |
|           |          |          |          |      |          |      |          |      | GTF2I ///   |
|           |          |          |          |      |          |      |          |      | GTF2IP1 /// |
|           |          |          |          |      |          |      |          |      | LOC100093   |
| 201065_s_ | 2.25E-05 | 2.36E-06 | 1.67787  | up   | 2.157497 | up   | 1.285855 | up   | 631         |
| 201067_at | 3.49E-04 | 9.79E-05 | 1.26919  | down | 2.025887 | down | 1.596205 | down | PSMC2       |
| 201069_at | 4.08E-06 | 2.15E-07 | 15.25633 | down | 10.77456 | down | 1.41596  | up   | MMP2        |
| 201071_x_ | 1.47E-05 | 1.32E-06 | 1.771542 | up   | 1.876408 | up   | 1.059195 | up   | SF3B1       |
| 201072_s_ | 2.33E-04 | 5.66E-05 | 4.620493 | up   | 4.666177 | up   | 1.009887 | up   | SMARCC1     |
| 201073_s_ | 0.004018 | 0.002623 | 3.261909 | up   | 3.549943 | up   | 1.088302 | up   | SMARCC1     |
| 201074_at | 2.92E-06 | 1.34E-07 | 4.405273 | up   | 3.322578 | up   | 1.32586  | down | SMARCC1     |
| 201075_s_ | 0.001104 | 4.64E-04 | 4.453291 | up   | 3.003365 | up   | 1.482768 | down | SMARCC1     |
| 201085_s_ | 0.021401 | 0.019767 | 1.534336 | up   | 2.452081 | up   | 1.598138 | up   | SON         |
| 201086_x_ | 0.002394 | 0.001324 | 1.384542 | up   | 1.294182 | up   | 1.069821 | down | SON         |
| 201088_at | 0.001575 | 7.53E-04 | 1.56712  | up   | 3.916362 | up   | 2.499083 | up   | KPNA2       |
| 201094_at | 6.07E-04 | 2.06E-04 | 1.216992 | up   | 1.30991  | up   | 1.076351 | up   | RPS29       |
| 201095_at | 4.31E-05 | 5.78E-06 | 3.197895 | down | 3.310829 | down | 1.035315 | down | DAP         |
| 201096_s_ | 0.003704 | 0.002363 | 2.174244 | down | 1.971559 | down | 1.102804 | up   | ARF4        |
| 201097_s_ | 2.08E-04 | 4.85E-05 | 1.938153 | down | 2.190962 | down | 1.130438 | down | ARF4        |
| 201099_at | 3.14E-04 | 8.46E-05 | 2.983311 | up   | 2.00256  | up   | 1.489748 | down | USP9X       |
| 201100_s_ | 3.28E-05 | 3.99E-06 | 3.122482 | up   | 2.225805 | up   | 1.402855 | down | USP9X       |

|           |          |          |               |               |               |  |             |
|-----------|----------|----------|---------------|---------------|---------------|--|-------------|
|           |          |          |               |               |               |  | NBPF10 ///  |
|           |          |          |               |               |               |  | NBPF12 ///  |
|           |          |          |               |               |               |  | NBPF15 ///  |
|           |          |          |               |               |               |  | NBPF16 ///  |
|           |          |          |               |               |               |  | NBPF8 ///   |
|           |          |          |               |               |               |  | NBPF9 ///   |
| 201103_x_ | 0.003157 | 0.001921 | 2.828573 down | 1.475389 down | 1.917171 up   |  | RP11-94I2.2 |
|           |          |          |               |               |               |  | NBPF10 ///  |
|           |          |          |               |               |               |  | NBPF11 ///  |
|           |          |          |               |               |               |  | NBPF12 ///  |
|           |          |          |               |               |               |  | NBPF14 ///  |
|           |          |          |               |               |               |  | NBPF15 ///  |
|           |          |          |               |               |               |  | NBPF16 ///  |
|           |          |          |               |               |               |  | NBPF8 ///   |
| 201104_x_ | 0.014426 | 0.012643 | 2.505709 down | 1.592995 down | 1.572956 up   |  | RP11-94I2.2 |
| 201105_at | 2.16E-07 | 3.50E-09 | 43.09348 down | 35.52035 down | 1.213206 up   |  | LGALS1      |
| 201106_at | 0.014666 | 0.012887 | 1.401848 down | 1.347409 down | 1.040403 up   |  | GPX4        |
| 201107_s_ | 7.38E-05 | 1.20E-05 | 41.24079 down | 42.67331 down | 1.034736 down |  | THBS1       |
| 201108_s_ | 1.74E-07 | 2.60E-09 | 69.33025 down | 81.52349 down | 1.175872 down |  | THBS1       |
| 201109_s_ | 6.07E-08 | 5.63E-10 | 63.27277 down | 62.53981 down | 1.01172 up    |  | THBS1       |
| 201110_s_ | 2.86E-06 | 1.30E-07 | 29.40347 down | 28.86499 down | 1.018655 up   |  | THBS1       |
| 201111_at | 0.002731 | 0.001577 | 2.568512 up   | 2.204513 up   | 1.165116 down |  | CSE1L       |
| 201112_s_ | 1.17E-04 | 2.23E-05 | 3.096349 up   | 2.853623 up   | 1.085059 down |  | CSE1L       |
| 201113_at | 0.00866  | 0.006923 | 2.171872 up   | 1.409083 up   | 1.541338 down |  | TUFM        |
| 201116_s_ | 0.0148   | 0.013026 | 2.611964 up   | 5.257251 up   | 2.012758 up   |  | CPE         |
| 201120_s_ | 0.004956 | 0.003453 | 1.969454 down | 1.722679 up   | 3.392736 up   |  | PGRMC1      |
| 201121_s_ | 1.45E-05 | 1.30E-06 | 1.553454 down | 1.678456 up   | 2.607404 up   |  | PGRMC1      |
| 201126_s_ | 1.56E-04 | 3.32E-05 | 1.924911 down | 2.715944 down | 1.410945 down |  | MGAT1       |
| 201127_s_ | 0.022723 | 0.021136 | 2.078238 up   | 1.119774 down | 2.327156 down |  | ACLY        |
| 201129_at | 6.16E-05 | 9.38E-06 | 2.972554 up   | 2.729253 up   | 1.089146 down |  | SFRS7       |
| 201130_s_ | 4.87E-05 | 6.79E-06 | 11.52386 up   | 8.043141 up   | 1.432756 down |  | CDH1        |
| 201131_s_ | 3.24E-10 | 3.89E-13 | 320.914 up    | 212.5948 up   | 1.50951 down  |  | CDH1        |



|           |          |          |               |               |               |          |
|-----------|----------|----------|---------------|---------------|---------------|----------|
| 201134_x_ | 2.98E-05 | 3.49E-06 | 1.941624 up   | 1.983908 up   | 1.021778 up   | COX7C    |
| 201136_at | 6.57E-07 | 1.61E-08 | 10.96911 down | 16.37513 down | 1.49284 down  | PLP2     |
| 201138_s_ | 4.34E-04 | 1.30E-04 | 2.798797 up   | 3.123927 up   | 1.116168 up   | SSB      |
| 201139_s_ | 0.002721 | 0.001569 | 2.438382 up   | 1.74457 up    | 1.397698 down | SSB      |
| 201141_at | 2.01E-07 | 3.16E-09 | 350.8666 down | 43.74715 down | 8.020328 up   | GPNMB    |
| 201142_at | 3.88E-05 | 4.99E-06 | 2.327454 down | 2.529885 down | 1.086976 down | EIF2S1   |
| 201146_at | 1.03E-04 | 1.87E-05 | 2.801984 down | 2.289251 down | 1.223974 up   | NFE2L2   |
| 201147_s_ | 4.48E-05 | 6.08E-06 | 16.34709 down | 32.02955 down | 1.959343 down | TIMP3    |
| 201148_s_ | 1.23E-05 | 1.01E-06 | 7.386698 down | 15.55484 down | 2.10579 down  | TIMP3    |
| 201149_s_ | 4.43E-06 | 2.41E-07 | 19.25197 down | 30.90539 down | 1.605311 down | TIMP3    |
| 201150_s_ | 3.33E-05 | 4.07E-06 | 49.937 down   | 80.47427 down | 1.611516 down | TIMP3    |
| 201151_s_ | 1.70E-06 | 6.24E-08 | 22.39298 down | 18.86226 down | 1.187185 up   | MBNL1    |
| 201152_s_ | 1.38E-06 | 4.57E-08 | 8.774365 down | 11.82064 down | 1.347178 down | MBNL1    |
| 201153_s_ | 5.55E-06 | 3.29E-07 | 12.68931 down | 14.3389 down  | 1.129998 down | MBNL1    |
| 201154_x_ | 0.013501 | 0.011708 | 1.325288 up   | 1.223498 up   | 1.083197 down | RPL4     |
| 201155_s_ | 0.001526 | 7.19E-04 | 1.568543 up   | 1.037565 up   | 1.511753 down | MFN2     |
| 201158_at | 0.028241 | 0.026788 | 1.521957 up   | 1.368021 up   | 1.112525 down | NMT1     |
| 201160_s_ | 0.002304 | 0.001258 | 1.227275 up   | 1.483422 up   | 1.208712 up   | CSDA     |
| 201162_at | 1.32E-05 | 1.13E-06 | 10.11692 down | 32.41802 down | 3.204338 down | IGFBP7   |
| 201163_s_ | 5.09E-04 | 1.62E-04 | 15.32795 down | 27.55341 down | 1.797593 down | IGFBP7   |
| 201164_s_ | 0.006022 | 0.004413 | 1.983627 up   | 1.823881 up   | 1.087585 down | PUM1     |
| 201165_s_ | 0.002183 | 0.001165 | 1.888926 up   | 1.874765 up   | 1.007554 down | PUM1     |
| 201166_s_ | 0.004425 | 0.002981 | 1.470063 up   | 1.619582 up   | 1.101709 up   | PUM1     |
| 201170_s_ | 0.005292 | 0.003753 | 1.696926 down | 7.219971 down | 4.254736 down | BHLHE40  |
| 201171_at | 0.008157 | 0.006437 | 4.75542 down  | 2.426698 down | 1.959626 up   | ATP6V0E1 |
| 201172_x_ | 5.46E-05 | 7.93E-06 | 2.266255 down | 2.232434 down | 1.01515 up    | ATP6V0E1 |
| 201173_x_ | 0.002013 | 0.001046 | 2.056882 up   | 1.399434 up   | 1.469796 down | NUDC     |
| 201174_s_ | 0.003122 | 0.001891 | 2.301537 down | 3.670323 down | 1.594727 down | TERF2IP  |
| 201176_s_ | 9.84E-05 | 1.76E-05 | 1.415726 down | 1.651288 down | 1.166389 down | ARCN1    |
| 201177_s_ | 2.30E-04 | 5.57E-05 | 1.815922 up   | 3.185805 up   | 1.754373 up   | UBA2     |
| 201183_s_ | 0.006519 | 0.004886 | 2.553932 up   | 2.426646 up   | 1.052453 down | CHD4     |
| 201184_s_ | 6.56E-04 | 2.29E-04 | 1.809458 up   | 1.479608 up   | 1.222931 down | CHD4     |
| 201185_at | 8.03E-07 | 2.17E-08 | 17.56693 down | 26.63721 down | 1.516327 down | HTRA1    |
| 201186_at | 5.48E-04 | 1.79E-04 | 1.913363 down | 2.328635 down | 1.217038 down | LRPAP1   |

|           |          |          |          |      |          |      |          |      |            |
|-----------|----------|----------|----------|------|----------|------|----------|------|------------|
| 201190_s_ | 0.001204 | 5.23E-04 | 1.283671 | down | 1.552169 | down | 1.209165 | down | PITPNA     |
| 201191_at | 0.00666  | 0.005016 | 1.437255 | down | 1.227171 | down | 1.171194 | up   | PITPNA     |
| 201197_at | 2.66E-05 | 2.97E-06 | 2.121022 | up   | 2.96483  | up   | 1.397831 | up   | AMD1       |
| 201198_s_ | 0.006559 | 0.004923 | 1.881918 | up   | 1.288461 | up   | 1.460594 | down | PSMD1      |
| 201201_at | 0.001494 | 6.99E-04 | 1.969074 | down | 1.551621 | down | 1.269043 | up   | CSTB       |
| 201202_at | 0.002254 | 0.001222 | 2.216909 | up   | 3.204656 | up   | 1.445551 | up   | PCNA       |
| 201204_s_ | 0.017143 | 0.015385 | 1.920627 | down | 2.314003 | down | 1.204817 | down | RRBP1      |
| 201206_s_ | 0.001013 | 4.13E-04 | 2.046017 | down | 3.018416 | down | 1.475264 | down | RRBP1      |
| 201207_at | 2.24E-04 | 5.39E-05 | 1.674061 | down | 3.281274 | down | 1.960068 | down | TNFAIP1    |
| 201208_s_ | 0.001409 | 6.47E-04 | 1.447374 | down | 2.201209 | down | 1.52083  | down | TNFAIP1    |
| 201212_at | 5.86E-04 | 1.96E-04 | 1.134048 | down | 2.190598 | down | 1.931662 | down | LGMN       |
| 201213_at | 0.022706 | 0.021118 | 1.739194 | down | 1.187282 | down | 1.464854 | up   | PPP1R7     |
| 201214_s_ | 0.001337 | 6.03E-04 | 1.920699 | down | 1.980202 | down | 1.03098  | down | PPP1R7     |
| 201217_x_ | 0.005064 | 0.003552 | 1.103796 | up   | 1.180895 | up   | 1.069849 | up   | RPL3       |
| 201218_at | 2.34E-04 | 5.70E-05 | 1.134923 | up   | 3.026665 | up   | 2.666847 | up   | CTBP2      |
| 201219_at | 1.02E-04 | 1.86E-05 | 2.220548 | up   | 2.686715 | up   | 1.209933 | up   | CTBP2      |
| 201220_x_ | 0.001209 | 5.26E-04 | 1.91423  | up   | 2.085236 | up   | 1.089334 | up   | CTBP2      |
| 201224_s_ | 2.63E-05 | 2.92E-06 | 3.131885 | up   | 1.96036  | up   | 1.597607 | down | SRRM1      |
| 201225_s_ | 5.88E-05 | 8.84E-06 | 2.671637 | up   | 2.382086 | up   | 1.121554 | down | SRRM1      |
|           |          |          |          |      |          |      |          |      | NDUFB8 /// |
| 201226_at | 8.13E-05 | 1.36E-05 | 1.356122 | up   | 1.122081 | down | 1.521679 | down | SEC31B     |
| 201229_s_ | 0.014341 | 0.012555 | 2.100765 | up   | 1.75539  | up   | 1.196751 | down | ARIH2      |
| 201234_at | 9.55E-05 | 1.69E-05 | 2.123834 | down | 2.340934 | down | 1.102221 | down | ILK        |
| 201242_s_ | 0.001807 | 9.03E-04 | 2.452183 | up   | 3.189799 | up   | 1.3008   | up   | ATP1B1     |
| 201243_s_ | 0.003433 | 0.002146 | 2.368377 | up   | 1.699942 | up   | 1.39321  | down | ATP1B1     |
| 201253_s_ | 3.56E-05 | 4.41E-06 | 2.145019 | down | 1.988344 | down | 1.078797 | up   | CDIPT      |
| 201255_x_ | 0.00354  | 0.002232 | 2.034753 | up   | 1.333787 | up   | 1.525545 | down | BAT3       |
| 201257_x_ | 0.002425 | 0.001345 | 1.092326 | up   | 1.178733 | up   | 1.079104 | up   | RPS3A      |
| 201259_s_ | 0.011546 | 0.009746 | 2.11308  | down | 1.103925 | down | 1.914152 | up   | SYPL1      |
| 201261_x_ | 1.93E-06 | 7.44E-08 | 7.19512  | down | 37.63144 | down | 5.230134 | down | BGN        |
| 201262_s_ | 0.001331 | 5.99E-04 | 2.401157 | down | 10.4118  | down | 4.336162 | down | BGN        |
| 201263_at | 0.005768 | 0.004178 | 2.409925 | up   | 1.217665 | up   | 1.979137 | down | TARS       |
| 201266_at | 0.002784 | 0.001621 | 1.449296 | down | 2.360939 | down | 1.629025 | down | TXNRD1     |
| 201270_x_ | 7.04E-04 | 2.52E-04 | 1.199307 | down | 1.635341 | down | 1.363572 | down | NUDCD3     |

|           |          |          |               |               |               |            |
|-----------|----------|----------|---------------|---------------|---------------|------------|
| 201273_s_ | 0.001735 | 8.56E-04 | 1.226757 up   | 1.689844 up   | 1.377489 up   | SRP9       |
| 201277_s_ | 0.002254 | 0.001222 | 2.5757 up     | 1.943514 up   | 1.32528 down  | HNRNPAB    |
| 201278_at | 1.99E-06 | 7.78E-08 | 28.1975 down  | 24.7074 down  | 1.141257 up   | DAB2       |
| 201279_s_ | 1.40E-05 | 1.24E-06 | 22.55541 down | 21.78984 down | 1.035134 up   | DAB2       |
| 201280_s_ | 4.71E-06 | 2.63E-07 | 28.56663 down | 29.27088 down | 1.024653 down | DAB2       |
| 201287_s_ | 0.001637 | 7.93E-04 | 1.118346 up   | 2.794445 up   | 2.498731 up   | SDC1       |
| 201288_at | 0.007128 | 0.005459 | 1.37265 up    | 2.918916 down | 4.006651 down | ARHGDIB    |
| 201289_at | 1.46E-04 | 3.02E-05 | 2.592764 down | 3.594571 down | 1.386386 down | CYR61      |
| 201291_s_ | 7.79E-04 | 2.90E-04 | 7.370779 up   | 15.29543 up   | 2.075145 up   | TOP2A      |
| 201292_at | 0.003316 | 0.00205  | 5.250103 up   | 9.027692 up   | 1.719527 up   | TOP2A      |
| 201297_s_ | 0.002715 | 0.001564 | 3.228901 down | 2.01401 down  | 1.60322 up    | MOBKL1B    |
| 201298_s_ | 0.001813 | 9.07E-04 | 1.649602 down | 1.453957 down | 1.13456 up    | MOBKL1B    |
| 201299_s_ | 0.002464 | 0.001377 | 3.452076 down | 1.385495 down | 2.491582 up   | MOBKL1B    |
| 201300_s_ | 9.33E-05 | 1.64E-05 | 13.38339 down | 9.391899 down | 1.424992 up   | PRNP       |
| 201301_s_ | 3.11E-06 | 1.47E-07 | 9.31396 down  | 7.39631 down  | 1.259271 up   | ANXA4      |
| 201302_at | 4.98E-05 | 7.03E-06 | 10.2029 down  | 7.438412 down | 1.37165 up    | ANXA4      |
| 201303_at | 2.60E-06 | 1.14E-07 | 2.196836 up   | 2.12803 up    | 1.032334 down | EIF4A3     |
| 201307_at | 5.81E-06 | 3.52E-07 | 5.200632 down | 2.942005 down | 1.767717 up   | 40797      |
| 201308_s_ | 3.44E-04 | 9.57E-05 | 7.950846 down | 2.361349 down | 3.367078 up   | 40797      |
| 201311_s_ | 3.40E-04 | 9.39E-05 | 2.856208 down | 2.715631 down | 1.051766 up   | SH3BGRL    |
| 201312_s_ | 0.003024 | 0.001811 | 2.31956 down  | 2.04651 down  | 1.133422 up   | SH3BGRL    |
| 201313_at | 0.004765 | 0.003282 | 4.358558 up   | 1.080745 down | 4.710488 down | ENO2       |
| 201315_x_ | 1.84E-04 | 4.14E-05 | 3.622234 down | 1.820841 down | 1.989319 up   | IFITM2     |
| 201316_at | 0.003333 | 0.002063 | 1.41662 up    | 2.448132 up   | 1.72815 up    | PSMA2      |
| 201317_s_ | 3.28E-04 | 8.99E-05 | 1.733978 up   | 2.005167 up   | 1.156397 up   | PSMA2      |
|           |          |          |               |               |               | MYL12A /// |
| 201318_s_ | 4.61E-05 | 6.31E-06 | 1.563332 down | 1.724243 down | 1.102928 down | MYL12B     |
| 201319_at | 1.31E-04 | 2.59E-05 | 1.894243 down | 1.805955 down | 1.048888 up   | MYL12A     |
| 201322_at | 5.76E-04 | 1.91E-04 | 1.955867 up   | 1.698516 up   | 1.151515 down | ATP5B      |
| 201324_at | 2.04E-07 | 3.24E-09 | 122.3246 down | 107.1397 down | 1.14173 up    | EMP1       |
| 201325_s_ | 2.65E-08 | 1.75E-10 | 32.7285 down  | 29.30962 down | 1.116647 up   | EMP1       |
| 201326_at | 0.001064 | 4.41E-04 | 1.694604 up   | 1.362191 up   | 1.244028 down | CCT6A      |
| 201327_s_ | 1.60E-04 | 3.44E-05 | 2.530722 up   | 1.946595 up   | 1.300077 down | CCT6A      |
| 201328_at | 4.87E-04 | 1.52E-04 | 1.375842 up   | 4.907337 up   | 3.566789 up   | ETS2       |

|           |          |          |               |               |               |          |
|-----------|----------|----------|---------------|---------------|---------------|----------|
| 201329_s_ | 0.006695 | 0.00505  | 1.093032 up   | 2.3219 up     | 2.124275 up   | ETS2     |
| 201331_s_ | 6.62E-05 | 1.04E-05 | 3.36715 down  | 4.252089 down | 1.262816 down | STAT6    |
| 201332_s_ | 0.007137 | 0.005468 | 2.708388 down | 2.536402 down | 1.067807 up   | STAT6    |
| 201333_s_ | 0.001943 | 9.97E-04 | 1.233976 down | 1.654805 down | 1.341035 down | ARHGEF12 |
| 201334_s_ | 4.01E-04 | 1.18E-04 | 3.153321 down | 2.433224 down | 1.295944 up   | ARHGEF12 |
| 201335_s_ | 0.00437  | 0.002936 | 2.759634 down | 2.173685 down | 1.269565 up   | ARHGEF12 |
| 201336_at | 1.59E-05 | 1.47E-06 | 2.337832 down | 2.68442 down  | 1.148252 down | VAMP3    |
| 201337_s_ | 0.001257 | 5.55E-04 | 4.210577 down | 2.993337 down | 1.40665 up    | VAMP3    |
| 201338_x_ | 0.013143 | 0.011345 | 1.01236 down  | 1.612483 down | 1.592797 down | GTF3A    |
| 201339_s_ | 1.11E-04 | 2.07E-05 | 2.619938 down | 2.201305 down | 1.190175 up   | SCP2     |
| 201340_s_ | 6.74E-04 | 2.37E-04 | 2.747774 up   | 3.859384 down | 10.60472 down | ENC1     |
| 201341_at | 0.001089 | 4.55E-04 | 1.719217 up   | 4.065506 down | 6.989486 down | ENC1     |
| 201342_at | 3.13E-05 | 3.76E-06 | 1.906041 up   | 1.982922 up   | 1.040336 up   | SNRPC    |
| 201349_at | 3.35E-04 | 9.24E-05 | 4.134069 up   | 3.230167 up   | 1.279832 down | SLC9A3R1 |
| 201354_s_ | 0.001181 | 5.10E-04 | 2.275149 up   | 1.481502 up   | 1.535704 down | BAZ2A    |
| 201356_at | 8.54E-04 | 3.27E-04 | 1.606985 up   | 1.534185 up   | 1.047452 down | SF3A1    |
| 201359_at | 0.003151 | 0.001916 | 1.707146 down | 1.548414 down | 1.102513 up   | COPB1    |
| 201360_at | 8.50E-05 | 1.44E-05 | 5.073414 down | 3.774937 down | 1.343974 up   | CST3     |
| 201361_at | 8.60E-05 | 1.46E-05 | 1.942086 down | 2.66871 down  | 1.374147 down | TMEM109  |
| 201362_at | 2.08E-04 | 4.85E-05 | 3.917295 up   | 1.571497 up   | 2.492715 down | IVNS1ABP |
| 201363_s_ | 8.66E-04 | 3.33E-04 | 2.848082 up   | 1.5575 up     | 1.828624 down | IVNS1ABP |
| 201365_at | 0.004764 | 0.003281 | 1.458548 up   | 1.482588 up   | 1.016482 up   | OAZ2     |
| 201366_at | 7.50E-04 | 2.75E-04 | 1.755845 down | 1.81382 down  | 1.033019 down | ANXA7    |
| 201373_at | 0.001146 | 4.89E-04 | 2.821254 down | 3.836537 down | 1.359869 down | PLEC1    |
| 201376_s_ | 0.004076 | 0.002671 | 1.978972 up   | 1.585635 up   | 1.248063 down | HNRNPF   |
| 201379_s_ | 7.87E-04 | 2.95E-04 | 1.727156 down | 2.492361 down | 1.443044 down | TPD52L2  |
| 201380_at | 8.74E-04 | 3.37E-04 | 3.716114 down | 2.662313 down | 1.395822 up   | CRTAP    |
| 201381_x_ | 0.001626 | 7.85E-04 | 2.310561 up   | 1.87969 up    | 1.229225 down | CACYBP   |
| 201385_at | 0.001642 | 7.96E-04 | 1.501367 up   | 2.153638 up   | 1.434452 up   | DHX15    |
| 201386_s_ | 2.24E-04 | 5.36E-05 | 2.035844 up   | 2.264924 up   | 1.112523 up   | DHX15    |
| 201388_at | 0.013085 | 0.011284 | 2.226941 up   | 1.703945 up   | 1.306933 down | PSMD3    |
| 201389_at | 2.54E-04 | 6.37E-05 | 3.062043 down | 11.46452 down | 3.744076 down | ITGA5    |
| 201391_at | 4.02E-05 | 5.28E-06 | 2.976738 up   | 2.448314 up   | 1.215832 down | TRAP1    |
| 201396_s_ | 0.006352 | 0.004727 | 1.542927 up   | 1.120624 up   | 1.376846 down | SGTA     |

|           |          |          |          |      |          |      |          |      |           |
|-----------|----------|----------|----------|------|----------|------|----------|------|-----------|
| 201398_s_ | 7.11E-05 | 1.14E-05 | 2.907961 | down | 2.771797 | down | 1.049125 | up   | TRAM1     |
| 201399_s_ | 2.65E-04 | 6.73E-05 | 3.844644 | down | 2.721545 | down | 1.41267  | up   | TRAM1     |
| 201400_at | 0.004081 | 0.002676 | 1.712738 | up   | 1.542263 | up   | 1.110536 | down | PSMB3     |
| 201403_s_ | 2.25E-04 | 5.40E-05 | 2.235575 | down | 1.40516  | down | 1.590976 | up   | MGST3     |
| 201405_s_ | 0.002462 | 0.001375 | 1.253743 | down | 1.527038 | down | 1.217984 | down | COPS6     |
| 201412_at | 9.31E-08 | 1.07E-09 | 12.15174 | down | 15.26564 | down | 1.256252 | down | LRP10     |
| 201413_at | 2.45E-04 | 6.05E-05 | 2.254912 | up   | 1.83619  | up   | 1.228039 | down | HSD17B4   |
| 201414_s_ | 0.001242 | 5.45E-04 | 1.978377 | up   | 1.641139 | up   | 1.20549  | down | NAP1L4    |
| 201415_at | 2.44E-04 | 6.02E-05 | 1.210405 | down | 2.020577 | down | 1.66934  | down | GSS       |
| 201416_at | 0.005789 | 0.004197 | 6.702922 | up   | 5.680972 | up   | 1.17989  | down | SOX4      |
| 201417_at | 0.005387 | 0.003835 | 4.937641 | up   | 3.374023 | up   | 1.463428 | down | SOX4      |
| 201418_s_ | 3.96E-04 | 1.16E-04 | 4.91414  | up   | 1.850672 | up   | 2.655327 | down | SOX4      |
| 201426_s_ | 1.68E-04 | 3.66E-05 | 3.255428 | down | 2.70234  | down | 1.20467  | up   | VIM       |
| 201432_at | 4.75E-06 | 2.66E-07 | 59.22403 | down | 30.66683 | down | 1.931207 | up   | CAT       |
| 201434_at | 0.018769 | 0.017053 | 1.352862 | up   | 1.035717 | down | 1.401182 | down | TTC1      |
| 201435_s_ | 0.005467 | 0.003907 | 1.846114 | up   | 2.534376 | up   | 1.372817 | up   | EIF4E     |
| 201438_at | 6.80E-05 | 1.08E-05 | 41.5878  | down | 34.42627 | down | 1.208025 | up   | COL6A3    |
| 201440_at | 0.001731 | 8.54E-04 | 1.460655 | up   | 1.420254 | up   | 1.028447 | down | DDX23     |
| 201443_s_ | 1.70E-04 | 3.72E-05 | 2.352667 | down | 1.58818  | down | 1.481361 | up   | ATP6AP2   |
| 201444_s_ | 0.003798 | 0.002443 | 2.740417 | down | 1.680876 | down | 1.63035  | up   | ATP6AP2   |
| 201446_s_ | 0.00239  | 0.001321 | 1.515634 | up   | 2.405362 | up   | 1.587034 | up   | TIA1      |
| 201447_at | 2.27E-05 | 2.39E-06 | 1.658444 | up   | 2.187191 | up   | 1.318821 | up   | TIA1      |
| 201448_at | 1.66E-04 | 3.61E-05 | 1.522897 | up   | 3.690765 | up   | 2.423516 | up   | TIA1      |
| 201449_at | 3.61E-04 | 1.02E-04 | 2.397945 | up   | 4.229214 | up   | 1.763682 | up   | TIA1      |
| 201450_s_ | 0.001396 | 6.40E-04 | 1.129523 | up   | 2.994279 | up   | 2.650924 | up   | TIA1      |
| 201459_at | 0.003172 | 0.001932 | 2.113387 | up   | 1.260563 | up   | 1.676542 | down | RUVBL2    |
|           |          |          |          |      |          |      |          |      | LOC100133 |
|           |          |          |          |      |          |      |          |      | 665 ///   |
| 201463_s_ | 0.014915 | 0.01314  | 1.227357 | up   | 1.4695   | down | 1.803601 | down | TALDO1    |
| 201467_s_ | 3.85E-04 | 1.12E-04 | 5.746901 | down | 7.587324 | down | 1.320246 | down | NQO1      |
| 201468_s_ | 1.30E-04 | 2.57E-05 | 8.541758 | down | 7.517014 | down | 1.136323 | up   | NQO1      |
| 201471_s_ | 3.79E-06 | 1.93E-07 | 4.072959 | down | 3.591805 | down | 1.133959 | up   | SQSTM1    |
| 201472_at | 5.80E-04 | 1.93E-04 | 1.876582 | up   | 1.597986 | up   | 1.174342 | down | VBP1      |
| 201473_at | 0.003397 | 0.002117 | 2.765234 | down | 4.110849 | down | 1.486619 | down | JUNB      |

|           |          |          |               |               |               |                      |
|-----------|----------|----------|---------------|---------------|---------------|----------------------|
| 201477_s_ | 0.011749 | 0.009948 | 1.791544 up   | 2.099396 up   | 1.171836 up   | RRM1                 |
| 201478_s_ | 3.23E-04 | 8.82E-05 | 2.967003 up   | 2.539934 up   | 1.168142 down | DKC1                 |
| 201479_at | 8.75E-04 | 3.38E-04 | 2.759966 up   | 1.891563 up   | 1.459092 down | DKC1                 |
| 201482_at | 2.04E-06 | 8.15E-08 | 5.568971 down | 7.813519 down | 1.403045 down | QSOX1                |
| 201485_s_ | 0.00275  | 0.001594 | 2.23938 up    | 1.800628 up   | 1.243666 down | RCN2                 |
| 201487_at | 5.78E-05 | 8.60E-06 | 1.448139 up   | 16.88537 up   | 11.66005 up   | CTSC                 |
| 201488_x_ | 1.51E-04 | 3.16E-05 | 2.59698 up    | 2.640574 up   | 1.016786 up   | KHDRBS1              |
| 201491_at | 0.002986 | 0.00178  | 1.441928 up   | 1.144208 up   | 1.260196 down | AHSA1                |
| 201493_s_ | 0.017617 | 0.015876 | 1.115227 up   | 1.524974 up   | 1.367412 up   | PUM2                 |
| 201494_at | 0.003471 | 0.002178 | 2.106436 down | 1.318903 down | 1.597113 up   | PRCP                 |
| 201495_x_ | 0.032118 | 0.030779 | 1.689427 up   | 1.053988 up   | 1.602891 down | MYH11                |
| 201496_x_ | 0.009113 | 0.007359 | 1.458461 up   | 1.227051 down | 1.789606 down | MYH11                |
| 201498_at | 8.85E-05 | 1.52E-05 | 2.339182 up   | 1.637832 up   | 1.428219 down | USP7                 |
| 201499_s_ | 2.87E-04 | 7.50E-05 | 2.157623 up   | 1.645381 up   | 1.311321 down | USP7                 |
| 201500_s_ | 6.54E-05 | 1.02E-05 | 1.978991 down | 3.068417 down | 1.550496 down | PPP1R11              |
| 201503_at | 0.002678 | 0.001537 | 1.827389 up   | 1.828049 up   | 1.000361 up   | G3BP1                |
| 201505_at | 5.82E-04 | 1.94E-04 | 2.871228 down | 1.982972 down | 1.447942 up   | LAMB1                |
| 201506_at | 1.11E-04 | 2.07E-05 | 11.53812 down | 32.70414 down | 2.834443 down | TGFBI                |
| 201507_at | 6.25E-04 | 2.14E-04 | 1.449714 up   | 1.261952 down | 1.82947 down  | PFDN1                |
| 201508_at | 2.65E-05 | 2.95E-06 | 14.97514 down | 13.54913 down | 1.105248 up   | IGFBP4               |
| 201509_at | 0.009079 | 0.007324 | 1.587301 up   | 1.270575 up   | 1.249278 down | IDH3B                |
| 201511_at | 0.005809 | 0.004213 | 1.279637 up   | 1.401809 up   | 1.095474 up   | AAMP                 |
| 201515_s_ | 7.25E-04 | 2.63E-04 | 1.374676 up   | 1.126487 up   | 1.220321 down | TSN                  |
| 201518_at | 6.60E-05 | 1.03E-05 | 2.361388 up   | 2.054457 up   | 1.149398 down | CBX1                 |
| 201519_at | 0.001192 | 5.16E-04 | 1.516727 up   | 1.099561 up   | 1.379393 down | TOMM70A<br>SNRPN /// |
| 201522_x_ | 6.83E-06 | 4.44E-07 | 5.824471 up   | 3.963483 up   | 1.469533 down | SNURF                |
| 201524_x_ | 0.006396 | 0.004774 | 1.833696 up   | 1.575234 up   | 1.164079 down | UBE2N                |
| 201525_at | 7.69E-06 | 5.33E-07 | 16.33897 down | 1.093748 down | 14.93852 up   | APOD                 |
| 201527_at | 0.018619 | 0.016898 | 1.100043 down | 1.508472 down | 1.371285 down | ATP6V1F              |
| 201528_at | 3.95E-04 | 1.15E-04 | 1.940558 up   | 1.922129 up   | 1.009588 down | RPA1                 |
| 201529_s_ | 0.001066 | 4.43E-04 | 2.14048 up    | 1.952104 up   | 1.096499 down | RPA1                 |
| 201530_x_ | 0.047629 | 0.046445 | 1.504672 up   | 1.32886 up    | 1.132303 down | EIF4A1               |
| 201531_at | 2.51E-04 | 6.26E-05 | 2.976572 down | 2.978936 down | 1.000794 down | ZFP36                |

|           |          |          |               |               |               |        |
|-----------|----------|----------|---------------|---------------|---------------|--------|
| 201532_at | 0.001081 | 4.51E-04 | 1.489152 up   | 1.901793 up   | 1.277098 up   | PSMA3  |
| 201539_s_ | 0.002273 | 0.001237 | 5.707316 down | 5.817762 down | 1.019352 down | FHL1   |
| 201540_at | 6.92E-05 | 1.10E-05 | 4.202432 down | 4.706358 down | 1.119913 down | FHL1   |
| 201542_at | 0.003351 | 0.002077 | 1.799837 down | 1.440047 down | 1.249846 up   | SAR1A  |
| 201544_x_ | 0.005424 | 0.003866 | 1.874986 up   | 2.052228 up   | 1.09453 up    | PABPN1 |
| 201545_s_ | 5.73E-04 | 1.90E-04 | 2.946617 up   | 2.848865 up   | 1.034313 down | PABPN1 |
| 201548_s_ | 7.19E-04 | 2.60E-04 | 3.035802 up   | 2.089265 up   | 1.453048 down | KDM5B  |
| 201549_x_ | 1.84E-04 | 4.13E-05 | 2.805046 up   | 1.93341 up    | 1.450828 down | KDM5B  |
| 201550_x_ | 0.009656 | 0.00788  | 1.118305 down | 1.217647 down | 1.088832 down | ACTG1  |
| 201552_at | 2.22E-05 | 2.32E-06 | 2.81874 down  | 2.583281 down | 1.091147 up   | LAMP1  |
| 201553_s_ | 7.77E-04 | 2.89E-04 | 2.31158 down  | 2.044331 down | 1.130727 up   | LAMP1  |
| 201555_at | 3.51E-05 | 4.34E-06 | 7.476354 up   | 8.580159 up   | 1.147639 up   | MCM3   |
| 201558_at | 4.29E-04 | 1.28E-04 | 1.688443 up   | 1.864685 up   | 1.104382 up   | RAE1   |
| 201560_at | 5.45E-04 | 1.77E-04 | 1.35733 down  | 2.01144 down  | 1.48191 down  | CLIC4  |
| 201561_s_ | 1.61E-04 | 3.48E-05 | 1.22223 up    | 1.898405 down | 2.320288 down | CLSTN1 |
| 201563_at | 0.005359 | 0.003811 | 2.635618 up   | 2.519016 up   | 1.046289 down | SORD   |
| 201570_at | 1.01E-04 | 1.82E-05 | 1.694002 up   | 1.222722 up   | 1.385436 down | SAMM50 |
| 201571_s_ | 1.48E-05 | 1.33E-06 | 2.729653 down | 2.833678 down | 1.038109 down | DCTD   |
| 201572_x_ | 1.29E-06 | 4.16E-08 | 2.247126 down | 2.444482 down | 1.087826 down | DCTD   |
| 201575_at | 0.012155 | 0.01036  | 1.266867 up   | 1.238709 up   | 1.022732 down | SNW1   |
| 201576_s_ | 1.51E-04 | 3.15E-05 | 2.834284 down | 2.170609 down | 1.305755 up   | GLB1   |
| 201578_at | 3.98E-06 | 2.08E-07 | 61.38317 up   | 30.10511 up   | 2.038962 down | PODXL  |
| 201580_s_ | 2.43E-06 | 1.04E-07 | 2.296667 down | 3.186282 down | 1.38735 down  | TMX4   |
| 201581_at | 0.001301 | 5.82E-04 | 4.390286 down | 2.743465 down | 1.600271 up   | TMX4   |
| 201583_s_ | 2.49E-04 | 6.19E-05 | 2.455769 up   | 1.368962 up   | 1.793891 down | SEC23B |
| 201584_s_ | 0.00118  | 5.10E-04 | 2.907548 up   | 2.598183 up   | 1.11907 down  | DDX39  |
| 201585_s_ | 8.71E-04 | 3.36E-04 | 2.705866 up   | 1.857319 up   | 1.456866 down | SFPQ   |
| 201586_s_ | 6.47E-04 | 2.24E-04 | 2.738368 up   | 2.477768 up   | 1.105175 down | SFPQ   |
| 201587_s_ | 1.49E-05 | 1.35E-06 | 4.101889 down | 5.363889 down | 1.307663 down | IRAK1  |
| 201590_x_ | 2.09E-04 | 4.87E-05 | 2.886599 down | 2.944367 down | 1.020012 down | ANXA2  |
| 201593_s_ | 0.001041 | 4.28E-04 | 2.15535 up    | 1.761951 up   | 1.223275 down | ZC3H15 |
| 201595_s_ | 0.008103 | 0.006383 | 1.49732 up    | 1.360343 up   | 1.100693 down | ZC3H15 |
| 201596_x_ | 4.00E-05 | 5.23E-06 | 50.44943 up   | 2.448959 up   | 20.60036 down | KRT18  |
| 201597_at | 0.01438  | 0.012595 | 1.326607 up   | 1.143331 up   | 1.1603 down   | COX7A2 |

|           |          |          |               |               |               |          |
|-----------|----------|----------|---------------|---------------|---------------|----------|
| 201600_at | 0.001351 | 6.13E-04 | 1.875334 up   | 1.851825 up   | 1.012695 down | PHB2     |
| 201601_x_ | 2.11E-04 | 4.96E-05 | 1.109088 down | 9.894762 up   | 10.97416 up   | IFITM1   |
| 201602_s_ | 0.015823 | 0.014046 | 2.466674 up   | 1.037806 down | 2.55993 down  | PPP1R12A |
| 201613_s_ | 1.34E-06 | 4.40E-08 | 2.936625 up   | 3.901371 up   | 1.328522 up   | AP1G2    |
| 201614_s_ | 5.62E-04 | 1.85E-04 | 3.264988 up   | 3.34335 up    | 1.024001 up   | RUVBL1   |
| 201615_x_ | 3.66E-04 | 1.04E-04 | 2.571542 down | 6.529047 down | 2.538962 down | CALD1    |
| 201616_s_ | 9.32E-05 | 1.63E-05 | 3.240679 down | 7.836963 down | 2.418309 down | CALD1    |
| 201617_x_ | 4.31E-04 | 1.29E-04 | 4.650544 down | 5.263792 down | 1.131866 down | CALD1    |
| 201618_x_ | 3.18E-04 | 8.64E-05 | 1.66356 down  | 2.422752 down | 1.456366 down | GPAA1    |
| 201620_at | 1.25E-05 | 1.05E-06 | 2.261948 down | 2.913353 down | 1.287984 down | MBTPS1   |
| 201621_at | 1.14E-05 | 9.09E-07 | 6.711308 down | 4.796719 down | 1.399146 up   | NBL1     |
| 201622_at | 0.005645 | 0.004066 | 1.168022 up   | 1.350283 down | 1.57716 down  | SND1     |
| 201628_s_ | 2.08E-04 | 4.84E-05 | 2.183343 down | 2.506366 down | 1.147949 down | RRAGA    |
| 201629_s_ | 0.00271  | 0.001561 | 2.690303 up   | 1.830515 up   | 1.469697 down | ACP1     |
| 201630_s_ | 4.03E-04 | 1.18E-04 | 1.591506 up   | 1.830336 up   | 1.150066 up   | ACP1     |
| 201631_s_ | 0.001239 | 5.43E-04 | 1.435861 up   | 4.635779 down | 6.656334 down | IER3     |
| 201632_at | 0.003201 | 0.001954 | 1.581895 up   | 1.028333 down | 1.626714 down | EIF2B1   |
| 201636_at | 9.30E-06 | 6.89E-07 | 2.93638 up    | 2.729818 up   | 1.075669 down | FXR1     |
| 201639_s_ | 3.13E-04 | 8.44E-05 | 2.147014 up   | 1.082835 up   | 1.982771 down | CPSF1    |
| 201641_at | 0.017982 | 0.016247 | 4.03311 up    | 4.643677 up   | 1.151389 up   | BST2     |
| 201642_at | 0.001365 | 6.21E-04 | 1.919936 down | 2.407513 down | 1.253955 down | IFNGR2   |
| 201643_x_ | 2.52E-04 | 6.32E-05 | 2.137466 up   | 2.774345 up   | 1.29796 up    | KDM3B    |
| 201645_at | 0.001455 | 6.76E-04 | 8.427535 down | 7.449539 down | 1.131283 up   | TNC      |
| 201646_at | 0.001604 | 7.71E-04 | 7.538874 down | 4.142531 down | 1.819871 up   | SCARB2   |
| 201647_s_ | 2.03E-04 | 4.70E-05 | 8.755303 down | 4.489237 down | 1.950288 up   | SCARB2   |
| 201648_at | 5.16E-05 | 7.36E-06 | 6.951323 down | 8.233786 down | 1.184492 down | JAK1     |
| 201649_at | 0.008245 | 0.00652  | 1.998179 down | 1.097124 down | 1.821289 up   | UBE2L6   |
| 201651_s_ | 0.00292  | 0.001726 | 1.859392 up   | 1.073628 down | 1.996295 down | PACSIN2  |
| 201655_s_ | 0.001014 | 4.13E-04 | 2.390586 down | 4.467358 down | 1.868729 down | HSPG2    |
| 201656_at | 0.003976 | 0.002587 | 4.10765 up    | 5.657137 up   | 1.37722 up    | ITGA6    |
| 201657_at | 0.015487 | 0.013711 | 2.576604 down | 1.61256 down  | 1.597835 up   | ARL1     |
| 201663_s_ | 6.86E-04 | 2.44E-04 | 1.537037 up   | 2.805202 up   | 1.825071 up   | SMC4     |
| 201664_at | 7.80E-04 | 2.91E-04 | 1.285288 up   | 2.522989 up   | 1.962975 up   | SMC4     |
| 201666_at | 2.36E-07 | 3.90E-09 | 14.94068 down | 12.27969 down | 1.216698 up   | TIMP1    |



|           |          |          |               |               |               |          |
|-----------|----------|----------|---------------|---------------|---------------|----------|
| 201674_s_ | 2.24E-04 | 5.38E-05 | 4.770178 up   | 3.779512 up   | 1.262115 down | AKAP1    |
| 201675_at | 3.09E-04 | 8.29E-05 | 4.411799 up   | 3.909603 up   | 1.128452 down | AKAP1    |
| 201676_x_ | 7.46E-04 | 2.73E-04 | 1.466591 up   | 1.075757 up   | 1.363311 down | PSMA1    |
| 201682_at | 0.001666 | 8.11E-04 | 1.253223 up   | 2.029687 up   | 1.619574 up   | PMPCB    |
| 201685_s_ | 0.003407 | 0.002124 | 1.690612 down | 2.002587 down | 1.184534 down | TOX4     |
| 201687_s_ | 0.002244 | 0.001214 | 1.50537 up    | 1.846597 up   | 1.226673 up   | API5     |
| 201688_s_ | 1.63E-10 | 1.24E-13 | 42.33818 up   | 42.86069 up   | 1.012341 up   | TPD52    |
| 201689_s_ | 5.46E-09 | 1.85E-11 | 43.36731 up   | 43.39198 up   | 1.000569 up   | TPD52    |
| 201690_s_ | 1.18E-08 | 5.60E-11 | 66.88654 up   | 52.27122 up   | 1.279606 down | TPD52    |
| 201691_s_ | 6.35E-05 | 9.74E-06 | 3.169276 up   | 3.153235 up   | 1.005087 down | TPD52    |
| 201695_s_ | 7.82E-05 | 1.30E-05 | 8.254241 up   | 2.338941 up   | 3.529051 down | NP       |
| 201696_at | 2.67E-04 | 6.80E-05 | 1.565788 up   | 1.682253 up   | 1.074381 up   | SFRS4    |
| 201697_s_ | 9.32E-04 | 3.69E-04 | 2.000878 up   | 2.678266 up   | 1.338545 up   | DNMT1    |
| 201698_s_ | 0.001356 | 6.15E-04 | 2.162639 up   | 1.308184 up   | 1.653161 down | SFRS9    |
| 201700_at | 0.006107 | 0.004493 | 2.053987 down | 2.092416 down | 1.01871 down  | CCND3    |
| 201703_s_ | 0.013542 | 0.011747 | 1.917996 up   | 1.405062 up   | 1.365061 down | PPP1R10  |
| 201705_at | 0.003641 | 0.002311 | 1.424618 up   | 1.097464 up   | 1.298101 down | PSMD7    |
| 201709_s_ | 1.88E-04 | 4.24E-05 | 3.146298 up   | 2.380853 up   | 1.321501 down | NIPSNAP1 |
| 201710_at | 2.41E-04 | 5.91E-05 | 5.779225 up   | 3.600019 up   | 1.605332 down | MYBL2    |
| 201711_x_ | 0.006676 | 0.005029 | 2.304205 up   | 2.491205 up   | 1.081156 up   | RANBP2   |
| 201712_s_ | 2.80E-04 | 7.27E-05 | 2.938043 up   | 2.956158 up   | 1.006166 up   | RANBP2   |
| 201715_s_ | 0.007261 | 0.005586 | 2.188014 up   | 1.473378 up   | 1.485033 down | ACIN1    |
| 201716_at | 3.49E-06 | 1.72E-07 | 2.217561 down | 2.292557 down | 1.033819 down | SNX1     |
| 201717_at | 0.005442 | 0.003884 | 1.412691 up   | 1.334775 up   | 1.058375 down | MRPL49   |
| 201721_s_ | 0.009548 | 0.007775 | 1.185149 down | 1.279329 down | 1.079468 down | LAPTM5   |
| 201722_s_ | 1.61E-06 | 5.77E-08 | 1.461413 up   | 3.573245 down | 5.221986 down | GALNT1   |
| 201723_s_ | 1.23E-06 | 3.96E-08 | 1.898314 up   | 2.140193 down | 4.062756 down | GALNT1   |
| 201724_s_ | 2.20E-05 | 2.30E-06 | 2.548971 up   | 2.671833 down | 6.810424 down | GALNT1   |
| 201725_at | 0.003275 | 0.002015 | 1.887952 up   | 1.632005 up   | 1.15683 down  | CDC123   |
| 201726_at | 0.008896 | 0.007148 | 1.565075 up   | 1.526144 up   | 1.025509 down | ELAVL1   |
| 201727_s_ | 0.028912 | 0.027495 | 1.773092 up   | 1.237949 up   | 1.432283 down | ELAVL1   |
| 201730_s_ | 0.004024 | 0.002627 | 3.300358 up   | 3.868984 up   | 1.172292 up   | TPR      |
| 201731_s_ | 3.72E-04 | 1.06E-04 | 2.115299 up   | 2.016906 up   | 1.048784 down | TPR      |
| 201739_at | 1.98E-04 | 4.53E-05 | 3.355211 down | 5.747479 down | 1.713001 down | SGK1     |

|           |          |          |               |               |               |          |
|-----------|----------|----------|---------------|---------------|---------------|----------|
| 201740_at | 0.0105   | 0.008709 | 1.387404 up   | 1.368776 up   | 1.013609 down | NDUFS3   |
| 201741_x_ | 0.002628 | 0.001498 | 1.320013 up   | 2.285718 up   | 1.731587 up   | SFRS1    |
| 201744_s_ | 0.020726 | 0.019068 | 21.84315 down | 3.395046 down | 6.433831 up   | LUM      |
| 201748_s_ | 0.001978 | 0.00102  | 1.840099 up   | 1.438793 up   | 1.278919 down | SAFB     |
| 201749_at | 0.005695 | 0.004111 | 2.246191 down | 2.023866 down | 1.109852 up   | ECE1     |
| 201751_at | 7.09E-05 | 1.14E-05 | 2.321669 down | 2.64759 down  | 1.140382 down | JOSD1    |
| 201754_at | 0.023764 | 0.022179 | 1.295909 up   | 1.583299 up   | 1.221768 up   | COX6C    |
| 201755_at | 0.002377 | 0.001312 | 5.318136 up   | 5.300786 up   | 1.003273 down | MCM5     |
| 201756_at | 2.67E-04 | 6.80E-05 | 2.493956 up   | 2.635243 up   | 1.056652 up   | RPA2     |
| 201759_at | 5.19E-04 | 1.66E-04 | 2.039843 up   | 1.59068 up    | 1.282371 down | TBCD     |
| 201760_s_ | 0.00199  | 0.001028 | 1.31129 down  | 3.050426 down | 2.326278 down | WSB2     |
| 201765_s_ | 3.86E-05 | 4.95E-06 | 3.213463 down | 2.68507 down  | 1.196789 up   | HEXA     |
| 201767_s_ | 9.28E-04 | 3.67E-04 | 2.231028 up   | 1.386899 up   | 1.608645 down | ELAC2    |
| 201770_at | 0.002719 | 0.001568 | 3.145223 up   | 2.463862 up   | 1.276542 down | SNRPA    |
| 201771_at | 3.57E-06 | 1.78E-07 | 1.637812 down | 2.918173 down | 1.78175 down  | SCAMP3   |
| 201772_at | 7.40E-05 | 1.21E-05 | 1.867833 up   | 2.820585 up   | 1.510084 up   | AZIN1    |
| 201773_at | 1.58E-04 | 3.37E-05 | 1.631965 up   | 2.03224 up    | 1.245271 up   | ADNP     |
| 201774_s_ | 5.09E-04 | 1.61E-04 | 3.375625 up   | 3.148711 up   | 1.072066 down | NCAPD2   |
| 201776_s_ | 7.20E-04 | 2.60E-04 | 2.334819 down | 1.743651 down | 1.33904 up    | KIAA0494 |
| 201777_s_ | 0.004895 | 0.0034   | 1.758625 down | 1.217136 down | 1.444889 up   | KIAA0494 |
| 201781_s_ | 0.001739 | 8.58E-04 | 2.198677 down | 2.265562 down | 1.030421 down | AIP      |
| 201782_s_ | 2.76E-04 | 7.13E-05 | 1.488156 down | 1.919466 down | 1.289828 down | AIP      |
| 201783_s_ | 3.23E-05 | 3.92E-06 | 2.766101 down | 4.391035 down | 1.587446 down | RELA     |
| 201785_at | 1.15E-04 | 2.19E-05 | 1.758714 up   | 1.733852 up   | 1.014339 down | RNASE1   |
| 201786_s_ | 0.00118  | 5.10E-04 | 1.60176 up    | 1.361047 up   | 1.176859 down | ADAR     |
| 201788_at | 1.24E-04 | 2.40E-05 | 1.783397 up   | 1.628647 up   | 1.095017 down | DDX42    |
| 201792_at | 1.15E-05 | 9.15E-07 | 10.76952 down | 5.481426 down | 1.964729 up   | AEBP1    |
| 201794_s_ | 2.12E-04 | 5.00E-05 | 2.690347 up   | 1.857805 up   | 1.448132 down | SMG7     |
| 201795_at | 0.003076 | 0.001852 | 1.839334 up   | 2.4111 up     | 1.310855 up   | LBR      |
| 201798_s_ | 1.08E-04 | 2.01E-05 | 15.14612 down | 15.4543 down  | 1.020347 down | MYOF     |
| 201799_s_ | 0.003844 | 0.00248  | 1.114257 down | 1.312341 down | 1.177773 down | OSBP     |
| 201800_s_ | 0.021976 | 0.020362 | 1.02836 up    | 1.316854 down | 1.3542 down   | OSBP     |
| 201802_at | 0.001112 | 4.68E-04 | 2.104036 up   | 1.841795 up   | 1.142383 down | SLC29A1  |
| 201803_at | 3.31E-04 | 9.10E-05 | 1.471792 up   | 1.585591 up   | 1.07732 up    | POLR2B   |

|           |          |          |               |               |               |         |
|-----------|----------|----------|---------------|---------------|---------------|---------|
| 201804_x_ | 0.020918 | 0.019271 | 1.166984 up   | 1.305663 down | 1.523687 down | TBCB    |
| 201805_at | 0.001341 | 6.06E-04 | 2.059426 down | 1.817513 down | 1.133101 up   | PRKAG1  |
| 201806_s_ | 0.007823 | 0.006123 | 2.277661 up   | 1.305456 down | 2.973385 down | ATXN2L  |
| 201808_s_ | 0.002034 | 0.00106  | 4.55534 down  | 4.73264 down  | 1.038922 down | ENG     |
| 201809_s_ | 1.35E-07 | 1.78E-09 | 11.54039 down | 24.33451 down | 2.108639 down | ENG     |
| 201810_s_ | 2.11E-04 | 4.95E-05 | 2.105471 down | 3.374836 down | 1.602889 down | SH3BP5  |
| 201811_x_ | 3.56E-04 | 1.00E-04 | 3.468839 down | 3.919817 down | 1.130009 down | SH3BP5  |
| 201813_s_ | 0.002196 | 0.001175 | 2.106481 down | 1.824111 down | 1.154799 up   | TBC1D5  |
| 201814_at | 0.001205 | 5.24E-04 | 1.98732 down  | 1.325946 down | 1.498794 up   | TBC1D5  |
| 201816_s_ | 0.027481 | 0.026    | 1.793309 down | 1.188494 down | 1.508892 up   | GBAS    |
| 201818_at | 2.62E-05 | 2.89E-06 | 2.609325 up   | 2.837181 up   | 1.087324 up   | LPCAT1  |
| 201822_at | 5.11E-04 | 1.62E-04 | 1.27244 down  | 2.258407 down | 1.774863 down | TIMM17A |
| 201823_s_ | 7.18E-05 | 1.16E-05 | 2.337558 down | 3.505418 down | 1.499607 down | RNF14   |
| 201824_at | 5.03E-04 | 1.59E-04 | 3.729399 down | 3.69098 down  | 1.010409 up   | RNF14   |
| 201825_s_ | 0.002275 | 0.001239 | 1.74938 down  | 1.896046 down | 1.083839 down | SCCPDH  |
| 201826_s_ | 0.003566 | 0.002252 | 2.680207 down | 2.398606 down | 1.117402 up   | SCCPDH  |
| 201828_x_ | 2.12E-06 | 8.51E-08 | 4.419326 down | 4.151436 down | 1.06453 up    | FAM127A |
| 201829_at | 0.004144 | 0.00273  | 2.223514 up   | 1.385206 up   | 1.605187 down | NET1    |
| 201830_s_ | 0.001702 | 8.35E-04 | 2.440793 up   | 1.386887 up   | 1.759907 down | NET1    |
| 201832_s_ | 0.01198  | 0.010181 | 1.650313 up   | 1.137508 up   | 1.450815 down | USO1    |
| 201833_at | 9.85E-07 | 2.88E-08 | 3.627214 up   | 3.077557 up   | 1.178602 down | HDAC2   |
| 201834_at | 0.001258 | 5.56E-04 | 1.268282 up   | 1.839842 up   | 1.450657 up   | PRKAB1  |
| 201839_s_ | 1.38E-10 | 7.83E-14 | 156.9756 up   | 196.6891 up   | 1.252991 up   | EPCAM   |
| 201841_s_ | 2.45E-05 | 2.64E-06 | 3.093129 down | 5.009946 down | 1.619701 down | HSPB1   |
| 201842_s_ | 2.63E-05 | 2.91E-06 | 15.89554 down | 24.89011 down | 1.565855 down | EFEMP1  |
| 201843_s_ | 4.59E-05 | 6.27E-06 | 30.51249 down | 34.92292 down | 1.144545 down | EFEMP1  |
| 201844_s_ | 0.015556 | 0.013784 | 1.846987 up   | 1.821548 up   | 1.013966 down | RYBP    |
| 201846_s_ | 0.009167 | 0.007412 | 2.027558 up   | 1.581258 up   | 1.282244 down | RYBP    |
| 201847_at | 5.36E-06 | 3.16E-07 | 5.922063 down | 2.588004 down | 2.288275 up   | LIPA    |
| 201851_at | 0.002485 | 0.001392 | 1.71781 down  | 1.966841 down | 1.14497 down  | SH3GL1  |
| 201852_x_ | 0.001593 | 7.65E-04 | 27.4129 down  | 19.63958 down | 1.395799 up   | COL3A1  |
| 201853_s_ | 0.002497 | 0.001402 | 2.933424 down | 1.235046 down | 2.375153 up   | CDC25B  |
| 201854_s_ | 6.51E-05 | 1.01E-05 | 1.720599 up   | 1.562156 up   | 1.101426 down | ATMIN   |
| 201858_s_ | 1.08E-06 | 3.23E-08 | 8.559722 down | 412.6299 down | 48.206 down   | SRGN    |

|           |          |          |          |      |          |      |          |      |         |
|-----------|----------|----------|----------|------|----------|------|----------|------|---------|
| 201859_at | 3.65E-07 | 7.05E-09 | 21.30034 | down | 551.3701 | down | 25.88551 | down | SRGN    |
| 201860_s_ | 0.002998 | 0.00179  | 9.877193 | down | 16.01651 | down | 1.621565 | down | PLAT    |
| 201861_s_ | 0.00117  | 5.02E-04 | 1.745238 | down | 2.616464 | down | 1.499202 | down | LRRFIP1 |
| 201865_x_ | 1.21E-05 | 9.95E-07 | 6.373612 | down | 5.766537 | down | 1.105275 | up   | NR3C1   |
| 201866_s_ | 4.09E-06 | 2.16E-07 | 5.435877 | down | 6.815749 | down | 1.253845 | down | NR3C1   |
| 201872_s_ | 0.005445 | 0.003888 | 1.755555 | up   | 1.563346 | up   | 1.122947 | down | ABCE1   |
| 201876_at | 0.003576 | 0.00226  | 1.51203  | down | 2.09824  | down | 1.387697 | down | PON2    |
| 201877_s_ | 0.015339 | 0.013568 | 2.327213 | down | 1.163219 | down | 2.000666 | up   | PPP2R5C |
| 201885_s_ | 1.51E-06 | 5.24E-08 | 3.267632 | down | 3.467394 | down | 1.061134 | down | CYB5R3  |
| 201887_at | 2.52E-06 | 1.09E-07 | 9.875255 | down | 7.492021 | down | 1.318103 | up   | IL13RA1 |
| 201888_s_ | 9.07E-08 | 1.01E-09 | 11.33089 | down | 10.76988 | down | 1.05209  | up   | IL13RA1 |
| 201891_s_ | 9.55E-07 | 2.75E-08 | 6.728797 | down | 4.461477 | down | 1.508199 | up   | B2M     |
| 201892_s_ | 5.04E-05 | 7.15E-06 | 1.950108 | up   | 1.584575 | up   | 1.230682 | down | IMPDH2  |
| 201893_x_ | 1.98E-05 | 1.97E-06 | 133.3565 | down | 28.84356 | down | 4.623439 | up   | DCN     |
| 201894_s_ | 0.002185 | 0.001168 | 1.301685 | down | 2.091033 | down | 1.606405 | down | SSR1    |
| 201895_at | 0.006054 | 0.004444 | 1.517966 | down | 1.683738 | down | 1.109206 | down | ARAF    |
| 201896_s_ | 0.004155 | 0.002739 | 3.215031 | up   | 3.784223 | up   | 1.177041 | up   | PSRC1   |
| 201897_s_ | 9.27E-05 | 1.62E-05 | 5.300082 | up   | 4.663468 | up   | 1.136511 | down | CKS1B   |
| 201899_s_ | 7.18E-04 | 2.60E-04 | 1.722991 | down | 2.183043 | down | 1.267008 | down | UBE2A   |
| 201901_s_ | 0.006064 | 0.004454 | 2.137334 | up   | 1.699361 | up   | 1.257729 | down | YY1     |
| 201908_at | 4.32E-04 | 1.30E-04 | 2.244902 | down | 3.362944 | down | 1.498036 | down | DVL3    |
| 201910_at | 9.10E-04 | 3.57E-04 | 2.038397 | down | 1.052112 | down | 1.937433 | up   | FARP1   |
| 201911_s_ | 5.19E-04 | 1.66E-04 | 2.105894 | down | 1.79095  | down | 1.175853 | up   | FARP1   |
| 201920_at | 0.001712 | 8.41E-04 | 1.421686 | up   | 1.914566 | down | 2.721911 | down | SLC20A1 |
| 201921_at | 0.011126 | 0.00933  | 2.05175  | down | 1.073399 | down | 1.911451 | up   | GNG10   |
| 201923_at | 0.004582 | 0.003127 | 1.525502 | down | 1.662098 | down | 1.089542 | down | PRDX4   |
| 201924_at | 0.001818 | 9.11E-04 | 2.088736 | up   | 2.216263 | up   | 1.061055 | up   | AFF1    |
| 201925_s_ | 0.001512 | 7.11E-04 | 2.752741 | down | 3.987951 | up   | 10.9778  | up   | CD55    |
| 201926_s_ | 4.19E-04 | 1.24E-04 | 2.515944 | down | 3.329932 | up   | 8.377921 | up   | CD55    |
| 201928_at | 0.001065 | 4.42E-04 | 1.613095 | up   | 1.156596 | up   | 1.394692 | down | PKP4    |
| 201930_at | 1.84E-04 | 4.12E-05 | 3.359055 | up   | 4.56012  | up   | 1.357561 | up   | MCM6    |
| 201932_at | 1.74E-04 | 3.85E-05 | 1.649388 | down | 2.60034  | down | 1.576549 | down | LRRC41  |
| 201933_at | 0.002399 | 0.001327 | 1.142669 | up   | 1.386396 | down | 1.584193 | down | CHMP1A  |
| 201939_at | 0.018068 | 0.016337 | 1.055544 | down | 3.275817 | down | 3.103439 | down | PLK2    |

|           |          |          |          |      |          |      |          |      |          |
|-----------|----------|----------|----------|------|----------|------|----------|------|----------|
| 201940_at | 0.00435  | 0.002917 | 2.641051 | down | 1.039399 | down | 2.540941 | up   | CPD      |
| 201942_s_ | 0.011616 | 0.009818 | 3.323811 | down | 1.486866 | down | 2.235448 | up   | CPD      |
| 201943_s_ | 0.001728 | 8.51E-04 | 2.919617 | down | 1.0482   | down | 2.785362 | up   | CPD      |
| 201944_at | 6.76E-05 | 1.07E-05 | 3.9928   | down | 2.319173 | down | 1.721648 | up   | HEXB     |
| 201945_at | 0.014324 | 0.012532 | 1.473879 | up   | 1.380813 | down | 2.035151 | down | FURIN    |
| 201946_s_ | 0.019892 | 0.018213 | 3.226846 | up   | 2.837674 | up   | 1.137145 | down | CCT2     |
| 201947_s_ | 1.48E-05 | 1.34E-06 | 2.989147 | up   | 2.013756 | up   | 1.484364 | down | CCT2     |
| 201948_at | 1.45E-04 | 2.98E-05 | 2.480838 | up   | 1.680872 | up   | 1.475923 | down | GNL2     |
| 201949_x_ | 0.001106 | 4.65E-04 | 1.862606 | down | 1.384077 | down | 1.345739 | up   | CAPZB    |
| 201951_at | 8.21E-05 | 1.38E-05 | 1.614792 | down | 5.239532 | down | 3.24471  | down | ALCAM    |
| 201952_at | 2.93E-05 | 3.40E-06 | 1.436899 | down | 4.802865 | down | 3.342522 | down | ALCAM    |
| 201953_at | 2.85E-05 | 3.28E-06 | 3.145365 | down | 4.446105 | down | 1.413542 | down | CIB1     |
| 201954_at | 1.81E-05 | 1.76E-06 | 3.444211 | down | 4.007007 | down | 1.163403 | down | ARPC1B   |
| 201955_at | 3.98E-06 | 2.06E-07 | 2.495647 | up   | 2.335278 | up   | 1.068672 | down | CCNC     |
| 201963_at | 1.04E-04 | 1.91E-05 | 12.79698 | down | 7.884815 | down | 1.622991 | up   | ACSL1    |
| 201966_at | 0.003176 | 0.001935 | 1.175551 | up   | 1.309338 | down | 1.539194 | down | NDUFS2   |
| 201967_at | 1.77E-05 | 1.71E-06 | 2.041277 | up   | 1.927827 | up   | 1.058849 | down | RBM6     |
| 201968_s_ | 0.026055 | 0.024555 | 1.242665 | up   | 1.634928 | down | 2.031668 | down | PGM1     |
| 201969_at | 6.75E-05 | 1.07E-05 | 6.180497 | up   | 9.317762 | up   | 1.507608 | up   | NASP     |
| 201970_s_ | 1.29E-05 | 1.10E-06 | 7.181308 | up   | 9.1916   | up   | 1.279934 | up   | NASP     |
| 201977_s_ | 0.002466 | 0.001379 | 1.390178 | down | 1.425253 | down | 1.02523  | down | KIAA0141 |
| 201980_s_ | 5.65E-05 | 8.31E-06 | 4.111371 | down | 3.884964 | down | 1.058278 | up   | RSU1     |
| 201981_at | 0.005647 | 0.004068 | 8.667546 | down | 3.947314 | down | 2.195809 | up   | PAPPA    |
| 201982_s_ | 0.004118 | 0.002706 | 3.823964 | down | 2.510183 | down | 1.523381 | up   | PAPPA    |
| 201983_s_ | 1.68E-06 | 6.17E-08 | 9.52194  | down | 14.4408  | down | 1.516581 | down | EGFR     |
| 201984_s_ | 0.002257 | 0.001225 | 3.529167 | down | 3.109294 | down | 1.135038 | up   | EGFR     |
| 201991_s_ | 0.018619 | 0.016898 | 1.029187 | up   | 1.517229 | down | 1.561513 | down | KIF5B    |
| 201992_s_ | 0.007355 | 0.005673 | 1.333571 | down | 2.485906 | down | 1.864097 | down | KIF5B    |
| 201993_x_ | 5.80E-06 | 3.51E-07 | 2.159443 | up   | 1.555376 | up   | 1.388374 | down | HNRPDL   |
| 201995_at | 5.56E-06 | 3.31E-07 | 3.882922 | down | 7.273532 | down | 1.873211 | down | EXT1     |
| 201998_at | 2.66E-05 | 2.97E-06 | 12.39358 | up   | 6.494144 | up   | 1.908424 | down | ST6GAL1  |
| 201999_s_ | 0.001875 | 9.49E-04 | 1.013338 | down | 1.687447 | down | 1.665235 | down | DYNLT1   |
| 202003_s_ | 4.78E-04 | 1.48E-04 | 1.966267 | up   | 1.461187 | up   | 1.345664 | down | ACAA2    |
| 202005_at | 3.61E-05 | 4.50E-06 | 2.595162 | up   | 2.203316 | up   | 1.177844 | down | ST14     |

|           |          |          |               |               |               |          |
|-----------|----------|----------|---------------|---------------|---------------|----------|
| 202006_at | 0.006001 | 0.004392 | 1.50623 up    | 1.677699 up   | 1.11384 up    | PTPN12   |
| 202007_at | 3.23E-06 | 1.55E-07 | 14.40344 down | 5.255821 down | 2.740474 up   | NID1     |
| 202008_s_ | 2.28E-05 | 2.42E-06 | 9.80578 down  | 3.669614 down | 2.672156 up   | NID1     |
| 202009_at | 0.005577 | 0.004004 | 1.59123 down  | 2.266203 down | 1.424183 down | TWF2     |
| 202011_at | 0.002095 | 0.001103 | 1.585717 up   | 1.411107 up   | 1.12374 down  | TJP1     |
| 202012_s_ | 3.71E-07 | 7.30E-09 | 2.940895 down | 3.701554 down | 1.258649 down | EXT2     |
| 202013_s_ | 1.22E-06 | 3.87E-08 | 2.863537 down | 3.910788 down | 1.365719 down | EXT2     |
| 202015_x_ | 0.005258 | 0.003724 | 1.170253 up   | 1.241726 up   | 1.061075 up   |          |
| 202025_x_ | 4.33E-04 | 1.30E-04 | 1.183074 down | 1.516451 down | 1.281789 down | ACAA1    |
| 202026_at | 0.007161 | 0.00549  | 1.308212 down | 1.475051 up   | 1.92968 up    | SDHD     |
| 202027_at | 0.002697 | 0.001551 | 1.197608 down | 1.724045 down | 1.439573 down | TMEM184B |
| 202031_s_ | 0.001034 | 4.24E-04 | 1.077225 down | 1.635872 down | 1.518597 down | WIPI2    |
| 202032_s_ | 0.004542 | 0.003091 | 1.421651 down | 1.740103 down | 1.224002 down | MAN2A2   |
| 202035_s_ | 0.010439 | 0.008645 | 1.039399 up   | 9.421277 up   | 9.06416 up    | SFRP1    |
| 202036_s_ | 0.001996 | 0.001033 | 1.291401 up   | 14.8009 up    | 11.46112 up   | SFRP1    |
| 202038_at | 9.46E-05 | 1.67E-05 | 1.105669 down | 1.732116 down | 1.566577 down | UBE4A    |
| 202043_s_ | 1.54E-04 | 3.24E-05 | 4.66534 up    | 1.937378 up   | 2.408068 down | SMS      |
| 202047_s_ | 7.41E-05 | 1.21E-05 | 3.763825 down | 3.285067 down | 1.145738 up   | CBX6     |
| 202048_s_ | 3.75E-04 | 1.08E-04 | 2.596087 down | 2.167886 down | 1.19752 up    | CBX6     |
| 202050_s_ | 0.001174 | 5.06E-04 | 1.192062 up   | 1.569225 up   | 1.316395 up   | ZMYM4    |
| 202051_s_ | 0.005592 | 0.004017 | 1.654962 up   | 1.943424 up   | 1.174302 up   | ZMYM4    |
| 202053_s_ | 7.82E-04 | 2.92E-04 | 3.903459 up   | 3.178503 up   | 1.228081 down | ALDH3A2  |
| 202054_s_ | 5.56E-04 | 1.82E-04 | 3.937421 up   | 4.483833 up   | 1.138774 up   | ALDH3A2  |
| 202055_at | 0.017081 | 0.015325 | 1.202008 down | 1.711394 down | 1.423779 down | KPNA1    |
| 202059_s_ | 6.08E-04 | 2.07E-04 | 1.058624 up   | 2.493652 down | 2.639839 down | KPNA1    |
| 202061_s_ | 2.67E-04 | 6.82E-05 | 2.860553 down | 3.642717 down | 1.273431 down | SEL1L    |
| 202062_s_ | 8.70E-04 | 3.35E-04 | 2.706261 down | 3.048355 down | 1.126408 down | SEL1L    |
| 202063_s_ | 0.003419 | 0.002133 | 1.496995 down | 1.8033 down   | 1.204614 down | SEL1L    |
| 202064_s_ | 7.56E-06 | 5.20E-07 | 3.735866 down | 3.835899 down | 1.026776 down | SEL1L    |
| 202069_s_ | 5.08E-04 | 1.61E-04 | 2.307257 down | 2.898716 down | 1.256347 down | IDH3A    |
| 202072_at | 0.013378 | 0.011583 | 4.497801 up   | 2.410803 up   | 1.865686 down | HNRNPL   |
| 202073_at | 1.73E-05 | 1.65E-06 | 24.11019 down | 12.35259 down | 1.951832 up   | OPTN     |
| 202074_s_ | 6.12E-05 | 9.30E-06 | 5.595364 down | 6.923386 down | 1.237343 down | OPTN     |
| 202075_s_ | 0.00292  | 0.001726 | 1.031298 down | 3.433131 up   | 3.540582 up   | PLTP     |

|           |          |          |          |      |          |      |          |      |          |
|-----------|----------|----------|----------|------|----------|------|----------|------|----------|
| 202077_at | 2.47E-04 | 6.12E-05 | 3.043873 | up   | 2.127625 | up   | 1.430643 | down | NDUFAB1  |
| 202081_at | 0.002527 | 0.001424 | 2.378925 | up   | 1.873105 | up   | 1.270043 | down | IER2     |
| 202084_s_ | 0.004248 | 0.00282  | 1.380002 | up   | 1.31851  | down | 1.819546 | down | SEC14L1  |
| 202085_at | 0.020604 | 0.018942 | 3.728867 | up   | 3.677707 | up   | 1.013911 | down | TJP2     |
| 202087_s_ | 2.52E-04 | 6.31E-05 | 4.76816  | down | 2.359644 | down | 2.020712 | up   | CTSL1    |
| 202090_s_ | 9.16E-05 | 1.59E-05 | 1.359704 | down | 1.580561 | down | 1.162431 | down | UQCR     |
| 202091_at | 0.008466 | 0.006731 | 2.098249 | down | 1.152341 | down | 1.820857 | up   | ARL2BP   |
| 202092_s_ | 3.88E-05 | 4.99E-06 | 4.748874 | down | 3.876244 | down | 1.225123 | up   | ARL2BP   |
| 202093_s_ | 4.96E-04 | 1.55E-04 | 1.331834 | down | 2.055092 | down | 1.543054 | down | PAF1     |
| 202095_s_ | 0.013676 | 0.011885 | 3.720538 | up   | 5.116434 | up   | 1.375186 | up   | BIRC5    |
| 202096_s_ | 1.90E-09 | 4.78E-12 | 19.99215 | down | 26.57398 | down | 1.329221 | down | TSPO     |
| 202097_at | 0.001294 | 5.77E-04 | 2.221744 | up   | 2.632907 | up   | 1.185063 | up   | NUP153   |
| 202100_at | 1.94E-06 | 7.48E-08 | 2.671276 | down | 2.948802 | down | 1.103892 | down | RALB     |
| 202101_s_ | 5.76E-04 | 1.91E-04 | 4.226732 | down | 2.969166 | down | 1.423542 | up   | RALB     |
| 202106_at | 0.008301 | 0.006576 | 1.756171 | down | 2.56994  | down | 1.463377 | down | GOLGA3   |
| 202107_s_ | 0.00135  | 6.11E-04 | 4.628031 | up   | 5.796749 | up   | 1.25253  | up   | MCM2     |
| 202110_at | 0.02224  | 0.020635 | 1.773046 | up   | 1.640411 | up   | 1.080855 | down | COX7B    |
| 202115_s_ | 0.012408 | 0.010611 | 2.049424 | up   | 1.159994 | up   | 1.766754 | down | NOC2L    |
| 202117_at | 1.55E-06 | 5.47E-08 | 2.009385 | down | 3.684895 | down | 1.833842 | down | ARHGAP1  |
| 202122_s_ | 6.33E-04 | 2.18E-04 | 3.103162 | down | 3.515786 | down | 1.132969 | down | M6PRBP1  |
| 202124_s_ | 0.001394 | 6.38E-04 | 2.985319 | down | 3.402873 | down | 1.139869 | down | TRAK2    |
| 202125_s_ | 8.97E-06 | 6.54E-07 | 5.249777 | down | 4.594447 | down | 1.142636 | up   | TRAK2    |
| 202127_at | 5.09E-04 | 1.62E-04 | 1.215259 | up   | 3.38673  | up   | 2.786838 | up   | PRPF4B   |
| 202128_at | 0.047062 | 0.045867 | 1.181696 | down | 1.635844 | down | 1.384319 | down | KIAA0317 |
| 202132_at | 1.98E-04 | 4.52E-05 | 3.524512 | down | 3.474369 | down | 1.014432 | up   | WWTR1    |
| 202133_at | 1.49E-04 | 3.09E-05 | 6.186172 | down | 5.688808 | down | 1.087429 | up   | WWTR1    |
| 202135_s_ | 0.00179  | 8.92E-04 | 1.574267 | down | 1.763781 | down | 1.120382 | down | ACTR1B   |
| 202136_at | 7.37E-04 | 2.68E-04 | 1.806462 | down | 2.045285 | down | 1.132204 | down | ZMYND11  |
| 202137_s_ | 8.83E-04 | 3.43E-04 | 3.167806 | down | 1.276222 | down | 2.482176 | up   | ZMYND11  |
| 202145_at | 2.50E-04 | 6.23E-05 | 5.03323  | down | 1.980104 | down | 2.541902 | up   | LY6E     |
| 202149_at | 1.95E-04 | 4.42E-05 | 7.442597 | down | 9.059773 | down | 1.217286 | down | NEDD9    |
| 202150_s_ | 0.001512 | 7.11E-04 | 2.391717 | down | 3.002609 | down | 1.25542  | down | NEDD9    |
| 202151_s_ | 0.001766 | 8.76E-04 | 1.789334 | up   | 1.194419 | up   | 1.498079 | down | UBAC1    |
| 202152_x_ | 0.010354 | 0.008558 | 1.259953 | up   | 1.135595 | down | 1.430796 | down | USF2     |

|           |          |          |               |               |               |           |
|-----------|----------|----------|---------------|---------------|---------------|-----------|
| 202153_s_ | 0.004806 | 0.003318 | 2.337265 up   | 1.743459 up   | 1.340591 down | NUP62     |
| 202154_x_ | 0.006645 | 0.005001 | 2.655522 up   | 1.779788 up   | 1.492044 down | TUBB3     |
| 202155_s_ | 3.26E-04 | 8.92E-05 | 1.61517 up    | 1.312821 up   | 1.230305 down | NUP214    |
| 202156_s_ | 0.003621 | 0.002295 | 1.365023 down | 3.295431 up   | 4.49834 up    | CUGBP2    |
| 202157_s_ | 3.46E-04 | 9.63E-05 | 1.113898 down | 16.04899 up   | 17.87694 up   | CUGBP2    |
| 202158_s_ | 3.74E-04 | 1.07E-04 | 1.984905 down | 7.692425 up   | 15.26873 up   | CUGBP2    |
| 202159_at | 0.047049 | 0.045851 | 1.391608 up   | 1.109237 down | 1.543623 down | FARSA     |
| 202167_s_ | 0.005435 | 0.003877 | 1.607292 up   | 1.613671 up   | 1.003969 up   | MMS19     |
|           |          |          |               |               |               | GAS6 ///  |
|           |          |          |               |               |               | LOC100133 |
| 202177_at | 3.59E-07 | 6.83E-09 | 15.77793 down | 39.1676 down  | 2.48243 down  | 684       |
| 202178_at | 1.61E-06 | 5.74E-08 | 8.177146 up   | 9.518192 up   | 1.163999 up   | PRKCZ     |
| 202179_at | 1.24E-04 | 2.40E-05 | 2.696204 up   | 1.899864 up   | 1.419156 down | BLMH      |
| 202180_s_ | 1.62E-07 | 2.34E-09 | 15.24557 down | 17.70792 down | 1.161513 down | MVP       |
| 202181_at | 9.04E-04 | 3.53E-04 | 2.630334 down | 4.170136 down | 1.585402 down | KIAA0247  |
| 202183_s_ | 7.46E-04 | 2.73E-04 | 3.269343 up   | 3.673753 up   | 1.123698 up   | KIF22     |
| 202184_s_ | 0.002077 | 0.001091 | 1.937735 up   | 2.041721 up   | 1.053664 up   | NUP133    |
| 202185_at | 1.98E-04 | 4.54E-05 | 3.386752 down | 3.573226 down | 1.05506 down  | PLOD3     |
| 202188_at | 9.15E-05 | 1.59E-05 | 3.111319 up   | 2.478095 up   | 1.255529 down | NUP93     |
| 202189_x_ | 1.89E-04 | 4.29E-05 | 2.167232 up   | 1.809136 up   | 1.197938 down | PTBP1     |
| 202190_at | 5.79E-04 | 1.93E-04 | 1.490711 up   | 1.790573 up   | 1.201154 up   | CSTF1     |
| 202191_s_ | 0.001241 | 5.45E-04 | 1.041054 up   | 2.827209 up   | 2.715718 up   | GAS7      |
| 202192_s_ | 4.13E-04 | 1.22E-04 | 1.017227 down | 2.259361 up   | 2.298282 up   | GAS7      |
| 202194_at | 0.003662 | 0.002329 | 1.800391 down | 1.276666 down | 1.410228 up   | TMED5     |
| 202195_s_ | 2.28E-04 | 5.50E-05 | 3.590995 down | 2.485971 down | 1.444504 up   | TMED5     |
| 202196_s_ | 2.04E-05 | 2.06E-06 | 17.21092 down | 5.193408 down | 3.313993 up   | DKK3      |
| 202200_s_ | 1.20E-04 | 2.31E-05 | 2.661486 up   | 2.278228 up   | 1.168226 down | SRPK1     |
| 202202_s_ | 7.48E-07 | 1.95E-08 | 121.2116 down | 39.92041 down | 3.036331 up   | LAMA4     |
| 202204_s_ | 5.02E-04 | 1.58E-04 | 1.956296 down | 2.594321 down | 1.326139 down | AMFR      |
| 202209_at | 0.00118  | 5.09E-04 | 1.991214 up   | 1.806684 up   | 1.102137 down | LSM3      |
| 202211_at | 0.00175  | 8.66E-04 | 3.804162 down | 3.384473 down | 1.124004 up   | ARFGAP3   |
| 202213_s_ | 0.001168 | 5.01E-04 | 3.667149 down | 2.011357 down | 1.823222 up   | CUL4B     |
| 202215_s_ | 0.012954 | 0.011152 | 1.522054 up   | 1.425069 up   | 1.068056 down | NFYC      |
| 202219_at | 0.001852 | 9.33E-04 | 2.691161 up   | 1.15536 up    | 2.329284 down | SLC6A8    |



|           |          |          |          |      |          |      |          |      |          |
|-----------|----------|----------|----------|------|----------|------|----------|------|----------|
| 202225_at | 0.014795 | 0.01302  | 1.207495 | down | 1.589683 | down | 1.316513 | down |          |
| 202228_s_ | 4.47E-04 | 1.35E-04 | 1.936131 | down | 1.89295  | down | 1.022811 | up   | NPTN     |
| 202230_s_ | 1.55E-04 | 3.27E-05 | 1.920691 | up   | 2.858038 | up   | 1.488026 | up   | CHERP    |
| 202231_at | 0.001173 | 5.05E-04 | 1.502121 | up   | 1.447536 | up   | 1.037709 | down | EIF3M    |
| 202232_s_ | 0.015332 | 0.013559 | 1.505628 | up   | 1.4821   | up   | 1.015875 | down | EIF3M    |
| 202233_s_ | 4.90E-05 | 6.86E-06 | 2.516485 | up   | 2.235287 | up   | 1.1258   | down | UQCRH    |
| 202234_s_ | 1.15E-06 | 3.56E-08 | 8.718092 | up   | 4.769757 | up   | 1.827785 | down | SLC16A1  |
| 202235_at | 8.06E-07 | 2.19E-08 | 7.526116 | up   | 3.799039 | up   | 1.981058 | down | SLC16A1  |
| 202236_s_ | 8.20E-05 | 1.38E-05 | 7.853658 | up   | 4.895972 | up   | 1.604106 | down | SLC16A1  |
| 202237_at | 1.43E-05 | 1.27E-06 | 120.2124 | down | 148.5397 | down | 1.235644 | down | NNMT     |
| 202238_s_ | 4.35E-06 | 2.35E-07 | 50.24388 | down | 62.2085  | down | 1.23813  | down | NNMT     |
| 202239_at | 0.0036   | 0.002278 | 1.523753 | down | 1.487695 | down | 1.024237 | up   | PARP4    |
| 202240_at | 0.01453  | 0.012753 | 4.129542 | up   | 3.688759 | up   | 1.119494 | down | PLK1     |
| 202241_at | 0.001111 | 4.68E-04 | 4.770412 | up   | 3.661917 | up   | 1.302709 | down | TRIB1    |
| 202242_at | 1.70E-04 | 3.71E-05 | 2.855485 | up   | 2.683189 | up   | 1.064213 | down | TSPAN7   |
| 202243_s_ | 0.002623 | 0.001494 | 1.845321 | up   | 1.826798 | up   | 1.010139 | down | PSMB4    |
| 202244_at | 0.003462 | 0.00217  | 1.298419 | up   | 1.436779 | up   | 1.106561 | up   | PSMB4    |
| 202251_at | 0.004639 | 0.003178 | 1.525697 | up   | 1.100456 | up   | 1.386422 | down | PRPF3    |
| 202252_at | 0.005014 | 0.003505 | 1.989789 | down | 1.370449 | down | 1.451925 | up   | RAB13    |
| 202254_at | 2.45E-04 | 6.07E-05 | 2.328858 | down | 4.16533  | down | 1.788572 | down | SIPA1L1  |
| 202256_at | 0.002899 | 0.00171  | 1.744155 | up   | 1.476304 | up   | 1.181433 | down | CD2BP2   |
| 202257_s_ | 6.79E-04 | 2.40E-04 | 1.117113 | down | 1.676197 | down | 1.500472 | down | CD2BP2   |
| 202260_s_ | 2.18E-05 | 2.26E-06 | 3.825714 | down | 4.44401  | down | 1.161616 | down | STXBP1   |
| 202261_at | 0.010303 | 0.008508 | 1.428161 | up   | 1.428947 | up   | 1.000551 | up   | VPS72    |
| 202263_at | 1.84E-04 | 4.13E-05 | 2.959291 | down | 5.814533 | down | 1.96484  | down | CYB5R1   |
| 202264_s_ | 0.011141 | 0.009345 | 2.925548 | up   | 1.396946 | up   | 2.094245 | down | TOMM40   |
| 202265_at | 0.003575 | 0.00226  | 4.736773 | down | 3.398629 | down | 1.393731 | up   | BMI1     |
| 202267_at | 0.004778 | 0.003293 | 2.383022 | up   | 1.52041  | up   | 1.567355 | down | LAMC2    |
| 202268_s_ | 0.002068 | 0.001084 | 1.982142 | up   | 1.883257 | up   | 1.052508 | down | NAE1     |
| 202269_x_ | 3.45E-10 | 4.33E-13 | 34.58714 | down | 40.09425 | down | 1.159225 | down | GBP1     |
| 202270_at | 1.03E-07 | 1.21E-09 | 27.75148 | down | 19.95383 | down | 1.390784 | up   | GBP1     |
| 202273_at | 6.98E-08 | 6.77E-10 | 13.32756 | down | 10.66624 | down | 1.249509 | up   | PDGFRB   |
| 202275_at | 0.008739 | 0.006998 | 3.136622 | down | 3.862306 | down | 1.231358 | down | G6PD     |
| 202282_at | 0.015898 | 0.014126 | 1.78979  | up   | 1.122218 | down | 2.008535 | down | HSD17B10 |

|           |          |          |          |      |          |      |          |      |          |
|-----------|----------|----------|----------|------|----------|------|----------|------|----------|
| 202283_at | 1.22E-04 | 2.36E-05 | 16.12804 | down | 2.284371 | down | 7.060164 | up   | SERPINF1 |
| 202284_s_ | 2.08E-06 | 8.32E-08 | 6.460608 | down | 8.842666 | down | 1.368705 | down | CDKN1A   |
| 202285_s_ | 8.42E-04 | 3.21E-04 | 1.213724 | up   | 1.747047 | down | 2.120432 | down | TACSTD2  |
| 202288_at | 1.25E-04 | 2.44E-05 | 1.89462  | up   | 1.47572  | up   | 1.283862 | down | FRAP1    |
| 202291_s_ | 3.36E-04 | 9.27E-05 | 5.251335 | down | 8.34901  | down | 1.589883 | down | MGP      |
| 202292_x_ | 0.003469 | 0.002176 | 2.230085 | up   | 1.876051 | up   | 1.188712 | down | LYPLA2   |
| 202293_at | 0.0042   | 0.002779 | 2.419205 | down | 1.377486 | down | 1.756247 | up   | STAG1    |
| 202294_at | 0.001384 | 6.32E-04 | 2.136656 | down | 1.606546 | down | 1.329969 | up   | STAG1    |
| 202295_s_ | 0.001057 | 4.37E-04 | 1.255634 | up   | 3.916459 | up   | 3.119109 | up   | CTSH     |
| 202297_s_ | 2.53E-04 | 6.34E-05 | 1.779913 | down | 2.491043 | down | 1.399531 | down | RER1     |
| 202300_at | 0.002136 | 0.001132 | 1.348054 | down | 1.432476 | down | 1.062625 | down | HBXIP    |
| 202301_s_ | 3.68E-04 | 1.05E-04 | 1.623812 | up   | 2.180314 | up   | 1.342713 | up   | RSRC2    |
| 202302_s_ | 0.003273 | 0.002013 | 1.652672 | up   | 1.848853 | up   | 1.118706 | up   | RSRC2    |
| 202303_x_ | 1.35E-05 | 1.18E-06 | 1.933272 | up   | 2.725104 | up   | 1.409581 | up   | SMARCA5  |
| 202304_at | 0.002577 | 0.001461 | 2.307956 | down | 1.027045 | down | 2.247181 | up   | FNDC3A   |
| 202306_at | 0.00431  | 0.00288  | 1.499985 | up   | 1.464417 | up   | 1.024288 | down | POLR2G   |
| 202307_s_ | 1.45E-08 | 7.21E-11 | 4.10311  | down | 4.387572 | down | 1.069328 | down | TAP1     |
| 202310_s_ | 1.97E-05 | 1.96E-06 | 17.77047 | down | 22.10681 | down | 1.244019 | down | COL1A1   |
| 202311_s_ | 8.51E-05 | 1.45E-05 | 17.42942 | down | 22.63207 | down | 1.298498 | down | COL1A1   |
| 202312_s_ | 0.002154 | 0.001146 | 1.975819 | up   | 1.473986 | down | 2.91233  | down | COL1A1   |
| 202313_at | 0.001248 | 5.49E-04 | 1.963484 | up   | 1.52905  | up   | 1.28412  | down | PPP2R2A  |
| 202315_s_ | 0.001898 | 9.64E-04 | 3.292837 | up   | 1.45796  | up   | 2.258523 | down | BCR      |
| 202321_at | 0.006724 | 0.005077 | 2.063501 | down | 1.311849 | down | 1.572972 | up   | GGPS1    |
| 202326_at | 0.002735 | 0.001582 | 2.744679 | up   | 1.988079 | up   | 1.380569 | down | EHMT2    |
| 202328_s_ | 9.30E-04 | 3.68E-04 | 1.265004 | down | 2.331453 | down | 1.84304  | down | PKD1     |
| 202329_at | 3.16E-04 | 8.55E-05 | 1.487544 | down | 2.580532 | down | 1.734759 | down | CSK      |
| 202330_s_ | 1.33E-05 | 1.14E-06 | 5.747334 | up   | 7.336609 | up   | 1.276524 | up   | UNG      |
| 202332_at | 0.003902 | 0.002528 | 1.495214 | up   | 1.108115 | down | 1.65687  | down | CSNK1E   |
| 202333_s_ | 0.006225 | 0.004606 | 1.653839 | down | 1.518943 | down | 1.088809 | up   | UBE2B    |
| 202335_s_ | 0.00424  | 0.002812 | 1.686896 | down | 1.403248 | down | 1.202136 | up   | UBE2B    |
| 202336_s_ | 1.99E-06 | 7.78E-08 | 6.61056  | down | 3.65598  | down | 1.80815  | up   | PAM      |
| 202337_at | 4.99E-04 | 1.57E-04 | 2.664321 | up   | 1.941323 | up   | 1.372425 | down | PMF1     |
| 202341_s_ | 0.008567 | 0.006826 | 1.539753 | up   | 4.81736  | up   | 3.128658 | up   | TRIM2    |
| 202345_s_ | 0.001079 | 4.50E-04 | 6.471448 | up   | 7.835203 | up   | 1.210734 | up   | FABP5    |

|           |          |          |          |      |          |      |          |      |            |
|-----------|----------|----------|----------|------|----------|------|----------|------|------------|
| 202349_at | 1.29E-04 | 2.54E-05 | 1.312018 | down | 1.820664 | down | 1.387682 | down | TOR1A      |
| 202351_at | 0.002825 | 0.001652 | 4.465071 | down | 4.199189 | down | 1.063317 | up   | ITGAV      |
| 202352_s_ | 2.09E-04 | 4.87E-05 | 2.211075 | up   | 1.646138 | up   | 1.34319  | down | PSMD12     |
| 202357_s_ | 5.42E-04 | 1.76E-04 | 9.469741 | down | 3.157837 | down | 2.998806 | up   | C2 /// CFB |
| 202358_s_ | 8.37E-06 | 5.98E-07 | 2.897477 | down | 2.977715 | down | 1.027692 | down | SNX19      |
| 202359_s_ | 3.22E-06 | 1.54E-07 | 3.513548 | down | 3.382666 | down | 1.038692 | up   | SNX19      |
| 202360_at | 1.41E-04 | 2.86E-05 | 1.575397 | up   | 1.591207 | up   | 1.010035 | up   | MAML1      |
| 202361_at | 0.021403 | 0.01977  | 1.210514 | up   | 1.141519 | down | 1.381825 | down | SEC24C     |
| 202362_at | 9.79E-04 | 3.94E-04 | 2.186064 | down | 1.829214 | down | 1.195084 | up   | RAP1A      |
| 202363_at | 4.02E-07 | 8.10E-09 | 15.83499 | down | 38.37736 | down | 2.423579 | down | SPOCK1     |
| 202367_at | 2.61E-04 | 6.59E-05 | 2.159061 | down | 1.275482 | down | 1.692741 | up   | CUX1       |
| 202368_s_ | 6.54E-06 | 4.17E-07 | 8.301742 | down | 5.764438 | down | 1.440165 | up   | TRAM2      |
| 202369_s_ | 4.82E-07 | 1.04E-08 | 8.945595 | down | 7.562838 | down | 1.182836 | up   | TRAM2      |
| 202370_s_ | 0.032606 | 0.031278 | 1.176629 | down | 1.890748 | down | 1.60692  | down | CBFB       |
| 202371_at | 8.79E-04 | 3.40E-04 | 1.933473 | down | 2.122769 | down | 1.097904 | down | TCEAL4     |
| 202375_at | 0.003201 | 0.001954 | 3.808218 | down | 2.730063 | down | 1.394919 | up   | SEC24D     |
| 202377_at | 9.84E-05 | 1.76E-05 | 4.340852 | down | 3.888179 | down | 1.116423 | up   |            |
| 202378_s_ | 3.77E-05 | 4.76E-06 | 3.340838 | down | 4.440956 | down | 1.329294 | down | LEPROT     |
| 202379_s_ | 6.95E-04 | 2.48E-04 | 3.843197 | up   | 3.321817 | up   | 1.156956 | down | NKTR       |
| 202380_s_ | 3.50E-04 | 9.83E-05 | 2.226681 | up   | 2.099796 | up   | 1.060427 | down | NKTR       |
| 202381_at | 1.52E-04 | 3.18E-05 | 8.053266 | down | 5.51055  | down | 1.461427 | up   | ADAM9      |
| 202382_s_ | 0.003414 | 0.00213  | 1.523218 | up   | 1.842925 | up   | 1.209889 | up   | GNPDA1     |
| 202384_s_ | 3.83E-04 | 1.11E-04 | 4.541992 | up   | 2.560122 | up   | 1.774131 | down | TCOF1      |
| 202385_s_ | 6.25E-04 | 2.14E-04 | 3.377129 | up   | 2.393426 | up   | 1.411003 | down | TCOF1      |
| 202386_s_ | 0.004126 | 0.002714 | 3.428665 | down | 2.589324 | down | 1.324155 | up   | KIAA0430   |
| 202388_at | 0.003288 | 0.002026 | 1.96787  | up   | 4.835889 | up   | 2.457423 | up   | RGS2       |
| 202389_s_ | 6.56E-05 | 1.02E-05 | 1.908705 | up   | 1.607905 | up   | 1.187075 | down | HTT        |
| 202391_at | 0.005633 | 0.004054 | 1.419527 | up   | 1.331479 | down | 1.890069 | down | BASP1      |
| 202392_s_ | 0.007028 | 0.005367 | 1.756325 | up   | 1.236931 | up   | 1.419906 | down | PISD       |
| 202395_at | 0.007313 | 0.005633 | 1.823283 | down | 1.87685  | down | 1.02938  | down | NSF        |
| 202396_at | 3.76E-05 | 4.76E-06 | 2.240295 | up   | 3.180764 | up   | 1.419797 | up   | TCERG1     |
| 202401_s_ | 0.046262 | 0.045054 | 1.319004 | up   | 1.261712 | down | 1.664204 | down | SRF        |
| 202403_s_ | 4.29E-05 | 5.75E-06 | 11.3939  | down | 11.36931 | down | 1.002163 | up   | COL1A2     |
| 202404_s_ | 6.84E-04 | 2.42E-04 | 12.27789 | down | 12.94536 | down | 1.054364 | down | COL1A2     |

|           |          |          |               |               |               |        |
|-----------|----------|----------|---------------|---------------|---------------|--------|
| 202412_s_ | 7.68E-04 | 2.85E-04 | 2.398486 up   | 3.529566 up   | 1.471581 up   | USP1   |
| 202413_s_ | 7.38E-05 | 1.20E-05 | 1.997806 up   | 2.420523 up   | 1.211591 up   | USP1   |
| 202418_at | 9.47E-06 | 7.04E-07 | 1.99309 down  | 3.696948 down | 1.854883 down | YIF1A  |
| 202420_s_ | 6.81E-05 | 1.08E-05 | 2.036613 up   | 1.661169 up   | 1.226012 down | DHX9   |
| 202421_at | 4.49E-06 | 2.46E-07 | 6.693226 up   | 11.46366 up   | 1.712725 up   | IGSF3  |
| 202425_x_ | 0.004908 | 0.003411 | 1.698172 down | 1.903726 down | 1.121044 down | PPP3CA |
| 202427_s_ | 0.003452 | 0.002163 | 1.689436 down | 1.898809 down | 1.123931 down | BRP44  |
| 202429_s_ | 1.49E-04 | 3.10E-05 | 2.28744 down  | 2.704017 down | 1.182115 down | PPP3CA |
| 202430_s_ | 0.032528 | 0.0312   | 4.856745 down | 1.161402 down | 4.181795 up   | PLSCR1 |
| 202432_at | 5.21E-04 | 1.67E-04 | 1.882022 down | 1.82402 down  | 1.031799 up   | PPP3CB |
| 202435_s_ | 0.005535 | 0.003962 | 4.670663 down | 8.737693 down | 1.870761 down | CYP1B1 |
| 202436_s_ | 0.008969 | 0.007217 | 3.750644 down | 7.973144 down | 2.125807 down | CYP1B1 |
| 202437_s_ | 0.008911 | 0.007162 | 5.943086 down | 9.148833 down | 1.539408 down | CYP1B1 |
| 202438_x_ | 8.53E-06 | 6.14E-07 | 3.394996 down | 2.480535 down | 1.368655 up   | IDS    |
| 202439_s_ | 3.51E-06 | 1.73E-07 | 4.194557 down | 5.561379 down | 1.325856 down | IDS    |
| 202440_s_ | 7.22E-04 | 2.61E-04 | 3.867389 down | 2.824075 down | 1.369436 up   | ST5    |
| 202441_at | 0.010008 | 0.008228 | 1.546721 down | 1.315983 down | 1.175335 up   | ERLIN1 |
| 202442_at | 6.34E-04 | 2.19E-04 | 1.751824 down | 1.49571 down  | 1.171232 up   | AP3S1  |
| 202443_x_ | 3.37E-06 | 1.64E-07 | 1.877837 down | 2.928828 down | 1.559682 down | NOTCH2 |
| 202445_s_ | 2.98E-04 | 7.88E-05 | 1.610838 down | 2.368879 down | 1.470588 down | NOTCH2 |
| 202446_s_ | 0.03978  | 0.038537 | 3.268304 down | 1.075656 up   | 3.515572 up   | PLSCR1 |
| 202447_at | 7.24E-05 | 1.17E-05 | 3.07385 down  | 3.097866 down | 1.007813 down | DECR1  |
| 202449_s_ | 2.02E-05 | 2.03E-06 | 1.931103 down | 2.176645 down | 1.127151 down | RXRA   |
| 202450_s_ | 1.51E-05 | 1.37E-06 | 105.2672 down | 3.61717 down  | 29.10209 up   | CTSK   |
| 202451_at | 3.82E-04 | 1.10E-04 | 4.521132 down | 4.271017 down | 1.058561 up   | GTF2H1 |
| 202452_at | 0.003339 | 0.002067 | 1.073272 down | 1.596411 down | 1.487424 down | ZER1   |
| 202453_s_ | 0.005316 | 0.003774 | 2.029403 down | 2.327326 down | 1.146803 down | GTF2H1 |
| 202454_s_ | 9.88E-08 | 1.15E-09 | 27.82735 up   | 28.72851 up   | 1.032384 up   | ERBB3  |
| 202457_s_ | 1.58E-04 | 3.37E-05 | 2.148423 down | 2.468315 down | 1.148896 down | PPP3CA |
| 202458_at | 0.001184 | 5.12E-04 | 7.925588 down | 12.32095 down | 1.55458 down  | PRSS23 |
| 202460_s_ | 0.012197 | 0.010402 | 2.185761 down | 1.922535 down | 1.136916 up   | LPIN2  |
| 202462_s_ | 2.03E-05 | 2.04E-06 | 2.491685 up   | 2.443329 up   | 1.019791 down | DDX46  |
| 202465_at | 6.91E-08 | 6.56E-10 | 23.59458 down | 11.81152 down | 1.99759 up    | PCOLCE |
| 202470_s_ | 1.34E-05 | 1.15E-06 | 3.236904 up   | 3.584786 up   | 1.107474 up   | CPSF6  |

|           |          |          |          |      |          |      |          |      |        |
|-----------|----------|----------|----------|------|----------|------|----------|------|--------|
| 202471_s_ | 5.03E-04 | 1.59E-04 | 1.671961 | down | 1.973885 | down | 1.180581 | down | IDH3G  |
| 202473_x_ | 0.009977 | 0.008199 | 1.801805 | up   | 1.038686 | up   | 1.734696 | down | HCFC1  |
| 202474_s_ | 0.002026 | 0.001055 | 2.138698 | up   | 1.535122 | up   | 1.393178 | down | HCFC1  |
| 202482_x_ | 0.010097 | 0.00831  | 2.310936 | up   | 1.205632 | up   | 1.916785 | down | RANBP1 |
| 202483_s_ | 7.98E-04 | 3.00E-04 | 3.540073 | up   | 3.081496 | up   | 1.148817 | down | RANBP1 |
| 202484_s_ | 6.11E-06 | 3.77E-07 | 34.45396 | down | 32.26411 | down | 1.067872 | up   | MBD2   |
| 202486_at | 6.85E-04 | 2.43E-04 | 2.049739 | up   | 1.670256 | up   | 1.227201 | down | AFG3L2 |
| 202491_s_ | 0.002654 | 0.001518 | 1.567744 | up   | 1.332095 | up   | 1.176901 | down | IKBKAP |
| 202492_at | 3.46E-04 | 9.63E-05 | 1.200761 | down | 2.576819 | down | 2.145988 | down | ATG9A  |
| 202495_at | 0.002368 | 0.001305 | 1.198677 | down | 1.442589 | up   | 1.729199 | up   | TBCC   |
| 202497_x_ | 2.00E-04 | 4.59E-05 | 7.1109   | up   | 5.272942 | up   | 1.348564 | down | SLC2A3 |
| 202498_s_ | 1.11E-05 | 8.76E-07 | 9.582998 | up   | 12.90127 | up   | 1.346266 | up   | SLC2A3 |
| 202499_s_ | 2.35E-06 | 9.89E-08 | 17.69259 | up   | 10.40182 | up   | 1.700913 | down | SLC2A3 |
| 202501_at | 4.50E-04 | 1.36E-04 | 1.048813 | up   | 2.010442 | up   | 1.916873 | up   | MAPRE2 |
| 202502_at | 0.001167 | 5.01E-04 | 1.383964 | up   | 2.817228 | up   | 2.035622 | up   | ACADM  |
| 202505_at | 0.002654 | 0.001518 | 1.764094 | up   | 1.529596 | up   | 1.153307 | down | SNRPB2 |
| 202515_at | 0.004969 | 0.003465 | 1.042996 | up   | 1.564798 | down | 1.632078 | down | DLG1   |
| 202517_at | 3.20E-07 | 5.83E-09 | 9.452425 | up   | 8.645162 | up   | 1.093378 | down | CRMP1  |
| 202520_s_ | 0.006702 | 0.005057 | 1.563498 | up   | 1.464722 | up   | 1.067437 | down | MLH1   |
| 202521_at | 1.47E-06 | 5.06E-08 | 2.581701 | up   | 2.704637 | up   | 1.047618 | up   | CTCF   |
| 202523_s_ | 0.012047 | 0.010248 | 1.063785 | up   | 1.189336 | down | 1.265198 | down | SPOCK2 |
| 202524_s_ | 0.008497 | 0.006764 | 1.573695 | up   | 1.342497 | down | 2.11268  | down | SPOCK2 |
| 202525_at | 1.38E-06 | 4.55E-08 | 10.91217 | up   | 12.64621 | up   | 1.158909 | up   | PRSS8  |
| 202526_at | 0.005869 | 0.004271 | 1.35705  | down | 1.151853 | up   | 1.563121 | up   | SMAD4  |
| 202527_s_ | 0.010625 | 0.008835 | 1.010317 | down | 1.676409 | up   | 1.693705 | up   | SMAD4  |
| 202528_at | 0.006967 | 0.005308 | 1.538018 | up   | 1.260407 | down | 1.938528 | down | GALE   |
| 202530_at | 9.60E-04 | 3.84E-04 | 1.700061 | down | 1.586774 | down | 1.071395 | up   | MAPK14 |
| 202531_at | 7.39E-06 | 5.02E-07 | 3.582116 | down | 2.731613 | down | 1.311356 | up   | IRF1   |
| 202532_s_ | 0.003014 | 0.001803 | 2.860799 | up   | 6.412741 | up   | 2.241591 | up   | DHFR   |
| 202539_s_ | 0.006272 | 0.004655 | 1.825962 | up   | 3.130962 | up   | 1.714692 | up   | HMGCR  |
| 202546_at | 2.20E-07 | 3.58E-09 | 47.94778 | up   | 16.8473  | up   | 2.846023 | down | VAMP8  |
| 202550_s_ | 0.011829 | 0.010027 | 1.357189 | up   | 1.163268 | down | 1.578775 | down | VAPB   |
| 202551_s_ | 3.35E-05 | 4.11E-06 | 6.056909 | down | 12.19587 | down | 2.013547 | down | CRIM1  |
| 202552_s_ | 1.07E-04 | 1.97E-05 | 8.373062 | down | 9.023921 | down | 1.077732 | down | CRIM1  |

|           |          |          |          |      |          |      |          |      |          |
|-----------|----------|----------|----------|------|----------|------|----------|------|----------|
| 202554_s_ | 4.09E-04 | 1.21E-04 | 12.30881 | down | 9.015931 | down | 1.365229 | up   | GSTM3    |
| 202555_s_ | 2.63E-06 | 1.16E-07 | 21.19471 | down | 23.09842 | down | 1.08982  | down | MYLK     |
| 202559_x_ | 2.83E-04 | 7.35E-05 | 1.630592 | up   | 1.538154 | up   | 1.060097 | down | C1orf77  |
| 202560_s_ | 0.002906 | 0.001716 | 1.796447 | up   | 1.49985  | up   | 1.197751 | down | C1orf77  |
| 202567_at | 7.47E-05 | 1.22E-05 | 2.471152 | up   | 1.835138 | up   | 1.346576 | down | SNRPD3   |
| 202575_at | 5.61E-05 | 8.22E-06 | 2.019128 | down | 3.134122 | up   | 6.328194 | up   | CRABP2   |
| 202579_x_ | 0.002988 | 0.001782 | 1.208226 | down | 1.201364 | up   | 1.45152  | up   | HMGN4    |
| 202584_at | 1.33E-04 | 2.65E-05 | 2.753818 | down | 2.709955 | down | 1.016186 | up   | NFX1     |
| 202585_s_ | 8.05E-04 | 3.03E-04 | 2.269255 | down | 2.286061 | down | 1.007406 | down | NFX1     |
| 202587_s_ | 2.52E-06 | 1.09E-07 | 3.600345 | down | 4.917039 | down | 1.365713 | down | AK1      |
| 202588_at | 1.79E-04 | 3.99E-05 | 1.402633 | down | 1.832956 | down | 1.306797 | down | AK1      |
| 202590_s_ | 0.001275 | 5.66E-04 | 2.202333 | down | 2.438644 | down | 1.1073   | down | PDK2     |
| 202594_at | 5.83E-04 | 1.95E-04 | 1.724781 | up   | 1.116471 | up   | 1.544851 | down | LEPROTL1 |
| 202596_at | 4.71E-04 | 1.45E-04 | 2.429501 | up   | 1.817902 | up   | 1.336431 | down | ENSA     |
| 202598_at | 3.43E-05 | 4.22E-06 | 2.524977 | down | 2.404637 | down | 1.050045 | up   | S100A13  |
| 202604_x_ | 3.13E-05 | 3.75E-06 | 3.048479 | down | 1.976774 | down | 1.542149 | up   | ADAM10   |
| 202607_at | 0.004719 | 0.003244 | 2.278295 | down | 2.703713 | down | 1.186727 | down | NDST1    |
| 202609_at | 3.36E-04 | 9.27E-05 | 11.33108 | down | 12.25842 | down | 1.08184  | down | EPS8     |
| 202610_s_ | 5.87E-05 | 8.78E-06 | 2.846886 | up   | 2.205878 | up   | 1.290591 | down | MED14    |
| 202611_s_ | 0.002807 | 0.001638 | 2.207657 | up   | 2.731739 | up   | 1.237393 | up   | MED14    |
| 202613_at | 0.002628 | 0.001498 | 3.433503 | up   | 1.01541  | up   | 3.381396 | down | CTPS     |
| 202614_at | 0.001177 | 5.07E-04 | 1.309337 | up   | 1.31908  | down | 1.727121 | down | SLC30A9  |
| 202616_s_ | 0.022065 | 0.020454 | 1.947427 | down | 1.196382 | down | 1.627763 | up   | MECP2    |
| 202619_s_ | 6.33E-04 | 2.18E-04 | 1.358624 | down | 11.19807 | down | 8.242212 | down | PLOD2    |
| 202620_s_ | 3.61E-04 | 1.02E-04 | 2.245602 | down | 8.471886 | down | 3.772657 | down | PLOD2    |
| 202627_s_ | 2.65E-05 | 2.95E-06 | 16.59972 | down | 53.36241 | down | 3.214658 | down | SERPINE1 |
| 202628_s_ | 1.61E-04 | 3.45E-05 | 12.6138  | down | 47.11601 | down | 3.735275 | down | SERPINE1 |
| 202630_at | 0.003447 | 0.002158 | 4.765128 | down | 3.090614 | down | 1.541807 | up   | APPBP2   |
| 202631_s_ | 3.48E-04 | 9.72E-05 | 3.178717 | down | 2.69449  | down | 1.17971  | up   | APPBP2   |
| 202633_at | 0.001748 | 8.64E-04 | 1.695566 | up   | 2.072923 | up   | 1.222555 | up   | TOPBP1   |
| 202636_at | 0.001126 | 4.77E-04 | 3.339255 | down | 4.004823 | down | 1.199316 | down | RNF103   |
| 202638_s_ | 0.020371 | 0.018701 | 3.553309 | down | 3.610207 | down | 1.016013 | down | ICAM1    |
| 202641_at | 0.0033   | 0.002036 | 1.017977 | up   | 1.339421 | down | 1.363501 | down | ARL3     |
| 202642_s_ | 0.001269 | 5.62E-04 | 1.920716 | up   | 1.793937 | up   | 1.070671 | down | TRRAP    |

|           |          |          |          |      |          |      |          |      |         |
|-----------|----------|----------|----------|------|----------|------|----------|------|---------|
| 202643_s_ | 0.002043 | 0.001067 | 2.58822  | down | 4.982205 | down | 1.924954 | down | TNFAIP3 |
| 202644_s_ | 3.46E-04 | 9.65E-05 | 2.523738 | down | 7.184458 | down | 2.846753 | down | TNFAIP3 |
| 202651_at | 0.001807 | 9.03E-04 | 3.903195 | down | 3.027372 | down | 1.289301 | up   | LPGAT1  |
| 202655_at | 0.014    | 0.012213 | 1.129839 | up   | 1.626833 | down | 1.838059 | down | ARMET   |
| 202656_s_ | 4.56E-04 | 1.39E-04 | 2.852848 | down | 6.519231 | down | 2.285166 | down | SERTAD2 |
| 202657_s_ | 2.40E-04 | 5.88E-05 | 3.286335 | down | 6.329754 | down | 1.926083 | down | SERTAD2 |
| 202658_at | 1.32E-05 | 1.13E-06 | 3.544691 | down | 3.056961 | down | 1.159547 | up   | PEX11B  |
| 202659_at | 0.003115 | 0.001884 | 1.982587 | down | 2.005733 | down | 1.011674 | down | PSMB10  |
| 202660_at | 0.008868 | 0.007121 | 2.20363  | down | 1.90081  | down | 1.159311 | up   | ITPR2   |
| 202663_at | 6.68E-05 | 1.05E-05 | 5.558851 | down | 3.354971 | down | 1.6569   | up   | WIPF1   |
| 202664_at | 0.00129  | 5.75E-04 | 9.668193 | down | 3.546744 | down | 2.725935 | up   | WIPF1   |
| 202665_s_ | 8.68E-08 | 9.37E-10 | 3.804682 | down | 4.062874 | down | 1.067862 | down | WIPF1   |
| 202667_s_ | 2.21E-04 | 5.27E-05 | 1.829388 | down | 3.990789 | down | 2.181488 | down | SLC39A7 |
| 202671_s_ | 2.12E-04 | 4.97E-05 | 1.152415 | up   | 2.138453 | down | 2.464384 | down | PDXK    |
| 202672_s_ | 9.60E-04 | 3.84E-04 | 5.840578 | up   | 3.811081 | up   | 1.532525 | down | ATF3    |
| 202673_at | 0.004306 | 0.002876 | 1.261562 | up   | 1.560128 | up   | 1.236664 | up   | DPM1    |
| 202674_s_ | 1.06E-05 | 8.21E-07 | 3.899565 | down | 7.359258 | down | 1.8872   | down | LMO7    |
| 202676_x_ | 4.49E-04 | 1.36E-04 | 1.599299 | down | 1.92811  | down | 1.205597 | down | FASTK   |
| 202681_at | 1.33E-06 | 4.36E-08 | 1.342398 | down | 2.039324 | down | 1.519166 | down | USP4    |
| 202683_s_ | 3.07E-04 | 8.22E-05 | 2.088639 | up   | 2.105579 | up   | 1.00811  | up   | RNMT    |
| 202685_s_ | 1.02E-04 | 1.85E-05 | 1.580309 | down | 3.8778   | down | 2.453825 | down | AXL     |
| 202686_s_ | 1.24E-06 | 3.97E-08 | 4.567085 | down | 7.092068 | down | 1.552866 | down | AXL     |
| 202689_at | 0.003668 | 0.002333 | 1.44955  | up   | 1.069811 | down | 1.550744 | down | RBM15B  |
| 202690_s_ | 1.38E-04 | 2.80E-05 | 3.151132 | up   | 2.82806  | up   | 1.114238 | down | SNRPD1  |
| 202691_at | 0.001344 | 6.08E-04 | 2.014106 | up   | 1.707025 | up   | 1.179892 | down | SNRPD1  |
| 202692_s_ | 0.010545 | 0.008754 | 1.772242 | up   | 1.111687 | down | 1.970178 | down | UBTF    |
| 202693_s_ | 2.69E-05 | 3.02E-06 | 3.653196 | down | 5.559366 | down | 1.521781 | down | STK17A  |
| 202694_at | 0.004226 | 0.0028   | 2.316073 | down | 3.637507 | down | 1.570549 | down | STK17A  |
| 202695_s_ | 4.68E-07 | 9.94E-09 | 5.477672 | down | 11.38379 | down | 2.078216 | down | STK17A  |
| 202697_at | 4.29E-05 | 5.75E-06 | 1.95091  | up   | 1.669007 | up   | 1.168905 | down | NUDT21  |
| 202700_s_ | 0.006288 | 0.004669 | 1.529665 | up   | 1.455072 | down | 2.225773 | down | TMEM63A |
| 202701_at | 3.71E-07 | 7.30E-09 | 3.197976 | down | 4.344955 | down | 1.358658 | down | BMP1    |
| 202705_at | 0.003822 | 0.00246  | 6.029676 | up   | 7.944478 | up   | 1.317563 | up   | CCNB2   |
| 202706_s_ | 5.08E-04 | 1.61E-04 | 2.647039 | up   | 1.746801 | up   | 1.515364 | down | UMPS    |

|           |          |          |               |               |               |            |
|-----------|----------|----------|---------------|---------------|---------------|------------|
| 202709_at | 0.003441 | 0.002154 | 7.568817 down | 2.152226 down | 3.516739 up   | FMOD       |
|           |          |          |               |               |               | CKMT1A /// |
| 202712_s_ | 6.93E-07 | 1.74E-08 | 11.53168 up   | 8.941053 up   | 1.289745 down | CKMT1B     |
| 202713_s_ | 0.003125 | 0.001894 | 1.848741 up   | 1.155284 up   | 1.600248 down | KIAA0391   |
| 202715_at | 0.001645 | 7.99E-04 | 3.036985 up   | 2.270084 up   | 1.337829 down | CAD        |
| 202716_at | 0.002669 | 0.00153  | 1.125844 down | 1.655653 down | 1.470588 down | PTPN1      |
| 202719_s_ | 0.002008 | 0.001041 | 1.114582 down | 3.342464 down | 2.998851 down | TES        |
| 202720_at | 0.001482 | 6.91E-04 | 1.089254 down | 3.635294 down | 3.337416 down | TES        |
| 202723_s_ | 4.05E-04 | 1.19E-04 | 6.559756 up   | 10.04557 up   | 1.531394 up   | FOXO1      |
| 202724_s_ | 3.67E-04 | 1.05E-04 | 7.306122 up   | 6.576338 up   | 1.110971 down | FOXO1      |
| 202726_at | 1.77E-04 | 3.94E-05 | 3.516387 up   | 3.423702 up   | 1.027072 down | LIG1       |
| 202728_s_ | 9.73E-04 | 3.91E-04 | 2.899422 down | 4.022809 down | 1.387452 down | LTBP1      |
| 202729_s_ | 4.42E-05 | 5.95E-06 | 3.690166 down | 5.198961 down | 1.408869 down | LTBP1      |
| 202732_at | 3.11E-06 | 1.47E-07 | 4.766189 down | 1.699806 down | 2.803961 up   | PKIG       |
| 202733_at | 2.21E-05 | 2.30E-06 | 12.50571 down | 13.41648 down | 1.072829 down | P4HA2      |
| 202736_s_ | 0.010238 | 0.008442 | 3.193594 up   | 3.127899 up   | 1.021003 down | LSM4       |
| 202737_s_ | 1.13E-05 | 8.91E-07 | 3.482714 up   | 2.19932 up    | 1.583541 down | LSM4       |
| 202738_s_ | 1.42E-04 | 2.91E-05 | 1.364923 down | 2.061968 down | 1.510685 down | PHKB       |
| 202741_at | 3.02E-04 | 8.04E-05 | 2.036584 down | 2.596407 down | 1.274884 down | PRKACB     |
| 202742_s_ | 2.22E-04 | 5.31E-05 | 4.030737 down | 2.738713 down | 1.471763 up   | PRKACB     |
| 202744_at | 0.010021 | 0.008241 | 1.899919 down | 1.63162 down  | 1.164438 up   | SLC20A2    |
| 202752_x_ | 0.00118  | 5.09E-04 | 1.527532 up   | 4.096187 up   | 2.681572 up   | SLC7A8     |
| 202753_at | 0.019551 | 0.017854 | 1.580143 up   | 1.276442 up   | 1.237928 down | PSMD6      |
| 202754_at | 0.002747 | 0.001591 | 1.61218 up    | 1.203289 up   | 1.339811 down | R3HDM1     |
| 202756_s_ | 6.53E-06 | 4.14E-07 | 5.028307 down | 4.894883 down | 1.027258 up   | GPC1       |
|           |          |          |               |               |               | AKAP2 ///  |
|           |          |          |               |               |               | PALM2 ///  |
|           |          |          |               |               |               | PALM2-     |
| 202759_s_ | 0.001346 | 6.09E-04 | 2.992079 down | 2.675616 down | 1.118277 up   | AKAP2      |
|           |          |          |               |               |               | PALM2-     |
| 202760_s_ | 0.002074 | 0.001089 | 2.181045 down | 2.680247 down | 1.228882 down | AKAP2      |
| 202761_s_ | 5.52E-06 | 3.26E-07 | 9.396544 up   | 14.8078 up    | 1.575877 up   | SYNE2      |
| 202762_at | 3.07E-05 | 3.65E-06 | 4.414019 down | 2.694189 down | 1.638348 up   | ROCK2      |



|           |          |          |               |               |               |         |
|-----------|----------|----------|---------------|---------------|---------------|---------|
| 202763_at | 7.21E-04 | 2.61E-04 | 2.94855 up    | 2.521926 up   | 1.169166 down | CASP3   |
| 202764_at | 1.84E-04 | 4.13E-05 | 2.208449 down | 2.532649 down | 1.1468 down   | STIM1   |
| 202765_s_ | 8.10E-07 | 2.21E-08 | 55.82132 down | 68.38763 down | 1.225117 down | FBN1    |
| 202766_s_ | 1.64E-07 | 2.41E-09 | 46.89921 down | 66.21493 down | 1.411856 down | FBN1    |
| 202768_at | 0.025727 | 0.024212 | 2.166496 up   | 1.510136 down | 3.271702 down | FOSB    |
| 202770_s_ | 0.029135 | 0.027722 | 3.667408 down | 1.853422 down | 1.978723 up   | CCNG2   |
| 202771_at | 2.96E-06 | 1.37E-07 | 3.075627 down | 7.665309 down | 2.492275 down | FAM38A  |
| 202772_at | 0.006911 | 0.005251 | 1.60774 down  | 1.870146 down | 1.163214 down | HMGCL   |
| 202776_at | 6.42E-04 | 2.22E-04 | 2.11427 up    | 1.454704 up   | 1.453402 down | DNTTIP2 |
| 202778_s_ | 5.36E-04 | 1.73E-04 | 2.76086 up    | 2.847653 up   | 1.031437 up   | ZMYM2   |
| 202781_s_ | 0.004777 | 0.003292 | 1.344246 down | 2.010663 down | 1.495755 down | INPP5K  |
| 202782_s_ | 0.009921 | 0.008143 | 1.42283 down  | 1.273237 down | 1.11749 up    | INPP5K  |
| 202783_at | 0.002275 | 0.001239 | 2.687575 down | 2.163266 down | 1.242369 up   | NNT     |
| 202785_at | 0.001239 | 5.44E-04 | 2.492878 up   | 1.399644 up   | 1.78108 down  | NDUFA7  |
| 202789_at | 5.33E-04 | 1.72E-04 | 1.585863 up   | 1.446014 up   | 1.096714 down | PLCG1   |
| 202790_at | 2.42E-09 | 6.61E-12 | 5.665244 up   | 7.816151 up   | 1.379667 up   | CLDN7   |
| 202791_s_ | 0.003753 | 0.002407 | 1.098236 up   | 1.439241 down | 1.580627 down | SAPS2   |
| 202794_at | 1.37E-04 | 2.77E-05 | 6.293019 down | 6.573237 down | 1.044528 down | INPP1   |
| 202795_x_ | 2.41E-05 | 2.59E-06 | 2.546552 down | 2.762095 down | 1.084641 down | TRIOBP  |
| 202796_at | 1.01E-04 | 1.84E-05 | 3.016011 down | 6.775807 down | 2.246613 down | SYNPO   |
| 202807_s_ | 1.36E-05 | 1.19E-06 | 1.200039 down | 2.615141 down | 2.179213 down | TOM1    |
| 202810_at | 0.006426 | 0.0048   | 1.728207 up   | 1.153636 up   | 1.498053 down | DRG1    |
| 202811_at | 0.002668 | 0.001529 | 1.474851 up   | 1.019995 down | 1.50434 down  | STAMBP  |
| 202813_at | 0.00208  | 0.001094 | 1.94441 up    | 1.232653 up   | 1.577418 down | TARBP1  |
| 202818_s_ | 0.006378 | 0.004754 | 1.48266 up    | 1.723098 up   | 1.162167 up   | TCEB3   |
| 202820_at | 2.03E-06 | 8.02E-08 | 7.003522 down | 5.681632 down | 1.23266 up    | AHR     |
| 202821_s_ | 0.016561 | 0.014804 | 1.800474 down | 2.181011 down | 1.211354 down | LPP     |
| 202825_at | 1.51E-05 | 1.37E-06 | 3.157916 up   | 1.33515 down  | 4.21629 down  | SLC25A4 |
| 202826_at | 5.55E-08 | 4.91E-10 | 20.16587 up   | 13.55789 up   | 1.48739 down  | SPINT1  |
| 202827_s_ | 0.008842 | 0.007098 | 5.217015 down | 3.59168 down  | 1.452528 up   | MMP14   |
| 202828_s_ | 0.006954 | 0.005296 | 2.324005 down | 2.930657 down | 1.261037 down | MMP14   |
| 202829_s_ | 1.01E-04 | 1.82E-05 | 2.001982 down | 2.523727 down | 1.260614 down | VAMP7   |
| 202830_s_ | 0.001655 | 8.04E-04 | 2.410063 up   | 2.435568 up   | 1.010583 up   | SLC37A4 |
| 202835_at | 0.021418 | 0.019787 | 1.323097 up   | 1.024864 up   | 1.290998 down | TXNL4A  |

|           |          |          |               |               |               |         |
|-----------|----------|----------|---------------|---------------|---------------|---------|
| 202836_s_ | 0.014845 | 0.013068 | 1.288056 up   | 1.266045 down | 1.630737 down | TXNL4A  |
| 202838_at | 0.007637 | 0.005943 | 1.252889 down | 2.478541 down | 1.97826 down  | FUCA1   |
| 202840_at | 0.003311 | 0.002046 | 3.582192 up   | 1.850186 up   | 1.936125 down | TAF15   |
| 202858_at | 4.25E-05 | 5.68E-06 | 1.850723 up   | 2.414146 up   | 1.304434 up   | U2AF1   |
| 202859_x_ | 0.009376 | 0.00761  | 19.59794 down | 3.757209 down | 5.216091 up   | IL8     |
| 202860_at | 0.006924 | 0.005265 | 1.304033 up   | 1.543776 up   | 1.183848 up   | DENND4B |
| 202861_at | 0.005428 | 0.003871 | 1.64784 up    | 1.118184 up   | 1.473676 down | PER1    |
| 202862_at | 0.001041 | 4.28E-04 | 2.430325 down | 2.11399 down  | 1.149639 up   | FAH     |
| 202863_at | 9.84E-07 | 2.87E-08 | 32.29922 down | 25.69189 down | 1.257176 up   | SP100   |
| 202864_s_ | 2.27E-08 | 1.38E-10 | 12.9378 down  | 12.27561 down | 1.053943 up   | SP100   |
| 202866_at | 9.24E-06 | 6.84E-07 | 1.982356 down | 2.431639 down | 1.226641 down | DNAJB12 |
| 202867_s_ | 2.95E-04 | 7.77E-05 | 1.968883 down | 2.024325 down | 1.02816 down  | DNAJB12 |
| 202868_s_ | 2.18E-05 | 2.27E-06 | 1.534889 down | 1.875564 down | 1.221954 down | POP4    |
| 202870_s_ | 0.004958 | 0.003455 | 6.250322 up   | 5.854886 up   | 1.067539 down | CDC20   |
| 202871_at | 0.004794 | 0.003305 | 3.225945 up   | 2.422097 up   | 1.331881 down | TRAF4   |
| 202875_s_ | 0.003108 | 0.001877 | 2.36817 up    | 2.412928 up   | 1.0189 up     | PBX2    |
| 202880_s_ | 0.002643 | 0.00151  | 1.178961 down | 2.180497 down | 1.849508 down | CYTH1   |
| 202883_s_ | 1.34E-04 | 2.68E-05 | 3.375755 up   | 4.343279 up   | 1.28661 up    | PPP2R1B |
| 202888_s_ | 1.88E-07 | 2.87E-09 | 106.2264 down | 33.22766 down | 3.196928 up   | ANPEP   |
| 202889_x_ | 9.22E-05 | 1.61E-05 | 3.354384 up   | 6.846508 up   | 2.041063 up   | MAP7    |
| 202890_at | 9.34E-06 | 6.94E-07 | 4.645324 up   | 26.82745 up   | 5.775151 up   | MAP7    |
| 202892_at | 0.001732 | 8.54E-04 | 1.648724 up   | 2.082111 up   | 1.262862 up   | CDC23   |
| 202893_at | 0.0052   | 0.003672 | 1.635521 up   | 1.573995 up   | 1.039089 down | UNC13B  |
| 202894_at | 0.002237 | 0.001209 | 1.662159 up   | 1.044124 up   | 1.591917 down | EPHB4   |
| 202896_s_ | 3.22E-04 | 8.79E-05 | 3.111368 down | 5.352032 down | 1.720154 down | SIRPA   |
| 202897_at | 1.15E-05 | 9.29E-07 | 5.94015 down  | 10.45552 down | 1.760144 down | SIRPA   |
| 202898_at | 5.13E-04 | 1.63E-04 | 3.441054 down | 3.420357 down | 1.006051 up   | SDC3    |
| 202899_s_ | 0.008934 | 0.007183 | 2.533945 up   | 2.485577 up   | 1.01946 down  | SFRS3   |
| 2028_s_at | 0.002449 | 0.001365 | 1.338957 up   | 1.829152 up   | 1.366103 up   | E2F1    |
| 202901_x_ | 1.88E-04 | 4.25E-05 | 2.032343 down | 1.117231 down | 1.81909 up    | CTSS    |
| 202902_s_ | 1.07E-05 | 8.32E-07 | 3.538556 down | 1.106004 down | 3.199407 up   | CTSS    |
| 202904_s_ | 0.003178 | 0.001936 | 1.937594 up   | 3.484476 up   | 1.798352 up   | LSM5    |
| 202908_at | 2.24E-04 | 5.39E-05 | 2.195001 down | 1.843474 down | 1.190687 up   | WFS1    |
| 202910_s_ | 2.36E-06 | 9.98E-08 | 7.754056 down | 13.2736 down  | 1.711827 down | CD97    |

|           |          |          |               |               |               |           |
|-----------|----------|----------|---------------|---------------|---------------|-----------|
| 202911_at | 2.53E-06 | 1.10E-07 | 3.709897 up   | 4.184212 up   | 1.127851 up   | MSH6      |
| 202912_at | 2.58E-04 | 6.50E-05 | 5.501323 down | 1.015814 down | 5.41568 up    | ADM       |
| 202919_at | 5.56E-04 | 1.82E-04 | 1.629068 up   | 1.430114 up   | 1.139117 down | MOBK3     |
| 202923_s_ | 3.29E-04 | 9.02E-05 | 2.203903 up   | 2.214255 up   | 1.004697 up   | GCLC      |
| 202925_s_ | 3.33E-05 | 4.06E-06 | 1.789659 up   | 2.840134 up   | 1.58697 up    | PLAGL2    |
| 202926_at | 3.83E-04 | 1.11E-04 | 1.096337 down | 1.967901 down | 1.794977 down | NBAS      |
| 202931_x_ | 0.001411 | 6.48E-04 | 2.017956 down | 1.897775 down | 1.063327 up   | BIN1      |
| 202932_at | 7.01E-04 | 2.51E-04 | 1.433687 up   | 1.696112 up   | 1.183042 up   | YES1      |
| 202934_at | 0.001323 | 5.94E-04 | 3.422453 up   | 1.250606 down | 4.280139 down | HK2       |
| 202936_s_ | 0.021982 | 0.020369 | 1.330821 up   | 2.735156 down | 3.640002 down | SOX9      |
| 202937_x_ | 0.027996 | 0.026529 | 1.844725 up   | 1.145173 up   | 1.61087 down  | RRP7A     |
| 202943_s_ | 2.76E-04 | 7.11E-05 | 2.410829 down | 1.98983 down  | 1.211575 up   | NAGA      |
| 202946_s_ | 0.002184 | 0.001167 | 1.761568 up   | 2.960311 up   | 1.680498 up   | BTBD3     |
| 202947_s_ | 0.001242 | 5.45E-04 | 3.587674 down | 2.406884 down | 1.490589 up   | GYPC      |
| 202948_at | 5.34E-07 | 1.20E-08 | 158.0028 down | 39.04116 down | 4.047083 up   | IL1R1     |
| 202949_s_ | 3.36E-06 | 1.63E-07 | 4.177719 down | 12.84893 down | 3.075584 down | FHL2      |
| 202951_at | 6.73E-05 | 1.06E-05 | 2.816731 down | 3.664563 down | 1.300999 down | STK38     |
| 202952_s_ | 3.80E-06 | 1.93E-07 | 14.45419 down | 73.12115 down | 5.058822 down | ADAM12    |
| 202954_at | 0.003902 | 0.002528 | 7.054345 up   | 6.19812 up    | 1.138143 down | UBE2C     |
| 202955_s_ | 8.79E-04 | 3.40E-04 | 1.512363 up   | 2.472335 up   | 1.63475 up    | ARFGF1    |
| 202956_at | 2.77E-04 | 7.15E-05 | 2.195779 up   | 1.966999 up   | 1.116309 down | ARFGF1    |
| 202957_at | 1.53E-04 | 3.22E-05 | 2.389886 down | 9.098005 down | 3.806878 down | HCLS1     |
| 202965_s_ | 3.78E-05 | 4.79E-06 | 3.778357 up   | 3.878069 up   | 1.02639 up    | CAPN6     |
| 202966_at | 5.36E-05 | 7.72E-06 | 2.048926 up   | 1.697359 up   | 1.207126 down | CAPN6     |
| 202969_at | 0.002873 | 0.001691 | 1.516569 up   | 1.164545 down | 1.766112 down | DYRK2     |
| 202974_at | 0.005756 | 0.004167 | 1.462078 down | 1.953822 down | 1.336333 down | MPP1      |
| 202976_s_ | 0.003032 | 0.001817 | 7.272704 down | 3.459701 down | 2.102119 up   | RHOBTB3   |
| 202978_s_ | 0.002467 | 0.00138  | 1.246764 up   | 2.423436 up   | 1.943782 up   | CREBZF    |
|           |          |          |               |               |               | ACOT1 /// |
| 202982_s_ | 1.47E-04 | 3.05E-05 | 4.773905 down | 9.085321 down | 1.903122 down | ACOT2     |
| 202986_at | 3.46E-04 | 9.66E-05 | 3.213076 down | 3.560281 down | 1.10806 down  | ARNT2     |
| 202990_at | 4.68E-04 | 1.44E-04 | 1.595227 down | 2.725941 down | 1.708811 down | PYGL      |
| 202992_at | 0.013142 | 0.011344 | 1.28696 up    | 1.271766 down | 1.636712 down | C7        |
| 202994_s_ | 7.77E-05 | 1.28E-05 | 16.01588 down | 3.738608 down | 4.283917 up   | FBLN1     |

|           |          |          |          |      |          |      |          |      |          |
|-----------|----------|----------|----------|------|----------|------|----------|------|----------|
| 202995_s_ | 1.44E-05 | 1.28E-06 | 24.94672 | down | 3.822178 | down | 6.526833 | up   | FBLN1    |
| 202996_at | 8.60E-04 | 3.30E-04 | 2.030593 | down | 3.024106 | down | 1.489273 | down | POLD4    |
| 202997_s_ | 0.003483 | 0.002188 | 3.699615 | down | 13.28538 | down | 3.591016 | down | LOXL2    |
| 202998_s_ | 6.68E-05 | 1.05E-05 | 5.115682 | down | 18.79973 | down | 3.674922 | down | LOXL2    |
| 203002_at | 0.011343 | 0.009546 | 1.213727 | down | 2.125511 | down | 1.751226 | down | AMOTL2   |
| 203005_at | 5.12E-07 | 1.14E-08 | 10.47883 | down | 9.780085 | down | 1.071446 | up   | LTBR     |
| 203006_at | 0.00645  | 0.004821 | 1.790786 | down | 1.378364 | down | 1.299211 | up   | INPP5A   |
| 203007_x_ | 9.34E-05 | 1.64E-05 | 2.863594 | up   | 2.598868 | up   | 1.101862 | down | LYPLA1   |
| 203009_at | 0.012366 | 0.010569 | 2.073668 | up   | 1.569799 | up   | 1.320977 | down | BCAM     |
| 203010_at | 0.025179 | 0.023631 | 1.666271 | down | 1.468302 | down | 1.134829 | up   | STAT5A   |
| 203013_at | 0.004908 | 0.003411 | 2.024568 | up   | 1.329675 | up   | 1.522604 | down | ECD      |
| 203017_s_ | 0.004067 | 0.002663 | 2.250306 | down | 1.368744 | up   | 3.080093 | up   | SSX2IP   |
| 203018_s_ | 0.002778 | 0.001617 | 2.539696 | down | 1.169208 | up   | 2.969433 | up   | SSX2IP   |
| 203020_at | 6.92E-06 | 4.53E-07 | 5.508911 | up   | 14.04806 | up   | 2.550062 | up   | RABGAP1L |
| 203022_at | 4.28E-04 | 1.28E-04 | 4.843226 | up   | 4.342317 | up   | 1.115355 | down | RNASEH2A |
| 203025_at | 0.004432 | 0.002988 | 1.026749 | up   | 1.955383 | down | 2.007688 | down | ARD1A    |
| 203028_s_ | 0.002235 | 0.001207 | 2.418585 | down | 2.030752 | down | 1.190981 | up   | CYBA     |
| 203029_s_ | 0.013206 | 0.011411 | 1.374182 | down | 1.835031 | up   | 2.521667 | up   | PTPRN2   |
| 203031_s_ | 3.09E-04 | 8.31E-05 | 1.78841  | down | 3.279424 | down | 1.833709 | down | UROS     |
| 203035_s_ | 2.35E-04 | 5.74E-05 | 1.41419  | down | 2.384115 | down | 1.685852 | down | PIAS3    |
| 203039_s_ | 0.003827 | 0.002465 | 1.926372 | up   | 1.136328 | up   | 1.695262 | down | NDUFS1   |
| 203041_s_ | 1.70E-05 | 1.62E-06 | 7.149028 | down | 5.028233 | down | 1.421777 | up   | LAMP2    |
| 203042_at | 1.82E-04 | 4.07E-05 | 10.39529 | down | 5.787246 | down | 1.796242 | up   | LAMP2    |
| 203044_at | 0.039651 | 0.038408 | 1.038755 | up   | 1.606327 | down | 1.66858  | down | CHSY1    |
| 203045_at | 0.016819 | 0.015063 | 1.230174 | down | 1.931042 | down | 1.569731 | down | NINJ1    |
| 203046_s_ | 2.57E-05 | 2.82E-06 | 4.392964 | up   | 5.86001  | up   | 1.333953 | up   | TIMELESS |
| 203047_at | 1.71E-04 | 3.74E-05 | 2.133238 | down | 2.686504 | down | 1.259355 | down | STK10    |
| 203049_s_ | 0.021335 | 0.019697 | 2.379365 | down | 1.16301  | down | 2.045867 | up   | TTC37    |
| 203053_at | 6.41E-04 | 2.22E-04 | 2.222022 | up   | 1.248574 | up   | 1.779649 | down | BCAS2    |
| 203054_s_ | 1.64E-05 | 1.53E-06 | 3.2538   | down | 7.188674 | down | 2.209316 | down | TCTA     |
| 203056_s_ | 0.037541 | 0.036264 | 1.585905 | down | 1.103708 | up   | 1.750376 | up   | PRDM2    |
| 203058_s_ | 8.68E-05 | 1.48E-05 | 4.713879 | down | 9.892314 | down | 2.098551 | down | PAPSS2   |
| 203059_s_ | 5.31E-04 | 1.71E-04 | 2.454909 | down | 4.910527 | down | 2.000289 | down | PAPSS2   |
| 203060_s_ | 3.06E-05 | 3.62E-06 | 6.094736 | down | 8.888681 | down | 1.458419 | down | PAPSS2   |

|           |          |          |               |               |               |           |
|-----------|----------|----------|---------------|---------------|---------------|-----------|
| 203061_s_ | 0.001366 | 6.21E-04 | 3.869045 up   | 2.074807 up   | 1.864774 down | MDC1      |
| 203062_s_ | 9.58E-05 | 1.69E-05 | 3.132789 up   | 2.16105 up    | 1.449661 down | MDC1      |
| 203063_at | 0.003036 | 0.001821 | 1.607722 down | 1.427775 down | 1.126034 up   | PPM1F     |
| 203065_s_ | 2.94E-04 | 7.73E-05 | 13.83008 down | 7.819775 down | 1.768603 up   | CAV1      |
| 203068_at | 1.70E-04 | 3.73E-05 | 1.454333 down | 2.861934 down | 1.967866 down | KLHL21    |
| 203071_at | 0.006509 | 0.004876 | 1.964391 down | 2.08877 down  | 1.063317 down | SEMA3B    |
| 203072_at | 0.018062 | 0.016331 | 1.202323 up   | 1.680327 down | 2.020296 down | MYO1E     |
|           |          |          |               |               |               | ANXA8 /// |
|           |          |          |               |               |               | ANXA8L1   |
|           |          |          |               |               |               | ///       |
| 203074_at | 0.001731 | 8.54E-04 | 1.426619 up   | 1.565784 down | 2.233778 down | ANXA8L2   |
| 203075_at | 0.048241 | 0.047063 | 2.151496 down | 1.756224 down | 1.225069 up   | SMAD2     |
| 203082_at | 6.84E-06 | 4.45E-07 | 2.756521 up   | 1.583555 up   | 1.740717 down | BMS1      |
| 203083_at | 1.45E-06 | 4.89E-08 | 40.09297 down | 56.30878 down | 1.404455 down | THBS2     |
| 203084_at | 0.006038 | 0.00443  | 1.506311 up   | 1.421746 down | 2.141592 down | TGFB1     |
| 203085_s_ | 0.030594 | 0.029208 | 3.558994 down | 5.96737 down  | 1.676702 down | TGFB1     |
| 203088_at | 1.12E-08 | 4.96E-11 | 64.58731 down | 17.34358 down | 3.72399 up    | FBLN5     |
| 203089_s_ | 2.32E-04 | 5.64E-05 | 1.677037 down | 1.956078 down | 1.16639 down  | HTRA2     |
| 203091_at | 9.96E-04 | 4.04E-04 | 2.439233 up   | 1.939166 up   | 1.257877 down | FUBP1     |
| 203092_at | 0.010991 | 0.009195 | 1.791141 up   | 1.021455 up   | 1.753519 down | TIMM44    |
| 203095_at | 0.002145 | 0.00114  | 1.881642 up   | 1.900002 up   | 1.009758 up   | MTIF2     |
| 203098_at | 0.001964 | 0.001011 | 1.805718 up   | 1.750454 up   | 1.031571 down | CDYL      |
| 203099_s_ | 2.69E-05 | 3.02E-06 | 2.28036 up    | 1.923427 up   | 1.185571 down | CDYL      |
| 203100_s_ | 0.010272 | 0.008475 | 1.759506 up   | 2.224084 up   | 1.264038 up   | CDYL      |
| 203102_s_ | 2.56E-04 | 6.42E-05 | 3.341383 down | 2.377517 down | 1.405409 up   | MGAT2     |
| 203103_s_ | 0.004819 | 0.003329 | 1.858585 up   | 1.649233 up   | 1.126939 down | PRPF19    |
| 203104_at | 0.019813 | 0.01813  | 1.01654 down  | 1.311121 down | 1.289788 down | CSF1R     |
| 203112_s_ | 1.35E-05 | 1.16E-06 | 2.014605 up   | 2.451921 up   | 1.217073 up   | WHSC2     |
| 203114_at | 0.023762 | 0.022174 | 1.623712 up   | 1.048655 down | 1.702714 down | SSSCA1    |
| 203115_at | 9.56E-04 | 3.81E-04 | 2.536387 down | 2.183321 down | 1.161711 up   | FECH      |
| 203117_s_ | 0.002589 | 0.00147  | 1.937168 up   | 2.263051 up   | 1.168227 up   | PAN2      |
| 203120_at | 7.72E-04 | 2.87E-04 | 1.723609 up   | 1.160122 up   | 1.485714 down | TP53BP2   |
| 203122_at | 0.00165  | 8.01E-04 | 1.377669 down | 2.209947 down | 1.604121 down | TTC15     |
| 203123_s_ | 8.92E-06 | 6.48E-07 | 3.170612 up   | 4.823784 up   | 1.521405 up   | SLC11A2   |

|           |          |          |               |               |               |          |
|-----------|----------|----------|---------------|---------------|---------------|----------|
| 203124_s_ | 3.01E-04 | 7.99E-05 | 3.506516 up   | 4.378169 up   | 1.248581 up   | SLC11A2  |
| 203125_x_ | 0.00558  | 0.004006 | 1.363996 down | 1.312306 up   | 1.78998 up    | SLC11A2  |
| 203126_at | 5.62E-04 | 1.85E-04 | 3.503113 up   | 6.555604 up   | 1.871365 up   | IMPA2    |
| 203127_s_ | 0.005771 | 0.004181 | 1.227808 up   | 1.667386 down | 2.04723 down  | SPTLC2   |
| 203128_at | 0.00177  | 8.79E-04 | 1.03327 up    | 1.866367 down | 1.92846 down  | SPTLC2   |
| 203129_s_ | 3.66E-07 | 7.14E-09 | 10.82115 up   | 7.457742 up   | 1.450996 down | KIF5C    |
| 203130_s_ | 2.85E-10 | 3.11E-13 | 46.09105 up   | 40.92377 up   | 1.126267 down | KIF5C    |
| 203131_at | 6.47E-06 | 4.09E-07 | 55.53804 down | 23.31131 down | 2.382451 up   | PDGFRA   |
| 203133_at | 0.002314 | 0.001266 | 1.269727 down | 1.485544 down | 1.169971 down | SEC61B   |
| 203135_at | 0.003561 | 0.002249 | 1.543562 up   | 1.313722 up   | 1.174953 down | TBP      |
| 203136_at | 5.68E-05 | 8.37E-06 | 3.113307 down | 2.689069 down | 1.157764 up   | RABAC1   |
| 203137_at | 0.014033 | 0.012245 | 1.919169 down | 1.261977 down | 1.520764 up   | WTAP     |
| 203139_at | 0.008055 | 0.006336 | 4.047162 up   | 7.05516 up    | 1.743237 up   | DAPK1    |
| 203140_at | 2.53E-04 | 6.35E-05 | 6.005481 down | 5.594029 down | 1.073552 up   | BCL6     |
| 203144_s_ | 0.013995 | 0.012207 | 1.543093 up   | 1.116345 down | 1.722624 down | KIAA0040 |
| 203145_at | 7.02E-04 | 2.51E-04 | 6.28542 up    | 6.767848 up   | 1.076754 up   | SPAG5    |
| 203147_s_ | 0.001446 | 6.69E-04 | 1.19261 down  | 2.923316 up   | 3.486375 up   | TRIM14   |
| 203148_s_ | 0.001097 | 4.60E-04 | 2.058778 down | 2.710459 up   | 5.580234 up   | TRIM14   |
| 203151_at | 6.83E-08 | 6.44E-10 | 7.431784 down | 14.5866 down  | 1.962732 down | MAP1A    |
| 203153_at | 0.003993 | 0.0026   | 7.325227 down | 1.038204 up   | 7.605084 up   | IFIT1    |
| 203155_at | 0.002703 | 0.001556 | 1.752373 up   | 1.638163 up   | 1.069719 down | SETDB1   |
| 203156_at | 4.21E-04 | 1.25E-04 | 2.142357 down | 1.88249 down  | 1.138045 up   | AKAP11   |
| 203157_s_ | 1.10E-05 | 8.58E-07 | 4.724933 down | 15.85697 down | 3.35602 down  | GLS      |
| 203158_s_ | 6.09E-06 | 3.75E-07 | 4.80205 down  | 26.03269 down | 5.421162 down | GLS      |
| 203159_at | 1.18E-05 | 9.61E-07 | 4.654657 down | 24.54326 down | 5.272841 down | GLS      |
| 203160_s_ | 0.001352 | 6.13E-04 | 1.688697 up   | 1.443842 up   | 1.169586 down | RNF8     |
| 203164_at | 3.21E-04 | 8.72E-05 | 2.076406 down | 2.824385 down | 1.360228 down | SLC33A1  |
| 203165_s_ | 6.96E-06 | 4.57E-07 | 2.986488 down | 3.351889 down | 1.122351 down | SLC33A1  |
| 203166_at | 0.001158 | 4.96E-04 | 1.605996 up   | 1.68848 up    | 1.05136 up    | CFDP1    |
| 203167_at | 5.37E-05 | 7.74E-06 | 3.990947 down | 3.54678 down  | 1.125231 up   | TIMP2    |
| 203169_at | 0.025822 | 0.024312 | 1.114304 down | 1.406108 down | 1.261871 down | RGP1     |
| 203172_at | 0.003044 | 0.001827 | 1.523941 up   | 1.177148 down | 1.793904 down | FXR2     |
| 203173_s_ | 0.002753 | 0.001597 | 1.328041 down | 1.685364 down | 1.26906 down  | C16orf62 |
| 203175_at | 2.76E-04 | 7.13E-05 | 1.994567 down | 2.699531 down | 1.353442 down | RHOG     |

|           |          |          |               |               |               |           |
|-----------|----------|----------|---------------|---------------|---------------|-----------|
| 203176_s_ | 4.78E-06 | 2.69E-07 | 2.92431 up    | 4.559568 up   | 1.559194 up   | TFAM      |
| 203177_x_ | 0.002364 | 0.001302 | 2.299949 up   | 4.197706 up   | 1.82513 up    | TFAM      |
| 203178_at | 2.04E-05 | 2.07E-06 | 10.98232 up   | 11.92399 up   | 1.085744 up   | GATM      |
| 203180_at | 0.017168 | 0.015412 | 1.325438 down | 5.470116 down | 4.127026 down | ALDH1A3   |
| 203184_at | 2.19E-04 | 5.21E-05 | 4.759404 down | 8.623088 up   | 41.04076 up   | FBN2      |
| 203185_at | 1.88E-04 | 4.23E-05 | 4.148251 down | 1.03967 down  | 3.989968 up   | RASSF2    |
| 203186_s_ | 1.51E-07 | 2.08E-09 | 70.36116 down | 1.048754 down | 67.09023 up   | S100A4    |
| 203187_at | 4.15E-04 | 1.23E-04 | 1.968408 down | 2.031276 down | 1.031939 down | DOCK1     |
| 203191_at | 0.001277 | 5.67E-04 | 1.817269 up   | 1.503506 down | 2.732274 down | ABCB6     |
| 203192_at | 0.014246 | 0.012458 | 1.031525 up   | 1.619932 down | 1.671 down    | ABCB6     |
| 203193_at | 0.020696 | 0.019036 | 1.535842 up   | 1.183067 down | 1.817003 down | ESRRA     |
| 203196_at | 0.001972 | 0.001016 | 2.697699 down | 1.947095 down | 1.3855 up     | ABCC4     |
| 203203_s_ | 0.010497 | 0.008705 | 1.465522 up   | 2.764704 up   | 1.886498 up   | KRR1      |
| 203204_s_ | 0.001014 | 4.13E-04 | 2.207841 up   | 2.210469 up   | 1.00119 up    | KDM4A     |
| 203205_at | 0.002425 | 0.001345 | 1.81549 up    | 1.54089 up    | 1.178208 down | KDM4A     |
| 203209_at | 8.09E-05 | 1.36E-05 | 3.21988 up    | 4.047644 up   | 1.257079 up   | RFC5      |
| 203210_s_ | 1.53E-04 | 3.23E-05 | 3.253353 up   | 4.491691 up   | 1.380634 up   | RFC5      |
| 203211_s_ | 0.002674 | 0.001534 | 1.699594 up   | 1.088268 down | 1.849614 down | MTMR2     |
| 203212_s_ | 0.001615 | 7.78E-04 | 1.336931 up   | 1.398803 down | 1.870103 down | MTMR2     |
| 203213_at | 0.001261 | 5.58E-04 | 5.059946 up   | 9.244312 up   | 1.826959 up   | CDC2      |
| 203214_x_ | 0.001807 | 9.03E-04 | 3.795494 up   | 9.673224 up   | 2.548607 up   | CDC2      |
| 203217_s_ | 0.002167 | 0.001154 | 1.263398 down | 2.561031 down | 2.027098 down | ST3GAL5   |
| 203219_s_ | 0.030117 | 0.028723 | 1.496023 up   | 1.106274 down | 1.655011 down | APRT      |
| 203221_at | 3.93E-05 | 5.07E-06 | 3.716889 up   | 4.42457 up    | 1.190396 up   | TLE1      |
| 203222_s_ | 3.11E-04 | 8.37E-05 | 3.464598 up   | 4.407094 up   | 1.272036 up   | TLE1      |
| 203225_s_ | 6.75E-04 | 2.38E-04 | 1.226015 down | 1.749913 down | 1.427318 down | RFK       |
| 203228_at | 0.006012 | 0.004405 | 2.714142 up   | 2.529479 up   | 1.073004 down | PAFAH1B3  |
| 203229_s_ | 9.48E-04 | 3.77E-04 | 1.373666 up   | 1.70712 up    | 1.242747 up   | CLK2      |
|           |          |          |               |               |               | DVL1 ///  |
| 203230_at | 0.013903 | 0.012112 | 1.180187 up   | 1.367981 down | 1.614474 down | LOC642469 |
| 203231_s_ | 0.006814 | 0.005157 | 7.178485 down | 5.347773 down | 1.342332 up   | ATXN1     |
| 203232_s_ | 0.001335 | 6.02E-04 | 7.888091 down | 6.293737 down | 1.253324 up   | ATXN1     |
| 203233_at | 8.09E-04 | 3.05E-04 | 1.089359 up   | 1.84534 down  | 2.010238 down | IL4R      |
| 203234_at | 0.002406 | 0.001332 | 2.895249 up   | 1.808057 up   | 1.601304 down | UPP1      |

|           |          |          |               |               |               |                                  |
|-----------|----------|----------|---------------|---------------|---------------|----------------------------------|
| 203238_s_ | 0.001574 | 7.52E-04 | 3.718538 up   | 1.150735 down | 4.279052 down | NOTCH3<br>FCGBP ///<br>LOC100133 |
| 203240_at | 0.003727 | 0.002383 | 1.433074 up   | 1.190592 up   | 1.203666 down | 944                              |
| 203242_s_ | 3.41E-04 | 9.43E-05 | 1.078604 up   | 9.814255 down | 10.58569 down | PDLIM5                           |
| 203243_s_ | 3.80E-05 | 4.84E-06 | 1.066785 up   | 7.222444 down | 7.704793 down | PDLIM5<br>NCRNA0009              |
| 203245_s_ | 1.83E-04 | 4.09E-05 | 2.052838 down | 1.854725 down | 1.106816 up   | 4                                |
| 203247_s_ | 0.001702 | 8.35E-04 | 2.119379 up   | 2.023166 up   | 1.047556 down | ZNF24                            |
| 203250_at | 5.43E-04 | 1.76E-04 | 1.588027 up   | 1.684463 up   | 1.060727 up   | RBM16                            |
| 203256_at | 4.23E-07 | 8.72E-09 | 14.9495 up    | 13.67604 up   | 1.093116 down | CDH3                             |
| 203269_at | 0.006772 | 0.005121 | 2.474793 down | 1.696188 down | 1.459032 up   | NSMAF                            |
| 203275_at | 9.08E-05 | 1.57E-05 | 4.163815 down | 1.711991 down | 2.432148 up   | IRF2                             |
| 203276_at | 5.17E-05 | 7.39E-06 | 13.96745 up   | 26.19144 up   | 1.875176 up   | LMNB1                            |
| 203277_at | 0.001664 | 8.10E-04 | 2.160802 up   | 1.767905 up   | 1.222239 down | DFFA                             |
| 203279_at | 2.50E-04 | 6.25E-05 | 3.122258 down | 3.560631 down | 1.140402 down | EDEM1                            |
| 203280_at | 0.004529 | 0.003078 | 1.55639 up    | 1.053621 down | 1.639845 down | SAFB2                            |
| 203281_s_ | 2.27E-04 | 5.46E-05 | 3.699909 down | 3.183493 down | 1.162217 up   | UBA7                             |
| 203282_at | 3.27E-06 | 1.58E-07 | 6.107938 down | 8.282908 down | 1.356089 down | GBE1                             |
| 203283_s_ | 6.34E-04 | 2.19E-04 | 2.870219 down | 1.649205 down | 1.740365 up   | HS2ST1                           |
| 203286_at | 6.62E-06 | 4.23E-07 | 5.719156 up   | 7.027023 up   | 1.228682 up   | RNF44                            |
| 203287_at | 5.08E-04 | 1.61E-04 | 1.716546 up   | 1.778264 up   | 1.035955 up   | LAD1                             |
| 203292_s_ | 8.83E-04 | 3.42E-04 | 1.474063 down | 1.610863 down | 1.092805 down | VPS11                            |
| 203293_s_ | 0.015763 | 0.013986 | 4.358075 down | 2.204469 down | 1.976927 up   | LMAN1                            |
| 203294_s_ | 0.013342 | 0.011544 | 4.762764 down | 2.318614 down | 2.054143 up   | LMAN1                            |
| 203296_s_ | 8.95E-04 | 3.49E-04 | 6.896925 up   | 7.656199 up   | 1.110089 up   | ATP1A2                           |
| 203297_s_ | 1.89E-06 | 7.19E-08 | 9.382292 up   | 6.427488 up   | 1.459714 down | JARID2                           |
| 203298_s_ | 6.75E-06 | 4.37E-07 | 10.71405 up   | 11.65494 up   | 1.087818 up   | JARID2                           |
| 203301_s_ | 5.40E-04 | 1.75E-04 | 2.041758 up   | 2.553682 up   | 1.250727 up   | DMTF1                            |
| 203303_at | 6.49E-05 | 1.01E-05 | 4.754293 down | 5.928688 down | 1.247018 down | DYNLT3                           |
| 203304_at | 1.23E-05 | 1.02E-06 | 12.86019 up   | 1.620633 up   | 7.935288 down | BAMBI                            |
| 203308_x_ | 5.42E-05 | 7.84E-06 | 2.373024 down | 2.356781 down | 1.006892 up   | HPS1                             |
| 203309_s_ | 1.61E-04 | 3.47E-05 | 2.452428 down | 1.722226 down | 1.423987 up   | HPS1                             |
| 203313_s_ | 3.80E-05 | 4.82E-06 | 2.81522 up    | 2.657921 up   | 1.059181 down | TGIF1                            |



|           |          |          |               |               |               |          |
|-----------|----------|----------|---------------|---------------|---------------|----------|
| 203316_s_ | 5.27E-05 | 7.55E-06 | 2.564415 up   | 2.043342 up   | 1.25501 down  | SNRPE    |
| 203317_at | 0.006363 | 0.004737 | 1.196552 down | 1.417524 down | 1.184674 down | PSD4     |
| 203321_s_ | 2.37E-04 | 5.79E-05 | 3.541761 up   | 2.434927 up   | 1.454565 down | ADNP2    |
| 203322_at | 4.46E-06 | 2.43E-07 | 3.904807 up   | 2.959818 up   | 1.319273 down | ADNP2    |
| 203323_at | 1.10E-05 | 8.60E-07 | 16.16427 down | 24.5789 down  | 1.52057 down  | CAV2     |
| 203324_s_ | 6.07E-06 | 3.72E-07 | 23.97214 down | 29.93216 down | 1.248623 down | CAV2     |
| 203325_s_ | 3.84E-06 | 1.97E-07 | 15.9526 down  | 25.47273 down | 1.596776 down | COL5A1   |
| 203326_x_ | 0.012545 | 0.010749 | 1.479492 up   | 1.050587 up   | 1.408252 down |          |
| 203329_at | 2.97E-04 | 7.85E-05 | 4.252001 down | 4.526039 down | 1.064449 down | PTPRM    |
| 203330_s_ | 0.007921 | 0.006211 | 1.799313 down | 1.788926 down | 1.005806 up   | STX5     |
| 203331_s_ | 0.006402 | 0.004779 | 1.777572 up   | 1.009608 down | 1.794652 down | INPP5D   |
| 203332_s_ | 1.37E-04 | 2.77E-05 | 1.777942 up   | 2.216777 up   | 1.246822 up   | INPP5D   |
| 203333_at | 0.002112 | 0.001115 | 3.126107 down | 3.325639 down | 1.063828 down | KIFAP3   |
| 203334_at | 3.84E-05 | 4.90E-06 | 1.688738 up   | 1.547048 up   | 1.091588 down | DHX8     |
| 203335_at | 0.008455 | 0.006719 | 2.938934 down | 2.262469 down | 1.298995 up   | PHYH     |
| 203336_s_ | 7.05E-05 | 1.13E-05 | 3.612839 down | 4.525252 down | 1.252547 down | ITGB1BP1 |
| 203338_at | 0.004354 | 0.002922 | 1.467047 up   | 1.292662 up   | 1.134904 down | PPP2R5E  |
| 203340_s_ | 6.89E-04 | 2.45E-04 | 2.121122 down | 1.402482 down | 1.512406 up   | SLC25A12 |
| 203341_at | 2.59E-06 | 1.13E-07 | 4.240396 up   | 4.185863 up   | 1.013028 down | CEBPZ    |
| 203342_at | 6.13E-04 | 2.09E-04 | 2.296939 up   | 1.557593 up   | 1.474672 down | TIMM17B  |
| 203344_s_ | 0.003064 | 0.001841 | 2.415757 up   | 1.606185 up   | 1.504035 down | RBBP8    |
| 203345_s_ | 8.24E-08 | 8.58E-10 | 10.2256 up    | 7.462363 up   | 1.37029 down  | MTF2     |
| 203346_s_ | 9.15E-07 | 2.57E-08 | 11.17842 up   | 9.348345 up   | 1.195765 down | MTF2     |
| 203347_s_ | 4.24E-05 | 5.66E-06 | 6.826244 up   | 7.919547 up   | 1.160162 up   | MTF2     |
| 203349_s_ | 0.003061 | 0.001839 | 1.932279 down | 4.022815 down | 2.081902 down | ETV5     |
| 203351_s_ | 6.70E-05 | 1.05E-05 | 2.026532 up   | 2.348795 up   | 1.159022 up   | ORC4L    |
| 203352_at | 2.63E-04 | 6.67E-05 | 1.977383 up   | 2.682215 up   | 1.356447 up   | ORC4L    |
| 203353_s_ | 3.75E-04 | 1.08E-04 | 1.553445 down | 1.980745 down | 1.275066 down | MBD1     |
| 203358_s_ | 1.45E-04 | 2.98E-05 | 4.537989 up   | 8.870224 up   | 1.95466 up    | EZH2     |
| 203359_s_ | 0.007617 | 0.005926 | 2.678906 up   | 2.393353 up   | 1.119311 down | MYCBP    |
| 203362_s_ | 0.001864 | 9.41E-04 | 4.631739 up   | 9.110413 up   | 1.966953 up   | MAD2L1   |
| 203365_s_ | 1.76E-04 | 3.91E-05 | 2.892237 up   | 2.034141 up   | 1.421847 down | MMP15    |
| 203366_at | 0.002987 | 0.001781 | 1.29081 up    | 1.238433 down | 1.598582 down | POLG     |
| 203367_at | 2.57E-05 | 2.81E-06 | 2.759265 down | 2.74528 down  | 1.005094 up   | DUSP14   |

|           |          |          |          |      |          |      |          |      |         |
|-----------|----------|----------|----------|------|----------|------|----------|------|---------|
| 203370_s_ | 0.003311 | 0.002046 | 3.432818 | down | 7.14317  | down | 2.080847 | down | PDLIM7  |
| 203372_s_ | 0.005001 | 0.003493 | 1.148884 | up   | 5.89072  | up   | 5.12734  | up   | SOCS2   |
| 203374_s_ | 0.005742 | 0.004153 | 1.287002 | up   | 1.679778 | up   | 1.305188 | up   | TPP2    |
| 203377_s_ | 0.010439 | 0.008645 | 1.449634 | down | 1.14815  | up   | 1.664397 | up   | CDC40   |
| 203378_at | 0.005868 | 0.00427  | 1.71702  | up   | 1.891485 | up   | 1.101609 | up   | PCF11   |
| 203379_at | 2.18E-05 | 2.25E-06 | 7.562779 | up   | 3.374581 | up   | 2.241102 | down | RPS6KA1 |
| 203381_s_ | 1.22E-05 | 1.00E-06 | 7.975882 | up   | 17.48577 | up   | 2.192331 | up   | APOE    |
| 203382_s_ | 4.55E-06 | 2.52E-07 | 9.48743  | up   | 23.13579 | up   | 2.438573 | up   | APOE    |
| 203383_s_ | 7.88E-05 | 1.31E-05 | 2.021714 | down | 1.909136 | down | 1.058968 | up   | GOLGA1  |
| 203384_s_ | 2.59E-04 | 6.55E-05 | 3.412565 | down | 2.91665  | down | 1.170029 | up   | GOLGA1  |
| 203385_at | 3.86E-04 | 1.12E-04 | 1.650607 | down | 2.799376 | down | 1.695968 | down | DGKA    |
| 203388_at | 0.001395 | 6.38E-04 | 2.54872  | up   | 3.093743 | up   | 1.213842 | up   | ARRB2   |
| 203389_at | 1.90E-05 | 1.87E-06 | 2.190142 | up   | 1.682542 | up   | 1.301686 | down | KIF3C   |
| 203394_s_ | 3.16E-04 | 8.54E-05 | 8.556108 | up   | 1.473746 | up   | 5.805685 | down | HES1    |
| 203395_s_ | 1.69E-04 | 3.69E-05 | 4.756833 | up   | 1.221365 | down | 5.809829 | down | HES1    |
| 203396_at | 0.002967 | 0.001766 | 1.606014 | up   | 1.569332 | up   | 1.023374 | down | PSMA4   |
| 203397_s_ | 4.05E-04 | 1.19E-04 | 12.79112 | up   | 4.310459 | up   | 2.967462 | down | GALNT3  |
| 203398_s_ | 0.006109 | 0.004496 | 1.264727 | up   | 1.357542 | up   | 1.073387 | up   | GALNT3  |
| 203399_x_ | 0.001406 | 6.45E-04 | 9.451453 | down | 1.87604  | down | 5.03798  | up   | PSG3    |
| 203407_at | 6.10E-05 | 9.24E-06 | 1.032758 | down | 8.386544 | up   | 8.661268 | up   | PPL     |
| 203408_s_ | 0.00482  | 0.00333  | 2.130924 | up   | 2.365322 | up   | 1.109998 | up   | SATB1   |
| 203411_s_ | 1.30E-06 | 4.22E-08 | 7.197251 | down | 9.282022 | down | 1.289662 | down | LMNA    |
| 203412_at | 5.87E-05 | 8.80E-06 | 1.768841 | down | 2.641691 | down | 1.493459 | down | LZTR1   |
| 203413_at | 9.91E-10 | 1.95E-12 | 27.65652 | up   | 29.83734 | up   | 1.078854 | up   | NELL2   |
| 203414_at | 0.001726 | 8.50E-04 | 2.33651  | up   | 3.509843 | up   | 1.502173 | up   | MMD     |
| 203415_at | 0.021292 | 0.019647 | 1.445059 | down | 1.200677 | down | 1.203537 | up   | PDCD6   |
| 203416_at | 0.002883 | 0.001698 | 1.172903 | up   | 1.45858  | up   | 1.243564 | up   | CD53    |
| 203418_at | 0.003789 | 0.002435 | 6.210414 | up   | 8.014867 | up   | 1.290553 | up   | CCNA2   |
| 203419_at | 0.014434 | 0.012653 | 1.461928 | up   | 1.547378 | up   | 1.05845  | up   | MLL4    |
| 203420_at | 0.005237 | 0.003704 | 2.68635  | down | 2.030559 | down | 1.322961 | up   | FAM8A1  |
| 203422_at | 2.58E-04 | 6.48E-05 | 3.807442 | up   | 4.345644 | up   | 1.141355 | up   | POLD1   |
| 203423_at | 6.89E-04 | 2.45E-04 | 12.96351 | up   | 6.448123 | up   | 2.010431 | down | RBP1    |
| 203432_at | 2.42E-04 | 5.96E-05 | 4.318246 | up   | 2.990264 | up   | 1.444102 | down | TMPO    |
| 203433_at | 0.003466 | 0.002173 | 1.771062 | up   | 1.109024 | up   | 1.596955 | down | MTHFS   |

|           |          |          |          |      |          |      |          |      |                                 |
|-----------|----------|----------|----------|------|----------|------|----------|------|---------------------------------|
| 203434_s_ | 6.41E-04 | 2.22E-04 | 37.37902 | down | 1.00605  | down | 37.15424 | up   | MME                             |
| 203435_s_ | 1.72E-05 | 1.65E-06 | 25.12633 | down | 1.241408 | down | 20.24018 | up   | MME                             |
| 203436_at | 4.19E-04 | 1.25E-04 | 2.251677 | up   | 1.961245 | up   | 1.148085 | down | RPP30                           |
| 203438_at | 1.50E-06 | 5.21E-08 | 8.898738 | down | 14.86756 | down | 1.67075  | down | STC2                            |
| 203439_s_ | 1.46E-04 | 3.00E-05 | 4.316047 | down | 8.579056 | down | 1.987712 | down | STC2                            |
| 203441_s_ | 0.004627 | 0.003168 | 3.320518 | up   | 1.936961 | down | 6.431713 | down | CDH2                            |
| 203442_x_ | 0.001865 | 9.42E-04 | 2.022496 | down | 2.245413 | down | 1.110219 | down | EML3                            |
| 203445_s_ | 0.003588 | 0.002269 | 2.331256 | down | 1.591858 | down | 1.464488 | up   | CTDSP2                          |
| 203446_s_ | 0.011303 | 0.009508 | 1.175698 | down | 1.807406 | down | 1.537305 | down | OCRL                            |
| 203447_at | 0.031027 | 0.029669 | 1.367845 | down | 1.790434 | down | 1.308945 | down | PSMD5                           |
| 203448_s_ | 1.51E-04 | 3.16E-05 | 10.87211 | up   | 10.56677 | up   | 1.028896 | down | TERF1                           |
| 203449_s_ | 2.00E-04 | 4.59E-05 | 8.923608 | up   | 9.731451 | up   | 1.090529 | up   | TERF1                           |
| 203450_at | 5.18E-04 | 1.66E-04 | 1.092855 | down | 1.487967 | down | 1.361542 | down | CBY1                            |
| 203453_at | 3.17E-08 | 2.40E-10 | 23.51642 | up   | 29.06484 | up   | 1.235939 | up   | SCNN1A                          |
| 203454_s_ | 0.003168 | 0.001929 | 1.367753 | down | 1.713146 | down | 1.252526 | down | ATOX1                           |
| 203456_at | 1.48E-05 | 1.34E-06 | 4.633921 | down | 6.165926 | down | 1.330606 | down | PRAF2                           |
| 203457_at | 0.00138  | 6.29E-04 | 1.548    | down | 1.73995  | down | 1.123999 | down | STX7                            |
| 203458_at | 5.36E-05 | 7.72E-06 | 2.095887 | down | 1.948674 | down | 1.075545 | up   | SPR                             |
| 203459_s_ | 2.20E-04 | 5.24E-05 | 1.63666  | down | 1.723763 | down | 1.05322  | down | VPS16A                          |
| 203462_x_ | 0.001853 | 9.34E-04 | 1.983112 | up   | 1.346531 | up   | 1.472756 | down | EIF3B                           |
| 203466_at | 1.68E-05 | 1.60E-06 | 2.651806 | down | 2.867488 | down | 1.081334 | down | MPV17                           |
| 203467_at | 6.19E-05 | 9.45E-06 | 2.425673 | down | 3.731289 | down | 1.538249 | down | PMM1                            |
| 203474_at | 1.03E-06 | 3.03E-08 | 24.13254 | up   | 24.45619 | up   | 1.013411 | up   | IQGAP2                          |
| 203476_at | 0.002013 | 0.001045 | 2.709341 | down | 1.639271 | down | 1.652772 | up   | TPBG                            |
| 203477_at | 9.49E-05 | 1.67E-05 | 128.1032 | down | 2.040636 | down | 62.77613 | up   | COL15A1<br>LOC100133<br>896 /// |
| 203483_at | 0.019031 | 0.017322 | 1.481952 | up   | 1.117367 | up   | 1.326289 | down | SEMA4G                          |
| 203488_at | 4.99E-04 | 1.57E-04 | 2.776995 | up   | 2.093522 | up   | 1.326471 | down | LPHN1                           |
| 203490_at | 2.95E-05 | 3.43E-06 | 2.539211 | down | 2.999401 | down | 1.181234 | down | ELF4                            |
| 203491_s_ | 3.69E-04 | 1.06E-04 | 1.31986  | up   | 3.956358 | up   | 2.997559 | up   | CEP57                           |
| 203492_x_ | 5.09E-04 | 1.61E-04 | 1.540816 | up   | 2.712712 | up   | 1.760569 | up   | CEP57                           |
| 203493_s_ | 0.002543 | 0.001436 | 1.325273 | up   | 3.25631  | up   | 2.457086 | up   | CEP57                           |
| 203496_s_ | 0.006622 | 0.004978 | 2.272595 | up   | 2.074181 | up   | 1.095659 | down | MED1                            |

|           |          |          |          |      |          |      |          |      |           |
|-----------|----------|----------|----------|------|----------|------|----------|------|-----------|
| 203498_at | 1.23E-04 | 2.38E-05 | 20.62799 | down | 1.292128 | down | 15.96436 | up   | RCAN2     |
| 203499_at | 3.23E-04 | 8.80E-05 | 3.007369 | up   | 1.79303  | down | 5.392303 | down | EPHA2     |
| 203500_at | 0.005571 | 0.003998 | 2.282638 | up   | 1.570202 | up   | 1.453722 | down | GCDH      |
| 203501_at | 7.13E-06 | 4.77E-07 | 31.23499 | down | 13.25364 | down | 2.35671  | up   | PGCP      |
| 203502_at | 4.96E-04 | 1.56E-04 | 2.543249 | down | 3.369314 | down | 1.324807 | down | BPGM      |
|           |          |          |          |      |          |      |          |      | CD68 ///  |
| 203507_at | 2.22E-04 | 5.29E-05 | 2.228997 | down | 1.919511 | down | 1.161232 | up   | EIF4A1    |
| 203509_at | 7.54E-07 | 1.98E-08 | 9.603737 | up   | 13.48678 | up   | 1.404327 | up   | SORL1     |
| 203510_at | 2.14E-04 | 5.05E-05 | 1.271786 | down | 11.46983 | down | 9.018681 | down | MET       |
| 203511_s_ | 0.00237  | 0.001307 | 1.666923 | down | 1.811414 | down | 1.086681 | down | TRAPPC3   |
| 203512_at | 0.004466 | 0.003021 | 1.228323 | down | 1.693146 | down | 1.37842  | down | TRAPPC3   |
| 203516_at | 0.002934 | 0.001738 | 1.760263 | down | 1.972325 | down | 1.120472 | down | SNTA1     |
| 203518_at | 2.96E-05 | 3.46E-06 | 14.34689 | down | 5.880892 | down | 2.439577 | up   | LYST      |
| 203519_s_ | 0.001765 | 8.75E-04 | 1.802301 | up   | 1.579503 | up   | 1.141056 | down | UPF2      |
| 203528_at | 1.35E-07 | 1.77E-09 | 4.721909 | up   | 7.918727 | up   | 1.677018 | up   | SEMA4D    |
| 203529_at | 0.00321  | 0.001961 | 1.231074 | up   | 1.444048 | down | 1.777731 | down | PPP6C     |
| 203530_s_ | 3.08E-06 | 1.45E-07 | 3.098805 | down | 3.559881 | down | 1.148792 | down | STX4      |
| 203537_at | 0.002742 | 0.001587 | 3.428184 | up   | 3.97969  | up   | 1.160874 | up   | PRPSAP2   |
| 203541_s_ | 0.015497 | 0.013722 | 1.573906 | up   | 1.072858 | down | 1.688577 | down | KLF9      |
| 203542_s_ | 2.26E-05 | 2.38E-06 | 9.00876  | down | 11.0816  | down | 1.230091 | down | KLF9      |
| 203543_s_ | 4.76E-07 | 1.03E-08 | 25.84644 | down | 19.08645 | down | 1.354178 | up   | KLF9      |
| 203548_s_ | 0.001262 | 5.59E-04 | 1.948805 | up   | 1.785266 | up   | 1.091605 | down | LPL       |
| 203552_at | 0.00279  | 0.001625 | 2.707562 | down | 2.367492 | down | 1.143642 | up   | MAP4K5    |
| 203553_s_ | 0.002361 | 0.001298 | 2.654135 | down | 2.364052 | down | 1.122706 | up   | MAP4K5    |
| 203554_x_ | 0.001756 | 8.69E-04 | 3.960459 | up   | 4.920645 | up   | 1.242443 | up   | PTTG1     |
| 203555_at | 2.78E-04 | 7.19E-05 | 1.858274 | down | 1.850362 | down | 1.004276 | up   | PTPN18    |
| 203558_at | 0.008814 | 0.007068 | 1.013218 | down | 1.730425 | down | 1.707851 | down | CUL7      |
| 203563_at | 0.001821 | 9.13E-04 | 2.299813 | down | 3.07071  | down | 1.3352   | down | AFAP1     |
| 203564_at | 0.001387 | 6.33E-04 | 2.339678 | up   | 3.740042 | up   | 1.598529 | up   | FANCG     |
| 203565_s_ | 0.025487 | 0.023957 | 1.375724 | up   | 1.151204 | up   | 1.195031 | down | MNAT1     |
| 203567_s_ | 9.25E-05 | 1.62E-05 | 5.065955 | down | 4.450702 | down | 1.138237 | up   | TRIM38    |
| 203568_s_ | 0.003328 | 0.002059 | 3.229472 | down | 2.178584 | down | 1.482372 | up   | TRIM38    |
| 203570_at | 7.33E-08 | 7.27E-10 | 14.75208 | down | 22.70735 | down | 1.539264 | down | LOXL1     |
| 203571_s_ | 3.51E-05 | 4.35E-06 | 12.09877 | down | 12.006   | down | 1.007727 | up   | C10orf116 |

|           |          |          |          |      |          |      |          |      |         |
|-----------|----------|----------|----------|------|----------|------|----------|------|---------|
| 203573_s_ | 3.61E-04 | 1.02E-04 | 1.104108 | down | 2.102314 | down | 1.904083 | down | RABGGTA |
| 203574_at | 0.004346 | 0.002913 | 4.116582 | down | 2.656803 | down | 1.54945  | up   | NFIL3   |
| 203583_at | 0.006766 | 0.005115 | 1.566316 | down | 1.522765 | down | 1.0286   | up   | UNC50   |
| 203586_s_ | 0.003289 | 0.002027 | 1.631364 | down | 1.975687 | down | 1.211065 | down | ARL4D   |
| 203588_s_ | 3.08E-06 | 1.45E-07 | 6.789136 | up   | 4.71311  | up   | 1.440479 | down | TFDP2   |
| 203589_s_ | 0.005045 | 0.003533 | 2.384103 | up   | 2.552389 | up   | 1.070586 | up   | TFDP2   |
| 203592_s_ | 9.57E-06 | 7.13E-07 | 1.761282 | down | 4.836398 | down | 2.745954 | down | FSTL3   |
| 203593_at | 1.20E-04 | 2.31E-05 | 3.335984 | up   | 2.279257 | up   | 1.463628 | down | CD2AP   |
| 203595_s_ | 1.01E-04 | 1.84E-05 | 11.10545 | down | 5.82482  | down | 1.906573 | up   | IFIT5   |
| 203596_s_ | 6.82E-04 | 2.41E-04 | 6.188755 | down | 3.368685 | down | 1.837143 | up   | IFIT5   |
| 203603_s_ | 0.001233 | 5.40E-04 | 15.40983 | down | 3.015722 | down | 5.109833 | up   | ZEB2    |
| 203604_at | 0.020039 | 0.018368 | 1.848556 | down | 1.204679 | up   | 2.226917 | up   | ZNF516  |
| 203606_at | 0.008476 | 0.006744 | 1.686673 | up   | 1.145641 | up   | 1.472252 | down | NDUFS6  |
| 203607_at | 8.01E-05 | 1.34E-05 | 4.950124 | up   | 7.227798 | up   | 1.460125 | up   | INPP5F  |
| 203608_at | 0.005577 | 0.004004 | 2.202259 | up   | 1.717912 | down | 3.783287 | down | ALDH5A1 |
| 203609_s_ | 0.007672 | 0.005977 | 1.240004 | up   | 1.068445 | down | 1.324876 | down | ALDH5A1 |
| 203610_s_ | 4.71E-06 | 2.64E-07 | 5.013633 | down | 4.173879 | down | 1.201193 | up   | TRIM38  |
| 203611_at | 0.002133 | 0.00113  | 1.843859 | down | 1.935975 | down | 1.049958 | down | TERF2   |
| 203612_at | 0.009098 | 0.007344 | 2.300511 | up   | 1.188737 | up   | 1.935256 | down | BYSL    |
| 203616_at | 3.25E-06 | 1.57E-07 | 2.396491 | up   | 1.96261  | up   | 1.221073 | down | POLB    |
| 203617_x_ | 0.002657 | 0.00152  | 1.128212 | up   | 1.355737 | down | 1.529559 | down | ELK1    |
| 203620_s_ | 5.93E-05 | 8.92E-06 | 4.065061 | down | 5.129033 | down | 1.261736 | down | FCHSD2  |
| 203621_at | 0.015066 | 0.013295 | 1.039717 | up   | 1.287193 | up   | 1.238022 | up   | NDUFB5  |
| 203623_at | 3.61E-05 | 4.51E-06 | 2.69389  | down | 4.113479 | down | 1.526966 | down | PLXNA3  |
| 203624_at | 0.00225  | 0.001219 | 1.632596 | up   | 1.505716 | up   | 1.084266 | down | SFRS17A |
| 203625_x_ | 3.03E-04 | 8.07E-05 | 2.349927 | up   | 3.139876 | up   | 1.336159 | up   | SKP2    |
| 203628_at | 0.001414 | 6.50E-04 | 2.084231 | up   | 3.957662 | up   | 1.89886  | up   | IGF1R   |
| 203629_s_ | 9.31E-04 | 3.68E-04 | 2.533513 | down | 1.656439 | down | 1.529494 | up   | COG5    |
| 203631_s_ | 9.17E-04 | 3.60E-04 | 3.026094 | up   | 3.183654 | up   | 1.052067 | up   | GPRC5B  |
| 203632_s_ | 1.77E-06 | 6.58E-08 | 9.503547 | up   | 42.36577 | up   | 4.45789  | up   | GPRC5B  |
| 203633_at | 0.011029 | 0.009231 | 1.855322 | down | 2.124815 | down | 1.145255 | down | CPT1A   |
| 203635_at | 1.77E-04 | 3.93E-05 | 1.672906 | down | 1.643452 | down | 1.017922 | up   | DSCR3   |
| 203638_s_ | 1.45E-06 | 4.87E-08 | 48.62492 | up   | 2.528211 | up   | 19.23294 | down | FGFR2   |
| 203639_s_ | 2.50E-06 | 1.08E-07 | 21.81008 | up   | 2.333304 | up   | 9.347299 | down | FGFR2   |

|           |          |          |               |               |               |         |
|-----------|----------|----------|---------------|---------------|---------------|---------|
| 203653_s_ | 0.004593 | 0.003137 | 2.111725 up   | 3.127451 up   | 1.480994 up   | COIL    |
| 203654_s_ | 0.001258 | 5.56E-04 | 2.305325 up   | 2.022432 up   | 1.139878 down | COIL    |
| 203655_at | 0.004247 | 0.002818 | 1.806927 up   | 1.131198 up   | 1.597358 down | XRCC1   |
| 203657_s_ | 0.001279 | 5.68E-04 | 4.999251 down | 3.384664 down | 1.477031 up   | CTSF    |
| 203659_s_ | 2.51E-05 | 2.73E-06 | 2.657545 up   | 2.5559 up     | 1.039769 down | TRIM13  |
| 203663_s_ | 4.79E-04 | 1.49E-04 | 2.064848 up   | 1.592247 up   | 1.296814 down | COX5A   |
| 203664_s_ | 2.57E-04 | 6.46E-05 | 2.928775 up   | 2.744083 up   | 1.067306 down | POLR2D  |
| 203665_at | 0.005747 | 0.004159 | 3.162137 down | 3.564461 down | 1.127232 down | HMOX1   |
| 203666_at | 8.56E-05 | 1.46E-05 | 7.586835 down | 6.020595 down | 1.260147 up   | CXCL12  |
| 203667_at | 1.68E-04 | 3.67E-05 | 1.504924 up   | 1.500459 up   | 1.002976 down | TBCA    |
| 203669_s_ | 0.002135 | 0.001131 | 1.328885 down | 1.930232 down | 1.45252 down  | DGAT1   |
| 203673_at | 0.001778 | 8.84E-04 | 1.344913 up   | 1.17296 down  | 1.577529 down | TG      |
| 203675_at | 2.07E-04 | 4.81E-05 | 5.634226 down | 7.044888 down | 1.250374 down | NUCB2   |
| 203676_at | 0.001196 | 5.19E-04 | 7.224455 down | 3.563271 down | 2.027479 up   | GNS     |
| 203677_s_ | 0.00119  | 5.15E-04 | 2.007303 up   | 1.887493 up   | 1.063476 down | TARBP2  |
| 203678_at | 8.15E-04 | 3.08E-04 | 1.9021 up     | 1.752202 up   | 1.085549 down | MTMR15  |
| 203679_at | 0.002731 | 0.001577 | 1.346973 down | 1.569762 down | 1.1654 down   | TMED1   |
| 203680_at | 8.53E-05 | 1.45E-05 | 2.248195 up   | 19.78638 up   | 8.801005 up   | PRKAR2B |
| 203683_s_ | 0.005977 | 0.004372 | 2.073522 down | 2.612502 down | 1.259935 down | VEGFB   |
| 203686_at | 0.006033 | 0.004424 | 1.850636 down | 2.214648 down | 1.196696 down | MPG     |
| 203688_at | 0.004013 | 0.002619 | 1.88249 down  | 2.337046 down | 1.241465 down | PKD2    |
| 203690_at | 0.001642 | 7.96E-04 | 1.034738 down | 2.441898 up   | 2.526724 up   | TUBGCP3 |
| 203692_s_ | 1.75E-04 | 3.88E-05 | 2.518034 up   | 1.713643 up   | 1.469404 down | E2F3    |
| 203693_s_ | 0.011257 | 0.009463 | 1.915615 up   | 1.493816 up   | 1.282364 down | E2F3    |
| 203694_s_ | 0.020642 | 0.018981 | 1.364997 up   | 1.065524 down | 1.454437 down | DHX16   |
| 203695_s_ | 1.88E-06 | 7.15E-08 | 5.955463 down | 8.834694 down | 1.483461 down | DFNA5   |
| 203696_s_ | 0.004104 | 0.002695 | 2.585547 up   | 3.344299 up   | 1.293459 up   | RFC2    |
| 203697_at | 0.003125 | 0.001893 | 5.260314 up   | 7.490143 up   | 1.423897 up   | FRZB    |
| 203698_s_ | 0.002707 | 0.001558 | 4.111786 up   | 5.665281 up   | 1.377815 up   | FRZB    |
| 203700_s_ | 0.047869 | 0.046689 | 5.034497 down | 1.218894 down | 4.13038 up    | DIO2    |
| 203702_s_ | 9.19E-06 | 6.77E-07 | 3.918873 up   | 3.820155 up   | 1.025841 down | TTLL4   |
| 203704_s_ | 0.001902 | 9.67E-04 | 1.927303 up   | 1.710872 up   | 1.126504 down | RREB1   |
| 203705_s_ | 0.013026 | 0.01122  | 2.478175 up   | 1.330586 up   | 1.862469 down | FZD7    |
| 203706_s_ | 0.018529 | 0.016806 | 2.422986 up   | 1.12021 up    | 2.162974 down | FZD7    |

|           |          |          |               |               |               |          |
|-----------|----------|----------|---------------|---------------|---------------|----------|
| 203707_at | 8.99E-04 | 3.51E-04 | 1.506735 up   | 1.456144 up   | 1.034743 down | ZNF263   |
| 203708_at | 0.036447 | 0.035179 | 2.272094 down | 1.632668 up   | 3.709575 up   | PDE4B    |
| 203712_at | 0.005637 | 0.004058 | 1.921448 up   | 1.475136 up   | 1.302556 down | KIAA0020 |
| 203713_s_ | 3.38E-06 | 1.64E-07 | 5.694419 up   | 3.39409 up    | 1.677745 down | LLGL2    |
| 203714_s_ | 0.008229 | 0.006506 | 1.629931 up   | 1.571656 up   | 1.037079 down | TBCE     |
| 203716_s_ | 1.11E-05 | 8.72E-07 | 15.27228 down | 1.490864 down | 10.24392 up   | DPP4     |
| 203717_at | 5.30E-05 | 7.61E-06 | 17.20178 down | 1.113226 down | 15.45219 up   | DPP4     |
| 203719_at | 4.99E-05 | 7.06E-06 | 2.985489 down | 3.036861 down | 1.017207 down | ERCC1    |
| 203720_s_ | 1.40E-05 | 1.24E-06 | 2.118661 down | 3.169626 down | 1.496051 down | ERCC1    |
| 203721_s_ | 2.92E-06 | 1.34E-07 | 2.764892 up   | 3.240356 up   | 1.171965 up   | UTP18    |
| 203725_at | 9.29E-04 | 3.67E-04 | 1.298017 down | 3.001185 down | 2.312131 down | GADD45A  |
| 203727_at | 0.00358  | 0.002264 | 1.268634 up   | 1.194144 down | 1.514932 down | SKIV2L   |
| 203729_at | 1.99E-05 | 2.00E-06 | 14.23428 down | 14.5633 down  | 1.023115 down | EMP3     |
| 203733_at | 0.007494 | 0.005804 | 2.093753 down | 2.060119 down | 1.016326 up   | DEXI     |
| 203736_s_ | 0.00181  | 9.05E-04 | 3.029825 down | 3.508564 down | 1.158009 down | PPFIBP1  |
| 203737_s_ | 0.028964 | 0.027549 | 1.986472 up   | 1.307342 up   | 1.519474 down | PPRC1    |
| 203740_at | 0.011089 | 0.009291 | 1.1743 down   | 1.512596 up   | 1.776241 up   | MPHOSPH6 |
| 203741_s_ | 2.58E-05 | 2.83E-06 | 8.673844 down | 11.53336 down | 1.329671 down | ADCY7    |
| 203742_s_ | 0.004433 | 0.00299  | 2.799417 up   | 3.426013 up   | 1.223831 up   | TDG      |
| 203743_s_ | 1.73E-04 | 3.82E-05 | 4.107858 up   | 2.105225 up   | 1.951268 down | TDG      |
| 203744_at | 3.56E-06 | 1.77E-07 | 5.510399 up   | 7.246396 up   | 1.31504 up    | HMGB3    |
| 203749_s_ | 2.70E-04 | 6.91E-05 | 1.50718 down  | 2.954252 down | 1.960119 down | RARA     |
| 203750_s_ | 0.008054 | 0.006334 | 1.573947 up   | 1.221371 down | 1.922373 down | RARA     |
| 203753_at | 0.001593 | 7.65E-04 | 1.152838 down | 2.243432 up   | 2.586313 up   | TCF4     |
| 203755_at | 0.001676 | 8.18E-04 | 8.210392 up   | 12.5581 up    | 1.529537 up   | BUB1B    |
| 203756_at | 2.38E-05 | 2.54E-06 | 1.367279 down | 2.520465 down | 1.843418 down | ARHGEF17 |
| 203758_at | 5.63E-05 | 8.27E-06 | 13.67418 down | 6.339169 down | 2.157094 up   | CTSO     |
| 203764_at | 0.001434 | 6.62E-04 | 7.496269 up   | 12.96963 up   | 1.730145 up   | DLGAP5   |
| 203765_at | 1.85E-04 | 4.17E-05 | 8.833512 up   | 14.39691 up   | 1.629805 up   | GCA      |
| 203766_s_ | 3.32E-08 | 2.59E-10 | 10.30517 down | 30.9941 down  | 3.007628 down | LMOD1    |
| 203767_s_ | 0.001699 | 8.33E-04 | 12.09628 down | 5.188068 down | 2.331558 up   | STS      |
| 203768_s_ | 0.001382 | 6.31E-04 | 3.684568 down | 2.7292 down   | 1.350054 up   | STS      |
| 203769_s_ | 0.001244 | 5.46E-04 | 6.240009 down | 3.704405 down | 1.684483 up   | STS      |

|           |          |          |          |      |          |      |          |      |          |
|-----------|----------|----------|----------|------|----------|------|----------|------|----------|
| 203770_s_ | 0.005621 | 0.004042 | 1.843293 | down | 1.88744  | down | 1.02395  | down | STS      |
| 203771_s_ | 0.006625 | 0.004981 | 2.711967 | down | 1.890827 | down | 1.434275 | up   | BLVRA    |
| 203773_x_ | 0.011844 | 0.010042 | 1.818753 | down | 1.552765 | down | 1.171299 | up   | BLVRA    |
| 203775_at | 1.63E-05 | 1.51E-06 | 9.95568  | up   | 4.57408  | up   | 2.176543 | down | SLC25A13 |
| 203776_at | 0.003101 | 0.001871 | 1.115769 | up   | 1.370933 | down | 1.529645 | down | GPKOW    |
| 203777_s_ | 5.15E-04 | 1.64E-04 | 1.028809 | up   | 1.80464  | down | 1.856629 | down | RPS6KB2  |
| 203782_s_ | 0.003631 | 0.002303 | 2.952915 | up   | 1.841616 | up   | 1.603437 | down | POLRMT   |
| 203785_s_ | 0.002994 | 0.001787 | 2.319812 | up   | 1.997383 | up   | 1.161425 | down | DDX28    |
| 203786_s_ | 0.006235 | 0.004615 | 1.140685 | up   | 4.691332 | down | 5.351332 | down | TPD52L1  |
| 203788_s_ | 7.60E-04 | 2.80E-04 | 8.341887 | down | 5.168911 | down | 1.613858 | up   | SEMA3C   |
| 203789_s_ | 0.00274  | 0.001585 | 11.70743 | down | 11.48313 | down | 1.019534 | up   | SEMA3C   |
| 203794_at | 0.003101 | 0.001871 | 1.987609 | down | 2.346291 | down | 1.18046  | down | CDC42BPA |
| 203796_s_ | 0.004959 | 0.003456 | 2.30709  | up   | 1.744712 | up   | 1.322333 | down | BCL7A    |
| 203797_at | 1.30E-04 | 2.57E-05 | 10.35658 | up   | 14.67703 | up   | 1.41717  | up   | VSNL1    |
| 203798_s_ | 1.66E-04 | 3.61E-05 | 10.57223 | up   | 10.19283 | up   | 1.037222 | down | VSNL1    |
| 203799_at | 4.54E-06 | 2.51E-07 | 55.85028 | down | 10.75136 | down | 5.194719 | up   | CD302    |
| 203801_at | 0.005825 | 0.004227 | 3.057741 | down | 2.025331 | down | 1.509749 | up   | MRPS14   |
| 203802_x_ | 3.63E-06 | 1.83E-07 | 2.164603 | up   | 2.525713 | up   | 1.166826 | up   | NSUN5    |
| 203803_at | 5.61E-04 | 1.84E-04 | 3.840959 | down | 3.229724 | down | 1.189253 | up   | PCYOX1   |
| 203806_s_ | 0.003161 | 0.001924 | 2.253024 | up   | 2.68024  | up   | 1.189619 | up   | FANCA    |
| 203810_at | 9.91E-04 | 4.01E-04 | 4.039203 | down | 6.482569 | down | 1.604913 | down | DNAJB4   |
| 203811_s_ | 0.00256  | 0.001449 | 3.800034 | down | 6.790241 | down | 1.786889 | down | DNAJB4   |
| 203812_at | 2.75E-04 | 7.10E-05 | 6.309051 | down | 2.456618 | down | 2.568186 | up   |          |
| 203813_s_ | 6.86E-07 | 1.72E-08 | 16.69124 | down | 10.79711 | down | 1.545899 | up   | SLIT3    |
| 203817_at | 0.006815 | 0.005158 | 6.109747 | down | 1.599144 | up   | 9.770364 | up   | GUCY1B3  |
| 203819_s_ | 1.46E-05 | 1.31E-06 | 4.879498 | up   | 46.0469  | up   | 9.436812 | up   | IGF2BP3  |
| 203820_s_ | 2.01E-06 | 7.90E-08 | 3.518335 | up   | 41.46236 | up   | 11.78466 | up   | IGF2BP3  |
| 203821_at | 0.001052 | 4.34E-04 | 1.168422 | up   | 3.446374 | down | 4.026819 | down | HBEGF    |
| 203822_s_ | 0.013752 | 0.011964 | 1.280479 | down | 1.668833 | up   | 2.136905 | up   | ELF2     |
| 203823_at | 7.93E-05 | 1.32E-05 | 5.243289 | down | 5.476147 | down | 1.044411 | down | RGS3     |
| 203825_at | 2.97E-04 | 7.84E-05 | 2.748157 | up   | 1.636522 | up   | 1.679267 | down | BRD3     |
| 203827_at | 4.01E-04 | 1.17E-04 | 6.188172 | down | 4.207769 | down | 1.470654 | up   | WIPI1    |
| 203830_at | 5.90E-04 | 1.98E-04 | 2.519235 | up   | 2.893564 | up   | 1.148588 | up   | C17orf75 |
| 203832_at | 2.45E-04 | 6.07E-05 | 2.954642 | up   | 2.948864 | up   | 1.001959 | down | SNRPF    |



|           |          |          |          |      |          |      |          |      |          |
|-----------|----------|----------|----------|------|----------|------|----------|------|----------|
| 203833_s_ | 4.99E-05 | 7.04E-06 | 2.873504 | down | 3.320291 | down | 1.155485 | down | TGOLN2   |
| 203834_s_ | 8.64E-05 | 1.48E-05 | 3.904276 | down | 5.663837 | down | 1.450675 | down | TGOLN2   |
| 203835_at | 2.07E-05 | 2.10E-06 | 5.755323 | down | 5.723429 | down | 1.005572 | up   | LRRC32   |
| 203836_s_ | 1.10E-04 | 2.06E-05 | 5.207729 | down | 3.175375 | down | 1.640036 | up   | MAP3K5   |
| 203837_at | 5.56E-04 | 1.82E-04 | 7.770742 | down | 3.786781 | down | 2.05207  | up   | MAP3K5   |
| 203840_at | 0.005277 | 0.00374  | 2.234241 | down | 1.457833 | down | 1.532577 | up   | BLZF1    |
| 203842_s_ | 0.005155 | 0.003631 | 1.849008 | up   | 2.295014 | down | 4.243501 | down | MAPRE3   |
| 203843_at | 1.63E-07 | 2.37E-09 | 4.241315 | down | 3.638997 | down | 1.165518 | up   | RPS6KA3  |
| 203844_at | 8.25E-04 | 3.13E-04 | 1.086067 | up   | 1.196836 | down | 1.299844 | down | VHL      |
| 203845_at | 0.003656 | 0.002322 | 8.04723  | down | 3.166082 | down | 2.541699 | up   | KAT2B    |
| 203846_at | 3.15E-04 | 8.52E-05 | 1.845987 | down | 2.36016  | down | 1.278536 | down | TRIM32   |
| 203849_s_ | 5.94E-04 | 2.00E-04 | 6.014477 | up   | 6.627476 | up   | 1.101921 | up   | KIF1A    |
| 203851_at | 4.19E-06 | 2.24E-07 | 17.34802 | down | 18.22197 | down | 1.050378 | down | IGFBP6   |
|           |          |          |          |      |          |      |          |      | SMN1 /// |
| 203852_s_ | 9.14E-05 | 1.59E-05 | 3.786305 | up   | 3.471788 | up   | 1.090593 | down | SMN2     |
| 203855_at | 0.003791 | 0.002437 | 3.761557 | down | 2.483271 | down | 1.514759 | up   | WDR47    |
| 203856_at | 1.70E-05 | 1.62E-06 | 6.304535 | up   | 5.530786 | up   | 1.139899 | down | VRK1     |
| 203857_s_ | 6.05E-05 | 9.15E-06 | 3.083896 | down | 2.940239 | down | 1.048859 | up   | PDIA5    |
| 203858_s_ | 0.003522 | 0.002218 | 1.692286 | up   | 1.328935 | up   | 1.273415 | down | COX10    |
| 203860_at | 6.47E-06 | 4.07E-07 | 2.272151 | up   | 2.522939 | up   | 1.110375 | up   | PCCA     |
| 203862_s_ | 0.027582 | 0.02611  | 1.52292  | up   | 1.108483 | up   | 1.373878 | down | ACTN2    |
| 203865_s_ | 1.34E-05 | 1.16E-06 | 2.535254 | down | 10.74594 | down | 4.238605 | down | ADARB1   |
| 203866_at | 0.001097 | 4.60E-04 | 2.165555 | up   | 2.203564 | up   | 1.017552 | up   | NLE1     |
| 203867_s_ | 0.002671 | 0.001531 | 2.540968 | up   | 1.714399 | up   | 1.482133 | down | NLE1     |
| 203868_s_ | 4.11E-08 | 3.47E-10 | 1.842632 | down | 129.7572 | down | 70.41943 | down | VCAM1    |
| 203869_at | 7.00E-04 | 2.50E-04 | 1.666355 | up   | 3.10408  | up   | 1.862797 | up   | USP46    |
| 203871_at | 0.011574 | 0.009776 | 1.679325 | up   | 1.076063 | up   | 1.560619 | down | SENP3    |
| 203872_at | 0.003663 | 0.002329 | 11.17024 | up   | 5.013578 | up   | 2.227999 | down | ACTA1    |
| 203880_at | 0.002495 | 0.0014   | 2.068821 | up   | 1.204671 | up   | 1.717333 | down | COX17    |
| 203882_at | 2.52E-05 | 2.74E-06 | 10.60885 | down | 5.035865 | down | 2.106659 | up   | IRF9     |
| 203886_s_ | 3.55E-06 | 1.75E-07 | 9.058605 | down | 1.745711 | down | 5.189062 | up   | FBLN2    |
| 203889_at | 0.010272 | 0.008475 | 1.85345  | down | 2.732706 | up   | 5.064935 | up   | SCG5     |
| 203891_s_ | 0.00176  | 8.72E-04 | 1.144051 | up   | 1.797958 | down | 2.056955 | down | DAPK3    |
| 203892_at | 1.44E-05 | 1.29E-06 | 3.863546 | up   | 3.185053 | up   | 1.213024 | down | WFDC2    |

|           |          |          |          |      |          |      |          |      |          |
|-----------|----------|----------|----------|------|----------|------|----------|------|----------|
| 203894_at | 0.003143 | 0.001908 | 2.002431 | down | 1.534015 | down | 1.305353 | up   | TUBG2    |
| 203897_at | 3.47E-04 | 9.68E-05 | 2.082677 | down | 1.718516 | down | 1.211904 | up   | LYRM1    |
| 203908_at | 0.002035 | 0.001061 | 1.938293 | down | 8.401566 | down | 4.334518 | down | SLC4A4   |
| 203909_at | 0.001248 | 5.49E-04 | 1.544758 | down | 1.540251 | down | 1.002927 | up   | SLC9A6   |
| 203910_at | 0.021391 | 0.019754 | 5.359403 | down | 1.31856  | down | 4.064588 | up   | ARHGAP29 |
| 203911_at | 0.00618  | 0.004564 | 1.325616 | up   | 1.778515 | up   | 1.341652 | up   | RAP1GAP  |
| 203912_s_ | 0.002712 | 0.001563 | 2.557787 | down | 3.282213 | down | 1.283224 | down | DNASE1L1 |
| 203913_s_ | 4.32E-04 | 1.30E-04 | 4.212716 | up   | 8.865972 | up   | 2.104574 | up   | HPGD     |
| 203914_x_ | 0.006262 | 0.004644 | 2.705682 | up   | 6.32734  | up   | 2.338538 | up   | HPGD     |
| 203916_at | 7.02E-04 | 2.52E-04 | 2.058215 | down | 1.821485 | down | 1.129966 | up   | NDST2    |
| 203917_at | 5.14E-10 | 6.77E-13 | 155.0989 | up   | 161.741  | up   | 1.042825 | up   | CXADR    |
| 203918_at | 1.98E-04 | 4.54E-05 | 3.921576 | up   | 1.300322 | up   | 3.01585  | down | PCDH1    |
| 203920_at | 0.00283  | 0.001656 | 1.539269 | down | 1.976352 | up   | 3.042136 | up   | NR1H3    |
| 203925_at | 0.001353 | 6.14E-04 | 3.270266 | down | 2.863531 | down | 1.14204  | up   | GCLM     |
| 203931_s_ | 0.009018 | 0.007266 | 2.165365 | up   | 1.630187 | up   | 1.328292 | down | MRPL12   |
| 203934_at | 4.57E-04 | 1.40E-04 | 10.37677 | up   | 10.32768 | up   | 1.004754 | down | KDR      |
| 203935_at | 4.02E-05 | 5.27E-06 | 3.587508 | down | 3.116098 | down | 1.151282 | up   | ACVR1    |
| 203936_s_ | 1.74E-06 | 6.43E-08 | 2.465298 | up   | 2.52274  | up   | 1.0233   | up   | MMP9     |
| 203939_at | 9.42E-10 | 1.77E-12 | 79.64325 | down | 73.1109  | down | 1.089348 | up   | NT5E     |
| 203940_s_ | 0.010475 | 0.008683 | 1.69579  | down | 1.795342 | down | 1.058706 | down | VASH1    |
| 203944_x_ | 1.42E-04 | 2.90E-05 | 1.598162 | down | 2.248411 | down | 1.406873 | down | BTN2A1   |
| 203945_at | 3.58E-04 | 1.01E-04 | 2.973436 | up   | 1.941268 | up   | 1.531698 | down | ARG2     |
| 203946_s_ | 1.30E-04 | 2.58E-05 | 13.92892 | up   | 5.343748 | up   | 2.606581 | down | ARG2     |
| 203947_at | 7.66E-05 | 1.26E-05 | 1.816803 | up   | 1.825795 | up   | 1.00495  | up   | CSTF3    |
| 203951_at | 0.002207 | 0.001183 | 1.107786 | up   | 6.953626 | down | 7.703132 | down | CNN1     |
| 203952_at | 0.002555 | 0.001445 | 1.435243 | down | 1.936483 | down | 1.349237 | down | ATF6     |
| 203953_s_ | 1.12E-04 | 2.09E-05 | 4.189588 | up   | 2.802632 | up   | 1.494876 | down | CLDN3    |
| 203954_x_ | 3.21E-05 | 3.87E-06 | 2.925731 | up   | 2.780114 | up   | 1.052378 | down | CLDN3    |
| 203955_at | 7.02E-06 | 4.66E-07 | 2.649193 | up   | 1.811552 | up   | 1.462389 | down | KIAA0649 |
| 203957_at | 0.001817 | 9.10E-04 | 1.470209 | up   | 1.96726  | up   | 1.338082 | up   | E2F6     |
| 203961_at | 5.59E-07 | 1.31E-08 | 16.09401 | up   | 24.54644 | up   | 1.525192 | up   | NEBL     |
| 203962_s_ | 1.87E-06 | 7.08E-08 | 15.26483 | up   | 21.58399 | up   | 1.413968 | up   | NEBL     |
| 203963_at | 4.99E-07 | 1.09E-08 | 5.758153 | down | 47.12181 | down | 8.183493 | down | CA12     |
| 203964_at | 1.30E-04 | 2.59E-05 | 3.886949 | down | 3.58938  | down | 1.082903 | up   | NMI      |

|           |          |          |          |      |          |      |          |      |         |
|-----------|----------|----------|----------|------|----------|------|----------|------|---------|
| 203967_at | 0.00367  | 0.002335 | 5.010845 | up   | 7.068784 | up   | 1.410697 | up   | CDC6    |
| 203968_s_ | 5.63E-04 | 1.86E-04 | 5.172977 | up   | 8.278291 | up   | 1.600295 | up   | CDC6    |
| 203973_s_ | 7.12E-05 | 1.15E-05 | 13.90392 | down | 8.923754 | down | 1.558079 | up   | CEBPD   |
| 203975_s_ | 3.58E-04 | 1.01E-04 | 6.673078 | up   | 4.893584 | up   | 1.363638 | down | CHAF1A  |
| 203976_s_ | 0.00183  | 9.19E-04 | 5.843894 | up   | 4.885919 | up   | 1.196069 | down | CHAF1A  |
| 203981_s_ | 3.49E-04 | 9.79E-05 | 1.946303 | up   | 2.48994  | up   | 1.279318 | up   | ABCD4   |
| 203984_s_ | 0.010345 | 0.00855  | 2.30652  | up   | 1.699451 | up   | 1.357214 | down | CASP9   |
| 203985_at | 6.24E-04 | 2.14E-04 | 1.860878 | up   | 1.47363  | up   | 1.262785 | down | ZNF212  |
| 203986_at | 0.001965 | 0.001011 | 1.667007 | down | 3.749625 | down | 2.249316 | down | STBD1   |
| 203990_s_ | 0.004719 | 0.003245 | 2.326526 | up   | 2.613965 | up   | 1.123548 | up   | KDM6A   |
| 203992_s_ | 1.37E-05 | 1.20E-06 | 3.724509 | up   | 2.816422 | up   | 1.322426 | down | KDM6A   |
| 203996_s_ | 0.004533 | 0.003082 | 1.319472 | up   | 1.10467  | down | 1.457581 | down | C21orf2 |
| 203998_s_ | 4.22E-04 | 1.26E-04 | 7.632307 | up   | 9.90355  | up   | 1.297583 | up   | SYT1    |
| 203999_at | 1.62E-06 | 5.85E-08 | 12.30893 | up   | 31.37098 | up   | 2.548636 | up   | SYT1    |
| 204004_at | 4.13E-04 | 1.22E-04 | 7.551642 | up   | 1.026275 | down | 7.750063 | down | PAWR    |
| 204005_s_ | 0.001679 | 8.20E-04 | 4.625981 | up   | 1.525951 | down | 7.059023 | down | PAWR    |
| 204009_s_ | 3.30E-04 | 9.07E-05 | 2.678025 | up   | 1.919782 | up   | 1.394963 | down | KRAS    |
| 204011_at | 0.004731 | 0.003255 | 1.227267 | up   | 2.020795 | up   | 1.646582 | up   | SPRY2   |
| 204017_at | 1.09E-06 | 3.29E-08 | 14.89188 | down | 21.50508 | down | 1.44408  | down | KDEL3   |
| 204020_at | 0.001656 | 8.05E-04 | 5.831632 | down | 6.258148 | down | 1.073138 | down | PURA    |
| 204021_s_ | 0.002512 | 0.001413 | 3.407507 | down | 3.26833  | down | 1.042584 | up   | PURA    |
| 204022_at | 0.001896 | 9.63E-04 | 1.059964 | down | 2.119816 | down | 1.999894 | down | WWP2    |
| 204023_at | 4.99E-05 | 7.06E-06 | 4.660503 | up   | 4.616482 | up   | 1.009536 | down | RFC4    |
| 204026_s_ | 0.003772 | 0.002422 | 4.365045 | up   | 7.579365 | up   | 1.736377 | up   | ZWINT   |
| 204029_at | 9.81E-06 | 7.39E-07 | 3.514025 | up   | 2.499222 | up   | 1.406048 | down | CELSR2  |
| 204032_at | 3.14E-04 | 8.48E-05 | 2.385619 | down | 3.680936 | down | 1.542969 | down | BCAR3   |
| 204034_at | 9.32E-04 | 3.69E-04 | 3.736768 | down | 3.387154 | down | 1.103218 | up   | ETHE1   |
| 204036_at | 5.46E-09 | 1.87E-11 | 28.5076  | down | 19.97186 | down | 1.427388 | up   | LPAR1   |
| 204037_at | 3.20E-07 | 5.83E-09 | 13.10992 | down | 13.90776 | down | 1.060857 | down | LPAR1   |
| 204038_s_ | 7.34E-07 | 1.89E-08 | 9.564748 | down | 8.082087 | down | 1.18345  | up   | LPAR1   |
| 204044_at | 3.00E-04 | 7.97E-05 | 1.439782 | up   | 11.7109  | up   | 8.133801 | up   | QPRT    |
| 204045_at | 7.77E-05 | 1.28E-05 | 6.279885 | down | 5.372315 | down | 1.168935 | up   | TCEAL1  |
| 204054_at | 7.71E-04 | 2.86E-04 | 2.351059 | down | 1.628592 | down | 1.443615 | up   | PTEN    |
| 204058_at | 7.32E-05 | 1.18E-05 | 20.20661 | down | 11.33259 | down | 1.783052 | up   | ME1     |

|           |          |          |               |               |               |          |
|-----------|----------|----------|---------------|---------------|---------------|----------|
| 204059_s_ | 4.74E-04 | 1.46E-04 | 4.773208 down | 4.244487 down | 1.124567 up   | ME1      |
|           |          |          |               |               |               | PRKX /// |
| 204060_s_ | 1.08E-05 | 8.37E-07 | 2.577161 up   | 6.624108 up   | 2.570312 up   | PRKY     |
| 204061_at | 1.08E-05 | 8.44E-07 | 4.218983 up   | 6.601172 up   | 1.564636 up   | PRKX     |
| 204064_at | 8.58E-05 | 1.46E-05 | 2.504826 up   | 2.223069 up   | 1.126742 down | THOC1    |
| 204066_s_ | 0.002028 | 0.001057 | 2.896823 up   | 1.500871 up   | 1.930095 down | AGAP1    |
| 204068_at | 0.027616 | 0.026144 | 1.939747 down | 1.07221 down  | 1.809111 up   | STK3     |
| 204069_at | 1.85E-04 | 4.17E-05 | 16.33864 down | 3.190659 down | 5.120774 up   | MEIS1    |
| 204070_at | 0.00157  | 7.50E-04 | 4.224683 down | 2.820996 down | 1.497586 up   | RARRES3  |
| 204072_s_ | 0.002373 | 0.001309 | 6.788885 down | 2.141234 down | 3.170548 up   | FRY      |
| 204075_s_ | 7.67E-05 | 1.26E-05 | 3.054313 down | 3.222139 down | 1.054947 down | KIAA0562 |
| 204078_at | 4.20E-05 | 5.59E-06 | 2.242373 down | 4.00842 down  | 1.78758 down  | SC65     |
| 204082_at | 1.85E-04 | 4.16E-05 | 1.507693 up   | 2.98126 up    | 1.977366 up   | PBX3     |
| 204083_s_ | 6.51E-05 | 1.01E-05 | 4.266123 down | 12.45213 down | 2.918839 down | TPM2     |
| 204084_s_ | 9.62E-06 | 7.21E-07 | 5.069474 down | 4.038663 down | 1.255236 up   | CLN5     |
| 204085_s_ | 4.10E-04 | 1.21E-04 | 7.823 down    | 3.827949 down | 2.043653 up   | CLN5     |
| 204087_s_ | 3.22E-05 | 3.90E-06 | 5.76091 up    | 5.473072 up   | 1.052592 down | SLC5A6   |
| 204089_x_ | 0.001165 | 5.00E-04 | 1.522717 up   | 2.52958 up    | 1.661228 up   | MAP3K4   |
| 204092_s_ | 0.009813 | 0.008034 | 3.114605 up   | 5.323698 up   | 1.709269 up   | AURKA    |
| 204099_at | 3.40E-06 | 1.66E-07 | 3.964604 down | 6.527493 down | 1.646442 down | SMARCD3  |
| 204104_at | 0.009013 | 0.007262 | 1.129309 up   | 1.908026 down | 2.154751 down | SNAPC2   |
| 204105_s_ | 0.021323 | 0.019682 | 1.102004 down | 3.842341 up   | 4.234274 up   | NRCAM    |
| 204106_at | 3.25E-06 | 1.57E-07 | 1.901637 down | 3.229278 down | 1.698157 down | TESK1    |
| 204108_at | 0.001467 | 6.82E-04 | 1.867286 up   | 1.978226 up   | 1.059413 up   | NFYA     |
| 204111_at | 6.76E-04 | 2.38E-04 | 1.630215 down | 1.806349 down | 1.108044 down | HNMT     |
| 204112_s_ | 2.69E-05 | 3.02E-06 | 10.40826 down | 5.42382 down  | 1.91899 up    | HNMT     |
| 204114_at | 9.50E-04 | 3.78E-04 | 12.01799 down | 8.231407 down | 1.460016 up   | NID2     |
| 204115_at | 3.01E-06 | 1.40E-07 | 16.16022 down | 5.350587 down | 3.02027 up    | GNG11    |
| 204117_at | 0.004067 | 0.002664 | 1.642106 up   | 1.075907 up   | 1.526253 down | PREP     |
| 204119_s_ | 0.008817 | 0.007072 | 1.558793 down | 1.947756 down | 1.249529 down | ADK      |
| 204122_at | 0.003374 | 0.002097 | 1.756541 up   | 1.042888 down | 1.831875 down | TYROBP   |
| 204123_at | 1.19E-06 | 3.72E-08 | 3.68577 up    | 2.340239 up   | 1.574954 down | LIG3     |
| 204125_at | 1.24E-04 | 2.42E-05 | 1.177186 down | 1.713757 down | 1.455808 down | NDUFAF1  |
| 204127_at | 1.99E-04 | 4.56E-05 | 4.353261 up   | 6.378625 up   | 1.465252 up   | RFC3     |

|           |          |          |          |      |          |      |          |      |          |
|-----------|----------|----------|----------|------|----------|------|----------|------|----------|
| 204128_s_ | 0.001275 | 5.66E-04 | 2.961508 | up   | 6.765305 | up   | 2.284412 | up   | RFC3     |
| 204133_at | 0.008576 | 0.006837 | 2.275192 | up   | 1.076688 | up   | 2.113139 | down | RRP9     |
| 204134_at | 0.003029 | 0.001815 | 1.492169 | up   | 1.640014 | up   | 1.099081 | up   | PDE2A    |
| 204135_at | 5.95E-05 | 8.96E-06 | 12.45338 | down | 11.99629 | down | 1.038103 | up   | FILIP1L  |
| 204136_at | 0.003264 | 0.002004 | 3.762215 | down | 1.705464 | down | 2.205977 | up   | COL7A1   |
| 204137_at | 0.002438 | 0.001356 | 4.939321 | down | 4.523357 | down | 1.091959 | up   | GPR137B  |
| 204138_s_ | 0.00497  | 0.003466 | 1.415209 | down | 1.24667  | down | 1.135191 | up   | MZF1     |
| 204140_at | 4.89E-05 | 6.83E-06 | 4.109223 | down | 3.748874 | down | 1.096122 | up   | TPST1    |
| 204141_at | 0.002813 | 0.001642 | 3.29946  | up   | 2.428405 | up   | 1.358694 | down | TUBB2A   |
| 204146_at | 2.37E-04 | 5.78E-05 | 5.577407 | up   | 13.79523 | up   | 2.473413 | up   | RAD51AP1 |
| 204149_s_ | 0.001952 | 0.001003 | 4.759964 | down | 1.593791 | down | 2.986568 | up   | GSTM4    |
| 204151_x_ | 0.001034 | 4.24E-04 | 17.48044 | down | 2.070747 | down | 8.441607 | up   | AKR1C1   |
| 204153_s_ | 0.037079 | 0.035806 | 1.645235 | up   | 1.18756  | up   | 1.385392 | down | MFNG     |
| 204154_at | 0.003635 | 0.002306 | 6.063866 | up   | 4.710371 | up   | 1.287344 | down | CDO1     |
| 204157_s_ | 9.05E-04 | 3.54E-04 | 2.029807 | down | 1.761881 | down | 1.152068 | up   | KIAA0999 |
| 204158_s_ | 3.65E-05 | 4.58E-06 | 4.327029 | down | 4.559594 | down | 1.053747 | down | TCIRG1   |
| 204159_at | 5.02E-07 | 1.11E-08 | 47.62911 | down | 15.49081 | down | 3.074667 | up   | CDKN2C   |
| 204162_at | 0.011482 | 0.009682 | 3.653048 | up   | 4.420142 | up   | 1.209988 | up   | NDC80    |
| 204163_at | 4.82E-06 | 2.73E-07 | 9.681108 | down | 15.1812  | down | 1.568126 | down | EMILIN1  |
| 204167_at | 0.007926 | 0.006216 | 1.428679 | down | 1.688049 | down | 1.181545 | down | BTD      |
| 204169_at | 3.59E-05 | 4.47E-06 | 2.308741 | down | 3.180609 | down | 1.377638 | down | IMPDH1   |
| 204170_s_ | 0.003024 | 0.001811 | 3.412291 | up   | 5.436524 | up   | 1.593218 | up   | CKS2     |
| 204172_at | 0.01879  | 0.01708  | 1.419044 | down | 1.052844 | down | 1.34782  | up   | CPOX     |
| 204176_at | 0.00504  | 0.003528 | 4.43845  | down | 1.940827 | down | 2.286886 | up   | KLHL20   |
| 204177_s_ | 5.64E-05 | 8.29E-06 | 1.432126 | down | 2.262611 | down | 1.579897 | down | KLHL20   |
| 204178_s_ | 0.002206 | 0.001182 | 2.669438 | up   | 1.835835 | up   | 1.454073 | down | RBM14    |
| 204182_s_ | 0.00488  | 0.003387 | 1.070823 | down | 2.455643 | down | 2.293231 | down | ZBTB43   |
| 204183_s_ | 1.21E-04 | 2.33E-05 | 2.063082 | up   | 1.848685 | up   | 1.115973 | down | ADRBK2   |
| 204184_s_ | 1.52E-04 | 3.20E-05 | 2.326097 | up   | 2.310753 | up   | 1.00664  | down | ADRBK2   |
| 204191_at | 5.81E-04 | 1.94E-04 | 3.791975 | down | 2.186369 | down | 1.734371 | up   | IFNAR1   |
| 204193_at | 0.001923 | 9.83E-04 | 1.989344 | down | 1.012532 | down | 1.964722 | up   | CHKB     |
| 204197_s_ | 0.003144 | 0.00191  | 1.054832 | down | 3.463277 | down | 3.283249 | down | RUNX3    |
| 204198_s_ | 0.01071  | 0.008917 | 1.192583 | down | 3.745325 | down | 3.140515 | down | RUNX3    |
| 204199_at | 0.001068 | 4.44E-04 | 2.153701 | up   | 3.047552 | up   | 1.41503  | up   | RALGPS1  |

|           |          |          |               |               |               |          |
|-----------|----------|----------|---------------|---------------|---------------|----------|
| 204200_s_ | 4.92E-04 | 1.54E-04 | 1.850922 up   | 1.101058 up   | 1.681039 down | PDGFB    |
| 204201_s_ | 5.50E-04 | 1.79E-04 | 1.53313 down  | 2.339402 up   | 3.586607 up   | PTPN13   |
| 204202_at | 5.71E-04 | 1.89E-04 | 3.318327 down | 2.160295 down | 1.536053 up   | IQCE     |
| 204204_at | 1.26E-05 | 1.06E-06 | 4.818963 down | 4.796582 down | 1.004666 up   | SLC31A2  |
| 204205_at | 0.006756 | 0.005106 | 3.268971 down | 1.047352 down | 3.121179 up   | APOBEC3G |
| 204206_at | 0.001093 | 4.58E-04 | 1.928542 down | 2.081015 down | 1.079061 down | MNT      |
| 204208_at | 1.67E-05 | 1.57E-06 | 2.453061 up   | 1.3859 up     | 1.770012 down | RNGTT    |
| 204209_at | 3.69E-05 | 4.63E-06 | 2.548668 down | 2.697183 down | 1.058271 down | PCYT1A   |
| 204210_s_ | 0.009607 | 0.007831 | 1.743063 down | 1.776497 down | 1.019181 down | PCYT1A   |
| 204214_s_ | 2.71E-05 | 3.06E-06 | 7.092875 down | 9.472933 down | 1.335556 down | RAB32    |
| 204215_at | 0.002463 | 0.001376 | 1.747666 down | 1.412521 down | 1.237268 up   | C7orf23  |
| 204216_s_ | 0.00232  | 0.001271 | 1.664346 up   | 1.502741 up   | 1.10754 down  | ZC3H14   |
| 204217_s_ | 0.01064  | 0.008851 | 1.642449 down | 1.270062 up   | 2.086012 up   | RTN2     |
| 204219_s_ | 0.001924 | 9.84E-04 | 1.56319 up    | 1.030448 down | 1.610786 down | PSMC1    |
| 204220_at | 2.36E-04 | 5.77E-05 | 1.410301 up   | 1.278398 down | 1.802926 down | GMFG     |
| 204221_x_ | 1.36E-05 | 1.19E-06 | 7.180051 down | 30.69621 down | 4.275209 down | GLIPR1   |
| 204222_s_ | 7.70E-06 | 5.35E-07 | 20.72588 down | 110.4757 down | 5.330324 down | GLIPR1   |
| 204223_at | 1.25E-05 | 1.04E-06 | 14.50512 down | 1.739059 down | 8.34079 up    | PRELP    |
| 204224_s_ | 0.002187 | 0.001169 | 3.577724 up   | 6.750202 up   | 1.886731 up   | GCH1     |
| 204226_at | 0.011056 | 0.009256 | 1.60275 up    | 1.934487 up   | 1.20698 up    | STAU2    |
| 204227_s_ | 3.78E-05 | 4.79E-06 | 2.92555 down  | 3.699669 down | 1.264606 down | TK2      |
| 204228_at | 7.51E-05 | 1.23E-05 | 3.340276 up   | 2.464479 up   | 1.355368 down | PPIH     |
| 204233_s_ | 9.61E-04 | 3.84E-04 | 3.377971 up   | 3.543467 up   | 1.048993 up   | CHKA     |
| 204234_s_ | 3.82E-05 | 4.87E-06 | 3.620822 up   | 4.924788 up   | 1.36013 up    | ZNF195   |
| 204235_s_ | 2.57E-05 | 2.81E-06 | 5.09509 up    | 5.924193 up   | 1.162726 up   | GULP1    |
| 204236_at | 6.52E-07 | 1.59E-08 | 8.218242 down | 11.55964 down | 1.406583 down | FLI1     |
| 204237_at | 3.59E-04 | 1.01E-04 | 3.481113 up   | 8.967642 up   | 2.576084 up   | GULP1    |
| 204240_s_ | 0.003267 | 0.002007 | 2.31194 up    | 2.994469 up   | 1.295219 up   | SMC2     |
| 204241_at | 3.83E-04 | 1.11E-04 | 2.335311 down | 3.066411 down | 1.313063 down | ACOX3    |
| 204243_at | 0.005842 | 0.004244 | 2.110615 up   | 1.816657 up   | 1.161813 down | RLF      |
| 204244_s_ | 6.88E-04 | 2.44E-04 | 3.45182 up    | 6.945276 up   | 2.012062 up   | DBF4     |
| 204246_s_ | 9.64E-07 | 2.78E-08 | 2.768628 down | 3.230603 down | 1.166861 down | DCTN3    |
| 204248_at | 0.001474 | 6.87E-04 | 2.176417 down | 4.233376 down | 1.945112 down | GNA11    |
| 204251_s_ | 0.002321 | 0.001271 | 1.505871 down | 1.600797 down | 1.063038 down | CEP164   |

|           |          |          |          |      |          |      |          |      |           |
|-----------|----------|----------|----------|------|----------|------|----------|------|-----------|
| 204253_s_ | 0.001898 | 9.65E-04 | 1.501033 | down | 1.740733 | down | 1.15969  | down | VDR       |
| 204254_s_ | 1.48E-05 | 1.33E-06 | 18.2702  | down | 13.57587 | down | 1.345785 | up   | VDR       |
| 204255_s_ | 1.52E-07 | 2.09E-09 | 16.36782 | down | 8.635079 | down | 1.895502 | up   | VDR       |
| 204257_at | 1.31E-04 | 2.60E-05 | 2.845906 | down | 3.946647 | down | 1.386781 | down | FADS3     |
| 204258_at | 3.15E-05 | 3.78E-06 | 2.832819 | up   | 3.006357 | up   | 1.06126  | up   | CHD1      |
| 204260_at | 5.94E-04 | 2.00E-04 | 2.833152 | up   | 2.035862 | up   | 1.391623 | down | CHGB      |
| 204263_s_ | 0.005602 | 0.004026 | 1.931747 | up   | 2.143953 | up   | 1.109852 | up   | CPT2      |
| 204266_s_ | 2.08E-04 | 4.85E-05 | 2.525426 | up   | 2.703187 | up   | 1.070389 | up   | CHKA      |
| 204268_at | 1.36E-05 | 1.19E-06 | 2.805586 | down | 3.036373 | down | 1.08226  | down | S100A2    |
| 204269_at | 6.12E-05 | 9.30E-06 | 5.924615 | up   | 4.659246 | up   | 1.271583 | down | PIM2      |
| 204270_at | 4.03E-04 | 1.18E-04 | 1.840076 | down | 2.413609 | down | 1.31169  | down | SKI       |
| 204271_s_ | 0.008344 | 0.006614 | 7.852215 | up   | 18.33896 | up   | 2.335515 | up   | EDNRB     |
| 204273_at | 0.009331 | 0.007567 | 2.962477 | up   | 4.312773 | up   | 1.4558   | up   | EDNRB     |
| 204276_at | 1.04E-07 | 1.24E-09 | 5.80112  | down | 10.07152 | down | 1.736134 | down | TK2       |
| 204277_s_ | 3.23E-04 | 8.80E-05 | 1.677858 | down | 2.532009 | down | 1.509072 | down | TK2       |
| 204279_at | 5.81E-06 | 3.53E-07 | 15.37439 | down | 7.67627  | down | 2.002846 | up   | PSMB9     |
| 204280_at | 0.011141 | 0.009347 | 2.08903  | up   | 1.198021 | up   | 1.743735 | down | RGS14     |
| 204281_at | 0.007675 | 0.00598  | 2.36648  | up   | 2.324448 | up   | 1.018083 | down | TEAD4     |
| 204282_s_ | 0.001028 | 4.20E-04 | 1.581946 | up   | 1.09219  | down | 1.727785 | down | FARS2     |
| 204284_at | 6.22E-07 | 1.48E-08 | 55.41208 | down | 119.4044 | down | 2.154845 | down | PPP1R3C   |
| 204285_s_ | 1.79E-05 | 1.73E-06 | 7.177387 | up   | 21.60093 | up   | 3.009581 | up   | PMAIP1    |
| 204286_s_ | 1.16E-05 | 9.37E-07 | 7.007174 | up   | 18.77349 | up   | 2.679182 | up   | PMAIP1    |
| 204287_at | 0.001329 | 5.98E-04 | 1.511058 | down | 1.492838 | up   | 2.255765 | up   | SYNGR1    |
| 204288_s_ | 2.53E-05 | 2.76E-06 | 1.084744 | down | 15.68399 | down | 14.45871 | down | SORBS2    |
| 204291_at | 0.001511 | 7.10E-04 | 2.61051  | up   | 6.893275 | up   | 2.640586 | up   | ZNF518A   |
| 204292_x_ | 0.002872 | 0.001689 | 1.516393 | up   | 1.402379 | down | 2.126558 | down | STK11     |
| 204293_at | 5.76E-05 | 8.55E-06 | 4.02095  | down | 3.008531 | down | 1.336516 | up   | SGSH      |
| 204294_at | 1.23E-05 | 1.02E-06 | 3.082701 | up   | 6.034474 | up   | 1.957529 | up   | AMT       |
|           |          |          |          |      |          |      |          |      | SURF1 /// |
| 204295_at | 0.011092 | 0.009294 | 1.448424 | up   | 1.287003 | up   | 1.125424 | down | VPS37A    |
| 204297_at | 0.014047 | 0.012258 | 1.059326 | down | 1.411585 | down | 1.332532 | down | PIK3C3    |
| 204298_s_ | 6.73E-07 | 1.67E-08 | 66.66902 | down | 116.6386 | down | 1.749517 | down | LOX       |
| 204302_s_ | 5.33E-04 | 1.72E-04 | 1.777367 | down | 2.20715  | down | 1.241809 | down | KIAA0427  |
| 204303_s_ | 5.33E-06 | 3.11E-07 | 3.450465 | down | 5.514577 | down | 1.598212 | down | KIAA0427  |

|           |          |          |               |               |               |         |
|-----------|----------|----------|---------------|---------------|---------------|---------|
| 204304_s_ | 5.33E-07 | 1.19E-08 | 61.86566 up   | 64.79557 up   | 1.047359 up   | PROM1   |
| 204306_s_ | 1.84E-05 | 1.79E-06 | 4.125794 down | 6.285721 down | 1.523518 down | CD151   |
| 204308_s_ | 1.50E-04 | 3.14E-05 | 2.464973 down | 2.042033 down | 1.207117 up   | TECPR2  |
| 204310_s_ | 3.92E-06 | 2.02E-07 | 3.402829 down | 5.068769 down | 1.489575 down | NPR2    |
| 204311_at | 5.49E-04 | 1.79E-04 | 1.855593 up   | 2.12656 up    | 1.146027 up   | ATP1B2  |
| 204315_s_ | 0.007327 | 0.005647 | 2.942487 up   | 4.262544 up   | 1.44862 up    | GTSE1   |
| 204316_at | 0.003898 | 0.002523 | 1.760006 down | 1.268089 down | 1.38792 up    | RGS10   |
| 204319_s_ | 0.011439 | 0.00964  | 3.791079 down | 2.500539 down | 1.516105 up   | RGS10   |
| 204321_at | 0.003314 | 0.002049 | 1.793463 up   | 1.705264 down | 3.058327 down | NEO1    |
| 204322_at | 0.010614 | 0.008822 | 1.591856 up   | 1.01706 down  | 1.619013 down |         |
| 204324_s_ | 5.30E-04 | 1.70E-04 | 2.718221 down | 6.563798 down | 2.414741 down | GOLIM4  |
| 204327_s_ | 2.80E-04 | 7.25E-05 | 2.782239 up   | 2.501444 up   | 1.112253 down | ZNF202  |
| 204328_at | 5.38E-07 | 1.24E-08 | 4.664691 up   | 4.208335 up   | 1.108441 down | TMC6    |
| 204329_s_ | 0.008057 | 0.006338 | 1.889997 up   | 1.427488 up   | 1.324002 down | ZNF202  |
| 204332_s_ | 2.41E-05 | 2.59E-06 | 4.359407 down | 4.005943 down | 1.088235 up   | AGA     |
| 204333_s_ | 2.21E-06 | 9.04E-08 | 10.30315 down | 6.277975 down | 1.641159 up   | AGA     |
| 204334_at | 0.003567 | 0.002254 | 1.085872 down | 2.351347 down | 2.165399 down | KLF7    |
| 204337_at | 1.63E-05 | 1.51E-06 | 6.491886 down | 128.1607 down | 19.74166 down | RGS4    |
| 204338_s_ | 2.63E-04 | 6.65E-05 | 4.275784 down | 84.9745 down  | 19.87343 down | RGS4    |
| 204339_s_ | 4.81E-05 | 6.70E-06 | 2.859053 down | 52.82924 down | 18.47788 down | RGS4    |
| 204340_at | 4.65E-05 | 6.38E-06 | 2.354774 down | 2.357086 down | 1.000982 down | TMEM187 |
| 204344_s_ | 0.021604 | 0.019978 | 3.213552 down | 2.438227 down | 1.317987 up   | SEC23A  |
| 204345_at | 5.35E-06 | 3.13E-07 | 9.627628 down | 7.30753 down  | 1.317494 up   | COL16A1 |
| 204346_s_ | 1.26E-04 | 2.46E-05 | 3.118782 down | 2.650587 down | 1.176639 up   | RASSF1  |
| 204347_at | 0.001997 | 0.001033 | 3.367554 up   | 1.188767 down | 4.003235 down | AK3L1   |
| 204355_at | 0.004446 | 0.003    | 2.209746 up   | 1.185827 up   | 1.863465 down | DHX30   |
| 204358_s_ | 0.003967 | 0.00258  | 1.578304 down | 2.30814 down  | 1.462418 down | FLRT2   |
| 204359_at | 7.76E-04 | 2.89E-04 | 3.956076 down | 3.526734 down | 1.121739 up   | FLRT2   |
| 204360_s_ | 3.86E-05 | 4.95E-06 | 2.491748 down | 2.959993 down | 1.187918 down | NAGLU   |
| 204363_at | 8.40E-04 | 3.20E-04 | 3.889848 down | 2.290316 up   | 8.908978 up   | F3      |
| 204366_s_ | 2.18E-04 | 5.18E-05 | 2.724957 up   | 2.200221 up   | 1.238493 down | GTF3C2  |
| 204368_at | 4.36E-04 | 1.31E-04 | 3.264464 up   | 3.629487 up   | 1.111817 up   | SLCO2A1 |
| 204375_at | 0.009095 | 0.007341 | 2.037613 up   | 1.361618 down | 2.77445 down  | CLSTN3  |
| 204376_at | 0.008606 | 0.006867 | 1.417609 up   | 1.29847 up    | 1.091753 down | VPRBP   |



|           |          |          |               |               |               |           |
|-----------|----------|----------|---------------|---------------|---------------|-----------|
| 204377_s_ | 1.06E-04 | 1.96E-05 | 1.841594 up   | 1.300246 up   | 1.416344 down | VPRBP     |
| 204379_s_ | 1.54E-06 | 5.43E-08 | 26.1551 up    | 21.27612 up   | 1.229317 down | FGFR3     |
| 204381_at | 0.003898 | 0.002523 | 1.60846 down  | 1.920581 down | 1.19405 down  | LRP3      |
| 204386_s_ | 0.004869 | 0.003377 | 1.445677 up   | 1.302105 up   | 1.110262 down | MRP63     |
| 204390_at | 0.005927 | 0.004327 | 1.782958 up   | 1.095882 down | 1.953912 down |           |
| 204391_x_ | 3.85E-07 | 7.69E-09 | 11.58743 up   | 11.31316 up   | 1.024243 down | TRIM24    |
| 204392_at | 0.004876 | 0.003384 | 2.315625 down | 1.886411 down | 1.22753 up    | CAMK1     |
| 204395_s_ | 1.60E-05 | 1.47E-06 | 3.094046 down | 1.422978 down | 2.174346 up   | GRK5      |
| 204396_s_ | 9.37E-06 | 6.96E-07 | 14.68654 down | 4.009096 down | 3.663305 up   | GRK5      |
| 204401_at | 1.54E-04 | 3.25E-05 | 1.495502 up   | 2.192315 down | 3.278613 down | KCNN4     |
| 204409_s_ | 0.006219 | 0.004598 | 1.636348 up   | 23.05277 up   | 14.08794 up   | EIF1AY    |
| 204410_at | 0.00729  | 0.005611 | 1.225257 up   | 8.740557 up   | 7.133655 up   | EIF1AY    |
| 204411_at | 3.35E-05 | 4.11E-06 | 2.24561 up    | 2.699638 up   | 1.202185 up   | KIF21B    |
| 204412_s_ | 0.008183 | 0.006462 | 3.011762 up   | 1.584911 up   | 1.900272 down | NEFH      |
| 204413_at | 0.001454 | 6.74E-04 | 1.757691 up   | 1.195779 up   | 1.469913 down | TRAF2     |
| 204416_x_ | 3.60E-05 | 4.48E-06 | 5.521774 up   | 12.42004 up   | 2.249284 up   | APOC1     |
| 204418_x_ | 1.53E-04 | 3.22E-05 | 4.972497 down | 2.046922 down | 2.429256 up   | GSTM2     |
| 204421_s_ | 0.007947 | 0.006238 | 2.450716 down | 2.270959 down | 1.079155 up   | FGF2      |
| 204425_at | 0.011012 | 0.009216 | 1.592368 up   | 1.17198 up    | 1.358699 down | ARHGAP4   |
| 204428_s_ | 0.004863 | 0.003372 | 2.24475 down  | 1.628034 down | 1.37881 up    | LCAT      |
| 204429_s_ | 0.004587 | 0.003132 | 2.629793 down | 1.727606 down | 1.522219 up   | SLC2A5    |
| 204436_at | 3.28E-04 | 8.98E-05 | 3.04384 down  | 1.57058 down  | 1.938036 up   | PLEKHO2   |
| 204437_s_ | 0.004452 | 0.003007 | 2.674982 up   | 2.157022 up   | 1.240128 down | FOLR1     |
| 204441_s_ | 0.007871 | 0.006165 | 2.035928 up   | 2.212592 up   | 1.086773 up   | POLA2     |
| 204443_at | 5.72E-06 | 3.45E-07 | 3.267239 down | 4.278026 down | 1.30937 down  | ARSA      |
| 204444_at | 0.004275 | 0.002848 | 3.080494 up   | 6.130188 up   | 1.990001 up   | KIF11     |
| 204445_s_ | 0.004094 | 0.002687 | 1.610087 up   | 1.262618 up   | 1.275197 down | ALOX5     |
| 204447_at | 1.14E-04 | 2.17E-05 | 2.33241 up    | 2.179516 up   | 1.07015 down  | ProSAP1P1 |
| 204450_x_ | 1.71E-05 | 1.63E-06 | 12.73663 up   | 8.175657 up   | 1.557872 down | APOA1     |
| 204451_at | 4.95E-04 | 1.55E-04 | 4.203677 down | 8.042286 down | 1.913155 down | FZD1      |
| 204452_s_ | 2.06E-04 | 4.77E-05 | 1.824353 down | 3.617747 down | 1.98303 down  | FZD1      |
| 204453_at | 2.04E-04 | 4.73E-05 | 3.038751 up   | 2.362796 up   | 1.286082 down | ZNF84     |
| 204457_s_ | 0.018125 | 0.016397 | 11.04283 down | 3.213894 down | 3.435967 up   | GAS1      |
| 204458_at | 2.47E-04 | 6.12E-05 | 2.361245 down | 4.101262 down | 1.736907 down | PLA2G15   |

|           |          |          |               |               |               |         |
|-----------|----------|----------|---------------|---------------|---------------|---------|
| 204459_at | 0.001193 | 5.17E-04 | 2.929366 up   | 2.011574 up   | 1.456256 down | CSTF2   |
| 204463_s_ | 0.003383 | 0.002103 | 5.361131 down | 1.134754 down | 4.724486 up   | EDNRA   |
| 204464_s_ | 0.013563 | 0.011771 | 5.728087 down | 1.181789 down | 4.846962 up   | EDNRA   |
| 204465_s_ | 0.001536 | 7.26E-04 | 2.721149 up   | 5.298384 up   | 1.947112 up   | INA     |
| 204466_s_ | 3.12E-05 | 3.74E-06 | 8.246491 up   | 9.902298 up   | 1.200789 up   | SNCA    |
| 204469_at | 1.32E-09 | 2.84E-12 | 109.0436 up   | 127.4171 up   | 1.168497 up   | PTPRZ1  |
| 204471_at | 1.13E-04 | 2.12E-05 | 16.71605 up   | 10.22421 up   | 1.634947 down | GAP43   |
| 204472_at | 1.35E-05 | 1.18E-06 | 13.2659 down  | 6.009848 down | 2.20736 up    | GEM     |
| 204475_at | 1.61E-07 | 2.30E-09 | 336.8093 down | 1.245445 up   | 419.4776 up   | MMP1    |
| 204476_s_ | 2.01E-04 | 4.63E-05 | 1.703504 down | 3.183898 down | 1.869029 down | PC      |
| 204477_at | 6.57E-05 | 1.03E-05 | 1.491011 down | 2.217928 down | 1.487532 down | RABIF   |
| 204478_s_ | 1.14E-04 | 2.14E-05 | 1.652705 down | 2.274947 down | 1.376499 down | RABIF   |
| 204479_at | 5.44E-04 | 1.77E-04 | 2.218981 down | 3.03641 down  | 1.36838 down  | OSTF1   |
| 204482_at | 0.00511  | 0.00359  | 1.758675 up   | 1.152638 down | 2.027116 down | CLDN5   |
| 204483_at | 3.95E-04 | 1.15E-04 | 2.273525 up   | 2.232182 up   | 1.018521 down | ENO3    |
| 204484_at | 2.85E-04 | 7.43E-05 | 1.820923 up   | 3.419424 up   | 1.877853 up   | PIK3C2B |
| 204485_s_ | 0.001904 | 9.70E-04 | 2.037767 up   | 3.796313 up   | 1.862976 up   | TOM1L1  |
| 204486_at | 0.006618 | 0.004973 | 1.566055 up   | 1.107325 down | 1.734132 down |         |
| 204488_at | 0.005591 | 0.004016 | 1.427767 down | 2.215602 down | 1.551795 down | DOLK    |
| 204489_s_ | 9.34E-06 | 6.93E-07 | 21.44959 down | 17.0117 down  | 1.260873 up   | CD44    |
| 204490_s_ | 1.64E-04 | 3.54E-05 | 16.30276 down | 10.76158 down | 1.514905 up   | CD44    |
| 204497_at | 8.33E-06 | 5.94E-07 | 13.00494 down | 6.354752 down | 2.046492 up   | ADCY9   |
| 204498_s_ | 0.001285 | 5.72E-04 | 2.128001 down | 1.879786 down | 1.132045 up   | ADCY9   |
| 204499_at | 3.46E-05 | 4.28E-06 | 2.269735 up   | 2.918927 up   | 1.286021 up   | AGTPBP1 |
| 204500_s_ | 2.82E-05 | 3.23E-06 | 4.760534 up   | 6.533274 up   | 1.372382 up   | AGTPBP1 |
| 204503_at | 5.71E-04 | 1.89E-04 | 1.443376 up   | 1.188577 up   | 1.214373 down | EVPL    |
| 204508_s_ | 1.13E-05 | 8.96E-07 | 2.716277 down | 20.43773 down | 7.524169 down | CA12    |
| 204509_at | 0.001572 | 7.51E-04 | 1.232831 up   | 1.236651 down | 1.524581 down | CA12    |
| 204510_at | 9.94E-05 | 1.79E-05 | 7.055235 up   | 19.38592 up   | 2.747735 up   | CDC7    |
| 204513_s_ | 1.22E-04 | 2.34E-05 | 2.3033 up     | 2.807668 up   | 1.218976 up   | ELMO1   |
| 204514_at | 4.79E-04 | 1.49E-04 | 2.642059 up   | 1.628363 up   | 1.622525 down | DPH2    |
| 204517_at | 5.81E-06 | 3.52E-07 | 7.418177 down | 9.2605 down   | 1.248353 down | PPIC    |
| 204518_s_ | 1.42E-05 | 1.26E-06 | 6.44793 down  | 8.950115 down | 1.38806 down  | PPIC    |
| 204527_at | 5.04E-04 | 1.59E-04 | 2.994274 down | 2.817012 down | 1.062926 up   | MYO5A   |

|           |          |          |               |               |               |          |
|-----------|----------|----------|---------------|---------------|---------------|----------|
| 204528_s_ | 3.15E-05 | 3.79E-06 | 2.249355 up   | 2.615256 up   | 1.162669 up   | NAP1L1   |
| 204529_s_ | 0.00371  | 0.002369 | 1.181208 down | 4.566008 up   | 5.393405 up   | TOX      |
| 204531_s_ | 0.003251 | 0.001994 | 3.490053 up   | 4.221555 up   | 1.209596 up   | BRCA1    |
| 204533_at | 2.89E-04 | 7.58E-05 | 1.55407 down  | 1.052473 down | 1.476589 up   | CXCL10   |
| 204534_at | 0.002137 | 0.001133 | 1.854862 up   | 1.225609 down | 2.273336 down | VTN      |
| 204535_s_ | 0.003904 | 0.002529 | 1.884355 up   | 1.062 up      | 1.774346 down | REST     |
| 204537_s_ | 0.001275 | 5.66E-04 | 5.454842 down | 3.138611 down | 1.73798 up    | GABRE    |
| 204540_at | 8.81E-04 | 3.41E-04 | 3.529629 up   | 2.549094 up   | 1.384661 down | EEF1A2   |
| 204541_at | 6.63E-04 | 2.32E-04 | 1.378372 up   | 2.872945 down | 3.959986 down | SEC14L2  |
| 204544_at | 0.001832 | 9.20E-04 | 1.475632 down | 2.044735 down | 1.385667 down | HPS5     |
| 204546_at | 3.93E-05 | 5.08E-06 | 2.298415 down | 3.039327 down | 1.322358 down | KIAA0513 |
| 204549_at | 2.64E-04 | 6.71E-05 | 2.023848 down | 2.001036 down | 1.0114 up     | IKBKE    |
| 204550_x_ | 1.11E-04 | 2.07E-05 | 4.928496 down | 1.738642 down | 2.834681 up   | GSTM1    |
| 204554_at | 2.71E-05 | 3.06E-06 | 4.373811 down | 3.7252 down   | 1.174115 up   | PPP1R3D  |
| 204555_s_ | 0.001884 | 9.54E-04 | 1.849866 down | 1.64246 down  | 1.126277 up   | PPP1R3D  |
| 204558_at | 1.73E-04 | 3.81E-05 | 3.144536 up   | 4.626811 up   | 1.471381 up   | RAD54L   |
| 204559_s_ | 0.002746 | 0.00159  | 2.321816 up   | 2.022874 up   | 1.147781 down | LSM7     |
| 204562_at | 0.00718  | 0.005508 | 1.070298 up   | 1.428795 up   | 1.334951 up   | IRF4     |
| 204569_at | 0.003419 | 0.002134 | 2.087523 down | 2.090156 down | 1.001261 down | ICK      |
| 204570_at | 1.46E-07 | 1.99E-09 | 27.14094 down | 17.91511 down | 1.514975 up   | COX7A1   |
| 204571_x_ | 0.002579 | 0.001463 | 1.681551 up   | 1.091753 down | 1.835838 down | PIN4     |
| 204573_at | 0.003712 | 0.002371 | 2.104795 down | 1.98488 down  | 1.060414 up   | CROT     |
| 204575_s_ | 5.02E-06 | 2.89E-07 | 9.564606 down | 3.288441 down | 2.908553 up   | MMP19    |
| 204576_s_ | 0.003436 | 0.00215  | 1.555593 down | 1.305776 down | 1.191317 up   | CLUAP1   |
| 204577_s_ | 0.003433 | 0.002147 | 3.043419 down | 1.691868 down | 1.798852 up   | CLUAP1   |
| 204578_at | 0.008435 | 0.006697 | 1.190119 down | 1.44966 down  | 1.21808 down  | HISPPD2A |
| 204579_at | 1.73E-04 | 3.81E-05 | 4.274107 up   | 3.747736 up   | 1.14045 down  | FGFR4    |
| 204581_at | 0.001861 | 9.40E-04 | 1.600526 up   | 1.052788 down | 1.685015 down | CD22     |
| 204582_s_ | 0.004251 | 0.002823 | 1.588668 up   | 1.415475 down | 2.24872 down  | KLK3     |
| 204583_x_ | 9.87E-04 | 3.99E-04 | 1.329354 up   | 1.455126 down | 1.934378 down | KLK3     |
| 204584_at | 0.002329 | 0.001277 | 3.243796 down | 3.803969 up   | 12.3393 up    | L1CAM    |
| 204600_at | 0.018719 | 0.017    | 1.556828 down | 1.159203 down | 1.343016 up   | EPHB3    |
| 204602_at | 2.31E-04 | 5.61E-05 | 14.94655 down | 12.32612 down | 1.212592 up   | DKK1     |
| 204603_at | 8.79E-04 | 3.40E-04 | 4.124817 up   | 5.435051 up   | 1.317647 up   | EXO1     |

|           |          |          |               |               |               |           |
|-----------|----------|----------|---------------|---------------|---------------|-----------|
| 204606_at | 0.011833 | 0.010031 | 1.897758 up   | 1.163818 up   | 1.630631 down | CCL21     |
| 204608_at | 0.014732 | 0.012954 | 1.453072 down | 2.424843 down | 1.66877 down  | ASL       |
| 204610_s_ | 3.69E-04 | 1.05E-04 | 3.467234 down | 3.228504 down | 1.073944 up   | CCDC85B   |
| 204611_s_ | 8.67E-04 | 3.33E-04 | 1.307121 down | 2.557 down    | 1.956207 down | PPP2R5B   |
| 204613_at | 0.007244 | 0.005567 | 1.112158 up   | 2.694954 up   | 2.423177 up   | PLCG2     |
| 204614_at | 0.010639 | 0.008849 | 26.86994 down | 3.664096 down | 7.333306 up   | SERPINB2  |
| 204616_at | 0.0135   | 0.011704 | 1.63003 up    | 1.440705 down | 2.348393 down | UCHL3     |
| 204627_s_ | 2.70E-05 | 3.05E-06 | 3.84903 down  | 6.419232 down | 1.667753 down | ITGB3     |
| 204628_s_ | 4.83E-04 | 1.50E-04 | 1.328514 down | 2.381418 down | 1.792542 down | ITGB3     |
| 204629_at | 0.005409 | 0.003854 | 2.733253 down | 3.162971 down | 1.157219 down | PARVB     |
| 204633_s_ | 0.009886 | 0.008111 | 1.658983 up   | 3.349152 up   | 2.018799 up   | RPS6KA5   |
| 204641_at | 0.004451 | 0.003006 | 3.151165 up   | 6.037571 up   | 1.915981 up   | NEK2      |
| 204646_at | 2.86E-06 | 1.30E-07 | 121.5968 down | 18.07127 down | 6.728736 up   | DPYD      |
| 204647_at | 1.30E-04 | 2.58E-05 | 2.882792 down | 2.694977 down | 1.069691 up   | HOMER3    |
| 204648_at | 0.004035 | 0.002636 | 1.746746 up   | 1.167244 down | 2.038879 down | NPR1      |
| 204649_at | 0.008052 | 0.006332 | 2.687078 up   | 2.807602 up   | 1.044853 up   | TROAP     |
| 204652_s_ | 0.001588 | 7.61E-04 | 1.82252 up    | 1.571366 up   | 1.159831 down | NRF1      |
| 204658_at | 0.002771 | 0.001611 | 1.615557 up   | 2.687167 up   | 1.663307 up   | TRA2A     |
| 204660_at | 0.003052 | 0.001832 | 2.103647 up   | 1.01907 up    | 2.064281 down | GFER      |
| 204661_at | 0.01982  | 0.018137 | 1.346754 up   | 1.145134 up   | 1.176067 down | CD52      |
| 204662_at | 0.016741 | 0.014983 | 1.373945 down | 1.247665 up   | 1.714223 up   | CP110     |
| 204663_at | 4.76E-04 | 1.47E-04 | 3.468394 down | 2.342874 down | 1.480401 up   | ME3       |
|           |          |          |               |               |               | RP5-      |
| 204666_s_ | 0.01633  | 0.014561 | 1.718934 down | 1.16287 up    | 1.998897 up   | 1000E10.4 |
| 204669_s_ | 0.006843 | 0.005186 | 2.892183 down | 1.110426 up   | 3.211555 up   | RNF24     |
| 204671_s_ | 0.032512 | 0.031183 | 3.697709 up   | 1.181548 up   | 3.129548 down | ANKRD6    |
| 204677_at | 0.009083 | 0.007328 | 1.391134 up   | 1.081222 up   | 1.286632 down | CDH5      |
| 204678_s_ | 6.36E-05 | 9.76E-06 | 2.287185 up   | 2.326553 up   | 1.017212 up   | KCNK1     |
| 204679_at | 0.001055 | 4.36E-04 | 3.496826 up   | 3.576631 up   | 1.022822 up   | KCNK1     |
| 204681_s_ | 8.13E-06 | 5.73E-07 | 3.225239 up   | 3.626276 up   | 1.124343 up   | RAPGEF5   |
| 204682_at | 3.38E-06 | 1.64E-07 | 19.64075 down | 60.30874 down | 3.070593 down | LTBP2     |
| 204683_at | 0.011811 | 0.010007 | 1.13669 up    | 1.453948 down | 1.652688 down | ICAM2     |
| 204686_at | 4.28E-04 | 1.28E-04 | 3.440038 down | 1.826156 down | 1.883759 up   | IRS1      |
| 204688_at | 8.05E-05 | 1.35E-05 | 5.052298 down | 1.575877 down | 3.206022 up   | SGCE      |

|           |          |          |          |      |          |      |          |      |          |
|-----------|----------|----------|----------|------|----------|------|----------|------|----------|
| 204689_at | 0.002316 | 0.001268 | 1.838597 | down | 1.554073 | up   | 2.857313 | up   | HHEX     |
| 204690_at | 0.005223 | 0.003692 | 1.590653 | down | 1.521277 | down | 1.045604 | up   | STX8     |
| 204693_at | 0.002056 | 0.001076 | 2.680363 | down | 4.959103 | down | 1.850161 | down | CDC42EP1 |
| 204695_at | 3.02E-05 | 3.55E-06 | 10.73961 | up   | 9.565621 | up   | 1.122729 | down | CDC25A   |
| 204696_s_ | 0.0018   | 8.98E-04 | 3.802307 | up   | 3.308383 | up   | 1.149295 | down | CDC25A   |
| 204697_s_ | 4.61E-04 | 1.41E-04 | 2.711597 | up   | 2.734977 | up   | 1.008622 | up   | CHGA     |
| 204701_s_ | 8.34E-05 | 1.41E-05 | 1.928671 | down | 2.158826 | down | 1.119334 | down | STOML1   |
| 204702_s_ | 5.88E-05 | 8.85E-06 | 4.091252 | up   | 6.864889 | up   | 1.677943 | up   | NFE2L3   |
| 204711_at | 0.008817 | 0.007071 | 1.033494 | up   | 1.389648 | up   | 1.344611 | up   | KIAA0753 |
| 204715_at | 0.005754 | 0.004165 | 1.678708 | down | 1.839908 | down | 1.096026 | down | PANX1    |
| 204717_s_ | 7.80E-05 | 1.29E-05 | 2.548562 | up   | 4.323094 | up   | 1.696288 | up   | SLC29A2  |
| 204719_at | 0.001316 | 5.91E-04 | 6.154274 | down | 16.99293 | down | 2.761159 | down | ABCA8    |
| 204723_at | 3.82E-04 | 1.10E-04 | 1.581341 | up   | 1.585912 | up   | 1.002891 | up   | SCN3B    |
| 204724_s_ | 1.01E-06 | 2.96E-08 | 24.41737 | up   | 20.0706  | up   | 1.216574 | down | COL9A3   |
| 204726_at | 2.44E-04 | 6.02E-05 | 6.045597 | down | 8.503324 | down | 1.406532 | down | CDH13    |
| 204727_at | 2.10E-05 | 2.14E-06 | 5.885244 | up   | 8.097878 | up   | 1.375963 | up   | WDHD1    |
| 204728_s_ | 1.18E-05 | 9.65E-07 | 5.68553  | up   | 8.587307 | up   | 1.510379 | up   | WDHD1    |
| 204730_at | 9.11E-04 | 3.57E-04 | 7.075533 | up   | 4.010874 | up   | 1.764088 | down | RIMS3    |
| 204731_at | 3.72E-04 | 1.06E-04 | 11.70781 | down | 1.049572 | down | 11.15484 | up   | TGFBR3   |
| 204733_at | 0.015951 | 0.01418  | 1.574732 | up   | 1.254608 | up   | 1.255158 | down | KLK6     |
| 204734_at | 0.003899 | 0.002525 | 1.467535 | up   | 1.360766 | down | 1.996972 | down | KRT15    |
| 204735_at | 3.18E-06 | 1.51E-07 | 3.868652 | down | 3.058564 | down | 1.264859 | up   | PDE4A    |
| 204736_s_ | 2.67E-05 | 2.99E-06 | 3.192324 | down | 4.368949 | down | 1.368579 | down | CSPG4    |
|           |          |          |          |      |          |      |          |      | MYH6 /// |
| 204737_s_ | 0.001155 | 4.94E-04 | 1.624475 | up   | 1.332735 | down | 2.164995 | down | MYH7     |
| 204740_at | 1.01E-05 | 7.71E-07 | 2.755431 | up   | 2.718695 | up   | 1.013513 | down | CNKSR1   |
| 204741_at | 0.002103 | 0.001109 | 1.558111 | up   | 1.258962 | up   | 1.237616 | down | BICD1    |
| 204743_at | 0.022749 | 0.021165 | 3.338974 | up   | 1.602148 | up   | 2.08406  | down | TAGLN3   |
| 204746_s_ | 0.001886 | 9.56E-04 | 1.676058 | up   | 1.112773 | down | 1.865072 | down | PICK1    |
| 204747_at | 1.22E-04 | 2.36E-05 | 6.961957 | down | 1.375867 | down | 5.060051 | up   | IFIT3    |
| 204748_at | 9.10E-04 | 3.57E-04 | 4.936538 | down | 8.549662 | down | 1.731915 | down | PTGS2    |
| 204749_at | 1.69E-04 | 3.68E-05 | 11.58225 | up   | 2.443847 | up   | 4.739353 | down | NAP1L3   |
| 204750_s_ | 2.36E-06 | 1.00E-07 | 4.459245 | up   | 4.534964 | up   | 1.01698  | up   | DSC2     |
| 204751_x_ | 2.92E-06 | 1.34E-07 | 18.91968 | up   | 17.69484 | up   | 1.06922  | down | DSC2     |

|           |          |          |               |               |               |            |
|-----------|----------|----------|---------------|---------------|---------------|------------|
| 204752_x_ | 4.21E-05 | 5.60E-06 | 2.169316 up   | 2.482446 up   | 1.144345 up   | PARP2      |
| 204757_s_ | 1.23E-04 | 2.38E-05 | 1.226672 down | 1.668188 down | 1.359929 down | C2CD2L     |
| 204761_at | 0.001946 | 9.99E-04 | 2.054495 up   | 2.588454 up   | 1.259898 up   | USP6NL     |
| 204767_s_ | 0.005759 | 0.004169 | 3.230244 up   | 3.012395 up   | 1.072317 down | FEN1       |
| 204768_s_ | 0.003796 | 0.002442 | 3.387975 up   | 4.09864 up    | 1.209761 up   | FEN1       |
| 204769_s_ | 2.99E-04 | 7.93E-05 | 1.840406 down | 1.931234 down | 1.049352 down | TAP2       |
| 204770_at | 2.71E-05 | 3.06E-06 | 2.649267 down | 1.347668 down | 1.965816 up   | TAP2       |
| 204771_s_ | 3.65E-07 | 7.05E-09 | 3.535114 up   | 2.581519 up   | 1.369393 down | TTF1       |
| 204772_s_ | 0.002447 | 0.001363 | 1.927989 up   | 2.271173 up   | 1.178001 up   | TTF1       |
| 204773_at | 1.28E-05 | 1.08E-06 | 7.359929 down | 4.592406 down | 1.60263 up    | IL11RA     |
| 204775_at | 0.00204  | 0.001065 | 2.28922 up    | 2.232678 up   | 1.025325 down | CHAF1B     |
| 204776_at | 2.33E-05 | 2.48E-06 | 3.75973 up    | 2.763878 up   | 1.36031 down  | THBS4      |
| 204778_x_ | 0.002044 | 0.001068 | 1.239684 down | 2.535792 down | 2.045516 down | HOXB7      |
| 204779_s_ | 0.004285 | 0.002855 | 1.531491 down | 9.630483 down | 6.288306 down | HOXB7      |
| 204780_s_ | 9.52E-07 | 2.73E-08 | 21.64347 down | 17.08319 down | 1.266946 up   | FAS        |
| 204781_s_ | 1.10E-05 | 8.65E-07 | 10.2495 down  | 9.637886 down | 1.063459 up   | FAS        |
| 204784_s_ | 0.010344 | 0.008548 | 2.360877 up   | 1.323324 up   | 1.784051 down | MLF1       |
| 204785_x_ | 0.007575 | 0.005887 | 1.51386 down  | 1.587525 down | 1.04866 down  | IFNAR2     |
| 204787_at | 0.018213 | 0.016487 | 1.383 up      | 1.014334 up   | 1.363456 down | VSIG4      |
| 204790_at | 1.99E-04 | 4.56E-05 | 1.551427 up   | 3.436454 down | 5.331409 down | SMAD7      |
| 204799_at | 0.001814 | 9.08E-04 | 2.095462 up   | 1.781329 up   | 1.176347 down | ZBED4      |
| 204801_s_ | 6.79E-04 | 2.40E-04 | 1.304759 up   | 1.463643 down | 1.909701 down | DHRS12     |
| 204806_x_ | 2.47E-04 | 6.14E-05 | 4.490732 down | 3.342842 down | 1.343388 up   | HLA-F      |
| 204807_at | 0.004971 | 0.003467 | 4.533544 down | 4.046153 down | 1.120458 up   | TMEM5      |
| 204811_s_ | 1.82E-04 | 4.06E-05 | 4.015553 up   | 4.209421 up   | 1.048279 up   | CACNA2D2   |
| 204817_at | 0.001587 | 7.61E-04 | 3.317151 up   | 3.895765 up   | 1.174431 up   | ESPL1      |
|           |          |          |               |               |               | BTN3A2 /// |
| 204820_s_ | 8.76E-08 | 9.51E-10 | 24.29457 down | 15.17023 down | 1.601463 up   | BTN3A3     |
| 204821_at | 1.83E-07 | 2.74E-09 | 13.32581 down | 6.611147 down | 2.015658 up   | BTN3A3     |
| 204822_at | 9.54E-04 | 3.80E-04 | 8.160083 up   | 14.74314 up   | 1.80674 up    | TTK        |
| 204823_at | 4.67E-06 | 2.60E-07 | 8.687455 down | 14.12435 down | 1.625833 down | NAV3       |
| 204826_at | 0.00716  | 0.005489 | 2.596819 up   | 1.770669 up   | 1.466575 down | CCNF       |
| 204828_at | 0.00145  | 6.72E-04 | 1.193078 up   | 1.860254 up   | 1.559205 up   | RAD9A      |

|           |          |          |               |               |               |         |
|-----------|----------|----------|---------------|---------------|---------------|---------|
| 204829_s_ | 0.004578 | 0.003124 | 1.384117 up   | 1.215203 down | 1.681984 down | FOLR2   |
| 204830_x_ | 6.74E-05 | 1.06E-05 | 84.93572 down | 24.0456 down  | 3.532277 up   | PSG5    |
| 204832_s_ | 0.003271 | 0.002011 | 2.075184 up   | 2.877763 up   | 1.386751 up   | BMPR1A  |
| 204835_at | 8.87E-04 | 3.45E-04 | 2.724055 up   | 3.294447 up   | 1.209391 up   | POLA1   |
| 204836_at | 1.09E-08 | 4.68E-11 | 39.71962 up   | 35.72481 up   | 1.111822 down | GLDC    |
| 204837_at | 0.002883 | 0.001698 | 1.600564 up   | 2.733954 up   | 1.70812 up    | MTMR9   |
| 204839_at | 0.003017 | 0.001805 | 2.099274 up   | 1.588503 up   | 1.321542 down | POP5    |
| 204841_s_ | 1.34E-04 | 2.68E-05 | 5.366182 down | 1.547345 down | 3.467993 up   | EEA1    |
| 204849_at | 0.001068 | 4.44E-04 | 2.61711 down  | 1.68326 down  | 1.554787 up   | TCFL5   |
| 204853_at | 2.63E-04 | 6.66E-05 | 2.925484 up   | 2.411117 up   | 1.213332 down | ORC2L   |
| 204854_at | 4.01E-04 | 1.17E-04 | 1.751145 down | 2.599129 down | 1.484245 down | LEPREL2 |
| 204856_at | 0.007914 | 0.006203 | 1.671886 up   | 1.001682 up   | 1.669079 down | B3GNT3  |
| 204859_s_ | 0.034728 | 0.033427 | 1.052546 down | 1.88913 up    | 1.988396 up   | APAF1   |
| 204863_s_ | 0.001435 | 6.63E-04 | 12.95242 down | 3.947671 down | 3.281029 up   | IL6ST   |
| 204864_s_ | 2.97E-05 | 3.46E-06 | 17.29275 down | 5.294407 down | 3.26623 up    | IL6ST   |
| 204866_at | 0.001314 | 5.89E-04 | 2.894792 up   | 3.140229 up   | 1.084786 up   | PHF16   |
| 204867_at | 9.78E-05 | 1.75E-05 | 2.810312 up   | 5.304519 up   | 1.88752 up    | GCHFR   |
| 204868_at | 5.82E-04 | 1.94E-04 | 1.79938 up    | 1.095431 up   | 1.642623 down | ICT1    |
| 204871_at | 0.007767 | 0.006071 | 1.583485 up   | 1.411339 up   | 1.121974 down | MTERF   |
| 204873_at | 5.00E-04 | 1.57E-04 | 2.367429 up   | 3.197328 up   | 1.350549 up   | PEX1    |
| 204876_at | 0.013291 | 0.011492 | 1.850284 up   | 1.452979 down | 2.688424 down | ZNF646  |
| 204878_s_ | 0.003294 | 0.002031 | 1.66269 up    | 1.54248 down  | 2.564667 down | TAOK2   |
| 204879_at | 7.72E-04 | 2.87E-04 | 2.201158 up   | 5.989034 up   | 2.720856 up   | PDPN    |
| 204880_at | 0.003493 | 0.002195 | 3.380867 down | 2.755726 down | 1.226852 up   | MGMT    |
| 204885_s_ | 0.008129 | 0.006408 | 1.491083 up   | 1.013411 up   | 1.47135 down  | MSLN    |
| 204886_at | 3.06E-04 | 8.19E-05 | 3.610076 up   | 5.791343 up   | 1.604216 up   | PLK4    |
| 204887_s_ | 0.001156 | 4.94E-04 | 4.074666 up   | 6.173338 up   | 1.515054 up   | PLK4    |
| 204890_s_ | 7.97E-04 | 2.99E-04 | 4.568245 up   | 4.701013 up   | 1.029063 up   | LCK     |
| 204891_s_ | 1.46E-04 | 3.03E-05 | 11.39502 up   | 11.93161 up   | 1.04709 up    | LCK     |
| 204895_x_ | 0.006194 | 0.004576 | 1.438177 up   | 1.011871 up   | 1.421305 down | MUC4    |
| 204897_at | 0.001669 | 8.13E-04 | 5.119094 down | 3.960862 down | 1.292419 up   | PTGER4  |
| 204905_s_ | 4.81E-04 | 1.49E-04 | 3.570369 up   | 2.406251 up   | 1.483789 down | EEF1E1  |
| 204906_at | 4.92E-05 | 6.89E-06 | 1.892699 down | 4.034743 down | 2.131741 down | RPS6KA2 |
| 204908_s_ | 1.18E-06 | 3.68E-08 | 4.831181 down | 6.306391 down | 1.305352 down | BCL3    |

|           |          |          |               |               |               |           |
|-----------|----------|----------|---------------|---------------|---------------|-----------|
| 204913_s_ | 3.41E-05 | 4.19E-06 | 43.92201 up   | 11.5335 up    | 3.80821 down  | SOX11     |
| 204914_s_ | 9.19E-05 | 1.60E-05 | 26.55766 up   | 7.512319 up   | 3.535215 down | SOX11     |
| 204915_s_ | 1.83E-05 | 1.78E-06 | 14.17859 up   | 7.87135 up    | 1.80129 down  | SOX11     |
| 204916_at | 0.002139 | 0.001135 | 1.56146 down  | 3.401195 down | 2.178215 down | RAMP1     |
| 204917_s_ | 8.82E-04 | 3.42E-04 | 2.387017 down | 1.216216 up   | 2.90313 up    | MLLT3     |
| 204918_s_ | 4.35E-04 | 1.31E-04 | 3.203017 down | 1.147257 up   | 3.674685 up   | MLLT3     |
| 204922_at | 0.001034 | 4.24E-04 | 2.740856 up   | 2.092949 up   | 1.309566 down | C11orf80  |
| 204925_at | 0.006952 | 0.005293 | 2.554137 down | 1.929493 down | 1.323735 up   | CTNS      |
| 204926_at | 5.85E-04 | 1.96E-04 | 1.025981 down | 2.636205 down | 2.569449 down | INHBA     |
| 204927_at | 1.22E-04 | 2.35E-05 | 2.110853 up   | 1.357378 up   | 1.555096 down | RASSF7    |
| 204928_s_ | 6.76E-06 | 4.38E-07 | 2.772579 down | 4.671789 down | 1.684998 down | SLC10A3   |
| 204929_s_ | 4.18E-07 | 8.52E-09 | 7.455425 down | 6.092515 down | 1.223702 up   | VAMP5     |
| 204932_at | 5.00E-07 | 1.10E-08 | 61.0139 down  | 15.06165 down | 4.050945 up   | TNFRSF11B |
| 204933_s_ | 2.94E-06 | 1.36E-07 | 85.55124 down | 33.17577 down | 2.578726 up   | TNFRSF11B |
| 204939_s_ | 0.003245 | 0.001989 | 1.519067 down | 1.683159 down | 1.108022 down | PLN       |
| 204947_at | 8.91E-04 | 3.47E-04 | 1.93304 up    | 1.465441 up   | 1.319084 down | E2F1      |
| 204949_at | 0.010153 | 0.008363 | 1.303894 down | 2.219996 down | 1.702589 down | ICAM3     |
| 204955_at | 9.14E-08 | 1.03E-09 | 31.71159 down | 7.72015 down  | 4.107639 up   | SRPX      |
| 204958_at | 0.003424 | 0.002139 | 1.248941 down | 2.381098 down | 1.906493 down | PLK3      |
| 204960_at | 5.58E-04 | 1.83E-04 | 1.984188 up   | 1.141142 down | 2.26424 down  | PTPRCAP   |
| 204963_at | 1.13E-04 | 2.13E-05 | 22.76765 down | 8.197531 down | 2.777379 up   | SSPN      |
| 204964_s_ | 0.001466 | 6.81E-04 | 7.430244 down | 5.716258 down | 1.299844 up   | SSPN      |
| 204968_at | 0.00375  | 0.002405 | 1.126603 up   | 1.590687 down | 1.792073 down | C6orf47   |
| 204974_at | 0.037607 | 0.036336 | 2.199113 up   | 1.054212 down | 2.318331 down | RAB3A     |
| 204975_at | 2.98E-04 | 7.87E-05 | 3.742926 down | 2.388084 down | 1.567334 up   | EMP2      |
| 204977_at | 8.85E-05 | 1.52E-05 | 2.728105 up   | 2.098442 up   | 1.300063 down | DDX10     |
| 204981_at | 3.29E-04 | 9.02E-05 | 2.601388 down | 2.663946 down | 1.024048 down | SLC22A18  |
| 204983_s_ | 0.00187  | 9.46E-04 | 12.39486 up   | 2.032929 up   | 6.097044 down | GPC4      |
| 204984_at | 2.47E-04 | 6.13E-05 | 13.1317 up    | 3.579371 up   | 3.668718 down | GPC4      |
| 204988_at | 0.015303 | 0.01353  | 6.481709 up   | 3.208253 up   | 2.020323 down | FGB       |
| 204989_s_ | 0.013463 | 0.011666 | 1.472367 up   | 1.246612 up   | 1.181095 down | ITGB4     |
| 204990_s_ | 0.004454 | 0.003009 | 1.693593 up   | 1.142356 up   | 1.482544 down | ITGB4     |
| 204994_at | 0.001411 | 6.48E-04 | 8.98925 down  | 1.593757 down | 5.64029 up    | MX2       |
| 204995_at | 5.57E-05 | 8.14E-06 | 3.914295 up   | 3.746674 up   | 1.044738 down | CDK5R1    |



|           |          |          |               |               |               |          |
|-----------|----------|----------|---------------|---------------|---------------|----------|
| 204997_at | 0.016832 | 0.015078 | 1.40728 up    | 1.194637 down | 1.681189 down | GPD1     |
| 205000_at | 0.005844 | 0.004246 | 1.903193 up   | 47.44612 up   | 24.92975 up   | DDX3Y    |
| 205001_s_ | 0.002517 | 0.001417 | 2.081767 up   | 11.15041 up   | 5.356221 up   | DDX3Y    |
| 205005_s_ | 3.66E-04 | 1.04E-04 | 3.215348 down | 4.743317 down | 1.475211 down | NMT2     |
| 205006_s_ | 2.93E-06 | 1.34E-07 | 5.148922 down | 7.489884 down | 1.454651 down | NMT2     |
| 205008_s_ | 1.97E-04 | 4.50E-05 | 2.46645 up    | 2.623113 up   | 1.063518 up   | CIB2     |
| 205012_s_ | 5.05E-04 | 1.60E-04 | 1.036473 up   | 1.744191 down | 1.807808 down | HAGH     |
| 205017_s_ | 0.006384 | 0.004761 | 2.513531 down | 1.926453 down | 1.304746 up   | MBNL2    |
| 205018_s_ | 3.25E-04 | 8.89E-05 | 9.11721 down  | 6.048154 down | 1.507437 up   | MBNL2    |
| 205020_s_ | 7.98E-04 | 3.00E-04 | 4.063902 up   | 1.732418 up   | 2.345798 down | ARL4A    |
| 205021_s_ | 0.002303 | 0.001257 | 1.285359 down | 1.889675 up   | 2.42891 up    | FOXN3    |
| 205022_s_ | 1.79E-04 | 4.00E-05 | 2.260868 up   | 2.115483 up   | 1.068725 down | FOXN3    |
| 205023_at | 0.009217 | 0.007462 | 1.135598 up   | 1.468753 up   | 1.293374 up   | RAD51    |
| 205024_s_ | 0.004604 | 0.003146 | 3.368502 up   | 3.853537 up   | 1.143991 up   | RAD51    |
| 205027_s_ | 0.002758 | 0.001601 | 4.92543 down  | 1.123736 down | 4.383085 up   | MAP3K8   |
| 205028_at | 6.87E-05 | 1.09E-05 | 2.673412 up   | 1.292617 up   | 2.068217 down | TRO      |
| 205029_s_ | 1.62E-04 | 3.49E-05 | 8.029639 up   | 6.343496 up   | 1.265806 down | FABP7    |
| 205030_at | 2.73E-05 | 3.09E-06 | 13.37598 up   | 12.75498 up   | 1.048686 down | FABP7    |
| 205031_at | 0.001088 | 4.55E-04 | 1.401426 up   | 3.528605 up   | 2.517867 up   | EFNB3    |
| 205032_at | 0.021806 | 0.020179 | 1.761693 down | 1.522871 down | 1.156824 up   | ITGA2    |
| 205035_at | 0.004305 | 0.002876 | 1.669688 up   | 1.060286 down | 1.770347 down | CTDP1    |
| 205036_at | 1.71E-04 | 3.75E-05 | 2.196213 up   | 2.98771 up    | 1.360392 up   | LSM6     |
| 205040_at | 0.002599 | 0.001477 | 1.442293 up   | 1.029986 up   | 1.400304 down | ORM1     |
| 205042_at | 2.07E-04 | 4.81E-05 | 2.361789 down | 2.381993 down | 1.008554 down | GNE      |
| 205046_at | 2.90E-04 | 7.62E-05 | 3.508018 up   | 7.298502 up   | 2.08052 up    | CENPE    |
| 205049_s_ | 0.007528 | 0.00584  | 1.602689 up   | 1.292701 down | 2.071798 down | CD79A    |
| 205050_s_ | 0.011097 | 0.0093   | 2.051748 up   | 1.593682 down | 3.269833 down | MAPK8IP2 |
| 205051_s_ | 1.07E-05 | 8.25E-07 | 1.599696 up   | 11.19516 up   | 6.998304 up   | KIT      |
| 205052_at | 9.19E-05 | 1.60E-05 | 1.581706 up   | 4.070771 up   | 2.573659 up   | AUH      |
| 205053_at | 1.64E-05 | 1.52E-06 | 9.132045 up   | 14.16442 up   | 1.551068 up   | PRIM1    |
| 205054_at | 0.008637 | 0.006897 | 1.460341 up   | 1.093545 down | 1.596948 down | NEB      |
| 205056_s_ | 0.042474 | 0.041226 | 1.399298 up   | 1.255493 down | 1.756809 down | GPR162   |
| 205057_s_ | 0.012284 | 0.010491 | 1.729209 down | 2.033065 down | 1.17572 down  | IDUA     |
| 205058_at | 0.007436 | 0.005748 | 1.354848 up   | 1.502682 down | 2.035906 down | SLC26A1  |

|           |          |          |          |      |          |      |          |      |          |
|-----------|----------|----------|----------|------|----------|------|----------|------|----------|
| 205059_s_ | 5.37E-04 | 1.73E-04 | 2.975061 | down | 3.825159 | down | 1.285742 | down | IDUA     |
| 205061_s_ | 0.002677 | 0.001537 | 2.530699 | up   | 1.90693  | up   | 1.327107 | down | EXOSC9   |
| 205062_x_ | 0.005637 | 0.004057 | 1.616404 | down | 1.012948 | down | 1.595742 | up   | ARID4A   |
| 205063_at | 1.74E-04 | 3.85E-05 | 3.088941 | up   | 5.193459 | up   | 1.681307 | up   | SIP1     |
| 205067_at | 0.00794  | 0.006229 | 2.371234 | down | 1.857378 | down | 1.276657 | up   | IL1B     |
| 205075_at | 0.005237 | 0.003704 | 1.467599 | up   | 1.02694  | down | 1.507137 | down | SERPINF2 |
| 205082_s_ | 8.02E-05 | 1.34E-05 | 7.249518 | down | 1.639552 | down | 4.421647 | up   | AOX1     |
| 205083_at | 6.08E-05 | 9.21E-06 | 19.67231 | down | 2.966697 | down | 6.631049 | up   | AOX1     |
| 205084_at | 8.78E-05 | 1.50E-05 | 4.271579 | down | 2.604817 | down | 1.639877 | up   | BCAP29   |
| 205085_at | 6.38E-05 | 9.84E-06 | 8.872643 | up   | 9.821689 | up   | 1.106963 | up   | ORC1L    |
| 205088_at | 2.17E-05 | 2.25E-06 | 8.513207 | down | 7.218514 | down | 1.179357 | up   | MAMLD1   |
| 205090_s_ | 0.004985 | 0.00348  | 2.084201 | down | 2.81993  | down | 1.353003 | down | NAGPA    |
| 205092_x_ | 0.002046 | 0.001069 | 4.399132 | down | 3.237449 | down | 1.358827 | up   | ZBTB1    |
| 205097_at | 0.004297 | 0.002869 | 2.067051 | down | 2.70082  | down | 1.306606 | down | SLC26A2  |
| 205102_at | 0.002293 | 0.001251 | 1.768004 | up   | 1.738708 | up   | 1.016849 | down | TMPRSS2  |
| 205103_at | 0.002933 | 0.001737 | 1.615762 | up   | 2.100532 | up   | 1.300026 | up   | C1orf61  |
| 205105_at | 1.45E-04 | 2.98E-05 | 1.19096  | up   | 4.292884 | up   | 3.60456  | up   | MAN2A1   |
| 205107_s_ | 0.004503 | 0.003053 | 1.825737 | up   | 1.647057 | up   | 1.108485 | down | EFNA4    |
| 205110_s_ | 4.51E-07 | 9.54E-09 | 4.499616 | up   | 52.06002 | up   | 11.56988 | up   | FGF13    |
| 205111_s_ | 0.002031 | 0.001059 | 1.020561 | down | 3.671437 | down | 3.59747  | down | PLCE1    |
| 205112_at | 3.49E-04 | 9.76E-05 | 1.091573 | down | 3.609176 | down | 3.3064   | down | PLCE1    |
| 205113_at | 9.25E-04 | 3.65E-04 | 16.61318 | up   | 2.9321   | up   | 5.665965 | down | NEFM     |
| 205116_at | 1.15E-04 | 2.18E-05 | 3.521232 | down | 1.055908 | down | 3.334792 | up   | LAMA2    |
| 205117_at | 0.002441 | 0.001359 | 6.624108 | down | 3.918257 | down | 1.690575 | up   | FGF1     |
| 205120_s_ | 2.66E-06 | 1.18E-07 | 4.05684  | down | 4.150647 | down | 1.023123 | down | SGCB     |
| 205121_at | 4.49E-05 | 6.11E-06 | 9.763807 | down | 2.854204 | down | 3.420851 | up   | SGCB     |
| 205122_at | 3.75E-05 | 4.73E-06 | 7.445799 | up   | 19.53774 | up   | 2.623996 | up   | TMEFF1   |
| 205123_s_ | 3.93E-05 | 5.09E-06 | 8.238654 | up   | 14.76317 | up   | 1.791939 | up   | TMEFF1   |
| 205126_at | 6.83E-04 | 2.42E-04 | 1.598588 | up   | 1.479328 | up   | 1.080618 | down | VRK2     |
| 205127_at | 7.31E-06 | 4.94E-07 | 7.491552 | down | 1.087915 | down | 6.886157 | up   | PTGS1    |
| 205128_x_ | 8.76E-08 | 9.60E-10 | 36.07037 | down | 2.77745  | down | 12.98687 | up   | PTGS1    |
| 205130_at | 1.59E-06 | 5.66E-08 | 2.254806 | down | 22.37492 | down | 9.923216 | down | RAGE     |
| 205131_x_ | 2.65E-05 | 2.95E-06 | 8.650428 | down | 6.243814 | down | 1.38544  | up   | CLEC11A  |
| 205133_s_ | 9.10E-05 | 1.58E-05 | 3.354173 | up   | 2.826944 | up   | 1.186501 | down | HSPE1    |

|           |          |          |               |               |               |           |
|-----------|----------|----------|---------------|---------------|---------------|-----------|
| 205134_s_ | 0.001498 | 7.03E-04 | 2.299863 up   | 2.506335 up   | 1.089776 up   | NUFIP1    |
| 205135_s_ | 2.79E-04 | 7.24E-05 | 2.848505 up   | 2.262039 up   | 1.259265 down | NUFIP1    |
| 205140_at | 0.004002 | 0.002608 | 3.716703 down | 1.91865 down  | 1.937145 up   | FPGT      |
|           |          |          |               |               |               | LOC649851 |
| 205145_s_ | 0.001174 | 5.06E-04 | 1.764708 down | 2.089377 down | 1.183979 down | /// MYL5  |
| 205146_x_ | 0.021332 | 0.019692 | 1.628747 up   | 1.076785 down | 1.753809 down | APBA3     |
| 205150_s_ | 0.011463 | 0.009664 | 1.224714 down | 3.40732 up    | 4.172991 up   | KIAA0644  |
| 205151_s_ | 0.005053 | 0.00354  | 1.210117 down | 3.570325 up   | 4.32051 up    | KIAA0644  |
| 205153_s_ | 0.001365 | 6.21E-04 | 1.857103 down | 1.087384 down | 1.707863 up   | CD40      |
| 205154_at | 7.98E-04 | 3.00E-04 | 1.816594 up   | 1.783203 up   | 1.018725 down | LRRN2     |
| 205155_s_ | 5.38E-04 | 1.74E-04 | 2.971163 up   | 1.563086 up   | 1.900832 down | SPTBN2    |
| 205158_at | 4.51E-04 | 1.37E-04 | 17.03937 down | 8.29735 down  | 2.053591 up   | RNASE4    |
| 205160_at | 1.18E-04 | 2.25E-05 | 4.539241 down | 2.255231 down | 2.012761 up   | PEX11A    |
| 205161_s_ | 1.74E-04 | 3.83E-05 | 3.058894 down | 1.767311 down | 1.730818 up   | PEX11A    |
| 205165_at | 9.83E-07 | 2.86E-08 | 4.088742 up   | 4.298651 up   | 1.051338 up   | CELSR3    |
| 205167_s_ | 9.85E-04 | 3.98E-04 | 4.214297 up   | 4.467975 up   | 1.060194 up   | CDC25C    |
| 205168_at | 1.02E-07 | 1.20E-09 | 24.03101 down | 27.24634 down | 1.133799 down | DDR2      |
| 205170_at | 0.002208 | 0.001184 | 5.075109 down | 2.564259 down | 1.979172 up   | STAT2     |
| 205171_at | 1.68E-04 | 3.66E-05 | 3.535982 up   | 2.97194 up    | 1.18979 down  | PTPN4     |
| 205172_x_ | 0.001445 | 6.69E-04 | 1.582896 down | 2.183745 down | 1.379588 down | CLTB      |
| 205173_x_ | 6.94E-04 | 2.48E-04 | 3.038773 down | 3.889767 down | 1.280045 down | CD58      |
| 205174_s_ | 9.90E-05 | 1.78E-05 | 4.157679 down | 1.710214 down | 2.431087 up   | QPCT      |
| 205176_s_ | 9.95E-04 | 4.03E-04 | 3.711 up      | 2.961237 up   | 1.253193 down | ITGB3BP   |
| 205177_at | 0.006388 | 0.004766 | 1.645528 up   | 1.280431 up   | 1.285136 down | TNNI1     |
| 205178_s_ | 6.27E-04 | 2.15E-04 | 1.844838 up   | 1.60862 up    | 1.146845 down | RBBP6     |
| 205179_s_ | 0.020159 | 0.018487 | 1.30889 up    | 1.052566 down | 1.377693 down | ADAM8     |
| 205181_at | 0.007196 | 0.005523 | 1.493456 up   | 1.233577 down | 1.842293 down | ZNF193    |
| 205184_at | 4.00E-05 | 5.24E-06 | 5.048023 up   | 5.159239 up   | 1.022032 up   | GNG4      |
| 205185_at | 5.24E-04 | 1.68E-04 | 2.724004 up   | 3.556984 up   | 1.305793 up   | SPINK5    |
| 205188_s_ | 0.030834 | 0.029458 | 1.572152 down | 1.073519 down | 1.464484 up   | SMAD5     |
| 205189_s_ | 0.005651 | 0.004071 | 1.500902 up   | 1.515678 up   | 1.009845 up   | FANCC     |
| 205190_at | 1.50E-08 | 7.53E-11 | 21.12713 up   | 14.27538 up   | 1.479969 down | PLS1      |
| 205191_at | 0.004103 | 0.002694 | 3.198223 down | 1.433201 down | 2.231524 up   | RP2       |

|           |          |          |               |               |               |  |           |
|-----------|----------|----------|---------------|---------------|---------------|--|-----------|
|           |          |          |               |               |               |  | ATP7A /// |
| 205197_s_ | 0.00315  | 0.001915 | 1.475056 down | 2.554555 down | 1.731836 down |  | LOC644732 |
| 205198_s_ | 0.001444 | 6.68E-04 | 3.450034 down | 4.180194 down | 1.211639 down |  | ATP7A     |
| 205200_at | 4.27E-04 | 1.28E-04 | 20.18381 down | 3.246648 down | 6.216817 up   |  | CLEC3B    |
| 205203_at | 3.14E-04 | 8.46E-05 | 2.377764 down | 1.200136 down | 1.981245 up   |  | PLD1      |
| 205206_at | 9.08E-04 | 3.55E-04 | 21.7469 up    | 14.38528 up   | 1.511747 down |  | KAL1      |
| 205207_at | 0.001104 | 4.64E-04 | 10.49652 down | 46.73008 down | 4.451961 down |  | IL6       |
| 205212_s_ | 0.004877 | 0.003385 | 2.174442 up   | 1.682281 down | 3.658022 down |  | ACAP1     |
| 205214_at | 1.46E-05 | 1.30E-06 | 4.713574 down | 5.29775 down  | 1.123935 down |  | STK17B    |
| 205215_at | 0.003323 | 0.002055 | 1.632847 up   | 1.165853 up   | 1.40056 down  |  | RNF2      |
| 205219_s_ | 0.003642 | 0.002312 | 1.904646 down | 1.423399 down | 1.338097 up   |  | GALK2     |
| 205221_at | 0.002336 | 0.001282 | 1.465799 up   | 1.101962 up   | 1.330172 down |  | HGD       |
| 205224_at | 0.003618 | 0.002293 | 2.506515 up   | 1.374538 up   | 1.823533 down |  | SURF2     |
| 205229_s_ | 1.06E-07 | 1.29E-09 | 27.62727 up   | 25.62056 up   | 1.078324 down |  | COCH      |
| 205234_at | 0.003387 | 0.002107 | 3.92407 down  | 8.014197 down | 2.042317 down |  | SLC16A4   |
| 205235_s_ | 2.38E-04 | 5.82E-05 | 3.007973 up   | 4.684618 up   | 1.5574 up     |  | KIF20B    |
| 205236_x_ | 3.25E-04 | 8.88E-05 | 6.378595 down | 1.191162 down | 5.354937 up   |  | SOD3      |
| 205237_at | 0.010322 | 0.008528 | 1.462478 up   | 1.079684 up   | 1.354543 down |  | FCN1      |
| 205240_at | 5.74E-05 | 8.49E-06 | 3.475303 down | 1.138178 up   | 3.955514 up   |  | GPSM2     |
| 205241_at | 1.03E-05 | 7.83E-07 | 1.746052 down | 2.538774 down | 1.454008 down |  | SCO2      |
| 205245_at | 0.003393 | 0.002113 | 2.205308 up   | 1.542462 up   | 1.429732 down |  | PARD6A    |
| 205248_at | 8.67E-04 | 3.33E-04 | 1.597129 down | 4.150353 down | 2.598633 down |  | DOPEY2    |
| 205251_at | 0.005052 | 0.003539 | 2.747972 down | 2.569408 down | 1.069496 up   |  | PER2      |
| 205252_at | 0.006146 | 0.004533 | 1.161708 down | 1.161672 up   | 1.349524 up   |  | ZNF174    |
| 205253_at | 7.47E-06 | 5.12E-07 | 1.530692 up   | 5.687346 up   | 3.715539 up   |  | PBX1      |
| 205256_at | 4.76E-05 | 6.57E-06 | 2.77055 up    | 2.841044 up   | 1.025444 up   |  | ZBTB39    |
| 205258_at | 0.016431 | 0.014661 | 4.277449 down | 3.872847 down | 1.104472 up   |  | INHBB     |
| 205262_at | 0.004576 | 0.003121 | 1.834054 up   | 1.144904 up   | 1.601928 down |  | KCNH2     |
| 205263_at | 0.006449 | 0.00482  | 1.835457 down | 1.880731 down | 1.024667 down |  | BCL10     |
| 205266_at | 5.13E-04 | 1.63E-04 | 1.420543 up   | 5.671381 down | 8.056439 down |  | LIF       |
| 205268_s_ | 1.67E-05 | 1.58E-06 | 13.39891 up   | 22.0926 up    | 1.648836 up   |  | ADD2      |
|           |          |          |               |               |               |  | PRH1 ///  |
| 205272_s_ | 0.002312 | 0.001264 | 1.904071 up   | 1.005866 down | 1.91524 down  |  | PRH2      |
| 205273_s_ | 7.05E-05 | 1.13E-05 | 2.372484 down | 3.31598 down  | 1.397683 down |  | PITRM1    |

|           |          |          |               |               |               |           |
|-----------|----------|----------|---------------|---------------|---------------|-----------|
| 205275_at | 1.30E-04 | 2.58E-05 | 1.105712 up   | 1.307817 down | 1.44607 down  | GTPBP1    |
| 205276_s_ | 0.006725 | 0.005078 | 2.081907 up   | 1.271878 up   | 1.636876 down | GTPBP1    |
| 205277_at | 6.94E-04 | 2.47E-04 | 3.129508 down | 1.47699 down  | 2.118842 up   | PRDM2     |
| 205278_at | 6.84E-05 | 1.08E-05 | 5.763668 up   | 6.674349 up   | 1.158004 up   | GAD1      |
| 205279_s_ | 2.44E-04 | 6.03E-05 | 6.507918 down | 4.420195 down | 1.472315 up   | GLRB      |
| 205280_at | 5.33E-04 | 1.72E-04 | 9.051612 down | 6.705198 down | 1.349939 up   | GLRB      |
| 205282_at | 7.57E-04 | 2.79E-04 | 3.77823 up    | 4.671462 up   | 1.236416 up   | LRP8      |
| 205283_at | 4.35E-06 | 2.36E-07 | 3.299785 down | 1.782164 down | 1.851561 up   | FKTN      |
| 205284_at | 0.002343 | 0.001286 | 2.29724 up    | 2.305935 up   | 1.003785 up   | URB2      |
| 205285_s_ | 0.030903 | 0.029537 | 1.330713 up   | 1.051154 down | 1.398785 down | FYB       |
| 205286_at | 1.50E-06 | 5.16E-08 | 1.137496 up   | 18.76489 up   | 16.49667 up   | TFAP2C    |
| 205287_s_ | 0.002477 | 0.001387 | 1.175749 down | 2.85125 up    | 3.352353 up   | TFAP2C    |
| 205289_at | 8.70E-04 | 3.35E-04 | 3.41802 up    | 7.754334 up   | 2.268662 up   | BMP2      |
| 205290_s_ | 0.001531 | 7.22E-04 | 4.870476 up   | 10.81422 up   | 2.220362 up   | BMP2      |
| 205292_s_ | 3.14E-04 | 8.49E-05 | 2.458527 up   | 2.123744 up   | 1.157638 down | HNRNPA2B1 |
| 205305_at | 0.026444 | 0.024948 | 1.146857 up   | 1.317872 down | 1.51141 down  | FGL1      |
| 205309_at | 1.04E-04 | 1.91E-05 | 10.58823 up   | 9.030803 up   | 1.172457 down | SMPDL3B   |
| 205310_at | 9.84E-04 | 3.97E-04 | 1.915643 up   | 1.778692 up   | 1.076996 down | FBXO46    |
| 205312_at | 0.001707 | 8.38E-04 | 1.27891 up    | 1.301635 down | 1.664674 down | SPI1      |
| 205313_at | 0.003581 | 0.002265 | 1.604157 up   | 1.622952 up   | 1.011716 up   | HNF1B     |
| 205314_x_ | 8.20E-04 | 3.10E-04 | 1.361275 up   | 1.372197 down | 1.867938 down | SNTB2     |
| 205315_s_ | 1.46E-05 | 1.31E-06 | 3.554379 down | 3.587797 down | 1.009402 down | SNTB2     |
| 205316_at | 0.001108 | 4.66E-04 | 2.556722 up   | 2.698931 up   | 1.055621 up   | SLC15A2   |
| 205320_at | 0.002687 | 0.001544 | 2.161842 up   | 1.087667 down | 2.351365 down | APC2      |
| 205325_at | 5.82E-04 | 1.94E-04 | 1.641856 up   | 1.068203 down | 1.753835 down | PHYHIP    |
| 205328_at | 1.62E-06 | 5.86E-08 | 22.33672 up   | 17.44043 up   | 1.280744 down | CLDN10    |
| 205332_at | 0.009463 | 0.007691 | 1.969268 up   | 1.231782 up   | 1.598715 down | RCE1      |
| 205333_s_ | 0.002074 | 0.001089 | 2.129878 up   | 1.021395 down | 2.175447 down | RCE1      |
| 205339_at | 8.54E-04 | 3.27E-04 | 3.96684 up    | 4.734143 up   | 1.19343 up    | STIL      |
| 205341_at | 0.001126 | 4.77E-04 | 1.777913 down | 3.979816 down | 2.238477 down | EHD2      |
| 205345_at | 2.83E-04 | 7.37E-05 | 4.681402 up   | 3.800204 up   | 1.231882 down | BARD1     |
| 205347_s_ | 1.37E-04 | 2.77E-05 | 35.46969 up   | 48.2002 up    | 1.358913 up   | TMSB15A   |
| 205348_s_ | 7.64E-04 | 2.83E-04 | 2.694899 up   | 1.913618 down | 5.157006 down | DYNC1I1   |

|           |          |          |          |      |          |      |          |      |          |
|-----------|----------|----------|----------|------|----------|------|----------|------|----------|
| 205350_at | 2.08E-07 | 3.34E-09 | 56.70062 | up   | 64.61823 | up   | 1.139639 | up   | CRABP1   |
| 205351_at | 0.004554 | 0.003102 | 2.268133 | down | 2.184316 | down | 1.038372 | up   | GGCX     |
| 205352_at | 0.007946 | 0.006238 | 5.219014 | up   | 2.476283 | up   | 2.1076   | down | SERPINI1 |
| 205353_s_ | 0.004272 | 0.002844 | 2.496851 | up   | 1.336782 | up   | 1.867807 | down | PEBP1    |
| 205356_at | 3.69E-04 | 1.05E-04 | 2.258605 | up   | 1.441905 | up   | 1.566404 | down | USP13    |
| 205357_s_ | 3.29E-04 | 9.04E-05 | 6.230914 | down | 11.52775 | down | 1.85009  | down | AGTR1    |
| 205361_s_ | 1.54E-04 | 3.26E-05 | 1.857501 | up   | 2.010898 | up   | 1.082583 | up   | PFDN4    |
| 205362_s_ | 0.004506 | 0.003057 | 1.304422 | up   | 1.285075 | down | 1.676281 | down | PFDN4    |
| 205364_at | 1.77E-05 | 1.71E-06 | 4.066687 | down | 3.636936 | down | 1.118163 | up   | ACOX2    |
| 205367_at | 1.09E-04 | 2.03E-05 | 1.73848  | up   | 2.114782 | up   | 1.216454 | up   | SH2B2    |
| 205370_x_ | 9.29E-04 | 3.67E-04 | 1.303089 | up   | 2.120235 | up   | 1.627084 | up   | DBT      |
| 205371_s_ | 0.005094 | 0.003576 | 1.553732 | down | 1.597823 | up   | 2.482589 | up   | DBT      |
| 205372_at | 0.002114 | 0.001117 | 1.252968 | down | 4.279554 | up   | 5.362143 | up   | PLAG1    |
| 205375_at | 1.14E-04 | 2.15E-05 | 2.905574 | up   | 1.084134 | up   | 2.680088 | down | MDFI     |
| 205376_at | 5.55E-06 | 3.29E-07 | 10.94258 | down | 3.306758 | down | 3.309156 | up   | INPP4B   |
| 205378_s_ | 0.005928 | 0.004328 | 1.74735  | up   | 1.166393 | up   | 1.49808  | down | ACHE     |
| 205379_at | 3.83E-06 | 1.95E-07 | 4.114406 | down | 6.250047 | down | 1.519064 | down | CBR3     |
| 205382_s_ | 0.01966  | 0.017967 | 7.529864 | down | 2.254586 | down | 3.3398   | up   | CFD      |
| 205383_s_ | 0.002721 | 0.00157  | 6.115052 | down | 5.24203  | down | 1.166543 | up   | ZBTB20   |
| 205393_s_ | 0.001716 | 8.44E-04 | 3.378275 | up   | 6.082434 | up   | 1.800456 | up   | CHEK1    |
| 205396_at | 0.008827 | 0.007081 | 2.362769 | down | 2.300785 | down | 1.026941 | up   | SMAD3    |
| 205398_s_ | 9.06E-05 | 1.57E-05 | 2.472001 | down | 4.709823 | down | 1.905268 | down | SMAD3    |
| 205405_at | 1.33E-05 | 1.14E-06 | 8.242049 | down | 3.775645 | down | 2.182951 | up   | SEMA5A   |
| 205407_at | 4.20E-09 | 1.28E-11 | 86.38747 | down | 22.88665 | down | 3.774579 | up   | RECK     |
| 205408_at | 0.001207 | 5.25E-04 | 1.175713 | up   | 3.179344 | up   | 2.704184 | up   | MLLT10   |
| 205409_at | 0.008406 | 0.006669 | 1.703872 | down | 2.686439 | down | 1.576667 | down | FOSL2    |
| 205410_s_ | 0.001849 | 9.31E-04 | 5.149427 | down | 3.721466 | down | 1.383709 | up   | ATP2B4   |
| 205412_at | 1.29E-04 | 2.54E-05 | 2.585032 | down | 2.298786 | down | 1.12452  | up   | ACAT1    |
| 205414_s_ | 9.64E-05 | 1.71E-05 | 3.391719 | up   | 2.210956 | up   | 1.534051 | down | RICH2    |
| 205417_s_ | 0.002799 | 0.001632 | 1.610389 | up   | 1.133246 | up   | 1.421041 | down | DAG1     |
| 205422_s_ | 1.52E-05 | 1.39E-06 | 34.52996 | down | 153.6021 | down | 4.448371 | down | ITGBL1   |
| 205429_s_ | 0.004456 | 0.003011 | 5.38107  | up   | 2.157731 | up   | 2.493856 | down | MPP6     |
| 205435_s_ | 0.007435 | 0.005746 | 1.172306 | up   | 1.15606  | down | 1.355256 | down | AAK1     |
| 205437_at | 9.97E-04 | 4.05E-04 | 1.161883 | up   | 1.845466 | up   | 1.588341 | up   | ZNF211   |

|           |          |          |               |               |               |         |
|-----------|----------|----------|---------------|---------------|---------------|---------|
| 205440_s_ | 1.32E-05 | 1.13E-06 | 7.728479 up   | 8.373353 up   | 1.083441 up   | NPY1R   |
| 205451_at | 8.31E-04 | 3.16E-04 | 2.071577 up   | 1.046976 down | 2.168892 down | FOXO4   |
| 205452_at | 2.04E-04 | 4.72E-05 | 2.060597 down | 2.485274 down | 1.206095 down | PIGB    |
| 205454_at | 0.001753 | 8.68E-04 | 1.609682 up   | 1.028521 down | 1.655593 down | HPCA    |
| 205456_at | 0.001248 | 5.49E-04 | 1.64286 down  | 1.052936 up   | 1.729826 up   | CD3E    |
| 205459_s_ | 0.007618 | 0.005927 | 1.841424 down | 1.05035 down  | 1.753152 up   | NPAS2   |
| 205464_at | 0.004689 | 0.003221 | 1.415381 up   | 1.225733 down | 1.73488 down  | SCNN1B  |
| 205466_s_ | 0.001396 | 6.40E-04 | 1.691737 up   | 1.413204 up   | 1.197094 down | HS3ST1  |
| 205469_s_ | 0.021976 | 0.020362 | 1.405178 up   | 1.106374 down | 1.554653 down | IRF5    |
| 205475_at | 4.21E-05 | 5.60E-06 | 1.257888 up   | 15.77671 down | 19.84534 down | SCRG1   |
| 205478_at | 2.29E-06 | 9.50E-08 | 8.488869 up   | 4.585186 up   | 1.851368 down | PPP1R1A |
| 205479_s_ | 9.58E-04 | 3.83E-04 | 2.031683 down | 4.942524 down | 2.432724 down | PLAU    |
| 205480_s_ | 2.25E-04 | 5.40E-05 | 2.186638 up   | 2.286726 up   | 1.045773 up   | UGP2    |
| 205486_at | 0.001056 | 4.37E-04 | 1.814012 up   | 2.72361 up    | 1.501429 up   | TESK2   |
| 205489_at | 4.42E-04 | 1.33E-04 | 3.010831 up   | 3.062326 up   | 1.017103 up   | CRYM    |
| 205497_at | 0.007117 | 0.005448 | 1.266051 down | 1.993427 down | 1.574524 down | ZNF175  |
| 205499_at | 2.78E-06 | 1.25E-07 | 12.24317 down | 9.315825 down | 1.314234 up   | SRPX2   |
| 205501_at | 0.011506 | 0.009704 | 2.898109 up   | 1.102149 up   | 2.629507 down | PDE10A  |
| 205505_at | 0.003531 | 0.002224 | 1.665925 up   | 1.835715 down | 3.058164 down | GCNT1   |
| 205506_at | 7.69E-04 | 2.85E-04 | 2.377668 up   | 1.89663 up    | 1.253628 down | VIL1    |
| 205508_at | 0.002475 | 0.001385 | 3.284731 down | 1.488432 down | 2.20684 up    | SCN1B   |
| 205515_at | 3.69E-04 | 1.05E-04 | 21.21566 down | 4.188836 down | 5.064811 up   | PRSS12  |
| 205518_s_ | 0.002463 | 0.001376 | 5.470386 down | 6.081925 down | 1.111791 down | CMAH    |
| 205523_at | 5.98E-04 | 2.02E-04 | 12.84433 up   | 5.032863 down | 64.64374 down | HAPLN1  |
| 205524_s_ | 4.95E-04 | 1.55E-04 | 5.302517 up   | 4.262205 down | 22.60042 down | HAPLN1  |
| 205527_s_ | 0.006518 | 0.004884 | 2.18009 up    | 1.466906 up   | 1.486183 down | GEMIN4  |
| 205528_s_ | 5.87E-05 | 8.79E-06 | 4.054187 down | 3.101772 up   | 12.57517 up   | RUNX1T1 |
| 205529_s_ | 0.00101  | 4.11E-04 | 3.887843 down | 3.303516 up   | 12.84355 up   | RUNX1T1 |
| 205530_at | 1.44E-05 | 1.28E-06 | 4.385191 down | 2.74258 down  | 1.598929 up   | ETFDH   |
| 205531_s_ | 1.00E-05 | 7.59E-07 | 4.589529 up   | 2.504409 up   | 1.832579 down | GLS2    |
| 205534_at | 0.003479 | 0.002184 | 3.608632 up   | 4.096956 up   | 1.135321 up   | PCDH7   |
| 205537_s_ | 0.007748 | 0.006053 | 1.841467 up   | 1.223831 up   | 1.504675 down | VAV2    |
| 205538_at | 7.77E-07 | 2.06E-08 | 6.791642 up   | 5.848846 up   | 1.161193 down | CORO2A  |
| 205539_at | 3.13E-04 | 8.43E-05 | 2.036154 down | 1.181064 down | 1.724 up      | AVIL    |

|           |          |          |          |      |          |      |          |      |         |
|-----------|----------|----------|----------|------|----------|------|----------|------|---------|
| 205540_s_ | 4.23E-04 | 1.26E-04 | 3.434507 | down | 2.247693 | down | 1.528014 | up   | RRAGB   |
| 205541_s_ | 4.81E-05 | 6.68E-06 | 2.078108 | up   | 2.431687 | up   | 1.170145 | up   | GSPT2   |
| 205542_at | 5.63E-04 | 1.86E-04 | 11.9157  | down | 5.04874  | down | 2.360134 | up   | STEAP1  |
| 205546_s_ | 2.03E-04 | 4.69E-05 | 1.598097 | down | 2.057382 | down | 1.287395 | down | TYK2    |
| 205547_s_ | 0.00463  | 0.003171 | 3.016982 | down | 16.3812  | down | 5.429665 | down | TAGLN   |
| 205549_at | 0.002113 | 0.001116 | 1.823306 | up   | 1.466969 | up   | 1.242907 | down | PCP4    |
| 205550_s_ | 8.22E-04 | 3.12E-04 | 1.438416 | down | 1.367533 | down | 1.051833 | up   | BRE     |
| 205553_s_ | 0.006854 | 0.005196 | 1.327344 | up   | 1.170339 | up   | 1.134154 | down | CSRP3   |
| 205555_s_ | 0.008641 | 0.0069   | 1.816019 | up   | 4.641905 | up   | 2.556089 | up   | MSX2    |
| 205561_at | 0.024585 | 0.023021 | 1.276534 | up   | 1.482206 | down | 1.892087 | down | KCTD17  |
| 205562_at | 0.003651 | 0.002319 | 1.445316 | up   | 1.548913 | up   | 1.071678 | up   | RPP38   |
| 205566_at | 0.001606 | 7.73E-04 | 1.924836 | down | 2.237823 | down | 1.162605 | down | ABHD2   |
| 205568_at | 0.002466 | 0.001378 | 1.587128 | down | 1.126366 | up   | 1.787688 | up   | AQP9    |
| 205573_s_ | 4.42E-04 | 1.33E-04 | 2.214672 | down | 2.474619 | down | 1.117375 | down | SNX7    |
| 205574_x_ | 3.78E-05 | 4.79E-06 | 5.702145 | down | 11.24562 | down | 1.972173 | down | BMP1    |
| 205577_at | 0.00193  | 9.88E-04 | 1.605433 | up   | 1.994623 | up   | 1.24242  | up   | PYGM    |
| 205578_at | 0.008886 | 0.007136 | 1.206166 | up   | 2.782749 | up   | 2.307103 | up   | ROR2    |
| 205579_at | 9.57E-06 | 7.14E-07 | 8.426297 | down | 6.173132 | down | 1.364995 | up   | HRH1    |
| 205580_s_ | 0.001581 | 7.56E-04 | 2.750576 | down | 2.060823 | down | 1.334698 | up   | HRH1    |
| 205581_s_ | 0.011829 | 0.010027 | 1.821736 | up   | 1.298222 | up   | 1.403255 | down | NOS3    |
| 205591_at | 0.001066 | 4.43E-04 | 2.614209 | up   | 3.472403 | up   | 1.32828  | up   | OLFM1   |
| 205593_s_ | 6.52E-07 | 1.59E-08 | 9.748183 | up   | 7.493353 | up   | 1.300911 | down | PDE9A   |
| 205596_s_ | 3.48E-04 | 9.74E-05 | 1.759091 | down | 3.615537 | down | 2.055344 | down | SMURF2  |
| 205598_at | 0.001895 | 9.62E-04 | 2.093298 | up   | 1.562784 | up   | 1.339467 | down | TRAIP   |
| 205599_at | 0.002501 | 0.001404 | 1.268099 | down | 1.555966 | down | 1.227006 | down | TRAF1   |
| 205602_x_ | 0.001637 | 7.93E-04 | 9.452924 | down | 3.057578 | down | 3.091638 | up   | PSG7    |
| 205603_s_ | 4.68E-04 | 1.44E-04 | 6.318836 | up   | 9.449307 | up   | 1.495419 | up   | DIAPH2  |
| 205605_at | 3.49E-04 | 9.75E-05 | 1.791317 | up   | 1.26642  | down | 2.268559 | down | HOXD9   |
| 205606_at | 9.65E-05 | 1.72E-05 | 3.116537 | up   | 2.027584 | up   | 1.53707  | down | LRP6    |
| 205608_s_ | 3.83E-04 | 1.11E-04 | 9.156157 | down | 4.32044  | down | 2.119265 | up   | ANGPT1  |
| 205609_at | 6.20E-04 | 2.12E-04 | 13.87439 | down | 5.510114 | down | 2.517986 | up   | ANGPT1  |
| 205611_at | 0.001427 | 6.58E-04 | 2.53566  | down | 2.683142 | down | 1.058163 | down | TNFSF12 |
| 205613_at | 5.55E-06 | 3.30E-07 | 4.172103 | up   | 2.862187 | up   | 1.457663 | down | SYT17   |
| 205615_at | 0.004055 | 0.002653 | 1.357368 | up   | 1.101988 | down | 1.495804 | down | CPA1    |



|           |          |          |               |               |               |          |
|-----------|----------|----------|---------------|---------------|---------------|----------|
| 205616_at | 0.011917 | 0.010114 | 2.169572 up   | 1.170049 up   | 1.854257 down | KCNA6    |
| 205619_s_ | 0.005157 | 0.003633 | 1.595868 up   | 1.068203 up   | 1.493973 down | MEOX1    |
| 205620_at | 7.58E-04 | 2.79E-04 | 4.33757 down  | 1.001318 down | 4.33186 up    | F10      |
| 205623_at | 0.018219 | 0.016498 | 1.594832 up   | 1.133212 up   | 1.407355 down | ALDH3A1  |
| 205625_s_ | 3.42E-04 | 9.47E-05 | 10.34443 up   | 10.44071 up   | 1.009308 up   | CALB1    |
| 205626_s_ | 4.50E-05 | 6.13E-06 | 11.25911 up   | 9.8942 up     | 1.137951 down | CALB1    |
| 205628_at | 0.017571 | 0.015829 | 1.312614 down | 1.944723 up   | 2.552671 up   | PRIM2    |
| 205629_s_ | 0.003391 | 0.002112 | 1.734052 up   | 1.003921 up   | 1.727279 down | CRH      |
| 205632_s_ | 3.07E-04 | 8.20E-05 | 3.326056 up   | 3.582034 up   | 1.076962 up   | PIP5K1B  |
| 205637_s_ | 1.04E-04 | 1.90E-05 | 6.488083 up   | 8.397129 up   | 1.294239 up   | SH3GL3   |
| 205640_at | 1.75E-06 | 6.46E-08 | 7.988242 down | 6.664142 down | 1.19869 up    | ALDH3B1  |
| 205641_s_ | 1.46E-05 | 1.31E-06 | 2.199369 down | 3.098008 down | 1.408589 down | TRADD    |
| 205642_at | 7.54E-05 | 1.24E-05 | 1.54845 up    | 2.45817 up    | 1.587504 up   | CEP110   |
| 205644_s_ | 0.005056 | 0.003543 | 2.106251 up   | 1.574869 up   | 1.337413 down | SNRPG    |
| 205648_at | 6.72E-07 | 1.67E-08 | 13.99652 down | 1.23613 up    | 17.30151 up   | WNT2     |
| 205650_s_ | 0.027568 | 0.026095 | 2.684305 up   | 1.966028 up   | 1.365344 down | FGA      |
| 205652_s_ | 1.15E-04 | 2.19E-05 | 1.801535 down | 3.097926 down | 1.719603 down | TTLL1    |
| 205656_at | 7.99E-04 | 3.00E-04 | 2.318201 up   | 3.018583 up   | 1.302123 up   | PCDH17   |
| 205662_at | 0.032662 | 0.031339 | 1.975617 up   | 1.339308 up   | 1.475102 down | B9D1     |
| 205670_at | 3.88E-05 | 4.99E-06 | 2.244617 up   | 1.828324 up   | 1.227691 down | GAL3ST1  |
| 205672_at | 0.002724 | 0.001572 | 2.7768 down   | 2.245593 down | 1.236555 up   | XPA      |
| 205673_s_ | 0.003073 | 0.001849 | 1.1244 down   | 1.172868 up   | 1.318773 up   | ASB9     |
| 205678_at | 3.63E-04 | 1.03E-04 | 1.563253 up   | 1.327441 up   | 1.177644 down | AP3B2    |
| 205679_x_ | 0.01183  | 0.010028 | 2.156775 down | 3.97264 down  | 1.841935 down | ACAN     |
| 205680_at | 0.0091   | 0.007346 | 1.244033 down | 1.367369 up   | 1.701052 up   | MMP10    |
| 205684_s_ | 0.028901 | 0.027483 | 1.881451 down | 1.179619 up   | 2.219395 up   | DENND4C  |
| 205691_at | 0.006396 | 0.004773 | 1.791436 up   | 5.834893 up   | 3.257103 up   | SYNGR3   |
| 205693_at | 0.001945 | 9.98E-04 | 1.524579 up   | 1.026416 up   | 1.485342 down | TNNT3    |
| 205697_at | 0.00848  | 0.006747 | 1.436502 up   | 1.019178 down | 1.46405 down  | SCGN     |
| 205698_s_ | 1.59E-04 | 3.41E-05 | 1.069203 up   | 7.20782 up    | 6.7413 up     | MAP2K6   |
| 205702_at | 0.003907 | 0.002532 | 1.725626 down | 1.390501 down | 1.24101 up    | PHTF1    |
| 205704_s_ | 0.00485  | 0.003358 | 1.836286 up   | 2.124078 up   | 1.156725 up   | ATP6V0A2 |
| 205707_at | 0.003427 | 0.002142 | 1.930221 down | 1.422742 down | 1.356691 up   | IL17RA   |
| 205709_s_ | 3.07E-04 | 8.23E-05 | 5.643263 up   | 9.061039 up   | 1.605638 up   | CDS1     |

|           |          |          |               |               |               |          |
|-----------|----------|----------|---------------|---------------|---------------|----------|
| 205710_at | 7.40E-04 | 2.70E-04 | 2.548935 up   | 2.897029 up   | 1.136565 up   | LRP2     |
| 205711_x_ | 0.007534 | 0.005846 | 1.422548 up   | 1.108382 up   | 1.283446 down | ATP5C1   |
| 205712_at | 6.71E-05 | 1.06E-05 | 3.788355 up   | 4.855992 up   | 1.281821 up   | PTPRD    |
| 205714_s_ | 0.003999 | 0.002605 | 1.580719 up   | 1.06037 down  | 1.676147 down | ZMYND10  |
| 205715_at | 2.39E-05 | 2.57E-06 | 7.522989 down | 14.17647 down | 1.88442 down  | BST1     |
|           |          |          |               |               |               | ///      |
|           |          |          |               |               |               | PCDHGA10 |
|           |          |          |               |               |               | ///      |
|           |          |          |               |               |               | PCDHGA11 |
|           |          |          |               |               |               | ///      |
|           |          |          |               |               |               | PCDHGA12 |
|           |          |          |               |               |               | ///      |
|           |          |          |               |               |               | PCDHGA2  |
|           |          |          |               |               |               | ///      |
|           |          |          |               |               |               | PCDHGA3  |
|           |          |          |               |               |               | ///      |
|           |          |          |               |               |               | PCDHGA4  |
|           |          |          |               |               |               | ///      |
|           |          |          |               |               |               | PCDHGA5  |
|           |          |          |               |               |               | ///      |
|           |          |          |               |               |               | PCDHGA6  |
|           |          |          |               |               |               | ///      |
|           |          |          |               |               |               | PCDHGA7  |
|           |          |          |               |               |               | ///      |
|           |          |          |               |               |               | PCDHGA8  |
|           |          |          |               |               |               | ///      |
|           |          |          |               |               |               | PCDHGA9  |
|           |          |          |               |               |               | ///      |
|           |          |          |               |               |               | PCDHGB1  |
|           |          |          |               |               |               | ///      |
|           |          |          |               |               |               | PCDHGB2  |
|           |          |          |               |               |               | ///      |
| 205717_x_ | 0.00435  | 0.002917 | 3.172216 down | 3.020271 down | 1.050309 up   | ///      |
| 205718_at | 0.020766 | 0.01911  | 1.340944 up   | 1.356166 down | 1.818543 down | ITGB7    |
| 205720_at | 0.011874 | 0.010072 | 1.702503 up   | 1.185423 up   | 1.436199 down | POMC     |

|           |          |          |               |               |               |         |
|-----------|----------|----------|---------------|---------------|---------------|---------|
| 205722_s_ | 0.029221 | 0.027813 | 1.817564 up   | 1.053904 up   | 1.724602 down | GFRA2   |
| 205729_at | 7.23E-07 | 1.85E-08 | 44.11731 down | 29.89555 down | 1.475715 up   | OSMR    |
| 205730_s_ | 4.77E-05 | 6.62E-06 | 5.377819 down | 2.334136 down | 2.303987 up   | ABLIM3  |
| 205733_at | 1.23E-05 | 1.01E-06 | 9.152097 up   | 10.7451 up    | 1.174059 up   | BLM     |
| 205736_at | 0.003104 | 0.001874 | 1.676415 up   | 1.012751 down | 1.697791 down | PGAM2   |
| 205737_at | 0.007518 | 0.005828 | 1.542941 up   | 1.260989 up   | 1.223596 down | KCNQ2   |
| 205739_x_ | 2.51E-04 | 6.27E-05 | 4.30162 up    | 7.118139 up   | 1.654758 up   | ZNF107  |
| 205747_at | 1.16E-04 | 2.20E-05 | 2.211835 up   | 2.633762 up   | 1.190759 up   | CBLN1   |
| 205750_at | 0.002632 | 0.001501 | 1.353405 up   | 2.092361 up   | 1.545997 up   | BPHL    |
| 205752_s_ | 5.04E-04 | 1.59E-04 | 3.813686 down | 1.122631 down | 3.397096 up   | GSTM5   |
| 205754_at | 0.011109 | 0.009312 | 1.474935 up   | 1.046056 down | 1.542864 down | F2      |
| 205756_s_ | 1.61E-04 | 3.46E-05 | 5.041621 down | 4.966869 down | 1.01505 up    | F8      |
| 205758_at | 0.012077 | 0.010276 | 1.360154 up   | 1.001907 down | 1.362748 down | CD8A    |
| 205760_s_ | 0.004443 | 0.002997 | 1.942222 down | 1.724401 down | 1.126317 up   | OGG1    |
| 205761_s_ | 2.13E-04 | 5.02E-05 | 2.718775 up   | 2.120093 up   | 1.282385 down | DUS4L   |
| 205763_s_ | 5.16E-04 | 1.64E-04 | 2.39106 up    | 2.461351 up   | 1.029398 up   | DDX18   |
| 205766_at | 0.005254 | 0.00372  | 1.699539 up   | 1.456709 down | 2.475735 down | TCAP    |
| 205768_s_ | 0.001451 | 6.73E-04 | 3.846239 up   | 3.507253 up   | 1.096653 down | SLC27A2 |
| 205769_at | 5.68E-04 | 1.88E-04 | 3.6099 up     | 3.799848 up   | 1.052619 up   | SLC27A2 |
| 205774_at | 0.015467 | 0.013692 | 1.823047 up   | 1.325223 up   | 1.375654 down | F12     |
| 205775_at | 1.48E-04 | 3.08E-05 | 3.518304 down | 3.97756 down  | 1.130533 down | FAM50B  |
| 205777_at | 0.002503 | 0.001406 | 2.069483 up   | 1.019165 up   | 2.030567 down | DUSP9   |
| 205779_at | 0.006351 | 0.004725 | 1.602405 up   | 1.420764 up   | 1.127847 down | RAMP2   |
| 205780_at | 1.75E-04 | 3.87E-05 | 4.100265 up   | 6.084639 up   | 1.483963 up   | BIK     |
| 205781_at | 2.79E-04 | 7.21E-05 | 1.180128 down | 2.243324 down | 1.900916 down | C16orf7 |
| 205782_at | 0.001885 | 9.55E-04 | 25.9114 down  | 7.882897 down | 3.28704 up    | FGF7    |
| 205784_x_ | 1.45E-04 | 2.99E-05 | 1.455431 up   | 1.438492 down | 2.093626 down | ARVCF   |
| 205789_at | 4.36E-05 | 5.86E-06 | 4.243914 up   | 3.653496 up   | 1.161604 down | CD1D    |
| 205790_at | 0.035242 | 0.033951 | 1.34104 up    | 1.162921 up   | 1.153166 down | SKAP1   |
| 205793_x_ | 0.012538 | 0.010741 | 1.487816 up   | 1.140065 up   | 1.305028 down | TNK1    |
| 205794_s_ | 3.17E-04 | 8.59E-05 | 1.277372 up   | 8.894164 up   | 6.962863 up   | NOVA1   |
| 205795_at | 0.001121 | 4.74E-04 | 2.180003 up   | 2.881702 down | 6.28212 down  | NRXN3   |
| 205796_at | 6.61E-05 | 1.03E-05 | 2.581728 down | 6.184037 down | 2.395309 down | TCP11L1 |
| 205797_s_ | 0.005553 | 0.003979 | 1.270667 down | 1.590789 down | 1.251932 down | TCP11L1 |

|           |          |          |          |      |          |      |          |      |            |
|-----------|----------|----------|----------|------|----------|------|----------|------|------------|
| 205798_at | 6.51E-04 | 2.27E-04 | 3.682164 | down | 1.852083 | down | 1.988121 | up   | IL7R       |
| 205801_s_ | 5.74E-05 | 8.51E-06 | 1.833429 | down | 1.222719 | down | 1.499469 | up   | RASGRP3    |
| 205805_s_ | 0.002726 | 0.001574 | 4.046581 | up   | 1.778985 | up   | 2.274657 | down | ROR1       |
| 205806_at | 6.51E-04 | 2.26E-04 | 1.048495 | up   | 1.866634 | down | 1.957157 | down | ROM1       |
| 205808_at | 6.13E-05 | 9.33E-06 | 17.3794  | down | 4.597261 | down | 3.78038  | up   | ASPH       |
| 205811_at | 5.68E-05 | 8.38E-06 | 2.115998 | up   | 3.579472 | up   | 1.691623 | up   | POLG2      |
| 205812_s_ | 0.002207 | 0.001183 | 1.838731 | down | 1.87309  | down | 1.018686 | down | TMED9      |
| 205814_at | 0.002964 | 0.001763 | 1.778554 | up   | 1.295999 | up   | 1.372342 | down | GRM3       |
| 205817_at | 0.002947 | 0.001749 | 1.951667 | down | 3.001771 | down | 1.538055 | down | SIX1       |
| 205824_at | 1.22E-06 | 3.88E-08 | 4.403384 | down | 5.292306 | down | 1.201873 | down | HSPB2      |
| 205828_at | 5.23E-06 | 3.04E-07 | 113.0319 | down | 1.021367 | down | 110.6673 | up   | MMP3       |
| 205832_at | 0.001056 | 4.37E-04 | 1.845004 | down | 7.434685 | down | 4.02963  | down | CPA4       |
| 205833_s_ | 1.88E-04 | 4.23E-05 | 1.342474 | up   | 1.192513 | down | 1.600918 | down | PART1      |
| 205841_at | 2.20E-05 | 2.29E-06 | 4.44306  | down | 3.362521 | down | 1.321348 | up   | JAK2       |
| 205842_s_ | 3.89E-06 | 2.00E-07 | 4.02689  | down | 3.707971 | down | 1.086009 | up   | JAK2       |
| 205843_x_ | 7.07E-06 | 4.71E-07 | 1.753614 | down | 1.844205 | down | 1.05166  | down | CRAT       |
| 205850_s_ | 4.67E-04 | 1.44E-04 | 11.44813 | up   | 7.996992 | up   | 1.431555 | down | GABRB3     |
| 205851_at | 6.05E-05 | 9.14E-06 | 2.512776 | down | 1.798754 | down | 1.396954 | up   | NME6       |
| 205852_at | 0.010784 | 0.008987 | 1.476176 | up   | 1.163198 | down | 1.717086 | down | CDK5R2     |
| 205853_at | 0.01678  | 0.015023 | 1.432033 | up   | 1.404519 | down | 2.011318 | down | ZBTB7B     |
| 205854_at | 0.004937 | 0.003436 | 1.812323 | down | 2.332876 | down | 1.28723  | down | TULP3      |
| 205856_at | 1.14E-05 | 9.11E-07 | 2.811662 | down | 22.93316 | down | 8.156446 | down | SLC14A1    |
| 205858_at | 0.013569 | 0.011777 | 1.685056 | up   | 1.252284 | up   | 1.345586 | down | NGFR       |
| 205861_at | 0.015703 | 0.013925 | 2.18416  | up   | 1.681686 | up   | 1.298792 | down | SPIB       |
| 205862_at | 3.18E-07 | 5.74E-09 | 5.723334 | up   | 5.966585 | up   | 1.042502 | up   | GREB1      |
| 205865_at | 3.92E-05 | 5.06E-06 | 3.171228 | up   | 5.912007 | up   | 1.864264 | up   | ARID3A     |
| 205866_at | 0.019891 | 0.01821  | 1.496572 | up   | 1.286279 | up   | 1.16349  | down | FCN3       |
| 205870_at | 3.93E-05 | 5.09E-06 | 8.380324 | down | 5.285004 | down | 1.58568  | up   | BDKRB2     |
|           |          |          |          |      |          |      |          |      | PLGLB1 /// |
| 205871_at | 1.71E-04 | 3.76E-05 | 4.019674 | down | 1.719172 | down | 2.338146 | up   | PLGLB2     |
| 205872_x_ | 1.41E-04 | 2.89E-05 | 4.413227 | down | 8.179364 | down | 1.853375 | down | PDE4DIP    |
| 205879_x_ | 0.008191 | 0.006471 | 1.137037 | up   | 1.888768 | up   | 1.661132 | up   | RET        |
| 205880_at | 1.31E-05 | 1.12E-06 | 6.494855 | down | 10.74566 | down | 1.654488 | down | PRKD1      |
| 205881_at | 7.33E-05 | 1.19E-05 | 2.272971 | up   | 2.008385 | up   | 1.131741 | down | ZNF74      |

|           |          |          |          |      |          |      |          |      |           |
|-----------|----------|----------|----------|------|----------|------|----------|------|-----------|
| 205884_at | 9.14E-08 | 1.04E-09 | 25.61564 | down | 2.599964 | down | 9.8523   | up   | ITGA4     |
| 205885_s_ | 5.36E-07 | 1.21E-08 | 24.86649 | down | 3.246975 | down | 7.658355 | up   | ITGA4     |
| 205888_s_ | 0.003426 | 0.002141 | 3.142153 | up   | 4.073139 | up   | 1.296289 | up   | JAKMIP2   |
| 205889_s_ | 6.68E-04 | 2.34E-04 | 1.382968 | up   | 1.387678 | up   | 1.003406 | up   | JAKMIP2   |
| 205891_at | 0.005003 | 0.003496 | 3.148877 | down | 2.079305 | down | 1.514389 | up   | ADORA2B   |
| 205895_s_ | 0.001845 | 9.28E-04 | 3.566182 | up   | 2.768915 | up   | 1.287935 | down | NOLC1     |
| 205896_at | 9.99E-05 | 1.80E-05 | 15.21482 | down | 5.603037 | down | 2.715459 | up   | SLC22A4   |
| 205897_at | 0.024844 | 0.023286 | 1.995842 | down | 1.529099 | down | 1.30524  | up   | NFATC4    |
| 205899_at | 0.001437 | 6.64E-04 | 1.823392 | up   | 2.37549  | up   | 1.302786 | up   | CCNA1     |
|           |          |          |          |      |          |      |          |      | KCNN3 /// |
|           |          |          |          |      |          |      |          |      | LOC100133 |
| 205902_at | 1.80E-04 | 4.03E-05 | 1.550733 | up   | 1.202873 | up   | 1.289191 | down | 958       |
| 205904_at | 0.004928 | 0.003429 | 2.486048 | down | 2.228427 | down | 1.115607 | up   | MICA      |
|           |          |          |          |      |          |      |          |      | MICA ///  |
| 205905_s_ | 9.03E-05 | 1.56E-05 | 2.326365 | down | 2.684677 | down | 1.154023 | down | MICB      |
| 205906_at | 0.003643 | 0.002313 | 2.044321 | up   | 1.254913 | down | 2.565444 | down | FOXJ1     |
| 205909_at | 1.78E-04 | 3.96E-05 | 6.783697 | up   | 10.3634  | up   | 1.527691 | up   | POLE2     |
| 205911_at | 0.005237 | 0.003705 | 1.22284  | down | 1.422144 | up   | 1.739055 | up   | PTH1R     |
| 205914_s_ | 0.018772 | 0.017058 | 1.749586 | up   | 1.080931 | down | 1.891182 | down | GRIN1     |
| 205928_at | 5.59E-04 | 1.83E-04 | 2.111019 | up   | 2.264595 | up   | 1.07275  | up   | ZNF443    |
| 205929_at | 0.003216 | 0.001966 | 1.335478 | down | 1.013855 | up   | 1.353981 | up   | GPA33     |
| 205930_at | 1.67E-05 | 1.58E-06 | 4.625456 | up   | 3.521546 | up   | 1.313473 | down | GTF2E1    |
| 205933_at | 0.020149 | 0.018476 | 3.806506 | down | 1.065772 | up   | 4.056869 | up   | SETBP1    |
| 205934_at | 0.039548 | 0.038302 | 2.608702 | down | 3.136282 | down | 1.202239 | down | PLCL1     |
| 205935_at | 9.70E-04 | 3.89E-04 | 7.224707 | down | 1.748571 | up   | 12.63291 | up   | FOXF1     |
| 205936_s_ | 0.010973 | 0.009177 | 1.386674 | up   | 1.054498 | up   | 1.315009 | down | HK3       |
| 205937_at | 0.003151 | 0.001915 | 1.001785 | down | 2.243631 | down | 2.239634 | down | CGREF1    |
| 205938_at | 1.35E-05 | 1.17E-06 | 2.93328  | up   | 3.020163 | up   | 1.02962  | up   | PPM1E     |
| 205940_at | 2.01E-04 | 4.64E-05 | 1.220692 | up   | 2.083695 | down | 2.543549 | down | MYH3      |
| 205953_at | 1.74E-04 | 3.84E-05 | 2.322167 | up   | 3.282264 | up   | 1.413449 | up   | LRIG2     |
| 205955_at | 0.007771 | 0.006076 | 1.269293 | down | 1.096962 | down | 1.157099 | up   |           |
| 205956_x_ | 0.005441 | 0.003882 | 1.368714 | up   | 1.974989 | up   | 1.442952 | up   | PSMC3IP   |
| 205961_s_ | 5.33E-06 | 3.12E-07 | 3.9262   | up   | 6.87077  | up   | 1.749979 | up   | PSIP1     |
| 205962_at | 0.002884 | 0.0017   | 1.334816 | up   | 1.742247 | down | 2.325579 | down | PAK2      |

|           |          |          |               |               |               |           |
|-----------|----------|----------|---------------|---------------|---------------|-----------|
| 205963_s_ | 0.008079 | 0.00636  | 1.302506 up   | 1.2499 up     | 1.042088 down | DNAJA3    |
| 205964_at | 0.005355 | 0.003807 | 1.05846 up    | 2.232509 up   | 2.109205 up   | ZNF426    |
| 205965_at | 0.031371 | 0.030014 | 1.434468 up   | 1.045737 up   | 1.371729 down | BATF      |
| 205966_at | 5.98E-04 | 2.01E-04 | 1.682838 down | 2.716151 down | 1.61403 down  | TAF13     |
| 205967_at | 0.003759 | 0.002412 | 3.79471 up    | 2.501944 up   | 1.516705 down | HIST1H4C  |
| 205968_at | 0.001482 | 6.91E-04 | 1.953219 down | 2.807617 up   | 5.483891 up   | KCNS3     |
| 205969_at | 0.001488 | 6.95E-04 | 1.29358 up    | 1.119414 up   | 1.155587 down | AADAC     |
|           |          |          |               |               |               | CTRB1 /// |
| 205971_s_ | 0.019502 | 0.017803 | 1.652112 up   | 1.060997 up   | 1.557132 down | CTRB2     |
| 205972_at | 0.003092 | 0.001865 | 1.484956 up   | 1.271774 down | 1.888529 down | SLC38A3   |
| 205977_s_ | 3.79E-07 | 7.54E-09 | 8.371807 up   | 10.81628 up   | 1.291989 up   | EPHA1     |
|           |          |          |               |               |               | ARHGAP8   |
|           |          |          |               |               |               | ///       |
|           |          |          |               |               |               | LOC553158 |
|           |          |          |               |               |               | /// PRR5  |
| 205980_s_ | 8.46E-08 | 9.08E-10 | 9.999928 up   | 13.58291 up   | 1.358301 up   | /// PRR5  |
| 205989_s_ | 0.014084 | 0.012291 | 1.251777 up   | 1.034825 down | 1.295369 down | MOG       |
| 205990_s_ | 9.57E-05 | 1.69E-05 | 22.65372 down | 5.841247 down | 3.878234 up   | WNT5A     |
| 205991_s_ | 2.58E-08 | 1.67E-10 | 52.80916 down | 30.26767 down | 1.744738 up   | PRRX1     |
| 205992_s_ | 1.97E-06 | 7.66E-08 | 25.79352 down | 6.136673 down | 4.203176 up   | IL15      |
| 205995_x_ | 0.002937 | 0.001741 | 1.745975 up   | 2.651628 up   | 1.518709 up   | IQCB1     |
| 205996_s_ | 0.001357 | 6.16E-04 | 2.117857 down | 2.970623 down | 1.402655 down | AK2       |
| 205998_x_ | 5.17E-04 | 1.65E-04 | 1.093942 up   | 1.715463 up   | 1.568149 up   | CYP3A4    |
| 206001_at | 0.001524 | 7.18E-04 | 1.892795 up   | 1.452573 up   | 1.303063 down | NPY       |
| 206002_at | 2.15E-05 | 2.22E-06 | 8.46904 up    | 8.022076 up   | 1.055717 down | GPR64     |
| 206011_at | 7.41E-05 | 1.21E-05 | 11.99951 down | 1.774164 down | 6.76347 up    | CASP1     |
| 206012_at | 1.21E-05 | 9.86E-07 | 13.23763 up   | 12.61526 up   | 1.049334 down | LEFTY2    |
| 206013_s_ | 9.20E-04 | 3.62E-04 | 1.701997 up   | 1.103152 up   | 1.542849 down | ACTL6B    |
| 206016_at | 0.00729  | 0.005612 | 1.521265 down | 1.923938 down | 1.264696 down | CCDC22    |
| 206019_at | 0.018418 | 0.016696 | 1.168484 up   | 1.59372 up    | 1.363921 up   | RBM19     |
| 206023_at | 6.45E-10 | 9.85E-13 | 55.22609 up   | 73.13749 up   | 1.324329 up   | NMU       |
| 206025_s_ | 0.008817 | 0.007072 | 10.90699 down | 4.970717 down | 2.194248 up   | TNFAIP6   |
| 206026_s_ | 0.007747 | 0.006052 | 17.05156 down | 4.822231 down | 3.536032 up   | TNFAIP6   |
| 206027_at | 1.48E-04 | 3.07E-05 | 3.519051 down | 1.87903 down  | 1.872801 up   | S100A3    |
| 206028_s_ | 1.04E-05 | 8.01E-07 | 4.382169 up   | 4.673513 up   | 1.066484 up   | MERTK     |

|           |          |          |               |               |               |           |
|-----------|----------|----------|---------------|---------------|---------------|-----------|
| 206034_at | 5.62E-08 | 5.08E-10 | 3.57611 down  | 4.8381 down   | 1.352894 down | SERPINB8  |
| 206037_at | 4.68E-04 | 1.44E-04 | 1.65684 up    | 2.271013 up   | 1.37069 up    | CCBL1     |
| 206039_at | 5.32E-04 | 1.72E-04 | 4.138861 down | 2.540762 down | 1.628984 up   | RAB33A    |
|           |          |          |               |               |               | SNRPN /// |
| 206042_x_ | 7.06E-04 | 2.53E-04 | 5.53332 up    | 4.778959 up   | 1.15785 down  | SNURF     |
| 206043_s_ | 7.77E-04 | 2.89E-04 | 1.757793 up   | 1.556696 up   | 1.129182 down | ATP2C2    |
| 206047_at | 0.002975 | 0.001771 | 1.424217 up   | 1.225364 up   | 1.16228 down  | GNB3      |
| 206049_at | 0.00759  | 0.005902 | 1.320825 down | 1.0089 up     | 1.33258 up    | SELP      |
| 206050_s_ | 3.57E-08 | 2.96E-10 | 5.555654 down | 7.527202 down | 1.354873 down | RNH1      |
| 206052_s_ | 0.006289 | 0.00467  | 1.204241 down | 1.280168 up   | 1.541631 up   | SLBP      |
| 206055_s_ | 0.003056 | 0.001835 | 2.697208 up   | 2.648112 up   | 1.01854 down  | SNRPA1    |
| 206056_x_ | 0.003866 | 0.002499 | 1.553781 up   | 1.570709 up   | 1.010895 up   | SPN       |
| 206059_at | 9.21E-04 | 3.63E-04 | 3.476198 up   | 5.273963 up   | 1.517164 up   | ZNF91     |
| 206062_at | 1.19E-04 | 2.28E-05 | 3.498213 up   | 4.755438 up   | 1.359391 up   | GUCA1A    |
| 206063_x_ | 0.003211 | 0.001962 | 1.324044 up   | 1.208779 down | 1.600477 down | PPIL2     |
| 206068_s_ | 0.002208 | 0.001185 | 2.097814 up   | 1.875955 up   | 1.118265 down | ACADL     |
| 206074_s_ | 0.005923 | 0.004323 | 5.024961 up   | 4.972651 up   | 1.01052 down  | HMGA1     |
| 206075_s_ | 0.014775 | 0.012997 | 2.066991 up   | 1.479087 up   | 1.397478 down | CSNK2A1   |
| 206081_at | 0.038787 | 0.037536 | 2.105609 down | 1.260698 down | 1.670194 up   | SLC24A1   |
| 206085_s_ | 0.002136 | 0.001133 | 3.178385 up   | 2.043375 up   | 1.555458 down | CTH       |
| 206086_x_ | 7.27E-04 | 2.64E-04 | 2.125248 down | 1.927133 down | 1.102803 up   | HFE       |
| 206087_x_ | 3.59E-04 | 1.01E-04 | 6.095681 down | 3.5814 down   | 1.702038 up   | HFE       |
| 206090_s_ | 0.006876 | 0.005219 | 1.570773 down | 1.925323 down | 1.225717 down | DISC1     |
| 206095_s_ | 0.002399 | 0.001327 | 1.801966 up   | 2.052974 up   | 1.139297 up   | FUSIP1    |
| 206101_at | 0.00118  | 5.09E-04 | 19.66039 down | 16.81665 down | 1.169102 up   | ECM2      |
| 206102_at | 1.84E-04 | 4.14E-05 | 8.616937 up   | 18.76098 up   | 2.177221 up   | GINS1     |
| 206106_at | 0.001774 | 8.82E-04 | 1.407244 down | 2.277978 down | 1.618751 down | MAPK12    |
| 206109_at | 2.88E-05 | 3.31E-06 | 2.917326 up   | 2.041789 up   | 1.428809 down | FUT1      |
| 206114_at | 0.003404 | 0.002122 | 2.357206 up   | 2.884069 up   | 1.223512 up   | EPHA4     |
| 206116_s_ | 9.86E-04 | 3.98E-04 | 1.44049 up    | 2.843722 down | 4.096354 down | TPM1      |
| 206117_at | 1.01E-04 | 1.85E-05 | 5.552007 up   | 1.064287 up   | 5.216645 down | TPM1      |
| 206118_at | 0.004677 | 0.003211 | 2.505145 down | 5.987558 down | 2.390105 down | STAT4     |
| 206122_at | 2.85E-06 | 1.29E-07 | 3.900329 up   | 5.085316 up   | 1.303817 up   | SOX15     |
| 206127_at | 4.77E-04 | 1.48E-04 | 3.987968 down | 1.976055 down | 2.018147 up   | ELK3      |

|           |          |          |               |               |               |         |
|-----------|----------|----------|---------------|---------------|---------------|---------|
| 206128_at | 9.21E-05 | 1.61E-05 | 3.086598 up   | 1.03828 down  | 3.204754 down | ADRA2C  |
| 206129_s_ | 8.94E-06 | 6.51E-07 | 3.635693 down | 3.76143 down  | 1.034584 down | ARSB    |
| 206133_at | 2.20E-04 | 5.23E-05 | 6.109114 down | 2.160533 down | 2.827596 up   | XAF1    |
| 206136_at | 2.40E-04 | 5.88E-05 | 2.76341 up    | 2.008416 up   | 1.375915 down | FZD5    |
| 206137_at | 5.52E-04 | 1.81E-04 | 1.98314 up    | 2.743829 up   | 1.383578 up   | RIMS2   |
| 206138_s_ | 2.47E-05 | 2.68E-06 | 1.776462 down | 1.693354 down | 1.049079 up   | PI4KB   |
| 206142_at | 0.012268 | 0.010475 | 2.004258 down | 2.019456 down | 1.007583 down | ZNF135  |
| 206144_at | 0.005038 | 0.003525 | 2.509475 up   | 2.350765 up   | 1.067514 down | MAGI1   |
| 206146_s_ | 0.007752 | 0.006058 | 1.27965 up    | 1.540836 down | 1.97173 down  | RHAG    |
| 206147_x_ | 0.003131 | 0.001898 | 1.234896 up   | 1.818748 up   | 1.472794 up   | SCML2   |
| 206148_at | 0.001909 | 9.73E-04 | 1.236567 up   | 1.169034 down | 1.445589 down | IL3RA   |
| 206152_at | 0.005316 | 0.003774 | 1.16195 up    | 1.387366 down | 1.61205 down  | AGAP2   |
| 206155_at | 0.012917 | 0.011116 | 1.500193 up   | 1.138402 up   | 1.317806 down | ABCC2   |
| 206156_at | 0.014947 | 0.013172 | 1.402168 up   | 1.039801 down | 1.457976 down | GJB5    |
| 206157_at | 1.32E-09 | 2.87E-12 | 285.831 down  | 288.2986 down | 1.008633 down | PTX3    |
| 206158_s_ | 3.01E-05 | 3.54E-06 | 1.173442 up   | 1.939128 up   | 1.652514 up   | CNBP    |
| 206160_at | 0.002643 | 0.00151  | 1.530796 up   | 1.065907 up   | 1.436145 down | APOBEC2 |
| 206161_s_ | 0.009505 | 0.007732 | 1.417139 up   | 1.010993 down | 1.432717 down | SYT5    |
| 206162_x_ | 0.008839 | 0.007093 | 1.563511 up   | 1.082611 down | 1.692675 down | SYT5    |
| 206163_at | 7.01E-08 | 6.92E-10 | 54.41914 down | 1.157479 down | 47.01522 up   | MAB21L1 |
| 206165_s_ | 0.002033 | 0.00106  | 6.974532 down | 1.676127 down | 4.161099 up   | CLCA2   |
| 206166_s_ | 6.55E-04 | 2.28E-04 | 2.421775 down | 1.281779 down | 1.889386 up   | CLCA2   |
| 206167_s_ | 0.001863 | 9.41E-04 | 8.11403 down  | 1.516741 down | 5.349649 up   | ARHGAP6 |
| 206169_x_ | 0.001211 | 5.28E-04 | 2.057986 up   | 2.439724 up   | 1.185491 up   | ZC3H7B  |
| 206172_at | 1.69E-05 | 1.60E-06 | 29.90694 down | 1.038609 down | 28.79517 up   | IL13RA2 |
| 206173_x_ | 0.008774 | 0.007031 | 1.827652 up   | 1.575839 up   | 1.159796 down | GABPB1  |
| 206179_s_ | 0.00211  | 0.001113 | 1.697429 up   | 1.299978 down | 2.20662 down  | TPPP    |
| 206182_at | 1.48E-04 | 3.07E-05 | 2.503211 up   | 2.372953 up   | 1.054893 down | ZNF134  |
| 206185_at | 9.13E-04 | 3.58E-04 | 2.266011 up   | 2.172803 up   | 1.042897 down | CRYBB1  |
| 206187_at | 2.89E-04 | 7.56E-05 | 2.8136 down   | 1.611621 down | 1.74582 up    | PTGIR   |
| 206188_at | 0.001754 | 8.69E-04 | 2.799661 down | 1.548807 down | 1.807625 up   | ZNF623  |
| 206192_at | 3.50E-04 | 9.84E-05 | 1.392047 down | 1.335381 up   | 1.858913 up   | CDSN    |
| 206194_at | 0.00129  | 5.75E-04 | 2.075521 down | 2.047109 down | 1.013879 up   | HOXC4   |
| 206200_s_ | 4.97E-06 | 2.84E-07 | 3.626201 down | 3.457947 down | 1.048657 up   | ANXA11  |



|           |          |          |               |               |               |           |
|-----------|----------|----------|---------------|---------------|---------------|-----------|
| 206204_at | 1.28E-06 | 4.12E-08 | 16.51335 up   | 10.16786 up   | 1.624073 down | GRB14     |
| 206213_at | 0.001534 | 7.24E-04 | 1.856096 up   | 1.438861 up   | 1.289976 down | WNT10B    |
| 206214_at | 8.53E-04 | 3.26E-04 | 2.247277 up   | 2.118691 up   | 1.060692 down | PLA2G7    |
| 206216_at | 0.023647 | 0.022063 | 1.418691 up   | 1.235593 down | 1.752925 down | SRPK3     |
| 206217_at | 3.97E-05 | 5.17E-06 | 2.657005 up   | 1.332176 up   | 1.994485 down | EDA       |
| 206224_at | 0.001816 | 9.09E-04 | 11.39514 up   | 8.540675 up   | 1.33422 down  | CST1      |
| 206230_at | 4.58E-04 | 1.40E-04 | 2.399654 up   | 1.173729 up   | 2.04447 down  | LHX1      |
| 206233_at | 6.10E-05 | 9.26E-06 | 4.340072 up   | 5.037958 up   | 1.160801 up   | B4GALT6   |
| 206237_s_ | 0.003373 | 0.002095 | 1.496793 down | 3.071555 down | 2.05209 down  | NRG1      |
| 206239_s_ | 0.015264 | 0.01349  | 2.967592 up   | 2.025966 up   | 1.464779 down | SPINK1    |
| 206245_s_ | 1.09E-04 | 2.04E-05 | 3.957201 up   | 1.816493 up   | 2.178484 down | IVNS1ABP  |
| 206247_at | 0.008938 | 0.007186 | 2.601809 down | 1.233889 up   | 3.210345 up   | MICB      |
| 206249_at | 0.005203 | 0.003676 | 1.195155 up   | 1.34178 down  | 1.603634 down | MAP3K13   |
| 206254_at | 0.002561 | 0.001449 | 1.668072 up   | 1.927889 down | 3.215858 down | EGF       |
| 206255_at | 0.024404 | 0.022827 | 1.111765 up   | 1.185073 down | 1.317523 down | BLK       |
| 206257_at | 0.006264 | 0.004646 | 1.564851 up   | 1.101993 up   | 1.42002 down  | CCDC9     |
| 206259_at | 0.002239 | 0.001211 | 2.050275 up   | 1.095536 up   | 1.87148 down  | PROC      |
| 206266_at | 0.024337 | 0.022761 | 1.351884 up   | 1.006262 up   | 1.343472 down | GPLD1     |
| 206267_s_ | 9.26E-04 | 3.65E-04 | 3.703029 up   | 1.554802 up   | 2.381672 down | MATK      |
| 206268_at | 1.81E-04 | 4.04E-05 | 42.65731 up   | 39.55411 up   | 1.078454 down | LEFTY1    |
| 206273_at | 0.002175 | 0.001161 | 1.886604 down | 1.822024 down | 1.035444 up   | SLMO1     |
| 206276_at | 0.016085 | 0.014314 | 1.43093 up    | 1.077765 down | 1.542206 down | LY6D      |
| 206277_at | 0.005349 | 0.003801 | 1.684144 up   | 1.399119 up   | 1.203718 down | P2RY2     |
| 206278_at | 0.006481 | 0.00485  | 1.871952 up   | 2.385849 down | 4.466193 down | PTAFR     |
| 206284_x_ | 6.68E-04 | 2.34E-04 | 1.67324 down  | 2.730406 down | 1.631808 down | CLTB      |
|           |          |          |               |               |               | TDGF1 /// |
| 206286_s_ | 1.14E-08 | 5.18E-11 | 223.8803 up   | 255.8171 up   | 1.142651 up   | TDGF3     |
| 206289_at | 9.40E-04 | 3.73E-04 | 1.004348 down | 2.086591 down | 2.077558 down | HOXA4     |
| 206291_at | 9.18E-07 | 2.59E-08 | 73.75978 up   | 88.61708 up   | 1.201428 up   | NTS       |
| 206296_x_ | 2.03E-04 | 4.67E-05 | 3.219927 up   | 2.849975 up   | 1.129809 down | MAP4K1    |
| 206298_at | 3.95E-04 | 1.15E-04 | 1.943637 down | 5.597689 down | 2.880008 down | ARHGAP22  |
| 206299_at | 2.52E-04 | 6.30E-05 | 3.133482 up   | 2.88212 up    | 1.087214 down | FAM155B   |
| 206300_s_ | 0.032066 | 0.030726 | 1.246457 down | 1.426152 down | 1.144165 down | PTHLH     |
| 206307_s_ | 1.93E-06 | 7.43E-08 | 11.38005 down | 35.81604 down | 3.147266 down | FOXD1     |

|           |          |          |               |               |               |            |
|-----------|----------|----------|---------------|---------------|---------------|------------|
| 206309_at | 1.76E-04 | 3.91E-05 | 12.80226 up   | 10.49266 up   | 1.220117 down | LECT1      |
| 206310_at | 0.001174 | 5.06E-04 | 2.015651 up   | 2.127593 up   | 1.055537 up   | SPINK2     |
| 206316_s_ | 6.81E-06 | 4.43E-07 | 5.214085 up   | 10.03655 up   | 1.924892 up   | KNTC1      |
| 206324_s_ | 0.003865 | 0.002497 | 1.723217 down | 1.638993 down | 1.051388 up   | DAPK2      |
| 206328_at | 0.019329 | 0.017624 | 1.500268 up   | 1.590971 down | 2.386883 down | CDH15      |
| 206329_at | 0.001787 | 8.90E-04 | 1.46476 up    | 1.785332 down | 2.615083 down | EXTL1      |
| 206332_s_ | 3.55E-06 | 1.76E-07 | 29.56301 down | 15.58572 down | 1.896802 up   | IFI16      |
| 206333_at | 6.53E-04 | 2.27E-04 | 2.515211 up   | 1.224962 up   | 2.053298 down | MSI1       |
| 206335_at | 5.31E-05 | 7.63E-06 | 4.425466 down | 3.2431 down   | 1.364579 up   | GALNS      |
| 206338_at | 0.002923 | 0.001728 | 2.3258 up     | 1.475968 down | 3.432807 down | ELAVL3     |
| 206342_x_ | 0.00174  | 8.59E-04 | 2.09348 down  | 3.180612 down | 1.519294 down | IDS        |
| 206344_at | 0.003004 | 0.001795 | 1.223067 up   | 1.03217 down  | 1.262413 down | PON1       |
| 206348_s_ | 6.91E-05 | 1.10E-05 | 4.438701 up   | 2.781207 up   | 1.595962 down | PDK3       |
| 206355_at | 7.00E-04 | 2.50E-04 | 2.496955 up   | 2.866573 up   | 1.148027 up   | GNAL       |
| 206356_s_ | 0.001073 | 4.46E-04 | 2.036415 up   | 2.641585 up   | 1.297174 up   | GNAL       |
| 206364_at | 0.002316 | 0.001267 | 5.253115 up   | 6.163279 up   | 1.173262 up   | KIF14      |
| 206368_at | 0.003024 | 0.001812 | 1.670764 up   | 1.190517 down | 1.989072 down | CPLX2      |
| 206375_s_ | 5.14E-10 | 7.56E-13 | 51.6664 down  | 1.095835 down | 47.14798 up   | HSPB3      |
| 206377_at | 8.25E-06 | 5.85E-07 | 53.05167 down | 7.541394 down | 7.034729 up   | FOXF2      |
| 206380_s_ | 0.020721 | 0.019062 | 1.231975 up   | 1.080664 down | 1.331352 down | CFP        |
| 206382_s_ | 1.26E-05 | 1.06E-06 | 5.467322 down | 11.60253 down | 2.12216 down  | BDNF       |
| 206384_at | 0.013737 | 0.011949 | 1.288523 up   | 1.024032 down | 1.319488 down | CACNG3     |
| 206385_s_ | 2.65E-05 | 2.96E-06 | 74.53941 up   | 4.453827 up   | 16.73604 down | ANK3       |
| 206387_at | 0.00199  | 0.001029 | 1.906665 up   | 1.410934 up   | 1.351349 down | CDX2       |
| 206388_at | 0.00632  | 0.004699 | 1.43266 up    | 1.048475 down | 1.502108 down | PDE3A      |
| 206391_at | 0.007247 | 0.005571 | 1.770847 down | 1.950354 down | 1.101368 down | RARRES1    |
| 206392_s_ | 8.05E-04 | 3.03E-04 | 4.29795 down  | 3.600169 down | 1.193819 up   | RARRES1    |
| 206393_at | 0.003472 | 0.002179 | 1.319896 up   | 1.400642 down | 1.848702 down | TNNI2      |
|           |          |          |               |               |               | GDF1 ///   |
| 206397_x_ | 0.001713 | 8.42E-04 | 1.933702 up   | 1.823479 up   | 1.060447 down | LASS1      |
|           |          |          |               |               |               | LGALS7 /// |
| 206400_at | 0.034167 | 0.032859 | 1.791483 up   | 1.011328 down | 1.811778 down | LGALS7B    |
| 206409_at | 0.001448 | 6.71E-04 | 2.038742 up   | 1.139616 up   | 1.788973 down | TIAM1      |
| 206412_at | 0.001642 | 7.96E-04 | 1.585958 down | 1.582663 down | 1.002082 up   | FER        |

|           |          |          |          |      |          |      |          |      |           |
|-----------|----------|----------|----------|------|----------|------|----------|------|-----------|
| 206414_s_ | 7.29E-05 | 1.18E-05 | 3.586315 | down | 6.119629 | down | 1.706384 | down | ASAP2     |
| 206416_at | 0.002008 | 0.001041 | 1.554805 | up   | 1.504559 | down | 2.339295 | down | ZNF205    |
| 206421_s_ | 6.63E-05 | 1.04E-05 | 9.139002 | down | 2.635055 | down | 3.46824  | up   | SERPINB7  |
| 206424_at | 3.67E-07 | 7.19E-09 | 62.66978 | up   | 48.06826 | up   | 1.303766 | down | CYP26A1   |
| 206429_at | 4.99E-04 | 1.57E-04 | 5.389102 | up   | 5.568643 | up   | 1.033315 | up   | F2RL1     |
| 206431_x_ | 2.36E-04 | 5.78E-05 | 1.839843 | down | 2.229776 | down | 1.211938 | down | TBC1D9B   |
| 206435_at | 9.30E-04 | 3.68E-04 | 1.014087 | down | 2.20099  | down | 2.170414 | down | B4GALNT1  |
| 206436_at | 0.001211 | 5.27E-04 | 1.182716 | up   | 1.44749  | down | 1.71197  | down | MPPED1    |
| 206437_at | 0.026306 | 0.024809 | 1.522386 | up   | 1.052906 | down | 1.60293  | down | S1PR4     |
| 206440_at | 0.004283 | 0.002854 | 2.047723 | up   | 1.025914 | down | 2.100787 | down | LIN7A     |
| 206445_s_ | 0.019114 | 0.017405 | 2.327631 | up   | 2.372318 | up   | 1.019198 | up   | PRMT1     |
| 206447_at | 0.011993 | 0.010194 | 1.406826 | up   | 1.038492 | down | 1.460977 | down | CELA2A    |
| 206448_at | 7.09E-06 | 4.73E-07 | 2.903838 | down | 4.801162 | down | 1.653385 | down | ZNF365    |
| 206450_at | 0.00778  | 0.006084 | 1.413704 | up   | 1.17578  | up   | 1.202354 | down | DBH       |
| 206453_s_ | 7.72E-05 | 1.27E-05 | 2.688379 | up   | 2.562888 | up   | 1.048964 | down | NDRG2     |
| 206456_at | 7.76E-04 | 2.89E-04 | 3.818201 | up   | 3.625281 | up   | 1.053215 | down | GABRA5    |
| 206468_s_ | 0.003625 | 0.002299 | 1.313978 | up   | 2.069716 | up   | 1.575153 | up   | METTL13   |
| 206469_x_ | 0.001671 | 8.15E-04 | 1.679811 | down | 1.321321 | down | 1.271312 | up   | AKR7A3    |
| 206470_at | 1.13E-04 | 2.13E-05 | 4.655588 | down | 1.005817 | down | 4.628661 | up   | PLXNC1    |
| 206471_s_ | 8.59E-05 | 1.46E-05 | 5.149878 | down | 1.094003 | up   | 5.633982 | up   | PLXNC1    |
| 206472_s_ | 0.004293 | 0.002864 | 2.624359 | up   | 1.145785 | up   | 2.290446 | down | TLE3      |
| 206473_at | 0.001196 | 5.19E-04 | 3.502205 | down | 1.948617 | down | 1.797277 | up   | MBTPS2    |
| 206482_at | 0.001079 | 4.50E-04 | 1.240156 | up   | 1.105283 | up   | 1.122025 | down | PTK6      |
| 206489_s_ | 0.0135   | 0.011705 | 1.584266 | up   | 1.187945 | up   | 1.33362  | down | DLGAP1    |
| 206490_at | 0.002729 | 0.001575 | 1.601461 | up   | 1.306725 | up   | 1.225553 | down | DLGAP1    |
| 206491_s_ | 0.01688  | 0.015128 | 2.077479 | down | 2.396313 | down | 1.153472 | down | NAPA      |
| 206493_at | 9.56E-04 | 3.82E-04 | 2.786067 | up   | 1.131752 | up   | 2.461728 | down | ITGA2B    |
| 206494_s_ | 0.00324  | 0.001986 | 1.490169 | up   | 1.50881  | up   | 1.01251  | up   | ITGA2B    |
| 206495_s_ | 0.001392 | 6.37E-04 | 1.501029 | up   | 1.941901 | up   | 1.293714 | up   | HINFP     |
|           |          |          |          |      |          |      |          |      | RCC1 ///  |
|           |          |          |          |      |          |      |          |      | SNHG3-    |
| 206499_s_ | 0.004007 | 0.002613 | 2.736893 | up   | 2.194602 | up   | 1.247103 | down | RCC1      |
| 206500_s_ | 2.60E-05 | 2.86E-06 | 3.841988 | up   | 5.113366 | up   | 1.330917 | up   | C14orf106 |
| 206501_x_ | 0.002734 | 0.001581 | 1.51007  | up   | 3.286294 | up   | 2.176253 | up   | ETV1      |

|           |          |          |          |      |          |      |          |      |           |
|-----------|----------|----------|----------|------|----------|------|----------|------|-----------|
| 206503_x_ | 0.007165 | 0.005495 | 1.838485 | down | 2.27473  | down | 1.237285 | down | PML       |
| 206506_s_ | 2.13E-05 | 2.18E-06 | 2.929274 | up   | 2.218475 | up   | 1.3204   | down | SUPT3H    |
| 206508_at | 0.009652 | 0.007875 | 1.416022 | up   | 1.047193 | down | 1.482849 | down | CD70      |
| 206510_at | 1.23E-04 | 2.40E-05 | 4.332748 | down | 7.783229 | down | 1.796372 | down | SIX2      |
| 206511_s_ | 2.87E-04 | 7.49E-05 | 2.248971 | down | 3.626998 | down | 1.612737 | down | SIX2      |
| 206512_at | 0.011952 | 0.010153 | 1.346835 | up   | 1.414778 | down | 1.905472 | down | ZRSR1     |
| 206513_at | 5.02E-04 | 1.58E-04 | 1.218323 | up   | 1.718397 | up   | 1.41046  | up   | AIM2      |
|           |          |          |          |      |          |      |          |      | LOC642103 |
| 206522_at | 2.53E-05 | 2.75E-06 | 1.176531 | up   | 4.667505 | down | 5.491462 | down | /// MGAM  |
| 206524_at | 2.23E-04 | 5.35E-05 | 2.472541 | up   | 3.033957 | up   | 1.22706  | up   | T         |
| 206527_at | 6.64E-04 | 2.32E-04 | 1.569361 | up   | 1.029536 | down | 1.615713 | down | ABAT      |
| 206530_at | 7.54E-04 | 2.77E-04 | 1.842664 | down | 1.333067 | down | 1.382274 | up   | RAB30     |
| 206531_at | 0.006839 | 0.005181 | 1.91061  | up   | 1.186126 | up   | 1.610798 | down | DPF1      |
| 206532_at | 0.001048 | 4.33E-04 | 1.453722 | down | 1.002114 | down | 1.450656 | up   |           |
| 206533_at | 1.46E-04 | 3.01E-05 | 3.838586 | up   | 3.851031 | up   | 1.003242 | up   | CHRNA5    |
| 206538_at | 3.91E-05 | 5.04E-06 | 1.925605 | down | 3.724516 | down | 1.934206 | down | MRAS      |
| 206539_s_ | 0.007924 | 0.006213 | 1.477178 | up   | 1.065992 | up   | 1.385732 | down | CYP4F12   |
| 206541_at | 0.001634 | 7.91E-04 | 7.268983 | up   | 3.833495 | up   | 1.896177 | down | KLKB1     |
| 206542_s_ | 2.63E-04 | 6.68E-05 | 9.428499 | down | 3.441946 | down | 2.739293 | up   | SMARCA2   |
| 206544_x_ | 5.26E-05 | 7.53E-06 | 10.0773  | down | 2.871037 | down | 3.509987 | up   | SMARCA2   |
| 206547_s_ | 0.035401 | 0.034116 | 1.161265 | up   | 1.001351 | up   | 1.159698 | down | PPEF1     |
| 206548_at | 0.028991 | 0.027577 | 1.694725 | up   | 3.054549 | up   | 1.802386 | up   |           |
| 206550_s_ | 4.75E-05 | 6.55E-06 | 2.655083 | up   | 2.225405 | up   | 1.193079 | down | NUP155    |
| 206555_s_ | 1.47E-04 | 3.04E-05 | 2.947114 | up   | 2.380806 | up   | 1.237864 | down | THUMPD1   |
| 206558_at | 4.15E-05 | 5.49E-06 | 1.069168 | down | 3.012491 | down | 2.817602 | down | SIM2      |
| 206560_s_ | 0.019376 | 0.017674 | 1.527996 | up   | 1.12827  | down | 1.723992 | down | MIA       |
| 206565_x_ | 0.012085 | 0.010285 | 1.765218 | up   | 2.735895 | up   | 1.549891 | up   | SMA4      |
| 206568_at | 0.001355 | 6.14E-04 | 1.662187 | up   | 1.241033 | up   | 1.339358 | down | TNP1      |
| 206571_s_ | 0.009458 | 0.007686 | 1.120464 | up   | 1.741475 | down | 1.951259 | down | MAP4K4    |
| 206574_s_ | 3.42E-04 | 9.48E-05 | 2.101697 | up   | 1.848708 | up   | 1.136846 | down | PTP4A3    |
| 206580_s_ | 1.00E-09 | 2.02E-12 | 13.20473 | down | 14.03413 | down | 1.062811 | down | EFEMP2    |
| 206581_at | 0.005226 | 0.003694 | 2.207554 | down | 2.567806 | down | 1.163191 | down | BNC1      |
| 206582_s_ | 0.013165 | 0.011367 | 1.52723  | up   | 1.143673 | up   | 1.335373 | down | GPR56     |
| 206584_at | 7.39E-11 | 3.22E-14 | 52.01966 | down | 51.16458 | down | 1.016712 | up   | LY96      |

|           |          |          |               |               |               |          |
|-----------|----------|----------|---------------|---------------|---------------|----------|
| 206585_at | 0.038559 | 0.037298 | 1.090256 up   | 1.156043 down | 1.260382 down | MKRN3    |
| 206595_at | 6.31E-04 | 2.17E-04 | 1.034509 down | 3.040488 down | 2.939063 down | CST6     |
| 206598_at | 9.59E-04 | 3.83E-04 | 1.37563 up    | 1.577208 down | 2.169653 down | INS      |
| 206614_at | 3.19E-04 | 8.68E-05 | 1.612973 down | 2.685046 down | 1.664656 down | GDF5     |
| 206616_s_ | 0.005868 | 0.00427  | 1.381124 up   | 1.08551 up    | 1.272328 down | ADAM22   |
| 206619_at | 0.006713 | 0.005067 | 2.094008 up   | 1.680667 up   | 1.245939 down | DKK4     |
| 206620_at | 9.29E-05 | 1.63E-05 | 2.088178 up   | 1.311348 down | 2.738328 down | GRAP     |
| 206623_at | 0.00183  | 9.19E-04 | 1.69337 up    | 1.081155 down | 1.830795 down | PDE6A    |
| 206624_at | 0.004511 | 0.003062 | 1.23683 up    | 10.03861 up   | 8.116401 up   | USP9Y    |
| 206627_s_ | 0.001662 | 8.09E-04 | 1.157566 up   | 1.060092 down | 1.227127 down | SSX1     |
| 206629_at | 0.003683 | 0.002348 | 1.574313 up   | 1.494075 down | 2.352141 down | ADAMTSL2 |
| 206631_at | 0.001252 | 5.52E-04 | 2.037572 down | 2.903091 down | 1.42478 down  | PTGER2   |
| 206638_at | 1.40E-06 | 4.67E-08 | 10.82143 down | 1.113515 down | 9.71826 up    | HTR2B    |

GAGE12C  
 ///  
 GAGE12D  
 ///  
 GAGE12E  
 ///  
 GAGE12F  
 ///  
 GAGE12G  
 ///  
 GAGE12H  
 /// GAGE12I  
 /// GAGE2A  
 /// GAGE2C  
 /// GAGE4  
 /// GAGE5  
 /// GAGE6  
 /// GAGE7

|           |          |          |             |             |               |  |
|-----------|----------|----------|-------------|-------------|---------------|--|
| 206640_x_ | 0.038025 | 0.036762 | 1.335232 up | 1.068243 up | 1.249932 down |  |
|-----------|----------|----------|-------------|-------------|---------------|--|

|           |          |          |               |               |               |                     |
|-----------|----------|----------|---------------|---------------|---------------|---------------------|
| 206646_at | 0.016034 | 0.014261 | 2.466365 up   | 1.489642 up   | 1.655677 down | GLI1                |
| 206649_s_ | 0.001033 | 4.23E-04 | 1.760982 down | 1.888779 down | 1.072572 down | TFE3                |
| 206650_at | 0.009977 | 0.008199 | 1.72943 up    | 1.595065 down | 2.758553 down | IQCC                |
| 206652_at | 0.010689 | 0.008897 | 1.814706 down | 1.215656 up   | 2.206057 up   | ZMYM5               |
| 206653_at | 3.06E-04 | 8.16E-05 | 16.51038 up   | 14.20305 up   | 1.162453 down | POLR3G              |
| 206654_s_ | 7.80E-04 | 2.91E-04 | 5.750133 up   | 4.584656 up   | 1.254213 down | POLR3G<br>GP1BB /// |
| 206655_s_ | 0.00578  | 0.004189 | 1.676927 down | 2.495807 down | 1.488322 down | SEPT5               |
| 206657_s_ | 0.004361 | 0.002928 | 1.258016 up   | 1.291891 down | 1.625219 down | MYOD1               |
| 206658_at | 0.004144 | 0.002731 | 1.285572 up   | 1.108301 down | 1.424801 down | UPK3B               |
| 206659_at | 8.47E-04 | 3.24E-04 | 1.795492 down | 1.321218 down | 1.358967 up   |                     |
| 206660_at | 0.005394 | 0.003841 | 1.644126 up   | 1.065604 down | 1.751987 down | IGLL1               |
| 206662_at | 1.60E-04 | 3.44E-05 | 2.414731 down | 2.457509 down | 1.017716 down | GLRX                |
| 206667_s_ | 0.02731  | 0.025824 | 2.649566 down | 1.614036 down | 1.641577 up   | SCAMP1              |
| 206669_at | 7.92E-04 | 2.97E-04 | 4.311304 up   | 2.524212 up   | 1.70798 down  | GAD1                |
| 206670_s_ | 2.74E-04 | 7.06E-05 | 5.337072 up   | 4.669816 up   | 1.142887 down | GAD1                |
| 206683_at | 2.65E-05 | 2.95E-06 | 9.069462 up   | 8.250072 up   | 1.099319 down | ZNF165              |
| 206687_s_ | 5.79E-07 | 1.36E-08 | 5.014183 up   | 2.722999 up   | 1.841419 down | PTPN6               |
| 206688_s_ | 0.002436 | 0.001354 | 2.05108 up    | 1.472895 up   | 1.39255 down  | CPSF4               |
| 206693_at | 0.029005 | 0.027592 | 3.480757 down | 1.77454 down  | 1.961498 up   | IL7                 |
| 206695_x_ | 2.25E-05 | 2.36E-06 | 5.270086 up   | 10.36682 up   | 1.967107 up   | ZNF43               |
| 206696_at | 6.34E-04 | 2.18E-04 | 3.227127 up   | 2.791817 up   | 1.155924 down | GPR143              |
| 206697_s_ | 0.006629 | 0.004985 | 1.804698 up   | 1.06412 down  | 1.920415 down | HP /// HPR          |
| 206698_at | 7.23E-06 | 4.86E-07 | 2.095654 up   | 1.916796 up   | 1.093311 down | XK                  |
| 206699_x_ | 0.003733 | 0.002389 | 2.207886 up   | 1.232845 down | 2.721982 down | NPAS1               |
| 206700_s_ | 0.002979 | 0.001775 | 1.54659 up    | 13.65569 up   | 8.829546 up   | KDM5D               |
| 206705_at | 0.005027 | 0.003516 | 1.632549 up   | 1.19455 up    | 1.366665 down | TULP1               |
| 206706_at | 0.001861 | 9.39E-04 | 3.71752 down  | 1.159682 down | 3.205639 up   | NTF3                |
| 206707_x_ | 0.001053 | 4.35E-04 | 1.166595 down | 2.436026 up   | 2.841857 up   | FAM65B              |
| 206708_at | 0.002591 | 0.001472 | 1.556916 down | 1.061276 up   | 1.652318 up   | FOXN2               |
| 206710_s_ | 2.41E-04 | 5.92E-05 | 1.77229 down  | 10.44163 up   | 18.50559 up   | EPB41L3             |
| 206712_at | 5.38E-04 | 1.74E-04 | 1.941672 up   | 1.116875 up   | 1.738487 down | GRTP1               |
| 206716_at | 0.023089 | 0.021508 | 1.295207 up   | 1.090143 down | 1.41196 down  | UMOD                |
| 206718_at | 0.003954 | 0.00257  | 1.895518 up   | 1.694131 up   | 1.118873 down | LMO1                |

|           |          |          |          |      |          |      |          |      |          |
|-----------|----------|----------|----------|------|----------|------|----------|------|----------|
| 206719_at | 0.001183 | 5.11E-04 | 1.305133 | down | 1.225563 | down | 1.064925 | up   | SYNGR4   |
| 206721_at | 5.25E-04 | 1.69E-04 | 3.367194 | up   | 2.93098  | up   | 1.148829 | down | C1orf114 |
| 206722_s_ | 4.13E-04 | 1.22E-04 | 2.143437 | up   | 2.583679 | up   | 1.205391 | up   | LPAR2    |
| 206723_s_ | 3.59E-05 | 4.48E-06 | 3.25928  | up   | 3.824569 | up   | 1.17344  | up   | LPAR2    |
| 206725_x_ | 0.004497 | 0.003048 | 1.582635 | down | 1.515053 | down | 1.044607 | up   | BMP1     |
| 206726_at | 0.010153 | 0.008362 | 1.406942 | down | 1.012385 | down | 1.38973  | up   | PGDS     |
| 206729_at | 0.002851 | 0.001672 | 2.520471 | up   | 2.09825  | up   | 1.201225 | down | TNFRSF8  |
| 206730_at | 2.59E-05 | 2.85E-06 | 7.50607  | down | 1.319781 | down | 5.68736  | up   | GRIA3    |
| 206738_at | 0.015468 | 0.013694 | 1.480799 | up   | 1.083072 | up   | 1.367221 | down | APOC4    |
| 206745_at | 0.013589 | 0.011796 | 1.940161 | down | 2.225276 | down | 1.146954 | down | HOXC11   |
| 206751_s_ | 5.18E-04 | 1.65E-04 | 4.085615 | up   | 3.236119 | up   | 1.262505 | down | PCYT1B   |
| 206757_at | 0.006083 | 0.004472 | 3.862727 | down | 3.079289 | down | 1.254422 | up   | PDE5A    |
| 206758_at | 0.011994 | 0.010195 | 1.287303 | up   | 1.248798 | down | 1.607582 | down | EDN2     |
| 206762_at | 2.04E-04 | 4.72E-05 | 1.622112 | up   | 1.377372 | up   | 1.177686 | down | KCNA5    |
| 206763_at | 0.007943 | 0.006233 | 1.507045 | up   | 1.320903 | down | 1.99066  | down | FKBP6    |
| 206764_x_ | 9.08E-04 | 3.55E-04 | 1.972847 | down | 1.850236 | down | 1.066268 | up   | MPPE1    |
| 206765_at | 0.007106 | 0.005437 | 4.965872 | down | 1.663985 | up   | 8.263135 | up   | KCNJ2    |
| 206766_at | 0.001392 | 6.37E-04 | 1.445531 | down | 2.74979  | down | 1.902269 | down | ITGA10   |
| 206767_at | 0.008054 | 0.006335 | 2.338996 | down | 2.636779 | down | 1.127313 | down | RBMS3    |
| 206771_at | 0.01791  | 0.016171 | 1.513483 | up   | 1.038901 | up   | 1.456813 | down | UPK3A    |
| 206778_at | 0.009072 | 0.007318 | 1.390839 | up   | 1.432058 | down | 1.991762 | down | CRYBB2   |
| 206779_s_ | 0.014998 | 0.013229 | 1.433005 | up   | 1.069318 | down | 1.532337 | down | ASMT     |
| 206781_at | 0.008145 | 0.006425 | 1.557643 | up   | 1.298988 | down | 2.023359 | down | DNAJC4   |
| 206783_at | 5.88E-05 | 8.84E-06 | 5.587105 | up   | 6.635678 | up   | 1.187677 | up   | FGF4     |
| 206789_s_ | 4.43E-07 | 9.35E-09 | 4.173931 | up   | 5.599888 | up   | 1.341634 | up   | POU2F1   |
| 206792_x_ | 0.006112 | 0.0045   | 1.592731 | up   | 1.656328 | up   | 1.03993  | up   | PDE4C    |
| 206794_at | 0.014794 | 0.013018 | 1.24096  | up   | 1.048916 | down | 1.301662 | down | ERBB4    |
| 206795_at | 9.61E-04 | 3.84E-04 | 2.71716  | down | 1.452546 | down | 1.870619 | up   | F2RL2    |
| 206801_at | 0.005967 | 0.004363 | 7.197613 | up   | 3.975706 | up   | 1.810399 | down | NPPB     |
| 206802_at | 0.004663 | 0.003199 | 1.678655 | up   | 1.04126  | down | 1.747916 | down | PAX5     |
| 206805_at | 2.98E-05 | 3.48E-06 | 1.124239 | up   | 10.31553 | up   | 9.175567 | up   | SEMA3A   |
| 206806_at | 0.00286  | 0.00168  | 2.03776  | down | 3.910204 | down | 1.918873 | down | DGKI     |
| 206807_s_ | 0.002941 | 0.001744 | 1.620176 | up   | 1.404844 | up   | 1.153279 | down | ADD2     |

|           |          |          |               |               |               |  |            |
|-----------|----------|----------|---------------|---------------|---------------|--|------------|
|           |          |          |               |               |               |  | HNRNPA3    |
|           |          |          |               |               |               |  | ///        |
| 206809_s_ | 5.40E-05 | 7.80E-06 | 1.815425 up   | 1.829855 up   | 1.007949 up   |  | HNRNPA3P1  |
|           |          |          |               |               |               |  | ADCY8 ///  |
|           |          |          |               |               |               |  | LOC100134  |
| 206811_at | 5.76E-04 | 1.91E-04 | 1.627582 up   | 1.474073 down | 2.399173 down |  | 077        |
| 206813_at | 6.13E-06 | 3.81E-07 | 4.712231 down | 3.642223 down | 1.293779 up   |  | CTF1       |
| 206814_at | 0.002818 | 0.001646 | 1.805313 down | 3.682222 down | 2.039659 down |  | NGF        |
| 206817_x_ | 0.015275 | 0.0135   | 1.478978 up   | 1.117291 down | 1.652448 down |  | TNRC4      |
| 206820_at | 0.00155  | 7.35E-04 | 1.490519 up   | 1.148944 down | 1.712522 down |  | AGFG2      |
| 206824_at | 0.001147 | 4.89E-04 | 2.060916 up   | 1.660204 down | 3.421541 down |  | CES4       |
| 206825_at | 0.002332 | 0.001279 | 9.050522 down | 12.42174 down | 1.37249 down  |  | OXTR       |
| 206827_s_ | 0.00919  | 0.007434 | 1.329335 up   | 1.618379 down | 2.151368 down |  | TRPV6      |
| 206829_x_ | 0.003818 | 0.002457 | 2.340145 up   | 2.059052 up   | 1.136516 down |  | ZNF430     |
| 206833_s_ | 1.23E-05 | 1.01E-06 | 3.556025 down | 4.925358 down | 1.385074 down |  | ACYP2      |
| 206837_at | 0.011528 | 0.009727 | 3.85557 up    | 1.704016 up   | 2.262637 down |  | ALX1       |
| 206843_at | 0.002363 | 0.001301 | 1.356152 up   | 1.024719 down | 1.389674 down |  | CRYBA4     |
| 206847_s_ | 0.001125 | 4.76E-04 | 1.172269 down | 2.384988 down | 2.034507 down |  | HOXA7      |
|           |          |          |               |               |               |  | FAM36A /// |
| 206848_at | 7.79E-04 | 2.91E-04 | 2.782902 up   | 3.030141 up   | 1.088842 up   |  | HOXA7      |
| 206852_at | 0.01679  | 0.015034 | 3.678441 up   | 2.856034 up   | 1.287954 down |  | EPHA7      |
| 206856_at | 0.042372 | 0.04112  | 1.330715 up   | 1.080407 down | 1.437715 down |  | LILRB5     |
| 206857_s_ | 7.34E-07 | 1.90E-08 | 4.414718 up   | 5.956509 up   | 1.349239 up   |  | FKBP1B     |
| 206858_s_ | 3.00E-04 | 7.98E-05 | 24.11388 down | 21.92755 down | 1.099707 up   |  | HOXC6      |
| 206860_s_ | 2.12E-05 | 2.18E-06 | 2.323899 up   | 1.520432 up   | 1.528447 down |  | MIOS       |
| 206862_at | 1.56E-04 | 3.32E-05 | 3.084195 up   | 3.460825 up   | 1.122116 up   |  | ZNF254     |
| 206863_x_ | 0.005039 | 0.003527 | 1.887259 up   | 1.010384 up   | 1.867864 down |  |            |
| 206864_s_ | 0.00417  | 0.002752 | 2.282878 up   | 1.872948 up   | 1.218869 down |  | HRK        |
| 206866_at | 0.006491 | 0.004858 | 1.3922 up     | 2.622013 down | 3.650367 down |  | CDH4       |
| 206867_at | 0.00201  | 0.001043 | 1.136675 up   | 1.514 down    | 1.720925 down |  | GCKR       |
| 206868_at | 0.028497 | 0.027052 | 1.340326 up   | 1.007091 up   | 1.330888 down |  | STARD8     |
| 206876_at | 3.10E-04 | 8.33E-05 | 11.20231 down | 1.038788 up   | 11.63683 up   |  | SIM1       |
| 206888_s_ | 0.003734 | 0.00239  | 1.847749 up   | 1.101403 up   | 1.677633 down |  | ARHGDI3    |



|           |          |          |               |               |               |          |
|-----------|----------|----------|---------------|---------------|---------------|----------|
| 206889_at | 0.001819 | 9.12E-04 | 1.596239 up   | 1.320497 down | 2.107829 down | PDIA2    |
| 206891_at | 0.003328 | 0.002059 | 2.979528 up   | 1.74619 up    | 1.706302 down | ACTN3    |
| 206893_at | 1.40E-05 | 1.23E-06 | 1.704951 up   | 20.39325 up   | 11.96119 up   | SALL1    |
| 206894_at | 0.001108 | 4.67E-04 | 1.901391 up   | 1.337346 down | 2.542818 down | APOA4    |
| 206896_s_ | 0.004247 | 0.002818 | 2.083121 up   | 1.676791 up   | 1.242326 down | GNG7     |
| 206897_at | 0.003407 | 0.002124 | 1.502235 up   | 1.105513 down | 1.66074 down  | PAGE1    |
| 206900_x_ | 9.49E-05 | 1.67E-05 | 3.165993 up   | 5.32848 up    | 1.683036 up   | ZNF253   |
| 206901_at | 0.004422 | 0.002978 | 1.327706 up   | 1.075022 up   | 1.23505 down  | C19orf57 |
| 206902_s_ | 0.010387 | 0.008589 | 1.427541 down | 1.089243 up   | 1.55494 up    | EXOG     |
| 206903_at | 0.001815 | 9.08E-04 | 1.20989 up    | 1.388746 down | 1.680229 down | EXOG     |
| 206905_s_ | 0.002414 | 0.001337 | 1.136383 down | 1.53974 down  | 1.354948 down | MATN1    |
| 206910_x_ | 5.90E-04 | 1.98E-04 | 1.510898 down | 1.66152 down  | 1.09969 down  | CFHR2    |
| 206913_at | 0.010434 | 0.008638 | 1.275732 up   | 1.310147 down | 1.671397 down | BAAT     |
| 206919_at | 0.001582 | 7.57E-04 | 1.369448 up   | 1.529779 up   | 1.117077 up   | ELK4     |
| 206928_at | 8.42E-06 | 6.05E-07 | 3.360317 up   | 4.514554 up   | 1.343491 up   | ZNF124   |
| 206929_s_ | 0.006696 | 0.005052 | 4.174319 down | 3.051534 down | 1.367941 up   | NFIC     |
| 206931_at | 3.79E-04 | 1.09E-04 | 2.216359 up   | 3.532331 up   | 1.593754 up   | ZNF141   |
| 206932_at | 3.31E-04 | 9.08E-05 | 17.40138 down | 2.029302 down | 8.575057 up   | CH25H    |
| 206935_at | 1.76E-04 | 3.90E-05 | 5.875158 up   | 5.413851 up   | 1.085209 down | PCDH8    |
| 206936_x_ | 0.001536 | 7.26E-04 | 1.686327 down | 1.04246 up    | 1.757928 up   |          |
| 206939_at | 0.003143 | 0.001909 | 1.288017 up   | 1.29186 up    | 1.002984 up   | DCC      |
| 206942_s_ | 0.003556 | 0.002245 | 1.110871 up   | 1.513436 up   | 1.362387 up   | PMCH     |
| 206943_at | 0.004008 | 0.002614 | 5.804757 down | 3.987415 down | 1.455769 up   | TGFBR1   |
| 206944_at | 0.028518 | 0.027079 | 1.659959 up   | 1.057608 down | 1.755586 down | HTR6     |
| 206953_s_ | 0.007449 | 0.005761 | 2.531568 up   | 3.363502 up   | 1.328624 up   | LPHN2    |
| 206962_x_ | 2.88E-04 | 7.55E-05 | 1.419179 up   | 1.304883 up   | 1.087591 down |          |
|           |          |          |               |               |               | NAT8 /// |
| 206963_s_ | 0.01918  | 0.017475 | 1.119163 up   | 1.296602 down | 1.451108 down | NAT8B    |
| 206968_s_ | 0.009425 | 0.007655 | 1.818804 up   | 1.847348 up   | 1.015694 up   | NFRKB    |
| 206969_at | 0.001557 | 7.40E-04 | 5.555501 down | 32.44356 down | 5.839898 down | KRT34    |
| 206973_at | 0.006378 | 0.004752 | 1.477404 up   | 1.298824 up   | 1.137494 down | PPFIA2   |
| 206974_at | 8.24E-04 | 3.12E-04 | 1.749692 up   | 1.298813 down | 2.272523 down | CXCR6    |
| 206975_at | 0.011354 | 0.009558 | 1.245606 up   | 1.215058 down | 1.513484 down | LTA      |
| 206976_s_ | 2.92E-04 | 7.66E-05 | 2.04252 up    | 1.701626 up   | 1.200334 down | HSPH1    |

|           |          |          |               |               |               |            |
|-----------|----------|----------|---------------|---------------|---------------|------------|
| 206981_at | 0.015493 | 0.013718 | 1.650817 up   | 1.166502 up   | 1.415186 down | SCN4A      |
| 206983_at | 0.001093 | 4.58E-04 | 1.24388 up    | 1.377329 down | 1.713232 down | CCR6       |
| 206986_at | 5.42E-04 | 1.76E-04 | 2.079069 up   | 1.359299 down | 2.826076 down | FGF18      |
| 206993_at | 0.04609  | 0.044884 | 1.676114 down | 1.215291 down | 1.379188 up   | ATP5S      |
| 207000_s_ | 1.11E-04 | 2.08E-05 | 3.352485 down | 5.374166 down | 1.603039 down | PPP3CC     |
| 207002_s_ | 7.19E-05 | 1.16E-05 | 16.15532 down | 4.48329 down  | 3.603451 up   | PLAGL1     |
| 207003_at | 3.01E-04 | 7.99E-05 | 1.631551 up   | 1.251083 down | 2.041206 down | GUCA2A     |
| 207004_at | 0.003711 | 0.00237  | 1.718031 up   | 1.493354 down | 2.565627 down | BCL2       |
| 207005_s_ | 0.002069 | 0.001085 | 1.428024 up   | 1.801743 down | 2.572932 down | BCL2       |
| 207008_at | 0.006335 | 0.00471  | 1.691488 up   | 1.307369 up   | 1.293811 down | IL8RB      |
| 207013_s_ | 0.007562 | 0.005874 | 1.402083 up   | 1.066185 down | 1.49488 down  | MMP16      |
| 207014_at | 0.025639 | 0.024118 | 1.26194 up    | 1.042071 down | 1.315031 down | GABRA2     |
| 207015_s_ | 0.017253 | 0.015502 | 1.524375 up   | 1.117134 up   | 1.364541 down | ALDH1A2    |
| 207019_s_ | 0.001725 | 8.49E-04 | 1.364752 up   | 1.204738 down | 1.644168 down | AKAP4      |
| 207025_at | 0.003846 | 0.002481 | 1.709718 up   | 1.075364 down | 1.838569 down | GJC2       |
| 207029_at | 2.65E-04 | 6.75E-05 | 4.549127 down | 1.169367 down | 3.890249 up   | KITLG      |
| 207030_s_ | 3.97E-04 | 1.16E-04 | 1.337015 up   | 3.34994 up    | 2.505537 up   | CSRP2      |
| 207039_at | 9.74E-05 | 1.74E-05 | 4.481031 down | 9.318215 down | 2.07948 down  | CDKN2A     |
| 207041_at | 0.006006 | 0.004399 | 1.195809 up   | 1.360048 up   | 1.137346 up   | MASP2      |
|           |          |          |               |               |               | CLCNKA /// |
| 207047_s_ | 0.00109  | 4.56E-04 | 1.554236 up   | 1.237517 up   | 1.255931 down | CLCNKB     |
| 207048_at | 0.005851 | 0.004253 | 1.591071 up   | 1.053397 up   | 1.51042 down  | SLC6A11    |
| 207053_at | 0.009001 | 0.007249 | 2.703707 down | 1.684168 down | 1.605367 up   | SLC8A1     |
| 207057_at | 1.35E-04 | 2.70E-05 | 8.253999 down | 3.547034 down | 2.327015 up   | SLC16A7    |
| 207063_at | 0.006761 | 0.00511  | 1.153086 down | 1.927597 up   | 2.222684 up   | CYorf14    |
| 207067_s_ | 0.010507 | 0.008717 | 1.418681 up   | 1.19735 down  | 1.698658 down | HDC        |
| 207071_s_ | 8.64E-05 | 1.47E-05 | 2.344754 down | 1.948165 down | 1.203571 up   | ACO1       |
| 207073_at | 0.013795 | 0.012006 | 1.117395 up   | 1.342191 up   | 1.201178 up   | CDKL2      |
| 207077_at | 0.001611 | 7.76E-04 | 1.692372 up   | 1.278009 down | 2.162867 down | CELA2B     |
| 207081_s_ | 1.98E-04 | 4.52E-05 | 1.855146 down | 1.702297 down | 1.08979 up    | PI4KA      |
| 207082_at | 0.001387 | 6.33E-04 | 1.869974 down | 1.199397 down | 1.559095 up   | CSF1       |
| 207084_at | 0.040875 | 0.03963  | 1.703314 up   | 1.018294 up   | 1.672714 down | POU3F2     |

|           |          |          |               |               |               |  |             |
|-----------|----------|----------|---------------|---------------|---------------|--|-------------|
|           |          |          |               |               |               |  | GAGE1 ///   |
|           |          |          |               |               |               |  | GAGE12C     |
|           |          |          |               |               |               |  | ///         |
|           |          |          |               |               |               |  | GAGE12D     |
|           |          |          |               |               |               |  | ///         |
|           |          |          |               |               |               |  | GAGE12E     |
|           |          |          |               |               |               |  | ///         |
|           |          |          |               |               |               |  | GAGE12F     |
|           |          |          |               |               |               |  | ///         |
|           |          |          |               |               |               |  | GAGE12G     |
|           |          |          |               |               |               |  | ///         |
|           |          |          |               |               |               |  | GAGE12H     |
|           |          |          |               |               |               |  | /// GAGE12I |
|           |          |          |               |               |               |  | /// GAGE12J |
|           |          |          |               |               |               |  | /// GAGE2A  |
|           |          |          |               |               |               |  | /// GAGE2C  |
|           |          |          |               |               |               |  | /// GAGE2D  |
|           |          |          |               |               |               |  | /// GAGE2E  |
|           |          |          |               |               |               |  | /// GAGE4   |
|           |          |          |               |               |               |  | /// GAGE5   |
|           |          |          |               |               |               |  | /// GAGE6   |
|           |          |          |               |               |               |  | /// GAGE7   |
| 207086_x_ | 0.002315 | 0.001266 | 1.498977 up   | 1.226214 up   | 1.222443 down |  | /// GAGE8   |
| 207099_s_ | 0.032167 | 0.030829 | 2.22036 down  | 1.176301 down | 1.887577 up   |  | CHM         |
| 207104_x_ | 0.018367 | 0.016641 | 1.562622 up   | 1.053439 up   | 1.483353 down |  | LILRB1      |
| 207106_s_ | 0.008707 | 0.006965 | 1.789635 up   | 1.957542 down | 3.503286 down |  | LTK         |
| 207119_at | 7.12E-06 | 4.76E-07 | 5.643187 down | 1.297276 up   | 7.320768 up   |  | PRKG1       |
| 207121_s_ | 4.18E-05 | 5.54E-06 | 2.563587 up   | 1.880997 up   | 1.362887 down |  | MAPK6       |
| 207123_s_ | 0.007586 | 0.005898 | 1.559077 up   | 1.1757 down   | 1.833006 down |  | MATN4       |
| 207124_s_ | 0.012276 | 0.010483 | 2.129105 down | 2.064984 down | 1.031052 up   |  | GNB5        |

|           |          |          |               |               |               |           |
|-----------|----------|----------|---------------|---------------|---------------|-----------|
| 207127_s_ | 7.74E-06 | 5.40E-07 | 2.392187 up   | 2.281826 up   | 1.048365 down | HNRNPH3   |
| 207129_at | 0.004693 | 0.003224 | 1.214467 down | 1.438013 up   | 1.746419 up   | CA5B      |
| 207130_at | 0.005628 | 0.004048 | 1.943683 up   | 2.171902 up   | 1.117416 up   | ZMYND8    |
| 207131_x_ | 5.56E-04 | 1.82E-04 | 2.006704 up   | 3.046235 up   | 1.518029 up   | GGT1      |
| 207133_x_ | 0.01151  | 0.00971  | 1.500249 up   | 1.335534 up   | 1.123333 down | ALPK1     |
| 207137_at | 0.016561 | 0.014804 | 1.99232 up    | 1.164941 down | 2.320936 down | NFKBIL2   |
| 207139_at | 0.03168  | 0.030331 | 1.330011 up   | 1.083153 down | 1.440606 down | ATP4A     |
| 207147_at | 0.004409 | 0.002966 | 1.399129 up   | 5.255631 down | 7.353304 down | DLX2      |
| 207150_at | 6.56E-05 | 1.02E-05 | 1.449923 up   | 1.170104 down | 1.696561 down | SLC18A3   |
| 207153_s_ | 3.06E-04 | 8.18E-05 | 2.20189 up    | 3.233991 up   | 1.468734 up   | GLMN      |
| 207155_at | 5.20E-04 | 1.67E-04 | 3.844738 down | 1.003313 down | 3.832044 up   | TBX5      |
| 207156_at | 8.14E-04 | 3.08E-04 | 1.895595 down | 1.719709 up   | 3.259872 up   | HIST1H2AG |
| 207162_s_ | 0.004447 | 0.003001 | 1.858065 up   | 1.156735 down | 2.14929 down  | CACNA1B   |
| 207165_at | 0.003854 | 0.002489 | 6.104047 up   | 11.04164 up   | 1.808904 up   | HMMR      |
| 207169_x_ | 1.40E-05 | 1.23E-06 | 6.156197 up   | 2.204146 up   | 2.793008 down | DDR1      |
| 207172_s_ | 4.27E-06 | 2.30E-07 | 18.68563 down | 20.55562 down | 1.100076 down | CDH11     |
| 207173_x_ | 3.47E-05 | 4.28E-06 | 29.06528 down | 24.5269 down  | 1.185037 up   | CDH11     |
| 207177_at | 5.42E-07 | 1.25E-08 | 26.91151 down | 5.45639 down  | 4.932108 up   | PTGFR     |
| 207179_at | 0.006583 | 0.004945 | 1.534992 up   | 1.10133 down  | 1.690532 down | TLX1      |
| 207181_s_ | 7.84E-05 | 1.30E-05 | 4.92612 down  | 3.280942 down | 1.501435 up   | CASP7     |
| 207183_at | 3.34E-07 | 6.19E-09 | 14.71945 up   | 26.42141 up   | 1.795 up      | GPR19     |
| 207186_s_ | 3.95E-04 | 1.15E-04 | 4.845183 up   | 5.417517 up   | 1.118124 up   | BPTF      |
| 207188_at | 0.001861 | 9.39E-04 | 1.172995 up   | 2.072992 up   | 1.767265 up   | CDK3      |
| 207191_s_ | 1.70E-05 | 1.62E-06 | 16.29013 down | 27.28094 down | 1.674692 down | ISLR      |
| 207195_at | 0.001537 | 7.27E-04 | 1.383408 up   | 1.317978 up   | 1.049645 down | CNTN6     |
| 207196_s_ | 0.00118  | 5.09E-04 | 2.204014 down | 3.080503 down | 1.397679 down | TNIP1     |
| 207197_at | 1.99E-08 | 1.09E-10 | 61.03131 up   | 63.43597 up   | 1.039401 up   | ZIC3      |
| 207198_s_ | 0.004723 | 0.003248 | 1.526629 down | 2.181795 down | 1.429159 down | LIMS1     |
| 207199_at | 0.001243 | 5.46E-04 | 2.683013 up   | 1.651238 up   | 1.62485 down  | TERT      |
| 207203_s_ | 0.015651 | 0.013873 | 1.21246 up    | 1.106973 down | 1.34216 down  | NR1I2     |
| 207207_at | 0.016747 | 0.01499  | 1.372382 up   | 1.117027 up   | 1.228602 down | RBMXL2    |
| 207219_at | 6.39E-04 | 2.21E-04 | 4.032641 up   | 3.114718 up   | 1.294705 down | ZNF643    |
| 207232_s_ | 3.15E-05 | 3.78E-06 | 2.424977 up   | 2.400213 up   | 1.010318 down | DZIP3     |
| 207233_s_ | 2.69E-04 | 6.90E-05 | 7.214869 down | 1.646915 down | 4.380839 up   | MITF      |

|           |          |          |               |               |               |             |
|-----------|----------|----------|---------------|---------------|---------------|-------------|
| 207235_s_ | 0.004131 | 0.002719 | 1.298407 up   | 1.146135 down | 1.48815 down  | GRM5        |
| 207241_at | 1.84E-04 | 4.13E-05 | 1.16873 up    | 1.158989 down | 1.354545 down | C4orf6      |
| 207243_s_ | 2.82E-04 | 7.32E-05 | 1.368138 down | 1.254605 down | 1.090493 up   | CALM2       |
| 207247_s_ | 0.007738 | 0.006044 | 2.696173 down | 1.512906 down | 1.782115 up   | ZFX /// ZFY |
| 207257_at | 0.001082 | 4.52E-04 | 1.522878 up   | 1.168633 down | 1.779685 down | EPO         |
| 207264_at | 1.05E-04 | 1.92E-05 | 4.308013 down | 6.824042 down | 1.584035 down | KDEL3       |
| 207265_s_ | 2.22E-06 | 9.12E-08 | 14.4144 down  | 15.53924 down | 1.078036 down | KDEL3       |
| 207267_s_ | 4.83E-04 | 1.50E-04 | 1.74555 up    | 1.804435 up   | 1.033734 up   | DSCR6       |
| 207269_at | 0.001522 | 7.17E-04 | 1.343046 up   | 1.050144 down | 1.410391 down | DEFA4       |
| 207271_x_ | 0.016498 | 0.014733 | 1.256868 up   | 1.023147 down | 1.28596 down  | SPAG11B     |
| 207273_at | 4.83E-04 | 1.50E-04 | 1.23641 up    | 1.338924 down | 1.655459 down |             |
| 207275_s_ | 1.02E-05 | 7.82E-07 | 4.907058 down | 5.607062 down | 1.142652 down | ACSL1       |
| 207278_s_ | 0.001816 | 9.09E-04 | 1.519014 up   | 1.108662 up   | 1.370132 down | CD209       |
| 207281_x_ | 0.001453 | 6.74E-04 | 2.108383 up   | 1.065489 up   | 1.978793 down | VCX2        |
| 207282_s_ | 0.010346 | 0.008551 | 1.408666 up   | 1.53991 down  | 2.169219 down | MYOG        |
| 207284_s_ | 0.034041 | 0.032734 | 1.178928 up   | 1.147529 down | 1.352854 down | ASPH        |
| 207289_at | 1.18E-04 | 2.25E-05 | 2.249452 up   | 1.19883 down  | 2.696711 down | MMP25       |
| 207296_at | 0.001488 | 6.95E-04 | 1.547044 down | 1.258904 down | 1.228882 up   | ZNF343      |
| 207303_at | 1.68E-05 | 1.59E-06 | 1.448808 down | 5.995614 down | 4.138307 down | PDE1C       |
| 207306_at | 8.19E-04 | 3.10E-04 | 3.251823 up   | 1.071948 down | 3.485783 down | TCF15       |
| 207307_at | 0.002731 | 0.001578 | 1.810308 up   | 1.619104 up   | 1.118092 down | HTR2C       |
| 207311_at | 0.018738 | 0.017019 | 1.44623 up    | 1.054279 down | 1.52473 down  | DOC2B       |
| 207316_at | 0.002266 | 0.001232 | 1.445575 up   | 7.770901 down | 11.23342 down | HAS1        |
| 207321_s_ | 0.006262 | 0.004643 | 1.290898 up   | 1.485977 down | 1.918246 down | ABCB9       |
| 207323_s_ | 0.007586 | 0.005898 | 1.623869 up   | 1.022693 down | 1.660719 down | MBP         |
| 207327_at | 0.008979 | 0.00723  | 1.252705 up   | 1.020639 up   | 1.227373 down | EYA4        |
| 207334_s_ | 4.42E-04 | 1.33E-04 | 4.5233 down   | 3.371212 down | 1.341743 up   | TGFBR2      |
| 207335_x_ | 0.003833 | 0.002471 | 1.961328 up   | 1.575188 up   | 1.245139 down | ATP5I       |
| 207337_at | 0.004324 | 0.002892 | 1.590695 up   | 1.07309 down  | 1.706959 down | CTAG2       |
| 207339_s_ | 0.005185 | 0.003657 | 2.031744 up   | 1.204431 down | 2.447095 down | LTB         |
| 207347_at | 9.02E-04 | 3.52E-04 | 1.437775 down | 5.796014 down | 4.031238 down | ERCC6       |
| 207348_s_ | 3.95E-04 | 1.15E-04 | 3.293866 up   | 2.196439 up   | 1.499639 down | LIG3        |
| 207350_s_ | 5.67E-07 | 1.33E-08 | 8.905067 down | 2.840529 down | 3.135004 up   | VAMP4       |
| 207352_s_ | 0.007105 | 0.005435 | 1.40175 up    | 1.590477 up   | 1.134636 up   | GABRB2      |

|           |          |          |               |               |               |           |
|-----------|----------|----------|---------------|---------------|---------------|-----------|
| 207353_s_ | 0.007931 | 0.00622  | 1.712481 up   | 1.384807 down | 2.371455 down | HMX1      |
| 207357_s_ | 4.23E-07 | 8.78E-09 | 3.024583 down | 14.54633 down | 4.809365 down | GALNT10   |
| 207359_at | 0.005478 | 0.003917 | 1.257012 down | 1.462975 down | 1.163851 down | CAMKK2    |
| 207362_at | 4.47E-05 | 6.06E-06 | 1.688602 down | 1.325046 down | 1.274373 up   | SLC30A4   |
| 207363_at | 0.023868 | 0.022289 | 1.262644 up   | 1.062312 down | 1.341321 down | RS1       |
| 207365_x_ | 0.001997 | 0.001034 | 1.791645 up   | 2.661001 up   | 1.485228 up   | USP34     |
| 207367_at | 0.007552 | 0.005864 | 1.353575 up   | 1.244921 up   | 1.087277 down | ATP12A    |
| 207370_at | 0.00498  | 0.003475 | 1.549915 up   | 1.096213 down | 1.699037 down | IBSP      |
| 207372_s_ | 0.002341 | 0.001285 | 1.610414 up   | 1.176533 down | 1.894705 down | ENTPD2    |
| 207375_s_ | 2.09E-04 | 4.89E-05 | 4.377026 down | 1.295502 down | 3.378632 up   | IL15RA    |
| 207376_at | 0.011811 | 0.010009 | 1.586421 up   | 1.345843 up   | 1.178757 down | VENTX     |
| 207377_at | 0.025151 | 0.0236   | 1.395691 up   | 1.089437 down | 1.520518 down | PPP1R2P9  |
| 207379_at | 5.80E-04 | 1.93E-04 | 1.990146 up   | 10.20427 down | 20.30799 down | EDIL3     |
| 207387_s_ | 6.17E-05 | 9.41E-06 | 4.579279 down | 1.200127 up   | 5.495714 up   | GK        |
| 207388_s_ | 0.005553 | 0.003979 | 1.599297 down | 2.638148 down | 1.649567 down | PTGES     |
| 207390_s_ | 0.003745 | 0.0024   | 3.489052 down | 5.660084 down | 1.622242 down | SMTN      |
| 207400_at | 7.34E-04 | 2.68E-04 | 1.68969 up    | 1.952121 up   | 1.155313 up   | NPY5R     |
| 207415_at | 5.29E-04 | 1.70E-04 | 3.018765 down | 1.351787 down | 2.233167 up   | PLA2R1    |
| 207416_s_ | 0.007245 | 0.005569 | 1.229935 up   | 1.373153 down | 1.688888 down | NFATC3    |
| 207418_s_ | 0.005981 | 0.004375 | 1.031944 up   | 1.634799 down | 1.68702 down  | DDO       |
| 207419_s_ | 0.008596 | 0.006857 | 2.608273 down | 4.035446 down | 1.547172 down | RAC2      |
| 207426_s_ | 5.49E-04 | 1.79E-04 | 4.662501 down | 1.236009 down | 3.772222 up   | TNFSF4    |
| 207431_s_ | 0.006063 | 0.004453 | 2.269434 down | 2.077049 down | 1.092624 up   | DEGS1     |
| 207434_s_ | 0.00168  | 8.22E-04 | 2.018853 up   | 1.411519 down | 2.84965 down  | FXD2      |
| 207436_x_ | 2.00E-04 | 4.58E-05 | 1.849077 up   | 1.989819 up   | 1.076115 up   | KIAA0894  |
| 207437_at | 0.010671 | 0.008879 | 1.021183 up   | 1.830555 up   | 1.792583 up   | NOVA1     |
| 207440_at | 3.64E-04 | 1.03E-04 | 1.480252 down | 3.472194 down | 2.345677 down | SLC35A2   |
| 207447_s_ | 1.46E-04 | 3.01E-05 | 2.621222 up   | 2.431184 up   | 1.078167 down | MGAT4C    |
| 207448_at | 0.001173 | 5.04E-04 | 1.766036 up   | 1.207226 down | 2.132005 down | POFUT2    |
|           |          |          |               |               |               | LOC100134 |
|           |          |          |               |               |               | 410 ///   |
| 207450_s_ | 0.009114 | 0.007361 | 1.351165 up   | 1.008028 up   | 1.340404 down | POU6F2    |
| 207451_at | 0.001133 | 4.81E-04 | 1.519522 up   | 1.328169 down | 2.018181 down | NKX2-8    |
| 207457_s_ | 0.011155 | 0.009365 | 1.582663 up   | 1.074679 down | 1.700855 down | LY6G6D    |

|           |          |          |               |               |               |         |
|-----------|----------|----------|---------------|---------------|---------------|---------|
| 207462_at | 0.010121 | 0.008334 | 1.515183 up   | 1.244297 up   | 1.217701 down | GLRA2   |
| 207467_x_ | 1.78E-04 | 3.95E-05 | 5.370602 down | 4.749693 down | 1.130726 up   | CAST    |
| 207468_s_ | 2.29E-04 | 5.54E-05 | 2.357948 up   | 1.150832 up   | 2.048907 down | SFRP5   |
| 207475_at | 0.004954 | 0.00345  | 1.735508 up   | 1.93377 down  | 3.356075 down | FABP2   |
| 207476_at | 0.004596 | 0.003139 | 1.740106 up   | 1.181768 down | 2.056402 down |         |
| 207480_s_ | 0.027878 | 0.026408 | 5.792239 down | 2.564 down    | 2.259064 up   | MEIS2   |
| 207482_at | 6.81E-04 | 2.41E-04 | 1.855273 up   | 1.167575 down | 2.16617 down  | TP53TG5 |
| 207483_s_ | 0.005383 | 0.003832 | 1.474077 up   | 1.795699 up   | 1.218185 up   | CAND1   |
| 207488_at | 0.001687 | 8.26E-04 | 1.174568 up   | 1.630373 down | 1.914985 down |         |
| 207496_at | 0.002517 | 0.001418 | 1.21443 up    | 1.032333 down | 1.253696 down | MS4A2   |
| 207504_at | 0.027493 | 0.026017 | 1.337626 up   | 1.091634 down | 1.460198 down | CA7     |
| 207506_at | 0.039924 | 0.038685 | 1.453994 up   | 1.009559 down | 1.467893 down | GLRX3   |
| 207507_s_ | 0.00224  | 0.001212 | 1.464235 up   | 1.935487 up   | 1.321842 up   | ATP5G3  |
| 207508_at | 0.002363 | 0.0013   | 1.711721 up   | 1.644687 up   | 1.040758 down | ATP5G3  |
| 207510_at | 7.78E-04 | 2.90E-04 | 4.436679 down | 10.05996 down | 2.267453 down | BDKRB1  |
| 207517_at | 0.01246  | 0.010663 | 1.571785 up   | 1.004329 up   | 1.56501 down  | LAMC2   |
| 207531_at | 0.002894 | 0.001707 | 1.444319 up   | 1.036052 down | 1.496389 down | CRYGC   |
| 207539_s_ | 0.007724 | 0.006027 | 1.232302 up   | 1.03126 down  | 1.270824 down | IL4     |
| 207540_s_ | 2.03E-04 | 4.68E-05 | 1.805743 up   | 1.199155 up   | 1.505846 down | SYK     |
| 207542_s_ | 0.004364 | 0.002931 | 2.139457 down | 1.990038 up   | 4.257599 up   | AQP1    |
| 207549_x_ | 0.022092 | 0.020486 | 2.134466 down | 1.147721 up   | 2.449771 up   | CD46    |
| 207551_s_ | 1.36E-04 | 2.73E-05 | 1.650756 down | 1.884571 down | 1.141641 down | MSL3    |
| 207554_x_ | 0.004808 | 0.00332  | 1.921838 down | 2.030627 down | 1.056607 down | TBXA2R  |
| 207555_s_ | 0.002703 | 0.001555 | 1.91284 up    | 1.196397 down | 2.288517 down | TBXA2R  |
| 207558_s_ | 0.003605 | 0.002283 | 1.038395 up   | 3.56833 down  | 3.705336 down | PITX2   |
| 207559_s_ | 1.20E-06 | 3.76E-08 | 2.636343 up   | 2.171336 up   | 1.214157 down | ZMYM3   |
| 207560_at | 0.001286 | 5.73E-04 | 1.641051 up   | 1.342068 down | 2.202402 down | SLC28A1 |
| 207565_s_ | 1.34E-09 | 3.14E-12 | 9.354644 down | 8.409132 down | 1.112439 up   | MR1     |
| 207566_at | 2.86E-04 | 7.47E-05 | 2.04735 down  | 2.590433 down | 1.265262 down | MR1     |
| 207573_x_ | 5.90E-04 | 1.98E-04 | 1.084465 up   | 1.477632 up   | 1.362546 up   | ATP5L   |
| 207574_s_ | 0.001791 | 8.93E-04 | 1.937717 down | 5.177775 down | 2.672101 down | GADD45B |
| 207575_at | 1.55E-04 | 3.27E-05 | 1.145616 down | 1.35851 up    | 1.556331 up   | GOLGA6  |
| 207578_s_ | 0.015221 | 0.013447 | 1.367554 up   | 1.559617 up   | 1.140443 up   | HTR4    |
| 207586_at | 0.009247 | 0.00749  | 1.297748 up   | 1.11187 down  | 1.442927 down | SHH     |

|           |          |          |               |               |               |            |
|-----------|----------|----------|---------------|---------------|---------------|------------|
| 207588_at | 0.011423 | 0.009623 | 1.176238 up   | 1.048759 down | 1.233591 down |            |
| 207594_s_ | 0.006542 | 0.004908 | 1.871362 down | 1.543687 down | 1.212267 up   | SYNJ1      |
| 207595_s_ | 1.48E-04 | 3.06E-05 | 4.267243 down | 6.072917 down | 1.423148 down | BMP1       |
| 207598_x_ | 3.09E-05 | 3.67E-06 | 2.461173 up   | 2.813853 up   | 1.143297 up   | XRCC2      |
| 207604_s_ | 0.006221 | 0.004601 | 1.81774 up    | 1.121985 down | 2.039477 down | SLC4A7     |
| 207608_x_ | 0.001565 | 7.46E-04 | 1.122724 down | 1.680365 up   | 1.886586 up   | CYP1A2     |
| 207612_at | 0.019118 | 0.01741  | 1.328078 up   | 1.005539 down | 1.335434 down | WNT8B      |
| 207616_s_ | 4.52E-04 | 1.37E-04 | 2.896526 down | 2.842419 down | 1.019035 up   | TANK       |
| 207617_at | 8.20E-04 | 3.11E-04 | 1.420755 up   | 1.310966 down | 1.862561 down | DDX3X      |
| 207623_at | 1.29E-04 | 2.54E-05 | 1.363775 up   | 1.470485 down | 2.005411 down | ABCF2      |
| 207627_s_ | 0.002436 | 0.001354 | 1.626628 up   | 2.103378 up   | 1.293091 up   | TFCP2      |
| 207630_s_ | 0.011553 | 0.009752 | 1.375848 down | 1.079092 down | 1.275005 up   | CREM       |
| 207632_at | 0.005795 | 0.004202 | 1.118042 up   | 1.277832 down | 1.42867 down  | MUSK       |
| 207634_at | 0.029404 | 0.028    | 1.413191 up   | 1.168834 down | 1.651785 down | PDCD1      |
|           |          |          |               |               |               | LOC100129  |
|           |          |          |               |               |               | 448 ///    |
| 207637_at | 0.01433  | 0.012541 | 1.217766 up   | 1.11772 down  | 1.361122 down | WSCD2      |
| 207643_s_ | 1.35E-07 | 1.76E-09 | 3.998974 down | 4.638208 down | 1.15985 down  | TNFRSF1A   |
| 207644_at | 4.49E-04 | 1.36E-04 | 11.4484 up    | 13.51694 up   | 1.180684 up   | FOXH1      |
| 207652_s_ | 0.001905 | 9.70E-04 | 1.095253 up   | 1.581253 down | 1.731872 down | CMKLR1     |
| 207657_x_ | 0.004185 | 0.002767 | 1.571965 up   | 1.546083 up   | 1.016741 down | TNPO1      |
| 207661_s_ | 4.69E-04 | 1.44E-04 | 3.352664 down | 1.467106 down | 2.285222 up   | SH3PXD2A   |
|           |          |          |               |               |               | ADAM21 /// |
| 207665_at | 0.005994 | 0.004387 | 1.464208 down | 1.126423 down | 1.299874 up   | ADAM21P    |
| 207671_s_ | 0.011479 | 0.009679 | 1.058339 up   | 1.613571 down | 1.707705 down | BEST1      |
| 207673_at | 0.012092 | 0.010294 | 1.41092 up    | 1.095827 down | 1.546124 down | NPHS1      |
| 207675_x_ | 0.012887 | 0.011088 | 1.78206 up    | 1.436728 up   | 1.24036 down  | ARTN       |
| 207676_at | 9.62E-04 | 3.85E-04 | 1.858905 up   | 1.307187 up   | 1.422065 down | ONECUT2    |
| 207681_at | 0.025354 | 0.023816 | 1.223217 up   | 1.050119 up   | 1.164836 down | CXCR3      |
| 207685_at | 0.004162 | 0.002746 | 1.37663 up    | 1.203586 down | 1.656892 down | CRYBB3     |
| 207686_s_ | 1.15E-04 | 2.19E-05 | 3.174216 down | 1.774452 down | 1.788843 up   | CASP8      |
| 207688_s_ | 5.68E-04 | 1.88E-04 | 2.198816 up   | 3.652478 up   | 1.661112 up   |            |
| 207694_at | 0.008441 | 0.006707 | 1.382568 up   | 1.155669 down | 1.597791 down | POU3F4     |



|           |          |          |               |               |               |          |
|-----------|----------|----------|---------------|---------------|---------------|----------|
| 207699_at | 3.91E-04 | 1.14E-04 | 1.425833 up   | 1.243334 down | 1.772787 down | ZFHX2    |
| 207703_at | 0.004665 | 0.003201 | 1.073304 down | 8.12694 up    | 8.722672 up   | NLGN4Y   |
| 207704_s_ | 3.04E-04 | 8.11E-05 | 1.550842 down | 1.364685 up   | 2.11641 up    | GAS7     |
| 207705_s_ | 6.59E-04 | 2.30E-04 | 2.458227 up   | 4.112787 up   | 1.673071 up   | NINL     |
| 207707_s_ | 0.002221 | 0.001195 | 1.287314 down | 1.627784 down | 1.264481 down | SEC13    |
| 207713_s_ | 5.11E-05 | 7.28E-06 | 2.181473 down | 4.235991 down | 1.941803 down | RBCK1    |
| 207717_s_ | 9.57E-06 | 7.13E-07 | 20.33221 up   | 20.66649 up   | 1.016441 up   | PKP2     |
| 207727_s_ | 2.59E-04 | 6.53E-05 | 2.994356 up   | 3.208621 up   | 1.071556 up   | MUTYH    |
| 207730_x_ | 0.004709 | 0.003236 | 1.832951 up   | 1.789531 up   | 1.024264 down |          |
| 207732_s_ | 5.82E-04 | 1.94E-04 | 2.167965 up   | 2.248548 up   | 1.03717 up    | DLG3     |
| 207733_x_ | 8.29E-04 | 3.15E-04 | 7.301901 down | 1.823538 down | 4.004249 up   | PSG9     |
| 207735_at | 1.26E-04 | 2.46E-05 | 3.750216 up   | 3.331018 up   | 1.125847 down | RNF125   |
| 207742_s_ | 7.42E-05 | 1.21E-05 | 1.886994 up   | 1.568424 up   | 1.203115 down | NR6A1    |
| 207745_at | 6.75E-04 | 2.37E-04 | 1.513261 up   | 1.355563 down | 2.05132 down  | CABP2    |
| 207746_at | 0.003258 | 0.001999 | 3.789413 up   | 5.631178 up   | 1.486029 up   | POLQ     |
| 207758_at | 0.005933 | 0.004333 | 1.741404 up   | 1.221291 down | 2.126761 down |          |
| 207760_s_ | 0.004128 | 0.002716 | 1.125085 up   | 1.801077 down | 2.026364 down | NCOR2    |
| 207763_at | 2.01E-04 | 4.61E-05 | 1.055403 down | 1.784415 down | 1.690743 down | S100A5   |
| 207764_s_ | 0.009586 | 0.007812 | 2.264952 down | 1.833337 down | 1.235426 up   | HIPK3    |
| 207765_s_ | 1.18E-04 | 2.26E-05 | 1.769577 down | 4.224499 down | 2.387293 down | KIAA1539 |
| 207772_s_ | 0.009443 | 0.007671 | 1.328156 up   | 1.211553 up   | 1.096243 down | PRMT8    |
| 207781_s_ | 3.98E-04 | 1.16E-04 | 6.814443 up   | 6.153964 up   | 1.107326 down | ZNF711   |
| 207783_x_ | 0.005538 | 0.003965 | 1.145625 down | 1.119685 down | 1.023168 up   | HUWE1    |
| 207784_at | 0.003017 | 0.001805 | 1.931562 up   | 1.048695 down | 2.02562 down  | ARSD     |
| 207785_s_ | 0.0091   | 0.007346 | 1.240323 up   | 1.767215 up   | 1.424803 up   | RBPJ     |
| 207791_s_ | 0.02513  | 0.023577 | 1.910623 down | 1.491258 down | 1.281215 up   | RAB1A    |
| 207792_at | 0.004736 | 0.003259 | 1.577185 up   | 1.047336 down | 1.651843 down | OPRD1    |
| 207797_s_ | 0.03568  | 0.034398 | 1.252542 up   | 1.176515 down | 1.473634 down | LRP2BP   |
| 207805_s_ | 4.40E-04 | 1.33E-04 | 1.635619 down | 2.088679 down | 1.276997 down | PSMD9    |
| 207808_s_ | 0.009779 | 0.008001 | 7.225297 down | 3.119635 down | 2.316072 up   | PROS1    |
| 207809_s_ | 0.002537 | 0.001432 | 1.954943 down | 2.347833 down | 1.200973 down | ATP6AP1  |
| 207811_at | 0.012408 | 0.010612 | 1.224973 up   | 1.045556 up   | 1.1716 down   | KRT12    |
| 207812_s_ | 2.78E-04 | 7.19E-05 | 1.531944 down | 1.723633 down | 1.125128 down | GORASP2  |
| 207817_at | 6.54E-04 | 2.28E-04 | 1.42202 up    | 1.226736 down | 1.744443 down | IFNW1    |

|           |          |          |               |               |               |           |
|-----------|----------|----------|---------------|---------------|---------------|-----------|
| 207821_s_ | 0.011166 | 0.009375 | 1.623614 up   | 2.029748 up   | 1.250142 up   | PTK2      |
| 207822_at | 9.21E-04 | 3.63E-04 | 1.249116 down | 2.424421 up   | 3.028382 up   | FGFR1     |
| 207826_s_ | 2.28E-06 | 9.43E-08 | 3.353856 up   | 2.40033 down  | 8.050363 down | ID3       |
| 207827_x_ | 4.95E-04 | 1.55E-04 | 3.162494 up   | 1.562433 up   | 2.024084 down | SNCA      |
| 207828_s_ | 8.54E-04 | 3.27E-04 | 7.151197 up   | 6.640321 up   | 1.076936 down | CENPF     |
| 207830_s_ | 8.71E-04 | 3.36E-04 | 1.319838 up   | 1.390125 up   | 1.053254 up   | PPP1R8    |
| 207832_at | 0.002114 | 0.001116 | 1.747246 up   | 1.177392 down | 2.057193 down | BAIAP2    |
| 207833_s_ | 3.83E-04 | 1.11E-04 | 1.576285 down | 2.559356 down | 1.623663 down | HLCS      |
| 207834_at | 0.008568 | 0.006827 | 1.582993 down | 1.390311 up   | 2.200852 up   | FBLN1     |
| 207835_at | 1.43E-04 | 2.92E-05 | 1.340659 down | 1.880453 up   | 2.521046 up   | FBLN1     |
| 207837_at | 1.99E-04 | 4.57E-05 | 2.108642 up   | 2.278207 up   | 1.080415 up   | RBPMS     |
| 207841_at | 0.004592 | 0.003136 | 1.312636 up   | 1.065031 down | 1.397997 down | SPIN2A    |
| 207842_s_ | 6.33E-04 | 2.18E-04 | 2.390443 up   | 1.848402 up   | 1.293249 down | CASC3     |
| 207848_at | 0.014136 | 0.012349 | 1.688097 up   | 1.153817 up   | 1.463054 down | AVP       |
|           |          |          |               |               |               | LOC150776 |
| 207856_s_ | 3.78E-04 | 1.09E-04 | 2.363237 up   | 1.549797 up   | 1.524869 down | /// SMPD4 |
| 207861_at | 0.001766 | 8.76E-04 | 1.199468 up   | 1.390912 down | 1.668355 down | CCL22     |
| 207865_s_ | 7.06E-04 | 2.53E-04 | 1.067868 up   | 1.30654 down  | 1.395212 down | BMP8B     |
| 207872_s_ | 0.004583 | 0.003128 | 1.34449 up    | 1.014017 up   | 1.325905 down | LILRA1    |
| 207876_s_ | 0.003218 | 0.001968 | 2.516883 down | 4.118235 down | 1.636244 down | FLNC      |
| 207877_s_ | 2.38E-04 | 5.83E-05 | 2.06486 up    | 2.36915 up    | 1.147366 up   | NVL       |
| 207883_s_ | 0.008867 | 0.007119 | 1.754416 up   | 1.256224 down | 2.203939 down | TFR2      |
| 207894_s_ | 0.006105 | 0.004491 | 1.161734 up   | 1.1595 down   | 1.34703 down  | TCL6      |
| 207895_at | 7.75E-04 | 2.88E-04 | 2.934707 down | 2.225978 down | 1.31839 up    | NAALADL1  |
| 207896_s_ | 0.006148 | 0.004535 | 1.683675 up   | 1.066939 down | 1.796378 down | DLEC1     |
| 207900_at | 0.031685 | 0.030338 | 1.474652 up   | 1.002858 down | 1.478866 down | CCL17     |
| 207904_s_ | 8.18E-06 | 5.78E-07 | 2.640168 down | 2.66996 down  | 1.011284 down | LNPEP     |
| 207907_at | 0.003057 | 0.001836 | 1.539166 up   | 1.250416 down | 1.924598 down | TNFSF14   |
| 207914_x_ | 0.017993 | 0.016258 | 1.778095 up   | 1.164001 down | 2.069704 down | EVX1      |
| 207917_at | 0.004342 | 0.002908 | 1.655102 up   | 1.320764 up   | 1.25314 down  |           |
| 207920_x_ | 9.80E-04 | 3.95E-04 | 2.114888 down | 2.300097 down | 1.087574 down | ZFX       |
| 207926_at | 0.003843 | 0.002478 | 1.463266 down | 1.061087 down | 1.379026 up   | GP5       |
| 207927_at | 0.002237 | 0.001209 | 1.259293 up   | 1.575657 down | 1.984214 down | HTR7      |
| 207939_x_ | 1.13E-04 | 2.13E-05 | 2.087706 up   | 1.587961 up   | 1.314709 down | RNPS1     |

|           |          |          |          |      |          |      |          |      |          |
|-----------|----------|----------|----------|------|----------|------|----------|------|----------|
| 207943_x_ | 1.23E-04 | 2.40E-05 | 10.20867 | down | 3.396907 | down | 3.005284 | up   | PLAGL1   |
| 207945_s_ | 0.001798 | 8.97E-04 | 1.221087 | down | 2.36898  | down | 1.940058 | down | CSNK1D   |
| 207949_s_ | 2.03E-06 | 8.06E-08 | 4.611272 | up   | 3.240247 | up   | 1.423124 | down | ICA1     |
| 207950_s_ | 1.57E-05 | 1.45E-06 | 3.333157 | up   | 3.63596  | up   | 1.090846 | up   | ANK3     |
| 207952_at | 0.001374 | 6.26E-04 | 1.201227 | up   | 1.402175 | down | 1.684331 | down | IL5      |
|           |          |          |          |      |          |      |          |      | RP5-     |
| 207953_at | 0.018428 | 0.016706 | 1.671593 | up   | 1.32024  | up   | 1.266129 | down | 886K2.1  |
| 207957_s_ | 0.001243 | 5.46E-04 | 3.165523 | up   | 2.773166 | up   | 1.141483 | down | PRKCB    |
| 207959_s_ | 0.003875 | 0.002506 | 1.660386 | up   | 1.427563 | down | 2.370305 | down | DNAH9    |
| 207962_at | 0.003793 | 0.002439 | 1.365648 | up   | 1.129108 | down | 1.541964 | down | CAPN11   |
| 207963_at | 0.004878 | 0.003386 | 1.713346 | up   | 1.4509   | up   | 1.180885 | down | C6orf54  |
| 207965_at | 0.005657 | 0.004076 | 1.219978 | up   | 1.158986 | down | 1.413938 | down | NEUROG3  |
| 207978_s_ | 1.98E-04 | 4.52E-05 | 3.178873 | down | 1.40128  | down | 2.268549 | up   | NR4A3    |
| 207979_s_ | 0.001006 | 4.09E-04 | 1.349974 | up   | 1.192675 | down | 1.610081 | down | CD8B     |
| 207981_s_ | 1.11E-05 | 8.73E-07 | 2.600694 | up   | 2.617177 | up   | 1.006338 | up   | ESRRG    |
| 207982_at | 0.03565  | 0.034367 | 1.217829 | up   | 1.002065 | up   | 1.21532  | down | HIST1H1T |
| 207983_s_ | 5.00E-05 | 7.07E-06 | 2.208045 | up   | 2.617389 | up   | 1.185388 | up   | STAG2    |
| 207988_s_ | 6.26E-04 | 2.15E-04 | 1.427567 | down | 2.008301 | down | 1.4068   | down | ARPC2    |
| 207992_s_ | 4.43E-04 | 1.34E-04 | 4.732677 | down | 2.105135 | down | 2.248158 | up   | AMPD3    |
| 207999_s_ | 1.17E-04 | 2.24E-05 | 1.061452 | down | 1.742027 | down | 1.641175 | down | ADARB1   |
| 208002_s_ | 0.022349 | 0.02076  | 2.446624 | up   | 1.301734 | down | 3.184852 | down | ACOT7    |
| 208008_at | 0.011183 | 0.009391 | 1.344194 | up   | 1.168734 | down | 1.571006 | down | TBC1D29  |
| 208009_s_ | 3.03E-05 | 3.58E-06 | 2.478543 | up   | 2.212415 | up   | 1.120288 | down | ARHGEF16 |
| 208012_x_ | 3.42E-05 | 4.21E-06 | 5.612831 | down | 4.057938 | down | 1.383173 | up   | SP110    |
| 208016_s_ | 0.006002 | 0.004394 | 2.469683 | down | 3.041288 | down | 1.231449 | down | AGTR1    |
| 208018_s_ | 0.004144 | 0.00273  | 1.986849 | up   | 1.594032 | up   | 1.24643  | down | HCK      |
| 208019_at | 0.02894  | 0.027523 | 1.254596 | up   | 1.014622 | down | 1.272941 | down | ZNF157   |
| 208021_s_ | 0.00658  | 0.004942 | 1.572353 | up   | 1.487745 | up   | 1.05687  | down | RFC1     |
| 208022_s_ | 9.77E-04 | 3.93E-04 | 1.53139  | up   | 4.189448 | up   | 2.735716 | up   | CDC14B   |
| 208025_s_ | 5.38E-05 | 7.77E-06 | 4.445216 | up   | 9.242111 | up   | 2.079114 | up   | HMGA2    |
| 208029_s_ | 1.89E-05 | 1.85E-06 | 4.280573 | up   | 4.313367 | up   | 1.007661 | up   | LAPTM4B  |
| 208030_s_ | 8.75E-05 | 1.50E-05 | 1.712773 | down | 1.837136 | down | 1.072609 | down | ADD1     |
| 208033_s_ | 0.002492 | 0.001398 | 1.536405 | down | 3.002764 | down | 1.95441  | down | ZFHX3    |
| 208041_at | 0.005596 | 0.004021 | 1.626023 | up   | 1.208973 | down | 1.965818 | down | GRK1     |

|           |          |          |          |      |          |      |          |      |             |
|-----------|----------|----------|----------|------|----------|------|----------|------|-------------|
| 208047_s_ | 0.008112 | 0.006391 | 2.600549 | down | 1.101074 | up   | 2.863397 | up   | NAB1        |
| 208049_s_ | 0.008738 | 0.006997 | 1.344235 | up   | 1.057145 | up   | 1.271571 | down | TACR1       |
| 208051_s_ | 7.34E-04 | 2.67E-04 | 4.342603 | up   | 4.356021 | up   | 1.00309  | up   | PAIP1       |
| 208055_s_ | 0.002174 | 0.001159 | 4.289397 | down | 3.664976 | down | 1.170376 | up   | HERC4       |
| 208058_s_ | 0.016301 | 0.014529 | 1.399625 | up   | 1.03254  | down | 1.445168 | down | MGAT3       |
| 208065_at | 0.001456 | 6.76E-04 | 1.868863 | up   | 1.616692 | up   | 1.15598  | down | ST8SIA3     |
| 208067_x_ | 0.008554 | 0.006814 | 1.129688 | down | 2.04058  | up   | 2.305218 | up   | UTY         |
|           |          |          |          |      |          |      |          |      | CSH1 ///    |
|           |          |          |          |      |          |      |          |      | CSH2 ///    |
|           |          |          |          |      |          |      |          |      | CSHL1 ///   |
| 208068_x_ | 0.001059 | 4.39E-04 | 1.34904  | up   | 1.559142 | up   | 1.155742 | up   | GH1 /// GH2 |
| 208070_s_ | 3.28E-05 | 3.99E-06 | 19.92212 | down | 2.091821 | down | 9.523814 | up   | REV3L       |
| 208071_s_ | 0.015202 | 0.013429 | 1.347313 | up   | 1.333772 | down | 1.797008 | down | LAIR1       |
| 208072_s_ | 0.004148 | 0.002733 | 1.501105 | up   | 1.109628 | up   | 1.352801 | down | DGKD        |
| 208079_s_ | 0.006184 | 0.004568 | 3.542085 | up   | 4.335091 | up   | 1.223881 | up   | AURKA       |
| 208082_x_ | 0.001313 | 5.89E-04 | 1.403978 | up   | 1.934584 | up   | 1.37793  | up   | MKRN1       |
| 208093_s_ | 1.15E-04 | 2.19E-05 | 1.923716 | down | 2.733459 | down | 1.420926 | down | NDEL1       |
| 208094_s_ | 4.10E-04 | 1.21E-04 | 1.254669 | down | 1.404331 | down | 1.119284 | down | CCDC130     |
| 208099_x_ | 0.005862 | 0.004263 | 1.614692 | up   | 1.450283 | up   | 1.113364 | down | TTLL5       |
| 208100_x_ | 0.024121 | 0.022542 | 1.336056 | up   | 1.103062 | down | 1.473752 | down | SEMA6C      |
| 208106_x_ | 3.94E-04 | 1.15E-04 | 15.47179 | down | 2.980867 | down | 5.190368 | up   | PSG6        |
| 208111_at | 0.003738 | 0.002393 | 1.555534 | up   | 1.553211 | down | 2.416073 | down | AVPR2       |
| 208112_x_ | 1.28E-04 | 2.52E-05 | 2.017204 | down | 2.611595 | down | 1.294661 | down | EHD1        |
| 208116_s_ | 6.94E-06 | 4.55E-07 | 10.0415  | down | 1.890742 | down | 5.310879 | up   | MAN1A1      |
| 208117_s_ | 1.37E-04 | 2.76E-05 | 3.369141 | up   | 2.651951 | up   | 1.270439 | down | LAS1L       |
| 208119_s_ | 8.34E-05 | 1.41E-05 | 7.181042 | up   | 7.054318 | up   | 1.017964 | down | ZNF93       |
| 208120_x_ | 0.004323 | 0.002892 | 1.258848 | up   | 1.942904 | up   | 1.543399 | up   | FKSG49      |
| 208127_s_ | 6.37E-05 | 9.80E-06 | 8.55869  | down | 6.512735 | down | 1.314147 | up   | SOCS5       |
| 208131_s_ | 0.001757 | 8.71E-04 | 5.961601 | down | 3.957881 | down | 1.506261 | up   | PTGIS       |
| 208134_x_ | 9.09E-05 | 1.57E-05 | 5.597051 | down | 1.618899 | down | 3.45732  | up   | PSG2        |
| 208137_x_ | 1.41E-04 | 2.87E-05 | 1.880718 | up   | 2.86156  | up   | 1.521525 | up   | ZNF611      |
| 208139_s_ | 0.018446 | 0.016724 | 1.306288 | up   | 1.061004 | down | 1.385977 | down |             |
| 208141_s_ | 7.18E-04 | 2.59E-04 | 1.641111 | up   | 1.677676 | down | 2.753252 | down | DOHH        |

|           |          |          |               |               |               |             |
|-----------|----------|----------|---------------|---------------|---------------|-------------|
| 208146_s_ | 2.64E-10 | 2.33E-13 | 28.93017 up   | 20.99801 up   | 1.377757 down | CPVL        |
| 208149_x_ | 7.24E-05 | 1.17E-05 | 3.997242 up   | 4.267645 up   | 1.067647 up   | DDX11       |
| 208152_s_ | 5.42E-05 | 7.84E-06 | 3.182584 up   | 5.528959 up   | 1.737255 up   | DDX21       |
| 208153_s_ | 0.033085 | 0.031765 | 1.325899 up   | 1.046331 down | 1.38733 down  | FAT2        |
|           |          |          |               |               |               | GAGE1 ///   |
|           |          |          |               |               |               | GAGE12F     |
|           |          |          |               |               |               | ///         |
|           |          |          |               |               |               | GAGE12G     |
|           |          |          |               |               |               | /// GAGE12I |
|           |          |          |               |               |               | /// GAGE12J |
|           |          |          |               |               |               | /// GAGE4   |
|           |          |          |               |               |               | /// GAGE5   |
|           |          |          |               |               |               | /// GAGE6   |
|           |          |          |               |               |               | /// GAGE7   |
| 208155_x_ | 0.005156 | 0.003632 | 1.416327 up   | 1.077591 up   | 1.314345 down | EPPK1       |
| 208156_x_ | 0.002549 | 0.001441 | 1.62788 up    | 2.195755 up   | 1.348843 up   | DDX11       |
| 208159_x_ | 1.01E-04 | 1.85E-05 | 2.81747 up    | 3.190177 up   | 1.132284 up   | ABCC3       |
| 208161_s_ | 3.23E-04 | 8.81E-05 | 6.735988 down | 5.004279 down | 1.346046 up   | PRSS16      |
| 208165_s_ | 1.26E-05 | 1.07E-06 | 4.865711 up   | 5.312436 up   | 1.091811 up   | DUX1        |
| 208176_at | 0.001527 | 7.20E-04 | 1.611038 up   | 1.309284 down | 2.109307 down | HIST1H4B    |
| 208180_s_ | 0.001515 | 7.13E-04 | 2.668211 down | 1.175553 down | 2.269749 up   | TRAPPC10    |
| 208184_s_ | 0.004849 | 0.003356 | 1.146686 down | 1.616792 down | 1.40997 down  | LSR         |
| 208190_s_ | 2.27E-05 | 2.40E-06 | 6.440798 up   | 8.258775 up   | 1.28226 up    | PSG4        |
| 208191_x_ | 0.004328 | 0.002896 | 15.03507 down | 6.447339 down | 2.33198 up    | STAM2       |
| 208194_s_ | 0.006539 | 0.004906 | 1.781034 down | 1.984024 down | 1.113973 down | KIR2DS1     |
| 208198_x_ | 0.025592 | 0.02407  | 1.211736 up   | 1.063517 up   | 1.139367 down | IL1A        |
| 208200_at | 0.021724 | 0.020094 | 1.252737 up   | 1.946588 up   | 1.553868 up   | PHF15       |
| 208202_s_ | 0.00201  | 0.001043 | 1.859946 up   | 1.549716 up   | 1.200185 down | MYH13       |
| 208208_at | 0.003678 | 0.002343 | 1.646705 up   | 1.063495 down | 1.751262 down | C4BPB       |
| 208209_s_ | 0.008714 | 0.006973 | 1.433161 up   | 1.233463 up   | 1.161901 down | MAS1        |
| 208210_at | 0.004647 | 0.003185 | 1.453206 down | 1.063518 up   | 1.54551 up    | DLX4        |
| 208216_at | 0.002823 | 0.00165  | 1.681957 up   | 1.315504 up   | 1.278565 down | SLIT1       |
| 208221_s_ | 0.016647 | 0.014891 | 2.031313 up   | 1.003613 down | 2.038653 down |             |

|           |          |          |               |               |               |             |
|-----------|----------|----------|---------------|---------------|---------------|-------------|
| 208228_s_ | 3.66E-07 | 7.12E-09 | 31.00109 up   | 2.286737 up   | 13.55691 down | FGFR2       |
| 208232_x_ | 9.73E-04 | 3.91E-04 | 1.848485 up   | 1.625236 down | 3.004224 down | NRG1        |
|           |          |          |               |               |               | GAGE12F     |
|           |          |          |               |               |               | ///         |
|           |          |          |               |               |               | GAGE12G     |
|           |          |          |               |               |               | /// GAGE12I |
| 208235_x_ | 0.017578 | 0.015837 | 1.403467 up   | 1.066386 up   | 1.316097 down | /// GAGE7   |
| 208239_at | 0.015686 | 0.013907 | 1.408441 up   | 1.221128 down | 1.719887 down | FOXE1       |
| 208240_s_ | 0.015288 | 0.013514 | 3.375034 down | 2.37251 down  | 1.422559 up   | FGF1        |
| 208244_at | 0.006024 | 0.004416 | 1.226338 up   | 1.14701 down  | 1.406621 down | BMP3        |
| 208246_x_ | 7.32E-04 | 2.66E-04 | 1.619743 up   | 2.304529 up   | 1.422775 up   |             |
| 208257_x_ | 0.00119  | 5.15E-04 | 9.508118 down | 2.497389 down | 3.807224 up   | PSG1        |
| 208269_s_ | 0.005722 | 0.004133 | 1.477828 up   | 1.019022 up   | 1.450242 down | ADAM28      |
| 208272_at | 0.001477 | 6.88E-04 | 1.71607 up    | 1.573716 down | 2.700607 down | RANBP3      |
| 208273_at | 5.49E-04 | 1.79E-04 | 1.338013 up   | 1.941022 up   | 1.450674 up   | ZNF695      |
| 208277_at | 0.007312 | 0.005632 | 1.675451 up   | 1.251259 down | 2.096422 down | PITX3       |
| 208278_s_ | 0.001756 | 8.70E-04 | 1.763269 up   | 1.227179 down | 2.163847 down |             |
| 208284_x_ | 6.72E-04 | 2.36E-04 | 1.558574 up   | 2.410779 up   | 1.546785 up   | GGT1        |
| 208285_at | 0.011415 | 0.009614 | 1.467462 down | 1.195165 down | 1.227832 up   | OR7A5       |
|           |          |          |               |               |               | POU5F1 ///  |
|           |          |          |               |               |               | POU5F1B     |
|           |          |          |               |               |               | ///         |
|           |          |          |               |               |               | POU5F1P3    |
|           |          |          |               |               |               | ///         |
| 208286_x_ | 1.20E-06 | 3.80E-08 | 50.13523 up   | 40.78671 up   | 1.229205 down | POU5F1P4    |
| 208294_x_ | 0.008494 | 0.006761 | 1.762175 up   | 1.432879 up   | 1.229814 down | CSHL1       |
| 208296_x_ | 0.045517 | 0.044306 | 2.163801 down | 1.31757 down  | 1.642266 up   | TNFAIP8     |
| 208299_at | 0.0053   | 0.00376  | 1.663956 up   | 1.154311 down | 1.920723 down | CACNA1I     |
| 208300_at | 0.010639 | 0.008848 | 1.524018 up   | 1.160071 down | 1.767969 down | PTPRH       |
| 208313_s_ | 0.001677 | 8.19E-04 | 1.749095 up   | 1.078729 up   | 1.621441 down | SF1         |
| 208315_x_ | 0.005856 | 0.004257 | 1.047194 down | 1.627542 down | 1.554193 down | TRAF3       |
| 208321_s_ | 0.009544 | 0.00777  | 1.955556 up   | 1.045618 up   | 1.870239 down | CABP1       |

|           |          |          |          |      |          |      |          |      |           |
|-----------|----------|----------|----------|------|----------|------|----------|------|-----------|
| 208322_s_ | 2.80E-04 | 7.25E-05 | 2.45338  | down | 2.225093 | down | 1.102596 | up   | ST3GAL1   |
| 208328_s_ | 5.76E-06 | 3.48E-07 | 3.27514  | down | 2.144809 | down | 1.527008 | up   | MEF2A     |
| 208338_at | 0.007128 | 0.005459 | 1.446948 | up   | 1.013672 | down | 1.46673  | down | P2RX3     |
| 208341_x_ | 0.013754 | 0.011967 | 1.875077 | up   | 1.393324 | up   | 1.345759 | down | CSH2      |
| 208345_s_ | 0.001543 | 7.30E-04 | 2.171187 | up   | 1.531289 | up   | 1.417882 | down | POU3F1    |
| 208361_s_ | 0.002356 | 0.001295 | 1.575952 | up   | 1.033045 | up   | 1.52554  | down | POLR3D    |
| 208365_s_ | 0.010434 | 0.008639 | 1.988265 | down | 1.234443 | down | 1.610657 | up   | GRK4      |
| 208366_at | 0.006494 | 0.004861 | 1.209738 | up   | 1.096971 | down | 1.327047 | down | PCDH11X   |
| 208368_s_ | 0.002083 | 0.001096 | 2.902721 | up   | 3.01472  | up   | 1.038584 | up   | BRCA2     |
| 208369_s_ | 0.009366 | 0.0076   | 2.801496 | up   | 1.615853 | up   | 1.733757 | down | GCDH      |
| 208370_s_ | 4.54E-06 | 2.51E-07 | 6.964806 | down | 15.60494 | down | 2.240542 | down | RCAN1     |
| 208371_s_ | 0.001148 | 4.90E-04 | 1.3343   | down | 1.7596   | down | 1.318744 | down | RING1     |
| 208373_s_ | 0.035958 | 0.03468  | 1.047086 | up   | 1.358823 | down | 1.422804 | down | P2RY6     |
| 208374_s_ | 0.007787 | 0.006089 | 1.243145 | down | 1.350087 | down | 1.086025 | down | CAPZA1    |
| 208378_x_ | 6.68E-05 | 1.05E-05 | 6.750431 | down | 4.974927 | down | 1.35689  | up   | FGF5      |
| 208381_s_ | 0.005766 | 0.004175 | 1.208667 | down | 1.885809 | down | 1.560239 | down | SGPL1     |
| 208384_s_ | 2.87E-04 | 7.50E-05 | 1.860689 | down | 1.855922 | down | 1.002569 | up   | MID2      |
| 208385_at | 0.010459 | 0.008665 | 1.776206 | up   | 1.192447 | up   | 1.489546 | down | NR2E3     |
| 208387_s_ | 0.007329 | 0.005649 | 1.324534 | up   | 1.144326 | up   | 1.157479 | down | MMP24     |
| 208392_x_ | 2.59E-05 | 2.85E-06 | 2.471288 | down | 2.02269  | down | 1.221783 | up   | SP110     |
| 208394_x_ | 3.10E-05 | 3.69E-06 | 1.654706 | down | 3.723727 | down | 2.250386 | down | ESM1      |
| 208398_s_ | 3.80E-05 | 4.83E-06 | 1.82712  | up   | 1.744247 | up   | 1.047512 | down | TBPL1     |
| 208400_at | 0.002939 | 0.001743 | 1.506777 | up   | 1.218085 | up   | 1.237005 | down | GLP1R     |
| 208401_s_ | 2.28E-04 | 5.51E-05 | 1.541335 | up   | 1.161594 | down | 1.790405 | down | GLP1R     |
| 208404_x_ | 0.002536 | 0.001431 | 1.232718 | up   | 1.389439 | down | 1.712787 | down | KCNJ5     |
| 208406_s_ | 0.001923 | 9.83E-04 | 1.532571 | up   | 1.120176 | up   | 1.368152 | down | GRAP2     |
| 208412_s_ | 4.03E-04 | 1.18E-04 | 1.650811 | up   | 1.73809  | down | 2.869258 | down | RARB      |
|           |          |          |          |      |          |      |          |      | LOC100130 |
| 208413_at | 0.010705 | 0.008912 | 1.261873 | up   | 1.142168 | down | 1.441272 | down | 354       |
| 208414_s_ | 0.001032 | 4.22E-04 | 1.392136 | up   | 2.182963 | down | 3.038982 | down | HOXB3     |
| 208415_x_ | 9.14E-04 | 3.59E-04 | 1.771007 | up   | 1.66148  | up   | 1.065921 | down | ING1      |
| 208420_x_ | 0.020163 | 0.018491 | 2.001492 | up   | 1.238097 | up   | 1.616588 | down | SUPT6H    |
| 208424_s_ | 0.003681 | 0.002345 | 1.830799 | up   | 1.651744 | up   | 1.108403 | down | CIAPIN1   |
| 208430_s_ | 0.001038 | 4.26E-04 | 1.182994 | down | 1.533128 | up   | 1.813681 | up   | DTNA      |

|           |          |          |               |               |               |             |
|-----------|----------|----------|---------------|---------------|---------------|-------------|
| 208432_s_ | 0.017482 | 0.015737 | 1.546959 up   | 1.067034 down | 1.650657 down | CACNA1E     |
| 208433_s_ | 3.49E-04 | 9.78E-05 | 6.600724 up   | 6.082079 up   | 1.085274 down | LRP8        |
| 208437_at | 0.009527 | 0.007751 | 1.866936 up   | 1.018298 down | 1.901097 down | CLCN1       |
| 208440_at | 0.018529 | 0.016808 | 1.408016 up   | 1.104721 up   | 1.274544 down | C3orf27     |
| 208443_x_ | 4.19E-06 | 2.23E-07 | 11.2526 down  | 1.454224 down | 7.737879 up   | SHOX2       |
| 208449_s_ | 0.011011 | 0.009214 | 1.869405 up   | 1.31621 up    | 1.420294 down | FGF8        |
| 208450_at | 0.02113  | 0.019487 | 1.753791 up   | 1.258453 down | 2.207064 down | LGALS2      |
| 208451_s_ | 0.007623 | 0.005931 | 1.936179 down | 1.544472 down | 1.253619 up   | C4A /// C4B |
| 208454_s_ | 3.87E-06 | 1.99E-07 | 11.53545 down | 8.91321 down  | 1.294197 up   | PGCP        |
| 208470_s_ | 0.009795 | 0.008017 | 1.820977 up   | 1.232518 down | 2.244387 down | HP /// HPR  |
| 208474_at | 4.89E-05 | 6.84E-06 | 12.2389 up    | 4.9481 up     | 2.473455 down | CLDN6       |
| 208485_x_ | 1.47E-04 | 3.03E-05 | 3.452868 down | 2.554937 down | 1.351449 up   | CFLAR       |
| 208488_s_ | 0.013252 | 0.011455 | 1.231967 up   | 1.029924 down | 1.268832 down | CR1         |
| 208496_x_ | 2.71E-04 | 6.96E-05 | 1.442687 up   | 2.070118 up   | 1.434904 up   | HIST1H3G    |
| 208497_x_ | 0.001341 | 6.07E-04 | 1.229963 up   | 1.346107 down | 1.655662 down | NEUROG1     |
| 208499_s_ | 0.004592 | 0.003135 | 1.823265 down | 1.692722 down | 1.07712 up    | DNAJC3      |
| 208504_x_ | 7.51E-04 | 2.76E-04 | 2.285027 up   | 1.640037 up   | 1.393278 down | PCDHB11     |
| 208505_s_ | 0.004765 | 0.003282 | 1.613624 up   | 1.090589 up   | 1.47959 down  | FUT2        |
| 208508_s_ | 0.008227 | 0.006505 | 1.094206 up   | 1.122078 down | 1.227785 down | OR2J2       |
| 208510_s_ | 0.001286 | 5.72E-04 | 4.880572 down | 1.651219 down | 2.955739 up   | PPARG       |
| 208511_at | 0.001818 | 9.11E-04 | 1.934042 up   | 2.927324 up   | 1.513579 up   | PTTG3       |
| 208512_s_ | 0.003293 | 0.00203  | 2.54913 up    | 1.466271 up   | 1.738513 down | MLLT4       |
| 208514_at | 0.008455 | 0.00672  | 1.279312 up   | 1.2339 down   | 1.578543 down | KCNE1       |
| 208522_s_ | 0.018044 | 0.016311 | 1.433713 up   | 1.17544 down  | 1.685243 down | PTCH1       |
| 208536_s_ | 0.00227  | 0.001235 | 2.129616 up   | 1.413948 up   | 1.506149 down | BCL2L11     |
|           |          |          |               |               |               | S100A11 /// |
| 208540_x_ | 8.09E-05 | 1.36E-05 | 4.363028 down | 3.638576 down | 1.199103 up   | S100A11P    |
| 208541_x_ | 6.04E-04 | 2.05E-04 | 3.008068 up   | 1.719347 up   | 1.749541 down | TFAM        |
| 208546_x_ | 0.00235  | 0.001291 | 1.241367 up   | 3.213891 up   | 2.588993 up   | HIST1H2BH   |
| 208549_x_ | 3.87E-04 | 1.12E-04 | 2.549449 up   | 2.821943 up   | 1.106883 up   | PTMAP7      |
| 208552_at | 0.032013 | 0.030672 | 1.47301 up    | 1.018222 up   | 1.446649 down | GRIK4       |
| 208553_at | 0.027421 | 0.025938 | 1.565019 up   | 1.106888 up   | 1.413891 down | HIST1H1E    |



|           |          |          |               |               |               |             |
|-----------|----------|----------|---------------|---------------|---------------|-------------|
| 208559_at | 7.48E-04 | 2.75E-04 | 1.548365 up   | 1.056779 down | 1.636279 down | PDX1        |
| 208560_at | 3.01E-04 | 8.01E-05 | 1.233723 up   | 1.456328 down | 1.796705 down | KCNA10      |
|           |          |          |               |               |               | LOC100131   |
| 208566_at | 0.028177 | 0.026713 | 1.383171 up   | 1.052211 up   | 1.314537 down | 509         |
|           |          |          |               |               |               | KCNJ12 ///  |
|           |          |          |               |               |               | LOC100131   |
|           |          |          |               |               |               | 509 ///     |
|           |          |          |               |               |               | LOC100134   |
| 208567_s_ | 0.01886  | 0.017154 | 1.886508 up   | 1.384452 up   | 1.362639 down | 444         |
| 208574_at | 0.018164 | 0.016438 | 1.339481 up   | 1.010281 up   | 1.32585 down  | SOX14       |
| 208576_s_ | 4.04E-05 | 5.31E-06 | 2.245492 up   | 1.897675 up   | 1.183286 down | HIST1H3B    |
| 208577_at | 0.001507 | 7.07E-04 | 1.420592 up   | 1.391435 up   | 1.020955 down | HIST1H3C    |
|           |          |          |               |               |               | HIST1H4J    |
|           |          |          |               |               |               | ///         |
|           |          |          |               |               |               | HIST1H4K    |
| 208580_x_ | 2.15E-04 | 5.09E-05 | 3.874919 up   | 2.845414 up   | 1.361812 down | /// HIST4H4 |
|           |          |          |               |               |               | SSX4 ///    |
| 208586_s_ | 0.010703 | 0.00891  | 1.135203 up   | 1.075356 down | 1.220747 down | SSX4B       |
| 208589_at | 0.042927 | 0.041684 | 1.297066 up   | 1.204645 up   | 1.076721 down | TRPC7       |
| 208591_s_ | 0.032292 | 0.030958 | 1.080168 down | 1.838841 up   | 1.986258 up   | PDE3B       |
| 208592_s_ | 0.003987 | 0.002595 | 1.452493 up   | 1.07861 down  | 1.566673 down | CD1E        |
| 208598_s_ | 0.009732 | 0.007952 | 2.194434 up   | 1.601555 up   | 1.37019 down  | HUWE1       |
| 208604_s_ | 0.001003 | 4.07E-04 | 1.595256 up   | 1.098538 down | 1.75245 down  | HOXA3       |
| 208605_s_ | 0.005257 | 0.003723 | 1.612995 up   | 1.204313 down | 1.942551 down | NTRK1       |
|           |          |          |               |               |               | SAA1 ///    |
| 208607_s_ | 0.011109 | 0.009311 | 1.532327 up   | 1.798286 down | 2.755562 down | SAA2        |
| 208613_s_ | 4.49E-05 | 6.11E-06 | 3.031946 up   | 2.256175 down | 6.840599 down | FLNB        |
| 208614_s_ | 9.59E-05 | 1.70E-05 | 2.964322 up   | 1.867026 down | 5.534465 down | FLNB        |
| 208616_s_ | 1.13E-04 | 2.13E-05 | 1.54703 down  | 1.581119 down | 1.022035 down | PTP4A2      |
| 208617_s_ | 1.80E-04 | 4.02E-05 | 2.128899 down | 1.961719 down | 1.085221 up   | PTP4A2      |
| 208620_at | 0.005159 | 0.003635 | 1.448164 up   | 1.12729 up    | 1.284643 down | PCBP1       |
| 208621_s_ | 0.024146 | 0.022566 | 3.710561 up   | 2.726507 up   | 1.360921 down | EZR         |
| 208622_s_ | 1.20E-04 | 2.30E-05 | 6.466506 up   | 2.860781 up   | 2.260398 down | EZR         |

|           |          |          |               |               |               |         |
|-----------|----------|----------|---------------|---------------|---------------|---------|
| 208623_s_ | 1.50E-04 | 3.14E-05 | 5.873448 up   | 2.581549 up   | 2.275165 down | EZR     |
| 208630_at | 0.001311 | 5.87E-04 | 1.690575 down | 1.520156 down | 1.112106 up   | HADHA   |
| 208631_s_ | 0.022284 | 0.020686 | 1.41061 down  | 1.255175 down | 1.123835 up   | HADHA   |
| 208636_at | 7.51E-04 | 2.76E-04 | 1.942086 down | 3.681505 down | 1.895645 down | ACTN1   |
| 208640_at | 0.002462 | 0.001375 | 1.246023 down | 1.365651 down | 1.096008 down | RAC1    |
| 208642_s_ | 3.62E-05 | 4.54E-06 | 2.752622 up   | 2.339202 up   | 1.176736 down | XRCC5   |
| 208643_s_ | 2.66E-06 | 1.18E-07 | 2.716691 up   | 2.515064 up   | 1.080168 down | XRCC5   |
| 208644_at | 3.27E-05 | 3.98E-06 | 4.545609 up   | 4.949235 up   | 1.088795 up   | PARP1   |
| 208649_s_ | 0.001977 | 0.00102  | 1.575099 up   | 1.001748 down | 1.577852 down | VCP     |
| 208650_s_ | 6.87E-09 | 2.51E-11 | 395.6695 up   | 385.6796 up   | 1.025902 down | CD24    |
| 208651_x_ | 6.65E-10 | 1.12E-12 | 98.56764 up   | 118.7737 up   | 1.204997 up   | CD24    |
| 208652_at | 0.001189 | 5.15E-04 | 1.753069 up   | 1.712342 up   | 1.023785 down | PPP2CA  |
| 208653_s_ | 8.90E-05 | 1.53E-05 | 5.176275 down | 2.112584 down | 2.45021 up    | CD164   |
| 208654_s_ | 0.001451 | 6.72E-04 | 3.07509 down  | 1.511531 down | 2.034421 up   | CD164   |
| 208659_at | 0.002117 | 0.001119 | 1.591049 down | 1.923249 down | 1.208793 down | CLIC1   |
| 208660_at | 0.010607 | 0.008814 | 1.725181 up   | 1.178407 up   | 1.463995 down | CS      |
| 208664_s_ | 0.008168 | 0.006449 | 3.256379 down | 3.464353 down | 1.063867 down | TTC3    |
| 208669_s_ | 0.019868 | 0.018188 | 1.756288 down | 1.073087 down | 1.636669 up   | EID1    |
| 208670_s_ | 0.001236 | 5.42E-04 | 2.255788 down | 1.430762 down | 1.576634 up   | EID1    |
| 208671_at | 0.003115 | 0.001884 | 3.119839 down | 2.673307 down | 1.167034 up   | SERINC1 |
| 208672_s_ | 1.76E-04 | 3.90E-05 | 2.144409 up   | 2.025632 up   | 1.058637 down | SFRS3   |
| 208673_s_ | 9.99E-05 | 1.80E-05 | 2.932993 up   | 2.428603 up   | 1.207687 down | SFRS3   |
| 208676_s_ | 0.005359 | 0.00381  | 2.829139 up   | 1.536242 up   | 1.841597 down | PA2G4   |
| 208679_s_ | 0.029163 | 0.027753 | 1.478928 down | 1.649255 down | 1.115169 down | ARPC2   |
| 208680_at | 9.60E-05 | 1.70E-05 | 1.780591 up   | 1.893959 up   | 1.063668 up   | PRDX1   |
| 208683_at | 2.55E-06 | 1.11E-07 | 6.57484 down  | 7.377344 down | 1.122057 down | CAPN2   |
| 208684_at | 0.006622 | 0.004977 | 1.741321 down | 1.826078 down | 1.048674 down | COPA    |
| 208687_x_ | 6.24E-04 | 2.14E-04 | 1.524001 up   | 1.292784 up   | 1.178852 down | HSPA8   |
| 208688_x_ | 0.002521 | 0.001421 | 1.770708 up   | 1.309527 up   | 1.352174 down | EIF3B   |
| 208693_s_ | 0.015764 | 0.013989 | 1.232009 up   | 1.721339 down | 2.120705 down | GARS    |
| 208694_at | 6.02E-04 | 2.04E-04 | 2.808908 up   | 3.304177 up   | 1.176321 up   | PRKDC   |
| 208696_at | 0.01259  | 0.010793 | 2.2124 up     | 1.928748 up   | 1.147065 down | CCT5    |
| 208697_s_ | 4.45E-04 | 1.34E-04 | 1.294999 up   | 1.859096 up   | 1.435597 up   | EIF3E   |
| 208698_s_ | 0.02609  | 0.024593 | 1.645361 up   | 1.940851 up   | 1.17959 up    | NONO    |

|           |          |          |               |               |               |           |
|-----------|----------|----------|---------------|---------------|---------------|-----------|
| 208707_at | 7.51E-06 | 5.17E-07 | 3.150855 up   | 3.076078 up   | 1.024309 down | EIF5      |
| 208724_s_ | 0.001992 | 0.00103  | 1.557301 down | 1.310979 down | 1.187891 up   | RAB1A     |
| 208728_s_ | 0.007207 | 0.005535 | 1.1701 up     | 1.374506 down | 1.60831 down  | CDC42     |
| 208729_x_ | 5.47E-05 | 7.96E-06 | 6.404537 down | 4.67308 down  | 1.370517 up   | HLA-B     |
| 208731_at | 5.35E-05 | 7.70E-06 | 3.328084 down | 2.825757 down | 1.177767 up   | RAB2A     |
| 208732_at | 7.88E-04 | 2.95E-04 | 2.497772 down | 2.741469 down | 1.097566 down | RAB2A     |
| 208733_at | 0.006388 | 0.004767 | 3.038997 down | 2.424667 down | 1.253367 up   | RAB2A     |
| 208734_x_ | 7.94E-05 | 1.32E-05 | 2.414181 down | 2.503065 down | 1.036818 down | RAB2A     |
| 208735_s_ | 0.001983 | 0.001023 | 1.570065 down | 1.249313 down | 1.256743 up   | CTDSP2    |
| 208737_at | 0.004232 | 0.002805 | 1.49432 up    | 1.775708 up   | 1.188305 up   | ATP6V1G1  |
|           |          |          |               |               |               | LOC100127 |
|           |          |          |               |               |               | 918 ///   |
|           |          |          |               |               |               | LOC100127 |
|           |          |          |               |               |               | 922 ///   |
|           |          |          |               |               |               | SUMO2 /// |
| 208738_x_ | 3.31E-04 | 9.09E-05 | 1.300997 up   | 1.928341 up   | 1.482203 up   | SUMO4     |
| 208739_x_ | 0.002706 | 0.001557 | 1.824076 up   | 1.79968 up    | 1.013555 down | SUMO2     |
| 208741_at | 0.001531 | 7.23E-04 | 2.549405 down | 1.210315 down | 2.106397 up   | SAP18     |
| 208742_s_ | 0.037812 | 0.036545 | 1.536717 up   | 1.500963 up   | 1.023821 down | SAP18     |
| 208744_x_ | 0.009743 | 0.007963 | 2.14832 up    | 1.882431 up   | 1.141247 down | HSPH1     |
| 208746_x_ | 0.001515 | 7.12E-04 | 1.184208 up   | 1.560331 up   | 1.317616 up   | ATP5L     |
| 208747_s_ | 2.03E-06 | 8.08E-08 | 74.3361 down  | 19.94017 down | 3.727958 up   | C1S       |
| 208748_s_ | 0.016666 | 0.014908 | 2.359547 down | 1.162806 up   | 2.743695 up   | FLOT1     |
| 208751_at | 0.00261  | 0.001485 | 2.370188 down | 2.862772 down | 1.207825 down | NAPA      |
| 208752_x_ | 3.34E-05 | 4.09E-06 | 1.931188 up   | 2.124921 up   | 1.100318 up   | NAP1L1    |
| 208753_s_ | 2.54E-04 | 6.38E-05 | 2.604146 up   | 3.298042 up   | 1.266458 up   | NAP1L1    |
| 208754_s_ | 1.90E-05 | 1.87E-06 | 3.011843 up   | 5.43061 up    | 1.803085 up   | NAP1L1    |
|           |          |          |               |               |               | H3F3A /// |
|           |          |          |               |               |               | H3F3B /// |
| 208755_x_ | 1.01E-04 | 1.82E-05 | 2.497785 up   | 2.297175 up   | 1.087329 down | LOC440926 |
| 208758_at | 9.62E-04 | 3.85E-04 | 2.346563 up   | 1.863764 up   | 1.259045 down | ATIC      |
| 208759_at | 0.001302 | 5.83E-04 | 1.833481 down | 1.784931 down | 1.0272 up     | NCSTN     |
| 208763_s_ | 7.33E-04 | 2.67E-04 | 1.912494 down | 3.257742 down | 1.703399 down | TSC22D3   |
| 208765_s_ | 1.34E-04 | 2.68E-05 | 2.113511 up   | 1.762862 up   | 1.198909 down | HNRNPR    |

|           |          |          |               |               |               |            |
|-----------|----------|----------|---------------|---------------|---------------|------------|
| 208766_s_ | 8.11E-04 | 3.06E-04 | 1.354092 up   | 1.822655 up   | 1.346034 up   | HNRNPR     |
| 208767_s_ | 0.001056 | 4.37E-04 | 3.667349 up   | 5.027633 up   | 1.370918 up   | LAPTM4B    |
| 208768_x_ | 3.22E-05 | 3.90E-06 | 1.255956 up   | 1.382486 up   | 1.100744 up   | RPL22      |
| 208770_s_ | 3.94E-04 | 1.15E-04 | 2.270298 up   | 1.952684 up   | 1.162655 down | EIF4EBP2   |
| 208771_s_ | 6.85E-05 | 1.09E-05 | 2.451359 up   | 2.009651 up   | 1.219793 down | LTA4H      |
|           |          |          |               |               |               | ANKHD1 /// |
|           |          |          |               |               |               | ANKHD1-    |
| 208773_s_ | 0.020949 | 0.019305 | 1.403199 up   | 1.593754 up   | 1.135801 up   | EIF4EBP3   |
| 208775_at | 5.36E-04 | 1.73E-04 | 2.012255 up   | 2.64369 up    | 1.313795 up   | XPO1       |
| 208776_at | 5.13E-04 | 1.63E-04 | 2.299795 up   | 3.545645 up   | 1.541722 up   | PSMD11     |
| 208777_s_ | 0.002753 | 0.001597 | 2.434448 up   | 1.760579 up   | 1.382755 down | PSMD11     |
| 208778_s_ | 3.88E-05 | 4.97E-06 | 2.562897 up   | 1.329393 up   | 1.927871 down | TCP1       |
| 208779_x_ | 7.70E-06 | 5.35E-07 | 4.775269 up   | 2.039352 up   | 2.341562 down | DDR1       |
| 208782_at | 4.54E-06 | 2.50E-07 | 2.916843 down | 3.035207 down | 1.040579 down | FSTL1      |
| 208783_s_ | 0.008149 | 0.006429 | 1.628998 down | 1.304472 up   | 2.124983 up   | CD46       |
| 208785_s_ | 0.039837 | 0.038594 | 1.749791 down | 1.815274 down | 1.037424 down | MAP1LC3B   |
| 208786_s_ | 6.72E-05 | 1.06E-05 | 2.273355 down | 2.081318 down | 1.092267 up   | MAP1LC3B   |
| 208787_at | 8.50E-04 | 3.25E-04 | 1.775062 up   | 1.636096 up   | 1.084938 down | MRPL3      |
| 208789_at | 2.07E-08 | 1.19E-10 | 10.14061 down | 16.27585 down | 1.605017 down | PTRF       |
| 208790_s_ | 7.42E-06 | 5.04E-07 | 12.69758 down | 28.32076 down | 2.230407 down | PTRF       |
| 208791_at | 0.001892 | 9.60E-04 | 1.077059 down | 2.438782 up   | 2.626712 up   | CLU        |
| 208792_s_ | 0.001774 | 8.82E-04 | 1.158131 down | 1.964423 up   | 2.27506 up    | CLU        |
| 208793_x_ | 9.99E-04 | 4.06E-04 | 4.203184 up   | 2.131885 up   | 1.971581 down | SMARCA4    |
| 208794_s_ | 7.12E-07 | 1.81E-08 | 3.930141 up   | 1.855343 up   | 2.118283 down | SMARCA4    |
| 208795_s_ | 3.05E-04 | 8.15E-05 | 4.37049 up    | 4.611861 up   | 1.055228 up   | MCM7       |
| 208796_s_ | 2.70E-04 | 6.93E-05 | 1.523739 up   | 2.295184 up   | 1.506285 up   | CCNG1      |
| 208799_at | 5.52E-04 | 1.80E-04 | 1.648007 up   | 1.035449 up   | 1.591587 down | PSMB5      |
| 208801_at | 0.001394 | 6.38E-04 | 1.366031 up   | 1.141281 up   | 1.196927 down | SRP72      |
| 208804_s_ | 1.89E-04 | 4.29E-05 | 1.72915 up    | 1.398475 up   | 1.236454 down | SFRS6      |
|           |          |          |               |               |               | KIAA0391   |
| 208805_at | 0.004347 | 0.002914 | 1.526189 up   | 1.304682 up   | 1.169779 down | /// PSMA6  |
| 208806_at | 0.003078 | 0.001854 | 1.576229 down | 2.191065 down | 1.390068 down | CHD3       |
| 208807_s_ | 1.34E-05 | 1.15E-06 | 3.172156 down | 3.431972 down | 1.081905 down | CHD3       |

|           |          |          |               |               |               |         |
|-----------|----------|----------|---------------|---------------|---------------|---------|
| 208808_s_ | 0.002698 | 0.001552 | 3.054217 up   | 4.689738 up   | 1.535496 up   | HMGB2   |
| 208812_x_ | 1.10E-06 | 3.32E-08 | 4.724749 down | 3.067575 down | 1.540223 up   | HLA-C   |
| 208814_at | 0.012816 | 0.011017 | 2.360475 up   | 3.625851 up   | 1.536068 up   | HSPA4   |
| 208815_x_ | 6.40E-04 | 2.22E-04 | 2.810072 up   | 1.819309 up   | 1.544582 down | HSPA4   |
| 208816_x_ | 4.09E-04 | 1.20E-04 | 2.974563 down | 2.652013 down | 1.121624 up   | ANXA2P2 |
| 208817_at | 1.53E-06 | 5.35E-08 | 12.39617 down | 12.62304 down | 1.018301 down | COMT    |
| 208818_s_ | 1.83E-06 | 6.87E-08 | 16.60903 down | 29.05115 down | 1.749118 down | COMT    |
| 208820_at | 5.11E-05 | 7.28E-06 | 1.915594 up   | 1.644025 up   | 1.165185 down | PTK2    |
| 208821_at | 7.41E-05 | 1.21E-05 | 2.143608 up   | 2.071789 up   | 1.034665 down | SNRPB   |
| 208823_s_ | 0.018662 | 0.016941 | 1.33875 up    | 1.156151 down | 1.547797 down | PCTK1   |
| 208827_at | 0.001485 | 6.94E-04 | 1.950705 up   | 1.156019 up   | 1.687434 down | PSMB6   |
| 208829_at | 4.78E-06 | 2.68E-07 | 4.52876 down  | 5.855357 down | 1.292927 down | TAPBP   |
| 208831_x_ | 0.017311 | 0.015564 | 1.919781 up   | 1.167909 up   | 1.643777 down | SUPT6H  |
| 208835_s_ | 0.002458 | 0.001372 | 2.521533 up   | 4.242057 up   | 1.682333 up   | CROP    |
| 208837_at | 1.78E-04 | 3.96E-05 | 2.574725 down | 3.083093 down | 1.197446 down | TMED3   |
| 208838_at | 4.59E-04 | 1.41E-04 | 2.258822 up   | 2.743918 up   | 1.214756 up   | CAND1   |
| 208840_s_ | 0.005272 | 0.003736 | 2.079353 up   | 2.042877 up   | 1.017855 down | G3BP2   |
| 208841_s_ | 2.68E-04 | 6.84E-05 | 2.173701 up   | 2.302329 up   | 1.059175 up   | G3BP2   |
| 208842_s_ | 0.006648 | 0.005005 | 1.242302 down | 1.40442 down  | 1.130498 down | GORASP2 |
| 208847_s_ | 4.80E-04 | 1.49E-04 | 1.385521 down | 1.261134 up   | 1.747328 up   | ADH5    |
| 208848_at | 3.53E-04 | 9.93E-05 | 2.28011 down  | 1.29415 up    | 2.950804 up   | ADH5    |
| 208850_s_ | 1.35E-04 | 2.70E-05 | 13.02161 down | 8.260852 down | 1.576303 up   | THY1    |
| 208851_s_ | 5.17E-04 | 1.65E-04 | 8.694386 down | 6.294836 down | 1.381193 up   | THY1    |
| 208855_s_ | 0.002454 | 0.001369 | 1.235409 up   | 1.346824 up   | 1.090185 up   | STK24   |
| 208862_s_ | 0.001569 | 7.49E-04 | 2.102647 up   | 1.107417 up   | 1.898695 down | CTNND1  |
| 208863_s_ | 2.13E-04 | 5.01E-05 | 2.518901 up   | 1.996849 up   | 1.261438 down | SFRS1   |
| 208864_s_ | 6.22E-04 | 2.13E-04 | 2.10828 down  | 1.387425 down | 1.519563 up   | TXN     |
| 208865_at | 2.53E-04 | 6.34E-05 | 2.286909 down | 1.611451 down | 1.419162 up   | CSNK1A1 |
| 208867_s_ | 0.04037  | 0.039129 | 2.279892 down | 1.154223 down | 1.975261 up   | CSNK1A1 |
| 208870_x_ | 0.003101 | 0.001871 | 1.502974 up   | 1.099891 up   | 1.366475 down | ATP5C1  |
| 208872_s_ | 0.007137 | 0.005468 | 1.650687 down | 1.916077 down | 1.160775 down | REEP5   |
| 208873_s_ | 0.005114 | 0.003595 | 1.909219 down | 1.827312 down | 1.044824 up   | REEP5   |
| 208877_at | 0.021503 | 0.019876 | 1.377647 down | 1.965162 down | 1.426463 down | PAK2    |
| 208883_at | 5.52E-04 | 1.80E-04 | 2.106708 up   | 2.09809 up    | 1.004108 down | UBR5    |

|           |          |          |               |               |               |         |
|-----------|----------|----------|---------------|---------------|---------------|---------|
| 208884_s_ | 0.012158 | 0.010362 | 1.854662 up   | 1.601423 up   | 1.158134 down | UBR5    |
| 208889_s_ | 0.018897 | 0.017191 | 1.725962 up   | 1.280661 down | 2.210373 down | NCOR2   |
| 208890_s_ | 6.04E-06 | 3.70E-07 | 2.860161 down | 4.459018 down | 1.55901 down  | PLXNB2  |
| 208895_s_ | 3.23E-05 | 3.92E-06 | 3.865804 up   | 2.186828 up   | 1.767767 down | DDX18   |
| 208896_at | 5.88E-04 | 1.97E-04 | 2.456296 up   | 2.897402 up   | 1.179582 up   | DDX18   |
| 208897_s_ | 6.85E-04 | 2.43E-04 | 2.374008 up   | 1.923149 up   | 1.234438 down | DDX18   |
| 208901_s_ | 1.02E-05 | 7.74E-07 | 2.167229 up   | 1.677532 up   | 1.291915 down | TOP1    |
| 208902_s_ | 0.022257 | 0.020656 | 1.456088 up   | 1.061598 up   | 1.3716 down   | RPS28   |
| 208905_at | 0.005822 | 0.004224 | 2.061324 up   | 1.53966 up    | 1.338818 down | CYCS    |
| 208906_at | 0.001602 | 7.70E-04 | 1.610082 up   | 1.628883 up   | 1.011677 up   | BSCL2   |
| 208908_s_ | 0.001112 | 4.68E-04 | 4.08657 down  | 4.008565 down | 1.01946 up    | CAST    |
| 208909_at | 0.004121 | 0.00271  | 1.458523 up   | 1.282887 up   | 1.136907 down | UQCRFS1 |
| 208910_s_ | 0.006413 | 0.004788 | 2.700922 up   | 2.594625 up   | 1.040968 down | C1QBP   |
| 208912_s_ | 0.001511 | 7.10E-04 | 1.610161 down | 1.646874 down | 1.022801 down | CNP     |
| 208913_at | 0.001949 | 0.001001 | 1.898055 up   | 1.974597 up   | 1.040327 up   | GGA2    |
| 208914_at | 2.00E-05 | 2.00E-06 | 1.859843 up   | 3.567851 up   | 1.918362 up   | GGA2    |
| 208916_at | 0.010295 | 0.0085   | 1.338068 up   | 2.207329 down | 2.953557 down | SLC1A5  |
| 208920_at | 0.005427 | 0.00387  | 1.950282 down | 1.190721 down | 1.637899 up   | SRI     |
| 208931_s_ | 2.23E-04 | 5.32E-05 | 5.049825 up   | 3.430148 up   | 1.472189 down | ILF3    |
| 208933_s_ | 1.65E-06 | 6.02E-08 | 13.18464 down | 11.07765 down | 1.190202 up   | LGALS8  |
| 208934_s_ | 1.41E-05 | 1.25E-06 | 3.573846 down | 5.891677 down | 1.648554 down | LGALS8  |
| 208935_s_ | 7.41E-05 | 1.21E-05 | 5.199653 down | 6.261331 down | 1.204183 down | LGALS8  |
| 208936_x_ | 2.03E-07 | 3.22E-09 | 4.393578 down | 6.822567 down | 1.55285 down  | LGALS8  |
| 208937_s_ | 1.01E-05 | 7.67E-07 | 15.32626 up   | 8.483919 up   | 1.806507 down | ID1     |
| 208939_at | 1.13E-05 | 8.98E-07 | 7.971529 up   | 7.311191 up   | 1.090319 down | SEPHS1  |
| 208940_at | 1.29E-04 | 2.54E-05 | 7.9842 up     | 8.264339 up   | 1.035087 up   | SEPHS1  |
| 208941_s_ | 4.13E-05 | 5.46E-06 | 8.597697 up   | 5.341011 up   | 1.609751 down | SEPHS1  |
| 208944_at | 3.23E-06 | 1.55E-07 | 19.23179 down | 16.40192 down | 1.172533 up   | TGFBR2  |
| 208948_s_ | 0.021546 | 0.019922 | 1.231188 up   | 1.086041 up   | 1.133648 down | STAU1   |
| 208949_s_ | 4.87E-05 | 6.79E-06 | 18.16573 down | 7.823394 down | 2.321975 up   | LGALS3  |
| 208950_s_ | 7.57E-04 | 2.79E-04 | 2.040968 up   | 1.859753 up   | 1.09744 down  | ALDH7A1 |
| 208951_at | 1.09E-04 | 2.03E-05 | 2.007696 up   | 2.428061 up   | 1.209377 up   | ALDH7A1 |
| 208954_s_ | 0.026373 | 0.024874 | 1.619749 up   | 1.049622 up   | 1.543174 down | LARP5   |
| 208955_at | 0.002737 | 0.001583 | 2.267217 up   | 4.149682 up   | 1.830298 up   | DUT     |

|           |          |          |          |      |          |      |          |      |          |
|-----------|----------|----------|----------|------|----------|------|----------|------|----------|
| 208960_s_ | 0.043133 | 0.041894 | 3.218998 | down | 3.145636 | down | 1.023322 | up   | KLF6     |
| 208965_s_ | 7.01E-08 | 6.84E-10 | 37.80295 | down | 11.32946 | down | 3.336694 | up   | IFI16    |
| 208966_x_ | 1.65E-06 | 5.96E-08 | 25.42253 | down | 17.80602 | down | 1.427749 | up   | IFI16    |
| 208968_s_ | 1.26E-05 | 1.06E-06 | 2.426783 | up   | 1.410892 | up   | 1.720034 | down | CIAPIN1  |
| 208969_at | 2.79E-04 | 7.24E-05 | 1.682023 | up   | 1.216469 | up   | 1.382709 | down | NDUFA9   |
| 208974_x_ | 6.20E-04 | 2.12E-04 | 2.46387  | up   | 2.48971  | up   | 1.010488 | up   | KPNB1    |
| 208977_x_ | 0.01613  | 0.014363 | 2.190681 | up   | 1.493441 | up   | 1.466868 | down | TUBB2C   |
| 208978_at | 5.30E-04 | 1.70E-04 | 1.766731 | down | 8.258319 | down | 4.67435  | down | CRIP2    |
| 208980_s_ | 0.003756 | 0.002409 | 1.546781 | down | 1.287728 | down | 1.201171 | up   | UBC      |
| 208984_x_ | 6.45E-04 | 2.24E-04 | 2.04316  | up   | 1.076895 | up   | 1.89727  | down | RBM10    |
| 208986_at | 0.006239 | 0.00462  | 1.490267 | down | 1.517481 | up   | 2.261452 | up   | TCF12    |
| 208988_at | 0.038069 | 0.036807 | 2.15852  | down | 1.472552 | down | 1.465837 | up   | KDM2A    |
| 208990_s_ | 1.33E-04 | 2.66E-05 | 2.433344 | up   | 2.588212 | up   | 1.063644 | up   | HNRNPH3  |
| 208991_at | 3.77E-04 | 1.09E-04 | 1.979605 | down | 1.957583 | down | 1.011249 | up   | STAT3    |
| 208992_s_ | 0.02439  | 0.022813 | 1.824252 | down | 1.444603 | down | 1.262805 | up   | STAT3    |
| 208993_s_ | 0.001365 | 6.20E-04 | 2.613715 | up   | 4.196789 | up   | 1.60568  | up   | PPIG     |
| 208994_s_ | 5.86E-04 | 1.96E-04 | 2.114481 | up   | 3.476726 | up   | 1.644246 | up   | PPIG     |
| 208995_s_ | 5.19E-04 | 1.66E-04 | 1.628897 | up   | 2.978267 | up   | 1.828396 | up   | PPIG     |
| 208997_s_ | 0.001867 | 9.44E-04 | 2.803872 | up   | 3.994385 | up   | 1.424596 | up   | UCP2     |
| 208998_at | 3.58E-05 | 4.45E-06 | 5.126259 | up   | 17.72627 | up   | 3.457935 | up   | UCP2     |
| 209000_s_ | 8.30E-04 | 3.15E-04 | 2.148425 | down | 2.018344 | down | 1.064449 | up   | 40794    |
| 209001_s_ | 0.003014 | 0.001803 | 1.975332 | down | 1.775402 | down | 1.112611 | up   | ANAPC13  |
| 209002_s_ | 0.00164  | 7.95E-04 | 2.380924 | down | 2.116194 | down | 1.125097 | up   | CALCOCO1 |
| 209006_s_ | 6.63E-04 | 2.32E-04 | 5.425268 | down | 1.426664 | down | 3.802764 | up   | C1orf63  |
| 209008_x_ | 1.18E-06 | 3.70E-08 | 25.33513 | up   | 15.06374 | up   | 1.681862 | down | KRT8     |
| 209009_at | 0.011587 | 0.009788 | 1.586246 | down | 1.49678  | down | 1.059772 | up   | ESD      |
| 209012_at | 1.60E-04 | 3.42E-05 | 2.377579 | down | 3.016766 | down | 1.26884  | down | TRIO     |
| 209014_at | 3.35E-04 | 9.24E-05 | 1.526551 | down | 1.995247 | down | 1.30703  | down | MAGED1   |
| 209018_s_ | 3.94E-04 | 1.15E-04 | 1.724476 | down | 1.922086 | down | 1.114591 | down | PINK1    |
| 209019_s_ | 5.30E-04 | 1.71E-04 | 1.498542 | down | 2.304425 | down | 1.537778 | down | PINK1    |
| 209022_at | 1.02E-04 | 1.87E-05 | 1.623502 | up   | 2.256244 | up   | 1.389739 | up   | STAG2    |
| 209023_s_ | 0.001161 | 4.97E-04 | 1.816904 | up   | 3.019944 | up   | 1.662137 | up   | STAG2    |
| 209024_s_ | 0.002623 | 0.001494 | 2.265758 | up   | 2.108139 | up   | 1.074767 | down | SYNCRIP  |
| 209029_at | 0.003438 | 0.002151 | 1.361335 | down | 1.911794 | down | 1.404353 | down | COPS7A   |

|           |          |          |               |               |               |        |
|-----------|----------|----------|---------------|---------------|---------------|--------|
| 209030_s_ | 5.80E-04 | 1.93E-04 | 3.234593 up   | 9.224551 up   | 2.851843 up   | CADM1  |
| 209031_at | 6.58E-04 | 2.30E-04 | 4.529534 up   | 24.92472 up   | 5.502709 up   | CADM1  |
| 209032_s_ | 0.003433 | 0.002146 | 2.38473 up    | 5.017272 up   | 2.103916 up   | CADM1  |
| 209035_at | 0.001403 | 6.44E-04 | 3.467194 up   | 4.18962 up    | 1.20836 up    | MDK    |
| 209036_s_ | 0.004523 | 0.003072 | 1.336903 up   | 1.010445 up   | 1.323084 down | MDH2   |
| 209037_s_ | 5.49E-04 | 1.79E-04 | 4.048472 down | 4.757222 down | 1.175066 down | EHD1   |
| 209039_x_ | 1.33E-04 | 2.66E-05 | 2.634174 down | 2.788854 down | 1.058721 down | EHD1   |
| 209040_s_ | 1.32E-04 | 2.62E-05 | 7.352228 down | 6.120876 down | 1.201173 up   | PSMB8  |
| 209043_at | 2.98E-04 | 7.88E-05 | 1.843855 up   | 1.172689 down | 2.162268 down | PAPSS1 |
| 209047_at | 0.008137 | 0.006415 | 3.172177 down | 2.377134 up   | 7.54069 up    | AQP1   |
| 209048_s_ | 5.15E-05 | 7.35E-06 | 4.752194 up   | 4.907614 up   | 1.032705 up   | ZMYND8 |
| 209049_s_ | 2.75E-05 | 3.12E-06 | 6.353125 up   | 5.895349 up   | 1.07765 down  | ZMYND8 |
| 209058_at | 0.006232 | 0.004612 | 1.203104 up   | 1.266568 down | 1.523813 down | EDF1   |
| 209059_s_ | 0.002504 | 0.001407 | 1.163686 up   | 1.368935 down | 1.59301 down  | EDF1   |
| 209064_x_ | 2.96E-04 | 7.81E-05 | 4.449442 up   | 4.22757 up    | 1.052482 down | PAIP1  |
| 209065_at | 0.02488  | 0.023326 | 1.893959 down | 1.042771 down | 1.816276 up   | UQCRB  |
| 209067_s_ | 7.82E-06 | 5.47E-07 | 2.869835 up   | 1.676089 up   | 1.712221 down | HNRPDL |
| 209068_at | 0.001586 | 7.60E-04 | 1.99626 up    | 2.049235 up   | 1.026537 up   | HNRPDL |
| 209069_s_ | 0.003898 | 0.002523 | 1.816397 up   | 1.784797 up   | 1.017705 down | H3F3B  |
| 209070_s_ | 0.008451 | 0.006716 | 5.349082 up   | 4.301932 up   | 1.243414 down | RGS5   |
| 209071_s_ | 0.002236 | 0.001207 | 10.7983 up    | 5.384363 up   | 2.005493 down | RGS5   |
| 209075_s_ | 0.009245 | 0.007487 | 1.514335 down | 1.020537 up   | 1.545436 up   | ISCU   |



///  
 PCDHGA10  
 ///  
 PCDHGA11  
 ///  
 PCDHGA12  
 ///  
 PCDHGA2  
 ///  
 PCDHGA3  
 ///  
 PCDHGA4  
 ///  
 PCDHGA5  
 ///  
 PCDHGA6  
 ///  
 PCDHGA7  
 ///  
 PCDHGA8  
 ///  
 PCDHGA9  
 ///  
 PCDHGB1  
 ///  
 PCDHGB2

|           |          |          |          |      |          |      |          |      |
|-----------|----------|----------|----------|------|----------|------|----------|------|
| 209079_x_ | 0.002559 | 0.001447 | 3.198645 | down | 3.17639  | down | 1.007006 | up   |
| 209080_x_ | 0.04341  | 0.04217  | 1.865696 | up   | 1.713324 | up   | 1.088933 | down |
| 209081_s_ | 1.40E-04 | 2.85E-05 | 2.213234 | up   | 6.868941 | up   | 3.103577 | up   |
| 209082_s_ | 2.30E-04 | 5.56E-05 | 2.206905 | up   | 8.20274  | up   | 3.716852 | up   |
| 209083_at | 0.03072  | 0.029342 | 1.768    | up   | 1.145264 | up   | 1.54375  | down |
| 209085_x_ | 4.57E-04 | 1.40E-04 | 1.445557 | up   | 1.577018 | up   | 1.090941 | up   |
| 209086_x_ | 1.09E-04 | 2.03E-05 | 1.077651 | up   | 4.013432 | down | 4.325077 | down |
| 209087_x_ | 2.01E-05 | 2.02E-06 | 2.821414 | up   | 7.335451 | down | 20.69634 | down |

///  
 GLRX3  
 COL18A1  
 COL18A1  
 CORO1A  
 RFC1  
 MCAM  
 MCAM

|           |          |          |               |               |               |         |
|-----------|----------|----------|---------------|---------------|---------------|---------|
| 209090_s_ | 0.002095 | 0.001103 | 2.326934 down | 2.684 down    | 1.153449 down | SH3GLB1 |
| 209091_s_ | 9.27E-04 | 3.66E-04 | 2.427782 down | 3.296505 down | 1.357825 down | SH3GLB1 |
|           |          |          |               |               |               | GBA /// |
| 209093_s_ | 7.23E-07 | 1.85E-08 | 3.816255 down | 3.898336 down | 1.021508 down | GBAP    |
| 209094_at | 9.09E-05 | 1.57E-05 | 3.555015 down | 5.533668 down | 1.556581 down | DDAH1   |
| 209097_s_ | 0.019122 | 0.017415 | 1.358867 up   | 1.154008 down | 1.568144 down | JAG1    |
| 209098_s_ | 0.00675  | 0.0051   | 1.762374 up   | 2.224769 down | 3.920874 down | JAG1    |
| 209101_at | 0.001382 | 6.30E-04 | 1.44964 down  | 6.53544 down  | 4.508319 down | CTGF    |
| 209104_s_ | 0.004248 | 0.00282  | 2.036649 up   | 1.475005 up   | 1.380774 down | NHP2    |
| 209105_at | 9.75E-04 | 3.92E-04 | 2.735416 down | 1.545117 down | 1.770362 up   | NCOA1   |
| 209108_at | 2.54E-05 | 2.77E-06 | 2.624226 up   | 2.873077 up   | 1.094829 up   | TSPAN6  |
| 209109_s_ | 3.82E-06 | 1.95E-07 | 2.123916 up   | 3.201566 up   | 1.507388 up   | TSPAN6  |
| 209124_at | 0.005129 | 0.003608 | 1.926086 down | 1.339794 down | 1.437599 up   | MYD88   |
| 209127_s_ | 7.81E-04 | 2.92E-04 | 3.600337 up   | 4.518328 up   | 1.254974 up   | SART3   |
| 209128_s_ | 7.11E-05 | 1.14E-05 | 1.899273 up   | 2.107198 up   | 1.109476 up   | SART3   |
| 209134_s_ | 0.003304 | 0.002039 | 1.046917 up   | 1.293832 up   | 1.23585 up    | RPS6    |
| 209135_at | 9.10E-06 | 6.66E-07 | 5.992686 down | 3.730261 down | 1.606506 up   | ASPH    |
| 209137_s_ | 3.07E-04 | 8.22E-05 | 2.32813 up    | 2.695985 up   | 1.158005 up   | USP10   |
| 209140_x_ | 9.42E-07 | 2.68E-08 | 7.530701 down | 5.696023 down | 1.322098 up   | HLA-B   |
| 209143_s_ | 1.60E-04 | 3.42E-05 | 1.507938 up   | 1.643189 up   | 1.089693 up   | CLNS1A  |
| 209148_at | 7.16E-04 | 2.58E-04 | 1.517449 down | 2.270414 down | 1.496205 down | RXRB    |
| 209149_s_ | 6.30E-07 | 1.51E-08 | 3.052547 down | 3.304246 down | 1.082456 down | TM9SF1  |
| 209150_s_ | 6.69E-06 | 4.30E-07 | 2.939294 down | 2.967186 down | 1.009489 down | TM9SF1  |
| 209152_s_ | 0.002671 | 0.001531 | 3.24825 up    | 1.791714 up   | 1.812928 down | TCF3    |
| 209153_s_ | 1.33E-05 | 1.14E-06 | 3.06493 up    | 3.836845 up   | 1.251854 up   | TCF3    |
| 209154_at | 4.91E-05 | 6.88E-06 | 3.152955 down | 3.179553 down | 1.008436 down | TAX1BP3 |
| 209156_s_ | 4.88E-06 | 2.77E-07 | 23.72894 down | 15.92194 down | 1.49033 up    | COL6A2  |
| 209158_s_ | 7.23E-04 | 2.62E-04 | 1.145033 down | 1.986996 down | 1.735318 down | CYTH2   |
| 209159_s_ | 8.94E-04 | 3.48E-04 | 2.044716 up   | 2.471126 up   | 1.208542 up   | NDRG4   |
| 209160_at | 6.26E-04 | 2.15E-04 | 23.47732 down | 8.125146 down | 2.889465 up   | AKR1C3  |
| 209161_at | 0.006875 | 0.005218 | 1.671094 up   | 1.231819 up   | 1.356606 down | PRPF4   |
| 209165_at | 0.001485 | 6.94E-04 | 1.74394 up    | 1.132474 up   | 1.539939 down | AATF    |
| 209167_at | 4.63E-04 | 1.42E-04 | 5.433748 up   | 35.72424 up   | 6.574513 up   | GPM6B   |
| 209168_at | 9.19E-05 | 1.60E-05 | 9.758887 up   | 24.75374 up   | 2.536533 up   | GPM6B   |

|           |          |          |               |               |               |          |
|-----------|----------|----------|---------------|---------------|---------------|----------|
| 209169_at | 1.48E-04 | 3.06E-05 | 9.135224 up   | 21.9975 up    | 2.407987 up   | GPM6B    |
| 209170_s_ | 2.26E-04 | 5.42E-05 | 3.655739 up   | 35.42009 up   | 9.6889 up     | GPM6B    |
| 209172_s_ | 7.43E-04 | 2.72E-04 | 3.633798 up   | 4.284207 up   | 1.178989 up   | CENPF    |
| 209174_s_ | 0.002936 | 0.00174  | 1.524503 up   | 1.360675 up   | 1.120402 down | QRICH1   |
| 209177_at | 2.98E-04 | 7.88E-05 | 3.082876 down | 3.148754 down | 1.021369 down | NDUFAF3  |
| 209182_s_ | 7.12E-05 | 1.15E-05 | 1.574594 down | 2.814745 down | 1.787601 down | C10orf10 |
| 209183_s_ | 6.66E-05 | 1.05E-05 | 4.13252 down  | 16.01433 down | 3.875197 down | C10orf10 |
| 209189_at | 0.002057 | 0.001077 | 13.43916 up   | 1.29427 down  | 17.3939 down  | FOS      |
| 209193_at | 0.014481 | 0.0127   | 2.06598 up    | 1.648291 up   | 1.253408 down | PIM1     |
| 209194_at | 0.001042 | 4.29E-04 | 1.746792 down | 1.675186 down | 1.042745 up   | CETN2    |
| 209197_at | 4.88E-05 | 6.81E-06 | 6.487505 down | 5.247577 down | 1.236286 up   | SYT11    |
| 209198_s_ | 4.12E-05 | 5.44E-06 | 7.374689 down | 12.28585 down | 1.665949 down | SYT11    |
| 209201_x_ | 0.001507 | 7.08E-04 | 5.476552 up   | 6.481665 up   | 1.18353 up    | CXCR4    |
| 209203_s_ | 1.50E-04 | 3.13E-05 | 1.840123 down | 2.087925 down | 1.134666 down | BICD2    |
| 209204_at | 0.017195 | 0.01544  | 1.837348 up   | 1.020073 down | 1.874228 down | LMO4     |
| 209206_at | 7.08E-05 | 1.14E-05 | 7.761859 down | 6.327622 down | 1.226663 up   | SEC22B   |
| 209207_s_ | 6.38E-05 | 9.84E-06 | 2.665305 down | 3.614956 down | 1.356301 down | SEC22B   |
| 209210_s_ | 0.002492 | 0.001398 | 1.53825 down  | 2.414758 down | 1.569809 down | FERMT2   |
| 209214_s_ | 2.55E-04 | 6.39E-05 | 1.747975 up   | 2.759974 up   | 1.578955 up   | EWSR1    |
| 209216_at | 1.47E-06 | 5.06E-08 | 3.544485 down | 4.092144 down | 1.15451 down  | WDR45    |
| 209217_s_ | 1.61E-06 | 5.79E-08 | 2.982027 down | 2.845697 down | 1.047907 up   | WDR45    |
| 209219_at | 0.049265 | 0.048115 | 1.301974 up   | 1.044559 down | 1.359988 down | RDBP     |
| 209220_at | 2.41E-06 | 1.02E-07 | 8.776081 up   | 17.64993 up   | 2.01114 up    | GPC3     |
| 209221_s_ | 0.001697 | 8.32E-04 | 2.009072 down | 2.276536 down | 1.133128 down | OSBPL2   |
| 209222_s_ | 0.017095 | 0.015339 | 1.13347 up    | 1.39488 down  | 1.581054 down | OSBPL2   |
| 209224_s_ | 6.81E-04 | 2.41E-04 | 1.706808 up   | 1.529893 up   | 1.115638 down | NDUFA2   |
| 209230_s_ | 6.95E-07 | 1.75E-08 | 23.12902 down | 24.08491 down | 1.041329 down | NUPR1    |
| 209232_s_ | 0.005316 | 0.003773 | 1.617408 up   | 1.101073 up   | 1.468938 down | DCTN5    |
| 209233_at | 5.86E-04 | 1.96E-04 | 2.338486 up   | 1.899266 up   | 1.231258 down | EMG1     |
| 209234_at | 1.15E-05 | 9.21E-07 | 4.552685 up   | 4.684427 up   | 1.028937 up   | KIF1B    |
| 209238_at | 4.81E-04 | 1.50E-04 | 2.860875 up   | 5.855983 up   | 2.04692 up    | STX3     |
| 209239_at | 2.03E-05 | 2.05E-06 | 4.185603 down | 2.979398 down | 1.404848 up   | NFKB1    |
| 209244_s_ | 0.009024 | 0.007272 | 1.352258 up   | 1.534349 down | 2.074837 down | KIF1C    |
| 209246_at | 0.016468 | 0.014698 | 1.431173 up   | 1.143785 down | 1.636954 down | ABCF2    |

|           |          |          |          |      |          |      |          |      |          |
|-----------|----------|----------|----------|------|----------|------|----------|------|----------|
| 209250_at | 0.004954 | 0.00345  | 2.202612 | down | 2.060841 | down | 1.068793 | up   | DEGS1    |
| 209257_s_ | 4.95E-04 | 1.55E-04 | 3.288987 | up   | 8.125166 | up   | 2.470416 | up   | SMC3     |
| 209258_s_ | 0.001068 | 4.44E-04 | 2.287543 | up   | 4.340275 | up   | 1.897352 | up   | SMC3     |
| 209259_s_ | 5.14E-04 | 1.64E-04 | 1.832445 | up   | 3.977727 | up   | 2.170721 | up   | SMC3     |
| 209260_at | 7.76E-04 | 2.89E-04 | 1.679693 | up   | 1.882808 | up   | 1.120924 | up   | SFN      |
| 209262_s_ | 1.36E-04 | 2.74E-05 | 2.354159 | up   | 1.494012 | up   | 1.57573  | down | NR2F6    |
| 209263_x_ | 5.27E-04 | 1.69E-04 | 3.849704 | down | 3.356317 | down | 1.147002 | up   | TSPAN4   |
| 209264_s_ | 7.14E-04 | 2.57E-04 | 5.255578 | down | 3.793781 | down | 1.385314 | up   | TSPAN4   |
| 209265_s_ | 6.68E-04 | 2.34E-04 | 1.995034 | up   | 1.961878 | up   | 1.016901 | down | METTL3   |
| 209266_s_ | 0.007127 | 0.005457 | 1.794687 | up   | 1.669811 | down | 2.996788 | down | SLC39A8  |
| 209267_s_ | 0.002227 | 0.001199 | 1.516128 | up   | 7.537869 | up   | 4.97179  | up   | SLC39A8  |
| 209269_s_ | 0.013661 | 0.011868 | 1.582522 | up   | 1.057325 | up   | 1.496723 | down | SYK      |
| 209271_at | 0.005673 | 0.004091 | 1.569665 | up   | 1.858911 | up   | 1.184272 | up   | BPTF     |
| 209276_s_ | 0.001086 | 4.53E-04 | 2.649454 | down | 2.584442 | down | 1.025155 | up   | GLRX     |
| 209282_at | 0.001679 | 8.20E-04 | 1.970835 | up   | 1.564432 | up   | 1.259777 | down | PRKD2    |
| 209283_at | 2.82E-08 | 1.94E-10 | 25.10244 | down | 37.86668 | down | 1.508486 | down | CRYAB    |
| 209286_at | 6.74E-06 | 4.34E-07 | 11.49887 | down | 18.1949  | down | 1.582321 | down | CDC42EP3 |
| 209287_s_ | 5.52E-04 | 1.80E-04 | 4.908306 | down | 6.428712 | down | 1.309762 | down | CDC42EP3 |
| 209288_s_ | 4.19E-06 | 2.25E-07 | 9.325533 | down | 12.0952  | down | 1.296998 | down | CDC42EP3 |
| 209289_at | 0.001044 | 4.30E-04 | 3.867587 | down | 5.24715  | down | 1.356699 | down | NFIB     |
| 209291_at | 0.00122  | 5.33E-04 | 7.238304 | up   | 2.437958 | down | 17.64668 | down | ID4      |
| 209292_at | 0.00586  | 0.004261 | 6.561402 | up   | 1.866485 | down | 12.24676 | down | ID4      |
| 209293_x_ | 0.003471 | 0.002178 | 2.626683 | up   | 1.305024 | down | 3.427884 | down | ID4      |
| 209296_at | 5.52E-05 | 8.04E-06 | 2.959481 | up   | 3.142362 | up   | 1.061795 | up   | PPM1B    |
| 209301_at | 3.31E-07 | 6.09E-09 | 25.02066 | up   | 22.39655 | up   | 1.117166 | down | CA2      |
| 209302_at | 7.71E-04 | 2.86E-04 | 1.881699 | up   | 1.315055 | up   | 1.43089  | down | POLR2H   |
| 209304_x_ | 8.03E-04 | 3.02E-04 | 1.311147 | down | 3.492628 | down | 2.663796 | down | GADD45B  |
| 209305_s_ | 0.006229 | 0.00461  | 1.864341 | down | 3.153349 | down | 1.691402 | down | GADD45B  |
| 209306_s_ | 0.010863 | 0.009068 | 1.58672  | down | 1.217068 | up   | 1.931145 | up   | SWAP70   |
| 209307_at | 0.005311 | 0.003769 | 1.932398 | down | 1.298941 | up   | 2.51007  | up   | SWAP70   |
| 209308_s_ | 0.002941 | 0.001745 | 1.618628 | down | 1.487003 | down | 1.088517 | up   | BNIP2    |
| 209310_s_ | 1.71E-05 | 1.64E-06 | 11.04688 | down | 9.933246 | down | 1.112111 | up   | CASP4    |
| 209311_at | 3.06E-05 | 3.63E-06 | 3.221792 | down | 3.205406 | down | 1.005112 | up   | BCL2L2   |
| 209313_at | 8.87E-04 | 3.45E-04 | 1.725656 | up   | 1.326286 | up   | 1.301119 | down | GPN1     |

|           |          |          |          |      |          |      |          |      |            |
|-----------|----------|----------|----------|------|----------|------|----------|------|------------|
| 209318_x_ | 3.20E-05 | 3.85E-06 | 11.51352 | down | 7.550654 | down | 1.524837 | up   | PLAGL1     |
| 209320_at | 0.00301  | 0.0018   | 2.828099 | down | 1.733026 | down | 1.631885 | up   | ADCY3      |
| 209321_s_ | 5.47E-05 | 7.95E-06 | 6.285741 | down | 2.118129 | down | 2.967592 | up   | ADCY3      |
| 209324_s_ | 0.002529 | 0.001426 | 3.692822 | up   | 3.176763 | up   | 1.162448 | down | RGS16      |
| 209330_s_ | 9.80E-04 | 3.95E-04 | 2.839185 | up   | 2.46155  | up   | 1.153414 | down | HNRNPD     |
| 209332_s_ | 0.002962 | 0.001761 | 2.458852 | down | 2.189622 | down | 1.122957 | up   | MAX        |
| 209335_at | 3.30E-05 | 4.03E-06 | 179.6751 | down | 12.50501 | down | 14.36825 | up   | DCN        |
| 209336_at | 7.12E-04 | 2.56E-04 | 3.038871 | up   | 1.576075 | up   | 1.928127 | down | PWP2       |
| 209337_at | 1.35E-05 | 1.17E-06 | 2.841518 | up   | 5.540895 | up   | 1.949977 | up   | PSIP1      |
| 209338_at | 0.002555 | 0.001445 | 1.482748 | up   | 1.412064 | up   | 1.050057 | down | TFCP2      |
| 209340_at | 1.27E-04 | 2.48E-05 | 2.028904 | down | 5.025453 | down | 2.476931 | down | UAP1       |
| 209341_s_ | 2.32E-05 | 2.47E-06 | 2.597218 | down | 2.524488 | down | 1.02881  | up   | IKBKB      |
| 209342_s_ | 1.71E-04 | 3.74E-05 | 2.381768 | down | 1.65002  | down | 1.443479 | up   | IKBKB      |
| 209345_s_ | 5.46E-04 | 1.77E-04 | 1.627789 | down | 1.585911 | down | 1.026406 | up   | PI4K2A     |
| 209348_s_ | 0.014903 | 0.013127 | 9.28873  | down | 1.266852 | down | 7.332134 | up   | MAF        |
| 209354_at | 0.004622 | 0.003164 | 2.163253 | down | 1.897759 | down | 1.139899 | up   | TNFRSF14   |
| 209355_s_ | 4.44E-04 | 1.34E-04 | 6.763053 | down | 4.582227 | down | 1.475931 | up   | PPAP2B     |
| 209356_x_ | 1.34E-09 | 3.14E-12 | 16.41056 | down | 21.54532 | down | 1.312894 | down | EFEMP2     |
| 209357_at | 0.004343 | 0.00291  | 2.869579 | down | 2.767426 | down | 1.036913 | up   | CITED2     |
| 209358_at | 0.028699 | 0.02727  | 1.526905 | up   | 1.540599 | up   | 1.008969 | up   | TAF11      |
| 209360_s_ | 4.02E-06 | 2.11E-07 | 20.39643 | down | 10.21483 | down | 1.996747 | up   | RUNX1      |
| 209364_at | 1.14E-04 | 2.16E-05 | 2.463965 | down | 2.342434 | down | 1.051882 | up   | BAD        |
| 209365_s_ | 6.91E-06 | 4.52E-07 | 15.59829 | down | 4.374764 | down | 3.565516 | up   | ECM1       |
| 209367_at | 3.89E-04 | 1.13E-04 | 2.404056 | up   | 1.815438 | up   | 1.324229 | down | STXBP2     |
| 209369_at | 0.002362 | 0.001299 | 5.516578 | up   | 15.23954 | up   | 2.7625   | up   | ANXA3      |
| 209370_s_ | 0.00151  | 7.09E-04 | 1.6118   | down | 1.006076 | down | 1.602066 | up   | SH3BP2     |
|           |          |          |          |      |          |      |          |      | TUBB2A /// |
| 209372_x_ | 0.004483 | 0.003035 | 4.83659  | up   | 4.635865 | up   | 1.043298 | down | TUBB2B     |
| 209375_at | 0.001549 | 7.35E-04 | 1.34596  | down | 1.051614 | up   | 1.415429 | up   | XPC        |
| 209377_s_ | 2.28E-05 | 2.41E-06 | 2.552661 | up   | 4.320565 | up   | 1.692573 | up   | HMG3       |
| 209378_s_ | 5.01E-04 | 1.58E-04 | 1.300387 | down | 2.400095 | down | 1.845677 | down | KIAA1128   |
| 209380_s_ | 0.006243 | 0.004627 | 1.593478 | up   | 1.785438 | up   | 1.120466 | up   | ABCC5      |
| 209384_at | 0.004252 | 0.002824 | 1.477319 | down | 1.360328 | down | 1.086002 | up   | PROSC      |
| 209386_at | 2.61E-05 | 2.88E-06 | 2.289317 | down | 25.57005 | down | 11.16929 | down | TM4SF1     |

|           |          |          |          |      |          |      |          |      |           |
|-----------|----------|----------|----------|------|----------|------|----------|------|-----------|
| 209387_s_ | 1.54E-05 | 1.41E-06 | 2.248804 | down | 18.00211 | down | 8.005192 | down | TM4SF1    |
| 209392_at | 9.67E-05 | 1.72E-05 | 33.94886 | down | 5.976831 | down | 5.680078 | up   | ENPP2     |
| 209393_s_ | 3.88E-05 | 4.98E-06 | 1.65349  | up   | 1.089843 | down | 1.802045 | down | EIF4E2    |
| 209394_at | 0.008151 | 0.00643  | 1.844066 | up   | 1.38714  | up   | 1.329401 | down | ASMTL     |
| 209395_at | 3.05E-04 | 8.15E-05 | 12.93696 | down | 44.09663 | down | 3.408577 | down | CHI3L1    |
| 209396_s_ | 7.76E-04 | 2.89E-04 | 6.067347 | down | 31.46375 | down | 5.185751 | down | CHI3L1    |
| 209397_at | 5.42E-04 | 1.76E-04 | 2.042761 | up   | 1.239547 | up   | 1.647991 | down | ME2       |
| 209399_at | 0.003589 | 0.00227  | 1.636321 | down | 1.849107 | down | 1.130039 | down | HLCS      |
| 209401_s_ | 0.004363 | 0.00293  | 1.981278 | down | 2.91415  | down | 1.470843 | down | SLC12A4   |
| 209402_s_ | 1.47E-05 | 1.32E-06 | 1.634944 | down | 2.484967 | down | 1.51991  | down | SLC12A4   |
| 209404_s_ | 0.001437 | 6.64E-04 | 2.296495 | down | 2.068025 | down | 1.110478 | up   | TMED7     |
| 209405_s_ | 0.001742 | 8.61E-04 | 1.014299 | up   | 2.093634 | down | 2.123571 | down | FAM3A     |
| 209406_at | 0.001914 | 9.76E-04 | 5.135961 | down | 2.150791 | down | 2.38794  | up   | BAG2      |
| 209408_at | 0.0079   | 0.00619  | 3.893028 | up   | 5.911523 | up   | 1.51849  | up   | KIF2C     |
| 209411_s_ | 8.79E-04 | 3.40E-04 | 1.844597 | up   | 1.905336 | up   | 1.032928 | up   | GGA3      |
| 209413_at | 0.004012 | 0.002618 | 1.291231 | down | 2.141989 | down | 1.658874 | down | B4GALT2   |
| 209415_at | 0.008279 | 0.006553 | 1.189944 | down | 1.279124 | down | 1.074944 | down | FZR1      |
| 209417_s_ | 2.25E-05 | 2.36E-06 | 7.41802  | down | 3.382287 | down | 2.193197 | up   | IFI35     |
| 209418_s_ | 0.007355 | 0.005673 | 1.557421 | up   | 1.049406 | up   | 1.484097 | down | THOC5     |
| 209420_s_ | 1.83E-06 | 6.87E-08 | 7.098946 | down | 11.68957 | down | 1.646663 | down | SMPD1     |
| 209421_at | 2.64E-05 | 2.93E-06 | 6.956685 | up   | 8.068083 | up   | 1.15976  | up   | MSH2      |
| 209425_at | 0.004565 | 0.003113 | 2.64656  | down | 2.285695 | down | 1.157879 | up   | C1QTNF3   |
|           |          |          |          |      |          |      |          |      | AMACR /// |
| 209426_s_ | 0.010111 | 0.008324 | 1.699957 | down | 1.923875 | down | 1.13172  | down | C1QTNF3   |
| 209427_at | 0.001914 | 9.76E-04 | 3.982219 | down | 6.29923  | down | 1.581839 | down | SMTN      |
| 209430_at | 0.004538 | 0.003086 | 2.087206 | up   | 1.58512  | up   | 1.316749 | down | BTAF1     |
| 209431_s_ | 6.57E-07 | 1.61E-08 | 6.252648 | up   | 5.420189 | up   | 1.153585 | down | PATZ1     |
| 209432_s_ | 4.18E-05 | 5.54E-06 | 2.421871 | down | 3.823589 | down | 1.578775 | down | CREB3     |
| 209433_s_ | 8.42E-08 | 8.91E-10 | 13.69045 | up   | 18.30252 | up   | 1.336882 | up   | PPAT      |
| 209434_s_ | 1.45E-06 | 4.90E-08 | 5.925804 | up   | 5.843692 | up   | 1.014051 | down | PPAT      |
| 209435_s_ | 4.04E-04 | 1.18E-04 | 2.118949 | down | 3.29849  | down | 1.556663 | down | ARHGEF2   |
| 209436_at | 0.004858 | 0.003366 | 2.624047 | down | 2.938857 | up   | 7.7117   | up   | SPON1     |
| 209437_s_ | 0.008568 | 0.006829 | 1.965038 | down | 1.507384 | up   | 2.962067 | up   | SPON1     |
| 209439_s_ | 1.70E-04 | 3.74E-05 | 1.705704 | up   | 1.841878 | up   | 1.079835 | up   | PHKA2     |

|           |          |          |               |               |               |          |
|-----------|----------|----------|---------------|---------------|---------------|----------|
| 209442_x_ | 3.05E-06 | 1.42E-07 | 10.57747 up   | 5.347142 up   | 1.978154 down | ANK3     |
| 209443_at | 0.041657 | 0.040408 | 1.442651 up   | 1.00642 down  | 1.451913 down | SERPINA5 |
| 209444_at | 8.30E-05 | 1.40E-05 | 2.894607 down | 4.847847 down | 1.674786 down | RAP1GDS1 |
| 209445_x_ | 6.54E-06 | 4.17E-07 | 3.456573 up   | 3.164781 up   | 1.0922 down   | C7orf44  |
| 209447_at | 1.15E-06 | 3.52E-08 | 7.122677 down | 11.53078 down | 1.618883 down | SYNE1    |
| 209449_at | 4.85E-05 | 6.76E-06 | 3.37934 up    | 2.283023 up   | 1.480204 down | LSM2     |
| 209450_at | 0.029302 | 0.027896 | 1.726622 up   | 1.070337 up   | 1.613158 down | OSGEP    |
| 209451_at | 0.003142 | 0.001907 | 6.919922 down | 2.66341 down  | 2.598143 up   | TANK     |
| 209452_s_ | 0.001317 | 5.91E-04 | 1.162008 down | 1.651813 down | 1.421516 down | VTI1B    |
| 209462_at | 0.005612 | 0.004034 | 2.139485 up   | 1.022263 up   | 2.092891 down | APLP1    |
| 209464_at | 0.006385 | 0.004763 | 4.849421 up   | 5.688624 up   | 1.173052 up   | AURKB    |
| 209466_x_ | 0.012474 | 0.010678 | 1.335733 up   | 5.626157 up   | 4.212037 up   | PTN      |
| 209467_s_ | 8.34E-05 | 1.41E-05 | 2.100054 down | 1.551333 down | 1.35371 up    | MKNK1    |
| 209478_at | 0.00694  | 0.005281 | 1.745512 up   | 1.949086 up   | 1.116627 up   | STRA13   |
| 209482_at | 0.002633 | 0.001503 | 2.41444 up    | 1.776775 up   | 1.358889 down | POP7     |
| 209484_s_ | 0.009039 | 0.007287 | 1.719465 up   | 1.918368 up   | 1.115677 up   | NSL1     |
| 209489_at | 3.66E-07 | 7.14E-09 | 3.514312 up   | 4.121134 up   | 1.172672 up   | CUGBP1   |
| 209492_x_ | 0.002568 | 0.001454 | 2.008424 up   | 1.582055 up   | 1.269503 down | ATP5I    |
| 209498_at | 0.003793 | 0.002439 | 1.285369 up   | 1.400273 up   | 1.089394 up   | CEACAM1  |
| 209504_s_ | 3.82E-04 | 1.10E-04 | 3.585492 up   | 3.84225 up    | 1.07161 up    | PLEKHB1  |
| 209507_at | 1.38E-04 | 2.80E-05 | 4.520991 up   | 4.194474 up   | 1.077845 down | RPA3     |
| 209508_x_ | 8.03E-04 | 3.02E-04 | 2.722065 down | 2.044861 down | 1.331173 up   | CFLAR    |
| 209511_at | 0.002741 | 0.001586 | 2.062048 up   | 1.141857 up   | 1.805872 down | POLR2F   |
| 209512_at | 8.70E-04 | 3.35E-04 | 3.917749 down | 1.025706 up   | 4.01846 up    | HSDL2    |
| 209513_s_ | 0.008522 | 0.006786 | 2.263727 down | 1.317347 down | 1.718399 up   | HSDL2    |
| 209514_s_ | 1.60E-05 | 1.48E-06 | 2.957766 down | 3.715926 down | 1.256329 down | RAB27A   |
| 209515_s_ | 1.49E-04 | 3.10E-05 | 3.516377 down | 4.108083 down | 1.168272 down | RAB27A   |
| 209517_s_ | 4.30E-05 | 5.76E-06 | 1.892896 up   | 1.444513 up   | 1.310404 down | ASH2L    |
| 209518_at | 0.003022 | 0.001809 | 2.292507 up   | 2.221413 up   | 1.032004 down | SMARCD1  |
| 209519_at | 0.014445 | 0.012664 | 1.385275 down | 1.055914 up   | 1.462731 up   | NCBP1    |
| 209522_s_ | 1.46E-06 | 4.95E-08 | 6.208045 down | 4.526501 down | 1.371489 up   | CRAT     |
| 209524_at | 0.001931 | 9.88E-04 | 2.170585 up   | 1.95567 up    | 1.109893 down | HDGFRP3  |
| 209525_at | 0.004187 | 0.002769 | 1.516653 up   | 1.871358 up   | 1.233874 up   | HDGFRP3  |
| 209526_s_ | 0.004966 | 0.003462 | 2.163095 up   | 1.75664 up    | 1.231382 down | HDGFRP3  |

|           |          |          |               |               |               |         |
|-----------|----------|----------|---------------|---------------|---------------|---------|
| 209527_at | 0.001384 | 6.32E-04 | 2.180768 up   | 3.014936 up   | 1.382511 up   | EXOSC2  |
| 209528_s_ | 0.006455 | 0.004825 | 1.794539 up   | 1.625441 up   | 1.104032 down | TELO2   |
| 209529_at | 9.00E-04 | 3.52E-04 | 2.783509 up   | 5.53116 up    | 1.987118 up   | PPAP2C  |
| 209537_at | 0.008898 | 0.00715  | 1.527077 up   | 1.116547 down | 1.705053 down | EXTL2   |
| 209538_at | 9.84E-05 | 1.76E-05 | 2.080371 down | 1.837865 down | 1.13195 up    | ZNF32   |
| 209539_at | 2.39E-04 | 5.85E-05 | 5.173031 down | 4.409703 down | 1.173102 up   | ARHGEF6 |
| 209546_s_ | 0.003362 | 0.002088 | 1.502604 down | 2.942462 down | 1.958242 down | APOL1   |
| 209549_s_ | 0.042704 | 0.041458 | 1.2751 up     | 1.300536 up   | 1.019949 up   | DGUOK   |
| 209550_at | 4.58E-04 | 1.40E-04 | 2.353094 down | 1.607616 down | 1.463716 up   | NDN     |
| 209551_at | 0.006644 | 0.005    | 3.11792 down  | 2.313021 down | 1.347986 up   | YIPF4   |
| 209554_at | 0.001441 | 6.67E-04 | 1.105488 up   | 1.530487 down | 1.691935 down | CD36    |
| 209559_at | 0.018842 | 0.017135 | 1.391776 up   | 1.344929 down | 1.871841 down | HIP1R   |
| 209560_s_ | 5.10E-06 | 2.94E-07 | 29.29417 up   | 54.80804 up   | 1.870954 up   | DLK1    |
| 209561_at | 0.005731 | 0.004142 | 2.610021 down | 3.968192 down | 1.520368 down | THBS3   |
| 209563_x_ | 0.009748 | 0.007969 | 1.645183 up   | 1.335606 up   | 1.231788 down | CALM1   |
| 209566_at | 0.020925 | 0.01928  | 1.555549 down | 3.491014 down | 2.244233 down | INSIG2  |
| 209567_at | 0.005823 | 0.004225 | 2.801242 up   | 1.86486 up    | 1.50212 down  | RRS1    |
| 209568_s_ | 0.005553 | 0.003981 | 4.871888 down | 2.295604 down | 2.122268 up   | RGL1    |
| 209569_x_ | 1.04E-05 | 8.01E-07 | 8.502969 up   | 10.3816 up    | 1.220939 up   | D4S234E |
| 209570_s_ | 1.30E-04 | 2.59E-05 | 5.195524 up   | 3.573258 up   | 1.454002 down | D4S234E |
| 209572_s_ | 0.004172 | 0.002754 | 1.492401 up   | 1.683585 up   | 1.128105 up   | EED     |
| 209575_at | 1.65E-06 | 6.00E-08 | 15.2381 down  | 12.13358 down | 1.255862 up   | IL10RB  |
| 209576_at | 0.006079 | 0.004468 | 2.679758 down | 1.199388 down | 2.234271 up   | GNAI1   |
| 209578_s_ | 1.98E-04 | 4.55E-05 | 1.663578 down | 2.615983 down | 1.572504 down | POFUT2  |
| 209579_s_ | 0.007181 | 0.00551  | 1.549178 up   | 1.394209 up   | 1.111152 down | MBD4    |
| 209581_at | 3.30E-05 | 4.03E-06 | 9.965694 up   | 1.943963 up   | 5.126483 down | PLA2G16 |
| 209582_s_ | 3.23E-06 | 1.55E-07 | 9.46667 up    | 2.818263 up   | 3.359045 down | CD200   |
| 209583_s_ | 3.18E-07 | 5.75E-09 | 37.49492 up   | 4.889394 up   | 7.668625 down | CD200   |
| 209586_s_ | 5.09E-04 | 1.61E-04 | 2.422378 up   | 1.846047 up   | 1.312197 down | PRUNE   |
| 209590_at | 0.001402 | 6.43E-04 | 2.784406 up   | 2.628045 up   | 1.059497 down | BMP7    |
| 209591_s_ | 2.25E-05 | 2.36E-06 | 4.452573 up   | 4.416151 up   | 1.008248 down | BMP7    |
| 209592_s_ | 0.009552 | 0.007779 | 2.056723 up   | 1.344902 up   | 1.529274 down | WDR68   |
| 209593_s_ | 8.62E-06 | 6.24E-07 | 2.330969 down | 3.277357 down | 1.406006 down | TOR1B   |
| 209594_x_ | 2.28E-04 | 5.52E-05 | 30.26369 down | 5.381521 down | 5.623632 up   | PSG9    |



|           |          |          |          |      |          |      |          |      |          |
|-----------|----------|----------|----------|------|----------|------|----------|------|----------|
| 209596_at | 5.29E-04 | 1.70E-04 | 42.58052 | down | 1.493499 | down | 28.51058 | up   | MXRA5    |
| 209604_s_ | 0.001336 | 6.03E-04 | 11.79084 | up   | 12.96533 | up   | 1.09961  | up   | GATA3    |
| 209605_at | 6.83E-04 | 2.42E-04 | 1.498677 | down | 2.186262 | down | 1.458795 | down | TST      |
| 209610_s_ | 1.66E-05 | 1.56E-06 | 6.618588 | down | 33.70467 | down | 5.092428 | down | SLC1A4   |
| 209611_s_ | 0.001127 | 4.77E-04 | 1.377799 | down | 2.988594 | down | 2.169107 | down | SLC1A4   |
| 209612_s_ | 1.60E-07 | 2.27E-09 | 88.64684 | down | 1.025652 | down | 86.42977 | up   | ADH1B    |
| 209613_s_ | 2.13E-07 | 3.43E-09 | 86.74991 | down | 1.14974  | down | 75.45175 | up   | ADH1B    |
| 209615_s_ | 4.08E-05 | 5.38E-06 | 3.477519 | up   | 4.522246 | up   | 1.300423 | up   | PAK1     |
| 209617_s_ | 1.23E-06 | 3.95E-08 | 3.714613 | up   | 2.352567 | up   | 1.578962 | down | CTNND2   |
| 209618_at | 7.71E-04 | 2.86E-04 | 2.342375 | up   | 2.461131 | up   | 1.050699 | up   | CTNND2   |
| 209620_s_ | 7.12E-07 | 1.81E-08 | 2.645216 | up   | 2.385687 | up   | 1.108786 | down | ABCB7    |
| 209621_s_ | 0.001912 | 9.75E-04 | 2.978097 | up   | 1.522347 | down | 4.533698 | down | PDLIM3   |
| 209622_at | 0.006268 | 0.004651 | 2.006505 | down | 1.429299 | down | 1.403838 | up   | STK16    |
| 209625_at | 0.001322 | 5.94E-04 | 1.701525 | down | 2.513395 | down | 1.477143 | down | PIGH     |
| 209626_s_ | 3.45E-04 | 9.58E-05 | 4.832194 | down | 2.405105 | down | 2.00914  | up   | OSBPL3   |
| 209627_s_ | 0.003683 | 0.002347 | 4.822379 | down | 1.54445  | down | 3.122391 | up   | OSBPL3   |
| 209631_s_ | 8.59E-04 | 3.29E-04 | 7.479007 | up   | 7.739842 | up   | 1.034876 | up   | GPR37    |
| 209632_at | 0.0045   | 0.003051 | 1.733449 | down | 1.456046 | down | 1.190518 | up   | PPP2R3A  |
| 209633_at | 0.001015 | 4.14E-04 | 2.14771  | down | 1.433936 | down | 1.497773 | up   | PPP2R3A  |
| 209635_at | 0.002119 | 0.00112  | 1.298292 | down | 2.003036 | down | 1.542824 | down | AP1S1    |
| 209640_at | 3.23E-05 | 3.91E-06 | 2.94556  | down | 1.915682 | down | 1.537604 | up   | PML      |
| 209641_s_ | 4.60E-04 | 1.41E-04 | 2.694499 | down | 3.04226  | down | 1.129064 | down | ABCC3    |
| 209642_at | 5.30E-04 | 1.70E-04 | 8.838369 | up   | 16.70994 | up   | 1.890613 | up   | BUB1     |
| 209644_x_ | 0.006356 | 0.004731 | 1.800659 | down | 3.50446  | down | 1.94621  | down | CDKN2A   |
| 209645_s_ | 0.00118  | 5.09E-04 | 1.159708 | up   | 5.042124 | down | 5.847394 | down | ALDH1B1  |
| 209646_x_ | 1.67E-04 | 3.62E-05 | 1.00213  | down | 4.97672  | down | 4.966143 | down | ALDH1B1  |
| 209647_s_ | 5.10E-06 | 2.94E-07 | 5.45098  | down | 3.441203 | down | 1.584033 | up   | SOCS5    |
| 209648_x_ | 1.14E-05 | 9.07E-07 | 7.786927 | down | 7.413169 | down | 1.050418 | up   | SOCS5    |
| 209649_at | 5.67E-04 | 1.87E-04 | 2.950332 | down | 2.831217 | down | 1.042072 | up   | STAM2    |
| 209651_at | 1.15E-06 | 3.54E-08 | 30.7215  | down | 42.11132 | down | 1.370744 | down | TGFB111  |
| 209652_s_ | 0.011475 | 0.009675 | 3.205334 | down | 3.805054 | down | 1.187101 | down | PGF      |
| 209654_at | 0.001246 | 5.48E-04 | 1.790095 | up   | 1.593387 | up   | 1.123453 | down | KIAA0947 |
| 209655_s_ | 1.13E-04 | 2.14E-05 | 5.60746  | down | 5.534824 | down | 1.013123 | up   | TMEM47   |
| 209656_s_ | 5.38E-04 | 1.74E-04 | 4.225433 | down | 4.116415 | down | 1.026484 | up   | TMEM47   |

|           |          |          |               |               |               |          |
|-----------|----------|----------|---------------|---------------|---------------|----------|
| 209661_at | 0.004503 | 0.003054 | 1.12893 up    | 1.802513 down | 2.034911 down | KIFC3    |
| 209662_at | 0.002904 | 0.001714 | 1.562781 up   | 2.526053 up   | 1.616383 up   | CETN3    |
| 209665_at | 0.001899 | 9.65E-04 | 1.27584 down  | 2.227906 down | 1.746226 down | CYB561D2 |
| 209667_at | 2.31E-07 | 3.77E-09 | 3.869702 down | 3.478693 down | 1.112401 up   | CES2     |
| 209668_x_ | 7.88E-04 | 2.95E-04 | 1.745204 down | 1.947959 down | 1.116179 down | CES2     |
| 209669_s_ | 0.00227  | 0.001234 | 2.064223 up   | 1.992977 up   | 1.035748 down | SERBP1   |
| 209670_at | 0.005247 | 0.003713 | 1.339646 up   | 1.102556 down | 1.477034 down | TRAC     |
| 209676_at | 0.002975 | 0.001772 | 8.377085 down | 1.785444 down | 4.691877 up   | TFPI     |
| 209678_s_ | 0.014954 | 0.013181 | 2.237749 up   | 1.740305 up   | 1.285837 down | PRKCI    |
| 209680_s_ | 0.008079 | 0.006359 | 2.989135 up   | 2.500404 up   | 1.195461 down | KIFC1    |
| 209681_at | 0.005191 | 0.003664 | 3.342202 up   | 3.507605 up   | 1.049489 up   | SLC19A2  |
| 209682_at | 0.00866  | 0.006922 | 1.378092 down | 2.661619 down | 1.931379 down | CBLB     |
| 209684_at | 2.48E-05 | 2.68E-06 | 16.12449 down | 12.13973 down | 1.328242 up   | RIN2     |
| 209685_s_ | 9.53E-05 | 1.68E-05 | 4.995298 up   | 4.906265 up   | 1.018147 down | PRKCB    |
| 209687_at | 8.46E-07 | 2.34E-08 | 21.27559 down | 11.13204 down | 1.911203 up   | CXCL12   |
| 209691_s_ | 0.022273 | 0.020674 | 1.456661 up   | 1.455345 down | 2.119944 down | DOK4     |
| 209692_at | 1.02E-04 | 1.86E-05 | 1.440409 up   | 4.662947 down | 6.716552 down | EYA2     |
| 209694_at | 0.001694 | 8.30E-04 | 1.325687 down | 2.117948 down | 1.597623 down | PTS      |
| 209695_at | 6.44E-04 | 2.23E-04 | 1.698968 up   | 1.149565 up   | 1.477922 down | PTP4A3   |
| 209696_at | 0.002138 | 0.001134 | 1.448171 up   | 1.177428 down | 1.705117 down | FBP1     |
| 209697_at | 0.005089 | 0.003572 | 1.550566 up   | 1.33799 down  | 2.074642 down |          |
| 209698_at | 0.003251 | 0.001994 | 1.302411 up   | 1.668534 up   | 1.281111 up   | CCHCR1   |
| 209699_x_ | 6.80E-04 | 2.40E-04 | 20.85204 down | 2.716738 down | 7.675394 up   | AKR1C2   |
| 209700_x_ | 8.79E-05 | 1.50E-05 | 7.677193 down | 4.007126 down | 1.915885 up   | PDE4DIP  |
| 209702_at | 1.79E-04 | 3.99E-05 | 1.643541 down | 1.97555 down  | 1.202009 down | FTO      |
| 209704_at | 7.61E-08 | 7.64E-10 | 10.56205 up   | 12.43964 up   | 1.177768 up   | MTF2     |
| 209705_at | 1.15E-05 | 9.23E-07 | 7.025927 up   | 5.685351 up   | 1.235795 down | MTF2     |
| 209706_at | 0.001183 | 5.11E-04 | 1.541067 down | 3.537588 down | 2.295544 down | NKX3-1   |
| 209707_at | 0.001252 | 5.52E-04 | 2.980481 down | 2.918216 down | 1.021337 up   | PIGK     |
| 209708_at | 4.31E-07 | 9.05E-09 | 66.11388 down | 5.973314 down | 11.06821 up   | MOXD1    |
| 209709_s_ | 0.003513 | 0.00221  | 5.403022 up   | 9.908569 up   | 1.833894 up   | HMMR     |
| 209710_at | 0.022247 | 0.020643 | 1.966827 down | 1.119802 down | 1.756406 up   | GATA2    |
| 209711_at | 6.01E-04 | 2.03E-04 | 2.090388 down | 3.367886 down | 1.61113 down  | SLC35D1  |
| 209712_at | 0.001322 | 5.94E-04 | 2.904112 down | 3.227106 down | 1.11122 down  | SLC35D1  |

|           |          |          |          |      |          |      |          |      |           |
|-----------|----------|----------|----------|------|----------|------|----------|------|-----------|
| 209713_s_ | 6.85E-04 | 2.43E-04 | 1.815882 | down | 2.747417 | down | 1.512994 | down | SLC35D1   |
| 209716_at | 8.41E-06 | 6.02E-07 | 3.981171 | down | 3.240259 | down | 1.228658 | up   | CSF1      |
| 209717_at | 0.00201  | 0.001044 | 3.144253 | down | 2.686675 | down | 1.170314 | up   | EVI5      |
| 209718_at | 0.009041 | 0.007289 | 1.203701 | up   | 1.335829 | down | 1.607938 | down | NCAPH2    |
| 209721_s_ | 1.74E-05 | 1.67E-06 | 3.25802  | down | 2.107571 | down | 1.545865 | up   | IFFO1     |
| 209722_s_ | 0.004658 | 0.003194 | 2.356569 | up   | 2.682975 | up   | 1.138509 | up   | SERPINB9  |
| 209723_at | 3.20E-04 | 8.70E-05 | 11.83304 | up   | 34.81925 | up   | 2.942546 | up   | SERPINB9  |
| 209726_at | 1.78E-04 | 3.96E-05 | 4.22134  | up   | 8.752403 | up   | 2.073371 | up   | CA11      |
| 209729_at | 3.61E-04 | 1.02E-04 | 1.978865 | down | 3.465577 | down | 1.751295 | down | GAS2L1    |
| 209731_at | 0.007969 | 0.006259 | 1.983185 | up   | 1.195017 | up   | 1.659545 | down | NTHL1     |
| 209732_at | 5.78E-05 | 8.61E-06 | 27.59473 | down | 1.886296 | down | 14.62905 | up   | CLEC2B    |
| 209735_at | 1.78E-04 | 3.97E-05 | 6.125283 | up   | 7.892934 | up   | 1.288583 | up   | ABCG2     |
| 209736_at | 2.17E-04 | 5.14E-05 | 1.974064 | up   | 1.995752 | up   | 1.010987 | up   | SOX13     |
| 209738_x_ | 5.36E-04 | 1.73E-04 | 25.75423 | down | 5.550952 | down | 4.639607 | up   | PSG6      |
| 209747_at | 0.002211 | 0.001187 | 1.443234 | down | 1.627494 | down | 1.127672 | down | TGFB3     |
| 209752_at | 0.021724 | 0.020096 | 1.49206  | up   | 1.205057 | up   | 1.238166 | down | REG1A     |
| 209755_at | 0.001022 | 4.17E-04 | 3.398003 | up   | 1.374705 | up   | 2.471807 | down | NMNAT2    |
| 209756_s_ | 0.012448 | 0.01065  | 1.918173 | up   | 1.340036 | up   | 1.431434 | down | MYCN      |
| 209757_s_ | 9.87E-09 | 4.14E-11 | 43.96478 | up   | 38.65627 | up   | 1.137326 | down | MYCN      |
| 209758_s_ | 0.00129  | 5.75E-04 | 6.48136  | down | 29.53957 | down | 4.557618 | down | MFAP5     |
| 209761_s_ | 4.66E-04 | 1.43E-04 | 4.800492 | down | 2.339335 | down | 2.052076 | up   | SP110     |
| 209762_x_ | 1.34E-05 | 1.15E-06 | 6.137748 | down | 5.117716 | down | 1.199314 | up   | SP110     |
| 209764_at | 4.55E-04 | 1.39E-04 | 2.152876 | up   | 1.465304 | up   | 1.469236 | down | MGAT3     |
| 209766_at | 0.002759 | 0.001602 | 1.709115 | down | 1.140969 | up   | 1.950048 | up   | PRDX3     |
|           |          |          |          |      |          |      |          |      | GP1BB /// |
| 209768_s_ | 0.013616 | 0.011822 | 1.595315 | up   | 1.434956 | down | 2.289206 | down | SEPT5     |
| 209769_s_ | 0.001533 | 7.24E-04 | 2.197582 | up   | 2.052772 | down | 4.511135 | down | GP1BB     |
| 209770_at | 3.84E-06 | 1.97E-07 | 4.673749 | down | 2.408437 | down | 1.940573 | up   | BTN3A1    |
| 209771_x_ | 1.64E-07 | 2.39E-09 | 155.0295 | up   | 194.1967 | up   | 1.252644 | up   | CD24      |
| 209772_s_ | 7.41E-10 | 1.29E-12 | 79.48455 | up   | 114.4444 | up   | 1.439832 | up   | CD24      |
| 209775_x_ | 0.016683 | 0.014926 | 1.491288 | up   | 1.005446 | up   | 1.483211 | down | SLC19A1   |
| 209778_at | 2.76E-04 | 7.13E-05 | 2.887606 | down | 2.762784 | down | 1.04518  | up   | TRIP11    |
| 209780_at | 0.001541 | 7.29E-04 | 2.291881 | down | 2.16932  | down | 1.056498 | up   | PHTF2     |
| 209783_at | 0.003454 | 0.002164 | 1.388446 | up   | 1.023002 | down | 1.420382 | down | DBP       |

|           |          |          |          |      |          |      |          |      |           |
|-----------|----------|----------|----------|------|----------|------|----------|------|-----------|
| 209785_s_ | 0.016437 | 0.014668 | 2.555467 | down | 2.010743 | down | 1.270906 | up   | PLA2G4C   |
| 209786_at | 0.006125 | 0.004514 | 1.544928 | down | 1.245334 | up   | 1.923951 | up   | HMGN4     |
| 209788_s_ | 0.001635 | 7.92E-04 | 3.997375 | down | 1.331023 | down | 3.003235 | up   | ERAP1     |
| 209789_at | 2.93E-05 | 3.40E-06 | 5.298398 | down | 5.642047 | down | 1.064859 | down | CORO2B    |
| 209793_at | 1.14E-04 | 2.15E-05 | 11.6071  | down | 1.344097 | down | 8.635609 | up   | GRIA1     |
| 209799_at | 0.00201  | 0.001043 | 1.886341 | down | 2.157474 | down | 1.143735 | down | PRKAA1    |
| 209800_at | 4.56E-05 | 6.23E-06 | 1.792474 | up   | 2.000167 | down | 3.585247 | down | KRT16     |
| 209802_at | 0.002408 | 0.001334 | 1.431633 | up   | 1.382849 | down | 1.979733 | down | PHLDA2    |
| 209803_s_ | 5.47E-04 | 1.78E-04 | 5.153435 | down | 6.068397 | down | 1.177544 | down | PHLDA2    |
| 209804_at | 3.09E-04 | 8.28E-05 | 1.491781 | up   | 1.825804 | up   | 1.223909 | up   | DCLRE1A   |
| 209806_at | 0.006111 | 0.004499 | 3.903551 | down | 1.93629  | down | 2.015995 | up   | HIST1H2BK |
| 209808_x_ | 8.92E-04 | 3.48E-04 | 1.613721 | up   | 1.89424  | up   | 1.173834 | up   | ING1      |
| 209810_at | 0.029916 | 0.028517 | 1.355729 | up   | 1.084649 | down | 1.47049  | down | SFTPB     |
| 209815_at | 3.00E-04 | 7.98E-05 | 3.490571 | up   | 8.958235 | up   | 2.566409 | up   | PTCH1     |
| 209817_at | 7.09E-05 | 1.14E-05 | 3.436869 | down | 3.875025 | down | 1.127487 | down | PPP3CB    |
| 209822_s_ | 0.008981 | 0.007231 | 1.277776 | up   | 1.965339 | down | 2.511263 | down | VLDLR     |
| 209824_s_ | 0.003217 | 0.001967 | 1.766418 | down | 2.071551 | down | 1.172741 | down | ARNTL     |
| 209828_s_ | 0.009089 | 0.007335 | 1.197302 | up   | 1.170131 | down | 1.400999 | down | IL16      |
| 209829_at | 1.10E-04 | 2.05E-05 | 10.25731 | down | 1.07334  | down | 9.556438 | up   | FAM65B    |
| 209832_s_ | 6.46E-04 | 2.24E-04 | 3.903473 | up   | 4.436482 | up   | 1.136548 | up   | CDT1      |
| 209834_at | 1.26E-05 | 1.07E-06 | 3.145595 | down | 6.996961 | down | 2.224368 | down | CHST3     |
| 209835_x_ | 2.52E-04 | 6.30E-05 | 17.82989 | down | 11.07239 | down | 1.610302 | up   | CD44      |
|           |          |          |          |      |          |      |          |      | BOLA2 /// |
| 209836_x_ | 0.005374 | 0.003823 | 2.848993 | up   | 1.58814  | up   | 1.793918 | down | BOLA2B    |
| 209842_at | 5.91E-04 | 1.99E-04 | 2.278886 | up   | 1.950831 | up   | 1.168162 | down | SOX10     |
| 209846_s_ | 1.15E-06 | 3.52E-08 | 12.11494 | down | 5.197569 | down | 2.330886 | up   | BTN3A2    |
| 209848_s_ | 7.99E-08 | 8.18E-10 | 8.100907 | up   | 6.329569 | up   | 1.279852 | down | SILV      |
| 209850_s_ | 0.00156  | 7.43E-04 | 2.010649 | down | 2.094007 | down | 1.041458 | down | CDC42EP2  |
| 209851_at | 0.027113 | 0.025629 | 1.275318 | down | 1.094909 | up   | 1.396357 | up   | ZC3H13    |
| 209858_x_ | 0.001468 | 6.83E-04 | 2.447654 | down | 2.283682 | down | 1.071802 | up   | MPPE1     |
| 209860_s_ | 4.73E-04 | 1.46E-04 | 1.454389 | down | 1.711415 | down | 1.176724 | down | ANXA7     |
| 209862_s_ | 7.98E-04 | 3.00E-04 | 1.663967 | up   | 2.870811 | up   | 1.725281 | up   | CEP57     |
| 209864_at | 2.85E-05 | 3.27E-06 | 6.588383 | up   | 9.926591 | up   | 1.506681 | up   | FRAT2     |
| 209866_s_ | 1.14E-04 | 2.14E-05 | 6.459756 | up   | 5.77823  | up   | 1.117947 | down | LPHN3     |

|           |          |          |               |               |               |          |
|-----------|----------|----------|---------------|---------------|---------------|----------|
| 209867_s_ | 3.13E-05 | 3.75E-06 | 6.113419 up   | 4.76374 up    | 1.283323 down | LPHN3    |
| 209869_at | 0.019916 | 0.018241 | 1.56213 down  | 1.782486 up   | 2.784475 up   | ADRA2A   |
| 209875_s_ | 3.84E-06 | 1.97E-07 | 62.47791 up   | 34.00459 up   | 1.837338 down | SPP1     |
| 209876_at | 0.003831 | 0.002468 | 2.506678 down | 1.677495 down | 1.494298 up   | GIT2     |
| 209878_s_ | 0.003738 | 0.002392 | 2.303583 down | 2.521517 down | 1.094607 down | RELA     |
| 209879_at | 3.95E-04 | 1.15E-04 | 1.893124 down | 2.397395 down | 1.26637 down  | SELPLG   |
| 209880_s_ | 0.010819 | 0.009023 | 1.358569 up   | 1.394912 down | 1.895083 down | SELPLG   |
| 209882_at | 0.003321 | 0.002054 | 1.33443 down  | 1.970347 down | 1.476546 down | RIT1     |
| 209885_at | 4.59E-04 | 1.40E-04 | 1.979271 down | 4.217132 down | 2.130649 down | RHOD     |
| 209889_at | 0.013608 | 0.011814 | 1.888378 down | 1.182502 up   | 2.23301 up    | SEC31B   |
| 209890_at | 0.005343 | 0.003796 | 3.398656 down | 1.472965 down | 2.307357 up   | TSPAN5   |
| 209891_at | 0.00573  | 0.004141 | 4.399896 up   | 8.703834 up   | 1.978191 up   | SPC25    |
| 209894_at | 0.021838 | 0.020214 | 6.828327 down | 8.017633 down | 1.174172 down | LEPR     |
| 209897_s_ | 1.15E-04 | 2.17E-05 | 7.561182 down | 2.993771 down | 2.525638 up   | SLIT2    |
| 209899_s_ | 0.009499 | 0.007725 | 1.567263 up   | 1.111478 up   | 1.410071 down | PUF60    |
| 209900_s_ | 1.64E-07 | 2.39E-09 | 6.458548 up   | 4.288312 up   | 1.506082 down | SLC16A1  |
| 209905_at | 1.44E-05 | 1.28E-06 | 5.596959 down | 9.710649 down | 1.734987 down | HOXA9    |
| 209906_at | 0.002129 | 0.001127 | 1.079103 up   | 1.431654 down | 1.544903 down | C3AR1    |
| 209908_s_ | 0.001344 | 6.08E-04 | 1.200915 up   | 4.606458 down | 5.531967 down | TGFB2    |
| 209909_s_ | 3.29E-07 | 6.01E-09 | 1.006134 up   | 22.73979 down | 22.87927 down | TGFB2    |
| 209912_s_ | 0.003719 | 0.002377 | 1.480982 down | 2.089861 down | 1.411132 down | KIAA0415 |
| 209913_x_ | 3.43E-04 | 9.51E-05 | 2.682483 up   | 3.185036 up   | 1.187346 up   | KIAA0415 |
| 209914_s_ | 1.65E-05 | 1.55E-06 | 3.41535 up    | 1.975683 up   | 1.728693 down | NRXN1    |
| 209916_at | 0.001508 | 7.08E-04 | 2.314848 up   | 4.832584 up   | 2.087647 up   | DHTKD1   |
| 209917_s_ | 0.004687 | 0.00322  | 2.462031 down | 1.944512 down | 1.266143 up   | TP53TG1  |
| 209918_at | 0.001374 | 6.26E-04 | 1.680952 up   | 1.101067 up   | 1.526657 down | GGTLC2   |
| 209919_x_ | 0.003244 | 0.001988 | 1.611832 up   | 2.176915 up   | 1.350584 up   | GGT1     |
| 209923_s_ | 0.001116 | 4.71E-04 | 1.311875 up   | 1.036991 down | 1.360402 down | BRAP     |
| 209925_at | 4.09E-06 | 2.17E-07 | 5.75108 up    | 5.976022 up   | 1.039113 up   | OCLN     |
| 209928_s_ | 9.81E-04 | 3.95E-04 | 2.171093 down | 3.346315 down | 1.541305 down | MSC      |
| 209929_s_ | 2.11E-04 | 4.94E-05 | 2.097673 down | 2.007262 down | 1.045042 up   | IKBKG    |
| 209930_s_ | 0.012812 | 0.011013 | 1.834067 up   | 1.269361 up   | 1.444875 down | NFE2     |
| 209931_s_ | 1.36E-05 | 1.18E-06 | 2.825646 up   | 3.145456 up   | 1.113181 up   | FKBP1B   |
| 209934_s_ | 6.30E-04 | 2.17E-04 | 1.026545 down | 2.094467 down | 2.040308 down | ATP2C1   |

|           |          |          |          |      |          |      |          |      |         |
|-----------|----------|----------|----------|------|----------|------|----------|------|---------|
| 209939_x_ | 4.99E-04 | 1.57E-04 | 5.610692 | down | 7.327074 | down | 1.305913 | down | CFLAR   |
| 209940_at | 3.49E-08 | 2.85E-10 | 2.6514   | down | 2.917039 | down | 1.100188 | down | PARP3   |
| 209942_x_ | 0.012438 | 0.01064  | 1.17956  | up   | 1.038858 | up   | 1.135439 | down | MAGEA3  |
| 209943_at | 2.72E-04 | 6.99E-05 | 2.868508 | down | 2.023066 | down | 1.417902 | up   | FBXL4   |
| 209945_s_ | 0.00763  | 0.005938 | 1.448978 | up   | 1.242401 | down | 1.800212 | down | GSK3B   |
| 209946_at | 2.64E-10 | 2.45E-13 | 26.73764 | down | 51.92557 | down | 1.942041 | down | VEGFC   |
| 209948_at | 6.08E-05 | 9.22E-06 | 1.064869 | up   | 4.825979 | down | 5.139032 | down | KCNMB1  |
| 209949_at | 0.013378 | 0.011584 | 1.011496 | up   | 1.291644 | down | 1.306493 | down | NCF2    |
| 209955_s_ | 5.50E-08 | 4.82E-10 | 89.56619 | down | 57.25943 | down | 1.564218 | up   | FAP     |
| 209957_s_ | 0.018125 | 0.016396 | 1.823155 | up   | 1.00708  | up   | 1.810338 | down | NPPA    |
| 209963_s_ | 0.004906 | 0.003409 | 1.692709 | up   | 1.542607 | up   | 1.097305 | down | EPOR    |
| 209969_s_ | 3.88E-05 | 4.98E-06 | 8.689738 | down | 7.862829 | down | 1.105167 | up   | STAT1   |
| 209970_x_ | 2.86E-06 | 1.30E-07 | 19.69342 | down | 1.565707 | down | 12.57797 | up   | CASP1   |
| 209972_s_ | 0.006777 | 0.005126 | 1.738179 | up   | 1.11083  | up   | 1.564757 | down | JTV1    |
| 209973_at | 0.001302 | 5.83E-04 | 1.283705 | up   | 1.363523 | down | 1.750361 | down | NFKBIL1 |
| 209979_at | 0.005591 | 0.004016 | 1.869561 | up   | 2.112275 | down | 3.949028 | down | ADARB1  |
| 209980_s_ | 0.004605 | 0.003149 | 3.512534 | up   | 6.231388 | up   | 1.774043 | up   | SHMT1   |
| 209982_s_ | 0.00402  | 0.002624 | 1.579792 | up   | 1.789718 | down | 2.827383 | down | NRXN2   |
| 209983_s_ | 0.001234 | 5.40E-04 | 1.530644 | up   | 1.614989 | down | 2.471973 | down | NRXN2   |
| 209984_at | 0.012784 | 0.010983 | 1.387556 | up   | 1.056692 | down | 1.466219 | down | KDM4C   |
| 209985_s_ | 0.004497 | 0.003048 | 1.511779 | up   | 1.166763 | down | 1.763887 | down | ASCL1   |
| 209989_at | 0.004067 | 0.002664 | 1.678419 | up   | 3.068763 | up   | 1.828366 | up   | ZNF268  |
| 209992_at | 2.21E-04 | 5.29E-05 | 1.582073 | up   | 2.140584 | up   | 1.353025 | up   | PFKFB2  |
| 210001_s_ | 0.043048 | 0.041806 | 1.232961 | up   | 2.248109 | up   | 1.823341 | up   | SOCS1   |
| 210002_at | 0.010672 | 0.008881 | 1.495076 | up   | 4.330142 | down | 6.473893 | down | GATA6   |
| 210005_at | 0.001411 | 6.48E-04 | 2.38188  | up   | 3.039675 | up   | 1.276166 | up   | GART    |
| 210006_at | 1.35E-05 | 1.16E-06 | 3.96515  | down | 2.878026 | down | 1.377733 | up   | ABHD14A |
| 210008_s_ | 0.016032 | 0.014257 | 1.905391 | up   | 1.353855 | up   | 1.407382 | down | MRPS12  |
| 210011_s_ | 0.002579 | 0.001463 | 2.24871  | up   | 2.079182 | up   | 1.081536 | down | EWSR1   |
| 210024_s_ | 0.005643 | 0.004064 | 1.1917   | down | 1.345224 | up   | 1.603103 | up   | UBE2E3  |
| 210025_s_ | 0.001852 | 9.33E-04 | 1.881754 | up   | 1.40404  | down | 2.642057 | down | CARD10  |
| 210027_s_ | 0.001338 | 6.04E-04 | 2.056485 | up   | 1.52377  | up   | 1.349604 | down | APEX1   |
| 210028_s_ | 1.88E-04 | 4.24E-05 | 2.382734 | up   | 2.08861  | up   | 1.140823 | down | ORC3L   |
| 210029_at | 0.002504 | 0.001407 | 6.273068 | up   | 8.1088   | up   | 1.292637 | up   | IDO1    |

|           |          |          |               |               |               |                                                      |
|-----------|----------|----------|---------------|---------------|---------------|------------------------------------------------------|
| 210031_at | 0.004928 | 0.003429 | 1.573853 up   | 1.436087 up   | 1.095932 down | CD247<br>RPL5 ///<br>RPL5P1 ///                      |
| 210034_s_ | 0.004719 | 0.003245 | 1.209082 up   | 1.809932 up   | 1.496948 up   | RPL5P34<br><br>RPL5 ///<br>RPL5P1 ///<br>RPL5P34 /// |
| 210035_s_ | 0.001388 | 6.34E-04 | 1.680923 down | 1.33396 down  | 1.260101 up   | SNORA66                                              |
| 210036_s_ | 5.69E-04 | 1.88E-04 | 1.828399 up   | 1.872472 up   | 1.024105 up   | KCNH2                                                |
| 210037_s_ | 0.003772 | 0.002422 | 1.418374 up   | 1.093581 up   | 1.296999 down | NOS2                                                 |
| 210038_at | 9.05E-05 | 1.56E-05 | 4.071141 up   | 6.381694 up   | 1.567545 up   | PRKCQ                                                |
| 210039_s_ | 7.39E-05 | 1.20E-05 | 3.073323 up   | 4.020532 up   | 1.308203 up   | PRKCQ                                                |
| 210041_s_ | 6.25E-04 | 2.14E-04 | 1.455735 down | 2.398838 down | 1.647854 down | PGM3                                                 |
| 210042_s_ | 1.23E-05 | 1.02E-06 | 4.771164 down | 9.851488 down | 2.064798 down | CTSZ                                                 |
| 210045_at | 2.67E-04 | 6.82E-05 | 3.264907 down | 2.011693 down | 1.622965 up   | IDH2                                                 |
| 210047_at | 0.023422 | 0.021835 | 1.699866 down | 1.370635 down | 1.240203 up   | SLC11A2                                              |
| 210051_at | 0.00313  | 0.001897 | 1.126289 up   | 1.402387 down | 1.579492 down | RAPGEF3                                              |
| 210052_s_ | 0.012139 | 0.010342 | 3.822142 up   | 4.135862 up   | 1.08208 up    | TPX2                                                 |
| 210053_at | 5.55E-06 | 3.29E-07 | 2.982452 up   | 4.110126 up   | 1.378103 up   | TAF5                                                 |
| 210056_at | 2.24E-04 | 5.37E-05 | 2.437141 up   | 2.191206 up   | 1.112237 down | RND1                                                 |
| 210062_s_ | 8.78E-04 | 3.40E-04 | 3.572395 up   | 6.756981 up   | 1.891443 up   | ZNF589                                               |
| 210072_at | 0.002472 | 0.001383 | 1.266802 up   | 1.465196 up   | 1.15661 up    | CCL19                                                |
| 210074_at | 1.63E-07 | 2.36E-09 | 22.34736 up   | 30.58707 up   | 1.368711 up   | CTSL2                                                |
| 210075_at | 9.04E-04 | 3.54E-04 | 2.243933 down | 2.655442 down | 1.183387 down | 40604                                                |
| 210084_x_ | 0.002095 | 0.001103 | 1.71588 up    | 1.066105 down | 1.829308 down | TPSAB1                                               |
| 210087_s_ | 8.46E-05 | 1.44E-05 | 2.811009 down | 3.957259 down | 1.407772 down | MPZL1                                                |
| 210089_s_ | 1.51E-04 | 3.17E-05 | 4.787265 down | 2.192252 down | 2.18372 up    | LAMA4                                                |
| 210092_at | 7.10E-04 | 2.55E-04 | 1.425219 up   | 2.413435 up   | 1.693379 up   | MAGOH                                                |
| 210093_s_ | 6.27E-04 | 2.15E-04 | 1.938235 up   | 2.620952 up   | 1.352237 up   | MAGOH                                                |
| 210094_s_ | 8.09E-05 | 1.36E-05 | 3.098238 up   | 2.738233 up   | 1.131473 down | PARD3                                                |
| 210095_s_ | 0.003911 | 0.002535 | 9.67719 down  | 18.04124 down | 1.864306 down | IGFBP3                                               |
| 210096_at | 0.003143 | 0.00191  | 1.091303 up   | 1.215651 down | 1.326644 down | CYP4B1                                               |
| 210099_at | 0.031048 | 0.029691 | 1.44779 up    | 1.08985 down  | 1.577875 down | ABCA2                                                |

|           |          |          |          |      |          |      |          |      |          |
|-----------|----------|----------|----------|------|----------|------|----------|------|----------|
| 210101_x_ | 0.00135  | 6.12E-04 | 2.274925 | down | 3.376212 | down | 1.484098 | down | SH3GLB1  |
| 210106_at | 6.15E-04 | 2.10E-04 | 1.475162 | down | 3.453589 | down | 2.341159 | down | RDH5     |
| 210110_x_ | 7.60E-04 | 2.81E-04 | 1.969302 | up   | 2.166688 | up   | 1.100231 | up   | HNRNPH3  |
| 210113_s_ | 6.75E-05 | 1.07E-05 | 1.874495 | down | 3.020059 | down | 1.611133 | down | NLRP1    |
| 210114_at | 5.61E-05 | 8.22E-06 | 2.712787 | down | 2.386384 | down | 1.136777 | up   | INVS     |
| 210122_at | 0.013562 | 0.011769 | 1.251857 | up   | 1.122584 | down | 1.405314 | down | PRM2     |
| 210126_at | 0.004343 | 0.00291  | 1.277484 | up   | 1.333678 | down | 1.703752 | down | PSG9     |
| 210130_s_ | 0.003152 | 0.001917 | 2.494457 | up   | 3.054127 | up   | 1.224366 | up   | TM7SF2   |
| 210132_at | 0.007515 | 0.005826 | 2.1483   | up   | 1.489365 | up   | 1.442427 | down | EFNA3    |
| 210134_x_ | 6.84E-04 | 2.42E-04 | 1.813714 | down | 1.025918 | down | 1.767893 | up   | SHOX2    |
| 210135_s_ | 7.23E-07 | 1.85E-08 | 31.4526  | down | 2.638773 | down | 11.9194  | up   | SHOX2    |
| 210137_s_ | 4.65E-05 | 6.37E-06 | 2.661768 | down | 2.364715 | down | 1.125619 | up   | DCTD     |
| 210138_at | 0.029518 | 0.028115 | 2.058142 | down | 2.58811  | down | 1.257498 | down | RGS20    |
| 210139_s_ | 1.79E-04 | 4.00E-05 | 17.67315 | down | 7.934706 | down | 2.227322 | up   | PMP22    |
| 210144_at | 3.15E-05 | 3.80E-06 | 1.401503 | down | 2.588068 | down | 1.846638 | down | TBC1D22A |
| 210145_at | 0.028221 | 0.02676  | 4.249255 | down | 4.431531 | down | 1.042896 | down | PLA2G4A  |
| 210148_at | 0.003383 | 0.002104 | 4.342056 | down | 1.702842 | down | 2.549888 | up   | HIPK3    |
| 210150_s_ | 2.96E-04 | 7.83E-05 | 2.418217 | up   | 5.41269  | up   | 2.238298 | up   | LAMA5    |
| 210151_s_ | 2.52E-05 | 2.74E-06 | 2.241717 | down | 2.227324 | down | 1.006462 | up   | DYRK3    |
| 210153_s_ | 0.015225 | 0.013453 | 2.036069 | up   | 1.435561 | up   | 1.418308 | down | ME2      |
| 210159_s_ | 0.004912 | 0.003414 | 1.618061 | up   | 1.015566 | up   | 1.59326  | down | TRIM31   |
| 210161_at | 5.99E-04 | 2.02E-04 | 2.047655 | up   | 1.195343 | up   | 1.713028 | down |          |
| 210170_at | 0.027939 | 0.026474 | 1.590259 | up   | 1.054862 | down | 1.677503 | down | PDLIM3   |
| 210176_at | 0.003956 | 0.002572 | 1.116673 | down | 1.316915 | down | 1.17932  | down | TLR1     |
| 210179_at | 0.022481 | 0.020897 | 1.386053 | up   | 1.113046 | up   | 1.245279 | down | KCNJ13   |
| 210180_s_ | 0.001307 | 5.85E-04 | 2.399974 | up   | 3.175438 | up   | 1.323114 | up   | TRA2B    |
| 210183_x_ | 0.00847  | 0.006737 | 1.822801 | down | 1.238124 | down | 1.472228 | up   | PNN      |
| 210184_at | 0.012314 | 0.010519 | 1.471936 | up   | 1.159238 | up   | 1.269744 | down | ITGAX    |
| 210189_at | 0.017149 | 0.015392 | 1.613847 | down | 1.152254 | down | 1.400601 | up   | HSPA1L   |
| 210193_at | 0.026655 | 0.025165 | 1.442016 | up   | 1.049765 | down | 1.513777 | down | MOBP     |
| 210195_s_ | 4.08E-06 | 2.16E-07 | 6.954993 | down | 1.32525  | down | 5.248062 | up   | PSG1     |
| 210196_s_ | 4.68E-04 | 1.44E-04 | 2.502926 | down | 1.070252 | down | 2.338633 | up   | PSG1     |
| 210198_s_ | 1.07E-08 | 4.54E-11 | 20.73413 | up   | 19.83313 | up   | 1.045429 | down | PLP1     |
| 210201_x_ | 4.61E-04 | 1.41E-04 | 2.221734 | down | 2.130063 | down | 1.043037 | up   | BIN1     |



|           |          |          |               |               |               |          |
|-----------|----------|----------|---------------|---------------|---------------|----------|
| 210208_x_ | 0.014793 | 0.013017 | 1.767255 up   | 1.399836 up   | 1.262472 down | BAT3     |
| 210211_s_ | 0.004154 | 0.002738 | 1.892315 up   | 1.494631 up   | 1.266076 down | HSP90AA1 |
| 210212_x_ | 2.47E-04 | 6.11E-05 | 1.46569 down  | 1.612892 down | 1.100432 down | MTCP1NB  |
| 210214_s_ | 0.005708 | 0.004121 | 1.701903 down | 1.776147 down | 1.043624 down | BMPR2    |
| 210218_s_ | 1.10E-06 | 3.34E-08 | 9.214751 down | 7.874702 down | 1.170172 up   | SP100    |
| 210219_at | 0.001708 | 8.38E-04 | 3.456778 down | 1.854559 down | 1.863935 up   | SP100    |
| 210221_at | 5.68E-05 | 8.37E-06 | 3.189267 up   | 3.242398 up   | 1.016659 up   | CHRNA3   |
| 210223_s_ | 3.49E-08 | 2.83E-10 | 5.041318 down | 6.345395 down | 1.258678 down | MR1      |
| 210224_at | 2.96E-08 | 2.10E-10 | 8.066839 down | 8.304076 down | 1.029409 down | MR1      |
| 210234_at | 0.016619 | 0.014863 | 2.040781 up   | 1.563763 up   | 1.305045 down | GRM4     |
| 210239_at | 2.92E-06 | 1.33E-07 | 7.033537 down | 5.865245 down | 1.199189 up   | IRX5     |
| 210241_s_ | 0.003746 | 0.002401 | 1.805814 down | 2.08164 down  | 1.152744 down | TP53TG1  |
| 210243_s_ | 1.36E-04 | 2.74E-05 | 1.409275 up   | 1.246989 down | 1.757351 down | B4GALT3  |
| 210245_at | 0.005435 | 0.003877 | 1.694944 up   | 1.007198 up   | 1.682831 down | ABCC8    |
| 210247_at | 0.001268 | 5.62E-04 | 1.859787 up   | 2.18039 up    | 1.172387 up   | SYN2     |
| 210250_x_ | 0.002487 | 0.001393 | 2.793789 up   | 1.845032 up   | 1.514223 down | ADSL     |
| 210260_s_ | 0.021315 | 0.01967  | 2.238655 down | 1.361791 down | 1.643905 up   | TNFAIP8  |
| 210261_at | 3.60E-05 | 4.49E-06 | 27.21258 down | 15.92657 down | 1.708628 up   | KCNK2    |
| 210263_at | 0.001017 | 4.15E-04 | 1.703045 up   | 1.371249 down | 2.3353 down   | KCNF1    |
| 210265_x_ | 1.20E-06 | 3.78E-08 | 99.08798 up   | 63.97166 up   | 1.548935 down | POU5F1P3 |
| 210266_s_ | 6.38E-04 | 2.20E-04 | 3.006434 up   | 2.8339 up     | 1.060882 down | TRIM33   |
| 210269_s_ | 0.048902 | 0.04774  | 2.095404 up   | 1.550028 up   | 1.35185 down  | SFRS17A  |
| 210272_at | 0.002015 | 0.001047 | 1.419578 down | 1.079698 up   | 1.532715 up   | CYP2B7P1 |
| 210276_s_ | 1.81E-04 | 4.05E-05 | 2.81626 down  | 4.47651 down  | 1.589523 down | TRIOBP   |
| 210287_s_ | 0.003545 | 0.002236 | 1.783716 up   | 1.89262 up    | 1.061054 up   | FLT1     |
| 210288_at | 0.005907 | 0.004307 | 1.394164 up   | 1.601364 up   | 1.148619 up   | KLRG1    |
|           |          |          |               |               |               | PCDH11X  |
|           |          |          |               |               |               | ///      |
| 210292_s_ | 7.74E-06 | 5.40E-07 | 4.200682 up   | 3.899637 up   | 1.077198 down | PCDH11Y  |
| 210294_at | 0.006952 | 0.005293 | 1.474506 down | 1.445906 down | 1.01978 up    | TAPBP    |
| 210295_at | 0.022332 | 0.02074  | 1.304701 up   | 1.022057 up   | 1.276543 down | MAGEA10  |
| 210297_s_ | 0.005731 | 0.004142 | 1.235699 up   | 1.071114 down | 1.323574 down | MSMB     |
| 210298_x_ | 0.001805 | 9.02E-04 | 6.094543 down | 6.243671 down | 1.024469 down | FHL1     |
| 210299_s_ | 2.96E-05 | 3.46E-06 | 5.71989 down  | 8.868376 down | 1.550445 down | FHL1     |

|           |          |          |               |               |               |            |
|-----------|----------|----------|---------------|---------------|---------------|------------|
| 210300_at | 0.002451 | 0.001366 | 1.53154 up    | 1.224621 down | 1.875556 down | REM1       |
| 210301_at | 0.00758  | 0.00589  | 1.257491 up   | 1.864175 up   | 1.482455 up   | XDH        |
| 210305_at | 3.33E-04 | 9.18E-05 | 7.643694 down | 16.98026 down | 2.221473 down | PDE4DIP    |
| 210310_s_ | 0.001127 | 4.78E-04 | 5.164398 down | 4.668474 down | 1.106228 up   | FGF5       |
| 210311_at | 1.54E-05 | 1.41E-06 | 6.935554 down | 3.922259 down | 1.768255 up   | FGF5       |
| 210313_at | 0.002502 | 0.001405 | 1.514777 up   | 1.484018 down | 2.247957 down | LILRA4     |
| 210314_x_ | 0.001808 | 9.04E-04 | 1.022514 up   | 1.769332 down | 1.809166 down | TNFSF13    |
| 210316_at | 7.38E-04 | 2.69E-04 | 1.856763 up   | 1.38673 up    | 1.338951 down | FLT4       |
| 210318_at | 0.004357 | 0.002924 | 1.431314 up   | 1.225739 down | 1.754417 down | RBP3       |
| 210322_x_ | 0.001868 | 9.44E-04 | 1.985299 up   | 2.372269 up   | 1.194918 up   | UTY        |
| 210323_at | 0.018044 | 0.01631  | 1.538606 up   | 1.132137 up   | 1.359027 down | TEKT2      |
| 210329_s_ | 0.002683 | 0.001541 | 3.849573 down | 2.237385 down | 1.720568 up   | SGCD       |
| 210330_at | 2.33E-04 | 5.67E-05 | 7.314287 down | 3.575575 down | 2.045625 up   | SGCD       |
|           |          |          |               |               |               | LOC100134  |
| 210332_at | 0.006952 | 0.005292 | 1.651338 up   | 1.377262 down | 2.274326 down | 498        |
| 210333_at | 0.006112 | 0.0045   | 1.320232 up   | 1.02883 down  | 1.358295 down | NR5A1      |
| 210335_at | 8.06E-04 | 3.04E-04 | 1.199304 up   | 1.901252 down | 2.280178 down | RASSF9     |
|           |          |          |               |               |               | CSF2RA /// |
|           |          |          |               |               |               | LOC100133  |
| 210340_s_ | 0.001277 | 5.67E-04 | 2.290581 up   | 1.038073 up   | 2.20657 down  | 516        |
| 210343_s_ | 0.004331 | 0.002899 | 1.822743 up   | 1.423947 down | 2.595489 down | SLC22A6    |
| 210346_s_ | 0.032236 | 0.030899 | 2.59809 down  | 1.076253 down | 2.414014 up   | CLK4       |
| 210347_s_ | 5.28E-04 | 1.70E-04 | 3.434846 up   | 4.149558 up   | 1.208077 up   | BCL11A     |
| 210350_x_ | 0.012092 | 0.010295 | 1.756574 up   | 1.817652 up   | 1.034771 up   | ING1       |
| 210361_s_ | 9.12E-04 | 3.57E-04 | 1.265655 down | 2.397702 up   | 3.034664 up   | ELF2       |
| 210364_at | 8.13E-04 | 3.07E-04 | 1.601763 up   | 1.4998 down   | 2.402324 down | SCN2B      |
| 210365_at | 1.38E-06 | 4.55E-08 | 2.84188 down  | 1.638771 down | 1.734153 up   | RUNX1      |
| 210367_s_ | 0.008103 | 0.006384 | 5.444572 down | 6.519784 down | 1.197483 down | PTGES      |
| 210369_at | 0.014002 | 0.012215 | 1.031817 down | 1.749961 up   | 1.80564 up    | SWAP70     |
| 210370_s_ | 0.008079 | 0.006359 | 1.359327 up   | 1.227509 up   | 1.107387 down | LY9        |
| 210371_s_ | 1.68E-06 | 6.16E-08 | 3.153139 up   | 2.596444 up   | 1.214407 down | RBBP4      |
| 210373_at | 0.005103 | 0.003584 | 1.134177 up   | 1.242961 down | 1.409737 down | TUSC4      |
| 210374_x_ | 0.005641 | 0.004062 | 1.104432 down | 1.173267 up   | 1.295794 up   | PTGER3     |
| 210381_s_ | 6.13E-06 | 3.81E-07 | 13.12777 up   | 7.939352 up   | 1.653506 down | CCKBR      |

|           |          |          |               |               |               |            |
|-----------|----------|----------|---------------|---------------|---------------|------------|
| 210382_at | 0.01748  | 0.015735 | 1.229302 up   | 1.003711 down | 1.233864 down | SCTR       |
| 210385_s_ | 5.86E-04 | 1.96E-04 | 6.093968 down | 2.668961 down | 2.283274 up   | ERAP1      |
| 210388_at | 0.004669 | 0.003204 | 1.155797 up   | 1.515605 down | 1.751731 down | PLCB2      |
| 210389_x_ | 9.59E-04 | 3.83E-04 | 2.67097 up    | 3.16547 up    | 1.185139 up   | TUBD1      |
| 210392_x_ | 1.55E-04 | 3.28E-05 | 1.891388 up   | 1.543262 up   | 1.225578 down | NR6A1      |
| 210409_at | 1.73E-04 | 3.82E-05 | 2.395613 up   | 2.674213 up   | 1.116296 up   | C6orf124   |
| 210415_s_ | 5.93E-04 | 1.99E-04 | 1.159306 down | 1.613871 down | 1.392102 down | ODF2       |
| 210416_s_ | 3.73E-05 | 4.69E-06 | 3.080889 up   | 4.105293 up   | 1.332503 up   | CHEK2      |
| 210417_s_ | 0.010678 | 0.008887 | 1.785602 down | 1.955264 down | 1.095017 down | PI4KB      |
| 210419_at | 0.003988 | 0.002596 | 1.439744 up   | 1.089721 down | 1.568919 down | BARX2      |
| 210420_at | 0.013114 | 0.011313 | 1.251503 up   | 1.021064 down | 1.277865 down | SLC24A1    |
| 210422_x_ | 0.006559 | 0.004923 | 1.451343 down | 1.093059 down | 1.32778 up    | SLC11A1    |
| 210427_x_ | 2.14E-04 | 5.05E-05 | 2.841244 down | 2.848661 down | 1.002611 down | ANXA2      |
| 210431_at | 0.013923 | 0.012137 | 1.960866 up   | 1.18139 up    | 1.659795 down | ALPPL2     |
| 210434_x_ | 3.93E-05 | 5.08E-06 | 1.71925 down  | 1.367792 down | 1.256953 up   | JTB        |
| 210438_x_ | 0.001387 | 6.33E-04 | 2.007994 up   | 1.462199 up   | 1.37327 down  | TROVE2     |
| 210445_at | 0.003024 | 0.001811 | 2.349936 up   | 1.410465 up   | 1.666072 down | FABP6      |
| 210446_at | 0.014689 | 0.012911 | 1.469003 up   | 1.051039 up   | 1.397668 down | GATA1      |
| 210453_x_ | 6.97E-04 | 2.49E-04 | 1.198147 up   | 1.589099 up   | 1.326297 up   | ATP5L      |
| 210456_at | 0.026478 | 0.024982 | 1.508532 up   | 1.016659 down | 1.533662 down | PCYT1B     |
| 210458_s_ | 3.19E-04 | 8.68E-05 | 5.511671 down | 2.251872 down | 2.447595 up   | TANK       |
| 210460_s_ | 0.001325 | 5.96E-04 | 1.497921 up   | 1.492092 up   | 1.003906 down | PSMD4      |
| 210466_s_ | 0.001138 | 4.84E-04 | 1.773489 up   | 2.124944 up   | 1.198171 up   | SERBP1     |
| 210470_x_ | 0.007089 | 0.00542  | 1.845054 up   | 1.887505 up   | 1.023008 up   | NONO       |
| 210473_s_ | 1.25E-05 | 1.04E-06 | 2.971934 up   | 3.482206 up   | 1.171697 up   | GPR125     |
|           |          |          |               |               |               | CDC2L1 /// |
| 210474_s_ | 0.011934 | 0.010132 | 1.556759 up   | 1.355249 up   | 1.148688 down | CDC2L2     |
| 210475_at | 0.014559 | 0.012783 | 1.826118 up   | 1.51356 up    | 1.206505 down | POU3F1     |
|           |          |          |               |               |               | MGC31957   |
|           |          |          |               |               |               | ///        |
| 210483_at | 2.18E-04 | 5.17E-05 | 2.407431 up   | 1.128043 down | 2.715686 down | TNFRSF10C  |
| 210487_at | 0.008287 | 0.006561 | 1.183053 up   | 1.233331 down | 1.459096 down | DNTT       |
| 210491_at | 0.007359 | 0.005677 | 1.421568 up   | 1.183733 down | 1.682758 down |            |
| 210492_at | 0.006683 | 0.005038 | 1.239858 up   | 1.209429 up   | 1.025161 down | MFAP3L     |

|           |          |          |               |               |               |         |
|-----------|----------|----------|---------------|---------------|---------------|---------|
| 210493_s_ | 0.006519 | 0.004886 | 1.286048 up   | 1.426385 up   | 1.109123 up   | MFAP3L  |
| 210495_x_ | 2.87E-04 | 7.50E-05 | 2.626503 down | 3.594714 down | 1.368632 down | FN1     |
| 210499_s_ | 0.00674  | 0.005091 | 1.518082 up   | 1.216091 down | 1.846126 down | PQBP1   |
| 210501_x_ | 7.48E-04 | 2.75E-04 | 2.085565 up   | 1.847565 up   | 1.128818 down | EIF3K   |
| 210507_s_ | 0.008215 | 0.006494 | 1.624047 up   | 1.22433 down  | 1.988369 down | AVIL    |
| 210508_s_ | 7.05E-06 | 4.68E-07 | 6.727704 up   | 6.719404 up   | 1.001235 down | KCNQ2   |
| 210510_s_ | 2.06E-08 | 1.17E-10 | 8.529725 down | 7.813961 down | 1.091601 up   | NRP1    |
| 210511_s_ | 1.23E-04 | 2.39E-05 | 3.357166 down | 61.20212 down | 18.23029 down | INHBA   |
| 210512_s_ | 0.005947 | 0.004345 | 1.913412 down | 4.628682 down | 2.419072 down | VEGFA   |
| 210514_x_ | 0.001727 | 8.50E-04 | 2.732175 down | 2.30717 down  | 1.18421 up    | HLA-G   |
| 210516_at | 0.001919 | 9.80E-04 | 1.253265 up   | 1.020807 down | 1.279341 down | FAM120A |
| 210518_at | 0.042881 | 0.041637 | 1.271471 up   | 1.018328 down | 1.294775 down | CDH8    |
| 210519_s_ | 5.50E-04 | 1.79E-04 | 5.187497 down | 5.68256 down  | 1.095434 down | NQO1    |
| 210530_s_ | 8.14E-06 | 5.74E-07 | 3.429626 up   | 4.149042 up   | 1.209765 up   | NR2C1   |
| 210539_at | 6.81E-04 | 2.41E-04 | 1.561771 up   | 1.461662 up   | 1.06849 down  | TTLL5   |
| 210541_s_ | 0.038142 | 0.03688  | 1.900803 up   | 1.697942 up   | 1.119475 down | TRIM27  |
| 210543_s_ | 0.011322 | 0.009527 | 3.213686 up   | 3.241414 up   | 1.008628 up   | PRKDC   |
| 210544_s_ | 0.002661 | 0.001524 | 2.291624 up   | 5.034397 up   | 2.196869 up   | ALDH3A2 |

CTAG1A ///

|           |          |          |               |               |               |         |
|-----------|----------|----------|---------------|---------------|---------------|---------|
| 210546_x_ | 0.001168 | 5.01E-04 | 1.200512 up   | 1.152354 down | 1.383415 down | CTAG1B  |
| 210547_x_ | 1.75E-05 | 1.68E-06 | 4.329892 up   | 5.363699 up   | 1.238761 up   | ICA1    |
| 210551_s_ | 0.005659 | 0.004078 | 1.45091 up    | 1.128381 down | 1.637179 down | ASMT    |
| 210552_s_ | 7.40E-05 | 1.20E-05 | 1.968326 up   | 1.646075 up   | 1.195769 down | RALGPS1 |
| 210557_x_ | 4.93E-05 | 6.93E-06 | 2.352392 down | 1.866857 down | 1.260081 up   | CSF1    |
| 210559_s_ | 0.001502 | 7.05E-04 | 4.464473 up   | 9.592969 up   | 2.148735 up   | CDC2    |
| 210560_at | 0.006899 | 0.00524  | 2.041926 up   | 1.139451 up   | 1.792026 down | GBX2    |
| 210563_x_ | 3.97E-04 | 1.16E-04 | 4.899411 down | 5.35826 down  | 1.093654 down | CFLAR   |
| 210564_x_ | 6.16E-05 | 9.37E-06 | 5.724796 down | 4.033921 down | 1.419164 up   | CFLAR   |
| 210567_s_ | 3.82E-04 | 1.10E-04 | 2.673035 up   | 6.719597 up   | 2.513846 up   | SKP2    |
| 210571_s_ | 0.012726 | 0.010924 | 2.800917 down | 3.028549 down | 1.08127 down  | CMAH    |
| 210574_s_ | 9.25E-04 | 3.64E-04 | 2.20909 up    | 1.414306 up   | 1.561961 down | NUDC    |
| 210576_at | 0.008269 | 0.006543 | 1.386738 up   | 1.025525 up   | 1.352223 down | CYP4F8  |
| 210579_s_ | 5.71E-04 | 1.89E-04 | 1.155766 up   | 1.116933 down | 1.290913 down | TRIM10  |

|           |          |          |               |               |               |                  |
|-----------|----------|----------|---------------|---------------|---------------|------------------|
| 210582_s_ | 1.62E-04 | 3.50E-05 | 2.229599 up   | 1.2211 up     | 1.825893 down | LIMK2            |
| 210586_x_ | 0.009198 | 0.007442 | 1.205818 down | 1.35837 down  | 1.126513 down | RHD              |
| 210588_x_ | 0.001034 | 4.24E-04 | 2.167909 up   | 1.826045 up   | 1.187215 down | HNRNPH3          |
| 210589_s_ | 4.45E-05 | 6.02E-06 | 3.100626 down | 3.48387 down  | 1.123602 down | GBAP<br>KIAA0913 |
| 210593_at | 0.011557 | 0.009757 | 1.457114 up   | 1.238092 down | 1.804042 down | /// SAT1         |
| 210594_x_ | 0.009669 | 0.007892 | 1.977892 down | 1.920729 down | 1.029761 up   | MPZL1            |
| 210601_at | 0.002353 | 0.001293 | 3.143267 up   | 1.376872 up   | 2.282905 down | CDH6             |
| 210602_s_ | 0.00103  | 4.21E-04 | 4.39017 up    | 1.251523 up   | 3.507863 down | CDH6             |
| 210605_s_ | 0.005561 | 0.003988 | 1.046887 down | 2.949059 down | 2.81698 down  | MFGE8            |
| 210607_at | 1.07E-04 | 1.98E-05 | 2.74291 down  | 1.76641 down  | 1.552817 up   | FLT3LG           |
| 210608_s_ | 0.002321 | 0.001272 | 1.826738 up   | 1.645899 up   | 1.109873 down | FUT2             |
| 210609_s_ | 0.006438 | 0.004811 | 1.562884 down | 3.299188 down | 2.110961 down | TP53I3           |
| 210611_s_ | 0.003792 | 0.002438 | 1.555429 up   | 1.903518 up   | 1.22379 up    | DTNA             |
| 210613_s_ | 4.93E-05 | 6.93E-06 | 1.964535 down | 1.446151 up   | 2.841013 up   | SYNGR1           |
| 210616_s_ | 1.09E-04 | 2.01E-05 | 2.323361 down | 2.526383 down | 1.087383 down | SEC31A           |
| 210618_at | 3.26E-04 | 8.94E-05 | 1.270586 up   | 1.027053 down | 1.304959 down | RAP1GAP          |
| 210623_at | 0.018095 | 0.016364 | 1.398145 up   | 1.13671 down  | 1.589285 down | UBXN1            |
| 210625_s_ | 8.67E-04 | 3.33E-04 | 3.746105 up   | 3.034826 up   | 1.234372 down | AKAP1            |
| 210629_x_ | 0.021406 | 0.019774 | 1.239791 up   | 1.008613 up   | 1.229205 down | LST1             |
| 210635_s_ | 0.012296 | 0.010503 | 2.418299 down | 1.513096 down | 1.598246 up   | KLHL20           |
| 210636_at | 0.014994 | 0.013223 | 1.02514 down  | 1.399874 down | 1.365545 down | PPARD            |
| 210637_at | 0.002151 | 0.001144 | 1.538429 up   | 1.070359 up   | 1.437301 down | TACR1            |
| 210638_s_ | 1.37E-04 | 2.75E-05 | 1.668789 down | 2.36535 down  | 1.417405 down | FBXO9            |
| 210640_s_ | 0.006934 | 0.005275 | 1.686183 down | 2.119961 down | 1.257254 down | GPER             |
| 210642_at | 1.57E-04 | 3.34E-05 | 1.048934 up   | 2.02505 down  | 2.124143 down | CCIN             |
| 210649_s_ | 0.013194 | 0.011398 | 3.532839 up   | 3.46354 up    | 1.020008 down | ARID1A           |
| 210652_s_ | 4.55E-04 | 1.39E-04 | 2.028981 up   | 1.573635 up   | 1.289359 down | TTC39A           |
| 210658_s_ | 1.49E-04 | 3.10E-05 | 1.846268 up   | 2.638984 up   | 1.429361 up   | GGA2             |
| 210673_x_ | 2.52E-04 | 6.32E-05 | 1.896572 up   | 1.007104 up   | 1.883193 down | NKX2-1           |

|           |          |          |               |               |               |  |            |
|-----------|----------|----------|---------------|---------------|---------------|--|------------|
|           |          |          |               |               |               |  | PCDHA1 /// |
|           |          |          |               |               |               |  | PCDHA10    |
|           |          |          |               |               |               |  | ///        |
|           |          |          |               |               |               |  | PCDHA11    |
|           |          |          |               |               |               |  | ///        |
|           |          |          |               |               |               |  | PCDHA12    |
|           |          |          |               |               |               |  | ///        |
|           |          |          |               |               |               |  | PCDHA13    |
|           |          |          |               |               |               |  | /// PCDHA2 |
|           |          |          |               |               |               |  | /// PCDHA3 |
|           |          |          |               |               |               |  | /// PCDHA4 |
|           |          |          |               |               |               |  | /// PCDHA5 |
|           |          |          |               |               |               |  | /// PCDHA6 |
|           |          |          |               |               |               |  | /// PCDHA7 |
|           |          |          |               |               |               |  | /// PCDHA8 |
|           |          |          |               |               |               |  | /// PCDHA9 |
|           |          |          |               |               |               |  | ///        |
|           |          |          |               |               |               |  | PCDHAC1    |
|           |          |          |               |               |               |  | ///        |
| 210674_s_ | 7.42E-06 | 5.07E-07 | 12.31419 up   | 13.27326 up   | 1.077883 up   |  | PCDHAC2    |
| 210679_x_ | 0.011895 | 0.010093 | 1.66969 up    | 1.615467 up   | 1.033565 down |  |            |
| 210683_at | 0.001045 | 4.31E-04 | 1.380359 up   | 2.117378 up   | 1.533932 up   |  | NRTN       |
| 210684_s_ | 0.009222 | 0.007467 | 1.824811 up   | 1.71186 down  | 3.12382 down  |  | DLG4       |
| 210688_s_ | 0.004488 | 0.003039 | 1.159773 down | 1.639401 down | 1.413554 down |  | CPT1A      |
| 210689_at | 0.013192 | 0.011396 | 1.274491 up   | 1.292177 down | 1.646867 down |  | CLDN14     |
| 210691_s_ | 0.003471 | 0.002178 | 2.460141 up   | 1.85908 up    | 1.323311 down |  | CACYBP     |
| 210692_s_ | 0.013197 | 0.011403 | 2.344441 down | 1.014637 up   | 2.378757 up   |  | SLC43A3    |

|           |          |          |          |      |          |      |          |      |          |
|-----------|----------|----------|----------|------|----------|------|----------|------|----------|
| 210701_at | 0.003866 | 0.002499 | 1.3833   | up   | 3.712874 | up   | 2.68407  | up   | CFDP1    |
| 210702_s_ | 0.004552 | 0.0031   | 3.175947 | down | 2.013538 | down | 1.577297 | up   | PTGIS    |
| 210705_s_ | 0.019179 | 0.017471 | 2.092656 | down | 1.393954 | down | 1.501238 | up   | TRIM5    |
| 210706_s_ | 9.70E-04 | 3.89E-04 | 2.382874 | down | 1.046423 | up   | 2.493495 | up   | RNF24    |
| 210715_s_ | 2.96E-07 | 5.18E-09 | 44.7584  | up   | 19.61845 | up   | 2.281445 | down | SPINT2   |
| 210731_s_ | 3.35E-04 | 9.23E-05 | 2.641139 | down | 1.654007 | down | 1.596813 | up   | LGALS8   |
| 210732_s_ | 1.06E-04 | 1.96E-05 | 4.46502  | down | 7.082423 | down | 1.586202 | down | LGALS8   |
| 210733_at | 0.002133 | 0.00113  | 3.021843 | down | 2.588924 | down | 1.16722  | up   | TRAM1    |
| 210735_s_ | 2.37E-04 | 5.79E-05 | 4.027807 | down | 23.60291 | down | 5.859992 | down | CA12     |
| 210736_x_ | 0.025435 | 0.023903 | 1.137512 | up   | 1.4301   | up   | 1.257217 | up   | DTNA     |
| 210737_at | 0.013378 | 0.011583 | 1.261718 | up   | 1.156172 | down | 1.458763 | down | TUB      |
| 210742_at | 8.39E-04 | 3.20E-04 | 1.587585 | up   | 1.422939 | up   | 1.115708 | down | CDC14A   |
| 210747_at | 0.011088 | 0.009289 | 1.34337  | up   | 1.123998 | down | 1.509946 | down | HLA-DQB1 |
| 210749_x_ | 1.48E-06 | 5.08E-08 | 4.826217 | up   | 2.462918 | up   | 1.959552 | down | DDR1     |
| 210751_s_ | 0.001921 | 9.81E-04 | 3.12879  | down | 2.010901 | down | 1.555915 | up   | RGN      |
| 210752_s_ | 6.01E-05 | 9.07E-06 | 1.683831 | down | 2.506202 | down | 1.488392 | down | MLX      |
| 210757_x_ | 4.54E-06 | 2.50E-07 | 19.62676 | down | 18.97904 | down | 1.034128 | up   | DAB2     |
| 210758_at | 3.98E-06 | 2.07E-07 | 4.654932 | up   | 5.253799 | up   | 1.128652 | up   | PSIP1    |
| 210759_s_ | 0.00133  | 5.98E-04 | 1.693104 | up   | 1.142421 | up   | 1.482032 | down | PSMA1    |
| 210761_s_ | 1.45E-06 | 4.90E-08 | 3.485493 | up   | 3.839025 | up   | 1.10143  | up   | GRB7     |
| 210762_s_ | 1.81E-05 | 1.76E-06 | 6.394442 | down | 14.82665 | down | 2.318678 | down | DLC1     |
| 210763_x_ | 0.021323 | 0.019683 | 1.659985 | up   | 1.104325 | down | 1.833162 | down | NCR3     |
| 210765_at | 3.41E-04 | 9.45E-05 | 1.690378 | up   | 1.765353 | up   | 1.044354 | up   | CSE1L    |
| 210766_s_ | 3.89E-05 | 5.01E-06 | 4.459024 | up   | 3.199692 | up   | 1.393579 | down | CSE1L    |
| 210769_at | 0.002804 | 0.001636 | 1.500153 | up   | 1.327547 | down | 1.991523 | down | CNGB1    |
| 210772_at | 0.005445 | 0.003888 | 1.051753 | up   | 1.41658  | down | 1.489892 | down | FPR2     |
| 210773_s_ | 0.018605 | 0.016882 | 1.169956 | down | 1.084956 | up   | 1.269351 | up   | FPR2     |
| 210775_x_ | 0.00399  | 0.002598 | 1.503542 | up   | 1.763322 | up   | 1.172779 | up   | CASP9    |
| 210776_x_ | 5.42E-05 | 7.85E-06 | 3.022582 | up   | 1.835991 | up   | 1.646295 | down | TCF3     |
| 210778_s_ | 6.70E-04 | 2.35E-04 | 2.930991 | down | 3.223867 | down | 1.099924 | down | MXD4     |
| 210779_x_ | 8.04E-04 | 3.03E-04 | 3.209624 | up   | 3.434641 | up   | 1.070107 | up   | SIP1     |
| 210780_at | 0.001164 | 4.99E-04 | 1.214793 | up   | 1.21939  | down | 1.481306 | down | ESR2     |
| 210782_x_ | 0.00307  | 0.001847 | 1.502408 | up   | 1.657118 | down | 2.489668 | down | GRIN1    |
| 210783_x_ | 4.93E-06 | 2.81E-07 | 6.626473 | down | 4.636657 | down | 1.429149 | up   | CLEC11A  |

LILRA6 ///

|           |          |          |               |               |               |           |
|-----------|----------|----------|---------------|---------------|---------------|-----------|
| 210784_x_ | 0.004009 | 0.002615 | 1.556216 up   | 1.182235 down | 1.839812 down | LILRB3    |
| 210786_s_ | 3.03E-04 | 8.08E-05 | 2.447473 down | 2.954487 down | 1.207158 down | FLI1      |
| 210790_s_ | 1.51E-04 | 3.17E-05 | 3.879152 down | 3.684483 down | 1.052835 up   | SAR1A     |
| 210791_s_ | 0.004357 | 0.002924 | 1.910149 up   | 1.601917 up   | 1.192414 down | RICS      |
| 210792_x_ | 0.010232 | 0.008437 | 1.692455 up   | 1.435142 up   | 1.179294 down | SIVA1     |
| 210798_x_ | 0.036375 | 0.035106 | 1.171408 up   | 1.141933 down | 1.337669 down | MASP2     |
| 210804_x_ | 0.002475 | 0.001385 | 1.740875 down | 1.492222 down | 1.166633 up   | SLC8A1    |
| 210807_s_ | 2.49E-04 | 6.18E-05 | 5.279297 down | 2.181281 down | 2.420273 up   | SLC16A7   |
| 210809_s_ | 2.96E-05 | 3.46E-06 | 42.09223 down | 93.35568 down | 2.217884 down | POSTN     |
| 210811_s_ | 0.006525 | 0.004893 | 1.097071 up   | 1.820009 down | 1.996679 down | DDX49     |
| 210817_s_ | 7.04E-05 | 1.13E-05 | 3.914317 down | 3.860786 down | 1.013866 up   | CALCOCO2  |
| 210824_at | 0.003257 | 0.001998 | 1.71134 down  | 1.253656 down | 1.36508 up    |           |
| 210825_s_ | 2.17E-04 | 5.15E-05 | 2.341036 up   | 1.358501 up   | 1.72325 down  | PEBP1     |
| 210826_x_ | 1.13E-04 | 2.12E-05 | 1.836167 up   | 1.940204 up   | 1.05666 up    | RAD17     |
| 210827_s_ | 0.001106 | 4.65E-04 | 3.639284 up   | 2.993361 up   | 1.215785 down | ELF3      |
| 210835_s_ | 9.96E-04 | 4.04E-04 | 1.954496 up   | 2.106568 up   | 1.077806 up   | CTBP2     |
| 210838_s_ | 0.007541 | 0.005853 | 1.836532 down | 1.20218 down  | 1.527668 up   | ACVRL1    |
| 210839_s_ | 2.13E-05 | 2.19E-06 | 26.75903 down | 5.063179 down | 5.285026 up   | ENPP2     |
| 210842_at | 0.023526 | 0.021939 | 1.663523 up   | 1.111432 up   | 1.496738 down | NRP2      |
| 210844_x_ | 0.002376 | 0.00131  | 1.215413 up   | 1.12093 down  | 1.362393 down | CTNNA1    |
| 210845_s_ | 2.96E-05 | 3.45E-06 | 3.818132 down | 8.876864 down | 2.324923 down | PLAUR     |
| 210846_x_ | 0.01497  | 0.013199 | 1.164534 up   | 1.609999 up   | 1.382527 up   | TRIM14    |
| 210852_s_ | 4.06E-04 | 1.19E-04 | 8.923935 up   | 10.75735 up   | 1.205449 up   | AASS      |
| 210864_x_ | 0.004262 | 0.002834 | 1.646164 down | 1.202077 down | 1.369433 up   | HFE       |
| 210866_s_ | 0.002629 | 0.001499 | 1.861605 down | 1.055284 down | 1.764079 up   | CNOT4     |
| 210867_at | 0.006973 | 0.005316 | 1.758364 up   | 1.063143 down | 1.869393 down | CNOT4     |
| 210869_s_ | 1.13E-04 | 2.13E-05 | 1.638918 up   | 7.228329 down | 11.84664 down | MCAM      |
| 210871_x_ | 0.002778 | 0.001617 | 2.300074 down | 1.52324 up    | 3.503565 up   | SSX2IP    |
| 210875_s_ | 7.34E-05 | 1.19E-05 | 22.92599 down | 3.972233 down | 5.771561 up   | ZEB1      |
| 210876_at | 7.10E-04 | 2.55E-04 | 2.579341 down | 2.418194 down | 1.066639 up   | ANXA2P1   |
| 210878_s_ | 3.36E-04 | 9.27E-05 | 2.398205 up   | 3.756048 up   | 1.566192 up   | KDM3B     |
| 210879_s_ | 4.71E-07 | 1.00E-08 | 2.98609 down  | 4.639633 down | 1.553749 down | RAB11FIP5 |
| 210882_s_ | 0.003631 | 0.002303 | 3.37891 up    | 2.696529 up   | 1.253059 down | TRO       |



|           |          |          |          |      |          |      |          |      |             |
|-----------|----------|----------|----------|------|----------|------|----------|------|-------------|
| 210886_x_ | 0.003108 | 0.001877 | 2.112762 | down | 2.196426 | down | 1.0396   | down | TP53TG1     |
|           |          |          |          |      |          |      |          |      | GTF2I ///   |
|           |          |          |          |      |          |      |          |      | GTF2IP1 /// |
|           |          |          |          |      |          |      |          |      | LOC100093   |
| 210891_s_ | 0.001553 | 7.37E-04 | 1.536537 | up   | 1.827643 | up   | 1.189456 | up   | 631         |
| 210894_s_ | 0.002426 | 0.001346 | 1.331621 | up   | 1.400541 | down | 1.86499  | down | CEP250      |
| 210896_s_ | 1.68E-04 | 3.66E-05 | 6.649052 | down | 4.850605 | down | 1.370768 | up   | ASPH        |
| 210904_s_ | 2.34E-06 | 9.80E-08 | 15.44437 | down | 10.57337 | down | 1.460686 |      | IL13RA1     |
| 210905_x_ | 1.65E-06 | 6.01E-08 | 50.73919 | up   | 39.01967 | up   | 1.300349 | down | POU5F1P4    |
| 210906_x_ | 0.023245 | 0.021662 | 1.186185 | up   | 1.000565 | down | 1.186855 | down | AQP4        |
| 210912_x_ | 7.93E-04 | 2.98E-04 | 2.692613 | down | 1.075697 | down | 2.503134 | up   | GSTM4       |
| 210916_s_ | 1.65E-04 | 3.57E-05 | 18.49913 | down | 8.789763 | down | 2.104622 | up   | CD44        |
| 210920_x_ | 0.001055 | 4.36E-04 | 1.829585 | up   | 1.685469 | up   | 1.085505 | down |             |
| 210921_at | 0.03081  | 0.029433 | 1.349284 | up   | 1.148948 | down | 1.550256 | down |             |
| 210927_x_ | 1.54E-04 | 3.25E-05 | 1.637156 | down | 1.367332 | down | 1.197337 | up   | JTB         |
|           |          |          |          |      |          |      |          |      | LOC100131   |
| 210928_at | 0.00378  | 0.002428 | 1.235422 | down | 1.047942 | down | 1.178903 | up   | 613         |
| 210932_s_ | 0.003142 | 0.001906 | 3.325697 | down | 1.591164 | down | 2.090103 | up   | RNF6        |
| 210934_at | 0.025095 | 0.023538 | 1.339023 | up   | 1.09129  | down | 1.461262 | down | BLK         |
| 210937_s_ | 0.009469 | 0.007698 | 1.3826   | up   | 1.106338 | down | 1.529623 | down | PDX1        |
| 210940_s_ | 0.027539 | 0.026062 | 1.344294 | up   | 1.042501 | up   | 1.289488 | down | GRM1        |
| 210942_s_ | 2.02E-06 | 8.00E-08 | 5.012202 | up   | 2.519045 | up   | 1.989723 | down | ST3GAL6     |
| 210944_s_ | 0.015104 | 0.01333  | 2.177933 | down | 1.20866  | down | 1.80194  | up   | CAPN3       |
| 210945_at | 0.001697 | 8.32E-04 | 1.467947 | up   | 1.409665 | up   | 1.041345 | down | COL4A6      |
| 210950_s_ | 0.012643 | 0.010843 | 1.950502 | up   | 2.289985 | up   | 1.174049 | up   | FDFT1       |
| 210951_x_ | 1.61E-05 | 1.49E-06 | 2.719424 | down | 3.384655 | down | 1.244622 | down | RAB27A      |
| 210963_s_ | 0.001817 | 9.10E-04 | 2.595633 | up   | 3.262389 | up   | 1.256876 | up   | GYG2        |
| 210964_s_ | 8.57E-04 | 3.28E-04 | 4.838891 | up   | 4.737048 | up   | 1.021499 | down | GYG2        |
| 210968_s_ | 0.00718  | 0.005508 | 1.44634  | down | 1.607577 | down | 1.111479 | down | RTN4        |
| 210971_s_ | 0.003211 | 0.001961 | 2.413776 | down | 2.249467 | down | 1.073043 | up   | ARNTL       |
| 210975_x_ | 0.002938 | 0.001742 | 1.41894  | down | 1.880541 | down | 1.325314 | down | FASTK       |
| 210978_s_ | 0.023448 | 0.021862 | 3.063032 | down | 3.097295 | down | 1.011186 | down | TAGLN2      |
| 210980_s_ | 0.010495 | 0.008703 | 3.515609 | down | 1.519868 | down | 2.313102 | up   | ASAH1       |

|           |          |          |               |               |               |                      |
|-----------|----------|----------|---------------|---------------|---------------|----------------------|
| 210983_s_ | 9.14E-04 | 3.59E-04 | 4.8597 up     | 6.012652 up   | 1.237248 up   | MCM7                 |
| 210984_x_ | 3.81E-04 | 1.10E-04 | 3.146904 down | 3.257635 down | 1.035187 down | EGFR                 |
| 210985_s_ | 0.002772 | 0.001612 | 1.982153 down | 1.789742 down | 1.107508 up   | SP100                |
| 210986_s_ | 6.88E-04 | 2.45E-04 | 1.023096 down | 2.448827 down | 2.393544 down | TPM1                 |
| 210987_x_ | 4.10E-04 | 1.21E-04 | 1.192897 up   | 3.091687 down | 3.688065 down | TPM1                 |
| 210988_s_ | 0.001712 | 8.41E-04 | 1.714851 up   | 2.271865 up   | 1.324818 up   | PRUNE                |
| 210989_at | 0.034487 | 0.033183 | 1.250499 down | 1.144687 down | 1.092437 up   | LAMA4                |
| 210990_s_ | 3.12E-05 | 3.73E-06 | 13.31235 down | 2.92282 down  | 4.554626 up   | LAMA4                |
| 210991_s_ | 0.007288 | 0.005609 | 1.557602 up   | 1.204846 up   | 1.292781 down | RIMS3                |
| 211000_s_ | 2.36E-04 | 5.75E-05 | 13.36403 down | 4.818367 down | 2.77356 up    | IL6ST                |
| 211004_s_ | 0.004055 | 0.002652 | 1.455361 down | 1.796585 down | 1.23446 down  | ALDH3B1<br>LOC161527 |
| 211012_s_ | 6.46E-04 | 2.24E-04 | 1.690081 down | 2.002115 down | 1.184626 down | /// PML              |
| 211013_x_ | 0.01369  | 0.011899 | 1.999188 down | 1.951287 down | 1.024548 up   | PML                  |
| 211015_s_ | 0.005178 | 0.00365  | 3.301206 up   | 2.5844 up     | 1.277359 down | HSPA4                |
| 211020_at | 0.0016   | 7.69E-04 | 3.40836 up    | 3.903345 up   | 1.145227 up   | GCNT2                |
| 211021_s_ | 0.023021 | 0.021438 | 1.574313 up   | 1.326767 down | 2.088746 down | RGS14                |
| 211024_s_ | 0.01414  | 0.012354 | 1.15149 up    | 1.166128 down | 1.342785 down | NKX2-1               |
| 211026_s_ | 2.85E-10 | 2.83E-13 | 61.70791 down | 24.85196 down | 2.48302 up    | MGLL                 |
| 211028_s_ | 1.37E-04 | 2.77E-05 | 2.044996 up   | 1.380877 up   | 1.48094 down  | KHK                  |
| 211029_x_ | 0.035266 | 0.03398  | 1.574098 up   | 1.139694 up   | 1.381159 down | FGF18                |
| 211030_s_ | 0.011564 | 0.009764 | 1.632685 up   | 1.219981 up   | 1.338287 down | SLC6A6               |
| 211031_s_ | 0.02138  | 0.019741 | 2.091721 down | 1.918539 down | 1.090268 up   | CLIP2                |
| 211040_x_ | 0.001899 | 9.66E-04 | 1.992429 up   | 1.751836 up   | 1.137338 down | GTSE1                |
| 211042_x_ | 0.001395 | 6.39E-04 | 2.135611 up   | 1.953631 up   | 1.09315 down  | MCAM                 |
| 211043_s_ | 3.54E-04 | 9.96E-05 | 2.365166 down | 2.619073 down | 1.107353 down | CLTB                 |
| 211044_at | 8.80E-05 | 1.51E-05 | 1.193526 down | 1.216486 up   | 1.451908 up   | TRIM14               |
| 211049_at | 0.00235  | 0.001291 | 1.530028 up   | 1.210175 down | 1.851602 down | TLX2                 |
| 211052_s_ | 9.79E-04 | 3.94E-04 | 2.208358 up   | 1.476023 up   | 1.496154 down | TBCD                 |
| 211053_at | 0.006913 | 0.005253 | 1.510461 up   | 1.084842 up   | 1.392332 down | KCNG1                |
| 211057_at | 5.90E-04 | 1.98E-04 | 3.224719 up   | 1.947722 up   | 1.655636 down | ROR1                 |
| 211060_x_ | 1.40E-05 | 1.23E-06 | 1.733417 down | 2.246136 down | 1.295785 down | GPAA1                |
| 211061_s_ | 4.00E-05 | 5.24E-06 | 2.650981 down | 2.860049 down | 1.078865 down | MGAT2                |
| 211063_s_ | 0.014511 | 0.012732 | 2.02758 down  | 1.255903 down | 1.614439 up   | NCK1                 |

|           |          |          |          |      |          |      |          |      |          |
|-----------|----------|----------|----------|------|----------|------|----------|------|----------|
| 211065_x_ | 0.003388 | 0.002109 | 1.201072 | down | 1.749211 | down | 1.456375 | down | PFKL     |
|           |          |          |          |      |          |      |          |      | ///      |
|           |          |          |          |      |          |      |          |      | PCDHGA10 |
|           |          |          |          |      |          |      |          |      | ///      |
|           |          |          |          |      |          |      |          |      | PCDHGA11 |
|           |          |          |          |      |          |      |          |      | ///      |
|           |          |          |          |      |          |      |          |      | PCDHGA12 |
|           |          |          |          |      |          |      |          |      | ///      |
|           |          |          |          |      |          |      |          |      | PCDHGA2  |
|           |          |          |          |      |          |      |          |      | ///      |
|           |          |          |          |      |          |      |          |      | PCDHGA3  |
|           |          |          |          |      |          |      |          |      | ///      |
|           |          |          |          |      |          |      |          |      | PCDHGA4  |
|           |          |          |          |      |          |      |          |      | ///      |
|           |          |          |          |      |          |      |          |      | PCDHGA5  |
|           |          |          |          |      |          |      |          |      | ///      |
|           |          |          |          |      |          |      |          |      | PCDHGA6  |
|           |          |          |          |      |          |      |          |      | ///      |
|           |          |          |          |      |          |      |          |      | PCDHGA7  |
|           |          |          |          |      |          |      |          |      | ///      |
|           |          |          |          |      |          |      |          |      | PCDHGA8  |
|           |          |          |          |      |          |      |          |      | ///      |
|           |          |          |          |      |          |      |          |      | PCDHGA9  |
|           |          |          |          |      |          |      |          |      | ///      |
|           |          |          |          |      |          |      |          |      | PCDHGB1  |
|           |          |          |          |      |          |      |          |      | ///      |
|           |          |          |          |      |          |      |          |      | PCDHGB2  |
|           |          |          |          |      |          |      |          |      | ///      |
| 211066_x_ | 0.002149 | 0.001143 | 3.487869 | down | 3.017639 | down | 1.155827 | up   |          |
| 211069_s_ | 3.00E-04 | 7.98E-05 | 1.672893 | up   | 1.63847  | up   | 1.021009 | down | SUMO1    |
| 211071_s_ | 4.35E-05 | 5.85E-06 | 7.046144 | up   | 1.318766 | up   | 5.342984 | down | MLLT11   |
| 211073_x_ | 0.007674 | 0.005979 | 1.118789 | up   | 1.198291 | up   | 1.07106  | up   | RPL3     |
| 211075_s_ | 1.70E-05 | 1.63E-06 | 3.984872 | down | 2.868802 | down | 1.389037 | up   | CD47     |
| 211078_s_ | 3.72E-04 | 1.07E-04 | 2.550879 | down | 1.019739 | down | 2.501501 | up   | STK3     |
| 211081_s_ | 0.001476 | 6.88E-04 | 3.309649 | down | 2.258182 | down | 1.465625 | up   | MAP4K5   |

|           |          |          |          |      |          |      |          |      |            |
|-----------|----------|----------|----------|------|----------|------|----------|------|------------|
| 211096_at | 1.99E-05 | 2.00E-06 | 1.045392 | down | 2.135599 | down | 2.042869 | down | PBX2       |
| 211099_s_ | 0.047014 | 0.045814 | 1.117075 | up   | 1.149291 | down | 1.283844 | down | CNGB1      |
| 211102_s_ | 0.001679 | 8.21E-04 | 1.363671 | up   | 1.374404 | down | 1.874234 | down | LILRA2     |
| 211103_at | 0.002683 | 0.001542 | 1.235521 | up   | 1.292058 | down | 1.596366 | down | MYO7A      |
| 211104_s_ | 0.0112   | 0.00941  | 1.609479 | up   | 1.223101 | down | 1.968555 | down | MYO7A      |
| 211109_at | 0.007034 | 0.005373 | 1.473903 | up   | 1.13795  | down | 1.677228 | down | JAK3       |
| 211110_s_ | 0.007614 | 0.005922 | 1.752489 | down | 1.671362 | up   | 2.929044 | up   | AR         |
| 211111_at | 4.97E-04 | 1.56E-04 | 1.284171 | up   | 1.605676 | down | 2.061963 | down | HGC6.3     |
| 211114_x_ | 1.16E-04 | 2.20E-05 | 2.831001 | up   | 3.373252 | up   | 1.19154  | up   | SIP1       |
| 211115_x_ | 6.87E-05 | 1.09E-05 | 2.878444 | up   | 3.294845 | up   | 1.144662 | up   | SIP1       |
| 211116_at | 1.61E-04 | 3.46E-05 | 1.248271 | up   | 1.253625 | down | 1.564864 | down | SLC9A2     |
| 211121_s_ | 1.38E-04 | 2.79E-05 | 1.516062 | down | 3.521843 | down | 2.32302  | down | DOK1       |
| 211124_s_ | 4.23E-04 | 1.26E-04 | 8.788656 | down | 1.627911 | down | 5.398732 | up   | KITLG      |
| 211126_s_ | 0.001537 | 7.27E-04 | 1.826362 | up   | 3.427983 | up   | 1.876946 | up   | CSRP2      |
| 211127_x_ | 0.003348 | 0.002075 | 1.318803 | up   | 1.371924 | up   | 1.040279 | up   | EDA        |
| 211129_x_ | 0.002875 | 0.001692 | 1.439749 | up   | 1.358148 | up   | 1.060082 | down | EDA        |
| 211130_x_ | 2.40E-04 | 5.89E-05 | 1.548744 | up   | 1.571323 | up   | 1.014579 | up   | EDA        |
|           |          |          |          |      |          |      |          |      | LILRA6 /// |
| 211133_x_ | 0.00201  | 0.001043 | 1.754459 | up   | 1.067575 | down | 1.873017 | down | LILRB3     |
| 211135_x_ | 0.001862 | 9.40E-04 | 1.790678 | up   | 1.040054 | up   | 1.721717 | down | LILRB3     |
| 211142_x_ | 0.017666 | 0.015927 | 1.579006 | up   | 1.093622 | down | 1.726837 | down | HLA-DOA    |
| 211149_at | 0.013973 | 0.012185 | 1.015326 | down | 1.8173   | up   | 1.845152 | up   | UTY        |
| 211151_x_ | 4.67E-04 | 1.44E-04 | 1.440018 | up   | 1.323624 | up   | 1.087936 | down | GH1        |
| 211152_s_ | 0.00142  | 6.53E-04 | 1.33198  | down | 1.564148 | down | 1.174303 | down | HTRA2      |
| 211160_x_ | 0.005161 | 0.003636 | 1.619348 | down | 4.569556 | down | 2.821849 | down | ACTN1      |
| 211161_s_ | 0.002572 | 0.001457 | 27.86656 | down | 19.50056 | down | 1.429013 | up   | COL3A1     |
| 211172_x_ | 0.036372 | 0.035101 | 1.35533  | up   | 1.244818 | down | 1.687139 | down | AKAP7      |
| 211176_s_ | 0.015286 | 0.013512 | 1.212882 | up   | 1.171813 | down | 1.421271 | down | PAX4       |
| 211185_s_ | 9.19E-05 | 1.60E-05 | 1.718783 | up   | 2.420045 | up   | 1.407999 | up   | SF3B1      |
| 211191_at | 0.017332 | 0.015586 | 1.218552 | up   | 1.181474 | down | 1.439688 | down | CD84       |
| 211202_s_ | 3.29E-04 | 9.03E-05 | 2.771591 | up   | 1.838301 | up   | 1.507692 | down | KDM5B      |
| 211203_s_ | 0.002489 | 0.001396 | 2.025317 | up   | 3.679619 | up   | 1.816811 | up   | CNTN1      |
| 211225_at | 0.001809 | 9.04E-04 | 1.386491 | up   | 1.26138  | down | 1.748891 | down | FUT5       |
| 211226_at | 0.003868 | 0.0025   | 1.688033 | up   | 1.079682 | up   | 1.563453 | down | GALR2      |

|           |          |          |               |               |               |           |
|-----------|----------|----------|---------------|---------------|---------------|-----------|
| 211227_s_ | 0.010844 | 0.009051 | 1.184058 up   | 1.032028 up   | 1.147311 down | PCDH11Y   |
| 211228_s_ | 0.01347  | 0.011673 | 1.925712 up   | 2.023349 up   | 1.050702 up   | RAD17     |
| 211230_s_ | 0.019857 | 0.018176 | 1.508459 up   | 1.736974 down | 2.620155 down | PIK3CD    |
| 211237_s_ | 0.001422 | 6.55E-04 | 2.669786 up   | 1.749839 up   | 1.525732 down | FGFR4     |
| 211239_s_ | 0.01062  | 0.008831 | 1.262559 up   | 1.012379 up   | 1.247121 down | ADAM7     |
| 211240_x_ | 0.001461 | 6.79E-04 | 2.036619 up   | 1.249931 up   | 1.629385 down | CTNND1    |
| 211241_at | 3.18E-04 | 8.61E-05 | 1.794459 down | 2.082684 down | 1.160619 down | ANXA2P3   |
| 211250_s_ | 0.002669 | 0.00153  | 1.375643 down | 2.132573 down | 1.550237 down | SH3BP2    |
| 211252_x_ | 0.005992 | 0.004385 | 1.299593 up   | 1.506297 down | 1.957572 down | PTCRA     |
| 211256_x_ | 1.00E-04 | 1.81E-05 | 1.37289 down  | 1.88668 down  | 1.374239 down | BTN2A1    |
| 211257_x_ | 1.83E-06 | 6.85E-08 | 2.05093 up    | 2.661189 up   | 1.297552 up   | ZNF638    |
| 211259_s_ | 2.15E-04 | 5.09E-05 | 2.004522 up   | 1.185543 up   | 1.690806 down | BMP7      |
| 211265_at | 0.008606 | 0.006869 | 1.186317 up   | 1.139841 down | 1.352212 down | PTGER3    |
| 211267_at | 3.86E-04 | 1.12E-04 | 5.468959 up   | 5.532062 up   | 1.011538 up   | HESX1     |
| 211270_x_ | 1.56E-04 | 3.31E-05 | 2.149957 up   | 1.940491 up   | 1.107945 down | PTBP1     |
| 211271_x_ | 1.59E-04 | 3.40E-05 | 2.835601 up   | 2.118295 up   | 1.338624 down | PTBP1     |
| 211272_s_ | 0.003715 | 0.002374 | 3.717401 down | 3.033876 down | 1.225298 up   | DGKA      |
| 211274_at | 0.002228 | 0.001201 | 1.351657 up   | 1.365751 down | 1.846027 down | TBX1      |
| 211275_s_ | 5.10E-04 | 1.62E-04 | 1.902124 down | 1.975583 down | 1.03862 down  | GYG1      |
| 211279_at | 5.46E-04 | 1.77E-04 | 1.549624 up   | 1.401548 up   | 1.105651 down | NRF1      |
| 211284_s_ | 1.90E-05 | 1.87E-06 | 3.571612 down | 2.485031 down | 1.437251 up   | GRN       |
| 211286_x_ | 0.003537 | 0.002229 | 2.050004 up   | 1.136863 up   | 1.803211 down | CSF2RA    |
| 211296_x_ | 0.002253 | 0.001221 | 1.296703 down | 1.185899 down | 1.093435 up   | UBC       |
| 211297_s_ | 5.01E-04 | 1.58E-04 | 1.989734 up   | 1.130409 up   | 1.76019 down  | CDK7      |
| 211302_s_ | 0.001674 | 8.17E-04 | 2.49389 down  | 1.560134 up   | 3.890802 up   | PDE4B     |
| 211304_x_ | 0.011943 | 0.010144 | 1.313142 up   | 1.111003 down | 1.458905 down | KCNJ5     |
| 211315_s_ | 0.007127 | 0.005458 | 1.397645 up   | 1.114388 down | 1.557518 down | CACNA1G   |
| 211316_x_ | 5.87E-04 | 1.97E-04 | 3.059935 down | 2.588132 down | 1.182295 up   | CFLAR     |
| 211317_s_ | 5.44E-05 | 7.89E-06 | 6.846372 down | 3.779502 down | 1.811448 up   | CFLAR     |
| 211318_s_ | 0.005189 | 0.003661 | 1.715689 up   | 1.868982 up   | 1.089348 up   | RAE1      |
| 211319_at | 0.020819 | 0.019168 | 1.30368 up    | 1.174025 down | 1.530553 down | RAE1      |
| 211325_x_ | 1.92E-04 | 4.36E-05 | 1.75276 down  | 1.815836 down | 1.035987 down | LOC171220 |
| 211327_x_ | 5.39E-04 | 1.74E-04 | 2.173099 down | 1.748391 down | 1.242914 up   | HFE       |
| 211328_x_ | 0.002058 | 0.001077 | 1.604848 down | 1.501595 down | 1.068762 up   | HFE       |

|           |          |          |          |      |          |      |          |      |          |
|-----------|----------|----------|----------|------|----------|------|----------|------|----------|
| 211329_x_ | 0.001633 | 7.90E-04 | 2.565043 | down | 1.877292 | down | 1.366353 | up   | HFE      |
| 211330_s_ | 2.03E-04 | 4.67E-05 | 7.074904 | down | 4.303975 | down | 1.643807 | up   | HFE      |
| 211331_x_ | 0.001187 | 5.13E-04 | 1.70771  | down | 1.637504 | down | 1.042874 | up   | HFE      |
| 211340_s_ | 3.29E-05 | 4.01E-06 | 1.926595 | up   | 7.354844 | down | 14.16981 | down | MCAM     |
| 211343_s_ | 0.008469 | 0.006735 | 7.848391 | down | 1.470885 | down | 5.335829 | up   | COL13A1  |
| 211351_at | 0.00957  | 0.007797 | 1.312394 | up   | 1.232881 | up   | 1.064494 | down | C6orf54  |
| 211354_s_ | 0.001295 | 5.78E-04 | 5.5801   | down | 9.341698 | down | 1.67411  | down | LEPR     |
| 211355_x_ | 0.002679 | 0.001538 | 5.953671 | down | 7.975567 | down | 1.339605 | down | LEPR     |
| 211356_x_ | 0.001558 | 7.41E-04 | 6.592263 | down | 9.791147 | down | 1.485248 | down | LEPR     |
| 211357_s_ | 0.042419 | 0.041168 | 1.370803 | up   | 1.04465  | down | 1.43201  | down | ALDOB    |
| 211366_x_ | 6.19E-06 | 3.86E-07 | 13.06564 | down | 1.862291 | down | 7.015896 | up   | CASP1    |
| 211367_s_ | 3.05E-06 | 1.42E-07 | 20.10018 | down | 2.073175 | down | 9.695361 | up   | CASP1    |
| 211368_s_ | 9.19E-07 | 2.60E-08 | 37.47619 | down | 2.013273 | down | 18.61456 | up   | CASP1    |
| 211375_s_ | 0.00382  | 0.002459 | 2.464616 | up   | 2.281819 | up   | 1.08011  | down | ILF3     |
| 211376_s_ | 0.00344  | 0.002153 | 2.199335 | up   | 3.479828 | up   | 1.582218 | up   | NSMCE4A  |
| 211377_x_ | 0.009352 | 0.007587 | 1.784281 | up   | 1.109216 | up   | 1.608597 | down | MYCN     |
| 211379_x_ | 0.007449 | 0.005762 | 4.269745 | down | 1.840432 | down | 2.319969 | up   | B3GALNT1 |
| 211382_s_ | 0.001994 | 0.001031 | 2.012058 | up   | 1.967419 | up   | 1.022689 | down | TACC2    |
| 211387_x_ | 0.004005 | 0.002611 | 1.926064 | up   | 2.323262 | up   | 1.206223 | up   | RNGTT    |
| 211391_s_ | 5.85E-04 | 1.96E-04 | 3.296065 | up   | 2.911552 | up   | 1.132064 | down | PATZ1    |
| 211393_at | 0.001587 | 7.61E-04 | 1.152347 | up   | 1.211697 | down | 1.396296 | down | PATZ1    |
| 211398_at | 0.004344 | 0.002911 | 1.592217 | up   | 1.038015 | up   | 1.533905 | down | FGFR2    |
| 211399_at | 0.00201  | 0.001043 | 1.511256 | up   | 1.059953 | down | 1.601861 | down | FGFR2    |
| 211400_at | 0.009159 | 0.007404 | 1.129337 | up   | 1.168009 | down | 1.319075 | down | FGFR2    |
| 211401_s_ | 1.11E-04 | 2.07E-05 | 7.774923 | up   | 2.537025 | up   | 3.064583 | down | FGFR2    |
| 211402_x_ | 3.41E-04 | 9.44E-05 | 1.886087 | up   | 1.613814 | up   | 1.168714 | down | NR6A1    |
| 211403_x_ | 0.004856 | 0.003363 | 1.651696 | up   | 1.110457 | up   | 1.487401 | down | VCX2     |
| 211406_at | 0.001806 | 9.02E-04 | 2.233998 | down | 2.335507 | down | 1.045438 | down | IER3IP1  |
| 211407_at | 0.003352 | 0.002079 | 1.198557 | up   | 1.278373 | down | 1.532203 | down | NDUFB7   |
| 211411_at | 0.008472 | 0.006739 | 1.495622 | up   | 1.210614 | up   | 1.235425 | down |          |
| 211414_at | 6.88E-04 | 2.44E-04 | 1.389224 | down | 1.982028 | down | 1.426716 | down | GLS      |
| 211417_x_ | 6.57E-04 | 2.29E-04 | 1.318481 | up   | 2.093438 | up   | 1.587766 | up   | GGT1     |
| 211419_s_ | 0.002322 | 0.001273 | 1.431611 | up   | 1.362171 | up   | 1.050978 | down | CHN2     |
| 211421_s_ | 0.006079 | 0.004468 | 1.763623 | up   | 2.023814 | up   | 1.147532 | up   | RET      |

|           |          |          |               |               |               |                                                                     |
|-----------|----------|----------|---------------|---------------|---------------|---------------------------------------------------------------------|
| 211425_x_ | 0.005508 | 0.003941 | 1.029547 up   | 1.567393 up   | 1.522409 up   | SSX4 ///<br>SSX4B<br>IGH@ ///<br>IGHG1 ///<br>IGHG2 ///<br>IGHM /// |
| 211430_s_ | 0.005453 | 0.003895 | 1.371012 up   | 1.047466 down | 1.436089 down | IGHV4-31                                                            |
| 211431_s_ | 0.002483 | 0.001391 | 2.413918 up   | 2.609845 up   | 1.081165 up   | TYRO3                                                               |
| 211432_s_ | 1.69E-04 | 3.69E-05 | 3.701899 up   | 3.709193 up   | 1.001971 up   | TYRO3                                                               |
| 211433_x_ | 1.24E-04 | 2.43E-05 | 1.223278 down | 3.092394 down | 2.527957 down | KIAA1539                                                            |
| 211434_s_ | 0.021416 | 0.019784 | 1.411713 up   | 1.012737 up   | 1.393958 down | CCRL2<br>LOC100131                                                  |
| 211436_at | 0.003112 | 0.00188  | 1.167178 down | 1.087931 up   | 1.269808 up   | 298                                                                 |
| 211448_s_ | 0.012901 | 0.0111   | 1.557855 up   | 1.618014 down | 2.520631 down | RGS6                                                                |
| 211450_s_ | 9.35E-04 | 3.70E-04 | 4.164851 up   | 7.688836 up   | 1.846126 up   | MSH6                                                                |
| 211451_s_ | 0.005136 | 0.003615 | 1.255081 up   | 1.3284 down   | 1.66725 down  | KCNJ4                                                               |
| 211465_x_ | 7.67E-05 | 1.26E-05 | 1.544934 up   | 1.36915 up    | 1.128389 down | FUT6                                                                |
| 211468_s_ | 0.002898 | 0.001709 | 1.735208 up   | 1.012286 down | 1.756527 down | RECQL5                                                              |
| 211470_s_ | 7.61E-04 | 2.81E-04 | 1.477772 up   | 1.511716 up   | 1.02297 up    | SULT1C2                                                             |
| 211474_s_ | 5.20E-05 | 7.43E-06 | 4.364798 down | 2.899469 down | 1.505378 up   | SERPINB6                                                            |
| 211478_s_ | 1.84E-06 | 6.91E-08 | 33.56789 down | 1.457959 down | 23.02388 up   | DPP4                                                                |
| 211485_s_ | 0.023526 | 0.021939 | 1.546607 up   | 1.041939 up   | 1.484354 down | FGF18                                                               |
| 211486_s_ | 0.003411 | 0.002127 | 1.310008 up   | 1.488131 down | 1.949463 down | KCNQ2                                                               |
| 211490_at | 0.019115 | 0.017406 | 1.313976 up   | 1.096685 up   | 1.198135 down | ADRA1A                                                              |
| 211491_at | 0.02464  | 0.023077 | 1.3707 up     | 1.007617 up   | 1.360339 down | ADRA1A                                                              |
| 211498_s_ | 0.018232 | 0.016512 | 1.519429 up   | 1.093573 up   | 1.389418 down | NKX3-1                                                              |
| 211499_s_ | 4.84E-05 | 6.73E-06 | 1.69665 down  | 2.548395 down | 1.502015 down | MAPK11                                                              |
| 211501_s_ | 0.001152 | 4.92E-04 | 2.580139 up   | 1.433249 up   | 1.800204 down | EIF3B                                                               |
| 211502_s_ | 0.004293 | 0.002864 | 2.056919 down | 1.425522 down | 1.442924 up   | PFTK1                                                               |
| 211503_s_ | 0.001278 | 5.68E-04 | 1.81096 down  | 2.401699 down | 1.326202 down | RAB14                                                               |
| 211504_x_ | 0.010302 | 0.008507 | 2.192104 down | 1.307284 down | 1.676839 up   | ROCK2                                                               |
| 211509_s_ | 0.001571 | 7.50E-04 | 1.269024 down | 1.636664 down | 1.289702 down | RTN4                                                                |
| 211518_s_ | 0.01556  | 0.013789 | 1.223028 up   | 4.747149 up   | 3.881473 up   | BMP4                                                                |
| 211519_s_ | 0.002131 | 0.001128 | 4.860471 up   | 5.873339 up   | 1.208389 up   | KIF2C                                                               |

|           |          |          |          |      |          |      |          |      |            |
|-----------|----------|----------|----------|------|----------|------|----------|------|------------|
| 211528_x_ | 2.55E-04 | 6.40E-05 | 3.495631 | down | 2.574076 | down | 1.358014 | up   | HLA-G      |
| 211529_x_ | 2.70E-05 | 3.05E-06 | 4.469935 | down | 2.864351 | down | 1.560541 | up   | HLA-G      |
| 211530_x_ | 3.04E-04 | 8.09E-05 | 3.301632 | down | 1.941249 | down | 1.700777 | up   | HLA-G      |
| 211531_x_ | 0.015944 | 0.014171 | 1.056603 | down | 1.510697 | up   | 1.596207 | up   | PRB1       |
| 211540_s_ | 0.001988 | 0.001026 | 2.57483  | down | 1.711    | down | 1.504868 | up   | RB1        |
| 211542_x_ | 0.001523 | 7.17E-04 | 1.248865 | up   | 1.25567  | up   | 1.005449 | up   | RPS10      |
| 211546_x_ | 0.001507 | 7.07E-04 | 2.104957 | up   | 1.647517 | up   | 1.277654 | down | SNCA       |
| 211548_s_ | 0.004552 | 0.0031   | 2.623747 | up   | 5.695055 | up   | 2.170582 | up   | HPGD       |
| 211555_s_ | 0.00179  | 8.92E-04 | 4.508439 | down | 1.486467 | up   | 6.701647 | up   | GUCY1B3    |
| 211556_at | 0.010294 | 0.008499 | 1.218441 | up   | 1.110842 | down | 1.353496 | down | MAPRE2     |
| 211562_s_ | 3.38E-04 | 9.33E-05 | 2.578467 | down | 4.658324 | down | 1.806625 | down | LMOD1      |
| 211563_s_ | 0.012728 | 0.010926 | 1.818221 | down | 1.92473  | down | 1.058579 | down | C19orf2    |
| 211564_s_ | 1.33E-05 | 1.14E-06 | 3.324382 | down | 11.03001 | down | 3.317912 | down | PDLIM4     |
| 211566_x_ | 1.51E-04 | 3.16E-05 | 1.558225 | down | 1.353688 | down | 1.151097 | up   | BRE        |
| 211574_s_ | 0.012012 | 0.010215 | 2.379763 | down | 1.086015 | up   | 2.584459 | up   | CD46       |
| 211576_s_ | 8.57E-04 | 3.28E-04 | 2.716881 | up   | 1.852945 | up   | 1.46625  | down | SLC19A1    |
| 211579_at | 0.013068 | 0.011265 | 1.238681 | up   | 1.109897 | down | 1.374809 | down | ITGB3      |
| 211581_x_ | 0.018231 | 0.01651  | 1.379458 | up   | 1.01236  | up   | 1.362616 | down | LST1       |
| 211582_x_ | 0.012101 | 0.010305 | 1.229901 | up   | 1.214928 | down | 1.494242 | down | LST1       |
| 211584_s_ | 1.54E-04 | 3.25E-05 | 1.18907  | up   | 2.536447 | up   | 2.133135 | up   | NPAT       |
|           |          |          |          |      |          |      |          |      | ATP2B2 /// |
|           |          |          |          |      |          |      |          |      | LOC100134  |
| 211586_s_ | 0.005203 | 0.003675 | 1.323886 | up   | 1.06781  | down | 1.413659 | down | 286        |
|           |          |          |          |      |          |      |          |      | LOC652346  |
| 211588_s_ | 0.002447 | 0.001363 | 1.842748 | down | 1.548174 | down | 1.190272 | up   | /// PML    |
| 211591_s_ | 0.002513 | 0.001414 | 1.296835 | up   | 1.312265 | down | 1.701792 | down | PDE4A      |
| 211592_s_ | 4.77E-05 | 6.62E-06 | 1.740871 | down | 2.661822 | down | 1.529018 | down | CACNA1C    |
| 211594_s_ | 1.71E-04 | 3.77E-05 | 1.74354  | up   | 1.140133 | up   | 1.529242 | down | MRPL9      |
| 211598_x_ | 0.007702 | 0.006005 | 1.579776 | up   | 1.199262 | up   | 1.31729  | down | VIPR2      |
| 211603_s_ | 1.67E-04 | 3.64E-05 | 3.891478 | up   | 2.984125 | up   | 1.30406  | down | ETV4       |
| 211604_x_ | 0.027881 | 0.026413 | 1.349287 | up   | 1.021035 | down | 1.37767  | down | HAP1       |
| 211607_x_ | 0.001903 | 9.69E-04 | 2.820567 | down | 3.437389 | down | 1.218687 | down | EGFR       |
| 211609_x_ | 0.002083 | 0.001095 | 1.557423 | up   | 1.497398 | up   | 1.040086 | down | PSMD4      |
| 211610_at | 0.010232 | 0.008437 | 1.719411 | down | 1.742456 | down | 1.013403 | down | KLF6       |



|           |          |          |          |      |          |      |          |      |           |
|-----------|----------|----------|----------|------|----------|------|----------|------|-----------|
| 211612_s_ | 3.46E-09 | 9.99E-12 | 16.07422 | down | 13.25267 | down | 1.212905 | up   | IL13RA1   |
| 211615_s_ | 1.27E-04 | 2.50E-05 | 2.646912 | up   | 2.073523 | up   | 1.276529 | down | LRPPRC    |
| 211616_s_ | 0.022853 | 0.021268 | 1.449108 | down | 1.291135 | down | 1.122352 | up   | HTR2A     |
| 211617_at | 0.021923 | 0.020306 | 1.372538 | up   | 1.158305 | up   | 1.184953 | down | ALDOAP2   |
| 211618_s_ | 0.002537 | 0.001432 | 1.406733 | up   | 1.281538 | down | 1.802782 | down | ALPI      |
| 211621_at | 8.68E-04 | 3.34E-04 | 2.847371 | down | 1.087405 | down | 2.618501 | up   | AR        |
| 211623_s_ | 4.56E-06 | 2.53E-07 | 2.593813 | up   | 2.801383 | up   | 1.080025 | up   | FBL       |
| 211628_x_ | 1.98E-05 | 1.99E-06 | 2.55159  | down | 1.893945 | down | 1.347235 | up   | FTHP1     |
| 211631_x_ | 0.004064 | 0.00266  | 1.842707 | down | 3.952492 | down | 2.144938 | down | B4GALT1   |
|           |          |          |          |      |          |      |          |      | IGHD ///  |
|           |          |          |          |      |          |      |          |      | IGHM ///  |
|           |          |          |          |      |          |      |          |      | LOC652128 |
| 211632_at | 0.015892 | 0.014118 | 1.460468 | up   | 1.870411 | down | 2.731674 | down | /// VSIG6 |
|           |          |          |          |      |          |      |          |      | IGH@ ///  |
|           |          |          |          |      |          |      |          |      | IGHA1 /// |
|           |          |          |          |      |          |      |          |      | IGHA2 /// |
|           |          |          |          |      |          |      |          |      | IGHG1 /// |
|           |          |          |          |      |          |      |          |      | IGHM ///  |
|           |          |          |          |      |          |      |          |      | LOC100126 |
|           |          |          |          |      |          |      |          |      | 583 ///   |
|           |          |          |          |      |          |      |          |      | LOC652128 |
| 211636_at | 0.025927 | 0.024419 | 1.202001 | up   | 1.015619 | up   | 1.183516 | down | /// VSIG6 |

|           |          |          |             |               |               |           |
|-----------|----------|----------|-------------|---------------|---------------|-----------|
|           |          |          |             |               |               | IGH@ ///  |
|           |          |          |             |               |               | IGHA1 /// |
|           |          |          |             |               |               | IGHA2 /// |
|           |          |          |             |               |               | IGHD ///  |
|           |          |          |             |               |               | IGHG1 /// |
|           |          |          |             |               |               | IGHG3 /// |
|           |          |          |             |               |               | IGHG4 /// |
|           |          |          |             |               |               | IGHM ///  |
|           |          |          |             |               |               | IGHV4-31  |
|           |          |          |             |               |               | ///       |
|           |          |          |             |               |               | LOC100126 |
|           |          |          |             |               |               | 583 ///   |
|           |          |          |             |               |               | LOC652128 |
| 211638_at | 0.005735 | 0.004146 | 1.684235 up | 1.464008 down | 2.465734 down | /// VSIG6 |
|           |          |          |             |               |               | IGH@ ///  |
|           |          |          |             |               |               | IGHA1 /// |
|           |          |          |             |               |               | IGHA2 /// |
|           |          |          |             |               |               | IGHD ///  |
|           |          |          |             |               |               | IGHG1 /// |
|           |          |          |             |               |               | IGHG3 /// |
|           |          |          |             |               |               | IGHG4 /// |
|           |          |          |             |               |               | IGHM ///  |
|           |          |          |             |               |               | IGHV4-31  |
|           |          |          |             |               |               | ///       |
|           |          |          |             |               |               | LOC100126 |
|           |          |          |             |               |               | 583 ///   |
|           |          |          |             |               |               | LOC642131 |
|           |          |          |             |               |               | ///       |
|           |          |          |             |               |               | LOC652128 |
| 211639_x_ | 0.008568 | 0.006828 | 1.286501 up | 1.2033 down   | 1.548046 down | /// VSIG6 |

|           |          |          |               |               |               |  |             |
|-----------|----------|----------|---------------|---------------|---------------|--|-------------|
|           |          |          |               |               |               |  | IGH@ ///    |
|           |          |          |               |               |               |  | IGHA1 ///   |
|           |          |          |               |               |               |  | IGHA2 ///   |
|           |          |          |               |               |               |  | IGHG1 ///   |
|           |          |          |               |               |               |  | IGHG3 ///   |
|           |          |          |               |               |               |  | IGHM ///    |
|           |          |          |               |               |               |  | IGHV3-23    |
|           |          |          |               |               |               |  | /// IGHV4-  |
| 211641_x_ | 0.006841 | 0.005183 | 1.334259 up   | 1.041934 down | 1.390209 down |  | 31          |
|           |          |          |               |               |               |  | IGK@ ///    |
|           |          |          |               |               |               |  | IGKV3-20    |
|           |          |          |               |               |               |  | /// IGKV3D- |
|           |          |          |               |               |               |  | 11 ///      |
|           |          |          |               |               |               |  | IGKV3D-15   |
|           |          |          |               |               |               |  | ///         |
| 211643_x_ | 0.005472 | 0.003912 | 1.276592 up   | 1.029443 down | 1.314178 down |  | LOC440871   |
| 211653_x_ | 2.48E-04 | 6.17E-05 | 18.30864 down | 2.441328 down | 7.499461 up   |  | AKR1C2      |
| 211658_at | 0.003775 | 0.002424 | 1.653746 up   | 1.140544 up   | 1.449963 down |  | PRDX2       |
| 211661_x_ | 0.014954 | 0.013183 | 1.377402 up   | 1.348353 up   | 1.021544 down |  | PTAFR       |
| 211662_s_ | 7.06E-04 | 2.53E-04 | 2.165647 up   | 1.466242 up   | 1.477005 down |  | VDAC2       |
| 211663_x_ | 9.77E-04 | 3.93E-04 | 10.40965 down | 3.606754 down | 2.886154 up   |  | PTGDS       |
| 211665_s_ | 0.011934 | 0.010134 | 2.3649 down   | 1.69008 down  | 1.399284 up   |  | SOS2        |
| 211667_x_ | 0.003113 | 0.001881 | 1.004314 down | 1.331611 up   | 1.337355 up   |  |             |
| 211670_x_ | 9.81E-04 | 3.96E-04 | 1.467923 up   | 1.114213 down | 1.63558 down  |  | SSX3        |
| 211671_s_ | 1.82E-05 | 1.77E-06 | 6.771438 down | 5.343277 down | 1.267282 up   |  | NR3C1       |
| 211675_s_ | 2.03E-05 | 2.05E-06 | 11.75782 down | 6.973731 down | 1.686016 up   |  | MDFIC       |
| 211677_x_ | 2.21E-04 | 5.28E-05 | 1.479367 up   | 1.374113 up   | 1.076597 down |  | CADM3       |
| 211678_s_ | 0.008273 | 0.006547 | 1.34025 down  | 1.464132 up   | 1.962304 up   |  | RNF114      |
| 211681_s_ | 5.20E-04 | 1.67E-04 | 1.340865 down | 11.19591 down | 8.349768 down |  | PDLIM5      |
| 211686_s_ | 0.007189 | 0.005516 | 1.90974 up    | 1.414919 up   | 1.349716 down |  | MAK16       |
|           |          |          |               |               |               |  | KIR3DL2 /// |
| 211688_x_ | 0.010545 | 0.008754 | 1.443768 up   | 1.165344 down | 1.682486 down |  | LOC727787   |
| 211689_s_ | 0.001775 | 8.83E-04 | 2.598841 up   | 2.024288 up   | 1.28383 down  |  | TMPRSS2     |

|           |          |          |               |               |               |            |
|-----------|----------|----------|---------------|---------------|---------------|------------|
| 211692_s_ | 0.001679 | 8.21E-04 | 2.04694 up    | 1.488165 down | 3.046184 down | BBC3       |
| 211693_at | 7.27E-04 | 2.64E-04 | 2.425132 up   | 1.306427 down | 3.168258 down | IGHG1      |
| 211700_s_ | 6.50E-04 | 2.26E-04 | 2.529749 up   | 2.566626 up   | 1.014577 up   | TRO        |
| 211701_s_ | 8.55E-04 | 3.27E-04 | 2.601845 up   | 1.925114 up   | 1.351528 down | TRO        |
| 211703_s_ | 0.003828 | 0.002466 | 2.673816 down | 1.916491 down | 1.395162 up   | TM2D1      |
|           |          |          |               |               |               | SPIN2A /// |
| 211704_s_ | 0.035223 | 0.033931 | 1.547459 down | 1.038155 down | 1.490586 up   | SPIN2B     |
| 211705_s_ | 0.001231 | 5.39E-04 | 1.224149 up   | 1.442203 down | 1.765471 down | SORBS1     |
| 211707_s_ | 0.001738 | 8.58E-04 | 1.842279 up   | 2.497927 up   | 1.35589 up    | IQCB1      |
| 211709_s_ | 3.31E-07 | 6.09E-09 | 21.58935 down | 11.2299 down  | 1.92249 up    | CLEC11A    |
| 211710_x_ | 0.006036 | 0.004427 | 1.392431 up   | 1.213347 up   | 1.147596 down | RPL4       |
| 211711_s_ | 9.61E-05 | 1.70E-05 | 5.286223 down | 2.511437 down | 2.10486 up    | PTEN       |
| 211715_s_ | 0.006122 | 0.00451  | 1.854161 up   | 2.50858 up    | 1.352946 up   | BDH1       |
| 211719_x_ | 2.89E-04 | 7.59E-05 | 2.369775 down | 3.199161 down | 1.349985 down | FN1        |
| 211721_s_ | 4.42E-05 | 5.97E-06 | 5.507593 up   | 5.221555 up   | 1.05478 down  | ZNF551     |
| 211722_s_ | 8.33E-04 | 3.17E-04 | 1.356378 up   | 1.160035 down | 1.573446 down | HDAC6      |
| 211724_x_ | 2.70E-05 | 3.03E-06 | 2.453336 up   | 1.367021 up   | 1.794658 down | MIOS       |
| 211727_s_ | 0.001059 | 4.38E-04 | 2.02392 up    | 1.729609 up   | 1.17016 down  | COX11      |
| 211729_x_ | 0.007575 | 0.005886 | 1.838784 down | 1.769255 down | 1.039299 up   | BLVRA      |
| 211732_x_ | 0.002392 | 0.001322 | 2.523112 down | 3.068141 down | 1.216015 down | HNMT       |
| 211733_x_ | 0.005642 | 0.004063 | 2.341277 down | 1.552787 down | 1.507791 up   | SCP2       |
| 211741_x_ | 4.87E-04 | 1.52E-04 | 7.080699 down | 2.018718 down | 3.507524 up   | PSG3       |
| 211744_s_ | 0.001401 | 6.42E-04 | 2.749478 down | 2.815253 down | 1.023923 down | CD58       |
| 211746_x_ | 4.49E-04 | 1.36E-04 | 1.495543 up   | 1.087286 up   | 1.375482 down | PSMA1      |
| 211747_s_ | 6.86E-04 | 2.43E-04 | 2.514469 up   | 2.852102 up   | 1.134276 up   | LSM5       |
| 211748_x_ | 0.001038 | 4.27E-04 | 12.96488 down | 5.407533 down | 2.397559 up   | PTGDS      |
| 211749_s_ | 3.09E-04 | 8.28E-05 | 3.483097 down | 2.376402 down | 1.465702 up   | VAMP3      |
| 211751_at | 0.011618 | 0.00982  | 1.21902 down  | 1.262383 down | 1.035572 down | PDE4DIP    |
| 211754_s_ | 0.006193 | 0.004575 | 1.557241 up   | 1.443912 up   | 1.078488 down | SLC25A17   |
| 211756_at | 0.006955 | 0.005297 | 1.511537 down | 1.754805 down | 1.160941 down | PTHLH      |
| 211759_x_ | 0.047552 | 0.046368 | 1.177887 up   | 1.258939 down | 1.482888 down | TBCB       |
| 211760_s_ | 1.05E-05 | 8.07E-07 | 14.28242 down | 3.016669 down | 4.7345 up     | VAMP4      |
| 211761_s_ | 1.46E-04 | 3.01E-05 | 1.737285 up   | 1.707895 up   | 1.017208 down | CACYBP     |
| 211762_s_ | 6.75E-04 | 2.37E-04 | 2.347873 up   | 3.669906 up   | 1.563077 up   | KPNA2      |

|           |          |          |          |      |          |      |          |      |           |
|-----------|----------|----------|----------|------|----------|------|----------|------|-----------|
| 211763_s_ | 0.003275 | 0.002015 | 2.999434 | down | 2.580754 | down | 1.162231 | up   | UBE2B     |
| 211767_at | 0.002273 | 0.001237 | 2.81644  | up   | 6.376814 | up   | 2.26414  | up   | GINS4     |
| 211768_at | 0.044596 | 0.043374 | 1.102884 | up   | 1.103473 | down | 1.217003 | down | LAT2      |
| 211769_x_ | 0.004533 | 0.003081 | 2.022005 | down | 2.688722 | down | 1.329731 | down | SERINC3   |
| 211772_x_ | 0.001791 | 8.93E-04 | 1.165075 | up   | 1.359868 | up   | 1.167194 | up   | CHRNA3    |
| 211776_s_ | 2.66E-04 | 6.77E-05 | 1.106622 | down | 6.775845 | up   | 7.498297 | up   | EPB41L3   |
| 211778_s_ | 1.00E-05 | 7.58E-07 | 4.299626 | up   | 4.055794 | up   | 1.06012  | down | OVOL2     |
| 211781_x_ | 2.67E-08 | 1.81E-10 | 18.15665 | up   | 15.15967 | up   | 1.197695 | down |           |
| 211782_at | 0.01367  | 0.011879 | 1.375622 | down | 1.469974 | down | 1.068588 | down | IDS       |
| 211784_s_ | 1.41E-04 | 2.88E-05 | 2.41932  | up   | 2.323246 | up   | 1.041354 | down | SFRS1     |
| 211787_s_ | 0.023991 | 0.022408 | 1.546207 | up   | 1.354285 | up   | 1.141714 | down | EIF4A1    |
| 211792_s_ | 1.85E-05 | 1.81E-06 | 2.989694 | down | 2.125896 | down | 1.406322 | up   | CDKN2C    |
| 211798_x_ | 0.011427 | 0.009629 | 1.739096 | up   | 1.001589 | down | 1.741859 | down | IGLJ3     |
| 211799_x_ | 2.63E-04 | 6.66E-05 | 4.185071 | down | 2.780984 | down | 1.504889 | up   | HLA-C     |
| 211800_s_ | 0.004655 | 0.003192 | 1.538465 | down | 1.816366 | down | 1.180636 | down | USP4      |
| 211801_x_ | 0.014136 | 0.012348 | 2.047178 | down | 1.150856 | down | 1.77883  | up   | MFN1      |
| 211812_s_ | 0.003907 | 0.002531 | 2.921202 | down | 1.76678  | down | 1.653405 | up   | B3GALNT1  |
| 211813_x_ | 3.05E-06 | 1.42E-07 | 154.3882 | down | 22.99935 | down | 6.712719 | up   | DCN       |
| 211817_s_ | 0.02263  | 0.021044 | 1.339927 | up   | 1.033963 | down | 1.385435 | down | KCNJ5     |
| 211821_x_ | 0.005175 | 0.003648 | 1.087657 | up   | 1.258148 | up   | 1.156751 | up   | GYPA      |
| 211822_s_ | 0.001252 | 5.52E-04 | 1.679473 | down | 2.444492 | down | 1.455511 | down | NLRP1     |
| 211824_x_ | 2.08E-04 | 4.84E-05 | 2.182091 | down | 3.722807 | down | 1.706074 | down | NLRP1     |
|           |          |          |          |      |          |      |          |      | EWSR1 /// |
| 211825_s_ | 0.00194  | 9.95E-04 | 1.991399 | down | 3.124946 | down | 1.569222 | down | FLI1      |
| 211828_s_ | 0.046409 | 0.04521  | 1.218044 | up   | 2.680644 | up   | 2.200778 | up   | TNIK      |
| 211837_s_ | 3.13E-04 | 8.44E-05 | 2.367914 | up   | 1.204715 | down | 2.852662 | down | PTCRA     |
| 211841_s_ | 0.004896 | 0.003401 | 1.705967 | up   | 1.049081 | down | 1.789697 | down | TNFRSF25  |
| 211844_s_ | 0.004289 | 0.002859 | 1.093931 | up   | 3.295671 | down | 3.605238 | down | NRP2      |
| 211845_at | 0.011675 | 0.009874 | 1.662174 | up   | 1.167624 | down | 1.940795 | down | PVRL1     |
| 211846_s_ | 0.015555 | 0.013782 | 1.869857 | up   | 1.30312  | up   | 1.434908 | down | PVRL1     |
| 211852_s_ | 0.011246 | 0.009453 | 1.926187 | down | 1.559134 | down | 1.235421 | up   | ATRN      |
| 211862_x_ | 1.98E-04 | 4.54E-05 | 4.369878 | down | 3.019434 | down | 1.447251 | up   | CFLAR     |
| 211863_x_ | 0.001295 | 5.78E-04 | 1.959717 | down | 1.912229 | down | 1.024834 | up   | HFE       |
| 211864_s_ | 1.05E-04 | 1.92E-05 | 16.84049 | down | 15.18559 | down | 1.108979 | up   | MYOF      |

|           |          |          |          |      |          |      |          |      |            |
|-----------|----------|----------|----------|------|----------|------|----------|------|------------|
| 211866_x_ | 0.004301 | 0.002873 | 1.709804 | down | 1.491884 | down | 1.146071 | up   | HFE        |
| 211867_s_ | 0.004    | 0.002606 | 1.726111 | up   | 1.107084 | down | 1.910949 | down | PCDHA10    |
|           |          |          |          |      |          |      |          |      | IGH@ ///   |
|           |          |          |          |      |          |      |          |      | IGHA1 ///  |
|           |          |          |          |      |          |      |          |      | IGHG1 ///  |
|           |          |          |          |      |          |      |          |      | IGHG3 ///  |
|           |          |          |          |      |          |      |          |      | IGHM ///   |
|           |          |          |          |      |          |      |          |      | IGHV3-23   |
|           |          |          |          |      |          |      |          |      | /// IGHV4- |
| 211868_x_ | 6.60E-04 | 2.31E-04 | 1.146944 | up   | 1.305651 | down | 1.497509 | down | 31         |
| 211869_at | 0.001376 | 6.27E-04 | 1.361105 | up   | 1.212152 | down | 1.649865 | down |            |
| 211870_s_ | 0.008163 | 0.006443 | 1.370788 | up   | 1.437571 | up   | 1.048719 | up   | PCDHA3     |
| 211871_x_ | 0.007744 | 0.006049 | 2.159306 | down | 1.811112 | down | 1.192254 | up   | GNB5       |
| 211878_at | 0.030599 | 0.029216 | 1.253533 | up   | 1.291143 | down | 1.618491 | down | IGHG1      |
| 211888_x_ | 0.019402 | 0.0177   | 1.201645 | down | 1.294384 | up   | 1.555389 | up   | CASP10     |
| 211891_s_ | 0.007962 | 0.006252 | 1.501225 | up   | 1.165516 | down | 1.749702 | down | ARHGEF4    |
| 211894_x_ | 0.037819 | 0.036553 | 1.285808 | up   | 1.109154 | down | 1.426159 | down | SEZ6L      |
| 211896_s_ | 2.42E-05 | 2.60E-06 | 142.8648 | down | 23.02951 | down | 6.203553 | up   | DCN        |
| 211901_s_ | 0.006371 | 0.004744 | 1.743103 | up   | 1.429041 | down | 2.490965 | down | PDE4A      |
| 211902_x_ | 0.016355 | 0.014586 | 1.312455 | up   | 1.165542 | up   | 1.126047 | down | TRA@       |
| 211903_s_ | 0.005121 | 0.003601 | 1.708779 | up   | 1.166055 | down | 1.99253  | down | MPL        |
| 211904_x_ | 0.002513 | 0.001414 | 1.662905 | up   | 1.035636 | down | 1.722164 | down | RAD52      |
| 211905_s_ | 0.027719 | 0.026244 | 1.639399 | up   | 1.025914 | up   | 1.597989 | down | ITGB4      |
| 211908_x_ | 0.008315 | 0.006589 | 1.294853 | up   | 1.242958 | down | 1.609448 | down | IGHG1      |
| 211909_x_ | 0.006857 | 0.005199 | 1.564175 | up   | 2.106397 | down | 3.294773 | down | PTGER3     |
| 211910_at | 0.010011 | 0.008231 | 1.446023 | up   | 1.100802 | down | 1.591786 | down |            |
| 211911_x_ | 4.70E-05 | 6.47E-06 | 6.278945 | down | 5.06962  | down | 1.238544 | up   | HLA-B      |
| 211913_s_ | 5.40E-04 | 1.75E-04 | 3.045637 | up   | 3.115145 | up   | 1.022822 | up   | MERTK      |
| 211915_s_ | 0.00417  | 0.002752 | 1.573645 | up   | 1.040905 | up   | 1.511805 | down | TUBB4Q     |
| 211919_s_ | 0.001022 | 4.17E-04 | 4.222457 | up   | 5.765349 | up   | 1.365402 | up   | CXCR4      |
| 211920_at | 0.004246 | 0.002817 | 1.853922 | up   | 1.67525  | down | 3.105783 | down | CFB        |
| 211921_x_ | 1.20E-04 | 2.31E-05 | 2.821664 | up   | 3.149923 | up   | 1.116335 | up   | PTMA       |
| 211922_s_ | 3.19E-06 | 1.52E-07 | 33.78295 | down | 13.04538 | down | 2.589649 | up   | CAT        |
| 211924_s_ | 6.98E-04 | 2.50E-04 | 2.82378  | down | 5.948551 | down | 2.106591 | down | PLAUR      |

|           |          |          |          |      |          |      |          |      |           |
|-----------|----------|----------|----------|------|----------|------|----------|------|-----------|
| 211926_s_ | 5.46E-05 | 7.93E-06 | 1.874294 | down | 5.541781 | down | 2.956729 | down | MYH9      |
| 211928_at | 0.021124 | 0.019478 | 1.637973 | up   | 1.085913 | down | 1.778696 | down | DYNC1H1   |
| 211929_at | 3.19E-04 | 8.65E-05 | 2.237868 | up   | 3.569284 | up   | 1.594949 | up   | HNRNPA3   |
| 211930_at | 6.20E-04 | 2.12E-04 | 1.857288 | up   | 3.732556 | up   | 2.009681 | up   | HNRNPA3   |
|           |          |          |          |      |          |      |          |      | HNRNPA3   |
|           |          |          |          |      |          |      |          |      | ///       |
| 211931_s_ | 0.001292 | 5.76E-04 | 2.234314 | up   | 2.304695 | up   | 1.0315   | up   | HNRNPA3P1 |
| 211932_at | 1.40E-05 | 1.23E-06 | 2.58122  | up   | 2.396214 | up   | 1.077207 | down | HNRNPA3   |
|           |          |          |          |      |          |      |          |      | HNRNPA3   |
|           |          |          |          |      |          |      |          |      | ///       |
| 211933_s_ | 1.26E-05 | 1.06E-06 | 2.156127 | up   | 2.153671 | up   | 1.00114  | down | HNRNPA3P1 |
| 211935_at | 3.93E-05 | 5.08E-06 | 2.709226 | up   | 2.54656  | up   | 1.063877 | down | ARL6IP1   |
|           |          |          |          |      |          |      |          |      | H3F3A /// |
|           |          |          |          |      |          |      |          |      | H3F3B /// |
| 211940_x_ | 0.001918 | 9.79E-04 | 2.504702 | up   | 2.697016 | up   | 1.076781 | up   | LOC440926 |
| 211941_s_ | 0.004509 | 0.00306  | 1.83484  | up   | 1.639994 | up   | 1.118809 | down | PEBP1     |
| 211943_x_ | 0.010486 | 0.008694 | 1.229487 | down | 1.099994 | down | 1.117722 | up   | TPT1      |
| 211944_at | 0.001258 | 5.56E-04 | 3.388769 | up   | 2.671555 | up   | 1.268463 | down | BAT2D1    |
| 211945_s_ | 1.31E-04 | 2.59E-05 | 2.271956 | down | 2.398834 | down | 1.055845 | down | ITGB1     |
| 211946_s_ | 0.01082  | 0.009025 | 1.521386 | up   | 1.498063 | up   | 1.015569 | down | BAT2D1    |
| 211948_x_ | 3.04E-04 | 8.11E-05 | 4.182444 | up   | 4.035565 | up   | 1.036396 | down | BAT2D1    |
| 211950_at | 0.002506 | 0.001408 | 2.085632 | up   | 1.36633  | up   | 1.526448 | down | UBR4      |
| 211951_at | 1.10E-05 | 8.61E-07 | 3.432112 | up   | 2.586159 | up   | 1.327108 | down | NOLC1     |
| 211959_at | 0.001812 | 9.06E-04 | 7.61756  | down | 6.33264  | down | 1.202904 | up   | IGFBP5    |
| 211960_s_ | 0.015743 | 0.013967 | 2.031298 | down | 1.205182 | down | 1.685469 | up   | RAB7A     |
| 211961_s_ | 0.00146  | 6.78E-04 | 2.561014 | down | 1.900031 | down | 1.34788  | up   | RAB7A     |
| 211962_s_ | 0.002013 | 0.001046 | 2.822469 | down | 1.009329 | down | 2.796383 | up   | ZFP36L1   |
| 211963_s_ | 9.55E-07 | 2.74E-08 | 2.388994 | down | 3.120745 | down | 1.306301 | down | ARPC5     |
| 211964_at | 6.37E-04 | 2.20E-04 | 1.50613  | down | 6.058524 | down | 4.022576 | down | COL4A2    |
| 211966_at | 0.002578 | 0.001462 | 1.248542 | down | 7.786399 | down | 6.236394 | down | COL4A2    |
| 211968_s_ | 0.006503 | 0.004869 | 2.315358 | up   | 2.133164 | up   | 1.08541  | down | HSP90AA1  |
| 211969_at | 0.002043 | 0.001067 | 2.200391 | up   | 1.764391 | up   | 1.247111 | down | HSP90AA1  |

|           |          |          |               |               |               |          |
|-----------|----------|----------|---------------|---------------|---------------|----------|
| 211971_s_ | 5.30E-06 | 3.09E-07 | 3.012087 up   | 3.22027 up    | 1.069116 up   | LRPPRC   |
| 211974_x_ | 0.011155 | 0.009366 | 1.360786 up   | 1.400677 up   | 1.029315 up   | RBPJ     |
| 211980_at | 0.001179 | 5.08E-04 | 1.276136 up   | 5.047345 down | 6.441096 down | COL4A1   |
| 211981_at | 0.003934 | 0.002553 | 1.064477 up   | 7.509915 down | 7.994134 down | COL4A1   |
| 211983_x_ | 0.008691 | 0.006951 | 1.134116 down | 1.187875 down | 1.047402 down | ACTG1    |
| 211984_at | 8.22E-05 | 1.38E-05 | 1.168211 up   | 1.718272 down | 2.007304 down | CALM1    |
| 211987_at | 0.001017 | 4.15E-04 | 1.470145 up   | 2.229361 up   | 1.516422 up   | TOP2B    |
| 211989_at | 6.62E-04 | 2.32E-04 | 1.83092 up    | 1.513588 up   | 1.209655 down | SMARCE1  |
| 211997_x_ | 0.002316 | 0.001268 | 2.210182 up   | 2.018163 up   | 1.095146 down | H3F3B    |
| 211999_at | 2.11E-04 | 4.93E-05 | 2.227095 up   | 1.793596 up   | 1.241693 down | H3F3B    |
| 212006_at | 0.024971 | 0.023414 | 1.563959 down | 1.192855 down | 1.311106 up   | UBXN4    |
| 212008_at | 0.005928 | 0.004328 | 2.487538 down | 1.724679 down | 1.44232 up    | UBXN4    |
| 212012_at | 1.37E-04 | 2.77E-05 | 2.697698 down | 3.468167 down | 1.285603 down | PXDN     |
| 212014_x_ | 3.85E-04 | 1.12E-04 | 14.51623 down | 9.078354 down | 1.598993 up   | CD44     |
| 212015_x_ | 2.21E-04 | 5.28E-05 | 3.05887 up    | 2.074657 up   | 1.474398 down | PTBP1    |
| 212017_at | 0.034248 | 0.032941 | 1.239719 up   | 1.362981 down | 1.689714 down | FAM168B  |
| 212018_s_ | 0.013654 | 0.011861 | 1.875759 up   | 1.75606 up    | 1.068164 down | RSL1D1   |
| 212023_s_ | 0.011082 | 0.009282 | 2.757088 up   | 3.140243 up   | 1.138971 up   | MKI67    |
| 212027_at | 0.002777 | 0.001616 | 4.913873 up   | 3.888612 up   | 1.263658 down | RBM25    |
| 212028_at | 0.00373  | 0.002386 | 2.716192 up   | 3.201857 up   | 1.178804 up   | RBM25    |
| 212029_s_ | 0.005743 | 0.004154 | 1.68212 up    | 1.443134 down | 2.427525 down |          |
| 212030_at | 3.19E-04 | 8.68E-05 | 1.679857 up   | 1.964494 up   | 1.169441 up   | RBM25    |
| 212031_at | 0.001251 | 5.51E-04 | 1.959431 up   | 1.954329 up   | 1.002611 down | RBM25    |
| 212033_at | 0.001789 | 8.91E-04 | 1.933834 up   | 1.958275 up   | 1.012639 up   | RBM25    |
| 212034_s_ | 0.008455 | 0.00672  | 1.110777 down | 1.606935 down | 1.446676 down | EXOC7    |
| 212036_s_ | 2.31E-04 | 5.59E-05 | 3.998368 up   | 3.551768 up   | 1.12574 down  | PNN      |
| 212037_at | 1.58E-04 | 3.35E-05 | 2.786977 up   | 2.833449 up   | 1.016675 up   | PNN      |
| 212040_at | 2.16E-05 | 2.23E-06 | 3.400776 down | 4.128553 down | 1.214003 down | TGOLN2   |
| 212041_at | 0.002857 | 0.001678 | 1.876528 down | 1.733209 down | 1.08269 up    | ATP6V0D1 |
| 212042_x_ | 1.23E-04 | 2.37E-05 | 1.014415 down | 1.224021 up   | 1.241664 up   | RPL7     |
| 212043_at | 1.75E-05 | 1.69E-06 | 2.974067 down | 2.961497 down | 1.004245 up   | TGOLN2   |
| 212045_at | 0.001655 | 8.04E-04 | 1.40804 down  | 1.812896 down | 1.287532 down | GLG1     |
| 212046_x_ | 6.34E-04 | 2.18E-04 | 1.865559 down | 1.825265 down | 1.022076 up   | MAPK3    |
| 212052_s_ | 5.40E-05 | 7.80E-06 | 1.501811 down | 2.671027 down | 1.778537 down | TBC1D9B  |



|           |          |          |          |      |          |      |          |      |             |
|-----------|----------|----------|----------|------|----------|------|----------|------|-------------|
| 212054_x_ | 1.66E-04 | 3.60E-05 | 1.901307 | down | 2.351036 | down | 1.236537 | down | TBC1D9B     |
| 212056_at | 0.001555 | 7.39E-04 | 1.936575 | up   | 1.076233 | up   | 1.799401 | down | KIAA0182    |
| 212057_at | 9.55E-04 | 3.81E-04 | 2.579651 | up   | 1.583548 | up   | 1.629032 | down | KIAA0182    |
| 212058_at | 0.002208 | 0.001184 | 2.021964 | up   | 2.189416 | up   | 1.082817 | up   | SR140       |
| 212061_at | 2.98E-05 | 3.48E-06 | 4.120604 | up   | 6.114768 | up   | 1.48395  | up   | SR140       |
| 212062_at | 0.001054 | 4.36E-04 | 2.819648 | down | 3.112709 | down | 1.103935 | down | ATP9A       |
| 212063_at | 1.16E-05 | 9.37E-07 | 84.43297 | down | 47.49693 | down | 1.777651 | up   | CD44        |
| 212067_s_ | 4.78E-06 | 2.69E-07 | 114.0162 | down | 13.91079 | down | 8.196241 | up   | C1R         |
| 212071_s_ | 0.004002 | 0.002608 | 1.54573  | up   | 1.085153 | up   | 1.424435 | down | SPTBN1      |
| 212072_s_ | 2.70E-05 | 3.04E-06 | 1.937293 | up   | 1.463413 | up   | 1.323818 | down | CSNK2A1     |
|           |          |          |          |      |          |      |          |      | CSNK2A1 /// |
| 212073_at | 0.006633 | 0.00499  | 2.180987 | up   | 1.434087 | up   | 1.520819 | down | CSNK2A1P    |
| 212075_s_ | 0.014556 | 0.01278  | 2.022111 | up   | 1.551994 | up   | 1.302911 | down | CSNK2A1     |
| 212077_at | 1.68E-04 | 3.68E-05 | 3.046035 | down | 3.214382 | down | 1.055268 | down | CALD1       |
| 212078_s_ | 5.86E-04 | 1.96E-04 | 2.380567 | up   | 3.359843 | up   | 1.411362 | up   | MLL         |
| 212079_s_ | 0.003668 | 0.002333 | 1.658801 | up   | 2.867199 | up   | 1.728476 | up   | MLL         |
| 212082_s_ | 0.003156 | 0.00192  | 1.372801 | down | 1.438205 | down | 1.047642 | down | MYL6        |
| 212083_at | 7.49E-06 | 5.14E-07 | 3.550304 | down | 5.062799 | down | 1.426018 | down | TEX261      |
| 212084_at | 0.002022 | 0.001051 | 1.901041 | down | 2.316389 | down | 1.218485 | down | TEX261      |
| 212086_x_ | 1.94E-05 | 1.92E-06 | 4.764231 | down | 5.64059  | down | 1.183946 | down | LMNA        |
| 212088_at | 0.008514 | 0.006778 | 1.606504 | up   | 1.189591 | up   | 1.350468 | down | PMPCA       |
| 212089_at | 6.49E-07 | 1.57E-08 | 3.231797 | down | 3.782178 | down | 1.170302 | down | LMNA        |
| 212091_s_ | 1.26E-04 | 2.48E-05 | 27.71526 | down | 12.31074 | down | 2.251308 | up   | COL6A1      |
| 212092_at | 1.15E-05 | 9.18E-07 | 2.773166 | up   | 18.38609 | up   | 6.629996 | up   | PEG10       |
| 212094_at | 1.35E-07 | 1.77E-09 | 4.22974  | up   | 83.53549 | up   | 19.74956 | up   | PEG10       |
| 212096_s_ | 0.00575  | 0.004161 | 1.658808 | up   | 8.852476 | up   | 5.336651 | up   | MTUS1       |
| 212097_at | 1.04E-04 | 1.90E-05 | 16.6511  | down | 13.54071 | down | 1.229706 | up   | CAV1        |
| 212100_s_ | 2.32E-04 | 5.64E-05 | 1.576633 | up   | 1.402833 | up   | 1.123893 | down | POLDIP3     |
| 212109_at | 7.43E-04 | 2.72E-04 | 2.307818 | up   | 2.539393 | up   | 1.100343 | up   | HN1L        |
| 212111_at | 1.92E-04 | 4.34E-05 | 3.454522 | down | 4.831598 | down | 1.39863  | down | STX12       |
| 212112_s_ | 4.20E-05 | 5.59E-06 | 5.284304 | down | 8.796354 | down | 1.664619 | down | STX12       |
| 212114_at | 0.003341 | 0.002069 | 1.643929 | up   | 1.524744 | up   | 1.078167 | down | LOC552889   |
| 212115_at | 6.11E-06 | 3.78E-07 | 3.456425 | up   | 2.235633 | up   | 1.546061 | down | HN1L        |

|           |          |          |               |               |               |          |
|-----------|----------|----------|---------------|---------------|---------------|----------|
| 212116_at | 1.80E-04 | 4.02E-05 | 1.683828 up   | 1.187443 up   | 1.418029 down | TRIM27   |
| 212117_at | 5.63E-04 | 1.86E-04 | 2.480694 down | 2.25445 down  | 1.100354 up   | RHOQ     |
| 212119_at | 0.001107 | 4.66E-04 | 2.151439 down | 2.149748 down | 1.000787 up   | RHOQ     |
| 212120_at | 3.05E-06 | 1.42E-07 | 4.553797 down | 3.073716 down | 1.481528 up   | RHOQ     |
| 212121_at | 0.011562 | 0.009761 | 1.600667 down | 1.600995 down | 1.000205 down | TCTN3    |
| 212122_at | 9.20E-05 | 1.61E-05 | 8.007034 down | 3.113308 down | 2.571873 up   | RHOQ     |
| 212124_at | 5.62E-04 | 1.85E-04 | 1.01464 down  | 1.85854 down  | 1.831724 down | ZMIZ1    |
| 212126_at | 0.001099 | 4.61E-04 | 2.647537 up   | 2.505935 up   | 1.056507 down | CBX5     |
| 212131_at | 5.72E-05 | 8.46E-06 | 2.737225 up   | 2.156102 up   | 1.269525 down | LSM14A   |
| 212132_at | 0.010958 | 0.009165 | 1.73504 up    | 1.444537 up   | 1.201104 down | LSM14A   |
| 212134_at | 1.51E-04 | 3.17E-05 | 1.124654 down | 2.234099 down | 1.986477 down | PHLDB1   |
| 212135_s_ | 1.56E-04 | 3.31E-05 | 3.87263 down  | 3.973743 down | 1.02611 down  | ATP2B4   |
| 212136_at | 2.16E-04 | 5.12E-05 | 4.886988 down | 3.758328 down | 1.300309 up   | ATP2B4   |
| 212139_at | 1.57E-04 | 3.32E-05 | 2.008076 up   | 1.294249 up   | 1.551538 down | GCN1L1   |
| 212141_at | 2.72E-04 | 6.98E-05 | 6.458645 up   | 7.561186 up   | 1.170708 up   | MCM4     |
| 212144_at | 3.22E-06 | 1.54E-07 | 1.373065 down | 2.97177 down  | 2.164334 down | UNC84B   |
| 212146_at | 0.001727 | 8.51E-04 | 1.681819 down | 1.5375 down   | 1.093866 up   | PLEKHM2  |
| 212147_at | 7.29E-04 | 2.65E-04 | 1.647607 up   | 1.171865 down | 1.930773 down | SMG5     |
| 212148_at | 1.02E-07 | 1.19E-09 | 1.403291 down | 9.757712 up   | 13.69291 up   | PBX1     |
| 212149_at | 0.005785 | 0.004194 | 2.360364 down | 1.633947 down | 1.444579 up   | EFR3A    |
| 212151_at | 4.99E-07 | 1.09E-08 | 1.048848 down | 7.400827 up   | 7.762342 up   | PBX1     |
| 212152_x_ | 0.003753 | 0.002407 | 2.691044 up   | 1.994124 up   | 1.349487 down | ARID1A   |
| 212153_at | 8.39E-04 | 3.20E-04 | 1.775012 up   | 1.987882 up   | 1.119926 up   | POGZ     |
| 212154_at | 0.001778 | 8.84E-04 | 2.368525 down | 4.430768 down | 1.870687 down | SDC2     |
| 212155_at | 9.46E-05 | 1.67E-05 | 1.504483 down | 2.440741 down | 1.622312 down | RNF187   |
| 212156_at | 0.016461 | 0.01469  | 1.239483 down | 1.408637 down | 1.136471 down | VPS39    |
| 212157_at | 3.66E-04 | 1.04E-04 | 1.424425 down | 3.809999 down | 2.674763 down | SDC2     |
| 212158_at | 7.54E-04 | 2.77E-04 | 2.224345 down | 3.671924 down | 1.650789 down | SDC2     |
|           |          |          |               |               |               | TMEM183A |
|           |          |          |               |               |               | ///      |
| 212165_at | 3.70E-04 | 1.06E-04 | 1.893244 up   | 1.326253 up   | 1.427514 down | TMEM183B |
| 212166_at | 2.75E-05 | 3.13E-06 | 1.89743 up    | 1.947383 up   | 1.026327 up   | XPO7     |
| 212168_at | 3.84E-05 | 4.91E-06 | 2.743322 up   | 2.53425 up    | 1.082499 down | RBM12    |
| 212169_at | 3.18E-06 | 1.51E-07 | 19.47319 down | 10.76541 down | 1.808868 up   | FKBP9    |

|           |          |          |               |               |               |           |
|-----------|----------|----------|---------------|---------------|---------------|-----------|
| 212170_at | 7.30E-04 | 2.65E-04 | 4.095063 up   | 3.355452 up   | 1.22042 down  | RBM12     |
| 212174_at | 8.22E-05 | 1.39E-05 | 3.963198 down | 6.194588 down | 1.563028 down | AK2       |
| 212175_s_ | 0.004928 | 0.003429 | 2.10782 up    | 1.62843 up    | 1.294387 down | AK2       |
| 212176_at | 8.24E-04 | 3.13E-04 | 1.651278 up   | 3.129043 up   | 1.894921 up   | SFRS18    |
| 212177_at | 0.007856 | 0.006152 | 1.657256 up   | 5.639016 up   | 3.402622 up   | SFRS18    |
| 212179_at | 0.001149 | 4.90E-04 | 2.118853 up   | 4.317898 up   | 2.037847 up   | SFRS18    |
| 212180_at | 2.65E-05 | 2.95E-06 | 2.186482 up   | 2.07072 up    | 1.055904 down | CRKL      |
| 212186_at | 0.002113 | 0.001116 | 1.838214 up   | 1.777449 up   | 1.034187 down | ACACA     |
| 212187_x_ | 0.001253 | 5.53E-04 | 10.71261 down | 4.790445 down | 2.236244 up   | PTGDS     |
| 212188_at | 0.001501 | 7.04E-04 | 4.19588 down  | 9.932564 down | 2.367218 down | KCTD12    |
| 212190_at | 6.31E-04 | 2.17E-04 | 4.82516 down  | 4.062043 down | 1.187865 up   | SERPINE2  |
| 212192_at | 0.002204 | 0.001181 | 6.986095 down | 9.58886 down  | 1.372564 down | KCTD12    |
| 212194_s_ | 0.00481  | 0.003322 | 1.748617 down | 2.210913 down | 1.264378 down | TM9SF4    |
| 212195_at | 9.54E-04 | 3.80E-04 | 14.43157 down | 8.540278 down | 1.689825 up   | IL6ST     |
| 212196_at | 7.38E-05 | 1.20E-05 | 20.09176 down | 8.414277 down | 2.387817 up   | IL6ST     |
| 212198_s_ | 0.005128 | 0.003607 | 1.086227 down | 1.55026 down  | 1.427198 down | TM9SF4    |
| 212203_x_ | 6.02E-04 | 2.04E-04 | 2.464324 down | 1.38028 down  | 1.78538 up    | IFITM3    |
| 212210_at | 0.001959 | 0.001007 | 2.036218 up   | 1.116798 up   | 1.823265 down | INTS1     |
| 212214_at | 0.002633 | 0.001502 | 1.618798 up   | 1.659215 up   | 1.024967 up   | OPA1      |
| 212216_at | 0.002919 | 0.001725 | 1.458831 down | 2.050267 down | 1.405418 down | PREPL     |
| 212219_at | 0.002523 | 0.001422 | 2.04566 up    | 1.116917 up   | 1.831523 down | PSME4     |
| 212224_at | 0.001546 | 7.33E-04 | 33.13994 down | 2.224201 up   | 73.70987 up   | ALDH1A1   |
| 212226_s_ | 0.001593 | 7.64E-04 | 5.612223 down | 3.456459 down | 1.623692 up   | PPAP2B    |
| 212230_at | 3.41E-04 | 9.43E-05 | 8.073845 down | 3.563054 down | 2.26599 up    | PPAP2B    |
| 212231_at | 0.001466 | 6.82E-04 | 1.977297 up   | 1.58428 up    | 1.248073 down | FBXO21    |
| 212233_at | 0.007445 | 0.005756 | 1.076124 up   | 1.743738 down | 1.876479 down | MAP1B     |
| 212234_at | 0.00156  | 7.43E-04 | 2.508297 down | 2.883616 down | 1.149631 down | ASXL1     |
| 212235_at | 1.37E-04 | 2.76E-05 | 2.77299 down  | 3.210693 down | 1.157845 down | PLXND1    |
| 212237_at | 2.01E-04 | 4.64E-05 | 2.308695 down | 2.110302 down | 1.094012 up   | ASXL1     |
| 212239_at | 0.010583 | 0.008792 | 3.936907 down | 1.131597 up   | 4.45499 up    | PIK3R1    |
| 212240_s_ | 0.017088 | 0.015332 | 2.303086 down | 1.430187 up   | 3.293842 up   | PIK3R1    |
|           |          |          |               |               |               | GCOM1 /// |
| 212244_at | 0.032317 | 0.030985 | 1.609209 down | 1.121073 down | 1.435418 up   | GRINL1A   |
| 212245_at | 0.001312 | 5.88E-04 | 2.602998 down | 2.284174 down | 1.139579 up   | MCFD2     |

|           |          |          |          |      |          |      |          |      |          |
|-----------|----------|----------|----------|------|----------|------|----------|------|----------|
| 212246_at | 7.83E-04 | 2.93E-04 | 2.82371  | down | 3.967303 | down | 1.404996 | down | MCFD2    |
| 212247_at | 9.77E-07 | 2.84E-08 | 4.1875   | up   | 4.07745  | up   | 1.02699  | down | NUP205   |
| 212248_at | 2.29E-06 | 9.50E-08 | 4.42518  | down | 4.257741 | down | 1.039326 | up   | MTDH     |
| 212249_at | 0.001616 | 7.79E-04 | 3.882958 | down | 1.093127 | down | 3.552156 | up   | PIK3R1   |
| 212250_at | 0.002659 | 0.001522 | 2.033    | down | 2.217032 | down | 1.090523 | down | MTDH     |
| 212251_at | 0.002663 | 0.001525 | 1.749426 | down | 1.917583 | down | 1.096122 | down | MTDH     |
| 212254_s_ | 1.01E-04 | 1.84E-05 | 2.607922 | down | 1.940903 | down | 1.343664 | up   | DST      |
| 212256_at | 9.07E-08 | 1.01E-09 | 3.712965 | down | 19.28143 | down | 5.192998 | down | GALNT10  |
| 212257_s_ | 1.66E-04 | 3.61E-05 | 10.61643 | down | 1.857375 | down | 5.715824 | up   | SMARCA2  |
| 212263_at | 0.0036   | 0.002278 | 1.4614   | up   | 1.580968 | up   | 1.081817 | up   | QKI      |
| 212266_s_ | 0.010926 | 0.009132 | 1.543973 | up   | 1.69417  | up   | 1.09728  | up   | SFRS5    |
| 212270_x_ | 0.007914 | 0.006203 | 1.309983 | up   | 1.248051 | up   | 1.049623 | down | RPL17    |
| 212271_at | 2.19E-04 | 5.22E-05 | 2.618252 | down | 2.786874 | down | 1.064402 | down | MAPK1    |
| 212275_s_ | 0.009153 | 0.007397 | 1.756724 | up   | 1.215169 | down | 2.134717 | down | SRCAP    |
| 212276_at | 0.001149 | 4.90E-04 | 6.594247 | down | 3.323162 | down | 1.984329 | up   | LPIN1    |
| 212279_at | 1.78E-04 | 3.95E-05 | 3.891392 | up   | 8.398831 | up   | 2.15831  | up   | TMEM97   |
| 212281_s_ | 7.25E-04 | 2.63E-04 | 2.800614 | up   | 7.938953 | up   | 2.834719 | up   | TMEM97   |
| 212282_at | 3.57E-04 | 1.01E-04 | 3.294032 | up   | 9.074177 | up   | 2.754732 | up   | TMEM97   |
| 212286_at | 0.003859 | 0.002493 | 3.196642 | down | 2.346321 | down | 1.362406 | up   | ANKRD12  |
| 212288_at | 0.005216 | 0.003686 | 2.221072 | down | 1.549784 | down | 1.433149 | up   | FNBP1    |
| 212289_at | 0.027799 | 0.026326 | 2.48377  | down | 1.651332 | down | 1.504101 | up   | ANKRD12  |
| 212294_at | 1.60E-05 | 1.48E-06 | 7.945655 | down | 7.361582 | down | 1.079341 | up   | GNG12    |
| 212296_at | 0.010958 | 0.009164 | 1.781974 | up   | 1.03636  | down | 1.846767 | down | PSMD14   |
| 212298_at | 3.16E-08 | 2.32E-10 | 73.4556  | down | 38.37804 | down | 1.914001 | up   | NRP1     |
| 212300_at | 0.002994 | 0.001787 | 1.539173 | down | 1.613473 | down | 1.048273 | down | TXLNA    |
| 212302_at | 0.009458 | 0.007687 | 1.463233 | up   | 1.261092 | up   | 1.160291 | down | RTF1     |
| 212303_x_ | 0.020905 | 0.019255 | 2.409348 | up   | 1.591518 | up   | 1.513868 | down | KHSRP    |
| 212306_at | 4.54E-05 | 6.20E-06 | 2.242244 | up   | 1.818675 | up   | 1.2329   | down | CLASP2   |
| 212308_at | 0.001032 | 4.22E-04 | 2.849475 | up   | 2.298662 | up   | 1.239623 | down | CLASP2   |
| 212309_at | 0.001046 | 4.31E-04 | 2.163859 | up   | 2.707248 | up   | 1.25112  | up   | CLASP2   |
| 212310_at | 2.70E-04 | 6.93E-05 | 3.742657 | down | 2.531551 | down | 1.478405 | up   | MIA3     |
| 212311_at | 0.003455 | 0.002165 | 2.802347 | up   | 2.665706 | down | 7.470233 | down | KIAA0746 |
| 212313_at | 2.23E-04 | 5.33E-05 | 1.174376 | up   | 1.711903 | down | 2.010417 | down | CHMP7    |
| 212314_at | 0.002288 | 0.001248 | 2.13438  | up   | 2.931424 | down | 6.256774 | down | KIAA0746 |

|           |          |          |               |               |               |          |
|-----------|----------|----------|---------------|---------------|---------------|----------|
| 212315_s_ | 1.60E-05 | 1.48E-06 | 4.960789 up   | 1.894997 up   | 2.617834 down | NUP210   |
| 212316_at | 4.46E-05 | 6.05E-06 | 4.357331 up   | 4.979006 up   | 1.142673 up   | NUP210   |
| 212318_at | 2.11E-04 | 4.95E-05 | 2.814076 up   | 2.208638 up   | 1.274123 down | TNPO3    |
| 212320_at | 0.016561 | 0.014804 | 1.78269 up    | 1.336469 up   | 1.33388 down  | TUBB     |
| 212321_at | 0.004831 | 0.00334  | 1.742903 up   | 1.159906 down | 2.021602 down | SGPL1    |
| 212325_at | 6.86E-04 | 2.44E-04 | 2.585807 down | 9.859179 down | 3.812806 down | LIMCH1   |
| 212327_at | 4.44E-04 | 1.34E-04 | 2.381977 down | 8.292365 down | 3.481295 down | LIMCH1   |
| 212328_at | 2.75E-04 | 7.09E-05 | 2.583505 down | 11.64463 down | 4.5073 down   | LIMCH1   |
| 212329_at | 0.010754 | 0.008958 | 1.582322 up   | 1.031138 up   | 1.534541 down | SCAP     |
| 212331_at | 0.007515 | 0.005825 | 3.072888 down | 2.049199 down | 1.499556 up   | RBL2     |
| 212333_at | 0.030555 | 0.029167 | 1.033538 down | 1.877044 down | 1.816134 down | FAM98A   |
| 212334_at | 0.001038 | 4.26E-04 | 5.813683 down | 3.112089 down | 1.868096 up   | GNS      |
| 212335_at | 2.72E-04 | 6.99E-05 | 7.946522 down | 4.518004 down | 1.758856 up   | GNS      |
| 212338_at | 7.93E-05 | 1.32E-05 | 6.706464 down | 1.021421 down | 6.565821 up   | MYO1D    |
| 212344_at | 0.002466 | 0.001378 | 8.487025 down | 34.76852 down | 4.096668 down | SULF1    |
| 212346_s_ | 2.64E-04 | 6.71E-05 | 1.909588 down | 2.01669 down  | 1.056086 down | MXD4     |
| 212347_x_ | 3.11E-04 | 8.37E-05 | 2.4785 down   | 2.08352 down  | 1.189573 up   | MXD4     |
| 212348_s_ | 2.54E-05 | 2.78E-06 | 4.391751 up   | 2.539848 up   | 1.729139 down | KDM1     |
| 212349_at | 7.29E-04 | 2.65E-04 | 1.104569 up   | 1.744114 down | 1.926495 down | POFUT1   |
| 212352_s_ | 3.27E-04 | 8.96E-05 | 1.827987 down | 1.535072 down | 1.190816 up   | TMED10   |
| 212353_at | 8.37E-04 | 3.19E-04 | 16.04478 down | 57.88128 down | 3.607485 down | SULF1    |
| 212354_at | 7.72E-04 | 2.86E-04 | 10.89341 down | 48.05044 down | 4.410965 down | SULF1    |
| 212355_at | 2.15E-05 | 2.21E-06 | 2.603327 down | 3.338542 down | 1.282414 down | KIAA0323 |
| 212356_at | 0.025225 | 0.023683 | 1.380029 down | 1.234647 up   | 1.703849 up   | KIAA0323 |
| 212357_at | 0.007881 | 0.006174 | 1.640641 down | 1.962301 down | 1.196058 down | FAM168A  |
| 212358_at | 1.22E-04 | 2.36E-05 | 3.534568 down | 4.199221 down | 1.188043 down | CLIP3    |
| 212359_s_ | 0.003058 | 0.001837 | 1.824337 down | 1.984357 down | 1.087714 down | KIAA0913 |
| 212360_at | 3.09E-04 | 8.29E-05 | 2.149141 down | 2.639351 down | 1.228096 down | AMPD2    |
| 212363_x_ | 0.001849 | 9.31E-04 | 1.17576 down  | 1.339165 down | 1.138978 down | ACTG1    |
| 212364_at | 0.001583 | 7.57E-04 | 2.076287 down | 2.536815 down | 1.221804 down | MYO1B    |
| 212365_at | 5.61E-04 | 1.84E-04 | 2.546788 down | 2.559241 down | 1.00489 down  | MYO1B    |
| 212368_at | 0.002335 | 0.001281 | 3.271335 up   | 1.968522 up   | 1.661823 down | ZNF292   |
| 212371_at | 2.50E-04 | 6.24E-05 | 2.167539 up   | 1.697318 up   | 1.277038 down | PPPDE1   |
| 212372_at | 8.58E-04 | 3.29E-04 | 1.894014 up   | 3.176229 up   | 1.676983 up   | MYH10    |

|           |          |          |               |               |               |             |
|-----------|----------|----------|---------------|---------------|---------------|-------------|
| 212376_s_ | 4.48E-05 | 6.09E-06 | 2.687189 up   | 1.780583 up   | 1.509163 down | EP400       |
| 212377_s_ | 3.62E-06 | 1.82E-07 | 2.110315 down | 3.079013 down | 1.45903 down  | NOTCH2      |
| 212381_at | 0.001284 | 5.71E-04 | 1.056989 up   | 1.526595 up   | 1.444287 up   | USP24       |
| 212386_at | 1.18E-04 | 2.26E-05 | 1.53869 down  | 2.120153 up   | 3.262258 up   | TCF4        |
| 212388_at | 0.013129 | 0.01133  | 1.144912 down | 1.416374 up   | 1.621624 up   | USP24       |
|           |          |          |               |               |               | LOC727893   |
| 212390_at | 3.00E-07 | 5.34E-09 | 12.22794 down | 15.411 down   | 1.260311 down | /// PDE4DIP |
| 212391_x_ | 0.003848 | 0.002484 | 1.068555 up   | 1.188802 up   | 1.112532 up   | RPS3A       |
|           |          |          |               |               |               | LOC652526   |
| 212392_s_ | 0.002448 | 0.001364 | 5.912608 down | 3.307807 down | 1.787471 up   | /// PDE4DIP |
| 212394_at | 6.46E-04 | 2.24E-04 | 1.676841 down | 1.96095 down  | 1.169431 down | KIAA0090    |
| 212403_at | 0.005446 | 0.003889 | 1.848094 down | 1.770567 down | 1.043786 up   | UBE3B       |
| 212406_s_ | 7.54E-04 | 2.78E-04 | 1.227083 down | 2.899701 up   | 3.558174 up   | PCMTD2      |
| 212408_at | 0.001937 | 9.93E-04 | 2.46927 down  | 2.174482 down | 1.135567 up   | TOR1AIP1    |
| 212409_s_ | 5.01E-04 | 1.58E-04 | 3.07136 down  | 2.144533 down | 1.432182 up   | TOR1AIP1    |
| 212412_at | 7.74E-06 | 5.39E-07 | 1.270048 up   | 5.31214 down  | 6.746675 down | PDLIM5      |
|           |          |          |               |               |               | N-PAC ///   |
| 212414_s_ | 0.030089 | 0.028693 | 2.423966 down | 1.078656 down | 2.247209 up   | SEPT6       |
| 212415_at | 0.005887 | 0.004288 | 2.070306 up   | 3.184154 up   | 1.538011 up   | 40792       |
| 212416_at | 0.026014 | 0.024514 | 1.282308 up   | 1.190979 down | 1.527203 down | SCAMP1      |
| 212419_at | 2.34E-06 | 9.73E-08 | 13.18493 down | 8.207436 down | 1.606462 up   | ZCCHC24     |
| 212421_at | 6.80E-04 | 2.40E-04 | 1.963915 down | 1.264999 down | 1.552503 up   | C22orf9     |
| 212422_at | 1.98E-04 | 4.55E-05 | 3.283058 up   | 1.964905 up   | 1.670848 down | PDCD11      |
| 212423_at | 1.45E-07 | 1.95E-09 | 12.36766 down | 7.219852 down | 1.713008 up   | ZCCHC24     |
| 212424_at | 1.13E-04 | 2.13E-05 | 2.498763 up   | 1.719952 up   | 1.45281 down  | PDCD11      |
| 212425_at | 0.004892 | 0.003396 | 2.185303 up   | 1.538589 up   | 1.420329 down | SCAMP1      |
| 212429_s_ | 3.95E-04 | 1.15E-04 | 2.70081 up    | 2.113693 up   | 1.277768 down | GTF3C2      |
| 212430_at | 1.48E-05 | 1.35E-06 | 5.523061 up   | 3.494224 up   | 1.580626 down | RBM38       |
| 212435_at | 3.18E-04 | 8.64E-05 | 2.568438 up   | 2.575451 up   | 1.00273 up    | TRIM33      |
| 212436_at | 0.010749 | 0.008954 | 1.72773 up    | 1.579533 up   | 1.093824 down | TRIM33      |
| 212437_at | 0.00858  | 0.006841 | 2.215791 down | 2.674989 down | 1.207239 down | CENPB       |
| 212439_at | 9.73E-04 | 3.91E-04 | 1.42443 down  | 1.613785 down | 1.132934 down | IP6K1       |

|           |          |          |               |               |               |           |
|-----------|----------|----------|---------------|---------------|---------------|-----------|
| 212442_s_ | 6.64E-05 | 1.04E-05 | 2.680398 up   | 2.124741 up   | 1.261517 down | LASS6     |
| 212443_at | 1.85E-04 | 4.17E-05 | 2.203019 up   | 1.919422 up   | 1.147751 down | NBEAL2    |
| 212445_s_ | 9.30E-04 | 3.68E-04 | 6.189834 up   | 3.497757 up   | 1.769658 down | NEDD4L    |
| 212448_at | 0.002613 | 0.001487 | 2.75903 up    | 2.990914 up   | 1.084045 up   | NEDD4L    |
| 212449_s_ | 3.21E-04 | 8.75E-05 | 2.845437 up   | 3.723811 up   | 1.308696 up   | LYPLA1    |
| 212453_at | 0.007571 | 0.005882 | 1.312109 down | 1.844391 down | 1.405669 down | KIAA1279  |
| 212455_at | 4.97E-05 | 7.01E-06 | 2.089175 up   | 2.839783 up   | 1.359284 up   | YTHDC1    |
| 212457_at | 5.45E-05 | 7.91E-06 | 2.472572 down | 2.33122 down  | 1.060634 up   | TFE3      |
| 212458_at | 0.008127 | 0.006406 | 1.660496 down | 1.574093 down | 1.054891 up   | SPRED2    |
| 212459_x_ | 0.006285 | 0.004666 | 2.108904 down | 1.363684 down | 1.546476 up   | SUCLG2    |
| 212460_at | 0.009838 | 0.008061 | 1.530715 down | 1.561346 up   | 2.389977 up   | C14orf147 |
| 212461_at | 6.57E-07 | 1.62E-08 | 2.909613 up   | 2.485886 up   | 1.170453 down | AZIN1     |
| 212462_at | 0.001497 | 7.02E-04 | 2.001155 down | 1.568619 up   | 3.13905 up    | MYST4     |
| 212463_at | 3.97E-05 | 5.16E-06 | 4.473898 down | 4.662084 down | 1.042063 down | CD59      |
| 212464_s_ | 2.63E-04 | 6.68E-05 | 2.860077 down | 4.122883 down | 1.441529 down | FN1       |
| 212465_at | 0.002008 | 0.001041 | 1.187838 up   | 1.290728 down | 1.533176 down | SETD3     |
| 212467_at | 4.23E-04 | 1.26E-04 | 2.573032 down | 1.914877 down | 1.343707 up   | DNAJC13   |
| 212469_at | 0.003125 | 0.001893 | 1.423844 up   | 2.139646 up   | 1.502725 up   | NIPBL     |
| 212471_at | 0.003618 | 0.002293 | 1.310086 up   | 1.088302 down | 1.425769 down | AVL9      |
| 212472_at | 1.95E-05 | 1.94E-06 | 7.214052 down | 43.80017 down | 6.071507 down | MICAL2    |
| 212473_s_ | 6.48E-06 | 4.09E-07 | 16.83823 down | 63.04546 down | 3.744186 down | MICAL2    |
| 212476_at | 0.032473 | 0.031143 | 2.477355 down | 1.160412 down | 2.134892 up   | ACAP2     |
| 212478_at | 1.21E-04 | 2.34E-05 | 2.289016 up   | 1.785195 up   | 1.282222 down | RMND5A    |
| 212479_s_ | 7.28E-04 | 2.64E-04 | 2.182562 up   | 2.99098 up    | 1.370399 up   | RMND5A    |
| 212481_s_ | 0.001258 | 5.56E-04 | 2.635114 down | 4.985315 down | 1.891879 down | TPM4      |
| 212482_at | 8.04E-06 | 5.65E-07 | 3.157675 up   | 5.109283 up   | 1.618052 up   | RMND5A    |
| 212484_at | 2.06E-05 | 2.09E-06 | 2.184532 down | 4.59898 down  | 2.105247 down | FAM89B    |
| 212485_at | 0.005018 | 0.003509 | 1.330258 up   | 1.49299 up    | 1.122331 up   | GPATCH8   |
| 212486_s_ | 0.001328 | 5.97E-04 | 2.838008 down | 2.181974 down | 1.300661 up   | FYN       |
| 212488_at | 4.20E-05 | 5.58E-06 | 12.37009 down | 17.72578 down | 1.432955 down | COL5A1    |
| 212489_at | 4.20E-05 | 5.58E-06 | 17.45013 down | 25.30836 down | 1.450325 down | COL5A1    |
| 212494_at | 2.70E-05 | 3.04E-06 | 5.11842 down  | 3.762496 down | 1.360379 up   | TENC1     |
| 212501_at | 2.37E-04 | 5.79E-05 | 4.023301 down | 2.74885 down  | 1.46363 up    | CEBPB     |
| 212503_s_ | 1.26E-05 | 1.05E-06 | 3.2299 down   | 6.029479 down | 1.86677 down  | DIP2C     |

|           |          |          |          |      |          |      |          |      |         |
|-----------|----------|----------|----------|------|----------|------|----------|------|---------|
| 212504_at | 4.31E-04 | 1.29E-04 | 2.391698 | down | 3.864708 | down | 1.615885 | down | DIP2C   |
| 212506_at | 6.35E-04 | 2.19E-04 | 2.096349 | down | 3.13321  | down | 1.494603 | down | PICALM  |
| 212507_at | 5.32E-04 | 1.72E-04 | 1.987023 | down | 1.584866 | down | 1.253748 | up   | TMEM131 |
| 212509_s_ | 1.68E-04 | 3.67E-05 | 4.845393 | down | 6.581928 | down | 1.358389 | down | MXRA7   |
| 212513_s_ | 0.012117 | 0.01032  | 2.08022  | down | 1.352901 | down | 1.5376   | up   | USP33   |
| 212516_at | 3.24E-04 | 8.86E-05 | 1.440047 | down | 2.28613  | down | 1.587539 | down | ARAP1   |
| 212517_at | 0.007518 | 0.005829 | 1.674008 | down | 2.073929 | down | 1.2389   | down | ATRN    |
| 212518_at | 4.84E-04 | 1.51E-04 | 1.863276 | down | 3.031199 | down | 1.626812 | down | PIP5K1C |
| 212520_s_ | 6.26E-04 | 2.15E-04 | 5.505271 | up   | 2.574472 | up   | 2.138408 | down | SMARCA4 |
| 212521_s_ | 6.89E-04 | 2.45E-04 | 2.031461 | down | 2.602639 | down | 1.281166 | down | PDE8A   |
| 212522_at | 3.98E-05 | 5.19E-06 | 5.473432 | down | 8.100558 | down | 1.479978 | down | PDE8A   |
| 212524_x_ | 0.025514 | 0.023988 | 1.301562 | up   | 1.234096 | down | 1.606253 | down | H2AFX   |
| 212527_at | 0.003168 | 0.001929 | 1.747962 | down | 2.556515 | down | 1.462569 | down | PPPDE2  |
| 212530_at | 3.75E-04 | 1.08E-04 | 7.258947 | down | 13.0669  | down | 1.80011  | down | NEK7    |
| 212532_s_ | 7.63E-05 | 1.25E-05 | 1.809351 | up   | 1.373527 | up   | 1.317303 | down | LSM12   |
| 212533_at | 2.02E-05 | 2.04E-06 | 1.487601 | up   | 4.793618 | up   | 3.222381 | up   | WEE1    |
| 212534_at | 0.003541 | 0.002233 | 1.918136 | up   | 2.050057 | up   | 1.068776 | up   | ZNF24   |
| 212535_at | 5.52E-04 | 1.80E-04 | 2.794383 | down | 2.829408 | down | 1.012534 | down | MEF2A   |
| 212537_x_ | 0.003138 | 0.001903 | 1.321141 | up   | 1.216436 | up   | 1.086075 | down | RPL17   |
| 212540_at | 0.002184 | 0.001166 | 1.821544 | up   | 1.538583 | up   | 1.18391  | down | CDC34   |
| 212541_at | 6.63E-04 | 2.32E-04 | 2.757905 | up   | 2.226156 | up   | 1.238864 | down | FLAD1   |
| 212542_s_ | 2.10E-05 | 2.15E-06 | 3.370987 | up   | 7.790004 | up   | 2.310897 | up   | PHIP    |
| 212543_at | 0.004923 | 0.003424 | 3.480287 | down | 2.077618 | up   | 7.230707 | up   | AIM1    |
| 212544_at | 1.36E-04 | 2.73E-05 | 2.36386  | up   | 2.246814 | up   | 1.052094 | down | ZNHIT3  |
| 212545_s_ | 2.27E-04 | 5.47E-05 | 1.572878 | down | 2.042274 | down | 1.298431 | down | ZHX3    |
| 212547_at | 3.62E-06 | 1.81E-07 | 2.307232 | up   | 1.549668 | up   | 1.488856 | down | BRD3    |
| 212551_at | 0.007397 | 0.005712 | 1.234705 | down | 3.234778 | down | 2.61988  | down | CAP2    |
| 212552_at | 5.41E-05 | 7.82E-06 | 2.547076 | down | 5.991001 | down | 2.352109 | down | HPCAL1  |
| 212554_at | 0.019649 | 0.017955 | 1.565631 | down | 2.849929 | down | 1.820308 | down | CAP2    |
| 212556_at | 0.001158 | 4.95E-04 | 1.329139 | up   | 1.616894 | up   | 1.216498 | up   | SCRIB   |
| 212558_at | 5.41E-04 | 1.75E-04 | 1.66367  | up   | 6.819795 | up   | 4.099248 | up   | SPRY1   |
| 212560_at | 2.31E-07 | 3.81E-09 | 33.96217 | up   | 61.06868 | up   | 1.798138 | up   | SORL1   |
| 212562_s_ | 0.012646 | 0.010848 | 1.497759 | up   | 1.056912 | up   | 1.417109 | down | CTSZ    |
| 212564_at | 0.014902 | 0.013123 | 1.391024 | up   | 1.19343  | up   | 1.165568 | down | KCTD2   |



|           |          |          |               |               |               |          |
|-----------|----------|----------|---------------|---------------|---------------|----------|
| 212565_at | 0.002024 | 0.001053 | 1.842913 up   | 2.055465 down | 3.788044 down | STK38L   |
| 212566_at | 2.60E-05 | 2.85E-06 | 2.407218 down | 2.89788 down  | 1.20383 down  | MAP4     |
| 212567_s_ | 0.001478 | 6.89E-04 | 1.155644 down | 2.040218 down | 1.765439 down | MAP4     |
| 212570_at | 3.15E-05 | 3.79E-06 | 1.583394 down | 3.900457 down | 2.463353 down | ENDOD1   |
| 212571_at | 5.79E-04 | 1.93E-04 | 2.774459 up   | 2.218506 up   | 1.250598 down | CHD8     |
| 212572_at | 2.08E-05 | 2.12E-06 | 1.946884 up   | 2.102341 down | 4.093015 down | STK38L   |
| 212573_at | 4.60E-04 | 1.41E-04 | 2.519599 down | 10.32048 down | 4.09608 down  | ENDOD1   |
| 212580_at | 5.85E-04 | 1.95E-04 | 3.177534 down | 1.594879 down | 1.992335 up   | ERAP1    |
| 212583_at | 4.25E-04 | 1.27E-04 | 1.414213 up   | 1.726114 up   | 1.220548 up   | AQR      |
| 212584_at | 1.08E-05 | 8.41E-07 | 2.509927 up   | 2.130841 up   | 1.177905 down | AQR      |
| 212586_at | 1.57E-04 | 3.33E-05 | 6.953746 down | 4.633987 down | 1.500597 up   | CAST     |
| 212591_at | 0.001196 | 5.19E-04 | 1.657233 up   | 1.194015 up   | 1.38795 down  | RBM34    |
| 212595_s_ | 0.006143 | 0.00453  | 4.089283 down | 2.70693 down  | 1.510672 up   | DAZAP2   |
| 212596_s_ | 0.014954 | 0.013182 | 1.496598 up   | 1.475676 up   | 1.014178 down | HMGXB4   |
| 212597_s_ | 0.004577 | 0.003123 | 1.706543 up   | 1.359113 up   | 1.25563 down  | HMGXB4   |
| 212599_at | 1.55E-04 | 3.28E-05 | 7.046482 up   | 2.47779 up    | 2.843859 down | AUTS2    |
| 212603_at | 2.93E-05 | 3.40E-06 | 2.544888 up   | 3.252466 up   | 1.278039 up   | MRPS31   |
| 212604_at | 1.85E-05 | 1.81E-06 | 2.96058 up    | 3.735261 up   | 1.261665 up   | MRPS31   |
| 212607_at | 3.78E-04 | 1.09E-04 | 3.44272 down  | 4.429144 down | 1.286525 down | AKT3     |
| 212608_s_ | 0.004185 | 0.002766 | 1.173627 down | 1.826347 up   | 2.143451 up   |          |
| 212611_at | 2.31E-04 | 5.61E-05 | 3.177936 up   | 6.642767 up   | 2.090277 up   | DTX4     |
| 212613_at | 3.18E-06 | 1.51E-07 | 3.307591 down | 2.455846 down | 1.346823 up   | BTN3A2   |
| 212614_at | 1.59E-06 | 5.64E-08 | 79.16217 down | 62.51408 down | 1.266309 up   | ARID5B   |
| 212619_at | 0.025702 | 0.024186 | 1.411744 up   | 2.775045 up   | 1.965686 up   | TMEM194A |
| 212621_at | 7.88E-05 | 1.31E-05 | 2.985063 up   | 5.637751 up   | 1.888654 up   | TMEM194A |
| 212624_s_ | 4.05E-05 | 5.33E-06 | 4.285404 down | 3.820928 up   | 16.37423 up   | CHN1     |
| 212625_at | 0.004603 | 0.003146 | 1.668583 down | 1.690687 down | 1.013247 down | STX10    |
| 212626_x_ | 1.36E-05 | 1.19E-06 | 2.192508 up   | 2.189715 up   | 1.001275 down | HNRNPC   |
| 212627_s_ | 2.66E-04 | 6.76E-05 | 1.634882 up   | 1.871465 up   | 1.144709 up   | EXOSC7   |
| 212630_at | 0.001126 | 4.77E-04 | 1.685844 down | 1.872906 down | 1.110961 down | EXOC3    |
| 212631_at | 0.00168  | 8.22E-04 | 1.852168 down | 2.837273 down | 1.531866 down | STX7     |
| 212638_s_ | 1.29E-04 | 2.54E-05 | 2.595931 up   | 1.964446 up   | 1.321457 down | WWP1     |
| 212640_at | 0.003691 | 0.002354 | 1.118807 up   | 2.276436 down | 2.546892 down | PTPLB    |
| 212642_s_ | 6.85E-04 | 2.43E-04 | 1.847477 down | 3.362051 down | 1.819807 down | HIVEP2   |

|           |          |          |               |               |               |           |
|-----------|----------|----------|---------------|---------------|---------------|-----------|
| 212643_at | 1.89E-05 | 1.85E-06 | 1.902568 up   | 1.511098 up   | 1.259063 down | MAPK1IP1L |
| 212644_s_ | 1.29E-04 | 2.56E-05 | 1.829498 up   | 1.465541 up   | 1.248343 down | MAPK1IP1L |
| 212645_x_ | 8.45E-04 | 3.23E-04 | 1.432753 down | 1.164435 down | 1.230428 up   | BRE       |
| 212646_at | 3.76E-07 | 7.44E-09 | 21.35154 down | 29.39465 down | 1.376699 down | RFTN1     |
| 212647_at | 4.08E-06 | 2.15E-07 | 9.232649 down | 9.790669 down | 1.06044 down  | RRAS      |
| 212650_at | 0.001256 | 5.54E-04 | 5.486132 down | 2.039839 down | 2.689493 up   | EHBP1     |
| 212653_s_ | 5.41E-04 | 1.75E-04 | 3.555795 down | 1.831497 down | 1.941469 up   | EHBP1     |
| 212654_at | 6.87E-05 | 1.09E-05 | 1.247369 up   | 4.476314 down | 5.583617 down | TPM2      |
| 212656_at | 0.001589 | 7.62E-04 | 1.56301 up    | 1.265779 up   | 1.23482 down  | TSFM      |
| 212662_at | 0.001283 | 5.70E-04 | 1.265381 up   | 3.367504 down | 4.261177 down | PVR       |
| 212663_at | 1.24E-05 | 1.03E-06 | 1.793156 down | 2.022976 down | 1.128165 down | FKBP15    |
| 212664_at | 0.007482 | 0.005792 | 1.348656 up   | 1.945181 up   | 1.442311 up   | TUBB4     |
| 212665_at | 5.18E-04 | 1.65E-04 | 3.30579 down  | 3.508973 down | 1.061463 down | TIPARP    |
| 212666_at | 0.014331 | 0.012543 | 1.509233 up   | 1.111231 up   | 1.358163 down | SMURF1    |
| 212667_at | 2.50E-06 | 1.08E-07 | 9.818276 down | 9.379704 down | 1.046758 up   | SPARC     |
| 212670_at | 0.00107  | 4.45E-04 | 3.708367 down | 3.485582 down | 1.063916 up   | ELN       |
|           |          |          |               |               |               | HLA-DQA1  |
|           |          |          |               |               |               | /// HLA-  |
| 212671_s_ | 0.006683 | 0.005038 | 1.306159 up   | 1.083371 down | 1.415054 down | DQA2      |
| 212673_at | 0.004299 | 0.00287  | 1.464232 up   | 1.319128 up   | 1.11 down     | METAP1    |
| 212674_s_ | 4.55E-04 | 1.39E-04 | 1.987081 up   | 1.259385 up   | 1.57782 down  | DHX30     |
| 212681_at | 0.001045 | 4.31E-04 | 2.670744 down | 5.567877 up   | 14.87037 up   | EPB41L3   |
| 212682_s_ | 0.014506 | 0.012726 | 1.748201 down | 2.128869 down | 1.217748 down | LMF2      |
| 212685_s_ | 2.78E-04 | 7.20E-05 | 2.013675 down | 2.0603 down   | 1.023154 down | TBL2      |
| 212686_at | 1.57E-05 | 1.44E-06 | 14.55338 up   | 4.666431 up   | 3.11874 down  | PPM1H     |
| 212687_at | 9.67E-05 | 1.72E-05 | 1.617974 down | 3.071693 down | 1.898481 down | LIMS1     |
| 212688_at | 0.002232 | 0.001205 | 2.362523 up   | 1.396927 up   | 1.691229 down | PIK3CB    |
| 212692_s_ | 1.68E-04 | 3.66E-05 | 2.775532 up   | 2.028447 up   | 1.368304 down | LRBA      |
| 212693_at | 3.34E-05 | 4.09E-06 | 7.191991 up   | 5.986276 up   | 1.201413 down | MDN1      |
| 212694_s_ | 0.002104 | 0.00111  | 2.360503 up   | 1.460635 up   | 1.616081 down | PCCB      |
| 212698_s_ | 2.98E-04 | 7.87E-05 | 2.39208 down  | 1.04126 down  | 2.297295 up   | 40796     |
| 212699_at | 0.014638 | 0.01286  | 2.265727 up   | 1.605183 up   | 1.411507 down | SCAMP5    |

|           |          |          |          |      |          |      |          |      |            |
|-----------|----------|----------|----------|------|----------|------|----------|------|------------|
| 212702_s_ | 0.006171 | 0.004557 | 1.103967 | down | 1.445035 | down | 1.308947 | down | BICD2      |
| 212703_at | 0.006213 | 0.004593 | 1.297102 | up   | 1.548432 | down | 2.008473 | down | TLN2       |
| 212704_at | 1.67E-04 | 3.63E-05 | 1.85843  | up   | 2.299734 | up   | 1.237461 | up   | ZCCHC11    |
|           |          |          |          |      |          |      |          |      | LOC100133  |
|           |          |          |          |      |          |      |          |      | 005 ///    |
|           |          |          |          |      |          |      |          |      | LOC100134  |
|           |          |          |          |      |          |      |          |      | 722 ///    |
|           |          |          |          |      |          |      |          |      | RASA4 ///  |
|           |          |          |          |      |          |      |          |      | RASA4B /// |
| 212707_s_ | 1.13E-04 | 2.14E-05 | 1.146568 | up   | 2.219455 | down | 2.544755 | down | RASA4P     |
| 212709_at | 1.13E-04 | 2.11E-05 | 3.003379 | up   | 6.593651 | up   | 2.195411 | up   | NUP160     |
| 212710_at | 0.001177 | 5.07E-04 | 2.152104 | up   | 1.407421 | up   | 1.529112 | down | CAMSAP1    |
| 212711_at | 0.002797 | 0.001631 | 1.791983 | up   | 1.030033 | down | 1.845801 | down | CAMSAP1    |
| 212712_at | 5.76E-05 | 8.56E-06 | 2.675627 | up   | 1.345035 | up   | 1.989262 | down | CAMSAP1    |
| 212713_at | 3.42E-05 | 4.21E-06 | 19.33266 | down | 1.528628 | down | 12.64707 | up   | MFAP4      |
| 212715_s_ | 6.43E-05 | 9.94E-06 | 1.461405 | down | 3.174516 | down | 2.172236 | down | MICAL3     |
| 212716_s_ | 1.37E-04 | 2.75E-05 | 1.842627 | up   | 1.73745  | up   | 1.060536 | down | EIF3K      |
| 212717_at | 5.40E-06 | 3.18E-07 | 3.059936 | down | 2.325355 | down | 1.315901 | up   | PLEKHM1    |
| 212718_at | 0.003113 | 0.001881 | 1.532532 | up   | 1.847514 | up   | 1.20553  | up   | PAPOLA     |
| 212719_at | 1.95E-07 | 3.04E-09 | 5.249102 | up   | 8.457724 | up   | 1.611271 | up   | PHLPP      |
| 212722_s_ | 0.001714 | 8.43E-04 | 1.074333 | down | 2.440047 | down | 2.271221 | down | JMJD6      |
| 212723_at | 0.001526 | 7.19E-04 | 1.183761 | down | 2.507858 | down | 2.118551 | down | JMJD6      |
| 212724_at | 1.55E-04 | 3.28E-05 | 6.290413 | down | 3.0137   | down | 2.087273 | up   | RND3       |
| 212725_s_ | 0.002044 | 0.001068 | 1.286714 | up   | 1.52859  | up   | 1.18798  | up   | TUG1       |
| 212726_at | 0.0044   | 0.00296  | 2.870316 | down | 1.557541 | down | 1.842851 | up   | PHF2       |
| 212727_at | 0.00113  | 4.79E-04 | 2.0901   | up   | 2.429739 | up   | 1.162499 | up   | DLG3       |
| 212728_at | 4.46E-06 | 2.43E-07 | 2.640922 | up   | 3.14561  | up   | 1.191103 | up   | DLG3       |
| 212729_at | 3.95E-04 | 1.15E-04 | 1.968221 | up   | 2.12406  | up   | 1.079178 | up   | DLG3       |
| 212733_at | 1.74E-04 | 3.85E-05 | 2.279337 | down | 1.941676 | down | 1.173902 | up   | KIAA0226   |
| 212735_at | 0.007738 | 0.006043 | 1.824654 | down | 1.694355 | down | 1.076902 | up   | KIAA0226   |
| 212736_at | 1.94E-05 | 1.92E-06 | 3.260002 | down | 2.108565 | down | 1.546076 | up   | C16orf45   |
| 212738_at | 1.07E-06 | 3.19E-08 | 4.446586 | up   | 6.582486 | up   | 1.480346 | up   | ARHGAP19   |
| 212740_at | 0.010006 | 0.008225 | 1.745029 | up   | 1.439554 | up   | 1.212201 | down | PIK3R4     |

|           |          |          |          |      |          |      |          |      |           |
|-----------|----------|----------|----------|------|----------|------|----------|------|-----------|
| 212742_at | 0.001195 | 5.18E-04 | 2.081314 | down | 1.71666  | down | 1.212421 | up   | RNF115    |
| 212747_at | 5.71E-04 | 1.89E-04 | 2.574405 | up   | 2.383514 | up   | 1.080088 | down | ANKS1A    |
| 212748_at | 0.001925 | 9.84E-04 | 1.066497 | down | 1.613794 | down | 1.513172 | down | MKL1      |
| 212750_at | 0.001033 | 4.23E-04 | 2.512394 | up   | 2.66976  | up   | 1.062636 | up   | PPP1R16B  |
| 212751_at | 8.43E-04 | 3.21E-04 | 1.727077 | up   | 1.634601 | up   | 1.056574 | down | UBE2N     |
| 212756_s_ | 0.034886 | 0.033593 | 1.02942  | up   | 1.301148 | down | 1.339427 | down | UBR2      |
| 212758_s_ | 9.61E-04 | 3.85E-04 | 11.5864  | down | 4.08896  | down | 2.833582 | up   | ZEB1      |
| 212759_s_ | 4.73E-04 | 1.46E-04 | 2.367328 | up   | 2.48526  | up   | 1.049817 | up   | TCF7L2    |
| 212764_at | 2.27E-04 | 5.47E-05 | 50.74654 | down | 21.02779 | down | 2.413308 | up   | ZEB1      |
| 212769_at | 2.96E-05 | 3.45E-06 | 2.449707 | up   | 1.322043 | down | 3.238618 | down | TLE3      |
| 212770_at | 4.51E-04 | 1.37E-04 | 2.827229 | up   | 1.577286 | up   | 1.792464 | down | TLE3      |
| 212772_s_ | 0.001645 | 7.98E-04 | 1.378134 | down | 2.139128 | down | 1.552192 | down | ABCA2     |
| 212778_at | 0.002313 | 0.001265 | 1.498923 | down | 1.842135 | down | 1.228972 | down | PACS2     |
| 212780_at | 0.003327 | 0.002058 | 2.491806 | down | 1.655012 | down | 1.505612 | up   | SOS1      |
| 212783_at | 1.46E-04 | 3.00E-05 | 2.368081 | up   | 1.854848 | up   | 1.276698 | down | RBBP6     |
| 212786_at | 0.003201 | 0.001953 | 1.518566 | down | 1.648443 | down | 1.085526 | down | CLEC16A   |
| 212787_at | 0.001034 | 4.24E-04 | 1.809184 | up   | 1.544189 | up   | 1.171608 | down | YLPM1     |
| 212788_x_ | 7.14E-06 | 4.79E-07 | 1.726777 | down | 1.32048  | down | 1.307689 | up   | FTL       |
| 212789_at | 0.001702 | 8.35E-04 | 2.214512 | up   | 2.431663 | up   | 1.098058 | up   | NCAPD3    |
| 212791_at | 2.93E-05 | 3.40E-06 | 3.607683 | down | 3.655182 | down | 1.013166 | down | C1orf216  |
| 212793_at | 2.64E-05 | 2.93E-06 | 8.608176 | down | 5.042753 | down | 1.707039 | up   | DAAM2     |
| 212796_s_ | 2.10E-05 | 2.14E-06 | 4.710361 | down | 3.228531 | down | 1.45898  | up   | TBC1D2B   |
| 212802_s_ | 0.011604 | 0.009806 | 1.164836 | down | 2.052118 | down | 1.761723 | down | GAPVD1    |
| 212803_at | 0.002129 | 0.001127 | 1.423888 | down | 2.400074 | down | 1.685578 | down | NAB2      |
| 212805_at | 8.68E-04 | 3.34E-04 | 2.328942 | down | 5.36894  | down | 2.305314 | down | PRUNE2    |
| 212806_at | 0.001061 | 4.40E-04 | 2.37744  | down | 5.28943  | down | 2.224843 | down | PRUNE2    |
| 212807_s_ | 7.11E-05 | 1.14E-05 | 1.274837 | up   | 3.244196 | down | 4.135821 | down | SORT1     |
| 212810_s_ | 4.17E-06 | 2.21E-07 | 2.649523 | down | 17.6301  | down | 6.654066 | down | SLC1A4    |
| 212811_x_ | 2.14E-05 | 2.21E-06 | 3.085086 | down | 14.38305 | down | 4.662124 | down | SLC1A4    |
| 212812_at | 7.15E-04 | 2.58E-04 | 3.389762 | up   | 2.28447  | up   | 1.483828 | down |           |
|           |          |          |          |      |          |      |          |      | JAM3 ///  |
|           |          |          |          |      |          |      |          |      | LOC100133 |
| 212813_at | 2.98E-04 | 7.88E-05 | 2.020216 | down | 1.640814 | down | 1.231228 | up   | 502       |
| 212821_at | 0.003029 | 0.001815 | 1.620065 | up   | 1.333972 | up   | 1.214467 | down | PLEKHG3   |

|           |          |          |          |      |          |      |          |      |                    |
|-----------|----------|----------|----------|------|----------|------|----------|------|--------------------|
| 212822_at | 7.66E-05 | 1.26E-05 | 6.653392 | down | 11.0481  | down | 1.660522 | down | HEG1               |
| 212823_s_ | 0.004853 | 0.003361 | 1.980455 | up   | 1.921159 | up   | 1.030865 | down | PLEKHG3            |
| 212825_at | 1.46E-04 | 3.02E-05 | 2.20371  | up   | 3.635443 | up   | 1.649693 | up   | PAXIP1             |
| 212828_at | 1.47E-04 | 3.04E-05 | 3.441359 | down | 8.528487 | down | 2.478232 | down | SYNJ2              |
| 212830_at | 2.26E-05 | 2.38E-06 | 7.154998 | down | 5.77483  | down | 1.238997 | up   | MEGF9              |
| 212832_s_ | 2.87E-06 | 1.31E-07 | 2.045763 | up   | 1.59184  | up   | 1.285156 | down | CKAP5              |
| 212833_at | 0.002192 | 0.001173 | 1.567552 | down | 1.443051 | down | 1.086277 | up   | SLC25A46           |
| 212836_at | 9.14E-05 | 1.59E-05 | 2.372184 | up   | 3.056744 | up   | 1.288578 | up   | POLD3              |
| 212839_s_ | 0.002951 | 0.001753 | 1.478373 | down | 1.714131 | down | 1.159472 | down | TROVE2             |
| 212845_at | 0.001977 | 0.00102  | 6.382694 | down | 3.574671 | down | 1.785533 | up   | SAMD4A             |
| 212846_at | 0.002426 | 0.001346 | 2.204666 | up   | 2.481714 | up   | 1.125664 | up   | RRP1B              |
| 212847_at | 5.42E-05 | 7.83E-06 | 3.171164 | up   | 8.940527 | up   | 2.81932  | up   | FUBP1              |
| 212848_s_ | 8.17E-07 | 2.24E-08 | 4.575854 | down | 7.134877 | down | 1.559245 | down | C9orf3             |
| 212850_s_ | 8.34E-05 | 1.41E-05 | 2.185015 | up   | 5.709715 | up   | 2.613123 | up   | LRP4               |
| 212851_at | 1.47E-06 | 5.04E-08 | 4.184828 | down | 4.395746 | down | 1.050401 | down | DCUN1D4            |
| 212852_s_ | 0.002305 | 0.001259 | 1.913091 | up   | 1.354305 | up   | 1.412599 | down | TROVE2             |
| 212853_at | 5.92E-04 | 1.99E-04 | 3.347886 | down | 2.529228 | down | 1.323679 | up   | DCUN1D4            |
| 212854_x_ | 4.63E-04 | 1.42E-04 | 3.274858 | down | 1.644057 | down | 1.991937 | up   | NBPF10             |
| 212857_x_ | 0.006065 | 0.004455 | 1.220778 | down | 1.341127 | up   | 1.637219 | up   | SUB1               |
| 212858_at | 0.001675 | 8.18E-04 | 1.941841 | up   | 1.840599 | up   | 1.055005 | down | PAQR4              |
| 212860_at | 0.003247 | 0.001991 | 1.690595 | up   | 1.502682 | up   | 1.125052 | down | ZDHHC18            |
| 212861_at | 3.12E-05 | 3.71E-06 | 2.184871 | down | 2.560161 | down | 1.171768 | down | MFSD5              |
| 212864_at | 0.028247 | 0.026795 | 1.916491 | up   | 1.221982 | up   | 1.568347 | down | CDS2               |
| 212869_x_ | 0.008534 | 0.006797 | 1.22899  | down | 1.123213 | down | 1.094174 | up   | TPT1               |
| 212871_at | 3.78E-04 | 1.09E-04 | 2.662433 | up   | 2.49497  | up   | 1.06712  | down | MAPKAPK5           |
| 212872_s_ | 6.46E-04 | 2.24E-04 | 1.898898 | up   | 1.646976 | up   | 1.152961 | down | MED20              |
| 212873_at | 1.73E-05 | 1.67E-06 | 3.594718 | up   | 2.260691 | up   | 1.590097 | down | HMHA1<br>LOC100129 |
| 212874_at | 0.008051 | 0.00633  | 1.929591 | up   | 1.326064 | up   | 1.455127 | down | 500                |
| 212875_s_ | 1.11E-05 | 8.76E-07 | 2.515835 | down | 2.608902 | down | 1.036993 | down | C2CD2              |
| 212876_at | 0.003311 | 0.002046 | 1.70617  | up   | 1.218738 | down | 2.079374 | down | B4GALT4            |
| 212881_at | 0.001996 | 0.001032 | 1.615179 | up   | 1.839842 | up   | 1.139095 | up   | PIAS4              |
| 212884_x_ | 4.56E-06 | 2.54E-07 | 5.51241  | up   | 3.887094 | up   | 1.418132 | down | APOE               |

| MPHOSPH1  |          |          |               |               |               |             |
|-----------|----------|----------|---------------|---------------|---------------|-------------|
| 212885_at | 7.10E-04 | 2.55E-04 | 1.747555 up   | 1.419484 up   | 1.23112 down  | 0           |
| 212887_at | 0.001835 | 9.22E-04 | 3.431291 down | 2.531988 down | 1.355177 up   | SEC23A      |
| 212888_at | 0.004273 | 0.002845 | 2.090256 up   | 1.931887 up   | 1.081976 down | DICER1      |
| 212890_at | 8.62E-06 | 6.22E-07 | 2.214863 down | 3.415546 down | 1.542103 down | SLC38A10    |
| 212894_at | 0.001891 | 9.60E-04 | 1.746926 up   | 1.261147 up   | 1.385188 down | SUPV3L1     |
| 212895_s_ | 3.46E-05 | 4.28E-06 | 1.740824 down | 2.671411 down | 1.534567 down | ABR         |
| 212896_at | 5.52E-05 | 8.06E-06 | 1.899204 up   | 1.935839 up   | 1.01929 up    | SKIV2L2     |
| 212897_at | 0.002547 | 0.001439 | 1.913387 down | 1.961647 down | 1.025223 down | CDC2L6      |
| 212898_at | 5.17E-06 | 3.00E-07 | 2.658091 up   | 3.31743 up    | 1.24805 up    | KIAA0406    |
| 212899_at | 0.002927 | 0.001732 | 3.395971 down | 3.532138 down | 1.040097 down | CDC2L6      |
| 212904_at | 0.00711  | 0.005442 | 1.479465 up   | 1.32027 up    | 1.120578 down | LRRC47      |
| 212909_at | 2.86E-05 | 3.30E-06 | 3.110845 up   | 7.069724 down | 21.99282 down | LYPD1       |
| 212912_at | 6.11E-06 | 3.78E-07 | 13.19075 down | 18.94722 down | 1.436403 down | RPS6KA2     |
|           |          |          |               |               |               | C6orf26 /// |
| 212913_at | 0.001511 | 7.10E-04 | 1.394663 up   | 2.989649 up   | 2.143636 up   | MSH5        |
| 212914_at | 0.001458 | 6.77E-04 | 2.245184 down | 1.027967 down | 2.184101 up   | CBX7        |
| 212915_at | 1.54E-04 | 3.26E-05 | 6.547949 down | 1.108011 down | 5.909645 up   | PDZRN3      |
| 212916_at | 5.51E-05 | 8.04E-06 | 2.062496 up   | 2.097843 up   | 1.017138 up   | PHF8        |
| 212919_at | 1.96E-07 | 3.05E-09 | 6.313682 up   | 7.369746 up   | 1.167266 up   | DCP2        |
| 212922_s_ | 0.007964 | 0.006254 | 1.170878 up   | 1.67322 down  | 1.959135 down | SMYD2       |
| 212923_s_ | 1.24E-04 | 2.42E-05 | 6.822371 down | 13.65232 down | 2.001111 down | C6orf145    |
| 212925_at | 0.005939 | 0.004338 | 1.65812 up    | 1.251748 up   | 1.324644 down | C19orf21    |
| 212927_at | 0.017969 | 0.016234 | 1.785009 down | 1.287898 up   | 2.298911 up   | SMC5        |
|           |          |          |               |               |               | FAM21A ///  |
|           |          |          |               |               |               | FAM21B ///  |
|           |          |          |               |               |               | FAM21C ///  |
| 212929_s_ | 0.029818 | 0.02842  | 1.89247 down  | 1.450837 down | 1.304399 up   | FAM21D      |
| 212931_at | 8.19E-04 | 3.10E-04 | 1.461882 up   | 1.473455 up   | 1.007916 up   | TCF20       |
| 212932_at | 0.001521 | 7.16E-04 | 1.51808 down  | 2.338932 down | 1.540717 down | RAB3GAP1    |
| 212935_at | 2.93E-05 | 3.39E-06 | 2.973389 up   | 2.725936 up   | 1.090777 down | MCF2L       |

|           |          |          |          |      |          |      |          |      |          |
|-----------|----------|----------|----------|------|----------|------|----------|------|----------|
| 212936_at | 0.006379 | 0.004756 | 3.213369 | down | 2.524277 | down | 1.272986 | up   | FAM172A  |
| 212937_s_ | 8.82E-04 | 3.42E-04 | 16.68911 | down | 7.476203 | down | 2.232298 | up   | COL6A1   |
| 212938_at | 0.002573 | 0.001458 | 5.949545 | down | 4.14425  | down | 1.435615 | up   | COL6A1   |
| 212940_at | 0.001558 | 7.41E-04 | 10.84942 | down | 4.765685 | down | 2.276571 | up   | COL6A1   |
| 212942_s_ | 1.77E-13 | 1.93E-17 | 367.7586 | down | 273.6892 | down | 1.343709 | up   | KIAA1199 |
| 212943_at | 9.29E-04 | 3.67E-04 | 2.136947 | up   | 3.131252 | up   | 1.465292 | up   | KIAA0528 |
| 212945_s_ | 4.82E-06 | 2.73E-07 | 2.762142 | up   | 2.313402 | up   | 1.193974 | down | MGA      |
| 212946_at | 0.002647 | 0.001513 | 2.588965 | down | 1.957048 | down | 1.322893 | up   | KIAA0564 |
| 212948_at | 1.39E-05 | 1.22E-06 | 4.276219 | down | 6.420038 | down | 1.501335 | down | CAMTA2   |
| 212949_at | 0.002117 | 0.001119 | 3.846847 | up   | 5.279197 | up   | 1.372344 | up   | NCAPH    |
| 212955_s_ | 0.00114  | 4.85E-04 | 2.155294 | up   | 1.64395  | up   | 1.311046 | down | POLR2I   |
| 212958_x_ | 9.85E-07 | 2.89E-08 | 6.54512  | down | 3.360327 | down | 1.947763 | up   | PAM      |
| 212961_x_ | 1.31E-04 | 2.60E-05 | 1.192197 | down | 1.808229 | down | 1.516719 | down | CXorf40B |
| 212964_at | 2.00E-09 | 5.13E-12 | 9.517148 | up   | 10.57112 | up   | 1.110744 | up   | HIC2     |
| 212965_at | 3.59E-05 | 4.47E-06 | 3.152709 | up   | 1.774759 | up   | 1.776416 | down | HIC2     |
| 212966_at | 7.54E-07 | 1.99E-08 | 11.28391 | up   | 14.93264 | up   | 1.323357 | up   | HIC2     |
| 212967_x_ | 0.001603 | 7.71E-04 | 1.543883 | up   | 1.68891  | up   | 1.093936 | up   | NAP1L1   |
| 212969_x_ | 0.001592 | 7.64E-04 | 1.983594 | down | 1.992145 | down | 1.004311 | down | EML3     |
| 212970_at | 2.70E-04 | 6.91E-05 | 1.37845  | down | 2.347973 | down | 1.703343 | down | APBB2    |
| 212978_at | 6.02E-05 | 9.08E-06 | 6.307853 | up   | 7.363042 | up   | 1.167282 | up   | LRRC8B   |
| 212985_at | 0.006502 | 0.004868 | 1.233566 | down | 2.158523 | down | 1.749823 | down | APBB2    |
| 212987_at | 7.42E-05 | 1.21E-05 | 2.458376 | down | 2.953742 | down | 1.201501 | down | FBXO9    |
| 212989_at | 0.008807 | 0.007062 | 3.894157 | down | 1.534689 | down | 2.537425 | up   | SGMS1    |
| 212992_at | 5.58E-05 | 8.16E-06 | 7.808903 | down | 8.749818 | down | 1.120493 | down | AHNAK2   |
| 212993_at | 2.70E-05 | 3.03E-06 | 3.480269 | down | 5.877099 | down | 1.688691 | down | NACC2    |
| 212994_at | 0.003476 | 0.002182 | 2.145299 | up   | 2.28144  | up   | 1.06346  | up   | THOC2    |
| 213001_at | 7.00E-05 | 1.12E-05 | 18.76041 | down | 2.084465 | down | 9.000106 | up   | ANGPTL2  |
| 213002_at | 0.017266 | 0.015518 | 1.152855 | down | 1.937536 | down | 1.680641 | down | MARCKS   |
| 213003_s_ | 0.00772  | 0.006023 | 1.541956 | down | 1.355078 | down | 1.13791  | up   | CEBPD    |
| 213004_at | 7.09E-06 | 4.72E-07 | 20.37966 | down | 3.242411 | down | 6.285344 | up   | ANGPTL2  |
| 213006_at | 5.06E-04 | 1.60E-04 | 6.676087 | down | 4.673554 | down | 1.428482 | up   | CEBPD    |
| 213007_at | 0.001005 | 4.09E-04 | 3.627229 | up   | 5.860362 | up   | 1.615658 | up   | FANCI    |
| 213008_at | 3.14E-04 | 8.47E-05 | 3.871331 | up   | 6.586526 | up   | 1.70136  | up   | FANCI    |
| 213009_s_ | 0.004385 | 0.002947 | 1.787796 | up   | 1.754908 | up   | 1.018741 | down | TRIM37   |

|           |          |          |          |      |          |      |          |      |           |
|-----------|----------|----------|----------|------|----------|------|----------|------|-----------|
| 213010_at | 0.001068 | 4.44E-04 | 6.24774  | down | 4.443132 | down | 1.406157 | up   | PRKCDBP   |
| 213012_at | 2.57E-05 | 2.82E-06 | 3.731578 | down | 6.636892 | down | 1.778575 | down | NEDD4     |
| 213025_at | 0.005585 | 0.00401  | 1.603376 | up   | 2.190267 | up   | 1.366035 | up   | THUMPD1   |
| 213027_at | 0.001481 | 6.91E-04 | 1.399383 | up   | 1.636787 | up   | 1.169649 | up   | TROVE2    |
| 213028_at | 0.004171 | 0.002753 | 1.7827   | up   | 1.689081 | up   | 1.055426 | down | NFRKB     |
| 213029_at | 0.002232 | 0.001204 | 3.230934 | down | 5.319575 | down | 1.646451 | down | NFIB      |
| 213030_s_ | 0.007518 | 0.005829 | 1.659514 | up   | 1.43781  | down | 2.386066 | down | PLXNA2    |
| 213032_at | 2.85E-04 | 7.43E-05 | 4.637677 | down | 6.575285 | down | 1.417797 | down | NFIB      |
| 213035_at | 5.12E-04 | 1.63E-04 | 2.23833  | down | 1.07825  | up   | 2.41348  | up   | ANKRD28   |
| 213036_x_ | 0.006842 | 0.005184 | 1.014579 | up   | 1.619958 | up   | 1.596679 | up   | ATP2A3    |
| 213039_at | 0.018238 | 0.016519 | 1.176564 | up   | 1.093956 | down | 1.287108 | down | ARHGEF18  |
| 213046_at | 0.009626 | 0.00785  | 1.219406 | down | 2.346353 | up   | 2.861157 | up   | PABPN1    |
| 213047_x_ | 6.68E-05 | 1.05E-05 | 2.724725 | up   | 2.909511 | up   | 1.067818 | up   | SET       |
| 213048_s_ | 5.17E-04 | 1.65E-04 | 3.023677 | up   | 2.375847 | up   | 1.272673 | down |           |
| 213050_at | 1.25E-05 | 1.04E-06 | 8.40738  | up   | 11.48303 | up   | 1.365828 | up   | COBL      |
| 213053_at | 3.13E-04 | 8.41E-05 | 2.162483 | up   | 1.133997 | up   | 1.906957 | down | HAUS5     |
| 213055_at | 7.60E-04 | 2.80E-04 | 2.235763 | down | 2.213706 | down | 1.009964 | up   | CD47      |
| 213057_at | 0.020594 | 0.01893  | 2.593308 | up   | 1.459527 | up   | 1.776814 | down | ATPAF2    |
| 213058_at | 0.001162 | 4.98E-04 | 5.181327 | down | 2.093332 | down | 2.475159 | up   | TTC28     |
| 213059_at | 4.67E-05 | 6.43E-06 | 13.66349 | down | 9.626712 | down | 1.419331 | up   | CREB3L1   |
| 213062_at | 0.003618 | 0.002292 | 2.226033 | down | 1.50431  | down | 1.47977  | up   | NTAN1     |
| 213064_at | 5.87E-04 | 1.97E-04 | 1.523459 | up   | 2.188325 | up   | 1.436419 | up   | ZC3H14    |
| 213066_at | 2.47E-05 | 2.67E-06 | 1.668623 | down | 3.438205 | down | 2.060505 | down | RUSC2     |
| 213068_at | 1.89E-04 | 4.28E-05 | 41.26526 | down | 1.289963 | down | 31.98949 | up   | DPT       |
| 213069_at | 4.19E-06 | 2.24E-07 | 11.26841 | down | 15.3979  | down | 1.366466 | down | HEG1      |
| 213074_at | 6.98E-05 | 1.11E-05 | 2.504598 | up   | 3.775524 | up   | 1.507437 | up   | PHIP      |
| 213079_at | 0.003218 | 0.001968 | 1.337141 | up   | 1.285663 | up   | 1.04004  | down | TSR2      |
| 213080_x_ | 0.016386 | 0.014616 | 1.21153  | up   | 1.274424 | up   | 1.051913 | up   | RPL5      |
| 213081_at | 0.018398 | 0.016671 | 1.177731 | up   | 1.404369 | down | 1.653969 | down | ZBTB22    |
| 213085_s_ | 2.34E-04 | 5.69E-05 | 3.042848 | up   | 3.40988  | up   | 1.120621 | up   | WWC1      |
| 213086_s_ | 0.002657 | 0.00152  | 1.397216 | down | 1.047821 | up   | 1.464032 | up   | CSNK1A1   |
| 213088_s_ | 0.005867 | 0.004268 | 2.465348 | up   | 2.262337 | up   | 1.089735 | down | DNAJC9    |
|           |          |          |          |      |          |      |          |      | LOC100272 |
| 213089_at | 0.002951 | 0.001754 | 5.550923 | up   | 5.287722 | up   | 1.049776 | down | 216       |



|           |          |          |               |               |               |          |
|-----------|----------|----------|---------------|---------------|---------------|----------|
| 213090_s_ | 0.001299 | 5.80E-04 | 1.508806 up   | 2.431049 up   | 1.61124 up    | TAF4     |
| 213092_x_ | 0.003535 | 0.002227 | 2.098832 up   | 3.139374 up   | 1.495772 up   | DNAJC9   |
| 213093_at | 5.47E-07 | 1.27E-08 | 7.459796 down | 8.082699 down | 1.083501 down | PRKCA    |
| 213095_x_ | 0.00554  | 0.003968 | 1.454593 up   | 1.667673 up   | 1.146488 up   | AIF1     |
| 213097_s_ | 2.50E-04 | 6.23E-05 | 2.788681 up   | 1.843743 up   | 1.512511 down | DNAJC2   |
| 213100_at | 8.34E-04 | 3.17E-04 | 1.913997 down | 2.787515 down | 1.456384 down | UNC5B    |
| 213101_s_ | 6.51E-04 | 2.26E-04 | 1.695607 down | 1.939984 down | 1.144123 down | ACTR3    |
| 213102_at | 9.35E-04 | 3.70E-04 | 2.445012 down | 2.732379 down | 1.117532 down | ACTR3    |
| 213103_at | 1.36E-05 | 1.19E-06 | 7.2698 down   | 4.900609 down | 1.483449 up   | STARD13  |
| 213105_s_ | 0.00179  | 8.93E-04 | 1.058931 up   | 1.929752 down | 2.043474 down | C16orf42 |
| 213106_at | 2.25E-05 | 2.36E-06 | 6.606207 up   | 5.660265 up   | 1.16712 down  | ATP8A1   |
| 213107_at | 0.016061 | 0.014289 | 1.386757 up   | 3.24152 up    | 2.337482 up   | TNIK     |
| 213108_at | 0.013916 | 0.012127 | 1.233707 down | 1.015217 up   | 1.25248 up    | CAMK2A   |
| 213110_s_ | 0.001016 | 4.14E-04 | 1.762949 up   | 21.99256 up   | 12.47487 up   | COL4A5   |
| 213112_s_ | 8.65E-05 | 1.48E-05 | 2.837267 down | 3.557653 down | 1.253902 down | SQSTM1   |
| 213115_at | 0.003602 | 0.00228  | 2.141094 down | 2.126716 down | 1.006761 up   | ATG4A    |
| 213116_at | 2.33E-04 | 5.66E-05 | 1.594061 up   | 1.973266 up   | 1.237886 up   | NEK3     |
| 213122_at | 1.03E-05 | 7.88E-07 | 20.86556 down | 27.2055 down  | 1.303847 down | TSPYL5   |
| 213125_at | 4.61E-04 | 1.41E-04 | 8.338514 down | 7.26567 down  | 1.147659 up   | OLFML2B  |
| 213126_at | 0.004121 | 0.00271  | 2.508431 down | 2.361448 down | 1.062243 up   | MED8     |
| 213127_s_ | 0.001771 | 8.79E-04 | 2.480796 down | 2.41689 down  | 1.026442 up   | MED8     |
| 213129_s_ | 3.82E-04 | 1.10E-04 | 2.431497 up   | 2.343763 up   | 1.037433 down | GCSH     |
| 213130_at | 0.002426 | 0.001347 | 1.559266 up   | 1.16254 down  | 1.81271 down  | ZNF473   |
| 213131_at | 2.41E-04 | 5.94E-05 | 5.418981 up   | 10.62067 up   | 1.959901 up   | OLFM1    |
| 213132_s_ | 0.004105 | 0.002696 | 1.466611 down | 1.705117 down | 1.162624 down | MCAT     |
| 213133_s_ | 9.08E-04 | 3.56E-04 | 2.930255 up   | 2.71903 up    | 1.077684 down | GCSH     |
| 213135_at | 5.37E-07 | 1.23E-08 | 16.00275 up   | 2.384058 up   | 6.712397 down | TIAM1    |
| 213136_at | 4.83E-04 | 1.50E-04 | 1.784867 up   | 2.202757 up   | 1.23413 up    | PTPN2    |
| 213137_s_ | 2.86E-04 | 7.47E-05 | 2.216885 up   | 2.18789 up    | 1.013253 down | PTPN2    |
| 213139_at | 4.88E-05 | 6.80E-06 | 16.98155 down | 13.8349 down  | 1.227443 up   | SNAI2    |
| 213141_at | 0.012004 | 0.010205 | 1.215689 down | 1.662805 down | 1.367788 down | PSKH1    |
| 213142_x_ | 0.002635 | 0.001504 | 4.209606 down | 3.266494 down | 1.288723 up   | PION     |
| 213143_at | 0.020729 | 0.019074 | 1.600911 up   | 1.068841 down | 1.711119 down | C2orf72  |
| 213144_at | 1.41E-04 | 2.87E-05 | 1.872813 down | 1.747518 down | 1.071699 up   | GOSR2    |

|           |          |          |               |               |               |              |
|-----------|----------|----------|---------------|---------------|---------------|--------------|
| 213145_at | 0.003351 | 0.002077 | 2.214832 up   | 2.409341 up   | 1.087822 up   | FBXL14       |
| 213147_at | 2.91E-05 | 3.36E-06 | 6.741916 down | 5.968062 down | 1.129666 up   | HOXA10       |
| 213148_at | 0.002339 | 0.001283 | 1.402713 up   | 1.232794 down | 1.729256 down | C2orf72      |
| 213150_at | 7.89E-07 | 2.11E-08 | 29.4551 down  | 21.76726 down | 1.353183 up   | HOXA10       |
| 213151_s_ | 0.005633 | 0.004053 | 1.441707 down | 1.24639 down  | 1.156706 up   | 40793        |
| 213152_s_ | 0.01257  | 0.010772 | 1.350607 down | 1.708284 down | 1.264827 down | SFRS2B       |
| 213154_s_ | 0.001045 | 4.31E-04 | 1.423512 down | 1.858869 down | 1.305833 down | BICD2        |
| 213155_at | 2.19E-06 | 8.94E-08 | 6.753352 up   | 6.084148 up   | 1.109991 down | WSCD1        |
| 213156_at | 0.00163  | 7.88E-04 | 16.01704 down | 5.117762 down | 3.129697 up   |              |
| 213157_s_ | 0.001485 | 6.94E-04 | 2.230431 up   | 1.202222 up   | 1.855257 down | WSCD1        |
| 213158_at | 0.001591 | 7.63E-04 | 20.05399 down | 7.426298 down | 2.700401 up   |              |
| 213169_at | 1.51E-06 | 5.22E-08 | 23.27902 down | 10.24834 down | 2.271492 up   | SEMA5A       |
| 213170_at | 3.67E-04 | 1.05E-04 | 2.186952 down | 3.216629 down | 1.470827 down | GPX7         |
| 213172_at | 1.48E-05 | 1.34E-06 | 5.401625 up   | 5.736363 up   | 1.06197 up    | TTC9         |
| 213173_at | 0.001522 | 7.16E-04 | 1.673636 down | 1.981138 down | 1.183733 down | PCNX         |
| 213174_at | 1.38E-04 | 2.79E-05 | 3.396301 up   | 2.538752 up   | 1.337784 down | TTC9         |
| 213175_s_ | 0.001562 | 7.44E-04 | 2.050116 up   | 1.86399 up    | 1.099854 down | SNRPB        |
| 213177_at | 0.00232  | 0.001271 | 2.104262 up   | 1.0113 down   | 2.12804 down  | MAPK8IP3     |
| 213179_at | 0.003431 | 0.002145 | 2.355755 up   | 2.285092 up   | 1.030923 down | RQCD1        |
| 213180_s_ | 0.002609 | 0.001484 | 2.349311 down | 1.537577 down | 1.527931 up   | GOSR2        |
| 213185_at | 0.004982 | 0.003477 | 1.487247 down | 1.444367 down | 1.029687 up   | KIAA0556     |
| 213186_at | 8.99E-04 | 3.51E-04 | 2.662957 up   | 2.943128 up   | 1.10521 up    | DZIP3        |
| 213187_x_ | 7.98E-06 | 5.61E-07 | 2.285065 down | 1.303372 down | 1.753196 up   | FTL          |
| 213188_s_ | 5.42E-04 | 1.76E-04 | 2.195084 down | 2.755117 down | 1.25513 down  | MINA         |
| 213189_at | 0.002369 | 0.001306 | 1.981899 down | 2.607118 down | 1.315465 down | MINA         |
| 213191_at | 4.61E-04 | 1.41E-04 | 2.217872 down | 2.847082 down | 1.2837 down   | TICAM1       |
| 213200_at | 0.002794 | 0.001628 | 1.755162 up   | 1.224465 down | 2.149134 down | SYP          |
| 213201_s_ | 3.17E-08 | 2.42E-10 | 13.83448 up   | 13.86304 up   | 1.002064 up   | TNNT1        |
| 213205_s_ | 0.001429 | 6.59E-04 | 1.902056 up   | 1.951425 up   | 1.025956 up   | RAD54L2      |
| 213206_at | 0.003277 | 0.002017 | 2.68731 down  | 1.90319 down  | 1.412003 up   | GOSR2        |
| 213207_s_ | 1.82E-04 | 4.07E-05 | 1.740953 down | 1.710666 down | 1.017705 up   | GOSR2        |
|           |          |          |               |               |               | FLJ40113 /// |
| 213212_x_ | 9.26E-04 | 3.65E-04 | 1.108145 up   | 3.734129 up   | 3.369714 up   | LOC440295    |

|           |          |          |          |      |          |      |          |      |                                 |
|-----------|----------|----------|----------|------|----------|------|----------|------|---------------------------------|
| 213213_at | 0.001474 | 6.86E-04 | 1.126821 | down | 2.386036 | up   | 2.688635 | up   | DIDO1                           |
| 213214_x_ | 0.004139 | 0.002726 | 1.108442 | down | 1.243817 | down | 1.12213  | down | ACTG1                           |
| 213215_at | 0.008441 | 0.006706 | 1.704268 | down | 1.113057 | up   | 1.896947 | up   | AP3S2                           |
| 213216_at | 2.28E-04 | 5.49E-05 | 2.606592 | up   | 1.912347 | up   | 1.363033 | down | OTUD3<br>ADCY2 ///<br>LOC100133 |
| 213217_at | 6.20E-05 | 9.47E-06 | 7.23706  | up   | 11.57171 | up   | 1.598952 | up   | 953                             |
| 213218_at | 0.00432  | 0.002889 | 1.827911 | down | 1.364307 | down | 1.339809 | up   | ZNF187<br>NCRNA0008             |
| 213220_at | 0.006048 | 0.004439 | 1.234319 | down | 1.651255 | down | 1.337786 | down | 1                               |
| 213221_s_ | 0.001126 | 4.77E-04 | 3.112385 | down | 2.019479 | down | 1.541182 | up   | SIK2                            |
| 213223_at | 0.00267  | 0.001531 | 1.651798 | down | 1.080086 | up   | 1.784084 | up   | RPL28<br>NCRNA0008              |
| 213224_s_ | 0.002049 | 0.001071 | 2.516316 | down | 1.91045  | down | 1.317133 | up   | 1                               |
| 213226_at | 7.42E-04 | 2.71E-04 | 4.129599 | up   | 7.230774 | up   | 1.750963 | up   | CCNA2                           |
| 213234_at | 1.10E-04 | 2.05E-05 | 2.630287 | up   | 2.542393 | up   | 1.034571 | down | KIAA1467                        |
| 213235_at | 2.57E-04 | 6.46E-05 | 3.785537 | up   | 2.237922 | up   | 1.691541 | down | C16orf88                        |
| 213236_at | 3.12E-05 | 3.72E-06 | 2.362261 | down | 1.133403 | down | 2.084219 | up   | SASH1                           |
| 213237_at | 7.90E-05 | 1.32E-05 | 4.544502 | up   | 3.880649 | up   | 1.171068 | down | C16orf88                        |
| 213238_at | 1.01E-04 | 1.82E-05 | 6.979725 | down | 11.00878 | down | 1.577252 | down | ATP10D                          |
| 213239_at | 0.007558 | 0.00587  | 2.264798 | down | 1.736401 | down | 1.304305 | up   | PIBF1                           |
| 213241_at | 1.66E-05 | 1.56E-06 | 17.42581 | down | 1.110653 | up   | 19.35403 | up   | PLXNC1                          |
| 213243_at | 2.45E-04 | 6.05E-05 | 4.477378 | down | 2.976108 | down | 1.50444  | up   | VPS13B                          |
| 213245_at | 0.004895 | 0.0034   | 1.0387   | down | 2.776084 | up   | 2.883519 | up   | ADCY1                           |
| 213247_at | 1.09E-04 | 2.02E-05 | 15.72791 | down | 2.24496  | down | 7.005877 | up   | SVEP1                           |
| 213248_at | 0.002742 | 0.001587 | 3.074818 | down | 1.114916 | down | 2.757891 | up   | LOC730101                       |
| 213249_at | 6.48E-04 | 2.25E-04 | 2.817798 | down | 1.706508 | down | 1.651207 | up   | FBXL7                           |
| 213250_at | 7.20E-04 | 2.60E-04 | 1.282745 | up   | 1.538476 | down | 1.973473 | down | CCDC85B                         |
| 213251_at | 1.61E-04 | 3.45E-05 | 2.677966 | up   | 3.915259 | up   | 1.462027 | up   | SMARCA5                         |
| 213252_at | 0.002869 | 0.001688 | 3.284698 | down | 3.065524 | down | 1.071496 | up   | SH3PXD2A                        |
| 213253_at | 0.006961 | 0.005303 | 1.722348 | up   | 2.195343 | up   | 1.274622 | up   | SMC2                            |
| 213254_at | 0.001859 | 9.38E-04 | 2.520981 | up   | 1.541796 | up   | 1.635094 | down | TNRC6B                          |
| 213257_at | 0.010518 | 0.008728 | 1.333902 | down | 1.805537 | down | 1.353576 | down | SARM1                           |
| 213258_at | 0.005273 | 0.003737 | 6.783769 | down | 2.621095 | down | 2.588143 | up   | TFPI                            |

|           |          |          |          |      |          |      |          |      |          |
|-----------|----------|----------|----------|------|----------|------|----------|------|----------|
| 213259_s_ | 7.09E-04 | 2.55E-04 | 1.057756 | down | 1.898027 | down | 1.79439  | down | SARM1    |
| 213260_at | 3.14E-04 | 8.47E-05 | 2.777815 | down | 5.584872 | down | 2.010527 | down | FOXC1    |
| 213261_at | 2.87E-04 | 7.49E-05 | 3.036274 | down | 1.445276 | down | 2.100827 | up   | LBA1     |
|           |          |          |          |      |          |      |          |      | PGA3 /// |
|           |          |          |          |      |          |      |          |      | PGA4 /// |
| 213265_at | 0.043699 | 0.04246  | 1.115374 | up   | 1.386701 | up   | 1.243261 | up   | PGA5     |
| 213267_at | 0.003979 | 0.002589 | 1.021884 | down | 1.1581   | up   | 1.183444 | up   | DOPEY1   |
| 213268_at | 3.47E-04 | 9.68E-05 | 4.770941 | up   | 4.203305 | up   | 1.135045 | down | CAMTA1   |
| 213270_at | 0.005183 | 0.003656 | 2.778705 | up   | 1.942136 | up   | 1.430748 | down | MPP2     |
| 213274_s_ | 9.29E-06 | 6.87E-07 | 24.33972 | down | 22.84272 | down | 1.065535 | up   | CTSB     |
| 213275_x_ | 5.33E-06 | 3.12E-07 | 8.373166 | down | 5.503186 | down | 1.521512 | up   | CTSB     |
| 213278_at | 0.012416 | 0.010619 | 1.71571  | up   | 1.106346 | up   | 1.55079  | down | MTMR9    |
| 213279_at | 0.001209 | 5.26E-04 | 1.697906 | down | 2.336085 | down | 1.375862 | down | DHRS1    |
| 213280_at | 3.25E-05 | 3.94E-06 | 5.254532 | up   | 5.471755 | up   | 1.04134  | up   | GARNL4   |
| 213283_s_ | 2.39E-07 | 3.98E-09 | 10.42672 | up   | 22.33386 | up   | 2.141985 | up   | SALL2    |
| 213285_at | 0.003924 | 0.002546 | 1.804552 | up   | 6.26054  | up   | 3.469304 | up   | TMEM30B  |
| 213287_s_ | 0.01529  | 0.013516 | 1.883464 | down | 1.261607 | down | 1.492909 | up   | KRT10    |
| 213290_at | 4.31E-07 | 9.07E-09 | 4.783972 | down | 5.768149 | down | 1.205724 | down | COL6A2   |
| 213292_s_ | 0.004275 | 0.002846 | 1.455802 | down | 1.129688 | down | 1.288676 | up   | SNX13    |
| 213296_at | 5.47E-04 | 1.78E-04 | 1.942598 | down | 2.202365 | down | 1.133722 | down | RER1     |
| 213298_at | 1.83E-04 | 4.10E-05 | 7.923019 | down | 4.997423 | down | 1.585421 | up   | NFIC     |
| 213301_x_ | 7.98E-07 | 2.15E-08 | 13.23269 | up   | 13.1823  | up   | 1.003822 | down | TRIM24   |
| 213302_at | 4.68E-04 | 1.44E-04 | 5.272189 | up   | 5.870919 | up   | 1.113564 | up   | PFAS     |
| 213304_at | 0.011749 | 0.009948 | 3.187559 | down | 1.464568 | down | 2.17645  | up   | FAM179B  |
| 213308_at | 0.001594 | 7.66E-04 | 4.86143  | up   | 4.849418 | up   | 1.002477 | down | SHANK2   |
| 213313_at | 0.001108 | 4.66E-04 | 2.401558 | down | 2.558246 | down | 1.065244 | down | RABGAP1  |
| 213315_x_ | 7.51E-05 | 1.23E-05 | 1.326616 | down | 1.942072 | down | 1.463929 | down | CXorf40A |
| 213316_at | 0.001065 | 4.42E-04 | 5.561937 | down | 13.14458 | down | 2.363309 | down | KIAA1462 |
| 213318_s_ | 0.002419 | 0.001341 | 2.341455 | up   | 1.368553 | up   | 1.710897 | down | BAT3     |
| 213319_s_ | 0.007727 | 0.006031 | 1.693687 | up   | 1.366689 | down | 2.314744 | down | CSDA     |
| 213322_at | 9.84E-05 | 1.76E-05 | 2.222385 | up   | 3.257471 | up   | 1.465755 | up   | C6orf130 |
| 213326_at | 0.007639 | 0.005946 | 1.489335 | down | 1.472449 | up   | 2.192971 | up   | VAMP1    |
| 213330_s_ | 0.023614 | 0.02203  | 2.711405 | up   | 1.726711 | up   | 1.570271 | down | STIP1    |
| 213331_s_ | 0.025184 | 0.023636 | 1.796914 | down | 1.988202 | down | 1.106454 | down | NEK1     |

|           |          |          |               |               |               |           |
|-----------|----------|----------|---------------|---------------|---------------|-----------|
| 213342_at | 0.006892 | 0.005233 | 1.384272 down | 2.37406 down  | 1.715025 down | YAP1      |
| 213343_s_ | 0.012603 | 0.010805 | 1.542421 down | 1.564889 down | 1.014566 down | GDPD5     |
| 213344_s_ | 0.004117 | 0.002706 | 1.951181 up   | 2.003213 up   | 1.026667 up   | H2AFX     |
| 213345_at | 1.47E-05 | 1.33E-06 | 2.076792 down | 1.981446 down | 1.048119 up   | NFATC4    |
| 213347_x_ | 0.016554 | 0.014795 | 1.026646 up   | 1.127032 down | 1.157063 down | RPS4X     |
| 213353_at | 0.004101 | 0.002692 | 6.154854 down | 1.74073 down  | 3.53579 up    | ABCA5     |
| 213355_at | 7.54E-04 | 2.78E-04 | 2.604922 up   | 1.919633 up   | 1.35699 down  | ST3GAL6   |
|           |          |          |               |               |               | ///       |
|           |          |          |               |               |               | HNRNPA1L1 |
|           |          |          |               |               |               | ///       |
|           |          |          |               |               |               | HNRNPA1L2 |
|           |          |          |               |               |               | ///       |
|           |          |          |               |               |               | HNRPA1L-2 |
|           |          |          |               |               |               | ///       |
|           |          |          |               |               |               | HNRPA1P5  |
|           |          |          |               |               |               | ///       |
|           |          |          |               |               |               | LOC100128 |
|           |          |          |               |               |               | 836 ///   |
|           |          |          |               |               |               | LOC391670 |
|           |          |          |               |               |               | ///       |
|           |          |          |               |               |               | LOC402112 |
|           |          |          |               |               |               | ///       |
|           |          |          |               |               |               | LOC642817 |
|           |          |          |               |               |               | ///       |
|           |          |          |               |               |               | LOC643033 |
|           |          |          |               |               |               | ///       |
|           |          |          |               |               |               | LOC644037 |
|           |          |          |               |               |               | ///       |
|           |          |          |               |               |               | LOC645001 |
|           |          |          |               |               |               | ///       |
|           |          |          |               |               |               | LOC728170 |
|           |          |          |               |               |               | ///       |
|           |          |          |               |               |               | LOC728732 |
|           |          |          |               |               |               | ///       |
| 213356_x_ | 3.35E-04 | 9.23E-05 | 1.462553 up   | 1.638939 up   | 1.120601 up   | ///       |

|           |          |          |               |               |               |            |
|-----------|----------|----------|---------------|---------------|---------------|------------|
| 213357_at | 7.23E-05 | 1.17E-05 | 1.752244 down | 2.043196 down | 1.166045 down | GTF2H5     |
| 213358_at | 8.74E-04 | 3.37E-04 | 2.358634 down | 1.013999 down | 2.326072 up   | KIAA0802   |
| 213359_at | 2.14E-04 | 5.04E-05 | 1.510562 up   | 6.049141 up   | 4.004562 up   | HNRNPD     |
|           |          |          |               |               |               | POM121 /// |
| 213360_s_ | 6.32E-05 | 9.68E-06 | 2.65803 up    | 1.431607 up   | 1.856676 down | POM121C    |
| 213361_at | 0.001505 | 7.06E-04 | 2.100797 down | 1.974022 down | 1.064222 up   | TDRD7      |
| 213362_at | 9.30E-07 | 2.63E-08 | 6.336604 up   | 11.06578 up   | 1.746326 up   | PTPRD      |
| 213364_s_ | 0.005136 | 0.003615 | 3.581956 down | 1.386386 down | 2.583664 up   | SNX1       |
| 213366_x_ | 0.003682 | 0.002346 | 1.562267 up   | 1.04561 up    | 1.49412 down  | ATP5C1     |
| 213373_s_ | 3.60E-05 | 4.50E-06 | 5.590072 down | 3.281755 down | 1.703378 up   | CASP8      |
|           |          |          |               |               |               | DDX11 ///  |
|           |          |          |               |               |               | DDX12 ///  |
| 213378_s_ | 0.001095 | 4.59E-04 | 2.571329 up   | 4.326325 up   | 1.682525 up   | LOC642846  |
| 213380_x_ | 0.006992 | 0.005333 | 1.281126 up   | 1.457997 up   | 1.138059 up   | MSTP9      |
| 213381_at | 8.01E-05 | 1.34E-05 | 2.922937 down | 2.657839 down | 1.099742 up   | C10orf72   |
| 213384_x_ | 0.008435 | 0.006697 | 1.448016 up   | 1.169084 up   | 1.238591 down | PLCB3      |
| 213386_at | 0.005139 | 0.003618 | 1.85273 down  | 1.416167 down | 1.308271 up   | C9orf125   |
| 213388_at | 0.002222 | 0.001196 | 6.660978 down | 5.609453 down | 1.187456 up   | PDE4DIP    |
| 213389_at | 0.002181 | 0.001164 | 1.557301 up   | 1.333756 down | 2.07706 down  | ZNF592     |
| 213391_at | 8.17E-04 | 3.09E-04 | 4.801687 down | 2.547755 down | 1.884674 up   | DPY19L4    |
| 213392_at | 0.0099   | 0.008124 | 2.252718 down | 1.334211 down | 1.688427 up   | IQCK       |
| 213394_at | 0.0027   | 0.001553 | 2.301215 down | 2.431211 down | 1.05649 down  | MAPKBP1    |
| 213397_x_ | 8.94E-04 | 3.49E-04 | 24.11879 down | 9.575138 down | 2.518898 up   | RNASE4     |
| 213399_x_ | 0.005885 | 0.004287 | 1.073736 up   | 1.172787 down | 1.259264 down | RPN2       |
| 213402_at | 0.011447 | 0.009648 | 2.245293 up   | 1.184172 up   | 1.896087 down | ZNF787     |
| 213405_at | 0.00187  | 9.46E-04 | 4.423751 down | 3.064892 down | 1.443363 up   | RAB22A     |
| 213410_at | 4.71E-05 | 6.49E-06 | 1.574601 up   | 2.755129 up   | 1.749731 up   | C10orf137  |
| 213411_at | 0.011305 | 0.00951  | 1.525605 up   | 1.990944 up   | 1.305019 up   |            |
| 213412_at | 3.85E-06 | 1.98E-07 | 3.906837 up   | 2.048486 up   | 1.907183 down | TJP3       |
| 213413_at | 0.042457 | 0.041207 | 2.967352 down | 1.456372 down | 2.037495 up   | STON1      |
| 213415_at | 3.91E-05 | 5.03E-06 | 5.604514 down | 1.115423 down | 5.024562 up   | CLIC2      |
| 213416_at | 7.20E-09 | 2.68E-11 | 28.41014 down | 5.071548 down | 5.601866 up   | ITGA4      |
| 213420_at | 2.05E-04 | 4.74E-05 | 1.956157 up   | 1.321936 up   | 1.479767 down | DHX57      |

|           |          |          |          |      |          |      |          |      |          |
|-----------|----------|----------|----------|------|----------|------|----------|------|----------|
| 213422_s_ | 6.31E-08 | 5.88E-10 | 8.126772 | down | 8.13723  | down | 1.001287 | down | MXRA8    |
| 213423_x_ | 0.008911 | 0.007162 | 1.290756 | up   | 1.645016 | down | 2.123314 | down | TUSC3    |
| 213425_at | 9.94E-05 | 1.79E-05 | 28.38208 | down | 7.742904 | down | 3.665561 | up   | WNT5A    |
| 213428_s_ | 1.82E-07 | 2.71E-09 | 13.77602 | down | 9.454111 | down | 1.457146 | up   | COL6A1   |
| 213429_at | 4.05E-07 | 8.21E-09 | 54.83743 | down | 33.84892 | down | 1.620065 | up   |          |
| 213434_at | 0.001549 | 7.35E-04 | 1.951303 | down | 1.625495 | down | 1.200437 | up   | STX2     |
| 213435_at | 0.00235  | 0.001291 | 2.01622  | down | 4.946255 | down | 2.453232 | down | SATB2    |
| 213436_at | 0.020925 | 0.01928  | 2.232055 | up   | 1.669262 | up   | 1.337151 | down | CNR1     |
| 213438_at | 7.31E-06 | 4.94E-07 | 7.913913 | down | 14.0018  | down | 1.769263 | down | NFASC    |
| 213441_x_ | 0.027024 | 0.025538 | 1.345936 | up   | 1.001404 | down | 1.347826 | down | SPDEF    |
| 213444_at | 0.007823 | 0.006123 | 1.666004 | down | 1.503165 | down | 1.108331 | up   | ZNF862   |
| 213447_at | 3.23E-06 | 1.55E-07 | 12.69879 | up   | 11.74009 | up   | 1.081661 | down | IPW      |
| 213448_at | 4.19E-06 | 2.24E-07 | 6.334254 | down | 5.24815  | down | 1.20695  | up   |          |
| 213455_at | 1.96E-06 | 7.62E-08 | 16.29705 | down | 15.95927 | down | 1.021166 | up   | FAM114A1 |
| 213459_at | 0.019484 | 0.017785 | 1.37326  | up   | 2.67088  | up   | 1.94492  | up   | RPL37A   |
| 213460_x_ | 7.42E-06 | 5.06E-07 | 2.145638 | up   | 2.40079  | up   | 1.118917 | up   | NSUN5C   |
| 213461_at | 0.003725 | 0.002381 | 1.396055 | up   | 2.859274 | up   | 2.04811  | up   | NUDT21   |
| 213462_at | 2.72E-04 | 7.00E-05 | 5.736819 | down | 3.706134 | down | 1.547925 | up   | NPAS2    |
| 213463_s_ | 6.14E-05 | 9.33E-06 | 4.303671 | down | 3.297963 | down | 1.304948 | up   | FAM149B1 |
| 213464_at | 0.009632 | 0.007857 | 1.471946 | up   | 1.686606 | up   | 1.145835 | up   | SHC2     |
| 213465_s_ | 0.006929 | 0.005271 | 1.358169 | down | 1.735782 | down | 1.27803  | down | PPP1R7   |
| 213467_at | 2.88E-07 | 4.92E-09 | 10.15399 | up   | 10.02339 | up   | 1.01303  | down | RND2     |
| 213468_at | 1.52E-04 | 3.18E-05 | 1.023853 | up   | 2.497439 | down | 2.55701  | down | ERCC2    |
| 213479_at | 0.001492 | 6.98E-04 | 3.146663 | up   | 6.256063 | up   | 1.988158 | up   | NPTX2    |
| 213480_at | 0.001052 | 4.34E-04 | 6.157621 | down | 2.392924 | down | 2.573263 | up   | VAMP4    |
| 213482_at | 1.13E-06 | 3.47E-08 | 3.168542 | up   | 2.540154 | up   | 1.247382 | down | DOCK3    |
| 213483_at | 6.71E-04 | 2.36E-04 | 1.318227 | up   | 2.20905  | up   | 1.675774 | up   | PPWD1    |
| 213484_at | 7.71E-05 | 1.27E-05 | 9.14141  | up   | 12.4602  | up   | 1.36305  | up   |          |
| 213488_at | 9.84E-04 | 3.97E-04 | 8.418723 | down | 2.771909 | down | 3.037157 | up   | SNED1    |
| 213489_at | 0.002351 | 0.001292 | 2.046828 | down | 1.50211  | up   | 3.074561 | up   | MAPRE2   |
| 213491_x_ | 0.001783 | 8.87E-04 | 1.170001 | up   | 1.217706 | down | 1.424717 | down | RPN2     |
| 213493_at | 0.00322  | 0.00197  | 4.357907 | down | 2.170028 | down | 2.008227 | up   | SNED1    |
| 213496_at | 5.15E-04 | 1.64E-04 | 19.45298 | down | 1.432221 | up   | 27.86095 | up   | LPPR4    |
| 213498_at | 0.007527 | 0.005838 | 4.682761 | down | 3.349064 | down | 1.39823  | up   | CREB3L1  |

|           |          |          |          |      |          |      |          |      |            |
|-----------|----------|----------|----------|------|----------|------|----------|------|------------|
| 213500_at | 0.014686 | 0.012907 | 2.189869 | down | 1.135368 | down | 1.928775 | up   |            |
| 213503_x_ | 2.34E-04 | 5.69E-05 | 3.00081  | down | 3.228192 | down | 1.075773 | down | ANXA2      |
| 213504_at | 0.007414 | 0.005726 | 1.963673 | down | 1.934505 | down | 1.015078 | up   | COPS6      |
| 213506_at | 8.29E-05 | 1.40E-05 | 23.66841 | up   | 35.67064 | up   | 1.5071   | up   | F2RL1      |
| 213509_x_ | 9.62E-04 | 3.85E-04 | 1.821908 | down | 2.007232 | down | 1.101719 | down | CES2       |
| 213512_at | 0.001332 | 5.99E-04 | 1.033978 | up   | 1.651343 | down | 1.707452 | down | C14orf79   |
| 213513_x_ | 5.01E-04 | 1.58E-04 | 1.6829   | down | 1.837302 | down | 1.091747 | down | ARPC2      |
| 213514_s_ | 0.022531 | 0.020948 | 1.386856 | up   | 1.021201 | up   | 1.358064 | down | DIAPH1     |
| 213519_s_ | 8.61E-05 | 1.47E-05 | 5.2315   | down | 1.31     | up   | 6.853264 | up   | LAMA2      |
| 213520_at | 0.001936 | 9.92E-04 | 2.528621 | up   | 1.619321 | up   | 1.561532 | down | RECQL4     |
| 213521_at | 9.42E-04 | 3.74E-04 | 1.538412 | down | 1.880502 | down | 1.222366 | down | PTPN18     |
| 213523_at | 6.66E-06 | 4.28E-07 | 5.487518 | up   | 4.513255 | up   | 1.215868 | down | CCNE1      |
| 213524_s_ | 0.004825 | 0.003335 | 2.716317 | down | 5.423757 | down | 1.996732 | down | GOS2       |
| 213525_at | 0.005059 | 0.003545 | 1.463143 | up   | 1.226648 | down | 1.794761 | down |            |
| 213526_s_ | 4.17E-04 | 1.24E-04 | 3.109831 | down | 3.693332 | down | 1.187631 | down | LIN37      |
| 213527_s_ | 1.15E-05 | 9.18E-07 | 2.28844  | down | 2.768393 | down | 1.209729 | down | ZNF688     |
| 213531_s_ | 0.001332 | 6.00E-04 | 1.984196 | down | 2.143761 | down | 1.080418 | down | RAB3GAP1   |
| 213532_at | 0.01252  | 0.010723 | 1.539834 | up   | 1.0859   | up   | 1.418025 | down | ADAM17     |
| 213533_at | 5.62E-04 | 1.85E-04 | 1.95609  | up   | 2.890947 | up   | 1.477921 | up   | D4S234E    |
| 213534_s_ | 9.75E-05 | 1.74E-05 | 6.37556  | up   | 6.305573 | up   | 1.011099 | down | PASK       |
| 213535_s_ | 3.34E-04 | 9.18E-05 | 1.732226 | up   | 1.649488 | up   | 1.05016  | down | UBE2I      |
| 213538_at | 1.23E-05 | 1.02E-06 | 2.04655  | up   | 1.583235 | up   | 1.292638 | down | SON        |
| 213539_at | 0.01064  | 0.008852 | 1.490002 | up   | 1.183103 | up   | 1.259402 | down | CD3D       |
| 213540_at | 0.003116 | 0.001885 | 1.334564 | up   | 1.835786 | up   | 1.37557  | up   | HSD17B8    |
| 213541_s_ | 0.003705 | 0.002364 | 1.356093 | up   | 1.23136  | down | 1.669838 | down | ERG        |
| 213543_at | 6.63E-05 | 1.04E-05 | 22.98686 | down | 4.274893 | down | 5.377179 | up   | SGCD       |
|           |          |          |          |      |          |      |          |      | DKFZP58611 |
| 213546_at | 1.48E-04 | 3.06E-05 | 7.383618 | up   | 9.065331 | up   | 1.227763 | up   | 420        |
| 213551_x_ | 0.002897 | 0.001709 | 1.670266 | up   | 1.821509 | up   | 1.09055  | up   | PCGF2      |
| 213552_at | 1.37E-04 | 2.76E-05 | 4.580441 | down | 2.441676 | down | 1.875941 | up   | GLCE       |
| 213553_x_ | 1.54E-04 | 3.26E-05 | 2.553919 | up   | 4.138748 | up   | 1.620548 | up   | APOC1      |
| 213564_x_ | 1.38E-04 | 2.80E-05 | 1.841223 | up   | 1.773564 | up   | 1.038148 | down | LDHB       |
| 213565_s_ | 1.81E-05 | 1.76E-06 | 1.184421 | up   | 1.715494 | down | 2.031868 | down | SMAD6      |
| 213568_at | 5.36E-06 | 3.14E-07 | 200.7032 | down | 2.415289 | down | 83.09696 | up   | OSR2       |



|           |          |          |          |      |          |      |          |      |            |
|-----------|----------|----------|----------|------|----------|------|----------|------|------------|
| 213570_at | 2.28E-04 | 5.49E-05 | 1.822032 | down | 1.588168 | down | 1.147254 | up   | EIF4E2     |
| 213571_s_ | 5.66E-05 | 8.32E-06 | 1.72698  | up   | 1.236844 | down | 2.136004 | down | EIF4E2     |
| 213572_s_ | 0.004226 | 0.0028   | 4.69582  | down | 2.303697 | down | 2.038384 | up   | SERPINB1   |
| 213582_at | 0.00445  | 0.003005 | 1.46433  | up   | 1.520897 | up   | 1.03863  | up   | ATP11A     |
| 213588_x_ | 0.03187  | 0.030524 | 1.267927 | up   | 1.081842 | up   | 1.172008 | down | RPL14      |
| 213591_at | 0.001042 | 4.29E-04 | 1.926167 | up   | 1.287717 | up   | 1.4958   | down | ALDH7A1    |
| 213592_at | 0.002436 | 0.001355 | 4.22764  | up   | 3.470343 | up   | 1.21822  | down | APLNR      |
| 213593_s_ | 0.002332 | 0.001279 | 1.863032 | up   | 3.772936 | up   | 2.025158 | up   | TRA2A      |
|           |          |          |          |      |          |      |          |      | FUSIP1 /// |
| 213594_x_ | 0.004466 | 0.003021 | 2.200018 | up   | 2.54693  | up   | 1.157686 | up   | LOC642558  |
| 213595_s_ | 5.38E-04 | 1.74E-04 | 1.566211 | down | 2.876842 | down | 1.836816 | down | CDC42BPA   |
| 213596_at | 3.97E-04 | 1.16E-04 | 1.52164  | down | 1.666424 | down | 1.09515  | down | CASP4      |
| 213598_at | 0.005003 | 0.003496 | 1.542726 | up   | 1.788888 | up   | 1.159563 | up   |            |
| 213599_at | 4.53E-04 | 1.38E-04 | 6.76816  | up   | 9.102841 | up   | 1.344951 | up   | OIP5       |
| 213603_s_ | 2.82E-05 | 3.23E-06 | 4.63789  | down | 10.00176 | down | 2.156531 | down | RAC2       |
| 213610_s_ | 7.74E-06 | 5.41E-07 | 10.30358 | up   | 19.59289 | up   | 1.901562 | up   | KLHL23     |
|           |          |          |          |      |          |      |          |      | NBPF10 /// |
|           |          |          |          |      |          |      |          |      | NBPF12 /// |
|           |          |          |          |      |          |      |          |      | NBPF15 /// |
|           |          |          |          |      |          |      |          |      | NBPF16 /// |
|           |          |          |          |      |          |      |          |      | NBPF8 ///  |
| 213612_x_ | 0.003748 | 0.002403 | 2.742172 | down | 1.437943 | down | 1.907011 | up   | NBPF9      |
| 213613_s_ | 0.002774 | 0.001613 | 1.374941 | up   | 1.597165 | down | 2.196007 | down | NADK       |
| 213616_at | 2.29E-04 | 5.54E-05 | 1.99353  | down | 2.36009  | down | 1.183875 | down | C18orf10   |
| 213620_s_ | 3.69E-04 | 1.05E-04 | 1.060424 | down | 3.040194 | down | 2.866961 | down | ICAM2      |
| 213622_at | 5.52E-04 | 1.80E-04 | 1.733962 | up   | 2.358565 | up   | 1.360217 | up   | COL9A2     |
| 213624_at | 0.001335 | 6.02E-04 | 12.14724 | down | 2.608035 | down | 4.65762  | up   | SMPDL3A    |
| 213625_at | 0.006381 | 0.004758 | 1.047092 | down | 1.554441 | up   | 1.627643 | up   | ZKSCAN4    |
| 213626_at | 9.20E-04 | 3.62E-04 | 2.365368 | up   | 3.602901 | up   | 1.523188 | up   | CBR4       |
| 213628_at | 3.54E-04 | 9.97E-05 | 2.464975 | down | 1.93703  | down | 1.272553 | up   | CLCC1      |
| 213632_at | 0.003143 | 0.001908 | 2.520862 | up   | 1.613062 | up   | 1.56278  | down | DHODH      |
| 213636_at | 0.009537 | 0.007762 | 1.293678 | up   | 1.147527 | up   | 1.127361 | down | KIAA1045   |
| 213640_s_ | 4.94E-05 | 6.96E-06 | 36.1781  | down | 48.50945 | down | 1.340851 | down | LOX        |
| 213644_at | 0.001421 | 6.55E-04 | 3.185839 | down | 1.611336 | down | 1.977142 | up   | CCDC46     |

|           |          |          |               |               |               |           |
|-----------|----------|----------|---------------|---------------|---------------|-----------|
| 213647_at | 4.22E-06 | 2.26E-07 | 7.727076 up   | 11.78375 up   | 1.524994 up   | DNA2      |
| 213649_at | 1.89E-05 | 1.86E-06 | 3.291027 up   | 6.904609 up   | 2.098011 up   | SFRS7     |
| 213651_at | 0.006186 | 0.004569 | 1.645356 up   | 1.159156 up   | 1.419444 down | INPP5J    |
| 213653_at | 1.97E-04 | 4.49E-05 | 1.860823 up   | 2.832345 up   | 1.522093 up   | METTL3    |
| 213658_at | 0.00312  | 0.001889 | 2.296787 down | 1.14132 down  | 2.012396 up   |           |
| 213660_s_ | 0.016129 | 0.014361 | 1.629271 up   | 1.167557 up   | 1.395453 down | TOP3B     |
| 213661_at | 3.82E-05 | 4.87E-06 | 8.176053 down | 1.918673 down | 4.261307 up   | PAMR1     |
| 213664_at | 3.47E-04 | 9.70E-05 | 1.054319 down | 7.151981 down | 6.783508 down | SLC1A1    |
| 213665_at | 0.001462 | 6.80E-04 | 2.230783 up   | 1.152021 up   | 1.936409 down | SOX4      |
| 213668_s_ | 2.94E-04 | 7.75E-05 | 8.615065 up   | 3.331159 up   | 2.586207 down | SOX4      |
| 213669_at | 0.005831 | 0.004233 | 1.920082 up   | 1.408094 up   | 1.363604 down | FCHO1     |
| 213670_x_ | 3.97E-06 | 2.06E-07 | 1.956005 up   | 2.68538 up    | 1.37289 up    | NSUN5B    |
| 213675_at | 6.44E-07 | 1.55E-08 | 11.96813 down | 15.18129 down | 1.268477 down |           |
| 213676_at | 3.75E-04 | 1.08E-04 | 2.2426 up     | 1.319015 up   | 1.700208 down | TMEM151B  |
| 213677_s_ | 2.67E-05 | 2.99E-06 | 2.335119 up   | 3.224105 up   | 1.380703 up   | PMS1      |
| 213678_at | 0.006307 | 0.004688 | 1.401499 up   | 1.220949 up   | 1.147877 down | TMEM151B  |
| 213682_at | 1.00E-04 | 1.82E-05 | 1.856306 up   | 2.234712 up   | 1.203849 up   | NUP50     |
| 213684_s_ | 7.93E-05 | 1.32E-05 | 2.027215 up   | 7.716308 down | 15.64262 down | PDLIM5    |
| 213687_s_ | 0.001445 | 6.69E-04 | 1.314291 up   | 1.3641 up     | 1.037898 up   | RPL35A    |
| 213689_x_ | 1.76E-05 | 1.70E-06 | 8.883303 down | 8.44291 down  | 1.052161 up   | FAM69A    |
| 213690_s_ | 0.001471 | 6.84E-04 | 2.09379 up    | 1.360994 down | 2.849635 down |           |
| 213691_at | 0.002087 | 0.001098 | 1.89926 up    | 1.188468 down | 2.257209 down |           |
| 213693_s_ | 0.00114  | 4.85E-04 | 2.176195 down | 2.192223 down | 1.007366 down | MUC1      |
| 213696_s_ | 6.60E-04 | 2.31E-04 | 1.926559 down | 2.670661 down | 1.386234 down | MED8      |
| 213698_at | 7.04E-05 | 1.13E-05 | 4.689324 down | 2.231367 down | 2.101548 up   | ZMYM6     |
| 213702_x_ | 0.006268 | 0.00465  | 3.00572 down  | 1.829928 down | 1.642535 up   | ASAH1     |
| 213703_at | 0.003917 | 0.00254  | 2.879784 down | 2.126606 down | 1.354169 up   | LOC150759 |
| 213707_s_ | 4.69E-04 | 1.45E-04 | 1.413578 up   | 2.74575 down  | 3.881333 down | DLX5      |
| 213709_at | 2.53E-05 | 2.76E-06 | 2.55466 up    | 4.981837 up   | 1.950098 up   | BHLHB9    |
| 213711_at | 0.006195 | 0.004577 | 1.521473 up   | 1.674436 down | 2.547608 down | KRT81     |
| 213712_at | 9.40E-04 | 3.73E-04 | 2.089475 up   | 1.412518 up   | 1.479255 down | ELOVL2    |
| 213713_s_ | 0.005359 | 0.003811 | 1.340614 up   | 1.647776 up   | 1.22912 up    | GLB1L2    |
| 213715_s_ | 0.005059 | 0.003546 | 1.949749 up   | 1.221618 down | 2.381847 down | KANK3     |
| 213716_s_ | 6.62E-05 | 1.04E-05 | 11.09125 down | 1.108068 down | 10.00954 up   | SECTM1    |

|           |          |          |               |               |               |           |
|-----------|----------|----------|---------------|---------------|---------------|-----------|
| 213718_at | 7.57E-04 | 2.79E-04 | 2.594223 up   | 2.060532 up   | 1.259006 down | RBM4      |
| 213720_s_ | 9.23E-05 | 1.61E-05 | 3.452292 up   | 2.131414 up   | 1.619719 down | SMARCA4   |
| 213721_at | 2.24E-08 | 1.32E-10 | 42.58351 up   | 33.76186 up   | 1.26129 down  | SOX2      |
| 213722_at | 2.77E-04 | 7.16E-05 | 5.553224 up   | 5.439503 up   | 1.020907 down | SOX2      |
| 213723_s_ | 0.016939 | 0.015187 | 1.382618 up   | 1.019394 up   | 1.356313 down | IDUA      |
| 213725_x_ | 1.43E-04 | 2.93E-05 | 5.151541 down | 7.596237 down | 1.474556 down | XYLT1     |
| 213726_x_ | 0.020596 | 0.018933 | 2.12884 up    | 1.3188 up     | 1.614225 down | TUBB2C    |
| 213727_x_ | 0.002504 | 0.001407 | 2.346437 down | 2.267362 down | 1.034875 up   | MPPE1     |
| 213728_at | 0.00683  | 0.005173 | 1.776855 down | 2.047793 down | 1.152482 down | LAMP1     |
| 213729_at | 4.89E-05 | 6.85E-06 | 3.596925 up   | 2.684794 up   | 1.33974 down  | PRPF40A   |
| 213730_x_ | 2.13E-04 | 5.01E-05 | 2.705782 up   | 1.616666 up   | 1.673681 down | TCF3      |
| 213731_s_ | 0.008025 | 0.006308 | 1.6179 up     | 1.378186 down | 2.229768 down | TCF3      |
| 213732_at | 0.017739 | 0.015996 | 1.531233 up   | 1.170483 down | 1.792283 down | TCF3      |
| 213733_at | 0.005834 | 0.004235 | 1.339279 down | 1.337345 up   | 1.791078 up   | MYO1F     |
| 213734_at | 9.91E-04 | 4.01E-04 | 1.398607 down | 4.378508 down | 3.13062 down  | WSB2      |
| 213737_x_ | 0.014398 | 0.012616 | 2.674706 down | 1.221994 down | 2.188804 up   | GOLGA9P   |
| 213738_s_ | 9.99E-05 | 1.80E-05 | 1.172399 up   | 1.616225 up   | 1.378563 up   | ATP5A1    |
| 213740_s_ | 0.003116 | 0.001885 | 1.889552 up   | 1.497657 down | 2.8299 down   | LOC399904 |
| 213748_at | 0.021845 | 0.020223 | 1.509527 down | 1.085094 down | 1.391149 up   | TRIM66    |
| 213749_at | 5.74E-05 | 8.50E-06 | 2.233738 down | 1.09052 up    | 2.435936 up   | MASP1     |
| 213750_at | 0.001222 | 5.34E-04 | 3.986667 down | 2.752598 down | 1.448329 up   | RSL1D1    |
|           |          |          |               |               |               | RP1-      |
| 213752_at | 0.005715 | 0.004126 | 1.178915 up   | 1.339145 down | 1.578737 down | 21O18.1   |
| 213755_s_ | 0.006782 | 0.005129 | 1.721292 up   | 1.055824 down | 1.817382 down |           |
| 213762_x_ | 4.04E-06 | 2.12E-07 | 3.277114 up   | 2.874588 up   | 1.140029 down | RBMX      |
| 213764_s_ | 3.65E-04 | 1.04E-04 | 5.897638 down | 36.08884 down | 6.119202 down | MFAP5     |
| 213765_at | 1.57E-04 | 3.35E-05 | 5.963974 down | 26.23002 down | 4.398077 down | MFAP5     |
| 213766_x_ | 8.83E-08 | 9.73E-10 | 2.651419 down | 5.686217 down | 2.144594 down | GNA11     |
| 213769_at | 0.009866 | 0.008089 | 1.482363 up   | 1.200387 up   | 1.234904 down | KSR1      |
| 213772_s_ | 1.94E-05 | 1.92E-06 | 2.127375 up   | 2.262318 up   | 1.063432 up   | GGA2      |
| 213773_x_ | 1.14E-05 | 9.11E-07 | 2.723039 up   | 2.387807 up   | 1.140394 down | NSUN5     |
| 213775_x_ | 4.91E-06 | 2.79E-07 | 2.059972 up   | 2.934986 up   | 1.42477 up    | ZNF638    |
| 213778_x_ | 0.003275 | 0.002015 | 1.272253 down | 1.583295 down | 1.244481 down | ZNF276    |
| 213784_at | 0.027268 | 0.025781 | 1.386967 down | 1.320906 up   | 1.832053 up   | RABL4     |

|           |          |          |          |      |          |      |          |      |             |
|-----------|----------|----------|----------|------|----------|------|----------|------|-------------|
| 213785_at | 0.012518 | 0.010722 | 1.239234 | down | 1.355124 | up   | 1.679316 | up   | IPO9        |
| 213787_s_ | 0.01444  | 0.012659 | 2.301742 | up   | 2.184804 | up   | 1.053524 | down | EBP         |
| 213790_at | 5.76E-05 | 8.56E-06 | 10.65869 | down | 26.89733 | down | 2.523513 | down | ADAM12      |
| 213791_at | 0.005738 | 0.00415  | 3.124251 | down | 12.84092 | down | 4.110078 | down | PENK        |
| 213793_s_ | 1.54E-05 | 1.41E-06 | 9.088523 | up   | 2.820822 | up   | 3.221941 | down | HOMER1      |
| 213794_s_ | 1.45E-06 | 4.92E-08 | 2.244279 | up   | 2.040129 | up   | 1.100067 | down | NGDN        |
| 213798_s_ | 0.006738 | 0.005088 | 1.245233 | down | 1.663547 | down | 1.335933 | down | CAP1        |
| 213800_at | 6.57E-06 | 4.19E-07 | 12.18591 | down | 13.07356 | down | 1.072842 | down | CFH         |
|           |          |          |          |      |          |      |          |      | RPSA ///    |
|           |          |          |          |      |          |      |          |      | RPSAP19 /// |
|           |          |          |          |      |          |      |          |      | RPSAP58 /// |
| 213801_x_ | 0.007528 | 0.005841 | 1.196905 | up   | 1.295057 | up   | 1.082005 | up   | RPSAP9      |
| 213802_at | 4.53E-05 | 6.18E-06 | 23.76609 | down | 7.104452 | down | 3.345239 | up   |             |
| 213805_at | 0.005909 | 0.00431  | 2.63043  | down | 2.014421 | down | 1.3058   | up   | ABHD5       |
| 213807_x_ | 0.004549 | 0.003096 | 1.859796 | down | 3.577285 | down | 1.923482 | down | MET         |
| 213808_at | 0.002362 | 0.0013   | 1.548301 | up   | 1.39153  | up   | 1.112661 | down |             |
| 213811_x_ | 8.18E-05 | 1.37E-05 | 3.034628 | up   | 1.864088 | up   | 1.627943 | down | TCF3        |
| 213812_s_ | 0.005335 | 0.00379  | 1.935635 | down | 1.82028  | down | 1.063372 | up   | CAMKK2      |
| 213816_s_ | 3.57E-04 | 1.01E-04 | 1.522195 | down | 4.541445 | down | 2.983485 | down | MET         |
| 213817_at | 8.17E-06 | 5.77E-07 | 12.22695 | down | 1.430644 | down | 8.546465 | up   | IRAK3       |
| 213819_s_ | 0.004094 | 0.002686 | 1.300399 | down | 1.131482 | up   | 1.471378 | up   | FLOT1       |
| 213820_s_ | 5.01E-04 | 1.58E-04 | 2.966207 | down | 2.099518 | down | 1.412804 | up   | STARD5      |
| 213823_at | 2.96E-04 | 7.80E-05 | 10.68914 | down | 3.341967 | down | 3.198457 | up   | HOXA11      |
|           |          |          |          |      |          |      |          |      | H3F3A ///   |
|           |          |          |          |      |          |      |          |      | H3F3B ///   |
| 213828_x_ | 1.42E-04 | 2.90E-05 | 2.472623 | up   | 2.302579 | up   | 1.07385  | down | LOC440926   |
| 213832_at | 0.014686 | 0.012907 | 3.591091 | down | 3.672975 | down | 1.022802 | down | KCND3       |
| 213835_x_ | 0.003111 | 0.00188  | 1.191118 | up   | 2.14064  | up   | 1.797169 | up   | GTPBP3      |
| 213836_s_ | 2.27E-04 | 5.48E-05 | 8.510698 | down | 4.323299 | down | 1.968566 | up   | WIPI1       |
| 213838_at | 7.12E-04 | 2.56E-04 | 2.41295  | down | 2.894471 | down | 1.199557 | down | NOL7        |
| 213839_at | 0.00209  | 0.0011   | 1.717435 | up   | 1.292709 | up   | 1.328555 | down | CLMN        |
| 213842_x_ | 7.85E-06 | 5.49E-07 | 1.883107 | up   | 2.693785 | up   | 1.4305   | up   | NSUN5C      |
| 213844_at | 1.37E-04 | 2.78E-05 | 2.83152  | down | 7.601224 | down | 2.684503 | down | HOXA5       |

|           |          |          |          |      |          |      |          |      |          |
|-----------|----------|----------|----------|------|----------|------|----------|------|----------|
| 213845_at | 9.74E-05 | 1.74E-05 | 4.089824 | down | 2.638404 | down | 1.550113 | up   | GRIK2    |
| 213846_at | 0.002671 | 0.001532 | 1.829468 | up   | 2.141415 | up   | 1.170512 | up   | COX7C    |
| 213848_at | 3.63E-04 | 1.03E-04 | 2.827591 | down | 2.133176 | down | 1.325532 | up   |          |
| 213849_s_ | 1.69E-04 | 3.70E-05 | 12.07783 | up   | 13.91356 | up   | 1.151992 | up   | PPP2R2B  |
| 213852_at | 7.73E-06 | 5.37E-07 | 1.762218 | up   | 3.777727 | up   | 2.143734 | up   | RBM8A    |
| 213854_at | 0.008858 | 0.007111 | 1.432079 | down | 1.036746 | up   | 1.484702 | up   | SYNGR1   |
| 213857_s_ | 0.003937 | 0.002556 | 2.8045   | down | 1.936213 | down | 1.448446 | up   | CD47     |
| 213859_x_ | 1.98E-04 | 4.55E-05 | 1.443963 | up   | 2.545825 | up   | 1.763082 | up   | SMARCA5  |
| 213860_x_ | 3.15E-04 | 8.52E-05 | 1.530928 | down | 1.084816 | up   | 1.660774 | up   | CSNK1A1  |
| 213862_at | 0.012743 | 0.010941 | 1.399966 | up   | 1.052095 | down | 1.472897 | down | PNPLA2   |
| 213864_s_ | 5.01E-04 | 1.58E-04 | 1.745927 | up   | 1.841617 | up   | 1.054808 | up   | NAP1L1   |
| 213867_x_ | 0.026008 | 0.024507 | 1.095783 | down | 1.304637 | down | 1.190598 | down | ACTB     |
| 213868_s_ | 0.01819  | 0.016462 | 1.452074 | down | 1.181884 | down | 1.228609 | up   | DHRS7    |
| 213869_x_ | 4.16E-04 | 1.23E-04 | 8.025345 | down | 5.49151  | down | 1.461409 | up   | THY1     |
| 213871_s_ | 0.007755 | 0.006061 | 1.639657 | up   | 1.036285 | up   | 1.582245 | down | C6orf108 |
| 213874_at | 0.003517 | 0.002213 | 1.556303 | up   | 1.170458 | up   | 1.329652 | down | SERPINA4 |
| 213878_at | 2.78E-04 | 7.18E-05 | 4.539662 | down | 4.500875 | down | 1.008618 | up   | PYROXD1  |
| 213879_at | 0.017969 | 0.016234 | 1.267508 | up   | 1.472431 | up   | 1.161674 | up   |          |
| 213881_x_ | 5.02E-05 | 7.12E-06 | 1.430481 | up   | 1.715885 | up   | 1.199516 | up   | SUMO2    |
| 213882_at | 0.003843 | 0.002479 | 3.750153 | down | 1.583059 | down | 2.368928 | up   | TM2D1    |
| 213883_s_ | 0.012996 | 0.011192 | 2.922312 | down | 1.552984 | down | 1.88174  | up   | TM2D1    |
| 213891_s_ | 0.002129 | 0.001127 | 1.67492  | down | 1.779717 | up   | 2.980882 | up   | TCF4     |
| 213893_x_ | 0.023775 | 0.022192 | 1.062264 | up   | 1.334308 | down | 1.417387 | down | PMS2L5   |
| 213895_at | 3.49E-06 | 1.72E-07 | 8.542483 | down | 3.42248  | down | 2.495992 | up   | EMP1     |
| 213898_at | 0.002542 | 0.001436 | 1.115348 | down | 1.597272 | down | 1.432084 | down | RBM9     |
| 213899_at | 1.67E-04 | 3.62E-05 | 2.375841 | up   | 2.652295 | up   | 1.11636  | up   | METAP2   |
| 213900_at | 0.001645 | 7.98E-04 | 2.863546 | up   | 2.517288 | up   | 1.137552 | down | C9orf61  |
| 213905_x_ | 1.54E-07 | 2.13E-09 | 11.79987 | down | 71.56768 | down | 6.065126 | down | BGN      |
| 213906_at | 3.42E-04 | 9.49E-05 | 4.735596 | down | 11.50497 | down | 2.429467 | down | MYBL1    |
| 213907_at | 0.003367 | 0.002091 | 1.91168  | up   | 2.819679 | up   | 1.474974 | up   | EEF1E1   |
|           |          |          |          |      |          |      |          |      | WHAMML1  |
|           |          |          |          |      |          |      |          |      | ///      |
| 213908_at | 9.60E-05 | 1.70E-05 | 3.619101 | down | 2.27635  | down | 1.589871 | up   | WHAMML2  |
| 213911_s_ | 4.23E-04 | 1.26E-04 | 1.601594 | up   | 2.214693 | up   | 1.382805 | up   | H2AFZ    |

|           |          |          |               |               |               |           |
|-----------|----------|----------|---------------|---------------|---------------|-----------|
| 213915_at | 7.53E-04 | 2.77E-04 | 1.303621 up   | 1.123086 down | 1.464079 down | NKG7      |
| 213916_at | 4.00E-05 | 5.23E-06 | 1.733065 up   | 1.691009 up   | 1.02487 down  | ZNF20     |
| 213920_at | 3.05E-06 | 1.42E-07 | 4.159191 up   | 4.668645 up   | 1.122489 up   | CUX2      |
| 213924_at | 1.54E-06 | 5.44E-08 | 9.182096 up   | 5.75017 up    | 1.596839 down | MPPE1     |
| 213927_at | 5.46E-09 | 1.78E-11 | 13.71589 up   | 12.84927 up   | 1.067445 down | MAP3K9    |
| 213930_at | 0.006012 | 0.004405 | 2.441415 down | 1.466565 down | 1.664716 up   |           |
| 213932_x_ | 3.24E-06 | 1.56E-07 | 4.192493 down | 3.436782 down | 1.219889 up   | HLA-A     |
| 213934_s_ | 0.006801 | 0.005146 | 2.058886 down | 1.629464 down | 1.263536 up   | ZNF23     |
| 213936_x_ | 0.006815 | 0.005159 | 1.451811 up   | 1.465178 up   | 1.009208 up   | SFTPB     |
| 213938_at | 2.75E-05 | 3.13E-06 | 3.126213 up   | 3.10307 up    | 1.007458 down | ERC2      |
| 213941_x_ | 7.08E-04 | 2.54E-04 | 1.178377 up   | 1.361926 up   | 1.155765 up   | RPS7      |
| 213942_at | 2.59E-04 | 6.54E-05 | 1.584544 down | 3.235945 down | 2.042193 down | MEGF6     |
| 213943_at | 6.71E-06 | 4.33E-07 | 24.03188 down | 7.991617 down | 3.007135 up   | TWIST1    |
| 213944_x_ | 1.33E-06 | 4.38E-08 | 1.436307 down | 3.832205 down | 2.668096 down | GNA11     |
| 213945_s_ | 1.02E-04 | 1.87E-05 | 1.942067 up   | 1.422967 up   | 1.364801 down | NUP210    |
| 213947_s_ | 2.66E-06 | 1.18E-07 | 5.308315 up   | 5.3827 up     | 1.014013 up   | NUP210    |
| 213949_s_ | 0.002585 | 0.001468 | 1.576848 up   | 1.013894 down | 1.598757 down | DOHH      |
| 213951_s_ | 0.010564 | 0.008771 | 2.62486 up    | 2.360969 up   | 1.111773 down | PSMC3IP   |
| 213954_at | 8.87E-09 | 3.53E-11 | 18.87849 up   | 15.01706 up   | 1.257136 down | FAM169A   |
| 213959_s_ | 0.001557 | 7.40E-04 | 2.523151 down | 1.863359 down | 1.354087 up   | RPGRIP1L  |
| 213965_s_ | 0.001174 | 5.05E-04 | 1.833841 up   | 1.019789 up   | 1.798256 down | CHD5      |
|           |          |          |               |               |               | SUZ12 /// |
| 213971_s_ | 5.80E-06 | 3.50E-07 | 1.943066 up   | 4.227609 up   | 2.175741 up   | SUZ12P    |
| 213972_at | 0.003277 | 0.002017 | 1.010454 down | 1.893258 down | 1.873671 down | FOXD1     |
| 213981_at | 4.88E-04 | 1.52E-04 | 1.450745 down | 3.262338 down | 2.248733 down | COMT      |
| 213985_s_ | 0.002511 | 0.001412 | 1.836472 up   | 1.017609 down | 1.868811 down | C19orf6   |
| 213987_s_ | 0.018769 | 0.017055 | 1.0966 up     | 1.347273 down | 1.477419 down | CDC2L5    |
| 213989_x_ | 0.002171 | 0.001157 | 1.499267 up   | 1.789884 up   | 1.19384 up    | SETD4     |
| 213990_s_ | 0.004796 | 0.003309 | 1.634403 up   | 1.267203 up   | 1.289772 down | PAK7      |
| 213992_at | 9.46E-09 | 3.88E-11 | 12.06582 up   | 18.14326 up   | 1.503691 up   | COL4A6    |
| 213996_at | 3.51E-04 | 9.85E-05 | 2.79934 up    | 2.217494 up   | 1.262389 down | YPEL1     |
| 214003_x_ | 0.001193 | 5.17E-04 | 1.145787 up   | 1.172925 up   | 1.023686 up   | RPS20     |
| 214006_s_ | 0.041137 | 0.03989  | 1.755057 down | 1.692054 down | 1.037235 up   | GGCX      |
| 214008_at | 0.001552 | 7.37E-04 | 2.975503 down | 1.491349 down | 1.995176 up   | TWF1      |

|           |          |          |          |      |          |      |          |      |           |
|-----------|----------|----------|----------|------|----------|------|----------|------|-----------|
| 214012_at | 0.002975 | 0.001772 | 4.289849 | down | 1.585569 | down | 2.705558 | up   | ERAP1     |
| 214014_at | 0.001138 | 4.84E-04 | 2.945308 | down | 2.0682   | down | 1.424092 | up   | CDC42EP2  |
| 214016_s_ | 0.001377 | 6.28E-04 | 2.419415 | up   | 2.817395 | up   | 1.164495 | up   | SFPQ      |
| 214017_s_ | 0.026374 | 0.024876 | 1.715413 | up   | 1.047843 | up   | 1.637089 | down | DHX34     |
| 214018_at | 0.004193 | 0.002774 | 1.557614 | up   | 1.112782 | down | 1.733285 | down | GRIP1     |
| 214022_s_ | 1.08E-04 | 2.00E-05 | 1.077486 | up   | 15.61875 | up   | 14.49554 | up   | IFITM1    |
| 214023_x_ | 2.97E-07 | 5.21E-09 | 75.22782 | up   | 91.12582 | up   | 1.211332 | up   | TUBB2B    |
| 214024_s_ | 0.004289 | 0.00286  | 1.499176 | up   | 1.142466 | down | 1.712757 | down | DGCR6L    |
|           |          |          |          |      |          |      |          |      | DES ///   |
| 214027_x_ | 0.01564  | 0.013862 | 1.650148 | up   | 1.335934 | down | 2.204489 | down | FAM48A    |
| 214030_at | 5.55E-04 | 1.82E-04 | 2.431554 | down | 2.501301 | down | 1.028684 | down | CRYBG3    |
| 214032_at | 5.30E-04 | 1.71E-04 | 1.55231  | up   | 1.177161 | down | 1.827319 | down | ZAP70     |
| 214035_x_ | 0.011364 | 0.009567 | 1.669219 | down | 1.211505 | down | 1.377807 | up   | LOC399491 |
| 214036_at | 0.013453 | 0.011654 | 2.332849 | up   | 3.105009 | up   | 1.330995 | up   | EFNA5     |
| 214037_s_ | 2.12E-04 | 4.97E-05 | 1.369083 | up   | 1.89864  | down | 2.599395 | down | CCDC22    |
| 214039_s_ | 9.27E-05 | 1.62E-05 | 3.00199  | up   | 3.270004 | up   | 1.089279 | up   | LAPTM4B   |
| 214040_s_ | 0.002602 | 0.001479 | 5.453223 | down | 3.367643 | down | 1.6193   | up   | GSN       |
| 214043_at | 2.09E-04 | 4.89E-05 | 7.013137 | up   | 23.17783 | up   | 3.304916 | up   | PTPRD     |
| 214045_at | 3.52E-06 | 1.74E-07 | 2.121248 | up   | 3.182514 | up   | 1.500303 | up   | LIAS      |
| 214046_at | 2.30E-05 | 2.45E-06 | 3.409858 | up   | 2.933507 | up   | 1.162383 | down | FUT9      |
| 214048_at | 0.014259 | 0.012471 | 1.076292 | up   | 2.065012 | up   | 1.918636 | up   | MBD4      |
| 214049_x_ | 0.045301 | 0.044086 | 1.391222 | up   | 1.057925 | up   | 1.315048 | down | CD7       |
| 214051_at | 0.02389  | 0.02231  | 1.798441 | up   | 1.455341 | up   | 1.235752 | down | TMSB15B   |
| 214055_x_ | 7.70E-05 | 1.27E-05 | 3.863834 | up   | 3.334148 | up   | 1.158867 | down | BAT2D1    |
| 214058_at | 8.35E-07 | 2.29E-08 | 5.711009 | up   | 7.119042 | up   | 1.246547 | up   | MYCL1     |
| 214059_at | 4.40E-04 | 1.33E-04 | 3.433395 | down | 1.440763 | down | 2.38304  | up   | IFI44     |
| 214060_at | 0.001639 | 7.94E-04 | 2.054103 | up   | 3.313712 | up   | 1.613216 | up   | SSBP1     |
| 214061_at | 0.004162 | 0.002745 | 1.818358 | up   | 2.320656 | up   | 1.276237 | up   | WDR67     |
| 214066_x_ | 1.29E-04 | 2.53E-05 | 2.701377 | down | 2.524752 | down | 1.069957 | up   | NPR2      |
| 214071_at | 3.69E-05 | 4.64E-06 | 7.122111 | up   | 7.71637  | up   | 1.083439 | up   | GNAL      |
| 214075_at | 1.06E-04 | 1.94E-05 | 1.948764 | down | 1.805249 | down | 1.079499 | up   | NENF      |
| 214084_x_ | 0.006461 | 0.004832 | 1.323275 | up   | 1.035844 | down | 1.370706 | down | LOC648998 |
| 214085_x_ | 7.34E-06 | 4.98E-07 | 7.812509 | down | 41.63824 | down | 5.329688 | down | GLIPR1    |
| 214086_s_ | 5.80E-05 | 8.64E-06 | 2.623185 | up   | 2.624793 | up   | 1.000613 | up   | PARP2     |

|           |          |          |               |               |               |           |
|-----------|----------|----------|---------------|---------------|---------------|-----------|
| 214088_s_ | 0.013695 | 0.011905 | 1.280312 up   | 1.222167 down | 1.564755 down | FUT3      |
| 214093_s_ | 1.13E-04 | 2.11E-05 | 3.07157 up    | 7.498702 up   | 2.441326 up   | FUBP1     |
| 214095_at | 0.016129 | 0.01436  | 1.216515 up   | 1.645553 down | 2.001839 down | SHMT2     |
| 214099_s_ | 1.85E-05 | 1.81E-06 | 2.13626 down  | 2.351155 down | 1.100594 down | PDE4DIP   |
| 214100_x_ | 2.14E-06 | 8.64E-08 | 2.135691 up   | 2.486479 up   | 1.16425 up    | NSUN5B    |
| 214102_at | 4.60E-06 | 2.56E-07 | 4.559169 up   | 9.295909 up   | 2.038948 up   | ARAP2     |
| 214105_at | 0.005834 | 0.004237 | 1.824333 up   | 1.429205 down | 2.607345 down | SOCS3     |
| 214108_at | 2.92E-04 | 7.67E-05 | 1.219503 down | 1.572411 down | 1.289387 down | MAX       |
| 214109_at | 0.004613 | 0.003156 | 2.876985 up   | 3.200633 up   | 1.112495 up   | LRBA      |
| 214110_s_ | 2.32E-06 | 9.66E-08 | 21.63197 down | 6.687356 down | 3.234757 up   |           |
|           |          |          |               |               |               | CXorf40A  |
|           |          |          |               |               |               | ///       |
| 214112_s_ | 2.48E-04 | 6.15E-05 | 1.278976 down | 1.897113 down | 1.483306 down | CXorf40B  |
| 214113_s_ | 3.36E-04 | 9.26E-05 | 1.950149 up   | 1.675718 up   | 1.163769 down | RBM8A     |
| 214114_x_ | 5.22E-05 | 7.46E-06 | 1.803906 down | 1.90134 down  | 1.054013 down | FASTK     |
| 214116_at | 1.05E-04 | 1.94E-05 | 2.671293 up   | 2.195274 up   | 1.216838 down | BTD       |
| 214122_at | 0.00289  | 0.001704 | 1.684185 up   | 1.643413 down | 2.767811 down | PDLIM7    |
| 214125_s_ | 0.002778 | 0.001617 | 1.55859 up    | 1.328684 down | 2.070873 down | NENF      |
| 214126_at | 6.27E-06 | 3.92E-07 | 3.495561 down | 3.736308 down | 1.068872 down |           |
| 214129_at | 3.28E-05 | 4.00E-06 | 3.158825 down | 4.480803 down | 1.418503 down | PDE4DIP   |
| 214130_s_ | 2.14E-05 | 2.20E-06 | 4.674392 down | 4.80791 down  | 1.028564 down | PDE4DIP   |
| 214131_at | 0.005706 | 0.004119 | 2.74384 up    | 4.978708 up   | 1.814504 up   | CYorf15B  |
| 214132_at | 0.017597 | 0.015857 | 2.463331 down | 1.080912 up   | 2.662645 up   | ATP5C1    |
|           |          |          |               |               |               | LOC100133 |
|           |          |          |               |               |               | 432 ///   |
| 214133_at | 0.015036 | 0.013266 | 1.533702 up   | 1.125815 up   | 1.362304 down | MUC6      |
| 214136_at | 0.001326 | 5.96E-04 | 2.207181 down | 1.085451 down | 2.033424 up   | NUDT13    |
| 214141_x_ | 3.35E-05 | 4.11E-06 | 3.383224 up   | 3.215149 up   | 1.052276 down | SFRS7     |
| 214143_x_ | 1.59E-05 | 1.47E-06 | 1.305889 up   | 1.357311 up   | 1.039377 up   | RPL24     |
| 214150_x_ | 0.003354 | 0.002081 | 1.780962 down | 2.054223 down | 1.153435 down | ATP6V0E1  |
| 214151_s_ | 9.84E-04 | 3.97E-04 | 7.696293 down | 10.59586 down | 1.376749 down | CCPG1     |
| 214152_at | 0.002004 | 0.001038 | 5.57686 down  | 8.659632 down | 1.552779 down | CCPG1     |
| 214154_s_ | 0.007484 | 0.005795 | 2.0667 up     | 1.759517 up   | 1.174584 down | PKP2      |
| 214157_at | 0.001912 | 9.75E-04 | 3.794895 up   | 4.141561 up   | 1.091351 up   | GNAS      |



|           |          |          |          |      |          |      |          |      |        |
|-----------|----------|----------|----------|------|----------|------|----------|------|--------|
| 214164_x_ | 1.34E-07 | 1.73E-09 | 5.135447 | down | 25.30588 | down | 4.927688 | down | CA12   |
| 214165_s_ | 0.007209 | 0.005537 | 1.581239 | up   | 1.103395 | up   | 1.433067 | down | HS6ST1 |
| 214171_s_ | 0.004232 | 0.002805 | 1.425952 | up   | 1.207608 | down | 1.721991 | down | U2AF2  |
| 214174_s_ | 9.06E-05 | 1.57E-05 | 2.179138 | up   | 1.222173 | down | 2.663284 | down | PDLIM4 |
| 214175_x_ | 4.54E-06 | 2.50E-07 | 1.913629 | down | 6.024841 | down | 3.148384 | down | PDLIM4 |
| 214176_s_ | 0.010469 | 0.008676 | 2.379854 | down | 2.055183 | down | 1.157977 | up   |        |
| 214177_s_ | 0.00401  | 0.002615 | 2.996393 | down | 1.843199 | down | 1.625648 | up   | PBXIP1 |
| 214179_s_ | 0.003424 | 0.002139 | 1.07827  | up   | 1.571453 | down | 1.694451 | down | NFE2L1 |
| 214181_x_ | 0.008003 | 0.006288 | 1.445173 | up   | 1.019656 | up   | 1.417315 | down | LST1   |
| 214184_at | 0.001121 | 4.73E-04 | 2.080137 | down | 1.074325 | down | 1.936226 | up   | NPFF   |
| 214186_s_ | 2.18E-04 | 5.16E-05 | 1.190363 | up   | 1.422109 | down | 1.692825 | down | HCG26  |
| 214187_x_ | 0.003516 | 0.002212 | 1.211243 | down | 1.532952 | up   | 1.856778 | up   | CTDSPL |
| 214188_at | 0.005682 | 0.004099 | 1.519403 | down | 1.963866 | down | 1.292525 | down |        |
| 214196_s_ | 0.001367 | 6.22E-04 | 5.8314   | down | 2.075661 | down | 2.809418 | up   | TPP1   |
| 214201_x_ | 0.016319 | 0.014548 | 1.565911 | up   | 1.111497 | down | 1.740505 | down | BAT2   |
| 214203_s_ | 0.002139 | 0.001135 | 3.41163  | up   | 2.882547 | up   | 1.183547 | down | PRODH  |
| 214206_at | 0.002549 | 0.001441 | 1.318455 | up   | 1.277392 | down | 1.684185 | down | PPIL6  |
| 214208_at | 0.016085 | 0.014313 | 1.49824  | up   | 1.087316 | down | 1.629061 | down | KLHL35 |
| 214209_s_ | 0.004019 | 0.002624 | 1.008515 | down | 2.121053 | down | 2.103144 | down | ABCB9  |
| 214211_at | 0.002115 | 0.001117 | 4.538756 | down | 3.88948  | down | 1.166931 | up   | FTH1   |
| 214213_x_ | 0.006003 | 0.004396 | 1.599574 | up   | 1.629734 | down | 2.60688  | down | LMNA   |
| 214219_x_ | 2.92E-04 | 7.68E-05 | 2.850762 | up   | 2.061796 | up   | 1.38266  | down | MAP4K1 |
| 214223_at | 9.59E-05 | 1.70E-05 | 2.097271 | up   | 1.300634 | down | 2.727782 | down |        |
| 214225_at | 1.09E-04 | 2.01E-05 | 1.421113 | down | 1.256457 | up   | 1.785567 | up   | PIN4   |
| 214229_at | 0.011354 | 0.009557 | 1.253501 | up   | 1.071328 | down | 1.34291  | down | DNAH17 |
| 214235_at | 0.005844 | 0.004245 | 1.448375 | up   | 1.251837 | up   | 1.157    | down | CYP3A5 |
| 214237_x_ | 0.002271 | 0.001235 | 2.056654 | up   | 1.352392 | down | 2.781402 | down | PAWR   |
| 214239_x_ | 0.008979 | 0.007229 | 1.52467  | up   | 1.858154 | up   | 1.218725 | up   | PCGF2  |
| 214240_at | 1.69E-05 | 1.61E-06 | 35.05131 | up   | 99.71724 | up   | 2.844894 | up   | GAL    |
| 214245_at | 0.003267 | 0.002007 | 1.359848 | down | 1.681583 | up   | 2.286698 | up   | RPS14  |
| 214247_s_ | 8.20E-06 | 5.80E-07 | 16.51858 | down | 6.732846 | down | 2.453433 | up   | DKK3   |
| 214248_s_ | 0.00176  | 8.72E-04 | 1.235643 | up   | 2.500923 | up   | 2.023986 | up   | TRIM2  |
| 214252_s_ | 5.65E-04 | 1.87E-04 | 3.191248 | down | 2.048481 | down | 1.557861 | up   | CLN5   |
| 214253_s_ | 0.002937 | 0.001741 | 1.666426 | up   | 1.233091 | up   | 1.351422 | down | DTNB   |

|           |          |          |          |      |          |      |          |      |           |
|-----------|----------|----------|----------|------|----------|------|----------|------|-----------|
| 214255_at | 1.57E-05 | 1.45E-06 | 4.369911 | down | 8.724727 | down | 1.996546 | down | ATP10A    |
| 214257_s_ | 1.29E-07 | 1.65E-09 | 2.759223 | down | 4.135567 | down | 1.498816 | down |           |
| 214264_s_ | 0.002999 | 0.001791 | 2.23381  | up   | 2.228494 | up   | 1.002386 | down | C14orf143 |
| 214267_s_ | 0.002316 | 0.001268 | 1.763997 | up   | 1.119069 | down | 1.974034 | down | CADM4     |
| 214273_x_ | 0.009047 | 0.007294 | 1.505622 | down | 1.654368 | down | 1.098794 | down | C16orf35  |
| 214274_s_ | 7.28E-04 | 2.64E-04 | 1.695091 | down | 2.166008 | down | 1.277812 | down | ACAA1     |
| 214276_at | 0.002803 | 0.001635 | 1.408704 | down | 2.740827 | down | 1.945637 | down | KLF12     |
| 214279_s_ | 0.002434 | 0.001352 | 2.207395 | up   | 2.415441 | up   | 1.09425  | up   | NDRG2     |
| 214280_x_ | 1.24E-05 | 1.03E-06 | 2.680432 | up   | 3.031821 | up   | 1.131094 | up   | HNRNPA1   |
| 214283_at | 7.25E-04 | 2.63E-04 | 1.348597 | up   | 3.427444 | up   | 2.541489 | up   | TMEM97    |
| 214284_s_ | 0.007717 | 0.006019 | 1.380961 | up   | 1.111631 | down | 1.535119 | down | FGF18     |
| 214288_s_ | 0.005469 | 0.003909 | 1.396663 | up   | 1.153122 | up   | 1.211202 | down | PSMB1     |
| 214293_at | 6.83E-07 | 1.71E-08 | 22.68696 | down | 10.11792 | down | 2.242255 | up   | 40797     |
| 214294_at | 0.007747 | 0.006051 | 1.420495 | up   | 1.196012 | down | 1.69893  | down | KIAA0485  |
| 214296_x_ | 0.004272 | 0.002843 | 1.499827 | up   | 1.175089 | down | 1.76243  | down | C19orf36  |
| 214297_at | 7.19E-06 | 4.83E-07 | 5.084884 | down | 4.59294  | down | 1.107109 | up   | CSPG4     |
| 214301_s_ | 0.008842 | 0.007097 | 1.295696 | up   | 1.460757 | down | 1.892698 | down | DPYSL4    |
| 214304_x_ | 6.16E-04 | 2.10E-04 | 1.499627 | up   | 1.318969 | down | 1.977962 | down | SYNM      |
| 214311_at | 0.001377 | 6.28E-04 | 1.39081  | up   | 1.431388 | down | 1.990788 | down | ZFPL1     |
| 214321_at | 0.005237 | 0.003704 | 15.01195 | down | 2.206811 | down | 6.802556 | up   | NOV       |
| 214324_at | 0.003114 | 0.001882 | 1.344683 | up   | 1.132153 | down | 1.522387 | down | GP2       |
| 214328_s_ | 0.001546 | 7.33E-04 | 1.635589 | up   | 1.384482 | up   | 1.181372 | down | HSP90AA1  |
| 214333_x_ | 0.003217 | 0.001968 | 1.151938 | down | 1.573974 | down | 1.366371 | down | IDH3G     |
| 214337_at | 0.003783 | 0.002431 | 1.861112 | down | 1.699987 | down | 1.09478  | up   | COPA      |
| 214339_s_ | 6.10E-04 | 2.07E-04 | 3.19231  | up   | 2.479523 | up   | 1.287469 | down | MAP4K1    |
| 214341_at | 0.004421 | 0.002976 | 1.617039 | up   | 1.193539 | down | 1.929999 | down | THTPA     |
| 214345_at | 0.022354 | 0.020766 | 1.606555 | up   | 1.147051 | down | 1.8428   | down |           |
| 214347_s_ | 0.012629 | 0.01083  | 1.525916 | up   | 1.028673 | down | 1.569668 | down | DDC       |
| 214351_x_ | 0.018907 | 0.017202 | 1.241743 | down | 1.112068 | up   | 1.380902 | up   | RPL13     |
| 214352_s_ | 0.001642 | 7.96E-04 | 4.692834 | up   | 2.92848  | up   | 1.602481 | down | KRAS      |
| 214354_x_ | 1.35E-05 | 1.17E-06 | 1.193359 | up   | 1.925855 | up   | 1.61381  | up   | SFTPB     |

|           |          |          |               |               |               |  |            |
|-----------|----------|----------|---------------|---------------|---------------|--|------------|
|           |          |          |               |               |               |  | CTAGE4 /// |
|           |          |          |               |               |               |  | LOC100142  |
|           |          |          |               |               |               |  | 659 ///    |
| 214355_x_ | 6.22E-04 | 2.13E-04 | 2.133552 up   | 3.275722 up   | 1.535338 up   |  | LOC441294  |
| 214359_s_ | 0.004387 | 0.002949 | 2.544764 up   | 2.613607 up   | 1.027052 up   |  | HSP90AB1   |
| 214362_at | 0.002752 | 0.001595 | 1.384709 up   | 1.537874 down | 2.129508 down |  | RGS12      |
| 214363_s_ | 6.36E-05 | 9.78E-06 | 1.66627 up    | 1.916788 up   | 1.150346 up   |  | MATR3      |
| 214366_s_ | 0.012077 | 0.010277 | 1.729013 up   | 1.076394 up   | 1.606301 down |  | ALOX5      |
| 214372_x_ | 0.004506 | 0.003057 | 1.451395 up   | 1.140116 up   | 1.273024 down |  | ERN2       |
| 214378_at | 0.003088 | 0.001862 | 1.372824 down | 1.063957 up   | 1.460626 up   |  | TFPI       |
| 214380_at | 0.003022 | 0.001809 | 1.350443 up   | 1.794845 down | 2.423835 down |  | PRPF31     |
| 214384_s_ | 1.28E-04 | 2.51E-05 | 1.01033 up    | 1.957812 down | 1.978036 down |  | DCTN2      |
| 214385_s_ | 0.008889 | 0.007141 | 1.622864 up   | 1.005751 down | 1.632196 down |  | MUC5AC     |
| 214386_at | 0.005377 | 0.003827 | 1.446986 up   | 1.278011 down | 1.849264 down |  | HMX1       |
| 214389_at | 0.007553 | 0.005865 | 1.110309 up   | 1.242232 down | 1.379261 down |  | SLC5A12    |
| 214393_at | 5.92E-04 | 1.99E-04 | 2.019514 up   | 1.688461 up   | 1.196068 down |  | RND2       |
| 214396_s_ | 3.32E-09 | 9.40E-12 | 15.01946 up   | 17.65253 up   | 1.17531 up    |  | MBD2       |
| 214397_at | 4.50E-12 | 9.81E-16 | 37.34495 up   | 39.77831 up   | 1.065159 up   |  | MBD2       |
| 214400_at | 1.65E-04 | 3.56E-05 | 1.663827 up   | 1.116714 down | 1.858019 down |  | INSL3      |
| 214402_s_ | 0.003158 | 0.001922 | 1.416142 up   | 1.391105 down | 1.970003 down |  | SFI1       |
| 214403_x_ | 0.001835 | 9.23E-04 | 1.577424 up   | 1.082543 up   | 1.457147 down |  | SPDEF      |
| 214404_x_ | 0.00214  | 0.001136 | 1.705147 up   | 1.499488 up   | 1.137153 down |  | SPDEF      |
|           |          |          |               |               |               |  | RFPL1S /// |
| 214408_s_ | 0.006794 | 0.00514  | 1.286147 up   | 1.366267 down | 1.75722 down  |  | RFPL3S     |
|           |          |          |               |               |               |  | PLGLB1 /// |
| 214415_at | 4.74E-04 | 1.47E-04 | 3.346444 down | 1.436377 down | 2.329781 up   |  | PLGLB2     |
| 214418_at | 0.010514 | 0.008724 | 1.320389 up   | 1.136988 down | 1.501266 down |  | LOC196993  |
| 214426_x_ | 0.001108 | 4.66E-04 | 4.692583 up   | 4.688808 up   | 1.000805 down |  | CHAF1A     |
| 214427_at | 2.95E-04 | 7.79E-05 | 2.684678 up   | 1.732397 up   | 1.549691 down |  | NOP2       |
| 214429_at | 2.79E-04 | 7.21E-05 | 2.58046 down  | 2.734739 down | 1.059787 down |  | MTMR6      |
| 214431_at | 5.56E-06 | 3.30E-07 | 2.887909 up   | 2.078991 up   | 1.389092 down |  | GMPS       |
| 214432_at | 0.00592  | 0.00432  | 2.010087 up   | 1.42739 up    | 1.408226 down |  | ATP1A3     |
| 214433_s_ | 0.001714 | 8.43E-04 | 4.268331 down | 1.411459 down | 3.024056 up   |  | SELENBP1   |
| 214434_at | 5.44E-05 | 7.89E-06 | 3.553654 down | 2.819468 down | 1.260399 up   |  | HSPA12A    |

|           |          |          |          |      |          |      |          |      |           |
|-----------|----------|----------|----------|------|----------|------|----------|------|-----------|
| 214439_x_ | 0.002013 | 0.001045 | 1.983946 | down | 1.778211 | down | 1.115697 | up   | BIN1      |
| 214440_at | 0.003234 | 0.001981 | 1.906517 | down | 2.195268 | down | 1.151455 | down | NAT1      |
| 214445_at | 0.001731 | 8.53E-04 | 1.543682 | down | 1.279405 | down | 1.206563 | up   | ELL2      |
| 214446_at | 0.007105 | 0.005436 | 3.753646 | down | 4.447053 | down | 1.184729 | down | ELL2      |
| 214447_at | 0.02305  | 0.021469 | 1.356326 | down | 1.277285 | down | 1.061882 | up   | ETS1      |
| 214449_s_ | 2.63E-04 | 6.67E-05 | 3.646715 | down | 2.657604 | down | 1.372181 | up   | RHOQ      |
| 214453_s_ | 1.38E-06 | 4.54E-08 | 21.15178 | down | 10.05729 | down | 2.103128 | up   | IFI44     |
| 214454_at | 1.23E-07 | 1.53E-09 | 5.913165 | down | 16.62235 | down | 2.811076 | down | ADAMTS2   |
| 214459_x_ | 1.85E-06 | 6.96E-08 | 4.534513 | down | 2.818718 | down | 1.608715 | up   | HLA-C     |
| 214463_x_ | 7.27E-04 | 2.64E-04 | 4.172118 | up   | 3.113759 | up   | 1.339898 | down | HIST1H4J  |
| 214481_at | 0.001085 | 4.53E-04 | 1.839232 | up   | 1.762427 | up   | 1.043579 | down | HIST1H2AM |
| 214486_x_ | 1.27E-04 | 2.48E-05 | 3.234525 | down | 2.464821 | down | 1.312276 | up   | CFLAR     |
| 214489_at | 0.009433 | 0.007662 | 1.259692 | up   | 1.272764 | down | 1.603291 | down | FSHB      |
| 214490_at | 9.59E-04 | 3.83E-04 | 1.373988 | up   | 1.032035 | down | 1.418003 | down | ARSF      |
| 214491_at | 0.006926 | 0.005268 | 1.813785 | up   | 1.049691 | down | 1.903913 | down | SSTR3     |
| 214492_at | 1.50E-04 | 3.14E-05 | 6.183124 | down | 2.3703   | down | 2.608583 | up   | SGCD      |
| 214493_s_ | 0.001608 | 7.74E-04 | 3.025157 | up   | 1.112146 | up   | 2.720107 | down | INADL     |
| 214495_at | 0.018119 | 0.016389 | 1.305324 | up   | 1.167036 | down | 1.523359 | down | CACNG2    |
| 214500_at | 1.06E-04 | 1.94E-05 | 13.70471 | down | 9.356238 | down | 1.464767 | up   | H2AFY     |
| 214502_at | 0.01659  | 0.014833 | 1.263777 | up   | 1.200248 | down | 1.516846 | down | HIST1H2BJ |
| 214505_s_ | 0.002557 | 0.001447 | 5.756615 | down | 6.772673 | down | 1.176503 | down | FHL1      |
| 214507_s_ | 0.006713 | 0.005067 | 2.536499 | up   | 2.442982 | up   | 1.03828  | down | EXOSC2    |
| 214509_at | 0.006382 | 0.004759 | 1.570772 | up   | 1.377659 | up   | 1.140175 | down | HIST1H3I  |
| 214516_at | 0.031921 | 0.030579 | 1.574256 | up   | 1.053897 | up   | 1.493747 | down | HIST1H4B  |
| 214521_at | 0.017558 | 0.015816 | 1.371222 | up   | 1.136276 | up   | 1.206769 | down | HES2      |
| 214523_at | 0.00516  | 0.003636 | 1.787454 | up   | 1.130494 | down | 2.020706 | down | CEBPE     |
| 214531_s_ | 2.99E-06 | 1.38E-07 | 2.754053 | down | 2.600343 | down | 1.059112 | up   | SNX1      |
| 214532_x_ | 6.66E-07 | 1.64E-08 | 35.09561 | up   | 28.98704 | up   | 1.210734 | down | POU5F1B   |
| 214533_at | 0.003085 | 0.001859 | 1.220862 | up   | 1.401394 | down | 1.710908 | down | CMA1      |
| 214535_s_ | 4.42E-05 | 5.96E-06 | 3.616094 | down | 6.413393 | down | 1.773569 | down | ADAMTS2   |
| 214536_at | 0.011117 | 0.009319 | 1.518691 | up   | 1.104184 | down | 1.676914 | down | SLURP1    |
| 214541_s_ | 0.004394 | 0.002955 | 1.518128 | down | 1.134791 | down | 1.337804 | up   | QKI       |
| 214547_at | 0.02148  | 0.01985  | 1.143353 | up   | 1.068015 | down | 1.221118 | down | ADCY10    |

|           |          |          |               |               |               |          |
|-----------|----------|----------|---------------|---------------|---------------|----------|
| 214550_s_ | 0.002506 | 0.001408 | 2.219636 up   | 2.125455 up   | 1.044311 down | TNPO3    |
| 214551_s_ | 0.013116 | 0.011316 | 1.707095 up   | 1.099367 up   | 1.552798 down | CD7      |
| 214555_at | 0.028143 | 0.026677 | 1.594886 up   | 1.009589 up   | 1.579738 down | SSTR5    |
| 214559_at | 0.007647 | 0.005952 | 1.201664 up   | 1.148377 down | 1.379963 down | DRD3     |
| 214568_at | 0.016838 | 0.015085 | 1.604399 up   | 1.085565 down | 1.741678 down | TPSD1    |
| 214579_at | 9.66E-05 | 1.72E-05 | 1.762431 down | 3.053608 down | 1.732611 down | NIPAL3   |
| 214581_x_ | 0.002956 | 0.001757 | 2.904729 up   | 4.531292 up   | 1.559971 up   | TNFRSF21 |
| 214587_at | 9.74E-05 | 1.74E-05 | 18.44491 down | 25.1192 down  | 1.36185 down  | COL8A1   |
| 214589_at | 0.001006 | 4.09E-04 | 1.794842 up   | 1.270714 up   | 1.412467 down | FGF12    |
| 214591_at | 0.001256 | 5.54E-04 | 1.685831 up   | 1.588411 up   | 1.061332 down | KLHL4    |
| 214592_s_ | 0.004506 | 0.003056 | 1.22937 up    | 1.164431 down | 1.431516 down | SNAPC5   |
| 214597_at | 0.00443  | 0.002985 | 1.827937 up   | 1.015081 up   | 1.80078 down  | SSTR2    |
| 214600_at | 0.015852 | 0.014078 | 2.458724 down | 1.586741 down | 1.549544 up   | TEAD1    |
| 214605_x_ | 5.26E-05 | 7.53E-06 | 1.503746 down | 3.824041 down | 2.54301 down  | GPR1     |
| 214609_at | 0.021844 | 0.020221 | 1.474004 up   | 1.162633 up   | 1.267815 down | PHOX2A   |
| 214613_at | 0.005322 | 0.003779 | 1.602741 up   | 1.221252 up   | 1.312376 down | GPR3     |
| 214614_at | 0.003084 | 0.001858 | 1.781958 up   | 1.501658 up   | 1.18666 down  | MNX1     |
| 214616_at | 0.004805 | 0.003316 | 1.746366 down | 1.108172 up   | 1.935274 up   | HIST1H3E |
| 214619_at | 9.67E-04 | 3.87E-04 | 1.464151 up   | 1.354752 down | 1.983561 down | CRHR1    |
| 214620_x_ | 1.82E-06 | 6.80E-08 | 6.310877 down | 2.648364 down | 2.382934 up   | PAM      |
| 214623_at | 3.07E-04 | 8.22E-05 | 1.627988 up   | 1.495228 up   | 1.088789 down | FBXW4P1  |
| 214629_x_ | 0.003142 | 0.001906 | 1.389782 down | 1.692537 down | 1.217843 down | RTN4     |
| 214630_at | 0.009122 | 0.007367 | 1.890045 up   | 1.773734 down | 3.352437 down | CYP11B2  |
| 214632_at | 0.00137  | 6.24E-04 | 1.137493 up   | 3.338383 down | 3.797386 down | NRP2     |
| 214633_at | 3.64E-05 | 4.56E-06 | 4.168168 up   | 3.216593 up   | 1.295834 down | SOX3     |
| 214634_at | 0.007017 | 0.005357 | 1.557083 up   | 1.15572 up    | 1.347283 down | HIST1H4B |
| 214635_at | 0.018129 | 0.016403 | 1.426239 up   | 1.015396 down | 1.448197 down | CLDN9    |
| 214638_s_ | 6.32E-04 | 2.17E-04 | 1.155861 down | 1.606422 up   | 1.8568 up     | CCNT2    |
| 214639_s_ | 0.047156 | 0.045961 | 3.608127 up   | 1.282122 up   | 2.814185 down | HOXA1    |
| 214645_at | 0.029342 | 0.027937 | 1.070389 down | 1.141856 up   | 1.222231 up   |          |
| 214647_s_ | 3.93E-05 | 5.09E-06 | 5.889319 down | 3.173263 down | 1.855919 up   | HFE      |
| 214650_x_ | 6.01E-04 | 2.03E-04 | 1.301074 up   | 1.481553 up   | 1.138715 up   | MOG      |
| 214651_s_ | 5.02E-07 | 1.11E-08 | 20.82955 down | 39.35004 down | 1.889145 down | HOXA9    |
| 214656_x_ | 0.005639 | 0.00406  | 1.392356 down | 1.937446 down | 1.391488 down | MYO1C    |

## NCRNA0008

|           |          |          |          |      |          |      |          |      |           |
|-----------|----------|----------|----------|------|----------|------|----------|------|-----------|
| 214657_s_ | 2.31E-04 | 5.62E-05 | 11.66001 | down | 1.875172 | down | 6.218103 | up   | 4         |
| 214660_at | 0.019364 | 0.017661 | 3.66023  | down | 2.369205 | down | 1.544919 | up   | PELO      |
| 214662_at | 0.001005 | 4.09E-04 | 2.712448 | up   | 1.840965 | up   | 1.473384 | down | WDR43     |
| 214663_at | 8.85E-05 | 1.52E-05 | 2.788637 | down | 2.000888 | down | 1.3937   | up   | DSTYK     |
| 214669_x_ | 0.006871 | 0.005214 | 1.423081 | up   | 1.056475 | down | 1.503449 | down | IGKC      |
| 214670_at | 0.003207 | 0.001959 | 3.234256 | down | 2.648862 | down | 1.220998 | up   | ZKSCAN1   |
| 214674_at | 0.001203 | 5.23E-04 | 1.37451  | up   | 1.112547 | down | 1.529206 | down | USP19     |
| 214676_x_ | 0.017435 | 0.015689 | 1.778913 | up   | 1.030185 | up   | 1.726791 | down | MUC3A     |
| 214679_x_ | 3.12E-05 | 3.72E-06 | 1.392712 | down | 3.110294 | down | 2.233265 | down | GNA11     |
| 214684_at | 0.001534 | 7.24E-04 | 3.064852 | down | 2.462237 | down | 1.244743 | up   | MEF2A     |
| 214686_at | 0.002457 | 0.001371 | 1.042054 | down | 1.911295 | up   | 1.991674 | up   | ZNF266    |
| 214689_at | 0.00102  | 4.16E-04 | 1.126155 | up   | 1.390689 | down | 1.566132 | down | PAPPA2    |
| 214696_at | 1.01E-04 | 1.82E-05 | 8.869814 | down | 6.196658 | down | 1.431387 | up   | C17orf91  |
| 214698_at | 0.035203 | 0.03391  | 1.388912 | up   | 1.034567 | up   | 1.342506 | down | ROD1      |
| 214701_s_ | 4.17E-05 | 5.52E-06 | 10.25016 | down | 31.66802 | down | 3.089515 | down | FN1       |
| 214702_at | 1.73E-04 | 3.81E-05 | 7.841507 | down | 48.18561 | down | 6.144943 | down | FN1       |
| 214703_s_ | 1.29E-07 | 1.64E-09 | 8.52768  | down | 9.641681 | down | 1.130634 | down | MAN2B2    |
| 214705_at | 1.49E-04 | 3.11E-05 | 1.839353 | up   | 1.907089 | up   | 1.036826 | up   | INADL     |
| 214707_x_ | 0.005184 | 0.003657 | 1.423081 | up   | 1.783843 | up   | 1.253508 | up   | ALMS1     |
| 214708_at | 0.001589 | 7.62E-04 | 3.717315 | down | 1.8751   | down | 1.982463 | up   | SNTB1     |
| 214710_s_ | 0.009041 | 0.007289 | 4.78486  | up   | 4.961738 | up   | 1.036966 | up   | CCNB1     |
| 214719_at | 3.51E-04 | 9.87E-05 | 4.772108 | down | 4.240857 | down | 1.12527  | up   | SLC46A3   |
| 214720_x_ | 0.040429 | 0.039188 | 2.391085 | down | 1.061023 | down | 2.253565 | up   | 40796     |
| 214724_at | 2.03E-04 | 4.70E-05 | 2.125931 | down | 3.321994 | down | 1.562607 | down | DIXDC1    |
| 214727_at | 0.001181 | 5.10E-04 | 2.167133 | up   | 3.385243 | up   | 1.562084 | up   | BRCA2     |
| 214728_x_ | 1.52E-06 | 5.31E-08 | 4.454755 | up   | 2.065923 | up   | 2.156303 | down | SMARCA4   |
| 214731_at | 0.01386  | 0.012072 | 1.533868 | up   | 3.041723 | up   | 1.983041 | up   | CTTNBP2NL |
| 214737_x_ | 1.10E-05 | 8.63E-07 | 2.225002 | up   | 2.122761 | up   | 1.048165 | down | HNRNPC    |
| 214738_s_ | 0.00435  | 0.002917 | 2.697413 | down | 1.792419 | down | 1.504901 | up   | NEK9      |
| 214739_at | 0.029216 | 0.027806 | 1.67542  | down | 1.08243  | up   | 1.813524 | up   | LRCH3     |
| 214742_at | 6.82E-04 | 2.41E-04 | 1.900016 | up   | 1.328566 | up   | 1.430126 | down | AZI1      |
| 214743_at | 0.017254 | 0.015504 | 1.370654 | down | 1.493229 | down | 1.089429 | down | CUX1      |

|           |          |          |               |               |               |          |
|-----------|----------|----------|---------------|---------------|---------------|----------|
| 214745_at | 1.88E-06 | 7.12E-08 | 6.639295 up   | 7.625272 up   | 1.148506 up   | PLCH1    |
| 214747_at | 0.006967 | 0.005308 | 1.44425 down  | 1.28494 up    | 1.855775 up   | ZBED4    |
| 214748_at | 0.001699 | 8.33E-04 | 3.127029 down | 2.806265 down | 1.114303 up   | N4BP2L2  |
| 214755_at | 0.002706 | 0.001558 | 4.115711 down | 4.313397 down | 1.048032 down | UAP1L1   |
| 214759_at | 4.13E-05 | 5.46E-06 | 1.833421 down | 1.182067 down | 1.551029 up   | WTAP     |
| 214764_at | 7.47E-04 | 2.74E-04 | 2.277401 up   | 3.48487 up    | 1.530196 up   | RRP15    |
| 214765_s_ | 6.28E-05 | 9.62E-06 | 5.347951 down | 4.185897 down | 1.277612 up   | NAAA     |
| 214766_s_ | 8.38E-05 | 1.42E-05 | 2.420471 up   | 2.213295 up   | 1.093605 down | AHCTF1   |
| 214767_s_ | 0.00244  | 0.001357 | 17.3168 down  | 9.089932 down | 1.905053 up   | HSPB6    |
| 214772_at | 1.56E-05 | 1.43E-06 | 3.341156 down | 3.972114 down | 1.188844 down | C11orf41 |
| 214774_x_ | 2.90E-08 | 2.04E-10 | 38.87124 up   | 38.35162 up   | 1.013548 down | TOX3     |
| 214775_at | 6.90E-06 | 4.51E-07 | 2.346635 up   | 1.94757 up    | 1.204904 down | N4BP3    |
| 214777_at | 0.009207 | 0.00745  | 1.306824 up   | 1.401016 down | 1.830882 down | IGKV4-1  |
| 214780_s_ | 9.99E-04 | 4.06E-04 | 1.078329 down | 1.855576 down | 1.720789 down | MYO9B    |
| 214781_at | 0.002657 | 0.001521 | 1.259951 up   | 1.655369 down | 2.085684 down |          |
| 214782_at | 0.003468 | 0.002175 | 1.97397 down  | 1.156835 up   | 2.283558 up   | CTTN     |
| 214783_s_ | 6.71E-05 | 1.06E-05 | 5.036449 down | 3.951052 down | 1.274711 up   | ANXA11   |
| 214785_at | 0.005078 | 0.003563 | 2.259459 up   | 2.810234 up   | 1.243764 up   | VPS13A   |
| 214787_at | 1.06E-05 | 8.13E-07 | 6.868107 down | 2.499755 down | 2.747512 up   | DENND4A  |
| 214791_at | 1.11E-05 | 8.75E-07 | 9.756082 down | 12.71634 down | 1.303427 down | SP140L   |
| 214797_s_ | 4.76E-04 | 1.47E-04 | 3.133373 up   | 1.700726 up   | 1.842374 down | PCTK3    |
| 214798_at | 0.008888 | 0.00714  | 1.670595 up   | 1.101492 up   | 1.516666 down | ATP2C2   |
| 214803_at | 0.002997 | 0.001789 | 1.675698 up   | 3.270638 down | 5.480602 down |          |
| 214805_at | 1.36E-04 | 2.73E-05 | 3.123681 up   | 5.351003 up   | 1.713044 up   | EIF4A1   |
| 214806_at | 5.19E-04 | 1.66E-04 | 3.343859 up   | 1.799629 up   | 1.858083 down | BICD1    |
| 214807_at | 0.018026 | 0.01629  | 1.949296 up   | 1.319749 down | 2.57258 down  |          |
| 214808_at | 5.39E-04 | 1.74E-04 | 2.392026 down | 2.101097 down | 1.138466 up   |          |
| 214812_s_ | 0.002141 | 0.001137 | 1.574548 down | 1.16958 down  | 1.346251 up   | MOBKL1B  |
| 214813_at | 0.003444 | 0.002155 | 1.647896 down | 1.378308 up   | 2.271308 up   | ZNF75D   |
| 214815_at | 0.002288 | 0.001247 | 1.199445 up   | 1.546704 up   | 1.289516 up   | TRIM33   |
| 214816_x_ | 0.015733 | 0.013958 | 1.511165 up   | 1.160451 up   | 1.302222 down | C19orf40 |
| 214817_at | 0.001511 | 7.10E-04 | 2.315029 up   | 1.426142 up   | 1.62328 down  | UNC13A   |
| 214819_at | 0.004426 | 0.002982 | 1.427618 up   | 1.168619 down | 1.668342 down | IQSEC2   |
| 214820_at | 0.013797 | 0.012009 | 1.582475 up   | 2.119323 up   | 1.339246 up   | BRWD1    |

|           |          |          |          |      |          |      |          |      |            |
|-----------|----------|----------|----------|------|----------|------|----------|------|------------|
| 214823_at | 1.14E-05 | 9.13E-07 | 12.17911 | up   | 8.537448 | up   | 1.426552 | down | ZNF204     |
| 214825_at | 0.019255 | 0.017551 | 2.914498 | up   | 1.635681 | up   | 1.781825 | down | FAM155A    |
| 214829_at | 2.30E-04 | 5.57E-05 | 10.9304  | up   | 16.22222 | up   | 1.484138 | up   | AASS       |
| 214830_at | 1.25E-05 | 1.04E-06 | 11.27278 | down | 3.1735   | down | 3.55216  | up   | SLC38A6    |
| 214831_at | 0.001125 | 4.76E-04 | 2.186229 | down | 1.68974  | down | 1.293826 | up   | MED28      |
| 214834_at | 3.68E-05 | 4.63E-06 | 11.38612 | up   | 11.04978 | up   | 1.030439 | down | PAR5       |
| 214835_s_ | 0.008164 | 0.006445 | 2.578146 | down | 1.138    | down | 2.265506 | up   | SUCLG2     |
| 214838_at | 5.07E-04 | 1.60E-04 | 3.726729 | down | 3.976924 | down | 1.067136 | down | SFT2D2     |
| 214839_at | 0.003001 | 0.001793 | 2.252048 | up   | 1.550551 | up   | 1.452418 | down | LOC157627  |
| 214843_s_ | 0.002988 | 0.001782 | 1.217026 | up   | 1.799687 | up   | 1.478758 | up   | USP33      |
| 214845_s_ | 9.73E-04 | 3.91E-04 | 5.531551 | down | 4.815422 | down | 1.148716 | up   | CALU       |
| 214846_s_ | 2.47E-05 | 2.67E-06 | 4.340538 | up   | 2.506051 | up   | 1.732023 | down | ALPK3      |
| 214848_at | 0.015713 | 0.013937 | 1.407917 | down | 1.739868 | down | 1.235775 | down |            |
| 214849_at | 9.20E-04 | 3.62E-04 | 2.21938  | down | 5.573931 | down | 2.511482 | down | KCTD20     |
| 214851_at | 0.002734 | 0.001581 | 1.351307 | up   | 1.065717 | down | 1.440111 | down | HNF4A      |
| 214853_s_ | 0.00329  | 0.002028 | 2.203576 | down | 2.003505 | down | 1.099861 | up   | SHC1       |
| 214857_at | 2.87E-04 | 7.52E-05 | 3.266887 | up   | 2.199161 | up   | 1.485515 | down |            |
| 214864_s_ | 0.003568 | 0.002254 | 1.063707 | down | 1.397434 | down | 1.31374  | down | GRHPR      |
| 214866_at | 1.36E-04 | 2.73E-05 | 3.273459 | down | 6.127732 | down | 1.871944 | down | PLAUR      |
| 214877_at | 0.002842 | 0.001665 | 2.143539 | up   | 2.651447 | up   | 1.236948 | up   | CDKAL1     |
|           |          |          |          |      |          |      |          |      | ZNF37A /// |
| 214878_at | 0.004354 | 0.002921 | 1.830898 | down | 1.575904 | down | 1.161808 | up   | ZNF37B     |
| 214879_x_ | 0.00375  | 0.002404 | 1.17729  | up   | 1.256447 | down | 1.479202 | down | USF2       |
| 214880_x_ | 1.68E-04 | 3.68E-05 | 1.36712  | down | 4.034846 | down | 2.951348 | down | CALD1      |
| 214882_s_ | 0.001733 | 8.55E-04 | 2.52725  | up   | 2.582359 | up   | 1.021806 | up   | SFRS2      |
| 214883_at | 0.004529 | 0.003077 | 1.037803 | up   | 1.351474 | down | 1.402565 | down | THRA       |
| 214886_s_ | 0.012398 | 0.0106   | 1.223956 | up   | 1.242013 | down | 1.520168 | down | N4BP2L1    |
| 214887_at | 0.014349 | 0.012563 | 1.098205 | up   | 1.070926 | down | 1.176096 | down | N4BP2L1    |
| 214893_x_ | 0.002246 | 0.001216 | 1.4114   | up   | 1.094045 | down | 1.544135 | down | HCN2       |
| 214895_s_ | 0.015718 | 0.013942 | 2.380133 | down | 1.427109 | down | 1.667801 | up   | ADAM10     |
| 214898_x_ | 0.002454 | 0.001369 | 3.119668 | up   | 1.455898 | up   | 2.14278  | down | MUC3B      |
| 214901_at | 0.003138 | 0.001903 | 1.716237 | up   | 1.924627 | up   | 1.121423 | up   | ZNF8       |
| 214902_x_ | 0.003227 | 0.001976 | 1.632828 | up   | 2.154471 | up   | 1.319473 | up   |            |
| 214903_at | 0.009731 | 0.007951 | 1.598417 | up   | 1.368007 | up   | 1.168428 | down | SYT2       |



|           |          |          |               |               |               |            |
|-----------|----------|----------|---------------|---------------|---------------|------------|
| 214912_at | 0.007242 | 0.005565 | 3.195445 up   | 2.221196 up   | 1.438614 down | IGH@ ///   |
|           |          |          |               |               |               | IGHA1 ///  |
|           |          |          |               |               |               | IGHA2 ///  |
|           |          |          |               |               |               | IGHD ///   |
|           |          |          |               |               |               | IGHG1 ///  |
|           |          |          |               |               |               | IGHG2 ///  |
|           |          |          |               |               |               | IGHG3 ///  |
|           |          |          |               |               |               | IGHM ///   |
|           |          |          |               |               |               | IGHV3-23   |
|           |          |          |               |               |               | /// IGHV4- |
|           |          |          |               |               |               | 31 ///     |
|           |          |          |               |               |               | LOC100126  |
| 214916_x_ | 0.00375  | 0.002404 | 1.230076 up   | 1.142594 down | 1.405478 down | 583        |
| 214927_at | 5.57E-06 | 3.32E-07 | 19.30706 down | 101.6441 down | 5.264606 down | ITGBL1     |
| 214930_at | 3.76E-05 | 4.75E-06 | 4.165798 up   | 4.240982 up   | 1.018048 up   | SLITRK5    |
|           |          |          |               |               |               | IL4I1 ///  |
| 214935_at | 0.032594 | 0.031265 | 1.637313 up   | 1.077417 down | 1.764069 down | NUP62      |
| 214937_x_ | 0.003305 | 0.00204  | 1.568781 up   | 1.758741 up   | 1.121088 up   | PCM1       |
| 214938_x_ | 4.15E-05 | 5.50E-06 | 1.678584 up   | 2.062483 up   | 1.228704 up   | HMGB1      |
| 214939_x_ | 3.75E-04 | 1.08E-04 | 2.856022 up   | 1.928541 up   | 1.480924 down | MLLT4      |
| 214941_s_ | 0.002425 | 0.001346 | 2.57305 up    | 2.571918 up   | 1.00044 down  | PRPF40A    |
| 214948_s_ | 3.80E-05 | 4.84E-06 | 2.659541 up   | 1.483361 up   | 1.792916 down | TMF1       |
| 214949_at | 0.003516 | 0.002212 | 2.215763 up   | 1.469515 up   | 1.50782 down  |            |
| 214958_s_ | 0.004772 | 0.003288 | 2.146617 up   | 1.330839 up   | 1.61298 down  | TMC6       |
| 214962_s_ | 0.00201  | 0.001043 | 1.857678 up   | 2.884612 up   | 1.552805 up   | NUP160     |
| 214963_at | 2.71E-05 | 3.05E-06 | 2.297998 up   | 2.497124 up   | 1.086652 up   | NUP160     |
| 214966_at | 2.07E-04 | 4.82E-05 | 2.408347 up   | 1.25425 up    | 1.92015 down  | GRIK5      |
| 214969_at | 0.002764 | 0.001606 | 1.826791 up   | 1.496893 up   | 1.220389 down | MAP3K9     |
| 214970_s_ | 7.87E-04 | 2.95E-04 | 1.083052 up   | 1.464264 down | 1.585874 down | ST6GAL1    |
| 214973_x_ | 0.019956 | 0.018278 | 1.360539 up   | 1.449771 down | 1.972469 down | IGHD       |
| 214977_at | 0.006007 | 0.0044   | 1.282213 up   | 1.598079 down | 2.049077 down |            |
| 214983_at | 0.001375 | 6.26E-04 | 3.123943 up   | 9.814239 up   | 3.141619 up   | TTY15      |
| 214985_at | 0.003194 | 0.001949 | 3.46254 down  | 3.289472 down | 1.052613 up   | EXT1       |

|           |          |          |               |               |               |                             |
|-----------|----------|----------|---------------|---------------|---------------|-----------------------------|
| 214987_at | 0.002853 | 0.001674 | 1.258222 up   | 1.391427 down | 1.750724 down | GAB1                        |
| 214988_s_ | 8.95E-04 | 3.49E-04 | 1.447705 up   | 1.404364 up   | 1.030862 down | SON                         |
| 214989_x_ | 1.52E-04 | 3.20E-05 | 1.691769 up   | 2.808078 up   | 1.659848 up   |                             |
| 214992_s_ | 0.002554 | 0.001444 | 2.862989 down | 1.797409 down | 1.592842 up   | DNASE2                      |
| 214994_at | 0.022083 | 0.020476 | 1.0386 up     | 1.706028 down | 1.771881 down | APOBEC3F<br>APOBEC3F<br>/// |
| 214995_s_ | 1.46E-04 | 3.02E-05 | 3.968682 down | 1.688356 down | 2.350618 up   | APOBEC3G                    |
| 215000_s_ | 0.003446 | 0.002158 | 1.996689 down | 2.230316 down | 1.117007 down | FEZ2                        |
| 215001_s_ | 0.001122 | 4.74E-04 | 1.156576 down | 3.18904 up    | 3.688368 up   | GLUL                        |
| 215005_at | 0.035907 | 0.034625 | 1.350669 up   | 1.100139 up   | 1.227726 down | NECAB2                      |
| 215009_s_ | 0.00222  | 0.001194 | 1.741169 up   | 2.1243 up     | 1.220042 up   | SEC31A                      |
| 215010_s_ | 0.003827 | 0.002464 | 1.665646 up   | 1.254777 up   | 1.327443 down | BRSK2                       |
| 215012_at | 0.034282 | 0.03298  | 1.456322 down | 2.25269 up    | 3.280643 up   | ZNF451                      |
| 215016_x_ | 6.15E-04 | 2.10E-04 | 2.411412 down | 1.822175 down | 1.32337 up    | DST                         |
| 215017_s_ | 1.24E-04 | 2.41E-05 | 5.162865 up   | 5.680858 up   | 1.100331 up   | FNBP1L                      |
| 215018_at | 0.002501 | 0.001405 | 1.466315 up   | 1.482438 up   | 1.010995 up   | KIAA1731                    |
| 215021_s_ | 6.70E-04 | 2.35E-04 | 1.510323 up   | 2.137702 down | 3.228621 down | NRXN3                       |
| 215023_s_ | 3.78E-05 | 4.78E-06 | 2.941789 up   | 3.079329 up   | 1.046754 up   | PEX1                        |
| 215028_at | 1.19E-09 | 2.46E-12 | 67.59737 up   | 67.6464 up    | 1.000726 up   | SEMA6A                      |
| 215029_at | 6.99E-05 | 1.12E-05 | 3.368672 up   | 7.90579 up    | 2.346857 up   |                             |
| 215031_x_ | 0.007752 | 0.006058 | 1.962118 up   | 1.059061 down | 2.078002 down | RNF126                      |
| 215034_s_ | 1.54E-06 | 5.40E-08 | 1.523442 down | 32.59066 down | 21.39278 down | TM4SF1                      |
| 215036_at | 0.00283  | 0.001656 | 1.48101 up    | 1.000999 up   | 1.479532 down |                             |
| 215040_at | 0.002661 | 0.001524 | 1.418072 down | 1.471099 up   | 2.086124 up   | RNASEH2B                    |
| 215044_s_ | 6.27E-04 | 2.15E-04 | 1.846168 down | 3.255726 down | 1.763504 down | STAM2                       |
| 215045_at | 0.016978 | 0.015225 | 1.674586 up   | 1.474153 down | 2.468596 down | TNRC4                       |
| 215046_at | 0.00206  | 0.001079 | 1.825465 down | 1.121315 down | 1.627968 up   | C2orf67                     |
| 215048_at | 0.007206 | 0.005534 | 1.104479 up   | 1.285182 up   | 1.16361 up    | ZNF280B                     |
| 215061_at | 0.020321 | 0.018648 | 1.346737 up   | 1.007719 down | 1.357132 down | METTLL10                    |
| 215066_at | 1.34E-04 | 2.67E-05 | 2.733624 up   | 2.127522 up   | 1.284887 down | PTPRF                       |
| 215067_x_ | 0.002819 | 0.001647 | 1.607803 up   | 2.058771 up   | 1.280487 up   | PRDX2                       |
| 215071_s_ | 0.008185 | 0.006465 | 6.239136 down | 1.735427 down | 3.595159 up   | HIST1H2AC                   |
| 215075_s_ | 0.004788 | 0.003301 | 1.205439 up   | 1.465725 down | 1.766843 down | GRB2                        |

|           |          |          |          |      |          |      |          |      |            |
|-----------|----------|----------|----------|------|----------|------|----------|------|------------|
| 215076_s_ | 0.004808 | 0.00332  | 22.49924 | down | 17.29639 | down | 1.300805 | up   | COL3A1     |
| 215077_at | 9.01E-04 | 3.52E-04 | 1.980757 | down | 1.172616 | down | 1.689178 | up   |            |
| 215083_at | 0.002171 | 0.001157 | 2.92628  | up   | 4.596793 | up   | 1.570866 | up   |            |
| 215089_s_ | 0.001161 | 4.98E-04 | 2.156789 | up   | 1.171572 | up   | 1.840936 | down | RBM10      |
| 215091_s_ | 0.022316 | 0.02072  | 1.035192 | down | 1.55101  | down | 1.498282 | down | GTF3A      |
| 215095_at | 0.005547 | 0.003974 | 1.609789 | down | 1.032394 | up   | 1.661936 | up   |            |
| 215099_s_ | 0.00756  | 0.005872 | 3.175111 | down | 1.995196 | down | 1.591378 | up   | RXRB       |
| 215104_at | 0.012555 | 0.010758 | 1.330093 | up   | 1.248016 | down | 1.659977 | down | NRIP2      |
| 215105_at | 0.001737 | 8.57E-04 | 1.451034 | up   | 1.694739 | up   | 1.167952 | up   | CG030      |
| 215106_at | 0.004894 | 0.003399 | 1.169045 | up   | 1.334709 | down | 1.560335 | down | TTC22      |
| 215108_x_ | 5.88E-08 | 5.35E-10 | 26.30121 | up   | 24.48318 | up   | 1.074257 | down | TOX3       |
| 215116_s_ | 0.001158 | 4.96E-04 | 3.668225 | down | 1.76173  | up   | 6.462421 | up   | DNM1       |
| 215118_s_ | 0.009423 | 0.007653 | 1.397664 | up   | 1.341174 | down | 1.874511 | down | IGHG1      |
|           |          |          |          |      |          |      |          |      | LOC642778  |
|           |          |          |          |      |          |      |          |      | ///        |
|           |          |          |          |      |          |      |          |      | LOC729602  |
| 215123_at | 0.00296  | 0.001759 | 4.992293 | up   | 4.859198 | up   | 1.027391 | down | /// NPIPL3 |
|           |          |          |          |      |          |      |          |      | UGT1A1 /// |
|           |          |          |          |      |          |      |          |      | UGT1A10    |
|           |          |          |          |      |          |      |          |      | /// UGT1A3 |
|           |          |          |          |      |          |      |          |      | /// UGT1A4 |
|           |          |          |          |      |          |      |          |      | /// UGT1A5 |
|           |          |          |          |      |          |      |          |      | /// UGT1A6 |
|           |          |          |          |      |          |      |          |      | /// UGT1A7 |
|           |          |          |          |      |          |      |          |      | /// UGT1A8 |
| 215125_s_ | 2.56E-04 | 6.42E-05 | 1.357752 | up   | 1.193279 | down | 1.620176 | down | /// UGT1A9 |

|           |          |          |          |      |          |      |          |      |           |
|-----------|----------|----------|----------|------|----------|------|----------|------|-----------|
| 215127_s_ | 0.007327 | 0.005647 | 1.774038 | down | 1.439049 | up   | 2.552928 | up   | RBMS1     |
| 215128_at | 2.42E-04 | 5.96E-05 | 4.220932 | up   | 6.605296 | up   | 1.56489  | up   |           |
| 215130_s_ | 7.51E-04 | 2.76E-04 | 1.825017 | down | 1.209232 | down | 1.509237 | up   | IQCK      |
| 215134_at | 0.001895 | 9.62E-04 | 2.279295 | down | 1.345989 | down | 1.693398 | up   | PI4K2A    |
| 215136_s_ | 0.001042 | 4.29E-04 | 3.514602 | up   | 2.659035 | up   | 1.321758 | down | EXOSC8    |
| 215137_at | 0.001856 | 9.36E-04 | 1.507964 | up   | 1.002336 | down | 1.511487 | down |           |
|           |          |          |          |      |          |      |          |      | LOC100128 |
| 215140_at | 4.07E-04 | 1.20E-04 | 1.683621 | up   | 1.524203 | up   | 1.104591 | down | 570       |
| 215145_s_ | 1.73E-05 | 1.66E-06 | 25.37898 | up   | 24.41514 | up   | 1.039477 | down | CNTNAP2   |
| 215146_s_ | 0.007957 | 0.006248 | 2.958727 | down | 1.43761  | down | 2.058088 | up   | TTC28     |
| 215151_at | 0.015393 | 0.013621 | 1.436551 | down | 1.473626 | down | 1.025809 | down | DOCK10    |
| 215157_x_ | 0.017563 | 0.015821 | 1.182667 | up   | 1.267533 | up   | 1.071758 | up   | PABPC1    |
| 215165_x_ | 0.001244 | 5.47E-04 | 2.489213 | up   | 1.757527 | up   | 1.416316 | down | UMPS      |
| 215170_s_ | 0.003402 | 0.00212  | 1.669881 | up   | 1.697519 | up   | 1.016551 | up   | CEP152    |
| 215171_s_ | 0.003273 | 0.002012 | 1.051703 | down | 1.806585 | down | 1.717771 | down | TIMM17A   |
| 215177_s_ | 0.00138  | 6.29E-04 | 4.640596 | up   | 6.602047 | up   | 1.422672 | up   | ITGA6     |
| 215178_x_ | 0.001138 | 4.84E-04 | 1.400699 | down | 1.434542 | up   | 2.009362 | up   | NAAA      |
| 215179_x_ | 0.003383 | 0.002103 | 1.5039   | up   | 2.075406 | up   | 1.380016 | up   | PGF       |
| 215180_at | 0.001751 | 8.67E-04 | 1.334073 | up   | 1.118017 | up   | 1.19325  | down |           |
| 215181_at | 0.003419 | 0.002134 | 1.490547 | up   | 1.058937 | down | 1.578395 | down | CDH22     |
| 215185_at | 1.17E-05 | 9.43E-07 | 2.661712 | down | 1.929947 | down | 1.379163 | up   |           |
| 215186_at | 0.001025 | 4.19E-04 | 1.386411 | down | 1.04904  | down | 1.3216   | up   | FLJ41278  |
| 215192_at | 0.007942 | 0.006232 | 1.045321 | up   | 1.19104  | down | 1.245018 | down | PMS2L4    |
|           |          |          |          |      |          |      |          |      | HLA-DRB1  |
|           |          |          |          |      |          |      |          |      | /// HLA-  |
|           |          |          |          |      |          |      |          |      | DRB3 ///  |
| 215193_x_ | 0.028238 | 0.02678  | 2.363695 | up   | 1.419929 | up   | 1.664657 | down | HLA-DRB4  |
| 215194_at | 0.011785 | 0.009982 | 1.486788 | up   | 1.51582  | down | 2.253703 | down | PRKCA     |
| 215195_at | 3.55E-04 | 1.00E-04 | 2.207765 | down | 3.045993 | down | 1.379673 | down | PRKCA     |
| 215200_x_ | 0.001541 | 7.29E-04 | 1.771553 | up   | 1.682309 | up   | 1.053049 | down |           |
| 215202_at | 0.00261  | 0.001485 | 1.678939 | up   | 1.071831 | up   | 1.566421 | down | LOC91316  |
| 215204_at | 0.011811 | 0.010009 | 1.613397 | up   | 3.095131 | up   | 1.918394 | up   |           |
| 215208_x_ | 0.002733 | 0.001579 | 1.825764 | up   | 1.501607 | up   | 1.215874 | down | RPL35A    |
| 215215_s_ | 0.023609 | 0.022025 | 1.090978 | up   | 1.579458 | up   | 1.447745 | up   | LOC81691  |

|           |          |          |          |      |          |      |          |      |           |
|-----------|----------|----------|----------|------|----------|------|----------|------|-----------|
| 215217_at | 0.025088 | 0.023529 | 1.224297 | down | 1.098541 | up   | 1.34494  | up   |           |
| 215218_s_ | 0.008353 | 0.006622 | 1.95295  | up   | 1.083259 | down | 2.11555  | down | WDR62     |
| 215223_s_ | 1.54E-04 | 3.24E-05 | 8.663842 | down | 2.036624 | down | 4.254022 | up   | SOD2      |
| 215224_at | 7.43E-04 | 2.72E-04 | 2.126279 | up   | 4.159792 | up   | 1.956372 | up   | SNORA21   |
| 215226_at | 0.016077 | 0.014305 | 1.232854 | up   | 1.038239 | down | 1.279997 | down | EXPH5     |
| 215227_x_ | 0.006069 | 0.004459 | 1.232789 | up   | 1.300473 | up   | 1.054904 | up   | ACP1      |
| 215235_at | 0.002529 | 0.001426 | 1.182754 | down | 2.003877 | down | 1.694247 | down | SPTAN1    |
| 215236_s_ | 0.026988 | 0.025499 | 3.081889 | down | 3.762613 | down | 1.220879 | down | PICALM    |
| 215238_s_ | 0.010007 | 0.008226 | 1.670318 | up   | 1.024857 | down | 1.711837 | down | DOCK9     |
| 215239_x_ | 6.07E-06 | 3.73E-07 | 4.167815 | up   | 10.18052 | up   | 2.442651 | up   | ZNF273    |
| 215242_at | 0.011419 | 0.009619 | 1.961759 | down | 1.829567 | down | 1.072253 | up   | PIGC      |
| 215243_s_ | 0.019259 | 0.017555 | 1.440767 | up   | 1.079607 | down | 1.555462 | down | GJB3      |
| 215244_at | 0.007431 | 0.005742 | 1.265536 | up   | 1.283519 | down | 1.624339 | down | DGCR5     |
| 215246_at | 6.04E-04 | 2.05E-04 | 1.693718 | up   | 1.702402 | up   | 1.005127 | up   | LARP7     |
| 215250_at | 0.00156  | 7.43E-04 | 1.502253 | down | 1.040065 | down | 1.444384 | up   | TMEM111   |
| 215253_s_ | 9.76E-04 | 3.92E-04 | 4.866687 | down | 7.190769 | down | 1.477549 | down | RCAN1     |
| 215255_at | 0.001772 | 8.80E-04 | 1.782811 | up   | 1.112011 | up   | 1.603232 | down | IGSF9B    |
| 215256_x_ | 0.001454 | 6.75E-04 | 1.30666  | up   | 2.285894 | down | 2.986886 | down | SNX26     |
| 215258_at | 0.006631 | 0.004987 | 1.825177 | up   | 1.048584 | up   | 1.740611 | down | CADM4     |
| 215262_at | 1.65E-04 | 3.58E-05 | 1.69206  | up   | 1.930223 | up   | 1.140754 | up   |           |
|           |          |          |          |      |          |      |          |      | ZXDA ///  |
| 215263_at | 0.001152 | 4.92E-04 | 1.319775 | down | 1.83597  | down | 1.391124 | down | ZXDB      |
| 215264_at | 0.00223  | 0.001202 | 1.509884 | up   | 1.037488 | up   | 1.455326 | down | EMX1      |
| 215265_at | 0.002261 | 0.001228 | 1.567155 | up   | 1.056531 | down | 1.655748 | down | EMX1      |
| 215267_s_ | 0.006086 | 0.004476 | 2.046497 | up   | 1.556645 | up   | 1.314684 | down | SLC8A2    |
| 215270_at | 0.002601 | 0.001479 | 1.619043 | up   | 1.663834 | down | 2.693818 | down | LFNG      |
| 215276_at | 0.001165 | 5.00E-04 | 1.558613 | up   | 1.104038 | down | 1.720767 | down | WFDC8     |
| 215277_at | 0.011082 | 0.009283 | 1.66521  | up   | 1.043551 | down | 1.737731 | down | PCDH1     |
| 215281_x_ | 0.020577 | 0.018912 | 1.180476 | up   | 1.895205 | up   | 1.605459 | up   | POGZ      |
| 215283_at | 0.001743 | 8.61E-04 | 1.870967 | down | 1.906771 | down | 1.019136 | down | LOC339290 |
| 215285_s_ | 0.045754 | 0.044544 | 1.299507 | down | 1.386679 | up   | 1.801999 | up   | PHTF1     |
| 215286_s_ | 0.015346 | 0.013574 | 1.734251 | down | 1.114267 | up   | 1.932418 | up   | PHTF2     |
| 215291_at | 0.004212 | 0.002789 | 1.266631 | up   | 1.411889 | down | 1.788342 | down | MKL1      |
| 215299_x_ | 0.01542  | 0.013645 | 2.358475 | up   | 1.230509 | up   | 1.916667 | down | SULT1A1   |

|           |          |          |          |      |          |      |          |      |           |
|-----------|----------|----------|----------|------|----------|------|----------|------|-----------|
| 215306_at | 0.007317 | 0.005636 | 3.869169 | down | 1.446144 | down | 2.675507 | up   |           |
| 215311_at | 0.020539 | 0.018871 | 1.204987 | up   | 1.030983 | up   | 1.168774 | down | NTRK3     |
| 215313_x_ | 2.01E-05 | 2.02E-06 | 6.812918 | down | 4.764414 | down | 1.429959 | up   | HLA-A     |
| 215319_at | 0.017313 | 0.015566 | 1.320719 | up   | 1.031281 | down | 1.362033 | down | ATP8B3    |
| 215320_at | 0.020171 | 0.0185   | 1.260768 | up   | 1.154197 | down | 1.455175 | down | LOC645961 |
| 215321_at | 0.00436  | 0.002927 | 1.763366 | up   | 1.492313 | up   | 1.181633 | down | RUNDC3B   |
| 215322_at | 0.003328 | 0.00206  | 1.942532 | up   | 2.71293  | up   | 1.396595 | up   |           |
| 215325_x_ | 0.008282 | 0.006556 | 1.6576   | up   | 1.156846 | down | 1.917587 | down | C19orf26  |
| 215331_at | 0.037224 | 0.035952 | 1.240711 | up   | 1.081915 | down | 1.342344 | down | MYH15     |
| 215332_s_ | 0.046648 | 0.045446 | 1.047799 | up   | 1.15731  | down | 1.212628 | down | CD8B      |
| 215333_x_ | 0.001338 | 6.04E-04 | 3.079256 | down | 1.526161 | down | 2.017649 | up   | GSTM1     |
| 215334_at | 1.16E-04 | 2.20E-05 | 1.669044 | down | 1.198105 | down | 1.39307  | up   | EFR3B     |
| 215337_at | 0.001669 | 8.13E-04 | 1.361951 | down | 1.012252 | up   | 1.378638 | up   | MED24     |
| 215338_s_ | 0.001414 | 6.50E-04 | 2.575491 | up   | 2.554323 | up   | 1.008287 | down | NKTR      |
| 215348_at | 0.002572 | 0.001457 | 1.444154 | up   | 1.370668 | down | 1.979455 | down | ADCY1     |
| 215353_at | 7.15E-04 | 2.58E-04 | 1.818312 | up   | 1.021971 | down | 1.858262 | down |           |
| 215354_s_ | 1.59E-04 | 3.39E-05 | 3.310315 | up   | 2.014144 | up   | 1.643535 | down | PELP1     |
| 215355_at | 0.003042 | 0.001825 | 1.118195 | up   | 1.158249 | down | 1.295148 | down | POU2F3    |
| 215359_x_ | 0.001818 | 9.11E-04 | 1.76199  | up   | 2.261852 | up   | 1.283692 | up   | ZNF44     |
| 215364_s_ | 9.57E-04 | 3.82E-04 | 1.616796 | down | 1.513071 | down | 1.068552 | up   | KIAA0467  |
| 215365_at | 0.006117 | 0.004506 | 1.285476 | up   | 1.019134 | up   | 1.261342 | down | CACNB2    |
| 215373_x_ | 0.003153 | 0.001918 | 1.709796 | up   | 1.915593 | up   | 1.120363 | up   |           |
| 215377_at | 0.006371 | 0.004744 | 1.979943 | up   | 1.253193 | up   | 1.579919 | down | CTBP2     |
| 215382_x_ | 0.00701  | 0.00535  | 1.426816 | up   | 1.04626  | down | 1.49282  | down | TPSAB1    |
| 215383_x_ | 5.54E-04 | 1.81E-04 | 1.465182 | up   | 2.219157 | up   | 1.514595 | up   | SPG21     |
| 215384_s_ | 0.006468 | 0.00484  | 1.447392 | up   | 1.502852 | down | 2.175216 | down | MAP1A     |
| 215386_at | 0.004741 | 0.003262 | 2.335049 | up   | 1.697613 | up   | 1.375489 | down |           |
|           |          |          |          |      |          |      |          |      | CFH ///   |
| 215388_s_ | 1.55E-06 | 5.47E-08 | 13.33433 | down | 31.21289 | down | 2.340791 | down | CFHR1     |
| 215389_s_ | 0.022447 | 0.020862 | 1.665335 | up   | 1.089369 | up   | 1.528715 | down | TNNT2     |
| 215398_at | 0.019786 | 0.018101 | 1.294426 | up   | 1.899917 | up   | 1.467768 | up   |           |
| 215399_s_ | 8.09E-04 | 3.05E-04 | 2.492594 | down | 1.904199 | down | 1.308999 | up   | OS9       |
| 215404_x_ | 5.61E-04 | 1.84E-04 | 1.492808 | up   | 1.946205 | up   | 1.303721 | up   | FGFR1     |
| 215407_s_ | 0.038469 | 0.037208 | 1.086903 | up   | 1.449606 | up   | 1.333702 | up   | ASTN2     |

|           |          |          |               |               |               |                                                                                                           |
|-----------|----------|----------|---------------|---------------|---------------|-----------------------------------------------------------------------------------------------------------|
| 215409_at | 0.002288 | 0.001248 | 1.441279 up   | 1.198046 down | 1.726719 down | LPCAT4<br>LOC100132<br>832 ///<br>LOC441259<br>///<br>LOC730324<br>/// PMS2L1<br>/// PMS2L2<br>/// PMS2L5 |
| 215410_at | 0.006993 | 0.005334 | 1.642935 up   | 1.034406 down | 1.699461 down |                                                                                                           |
| 215411_s_ | 7.29E-06 | 4.92E-07 | 3.492074 down | 1.493504 down | 2.338176 up   | TRAF3IP2                                                                                                  |
| 215416_s_ | 0.01099  | 0.009194 | 1.705241 up   | 1.54415 up    | 1.104324 down | STOML2                                                                                                    |
| 215417_at | 0.012267 | 0.010474 | 1.369685 up   | 1.163552 up   | 1.177159 down | EXOC6B                                                                                                    |
| 215420_at | 9.21E-04 | 3.63E-04 | 1.405872 up   | 1.09151 down  | 1.534522 down | IHH                                                                                                       |
| 215425_at | 1.66E-05 | 1.56E-06 | 3.666499 up   | 3.720358 up   | 1.014689 up   | BTG3                                                                                                      |
| 215426_at | 0.002393 | 0.001323 | 1.455674 up   | 1.288899 down | 1.876217 down | ZCCHC14                                                                                                   |
| 215427_s_ | 0.006939 | 0.00528  | 1.044192 up   | 1.718522 down | 1.794466 down | ZCCHC14                                                                                                   |
| 215428_at | 0.006378 | 0.004754 | 1.483867 up   | 1.620727 up   | 1.092232 up   |                                                                                                           |
| 215431_at | 0.004156 | 0.00274  | 1.416951 up   | 1.044753 down | 1.480364 down | SNTB1                                                                                                     |
| 215436_at | 0.002499 | 0.001403 | 2.820654 down | 1.235358 down | 2.283269 up   | HSDL2                                                                                                     |
| 215440_s_ | 3.11E-05 | 3.70E-06 | 1.36575 up    | 11.90611 up   | 8.717631 up   | BEX4                                                                                                      |
| 215445_x_ | 0.003909 | 0.002534 | 1.392369 up   | 1.020211 up   | 1.364785 down |                                                                                                           |
| 215446_s_ | 1.98E-06 | 7.71E-08 | 91.63847 down | 132.7363 down | 1.448477 down | LOX                                                                                                       |
| 215450_at | 0.001583 | 7.58E-04 | 2.462095 up   | 4.215437 up   | 1.712135 up   |                                                                                                           |
| 215451_s_ | 0.003205 | 0.001957 | 1.109914 up   | 1.521123 up   | 1.370487 up   | AFF1<br>SUMO2 ///                                                                                         |
| 215452_x_ | 6.98E-04 | 2.49E-04 | 1.669793 up   | 2.324976 up   | 1.392374 up   | SUMO4                                                                                                     |
| 215454_x_ | 0.004956 | 0.003452 | 2.11904 up    | 1.634316 down | 3.46318 down  | SFTPC                                                                                                     |
| 215464_s_ | 2.32E-04 | 5.63E-05 | 3.284043 down | 3.362451 down | 1.023875 down | TAX1BP3                                                                                                   |
| 215467_x_ | 0.002531 | 0.001428 | 1.535299 up   | 1.779272 up   | 1.15891 up    | LOC647070                                                                                                 |
| 215471_s_ | 2.07E-04 | 4.81E-05 | 2.99147 up    | 5.915883 up   | 1.977584 up   | MAP7                                                                                                      |
| 215473_at | 0.001157 | 4.95E-04 | 1.6124 up     | 1.580671 up   | 1.020073 down |                                                                                                           |
| 215479_at | 1.84E-04 | 4.13E-05 | 4.621159 up   | 5.80532 up    | 1.256248 up   |                                                                                                           |
| 215480_at | 7.92E-04 | 2.97E-04 | 1.20814 up    | 1.50257 down  | 1.815315 down | KIAA0509                                                                                                  |
| 215484_at | 7.56E-04 | 2.78E-04 | 1.279913 down | 1.200415 up   | 1.536426 up   |                                                                                                           |

|           |          |          |               |               |               |             |
|-----------|----------|----------|---------------|---------------|---------------|-------------|
| 215488_at | 0.005308 | 0.003767 | 2.079347 up   | 1.02546 down  | 2.132288 down |             |
| 215489_x_ | 0.008962 | 0.007209 | 3.179781 down | 2.418749 down | 1.314639 up   | HOMER3      |
| 215490_at | 0.007926 | 0.006215 | 1.827398 up   | 1.357325 up   | 1.346323 down | C1orf69     |
| 215491_at | 6.91E-06 | 4.52E-07 | 1.642345 up   | 2.417659 up   | 1.472077 up   | MYCL1       |
| 215492_x_ | 5.77E-04 | 1.92E-04 | 1.037796 up   | 1.4289 down   | 1.482906 down | PTCRA       |
| 215493_x_ | 2.10E-05 | 2.14E-06 | 1.499093 down | 2.094865 down | 1.397422 down | BTN2A1      |
| 215495_s_ | 1.46E-04 | 3.01E-05 | 2.086903 down | 2.567406 down | 1.230247 down | SAMD4A      |
| 215497_s_ | 2.81E-04 | 7.29E-05 | 1.909079 down | 2.355441 down | 1.23381 down  | WDTC1       |
| 215499_at | 0.001182 | 5.11E-04 | 1.477378 down | 2.479104 down | 1.678043 down | MAP2K3      |
| 215502_at | 0.002734 | 0.001581 | 1.952037 up   | 1.076197 down | 2.100775 down |             |
| 215504_x_ | 0.009613 | 0.007837 | 1.208345 up   | 1.773394 up   | 1.467622 up   |             |
| 215506_s_ | 1.65E-05 | 1.54E-06 | 12.01441 down | 10.06171 down | 1.194072 up   | DIRAS3      |
| 215507_x_ | 0.001315 | 5.90E-04 | 1.072027 up   | 1.451141 down | 1.555662 down |             |
| 215514_at | 0.015333 | 0.01356  | 1.011076 up   | 1.094423 down | 1.106544 down |             |
| 215515_at | 0.007604 | 0.005913 | 1.437585 down | 2.136201 up   | 3.070971 up   |             |
| 215517_at | 0.004584 | 0.003129 | 1.154254 down | 1.522758 down | 1.319257 down | PYGO1       |
| 215527_at | 0.006578 | 0.004939 | 1.571876 up   | 1.338916 up   | 1.173991 down | KHDRBS2     |
| 215529_x_ | 0.007455 | 0.005767 | 1.366298 up   | 1.856821 up   | 1.359016 up   | DIP2A       |
| 215530_at | 0.013116 | 0.011316 | 1.41534 up    | 1.033614 up   | 1.369313 down | FANCA       |
| 215531_s_ | 0.004415 | 0.002971 | 2.341175 up   | 1.385346 up   | 1.689957 down | GABRA5      |
| 215538_at | 2.40E-04 | 5.88E-05 | 1.982603 up   | 1.034563 down | 2.051127 down | LARGE       |
| 215547_at | 0.032412 | 0.031082 | 1.234637 up   | 1.303064 down | 1.608812 down | TSC22D2     |
| 215549_x_ | 7.42E-04 | 2.71E-04 | 2.731099 up   | 2.111841 up   | 1.293231 down | CTAGE4      |
| 215551_at | 0.002144 | 0.001139 | 1.184711 down | 1.136458 up   | 1.346374 up   | ESR1        |
| 215561_s_ | 3.05E-06 | 1.43E-07 | 7.17257 down  | 2.813757 down | 2.549108 up   | IL1R1       |
|           |          |          |               |               |               | ZNF780A /// |
| 215570_s_ | 2.90E-05 | 3.35E-06 | 2.205514 down | 1.245393 up   | 2.746731 up   | ZNF780B     |
| 215579_at | 0.011414 | 0.009613 | 1.724675 up   | 1.256959 down | 2.167846 down | APOBEC3G    |
| 215587_x_ | 3.07E-04 | 8.21E-05 | 1.862096 up   | 1.490052 up   | 1.249685 down |             |
| 215588_x_ | 9.54E-04 | 3.80E-04 | 1.577256 up   | 2.423906 up   | 1.536787 up   | RIOK3       |
| 215592_at | 0.00282  | 0.001648 | 1.004573 down | 1.999597 up   | 2.008742 up   |             |
| 215594_at | 0.003635 | 0.002306 | 6.498673 up   | 4.479758 up   | 1.450675 down |             |
| 215595_x_ | 0.001023 | 4.18E-04 | 1.529056 up   | 1.366781 up   | 1.118728 down |             |



|           |          |          |               |               |               |            |
|-----------|----------|----------|---------------|---------------|---------------|------------|
| 215599_at | 0.003536 | 0.002228 | 2.887588 up   | 7.248044 up   | 2.510069 up   | LOC653188  |
| 215600_x_ | 0.010214 | 0.00842  | 1.717581 up   | 1.722086 up   | 1.002623 up   | FBXW12     |
|           |          |          |               |               |               | GGT1 ///   |
|           |          |          |               |               |               | GGT2 ///   |
|           |          |          |               |               |               | GGT3P ///  |
|           |          |          |               |               |               | GGTLC2 /// |
| 215603_x_ | 4.88E-04 | 1.52E-04 | 1.792818 up   | 2.026393 up   | 1.130284 up   | GGTLC3     |
| 215604_x_ | 3.47E-04 | 9.71E-05 | 1.514207 up   | 1.965825 up   | 1.298254 up   |            |
| 215607_x_ | 0.003213 | 0.001964 | 1.183033 up   | 1.607209 up   | 1.35855 up    |            |
| 215609_at | 0.002139 | 0.001135 | 1.963079 up   | 1.538394 down | 3.019988 down |            |
| 215616_s_ | 0.014589 | 0.012813 | 1.480021 up   | 1.424743 down | 2.108651 down | KDM4B      |
| 215617_at | 4.71E-07 | 1.01E-08 | 8.208225 down | 8.2303 down   | 1.002689 down | LOC26010   |
| 215623_x_ | 5.52E-04 | 1.80E-04 | 1.697627 up   | 1.996319 up   | 1.175946 up   | SMC4       |
| 215625_at | 0.002092 | 0.001101 | 1.255986 up   | 1.081034 down | 1.357764 down | LOC644450  |
| 215628_x_ | 0.002377 | 0.001311 | 1.535911 up   | 1.945008 up   | 1.266355 up   |            |
| 215630_at | 0.001336 | 6.03E-04 | 1.114576 up   | 2.030199 down | 2.26281 down  |            |
| 215651_at | 0.012139 | 0.010342 | 1.423721 up   | 1.191007 up   | 1.195392 down |            |
| 215654_at | 0.007209 | 0.005537 | 1.323306 up   | 1.223863 down | 1.619545 down | BCAT2      |
| 215661_at | 0.005702 | 0.004116 | 1.240226 up   | 1.510276 down | 1.873083 down | MAST2      |
| 215674_at | 9.24E-04 | 3.64E-04 | 1.232698 up   | 1.019004 up   | 1.209709 down | KIAA1659   |
| 215676_at | 6.70E-04 | 2.35E-04 | 1.566979 up   | 1.446219 down | 2.266194 down | BRF1       |
| 215677_s_ | 0.006892 | 0.005232 | 1.494665 up   | 1.033565 down | 1.544834 down | BRF1       |
| 215680_at | 0.001689 | 8.27E-04 | 1.358989 up   | 1.009566 up   | 1.346112 down | KIAA1654   |
| 215685_s_ | 0.001257 | 5.55E-04 | 1.801057 up   | 1.224171 down | 2.204801 down | DLX2       |
| 215686_x_ | 0.006504 | 0.004871 | 1.286167 up   | 1.125553 up   | 1.142698 down | TFAP2B     |
| 215690_x_ | 3.45E-05 | 4.26E-06 | 1.818136 down | 2.472071 down | 1.359673 down | GPAA1      |
| 215692_s_ | 0.001064 | 4.41E-04 | 2.917759 up   | 2.428914 up   | 1.201261 down | MPPED2     |
| 215693_x_ | 0.009297 | 0.007536 | 1.495328 up   | 1.533011 up   | 1.0252 up     | DDX27      |
| 215695_s_ | 0.005723 | 0.004135 | 4.054172 up   | 1.860371 up   | 2.179229 down | GYG2       |
| 215696_s_ | 0.001588 | 7.61E-04 | 2.013633 down | 2.094382 down | 1.040101 down | SEC16A     |
| 215702_s_ | 0.008058 | 0.006341 | 1.351557 up   | 1.131585 up   | 1.194393 down | CFTR       |
| 215704_at | 5.63E-05 | 8.27E-06 | 1.128359 down | 23.30664 down | 20.65534 down | FLG        |
| 215707_s_ | 8.34E-05 | 1.41E-05 | 12.22729 down | 6.738944 down | 1.814422 up   | PRNP       |
| 215708_s_ | 0.007251 | 0.005575 | 1.733342 down | 2.239307 up   | 3.881485 up   | PRIM2      |

|           |          |          |               |               |               |                                   |
|-----------|----------|----------|---------------|---------------|---------------|-----------------------------------|
| 215711_s_ | 1.57E-04 | 3.34E-05 | 1.78488 up    | 4.870749 up   | 2.728894 up   | WEE1                              |
| 215712_s_ | 0.00923  | 0.007475 | 2.148433 up   | 1.239341 down | 2.662641 down | IGFALS                            |
| 215714_s_ | 3.01E-05 | 3.54E-06 | 5.93784 up    | 2.66498 up    | 2.228099 down | SMARCA4                           |
| 215716_s_ | 0.04394  | 0.042704 | 2.441139 down | 1.061378 down | 2.299971 up   | ATP2B1                            |
| 215718_s_ | 0.002715 | 0.001565 | 1.423887 up   | 1.555178 up   | 1.092206 up   | PHF3                              |
| 215719_x_ | 9.15E-06 | 6.72E-07 | 28.6387 down  | 18.2806 down  | 1.566617 up   | FAS<br>IGHG1 ///                  |
| 215721_at | 0.009216 | 0.007461 | 1.104348 up   | 1.171561 down | 1.29381 down  | LOC90925                          |
| 215722_s_ | 8.98E-05 | 1.55E-05 | 4.316952 up   | 2.421117 up   | 1.783042 down | SNRPA1                            |
| 215723_s_ | 1.84E-04 | 4.15E-05 | 5.161193 down | 1.352587 down | 3.815794 up   | PLD1                              |
| 215731_s_ | 2.08E-04 | 4.83E-05 | 3.321995 up   | 4.646798 up   | 1.398797 up   | MPHOSPH9<br>DTX2 ///<br>LOC100134 |
| 215732_s_ | 0.002627 | 0.001497 | 2.023499 up   | 1.15474 up    | 1.752341 down | 197                               |
| 215737_x_ | 3.61E-04 | 1.02E-04 | 1.092556 up   | 1.291082 down | 1.41058 down  | USF2                              |
| 215744_at | 0.031638 | 0.03029  | 1.584197 up   | 1.096136 down | 1.736496 down | FUS                               |
| 215749_s_ | 4.14E-04 | 1.23E-04 | 1.627231 down | 1.937224 down | 1.190504 down | GORASP1                           |
| 215756_at | 0.007484 | 0.005794 | 1.369591 down | 1.045505 down | 1.309981 up   | LOC730227                         |
| 215758_x_ | 2.30E-04 | 5.58E-05 | 4.756291 up   | 7.754792 up   | 1.630429 up   | ZNF93                             |
| 215759_at | 0.00858  | 0.00684  | 1.379028 up   | 1.464429 down | 2.01949 down  | ANKRD53                           |
| 215764_x_ | 0.004959 | 0.003456 | 1.070514 down | 1.542101 down | 1.440524 down | AP2A2                             |
| 215772_x_ | 0.013596 | 0.011804 | 2.057287 down | 1.231719 down | 1.670257 up   | SUCLG2                            |
| 215773_x_ | 9.78E-05 | 1.75E-05 | 2.200236 up   | 2.604317 up   | 1.183654 up   | PARP2                             |
| 215774_s_ | 0.002419 | 0.001341 | 1.803199 down | 1.06698 down  | 1.690002 up   |                                   |
| 215775_at | 0.007545 | 0.005857 | 4.354168 down | 2.409267 down | 1.807258 up   | THBS1                             |
| 215777_at | 0.011573 | 0.009773 | 1.653065 up   | 1.068662 down | 1.766567 down | IGLV4-60                          |
| 215778_x_ | 9.80E-04 | 3.95E-04 | 2.57962 up    | 1.217229 down | 3.139988 down | HAB1<br>hCG_16446                 |
| 215780_s_ | 0.006956 | 0.005299 | 3.594439 up   | 3.685559 up   | 1.025351 up   | 08 ///<br>SET                     |
| 215785_s_ | 6.11E-06 | 3.78E-07 | 6.035553 up   | 7.139286 up   | 1.182872 up   | CYFIP2                            |
| 215791_at | 0.007379 | 0.005696 | 1.877442 up   | 3.453094 up   | 1.839255 up   |                                   |
| 215795_at | 0.045226 | 0.04401  | 1.278477 up   | 1.024544 down | 1.309856 down | MYH7B                             |
| 215797_at | 0.004823 | 0.003333 | 1.161316 up   | 1.176148 down | 1.36588 down  | TRAV8-3                           |

|           |          |          |               |               |               |                                        |
|-----------|----------|----------|---------------|---------------|---------------|----------------------------------------|
| 215799_at | 0.012209 | 0.010414 | 1.488083 up   | 1.421804 down | 2.115763 down |                                        |
| 215800_at | 0.001977 | 0.001019 | 1.408146 up   | 1.276902 down | 1.798065 down | DUOX1                                  |
| 215802_at | 0.001682 | 8.23E-04 | 1.404482 up   | 1.545148 up   | 1.100155 up   |                                        |
| 215807_s_ | 0.001569 | 7.48E-04 | 2.02962 up    | 2.608873 up   | 1.2854 up     | PLXNB1<br>LOC653562<br>///<br>SLC6A10P |
| 215812_s_ | 0.003507 | 0.002205 | 2.35708 up    | 1.580156 up   | 1.491675 down | ///<br>SLC6A8                          |
| 215813_s_ | 1.16E-06 | 3.61E-08 | 59.56106 down | 3.364955 down | 17.7004 up    | PTGS1                                  |
| 215820_x_ | 0.015892 | 0.014118 | 2.263016 down | 1.24819 down  | 1.813039 up   | SNX13                                  |
| 215821_x_ | 1.71E-04 | 3.75E-05 | 11.12771 down | 3.195834 down | 3.481942 up   | PSG3                                   |
| 215827_x_ | 0.002285 | 0.001245 | 1.452912 up   | 1.146697 down | 1.66605 down  | CROCCL2                                |
| 215830_at | 0.034743 | 0.03345  | 1.315074 up   | 1.091432 down | 1.435315 down | SHANK2                                 |

///  
 PCDHGA10  
 ///  
 PCDHGA11  
 ///  
 PCDHGA12  
 ///  
 PCDHGA2  
 ///  
 PCDHGA3  
 ///  
 PCDHGA4  
 ///  
 PCDHGA5  
 ///  
 PCDHGA6  
 ///  
 PCDHGA7  
 ///  
 PCDHGA8  
 ///  
 PCDHGA9  
 ///  
 PCDHGB1  
 ///  
 PCDHGB2

|           |          |          |          |      |          |      |          |      |           |
|-----------|----------|----------|----------|------|----------|------|----------|------|-----------|
| 215836_s_ | 0.004262 | 0.002834 | 3.233372 | down | 3.071329 | down | 1.05276  | up   | ///       |
| 215841_at | 0.012011 | 0.010213 | 1.301533 | up   | 1.007705 | up   | 1.291582 | down | GUCA1B    |
| 215842_s_ | 0.001945 | 9.98E-04 | 1.671316 | up   | 1.2078   | up   | 1.383769 | down | ATP11A    |
| 215844_at | 0.004999 | 0.003492 | 2.190908 | up   | 1.556455 | down | 3.410048 | down | TNPO2     |
| 215845_x_ | 0.001549 | 7.35E-04 | 1.339065 | down | 1.011851 | up   | 1.354934 | up   |           |
| 215848_at | 0.002189 | 0.00117  | 1.40963  | up   | 1.386207 | up   | 1.016897 | down | SCAPER    |
| 215852_x_ | 0.015499 | 0.013725 | 1.289953 | up   | 1.408565 | up   | 1.091951 | up   | C20orf117 |
| 215858_at | 0.028718 | 0.027289 | 1.429887 | up   | 1.049085 | up   | 1.362986 | down |           |

|           |          |          |               |               |               |           |
|-----------|----------|----------|---------------|---------------|---------------|-----------|
| 215859_at | 0.037614 | 0.036345 | 1.350362 up   | 1.096989 down | 1.481333 down | NCLN      |
| 215860_at | 0.001204 | 5.23E-04 | 1.377362 up   | 1.694461 down | 2.333886 down | SYT12     |
| 215863_at | 0.00624  | 0.004621 | 2.074043 up   | 1.019287 down | 2.114045 down | TFR2      |
| 215867_x_ | 3.61E-07 | 6.89E-09 | 5.487638 down | 24.85028 down | 4.52841 down  | CA12      |
| 215869_at | 0.002122 | 0.001122 | 1.740147 up   | 1.205891 down | 2.098428 down |           |
| 215871_at | 5.93E-04 | 1.99E-04 | 1.586285 up   | 1.020467 up   | 1.554469 down | PLA2G5    |
| 215873_x_ | 0.006417 | 0.004792 | 1.083311 down | 1.759981 down | 1.624633 down | ABCC10    |
| 215876_at | 0.006384 | 0.004762 | 1.177239 up   | 1.321958 down | 1.556261 down |           |
| 215880_at | 0.007771 | 0.006075 | 1.086205 up   | 1.655049 down | 1.797722 down | NAGLU     |
|           |          |          |               |               |               | LOC100130 |
|           |          |          |               |               |               | 648 ///   |
|           |          |          |               |               |               | SSX10 /// |
|           |          |          |               |               |               | SSX2 ///  |
|           |          |          |               |               |               | SSX2B /// |
|           |          |          |               |               |               | SSX3 ///  |
|           |          |          |               |               |               | SSX5 ///  |
|           |          |          |               |               |               | SSX7 ///  |
| 215881_x_ | 0.006631 | 0.004987 | 1.491759 up   | 1.11667 up    | 1.3359 down   | SSX9      |
| 215887_at | 0.001196 | 5.19E-04 | 1.77195 up    | 2.405884 up   | 1.35776 up    | ZNF277    |
| 215895_x_ | 0.009126 | 0.007372 | 1.321786 up   | 1.297155 up   | 1.018988 down | ADFP      |
| 215902_at | 3.58E-04 | 1.01E-04 | 1.224058 down | 1.148052 up   | 1.405282 up   |           |
| 215904_at | 0.021931 | 0.020316 | 1.423325 up   | 1.094274 up   | 1.300703 down | MLLT4     |
| 215905_s_ | 0.001964 | 0.001011 | 2.688292 up   | 2.873146 up   | 1.068763 up   | SNRNP40   |
| 215907_at | 0.010188 | 0.008395 | 1.600247 up   | 1.459942 up   | 1.096103 down |           |
| 215910_s_ | 0.019221 | 0.017515 | 2.476557 down | 1.317374 down | 1.879919 up   | FNDC3A    |
| 215911_x_ | 0.00643  | 0.004803 | 1.331623 up   | 1.154265 down | 1.537045 down | ATP2B3    |
| 215912_at | 0.011187 | 0.009396 | 1.504465 up   | 1.044271 down | 1.57107 down  | GNAO1     |
| 215913_s_ | 0.001156 | 4.95E-04 | 3.271947 up   | 4.725398 up   | 1.444216 up   | GULP1     |
| 215918_s_ | 0.001066 | 4.43E-04 | 1.931709 down | 3.421529 down | 1.771245 down | SPTBN1    |
| 215921_at | 6.56E-04 | 2.29E-04 | 2.77173 down  | 1.456862 up   | 4.038028 up   | NPIPL1    |
| 215927_at | 0.00544  | 0.003881 | 1.564989 down | 1.347151 down | 1.161702 up   | ARFGEF2   |
| 215928_at | 0.008269 | 0.006543 | 1.419846 up   | 1.086966 up   | 1.306247 down |           |
| 215940_at | 0.027939 | 0.026473 | 1.109773 down | 1.058592 up   | 1.174796 up   |           |
| 215943_at | 1.41E-04 | 2.88E-05 | 4.467501 up   | 3.799974 up   | 1.175666 down | KIAA1661  |

|           |          |          |               |               |               |           |
|-----------|----------|----------|---------------|---------------|---------------|-----------|
| 215945_s_ | 0.002315 | 0.001266 | 1.192303 up   | 3.758201 up   | 3.152052 up   | TRIM2     |
| 215946_x_ | 0.009305 | 0.007545 | 1.524321 up   | 1.444961 down | 2.202585 down | IGLL3     |
| 215947_s_ | 7.08E-05 | 1.13E-05 | 2.921964 up   | 2.793181 up   | 1.046107 down | FAM136A   |
|           |          |          |               |               |               | IGHM ///  |
| 215949_x_ | 0.009113 | 0.007358 | 1.676174 up   | 1.376034 down | 2.306473 down | LOC652494 |
| 215952_s_ | 0.016197 | 0.014427 | 1.466944 down | 1.207617 down | 1.214743 up   | OAZ1      |
| 215956_at | 0.006516 | 0.004882 | 1.174306 up   | 1.401506 up   | 1.193476 up   |           |
|           |          |          |               |               |               | LOC100130 |
| 215970_at | 0.002689 | 0.001546 | 1.597516 down | 1.049987 down | 1.521462 up   | 331       |
| 215972_at | 0.006032 | 0.004422 | 1.302183 up   | 1.156117 up   | 1.126341 down |           |
| 215978_x_ | 0.002047 | 0.00107  | 1.388768 up   | 2.059003 up   | 1.482612 up   | LOC152719 |
| 215980_s_ | 0.023069 | 0.021489 | 1.257859 up   | 1.060267 down | 1.333666 down | IGHMBP2   |
| 215982_s_ | 0.002852 | 0.001673 | 1.837762 down | 2.084985 down | 1.134524 down | DOM3Z     |
| 215984_s_ | 0.021946 | 0.020332 | 2.511084 down | 2.15854 down  | 1.163325 up   | ARFRP1    |
| 215988_s_ | 0.008345 | 0.006615 | 1.28208 up    | 1.387725 down | 1.779174 down | DLG1      |
| 215990_s_ | 6.13E-04 | 2.09E-04 | 3.800295 down | 2.895414 down | 1.312522 up   | BCL6      |
| 215992_s_ | 0.004262 | 0.002834 | 1.236244 up   | 1.837898 up   | 1.486679 up   | RAPGEF2   |
| 215994_x_ | 3.35E-05 | 4.10E-06 | 1.894876 down | 2.383037 down | 1.257622 down | TBC1D9B   |
| 215997_s_ | 0.004104 | 0.002695 | 3.97387 down  | 2.442797 down | 1.626771 up   | CUL4B     |
| 215999_at | 0.018958 | 0.017252 | 1.344534 down | 1.129754 down | 1.190113 up   | CDRT1     |
| 216000_at | 4.74E-04 | 1.46E-04 | 1.382392 up   | 1.754839 up   | 1.269422 up   |           |
| 216026_s_ | 0.00126  | 5.57E-04 | 3.713018 up   | 2.569047 up   | 1.44529 down  | POLE      |
| 216027_at | 0.019468 | 0.017768 | 1.242235 up   | 1.04919 up    | 1.183993 down | TMX4      |
| 216035_x_ | 0.003668 | 0.002334 | 1.672351 up   | 2.04982 up    | 1.225712 up   | TCF7L2    |
| 216037_x_ | 9.17E-04 | 3.60E-04 | 1.795551 up   | 1.983635 up   | 1.104751 up   | TCF7L2    |
| 216038_x_ | 0.012162 | 0.010367 | 1.455375 up   | 1.177849 down | 1.714212 down | DAXX      |
| 216041_x_ | 8.05E-05 | 1.35E-05 | 3.446448 down | 2.355236 down | 1.463313 up   | GRN       |
| 216044_x_ | 1.54E-05 | 1.40E-06 | 8.58658 down  | 8.601453 down | 1.001732 down | FAM69A    |
| 216048_s_ | 0.002757 | 0.0016   | 7.411682 down | 3.387666 down | 2.187843 up   | RHOBTB3   |
| 216049_at | 0.00244  | 0.001358 | 1.905734 down | 1.32768 down  | 1.435387 up   | RHOBTB3   |
| 216053_x_ | 0.00187  | 9.46E-04 | 1.664066 up   | 1.291775 down | 2.149599 down | FAM182A   |
| 216056_at | 0.006345 | 0.00472  | 1.657001 down | 1.24281 down  | 1.33327 up    | CD44      |
| 216061_x_ | 8.15E-04 | 3.08E-04 | 1.667778 up   | 1.061856 up   | 1.570625 down | PDGFB     |
| 216064_s_ | 5.72E-06 | 3.44E-07 | 5.472152 down | 3.73958 down  | 1.463307 up   | AGA       |

|           |          |          |          |      |          |      |          |      |                   |
|-----------|----------|----------|----------|------|----------|------|----------|------|-------------------|
| 216072_at | 0.017522 | 0.015777 | 1.365276 | down | 1.048121 | down | 1.302594 | up   |                   |
| 216074_x_ | 2.46E-04 | 6.08E-05 | 2.088998 | up   | 2.162756 | up   | 1.035308 | up   | WWC1              |
| 216076_at | 0.002854 | 0.001675 | 1.676429 | up   | 1.626441 | down | 2.726612 | down | L3MBTL            |
| 216077_s_ | 0.004454 | 0.00301  | 1.467841 | up   | 1.197704 | up   | 1.225546 | down | L3MBTL            |
| 216080_s_ | 4.68E-04 | 1.44E-04 | 3.368744 | down | 4.81071  | down | 1.428043 | down | FADS3             |
| 216083_s_ | 0.015703 | 0.013925 | 1.11805  | down | 1.21795  | up   | 1.361729 | up   | NEU3<br>DKFZP434C |
| 216085_at | 0.019892 | 0.018214 | 1.250117 | down | 1.003075 | down | 1.246285 | up   | 153               |
| 216086_at | 0.001894 | 9.62E-04 | 1.400984 | up   | 1.31692  | up   | 1.063834 | down | SV2C              |
| 216092_s_ | 0.00569  | 0.004106 | 1.365972 | up   | 3.863575 | up   | 2.828444 | up   | SLC7A8            |
| 216094_at | 0.001285 | 5.72E-04 | 1.882565 | up   | 3.511366 | up   | 1.865203 | up   |                   |
| 216100_s_ | 5.05E-04 | 1.60E-04 | 5.36371  | down | 1.997218 | down | 2.685591 | up   | TOR1AIP1          |
| 216119_s_ | 0.002788 | 0.001624 | 1.585085 | up   | 1.148515 | down | 1.820494 | down | SPEF1             |
| 216120_s_ | 0.003001 | 0.001792 | 1.134287 | up   | 1.199112 | down | 1.360136 | down | ATP2B2            |
| 216122_at | 0.001058 | 4.38E-04 | 1.410257 | up   | 1.091864 | down | 1.539808 | down |                   |
| 216127_at | 3.75E-04 | 1.08E-04 | 1.608895 | up   | 1.4076   | down | 2.264681 | down | PDIA2             |
| 216130_at | 0.02054  | 0.018873 | 1.394218 | down | 1.175704 | up   | 1.639188 | up   |                   |
| 216131_at | 0.032313 | 0.030979 | 1.366928 | up   | 1.011784 | down | 1.383037 | down | FRMD4B            |
| 216139_s_ | 0.002752 | 0.001596 | 1.692862 | up   | 1.06584  | up   | 1.58829  | down | MAPK8IP3          |
| 216142_at | 0.006335 | 0.004711 | 1.632332 | up   | 1.381761 | down | 2.255493 | down |                   |
| 216143_at | 0.003908 | 0.002532 | 1.268597 | up   | 1.344284 | down | 1.705354 | down |                   |
| 216149_at | 0.004053 | 0.002651 | 1.146653 | down | 1.253515 | up   | 1.437347 | up   | LRRC37B2          |
| 216173_at | 2.01E-05 | 2.02E-06 | 2.141131 | down | 1.052462 | down | 2.034401 | up   |                   |
| 216178_x_ | 9.54E-04 | 3.80E-04 | 1.875241 | down | 1.831069 | down | 1.024124 | up   | ITGB1             |
| 216180_s_ | 4.18E-04 | 1.24E-04 | 1.384935 | up   | 3.419086 | down | 4.735212 | down | SYNJ2             |
| 216184_s_ | 7.03E-04 | 2.52E-04 | 1.359813 | up   | 2.007328 | down | 2.729591 | down | RIMS1             |
| 216187_x_ | 6.28E-04 | 2.16E-04 | 2.041466 | up   | 2.462956 | up   | 1.206464 | up   |                   |
| 216188_at | 0.001284 | 5.71E-04 | 1.516925 | up   | 1.23249  | up   | 1.230781 | down | MYCNOS            |
| 216193_at | 0.007132 | 0.005463 | 1.164935 | up   | 1.089184 | down | 1.268829 | down | LOC440366         |
| 216194_s_ | 0.03547  | 0.034188 | 1.293346 | up   | 1.169855 | down | 1.513028 | down | TBCB              |
| 216199_s_ | 4.59E-04 | 1.40E-04 | 1.89729  | up   | 2.672167 | up   | 1.408413 | up   | MAP3K4            |
| 216206_x_ | 0.013281 | 0.011481 | 2.068347 | up   | 1.00783  | down | 2.084542 | down | MAP2K7            |
| 216210_x_ | 1.46E-04 | 3.02E-05 | 2.314286 | down | 2.78287  | down | 1.202475 | down | TRIOBP            |
| 216212_s_ | 4.80E-04 | 1.49E-04 | 3.118584 | up   | 2.267617 | up   | 1.375269 | down | DKC1              |

|           |          |          |          |      |          |      |          |      |             |
|-----------|----------|----------|----------|------|----------|------|----------|------|-------------|
| 216215_s_ | 0.001357 | 6.17E-04 | 1.526552 | down | 1.209279 | down | 1.262365 | up   | RBM9        |
| 216218_s_ | 0.00923  | 0.007475 | 1.38552  | up   | 2.812253 | up   | 2.029746 | up   | PLCL2       |
| 216219_at | 0.012168 | 0.010374 | 1.306572 | up   | 1.052763 | down | 1.375511 | down | AQP6        |
| 216220_s_ | 0.004087 | 0.002681 | 1.723069 | up   | 1.14976  | down | 1.981116 | down | ADORA1      |
| 216228_s_ | 9.90E-05 | 1.78E-05 | 6.200985 | up   | 9.679189 | up   | 1.560911 | up   | WDHD1       |
| 216229_x_ | 8.06E-05 | 1.35E-05 | 1.504773 | up   | 1.757679 | up   | 1.168069 | up   | HCG2P7      |
| 216230_x_ | 3.10E-04 | 8.33E-05 | 4.087946 | down | 4.448506 | down | 1.088201 | down | SMPD1       |
| 216231_s_ | 5.36E-07 | 1.21E-08 | 8.37274  | down | 4.590072 | down | 1.824098 | up   | B2M         |
| 216232_s_ | 0.007718 | 0.006021 | 2.757138 | up   | 1.416471 | up   | 1.946484 | down | GCN1L1      |
|           |          |          |          |      |          |      |          |      | SLC2A14 /// |
| 216236_s_ | 1.24E-04 | 2.43E-05 | 8.283121 | up   | 7.667961 | up   | 1.080225 | down | SLC2A3      |
| 216237_s_ | 0.002208 | 0.001184 | 6.038469 | up   | 6.991318 | up   | 1.157797 | up   | MCM5        |
| 216244_at | 0.010365 | 0.008569 | 1.226615 | up   | 1.021513 | down | 1.253003 | down | IL1RN       |
| 216250_s_ | 9.85E-04 | 3.98E-04 | 13.44814 | down | 10.00743 | down | 1.343815 | up   | LPXN        |
| 216251_s_ | 0.014658 | 0.012879 | 2.381155 | up   | 1.390697 | up   | 1.712203 | down | TTLL12      |
| 216252_x_ | 1.08E-05 | 8.39E-07 | 22.18148 | down | 12.15726 | down | 1.824546 | up   | FAS         |
| 216257_at | 0.002064 | 0.001081 | 1.131047 | up   | 1.286627 | down | 1.455236 | down | SERPINB13   |
| 216262_s_ | 3.80E-05 | 4.84E-06 | 3.565431 | up   | 2.092129 | up   | 1.704212 | down | TGIF2       |
| 216264_s_ | 3.07E-06 | 1.44E-07 | 4.350456 | down | 6.76374  | down | 1.55472  | down | LAMB2       |
| 216267_s_ | 2.59E-05 | 2.84E-06 | 2.287781 | down | 2.71569  | down | 1.187041 | down | TMEM115     |
| 216270_at | 2.82E-04 | 7.33E-05 | 1.179374 | up   | 1.650618 | down | 1.946696 | down | ILVBL       |
| 216272_x_ | 0.001373 | 6.25E-04 | 1.765665 | down | 2.623838 | down | 1.486034 | down | SYDE1       |
| 216282_x_ | 0.001954 | 0.001005 | 1.430099 | up   | 1.141571 | up   | 1.252747 | down | POLR2C      |
| 216285_at | 0.00323  | 0.001979 | 1.223901 | up   | 1.069418 | down | 1.308862 | down | DGCR14      |
| 216286_at | 8.87E-04 | 3.45E-04 | 1.648724 | up   | 1.646872 | up   | 1.001124 | down |             |
| 216289_at | 0.007942 | 0.006231 | 2.03318  | up   | 1.624277 | down | 3.302448 | down | GPR144      |
| 216290_x_ | 3.13E-04 | 8.42E-05 | 1.376996 | up   | 1.314345 | up   | 1.047667 | down |             |
| 216296_at | 0.021533 | 0.019909 | 1.373946 | up   | 1.241168 | down | 1.705298 | down | CLTA        |
| 216299_s_ | 0.010958 | 0.009163 | 2.170551 | up   | 1.471774 | up   | 1.474785 | down | XRCC3       |
| 216300_x_ | 0.001571 | 7.50E-04 | 1.023551 | down | 1.876789 | down | 1.833605 | down | RARA        |
| 216306_x_ | 1.74E-04 | 3.86E-05 | 3.086102 | up   | 2.212096 | up   | 1.395103 | down | PTBP1       |
| 216307_at | 0.00187  | 9.46E-04 | 1.190468 | up   | 1.006532 | up   | 1.182742 | down | DGKB        |
| 216318_at | 2.87E-04 | 7.49E-05 | 1.478267 | up   | 1.244026 | down | 1.839002 | down | IGHG1       |
| 216319_at | 6.87E-04 | 2.44E-04 | 11.2561  | up   | 9.590134 | up   | 1.173717 | down |             |



|           |          |          |          |      |          |      |          |      |           |
|-----------|----------|----------|----------|------|----------|------|----------|------|-----------|
| 216321_s_ | 1.76E-05 | 1.70E-06 | 8.425547 | down | 9.134403 | down | 1.084132 | down | NR3C1     |
| 216324_at | 0.006126 | 0.004516 | 1.415462 | up   | 1.14885  | down | 1.626153 | down |           |
| 216325_x_ | 0.008441 | 0.006704 | 1.616716 | up   | 1.151435 | down | 1.861543 | down | RTEL1     |
| 216327_s_ | 0.001665 | 8.11E-04 | 1.366842 | up   | 1.534355 | down | 2.097221 | down | SIGLEC8   |
| 216330_s_ | 0.008344 | 0.006614 | 1.206924 | down | 1.282526 | down | 1.06264  | down | POU6F1    |
| 216331_at | 9.10E-04 | 3.57E-04 | 1.245352 | up   | 2.425714 | down | 3.020867 | down | ITGA7     |
| 216334_s_ | 0.00374  | 0.002394 | 1.547624 | up   | 1.038476 | down | 1.607171 | down | CYP2A7P1  |
| 216337_at | 0.001672 | 8.16E-04 | 1.495788 | down | 1.101342 | down | 1.358151 | up   |           |
| 216338_s_ | 2.61E-05 | 2.88E-06 | 2.775249 | down | 2.712373 | down | 1.023181 | up   | YIPF3     |
| 216344_at | 0.001304 | 5.84E-04 | 1.087664 | up   | 1.361415 | down | 1.480762 | down | NPHP4     |
| 216345_at | 0.003608 | 0.002285 | 1.614153 | up   | 1.728831 | down | 2.790597 | down | KIAA0913  |
| 216347_s_ | 6.26E-05 | 9.58E-06 | 1.823809 | up   | 1.320591 | down | 2.408506 | down | PPP1R13B  |
| 216348_at | 6.57E-04 | 2.29E-04 | 1.220884 | up   | 2.051506 | up   | 1.680345 | up   | RPS17P5   |
| 216356_x_ | 4.34E-04 | 1.30E-04 | 1.736677 | up   | 1.254073 | up   | 1.384829 | down | BAIAP3    |
| 216358_at | 0.001891 | 9.60E-04 | 1.941141 | up   | 1.115566 | up   | 1.74005  | down |           |
|           |          |          |          |      |          |      |          |      | LOC100129 |
| 216359_at | 0.004128 | 0.002716 | 1.181861 | up   | 1.12442  | down | 1.328908 | down | 410       |
| 216369_at | 4.61E-04 | 1.41E-04 | 1.025093 | down | 1.270249 | down | 1.239154 | down |           |
| 216372_at | 0.035983 | 0.034706 | 1.284039 | up   | 1.15307  | down | 1.480586 | down |           |
| 216376_x_ | 0.004565 | 0.003112 | 1.345596 | down | 1.377713 | up   | 1.853844 | up   |           |
| 216378_at | 0.012702 | 0.010901 | 1.380776 | up   | 1.23147  | down | 1.700384 | down |           |
| 216379_x_ | 1.24E-07 | 1.54E-09 | 212.2478 | up   | 189.4374 | up   | 1.120412 | down | CD24      |
| 216381_x_ | 0.005131 | 0.00361  | 1.520502 | down | 1.118891 | down | 1.358937 | up   | AKR7A3    |
| 216384_x_ | 9.74E-05 | 1.74E-05 | 2.894098 | up   | 3.419095 | up   | 1.181402 | up   | LOC643287 |
| 216386_at | 0.004806 | 0.003317 | 1.1887   | up   | 1.347048 | down | 1.601236 | down | LOC220077 |
|           |          |          |          |      |          |      |          |      | LOC100130 |
|           |          |          |          |      |          |      |          |      | 233 ///   |
| 216387_x_ | 3.49E-04 | 9.76E-05 | 1.65682  | up   | 1.616734 | up   | 1.024795 | down | LOC399804 |
| 216395_at | 0.022082 | 0.020474 | 1.443853 | up   | 1.131225 | down | 1.633322 | down | FBXL18    |
| 216397_s_ | 0.006263 | 0.004645 | 2.253302 | up   | 1.19595  | up   | 1.884111 | down | BOP1      |
| 216402_at | 0.002535 | 0.00143  | 1.476486 | up   | 1.176997 | down | 1.73782  | down | SEC14L4   |
| 216407_at | 0.004949 | 0.003446 | 1.586399 | up   | 1.19055  | down | 1.888686 | down | VAC14     |
| 216413_at | 0.006826 | 0.00517  | 1.406718 | up   | 1.262824 | down | 1.776438 | down |           |
| 216417_x_ | 0.004461 | 0.003016 | 1.377786 | down | 1.2083   | down | 1.140269 | up   | HOXB9     |

|           |          |          |               |               |               |              |
|-----------|----------|----------|---------------|---------------|---------------|--------------|
| 216426_at | 0.009225 | 0.00747  | 1.14501 up    | 1.28014 down  | 1.465774 down | TCEB1P3      |
| 216427_at | 0.009393 | 0.007626 | 1.533106 up   | 1.398611 down | 2.144219 down |              |
| 216430_x_ | 0.00189  | 9.59E-04 | 1.081163 up   | 1.395083 down | 1.508312 down | IGL@         |
| 216434_at | 0.017803 | 0.016062 | 1.690247 up   | 1.161919 up   | 1.454704 down | TTC38        |
| 216436_at | 0.002019 | 0.001049 | 1.141106 down | 1.162394 up   | 1.326415 up   | PIK3R4       |
| 216439_at | 0.005308 | 0.003767 | 1.256834 up   | 1.520418 down | 1.910914 down | TNK2         |
| 216442_x_ | 3.46E-04 | 9.62E-05 | 2.572142 down | 3.766402 down | 1.464305 down | FN1          |
| 216445_at | 0.006824 | 0.005167 | 1.194254 up   | 1.148707 down | 1.371849 down | PRDM2        |
| 216457_s_ | 0.001886 | 9.56E-04 | 1.549071 up   | 1.841115 up   | 1.188529 up   | SF3A1        |
| 216459_x_ | 0.008142 | 0.006422 | 1.286345 up   | 1.418355 up   | 1.102624 up   | TIGD1L       |
| 216460_at | 0.003308 | 0.002043 | 1.406697 up   | 1.379795 down | 1.940953 down | FLJ00049     |
| 216464_x_ | 0.007353 | 0.005671 | 1.495481 up   | 1.019756 up   | 1.466509 down | GPR44        |
| 216467_s_ | 0.00252  | 0.00142  | 1.575683 down | 1.138127 down | 1.384453 up   |              |
|           |          |          |               |               |               | LOC100130    |
|           |          |          |               |               |               | 648 /// SSX2 |
| 216471_x_ | 0.002088 | 0.001098 | 1.321878 up   | 1.531413 up   | 1.158513 up   | /// SSX2B    |
|           |          |          |               |               |               | DUX4 ///     |
|           |          |          |               |               |               | LOC653543    |
|           |          |          |               |               |               | ///          |
|           |          |          |               |               |               | LOC653544    |
|           |          |          |               |               |               | ///          |
|           |          |          |               |               |               | LOC653545    |
|           |          |          |               |               |               | ///          |
| 216473_x_ | 0.003802 | 0.002446 | 1.79054 up    | 1.615289 down | 2.892239 down | LOC728410    |
|           |          |          |               |               |               | TPSAB1 ///   |
| 216474_x_ | 0.00853  | 0.006794 | 1.333441 up   | 1.143207 up   | 1.166404 down | TPSB2        |
| 216483_s_ | 1.31E-04 | 2.60E-05 | 3.078703 down | 3.554841 down | 1.154655 down | C19orf10     |
| 216485_s_ | 0.004424 | 0.00298  | 1.693253 up   | 1.167478 down | 1.976835 down | TPSAB1       |
| 216491_x_ | 0.004956 | 0.003452 | 1.429904 up   | 1.091242 up   | 1.310345 down | IGHM         |
| 216492_at | 0.002785 | 0.001622 | 1.266899 up   | 1.159588 down | 1.469082 down | KIR3DX1      |
|           |          |          |               |               |               | IGF2BP3 ///  |
| 216493_s_ | 4.79E-05 | 6.65E-06 | 2.405688 up   | 12.03559 up   | 5.002974 up   | LOC645468    |

|           |          |          |               |               |               |             |
|-----------|----------|----------|---------------|---------------|---------------|-------------|
| 216496_s_ | 0.01655  | 0.01479  | 1.606082 up   | 1.317793 down | 2.116483 down |             |
| 216499_at | 0.006243 | 0.004626 | 1.490861 up   | 1.459048 up   | 1.021804 down |             |
| 216500_at | 0.004604 | 0.003147 | 1.374113 up   | 1.692059 up   | 1.231383 up   |             |
| 216503_s_ | 0.001218 | 5.32E-04 | 1.993545 up   | 2.874743 up   | 1.442026 up   | MLLT10      |
| 216506_x_ | 0.002119 | 0.00112  | 1.522016 up   | 2.081816 up   | 1.367802 up   | MLLT10      |
| 216507_at | 0.027205 | 0.025717 | 1.159635 up   | 1.114882 up   | 1.040142 down | TAPT1       |
|           |          |          |               |               |               | CTCFL ///   |
|           |          |          |               |               |               | HMGB1 ///   |
|           |          |          |               |               |               | HMGB1L1     |
|           |          |          |               |               |               | ///         |
|           |          |          |               |               |               | HMGB1L10    |
|           |          |          |               |               |               | ///         |
|           |          |          |               |               |               | LOC100132   |
| 216508_x_ | 0.002625 | 0.001496 | 2.107908 up   | 2.759076 up   | 1.308917 up   | 863         |
| 216509_x_ | 0.002734 | 0.001581 | 1.375419 up   | 1.569666 up   | 1.141227 up   | MLLT10      |
| 216511_s_ | 0.001495 | 7.00E-04 | 2.001946 up   | 2.371833 up   | 1.184763 up   | TCF7L2      |
|           |          |          |               |               |               | LOC643287   |
| 216515_x_ | 1.38E-04 | 2.80E-05 | 1.878588 up   | 2.050644 up   | 1.091588 up   | /// PTMA    |
|           |          |          |               |               |               | IGKC ///    |
|           |          |          |               |               |               | IGKV1-5 /// |
|           |          |          |               |               |               | LOC100130   |
|           |          |          |               |               |               | 100 ///     |
|           |          |          |               |               |               | LOC647506   |
|           |          |          |               |               |               | ///         |
|           |          |          |               |               |               | LOC650405   |
|           |          |          |               |               |               | ///         |
|           |          |          |               |               |               | LOC652493   |
|           |          |          |               |               |               | ///         |
| 216517_at | 0.008713 | 0.006972 | 1.212512 up   | 1.102934 up   | 1.099351 down | LOC652694   |
| 216524_x_ | 0.001213 | 5.28E-04 | 1.401076 up   | 1.561091 up   | 1.114208 up   |             |
| 216526_x_ | 1.03E-05 | 7.84E-07 | 5.649715 down | 4.204753 down | 1.34365 up    | HLA-C       |
| 216535_at | 0.00196  | 0.001008 | 1.470641 down | 1.42328 up    | 2.093134 up   | CADM3       |
| 216537_s_ | 0.008225 | 0.006502 | 1.606504 up   | 1.080736 up   | 1.486492 down | SIGLEC7     |

|           |          |          |             |               |               |            |
|-----------|----------|----------|-------------|---------------|---------------|------------|
| 216548_x_ | 3.13E-05 | 3.75E-06 | 2.91601 up  | 5.21826 up    | 1.789521 up   | HMGB3L1    |
| 216555_at | 0.006105 | 0.004492 | 1.327481 up | 1.396575 up   | 1.052049 up   | C22orf30   |
|           |          |          |             |               |               | IGH@ ///   |
|           |          |          |             |               |               | IGHA1 ///  |
|           |          |          |             |               |               | IGHG1 ///  |
|           |          |          |             |               |               | IGHG3 ///  |
|           |          |          |             |               |               | IGHM ///   |
|           |          |          |             |               |               | IGHV3-23   |
|           |          |          |             |               |               | /// IGHV4- |
| 216557_x_ | 0.022195 | 0.020587 | 1.390143 up | 1.085596 down | 1.509134 down | 31         |

.....  
 ///  
 HNRNPA1L2  
 ///  
 HNRPA1L-2  
 ///  
 LOC100128  
 836 ///  
 LOC120364  
 ///  
 LOC391670  
 ///  
 LOC402112  
 ///  
 LOC642817  
 ///  
 LOC643033  
 ///  
 LOC644037  
 ///  
 LOC645001  
 ///  
 LOC728170  
 ///  
 LOC728643  
 ///  
 LOC728732  
 ///

|           |          |          |               |               |               |
|-----------|----------|----------|---------------|---------------|---------------|
| 216559_x_ | 7.34E-06 | 4.98E-07 | 1.939655 up   | 1.903621 up   | 1.018929 down |
| 216565_x_ | 5.91E-04 | 1.99E-04 | 2.986314 down | 1.151292 down | 2.593881 up   |
| 216568_x_ | 0.003302 | 0.002038 | 2.656538 up   | 2.144978 up   | 1.238492 down |
| 216571_at | 8.86E-04 | 3.44E-04 | 1.376274 up   | 1.326127 down | 1.825114 down |
| 216573_at | 0.009727 | 0.007947 | 1.217031 up   | 1.179014 down | 1.434897 down |
| 216589_at | 0.006005 | 0.004397 | 1.394478 down | 1.548119 down | 1.110178 down |
| 216593_s_ | 0.002112 | 0.001115 | 1.269914 down | 1.554596 up   | 1.974204 up   |
| 216594_x_ | 5.41E-04 | 1.75E-04 | 12.13583 down | 2.017102 down | 6.016468 up   |

IGL@  
 LOC390998  
 PIGC  
 AKR1C1

|           |          |          |               |               |               |                  |
|-----------|----------|----------|---------------|---------------|---------------|------------------|
| 216596_at | 0.016753 | 0.014997 | 1.529691 up   | 1.044136 down | 1.597204 down | DKFZP434L1<br>87 |
| 216598_s_ | 0.007549 | 0.005861 | 13.09601 down | 8.57991 down  | 1.526357 up   | CCL2             |
| 216601_at | 0.004991 | 0.003485 | 1.220033 up   | 1.378468 down | 1.681776 down | LOC90586         |
| 216611_s_ | 0.006897 | 0.005237 | 1.871566 up   | 1.69716 down  | 3.176347 down | SLC6A2           |
| 216615_s_ | 0.002637 | 0.001505 | 2.111831 up   | 1.968508 up   | 1.072808 down | HTR3A            |
| 216617_s_ | 0.00954  | 0.007766 | 1.753208 up   | 1.127001 down | 1.975868 down | MAG              |
| 216623_x_ | 8.05E-09 | 3.12E-11 | 46.24345 up   | 45.16419 up   | 1.023896 down | TOX3             |
| 216627_s_ | 7.64E-04 | 2.83E-04 | 4.458577 down | 10.06416 down | 2.257257 down | B4GALT1          |
| 216630_at | 0.00149  | 6.97E-04 | 1.482372 up   | 1.716706 down | 2.544796 down |                  |
| 216631_s_ | 0.005566 | 0.003993 | 1.09011 up    | 1.221594 down | 1.331672 down |                  |
| 216641_s_ | 7.65E-04 | 2.83E-04 | 2.518753 up   | 1.062008 up   | 2.371688 down | LAD1             |
| 216644_at | 0.002875 | 0.001692 | 1.349363 up   | 1.360732 up   | 1.008426 up   |                  |
| 216645_at | 2.35E-04 | 5.74E-05 | 1.742518 up   | 1.148722 up   | 1.516919 down |                  |
| 216647_at | 0.027864 | 0.026393 | 1.780305 up   | 1.098884 up   | 1.620103 down | TCF3             |
| 216649_at | 0.005109 | 0.003588 | 1.240898 up   | 1.356629 down | 1.683438 down | RREB1            |
| 216650_at | 0.013035 | 0.01123  | 1.216327 down | 1.170345 up   | 1.423523 up   |                  |
| 216655_s_ | 4.67E-04 | 1.44E-04 | 1.528734 up   | 1.237134 down | 1.891249 down |                  |
| 216656_at | 0.004049 | 0.002647 | 1.295436 up   | 1.171732 down | 1.517904 down |                  |
| 216663_s_ | 0.002947 | 0.001749 | 1.316044 up   | 1.016845 up   | 1.294242 down | ZMYND10          |
| 216664_at | 0.003091 | 0.001864 | 1.082067 up   | 1.252945 down | 1.355771 down |                  |
| 216670_at | 2.01E-04 | 4.62E-05 | 1.597281 up   | 1.167052 down | 1.86411 down  | KLK13            |
| 216679_at | 5.79E-04 | 1.93E-04 | 1.755534 up   | 1.134975 down | 1.992487 down | TIGD1L           |
| 216680_s_ | 0.01062  | 0.008831 | 1.954493 up   | 1.230442 down | 2.404891 down | EPHB4            |
| 216686_at | 0.015898 | 0.014124 | 1.020327 up   | 1.211542 down | 1.236169 down | FLJ40330         |
| 216691_at | 5.76E-04 | 1.91E-04 | 1.068886 up   | 1.416458 down | 1.514033 down |                  |
| 216693_x_ | 0.001358 | 6.17E-04 | 2.157761 up   | 1.935401 up   | 1.114891 down | HDGFRP3          |

|           |          |          |               |               |               |  |             |
|-----------|----------|----------|---------------|---------------|---------------|--|-------------|
|           |          |          |               |               |               |  | LOC441453   |
|           |          |          |               |               |               |  | /// OR7E18P |
|           |          |          |               |               |               |  | /// OR7E35P |
|           |          |          |               |               |               |  | /// OR7E37P |
|           |          |          |               |               |               |  | /// OR7E47P |
| 216698_x_ | 0.026591 | 0.025097 | 1.627014 down | 1.596188 down | 1.019312 up   |  |             |
| 216699_s_ | 0.02416  | 0.022581 | 1.298058 up   | 1.186044 down | 1.539553 down |  | KLK1        |
| 216701_at | 0.004256 | 0.002827 | 1.933362 up   | 1.466945 down | 2.836137 down |  | C1orf68     |
| 216702_x_ | 0.004395 | 0.002956 | 1.266297 up   | 1.287339 up   | 1.016617 up   |  |             |
|           |          |          |               |               |               |  | IGH@ ///    |
|           |          |          |               |               |               |  | IGHA1 ///   |
|           |          |          |               |               |               |  | IGHD ///    |
|           |          |          |               |               |               |  | IGHG1 ///   |
|           |          |          |               |               |               |  | IGHG3 ///   |
|           |          |          |               |               |               |  | IGHM ///    |
|           |          |          |               |               |               |  | IGHV3-23    |
|           |          |          |               |               |               |  | /// IGHV4-  |
|           |          |          |               |               |               |  | 31          |
| 216706_x_ | 3.37E-04 | 9.31E-05 | 1.426877 up   | 1.543995 down | 2.203091 down |  |             |
| 216707_at | 4.86E-04 | 1.51E-04 | 2.12658 up    | 1.124944 down | 2.392283 down |  |             |
| 216716_at | 0.00679  | 0.005136 | 1.303749 up   | 1.415645 down | 1.845645 down |  | ABO         |
| 216727_at | 5.17E-04 | 1.65E-04 | 1.417492 up   | 1.408169 down | 1.996068 down |  | STK38       |
| 216729_at | 0.005792 | 0.004199 | 1.650568 up   | 1.428366 down | 2.357616 down |  |             |
| 216730_at | 2.78E-04 | 7.18E-05 | 1.424543 down | 1.138743 up   | 1.622189 up   |  |             |
| 216731_s_ | 0.021783 | 0.020156 | 1.367034 up   | 1.042023 down | 1.424481 down |  |             |
| 216732_at | 0.002615 | 0.001488 | 1.342862 down | 1.061999 up   | 1.426118 up   |  |             |
| 216733_s_ | 3.03E-07 | 5.42E-09 | 15.63267 up   | 16.56113 up   | 1.059392 up   |  | GATM        |
| 216736_at | 0.001604 | 7.72E-04 | 1.596182 up   | 1.562615 down | 2.494218 down |  | TM6SF2      |
| 216744_at | 3.00E-04 | 7.95E-05 | 1.854456 up   | 1.346854 up   | 1.37688 down  |  |             |
| 216745_x_ | 0.007684 | 0.005988 | 1.364616 up   | 1.777924 up   | 1.302875 up   |  |             |
| 216747_at | 0.028725 | 0.0273   | 1.34083 up    | 1.121376 up   | 1.195701 down |  | APBB2       |
| 216757_at | 0.011117 | 0.009319 | 1.222169 down | 1.212834 up   | 1.482288 up   |  |             |

|           |          |          |               |               |               |             |
|-----------|----------|----------|---------------|---------------|---------------|-------------|
| 216759_at | 0.003328 | 0.002059 | 1.255529 up   | 1.208284 down | 1.517035 down | HRASLS2     |
| 216768_x_ | 0.001209 | 5.26E-04 | 1.862 up      | 1.106909 down | 2.061064 down | TTC38       |
| 216784_at | 6.37E-04 | 2.20E-04 | 1.566489 up   | 1.127113 down | 1.765609 down |             |
| 216791_at | 0.013853 | 0.012062 | 1.389287 up   | 1.19625 down  | 1.661934 down | TMEM92      |
| 216797_at | 6.96E-04 | 2.48E-04 | 1.57583 up    | 1.35659 down  | 2.137754 down |             |
| 216804_s_ | 5.75E-05 | 8.52E-06 | 1.035124 down | 10.09729 down | 9.754668 down | PDLIM5      |
| 216806_at | 8.80E-04 | 3.41E-04 | 1.396222 up   | 1.650736 up   | 1.182288 up   |             |
| 216808_at | 0.04532  | 0.044107 | 1.390825 up   | 1.128693 down | 1.569815 down |             |
| 216820_at | 0.002151 | 0.001144 | 1.606474 up   | 1.431235 down | 2.299242 down |             |
|           |          |          |               |               |               | KRT8 ///    |
|           |          |          |               |               |               | KRT8P9 ///  |
|           |          |          |               |               |               | LOC149501   |
|           |          |          |               |               |               | ///         |
| 216821_at | 3.15E-04 | 8.51E-05 | 2.283314 up   | 1.362046 down | 3.109977 down | LOC647954   |
|           |          |          |               |               |               | RPS3A ///   |
|           |          |          |               |               |               | RPS3AP20    |
|           |          |          |               |               |               | ///         |
|           |          |          |               |               |               | RPS3AP44    |
|           |          |          |               |               |               | ///         |
|           |          |          |               |               |               | RPS3AP47    |
|           |          |          |               |               |               | ///         |
|           |          |          |               |               |               | RPS3AP49    |
| 216823_at | 0.001295 | 5.78E-04 | 1.292565 up   | 1.627195 up   | 1.258889 up   | /// RPS3AP5 |
| 216831_s_ | 5.11E-05 | 7.28E-06 | 2.444735 down | 1.591609 up   | 3.891062 up   | RUNX1T1     |
| 216832_at | 3.46E-05 | 4.28E-06 | 1.706221 down | 1.298396 up   | 2.215349 up   | RUNX1T1     |
| 216835_s_ | 1.61E-05 | 1.49E-06 | 1.133188 down | 3.066673 down | 2.706234 down | DOK1        |
| 216836_s_ | 1.17E-04 | 2.23E-05 | 3.892765 up   | 3.716304 up   | 1.047483 down | ERBB2       |
| 216840_s_ | 1.91E-04 | 4.33E-05 | 5.856999 down | 1.374808 up   | 8.05225 up    | LAMA2       |
| 216841_s_ | 2.16E-04 | 5.12E-05 | 13.96853 down | 2.335207 down | 5.981709 up   | SOD2        |
| 216844_at | 0.009652 | 0.007874 | 1.291482 up   | 1.319577 down | 1.70421 down  | ZC3H7B      |
| 216845_x_ | 0.004091 | 0.002684 | 1.503058 up   | 1.19269 up    | 1.260226 down | MLL2        |
| 216850_at | 1.69E-05 | 1.61E-06 | 8.418117 up   | 8.487731 up   | 1.00827 up    | SNRPN       |
| 216853_x_ | 0.002148 | 0.001142 | 1.726854 up   | 1.007574 up   | 1.713872 down | IGLV3-19    |



|           |          |          |               |               |               |             |
|-----------|----------|----------|---------------|---------------|---------------|-------------|
| 216858_x_ | 0.003119 | 0.001887 | 1.801127 up   | 1.801818 up   | 1.000384 up   |             |
| 216859_x_ | 0.007332 | 0.005652 | 1.273609 up   | 1.952266 up   | 1.532861 up   |             |
| 216861_at | 0.008747 | 0.007007 | 1.319806 up   | 1.174697 down | 1.550373 down |             |
| 216862_s_ | 0.002164 | 0.001152 | 1.215566 down | 1.54233 down  | 1.268816 down | MTCP1NB     |
| 216869_at | 0.001143 | 4.87E-04 | 1.188633 down | 3.187979 down | 2.682055 down | PDE1C       |
| 216873_s_ | 6.52E-04 | 2.27E-04 | 1.265471 down | 2.015241 down | 1.592483 down | ATP8B2      |
| 216875_x_ | 0.020531 | 0.018859 | 1.515462 up   | 1.093164 down | 1.656649 down | HAB1        |
| 216886_at | 0.043743 | 0.042506 | 1.454437 up   | 1.055362 up   | 1.37814 down  | CHRNA4      |
| 216888_at | 0.001216 | 5.31E-04 | 1.781128 up   | 1.07536 down  | 1.915355 down | LDB3        |
| 216889_s_ | 0.006396 | 0.004773 | 1.456513 up   | 1.320876 down | 1.923872 down | HNF4A       |
| 216893_s_ | 0.029161 | 0.02775  | 1.150243 down | 1.051651 up   | 1.209654 up   | COL4A3      |
| 216901_s_ | 0.001033 | 4.23E-04 | 1.522182 up   | 1.047954 down | 1.595176 down | IKZF1       |
| 216903_s_ | 7.98E-04 | 3.00E-04 | 1.617289 down | 1.61126 down  | 1.003742 up   | CBARA1      |
| 216905_s_ | 9.58E-05 | 1.70E-05 | 3.810812 up   | 2.147025 up   | 1.774926 down | ST14        |
|           |          |          |               |               |               | KIR3DL2 /// |
| 216907_x_ | 0.005977 | 0.004372 | 1.309718 up   | 1.157803 down | 1.516395 down | LOC727787   |
| 216908_x_ | 0.004475 | 0.003028 | 1.006729 down | 1.738304 up   | 1.750001 up   | LOC730092   |
| 216910_at | 0.002876 | 0.001693 | 1.651448 down | 1.287885 up   | 2.126875 up   | XPNPEP2     |
| 216913_s_ | 0.006624 | 0.00498  | 1.885243 up   | 1.512313 up   | 1.246596 down | RRP12       |
| 216919_at | 4.63E-04 | 1.42E-04 | 1.418764 down | 1.175087 up   | 1.667172 up   | TP53I11     |
| 216923_at | 0.001767 | 8.77E-04 | 1.058251 up   | 1.397192 down | 1.478581 down | CDKL5       |
| 216924_s_ | 0.025641 | 0.024122 | 1.472835 up   | 1.026076 down | 1.511241 down | DRD2        |
| 216928_at | 0.001441 | 6.66E-04 | 1.980187 up   | 1.213603 down | 2.40316 down  | TAL1        |
| 216929_x_ | 0.008606 | 0.006869 | 1.877277 up   | 1.014882 down | 1.905214 down | ABO         |
| 216939_s_ | 0.020377 | 0.018707 | 1.225802 up   | 1.009761 down | 1.237767 down | HTR4        |
|           |          |          |               |               |               | YBX1 ///    |
| 216940_x_ | 0.006278 | 0.00466  | 1.870238 up   | 1.65382 down  | 3.093036 down | YBX1P2      |
| 216942_s_ | 0.001106 | 4.65E-04 | 2.64197 down  | 2.998782 down | 1.135055 down | CD58        |
| 216945_x_ | 1.99E-06 | 7.77E-08 | 4.49805 up    | 7.546354 up   | 1.677695 up   | PASK        |
| 216946_at | 0.012451 | 0.010654 | 1.42509 up    | 1.160089 up   | 1.228432 down | HLA-DOA     |
|           |          |          |               |               |               | FCGR1A ///  |
| 216950_s_ | 0.01671  | 0.014954 | 1.059578 up   | 1.324403 down | 1.403308 down | FCGR1C      |
| 216952_s_ | 7.22E-04 | 2.61E-04 | 3.176224 up   | 2.83132 up    | 1.121818 down | LMNB2       |

|           |          |          |               |               |               |            |
|-----------|----------|----------|---------------|---------------|---------------|------------|
| 216954_x_ | 0.008971 | 0.00722  | 1.395399 up   | 1.338776 up   | 1.042295 down | ATP5O      |
| 216957_at | 0.001301 | 5.82E-04 | 1.451809 up   | 1.445792 up   | 1.004162 down | USP22      |
| 216963_s_ | 5.06E-06 | 2.92E-07 | 4.555628 up   | 4.193934 up   | 1.086242 down | GAP43      |
| 216971_s_ | 0.014195 | 0.012405 | 3.920343 down | 5.581451 down | 1.423715 down | PLEC1      |
| 216973_s_ | 0.002941 | 0.001745 | 1.55908 down  | 8.211701 down | 5.267017 down | HOXB7      |
| 216975_x_ | 0.001763 | 8.74E-04 | 2.486822 up   | 1.345242 down | 3.345378 down | NPAS1      |
| 216977_x_ | 3.02E-04 | 8.04E-05 | 3.773381 up   | 2.437855 up   | 1.547828 down | SNRPA1     |
| 216980_s_ | 0.030993 | 0.029631 | 1.49111 up    | 1.407966 down | 2.099432 down | SPN        |
| 216982_x_ | 0.001174 | 5.06E-04 | 1.554224 up   | 2.316962 down | 3.601078 down |            |
| 216987_at | 0.024543 | 0.022977 | 1.118932 up   | 1.074374 down | 1.202152 down | IRF4       |
| 216993_s_ | 0.002208 | 0.001184 | 1.609827 up   | 1.150537 down | 1.852165 down | COL11A2    |
| 216999_at | 0.043332 | 0.042092 | 1.194693 down | 1.055124 down | 1.132278 up   | EPOR       |
| 217000_at | 4.85E-04 | 1.51E-04 | 1.863616 up   | 1.079111 down | 2.011048 down | KRT18P50   |
| 217006_x_ | 0.005247 | 0.003713 | 1.866198 up   | 1.166323 down | 2.17659 down  | FASN       |
|           |          |          |               |               |               | AZGP1 ///  |
| 217014_s_ | 0.008119 | 0.006397 | 1.591753 up   | 1.230888 down | 1.959269 down | AZGP1P1    |
|           |          |          |               |               |               | IGH@ ///   |
|           |          |          |               |               |               | IGHA1 ///  |
|           |          |          |               |               |               | IGHA2 ///  |
|           |          |          |               |               |               | LOC100126  |
| 217022_s_ | 0.025193 | 0.02365  | 1.419927 up   | 1.106169 down | 1.570679 down | 583        |
|           |          |          |               |               |               | TPSAB1 /// |
| 217023_x_ | 6.94E-04 | 2.48E-04 | 1.629671 up   | 1.25912 down  | 2.051951 down | TPSB2      |
| 217027_x_ | 0.005279 | 0.003742 | 1.86907 up    | 1.848131 up   | 1.01133 down  | KPNB1      |
| 217028_at | 2.69E-04 | 6.87E-05 | 21.27078 up   | 13.76361 up   | 1.545437 down | CXCR4      |
| 217029_at | 7.63E-04 | 2.82E-04 | 1.754775 down | 1.031302 down | 1.701514 up   |            |
| 217030_at | 0.009891 | 0.008115 | 1.242068 down | 1.155055 up   | 1.434656 up   |            |
| 217034_at | 0.005362 | 0.003813 | 1.442982 up   | 1.293434 down | 1.866401 down | NTN3       |
| 217037_at | 0.007157 | 0.005487 | 1.208457 up   | 1.202307 down | 1.452937 down |            |
| 217040_x_ | 0.01013  | 0.008342 | 2.521618 up   | 1.602054 down | 4.039767 down | SOX15      |
| 217042_at | 5.82E-04 | 1.94E-04 | 1.698645 up   | 1.995516 up   | 1.174769 up   | RDH11      |
| 217043_s_ | 0.031216 | 0.029858 | 1.395785 down | 1.32217 down  | 1.055677 up   | MFN1       |
| 217046_s_ | 0.006455 | 0.004826 | 1.771465 up   | 1.072804 down | 1.900435 down | AGER       |
| 217049_x_ | 0.001751 | 8.67E-04 | 1.296166 up   | 1.428424 up   | 1.102038 up   | PCDH11Y    |

|           |          |          |               |               |               |                    |
|-----------|----------|----------|---------------|---------------|---------------|--------------------|
| 217053_x_ | 0.002288 | 0.001247 | 1.544325 up   | 3.172867 up   | 2.054533 up   | ETV1               |
| 217054_at | 8.69E-04 | 3.35E-04 | 1.891861 up   | 1.576136 down | 2.981831 down |                    |
| 217055_x_ | 0.006685 | 0.00504  | 1.347824 up   | 1.422471 down | 1.91724 down  |                    |
| 217058_at | 0.001831 | 9.19E-04 | 2.260062 up   | 1.467524 down | 3.316695 down | GNAS               |
| 217062_at | 0.005672 | 0.004089 | 1.615763 up   | 1.218085 down | 1.968138 down | DMPK               |
| 217069_at | 0.002327 | 0.001276 | 1.880006 up   | 1.591971 down | 2.992914 down | MLL4               |
| 217073_x_ | 2.73E-05 | 3.09E-06 | 13.37774 up   | 9.310619 up   | 1.436826 down | APOA1              |
| 217074_at | 0.004451 | 0.003006 | 1.466225 up   | 1.561763 down | 2.289897 down | SMOX               |
| 217079_at | 0.002623 | 0.001494 | 1.834843 up   | 1.787088 down | 3.279025 down |                    |
| 217080_s_ | 0.002487 | 0.001394 | 1.743617 up   | 1.365854 down | 2.381527 down | HOMER2             |
| 217097_s_ | 0.00221  | 0.001186 | 4.662115 down | 2.558154 down | 1.822452 up   | PHTF2              |
| 217100_s_ | 0.001282 | 5.70E-04 | 1.156241 up   | 2.677504 up   | 2.315698 up   | UBXN7              |
| 217101_at | 0.006525 | 0.004893 | 1.909053 up   | 1.253344 down | 2.392701 down | TTC39A             |
| 217103_at | 0.009195 | 0.007439 | 1.199284 up   | 1.270582 down | 1.523789 down | LDLR               |
| 217105_at | 0.013763 | 0.011975 | 1.174884 up   | 1.059135 down | 1.24436 down  |                    |
| 217109_at | 9.46E-04 | 3.76E-04 | 1.755955 up   | 1.142828 up   | 1.5365 down   | MUC4               |
| 217111_at | 0.028897 | 0.027474 | 1.489793 up   | 1.116513 up   | 1.334326 down | AMACR<br>LOC100240 |
| 217115_at | 0.013849 | 0.012058 | 1.264456 up   | 1.003441 down | 1.268807 down | 726                |
| 217118_s_ | 8.74E-04 | 3.37E-04 | 2.568677 down | 1.524821 down | 1.684576 up   | C22orf9            |
| 217119_s_ | 0.006913 | 0.005253 | 1.552043 up   | 1.754599 down | 2.723214 down | CXCR3              |
| 217125_at | 0.004819 | 0.00333  | 1.019451 down | 1.869474 up   | 1.905836 up   |                    |
| 217127_at | 0.001888 | 9.58E-04 | 4.719666 up   | 2.737323 up   | 1.72419 down  | CTH                |
| 217133_x_ | 0.0206   | 0.018937 | 1.233039 down | 1.162503 up   | 1.433412 up   | CYP2B6             |
| 217135_x_ | 0.015061 | 0.01329  | 1.290723 up   | 1.077747 down | 1.391073 down |                    |
| 217137_x_ | 7.81E-04 | 2.92E-04 | 2.370235 up   | 2.656318 up   | 1.120698 up   |                    |
| 217138_x_ | 0.005967 | 0.004363 | 1.101285 up   | 1.311453 down | 1.444283 down | IGL@               |
| 217151_at | 0.010875 | 0.009081 | 1.29508 up    | 1.110171 down | 1.43776 down  |                    |
| 217155_at | 0.030336 | 0.028943 | 1.036319 down | 1.153155 up   | 1.195037 up   |                    |
| 217159_x_ | 0.007088 | 0.005419 | 1.665445 up   | 1.012519 down | 1.686296 down | SIGLEC7            |
| 217161_x_ | 0.003264 | 0.002004 | 1.52059 down  | 3.377827 down | 2.221392 down | ACAN               |
| 217166_at | 0.002569 | 0.001455 | 1.342041 up   | 1.954644 up   | 1.456471 up   |                    |
| 217168_s_ | 1.24E-04 | 2.41E-05 | 4.340968 down | 5.684273 down | 1.309449 down | HERPUD1            |
| 217176_s_ | 0.002924 | 0.001729 | 1.926884 down | 1.750824 down | 1.100559 up   | ZFX                |

|           |          |          |               |               |               |            |
|-----------|----------|----------|---------------|---------------|---------------|------------|
| 217179_x_ | 0.002144 | 0.001139 | 1.434086 up   | 1.342195 down | 1.924823 down |            |
| 217182_at | 5.30E-04 | 1.71E-04 | 2.067752 up   | 1.610899 down | 3.330941 down | MUC5AC     |
|           |          |          |               |               |               | ZNF259 /// |
| 217185_s_ | 0.047403 | 0.046209 | 2.049095 up   | 1.1444 up     | 1.790542 down | ZNF259P    |
| 217190_x_ | 7.98E-04 | 3.00E-04 | 2.044019 up   | 1.158617 down | 2.368234 down | ESR1       |
| 217199_s_ | 0.007459 | 0.00577  | 1.705998 down | 2.19213 down  | 1.284954 down | STAT2      |
| 217202_s_ | 0.001122 | 4.75E-04 | 1.361398 down | 3.320492 up   | 4.520512 up   | GLUL       |
|           |          |          |               |               |               | IGH@ ///   |
|           |          |          |               |               |               | IGHA1 ///  |
|           |          |          |               |               |               | IGHA2 ///  |
|           |          |          |               |               |               | IGHD ///   |
|           |          |          |               |               |               | IGHG1 ///  |
|           |          |          |               |               |               | IGHG3 ///  |
|           |          |          |               |               |               | IGHG4 ///  |
|           |          |          |               |               |               | IGHM ///   |
|           |          |          |               |               |               | IGHV4-31   |
|           |          |          |               |               |               | ///        |
|           |          |          |               |               |               | LOC100126  |
|           |          |          |               |               |               | 583 ///    |
|           |          |          |               |               |               | LOC642131  |
|           |          |          |               |               |               | ///        |
|           |          |          |               |               |               | LOC652128  |
|           |          |          |               |               |               | /// VSIG6  |
| 217217_at | 0.025879 | 0.024368 | 1.407887 up   | 1.062264 up   | 1.325365 down |            |
| 217219_at | 0.02086  | 0.019211 | 1.130972 up   | 1.079532 down | 1.22092 down  | LOC26102   |
| 217220_at | 1.86E-07 | 2.82E-09 | 27.42172 down | 2.349215 down | 11.67272 up   |            |
| 217221_x_ | 0.001739 | 8.58E-04 | 2.033014 up   | 1.028278 up   | 1.977105 down | RBM10      |
| 217223_s_ | 0.004831 | 0.00334  | 2.723912 up   | 1.680584 up   | 1.620813 down | BCR        |
|           |          |          |               |               |               |            |
|           |          |          |               |               |               | NOMO1 ///  |
|           |          |          |               |               |               | NOMO2 ///  |
| 217225_x_ | 4.87E-04 | 1.52E-04 | 1.055634 up   | 1.536322 down | 1.621793 down | NOMO3      |
| 217226_s_ | 8.89E-07 | 2.49E-08 | 9.341041 down | 8.227119 down | 1.135396 up   | SFXN3      |
| 217231_s_ | 0.003359 | 0.002085 | 1.498349 up   | 1.034569 up   | 1.448284 down | MAST1      |

|           |          |          |               |               |               |            |
|-----------|----------|----------|---------------|---------------|---------------|------------|
| 217232_x_ | 0.008742 | 0.007002 | 1.426113 down | 1.053409 down | 1.353808 up   | HBB        |
| 217234_s_ | 0.001942 | 9.96E-04 | 4.800077 up   | 3.609088 up   | 1.329997 down | EZR        |
| 217237_at | 0.01867  | 0.016951 | 1.450534 up   | 1.051424 up   | 1.37959 down  |            |
| 217238_s_ | 0.01057  | 0.008778 | 1.174122 up   | 1.071196 down | 1.257714 down | ALDOB      |
| 217249_x_ | 0.002749 | 0.001593 | 1.289942 up   | 1.363265 up   | 1.056843 up   | COX7A2     |
| 217251_x_ | 0.02286  | 0.021278 | 1.415409 up   | 1.168482 down | 1.65388 down  | IVD        |
| 217253_at | 0.005641 | 0.004062 | 1.642787 down | 1.019354 down | 1.611596 up   | SH3BP2     |
| 217254_s_ | 0.00566  | 0.004079 | 1.849583 up   | 1.174034 down | 2.171474 down | EPO        |
|           |          |          |               |               |               | RPL36A /// |
| 217256_x_ | 0.005198 | 0.00367  | 1.135356 up   | 1.345689 up   | 1.185258 up   | RPL36AP51  |
| 217264_s_ | 0.002628 | 0.001498 | 2.444302 up   | 1.163093 down | 2.842951 down | SCNN1A     |
| 217266_at | 0.002843 | 0.001666 | 1.138301 down | 1.536035 up   | 1.748471 up   | RPL15P22   |
| 217271_at | 0.006461 | 0.004833 | 1.411542 up   | 1.203067 down | 1.698181 down | GNA11      |
| 217278_x_ | 0.00758  | 0.005891 | 2.083195 up   | 1.288398 down | 2.683985 down |            |
| 217279_x_ | 0.012909 | 0.011107 | 2.723998 down | 1.954312 down | 1.393839 up   | MMP14      |
|           |          |          |               |               |               | IGH@ ///   |
|           |          |          |               |               |               | IGHA1 ///  |
|           |          |          |               |               |               | IGHA2 ///  |
|           |          |          |               |               |               | IGHG1 ///  |
|           |          |          |               |               |               | IGHG2 ///  |
|           |          |          |               |               |               | IGHG3 ///  |
|           |          |          |               |               |               | IGHM ///   |
|           |          |          |               |               |               | IGHV4-31   |
|           |          |          |               |               |               | ///        |
|           |          |          |               |               |               | LOC100126  |
|           |          |          |               |               |               | 583 ///    |
| 217281_x_ | 0.001291 | 5.75E-04 | 1.519099 up   | 1.306914 down | 1.985331 down | LOC652494  |
| 217283_at | 0.008459 | 0.006725 | 1.37698 up    | 1.384877 down | 1.906948 down |            |
| 217291_at | 0.025959 | 0.024451 | 1.281613 up   | 1.074523 down | 1.377123 down | CEACAM5    |
| 217293_at | 0.004493 | 0.003044 | 1.537923 up   | 1.448073 up   | 1.062047 down |            |
| 217301_x_ | 0.004851 | 0.003359 | 2.574561 up   | 3.035726 up   | 1.179124 up   | RBBP4      |
| 217312_s_ | 6.90E-04 | 2.45E-04 | 3.413953 down | 1.47822 down  | 2.309503 up   | COL7A1     |
| 217314_at | 0.001343 | 6.08E-04 | 2.209697 up   | 1.229318 down | 2.71642 down  |            |
| 217315_s_ | 0.010799 | 0.009004 | 1.72605 up    | 1.002192 down | 1.729834 down | KLK13      |

|           |          |          |             |               |               |                                                                                                                                                                                                                                                                             |
|-----------|----------|----------|-------------|---------------|---------------|-----------------------------------------------------------------------------------------------------------------------------------------------------------------------------------------------------------------------------------------------------------------------------|
| 217318_x_ | 8.52E-04 | 3.26E-04 | 1.158556 up | 2.361137 down | 2.735508 down | KIR2DL1 ///                                                                                                                                                                                                                                                                 |
| 217322_x_ | 6.15E-05 | 9.35E-06 | 2.967132 up | 1.78848 up    | 1.659025 down | KIR2DL2 ///                                                                                                                                                                                                                                                                 |
| 217323_at | 0.007026 | 0.005364 | 1.150866 up | 1.150433 down | 1.323995 down | KIR2DL3 ///                                                                                                                                                                                                                                                                 |
| 217325_at | 0.001209 | 5.26E-04 | 1.229486 up | 2.24153 down  | 2.75593 down  | KIR2DL5A<br>///<br>KIR2DL5B<br>///<br>KIR2DS1<br>///<br>KIR2DS2<br>///<br>KIR2DS3<br>///<br>KIR2DS4<br>///<br>KIR2DS5<br>///<br>KIR3DL1<br>///<br>KIR3DL2<br>///<br>KIR3DL3<br>///<br>KIR3DP1<br>///<br>KIR3DP1<br>///<br>LOC652001<br>///<br>LOC652779<br>///<br>LOC727787 |
|           |          |          |             |               |               | HLA-DRB6                                                                                                                                                                                                                                                                    |
|           |          |          |             |               |               | KRT3                                                                                                                                                                                                                                                                        |

|           |          |          |               |               |               |  |             |
|-----------|----------|----------|---------------|---------------|---------------|--|-------------|
|           |          |          |               |               |               |  | TRBC1 ///   |
|           |          |          |               |               |               |  | TRBC2 ///   |
|           |          |          |               |               |               |  | TRBV7-4 /// |
|           |          |          |               |               |               |  | TRBV7-6 /// |
|           |          |          |               |               |               |  | TRBV7-7 /// |
| 217326_x_ | 0.004823 | 0.003333 | 1.558174 up   | 1.145767 down | 1.785303 down |  | TRBV7-8     |
|           |          |          |               |               |               |  | LOC100134   |
| 217328_at | 0.017868 | 0.016131 | 1.349783 up   | 1.023304 up   | 1.319043 down |  | 017         |
| 217331_at | 0.014954 | 0.013183 | 1.206409 down | 1.137118 up   | 1.371829 up   |  |             |
|           |          |          |               |               |               |  | CTAG1A ///  |
| 217339_x_ | 0.012056 | 0.010256 | 1.393564 up   | 1.119638 down | 1.560288 down |  | CTAG1B      |
| 217341_at | 0.002077 | 0.001092 | 1.660072 up   | 1.132767 down | 1.880474 down |  |             |
| 217350_at | 0.012475 | 0.010681 | 1.405981 up   | 1.32552 down  | 1.863656 down |  | KRT19P2     |
| 217351_at | 0.00369  | 0.002353 | 1.504267 up   | 1.289935 up   | 1.166157 down |  |             |
|           |          |          |               |               |               |  | IGHA1 ///   |
|           |          |          |               |               |               |  | IGHG1 ///   |
|           |          |          |               |               |               |  | IGHG3 ///   |
|           |          |          |               |               |               |  | IGHM ///    |
| 217360_x_ | 0.01996  | 0.018287 | 1.296296 up   | 1.077073 down | 1.396206 down |  | LOC652494   |
| 217367_s_ | 8.68E-07 | 2.41E-08 | 5.504159 down | 6.094399 down | 1.107235 down |  | ZHX3        |
|           |          |          |               |               |               |  | IGHG1 ///   |
|           |          |          |               |               |               |  | LOC100132   |
| 217369_at | 0.001723 | 8.48E-04 | 2.747248 down | 2.955192 down | 1.075692 down |  | 941         |
| 217371_s_ | 8.92E-06 | 6.48E-07 | 7.606272 down | 1.632905 down | 4.658122 up   |  | IL15        |
|           |          |          |               |               |               |  | TARP ///    |
|           |          |          |               |               |               |  | TRGV3 ///   |
| 217374_x_ | 0.03616  | 0.034885 | 1.316971 down | 1.063282 up   | 1.400311 up   |  | TRGV5       |
| 217379_at | 0.004987 | 0.003481 | 1.603441 down | 1.00372 up    | 1.609407 up   |  | RPL10       |
| 217381_s_ | 0.005245 | 0.003711 | 1.201687 up   | 1.39141 down  | 1.67204 down  |  | TRGV5       |
| 217389_s_ | 0.005633 | 0.004055 | 1.555056 up   | 1.263949 down | 1.965512 down |  | ATF5        |
| 217390_x_ | 0.002995 | 0.001788 | 1.42417 up    | 1.00282 down  | 1.428186 down |  |             |

|           |          |          |               |               |               |           |
|-----------|----------|----------|---------------|---------------|---------------|-----------|
| 217396_at | 0.003731 | 0.002387 | 2.015253 up   | 1.097028 down | 2.21079 down  |           |
| 217403_s_ | 2.99E-04 | 7.93E-05 | 1.495548 up   | 2.850393 up   | 1.905919 up   | ZNF227    |
| 217410_at | 0.006118 | 0.004507 | 1.770319 up   | 1.509603 down | 2.672479 down | AGRN      |
| 217413_s_ | 0.001646 | 7.99E-04 | 1.792669 up   | 1.405776 down | 2.52009 down  | TNXB      |
| 217422_s_ | 0.006929 | 0.005271 | 1.285806 up   | 1.147327 down | 1.47524 down  | CD22      |
| 217430_x_ | 8.86E-04 | 3.44E-04 | 15.84355 down | 18.72279 down | 1.181729 down | COL1A1    |
| 217432_s_ | 9.53E-04 | 3.80E-04 | 2.23513 down  | 2.20874 down  | 1.011948 up   | IDS       |
|           |          |          |               |               |               | HLA-A /// |
|           |          |          |               |               |               | HLA-B /// |
|           |          |          |               |               |               | HLA-G /// |
|           |          |          |               |               |               | HLA-H /// |
| 217436_x_ | 3.84E-04 | 1.11E-04 | 3.913795 down | 2.793701 down | 1.400935 up   | HLA-J     |
| 217437_s_ | 0.00223  | 0.001203 | 5.360652 down | 2.793929 down | 1.918679 up   | TACC1     |
| 217438_at | 0.003271 | 0.00201  | 1.546628 up   | 1.381028 down | 2.135936 down |           |
| 217441_at | 0.011615 | 0.009816 | 2.302927 down | 1.453592 down | 1.584301 up   | USP33     |
| 217446_x_ | 0.00586  | 0.004261 | 1.593935 up   | 1.367631 up   | 1.165471 down |           |
| 217447_at | 0.023424 | 0.021838 | 1.282112 up   | 1.004851 up   | 1.275922 down | MAG       |
|           |          |          |               |               |               | HMGB3 /// |
| 217454_at | 0.006243 | 0.004625 | 1.276829 up   | 1.335652 down | 1.705399 down | LOC203510 |
| 217456_x_ | 1.76E-06 | 6.52E-08 | 4.138839 down | 3.108398 down | 1.331502 up   | HLA-E     |
| 217457_s_ | 1.15E-04 | 2.19E-05 | 2.490737 down | 3.28468 down  | 1.318759 down | RAP1GDS1  |
| 217462_at | 0.003693 | 0.002356 | 1.904704 up   | 1.463445 down | 2.78743 down  | C11orf9   |
| 217465_at | 0.048776 | 0.047612 | 2.753534 down | 1.519831 down | 1.811737 up   | NCKAP1    |
| 217472_at | 0.006951 | 0.00529  | 1.350236 up   | 1.214486 down | 1.639842 down |           |
| 217475_s_ | 0.009035 | 0.007282 | 1.920216 up   | 1.098075 up   | 1.748712 down | LIMK2     |
|           |          |          |               |               |               | NR1D1 /// |
| 217476_at | 0.003809 | 0.002451 | 1.293877 up   | 1.674887 down | 2.167098 down | THRA      |
| 217490_at | 0.014698 | 0.012921 | 1.093191 down | 1.351095 down | 1.235918 down |           |
| 217491_x_ | 3.62E-05 | 4.53E-06 | 1.681225 up   | 1.915788 up   | 1.139519 up   | COX7C     |
| 217495_x_ | 0.001919 | 9.80E-04 | 1.578659 up   | 1.108049 up   | 1.424719 down | CALCA     |
| 217499_x_ | 3.93E-04 | 1.14E-04 | 1.772203 down | 4.098114 down | 2.312441 down | OR7E37P   |
| 217502_at | 5.92E-04 | 1.99E-04 | 4.262871 down | 1.082786 down | 3.936947 up   | IFIT2     |
| 217503_at | 7.83E-04 | 2.93E-04 | 2.498478 down | 3.370612 down | 1.349066 down | STK17B    |
| 217504_at | 0.003847 | 0.002483 | 3.394535 down | 1.666796 down | 2.036563 up   | ABCA6     |



|           |          |          |               |               |               |          |
|-----------|----------|----------|---------------|---------------|---------------|----------|
| 217509_x_ | 5.94E-04 | 2.00E-04 | 1.880055 up   | 1.36706 up    | 1.375254 down | GRIK5    |
| 217510_at | 0.003411 | 0.002127 | 1.652383 up   | 1.344522 down | 2.221665 down | CRX      |
| 217513_at | 5.56E-04 | 1.82E-04 | 1.20853 down  | 2.400442 down | 1.986249 down | C17orf60 |
| 217514_at | 0.007282 | 0.005604 | 1.501539 up   | 1.336164 down | 2.006301 down |          |
| 217515_s_ | 0.011265 | 0.009472 | 1.340853 up   | 1.003747 up   | 1.335847 down | CACNA1S  |
| 217516_x_ | 2.46E-04 | 6.11E-05 | 1.608312 up   | 1.682132 down | 2.705394 down | ARVCF    |
| 217523_at | 0.003707 | 0.002366 | 5.414372 down | 1.718039 down | 3.151485 up   | CD44     |
| 217525_at | 0.001795 | 8.95E-04 | 19.82186 down | 2.312947 down | 8.56996 up    | OLFML1   |
| 217526_at | 0.00198  | 0.001022 | 1.115271 down | 2.120509 up   | 2.364942 up   | NFATC2IP |
| 217529_at | 1.29E-05 | 1.10E-06 | 3.273342 down | 4.160379 down | 1.270988 down | ORAI2    |
| 217530_at | 0.008092 | 0.006372 | 1.386523 up   | 1.342284 down | 1.861107 down | SLC34A1  |
| 217540_at | 7.00E-06 | 4.64E-07 | 6.370038 down | 1.88429 down  | 3.380605 up   | FAM55C   |
| 217545_at | 0.004036 | 0.002637 | 1.713299 up   | 1.142353 down | 1.957192 down | MYH14    |
| 217547_x_ | 2.27E-04 | 5.46E-05 | 3.433646 up   | 4.290777 up   | 1.249627 up   | ZNF675   |
| 217549_at | 0.005595 | 0.00402  | 1.448306 up   | 1.339276 down | 1.939681 down |          |
| 217553_at | 7.21E-04 | 2.60E-04 | 2.686099 down | 4.670388 down | 1.738725 down | MGC87042 |
| 217555_at | 0.001716 | 8.44E-04 | 1.932037 up   | 1.050126 down | 2.028881 down | SMC1A    |
| 217573_at | 0.002388 | 0.00132  | 1.318 up      | 1.035802 down | 1.365186 down | GRIN2C   |
| 217574_at | 4.29E-05 | 5.74E-06 | 2.303824 up   | 1.762398 up   | 1.30721 down  | CDH8     |
| 217576_x_ | 0.01027  | 0.008471 | 1.58125 down  | 1.015718 down | 1.556781 up   | SOS2     |
| 217579_x_ | 0.002192 | 0.001172 | 1.488555 up   | 1.538346 up   | 1.033449 up   |          |
| 217581_at | 0.009947 | 0.008171 | 1.315059 up   | 1.220943 down | 1.605612 down |          |
| 217585_at | 0.002023 | 0.001052 | 1.666199 up   | 1.21235 up    | 1.374355 down | NEBL     |
| 217590_s_ | 0.016925 | 0.015174 | 1.684304 down | 1.799197 up   | 3.030395 up   | TRPA1    |
| 217591_at | 0.004602 | 0.003145 | 2.672919 up   | 2.629881 up   | 1.016365 down | SKIL     |
| 217595_at | 0.027999 | 0.026533 | 1.7015 down   | 1.011373 up   | 1.720851 up   | GSPT1    |
| 217597_x_ | 4.05E-04 | 1.19E-04 | 1.765876 up   | 1.169483 down | 2.065162 down | RAB40B   |
| 217598_at | 0.00791  | 0.006198 | 2.2857 down   | 1.604571 down | 1.424493 up   |          |
| 217599_s_ | 1.03E-06 | 3.07E-08 | 16.41538 down | 5.11403 down  | 3.209872 up   | MDFIC    |
| 217603_at | 0.002937 | 0.001741 | 1.369918 up   | 1.413782 up   | 1.03202 up    | ATP6V0A2 |
| 217604_at | 6.56E-05 | 1.02E-05 | 5.224175 down | 2.448551 down | 2.133579 up   |          |
| 217617_at | 2.39E-04 | 5.85E-05 | 1.40807 up    | 5.156678 up   | 3.662231 up   |          |
| 217618_x_ | 0.042687 | 0.041439 | 1.857731 down | 1.256196 down | 1.478855 up   | HUS1     |
| 217619_x_ | 0.002225 | 0.001198 | 1.469597 up   | 1.714489 up   | 1.166639 up   |          |

|           |          |          |          |      |          |      |          |      |          |
|-----------|----------|----------|----------|------|----------|------|----------|------|----------|
| 217625_x_ | 2.09E-04 | 4.88E-05 | 2.788248 | down | 1.988973 | down | 1.401853 | up   |          |
| 217647_at | 0.021243 | 0.019597 | 1.549145 | up   | 1.198678 | down | 1.856926 | down |          |
| 217650_x_ | 0.001559 | 7.42E-04 | 1.080381 | up   | 1.4093   | down | 1.52258  | down | ST3GAL2  |
| 217660_at | 0.001967 | 0.001013 | 1.906924 | up   | 1.128466 | down | 2.151899 | down | MYH14    |
| 217664_at | 0.017043 | 0.015287 | 1.579481 | up   | 1.249459 | down | 1.973497 | down |          |
| 217665_at | 0.001042 | 4.29E-04 | 3.067832 | up   | 2.797877 | up   | 1.096485 | down |          |
| 217670_at | 0.012613 | 0.010814 | 1.41933  | up   | 1.1755   | up   | 1.207426 | down | RPLP2    |
| 217671_at | 0.003979 | 0.002589 | 1.952826 | up   | 3.797313 | up   | 1.944522 | up   |          |
| 217674_at | 0.001849 | 9.30E-04 | 1.196446 | up   | 1.288285 | down | 1.541362 | down |          |
| 217677_at | 0.001783 | 8.88E-04 | 1.781439 | down | 1.478256 | down | 1.205095 | up   | PLEKHA2  |
| 217679_x_ | 0.007711 | 0.006013 | 1.970575 | up   | 1.762204 | up   | 1.118245 | down |          |
| 217685_at | 0.002851 | 0.001672 | 2.027249 | up   | 1.230762 | up   | 1.647149 | down | SLC16A3  |
| 217686_at | 0.021129 | 0.019485 | 1.241109 | up   | 1.113363 | down | 1.381805 | down | PTPN1    |
| 217696_at | 0.003744 | 0.002398 | 2.163705 | up   | 1.809224 | down | 3.914628 | down | FUT7     |
| 217700_at | 0.008567 | 0.006826 | 1.704971 | up   | 1.957688 | down | 3.337802 | down | CNPY4    |
| 217701_x_ | 0.027621 | 0.02615  | 1.243313 | up   | 1.665064 | up   | 1.339215 | up   |          |
| 217702_at | 0.009213 | 0.007458 | 1.176652 | up   | 1.271758 | down | 1.496417 | down | IL27RA   |
| 217703_x_ | 7.21E-05 | 1.16E-05 | 1.537362 | up   | 2.405485 | up   | 1.564683 | up   |          |
| 217704_x_ | 0.00486  | 0.003368 | 1.624321 | up   | 1.733128 | up   | 1.066986 | up   | SUZ12P   |
| 217706_at | 0.009558 | 0.007785 | 1.64865  | up   | 1.158233 | down | 1.90952  | down |          |
| 217707_x_ | 7.49E-04 | 2.75E-04 | 11.74847 | down | 3.371453 | down | 3.484691 | up   | SMARCA2  |
| 217709_at | 0.005681 | 0.004098 | 1.171547 | up   | 1.061508 | up   | 1.103663 | down |          |
| 217711_at | 0.022436 | 0.020849 | 1.369934 | up   | 1.349379 | up   | 1.015233 | down | TEK      |
| 217714_x_ | 0.004996 | 0.003488 | 1.93202  | up   | 1.423099 | up   | 1.357615 | down | STMN1    |
| 217716_s_ | 1.48E-05 | 1.34E-06 | 2.335429 | down | 2.795381 | down | 1.196945 | down | SEC61A1  |
| 217719_at | 0.00445  | 0.003004 | 1.428483 | up   | 1.411263 | up   | 1.012202 | down | EIF3L    |
| 217724_at | 1.30E-06 | 4.22E-08 | 2.5569   | up   | 1.795227 | up   | 1.424277 | down | SERBP1   |
| 217728_at | 1.62E-06 | 5.84E-08 | 75.0639  | down | 47.84401 | down | 1.56893  | up   | S100A6   |
| 217730_at | 1.66E-04 | 3.59E-05 | 4.280083 | down | 3.915893 | down | 1.093003 | up   | TMBIM1   |
| 217733_s_ | 4.80E-04 | 1.49E-04 | 1.541607 | down | 1.816079 | down | 1.178042 | down | TMSB10   |
| 217734_s_ | 2.18E-04 | 5.18E-05 | 3.147517 | up   | 1.507988 | up   | 2.087229 | down | WDR6     |
| 217736_s_ | 0.005723 | 0.004135 | 1.50646  | up   | 1.009894 | down | 1.521365 | down | EIF2AK1  |
| 217737_x_ | 9.67E-05 | 1.72E-05 | 1.838197 | down | 2.04397  | down | 1.111943 | down | C20orf43 |
| 217738_at | 1.29E-04 | 2.53E-05 | 1.186901 | down | 2.446164 | up   | 2.903354 | up   | NAMPT    |

|           |          |          |          |      |          |      |          |      |           |
|-----------|----------|----------|----------|------|----------|------|----------|------|-----------|
| 217739_s_ | 5.90E-04 | 1.98E-04 | 1.347542 | down | 2.620831 | up   | 3.531678 | up   | NAMPT     |
| 217740_x_ | 0.001183 | 5.11E-04 | 1.01688  | up   | 1.149979 | up   | 1.13089  | up   | RPL7A     |
| 217743_s_ | 0.004693 | 0.003224 | 2.953476 | down | 1.853558 | down | 1.593409 | up   | TMEM30A   |
| 217744_s_ | 0.001627 | 7.86E-04 | 1.133007 | up   | 3.519138 | up   | 3.106016 | up   | PERP      |
| 217751_at | 6.91E-08 | 6.63E-10 | 3.235642 | down | 2.811018 | down | 1.151057 | up   | GSTK1     |
| 217753_s_ | 0.001338 | 6.04E-04 | 2.111328 | up   | 1.503184 | up   | 1.404571 | down | RPS26     |
| 217755_at | 0.013895 | 0.012103 | 3.664964 | up   | 2.318109 | up   | 1.581015 | down | HN1       |
|           |          |          |          |      |          |      |          |      | HYPK ///  |
| 217756_x_ | 0.016812 | 0.015056 | 2.079987 | down | 1.381852 | down | 1.505216 | up   | SERF2     |
| 217760_at | 0.00345  | 0.002161 | 1.767487 | down | 1.637901 | down | 1.079117 | up   | TRIM44    |
| 217762_s_ | 2.46E-04 | 6.08E-05 | 2.467218 | down | 3.696215 | down | 1.498131 | down | RAB31     |
| 217763_s_ | 1.53E-04 | 3.22E-05 | 2.545372 | down | 3.534998 | down | 1.388794 | down | RAB31     |
| 217764_s_ | 0.001125 | 4.76E-04 | 2.510542 | down | 2.86317  | down | 1.140459 | down | RAB31     |
| 217766_s_ | 0.006865 | 0.005207 | 1.466273 | down | 2.406235 | down | 1.641055 | down | TMEM50A   |
| 217768_at | 2.72E-05 | 3.07E-06 | 1.59276  | up   | 1.355526 | up   | 1.175012 | down | C14orf166 |
| 217770_at | 0.001187 | 5.14E-04 | 1.915459 | down | 1.888053 | down | 1.014515 | up   | PIGT      |
| 217773_s_ | 0.001196 | 5.19E-04 | 1.747716 | up   | 1.46443  | up   | 1.193445 | down | NDUFA4    |
| 217774_s_ | 6.69E-04 | 2.35E-04 | 1.480891 | up   | 1.448165 | up   | 1.022598 | down | HSPC152   |
| 217778_at | 0.003159 | 0.001923 | 1.425356 | up   | 2.135482 | up   | 1.49821  | up   | SLC39A1   |
|           |          |          |          |      |          |      |          |      | LOC100132 |
|           |          |          |          |      |          |      |          |      | 235 ///   |
| 217779_s_ | 0.001832 | 9.20E-04 | 1.595688 | up   | 2.052303 | up   | 1.286156 | up   | PNRC2     |
| 217782_s_ | 0.004567 | 0.003115 | 2.091626 | up   | 1.22225  | up   | 1.711291 | down | GPS1      |
| 217783_s_ | 0.002645 | 0.001511 | 3.10725  | down | 2.688381 | down | 1.155808 | up   | YPEL5     |
| 217786_at | 0.002484 | 0.001392 | 2.350611 | up   | 2.12943  | up   | 1.103869 | down | PRMT5     |
| 217787_s_ | 0.001789 | 8.92E-04 | 1.940711 | down | 3.339033 | down | 1.72052  | down | GALNT2    |
| 217788_s_ | 1.08E-05 | 8.37E-07 | 1.78063  | down | 2.324694 | down | 1.305546 | down | GALNT2    |
| 217792_at | 6.74E-06 | 4.36E-07 | 1.455605 | up   | 2.250758 | up   | 1.54627  | up   | SNX5      |
| 217795_s_ | 1.31E-05 | 1.12E-06 | 2.750912 | down | 3.540681 | down | 1.287094 | down | TMEM43    |
| 217796_s_ | 0.002512 | 0.001413 | 1.090651 | down | 1.586549 | down | 1.454681 | down | NPLOC4    |
| 217800_s_ | 0.002975 | 0.001772 | 2.401049 | down | 1.956817 | down | 1.227018 | up   | NDFIP1    |
| 217802_s_ | 0.001265 | 5.60E-04 | 1.879057 | up   | 2.013877 | up   | 1.071749 | up   | NUCKS1    |
| 217805_at | 3.82E-04 | 1.10E-04 | 3.868431 | up   | 2.417374 | up   | 1.600262 | down | ILF3      |
| 217810_x_ | 0.006499 | 0.004866 | 1.356542 | up   | 1.864826 | up   | 1.374691 | up   | LARS      |

|           |          |          |               |               |               |         |
|-----------|----------|----------|---------------|---------------|---------------|---------|
| 217812_at | 0.001897 | 9.64E-04 | 1.628296 up   | 1.864804 up   | 1.145249 up   | YTHDF2  |
| 217815_at | 3.62E-05 | 4.53E-06 | 2.775791 up   | 2.638563 up   | 1.052009 down | SUPT16H |
| 217818_s_ | 0.004604 | 0.003148 | 1.664146 down | 2.452959 down | 1.474005 down | ARPC4   |
| 217821_s_ | 0.005591 | 0.004015 | 3.007946 up   | 2.132654 up   | 1.410424 down | WBP11   |
| 217822_at | 1.03E-04 | 1.88E-05 | 2.311737 up   | 2.122621 up   | 1.089096 down | WBP11   |
| 217823_s_ | 0.001421 | 6.54E-04 | 2.985606 down | 4.148892 down | 1.389632 down | UBE2J1  |
| 217826_s_ | 0.001768 | 8.78E-04 | 4.45588 down  | 4.005116 down | 1.112547 up   | UBE2J1  |
| 217829_s_ | 5.03E-04 | 1.59E-04 | 1.540113 up   | 1.486762 up   | 1.035884 down | USP39   |
| 217832_at | 0.002051 | 0.001073 | 1.712663 up   | 1.305471 up   | 1.311912 down | SYNCRIP |
| 217837_s_ | 2.18E-06 | 8.88E-08 | 8.57932 down  | 7.499772 down | 1.143944 up   | VPS24   |
| 217839_at | 0.009952 | 0.008176 | 1.289469 down | 1.402242 down | 1.087457 down | TFG     |
| 217840_at | 0.002407 | 0.001333 | 1.408526 up   | 1.237529 down | 1.743091 down | DDX41   |
| 217844_at | 2.66E-06 | 1.18E-07 | 2.468018 down | 2.717733 down | 1.10118 down  | CTDSP1  |
| 217850_at | 1.32E-04 | 2.63E-05 | 2.802361 up   | 2.306846 up   | 1.214802 down | GNL3    |
| 217851_s_ | 0.003968 | 0.002581 | 3.568448 down | 1.626672 down | 2.193711 up   | SLMO2   |
| 217853_at | 0.006753 | 0.005103 | 4.961492 down | 2.581 down    | 1.922314 up   | TNS3    |
| 217855_x_ | 3.92E-06 | 2.03E-07 | 3.111414 down | 3.027915 down | 1.027577 up   | SDF4    |
| 217856_at | 0.003312 | 0.002047 | 2.161582 up   | 2.988442 up   | 1.382526 up   | RBM8A   |
| 217857_s_ | 1.20E-04 | 2.31E-05 | 2.135484 up   | 1.482821 up   | 1.44015 down  | RBM8A   |
| 217859_s_ | 0.001434 | 6.62E-04 | 2.504313 down | 2.358979 down | 1.061609 up   | SLC39A9 |
| 217861_s_ | 8.69E-04 | 3.35E-04 | 1.25427 up    | 1.428453 down | 1.791665 down | PREB    |
| 217864_s_ | 0.001265 | 5.60E-04 | 1.599571 up   | 2.602079 up   | 1.626735 up   | PIAS1   |
| 217865_at | 0.005516 | 0.003947 | 1.767481 up   | 1.34506 up    | 1.314054 down | RNF130  |
| 217867_x_ | 7.48E-04 | 2.74E-04 | 2.213633 down | 4.647643 down | 2.099554 down | BACE2   |
| 217870_s_ | 9.13E-04 | 3.58E-04 | 3.848046 down | 4.23236 down  | 1.099873 down | CMPK1   |
| 217871_s_ | 0.004354 | 0.002921 | 1.79713 up    | 1.340099 up   | 1.341043 down | MIF     |
| 217876_at | 0.002454 | 0.001369 | 1.871275 up   | 1.723766 up   | 1.085574 down | GTF3C5  |
| 217877_s_ | 0.003089 | 0.001862 | 2.034862 up   | 1.641342 up   | 1.239755 down | GPBP1L1 |
| 217879_at | 0.003748 | 0.002402 | 1.786859 down | 1.76678 down  | 1.011365 up   | CDC27   |
| 217882_at | 3.35E-04 | 9.22E-05 | 1.691863 down | 1.965592 down | 1.161792 down | TMEM111 |
| 217884_at | 8.08E-05 | 1.35E-05 | 3.008499 up   | 2.361527 up   | 1.273964 down | NAT10   |
| 217885_at | 0.003591 | 0.002272 | 2.142444 up   | 1.565988 up   | 1.368111 down | IPO9    |
| 217888_s_ | 0.002444 | 0.001361 | 1.045332 down | 1.62375 down  | 1.553335 down | ARFGAP1 |
| 217889_s_ | 7.99E-08 | 8.17E-10 | 33.46714 down | 15.26182 down | 2.192868 up   | CYBRD1  |

|           |          |          |          |      |          |      |          |      |          |
|-----------|----------|----------|----------|------|----------|------|----------|------|----------|
| 217890_s_ | 3.31E-07 | 6.12E-09 | 11.53321 | down | 18.39483 | down | 1.594945 | down | PARVA    |
| 217891_at | 0.001852 | 9.34E-04 | 2.225266 | down | 3.208162 | down | 1.441698 | down | C16orf58 |
| 217892_s_ | 3.66E-05 | 4.60E-06 | 4.189943 | down | 5.953207 | down | 1.420832 | down | LIMA1    |
| 217893_s_ | 3.09E-04 | 8.29E-05 | 4.492591 | up   | 2.99224  | up   | 1.501414 | down | AKIRIN1  |
| 217895_at | 2.40E-05 | 2.58E-06 | 2.379405 | up   | 2.673646 | up   | 1.123662 | up   | PTCD3    |
| 217897_at | 2.43E-06 | 1.04E-07 | 5.885003 | up   | 7.355601 | up   | 1.249889 | up   | FXVD6    |
| 217898_at | 5.26E-05 | 7.54E-06 | 1.627889 | down | 2.449693 | down | 1.504828 | down | C15orf24 |
| 217899_at | 1.53E-04 | 3.22E-05 | 2.875779 | down | 3.615387 | down | 1.257185 | down | TMEM214  |
| 217900_at | 0.00715  | 0.005481 | 1.310124 | up   | 1.276988 | up   | 1.025949 | down | IARS2    |
| 217901_at | 1.10E-10 | 5.38E-14 | 124.8871 | up   | 124.1119 | up   | 1.006246 | down | DSG2     |
| 217904_s_ | 2.35E-06 | 9.89E-08 | 11.8622  | down | 14.25322 | down | 1.201566 | down | BACE1    |
| 217908_s_ | 3.03E-05 | 3.59E-06 | 5.633951 | down | 4.300138 | down | 1.310179 | up   | IQWD1    |
| 217910_x_ | 0.011878 | 0.010077 | 1.016417 | up   | 1.345295 | down | 1.36738  | down | MLX      |
| 217911_s_ | 3.39E-05 | 4.17E-06 | 2.833328 | down | 3.894254 | down | 1.374445 | down | BAG3     |
| 217912_at | 0.01108  | 0.00928  | 1.864968 | up   | 1.373351 | up   | 1.357969 | down | DUS1L    |
| 217913_at | 8.33E-04 | 3.17E-04 | 1.126071 | up   | 1.809981 | down | 2.038167 | down | VPS4A    |
| 217916_s_ | 5.53E-06 | 3.27E-07 | 3.847497 | up   | 2.243823 | up   | 1.714706 | down | FAM49B   |
| 217917_s_ | 0.008968 | 0.007215 | 1.288023 | down | 1.391379 | down | 1.080244 | down | DYNLRB1  |
| 217918_at | 1.47E-04 | 3.05E-05 | 1.38088  | down | 1.637179 | down | 1.185605 | down | DYNLRB1  |
| 217919_s_ | 0.001346 | 6.09E-04 | 2.387883 | up   | 2.350639 | up   | 1.015844 | down | MRPL42   |
| 217920_at | 1.67E-04 | 3.63E-05 | 3.082712 | down | 2.635313 | down | 1.169771 | up   | MAN1A2   |
| 217921_at | 9.34E-06 | 6.94E-07 | 5.29462  | down | 3.791341 | down | 1.396504 | up   | MAN1A2   |
| 217926_at | 0.018418 | 0.016695 | 1.080638 | up   | 1.214184 | down | 1.312093 | down | C19orf53 |
| 217928_s_ | 7.66E-04 | 2.84E-04 | 2.02794  | up   | 2.09808  | up   | 1.034587 | up   | SAPS3    |
| 217930_s_ | 0.009418 | 0.007648 | 1.405677 | down | 1.757257 | down | 1.250114 | down | TOLLIP   |
| 217932_at | 7.63E-05 | 1.25E-05 | 2.652945 | up   | 2.102107 | up   | 1.262041 | down | MRPS7    |
| 217934_x_ | 0.037211 | 0.035937 | 1.427816 | down | 1.5365   | down | 1.076119 | down | STUB1    |
| 217938_s_ | 2.19E-04 | 5.22E-05 | 1.717988 | up   | 1.098593 | up   | 1.563808 | down | KCMF1    |
| 217941_s_ | 0.004693 | 0.003224 | 2.254717 | down | 1.580177 | down | 1.426876 | up   | ERBB2IP  |
| 217942_at | 0.001774 | 8.81E-04 | 1.489752 | up   | 1.316618 | up   | 1.131499 | down | MRPS35   |
| 217943_s_ | 9.78E-04 | 3.93E-04 | 1.709879 | down | 3.289065 | down | 1.923566 | down | MAP7D1   |
| 217944_at | 0.002315 | 0.001266 | 1.451947 | down | 2.096054 | down | 1.443616 | down | POMGNT1  |
| 217946_s_ | 0.003846 | 0.002481 | 1.991925 | up   | 1.841185 | up   | 1.081871 | down | SAE1     |
| 217948_at | 2.75E-04 | 7.09E-05 | 2.242904 | down | 1.937168 | down | 1.157826 | up   | FAM127B  |

|           |          |          |               |               |               |                   |
|-----------|----------|----------|---------------|---------------|---------------|-------------------|
| 217949_s_ | 6.67E-05 | 1.05E-05 | 2.175007 down | 3.19153 down  | 1.467366 down | VKORC1            |
| 217950_at | 8.07E-04 | 3.04E-04 | 1.735395 up   | 1.104091 up   | 1.571786 down | NOSIP             |
| 217952_x_ | 0.001037 | 4.26E-04 | 1.899132 up   | 1.801533 up   | 1.054175 down | PHF3              |
| 217955_at | 0.001038 | 4.26E-04 | 1.738749 down | 2.010366 down | 1.156214 down | BCL2L13           |
| 217956_s_ | 5.70E-05 | 8.41E-06 | 2.014728 up   | 2.170185 up   | 1.077161 up   | ENOPH1            |
| 217957_at | 4.46E-05 | 6.06E-06 | 2.153517 up   | 1.469323 up   | 1.465653 down | C16orf80          |
| 217964_at | 2.71E-06 | 1.22E-07 | 3.15798 up    | 2.292621 up   | 1.377454 down | TTC19             |
| 217966_s_ | 0.047765 | 0.046586 | 3.781152 down | 2.845606 down | 1.328768 up   | FAM129A           |
| 217967_s_ | 0.005668 | 0.004086 | 8.410692 down | 3.742666 down | 2.247246 up   | FAM129A           |
| 217970_s_ | 2.08E-04 | 4.85E-05 | 1.683357 up   | 2.144374 up   | 1.273868 up   | CNOT6             |
| 217972_at | 0.00259  | 0.001471 | 1.627772 up   | 1.766801 up   | 1.085411 up   | CHCHD3            |
| 217973_at | 0.029561 | 0.028159 | 1.730644 up   | 1.204087 up   | 1.437308 down | DCXR              |
| 217975_at | 1.39E-04 | 2.83E-05 | 2.477568 down | 1.458153 down | 1.699114 up   | WBP5              |
| 217979_at | 0.004035 | 0.002636 | 3.912979 up   | 4.057259 up   | 1.036872 up   | TSPAN13           |
| 217988_at | 3.27E-05 | 3.97E-06 | 3.032029 up   | 3.87713 up    | 1.278725 up   | CCNB1IP1          |
| 217990_at | 7.83E-04 | 2.93E-04 | 1.340228 up   | 1.400106 up   | 1.044678 up   | GMPR2             |
| 217995_at | 1.04E-07 | 1.23E-09 | 39.72902 down | 22.29906 down | 1.781646 up   | SQRDL             |
| 218001_at | 0.007199 | 0.005527 | 2.029472 up   | 1.54198 up    | 1.316147 down | MRPS2             |
| 218003_s_ | 2.70E-04 | 6.90E-05 | 2.488254 up   | 2.015035 up   | 1.234844 down | FKBP3             |
| 218005_at | 0.005113 | 0.003593 | 1.338377 up   | 1.812269 up   | 1.35408 up    | ZNF22             |
| 218007_s_ | 8.74E-04 | 3.37E-04 | 1.649443 down | 1.996378 down | 1.210334 down | RPS27L            |
| 218014_at | 9.94E-05 | 1.79E-05 | 2.207356 up   | 1.880114 up   | 1.174054 down | NUP85             |
| 218016_s_ | 1.65E-04 | 3.57E-05 | 2.823438 up   | 2.093587 up   | 1.348613 down | POLR3E            |
| 218017_s_ | 1.05E-07 | 1.28E-09 | 8.482526 down | 8.761708 down | 1.032913 down | HGSNAT            |
| 218018_at | 3.39E-04 | 9.36E-05 | 1.082746 down | 2.473558 down | 2.284523 down | PDXK<br>DHRS4 /// |
| 218021_at | 2.13E-05 | 2.19E-06 | 2.171737 down | 1.640714 down | 1.323654 up   | DHRS4L2           |
| 218023_s_ | 0.001257 | 5.55E-04 | 1.508775 up   | 1.423634 up   | 1.059806 down | FAM53C            |
| 218024_at | 1.27E-04 | 2.49E-05 | 2.236747 down | 3.045458 down | 1.361557 down | BRP44L            |
| 218027_at | 0.003274 | 0.002013 | 2.355178 up   | 1.809975 up   | 1.301221 down | MRPL15            |
| 218028_at | 9.18E-04 | 3.61E-04 | 2.91945 down  | 3.198358 down | 1.095534 down | ELOVL1            |
| 218029_at | 4.31E-04 | 1.29E-04 | 2.001775 down | 3.503808 down | 1.750351 down | FAM65A            |
| 218030_at | 0.001819 | 9.12E-04 | 1.509909 up   | 1.18881 down  | 1.794995 down | GIT1              |
| 218031_s_ | 0.003269 | 0.002009 | 1.64173 up    | 2.447476 up   | 1.490791 up   | FOXN3             |

|           |          |          |          |      |          |      |          |      |          |
|-----------|----------|----------|----------|------|----------|------|----------|------|----------|
| 218032_at | 0.001351 | 6.12E-04 | 2.761562 | up   | 2.992437 | up   | 1.083603 | up   | SNN      |
| 218034_at | 5.81E-04 | 1.94E-04 | 1.439503 | down | 1.762618 | down | 1.224463 | down | FIS1     |
| 218035_s_ | 1.38E-06 | 4.59E-08 | 35.00356 | up   | 30.30834 | up   | 1.154916 | down | RBM47    |
| 218038_at | 4.49E-04 | 1.36E-04 | 1.628306 | up   | 1.626098 | up   | 1.001358 | down | ATP5SL   |
| 218039_at | 0.006094 | 0.004481 | 4.609903 | up   | 8.872744 | up   | 1.924714 | up   | NUSAP1   |
| 218040_at | 0.002696 | 0.001551 | 1.30449  | up   | 1.932223 | up   | 1.481209 | up   | PRPF38B  |
| 218041_x_ | 7.85E-04 | 2.94E-04 | 1.155711 | down | 1.787517 | down | 1.546682 | down | SLC38A2  |
| 218043_s_ | 0.00371  | 0.002368 | 4.272646 | down | 1.713948 | down | 2.492868 | up   | AZI2     |
| 218044_x_ | 0.00131  | 5.87E-04 | 2.006234 | up   | 1.059792 | down | 2.126191 | down | PTMS     |
| 218047_at | 2.27E-04 | 5.47E-05 | 1.797255 | up   | 1.522169 | up   | 1.18072  | down | OSBPL9   |
| 218048_at | 1.41E-06 | 4.70E-08 | 5.880914 | down | 7.656451 | down | 1.301915 | down | COMMD3   |
| 218053_at | 5.47E-06 | 3.23E-07 | 2.438539 | up   | 2.145458 | up   | 1.136605 | down | PRPF40A  |
| 218055_s_ | 0.003493 | 0.002195 | 1.440123 | down | 2.162717 | down | 1.501759 | down | WDR41    |
| 218057_x_ | 0.014511 | 0.012732 | 1.687083 | up   | 1.461641 | up   | 1.154239 | down | COX4NB   |
| 218060_s_ | 0.024033 | 0.022456 | 1.844553 | up   | 1.162848 | down | 2.144935 | down | C16orf57 |
| 218061_at | 0.022311 | 0.020713 | 1.720159 | up   | 1.08269  | down | 1.862399 | down | MEA1     |
| 218064_s_ | 0.00138  | 6.29E-04 | 1.861869 | up   | 1.665216 | up   | 1.118095 | down | AKAP8L   |
| 218065_s_ | 3.22E-04 | 8.77E-05 | 2.965134 | down | 2.621679 | down | 1.131006 | up   | TMEM9B   |
| 218067_s_ | 1.89E-05 | 1.87E-06 | 1.690215 | up   | 3.005853 | up   | 1.778385 | up   | ARGLU1   |
| 218070_s_ | 8.90E-04 | 3.47E-04 | 2.009405 | down | 3.037936 | down | 1.511858 | down | GMPPA    |
| 218071_s_ | 0.001756 | 8.70E-04 | 1.999725 | down | 2.176066 | down | 1.088182 | down | MKRN2    |
| 218073_s_ | 3.16E-04 | 8.55E-05 | 5.14485  | up   | 7.196768 | up   | 1.398829 | up   | TMEM48   |
| 218077_s_ | 4.49E-04 | 1.36E-04 | 2.016066 | down | 1.239328 | down | 1.626741 | up   | ZDHHC3   |
| 218080_x_ | 0.012259 | 0.010464 | 1.579498 | up   | 1.197333 | up   | 1.319181 | down | FAF1     |
| 218083_at | 0.010874 | 0.00908  | 1.525614 | up   | 1.236573 | down | 1.886534 | down | PTGES2   |
| 218084_x_ | 0.006871 | 0.005213 | 3.201412 | down | 2.583203 | down | 1.239319 | up   | FXD5     |
| 218087_s_ | 2.35E-05 | 2.51E-06 | 6.641388 | up   | 9.700185 | up   | 1.460566 | up   | SORBS1   |
| 218088_s_ | 0.002107 | 0.001112 | 2.01634  | down | 2.995284 | down | 1.485506 | down | RRAGC    |
| 218091_at | 8.51E-05 | 1.45E-05 | 2.022141 | up   | 2.533815 | up   | 1.253036 | up   | AGFG1    |
| 218093_s_ | 0.001341 | 6.06E-04 | 1.091262 | up   | 4.02423  | up   | 3.687686 | up   | ANKRD10  |
| 218095_s_ | 0.017249 | 0.015496 | 2.255487 | down | 1.60603  | down | 1.404387 | up   | TMEM165  |
| 218096_at | 6.50E-06 | 4.11E-07 | 5.132775 | up   | 3.322249 | up   | 1.54497  | down | AGPAT5   |
| 218097_s_ | 1.70E-04 | 3.74E-05 | 2.028243 | down | 2.006465 | down | 1.010854 | up   | CUEDC2   |
| 218099_at | 0.001053 | 4.35E-04 | 1.648486 | down | 2.313361 | down | 1.403325 | down | TEX2     |

|           |          |          |               |               |               |          |
|-----------|----------|----------|---------------|---------------|---------------|----------|
| 218100_s_ | 0.00225  | 0.00122  | 1.92451 down  | 1.579935 down | 1.218094 up   | IFT57    |
| 218104_at | 0.001136 | 4.83E-04 | 2.143652 up   | 2.822307 up   | 1.316588 up   | TEX10    |
| 218107_at | 0.00532  | 0.003777 | 1.007502 down | 1.436717 down | 1.426019 down | WDR26    |
| 218109_s_ | 2.96E-06 | 1.36E-07 | 8.07642 down  | 9.133234 down | 1.130852 down | MFSD1    |
| 218111_s_ | 0.002664 | 0.001527 | 2.177348 up   | 1.772001 up   | 1.228751 down | CMAS     |
| 218112_at | 0.004077 | 0.002672 | 2.285379 up   | 1.462348 up   | 1.562814 down | MRPS34   |
| 218121_at | 0.005851 | 0.004252 | 1.131652 down | 1.798306 down | 1.589098 down | HMOX2    |
| 218123_at | 3.19E-05 | 3.84E-06 | 3.40521 up    | 2.3046 up     | 1.477571 down | C21orf59 |
| 218124_at | 4.29E-05 | 5.73E-06 | 3.040306 down | 3.833706 down | 1.26096 down  | RETSAT   |
| 218125_s_ | 0.005425 | 0.003868 | 1.245972 down | 1.477256 up   | 1.840619 up   | CCDC25   |
| 218129_s_ | 0.004121 | 0.00271  | 1.754587 up   | 2.664157 up   | 1.518395 up   | NFYB     |
| 218131_s_ | 0.002809 | 0.00164  | 2.65967 up    | 1.518937 up   | 1.751008 down | GATAD2A  |
| 218133_s_ | 4.51E-06 | 2.47E-07 | 2.937408 up   | 2.610453 up   | 1.125248 down | NIF3L1   |
| 218140_x_ | 2.81E-04 | 7.28E-05 | 1.342695 down | 2.623338 down | 1.953785 down | SRPRB    |
| 218141_at | 6.33E-04 | 2.18E-04 | 2.753886 up   | 2.028086 up   | 1.357874 down | UBE2O    |
| 218143_s_ | 6.26E-05 | 9.57E-06 | 1.717611 down | 2.352723 down | 1.369765 down | SCAMP2   |
| 218144_s_ | 4.62E-05 | 6.33E-06 | 1.513392 down | 2.287359 down | 1.511412 down | INF2     |
| 218145_at | 3.46E-04 | 9.63E-05 | 3.650338 down | 7.453016 down | 2.041733 down | TRIB3    |
| 218146_at | 9.06E-05 | 1.57E-05 | 2.321686 down | 1.953884 down | 1.188241 up   | GLT8D1   |
| 218147_s_ | 1.56E-04 | 3.31E-05 | 3.281424 down | 2.140643 down | 1.532915 up   | GLT8D1   |
| 218150_at | 8.82E-04 | 3.42E-04 | 1.714897 up   | 2.294778 up   | 1.338143 up   | ARL5A    |
| 218152_at | 0.001495 | 7.00E-04 | 1.72101 up    | 1.539317 up   | 1.118035 down | HMG20A   |
| 218153_at | 6.04E-04 | 2.05E-04 | 1.656117 down | 2.675186 down | 1.615336 down | CARS2    |
| 218154_at | 0.001213 | 5.29E-04 | 2.033255 down | 1.396752 down | 1.455703 up   | GSDMD    |
| 218155_x_ | 0.003672 | 0.002338 | 2.002143 up   | 1.216447 up   | 1.645894 down | TSR1     |
| 218156_s_ | 0.001314 | 5.89E-04 | 3.45573 up    | 2.535947 up   | 1.362698 down | TSR1     |
| 218159_at | 9.30E-04 | 3.68E-04 | 1.250005 down | 1.900011 down | 1.520003 down | DDRGK1   |
| 218164_at | 5.15E-05 | 7.35E-06 | 3.858007 down | 4.430505 down | 1.148392 down | SPATA20  |
| 218168_s_ | 0.007253 | 0.005578 | 1.582604 up   | 2.200991 up   | 1.39074 up    | CABC1    |
| 218175_at | 1.03E-06 | 3.04E-08 | 11.614 down   | 19.93622 down | 1.716569 down | CCDC92   |
| 218186_at | 2.42E-06 | 1.03E-07 | 15.65809 up   | 14.90461 up   | 1.050554 down | RAB25    |
| 218190_s_ | 0.009731 | 0.00795  | 1.452393 up   | 1.837845 up   | 1.265391 up   | UCRC     |
| 218192_at | 4.06E-04 | 1.19E-04 | 2.126448 up   | 1.468918 up   | 1.447629 down | IP6K2    |
| 218194_at | 4.32E-04 | 1.30E-04 | 1.862645 down | 2.476483 down | 1.329552 down | REXO2    |



|           |          |          |          |      |          |      |          |      |           |
|-----------|----------|----------|----------|------|----------|------|----------|------|-----------|
| 218196_at | 0.00356  | 0.002248 | 1.716489 | down | 2.509957 | down | 1.462262 | down | OSTM1     |
| 218197_s_ | 0.039872 | 0.038631 | 3.660785 | down | 1.672249 | down | 2.189139 | up   | OXR1      |
| 218198_at | 0.006868 | 0.00521  | 1.122198 | down | 1.582623 | down | 1.410289 | down | DHX32     |
| 218200_s_ | 0.002327 | 0.001276 | 1.348537 | up   | 1.261903 | down | 1.701723 | down | NDUFB2    |
| 218203_at | 0.0162   | 0.014431 | 1.500232 | down | 1.692062 | down | 1.127867 | down | ALG5      |
| 218204_s_ | 1.67E-04 | 3.64E-05 | 5.393332 | down | 4.137251 | down | 1.303603 | up   | FYCO1     |
| 218205_s_ | 0.030434 | 0.029045 | 1.279062 | up   | 1.473853 | up   | 1.152292 | up   | MKNK2     |
| 218207_s_ | 0.010797 | 0.009001 | 1.469773 | up   | 1.189877 | down | 1.74885  | down | STMN3     |
|           |          |          |          |      |          |      |          |      | LOC100131 |
|           |          |          |          |      |          |      |          |      | 178 ///   |
| 218208_at | 5.70E-05 | 8.43E-06 | 1.915943 | down | 2.428271 | down | 1.267403 | down | PQLC1     |
| 218212_s_ | 2.50E-04 | 6.23E-05 | 3.173979 | down | 1.999317 | down | 1.587532 | up   | MOCS2     |
| 218213_s_ | 0.00782  | 0.00612  | 1.162271 | up   | 1.297032 | up   | 1.115947 | up   | C11orf10  |
| 218214_at | 0.001494 | 6.99E-04 | 1.017148 | down | 1.580165 | down | 1.553525 | down | C12orf44  |
| 218215_s_ | 3.64E-04 | 1.03E-04 | 2.361809 | down | 3.625883 | down | 1.535215 | down | NR1H2     |
| 218217_at | 0.001434 | 6.63E-04 | 3.13493  | down | 1.728852 | down | 1.813302 | up   | SCPEP1    |
| 218218_at | 2.16E-04 | 5.11E-05 | 6.783723 | down | 3.453652 | down | 1.964217 | up   | APPL2     |
| 218226_s_ | 0.005281 | 0.003743 | 1.505567 | up   | 1.57871  | up   | 1.048582 | up   | NDUFB4    |
| 218227_at | 0.016121 | 0.014352 | 1.279422 | up   | 1.092206 | down | 1.397392 | down | NUBP2     |
| 218231_at | 3.37E-04 | 9.29E-05 | 1.667957 | down | 2.51884  | down | 1.510135 | down | NAGK      |
| 218232_at | 8.06E-04 | 3.04E-04 | 1.241661 | up   | 1.369987 | down | 1.70106  | down | C1QA      |
|           |          |          |          |      |          |      |          |      | PRICKLE4  |
| 218233_s_ | 1.14E-04 | 2.15E-05 | 1.757458 | up   | 1.679438 | up   | 1.046456 | down | /// TOMM6 |
| 218234_at | 0.008082 | 0.006362 | 1.859111 | down | 1.104269 | down | 1.683567 | up   | ING4      |
| 218236_s_ | 0.006713 | 0.005066 | 1.305451 | down | 1.536558 | up   | 2.005901 | up   | PRKD3     |
| 218238_at | 9.44E-05 | 1.66E-05 | 1.81627  | up   | 1.199451 | up   | 1.514251 | down | GTPBP4    |
| 218240_at | 0.001429 | 6.59E-04 | 1.363398 | up   | 1.795281 | down | 2.447683 | down | NKIRAS2   |
| 218242_s_ | 0.001054 | 4.36E-04 | 2.025162 | down | 1.953989 | down | 1.036424 | up   | SUV420H1  |
| 218243_at | 2.81E-04 | 7.28E-05 | 1.570285 | down | 1.477623 | down | 1.06271  | up   | RUFY1     |
| 218248_at | 0.002072 | 0.001087 | 2.505261 | down | 1.617541 | down | 1.548809 | up   | FAM111A   |
| 218250_s_ | 6.37E-05 | 9.81E-06 | 2.806928 | up   | 2.179848 | up   | 1.287671 | down | CNOT7     |
| 218254_s_ | 0.002116 | 0.001118 | 2.131155 | down | 2.5685   | down | 1.205215 | down | SAR1B     |
| 218256_s_ | 9.17E-05 | 1.59E-05 | 1.890916 | up   | 3.184101 | up   | 1.683893 | up   | NUP54     |

|           |          |          |               |               |               |                       |
|-----------|----------|----------|---------------|---------------|---------------|-----------------------|
| 218258_at | 1.36E-05 | 1.19E-06 | 2.52893 up    | 3.625044 up   | 1.43343 up    | POLR1D                |
| 218262_at | 0.001823 | 9.14E-04 | 1.659477 up   | 1.558499 up   | 1.064792 down | RMND5B                |
| 218264_at | 5.20E-04 | 1.66E-04 | 2.119638 up   | 2.274591 up   | 1.073104 up   | BCCIP                 |
| 218265_at | 2.02E-06 | 7.95E-08 | 2.370109 up   | 2.767904 up   | 1.167838 up   | SECISBP2              |
| 218269_at | 0.002994 | 0.001787 | 1.986181 up   | 1.343286 up   | 1.478599 down | RNASEN                |
| 218271_s_ | 0.003728 | 0.002383 | 1.591327 up   | 1.496629 up   | 1.063274 down | PARL                  |
| 218274_s_ | 0.003543 | 0.002235 | 1.645078 up   | 1.329209 up   | 1.237636 down | ANKZF1                |
| 218279_s_ | 0.01422  | 0.012427 | 1.540282 up   | 1.063749 down | 1.638474 down | HIST2H2AA3            |
| 218283_at | 4.54E-04 | 1.38E-04 | 2.631377 up   | 2.617572 up   | 1.005274 down | SS18L2                |
| 218284_at | 7.81E-04 | 2.91E-04 | 2.86914 down  | 3.832305 down | 1.335698 down | SMAD3                 |
| 218289_s_ | 0.002948 | 0.001751 | 2.376438 down | 1.194543 down | 1.989412 up   | UBA5                  |
| 218292_s_ | 0.004299 | 0.002871 | 1.677062 down | 2.208578 down | 1.316933 down | PRKAG2                |
| 218297_at | 0.001915 | 9.77E-04 | 2.515492 down | 2.026131 down | 1.241525 up   | C10orf97              |
| 218299_at | 2.87E-04 | 7.49E-05 | 1.617334 down | 4.379055 down | 2.707577 down | C11orf24              |
| 218300_at | 1.45E-04 | 2.98E-05 | 2.336166 up   | 2.279069 up   | 1.025053 down | C16orf53              |
| 218303_x_ | 7.19E-05 | 1.16E-05 | 5.561132 down | 3.101996 down | 1.792759 up   | KRCC1                 |
| 218304_s_ | 0.012174 | 0.01038  | 1.437141 up   | 1.664125 up   | 1.157941 up   | OSBPL11               |
| 218305_at | 0.004909 | 0.003412 | 2.894418 up   | 1.025543 up   | 2.822327 down | IPO4                  |
| 218308_at | 0.002725 | 0.001573 | 6.244876 up   | 4.757854 up   | 1.312541 down | TACC3                 |
| 218309_at | 3.42E-05 | 4.20E-06 | 19.33354 down | 1.234097 down | 15.66615 up   | CAMK2N1               |
| 218310_at | 2.84E-04 | 7.40E-05 | 3.438236 down | 3.229826 down | 1.064527 up   | RABGEF1               |
| 218313_s_ | 4.01E-05 | 5.27E-06 | 3.783532 up   | 2.966526 up   | 1.275408 down | GALNT7                |
| 218315_s_ | 3.69E-04 | 1.05E-04 | 1.902456 up   | 1.326047 up   | 1.434683 down | CDK5RAP1<br>GIYD1 /// |
| 218317_x_ | 5.30E-05 | 7.62E-06 | 2.284094 up   | 1.868262 up   | 1.222577 down | GIYD2                 |
| 218318_s_ | 4.35E-04 | 1.31E-04 | 3.105969 up   | 4.169556 up   | 1.342433 up   | NLK                   |
| 218319_at | 1.22E-06 | 3.88E-08 | 5.63992 up    | 11.36128 up   | 2.014441 up   | PELI1                 |
| 218320_s_ | 0.014127 | 0.012339 | 1.488397 up   | 1.165599 up   | 1.276938 down | NDUFB11               |
| 218321_x_ | 0.006871 | 0.005213 | 1.197467 up   | 1.313737 down | 1.573157 down | STYXL1                |
| 218325_s_ | 0.001017 | 4.15E-04 | 1.79074 up    | 2.78488 up    | 1.555156 up   | DIDO1                 |
| 218326_s_ | 0.003854 | 0.002489 | 3.893544 up   | 4.371602 up   | 1.122782 up   | LGR4                  |
| 218327_s_ | 1.98E-04 | 4.52E-05 | 1.358546 down | 2.001438 down | 1.473221 down | SNAP29                |
| 218330_s_ | 0.006151 | 0.004539 | 2.848278 up   | 4.553792 up   | 1.598788 up   | NAV2                  |

|           |          |          |               |               |               |           |
|-----------|----------|----------|---------------|---------------|---------------|-----------|
| 218337_at | 1.96E-04 | 4.47E-05 | 2.2248 down   | 2.177214 down | 1.021856 up   | FAM160B2  |
|           |          |          |               |               |               | PHC1 ///  |
| 218338_at | 3.17E-06 | 1.50E-07 | 8.017818 up   | 11.09698 up   | 1.38404 up    | PHC1B     |
| 218339_at | 0.00296  | 0.00176  | 1.611757 up   | 1.46448 up    | 1.100566 down | MRPL22    |
| 218342_s_ | 0.002083 | 0.001095 | 1.341026 up   | 4.075398 up   | 3.039015 up   | ERMP1     |
| 218343_s_ | 0.00113  | 4.80E-04 | 1.791605 up   | 2.044656 up   | 1.141243 up   | GTF3C3    |
| 218345_at | 3.98E-06 | 2.08E-07 | 2.332281 down | 1.211169 up   | 2.824786 up   | TMEM176A  |
| 218347_at | 0.004817 | 0.003327 | 1.58306 up    | 1.208091 up   | 1.310382 down | TYW1      |
| 218349_s_ | 0.006447 | 0.004818 | 4.332303 up   | 4.337976 up   | 1.00131 up    | ZWILCH    |
| 218350_s_ | 1.62E-04 | 3.48E-05 | 4.263858 up   | 5.897105 up   | 1.383045 up   | GMNN      |
| 218351_at | 0.001545 | 7.32E-04 | 3.752718 down | 2.011841 down | 1.865316 up   | COMMD8    |
| 218355_at | 0.005192 | 0.003664 | 3.870768 up   | 5.128566 up   | 1.324948 up   | KIF4A     |
| 218357_s_ | 0.001271 | 5.64E-04 | 2.13376 up    | 1.17892 up    | 1.809928 down | TIMM8B    |
| 218358_at | 0.006112 | 0.004499 | 2.255887 down | 2.182519 down | 1.033616 up   | CRELD2    |
| 218359_at | 0.002825 | 0.001652 | 2.757321 down | 3.08026 down  | 1.11712 down  | NRSN2     |
| 218360_at | 6.67E-05 | 1.05E-05 | 2.907656 down | 4.069241 down | 1.399492 down | RAB22A    |
| 218364_at | 1.25E-07 | 1.56E-09 | 4.455002 down | 2.981955 down | 1.493987 up   | LRRFIP2   |
|           |          |          |               |               |               | LOC731602 |
|           |          |          |               |               |               | ///       |
| 218366_x_ | 3.72E-04 | 1.06E-04 | 1.997668 up   | 2.265609 up   | 1.134127 up   | METT11D1  |
|           |          |          |               |               |               |           |
| 218368_s_ | 8.52E-04 | 3.26E-04 | 1.476542 down | 3.508877 down | 2.376414 down | TNFRSF12A |
| 218370_s_ | 0.015456 | 0.01368  | 1.566492 up   | 1.964101 up   | 1.253822 up   | S100BPB   |
| 218373_at | 0.005344 | 0.003797 | 1.270976 down | 2.109041 down | 1.659387 down | AKTIP     |
| 218377_s_ | 7.09E-06 | 4.74E-07 | 4.199573 down | 5.046966 down | 1.201781 down | RWDD2B    |
| 218383_at | 0.001036 | 4.25E-04 | 1.92324 up    | 2.170116 up   | 1.128364 up   | HAUS4     |
| 218384_at | 3.49E-04 | 9.79E-05 | 1.768175 up   | 2.622443 up   | 1.483136 up   | CARHSP1   |
| 218385_at | 0.01594  | 0.014165 | 1.669863 up   | 1.086537 down | 1.814368 down | MRPS18A   |
| 218387_s_ | 1.88E-04 | 4.25E-05 | 1.943508 down | 2.897875 down | 1.491054 down | PGLS      |
| 218390_s_ | 0.019646 | 0.017952 | 1.392496 down | 1.095576 down | 1.271017 up   | C10orf84  |
| 218392_x_ | 3.23E-04 | 8.80E-05 | 2.277231 up   | 1.122393 up   | 2.028907 down | SFXN1     |
| 218397_at | 2.93E-05 | 3.41E-06 | 3.597366 up   | 8.181741 up   | 2.27437 up    | FANCL     |
| 218398_at | 2.49E-04 | 6.18E-05 | 2.695298 up   | 2.517206 up   | 1.07075 down  | MRPS30    |
| 218399_s_ | 4.03E-04 | 1.18E-04 | 3.694454 up   | 2.439006 up   | 1.514737 down | CDCA4     |

|           |          |          |               |               |               |          |
|-----------|----------|----------|---------------|---------------|---------------|----------|
| 218403_at | 1.07E-05 | 8.25E-07 | 1.927907 up   | 1.679374 up   | 1.147991 down | TRIAP1   |
| 218404_at | 3.40E-06 | 1.66E-07 | 14.42599 up   | 11.2642 up    | 1.280693 down | SNX10    |
| 218405_at | 2.75E-05 | 3.12E-06 | 1.737563 up   | 2.030189 up   | 1.168412 up   | ABT1     |
| 218407_x_ | 3.14E-04 | 8.49E-05 | 2.511097 down | 2.438472 down | 1.029783 up   | NENF     |
| 218409_s_ | 0.00299  | 0.001784 | 1.090532 down | 1.925189 down | 1.765367 down | DNAJC1   |
| 218412_s_ | 0.001053 | 4.35E-04 | 1.689626 up   | 1.163159 down | 1.965303 down | GTF2IRD1 |
| 218415_at | 0.014424 | 0.012641 | 1.280522 up   | 1.042175 down | 1.334529 down | VPS33B   |
| 218417_s_ | 3.97E-05 | 5.15E-06 | 3.383417 down | 3.016957 down | 1.121467 up   | SLC48A1  |
| 218418_s_ | 1.57E-06 | 5.55E-08 | 7.158793 down | 5.34019 down  | 1.34055 up    | KANK2    |
| 218419_s_ | 0.002511 | 0.001412 | 2.013232 down | 1.852242 down | 1.086916 up   | TMUB2    |
| 218420_s_ | 9.10E-06 | 6.67E-07 | 3.97665 up    | 3.075389 up   | 1.293056 down | C13orf23 |
| 218422_s_ | 0.00265  | 0.001515 | 1.667533 up   | 4.206073 up   | 2.522332 up   | RBM26    |
| 218425_at | 0.003086 | 0.00186  | 1.388739 down | 1.887143 down | 1.358889 down | RNF216   |
| 218429_s_ | 0.005781 | 0.00419  | 2.792209 down | 1.793503 down | 1.556846 up   | C19orf66 |
| 218432_at | 0.00186  | 9.39E-04 | 2.570095 down | 1.429632 down | 1.797733 up   | FBXO3    |
| 218436_at | 6.72E-07 | 1.67E-08 | 2.343779 down | 3.78473 down  | 1.614798 down | SIL1     |
| 218438_s_ | 1.06E-04 | 1.96E-05 | 1.785641 up   | 2.155638 up   | 1.207207 up   | MED28    |
| 218439_s_ | 0.001779 | 8.85E-04 | 1.107195 up   | 1.889583 up   | 1.70664 up    | COMMD10  |
| 218441_s_ | 0.001712 | 8.40E-04 | 2.252142 up   | 1.736514 up   | 1.296933 down | RPAP1    |
| 218443_s_ | 0.010741 | 0.008946 | 2.422329 up   | 2.190821 up   | 1.105672 down | DAZAP1   |
| 218445_at | 9.95E-05 | 1.79E-05 | 2.74333 up    | 1.859154 up   | 1.475579 down | H2AFY2   |
| 218448_at | 0.00149  | 6.97E-04 | 2.230762 up   | 2.052133 up   | 1.087046 down | C20orf11 |
| 218450_at | 5.50E-04 | 1.79E-04 | 2.470255 down | 3.992698 down | 1.61631 down  | HEBP1    |
| 218452_at | 0.00486  | 0.003369 | 1.396242 down | 1.547908 down | 1.108624 down | SMARCAL1 |
| 218453_s_ | 0.022271 | 0.020671 | 1.857764 down | 1.244159 down | 1.493188 up   | C6orf35  |
| 218454_at | 8.68E-04 | 3.34E-04 | 6.342831 up   | 4.361271 up   | 1.454354 down | PLBD1    |
| 218457_s_ | 3.43E-04 | 9.54E-05 | 4.34319 up    | 4.349985 up   | 1.001565 up   | DNMT3A   |
| 218458_at | 0.030838 | 0.029464 | 1.184817 up   | 2.34186 up    | 1.976558 up   | GMCL1    |
| 218461_at | 0.001748 | 8.65E-04 | 2.259824 up   | 2.32923 up    | 1.030713 up   | GPN3     |
| 218462_at | 2.00E-04 | 4.60E-05 | 1.674645 up   | 1.124781 up   | 1.488863 down | BXDC5    |
| 218463_s_ | 4.47E-05 | 6.08E-06 | 1.1615 down   | 1.982537 down | 1.706876 down | MUS81    |
| 218464_s_ | 4.54E-06 | 2.51E-07 | 3.954287 up   | 2.78718 up    | 1.418741 down | C17orf63 |
| 218468_s_ | 9.54E-05 | 1.68E-05 | 121.4677 down | 49.94774 down | 2.431897 up   | GREM1    |
| 218469_at | 1.98E-05 | 1.99E-06 | 105.1747 down | 43.12488 down | 2.43884 up    | GREM1    |

|           |          |          |               |               |               |          |
|-----------|----------|----------|---------------|---------------|---------------|----------|
| 218470_at | 3.22E-05 | 3.90E-06 | 2.525144 up   | 1.939268 up   | 1.302112 down | YARS2    |
| 218471_s_ | 0.008483 | 0.006751 | 1.836875 down | 1.333548 down | 1.377435 up   | BBS1     |
| 218473_s_ | 0.005308 | 0.003766 | 1.770991 down | 2.341999 down | 1.322423 down | GLT25D1  |
| 218476_at | 0.003121 | 0.00189  | 1.026251 up   | 1.640836 down | 1.68391 down  | POMT1    |
| 218477_at | 1.25E-04 | 2.45E-05 | 3.004809 down | 3.090109 down | 1.028388 down | TMEM14A  |
| 218479_s_ | 0.00113  | 4.79E-04 | 1.88158 up    | 2.157059 up   | 1.146408 up   | XPO4     |
| 218480_at | 5.63E-04 | 1.86E-04 | 2.437149 up   | 2.115483 up   | 1.152053 down | AGBL5    |
| 218482_at | 0.003277 | 0.002017 | 1.855594 up   | 1.565838 up   | 1.185049 down | ENY2     |
| 218483_s_ | 2.50E-04 | 6.22E-05 | 2.319655 down | 2.065002 down | 1.123318 up   | C11orf60 |
| 218485_s_ | 2.97E-05 | 3.47E-06 | 1.032981 down | 2.348062 down | 2.273093 down | SLC35C1  |
| 218486_at | 0.014361 | 0.012575 | 1.34397 down  | 2.551224 up   | 3.428768 up   | KLF11    |
| 218487_at | 7.15E-04 | 2.58E-04 | 2.352902 down | 1.870451 down | 1.257933 up   | ALAD     |
| 218491_s_ | 1.65E-05 | 1.54E-06 | 2.752255 up   | 2.775902 up   | 1.008592 up   | THYN1    |
| 218492_s_ | 0.002884 | 0.001699 | 1.150041 down | 1.338426 down | 1.163808 down | THAP7    |
| 218498_s_ | 0.002175 | 0.00116  | 2.781313 down | 2.996032 down | 1.077201 down | ERO1L    |
|           |          |          |               |               |               | RP6-     |
| 218499_at | 3.94E-05 | 5.10E-06 | 20.40194 up   | 10.3055 up    | 1.979713 down | 213H19.1 |
| 218501_at | 0.011522 | 0.009722 | 2.566291 down | 1.647038 down | 1.558125 up   | ARHGEF3  |
| 218502_s_ | 1.73E-04 | 3.80E-05 | 6.85915 down  | 5.290846 down | 1.296419 up   | TRPS1    |
| 218505_at | 1.41E-04 | 2.88E-05 | 1.968191 up   | 1.76523 up    | 1.114978 down | WDR59    |
| 218509_at | 0.001898 | 9.65E-04 | 1.295629 down | 3.048991 down | 2.353291 down | LPPR2    |
| 218511_s_ | 4.73E-04 | 1.46E-04 | 2.53937 down  | 3.272313 down | 1.288632 down | PNPO     |
| 218512_at | 9.65E-05 | 1.71E-05 | 3.229145 up   | 2.154563 up   | 1.498747 down | WDR12    |
| 218514_at | 0.008102 | 0.006381 | 1.684426 up   | 1.398053 up   | 1.204837 down | C17orf71 |
| 218515_at | 2.51E-04 | 6.28E-05 | 2.296753 up   | 4.564025 up   | 1.987164 up   | C21orf66 |
| 218516_s_ | 4.77E-05 | 6.62E-06 | 2.983888 down | 4.578851 down | 1.534525 down | IMPAD1   |
| 218517_at | 0.001706 | 8.37E-04 | 2.541997 up   | 2.810011 up   | 1.105434 up   | PHF17    |
| 218522_s_ | 0.02468  | 0.023118 | 2.47944 up    | 1.178513 up   | 2.103872 down | MAP1S    |
| 218524_at | 3.23E-04 | 8.79E-05 | 1.546769 up   | 1.030168 up   | 1.501473 down | E4F1     |
| 218528_s_ | 0.001463 | 6.80E-04 | 2.616135 up   | 2.973803 up   | 1.136716 up   | RNF38    |
| 218531_at | 0.001311 | 5.87E-04 | 1.063022 down | 1.926269 down | 1.812069 down | TMEM134  |
| 218536_at | 1.90E-06 | 7.23E-08 | 6.111459 up   | 6.402356 up   | 1.047599 up   | MRS2     |
| 218538_s_ | 7.02E-06 | 4.66E-07 | 6.237157 up   | 6.154105 up   | 1.013495 down | MRS2     |
| 218541_s_ | 0.004051 | 0.002649 | 6.937476 down | 3.640025 up   | 25.25258 up   | C8orf4   |

|           |          |          |               |               |               |          |
|-----------|----------|----------|---------------|---------------|---------------|----------|
| 218544_s_ | 0.003658 | 0.002325 | 1.966708 up   | 1.704163 up   | 1.15406 down  | RCL1     |
| 218546_at | 9.81E-04 | 3.95E-04 | 1.462549 down | 5.713547 up   | 8.35634 up    | C1orf115 |
| 218547_at | 0.006826 | 0.00517  | 1.061893 up   | 1.430818 down | 1.519376 down | DHDDS    |
| 218548_x_ | 6.12E-06 | 3.79E-07 | 2.086155 down | 2.893626 down | 1.387062 down | TEX264   |
| 218551_at | 0.003143 | 0.001907 | 1.996331 up   | 1.283812 up   | 1.555003 down | MIIP     |
| 218552_at | 0.011225 | 0.009433 | 2.284951 down | 1.619475 down | 1.410921 up   | ECHDC2   |
| 218553_s_ | 0.008037 | 0.006317 | 1.550524 up   | 1.444775 down | 2.240159 down | KCTD15   |
| 218557_at | 0.002989 | 0.001783 | 1.294297 down | 1.833663 down | 1.416725 down | NIT2     |
| 218558_s_ | 0.002025 | 0.001054 | 1.92591 up    | 1.735562 up   | 1.109675 down | MRPL39   |
| 218560_s_ | 0.003338 | 0.002067 | 1.4685 down   | 2.007657 down | 1.367148 down | JMJD4    |
| 218561_s_ | 2.61E-04 | 6.59E-05 | 1.659705 up   | 1.97248 up    | 1.188452 up   | LYRM4    |
| 218563_at | 0.006701 | 0.005056 | 1.591575 up   | 1.159751 up   | 1.372342 down | NDUFA3   |
| 218564_at | 1.80E-04 | 4.01E-05 | 4.013408 up   | 6.779449 up   | 1.6892 up     | RFWD3    |
| 218575_at | 2.00E-05 | 2.01E-06 | 2.715836 up   | 2.140198 up   | 1.268965 down | ANAPC1   |
| 218576_s_ | 0.018773 | 0.01706  | 1.286082 up   | 1.515745 up   | 1.178576 up   | DUSP12   |
| 218577_at | 9.13E-04 | 3.58E-04 | 2.039448 up   | 2.766987 up   | 1.356733 up   | LRRC40   |
| 218579_s_ | 0.003719 | 0.002376 | 1.960348 up   | 1.937872 up   | 1.011599 down | DHX35    |
| 218581_at | 0.001601 | 7.69E-04 | 1.703299 down | 1.721966 down | 1.010959 down | ABHD4    |
| 218582_at | 5.18E-04 | 1.65E-04 | 1.99027 down  | 2.968001 down | 1.491256 down | 40607    |
| 218584_at | 1.47E-04 | 3.05E-05 | 3.864048 down | 3.248164 down | 1.18961 up    | TCTN1    |
| 218585_s_ | 7.85E-04 | 2.94E-04 | 6.844622 up   | 13.20398 up   | 1.929103 up   | DTL      |
| 218590_at | 0.001994 | 0.001031 | 2.798633 up   | 1.817583 up   | 1.539755 down | C10orf2  |
| 218594_at | 0.001284 | 5.71E-04 | 2.105132 up   | 1.77756 up    | 1.184282 down | HEATR1   |
| 218595_s_ | 0.005989 | 0.004382 | 1.715977 up   | 1.99564 up    | 1.162976 up   | HEATR1   |
| 218596_at | 0.011917 | 0.010116 | 1.020274 up   | 1.358662 down | 1.386208 down | TBC1D13  |
| 218599_at | 5.50E-04 | 1.79E-04 | 2.286027 up   | 3.047594 up   | 1.33314 up    | REC8     |
| 218601_at | 0.001115 | 4.70E-04 | 2.065088 down | 1.820109 down | 1.134596 up   | URG4     |
| 218602_s_ | 2.88E-04 | 7.55E-05 | 2.094584 up   | 5.824362 up   | 2.780677 up   | HAUS6    |
| 218606_at | 1.44E-05 | 1.28E-06 | 1.489517 down | 2.283176 down | 1.53283 down  | ZDHHC7   |
| 218608_at | 3.64E-04 | 1.03E-04 | 2.996176 up   | 1.470668 down | 4.406379 down | ATP13A2  |
| 218610_s_ | 2.96E-06 | 1.37E-07 | 4.213323 down | 3.996665 down | 1.05421 up    | CPPED1   |
| 218611_at | 0.00495  | 0.003447 | 2.843481 down | 1.614383 down | 1.761342 up   | IER5     |
| 218613_at | 4.18E-04 | 1.24E-04 | 2.601489 down | 2.462542 down | 1.056424 up   | PSD3     |
| 218614_at | 4.18E-06 | 2.22E-07 | 5.598172 up   | 9.777631 up   | 1.746576 up   | C12orf35 |

|           |          |          |               |               |               |          |
|-----------|----------|----------|---------------|---------------|---------------|----------|
| 218617_at | 0.003769 | 0.002419 | 1.916119 up   | 1.538078 up   | 1.245788 down | TRIT1    |
| 218618_s_ | 3.45E-04 | 9.60E-05 | 3.44261 down  | 4.629327 down | 1.344715 down | FNDC3B   |
| 218620_s_ | 3.90E-04 | 1.13E-04 | 1.661873 down | 1.639912 down | 1.013392 up   | HEMK1    |
| 218622_at | 5.49E-06 | 3.24E-07 | 2.141724 up   | 2.836878 up   | 1.324577 up   | NUP37    |
| 218623_at | 0.008761 | 0.00702  | 1.575146 up   | 1.115808 up   | 1.411664 down | HMP19    |
| 218627_at | 2.02E-04 | 4.65E-05 | 19.52928 down | 7.128055 down | 2.739776 up   | DRAM     |
| 218628_at | 1.08E-04 | 2.00E-05 | 3.388691 down | 4.757546 down | 1.403948 down | CCDC53   |
| 218629_at | 0.004639 | 0.003177 | 1.717425 up   | 1.749254 up   | 1.018533 up   | SMO      |
| 218630_at | 0.003847 | 0.002483 | 1.65608 up    | 1.928673 up   | 1.164601 up   | MKS1     |
| 218631_at | 4.66E-05 | 6.40E-06 | 3.547783 down | 4.663846 down | 1.31458 down  | AVPI1    |
| 218634_at | 1.14E-04 | 2.16E-05 | 2.497172 down | 3.010245 down | 1.205461 down | PHLDA3   |
| 218636_s_ | 2.17E-04 | 5.15E-05 | 1.981308 down | 2.615395 down | 1.320035 down | MAN1B1   |
| 218638_s_ | 1.15E-05 | 9.21E-07 | 20.51228 down | 3.541511 down | 5.791956 up   | SPON2    |
| 218647_s_ | 2.03E-06 | 8.09E-08 | 2.864304 up   | 1.247966 up   | 2.295179 down | YRDC     |
| 218648_at | 5.85E-05 | 8.74E-06 | 4.541307 down | 4.953002 down | 1.090656 down | CRTC3    |
| 218651_s_ | 1.43E-07 | 1.90E-09 | 5.551579 down | 7.407405 down | 1.334288 down | LARP6    |
| 218652_s_ | 0.002808 | 0.001639 | 2.127006 down | 1.979031 down | 1.074771 up   | PIGG     |
| 218653_at | 6.12E-05 | 9.31E-06 | 3.095819 up   | 1.992232 up   | 1.553945 down | SLC25A15 |
| 218656_s_ | 9.22E-06 | 6.81E-07 | 14.94882 down | 9.961035 down | 1.50073 up    | LHFP     |
| 218658_s_ | 0.005474 | 0.003913 | 2.453367 down | 1.699114 down | 1.443909 up   | ACTR8    |
| 218661_at | 0.013444 | 0.011645 | 1.065633 down | 1.549751 down | 1.454301 down | NAT15    |
| 218662_s_ | 0.001979 | 0.001021 | 5.669469 up   | 6.542333 up   | 1.153959 up   | NCAPG    |
| 218663_at | 0.00587  | 0.004273 | 5.099253 up   | 8.802288 up   | 1.726192 up   | NCAPG    |
| 218664_at | 0.006176 | 0.004561 | 1.117511 down | 1.524055 down | 1.363794 down | MECR     |
| 218670_at | 0.004817 | 0.003327 | 2.283467 up   | 1.933454 up   | 1.18103 down  | PUS1     |
| 218671_s_ | 0.014516 | 0.012737 | 1.625176 up   | 1.164158 up   | 1.396011 down | ATPIF1   |
| 218673_s_ | 0.001192 | 5.17E-04 | 2.227673 down | 1.971125 down | 1.130153 up   | ATG7     |
| 218676_s_ | 0.001915 | 9.77E-04 | 1.746437 up   | 2.168402 up   | 1.241615 up   | PCTP     |
| 218677_at | 5.42E-05 | 7.85E-06 | 3.185023 up   | 2.129881 up   | 1.4954 down   | S100A14  |
| 218679_s_ | 1.18E-05 | 9.54E-07 | 2.322052 down | 2.948716 down | 1.269875 down | VPS28    |
| 218680_x_ | 0.011776 | 0.009974 | 1.659883 up   | 1.090527 down | 1.810148 down | HYPK     |
| 218683_at | 5.63E-05 | 8.27E-06 | 3.265388 up   | 9.557576 up   | 2.926934 up   | PTBP2    |
| 218684_at | 5.63E-04 | 1.86E-04 | 1.882578 up   | 1.356893 up   | 1.387418 down | LRRRC8D  |
| 218686_s_ | 0.001545 | 7.32E-04 | 2.300935 down | 1.527603 down | 1.506239 up   | RHBDF1   |

|           |          |          |               |               |               |            |
|-----------|----------|----------|---------------|---------------|---------------|------------|
| 218687_s_ | 0.001106 | 4.65E-04 | 1.538968 up   | 1.698391 down | 2.613769 down | MUC13      |
| 218691_s_ | 1.01E-05 | 7.66E-07 | 2.414515 down | 5.450017 down | 2.257189 down | PDLIM4     |
| 218692_at | 0.01414  | 0.012354 | 5.271035 down | 3.579946 down | 1.472379 up   | GOLSYN     |
| 218693_at | 0.027775 | 0.0263   | 1.865226 up   | 1.209657 up   | 1.541947 down | TSPAN15    |
| 218699_at | 7.72E-05 | 1.27E-05 | 5.952969 down | 3.265672 down | 1.822892 up   | RAB7L1     |
| 218700_s_ | 7.74E-06 | 5.39E-07 | 7.123591 down | 3.70799 down  | 1.921146 up   | RAB7L1     |
| 218701_at | 0.022353 | 0.020765 | 2.694692 down | 1.390102 up   | 3.745896 up   | LACTB2     |
| 218703_at | 9.77E-04 | 3.93E-04 | 2.084657 down | 1.743884 down | 1.19541 up    | SEC22A     |
| 218704_at | 2.85E-05 | 3.28E-06 | 4.234652 up   | 2.58355 up    | 1.639083 down | RNF43      |
| 218705_s_ | 0.003355 | 0.002082 | 1.707923 up   | 1.843916 up   | 1.079625 up   | SNX24      |
| 218706_s_ | 9.42E-04 | 3.74E-04 | 4.610254 down | 5.146139 down | 1.116238 down | GRAMD3     |
| 218715_at | 1.97E-04 | 4.49E-05 | 2.008781 up   | 1.329178 up   | 1.511296 down | UTP6       |
| 218717_s_ | 0.006061 | 0.00445  | 4.176177 up   | 1.014989 down | 4.238772 down | LEPREL1    |
| 218718_at | 0.001525 | 7.18E-04 | 7.322629 down | 9.584992 down | 1.308955 down | PDGFC      |
| 218719_s_ | 0.002769 | 0.001609 | 3.073947 up   | 2.916145 up   | 1.054113 down | GINS3      |
|           |          |          |               |               |               | LOC652900  |
| 218720_x_ | 0.011982 | 0.010184 | 2.327637 up   | 1.546671 up   | 1.504933 down | /// SEZ6L2 |
| 218722_s_ | 0.005633 | 0.004054 | 2.05367 up    | 1.509514 up   | 1.360484 down | CCDC51     |
| 218723_s_ | 9.42E-10 | 1.80E-12 | 73.34029 down | 1.03755 up    | 76.09426 up   | C13orf15   |
| 218724_s_ | 1.08E-04 | 1.99E-05 | 3.495607 up   | 2.99199 up    | 1.168322 down | TGIF2      |
| 218726_at | 0.004666 | 0.003202 | 4.526731 up   | 5.186975 up   | 1.145855 up   | HJURP      |
| 218728_s_ | 3.20E-04 | 8.69E-05 | 1.824424 up   | 1.770987 up   | 1.030174 down | CNIH4      |
| 218729_at | 3.56E-04 | 1.00E-04 | 3.352845 down | 7.505854 down | 2.238653 down | LXN        |
| 218730_s_ | 2.90E-04 | 7.61E-05 | 5.622345 down | 1.026538 up   | 5.771549 up   | OGN        |
|           |          |          |               |               |               | LOC727901  |
| 218731_s_ | 0.018044 | 0.01631  | 1.973576 up   | 1.034378 up   | 1.907983 down | /// VWA1   |
| 218732_at | 2.68E-04 | 6.84E-05 | 1.810782 up   | 1.121675 up   | 1.614356 down | PTRH2      |
| 218733_at | 0.001587 | 7.60E-04 | 2.042158 up   | 3.527607 up   | 1.727392 up   | MSL2       |
| 218735_s_ | 0.004943 | 0.003441 | 2.79705 up    | 2.009361 up   | 1.39201 down  | ZNF544     |
| 218738_s_ | 6.11E-07 | 1.44E-08 | 4.432512 up   | 4.867324 up   | 1.098096 up   | RNF138     |
| 218739_at | 0.004266 | 0.002838 | 1.615096 down | 2.10681 down  | 1.304449 down | ABHD5      |
| 218740_s_ | 0.023665 | 0.022081 | 1.071142 up   | 1.479159 up   | 1.380917 up   | CDK5RAP3   |
| 218742_at | 0.003193 | 0.001948 | 1.104668 up   | 1.358654 down | 1.500861 down | NARFL      |
| 218743_at | 1.33E-04 | 2.66E-05 | 1.181024 down | 2.25713 down  | 1.911163 down | CHMP6      |



|           |          |          |          |      |          |      |          |      |           |
|-----------|----------|----------|----------|------|----------|------|----------|------|-----------|
| 218746_at | 1.67E-05 | 1.57E-06 | 3.24402  | down | 3.548871 | down | 1.093973 | down | TAPBPL    |
| 218747_s_ | 4.92E-05 | 6.90E-06 | 2.952891 | down | 2.879919 | down | 1.025338 | up   | TAPBPL    |
| 218749_s_ | 0.014736 | 0.01296  | 1.3827   | down | 1.156811 | down | 1.195269 | up   | SLC24A6   |
| 218750_at | 0.009499 | 0.007725 | 1.458707 | up   | 3.067015 | up   | 2.102557 | up   | TAF1D     |
| 218755_at | 0.023603 | 0.022018 | 3.862652 | up   | 5.958179 | up   | 1.54251  | up   | KIF20A    |
| 218756_s_ | 7.01E-04 | 2.51E-04 | 4.151724 | up   | 4.659039 | up   | 1.122194 | up   | DHRS11    |
| 218757_s_ | 1.10E-05 | 8.62E-07 | 3.710476 | up   | 4.968194 | up   | 1.338964 | up   | UPF3B     |
| 218758_s_ | 0.007617 | 0.005925 | 1.884522 | up   | 1.036716 | down | 1.953713 | down | RRP1      |
| 218760_at | 0.004474 | 0.003027 | 1.40875  | down | 1.883332 | down | 1.336882 | down | COQ6      |
| 218762_at | 0.014237 | 0.012447 | 2.150512 | up   | 1.060542 | up   | 2.027747 | down | ZNF574    |
| 218765_at | 2.90E-07 | 4.98E-09 | 2.077002 | down | 3.005914 | down | 1.447237 | down | SIDT2     |
| 218768_at | 4.91E-06 | 2.80E-07 | 3.851158 | up   | 4.125816 | up   | 1.071318 | up   | NUP107    |
| 218773_s_ | 8.85E-05 | 1.52E-05 | 2.45104  | down | 2.360333 | down | 1.03843  | up   | MSRB2     |
| 218775_s_ | 0.006135 | 0.004524 | 2.116554 | up   | 1.611108 | up   | 1.313726 | down | WWC2      |
| 218776_s_ | 0.009986 | 0.008208 | 1.961986 | down | 1.588443 | down | 1.235163 | up   | TMEM62    |
| 218778_x_ | 0.014551 | 0.012774 | 1.68976  | up   | 1.059    | down | 1.789456 | down | EPS8L1    |
| 218779_x_ | 0.001295 | 5.78E-04 | 1.771169 | up   | 1.975577 | up   | 1.115408 | up   | EPS8L1    |
| 218782_s_ | 0.003083 | 0.001857 | 1.003839 | up   | 2.839807 | up   | 2.828947 | up   | ATAD2     |
| 218784_s_ | 0.03348  | 0.032167 | 1.816425 | down | 1.243261 | down | 1.461017 | up   | C6orf64   |
| 218785_s_ | 0.001145 | 4.88E-04 | 1.84916  | down | 1.18256  | up   | 2.186743 | up   | RABL5     |
| 218786_at | 0.010887 | 0.009094 | 1.342564 | up   | 1.36995  | down | 1.839245 | down | NT5DC3    |
| 218792_s_ | 4.20E-04 | 1.25E-04 | 2.443165 | up   | 1.786967 | up   | 1.367213 | down | BSPRY     |
| 218793_s_ | 0.001099 | 4.61E-04 | 9.920011 | down | 3.787216 | down | 2.619341 | up   | SCML1     |
| 218795_at | 0.005287 | 0.003748 | 1.626507 | up   | 1.32522  | up   | 1.227348 | down | ACP6      |
| 218796_at | 0.00536  | 0.003812 | 3.000065 | up   | 3.597368 | up   | 1.199096 | up   | FERMT1    |
| 218801_at | 4.10E-05 | 5.41E-06 | 3.264725 | down | 4.665557 | down | 1.429081 | down | UGCGL2    |
| 218803_at | 0.008957 | 0.007205 | 1.49792  | up   | 1.098375 | up   | 1.36376  | down | CHFR      |
| 218805_at | 0.019168 | 0.017459 | 1.47992  | down | 1.005444 | up   | 1.487977 | up   | GIMAP5    |
| 218806_s_ | 0.002072 | 0.001088 | 1.999632 | up   | 2.889568 | up   | 1.44505  | up   | VAV3      |
| 218807_at | 4.88E-04 | 1.53E-04 | 2.744659 | up   | 4.248207 | up   | 1.547808 | up   | VAV3      |
| 218812_s_ | 0.041304 | 0.040057 | 1.773307 | down | 2.178971 | down | 1.228761 | down | ORAI2     |
| 218817_at | 1.25E-05 | 1.04E-06 | 3.022073 | down | 7.142594 | down | 2.363475 | down | SPCS3     |
| 218818_at | 2.15E-05 | 2.22E-06 | 1.508699 | down | 2.396877 | down | 1.588704 | down | FHL3      |
| 218820_at | 0.003708 | 0.002367 | 3.178308 | down | 1.731148 | down | 1.835954 | up   | C14orf132 |

|           |          |          |          |      |          |      |          |      |           |
|-----------|----------|----------|----------|------|----------|------|----------|------|-----------|
| 218823_s_ | 3.27E-04 | 8.97E-05 | 3.208068 | down | 2.269849 | down | 1.41334  | up   | KCTD9     |
| 218824_at | 0.001415 | 6.51E-04 | 3.896565 | up   | 4.441462 | up   | 1.13984  | up   | PNMAL1    |
| 218825_at | 0.04865  | 0.04748  | 1.746669 | up   | 1.030301 | up   | 1.695299 | down | EGFL7     |
| 218826_at | 6.38E-05 | 9.84E-06 | 5.39872  | up   | 6.05854  | up   | 1.122218 | up   | SLC35F2   |
| 218827_s_ | 0.001209 | 5.26E-04 | 1.338796 | up   | 2.405188 | up   | 1.796531 | up   | CEP192    |
| 218828_at | 0.001444 | 6.68E-04 | 1.705733 | down | 3.238353 | down | 1.898511 | down | PLSCR3    |
| 218829_s_ | 5.14E-10 | 7.41E-13 | 68.60638 | up   | 34.28425 | up   | 2.001105 | down | CHD7      |
| 218830_at | 0.001126 | 4.77E-04 | 1.455735 | up   | 1.194935 | down | 1.739509 | down | RPL26L1   |
| 218831_s_ | 1.46E-04 | 3.00E-05 | 5.261127 | down | 2.571084 | down | 2.046269 | up   | FCGRT     |
| 218833_at | 0.006008 | 0.004402 | 1.906886 | down | 1.825344 | down | 1.044672 | up   | ZAK       |
|           |          |          |          |      |          |      |          |      | RPP21 /// |
| 218836_at | 0.008121 | 0.006401 | 1.407385 | up   | 1.017684 | down | 1.432273 | down | TRIM39R   |
| 218837_s_ | 6.76E-06 | 4.38E-07 | 2.124731 | down | 2.261958 | down | 1.064585 | down | UBE2D4    |
| 218840_s_ | 6.76E-04 | 2.38E-04 | 1.158256 | down | 2.007131 | down | 1.732891 | down | NADSYN1   |
| 218841_at | 0.00691  | 0.005249 | 2.99453  | down | 1.457272 | down | 2.054888 | up   | ASB8      |
| 218842_at | 0.017309 | 0.01556  | 1.169931 | up   | 2.109901 | up   | 1.803441 | up   | RPAP3     |
| 218847_at | 7.74E-04 | 2.88E-04 | 1.434582 | up   | 2.836999 | up   | 1.977578 | up   | IGF2BP2   |
| 218848_at | 0.010462 | 0.008669 | 1.52867  | up   | 1.899784 | up   | 1.242769 | up   | THOC6     |
| 218849_s_ | 0.002135 | 0.001131 | 1.897066 | up   | 1.461281 | down | 2.772146 | down | PPP1R13L  |
| 218854_at | 4.09E-04 | 1.21E-04 | 2.58692  | down | 3.653342 | down | 1.412237 | down | DSE       |
| 218855_at | 4.02E-04 | 1.18E-04 | 1.881423 | down | 2.448287 | down | 1.301296 | down | GPR175    |
| 218856_at | 6.35E-04 | 2.19E-04 | 2.434027 | up   | 3.599566 | up   | 1.478852 | up   | TNFRSF21  |
| 218857_s_ | 1.23E-06 | 3.95E-08 | 6.714095 | up   | 9.843411 | up   | 1.466082 | up   | ASRGL1    |
| 218858_at | 0.005065 | 0.003553 | 1.511877 | up   | 5.593132 | down | 8.456127 | down | DEPDC6    |
| 218859_s_ | 0.001041 | 4.28E-04 | 3.14732  | up   | 6.185726 | up   | 1.965395 | up   | ESF1      |
| 218862_at | 0.019546 | 0.017848 | 1.969027 | down | 1.055794 | down | 1.864973 | up   | ASB13     |
| 218863_s_ | 0.003519 | 0.002215 | 1.379744 | up   | 1.725762 | down | 2.38111  | down | TNS1      |
| 218864_at | 6.57E-06 | 4.19E-07 | 2.850741 | down | 10.71062 | down | 3.757135 | down | TNS1      |
| 218865_at | 0.001236 | 5.42E-04 | 3.341323 | up   | 3.324951 | up   | 1.004924 | down | MOSC1     |
| 218866_s_ | 0.00179  | 8.92E-04 | 4.250575 | up   | 2.985269 | up   | 1.42385  | down | POLR3K    |
| 218868_at | 6.99E-06 | 4.60E-07 | 3.121325 | up   | 3.016546 | up   | 1.034735 | down | ACTR3B    |
|           |          |          |          |      |          |      |          |      | CSGALNACT |
| 218871_x_ | 8.77E-04 | 3.39E-04 | 7.298157 | down | 2.79478  | down | 2.611353 | up   | 2         |
| 218872_at | 1.75E-04 | 3.87E-05 | 2.737312 | up   | 2.204475 | up   | 1.241707 | down | TESC      |

|           |          |          |               |               |               |          |
|-----------|----------|----------|---------------|---------------|---------------|----------|
| 218873_at | 0.00103  | 4.21E-04 | 1.426589 up   | 1.440235 up   | 1.009566 up   | GON4L    |
| 218875_s_ | 4.06E-04 | 1.19E-04 | 2.495079 up   | 5.381505 up   | 2.156848 up   | FBXO5    |
| 218878_s_ | 3.95E-05 | 5.12E-06 | 3.409828 up   | 4.566155 up   | 1.339116 up   | SIRT1    |
| 218880_at | 3.24E-04 | 8.86E-05 | 5.973985 down | 7.544034 down | 1.262814 down | FOSL2    |
| 218881_s_ | 2.28E-04 | 5.51E-05 | 2.578205 down | 3.610166 down | 1.400263 down | FOSL2    |
| 218882_s_ | 0.002316 | 0.001268 | 2.053972 up   | 1.642884 up   | 1.250224 down | WDR3     |
| 218883_s_ | 2.47E-04 | 6.11E-05 | 10.78243 up   | 14.03417 up   | 1.301578 up   | MLF1IP   |
| 218885_s_ | 0.010602 | 0.00881  | 3.876657 up   | 6.082293 up   | 1.568953 up   | GALNT12  |
| 218886_at | 0.001349 | 6.11E-04 | 3.079101 up   | 2.348366 up   | 1.311167 down | PAK1IP1  |
| 218888_s_ | 8.80E-04 | 3.41E-04 | 3.407677 up   | 1.002595 up   | 3.398856 down | NETO2    |
| 218891_at | 0.009803 | 0.008024 | 1.232886 down | 1.426424 down | 1.156979 down | C10orf76 |
| 218897_at | 0.001404 | 6.44E-04 | 3.437739 up   | 2.874901 up   | 1.195776 down | TMEM177  |
| 218898_at | 1.13E-05 | 8.97E-07 | 1.836824 down | 3.392113 down | 1.846727 down | FAM57A   |
| 218900_at | 0.001509 | 7.09E-04 | 1.523414 up   | 1.37031 up    | 1.11173 down  | CNNM4    |
| 218901_at | 1.95E-04 | 4.43E-05 | 42.12088 down | 12.39658 down | 3.397783 up   | PLSCR4   |
| 218902_at | 5.14E-04 | 1.64E-04 | 2.323295 up   | 1.70649 up    | 1.361446 down | NOTCH1   |
| 218905_at | 6.55E-04 | 2.28E-04 | 1.197537 up   | 1.951424 up   | 1.629532 up   | INTS8    |
| 218910_at | 0.002107 | 0.001112 | 1.024639 down | 1.677907 down | 1.637559 down | ANO10    |
| 218911_at | 9.07E-04 | 3.55E-04 | 3.727475 up   | 3.804334 up   | 1.02062 up    | YEATS4   |
| 218915_at | 6.03E-04 | 2.04E-04 | 1.627658 down | 2.291835 down | 1.408057 down | NF2      |
| 218916_at | 0.005602 | 0.004026 | 1.25672 up    | 1.282411 down | 1.611631 down | ZNF768   |
| 218917_s_ | 4.81E-06 | 2.72E-07 | 2.754545 up   | 2.574487 up   | 1.06994 down  | ARID1A   |
| 218922_s_ | 2.74E-04 | 7.06E-05 | 2.982804 up   | 2.722003 up   | 1.095812 down | LASS4    |
| 218923_at | 0.001152 | 4.92E-04 | 6.523269 down | 3.603229 down | 1.810395 up   | CTBS     |
| 218924_s_ | 6.56E-04 | 2.29E-04 | 7.555595 down | 5.184693 down | 1.457289 up   | CTBS     |
| 218927_s_ | 2.08E-05 | 2.11E-06 | 1.653923 down | 2.179157 down | 1.317569 down | CHST12   |
| 218928_s_ | 3.73E-04 | 1.07E-04 | 3.454667 up   | 2.360643 up   | 1.463444 down | SLC37A1  |
| 218932_at | 0.010309 | 0.008515 | 1.791557 down | 1.109333 down | 1.614986 up   | ZNHIT6   |
| 218934_s_ | 1.85E-05 | 1.81E-06 | 9.755637 down | 13.19808 down | 1.352867 down | HSPB7    |
| 218935_at | 1.95E-04 | 4.45E-05 | 8.728522 down | 2.322274 down | 3.758611 up   | EHD3     |
| 218936_s_ | 0.002505 | 0.001408 | 2.040019 up   | 2.068599 up   | 1.014009 up   | CCDC59   |
| 218941_at | 0.005687 | 0.004103 | 1.292215 down | 1.893226 down | 1.465102 down | FBXW2    |
| 218942_at | 0.005864 | 0.004266 | 1.591884 up   | 1.042875 down | 1.660135 down | PIP4K2C  |
| 218945_at | 3.49E-04 | 9.78E-05 | 1.04199 up    | 2.074176 down | 2.16127 down  | C16orf68 |

|           |          |          |               |               |               |          |
|-----------|----------|----------|---------------|---------------|---------------|----------|
| 218947_s_ | 5.63E-05 | 8.26E-06 | 2.078199 up   | 2.850127 up   | 1.37144 up    | MTPAP    |
| 218949_s_ | 1.35E-05 | 1.18E-06 | 2.44386 up    | 2.847427 up   | 1.165135 up   | QRSL1    |
| 218950_at | 9.83E-04 | 3.96E-04 | 1.013637 up   | 2.154365 up   | 2.125382 up   | ARAP3    |
| 218951_s_ | 1.26E-05 | 1.06E-06 | 4.593935 up   | 7.363042 up   | 1.602774 up   | PLCXD1   |
| 218954_s_ | 0.003203 | 0.001955 | 1.586964 up   | 1.6536 up     | 1.04199 up    | BRF2     |
| 218958_at | 0.031884 | 0.03054  | 1.249392 up   | 1.306202 down | 1.631958 down | C19orf60 |
| 218959_at | 3.31E-07 | 6.07E-09 | 14.70797 down | 19.54274 down | 1.328717 down | HOXC10   |
| 218960_at | 0.009435 | 0.007664 | 1.633444 up   | 1.16592 up    | 1.400992 down | TMPRSS4  |
| 218961_s_ | 0.009027 | 0.007275 | 1.608778 up   | 1.17169 down  | 1.884989 down | PNKP     |
| 218964_at | 1.14E-08 | 5.24E-11 | 15.55158 up   | 14.93859 up   | 1.041034 down | ARID3B   |
| 218965_s_ | 6.24E-04 | 2.14E-04 | 1.760488 up   | 1.559115 down | 2.744804 down | TUT1     |
| 218966_at | 2.21E-06 | 9.07E-08 | 9.884809 up   | 12.28482 up   | 1.242798 up   | MYO5C    |
| 218969_at | 0.004862 | 0.003371 | 2.489581 up   | 1.482375 up   | 1.679454 down | Magmas   |
| 218970_s_ | 0.008413 | 0.006677 | 1.757933 up   | 1.603561 up   | 1.096268 down | CUTC     |
| 218971_s_ | 0.013134 | 0.011336 | 1.299076 up   | 1.19757 up    | 1.08476 down  | WDR91    |
| 218973_at | 0.006663 | 0.005019 | 1.64674 up    | 1.076071 up   | 1.530326 down | EFTUD1   |
| 218975_at | 1.14E-04 | 2.15E-05 | 3.300673 down | 1.600086 down | 2.06281 up    | COL5A3   |
| 218979_at | 0.001996 | 0.001032 | 1.644692 up   | 2.570034 up   | 1.562623 up   | RMI1     |
| 218980_at | 1.09E-04 | 2.02E-05 | 4.685648 down | 3.619821 down | 1.294442 up   | FHOD3    |
| 218983_at | 8.85E-05 | 1.52E-05 | 15.7501 down  | 2.916724 down | 5.399926 up   | C1RL     |
| 218985_at | 0.016148 | 0.014382 | 1.801794 up   | 1.48245 up    | 1.215416 down | SLC2A8   |
| 218986_s_ | 1.04E-04 | 1.91E-05 | 8.105519 down | 1.549333 down | 5.23162 up    | DDX60    |
| 218987_at | 0.004076 | 0.002671 | 1.515424 up   | 1.197603 up   | 1.265381 down | ATF7IP   |
| 218991_at | 0.012755 | 0.010953 | 1.583107 up   | 1.082952 down | 1.714429 down | HEATR6   |
| 218993_at | 0.007231 | 0.005555 | 1.768841 up   | 1.124437 up   | 1.573091 down | RNMTL1   |
| 218996_at | 1.16E-04 | 2.20E-05 | 1.237779 down | 2.547563 down | 2.058173 down | TFPT     |
| 218999_at | 0.007292 | 0.005613 | 3.116525 down | 2.021235 down | 1.541892 up   | TMEM140  |
| 219000_s_ | 3.52E-04 | 9.88E-05 | 7.009253 up   | 4.510626 up   | 1.553942 down | DSCC1    |
| 219001_s_ | 0.002477 | 0.001387 | 2.803019 down | 2.995795 down | 1.068775 down | WDR32    |
| 219002_at | 7.27E-05 | 1.18E-05 | 2.979729 up   | 3.40814 up    | 1.143775 up   | FASTKD1  |
| 219003_s_ | 0.004018 | 0.002622 | 2.145307 down | 1.173047 up   | 2.516546 up   | MANEA    |
| 219004_s_ | 0.001117 | 4.72E-04 | 3.392693 up   | 4.591761 up   | 1.353427 up   | C21orf45 |
| 219005_at | 0.004856 | 0.003363 | 1.449786 up   | 1.698905 down | 2.46305 down  | TMEM59L  |
| 219006_at | 5.69E-04 | 1.88E-04 | 3.005523 up   | 2.003991 up   | 1.499769 down | NDUFAF4  |

|           |          |          |               |               |               |          |
|-----------|----------|----------|---------------|---------------|---------------|----------|
| 219007_at | 2.11E-04 | 4.93E-05 | 2.524823 up   | 2.462422 up   | 1.025342 down | NUP43    |
| 219008_at | 0.010956 | 0.00916  | 1.522032 up   | 1.457687 up   | 1.044142 down | C2orf43  |
| 219010_at | 1.66E-07 | 2.45E-09 | 15.86783 up   | 19.8727 up    | 1.252389 up   | C1orf106 |
| 219014_at | 0.00421  | 0.002787 | 2.482511 down | 1.614132 up   | 4.007101 up   | PLAC8    |
| 219016_at | 9.95E-04 | 4.03E-04 | 1.783879 up   | 1.572831 up   | 1.134184 down | FASTKD5  |
| 219021_at | 6.93E-04 | 2.47E-04 | 1.370017 up   | 1.481953 down | 2.0303 down   | RNF121   |
| 219025_at | 6.48E-07 | 1.56E-08 | 13.13883 down | 12.99328 down | 1.011202 up   | CD248    |
| 219026_s_ | 0.008658 | 0.006918 | 1.377225 down | 2.682092 down | 1.94746 down  | RASAL2   |
| 219028_at | 0.002462 | 0.001375 | 1.444965 up   | 1.946292 down | 2.812323 down | HIPK2    |
| 219029_at | 7.53E-04 | 2.77E-04 | 3.002158 down | 3.584139 down | 1.193854 down | C5orf28  |
| 219033_at | 0.002659 | 0.001522 | 2.224313 up   | 1.387114 up   | 1.603555 down | PARP8    |
| 219036_at | 0.001866 | 9.43E-04 | 2.136192 up   | 2.888367 up   | 1.35211 up    | CEP70    |
| 219038_at | 3.43E-04 | 9.52E-05 | 7.011375 down | 7.87414 down  | 1.123052 down | MORC4    |
| 219040_at | 0.025891 | 0.024382 | 1.402382 up   | 1.079239 down | 1.513506 down | CORO7    |
| 219046_s_ | 0.004157 | 0.002741 | 1.581118 up   | 1.581125 up   | 1.000004 up   | PKNOX2   |
| 219047_s_ | 2.50E-04 | 6.22E-05 | 1.691587 down | 2.046112 down | 1.209581 down | ZNF668   |
| 219054_at | 1.01E-04 | 1.84E-05 | 3.951533 down | 20.35552 down | 5.151296 down | C5orf23  |
| 219059_s_ | 0.012917 | 0.011116 | 1.165042 up   | 1.199487 down | 1.397453 down | LYVE1    |
| 219061_s_ | 6.35E-04 | 2.19E-04 | 1.972963 up   | 1.577285 up   | 1.25086 down  | LAGE3    |
| 219063_at | 0.00839  | 0.006656 | 1.617111 up   | 1.219885 up   | 1.325625 down | C1orf35  |
| 219067_s_ | 3.06E-04 | 8.17E-05 | 2.347827 up   | 3.304166 up   | 1.40733 up    | NSMCE4A  |
| 219072_at | 0.007287 | 0.005608 | 1.68829 down  | 2.142197 down | 1.268856 down | BCL7C    |
| 219080_s_ | 5.02E-06 | 2.89E-07 | 2.610588 up   | 2.821955 up   | 1.080965 up   | CTPS2    |
| 219081_at | 5.53E-06 | 3.27E-07 | 2.601394 up   | 2.544717 up   | 1.022273 down | ANKHD1   |
| 219084_at | 5.76E-04 | 1.91E-04 | 2.071351 up   | 1.642404 up   | 1.26117 down  | NSD1     |
| 219087_at | 1.54E-05 | 1.41E-06 | 11.37943 down | 1.429618 down | 7.95977 up    | ASPN     |
| 219092_s_ | 0.002051 | 0.001073 | 1.41788 up    | 1.248803 down | 1.770652 down | IPPK     |
| 219093_at | 5.32E-05 | 7.65E-06 | 19.22028 down | 7.080745 down | 2.714443 up   | PID1     |
| 219094_at | 7.27E-04 | 2.63E-04 | 2.620361 up   | 3.196873 up   | 1.220012 up   | ARMC8    |
| 219096_at | 0.006508 | 0.004875 | 1.467234 up   | 1.121881 up   | 1.307834 down | ARMC7    |
| 219102_at | 1.99E-08 | 1.09E-10 | 5.979465 down | 11.79129 down | 1.971963 down | RCN3     |
| 219104_at | 2.90E-05 | 3.34E-06 | 2.052253 down | 2.566147 down | 1.250405 down | RNF141   |
| 219105_x_ | 1.21E-04 | 2.32E-05 | 4.766701 up   | 4.752684 up   | 1.00295 down  | ORC6L    |

## DDX27 ///

|           |          |          |               |               |               |         |
|-----------|----------|----------|---------------|---------------|---------------|---------|
| 219108_x_ | 9.74E-05 | 1.74E-05 | 1.712767 up   | 1.568529 up   | 1.091957 down | SS18    |
| 219109_at | 0.018688 | 0.01697  | 1.320028 down | 2.114461 up   | 2.791146 up   | SPAG16  |
| 219110_at | 0.004493 | 0.003043 | 1.738308 up   | 1.291195 up   | 1.346279 down | GAR1    |
| 219111_s_ | 5.81E-05 | 8.67E-06 | 1.848869 up   | 1.093368 up   | 1.690986 down | DDX54   |
| 219114_at | 6.74E-04 | 2.37E-04 | 1.619262 down | 2.263074 down | 1.397596 down | C3orf18 |
| 219117_s_ | 3.23E-04 | 8.80E-05 | 3.209246 down | 3.001931 down | 1.06906 up    | FKBP11  |
| 219118_at | 0.001333 | 6.00E-04 | 5.713636 down | 3.880401 down | 1.472434 up   | FKBP11  |
| 219120_at | 1.45E-05 | 1.29E-06 | 2.864762 up   | 2.132125 up   | 1.343618 down | C2orf44 |
| 219121_s_ | 7.52E-09 | 2.87E-11 | 44.35568 up   | 71.0098 up    | 1.600918 up   | ESRP1   |
| 219122_s_ | 0.001999 | 0.001035 | 1.737569 down | 1.550043 down | 1.120981 up   | THG1L   |
| 219123_at | 2.23E-05 | 2.33E-06 | 3.696576 up   | 4.042578 up   | 1.093601 up   | ZNF232  |
| 219124_at | 1.22E-04 | 2.36E-05 | 1.920544 up   | 1.316836 up   | 1.458454 down | C8orf41 |
| 219126_at | 0.003275 | 0.002014 | 1.488639 up   | 2.32138 up    | 1.559398 up   | PHF10   |
| 219128_at | 5.06E-04 | 1.60E-04 | 2.670841 down | 2.456384 down | 1.087306 up   | C2orf42 |
| 219130_at | 0.001203 | 5.23E-04 | 1.033447 up   | 2.750742 up   | 2.661715 up   | CCDC76  |
| 219134_at | 1.05E-06 | 3.13E-08 | 8.098542 down | 14.58223 down | 1.800599 down | ELTD1   |
| 219135_s_ | 6.10E-04 | 2.08E-04 | 2.060641 down | 2.626623 down | 1.274663 down | LMF1    |
| 219136_s_ | 2.62E-04 | 6.64E-05 | 2.328572 down | 2.569275 down | 1.103369 down | LMF1    |
| 219137_s_ | 8.59E-04 | 3.29E-04 | 2.982077 down | 1.839472 down | 1.621159 up   | MFF     |
| 219141_s_ | 0.001424 | 6.56E-04 | 1.368602 up   | 1.406175 up   | 1.027453 up   | AMBRA1  |
| 219142_at | 1.98E-05 | 1.98E-06 | 5.141399 up   | 12.78183 up   | 2.48606 up    | RASL11B |
| 219144_at | 0.010682 | 0.008891 | 1.602074 up   | 1.072615 up   | 1.493616 down | DUSP26  |
| 219145_at | 5.57E-04 | 1.83E-04 | 2.172659 up   | 2.570533 up   | 1.183127 up   | LPHN1   |
| 219147_s_ | 2.37E-04 | 5.81E-05 | 3.932139 down | 3.183452 down | 1.235181 up   | C9orf95 |
| 219149_x_ | 0.010767 | 0.00897  | 1.36999 down  | 1.377175 up   | 1.886716 up   | DBR1    |
| 219150_s_ | 0.012933 | 0.011132 | 1.373191 up   | 1.703634 down | 2.339414 down | ADAP1   |
| 219153_s_ | 0.039007 | 0.037757 | 1.532045 down | 1.365955 down | 1.121593 up   | THSD4   |
| 219155_at | 0.002245 | 0.001215 | 2.269702 up   | 3.467061 up   | 1.527541 up   | PITPNC1 |
| 219158_s_ | 3.67E-04 | 1.04E-04 | 4.294461 up   | 3.408669 up   | 1.259865 down | NARG1   |
| 219161_s_ | 4.40E-04 | 1.33E-04 | 2.997715 down | 2.176964 down | 1.377016 up   | CKLF    |
| 219162_s_ | 7.09E-04 | 2.55E-04 | 2.322691 up   | 1.982022 up   | 1.171879 down | MRPL11  |
| 219164_s_ | 0.001184 | 5.12E-04 | 3.814019 down | 3.008903 down | 1.267578 up   | ATG2B   |
| 219165_at | 9.61E-06 | 7.20E-07 | 5.564788 down | 6.279899 down | 1.128506 down | PDLIM2  |

|           |          |          |               |               |               |           |
|-----------|----------|----------|---------------|---------------|---------------|-----------|
| 219166_at | 6.46E-05 | 9.99E-06 | 3.119489 up   | 4.204038 up   | 1.347669 up   | C14orf104 |
| 219167_at | 0.014978 | 0.013206 | 1.236985 down | 3.127684 up   | 3.868897 up   | RASL12    |
| 219168_s_ | 0.001549 | 7.34E-04 | 2.558095 down | 1.229088 down | 2.081294 up   | PRR5      |
| 219169_s_ | 1.46E-04 | 3.01E-05 | 2.830693 up   | 1.979841 up   | 1.429758 down | TFB1M     |
| 219170_at | 0.002164 | 0.001152 | 2.471894 up   | 3.131576 up   | 1.266873 up   | FSD1      |
| 219175_s_ | 9.27E-04 | 3.66E-04 | 1.262171 down | 1.687444 down | 1.336938 down | SLC41A3   |
| 219176_at | 4.49E-04 | 1.36E-04 | 1.874651 up   | 1.558023 up   | 1.203225 down | C2orf47   |
| 219177_at | 0.010292 | 0.008496 | 1.966648 up   | 1.955281 up   | 1.005814 down | BXDC2     |
| 219179_at | 0.002527 | 0.001425 | 3.084837 up   | 2.238573 down | 6.905633 down | DACT1     |
| 219185_at | 0.017406 | 0.015657 | 1.39867 up    | 1.219846 up   | 1.146596 down | SIRT5     |
| 219186_at | 0.002025 | 0.001054 | 1.988928 down | 2.276929 down | 1.144802 down | ZBTB7A    |
| 219192_at | 3.78E-04 | 1.09E-04 | 2.049493 up   | 2.00882 up    | 1.020247 down | UBAP2     |
| 219193_at | 2.33E-04 | 5.66E-05 | 1.423836 up   | 1.633503 up   | 1.147255 up   | WDR70     |
| 219194_at | 0.013888 | 0.012097 | 1.046406 down | 1.399417 up   | 1.464358 up   | SEMA4G    |
| 219196_at | 6.30E-07 | 1.51E-08 | 26.57926 up   | 23.553 up     | 1.128487 down | SCG3      |
| 219197_s_ | 7.81E-05 | 1.29E-05 | 6.219961 down | 1.482292 down | 4.196177 up   | SCUBE2    |
| 219198_at | 0.003451 | 0.002162 | 1.83066 up    | 2.232853 up   | 1.219698 up   | GTF3C4    |
| 219201_s_ | 1.42E-05 | 1.26E-06 | 7.073018 down | 3.843276 down | 1.840362 up   | TWSG1     |
| 219202_at | 0.002681 | 0.001539 | 1.394885 up   | 1.763969 down | 2.460534 down | RHBDF2    |
| 219203_at | 0.002148 | 0.001142 | 1.826532 up   | 1.213244 up   | 1.505494 down | FAM158A   |
| 219204_s_ | 1.43E-04 | 2.94E-05 | 3.499836 down | 3.049732 down | 1.147588 up   | SRR       |
| 219205_at | 2.23E-04 | 5.32E-05 | 3.510694 down | 3.458464 down | 1.015102 up   | SRR       |
| 219206_x_ | 0.002986 | 0.00178  | 2.704008 down | 1.368536 down | 1.97584 up    | TMBIM4    |
| 219209_at | 2.23E-04 | 5.35E-05 | 9.536223 down | 1.595577 down | 5.97666 up    | IFIH1     |
| 219210_s_ | 0.010311 | 0.008517 | 1.780902 down | 1.566523 down | 1.13685 up    | RAB8B     |
| 219211_at | 0.005813 | 0.004217 | 2.419519 down | 1.264933 down | 1.912764 up   | USP18     |
| 219212_at | 2.71E-04 | 6.95E-05 | 2.69197 up    | 2.498845 up   | 1.077286 down | HSPA14    |
| 219215_s_ | 5.86E-04 | 1.96E-04 | 4.05235 down  | 2.816109 down | 1.438989 up   | SLC39A4   |
| 219217_at | 1.52E-05 | 1.38E-06 | 2.330523 up   | 3.051975 up   | 1.309567 up   | NARS2     |
| 219219_at | 0.005559 | 0.003986 | 2.543796 up   | 1.767569 up   | 1.439149 down | TMEM160   |
| 219221_at | 9.19E-05 | 1.60E-05 | 5.058735 down | 4.494019 down | 1.125659 up   | ZBTB38    |
| 219223_at | 1.94E-04 | 4.40E-05 | 1.821853 up   | 1.169936 up   | 1.557224 down | C9orf7    |
| 219224_x_ | 0.006916 | 0.005257 | 1.226593 up   | 1.239719 down | 1.520631 down | ZNF408    |

LOC100134

440 ///

|           |          |          |               |               |               |           |
|-----------|----------|----------|---------------|---------------|---------------|-----------|
| 219225_at | 1.04E-04 | 1.90E-05 | 3.662292 up   | 3.977493 up   | 1.086066 up   | PGBD5     |
| 219226_at | 4.79E-04 | 1.49E-04 | 2.453829 up   | 1.553973 up   | 1.579068 down | CRKRS     |
| 219227_at | 2.37E-04 | 5.79E-05 | 3.311204 up   | 1.198011 up   | 2.763919 down | CCNJL     |
| 219228_at | 5.60E-06 | 3.35E-07 | 2.763989 up   | 2.655737 up   | 1.040762 down | ZNF331    |
| 219231_at | 9.15E-04 | 3.60E-04 | 2.046417 up   | 2.834643 up   | 1.385174 up   | TGS1      |
| 219232_s_ | 7.85E-04 | 2.94E-04 | 3.533745 up   | 5.98647 up    | 1.694087 up   | EGLN3     |
| 219234_x_ | 0.001638 | 7.93E-04 | 2.990684 down | 1.555938 down | 1.92211 up    | SCRN3     |
| 219236_at | 4.17E-04 | 1.24E-04 | 1.805904 up   | 2.434557 up   | 1.34811 up    | PAQR6     |
| 219238_at | 0.003302 | 0.002038 | 1.758562 down | 1.445719 down | 1.216393 up   | PIGV      |
| 219239_s_ | 0.049184 | 0.048034 | 2.000343 down | 1.137743 up   | 2.275876 up   | ZNF654    |
| 219242_at | 0.008877 | 0.007128 | 1.929582 down | 1.613298 down | 1.196048 up   | CEP63     |
| 219244_s_ | 0.008973 | 0.007223 | 1.562235 up   | 1.217717 up   | 1.282921 down | MRPL46    |
| 219248_at | 0.00312  | 0.001889 | 1.758145 up   | 1.075998 down | 1.891761 down | THUMPD2   |
| 219249_s_ | 0.022003 | 0.02039  | 4.958678 down | 4.500904 down | 1.101707 up   | FKBP10    |
| 219250_s_ | 0.006265 | 0.004647 | 3.729677 up   | 13.36454 up   | 3.583298 up   | FLRT3     |
| 219252_s_ | 0.024027 | 0.022446 | 1.555762 down | 1.920468 down | 1.234422 down | GEMIN8    |
| 219253_at | 4.51E-04 | 1.37E-04 | 2.119242 down | 2.988431 down | 1.410141 down | TMEM185B  |
| 219254_at | 0.004564 | 0.003111 | 1.777233 down | 2.282798 down | 1.284467 down | C17orf101 |
| 219255_x_ | 1.97E-04 | 4.50E-05 | 2.419884 down | 2.412453 up   | 5.837855 up   | IL17RB    |
| 219257_s_ | 3.65E-06 | 1.84E-07 | 3.585062 down | 10.26986 down | 2.864624 down | SPHK1     |
| 219258_at | 0.003419 | 0.002134 | 3.49141 up    | 3.239614 up   | 1.077724 down | TIPIN     |

LOC100134

089 ///

|           |          |          |               |               |               |          |
|-----------|----------|----------|---------------|---------------|---------------|----------|
| 219264_s_ | 0.007131 | 0.005462 | 2.213533 up   | 1.555245 up   | 1.42327 down  | PPP2R3B  |
| 219265_at | 7.22E-05 | 1.16E-05 | 1.672059 up   | 3.489565 up   | 2.086986 up   | MOBK2L2B |
| 219267_at | 0.008838 | 0.007092 | 2.397561 down | 3.096212 down | 1.291401 down | GLTP     |
| 219268_at | 0.003454 | 0.002164 | 1.7456 up     | 1.605177 up   | 1.087481 down | ETNK2    |
| 219270_at | 0.013105 | 0.011303 | 1.011489 down | 3.245585 down | 3.208719 down | CHAC1    |
| 219271_at | 0.002853 | 0.001674 | 2.694717 down | 2.010754 up   | 5.418411 up   | GALNT14  |
| 219272_at | 7.78E-04 | 2.90E-04 | 1.638993 up   | 1.707694 down | 2.798899 down | TRIM62   |
| 219274_at | 6.07E-06 | 3.73E-07 | 18.80828 up   | 13.7146 up    | 1.371406 down | TSPAN12  |
| 219276_x_ | 1.75E-04 | 3.88E-05 | 1.995243 up   | 2.183437 up   | 1.094322 up   | C9orf82  |



|           |          |          |               |               |               |           |
|-----------|----------|----------|---------------|---------------|---------------|-----------|
| 219277_s_ | 5.06E-04 | 1.60E-04 | 3.145311 up   | 2.456853 up   | 1.280219 down | OGDHL     |
| 219278_at | 2.37E-05 | 2.53E-06 | 2.033887 down | 3.240501 down | 1.593255 down | MAP3K6    |
| 219279_at | 1.34E-07 | 1.72E-09 | 17.99207 down | 17.94416 down | 1.00267 up    | DOCK10    |
| 219280_at | 0.002272 | 0.001236 | 1.532264 up   | 1.804733 up   | 1.177821 up   | BRWD1     |
| 219281_at | 0.001387 | 6.33E-04 | 3.542149 down | 2.299153 down | 1.540632 up   | MSRA      |
| 219283_at | 7.44E-04 | 2.72E-04 | 2.790328 down | 1.823882 down | 1.529884 up   | C1GALT1C1 |
| 219285_s_ | 0.032926 | 0.031607 | 1.302664 up   | 1.06892 down  | 1.392443 down | NIN       |
| 219286_s_ | 4.38E-04 | 1.32E-04 | 2.654832 up   | 2.129375 up   | 1.246766 down | RBM15     |
| 219287_at | 2.08E-04 | 4.84E-05 | 3.389574 up   | 5.616995 up   | 1.657139 up   | KCNMB4    |
| 219291_at | 7.12E-05 | 1.14E-05 | 3.735641 down | 1.059114 up   | 3.95647 up    | DTWD1     |
| 219293_s_ | 2.99E-04 | 7.93E-05 | 1.867649 up   | 1.679545 up   | 1.111997 down | OLA1      |
| 219294_at | 0.00865  | 0.00691  | 1.685433 up   | 2.750244 up   | 1.631774 up   | CENPQ     |
| 219300_s_ | 2.50E-06 | 1.08E-07 | 29.11824 up   | 21.27702 up   | 1.36853 down  | CNTNAP2   |
| 219301_s_ | 2.56E-06 | 1.12E-07 | 21.12722 up   | 14.65931 up   | 1.441215 down | CNTNAP2   |
| 219302_s_ | 6.21E-07 | 1.47E-08 | 24.44619 up   | 17.57559 up   | 1.390917 down | CNTNAP2   |
| 219303_at | 0.003009 | 0.001799 | 1.740892 up   | 2.931317 up   | 1.683801 up   | RNF219    |
| 219304_s_ | 7.03E-05 | 1.12E-05 | 13.62964 down | 1.876964 up   | 25.58235 up   | PDGFD     |
| 219305_x_ | 8.90E-04 | 3.47E-04 | 2.723537 up   | 2.672339 up   | 1.019159 down | FBXO2     |
| 219306_at | 7.57E-04 | 2.79E-04 | 5.323706 up   | 8.272613 up   | 1.55392 up    | KIF15     |
| 219308_s_ | 1.64E-05 | 1.52E-06 | 10.8962 down  | 5.742694 down | 1.897402 up   | AK5       |
| 219311_at | 4.03E-05 | 5.30E-06 | 2.259385 up   | 2.76559 up    | 1.224045 up   | CEP76     |
| 219314_s_ | 1.60E-04 | 3.43E-05 | 1.800053 up   | 1.823064 up   | 1.012784 up   | ZNF219    |
| 219315_s_ | 7.20E-09 | 2.71E-11 | 10.84581 down | 10.43866 down | 1.039004 up   | TMEM204   |
| 219316_s_ | 7.14E-04 | 2.57E-04 | 1.355587 up   | 1.892106 up   | 1.395784 up   | FLVCR2    |
| 219320_at | 0.004756 | 0.003274 | 1.908656 up   | 2.164782 up   | 1.134192 up   | MYO19     |
| 219323_s_ | 0.02382  | 0.022239 | 1.384176 up   | 1.006366 up   | 1.37542 down  | IL18BP    |
| 219325_s_ | 1.29E-04 | 2.53E-05 | 1.438555 down | 1.895006 down | 1.317298 down | ELAC1     |
| 219326_s_ | 4.74E-04 | 1.46E-04 | 3.316465 up   | 2.754681 up   | 1.203938 down | B3GNT2    |
| 219327_s_ | 2.66E-05 | 2.98E-06 | 4.424813 up   | 3.222221 up   | 1.373218 down | GPRC5C    |
| 219328_at | 0.001662 | 8.09E-04 | 1.647437 up   | 1.459951 up   | 1.128419 down | DDX31     |
| 219331_s_ | 0.004453 | 0.003008 | 1.573785 up   | 1.191882 up   | 1.32042 down  | KLHDC8A   |
| 219332_at | 6.74E-04 | 2.37E-04 | 2.132433 down | 1.961796 down | 1.08698 up    | MICALL2   |
| 219334_s_ | 0.003144 | 0.00191  | 2.978501 down | 2.652635 down | 1.122846 up   | OBFC2A    |
| 219341_at | 0.003077 | 0.001853 | 3.130209 up   | 2.013193 up   | 1.554848 down | CLN8      |

|           |          |          |          |      |          |      |          |      |          |
|-----------|----------|----------|----------|------|----------|------|----------|------|----------|
| 219345_at | 9.39E-05 | 1.65E-05 | 1.601712 | down | 2.075031 | down | 1.295508 | down | BOLA1    |
| 219347_at | 2.94E-04 | 7.73E-05 | 3.67061  | up   | 3.958885 | up   | 1.078536 | up   | NUDT15   |
| 219348_at | 3.65E-05 | 4.58E-06 | 2.135168 | down | 3.472261 | down | 1.626223 | down | USE1     |
| 219349_s_ | 0.006654 | 0.005011 | 1.679534 | up   | 1.322837 | up   | 1.269645 | down | EXOC2    |
| 219353_at | 0.010475 | 0.008682 | 1.266896 | down | 1.849365 | up   | 2.342953 | up   | NHLRC2   |
| 219357_at | 0.007687 | 0.005991 | 1.565275 | up   | 1.789097 | up   | 1.142992 | up   | GTPBP1   |
| 219360_s_ | 6.96E-04 | 2.48E-04 | 2.001711 | down | 3.057213 | down | 1.5273   | down | TRPM4    |
| 219361_s_ | 6.75E-04 | 2.37E-04 | 2.625585 | up   | 1.803426 | up   | 1.455888 | down | AEN      |
| 219363_s_ | 0.002369 | 0.001305 | 1.285203 | up   | 1.78675  | up   | 1.390247 | up   | MTERFD1  |
| 219365_s_ | 0.001102 | 4.63E-04 | 3.83465  | up   | 2.587727 | up   | 1.481861 | down | CAMKV    |
| 219366_at | 4.77E-05 | 6.62E-06 | 1.281899 | down | 3.811604 | down | 2.973404 | down | AVEN     |
| 219368_at | 1.17E-04 | 2.24E-05 | 4.05899  | up   | 8.748221 | up   | 2.15527  | up   | NAP1L2   |
| 219370_at | 1.26E-05 | 1.05E-06 | 9.370533 | up   | 10.56545 | up   | 1.127519 | up   | RPRM     |
| 219371_s_ | 1.05E-06 | 3.14E-08 | 2.607094 | down | 16.6406  | down | 6.382815 | down | KLF2     |
| 219373_at | 9.19E-04 | 3.62E-04 | 1.803026 | down | 2.165626 | down | 1.201106 | down | DPM3     |
| 219377_at | 0.005014 | 0.003505 | 2.74417  | up   | 1.944988 | up   | 1.410893 | down | FAM59A   |
| 219378_at | 1.35E-04 | 2.71E-05 | 1.672046 | up   | 5.047755 | up   | 3.01891  | up   | NARG1L   |
| 219380_x_ | 1.62E-05 | 1.50E-06 | 1.020541 | up   | 2.805317 | down | 2.862941 | down | POLH     |
| 219383_at | 0.00454  | 0.003088 | 1.530358 | down | 2.738047 | down | 1.789155 | down | FLJ14213 |
| 219388_at | 4.76E-05 | 6.57E-06 | 5.170568 | up   | 5.586826 | up   | 1.080505 | up   | GRHL2    |
| 219390_at | 4.78E-06 | 2.69E-07 | 4.74457  | down | 5.943524 | down | 1.2527   | down | FKBP14   |
| 219392_x_ | 0.001146 | 4.89E-04 | 2.1267   | up   | 2.206855 | up   | 1.03769  | up   | PRR11    |
| 219393_s_ | 9.53E-05 | 1.68E-05 | 2.644172 | down | 3.096625 | down | 1.171113 | down | AKT3     |
| 219394_at | 0.002464 | 0.001377 | 1.210955 | up   | 1.953777 | up   | 1.613418 | up   | PGS1     |
| 219395_at | 3.60E-09 | 1.06E-11 | 11.87606 | up   | 6.478762 | up   | 1.833075 | down | ESRP2    |
| 219400_at | 7.34E-04 | 2.68E-04 | 5.118939 | down | 2.456332 | down | 2.083978 | up   | CNTNAP1  |
| 219402_s_ | 0.003305 | 0.002041 | 1.453569 | down | 1.858025 | down | 1.27825  | down | DERL1    |
| 219410_at | 2.47E-05 | 2.68E-06 | 6.484243 | down | 3.638441 | down | 1.782149 | up   | TMEM45A  |
| 219411_at | 6.41E-04 | 2.22E-04 | 1.819075 | up   | 1.471902 | up   | 1.235867 | down | ELMO3    |
| 219412_at | 4.54E-04 | 1.38E-04 | 1.57933  | up   | 10.13891 | up   | 6.419754 | up   | RAB38    |
| 219416_at | 4.70E-04 | 1.45E-04 | 2.578342 | down | 4.186452 | down | 1.6237   | down | SCARA3   |
| 219418_at | 0.002713 | 0.001563 | 1.165492 | up   | 1.843696 | up   | 1.581903 | up   | NHEJ1    |
| 219422_at | 0.007528 | 0.005841 | 1.581289 | up   | 1.132112 | down | 1.790197 | down | TNFRSF25 |
| 219424_at | 0.005571 | 0.003998 | 1.635472 | up   | 1.067615 | down | 1.746054 | down | EBI3     |

|           |          |          |               |               |               |          |
|-----------|----------|----------|---------------|---------------|---------------|----------|
| 219425_at | 3.37E-05 | 4.13E-06 | 2.465733 up   | 1.6563 up     | 1.4887 down   | SULT4A1  |
| 219427_at | 0.001183 | 5.11E-04 | 5.635834 down | 2.196547 down | 2.56577 up    | FAT4     |
| 219428_s_ | 3.94E-04 | 1.15E-04 | 2.119802 down | 2.069238 down | 1.024436 up   | PXMP4    |
| 219429_at | 0.001902 | 9.68E-04 | 2.901369 up   | 2.848238 up   | 1.018654 down | FA2H     |
| 219432_at | 1.34E-05 | 1.15E-06 | 11.10297 down | 5.55629 down  | 1.998271 up   | EVC      |
| 219433_at | 0.003131 | 0.001898 | 3.540657 up   | 2.758134 up   | 1.283715 down | BCOR     |
| 219438_at | 5.31E-05 | 7.63E-06 | 4.569529 up   | 4.848564 up   | 1.061064 up   | NKAIN1   |
| 219439_at | 0.002152 | 0.001145 | 3.366125 up   | 1.230064 up   | 2.736546 down | C1GALT1  |
| 219441_s_ | 3.78E-06 | 1.91E-07 | 3.668446 down | 3.33131 down  | 1.101202 up   | LRRK1    |
| 219446_at | 0.002856 | 0.001676 | 1.725148 up   | 1.459211 up   | 1.182247 down | RIC8B    |
| 219451_at | 0.049736 | 0.048579 | 2.686175 down | 1.393096 down | 1.928206 up   | MSRB2    |
| 219454_at | 0.00449  | 0.003041 | 10.72462 down | 2.906461 up   | 31.1707 up    | EGFL6    |
| 219457_s_ | 9.57E-06 | 7.14E-07 | 1.868002 down | 2.706349 down | 1.448794 down | RIN3     |
| 219458_s_ | 0.004927 | 0.003427 | 1.249727 down | 1.457525 down | 1.166275 down | NSUN3    |
| 219459_at | 7.08E-04 | 2.55E-04 | 1.832881 up   | 1.252707 up   | 1.463136 down | POLR3B   |
| 219460_s_ | 1.18E-05 | 9.59E-07 | 2.734482 down | 3.980555 down | 1.455689 down | TMEM127  |
| 219461_at | 6.61E-04 | 2.31E-04 | 2.661126 up   | 1.981749 up   | 1.342817 down | PAK6     |
| 219464_at | 3.96E-08 | 3.32E-10 | 11.39824 up   | 10.99975 up   | 1.036227 down | CA14     |
| 219465_at | 8.59E-04 | 3.29E-04 | 9.370051 up   | 9.200068 up   | 1.018476 down | APOA2    |
| 219466_s_ | 4.44E-04 | 1.34E-04 | 17.23211 up   | 14.26996 up   | 1.207579 down | APOA2    |
| 219468_s_ | 5.15E-04 | 1.64E-04 | 1.789332 down | 3.368081 down | 1.882312 down | CUEDC1   |
| 219470_x_ | 4.08E-06 | 2.15E-07 | 6.761381 up   | 7.779217 up   | 1.150537 up   | CCNJ     |
|           |          |          |               |               |               | C13orf18 |
|           |          |          |               |               |               | ///      |
| 219471_at | 1.25E-04 | 2.45E-05 | 1.356949 down | 1.84547 up    | 2.504207 up   | PPP1R2P4 |
| 219472_at | 0.011763 | 0.009961 | 1.642208 up   | 1.088123 up   | 1.509212 down | CENPO    |
| 219474_at | 0.019575 | 0.01788  | 2.703076 up   | 1.614033 up   | 1.674734 down | C3orf52  |
| 219475_at | 4.45E-04 | 1.35E-04 | 1.555194 up   | 1.875443 down | 2.916677 down | OSGIN1   |
| 219478_at | 1.65E-04 | 3.57E-05 | 19.05353 down | 1.828269 down | 10.42163 up   | WFDC1    |
| 219480_at | 0.00446  | 0.003015 | 1.376244 up   | 1.387615 down | 1.909697 down | SNAI1    |
| 219481_at | 0.002206 | 0.001182 | 2.261545 down | 2.755405 down | 1.218373 down | TTC13    |
| 219483_s_ | 0.005243 | 0.003709 | 1.027005 up   | 2.138362 down | 2.196108 down | PORCN    |
| 219484_at | 2.28E-06 | 9.42E-08 | 5.233499 down | 4.663538 down | 1.122216 up   | HCFC2    |
| 219492_at | 0.013387 | 0.011594 | 3.143998 down | 3.379396 down | 1.074872 down | CHIC2    |

|           |          |          |               |               |               |          |
|-----------|----------|----------|---------------|---------------|---------------|----------|
| 219494_at | 3.07E-04 | 8.23E-05 | 4.275665 up   | 5.142933 up   | 1.202838 up   | RAD54B   |
| 219497_s_ | 7.13E-06 | 4.78E-07 | 6.115955 up   | 13.46878 up   | 2.202236 up   | BCL11A   |
| 219498_s_ | 1.99E-06 | 7.75E-08 | 3.995844 up   | 5.932054 up   | 1.484556 up   | BCL11A   |
| 219499_at | 2.41E-04 | 5.94E-05 | 2.096004 up   | 2.204747 up   | 1.051881 up   | SEC61A2  |
| 219500_at | 7.72E-04 | 2.87E-04 | 1.102599 down | 2.726043 down | 2.472379 down | CLCF1    |
| 219501_at | 5.82E-04 | 1.94E-04 | 2.842635 down | 1.828572 down | 1.554565 up   | ENOX1    |
| 219505_at | 1.95E-04 | 4.43E-05 | 3.388026 up   | 10.92942 up   | 3.225896 up   | CECR1    |
| 219506_at | 8.62E-04 | 3.31E-04 | 1.392426 down | 3.633256 down | 2.6093 down   | C1orf54  |
| 219507_at | 0.01439  | 0.012607 | 1.450849 down | 1.653125 up   | 2.398436 up   | RSRC1    |
| 219508_at | 0.02609  | 0.024592 | 1.165542 up   | 1.075017 down | 1.252977 down | GCNT3    |
| 219510_at | 0.001275 | 5.66E-04 | 2.338692 up   | 3.252126 up   | 1.390575 up   | POLQ     |
| 219512_at | 0.008163 | 0.006443 | 1.649613 up   | 2.322573 up   | 1.40795 up    | DSN1     |
| 219513_s_ | 1.95E-04 | 4.43E-05 | 2.544425 up   | 2.05243 up    | 1.239713 down | SH2D3A   |
| 219514_at | 4.23E-07 | 8.69E-09 | 14.3448 down  | 2.065892 down | 6.943638 up   | ANGPTL2  |
| 219516_at | 0.008046 | 0.006325 | 1.566304 up   | 1.203973 down | 1.885788 down | TRPV4    |
| 219521_at | 5.12E-04 | 1.63E-04 | 2.364059 up   | 2.601288 up   | 1.100348 up   | B3GAT1   |
| 219523_s_ | 0.002136 | 0.001132 | 5.7971 up     | 1.061109 up   | 5.463245 down | ODZ3     |
| 219525_at | 0.007142 | 0.005473 | 1.964874 up   | 4.146901 up   | 2.110517 up   | SLC47A1  |
| 219528_s_ | 0.005945 | 0.004343 | 2.150717 up   | 3.058498 up   | 1.422083 up   | BCL11B   |
| 219529_at | 0.001045 | 4.31E-04 | 2.381126 down | 11.41089 down | 4.792221 down | CLIC3    |
| 219530_at | 4.50E-04 | 1.36E-04 | 2.232987 up   | 2.448434 up   | 1.096484 up   | PALB2    |
| 219531_at | 1.07E-04 | 1.99E-05 | 3.169667 up   | 3.289067 up   | 1.03767 up    | CEP72    |
| 219533_at | 0.009128 | 0.007375 | 1.194528 up   | 1.130568 down | 1.350495 down | CDKN1C   |
| 219535_at | 8.05E-07 | 2.18E-08 | 1.348426 up   | 1.633238 down | 2.2023 down   | HUNK     |
| 219536_s_ | 0.001602 | 7.70E-04 | 1.002771 up   | 2.218769 down | 2.224916 down | ZFP64    |
| 219538_at | 0.002748 | 0.001592 | 2.733832 down | 2.05038 down  | 1.333329 up   | WDR5B    |
| 219540_at | 0.003223 | 0.001972 | 2.189172 up   | 3.49223 up    | 1.595229 up   | ZNF267   |
| 219542_at | 6.01E-04 | 2.03E-04 | 3.927945 down | 2.241244 down | 1.752573 up   | NEK11    |
| 219543_at | 9.10E-05 | 1.58E-05 | 4.468848 down | 5.074799 down | 1.135595 down | PBLD     |
| 219544_at | 1.82E-04 | 4.08E-05 | 4.719592 up   | 6.112251 up   | 1.29508 up    | C13orf34 |
| 219545_at | 8.93E-05 | 1.54E-05 | 4.115872 up   | 4.174823 up   | 1.014323 up   | KCTD14   |
| 219546_at | 0.002201 | 0.001179 | 3.020974 down | 1.013611 down | 2.980408 up   | BMP2K    |
| 219551_at | 2.52E-05 | 2.74E-06 | 3.649293 up   | 2.800107 up   | 1.303269 down | EAF2     |
| 219552_at | 1.16E-06 | 3.58E-08 | 9.152368 down | 1.446471 down | 6.327378 up   | SVEP1    |

|           |          |          |               |               |               |           |
|-----------|----------|----------|---------------|---------------|---------------|-----------|
| 219555_s_ | 0.001113 | 4.69E-04 | 3.615381 up   | 4.833176 up   | 1.336837 up   | CENPN     |
| 219558_at | 0.006695 | 0.00505  | 3.434254 down | 3.107848 down | 1.105026 up   | ATP13A3   |
| 219561_at | 1.63E-10 | 1.11E-13 | 13.2015 down  | 21.33334 down | 1.615978 down | COPZ2     |
| 219562_at | 0.008817 | 0.007071 | 1.167458 up   | 1.735214 up   | 1.486318 up   | RAB26     |
| 219563_at | 1.02E-05 | 7.83E-07 | 26.93185 down | 9.391609 down | 2.86765 up    | C14orf139 |
| 219566_at | 7.61E-04 | 2.81E-04 | 2.183171 down | 2.039315 down | 1.070542 up   | PLEKHF1   |
| 219569_s_ | 0.002429 | 0.001348 | 3.277355 down | 2.814676 down | 1.164381 up   | TMEM22    |
|           |          |          |               |               |               | COG8 ///  |
| 219575_s_ | 0.016329 | 0.014559 | 2.025099 up   | 1.111165 up   | 1.822501 down | PDF       |
| 219577_s_ | 2.67E-04 | 6.82E-05 | 1.962592 up   | 1.172012 down | 2.300182 down | ABCA7     |
| 219580_s_ | 6.56E-05 | 1.02E-05 | 1.83966 up    | 1.780428 up   | 1.033269 down | TMC5      |
| 219581_at | 0.007833 | 0.006133 | 1.201386 down | 1.564156 up   | 1.879155 up   | TSEN2     |
| 219582_at | 0.010442 | 0.008648 | 2.055878 down | 1.685048 down | 1.220071 up   | OGFRL1    |
| 219588_s_ | 0.002488 | 0.001395 | 2.950431 up   | 4.188869 up   | 1.419748 up   | NCAPG2    |
| 219590_x_ | 6.83E-04 | 2.42E-04 | 1.658889 up   | 1.670119 up   | 1.00677 up    | DPH5      |
| 219594_at | 0.003921 | 0.002543 | 1.683787 down | 3.184569 down | 1.891314 down | NINJ2     |
| 219596_at | 0.04426  | 0.043032 | 1.916178 down | 1.170371 down | 1.63724 up    | THAP10    |
| 219598_s_ | 0.001676 | 8.18E-04 | 1.326001 down | 1.835833 down | 1.384489 down | RWDD1     |
| 219600_s_ | 2.51E-05 | 2.73E-06 | 3.380928 down | 2.702256 down | 1.25115 up    | TMEM50B   |
| 219609_at | 0.004797 | 0.00331  | 1.189613 down | 2.006638 down | 1.686799 down | WDR25     |
| 219611_s_ | 8.86E-05 | 1.52E-05 | 2.146918 up   | 2.550048 up   | 1.187772 up   | CCDC21    |
| 219615_s_ | 5.98E-04 | 2.01E-04 | 4.066255 up   | 3.049704 up   | 1.333328 down | KCNK5     |
| 219618_at | 1.83E-06 | 6.87E-08 | 3.742331 down | 2.973278 down | 1.258655 up   | IRAK4     |
| 219621_at | 0.001927 | 9.86E-04 | 1.990766 up   | 1.074644 up   | 1.852489 down | CLSPN     |
| 219622_at | 0.001421 | 6.54E-04 | 2.876674 up   | 2.070521 up   | 1.389348 down | RAB20     |
| 219623_at | 9.25E-05 | 1.62E-05 | 1.842521 up   | 1.441404 up   | 1.278282 down | ACTR5     |
| 219626_at | 0.010763 | 0.008967 | 2.263853 down | 1.182054 down | 1.915185 up   | MAP7D3    |
| 219627_at | 0.047297 | 0.046101 | 1.521038 down | 1.142237 up   | 1.737385 up   | ZNF767    |
| 219628_at | 7.74E-05 | 1.28E-05 | 8.700599 down | 8.111099 down | 1.072678 up   | ZMAT3     |
| 219630_at | 0.011435 | 0.009636 | 1.24982 up    | 1.183071 down | 1.478626 down | PDZK1IP1  |
| 219631_at | 0.00114  | 4.85E-04 | 3.220813 down | 5.008432 down | 1.555021 down | LRP12     |
| 219634_at | 0.007445 | 0.005756 | 2.69906 up    | 1.172772 up   | 2.301437 down | CHST11    |
| 219636_s_ | 4.41E-05 | 5.94E-06 | 3.152218 down | 2.02032 down  | 1.560257 up   | ARMC9     |
| 219637_at | 2.91E-05 | 3.35E-06 | 4.324729 down | 1.515265 down | 2.854108 up   | ARMC9     |

|           |          |          |          |      |          |      |          |      |           |
|-----------|----------|----------|----------|------|----------|------|----------|------|-----------|
| 219641_at | 0.005285 | 0.003746 | 1.312159 | down | 1.379798 | down | 1.051548 | down | DET1      |
| 219644_at | 0.00123  | 5.38E-04 | 1.380817 | up   | 2.63303  | up   | 1.906864 | up   | CCDC41    |
| 219646_at | 7.63E-04 | 2.82E-04 | 1.362771 | down | 2.647728 | down | 1.9429   | down | DEF8      |
| 219647_at | 0.00118  | 5.09E-04 | 1.219397 | up   | 1.376083 | down | 1.677991 | down | POPDC2    |
| 219648_at | 6.38E-05 | 9.85E-06 | 2.96825  | up   | 9.626228 | up   | 3.243066 | up   | MREG      |
| 219649_at | 3.83E-04 | 1.11E-04 | 2.404407 | up   | 2.754952 | up   | 1.145793 | up   | ALG6      |
| 219650_at | 0.002744 | 0.001588 | 4.287224 | up   | 5.305202 | up   | 1.237445 | up   | ERCC6L    |
| 219651_at | 6.45E-10 | 1.03E-12 | 53.10841 | up   | 49.16097 | up   | 1.080296 | down | DPPA4     |
| 219654_at | 0.014355 | 0.012568 | 1.574835 | down | 3.770977 | down | 2.394522 | down | PTPLA     |
| 219655_at | 4.31E-07 | 9.06E-09 | 2.310573 | down | 7.30343  | down | 3.160874 | down | C7orf10   |
| 219659_at | 0.015467 | 0.013691 | 1.624763 | up   | 1.221911 | up   | 1.32969  | down | ATP8A2    |
| 219664_s_ | 0.001967 | 0.001013 | 1.018027 | up   | 1.787875 | down | 1.820105 | down | DECR2     |
| 219665_at | 4.60E-04 | 1.41E-04 | 1.902722 | down | 2.624278 | down | 1.379223 | down | NUDT18    |
| 219668_at | 7.15E-04 | 2.58E-04 | 2.601551 | up   | 1.053345 | up   | 2.469799 | down | GDAP1L1   |
| 219674_s_ | 4.98E-05 | 7.03E-06 | 1.427152 | up   | 1.419887 | down | 2.026395 | down | HDLBP     |
| 219676_at | 0.002132 | 0.001129 | 2.36829  | up   | 2.911237 | up   | 1.229257 | up   | ZSCAN16   |
| 219677_at | 0.001478 | 6.89E-04 | 1.952602 | down | 1.941215 | down | 1.005866 | up   | SPSB1     |
| 219678_x_ | 0.001177 | 5.07E-04 | 1.199508 | up   | 1.690744 | up   | 1.409531 | up   | DCLRE1C   |
| 219680_at | 8.97E-04 | 3.50E-04 | 1.448116 | down | 1.990157 | down | 1.374307 | down | NLRX1     |
| 219681_s_ | 0.007672 | 0.005976 | 3.603304 | up   | 4.152566 | up   | 1.152433 | up   | RAB11FIP1 |
| 219682_s_ | 2.48E-04 | 6.17E-05 | 13.28201 | down | 2.289009 | down | 5.802514 | up   | TBX3      |
| 219683_at | 5.52E-05 | 8.05E-06 | 14.23063 | up   | 13.6409  | up   | 1.043233 | down | FZD3      |
| 219684_at | 1.98E-04 | 4.53E-05 | 4.402113 | down | 1.352508 | down | 3.254776 | up   | RTP4      |
| 219687_at | 0.014936 | 0.013161 | 1.619615 | down | 2.752259 | down | 1.699329 | down | HHAT      |
| 219688_at | 8.65E-05 | 1.48E-05 | 3.222133 | down | 2.12736  | down | 1.514616 | up   | BBS7      |
| 219691_at | 1.89E-05 | 1.86E-06 | 4.217158 | down | 4.580379 | down | 1.086129 | down | SAMD9     |
| 219699_at | 0.014954 | 0.013179 | 1.657459 | up   | 1.390206 | up   | 1.19224  | down | LGI2      |
| 219701_at | 7.26E-04 | 2.63E-04 | 1.315617 | down | 1.427002 | down | 1.084663 | down | TMOD2     |
| 219704_at | 0.006534 | 0.004901 | 1.516392 | up   | 2.17411  | up   | 1.433739 | up   | YBX2      |
| 219705_at | 8.79E-04 | 3.40E-04 | 2.434913 | up   | 2.329543 | up   | 1.045232 | down | QSER1     |
| 219706_at | 7.00E-06 | 4.64E-07 | 2.358107 | down | 2.969401 | down | 1.259231 | down | C20orf29  |
| 219708_at | 0.034821 | 0.033528 | 2.750967 | up   | 1.782211 | up   | 1.54357  | down | NT5M      |
| 219709_x_ | 3.11E-05 | 3.71E-06 | 1.527212 | down | 3.11114  | down | 2.037137 | down | FAM173A   |
| 219711_at | 6.95E-04 | 2.48E-04 | 2.276275 | up   | 2.073058 | up   | 1.098028 | down | ZNF586    |

|           |          |          |          |      |          |      |          |      |           |
|-----------|----------|----------|----------|------|----------|------|----------|------|-----------|
| 219714_s_ | 0.01803  | 0.016294 | 1.592103 | down | 1.918969 | up   | 3.055195 | up   | CACNA2D3  |
| 219715_s_ | 3.60E-04 | 1.02E-04 | 2.870559 | up   | 3.328273 | up   | 1.159451 | up   | TDP1      |
| 219716_at | 5.27E-05 | 7.56E-06 | 5.549494 | down | 2.103749 | down | 2.637908 | up   | APOL6     |
| 219717_at | 0.005308 | 0.003767 | 2.17209  | up   | 3.382785 | up   | 1.557388 | up   | C4orf30   |
| 219719_at | 0.013266 | 0.011467 | 1.265803 | up   | 1.097299 | down | 1.388964 | down | HIGD1B    |
| 219726_at | 0.019994 | 0.018323 | 1.748661 | up   | 1.038594 | up   | 1.683681 | down | NLGN3     |
| 219729_at | 2.18E-05 | 2.27E-06 | 4.078203 | down | 2.488429 | down | 1.638866 | up   | PRRX2     |
|           |          |          |          |      |          |      |          |      | RP11-     |
| 219732_at | 6.08E-04 | 2.06E-04 | 1.967805 | up   | 1.845594 | up   | 1.066218 | down | 35N6.1    |
| 219733_s_ | 2.96E-04 | 7.81E-05 | 1.919015 | up   | 1.355125 | up   | 1.416117 | down | SLC27A5   |
| 219735_s_ | 0.005748 | 0.00416  | 1.011329 | up   | 1.461599 | up   | 1.445226 | up   | TFCP2L1   |
| 219736_at | 1.28E-04 | 2.53E-05 | 9.306337 | up   | 7.110043 | up   | 1.3089   | down | TRIM36    |
| 219739_at | 0.007668 | 0.005971 | 1.542211 | up   | 1.076036 | up   | 1.433235 | down | RNF186    |
| 219740_at | 1.85E-05 | 1.80E-06 | 20.04153 | up   | 15.75534 | up   | 1.272047 | down | VASH2     |
| 219743_at | 5.60E-06 | 3.34E-07 | 8.846312 | up   | 7.763296 | up   | 1.139505 | down | HEY2      |
| 219749_at | 1.29E-05 | 1.10E-06 | 3.957768 | down | 3.662554 | down | 1.080603 | up   | SH2D4A    |
| 219751_at | 2.95E-04 | 7.76E-05 | 2.989125 | up   | 2.979158 | up   | 1.003346 | down | SETD6     |
| 219753_at | 0.001053 | 4.35E-04 | 1.590358 | up   | 1.349612 | up   | 1.178382 | down | STAG3     |
| 219754_at | 1.06E-04 | 1.95E-05 | 1.39757  | up   | 2.601456 | up   | 1.861414 | up   | RBM41     |
| 219760_at | 9.64E-04 | 3.86E-04 | 1.21134  | down | 2.212451 | down | 1.826449 | down | LIN7B     |
| 219763_at | 0.00742  | 0.005732 | 2.711268 | down | 1.394723 | down | 1.943948 | up   | DENND1A   |
| 219766_at | 5.82E-04 | 1.95E-04 | 1.157847 | up   | 1.452163 | down | 1.681382 | down | B9D2      |
| 219767_s_ | 0.002734 | 0.001581 | 1.705488 | down | 1.62063  | down | 1.052362 | up   | CRYZL1    |
| 219771_at | 1.67E-08 | 8.63E-11 | 11.50442 | down | 9.599351 | down | 1.198458 | up   | TBC1D8B   |
|           |          |          |          |      |          |      |          |      | CPLX3 /// |
| 219775_s_ | 5.51E-04 | 1.80E-04 | 1.732026 | up   | 1.152066 | down | 1.995409 | down | LMAN1L    |
| 219779_at | 0.001357 | 6.17E-04 | 1.617067 | down | 7.100171 | down | 4.390771 | down | ZFHX4     |
| 219785_s_ | 0.001029 | 4.21E-04 | 2.870771 | down | 2.680917 | down | 1.070817 | up   | FBXO31    |
| 219786_at | 8.31E-04 | 3.16E-04 | 1.869379 | up   | 1.667716 | up   | 1.120922 | down | MTL5      |
| 219787_s_ | 0.002416 | 0.001339 | 2.38148  | up   | 4.332714 | up   | 1.819337 | up   | ECT2      |
| 219788_at | 0.019905 | 0.01823  | 1.526418 | up   | 1.112629 | down | 1.698337 | down | PILRA     |
| 219789_at | 1.79E-04 | 4.00E-05 | 3.668728 | down | 27.43551 | down | 7.478208 | down | NPR3      |
| 219790_s_ | 8.61E-05 | 1.47E-05 | 1.392597 | down | 6.659426 | down | 4.782019 | down | NPR3      |
| 219793_at | 0.006738 | 0.005088 | 1.869218 | down | 1.159346 | up   | 2.167069 | up   | SNX16     |

|           |          |          |               |               |               |          |
|-----------|----------|----------|---------------|---------------|---------------|----------|
| 219796_s_ | 0.003796 | 0.002441 | 1.250408 up   | 1.324469 down | 1.656127 down | MUPCDH   |
| 219803_at | 0.011917 | 0.010115 | 1.336856 up   | 1.131601 up   | 1.181385 down | ANGPTL3  |
| 219805_at | 0.001381 | 6.30E-04 | 1.51212 up    | 1.556795 up   | 1.029545 up   | CXorf56  |
| 219806_s_ | 0.009004 | 0.007254 | 2.018821 up   | 1.083835 up   | 1.862665 down | C11orf75 |
| 219808_at | 0.002072 | 0.001088 | 2.217431 up   | 1.423338 up   | 1.557909 down | SCLY     |
| 219816_s_ | 0.014121 | 0.012331 | 1.317622 down | 1.003189 down | 1.313434 up   | RBM23    |
| 219817_at | 0.004133 | 0.002721 | 1.779577 up   | 2.204386 up   | 1.238714 up   | C12orf47 |
| 219819_s_ | 0.001953 | 0.001004 | 1.744195 up   | 2.058385 up   | 1.180135 up   | MRPS28   |
| 219822_at | 1.39E-04 | 2.82E-05 | 1.034174 up   | 2.062705 up   | 1.994544 up   | MTRF1    |
| 219823_at | 2.85E-10 | 3.05E-13 | 514.3818 up   | 523.2269 up   | 1.017196 up   | LIN28    |
| 219824_at | 0.006079 | 0.004468 | 2.007078 up   | 1.688796 up   | 1.188467 down | SLC13A4  |
| 219827_at | 0.012789 | 0.010987 | 1.545903 up   | 1.378138 down | 2.130467 down | UCP3     |
| 219828_at | 0.00172  | 8.46E-04 | 2.225458 up   | 2.013272 up   | 1.105394 down | C9orf86  |
| 219830_at | 0.002361 | 0.001299 | 1.803462 up   | 1.059789 down | 1.911289 down | RAI1     |
| 219832_s_ | 0.001069 | 4.45E-04 | 1.183789 up   | 1.337347 down | 1.583137 down | HOXC13   |
| 219834_at | 9.03E-05 | 1.56E-05 | 2.358903 down | 1.504394 down | 1.568008 up   | ALS2CR8  |
| 219835_at | 0.004311 | 0.002881 | 1.599928 up   | 1.132666 up   | 1.412533 down | PRDM8    |
| 219842_at | 0.003733 | 0.002389 | 1.689774 down | 1.051065 down | 1.607678 up   | ARL15    |
| 219843_at | 1.88E-04 | 4.26E-05 | 2.419505 down | 2.524121 down | 1.043239 down | IPP      |
| 219845_at | 5.96E-04 | 2.01E-04 | 1.664806 up   | 1.44186 down  | 2.400418 down | BARX1    |
| 219852_s_ | 0.003133 | 0.0019   | 1.856255 up   | 1.104718 down | 2.050638 down | MORN1    |
| 219855_at | 1.18E-04 | 2.25E-05 | 3.863581 up   | 2.262388 up   | 1.707745 down | NUDT11   |
| 219856_at | 0.003921 | 0.002543 | 1.598731 up   | 1.355436 up   | 1.179496 down | C1orf116 |
| 219860_at | 5.76E-05 | 8.57E-06 | 2.650299 down | 1.554023 down | 1.705444 up   | LY6G5C   |
| 219862_s_ | 7.00E-04 | 2.51E-04 | 2.903858 up   | 1.384146 up   | 2.097943 down | NARF     |
| 219863_at | 8.99E-06 | 6.56E-07 | 5.981343 up   | 17.09651 up   | 2.858306 up   | HERC5    |
| 219869_s_ | 0.002645 | 0.001512 | 1.334351 up   | 4.387173 up   | 3.28787 up    | SLC39A8  |
| 219870_at | 0.001852 | 9.34E-04 | 2.412011 up   | 2.495802 up   | 1.034739 up   | ATF7IP2  |
| 219872_at | 2.28E-04 | 5.52E-05 | 10.10998 down | 8.601427 down | 1.175383 up   | C4orf18  |
| 219879_s_ | 0.001341 | 6.06E-04 | 2.357698 up   | 1.596428 up   | 1.476858 down | C17orf53 |
| 219882_at | 6.47E-04 | 2.25E-04 | 1.624735 down | 2.783805 down | 1.71339 down  | TTLL7    |
| 219889_at | 0.044802 | 0.043593 | 1.14503 up    | 1.642694 up   | 1.434629 up   | FRAT1    |
| 219891_at | 0.001521 | 7.16E-04 | 1.701249 down | 2.410133 down | 1.416685 down | PGPEP1   |
| 219894_at | 4.42E-04 | 1.33E-04 | 3.05085 up    | 2.304448 up   | 1.323896 down | MAGEL2   |



|           |          |          |               |               |               |           |
|-----------|----------|----------|---------------|---------------|---------------|-----------|
| 219896_at | 0.004174 | 0.002756 | 1.542754 up   | 1.266303 up   | 1.218314 down | CALY      |
| 219901_at | 3.92E-04 | 1.14E-04 | 3.914775 up   | 3.933497 up   | 1.004782 up   | FGD6      |
| 219902_at | 2.45E-07 | 4.10E-09 | 12.59744 down | 4.780456 down | 2.635196 up   | BHMT2     |
| 219905_at | 6.56E-05 | 1.02E-05 | 3.185213 down | 2.758669 down | 1.15462 up    | ERMAP     |
| 219906_at | 0.00248  | 0.001389 | 2.331753 up   | 2.88834 up    | 1.238699 up   | FLJ10213  |
| 219909_at | 0.00127  | 5.63E-04 | 1.529252 up   | 1.249147 down | 1.910261 down | MMP28     |
| 219910_at | 6.76E-04 | 2.38E-04 | 1.563485 down | 2.657149 down | 1.699504 down | FICD      |
|           |          |          |               |               |               | LOC100134 |
|           |          |          |               |               |               | 295 ///   |
| 219911_s_ | 0.004528 | 0.003076 | 2.04999 up    | 1.720042 up   | 1.191826 down | SLCO4A1   |
| 219915_s_ | 4.71E-05 | 6.50E-06 | 1.797133 up   | 2.400672 up   | 1.335835 up   | SLC16A10  |
| 219917_at | 0.019571 | 0.017875 | 1.609844 down | 1.101412 up   | 1.773102 up   | ZCCHC4    |
| 219918_s_ | 0.008674 | 0.006936 | 3.537911 up   | 7.334789 up   | 2.073198 up   | ASPM      |
| 219921_s_ | 4.78E-04 | 1.48E-04 | 2.755545 down | 4.30124 down  | 1.56094 down  | DOCK5     |
| 219922_s_ | 1.54E-07 | 2.16E-09 | 6.511772 down | 13.66944 down | 2.09919 down  | LTBP3     |
| 219923_at | 0.006924 | 0.005266 | 1.471451 up   | 1.621118 up   | 1.101714 up   | TRIM45    |
| 219924_s_ | 4.53E-04 | 1.38E-04 | 3.459575 down | 1.479424 down | 2.338462 up   | ZMYM6     |
| 219926_at | 2.77E-05 | 3.15E-06 | 5.980254 down | 5.753832 down | 1.039352 up   | POPDC3    |
| 219933_at | 2.64E-04 | 6.72E-05 | 2.055159 down | 4.041453 down | 1.966492 down | GLRX2     |
| 219935_at | 0.00251  | 0.001412 | 30.90108 down | 4.459647 down | 6.929041 up   | ADAMTS5   |
| 219937_at | 0.001389 | 6.35E-04 | 13.09514 down | 2.399151 down | 5.45824 up    | TRHDE     |
| 219940_s_ | 1.73E-04 | 3.82E-05 | 1.046967 up   | 1.800149 up   | 1.719395 up   | PCID2     |
| 219942_at | 0.017544 | 0.0158   | 3.124725 up   | 1.947169 up   | 1.604753 down | MYL7      |
| 219943_s_ | 0.0135   | 0.011705 | 1.322399 down | 1.113526 up   | 1.472525 up   | USP46     |
| 219944_at | 1.78E-06 | 6.62E-08 | 3.714227 down | 3.977875 down | 1.070983 down | CLIP4     |
| 219945_at | 5.99E-04 | 2.02E-04 | 7.344961 up   | 5.101456 up   | 1.439778 down | DDX25     |
| 219951_s_ | 4.55E-04 | 1.38E-04 | 2.952678 up   | 2.159497 up   | 1.367299 down | C20orf12  |
| 219952_s_ | 0.020913 | 0.019264 | 1.884963 down | 1.323906 down | 1.42379 up    | MCOLN1    |
| 219953_s_ | 9.26E-05 | 1.62E-05 | 2.539103 down | 1.966119 down | 1.291429 up   | C11orf17  |
| 219955_at | 3.24E-08 | 2.50E-10 | 172.8135 up   | 239.2659 up   | 1.384532 up   | L1TD1     |
| 219956_at | 0.027483 | 0.026004 | 2.610778 down | 1.562104 down | 1.671322 up   | GALNT6    |
| 219958_at | 0.012729 | 0.010928 | 1.610759 up   | 1.26299 up    | 1.275355 down | C20orf46  |
|           |          |          |               |               |               | NCRNA0015 |
| 219961_s_ | 0.005229 | 0.003697 | 1.557306 down | 1.392833 up   | 2.169067 up   | 3         |

|           |          |          |               |               |               |            |
|-----------|----------|----------|---------------|---------------|---------------|------------|
| 219963_at | 0.003374 | 0.002097 | 1.790952 up   | 1.578782 up   | 1.134388 down | DUSP13     |
| 219964_at | 0.003419 | 0.002134 | 1.731225 down | 1.609134 down | 1.075874 up   | ST7L       |
| 219966_x_ | 0.021772 | 0.020143 | 1.414801 up   | 1.309528 up   | 1.08039 down  | BANP       |
| 219968_at | 3.17E-04 | 8.60E-05 | 3.85362 up    | 7.082018 up   | 1.837757 up   | ZNF589     |
| 219972_s_ | 0.026208 | 0.024711 | 2.309983 down | 1.060793 down | 2.177601 up   | C14orf135  |
| 219973_at | 2.33E-08 | 1.44E-10 | 13.15496 down | 16.75277 down | 1.273495 down | ARSJ       |
| 219976_at | 2.07E-06 | 8.27E-08 | 5.871082 up   | 5.352073 up   | 1.096974 down | HOOK1      |
| 219977_at | 0.019471 | 0.017771 | 1.138075 up   | 1.067029 down | 1.214359 down | AIPL1      |
| 219978_s_ | 0.002446 | 0.001362 | 4.793099 up   | 10.54459 up   | 2.199951 up   | NUSAP1     |
|           |          |          |               |               |               | SERF1A /// |
| 219982_s_ | 0.006297 | 0.004678 | 1.815004 up   | 1.162286 up   | 1.561581 down | SERF1B     |
| 219983_at | 3.65E-06 | 1.84E-07 | 8.367132 up   | 6.234771 up   | 1.342011 down | HRASLS     |
| 219984_s_ | 1.86E-05 | 1.83E-06 | 4.396803 up   | 3.301658 up   | 1.331696 down | HRASLS     |
| 219985_at | 0.010542 | 0.008749 | 3.349171 down | 1.494835 down | 2.240496 up   | HS3ST3A1   |
| 219987_at | 3.09E-04 | 8.31E-05 | 4.654882 up   | 3.915132 up   | 1.188946 down |            |
| 219989_s_ | 0.002247 | 0.001216 | 1.584551 up   | 1.126498 up   | 1.406617 down | ANKS1B     |
| 219990_at | 0.002841 | 0.001664 | 4.180916 up   | 5.543404 up   | 1.325883 up   | E2F8       |
| 219991_at | 0.028662 | 0.02723  | 2.102651 down | 1.3009 down   | 1.616305 up   | SLC2A9     |
| 219992_at | 0.001046 | 4.32E-04 | 2.020298 up   | 3.462374 up   | 1.713794 up   | TAC3       |
| 219993_at | 1.50E-04 | 3.14E-05 | 4.816988 up   | 4.759843 up   | 1.012006 down | SOX17      |
| 219997_s_ | 0.010648 | 0.008859 | 1.860094 up   | 1.523842 up   | 1.22066 down  | COPS7B     |
| 219998_at | 1.11E-04 | 2.07E-05 | 3.744735 up   | 2.564195 up   | 1.460394 down | HSPC159    |
| 220002_at | 0.010463 | 0.00867  | 1.581447 down | 1.745347 down | 1.10364 down  | KIF26B     |
| 220005_at | 0.010799 | 0.009004 | 1.137687 down | 1.352118 down | 1.18848 down  | P2RY13     |
| 220007_at | 0.003626 | 0.0023   | 1.583165 up   | 2.668311 up   | 1.685428 up   | METTL8     |
| 220008_at | 4.60E-04 | 1.41E-04 | 1.229911 down | 1.94969 down  | 1.585229 down | SGK269     |
| 220011_at | 6.56E-05 | 1.02E-05 | 6.06234 up    | 7.300314 up   | 1.204207 up   | C1orf135   |
| 220013_at | 1.61E-06 | 5.75E-08 | 8.461249 up   | 6.313999 up   | 1.340078 down | EPHX3      |
| 220014_at | 3.41E-08 | 2.70E-10 | 36.93587 down | 48.41749 down | 1.310853 down | PRR16      |
| 220016_at | 3.44E-04 | 9.56E-05 | 4.336954 down | 3.747975 down | 1.157146 up   | AHNAK      |
| 220021_at | 0.013527 | 0.011733 | 1.36926 up    | 1.218394 up   | 1.123823 down | TMC7       |
| 220022_at | 5.88E-05 | 8.83E-06 | 2.381323 up   | 3.284483 up   | 1.379268 up   | ZNF334     |
| 220024_s_ | 0.01679  | 0.015033 | 1.347925 up   | 1.321858 down | 1.781766 down | PRX        |
| 220028_at | 1.46E-07 | 2.00E-09 | 9.047271 up   | 11.62493 up   | 1.28491 up    | ACVR2B     |

|           |          |          |          |      |          |      |          |      |             |
|-----------|----------|----------|----------|------|----------|------|----------|------|-------------|
| 220032_at | 4.07E-04 | 1.20E-04 | 4.029457 | down | 2.324767 | down | 1.733274 | up   | C7orf58     |
| 220034_at | 0.004011 | 0.002617 | 1.926247 | down | 1.115248 | up   | 2.148243 | up   | IRAK3       |
| 220035_at | 5.29E-04 | 1.70E-04 | 2.489943 | up   | 2.087805 | up   | 1.192613 | down | NUP210      |
|           |          |          |          |      |          |      |          |      | C8orf44 /// |
| 220038_at | 0.010511 | 0.008721 | 2.60148  | down | 1.287169 | down | 2.021087 | up   | SGK3        |
| 220040_x_ | 7.61E-04 | 2.82E-04 | 1.58518  | up   | 1.864001 | up   | 1.175893 | up   | ZC4H2       |
| 220041_at | 0.001241 | 5.45E-04 | 2.769078 | down | 2.652608 | down | 1.043908 | up   | PIGZ        |
| 220044_x_ | 0.001125 | 4.76E-04 | 1.577612 | up   | 2.084724 | up   | 1.321443 | up   | CROP        |
| 220049_s_ | 5.96E-04 | 2.01E-04 | 6.559867 | down | 6.475664 | down | 1.013003 |      | PDCD1LG2    |
| 220050_at | 0.001077 | 4.49E-04 | 1.218895 | down | 2.018889 | down | 1.656327 | down | C9orf9      |
| 220052_s_ | 1.50E-04 | 3.12E-05 | 1.749363 | down | 2.095032 | down | 1.197597 | down | TINF2       |
| 220053_at | 2.57E-05 | 2.81E-06 | 13.36817 | up   | 13.06312 | up   | 1.023352 | down | GDF3        |
| 220054_at | 0.002005 | 0.001039 | 2.017555 | up   | 1.391966 | up   | 1.449428 | down | IL23A       |
|           |          |          |          |      |          |      |          |      | XAGE1A ///  |
|           |          |          |          |      |          |      |          |      | XAGE1B ///  |
|           |          |          |          |      |          |      |          |      | XAGE1C ///  |
|           |          |          |          |      |          |      |          |      | XAGE1D ///  |
| 220057_at | 5.52E-04 | 1.81E-04 | 1.906192 | up   | 1.415699 | down | 2.698595 | down | XAGE1E      |
| 220060_s_ | 9.77E-04 | 3.93E-04 | 3.046405 | up   | 4.518842 | up   | 1.483336 | up   | C12orf48    |
| 220063_at | 0.002095 | 0.001103 | 1.272074 | up   | 1.614729 | up   | 1.269367 | up   | GSTCD       |
| 220068_at | 0.048568 | 0.047395 | 1.396112 | up   | 1.001543 | down | 1.398267 | down | VPREB3      |
| 220071_x_ | 8.49E-04 | 3.25E-04 | 1.8744   | up   | 2.203485 | up   | 1.175568 | up   | HAUS2       |
| 220072_at | 0.010114 | 0.008327 | 2.180148 | up   | 2.28061  | up   | 1.046081 | up   | CSPP1       |
| 220073_s_ | 5.28E-05 | 7.58E-06 | 1.889771 | up   | 2.157013 | up   | 1.141415 | up   | PLEKHG6     |
| 220075_s_ | 0.00608  | 0.004469 | 1.168601 | up   | 1.226498 | down | 1.433287 | down | MUPCDH      |
| 220076_at | 0.006954 | 0.005295 | 2.429707 | down | 1.606623 | down | 1.512307 | up   | ANKH        |
| 220077_at | 0.003318 | 0.002052 | 1.565948 | up   | 1.200928 | down | 1.880591 | down | CCDC134     |
| 220081_x_ | 2.95E-04 | 7.77E-05 | 1.549138 | up   | 2.814757 | up   | 1.816983 | up   | HSD17B7     |
| 220085_at | 2.03E-06 | 8.10E-08 | 12.63741 | up   | 30.48446 | up   | 2.412239 | up   | HELLS       |
| 220086_at | 0.006166 | 0.004551 | 1.399357 | down | 1.263351 | up   | 1.76788  |      | IKZF5       |
| 220089_at | 1.48E-05 | 1.34E-06 | 2.503988 | up   | 2.739765 | up   | 1.094161 | up   | L2HGDH      |

|           |          |          |          |      |          |      |          |      |             |
|-----------|----------|----------|----------|------|----------|------|----------|------|-------------|
| 220092_s_ | 2.73E-04 | 7.01E-05 | 8.013712 | down | 5.09462  | down | 1.572976 | up   | ANTXR1      |
| 220101_x_ | 0.00802  | 0.006302 | 1.59038  | up   | 1.008915 | up   | 1.576327 | down |             |
| 220102_at | 7.49E-07 | 1.97E-08 | 8.415091 | down | 1.228222 | down | 6.851441 | up   | FOXL2       |
| 220109_at | 0.005925 | 0.004324 | 1.073407 | up   | 1.061248 | down | 1.139151 | down | TF          |
| 220112_at | 0.009647 | 0.00787  | 1.136106 | down | 1.1344   | up   | 1.288798 | up   | ANKRD55     |
| 220113_x_ | 1.76E-04 | 3.90E-05 | 1.582854 | up   | 2.417726 | up   | 1.527448 | up   | POLR1B      |
| 220116_at | 0.001586 | 7.59E-04 | 4.890044 | up   | 17.37083 | up   | 3.552284 | up   | KCNN2       |
| 220125_at | 0.02325  | 0.021668 | 1.366585 | up   | 1.025615 | up   | 1.332454 | down | DNAI1       |
| 220126_at | 0.016039 | 0.014266 | 1.551703 | up   | 1.154512 | down | 1.79146  | down | TSP50       |
| 220127_s_ | 0.004122 | 0.002711 | 1.046915 | down | 1.248651 | up   | 1.307232 | up   | FBXL12      |
| 220128_s_ | 7.47E-05 | 1.22E-05 | 3.284131 | down | 1.432504 | down | 2.292581 | up   | NIPAL2      |
| 220130_x_ | 0.007776 | 0.00608  | 1.732305 | up   | 1.806979 | down | 3.130238 | down | LTB4R2      |
| 220131_at | 0.007771 | 0.006075 | 2.089802 | up   | 1.681057 | up   | 1.243148 | down | FXD7        |
| 220133_at | 0.006635 | 0.004992 | 1.472149 | up   | 1.250209 | up   | 1.177523 | down | ODAM        |
| 220134_x_ | 1.65E-04 | 3.56E-05 | 4.239005 | down | 2.891655 | down | 1.465944 | up   | FAM176B     |
| 220136_s_ | 0.030677 | 0.029298 | 1.307006 | up   | 1.05755  | down | 1.382224 | down | CRYBA2      |
| 220138_at | 3.88E-04 | 1.13E-04 | 8.048986 | up   | 7.748261 | up   | 1.038812 | down | HAND1       |
| 220139_at | 0.012572 | 0.010774 | 1.388465 | up   | 1.08201  | up   | 1.283227 | down | DNMT3L      |
| 220140_s_ | 0.00114  | 4.85E-04 | 1.255359 | up   | 1.30344  | down | 1.636284 | down | SNX11       |
| 220141_at | 2.87E-04 | 7.49E-05 | 4.123262 | down | 3.128608 | down | 1.317922 | up   | C11orf63    |
| 220143_x_ | 9.17E-06 | 6.74E-07 | 2.03001  | up   | 1.837034 | up   | 1.105048 | down | LUC7L       |
| 220144_s_ | 1.83E-05 | 1.78E-06 | 3.128706 | up   | 2.386137 | up   | 1.311201 | down | ANKRD5      |
| 220147_s_ | 5.55E-08 | 4.96E-10 | 39.81243 | up   | 21.57158 | up   | 1.845597 | down | FAM60A      |
| 220149_at | 0.005967 | 0.004363 | 1.262186 | up   | 1.021798 | up   | 1.23526  | down | C2orf54     |
| 220150_s_ | 1.46E-07 | 1.98E-09 | 4.81347  | up   | 8.188937 | up   | 1.701254 | up   | FAM184A     |
| 220152_at | 0.018803 | 0.017093 | 1.554394 | up   | 1.19672  | up   | 1.298878 | down | C10orf95    |
| 220153_at | 0.047699 | 0.046516 | 1.045151 | down | 1.375443 | down | 1.316023 | down | ENTPD7      |
| 220155_s_ | 0.020078 | 0.018406 | 1.389084 | up   | 1.017714 | up   | 1.364907 | down | BRD9        |
|           |          |          |          |      |          |      |          |      | PLEKHA8 /// |
| 220157_x_ | 0.003186 | 0.001943 | 1.567123 | up   | 1.661752 | up   | 1.060384 | up   | PLEKHA9     |
| 220161_s_ | 2.85E-05 | 3.27E-06 | 15.21326 | up   | 5.424705 | up   | 2.80444  | down | EPB41L4B    |
| 220162_s_ | 0.016835 | 0.015081 | 1.573155 | down | 1.6452   | down | 1.045797 | down | CARD9       |
| 220166_at | 0.006243 | 0.004626 | 1.206598 | down | 1.377363 | up   | 1.661923 | up   | CNNM1       |

|           |          |          |               |               |               |                                                                                               |
|-----------|----------|----------|---------------|---------------|---------------|-----------------------------------------------------------------------------------------------|
| 220173_at | 3.88E-05 | 4.99E-06 | 4.418912 down | 6.731323 down | 1.523299 down | C14orf45<br>CBWD1 ///<br>CBWD2 ///<br>CBWD3 ///<br>CBWD5 ///<br>CBWD6 ///                     |
| 220175_s_ | 0.002307 | 0.00126  | 1.723513 up   | 1.263484 up   | 1.364096 down | CBWD7                                                                                         |
| 220184_at | 3.54E-08 | 2.92E-10 | 125.886 up    | 186.1238 up   | 1.478511 up   | NANOG                                                                                         |
| 220188_at | 0.006505 | 0.004871 | 1.682394 up   | 1.349802 up   | 1.246401 down | JPH3                                                                                          |
| 220189_s_ | 0.015192 | 0.013418 | 1.773655 down | 2.439169 down | 1.375222 down | MGAT4B                                                                                        |
| 220192_x_ | 0.008073 | 0.006354 | 1.576088 up   | 1.184169 up   | 1.330965 down | SPDEF                                                                                         |
| 220194_at | 5.79E-04 | 1.92E-04 | 1.483088 up   | 1.78107 up    | 1.20092 up    | NSUN7                                                                                         |
| 220198_s_ | 1.14E-05 | 9.04E-07 | 3.146926 down | 1.525943 down | 2.062283 up   | EIF5A2                                                                                        |
| 220199_s_ | 0.022454 | 0.02087  | 1.870862 down | 1.059881 up   | 1.982892 up   | AIDA                                                                                          |
| 220209_at | 0.015157 | 0.013385 | 1.461592 up   | 1.007635 down | 1.472751 down | PYY2                                                                                          |
| 220212_s_ | 0.005039 | 0.003526 | 1.137072 down | 1.817294 down | 1.598222 down | THADA                                                                                         |
| 220214_at | 0.001296 | 5.79E-04 | 1.589455 up   | 2.686835 up   | 1.690413 up   | ZNF215                                                                                        |
| 220215_at | 5.66E-04 | 1.87E-04 | 1.559166 up   | 2.170776 up   | 1.392267 up   | ZNF669                                                                                        |
|           |          |          |               |               |               | LOC100133<br>503 ///<br>LOC644397<br>/// LRRC37A<br>///<br>LRRC37A2<br>///<br>LRRC37A3<br>/// |
| 220219_s_ | 0.018775 | 0.017063 | 1.709012 up   | 1.174287 up   | 1.455362 down | LRRC37A4                                                                                      |
| 220229_s_ | 0.003728 | 0.002385 | 1.432582 down | 1.256495 down | 1.140141 up   | AP4E1                                                                                         |
| 220230_s_ | 1.35E-05 | 1.16E-06 | 1.283087 up   | 3.704151 up   | 2.886905 up   | CYB5R2                                                                                        |
| 220234_at | 0.00312  | 0.001889 | 1.676145 up   | 1.478148 up   | 1.133949 down | CA8                                                                                           |
| 220235_s_ | 0.049167 | 0.048012 | 1.719424 down | 1.612759 up   | 2.773016 up   | C1orf103                                                                                      |
| 220238_s_ | 8.14E-04 | 3.08E-04 | 3.533911 up   | 4.530007 up   | 1.281868 up   | KLHL7                                                                                         |

|           |          |          |               |               |               |          |
|-----------|----------|----------|---------------|---------------|---------------|----------|
| 220239_at | 4.56E-05 | 6.23E-06 | 8.385919 up   | 6.062381 up   | 1.383272 down | KLHL7    |
| 220240_s_ | 7.15E-04 | 2.58E-04 | 3.245745 down | 2.522483 down | 1.286727 up   | TMCO3    |
| 220241_at | 3.84E-05 | 4.92E-06 | 3.110579 down | 1.387853 down | 2.24129 up    | TMCO3    |
| 220248_x_ | 0.031584 | 0.03023  | 1.66133 up    | 1.200605 up   | 1.383745 down | NSFL1C   |
| 220249_at | 0.014392 | 0.01261  | 1.390603 up   | 1.14866 up    | 1.210631 down | HYAL4    |
| 220251_at | 8.30E-04 | 3.15E-04 | 2.378189 down | 2.809011 down | 1.181155 down | C1orf107 |
| 220252_x_ | 0.027829 | 0.026358 | 1.262508 up   | 1.019477 down | 1.287097 down | CXorf21  |
| 220253_s_ | 4.74E-04 | 1.46E-04 | 4.943997 down | 2.842742 down | 1.739165 up   | LRP12    |
| 220254_at | 2.02E-04 | 4.66E-05 | 4.69526 down  | 4.744621 down | 1.010513 down | LRP12    |
| 220260_at | 1.60E-06 | 5.67E-08 | 4.713821 down | 8.540215 down | 1.811739 down | TBC1D19  |
| 220262_s_ | 0.002676 | 0.001535 | 1.491168 down | 1.291955 up   | 1.926521 up   | DLK2     |
| 220263_at | 0.001004 | 4.08E-04 | 1.555027 down | 1.182785 down | 1.314717 up   | SMAD5OS  |
| 220266_s_ | 0.003004 | 0.001796 | 4.486771 down | 2.292756 down | 1.956934 up   | KLF4     |
| 220267_at | 0.013715 | 0.011925 | 1.354531 up   | 1.145277 down | 1.551313 down | KRT24    |
| 220269_at | 0.035188 | 0.033893 | 1.753393 up   | 1.492607 up   | 1.174718 down | ZBBX     |
| 220273_at | 0.002025 | 0.001054 | 1.608776 up   | 1.291612 down | 2.077914 down | IL17B    |
| 220277_at | 0.001112 | 4.69E-04 | 2.484988 up   | 2.223481 up   | 1.117612 down | CXXC4    |
| 220278_at | 0.005326 | 0.003781 | 1.395087 up   | 1.238408 up   | 1.126516 down | KDM4D    |
| 220279_at | 0.009584 | 0.00781  | 1.625295 up   | 1.335185 down | 2.17007 down  | TRIM17   |
| 220282_at | 8.68E-04 | 3.34E-04 | 1.428788 up   | 1.41548 up    | 1.009401 down | RIC3     |
| 220289_s_ | 6.92E-05 | 1.10E-05 | 4.040658 up   | 2.828484 up   | 1.428559 down | AIM1L    |
| 220291_at | 0.001239 | 5.43E-04 | 2.410812 up   | 2.623999 up   | 1.08843 up    | GDPD2    |
| 220296_at | 6.53E-04 | 2.27E-04 | 1.197454 up   | 3.485742 down | 4.174015 down | GALNT10  |
| 220298_s_ | 0.006525 | 0.004893 | 1.758548 down | 1.63675 up    | 2.878304 up   | SPATA6   |
| 220311_at | 5.78E-05 | 8.61E-06 | 1.323364 down | 2.610597 down | 1.972698 down | N6AMT1   |
| 220317_at | 6.38E-04 | 2.21E-04 | 7.191465 up   | 6.877441 up   | 1.04566 down  | LRAT     |
| 220319_s_ | 9.18E-04 | 3.61E-04 | 1.125994 down | 2.065253 up   | 2.325463 up   | MYLIP    |
| 220323_at | 3.00E-04 | 7.95E-05 | 1.172621 down | 1.487042 up   | 1.743736 up   | CNTD2    |
| 220325_at | 0.002433 | 0.001351 | 1.408421 down | 1.130662 down | 1.245661 up   | TAF7L    |
| 220326_s_ | 0.002146 | 0.00114  | 2.387181 down | 1.686696 down | 1.4153 up     | FLJ10357 |
| 220327_at | 1.85E-07 | 2.79E-09 | 49.07269 down | 17.6109 down  | 2.786497 up   | VGLL3    |
| 220331_at | 0.005597 | 0.004022 | 1.407581 up   | 1.091012 down | 1.535688 down | CYP46A1  |
| 220334_at | 5.68E-04 | 1.88E-04 | 1.121353 up   | 3.971589 up   | 3.541782 up   | RGS17    |
| 220335_x_ | 6.35E-04 | 2.19E-04 | 2.040525 up   | 2.429399 up   | 1.190576 up   | CES3     |

|           |          |          |               |               |               |           |
|-----------|----------|----------|---------------|---------------|---------------|-----------|
| 220337_at | 5.56E-04 | 1.82E-04 | 1.680703 up   | 1.444861 down | 2.428382 down | NGB       |
| 220341_s_ | 3.24E-04 | 8.86E-05 | 1.44048 up    | 1.602642 up   | 1.112575 up   | C5orf45   |
| 220342_x_ | 0.004342 | 0.002909 | 3.525245 down | 1.893944 down | 1.861325 up   | EDEM3     |
| 220343_at | 0.001332 | 6.00E-04 | 1.455478 down | 2.026052 down | 1.392019 down | PDE7B     |
| 220344_at | 0.019322 | 0.017617 | 1.381144 up   | 1.195453 up   | 1.155332 down | C11orf16  |
| 220345_at | 2.84E-04 | 7.39E-05 | 2.367536 up   | 2.289809 up   | 1.033945 down | LRRTM4    |
| 220351_at | 3.17E-08 | 2.38E-10 | 118.5487 down | 1.10066 down  | 107.707 up    | CCRL1     |
| 220355_s_ | 6.62E-04 | 2.32E-04 | 1.593911 up   | 1.007617 down | 1.606052 down | PBRM1     |
| 220360_at | 0.00109  | 4.56E-04 | 2.71445 up    | 2.80609 up    | 1.03376 up    | THAP9     |
| 220367_s_ | 6.04E-04 | 2.05E-04 | 2.00564 up    | 1.676975 up   | 1.195987 down | SAP130    |
| 220368_s_ | 0.015509 | 0.013737 | 2.43757 up    | 3.454227 up   | 1.417078 up   | SMEK1     |
| 220370_s_ | 6.31E-04 | 2.17E-04 | 2.396492 up   | 2.295953 up   | 1.04379 down  | USP36     |
| 220374_at | 0.011385 | 0.009587 | 1.178948 up   | 1.626664 up   | 1.379759 up   | KLHL28    |
| 220377_at | 0.022487 | 0.020905 | 1.499815 up   | 1.056263 up   | 1.419926 down | FAM30A    |
| 220381_at | 5.90E-04 | 1.98E-04 | 1.859463 up   | 2.273073 up   | 1.222435 up   | ARHGAP28  |
| 220382_s_ | 0.008699 | 0.006958 | 1.844781 up   | 2.944107 up   | 1.595911 up   | ARHGAP28  |
| 220395_at | 0.036052 | 0.034775 | 1.271581 down | 1.044262 up   | 1.327863 up   | DNAJA4    |
| 220403_s_ | 0.002314 | 0.001266 | 1.481727 up   | 1.019246 down | 1.510245 down | TP53AIP1  |
| 220407_s_ | 2.98E-04 | 7.90E-05 | 1.220005 down | 11.98133 down | 9.820725 down | TGFB2     |
| 220408_x_ | 0.003485 | 0.00219  | 1.698689 up   | 1.738577 up   | 1.023482 up   | FAM48A    |
| 220410_s_ | 6.70E-04 | 2.35E-04 | 2.050102 up   | 1.862873 up   | 1.100505 down | CAMSAP1   |
| 220411_x_ | 0.004272 | 0.002844 | 1.664194 down | 1.632047 down | 1.019698 up   | PODNL1    |
| 220416_at | 3.94E-05 | 5.11E-06 | 5.778641 down | 1.059504 down | 5.454103 up   | ATP8B4    |
| 220417_s_ | 0.012425 | 0.010627 | 1.634265 up   | 1.132965 up   | 1.442468 down | THAP4     |
| 220418_at | 0.015533 | 0.013761 | 1.417808 up   | 1.015897 down | 1.440347 down | UBASH3A   |
| 220430_at | 0.0118   | 0.009996 | 1.432752 up   | 1.172291 down | 1.679603 down | GRRP1     |
|           |          |          |               |               |               | TMPRSS11E |
|           |          |          |               |               |               | ///       |
|           |          |          |               |               |               | TMPRSS11E |
| 220431_at | 9.61E-04 | 3.84E-04 | 1.94617 up    | 1.955728 up   | 1.004911 up   | 2         |
| 220437_at | 0.004185 | 0.002767 | 1.33458 up    | 1.043454 down | 1.392573 down | LOC55908  |
| 220439_at | 0.028058 | 0.026595 | 1.325271 up   | 1.015356 up   | 1.305228 down | RIN3      |

|           |          |          |               |               |               |  |            |
|-----------|----------|----------|---------------|---------------|---------------|--|------------|
|           |          |          |               |               |               |  | GALNT4 /// |
| 220442_at | 0.007196 | 0.005523 | 2.096193 down | 1.521169 down | 1.378015 up   |  | WDR51B     |
| 220444_at | 9.89E-04 | 4.00E-04 | 2.326582 down | 1.660148 down | 1.401431 up   |  | ZNF557     |
|           |          |          |               |               |               |  | CSAG2 ///  |
| 220445_s_ | 0.001466 | 6.81E-04 | 1.196261 up   | 1.287341 down | 1.539995 down |  | CSAG3      |
| 220446_s_ | 9.67E-04 | 3.87E-04 | 2.722221 up   | 3.716422 up   | 1.365217 up   |  | CHST4      |
| 220447_at | 0.024377 | 0.0228   | 1.106996 down | 1.264393 up   | 1.399678 up   |  | HRH3       |
| 220451_s_ | 9.26E-04 | 3.65E-04 | 2.214338 up   | 1.009459 down | 2.235283 down |  | BIRC7      |
| 220452_x_ | 0.003194 | 0.001948 | 2.157016 down | 1.331404 down | 1.620106 up   |  |            |
| 220454_s_ | 3.90E-06 | 2.01E-07 | 15.08187 up   | 12.0713 up    | 1.2494 down   |  | SEMA6A     |
| 220455_at | 0.002462 | 0.001375 | 1.648895 up   | 1.083681 down | 1.786876 down |  | SLC16A8    |
| 220458_at | 0.004081 | 0.002676 | 1.332727 up   | 1.871676 up   | 1.404396 up   |  |            |
|           |          |          |               |               |               |  |            |
| 220459_at | 0.011636 | 0.009837 | 1.032331 up   | 1.792885 up   | 1.736735 up   |  | MCM3APAS   |
| 220465_at | 8.14E-04 | 3.08E-04 | 1.823984 up   | 1.131564 up   | 1.611915 down |  | LOC80054   |
| 220466_at | 0.003519 | 0.002215 | 1.48256 up    | 2.321983 up   | 1.566198 up   |  | CCDC15     |
| 220470_at | 0.004206 | 0.002783 | 1.89742 down  | 1.995023 down | 1.05144 down  |  | BET1L      |
| 220471_s_ | 0.007667 | 0.00597  | 1.261594 up   | 1.146407 down | 1.446301 down |  | MYCT1      |
| 220472_at | 0.040488 | 0.039247 | 1.338583 down | 1.036917 up   | 1.388 up      |  | ZCCHC4     |
| 220473_s_ | 0.028679 | 0.027248 | 1.122865 down | 1.198034 up   | 1.345231 up   |  | ZCCHC4     |
| 220482_s_ | 0.007465 | 0.005776 | 1.070772 up   | 1.523172 down | 1.630971 down |  | SERGEF     |
| 220487_at | 0.011499 | 0.009698 | 1.499409 up   | 1.230655 up   | 1.218383 down |  | SNTG2      |
| 220489_s_ | 0.003728 | 0.002384 | 1.805868 up   | 1.393131 down | 2.51581 down  |  |            |
| 220490_at | 0.012404 | 0.010606 | 1.573485 up   | 1.108441 down | 1.744115 down |  |            |
| 220491_at | 0.002249 | 0.001218 | 2.023195 up   | 1.060028 up   | 1.908625 down |  | HAMP       |
| 220494_s_ | 4.67E-05 | 6.41E-06 | 4.073987 down | 7.121397 down | 1.748017 down |  |            |
| 220495_s_ | 3.20E-05 | 3.86E-06 | 3.467584 down | 3.773785 down | 1.088304 down |  | TXNDC15    |
|           |          |          |               |               |               |  | RP11-      |
| 220513_at | 0.010404 | 0.008606 | 1.169892 up   | 1.152512 down | 1.348314 down |  | 257K9.7    |
| 220516_at | 0.009383 | 0.007617 | 1.782627 up   | 1.068592 up   | 1.668201 down |  | ZSCAN2     |
| 220520_s_ | 0.001134 | 4.82E-04 | 2.829897 up   | 2.07166 up    | 1.366005 down |  | NUP62CL    |
| 220529_at | 0.014341 | 0.012554 | 1.22924 up    | 1.275104 down | 1.567408 down |  | FLJ11710   |
| 220532_s_ | 1.54E-05 | 1.40E-06 | 8.221262 down | 1.068858 down | 7.691629 up   |  | TMEM176B   |



|           |          |          |               |               |               |           |
|-----------|----------|----------|---------------|---------------|---------------|-----------|
| 220535_at | 0.002764 | 0.001606 | 1.107669 up   | 1.337133 up   | 1.207159 up   | FAM90A1   |
| 220536_at | 9.85E-05 | 1.77E-05 | 6.324259 up   | 2.460072 up   | 2.570762 down | C14orf115 |
| 220538_at | 0.002425 | 0.001346 | 1.169873 up   | 1.553547 down | 1.817451 down | ADM2      |
| 220544_at | 0.034539 | 0.033236 | 1.446563 up   | 1.101938 down | 1.594022 down | TSKS      |
| 220549_at | 1.97E-04 | 4.49E-05 | 2.326774 up   | 2.309961 up   | 1.007279 down | RAD54B    |
| 220554_at | 6.03E-04 | 2.04E-04 | 1.76556 up    | 1.246253 down | 2.200333 down | SLC22A7   |
| 220557_s_ | 0.001031 | 4.22E-04 | 1.388608 down | 2.192624 down | 1.579008 down | PACS1     |
| 220559_at | 0.038776 | 0.037522 | 2.121192 down | 3.334193 down | 1.571849 down | EN1       |
| 220561_at | 0.006413 | 0.004789 | 1.754294 up   | 1.093008 down | 1.917457 down | IGF2AS    |
| 220562_at | 1.01E-04 | 1.82E-05 | 1.950303 up   | 1.16202 down  | 2.266292 down | CYP2W1    |
| 220564_at | 2.95E-04 | 7.77E-05 | 1.12629 up    | 1.602458 down | 1.804834 down | RNLS      |
| 220576_at | 3.36E-04 | 9.27E-05 | 4.37635 up    | 7.792758 up   | 1.780652 up   | PGAP1     |
| 220580_at | 9.54E-04 | 3.80E-04 | 3.410848 down | 1.890236 down | 1.804457 up   | BICC1     |
| 220584_at | 0.002087 | 0.001098 | 1.844191 up   | 1.995091 up   | 1.081825 up   | FLJ22184  |
| 220592_at | 0.010462 | 0.008669 | 1.644113 up   | 1.232477 up   | 1.33399 down  | CCDC40    |
| 220593_s_ | 0.00434  | 0.002906 | 1.535488 up   | 1.181904 down | 1.814799 down | CCDC40    |
| 220597_s_ | 3.95E-04 | 1.15E-04 | 1.012417 down | 1.654048 down | 1.633762 down | ARL6IP4   |
| 220598_at | 0.002213 | 0.001188 | 1.387333 up   | 1.56203 down  | 2.167056 down | CARD14    |
| 220601_at | 0.009537 | 0.007763 | 1.378562 up   | 1.183943 up   | 1.164383 down | C16orf70  |
|           |          |          |               |               |               | LOC388152 |
|           |          |          |               |               |               | ///       |
|           |          |          |               |               |               | LOC727751 |
|           |          |          |               |               |               | ///       |
|           |          |          |               |               |               | LOC727849 |
|           |          |          |               |               |               | ///       |
| 220602_s_ | 3.70E-04 | 1.06E-04 | 3.024432 up   | 1.506102 up   | 2.008119 down | LOC80154  |
| 220604_x_ | 0.002016 | 0.001048 | 1.596076 up   | 1.128865 up   | 1.413878 down | FTCD      |
| 220605_s_ | 0.001237 | 5.42E-04 | 1.45754 down  | 2.412396 down | 1.655115 down | SIRT2     |
| 220608_s_ | 0.00613  | 0.00452  | 1.051047 down | 1.53142 up    | 1.609594 up   | ZNF770    |
| 220610_s_ | 1.00E-05 | 7.58E-07 | 2.975812 down | 2.37243 down  | 1.254331 up   | LRRFIP2   |
| 220611_at | 5.57E-04 | 1.83E-04 | 1.561669 up   | 1.82852 up    | 1.170876 up   | DAB1      |
| 220613_s_ | 1.89E-05 | 1.86E-06 | 4.177059 down | 1.617087 down | 2.583076 up   | SYTL2     |
| 220622_at | 0.003351 | 0.002078 | 1.350534 down | 1.104385 down | 1.222883 up   | LRRC31    |
| 220628_s_ | 0.004796 | 0.003309 | 1.833464 up   | 1.104096 up   | 1.660603 down | SDK2      |

|           |          |          |               |               |               |            |
|-----------|----------|----------|---------------|---------------|---------------|------------|
| 220629_at | 0.001435 | 6.63E-04 | 1.614861 up   | 1.482574 down | 2.39415 down  | KCNQ1DN    |
| 220632_s_ | 6.81E-04 | 2.40E-04 | 1.476828 up   | 1.065769 down | 1.573958 down | POMT2      |
| 220638_s_ | 0.001262 | 5.58E-04 | 2.272394 up   | 1.323749 up   | 1.716636 down | CBLC       |
| 220640_at | 0.001727 | 8.50E-04 | 2.032597 up   | 1.031798 down | 2.097229 down | CSNK1G1    |
| 220641_at | 0.001805 | 9.01E-04 | 1.792671 up   | 1.060473 up   | 1.690445 down | NOX5       |
| 220651_s_ | 0.001112 | 4.69E-04 | 7.705804 up   | 12.12638 up   | 1.573669 up   | MCM10      |
| 220668_s_ | 1.35E-07 | 1.78E-09 | 104.8007 up   | 98.20635 up   | 1.067148 down | DNMT3B     |
| 220674_at | 0.004275 | 0.002847 | 1.431252 up   | 1.20871 down  | 1.729969 down | CD22       |
| 220676_at | 0.004835 | 0.003344 | 1.386582 up   | 1.211618 up   | 1.144405 down | ADAMTS8    |
| 220680_at | 0.018825 | 0.017117 | 1.282695 up   | 1.018838 down | 1.306858 down | RAVER2     |
| 220685_at | 0.00116  | 4.97E-04 | 2.048088 up   | 1.482855 up   | 1.381178 down | FAM120C    |
| 220687_at | 0.002013 | 0.001045 | 1.434205 up   | 1.236927 down | 1.774007 down |            |
| 220698_at | 3.14E-04 | 8.45E-05 | 1.229392 up   | 1.794684 down | 2.20637 down  | MGC4294    |
| 220702_at | 2.74E-04 | 7.07E-05 | 2.032377 up   | 2.600813 up   | 1.279691 up   |            |
| 220703_at | 0.001678 | 8.20E-04 | 1.808609 down | 1.381506 up   | 2.498603 up   | C10orf110  |
| 220704_at | 0.005812 | 0.004216 | 1.114478 up   | 1.131652 down | 1.261202 down | IKZF1      |
| 220714_at | 0.001094 | 4.58E-04 | 5.997451 up   | 5.045194 up   | 1.188745 down | PRDM14     |
| 220716_at | 1.05E-04 | 1.92E-05 | 2.05391 up    | 1.95187 up    | 1.052278 down | GNL3LP     |
| 220720_x_ | 0.003167 | 0.001928 | 1.783181 up   | 1.475912 up   | 1.208189 down | FAM128B    |
| 220721_at | 4.05E-04 | 1.19E-04 | 2.458772 up   | 2.434887 up   | 1.009809 down | ZNF614     |
| 220725_x_ | 0.036417 | 0.035148 | 1.229383 down | 1.710459 up   | 2.102809 up   | DNAH3      |
| 220727_at | 0.001546 | 7.33E-04 | 1.785173 up   | 1.309128 up   | 1.363635 down | KCNK10     |
| 220730_at | 9.14E-04 | 3.59E-04 | 2.02516 up    | 1.459922 up   | 1.38717 down  | ZNF778     |
| 220731_s_ | 9.73E-05 | 1.74E-05 | 1.842595 down | 1.986994 down | 1.078367 down | NECAP2     |
| 220733_at | 0.002826 | 0.001653 | 1.660348 up   | 1.264743 down | 2.099914 down | SLC26A1    |
|           |          |          |               |               |               | GLTPD1 /// |
| 220734_s_ | 0.002515 | 0.001415 | 1.391429 down | 2.210307 down | 1.588516 down | LOC727825  |
| 220736_at | 6.89E-04 | 2.45E-04 | 1.657438 up   | 1.658593 up   | 1.000697 up   | SLC19A3    |
| 220737_at | 0.003319 | 0.002053 | 1.324763 down | 1.12141 up    | 1.485602 up   | RPS6KA6    |
| 220739_s_ | 0.003967 | 0.00258  | 1.638532 up   | 1.929707 up   | 1.177704 up   | CNNM3      |
| 220742_s_ | 0.013569 | 0.011777 | 1.420597 up   | 1.086027 down | 1.542807 down | NGLY1      |
| 220746_s_ | 0.001354 | 6.14E-04 | 1.432881 up   | 1.381705 up   | 1.037038 down | UIMC1      |
| 220750_s_ | 2.76E-05 | 3.15E-06 | 3.247036 down | 4.198265 down | 1.292953 down | LEPRE1     |
| 220751_s_ | 0.002492 | 0.001398 | 2.914247 down | 1.323285 up   | 3.856379 up   | C5orf4     |

|           |          |          |          |      |          |      |          |      |           |
|-----------|----------|----------|----------|------|----------|------|----------|------|-----------|
| 220757_s_ | 1.59E-04 | 3.40E-05 | 2.490951 | down | 3.227509 | down | 1.295694 | down | UBXN6     |
| 220758_s_ | 0.011823 | 0.01002  | 1.428679 | up   | 1.238036 | down | 1.768756 | down | ROBO4     |
| 220760_x_ | 0.003924 | 0.002546 | 1.066358 | down | 1.808903 | up   | 1.928938 | up   | ZNF665    |
| 220761_s_ | 3.77E-04 | 1.08E-04 | 5.129496 | down | 2.958255 | down | 1.73396  | up   | TAOK3     |
| 220765_s_ | 1.60E-05 | 1.48E-06 | 1.982239 | down | 5.424022 | down | 2.736311 | down | LIMS2     |
| 220769_s_ | 7.62E-05 | 1.25E-05 | 2.130461 | down | 1.394488 | down | 1.527773 | up   | WDR78     |
| 220772_at | 0.002224 | 0.001197 | 1.026503 | up   | 1.381879 | down | 1.418503 | down | BPESC1    |
| 220775_s_ | 3.00E-07 | 5.32E-09 | 5.66791  | down | 3.538987 | down | 1.601563 | up   | UEVLD     |
| 220778_x_ | 0.005261 | 0.003726 | 2.282069 | up   | 1.072072 | up   | 2.128653 | down | SEMA6B    |
| 220783_at | 2.03E-04 | 4.69E-05 | 7.354131 | down | 1.028038 | down | 7.153557 | up   | MMP27     |
| 220786_s_ | 2.30E-05 | 2.44E-06 | 7.299954 | down | 1.030674 | down | 7.082701 | up   | SLC38A4   |
| 220789_s_ | 0.008292 | 0.006568 | 1.940137 | up   | 1.600266 | up   | 1.212384 | down | TBRG4     |
| 220792_at | 0.021435 | 0.019804 | 1.10362  | up   | 1.403493 | up   | 1.271718 | up   | PRDM5     |
| 220794_at | 0.013916 | 0.012129 | 4.374309 | down | 4.676659 | down | 1.06912  | down | GREM2     |
| 220796_x_ | 5.27E-04 | 1.69E-04 | 1.757725 | up   | 2.436042 | up   | 1.385907 | up   | SLC35E1   |
| 220798_x_ | 0.003115 | 0.001884 | 2.261881 | up   | 1.454365 | up   | 1.555236 | down | PRG2      |
| 220800_s_ | 5.79E-04 | 1.92E-04 | 4.242392 | down | 2.242577 | down | 1.891749 | up   | TMOD3     |
| 220802_at | 0.001935 | 9.91E-04 | 1.375995 | up   | 1.235436 | down | 1.699953 | down | KCNH4     |
| 220808_at | 0.009537 | 0.007763 | 1.293797 | up   | 1.07631  | down | 1.392527 | down | THEG      |
| 220812_s_ | 0.012177 | 0.010383 | 1.413436 | up   | 1.009839 | up   | 1.399665 | down | HHLA2     |
| 220824_at | 0.005961 | 0.004357 | 1.260635 | up   | 1.258553 | up   | 1.001655 | down |           |
| 220825_s_ | 0.016518 | 0.014752 | 2.059083 | down | 1.846676 | down | 1.115021 | up   | KIRREL    |
| 220838_at | 0.009209 | 0.007453 | 1.675302 | up   | 1.148407 | down | 1.923928 | down | EXD3      |
| 220840_s_ | 4.94E-04 | 1.55E-04 | 3.092817 | up   | 4.944313 | up   | 1.598644 | up   | C1orf112  |
| 220844_at | 0.001384 | 6.32E-04 | 1.196872 | up   | 1.137369 | down | 1.361285 | down | TCEB3B    |
| 220845_at | 0.001631 | 7.88E-04 | 1.384966 | up   | 1.101702 | up   | 1.257115 | down | ACOXL     |
| 220849_at | 0.002994 | 0.001786 | 1.784169 | up   | 1.149211 | down | 2.050387 | down | LOC79999  |
| 220864_s_ | 0.006581 | 0.004943 | 1.381016 | up   | 1.041413 | up   | 1.326098 | down | NDUFA13   |
| 220866_at | 0.03046  | 0.029074 | 1.591188 | down | 2.089185 | down | 1.312972 | down | ADAMTS6   |
| 220868_s_ | 2.08E-04 | 4.83E-05 | 1.756592 | up   | 1.120624 | down | 1.968479 | down | SLC7A10   |
| 220875_at | 0.011911 | 0.010108 | 1.309448 | up   | 1.049638 | down | 1.374446 | down |           |
| 220885_s_ | 0.002895 | 0.001707 | 3.182971 | up   | 2.633275 | up   | 1.20875  | down | CENPJ     |
| 220887_at | 3.12E-05 | 3.72E-06 | 2.305696 | up   | 2.41202  | up   | 1.046114 | up   | C14orf162 |
| 220889_s_ | 0.003931 | 0.002551 | 1.218756 | up   | 1.220092 | up   | 1.001096 | up   | CA10      |

|           |          |          |               |               |               |           |
|-----------|----------|----------|---------------|---------------|---------------|-----------|
| 220890_s_ | 1.11E-04 | 2.09E-05 | 1.647883 up   | 1.002553 down | 1.652091 down | DDX47     |
| 220905_at | 0.003047 | 0.001829 | 1.555607 up   | 1.601865 up   | 1.029737 up   |           |
| 220907_at | 0.024222 | 0.022645 | 1.267382 up   | 1.046793 down | 1.326686 down | GPR110    |
| 220910_at | 3.40E-04 | 9.40E-05 | 2.461372 up   | 3.758252 up   | 1.526893 up   | FRAS1     |
| 220911_s_ | 0.004678 | 0.003212 | 1.4708 down   | 1.841691 up   | 2.70876 up    | KIAA1305  |
| 220912_at | 0.004802 | 0.003314 | 1.249907 up   | 1.102621 up   | 1.133578 down |           |
| 220920_at | 0.013325 | 0.011529 | 1.22669 down  | 1.141088 up   | 1.399761 up   | ATP10B    |
| 220923_s_ | 8.45E-04 | 3.23E-04 | 2.192547 up   | 1.144502 down | 2.509374 down | PNMA3     |
| 220924_s_ | 0.001485 | 6.93E-04 | 1.183587 down | 1.796778 down | 1.518079 down | SLC38A2   |
| 220925_at | 3.51E-04 | 9.87E-05 | 2.53466 up    | 2.262126 up   | 1.120477 down | MAK10     |
| 220926_s_ | 0.003374 | 0.002097 | 3.211804 down | 2.462855 down | 1.304098 up   | EDEM3     |
| 220932_at | 0.009373 | 0.007607 | 1.299545 up   | 1.207527 down | 1.569235 down |           |
|           |          |          |               |               |               | ST6GALNAC |
| 220937_s_ | 0.001038 | 4.27E-04 | 2.381624 down | 2.910524 down | 1.222075 down | 4         |
| 220941_s_ | 0.003672 | 0.002338 | 1.97008 up    | 1.610384 up   | 1.22336 down  | C21orf91  |
| 220942_x_ | 0.018405 | 0.01668  | 1.936253 up   | 1.072398 up   | 1.805535 down | FAM162A   |
| 220943_s_ | 0.004658 | 0.003193 | 1.225956 up   | 1.730585 up   | 1.411621 up   | C2orf56   |
| 220948_s_ | 0.006739 | 0.005089 | 1.473288 up   | 1.440599 up   | 1.022691 down | ATP1A1    |
| 220955_x_ | 4.16E-04 | 1.23E-04 | 5.598456 down | 4.481203 down | 1.24932 up    | RAB23     |
| 220960_x_ | 9.56E-04 | 3.81E-04 | 1.127005 up   | 1.308894 up   | 1.161392 up   | RPL22     |
| 220961_s_ | 0.005801 | 0.004207 | 1.799681 down | 1.258296 down | 1.430252 up   | TBRG4     |
| 220964_s_ | 2.32E-04 | 5.65E-05 | 1.844733 down | 2.448294 down | 1.327181 down | RAB1B     |
| 220967_s_ | 0.001209 | 5.26E-04 | 1.53791 up    | 1.190302 down | 1.830578 down | ZNF696    |
| 220969_s_ | 0.032811 | 0.03149  | 1.344922 up   | 2.558227 up   | 1.902137 up   |           |
| 220971_at | 0.028181 | 0.026719 | 1.195759 up   | 1.055868 down | 1.262564 down | IL25      |
| 220974_x_ | 2.46E-08 | 1.55E-10 | 10.9859 down  | 8.623959 down | 1.273881 up   | SFXN3     |
| 220976_s_ | 2.93E-04 | 7.72E-05 | 1.502015 down | 19.63487 down | 13.07235 down | KRTAP1-1  |
| 220980_s_ | 0.029681 | 0.028278 | 1.408749 down | 1.103126 up   | 1.554027 up   | ADPGK     |
| 220982_s_ | 0.002444 | 0.00136  | 1.12411 down  | 1.108272 up   | 1.245819 up   | SPACA1    |
| 220984_s_ | 0.007726 | 0.006029 | 1.413914 up   | 1.181824 up   | 1.196383 down | SLCO5A1   |
| 220985_s_ | 1.00E-03 | 4.06E-04 | 2.51982 down  | 1.721893 down | 1.463402 up   | RNF170    |
| 220989_s_ | 9.32E-04 | 3.69E-04 | 1.651603 up   | 1.344392 down | 2.220402 down | AMN       |
|           |          |          |               |               |               | MIR21 /// |
| 220990_s_ | 0.018911 | 0.017206 | 1.168691 down | 1.570866 down | 1.344124 down | TMEM49    |

|           |          |          |          |      |          |      |          |      |            |
|-----------|----------|----------|----------|------|----------|------|----------|------|------------|
| 220991_s_ | 0.00457  | 0.003117 | 1.321734 | down | 1.174592 | down | 1.125271 | up   | RNF32      |
| 220993_s_ | 2.95E-04 | 7.77E-05 | 1.975784 | up   | 1.797218 | up   | 1.099357 | down | GPR63      |
| 220994_s_ | 5.79E-04 | 1.92E-04 | 1.308098 | down | 3.506291 | up   | 4.586572 | up   | STXBP6     |
| 220999_s_ | 2.49E-05 | 2.70E-06 | 2.272665 | up   | 3.360016 | up   | 1.478447 | up   | CYFIP2     |
| 221001_at | 0.006262 | 0.004643 | 1.116035 | up   | 1.511314 | up   | 1.354182 | up   | C15orf49   |
| 221011_s_ | 0.002359 | 0.001297 | 6.382598 | down | 1.796496 | down | 3.552804 | up   | LBH        |
| 221012_s_ | 2.93E-05 | 3.39E-06 | 5.144662 | down | 5.301194 | down | 1.030426 | down | TRIM8      |
| 221013_s_ | 0.013924 | 0.012138 | 1.506736 | up   | 1.819894 | down | 2.742099 | down | APOL2      |
| 221015_s_ | 0.003163 | 0.001926 | 2.031978 | down | 1.616507 | down | 1.257018 | up   | CDADC1     |
| 221017_s_ | 0.028481 | 0.027036 | 1.293243 | up   | 1.141802 | down | 1.476627 | down | LRRC3      |
| 221019_s_ | 4.35E-05 | 5.85E-06 | 10.29213 | down | 5.222585 | up   | 53.75153 | up   | COLEC12    |
| 221020_s_ | 0.003301 | 0.002037 | 2.125852 | down | 1.905434 | down | 1.115679 | up   | SLC25A32   |
| 221021_s_ | 2.26E-04 | 5.44E-05 | 1.937758 | up   | 1.168012 | up   | 1.659023 | down | CTNBL1     |
| 221024_s_ | 5.36E-06 | 3.15E-07 | 12.33787 | down | 8.935156 | down | 1.380824 | up   | SLC2A10    |
| 221027_s_ | 0.015665 | 0.013887 | 1.588433 | up   | 1.948252 | up   | 1.226525 | up   | PLA2G12A   |
| 221029_s_ | 8.37E-06 | 5.99E-07 | 19.61529 | down | 23.92716 | down | 1.219822 | down | WNT5B      |
| 221030_s_ | 1.37E-04 | 2.76E-05 | 2.678351 | down | 2.095241 | down | 1.278302 | up   | ARHGAP24   |
| 221031_s_ | 4.66E-05 | 6.41E-06 | 4.949295 | down | 5.365121 | down | 1.084017 | down | APOLD1     |
| 221036_s_ | 7.01E-08 | 6.90E-10 | 3.139009 | down | 2.838992 | down | 1.105677 | up   | APH1B      |
| 221039_s_ | 5.74E-04 | 1.91E-04 | 4.612042 | down | 3.344577 | down | 1.378961 | up   | ASAP1      |
| 221041_s_ | 0.003266 | 0.002005 | 2.644506 | down | 1.690592 | down | 1.564249 | up   | SLC17A5    |
|           |          |          |          |      |          |      |          |      | TRIM34 /// |
|           |          |          |          |      |          |      |          |      | TRIM6-     |
| 221044_s_ | 9.25E-04 | 3.65E-04 | 2.810256 | down | 3.332538 | down | 1.185849 | down | TRIM34     |
| 221045_s_ | 0.006629 | 0.004984 | 4.250289 | down | 1.554347 | down | 2.734453 | up   | PER3       |
| 221047_s_ | 0.002063 | 0.001081 | 2.903882 | up   | 4.560543 | up   | 1.570499 | up   | MARK1      |
| 221050_s_ | 2.74E-04 | 7.07E-05 | 1.754671 | down | 2.029488 | down | 1.15662  | down | GTPBP2     |
| 221051_s_ | 3.98E-05 | 5.19E-06 | 14.75781 | up   | 9.35907  | up   | 1.576846 | down | ITGB1BP3   |
| 221057_at | 0.028514 | 0.027073 | 1.046844 | up   | 1.130515 | down | 1.183473 | down | SPATA1     |
| 221058_s_ | 5.61E-04 | 1.84E-04 | 2.357171 | down | 2.990463 | down | 1.268666 | down | CKLF       |
| 221059_s_ | 0.002489 | 0.001396 | 1.498675 | down | 3.125804 | down | 2.085712 | down | COTL1      |
| 221060_s_ | 0.002063 | 0.001081 | 2.825234 | down | 3.413056 | down | 1.208061 | down | TLR4       |
| 221065_s_ | 0.001443 | 6.67E-04 | 3.231326 | up   | 1.802142 | up   | 1.793047 | down | CHST8      |
| 221068_at | 0.008194 | 0.006473 | 1.743384 | up   | 1.067295 | up   | 1.63346  | down | KANK2      |

|           |          |          |               |               |               |           |
|-----------|----------|----------|---------------|---------------|---------------|-----------|
| 221070_s_ | 0.029598 | 0.028197 | 1.405063 up   | 1.113851 up   | 1.261446 down | KIAA1967  |
| 221071_at | 0.007717 | 0.006019 | 1.732846 up   | 1.088161 down | 1.885615 down |           |
| 221073_s_ | 0.02537  | 0.023834 | 1.278713 up   | 1.133479 up   | 1.128131 down | NOD1      |
| 221074_at | 0.008053 | 0.006333 | 1.190417 up   | 1.116785 down | 1.32944 down  | NCR2      |
| 221075_s_ | 0.005292 | 0.003753 | 1.298376 up   | 1.000147 down | 1.298566 down | NCR2      |
| 221081_s_ | 5.41E-04 | 1.75E-04 | 3.579536 down | 1.437967 down | 2.489304 up   | DENND2D   |
| 221083_at | 0.023781 | 0.022198 | 1.800796 up   | 1.014652 up   | 1.774791 down | KCNQ4     |
| 221087_s_ | 1.68E-05 | 1.59E-06 | 5.779841 down | 2.33505 down  | 2.475254 up   | APOL3     |
| 221088_s_ | 3.16E-04 | 8.54E-05 | 2.71667 up    | 3.913192 up   | 1.440437 up   | PPP1R9A   |
| 221093_at | 0.005927 | 0.004326 | 1.362893 up   | 1.01634 down  | 1.385163 down | BRD7P3    |
| 221099_at | 0.004638 | 0.003176 | 1.330188 up   | 1.180454 up   | 1.126845 down |           |
| 221104_s_ | 0.012097 | 0.010299 | 2.377155 down | 1.740586 down | 1.365721 up   | NIPSNAP3B |
| 221122_at | 0.009536 | 0.00776  | 1.257628 up   | 1.249195 down | 1.571022 down | HRASLS2   |
| 221124_s_ | 0.006291 | 0.004673 | 1.389917 up   | 1.469849 down | 2.042968 down | VSX1      |
| 221127_s_ | 5.24E-04 | 1.68E-04 | 9.557356 down | 2.623058 down | 3.643593 up   | DKK3      |
| 221129_at | 0.0134   | 0.011606 | 1.444138 up   | 1.027322 down | 1.483594 down | C17orf88  |
| 221136_at | 0.019251 | 0.017543 | 1.488056 up   | 1.253797 down | 1.865719 down | GDF2      |
| 221139_s_ | 0.006697 | 0.005053 | 3.719294 down | 1.586687 down | 2.344063 up   | CSAD      |
| 221141_x_ | 0.005622 | 0.004043 | 1.813891 up   | 1.466381 down | 2.659855 down | EPN1      |
| 221147_x_ | 0.010279 | 0.008481 | 1.040785 up   | 1.660269 up   | 1.595209 up   | WVOX      |
| 221149_at | 0.013378 | 0.011583 | 1.230894 up   | 1.139004 down | 1.401993 down | GPR77     |
| 221150_at | 0.02324  | 0.021656 | 1.452147 up   | 1.022456 up   | 1.420254 down | MEPE      |
| 221157_s_ | 0.002758 | 0.001601 | 1.849388 up   | 1.173134 up   | 1.57645 down  | FBXO24    |
| 221158_at | 5.95E-05 | 8.97E-06 | 2.088739 up   | 3.318051 up   | 1.588543 up   | C21orf66  |
| 221163_s_ | 6.15E-04 | 2.10E-04 | 1.6063 up     | 1.799832 down | 2.89107 down  | MLXIPL    |
| 221176_x_ | 7.33E-04 | 2.67E-04 | 1.821707 up   | 1.175777 up   | 1.549364 down | WBSCR23   |
| 221179_at | 0.017499 | 0.015754 | 1.390229 up   | 1.093523 up   | 1.271331 down |           |
| 221189_s_ | 5.17E-04 | 1.65E-04 | 1.814288 up   | 1.42867 up    | 1.269915 down | TARS2     |
| 221190_s_ | 0.001641 | 7.95E-04 | 1.738256 down | 1.932942 down | 1.112001 down | C18orf8   |
| 221192_x_ | 0.006987 | 0.005327 | 1.196208 up   | 1.764229 up   | 1.474851 up   | MFSD11    |
| 221193_s_ | 0.00979  | 0.008011 | 2.024777 up   | 2.775613 up   | 1.370824 up   | ZCCHC10   |
| 221198_at | 4.30E-04 | 1.29E-04 | 2.522351 up   | 1.029121 down | 2.595803 down | SCT       |
| 221207_s_ | 0.001431 | 6.60E-04 | 1.758801 down | 5.138573 up   | 9.037727 up   | NBEA      |

|           |          |          |               |               |               |           |
|-----------|----------|----------|---------------|---------------|---------------|-----------|
| 221209_s_ | 3.69E-04 | 1.05E-04 | 1.562098 up   | 1.209907 down | 1.889993 down | OTOR      |
| 221211_s_ | 0.001215 | 5.30E-04 | 9.157401 down | 18.10492 down | 1.977081 down | C21orf7   |
| 221213_s_ | 3.03E-05 | 3.59E-06 | 10.66838 down | 4.529942 down | 2.355081 up   | ZNF280D   |
| 221216_s_ | 2.18E-04 | 5.16E-05 | 1.57378 down  | 2.059053 down | 1.308349 down | SCMH1     |
| 221217_s_ | 0.009668 | 0.00789  | 1.605957 up   | 1.381932 up   | 1.16211 down  | A2BP1     |
| 221219_s_ | 0.010308 | 0.008513 | 1.671602 up   | 1.026632 up   | 1.628238 down | KLHDC4    |
| 221221_s_ | 0.001524 | 7.18E-04 | 3.419156 up   | 2.605121 up   | 1.312475 down | KLHL3     |
| 221223_x_ | 0.002405 | 0.001331 | 1.528947 down | 1.236445 up   | 1.890458 up   | CISH      |
| 221232_s_ | 0.002942 | 0.001746 | 1.482017 up   | 1.586714 down | 2.351538 down | ANKRD2    |
| 221234_s_ | 0.015988 | 0.014215 | 3.163648 up   | 1.92039 up    | 1.647399 down | BACH2     |
| 221235_s_ | 0.004349 | 0.002916 | 1.791164 down | 2.212888 down | 1.235447 down | LOC644617 |
| 221245_s_ | 1.24E-05 | 1.03E-06 | 50.53275 up   | 25.28252 up   | 1.998723 down | FZD5      |
| 221246_x_ | 5.02E-05 | 7.11E-06 | 1.973363 down | 5.801471 down | 2.93989 down  | TNS1      |
| 221249_s_ | 1.38E-04 | 2.80E-05 | 3.391357 up   | 3.930107 up   | 1.15886 up    | FAM117A   |
| 221251_x_ | 0.004053 | 0.002651 | 1.472779 down | 1.970707 down | 1.338087 down | INO80B    |
| 221253_s_ | 7.00E-06 | 4.63E-07 | 1.94019 down  | 2.39846 down  | 1.236199 down | TXNDC5    |
| 221255_s_ | 0.003027 | 0.001814 | 1.436062 up   | 1.255591 up   | 1.143734 down | TMEM93    |
| 221259_s_ | 0.00431  | 0.00288  | 1.541298 up   | 1.133075 down | 1.746406 down | TEX11     |
| 221262_s_ | 0.001538 | 7.27E-04 | 1.208706 down | 1.677709 down | 1.388021 down | SLC2A11   |
|           |          |          |               |               |               | LOC100128 |
|           |          |          |               |               |               | 223 ///   |
| 221264_s_ | 0.002075 | 0.00109  | 2.283004 up   | 3.09685 up    | 1.35648 up    | TARDBP    |
| 221267_s_ | 0.003646 | 0.002315 | 1.693935 down | 1.99668 down  | 1.178724 down | FAM108A1  |
| 221269_s_ | 0.00109  | 4.56E-04 | 4.292606 down | 5.411169 down | 1.260579 down | SH3BGRL3  |
| 221276_s_ | 1.38E-08 | 6.74E-11 | 33.76127 down | 54.3755 down  | 1.610588 down | SYNC      |
| 221277_s_ | 7.76E-04 | 2.89E-04 | 2.091385 up   | 1.418298 up   | 1.474574 down | PUS3      |
| 221279_at | 0.030861 | 0.029488 | 1.406351 up   | 1.938462 up   | 1.378362 up   | GDAP1     |
| 221280_s_ | 0.001102 | 4.62E-04 | 1.768993 up   | 1.530673 up   | 1.155696 down | PARD3     |
| 221283_at | 0.002876 | 0.001694 | 1.609815 up   | 1.16447 up    | 1.382444 down | RUNX2     |
| 221286_s_ | 4.16E-04 | 1.23E-04 | 1.346928 up   | 1.407464 down | 1.895752 down | MGC29506  |
| 221289_at | 0.01439  | 0.012606 | 1.404463 up   | 1.05598 down  | 1.483084 down | DLX6      |
| 221293_s_ | 0.001172 | 5.04E-04 | 2.054009 up   | 1.170356 up   | 1.755029 down | DEF6      |
| 221301_at | 0.027906 | 0.026438 | 1.325148 up   | 1.071601 down | 1.420029 down | C6orf27   |
| 221309_at | 0.01042  | 0.008623 | 1.757231 up   | 1.116097 down | 1.961239 down | RBM17     |

|           |          |          |               |               |               |           |
|-----------|----------|----------|---------------|---------------|---------------|-----------|
| 221317_x_ | 7.47E-04 | 2.74E-04 | 1.97984 up    | 1.746239 up   | 1.133774 down | PCDHB6    |
| 221320_at | 0.005767 | 0.004177 | 1.259454 up   | 1.113884 up   | 1.130687 down | BCL2L10   |
| 221321_s_ | 0.004902 | 0.003406 | 1.230068 up   | 1.336486 down | 1.643969 down | KCNIP2    |
| 221326_s_ | 0.004941 | 0.003439 | 1.27226 up    | 2.261992 up   | 1.777932 up   | TUBD1     |
| 221333_at | 0.003435 | 0.002149 | 1.616388 up   | 1.340308 down | 2.166457 down | FOXP3     |
| 221336_at | 0.015713 | 0.013937 | 1.449652 up   | 1.045462 down | 1.515555 down | ATOH1     |
| 221346_at | 0.033702 | 0.03239  | 1.029863 down | 1.255807 up   | 1.293309 up   | OR10J1    |
| 221351_at | 0.012487 | 0.010691 | 1.302507 up   | 1.017813 down | 1.325708 down | HTR1A     |
| 221357_at | 0.002222 | 0.001196 | 1.208691 down | 1.13461 up    | 1.371393 up   | CHRM4     |
| 221360_s_ | 0.006377 | 0.00475  | 1.404975 up   | 1.309683 down | 1.840073 down | GHSR      |
| 221363_x_ | 0.00389  | 0.002517 | 1.401254 up   | 1.232734 down | 1.727373 down | GPR25     |
| 221368_at | 0.02549  | 0.023962 | 1.486846 up   | 1.082798 down | 1.609954 down | NEU2      |
| 221375_at | 0.00929  | 0.007529 | 1.395212 down | 1.189622 down | 1.17282 up    | OR1G1     |
| 221376_at | 0.004419 | 0.002975 | 2.131726 up   | 1.209074 up   | 1.763106 down | FGF17     |
| 221384_at | 0.025808 | 0.024297 | 1.344355 up   | 1.156673 up   | 1.162261 down | UCP1      |
| 221399_at | 0.003004 | 0.001795 | 1.841225 down | 1.01834 down  | 1.808065 up   | EDA2R     |
| 221404_at | 0.013996 | 0.012208 | 1.527452 up   | 1.023054 down | 1.562666 down | IL1F6     |
| 221408_x_ | 1.09E-04 | 2.02E-05 | 2.125981 up   | 1.152968 up   | 1.843921 down | PCDHB12   |
| 221410_x_ | 1.79E-05 | 1.73E-06 | 3.444607 up   | 1.996436 up   | 1.725378 down | PCDHB3    |
| 221421_s_ | 0.01115  | 0.009357 | 1.528243 down | 1.465402 down | 1.042884 up   | ADAMTS12  |
| 221422_s_ | 0.004172 | 0.002755 | 1.740907 up   | 1.404244 up   | 1.239747 down | C9orf45   |
| 221423_s_ | 0.012068 | 0.010267 | 4.35053 down  | 3.718916 down | 1.169838 up   | YIPF5     |
| 221426_s_ | 0.022549 | 0.020966 | 1.471138 up   | 1.010055 down | 1.48593 down  | OR3A3     |
| 221429_x_ | 0.00754  | 0.005852 | 1.201265 up   | 1.373754 down | 1.650241 down | TEX13A    |
| 221431_s_ | 0.007701 | 0.006004 | 1.415792 down | 1.020813 down | 1.386926 up   | OR12D3    |
| 221432_s_ | 0.00284  | 0.001663 | 1.740772 down | 1.780864 down | 1.023032 down | SLC25A28  |
| 221433_at | 0.010881 | 0.009087 | 1.663906 up   | 1.039953 down | 1.730384 down | FGF21     |
| 221434_s_ | 3.85E-04 | 1.11E-04 | 3.58152 up    | 2.255507 up   | 1.5879 down   | C14orf156 |
| 221435_x_ | 0.005333 | 0.003788 | 1.528168 down | 1.818655 down | 1.190089 down | HYI       |
| 221441_at | 0.011931 | 0.010129 | 1.288337 up   | 1.185117 down | 1.526829 down | GSC2      |
| 221447_s_ | 1.68E-05 | 1.58E-06 | 12.35982 down | 2.737403 down | 4.515166 up   | GLT8D2    |
| 221449_s_ | 2.97E-04 | 7.84E-05 | 2.399895 down | 3.065812 down | 1.277478 down | ITFG1     |
| 221451_s_ | 0.004256 | 0.002827 | 1.118038 up   | 1.209385 up   | 1.081703 up   | OR2W1     |
| 221454_at | 0.002265 | 0.00123  | 1.412233 up   | 1.276701 down | 1.802999 down | BOK       |



|           |          |          |          |      |          |      |          |      |           |
|-----------|----------|----------|----------|------|----------|------|----------|------|-----------|
| 221465_at | 0.009918 | 0.00814  | 1.132107 | down | 1.233272 | up   | 1.396196 | up   | OR6A2     |
| 221471_at | 6.20E-04 | 2.12E-04 | 2.596445 | down | 3.043753 | down | 1.172277 | down | SERINC3   |
| 221472_at | 0.00411  | 0.002699 | 2.139918 | down | 2.303971 | down | 1.076664 | down | SERINC3   |
| 221473_x_ | 0.002016 | 0.001048 | 2.110831 | down | 2.791983 | down | 1.322694 | down | SERINC3   |
| 221474_at | 3.66E-04 | 1.04E-04 | 1.807764 | down | 1.787269 | down | 1.011467 | up   | MYL12B    |
| 221477_s_ | 5.88E-05 | 8.83E-06 | 6.282684 | down | 1.680774 | down | 3.737971 | up   | SOD2      |
| 221478_at | 0.001182 | 5.10E-04 | 3.441447 | down | 3.094768 | down | 1.112021 | up   | BNIP3L    |
| 221480_at | 0.001749 | 8.65E-04 | 2.367004 | up   | 2.168995 | up   | 1.091291 | down | HNRNPD    |
| 221483_s_ | 1.99E-04 | 4.57E-05 | 1.682731 | up   | 1.325853 | up   | 1.269169 | down | ARPP19    |
| 221490_at | 0.007527 | 0.005839 | 1.466832 | down | 1.168328 | down | 1.255497 | up   | UBAP1     |
| 221493_at | 0.006969 | 0.005311 | 1.614913 | down | 1.21101  | down | 1.333526 | up   | TSPYL1    |
| 221494_x_ | 3.21E-04 | 8.72E-05 | 2.030809 | up   | 1.794198 | up   | 1.131876 | down | EIF3K     |
| 221495_s_ | 1.07E-04 | 1.98E-05 | 1.653535 | down | 2.050598 | down | 1.24013  | down | TCF25     |
| 221498_at | 0.001123 | 4.75E-04 | 1.448291 | up   | 1.978129 | up   | 1.365837 | up   | SNX27     |
| 221501_x_ | 0.01814  | 0.016414 | 1.746176 | down | 1.259695 | down | 1.386189 | up   | LOC339047 |
| 221504_s_ | 0.007108 | 0.005439 | 1.130513 | up   | 1.499978 | down | 1.695745 | down | ATP6V1H   |
| 221505_at | 7.46E-06 | 5.11E-07 | 3.499251 | up   | 3.001778 | up   | 1.165726 | down | ANP32E    |
| 221508_at | 0.001611 | 7.76E-04 | 1.571462 | down | 1.304917 | down | 1.204262 | up   | TAOK3     |
| 221511_x_ | 8.18E-04 | 3.10E-04 | 7.833764 | down | 9.139053 | down | 1.166623 | down | CCPG1     |
| 221512_at | 0.001415 | 6.51E-04 | 1.432574 | down | 2.006306 | down | 1.40049  | down | TMEM222   |
| 221515_s_ | 8.96E-05 | 1.55E-05 | 2.193566 | up   | 1.320704 | up   | 1.660908 | down | LCMT1     |
| 221521_s_ | 6.97E-04 | 2.49E-04 | 6.796071 | up   | 8.570762 | up   | 1.261135 | up   | GINS2     |
| 221523_s_ | 0.005041 | 0.003529 | 3.956478 | up   | 5.301287 | up   | 1.339901 | up   | RRAGD     |
| 221524_s_ | 0.001207 | 5.25E-04 | 3.085332 | up   | 7.350939 | up   | 2.382544 | up   | RRAGD     |
| 221526_x_ | 4.97E-05 | 7.00E-06 | 2.469839 | up   | 2.788409 | up   | 1.128984 | up   | PARD3     |
| 221530_s_ | 1.43E-05 | 1.27E-06 | 4.492625 | down | 12.994   | down | 2.892295 | down | BHLHE41   |
| 221534_at | 1.98E-05 | 1.98E-06 | 2.797195 | down | 3.527527 | down | 1.261094 | down | C11orf68  |
| 221538_s_ | 3.81E-04 | 1.10E-04 | 2.210633 | down | 2.646059 | down | 1.196969 | down | PLXNA1    |
| 221541_at | 9.93E-04 | 4.02E-04 | 8.946667 | down | 10.04824 | down | 1.123126 | down | CRISPLD2  |
| 221546_at | 0.004177 | 0.00276  | 1.354637 | down | 1.23063  | up   | 1.667057 | up   | PRPF18    |
| 221550_at | 0.005744 | 0.004155 | 1.268223 | up   | 1.532898 | up   | 1.208697 | up   | COX15     |
|           |          |          |          |      |          |      |          |      | ST6GALNAC |
| 221551_x_ | 0.004258 | 0.00283  | 2.236971 | down | 2.807854 | down | 1.255204 | down | 4         |
| 221552_at | 0.003624 | 0.002298 | 1.046173 | up   | 1.522032 | down | 1.592309 | down | ABHD6     |

|           |          |          |               |               |               |           |
|-----------|----------|----------|---------------|---------------|---------------|-----------|
| 221557_s_ | 0.018485 | 0.016761 | 1.430252 up   | 1.633036 down | 2.335654 down | LEF1      |
| 221559_s_ | 0.012851 | 0.011053 | 1.418047 up   | 1.91777 up    | 1.352402 up   | MIS12     |
| 221561_at | 9.81E-04 | 3.95E-04 | 5.188111 down | 3.370949 down | 1.539066 up   | SOAT1     |
| 221564_at | 3.06E-06 | 1.44E-07 | 4.754606 down | 3.03268 down  | 1.567791 up   | PRMT2     |
| 221565_s_ | 1.92E-07 | 2.97E-09 | 11.51509 down | 9.602915 down | 1.199125 up   | CALHM2    |
| 221566_s_ | 0.003032 | 0.001817 | 1.591996 down | 2.040776 down | 1.281898 down | NOL3      |
| 221567_at | 2.32E-04 | 5.63E-05 | 1.989011 down | 2.441045 down | 1.227266 down | NOL3      |
| 221569_at | 7.29E-04 | 2.65E-04 | 3.303308 down | 4.031955 down | 1.220581 down | AHI1      |
| 221571_at | 6.56E-05 | 1.02E-05 | 2.579186 down | 3.131737 down | 1.214235 down | TRAF3     |
| 221573_at | 8.83E-06 | 6.40E-07 | 2.550774 down | 2.361064 down | 1.080349 up   | C7orf25   |
| 221575_at | 0.00742  | 0.005732 | 1.429759 up   | 2.530104 up   | 1.769602 up   | SCLY      |
| 221577_x_ | 0.01126  | 0.009467 | 1.569808 down | 5.532313 down | 3.524198 down | GDF15     |
| 221580_s_ | 0.001787 | 8.90E-04 | 2.200907 up   | 1.899826 up   | 1.158478 down | TAF1D     |
| 221583_s_ | 5.89E-05 | 8.87E-06 | 1.863619 down | 5.529294 down | 2.966966 down | KCNMA1    |
| 221584_s_ | 1.35E-05 | 1.16E-06 | 6.768966 down | 18.76697 down | 2.772501 down | KCNMA1    |
| 221586_s_ | 3.49E-06 | 1.71E-07 | 7.98825 up    | 7.099771 up   | 1.125142 down | E2F5      |
| 221587_s_ | 0.008828 | 0.007083 | 1.149604 up   | 1.432118 down | 1.646368 down | C19orf24  |
| 221591_s_ | 0.004998 | 0.00349  | 5.013123 up   | 5.30333 up    | 1.05789 up    | FAM64A    |
| 221594_at | 0.01237  | 0.010573 | 1.371673 down | 1.042948 down | 1.315188 up   | C7orf64   |
|           |          |          |               |               |               | LOC100131 |
|           |          |          |               |               |               | 612 ///   |
| 221598_s_ | 0.005211 | 0.003683 | 1.299842 up   | 1.223807 down | 1.590755 down | MED27     |
| 221600_s_ | 0.005404 | 0.00385  | 1.448573 down | 1.630215 down | 1.125394 down | C11orf67  |
| 221601_s_ | 4.26E-04 | 1.27E-04 | 5.116411 down | 1.027723 up   | 5.258253 up   | FAIM3     |
| 221605_s_ | 2.26E-04 | 5.43E-05 | 8.534796 up   | 6.803072 up   | 1.254551 down | PIPOX     |
| 221606_s_ | 0.031884 | 0.03054  | 2.06627 up    | 5.33889 up    | 2.58383 up    | NSBP1     |
| 221610_s_ | 0.001309 | 5.86E-04 | 2.053086 up   | 2.167867 up   | 1.055906 up   | STAP2     |
| 221614_s_ | 3.23E-04 | 8.80E-05 | 1.118746 up   | 1.859405 down | 2.080202 down | RPH3AL    |
| 221618_s_ | 0.014485 | 0.012703 | 1.78403 down  | 2.696431 up   | 4.810513 up   | TAF9B     |
| 221620_s_ | 8.86E-04 | 3.44E-04 | 3.18647 up    | 1.940092 up   | 1.642432 down | APOO      |
| 221624_at | 0.001645 | 7.99E-04 | 1.808057 up   | 1.083472 down | 1.958978 down | TCL6      |
| 221633_at | 0.002369 | 0.001306 | 1.441064 up   | 1.064995 up   | 1.353119 down | NCAPH2    |
| 221634_at | 0.002584 | 0.001466 | 2.273595 down | 1.900104 down | 1.196564 up   | RPL23AP7  |
| 221637_s_ | 0.002624 | 0.001495 | 2.890875 up   | 1.996428 up   | 1.448024 down | C11orf48  |

|           |          |          |          |      |          |      |          |      |           |
|-----------|----------|----------|----------|------|----------|------|----------|------|-----------|
| 221642_at | 0.038921 | 0.03767  | 1.346447 | down | 1.097645 | down | 1.22667  | up   |           |
| 221646_s_ | 6.47E-06 | 4.08E-07 | 4.771053 | up   | 2.505673 | up   | 1.9041   | down | ZDHHC11   |
| 221647_s_ | 0.0024   | 0.001328 | 1.449226 | down | 1.943479 | down | 1.341046 | down | RIC8A     |
| 221649_s_ | 7.59E-04 | 2.80E-04 | 2.185368 | up   | 1.151734 | up   | 1.897458 | down | PPAN      |
| 221652_s_ | 0.017434 | 0.015687 | 1.605773 | up   | 1.079317 | up   | 1.487768 | down | C12orf11  |
| 221653_x_ | 1.06E-04 | 1.95E-05 | 2.240802 | down | 2.905094 | down | 1.296453 | down | APOL2     |
| 221655_x_ | 1.34E-04 | 2.69E-05 | 2.005865 | up   | 2.190205 | up   | 1.091901 | up   | EPS8L1    |
| 221657_s_ | 6.90E-04 | 2.46E-04 | 1.084303 | down | 2.157122 | down | 1.989409 | down | ASB6      |
| 221660_at | 0.002174 | 0.00116  | 1.65357  | up   | 1.629662 | down | 2.69476  | down | MYL10     |
| 221661_at | 0.004642 | 0.003181 | 1.375932 | up   | 1.406142 | down | 1.934755 | down | SLC22A7   |
| 221664_s_ | 5.14E-10 | 7.45E-13 | 48.39407 | up   | 30.29046 | up   | 1.597667 | down | F11R      |
| 221665_s_ | 5.64E-04 | 1.86E-04 | 2.040999 | up   | 2.165638 | up   | 1.061068 | up   | EPS8L1    |
| 221669_s_ | 0.002658 | 0.001521 | 1.570039 | up   | 2.219906 | up   | 1.413918 | up   | ACAD8     |
| 221672_s_ | 0.017284 | 0.015536 | 1.457523 | up   | 1.204533 | down | 1.755634 | down | TRAPPC9   |
| 221676_s_ | 5.68E-04 | 1.88E-04 | 1.822113 | down | 2.440984 | down | 1.339644 | down | CORO1C    |
| 221677_s_ | 5.08E-04 | 1.61E-04 | 2.516438 | up   | 3.30956  | up   | 1.315176 | up   | DONSON    |
| 221680_s_ | 0.001248 | 5.49E-04 | 1.385465 | up   | 1.6709   | down | 2.314973 | down | ETV7      |
| 221684_s_ | 0.001294 | 5.77E-04 | 1.474197 | up   | 1.177322 | down | 1.735604 | down | NYX       |
| 221689_s_ | 3.04E-04 | 8.12E-05 | 1.646338 | down | 1.941309 | down | 1.179168 | down | PIGP      |
| 221691_x_ | 4.38E-04 | 1.32E-04 | 2.100626 | up   | 1.947075 | up   | 1.078862 | down | NPM1      |
| 221698_s_ | 0.028899 | 0.027478 | 1.220745 | down | 1.290933 | down | 1.057496 | down | CLEC7A    |
| 221706_s_ | 3.03E-05 | 3.58E-06 | 2.331144 | down | 2.756923 | down | 1.182648 | down | USE1      |
| 221708_s_ | 0.001671 | 8.15E-04 | 1.019956 | down | 1.56109  | down | 1.530546 | down | UNC45A    |
| 221709_s_ | 7.72E-04 | 2.86E-04 | 2.008496 | up   | 1.168943 | up   | 1.718216 | down | ZNF839    |
|           |          |          |          |      |          |      |          |      | FAM176B   |
|           |          |          |          |      |          |      |          |      | ///       |
|           |          |          |          |      |          |      |          |      | LOC100133 |
| 221710_x_ | 1.53E-04 | 3.22E-05 | 4.245355 | down | 2.974839 | down | 1.427088 | up   | 999       |
| 221713_s_ | 0.008504 | 0.006769 | 1.842644 | up   | 1.083325 | down | 1.996181 | down | MAP6D1    |
| 221719_s_ | 0.006955 | 0.005297 | 1.74817  | up   | 1.168435 | down | 2.042622 | down | LZTS1     |
| 221720_s_ | 0.040862 | 0.039614 | 1.431628 | up   | 1.006559 | down | 1.441018 | down |           |
| 221721_s_ | 0.004928 | 0.003428 | 1.697317 | up   | 1.014268 | up   | 1.67344  | down | LZTS1     |
| 221725_at | 0.001152 | 4.92E-04 | 1.038296 | up   | 1.672871 | down | 1.736935 | down |           |
| 221729_at | 0.002148 | 0.001142 | 8.578369 | down | 6.574006 | down | 1.304892 | up   | COL5A2    |

|           |          |          |          |      |          |      |          |      |          |
|-----------|----------|----------|----------|------|----------|------|----------|------|----------|
| 221730_at | 6.99E-04 | 2.50E-04 | 9.742798 | down | 8.902852 | down | 1.094346 | up   | COL5A2   |
| 221732_at | 0.00511  | 0.00359  | 1.559375 | down | 1.94611  | down | 1.248007 | down | CANT1    |
| 221733_s_ | 0.001749 | 8.65E-04 | 1.361525 | up   | 1.074007 | down | 1.462288 | down | GPATCH4  |
| 221735_at | 0.002843 | 0.001666 | 1.446042 | up   | 1.523615 | up   | 1.053645 | up   | WDR48    |
| 221739_at | 1.84E-05 | 1.80E-06 | 3.065591 | down | 3.986557 | down | 1.300421 | down | C19orf10 |
| 221741_s_ | 8.94E-05 | 1.54E-05 | 2.037773 | up   | 1.315152 | up   | 1.549459 | down | YTHDF1   |
| 221742_at | 0.007064 | 0.005397 | 2.198209 | up   | 1.665129 | up   | 1.320144 | down | CUGBP1   |
| 221743_at | 1.92E-04 | 4.36E-05 | 1.936782 | up   | 1.430069 | up   | 1.354328 | down | CUGBP1   |
| 221746_at | 0.021292 | 0.019647 | 1.089092 | down | 1.345146 | down | 1.235108 | down | UBL4A    |
| 221747_at | 3.98E-06 | 2.07E-07 | 5.525569 | down | 17.8132  | down | 3.223777 | down | TNS1     |
| 221748_s_ | 2.33E-08 | 1.45E-10 | 45.32576 | down | 90.80473 | down | 2.003381 | down | TNS1     |
| 221750_at | 0.025457 | 0.023925 | 1.974128 | up   | 3.69591  | up   | 1.872174 | up   | HMGCS1   |
| 221752_at | 1.16E-04 | 2.22E-05 | 2.610078 | down | 6.442268 | down | 2.468228 | down | SSH1     |
| 221753_at | 3.22E-04 | 8.76E-05 | 1.469375 | down | 4.492017 | down | 3.057093 | down | SSH1     |
| 221755_at | 3.42E-05 | 4.21E-06 | 3.624574 | down | 6.165153 | down | 1.700932 | down | EHBP1L1  |
| 221756_at | 0.009965 | 0.008187 | 2.321358 | down | 1.366813 | down | 1.698374 | up   | PIK3IP1  |
| 221757_at | 4.18E-04 | 1.24E-04 | 2.279403 | down | 1.47443  | down | 1.545956 | up   | PIK3IP1  |
| 221758_at | 0.005456 | 0.003897 | 1.963854 | up   | 1.020042 | up   | 1.925269 | down | ARMC6    |
| 221760_at | 5.01E-04 | 1.58E-04 | 11.85031 | down | 2.88369  | down | 4.109425 | up   | MAN1A1   |
| 221763_at | 2.37E-04 | 5.78E-05 | 2.250649 | up   | 5.292139 | up   | 2.351384 | up   | JMJD1C   |
| 221766_s_ | 0.00113  | 4.79E-04 | 4.939592 | down | 5.574767 | down | 1.128588 | down | FAM46A   |
| 221767_x_ | 1.08E-05 | 8.44E-07 | 1.967344 | down | 2.427726 | down | 1.234012 | down | HDLBP    |
| 221768_at | 5.20E-04 | 1.67E-04 | 2.24125  | up   | 4.795113 | up   | 2.139481 | up   | SFPQ     |
| 221772_s_ | 0.006226 | 0.004608 | 1.315773 | up   | 1.155732 | down | 1.520681 | down | PPP2R2D  |
| 221773_at | 5.34E-05 | 7.69E-06 | 5.669673 | down | 2.44947  | down | 2.314653 | up   | ELK3     |
| 221774_x_ | 0.001382 | 6.30E-04 | 1.911004 | up   | 1.917107 | up   | 1.003193 | up   | FAM48A   |
| 221775_x_ | 2.22E-04 | 5.30E-05 | 1.2712   | up   | 1.441165 | up   | 1.133704 | up   | RPL22    |
| 221776_s_ | 1.31E-04 | 2.62E-05 | 2.503296 | up   | 1.956603 | up   | 1.279409 | down | BRD7     |
| 221780_s_ | 3.88E-05 | 4.97E-06 | 2.108588 | up   | 1.726195 | up   | 1.221524 | down | DDX27    |
| 221783_at | 0.011257 | 0.009463 | 1.454835 | up   | 1.465208 | down | 2.131635 | down | WIZ      |
| 221784_at | 2.59E-04 | 6.53E-05 | 1.10346  | up   | 1.352465 | down | 1.49239  | down | WIZ      |
| 221786_at | 3.43E-04 | 9.52E-05 | 1.694524 | down | 1.474883 | down | 1.148921 | up   | C6orf120 |
| 221787_at | 1.33E-04 | 2.65E-05 | 2.935614 | down | 2.099307 | down | 1.398372 | up   | C6orf120 |
| 221788_at | 0.003455 | 0.002165 | 2.175946 | down | 2.409149 | down | 1.107173 | down |          |

|           |          |          |          |      |          |      |          |      |            |
|-----------|----------|----------|----------|------|----------|------|----------|------|------------|
| 221790_s_ | 0.002508 | 0.00141  | 1.494085 | down | 2.358819 | down | 1.578771 | down | LDLRAP1    |
| 221794_at | 0.004186 | 0.002768 | 1.542041 | up   | 1.191027 | up   | 1.294715 | down | DOCK6      |
| 221799_at | 3.05E-06 | 1.43E-07 | 2.204718 | down | 3.497241 | down | 1.586253 | down | CSGLCA-T   |
| 221800_s_ | 6.77E-04 | 2.39E-04 | 1.018963 | up   | 1.675919 | down | 1.707699 | down | C17orf70   |
| 221802_s_ | 1.11E-04 | 2.08E-05 | 3.601266 | up   | 9.183287 | up   | 2.550016 | up   | KIAA1598   |
| 221805_at | 7.98E-07 | 2.15E-08 | 16.70349 | up   | 22.72367 | up   | 1.360414 | up   | NEFL       |
| 221806_s_ | 0.015571 | 0.0138   | 1.987421 | up   | 1.586842 | up   | 1.252438 | down | SETD5      |
| 221810_at | 2.57E-05 | 2.80E-06 | 3.556784 | up   | 3.080727 | up   | 1.154527 | down | RAB15      |
| 221814_at | 4.08E-06 | 2.16E-07 | 21.84263 | down | 8.606816 | down | 2.537828 | up   | GPR124     |
| 221816_s_ | 1.41E-06 | 4.71E-08 | 5.258265 | down | 4.698156 | down | 1.119219 | up   | PHF11      |
| 221817_at | 7.36E-05 | 1.19E-05 | 1.953522 | up   | 1.334529 | up   | 1.463828 | down | DOLPP1     |
| 221818_at | 0.025843 | 0.024333 | 1.415915 | up   | 1.026432 | down | 1.453341 | down | INTS5      |
| 221821_s_ | 0.00342  | 0.002136 | 1.575313 | up   | 1.934275 | up   | 1.227867 | up   | C12orf41   |
| 221822_at | 0.003846 | 0.002482 | 1.235485 | up   | 1.239683 | down | 1.53161  | down | CCDC101    |
| 221824_s_ | 0.032694 | 0.031372 | 2.137354 | down | 1.934394 | down | 1.104922 | up   | 40610      |
| 221831_at | 1.06E-04 | 1.95E-05 | 1.829522 | up   | 1.122907 | up   | 1.629273 | down | LUZP1      |
| 221832_s_ | 0.014385 | 0.012601 | 1.639642 | up   | 1.047472 | down | 1.71748  | down | LUZP1      |
| 221833_at | 7.56E-05 | 1.24E-05 | 3.941147 | down | 2.678119 | down | 1.47161  | up   | LONP2      |
| 221834_at | 3.18E-04 | 8.62E-05 | 4.353771 | down | 3.508271 | down | 1.241002 | up   | LONP2      |
| 221837_at | 0.008557 | 0.006817 | 2.381191 | down | 1.603119 | down | 1.485349 | up   | KLHL22     |
| 221838_at | 5.88E-04 | 1.97E-04 | 3.230161 | down | 2.196676 | down | 1.470477 | up   | KLHL22     |
| 221839_s_ | 0.005027 | 0.003516 | 1.921776 | up   | 1.687778 | up   | 1.138642 | down | UBAP2      |
| 221841_s_ | 4.39E-04 | 1.32E-04 | 8.356733 | down | 3.764404 | down | 2.219935 | up   | KLF4       |
| 221844_x_ | 5.18E-04 | 1.65E-04 | 1.295402 | down | 2.472847 | down | 1.908942 | down | SPCS3      |
| 221848_at | 0.00896  | 0.007207 | 1.522219 | up   | 1.282358 | down | 1.952028 | down | ZGPAT      |
|           |          |          |          |      |          |      |          |      | AGAP11 /// |
|           |          |          |          |      |          |      |          |      | AGAP4 ///  |
|           |          |          |          |      |          |      |          |      | AGAP6 ///  |
|           |          |          |          |      |          |      |          |      | AGAP7 ///  |
| 221850_x_ | 0.003228 | 0.001977 | 1.794861 | up   | 1.671194 | up   | 1.073999 | down | AGAP8      |

|           |          |          |               |               |               |  |           |
|-----------|----------|----------|---------------|---------------|---------------|--|-----------|
|           |          |          |               |               |               |  | NOMO1 /// |
|           |          |          |               |               |               |  | NOMO2 /// |
| 221853_s_ | 0.009125 | 0.007371 | 1.054816 up   | 1.542956 down | 1.627535 down |  | NOMO3     |
| 221856_s_ | 0.003119 | 0.001888 | 1.805791 down | 1.495184 down | 1.207739 up   |  | FAM63A    |
| 221858_at | 0.005836 | 0.004238 | 3.50146 down  | 3.713507 down | 1.06056 down  |  | TBC1D12   |
| 221863_at | 0.021499 | 0.019871 | 1.774681 up   | 1.133127 up   | 1.566181 down |  | MIER2     |
| 221864_at | 5.16E-05 | 7.36E-06 | 4.473187 down | 2.851265 down | 1.568844 up   |  | ORAI3     |
| 221867_at | 0.005562 | 0.003989 | 2.125263 down | 1.482475 down | 1.433591 up   |  | N4BP1     |
| 221868_at | 2.20E-07 | 3.57E-09 | 5.703867 up   | 5.590036 up   | 1.020363 down |  | PAIP2B    |
| 221870_at | 1.05E-07 | 1.26E-09 | 7.539239 down | 10.57409 down | 1.40254 down  |  | EHD2      |
| 221871_s_ | 0.013916 | 0.012128 | 1.806896 down | 1.06319 down  | 1.699505 up   |  | TFG       |
| 221872_at | 0.002394 | 0.001324 | 8.185536 down | 3.823372 down | 2.140921 up   |  | RARRES1   |
| 221875_x_ | 4.81E-05 | 6.69E-06 | 5.107619 down | 3.378482 down | 1.511809 up   |  | HLA-F     |
| 221877_at | 0.013923 | 0.012137 | 1.541012 up   | 1.017516 up   | 1.514484 down |  | IRGQ      |
| 221879_at | 0.002035 | 0.001062 | 1.662135 up   | 2.513032 up   | 1.51193 up    |  | CALML4    |
| 221883_at | 0.00265  | 0.001515 | 1.791374 down | 1.766896 down | 1.013853 up   |  | PKNOX1    |
| 221884_at | 0.01208  | 0.01028  | 1.772586 down | 3.106635 down | 1.7526 down   |  | EVI1      |
| 221888_at | 0.012166 | 0.010371 | 1.338356 up   | 1.324866 down | 1.773142 down |  | CC2D1A    |
| 221889_at | 0.002759 | 0.001603 | 1.521124 down | 1.899153 down | 1.248519 down |  | KCTD13    |
| 221891_x_ | 0.006003 | 0.004396 | 1.448661 up   | 1.280597 up   | 1.131239 down |  | HSPA8     |
| 221892_at | 1.51E-04 | 3.16E-05 | 3.103964 down | 1.746283 down | 1.77747 up    |  | H6PD      |
| 221897_at | 1.30E-04 | 2.58E-05 | 3.86239 down  | 1.483304 down | 2.60391 up    |  | TRIM52    |
| 221898_at | 5.92E-04 | 1.99E-04 | 1.612733 up   | 11.46871 up   | 7.111353 up   |  | PDPN      |
| 221900_at | 7.40E-04 | 2.70E-04 | 7.909671 down | 8.874814 down | 1.122021 down |  | COL8A2    |
| 221901_at | 0.001707 | 8.38E-04 | 1.510349 down | 4.01905 down  | 2.661007 down |  | KIAA1644  |
| 221903_s_ | 1.20E-05 | 9.78E-07 | 2.662734 down | 3.543768 down | 1.330876 down |  | CYLD      |
| 221906_at | 0.001404 | 6.44E-04 | 2.259262 down | 2.28931 down  | 1.0133 down   |  | TXNRD3    |
| 221907_at | 0.039097 | 0.03785  | 1.267492 up   | 1.010687 down | 1.281037 down |  | TRMT61A   |
| 221908_at | 1.14E-04 | 2.16E-05 | 4.919869 up   | 5.041176 up   | 1.024656 up   |  | RNFT2     |
| 221909_at | 1.95E-05 | 1.94E-06 | 7.954001 up   | 5.781066 up   | 1.375871 down |  | RNFT2     |
| 221911_at | 2.69E-04 | 6.87E-05 | 3.07849 up    | 9.202196 up   | 2.989192 up   |  | ETV1      |
| 221915_s_ | 0.016431 | 0.01466  | 1.156806 up   | 1.539014 up   | 1.3304 up     |  | RANBP1    |

|           |          |          |               |               |               |            |
|-----------|----------|----------|---------------|---------------|---------------|------------|
| 221916_at | 1.30E-05 | 1.11E-06 | 13.91511 up   | 20.15157 up   | 1.448179 up   | NEFL       |
| 221917_s_ | 0.018219 | 0.016499 | 1.536469 down | 1.091648 up   | 1.677283 up   | GRSF1      |
|           |          |          |               |               |               | HNRNPA1    |
|           |          |          |               |               |               | ///        |
| 221919_at | 5.08E-04 | 1.61E-04 | 2.299509 up   | 5.573011 up   | 2.423565 up   | LOC728844  |
| 221921_s_ | 0.001915 | 9.77E-04 | 1.73529 up    | 1.133643 down | 1.967199 down | CADM3      |
| 221922_at | 2.24E-04 | 5.39E-05 | 5.041287 down | 1.208632 down | 4.171068 up   | GPSM2      |
| 221926_s_ | 0.001365 | 6.21E-04 | 2.184321 down | 1.464224 down | 1.491795 up   | IL17RC     |
| 221932_s_ | 6.77E-04 | 2.39E-04 | 2.072125 up   | 1.627388 up   | 1.273282 down | GLRX5      |
| 221933_at | 0.0018   | 8.98E-04 | 6.379928 up   | 21.21604 up   | 3.325435 up   | NLGN4X     |
|           |          |          |               |               |               | LOC100129  |
| 221936_x_ | 0.005038 | 0.003525 | 1.396246 up   | 1.058944 up   | 1.318527 down | 015        |
| 221941_at | 0.00742  | 0.005731 | 1.073893 down | 1.421372 down | 1.32357 down  | PAOX       |
| 221949_at | 5.24E-04 | 1.68E-04 | 2.20184 down  | 2.045322 down | 1.076525 up   | LOC222070  |
| 221950_at | 2.21E-04 | 5.26E-05 | 25.24023 down | 8.833428 down | 2.857353 up   | EMX2       |
| 221951_at | 1.76E-04 | 3.91E-05 | 2.959556 down | 3.278426 down | 1.107742 down | TMEM80     |
| 221953_s_ | 3.50E-04 | 9.82E-05 | 2.023086 down | 4.169415 down | 2.060918 down | EDEM2      |
| 221957_at | 7.75E-04 | 2.88E-04 | 3.152209 up   | 3.625456 up   | 1.150132 up   | PDK3       |
| 221959_at | 0.007626 | 0.005934 | 2.220701 down | 1.668583 down | 1.33089 up    | FAM110B    |
| 221960_s_ | 0.005745 | 0.004157 | 5.563866 down | 2.452965 down | 2.268221 up   | RAB2A      |
| 221961_at | 2.03E-04 | 4.69E-05 | 1.206772 up   | 1.694418 down | 2.044777 down | CLCN7      |
| 221963_x_ | 0.003872 | 0.002504 | 2.891098 up   | 3.543819 up   | 1.225769 up   |            |
| 221964_at | 0.004597 | 0.003141 | 1.621913 down | 1.463779 down | 1.108032 up   | TULP3      |
|           |          |          |               |               |               |            |
| 221965_at | 4.89E-05 | 6.85E-06 | 3.662938 up   | 5.46278 up    | 1.491366 up   | MPHOSPH9   |
| 221968_s_ | 0.010062 | 0.008278 | 1.868057 up   | 1.563569 down | 2.920836 down | ZNF771     |
| 221969_at | 0.010502 | 0.008712 | 1.311448 up   | 1.179118 up   | 1.112228 down |            |
| 221970_s_ | 2.90E-08 | 2.04E-10 | 3.604004 up   | 3.688651 up   | 1.023487 up   | NOL11      |
|           |          |          |               |               |               | AGAP10 /// |
|           |          |          |               |               |               | AGAP4 ///  |
|           |          |          |               |               |               | AGAP5 ///  |
|           |          |          |               |               |               | AGAP9 ///  |
|           |          |          |               |               |               | RP11-      |
| 221971_x_ | 5.29E-04 | 1.70E-04 | 1.938585 up   | 1.853285 up   | 1.046026 down | 144G6.7    |

|           |          |          |          |      |          |      |          |      |           |
|-----------|----------|----------|----------|------|----------|------|----------|------|-----------|
| 221972_s_ | 5.99E-06 | 3.66E-07 | 4.72163  | down | 4.816528 | down | 1.020099 | down | SDF4      |
| 221973_at | 0.001452 | 6.73E-04 | 3.186006 | down | 2.226374 | down | 1.431029 | up   |           |
| 221974_at | 1.68E-05 | 1.59E-06 | 11.42588 | up   | 17.352   | up   | 1.518658 | up   | IPW       |
| 221975_s_ | 0.008709 | 0.006968 | 1.356234 | up   | 1.094655 | down | 1.484609 | down | C21orf2   |
| 221977_at | 0.002443 | 0.00136  | 1.356689 | up   | 1.180826 | down | 1.602014 | down | TBX2      |
| 221980_at | 0.001642 | 7.96E-04 | 1.331684 | down | 1.29896  | up   | 1.729804 | up   | EMILIN2   |
| 221981_s_ | 0.0063   | 0.004682 | 1.544682 | up   | 1.735483 | up   | 1.123522 | up   | WDR59     |
| 221983_at | 4.91E-05 | 6.88E-06 | 9.315665 | down | 6.763907 | down | 1.377261 | up   | FAM134A   |
| 221987_s_ | 0.002875 | 0.001693 | 3.766731 | up   | 1.95998  | up   | 1.921822 | down | TSR1      |
| 221990_at | 0.006481 | 0.00485  | 1.652826 | up   | 1.231664 | down | 2.035726 | down | PAX8      |
| 221991_at | 1.65E-04 | 3.57E-05 | 1.3773   | up   | 1.308861 | down | 1.802694 | down | NXPH3     |
| 221992_at | 0.006511 | 0.004878 | 1.569628 | down | 1.163935 | up   | 1.826945 | up   | PDXDC2    |
| 221993_s_ | 0.003895 | 0.00252  | 1.906929 | up   | 1.043773 | down | 1.9904   | down | C16orf42  |
| 221994_at | 5.59E-06 | 3.34E-07 | 1.121095 | up   | 5.649455 | down | 6.333573 | down | PDLIM5    |
| 221999_at | 6.17E-04 | 2.11E-04 | 1.824788 | down | 1.293416 | down | 1.410829 | up   | VRK3      |
| 222001_x_ | 3.57E-05 | 4.44E-06 | 1.956263 | up   | 4.418689 | up   | 2.25874  | up   | LOC728855 |
| 222005_s_ | 0.002958 | 0.001758 | 2.401175 | up   | 2.072241 | up   | 1.158734 | down | GNG3      |
| 222006_at | 0.030641 | 0.029258 | 1.043166 | down | 1.99417  | down | 1.911652 | down | LETM1     |
| 222008_at | 0.001334 | 6.02E-04 | 3.031309 | up   | 2.457838 | up   | 1.233324 | down | COL9A1    |
| 222009_at | 0.002867 | 0.001686 | 1.894927 | up   | 1.550541 | down | 2.938161 | down | CEMP1     |
| 222012_at | 0.003733 | 0.002388 | 1.458094 | up   | 1.230946 | down | 1.794835 | down | C19orf72  |
|           |          |          |          |      |          |      |          |      | NACA ///  |
|           |          |          |          |      |          |      |          |      | NACA2 /// |
| 222018_at | 0.00297  | 0.001767 | 1.074523 | up   | 4.156946 | up   | 3.868645 | up   | NACAP1    |
| 222019_at | 5.86E-05 | 8.77E-06 | 1.839765 | down | 1.096857 | down | 1.677307 | up   | PFDN6     |
| 222020_s_ | 0.001474 | 6.86E-04 | 2.088137 | down | 4.547292 | down | 2.177679 | down | NTM       |
| 222022_at | 0.004484 | 0.003036 | 1.213381 | up   | 1.303297 | down | 1.581395 | down | DTX3      |
| 222024_s_ | 0.001115 | 4.70E-04 | 1.923604 | up   | 1.82846  | up   | 1.052035 | down | AKAP13    |
| 222025_s_ | 0.004659 | 0.003196 | 1.736956 | down | 1.932199 | down | 1.112405 | down | OPLAH     |
| 222029_x_ | 0.006972 | 0.005315 | 2.241855 | up   | 1.300083 | up   | 1.724394 | down | PFDN6     |
| 222032_s_ | 0.005554 | 0.003981 | 1.2953   | up   | 1.167064 | down | 1.511697 | down | USP7      |
| 222033_s_ | 0.011896 | 0.010095 | 1.811865 | up   | 4.178904 | up   | 2.30641  | up   |           |
| 222034_at | 0.001597 | 7.67E-04 | 1.581604 | up   | 3.025871 | up   | 1.913166 | up   | GNB2L1    |
| 222036_s_ | 1.50E-04 | 3.13E-05 | 6.045364 | up   | 9.061502 | up   | 1.498918 | up   | MCM4      |



|           |          |          |               |               |               |                        |
|-----------|----------|----------|---------------|---------------|---------------|------------------------|
| 222037_at | 5.99E-04 | 2.02E-04 | 7.509 up      | 8.024528 up   | 1.068655 up   | MCM4<br>HNRNPA1<br>/// |
| 222040_at | 1.25E-07 | 1.57E-09 | 7.334204 up   | 15.71949 up   | 2.143313 up   | LOC728844<br>DPH1 ///  |
| 222041_at | 0.007717 | 0.00602  | 1.216832 down | 1.433879 down | 1.17837 down  | OVCA2                  |
| 222042_x_ | 0.028574 | 0.027138 | 1.664548 up   | 1.325776 down | 2.206817 down | MEX3D                  |
| 222043_at | 1.21E-05 | 9.89E-07 | 9.333821 down | 4.335995 down | 2.152637 up   | CLU                    |
| 222044_at | 0.002741 | 0.001586 | 1.737983 up   | 1.899659 up   | 1.093025 up   | PCIF1                  |
| 222046_at | 0.016406 | 0.014635 | 1.707846 up   | 1.304898 up   | 1.308796 down | SRRT<br>LOC100131      |
| 222051_s_ | 0.008021 | 0.006304 | 1.1605 down   | 1.184604 up   | 1.374732 up   | 637                    |
| 222052_at | 0.00406  | 0.002657 | 1.844607 up   | 1.985339 up   | 1.076294 up   | C19orf54               |
| 222059_at | 0.008121 | 0.006401 | 1.579744 up   | 1.308284 down | 2.066753 down | ZNF335                 |
| 222060_at | 0.003588 | 0.002269 | 1.813184 up   | 1.022301 up   | 1.773631 down | KRT8P12                |
| 222064_s_ | 3.04E-04 | 8.10E-05 | 1.804297 up   | 1.286739 up   | 1.402224 down | AARSD1                 |
| 222066_at | 0.031547 | 0.03019  | 1.137791 up   | 1.23722 down  | 1.407698 down | EPB41L1                |
| 222071_s_ | 4.95E-04 | 1.55E-04 | 4.76507 up    | 3.934009 up   | 1.21125 down  | SLCO4C1                |
| 222080_s_ | 0.004859 | 0.003368 | 1.445338 up   | 1.404235 down | 2.029594 down | SIRT5                  |
| 222083_at | 0.004563 | 0.00311  | 1.181208 down | 1.153255 down | 1.024238 up   | GLYAT                  |
| 222085_at | 0.004519 | 0.003069 | 1.37715 up    | 1.23114 up    | 1.118597 down | FAM174B<br>SLC2A14 /// |
| 222088_s_ | 8.52E-06 | 6.12E-07 | 12.6926 up    | 10.87605 up   | 1.167022 down | SLC2A3                 |
| 222091_at | 0.001852 | 9.32E-04 | 1.523945 up   | 1.044878 down | 1.592337 down | HPCAL4                 |
| 222099_s_ | 4.87E-04 | 1.52E-04 | 1.71612 up    | 1.477795 up   | 1.161271 down | LSM14A                 |
| 222100_at | 0.008647 | 0.006907 | 1.407224 up   | 1.076441 down | 1.514794 down | CYP2E1                 |
| 222101_s_ | 2.66E-06 | 1.18E-07 | 3.036052 down | 5.263644 up   | 15.9807 up    | DCHS1                  |
| 222104_x_ | 0.012201 | 0.010406 | 1.550316 up   | 1.782241 up   | 1.149598 up   | GTF2H3                 |
| 222105_s_ | 0.001104 | 4.64E-04 | 1.067865 up   | 1.83577 down  | 1.960354 down | NKIRAS2                |
| 222108_at | 2.74E-05 | 3.11E-06 | 9.813564 down | 15.04153 down | 1.532729 down | AMIGO2                 |
| 222109_at | 0.009392 | 0.007625 | 1.673144 up   | 1.258687 up   | 1.329278 down | GNL3L                  |
| 222125_s_ | 6.09E-04 | 2.07E-04 | 2.335558 down | 1.911659 down | 1.221744 up   | P4HTM                  |
| 222128_at | 5.00E-04 | 1.57E-04 | 2.945528 up   | 2.474954 up   | 1.190134 down | NSUN6                  |
| 222129_at | 2.36E-06 | 1.00E-07 | 10.12876 down | 9.003566 down | 1.124972 up   | FAM134A                |

|           |          |          |               |               |               |           |
|-----------|----------|----------|---------------|---------------|---------------|-----------|
| 222136_x_ | 1.89E-06 | 7.17E-08 | 2.04988 up    | 3.699536 up   | 1.804757 up   | ZNF43     |
| 222138_s_ | 1.31E-04 | 2.59E-05 | 3.434199 down | 4.030256 down | 1.173565 down | WDR13     |
| 222142_at | 0.002721 | 0.00157  | 1.424295 down | 1.363055 down | 1.044928 up   | CYLD      |
| 222147_s_ | 0.00109  | 4.56E-04 | 1.844738 up   | 2.049144 up   | 1.110805 up   | ACTR5     |
| 222150_s_ | 0.005558 | 0.003985 | 3.918528 down | 3.067488 down | 1.277439 up   | PION      |
| 222154_s_ | 0.00593  | 0.004331 | 1.956693 down | 1.569168 down | 1.246961 up   | LOC26010  |
| 222156_x_ | 0.00101  | 4.11E-04 | 9.137108 down | 8.918746 down | 1.024484 up   | CCPG1     |
| 222158_s_ | 0.002217 | 0.001191 | 3.194032 up   | 3.629888 up   | 1.13646 up    | PPPDE1    |
| 222159_at | 0.002438 | 0.001355 | 1.438227 up   | 1.139952 up   | 1.261656 down |           |
| 222161_at | 4.29E-04 | 1.28E-04 | 4.233258 up   | 7.331417 up   | 1.731862 up   | NAALAD2   |
| 222162_s_ | 9.19E-06 | 6.76E-07 | 7.456339 down | 10.02488 down | 1.344477 down | ADAMTS1   |
| 222164_at | 2.98E-04 | 7.90E-05 | 2.409671 up   | 4.508944 up   | 1.871187 up   | FGFR1     |
| 222168_at | 0.017527 | 0.015783 | 1.23726 up    | 1.316959 down | 1.62942 down  |           |
| 222173_s_ | 3.00E-05 | 3.52E-06 | 1.209626 down | 5.059123 down | 4.182387 down | TBC1D2    |
| 222184_at | 0.006956 | 0.005298 | 3.059794 down | 2.334331 down | 1.31078 up    |           |
| 222190_s_ | 0.00246  | 0.001373 | 1.409466 down | 2.192508 down | 1.555559 down | C16orf58  |
| 222192_s_ | 4.56E-04 | 1.39E-04 | 1.210721 up   | 1.934033 up   | 1.597423 up   | C2orf43   |
| 222193_at | 0.00245  | 0.001366 | 1.386716 up   | 1.739611 up   | 1.254482 up   | C2orf43   |
|           |          |          |               |               |               | LOC100128 |
| 222197_s_ | 7.97E-04 | 2.99E-04 | 2.575489 up   | 1.06261 down  | 2.73674 down  | 008       |
| 222201_s_ | 0.001068 | 4.44E-04 | 1.807121 up   | 2.854591 up   | 1.579635 up   | CASP8AP2  |
| 222202_at | 0.001898 | 9.65E-04 | 1.15876 up    | 1.175642 down | 1.362286 down | LOC644213 |
| 222207_x_ | 0.002434 | 0.001352 | 1.629672 up   | 1.424486 up   | 1.144042 down | LOC441258 |
| 222212_s_ | 2.26E-04 | 5.44E-05 | 1.088953 up   | 1.523996 down | 1.65956 down  | LASS2     |
| 222214_at | 0.007698 | 0.006001 | 1.938556 up   | 3.291325 up   | 1.697823 up   |           |
| 222219_s_ | 0.00319  | 0.001945 | 1.870608 up   | 1.009982 down | 1.889281 down | TLE6      |
| 222221_x_ | 1.85E-04 | 4.17E-05 | 2.381113 down | 3.331727 down | 1.399231 down | EHD1      |
| 222222_s_ | 0.001402 | 6.43E-04 | 2.337164 down | 2.100416 down | 1.112715 up   | HOMER3    |
| 222224_at | 0.022415 | 0.020828 | 1.189162 up   | 1.152452 down | 1.370452 down | NACA2     |
| 222226_at | 2.89E-04 | 7.57E-05 | 1.213922 up   | 2.021172 down | 2.453545 down | SAA3P     |
| 222230_s_ | 7.52E-04 | 2.76E-04 | 1.929175 down | 1.818332 down | 1.060959 up   | ACTR10    |
| 222231_s_ | 0.006129 | 0.004519 | 1.452582 down | 1.961741 down | 1.35052 down  | LRRC59    |
| 222234_s_ | 0.001414 | 6.50E-04 | 2.69492 up    | 1.943501 up   | 1.386631 down | DBNDD1    |

|           |          |          |          |      |          |      | CSGALNACT |      |           |
|-----------|----------|----------|----------|------|----------|------|-----------|------|-----------|
| 222235_s_ | 3.75E-04 | 1.08E-04 | 4.899402 | down | 3.056944 | down | 1.602712  | up   | 2         |
| 222237_s_ | 0.003982 | 0.002591 | 2.681594 | down | 1.724954 | down | 1.554589  | up   | ZFP112    |
| 222240_s_ | 4.88E-06 | 2.77E-07 | 5.495668 | up   | 6.384437 | up   | 1.161722  | up   | ISYNA1    |
| 222243_s_ | 0.013972 | 0.012184 | 1.79916  | down | 1.375283 | up   | 2.474354  | up   | TOB2      |
| 222244_s_ | 0.030016 | 0.028617 | 1.888814 | up   | 1.392849 | up   | 1.356079  | down | TUG1      |
| 222249_at | 0.02381  | 0.022228 | 1.202136 | down | 1.060795 | up   | 1.27522   | up   |           |
| 222251_s_ | 0.044498 | 0.043271 | 1.092736 | up   | 1.125969 | down | 1.230387  | down | GMEB2     |
| 222258_s_ | 0.002795 | 0.001628 | 1.106073 | down | 2.670292 | down | 2.414209  | down | SH3BP4    |
| 222260_at | 0.004621 | 0.003163 | 1.742063 | up   | 1.004142 | down | 1.749278  | down |           |
| 222263_at | 0.004342 | 0.002909 | 1.928382 | down | 2.363723 | down | 1.225754  | down | SLC35E1   |
| 222265_at | 8.44E-04 | 3.22E-04 | 1.612919 | up   | 1.039321 | down | 1.676341  | down | TNS4      |
| 222274_at | 0.007369 | 0.005687 | 1.555165 | up   | 1.189795 | up   | 1.307086  | down | ZDHC8P    |
|           |          |          |          |      |          |      |           |      | RP3-      |
| 222279_at | 0.004248 | 0.00282  | 1.04623  | down | 1.762499 | up   | 1.84398   | up   | 377H14.5  |
| 222280_at | 8.29E-05 | 1.40E-05 | 2.575121 | up   | 3.205772 | up   | 1.244901  | up   |           |
| 222283_at | 0.044218 | 0.042982 | 1.603898 | down | 1.300789 | up   | 2.086333  | up   | ZNF480    |
| 222288_at | 1.15E-05 | 9.20E-07 | 6.817856 | down | 16.02165 | down | 2.349954  | down |           |
| 222289_at | 0.010868 | 0.009073 | 1.145306 | up   | 1.363161 | down | 1.561237  | down | KCNC2     |
| 222294_s_ | 0.008718 | 0.006978 | 3.28379  | down | 3.108976 | down | 1.056229  | up   |           |
| 222298_at | 0.021041 | 0.019396 | 1.229649 | down | 1.001955 | down | 1.22725   | up   |           |
| 222305_at | 0.032791 | 0.031468 | 1.757814 | up   | 1.046281 | down | 1.839168  | down | HK2       |
| 222310_at | 0.004293 | 0.002864 | 2.405611 | up   | 5.110845 | up   | 2.124552  | up   | SFRS15    |
| 222311_s_ | 7.60E-04 | 2.81E-04 | 1.647689 | up   | 2.349507 | up   | 1.425941  | up   | SFRS15    |
| 222313_at | 0.006644 | 0.004999 | 2.47532  | up   | 4.108512 | up   | 1.659791  | up   |           |
| 222314_x_ | 0.001963 | 0.00101  | 1.379992 | up   | 1.253524 | down | 1.729853  | down | EGO       |
| 222315_at | 0.003838 | 0.002474 | 1.625853 | down | 1.254651 | up   | 2.039877  | up   |           |
| 222323_at | 0.005133 | 0.003612 | 2.35792  | up   | 1.008636 | down | 2.378284  | down |           |
| 222325_at | 2.81E-05 | 3.21E-06 | 17.34691 | up   | 18.47458 | up   | 1.065007  | up   |           |
| 222326_at | 0.024463 | 0.022894 | 1.210129 | down | 1.115391 | up   | 1.349767  | up   |           |
| 222331_at | 0.017224 | 0.01547  | 1.407675 | up   | 1.245133 | down | 1.752743  | down |           |
| 222338_x_ | 0.004999 | 0.003491 | 1.468639 | up   | 1.400791 | up   | 1.048436  | down | LOC646808 |
| 222343_at | 0.007397 | 0.005712 | 1.682541 | up   | 1.542602 | up   | 1.090717  | down | BCL2L11   |
| 222346_at | 0.001045 | 4.31E-04 | 2.259544 | up   | 1.443268 | up   | 1.565575  | down | LAMA1     |

|           |          |          |          |      |          |      |          |      |           |
|-----------|----------|----------|----------|------|----------|------|----------|------|-----------|
| 222352_at | 5.68E-05 | 8.37E-06 | 1.718771 | down | 1.789237 | down | 1.040998 | down |           |
| 222354_at | 0.001058 | 4.38E-04 | 2.840694 | up   | 2.087943 | up   | 1.360523 | down | F11R      |
| 222356_at | 0.013319 | 0.011519 | 2.439386 | up   | 1.702505 | up   | 1.432822 | down |           |
| 222359_x_ | 0.009314 | 0.007554 | 1.013643 | down | 1.238667 | down | 1.221996 | down | KDSR      |
| 222360_at | 0.012113 | 0.010316 | 1.802369 | up   | 2.324057 | up   | 1.289446 | up   | DPH5      |
| 222363_at | 5.60E-04 | 1.84E-04 | 1.575332 | down | 1.110504 | down | 1.418574 | up   |           |
| 222366_at | 3.94E-05 | 5.11E-06 | 2.547469 | up   | 5.435444 | up   | 2.133664 | up   |           |
|           |          |          |          |      |          |      |          |      | WHAMM     |
|           |          |          |          |      |          |      |          |      | ///       |
|           |          |          |          |      |          |      |          |      | WHAMML1   |
|           |          |          |          |      |          |      |          |      | ///       |
| 222367_at | 0.019168 | 0.017459 | 1.239859 | up   | 1.089428 | down | 1.350737 | down | WHAMML2   |
| 222368_at | 0.002944 | 0.001747 | 1.148619 | up   | 2.485679 | up   | 2.164059 | up   |           |
| 222369_at | 0.014195 | 0.012405 | 1.117409 | up   | 2.21755  | up   | 1.984547 | up   | NAT11     |
| 222375_at | 0.021384 | 0.019746 | 1.097851 | up   | 2.204377 | up   | 2.007902 | up   |           |
| 222376_at | 5.73E-04 | 1.90E-04 | 2.731109 | down | 1.14997  | down | 2.374939 | up   |           |
| 222379_at | 0.001277 | 5.67E-04 | 3.644407 | down | 14.6546  | down | 4.02112  | down | KCNE4     |
| 222381_at | 0.002168 | 0.001155 | 2.121073 | up   | 1.047031 | down | 2.22083  | down | PDCD6     |
| 222382_x_ | 1.13E-04 | 2.12E-05 | 1.93157  | up   | 2.152903 | up   | 1.114587 | up   | NUP205    |
| 243_g_at  | 0.002908 | 0.001717 | 1.568753 | down | 2.035471 | down | 1.297509 | down | MAP4      |
| 266_s_at  | 5.89E-08 | 5.40E-10 | 216.0023 | up   | 193.7669 | up   | 1.114754 | down | CD24      |
|           |          |          |          |      |          |      |          |      | NR1D1 /// |
| 31637_s_a | 2.79E-05 | 3.19E-06 | 2.796819 | down | 1.397075 | down | 2.001911 | up   | THRA      |
| 31799_at  | 0.002567 | 0.001453 | 2.102344 | down | 1.048836 | down | 2.004455 | up   |           |
| 31807_at  | 0.006688 | 0.005043 | 1.081429 | up   | 1.447974 | down | 1.565882 | down | DDX49     |
| 31826_at  | 1.43E-05 | 1.27E-06 | 1.636818 | down | 1.812795 | down | 1.107512 | down | FKBP15    |
| 31837_at  | 0.008904 | 0.007155 | 1.892502 | down | 1.929253 | down | 1.019419 | down | LMF2      |
| 31845_at  | 9.64E-05 | 1.71E-05 | 7.230792 | down | 6.25676  | down | 1.155677 | up   | ELF4      |
| 31846_at  | 1.71E-04 | 3.75E-05 | 1.598    | down | 1.832492 | down | 1.146741 | down | RHOD      |
| 31874_at  | 7.22E-05 | 1.16E-05 | 3.688348 | down | 4.59948  | down | 1.24703  | down | GAS2L1    |
| 32032_at  | 0.002169 | 0.001155 | 1.430485 | down | 1.175542 | down | 1.216873 | up   | DGCR14    |
| 32042_at  | 0.020854 | 0.019205 | 1.76168  | down | 1.725839 | down | 1.020767 | up   | ENOX2     |
| 32088_at  | 0.004336 | 0.002903 | 2.599241 | down | 1.705451 | down | 1.524078 | up   | BLZF1     |
| 32094_at  | 3.48E-06 | 1.70E-07 | 2.410417 | down | 4.50105  | down | 1.867332 | down | CHST3     |

|            |          |          |               |               |               |          |
|------------|----------|----------|---------------|---------------|---------------|----------|
| 32137_at   | 0.005769 | 0.004179 | 1.498177 up   | 1.959383 up   | 1.307845 up   | JAG2     |
| 32209_at   | 1.07E-04 | 1.97E-05 | 2.934546 down | 4.768833 down | 1.625067 down | FAM89B   |
| 32541_at   | 2.69E-04 | 6.87E-05 | 4.035862 down | 5.795534 down | 1.436009 down | PPP3CC   |
| 32811_at   | 0.001035 | 4.25E-04 | 2.435163 down | 2.280613 down | 1.067767 up   | MYO1C    |
| 33132_at   | 0.001529 | 7.21E-04 | 2.326663 up   | 1.486762 up   | 1.564919 down | CPSF1    |
| 33148_at   | 0.038351 | 0.03709  | 1.626999 down | 1.008973 up   | 1.641599 up   | ZFR      |
| 33322_i_at | 1.45E-04 | 2.97E-05 | 3.272498 up   | 3.31292 up    | 1.012352 up   | SFN      |
| 33323_r_at | 0.001235 | 5.41E-04 | 4.195461 up   | 5.072263 up   | 1.208988 up   | SFN      |
| 33494_at   | 5.00E-05 | 7.07E-06 | 3.940265 down | 2.834707 down | 1.390008 up   | ETFDH    |
| 336_at     | 4.58E-04 | 1.40E-04 | 2.40236 down  | 2.191212 down | 1.096362 up   | TBXA2R   |
| 33736_at   | 2.27E-05 | 2.40E-06 | 4.00675 down  | 5.277429 down | 1.317135 down | STOML1   |
| 33767_at   | 0.002809 | 0.00164  | 3.082005 up   | 2.294776 up   | 1.343053 down | NEFH     |
| 33768_at   | 0.01433  | 0.012542 | 1.184627 down | 1.296654 up   | 1.536051 up   | DMWD     |
| 33778_at   | 0.002544 | 0.001437 | 1.823379 down | 1.629153 down | 1.119219 up   | TBC1D22A |
| 33814_at   | 0.004061 | 0.002658 | 1.926304 up   | 1.339893 up   | 1.437655 down | PAK4     |
| 33850_at   | 0.001215 | 5.30E-04 | 1.128847 down | 2.008967 down | 1.779664 down | MAP4     |
| 34031_i_at | 0.008757 | 0.007016 | 1.399986 down | 2.133074 up   | 2.986274 up   | KRIT1    |
| 34187_at   | 0.001528 | 7.20E-04 | 1.264531 down | 1.966356 down | 1.555008 down | RBMS2    |
| 34206_at   | 0.001318 | 5.92E-04 | 1.539971 down | 1.838909 down | 1.19412 down  | ARAP1    |
| 34210_at   | 0.004644 | 0.003183 | 1.405209 up   | 1.09193 up    | 1.286905 down | CD52     |
| 34225_at   | 5.75E-05 | 8.53E-06 | 1.737769 up   | 2.413924 up   | 1.389094 up   | WHSC2    |
| 34406_at   | 6.35E-04 | 2.19E-04 | 1.451908 down | 1.655416 down | 1.140166 down | PACS2    |
| 34408_at   | 6.84E-04 | 2.42E-04 | 2.151879 down | 1.057401 up   | 2.275399 up   | RTN2     |
| 34689_at   | 2.34E-04 | 5.70E-05 | 1.873285 down | 1.499916 down | 1.248926 up   | TREX1    |
| 34697_at   | 4.02E-05 | 5.27E-06 | 2.380081 up   | 2.287057 up   | 1.040674 down | LRP6     |
| 34858_at   | 8.31E-04 | 3.16E-04 | 1.482044 up   | 1.453156 up   | 1.019879 down | KCTD2    |
| 35147_at   | 4.72E-05 | 6.51E-06 | 1.740737 up   | 3.079699 up   | 1.769192 up   | MCF2L    |
| 35148_at   | 7.88E-06 | 5.52E-07 | 5.69232 up    | 4.079309 up   | 1.395413 down | TJP3     |
| 35150_at   | 6.97E-04 | 2.49E-04 | 1.361164 down | 1.266832 up   | 1.724366 up   | CD40     |
| 35265_at   | 0.002868 | 0.001686 | 1.777823 up   | 1.241347 down | 2.206894 down | FXR2     |
| 35436_at   | 0.00636  | 0.004734 | 1.510906 down | 2.447754 down | 1.620057 down | GOLGA2   |
| 35626_at   | 1.08E-04 | 2.00E-05 | 5.669848 down | 3.622873 down | 1.565014 up   | SGSH     |
| 35671_at   | 0.00109  | 4.56E-04 | 1.717012 up   | 1.51014 up    | 1.136988 down | GTF3C1   |
| 35685_at   | 5.86E-05 | 8.77E-06 | 1.728454 down | 1.640602 down | 1.053548 up   | RING1    |

|           |          |          |          |      |          |      |          |      |           |
|-----------|----------|----------|----------|------|----------|------|----------|------|-----------|
| 36030_at  | 5.16E-06 | 2.99E-07 | 5.217926 | down | 2.562777 | down | 2.036044 | up   | IFFO1     |
| 36129_at  | 0.002366 | 0.001303 | 1.236269 | down | 1.382847 | up   | 1.70957  | up   | SGSM2     |
| 36499_at  | 1.50E-04 | 3.14E-05 | 3.934267 | up   | 2.84     | up   | 1.385305 | down | CELSR2    |
| 36566_at  | 0.003362 | 0.002087 | 2.149145 | down | 1.706245 | down | 1.259576 | up   | CTNS      |
| 36612_at  | 0.002234 | 0.001206 | 3.046017 | down | 1.767852 | down | 1.723005 | up   | FAM168A   |
| 36829_at  | 0.004262 | 0.002835 | 1.210727 | up   | 1.20192  | up   | 1.007327 | down | PER1      |
| 37005_at  | 6.39E-06 | 4.01E-07 | 10.99647 | down | 5.622863 | down | 1.955671 | up   | NBL1      |
| 37012_at  | 0.00311  | 0.001879 | 2.097968 | down | 1.526734 | down | 1.374154 | up   | CAPZB     |
| 37022_at  | 2.27E-05 | 2.40E-06 | 2.766604 | down | 1.246859 | down | 2.218859 | up   | PRELP     |
|           |          |          |          |      |          |      |          |      | ARHGAP8   |
|           |          |          |          |      |          |      |          |      | ///       |
|           |          |          |          |      |          |      |          |      | LOC553158 |
| 37117_at  | 1.95E-08 | 1.02E-10 | 13.59882 | up   | 16.91799 | up   | 1.244078 | up   | /// PRR5  |
| 37152_at  | 2.35E-06 | 9.92E-08 | 3.473507 | down | 3.315262 | down | 1.047732 | up   | PPARD     |
| 37170_at  | 0.002295 | 0.001253 | 1.875755 | down | 1.296102 | up   | 2.431168 | up   | BMP2K     |
| 37278_at  | 0.010662 | 0.008871 | 1.073517 | down | 1.187288 | up   | 1.274574 | up   | TAZ       |
| 37384_at  | 6.17E-04 | 2.11E-04 | 1.588035 | down | 1.496894 | down | 1.060887 | up   | PPM1F     |
| 37408_at  | 5.11E-08 | 4.40E-10 | 8.036854 | down | 5.993883 | down | 1.340843 | up   | MRC2      |
| 37433_at  | 0.015509 | 0.013738 | 1.414756 | down | 1.245656 | up   | 1.762299 | up   | PIAS2     |
| 37566_at  | 0.003306 | 0.002041 | 1.343887 | up   | 1.042877 | down | 1.401509 | down | KIAA1045  |
| 37577_at  | 6.79E-07 | 1.69E-08 | 4.700587 | up   | 7.424416 | up   | 1.579465 | up   | ARHGAP19  |
| 37590_g_a | 0.01174  | 0.009938 | 2.631687 | down | 1.17609  | down | 2.237657 | up   |           |
| 37793_r_a | 8.71E-04 | 3.36E-04 | 2.247679 | down | 1.10551  | down | 2.033161 | up   | RAD51L3   |
| 37943_at  | 0.006008 | 0.004402 | 1.333414 | down | 1.209291 | up   | 1.612486 | up   | ZFYVE26   |
| 37950_at  | 0.005178 | 0.003651 | 1.428774 | up   | 1.113537 | down | 1.590993 | down | PREP      |
| 37965_at  | 0.004959 | 0.003456 | 3.126005 | down | 3.492933 | down | 1.117379 | down | PARVB     |
| 37966_at  | 1.76E-05 | 1.70E-06 | 3.67995  | down | 3.746776 | down | 1.01816  | down | PARVB     |
| 37996_s_a | 6.82E-04 | 2.41E-04 | 4.651528 | down | 2.334294 | down | 1.992691 | up   | DMPK      |
| 38037_at  | 5.81E-04 | 1.93E-04 | 1.307123 | up   | 3.163976 | down | 4.135706 | down | HBEGF     |
| 38043_at  | 9.99E-04 | 4.05E-04 | 1.414872 | down | 2.126344 | down | 1.502853 | down | FAM3A     |
| 38149_at  | 0.003918 | 0.002541 | 1.408872 | up   | 1.164538 | down | 1.640685 | down | ARHGAP25  |
| 38157_at  | 0.001301 | 5.82E-04 | 1.75204  | down | 1.791007 | down | 1.022241 | down | DOM3Z     |
| 38158_at  | 0.001403 | 6.43E-04 | 3.563834 | up   | 4.452591 | up   | 1.249382 | up   | ESPL1     |
| 38241_at  | 1.18E-08 | 5.61E-11 | 13.31279 | down | 6.443371 | down | 2.066123 | up   | BTN3A3    |

|            |          |          |               |               |               |          |
|------------|----------|----------|---------------|---------------|---------------|----------|
| 38269_at   | 0.00238  | 0.001314 | 1.629894 up   | 1.53142 up    | 1.064302 down | PRKD2    |
| 38487_at   | 0.0134   | 0.011605 | 1.047884 down | 1.323319 up   | 1.386685 up   | STAB1    |
| 38671_at   | 1.65E-04 | 3.56E-05 | 3.907548 down | 3.23571 down  | 1.207633 up   | PLXND1   |
| 38707_r_at | 0.008646 | 0.006905 | 1.240498 down | 1.182052 up   | 1.466333 up   | E2F4     |
| 38918_at   | 2.60E-05 | 2.86E-06 | 4.611887 up   | 4.156692 up   | 1.109509 down | SOX13    |
| 39402_at   | 0.009621 | 0.007846 | 2.265161 down | 1.659393 down | 1.365054 up   | IL1B     |
| 39548_at   | 4.57E-04 | 1.39E-04 | 2.752572 down | 1.782945 down | 1.543834 up   | NPAS2    |
| 39549_at   | 2.20E-05 | 2.29E-06 | 7.773217 down | 2.860799 down | 2.717149 up   | NPAS2    |
| 39729_at   | 0.002982 | 0.001777 | 1.861223 up   | 1.405929 up   | 1.323839 down | PRDX2    |
| 39966_at   | 8.08E-05 | 1.35E-05 | 2.009664 up   | 3.282256 up   | 1.633236 up   | CSPG5    |
| 40020_at   | 1.08E-07 | 1.33E-09 | 3.648203 up   | 4.384818 up   | 1.201912 up   | CELSR3   |
| 40093_at   | 4.74E-04 | 1.46E-04 | 2.107113 up   | 2.014797 up   | 1.045819 down | BCAM     |
| 40189_at   | 7.38E-05 | 1.20E-05 | 2.731407 up   | 2.93559 up    | 1.074754 up   | SET      |
| 40284_at   | 0.00224  | 0.001211 | 1.843971 up   | 2.290868 up   | 1.242356 up   | FOXA2    |
| 40420_at   | 4.90E-06 | 2.78E-07 | 2.876767 down | 2.840739 down | 1.012683 up   | STK10    |
| 40560_at   | 0.001476 | 6.88E-04 | 3.512218 down | 2.019148 down | 1.739456 up   | TBX2     |
| 40562_at   | 8.85E-05 | 1.52E-05 | 2.577363 down | 4.341479 down | 1.684465 down | GNA11    |
| 40640_at   | 0.004242 | 0.002814 | 1.253325 up   | 1.26855 up    | 1.012148 up   | NCAPH2   |
| 40829_at   | 8.99E-04 | 3.51E-04 | 1.367113 down | 1.554066 down | 1.13675 down  | WDTC1    |
| 41220_at   | 0.009163 | 0.007409 | 1.409545 down | 1.002965 down | 1.405379 up   | 40795    |
| 41329_at   | 0.006833 | 0.005175 | 1.877709 down | 1.310138 down | 1.433215 up   | SCYL3    |
| 41577_at   | 6.55E-04 | 2.28E-04 | 2.656926 up   | 2.45132 up    | 1.083876 down | PPP1R16B |
| 41644_at   | 5.53E-04 | 1.81E-04 | 2.696906 down | 1.100572 down | 2.450459 up   | SASH1    |
| 41660_at   | 6.34E-04 | 2.18E-04 | 3.681019 up   | 1.762789 up   | 2.088178 down | CELSR1   |
| 41856_at   | 0.001245 | 5.48E-04 | 1.299436 down | 2.043285 down | 1.57244 down  | UNC5B    |
| 44563_at   | 0.001451 | 6.72E-04 | 1.634855 up   | 1.955709 up   | 1.196259 up   | WRAP53   |
| 44617_at   | 0.004463 | 0.003018 | 1.177851 down | 1.275134 up   | 1.501918 up   | OGFOD2   |
| 44702_at   | 5.68E-06 | 3.41E-07 | 2.768408 down | 3.463315 down | 1.251013 down | SYDE1    |
|            |          |          |               |               |               | C13orf18 |
|            |          |          |               |               |               | ///      |
| 44790_s_at | 0.001107 | 4.66E-04 | 1.577886 down | 1.630076 up   | 2.572074 up   | PPP1R2P4 |
| 45288_at   | 0.004864 | 0.003373 | 1.239697 down | 1.799487 down | 1.451554 down | ABHD6    |
| 45297_at   | 5.11E-08 | 4.39E-10 | 9.034779 down | 11.61949 down | 1.286085 down | EHD2     |
| 45687_at   | 5.62E-04 | 1.85E-04 | 1.681856 down | 1.342908 down | 1.252399 up   | PRR14    |

|            |          |          |          |      |          |      |          |      |           |
|------------|----------|----------|----------|------|----------|------|----------|------|-----------|
| 45749_at   | 4.42E-05 | 5.97E-06 | 1.979994 | down | 2.767453 | down | 1.397708 | down | FAM65A    |
| 45828_at   | 1.08E-05 | 8.36E-07 | 1.862103 | up   | 1.783721 | up   | 1.043943 | down | ATP5SL    |
| 46142_at   | 3.68E-05 | 4.62E-06 | 3.670833 | down | 4.48907  | down | 1.222902 | down | LMF1      |
| 46270_at   | 0.041464 | 0.040216 | 1.374006 | down | 1.176148 | down | 1.168225 | up   | UBAP1     |
| 46323_at   | 0.006358 | 0.004733 | 2.005788 | down | 1.982935 | down | 1.011525 | up   | CANT1     |
| 46665_at   | 0.003262 | 0.002002 | 1.732824 | up   | 1.913133 | up   | 1.104055 | up   | SEMA4C    |
| 47069_at   | 2.69E-04 | 6.90E-05 | 2.923696 | down | 1.296338 | down | 2.25535  | up   | PRR5      |
| 47560_at   | 6.15E-04 | 2.10E-04 | 3.731125 | up   | 4.760177 | up   | 1.275802 | up   | LPHN1     |
| 48030_i_at | 7.18E-04 | 2.59E-04 | 1.48239  | down | 1.067476 | up   | 1.582415 | up   | C5orf4    |
| 48031_r_at | 0.02289  | 0.021311 | 1.867339 | down | 1.071254 | up   | 2.000394 | up   | C5orf4    |
| 48106_at   | 1.59E-05 | 1.47E-06 | 2.939822 | down | 2.483641 | down | 1.183674 | up   | SLC48A1   |
| 48580_at   | 0.010109 | 0.008322 | 1.177612 | up   | 1.507598 | up   | 1.280217 | up   | CXXC1     |
| 48612_at   | 0.003387 | 0.002108 | 1.237867 | down | 1.074299 | up   | 1.32984  | up   | N4BP1     |
| 48659_at   | 0.002213 | 0.001188 | 1.974393 | up   | 1.768695 | up   | 1.116299 | down | MIIP      |
| 48825_at   | 0.030667 | 0.029285 | 1.726054 | down | 1.092461 | down | 1.579968 | up   | ING4      |
| 49327_at   | 0.001781 | 8.86E-04 | 1.375982 | down | 1.001488 | down | 1.373938 | up   | SIRT3     |
| 49329_at   | 1.05E-04 | 1.92E-05 | 2.560066 | down | 1.964948 | down | 1.302867 | up   | KLHL22    |
| 49679_s_a  | 0.001148 | 4.90E-04 | 1.511577 | down | 2.864868 | down | 1.895284 | down | EDEM2     |
| 49878_at   | 0.016322 | 0.014551 | 1.219199 | down | 1.019349 | down | 1.196057 | up   | PEX16     |
| 50221_at   | 6.54E-06 | 4.17E-07 | 2.760447 | down | 2.111217 | down | 1.307515 | up   | TFEB      |
| 50400_at   | 0.025761 | 0.024248 | 1.517953 | down | 1.383234 | down | 1.097395 | up   | PAOX      |
| 50965_at   | 0.0135   | 0.011706 | 1.022156 | up   | 1.534891 | up   | 1.50162  | up   | RAB26     |
| 51146_at   | 0.009535 | 0.007758 | 2.074291 | down | 1.555499 | down | 1.333522 | up   | PIGV      |
| 51158_at   | 0.009278 | 0.007519 | 1.883723 | up   | 2.675791 | up   | 1.42048  | up   | FAM174B   |
| 51774_s_a  | 5.68E-04 | 1.88E-04 | 2.223388 | down | 1.515085 | down | 1.4675   | up   | LOC222070 |
| 52078_at   | 0.004059 | 0.002656 | 1.489523 | down | 1.612674 | down | 1.082678 | down | TMEM222   |
| 52164_at   | 4.08E-05 | 5.38E-06 | 2.743709 | down | 4.829352 | down | 1.760155 | down | C11orf24  |
| 52255_s_a  | 2.82E-05 | 3.23E-06 | 4.275753 | down | 2.443383 | down | 1.749931 | up   | COL5A3    |
| 52651_at   | 0.007285 | 0.005606 | 2.466146 | down | 3.183064 | down | 1.290704 | down | COL8A2    |
| 52741_at   | 0.011008 | 0.009211 | 1.149045 | up   | 1.295257 | down | 1.488308 | down | TRMT61A   |
| 52837_at   | 0.017676 | 0.015937 | 2.985296 | down | 5.340622 | down | 1.788976 | down | KIAA1644  |
| 53071_s_a  | 7.79E-04 | 2.90E-04 | 3.602276 | down | 2.067986 | down | 1.741925 | up   | C17orf101 |
| 53076_at   | 7.17E-05 | 1.15E-05 | 1.082134 | down | 2.495823 | down | 2.306389 | down | B4GALT7   |
| 53202_at   | 8.09E-04 | 3.05E-04 | 3.613364 | down | 2.323892 | down | 1.554876 | up   | C7orf25   |



|           |          |          |          |      |          |      |          |      |           |
|-----------|----------|----------|----------|------|----------|------|----------|------|-----------|
| 53720_at  | 4.26E-04 | 1.27E-04 | 6.28096  | down | 2.763995 | down | 2.272421 | up   | C19orf66  |
| 53991_at  | 0.005738 | 0.00415  | 1.583966 | down | 2.156304 | up   | 3.415512 | up   | DENND2A   |
| 55093_at  | 2.63E-07 | 4.43E-09 | 3.128845 | down | 4.240793 | down | 1.355386 | down | CSGLCA-T  |
| 55583_at  | 0.008101 | 0.00638  | 1.303924 | up   | 1.141968 | up   | 1.141822 | down | DOCK6     |
| 55662_at  | 0.003172 | 0.001932 | 1.548041 | down | 1.787492 | down | 1.15468  | down | C10orf76  |
| 55692_at  | 0.004971 | 0.003467 | 1.893346 | down | 1.595025 | down | 1.187032 | up   | ELMO2     |
| 56197_at  | 2.96E-06 | 1.37E-07 | 3.808918 | down | 3.723725 | down | 1.022878 | up   | PLSCR3    |
| 56256_at  | 3.01E-04 | 8.01E-05 | 2.810198 | down | 5.486318 | down | 1.952289 | down | SIDT2     |
| 564_at    | 2.03E-04 | 4.71E-05 | 2.381977 | down | 3.672861 | down | 1.541938 | down | GNA11     |
| 57082_at  | 0.004401 | 0.00296  | 2.058812 | down | 1.94407  | down | 1.059021 | up   | LDLRAP1   |
| 57163_at  | 5.25E-06 | 3.06E-07 | 3.085813 | down | 3.745103 | down | 1.213652 | down | ELOVL1    |
| 57539_at  | 0.027777 | 0.026303 | 1.332936 | up   | 1.250311 | down | 1.666585 | down | ZGPAT     |
| 57703_at  | 0.029901 | 0.028501 | 1.171822 | down | 1.573919 | down | 1.343139 | down | SENP5     |
| 57715_at  | 1.97E-08 | 1.06E-10 | 10.58297 | down | 12.9463  | down | 1.223315 | down | CALHM2    |
| 58308_at  | 5.80E-05 | 8.64E-06 | 1.458989 | up   | 1.664037 | down | 2.427811 | down | TRIM62    |
| 58696_at  | 0.037607 | 0.036334 | 1.533602 | up   | 1.060348 | up   | 1.446319 | down | EXOSC4    |
| 58780_s_a | 0.001488 | 6.95E-04 | 3.291457 | down | 1.999372 | down | 1.646246 | up   | FLJ10357  |
| 58900_at  | 8.74E-04 | 3.37E-04 | 2.031931 | down | 1.363715 | down | 1.489997 | up   | LOC222070 |
| 58916_at  | 4.76E-05 | 6.58E-06 | 4.482513 | up   | 5.7921   | up   | 1.292155 | up   | KCTD14    |
| 58994_at  | 0.003477 | 0.002182 | 1.749927 | up   | 1.334412 | down | 2.335124 | down | CC2D1A    |
| 59625_at  | 4.17E-04 | 1.24E-04 | 2.317117 | down | 3.073094 | down | 1.326258 | down | NOL3      |
| 59631_at  | 6.51E-04 | 2.26E-04 | 2.97772  | down | 2.224591 | down | 1.338547 | up   | TXNRD3    |
| 59644_at  | 0.004329 | 0.002896 | 3.158214 | down | 1.131939 | up   | 3.574905 | up   | BMP2K     |
| 59697_at  | 5.64E-04 | 1.86E-04 | 2.937286 | up   | 3.402347 | up   | 1.15833  | up   | RAB15     |
| 60084_at  | 0.001016 | 4.14E-04 | 1.446158 | down | 1.531123 | down | 1.058752 | down | CYLD      |
| 60471_at  | 4.46E-06 | 2.44E-07 | 2.651752 | down | 2.733434 | down | 1.030803 | down | RIN3      |
| 60474_at  | 0.002637 | 0.001505 | 2.345513 | up   | 4.00054  | up   | 1.705614 | up   | FERMT1    |
| 61734_at  | 2.27E-08 | 1.37E-10 | 11.39385 | down | 23.48904 | down | 2.061554 | down | RCN3      |
| 635_s_at  | 0.00155  | 7.36E-04 | 1.596249 | down | 3.165596 | down | 1.983147 | down | PPP2R5B   |
| 63825_at  | 2.74E-05 | 3.11E-06 | 2.930676 | down | 3.309686 | down | 1.129325 | down | ABHD2     |
| 64432_at  | 0.002231 | 0.001204 | 2.291871 | up   | 3.300803 | up   | 1.440222 | up   | C12orf47  |
| 64883_at  | 0.008718 | 0.006977 | 2.281694 | down | 1.562466 | down | 1.460316 | up   | MOSPD2    |
| 64899_at  | 0.008841 | 0.007095 | 1.951557 | down | 2.33296  | down | 1.195435 | down | LPPR2     |
| 64942_at  | 0.00587  | 0.004272 | 1.672499 | down | 1.237702 | up   | 2.070055 | up   | GPR153    |

|            |          |          |          |      |          |      |          |      |           |
|------------|----------|----------|----------|------|----------|------|----------|------|-----------|
| 65086_at   | 0.003885 | 0.002513 | 1.729028 | down | 1.875977 | down | 1.08499  | down | YIPF2     |
| 65133_i_at | 0.006291 | 0.004673 | 1.796664 | down | 2.56325  | down | 1.426672 | down | INO80B    |
| 65438_at   | 0.001727 | 8.50E-04 | 1.462295 | down | 2.146261 | down | 1.467735 | down | KIAA1609  |
| 65472_at   | 0.020243 | 0.018573 | 1.971798 | down | 1.161531 | down | 1.697585 | up   | C2orf68   |
| 65521_at   | 0.010891 | 0.009099 | 1.543181 | down | 1.237176 | down | 1.247342 | up   | UBE2D4    |
| 65588_at   | 5.30E-04 | 1.71E-04 | 2.976287 | up   | 4.215144 | up   | 1.416242 | up   | LOC388796 |
| 65591_at   | 3.40E-04 | 9.41E-05 | 1.01374  | up   | 1.824741 | up   | 1.800009 | up   | WDR48     |
| 65630_at   | 2.86E-04 | 7.45E-05 | 3.116741 | down | 2.02409  | down | 1.539823 | up   | TMEM80    |
| 65635_at   | 0.027057 | 0.025573 | 1.033578 | down | 1.235382 | up   | 1.276864 | up   | ENGASE    |
| 65718_at   | 3.54E-05 | 4.39E-06 | 7.970738 | down | 2.351229 | down | 3.390031 | up   | GPR124    |
| 65884_at   | 3.08E-04 | 8.25E-05 | 2.053811 | down | 2.492702 | down | 1.213696 | down | MAN1B1    |
|            |          |          |          |      |          |      |          |      | LOC100133 |
|            |          |          |          |      |          |      |          |      | 585 ///   |
| 74694_s_a  | 1.58E-04 | 3.37E-05 | 2.981664 | down | 3.284333 | down | 1.10151  | down | RABEP2    |
| 76897_s_a  | 0.014595 | 0.012818 | 3.263856 | down | 1.639155 | down | 1.991182 | up   | FKBP15    |
| 78047_s_a  | 5.72E-06 | 3.44E-07 | 1.936611 | down | 2.229476 | down | 1.151226 | down | LOC729580 |
| 87100_at   | 0.00829  | 0.006564 | 2.487371 | down | 2.258028 | down | 1.101568 | up   | ABHD2     |
| 89476_r_a  | 0.018754 | 0.017035 | 1.698673 | up   | 1.510853 | down | 2.566445 | down | NPEPL1    |
| 91684_g_a  | 0.028249 | 0.026799 | 1.529441 | up   | 1.031186 | up   | 1.483187 | down | EXOSC4    |
| 91703_at   | 2.76E-05 | 3.14E-06 | 4.017824 | down | 6.846812 | down | 1.70411  | down | EHBP1L1   |
| 91826_at   | 0.001301 | 5.81E-04 | 2.147546 | up   | 2.136762 | up   | 1.005047 | down | EPS8L1    |
| 91920_at   | 0.024065 | 0.022487 | 1.142943 | up   | 1.028926 | down | 1.176003 | down | BCAN      |
| 222385_x_  | 0.006366 | 0.00474  | 4.259223 | down | 3.290136 | down | 1.294543 | up   | SEC61A1   |
| 222396_at  | 2.12E-04 | 4.98E-05 | 2.646402 | up   | 2.089088 | up   | 1.266774 | down | HN1       |
| 222398_s_  | 3.94E-05 | 5.10E-06 | 2.285898 | up   | 1.861377 | up   | 1.228068 | down | EFTUD2    |
| 222400_s_  | 0.006809 | 0.005152 | 1.356617 | down | 2.029205 | down | 1.495784 | down | ADI1      |
| 222401_s_  | 3.50E-04 | 9.84E-05 | 1.619787 | down | 2.503049 | down | 1.545295 | down | TMEM50A   |
| 222402_at  | 0.007108 | 0.005439 | 3.261596 | down | 2.590377 | down | 1.25912  | up   | POMP      |
| 222403_at  | 8.61E-04 | 3.30E-04 | 3.714104 | down | 3.931938 | down | 1.05865  | down | MTCH2     |
| 222404_x_  | 5.49E-05 | 7.99E-06 | 2.579409 | up   | 1.835555 | up   | 1.405247 | down | PTPLAD1   |
| 222405_at  | 5.84E-06 | 3.55E-07 | 2.105555 | up   | 1.605075 | up   | 1.311811 | down | PTPLAD1   |
| 222408_s_  | 0.007465 | 0.005776 | 2.926559 | down | 2.047355 | down | 1.429434 | up   | YPEL5     |
| 222409_at  | 0.001428 | 6.58E-04 | 2.220052 | down | 2.636381 | down | 1.187531 | down | CORO1C    |
| 222410_s_  | 2.69E-04 | 6.86E-05 | 1.649141 | down | 1.498688 | down | 1.10039  | up   | SNX6      |

|           |          |          |          |      |          |      |          |      |           |
|-----------|----------|----------|----------|------|----------|------|----------|------|-----------|
| 222412_s_ | 0.00377  | 0.00242  | 2.451856 | down | 2.257296 | down | 1.086191 | up   | SSR3      |
| 222417_s_ | 1.95E-04 | 4.42E-05 | 2.058511 | up   | 2.526126 | up   | 1.227162 | up   | SNX5      |
| 222418_s_ | 1.44E-04 | 2.95E-05 | 3.599007 | down | 2.985347 | down | 1.205558 | up   | TMEM43    |
| 222422_s_ | 0.001922 | 9.82E-04 | 2.263731 | down | 2.220204 | down | 1.019605 | up   | NDFIP1    |
| 222426_at | 0.006107 | 0.004493 | 1.671025 | down | 1.071551 | down | 1.559445 | up   | MAPKAP1   |
| 222427_s_ | 0.001872 | 9.48E-04 | 2.352432 | up   | 1.863785 | up   | 1.26218  | down | LARS      |
| 222428_s_ | 0.001615 | 7.78E-04 | 2.041393 | up   | 1.782399 | up   | 1.145307 | down | LARS      |
| 222429_at | 3.73E-05 | 4.70E-06 | 1.820396 | down | 3.047844 | down | 1.674275 | down | DBNL      |
| 222430_s_ | 0.001443 | 6.67E-04 | 2.312058 | up   | 1.779356 | up   | 1.299379 | down | YTHDF2    |
| 222433_at | 7.00E-06 | 4.63E-07 | 2.027763 | up   | 1.494002 | down | 3.029482 | down | ENAH      |
| 222434_at | 2.19E-04 | 5.21E-05 | 3.287665 | up   | 1.675835 | up   | 1.961808 | down | ENAH      |
| 222435_s_ | 2.11E-04 | 4.94E-05 | 3.336989 | down | 4.32062  | down | 1.294766 | down | UBE2J1    |
| 222436_s_ | 2.86E-06 | 1.29E-07 | 3.698265 | down | 3.688788 | down | 1.002569 | up   | VPS24     |
| 222437_s_ | 1.68E-06 | 6.12E-08 | 5.7391   | down | 5.206693 | down | 1.102254 | up   | VPS24     |
| 222441_x_ | 0.002691 | 0.001547 | 2.176225 | down | 2.195669 | down | 1.008935 | down | SLMO2     |
| 222442_s_ | 0.001325 | 5.96E-04 | 1.915729 | down | 1.848406 | down | 1.036422 | up   | ARL8B     |
| 222443_s_ | 0.001103 | 4.63E-04 | 2.411977 | up   | 1.366348 | up   | 1.765273 | down | RBM8A     |
| 222444_at | 0.004138 | 0.002724 | 5.709867 | down | 2.891516 | down | 1.974697 | up   | ARMCX3    |
| 222446_s_ | 3.95E-04 | 1.15E-04 | 3.418304 | down | 6.020096 | down | 1.761135 | down | BACE2     |
| 222448_s_ | 0.001827 | 9.17E-04 | 2.075287 | down | 2.326237 | down | 1.120923 | down | CMPK1     |
| 222452_s_ | 0.005838 | 0.00424  | 2.196819 | up   | 1.788439 | up   | 1.228344 | down | GPBP1L1   |
| 222453_at | 2.18E-06 | 8.85E-08 | 110.2136 | down | 31.23188 | down | 3.528882 | up   | CYBRD1    |
| 222454_s_ | 8.34E-06 | 5.95E-07 | 6.848461 | down | 8.865406 | down | 1.294511 | down | PARVA     |
| 222455_s_ | 1.54E-07 | 2.14E-09 | 11.00031 | down | 12.22537 | down | 1.111366 | down | PARVA     |
| 222457_s_ | 1.59E-05 | 1.46E-06 | 5.332947 | down | 7.642284 | down | 1.433032 | down | LIMA1     |
| 222459_at | 0.001294 | 5.77E-04 | 2.528019 | up   | 3.345974 | up   | 1.323556 | up   | AKIRIN1   |
| 222460_s_ | 0.004329 | 0.002897 | 1.506937 | up   | 1.254971 | up   | 1.200774 | down | NIP30     |
| 222462_s_ | 2.41E-06 | 1.03E-07 | 3.134354 | down | 4.413004 | down | 1.407947 | down | BACE1     |
| 222463_s_ | 1.56E-04 | 3.32E-05 | 2.718208 | down | 3.548166 | down | 1.305333 | down | BACE1     |
| 222464_s_ | 0.006839 | 0.005181 | 1.566382 | up   | 1.585473 | up   | 1.012188 | up   | C10orf119 |
| 222466_s_ | 1.26E-05 | 1.06E-06 | 3.062068 | up   | 2.239322 | up   | 1.367409 | down | MRPL42    |
| 222467_s_ | 8.84E-04 | 3.43E-04 | 1.475532 | up   | 1.81749  | up   | 1.231752 | up   | SAPS3     |
| 222468_at | 0.007446 | 0.005758 | 1.517418 | up   | 1.29202  | down | 1.960534 | down | KIAA0319L |
| 222469_s_ | 9.84E-04 | 3.97E-04 | 1.698069 | down | 1.93375  | down | 1.138794 | down | TOLLIP    |

|           |          |          |          |      |          |      |          |      |          |
|-----------|----------|----------|----------|------|----------|------|----------|------|----------|
| 222473_s_ | 9.32E-04 | 3.69E-04 | 2.979067 | down | 2.178728 | down | 1.367343 | up   | ERBB2IP  |
| 222477_s_ | 3.42E-04 | 9.49E-05 | 2.321598 | up   | 1.142173 | up   | 2.032615 | down | TM7SF3   |
| 222479_s_ | 2.17E-04 | 5.12E-05 | 2.046976 | up   | 1.417006 | up   | 1.444578 | down | DYNC1L11 |
| 222480_at | 0.00699  | 0.005331 | 1.251988 | down | 1.843748 | down | 1.472656 | down | UBE2Q1   |
| 222481_at | 0.031502 | 0.030144 | 1.734724 | down | 1.420483 | down | 1.221221 | up   | FXC1     |
| 222483_at | 0.004467 | 0.003022 | 1.06483  | up   | 2.212529 | down | 2.355968 | down | EFHD2    |
| 222484_s_ | 0.009743 | 0.007962 | 2.501846 | down | 4.998227 | up   | 12.50479 | up   | CXCL14   |
| 222485_at | 0.017969 | 0.016233 | 1.447004 | up   | 1.064753 | down | 1.540703 | down | FKBP3    |
| 222486_s_ | 5.54E-05 | 8.09E-06 | 8.132388 | down | 10.20843 | down | 1.255281 | down | ADAMTS1  |
| 222487_s_ | 0.002966 | 0.001765 | 2.296068 | down | 3.169164 | down | 1.380258 | down | RPS27L   |
| 222489_s_ | 0.017238 | 0.015484 | 1.337201 | up   | 1.007088 | up   | 1.327789 | down | WRNIP1   |
| 222490_at | 0.00223  | 0.001202 | 1.865773 | up   | 2.88474  | up   | 1.546137 | up   | POLR3E   |
| 222491_at | 6.71E-05 | 1.06E-05 | 3.262032 | down | 3.10624  | down | 1.050155 | up   | HGSNAT   |
| 222492_at | 5.41E-04 | 1.75E-04 | 1.610597 | down | 2.150106 | down | 1.334974 | down | PDXK     |
| 222495_at | 0.003412 | 0.002129 | 2.776689 | down | 2.094663 | down | 1.325602 | up   | TMEM167B |
| 222496_s_ | 7.61E-08 | 7.68E-10 | 18.40922 | up   | 19.44558 | up   | 1.056296 | up   | RBM47    |
| 222498_at | 0.001209 | 5.26E-04 | 3.337887 | down | 3.313461 | down | 1.007372 | up   | AZI2     |
| 222500_at | 1.64E-04 | 3.55E-05 | 4.180934 | up   | 3.897256 | up   | 1.072789 | down | PPIL1    |
| 222503_s_ | 7.82E-04 | 2.92E-04 | 2.189229 | down | 1.966229 | down | 1.113415 | up   | WDR41    |
| 222505_at | 0.00275  | 0.001594 | 1.368315 | up   | 1.291485 | up   | 1.05949  | down | LMBR1    |
| 222507_s_ | 9.84E-04 | 3.97E-04 | 3.713555 | down | 3.119364 | down | 1.190485 | up   | TMEM9B   |
| 222510_s_ | 0.005181 | 0.003654 | 2.010653 | down | 1.899177 | down | 1.058697 | up   | MKRN2    |
| 222512_at | 0.002677 | 0.001537 | 2.190772 | down | 2.43882  | down | 1.113224 | down | NUB1     |
| 222513_s_ | 4.77E-05 | 6.61E-06 | 7.684831 | up   | 8.764462 | up   | 1.140489 | up   | SORBS1   |
| 222514_at | 0.002915 | 0.001722 | 1.720985 | down | 2.608945 | down | 1.515961 | down | RRAGC    |
| 222517_at | 0.008818 | 0.007074 | 1.274318 | down | 1.28922  | up   | 1.642877 | up   | AP3M1    |
| 222519_s_ | 6.93E-04 | 2.47E-04 | 2.936512 | down | 1.780725 | down | 1.649054 | up   | IFT57    |
| 222521_x_ | 2.29E-04 | 5.54E-05 | 1.779709 | down | 1.028096 | up   | 1.829712 | up   | NDUFC2   |
| 222532_at | 0.00449  | 0.003041 | 1.316766 | down | 2.352274 | down | 1.786403 | down | SRPRB    |
| 222538_s_ | 0.013323 | 0.011525 | 1.499548 | down | 1.118324 | up   | 1.67698  | up   | APPL1    |
| 222539_at | 0.008279 | 0.006553 | 1.475218 | up   | 1.045372 | up   | 1.41119  | down | CLN6     |
| 222544_s_ | 0.008142 | 0.006421 | 2.242651 | up   | 2.162217 | up   | 1.0372   | down | WHSC1L1  |
| 222550_at | 4.77E-04 | 1.48E-04 | 1.597193 | up   | 1.981051 | up   | 1.240333 | up   | ARMC1    |
| 222555_s_ | 9.47E-04 | 3.77E-04 | 1.858042 | up   | 1.611321 | up   | 1.153117 | down | MRPL44   |

|           |          |          |               |               |               |                       |
|-----------|----------|----------|---------------|---------------|---------------|-----------------------|
| 222559_s_ | 0.001842 | 9.26E-04 | 2.353158 up   | 1.691221 up   | 1.391396 down | RPRD1A                |
| 222560_at | 0.007691 | 0.005994 | 1.484389 up   | 1.403294 down | 2.083033 down | LANCL2                |
| 222566_at | 1.61E-04 | 3.46E-05 | 2.880529 down | 3.031775 down | 1.052506 down | SUV420H1<br>ST6GALNAC |
| 222571_at | 0.001037 | 4.26E-04 | 2.450205 down | 2.244131 down | 1.091828 up   | 6                     |
| 222573_s_ | 0.04422  | 0.042988 | 1.165788 down | 1.775414 up   | 2.069756 up   | SAV1                  |
| 222577_at | 0.001042 | 4.29E-04 | 1.924444 down | 1.245903 down | 1.544618 up   | CCDC90B               |
| 222580_at | 1.32E-04 | 2.63E-05 | 2.431446 up   | 2.711116 up   | 1.11504 up    | ZNF644                |
| 222581_at | 1.42E-04 | 2.91E-05 | 2.409381 up   | 1.570516 up   | 1.534133 down | XPR1                  |
| 222583_s_ | 0.001842 | 9.26E-04 | 1.259969 up   | 2.418493 up   | 1.919486 up   | NUP50                 |
| 222585_x_ | 0.001156 | 4.94E-04 | 4.048389 down | 2.93912 down  | 1.377416 up   | KRCC1                 |
| 222587_s_ | 5.41E-04 | 1.75E-04 | 2.79394 up    | 4.00085 up    | 1.431974 up   | GALNT7                |
| 222589_at | 7.69E-05 | 1.27E-05 | 3.264293 up   | 3.939083 up   | 1.206718 up   | NLK                   |
| 222590_s_ | 0.002014 | 0.001046 | 2.830478 up   | 2.894111 up   | 1.022481 up   | NLK                   |
| 222595_s_ | 4.24E-04 | 1.27E-04 | 1.748475 up   | 1.507462 up   | 1.15988 down  | DIDO1                 |
| 222596_s_ | 0.023148 | 0.021566 | 1.807216 up   | 1.009827 up   | 1.789629 down | LGR4                  |
| 222597_at | 7.00E-06 | 4.64E-07 | 3.10807 down  | 2.661768 down | 1.167671 up   | SNAP29                |
| 222598_s_ | 2.32E-05 | 2.47E-06 | 2.381674 up   | 1.91494 up    | 1.243733 down | NAV2                  |
| 222603_at | 0.001903 | 9.69E-04 | 1.529606 up   | 6.228755 up   | 4.072131 up   | ERMP1                 |
| 222606_at | 0.004422 | 0.002977 | 3.284267 up   | 3.0271 up     | 1.084955 down | ZWILCH                |
| 222609_s_ | 0.00123  | 5.38E-04 | 1.818456 up   | 1.238072 up   | 1.468781 down | EXOSC1                |
| 222610_s_ | 9.60E-05 | 1.70E-05 | 1.368655 up   | 2.152268 up   | 1.572542 up   | S100BPB               |
| 222612_at | 4.66E-05 | 6.40E-06 | 2.05469 up    | 3.003397 up   | 1.461727 up   | PSPC1                 |
| 222614_at | 7.69E-06 | 5.33E-07 | 6.846362 down | 10.07569 down | 1.471686 down | RWDD2B                |
| 222619_at | 3.83E-04 | 1.11E-04 | 2.080356 up   | 1.207632 down | 2.512305 down | ZNF281                |
| 222622_at | 0.004447 | 0.003001 | 2.612658 up   | 2.023191 up   | 1.291355 down | PGP                   |
| 222626_at | 0.001558 | 7.41E-04 | 1.673077 up   | 2.697851 up   | 1.612508 up   | RBM26                 |
| 222632_s_ | 8.44E-05 | 1.43E-05 | 2.900011 down | 1.530955 down | 1.89425 up    | LZTFL1                |
| 222635_s_ | 0.001984 | 0.001024 | 1.820783 up   | 2.213635 up   | 1.21576 up    | MED28                 |
| 222636_at | 3.08E-04 | 8.26E-05 | 1.974208 up   | 3.723273 up   | 1.885958 up   | MED28                 |
| 222638_s_ | 0.00309  | 0.001863 | 1.016136 down | 1.55111 down  | 1.526479 down | C6orf35               |
| 222639_s_ | 0.003683 | 0.002348 | 1.22832 up    | 1.231874 down | 1.513136 down | PLBD1                 |
| 222640_at | 9.16E-06 | 6.73E-07 | 7.496017 up   | 5.735496 up   | 1.306952 down | DNMT3A                |
| 222641_s_ | 2.73E-04 | 7.01E-05 | 4.201695 up   | 3.2645 up     | 1.287087 down | C17orf63              |

|           |          |          |          |      |          |      |          |      |           |
|-----------|----------|----------|----------|------|----------|------|----------|------|-----------|
| 222644_s_ | 0.00125  | 5.51E-04 | 2.9333   | down | 4.178053 | down | 1.424352 | down | GLT25D1   |
| 222646_s_ | 6.72E-04 | 2.36E-04 | 2.5672   | down | 2.841429 | down | 1.10682  | down | ERO1L     |
| 222647_at | 7.87E-04 | 2.95E-04 | 1.909802 | down | 2.052578 | down | 1.074759 | down | SLC35C1   |
| 222648_at | 0.001258 | 5.55E-04 | 1.653153 | up   | 1.286128 | down | 2.126166 | down | TBC1D16   |
| 222649_at | 2.25E-05 | 2.36E-06 | 2.337064 | up   | 2.332042 | up   | 1.002154 | down | XPO4      |
| 222651_s_ | 0.002269 | 0.001233 | 5.641733 | down | 3.024971 | down | 1.865054 | up   | TRPS1     |
| 222654_at | 3.45E-04 | 9.59E-05 | 5.560298 | down | 6.580877 | down | 1.183548 | down | IMPAD1    |
| 222657_s_ | 0.009694 | 0.007916 | 1.18425  | down | 1.713432 | down | 1.446849 | down | UBE2W     |
| 222659_at | 0.001218 | 5.32E-04 | 2.073548 | up   | 1.944292 | up   | 1.06648  | down | IPO11     |
| 222662_at | 0.00606  | 0.00445  | 3.327951 | up   | 1.990322 | up   | 1.672066 | down | PPP1R3B   |
| 222665_at | 0.001291 | 5.75E-04 | 2.209112 | down | 1.804949 | down | 1.223919 | up   | FAM82B    |
| 222666_s_ | 1.23E-04 | 2.38E-05 | 2.620565 | up   | 1.826588 | up   | 1.434677 | down | RCL1      |
| 222668_at | 0.005124 | 0.003603 | 1.368411 | up   | 2.241228 | down | 3.066921 | down | KCTD15    |
| 222674_at | 0.001807 | 9.03E-04 | 2.045417 | up   | 2.274708 | up   | 1.1121   | up   | C9orf114  |
| 222675_s_ | 0.015856 | 0.014082 | 1.999155 | up   | 1.175119 | up   | 1.701236 | down | BAIAP2L1  |
| 222680_s_ | 0.002803 | 0.001635 | 4.749205 | up   | 12.5874  | up   | 2.650423 | up   | DTL       |
| 222682_s_ | 5.32E-05 | 7.65E-06 | 2.769712 | down | 2.835761 | down | 1.023847 | down | FAM114A2  |
| 222685_at | 4.13E-04 | 1.22E-04 | 3.373235 | up   | 4.265595 | up   | 1.264541 | up   | HAUS6     |
| 222686_s_ | 3.67E-04 | 1.05E-04 | 2.417217 | down | 2.938764 | down | 1.215764 | down | CPPED1    |
| 222691_at | 1.24E-04 | 2.41E-05 | 5.688776 | down | 4.693401 | down | 1.21208  | up   | SLC35B3   |
| 222692_s_ | 1.47E-06 | 5.06E-08 | 6.02909  | down | 7.149725 | down | 1.185871 | down | FNDC3B    |
| 222693_at | 5.01E-06 | 2.87E-07 | 8.273386 | down | 5.426394 | down | 1.524656 | up   | FNDC3B    |
| 222696_at | 3.96E-05 | 5.15E-06 | 2.866864 | up   | 10.56826 | up   | 3.686349 | up   | AXIN2     |
| 222700_at | 7.05E-06 | 4.69E-07 | 2.789569 | up   | 3.51708  | up   | 1.260797 | up   | ATL2      |
| 222703_s_ | 0.0162   | 0.014433 | 1.979819 | up   | 1.461321 | up   | 1.354815 | down | YRDC      |
| 222707_s_ | 0.010575 | 0.008783 | 1.327079 | down | 1.360813 | down | 1.02542  | down | ACTR8     |
| 222709_at | 4.63E-04 | 1.42E-04 | 2.117896 | down | 1.027939 | up   | 2.177068 | up   | ATG7      |
| 222713_s_ | 0.001193 | 5.17E-04 | 2.001459 | up   | 1.964396 | up   | 1.018867 | down | FANCF     |
| 222716_s_ | 0.002033 | 0.00106  | 2.453509 | up   | 1.494607 | up   | 1.641575 | down | SNX24     |
| 222719_s_ | 0.001088 | 4.55E-04 | 10.67784 | down | 12.39745 | down | 1.161045 | down | PDGFC     |
| 222722_at | 2.44E-04 | 6.01E-05 | 7.36833  | down | 1.070451 | down | 6.88339  | up   | OGN       |
| 222723_at | 1.59E-04 | 3.40E-05 | 1.603557 | up   | 1.314112 | up   | 1.220259 | down | LOC727901 |
| 222728_s_ | 0.005781 | 0.00419  | 1.7038   | up   | 2.378923 | up   | 1.396246 | up   | TAF1D     |
| 222731_at | 0.026218 | 0.024723 | 1.965362 | down | 1.274812 | up   | 2.505467 | up   | ZDHHC2    |

|           |          |          |               |               |               |          |
|-----------|----------|----------|---------------|---------------|---------------|----------|
| 222732_at | 0.009604 | 0.007828 | 1.352921 up   | 1.35267 up    | 1.000186 down | TRIM39   |
| 222733_x_ | 0.00181  | 9.05E-04 | 1.273512 up   | 1.276369 down | 1.62547 down  | RRP1     |
| 222737_s_ | 0.002237 | 0.001209 | 2.234268 up   | 2.723904 up   | 1.219148 up   | BRD7     |
| 222741_s_ | 0.016545 | 0.014782 | 1.672182 down | 1.513006 down | 1.105205 up   | C6orf64  |
| 222742_s_ | 6.90E-04 | 2.46E-04 | 1.367937 down | 1.559443 down | 1.139996 down | RABL5    |
| 222743_s_ | 0.002433 | 0.001352 | 1.290069 up   | 1.560499 up   | 1.209625 up   | C11orf71 |
| 222744_s_ | 2.25E-05 | 2.37E-06 | 1.846113 down | 2.755931 down | 1.492829 down | TMLHE    |
| 222746_s_ | 9.58E-06 | 7.17E-07 | 2.355269 up   | 2.529522 up   | 1.073985 up   | BSPRY    |
| 222747_s_ | 0.003122 | 0.00189  | 4.612305 down | 1.44358 down  | 3.195046 up   | SCML1    |
| 222748_s_ | 0.012139 | 0.010341 | 1.658953 down | 1.775684 down | 1.070364 down | TXNL4B   |
| 222749_at | 2.99E-04 | 7.94E-05 | 1.27583 down  | 2.385907 down | 1.870082 down | SUFU     |
| 222752_s_ | 0.002665 | 0.001527 | 1.648474 up   | 2.046592 up   | 1.241507 up   | TMEM206  |
| 222753_s_ | 9.33E-05 | 1.64E-05 | 1.189835 up   | 3.224247 down | 3.83632 down  | SPCS3    |
| 222755_s_ | 5.05E-04 | 1.60E-04 | 3.915387 up   | 3.531516 up   | 1.108699 down | CHD7     |
| 222757_s_ | 1.73E-07 | 2.56E-09 | 4.64676 down  | 3.469768 down | 1.339214 up   | ZAK      |
| 222759_at | 6.66E-08 | 6.24E-10 | 5.671736 up   | 4.20826 up    | 1.347763 down | SUV420H1 |
| 222760_at | 2.12E-05 | 2.18E-06 | 3.277566 down | 7.42035 down  | 2.263981 down | ZNF703   |
| 222761_at | 7.32E-05 | 1.19E-05 | 5.211223 down | 4.228157 down | 1.232505 up   | BIVM     |
| 222764_at | 5.29E-06 | 3.08E-07 | 6.091634 up   | 5.412944 up   | 1.125383 down | ASRGL1   |
| 222767_s_ | 0.003689 | 0.002352 | 1.385735 up   | 1.1846 down   | 1.641541 down | C12orf49 |
| 222768_s_ | 1.10E-04 | 2.04E-05 | 3.37467 up    | 1.721656 up   | 1.96013 down  | TRMT6    |
| 222770_s_ | 0.001298 | 5.80E-04 | 1.905692 up   | 1.951765 up   | 1.024176 up   | GUF1     |
| 222771_s_ | 1.98E-06 | 7.72E-08 | 12.75491 up   | 8.899129 up   | 1.433276 down | MYEF2    |
| 222772_at | 3.52E-05 | 4.36E-06 | 7.927495 up   | 6.363595 up   | 1.245757 down | MYEF2    |
| 222773_s_ | 8.95E-04 | 3.49E-04 | 3.704838 up   | 5.516038 up   | 1.488874 up   | GALNT12  |
| 222774_s_ | 0.003029 | 0.001815 | 4.270573 up   | 1.118383 up   | 3.818525 down | NETO2    |
| 222776_at | 0.005001 | 0.003493 | 1.59301 up    | 1.696778 up   | 1.065139 up   | MAGOHB   |
| 222780_s_ | 0.003828 | 0.002466 | 6.335524 down | 2.113589 down | 2.99752 up    | BAALC    |
| 222785_x_ | 0.005887 | 0.004289 | 2.378953 up   | 1.588726 up   | 1.497397 down | C11orf1  |
| 222788_s_ | 0.00103  | 4.21E-04 | 1.964367 up   | 2.042125 up   | 1.039585 up   | RSBN1    |
| 222792_s_ | 2.16E-04 | 5.11E-05 | 2.519318 up   | 1.702177 up   | 1.480057 down | CCDC59   |
| 222794_x_ | 1.23E-04 | 2.39E-05 | 2.488522 up   | 3.273986 up   | 1.315635 up   | MTPAP    |
| 222795_s_ | 6.34E-04 | 2.18E-04 | 2.893671 up   | 2.181801 up   | 1.326276 down | PLCXD1   |
| 222796_at | 0.009174 | 0.007419 | 1.984475 up   | 1.210764 up   | 1.639028 down | PTCD1    |

|           |          |          |               |               |               |          |
|-----------|----------|----------|---------------|---------------|---------------|----------|
| 222797_at | 1.01E-04 | 1.84E-05 | 2.830137 up   | 2.624785 up   | 1.078236 down | DPYSL5   |
| 222803_at | 0.004969 | 0.003465 | 2.449352 down | 1.474634 up   | 3.611896 up   | PRTFDC1  |
| 222804_x_ | 0.002065 | 0.001082 | 2.218706 down | 2.321392 down | 1.046282 down | WDR32    |
| 222805_at | 0.028004 | 0.02654  | 2.747499 down | 1.363485 down | 2.015056 up   | MANEA    |
| 222806_s_ | 0.002257 | 0.001224 | 2.423987 up   | 3.198336 up   | 1.319453 up   | C11orf30 |
| 222808_at | 0.029699 | 0.028298 | 2.042181 down | 1.108516 down | 1.842266 up   | ALG13    |
| 222809_x_ | 3.98E-06 | 2.08E-07 | 4.35577 up    | 1.083909 up   | 4.018575 down | CCDC85C  |
| 222810_s_ | 0.008154 | 0.006433 | 1.448705 up   | 1.213035 down | 1.757329 down | RASAL2   |
| 222817_at | 2.38E-05 | 2.54E-06 | 3.733251 down | 2.145972 down | 1.739655 up   | HSD3B7   |
| 222818_at | 0.021094 | 0.019447 | 1.279666 up   | 1.060565 down | 1.357169 down | OSBPL10  |
| 222819_at | 9.50E-06 | 7.07E-07 | 2.942914 up   | 4.679776 up   | 1.590185 up   | CTPS2    |
| 222822_s_ | 0.001849 | 9.30E-04 | 1.356481 up   | 1.129339 down | 1.531926 down | MMRN2    |
| 222824_at | 0.001669 | 8.13E-04 | 1.108612 down | 2.587654 up   | 2.868705 up   |          |
| 222825_at | 0.00238  | 0.001314 | 2.580052 up   | 3.590884 up   | 1.391787 up   | OTUD6B   |
| 222831_at | 0.003621 | 0.002296 | 2.371973 up   | 1.950787 down | 4.627213 down | SAP30L   |
| 222833_at | 0.004049 | 0.002647 | 1.904936 down | 2.070723 down | 1.08703 down  | LPCAT2   |
| 222834_s_ | 0.002362 | 0.0013   | 7.255717 down | 6.168921 down | 1.176173 up   | GNG12    |
| 222835_at | 0.002072 | 0.001088 | 6.03037 down  | 3.781992 down | 1.594496 up   | THSD4    |
| 222836_at | 0.005036 | 0.003523 | 1.695725 up   | 1.205504 down | 2.044203 down | NARG1    |
| 222840_at | 1.34E-04 | 2.69E-05 | 3.083264 down | 2.74751 down  | 1.122203 up   | ATG2B    |
| 222844_s_ | 6.94E-06 | 4.55E-07 | 5.101662 down | 3.449347 down | 1.479023 up   | SRR      |
| 222845_x_ | 4.98E-04 | 1.57E-04 | 2.390784 down | 2.296532 down | 1.041041 up   | TMBIM4   |
| 222846_at | 1.87E-04 | 4.23E-05 | 3.018534 down | 1.150995 up   | 3.474316 up   | RAB8B    |
| 222847_s_ | 3.97E-04 | 1.16E-04 | 4.176864 up   | 4.522762 up   | 1.082813 up   | EGLN3    |
| 222848_at | 0.001355 | 6.15E-04 | 3.284061 up   | 11.39829 up   | 3.470791 up   | CENPK    |
| 222851_at | 0.003277 | 0.002017 | 3.010289 down | 2.284389 down | 1.317766 up   | ZNF654   |
| 222853_at | 0.005383 | 0.003832 | 2.827433 up   | 13.8509 up    | 4.898753 up   | FLRT3    |
| 222856_at | 0.002746 | 0.00159  | 1.360561 up   | 1.682257 down | 2.288812 down | APLN     |
| 222857_s_ | 1.89E-05 | 1.85E-06 | 4.943595 up   | 10.31911 up   | 2.08737 up    | KCNMB4   |
| 222860_s_ | 8.25E-06 | 5.86E-07 | 7.29037 down  | 1.488738 up   | 10.85345 up   | PDGFD    |
| 222861_x_ | 9.97E-04 | 4.04E-04 | 2.214114 up   | 1.080638 down | 2.392655 down | FBXO44   |
| 222862_s_ | 8.42E-05 | 1.43E-05 | 8.339855 down | 6.050391 down | 1.3784 up     | AK5      |
| 222866_s_ | 2.71E-04 | 6.95E-05 | 1.475129 up   | 1.726338 up   | 1.170297 up   | FLVCR2   |
| 222867_s_ | 0.001713 | 8.42E-04 | 1.43116 down  | 1.743607 down | 1.218317 down | MED31    |



|           |          |          |          |      |          |      |          |      |          |
|-----------|----------|----------|----------|------|----------|------|----------|------|----------|
| 222868_s_ | 0.006113 | 0.004502 | 1.629132 | down | 1.009603 | down | 1.613637 | up   | IL18BP   |
| 222869_s_ | 6.86E-04 | 2.44E-04 | 2.0351   | down | 2.168142 | down | 1.065374 | down | ELAC1    |
| 222870_s_ | 3.31E-04 | 9.11E-05 | 3.617981 | up   | 2.384588 | up   | 1.517235 | down | B3GNT2   |
| 222872_x_ | 2.01E-04 | 4.63E-05 | 11.29455 | down | 12.82954 | down | 1.135906 | down | OBFC2A   |
| 222874_s_ | 0.013116 | 0.011315 | 1.882858 | up   | 1.398757 | up   | 1.346094 | down | CLN8     |
| 222875_at | 0.007436 | 0.005748 | 2.802042 | up   | 1.981765 | up   | 1.413912 | down | DHX33    |
| 222877_at | 0.00266  | 0.001523 | 1.299403 | down | 5.187963 | down | 3.992573 | down |          |
| 222879_s_ | 6.57E-06 | 4.19E-07 | 2.834107 | down | 3.155433 | down | 1.113378 | down | POLH     |
| 222880_at | 2.68E-04 | 6.86E-05 | 5.368416 | down | 4.676819 | down | 1.147878 | up   | AKT3     |
| 222887_s_ | 1.16E-04 | 2.20E-05 | 2.10033  | down | 2.290094 | down | 1.09035  | down | TMEM127  |
| 222888_at | 0.009689 | 0.007912 | 1.479799 | up   | 1.036195 | down | 1.53336  | down | CCNJ     |
| 222891_s_ | 7.42E-06 | 5.06E-07 | 7.988615 | up   | 15.59769 | up   | 1.952491 | up   | BCL11A   |
| 222893_s_ | 0.001774 | 8.81E-04 | 1.197239 | up   | 1.582141 | up   | 1.321491 | up   | RPAP2    |
| 222895_s_ | 0.001434 | 6.62E-04 | 2.56004  | up   | 3.997397 | up   | 1.561458 | up   | BCL11B   |
| 222896_at | 0.00736  | 0.005678 | 1.328534 | up   | 1.247635 | down | 1.657526 | down | TMEM38A  |
| 222898_s_ | 0.006001 | 0.004393 | 1.881507 | up   | 1.051806 | up   | 1.788835 | down | DLL3     |
| 222899_at | 4.01E-05 | 5.27E-06 | 4.462521 | down | 53.47474 | down | 11.98308 | down | ITGA11   |
| 222900_at | 0.00266  | 0.001523 | 1.687975 | down | 1.909742 | down | 1.131381 | down | NRIP3    |
| 222906_at | 1.17E-05 | 9.45E-07 | 6.081241 | up   | 11.58205 | up   | 1.904553 | up   | FLVCR1   |
| 222907_x_ | 7.44E-06 | 5.10E-07 | 4.712178 | down | 1.625456 | down | 2.898989 | up   | TMEM50B  |
| 222909_s_ | 0.006378 | 0.004753 | 1.908966 | up   | 1.580301 | up   | 1.207976 | down | BAG4     |
| 222913_at | 0.024287 | 0.022711 | 1.326023 | down | 1.047836 | down | 1.265487 | up   | KLF3     |
| 222915_s_ | 0.01464  | 0.012862 | 1.198152 | up   | 1.1176   | down | 1.339054 | down | BANK1    |
| 222917_s_ | 0.003427 | 0.002141 | 2.251548 | down | 1.435265 | down | 1.568733 | up   | TBX3     |
| 222918_at | 1.30E-04 | 2.59E-05 | 1.042249 | down | 1.98403  | down | 1.903604 | down | RAB9B    |
| 222921_s_ | 4.47E-05 | 6.07E-06 | 8.639174 | up   | 8.391727 | up   | 1.029487 | down | HEY2     |
| 222931_s_ | 0.004552 | 0.0031   | 1.771674 | up   | 1.631333 | up   | 1.086029 | down | THNSL1   |
| 222939_s_ | 3.59E-07 | 6.83E-09 | 13.89843 | up   | 17.66794 | up   | 1.271218 | up   | SLC16A10 |
| 222941_at | 0.006525 | 0.004891 | 1.780258 | up   | 2.450034 | up   | 1.376224 | up   | USP46    |
| 222943_at | 0.00217  | 0.001156 | 1.259063 | down | 1.120217 | down | 1.123945 | up   | GBA3     |
| 222948_s_ | 0.011391 | 0.009593 | 1.345229 | up   | 1.153741 | down | 1.552045 | down | MRPS18C  |
| 222951_s_ | 0.001241 | 5.45E-04 | 1.882344 | up   | 1.460895 | up   | 1.288487 | down | ANKRD5   |
| 222954_at | 0.014328 | 0.012537 | 1.320556 | up   | 1.156075 | down | 1.526662 | down | FBXO40   |
| 222957_at | 0.018219 | 0.016498 | 1.379539 | up   | 1.208239 | down | 1.666814 | down | NEU4     |

|           |          |          |               |               |               |         |
|-----------|----------|----------|---------------|---------------|---------------|---------|
| 222960_at | 3.88E-04 | 1.12E-04 | 2.104395 up   | 1.036749 up   | 2.029803 down | CACNA1H |
| 222962_s_ | 2.85E-04 | 7.42E-05 | 6.199446 up   | 6.688017 up   | 1.078809 up   | MCM10   |
| 222965_at | 0.002477 | 0.001387 | 1.775028 down | 1.025116 down | 1.731539 up   | PRO2214 |
| 222973_at | 0.004313 | 0.002883 | 1.899501 up   | 1.058822 up   | 1.793976 down |         |
| 222978_at | 9.95E-04 | 4.03E-04 | 1.800929 down | 1.894733 down | 1.052086 down | SURF4   |
| 222979_s_ | 0.036916 | 0.035646 | 1.852539 down | 1.626006 down | 1.139318 up   | SURF4   |
| 222982_x_ | 3.75E-04 | 1.08E-04 | 1.345192 down | 1.882896 down | 1.399723 down | SLC38A2 |
| 222983_s_ | 0.003127 | 0.001895 | 1.682872 up   | 2.204981 up   | 1.310249 up   | PAIP2   |
| 222984_at | 1.06E-05 | 8.12E-07 | 1.92593 up    | 2.170761 up   | 1.127124 up   | PAIP2   |
| 222991_s_ | 0.010739 | 0.008943 | 1.21447 up    | 1.408387 down | 1.710443 down | UBQLN1  |
| 222992_s_ | 5.23E-04 | 1.68E-04 | 1.576115 up   | 1.61234 up    | 1.022984 up   | NDUFB9  |
| 222994_at | 3.87E-04 | 1.12E-04 | 1.970637 down | 2.307353 down | 1.170867 down | PRDX5   |
| 222996_s_ | 8.89E-04 | 3.46E-04 | 1.107279 up   | 2.042487 down | 2.261603 down | CXXC5   |
| 222997_s_ | 0.013546 | 0.011753 | 1.611473 up   | 1.114755 up   | 1.445585 down | MRPS21  |
| 223000_s_ | 6.45E-10 | 1.06E-12 | 145.8716 up   | 191.7168 up   | 1.314285 up   | F11R    |
| 223002_s_ | 0.001374 | 6.26E-04 | 2.033206 up   | 1.904423 up   | 1.067623 down | XRN2    |
| 223012_at | 4.60E-06 | 2.56E-07 | 2.928178 down | 3.849514 down | 1.314645 down | UBXN6   |
| 223017_at | 0.002987 | 0.001781 | 1.449567 up   | 1.637148 up   | 1.129406 up   | TXNDC12 |
| 223018_at | 0.005554 | 0.003981 | 1.606503 up   | 1.522615 up   | 1.055095 down | NOB1    |
| 223019_at | 1.21E-05 | 9.96E-07 | 4.169058 down | 5.384703 down | 1.291588 down | FAM129B |
| 223023_at | 9.68E-05 | 1.72E-05 | 2.066659 down | 2.285497 down | 1.10589 down  | BET1L   |
| 223024_at | 0.001347 | 6.10E-04 | 1.85268 down  | 2.488609 down | 1.343248 down | AP1M1   |
| 223027_at | 9.37E-05 | 1.65E-05 | 3.762348 down | 3.211845 down | 1.171398 up   | SNX9    |
| 223028_s_ | 0.001332 | 6.00E-04 | 2.502944 down | 1.739518 down | 1.438872 up   | SNX9    |
| 223030_at | 0.014434 | 0.012653 | 1.289988 up   | 1.080979 down | 1.394449 down | TRAF7   |
| 223033_s_ | 0.002592 | 0.001473 | 1.410153 down | 2.011795 down | 1.42665 down  | SCYL1   |
| 223037_at | 4.68E-04 | 1.44E-04 | 1.593482 down | 2.4457 down   | 1.534815 down | PDZD11  |
| 223038_s_ | 3.05E-06 | 1.43E-07 | 32.415 up     | 22.49003 up   | 1.441305 down | FAM60A  |
| 223040_at | 4.33E-06 | 2.34E-07 | 1.455761 down | 2.347669 down | 1.612675 down | NAT5    |
| 223041_at | 4.93E-07 | 1.07E-08 | 7.433147 down | 7.02637 down  | 1.057893 up   | CD99L2  |
| 223046_at | 0.002733 | 0.001579 | 2.853637 down | 3.924688 down | 1.375329 down | EGLN1   |
| 223049_at | 0.005365 | 0.003816 | 1.381165 up   | 1.002508 up   | 1.377711 down | GRB2    |
| 223050_s_ | 1.00E-04 | 1.81E-05 | 2.263312 down | 2.409887 down | 1.064762 down | FBXW5   |
| 223055_s_ | 7.29E-04 | 2.65E-04 | 4.051035 up   | 2.103211 up   | 1.926119 down | XPO5    |

|           |          |          |               |               |               |          |
|-----------|----------|----------|---------------|---------------|---------------|----------|
| 223056_s_ | 1.88E-04 | 4.23E-05 | 2.944734 up   | 1.68241 up    | 1.750307 down | XPO5     |
| 223057_s_ | 0.001856 | 9.36E-04 | 3.28303 up    | 1.818557 up   | 1.805294 down | XPO5     |
| 223061_at | 0.009488 | 0.007715 | 1.560287 down | 1.680864 down | 1.077279 down | CHID1    |
| 223063_at | 6.40E-06 | 4.02E-07 | 5.378901 down | 5.163885 down | 1.041638 up   | C1orf198 |
| 223067_at | 0.006898 | 0.005238 | 1.703264 up   | 1.972488 up   | 1.158064 up   | CWC15    |
| 223068_at | 0.006236 | 0.004616 | 1.933047 up   | 1.401801 up   | 1.378974 down | EML4     |
| 223074_s_ | 0.004719 | 0.003244 | 2.600786 up   | 1.535211 up   | 1.69409 down  | AIF1L    |
| 223075_s_ | 3.48E-08 | 2.79E-10 | 20.81824 up   | 39.79134 up   | 1.911369 up   | AIF1L    |
| 223076_s_ | 0.00435  | 0.002918 | 1.752301 up   | 1.339753 up   | 1.307928 down | NSUN2    |
| 223077_at | 0.001854 | 9.34E-04 | 2.697814 down | 1.62357 down  | 1.661656 up   | TMOD3    |
| 223078_s_ | 0.00201  | 0.001042 | 2.065846 down | 2.506072 down | 1.213097 down | TMOD3    |
| 223079_s_ | 0.001285 | 5.72E-04 | 3.508125 down | 5.199073 down | 1.482009 down | GLS      |
| 223080_at | 0.020252 | 0.018582 | 1.140755 up   | 1.915874 up   | 1.679479 up   | GLS      |
| 223082_at | 4.01E-06 | 2.10E-07 | 3.415609 down | 3.057133 down | 1.117259 up   | SH3KBP1  |
| 223086_x_ | 8.69E-04 | 3.34E-04 | 1.606771 up   | 1.130673 up   | 1.421074 down | MRPL51   |
| 223088_x_ | 0.005224 | 0.003692 | 1.168583 down | 1.308775 down | 1.119968 down | ECHDC1   |
| 223091_x_ | 0.004332 | 0.0029   | 2.637102 down | 2.354305 down | 1.120119 up   | MFF      |
| 223092_at | 5.28E-07 | 1.18E-08 | 4.894403 down | 12.82803 down | 2.620958 down | ANKH     |
| 223093_at | 2.93E-06 | 1.35E-07 | 4.079867 down | 8.716588 down | 2.136488 down | ANKH     |
| 223094_s_ | 6.56E-05 | 1.02E-05 | 2.196854 down | 6.013567 down | 2.737354 down | ANKH     |
| 223095_at | 1.15E-05 | 9.29E-07 | 3.718064 down | 4.544421 down | 1.222255 down | MARVELD1 |
| 223096_at | 1.47E-04 | 3.06E-05 | 3.175141 up   | 3.094737 up   | 1.025981 down | NOP58    |
| 223097_at | 0.024684 | 0.023124 | 1.130093 up   | 1.41374 down  | 1.597657 down | ADPRHL2  |
| 223098_s_ | 0.002271 | 0.001236 | 1.232629 down | 2.030647 down | 1.647411 down | LONP2    |
| 223099_s_ | 4.97E-04 | 1.56E-04 | 2.45868 down  | 2.152128 down | 1.142441 up   | LONP2    |
| 223100_s_ | 0.00293  | 0.001735 | 1.63579 up    | 1.57599 up    | 1.037944 down | NUDT5    |
| 223106_at | 0.005633 | 0.004054 | 1.37515 down  | 1.048254 down | 1.311849 up   | TMEM14C  |
| 223108_s_ | 0.005896 | 0.004298 | 1.735168 up   | 1.473056 up   | 1.177938 down | ZCCHC17  |
| 223113_at | 3.92E-05 | 5.06E-06 | 1.575575 down | 2.61552 down  | 1.660041 down | TMEM138  |
| 223114_at | 0.001194 | 5.17E-04 | 1.83255 up    | 1.776569 up   | 1.031511 down | COQ5     |
| 223115_at | 0.002393 | 0.001323 | 1.529084 down | 1.726562 down | 1.129147 down | MED17    |
| 223121_s_ | 6.33E-05 | 9.70E-06 | 12.89653 up   | 40.13086 up   | 3.111755 up   | SFRP2    |
| 223122_s_ | 2.56E-04 | 6.42E-05 | 8.82046 up    | 64.96459 up   | 7.365214 up   | SFRP2    |
| 223124_s_ | 1.41E-04 | 2.87E-05 | 2.232158 up   | 1.631087 up   | 1.36851 down  | C1orf128 |

|           |          |          |               |               |               |          |
|-----------|----------|----------|---------------|---------------|---------------|----------|
| 223128_at | 5.16E-04 | 1.64E-04 | 1.902513 up   | 2.301705 up   | 1.209823 up   | FOXRED1  |
| 223129_x_ | 0.001039 | 4.27E-04 | 1.010315 up   | 2.418344 up   | 2.393653 up   | MYLIP    |
| 223130_s_ | 0.001729 | 8.52E-04 | 1.384733 down | 4.095462 up   | 5.671121 up   | MYLIP    |
| 223132_s_ | 0.002218 | 0.001192 | 2.537335 down | 3.163564 down | 1.246806 down | TRIM8    |
| 223135_s_ | 0.007245 | 0.005569 | 2.785983 up   | 1.528525 up   | 1.822661 down | BBX      |
| 223137_at | 0.001277 | 5.67E-04 | 1.239967 up   | 1.33201 down  | 1.651649 down | ZDHHC4   |
| 223138_s_ | 0.007897 | 0.006187 | 1.955288 up   | 1.953493 up   | 1.000919 down | DHX36    |
| 223139_s_ | 9.47E-05 | 1.67E-05 | 2.980667 up   | 2.924877 up   | 1.019074 down | DHX36    |
| 223140_s_ | 3.98E-06 | 2.08E-07 | 2.055762 up   | 2.273127 up   | 1.105735 up   | DHX36    |
| 223146_at | 0.002768 | 0.001609 | 1.753364 up   | 2.082551 up   | 1.187746 up   | WDR33    |
| 223147_s_ | 0.002239 | 0.00121  | 2.832485 up   | 1.456352 up   | 1.944918 down | WDR33    |
| 223148_at | 0.04394  | 0.042703 | 1.00418 up    | 1.301671 down | 1.307112 down | PIGS     |
| 223151_at | 3.05E-04 | 8.15E-05 | 2.460754 up   | 1.649653 up   | 1.49168 down  | DCUN1D5  |
| 223154_at | 0.003151 | 0.001916 | 1.776638 up   | 1.89897 up    | 1.068856 up   | MRPL1    |
| 223155_at | 0.001631 | 7.89E-04 | 1.810694 up   | 1.499361 up   | 1.207644 down | HDHD2    |
| 223156_at | 4.23E-05 | 5.63E-06 | 2.386849 up   | 1.569617 up   | 1.520657 down | MRPS23   |
| 223157_at | 0.002173 | 0.001158 | 1.477712 up   | 1.644698 up   | 1.113003 up   | C4orf14  |
| 223158_s_ | 0.001009 | 4.11E-04 | 2.480069 down | 3.390518 down | 1.367106 down | NEK6     |
| 223159_s_ | 1.34E-05 | 1.15E-06 | 5.266895 down | 8.876241 down | 1.685289 down | NEK6     |
| 223160_s_ | 5.18E-04 | 1.65E-04 | 2.200628 up   | 2.364362 up   | 1.074403 up   | SMEK1    |
| 223162_s_ | 4.25E-06 | 2.28E-07 | 3.415323 up   | 3.356877 up   | 1.017411 down | KIAA1147 |
| 223163_s_ | 0.002237 | 0.001208 | 1.787872 up   | 1.526159 up   | 1.171485 down | ZC3HC1   |
| 223164_at | 9.96E-06 | 7.53E-07 | 1.723419 down | 2.965466 down | 1.720689 down | CCM2     |
| 223165_s_ | 8.30E-04 | 3.15E-04 | 1.908521 up   | 2.746112 up   | 1.438869 up   | IP6K2    |
| 223166_x_ | 0.005553 | 0.00398  | 1.544718 up   | 1.141912 down | 1.763932 down | C9orf86  |
| 223168_at | 0.004329 | 0.002897 | 1.266734 up   | 8.837158 up   | 6.976334 up   | RHO      |
| 223169_s_ | 0.030048 | 0.028652 | 2.038681 up   | 4.463502 up   | 2.189407 up   | RHO      |
| 223170_at | 0.001052 | 4.34E-04 | 1.672963 down | 1.091737 up   | 1.826435 up   | TMEM98   |
| 223172_s_ | 5.57E-05 | 8.13E-06 | 6.663349 up   | 3.32229 up    | 2.005649 down | MTP18    |
| 223174_at | 0.001518 | 7.14E-04 | 1.238688 up   | 1.499613 down | 1.857552 down | BTBD10   |
| 223175_s_ | 3.37E-04 | 9.31E-05 | 1.804115 up   | 1.249839 up   | 1.443478 down | FEM1A    |
| 223176_at | 8.53E-05 | 1.45E-05 | 2.652436 down | 13.40007 down | 5.051986 down | KCTD20   |
| 223178_s_ | 0.002361 | 0.001299 | 2.397317 up   | 4.451215 up   | 1.856749 up   | NT5DC1   |
| 223182_s_ | 1.92E-06 | 7.33E-08 | 9.712833 down | 17.0165 down  | 1.75196 down  | AGPAT3   |

|           |          |          |               |               |               |                              |
|-----------|----------|----------|---------------|---------------|---------------|------------------------------|
| 223183_at | 4.04E-07 | 8.17E-09 | 7.585149 down | 8.374507 down | 1.104066 down | AGPAT3                       |
| 223184_s_ | 2.77E-07 | 4.68E-09 | 13.29161 down | 15.76762 down | 1.186283 down | AGPAT3                       |
| 223185_s_ | 4.25E-06 | 2.29E-07 | 1.07228 down  | 2.158872 down | 2.013348 down | BHLHE41<br>TMEM189           |
| 223186_at | 4.08E-04 | 1.20E-04 | 1.177154 up   | 2.139713 down | 2.51877 down  | /// UBE2V1                   |
| 223192_at | 6.85E-04 | 2.43E-04 | 1.537076 down | 1.722813 down | 1.120838 down | SLC25A28                     |
| 223195_s_ | 0.002192 | 0.001172 | 1.276519 up   | 1.635305 down | 2.087499 down | SESN2                        |
| 223196_s_ | 0.001527 | 7.20E-04 | 1.066082 up   | 1.806223 down | 1.925582 down | SESN2                        |
| 223197_s_ | 7.87E-05 | 1.31E-05 | 2.476069 up   | 2.225828 up   | 1.112426 down | SMARCAD1                     |
| 223200_s_ | 0.002303 | 0.001257 | 2.600138 up   | 1.639489 up   | 1.585944 down | LSG1<br>LOC100130<br>886 /// |
| 223202_s_ | 0.009615 | 0.00784  | 1.566961 up   | 1.05074 up    | 1.491293 down | TMEM164                      |
| 223204_at | 0.001654 | 8.04E-04 | 14.93767 down | 10.31264 down | 1.448482 up   | C4orf18                      |
| 223207_x_ | 0.004342 | 0.002908 | 1.284121 down | 1.711484 down | 1.332806 down | PHPT1                        |
| 223208_at | 0.001616 | 7.79E-04 | 2.079919 down | 2.090273 down | 1.004978 down | KCTD10                       |
| 223209_s_ | 0.001048 | 4.33E-04 | 1.549461 down | 2.530826 down | 1.63336 down  | SELS                         |
| 223211_at | 0.001434 | 6.63E-04 | 2.992328 up   | 2.480054 up   | 1.206557 down | HACL1                        |
| 223213_s_ | 0.005663 | 0.004082 | 6.835994 down | 4.021737 down | 1.699762 up   | ZHX1                         |
| 223214_s_ | 4.56E-04 | 1.39E-04 | 8.012551 down | 6.956456 down | 1.151815 up   | ZHX1                         |
| 223215_s_ | 0.006123 | 0.004512 | 1.091724 down | 1.732811 down | 1.587224 down | C14orf100                    |
| 223218_s_ | 0.002156 | 0.001147 | 3.010579 down | 3.923198 down | 1.303137 down | NFKBIZ                       |
| 223219_s_ | 7.88E-05 | 1.31E-05 | 2.366978 up   | 2.091956 up   | 1.131466 down | CNOT10                       |
| 223220_s_ | 2.63E-06 | 1.16E-07 | 11.56579 down | 3.124921 down | 3.701148 up   | PARP9                        |
| 223221_at | 0.002429 | 0.001349 | 2.382927 up   | 1.735788 up   | 1.372821 down | SCO1                         |
| 223222_at | 0.002122 | 0.001122 | 1.438418 up   | 1.822248 up   | 1.266842 up   | SLC25A19                     |
| 223223_at | 9.58E-04 | 3.83E-04 | 1.39278 down  | 1.440572 down | 1.034314 down | ARV1                         |
| 223226_x_ | 0.002392 | 0.001322 | 2.031343 down | 1.631844 down | 1.244814 up   | SSBP4                        |
| 223228_at | 2.95E-05 | 3.44E-06 | 1.468377 down | 2.206614 down | 1.502757 down | LDOC1L                       |
| 223229_at | 0.002864 | 0.001683 | 4.133448 up   | 3.873533 up   | 1.0671 down   | UBE2T                        |
| 223230_at | 1.18E-05 | 9.62E-07 | 2.253018 up   | 2.484378 up   | 1.102689 up   | PRPF38A                      |
| 223231_at | 8.00E-04 | 3.01E-04 | 1.742473 up   | 1.658392 up   | 1.0507 down   | TATDN1                       |
| 223232_s_ | 1.38E-08 | 6.75E-11 | 4.954826 up   | 4.297322 up   | 1.153003 down | CGN                          |

|           |          |          |               |               |               |           |
|-----------|----------|----------|---------------|---------------|---------------|-----------|
| 223233_s_ | 7.00E-06 | 4.61E-07 | 4.550278 up   | 4.679712 up   | 1.028446 up   | CGN       |
| 223234_at | 8.13E-05 | 1.36E-05 | 3.895614 up   | 4.789714 up   | 1.229515 up   | MAD2L2    |
| 223239_at | 0.021531 | 0.019906 | 1.596436 up   | 1.532798 up   | 1.041517 down | C14orf129 |
| 223243_s_ | 0.001676 | 8.19E-04 | 2.484542 down | 2.485789 down | 1.000502 down | EDEM3     |
| 223244_s_ | 0.001496 | 7.01E-04 | 1.525602 up   | 1.009903 down | 1.54071 down  | NDUFA12   |
| 223245_at | 1.10E-06 | 3.33E-08 | 10.54293 up   | 11.25674 up   | 1.067705 up   | STRBP     |
| 223246_s_ | 6.64E-06 | 4.25E-07 | 8.517955 up   | 7.617568 up   | 1.118199 down | STRBP     |
| 223247_at | 0.003068 | 0.001845 | 1.52657 down  | 1.893302 down | 1.240232 down | MED10     |
| 223248_at | 8.37E-04 | 3.19E-04 | 2.023136 up   | 1.456855 up   | 1.388701 down | HSDL1     |
| 223249_at | 0.001496 | 7.01E-04 | 1.912172 up   | 1.788417 up   | 1.069198 down | CLDN12    |
| 223251_s_ | 3.19E-04 | 8.68E-05 | 3.548293 up   | 4.196993 up   | 1.18282 up    | ANKRD10   |
| 223253_at | 1.76E-04 | 3.89E-05 | 6.013604 down | 8.397774 down | 1.396463 down | EPDR1     |
| 223254_s_ | 0.002011 | 0.001044 | 2.063891 up   | 3.346963 up   | 1.621676 up   | G2E3      |
| 223255_at | 3.01E-04 | 8.01E-05 | 1.845735 up   | 2.883536 up   | 1.56227 up    | G2E3      |
| 223256_at | 5.88E-05 | 8.84E-06 | 2.482248 up   | 3.169777 up   | 1.276978 up   | G2E3      |
| 223258_s_ | 2.87E-04 | 7.49E-05 | 2.174172 up   | 3.106294 up   | 1.428725 up   | G2E3      |
| 223260_s_ | 0.001944 | 9.97E-04 | 3.677505 down | 2.140548 down | 1.71802 up    | POLK      |
| 223267_at | 0.001017 | 4.15E-04 | 2.649154 up   | 1.950466 up   | 1.358216 down | RG9MTD1   |
| 223269_at | 1.27E-04 | 2.49E-05 | 5.04782 down  | 3.73899 down  | 1.350049 up   | POLR3GL   |
| 223270_at | 0.012441 | 0.010643 | 2.00979 up    | 1.834812 up   | 1.095366 down | CTDSPL2   |
| 223271_s_ | 0.004099 | 0.002691 | 1.768216 up   | 2.033247 up   | 1.149886 up   | CTDSPL2   |
| 223272_s_ | 6.33E-04 | 2.18E-04 | 1.642118 up   | 1.786728 up   | 1.088063 up   | C1orf57   |
| 223276_at | 7.84E-05 | 1.30E-05 | 4.934371 down | 6.71823 down  | 1.361517 down | MST150    |
| 223279_s_ | 1.25E-05 | 1.04E-06 | 1.29749 down  | 3.712041 down | 2.86094 down  | UACA      |
| 223282_at | 1.57E-05 | 1.44E-06 | 54.2331 down  | 8.595859 down | 6.309212 up   | TSHZ1     |
| 223283_s_ | 2.78E-05 | 3.17E-06 | 22.11593 down | 6.569702 down | 3.366351 up   | TSHZ1     |
| 223287_s_ | 8.20E-05 | 1.38E-05 | 1.29673 down  | 4.707516 down | 3.630299 down | FOXP1     |
| 223290_at | 0.004665 | 0.0032   | 2.961358 up   | 1.547738 up   | 1.913345 down | PDXP      |
| 223294_at | 0.002126 | 0.001125 | 1.888653 up   | 1.676431 up   | 1.126591 down | CXorf26   |
| 223295_s_ | 2.20E-04 | 5.24E-05 | 1.864836 up   | 2.394487 up   | 1.28402 up    | LUC7L     |
| 223296_at | 0.001594 | 7.65E-04 | 2.286492 up   | 1.777382 up   | 1.286438 down | SLC25A33  |
| 223298_s_ | 0.011187 | 0.009396 | 1.030899 down | 1.553371 up   | 1.601368 up   | NT5C3     |
| 223302_s_ | 0.005834 | 0.004236 | 2.004755 down | 1.654182 down | 1.211931 up   | ZNF655    |
| 223305_at | 5.98E-06 | 3.64E-07 | 1.54365 up    | 2.413289 up   | 1.563365 up   | TMEM216   |

|           |          |          |               |               |               |           |
|-----------|----------|----------|---------------|---------------|---------------|-----------|
| 223306_at | 0.002135 | 0.001131 | 1.521752 up   | 1.518654 up   | 1.00204 down  | EBPL      |
| 223311_s_ | 8.69E-07 | 2.42E-08 | 4.844811 up   | 4.837421 up   | 1.001528 down | MTA3      |
| 223312_at | 0.004289 | 0.002859 | 1.692243 down | 2.103725 down | 1.243158 down | C2orf7    |
| 223315_at | 3.12E-05 | 3.72E-06 | 35.53634 down | 76.0191 down  | 2.139193 down | NTN4      |
| 223316_at | 2.74E-04 | 7.06E-05 | 1.45206 down  | 2.574253 up   | 3.737969 up   | CCDC3     |
| 223317_at | 0.004715 | 0.003241 | 1.652451 up   | 1.370434 down | 2.264574 down | ALKBH7    |
| 223320_s_ | 0.018944 | 0.017237 | 2.161391 down | 1.385357 down | 1.560169 up   | ABCB10    |
| 223321_s_ | 0.001901 | 9.67E-04 | 1.120382 down | 2.347676 down | 2.095424 down | FGFRL1    |
| 223322_at | 7.32E-06 | 4.95E-07 | 3.256559 down | 2.28029 down  | 1.428134 up   | RASSF5    |
| 223323_x_ | 8.20E-04 | 3.10E-04 | 1.619416 down | 1.219324 up   | 1.974593 up   | TRPM7     |
| 223325_at | 1.10E-04 | 2.04E-05 | 1.626171 down | 2.594305 down | 1.595345 down | TXNDC11   |
|           |          |          |               |               |               | LOC727751 |
|           |          |          |               |               |               | ///       |
|           |          |          |               |               |               | LOC727849 |
|           |          |          |               |               |               | ///       |
| 223326_s_ | 2.51E-04 | 6.27E-05 | 2.754558 up   | 1.675406 up   | 1.644114 down | LOC80154  |
|           |          |          |               |               |               | LOC727751 |
|           |          |          |               |               |               | ///       |
|           |          |          |               |               |               | LOC727849 |
|           |          |          |               |               |               | ///       |
| 223327_x_ | 9.32E-05 | 1.63E-05 | 2.429599 up   | 1.461039 up   | 1.662926 down | LOC80154  |
| 223329_x_ | 0.003566 | 0.002253 | 1.669324 up   | 1.580797 up   | 1.056002 down | SUGT1     |
| 223331_s_ | 0.003713 | 0.002372 | 2.124885 up   | 1.841936 up   | 1.153616 down | DDX20     |
| 223332_x_ | 0.002755 | 0.001599 | 1.931513 up   | 1.087137 down | 2.099819 down | RNF126    |
| 223337_at | 1.22E-04 | 2.36E-05 | 2.127128 up   | 1.965445 up   | 1.082263 down | SDCCAG10  |
| 223345_at | 0.004878 | 0.003386 | 2.160907 down | 1.315047 down | 1.643217 up   | HDAC8     |
| 223349_s_ | 4.04E-04 | 1.19E-04 | 1.010036 down | 4.267104 down | 4.224705 down | BOK       |
| 223351_at | 2.25E-05 | 2.36E-06 | 1.81557 up    | 1.944753 up   | 1.071152 up   | C17orf80  |
| 223353_at | 3.79E-04 | 1.09E-04 | 1.3221 down   | 1.760526 down | 1.331614 down | HCCA2     |
| 223358_s_ | 4.38E-06 | 2.38E-07 | 7.390569 up   | 9.416727 up   | 1.274155 up   | PDE7A     |
| 223361_at | 5.85E-04 | 1.96E-04 | 3.927971 up   | 3.947754 up   | 1.005036 up   | C6orf115  |
| 223362_s_ | 1.48E-04 | 3.08E-05 | 2.694992 up   | 3.955288 up   | 1.467643 up   | 40789     |
| 223365_at | 0.00774  | 0.006045 | 1.669626 up   | 1.080302 down | 1.8037 down   | DHX37     |
| 223367_at | 1.43E-05 | 1.27E-06 | 2.591657 down | 2.371313 down | 1.092921 up   | DNAJC30   |

|           |          |          |               |               |               |          |
|-----------|----------|----------|---------------|---------------|---------------|----------|
| 223368_s_ | 0.016753 | 0.014997 | 1.080705 up   | 1.572988 down | 1.699936 down | METTL11A |
| 223372_at | 0.013733 | 0.011944 | 1.586658 up   | 1.032817 up   | 1.536243 down | DNAJC4   |
| 223374_s_ | 0.010674 | 0.008883 | 4.120543 down | 2.566995 down | 1.605201 up   | B3GALNT1 |
| 223376_s_ | 0.002054 | 0.001075 | 2.636894 down | 2.237629 down | 1.178433 up   | BRI3     |
| 223377_x_ | 0.004374 | 0.002939 | 1.451468 down | 1.339576 up   | 1.944352 up   | CISH     |
| 223378_at | 9.69E-04 | 3.89E-04 | 3.314537 down | 3.184357 down | 1.040881 up   | GLIS2    |
| 223381_at | 0.00498  | 0.003475 | 3.55127 up    | 6.948411 up   | 1.956599 up   | NUF2     |
| 223384_s_ | 9.51E-08 | 1.10E-09 | 27.47763 down | 23.533 down   | 1.167621 up   | TRIM4    |
| 223385_at | 2.20E-05 | 2.29E-06 | 17.92109 up   | 15.82551 up   | 1.132418 down | CYP2S1   |
| 223387_at | 7.39E-04 | 2.70E-04 | 1.609133 down | 1.940429 down | 1.205885 down | ZFYVE1   |
| 223389_s_ | 0.003997 | 0.002604 | 1.722639 up   | 1.863958 up   | 1.082036 up   | ZNF581   |
| 223392_s_ | 1.66E-05 | 1.56E-06 | 6.091476 down | 4.215246 down | 1.445106 up   | TSHZ3    |
| 223393_s_ | 1.68E-04 | 3.65E-05 | 6.369825 down | 3.985736 down | 1.598155 up   | TSHZ3    |
| 223394_at | 5.41E-04 | 1.75E-04 | 1.815916 down | 3.079851 down | 1.696032 down | SERTAD1  |
| 223395_at | 2.95E-07 | 5.15E-09 | 38.9806 down  | 97.45773 down | 2.50016 down  | ABI3BP   |
| 223398_at | 8.66E-04 | 3.33E-04 | 1.493051 down | 2.380201 down | 1.594186 down | C9orf89  |
| 223403_s_ | 0.002353 | 0.001293 | 3.093363 up   | 2.608773 up   | 1.185754 down | POLR1B   |
| 223407_at | 0.001014 | 4.13E-04 | 1.85951 down  | 1.65031 down  | 1.126764 up   | C16orf48 |
| 223412_at | 6.86E-04 | 2.44E-04 | 2.402881 up   | 3.70555 up    | 1.542128 up   | KBTBD7   |
| 223413_s_ | 3.21E-04 | 8.75E-05 | 4.75504 up    | 3.530644 up   | 1.346791 down | LYAR     |
| 223414_s_ | 0.001351 | 6.12E-04 | 3.483026 up   | 2.173106 up   | 1.602786 down | LYAR     |
| 223415_at | 0.014806 | 0.013033 | 1.954718 up   | 1.410412 down | 2.756957 down | RPP25    |
| 223418_x_ | 0.01159  | 0.009792 | 2.014104 down | 1.26086 up    | 2.539502 up   | ANKRD13C |
| 223421_at | 2.77E-04 | 7.17E-05 | 1.638867 down | 1.806074 down | 1.102026 down | CYHR1    |
| 223422_s_ | 1.41E-05 | 1.25E-06 | 4.906184 down | 8.250132 down | 1.681578 down | ARHGAP24 |
| 223423_at | 2.96E-08 | 2.12E-10 | 20.42445 up   | 24.97334 up   | 1.222718 up   | GPR160   |
| 223424_s_ | 1.24E-04 | 2.42E-05 | 2.39785 up    | 2.069926 up   | 1.158423 down | ZSCAN21  |
| 223426_s_ | 0.002462 | 0.001375 | 2.227207 up   | 1.11032 up    | 2.005914 down | EPB41L4B |
| 223427_s_ | 3.87E-06 | 1.99E-07 | 8.002428 up   | 3.639861 up   | 2.198553 down | EPB41L4B |
| 223428_s_ | 6.89E-04 | 2.45E-04 | 1.629735 down | 1.839696 down | 1.128831 down | ISY1     |
| 223429_x_ | 6.15E-04 | 2.10E-04 | 1.98134 down  | 1.809898 down | 1.094724 up   | ISY1     |
| 223434_at | 2.21E-04 | 5.27E-05 | 57.46654 down | 40.55702 down | 1.416932 up   | GBP3     |



|           |          |          |               |               |               |  |            |
|-----------|----------|----------|---------------|---------------|---------------|--|------------|
|           |          |          |               |               |               |  | PCDHA1 /// |
|           |          |          |               |               |               |  | PCDHA10    |
|           |          |          |               |               |               |  | ///        |
|           |          |          |               |               |               |  | PCDHA11    |
|           |          |          |               |               |               |  | ///        |
|           |          |          |               |               |               |  | PCDHA12    |
|           |          |          |               |               |               |  | ///        |
|           |          |          |               |               |               |  | PCDHA13    |
|           |          |          |               |               |               |  | /// PCDHA2 |
|           |          |          |               |               |               |  | /// PCDHA3 |
|           |          |          |               |               |               |  | /// PCDHA4 |
|           |          |          |               |               |               |  | /// PCDHA5 |
|           |          |          |               |               |               |  | /// PCDHA6 |
|           |          |          |               |               |               |  | /// PCDHA7 |
|           |          |          |               |               |               |  | /// PCDHA8 |
|           |          |          |               |               |               |  | /// PCDHA9 |
|           |          |          |               |               |               |  | ///        |
|           |          |          |               |               |               |  | PCDHAC1    |
|           |          |          |               |               |               |  | ///        |
| 223435_s_ | 3.93E-07 | 7.91E-09 | 17.78366 up   | 10.15622 up   | 1.751011 down |  | PCDHAC2    |
| 223436_s_ | 0.002339 | 0.001284 | 1.105913 down | 1.85133 down  | 1.674029 down |  | TRPT1      |
| 223437_at | 4.64E-05 | 6.36E-06 | 5.171439 down | 3.496099 down | 1.479203 up   |  | PPARA      |
| 223438_s_ | 2.31E-04 | 5.62E-05 | 5.025021 down | 3.14832 down  | 1.596096 up   |  | PPARA      |
| 223441_at | 0.001244 | 5.47E-04 | 5.039422 down | 2.161801 down | 2.331121 up   |  | SLC17A5    |
| 223449_at | 8.25E-08 | 8.64E-10 | 40.85352 up   | 62.72482 up   | 1.535359 up   |  | SEMA6A     |
| 223451_s_ | 1.35E-05 | 1.16E-06 | 4.140035 down | 5.473338 down | 1.322051 down |  | CKLF       |
| 223452_s_ | 0.00833  | 0.006601 | 1.429716 down | 2.081596 down | 1.455951 down |  | ATL3       |

|           |          |          |               |               |               |                            |
|-----------|----------|----------|---------------|---------------|---------------|----------------------------|
| 223453_s_ | 6.17E-05 | 9.40E-06 | 2.965868 down | 1.589565 down | 1.865836 up   | ATL3<br>LOC652900          |
| 223458_at | 0.006211 | 0.004591 | 1.818589 up   | 1.267028 down | 2.304203 down | /// SEZ6L2                 |
| 223461_at | 0.013019 | 0.011213 | 1.944342 up   | 1.251337 up   | 1.553812 down | TBC1D7                     |
| 223462_at | 0.001035 | 4.25E-04 | 1.127658 down | 2.068506 down | 1.834338 down | TMEM175                    |
| 223463_at | 1.26E-04 | 2.46E-05 | 3.998373 down | 3.501665 down | 1.141849 up   | RAB23                      |
| 223464_at | 5.67E-04 | 1.87E-04 | 3.408778 down | 3.724289 down | 1.092558 down | OSBPL5                     |
| 223468_s_ | 7.09E-04 | 2.55E-04 | 2.116632 up   | 4.556922 up   | 2.152912 up   | RGMA                       |
| 223471_at | 2.60E-05 | 2.87E-06 | 17.00473 up   | 9.928982 up   | 1.712636 down | RAB3IP                     |
| 223475_at | 9.39E-04 | 3.73E-04 | 30.58388 up   | 6.322994 up   | 4.83693 down  | CRISPLD1                   |
| 223478_at | 0.003681 | 0.002345 | 1.739492 up   | 1.706557 up   | 1.019299 down | TIMM8B                     |
| 223482_at | 1.11E-05 | 8.75E-07 | 3.054185 down | 2.716491 down | 1.124313 up   | TMEM120A                   |
| 223487_x_ | 0.004831 | 0.00334  | 1.628836 down | 1.265855 up   | 2.06187 up    | GNB4                       |
| 223488_s_ | 0.010933 | 0.009139 | 2.474774 down | 1.390714 down | 1.779499 up   | GNB4                       |
| 223493_at | 5.10E-06 | 2.95E-07 | 9.311176 down | 7.451104 down | 1.249637 up   | FBXO4<br>C1QTNF5           |
| 223499_at | 3.20E-05 | 3.86E-06 | 6.656033 down | 9.526889 down | 1.431316 down | /// MFRP                   |
| 223510_at | 7.42E-04 | 2.71E-04 | 1.174769 up   | 1.998926 down | 2.348276 down | NRP2                       |
| 223512_at | 0.0016   | 7.69E-04 | 1.765768 down | 2.476165 down | 1.402317 down | SAR1B                      |
| 223513_at | 1.65E-05 | 1.54E-06 | 4.225236 up   | 3.474623 up   | 1.216027 down | CENPJ                      |
| 223514_at | 3.83E-04 | 1.11E-04 | 2.705353 up   | 1.487003 up   | 1.819332 down | CARD11<br>PRICKLE4         |
| 223516_s_ | 0.001458 | 6.77E-04 | 1.52952 up    | 1.710881 up   | 1.118574 up   | /// TOMM6                  |
| 223519_at | 2.12E-06 | 8.56E-08 | 15.55003 down | 10.21296 down | 1.522579 up   | ZAK                        |
| 223522_at | 9.19E-06 | 6.77E-07 | 4.370499 up   | 4.115164 up   | 1.062048 down | C9orf45                    |
| 223523_at | 0.002131 | 0.001128 | 1.819728 up   | 1.408293 up   | 1.292152 down | TMEM108                    |
| 223524_s_ | 8.06E-04 | 3.04E-04 | 4.72174 up    | 3.069189 up   | 1.538432 down | TMEM108                    |
| 223526_at | 0.003422 | 0.002137 | 1.880643 up   | 1.582862 up   | 1.188129 down | C18orf21                   |
| 223527_s_ | 0.009937 | 0.008162 | 2.068013 down | 1.972826 down | 1.048249 up   | CDADC1<br>LOC731602<br>/// |
| 223528_s_ | 1.27E-05 | 1.07E-06 | 2.112688 up   | 2.447185 up   | 1.158328 up   | METT11D1                   |
| 223530_at | 2.41E-04 | 5.92E-05 | 4.487585 up   | 3.240029 up   | 1.385045 down | TDRKH                      |

|           |          |          |          |      |          |      |          |      |            |
|-----------|----------|----------|----------|------|----------|------|----------|------|------------|
| 223533_at | 0.001003 | 4.07E-04 | 2.669473 | down | 1.123456 | down | 2.376126 | up   | LRR8C      |
| 223534_s_ | 0.004007 | 0.002613 | 2.062138 | up   | 1.793977 | up   | 1.149479 | down | RPS6KL1    |
| 223537_s_ | 0.008401 | 0.006666 | 4.096757 | down | 5.844881 | down | 1.426709 | down | WNT5B      |
| 223538_at | 3.09E-04 | 8.29E-05 | 3.560452 | up   | 2.16818  | up   | 1.642138 | down | SERF1A     |
|           |          |          |          |      |          |      |          |      | SERF1A /// |
| 223539_s_ | 5.86E-05 | 8.77E-06 | 4.373225 | up   | 2.850925 | up   | 1.533967 | down | SERF1B     |
| 223541_at | 0.001292 | 5.76E-04 | 14.49741 | up   | 3.713158 | up   | 3.904335 | down | HAS3       |
| 223542_at | 6.90E-06 | 4.50E-07 | 3.273737 | up   | 4.570191 | up   | 1.396017 | up   | ANKRD32    |
| 223543_at | 1.59E-04 | 3.41E-05 | 3.361078 | up   | 2.320264 | up   | 1.448576 | down | PDZD4      |
| 223545_at | 3.12E-05 | 3.74E-06 | 3.517952 | up   | 3.213146 | up   | 1.094862 | down | FANCD2     |
| 223546_x_ | 1.63E-05 | 1.52E-06 | 2.331421 | up   | 1.978137 | up   | 1.178595 | down | LUC7L      |
| 223552_at | 7.98E-05 | 1.33E-05 | 1.626703 | up   | 2.099407 | up   | 1.29059  | up   | LRR8C      |
| 223556_at | 2.07E-04 | 4.82E-05 | 5.749947 | up   | 13.15602 | up   | 2.288024 | up   | HELLS      |
| 223559_s_ | 0.004007 | 0.002612 | 1.347652 | up   | 1.627615 | up   | 1.207741 | up   | C9orf80    |
| 223560_s_ | 8.83E-05 | 1.51E-05 | 2.712732 | up   | 2.815445 | up   | 1.037863 | up   | C2orf56    |
| 223565_at | 0.002434 | 0.001352 | 1.530879 | up   | 1.230577 | down | 1.883865 | down | MGC29506   |
| 223566_s_ | 0.003358 | 0.002084 | 3.419449 | up   | 2.949821 | up   | 1.159206 | down | BCOR       |
| 223567_at | 0.004719 | 0.003244 | 2.892101 | up   | 1.629125 | up   | 1.775248 | down | SEMA6B     |
| 223569_at | 0.002868 | 0.001686 | 1.678718 | down | 1.664532 | down | 1.008522 | up   | PPAPDC1B   |
| 223570_at | 0.001671 | 8.15E-04 | 4.022602 | up   | 1.691103 | up   | 2.378686 | down | MCM10      |
| 223573_s_ | 0.027207 | 0.025721 | 1.266203 | up   | 1.058335 | down | 1.340067 | down | PPP2R2C    |
| 223576_at | 4.09E-04 | 1.21E-04 | 2.078923 | down | 1.758292 | down | 1.182353 | up   | C6orf203   |
| 223577_x_ | 0.025506 | 0.023979 | 2.309976 | down | 1.18213  | up   | 2.73069  | up   | MALAT1     |
| 223581_at | 4.23E-04 | 1.26E-04 | 2.677253 | up   | 2.560417 | up   | 1.045632 | down | ZNF577     |
| 223582_at | 3.65E-07 | 7.02E-09 | 13.78305 | up   | 13.85672 | up   | 1.005345 | up   | GPR98      |
| 223586_at | 8.70E-04 | 3.35E-04 | 1.239035 | down | 2.116668 | down | 1.70832  | down | ARNTL2     |
| 223591_at | 0.002329 | 0.001277 | 1.975568 | down | 1.803804 | down | 1.095224 | up   | RNF135     |
| 223592_s_ | 0.001576 | 7.53E-04 | 2.34776  | down | 2.544448 | down | 1.083777 | down | RNF135     |
| 223594_at | 1.46E-04 | 3.00E-05 | 4.547092 | down | 5.486975 | down | 1.2067   | down | TMEM117    |
| 223595_at | 3.26E-04 | 8.92E-05 | 3.647343 | up   | 4.004342 | up   | 1.097879 | up   | TMEM133    |
| 223601_at | 1.59E-05 | 1.46E-06 | 1.37692  | down | 1.836047 | up   | 2.528088 | up   | OLFM2      |
| 223606_x_ | 0.014528 | 0.012751 | 1.946297 | down | 1.008834 | down | 1.929254 | up   | KIAA1704   |
| 223610_at | 0.001209 | 5.26E-04 | 1.354347 | up   | 2.599919 | up   | 1.919685 | up   | SEMA5B     |
| 223616_at | 0.001187 | 5.14E-04 | 3.916306 | up   | 4.390889 | up   | 1.121181 | up   | ZNF649     |

|           |          |          |          |      |          |      |          |      |             |
|-----------|----------|----------|----------|------|----------|------|----------|------|-------------|
| 223618_at | 2.35E-04 | 5.72E-05 | 11.0052  | down | 4.604057 | down | 2.390327 | up   | FMN2        |
| 223619_x_ | 0.020349 | 0.018678 | 1.379329 | up   | 1.75125  | up   | 1.269639 | up   | PECR        |
| 223622_s_ | 0.001357 | 6.17E-04 | 1.786038 | down | 2.661946 | down | 1.49042  | down | HYI         |
| 223626_x_ | 1.28E-05 | 1.08E-06 | 2.23459  | down | 3.546814 | down | 1.587232 | down | IFI27L2     |
| 223631_s_ | 3.97E-05 | 5.17E-06 | 6.438292 | up   | 3.84824  | up   | 1.673048 | down | C19orf33    |
| 223633_s_ | 0.008058 | 0.006341 | 1.475958 | up   | 1.307868 | down | 1.930358 | down | BCAN        |
| 223634_at | 0.004101 | 0.002693 | 1.260266 | up   | 1.844622 | down | 2.324716 | down | RASD2       |
| 223638_at | 1.23E-04 | 2.38E-05 | 3.406787 | down | 1.191608 | down | 2.858982 | up   | NBPF3       |
| 223639_s_ | 0.009297 | 0.007537 | 1.268575 | up   | 1.357791 | up   | 1.070327 | up   | ZNRD1       |
| 223641_at | 0.003403 | 0.002121 | 3.845233 | down | 2.926605 | down | 1.313888 | up   |             |
| 223642_at | 2.65E-09 | 7.38E-12 | 208.4043 | up   | 164.009  | up   | 1.270688 | down | ZIC2        |
| 223645_s_ | 5.04E-04 | 1.59E-04 | 2.616547 | up   | 9.058808 | up   | 3.462124 | up   | CYorf15B    |
| 223646_s_ | 0.002931 | 0.001736 | 2.387502 | up   | 8.630024 | up   | 3.614667 | up   | CYorf15B    |
| 223647_x_ | 0.001351 | 6.13E-04 | 1.543813 | down | 1.189521 | up   | 1.836397 | up   | HSCB        |
| 223655_at | 7.40E-04 | 2.70E-04 | 1.593754 | down | 1.29476  | up   | 2.063529 | up   | CD163L1     |
| 223656_s_ | 1.68E-04 | 3.67E-05 | 1.842573 | down | 1.766128 | down | 1.043284 | up   | C1orf91     |
| 223658_at | 0.019964 | 0.018291 | 1.111271 | down | 1.570837 | down | 1.413551 | down | KCNK6       |
| 223662_x_ | 0.007355 | 0.005673 | 1.286123 | up   | 1.564016 | up   | 1.21607  | up   | DDX59       |
| 223663_at | 8.60E-04 | 3.30E-04 | 1.703212 | up   | 1.057814 | down | 1.801682 | down | CCDC88B     |
| 223665_at | 0.005124 | 0.003603 | 2.150012 | down | 2.163277 | down | 1.00617  | down | ARPM1       |
| 223666_at | 1.95E-05 | 1.94E-06 | 4.57343  | up   | 3.279416 | up   | 1.394587 | down | SNX5        |
| 223667_at | 2.98E-05 | 3.50E-06 | 6.213783 | down | 2.177323 | down | 2.853864 | up   | FKBP7       |
| 223669_at | 0.008951 | 0.007198 | 1.121346 | up   | 1.136067 | down | 1.273925 | down | HEMGN       |
| 223671_x_ | 2.08E-04 | 4.85E-05 | 1.723472 | up   | 1.681454 | up   | 1.024989 | down | DPH5        |
| 223672_at | 4.59E-04 | 1.40E-04 | 4.87925  | down | 1.268765 | down | 3.84567  | up   | SGIP1       |
|           |          |          |          |      |          |      |          |      | SFTPA1 ///  |
|           |          |          |          |      |          |      |          |      | SFTPA1B /// |
|           |          |          |          |      |          |      |          |      | SFTPA2 ///  |
| 223678_s_ | 0.005475 | 0.003914 | 1.193088 | up   | 1.200831 | down | 1.432697 | down | SFTPA2B     |
| 223680_at | 2.66E-06 | 1.19E-07 | 2.269309 | up   | 3.869532 | up   | 1.705159 | up   | ZNF607      |
| 223681_s_ | 1.19E-04 | 2.28E-05 | 3.899652 | up   | 5.373475 | up   | 1.377937 | up   | INADL       |
| 223682_s_ | 0.006157 | 0.004544 | 1.138751 | up   | 1.400899 | down | 1.595275 | down | EIF1AD      |
| 223683_at | 0.013463 | 0.011666 | 1.539412 | up   | 1.075297 | down | 1.655324 | down | ZMYND15     |

|           |          |          |               |               |               |           |
|-----------|----------|----------|---------------|---------------|---------------|-----------|
| 223686_at | 0.00122  | 5.33E-04 | 1.251811 up   | 1.432071 down | 1.792682 down | TPK1      |
| 223687_s_ | 0.011458 | 0.009659 | 5.611104 down | 1.657361 down | 3.385566 up   | LY6K      |
| 223689_at | 2.14E-05 | 2.21E-06 | 7.207027 up   | 5.896145 up   | 1.222329 down | IGF2BP1   |
| 223690_at | 1.15E-05 | 9.23E-07 | 17.92026 down | 44.27114 down | 2.470452 down | LTBP2     |
| 223692_at | 0.001283 | 5.70E-04 | 2.864067 down | 2.126408 down | 1.346904 up   | NMNAT1    |
| 223696_at | 7.48E-04 | 2.74E-04 | 2.971032 down | 2.366437 down | 1.255487 up   | ARSD      |
| 223699_at | 0.023763 | 0.022176 | 1.238423 down | 1.029326 up   | 1.274741 up   | CNDP1     |
| 223700_at | 2.41E-04 | 5.93E-05 | 7.632732 up   | 11.72874 up   | 1.536637 up   | MND1      |
| 223702_x_ | 0.008787 | 0.007044 | 1.495777 up   | 1.003067 down | 1.500365 down | FTCD      |
| 223705_s_ | 1.01E-04 | 1.82E-05 | 1.926528 up   | 2.458011 up   | 1.275876 up   | GPBP1     |
| 223708_at | 0.007701 | 0.006004 | 1.088425 down | 1.544396 up   | 1.680958 up   | C1QTNF4   |
| 223711_s_ | 1.13E-04 | 2.14E-05 | 3.361704 up   | 2.755909 up   | 1.219817 down | THYN1     |
| 223713_at | 0.002025 | 0.001054 | 1.488556 down | 2.110606 down | 1.417888 down | RSPH3     |
| 223714_at | 2.78E-05 | 3.18E-06 | 3.932218 up   | 2.561277 up   | 1.535257 down | ZNF256    |
| 223715_at | 0.003522 | 0.002218 | 1.329794 up   | 1.276111 up   | 1.042068 down | BRSK2     |
| 223727_at | 1.84E-04 | 4.14E-05 | 1.18403 down  | 1.48175 up    | 1.754436 up   | KCNIP2    |
| 223729_at | 3.14E-05 | 3.77E-06 | 5.524271 up   | 7.212711 up   | 1.305641 up   | CECR2     |
| 223734_at | 7.00E-04 | 2.51E-04 | 7.673104 down | 6.138942 down | 1.249907 up   | C4orf49   |
| 223737_x_ | 5.18E-04 | 1.65E-04 | 4.636269 up   | 4.37956 up    | 1.058615 down | CHST9     |
| 223741_s_ | 0.004026 | 0.00263  | 2.439811 up   | 1.557844 up   | 1.566146 down | TTYH2     |
| 223747_x_ | 6.17E-04 | 2.11E-04 | 2.020368 up   | 1.146598 down | 2.31655 down  | WVOX      |
| 223748_at | 0.005165 | 0.00364  | 2.023437 up   | 2.816718 up   | 1.392047 up   | SLC4A11   |
|           |          |          |               |               |               | CFC1 ///  |
| 223753_s_ | 4.19E-06 | 2.23E-07 | 2.970308 up   | 2.26342 up    | 1.312309 down | CFC1B     |
| 223755_at | 0.012826 | 0.011029 | 1.714633 up   | 1.106847 up   | 1.549115 down | KIRREL2   |
| 223759_s_ | 0.003102 | 0.001873 | 2.832494 up   | 2.617714 up   | 1.082049 down | GSG2      |
| 223761_at | 4.09E-04 | 1.21E-04 | 4.603239 up   | 4.348413 up   | 1.058602 down | FGF19     |
| 223764_x_ | 0.018403 | 0.016677 | 2.992722 down | 1.615728 down | 1.852244 up   | NIPSNAP3B |
| 223768_at | 0.001064 | 4.41E-04 | 1.458259 down | 1.521839 down | 1.0436 down   | C21orf122 |
| 223769_x_ | 7.15E-04 | 2.58E-04 | 1.407247 down | 2.594024 down | 1.843332 down | HYI       |
| 223773_s_ | 0.003101 | 0.001871 | 1.086295 up   | 1.987704 up   | 1.829801 up   | SNHG12    |
| 223776_x_ | 0.001499 | 7.03E-04 | 1.492678 down | 1.727527 down | 1.157334 down | TINF2     |
| 223780_s_ | 0.014333 | 0.012547 | 1.032719 up   | 1.606262 up   | 1.555372 up   | MED13     |

|           |          |          |               |               |               |           |
|-----------|----------|----------|---------------|---------------|---------------|-----------|
| 223784_at | 0.001213 | 5.29E-04 | 3.424427 up   | 3.578703 up   | 1.045052 up   | TMEM27    |
| 223785_at | 0.038876 | 0.037623 | 1.515493 up   | 3.369231 up   | 2.223192 up   | FANCI     |
| 223786_at | 2.15E-04 | 5.08E-05 | 4.043793 up   | 2.620872 up   | 1.542919 down | CHST6     |
| 223787_s_ | 0.009746 | 0.007966 | 1.303844 down | 1.158244 up   | 1.51017 up    | C3orf19   |
| 223788_at | 0.00664  | 0.004996 | 1.788897 up   | 1.824688 down | 3.26418 down  |           |
| 223790_at | 0.002926 | 0.001731 | 1.819532 down | 1.853921 down | 1.0189 down   | KATNAL1   |
| 223794_at | 0.027475 | 0.025992 | 1.125832 down | 1.501612 up   | 1.690563 up   | ARMC4     |
| 223795_at | 8.00E-04 | 3.01E-04 | 1.184287 down | 1.780402 down | 1.503353 down | TSPAN10   |
|           |          |          |               |               |               | CNTNAP3   |
|           |          |          |               |               |               | ///       |
| 223796_at | 0.029058 | 0.027643 | 3.410239 up   | 1.127793 down | 3.846044 down | LOC643827 |
| 223798_at | 3.18E-04 | 8.64E-05 | 3.143485 down | 3.292576 down | 1.047429 down | SLC41A2   |
| 223799_at | 0.028249 | 0.0268   | 2.527555 down | 1.079278 down | 2.341893 up   | KIAA1826  |
| 223800_s_ | 3.33E-05 | 4.06E-06 | 1.890552 down | 7.572644 down | 4.005519 down | LIMS3     |
| 223801_s_ | 0.019434 | 0.017733 | 1.204261 up   | 1.29327 down  | 1.557434 down | APOL4     |
| 223803_s_ | 1.24E-04 | 2.41E-05 | 1.377685 up   | 2.394397 up   | 1.737985 up   | ZCCHC10   |
| 223808_s_ | 0.012977 | 0.011174 | 1.052559 down | 1.423438 down | 1.352359 down | PTPMT1    |
| 223811_s_ | 1.16E-04 | 2.21E-05 | 2.989803 up   | 1.77948 up    | 1.680155 down | C7orf20   |
| 223815_at | 0.005189 | 0.003662 | 1.971211 up   | 1.416407 up   | 1.391698 down | CCDC45    |
| 223818_s_ | 0.009504 | 0.00773  | 2.150243 up   | 3.123538 up   | 1.452644 up   | RSF1      |
| 223819_x_ | 0.001693 | 8.29E-04 | 1.40319 down  | 1.518644 down | 1.082279 down | COMMD5    |
| 223820_at | 0.024222 | 0.022646 | 1.579114 up   | 1.006802 down | 1.589854 down | RBP5      |
| 223824_at | 0.002622 | 0.001493 | 2.683178 down | 2.563037 down | 1.046875 up   | RNLS      |
| 223826_s_ | 0.004116 | 0.002704 | 2.725178 down | 1.762772 down | 1.545962 up   | KIAA1432  |
| 223827_at | 5.97E-08 | 5.50E-10 | 5.19536 down  | 1.424729 up   | 7.401982 up   | TNFRSF19  |
| 223828_s_ | 0.015687 | 0.013909 | 1.557167 up   | 1.172703 up   | 1.327845 down | LGALS12   |
| 223830_s_ | 0.015218 | 0.013444 | 1.449045 down | 1.191134 down | 1.216526 up   | TRIM5     |
| 223831_x_ | 4.16E-05 | 5.51E-06 | 1.516683 down | 2.088969 down | 1.377327 down | ISY1      |
| 223834_at | 0.00103  | 4.21E-04 | 1.218812 down | 2.460446 down | 2.018724 down | CD274     |
| 223837_at | 2.66E-05 | 2.97E-06 | 3.809576 up   | 4.570481 up   | 1.199735 up   | GULP1     |
| 223840_s_ | 0.00318  | 0.001939 | 1.60822 down  | 1.487897 down | 1.080868 up   | SPATA9    |
| 223842_s_ | 0.024687 | 0.023129 | 2.639965 down | 3.336129 down | 1.263702 down | SCARA3    |
| 223843_at | 0.001258 | 5.56E-04 | 3.722829 down | 3.275686 down | 1.136504 up   | SCARA3    |
| 223853_at | 2.65E-05 | 2.94E-06 | 2.619466 down | 1.470187 down | 1.781724 up   | BVES      |

|           |          |          |               |               |               |           |
|-----------|----------|----------|---------------|---------------|---------------|-----------|
| 223855_s_ | 0.006282 | 0.004664 | 1.700403 up   | 1.163558 up   | 1.461382 down | MCHR1     |
| 223856_at | 1.84E-04 | 4.14E-05 | 1.172743 down | 1.923382 down | 1.640071 down | AKR1CL2   |
| 223859_at | 0.023034 | 0.021453 | 1.194956 up   | 1.124283 down | 1.343469 down | EPB41L4B  |
| 223885_at | 0.044236 | 0.043006 | 1.287718 up   | 1.739932 up   | 1.351175 up   | CALN1     |
| 223892_s_ | 5.60E-04 | 1.84E-04 | 2.542792 down | 2.181343 down | 1.1657 up     | TMBIM4    |
| 223893_at | 0.02819  | 0.026728 | 1.362077 up   | 1.023231 up   | 1.331154 down | ENAM      |
| 223898_at | 8.18E-04 | 3.10E-04 | 2.167072 up   | 3.121008 up   | 1.440196 up   | ZNF670    |
| 223906_s_ | 1.72E-04 | 3.79E-05 | 1.492873 up   | 1.231719 down | 1.8388 down   | TEX101    |
| 223907_s_ | 3.73E-04 | 1.07E-04 | 3.018717 up   | 1.630124 up   | 1.851833 down | PINX1     |
| 223910_at | 0.017767 | 0.016027 | 1.400846 up   | 1.07125 down  | 1.500656 down | ERN2      |
| 223915_at | 0.021775 | 0.020148 | 2.344958 up   | 2.3362 up     | 1.003749 down | BCOR      |
| 223917_s_ | 7.37E-04 | 2.69E-04 | 1.186659 down | 1.888062 down | 1.591075 down | SLC39A3   |
| 223921_s_ | 6.11E-04 | 2.08E-04 | 1.982274 up   | 2.257074 up   | 1.138629 up   | GBA2      |
| 223926_at | 0.044692 | 0.043474 | 1.336547 up   | 1.025166 up   | 1.303738 down | KIF2B     |
| 223929_s_ | 0.002077 | 0.001091 | 1.646017 up   | 1.072421 up   | 1.534861 down |           |
| 223932_at | 0.0054   | 0.003847 | 1.683757 up   | 1.418215 up   | 1.187237 down |           |
| 223935_at | 0.002368 | 0.001304 | 1.611376 up   | 1.162658 down | 1.873479 down | TRPM5     |
| 223937_at | 1.95E-04 | 4.42E-05 | 1.606231 up   | 1.041636 up   | 1.542027 down | FOXP1     |
| 223938_at | 0.002025 | 0.001054 | 1.243719 up   | 1.241897 down | 1.544571 down | C1orf49   |
| 223944_at | 0.002358 | 0.001296 | 1.979852 up   | 1.880818 up   | 1.052655 down | NLRP12    |
| 223945_x_ | 0.002643 | 0.00151  | 2.174009 down | 1.310327 down | 1.659135 up   | RP9P      |
| 223950_s_ | 3.84E-04 | 1.11E-04 | 1.63866 down  | 2.248283 down | 1.372025 down | FLYWCH1   |
| 223956_at | 0.00205  | 0.001072 | 1.752443 up   | 1.01607 up    | 1.724727 down | TMPRSS13  |
| 223958_s_ | 0.035471 | 0.034191 | 1.506588 down | 1.235919 down | 1.219002 up   | DNAL1     |
| 223960_s_ | 0.007583 | 0.005894 | 2.262437 up   | 1.194537 up   | 1.893987 down | C16orf5   |
| 223964_x_ | 7.01E-04 | 2.51E-04 | 1.203741 down | 1.74179 down  | 1.446981 down |           |
| 223965_at | 0.001414 | 6.50E-04 | 1.090503 up   | 1.163196 down | 1.268468 down | TRNAU1AP  |
| 223973_at | 0.001591 | 7.63E-04 | 1.165201 up   | 1.73654 down  | 2.023417 down | C19orf30  |
| 223975_at | 3.90E-04 | 1.13E-04 | 1.266203 up   | 1.075649 down | 1.361991 down | SPRYD5    |
| 223979_x_ | 0.002924 | 0.001729 | 1.575693 up   | 1.087129 up   | 1.449408 down | FTCD      |
| 223980_s_ | 3.74E-04 | 1.07E-04 | 3.154642 down | 1.746622 down | 1.806139 up   | SP110     |
|           |          |          |               |               |               | LOC731602 |
|           |          |          |               |               |               | ///       |
| 223988_x_ | 1.05E-04 | 1.92E-05 | 2.061212 up   | 2.422095 up   | 1.175083 up   | METT11D1  |

|           |          |          |          |      |          |      |          |      |            |
|-----------|----------|----------|----------|------|----------|------|----------|------|------------|
| 223989_s_ | 0.001651 | 8.02E-04 | 1.984494 | down | 2.969873 | down | 1.496539 | down | REXO2      |
|           |          |          |          |      |          |      |          |      | GALNT2 /// |
|           |          |          |          |      |          |      |          |      | LOC100132  |
| 223991_s_ | 1.41E-04 | 2.87E-05 | 1.874566 | down | 3.716253 | down | 1.98246  | down | 910        |
| 223993_s_ | 5.09E-04 | 1.61E-04 | 2.053253 | up   | 1.671547 | up   | 1.228355 | down | CNIH4      |
| 223996_s_ | 0.019553 | 0.017857 | 1.963015 | up   | 2.084484 | up   | 1.061879 | up   | MRPL30     |
| 224002_s_ | 7.90E-06 | 5.54E-07 | 7.702937 | down | 7.690584 | down | 1.001606 | up   | FKBP7      |
| 224003_at | 0.004096 | 0.002689 | 1.508526 | up   | 1.598635 | down | 2.411583 | down | TTY14      |
| 224004_at | 0.005014 | 0.003504 | 1.361792 | down | 1.061029 | up   | 1.444901 | up   | ZNF226     |
| 224008_s_ | 0.006924 | 0.005265 | 1.150865 | up   | 1.370064 | down | 1.576759 | down | KCNK7      |
| 224017_at | 0.002677 | 0.001536 | 1.175869 | up   | 1.176501 | up   | 1.000538 | up   | TBX22      |
| 224025_s_ | 0.002228 | 0.0012   | 1.465761 | down | 1.470807 | down | 1.003442 | down | ATG7       |
| 224039_at | 0.012977 | 0.011172 | 1.615015 | up   | 1.287509 | up   | 1.254372 | down | FAM186B    |
| 224046_s_ | 1.29E-05 | 1.10E-06 | 7.391729 | up   | 7.369908 | up   | 1.002961 | down | PDE7A      |
| 224048_at | 2.95E-07 | 5.13E-09 | 64.24686 | up   | 79.60201 | up   | 1.239003 | up   | USP44      |
| 224053_s_ | 0.006037 | 0.004428 | 1.438789 | up   | 1.350465 | down | 1.943035 | down | SLC4A9     |
| 224060_s_ | 1.58E-04 | 3.36E-05 | 1.658767 | up   | 1.891864 | up   | 1.140524 | up   | DPH5       |
| 224066_s_ | 9.73E-04 | 3.91E-04 | 1.375921 | up   | 1.623905 | down | 2.234364 | down | HIPK2      |
| 224067_at | 0.006508 | 0.004875 | 1.095263 | up   | 1.167764 | down | 1.279008 | down |            |
| 224071_at | 0.036747 | 0.035477 | 1.227426 | up   | 1.057545 | down | 1.298058 | down | IL20       |
| 224081_at | 0.037678 | 0.036408 | 1.024363 | up   | 1.099927 | down | 1.126725 | down |            |
| 224085_at | 0.027017 | 0.02553  | 1.509415 | up   | 1.153907 | down | 1.741725 | down |            |
| 224087_at | 2.05E-04 | 4.75E-05 | 1.648393 | up   | 1.316502 | up   | 1.252101 | down |            |
| 224090_s_ | 1.02E-05 | 7.76E-07 | 2.409936 | down | 1.037208 | up   | 2.499604 | up   | TNFRSF19   |
| 224097_s_ | 5.58E-09 | 1.95E-11 | 14.54699 | up   | 8.612898 | up   | 1.688977 | down | F11R       |
| 224107_at | 0.008197 | 0.006477 | 1.253679 | up   | 1.11564  | up   | 1.123731 | down |            |
| 224111_x_ | 0.006285 | 0.004666 | 1.708876 | up   | 1.340302 | down | 2.290411 | down | KLF16      |
| 224117_at | 0.008483 | 0.006751 | 1.280752 | down | 1.142832 | up   | 1.463685 | up   | LOC284912  |
| 224125_at | 0.002253 | 0.001221 | 2.032067 | up   | 1.2205   | down | 2.480138 | down | PLEKHN1    |
| 224128_at | 0.001186 | 5.13E-04 | 1.485766 | up   | 1.241095 | down | 1.843976 | down | C20orf43   |
| 224129_s_ | 1.32E-04 | 2.62E-05 | 2.439835 | up   | 1.880754 | up   | 1.297265 | down | DPY30      |
| 224133_at | 0.001897 | 9.64E-04 | 1.874475 | up   | 1.245385 | down | 2.334443 | down |            |
| 224134_at | 0.003826 | 0.002463 | 1.999804 | up   | 1.320705 | down | 2.64115  | down | MGC10814   |



LOC100101

118 ///

|           |          |          |               |               |               |         |
|-----------|----------|----------|---------------|---------------|---------------|---------|
| 224143_at | 0.005227 | 0.003695 | 1.255708 up   | 1.451262 down | 1.82236 down  | TTY8    |
| 224146_s_ | 0.002035 | 0.001061 | 1.349963 up   | 1.043315 down | 1.408436 down | ABCC11  |
| 224150_s_ | 9.60E-04 | 3.84E-04 | 2.073757 up   | 2.758589 up   | 1.330238 up   | CEP70   |
| 224151_s_ | 0.028901 | 0.027481 | 1.963518 down | 1.585636 up   | 3.113425 up   | AK3     |
| 224156_x_ | 5.07E-05 | 7.20E-06 | 2.45117 down  | 2.588214 up   | 6.344153 up   | IL17RB  |
| 224157_at | 0.009257 | 0.007499 | 1.296498 up   | 1.239305 down | 1.606756 down | KAAG1   |
| 224162_s_ | 3.22E-04 | 8.76E-05 | 1.780224 down | 1.538044 down | 1.15746 up    | FBXO31  |
| 224163_s_ | 0.019001 | 0.017293 | 1.469148 up   | 1.03797 up    | 1.415404 down | DMAP1   |
| 224164_at | 2.97E-05 | 3.47E-06 | 2.668372 up   | 2.153288 up   | 1.239208 down | TPM3    |
| 224177_s_ | 0.001387 | 6.33E-04 | 1.715233 up   | 1.905746 up   | 1.111071 up   | CXorf26 |
| 224179_s_ | 0.019342 | 0.017637 | 1.212715 up   | 1.309832 down | 1.588453 down | MIOX    |
| 224181_at | 0.004286 | 0.002856 | 1.390126 down | 1.025904 up   | 1.426135 up   | C18orf2 |
| 224182_x_ | 0.0267   | 0.025214 | 1.5301 up     | 1.139553 up   | 1.342719 down | SEMA6B  |
| 224184_s_ | 4.24E-04 | 1.27E-04 | 1.960361 down | 1.35088 up    | 2.648211 up   | BOC     |
| 224185_at | 1.13E-04 | 2.13E-05 | 2.867227 up   | 4.585126 up   | 1.59915 up    |         |
| 224186_s_ | 0.001338 | 6.04E-04 | 1.820574 down | 2.226787 down | 1.223124 down | RNF123  |
| 224187_x_ | 0.002226 | 0.001199 | 1.389077 up   | 1.229893 up   | 1.129429 down | HSPA8   |
| 224191_x_ | 0.006672 | 0.005027 | 1.316136 up   | 1.097 up      | 1.199759 down | ROPN1   |
| 224194_at | 0.008597 | 0.00686  | 1.084905 up   | 1.329131 down | 1.441982 down | FCRL2   |
| 224196_x_ | 2.08E-04 | 4.85E-05 | 1.649174 up   | 1.629161 up   | 1.012284 down | DPH5    |
| 224198_at | 0.004349 | 0.002916 | 1.248809 up   | 1.293198 down | 1.614958 down | CELA1   |
| 224210_s_ | 9.50E-04 | 3.78E-04 | 1.835572 down | 2.064519 down | 1.124728 down | PXMP4   |

|           |          |          |               |               |               |  |            |
|-----------|----------|----------|---------------|---------------|---------------|--|------------|
|           |          |          |               |               |               |  | PCDHA1 /// |
|           |          |          |               |               |               |  | PCDHA10    |
|           |          |          |               |               |               |  | ///        |
|           |          |          |               |               |               |  | PCDHA11    |
|           |          |          |               |               |               |  | ///        |
|           |          |          |               |               |               |  | PCDHA12    |
|           |          |          |               |               |               |  | ///        |
|           |          |          |               |               |               |  | PCDHA13    |
|           |          |          |               |               |               |  | /// PCDHA2 |
|           |          |          |               |               |               |  | /// PCDHA3 |
|           |          |          |               |               |               |  | /// PCDHA4 |
|           |          |          |               |               |               |  | /// PCDHA5 |
|           |          |          |               |               |               |  | /// PCDHA6 |
|           |          |          |               |               |               |  | /// PCDHA7 |
|           |          |          |               |               |               |  | /// PCDHA8 |
|           |          |          |               |               |               |  | /// PCDHA9 |
|           |          |          |               |               |               |  | ///        |
|           |          |          |               |               |               |  | PCDHAC1    |
|           |          |          |               |               |               |  | ///        |
| 224212_s_ | 2.92E-07 | 5.03E-09 | 6.384311 up   | 4.493835 up   | 1.420682 down |  | PCDHAC2    |
| 224215_s_ | 0.023927 | 0.022348 | 1.314018 up   | 3.228953 up   | 2.457314 up   |  | DLL1       |
| 224217_s_ | 0.001268 | 5.62E-04 | 1.716389 up   | 1.397367 up   | 1.228302 down |  | FAF1       |
| 224218_s_ | 0.010155 | 0.008366 | 3.210254 down | 1.847581 down | 1.737544 up   |  | TRPS1      |
| 224220_x_ | 8.93E-04 | 3.48E-04 | 1.265468 up   | 1.731483 down | 2.191136 down |  | TRPC4      |
| 224223_s_ | 7.94E-04 | 2.98E-04 | 1.207054 up   | 1.888217 down | 2.27918 down  |  | PDE11A     |
| 224227_s_ | 0.001662 | 8.09E-04 | 1.844416 up   | 1.472452 up   | 1.252616 down |  | BDP1       |
| 224229_s_ | 0.001388 | 6.34E-04 | 2.005463 down | 2.478748 down | 1.235997 down |  | AKT3       |

|           |          |          |               |               |               |                            |
|-----------|----------|----------|---------------|---------------|---------------|----------------------------|
| 224232_s_ | 0.021901 | 0.020282 | 1.895002 up   | 1.01079 down  | 1.915449 down | PRELID1<br>DEFB103A<br>/// |
| 224239_at | 0.001679 | 8.20E-04 | 1.374184 up   | 1.450487 down | 1.993235 down | DEFB103B                   |
| 224240_s_ | 0.001488 | 6.95E-04 | 1.199303 down | 1.979219 down | 1.650307 down | CCL28                      |
| 224248_x_ | 0.014903 | 0.013127 | 1.360035 up   | 1.128161 up   | 1.205533 down | NIP30                      |
| 224250_s_ | 1.67E-04 | 3.64E-05 | 3.761421 up   | 4.456536 up   | 1.184801 up   | SECISBP2                   |
| 224252_s_ | 0.002696 | 0.00155  | 3.163768 down | 2.13242 down  | 1.483651 up   | FXD5                       |
| 224254_x_ | 7.06E-04 | 2.53E-04 | 1.960499 up   | 4.956238 up   | 2.52805 up    |                            |
| 224261_at | 0.001023 | 4.18E-04 | 2.839875 down | 2.898782 down | 1.020743 down |                            |
| 224263_x_ | 0.001431 | 6.60E-04 | 1.415033 up   | 1.087118 up   | 1.301637 down | ZAN                        |
| 224273_at | 0.018297 | 0.016575 | 1.237474 up   | 1.028426 up   | 1.20327 down  | C3orf20                    |
| 224275_at | 0.001478 | 6.89E-04 | 1.871793 up   | 1.820092 up   | 1.028406 down | GPR98                      |
| 224280_s_ | 1.27E-04 | 2.49E-05 | 2.654331 down | 2.682629 down | 1.010661 down | FAM54B                     |
| 224287_at | 0.001948 | 1.00E-03 | 1.667549 up   | 1.036563 up   | 1.608729 down |                            |
| 224288_x_ | 0.002699 | 0.001553 | 1.628868 up   | 1.564927 up   | 1.040859 down | FKSG49                     |
| 224297_s_ | 0.001787 | 8.90E-04 | 1.590902 up   | 1.127825 down | 1.79426 down  | SPTBN4                     |
| 224299_x_ | 0.010802 | 0.009008 | 1.604772 up   | 1.040598 up   | 1.542163 down | FTCD                       |
| 224300_x_ | 5.80E-04 | 1.93E-04 | 1.576246 up   | 1.111572 up   | 1.418033 down | FTCD                       |
| 224301_x_ | 0.006243 | 0.004626 | 1.388722 down | 1.976633 down | 1.423346 down | H2AFJ                      |
| 224304_x_ | 0.002954 | 0.001755 | 1.76873 down  | 2.102259 down | 1.18857 down  | NIN                        |
| 224305_s_ | 0.002845 | 0.001667 | 1.368692 up   | 1.185345 down | 1.622372 down | NPC1L1                     |
| 224306_at | 0.004217 | 0.002793 | 1.671839 up   | 1.287853 down | 2.153082 down | NPC1L1                     |
| 224308_s_ | 0.001689 | 8.27E-04 | 2.426741 up   | 3.092532 up   | 1.274356 up   | INTS2                      |
| 224309_s_ | 0.002229 | 0.001201 | 1.84034 up    | 1.688156 up   | 1.090148 down | SUGT1                      |
| 224319_s_ | 0.015942 | 0.014169 | 1.497724 up   | 1.364345 down | 2.043413 down | SMCR7L                     |
| 224320_s_ | 0.003749 | 0.002404 | 2.868725 up   | 4.372896 up   | 1.524334 up   | MCM8                       |
| 224326_s_ | 0.002843 | 0.001666 | 1.456914 up   | 1.931075 up   | 1.325456 up   | PCGF6                      |
| 224327_s_ | 0.014924 | 0.013151 | 1.00183 down  | 1.35942 down  | 1.356937 down | DGAT2                      |
| 224333_s_ | 1.86E-05 | 1.82E-06 | 1.775066 up   | 1.307609 up   | 1.35749 down  | MRPS5                      |
| 224335_s_ | 1.58E-04 | 3.38E-05 | 2.798396 down | 2.839498 down | 1.014688 down | BACE1                      |
| 224336_s_ | 3.49E-06 | 1.72E-07 | 6.210723 up   | 4.418243 up   | 1.4057 down   | DUSP16                     |
| 224341_x_ | 5.52E-04 | 1.81E-04 | 2.717311 down | 7.181893 down | 2.643014 down | TLR4                       |

|           |          |          |               |               |               |           |
|-----------|----------|----------|---------------|---------------|---------------|-----------|
| 224343_x_ | 0.007352 | 0.005669 | 1.249563 up   | 1.070172 down | 1.337248 down | KIFC3 /// |
|           |          |          |               |               |               | TRD@      |
|           |          |          |               |               |               | LOC100131 |
| 224351_at | 0.003053 | 0.001833 | 1.037292 down | 1.24181 down  | 1.197166 down | 508       |
| 224352_s_ | 5.10E-06 | 2.95E-07 | 7.677962 down | 6.631918 down | 1.157729 up   | CFL2      |
| 224360_s_ | 0.002925 | 0.00173  | 1.80028 up    | 1.111878 down | 2.001692 down | PACSIN1   |
| 224361_s_ | 6.59E-05 | 1.03E-05 | 2.375065 down | 2.170857 up   | 5.155926 up   | IL17RB    |
| 224366_s_ | 3.93E-05 | 5.09E-06 | 2.544287 up   | 2.209385 up   | 1.151582 down | REPS1     |
| 224367_at | 8.37E-07 | 2.30E-08 | 30.17856 up   | 29.33895 up   | 1.028617 down | BEX2      |
| 224374_s_ | 0.001931 | 9.88E-04 | 3.612856 down | 1.967799 up   | 7.109374 up   | EMILIN2   |
| 224377_s_ | 2.33E-04 | 5.68E-05 | 1.945336 down | 1.762714 down | 1.103603 up   | RAB18     |
| 224378_x_ | 2.95E-05 | 3.44E-06 | 3.858111 down | 3.09025 down  | 1.248479 up   | MAP1LC3A  |
| 224391_s_ | 3.84E-05 | 4.90E-06 | 10.79765 down | 3.815744 down | 2.829763 up   | SIAE      |
| 224393_s_ | 4.84E-06 | 2.75E-07 | 2.638787 up   | 3.570086 up   | 1.352927 up   | CECR6     |
| 224394_at | 0.002025 | 0.001055 | 1.675075 down | 1.083015 down | 1.546677 up   | RNF7      |
| 224396_s_ | 7.61E-04 | 2.81E-04 | 3.696661 down | 1.062492 down | 3.479235 up   | ASPN      |
| 224399_at | 0.001007 | 4.10E-04 | 4.176204 down | 6.626864 down | 1.586815 down | PDCD1LG2  |
| 224400_s_ | 3.01E-05 | 3.54E-06 | 5.42786 up    | 5.722204 up   | 1.054228 up   | CHST9     |
|           |          |          |               |               |               | RP6-      |
| 224407_s_ | 1.07E-04 | 1.98E-05 | 13.9956 up    | 9.879886 up   | 1.416575 down | 213H19.1  |
| 224409_s_ | 0.001296 | 5.79E-04 | 1.365673 up   | 1.677204 down | 2.290512 down | TSSK6     |
| 224414_s_ | 1.72E-04 | 3.78E-05 | 3.01847 down  | 6.168365 down | 2.043541 down | CARD6     |
| 224416_s_ | 6.46E-04 | 2.24E-04 | 1.665438 up   | 3.231199 up   | 1.94015 up    | MED28     |
| 224428_s_ | 1.15E-05 | 9.28E-07 | 5.613858 up   | 31.63195 up   | 5.63462 up    | CDCA7     |
| 224429_x_ | 0.003125 | 0.001894 | 1.466998 down | 1.726964 up   | 2.533453 up   |           |
| 224431_s_ | 0.002303 | 0.001258 | 1.728754 up   | 1.177697 down | 2.035948 down | SUV420H2  |
| 224435_at | 0.003851 | 0.002486 | 4.430566 up   | 23.72679 up   | 5.355251 up   | C10orf58  |
| 224445_s_ | 3.23E-04 | 8.79E-05 | 1.652964 down | 1.797123 down | 1.087213 down | ZFYVE21   |
| 224447_s_ | 0.004456 | 0.003012 | 1.375949 down | 1.864945 down | 1.355388 down | C17orf37  |
| 224451_x_ | 5.92E-04 | 1.99E-04 | 1.685841 up   | 1.031854 up   | 1.633798 down | ARHGAP9   |
| 224457_at | 0.008141 | 0.00642  | 1.585464 up   | 1.059795 up   | 1.49601 down  | MGC12982  |
| 224459_at | 0.013402 | 0.011608 | 1.506589 up   | 1.240042 up   | 1.21495 down  | L2HGDH    |
| 224460_s_ | 5.07E-04 | 1.61E-04 | 3.357549 up   | 3.025594 up   | 1.109716 down | L2HGDH    |
| 224461_s_ | 1.04E-04 | 1.90E-05 | 2.641856 down | 3.259161 down | 1.233663 down | AIFM2     |

|           |          |          |               |               |               |                               |
|-----------|----------|----------|---------------|---------------|---------------|-------------------------------|
| 224462_s_ | 4.34E-04 | 1.30E-04 | 2.248346 up   | 1.120383 up   | 2.006765 down | CHCHD6                        |
| 224463_s_ | 9.32E-07 | 2.64E-08 | 13.4282 down  | 10.39807 down | 1.291412 up   | C11orf70                      |
| 224465_s_ | 0.002459 | 0.001372 | 2.042402 up   | 1.864285 up   | 1.095542 down | WIBG                          |
| 224466_s_ | 5.71E-04 | 1.89E-04 | 1.648569 up   | 1.177777 down | 1.941646 down | MAFG                          |
| 224467_s_ | 9.60E-06 | 7.19E-07 | 5.331675 up   | 3.797884 up   | 1.403854 down | PDCD2L                        |
| 224468_s_ | 0.003184 | 0.001941 | 2.594457 up   | 2.277648 up   | 1.139095 down | C19orf48                      |
| 224472_x_ | 1.47E-06 | 5.06E-08 | 3.195238 down | 3.552232 down | 1.111727 down | SDF4                          |
| 224473_x_ | 5.41E-04 | 1.75E-04 | 1.668889 down | 1.642592 down | 1.016009 up   | LZTS2                         |
| 224477_s_ | 0.006654 | 0.005011 | 1.607641 up   | 1.058903 down | 1.702335 down | NUDT16L1                      |
| 224478_s_ | 2.12E-04 | 4.97E-05 | 1.194897 up   | 2.071605 down | 2.475355 down | C7orf50                       |
| 224479_s_ | 2.42E-04 | 5.95E-05 | 2.164039 up   | 2.124958 up   | 1.018392 down | MRPL45                        |
| 224481_s_ | 0.029134 | 0.027719 | 1.044897 up   | 1.289653 down | 1.347555 down | HECTD1                        |
| 224482_s_ | 4.15E-05 | 5.50E-06 | 5.812999 up   | 4.794104 up   | 1.212531 down | RAB11FIP4                     |
| 224484_s_ | 0.005201 | 0.003674 | 1.628133 down | 1.575282 up   | 2.564768 up   | BRMS1L                        |
| 224501_at | 0.002909 | 0.001718 | 1.875246 up   | 1.34976 down  | 2.531132 down | C1orf170                      |
| 224503_s_ | 0.004612 | 0.003155 | 1.520821 up   | 1.004746 up   | 1.513637 down | ZCCHC2                        |
| 224504_s_ | 3.12E-05 | 3.72E-06 | 2.164733 up   | 2.01719 up    | 1.073143 down | BUD13                         |
| 224506_s_ | 2.06E-05 | 2.09E-06 | 2.720204 down | 3.398349 down | 1.249299 down | PPAPDC3                       |
| 224509_s_ | 8.96E-05 | 1.55E-05 | 3.283091 up   | 3.057197 up   | 1.073889 down | RTN4IP1                       |
| 224510_s_ | 7.66E-04 | 2.84E-04 | 1.532239 up   | 1.470497 up   | 1.041987 down | CLPB                          |
| 224511_s_ | 0.020531 | 0.01886  | 1.981209 up   | 1.132531 up   | 1.749364 down | TXNDC17                       |
| 224512_s_ | 7.02E-04 | 2.52E-04 | 1.361967 down | 2.019748 down | 1.482963 down | LSMD1                         |
| 224513_s_ | 3.11E-04 | 8.37E-05 | 2.073615 up   | 1.616858 up   | 1.282497 down | UBQLN4                        |
| 224514_x_ | 2.12E-04 | 4.98E-05 | 1.635246 down | 2.073368 down | 1.267924 down | IL17RC                        |
| 224516_s_ | 1.23E-04 | 2.37E-05 | 1.196542 up   | 2.156387 down | 2.580209 down | CXXC5<br>LOC100132<br>167 /// |
| 224519_at | 0.010472 | 0.008679 | 1.01062 down  | 1.659712 down | 1.642271 down | RPL7AP45                      |
| 224521_s_ | 4.63E-04 | 1.42E-04 | 2.940745 up   | 3.509359 up   | 1.193357 up   | CCDC77                        |
| 224524_s_ | 2.12E-04 | 4.97E-05 | 1.988112 up   | 2.019898 up   | 1.015988 up   | ASB3                          |
| 224534_at | 0.004002 | 0.002607 | 2.517561 down | 1.303031 down | 1.93208 up    | KREMEN1                       |
| 224538_s_ | 0.002568 | 0.001454 | 1.746012 up   | 1.091204 down | 1.905256 down | PAR6G                         |
| 224539_s_ | 0.001172 | 5.04E-04 | 1.754511 up   | 1.489029 up   | 1.178292 down | PCDHAC2                       |
| 224540_at | 0.004261 | 0.002833 | 1.363448 up   | 1.060557 down | 1.446015 down | LACRT                         |

|           |          |          |          |      |          |      |          |      |           |
|-----------|----------|----------|----------|------|----------|------|----------|------|-----------|
| 224543_at | 9.58E-05 | 1.69E-05 | 5.165515 | down | 1.11274  | down | 4.64216  | up   | SVEP1     |
| 224550_s_ | 0.005411 | 0.003857 | 2.927594 | down | 3.60001  | down | 1.229682 | down | MRVI1     |
| 224560_at | 6.52E-07 | 1.58E-08 | 15.81366 | down | 9.667963 | down | 1.635676 | up   | TIMP2     |
|           |          |          |          |      |          |      |          |      | NCRNA0008 |
| 224565_at | 0.001363 | 6.20E-04 | 17.87364 | down | 3.266908 | down | 5.471118 | up   | 4         |
|           |          |          |          |      |          |      |          |      | NCRNA0008 |
| 224566_at | 5.47E-04 | 1.78E-04 | 23.06699 | down | 3.105075 | down | 7.4288   | up   | 4         |
| 224572_s_ | 0.004641 | 0.00318  | 1.528536 | up   | 1.703381 | down | 2.603679 | down | IRF2BP2   |
| 224573_at | 9.70E-05 | 1.73E-05 | 1.992919 | down | 1.856684 | down | 1.073376 | up   | RNASEK    |
| 224574_at | 0.00744  | 0.005752 | 1.305737 | up   | 1.404844 | down | 1.834357 | down | C17orf49  |
| 224575_at | 6.42E-04 | 2.22E-04 | 1.653297 | down | 1.201322 | down | 1.376231 | up   | C3orf10   |
| 224576_at | 8.29E-04 | 3.15E-04 | 1.892478 | down | 5.652296 | down | 2.986716 | down | ERGIC1    |
| 224577_at | 8.07E-04 | 3.04E-04 | 2.267848 | down | 5.566343 | down | 2.45446  | down | ERGIC1    |
| 224578_at | 1.30E-04 | 2.59E-05 | 5.16948  | up   | 3.544045 | up   | 1.458638 | down | RCC2      |
| 224579_at | 0.00936  | 0.007594 | 2.246005 | up   | 2.151447 | up   | 1.043951 | down | SLC38A1   |
| 224580_at | 0.001097 | 4.60E-04 | 2.646122 | up   | 2.046252 | up   | 1.293155 | down | SLC38A1   |
| 224581_s_ | 4.26E-04 | 1.27E-04 | 1.683922 | up   | 2.025042 | up   | 1.202575 | up   | NUCKS1    |
| 224584_at | 8.76E-04 | 3.39E-04 | 1.594171 | down | 1.348348 | down | 1.182314 | up   | C20orf30  |
| 224585_x_ | 0.008269 | 0.006544 | 1.127461 | down | 1.18805  | down | 1.05374  | down | ACTG1     |
| 224586_x_ | 0.007909 | 0.006197 | 1.219197 | down | 1.251107 | up   | 1.525345 | up   | SUB1      |
| 224588_at | 0.023024 | 0.021443 | 1.225506 | down | 34.25267 | down | 27.94982 | down | XIST      |
| 224589_at | 0.025259 | 0.02372  | 1.465811 | down | 9.871618 | down | 6.73458  | down | XIST      |
| 224590_at | 0.035059 | 0.033765 | 1.634774 | down | 9.668964 | down | 5.914558 | down | XIST      |
| 224591_at | 8.56E-04 | 3.28E-04 | 2.067391 | down | 1.398    | down | 1.47882  | up   | HP1BP3    |
| 224592_x_ | 0.012587 | 0.010789 | 1.644285 | down | 1.519542 | down | 1.082093 | up   | HP1BP3    |
| 224595_at | 0.001085 | 4.53E-04 | 1.115807 | down | 5.361318 | up   | 5.982198 | up   | SLC44A1   |
| 224598_at | 1.07E-05 | 8.28E-07 | 2.71005  | down | 2.956953 | down | 1.091106 | down | MGAT4B    |
| 224604_at | 2.03E-04 | 4.68E-05 | 3.899293 | down | 3.181862 | down | 1.225475 | up   | C4orf3    |
| 224605_at | 1.35E-05 | 1.16E-06 | 4.056064 | down | 3.46255  | down | 1.17141  | up   | C4orf3    |
| 224607_s_ | 0.007583 | 0.005894 | 1.396648 | up   | 1.085663 | up   | 1.286446 | down | SRP68     |
| 224608_s_ | 0.00167  | 8.14E-04 | 1.994908 | up   | 1.414847 | up   | 1.409982 | down | VPS25     |
| 224609_at | 0.013197 | 0.011401 | 1.877237 | up   | 1.05957  | down | 1.989063 | down | SLC44A2   |
| 224610_at | 8.98E-09 | 3.62E-11 | 5.2794   | up   | 8.600835 | up   | 1.629131 | up   | SNHG1     |
| 224611_s_ | 0.001734 | 8.55E-04 | 1.216402 | down | 2.128607 | down | 1.749921 | down | DNAJC5    |

|           |          |          |          |      |          |      |          |      |                       |
|-----------|----------|----------|----------|------|----------|------|----------|------|-----------------------|
| 224612_s_ | 2.69E-04 | 6.88E-05 | 1.245726 | down | 2.422248 | down | 1.944448 | down | DNAJC5                |
| 224613_s_ | 0.002982 | 0.001777 | 1.492208 | down | 1.988155 | down | 1.332357 | down | DNAJC5                |
| 224615_x_ | 0.00221  | 0.001186 | 1.349985 | down | 2.294491 | down | 1.699642 | down | HM13                  |
| 224617_at | 4.94E-05 | 6.94E-06 | 3.26943  | up   | 2.59432  | up   | 1.260226 | down | ROD1                  |
| 224619_at | 1.45E-04 | 2.98E-05 | 4.112103 | down | 3.645445 | down | 1.128011 | up   | CASC4                 |
| 224622_at | 1.53E-04 | 3.21E-05 | 1.802557 | up   | 1.498513 | up   | 1.202897 | down | TBC1D14<br>LOC728554  |
| 224623_at | 9.98E-05 | 1.80E-05 | 3.314625 | up   | 4.132584 | up   | 1.246773 | up   | /// THOC3<br>HYPK /// |
| 224625_x_ | 0.006689 | 0.005044 | 2.014251 | down | 1.403457 | down | 1.435207 | up   | SERF2                 |
| 224627_at | 1.64E-04 | 3.53E-05 | 2.113048 | up   | 1.823646 | up   | 1.158694 | down | GBA2                  |
| 224628_at | 5.06E-04 | 1.60E-04 | 2.429286 | down | 2.868959 | down | 1.180988 | down | C2orf30               |
| 224630_at | 0.001873 | 9.48E-04 | 2.010361 | down | 2.52169  | down | 1.254347 | down | C2orf30               |
| 224633_s_ | 0.022249 | 0.020647 | 1.576888 | up   | 1.328661 | down | 2.095149 | down | GPATCH4               |
| 224636_at | 1.64E-04 | 3.54E-05 | 1.880842 | down | 2.377843 | down | 1.264243 | down | ZFP91<br>LOC100128    |
| 224637_at | 1.69E-05 | 1.60E-06 | 1.84115  | down | 2.158925 | down | 1.172596 | down | 731                   |
| 224641_at | 0.001115 | 4.70E-04 | 2.972249 | down | 2.879746 | down | 1.032122 | up   | FYTTD1                |
| 224642_at | 4.97E-04 | 1.56E-04 | 4.05078  | down | 4.064639 | down | 1.003421 | down | FYTTD1                |
| 224644_at | 0.018216 | 0.016491 | 1.953652 | down | 1.500446 | down | 1.302048 | up   |                       |
| 224647_at | 9.91E-04 | 4.01E-04 | 1.658595 | down | 2.114203 | down | 1.274695 | down | CCNY                  |
| 224648_at | 0.001527 | 7.20E-04 | 1.864486 | up   | 2.336077 | up   | 1.252934 | up   | GPBP1                 |
| 224650_at | 2.20E-11 | 6.00E-15 | 108.7149 | up   | 104.2105 | up   | 1.043224 | down | MAL2                  |
| 224651_at | 6.10E-04 | 2.08E-04 | 1.43589  | down | 2.417121 | down | 1.68336  | down | CCNY                  |
| 224654_at | 3.04E-04 | 8.10E-05 | 2.894349 | up   | 2.228523 | up   | 1.298775 | down | DDX21                 |
| 224655_at | 0.001623 | 7.83E-04 | 1.749441 | down | 1.046127 | down | 1.672303 | up   | AK3                   |
| 224657_at | 0.001373 | 6.25E-04 | 2.184338 | up   | 2.652457 | down | 5.793862 | down | ERRFI1                |
| 224660_at | 0.001886 | 9.56E-04 | 1.617499 | down | 1.804512 | down | 1.115619 | down | PIGY                  |
| 224663_s_ | 1.92E-07 | 2.96E-09 | 7.73101  | down | 9.304477 | down | 1.203527 | down | CFL2                  |
| 224666_at | 3.67E-04 | 1.04E-04 | 2.358789 | down | 3.196481 | down | 1.355136 | down | NSMCE1                |
| 224667_x_ | 0.008828 | 0.007082 | 1.466782 | up   | 1.73836  | up   | 1.185153 | up   | C10orf104             |
| 224670_at | 5.50E-04 | 1.79E-04 | 1.318206 | down | 1.60661  | down | 1.218785 | down | SYS1                  |
| 224671_at | 6.35E-05 | 9.75E-06 | 2.136855 | up   | 2.344516 | up   | 1.097181 | up   | MRPL10                |
| 224677_x_ | 4.84E-04 | 1.51E-04 | 1.834751 | up   | 1.861231 | up   | 1.014432 | up   | C11orf31              |

|           |          |          |          |      |          |      |          |      |           |
|-----------|----------|----------|----------|------|----------|------|----------|------|-----------|
| 224682_at | 8.32E-05 | 1.41E-05 | 1.485156 | down | 1.966011 | down | 1.323774 | down | ANKIB1    |
| 224683_at | 1.50E-04 | 3.12E-05 | 1.104269 | down | 1.950987 | down | 1.766767 | down | FBXO18    |
| 224684_at | 0.001927 | 9.86E-04 | 1.2127   | down | 1.442723 | down | 1.189679 | down | SNX12     |
| 224685_at | 3.07E-07 | 5.51E-09 | 5.997037 | up   | 7.317734 | up   | 1.220225 | up   | MLLT4     |
| 224687_at | 2.05E-04 | 4.76E-05 | 1.17515  | down | 2.174302 | down | 1.850233 | down | ANKIB1    |
| 224688_at | 0.003043 | 0.001826 | 2.038729 | down | 1.834165 | down | 1.11153  | up   | C7orf42   |
| 224689_at | 1.06E-05 | 8.16E-07 | 1.318208 | down | 1.945104 | down | 1.475566 | down | MANBAL    |
| 224690_at | 3.55E-06 | 1.75E-07 | 4.622711 | down | 2.850096 | down | 1.62195  | up   | C20orf108 |
| 224693_at | 1.63E-05 | 1.52E-06 | 4.816907 | down | 2.831878 | down | 1.700958 | up   | C20orf108 |
| 224694_at | 4.23E-05 | 5.65E-06 | 9.689393 | down | 5.406203 | down | 1.792274 | up   | ANTXR1    |
| 224695_at | 0.001043 | 4.30E-04 | 1.555689 | up   | 1.600456 | up   | 1.028777 | up   | C2orf29   |
| 224698_at | 0.002719 | 0.001568 | 2.742916 | down | 3.272245 | down | 1.19298  | down | FAM62B    |
| 224699_s_ | 9.67E-04 | 3.87E-04 | 1.80323  | down | 2.686867 | down | 1.49003  | down | FAM62B    |
| 224701_at | 0.002837 | 0.001661 | 3.188423 | down | 1.294811 | down | 2.462462 | up   | PARP14    |
| 224704_at | 6.48E-04 | 2.25E-04 | 2.020118 | up   | 2.606765 | up   | 1.290402 | up   | TNRC6A    |
| 224705_s_ | 0.003143 | 0.001909 | 1.071254 | up   | 2.027168 | up   | 1.892331 | up   | TNRC6A    |
| 224707_at | 6.07E-04 | 2.06E-04 | 1.315302 | down | 1.852272 | down | 1.408249 | down | C5orf32   |
| 224709_s_ | 7.33E-04 | 2.67E-04 | 2.465912 | up   | 1.73181  | up   | 1.423892 | down | CDC42SE2  |
| 224714_at | 0.005955 | 0.004352 | 2.380085 | up   | 1.79985  | up   | 1.32238  | down | MKI67IP   |
| 224716_at | 8.69E-04 | 3.34E-04 | 1.528812 | down | 2.696385 | down | 1.763712 | down | SLC35B2   |
| 224717_s_ | 0.002212 | 0.001188 | 1.817451 | down | 1.549741 | down | 1.172745 | up   | C19orf42  |
| 224718_at | 0.01742  | 0.015672 | 1.306786 | up   | 2.336478 | up   | 1.787958 | up   | YY1       |
| 224721_at | 4.07E-05 | 5.37E-06 | 3.342358 | up   | 2.744371 | up   | 1.217896 | down | WDR75     |
| 224728_at | 4.99E-05 | 7.05E-06 | 2.128115 | up   | 4.611033 | up   | 2.166721 | up   | ATPAF1    |
| 224731_at | 2.31E-04 | 5.62E-05 | 1.677875 | up   | 2.812808 | up   | 1.676411 | up   | HMGB1     |
| 224734_at | 1.92E-04 | 4.35E-05 | 4.109772 | up   | 3.593028 | up   | 1.143819 | down | HMGB1     |
| 224735_at | 8.92E-06 | 6.49E-07 | 3.272603 | down | 7.37242  | down | 2.25277  | down | CYBASC3   |
| 224736_at | 7.33E-04 | 2.67E-04 | 3.15551  | up   | 2.982703 | up   | 1.057936 | down | CCAR1     |
| 224744_at | 7.39E-05 | 1.20E-05 | 3.369274 | down | 3.286599 | down | 1.025155 | up   | IMPAD1    |
| 224745_x_ | 0.015835 | 0.014058 | 1.512194 | up   | 1.052986 | down | 1.592319 | down | OTUD5     |
| 224746_at | 9.52E-07 | 2.73E-08 | 2.033959 | up   | 3.060412 | up   | 1.504658 | up   | KIAA1522  |
| 224747_at | 0.007081 | 0.005413 | 2.347495 | down | 1.818359 | down | 1.290996 | up   | UBE2Q2    |
| 224750_at | 1.31E-04 | 2.60E-05 | 1.985509 | down | 1.795253 | down | 1.105977 | up   | RNF185    |
| 224753_at | 9.79E-04 | 3.94E-04 | 4.371839 | up   | 7.177156 | up   | 1.641679 | up   | CDCA5     |



|           |          |          |          |      |          |      |          |      |          |
|-----------|----------|----------|----------|------|----------|------|----------|------|----------|
| 224759_s_ | 0.001627 | 7.86E-04 | 6.297418 | down | 5.808344 | down | 1.084202 | up   | C12orf23 |
| 224764_at | 0.002819 | 0.001648 | 3.043967 | down | 1.987806 | down | 1.53132  | up   | ARHGAP21 |
| 224768_at | 2.75E-05 | 3.12E-06 | 1.922956 | up   | 1.74878  | up   | 1.099599 | down | IWS1     |
| 224770_s_ | 0.003327 | 0.002058 | 1.171319 | down | 3.013279 | down | 2.572552 | down | NAV1     |
| 224771_at | 0.006241 | 0.004622 | 1.646324 | down | 4.393856 | down | 2.668888 | down | NAV1     |
| 224772_at | 4.76E-05 | 6.58E-06 | 4.57574  | down | 7.831529 | down | 1.711533 | down | NAV1     |
| 224773_at | 1.24E-04 | 2.41E-05 | 2.686332 | down | 8.439265 | down | 3.141557 | down | NAV1     |
| 224774_s_ | 3.15E-04 | 8.53E-05 | 2.031242 | down | 5.239611 | down | 2.579511 | down | NAV1     |
| 224776_at | 0.041828 | 0.040576 | 1.218372 | up   | 1.239792 | down | 1.510528 | down | AGPAT6   |
| 224777_s_ | 0.003284 | 0.002022 | 1.603535 | up   | 1.330764 | up   | 1.204973 | down | PAFAH1B2 |
| 224779_s_ | 1.45E-04 | 2.98E-05 | 1.406249 | up   | 2.394093 | up   | 1.702467 | up   | FAM96A   |
| 224781_s_ | 5.99E-04 | 2.02E-04 | 1.755162 | up   | 1.91144  | up   | 1.089039 | up   | RBM17    |
| 224787_s_ | 0.007335 | 0.005655 | 1.909136 | down | 1.411925 | down | 1.352151 | up   | RAB18    |
| 224788_at | 4.68E-04 | 1.44E-04 | 1.761822 | down | 2.252781 | down | 1.278665 | down | ARF6     |
| 224790_at | 6.71E-05 | 1.06E-05 | 3.14431  | down | 2.987401 | down | 1.052524 | up   | ASAP1    |
| 224791_at | 1.48E-05 | 1.33E-06 | 3.31679  | down | 2.978545 | down | 1.113561 | up   | ASAP1    |
| 224794_s_ | 7.40E-07 | 1.92E-08 | 9.696536 | down | 14.38038 | down | 1.483043 | down | CERCAM   |
| 224796_at | 2.18E-05 | 2.25E-06 | 2.915256 | down | 2.844779 | down | 1.024774 | up   | ASAP1    |
| 224798_s_ | 0.003152 | 0.001917 | 2.091719 | down | 1.44478  | down | 1.447777 | up   | C15orf17 |
| 224799_at | 0.001213 | 5.29E-04 | 2.565539 | down | 1.469787 | down | 1.745518 | up   | NDFIP2   |
| 224802_at | 0.019701 | 0.018013 | 3.119952 | down | 1.324709 | down | 2.355198 | up   | NDFIP2   |
| 224806_at | 7.62E-04 | 2.82E-04 | 1.81893  | down | 1.738407 | down | 1.04632  | up   | TRIM25   |
| 224809_x_ | 2.37E-04 | 5.79E-05 | 1.875867 | down | 1.724078 | down | 1.088041 | up   | TINF2    |
| 224810_s_ | 3.45E-04 | 9.61E-05 | 4.652963 | down | 3.71746  | down | 1.251651 | up   | ANKRD13A |
| 224812_at | 0.020349 | 0.018677 | 2.2382   | down | 1.417199 | down | 1.579312 | up   | HIBADH   |
| 224814_at | 8.42E-06 | 6.04E-07 | 3.969343 | down | 4.543016 | down | 1.144526 | down | DPP7     |
| 224816_at | 0.01043  | 0.008634 | 1.25014  | up   | 1.241592 | down | 1.552164 | down | C7orf20  |
| 224817_at | 3.22E-06 | 1.54E-07 | 20.4582  | down | 8.952168 | down | 2.28528  | up   | SH3PXD2A |
| 224818_at | 1.65E-05 | 1.55E-06 | 1.785763 | up   | 2.032234 | down | 3.629088 | down | SORT1    |
| 224820_at | 0.002478 | 0.001387 | 1.583426 | down | 2.598217 | down | 1.640883 | down | FAM36A   |
| 224821_at | 8.04E-06 | 5.66E-07 | 4.172473 | down | 8.510585 | down | 2.039698 | down | ABHD14B  |
| 224822_at | 4.37E-06 | 2.37E-07 | 6.956234 | down | 15.82898 | down | 2.27551  | down | DLC1     |
| 224823_at | 1.13E-06 | 3.46E-08 | 42.58843 | down | 22.7635  | down | 1.870908 | up   | MYLK     |
| 224830_at | 8.11E-06 | 5.71E-07 | 2.123274 | up   | 5.208024 | up   | 2.452827 | up   | NUDT21   |

|           |          |          |               |               |               |          |
|-----------|----------|----------|---------------|---------------|---------------|----------|
| 224832_at | 1.18E-06 | 3.68E-08 | 3.716798 up   | 5.634823 up   | 1.516042 up   | DUSP16   |
| 224836_at | 0.00959  | 0.007816 | 1.783833 down | 2.328563 down | 1.305371 down | TP53INP2 |
| 224837_at | 8.21E-05 | 1.38E-05 | 1.433829 down | 3.419565 down | 2.384919 down | FOXP1    |
| 224838_at | 1.52E-04 | 3.19E-05 | 1.849003 down | 5.188178 down | 2.805933 down | FOXP1    |
| 224839_s_ | 1.40E-04 | 2.85E-05 | 4.889752 up   | 1.123876 up   | 4.350793 down | GPT2     |
| 224842_at | 0.016157 | 0.014391 | 1.430571 up   | 1.401691 up   | 1.020604 down | SMG1     |
| 224844_at | 0.001074 | 4.47E-04 | 2.176137 down | 2.30764 down  | 1.06043 down  | SLAIN2   |
| 224845_s_ | 0.001207 | 5.25E-04 | 1.39546 down  | 1.978185 down | 1.417586 down | SLAIN2   |
| 224854_s_ | 0.01648  | 0.01471  | 1.796508 down | 1.494274 down | 1.202262 up   | SLAIN2   |
| 224860_at | 0.015842 | 0.014067 | 2.016502 down | 1.139284 down | 1.769973 up   | C9orf123 |
| 224864_at | 0.002112 | 0.001115 | 1.449523 down | 1.86594 down  | 1.287279 down | SRA1     |
| 224870_at | 5.05E-05 | 7.18E-06 | 5.705155 up   | 4.775475 up   | 1.194678 down | KIAA0114 |
| 224871_at | 4.48E-05 | 6.10E-06 | 1.887278 down | 2.532426 down | 1.34184 down  | TPRG1L   |
| 224875_at | 0.002708 | 0.001559 | 4.059831 down | 2.024588 down | 2.005263 up   | C5orf24  |
| 224879_at | 0.001253 | 5.53E-04 | 2.156072 up   | 1.520806 up   | 1.417716 down | C9orf123 |
| 224883_at | 0.007333 | 0.005652 | 1.956666 down | 2.005047 down | 1.024727 down | PLDN     |
| 224885_s_ | 0.002747 | 0.001591 | 1.26406 down  | 1.823196 down | 1.442334 down | KRTCAP2  |
| 224887_at | 1.12E-05 | 8.87E-07 | 2.355051 down | 2.238305 down | 1.052158 up   | GNPTG    |
| 224888_at | 2.03E-04 | 4.69E-05 | 2.620155 up   | 2.179987 up   | 1.201913 down | SELI     |
| 224893_at | 7.08E-07 | 1.79E-08 | 5.516391 down | 6.809584 down | 1.234427 down | ATL3     |
| 224896_s_ | 0.016706 | 0.01495  | 1.188769 down | 1.817206 down | 1.528645 down | TTL      |
| 224898_at | 0.001357 | 6.16E-04 | 2.727801 down | 2.103471 down | 1.296809 up   | WDR26    |
| 224899_s_ | 4.93E-04 | 1.54E-04 | 1.577999 down | 1.506504 down | 1.047457 up   | MAGT1    |
| 224905_at | 0.001672 | 8.16E-04 | 1.600651 down | 1.472744 down | 1.08685 up    | WDR26    |
| 224910_at | 8.25E-04 | 3.13E-04 | 1.652633 up   | 2.679262 up   | 1.621208 up   | CARHSP1  |
| 224912_at | 0.00199  | 0.001028 | 1.617282 down | 2.068162 down | 1.278789 down | TTC7A    |
| 224913_s_ | 0.005074 | 0.00356  | 2.287925 up   | 1.148971 up   | 1.991282 down | TIMM50   |
| 224914_s_ | 5.15E-04 | 1.64E-04 | 1.637064 up   | 1.846266 up   | 1.127791 up   | SARNP    |
| 224916_at | 9.46E-09 | 3.92E-11 | 18.8478 down  | 19.24634 down | 1.021146 down | TMEM173  |
| 224917_at | 0.005662 | 0.004081 | 3.272285 down | 5.228338 down | 1.597764 down | MIR21    |
| 224918_x_ | 6.84E-05 | 1.08E-05 | 1.1058 up     | 3.186108 up   | 2.881271 up   | MGST1    |
| 224919_at | 8.45E-04 | 3.23E-04 | 1.048873 up   | 2.076707 up   | 1.979942 up   | MRPS6    |
| 224921_at | 0.005365 | 0.003815 | 1.282615 down | 1.922259 down | 1.498703 down | SCAMP2   |
| 224922_at | 1.63E-05 | 1.52E-06 | 2.50987 up    | 2.674275 up   | 1.065504 up   | CSNK2A2  |

|           |          |          |          |      |          |      |          |      |          |
|-----------|----------|----------|----------|------|----------|------|----------|------|----------|
| 224923_at | 1.59E-04 | 3.42E-05 | 2.005779 | down | 1.718214 | down | 1.167363 | up   | TTC7A    |
| 224927_at | 1.21E-04 | 2.32E-05 | 3.032593 | down | 4.512302 | down | 1.487936 | down | KIAA1949 |
| 224928_at | 5.89E-05 | 8.87E-06 | 6.206243 | down | 9.283085 | down | 1.495766 | down | SETD7    |
| 224929_at | 2.25E-08 | 1.34E-10 | 11.96045 | down | 11.71383 | down | 1.021054 | up   | TMEM173  |
| 224930_x_ | 0.002394 | 0.001324 | 1.070283 | up   | 1.231476 | up   | 1.150607 | up   | RPL7A    |
| 224931_at | 0.002918 | 0.001724 | 1.695963 | down | 1.638854 | down | 1.034847 | up   | SLC41A3  |
| 224933_s_ | 9.72E-05 | 1.73E-05 | 4.097321 | up   | 3.973721 | up   | 1.031104 | down | JMJD1C   |
| 224934_at | 3.46E-04 | 9.66E-05 | 2.327987 | down | 2.172761 | down | 1.071442 | up   | YIPF5    |
| 224936_at | 0.004272 | 0.002844 | 1.465136 | up   | 1.303633 | up   | 1.123886 | down | EIF2S3   |
| 224939_at | 0.004297 | 0.002868 | 2.362123 | up   | 2.01106  | up   | 1.174566 | down | NUFIP2   |
| 224940_s_ | 0.002617 | 0.00149  | 20.426   | down | 13.93231 | down | 1.466089 | up   | PAPPA    |
| 224941_at | 9.84E-04 | 3.97E-04 | 22.29637 | down | 14.36217 | down | 1.552437 | up   | PAPPA    |
| 224942_at | 0.004242 | 0.002814 | 11.12701 | down | 8.218484 | down | 1.353901 | up   | PAPPA    |
| 224944_at | 1.67E-05 | 1.57E-06 | 3.468431 | up   | 4.818193 | up   | 1.389156 | up   | TMPO     |
| 224947_at | 0.017329 | 0.015582 | 1.864227 | up   | 1.157691 | up   | 1.610298 | down | RNF26    |
| 224948_at | 0.001466 | 6.81E-04 | 1.472885 | down | 1.198136 | down | 1.229313 | up   | MRPS24   |
| 224949_at | 9.17E-04 | 3.60E-04 | 3.819324 | down | 3.165814 | down | 1.206427 | up   | YIPF5    |
| 224950_at | 0.006097 | 0.004485 | 2.920048 | down | 2.291432 | down | 1.274333 | up   | PTGFRN   |
| 224951_at | 0.011153 | 0.009362 | 1.230758 | up   | 1.222523 | down | 1.504631 | down | LASS5    |
| 224952_at | 0.002191 | 0.001172 | 5.65841  | down | 4.092782 | down | 1.382534 | up   | TANC2    |
| 224954_at | 0.004808 | 0.00332  | 2.443331 | up   | 3.781368 | up   | 1.547628 | up   | SHMT1    |
| 224955_at | 7.51E-04 | 2.76E-04 | 2.362051 | down | 1.939146 | down | 1.218088 | up   | TEAD1    |
| 224964_s_ | 0.004178 | 0.002761 | 1.839268 | down | 2.96398  | up   | 5.451552 | up   | GNG2     |
| 224965_at | 7.66E-04 | 2.84E-04 | 2.296351 | down | 1.253263 | up   | 2.877932 | up   | GNG2     |
| 224967_at | 0.005058 | 0.003544 | 1.98753  | down | 2.2697   | down | 1.14197  | down | UGCG     |
| 224970_at | 7.34E-04 | 2.67E-04 | 3.60853  | down | 3.482816 | down | 1.036096 | up   | NFIA     |
| 224971_at | 1.67E-05 | 1.58E-06 | 2.505563 | up   | 2.077051 | up   | 1.206307 | down | MRPL30   |
| 224973_at | 3.52E-04 | 9.90E-05 | 9.961904 | down | 7.317613 | down | 1.36136  | up   | FAM46A   |
| 224975_at | 0.001086 | 4.54E-04 | 4.078973 | down | 3.657191 | down | 1.11533  | up   | NFIA     |
| 224976_at | 0.002818 | 0.001646 | 3.279418 | down | 2.655097 | down | 1.235141 | up   | NFIA     |
| 224977_at | 4.78E-06 | 2.69E-07 | 8.330512 | down | 6.341472 | down | 1.313656 | up   | C6orf89  |
| 224979_s_ | 0.005064 | 0.003551 | 2.321693 | up   | 1.220502 | up   | 1.902244 | down | USP36    |
| 224983_at | 7.71E-04 | 2.86E-04 | 3.783478 | down | 2.537657 | down | 1.490933 | up   | SCARB2   |
| 224985_at | 0.001129 | 4.79E-04 | 1.721743 | up   | 1.610026 | up   | 1.069388 | down | NRAS     |

|           |          |          |          |      |          |      |          |      |           |
|-----------|----------|----------|----------|------|----------|------|----------|------|-----------|
| 224987_at | 5.39E-07 | 1.24E-08 | 5.012943 | down | 5.116259 | down | 1.02061  | down | C6orf89   |
| 224988_at | 3.84E-07 | 7.66E-09 | 5.077066 | down | 4.785354 | down | 1.060959 | up   | C6orf89   |
| 224989_at | 7.78E-05 | 1.29E-05 | 7.665213 | down | 7.554958 | down | 1.014594 | up   |           |
| 224990_at | 6.44E-04 | 2.23E-04 | 2.424236 | down | 2.68722  | down | 1.108481 | down | C4orf34   |
| 224993_at | 5.88E-05 | 8.84E-06 | 1.610688 | down | 2.025173 | down | 1.257335 | down | MLLT1     |
| 224994_at | 5.06E-04 | 1.60E-04 | 5.543468 | down | 4.75793  | down | 1.165101 | up   | CAMK2D    |
| 224995_at | 6.79E-04 | 2.40E-04 | 1.714788 | down | 2.831436 | down | 1.651187 | down | SPIRE1    |
| 224996_at | 1.13E-08 | 5.05E-11 | 15.67429 | down | 4.900661 | down | 3.198404 | up   | ASPH      |
| 224999_at | 3.56E-06 | 1.77E-07 | 15.99497 | down | 9.884078 | down | 1.618256 | up   |           |
| 225000_at | 0.013856 | 0.012066 | 1.309412 | up   | 1.051796 | down | 1.377235 | down | PRKAR2A   |
| 225001_at | 5.52E-04 | 1.80E-04 | 1.103322 | up   | 1.977832 | up   | 1.792616 | up   | RAB3D     |
| 225002_s_ | 0.002388 | 0.00132  | 2.568988 | down | 2.164542 | down | 1.186851 | up   | SUMF2     |
| 225003_at | 0.004433 | 0.002989 | 1.080317 | up   | 1.621757 | up   | 1.501186 | up   | TMEM205   |
| 225005_at | 9.55E-04 | 3.81E-04 | 1.566783 | up   | 1.325183 | up   | 1.182314 | down | PHF13     |
| 225007_at | 4.97E-06 | 2.85E-07 | 3.878659 | up   | 4.202438 | up   | 1.083477 | up   | G3BP1     |
| 225008_at | 7.89E-07 | 2.11E-08 | 14.26637 | down | 8.373997 | down | 1.703651 | up   | ASPH      |
| 225009_at | 0.025677 | 0.02416  | 2.748643 | up   | 1.430871 | up   | 1.920958 | down | CMTM4     |
| 225012_at | 0.001312 | 5.88E-04 | 1.829484 | down | 1.70789  | down | 1.071195 | up   | HDLBP     |
| 225016_at | 6.52E-07 | 1.59E-08 | 26.90189 | down | 8.452618 | up   | 227.3914 | up   | APCDD1    |
| 225018_at | 3.65E-06 | 1.84E-07 | 2.632672 | down | 3.384126 | down | 1.285434 | down | SPIRE1    |
| 225019_at | 7.83E-04 | 2.93E-04 | 3.893152 | down | 4.429832 | down | 1.137852 | down | CAMK2D    |
| 225022_at | 2.53E-05 | 2.76E-06 | 2.700851 | down | 3.645398 | down | 1.349722 | down | GOPC      |
| 225023_at | 2.67E-05 | 2.99E-06 | 3.307203 | down | 3.493352 | down | 1.056286 | down | GOPC      |
| 225026_at | 0.002159 | 0.001149 | 1.009384 | up   | 1.961858 | up   | 1.943619 | up   | CHD6      |
| 225030_at | 0.001908 | 9.72E-04 | 1.356386 | up   | 1.648438 | up   | 1.215317 | up   | BOD1      |
| 225032_at | 3.65E-05 | 4.58E-06 | 3.601926 | down | 3.720427 | down | 1.032899 | down | FNDC3B    |
| 225033_at | 3.62E-06 | 1.81E-07 | 8.799759 | down | 10.84287 | down | 1.232178 | down | ST3GAL1   |
| 225034_at | 8.19E-05 | 1.38E-05 | 2.967865 | down | 4.279145 | down | 1.441826 | down | ST3GAL1   |
| 225038_s_ | 0.002712 | 0.001562 | 2.14981  | up   | 1.399174 | up   | 1.536485 | down | SURF6     |
| 225043_at | 8.16E-04 | 3.09E-04 | 1.211672 | up   | 1.314705 | down | 1.592992 | down | SLC15A4   |
| 225051_at | 3.01E-05 | 3.54E-06 | 3.759884 | up   | 5.333708 | up   | 1.418583 | up   | EPB41     |
| 225053_at | 8.50E-05 | 1.44E-05 | 1.905819 | up   | 1.646816 | up   | 1.157275 | down | CNOT7     |
| 225055_at | 0.003269 | 0.002009 | 4.111666 | down | 4.006771 | down | 1.026179 | up   | LOC651250 |
| 225056_at | 2.64E-05 | 2.93E-06 | 2.586007 | up   | 16.17771 | up   | 6.255865 | up   | SIPA1L2   |

|           |          |          |          |      |          |      |          |      |           |
|-----------|----------|----------|----------|------|----------|------|----------|------|-----------|
| 225058_at | 0.001022 | 4.18E-04 | 1.71878  | down | 1.926051 | down | 1.120592 | down | GPR108    |
| 225060_at | 0.002145 | 0.00114  | 5.354018 | down | 3.074691 | down | 1.741319 | up   | LRP11     |
| 225061_at | 0.001114 | 4.70E-04 | 3.877148 | down | 3.676007 | down | 1.054717 | up   | DNAJA4    |
| 225069_at | 4.13E-04 | 1.22E-04 | 2.232604 | down | 3.67629  | down | 1.646638 | down | PCYT1A    |
| 225071_at | 0.012098 | 0.010301 | 1.477034 | up   | 1.078781 | down | 1.593396 | down | NUS1      |
| 225072_at | 6.40E-04 | 2.21E-04 | 1.58139  | up   | 1.249516 | down | 1.975972 | down | ZCCHC3    |
| 225075_at | 0.002731 | 0.001577 | 2.014208 | up   | 1.909279 | up   | 1.054958 | down | PDRG1     |
| 225076_s_ | 7.20E-06 | 4.84E-07 | 4.42272  | down | 4.400322 | down | 1.00509  | up   | ZNFX1     |
| 225078_at | 6.01E-04 | 2.03E-04 | 5.275126 | down | 3.038413 | down | 1.736145 | up   | EMP2      |
| 225079_at | 1.46E-04 | 3.03E-05 | 3.582648 | down | 2.420077 | down | 1.480386 | up   | EMP2      |
| 225080_at | 6.48E-05 | 1.00E-05 | 3.31967  | down | 5.488903 | down | 1.653448 | down | MYO1C     |
| 225081_s_ | 5.10E-04 | 1.62E-04 | 3.033456 | up   | 5.776369 | up   | 1.904221 | up   | CDCA7L    |
| 225082_at | 8.34E-04 | 3.17E-04 | 2.175269 | up   | 2.074808 | up   | 1.04842  | down | CPSF3     |
| 225084_at | 0.003958 | 0.002573 | 1.334737 | up   | 1.314134 | up   | 1.015678 | down | EXOC5     |
| 225085_at | 0.002577 | 0.001461 | 2.332612 | down | 2.289162 | down | 1.018981 | up   | USP40     |
| 225086_at | 0.02846  | 0.027015 | 1.688521 | up   | 1.467447 | up   | 1.150653 | down | FAM98B    |
| 225088_at | 0.028959 | 0.027543 | 2.370418 | down | 1.082178 | up   | 2.565214 | up   | C16orf63  |
| 225090_at | 0.002884 | 0.001699 | 1.437122 | down | 1.614522 | down | 1.123441 | down | SYVN1     |
| 225091_at | 1.53E-04 | 3.23E-05 | 2.394006 | up   | 2.515555 | up   | 1.050772 | up   | ZCCHC3    |
| 225094_at | 2.26E-04 | 5.45E-05 | 1.419084 | down | 2.228293 | down | 1.570233 | down | SETD8     |
| 225095_at | 0.004362 | 0.002929 | 1.121355 | down | 1.870611 | down | 1.668171 | down | SPTLC2    |
| 225096_at | 0.00152  | 7.15E-04 | 1.5373   | down | 2.139709 | down | 1.391862 | down | C17orf79  |
| 225098_at | 2.36E-04 | 5.78E-05 | 4.183623 | up   | 4.427684 | up   | 1.058337 | up   | ABI2      |
| 225099_at | 6.34E-06 | 3.97E-07 | 2.671171 | up   | 2.260157 | up   | 1.181852 | down | FBXO45    |
| 225100_at | 4.40E-04 | 1.33E-04 | 3.10048  | up   | 1.581124 | up   | 1.960934 | down | FBXO45    |
| 225101_s_ | 0.002683 | 0.001542 | 2.787862 | down | 1.785077 | down | 1.56176  | up   | SNX14     |
| 225102_at | 8.01E-08 | 8.28E-10 | 20.94923 | down | 10.37708 | down | 2.018799 | up   | MGLL      |
| 225105_at | 1.54E-05 | 1.41E-06 | 6.794516 | down | 4.010505 | down | 1.69418  | up   | C12orf75  |
| 225107_at | 0.002734 | 0.001581 | 1.863853 | up   | 4.404033 | up   | 2.362866 | up   | HNRNPA2B1 |
| 225112_at | 0.001253 | 5.53E-04 | 2.628664 | up   | 2.36097  | up   | 1.113383 | down | ABI2      |
| 225125_at | 0.0175   | 0.015757 | 1.009957 | down | 1.528795 | down | 1.513722 | down | MMGT1     |
| 225127_at | 0.006792 | 0.005138 | 1.165791 | down | 1.812322 | down | 1.554586 | down | TMEM181   |
| 225128_at | 0.007209 | 0.005538 | 2.843617 | down | 1.337648 | down | 2.125834 | up   | KDEL2     |

|           |          |          |          |      |          |      |          |      |           |
|-----------|----------|----------|----------|------|----------|------|----------|------|-----------|
| 225129_at | 7.60E-04 | 2.80E-04 | 3.136669 | down | 2.288367 | down | 1.370702 | up   | CPNE2     |
| 225132_at | 2.26E-04 | 5.44E-05 | 3.718257 | down | 3.070149 | down | 1.2111   | up   | FBXL3     |
| 225133_at | 0.028822 | 0.0274   | 2.691381 | down | 1.481636 | down | 1.816492 | up   | KLF3      |
| 225134_at | 7.39E-05 | 1.20E-05 | 1.437035 | down | 2.710638 | down | 1.886271 | down | SPRYD3    |
| 225135_at | 8.87E-05 | 1.53E-05 | 1.745745 | up   | 2.221204 | up   | 1.272353 | up   | SIN3A     |
| 225136_at | 6.30E-04 | 2.16E-04 | 4.349187 | down | 7.383667 | down | 1.697712 | down | PLEKHA2   |
| 225140_at | 0.002778 | 0.001616 | 2.526921 | down | 1.304533 | up   | 3.296451 | up   | KLF3      |
| 225141_at | 0.002731 | 0.001577 | 1.353064 | up   | 1.015743 | down | 1.374365 | down |           |
| 225144_at | 8.31E-05 | 1.40E-05 | 5.554044 | down | 4.481933 | down | 1.239208 | up   | BMPR2     |
| 225146_at | 0.013324 | 0.011527 | 1.242781 | up   | 1.670208 | down | 2.075703 | down | C9orf25   |
| 225147_at | 7.48E-05 | 1.22E-05 | 4.420939 | down | 3.826407 | down | 1.155376 | up   | CYTH3     |
| 225149_at | 0.008021 | 0.006303 | 1.024192 | down | 1.506435 | up   | 1.542879 | up   | PCID2     |
| 225150_s_ | 0.002519 | 0.001419 | 2.333936 | up   | 2.658214 | up   | 1.138941 | up   | RTKN      |
| 225151_at | 0.011937 | 0.010137 | 1.751243 | up   | 1.044876 | down | 1.829831 | down | RTKN      |
| 225152_at | 1.22E-04 | 2.35E-05 | 1.097583 | up   | 1.66951  | down | 1.832426 | down | ZNF622    |
| 225156_at | 0.042257 | 0.041006 | 1.453789 | up   | 1.136846 | down | 1.652733 | down | ELOF1     |
| 225157_at | 8.90E-04 | 3.46E-04 | 1.711484 | down | 2.45038  | down | 1.431728 | down | MLXIP     |
| 225159_s_ | 0.004007 | 0.002612 | 3.03792  | down | 2.319135 | down | 1.309937 | up   |           |
| 225163_at | 8.68E-04 | 3.34E-04 | 3.84639  | down | 5.513107 | down | 1.43332  | down | FRMD4A    |
| 225165_at | 0.008627 | 0.006887 | 2.594092 | up   | 2.160985 | up   | 1.200421 | down | PPP1R1B   |
| 225166_at | 1.01E-05 | 7.68E-07 | 3.956461 | down | 2.918608 | down | 1.355598 | up   | ARHGAP18  |
| 225168_at | 1.80E-05 | 1.75E-06 | 1.04389  | down | 2.37072  | down | 2.271045 | down | FRMD4A    |
| 225169_at | 2.15E-04 | 5.07E-05 | 1.661369 | up   | 1.490999 | up   | 1.114265 | down | INTS4     |
| 225170_at | 0.002575 | 0.00146  | 1.52061  | up   | 1.979232 | up   | 1.301604 | up   | WDR5      |
| 225171_at | 7.12E-05 | 1.15E-05 | 4.33244  | down | 3.098987 | down | 1.398018 | up   | ARHGAP18  |
| 225173_at | 0.001074 | 4.47E-04 | 5.50675  | down | 2.048953 | down | 2.687593 | up   | ARHGAP18  |
| 225175_s_ | 1.45E-04 | 2.97E-05 | 1.415083 | up   | 1.80838  | down | 2.559007 | down | SLC44A2   |
| 225176_at | 0.001118 | 4.72E-04 | 4.793704 | down | 4.069185 | down | 1.17805  | up   |           |
| 225177_at | 0.001116 | 4.71E-04 | 4.208714 | up   | 5.504229 | up   | 1.307818 | up   | RAB11FIP1 |
| 225179_at | 2.70E-05 | 3.04E-06 | 3.80789  | up   | 3.514195 | up   | 1.083574 | down | UBE2K     |
| 225182_at | 4.07E-05 | 5.37E-06 | 6.861121 | down | 4.353251 | down | 1.576092 | up   | TMEM50B   |
| 225185_at | 5.00E-07 | 1.10E-08 | 4.513164 | down | 7.679572 | down | 1.701594 | down | MRAS      |
| 225186_at | 7.32E-05 | 1.19E-05 | 2.412393 | down | 5.549866 | down | 2.300564 | down | RAPH1     |
| 225188_at | 8.30E-04 | 3.15E-04 | 3.188654 | down | 5.38468  | down | 1.6887   | down | RAPH1     |

|           |          |          |          |      |          |      |          |      |           |
|-----------|----------|----------|----------|------|----------|------|----------|------|-----------|
| 225189_s_ | 1.01E-04 | 1.84E-05 | 3.403273 | down | 6.085007 | down | 1.787987 | down | RAPH1     |
| 225190_x_ | 0.006096 | 0.004484 | 1.258386 | up   | 1.409803 | up   | 1.120327 | up   | RPL35A    |
| 225191_at | 0.004049 | 0.002647 | 3.799353 | down | 1.1302   | down | 3.361666 | up   | CIRBP     |
| 225193_at | 0.002009 | 0.001042 | 1.418186 | up   | 2.507419 | up   | 1.768047 |      |           |
| 225196_s_ | 1.92E-05 | 1.90E-06 | 2.855617 | up   | 1.888773 | up   | 1.51189  | down | MRPS26    |
| 225200_at | 3.84E-05 | 4.92E-06 | 3.272614 | down | 2.666127 | down | 1.227479 | up   | DPH3      |
| 225202_at | 8.11E-04 | 3.07E-04 | 8.276244 | down | 4.520457 | down | 1.830842 | up   | RHOBTB3   |
| 225205_at | 1.18E-05 | 9.64E-07 | 1.309295 | down | 2.193621 | down | 1.675421 | down | KIF3B     |
| 225208_s_ | 0.007734 | 0.006038 | 1.691022 | up   | 1.207058 | up   | 1.400945 | down | FAM103A1  |
| 225211_at | 6.08E-04 | 2.07E-04 | 2.283163 | up   | 1.621093 | up   | 1.40841  | down | PVRL1     |
|           |          |          |          |      |          |      |          |      | LOC100129 |
| 225214_at | 1.94E-05 | 1.92E-06 | 3.283371 | down | 4.759018 | down | 1.44943  | down | 034       |
| 225225_at | 4.64E-04 | 1.42E-04 | 1.68568  | up   | 1.886829 | up   | 1.119328 | up   | LOC729082 |
| 225227_at | 5.76E-04 | 1.91E-04 | 4.948272 | up   | 3.467631 | up   | 1.426989 | down |           |
| 225231_at | 1.00E-04 | 1.81E-05 | 2.245757 | up   | 2.566647 | up   | 1.142888 | up   | CBL       |
| 225232_at | 0.013663 | 0.011871 | 1.675346 | up   | 1.624224 | up   | 1.031474 | down | MTMR12    |
| 225234_at | 0.002654 | 0.001518 | 2.135459 | up   | 1.302743 | up   | 1.639203 | down | CBL       |
| 225237_s_ | 3.42E-04 | 9.49E-05 | 6.308851 | up   | 6.559515 | up   | 1.039732 | up   | MSI2      |
| 225240_s_ | 3.34E-05 | 4.09E-06 | 7.774235 | up   | 6.091712 | up   | 1.276199 | down | MSI2      |
| 225241_at | 6.72E-07 | 1.67E-08 | 13.80311 | down | 21.03438 | down | 1.523887 | down | CCDC80    |
| 225242_s_ | 4.32E-05 | 5.80E-06 | 32.51798 | down | 68.60873 | down | 2.109871 | down | CCDC80    |
| 225245_x_ | 0.006001 | 0.004394 | 1.292435 | down | 1.928426 | down | 1.492088 | down | H2AFJ     |
| 225248_at | 3.46E-04 | 9.65E-05 | 1.414918 | up   | 1.361131 | down | 1.925889 | down | SPPL2B    |
| 225249_at | 0.002006 | 0.001039 | 1.182954 | down | 1.584293 | down | 1.339268 | down | SPPL2B    |
| 225251_at | 0.001646 | 7.99E-04 | 1.649684 | down | 2.231715 | down | 1.352814 | down | RAB24     |
| 225252_at | 2.50E-04 | 6.23E-05 | 1.753152 | down | 2.56324  | down | 1.462075 | down | SRXN1     |
|           |          |          |          |      |          |      |          |      | METTL2A   |
|           |          |          |          |      |          |      |          |      | ///       |
| 225253_s_ | 0.011354 | 0.009558 | 1.794922 | up   | 1.496596 | up   | 1.199337 | down | METTL2B   |
| 225258_at | 7.52E-05 | 1.23E-05 | 2.118406 | down | 4.841486 | down | 2.285437 | down | FBLIM1    |
| 225259_at | 0.004512 | 0.003064 | 2.193416 | up   | 1.531674 | up   | 1.432039 | down | RAB6B     |
| 225260_s_ | 1.12E-04 | 2.11E-05 | 1.639374 | up   | 2.247053 | up   | 1.370678 | up   | MRPL32    |
| 225262_at | 4.46E-05 | 6.05E-06 | 11.28602 | down | 12.88782 | down | 1.141927 | down | FOSL2     |
| 225265_at | 0.004842 | 0.003351 | 3.040695 | down | 1.870574 | down | 1.625541 | up   | RBMS1     |

|           |          |          |               |               |               |           |
|-----------|----------|----------|---------------|---------------|---------------|-----------|
| 225270_at | 6.96E-04 | 2.48E-04 | 1.657112 up   | 2.061757 down | 3.416563 down | NEO1      |
| 225271_at | 0.012196 | 0.0104   | 1.369622 up   | 1.177231 down | 1.612361 down | TMEM63B   |
| 225274_at | 2.18E-04 | 5.16E-05 | 3.79143 down  | 2.138811 down | 1.772681 up   | PCYOX1    |
| 225275_at | 3.03E-04 | 8.06E-05 | 8.660311 up   | 4.367517 down | 37.82405 down | EDIL3     |
| 225277_at | 6.05E-07 | 1.43E-08 | 2.808095 down | 4.361575 down | 1.553215 down | SLC39A13  |
| 225279_s_ | 0.022354 | 0.020768 | 1.272313 down | 1.436576 up   | 1.827775 up   | C3orf17   |
| 225280_x_ | 0.001578 | 7.55E-04 | 2.376333 down | 2.591119 down | 1.090386 down | ARSD      |
| 225282_at | 3.49E-06 | 1.72E-07 | 4.188465 down | 3.692025 down | 1.134463 up   | SMAP2     |
| 225283_at | 0.001287 | 5.73E-04 | 21.19925 down | 2.000362 down | 10.59771 up   | ARRDC4    |
| 225285_at | 0.010853 | 0.00906  | 3.400317 up   | 1.499055 up   | 2.268307 down | BCAT1     |
| 225286_at | 5.45E-04 | 1.77E-04 | 3.01892 down  | 2.123865 down | 1.421428 up   | ARSD      |
| 225288_at | 0.012881 | 0.011081 | 2.448009 down | 1.03208 down  | 2.371918 up   | COL27A1   |
| 225290_at | 7.52E-04 | 2.77E-04 | 1.67154 up    | 8.189335 up   | 4.899274 up   | ETNK1     |
| 225291_at | 4.30E-04 | 1.29E-04 | 2.601763 up   | 2.062484 up   | 1.261471 down | PNPT1     |
| 225293_at | 0.001127 | 4.78E-04 | 2.186842 down | 1.398536 up   | 3.058376 up   | COL27A1   |
| 225295_at | 1.32E-06 | 4.32E-08 | 5.556035 up   | 3.91982 up    | 1.417421 down | SLC39A10  |
| 225297_at | 5.19E-06 | 3.01E-07 | 2.879308 up   | 5.29971 up    | 1.840619 up   | HAUS1     |
| 225300_at | 9.29E-04 | 3.67E-04 | 2.930651 up   | 2.607704 up   | 1.123843 down | C15orf23  |
| 225301_s_ | 9.83E-06 | 7.40E-07 | 7.527062 up   | 9.009704 up   | 1.196975 up   | MYO5B     |
| 225302_at | 2.60E-04 | 6.58E-05 | 4.931643 down | 3.118734 down | 1.581297 up   | TMX3      |
| 225303_at | 4.45E-05 | 6.03E-06 | 5.892153 down | 5.749567 down | 1.0248 up     | KIRREL    |
| 225305_at | 1.10E-04 | 2.04E-05 | 4.591185 up   | 2.173622 up   | 2.112228 down | SLC25A29  |
| 225306_s_ | 2.81E-04 | 7.30E-05 | 2.827809 up   | 2.301566 up   | 1.228646 down | SLC25A29  |
| 225309_at | 0.003373 | 0.002095 | 1.983401 up   | 2.360493 up   | 1.190124 up   | PHF5A     |
| 225310_at | 2.65E-05 | 2.95E-06 | 3.128097 up   | 3.39644 up    | 1.085785 up   | RBMX      |
| 225314_at | 5.10E-04 | 1.62E-04 | 3.880053 up   | 1.440408 up   | 2.693718 down | OCIAD2    |
| 225315_at | 0.016136 | 0.014369 | 1.987172 up   | 1.602094 up   | 1.24036 down  | MRPL21    |
| 225326_at | 2.11E-05 | 2.17E-06 | 3.140775 up   | 3.38404 up    | 1.077454 up   | RBM27     |
| 225327_at | 0.003394 | 0.002114 | 3.558509 down | 2.112333 down | 1.684635 up   | KIAA1370  |
| 225328_at | 0.0022   | 0.001178 | 11.48449 down | 6.692875 down | 1.715928 up   |           |
| 225329_at | 2.48E-04 | 6.17E-05 | 1.31713 down  | 1.948705 down | 1.479508 down | LOC348262 |
| 225330_at | 0.001143 | 4.87E-04 | 1.405758 up   | 3.965553 up   | 2.820935 up   | IGF1R     |
| 225331_at | 9.30E-04 | 3.68E-04 | 2.350557 down | 2.844211 down | 1.210016 down | CCDC50    |
| 225334_at | 0.001972 | 0.001016 | 4.269554 down | 2.962052 down | 1.441417 up   | C10orf32  |



|           |          |          |               |               |               |           |
|-----------|----------|----------|---------------|---------------|---------------|-----------|
| 225335_at | 1.19E-04 | 2.28E-05 | 1.539396 up   | 2.344978 up   | 1.52331 up    | ZNF496    |
| 225337_at | 6.46E-04 | 2.24E-04 | 1.377621 down | 2.704777 down | 1.963368 down | ABHD2     |
| 225338_at | 0.00177  | 8.79E-04 | 2.05925 down  | 1.544734 down | 1.333078 up   | ZYG11B    |
| 225341_at | 0.044626 | 0.043407 | 1.548639 down | 1.086021 up   | 1.681855 up   | MTERFD3   |
| 225342_at | 0.004293 | 0.002865 | 4.496947 up   | 1.271733 down | 5.718917 down | AK3L1     |
| 225344_at | 5.44E-05 | 7.88E-06 | 5.076375 down | 8.061062 down | 1.587956 down | NCOA7     |
| 225356_at | 0.00255  | 0.001441 | 2.842632 down | 1.997596 down | 1.423027 up   |           |
| 225359_at | 0.001498 | 7.03E-04 | 1.901889 up   | 1.711067 up   | 1.111523 down | DNAJC19   |
| 225362_at | 1.94E-04 | 4.42E-05 | 1.289919 down | 2.205117 up   | 2.844422 up   | FAM122B   |
| 225363_at | 6.88E-04 | 2.45E-04 | 3.052061 down | 1.983958 down | 1.53837 up    | PTEN      |
| 225365_at | 7.41E-04 | 2.71E-04 | 1.095125 up   | 2.300518 up   | 2.10069 up    | ZDHHC20   |
| 225372_at | 0.001735 | 8.56E-04 | 3.324308 down | 3.958519 down | 1.19078 down  | C10orf54  |
| 225373_at | 1.95E-06 | 7.52E-08 | 9.577627 down | 9.98811 down  | 1.042858 down | C10orf54  |
| 225376_at | 0.01278  | 0.010977 | 1.525075 up   | 1.373157 up   | 1.110634 down | C20orf11  |
| 225380_at | 0.001202 | 5.22E-04 | 3.746752 up   | 3.945933 up   | 1.053161 up   | SGK493    |
| 225381_at | 4.46E-05 | 6.04E-06 | 56.08161 down | 47.45813 down | 1.181707 up   | LOC399959 |
| 225382_at | 2.39E-04 | 5.85E-05 | 2.184786 down | 3.348316 down | 1.53256 down  | ZNF275    |
| 225383_at | 5.55E-04 | 1.82E-04 | 2.198065 down | 2.468142 down | 1.12287 down  | ZNF275    |
| 225384_at | 3.22E-04 | 8.76E-05 | 1.547676 down | 1.935368 down | 1.250499 down | DOCK7     |
| 225387_at | 2.27E-04 | 5.46E-05 | 4.518895 down | 2.102616 down | 2.149178 up   | TSPAN5    |
| 225388_at | 0.001236 | 5.41E-04 | 4.22035 down  | 1.833509 down | 2.301789 up   | TSPAN5    |
| 225389_at | 1.65E-06 | 6.01E-08 | 2.534319 down | 3.51652 down  | 1.38756 down  | BTBD6     |
| 225392_at | 0.005189 | 0.003661 | 1.694025 up   | 1.28555 up    | 1.317744 down | GFM2      |
| 225393_at | 0.00791  | 0.006199 | 1.504267 down | 1.345007 up   | 2.023248 up   | GATAD2B   |
| 225396_at | 2.20E-06 | 9.01E-08 | 3.314224 up   | 5.642739 up   | 1.702583 up   | RBBP4     |
| 225397_at | 0.004028 | 0.002631 | 2.718364 down | 2.577517 down | 1.054644 up   | C15orf57  |
| 225398_at | 0.03573  | 0.034448 | 1.508797 up   | 1.742301 up   | 1.154762 up   | RPUSD4    |
| 225406_at | 1.68E-04 | 3.67E-05 | 5.883869 down | 2.254987 down | 2.60927 up    | TWSG1     |
| 225410_at | 0.006198 | 0.00458  | 1.135826 down | 1.370406 up   | 1.556543 up   | C2orf64   |
| 225411_at | 1.38E-04 | 2.79E-05 | 4.852737 down | 2.647394 down | 1.833025 up   | TMEM87B   |
| 225412_at | 3.95E-04 | 1.15E-04 | 3.479441 down | 2.570812 down | 1.353441 up   | TMEM87B   |
| 225415_at | 2.68E-05 | 3.01E-06 | 14.98638 down | 3.951029 down | 3.793031 up   | DTX3L     |
| 225421_at | 7.44E-04 | 2.72E-04 | 1.233308 up   | 7.283207 up   | 5.905426 up   | PM20D2    |
| 225428_s_ | 0.00749  | 0.005799 | 2.255685 up   | 1.183952 down | 2.670623 down | DDX54     |

|           |          |          |               |               |               |          |
|-----------|----------|----------|---------------|---------------|---------------|----------|
| 225429_at | 0.030233 | 0.028844 | 2.131709 up   | 1.79237 up    | 1.189324 down | PPP6C    |
| 225431_x_ | 0.002392 | 0.001322 | 1.232523 down | 3.773101 up   | 4.650435 up   | PM20D2   |
| 225436_at | 0.001138 | 4.83E-04 | 2.170194 down | 1.413766 up   | 3.068148 up   | FAM108C1 |
| 225438_at | 0.030935 | 0.029572 | 1.629309 up   | 2.413759 up   | 1.481462 up   | NUDCD1   |
| 225439_at | 7.96E-05 | 1.33E-05 | 2.90257 up    | 2.874818 up   | 1.009654 down | NUDCD1   |
| 225440_at | 8.31E-04 | 3.16E-04 | 2.072377 down | 3.157309 down | 1.523521 down | AGPAT3   |
| 225441_x_ | 0.002702 | 0.001555 | 1.216099 down | 1.797326 down | 1.477943 down | LSMD1    |
| 225442_at | 2.00E-08 | 1.12E-10 | 79.82713 down | 81.21652 down | 1.017405 down | DDR2     |
| 225444_at | 4.28E-04 | 1.28E-04 | 3.300264 up   | 4.423607 up   | 1.34038 up    | UBN2     |
| 225445_at | 0.001132 | 4.81E-04 | 3.453995 up   | 3.919583 up   | 1.134797 up   | UBN2     |
| 225447_at | 0.020366 | 0.018695 | 1.612973 up   | 1.873427 up   | 1.161474 up   | GPD2     |
| 225455_at | 8.03E-05 | 1.34E-05 | 2.735685 up   | 4.993101 up   | 1.825174 up   | TADA1L   |
| 225457_s_ | 0.015557 | 0.013786 | 1.633502 down | 1.000103 up   | 1.63367 up    | LOC25845 |
| 225460_at | 0.001427 | 6.58E-04 | 2.032123 down | 1.748545 down | 1.16218 up    | SEC22C   |
| 225461_at | 4.50E-04 | 1.37E-04 | 2.238231 up   | 3.517677 up   | 1.571633 up   | EHMT1    |
| 225464_at | 5.40E-07 | 1.25E-08 | 12.23922 down | 14.83629 down | 1.212193 down | FRMD6    |
| 225466_at | 6.24E-04 | 2.14E-04 | 2.118649 down | 1.796858 down | 1.179086 up   | PATL1    |
| 225468_at | 0.002211 | 0.001187 | 2.583149 down | 1.912613 down | 1.350587 up   | PATL1    |
| 225469_at | 9.47E-04 | 3.76E-04 | 2.974342 down | 2.040514 down | 1.457644 up   | LYRM5    |
| 225470_at | 2.05E-04 | 4.75E-05 | 3.162014 up   | 5.104894 up   | 1.614444 up   | NUP35    |
| 225474_at | 0.015003 | 0.013234 | 2.004432 up   | 1.181319 up   | 1.696774 down | MAGI1    |
| 225476_at | 3.71E-04 | 1.06E-04 | 1.326786 up   | 1.908666 up   | 1.438564 up   | BAT4     |
| 225478_at | 2.84E-06 | 1.28E-07 | 3.323298 up   | 5.377873 up   | 1.618234 up   | MFHAS1   |
| 225479_at | 0.006241 | 0.004622 | 1.729452 down | 1.45723 down  | 1.186808 up   | LRRC58   |
| 225480_at | 9.55E-05 | 1.69E-05 | 1.428155 down | 2.148026 down | 1.504057 down | C1orf122 |
| 225481_at | 6.48E-06 | 4.10E-07 | 13.79503 down | 13.25387 down | 1.04083 up    | FRMD6    |
| 225482_at | 2.75E-06 | 1.24E-07 | 6.57757 up    | 8.708013 up   | 1.323895 up   | KIF1A    |
| 225483_at | 2.69E-04 | 6.89E-05 | 1.488421 down | 1.894619 down | 1.272905 down | VPS26B   |
| 225484_at | 4.97E-04 | 1.56E-04 | 3.107 down    | 1.641332 down | 1.892975 up   | TSGA14   |
| 225486_at | 0.001757 | 8.71E-04 | 2.125009 up   | 3.296343 up   | 1.551214 up   | ARID2    |
| 225488_at | 0.002825 | 0.001652 | 1.380987 up   | 1.581851 down | 2.184515 down | DERL1    |
| 225489_at | 0.002295 | 0.001252 | 1.314024 down | 1.845755 down | 1.404659 down | TMEM18   |
| 225490_at | 7.81E-05 | 1.29E-05 | 3.789783 up   | 3.021407 up   | 1.254311 down | ARID2    |
| 225491_at | 0.001403 | 6.43E-04 | 2.49481 down  | 3.718594 up   | 9.277187 up   | SLC1A2   |

|           |          |          |               |               |               |         |
|-----------|----------|----------|---------------|---------------|---------------|---------|
| 225492_at | 1.21E-05 | 9.93E-07 | 2.826798 up   | 2.00446 up    | 1.410254 down | TMEM33  |
| 225494_at | 0.002751 | 0.001595 | 1.478366 up   | 1.381334 up   | 1.070246 down | DYNLL2  |
| 225496_s_ | 1.50E-04 | 3.12E-05 | 13.33107 down | 1.663605 down | 8.013364 up   | SYTL2   |
| 225499_at | 0.002237 | 0.001209 | 1.892523 up   | 1.7626 up     | 1.073711 down |         |
| 225501_at | 0.001467 | 6.82E-04 | 1.912882 up   | 2.972176 up   | 1.553769 up   | PHF6    |
| 225505_s_ | 0.004693 | 0.003225 | 2.501876 down | 1.050261 down | 2.382147 up   | FAM113A |
| 225507_at | 4.01E-04 | 1.17E-04 | 4.152402 up   | 5.229521 up   | 1.259396 up   | SFRS18  |
| 225509_at | 0.001074 | 4.47E-04 | 4.958455 down | 2.776521 down | 1.785852 up   | SAP30L  |
| 225510_at | 0.003659 | 0.002326 | 4.021624 down | 2.133429 down | 1.885052 up   | OAF     |
| 225511_at | 6.38E-05 | 9.84E-06 | 2.333033 up   | 5.675742 up   | 2.432774 up   | GPRC5B  |
| 225512_at | 8.66E-05 | 1.48E-05 | 10.11196 down | 5.020229 down | 2.014242 up   | ZBTB38  |
| 225513_at | 0.018194 | 0.016467 | 1.391475 up   | 1.206662 down | 1.679039 down | SCRN2   |
| 225516_at | 3.19E-04 | 8.68E-05 | 5.983474 up   | 5.83527 up    | 1.025398 down | SLC7A2  |
| 225517_at | 2.18E-04 | 5.16E-05 | 2.623556 up   | 3.198201 up   | 1.219033 up   | ZNF770  |
| 225518_x_ | 0.00503  | 0.003518 | 1.338093 up   | 1.26883 down  | 1.697812 down |         |
| 225523_at | 0.00175  | 8.66E-04 | 1.612342 down | 1.802896 down | 1.118185 down | MRPL53  |
| 225524_at | 8.53E-06 | 6.14E-07 | 11.88139 down | 11.7696 down  | 1.009498 up   | ANTXR2  |
|           |          |          |               |               |               | CTA-    |
| 225525_at | 2.16E-06 | 8.77E-08 | 7.548012 up   | 1.002317 up   | 7.530566 down | 221G9.4 |
| 225529_at | 0.007077 | 0.005409 | 2.281126 down | 1.931972 down | 1.180724 up   | ACAP3   |
| 225530_at | 1.26E-05 | 1.05E-06 | 5.165186 down | 5.435648 down | 1.052363 down | MOBKL2A |
| 225535_s_ | 0.016494 | 0.014727 | 1.602809 up   | 1.039576 up   | 1.54179 down  | TIMM23  |
| 225538_at | 8.58E-04 | 3.29E-04 | 1.221973 down | 1.55832 up    | 1.904226 up   | ZCCHC9  |
| 225540_at | 0.011096 | 0.009298 | 1.727923 up   | 5.939917 up   | 3.437606 up   | MAP2    |
| 225544_at | 7.15E-06 | 4.80E-07 | 7.184538 down | 1.545515 down | 4.648638 up   | TBX3    |
| 225545_at | 0.002654 | 0.001518 | 1.49899 down  | 2.127548 down | 1.419321 down | EEF2K   |
| 225546_at | 9.17E-04 | 3.60E-04 | 2.405573 down | 1.098349 down | 2.190172 up   | EEF2K   |
| 225548_at | 5.98E-04 | 2.02E-04 | 1.577352 down | 1.910111 up   | 3.012917 up   | SHROOM3 |
| 225550_at | 0.00307  | 0.001847 | 1.611744 down | 2.473365 down | 1.534589 down | C1orf71 |
| 225554_s_ | 6.98E-05 | 1.11E-05 | 1.913693 up   | 1.464239 up   | 1.306954 down | ANAPC7  |
| 225557_at | 0.028725 | 0.027299 | 1.303456 up   | 1.32623 down  | 1.728683 down | CSRNP1  |
| 225558_at | 4.93E-06 | 2.82E-07 | 3.885049 down | 3.863823 down | 1.005494 up   | GIT2    |
| 225562_at | 2.20E-05 | 2.30E-06 | 2.163229 down | 3.057285 down | 1.413297 down | RASA3   |
| 225564_at | 0.001494 | 6.99E-04 | 1.185736 down | 5.688357 up   | 6.744892 up   | SPATA13 |

|           |          |          |               |               |               |          |
|-----------|----------|----------|---------------|---------------|---------------|----------|
| 225566_at | 0.003341 | 0.00207  | 1.259904 up   | 2.809858 down | 3.540151 down | NRP2     |
| 225567_at | 4.15E-04 | 1.23E-04 | 1.241265 down | 3.032549 down | 2.443111 down |          |
| 225568_at | 0.014474 | 0.012692 | 1.375297 up   | 1.200369 down | 1.650864 down | TMEM141  |
| 225569_at | 1.83E-04 | 4.11E-05 | 1.938797 up   | 3.37906 up    | 1.742864 up   | EIF2C2   |
| 225570_at | 0.006381 | 0.004757 | 1.204165 down | 1.683898 down | 1.398394 down | SLC41A1  |
| 225573_at | 0.001472 | 6.85E-04 | 3.916338 down | 1.306775 down | 2.996949 up   | ACAD11   |
| 225576_at | 5.42E-04 | 1.76E-04 | 2.604356 down | 1.679727 down | 1.550464 up   | C6orf72  |
| 225578_at | 7.54E-04 | 2.77E-04 | 2.582254 up   | 1.664958 up   | 1.550942 down | C13orf37 |
| 225579_at | 4.00E-04 | 1.17E-04 | 4.22441 down  | 3.313465 down | 1.274922 up   | PQLC3    |
| 225581_s_ | 0.004611 | 0.003153 | 1.941396 up   | 2.082588 up   | 1.072727 up   | MRPL50   |
| 225582_at | 3.83E-04 | 1.11E-04 | 1.192174 down | 2.795962 down | 2.345263 down | ITPRIP   |
| 225586_at | 6.93E-04 | 2.47E-04 | 1.753953 up   | 1.695114 up   | 1.034711 down | WDR85    |
| 225587_at | 0.024555 | 0.022992 | 1.366767 up   | 1.774177 down | 2.424887 down | TMEM129  |
| 225588_s_ | 0.002492 | 0.001397 | 1.478166 down | 2.331805 down | 1.577499 down | TMEM129  |
| 225589_at | 0.001054 | 4.36E-04 | 2.850774 down | 3.314448 down | 1.162649 down | SH3RF1   |
| 225591_at | 8.21E-05 | 1.38E-05 | 2.782653 down | 2.969229 down | 1.06705 down  | FBXO25   |
| 225599_s_ | 0.020696 | 0.019037 | 3.273356 down | 1.53226 down  | 2.136293 up   | C8orf83  |
| 225600_at | 0.004971 | 0.003467 | 2.651743 down | 1.433603 down | 1.849705 up   | C8orf83  |
| 225601_at | 4.72E-07 | 1.01E-08 | 7.902287 up   | 12.4116 up    | 1.570634 up   | HMGB3    |
| 225602_at | 0.001738 | 8.58E-04 | 3.13038 down  | 3.74555 down  | 1.196516 down | GLIPR2   |
| 225605_at | 4.70E-04 | 1.45E-04 | 1.504944 down | 2.580483 down | 1.71467 down  | TP53I13  |
| 225607_at | 0.002026 | 0.001055 | 1.905474 up   | 1.36155 up    | 1.399488 down | CCDC43   |
| 225608_at | 6.37E-05 | 9.80E-06 | 1.997802 down | 1.430939 down | 1.396148 up   | SNX29    |
| 225614_at | 3.80E-05 | 4.84E-06 | 2.480877 up   | 3.008274 up   | 1.212585 up   | SAAL1    |
| 225615_at | 0.006581 | 0.004943 | 1.256299 down | 2.973715 down | 2.367044 down | IFFO2    |
| 225618_at | 4.86E-04 | 1.52E-04 | 1.706929 up   | 1.347513 up   | 1.266725 down | ARHGAP27 |
| 225619_at | 6.19E-07 | 1.46E-08 | 15.13405 up   | 13.93791 up   | 1.085819 down | SLAIN1   |
| 225621_at | 0.001266 | 5.61E-04 | 1.562465 down | 1.734976 down | 1.11041 down  | ALG2     |
| 225622_at | 2.42E-04 | 5.95E-05 | 3.339313 down | 1.070644 down | 3.118978 up   | PAG1     |
| 225623_at | 0.005691 | 0.004107 | 1.582523 up   | 2.217814 up   | 1.401442 up   | KIAA1737 |
| 225624_at | 1.39E-04 | 2.83E-05 | 2.843923 down | 2.1569 down   | 1.318523 up   | SNX29    |
| 225626_at | 0.00455  | 0.003098 | 6.351309 down | 1.114425 up   | 7.078054 up   | PAG1     |
| 225627_s_ | 2.63E-06 | 1.16E-07 | 6.07644 up    | 12.10725 up   | 1.99249 up    | CACHD1   |
| 225629_s_ | 3.04E-05 | 3.60E-06 | 4.75845 down  | 4.556882 down | 1.044234 up   | ZBTB4    |

|           |          |          |          |      |          |      |          |      |           |
|-----------|----------|----------|----------|------|----------|------|----------|------|-----------|
| 225630_at | 0.027487 | 0.02601  | 1.640157 | down | 1.201954 | up   | 1.971393 | up   | EEPD1     |
| 225632_s_ | 3.46E-04 | 9.65E-05 | 1.062657 | up   | 1.936388 | down | 2.057715 | down | RAB43     |
| 225636_at | 3.77E-04 | 1.08E-04 | 5.673802 | down | 2.683884 | down | 2.114027 | up   | STAT2     |
| 225644_at | 0.003022 | 0.001809 | 1.567277 | up   | 3.305965 | up   | 2.109368 | up   | CCDC117   |
| 225646_at | 8.80E-04 | 3.41E-04 | 3.233872 | down | 2.618762 | up   | 8.46874  | up   | CTSC      |
| 225647_s_ | 6.09E-04 | 2.07E-04 | 1.869215 | down | 12.02404 | up   | 22.47551 | up   | CTSC      |
| 225648_at | 6.14E-06 | 3.81E-07 | 3.060389 | up   | 1.789903 | up   | 1.709807 | down | STK35     |
| 225649_s_ | 0.005064 | 0.003551 | 2.381878 | up   | 2.01095  | up   | 1.184454 | down | STK35     |
| 225652_at | 5.65E-04 | 1.87E-04 | 2.214586 | down | 1.678064 | down | 1.319726 | up   |           |
| 225657_at | 3.60E-04 | 1.02E-04 | 2.19614  | up   | 1.66703  | up   | 1.317396 | down | LOC152217 |
| 225660_at | 8.76E-08 | 9.60E-10 | 115.9702 | up   | 94.72641 | up   | 1.224265 | down | SEMA6A    |
| 225661_at | 2.67E-06 | 1.19E-07 | 11.28424 | down | 7.90103  | down | 1.428198 | up   | IFNAR1    |
| 225662_at | 9.76E-07 | 2.83E-08 | 19.31608 | down | 9.8827   | down | 1.954534 | up   | ZAK       |
| 225664_at | 2.70E-05 | 3.03E-06 | 61.26822 | down | 59.27563 | down | 1.033616 | up   | COL12A1   |
| 225665_at | 2.82E-08 | 1.92E-10 | 17.91614 | down | 12.75283 | down | 1.404875 | up   | ZAK       |
| 225669_at | 1.93E-05 | 1.91E-06 | 9.96557  | down | 8.749722 | down | 1.138959 | up   | IFNAR1    |
| 225672_at | 0.003759 | 0.002412 | 1.33966  | down | 1.942091 | down | 1.44969  | down | GOLGA2    |
| 225673_at | 8.99E-05 | 1.55E-05 | 2.67272  | down | 3.82988  | down | 1.432952 | down | MYADM     |
| 225674_at | 3.24E-04 | 8.86E-05 | 3.774681 | down | 2.082215 | down | 1.812821 | up   | BCAP29    |
| 225676_s_ | 0.001319 | 5.92E-04 | 2.423657 | up   | 2.011961 | up   | 1.204624 | down | WDSOF1    |
| 225677_at | 7.58E-04 | 2.79E-04 | 2.569482 | down | 2.3787   | down | 1.080204 | up   | BCAP29    |
| 225680_at | 0.016923 | 0.01517  | 1.755672 | up   | 1.097046 | down | 1.926052 | down | LRWD1     |
| 225681_at | 2.29E-05 | 2.42E-06 | 46.76507 | down | 34.12272 | down | 1.370496 | up   | CTHRC1    |
| 225683_x_ | 0.005454 | 0.003896 | 1.074009 | up   | 1.541689 | down | 1.655789 | down | PHPT1     |
| 225685_at | 1.98E-05 | 1.98E-06 | 14.41579 | down | 21.65768 | down | 1.502358 | down |           |
| 225686_at | 6.13E-04 | 2.09E-04 | 2.012867 | up   | 2.498961 | up   | 1.241493 | up   | FAM33A    |
| 225687_at | 0.009001 | 0.00725  | 5.603007 | up   | 6.258719 | up   | 1.117029 | up   | FAM83D    |
| 225688_s_ | 7.71E-04 | 2.86E-04 | 1.541652 | down | 3.361353 | down | 2.180359 | down | PHLDB2    |
| 225691_at | 8.25E-04 | 3.13E-04 | 1.722522 | up   | 2.022987 | up   | 1.174434 | up   | CRKRS     |
| 225693_s_ | 0.010497 | 0.008706 | 1.626991 | up   | 1.14213  | up   | 1.424524 | down | CAMTA1    |
| 225694_at | 3.98E-04 | 1.16E-04 | 1.927736 | up   | 2.689724 | up   | 1.395276 | up   | CRKRS     |
| 225695_at | 2.18E-04 | 5.18E-05 | 1.793644 | down | 2.280701 | down | 1.271546 | down | C2orf18   |
| 225697_at | 5.25E-05 | 7.52E-06 | 2.004323 | up   | 1.985438 | up   | 1.009512 | down | CRKRS     |
| 225699_at | 9.19E-05 | 1.60E-05 | 2.32854  | up   | 2.231391 | up   | 1.043538 | down | C7orf40   |

|           |          |          |               |               |               |           |
|-----------|----------|----------|---------------|---------------|---------------|-----------|
| 225700_at | 0.001141 | 4.86E-04 | 1.665286 up   | 2.762414 up   | 1.658822 up   | GLCCI1    |
| 225702_at | 0.018844 | 0.017138 | 1.688351 down | 1.09169 down  | 1.546549 up   | C8orf76   |
| 225703_at | 0.010603 | 0.008811 | 2.029455 up   | 1.639834 up   | 1.237598 down | FBRSL1    |
| 225705_at | 0.004089 | 0.002682 | 2.038176 up   | 3.145495 up   | 1.543289 up   | CCDC45    |
| 225706_at | 2.10E-05 | 2.15E-06 | 2.473816 up   | 7.155794 up   | 2.892614 up   | GLCCI1    |
| 225707_at | 8.06E-05 | 1.35E-05 | 2.250876 up   | 3.867037 up   | 1.718015 up   | ARL6IP6   |
| 225711_at | 0.00353  | 0.002223 | 1.849353 up   | 3.877717 up   | 2.096797 up   | ARL6IP6   |
| 225712_at | 0.002371 | 0.001307 | 2.233977 up   | 2.050012 up   | 1.089739 down | GEMIN5    |
| 225717_at | 0.001848 | 9.30E-04 | 8.020137 down | 3.659202 down | 2.191772 up   | KIAA1715  |
| 225718_at | 0.002487 | 0.001394 | 3.306125 down | 2.807147 down | 1.177753 up   | KIAA1715  |
| 225719_s_ | 0.039924 | 0.038684 | 1.604961 up   | 1.015996 down | 1.630633 down | MRPL55    |
| 225720_at | 0.001712 | 8.41E-04 | 19.70664 down | 23.44812 down | 1.189859 down | SYNPO2    |
| 225721_at | 1.57E-04 | 3.34E-05 | 19.26391 down | 24.79514 down | 1.287129 down | SYNPO2    |
| 225723_at | 0.001086 | 4.54E-04 | 1.539295 up   | 1.416432 down | 2.180307 down | C6orf129  |
| 225726_s_ | 1.50E-05 | 1.37E-06 | 6.694662 up   | 8.536904 up   | 1.275181 up   | PLEKHH1   |
| 225727_at | 3.43E-07 | 6.49E-09 | 4.212504 up   | 3.985653 up   | 1.056917 down | PLEKHH1   |
| 225728_at | 1.95E-04 | 4.44E-05 | 1.246443 down | 24.70306 down | 19.81884 down | SORBS2    |
| 225729_at | 2.31E-06 | 9.59E-08 | 6.833647 down | 5.876724 down | 1.162833 up   | C6orf89   |
| 225733_at | 2.59E-04 | 6.52E-05 | 1.25795 down  | 2.313819 down | 1.839356 down | B3GALT6   |
| 225739_at | 3.02E-08 | 2.17E-10 | 5.107173 up   | 5.022537 up   | 1.016851 down | RAB11FIP4 |
| 225740_x_ | 0.002156 | 0.001147 | 1.455161 up   | 2.620972 up   | 1.801157 up   | MDM4      |
| 225742_at | 8.79E-04 | 3.40E-04 | 1.19386 up    | 3.849614 up   | 3.22451 up    | MDM4      |
| 225747_at | 0.001587 | 7.61E-04 | 1.421721 up   | 2.071453 up   | 1.457004 up   | COQ10A    |
| 225751_at | 0.007124 | 0.005454 | 1.9168 up     | 2.271959 up   | 1.185287 up   | RBM17     |
| 225754_at | 3.29E-04 | 9.03E-05 | 1.684775 down | 1.983061 down | 1.177048 down | AP1G1     |
| 225756_at | 0.026606 | 0.025112 | 1.69502 up    | 1.126264 down | 1.90904 down  | CSNK1E    |
| 225757_s_ | 0.007256 | 0.005581 | 1.614746 up   | 1.261028 up   | 1.2805 down   | CLMN      |
| 225760_at | 0.002638 | 0.001507 | 1.841997 up   | 2.919936 up   | 1.585201 up   | MYSM1     |
| 225762_x_ | 0.027568 | 0.026094 | 2.214899 up   | 1.027972 down | 2.276853 down | LOC284801 |
| 225764_at | 0.002264 | 0.00123  | 1.452528 down | 1.777823 down | 1.223951 down | ETV6      |
| 225768_at | 0.023139 | 0.021556 | 2.467683 down | 1.451642 up   | 3.582192 up   | NR1D2     |
| 225771_at | 0.001043 | 4.30E-04 | 1.442059 up   | 1.227401 down | 1.769985 down | AP1G1     |
| 225775_at | 2.08E-05 | 2.11E-06 | 4.447179 up   | 4.50363 up    | 1.012694 up   | TSPAN33   |
| 225777_at | 1.96E-04 | 4.47E-05 | 4.124487 up   | 3.59877 up    | 1.146083 down | C9orf140  |

|           |          |          |          |      |          |      |          |      |           |
|-----------|----------|----------|----------|------|----------|------|----------|------|-----------|
| 225778_at | 2.64E-04 | 6.71E-05 | 1.918584 | down | 3.020771 | down | 1.57448  | down | RBMS2     |
| 225780_at | 0.00208  | 0.001093 | 2.34922  | up   | 1.894408 | up   | 1.240081 | down | RSC1A1    |
| 225782_at | 1.89E-07 | 2.89E-09 | 60.52576 | down | 77.74104 | down | 1.284429 | down | MSRB3     |
| 225783_at | 5.74E-04 | 1.91E-04 | 1.87985  | down | 2.227516 | down | 1.184944 | down | UBE2F     |
| 225784_s_ | 0.002803 | 0.001634 | 1.668785 | up   | 2.074006 | up   | 1.242824 | up   | ZC4H2     |
| 225785_at | 0.003606 | 0.002283 | 3.700216 | down | 2.20462  | down | 1.678392 | up   | REEP3     |
| 225786_at | 0.011359 | 0.009563 | 1.314826 | up   | 4.489447 | up   | 3.41448  | up   | C1orf199  |
| 225790_at | 2.07E-08 | 1.19E-10 | 22.40561 | down | 30.49525 | down | 1.361054 | down | MSRB3     |
| 225792_at | 5.34E-09 | 1.69E-11 | 27.47282 | up   | 23.42472 | up   | 1.172813 | down | HOOK1     |
| 225793_at | 1.18E-05 | 9.61E-07 | 5.291342 | down | 5.554459 | down | 1.049726 | down | LIX1L     |
| 225795_at | 0.004796 | 0.003308 | 1.579992 | down | 1.45908  | down | 1.082869 | up   | C22orf32  |
| 225796_at | 1.32E-06 | 4.31E-08 | 20.83234 | down | 7.706218 | down | 2.703315 | up   | PXK       |
| 225798_at | 1.10E-04 | 2.05E-05 | 4.572005 | down | 3.158549 | down | 1.447502 | up   | JAZF1     |
|           |          |          |          |      |          |      |          |      | LOC541471 |
|           |          |          |          |      |          |      |          |      | ///       |
|           |          |          |          |      |          |      |          |      | NCRNA0015 |
| 225799_at | 0.001994 | 0.001031 | 5.76527  | down | 5.117529 | down | 1.126573 | up   | 2         |
| 225800_at | 1.24E-04 | 2.40E-05 | 4.550453 | down | 3.723691 | down | 1.222028 | up   | JAZF1     |
| 225803_at | 8.33E-04 | 3.17E-04 | 6.416351 | down | 6.424456 | down | 1.001263 | down | FBXO32    |
| 225804_at | 4.45E-05 | 6.03E-06 | 2.399973 | down | 2.401121 | down | 1.000478 | down | CYB5D2    |
| 225805_at | 4.15E-04 | 1.23E-04 | 2.053742 | up   | 2.714639 | up   | 1.321801 | up   | HNRNPU    |
| 225806_at | 0.002747 | 0.001591 | 1.516159 | down | 2.149744 | down | 1.417888 | down | JUB       |
| 225807_at | 8.52E-04 | 3.26E-04 | 1.554271 | down | 2.999804 | down | 1.930039 | down | JUB       |
|           |          |          |          |      |          |      |          |      | DKFZP5640 |
| 225809_at | 0.001302 | 5.82E-04 | 4.460887 | up   | 4.493719 | up   | 1.00736  | up   | 0823      |
| 225811_at | 0.004375 | 0.00294  | 1.495439 | up   | 1.557566 | up   | 1.041545 | up   | C11orf58  |
| 225817_at | 2.48E-06 | 1.07E-07 | 12.53245 | up   | 10.54065 | up   | 1.188964 | down | CGNL1     |
| 225820_at | 0.011073 | 0.009272 | 1.88204  | up   | 3.072768 | up   | 1.632679 | up   | PHF17     |
| 225822_at | 1.36E-07 | 1.80E-09 | 5.579615 | up   | 6.787293 | up   | 1.216445 | up   | TMEM125   |
| 225823_at | 2.34E-06 | 9.84E-08 | 2.509456 | down | 3.74992  | down | 1.494316 | down | C19orf70  |
| 225825_at | 8.49E-04 | 3.24E-04 | 2.302356 | down | 1.651292 | down | 1.394275 | up   | C20orf194 |
| 225827_at | 0.003703 | 0.002363 | 3.586184 | up   | 2.538128 | up   | 1.412925 | down | EIF2C2    |
| 225831_at | 0.013642 | 0.011847 | 1.532156 | up   | 1.36394  | down | 2.089769 | down | LUZP1     |

|           |          |          |               |               |               |  |            |
|-----------|----------|----------|---------------|---------------|---------------|--|------------|
|           |          |          |               |               |               |  | FAM72A /// |
|           |          |          |               |               |               |  | FAM72B /// |
| 225834_at | 2.12E-04 | 5.00E-05 | 6.17045 up    | 11.00417 up   | 1.783366 up   |  | FAM72D     |
| 225837_at | 5.82E-04 | 1.94E-04 | 2.253169 up   | 2.485476 up   | 1.103102 up   |  | C12orf32   |
| 225840_at | 6.03E-04 | 2.04E-04 | 1.762667 down | 1.607833 down | 1.0963 up     |  | TEF        |
| 225843_at | 0.001641 | 7.95E-04 | 1.464497 down | 1.257661 down | 1.164461 up   |  | ZFYVE19    |
| 225845_at | 0.001306 | 5.85E-04 | 1.444821 up   | 4.110935 up   | 2.845291 up   |  | ZBTB44     |
| 225846_at | 2.91E-11 | 1.02E-14 | 90.15062 up   | 96.74615 up   | 1.073161 up   |  | ESRP1      |
| 225847_at | 0.001492 | 6.98E-04 | 4.357904 down | 4.873719 down | 1.118363 down |  | AADAACL1   |
| 225852_at | 0.002824 | 0.001651 | 2.260314 up   | 1.667155 up   | 1.355791 down |  | ANKRD17    |
| 225853_at | 0.001748 | 8.64E-04 | 1.022331 down | 2.08098 down  | 2.035526 down |  | GNPNAT1    |
| 225854_x_ | 0.014784 | 0.013007 | 1.399347 up   | 1.167242 down | 1.633377 down |  | LOC729397  |
| 225855_at | 0.002628 | 0.001498 | 1.484854 up   | 3.203574 up   | 2.1575 up     |  | EPB41L5    |
| 225856_at | 0.00463  | 0.003171 | 1.201729 up   | 1.594698 down | 1.916395 down |  |            |
| 225857_s_ | 4.53E-04 | 1.38E-04 | 3.833677 up   | 3.433458 up   | 1.116565 down |  | LOC388796  |
| 225860_at | 1.66E-04 | 3.61E-05 | 2.023316 down | 3.537089 down | 1.748164 down |  | LOC729580  |
| 225862_at | 0.001249 | 5.49E-04 | 1.995574 up   | 1.644222 up   | 1.213689 down |  | SLC25A26   |
| 225863_s_ | 0.001517 | 7.14E-04 | 1.903272 down | 2.103979 down | 1.105454 down |  | C19orf12   |
| 225864_at | 5.12E-08 | 4.43E-10 | 69.79192 up   | 43.83868 up   | 1.592017 down |  | FAM84B     |
| 225866_at | 1.48E-04 | 3.08E-05 | 2.591264 up   | 1.774262 up   | 1.460475 down |  | BXDC1      |
| 225867_at | 2.70E-06 | 1.21E-07 | 7.982535 down | 9.073079 down | 1.136616 down |  | VASN       |
| 225868_at | 0.001582 | 7.57E-04 | 2.681282 down | 2.049172 down | 1.308471 up   |  | TRIM47     |
| 225872_at | 0.001552 | 7.37E-04 | 3.856726 down | 3.311922 down | 1.164498 up   |  | SLC35F5    |
| 225875_s_ | 5.99E-06 | 3.66E-07 | 3.84768 down  | 3.090865 down | 1.244855 up   |  | NIPAL3     |
| 225876_at | 9.70E-05 | 1.73E-05 | 3.074355 down | 2.981965 down | 1.030983 up   |  | NIPAL3     |
| 225879_at | 8.78E-05 | 1.50E-05 | 2.476909 up   | 2.506751 up   | 1.012048 up   |  | TSEN54     |
| 225880_at | 0.006717 | 0.00507  | 2.299827 down | 1.777849 down | 1.293601 up   |  |            |
| 225882_at | 3.76E-04 | 1.08E-04 | 1.15263 up    | 2.059141 up   | 1.786473 up   |  | SLC35B4    |
| 225885_at | 0.019061 | 0.017352 | 3.611315 down | 1.196983 down | 3.017014 up   |  | EEA1       |
| 225887_at | 1.20E-06 | 3.78E-08 | 3.726794 up   | 4.265641 up   | 1.144587 up   |  | C13orf23   |
| 225888_at | 1.23E-04 | 2.37E-05 | 4.069833 up   | 3.492989 up   | 1.165143 down |  | C12orf30   |
| 225890_at | 4.55E-06 | 2.52E-07 | 2.477868 up   | 5.255444 up   | 2.120954 up   |  | C20orf72   |



|           |          |          |               |               |               |              |
|-----------|----------|----------|---------------|---------------|---------------|--------------|
| 225894_at | 0.002311 | 0.001263 | 8.664871 down | 10.24947 down | 1.182876 down | SYNPO2       |
| 225895_at | 1.23E-04 | 2.40E-05 | 55.59465 down | 47.9982 down  | 1.158265 up   | SYNPO2       |
|           |          |          |               |               |               | FLJ45445 /// |
|           |          |          |               |               |               | LOC643670    |
|           |          |          |               |               |               | ///          |
|           |          |          |               |               |               | LOC728105    |
|           |          |          |               |               |               | ///          |
| 225899_x_ | 0.001609 | 7.75E-04 | 2.295176 up   | 6.001681 up   | 2.614911 up   | tcag7.907    |
| 225906_at | 1.41E-04 | 2.86E-05 | 1.746791 up   | 1.457571 up   | 1.198426 down |              |
| 225908_at | 6.95E-07 | 1.75E-08 | 36.35645 down | 38.70345 down | 1.064555 down | IAH1         |
| 225909_at | 0.005593 | 0.004018 | 1.040924 up   | 1.632469 up   | 1.568288 up   | tcag7.1196   |
| 225913_at | 2.99E-05 | 3.51E-06 | 3.876008 down | 4.853067 down | 1.252079 down | SGK269       |
| 225915_at | 0.011279 | 0.009485 | 4.038916 down | 1.987894 down | 2.031756 up   | CAB39L       |
| 225919_s_ | 4.93E-05 | 6.94E-06 | 5.138067 up   | 5.338604 up   | 1.03903 up    | C9orf72      |
| 225926_at | 0.010272 | 0.008474 | 1.78766 down  | 1.656745 down | 1.079019 up   | VTI1B        |
| 225927_at | 0.00183  | 9.19E-04 | 2.285883 up   | 3.318686 up   | 1.451818 up   | MAP3K1       |
| 225928_at | 0.005059 | 0.003545 | 2.002543 down | 1.667489 down | 1.200933 up   | VTI1B        |
| 225930_at | 1.68E-04 | 3.68E-05 | 4.655052 down | 3.11668 down  | 1.493593 up   | NKIRAS1      |
| 225931_s_ | 0.008742 | 0.007002 | 2.449995 down | 1.39501 down  | 1.756257 up   | RNF213       |
| 225932_s_ | 0.001057 | 4.38E-04 | 1.665434 up   | 2.267152 up   | 1.361298 up   | HNRNPA2B1    |
| 225933_at | 0.010425 | 0.008628 | 2.70056 up    | 1.822665 up   | 1.481654 down | CCDC137      |
| 225939_at | 0.004121 | 0.002709 | 1.96401 down  | 1.22436 up    | 2.404655 up   | EIF4E3       |
| 225942_at | 8.79E-04 | 3.40E-04 | 2.852792 up   | 3.211492 up   | 1.125737 up   | NLN          |
| 225943_at | 0.008462 | 0.006727 | 2.826943 up   | 1.348398 up   | 2.096521 down | NLN          |
| 225944_at | 0.001141 | 4.86E-04 | 3.318745 up   | 2.460642 up   | 1.348732 down | NLN          |
| 225946_at | 0.0135   | 0.011707 | 2.531864 down | 1.004843 down | 2.519662 up   | RASSF8       |
| 225947_at | 3.03E-04 | 8.06E-05 | 2.76362 up    | 2.052168 up   | 1.346684 down | MYO19        |
| 225949_at | 5.62E-05 | 8.24E-06 | 2.565011 down | 2.593075 down | 1.010941 down | NRBP2        |
| 225950_at | 0.01996  | 0.018286 | 2.56413 down  | 1.679431 down | 1.526785 up   |              |
| 225953_at | 0.002449 | 0.001365 | 1.742098 up   | 2.40968 up    | 1.383206 up   | RPRD1A       |

|           |          |          |               |               |               |     |           |
|-----------|----------|----------|---------------|---------------|---------------|-----|-----------|
|           |          |          |               |               |               |     | LOC653506 |
| 225955_at | 4.91E-04 | 1.54E-04 | 2.990771 down | 6.139193 down | 2.052712 down | /// | METRNL    |
| 225956_at | 0.021821 | 0.020197 | 6.357234 down | 1.75774 down  | 3.616708 up   |     | C5orf41   |
| 225958_at | 9.67E-06 | 7.27E-07 | 11.58194 up   | 12.60637 up   | 1.088451 up   |     | PHC1      |
| 225960_at | 0.040217 | 0.038976 | 1.49023 up    | 1.125636 up   | 1.323901 down |     | ZNRF1     |
| 225965_at | 0.001446 | 6.70E-04 | 2.03846 down  | 1.588326 down | 1.283401 up   |     | DDHD1     |
|           |          |          |               |               |               |     | C17orf89  |
|           |          |          |               |               |               |     | ///       |
|           |          |          |               |               |               |     | LOC100133 |
| 225966_at | 7.82E-04 | 2.92E-04 | 1.521332 up   | 1.094321 down | 1.664825 down |     | 328       |
| 225968_at | 1.19E-04 | 2.28E-05 | 5.404818 down | 2.366392 down | 2.283991 up   |     | PRICKLE2  |
| 225969_at | 0.005168 | 0.003642 | 1.062838 up   | 1.558455 down | 1.656385 down |     | ALKBH6    |
| 225970_at | 1.29E-04 | 2.54E-05 | 4.154478 down | 2.91633 down  | 1.424556 up   |     | DDHD1     |
| 225971_at | 7.12E-05 | 1.15E-05 | 4.058914 down | 2.380298 down | 1.705213 up   |     | DDHD1     |
| 225972_at | 0.008953 | 0.0072   | 1.614887 up   | 1.975637 up   | 1.22339 up    |     | TMEM64    |
| 225973_at | 2.18E-05 | 2.26E-06 | 9.168242 down | 6.490684 down | 1.412524 up   |     | TAP2      |
| 225975_at | 0.003758 | 0.002411 | 3.272724 down | 1.184063 up   | 3.875112 up   |     | PCDH18    |
| 225976_at | 0.001024 | 4.18E-04 | 2.264093 up   | 1.817368 up   | 1.245809 down |     | BTF3L4    |
| 225977_at | 3.71E-04 | 1.06E-04 | 2.420625 down | 1.60739 up    | 3.890887 up   |     | PCDH18    |
| 225978_at | 3.82E-04 | 1.10E-04 | 3.640874 up   | 1.46764 up    | 2.480768 down |     | RIMKLB    |
| 225980_at | 6.97E-04 | 2.49E-04 | 2.999755 down | 2.949912 down | 1.016896 up   |     | C14orf43  |
| 225981_at | 0.00117  | 5.03E-04 | 1.706198 up   | 1.021936 up   | 1.669574 down |     | C17orf28  |
| 225984_at | 0.010629 | 0.008839 | 3.621516 down | 2.188938 down | 1.654463 up   |     | PRKAA1    |
| 225985_at | 7.80E-04 | 2.91E-04 | 2.821253 down | 3.217521 down | 1.140458 down |     | PRKAA1    |
| 225986_x_ | 6.54E-04 | 2.28E-04 | 1.042174 up   | 1.820353 up   | 1.746689 up   |     | CPSF2     |
| 225988_at | 4.05E-04 | 1.19E-04 | 2.865982 down | 3.029406 down | 1.057022 down |     | HERC4     |
| 225989_at | 2.32E-04 | 5.64E-05 | 3.890427 down | 3.977502 down | 1.022382 down |     | HERC4     |
| 225990_at | 0.004093 | 0.002686 | 2.702605 down | 1.22283 up    | 3.304826 up   |     | BOC       |
| 225991_at | 0.001775 | 8.83E-04 | 1.921485 up   | 1.275619 up   | 1.506315 down |     | TMEM41A   |
| 225992_at | 5.76E-06 | 3.48E-07 | 1.71333 up    | 3.456035 up   | 2.017145 up   |     | MLLT10    |
| 225993_at | 0.006772 | 0.005121 | 1.963826 up   | 1.425449 up   | 1.37769 down  |     | EARS2     |
| 225999_at | 2.02E-05 | 2.03E-06 | 5.454576 up   | 1.751784 up   | 3.113727 down |     | RIMKLB    |
| 226001_at | 0.002643 | 0.00151  | 2.60705 down  | 1.869763 down | 1.394321 up   |     | KLHL5     |

|           |          |          |               |               |               |                  |
|-----------|----------|----------|---------------|---------------|---------------|------------------|
| 226003_at | 1.69E-06 | 6.19E-08 | 19.30506 up   | 14.65039 up   | 1.317717 down | KIF21A           |
| 226004_at | 0.006385 | 0.004763 | 1.478738 down | 1.016243 up   | 1.502757 up   | CABLES2          |
| 226005_at | 1.07E-05 | 8.25E-07 | 3.03026 up    | 2.027327 up   | 1.494707 down | UBE2G1           |
| 226007_at | 0.003175 | 0.001934 | 1.486478 up   | 1.509737 up   | 1.015647 up   | ISCA2<br>RP11-   |
| 226009_at | 0.004111 | 0.0027   | 1.395635 up   | 1.41832 down  | 1.979456 down | 529I10.4         |
| 226011_at | 0.006388 | 0.004766 | 1.518594 up   | 1.151221 up   | 1.319116 down | CCDC12           |
| 226016_at | 0.00485  | 0.003357 | 6.153991 down | 4.070491 down | 1.511855 up   | CD47             |
| 226019_at | 0.001815 | 9.08E-04 | 1.5291 up     | 2.594382 up   | 1.696672 up   | OMA1<br>DAB1 /// |
| 226020_s_ | 5.51E-04 | 1.80E-04 | 1.280111 up   | 1.995143 up   | 1.558571 up   | OMA1             |
| 226021_at | 5.39E-04 | 1.74E-04 | 7.282685 down | 2.851228 down | 2.554228 up   | RDH10            |
| 226022_at | 6.37E-04 | 2.20E-04 | 4.228458 down | 1.057163 down | 3.999815 up   | SASH1            |
| 226023_at | 1.59E-04 | 3.41E-05 | 1.925075 up   | 1.869822 down | 3.599547 down | MAP2K7           |
| 226025_at | 0.001555 | 7.39E-04 | 1.758938 down | 1.412462 up   | 2.484434 up   | ANKRD28          |
| 226029_at | 2.15E-07 | 3.47E-09 | 22.00227 up   | 21.9135 up    | 1.004051 down | VANGL2           |
| 226031_at | 0.001449 | 6.71E-04 | 2.229699 down | 1.898111 down | 1.174694 up   | CCDC132          |
| 226033_at | 5.46E-04 | 1.77E-04 | 2.013269 up   | 2.574765 up   | 1.278897 up   | USP31            |
| 226037_s_ | 0.004251 | 0.002824 | 1.647528 up   | 2.5624 up     | 1.5553 up     | TAF9B            |
| 226038_at | 7.00E-04 | 2.51E-04 | 3.006232 up   | 3.89075 up    | 1.294228 up   | LONRF1           |
| 226040_at | 4.12E-04 | 1.22E-04 | 7.02997 down  | 3.498865 down | 2.009215 up   |                  |
| 226041_at | 0.00443  | 0.002985 | 4.050099 down | 1.879052 down | 2.155395 up   | NAPEPLD          |
| 226043_at | 4.58E-04 | 1.40E-04 | 2.917384 down | 2.503248 down | 1.16544 up    | GPSM1            |
| 226044_at | 0.001093 | 4.58E-04 | 1.686714 up   | 2.201941 up   | 1.305462 up   | TDP1             |
| 226047_at | 4.94E-08 | 4.20E-10 | 7.838066 down | 8.065372 down | 1.029 down    | MRV11            |
| 226048_at | 8.33E-04 | 3.17E-04 | 1.683967 up   | 2.122733 up   | 1.260556 up   | MAPK8            |
| 226049_at | 0.004121 | 0.002711 | 1.243602 down | 1.6222 down   | 1.304436 down | ERC1             |
| 226050_at | 1.31E-04 | 2.61E-05 | 3.618117 down | 3.858513 down | 1.066442 down | TMCO3            |
| 226051_at | 1.23E-05 | 1.01E-06 | 12.89932 down | 15.25683 down | 1.182763 down | SELM             |
| 226052_at | 0.008745 | 0.007005 | 1.472977 up   | 1.064819 up   | 1.383312 down | BRD4             |
| 226054_at | 0.00606  | 0.004449 | 1.50761 up    | 1.118991 up   | 1.347294 down | BRD4             |
| 226056_at | 2.39E-07 | 3.98E-09 | 1.729598 down | 8.542851 down | 4.939211 down | CDGAP            |
| 226057_at | 9.13E-04 | 3.58E-04 | 1.422205 down | 2.667145 down | 1.875359 down | CDGAP            |
| 226058_at | 3.35E-07 | 6.25E-09 | 3.816729 down | 4.307643 down | 1.128622 down | B3GNT9           |

|           |          |          |               |               |               |           |
|-----------|----------|----------|---------------|---------------|---------------|-----------|
| 226062_x_ | 0.002225 | 0.001198 | 1.76967 up    | 1.762119 up   | 1.004286 down | FAM63A    |
| 226063_at | 0.018297 | 0.016575 | 1.390116 up   | 1.100685 down | 1.53008 down  | VAV2      |
| 226066_at | 2.74E-04 | 7.04E-05 | 9.311758 down | 1.93096 down  | 4.822346 up   | MITF      |
| 226067_at | 0.001245 | 5.47E-04 | 1.174718 up   | 1.220676 down | 1.433949 down | C20orf114 |
| 226068_at | 0.002025 | 0.001054 | 1.597837 up   | 1.43366 up    | 1.114515 down | SYK       |
| 226070_at | 0.004663 | 0.003198 | 1.575827 up   | 1.313313 down | 2.069554 down | C9orf142  |
| 226072_at | 0.017162 | 0.015406 | 1.234065 down | 1.391688 down | 1.127727 down | FUK       |
| 226074_at | 1.74E-05 | 1.67E-06 | 2.592411 down | 2.375076 down | 1.091507 up   | PPM1M     |
| 226078_at | 0.003058 | 0.001836 | 1.305868 up   | 1.712285 down | 2.236018 down | RPUSD1    |
| 226081_at | 0.001581 | 7.56E-04 | 1.806795 down | 1.374143 down | 1.314853 up   | LZIC      |
| 226082_s_ | 0.004445 | 0.002999 | 1.769294 up   | 1.533232 up   | 1.153964 down | SFRS15    |
| 226084_at | 7.99E-04 | 3.01E-04 | 1.186498 up   | 2.177625 down | 2.583747 down | MAP1B     |
| 226086_at | 1.20E-06 | 3.81E-08 | 7.647958 up   | 7.337268 up   | 1.042344 down | SYT13     |
| 226090_x_ | 0.00187  | 9.46E-04 | 1.889047 down | 1.151736 down | 1.640173 up   | RABL3     |
| 226095_s_ | 0.001971 | 0.001015 | 1.589042 up   | 1.477939 up   | 1.075175 down | ATXN1L    |
| 226097_at | 0.014742 | 0.012966 | 1.097016 down | 1.328857 up   | 1.457778 up   | FNDC5     |
| 226098_at | 0.01612  | 0.01435  | 2.099539 down | 1.325972 up   | 2.78393 up    | IFT80     |
| 226099_at | 0.001695 | 8.30E-04 | 4.103676 down | 3.564299 down | 1.151328 up   | ELL2      |
| 226101_at | 8.27E-06 | 5.87E-07 | 2.961571 down | 1.546679 down | 1.914794 up   | PRKCE     |
| 226103_at | 8.41E-06 | 6.03E-07 | 19.22323 down | 23.25422 down | 1.209693 down | NEXN      |
| 226107_at | 0.014364 | 0.012579 | 2.995556 up   | 1.41132 up    | 2.122521 down |           |
| 226110_at | 0.013715 | 0.011926 | 1.732059 up   | 1.836672 up   | 1.060398 up   | PTAR1     |
| 226112_at | 0.001194 | 5.18E-04 | 3.1975 down   | 2.092393 down | 1.528154 up   | SGCB      |
| 226113_at | 5.46E-04 | 1.77E-04 | 5.578811 down | 3.293052 down | 1.694115 up   | ZNF436    |
| 226114_at | 6.14E-05 | 9.34E-06 | 5.925606 down | 2.740257 down | 2.162428 up   | ZNF436    |
| 226116_at | 1.35E-05 | 1.18E-06 | 2.301141 up   | 2.352134 up   | 1.02216 up    |           |
| 226117_at | 1.30E-04 | 2.58E-05 | 6.074008 down | 4.136353 down | 1.468445 up   | TIFA      |
| 226120_at | 0.001928 | 9.87E-04 | 3.521413 down | 1.538593 down | 2.288724 up   | TTC8      |
| 226121_at | 2.18E-04 | 5.16E-05 | 2.668919 up   | 2.13073 up    | 1.252584 down | DHRS13    |
| 226122_at | 0.001314 | 5.90E-04 | 3.955082 down | 1.465749 up   | 5.797159 up   | PLEKHG1   |
| 226123_at | 6.43E-09 | 2.31E-11 | 30.17246 up   | 21.05447 up   | 1.433067 down | CHD7      |
| 226125_at | 0.012113 | 0.010316 | 1.417914 down | 1.533438 up   | 2.174283 up   |           |
| 226126_at | 0.001551 | 7.36E-04 | 2.35866 down  | 1.802987 down | 1.308196 up   | TBCKL     |
| 226127_at | 4.05E-04 | 1.19E-04 | 2.623611 down | 2.66938 down  | 1.017445 down | ALKBH3    |

|           |          |          |               |               |               |                     |
|-----------|----------|----------|---------------|---------------|---------------|---------------------|
| 226129_at | 3.75E-04 | 1.08E-04 | 4.925193 up   | 3.937036 up   | 1.25099 down  | FAM83H<br>RPS16 /// |
| 226130_at | 0.001812 | 9.06E-04 | 1.534935 up   | 1.536826 up   | 1.001232 up   | RPS16P1             |
| 226132_s_ | 1.59E-04 | 3.40E-05 | 2.930289 up   | 2.611895 up   | 1.121902 down | MANEAL              |
| 226133_s_ | 2.89E-04 | 7.59E-05 | 1.436177 down | 2.300809 down | 1.602037 down | TBC1D10A            |
| 226134_s_ | 6.75E-04 | 2.37E-04 | 4.460372 up   | 6.053057 up   | 1.357074 up   |                     |
| 226136_at | 5.08E-05 | 7.23E-06 | 14.11101 down | 39.25093 down | 2.781581 down | GLIPR1              |
| 226138_s_ | 0.030903 | 0.029539 | 1.686204 up   | 1.005178 down | 1.694935 down |                     |
| 226139_at | 1.99E-04 | 4.57E-05 | 2.391004 down | 1.915575 down | 1.248191 up   |                     |
| 226141_at | 2.76E-04 | 7.14E-05 | 2.839348 down | 2.659646 down | 1.067566 up   | CCDC149             |
| 226142_at | 9.77E-07 | 2.84E-08 | 17.70575 down | 70.66745 down | 3.991214 down | GLIPR1              |
| 226145_s_ | 1.11E-04 | 2.08E-05 | 3.847148 up   | 41.71223 up   | 10.84238 up   | FRAS1               |
| 226146_at | 0.006916 | 0.005258 | 1.775762 down | 1.36491 down  | 1.30101 up    |                     |
| 226148_at | 0.001989 | 0.001027 | 2.081971 up   | 5.143896 up   | 2.470685 up   | ZBTB44              |
| 226151_x_ | 0.002631 | 0.001501 | 1.731161 down | 1.36506 down  | 1.268195 up   | CRYZL1              |
| 226155_at | 6.53E-04 | 2.27E-04 | 3.077661 down | 4.216134 down | 1.369915 down | FAM160B1            |
| 226160_at | 1.08E-05 | 8.39E-07 | 4.981379 down | 3.982726 down | 1.250746 up   | H6PD                |
| 226164_x_ | 9.08E-04 | 3.55E-04 | 3.685196 up   | 4.568691 up   | 1.239742 up   | RIMKLB              |
| 226165_at | 0.009458 | 0.007686 | 1.556652 up   | 1.412261 up   | 1.102241 down | C8orf59             |
| 226166_x_ | 0.005681 | 0.004098 | 1.096438 up   | 1.619336 up   | 1.476907 up   | STK36               |
| 226168_at | 4.90E-05 | 6.87E-06 | 1.551773 down | 2.176276 down | 1.402445 down | ZFAND2B             |
| 226169_at | 0.003244 | 0.001988 | 3.137293 down | 2.149321 down | 1.459667 up   | SBF2                |
| 226171_at | 0.001856 | 9.36E-04 | 1.591525 up   | 2.243135 up   | 1.409425 up   | ZDHHC3              |
| 226176_s_ | 6.04E-04 | 2.05E-04 | 2.08813 up    | 1.565369 up   | 1.333953 down | USP42               |
| 226177_at | 6.89E-05 | 1.09E-05 | 2.453129 down | 3.395641 down | 1.384208 down | GLTP                |
| 226181_at | 0.00749  | 0.0058   | 2.796691 down | 1.118287 down | 2.50087 up    | TUBE1               |
| 226184_at | 0.005059 | 0.003546 | 2.345481 up   | 2.00653 up    | 1.168924 down | FMNL2               |
| 226185_at | 1.50E-04 | 3.13E-05 | 7.163425 up   | 7.20562 up    | 1.00589 up    | CDS1                |
| 226186_at | 0.00244  | 0.001358 | 3.810365 down | 2.221028 down | 1.715586 up   | TMOD2               |
| 226187_at | 2.99E-05 | 3.50E-06 | 3.169632 up   | 4.244553 up   | 1.339131 up   | CDS1                |
| 226188_at | 0.016319 | 0.014547 | 3.620844 up   | 2.802326 up   | 1.292085 down | HSPC159             |
| 226192_at | 0.011424 | 0.009624 | 5.890051 down | 1.149268 down | 5.125048 up   |                     |
| 226195_at | 8.01E-04 | 3.02E-04 | 1.802116 down | 2.107131 down | 1.169254 down | C14orf179           |
| 226196_s_ | 2.10E-05 | 2.14E-06 | 1.839342 down | 2.10229 down  | 1.142958 down | C14orf179           |

|           |          |          |          |      |          |      |          |      |           |
|-----------|----------|----------|----------|------|----------|------|----------|------|-----------|
| 226197_at | 0.002752 | 0.001595 | 4.777422 | down | 1.238003 | up   | 5.914462 | up   |           |
| 226199_at | 0.020729 | 0.019074 | 1.544765 | up   | 1.088616 | up   | 1.419018 | down | UPRT      |
| 226202_at | 0.001076 | 4.48E-04 | 2.402629 | up   | 2.627849 | up   | 1.093739 | up   | ZNF398    |
| 226204_at | 0.008119 | 0.006398 | 1.993338 | down | 1.176834 | up   | 2.345829 | up   | C22orf29  |
| 226205_at | 0.014734 | 0.012957 | 1.452853 | up   | 1.43702  | down | 2.087778 | down | ANKRD13D  |
| 226213_at | 2.33E-08 | 1.43E-10 | 25.0748  | up   | 32.38599 | up   | 1.291575 | up   | ERBB3     |
| 226215_s_ | 2.42E-06 | 1.03E-07 | 3.538375 | up   | 3.517282 | up   | 1.005997 | down | KDM2B     |
| 226216_at | 8.64E-04 | 3.32E-04 | 2.295494 | up   | 1.990997 | up   | 1.152937 | down | INSR      |
| 226218_at | 8.05E-04 | 3.03E-04 | 8.087358 | down | 3.461684 | down | 2.33625  | up   | IL7R      |
| 226221_at | 4.89E-04 | 1.53E-04 | 2.717654 | down | 2.158683 | down | 1.258941 | up   | KIAA1432  |
| 226223_at | 2.27E-04 | 5.46E-05 | 4.976289 | up   | 1.144606 | up   | 4.347601 | down |           |
| 226228_at | 5.19E-04 | 1.66E-04 | 1.461637 | up   | 1.336887 | up   | 1.093314 | down | AQP4      |
| 226230_at | 0.020696 | 0.019037 | 1.963588 | down | 1.540166 | down | 1.27492  | up   | SMEK2     |
| 226231_at | 2.71E-04 | 6.95E-05 | 5.583299 | up   | 1.141917 | down | 6.375662 | down |           |
| 226235_at | 2.03E-05 | 2.05E-06 | 2.930197 | down | 2.352528 | down | 1.245552 | up   | LOC339290 |
| 226237_at | 4.74E-07 | 1.02E-08 | 107.5989 | down | 245.9898 | down | 2.286174 | down |           |
| 226238_at | 0.003101 | 0.001871 | 2.151769 | down | 1.99123  | down | 1.080623 | up   | MCEE      |
| 226241_s_ | 0.003343 | 0.002072 | 1.863701 | up   | 1.006053 | down | 1.874983 | down | MRPL52    |
| 226245_at | 0.024739 | 0.023181 | 1.308852 | up   | 1.101275 | down | 1.441405 | down | KCTD1     |
| 226246_at | 0.004276 | 0.002848 | 1.542328 | up   | 1.219159 | down | 1.880343 | down | KCTD1     |
| 226251_at | 0.00323  | 0.001978 | 1.341089 | down | 1.282663 | up   | 1.720165 | up   | ASXL2     |
| 226253_at | 0.001632 | 7.89E-04 | 2.005489 | up   | 1.287514 | up   | 1.557644 | down | LRRC45    |
| 226262_at | 5.99E-04 | 2.02E-04 | 3.817581 | up   | 2.588773 | up   | 1.474668 | down |           |
| 226263_at | 0.011713 | 0.00991  | 1.408571 | up   | 1.49573  | up   | 1.061878 | up   | SNRNP48   |
| 226264_at | 3.10E-05 | 3.68E-06 | 5.996735 | down | 3.858961 | down | 1.553977 | up   | SUSD1     |
| 226265_at | 2.02E-05 | 2.03E-06 | 2.854675 | up   | 3.179239 | up   | 1.113696 | up   | QSER1     |
| 226267_at | 0.014522 | 0.012745 | 2.419046 | down | 1.816718 | down | 1.331547 | up   | JDP2      |
| 226269_at | 0.006623 | 0.004979 | 5.300309 | up   | 5.624192 | up   | 1.061107 | up   | GDAP1     |
| 226270_at | 0.004394 | 0.002954 | 1.617555 | up   | 1.850586 | up   | 1.144064 | up   | EXOC2     |
| 226271_at | 0.004763 | 0.00328  | 3.13716  | up   | 3.036603 | up   | 1.033115 | down | GDAP1     |
| 226272_at | 0.0021   | 0.001107 | 1.498841 | up   | 3.473701 | up   | 2.317591 | up   | RCAN3     |
| 226279_at | 8.76E-04 | 3.38E-04 | 13.84752 | down | 17.62629 | down | 1.272884 | down | PRSS23    |
| 226282_at | 0.006239 | 0.004619 | 1.352119 | down | 2.41294  | down | 1.784562 | down |           |
| 226285_at | 3.56E-05 | 4.42E-06 | 2.951326 | up   | 2.097724 | up   | 1.406919 | down | CAPRIN1   |

|           |          |          |               |               |               |                          |
|-----------|----------|----------|---------------|---------------|---------------|--------------------------|
| 226287_at | 5.50E-04 | 1.79E-04 | 4.400414 up   | 3.883465 up   | 1.133115 down | CCDC34                   |
| 226291_at | 0.001249 | 5.50E-04 | 1.402445 up   | 1.258577 up   | 1.114311 down | ALS2                     |
| 226292_at | 0.00364  | 0.00231  | 1.66576 down  | 1.550391 down | 1.074413 up   | CAPN5                    |
| 226296_s_ | 0.004237 | 0.002809 | 1.85283 up    | 1.543502 up   | 1.200407 down | MRPS15                   |
| 226298_at | 0.007124 | 0.005454 | 1.581194 up   | 1.116968 up   | 1.415612 down | RUNDC1                   |
| 226299_at | 3.63E-04 | 1.03E-04 | 2.197312 up   | 3.026507 up   | 1.377368 up   | PKN3                     |
| 226301_at | 0.00213  | 0.001128 | 2.290946 up   | 5.209285 up   | 2.273858 up   | C6orf192                 |
| 226302_at | 2.39E-05 | 2.55E-06 | 41.20752 down | 39.81434 down | 1.034992 up   | ATP8B1                   |
| 226304_at | 0.00101  | 4.11E-04 | 9.576118 down | 9.116247 down | 1.050445 up   | HSPB6                    |
| 226305_at | 0.018661 | 0.01694  | 2.169865 down | 1.768601 down | 1.226882 up   | LYNX1                    |
| 226306_at | 5.86E-04 | 1.96E-04 | 2.251181 down | 2.651868 down | 1.17799 down  | C6orf1                   |
| 226308_at | 0.002687 | 0.001544 | 1.791282 up   | 1.754521 up   | 1.020952 down | HAUS8                    |
| 226311_at | 3.17E-08 | 2.38E-10 | 30.30115 down | 72.35133 down | 2.387742 down |                          |
| 226313_at | 7.06E-05 | 1.13E-05 | 3.817725 up   | 2.256517 up   | 1.691867 down | C10orf35                 |
| 226314_at | 0.0017   | 8.34E-04 | 1.73823 down  | 1.735936 down | 1.001322 up   | CHST14                   |
| 226316_at | 7.43E-04 | 2.72E-04 | 1.561594 up   | 4.660425 up   | 2.984402 up   |                          |
| 226319_s_ | 0.020915 | 0.019267 | 2.832048 up   | 2.093002 up   | 1.353103 down | THOC4                    |
| 226320_at | 0.002238 | 0.00121  | 3.045258 up   | 1.740854 up   | 1.74929 down  | THOC4                    |
| 226323_at | 0.036608 | 0.035337 | 1.501342 up   | 1.011736 up   | 1.483926 down | ZNF830                   |
| 226324_s_ | 0.004903 | 0.003406 | 1.53951 down  | 1.314808 down | 1.170901 up   | IFT172                   |
| 226326_at | 1.63E-05 | 1.52E-06 | 17.34921 down | 29.57423 down | 1.704644 down | PCGF5                    |
| 226328_at | 0.01113  | 0.009335 | 1.599254 up   | 1.137545 down | 1.819223 down | KLF16                    |
| 226329_s_ | 0.002731 | 0.001577 | 1.051008 down | 1.850667 up   | 1.945066 up   | MITD1                    |
| 226330_s_ | 0.001178 | 5.08E-04 | 2.242508 up   | 1.891735 up   | 1.185424 down | FAM48A<br>FAM133B<br>/// |
| 226332_at | 5.11E-05 | 7.28E-06 | 1.717255 up   | 2.726022 up   | 1.58743 up    | LOC728153                |
| 226333_at | 8.20E-04 | 3.11E-04 | 3.942854 down | 1.181827 down | 3.336237 up   | IL6R                     |
| 226335_at | 0.004592 | 0.003136 | 3.826443 down | 2.2245 down   | 1.720136 up   | RPS6KA3                  |
| 226336_at | 0.001529 | 7.21E-04 | 1.932992 up   | 1.912854 up   | 1.010528 down | PPIA                     |
| 226337_at | 0.008209 | 0.006487 | 2.414085 down | 1.287271 down | 1.875351 up   | GORAB                    |
| 226342_at | 5.28E-07 | 1.18E-08 | 6.652569 down | 19.37252 down | 2.912036 down | SPTBN1                   |
| 226343_at | 0.002662 | 0.001525 | 2.478463 down | 2.017338 down | 1.228581 up   |                          |
| 226345_at | 1.00E-04 | 1.80E-05 | 4.143721 up   | 4.575411 up   | 1.104179 up   |                          |

|           |          |          |               |               |               |           |
|-----------|----------|----------|---------------|---------------|---------------|-----------|
| 226346_at | 1.67E-08 | 8.56E-11 | 7.274066 up   | 4.198738 up   | 1.732441 down | MEX3A     |
| 226347_at | 8.56E-05 | 1.46E-05 | 3.405134 down | 5.635433 down | 1.654981 down |           |
| 226348_at | 3.79E-04 | 1.09E-04 | 3.319535 down | 7.240612 down | 2.181212 down |           |
| 226349_at | 7.64E-06 | 5.27E-07 | 3.671756 up   | 2.848612 up   | 1.288963 down | C12orf45  |
| 226350_at | 2.25E-04 | 5.41E-05 | 4.774988 up   | 3.821942 up   | 1.249362 down | CHML      |
| 226353_at | 6.76E-04 | 2.38E-04 | 2.497516 down | 2.923953 down | 1.170744 down | SPPL2A    |
| 226358_at | 0.007726 | 0.00603  | 1.339845 down | 1.433603 up   | 1.920805 up   | APH1B     |
| 226359_at | 0.012812 | 0.011013 | 2.033811 up   | 1.408012 up   | 1.444456 down | GTPBP1    |
| 226360_at | 0.005201 | 0.003673 | 1.952834 up   | 2.398114 up   | 1.228017 up   | ZNRF3     |
| 226361_at | 9.58E-06 | 7.16E-07 | 2.286355 down | 2.125217 down | 1.075822 up   | TMEM42    |
| 226364_at | 0.012233 | 0.010438 | 2.383695 up   | 1.193991 up   | 1.996409 down | HIP1      |
| 226368_at | 0.004899 | 0.003403 | 1.874765 down | 2.710486 down | 1.445774 down | CHST11    |
| 226369_at | 0.006064 | 0.004454 | 1.054124 down | 1.546015 up   | 1.629691 up   | LOC338799 |
| 226372_at | 0.001866 | 9.43E-04 | 1.9338 down   | 3.866054 down | 1.999201 down | CHST11    |
| 226374_at | 2.10E-10 | 1.72E-13 | 118.6638 up   | 121.156 up    | 1.021003 up   |           |
| 226375_at | 9.33E-04 | 3.69E-04 | 2.628675 up   | 1.592021 up   | 1.651156 down |           |
| 226376_at | 0.014089 | 0.012297 | 1.778877 up   | 1.159665 up   | 1.533959 down | UNK       |
| 226377_at | 1.53E-06 | 5.35E-08 | 23.31402 down | 22.51824 down | 1.035339 up   |           |
| 226380_at | 0.003312 | 0.002047 | 3.545399 down | 1.969529 down | 1.800126 up   | PTPN21    |
| 226384_at | 0.015078 | 0.013306 | 1.795541 down | 1.445576 down | 1.242094 up   | PPAPDC1B  |
| 226386_at | 0.014233 | 0.012441 | 1.495263 up   | 1.060922 up   | 1.4094 down   | C7orf30   |
| 226388_at | 6.97E-06 | 4.58E-07 | 10.25713 down | 7.295968 down | 1.405862 up   | TCEA3     |
| 226392_at | 0.004299 | 0.002871 | 2.526916 down | 1.274023 up   | 3.219348 up   |           |
|           |          |          |               |               |               | CDK3 ///  |
|           |          |          |               |               |               | LOC100134 |
| 226396_at | 0.001388 | 6.34E-04 | 1.619711 down | 1.815924 down | 1.121141 down | 934       |
| 226397_s_ | 0.001594 | 7.65E-04 | 1.699302 down | 2.235582 up   | 3.798928 up   |           |
| 226400_at | 0.025089 | 0.023531 | 1.371908 up   | 1.476567 down | 2.025713 down | CDC42     |
| 226402_at | 2.41E-04 | 5.93E-05 | 9.182591 down | 4.690101 down | 1.957867 up   | CYP2U1    |
|           |          |          |               |               |               | LOC100190 |
| 226407_at | 0.002215 | 0.00119  | 3.767388 down | 1.347617 down | 2.795593 up   | 939       |
| 226408_at | 0.001495 | 7.00E-04 | 2.456558 up   | 2.523542 up   | 1.027268 up   | TEAD2     |
| 226409_at | 4.93E-05 | 6.94E-06 | 3.392704 down | 3.507919 down | 1.03396 down  | TBC1D20   |
| 226415_at | 5.80E-05 | 8.65E-06 | 4.649792 up   | 20.20231 up   | 4.344777 up   | VAT1L     |



|           |          |          |               |               |               |          |
|-----------|----------|----------|---------------|---------------|---------------|----------|
| 226417_at | 0.007091 | 0.005423 | 1.333477 up   | 1.294274 down | 1.725885 down | RHOB     |
| 226418_at | 0.001805 | 9.02E-04 | 2.475658 down | 1.304045 down | 1.898445 up   | ERGIC2   |
| 226419_s_ | 0.003023 | 0.00181  | 2.571851 up   | 3.415747 up   | 1.328128 up   | FLJ44342 |
| 226420_at | 0.005087 | 0.003571 | 2.825966 down | 3.313226 down | 1.172423 down | EVI1     |
| 226425_at | 1.40E-05 | 1.23E-06 | 35.33484 down | 19.79542 down | 1.785001 up   | CLIP4    |
| 226426_at | 2.51E-04 | 6.27E-05 | 1.583384 up   | 1.859081 up   | 1.174119 up   | ADNP     |
| 226427_s_ | 0.007    | 0.00534  | 1.753947 up   | 1.081062 up   | 1.62243 down  | B3GALT6  |
| 226431_at | 1.62E-04 | 3.50E-05 | 6.034357 up   | 8.892371 up   | 1.473624 up   | FAM117B  |
| 226432_at | 0.002261 | 0.001227 | 1.261688 up   | 5.068827 up   | 4.017496 up   | ETNK1    |
| 226433_at | 0.010365 | 0.008569 | 1.253202 down | 2.927417 up   | 3.668644 up   | RNF157   |
| 226437_at | 0.001594 | 7.65E-04 | 1.076553 down | 2.200327 down | 2.043863 down | YIF1B    |
| 226439_s_ | 0.001558 | 7.41E-04 | 1.138178 down | 5.594946 up   | 6.368047 up   | NBEA     |
| 226444_at | 0.001563 | 7.45E-04 | 3.43725 down  | 1.016088 down | 3.382828 up   |          |
| 226446_at | 6.37E-04 | 2.20E-04 | 3.825014 up   | 2.589069 up   | 1.47737 down  | HES6     |
| 226447_at | 0.002103 | 0.001109 | 2.673292 down | 2.808337 down | 1.050516 down | ASH1L    |
| 226452_at | 0.005308 | 0.003765 | 2.648986 up   | 2.08742 up    | 1.269024 down | PDK1     |
| 226453_at | 0.006602 | 0.004961 | 1.14733 down  | 1.639502 down | 1.428972 down | RNASEH2C |
| 226455_at | 4.46E-06 | 2.43E-07 | 2.711262 up   | 3.035519 up   | 1.119596 up   | CREB3L4  |
| 226456_at | 8.91E-04 | 3.47E-04 | 4.435875 up   | 8.654882 up   | 1.951111 up   | C16orf75 |
| 226458_at | 0.011458 | 0.009659 | 1.377097 up   | 2.937523 up   | 2.133127 up   |          |
| 226462_at | 0.001308 | 5.86E-04 | 1.638982 down | 2.294846 up   | 3.761211 up   | STXBP6   |
| 226464_at | 0.005069 | 0.003556 | 1.33895 up    | 2.795249 up   | 2.087643 up   | C3orf58  |
| 226465_s_ | 0.003828 | 0.002466 | 2.159649 up   | 2.140928 up   | 1.008745 down | SON      |
| 226468_at | 6.04E-04 | 2.05E-04 | 2.791037 down | 2.170747 down | 1.28575 up    |          |
| 226473_at | 2.42E-07 | 4.03E-09 | 15.14593 up   | 12.76949 up   | 1.186103 down | CBX2     |
| 226474_at | 1.48E-05 | 1.34E-06 | 6.54444 down  | 5.6846 down   | 1.151258 up   | NLRC5    |
| 226476_s_ | 0.001317 | 5.91E-04 | 1.657387 up   | 1.2265 up     | 1.351315 down | VPRBP    |
| 226480_at | 6.76E-04 | 2.38E-04 | 1.78537 up    | 1.956904 up   | 1.096078 up   |          |
|           |          |          |               |               |               | RP11-    |
| 226482_s_ | 1.54E-06 | 5.43E-08 | 22.23344 up   | 25.91766 up   | 1.165706 up   | 544M22.4 |
| 226484_at | 4.88E-09 | 1.52E-11 | 10.31173 down | 5.69286 down  | 1.811345 up   | ZBTB47   |
| 226485_at | 2.28E-04 | 5.50E-05 | 2.459121 up   | 3.433667 up   | 1.396298 up   | FLJ20674 |
| 226487_at | 0.002417 | 0.00134  | 1.748373 up   | 1.138931 up   | 1.5351 down   | C12orf34 |
| 226489_at | 7.40E-04 | 2.70E-04 | 3.103696 up   | 2.64483 up    | 1.173495 down | TMCC3    |

|           |          |          |               |               |               |          |
|-----------|----------|----------|---------------|---------------|---------------|----------|
| 226491_x_ | 0.002425 | 0.001345 | 1.715959 up   | 1.003985 up   | 1.709149 down | PTBP1    |
| 226493_at | 7.00E-05 | 1.12E-05 | 9.717999 down | 4.771747 down | 2.036571 up   | KCTD18   |
| 226494_at | 1.58E-04 | 3.36E-05 | 2.353511 up   | 1.537816 up   | 1.530425 down | KIAA1543 |
| 226497_s_ | 3.99E-05 | 5.21E-06 | 4.238615 up   | 9.636091 up   | 2.273406 up   |          |
| 226498_at | 3.26E-05 | 3.95E-06 | 5.38428 up    | 16.86277 up   | 3.131852 up   |          |
| 226499_at | 4.67E-05 | 6.43E-06 | 4.266258 up   | 3.631438 up   | 1.174812 down | NRARP    |
| 226500_at | 3.17E-04 | 8.59E-05 | 1.817328 down | 1.941913 down | 1.068554 down | ZBTB47   |
| 226503_at | 0.004525 | 0.003073 | 2.22019 up    | 3.022454 up   | 1.361349 up   | RIF1     |
| 226504_at | 8.20E-06 | 5.81E-07 | 6.243537 down | 5.683242 down | 1.098587 up   | FAM109B  |
| 226506_at | 3.91E-05 | 5.04E-06 | 3.585957 down | 3.809625 down | 1.062373 down | THSD4    |
| 226507_at | 6.03E-05 | 9.11E-06 | 2.83341 up    | 3.494127 up   | 1.233188 up   | PAK1     |
| 226510_at | 3.60E-04 | 1.02E-04 | 3.079713 down | 2.930537 down | 1.050904 up   | HEATR5A  |
| 226512_at | 3.14E-04 | 8.48E-05 | 3.758471 up   | 6.51625 up    | 1.73375 up    | ZMYM2    |
| 226517_at | 0.010744 | 0.008949 | 3.638182 up   | 1.702535 up   | 2.13692 down  | BCAT1    |
| 226518_at | 8.06E-04 | 3.04E-04 | 3.602395 down | 3.190264 down | 1.129184 up   | KCTD10   |
| 226519_s_ | 3.66E-04 | 1.04E-04 | 2.756751 down | 1.926256 down | 1.431145 up   | AGXT2L2  |
| 226522_at | 1.47E-04 | 3.03E-05 | 9.829958 down | 1.976584 down | 4.973205 up   | PODN     |
| 226523_at | 5.01E-06 | 2.88E-07 | 1.109067 up   | 7.577655 down | 8.404123 down | TAGLN    |
| 226525_at | 1.35E-05 | 1.18E-06 | 7.085006 down | 11.49636 down | 1.622633 down | STK17B   |
| 226528_at | 0.013733 | 0.011944 | 1.787578 up   | 2.273885 up   | 1.272048 up   | MTX3     |
| 226530_at | 0.001252 | 5.52E-04 | 1.506512 up   | 2.054182 up   | 1.363536 up   | BMF      |
| 226532_at | 0.004138 | 0.002725 | 2.575285 down | 1.143994 down | 2.251134 up   |          |
| 226534_at | 0.017236 | 0.015481 | 2.740363 down | 1.389465 down | 1.972243 up   | KITLG    |
| 226538_at | 3.54E-04 | 9.97E-05 | 1.023638 down | 2.23592 up    | 2.288772 up   | MAN2A1   |
| 226542_at | 1.27E-04 | 2.50E-05 | 3.899393 down | 3.163414 down | 1.232654 up   |          |
| 226543_at | 0.01688  | 0.015127 | 1.743109 down | 1.26385 up    | 2.203028 up   | MUTED    |
| 226545_at | 1.86E-07 | 2.81E-09 | 64.46775 down | 14.93556 down | 4.316394 up   | CD109    |
| 226548_at | 1.34E-05 | 1.15E-06 | 5.845219 up   | 7.056746 up   | 1.207268 up   | SBK1     |
| 226549_at | 5.62E-08 | 5.07E-10 | 11.7195 up    | 8.519445 up   | 1.375618 down | SBK1     |
| 226551_at | 0.004085 | 0.002679 | 2.063134 down | 1.697236 down | 1.215584 up   | RIPK1    |
| 226553_at | 3.45E-04 | 9.58E-05 | 1.851543 up   | 2.882284 up   | 1.556693 up   | TMPRSS2  |
| 226554_at | 2.91E-04 | 7.64E-05 | 1.682069 down | 2.421864 down | 1.439812 down | ZBTB7A   |
| 226555_at | 5.94E-05 | 8.95E-06 | 2.6987 up     | 2.37131 up    | 1.138063 down | INO80D   |
| 226556_at | 0.003444 | 0.002156 | 1.586706 down | 1.646643 down | 1.037774 down |          |

|           |          |          |          |      |          |      |          |      |              |
|-----------|----------|----------|----------|------|----------|------|----------|------|--------------|
| 226558_at | 0.004996 | 0.003488 | 2.669217 | down | 4.158106 | down | 1.5578   | down | LOC389834    |
| 226559_at | 0.002487 | 0.001393 | 1.285728 | down | 2.983134 | down | 2.320191 | down | IER5L        |
| 226562_at | 0.001732 | 8.54E-04 | 1.619953 | up   | 1.546035 | up   | 1.047812 | down | ZSCAN29      |
| 226567_at | 4.55E-04 | 1.39E-04 | 1.792742 | up   | 1.561448 | up   | 1.148128 | down | USP14        |
| 226569_s_ | 1.31E-04 | 2.61E-05 | 3.456276 | up   | 2.898162 | up   | 1.192575 | down | CHTF18       |
| 226572_at | 0.003619 | 0.002293 | 2.152324 | up   | 1.766159 | up   | 1.218647 | down | SOCS7        |
| 226574_at | 9.93E-04 | 4.02E-04 | 2.886493 | up   | 1.864629 | up   | 1.548025 | down | PSPC1        |
| 226575_at | 6.31E-06 | 3.94E-07 | 13.1458  | up   | 8.643943 | up   | 1.520811 | down | ZNF462       |
| 226576_at | 3.33E-05 | 4.07E-06 | 6.909994 | down | 1.221961 | down | 5.654841 | up   | ARHGAP26     |
| 226582_at | 0.001337 | 6.04E-04 | 11.40915 | down | 5.159089 | down | 2.211466 | up   | LOC400043    |
| 226586_at | 0.002985 | 0.001779 | 1.547195 | up   | 1.512026 | up   | 1.02326  | down | ANKS6        |
| 226587_at | 7.42E-07 | 1.93E-08 | 60.0033  | up   | 96.08751 | up   | 1.601371 | up   | SNRPN        |
| 226588_at | 0.00203  | 0.001058 | 1.978847 | up   | 2.591169 | up   | 1.309434 | up   | CWC22        |
| 226591_at | 6.98E-08 | 6.74E-10 | 71.00299 | up   | 74.80414 | up   | 1.053535 | up   | SNRPN        |
| 226594_at | 0.002007 | 0.001041 | 1.691063 | down | 2.589449 | down | 1.531256 | down |              |
| 226595_at | 0.001936 | 9.92E-04 | 2.131676 | down | 1.481635 | down | 1.438733 | up   | SNX21        |
| 226599_at | 2.10E-05 | 2.15E-06 | 3.959271 | up   | 5.177121 | up   | 1.307594 | up   | FHDC1        |
| 226601_at | 0.014416 | 0.012633 | 2.672016 | down | 1.718872 | down | 1.554517 | up   | SLC30A7      |
|           |          |          |          |      |          |      |          |      | BCR ///      |
|           |          |          |          |      |          |      |          |      | FLJ42953 /// |
|           |          |          |          |      |          |      |          |      | LOC100133    |
|           |          |          |          |      |          |      |          |      | 163 ///      |
| 226602_s_ | 9.84E-04 | 3.97E-04 | 1.862268 | up   | 1.828149 | up   | 1.018663 | down | LOC728468    |
| 226603_at | 4.61E-07 | 9.77E-09 | 12.81918 | down | 11.72847 | down | 1.092997 | up   | SAMD9L       |
| 226605_at | 5.38E-05 | 7.77E-06 | 2.482387 | down | 2.378336 | down | 1.04375  | up   | DGKQ         |
| 226607_at | 2.35E-04 | 5.72E-05 | 3.64664  | down | 2.183232 | down | 1.670294 | up   | C20orf194    |
| 226608_at | 0.00156  | 7.43E-04 | 2.750212 | up   | 2.048396 | up   | 1.342617 | down | C16orf87     |
| 226609_at | 3.56E-05 | 4.42E-06 | 4.200651 | down | 6.506957 | down | 1.549035 | down | DCBLD1       |
| 226610_at | 2.39E-05 | 2.56E-06 | 31.34598 | up   | 9.714118 | up   | 3.226848 | down | CENPV        |
| 226611_s_ | 4.97E-04 | 1.56E-04 | 37.76988 | up   | 14.86473 | up   | 2.540905 | down | CENPV        |
| 226613_at | 0.004971 | 0.003468 | 1.136352 | up   | 1.529579 | down | 1.73814  | down | GATSL3       |
| 226616_s_ | 0.016847 | 0.015094 | 2.043539 | up   | 1.362292 | up   | 1.500075 | down | NDUFV3       |
| 226620_x_ | 0.003674 | 0.002339 | 1.987706 | up   | 1.831662 | up   | 1.085192 | down | DAZAP1       |

|           |          |          |          |      |          |      |          |      |           |
|-----------|----------|----------|----------|------|----------|------|----------|------|-----------|
| 226621_at | 5.55E-08 | 4.96E-10 | 46.92881 | down | 56.57987 | down | 1.205653 | down |           |
| 226624_at | 0.016533 | 0.014767 | 1.479379 | up   | 1.381305 | up   | 1.071001 | down |           |
| 226625_at | 2.97E-04 | 7.85E-05 | 14.16091 | down | 1.802314 | down | 7.857075 | up   | TGFBR3    |
| 226626_at | 9.79E-04 | 3.94E-04 | 1.926757 | up   | 1.764188 | up   | 1.092149 | down | THOC2     |
| 226628_at | 0.002619 | 0.001491 | 2.053317 | down | 1.609219 | down | 1.275972 | up   | THOC2     |
| 226629_at | 7.71E-04 | 2.86E-04 | 1.835305 | up   | 1.622901 | down | 2.978517 | down | SLC43A2   |
| 226630_at | 3.84E-05 | 4.90E-06 | 3.366747 | up   | 6.293883 | up   | 1.869426 | up   | C14orf106 |
| 226632_at | 9.26E-04 | 3.65E-04 | 4.352929 | down | 5.361244 | down | 1.231641 | down | CYGB      |
| 226633_at | 0.002799 | 0.001632 | 1.702443 | down | 1.287188 | up   | 2.191364 | up   | RAB8B     |
| 226636_at | 2.62E-04 | 6.62E-05 | 6.736151 | down | 1.779447 | down | 3.785531 | up   | PLD1      |
| 226638_at | 1.05E-07 | 1.28E-09 | 4.196363 | down | 5.021065 | down | 1.196528 | down | ARHGAP23  |
| 226639_at | 0.028235 | 0.026776 | 1.008317 | up   | 1.380974 | up   | 1.369583 | up   | SFT2D3    |
| 226640_at | 0.002141 | 0.001137 | 1.842985 | up   | 1.038988 | down | 1.914839 | down | DAGLB     |
| 226641_at | 0.009001 | 0.00725  | 4.252632 | down | 4.555593 | down | 1.071241 | down |           |
| 226642_s_ | 3.47E-04 | 9.70E-05 | 2.031589 | up   | 2.11792  | up   | 1.042494 | up   | NUDCD2    |
| 226643_s_ | 0.031554 | 0.030198 | 1.229373 | down | 2.012761 | up   | 2.474434 | up   | NUDCD2    |
| 226645_at | 7.05E-04 | 2.53E-04 | 1.610406 | up   | 1.156218 | down | 1.86198  | down | KLF2      |
| 226649_at | 0.001849 | 9.30E-04 | 2.888645 | up   | 5.784999 | up   | 2.002669 | up   | PANK1     |
| 226650_at | 0.005539 | 0.003966 | 1.630044 | down | 2.565995 | down | 1.574187 | down | ZFAND2A   |
| 226651_at | 2.08E-06 | 8.37E-08 | 8.99666  | up   | 3.926215 | up   | 2.291434 | down | HOMER1    |
| 226655_at | 0.003509 | 0.002207 | 1.842709 | down | 1.323005 | down | 1.392821 | up   | STX17     |
| 226656_at | 0.002181 | 0.001165 | 3.388117 | down | 2.125914 | down | 1.593723 | up   | CRTAP     |
| 226658_at | 1.46E-04 | 3.00E-05 | 1.593398 | up   | 6.835986 | up   | 4.290195 | up   | PDPN      |
| 226659_at | 0.004074 | 0.002669 | 1.545906 | up   | 1.516183 | up   | 1.019603 | down | DEF6      |
| 226661_at | 0.00865  | 0.00691  | 6.021295 | up   | 5.620137 | up   | 1.071379 | down | CDCA2     |
| 226662_at | 0.013954 | 0.012166 | 2.084706 | down | 1.095923 | down | 1.902238 | up   | STX17     |
| 226663_at | 5.75E-05 | 8.53E-06 | 1.66027  | up   | 7.227596 | up   | 4.353264 | up   | ANKRD10   |
| 226664_at | 4.93E-06 | 2.82E-07 | 2.86616  | down | 2.198074 | down | 1.303941 | up   | TBC1D20   |
| 226665_at | 0.008524 | 0.006788 | 3.190515 | down | 1.638805 | up   | 5.228631 | up   | AHSA2     |
| 226666_at | 1.41E-04 | 2.87E-05 | 3.838856 | up   | 2.832158 | up   | 1.355453 | down | DAAM1     |
| 226667_x_ | 0.028791 | 0.027369 | 1.6502   | up   | 1.135097 | down | 1.873137 | down | EPN1      |
| 226670_s_ | 0.001312 | 5.88E-04 | 2.466571 | up   | 3.920523 | up   | 1.589462 | up   | PABPC1L   |
| 226671_at | 0.00848  | 0.006747 | 5.543674 | down | 2.331735 | down | 2.377489 | up   | LAMP2     |
| 226674_at | 0.005126 | 0.003605 | 1.767518 | down | 3.511504 | down | 1.986686 | down | SHISA4    |

|           |          |          |          |      |          |      |          |      |                                           |
|-----------|----------|----------|----------|------|----------|------|----------|------|-------------------------------------------|
| 226676_at | 2.76E-04 | 7.14E-05 | 1.692516 | down | 8.888763 | up   | 15.04438 | up   | ZNF521                                    |
| 226677_at | 7.11E-04 | 2.56E-04 | 3.031261 | down | 6.578178 | up   | 19.94017 | up   | ZNF521                                    |
| 226678_at | 0.002464 | 0.001377 | 1.531608 | up   | 1.130256 | down | 1.731108 | down | UNC13D                                    |
| 226683_at | 0.002918 | 0.001724 | 4.623529 | down | 2.694555 | down | 1.715879 | up   | SNX18                                     |
| 226685_at | 1.15E-06 | 3.56E-08 | 8.23493  | down | 6.197785 | down | 1.328689 | up   | SNTB2                                     |
| 226687_at | 2.13E-05 | 2.19E-06 | 3.029424 | up   | 4.708072 | up   | 1.554115 | up   | PRPF40A                                   |
| 226688_at | 4.59E-04 | 1.40E-04 | 2.875948 | down | 1.762968 | down | 1.63131  | up   | C3orf23                                   |
| 226689_at | 0.001546 | 7.33E-04 | 1.731274 | up   | 1.008576 | down | 1.746122 | down | CISD2                                     |
| 226690_at | 5.71E-04 | 1.89E-04 | 1.796633 | up   | 1.8429   | up   | 1.025752 | up   | ADCYAP1R1                                 |
| 226691_at | 1.85E-04 | 4.16E-05 | 3.739425 | down | 3.342175 | down | 1.11886  | up   | TNRC18<br>HYPK ///                        |
| 226692_at | 3.44E-05 | 4.25E-06 | 5.145821 | down | 4.253617 | down | 1.209752 | up   | SERF2<br>AKAP2 ///<br>PALM2 ///<br>PALM2- |
| 226694_at | 0.001172 | 5.04E-04 | 3.435757 | down | 2.429718 | down | 1.414056 | up   | AKAP2                                     |
| 226695_at | 1.14E-08 | 5.26E-11 | 106.0003 | down | 92.45685 | down | 1.146483 | up   | PRRX1                                     |
| 226697_at | 9.67E-05 | 1.72E-05 | 9.246911 | down | 7.98487  | down | 1.158054 | up   | FAM114A1                                  |
| 226698_at | 7.03E-05 | 1.12E-05 | 2.19198  | down | 2.844438 | down | 1.297657 | down | FCHSD1                                    |
| 226701_at | 0.020233 | 0.018562 | 1.384585 | up   | 1.160319 | down | 1.60656  | down | GJA5<br>FLJ23867 ///                      |
| 226706_at | 6.07E-04 | 2.06E-04 | 1.689475 | down | 4.857863 | down | 2.875368 | down | QSOX1                                     |
| 226715_at | 9.39E-04 | 3.72E-04 | 1.925948 | down | 3.081892 | down | 1.600195 | down | FOXK1                                     |
| 226720_at | 8.07E-05 | 1.35E-05 | 3.117943 | up   | 3.290075 | up   | 1.055207 | up   | PWWP2A                                    |
| 226721_at | 0.042998 | 0.041756 | 2.240116 | down | 1.002256 | up   | 2.24517  | up   | DPY19L4                                   |
| 226722_at | 2.61E-05 | 2.88E-06 | 8.037206 | down | 3.624708 | down | 2.217339 | up   | FAM20C                                    |
| 226723_at | 0.007378 | 0.005694 | 1.270008 | up   | 1.975412 | up   | 1.555432 | up   | CCDC23                                    |
| 226725_at | 8.66E-07 | 2.40E-08 | 8.371738 | down | 7.662253 | down | 1.092595 | up   |                                           |
| 226726_at | 3.63E-04 | 1.03E-04 | 1.038184 | down | 3.216875 | down | 3.098561 | down | MBOAT2                                    |
| 226727_at | 9.58E-04 | 3.83E-04 | 1.493413 | down | 2.2256   | down | 1.490278 | down | CISD3                                     |
| 226728_at | 5.97E-05 | 9.01E-06 | 2.407275 | down | 1.581874 | down | 1.521787 | up   | SLC27A1                                   |
| 226729_at | 4.23E-05 | 5.64E-06 | 3.048897 | up   | 1.881415 | up   | 1.620534 | down | USP37                                     |
| 226730_s_ | 0.009091 | 0.007337 | 2.12265  | up   | 2.011063 | up   | 1.055487 | down | USP37                                     |

|           |          |          |               |               |               |         |
|-----------|----------|----------|---------------|---------------|---------------|---------|
| 226732_at | 0.002004 | 0.001038 | 1.624926 up   | 1.531158 up   | 1.06124 down  | RBM33   |
| 226735_at | 9.92E-04 | 4.02E-04 | 1.602452 down | 1.637404 down | 1.021812 down | TAPT1   |
| 226738_at | 0.007067 | 0.0054   | 1.461833 down | 1.536789 down | 1.051276 down | WDR81   |
| 226740_x_ | 0.00315  | 0.001914 | 2.942745 down | 1.562439 down | 1.883431 up   | NBPF1   |
| 226742_at | 0.003352 | 0.002079 | 2.789936 down | 2.097507 down | 1.33012 up    |         |
| 226743_at | 2.48E-08 | 1.60E-10 | 11.95494 down | 9.626117 down | 1.241928 up   | SLFN11  |
| 226744_at | 9.69E-06 | 7.29E-07 | 2.448617 up   | 2.789021 up   | 1.139019 up   | METT10D |
| 226745_at | 0.00128  | 5.69E-04 | 2.942362 down | 2.233546 down | 1.31735 up    | CYP4V2  |
| 226748_at | 0.002475 | 0.001385 | 3.221264 down | 2.491462 down | 1.292921 up   | LYSMD2  |
| 226749_at | 1.72E-05 | 1.65E-06 | 3.561137 up   | 2.643908 up   | 1.346922 down | MRPS9   |
| 226750_at | 2.26E-05 | 2.38E-06 | 4.082572 up   | 3.424656 up   | 1.192111 down | LARP2   |
| 226751_at | 3.63E-07 | 6.96E-09 | 24.3687 down  | 19.35837 down | 1.25882 up    | CNRIP1  |
| 226756_at | 5.50E-04 | 1.79E-04 | 7.947402 down | 4.528013 down | 1.755163 up   |         |
| 226757_at | 5.92E-04 | 1.99E-04 | 12.53654 down | 2.022703 down | 6.197915 up   | IFIT2   |
| 226760_at | 4.92E-05 | 6.90E-06 | 3.861317 down | 4.29369 down  | 1.111975 down | MBTPS2  |
| 226769_at | 1.81E-04 | 4.05E-05 | 27.81037 down | 15.10617 down | 1.840995 up   | FIBIN   |
| 226771_at | 0.001496 | 7.01E-04 | 2.472669 down | 2.890329 down | 1.168911 down | ATP8B2  |
| 226774_at | 4.77E-05 | 6.61E-06 | 2.606012 down | 1.545691 down | 1.685985 up   | FAM120B |
| 226777_at | 3.25E-06 | 1.57E-07 | 18.71857 down | 81.96491 down | 4.378801 down |         |
| 226778_at | 7.61E-05 | 1.25E-05 | 5.450376 up   | 6.61962 up    | 1.214526 up   | C8orf42 |
| 226788_at | 0.007792 | 0.006096 | 1.371787 up   | 1.294995 down | 1.776458 down | THAP11  |
| 226789_at | 6.93E-05 | 1.10E-05 | 6.512949 up   | 1.211503 up   | 5.375924 down | EMB     |
| 226790_at | 0.001467 | 6.82E-04 | 2.015353 down | 1.718128 down | 1.172993 up   | MORN2   |
| 226794_at | 4.01E-06 | 2.09E-07 | 9.811924 down | 7.998871 down | 1.226664 up   | STXBP5  |
| 226796_at | 2.15E-05 | 2.21E-06 | 4.312355 down | 3.653746 down | 1.180256 up   | ABHD15  |
| 226797_at | 4.37E-05 | 5.89E-06 | 4.156219 up   | 11.27667 up   | 2.713204 up   | MBTD1   |
| 226799_at | 5.63E-04 | 1.85E-04 | 2.715737 up   | 2.873292 up   | 1.058016 up   | FGD6    |
| 226803_at | 5.10E-06 | 2.95E-07 | 4.718568 up   | 5.397712 up   | 1.14393 up    | CHMP4C  |
| 226804_at | 0.006893 | 0.005234 | 7.122277 down | 1.116168 down | 6.38101 up    | FAM20A  |
| 226805_at | 2.34E-06 | 9.76E-08 | 6.260656 down | 7.09171 down  | 1.132742 down |         |
| 226806_s_ | 5.99E-04 | 2.02E-04 | 7.991645 down | 5.45916 down  | 1.463896 up   | NFIA    |
| 226808_at | 0.007617 | 0.005925 | 4.844693 down | 2.655953 down | 1.824089 up   | ZNF862  |
| 226810_at | 3.46E-04 | 9.66E-05 | 10.13018 down | 8.029803 down | 1.261572 up   | OGFRL1  |
| 226813_at | 0.00756  | 0.005872 | 1.53195 up    | 1.874535 up   | 1.223627 up   | C1orf57 |

|           |          |          |               |               |               |          |
|-----------|----------|----------|---------------|---------------|---------------|----------|
| 226817_at | 1.06E-07 | 1.30E-09 | 37.1913 up    | 48.49158 up   | 1.303842 up   | DSC2     |
| 226821_at | 7.26E-04 | 2.63E-04 | 1.651846 up   | 3.065262 up   | 1.855658 up   |          |
| 226822_at | 1.66E-05 | 1.57E-06 | 4.976068 up   | 8.211574 up   | 1.650213 up   | STOX2    |
| 226823_at | 1.54E-04 | 3.26E-05 | 1.704944 up   | 1.616122 up   | 1.05496 down  | PHACTR4  |
| 226824_at | 6.54E-04 | 2.28E-04 | 9.492591 down | 1.198656 down | 7.919364 up   | CPXM2    |
| 226826_at | 0.004941 | 0.003439 | 1.556571 up   | 1.928574 down | 3.001962 down |          |
| 226829_at | 0.003074 | 0.00185  | 1.290534 up   | 1.638369 up   | 1.269528 up   | AFAP1L2  |
| 226831_at | 0.002191 | 0.001172 | 9.798033 down | 3.967708 down | 2.469444 up   | SLC25A46 |
| 226832_at | 0.003552 | 0.002241 | 1.750664 up   | 2.486299 up   | 1.420203 up   |          |
| 226834_at | 5.37E-07 | 1.23E-08 | 12.50925 down | 14.7796 down  | 1.181494 down |          |
| 226837_at | 0.002405 | 0.001331 | 1.906987 down | 1.28095 up    | 2.442755 up   | SPRED1   |
| 226844_at | 3.88E-05 | 4.99E-06 | 2.959063 up   | 16.10989 up   | 5.444252 up   | MOBKL2B  |
| 226850_at | 3.36E-06 | 1.63E-07 | 5.040813 down | 4.069181 down | 1.238778 up   | SUMF1    |
| 226853_at | 6.15E-06 | 3.82E-07 | 6.661088 down | 1.190927 down | 5.593196 up   | BMP2K    |
| 226856_at | 0.002174 | 0.001159 | 1.606583 up   | 2.186995 up   | 1.361271 up   | MUSTN1   |
| 226860_at | 0.00383  | 0.002468 | 2.084545 down | 1.7002 down   | 1.226058 up   | TMEM19   |
| 226862_at | 0.014601 | 0.012824 | 1.078152 up   | 1.301089 down | 1.402771 down | MBD1     |
| 226863_at | 0.001997 | 0.001033 | 3.946885 up   | 3.069123 up   | 1.285998 down | FAM110C  |
| 226865_at | 0.00454  | 0.003089 | 4.311699 up   | 1.504349 up   | 2.866157 down |          |
| 226866_at | 1.96E-04 | 4.46E-05 | 2.894942 up   | 3.951891 up   | 1.365102 up   | ESCO1    |
| 226868_at | 0.001833 | 9.21E-04 | 1.443664 up   | 3.482387 up   | 2.412186 up   | GLT8D3   |
| 226869_at | 4.17E-04 | 1.24E-04 | 2.874068 down | 9.555859 down | 3.324856 down | MEGF6    |
| 226871_s_ | 0.003143 | 0.001909 | 1.839042 up   | 1.271495 up   | 1.446362 down | ATG4D    |
| 226872_at | 3.44E-05 | 4.23E-06 | 3.050826 down | 1.550845 down | 1.967202 up   | RFX2     |
| 226875_at | 0.028725 | 0.027298 | 2.636164 down | 1.053998 down | 2.501108 up   | DOCK11   |
| 226878_at | 6.74E-06 | 4.36E-07 | 2.578955 up   | 2.98767 up    | 1.158481 up   | HLA-DOA  |
| 226879_at | 0.003913 | 0.002537 | 1.524309 down | 1.174948 up   | 1.790983 up   | HVCN1    |
| 226880_at | 0.020645 | 0.018985 | 1.747937 up   | 1.999996 up   | 1.144204 up   | NUCKS1   |
| 226881_at | 0.008828 | 0.007083 | 1.429856 up   | 1.800473 up   | 1.259199 up   | GRPEL2   |
| 226884_at | 2.48E-08 | 1.58E-10 | 84.61221 up   | 101.8308 up   | 1.2035 up     | LRRN1    |
| 226886_at | 0.003248 | 0.001992 | 1.955547 up   | 2.455135 up   | 1.255472 up   | GFPT1    |
| 226887_at | 0.006493 | 0.004861 | 1.498034 up   | 1.174584 up   | 1.275374 down | HSPA14   |
| 226895_at | 3.17E-08 | 2.40E-10 | 30.81114 down | 29.72486 down | 1.036544 up   | NFIC     |
| 226896_at | 0.002837 | 0.001661 | 1.713596 up   | 1.453934 up   | 1.178593 down | CHCHD1   |

|           |          |          |          |      |          |      |          |      |            |
|-----------|----------|----------|----------|------|----------|------|----------|------|------------|
| 226898_s_ | 0.042804 | 0.04156  | 1.192713 | down | 1.360873 | up   | 1.62313  | up   | SFPQ       |
| 226901_at | 0.001999 | 0.001035 | 1.279589 | down | 1.725255 | up   | 2.207617 | up   | C17orf58   |
| 226902_at | 0.002122 | 0.001122 | 1.749683 | up   | 1.469944 | up   | 1.190306 | down | USP13      |
|           |          |          |          |      |          |      |          |      | SLC6A10P   |
| 226903_s_ | 0.026082 | 0.024582 | 1.237879 | up   | 1.269885 | down | 1.571963 | down | /// SLC6A8 |
|           |          |          |          |      |          |      |          |      | SLC6A10P   |
| 226904_at | 0.003875 | 0.002506 | 1.518124 | up   | 1.1725   | down | 1.78     | down | /// SLC6A8 |
| 226906_s_ | 0.003168 | 0.001929 | 1.774247 | up   | 1.361203 | down | 2.415111 | down | ARHGAP9    |
| 226908_at | 0.00336  | 0.002086 | 3.731578 | down | 1.603904 | up   | 5.985092 | up   | LRIG3      |
| 226912_at | 2.61E-06 | 1.15E-07 | 3.899087 | up   | 5.127381 | up   | 1.315021 | up   | ZDHHC23    |
| 226913_s_ | 4.54E-05 | 6.20E-06 | 4.162251 | up   | 4.273386 | up   | 1.026701 | up   | SOX8       |
| 226914_at | 0.003387 | 0.002108 | 1.632927 | up   | 1.158807 | down | 1.892248 | down | ARPC5L     |
| 226918_at | 0.00204  | 0.001065 | 2.070724 | up   | 1.710157 | up   | 1.210838 | down | JPH4       |
| 226919_at | 1.32E-04 | 2.64E-05 | 1.979545 | down | 1.71248  | down | 1.155953 | up   | LYRM2      |
| 226922_at | 0.007669 | 0.005973 | 2.460708 | up   | 2.623108 | up   | 1.065997 | up   | RANBP2     |
| 226923_at | 0.003302 | 0.002038 | 2.055602 | down | 3.019727 | down | 1.469023 | down | SCFD2      |
| 226924_at | 0.013542 | 0.011747 | 2.089205 | down | 1.105746 | down | 1.889408 | up   | LOC400657  |
| 226925_at | 9.39E-04 | 3.72E-04 | 1.880994 | up   | 3.623517 | up   | 1.926384 | up   | ACPL2      |
| 226926_at | 2.16E-04 | 5.11E-05 | 8.049896 | up   | 17.14798 | up   | 2.130212 | up   | DMKN       |
| 226929_at | 0.001972 | 0.001017 | 3.150648 | down | 1.082875 | up   | 3.411757 | up   | MTHFR      |
| 226930_at | 9.25E-04 | 3.64E-04 | 13.08568 | down | 53.76859 | down | 4.108965 | down | FNDC1      |
| 226932_at | 2.18E-06 | 8.84E-08 | 17.43281 | down | 25.55734 | down | 1.466048 | down | SSPN       |
| 226934_at | 1.66E-04 | 3.60E-05 | 7.011981 | up   | 8.981635 | up   | 1.280899 | up   | CPSF6      |
| 226935_s_ | 0.007081 | 0.005413 | 1.070871 | up   | 1.444549 | down | 1.546925 | down | CLPTM1L    |
| 226936_at | 0.00116  | 4.97E-04 | 3.242566 | up   | 4.828208 | up   | 1.489009 | up   | C6orf173   |
| 226940_at | 0.031698 | 0.030352 | 1.419051 | up   | 1.109221 | down | 1.574041 | down | FAM69B     |
| 226942_at | 6.69E-04 | 2.34E-04 | 2.619891 | down | 3.237582 | down | 1.23577  | down | PHF20L1    |
| 226943_at | 9.60E-04 | 3.84E-04 | 3.296916 | up   | 2.056036 | up   | 1.603531 | down | C12orf73   |
| 226945_at | 2.17E-04 | 5.14E-05 | 2.538461 | down | 2.505127 | down | 1.013306 | up   | RHBDD1     |
| 226946_at | 0.003576 | 0.002261 | 2.436347 | down | 2.485788 | down | 1.020293 | down | C5orf33    |
|           |          |          |          |      |          |      |          |      | GUSBL2 /// |
| 226947_at | 7.06E-04 | 2.53E-04 | 3.259929 | down | 2.321465 | down | 1.404255 | up   | LOC728411  |
| 226948_at | 7.00E-06 | 4.62E-07 | 4.377276 | down | 3.812481 | down | 1.148144 | up   | RHBDD1     |
| 226949_at | 7.23E-04 | 2.62E-04 | 1.174048 | down | 1.96337  | down | 1.672309 | down | GOLGA3     |



|           |          |          |          |      |          |      |          |      |           |
|-----------|----------|----------|----------|------|----------|------|----------|------|-----------|
| 226950_at | 7.76E-07 | 2.06E-08 | 9.767553 | down | 1.934307 | down | 5.049641 | up   | ACVRL1    |
| 226961_at | 0.001312 | 5.88E-04 | 4.331097 | up   | 2.027125 | up   | 2.136571 | down | PRR15     |
| 226963_at | 5.47E-04 | 1.78E-04 | 1.873385 | up   | 1.662474 | up   | 1.126866 | down | BTF3L4    |
| 226969_at | 0.007479 | 0.005789 | 1.94783  | down | 1.230448 | down | 1.583025 | up   | MTR       |
| 226972_s_ | 2.84E-04 | 7.41E-05 | 1.723374 | up   | 2.086378 | up   | 1.210636 | up   | CCDC136   |
| 226973_at | 0.003539 | 0.002231 | 1.259395 | up   | 1.855683 | down | 2.337038 | down | VSTM2L    |
| 226974_at | 7.11E-04 | 2.56E-04 | 2.519473 | up   | 3.367592 | up   | 1.336626 | up   | NEDD4L    |
| 226977_at | 7.09E-04 | 2.55E-04 | 6.384852 | down | 6.293109 | down | 1.014578 | up   | C5orf53   |
| 226978_at | 2.57E-05 | 2.82E-06 | 7.104802 | down | 4.229692 | down | 1.679745 | up   | PPARA     |
| 226980_at | 3.78E-05 | 4.78E-06 | 12.68292 | up   | 15.70149 | up   | 1.238003 | up   | DEPDC1B   |
| 226982_at | 3.45E-04 | 9.60E-05 | 3.751477 | down | 3.532255 | down | 1.062063 | up   | ELL2      |
| 226985_at | 8.85E-05 | 1.52E-05 | 2.083802 | up   | 2.208871 | up   | 1.06002  | up   | FGD5      |
| 226988_s_ | 0.029319 | 0.027914 | 1.226157 | up   | 1.105277 | down | 1.355244 | down | MYH14     |
| 226989_at | 0.001628 | 7.86E-04 | 6.84461  | down | 2.558309 | down | 2.675443 | up   | RGMB      |
| 226994_at | 2.41E-04 | 5.94E-05 | 2.172435 | up   | 2.542922 | up   | 1.17054  | up   | DNAJA2    |
| 226997_at | 0.004587 | 0.003131 | 3.919543 | down | 3.934932 | down | 1.003926 | down | ADAMTS12  |
| 226998_at | 5.13E-05 | 7.31E-06 | 2.956839 | up   | 2.563586 | up   | 1.1534   | down | NARG1     |
| 226999_at | 0.035083 | 0.03379  | 1.800767 | up   | 1.289601 | up   | 1.396376 | down | RNPC3     |
| 227001_at | 3.02E-08 | 2.19E-10 | 29.8137  | down | 16.69885 | down | 1.785375 | up   | NIPAL2    |
| 227002_at | 0.008887 | 0.007138 | 1.627534 | up   | 1.367887 | up   | 1.189816 | down | FAM78A    |
| 227005_at | 0.005772 | 0.004181 | 1.991409 | up   | 1.640853 | up   | 1.213643 | down | RPP14     |
| 227007_at | 2.04E-05 | 2.07E-06 | 3.434441 | down | 1.974967 | down | 1.738987 | up   | TMCO4     |
| 227009_at | 2.36E-04 | 5.76E-05 | 2.657587 | down | 1.660597 | down | 1.60038  | up   |           |
| 227010_at | 0.002856 | 0.001676 | 1.164876 | up   | 1.699683 | up   | 1.459111 | up   |           |
|           |          |          |          |      |          |      |          |      | LOC100130 |
| 227011_at | 0.00752  | 0.005831 | 1.232724 | up   | 1.416586 | down | 1.74626  | down | 262       |
| 227013_at | 0.001619 | 7.81E-04 | 2.204742 | down | 2.744937 | down | 1.245015 | down | LATS2     |
| 227016_at | 2.75E-04 | 7.09E-05 | 2.734794 | up   | 1.947096 | up   | 1.404551 | down | ERICH1    |
| 227018_at | 0.00617  | 0.004555 | 1.470806 | down | 1.813412 | down | 1.232937 | down | DPP8      |
| 227019_at | 2.45E-04 | 6.05E-05 | 4.189308 | up   | 3.465947 | up   | 1.208705 | down | C1orf226  |
| 227021_at | 0.009967 | 0.008189 | 2.702626 | down | 2.502451 | down | 1.079992 | up   | AOF1      |
| 227022_at | 3.37E-06 | 1.64E-07 | 8.751468 | down | 6.496799 | down | 1.347043 | up   | GNPDA2    |
| 227026_at | 0.003664 | 0.00233  | 1.745144 | down | 1.118194 | down | 1.56068  | up   | MPHOSPH8  |

|           |          |          |               |               |               |             |
|-----------|----------|----------|---------------|---------------|---------------|-------------|
| 227028_s_ | 0.003539 | 0.002231 | 1.588509 up   | 1.214028 up   | 1.308462 down | DGCR2       |
| 227033_at | 0.006423 | 0.004798 | 2.002066 down | 1.549205 down | 1.292318 up   | PDIA3       |
| 227035_x_ | 0.001948 | 0.001    | 2.077849 down | 1.378362 down | 1.507477 up   | RP9P        |
| 227038_at | 3.10E-05 | 3.68E-06 | 15.35342 down | 13.62871 down | 1.12655 up    | SGMS2       |
| 227044_at | 8.52E-04 | 3.26E-04 | 3.071324 up   | 2.750377 up   | 1.116692 down |             |
| 227045_at | 0.001134 | 4.81E-04 | 2.274436 up   | 2.282886 up   | 1.003715 up   | ZNF614      |
| 227047_x_ | 0.002734 | 0.00158  | 1.899408 down | 2.098874 down | 1.105015 down | ZBTB4       |
| 227048_at | 2.02E-07 | 3.18E-09 | 16.11361 up   | 9.890746 up   | 1.629161 down | LAMA1       |
| 227049_at | 1.72E-05 | 1.64E-06 | 24.13236 down | 6.176806 down | 3.906933 up   | ZADH2       |
| 227051_at | 4.45E-05 | 6.02E-06 | 7.208042 down | 9.184372 down | 1.274184 down |             |
| 227052_at | 4.76E-04 | 1.47E-04 | 3.776766 down | 3.812674 down | 1.009508 down |             |
| 227053_at | 2.17E-05 | 2.25E-06 | 3.343405 up   | 2.246859 up   | 1.488035 down | PACSIN1     |
| 227054_at | 2.40E-04 | 5.90E-05 | 2.18329 down  | 2.147499 down | 1.016667 up   | N6AMT2      |
| 227058_at | 2.12E-05 | 2.18E-06 | 3.031902 down | 7.351827 down | 2.424823 down | C13orf33    |
| 227061_at | 4.23E-07 | 8.76E-09 | 64.01456 down | 138.1832 down | 2.158622 down |             |
| 227063_at | 0.00701  | 0.00535  | 2.060001 up   | 2.293734 up   | 1.113462 up   | C17orf61    |
| 227065_at | 1.25E-05 | 1.03E-06 | 1.777926 down | 1.745179 down | 1.018764 up   | RNF216      |
| 227066_at | 2.17E-04 | 5.14E-05 | 3.610627 down | 1.831826 down | 1.971053 up   | MOBK2C      |
| 227067_x_ | 0.001151 | 4.91E-04 | 2.597057 down | 4.884265 down | 1.880693 down | NOTCH2NL    |
| 227070_at | 2.35E-05 | 2.50E-06 | 21.33887 down | 5.570482 down | 3.830703 up   | GLT8D2      |
| 227072_at | 6.60E-04 | 2.31E-04 | 1.937916 up   | 2.288315 up   | 1.180812 up   | RTTN        |
|           |          |          |               |               |               | ZNF286A /// |
| 227077_at | 1.67E-05 | 1.58E-06 | 2.812327 up   | 2.751101 up   | 1.022255 down | ZNF286B     |
| 227084_at | 0.006225 | 0.004605 | 2.117161 up   | 3.719551 up   | 1.756858 up   | DTNA        |
| 227086_at | 0.012643 | 0.010843 | 1.004044 up   | 1.44801 down  | 1.453866 down | C22orf39    |
| 227089_at | 0.001516 | 7.13E-04 | 2.287178 down | 2.19033 down  | 1.044216 up   |             |
| 227091_at | 0.001719 | 8.46E-04 | 2.341001 down | 1.200571 down | 1.949907 up   | CCDC146     |
| 227092_at | 4.79E-05 | 6.66E-06 | 3.235281 down | 2.752156 down | 1.175544 up   |             |
| 227094_at | 1.69E-05 | 1.61E-06 | 3.586595 up   | 3.311071 up   | 1.083213 down | DHTKD1      |
| 227095_at | 0.02729  | 0.025804 | 4.279501 down | 1.562525 down | 2.738837 up   |             |
| 227096_at | 0.005844 | 0.004245 | 2.656975 down | 3.590253 down | 1.351256 down | JOSD2       |
| 227097_at | 0.002112 | 0.001115 | 1.65532 up    | 1.189953 down | 1.969754 down |             |
| 227098_at | 7.52E-04 | 2.76E-04 | 2.031956 down | 2.173308 down | 1.069565 down | DUSP18      |

|           |          |          |          |      |          |      |          |      |           |
|-----------|----------|----------|----------|------|----------|------|----------|------|-----------|
| 227101_at | 0.00434  | 0.002906 | 1.912135 | down | 1.588125 | down | 1.204021 | up   | ZNF800    |
| 227104_x_ | 0.003668 | 0.002334 | 1.243031 | up   | 1.316086 | down | 1.635935 | down | ZNF800    |
|           |          |          |          |      |          |      |          |      | LOC100133 |
|           |          |          |          |      |          |      |          |      | 666 ///   |
| 227106_at | 0.002186 | 0.001168 | 1.67042  | down | 1.244689 | up   | 2.079153 | up   | LOC440104 |
| 227110_at | 1.23E-05 | 1.01E-06 | 3.798191 | up   | 3.970522 | up   | 1.045372 | up   | HNRNPC    |
| 227111_at | 0.005145 | 0.003622 | 1.010301 | up   | 2.51936  | up   | 2.493674 | up   | ZBTB34    |
| 227115_at | 1.48E-05 | 1.34E-06 | 2.667353 | down | 1.614717 | down | 1.651902 | up   |           |
| 227124_at | 0.008431 | 0.006694 | 1.466762 | down | 1.898502 | down | 1.29435  | down | LOC221710 |
| 227125_at | 1.09E-04 | 2.02E-05 | 2.158524 | down | 1.819847 | down | 1.186102 | up   |           |
| 227129_x_ | 0.001893 | 9.61E-04 | 2.195983 | up   | 3.571941 | up   | 1.626579 | up   | tcag7.907 |
| 227130_s_ | 0.007245 | 0.005569 | 1.331253 | up   | 1.187064 | up   | 1.121468 | down | TLE1      |
| 227134_at | 1.34E-05 | 1.15E-06 | 3.682636 | up   | 4.806001 | up   | 1.305044 | up   | SYTL1     |
| 227135_at | 5.67E-05 | 8.36E-06 | 8.782474 | down | 4.138582 | down | 2.122097 | up   | NAAA      |
| 227138_at | 6.12E-04 | 2.08E-04 | 2.215141 | down | 1.447669 | down | 1.530143 | up   | CRTAP     |
| 227140_at | 1.22E-04 | 2.34E-05 | 10.77723 | down | 117.9502 | down | 10.94439 | down |           |
| 227143_s_ | 0.001475 | 6.87E-04 | 2.340782 | down | 2.196506 | down | 1.065684 | up   | BID       |
| 227144_at | 0.011973 | 0.010174 | 2.081302 | down | 1.033717 | up   | 2.151478 | up   | C22orf9   |
| 227145_at | 8.89E-07 | 2.49E-08 | 13.85666 | down | 7.41433  | down | 1.868903 | up   | LOXL4     |
| 227146_at | 0.013084 | 0.011282 | 1.539392 | up   | 1.129456 | up   | 1.36295  | down | QSOX2     |
| 227148_at | 0.023829 | 0.02225  | 2.829018 | down | 1.602583 | down | 1.765286 | up   | PLEKHH2   |
| 227150_at | 0.003255 | 0.001997 | 1.806751 | down | 2.035156 | down | 1.126418 | down | MTF1      |
| 227151_at | 2.41E-04 | 5.92E-05 | 2.040906 | down | 2.023433 | down | 1.008635 | up   | SNX33     |
| 227152_at | 4.30E-06 | 2.32E-07 | 5.210098 | up   | 13.17572 | up   | 2.528882 | up   | C12orf35  |
| 227156_at | 0.011307 | 0.009513 | 2.479707 | down | 1.042489 | up   | 2.585068 | up   | CASK      |
| 227157_at | 0.00155  | 7.35E-04 | 3.024974 | down | 1.962552 | down | 1.541347 | up   | CCDC111   |
| 227159_at | 0.005291 | 0.003751 | 2.549394 | down | 2.292285 | down | 1.112163 | up   | GHDC      |
| 227163_at | 0.008294 | 0.00657  | 3.069423 | up   | 2.819454 | up   | 1.088659 | down | GSTO2     |
| 227164_at | 8.84E-04 | 3.43E-04 | 2.471715 | up   | 3.054423 | up   | 1.23575  | up   | SFRS1     |
| 227165_at | 0.003387 | 0.002108 | 3.076541 | up   | 4.312409 | up   | 1.401707 | up   | C13orf3   |
| 227168_at | 3.50E-04 | 9.82E-05 | 2.865538 | up   | 4.344417 | up   | 1.516091 | up   | MIAT      |
| 227174_at | 3.12E-04 | 8.38E-05 | 19.30198 | up   | 19.54983 | up   | 1.012841 | up   | WDR72     |
| 227177_at | 2.74E-06 | 1.23E-07 | 10.84266 | up   | 6.640272 | up   | 1.632864 | down | CORO2A    |
| 227178_at | 0.002811 | 0.001641 | 1.150079 | down | 2.262215 | up   | 2.601727 | up   | CUGBP2    |

|           |          |          |               |               |               |                       |
|-----------|----------|----------|---------------|---------------|---------------|-----------------------|
| 227180_at | 2.93E-07 | 5.07E-09 | 9.006587 up   | 8.368514 up   | 1.076247 down | ELOVL7                |
| 227181_at | 0.001594 | 7.65E-04 | 1.911634 up   | 2.68562 up    | 1.404882 up   | LNP1                  |
| 227182_at | 0.010162 | 0.008372 | 2.153378 up   | 1.098846 down | 2.366231 down | SUSD3                 |
| 227183_at | 9.52E-04 | 3.79E-04 | 4.324188 down | 5.816719 down | 1.345159 down | LOC728264             |
| 227188_at | 0.004528 | 0.003076 | 1.780179 down | 4.017865 down | 2.257 down    | C21orf63              |
| 227190_at | 0.011844 | 0.010042 | 2.262706 up   | 1.718261 up   | 1.316858 down | TMEM37                |
| 227191_at | 0.004506 | 0.003057 | 2.599364 down | 1.699495 down | 1.529492 up   |                       |
| 227193_at | 1.17E-04 | 2.23E-05 | 14.59469 down | 13.49372 down | 1.081591 up   |                       |
| 227194_at | 0.003355 | 0.002082 | 1.769487 up   | 1.746003 up   | 1.01345 down  | FAM3B                 |
| 227196_at | 2.17E-06 | 8.81E-08 | 10.02042 up   | 20.07297 up   | 2.003206 up   | RHPN2                 |
| 227197_at | 2.06E-05 | 2.09E-06 | 6.202471 up   | 6.587096 up   | 1.062012 up   | SGEF                  |
| 227198_at | 1.66E-04 | 3.60E-05 | 15.93477 down | 1.519583 down | 10.48628 up   | AFF3                  |
| 227203_at | 9.13E-04 | 3.58E-04 | 2.98031 down  | 3.317378 down | 1.113098 down | FBXL17                |
| 227204_at | 5.37E-04 | 1.73E-04 | 1.534164 up   | 3.281846 up   | 2.139175 up   | PARD6G                |
| 227208_at | 0.001592 | 7.63E-04 | 2.134831 up   | 2.293595 up   | 1.074369 up   | CCDC84                |
| 227209_at | 0.020421 | 0.01875  | 2.073227 up   | 6.111248 up   | 2.947698 up   | CNTN1                 |
| 227210_at | 0.025254 | 0.023714 | 1.879742 up   | 2.503698 up   | 1.331937 up   |                       |
| 227214_at | 4.32E-04 | 1.30E-04 | 3.78432 down  | 6.671905 down | 1.763039 down | GOPC                  |
| 227215_at | 4.77E-05 | 6.60E-06 | 1.293094 down | 3.681774 down | 2.847259 down | GOPC                  |
| 227216_at | 0.003396 | 0.002116 | 1.970702 up   | 1.146653 up   | 1.718656 down | RLTPR                 |
| 227217_at | 4.00E-05 | 5.24E-06 | 2.799619 up   | 2.061067 up   | 1.358335 down | WNK2                  |
| 227218_at | 0.002364 | 0.001301 | 1.99136 up    | 1.013327 up   | 1.965169 down | RLTPR                 |
| 227219_x_ | 2.13E-04 | 5.01E-05 | 2.63078 down  | 2.359757 down | 1.114852 up   | MAP1LC3A              |
| 227220_at | 0.001467 | 6.83E-04 | 2.425969 up   | 1.552867 up   | 1.562252 down | NFXL1                 |
| 227221_at | 3.90E-04 | 1.13E-04 | 6.104996 down | 6.850049 down | 1.12204 down  |                       |
| 227224_at | 0.013933 | 0.012146 | 1.644221 down | 1.027076 up   | 1.68874 up    | RALGPS2               |
| 227226_at | 0.0181   | 0.016371 | 4.212637 up   | 1.509141 up   | 2.791414 down | MRAP2                 |
| 227228_s_ | 2.47E-05 | 2.67E-06 | 6.741854 up   | 4.940328 up   | 1.364657 down | CCDC88C               |
| 227229_at | 2.17E-04 | 5.15E-05 | 1.549591 down | 1.70039 down  | 1.097315 down | VPS53                 |
| 227230_s_ | 5.65E-06 | 3.38E-07 | 5.891431 up   | 20.13324 up   | 3.417377 up   | KIAA1211              |
| 227231_at | 0.001545 | 7.32E-04 | 3.044787 up   | 5.996606 up   | 1.969467 up   | KIAA1211<br>LOC100132 |
| 227234_at | 2.24E-04 | 5.39E-05 | 3.042293 up   | 4.109617 up   | 1.350829 up   | 815                   |
| 227239_at | 0.001775 | 8.83E-04 | 2.135432 down | 1.121069 up   | 2.393966 up   | FAM126A               |

|           |          |          |               |               |               |          |
|-----------|----------|----------|---------------|---------------|---------------|----------|
| 227247_at | 1.19E-04 | 2.28E-05 | 2.702097 up   | 4.727055 up   | 1.749402 up   | PLEKHA8  |
| 227250_at | 8.20E-04 | 3.11E-04 | 4.560507 down | 1.52885 down  | 2.982965 up   | KREMEN1  |
| 227251_at | 0.002497 | 0.001402 | 1.63047 down  | 1.244324 down | 1.310326 up   | WDR22    |
| 227252_at | 4.20E-05 | 5.57E-06 | 2.966165 down | 2.857379 down | 1.038072 up   |          |
| 227254_at | 7.28E-06 | 4.90E-07 | 5.883009 up   | 4.580218 up   | 1.284439 down | POU2F1   |
| 227258_at | 0.013663 | 0.011871 | 1.855429 up   | 1.12654 down  | 2.090214 down | C10orf46 |
| 227259_at | 7.77E-04 | 2.89E-04 | 4.73602 down  | 3.280706 down | 1.443598 up   | CD47     |
| 227266_s_ | 0.012586 | 0.010787 | 1.167871 up   | 1.032434 down | 1.20575 down  | FYB      |
| 227271_at | 6.88E-04 | 2.45E-04 | 4.041413 up   | 1.971116 up   | 2.050317 down | FGF11    |
| 227272_at | 1.28E-06 | 4.12E-08 | 6.844586 down | 7.203702 down | 1.052467 down | C15orf52 |
| 227273_at | 0.012539 | 0.010743 | 1.775065 up   | 1.690115 up   | 1.050263 down |          |
| 227276_at | 1.29E-04 | 2.54E-05 | 6.32804 up    | 1.120641 up   | 5.646806 down | PLXDC2   |
| 227277_at | 3.78E-06 | 1.92E-07 | 3.601941 down | 5.045083 down | 1.400657 down | MTDH     |
| 227279_at | 5.25E-08 | 4.58E-10 | 5.158166 down | 5.384132 down | 1.043808 down | TCEAL3   |
| 227281_at | 0.00742  | 0.005733 | 1.727353 up   | 1.391589 up   | 1.241281 down | SLC29A4  |
| 227283_at | 5.14E-04 | 1.64E-04 | 2.323457 up   | 1.927067 up   | 1.205696 down | EFR3B    |
| 227284_at | 0.001181 | 5.10E-04 | 2.218771 up   | 1.910454 up   | 1.161384 down | ZNF766   |
| 227290_at | 2.23E-05 | 2.33E-06 | 1.844121 down | 2.715316 down | 1.472417 down |          |
| 227295_at | 3.00E-04 | 7.97E-05 | 6.309272 down | 6.199902 down | 1.017641 up   | IKIP     |
| 227296_at | 0.016838 | 0.015086 | 2.111774 up   | 1.365601 up   | 1.546407 down | MFSD3    |
| 227297_at | 0.006197 | 0.004579 | 2.883749 up   | 2.671341 up   | 1.079514 down | ITGA9    |
| 227298_at | 3.02E-05 | 3.56E-06 | 2.212928 down | 2.608872 down | 1.178924 down | FLJ37798 |
| 227300_at | 1.40E-05 | 1.23E-06 | 53.11353 down | 7.707172 down | 6.891443 up   | TMEM119  |
| 227303_at | 8.95E-04 | 3.49E-04 | 1.147732 up   | 1.392094 down | 1.597752 down | ANKS3    |
| 227306_at | 0.006767 | 0.005117 | 2.125754 up   | 1.683361 up   | 1.262804 down |          |
| 227307_at | 0.009156 | 0.007401 | 4.272028 up   | 1.529905 up   | 2.792349 down | TSPAN18  |
| 227308_x_ | 3.31E-04 | 9.10E-05 | 2.370515 down | 3.494198 down | 1.474025 down | LTBP3    |
| 227309_at | 0.003307 | 0.002043 | 2.327252 up   | 3.135054 up   | 1.347105 up   | YOD1     |
| 227312_at | 6.30E-07 | 1.51E-08 | 11.15759 down | 6.010644 down | 1.856305 up   | SNTB2    |
| 227313_at | 9.84E-05 | 1.76E-05 | 2.667486 down | 1.902247 down | 1.402282 up   | CNPY4    |
| 227314_at | 0.003287 | 0.002025 | 3.183582 down | 2.471791 down | 1.287966 up   | ITGA2    |
| 227318_at | 0.00185  | 9.31E-04 | 3.644585 up   | 1.411933 up   | 2.581274 down |          |
| 227319_at | 0.001156 | 4.94E-04 | 2.260907 down | 1.50436 down  | 1.502904 up   |          |
| 227320_at | 4.36E-04 | 1.31E-04 | 1.065494 up   | 4.268871 down | 4.548454 down | FAM101A  |

|           |          |          |               |               |               |                     |
|-----------|----------|----------|---------------|---------------|---------------|---------------------|
| 227322_s_ | 0.00143  | 6.59E-04 | 2.110886 up   | 1.9673 up     | 1.072986 down | BCCIP               |
| 227324_at | 0.004352 | 0.00292  | 1.205497 up   | 1.357318 up   | 1.12594 up    | ADCK4               |
| 227325_at | 2.96E-04 | 7.80E-05 | 2.722496 down | 4.464028 down | 1.639682 down | LOC255783           |
| 227326_at | 9.64E-06 | 7.23E-07 | 6.386576 down | 13.55761 down | 2.122829 down | MXRA7               |
| 227328_at | 0.029141 | 0.027729 | 1.276936 down | 1.165315 up   | 1.488033 up   | CAMTA1              |
| 227329_at | 5.63E-04 | 1.86E-04 | 3.172116 up   | 2.664101 up   | 1.190689 down | ZBTB46<br>LOC100129 |
| 227332_at | 7.66E-05 | 1.26E-05 | 2.724242 up   | 2.664809 up   | 1.022303 down | 022                 |
| 227334_at | 1.76E-04 | 3.92E-05 | 3.541263 up   | 3.289998 up   | 1.076372 down | USP54               |
| 227337_at | 0.001885 | 9.55E-04 | 1.558103 up   | 10.0477 down  | 15.65536 down | ANKRD37             |
| 227338_at | 0.012242 | 0.010447 | 1.620589 up   | 1.640712 down | 2.658919 down | LOC440983           |
| 227339_at | 0.016105 | 0.014335 | 2.429581 down | 1.083736 down | 2.241858 up   | RGMB                |
| 227340_s_ | 0.002994 | 0.001787 | 7.041253 down | 2.543539 down | 2.768289 up   | RGMB                |
| 227342_s_ | 0.004511 | 0.003063 | 1.551669 up   | 1.000381 up   | 1.551078 down | MYEOV               |
| 227343_at | 0.011322 | 0.009527 | 1.649587 up   | 1.143024 down | 1.885518 down |                     |
| 227345_at | 2.60E-04 | 6.58E-05 | 1.251091 down | 4.746225 down | 3.793671 down | TNFRSF10D           |
| 227348_at | 1.27E-04 | 2.49E-05 | 1.959155 up   | 1.628589 up   | 1.202977 down | PARS2               |
| 227349_at | 6.86E-05 | 1.09E-05 | 7.760162 up   | 12.74542 up   | 1.642417 up   | HELLS               |
| 227350_at | 6.60E-06 | 4.22E-07 | 7.388382 up   | 23.04602 up   | 3.119224 up   | HELLS               |
| 227351_at | 0.002237 | 0.001208 | 2.343877 down | 1.786883 down | 1.311713 up   | C16orf52            |
| 227354_at | 9.63E-05 | 1.71E-05 | 5.010691 down | 1.149383 down | 4.359464 up   | PAG1                |
| 227358_at | 2.94E-05 | 3.42E-06 | 2.095164 up   | 2.023056 up   | 1.035643 down | ZBTB46              |
| 227360_at | 0.018945 | 0.017239 | 1.259985 up   | 1.01069 up    | 1.246659 down | RDH13               |
| 227361_at | 0.001292 | 5.76E-04 | 8.959806 down | 2.793701 down | 3.207145 up   | HS3ST3B1            |
| 227363_s_ | 0.001065 | 4.42E-04 | 1.837265 up   | 1.44813 up    | 1.268716 down | COX4NB              |
| 227365_at | 2.43E-06 | 1.04E-07 | 2.956046 up   | 3.234989 up   | 1.094364 up   | ATCAY               |
| 227367_at | 0.002187 | 0.001169 | 2.451025 down | 2.367785 down | 1.035155 up   | SLCO3A1             |
| 227369_at | 2.65E-04 | 6.73E-05 | 2.262765 up   | 2.012836 up   | 1.124168 down | SERBP1              |
| 227371_at | 0.001153 | 4.93E-04 | 4.691313 up   | 2.472649 up   | 1.897282 down | BAIAP2L1            |
| 227372_s_ | 0.003338 | 0.002067 | 4.414102 up   | 3.521792 up   | 1.253368 down | BAIAP2L1            |
| 227374_at | 1.65E-04 | 3.56E-05 | 2.579272 up   | 2.546951 up   | 1.01269 down  | EARS2               |
| 227375_at | 0.03421  | 0.032903 | 2.202607 down | 1.118083 down | 1.969984 up   | ANKRD13C            |
| 227376_at | 0.002062 | 0.00108  | 1.47201 down  | 2.195605 up   | 3.231953 up   | GLI3                |

|           |          |          |               |               |               |           |
|-----------|----------|----------|---------------|---------------|---------------|-----------|
| 227377_at | 3.07E-07 | 5.53E-09 | 11.93661 up   | 16.39803 up   | 1.37376 up    | IGF2BP1   |
| 227383_at | 3.76E-04 | 1.08E-04 | 3.592371 up   | 7.932574 up   | 2.208173 up   | LOC727820 |
| 227384_s_ | 4.86E-04 | 1.51E-04 | 3.432786 up   | 5.102172 up   | 1.486307 up   | LOC727820 |
| 227386_s_ | 0.008591 | 0.006852 | 2.863724 down | 1.315587 down | 2.176765 up   | TMEM200B  |
| 227388_at | 8.64E-05 | 1.48E-05 | 11.78123 down | 22.13106 down | 1.878501 down | TUSC1     |
| 227392_at | 0.006848 | 0.005191 | 1.02625 up    | 1.630176 down | 1.672967 down | NISCH     |
| 227393_at | 0.002099 | 0.001106 | 1.72277 up    | 1.00327 up    | 1.717155 down | ANO9      |
| 227395_at | 9.87E-04 | 3.99E-04 | 3.495485 down | 2.217011 down | 1.576666 up   | TBCEL     |
| 227399_at | 8.21E-05 | 1.38E-05 | 20.9964 down  | 9.580026 down | 2.191685 up   | VGLL3     |
| 227400_at | 1.46E-07 | 2.00E-09 | 23.54256 down | 10.72259 down | 2.195603 up   | NFIX      |
| 227405_s_ | 0.001484 | 6.93E-04 | 4.051189 up   | 1.549363 down | 6.276763 down | FZD8      |
|           |          |          |               |               |               | LOC100129 |
| 227406_at | 0.001189 | 5.15E-04 | 1.439165 up   | 2.008497 up   | 1.395599 up   | 387       |
| 227408_s_ | 3.19E-06 | 1.52E-07 | 1.041637 up   | 4.844182 down | 5.045878 down | SNX25     |
| 227409_at | 0.003949 | 0.002567 | 1.820046 down | 2.000972 down | 1.099407 down | PPP1R3E   |
| 227410_at | 1.48E-04 | 3.07E-05 | 6.635716 down | 8.055119 down | 1.213903 down | FAM43A    |
| 227411_at | 0.013064 | 0.011261 | 1.119192 down | 1.580429 down | 1.412117 down | WTIP      |
| 227412_at | 0.026125 | 0.024627 | 1.406534 down | 1.075918 up   | 1.513314 up   | PPP1R3E   |
| 227414_at | 5.85E-05 | 8.74E-06 | 3.129665 down | 3.163874 down | 1.010931 down | RHBDD1    |
| 227415_at | 0.005183 | 0.003655 | 2.333671 down | 1.382309 down | 1.688241 up   | LOC283508 |
| 227418_at | 0.015024 | 0.013255 | 1.713356 down | 1.146613 up   | 1.964557 up   | KIAA1826  |
| 227419_x_ | 1.18E-05 | 9.63E-07 | 12.58907 down | 5.195529 down | 2.423058 up   | PLAC9     |
| 227422_at | 9.37E-04 | 3.71E-04 | 1.747415 up   | 2.213064 up   | 1.266479 up   |           |
| 227423_at | 0.001929 | 9.87E-04 | 1.03981 down  | 1.523252 down | 1.464933 down | LRRC28    |
| 227424_x_ | 0.001931 | 9.89E-04 | 1.332317 down | 1.79801 down  | 1.349537 down | C21orf119 |
| 227429_at | 0.0035   | 0.0022   | 2.033574 up   | 1.322931 up   | 1.537174 down | EFCAB4A   |
| 227434_at | 3.64E-04 | 1.03E-04 | 3.606583 up   | 3.866797 up   | 1.07215 up    | WBSCR17   |
| 227438_at | 1.38E-04 | 2.80E-05 | 3.76557 down  | 3.069627 down | 1.226719 up   | ALPK1     |
| 227439_at | 0.018218 | 0.016495 | 1.336188 up   | 1.142248 up   | 1.169788 down | ANKS1B    |
| 227440_at | 0.00188  | 9.52E-04 | 1.610496 up   | 1.02707 down  | 1.654092 down | ANKS1B    |
| 227442_at | 0.020031 | 0.01836  | 1.534422 up   | 1.262149 up   | 1.215722 down | COX18     |
| 227443_at | 5.68E-06 | 3.41E-07 | 17.86746 down | 21.3858 down  | 1.196913 down | C9orf150  |
| 227446_s_ | 3.49E-04 | 9.80E-05 | 3.387408 down | 2.070881 down | 1.635733 up   | C14orf167 |
| 227447_at | 4.65E-04 | 1.43E-04 | 1.990061 up   | 2.718818 up   | 1.366198 up   | SKIV2L2   |

|           |          |          |               |               |               |                    |
|-----------|----------|----------|---------------|---------------|---------------|--------------------|
| 227453_at | 1.01E-04 | 1.84E-05 | 2.853606 up   | 2.181474 up   | 1.308109 down | UNC13A             |
| 227458_at | 3.18E-04 | 8.63E-05 | 2.738441 down | 7.319723 down | 2.672953 down |                    |
| 227461_at | 2.98E-04 | 7.89E-05 | 5.659815 up   | 8.262798 up   | 1.459906 up   | STON2              |
| 227464_at | 0.002425 | 0.001346 | 1.116846 down | 1.843722 down | 1.65083 down  | ACSF3              |
| 227467_at | 0.00225  | 0.001218 | 4.526021 down | 1.689863 down | 2.678336 up   | RDH10              |
| 227469_at | 0.00114  | 4.85E-04 | 1.459483 up   | 1.006785 down | 1.469385 down | PTEN               |
| 227470_at | 3.31E-05 | 4.03E-06 | 2.483556 up   | 2.161128 up   | 1.149195 down | ZNF48              |
| 227474_at | 4.46E-05 | 6.05E-06 | 1.960527 down | 5.072146 down | 2.587134 down | LOC654433          |
| 227475_at | 0.00455  | 0.003098 | 4.551723 down | 2.814916 up   | 12.81272 up   | FOXQ1              |
| 227476_at | 0.004138 | 0.002724 | 3.032545 down | 2.540972 down | 1.193459 up   | LPGAT1             |
| 227477_at | 0.005872 | 0.004275 | 1.761458 up   | 1.462387 up   | 1.204508 down | ZMYND19            |
| 227478_at | 0.014771 | 0.012993 | 7.518343 down | 1.543112 down | 4.872195 up   | SETBP1             |
| 227481_at | 0.009933 | 0.008158 | 3.633802 down | 2.20168 down  | 1.650469 up   | CNKSR3             |
| 227483_s_ | 0.001619 | 7.81E-04 | 1.688664 up   | 1.409808 down | 2.380692 down |                    |
| 227484_at | 2.94E-07 | 5.10E-09 | 4.025791 down | 4.502513 down | 1.118417 down | SRGAP1             |
| 227485_at | 0.011645 | 0.009845 | 1.439242 up   | 1.625258 up   | 1.129246 up   | DDX26B             |
| 227486_at | 1.95E-06 | 7.56E-08 | 5.554023 down | 7.294926 down | 1.313449 down | NT5E               |
| 227487_s_ | 0.022848 | 0.021263 | 5.887102 down | 2.935421 down | 2.005539 up   | SERPINE2           |
| 227488_at | 3.55E-06 | 1.76E-07 | 4.612804 down | 1.271002 up   | 5.862886 up   | MGC16121           |
| 227489_at | 0.001649 | 8.01E-04 | 2.271863 down | 4.0765 down   | 1.794342 down | SMURF2             |
| 227490_at | 0.007766 | 0.00607  | 1.681679 up   | 1.201167 up   | 1.400038 down | WDFY2              |
| 227491_at | 0.006149 | 0.004536 | 2.264461 up   | 2.017356 up   | 1.12249 down  | ELOVL6             |
| 227492_at | 3.16E-08 | 2.32E-10 | 22.30357 up   | 34.72525 up   | 1.556937 up   |                    |
| 227493_s_ | 0.001201 | 5.21E-04 | 2.345326 up   | 1.745277 up   | 1.343813 down | KIAA1143           |
| 227494_at | 1.29E-05 | 1.10E-06 | 6.086873 up   | 5.490459 up   | 1.108627 down | NR6A1<br>LOC253842 |
| 227496_at | 1.14E-04 | 2.16E-05 | 6.560024 up   | 7.928145 up   | 1.208554 up   | /// NR6A1          |
| 227499_at | 9.18E-05 | 1.60E-05 | 7.399813 up   | 7.52097 up    | 1.016373 up   |                    |
| 227500_at | 0.002316 | 0.001267 | 1.16737 down  | 2.368161 down | 2.02863 down  | FBXL18             |
| 227506_at | 1.49E-06 | 5.13E-08 | 23.58422 up   | 13.22749 up   | 1.78297 down  | SLC16A9            |
| 227508_at | 0.00204  | 0.001065 | 1.392961 up   | 2.087364 up   | 1.498509 up   |                    |
| 227509_x_ | 8.44E-04 | 3.22E-04 | 1.415616 up   | 2.289839 up   | 1.617556 up   |                    |
| 227512_at | 3.77E-07 | 7.47E-09 | 5.035191 up   | 3.936668 up   | 1.279049 down | MEX3A              |
| 227514_at | 3.15E-06 | 1.49E-07 | 10.17124 down | 8.900448 down | 1.142779 up   | ITPRIPL2           |



|           |          |          |               |               |               |           |
|-----------|----------|----------|---------------|---------------|---------------|-----------|
| 227516_at | 1.83E-04 | 4.10E-05 | 1.824035 up   | 1.892327 up   | 1.03744 up    | SF3A1     |
| 227517_s_ | 4.65E-05 | 6.38E-06 | 2.814941 up   | 4.43724 up    | 1.576317 up   | GAS5      |
| 227518_at | 7.85E-05 | 1.30E-05 | 2.069472 down | 3.910765 down | 1.88974 down  | SLC35E1   |
| 227520_at | 1.88E-04 | 4.25E-05 | 2.539235 up   | 3.407457 up   | 1.341923 up   | CXorf15   |
| 227522_at | 3.48E-04 | 9.72E-05 | 3.33684 down  | 1.835017 down | 1.818425 up   | CMBL      |
| 227523_s_ | 0.002845 | 0.001668 | 1.451911 down | 2.614774 down | 1.80092 down  | PHF20L1   |
| 227524_at | 3.94E-06 | 2.04E-07 | 10.47075 up   | 11.02678 up   | 1.053103 up   |           |
| 227525_at | 0.001825 | 9.16E-04 | 1.710217 up   | 5.518131 up   | 3.226568 up   | GLCCI1    |
| 227534_at | 1.12E-04 | 2.11E-05 | 3.702058 down | 1.962786 down | 1.886124 up   | C9orf21   |
| 227536_at | 0.013187 | 0.01139  | 1.416402 up   | 1.833657 up   | 1.294588 up   | ZC3H13    |
| 227538_at | 0.028788 | 0.027365 | 1.305409 up   | 1.078593 up   | 1.210288 down | MED26     |
| 227543_at | 0.013181 | 0.011383 | 1.352651 down | 1.09591 up    | 1.482384 up   | RNASEH2C  |
| 227545_at | 5.65E-04 | 1.87E-04 | 2.362522 up   | 3.805647 up   | 1.610841 up   |           |
| 227546_x_ | 0.003292 | 0.002029 | 1.259478 up   | 1.101658 down | 1.387514 down | AURKAIP1  |
| 227547_at | 3.71E-04 | 1.06E-04 | 2.633992 up   | 2.625563 up   | 1.00321 down  |           |
| 227551_at | 1.03E-04 | 1.89E-05 | 3.796425 up   | 5.527321 up   | 1.455928 up   | FAM108B1  |
| 227554_at | 1.14E-05 | 9.08E-07 | 7.703739 down | 8.517721 down | 1.105661 down |           |
| 227556_at | 0.004503 | 0.003054 | 4.339076 up   | 1.70871 up    | 2.539387 down | NME7      |
| 227557_at | 3.05E-04 | 8.16E-05 | 3.115755 down | 5.927463 down | 1.902417 down | SCARF2    |
| 227558_at | 0.001898 | 9.65E-04 | 3.4578 down   | 4.857439 down | 1.404777 down | CBX4      |
| 227561_at | 1.54E-07 | 2.15E-09 | 38.99291 down | 44.89288 down | 1.151309 down | DDR2      |
| 227563_at | 0.009762 | 0.007983 | 1.368157 up   | 1.234717 down | 1.689287 down | FAM27E3   |
| 227564_at | 0.004291 | 0.002861 | 2.008128 down | 2.047352 down | 1.019532 down | HGSNAT    |
| 227565_at | 0.003549 | 0.002239 | 4.089691 down | 2.769646 down | 1.476612 up   |           |
| 227566_at | 0.002209 | 0.001185 | 4.257982 down | 6.849694 down | 1.608672 down | NTM       |
| 227567_at | 1.58E-04 | 3.37E-05 | 5.420961 down | 4.838194 down | 1.120451 up   | LOC651250 |
| 227573_s_ | 0.021508 | 0.019883 | 1.730023 up   | 1.164999 up   | 1.485 down    | OBSL1     |
|           |          |          |               |               |               | LOC100128 |
| 227578_at | 0.00925  | 0.007493 | 2.033539 up   | 2.200564 up   | 1.082135 up   | 191       |
| 227580_s_ | 5.61E-05 | 8.22E-06 | 1.569522 down | 2.637744 down | 1.680603 down | TECPR1    |
| 227581_at | 0.002364 | 0.001302 | 1.152543 down | 1.669021 down | 1.44812 down  | TECPR1    |
| 227582_at | 7.31E-04 | 2.66E-04 | 2.205962 up   | 3.608408 up   | 1.635752 up   | KLHDC9    |
| 227584_at | 5.08E-05 | 7.22E-06 | 3.552525 down | 5.04646 down  | 1.420528 down | NAV1      |
| 227586_at | 4.35E-04 | 1.31E-04 | 2.224113 up   | 4.848449 up   | 2.179947 up   | TMEM170A  |

|           |          |          |               |               |               |           |           |
|-----------|----------|----------|---------------|---------------|---------------|-----------|-----------|
|           |          |          |               |               |               |           | hCG_20081 |
| 227593_at | 2.03E-04 | 4.68E-05 | 1.81659 up    | 2.726414 up   | 1.500842 up   | 40        |           |
| 227594_at | 0.019813 | 0.018129 | 2.177611 down | 1.30982 down  | 1.662527 up   | ZMYM6     |           |
|           |          |          |               |               |               |           | hCG_20081 |
| 227596_at | 0.030694 | 0.029315 | 1.389993 up   | 1.007809 up   | 1.379223 down | 40        |           |
| 227599_at | 0.001412 | 6.49E-04 | 2.594457 up   | 1.673258 up   | 1.550542 down | C3orf59   |           |
| 227601_at | 0.001689 | 8.26E-04 | 1.463128 up   | 1.793015 up   | 1.225467 up   | METTL14   |           |
| 227602_at | 9.52E-04 | 3.79E-04 | 1.855314 down | 1.189924 up   | 2.207683 up   | RAB7A     |           |
| 227604_at | 1.60E-04 | 3.44E-05 | 1.827406 down | 1.777536 down | 1.028056 up   | LOC151146 |           |
| 227606_s_ | 3.74E-04 | 1.07E-04 | 4.917662 down | 1.647912 down | 2.984177 up   | STAMBPL1  |           |
| 227607_at | 2.08E-04 | 4.84E-05 | 5.905213 down | 2.179202 down | 2.709806 up   | STAMBPL1  |           |
| 227611_at | 0.016549 | 0.014788 | 1.887261 down | 1.086527 up   | 2.05056 up    | TARSL2    |           |
| 227613_at | 6.02E-04 | 2.04E-04 | 1.785556 up   | 2.105792 up   | 1.179348 up   | ZNF331    |           |
| 227621_at | 0.00819  | 0.006469 | 2.300384 up   | 1.995874 up   | 1.15257 down  |           |           |
| 227625_s_ | 0.002455 | 0.00137  | 1.49251 down  | 1.532049 down | 1.026492 down | STUB1     |           |
| 227628_at | 1.31E-04 | 2.60E-05 | 2.594697 down | 2.573264 down | 1.008329 up   | GPX8      |           |
| 227630_at | 0.020084 | 0.018413 | 1.447121 down | 1.109188 down | 1.304667 up   |           |           |
| 227632_at | 0.002003 | 0.001037 | 1.708943 down | 2.194656 down | 1.284218 down | TBC1D24   |           |
| 227635_at | 0.040325 | 0.039083 | 1.72756 up    | 1.03176 up    | 1.674382 down | RBBP6     |           |
| 227638_at | 4.06E-04 | 1.19E-04 | 2.633317 down | 5.862721 down | 2.226363 down | KIAA1632  |           |
| 227639_at | 6.47E-04 | 2.25E-04 | 2.751798 down | 1.864862 down | 1.475604 up   | PIGK      |           |
| 227641_at | 1.49E-04 | 3.11E-05 | 5.017114 up   | 6.780977 up   | 1.351569 up   | FBXL16    |           |
| 227642_at | 0.005827 | 0.00423  | 1.868985 up   | 1.321936 up   | 1.413824 down | TFCP2L1   |           |
| 227644_at | 3.55E-05 | 4.40E-06 | 3.310029 up   | 1.771412 up   | 1.868583 down | RIMS4     |           |
| 227645_at | 0.004314 | 0.002885 | 1.75568 up    | 1.568146 up   | 1.119589 down | PIK3R5    |           |
| 227646_at | 0.002271 | 0.001236 | 17.09855 down | 15.0306 down  | 1.137583 up   | EBF1      |           |
| 227649_s_ | 3.56E-05 | 4.42E-06 | 2.459302 down | 1.882325 down | 1.306523 up   | SRGAP2    |           |
| 227650_at | 0.00393  | 0.00255  | 1.840447 up   | 1.750394 up   | 1.051447 down | HSPA14    |           |
| 227654_at | 1.03E-06 | 3.04E-08 | 11.97756 down | 1.379604 up   | 16.52429 up   | FAM65C    |           |
| 227655_at | 0.003683 | 0.002347 | 2.372429 down | 1.353581 down | 1.752706 up   | SNORD123  |           |
| 227657_at | 7.37E-04 | 2.69E-04 | 3.95458 down  | 2.309009 down | 1.712675 up   | RNF150    |           |
| 227660_at | 1.91E-04 | 4.33E-05 | 5.80238 down  | 4.804154 down | 1.207784 up   | ANTXR1    |           |
| 227661_at | 0.002069 | 0.001085 | 1.432253 up   | 1.373411 down | 1.967073 down |           |           |

|           |          |          |               |               |               | hCG_20081 |
|-----------|----------|----------|---------------|---------------|---------------|-----------|
| 227664_at | 0.012793 | 0.010992 | 1.333716 up   | 1.028796 up   | 1.296385 down | 40        |
| 227665_at | 5.80E-05 | 8.65E-06 | 5.809478 down | 7.155392 down | 1.231675 down |           |
| 227666_at | 4.50E-04 | 1.37E-04 | 1.920214 down | 2.695899 down | 1.403957 down | DCLK2     |
| 227667_at | 7.65E-06 | 5.29E-07 | 2.712329 down | 2.897542 down | 1.068286 down | CUEDC1    |
| 227669_at | 0.001295 | 5.78E-04 | 2.389253 down | 2.866844 down | 1.199891 down | BRP44     |
| 227671_at | 0.01533  | 0.013556 | 1.014118 up   | 21.34851 down | 21.6499 down  | XIST      |
| 227676_at | 0.003342 | 0.002071 | 1.563878 up   | 1.360058 down | 2.126966 down | FAM3D     |
| 227678_at | 4.98E-04 | 1.56E-04 | 1.133003 down | 1.882714 up   | 2.13312 up    | XRCC6BP1  |
| 227679_at | 0.001537 | 7.26E-04 | 1.676028 down | 1.988687 down | 1.186548 down | HDAC11    |
| 227682_at | 0.039077 | 0.037829 | 2.978741 down | 1.423312 down | 2.092823 up   |           |
| 227686_at | 9.12E-05 | 1.58E-05 | 2.452295 up   | 2.537534 up   | 1.034759 up   | OXNAD1    |
| 227688_at | 4.55E-04 | 1.39E-04 | 3.518798 down | 2.820401 up   | 9.924421 up   | LRCH2     |
| 227690_at | 2.67E-08 | 1.80E-10 | 28.86385 up   | 26.44667 up   | 1.091398 down | GABRB3    |
| 227696_at | 0.00433  | 0.002898 | 2.339404 down | 2.923514 down | 1.249683 down | EXOSC6    |
| 227697_at | 0.002848 | 0.00167  | 3.912798 down | 1.78421 down  | 2.193015 up   | SOCS3     |
| 227699_at | 5.13E-05 | 7.30E-06 | 3.849131 down | 5.893202 down | 1.531047 down | C14orf149 |
| 227703_s_ | 4.81E-05 | 6.69E-06 | 2.392752 down | 2.618699 down | 1.09443 down  | SYTL4     |
| 227704_at | 4.45E-04 | 1.34E-04 | 3.00922 down  | 2.928424 down | 1.02759 up    | C19orf12  |
| 227705_at | 5.02E-04 | 1.58E-04 | 2.828327 down | 8.95964 up    | 25.34078 up   | TCEAL7    |
| 227712_at | 0.00448  | 0.003032 | 1.775114 down | 1.134652 down | 1.564457 up   | LYRM2     |
| 227713_at | 0.002521 | 0.001421 | 2.417475 down | 3.325025 down | 1.375412 down | KATNAL1   |
| 227714_s_ | 0.004225 | 0.002799 | 1.540234 up   | 1.0331 up     | 1.490886 down |           |
| 227718_at | 0.002946 | 0.001748 | 1.82205 up    | 1.590187 up   | 1.145809 down | PURB      |
| 227722_at | 0.001623 | 7.83E-04 | 5.873097 down | 4.433549 down | 1.324695 up   | RPS23     |
| 227724_at | 2.54E-04 | 6.38E-05 | 2.11452 up    | 1.805676 up   | 1.171041 down |           |
| 227727_at | 5.71E-04 | 1.89E-04 | 14.97745 down | 4.254754 down | 3.520168 up   | MRGPRF    |
| 227729_at | 6.54E-06 | 4.16E-07 | 1.901832 up   | 2.392366 up   | 1.257927 up   |           |
| 227731_at | 0.030672 | 0.029291 | 1.942278 down | 1.16008 down  | 1.674263 up   | CNBP      |
| 227732_at | 3.06E-04 | 8.18E-05 | 1.511717 up   | 3.51242 up    | 2.323463 up   | ATXN7L1   |
| 227733_at | 0.010379 | 0.008582 | 2.023921 up   | 1.599446 up   | 1.265389 down | TMEM63C   |
| 227736_at | 0.003288 | 0.002025 | 1.123224 up   | 1.327008 down | 1.490527 down | C10orf99  |
| 227737_at | 9.62E-04 | 3.85E-04 | 1.598214 down | 2.16895 down  | 1.357108 down | SRPRB     |
| 227738_s_ | 0.001609 | 7.75E-04 | 2.178608 up   | 1.483506 down | 3.231979 down | ARMC5     |

|           |          |          |               |               |               |          |
|-----------|----------|----------|---------------|---------------|---------------|----------|
| 227743_at | 0.030871 | 0.029501 | 1.31309 up    | 1.06064 up    | 1.238017 down | MYO15B   |
| 227747_at | 0.004842 | 0.00335  | 2.423123 up   | 1.453364 up   | 1.667251 down | MPZL3    |
| 227748_at | 0.001963 | 0.00101  | 1.797238 up   | 2.472014 up   | 1.375451 up   | CCBL2    |
| 227751_at | 0.015703 | 0.013925 | 1.164326 down | 1.984752 up   | 2.310899 up   | PDCD5    |
| 227752_at | 0.008441 | 0.006706 | 1.302188 down | 2.085062 down | 1.601199 down | SPTLC3   |
| 227757_at | 0.014618 | 0.012841 | 1.863826 up   | 1.018795 down | 1.898857 down | CUL4A    |
| 227760_at | 5.36E-07 | 1.21E-08 | 18.53246 up   | 7.848331 up   | 2.361326 down | IGFBPL1  |
| 227765_at | 0.021674 | 0.020047 | 1.365405 down | 1.662563 down | 1.217634 down |          |
| 227769_at | 9.07E-08 | 1.02E-09 | 19.63163 up   | 25.83548 up   | 1.316014 up   |          |
| 227778_at | 6.78E-04 | 2.39E-04 | 1.849675 down | 2.020786 down | 1.092509 down | HEATR7A  |
| 227780_s_ | 0.019699 | 0.018011 | 1.956896 up   | 1.356713 up   | 1.44238 down  | ECSCR    |
| 227781_x_ | 9.20E-04 | 3.62E-04 | 2.578686 up   | 1.452471 down | 3.745465 down | FAM57B   |
| 227786_at | 0.001041 | 4.28E-04 | 1.064358 down | 2.597373 up   | 2.764535 up   | MED30    |
| 227790_at | 6.65E-04 | 2.33E-04 | 1.691232 up   | 2.684914 up   | 1.587549 up   | UBE2CBP  |
| 227791_at | 1.00E-05 | 7.59E-07 | 6.7754 down   | 1.536851 down | 4.408627 up   | SLC9A9   |
| 227792_at | 1.29E-04 | 2.55E-05 | 10.42098 down | 10.72959 down | 1.029615 down | ITPRIPL2 |
| 227795_at | 0.009693 | 0.007915 | 1.330485 up   | 1.238015 down | 1.64716 down  | NDUFV1   |
| 227796_at | 3.61E-04 | 1.02E-04 | 1.977969 up   | 2.317387 up   | 1.171599 up   | ZFP62    |
| 227799_at | 0.007697 | 0.006    | 1.415539 up   | 1.051911 up   | 1.345683 down | MYO1G    |
| 227803_at | 5.10E-04 | 1.62E-04 | 1.881207 up   | 4.559895 up   | 2.42392 up    | ENPP5    |
| 227804_at | 7.60E-04 | 2.80E-04 | 2.493706 up   | 2.479349 up   | 1.005791 down | TLCD1    |
| 227805_at | 0.005546 | 0.003973 | 2.153393 down | 1.871004 down | 1.150929 up   |          |
| 227807_at | 0.001356 | 6.15E-04 | 2.213689 down | 1.412157 down | 1.567594 up   | PARP9    |
| 227808_at | 0.002586 | 0.001468 | 4.321207 down | 2.807356 down | 1.539245 up   | DNAJC15  |
| 227811_at | 0.001631 | 7.88E-04 | 1.433669 up   | 1.373836 up   | 1.043552 down | FGD3     |
| 227812_at | 0.00326  | 0.002001 | 5.425353 down | 1.607232 up   | 8.719803 up   | TNFRSF19 |
| 227813_at | 0.010525 | 0.008735 | 1.519733 down | 1.194569 down | 1.272202 up   | THAP6    |
| 227816_at | 9.57E-06 | 7.13E-07 | 3.014009 down | 1.784473 up   | 5.378418 up   | NTN1     |
| 227818_at | 8.94E-06 | 6.51E-07 | 4.141386 up   | 3.430196 up   | 1.207332 down | CCDC21   |
| 227820_at | 5.95E-04 | 2.00E-04 | 1.385147 up   | 1.408323 down | 1.950733 down | TBC1D25  |
| 227823_at | 0.01082  | 0.009026 | 1.499343 down | 1.714619 down | 1.14358 down  | RGAG4    |
| 227824_at | 0.024659 | 0.023097 | 1.668879 up   | 1.245341 up   | 1.340098 down | PRKCB    |
| 227825_at | 0.010272 | 0.008473 | 1.248696 down | 1.458617 down | 1.168111 down | NAIF1    |
| 227828_s_ | 2.80E-06 | 1.26E-07 | 9.923747 down | 13.64449 down | 1.374934 down | FAM176A  |

|           |          |          |               |               |               |           |
|-----------|----------|----------|---------------|---------------|---------------|-----------|
| 227829_at | 0.002671 | 0.001532 | 3.08425 up    | 2.079433 up   | 1.483217 down | GYLTL1B   |
| 227830_at | 2.35E-06 | 9.90E-08 | 29.02925 up   | 27.52486 up   | 1.054656 down | GABRB3    |
| 227836_at | 0.018209 | 0.016482 | 2.057732 down | 1.157518 down | 1.77771 up    | UTP23     |
| 227837_at | 0.001196 | 5.19E-04 | 1.250608 up   | 2.136156 up   | 1.708093 up   | LOC729570 |
| 227839_at | 0.004378 | 0.002942 | 3.418186 down | 3.263765 down | 1.047314 up   | MBD5      |
| 227840_at | 3.74E-05 | 4.72E-06 | 2.515985 down | 2.87942 down  | 1.14445 down  | C2orf76   |
| 227842_at | 0.00246  | 0.001373 | 2.029559 down | 1.163245 down | 1.74474 up    | RAB30     |
| 227845_s_ | 0.008173 | 0.006454 | 1.761251 up   | 1.212338 up   | 1.452772 down | SHD       |
| 227847_at | 6.40E-04 | 2.22E-04 | 1.927725 down | 2.532841 down | 1.313902 down | EPM2AIP1  |
| 227849_at | 0.008269 | 0.006542 | 1.253654 down | 1.349075 up   | 1.691274 up   | RP9       |
| 227850_x_ | 3.58E-06 | 1.78E-07 | 27.184 down   | 13.26691 down | 2.049008 up   | CDC42EP5  |
| 227853_at | 1.83E-06 | 6.83E-08 | 4.605355 down | 5.018183 down | 1.089641 down |           |
| 227855_at | 0.039521 | 0.038274 | 1.641009 down | 1.403711 down | 1.169051 up   | FLJ10357  |
| 227856_at | 4.42E-05 | 5.97E-06 | 9.130321 down | 8.862928 down | 1.03017 up    | C4orf32   |
| 227859_at | 0.007788 | 0.00609  | 2.40306 down  | 1.519061 down | 1.581937 up   | DNAJC27   |
| 227860_at | 0.004227 | 0.002801 | 1.403676 up   | 8.6867 up     | 6.188537 up   | CPXM1     |
| 227861_at | 0.01135  | 0.009553 | 1.667731 up   | 1.818395 up   | 1.090341 up   | TMEM161B  |
| 227862_at | 0.00136  | 6.18E-04 | 5.441708 down | 1.5519 down   | 3.506481 up   | TRNP1     |
| 227863_at | 3.21E-05 | 3.88E-06 | 1.115322 down | 8.144072 down | 7.301989 down | CTSD      |
| 227865_at | 4.31E-04 | 1.29E-04 | 3.195533 down | 1.763238 down | 1.81231 up    | C9orf103  |
| 227868_at | 0.00981  | 0.008031 | 1.736661 down | 2.213233 down | 1.274418 down | LOC154761 |
| 227870_at | 0.002043 | 0.001068 | 3.585839 down | 3.417426 up   | 12.25434 up   | IGDCC4    |
| 227872_at | 0.044094 | 0.042859 | 1.583407 up   | 1.251719 up   | 1.264986 down | POLR3A    |
| 227873_at | 5.71E-04 | 1.89E-04 | 1.824713 down | 2.329784 down | 1.276795 down | TXNDC15   |
|           |          |          |               |               |               | LOC100132 |
|           |          |          |               |               |               | 969 ///   |
| 227880_s_ | 6.30E-04 | 2.16E-04 | 1.92073 down  | 1.308708 down | 1.467654 up   | TMEM185A  |
| 227884_at | 0.001209 | 5.27E-04 | 2.000905 up   | 5.147957 up   | 2.572814 up   | TAF15     |
| 227889_at | 7.22E-04 | 2.61E-04 | 3.860481 down | 5.964202 down | 1.544938 down | LPCAT2    |
| 227892_at | 6.06E-04 | 2.06E-04 | 3.583485 up   | 6.60717 up    | 1.843783 up   | PRKAA2    |
| 227896_at | 9.34E-04 | 3.70E-04 | 3.049474 up   | 2.76075 up    | 1.104582 down | BCCIP     |
| 227900_at | 2.79E-04 | 7.22E-05 | 3.352953 down | 4.967091 down | 1.481408 down | CBLB      |
| 227903_x_ | 0.012744 | 0.010943 | 1.88092 down  | 2.251775 down | 1.197167 down | C19orf20  |
| 227905_s_ | 0.006915 | 0.005256 | 2.576515 down | 2.001527 down | 1.287275 up   | AZI2      |

|           |          |          |          |      |          |      |          |      |             |
|-----------|----------|----------|----------|------|----------|------|----------|------|-------------|
| 227908_at | 1.64E-04 | 3.54E-05 | 2.32718  | down | 2.394108 | down | 1.02876  | down | TBC1D24     |
| 227910_at | 9.35E-04 | 3.70E-04 | 2.560111 | down | 2.963642 | down | 1.157623 | down | XPNPEP3     |
| 227912_s_ | 0.003034 | 0.001819 | 1.217357 | down | 1.381857 | up   | 1.682214 | up   | EXOSC3      |
| 227915_at | 9.82E-04 | 3.96E-04 | 1.406465 | up   | 1.267816 | down | 1.78314  | down | ASB2        |
| 227916_x_ | 0.003341 | 0.002069 | 1.859643 | up   | 2.286388 | up   | 1.229477 | up   | EXOSC3      |
| 227920_at | 4.54E-06 | 2.51E-07 | 10.24878 | up   | 7.143942 | up   | 1.434612 | down | BEND3       |
| 227921_at | 3.75E-06 | 1.90E-07 | 2.518566 | up   | 9.380576 | up   | 3.72457  | up   |             |
| 227922_x_ | 0.001141 | 4.86E-04 | 1.309874 | down | 1.759151 | up   | 2.304265 | up   | LOC441124   |
| 227924_at | 0.005148 | 0.003625 | 1.528437 | up   | 1.972939 | up   | 1.290821 | up   | INO80D      |
| 227925_at | 1.21E-04 | 2.33E-05 | 4.054533 | down | 2.188501 | down | 1.852653 | up   | FLJ39051    |
|           |          |          |          |      |          |      |          |      | NBPF11 ///  |
| 227926_s_ | 6.78E-04 | 2.39E-04 | 5.589065 | down | 4.246371 | down | 1.316198 | up   | RP11-94I2.2 |
| 227927_at | 5.16E-05 | 7.36E-06 | 3.008622 | down | 2.447905 | down | 1.22906  | up   |             |
| 227928_at | 1.60E-04 | 3.44E-05 | 3.873571 | up   | 5.773747 | up   | 1.490549 | up   | C12orf48    |
| 227931_at | 8.90E-04 | 3.46E-04 | 2.753732 | up   | 2.592787 | up   | 1.062074 | down | INO80D      |
| 227933_at | 6.24E-04 | 2.13E-04 | 5.92953  | up   | 2.855434 | up   | 2.076577 | down | LINGO1      |
| 227935_s_ | 1.60E-04 | 3.44E-05 | 1.185454 | down | 2.360591 | down | 1.991298 | down | PCGF5       |
| 227936_at | 8.86E-04 | 3.44E-04 | 2.11678  | up   | 2.779162 | up   | 1.31292  | up   | TMEM68      |
| 227940_at | 0.017177 | 0.015424 | 2.446365 | down | 1.949121 | down | 1.255112 | up   | LOC339803   |
| 227944_at | 0.00123  | 5.37E-04 | 1.619381 | up   | 1.275699 | down | 2.065843 | down | PTPN3       |
| 227945_at | 0.017251 | 0.015499 | 1.389105 | down | 1.923595 | down | 1.384773 | down | TBC1D1      |
| 227948_at | 5.18E-04 | 1.66E-04 | 2.187775 | up   | 9.130264 | up   | 4.173311 | up   | FGD4        |
| 227950_at | 0.009302 | 0.007542 | 1.289642 | down | 1.188787 | up   | 1.533109 | up   | UBE2H       |
| 227951_s_ | 0.001127 | 4.78E-04 | 2.232028 | down | 1.920726 | down | 1.162075 | up   | FAM98C      |
| 227954_at | 7.60E-04 | 2.80E-04 | 4.394308 | down | 2.512067 | down | 1.74928  | up   | ITPRIPL2    |
| 227956_at | 0.006946 | 0.005286 | 1.480705 | up   | 1.096962 | down | 1.624276 | down | ITPRIPL2    |
| 227960_s_ | 2.74E-04 | 7.05E-05 | 2.466626 | down | 2.141385 | down | 1.151884 | up   | FAHD1       |
| 227961_at | 1.22E-05 | 1.00E-06 | 17.14158 | down | 13.29702 | down | 1.28913  | up   | CTSB        |
| 227964_at | 0.015286 | 0.013511 | 2.2018   | down | 2.437673 | down | 1.107127 | down | FRMD8       |
| 227965_at | 0.004213 | 0.002789 | 1.920928 | down | 1.710172 | down | 1.123236 | up   |             |
| 227968_at | 4.09E-04 | 1.21E-04 | 1.407571 | down | 1.597694 | down | 1.135072 | down | PDDC1       |
| 227974_at | 0.018126 | 0.016399 | 1.79836  | down | 1.427915 | down | 1.259431 | up   |             |
| 227975_at | 0.001886 | 9.56E-04 | 2.185685 | up   | 1.160817 | up   | 1.882885 | down | GPRIN1      |

|           |          |          |               |               |               |           |
|-----------|----------|----------|---------------|---------------|---------------|-----------|
| 227976_at | 9.63E-04 | 3.86E-04 | 1.95937 down  | 1.432949 down | 1.36737 up    | LOC644538 |
| 227977_at | 3.92E-07 | 7.86E-09 | 5.094953 down | 1.718942 down | 2.964005 up   | ZADH2     |
| 227978_s_ | 2.27E-05 | 2.39E-06 | 7.631199 down | 2.132177 down | 3.579064 up   | ZADH2     |
| 227979_at | 0.006519 | 0.004886 | 2.19722 down  | 1.584072 up   | 3.480554 up   |           |
| 227980_at | 6.34E-04 | 2.18E-04 | 2.994395 up   | 2.655765 up   | 1.127507 down | ZNF322A   |
| 227981_at | 6.94E-05 | 1.11E-05 | 2.230446 down | 2.171945 down | 1.026935 up   | CYB561D1  |
| 227983_at | 7.59E-06 | 5.23E-07 | 3.77622 down  | 3.386784 down | 1.114987 up   | RILPL2    |
| 227985_at | 4.51E-04 | 1.37E-04 | 2.597831 up   | 2.526182 up   | 1.028363 down |           |
| 227986_at | 0.006847 | 0.005189 | 2.230967 down | 1.82078 down  | 1.225281 up   | ZNF343    |
| 227990_at | 0.00937  | 0.007604 | 1.967631 down | 1.663066 down | 1.183135 up   | SLU7      |
| 227993_at | 0.001842 | 9.26E-04 | 2.25476 up    | 1.529637 up   | 1.474049 down | METAP2    |
| 227997_at | 4.77E-04 | 1.48E-04 | 1.785962 up   | 16.00428 up   | 8.961156 up   | IL17RD    |
| 227998_at | 7.44E-06 | 5.10E-07 | 4.122298 down | 6.338702 down | 1.537662 down | S100A16   |
| 228001_at | 0.012773 | 0.010971 | 1.047883 up   | 1.990569 up   | 1.89961 up    | TMEM50B   |
| 228003_at | 9.59E-04 | 3.83E-04 | 2.713238 down | 1.664623 down | 1.629941 up   | RAB30     |
| 228004_at | 0.00164  | 7.95E-04 | 4.082988 up   | 3.459434 up   | 1.180247 down | C20orf56  |
| 228006_at | 5.05E-04 | 1.60E-04 | 5.661616 down | 2.929727 down | 1.932473 up   |           |
| 228008_at | 9.58E-06 | 7.17E-07 | 4.42956 up    | 4.787566 up   | 1.080822 up   |           |
| 228010_at | 0.004455 | 0.003011 | 2.422034 up   | 2.419761 up   | 1.000939 down | PPP2R2C   |
| 228011_at | 0.00225  | 0.001219 | 2.146546 down | 1.110529 down | 1.932904 up   | FAM92A1   |
| 228012_at | 0.017555 | 0.015813 | 1.464117 up   | 2.245946 up   | 1.533994 up   | MATR3     |
| 228014_at | 0.001144 | 4.87E-04 | 1.990405 down | 3.004938 down | 1.509712 down | PTRH1     |
| 228015_s_ | 4.28E-04 | 1.28E-04 | 1.358606 up   | 1.583172 down | 2.150907 down | TRIM8     |
| 228016_s_ | 0.006645 | 0.005002 | 1.534403 up   | 1.504195 down | 2.308042 down | EDEM2     |
| 228017_s_ | 0.001269 | 5.62E-04 | 4.197004 up   | 3.112542 up   | 1.348417 down | NKAIN4    |
| 228020_at | 0.002247 | 0.001216 | 1.65391 up    | 2.337968 up   | 1.4136 up     | PTCD3     |
| 228028_at | 0.001631 | 7.89E-04 | 1.495231 up   | 1.361835 down | 2.036258 down | FAM59B    |
| 228029_at | 3.91E-04 | 1.14E-04 | 2.931869 up   | 3.870341 up   | 1.320093 up   | ZNF721    |
| 228031_at | 9.99E-04 | 4.06E-04 | 2.408051 down | 2.367173 down | 1.017269 up   | TTPAL     |
| 228033_at | 0.00322  | 0.001969 | 3.001334 up   | 3.954942 up   | 1.317728 up   | E2F7      |
| 228035_at | 3.05E-05 | 3.61E-06 | 2.199683 up   | 4.091192 up   | 1.8599 up     | STK33     |
| 228038_at | 2.53E-12 | 4.14E-16 | 318.1647 up   | 354.2704 up   | 1.113481 up   | SOX2      |
| 228039_at | 0.001898 | 9.65E-04 | 1.692834 up   | 2.151467 up   | 1.270926 up   | DDX46     |
| 228044_at | 1.01E-04 | 1.84E-05 | 5.185557 down | 2.896318 down | 1.790397 up   | SERP2     |

|           |          |          |               |               |               |           |
|-----------|----------|----------|---------------|---------------|---------------|-----------|
| 228045_at | 0.00265  | 0.001515 | 1.570783 up   | 3.139185 up   | 1.998485 up   |           |
| 228047_at | 0.004306 | 0.002877 | 1.540098 up   | 1.934573 up   | 1.256137 up   | SNORA72   |
| 228048_at | 0.010057 | 0.008273 | 1.222499 up   | 1.408593 down | 1.722004 down | C10orf41  |
| 228051_at | 1.90E-06 | 7.26E-08 | 5.292499 up   | 6.958817 up   | 1.314845 up   | LOC202451 |
| 228052_x_ | 0.002048 | 0.001071 | 1.363461 up   | 1.195147 down | 1.629536 down | TCF3      |
| 228054_at | 4.93E-04 | 1.54E-04 | 1.097285 down | 2.244056 down | 2.045099 down | TMEM44    |
| 228060_at | 2.65E-08 | 1.76E-10 | 6.592162 up   | 9.838114 up   | 1.492396 up   | SLC35F1   |
| 228062_at | 0.004546 | 0.003094 | 7.329741 down | 4.205231 down | 1.743006 up   | NAP1L5    |
| 228065_at | 0.002262 | 0.001228 | 2.388038 down | 2.414446 down | 1.011058 down | BCL9L     |
| 228066_at | 4.81E-04 | 1.49E-04 | 2.158032 up   | 1.191817 up   | 1.810707 down | C17orf96  |
| 228068_at | 0.00238  | 0.001314 | 1.481499 up   | 1.03188 down  | 1.528728 down | GOLGA7B   |
| 228071_at | 9.94E-04 | 4.02E-04 | 1.126167 up   | 1.099667 down | 1.238409 down | GIMAP7    |
| 228072_at | 7.04E-04 | 2.53E-04 | 1.232523 up   | 2.215088 down | 2.730146 down | SYT12     |
| 228073_at | 0.013114 | 0.011312 | 1.667386 down | 1.583027 down | 1.05329 up    | NANP      |
| 228075_x_ | 1.71E-04 | 3.77E-05 | 2.5028 up     | 1.981419 up   | 1.263135 down | TFB1M     |
| 228080_at | 4.70E-06 | 2.63E-07 | 16.33187 down | 9.804005 down | 1.665837 up   | LAYN      |
| 228082_at | 1.44E-06 | 4.84E-08 | 8.17407 down  | 7.544161 down | 1.083496 up   | ASAM      |
| 228083_at | 0.023512 | 0.021924 | 1.519361 down | 1.081006 down | 1.405507 up   | CACNA2D4  |
| 228086_at | 1.47E-04 | 3.04E-05 | 2.082815 up   | 2.293269 up   | 1.101043 up   | STK33     |
| 228089_x_ | 6.46E-05 | 1.00E-05 | 1.657714 down | 1.985033 down | 1.197452 down | TMEM179B  |
| 228093_at | 0.001134 | 4.81E-04 | 2.135752 down | 1.661043 down | 1.28579 up    | ZNF599    |
| 228094_at | 0.017863 | 0.016125 | 1.566917 up   | 1.057023 up   | 1.482386 down | AMICA1    |
| 228096_at | 0.003409 | 0.002126 | 2.526728 down | 1.54417 down  | 1.636302 up   | C1orf151  |
| 228097_at | 0.001076 | 4.48E-04 | 1.256653 up   | 2.790534 up   | 2.220608 up   | MYLIP     |
| 228098_s_ | 0.001075 | 4.48E-04 | 1.066498 down | 6.295351 up   | 6.713979 up   | MYLIP     |
| 228099_at | 0.018487 | 0.016765 | 1.061136 down | 2.032562 up   | 2.156825 up   | ZNF550    |
| 228100_at | 7.60E-04 | 2.80E-04 | 2.530816 up   | 3.581242 up   | 1.415054 up   | C1orf88   |
| 228101_at | 9.52E-04 | 3.79E-04 | 4.358288 down | 2.181929 down | 1.997447 up   | APBA1     |
| 228103_s_ | 0.017196 | 0.015442 | 1.288709 up   | 1.01426 down  | 1.307085 down | NRP2      |
| 228106_at | 0.002369 | 0.001306 | 1.304247 up   | 4.299426 up   | 3.296483 up   | C4orf30   |
|           |          |          |               |               |               | LOC100132 |
| 228117_at | 0.010375 | 0.008578 | 1.295005 up   | 1.204654 down | 1.560033 down | 273       |
| 228120_at | 1.47E-06 | 5.04E-08 | 7.859323 up   | 8.065444 up   | 1.026226 up   |           |
| 228121_at | 1.47E-04 | 3.04E-05 | 1.067399 up   | 10.01522 down | 10.69023 down | TGFB2     |



|           |          |          |          |      |          |      |          |      |           |
|-----------|----------|----------|----------|------|----------|------|----------|------|-----------|
| 228125_at | 0.010214 | 0.008419 | 1.650659 | down | 1.421685 | down | 1.161058 | up   | ZNF397OS  |
| 228128_x_ | 0.002719 | 0.001568 | 25.33874 | down | 14.56968 | down | 1.739142 | up   | PAPPA     |
| 228129_at | 7.72E-04 | 2.87E-04 | 2.095434 | up   | 1.587952 | up   | 1.319583 | down | SERBP1    |
| 228130_at | 5.16E-04 | 1.65E-04 | 1.596442 | down | 1.135618 | down | 1.405792 | up   | ZNF397OS  |
| 228131_at | 8.86E-05 | 1.52E-05 | 3.798217 | down | 2.513525 | down | 1.511112 | up   | ERCC1     |
| 228137_s_ | 0.005468 | 0.003908 | 1.293568 | up   | 1.465239 | down | 1.895386 | down | PPP2R2C   |
| 228138_at | 0.038945 | 0.037694 | 1.527272 | up   | 1.361806 | up   | 1.121505 | down | ZNF498    |
| 228139_at | 0.002868 | 0.001687 | 2.220192 | down | 1.146828 | down | 1.935942 | up   | RIPK3     |
| 228140_s_ | 0.002492 | 0.001398 | 1.50997  | up   | 1.273554 | down | 1.923028 | down | PPP2R2C   |
| 228141_at | 6.26E-05 | 9.58E-06 | 3.407482 | down | 2.925025 | down | 1.164941 | up   | GPX8      |
| 228142_at | 0.001088 | 4.55E-04 | 2.023344 | down | 1.461519 | down | 1.384412 | up   | UCRC      |
| 228144_at | 6.24E-05 | 9.54E-06 | 3.408098 | up   | 5.61186  | up   | 1.646625 | up   | ZNF300    |
| 228145_s_ | 0.002809 | 0.00164  | 2.788443 | up   | 2.58903  | up   | 1.077023 | down | ZNF398    |
| 228148_at | 2.94E-05 | 3.41E-06 | 1.521179 | down | 1.928794 | down | 1.26796  | down | ZNF584    |
| 228150_at | 6.01E-04 | 2.03E-04 | 5.498974 | down | 1.858085 | down | 2.959484 | up   | SEC16B    |
| 228152_s_ | 2.32E-05 | 2.46E-06 | 8.635252 | down | 3.979687 | down | 2.169832 | up   | DDX60L    |
|           |          |          |          |      |          |      |          |      | LOC645166 |
|           |          |          |          |      |          |      |          |      | ///       |
| 228158_at | 1.10E-04 | 2.06E-05 | 10.67872 | down | 8.933059 | down | 1.195416 | up   | LOC654342 |
| 228159_at | 7.86E-05 | 1.31E-05 | 2.470023 | up   | 2.222029 | up   | 1.111607 | down |           |
| 228160_at | 0.002761 | 0.001604 | 1.312385 | down | 2.122016 | down | 1.616915 | down | LOC339290 |
| 228161_at | 7.78E-04 | 2.90E-04 | 2.860933 | down | 2.263716 | down | 1.263822 | up   | RAB32     |
| 228162_at | 0.005571 | 0.003999 | 2.10972  | down | 1.561008 | down | 1.351511 | up   | ESD       |
|           |          |          |          |      |          |      |          |      | ST6GALNAC |
| 228163_at | 1.41E-04 | 2.88E-05 | 1.356478 | up   | 1.106811 | down | 1.501364 | down | 4         |
| 228164_at | 0.001336 | 6.03E-04 | 1.253179 | down | 2.507182 | down | 2.000658 | down | AP4E1     |
| 228171_s_ | 0.002095 | 0.001103 | 3.241658 | down | 1.973296 | down | 1.642764 | up   | PLEKHG4   |
| 228172_at | 0.004431 | 0.002987 | 1.993192 | down | 2.11379  | down | 1.060505 | down |           |
| 228176_at | 0.015597 | 0.013824 | 9.099409 | down | 2.068062 | down | 4.399968 | up   | S1PR3     |
| 228177_at | 0.003479 | 0.002184 | 2.133779 | down | 1.496298 | down | 1.426038 | up   | CREBBP    |
| 228183_s_ | 4.05E-06 | 2.13E-07 | 2.7059   | up   | 2.0115   | up   | 1.345215 | down | RPAIN     |
| 228185_at | 4.02E-04 | 1.18E-04 | 6.196318 | down | 4.902278 | down | 1.263967 | up   | ZNF25     |
| 228186_s_ | 6.01E-04 | 2.03E-04 | 1.509482 | down | 9.544563 | up   | 14.40734 | up   | RSPO3     |
| 228188_at | 5.46E-05 | 7.93E-06 | 12.28466 | down | 10.25467 | down | 1.197958 | up   | FOSL2     |

|           |          |          |               |               |               |                        |
|-----------|----------|----------|---------------|---------------|---------------|------------------------|
| 228189_at | 0.013663 | 0.011872 | 1.549285 up   | 1.88438 up    | 1.21629 up    | BAG4<br>ATG4C ///      |
| 228190_at | 3.58E-04 | 1.01E-04 | 1.233121 up   | 2.333317 up   | 1.892205 up   | CTR9                   |
| 228191_at | 1.06E-05 | 8.18E-07 | 7.793396 up   | 15.93948 up   | 2.045255 up   |                        |
| 228194_s_ | 0.001335 | 6.02E-04 | 1.91267 up    | 1.910326 up   | 1.001227 down | SORCS1                 |
| 228195_at | 7.26E-04 | 2.63E-04 | 1.662143 down | 1.541686 down | 1.078133 up   | C2orf88                |
| 228197_at | 0.013472 | 0.011676 | 1.499677 up   | 1.243222 down | 1.86443 down  | C1orf86                |
| 228199_at | 0.006296 | 0.004677 | 1.681028 up   | 1.008762 up   | 1.666427 down | LOC729234<br>LOC100128 |
| 228203_at | 0.014903 | 0.013126 | 1.618201 up   | 1.145542 up   | 1.412607 down | 074                    |
| 228205_at | 1.60E-04 | 3.42E-05 | 3.265387 up   | 4.520314 up   | 1.384312 up   | TKT                    |
| 228206_at | 1.14E-04 | 2.16E-05 | 2.680498 up   | 2.396241 up   | 1.118626 down | HS3ST4                 |
| 228207_at | 6.23E-06 | 3.89E-07 | 1.855461 down | 2.858155 down | 1.540401 down |                        |
| 228208_x_ | 0.002896 | 0.001708 | 3.084833 down | 1.963595 down | 1.571013 up   | ZNF354C                |
| 228212_at | 2.23E-04 | 5.32E-05 | 1.705021 up   | 1.000338 up   | 1.704446 down | ISM2                   |
| 228213_at | 0.037175 | 0.035901 | 1.505373 down | 1.023705 down | 1.470514 up   | H2AFJ                  |
| 228216_at | 0.001775 | 8.82E-04 | 1.891943 up   | 3.981892 up   | 2.104658 up   |                        |
| 228219_s_ | 0.017763 | 0.016021 | 1.479036 up   | 1.269254 down | 1.877273 down | UPB1                   |
| 228224_at | 1.78E-06 | 6.59E-08 | 11.90976 down | 1.433217 down | 8.309809 up   | PRELP                  |
| 228226_s_ | 0.014025 | 0.012237 | 1.839715 up   | 1.416272 up   | 1.298984 down | ZNF775                 |
| 228228_at | 5.51E-04 | 1.80E-04 | 2.869344 down | 1.113087 down | 2.577824 up   | DACT3                  |
| 228230_at | 0.00227  | 0.001235 | 1.77531 down  | 1.210466 down | 1.466634 up   | PRIC285                |
| 228233_at | 0.004139 | 0.002726 | 2.14131 up    | 1.521517 up   | 1.407352 down | FREM1                  |
| 228234_at | 6.76E-04 | 2.38E-04 | 10.20916 down | 10.1195 down  | 1.00886 up    | TICAM2                 |
| 228235_at | 1.29E-04 | 2.54E-05 | 6.582544 down | 1.332082 down | 4.941546 up   | MGC16121               |
| 228236_at | 0.001389 | 6.35E-04 | 2.552566 up   | 1.493217 up   | 1.709441 down | C20orf54               |
| 228238_at | 3.04E-04 | 8.11E-05 | 3.296631 up   | 3.314292 up   | 1.005357 up   | GAS5                   |
| 228239_at | 0.004251 | 0.002823 | 3.048726 down | 2.403388 down | 1.268512 up   | FAM165B                |
| 228240_at | 2.10E-04 | 4.91E-05 | 2.028633 up   | 1.586896 up   | 1.278365 down |                        |
| 228242_at | 7.95E-04 | 2.98E-04 | 5.176382 up   | 7.967617 up   | 1.539225 up   | N4BP2                  |
| 228243_at | 6.38E-05 | 9.84E-06 | 4.382623 down | 3.5059 down   | 1.250071 up   |                        |
| 228244_at | 4.20E-05 | 5.57E-06 | 2.450207 down | 2.382743 down | 1.028314 up   | BLOC1S3                |

|           |          |          |               |               |               |              |
|-----------|----------|----------|---------------|---------------|---------------|--------------|
|           |          |          |               |               |               | LOC728715    |
|           |          |          |               |               |               | /// OVOS /// |
| 228245_s_ | 3.00E-07 | 5.30E-09 | 22.66588 up   | 35.63179 up   | 1.572045 up   | OVOS2        |
| 228247_at | 1.23E-04 | 2.37E-05 | 3.269289 down | 3.824604 down | 1.169858 down | LOC283788    |
| 228250_at | 0.002875 | 0.001693 | 4.978101 down | 1.713511 down | 2.905206 up   | FNIP1        |
| 228252_at | 0.001478 | 6.89E-04 | 4.128184 up   | 3.654679 up   | 1.129561 down | PIF1         |
| 228253_at | 0.00751  | 0.00582  | 2.90913 down  | 3.04222 down  | 1.045749 down | LOXL3        |
| 228254_at | 2.86E-04 | 7.45E-05 | 2.560838 down | 3.343501 down | 1.305628 down | STAM2        |
| 228256_s_ | 0.034024 | 0.032713 | 2.910191 up   | 2.742735 up   | 1.061054 down | EPB41L4A     |
| 228257_at | 8.22E-04 | 3.12E-04 | 1.257985 down | 2.460353 down | 1.955789 down | ANKRD52      |
| 228259_s_ | 3.47E-04 | 9.69E-05 | 2.018901 up   | 1.91687 up    | 1.053228 down | EPB41L4A     |
| 228260_at | 4.78E-05 | 6.63E-06 | 22.87334 up   | 23.624 up     | 1.032818 up   | ELAVL2       |
| 228261_at | 0.002974 | 0.001771 | 1.051558 down | 1.818192 down | 1.729046 down | MIB2         |
| 228262_at | 0.00975  | 0.007972 | 1.968283 up   | 1.464644 up   | 1.343865 down | MAP7D2       |
| 228269_x_ | 9.42E-04 | 3.74E-04 | 1.530497 down | 1.111868 up   | 1.701711 up   | KCNIP3       |
| 228274_at | 1.97E-04 | 4.51E-05 | 1.178173 up   | 3.27842 down  | 3.862545 down | SDSL         |
| 228275_at | 6.75E-04 | 2.37E-04 | 2.104055 up   | 2.150344 up   | 1.022 up      |              |
| 228276_at | 0.002394 | 0.001324 | 1.250073 up   | 1.944684 down | 2.430996 down | SAMD1        |
| 228277_at | 0.016609 | 0.014851 | 1.971421 up   | 1.623204 up   | 1.214525 down | FBXL19       |
| 228278_at | 2.48E-04 | 6.16E-05 | 2.850214 down | 3.496804 down | 1.226857 down | NFIX         |
| 228279_s_ | 0.002634 | 0.001503 | 1.805381 up   | 1.343381 down | 2.425314 down |              |
| 228280_at | 0.001869 | 9.45E-04 | 8.350543 down | 3.626917 down | 2.302381 up   | ZC3HAV1L     |
| 228281_at | 0.002856 | 0.001677 | 4.432919 up   | 4.572087 up   | 1.031394 up   | C11orf82     |
| 228284_at | 3.12E-04 | 8.40E-05 | 2.818513 up   | 4.410561 up   | 1.564854 up   | TLE1         |
| 228287_at | 0.002313 | 0.001265 | 1.429521 up   | 3.302988 up   | 2.310556 up   | ING5         |
| 228289_at | 0.003213 | 0.001964 | 1.485794 up   | 1.985303 up   | 1.33619 up    |              |
|           |          |          |               |               |               | NCRNA0015    |
| 228290_at | 0.011153 | 0.009362 | 1.365167 down | 1.320938 up   | 1.803301 up   | 3            |
|           |          |          |               |               |               | NCRNA0015    |
| 228291_s_ | 0.01218  | 0.010386 | 1.602361 down | 1.826017 up   | 2.925939 up   | 3            |
| 228292_at | 0.001553 | 7.38E-04 | 1.555966 down | 2.003437 down | 1.287584 down |              |
| 228293_at | 0.005774 | 0.004183 | 3.176226 down | 2.171095 down | 1.462961 up   | DEPDC7       |
| 228294_s_ | 0.013063 | 0.011259 | 1.375118 up   | 1.133499 up   | 1.213162 down | tcag7.1196   |
| 228299_at | 1.54E-07 | 2.16E-09 | 2.093467 down | 8.487547 down | 4.054303 down | KCTD20       |

|           |          |          |          |      |          |      |          |      |           |
|-----------|----------|----------|----------|------|----------|------|----------|------|-----------|
| 228302_x_ | 0.001522 | 7.17E-04 | 5.208072 | down | 1.059139 | up   | 5.516073 | up   | CAMK2N1   |
| 228303_at | 0.019366 | 0.017663 | 1.868954 | down | 1.284308 | down | 1.455222 | up   | GALNT6    |
| 228304_at | 4.77E-04 | 1.48E-04 | 8.196242 | down | 2.400881 | down | 3.413848 | up   | RBM43     |
| 228307_at | 0.001666 | 8.12E-04 | 2.402368 | down | 1.285469 | up   | 3.088171 | up   | EMILIN3   |
| 228310_at | 0.006264 | 0.004646 | 2.340727 | up   | 1.233828 | up   | 1.897126 | down | ENAH      |
| 228311_at | 0.026428 | 0.024931 | 1.605155 | up   | 1.110412 | up   | 1.44555  | down | BCL6B     |
| 228312_at | 0.005442 | 0.003883 | 1.778818 | up   | 1.229549 | down | 2.187143 | down | PI16      |
| 228313_at | 0.016066 | 0.014294 | 1.513424 | up   | 1.052981 | up   | 1.437276 | down | GPRC5B    |
| 228314_at | 1.36E-04 | 2.74E-05 | 3.206626 | down | 1.573767 | down | 2.037549 | up   | LRRRC8C   |
| 228319_at | 0.001868 | 9.44E-04 | 1.961224 | up   | 1.542122 | down | 3.024447 | down | FAM84A    |
| 228320_x_ | 2.80E-05 | 3.20E-06 | 3.491756 | up   | 2.074335 | up   | 1.683314 | down | CCDC64    |
| 228322_at | 6.81E-04 | 2.41E-04 | 1.185113 | up   | 1.369091 | down | 1.622528 | down | NAT12     |
| 228325_at | 2.40E-04 | 5.88E-05 | 9.244094 | down | 4.98689  | down | 1.853679 | up   | KIAA0146  |
| 228326_at | 0.002755 | 0.001598 | 1.642818 | up   | 2.2426   | up   | 1.365093 | up   | WDR27     |
| 228329_at | 6.39E-04 | 2.21E-04 | 4.210592 | up   | 7.393879 | up   | 1.756019 | up   | DAB1      |
| 228332_s_ | 4.52E-04 | 1.37E-04 | 1.76625  | up   | 1.915712 | up   | 1.084621 | up   | C11orf31  |
| 228333_at | 0.002608 | 0.001484 | 10.43889 | down | 2.895785 | down | 3.604855 | up   |           |
| 228335_at | 1.54E-04 | 3.25E-05 | 56.84552 | down | 2.812149 | down | 20.21426 | up   | CLDN11    |
| 228338_at | 0.001326 | 5.96E-04 | 1.046861 | down | 1.793558 | up   | 1.877605 | up   | LOC120376 |
| 228340_at | 2.66E-05 | 2.98E-06 | 2.595908 | up   | 1.064381 | up   | 2.43889  | down | TLE3      |
| 228342_s_ | 1.99E-04 | 4.55E-05 | 2.750232 | up   | 2.717325 | up   | 1.01211  | down | ALPK3     |
| 228347_at | 0.001972 | 0.001017 | 13.40874 | down | 11.72329 | down | 1.143769 | up   | SIX1      |
| 228349_at | 4.27E-04 | 1.28E-04 | 2.032299 | up   | 2.478817 | up   | 1.219711 | up   |           |
| 228350_at | 0.001543 | 7.31E-04 | 1.135579 | up   | 1.685808 | down | 1.914368 | down | UNC13D    |
| 228351_at | 7.26E-04 | 2.63E-04 | 1.717341 | up   | 2.864709 | up   | 1.668107 | up   | HEATR1    |
| 228352_at | 0.004891 | 0.003396 | 1.820147 | up   | 1.029548 | down | 1.873929 | down | UNC13D    |
| 228353_x_ | 0.004813 | 0.003324 | 2.526304 | down | 2.066847 | down | 1.222299 | up   | UBASH3B   |
| 228354_at | 0.005456 | 0.003898 | 1.058053 | up   | 1.650169 | down | 1.745966 | down | MORN4     |
| 228356_at | 0.001689 | 8.27E-04 | 1.064832 | up   | 1.915116 | down | 2.039276 | down | ANKRD11   |
| 228357_at | 0.006122 | 0.004511 | 1.645158 | up   | 3.562347 | up   | 2.165352 | up   | UNK       |
| 228358_at | 0.026488 | 0.024992 | 1.085769 | up   | 1.330435 | up   | 1.225338 | up   | SOX12     |
| 228360_at | 0.001564 | 7.45E-04 | 1.715927 | up   | 2.542068 | down | 4.362003 | down | LYPD6B    |
| 228361_at | 0.003473 | 0.00218  | 1.751294 | up   | 1.935551 | up   | 1.105212 | up   | E2F2      |
| 228367_at | 1.25E-05 | 1.04E-06 | 14.07883 | down | 24.47079 | down | 1.738127 | down | ALPK2     |

|           |          |          |          |      |          |      |          |      |           |
|-----------|----------|----------|----------|------|----------|------|----------|------|-----------|
| 228368_at | 0.001145 | 4.88E-04 | 6.888795 | down | 1.376359 | down | 5.005085 | up   | ARHGAP20  |
| 228370_at | 1.50E-06 | 5.20E-08 | 15.52883 | up   | 17.21172 | up   | 1.108372 | up   | SNRPN     |
| 228371_s_ | 0.011175 | 0.009383 | 1.275628 | down | 1.065693 | down | 1.196994 | up   |           |
| 228380_at | 0.023394 | 0.021807 | 1.518187 | up   | 1.708234 | up   | 1.125181 |      |           |
| 228381_at | 0.001886 | 9.56E-04 | 2.529645 | up   | 2.795013 | up   | 1.104903 | up   | ATF7IP2   |
| 228382_at | 0.00599  | 0.004383 | 1.239359 | down | 1.69276  | down | 1.365835 | down | FAM105B   |
| 228384_s_ | 0.001462 | 6.79E-04 | 3.270223 | down | 3.083237 | down | 1.060646 | up   | PYROXD2   |
| 228388_at | 0.005678 | 0.004095 | 1.501206 | up   | 1.281065 | down | 1.923142 | down | NFKBIB    |
| 228390_at | 0.00463  | 0.00317  | 7.718964 | down | 2.995363 | down | 2.576971 | up   |           |
| 228391_at | 7.63E-04 | 2.82E-04 | 6.530967 | down | 4.439227 | down | 1.471195 | up   | CYP4V2    |
| 228394_at | 3.61E-04 | 1.02E-04 | 1.855095 | down | 2.09974  | down | 1.131877 | down | STK10     |
| 228395_at | 7.78E-04 | 2.90E-04 | 1.383591 | up   | 1.508322 | up   | 1.090151 | up   | GLT8D1    |
| 228396_at | 0.001278 | 5.68E-04 | 3.743168 | down | 2.105521 | up   | 7.88132  | up   | PRKG1     |
| 228399_at | 0.003181 | 0.001939 | 5.278838 | down | 2.825465 | down | 1.868308 | up   | OSR1      |
| 228405_at | 0.001791 | 8.93E-04 | 2.190276 | up   | 1.140011 | down | 2.496939 | down | RHPN1     |
| 228407_at | 1.42E-04 | 2.92E-05 | 1.70657  | down | 30.06232 | down | 17.61564 | down | SCUBE3    |
| 228408_s_ | 0.002915 | 0.001722 | 2.253045 | up   | 2.108165 | up   | 1.068723 | down | SDAD1     |
| 228411_at | 0.006097 | 0.004484 | 4.040926 | down | 2.235344 | down | 1.807743 | up   | PARD3B    |
| 228414_at | 0.004128 | 0.002716 | 1.175903 | down | 1.554767 | down | 1.32219  | down | KCNMA1    |
| 228415_at | 7.49E-07 | 1.97E-08 | 30.66555 | up   | 37.09937 | up   | 1.209806 | up   | AP1S2     |
| 228419_at | 0.016538 | 0.014773 | 1.448907 | up   | 1.100969 | up   | 1.316028 | down | METRNL    |
| 228420_at | 0.013317 | 0.011517 | 2.056367 | down | 1.717391 | down | 1.197378 | up   | PDCD2     |
| 228422_at | 0.001919 | 9.80E-04 | 2.223171 | up   | 2.224134 | up   | 1.000433 | up   | LHFPL4    |
| 228424_at | 0.002797 | 0.001631 | 2.065277 | down | 1.984076 | down | 1.040927 | up   | NAALADL1  |
| 228425_at | 0.001492 | 6.98E-04 | 3.165414 | down | 4.683829 | down | 1.479689 | down | LOC654433 |
| 228427_at | 4.73E-04 | 1.46E-04 | 2.984791 | up   | 1.64578  | up   | 1.813602 | down | FBXO16    |
| 228428_at | 0.00715  | 0.005481 | 1.199141 | up   | 1.127745 | down | 1.352324 | down | FAM102A   |
| 228429_x_ | 0.004211 | 0.002787 | 1.506317 | up   | 1.342758 | up   | 1.121809 | down | KIF9      |
|           |          |          |          |      |          |      |          |      | LOC100132 |
| 228438_at | 4.23E-06 | 2.27E-07 | 19.54361 | down | 11.57923 | down | 1.687816 | up   | 891       |
| 228440_at | 3.75E-05 | 4.73E-06 | 2.684647 | up   | 2.194551 | up   | 1.223324 | down |           |
| 228441_s_ | 7.53E-08 | 7.51E-10 | 6.16262  | up   | 3.775881 | up   | 1.632101 | down |           |
| 228443_s_ | 3.29E-04 | 9.03E-05 | 1.826563 | down | 3.430735 | down | 1.878246 | down |           |
| 228445_at | 4.50E-04 | 1.36E-04 | 2.80872  | down | 1.741074 | down | 1.613212 | up   | AIFM2     |

|           |          |          |               |               |               |           |
|-----------|----------|----------|---------------|---------------|---------------|-----------|
| 228450_at | 8.03E-05 | 1.34E-05 | 3.115025 up   | 2.435523 up   | 1.278996 down | PLEKHA7   |
| 228453_at | 1.23E-04 | 2.37E-05 | 4.329923 down | 4.262394 down | 1.015843 up   | KIAA1632  |
| 228455_at | 0.014893 | 0.013114 | 1.63344 up    | 3.942406 up   | 2.41356 up    | RBM15     |
| 228456_s_ | 4.89E-04 | 1.53E-04 | 1.466098 up   | 1.949814 up   | 1.329935 up   | LOC149832 |
| 228457_at | 0.002721 | 0.00157  | 2.507306 up   | 1.521795 up   | 1.647597 down |           |
| 228460_at | 0.002497 | 0.001401 | 1.794941 down | 1.401627 down | 1.280613 up   | ZNF319    |
| 228461_at | 4.31E-07 | 9.02E-09 | 5.889022 down | 6.255788 down | 1.06228 down  | SH3RF3    |
| 228462_at | 6.36E-06 | 3.99E-07 | 9.5348 up     | 10.0032 up    | 1.049126 up   | IRX2      |
| 228463_at | 5.97E-05 | 9.01E-06 | 6.929294 up   | 3.500441 up   | 1.979549 down | FOXA3     |
| 228464_at | 0.00116  | 4.97E-04 | 1.587895 up   | 2.720128 up   | 1.713041 up   |           |
| 228466_at | 5.30E-04 | 1.71E-04 | 3.520886 down | 2.426407 down | 1.45107 up    |           |
| 228467_at | 0.003641 | 0.002311 | 1.466742 up   | 1.207339 down | 1.770855 down | PURB      |
| 228468_at | 3.69E-04 | 1.05E-04 | 3.205647 up   | 5.86285 up    | 1.828913 up   | MASTL     |
| 228469_at | 3.99E-05 | 5.20E-06 | 4.300049 down | 1.148049 down | 3.745526 up   | PPID      |
| 228474_s_ | 0.001097 | 4.60E-04 | 1.066059 down | 1.621646 down | 1.52116 down  | KLF9      |
| 228476_at | 9.69E-04 | 3.89E-04 | 2.064582 down | 1.022885 up   | 2.111831 up   | KIAA1407  |
| 228477_at | 2.38E-04 | 5.82E-05 | 2.332939 up   | 2.162394 up   | 1.078869 down | ARGLU1    |
| 228479_at | 8.87E-04 | 3.45E-04 | 5.545803 down | 3.43582 down  | 1.614113 up   |           |
| 228481_at | 7.02E-04 | 2.51E-04 | 2.584792 down | 23.13391 down | 8.950007 down |           |
| 228485_s_ | 0.00126  | 5.57E-04 | 1.620762 down | 2.765269 up   | 4.481843 up   | SLC44A1   |
| 228490_at | 0.002535 | 0.00143  | 2.758615 down | 3.723682 down | 1.349838 down | ABHD2     |
| 228492_at | 0.012029 | 0.01023  | 1.625287 up   | 12.26854 up   | 7.548537 up   | USP9Y     |
| 228494_at | 5.48E-05 | 7.98E-06 | 5.910061 up   | 9.552196 up   | 1.61626 up    | PPP1R9A   |
| 228495_at | 0.00455  | 0.003098 | 1.624518 down | 1.9127 down   | 1.177396 down | CCDC75    |
| 228496_s_ | 3.66E-05 | 4.60E-06 | 6.152838 down | 13.53778 down | 2.200249 down | CRIM1     |
| 228498_at | 9.09E-04 | 3.56E-04 | 1.996652 down | 4.717924 down | 2.362918 down |           |
| 228501_at | 0.004987 | 0.003481 | 4.807977 down | 2.827444 down | 1.700468 up   | GALNTL2   |
| 228502_at | 1.01E-04 | 1.83E-05 | 1.673573 up   | 1.387124 up   | 1.206506 down |           |
| 228503_at | 1.73E-06 | 6.38E-08 | 4.057514 up   | 1.922533 up   | 2.110505 down |           |
| 228506_at | 0.007242 | 0.005565 | 1.049418 up   | 1.777691 up   | 1.693977 up   | NSMCE4A   |
| 228510_at | 0.001897 | 9.64E-04 | 1.469169 up   | 1.713025 up   | 1.165982 up   | C6orf134  |
| 228511_s_ | 0.002265 | 0.00123  | 1.865847 up   | 1.366394 down | 2.549482 down | ZNF219    |
| 228513_at | 0.001079 | 4.50E-04 | 1.553365 down | 1.179753 down | 1.316687 up   | TMEM219   |
| 228516_at | 0.003423 | 0.002138 | 1.732378 down | 1.221777 down | 1.417917 up   | CDAN1     |

|           |          |          |          |      |          |      |          |      |                                           |
|-----------|----------|----------|----------|------|----------|------|----------|------|-------------------------------------------|
| 228517_at | 0.003004 | 0.001796 | 1.009069 | down | 1.810213 | down | 1.793944 | down | C1orf149<br>IGH@ ///<br>IGHG1 ///<br>IGHM |
| 228518_at | 0.011712 | 0.009909 | 1.338766 | up   | 1.030751 | down | 1.379934 | down |                                           |
| 228528_at | 7.06E-06 | 4.70E-07 | 4.47203  | down | 1.039531 | down | 4.301969 | up   |                                           |
| 228531_at | 8.53E-06 | 6.16E-07 | 18.49152 | down | 14.43572 | down | 1.280956 | up   | SAMD9                                     |
| 228538_at | 0.005257 | 0.003722 | 1.927682 | down | 1.739323 | down | 1.108294 | up   | ZNF662                                    |
| 228543_at | 0.004611 | 0.003154 | 1.911821 | up   | 2.712536 | up   | 1.418823 | up   | CSRP2BP                                   |
| 228544_s_ | 4.33E-05 | 5.82E-06 | 2.27028  | up   | 1.529563 | up   | 1.484267 | down | CSRP2BP                                   |
| 228547_at | 0.001254 | 5.53E-04 | 2.180967 | up   | 2.489601 | up   | 1.141513 | up   | NRXN1                                     |
| 228550_at | 5.62E-04 | 1.85E-04 | 2.455278 | up   | 2.265036 | up   | 1.083991 | down | RTN4R                                     |
| 228555_at | 6.83E-04 | 2.42E-04 | 4.246486 | down | 2.337195 | down | 1.816916 | up   | CAMK2D                                    |
| 228560_at | 2.58E-04 | 6.51E-05 | 1.043075 | up   | 2.36808  | up   | 2.270288 | up   |                                           |
| 228564_at | 1.66E-04 | 3.59E-05 | 5.877252 | down | 24.71517 | down | 4.205226 | down | LOC375295                                 |
| 228565_at | 4.21E-07 | 8.61E-09 | 9.241908 | up   | 10.70479 | up   | 1.158288 | up   | KIAA1804                                  |
| 228566_at | 8.90E-06 | 6.46E-07 | 3.958795 | up   | 5.701843 | up   | 1.440298 | up   | RPRD1A                                    |
| 228567_at | 0.001966 | 0.001012 | 2.551471 | up   | 2.735919 | up   | 1.072291 | up   |                                           |
| 228573_at | 3.06E-06 | 1.43E-07 | 15.07474 | down | 14.56169 | down | 1.035233 | up   | ANTXR2                                    |
| 228576_s_ | 0.004642 | 0.003181 | 1.408638 | up   | 1.075759 | down | 1.515354 | down | MXRA8                                     |
| 228577_x_ | 5.65E-04 | 1.87E-04 | 2.070973 | down | 1.840454 | down | 1.125251 | up   | ODF2L                                     |
| 228579_at | 0.003539 | 0.002231 | 1.053744 | down | 1.591656 | up   | 1.677198 | up   |                                           |
| 228581_at | 0.011932 | 0.01013  | 1.266713 | up   | 1.130243 | down | 1.431694 | down | KCNJ10                                    |
| 228584_at | 4.59E-05 | 6.27E-06 | 6.466841 | down | 3.516902 | down | 1.838789 | up   | SGCB                                      |
| 228587_at | 1.74E-04 | 3.84E-05 | 2.47993  | up   | 1.235428 | up   | 2.007346 | down | FAM83G                                    |
| 228588_s_ | 6.36E-05 | 9.79E-06 | 3.349995 | down | 3.227345 | down | 1.038004 | up   | UBE2B                                     |
| 228589_at | 0.004261 | 0.002833 | 1.434658 | up   | 1.332759 | down | 1.912052 | down |                                           |
| 228596_at | 9.98E-04 | 4.05E-04 | 3.382372 | up   | 2.872256 | up   | 1.177601 | down | LOC728377                                 |
| 228597_at | 1.20E-04 | 2.30E-05 | 3.904923 | up   | 7.433562 | up   | 1.903639 | up   | C21orf45                                  |
| 228598_at | 7.64E-06 | 5.28E-07 | 5.988156 | up   | 4.913048 | up   | 1.218827 | down | DPP10                                     |
| 228600_x_ | 6.88E-06 | 4.48E-07 | 3.510822 | up   | 5.495488 | up   | 1.5653   | up   | C7orf46                                   |
| 228602_at | 2.91E-04 | 7.65E-05 | 12.30853 | down | 3.205968 | down | 3.839254 | up   | SGCD                                      |
| 228604_at | 0.010583 | 0.008792 | 2.200532 | down | 1.150765 | down | 1.912234 | up   | FAM76A                                    |
| 228608_at | 9.41E-05 | 1.66E-05 | 1.091328 | down | 7.375632 | down | 6.758401 | down | NALCN                                     |
| 228609_at | 7.50E-04 | 2.75E-04 | 1.539025 | up   | 1.289666 | down | 1.984828 | down |                                           |

|           |          |          |          |      |          |      |          |      |           |
|-----------|----------|----------|----------|------|----------|------|----------|------|-----------|
| 228610_at | 0.008441 | 0.006707 | 2.409826 | down | 1.148188 | down | 2.098807 | up   | TM9SF3    |
| 228611_s_ | 3.87E-04 | 1.12E-04 | 1.936071 | up   | 1.673981 | up   | 1.156566 | down |           |
| 228617_at | 6.16E-06 | 3.84E-07 | 15.09019 | down | 5.106474 | down | 2.955109 | up   | XAF1      |
| 228618_at | 7.04E-05 | 1.12E-05 | 2.766066 | down | 18.48002 | down | 6.680974 | down | PEAR1     |
| 228621_at | 0.001059 | 4.39E-04 | 1.110062 | up   | 1.689384 | down | 1.87532  | down | HFE2      |
| 228627_at | 0.002293 | 0.001251 | 1.434167 | up   | 1.678105 | up   | 1.170091 | up   | TLK2      |
| 228635_at | 0.009678 | 0.0079   | 5.422909 | up   | 4.430318 | up   | 1.224045 | down | PCDH10    |
| 228637_at | 1.91E-04 | 4.33E-05 | 2.505856 | down | 2.087645 | down | 1.200326 | up   | ZDHHC1    |
| 228639_at | 0.00384  | 0.002476 | 1.532991 | down | 1.122234 | down | 1.366017 | up   |           |
| 228640_at | 0.005547 | 0.003974 | 4.617958 | up   | 9.092999 | up   | 1.969052 | up   | PCDH7     |
| 228646_at | 4.95E-04 | 1.55E-04 | 2.038277 | up   | 2.135752 | up   | 1.047822 | up   | PPP1R1C   |
|           |          |          |          |      |          |      |          |      | LOC100049 |
| 228647_at | 0.001103 | 4.63E-04 | 2.462758 | down | 1.75746  | down | 1.401317 | up   | 716       |
| 228648_at | 0.004712 | 0.003239 | 1.562854 | up   | 1.327551 | down | 2.074769 | down | LRG1      |
| 228649_at | 0.003428 | 0.002143 | 1.560942 | up   | 1.192521 | down | 1.861455 | down | NOTUM     |
| 228654_at | 0.002108 | 0.001113 | 2.344507 | up   | 5.304896 | up   | 2.262691 | up   | SPIN4     |
| 228658_at | 1.66E-05 | 1.55E-06 | 4.904104 | up   | 21.59818 | up   | 4.404104 | up   | MIAT      |
| 228661_s_ | 5.12E-04 | 1.63E-04 | 3.980434 | down | 2.752989 | down | 1.445859 | up   |           |
| 228662_at | 0.005409 | 0.003855 | 2.406539 | up   | 1.836634 | up   | 1.310298 | down | SOCS7     |
| 228664_at | 0.017712 | 0.015971 | 1.169965 | down | 1.234253 | up   | 1.444032 | up   |           |
| 228665_at | 5.38E-05 | 7.76E-06 | 5.343199 | up   | 16.58241 | up   | 3.103461 | up   | CYYR1     |
| 228668_x_ | 0.02496  | 0.023402 | 1.579711 | up   | 1.126866 | up   | 1.401862 | down | FLJ36031  |
| 228670_at | 0.005264 | 0.003729 | 2.58479  | down | 1.771317 | down | 1.459247 | up   | TEP1      |
| 228671_at | 0.010784 | 0.008988 | 1.61678  | up   | 1.391595 | up   | 1.161818 | down | TMEM201   |
| 228677_s_ | 0.002841 | 0.001664 | 1.960547 | up   | 1.30516  | down | 2.558828 | down | RASAL3    |
| 228678_at | 0.001518 | 7.15E-04 | 1.041855 | up   | 1.557764 | down | 1.622963 | down | FAM116B   |
| 228682_at | 0.010484 | 0.008691 | 1.345249 | up   | 1.170811 | down | 1.575033 | down |           |
| 228686_at | 1.59E-04 | 3.38E-05 | 2.612182 | down | 2.548093 | down | 1.025152 | up   | FLJ33630  |
| 228687_at | 0.002759 | 0.001603 | 1.358717 | up   | 1.001747 | up   | 1.356348 | down | ZNF777    |
| 228691_at | 0.023589 | 0.022003 | 1.43655  | up   | 1.360921 | up   | 1.055573 | down | BICD1     |
| 228692_at | 2.23E-04 | 5.35E-05 | 3.277402 | up   | 4.55656  | up   | 1.390296 | up   |           |
| 228694_at | 1.07E-04 | 1.98E-05 | 1.641789 | up   | 2.323692 | up   | 1.415341 | up   |           |
| 228696_at | 0.004454 | 0.00301  | 1.89685  | up   | 1.76966  | up   | 1.071873 | down | SLC45A3   |
| 228702_at | 0.003517 | 0.002213 | 3.924597 | down | 1.921744 | down | 2.042205 | up   | FLJ43663  |



|           |          |          |          |      |          |      |          |      |          |
|-----------|----------|----------|----------|------|----------|------|----------|------|----------|
| 228703_at | 5.02E-05 | 7.12E-06 | 3.39766  | down | 5.040579 | down | 1.483545 | down | P4HA3    |
| 228705_at | 0.007836 | 0.006135 | 1.726353 | up   | 1.37887  | up   | 1.252006 | down | CAPN12   |
| 228710_at | 0.001375 | 6.27E-04 | 1.331463 | up   | 2.326138 | up   | 1.747054 | up   |          |
| 228711_at | 1.29E-04 | 2.54E-05 | 4.210789 | down | 4.984818 | down | 1.183821 | down | ZNF37A   |
| 228715_at | 0.002515 | 0.001415 | 1.807061 | up   | 1.590818 | up   | 1.135932 | down | ZCCHC12  |
| 228716_at | 3.43E-04 | 9.52E-05 | 6.944616 | down | 3.367578 | up   | 23.38654 | up   | THRB     |
| 228717_at | 0.002743 | 0.001588 | 1.694257 | up   | 1.731045 | up   | 1.021713 | up   |          |
| 228720_at | 0.00131  | 5.87E-04 | 1.044536 | up   | 2.652799 | down | 2.770944 | down | SORCS2   |
| 228721_at | 6.76E-04 | 2.39E-04 | 2.576397 | down | 3.075854 | down | 1.193859 | down | C3orf41  |
| 228725_x_ | 0.005393 | 0.00384  | 1.682147 | down | 1.782512 | down | 1.059665 | down | PRMT2    |
| 228726_at | 0.036738 | 0.035467 | 2.944571 | down | 1.991819 | down | 1.478333 | up   |          |
| 228727_at | 0.001444 | 6.68E-04 | 2.719225 | down | 1.013352 | up   | 2.755531 | up   | ANXA11   |
| 228728_at | 1.18E-05 | 9.64E-07 | 21.505   | down | 4.492005 | down | 4.787394 | up   | C7orf58  |
| 228729_at | 0.007287 | 0.005608 | 4.513386 | up   | 5.752895 | up   | 1.27463  | up   | CCNB1    |
| 228736_at | 0.008757 | 0.007015 | 1.976443 | down | 1.6191   | down | 1.220704 | up   | HELQ     |
| 228737_at | 1.05E-04 | 1.93E-05 | 8.28202  | down | 4.517614 | down | 1.833273 | up   | TOX2     |
| 228739_at | 2.82E-04 | 7.32E-05 | 2.659692 | down | 1.429661 | down | 1.860366 | up   | CYS1     |
| 228741_s_ | 0.002444 | 0.001361 | 1.185743 | up   | 1.2411   | down | 1.471626 | down | HCN3     |
| 228743_at | 0.001583 | 7.57E-04 | 2.76141  | down | 1.876515 | down | 1.471563 | up   | TXNDC17  |
| 228744_at | 0.006924 | 0.005265 | 1.275338 | up   | 1.683998 | up   | 1.320433 | up   | HAUS2    |
| 228745_at | 0.002219 | 0.001193 | 2.4666   | down | 2.522813 | down | 1.022789 | down | SGTB     |
| 228748_at | 1.10E-05 | 8.63E-07 | 11.53093 | down | 4.916835 | down | 2.345193 | up   | CD59     |
| 228751_at | 0.008971 | 0.00722  | 4.122937 | down | 1.278276 | down | 3.22539  | up   | CLK4     |
| 228752_at | 4.49E-05 | 6.11E-06 | 1.774833 | down | 5.292165 | down | 2.981781 | down | BCORL1   |
| 228765_at | 0.002296 | 0.001253 | 1.465545 | down | 1.935644 | down | 1.320768 | down | GTF2IRD2 |
| 228768_at | 0.002228 | 0.001201 | 4.930319 | down | 1.81096  | down | 2.72249  | up   | FNIP1    |
| 228771_at | 4.26E-07 | 8.87E-09 | 8.097072 | up   | 12.10863 | up   | 1.495433 | up   | ADRBK2   |
| 228772_at | 0.004193 | 0.002774 | 6.174348 | down | 4.661026 | down | 1.324676 | up   | HNMT     |
| 228774_at | 1.52E-05 | 1.38E-06 | 3.973524 | up   | 3.231267 | up   | 1.229711 | down | CEP78    |
| 228775_at | 6.36E-04 | 2.19E-04 | 1.959997 | down | 2.168151 | down | 1.106201 | down |          |
| 228776_at | 0.005539 | 0.003966 | 2.110458 | up   | 2.087494 | up   | 1.011001 | down | GJC1     |
| 228777_at | 0.013114 | 0.011312 | 1.220987 | down | 1.493193 | up   | 1.82317  | up   | KBTBD3   |
| 228782_at | 1.99E-06 | 7.82E-08 | 10.9107  | up   | 10.37083 | up   | 1.052056 | down | SCGB3A2  |
| 228783_at | 0.001113 | 4.69E-04 | 3.846432 | down | 2.669665 | down | 1.440792 | up   | BVES     |

|           |          |          |               |               |               |                          |
|-----------|----------|----------|---------------|---------------|---------------|--------------------------|
| 228784_at | 0.005049 | 0.003536 | 1.81111 up    | 1.342994 down | 2.432309 down | ST3GAL2                  |
| 228786_at | 1.71E-05 | 1.64E-06 | 2.656033 down | 3.173677 down | 1.194893 down | LOC387647                |
| 228789_at | 0.00586  | 0.00426  | 2.085771 down | 2.08897 down  | 1.001533 down | MTMR6                    |
| 228790_at | 0.013063 | 0.011259 | 3.094826 down | 2.026459 down | 1.527209 up   | FAM110B<br>LOC100129     |
| 228791_at | 4.17E-04 | 1.24E-04 | 3.163563 down | 1.287107 down | 2.457886 up   | 502                      |
| 228792_at | 0.001059 | 4.39E-04 | 2.370512 up   | 2.420732 up   | 1.021186 up   |                          |
| 228797_at | 0.004344 | 0.002911 | 2.038973 up   | 1.987925 up   | 1.025679 down |                          |
| 228798_x_ | 0.010958 | 0.009164 | 1.618271 up   | 1.518225 down | 2.456899 down | MAZ                      |
| 228799_at | 2.19E-05 | 2.27E-06 | 1.453499 up   | 3.514369 up   | 2.417868 up   |                          |
| 228801_at | 9.64E-05 | 1.71E-05 | 3.650628 down | 1.715717 down | 2.127756 up   | ORMDL1                   |
| 228802_at | 9.36E-07 | 2.66E-08 | 26.14393 up   | 21.04144 up   | 1.242497 down | RBPMS2<br>LOC100129      |
| 228803_at | 0.003394 | 0.002114 | 1.187613 down | 1.162554 up   | 1.380665 up   | 592                      |
| 228804_at | 5.11E-04 | 1.62E-04 | 1.426322 up   | 1.07507 down  | 1.533396 down | DGCR5                    |
| 228806_at | 0.017156 | 0.0154   | 1.571969 up   | 1.445004 down | 2.271501 down | RORC                     |
| 228813_at | 0.002752 | 0.001596 | 2.92545 down  | 2.461257 down | 1.1886 up     | HDAC4                    |
| 228815_s_ | 0.002327 | 0.001276 | 1.781674 up   | 1.162576 down | 2.071331 down | REPIN1                   |
| 228818_at | 7.63E-05 | 1.25E-05 | 1.470201 up   | 1.357098 up   | 1.083342 down |                          |
| 228821_at | 1.74E-04 | 3.85E-05 | 4.332003 up   | 2.82275 up    | 1.534675 down | ST6GAL2                  |
| 228823_at | 0.006072 | 0.004462 | 1.431284 up   | 1.362524 down | 1.950159 down | POLR2J2                  |
| 228826_at | 0.010198 | 0.008404 | 1.735141 down | 1.468976 down | 1.181191 up   |                          |
| 228827_at | 0.001931 | 9.89E-04 | 5.154501 down | 2.879972 up   | 14.84482 up   |                          |
| 228828_at | 5.20E-04 | 1.67E-04 | 1.956687 down | 1.515461 down | 1.291149 up   |                          |
| 228832_at | 0.006086 | 0.004475 | 1.103881 down | 1.687866 down | 1.529029 down | FLJ20021                 |
| 228835_at | 0.00342  | 0.002135 | 3.515221 down | 1.79231 down  | 1.961279 up   |                          |
| 228837_at | 1.41E-04 | 2.87E-05 | 2.592636 down | 1.250953 up   | 3.243266 up   | TCF4<br>LOC439994<br>/// |
| 228839_s_ | 0.009455 | 0.007682 | 1.538114 down | 1.085618 down | 1.416809 up   | LOC642361                |
| 228843_at | 1.21E-04 | 2.33E-05 | 3.480598 down | 4.665129 down | 1.340324 down |                          |
| 228844_at | 0.00686  | 0.005203 | 1.450649 up   | 1.248222 up   | 1.162172 down | SLC13A5                  |
| 228845_at | 1.51E-04 | 3.15E-05 | 2.344649 down | 2.111025 down | 1.110668 up   | PLBD2                    |
| 228850_s_ | 2.50E-04 | 6.23E-05 | 11.29992 down | 3.348471 down | 3.374651 up   |                          |

|           |          |          |               |               |               |           |
|-----------|----------|----------|---------------|---------------|---------------|-----------|
| 228855_at | 6.70E-04 | 2.35E-04 | 1.23589 up    | 3.943727 up   | 3.191002 up   | NUDT7     |
|           |          |          |               |               |               | GNL1 ///  |
| 228857_at | 0.00116  | 4.97E-04 | 2.37628 down  | 1.024095 down | 2.32037 up    | LOC285831 |
| 228859_at | 1.89E-05 | 1.86E-06 | 5.862851 up   | 6.946554 up   | 1.184843 up   | LOC91431  |
| 228861_at | 0.005394 | 0.003841 | 1.392066 up   | 1.078981 up   | 1.290166 down |           |
| 228862_at | 0.001748 | 8.64E-04 | 1.316342 up   | 1.437668 down | 1.892463 down | TSNARE1   |
| 228866_at | 0.001455 | 6.75E-04 | 3.03195 up    | 1.677615 up   | 1.807298 down |           |
| 228868_x_ | 0.001529 | 7.21E-04 | 3.909555 up   | 6.964401 up   | 1.78138 up    | CDT1      |
| 228870_at | 0.001766 | 8.76E-04 | 1.54512 up    | 1.595762 up   | 1.032775 up   | FAM84B    |
| 228872_at | 3.50E-04 | 9.82E-05 | 1.338556 up   | 1.267084 down | 1.696062 down | FAM108B1  |
| 228874_at | 0.047001 | 0.045799 | 1.302008 up   | 1.047286 down | 1.363575 down | PHLDB3    |
| 228875_at | 0.001727 | 8.51E-04 | 2.056522 down | 5.984344 up   | 12.30693 up   | FAM162B   |
| 228876_at | 0.006968 | 0.005311 | 1.989997 up   | 1.418078 down | 2.82197 down  | BAIAP2L2  |
| 228877_at | 1.30E-06 | 4.21E-08 | 2.962885 up   | 2.764818 up   | 1.071638 down | RGL3      |
| 228879_at | 2.69E-04 | 6.90E-05 | 2.867503 up   | 2.880879 up   | 1.004665 up   | SNORD104  |
| 228880_at | 2.57E-05 | 2.82E-06 | 1.95912 up    | 1.126669 down | 2.207279 down |           |
| 228884_at | 0.004549 | 0.003096 | 1.107747 up   | 1.321012 down | 1.463347 down | LRRC27    |
| 228885_at | 0.032618 | 0.031294 | 1.206828 down | 3.578165 up   | 4.31823 up    | MAMDC2    |
| 228886_at | 8.66E-04 | 3.33E-04 | 1.965271 down | 2.28413 down  | 1.162247 down | LRRC27    |
| 228887_x_ | 0.0097   | 0.007922 | 1.541783 up   | 1.226225 down | 1.890573 down | CCDC61    |
| 228890_at | 1.01E-04 | 1.83E-05 | 1.300832 down | 4.394464 down | 3.378195 down | ATOH8     |
| 228892_at | 6.45E-04 | 2.23E-04 | 1.549896 up   | 1.942 down    | 3.009898 down | SH3RF2    |
| 228893_at | 0.014364 | 0.012579 | 1.453982 up   | 1.002937 down | 1.458252 down |           |
|           |          |          |               |               |               | LOC253842 |
| 228894_at | 4.30E-05 | 5.77E-06 | 9.525453 up   | 8.411813 up   | 1.13239 down  | /// NR6A1 |
| 228898_s_ | 0.004053 | 0.00265  | 2.009625 up   | 1.067851 up   | 1.881934 down | SMARCB1   |
| 228900_at | 0.020434 | 0.018764 | 2.663875 up   | 1.423832 up   | 1.87092 down  | CYTSB     |
| 228903_at | 0.001844 | 9.28E-04 | 1.020049 down | 1.595909 down | 1.564542 down | CES8      |
| 228905_at | 0.005082 | 0.003567 | 1.259688 down | 1.764908 up   | 2.223232 up   | PCM1      |
| 228906_at | 3.41E-08 | 2.69E-10 | 29.34176 up   | 29.36413 up   | 1.000762 up   | TET1      |
| 228911_at | 8.66E-04 | 3.33E-04 | 1.548343 up   | 1.429677 down | 2.213631 down | ADAMTS7   |
| 228912_at | 0.002883 | 0.001698 | 2.123688 up   | 1.710451 up   | 1.241595 down | VIL1      |
| 228914_at | 4.09E-05 | 5.40E-06 | 4.221497 down | 2.829257 down | 1.492087 up   |           |
| 228917_at | 0.001059 | 4.39E-04 | 2.178551 down | 1.369232 down | 1.591075 up   |           |

|           |          |          |               |               |               |           |
|-----------|----------|----------|---------------|---------------|---------------|-----------|
| 228919_at | 0.002936 | 0.00174  | 2.446228 up   | 1.738616 up   | 1.406997 down |           |
| 228921_at | 0.011821 | 0.010018 | 1.45136 down  | 1.458016 down | 1.004586 down | SLC25A42  |
| 228922_at | 0.019994 | 0.018323 | 1.208399 up   | 1.670154 up   | 1.382122 up   | SHF       |
| 228937_at | 2.92E-05 | 3.37E-06 | 9.371661 down | 10.52457 down | 1.123021 down | C13orf31  |
| 228942_s_ | 0.035339 | 0.034052 | 1.607606 up   | 1.098526 down | 1.765996 down | DAB2IP    |
| 228943_at | 0.002268 | 0.001233 | 2.84834 down  | 1.82406 down  | 1.561539 up   | MAP6      |
| 228948_at | 0.001282 | 5.70E-04 | 2.139099 up   | 3.259444 up   | 1.523746 up   | EPHA4     |
| 228949_at | 0.002681 | 0.001539 | 7.341206 down | 3.196502 down | 2.296637 up   | GPR177    |
| 228952_at | 9.69E-04 | 3.89E-04 | 2.557934 down | 1.253833 up   | 3.207221 up   | ENPP1     |
| 228953_at | 0.001192 | 5.16E-04 | 4.025429 down | 3.907124 down | 1.030279 up   | WHAMM     |
| 228956_at | 1.04E-05 | 7.97E-07 | 15.0164 up    | 13.55132 up   | 1.108114 down | UGT8      |
| 228957_at | 0.006109 | 0.004496 | 1.388799 up   | 1.000589 up   | 1.387981 down | ZNF362    |
| 228959_at | 2.49E-04 | 6.18E-05 | 5.230815 up   | 3.926359 up   | 1.33223 down  |           |
| 228964_at | 2.22E-04 | 5.30E-05 | 5.12986 down  | 1.851026 up   | 9.495504 up   | PRDM1     |
| 228971_at | 0.010618 | 0.008828 | 2.076622 down | 2.162706 down | 1.041454 down |           |
| 228972_at | 0.001912 | 9.74E-04 | 1.478908 up   | 2.242106 up   | 1.516055 up   |           |
| 228973_at | 0.003336 | 0.002065 | 1.572591 up   | 1.380058 up   | 1.139511 down | DLG2      |
| 228979_at | 0.00506  | 0.003547 | 1.037593 up   | 1.214888 down | 1.26056 down  | SFTA3     |
| 228983_at | 3.01E-05 | 3.54E-06 | 2.044772 up   | 2.212197 up   | 1.081879 up   |           |
| 228987_at | 2.48E-04 | 6.17E-05 | 3.843237 up   | 3.029077 up   | 1.268782 down |           |
| 228988_at | 2.66E-06 | 1.18E-07 | 19.4966 up    | 12.87884 up   | 1.513848 down | ZNF711    |
| 228989_at | 0.001433 | 6.61E-04 | 2.319169 up   | 1.70533 up    | 1.359953 down | C18orf56  |
| 228992_at | 1.46E-05 | 1.31E-06 | 2.593844 up   | 4.116558 up   | 1.58705 up    | MED28     |
| 228994_at | 0.006375 | 0.004748 | 1.594611 up   | 1.683681 up   | 1.055857 up   | CCDC24    |
| 228997_at | 5.61E-04 | 1.84E-04 | 1.280741 up   | 2.020727 up   | 1.57778 up    | TRNAU1AP  |
| 229001_at | 0.012586 | 0.010788 | 2.333137 down | 1.364835 down | 1.709465 up   | PPP1R3E   |
| 229002_at | 3.96E-08 | 3.33E-10 | 7.570433 up   | 6.047761 up   | 1.251774 down | FAM69B    |
| 229003_x_ | 0.006745 | 0.005095 | 1.353767 up   | 1.105285 up   | 1.224812 down | FAM69B    |
| 229007_at | 2.39E-05 | 2.56E-06 | 9.639553 down | 3.929383 down | 2.453198 up   | LOC283788 |
| 229010_at | 7.14E-04 | 2.57E-04 | 4.051488 up   | 5.495369 up   | 1.356383 up   | CBL       |
| 229011_at | 3.27E-05 | 3.97E-06 | 6.970005 down | 5.496741 down | 1.268025 up   |           |
| 229014_at | 3.73E-04 | 1.07E-04 | 5.077907 down | 3.429673 down | 1.48058 up    | FLJ42709  |
| 229015_at | 0.002243 | 0.001214 | 1.517227 down | 1.013963 up   | 1.538412 up   | LOC286367 |
| 229016_s_ | 0.005681 | 0.004098 | 1.602131 up   | 1.96964 up    | 1.229388 up   | TRERF1    |

|           |          |          |          |      |          |      |          |      |           |
|-----------|----------|----------|----------|------|----------|------|----------|------|-----------|
| 229017_s_ | 2.49E-05 | 2.70E-06 | 3.808495 | down | 2.299473 | down | 1.656247 | up   | DSTYK     |
| 229022_at | 0.001326 | 5.96E-04 | 2.857682 | down | 3.253547 | down | 1.138527 | down | ZFX       |
| 229023_at | 0.00445  | 0.003004 | 1.516057 | up   | 1.177502 | up   | 1.287519 | down | SFT2D3    |
| 229024_at | 2.70E-04 | 6.92E-05 | 3.861744 | down | 2.460868 | down | 1.569261 | up   |           |
| 229025_s_ | 4.10E-04 | 1.21E-04 | 2.580509 | up   | 3.224507 | up   | 1.249563 | up   | IMMP1L    |
| 229026_at | 0.014687 | 0.012909 | 1.213026 | down | 2.880078 | down | 2.374292 | down |           |
| 229028_s_ | 0.005883 | 0.004283 | 1.97509  | up   | 3.231873 | up   | 1.636317 | up   | ARL17     |
| 229030_at | 0.012359 | 0.010562 | 1.255666 | up   | 1.010953 | up   | 1.242062 | down | CAPN8     |
| 229032_at | 0.006423 | 0.004797 | 1.40551  | up   | 1.399945 | up   | 1.003975 | down | WSCD2     |
| 229037_at | 0.004292 | 0.002863 | 1.403627 | down | 1.045442 | down | 1.342616 | up   | TRIM69    |
| 229040_at | 1.16E-04 | 2.22E-05 | 1.83113  | up   | 1.840507 | down | 3.370206 | down |           |
| 229045_at | 0.02831  | 0.026863 | 1.388415 | up   | 1.071135 | up   | 1.296209 | down | SNX20     |
| 229046_s_ | 4.20E-04 | 1.25E-04 | 1.756495 | up   | 1.517169 | down | 2.664899 | down | PLEKHB1   |
| 229047_at | 0.006291 | 0.004672 | 1.29879  | up   | 1.624462 | down | 2.109835 | down | PLEKHB1   |
| 229053_at | 5.27E-04 | 1.69E-04 | 2.730236 | up   | 2.028074 | up   | 1.346221 | down | SYT17     |
| 229054_at | 0.002492 | 0.001398 | 1.928526 | up   | 1.641825 | up   | 1.174623 | down | C14orf181 |
| 229055_at | 0.001786 | 8.89E-04 | 2.227212 | down | 3.576004 | down | 1.605597 | down | GPR68     |
|           |          |          |          |      |          |      |          |      | C9orf109  |
|           |          |          |          |      |          |      |          |      | ///       |
| 229059_at | 2.59E-04 | 6.53E-05 | 1.036965 | down | 2.658934 | down | 2.564151 | down | C9orf110  |
| 229061_s_ | 2.82E-04 | 7.32E-05 | 4.621228 | up   | 4.95573  | up   | 1.072384 | up   | SLC25A13  |
| 229063_s_ | 2.25E-05 | 2.36E-06 | 1.592075 | down | 4.243686 | down | 2.665506 | down | CCDC107   |
| 229064_s_ | 0.002629 | 0.001499 | 1.621465 | up   | 2.568982 | up   | 1.584359 | up   | RCAN3     |
| 229065_at | 0.002178 | 0.001162 | 1.435631 | up   | 1.459616 | up   | 1.016707 | up   | SLC35F3   |
| 229066_at | 3.49E-04 | 9.78E-05 | 1.778746 | up   | 2.721577 | up   | 1.530054 | up   |           |
| 229067_at | 6.97E-04 | 2.49E-04 | 2.91212  | down | 3.410341 | down | 1.171085 | down | SRGAP2P1  |
| 229071_at | 0.001556 | 7.40E-04 | 1.785768 | down | 1.324294 | down | 1.348468 | up   | C17orf100 |
| 229072_at | 7.69E-04 | 2.85E-04 | 9.621069 | down | 4.428937 | down | 2.17232  | up   |           |
| 229073_at | 2.32E-05 | 2.46E-06 | 35.5692  | up   | 34.291   | up   | 1.037275 | down | PRTG      |
| 229074_at | 1.83E-04 | 4.09E-05 | 5.690787 | down | 6.617785 | down | 1.162894 | down |           |
| 229076_s_ | 0.001332 | 6.00E-04 | 1.374272 | up   | 2.180987 | down | 2.99727  | down |           |
| 229077_at | 0.002227 | 0.001199 | 1.336288 | up   | 1.39264  | down | 1.860968 | down | KATNB1    |
| 229080_at | 1.65E-05 | 1.55E-06 | 3.499876 | up   | 4.141816 | up   | 1.183418 | up   | EMID2     |
| 229082_at | 0.003376 | 0.002098 | 1.61866  | down | 1.946583 | down | 1.202589 | down | CCDC125   |

|           |          |          |               |               |               |           |
|-----------|----------|----------|---------------|---------------|---------------|-----------|
| 229083_at | 0.026547 | 0.025051 | 1.864465 up   | 1.655826 up   | 1.126003 down | HNRNPA0   |
| 229091_s_ | 1.07E-05 | 8.30E-07 | 8.177409 up   | 5.557907 up   | 1.471311 down | CCNJ      |
|           |          |          |               |               |               | LIMS3-    |
|           |          |          |               |               |               | LOC440895 |
|           |          |          |               |               |               | ///       |
| 229095_s_ | 0.003179 | 0.001938 | 2.825985 down | 2.415306 down | 1.170032 up   | LOC440895 |
|           |          |          |               |               |               | LIMS3-    |
|           |          |          |               |               |               | LOC440895 |
|           |          |          |               |               |               | ///       |
| 229096_at | 1.25E-04 | 2.45E-05 | 1.841784 down | 1.030147 down | 1.787883 up   | LOC440895 |
| 229098_s_ | 0.001894 | 9.62E-04 | 1.48665 down  | 1.120209 down | 1.327118 up   | DDX46     |
| 229099_at | 0.017959 | 0.01622  | 1.642674 up   | 1.131965 up   | 1.45117 down  | C11orf83  |
| 229101_at | 2.44E-04 | 6.02E-05 | 3.680944 down | 1.712551 down | 2.149392 up   | LOC150166 |
| 229104_s_ | 1.08E-04 | 2.00E-05 | 1.585821 up   | 1.62282 down  | 2.573502 down | GPR39     |
| 229111_at | 0.004318 | 0.002888 | 1.646531 up   | 2.395491 up   | 1.454871 up   |           |
| 229112_at | 0.010388 | 0.008592 | 1.59338 up    | 1.280849 down | 2.040879 down | SIRT5     |
| 229116_at | 4.63E-04 | 1.42E-04 | 7.979413 up   | 5.616745 up   | 1.420647 down | CNKSR2    |
| 229118_at | 0.007693 | 0.005997 | 1.000106 up   | 2.065511 up   | 2.065293 up   |           |
| 229121_at | 0.006378 | 0.004754 | 1.235758 down | 2.804431 down | 2.269402 down | CMKLR1    |
| 229122_x_ | 0.003672 | 0.002338 | 1.574875 up   | 1.239958 down | 1.95278 down  | C16orf35  |
| 229127_at | 0.005327 | 0.003783 | 6.702686 down | 1.950473 down | 3.436442 up   | JAM2      |
| 229129_at | 6.66E-04 | 2.33E-04 | 1.931437 up   | 3.096084 up   | 1.602995 up   |           |
| 229132_at | 0.004825 | 0.003335 | 1.910294 down | 1.489005 down | 1.282933 up   | MINA      |
| 229133_s_ | 0.011546 | 0.009744 | 1.690616 up   | 1.444981 up   | 1.169992 down | ZNF397    |
| 229134_at | 0.018052 | 0.016319 | 1.298203 down | 1.808382 down | 1.392989 down | VANGL1    |
| 229139_at | 1.47E-05 | 1.32E-06 | 8.953009 up   | 12.14217 up   | 1.356211 up   | JPH1      |
| 229142_s_ | 0.006636 | 0.004993 | 1.559331 up   | 1.132614 down | 1.76612 down  | BBS1      |
| 229147_at | 0.002087 | 0.001098 | 1.683993 up   | 1.507261 up   | 1.117254 down |           |
| 229151_at | 7.09E-05 | 1.14E-05 | 1.825313 down | 14.6325 down  | 8.016435 down | SLC14A1   |
| 229156_s_ | 0.012679 | 0.010879 | 1.338258 up   | 1.006893 up   | 1.329097 down |           |
| 229157_at | 0.020491 | 0.018819 | 1.401592 up   | 1.103181 up   | 1.270501 down |           |
| 229160_at | 0.008474 | 0.006741 | 1.087763 up   | 1.408014 up   | 1.294413 up   | MUM1L1    |
| 229163_at | 3.72E-04 | 1.07E-04 | 6.552237 down | 1.046556 up   | 6.85728 up    | CAMK2N1   |
| 229164_s_ | 4.33E-04 | 1.30E-04 | 1.875565 down | 2.219787 down | 1.18353 down  | ABTB1     |

|           |          |          |               |               |               |           |
|-----------|----------|----------|---------------|---------------|---------------|-----------|
| 229165_at | 0.045783 | 0.044576 | 1.357996 up   | 1.136019 up   | 1.195399 down | MRPL12    |
| 229166_s_ | 3.89E-04 | 1.13E-04 | 1.07894 up    | 1.219703 down | 1.315986 down | GATAD2A   |
| 229167_at | 0.001449 | 6.71E-04 | 3.078424 down | 3.946379 down | 1.281948 down |           |
| 229173_at | 0.002262 | 0.001228 | 3.773409 down | 3.076747 down | 1.226428 up   | KIAA1715  |
| 229175_at | 0.003341 | 0.00207  | 1.726324 up   | 1.907559 up   | 1.104983 up   | SMYD4     |
| 229176_at | 2.15E-04 | 5.09E-05 | 1.788945 down | 2.2792 down   | 1.274047 down | ANKH      |
| 229177_at | 0.009044 | 0.007292 | 2.482528 up   | 1.474438 up   | 1.683711 down | C16orf89  |
| 229178_at | 2.56E-06 | 1.12E-07 | 47.78353 up   | 56.50465 up   | 1.182513 up   | PRTG      |
| 229182_at | 0.0017   | 8.34E-04 | 1.648012 up   | 1.251502 up   | 1.316827 down |           |
| 229183_at | 0.029229 | 0.027822 | 1.280298 up   | 1.052489 down | 1.347499 down | KCTD1     |
| 229187_at | 0.00695  | 0.005289 | 1.600746 down | 1.523513 down | 1.050694 up   | LOC283788 |
| 229191_at | 0.001211 | 5.28E-04 | 1.657242 up   | 1.467663 down | 2.432272 down | TBCD      |
| 229194_at | 3.91E-05 | 5.03E-06 | 10.23253 down | 13.68061 down | 1.336972 down | PCGF5     |
| 229199_at | 0.014729 | 0.01295  | 1.541868 down | 1.955741 down | 1.268423 down | SCN9A     |
| 229200_at | 0.001258 | 5.56E-04 | 1.889798 up   | 1.447622 up   | 1.30545 down  | LOC729810 |
| 229206_at | 0.009707 | 0.007928 | 1.799197 up   | 2.849886 up   | 1.583976 up   |           |
| 229212_at | 0.002262 | 0.001228 | 1.675858 up   | 1.527834 down | 2.560433 down |           |
| 229215_at | 0.03866  | 0.037402 | 1.563415 up   | 1.036352 down | 1.620248 down | ASCL2     |
| 229218_at | 6.44E-04 | 2.23E-04 | 24.21032 down | 10.93974 down | 2.213062 up   | COL1A2    |
| 229219_s_ | 0.001553 | 7.38E-04 | 1.117603 down | 1.344355 up   | 1.502455 up   |           |
| 229221_at | 3.61E-04 | 1.02E-04 | 6.76659 down  | 2.940377 down | 2.301266 up   | CD44      |
| 229223_at | 3.65E-05 | 4.57E-06 | 3.303325 up   | 2.926028 up   | 1.128945 down |           |
| 229225_at | 0.0039   | 0.002525 | 1.093511 down | 3.777128 down | 3.45413 down  | NRP2      |
| 229227_at | 0.004642 | 0.003181 | 1.861969 up   | 1.104667 up   | 1.685547 down | FLJ45244  |
| 229233_at | 0.004578 | 0.003123 | 2.338816 up   | 1.929438 up   | 1.212175 down | NRG3      |
| 229234_at | 0.0315   | 0.03014  | 1.642478 down | 1.055382 up   | 1.733441 up   | ZC3H12B   |
| 229235_at | 0.006058 | 0.004447 | 1.434299 down | 2.303239 up   | 3.303533 up   | ZCCHC11   |
| 229237_s_ | 6.87E-04 | 2.44E-04 | 1.31409 up    | 1.169471 down | 1.53679 down  | FOXN3     |
| 229238_at | 2.08E-04 | 4.83E-05 | 2.448439 down | 3.270418 down | 1.335715 down | C17orf97  |
| 229247_at | 4.19E-04 | 1.25E-04 | 3.961263 down | 3.322325 down | 1.192317 up   | FBLN7     |
| 229253_at | 0.003715 | 0.002373 | 1.755014 down | 2.017831 down | 1.149752 down | THEM4     |
| 229255_x_ | 9.94E-04 | 4.03E-04 | 2.605171 down | 2.0582 down   | 1.265752 up   |           |
| 229256_at | 0.004672 | 0.003207 | 3.505674 up   | 1.873445 up   | 1.871245 down | PGM2L1    |

|           |          |          |               |               |               |                                        |
|-----------|----------|----------|---------------|---------------|---------------|----------------------------------------|
| 229269_x_ | 5.93E-04 | 1.99E-04 | 2.26899 down  | 1.771082 down | 1.281132 up   | LOC646044<br>///<br>SSBP4<br>LOC646044 |
| 229270_x_ | 0.030233 | 0.028844 | 1.245391 up   | 1.238801 down | 1.542792 down | ///<br>SSBP4                           |
| 229272_at | 0.039203 | 0.037961 | 1.268325 down | 1.90369 up    | 2.414498 up   | FNBP4                                  |
| 229273_at | 2.56E-07 | 4.30E-09 | 2.236234 up   | 37.93484 up   | 16.96372 up   | SALL1                                  |
| 229276_at | 3.89E-04 | 1.13E-04 | 3.096219 up   | 1.681984 up   | 1.840814 down | IGSF9                                  |
| 229279_at | 0.002228 | 0.001201 | 1.349885 up   | 1.061385 down | 1.432748 down |                                        |
| 229280_s_ | 4.88E-04 | 1.52E-04 | 1.97477 up    | 1.7232 up     | 1.14599 down  | FLJ22536                               |
| 229283_at | 6.86E-04 | 2.43E-04 | 1.555803 down | 1.104286 up   | 1.71805 up    | LOC728613                              |
| 229285_at | 2.85E-04 | 7.44E-05 | 10.89472 down | 4.726313 down | 2.305121 up   | RNASL                                  |
| 229288_at | 1.13E-04 | 2.14E-05 | 9.085623 up   | 9.590917 up   | 1.055615 up   | EPHA7                                  |
| 229290_at | 0.027811 | 0.026339 | 1.299907 up   | 1.021811 up   | 1.27216 down  | DAPL1                                  |
| 229291_at | 0.02841  | 0.026963 | 1.472068 up   | 1.062625 up   | 1.385313 down |                                        |
| 229292_at | 2.22E-09 | 5.94E-12 | 11.92737 up   | 11.79976 up   | 1.010815 down | EPB41L5                                |
| 229293_at | 0.002024 | 0.001053 | 1.594152 up   | 1.005529 up   | 1.585386 down |                                        |
| 229294_at | 9.36E-08 | 1.08E-09 | 6.653737 up   | 6.777993 up   | 1.018675 up   | JPH3                                   |
| 229295_at | 0.001558 | 7.41E-04 | 2.221341 down | 1.423827 down | 1.560121 up   | LOC150166<br>LOC100128                 |
| 229296_at | 0.0022   | 0.001178 | 4.52519 down  | 6.055078 down | 1.338083 down | 501                                    |
| 229298_at | 0.008709 | 0.006967 | 2.157122 up   | 2.47402 up    | 1.146908 up   | KBTBD7                                 |
| 229299_at | 0.003685 | 0.002349 | 2.812304 down | 2.067649 down | 1.360145 up   | C5orf33                                |
| 229302_at | 0.006321 | 0.004699 | 1.564468 up   | 4.128784 up   | 2.639097 up   | TMEM178                                |
| 229304_s_ | 1.52E-04 | 3.19E-05 | 3.276052 up   | 6.08566 up    | 1.85762 up    | MLF1IP                                 |
| 229305_at | 2.62E-04 | 6.63E-05 | 8.592105 up   | 9.805726 up   | 1.141248 up   | MLF1IP                                 |
| 229307_at | 3.60E-04 | 1.02E-04 | 5.846383 down | 3.057058 down | 1.912421 up   | ANKRD28                                |
| 229308_at | 0.006062 | 0.004452 | 9.412129 down | 2.661212 down | 3.536784 up   |                                        |
| 229310_at | 1.57E-04 | 3.33E-05 | 5.554016 down | 4.14813 down  | 1.338921 up   | KLHL29                                 |
| 229312_s_ | 0.008568 | 0.006828 | 2.135692 up   | 3.087975 up   | 1.44589 up    | GKAP1                                  |
| 229313_at | 9.10E-04 | 3.57E-04 | 2.190227 up   | 1.981631 up   | 1.105265 down | ANO5                                   |
| 229320_at | 9.21E-04 | 3.62E-04 | 1.970738 up   | 1.240437 down | 2.444575 down | C2orf55                                |
| 229323_at | 0.00872  | 0.00698  | 2.545186 down | 1.657294 down | 1.535748 up   | LOC387723                              |
| 229324_x_ | 8.68E-04 | 3.34E-04 | 2.576048 up   | 1.353227 down | 3.485979 down | ISYNA1                                 |
| 229326_at | 0.005763 | 0.004173 | 1.645943 up   | 1.070654 down | 1.762235 down | TNFSF13                                |



|           |          |          |          |      |          |      |          |      |           |
|-----------|----------|----------|----------|------|----------|------|----------|------|-----------|
| 229331_at | 8.40E-04 | 3.20E-04 | 17.06675 | down | 2.733066 | down | 6.244546 | up   | SPATA18   |
| 229335_at | 0.035465 | 0.03418  | 1.765469 | up   | 1.107688 | up   | 1.593831 | down | CADM4     |
| 229338_at | 0.002001 | 0.001036 | 2.095342 | up   | 1.579124 | up   | 1.326902 | down |           |
| 229340_at | 0.00227  | 0.001234 | 1.091382 | down | 2.203415 | down | 2.018922 | down | NKAPL     |
| 229343_at | 0.016743 | 0.014985 | 1.608638 | up   | 1.321664 | down | 2.126078 | down | GTSE1     |
| 229344_x_ | 4.28E-04 | 1.28E-04 | 3.665437 | up   | 4.101486 | up   | 1.118962 | up   | RIMKLB    |
| 229345_at | 0.001797 | 8.96E-04 | 1.024717 | down | 1.248591 | up   | 1.279453 | up   | RTN4RL2   |
| 229347_at | 0.00194  | 9.95E-04 | 2.446781 | down | 2.029548 | down | 1.20558  | up   |           |
| 229349_at | 5.79E-14 | 3.16E-18 | 218.0101 | up   | 226.7919 | up   | 1.040282 | up   | LIN28B    |
| 229350_x_ | 2.80E-05 | 3.21E-06 | 2.88737  | down | 2.072516 | down | 1.393172 | up   | PARP10    |
| 229351_at | 4.77E-05 | 6.59E-06 | 2.486409 | up   | 4.369027 | up   | 1.757164 | up   |           |
| 229352_at | 0.005355 | 0.003807 | 3.689051 | down | 3.176248 | down | 1.161449 | up   | SPESP1    |
| 229353_s_ | 0.001256 | 5.54E-04 | 2.179987 | up   | 1.815982 | up   | 1.200445 | down | NUCKS1    |
| 229354_at | 1.97E-08 | 1.06E-10 | 27.63259 | down | 11.4039  | down | 2.423083 | up   | AHRR      |
| 229355_at | 5.61E-04 | 1.84E-04 | 1.912813 | up   | 2.909501 | up   | 1.521059 | up   |           |
| 229357_at | 0.001332 | 6.00E-04 | 30.28013 | down | 5.336091 | down | 5.67459  | up   | ADAMTS5   |
| 229358_at | 8.59E-04 | 3.29E-04 | 1.576604 | up   | 1.365886 | down | 2.153462 | down | IHH       |
| 229360_at | 5.61E-04 | 1.84E-04 | 3.960203 | up   | 2.457184 | up   | 1.611684 | down | ZNF280B   |
| 229365_at | 0.006824 | 0.005167 | 1.522766 | up   | 1.180866 | down | 1.798182 | down | PPP1R3F   |
| 229372_at | 0.004533 | 0.003082 | 1.454256 | up   | 1.26594  | up   | 1.148756 | down | GOLT1A    |
| 229377_at | 2.41E-05 | 2.59E-06 | 4.586017 | up   | 10.33537 | up   | 2.25367  | up   | GRTP1     |
| 229378_at | 0.001088 | 4.55E-04 | 1.952064 | up   | 1.975078 | up   | 1.011789 | up   | STOX1     |
| 229381_at | 0.004206 | 0.002783 | 1.675523 | up   | 1.107352 | down | 1.855394 | down | C1orf64   |
| 229386_at | 0.003387 | 0.002108 | 1.124153 | up   | 1.305634 | down | 1.467732 | down | ID4       |
| 229390_at | 0.003212 | 0.001963 | 1.850632 | down | 2.8021   | down | 1.514132 | down | FAM26F    |
| 229394_s_ | 3.67E-04 | 1.04E-04 | 1.61494  | down | 2.284364 | down | 1.414519 | down | GRLF1     |
| 229404_at | 1.63E-10 | 1.23E-13 | 180.3807 | down | 5.817164 | down | 31.00835 | up   | TWIST2    |
| 229409_s_ | 5.32E-04 | 1.71E-04 | 1.76095  | up   | 1.1778   | down | 2.074047 | down | ADO       |
| 229410_at | 9.13E-05 | 1.58E-05 | 1.720848 | down | 3.41364  | down | 1.983696 | down | SLC35E1   |
| 229418_at | 1.39E-04 | 2.83E-05 | 2.65899  | up   | 2.005434 | up   | 1.325893 | down | C17orf63  |
| 229422_at | 0.004435 | 0.002991 | 1.76111  | down | 2.158697 | up   | 3.801703 | up   | NRD1      |
| 229427_at | 2.50E-05 | 2.71E-06 | 14.64037 | down | 4.140455 | down | 3.535931 | up   | SEMA5A    |
| 229429_x_ | 9.77E-05 | 1.75E-05 | 2.509632 | up   | 4.357301 | up   | 1.736231 | up   | LOC728855 |
| 229434_at | 2.39E-04 | 5.85E-05 | 4.08507  | up   | 9.362701 | up   | 2.291932 | up   |           |

|           |          |          |          |      |          |      |          |      |             |
|-----------|----------|----------|----------|------|----------|------|----------|------|-------------|
| 229435_at | 1.64E-04 | 3.54E-05 | 12.59149 | down | 8.471076 | down | 1.486409 | up   | GLIS3       |
| 229437_at | 0.003386 | 0.002106 | 2.205162 | down | 1.502053 | down | 1.468098 | up   | MIRHG2      |
| 229440_at | 2.61E-04 | 6.61E-05 | 2.558558 | up   | 1.824597 | up   | 1.40226  | down | RBM47       |
| 229441_at | 1.36E-04 | 2.73E-05 | 10.84264 | down | 19.40842 | down | 1.79001  | down | PRSS23      |
| 229442_at | 8.47E-05 | 1.44E-05 | 3.479488 | up   | 8.120814 | up   | 2.33391  | up   | C18orf54    |
| 229445_at | 0.024437 | 0.022866 | 1.280599 | up   | 1.220129 | down | 1.562496 | down | CYBA        |
|           |          |          |          |      |          |      |          |      | NBPF10 ///  |
|           |          |          |          |      |          |      |          |      | NBPF11 ///  |
|           |          |          |          |      |          |      |          |      | NBPF8 ///   |
| 229447_x_ | 0.003495 | 0.002196 | 2.779911 | down | 1.51551  | down | 1.834307 | up   | RP11-94I2.2 |
| 229448_at | 0.002275 | 0.001239 | 2.466787 | up   | 1.538706 | up   | 1.603156 | down | LASS1       |
| 229450_at | 6.71E-06 | 4.33E-07 | 54.90604 | down | 6.0562   | down | 9.066089 | up   | IFIT3       |
|           |          |          |          |      |          |      |          |      | GALNT9 ///  |
|           |          |          |          |      |          |      |          |      | LOC100133   |
| 229451_at | 6.30E-04 | 2.16E-04 | 1.873385 | up   | 1.435521 | down | 2.689284 | down | 441         |
| 229452_at | 6.66E-04 | 2.33E-04 | 3.951028 | up   | 3.206217 | up   | 1.232302 | down | TMEM88      |
| 229456_s_ | 1.26E-05 | 1.06E-06 | 2.805329 | down | 7.550926 | down | 2.691636 | down | DDAH1       |
| 229458_s_ | 0.001535 | 7.25E-04 | 1.796283 | up   | 1.237236 | up   | 1.451852 | down | GALK1       |
| 229461_x_ | 2.18E-08 | 1.27E-10 | 29.26387 | down | 18.33696 | down | 1.595895 | up   | NEGR1       |
| 229464_at | 2.71E-05 | 3.06E-06 | 9.933494 | up   | 10.5532  | up   | 1.062386 | up   | MYEF2       |
| 229467_at | 9.45E-04 | 3.76E-04 | 2.229055 | up   | 4.040747 | up   | 1.812762 | up   | PCBP2       |
| 229471_s_ | 0.022794 | 0.021209 | 1.517771 | up   | 1.06917  | down | 1.622755 | down | SFRS2B      |
| 229474_at | 0.001697 | 8.32E-04 | 1.624991 | up   | 1.002552 | down | 1.629138 | down | MICAL3      |
| 229479_at | 1.60E-06 | 5.71E-08 | 1.49815  | down | 80.93414 | down | 54.02271 | down |             |
| 229480_at | 7.66E-06 | 5.30E-07 | 9.936373 | down | 8.472563 | down | 1.172771 | up   |             |
| 229481_at | 0.005374 | 0.003823 | 1.543632 | up   | 1.386088 | up   | 1.113661 | down | LOC283859   |
| 229482_at | 0.001337 | 6.04E-04 | 1.590464 | up   | 1.216073 | down | 1.934121 | down | DDX51       |
| 229486_s_ | 0.00223  | 0.001202 | 1.573812 | up   | 1.264989 | down | 1.990854 | down | TMEM132A    |
| 229487_at | 0.002683 | 0.001542 | 5.522551 | down | 8.839959 | down | 1.600702 | down | EBF1        |
| 229489_at | 0.004665 | 0.003201 | 1.60537  | up   | 1.397371 | down | 2.243298 | down |             |
| 229491_at | 3.12E-05 | 3.73E-06 | 6.526771 | down | 5.119314 | down | 1.274931 | up   | NHEDC2      |
| 229493_at | 5.60E-06 | 3.34E-07 | 1.632711 | down | 3.469066 | down | 2.124728 | down |             |

|           |          |          |          |      |          |      |          |      |            |
|-----------|----------|----------|----------|------|----------|------|----------|------|------------|
| 229497_at | 9.97E-04 | 4.04E-04 | 3.676985 | down | 1.461083 | down | 2.516617 | up   | ANKDD1A    |
| 229502_at | 0.017426 | 0.015678 | 1.136828 | down | 1.41417  | up   | 1.607669 | up   | CHDH       |
| 229503_at | 0.009822 | 0.008044 | 1.570259 | up   | 1.413379 | down | 2.219371 | down | SLC15A4    |
| 229504_at | 0.003113 | 0.001881 | 2.873487 | down | 2.410707 | down | 1.191968 | up   |            |
| 229508_at | 0.0081   | 0.006379 | 1.576442 | up   | 1.51659  | down | 2.390816 | down | U2AF2      |
| 229512_at | 1.72E-05 | 1.65E-06 | 3.302738 | down | 2.15658  | down | 1.53147  | up   | FAM120C    |
| 229513_at | 2.90E-08 | 2.04E-10 | 18.32572 | up   | 22.57222 | up   | 1.231724 | up   | STRBP      |
| 229515_at | 2.19E-04 | 5.22E-05 | 5.287226 | up   | 1.407929 | up   | 3.755321 | down | PAWR       |
| 229516_at | 0.010837 | 0.009044 | 1.378597 | down | 1.235286 | down | 1.116015 | up   | WDR31      |
| 229518_at | 5.31E-04 | 1.71E-04 | 10.99719 | up   | 7.60456  | up   | 1.44613  | down | FAM46B     |
| 229522_at | 0.048712 | 0.047546 | 1.315951 | up   | 1.153017 | down | 1.517315 | down | SDR42E1    |
| 229523_at | 3.40E-06 | 1.66E-07 | 4.968786 | up   | 5.280833 | up   | 1.062801 | up   | TTMA       |
| 229524_at | 0.005464 | 0.003904 | 1.416682 | up   | 1.185882 | down | 1.680017 | down | KIAA0494   |
| 229525_at | 0.013298 | 0.011499 | 1.673246 | down | 1.141598 | down | 1.465705 | up   |            |
| 229527_s_ | 0.048531 | 0.047357 | 1.543645 | up   | 1.00111  | down | 1.545358 | down | OSBPL11    |
| 229528_at | 0.005126 | 0.003605 | 1.849052 | up   | 1.727467 | up   | 1.070384 | down | LOC283378  |
| 229529_at | 0.00117  | 5.02E-04 | 2.304912 | down | 1.048316 | down | 2.198679 | up   | TCF21      |
| 229531_at | 0.00118  | 5.09E-04 | 4.147076 | down | 1.93502  | down | 2.143169 | up   |            |
| 229534_at | 0.004225 | 0.002798 | 1.742395 | down | 2.742626 | down | 1.574055 | down | ACOT4      |
| 229537_at | 0.006579 | 0.00494  | 1.593035 | down | 1.657494 | down | 1.040463 | down | LMO4       |
| 229547_s_ | 0.00148  | 6.90E-04 | 2.525544 | up   | 1.484531 | up   | 1.70124  | down | WNK2       |
| 229550_at | 0.002584 | 0.001466 | 1.970968 | up   | 2.014943 | up   | 1.022311 | up   | KIAA1409   |
| 229552_at | 6.95E-04 | 2.48E-04 | 2.530764 | up   | 1.769104 | up   | 1.430535 | down | LOC283454  |
| 229553_at | 5.20E-04 | 1.66E-04 | 4.390799 | up   | 1.672816 | up   | 2.624794 | down | PGM2L1     |
| 229554_at | 0.00135  | 6.12E-04 | 26.41169 | down | 4.443011 | down | 5.944547 | up   |            |
| 229555_at | 2.10E-04 | 4.92E-05 | 4.703072 | down | 7.605193 | down | 1.617069 | down | GALNT5     |
| 229558_at | 4.27E-05 | 5.70E-06 | 4.505029 | up   | 3.681929 | up   | 1.223551 | down |            |
| 229559_at | 0.002676 | 0.001535 | 1.893715 | up   | 1.973427 | up   | 1.042093 | up   | FLJ40125   |
| 229561_at | 1.97E-04 | 4.50E-05 | 2.334974 | up   | 1.139835 | up   | 2.048519 | down | LRRC16B    |
|           |          |          |          |      |          |      |          |      | RPL10A /// |
|           |          |          |          |      |          |      |          |      | RPL10AP6   |
|           |          |          |          |      |          |      |          |      | ///        |
| 229562_at | 0.003502 | 0.002202 | 2.060782 | up   | 1.263861 | up   | 1.630545 | down | RPL10AP9   |
| 229566_at | 0.016301 | 0.014529 | 1.69748  | down | 2.340225 | down | 1.378646 | down | LOC645638  |

|           |          |          |          |      |          |      |          |      |          |
|-----------|----------|----------|----------|------|----------|------|----------|------|----------|
| 229568_at | 0.001037 | 4.25E-04 | 2.395624 | up   | 7.803175 | up   | 3.257262 | up   | MOBK2B   |
| 229569_at | 6.61E-04 | 2.31E-04 | 1.339796 | down | 5.944681 | up   | 7.964657 | up   |          |
| 229572_at | 0.001767 | 8.77E-04 | 1.03794  | up   | 2.322827 | up   | 2.237921 | up   |          |
| 229574_at | 0.009264 | 0.007506 | 1.289803 | up   | 2.929138 | up   | 2.270996 | up   | TRA2A    |
| 229575_at | 0.005444 | 0.003887 | 1.590365 | up   | 2.142462 | up   | 1.347151 | up   |          |
| 229576_s_ | 2.48E-04 | 6.15E-05 | 5.269923 | down | 1.436975 | down | 3.667373 | up   | TBX3     |
| 229582_at | 1.89E-05 | 1.85E-06 | 4.401656 | up   | 1.190838 | up   | 3.696269 | down | INO80C   |
| 229583_at | 0.006412 | 0.004787 | 1.850102 | up   | 1.123037 | down | 2.077733 | down |          |
| 229584_at | 7.51E-05 | 1.23E-05 | 4.139751 | down | 1.173647 | down | 3.527254 | up   | LRRK2    |
| 229585_at | 2.51E-04 | 6.28E-05 | 4.589727 | down | 11.304   | down | 2.462891 | down | ADAMTSL1 |
| 229587_at | 3.72E-04 | 1.07E-04 | 2.362309 | up   | 2.376201 | up   | 1.005881 | up   | UBA2     |
| 229589_x_ | 0.001219 | 5.32E-04 | 2.088409 | down | 1.333067 | down | 1.56662  | up   | BIVM     |
| 229603_at | 0.002778 | 0.001617 | 3.495871 | down | 2.729389 | down | 1.280825 | up   | BBS12    |
| 229604_at | 0.019898 | 0.018222 | 1.465551 | down | 2.191023 | down | 1.495017 | down | CMAH     |
| 229606_at | 8.15E-07 | 2.23E-08 | 1.67442  | down | 2.564124 | down | 1.531351 | down |          |
| 229607_at | 7.97E-04 | 2.99E-04 | 1.857291 | up   | 1.207475 | down | 2.242633 | down |          |
| 229612_at | 0.001476 | 6.87E-04 | 2.771135 | up   | 1.688774 | up   | 1.640915 | down |          |
| 229613_at | 0.001265 | 5.60E-04 | 1.46879  | up   | 1.362464 | up   | 1.07804  | down |          |
| 229615_at | 9.67E-04 | 3.87E-04 | 2.441531 | up   | 1.675913 | up   | 1.456837 | down |          |
| 229619_at | 0.004026 | 0.002629 | 1.496142 | up   | 1.271808 | down | 1.902805 | down | FOLR2    |
| 229621_x_ | 0.004113 | 0.002702 | 1.325021 | down | 1.487614 | down | 1.12271  | down |          |
| 229632_s_ | 0.007813 | 0.006114 | 1.412046 | down | 1.329898 | down | 1.06177  | up   | INTS10   |
| 229634_at | 0.030152 | 0.02876  | 1.251921 | up   | 1.007486 | up   | 1.242619 | down | TMEM139  |
| 229635_at | 4.04E-04 | 1.18E-04 | 2.748846 | down | 1.319859 | down | 2.082682 | up   |          |
| 229637_at | 0.006686 | 0.005041 | 1.69153  | up   | 1.412616 | up   | 1.197445 | down | RIC8B    |
| 229638_at | 0.00113  | 4.79E-04 | 2.716641 | down | 5.778022 | down | 2.126899 | down | IRX3     |
| 229640_x_ | 0.002729 | 0.001576 | 1.618758 | up   | 1.159043 | up   | 1.396634 | down |          |
| 229641_at | 9.08E-06 | 6.63E-07 | 31.9203  | down | 7.110996 | down | 4.488864 | up   |          |
| 229646_at | 0.007524 | 0.005835 | 1.12366  | up   | 1.171191 | down | 1.316021 | down | SOBP     |
| 229649_at | 8.43E-05 | 1.43E-05 | 2.433679 | up   | 5.461717 | down | 13.29207 | down | NRXN3    |
| 229653_at | 4.30E-04 | 1.29E-04 | 1.992457 | down | 3.170057 | down | 1.591029 | down | VPS53    |
| 229655_at | 0.001773 | 8.81E-04 | 2.832115 | up   | 1.062771 | up   | 2.66484  | down | FAM19A5  |
| 229657_at | 2.64E-04 | 6.70E-05 | 4.98542  | down | 2.110063 | up   | 10.51955 | up   | THRB     |
| 229661_at | 9.85E-07 | 2.89E-08 | 36.44622 | up   | 42.09131 | up   | 1.154888 | up   | SALL4    |

|           |          |          |               |               |               |           |
|-----------|----------|----------|---------------|---------------|---------------|-----------|
| 229662_at | 0.002856 | 0.001677 | 1.433676 up   | 1.045833 up   | 1.370846 down | MSH3      |
| 229663_at | 8.92E-06 | 6.48E-07 | 2.632357 down | 3.804712 down | 1.445363 down | LONP2     |
| 229664_at | 7.98E-05 | 1.33E-05 | 2.313233 up   | 3.317309 up   | 1.434057 up   | MAPK8     |
| 229665_at | 0.001462 | 6.79E-04 | 1.847995 up   | 2.581825 up   | 1.397095 up   | CSTF3     |
| 229666_s_ | 0.001213 | 5.29E-04 | 1.930905 up   | 2.727166 up   | 1.412377 up   | CSTF3     |
| 229668_at | 0.014009 | 0.012222 | 1.250148 up   | 1.262048 down | 1.577746 down |           |
| 229671_s_ | 0.004386 | 0.002948 | 3.009012 up   | 2.597926 up   | 1.158236 down | C21orf45  |
| 229672_at | 0.004286 | 0.002857 | 1.060111 up   | 1.887012 up   | 1.780014 up   | UQCC      |
| 229677_at | 0.001389 | 6.35E-04 | 1.448908 up   | 1.254113 down | 1.817096 down | SLC39A3   |
| 229678_at | 6.56E-05 | 1.02E-05 | 1.577797 down | 2.441587 down | 1.547466 down | LOC728431 |
| 229681_at | 0.014121 | 0.012331 | 1.241027 up   | 1.096027 down | 1.360199 down |           |
|           |          |          |               |               |               | LOC100134 |
| 229685_at | 0.008606 | 0.006868 | 1.301038 down | 1.405811 down | 1.08053 down  | 937       |
| 229688_at | 0.028653 | 0.02722  | 1.376833 up   | 1.20557 up    | 1.14206 down  |           |
| 229690_at | 0.004483 | 0.003034 | 1.432097 up   | 1.232348 down | 1.764841 down | FAM109A   |
| 229691_at | 2.35E-04 | 5.74E-05 | 1.261087 up   | 1.393369 down | 1.75716 down  | ZBTB42    |
| 229693_at | 0.002057 | 0.001077 | 3.473928 down | 3.038576 down | 1.143275 up   | TMEM220   |
| 229696_at | 8.80E-04 | 3.41E-04 | 1.671611 down | 1.268306 down | 1.317987 up   | FECH      |
|           |          |          |               |               |               | LOC100129 |
| 229699_at | 0.019322 | 0.017615 | 4.716562 down | 1.902838 down | 2.478699 up   | 550       |
| 229700_at | 3.10E-05 | 3.68E-06 | 6.158052 up   | 9.454535 up   | 1.535312 up   | ZNF738    |
| 229705_at | 0.009163 | 0.007408 | 2.497714 down | 1.375982 down | 1.815223 up   |           |
| 229708_at | 0.030349 | 0.028958 | 1.377586 up   | 1.045461 down | 1.440212 down | C9orf167  |
| 229710_at | 0.028154 | 0.02669  | 1.745303 down | 1.309318 down | 1.332987 up   |           |
| 229712_at | 0.030216 | 0.028823 | 1.499572 down | 1.315753 up   | 1.973066 up   | SNAPC3    |
| 229714_at | 0.002004 | 0.001038 | 1.512599 up   | 1.147939 down | 1.736371 down | HS6ST3    |
|           |          |          |               |               |               | DKFZp686O |
| 229715_at | 0.007919 | 0.006208 | 3.057349 down | 2.243841 down | 1.362552 up   | 24166     |
| 229717_at | 0.028549 | 0.027113 | 1.62508 up    | 1.195873 up   | 1.358907 down | AMIGO3    |
| 229718_at | 0.01841  | 0.016687 | 1.555638 up   | 1.238829 up   | 1.255733 down | N4BP2L1   |
| 229719_s_ | 0.004266 | 0.002838 | 1.388076 up   | 1.771626 down | 2.459152 down | DERL3     |
| 229724_at | 5.34E-07 | 1.20E-08 | 38.85828 up   | 52.49951 up   | 1.351051 up   | GABRB3    |
| 229727_x_ | 0.002238 | 0.00121  | 1.992268 up   | 1.212304 up   | 1.643373 down | FAM148B   |
| 229730_at | 0.001114 | 4.70E-04 | 2.071302 up   | 2.367818 up   | 1.143154 up   | SMTNL2    |

|           |          |          |               |               |               |           |
|-----------|----------|----------|---------------|---------------|---------------|-----------|
| 229731_at | 0.003861 | 0.002495 | 1.295412 up   | 1.52096 down  | 1.97027 down  | FOXS1     |
| 229733_s_ | 1.90E-06 | 7.28E-08 | 5.866408 down | 6.977795 down | 1.189449 down |           |
| 229734_at | 2.40E-04 | 5.89E-05 | 2.615666 up   | 2.285522 up   | 1.14445 down  | LOC283174 |
| 229735_s_ | 3.77E-04 | 1.08E-04 | 1.866631 down | 2.594759 down | 1.390076 down |           |
| 229740_at | 0.006371 | 0.004743 | 1.413804 up   | 1.015657 up   | 1.392009 down | LOC643008 |
| 229741_at | 4.05E-04 | 1.19E-04 | 3.230209 down | 2.46957 down  | 1.308004 up   | MAVS      |
| 229742_at | 4.48E-05 | 6.09E-06 | 3.037872 down | 2.099771 down | 1.446764 up   | C15orf61  |
| 229743_at | 9.82E-04 | 3.96E-04 | 2.414699 down | 1.762312 down | 1.370189 up   | ZNF438    |
| 229745_x_ | 0.002421 | 0.001342 | 2.115655 up   | 1.855068 down | 3.924684 down | DACT3     |
| 229747_x_ | 0.001674 | 8.17E-04 | 1.968418 up   | 1.458335 down | 2.870614 down | LOC146880 |
| 229749_at | 3.64E-04 | 1.03E-04 | 2.139868 down | 2.061309 up   | 4.410928 up   | ANO4      |
| 229756_at | 0.006357 | 0.004732 | 2.079134 down | 1.409745 down | 1.47483 up    |           |
| 229758_at | 0.00532  | 0.003777 | 1.522651 up   | 1.388922 down | 2.114844 down | TIGD5     |
| 229759_s_ | 0.00237  | 0.001307 | 3.380295 down | 3.197529 down | 1.057159 up   | VEPH1     |
| 229761_at | 0.005409 | 0.003855 | 2.737936 up   | 2.071947 up   | 1.321431 down | LOC440173 |
| 229765_at | 8.87E-04 | 3.45E-04 | 3.112402 up   | 6.417436 up   | 2.061892 up   | ZNF207    |
| 229767_at | 0.004794 | 0.003306 | 1.511182 up   | 1.072545 down | 1.62081 down  | TBCD      |
| 229770_at | 1.55E-04 | 3.28E-05 | 2.002022 up   | 2.929987 up   | 1.463514 up   | GLT1D1    |
| 229776_at | 0.002011 | 0.001044 | 1.645154 down | 1.745119 down | 1.060764 down | SLCO3A1   |
| 229781_at | 0.001927 | 9.86E-04 | 1.580616 down | 1.092363 up   | 1.726606 up   |           |
| 229782_at | 8.14E-10 | 1.46E-12 | 29.11776 up   | 35.5381 up    | 1.220496 up   | RMST      |
| 229783_at | 0.005948 | 0.004346 | 1.477916 up   | 1.075189 down | 1.589039 down | LOC728163 |
| 229784_at | 7.37E-04 | 2.69E-04 | 3.205946 down | 1.171352 up   | 3.755291 up   | MGC16121  |
| 229786_at | 2.25E-04 | 5.40E-05 | 2.072881 down | 1.673214 down | 1.238862 up   |           |
| 229789_at | 0.009724 | 0.007943 | 1.497018 up   | 1.092181 up   | 1.370668 down | TIGD3     |
| 229790_at | 3.54E-04 | 9.96E-05 | 2.339576 up   | 1.761722 up   | 1.328005 down | TERF2     |
| 229799_s_ | 0.002654 | 0.001518 | 1.482327 up   | 1.166155 up   | 1.271124 down | NCAM1     |
| 229801_at | 6.38E-05 | 9.82E-06 | 4.774346 up   | 1.492598 up   | 3.198682 down | C10orf47  |
| 229810_at | 1.92E-04 | 4.37E-05 | 5.421959 down | 4.327013 down | 1.253049 up   |           |
| 229812_at | 0.019777 | 0.018091 | 2.117679 down | 1.39723 down  | 1.515627 up   | USP48     |
| 229813_x_ | 0.003939 | 0.002558 | 1.889247 up   | 1.667639 up   | 1.132888 down | DAZAP1    |
| 229816_at | 0.00106  | 4.40E-04 | 2.794795 down | 1.910984 down | 1.46249 up    | WDR78     |
| 229817_at | 7.11E-04 | 2.56E-04 | 2.034235 up   | 8.18836 up    | 4.025278 up   | ZNF608    |
| 229819_at | 0.019136 | 0.017428 | 1.673551 down | 1.23371 down  | 1.356519 up   | A1BG      |

|           |          |          |          |      |          |      |          |      |           |
|-----------|----------|----------|----------|------|----------|------|----------|------|-----------|
| 229822_at | 9.45E-04 | 3.76E-04 | 2.178897 | down | 3.165174 | down | 1.45265  | down |           |
| 229823_at | 9.01E-05 | 1.56E-05 | 1.515611 | up   | 4.791885 | up   | 3.161685 | up   |           |
| 229824_at | 9.62E-05 | 1.71E-05 | 5.660647 | down | 1.018894 | down | 5.555677 | up   |           |
| 229826_at | 0.025887 | 0.024377 | 2.08282  | up   | 1.133945 | up   | 1.83679  | down | LOC440957 |
| 229828_at | 0.038025 | 0.036763 | 1.15933  | up   | 1.358552 | down | 1.57501  | down |           |
| 229829_at | 0.001392 | 6.37E-04 | 1.547114 | up   | 2.333267 | up   | 1.508141 | up   | C18orf18  |
| 229830_at | 0.003138 | 0.001904 | 2.107851 | up   | 1.921418 | down | 4.050064 | down |           |
| 229831_at | 8.31E-06 | 5.92E-07 | 45.12079 | down | 1.231926 | up   | 55.58548 | up   | CNTN3     |
| 229833_at | 0.009291 | 0.00753  | 2.000912 | down | 1.319428 | down | 1.516499 | up   |           |
| 229835_s_ | 0.001275 | 5.66E-04 | 1.339947 | down | 3.472114 | down | 2.591232 | down |           |
| 229836_s_ | 0.003301 | 0.002037 | 1.32092  | up   | 1.287321 | down | 1.700448 | down | NUDT4P1   |
| 229837_s_ | 0.004497 | 0.003048 | 1.641099 | up   | 1.106754 | down | 1.816293 | down | PRO0461   |
| 229838_at | 1.21E-06 | 3.84E-08 | 6.745223 | down | 4.235304 | down | 1.592618 | up   | NUCB2     |
| 229840_at | 0.015137 | 0.013364 | 1.383562 | up   | 1.305245 | down | 1.805888 | down | IQSEC2    |
| 229841_at | 0.00154  | 7.29E-04 | 2.81009  | up   | 2.739683 | up   | 1.025699 | down |           |
| 229843_at | 0.015814 | 0.014037 | 2.269915 | down | 2.104618 | down | 1.07854  | up   | FAM82B    |
| 229844_at | 7.42E-06 | 5.07E-07 | 1.884079 | down | 6.922558 | down | 3.67424  | down |           |
| 229848_at | 9.13E-05 | 1.58E-05 | 2.442102 | up   | 2.563085 | up   | 1.049541 | up   | ZNF10     |
| 229849_at | 3.62E-06 | 1.81E-07 | 6.760246 | up   | 9.543876 | up   | 1.411765 | up   | WIPF3     |
| 229850_at | 2.58E-04 | 6.49E-05 | 8.788066 | down | 2.83327  | down | 3.101739 | up   | KDSR      |
| 229852_at | 0.001322 | 5.94E-04 | 2.63419  | down | 2.308329 | down | 1.141167 | up   | NMNAT1    |
| 229854_at | 8.91E-04 | 3.47E-04 | 1.781782 | up   | 1.328616 | up   | 1.341082 | down | OBSCN     |
| 229855_at | 7.61E-04 | 2.81E-04 | 2.251429 | up   | 2.177504 | up   | 1.03395  | down | RNF34     |
| 229858_at | 0.003387 | 0.002108 | 2.492428 | up   | 4.472978 | up   | 1.794627 | up   |           |
| 229860_x_ | 4.42E-04 | 1.33E-04 | 1.559498 | down | 2.298693 | down | 1.473995 | down | C4orf48   |
| 229861_at | 0.001605 | 7.72E-04 | 2.188372 | up   | 2.569171 | up   | 1.17401  | up   |           |
| 229865_at | 6.76E-04 | 2.38E-04 | 3.973941 | down | 4.516079 | down | 1.136424 | down | FNDC3B    |
| 229868_s_ | 4.88E-04 | 1.53E-04 | 1.131429 | up   | 1.712574 | down | 1.937655 | down | GDF15     |
|           |          |          |          |      |          |      |          |      | LOC100132 |
| 229872_s_ | 9.91E-04 | 4.01E-04 | 1.674808 | up   | 4.227002 | up   | 2.523874 | up   | 999       |
| 229873_at | 1.47E-05 | 1.32E-06 | 2.679253 | down | 3.960627 | down | 1.478258 | down | KCTD21    |
| 229874_x_ | 1.39E-04 | 2.83E-05 | 2.720275 | up   | 4.400174 | up   | 1.617547 | up   |           |
| 229875_at | 0.003267 | 0.002007 | 2.697974 | up   | 2.179442 | up   | 1.23792  | down | ZDHHC22   |
| 229881_at | 0.00198  | 0.001021 | 1.577142 | down | 2.147165 | down | 1.361427 | down | KLF12     |

|           |          |          |               |               |               |            |
|-----------|----------|----------|---------------|---------------|---------------|------------|
| 229882_at | 0.001852 | 9.33E-04 | 1.517432 up   | 1.727034 up   | 1.138129 up   | RPS15A     |
| 229886_at | 0.005114 | 0.003594 | 1.977406 up   | 2.657634 up   | 1.344 up      | C5orf34    |
| 229888_at | 6.87E-05 | 1.09E-05 | 3.03675 up    | 2.017747 up   | 1.505021 down | C12orf60   |
| 229890_at | 0.003845 | 0.002481 | 2.346425 down | 1.09229 down  | 2.148171 up   | PRRT1      |
| 229892_at | 1.09E-04 | 2.03E-05 | 1.989383 up   | 2.29986 up    | 1.156067 up   | EP400NL    |
| 229895_s_ | 1.48E-04 | 3.06E-05 | 1.81872 down  | 1.352205 up   | 2.459283 up   | NCK1       |
| 229899_s_ | 9.95E-04 | 4.03E-04 | 3.154895 up   | 4.937159 up   | 1.56492 up    | C20orf199  |
| 229900_at | 1.24E-04 | 2.43E-05 | 10.48112 down | 4.085021 down | 2.565743 up   | CD109      |
| 229904_at | 0.006027 | 0.004418 | 1.208564 up   | 1.380812 down | 1.6688 down   |            |
| 229905_at | 8.15E-07 | 2.23E-08 | 4.324941 down | 6.802458 down | 1.572844 down | RAP1GDS1   |
| 229909_at | 0.048241 | 0.047061 | 1.835728 up   | 1.099777 up   | 1.669183 down | B4GALNT3   |
| 229918_at | 0.009033 | 0.00728  | 1.399418 up   | 1.347579 down | 1.885827 down | CCDC40     |
| 229921_at | 2.14E-04 | 5.04E-05 | 2.847594 up   | 3.493075 up   | 1.226676 up   |            |
| 229922_at | 0.024798 | 0.023238 | 1.39384 up    | 1.014057 up   | 1.374519 down | GPRIN1     |
| 229924_s_ | 0.016574 | 0.014819 | 1.511627 up   | 1.051321 down | 1.589205 down |            |
| 229928_at | 0.006083 | 0.004472 | 1.894306 down | 1.736473 down | 1.090894 up   |            |
| 229929_at | 2.69E-04 | 6.90E-05 | 2.331505 up   | 1.469503 up   | 1.586594 down | SPSB4      |
|           |          |          |               |               |               | LOC100134  |
| 229930_at | 4.09E-04 | 1.21E-04 | 1.333628 up   | 5.051544 up   | 3.787821 up   | 361        |
| 229931_at | 0.003529 | 0.002222 | 1.531664 up   | 1.013578 up   | 1.511146 down | tcag7.1196 |
| 229938_at | 0.006044 | 0.004435 | 1.614383 up   | 1.054293 down | 1.702032 down | LOC388564  |
| 229942_at | 0.008187 | 0.006466 | 2.513008 down | 1.92966 down  | 1.302307 up   | BNC2       |
| 229943_at | 0.003789 | 0.002435 | 1.79605 down  | 2.234679 down | 1.244219 down | TRIM13     |
| 229951_x_ | 0.005553 | 0.003979 | 2.232483 down | 2.412364 down | 1.080575 down |            |
| 229954_at | 0.004353 | 0.002921 | 1.759509 down | 1.646973 up   | 2.897864 up   | CHDH       |
| 229955_at | 0.047441 | 0.046254 | 1.857223 down | 1.408259 down | 1.318808 up   | FBXO3      |
| 229959_at | 0.024174 | 0.022596 | 1.417568 up   | 1.295582 down | 1.836576 down | KLKB1      |
| 229961_x_ | 0.002471 | 0.001382 | 1.554998 up   | 1.050525 up   | 1.480211 down | YJEFN3     |
| 229971_at | 0.001271 | 5.64E-04 | 2.19706 up    | 1.283219 up   | 1.712148 down | GPR114     |
| 229972_at | 0.030766 | 0.029387 | 1.385126 up   | 1.096551 down | 1.518861 down |            |
| 229974_at | 4.74E-04 | 1.47E-04 | 2.772921 down | 1.48292 down  | 1.869906 up   | EVC2       |
| 229980_s_ | 1.16E-04 | 2.22E-05 | 1.907758 up   | 2.448868 up   | 1.283636 up   | SNX5       |
| 229981_at | 0.001442 | 6.67E-04 | 2.615426 up   | 3.573553 up   | 1.366337 up   | SNX5       |
| 229982_at | 0.010886 | 0.009093 | 4.052302 up   | 3.28924 up    | 1.231987 down | QSER1      |



|           |          |          |          |      |          |      |          |      |           |
|-----------|----------|----------|----------|------|----------|------|----------|------|-----------|
| 229984_at | 0.002487 | 0.001394 | 2.663036 | down | 1.177684 | up   | 3.136215 | up   | DTWD1     |
| 229988_at | 0.002404 | 0.001331 | 1.485009 | down | 1.465472 | down | 1.013332 | up   |           |
| 229989_at | 0.034905 | 0.033613 | 1.092619 | down | 1.297755 | up   | 1.417952 | up   | FDXACB1   |
| 229991_s_ | 0.001971 | 0.001015 | 2.589048 | down | 1.411136 | down | 1.834726 | up   | SYTL4     |
| 229994_at | 0.008516 | 0.00678  | 3.90973  | down | 2.691472 | down | 1.452636 | up   | NFIA      |
| 229998_x_ | 0.009179 | 0.007425 | 1.629089 | up   | 1.147036 | down | 1.868623 | down | FAM176B   |
| 230002_at | 2.87E-04 | 7.52E-05 | 3.888556 | down | 1.038267 | down | 3.745237 | up   | CLCC1     |
| 230003_at | 2.34E-05 | 2.50E-06 | 18.63024 | down | 4.805295 | down | 3.877023 | up   |           |
| 230006_s_ | 0.002219 | 0.001193 | 3.625971 | up   | 4.247621 | up   | 1.171444 | up   | SVIP      |
| 230007_at | 0.002826 | 0.001653 | 1.535616 | up   | 1.218916 | down | 1.871786 | down | JMJD1C    |
| 230010_at | 0.009857 | 0.00808  | 1.422498 | up   | 1.109642 | up   | 1.281943 | down | KIAA1853  |
| 230021_at | 1.56E-04 | 3.31E-05 | 3.495854 | up   | 3.212    | up   | 1.088373 | down | C15orf42  |
| 230024_at | 0.011708 | 0.009904 | 1.459177 | up   | 1.363425 | up   | 1.070229 | down | AARS2     |
| 230025_at | 0.001307 | 5.85E-04 | 3.216662 | down | 1.456103 | down | 2.209089 | up   | GJD3      |
| 230030_at | 7.32E-06 | 4.96E-07 | 8.887859 | up   | 10.09697 | up   | 1.13604  | up   | HS6ST2    |
| 230031_at | 2.97E-05 | 3.47E-06 | 3.907619 | down | 4.008056 | down | 1.025703 | down | HSPA5     |
| 230032_at | 0.003738 | 0.002393 | 2.104842 | up   | 2.061667 | up   | 1.020942 | down | OSGEPL1   |
| 230036_at | 1.38E-06 | 4.60E-08 | 7.026663 | down | 6.896107 | down | 1.018932 | up   | SAMD9L    |
| 230046_at | 0.008927 | 0.007176 | 1.456492 | up   | 1.770639 | down | 2.57892  | down |           |
| 230047_at | 0.002977 | 0.001773 | 2.855784 | up   | 2.993375 | up   | 1.04818  | up   | FLJ32810  |
| 230051_at | 0.003196 | 0.00195  | 4.008725 | up   | 1.345334 | up   | 2.979725 | down | C10orf47  |
| 230060_at | 0.005961 | 0.004357 | 1.673017 | up   | 1.84716  | up   | 1.10409  | up   | CDCA7     |
| 230063_at | 0.001394 | 6.38E-04 | 1.750514 | down | 2.418997 | down | 1.381878 | down | ZNF264    |
| 230067_at | 5.01E-04 | 1.58E-04 | 9.755008 | up   | 8.109476 | up   | 1.202915 | down | FAM124A   |
| 230071_at | 7.82E-05 | 1.30E-05 | 31.8884  | down | 15.3585  | down | 2.07627  | up   | 40797     |
|           |          |          |          |      |          |      |          |      | LOC100131 |
| 230073_at | 0.002568 | 0.001453 | 2.341948 | up   | 1.420497 | down | 3.326729 | down | 564       |
| 230075_at | 5.87E-04 | 1.96E-04 | 2.901841 | up   | 2.78735  | up   | 1.041075 | down | RAB39B    |
| 230078_at | 7.68E-04 | 2.85E-04 | 2.613285 | down | 1.502912 | up   | 3.927537 | up   | RAPGEF6   |
| 230080_at | 0.002424 | 0.001344 | 1.416436 | up   | 1.563014 | down | 2.21391  | down | LOC285943 |
| 230084_at | 0.009008 | 0.007257 | 1.569444 | up   | 1.200199 | up   | 1.307653 | down | SLC30A2   |
| 230085_at | 0.008521 | 0.006784 | 4.326103 | up   | 2.341083 | up   | 1.847906 | down |           |
| 230087_at | 4.97E-07 | 1.08E-08 | 4.694504 | up   | 4.615954 | up   | 1.017017 | down | PRIMA1    |
| 230090_at | 2.75E-04 | 7.08E-05 | 2.248307 | down | 4.646937 | down | 2.06686  | down | GDNF      |

|           |          |          |               |               |               |           |
|-----------|----------|----------|---------------|---------------|---------------|-----------|
| 230092_at | 0.027477 | 0.025996 | 1.403369 up   | 1.034003 up   | 1.357219 down | UBXN10    |
| 230096_at | 0.00847  | 0.006737 | 1.364106 up   | 1.363782 down | 1.860343 down |           |
| 230098_at | 5.52E-05 | 8.06E-06 | 5.331838 down | 5.422123 down | 1.016933 down | PHF20L1   |
| 230100_x_ | 2.92E-04 | 7.67E-05 | 3.421314 up   | 6.561403 up   | 1.917802 up   | PAK1      |
| 230103_at | 0.003351 | 0.002078 | 1.540354 up   | 1.068356 down | 1.645646 down | C10orf72  |
| 230105_at | 0.005589 | 0.004013 | 1.274486 down | 1.240229 up   | 1.580653 up   | HOXB13    |
| 230107_at | 0.0214   | 0.019765 | 1.026814 up   | 1.59589 down  | 1.638683 down |           |
| 230108_at | 1.68E-06 | 6.17E-08 | 1.120143 down | 4.245986 down | 3.790573 down | ERCC6     |
| 230109_at | 8.27E-06 | 5.88E-07 | 9.259976 down | 10.90743 down | 1.177911 down | PDE7B     |
| 230111_at | 0.001065 | 4.42E-04 | 2.029359 down | 2.386007 down | 1.175744 down |           |
| 230112_at | 4.45E-04 | 1.34E-04 | 2.958992 down | 4.248867 down | 1.435917 down | 40606     |
| 230114_at | 0.024254 | 0.022678 | 1.356278 up   | 1.194927 down | 1.620653 down | HOXB8     |
|           |          |          |               |               |               | DKFZp779M |
| 230115_at | 0.011509 | 0.009708 | 1.507104 up   | 1.073183 up   | 1.404331 down | 0652      |
| 230116_at | 0.005101 | 0.003582 | 1.319816 down | 1.414832 up   | 1.867319 up   | KRT8P12   |
| 230121_at | 0.001714 | 8.42E-04 | 2.491328 down | 1.256232 down | 1.983175 up   | C1orf133  |
| 230125_at | 0.001112 | 4.68E-04 | 1.481716 up   | 1.299276 down | 1.925158 down | GUSB      |
| 230127_at | 3.29E-04 | 9.02E-05 | 5.143153 down | 1.955451 down | 2.630162 up   |           |
| 230129_at | 0.003728 | 0.002384 | 1.581667 up   | 1.950584 up   | 1.233246 up   | PSTK      |
| 230130_at | 1.33E-04 | 2.67E-05 | 9.021237 down | 3.546991 down | 2.54335 up    |           |
| 230139_at | 7.29E-04 | 2.65E-04 | 2.917769 up   | 2.734796 up   | 1.066906 down |           |
| 230140_at | 0.003459 | 0.002168 | 1.314677 down | 1.309725 down | 1.003781 up   | PTPN9     |
| 230144_at | 1.60E-05 | 1.48E-06 | 15.71671 down | 1.718383 down | 9.146221 up   | GRIA3     |
| 230147_at | 9.07E-06 | 6.63E-07 | 22.26612 down | 7.376031 down | 3.018713 up   | F2RL2     |
| 230151_at | 0.006888 | 0.005229 | 1.154399 down | 2.090459 down | 1.810864 down | C13orf1   |
| 230152_at | 0.004075 | 0.00267  | 1.738916 down | 1.13169 down  | 1.536565 up   | WDR52     |
| 230155_x_ | 0.008163 | 0.006443 | 1.494667 up   | 1.262609 down | 1.88718 down  | MSL1      |
| 230159_at | 0.029548 | 0.028146 | 1.408842 up   | 1.000049 down | 1.408911 down | C1orf115  |
| 230160_x_ | 0.008274 | 0.006548 | 1.487193 up   | 1.376962 down | 2.047808 down | hCG_20426 |
| 230161_at | 6.10E-04 | 2.07E-04 | 2.874602 down | 4.525364 down | 1.574258 down |           |
| 230163_at | 0.010106 | 0.008319 | 2.511042 down | 2.057569 down | 1.220393 up   | GFRA1     |
| 230165_at | 0.001209 | 5.26E-04 | 2.550378 up   | 4.976626 up   | 1.951329 up   | SGOL2     |
| 230166_at | 2.99E-07 | 5.27E-09 | 5.923523 up   | 10.81121 up   | 1.825131 up   | KIAA1958  |
| 230170_at | 0.01042  | 0.008622 | 1.997266 up   | 1.040504 up   | 1.919519 down | OSM       |

|           |          |          |          |      |          |      |          |      |           |
|-----------|----------|----------|----------|------|----------|------|----------|------|-----------|
| 230173_at | 0.003796 | 0.002441 | 1.343897 | down | 1.516735 | down | 1.12861  | down | TRIM4     |
| 230176_at | 3.83E-06 | 1.96E-07 | 7.188007 | down | 3.843433 | down | 1.870205 | up   |           |
| 230181_at | 0.001412 | 6.49E-04 | 1.387039 | up   | 1.204096 | down | 1.670128 | down | PQLC1     |
| 230183_at | 0.002337 | 0.001282 | 5.437448 | down | 6.344115 | down | 1.166745 | down | EXT1      |
| 230185_at | 1.62E-07 | 2.32E-09 | 8.238536 | up   | 13.26651 | up   | 1.610299 | up   | THAP9     |
| 230186_at | 0.007987 | 0.006273 | 1.264617 | down | 1.658806 | down | 1.311707 | down | TMEM136   |
| 230189_x_ | 0.008383 | 0.006649 | 1.509528 | up   | 1.161529 | down | 1.75336  | down | NELF      |
| 230194_at | 0.010844 | 0.00905  | 2.117945 | up   | 2.08429  | up   | 1.016147 | down | LRPPRC    |
|           |          |          |          |      |          |      |          |      | LOC100131 |
| 230195_at | 1.05E-06 | 3.12E-08 | 23.49967 | up   | 14.90985 | up   | 1.576118 | down | 138       |
| 230196_x_ | 0.00829  | 0.006565 | 1.377934 | up   | 1.419751 | down | 1.956322 | down | ARHGAP23  |
| 230200_at | 2.49E-04 | 6.21E-05 | 1.872099 | up   | 2.582152 | up   | 1.379282 | up   | NSUN6     |
| 230201_at | 6.68E-04 | 2.34E-04 | 3.657335 | up   | 3.37968  | up   | 1.082155 | down |           |
| 230204_at | 2.87E-04 | 7.49E-05 | 9.710524 | up   | 4.717418 | down | 45.8086  | down | HAPLN1    |
| 230205_at | 1.54E-04 | 3.23E-05 | 2.143561 | up   | 1.883586 | up   | 1.138021 | down | ZNF561    |
| 230206_at | 6.06E-05 | 9.18E-06 | 3.51026  | down | 7.435911 | down | 2.118336 | down | DOCK5     |
| 230207_s_ | 0.005165 | 0.00364  | 4.228003 | down | 4.540032 | down | 1.073801 | down | DOCK5     |
| 230208_at | 0.001499 | 7.03E-04 | 2.468978 | up   | 1.897241 | up   | 1.301352 | down | HCN4      |
| 230211_at | 0.003483 | 0.002188 | 2.586371 | down | 1.417612 | down | 1.824457 | up   |           |
| 230212_at | 0.003827 | 0.002464 | 1.799306 | up   | 2.173456 | up   | 1.207941 | up   | LOC729345 |
| 230214_at | 1.94E-05 | 1.93E-06 | 3.758729 | down | 7.602047 | down | 2.022505 | down | MRVI1     |
| 230218_at | 2.79E-05 | 3.19E-06 | 8.024432 | down | 6.317922 | down | 1.270106 | up   | HIC1      |
| 230219_at | 0.03224  | 0.030904 | 1.3544   | down | 1.340302 | down | 1.010519 | up   | NDE1      |
| 230221_at | 0.00295  | 0.001752 | 2.118203 | up   | 1.542728 | down | 3.267811 | down | BAT5      |
| 230227_at | 0.002003 | 0.001037 | 2.401903 | down | 1.444311 | down | 1.66301  | up   |           |
| 230233_at | 2.67E-04 | 6.81E-05 | 7.950509 | up   | 5.658794 | up   | 1.404983 | down |           |
| 230240_at | 1.15E-04 | 2.19E-05 | 2.410957 | down | 2.265909 | down | 1.064014 | up   |           |
| 230241_at | 0.004864 | 0.003374 | 2.563009 | down | 2.374987 | down | 1.079168 | up   |           |
| 230242_at | 2.48E-04 | 6.18E-05 | 1.316115 | down | 2.788945 | down | 2.119075 | down | NFASC     |
| 230247_at | 0.033415 | 0.032099 | 1.600261 | up   | 1.016805 | up   | 1.573813 | down |           |
| 230248_x_ | 4.65E-04 | 1.43E-04 | 1.690664 | up   | 1.931427 | up   | 1.142407 | up   |           |
| 230253_at | 0.002441 | 0.001359 | 1.535689 | up   | 2.020247 | down | 3.10247  | down | SCUBE3    |
| 230254_at | 2.28E-06 | 9.41E-08 | 3.545263 | down | 6.41266  | down | 1.808797 | down |           |
| 230258_at | 0.001187 | 5.14E-04 | 4.449443 | down | 3.190949 | down | 1.394395 | up   | GLIS3     |

|           |          |          |          |      |          |      |          |      |           |
|-----------|----------|----------|----------|------|----------|------|----------|------|-----------|
| 230263_s_ | 1.37E-04 | 2.76E-05 | 5.123034 | down | 10.27727 | down | 2.006089 | down | DOCK5     |
| 230265_at | 6.94E-05 | 1.10E-05 | 5.161545 | down | 10.46267 | down | 2.027043 | down | SEL1L     |
| 230266_at | 1.15E-05 | 9.18E-07 | 6.066123 | down | 5.042577 | down | 1.202981 | up   | RAB7B     |
| 230267_at | 0.003848 | 0.002484 | 1.999921 | up   | 1.574737 | up   | 1.270003 | down |           |
| 230269_at | 0.001569 | 7.49E-04 | 3.038087 | up   | 2.914983 | up   | 1.042232 | down |           |
| 230275_at | 9.59E-04 | 3.83E-04 | 1.416348 | down | 1.902382 | down | 1.34316  | down | ARSI      |
| 230278_at | 0.001172 | 5.04E-04 | 2.344191 | down | 1.745105 | down | 1.343296 | up   |           |
| 230284_at | 9.48E-04 | 3.77E-04 | 1.50795  | up   | 1.047235 | up   | 1.439935 | down | MYOM3     |
| 230286_at | 0.019028 | 0.017319 | 1.523477 | up   | 1.189637 | down | 1.812385 | down |           |
| 230289_at | 0.00625  | 0.004632 | 1.103792 | up   | 1.226587 | down | 1.353896 | down | EPB41L1   |
| 230290_at | 6.94E-05 | 1.11E-05 | 1.360575 | up   | 10.09658 | down | 13.73715 | down | SCUBE3    |
| 230291_s_ | 2.40E-05 | 2.57E-06 | 4.137029 | down | 6.991815 | down | 1.690057 | down | NFIB      |
| 230295_at | 0.009537 | 0.007762 | 1.618403 | up   | 1.155515 | up   | 1.40059  | down | SOLH      |
| 230296_at | 0.002711 | 0.001562 | 1.848205 | down | 1.769041 | down | 1.04475  | up   | C16orf52  |
| 230304_at | 0.010229 | 0.008433 | 1.041734 | up   | 3.059775 | up   | 2.937194 | up   |           |
| 230305_at | 5.08E-04 | 1.61E-04 | 3.590212 | down | 1.331312 | down | 2.696747 | up   |           |
| 230306_at | 5.42E-04 | 1.76E-04 | 1.192846 | down | 2.036563 | down | 1.707314 | down | VPS26B    |
| 230309_at | 4.00E-05 | 5.25E-06 | 10.46107 | down | 3.452426 | down | 3.030063 | up   |           |
| 230312_at | 3.75E-04 | 1.08E-04 | 5.705045 | up   | 11.02513 | up   | 1.932522 | up   |           |
| 230313_at | 1.58E-05 | 1.45E-06 | 3.901731 | down | 5.889278 | down | 1.509402 | down |           |
| 230316_at | 4.90E-04 | 1.53E-04 | 1.157627 | down | 3.56194  | down | 3.076933 | down | SEC14L2   |
| 230320_at | 0.001075 | 4.48E-04 | 2.922162 | down | 2.356696 | down | 1.23994  | up   | TBRG1     |
| 230322_at | 0.011191 | 0.0094   | 1.508202 | up   | 1.123519 | down | 1.694494 | down | NFAM1     |
| 230324_at | 0.006045 | 0.004436 | 1.415837 | up   | 1.050494 | up   | 1.347783 | down |           |
| 230326_s_ | 0.002224 | 0.001197 | 1.592377 | up   | 1.41763  | up   | 1.123267 | down | C11orf73  |
| 230327_at | 0.00186  | 9.38E-04 | 1.495631 | up   | 1.199446 | down | 1.793928 | down | LOC730098 |
| 230329_s_ | 0.006914 | 0.005255 | 2.163194 | down | 1.210775 | down | 1.78662  | up   | NUDT6     |
| 230330_at | 0.002923 | 0.001728 | 1.578566 | up   | 1.12243  | up   | 1.406383 | down |           |
| 230336_at | 0.003272 | 0.002012 | 2.578031 | down | 1.570461 | down | 1.641576 | up   |           |
| 230339_at | 0.010951 | 0.009154 | 1.674727 | up   | 1.62304  | up   | 1.031846 | down | CCDC138   |
| 230341_x_ | 0.009382 | 0.007616 | 1.45094  | up   | 2.181474 | down | 3.165188 | down | ADAMTS10  |
| 230342_at | 0.001299 | 5.80E-04 | 1.411978 | up   | 1.374366 | down | 1.940574 | down | FOXK1     |
| 230343_at | 0.002434 | 0.001352 | 1.998423 | down | 2.036164 | down | 1.018885 | down |           |
| 230347_at | 0.00223  | 0.001202 | 1.601453 | up   | 1.468773 | down | 2.352171 | down | ORAI2     |

|           |          |          |               |               |               |           |
|-----------|----------|----------|---------------|---------------|---------------|-----------|
| 230348_at | 0.008637 | 0.006896 | 2.181855 up   | 1.785248 up   | 1.222158 down | LATS2     |
| 230349_at | 0.003109 | 0.001878 | 1.234962 up   | 1.377898 up   | 1.115741 up   | XKRX      |
| 230351_at | 2.70E-05 | 3.04E-06 | 2.137349 up   | 2.331448 up   | 1.090813 up   | LOC283481 |
| 230353_at | 0.006924 | 0.005265 | 1.093756 up   | 1.490338 down | 1.630066 down | LOC284112 |
| 230356_at | 8.63E-05 | 1.47E-05 | 29.69942 up   | 25.70646 up   | 1.155329 down |           |
| 230364_at | 2.16E-04 | 5.12E-05 | 5.075243 down | 3.357383 down | 1.511666 up   | CHPT1     |
| 230367_at | 0.001205 | 5.24E-04 | 1.801068 up   | 1.26034 down  | 2.269958 down | SMTNL1    |
| 230368_at | 0.020783 | 0.019128 | 1.501696 up   | 1.020321 up   | 1.471789 down | ERF       |
| 230369_at | 0.001068 | 4.44E-04 | 3.656889 down | 2.70259 down  | 1.353106 up   | GPR161    |
| 230371_at | 0.007281 | 0.005603 | 1.544316 up   | 1.219965 down | 1.884012 down | HPS6      |
| 230372_at | 0.006466 | 0.004837 | 1.557938 up   | 3.171206 down | 4.940543 down | HAS2      |
| 230378_at | 0.028503 | 0.02706  | 1.219185 up   | 1.190046 down | 1.450886 down | SCGB3A1   |
| 230383_x_ | 2.92E-06 | 1.34E-07 | 18.53213 down | 14.59327 down | 1.269909 up   |           |
| 230388_s_ | 2.19E-04 | 5.21E-05 | 1.760915 down | 4.365726 down | 2.479237 down | LOC644246 |
| 230393_at | 0.003213 | 0.001964 | 1.182209 down | 2.113537 down | 1.787786 down | CUL5      |
| 230402_at | 0.011681 | 0.009879 | 1.677241 up   | 1.32542 down  | 2.223049 down | DUSP15    |
| 230404_at | 6.63E-04 | 2.32E-04 | 1.695788 down | 2.179467 down | 1.285223 down | FLJ44606  |
| 230405_at | 1.13E-04 | 2.12E-05 | 3.502935 down | 1.708555 down | 2.050233 up   | C5orf56   |
| 230410_at | 0.003086 | 0.00186  | 1.575863 up   | 1.374181 down | 2.16552 down  | NRP2      |
| 230411_at | 0.003477 | 0.002183 | 1.741522 up   | 1.296418 up   | 1.343334 down |           |
| 230416_at | 3.37E-04 | 9.31E-05 | 4.076873 down | 2.812579 down | 1.449514 up   |           |
| 230418_s_ | 2.11E-04 | 4.93E-05 | 6.762271 down | 2.242225 up   | 15.16253 up   | GALNTL1   |
| 230423_at | 3.71E-05 | 4.67E-06 | 6.912812 up   | 3.842244 up   | 1.79916 down  |           |
| 230426_at | 0.010614 | 0.008822 | 1.496532 up   | 1.628659 up   | 1.088289 up   | DLD       |
| 230428_at | 0.002898 | 0.00171  | 1.53166 up    | 1.013939 up   | 1.510603 down |           |
| 230431_at | 7.71E-04 | 2.86E-04 | 1.681187 down | 1.823506 down | 1.084654 down |           |
| 230435_at | 0.003658 | 0.002325 | 3.126087 down | 2.087203 down | 1.49774 up    | LOC375190 |
| 230438_at | 8.28E-06 | 5.89E-07 | 4.898248 down | 3.545873 down | 1.381394 up   | TBX15     |
| 230439_at | 0.003247 | 0.001991 | 1.896403 up   | 1.370604 down | 2.599219 down | LOC389458 |
| 230440_at | 8.21E-05 | 1.38E-05 | 1.796581 down | 3.282041 down | 1.826826 down | ZNF469    |
| 230441_at | 4.23E-07 | 8.74E-09 | 10.7384 up    | 5.988085 up   | 1.793295 down | PLEKHG4B  |
| 230444_at | 0.003744 | 0.002399 | 1.596625 up   | 2.025299 up   | 1.268488 up   |           |
| 230451_at | 0.008778 | 0.007035 | 1.435902 down | 1.152124 down | 1.246309 up   |           |

|           |          |          |               |               |               |              |
|-----------|----------|----------|---------------|---------------|---------------|--------------|
|           |          |          |               |               |               | FLJ42351 /// |
|           |          |          |               |               |               | LOC100131    |
| 230452_at | 9.12E-04 | 3.58E-04 | 1.725565 down | 2.067062 down | 1.197905 down | 455          |
| 230454_at | 0.00474  | 0.003262 | 2.423611 down | 1.670848 down | 1.450528 up   | ICA1L        |
| 230465_at | 7.77E-04 | 2.89E-04 | 2.274568 down | 1.168787 down | 1.946093 up   | HS2ST1       |
| 230467_at | 3.28E-04 | 8.99E-05 | 2.573851 up   | 2.508593 up   | 1.026014 down | TMEM52       |
| 230472_at | 0.010407 | 0.00861  | 1.008878 down | 3.411474 up   | 3.441759 up   | IRX1         |
| 230474_at | 0.004293 | 0.002864 | 1.721394 up   | 1.128831 down | 1.943163 down | UBIAD1       |
| 230476_at | 1.69E-04 | 3.70E-05 | 1.2787 up     | 1.510837 down | 1.931907 down |              |
| 230479_at | 0.011562 | 0.009762 | 2.680514 down | 2.141525 down | 1.251685 up   |              |
| 230481_at | 0.001296 | 5.79E-04 | 1.236983 up   | 1.324727 down | 1.638665 down | ACY3         |
| 230483_at | 0.002417 | 0.001339 | 1.500514 up   | 1.988715 up   | 1.325356 up   |              |
| 230484_at | 0.006268 | 0.00465  | 1.280019 up   | 1.451916 up   | 1.134293 up   | CHDH         |
| 230486_at | 0.001261 | 5.58E-04 | 2.181191 down | 1.36582 up    | 2.979116 up   | PCBP3        |
| 230490_x_ | 0.010993 | 0.009197 | 2.660183 down | 1.394661 down | 1.907404 up   | RSU1         |
| 230493_at | 1.10E-05 | 8.66E-07 | 24.39106 up   | 2.744472 up   | 8.887342 down | SHISA2       |
| 230497_at | 6.47E-04 | 2.25E-04 | 1.838339 up   | 1.730248 up   | 1.062472 down | BRUNOL5      |
| 230498_at | 0.005373 | 0.003822 | 2.559398 up   | 2.088856 up   | 1.225263 down | MCHR1        |
| 230499_at | 3.89E-04 | 1.13E-04 | 1.655409 down | 1.16377 down  | 1.422454 up   |              |
| 230500_at | 0.010426 | 0.008629 | 1.307977 up   | 1.125093 down | 1.471595 down | PDE7A        |
|           |          |          |               |               |               | LOC100130    |
| 230507_at | 0.005078 | 0.003563 | 1.278755 up   | 1.098241 down | 1.404382 down | 360          |
| 230508_at | 3.14E-04 | 8.47E-05 | 2.585656 down | 1.041903 up   | 2.694003 up   | DKK3         |
| 230510_at | 0.001951 | 0.001002 | 1.482582 up   | 1.186439 down | 1.758993 down | HSPB9        |
| 230513_at | 0.007293 | 0.005616 | 1.745661 up   | 1.018901 down | 1.778655 down | BAT3         |
|           |          |          |               |               |               | LYZL1 ///    |
| 230514_s_ | 0.007138 | 0.00547  | 1.519217 up   | 1.141101 down | 1.73358 down  | LYZL2        |
| 230519_at | 1.71E-04 | 3.75E-05 | 4.808778 up   | 6.527172 up   | 1.357345 up   | FAM124A      |
| 230522_s_ | 5.26E-04 | 1.69E-04 | 2.982087 up   | 1.965305 up   | 1.517366 down | C9orf100     |
| 230523_at | 6.92E-04 | 2.47E-04 | 2.573824 down | 2.499939 down | 1.029555 up   |              |
| 230524_at | 0.034739 | 0.033442 | 1.339367 down | 1.219044 down | 1.098702 up   | MPI          |
| 230525_at | 0.002735 | 0.001582 | 1.685816 up   | 1.372051 down | 2.313026 down | LOC283875    |
| 230530_at | 0.012513 | 0.010716 | 1.5361 up     | 1.302209 down | 2.000322 down |              |

|           |          |          |               |               |               |           |
|-----------|----------|----------|---------------|---------------|---------------|-----------|
| 230531_at | 0.004543 | 0.003092 | 1.577621 up   | 1.787165 down | 2.819468 down | KCNC3     |
| 230534_at | 6.70E-04 | 2.35E-04 | 4.034769 up   | 4.199059 up   | 1.040719 up   | ZNF678    |
| 230537_at | 6.05E-04 | 2.05E-04 | 2.314755 up   | 2.438364 up   | 1.053401 up   |           |
| 230548_at | 5.04E-05 | 7.15E-06 | 1.438783 down | 1.750535 down | 1.216677 down |           |
| 230549_at | 0.010245 | 0.008449 | 1.473265 up   | 1.194351 up   | 1.233528 down | ELK4      |
| 230551_at | 0.001148 | 4.89E-04 | 1.610515 up   | 1.499542 up   | 1.074005 down | KSR2      |
| 230554_at | 7.57E-05 | 1.24E-05 | 1.02467 up    | 1.128175 down | 1.156007 down | ACSM2A    |
| 230556_at | 4.74E-04 | 1.46E-04 | 2.505236 up   | 2.491628 up   | 1.005462 down | IMMP1L    |
| 230559_x_ | 0.003444 | 0.002156 | 1.22288 up    | 3.458747 up   | 2.828361 up   | FGD4      |
| 230560_at | 1.37E-04 | 2.78E-05 | 2.230398 down | 5.409207 up   | 12.06468 up   | STXBP6    |
| 230561_s_ | 0.025611 | 0.024089 | 2.459841 down | 1.214261 down | 2.025792 up   | C2orf67   |
| 230563_at | 8.46E-07 | 2.34E-08 | 6.410025 up   | 14.01858 up   | 2.186978 up   | RASGEF1A  |
| 230568_x_ | 4.62E-04 | 1.42E-04 | 1.673439 up   | 1.122391 up   | 1.490958 down | DLL3      |
| 230571_at | 0.001713 | 8.42E-04 | 2.262706 down | 1.21869 down  | 1.85667 up    |           |
| 230576_at | 0.007806 | 0.006108 | 1.345691 up   | 1.352199 down | 1.819642 down | BLOC1S3   |
| 230578_at | 0.001662 | 8.09E-04 | 2.200911 down | 1.421329 down | 1.548488 up   |           |
| 230581_at | 7.57E-04 | 2.79E-04 | 1.07193 up    | 1.278215 down | 1.370158 down |           |
| 230583_s_ | 0.021323 | 0.019682 | 1.53476 up    | 1.018237 up   | 1.507272 down |           |
| 230584_at | 0.034413 | 0.033109 | 1.422372 up   | 1.009928 down | 1.436494 down |           |
| 230586_s_ | 9.84E-04 | 3.97E-04 | 1.265889 up   | 1.662261 down | 2.104239 down | ZNF703    |
| 230587_at | 4.82E-05 | 6.71E-06 | 1.430757 down | 2.644761 down | 1.848505 down | STGC3     |
| 230591_at | 0.017662 | 0.015922 | 1.250172 down | 1.516415 down | 1.212965 down | LOC729887 |
| 230597_at | 1.54E-07 | 2.18E-09 | 76.31422 up   | 66.62631 up   | 1.145407 down | SLC7A3    |
| 230605_at | 0.003645 | 0.002314 | 1.690994 down | 1.263449 up   | 2.136484 up   |           |
| 230606_at | 0.009865 | 0.008087 | 1.833648 down | 1.750538 down | 1.047477 up   |           |
| 230615_at | 0.003296 | 0.002033 | 1.828869 up   | 1.355712 down | 2.47942 down  | DUOXA2    |
| 230622_at | 0.002663 | 0.001526 | 2.062678 up   | 1.560007 up   | 1.322224 down | MLLT4     |
| 230623_x_ | 1.19E-04 | 2.27E-05 | 2.20439 up    | 4.190664 up   | 1.901054 up   | USP28     |
| 230625_s_ | 1.71E-04 | 3.75E-05 | 3.75775 up    | 1.802668 up   | 2.084549 down | TSPAN12   |
| 230626_at | 1.54E-04 | 3.25E-05 | 3.030508 up   | 2.43271 up    | 1.245733 down | TSPAN12   |
| 230627_at | 0.01356  | 0.011765 | 1.498351 up   | 1.511845 down | 2.265275 down |           |
| 230630_at | 0.0058   | 0.004206 | 2.892548 up   | 1.279501 down | 3.70102 down  | AK3L1     |
| 230632_at | 0.006212 | 0.004592 | 1.368119 up   | 1.195825 down | 1.63603 down  |           |
| 230636_s_ | 4.26E-05 | 5.69E-06 | 3.189771 down | 5.677165 down | 1.779803 down | KLF9      |

|           |          |          |          |      |          |      |          |      |           |
|-----------|----------|----------|----------|------|----------|------|----------|------|-----------|
| 230640_at | 0.011666 | 0.009865 | 1.341743 | down | 1.578104 | down | 1.17616  | down |           |
| 230641_at | 0.00231  | 0.001263 | 1.874424 | up   | 1.314685 | up   | 1.425759 | down |           |
| 230642_at | 5.18E-04 | 1.66E-04 | 1.365012 | down | 1.054882 | up   | 1.439927 | up   |           |
| 230646_at | 0.002257 | 0.001225 | 1.445076 | up   | 1.516444 | down | 2.191376 | down | FNDC5     |
| 230648_at | 6.26E-04 | 2.15E-04 | 1.74145  | up   | 1.154349 | down | 2.01024  | down | LOC283663 |
| 230650_at | 4.71E-04 | 1.45E-04 | 2.676734 | up   | 2.347739 | up   | 1.140133 | down |           |
| 230652_at | 5.89E-04 | 1.97E-04 | 2.304017 | down | 2.303478 | down | 1.000234 | up   | ARAF      |
| 230655_at | 0.003849 | 0.002485 | 1.430046 | down | 3.19842  | down | 2.236586 | down |           |
| 230657_at | 0.001915 | 9.77E-04 | 3.509539 | down | 1.578412 | down | 2.223462 | up   |           |
| 230659_at | 2.03E-04 | 4.67E-05 | 3.587796 | down | 7.681178 | down | 2.140918 | down |           |
| 230668_at | 0.003956 | 0.002572 | 2.709178 | up   | 1.223028 | up   | 2.21514  | down | NKAIN4    |
| 230670_at | 8.53E-06 | 6.15E-07 | 2.369392 | down | 1.264242 | up   | 2.995484 | up   | IGSF10    |
| 230671_at | 0.034739 | 0.03344  | 1.385419 | up   | 1.021776 | down | 1.415587 | down |           |
| 230672_at | 0.002322 | 0.001273 | 1.716    | up   | 1.506044 | up   | 1.139409 | down |           |
| 230673_at | 0.004144 | 0.00273  | 1.195032 | up   | 1.048073 | down | 1.252481 | down | PKHD1L1   |
| 230674_at | 0.045931 | 0.044722 | 1.427075 | up   | 1.12986  | down | 1.612395 | down | LGR4      |
| 230682_x_ | 0.007752 | 0.006058 | 1.702902 | down | 1.11487  | down | 1.527445 | up   | ABCC3     |
| 230683_at | 0.010013 | 0.008233 | 1.586879 | down | 1.532865 | down | 1.035238 | up   | ANKRD60   |
| 230685_at | 2.51E-04 | 6.28E-05 | 1.532394 | down | 1.963948 | down | 1.281621 | down | FLJ33630  |
| 230693_at | 0.021821 | 0.020196 | 1.516422 | up   | 1.196698 | down | 1.814699 | down | ATP2A1    |
| 230696_at | 3.43E-04 | 9.53E-05 | 3.339267 | up   | 3.61821  | up   | 1.083534 | up   |           |
| 230697_at | 1.42E-04 | 2.91E-05 | 2.468709 | down | 1.578905 | down | 1.563558 | up   | BBS5      |
| 230698_at | 0.00719  | 0.005517 | 1.742463 | up   | 1.486415 | up   | 1.172259 | down | CALN1     |
| 230704_s_ | 0.008287 | 0.006562 | 1.606586 | up   | 1.185016 | down | 1.903831 | down | ITGB4     |
| 230706_s_ | 7.02E-04 | 2.52E-04 | 1.878762 | up   | 1.895121 | up   | 1.008707 | up   | CAMK2N2   |
| 230707_at | 1.62E-04 | 3.49E-05 | 2.375268 | up   | 1.837405 | up   | 1.29273  | down | SORL1     |
| 230710_at | 0.007294 | 0.005617 | 1.475419 | down | 5.011296 | down | 3.396524 | down |           |
| 230714_s_ | 0.001591 | 7.63E-04 | 2.702169 | up   | 1.271497 | down | 3.4358   | down |           |
| 230721_at | 5.73E-05 | 8.48E-06 | 2.807055 | down | 1.234823 | down | 2.273245 | up   | C16orf52  |
| 230722_at | 0.028146 | 0.026681 | 2.582364 | down | 2.363828 | down | 1.09245  | up   | BNC2      |
| 230723_at | 1.89E-05 | 1.87E-06 | 3.551899 | down | 1.408612 | down | 2.52156  | up   | SPATA18   |
|           |          |          |          |      |          |      |          |      | LOC100133 |
| 230725_at | 0.001005 | 4.08E-04 | 1.329633 | up   | 1.56139  | up   | 1.174302 | up   | 781       |
| 230727_at | 0.005986 | 0.004379 | 1.329623 | down | 1.912559 | down | 1.438422 | down | CISD3     |



|           |          |          |          |      |          |      |          |      |           |
|-----------|----------|----------|----------|------|----------|------|----------|------|-----------|
| 230728_at | 1.07E-04 | 1.98E-05 | 4.478328 | down | 5.930495 | down | 1.324265 | down |           |
| 230729_at | 1.31E-04 | 2.61E-05 | 3.168565 | down | 2.985018 | down | 1.06149  | up   |           |
| 230730_at | 9.64E-05 | 1.71E-05 | 32.71854 | down | 5.211831 | down | 6.277744 | up   | SGCD      |
| 230736_at | 7.78E-04 | 2.90E-04 | 2.385379 | down | 2.658372 | down | 1.114444 | down | LOC387647 |
| 230737_s_ | 1.94E-05 | 1.92E-06 | 4.195829 | down | 5.20673  | down | 1.24093  | down | LOC387647 |
| 230738_at | 0.004558 | 0.003105 | 1.746437 | up   | 1.960483 | up   | 1.122562 | up   | LOC730631 |
| 230740_at | 6.36E-05 | 9.77E-06 | 4.744233 | down | 1.946221 | down | 2.437664 | up   |           |
| 230741_at | 0.00238  | 0.001314 | 5.246364 | down | 1.349313 | down | 3.888176 | up   |           |
| 230744_at | 4.78E-04 | 1.48E-04 | 8.074852 | down | 5.120457 | down | 1.576979 | up   |           |
| 230747_s_ | 4.45E-04 | 1.35E-04 | 3.017833 | down | 1.355275 | down | 2.226732 | up   | TTC39C    |
| 230749_s_ | 0.002035 | 0.001061 | 2.228345 | up   | 1.082673 | up   | 2.058188 | down | CAMK2D    |
| 230750_at | 2.11E-05 | 2.15E-06 | 7.587835 | down | 3.476446 | down | 2.182641 | up   |           |
| 230752_at | 3.45E-04 | 9.62E-05 | 1.915083 | up   | 1.567226 | up   | 1.221957 | down |           |
| 230756_at | 0.013724 | 0.011935 | 1.613936 | up   | 1.282705 | down | 2.070204 | down | ZNF683    |
| 230758_at | 0.037554 | 0.036279 | 2.292613 | down | 2.168792 | down | 1.057092 | up   | GEMIN8    |
| 230759_at | 0.01369  | 0.011898 | 2.328229 | down | 1.109    | down | 2.099395 | up   | SNX14     |
| 230760_at | 0.007494 | 0.005804 | 1.586147 | down | 3.977944 | up   | 6.309605 | up   | ZFY       |
| 230772_at | 9.84E-04 | 3.97E-04 | 1.864484 | up   | 1.440078 | up   | 1.29471  | down |           |
|           |          |          |          |      |          |      |          |      | RP11-     |
| 230775_s_ | 0.005543 | 0.00397  | 1.206526 | down | 1.122754 | up   | 1.354632 | up   | 251J8.3   |
| 230778_at | 4.15E-05 | 5.49E-06 | 1.082746 | down | 2.510796 | down | 2.318915 | down |           |
| 230782_at | 0.017688 | 0.015948 | 1.237768 | up   | 1.964427 | up   | 1.587073 | up   | SORD      |
| 230785_at | 2.34E-06 | 9.74E-08 | 14.63559 | up   | 12.59284 | up   | 1.162216 | down |           |
| 230788_at | 1.58E-09 | 3.79E-12 | 54.95281 | up   | 30.78741 | up   | 1.784912 | down | GCNT2     |
| 230789_at | 0.011649 | 0.009849 | 2.940316 | up   | 2.821854 | up   | 1.04198  | down | ZNF280B   |
| 230792_at | 2.18E-04 | 5.17E-05 | 2.119142 | up   | 2.011379 | up   | 1.053577 | down | FAAH2     |
| 230796_at | 0.021024 | 0.019378 | 1.255568 | up   | 1.214672 | down | 1.525103 | down | LOC440900 |
| 230797_s_ | 0.010208 | 0.008413 | 1.193839 | up   | 1.100148 | down | 1.313399 | down | LOC440900 |
| 230798_at | 0.013738 | 0.01195  | 1.543902 | up   | 1.254057 | up   | 1.231126 | down |           |
|           |          |          |          |      |          |      |          |      | LOC100134 |
| 230799_at | 5.75E-05 | 8.54E-06 | 4.847263 | down | 5.37577  | down | 1.109032 | down | 259       |
| 230800_at | 0.001712 | 8.41E-04 | 3.347128 | down | 3.311605 | down | 1.010727 | up   | ADCY4     |
| 230801_at | 0.008669 | 0.006931 | 1.814963 | up   | 1.077053 | down | 1.95481  | down | RPRD1B    |
| 230802_at | 0.008052 | 0.006332 | 1.063263 | down | 1.354315 | down | 1.273735 | down | ARHGAP24  |

|           |          |          |          |      |          |      |          |      |           |
|-----------|----------|----------|----------|------|----------|------|----------|------|-----------|
| 230803_s_ | 5.52E-04 | 1.81E-04 | 3.984071 | down | 3.220341 | down | 1.237158 | up   | ARHGAP24  |
| 230805_at | 0.001086 | 4.54E-04 | 2.072499 | up   | 1.338812 | down | 2.774686 | down |           |
| 230812_at | 4.44E-04 | 1.34E-04 | 1.342723 | up   | 1.490937 | down | 2.001916 | down |           |
| 230814_at | 0.001298 | 5.80E-04 | 1.993962 | up   | 1.177296 | down | 2.347484 | down | LOC342918 |
| 230819_at | 0.003044 | 0.001826 | 1.729162 | up   | 1.24404  | up   | 1.389957 | down | FAM148C   |
| 230831_at | 0.001357 | 6.17E-04 | 3.126254 | up   | 1.841597 | up   | 1.697578 | down | FRMD5     |
| 230833_at | 0.012267 | 0.010473 | 1.374189 | up   | 1.534716 | down | 2.10899  | down | ACRBP     |
| 230839_at | 0.002231 | 0.001203 | 1.684644 | up   | 1.204865 | up   | 1.398201 | down | PRMT8     |
| 230846_at | 0.003396 | 0.002116 | 1.580937 | up   | 1.227268 | down | 1.940234 | down | AKAP5     |
| 230848_s_ | 0.001495 | 7.01E-04 | 1.973787 | up   | 1.218175 | up   | 1.620282 | down | MGA       |
| 230851_x_ | 0.006381 | 0.004758 | 1.275187 | up   | 1.427914 | down | 1.820858 | down | C16orf13  |
| 230852_at | 0.011573 | 0.009774 | 1.692456 | up   | 1.07374  | down | 1.817257 | down | STAC3     |
| 230859_at | 0.001334 | 6.01E-04 | 2.350754 | up   | 2.358644 | up   | 1.003356 | up   |           |
| 230860_at | 0.003066 | 0.001844 | 2.772261 | down | 2.039816 | down | 1.359074 | up   | C3orf34   |
| 230864_at | 6.25E-04 | 2.14E-04 | 1.699491 | down | 1.950573 | down | 1.14774  | down | MGC42105  |
| 230869_at | 0.026387 | 0.02489  | 3.498539 | up   | 1.141074 | up   | 3.066006 | down | FAM155A   |
| 230871_at | 0.001347 | 6.10E-04 | 1.828946 | up   | 2.281338 | up   | 1.247351 | up   | DHX30     |
| 230872_s_ | 0.00286  | 0.00168  | 2.6196   | down | 1.412141 | down | 1.855056 | up   | TTLL3     |
| 230873_at | 0.002221 | 0.001194 | 1.517571 | down | 1.613232 | down | 1.063036 | down | TTLL3     |
| 230879_at | 0.022442 | 0.020857 | 2.123315 | down | 1.281955 | down | 1.656311 | up   | BAG2      |
| 230883_at | 0.001181 | 5.10E-04 | 1.74571  | up   | 1.692568 | up   | 1.031397 | down | NXPH2     |
| 230885_at | 0.002706 | 0.001557 | 1.164141 | up   | 3.041943 | up   | 2.613038 | up   | SPG7      |
| 230887_at | 8.86E-04 | 3.44E-04 | 1.887708 | down | 1.258303 | down | 1.500201 | up   | CDC14B    |
| 230889_at | 0.002502 | 0.001405 | 3.268337 | up   | 2.585652 | up   | 1.264028 | down |           |
| 230893_at | 0.007192 | 0.005519 | 1.81577  | down | 1.218709 | up   | 2.212895 | up   | DNAJC21   |
| 230895_at | 2.71E-04 | 6.96E-05 | 3.248739 | up   | 7.580681 | down | 24.62765 | down | HAPLN1    |
| 230896_at | 1.45E-07 | 1.93E-09 | 33.0018  | up   | 31.15594 | up   | 1.059246 | down | BEND4     |
| 230902_at | 0.012646 | 0.010848 | 1.603963 | up   | 1.411215 | down | 2.263536 | down | LOC645323 |
| 230903_s_ | 9.15E-06 | 6.71E-07 | 8.091743 | up   | 15.42174 | up   | 1.905862 | up   | C8orf42   |
| 230905_at | 0.014242 | 0.012453 | 1.552157 | up   | 1.10678  | down | 1.717897 | down | ZDHHC4    |
| 230907_at | 0.015137 | 0.013364 | 1.382842 | up   | 1.15402  | down | 1.595828 | down | GPRC5C    |
| 230908_at | 0.021923 | 0.020308 | 1.383542 | up   | 1.130989 | up   | 1.223303 | down | TACR1     |
| 230911_at | 0.003207 | 0.001958 | 1.926924 | up   | 1.195899 | up   | 1.611277 | down | SIX1      |
| 230912_at | 0.00968  | 0.007902 | 1.640599 | up   | 1.047144 | up   | 1.566737 | down | ASPDH     |

|           |          |          |               |               |               |           |
|-----------|----------|----------|---------------|---------------|---------------|-----------|
| 230916_at | 1.41E-04 | 2.87E-05 | 12.16282 up   | 11.54005 up   | 1.053966 down | NODAL     |
| 230919_at | 0.001891 | 9.59E-04 | 1.236078 down | 1.174524 up   | 1.451803 up   | ZNF233    |
| 230925_at | 1.12E-06 | 3.41E-08 | 4.202253 down | 13.14734 down | 3.12864 down  | APBB1IP   |
| 230929_s_ | 0.001373 | 6.25E-04 | 2.536322 up   | 1.342013 down | 3.403777 down |           |
| 230930_at | 0.001683 | 8.24E-04 | 3.395192 down | 1.997592 down | 1.699642 up   | LOC338620 |
| 230931_at | 0.004677 | 0.003211 | 1.269539 up   | 1.082379 down | 1.374122 down |           |
| 230932_at | 6.61E-04 | 2.31E-04 | 1.993013 up   | 1.451663 up   | 1.372917 down |           |
| 230933_at | 0.008358 | 0.006626 | 1.61266 down  | 2.973799 down | 1.844033 down | DSTN      |
| 230938_x_ | 0.010583 | 0.008791 | 1.390822 up   | 1.511045 down | 2.101594 down | ATF5      |
|           |          |          |               |               |               | LOC100131 |
| 230940_at | 0.00232  | 0.001271 | 1.337477 up   | 1.203884 down | 1.610166 down | 088       |
| 230944_at | 0.044419 | 0.043191 | 1.528753 up   | 1.07545 up    | 1.4215 down   |           |
| 230946_at | 0.001724 | 8.49E-04 | 1.660352 up   | 1.486396 down | 2.46794 down  | FMN2      |
| 230948_at | 0.002446 | 0.001362 | 1.810677 down | 1.031689 up   | 1.868056 up   | TAF1B     |
| 230951_at | 2.39E-05 | 2.56E-06 | 4.321258 up   | 3.870243 up   | 1.116534 down |           |
| 230958_s_ | 0.002184 | 0.001167 | 4.314432 down | 4.070121 down | 1.060025 up   |           |
| 230959_at | 5.85E-04 | 1.96E-04 | 1.293978 up   | 1.373162 down | 1.776841 down |           |
| 230960_at | 7.90E-06 | 5.54E-07 | 11.3369 up    | 10.6061 up    | 1.068904 down | IGDCC3    |
| 230963_at | 0.002204 | 0.001181 | 2.500645 down | 1.970442 down | 1.269078 up   | EMX2OS    |
| 230964_at | 2.50E-06 | 1.08E-07 | 32.08604 up   | 30.39392 up   | 1.055673 down | FREM2     |
| 230965_at | 0.002077 | 0.001092 | 1.798066 up   | 1.195311 down | 2.149248 down | USP2      |
| 230971_x_ | 0.019519 | 0.017819 | 1.144282 up   | 1.428802 down | 1.634952 down | GLTPD2    |
| 230980_x_ | 0.005063 | 0.00355  | 1.565935 up   | 1.25974 down  | 1.972671 down |           |
| 230988_at | 7.77E-05 | 1.28E-05 | 7.112048 up   | 6.293207 up   | 1.130115 down |           |
| 230992_at | 0.015995 | 0.014221 | 1.326438 up   | 1.025901 up   | 1.292949 down | BTNL9     |
| 230994_at | 0.002575 | 0.001459 | 1.745202 up   | 1.433922 down | 2.502484 down | FAM181B   |
| 230998_at | 0.007077 | 0.005408 | 1.960996 up   | 3.154267 up   | 1.608503 up   |           |
| 231001_at | 0.003062 | 0.00184  | 7.036933 down | 3.368873 down | 2.088809 up   | FIBIN     |
| 231007_at | 0.019692 | 0.018001 | 1.182995 up   | 1.090302 down | 1.289822 down |           |
| 231009_at | 2.11E-04 | 4.93E-05 | 1.413266 up   | 1.101516 up   | 1.283019 down | PLA2G12B  |
| 231010_at | 0.002104 | 0.001109 | 1.146789 down | 1.045059 up   | 1.198461 up   | C4orf16   |
| 231015_at | 0.009209 | 0.007454 | 2.036528 up   | 1.391232 up   | 1.46383 down  | KLF15     |
| 231016_s_ | 0.004299 | 0.002871 | 2.541176 down | 2.189031 down | 1.160868 up   |           |
| 231017_at | 0.006815 | 0.005159 | 1.505761 down | 1.215783 down | 1.238511 up   | STK11     |

|           |          |          |               |               |               |                    |
|-----------|----------|----------|---------------|---------------|---------------|--------------------|
| 231018_at | 9.99E-04 | 4.05E-04 | 3.2915 up     | 3.145485 up   | 1.046421 down | PALM3              |
| 231019_x_ | 0.007323 | 0.005643 | 1.466134 up   | 1.089316 down | 1.597083 down | STK11              |
| 231020_at | 0.002903 | 0.001714 | 1.62657 up    | 1.343016 down | 2.184509 down | ARX                |
| 231022_at | 1.04E-07 | 1.24E-09 | 7.009534 up   | 11.21152 up   | 1.599467 up   |                    |
| 231026_at | 0.001936 | 9.92E-04 | 1.520903 down | 1.040484 up   | 1.582475 up   | EFHC1<br>LOC100132 |
| 231030_at | 0.003899 | 0.002524 | 1.636406 up   | 1.212664 down | 1.98441 down  | 618                |
| 231031_at | 0.019255 | 0.01755  | 6.901934 down | 5.050819 down | 1.366498 up   | KGFLP2             |
| 231032_at | 0.001665 | 8.11E-04 | 1.756829 down | 1.269736 down | 1.383618 up   | LOC286071          |
| 231036_at | 0.021848 | 0.020227 | 1.23165 up    | 1.050354 down | 1.293668 down |                    |
| 231042_s_ | 7.77E-05 | 1.28E-05 | 6.9864 down   | 9.065302 down | 1.297564 down |                    |
| 231044_at | 0.004842 | 0.003351 | 1.088905 down | 1.450053 up   | 1.57897 up    | C1orf194           |
| 231045_x_ | 0.001283 | 5.71E-04 | 1.836982 up   | 1.752725 up   | 1.048072 down | C11orf31           |
| 231046_at | 0.002025 | 0.001054 | 1.374813 up   | 1.836079 down | 2.524265 down |                    |
| 231053_at | 4.82E-04 | 1.50E-04 | 1.451793 down | 1.016067 down | 1.428835 up   |                    |
| 231054_at | 0.002715 | 0.001565 | 1.463427 up   | 1.398743 down | 2.046958 down | SPACA4             |
| 231055_at | 2.60E-06 | 1.14E-07 | 2.276909 down | 2.700296 down | 1.185948 down |                    |
| 231061_at | 7.91E-07 | 2.12E-08 | 76.22821 up   | 159.6916 up   | 2.094914 up   |                    |
| 231069_at | 0.00171  | 8.40E-04 | 1.632557 down | 1.253692 up   | 2.046723 up   |                    |
| 231071_at | 0.001604 | 7.72E-04 | 1.422258 up   | 1.420912 up   | 1.000947 down |                    |
| 231075_x_ | 0.009777 | 0.008    | 1.348721 down | 2.38964 down  | 1.771782 down | RAPH1              |
| 231076_at | 0.049065 | 0.047907 | 1.022541 up   | 1.238263 down | 1.266175 down | C16orf82           |
| 231078_at | 0.001774 | 8.81E-04 | 1.092255 down | 1.658483 down | 1.518402 down |                    |
| 231079_at | 1.54E-06 | 5.43E-08 | 10.88785 up   | 7.071432 up   | 1.539696 down |                    |
| 231080_at | 0.012011 | 0.010212 | 1.912074 up   | 1.230095 down | 2.352033 down | CDAN1              |
| 231086_at | 7.06E-04 | 2.53E-04 | 1.377541 up   | 1.786284 up   | 1.296719 up   |                    |
| 231089_at | 6.76E-04 | 2.38E-04 | 1.410538 up   | 1.052116 down | 1.48405 down  |                    |
| 231090_s_ | 4.65E-04 | 1.43E-04 | 2.078677 up   | 2.423624 up   | 1.165946 up   | ARID2              |
| 231098_at | 5.61E-06 | 3.36E-07 | 3.38199 down  | 11.86521 down | 3.508352 down |                    |
| 231108_at | 1.96E-04 | 4.48E-05 | 1.768579 up   | 4.798964 up   | 2.713458 up   | FUS                |
| 231110_at | 0.003557 | 0.002246 | 1.673476 up   | 1.451841 up   | 1.152658 down |                    |
| 231115_at | 2.03E-04 | 4.68E-05 | 2.244948 down | 2.804821 down | 1.249392 down | POLH               |
| 231118_at | 6.84E-04 | 2.42E-04 | 3.620477 down | 2.471259 down | 1.465033 up   | ANKRD35            |
| 231123_at | 0.006112 | 0.0045   | 1.557737 up   | 1.061422 up   | 1.467594 down | TRIM36             |

|           |          |          |               |               |               |           |
|-----------|----------|----------|---------------|---------------|---------------|-----------|
| 231129_at | 0.001562 | 7.44E-04 | 1.367949 up   | 1.020352 up   | 1.340663 down | LOC728012 |
| 231130_at | 8.41E-06 | 6.03E-07 | 10.26074 down | 6.825491 down | 1.503297 up   | FKBP7     |
| 231131_at | 0.038601 | 0.037341 | 1.453768 up   | 1.111231 up   | 1.308249 down | FAM133A   |
| 231137_at | 3.59E-05 | 4.47E-06 | 3.206347 down | 2.177629 down | 1.472403 up   |           |
| 231138_at | 0.02774  | 0.026266 | 1.193594 up   | 1.063665 down | 1.269584 down |           |
| 231140_at | 0.018317 | 0.016594 | 1.383398 up   | 1.126231 down | 1.558025 down | TPPP2     |
| 231144_at | 0.001752 | 8.67E-04 | 1.650255 up   | 1.197576 down | 1.976307 down | SMARCD3   |
| 231145_at | 0.002308 | 0.001261 | 1.08938 down  | 1.279804 down | 1.1748 down   |           |
| 231157_at | 1.81E-05 | 1.76E-06 | 2.6988 down   | 1.809106 down | 1.491787 up   | TTLL11    |
| 231158_x_ | 3.67E-04 | 1.04E-04 | 2.185747 up   | 1.115534 up   | 1.959372 down | PTBP1     |
| 231161_x_ | 0.001361 | 6.19E-04 | 1.852347 up   | 1.652376 down | 3.060773 down |           |
| 231163_at | 0.00132  | 5.93E-04 | 1.316476 up   | 1.398307 up   | 1.06216 up    | C1orf111  |
| 231166_at | 8.74E-04 | 3.37E-04 | 2.613683 down | 3.983861 down | 1.524233 down | GPR155    |
| 231168_at | 0.010238 | 0.008443 | 1.700761 up   | 1.235801 down | 2.101802 down |           |
| 231171_at | 0.007897 | 0.006187 | 1.681017 down | 1.3429 down   | 1.251781 up   |           |
| 231175_at | 1.09E-05 | 8.50E-07 | 15.06863 down | 6.793953 down | 2.217948 up   | BEND6     |
| 231185_at | 0.003901 | 0.002526 | 1.536674 up   | 1.325001 up   | 1.159752 down | KIAA1161  |
| 231188_at | 0.005854 | 0.004255 | 1.993147 up   | 1.71046 up    | 1.165269 down | ZSCAN2    |
| 231189_at | 7.11E-04 | 2.56E-04 | 1.45889 up    | 1.003914 up   | 1.453202 down |           |
|           |          |          |               |               |               | POM121L10 |
| 231190_at | 0.003867 | 0.0025   | 1.317152 up   | 1.38209 down  | 1.820423 down | P         |
| 231191_at | 0.014806 | 0.013033 | 1.445046 up   | 1.203459 down | 1.739054 down |           |
| 231192_at | 0.0162   | 0.014432 | 1.056605 up   | 4.131336 up   | 3.910011 up   |           |
| 231195_at | 4.46E-04 | 1.35E-04 | 2.813822 up   | 2.766271 up   | 1.01719 down  | KLRG2     |
| 231196_x_ | 0.011738 | 0.009934 | 1.411345 up   | 1.018519 down | 1.437482 down | C10orf51  |
| 231197_at | 0.010903 | 0.00911  | 1.283216 up   | 1.002351 down | 1.286233 down | PPP1R3F   |
| 231198_at | 0.036322 | 0.035047 | 1.654297 up   | 1.015735 up   | 1.62867 down  | CDK6      |
| 231199_at | 0.002581 | 0.001464 | 2.138085 up   | 4.190797 up   | 1.96007 up    |           |
| 231201_at | 0.01151  | 0.009709 | 1.891516 up   | 1.066741 up   | 1.773173 down | PTGER1    |
| 231202_at | 4.79E-06 | 2.70E-07 | 27.36905 down | 27.35157 down | 1.000639 up   | ALDH1L2   |
| 231204_at | 0.004365 | 0.002932 | 1.431912 up   | 1.298898 up   | 1.102405 down | C4orf21   |
| 231209_at | 0.004599 | 0.003142 | 1.300718 up   | 1.473051 down | 1.916024 down | C14orf73  |
| 231211_s_ | 6.41E-04 | 2.22E-04 | 1.010193 up   | 2.516938 down | 2.542592 down | YIF1B     |
| 231214_at | 7.63E-04 | 2.82E-04 | 1.283226 up   | 1.178536 up   | 1.088831 down |           |

|           |          |          |               |               |               |                      |
|-----------|----------|----------|---------------|---------------|---------------|----------------------|
| 231221_at | 4.08E-04 | 1.20E-04 | 1.491113 up   | 1.323084 down | 1.972867 down | CLEC16A              |
| 231224_x_ | 7.09E-05 | 1.14E-05 | 1.232679 up   | 1.686709 down | 2.07917 down  | PRKAG2               |
| 231226_at | 0.00354  | 0.002232 | 1.575853 up   | 1.330383 down | 2.096488 down | LOC728142            |
| 231227_at | 3.15E-05 | 3.79E-06 | 24.54019 down | 8.525844 down | 2.87833 up    |                      |
| 231229_at | 5.99E-04 | 2.02E-04 | 1.330918 up   | 1.54637 down  | 2.058092 down | HILS1                |
| 231234_at | 1.80E-05 | 1.74E-06 | 3.831786 down | 3.215137 up   | 12.31972 up   | CTSC                 |
| 231238_at | 0.011135 | 0.00934  | 1.346788 down | 1.327014 down | 1.014901 up   |                      |
| 231242_at | 0.013913 | 0.012123 | 1.418494 up   | 1.174666 down | 1.666257 down | BHLHE41              |
| 231247_s_ | 0.01314  | 0.011342 | 1.275188 down | 1.277099 up   | 1.628541 up   | LOC727820            |
| 231250_at | 0.007946 | 0.006237 | 1.449559 up   | 1.730842 down | 2.508957 down |                      |
| 231253_at | 0.030594 | 0.029208 | 1.669934 up   | 1.071857 up   | 1.557982 down | IMP5                 |
| 231255_at | 0.047432 | 0.046243 | 1.725211 up   | 1.123421 up   | 1.535676 down | MPRIP                |
| 231257_at | 1.50E-05 | 1.37E-06 | 2.93261 up    | 2.80159 up    | 1.046766 down | TCERG1L              |
| 231259_s_ | 0.003578 | 0.002263 | 1.029828 up   | 1.498956 up   | 1.45554 up    |                      |
| 231262_at | 0.001746 | 8.63E-04 | 1.246478 up   | 1.204122 down | 1.500912 down |                      |
| 231267_at | 0.024866 | 0.023311 | 1.308556 up   | 1.038995 down | 1.359583 down | FAM163A<br>LOC645895 |
| 231268_at | 0.005255 | 0.00372  | 2.098074 up   | 1.549748 down | 3.251485 down | /// MYBL1            |
| 231273_x_ | 0.002888 | 0.001702 | 1.369921 up   | 1.173634 down | 1.607785 down | FRZB<br>LOC100129    |
| 231275_at | 2.02E-04 | 4.65E-05 | 1.632966 up   | 1.085195 down | 1.772087 down | 346                  |
| 231276_at | 0.006952 | 0.005293 | 1.972551 up   | 1.292988 down | 2.550484 down | PDE3B                |
| 231277_x_ | 0.004949 | 0.003445 | 1.386362 up   | 1.521046 up   | 1.09715 up    | DTWD2                |
| 231278_at | 0.001623 | 7.83E-04 | 1.439733 up   | 1.262573 down | 1.817768 down |                      |
| 231279_at | 0.018746 | 0.017027 | 1.180884 up   | 1.09209 down  | 1.289631 down | PATE1                |
| 231285_at | 0.002071 | 0.001086 | 1.618061 up   | 1.730652 up   | 1.069584 up   |                      |
| 231288_at | 7.40E-05 | 1.21E-05 | 1.788928 up   | 1.206371 up   | 1.482901 down | CCDC88C              |
| 231289_at | 0.001039 | 4.27E-04 | 1.469622 up   | 1.020668 down | 1.499996 down | NCOA1                |
| 231292_at | 0.008707 | 0.006965 | 2.264956 down | 1.585608 down | 1.428446 up   | EID3                 |
| 231293_at | 0.035242 | 0.033953 | 1.525686 down | 1.36527 down  | 1.117498 up   |                      |
| 231294_at | 9.67E-04 | 3.88E-04 | 1.192052 up   | 1.029941 down | 1.227743 down | STT3B                |
| 231297_at | 0.00408  | 0.002675 | 2.617201 up   | 1.486826 up   | 1.760261 down | DOT1L                |
| 231298_at | 0.00746  | 0.005772 | 1.534692 up   | 1.187002 up   | 1.292914 down |                      |

|           |          |          |               |               |               |                                                     |
|-----------|----------|----------|---------------|---------------|---------------|-----------------------------------------------------|
| 231303_at | 5.93E-04 | 2.00E-04 | 1.366177 down | 1.01254 up    | 1.383308 up   | NCRNA0015<br>8<br>LOC100130<br>725 ///<br>PAGE2 /// |
| 231307_at | 0.002197 | 0.001176 | 1.020324 up   | 1.298679 down | 1.325074 down | PAGE2B                                              |
| 231310_at | 2.91E-11 | 1.11E-14 | 232.1006 up   | 247.1535 up   | 1.064855 up   |                                                     |
| 231311_at | 3.92E-06 | 2.03E-07 | 8.737057 up   | 5.932689 up   | 1.472698 down |                                                     |
| 231322_at | 0.00246  | 0.001373 | 1.472853 up   | 1.539111 down | 2.266885 down |                                                     |
| 231325_at | 4.78E-06 | 2.69E-07 | 9.868982 up   | 8.906652 up   | 1.108046 down | UNC5D                                               |
| 231327_at | 0.001942 | 9.96E-04 | 1.391737 up   | 1.221916 down | 1.700585 down |                                                     |
| 231328_s_ | 4.49E-04 | 1.36E-04 | 1.216372 up   | 1.603209 down | 1.950099 down | RASGRP4                                             |
| 231344_at | 0.030974 | 0.029612 | 1.287359 up   | 1.123734 down | 1.446649 down |                                                     |
| 231346_s_ | 0.00119  | 5.15E-04 | 1.536871 up   | 1.369542 down | 2.104809 down |                                                     |
| 231350_at | 0.038353 | 0.037094 | 1.275931 up   | 1.04945 down  | 1.339026 down |                                                     |
| 231358_at | 0.024553 | 0.022988 | 1.480659 up   | 1.110213 up   | 1.333672 down | MRO                                                 |
| 231360_at | 0.001106 | 4.65E-04 | 1.540454 up   | 1.224474 down | 1.886246 down | C20orf141                                           |
| 231369_at | 0.004339 | 0.002905 | 1.31111 down  | 1.482904 down | 1.131029 down | ZNF333                                              |
| 231375_at | 0.001452 | 6.73E-04 | 1.739696 down | 1.305907 down | 1.332174 up   | LOC202181                                           |
| 231380_at | 0.003367 | 0.002091 | 2.701907 down | 2.538572 down | 1.064341 up   | C8orf34                                             |
| 231381_at | 2.00E-08 | 1.12E-10 | 499.1836 up   | 463.3936 up   | 1.077234 down | HESRG                                               |
| 231384_at | 0.010577 | 0.008785 | 1.203621 up   | 1.074344 down | 1.293103 down | GRIN2A                                              |
| 231385_at | 5.47E-04 | 1.78E-04 | 2.256354 up   | 2.297438 up   | 1.018208 up   | DPPA3                                               |
| 231395_at | 0.002717 | 0.001566 | 2.050583 up   | 1.234785 up   | 1.660681 down | ATP8A2                                              |
| 231396_s_ | 0.00573  | 0.004141 | 3.860991 down | 2.110797 down | 1.829162 up   | FAM126A                                             |
| 231397_at | 0.001627 | 7.86E-04 | 1.228376 up   | 1.183368 up   | 1.038034 down | PAP2D                                               |
| 231399_at | 0.001335 | 6.02E-04 | 1.814077 up   | 1.557133 up   | 1.165011 down | RAB3IP                                              |
| 231405_at | 1.45E-04 | 2.97E-05 | 1.280152 up   | 1.156606 up   | 1.106819 down | C13orf28                                            |
| 231406_at | 6.76E-06 | 4.39E-07 | 4.324491 down | 3.715239 down | 1.163987 up   | ORAI2                                               |
| 231407_s_ | 9.24E-06 | 6.84E-07 | 15.11507 up   | 14.32664 up   | 1.055033 down | FOXH1                                               |
| 231411_at | 7.67E-05 | 1.26E-05 | 5.429067 down | 5.537932 down | 1.020052 down | LHFP                                                |
| 231413_at | 0.003695 | 0.002357 | 1.496404 up   | 1.042049 down | 1.559327 down |                                                     |
| 231414_at | 5.82E-04 | 1.94E-04 | 1.026691 up   | 1.628295 down | 1.671756 down |                                                     |
| 231416_at | 6.47E-05 | 1.00E-05 | 2.01425 up    | 1.332424 up   | 1.511719 down | DHDH                                                |

|           |          |          |               |               |               |           |
|-----------|----------|----------|---------------|---------------|---------------|-----------|
| 231417_at | 0.001902 | 9.68E-04 | 1.087333 up   | 1.171759 down | 1.274092 down |           |
| 231431_s_ | 0.003847 | 0.002482 | 1.081305 up   | 2.102081 down | 2.27299 down  |           |
| 231447_at | 0.003269 | 0.002009 | 1.317272 up   | 1.12867 down  | 1.486766 down | MGC44328  |
| 231452_at | 0.002449 | 0.001365 | 2.267221 up   | 1.90831 up    | 1.188078 down | HRASLS5   |
| 231453_at | 0.002515 | 0.001416 | 1.279556 up   | 1.018385 down | 1.303081 down | LOC284067 |
| 231455_at | 0.005883 | 0.004284 | 1.113802 up   | 1.050883 down | 1.170476 down | FLJ42418  |
| 231458_at | 0.006592 | 0.004953 | 1.314471 up   | 1.281252 down | 1.684168 down |           |
| 231459_at | 0.002016 | 0.001048 | 1.221201 up   | 1.235696 down | 1.509033 down |           |
| 231460_at | 0.01627  | 0.014499 | 2.714126 up   | 1.765863 up   | 1.536997 down |           |
| 231463_at | 0.004873 | 0.003381 | 1.069319 up   | 1.17272 down  | 1.254012 down | CNTD1     |
| 231469_at | 0.016334 | 0.014567 | 1.352024 up   | 1.094622 up   | 1.235152 down | LOC283738 |
| 231470_at | 0.001243 | 5.46E-04 | 4.407134 up   | 5.152926 up   | 1.169224 up   |           |
| 231480_at | 0.002938 | 0.001743 | 1.489888 up   | 1.273067 down | 1.896727 down | SLC6A19   |
| 231485_at | 0.003079 | 0.001855 | 1.339368 up   | 1.39594 down  | 1.869677 down |           |
| 231486_x_ | 0.003822 | 0.00246  | 1.223734 down | 1.390606 down | 1.136363 down |           |
| 231490_at | 9.52E-04 | 3.79E-04 | 1.238749 down | 1.13808 up    | 1.409796 up   |           |
| 231502_at | 0.008342 | 0.006611 | 1.843681 up   | 2.290717 up   | 1.242469 up   |           |
| 231507_at | 0.001571 | 7.50E-04 | 1.428316 up   | 1.074437 up   | 1.329362 down |           |
| 231513_at | 0.001538 | 7.28E-04 | 6.219468 down | 1.658544 up   | 10.31526 up   |           |
| 231515_at | 0.003297 | 0.002034 | 1.623276 up   | 1.189608 up   | 1.364547 down |           |
| 231516_at | 0.007651 | 0.005955 | 1.519216 up   | 1.560173 down | 2.37024 down  |           |
| 231517_at | 4.45E-04 | 1.34E-04 | 2.847249 up   | 3.122852 up   | 1.096796 up   | ZYG11A    |
| 231520_at | 0.001919 | 9.80E-04 | 1.852437 up   | 1.338225 down | 2.478977 down | SLC35F3   |
| 231526_at | 0.009642 | 0.007866 | 1.308226 up   | 1.250603 down | 1.636071 down |           |
| 231528_at | 0.002986 | 0.00178  | 1.335125 down | 1.062818 down | 1.256213 up   |           |
| 231529_at | 0.033598 | 0.032285 | 1.054494 up   | 1.252923 down | 1.3212 down   | MEG3      |
| 231530_s_ | 0.006847 | 0.005189 | 2.163064 up   | 1.624697 up   | 1.331364 down | C11orf1   |
| 231537_at | 3.27E-04 | 8.95E-05 | 1.837928 up   | 1.241599 up   | 1.480291 down |           |
| 231543_at | 0.012372 | 0.010575 | 1.479882 up   | 1.184933 down | 1.75356 down  | PLEKHA8   |
| 231549_at | 0.014565 | 0.012789 | 1.304066 up   | 1.228818 down | 1.602459 down | C1orf158  |
| 231556_at | 0.004349 | 0.002916 | 1.459979 up   | 1.085768 up   | 1.344651 down | GPSN2     |
| 231558_at | 0.016523 | 0.014758 | 1.362136 up   | 1.121189 down | 1.527212 down |           |
| 231559_at | 4.55E-04 | 1.38E-04 | 5.003589 down | 4.312765 down | 1.160181 up   | NNMT      |
| 231561_s_ | 0.002752 | 0.001596 | 1.6291 up     | 1.220334 down | 1.988047 down | APOC2     |



|           |          |          |               |               |               |             |
|-----------|----------|----------|---------------|---------------|---------------|-------------|
| 231564_at | 0.014568 | 0.012793 | 1.356081 up   | 1.033125 up   | 1.312601 down | MANEAL      |
| 231565_at | 0.00701  | 0.005351 | 1.440516 down | 1.106303 down | 1.3021 up     | C4orf22     |
|           |          |          |               |               |               | CT47A1 ///  |
|           |          |          |               |               |               | CT47A10 /// |
|           |          |          |               |               |               | CT47A11 /// |
|           |          |          |               |               |               | CT47A2 ///  |
|           |          |          |               |               |               | CT47A3 ///  |
|           |          |          |               |               |               | CT47A4 ///  |
|           |          |          |               |               |               | CT47A5 ///  |
|           |          |          |               |               |               | CT47A6 ///  |
|           |          |          |               |               |               | CT47A7 ///  |
|           |          |          |               |               |               | CT47A8 ///  |
| 231568_at | 0.003353 | 0.00208  | 2.050452 up   | 1.167925 up   | 1.755637 down | CT47A9      |
| 231577_s_ | 1.72E-09 | 4.21E-12 | 42.04928 down | 49.0788 down  | 1.167174 down | GBP1        |
| 231579_s_ | 2.80E-07 | 4.75E-09 | 16.60771 down | 9.21794 down  | 1.801672 up   | TIMP2       |
| 231580_at | 0.015171 | 0.013398 | 1.414788 up   | 1.179738 down | 1.669079 down |             |
| 231590_at | 0.048524 | 0.047347 | 1.343706 up   | 1.06332 down  | 1.42879 down  | GATM        |
| 231599_x_ | 0.017109 | 0.015354 | 1.542623 up   | 1.122344 down | 1.731353 down | DPF1        |
| 231606_at | 0.028222 | 0.026762 | 1.234012 up   | 1.060202 up   | 1.16394 down  |             |
| 231609_at | 6.07E-06 | 3.73E-07 | 3.472978 up   | 2.684759 up   | 1.29359 down  | C10orf82    |
| 231613_at | 0.002163 | 0.001152 | 1.106696 up   | 1.204278 down | 1.332769 down | MARK1       |
| 231618_s_ | 0.00406  | 0.002657 | 1.256159 up   | 1.123905 down | 1.411804 down | SUNC1       |
| 231629_x_ | 0.001717 | 8.44E-04 | 1.621857 down | 1.093048 up   | 1.772768 up   | KLK3        |
| 231630_at | 0.004876 | 0.003384 | 1.159872 up   | 1.025439 down | 1.189378 down |             |
| 231635_x_ | 0.014325 | 0.012533 | 1.589177 up   | 1.140966 up   | 1.392835 down | RNF31       |
| 231644_at | 3.88E-05 | 4.97E-06 | 12.96472 up   | 10.76237 up   | 1.204634 down |             |
| 231646_at | 0.014471 | 0.012689 | 1.357207 up   | 1.065031 down | 1.445468 down | DPCR1       |
| 231651_at | 0.003657 | 0.002324 | 1.705554 up   | 1.314603 down | 2.242126 down |             |
| 231655_x_ | 0.027543 | 0.026067 | 1.853826 up   | 1.139252 down | 2.111975 down |             |
| 231661_at | 0.002945 | 0.001748 | 1.303975 up   | 1.094014 down | 1.426567 down | REG3G       |
| 231662_at | 0.010506 | 0.008716 | 1.360729 up   | 1.145373 down | 1.558543 down | ARG1        |
| 231664_at | 0.007704 | 0.006008 | 1.379165 up   | 1.408253 down | 1.942213 down | SLC25A29    |
| 231666_at | 0.001076 | 4.48E-04 | 3.515736 down | 2.759827 up   | 9.702821 up   | PAX3        |

|           |          |          |               |               |               |         |
|-----------|----------|----------|---------------|---------------|---------------|---------|
| 231670_at | 0.014117 | 0.012326 | 1.164838 up   | 1.205466 down | 1.404172 down |         |
| 231682_at | 0.002407 | 0.001332 | 1.626427 up   | 1.046972 down | 1.702824 down |         |
| 231685_at | 0.025301 | 0.023764 | 1.324126 up   | 1.306298 down | 1.729703 down |         |
| 231690_at | 4.54E-04 | 1.38E-04 | 11.12244 up   | 9.173317 up   | 1.212477 down |         |
| 231691_at | 0.048993 | 0.047834 | 1.330799 up   | 1.047469 down | 1.39397 down  | C3P1    |
| 231692_at | 0.002615 | 0.001488 | 1.396093 up   | 1.18249 down  | 1.650866 down | PIGG    |
| 231696_x_ | 0.002747 | 0.001591 | 1.090581 up   | 1.411234 up   | 1.29402 up    |         |
| 231697_s_ | 0.038724 | 0.037471 | 1.530171 down | 3.062384 down | 2.001335 down |         |
| 231705_at | 0.002125 | 0.001124 | 1.701795 down | 1.130434 up   | 1.923766 up   | HRSP12  |
| 231710_at | 0.005498 | 0.003933 | 1.714738 up   | 1.347337 down | 2.31033 down  | CAPS    |
| 231712_at | 0.007012 | 0.005352 | 1.27492 up    | 1.158764 down | 1.477332 down |         |
| 231713_s_ | 2.90E-05 | 3.35E-06 | 1.657672 up   | 1.288979 up   | 1.286035 down | ELP2    |
| 231719_at | 0.017061 | 0.015306 | 1.52881 down  | 1.104048 down | 1.384732 up   | IFRG15  |
| 231720_s_ | 0.013542 | 0.011748 | 3.803731 down | 1.890458 down | 2.012069 up   | JAM3    |
| 231725_at | 9.17E-04 | 3.60E-04 | 4.613552 up   | 4.711808 up   | 1.021297 up   | PCDHB2  |
| 231730_at | 0.003909 | 0.002533 | 1.882238 down | 1.263448 down | 1.489763 up   | SEPSECS |
| 231731_at | 2.88E-07 | 4.93E-09 | 34.06947 up   | 30.63973 up   | 1.111938 down | OTX2    |
| 231732_at | 3.24E-04 | 8.86E-05 | 1.230549 up   | 1.749734 down | 2.153133 down | SMPD3   |
| 231734_at | 0.002441 | 0.001358 | 1.548579 up   | 1.003839 down | 1.554524 down | RBP2    |
| 231736_x_ | 2.66E-04 | 6.78E-05 | 1.047132 up   | 3.120809 up   | 2.980341 up   | MGST1   |
| 231740_at | 0.001177 | 5.07E-04 | 1.309208 up   | 1.397307 up   | 1.067292 up   | KCNJ11  |
| 231741_at | 6.06E-04 | 2.06E-04 | 4.40431 down  | 1.137831 down | 3.870796 up   | S1PR3   |
| 231743_at | 0.007294 | 0.005617 | 1.911118 up   | 1.156008 up   | 1.653205 down | WNT3    |
| 231746_at | 0.00149  | 6.97E-04 | 3.481097 up   | 2.733478 up   | 1.273505 down | MIXL1   |
| 231758_at | 0.009467 | 0.007695 | 1.309767 up   | 1.094306 down | 1.433286 down | PRM3    |
| 231759_at | 0.0063   | 0.004681 | 1.703765 up   | 1.307915 up   | 1.302658 down | TAL2    |
| 231761_at | 0.00155  | 7.36E-04 | 1.194716 up   | 1.372172 down | 1.639356 down | FFAR1   |
| 231763_at | 0.009207 | 0.007451 | 1.761708 up   | 1.198752 up   | 1.469618 down | POLR3A  |
| 231766_s_ | 2.23E-05 | 2.34E-06 | 50.25254 down | 60.21226 down | 1.198194 down | COL12A1 |
| 231767_at | 0.002217 | 0.001191 | 1.525881 up   | 1.375861 down | 2.0994 down   | HOXB4   |
| 231768_at | 0.007755 | 0.006061 | 2.475797 up   | 1.613445 up   | 1.534479 down | USF1    |
| 231769_at | 2.91E-05 | 3.36E-06 | 7.566313 down | 3.938165 down | 1.921279 up   | FBXO6   |
| 231772_x_ | 4.45E-05 | 6.01E-06 | 6.770039 up   | 8.5145 up     | 1.257674 up   | CENPH   |
| 231773_at | 0.003842 | 0.002477 | 2.427064 down | 1.36517 down  | 1.777848 up   | ANGPTL1 |

|           |          |          |               |               |               |           |
|-----------|----------|----------|---------------|---------------|---------------|-----------|
| 231774_at | 0.002875 | 0.001692 | 1.60188 up    | 1.644058 down | 2.633584 down | KCNIP3    |
| 231776_at | 2.82E-04 | 7.34E-05 | 13.7701 up    | 16.03764 up   | 1.164671 up   | EOMES     |
| 231779_at | 0.001293 | 5.76E-04 | 2.3358 down   | 1.64447 down  | 1.420396 up   | IRAK2     |
| 231782_s_ | 0.004849 | 0.003357 | 1.437878 up   | 1.399865 down | 2.012834 down | KLK4      |
| 231785_at | 0.003065 | 0.001842 | 1.564092 up   | 1.577126 up   | 1.008333 up   | NTF4      |
| 231790_at | 0.010048 | 0.008266 | 1.605663 down | 1.342093 down | 1.196388 up   | DMGDH     |
| 231793_s_ | 1.26E-04 | 2.47E-05 | 4.952712 down | 4.628816 down | 1.069974 up   | CAMK2D    |
| 231794_at | 0.003683 | 0.002348 | 1.526315 up   | 1.079933 down | 1.648318 down | CTLA4     |
| 231795_at | 4.16E-04 | 1.23E-04 | 2.408729 down | 1.483028 down | 1.624196 up   | STON1     |
| 231800_s_ | 0.031565 | 0.030211 | 1.315345 up   | 1.045907 up   | 1.257612 down | DMRT3     |
| 231803_at | 0.01867  | 0.016951 | 1.426356 up   | 1.093273 down | 1.559396 down | FGF11     |
| 231808_at | 6.81E-06 | 4.42E-07 | 3.256937 up   | 5.077449 up   | 1.558964 up   | LOC729082 |
| 231809_x_ | 0.004919 | 0.00342  | 1.000845 down | 1.592771 up   | 1.594117 up   | PDCD7     |
| 231815_at | 0.013052 | 0.011247 | 1.04499 down  | 1.426913 up   | 1.49111 up    | PHF12     |
| 231824_at | 1.61E-05 | 1.49E-06 | 2.962238 down | 1.516034 down | 1.953939 up   | LARP2     |
| 231825_x_ | 0.00114  | 4.85E-04 | 1.666259 up   | 2.537022 up   | 1.522586 up   | ATF7IP    |
| 231827_at | 0.002368 | 0.001304 | 2.63695 up    | 1.845781 up   | 1.428636 down |           |
| 231830_x_ | 4.46E-04 | 1.35E-04 | 2.134339 up   | 1.713487 up   | 1.245612 down | RAB11FIP1 |
| 231831_at | 0.003762 | 0.002414 | 1.447878 up   | 1.420213 down | 2.056295 down | COX19     |
| 231832_at | 0.001071 | 4.46E-04 | 3.926033 down | 2.420295 down | 1.62213 up    | GALNT4    |
| 231833_at | 0.017537 | 0.015793 | 1.591252 up   | 1.228091 up   | 1.295712 down | RBM33     |
| 231836_at | 0.001239 | 5.43E-04 | 1.624371 up   | 1.950409 up   | 1.200717 up   | HKR1      |
| 231837_at | 1.08E-05 | 8.45E-07 | 2.97275 up    | 6.559503 up   | 2.206544 up   | USP28     |
| 231841_s_ | 0.001698 | 8.33E-04 | 5.556213 down | 9.332924 down | 1.679727 down | KIAA1462  |
| 231842_at | 0.002528 | 0.001425 | 5.259868 down | 9.510041 down | 1.808038 down | KIAA1462  |
| 231843_at | 9.73E-05 | 1.74E-05 | 2.839105 up   | 3.394716 up   | 1.195699 up   | DDX55     |
| 231844_at | 5.30E-04 | 1.71E-04 | 1.599898 up   | 1.471671 up   | 1.087131 down | MGC27345  |
| 231845_at | 9.17E-04 | 3.60E-04 | 1.697692 up   | 1.475662 up   | 1.150462 down | AARS2     |
| 231848_x_ | 0.006931 | 0.005273 | 1.240763 up   | 3.775697 up   | 3.043044 up   | ZNF207    |
| 231851_at | 0.004242 | 0.002814 | 2.601893 up   | 2.251234 up   | 1.155763 down | RAVER2    |
| 231853_at | 7.12E-04 | 2.56E-04 | 3.810622 up   | 3.841852 up   | 1.008196 up   | TUBD1     |
| 231855_at | 0.001739 | 8.58E-04 | 2.250225 up   | 3.415831 up   | 1.517996 up   | KIAA1524  |
| 231856_at | 5.30E-05 | 7.60E-06 | 3.927858 up   | 3.108637 up   | 1.263531 down | KIAA1244  |
| 231860_at | 0.001607 | 7.73E-04 | 1.838811 up   | 1.588576 up   | 1.157521 down | BRWD1     |

|           |          |          |          |      |          |      |          |      |              |
|-----------|----------|----------|----------|------|----------|------|----------|------|--------------|
| 231861_at | 3.10E-04 | 8.35E-05 | 1.930025 | down | 2.570733 | down | 1.331969 | down | LRP10        |
| 231867_at | 0.004471 | 0.003025 | 4.939629 | down | 16.79957 | down | 3.400978 | down | ODZ2         |
| 231872_at | 0.004394 | 0.002954 | 1.556642 | up   | 2.731571 | up   | 1.754785 | up   | LRRCC1       |
| 231873_at | 7.30E-07 | 1.87E-08 | 6.012281 | down | 6.692006 | down | 1.113056 | down | BMPR2        |
| 231875_at | 0.002628 | 0.001498 | 3.476605 | up   | 2.844331 | up   | 1.222292 | down | KIF21A       |
| 231876_at | 0.00222  | 0.001194 | 2.334361 | down | 1.537254 | down | 1.518527 | up   | TRIM56       |
| 231879_at | 1.70E-05 | 1.63E-06 | 54.1682  | down | 37.83679 | down | 1.431628 | up   | COL12A1      |
|           |          |          |          |      |          |      |          |      | FLJ39632 /// |
|           |          |          |          |      |          |      |          |      | LOC100131    |
| 231882_at | 1.15E-05 | 9.28E-07 | 1.047125 | down | 6.493805 | down | 6.20156  | down | 139          |
| 231884_at | 0.014618 | 0.012841 | 1.886097 | up   | 1.664832 | down | 3.140034 | down | CNTROB       |
| 231887_s_ | 2.46E-04 | 6.09E-05 | 3.618973 | up   | 3.085193 | up   | 1.173013 | down | KIAA1274     |
| 231890_at | 8.40E-04 | 3.20E-04 | 2.00048  | down | 1.542767 | down | 1.296683 | up   |              |
| 231893_at | 0.011386 | 0.009588 | 1.178061 | up   | 1.18469  | down | 1.395637 | down | KIAA1755     |
| 231894_at | 6.97E-04 | 2.49E-04 | 3.467054 | down | 4.776873 | down | 1.37779  | down |              |
| 231895_at | 6.75E-04 | 2.38E-04 | 2.179629 | up   | 2.77461  | up   | 1.272973 | up   | SASS6        |
| 231896_s_ | 4.00E-04 | 1.17E-04 | 1.971228 | up   | 1.418168 | up   | 1.389982 | down | DENR         |
| 231903_x_ | 0.006268 | 0.004651 | 1.707878 | up   | 1.028852 | up   | 1.659984 | down | ARHGAP23     |
| 231906_at | 9.25E-04 | 3.65E-04 | 4.704407 | down | 5.354468 | down | 1.138181 | down | HOXD8        |
| 231908_at | 0.021909 | 0.020292 | 1.180494 | up   | 1.198165 | down | 1.414427 | down | ZDHHC18      |
| 231909_x_ | 0.006914 | 0.005254 | 1.862224 | down | 1.268218 | down | 1.468378 | up   | ODF2L        |
| 231912_s_ | 0.007322 | 0.005641 | 1.386851 | down | 2.030111 | down | 1.463827 | down | TECPR1       |
| 231921_at | 0.001429 | 6.59E-04 | 1.35743  | up   | 2.025279 | up   | 1.491995 | up   | C2orf37      |
| 231925_at | 9.33E-04 | 3.70E-04 | 3.045823 | up   | 4.246872 | up   | 1.394327 | up   |              |
| 231926_at | 5.59E-07 | 1.30E-08 | 3.288137 | down | 5.874855 | down | 1.786682 | down | EPS15L1      |
| 231928_at | 0.008526 | 0.00679  | 1.458664 | up   | 1.192369 | up   | 1.223333 | down | HES2         |
| 231932_at | 0.007726 | 0.00603  | 1.310472 | up   | 1.121844 | down | 1.470145 | down | TRAF3IP3     |
| 231936_at | 0.001856 | 9.36E-04 | 3.499519 | down | 3.999497 | down | 1.142871 | down | HOXC9        |
| 231938_at | 1.13E-04 | 2.13E-05 | 2.393339 | up   | 2.482646 | up   | 1.037315 | up   | SGOL1        |
| 231945_at | 6.79E-04 | 2.40E-04 | 2.754358 | up   | 3.145784 | up   | 1.142111 | up   | FILIP1       |
| 231946_at | 0.001989 | 0.001027 | 1.926295 | up   | 1.812096 | up   | 1.06302  | down | ZFHX2        |
| 231948_s_ | 6.51E-04 | 2.27E-04 | 1.654673 | down | 1.701088 | down | 1.028051 | down | UBE2F        |
| 231953_at | 2.31E-07 | 3.79E-09 | 8.643583 | up   | 10.3575  | up   | 1.198288 | up   | BPTF         |

|           |          |          |          |      |          |      |          |      |           |
|-----------|----------|----------|----------|------|----------|------|----------|------|-----------|
| 231956_at | 0.013184 | 0.011387 | 3.01883  | down | 1.136459 | up   | 3.430775 | up   | KIAA1618  |
| 231960_at | 0.003711 | 0.00237  | 2.162858 | up   | 3.243724 | up   | 1.49974  | up   | BRWD1     |
| 231961_at | 0.002293 | 0.001251 | 2.060007 | up   | 1.407062 | up   | 1.464049 | down | RBPMS     |
| 231962_at | 7.79E-04 | 2.91E-04 | 1.268538 | down | 1.616914 | down | 1.274628 | down | AP4B1     |
| 231966_at | 0.007253 | 0.005579 | 1.115907 | up   | 1.242594 | up   | 1.113529 | up   | PPP1R9A   |
| 231969_at | 2.05E-05 | 2.07E-06 | 15.393   | up   | 16.35422 | up   | 1.062446 | up   | STOX2     |
| 231972_at | 0.001862 | 9.40E-04 | 1.566628 | down | 1.717033 | up   | 2.689953 | up   |           |
| 231973_s_ | 0.006008 | 0.004401 | 1.44529  | up   | 1.757256 | up   | 1.21585  | up   | ANAPC1    |
| 231975_s_ | 0.009857 | 0.00808  | 1.392503 | up   | 2.290263 | up   | 1.64471  | up   | MIER3     |
| 231983_at | 5.63E-04 | 1.86E-04 | 1.65305  | up   | 1.246875 | down | 2.061147 | down | C1orf69   |
| 231984_at | 0.006593 | 0.004953 | 1.778475 | up   | 1.253404 | up   | 1.418916 | down | MTAP      |
| 231986_at | 9.64E-07 | 2.78E-08 | 1.118692 | up   | 4.06343  | down | 4.545725 | down | RIMS1     |
| 231988_x_ | 0.006023 | 0.004414 | 1.78542  | down | 1.068034 | up   | 1.906889 | up   | ZNF490    |
| 231991_at | 3.75E-04 | 1.08E-04 | 3.751746 | up   | 3.781467 | up   | 1.007922 | up   | C20orf160 |
| 231992_x_ | 0.003258 | 0.001999 | 1.601903 | up   | 1.486249 | up   | 1.077816 | down | LOC493754 |
| 231993_at | 2.57E-05 | 2.82E-06 | 15.82394 | down | 69.98531 | down | 4.42275  | down | ITGBL1    |
| 231996_at | 6.34E-05 | 9.72E-06 | 3.878974 | up   | 5.213014 | up   | 1.343916 | up   | N4BP2     |
| 231997_at | 2.93E-05 | 3.39E-06 | 3.869925 | down | 1.710577 | down | 2.26235  | up   | TBCEL     |
| 231998_at | 0.008003 | 0.006287 | 2.05687  | up   | 1.16728  | down | 2.400944 | down |           |
| 231999_at | 0.02113  | 0.019487 | 1.806283 | up   | 1.374595 | up   | 1.314048 | down | ANKRD11   |
| 232000_at | 0.008702 | 0.00696  | 2.12418  | down | 1.403929 | down | 1.513026 | up   | TTC39B    |
| 232001_at | 6.75E-04 | 2.38E-04 | 4.269336 | up   | 4.115274 | up   | 1.037437 | down | LOC439949 |
| 232007_at | 5.61E-05 | 8.21E-06 | 3.181061 | up   | 2.77218  | up   | 1.147494 | down | AGPAT5    |
| 232011_s_ | 0.00103  | 4.22E-04 | 4.274718 | down | 2.925405 | down | 1.46124  | up   | MAP1LC3A  |
| 232018_at | 4.26E-04 | 1.27E-04 | 1.259278 | up   | 2.145361 | down | 2.701606 | down | LENG1     |
| 232019_at | 0.003674 | 0.00234  | 1.963485 | up   | 1.725236 | up   | 1.138096 | down | ZKSCAN2   |
| 232020_at | 0.001942 | 9.96E-04 | 3.864306 | down | 4.221745 | down | 1.092498 | down | SMURF2    |
| 232021_at | 0.002841 | 0.001665 | 1.824111 | up   | 4.526565 | up   | 2.481519 | up   | GLT8D3    |
| 232022_at | 1.18E-04 | 2.26E-05 | 1.603377 | up   | 1.483784 | up   | 1.0806   | down |           |
| 232023_at | 0.003479 | 0.002185 | 2.033679 | down | 1.172325 | down | 1.734739 | up   | TMEM67    |
| 232024_at | 0.001574 | 7.52E-04 | 3.219052 | down | 1.319081 | down | 2.440375 | up   | GIMAP2    |
| 232025_at | 0.002436 | 0.001354 | 1.565932 | up   | 1.069689 | down | 1.67506  | down | SYT7      |
| 232027_at | 0.037812 | 0.03654  | 2.393379 | down | 1.922409 | down | 1.24499  | up   | SYNE1     |
| 232032_x_ | 3.62E-06 | 1.81E-07 | 3.324993 | down | 3.201986 | down | 1.038416 | up   | SDF4      |

|           |          |          |               |               |               |           |
|-----------|----------|----------|---------------|---------------|---------------|-----------|
| 232033_at | 0.001602 | 7.70E-04 | 2.984762 up   | 2.978783 up   | 1.002007 down | USP37     |
| 232037_at | 6.05E-07 | 1.42E-08 | 5.613332 up   | 7.745294 up   | 1.379803 up   | IGDCC3    |
| 232040_at | 0.003075 | 0.001851 | 1.606686 up   | 1.837858 down | 2.952861 down | LOC157860 |
| 232042_at | 0.005631 | 0.004051 | 1.367868 up   | 1.043128 up   | 1.311314 down | TTYH2     |
| 232044_at | 0.033628 | 0.032317 | 1.35183 down  | 1.622174 up   | 2.192903 up   | RBBP6     |
| 232051_at | 4.60E-04 | 1.41E-04 | 2.107419 down | 1.878524 down | 1.121849 up   | CCDC102A  |
| 232053_x_ | 0.00672  | 0.005073 | 2.369264 down | 1.514176 down | 1.564722 up   | RHBDD2    |
| 232055_at | 0.002046 | 0.00107  | 1.659962 up   | 2.713069 up   | 1.634416 up   | SFXN1     |
| 232061_at | 3.18E-04 | 8.64E-05 | 1.922109 up   | 1.441132 up   | 1.333749 down | SDK2      |
| 232064_at | 0.007462 | 0.005774 | 2.529663 down | 1.949088 down | 1.29787 up    |           |
| 232067_at | 6.08E-05 | 9.21E-06 | 4.913723 up   | 4.822067 up   | 1.019008 down | C6orf168  |
| 232069_at | 0.001545 | 7.32E-04 | 3.271266 up   | 3.242072 up   | 1.009005 down | KIF26A    |
| 232072_at | 0.003876 | 0.002507 | 1.468342 down | 1.608298 down | 1.095316 down |           |
| 232074_at | 0.02419  | 0.022613 | 1.529193 up   | 1.023175 up   | 1.494557 down | PRSS27    |
| 232076_at | 0.00374  | 0.002395 | 1.557462 up   | 1.132018 down | 1.763075 down | ZNF707    |
| 232080_at | 9.66E-05 | 1.72E-05 | 1.440148 down | 3.403014 down | 2.362962 down | HECW2     |
| 232083_at | 4.49E-04 | 1.36E-04 | 2.096882 up   | 1.704601 up   | 1.23013 down  | KIF16B    |
| 232087_at | 0.001529 | 7.21E-04 | 2.753775 down | 2.537465 down | 1.085246 up   | CXorf23   |
|           |          |          |               |               |               | hCG_20390 |
| 232088_x_ | 0.003393 | 0.002114 | 3.971463 down | 1.757543 down | 2.259668 up   | 27        |
|           |          |          |               |               |               | LOC100128 |
| 232090_at | 8.89E-06 | 6.44E-07 | 34.29514 down | 11.90505 down | 2.880723 up   | 178       |
| 232091_s_ | 0.001476 | 6.88E-04 | 1.084156 down | 1.76139 down  | 1.624665 down | ZDHHC24   |
| 232098_at | 0.026651 | 0.025159 | 1.63039 down  | 2.963094 up   | 4.830998 up   | DST       |
| 232100_at | 0.025187 | 0.023643 | 1.537945 down | 1.56483 down  | 1.017481 down |           |
| 232104_at | 0.005718 | 0.00413  | 1.500292 up   | 1.048202 down | 1.57261 down  | C1orf95   |
| 232105_at | 2.05E-05 | 2.08E-06 | 3.519846 up   | 2.818736 up   | 1.248732 down |           |
| 232110_at | 0.011603 | 0.009805 | 2.826749 down | 2.418943 down | 1.168588 up   |           |
| 232111_at | 3.55E-06 | 1.75E-07 | 11.99056 up   | 12.23312 up   | 1.02023 up    | LOC730125 |
| 232112_at | 3.94E-04 | 1.15E-04 | 2.568558 down | 1.128431 down | 2.276221 up   | RALGPS2   |
| 232113_at | 6.61E-04 | 2.31E-04 | 31.99899 down | 24.0289 down  | 1.331687 up   |           |
| 232117_at | 5.71E-04 | 1.89E-04 | 1.709819 down | 1.537772 down | 1.111881 up   | ZNF471    |
| 232119_at | 0.046738 | 0.045536 | 2.659377 down | 2.419179 down | 1.099289 up   | SYNPO2    |
| 232122_s_ | 2.40E-05 | 2.57E-06 | 6.526594 down | 5.88262 down  | 1.109471 up   | VEPH1     |

|           |          |          |               |               |               |                                   |
|-----------|----------|----------|---------------|---------------|---------------|-----------------------------------|
| 232123_at | 0.001068 | 4.44E-04 | 2.303922 up   | 1.351659 up   | 1.704514 down | LOC283174                         |
| 232125_at | 0.002269 | 0.001233 | 5.86268 down  | 1.73784 down  | 3.373545 up   |                                   |
| 232133_at | 0.029691 | 0.028289 | 1.296244 up   | 1.158336 down | 1.501486 down | ADAMTS10                          |
| 232135_at | 0.009776 | 0.007998 | 2.153642 down | 1.07131 up    | 2.307219 up   | SAP30L                            |
| 232136_s_ | 1.93E-04 | 4.37E-05 | 3.220612 up   | 3.240849 up   | 1.006284 up   | CTTNBP2                           |
| 232139_s_ | 0.002266 | 0.001232 | 1.631444 up   | 1.755451 up   | 1.07601 up    | KIAA1919                          |
| 232144_at | 0.021165 | 0.019521 | 1.555521 up   | 3.033368 up   | 1.950065 up   |                                   |
| 232146_at | 0.008055 | 0.006337 | 1.49341 up    | 1.95369 up    | 1.308207 up   | NDUFC1                            |
| 232149_s_ | 5.18E-04 | 1.66E-04 | 2.646038 down | 1.393772 down | 1.898472 up   | NSMAF                             |
| 232151_at | 0.001064 | 4.41E-04 | 2.68392 up    | 2.41498 up    | 1.111363 down | MACC1                             |
| 232153_at | 0.004362 | 0.002929 | 1.204465 up   | 1.591566 down | 1.916986 down | SPEG                              |
| 232154_at | 9.29E-05 | 1.63E-05 | 3.102085 up   | 1.545871 up   | 2.006691 down | LOC199800                         |
| 232155_at | 2.07E-05 | 2.11E-06 | 3.420917 down | 3.900394 down | 1.140161 down | KIAA1618                          |
| 232158_x_ | 2.54E-04 | 6.36E-05 | 1.626186 up   | 1.450712 up   | 1.120957 down | NIPAL1                            |
| 232159_at | 0.004959 | 0.003456 | 1.371837 up   | 1.21746 down  | 1.670157 down |                                   |
| 232162_at | 1.01E-04 | 1.85E-05 | 1.488786 up   | 1.379733 down | 2.054128 down | ZNF696                            |
| 232164_s_ | 1.80E-06 | 6.72E-08 | 16.15713 up   | 11.80251 up   | 1.368957 down | EPPK1                             |
| 232165_at | 1.30E-05 | 1.11E-06 | 12.51001 up   | 12.56733 up   | 1.004582 up   | EPPK1                             |
| 232166_at | 8.35E-04 | 3.18E-04 | 2.908357 down | 1.518932 down | 1.914738 up   | KIAA1377                          |
| 232169_x_ | 0.00225  | 0.001219 | 2.035716 up   | 2.073113 up   | 1.018371 up   | NDUFS8                            |
| 232173_at | 0.007446 | 0.005758 | 1.398502 up   | 1.065406 down | 1.489973 down | CLEC2L                            |
| 232180_at | 1.28E-04 | 2.53E-05 | 4.495555 up   | 7.711005 up   | 1.715251 up   | UGP2                              |
| 232181_at | 0.002173 | 0.001159 | 2.307466 up   | 3.007116 up   | 1.303212 up   | LOC153346                         |
| 232183_at | 0.009821 | 0.008043 | 1.602293 down | 2.562748 down | 1.599425 down | SERAC1                            |
| 232185_at | 0.024031 | 0.022451 | 1.628186 down | 1.229 down    | 1.324805 up   | C20orf132<br>LOC100133<br>445 /// |
| 232190_x_ | 0.007257 | 0.005582 | 1.270952 up   | 1.2486 up     | 1.017902 down | LOC115110                         |
| 232191_at | 0.00476  | 0.003277 | 6.068251 up   | 4.872669 up   | 1.245365 down | C21orf105                         |
| 232197_x_ | 0.002685 | 0.001543 | 5.476802 down | 2.523598 down | 2.170236 up   | ARSB                              |
| 232202_at | 0.002736 | 0.001583 | 4.089523 up   | 4.607371 up   | 1.126628 up   |                                   |
| 232204_at | 6.98E-04 | 2.50E-04 | 6.204523 down | 9.900808 down | 1.59574 down  | EBF1                              |
| 232205_at | 0.006683 | 0.005037 | 2.474169 down | 1.049551 down | 2.357358 up   |                                   |
| 232209_x_ | 2.80E-04 | 7.27E-05 | 1.166214 down | 1.807126 down | 1.549567 down | HM13                              |

|           |          |          |          |      |          |      |          |      |           |
|-----------|----------|----------|----------|------|----------|------|----------|------|-----------|
| 232211_at | 0.002211 | 0.001187 | 1.992173 | up   | 1.047712 | down | 2.087225 | down | PPP1R3F   |
| 232213_at | 1.36E-05 | 1.19E-06 | 2.855743 | up   | 3.773894 | up   | 1.32151  | up   | PELI1     |
| 232215_x_ | 3.95E-04 | 1.15E-04 | 2.076962 | up   | 2.650715 | up   | 1.276246 | up   | PRR11     |
| 232216_at | 8.33E-04 | 3.17E-04 | 2.890647 | up   | 4.352332 | up   | 1.50566  | up   | YME1L1    |
| 232217_at | 7.42E-06 | 5.07E-07 | 3.497191 | down | 7.516345 | down | 2.149252 | down | FAM26E    |
| 232221_x_ | 0.003746 | 0.002401 | 1.515622 | up   | 1.722889 | up   | 1.136753 | up   | RSBN1L    |
| 232224_at | 1.67E-08 | 8.63E-11 | 62.08369 | down | 1.083636 | up   | 67.27612 | up   | MASP1     |
| 232227_at | 0.002962 | 0.001761 | 1.148718 | up   | 1.249412 | down | 1.435222 | down |           |
| 232228_at | 2.72E-05 | 3.08E-06 | 1.92922  | up   | 1.399459 | up   | 1.378547 | down | ZNF530    |
| 232231_at | 1.11E-05 | 8.77E-07 | 21.018   | down | 22.56801 | down | 1.073747 | down | RUNX2     |
| 232233_at | 0.005913 | 0.004314 | 1.236449 | up   | 1.173516 | down | 1.450992 | down | SLC22A16  |
| 232235_at | 7.92E-04 | 2.97E-04 | 8.329199 | down | 2.882661 | down | 2.889414 | up   | DSEL      |
|           |          |          |          |      |          |      |          |      | hCG_20240 |
| 232239_at | 0.031216 | 0.02986  | 2.017178 | down | 1.257781 | down | 1.603759 | up   | 94        |
| 232241_at | 0.00323  | 0.001979 | 1.337082 | up   | 1.093227 | up   | 1.22306  | down |           |
| 232242_at | 1.51E-04 | 3.17E-05 | 2.077079 | up   | 2.341497 | up   | 1.127303 | up   |           |
| 232244_at | 0.002006 | 0.00104  | 1.608592 | up   | 1.946825 | up   | 1.210267 | up   | KIAA1161  |
| 232248_at | 0.004415 | 0.002971 | 1.28814  | up   | 1.189943 | down | 1.532812 | down | PCSK7     |
| 232253_at | 8.37E-04 | 3.19E-04 | 1.894464 | down | 1.06197  | up   | 2.011864 | up   | LOC441108 |
| 232254_at | 4.30E-05 | 5.77E-06 | 5.377736 | up   | 6.792361 | up   | 1.263053 | up   |           |
|           |          |          |          |      |          |      |          |      | LOC100009 |
| 232259_s_ | 0.004422 | 0.002978 | 1.20489  | down | 1.831563 | down | 1.520108 | down | 676       |
| 232263_at | 1.40E-05 | 1.23E-06 | 5.257569 | up   | 9.58321  | up   | 1.822745 | up   | SLC6A15   |
| 232265_at | 0.001514 | 7.12E-04 | 2.000034 | up   | 2.461525 | up   | 1.230741 | up   | ATXN7L1   |
| 232266_x_ | 0.008294 | 0.006569 | 1.498093 | up   | 2.292353 | up   | 1.530181 | up   | CDC2L5    |
| 232267_at | 2.66E-06 | 1.18E-07 | 34.93425 | down | 1.009935 | down | 34.5906  | up   | GPR133    |
| 232270_at | 2.70E-06 | 1.20E-07 | 3.796684 | down | 6.953192 | down | 1.831385 | down | C9orf3    |
| 232271_at | 0.001195 | 5.18E-04 | 1.233309 | up   | 1.136143 | down | 1.401215 | down | HNF4G     |
| 232273_at | 7.23E-04 | 2.62E-04 | 1.921022 | down | 1.275149 | down | 1.506508 | up   |           |
| 232274_at | 0.013381 | 0.011586 | 1.467111 | up   | 1.119464 | down | 1.642378 | down | CCNL2     |
| 232276_at | 0.001748 | 8.64E-04 | 1.781306 | up   | 1.171361 | down | 2.086553 | down | HS6ST3    |
| 232279_at | 0.010886 | 0.009093 | 1.616457 | up   | 1.057373 | down | 1.709198 | down | PHF15     |
| 232280_at | 3.42E-04 | 9.50E-05 | 2.779863 | up   | 2.351908 | up   | 1.181961 | down | SLC25A29  |
| 232282_at | 3.35E-07 | 6.25E-09 | 14.83748 | up   | 13.09246 | up   | 1.133284 | down | WNK3      |



|           |          |          |          |      |          |      |          |      |           |
|-----------|----------|----------|----------|------|----------|------|----------|------|-----------|
| 232287_at | 9.15E-05 | 1.59E-05 | 2.642917 | down | 9.385541 | down | 3.551205 | down | PGBD3     |
| 232290_at | 0.001739 | 8.59E-04 | 1.554289 | up   | 1.250454 | down | 1.943566 | down |           |
| 232291_at | 2.16E-06 | 8.74E-08 | 8.19449  | up   | 12.54715 | up   | 1.531169 | up   | MIRHG1    |
| 232295_at | 0.008142 | 0.006421 | 1.158583 | up   | 1.458933 | up   | 1.259239 | up   | GFM1      |
| 232297_at | 0.005194 | 0.003666 | 3.951454 | down | 1.862749 | down | 2.121303 | up   |           |
|           |          |          |          |      |          |      |          |      | hCG_18069 |
| 232298_at | 7.91E-07 | 2.12E-08 | 7.077869 | down | 13.88057 | down | 1.961123 | down | 64        |
| 232299_at | 0.008955 | 0.007202 | 1.320993 | up   | 1.009506 | up   | 1.308554 | down | C2orf82   |
| 232303_at | 0.001737 | 8.57E-04 | 2.608321 | up   | 2.586188 | up   | 1.008558 | down | ZNF608    |
| 232304_at | 1.20E-04 | 2.31E-05 | 4.240356 | up   | 5.49066  | up   | 1.294858 | up   | PEL1      |
| 232313_at | 1.78E-04 | 3.96E-05 | 2.253173 | up   | 1.462821 | up   | 1.540293 | down | TMEM132C  |
| 232315_at | 0.004856 | 0.003363 | 5.658889 | down | 2.183041 | down | 2.592205 | up   | LOC400713 |
| 232316_at | 0.00445  | 0.003004 | 1.184257 | up   | 1.110925 | down | 1.31562  | down | C14orf174 |
| 232328_at | 0.00277  | 0.00161  | 1.838803 | up   | 1.345899 | down | 2.474843 | down | ZNF552    |
| 232331_at | 0.025264 | 0.023726 | 2.040761 | down | 1.10539  | down | 1.846191 | up   |           |
| 232336_at | 0.036165 | 0.034892 | 1.156683 | up   | 1.786477 | up   | 1.544483 | up   | ZSWIM5    |
| 232341_x_ | 0.012309 | 0.010515 | 2.24368  | down | 1.331958 | down | 1.684497 | up   | HABP4     |
| 232342_at | 0.014132 | 0.012343 | 1.050113 | up   | 1.215818 | down | 1.276746 | down | MTMR14    |
| 232347_x_ | 0.005158 | 0.003634 | 1.729374 | up   | 2.600289 | up   | 1.503601 | up   |           |
| 232349_x_ | 4.76E-05 | 6.59E-06 | 3.268773 | down | 2.305266 | down | 1.417959 | up   | IQWD1     |
| 232351_at | 0.008602 | 0.006864 | 1.449081 | up   | 2.22167  | up   | 1.533158 | up   |           |
| 232353_s_ | 0.011424 | 0.009625 | 1.225678 | up   | 1.325719 | down | 1.624904 | down | STYXL1    |
| 232362_at | 0.001262 | 5.59E-04 | 1.208021 | up   | 2.006543 | up   | 1.661016 | up   | CCDC18    |
| 232370_at | 0.006681 | 0.005035 | 1.266751 | down | 1.204772 | up   | 1.526147 | up   | LOC254057 |
| 232374_s_ | 0.003828 | 0.002465 | 1.50497  | up   | 1.494587 | up   | 1.006947 | down |           |
| 232381_s_ | 0.004347 | 0.002914 | 1.39684  | down | 1.171854 | down | 1.191992 | up   | DNAH5     |
| 232384_s_ | 0.029746 | 0.028345 | 1.191061 | up   | 1.085609 | down | 1.293027 | down |           |
| 232389_at | 0.00123  | 5.38E-04 | 2.59303  | up   | 1.454025 | up   | 1.783346 | down | WIPF3     |
| 232391_at | 0.002931 | 0.001736 | 1.300082 | down | 1.10568  | up   | 1.437475 | up   | ZNF461    |
| 232394_at | 0.003305 | 0.002041 | 1.447892 | up   | 1.327662 | down | 1.922311 | down |           |
| 232398_at | 2.62E-04 | 6.64E-05 | 4.439668 | up   | 4.364247 | up   | 1.017281 | down | CCDC150   |
| 232399_at | 0.01782  | 0.016078 | 1.077796 | up   | 1.126666 | down | 1.214315 | down | DCLK3     |
| 232402_at | 3.61E-04 | 1.02E-04 | 1.689934 | up   | 1.270286 | down | 2.146699 | down | LOC642346 |
| 232408_at | 0.008571 | 0.006831 | 1.468324 | down | 1.271391 | down | 1.154895 | up   | ZFYVE28   |

|           |          |          |          |      |          |      |          |      |           |
|-----------|----------|----------|----------|------|----------|------|----------|------|-----------|
| 232413_at | 1.01E-04 | 1.85E-05 | 1.316568 | down | 1.670127 | down | 1.268546 | down |           |
| 232417_x_ | 0.002837 | 0.001661 | 1.54867  | up   | 1.378477 | up   | 1.123464 | down | ZDHHC11   |
| 232420_x_ | 0.009609 | 0.007834 | 1.04488  | down | 1.283749 | up   | 1.341364 | up   | LOC286260 |
| 232422_at | 0.002464 | 0.001377 | 1.950592 | down | 2.78456  | down | 1.427546 | down | A2LD1     |
| 232423_at | 0.003134 | 0.001901 | 2.533794 | down | 1.581649 | down | 1.601995 | up   | ARSD      |
| 232424_at | 8.87E-04 | 3.45E-04 | 1.34718  | up   | 4.314392 | down | 5.812261 | down | PRDM16    |
| 232425_at | 7.81E-04 | 2.92E-04 | 1.00189  | up   | 1.416511 | down | 1.419188 | down | SNX25     |
| 232429_at | 0.002139 | 0.001135 | 3.233488 | down | 1.575231 | down | 2.052707 | up   |           |
| 232438_at | 0.017377 | 0.015629 | 1.810717 | up   | 1.299858 | down | 2.353674 | down | EPS15L1   |
| 232441_at | 7.85E-04 | 2.94E-04 | 2.197379 | up   | 3.946489 | up   | 1.795998 | up   | KRR1      |
| 232444_at | 0.019697 | 0.018008 | 1.271742 | down | 1.034783 | down | 1.228994 | up   | C6orf204  |
| 232445_at | 0.001971 | 0.001015 | 1.247034 | up   | 1.162471 | down | 1.449641 | down | SYT9      |
| 232446_at | 0.025138 | 0.023587 | 1.649979 | up   | 1.282619 | down | 2.116293 | down | MGC45800  |
| 232453_at | 0.006154 | 0.004541 | 5.687695 | up   | 6.382771 | up   | 1.122207 | up   |           |
| 232455_x_ | 0.002572 | 0.001457 | 1.295328 | up   | 1.510021 | up   | 1.165744 | up   | LOC340085 |
| 232457_at | 0.011204 | 0.009414 | 1.416485 | up   | 1.62887  | down | 2.30727  | down | LIMCH1    |
| 232458_at | 5.80E-04 | 1.93E-04 | 14.32128 | down | 3.323316 | down | 4.309334 | up   | COL3A1    |
| 232460_at | 0.031455 | 0.030095 | 1.106854 | up   | 1.224479 | down | 1.355319 | down |           |
| 232467_at | 0.008483 | 0.006751 | 1.740926 | down | 1.735335 | down | 1.003222 | up   | KIRREL    |
|           |          |          |          |      |          |      |          |      | chromosom |
|           |          |          |          |      |          |      |          |      | e 1 open  |
|           |          |          |          |      |          |      |          |      | reading   |
|           |          |          |          |      |          |      |          |      | frame 191 |
| 232469_x_ | 0.001326 | 5.97E-04 | 2.229557 | up   | 2.336893 | up   | 1.048142 | up   |           |
| 232470_at | 0.002284 | 0.001245 | 1.497497 | up   | 1.71753  | down | 2.571994 | down | SIK1      |
| 232480_at | 0.007143 | 0.005474 | 1.939755 | down | 1.629361 | down | 1.1905   | up   | LOC400931 |
| 232483_at | 0.002614 | 0.001487 | 2.049695 | up   | 2.667409 | up   | 1.301368 | up   | MED17     |
| 232484_at | 0.011799 | 0.009995 | 3.024602 | down | 2.525032 | down | 1.197847 | up   |           |
| 232488_at | 7.84E-05 | 1.30E-05 | 2.360016 | down | 1.222048 | down | 1.931198 | up   | AGXT2L2   |
| 232496_at | 0.001236 | 5.41E-04 | 1.087683 | up   | 1.349575 | down | 1.46791  | down |           |
| 232497_at | 0.00417  | 0.002752 | 1.270431 | up   | 1.150156 | down | 1.461194 | down | ZNF3      |
| 232500_at | 0.001014 | 4.13E-04 | 3.262429 | up   | 2.719205 | up   | 1.199773 | down | C20orf74  |
| 232516_x_ | 0.00362  | 0.002294 | 1.741971 | up   | 1.024175 | down | 1.784083 | down |           |
| 232517_s_ | 0.011191 | 0.009401 | 1.603217 | down | 1.577358 | down | 1.016394 | up   | PRIC285   |
| 232518_at | 0.006489 | 0.004856 | 1.636908 | up   | 1.269757 | down | 2.078476 | down | PRIC285   |

|           |          |          |               |               |               |           |
|-----------|----------|----------|---------------|---------------|---------------|-----------|
| 232520_s_ | 0.021301 | 0.019655 | 1.485059 up   | 1.152353 up   | 1.288719 down | NSFL1C    |
| 232523_at | 1.25E-05 | 1.04E-06 | 16.53957 up   | 15.17514 up   | 1.089912 down | MEGF10    |
| 232524_x_ | 0.00558  | 0.004006 | 1.257681 up   | 1.989356 up   | 1.581765 up   | ANAPC4    |
| 232531_at | 1.52E-04 | 3.19E-05 | 14.84502 down | 4.234077 down | 3.506082 up   | EMX2OS    |
| 232534_at | 7.34E-04 | 2.67E-04 | 1.475833 up   | 1.495282 down | 2.206786 down | LIN37     |
| 232538_at | 0.030371 | 0.028982 | 1.995691 down | 1.399589 down | 1.425912 up   |           |
| 232545_at | 0.001962 | 0.001009 | 1.013792 down | 1.795016 down | 1.770595 down | LRRC29    |
| 232546_at | 0.019579 | 0.017885 | 1.302374 up   | 1.091262 up   | 1.193456 down | TP73      |
| 232549_at | 1.42E-04 | 2.90E-05 | 2.174499 up   | 2.204564 up   | 1.013826 up   | RBM11     |
| 232550_at | 0.007607 | 0.005916 | 1.539605 up   | 1.002133 down | 1.542889 down | ABHD1     |
| 232553_at | 5.87E-04 | 1.97E-04 | 4.367845 up   | 4.10922 up    | 1.062938 down | PCYT1B    |
| 232557_at | 0.018529 | 0.016808 | 1.627056 up   | 1.080502 down | 1.758037 down | LOC390595 |
| 232561_at | 8.33E-04 | 3.17E-04 | 1.50152 up    | 1.255478 up   | 1.195975 down | ZNF771    |
| 232567_at | 2.17E-04 | 5.15E-05 | 3.458822 up   | 2.250354 up   | 1.537012 down | ARHGAP8   |
| 232569_at | 8.86E-04 | 3.44E-04 | 2.258039 up   | 2.451017 up   | 1.085463 up   |           |
| 232570_s_ | 9.37E-07 | 2.67E-08 | 20.182 down   | 1.315996 down | 15.33591 up   | ADAM33    |
| 232571_at | 1.74E-04 | 3.84E-05 | 1.385774 up   | 1.401958 up   | 1.011679 up   |           |
| 232574_at | 0.012213 | 0.010419 | 1.54961 up    | 1.276239 down | 1.977673 down | XYLT1     |
| 232580_x_ | 0.001509 | 7.09E-04 | 1.774555 up   | 1.919135 up   | 1.081474 up   |           |
|           |          |          |               |               |               | LOC100133 |
| 232586_x_ | 0.001245 | 5.47E-04 | 1.919911 up   | 4.861377 up   | 2.532085 up   | 315       |
| 232589_at | 9.40E-05 | 1.65E-05 | 3.45189 down  | 1.923621 down | 1.794475 up   |           |
| 232591_s_ | 6.77E-04 | 2.39E-04 | 5.77849 down  | 3.587277 down | 1.610829 up   | TMEM30A   |
| 232594_at | 0.003214 | 0.001964 | 1.644824 down | 2.691193 down | 1.636159 down | LOC440498 |
|           |          |          |               |               |               | RP11-     |
| 232605_s_ | 0.014461 | 0.012679 | 1.178118 up   | 1.143609 down | 1.347307 down | 251J8.3   |
| 232606_at | 2.65E-04 | 6.74E-05 | 1.438404 up   | 1.445014 up   | 1.004596 up   | ANK2      |
| 232607_at | 0.001737 | 8.57E-04 | 1.307233 up   | 1.014646 up   | 1.288364 down |           |
| 232609_at | 0.001334 | 6.02E-04 | 2.426774 up   | 1.577382 up   | 1.538482 down | CRB3      |
| 232611_at | 0.002026 | 0.001055 | 1.937553 up   | 1.607273 up   | 1.205491 down | GOLGA2L1  |
| 232612_s_ | 0.005018 | 0.003509 | 1.664569 up   | 1.083305 down | 1.803236 down | ATG16L1   |
| 232615_at | 0.004261 | 0.002832 | 3.417182 up   | 6.938808 up   | 2.030565 up   |           |
| 232617_at | 0.001697 | 8.32E-04 | 2.270515 down | 1.014362 up   | 2.303124 up   | CTSS      |
| 232618_at | 0.00496  | 0.003457 | 2.061503 up   | 7.054088 up   | 3.421818 up   | CYorf15A  |

|           |          |          |               |               |               |           |
|-----------|----------|----------|---------------|---------------|---------------|-----------|
| 232619_at | 4.67E-05 | 6.41E-06 | 1.022296 up   | 1.880814 down | 1.922748 down | C20orf134 |
| 232624_at | 0.004491 | 0.003042 | 1.390074 up   | 1.297808 down | 1.804049 down | ABTB2     |
| 232629_at | 6.37E-04 | 2.20E-04 | 1.818341 up   | 1.683964 up   | 1.079798 down | PROK2     |
| 232633_at | 0.006464 | 0.004835 | 1.718977 up   | 2.564415 up   | 1.491827 up   | XRCC5     |
| 232636_at | 0.001259 | 5.57E-04 | 3.286732 up   | 2.873653 up   | 1.143747 down | SLITRK4   |
| 232641_at | 4.86E-04 | 1.52E-04 | 2.201411 down | 2.476148 down | 1.1248 down   | ZNF596    |
| 232642_at | 0.001152 | 4.92E-04 | 1.64879 up    | 1.11561 down  | 1.839407 down | VWA5B2    |
| 232644_x_ | 7.23E-05 | 1.17E-05 | 1.202265 up   | 1.892361 up   | 1.573997 up   | OCIAD1    |
| 232645_at | 7.88E-05 | 1.31E-05 | 2.70691 down  | 2.101422 down | 1.288132 up   | LOC153684 |
| 232647_at | 4.44E-04 | 1.34E-04 | 2.070691 up   | 1.8714 up     | 1.106493 down | PROCA1    |
| 232656_at | 3.19E-04 | 8.66E-05 | 3.455365 down | 1.55591 down  | 2.2208 up     |           |
| 232665_x_ | 0.008012 | 0.006295 | 1.445112 up   | 1.784514 up   | 1.234862 up   |           |
| 232669_at | 0.013152 | 0.011354 | 1.622094 up   | 1.214388 up   | 1.33573 down  | HIF3A     |
| 232670_at | 0.002933 | 0.001737 | 1.88204 up    | 1.226261 down | 2.307872 down |           |
| 232673_at | 0.029499 | 0.028095 | 1.199549 up   | 1.002427 up   | 1.196645 down | LRRFIP2   |
| 232676_x_ | 1.41E-06 | 4.69E-08 | 10.06714 up   | 6.997652 up   | 1.438646 down | MYEF2     |
| 232681_at | 0.002572 | 0.001457 | 1.59232 up    | 3.303448 up   | 2.074613 up   |           |
| 232682_at | 0.001353 | 6.14E-04 | 1.781424 up   | 3.964661 up   | 2.225557 up   | MREG      |
| 232688_at | 0.012515 | 0.010718 | 1.089467 down | 1.191003 up   | 1.297558 up   | BMP2K     |
| 232697_at | 0.002872 | 0.001689 | 1.132989 up   | 1.311445 down | 1.485853 down | LRFN2     |
| 232702_at | 0.013319 | 0.011521 | 1.562754 down | 1.042476 down | 1.499079 up   | RABGAP1L  |
| 232706_s_ | 0.015008 | 0.013239 | 1.523785 up   | 1.40936 down  | 2.147561 down | TRABD     |
| 232711_at | 0.005494 | 0.00393  | 1.612865 up   | 1.141125 up   | 1.413399 down |           |
| 232713_at | 0.010693 | 0.008901 | 1.305568 up   | 1.282514 down | 1.67441 down  |           |
| 232719_at | 0.001155 | 4.94E-04 | 1.51698 up    | 1.183922 down | 1.795985 down | BRUNOL4   |
| 232720_at | 0.00306  | 0.001839 | 1.704013 up   | 1.561689 up   | 1.091134 down | LINGO2    |
| 232726_at | 0.009776 | 0.007997 | 2.358394 up   | 4.098537 up   | 1.737851 up   |           |
| 232729_at | 0.004604 | 0.003148 | 1.235294 down | 1.314129 down | 1.063819 down |           |
|           |          |          |               |               |               | LOC100190 |
| 232731_x_ | 0.002872 | 0.00169  | 1.942725 up   | 1.25077 down  | 2.429901 down | 938       |
| 232733_s_ | 0.005868 | 0.00427  | 1.293406 up   | 1.276727 down | 1.651327 down | COL20A1   |
| 232735_at | 6.70E-04 | 2.35E-04 | 1.838502 down | 1.915971 down | 1.042137 down | ANKRD34A  |
| 232738_at | 0.008103 | 0.006383 | 1.238463 up   | 1.160936 up   | 1.06678 down  | KIAA1680  |
| 232739_at | 0.01223  | 0.010434 | 1.576975 up   | 1.311143 up   | 1.202748 down | SPIB      |

|           |          |          |               |               |               |           |
|-----------|----------|----------|---------------|---------------|---------------|-----------|
| 232743_at | 0.006961 | 0.005303 | 1.187664 up   | 1.158971 down | 1.376469 down |           |
| 232752_at | 4.99E-05 | 7.05E-06 | 7.848614 down | 5.167201 down | 1.51893 up    |           |
| 232755_at | 0.001656 | 8.05E-04 | 1.837751 up   | 1.623121 up   | 1.132233 down | UBE2G2    |
| 232760_at | 9.47E-04 | 3.76E-04 | 4.379645 up   | 4.179396 up   | 1.047913 down | TEX15     |
| 232761_at | 0.003635 | 0.002307 | 1.53525 up    | 1.132783 up   | 1.355291 down | COX4I2    |
| 232763_at | 0.006307 | 0.004688 | 1.528432 down | 1.059312 up   | 1.619085 up   | TLN1      |
| 232764_at | 0.010564 | 0.008772 | 1.361023 up   | 1.285055 down | 1.748989 down | CCNB2     |
| 232765_x_ | 0.011522 | 0.009722 | 1.55801 up    | 1.21162 down  | 1.887715 down | LOC146429 |
| 232771_at | 0.013562 | 0.011768 | 1.29172 up    | 1.061342 down | 1.370957 down | NRK       |
| 232774_x_ | 4.00E-05 | 5.24E-06 | 4.749225 up   | 4.617551 up   | 1.028516 down | ZIK1      |
| 232777_s_ | 0.00549  | 0.003927 | 1.596152 up   | 1.022832 down | 1.632595 down | C6orf118  |
| 232786_at | 4.55E-04 | 1.39E-04 | 1.358608 down | 1.219104 down | 1.114431 up   | COG6      |
| 232792_at | 1.24E-05 | 1.03E-06 | 1.872409 down | 1.335075 down | 1.402475 up   | TRIM69    |
| 232794_at | 0.024164 | 0.022586 | 2.616513 down | 1.446413 down | 1.808968 up   |           |
| 232795_at | 0.00668  | 0.005033 | 2.125521 down | 2.49367 down  | 1.173204 down |           |
| 232798_at | 0.006065 | 0.004456 | 1.221889 up   | 1.010286 up   | 1.209448 down | DNAJC5B   |
| 232802_at | 0.001681 | 8.22E-04 | 1.622413 up   | 1.059098 down | 1.718294 down | SYT8      |
| 232809_s_ | 0.022219 | 0.020614 | 1.425815 up   | 1.836143 up   | 1.287785 up   | FLT1      |
| 232812_at | 0.013618 | 0.011825 | 1.331886 down | 1.514242 down | 1.136916 down | LOC401052 |
| 232814_x_ | 1.03E-04 | 1.87E-05 | 1.745601 up   | 2.667705 up   | 1.528245 up   | KLC1      |
| 232815_at | 8.16E-04 | 3.09E-04 | 1.482115 down | 1.052961 down | 1.407569 up   | FBXO3     |
| 232816_s_ | 0.006874 | 0.005217 | 3.959457 up   | 2.484111 up   | 1.593913 down | DDX11     |
| 232818_at | 0.0135   | 0.011707 | 1.327745 up   | 1.049849 down | 1.393932 down |           |
| 232825_s_ | 7.39E-05 | 1.20E-05 | 3.326546 down | 1.313748 down | 2.532105 up   | DSEL      |
| 232828_at | 0.001559 | 7.42E-04 | 1.446812 up   | 1.109129 down | 1.604701 down |           |
| 232829_at | 0.025363 | 0.023825 | 1.178808 down | 1.066653 up   | 1.257379 up   | OR52K3P   |
| 232834_at | 0.001922 | 9.82E-04 | 2.924344 up   | 3.733357 up   | 1.276648 up   |           |
| 232835_at | 9.46E-04 | 3.76E-04 | 3.828313 up   | 3.536174 up   | 1.082615 down |           |
| 232837_at | 5.32E-04 | 1.72E-04 | 1.692669 down | 1.611585 down | 1.050313 up   | KIF13A    |
| 232845_at | 0.005039 | 0.003527 | 1.625567 up   | 1.244031 down | 2.022256 down | CDH23     |
| 232846_s_ | 0.004683 | 0.003216 | 1.316402 up   | 1.203817 down | 1.584707 down | CDH23     |
| 232847_at | 1.90E-04 | 4.30E-05 | 4.510125 up   | 3.984748 up   | 1.131847 down | SALL3     |
| 232856_at | 0.022386 | 0.020799 | 1.165815 up   | 1.160857 down | 1.353344 down | LRRC55    |
| 232859_s_ | 0.007095 | 0.005426 | 2.047046 up   | 1.021803 up   | 2.003367 down | MAGI1     |

|           |          |          |               |               |               | hCG_17861 |
|-----------|----------|----------|---------------|---------------|---------------|-----------|
|           |          |          |               |               |               | 32 ///    |
| 232863_at | 0.00711  | 0.005442 | 1.594421 up   | 1.153332 up   | 1.382447 down | ZNF815    |
| 232869_at | 5.35E-04 | 1.73E-04 | 1.664779 up   | 1.036769 down | 1.725991 down | SRGAP3    |
| 232870_at | 0.008583 | 0.006844 | 1.444265 up   | 1.142568 down | 1.65017 down  | HDAC10    |
| 232882_at | 0.001335 | 6.02E-04 | 4.559722 up   | 5.324453 up   | 1.167715 up   |           |
| 232884_s_ | 0.007657 | 0.005961 | 1.867989 up   | 1.291086 up   | 1.446836 down | ZNF853    |
| 232886_at | 0.001583 | 7.58E-04 | 1.419287 down | 1.042949 down | 1.36084 up    |           |
| 232889_at | 0.005015 | 0.003505 | 4.959539 up   | 10.58865 up   | 2.135006 up   |           |
| 232892_at | 0.004266 | 0.002838 | 1.557008 down | 1.057247 down | 1.472701 up   | C20orf166 |
| 232893_at | 7.74E-06 | 5.41E-07 | 2.944588 down | 1.985977 down | 1.48269 up    | LMBRD2    |
| 232897_at | 0.025487 | 0.023956 | 1.961175 up   | 1.200225 up   | 1.634007 down | FLJ20444  |
| 232903_at | 0.004596 | 0.003139 | 1.938241 down | 1.004368 down | 1.929812 up   |           |
| 232909_s_ | 0.001424 | 6.56E-04 | 2.206048 up   | 1.852791 up   | 1.190662 down | BPTF      |
| 232913_at | 0.014923 | 0.013149 | 1.351065 up   | 1.14891 down  | 1.552252 down | TMED8     |
| 232914_s_ | 1.68E-04 | 3.65E-05 | 21.34435 down | 2.689625 down | 7.935812 up   | SYTL2     |
| 232917_at | 0.006544 | 0.00491  | 1.057845 up   | 1.108116 down | 1.172214 down |           |
| 232918_at | 0.003434 | 0.002148 | 1.846366 down | 2.130062 down | 1.153651 down | LOC541471 |
| 232927_at | 0.005727 | 0.004138 | 1.874016 up   | 1.181768 up   | 1.585773 down |           |
| 232933_at | 0.046368 | 0.045165 | 1.258295 up   | 1.187773 down | 1.494569 down | KIAA1656  |
| 232936_at | 0.006143 | 0.00453  | 1.31184 up    | 1.091074 down | 1.431314 down | KCNA7     |
| 232941_at | 0.001774 | 8.82E-04 | 1.190614 up   | 1.713453 down | 2.04006 down  | TMPRSS6   |
| 232946_s_ | 5.42E-04 | 1.76E-04 | 1.534731 down | 2.300331 down | 1.49885 down  | NADSYN1   |
| 232950_s_ | 0.003544 | 0.002235 | 1.15806 up    | 1.166297 down | 1.350642 down | PITPNM2   |
| 232954_at | 0.00195  | 0.001002 | 1.445503 up   | 1.263069 down | 1.82577 down  |           |
| 232958_at | 0.005203 | 0.003676 | 1.373701 down | 1.157131 down | 1.187161 up   |           |
| 232959_at | 2.92E-04 | 7.67E-05 | 1.503853 up   | 2.398215 up   | 1.594713 up   |           |
| 232966_at | 0.021875 | 0.020256 | 1.241803 up   | 1.157308 down | 1.437148 down | LPIN3     |
| 232970_at | 0.007838 | 0.006137 | 1.746824 up   | 1.259301 down | 2.199777 down |           |
| 232972_at | 0.006413 | 0.004789 | 1.198417 up   | 1.276312 down | 1.529554 down | C17orf72  |
|           |          |          |               |               |               | SNORD116  |
| 232976_at | 0.001563 | 7.45E-04 | 2.677285 up   | 1.983988 up   | 1.349446 down | @         |
| 232985_s_ | 1.33E-09 | 2.97E-12 | 212.7412 up   | 240.5591 up   | 1.13076 up    | DPPA4     |

|           |          |          |               |               |               |          |           |
|-----------|----------|----------|---------------|---------------|---------------|----------|-----------|
|           |          |          |               |               |               |          | LOC100131 |
| 232992_at | 0.031017 | 0.029656 | 1.311381 up   | 1.013997 up   | 1.293278 down | 031      |           |
| 232994_s_ | 2.46E-04 | 6.11E-05 | 2.397387 down | 4.66393 down  | 1.945422 down | RGNEF    |           |
| 232998_at | 0.001079 | 4.50E-04 | 1.305964 up   | 1.315689 up   | 1.007446 up   |          |           |
| 233002_at | 0.008641 | 0.006901 | 1.507646 down | 1.928302 up   | 2.907196 up   | PPP4R4   |           |
| 233015_at | 0.001989 | 0.001028 | 1.467477 down | 1.224989 down | 1.197951 up   | MBNL1    |           |
| 233018_at | 0.002915 | 0.001722 | 1.474643 up   | 1.386139 down | 2.044061 down | TMEM134  |           |
| 233019_at | 0.007921 | 0.006211 | 1.541359 up   | 3.282215 up   | 2.129429 up   | CNOT7    |           |
| 233020_at | 6.12E-04 | 2.09E-04 | 7.734446 down | 5.421398 down | 1.426652 up   |          |           |
| 233022_at | 9.14E-04 | 3.59E-04 | 1.509829 up   | 1.550391 up   | 1.026865 up   | TRPM3    |           |
| 233023_at | 0.020966 | 0.019323 | 1.210754 up   | 1.060358 down | 1.283832 down |          |           |
| 233025_at | 0.00779  | 0.006092 | 1.227815 up   | 1.133981 up   | 1.082747 down | PDZD2    |           |
| 233026_s_ | 0.020792 | 0.019137 | 1.481293 up   | 1.08955 up    | 1.359546 down | PDZD2    |           |
| 233032_x_ | 0.04736  | 0.046164 | 1.208197 up   | 1.096249 down | 1.324485 down |          |           |
| 233035_at | 0.001631 | 7.89E-04 | 1.614078 up   | 1.673524 up   | 1.03683 up    |          |           |
| 233041_x_ | 0.003351 | 0.002078 | 1.687137 up   | 1.636495 up   | 1.030945 down |          |           |
| 233058_at | 1.94E-05 | 1.92E-06 | 3.017294 down | 1.051177 down | 2.870396 up   |          |           |
| 233060_at | 0.001777 | 8.84E-04 | 1.500052 up   | 1.275669 up   | 1.175894 down | ZMIZ1    |           |
| 233062_at | 0.025195 | 0.023652 | 1.299761 up   | 1.021157 up   | 1.272832 down |          |           |
| 233063_s_ | 2.79E-04 | 7.23E-05 | 2.27871 down  | 1.493496 down | 1.525755 up   |          |           |
| 233064_at | 7.48E-07 | 1.96E-08 | 8.468091 up   | 8.343884 up   | 1.014886 down | ZFR2     |           |
| 233067_at | 0.025138 | 0.023587 | 1.417728 up   | 1.117315 down | 1.584048 down |          |           |
| 233080_s_ | 2.05E-04 | 4.75E-05 | 2.048941 up   | 1.786508 up   | 1.146898 down | PRPF40A  |           |
| 233085_s_ | 3.95E-04 | 1.15E-04 | 8.70013 down  | 9.322115 down | 1.071492 down | OBFC2A   |           |
| 233088_at | 0.008166 | 0.006447 | 1.332972 down | 1.342137 down | 1.006876 down |          |           |
| 233089_at | 0.001134 | 4.82E-04 | 1.349072 up   | 1.603881 up   | 1.188877 up   | QRSL1    |           |
| 233090_at | 0.005942 | 0.004341 | 4.853705 up   | 5.886182 up   | 1.212719 up   |          |           |
| 233110_s_ | 5.94E-04 | 2.00E-04 | 3.557299 up   | 3.505759 up   | 1.014701 down | BCL2L12  |           |
| 233115_at | 6.05E-04 | 2.05E-04 | 1.498078 up   | 1.478592 up   | 1.013178 down | DEPDC1B  |           |
| 233119_at | 7.44E-04 | 2.72E-04 | 1.64908 up    | 1.252525 up   | 1.316605 down | FLJ14213 |           |
| 233122_at | 0.004526 | 0.003074 | 1.495325 down | 1.207302 up   | 1.805308 up   | KRTCAP2  |           |
| 233128_at | 0.001422 | 6.55E-04 | 1.507433 up   | 1.429217 down | 2.154449 down |          |           |
| 233129_at | 0.001259 | 5.57E-04 | 1.437189 up   | 1.145389 up   | 1.254762 down |          |           |
| 233131_at | 0.024829 | 0.023268 | 1.382559 up   | 1.103265 down | 1.525328 down | CCDC147  |           |

|           |          |          |          |      |          |      |          |      |          |
|-----------|----------|----------|----------|------|----------|------|----------|------|----------|
| 233132_at | 0.001749 | 8.65E-04 | 1.786831 | down | 1.506378 | down | 1.186177 | up   | LOC96610 |
| 233141_s_ | 0.002278 | 0.001241 | 2.301904 | down | 1.511346 | down | 1.523082 | up   | ST7L     |
| 233142_at | 1.22E-04 | 2.36E-05 | 6.218873 | up   | 7.061203 | up   | 1.135447 | up   |          |
| 233152_x_ | 0.001622 | 7.82E-04 | 1.545808 | up   | 1.493205 | up   | 1.035228 | down |          |
| 233157_x_ | 0.001454 | 6.75E-04 | 1.58729  | up   | 1.571636 | down | 2.494642 | down | CCDC114  |
| 233161_at | 0.003856 | 0.00249  | 1.690294 | up   | 1.492955 | up   | 1.13218  | down |          |
|           |          |          |          |      |          |      |          |      | RP3-     |
| 233167_at | 0.001879 | 9.51E-04 | 2.179648 | down | 2.761256 | down | 1.266836 | down | 402G11.5 |
|           |          |          |          |      |          |      |          |      | RP3-     |
| 233168_s_ | 4.62E-04 | 1.42E-04 | 1.354662 | down | 1.89917  | down | 1.401951 | down | 402G11.5 |
| 233171_at | 0.00646  | 0.00483  | 1.372683 | up   | 1.215153 | down | 1.668021 | down | GRIN3A   |
| 233173_x_ | 6.04E-05 | 9.13E-06 | 1.913875 | up   | 1.517341 | up   | 1.261335 | down | GTF3C5   |
| 233176_at | 0.001249 | 5.50E-04 | 2.188636 | down | 1.206776 | down | 1.813623 | up   |          |
| 233192_s_ | 0.001232 | 5.39E-04 | 1.52154  | down | 1.557571 | down | 1.02368  | down | RUFY2    |
| 233193_x_ | 0.006074 | 0.004464 | 1.422096 | up   | 1.475781 | up   | 1.03775  | up   | INTS4    |
| 233198_at | 6.03E-04 | 2.04E-04 | 1.975268 | up   | 2.727383 | up   | 1.380766 | up   | GOLGA2L1 |
| 233200_at | 0.025124 | 0.023569 | 1.46075  | up   | 1.047913 | up   | 1.393961 | down |          |
| 233212_at | 0.002066 | 0.001083 | 1.883178 | down | 1.083841 | down | 1.737504 | up   |          |
| 233229_at | 0.014651 | 0.012873 | 1.376398 | up   | 1.023134 | up   | 1.345278 | down | SCFD1    |
| 233230_s_ | 0.003412 | 0.002129 | 3.111247 | down | 1.57086  | down | 1.980601 | up   | SLAIN2   |
| 233234_at | 4.23E-04 | 1.26E-04 | 1.265263 | down | 3.309985 | down | 2.616046 | down | KCTD16   |
| 233235_x_ | 0.014516 | 0.012738 | 1.57138  | up   | 1.02199  | up   | 1.537569 | down |          |
| 233245_at | 0.009769 | 0.007991 | 1.504536 | up   | 1.13086  | down | 1.70142  | down | UHRF1BP1 |
| 233251_at | 5.20E-04 | 1.67E-04 | 2.779623 | up   | 2.574702 | up   | 1.07959  | down | STRBP    |
| 233252_s_ | 5.81E-06 | 3.53E-07 | 8.996474 | up   | 13.61094 | up   | 1.512919 | up   | STRBP    |
| 233255_s_ | 7.29E-06 | 4.92E-07 | 8.641939 | down | 3.467517 | down | 2.492255 | up   | BIVM     |
| 233264_at | 0.001227 | 5.36E-04 | 1.264931 | up   | 1.719815 | up   | 1.359612 | up   |          |
| 233267_at | 0.009865 | 0.008088 | 1.387855 | up   | 1.199503 | down | 1.664736 | down | SELENBP1 |
| 233273_at | 0.002219 | 0.001193 | 1.494793 | up   | 2.766666 | up   | 1.850869 | up   |          |
| 233276_at | 0.017456 | 0.015709 | 1.071355 | up   | 3.650056 | up   | 3.406952 | up   |          |
| 233296_x_ | 0.031624 | 0.030272 | 1.159939 | up   | 1.537772 | up   | 1.325736 | up   |          |
| 233306_at | 0.00484  | 0.003348 | 1.716255 | up   | 1.616781 | up   | 1.061526 | down |          |
| 233309_at | 0.010398 | 0.0086   | 1.757453 | up   | 1.867927 | up   | 1.06286  | up   |          |
| 233319_x_ | 0.002137 | 0.001134 | 1.538037 | up   | 2.221386 | up   | 1.4443   | up   |          |



|           |          |          |               |               |               |             |
|-----------|----------|----------|---------------|---------------|---------------|-------------|
| 233329_s_ | 1.59E-04 | 3.39E-05 | 5.356831 down | 3.067262 down | 1.746454 up   | KRCC1       |
| 233331_at | 0.003248 | 0.001992 | 1.213421 up   | 1.390593 up   | 1.146011 up   |             |
|           |          |          |               |               |               | GIYD1 ///   |
|           |          |          |               |               |               | GIYD2 ///   |
|           |          |          |               |               |               | SULT1A3 /// |
| 233334_x_ | 3.99E-04 | 1.17E-04 | 1.844873 up   | 1.621424 up   | 1.13781 down  | SULT1A4     |
|           |          |          |               |               |               | LOC652900   |
| 233337_s_ | 0.007092 | 0.005423 | 2.623346 up   | 1.721312 up   | 1.524038 down | /// SEZ6L2  |
| 233344_x_ | 0.025532 | 0.024011 | 1.271308 up   | 1.207133 down | 1.534637 down | KIAA1875    |
| 233350_s_ | 6.55E-05 | 1.02E-05 | 2.005004 down | 2.518927 down | 1.25632 down  | TEX264      |
| 233355_at | 0.031638 | 0.030289 | 1.544803 up   | 1.041642 up   | 1.483046 down | PRR17       |
| 233361_at | 0.002224 | 0.001197 | 1.331121 up   | 1.418797 down | 1.88859 down  | ANKRD44     |
| 233364_s_ | 6.05E-04 | 2.05E-04 | 30.71297 down | 10.54176 down | 2.913458 up   |             |
| 233380_s_ | 0.009544 | 0.007771 | 1.336775 down | 1.613589 down | 1.207076 down | RUFY1       |
| 233388_at | 0.004616 | 0.003159 | 1.266803 down | 1.403056 down | 1.107557 down |             |
| 233389_at | 0.017835 | 0.016095 | 1.381978 up   | 1.161812 down | 1.605598 down | C20orf26    |
| 233395_at | 0.017999 | 0.016264 | 1.35728 up    | 1.240301 down | 1.683436 down |             |
| 233396_s_ | 0.017048 | 0.015293 | 1.134454 up   | 1.428155 down | 1.620176 down | CSRP2BP     |
| 233399_x_ | 0.004345 | 0.002912 | 1.471258 up   | 1.734571 up   | 1.178972 up   | ZNF252      |
| 233415_at | 0.015898 | 0.014125 | 1.152296 down | 1.064669 up   | 1.226813 up   |             |
| 233417_at | 0.006464 | 0.004835 | 1.621262 up   | 2.164538 up   | 1.335095 up   |             |
| 233418_at | 0.011987 | 0.010188 | 1.277778 up   | 1.15741 down  | 1.478913 down | LOC91450    |
| 233424_at | 3.37E-04 | 9.30E-05 | 2.301554 up   | 1.786071 up   | 1.288613 down |             |
| 233427_x_ | 0.0045   | 0.003051 | 1.710049 up   | 1.696932 up   | 1.00773 down  |             |
| 233432_at | 0.001152 | 4.92E-04 | 1.600274 up   | 1.327589 down | 2.124507 down | LOC646982   |
| 233436_at | 4.02E-04 | 1.18E-04 | 1.648575 up   | 1.861718 up   | 1.129289 up   | MTBP        |
| 233443_at | 0.001903 | 9.69E-04 | 1.748101 up   | 1.132379 down | 1.979513 down | PSMG4       |
| 233445_at | 0.004841 | 0.003349 | 1.805044 up   | 3.527206 up   | 1.954083 up   |             |
| 233447_at | 0.031611 | 0.030258 | 1.233815 up   | 1.022323 down | 1.261358 down | PSMG4       |
| 233448_s_ | 0.015889 | 0.014114 | 1.483762 up   | 1.13711 up    | 1.304854 down |             |
| 233454_at | 0.003675 | 0.002341 | 1.239005 up   | 1.303469 down | 1.615004 down | POLN        |
| 233462_at | 0.003859 | 0.002493 | 1.416593 up   | 1.087979 down | 1.541223 down | TBC1D28     |
| 233463_at | 0.003003 | 0.001794 | 1.58148 up    | 1.124311 up   | 1.406621 down | RASSF6      |

|           |          |          |               |               |               |           |
|-----------|----------|----------|---------------|---------------|---------------|-----------|
| 233467_s_ | 0.005716 | 0.004128 | 1.267129 up   | 1.195431 down | 1.514765 down | TSPAN32   |
| 233471_at | 0.010614 | 0.008823 | 1.380888 up   | 1.146386 up   | 1.204558 down | PTPN5     |
| 233476_at | 0.004036 | 0.002638 | 1.164404 down | 1.223365 up   | 1.424492 up   |           |
| 233479_at | 0.006824 | 0.005166 | 1.379519 up   | 1.681769 up   | 1.219098 up   |           |
| 233480_at | 0.002731 | 0.001578 | 2.505438 down | 1.040661 down | 2.407546 up   | TMEM43    |
| 233484_at | 0.022203 | 0.020597 | 1.230857 up   | 1.179814 down | 1.452183 down |           |
| 233486_at | 0.002861 | 0.001681 | 1.040519 down | 1.488137 up   | 1.548435 up   | LOC729940 |
| 233487_s_ | 0.016961 | 0.015208 | 1.45863 up    | 1.400904 down | 2.0434 down   | LRRC8A    |
| 233489_at | 0.004836 | 0.003345 | 1.319647 up   | 1.384176 down | 1.826623 down | TMEM43    |
| 233490_at | 0.00593  | 0.00433  | 1.426061 down | 1.221232 down | 1.167724 up   | DCTN4     |
| 233496_s_ | 2.37E-06 | 1.01E-07 | 14.85656 down | 12.07381 down | 1.230478 up   | CFL2      |
| 233506_at | 5.74E-04 | 1.90E-04 | 1.339223 down | 2.580249 down | 1.926676 down |           |
| 233509_at | 0.018878 | 0.017172 | 1.515132 down | 1.004006 up   | 1.5212 up     | HERC4     |
| 233511_at | 0.009051 | 0.007299 | 1.325494 up   | 1.179546 down | 1.563482 down |           |
| 233514_x_ | 0.004422 | 0.002978 | 1.0673 up     | 1.143733 up   | 1.071614 up   | TEX11     |
| 233518_at | 3.15E-04 | 8.53E-05 | 7.438444 down | 1.570067 down | 4.737662 up   |           |
| 233520_s_ | 0.002548 | 0.00144  | 1.883824 down | 1.385309 up   | 2.609679 up   | CMYA5     |
| 233524_at | 0.014171 | 0.012383 | 1.460079 up   | 1.258691 down | 1.837788 down | C9orf44   |
| 233525_s_ | 0.01221  | 0.010415 | 1.897037 up   | 1.449782 down | 2.75029 down  | C9orf44   |
| 233533_at | 6.74E-06 | 4.35E-07 | 19.28289 down | 90.14857 down | 4.675055 down | KRTAP1-5  |
| 233538_s_ | 0.0055   | 0.003935 | 1.935 down    | 1.455361 down | 1.329567 up   | CYBB      |
| 233540_s_ | 0.014231 | 0.012438 | 1.125115 up   | 1.986095 down | 2.234585 down | CDK5RAP2  |
| 233543_s_ | 0.01197  | 0.01017  | 1.321775 down | 2.515081 up   | 3.324372 up   | FAM175A   |
| 233545_at | 0.003535 | 0.002227 | 1.397483 up   | 1.055434 up   | 1.324083 down | INPP5D    |
| 233546_at | 8.05E-04 | 3.03E-04 | 2.317495 down | 1.533434 down | 1.511311 up   |           |
| 233550_s_ | 0.002549 | 0.001441 | 1.868415 up   | 1.461014 up   | 1.278848 down | SLC4A11   |
| 233554_at | 0.005888 | 0.00429  | 2.015156 up   | 1.779173 up   | 1.132637 down |           |
| 233556_at | 0.001593 | 7.64E-04 | 1.260946 up   | 1.142122 down | 1.440155 down | CRYBB2P1  |
| 233562_at | 0.001232 | 5.39E-04 | 4.927571 down | 3.703166 down | 1.330637 up   | LOC84856  |
| 233564_s_ | 0.019622 | 0.017928 | 1.876136 down | 1.598755 down | 1.173498 up   | CDADC1    |
| 233567_at | 0.020622 | 0.018961 | 1.324191 up   | 1.11014 up    | 1.192815 down | NAV1      |
| 233568_x_ | 8.40E-04 | 3.20E-04 | 1.478086 up   | 1.638721 up   | 1.108678 up   | CWF19L1   |
| 233570_at | 0.007005 | 0.005345 | 1.395131 up   | 1.938501 up   | 1.389476 up   |           |
| 233576_at | 0.005041 | 0.00353  | 1.088469 up   | 1.201535 up   | 1.103877 up   | HMGCLL1   |

|           |          |          |               |               |               |                       |
|-----------|----------|----------|---------------|---------------|---------------|-----------------------|
| 233583_at | 0.008593 | 0.006855 | 1.385982 up   | 1.112309 down | 1.54164 down  |                       |
| 233587_s_ | 8.31E-06 | 5.92E-07 | 2.770936 up   | 11.13597 up   | 4.018847 up   | SIPA1L2               |
| 233588_x_ | 0.009122 | 0.007368 | 2.083588 up   | 1.433373 up   | 1.453626 down | PFDN6                 |
| 233589_x_ | 0.035936 | 0.034657 | 3.201434 down | 2.017436 down | 1.586882 up   | C9orf167              |
| 233593_at | 0.009018 | 0.007266 | 1.565983 up   | 1.554634 up   | 1.0073 down   |                       |
| 233594_at | 0.04551  | 0.044297 | 1.2466 up     | 1.043777 down | 1.301172 down |                       |
| 233597_at | 0.02085  | 0.0192   | 1.450686 up   | 1.263444 up   | 1.1482 down   | PNPLA5                |
| 233600_at | 0.012362 | 0.010565 | 1.401211 up   | 1.056989 down | 1.481065 down | EFCAB6                |
| 233601_at | 0.01633  | 0.014561 | 1.335002 up   | 1.186701 down | 1.584248 down |                       |
| 233602_at | 0.006038 | 0.004429 | 1.192659 down | 1.138495 down | 1.047575 up   |                       |
| 233605_x_ | 0.001295 | 5.78E-04 | 1.373598 up   | 1.67493 up    | 1.219374 up   | HNRNPM                |
| 233613_x_ | 0.003813 | 0.002453 | 1.46101 down  | 1.479194 down | 1.012446 down | REXO2                 |
| 233615_at | 0.004822 | 0.003332 | 1.492749 up   | 1.09918 down  | 1.6408 down   | CGA                   |
| 233622_x_ | 0.002971 | 0.001769 | 1.22149 up    | 1.340332 up   | 1.097292 up   |                       |
| 233624_at | 0.005673 | 0.004091 | 1.624003 up   | 1.309679 down | 2.126923 down |                       |
| 233632_s_ | 0.014109 | 0.012318 | 2.375543 down | 1.517616 down | 1.565313 up   | XRN1                  |
| 233634_at | 9.96E-06 | 7.53E-07 | 2.999662 up   | 2.105867 up   | 1.424431 down | MARVELD3              |
| 233636_at | 0.018789 | 0.017079 | 1.259636 up   | 1.014931 up   | 1.241105 down | MIRHG1                |
| 233645_s_ | 0.001619 | 7.81E-04 | 1.738182 down | 1.050232 down | 1.655046 up   | C1RL                  |
| 233655_s_ | 9.77E-04 | 3.93E-04 | 2.20972 up    | 4.287808 up   | 1.940431 up   | HAUS6                 |
| 233660_at | 0.00293  | 0.001734 | 2.27411 down  | 1.999687 down | 1.137233 up   | EHD4                  |
| 233662_at | 0.002041 | 0.001066 | 1.170405 up   | 1.0247 down   | 1.199314 down | CDH26                 |
| 233663_s_ | 0.034034 | 0.032724 | 1.227975 up   | 1.021717 up   | 1.201874 down | CDH26                 |
| 233669_s_ | 0.032403 | 0.031072 | 1.930011 up   | 1.113785 up   | 1.732839 down | TRIM54                |
| 233670_at | 0.017919 | 0.016182 | 1.359287 up   | 1.155503 down | 1.570659 down |                       |
| 233679_at | 0.002481 | 0.001389 | 1.976593 up   | 1.12192 down  | 2.217579 down | MAP3K7IP1<br>KLK8 /// |
| 233687_s_ | 0.004555 | 0.003103 | 2.030338 up   | 1.199345 down | 2.435076 down | KLK9                  |
| 233698_at | 0.001046 | 4.32E-04 | 1.137014 up   | 1.226194 down | 1.3942 down   |                       |
| 233699_at | 5.56E-04 | 1.82E-04 | 1.805268 up   | 1.059123 up   | 1.704494 down |                       |
| 233701_at | 0.005862 | 0.004263 | 1.337175 up   | 1.035904 down | 1.385184 down |                       |
| 233702_x_ | 9.24E-04 | 3.64E-04 | 1.367685 up   | 2.301647 up   | 1.682878 up   |                       |
| 233709_at | 0.002262 | 0.001228 | 1.650683 up   | 1.090262 up   | 1.514024 down |                       |

|           |          |          |               |               |               |                        |
|-----------|----------|----------|---------------|---------------|---------------|------------------------|
| 233727_at | 0.001625 | 7.85E-04 | 1.334046 up   | 1.573839 up   | 1.179749 up   |                        |
| 233728_at | 3.33E-04 | 9.16E-05 | 1.02457 down  | 1.755065 up   | 1.798186 up   |                        |
| 233730_at | 5.44E-04 | 1.77E-04 | 1.797133 up   | 1.571765 up   | 1.143385 down | FAM135A                |
| 233739_at | 0.024415 | 0.022839 | 1.257084 up   | 1.033269 up   | 1.216609 down |                        |
| 233746_x_ | 0.006721 | 0.005074 | 1.681719 up   | 1.06426 down  | 1.789786 down | HYPK                   |
| 233750_s_ | 0.001718 | 8.45E-04 | 1.098601 down | 1.970106 up   | 2.16436 up    | C1orf25                |
| 233756_at | 9.47E-04 | 3.77E-04 | 1.304248 up   | 1.356687 down | 1.769455 down |                        |
| 233764_s_ | 0.006148 | 0.004534 | 1.441597 up   | 1.65636 up    | 1.148976 up   | LARP2                  |
| 233767_at | 0.018608 | 0.016887 | 3.374682 up   | 2.07958 up    | 1.622771 down | HHLA1                  |
| 233775_x_ | 0.001497 | 7.02E-04 | 1.83883 up    | 1.492038 up   | 1.232428 down |                        |
| 233776_at | 0.008667 | 0.006929 | 1.179602 up   | 1.357807 down | 1.601672 down | PTPRA                  |
| 233777_at | 0.008657 | 0.006917 | 1.462896 up   | 1.040085 down | 1.521537 down |                        |
| 233781_s_ | 0.006297 | 0.004679 | 1.39424 up    | 1.352859 up   | 1.030587 down | RIF1                   |
| 233783_at | 0.016269 | 0.014497 | 1.319747 up   | 1.159738 up   | 1.13797 down  |                        |
| 233787_at | 0.002803 | 0.001635 | 1.93704 up    | 1.104127 up   | 1.754363 down | C6orf163               |
| 233790_at | 0.005795 | 0.004202 | 1.44739 up    | 1.279015 down | 1.851233 down |                        |
| 233796_at | 0.005767 | 0.004176 | 1.429096 up   | 1.101671 down | 1.574393 down |                        |
| 233804_at | 0.00821  | 0.006488 | 1.181346 up   | 1.356656 down | 1.60268 down  | LOC440131<br>NCRNA0002 |
| 233812_at | 0.007938 | 0.006227 | 1.464795 up   | 1.180239 down | 1.728807 down | 8                      |
| 233815_at | 7.28E-04 | 2.64E-04 | 1.152593 up   | 1.482202 up   | 1.285971 up   | NAALAD2                |
| 233820_at | 1.36E-04 | 2.72E-05 | 2.599921 down | 2.281029 down | 1.139802 up   |                        |
| 233825_s_ | 1.93E-06 | 7.44E-08 | 8.866838 down | 4.792289 down | 1.85023 up    | CD99L2                 |
| 233828_at | 0.006989 | 0.005329 | 1.254084 up   | 1.166965 down | 1.463472 down |                        |
| 233835_at | 0.002747 | 0.001592 | 1.480928 down | 1.019561 down | 1.452514 up   | LOC90246               |
| 233836_at | 3.02E-04 | 8.05E-05 | 1.841665 up   | 1.963285 up   | 1.066038 up   | TNRC6A                 |
| 233838_at | 0.009396 | 0.007629 | 1.200172 up   | 1.074829 down | 1.28998 down  |                        |
| 233839_at | 7.14E-04 | 2.57E-04 | 1.031397 down | 1.381237 down | 1.339191 down | EFCAB6                 |
| 233842_x_ | 2.18E-04 | 5.16E-05 | 1.982781 down | 2.174188 down | 1.096535 down | C20orf43               |
| 233845_at | 0.022332 | 0.020743 | 1.152996 down | 1.007183 up   | 1.161278 up   |                        |
| 233846_at | 0.012953 | 0.01115  | 1.484581 up   | 1.198032 down | 1.778575 down | CCDC85A                |
| 233850_s_ | 0.013167 | 0.011369 | 1.613831 up   | 1.217888 down | 1.965465 down | EBF4                   |
| 233852_at | 5.05E-05 | 7.17E-06 | 2.776065 down | 3.684187 down | 1.327126 down | POLH                   |

|           |          |          |               |               |               |            |
|-----------|----------|----------|---------------|---------------|---------------|------------|
| 233860_s_ | 0.003158 | 0.001922 | 1.418473 up   | 1.267405 up   | 1.119195 down | OBP2A ///  |
| 233863_at | 0.005287 | 0.003748 | 1.337789 up   | 1.070569 down | 1.432196 down | OBP2B      |
| 233865_at | 0.027322 | 0.025839 | 1.053528 up   | 1.255638 up   | 1.191841 up   | CASZ1      |
| 233868_x_ | 1.43E-06 | 4.81E-08 | 4.711687 down | 1.417772 up   | 6.680097 up   | ADAM33     |
| 233869_x_ | 0.003932 | 0.002552 | 2.216299 up   | 1.962403 up   | 1.129381 down |            |
| 233870_at | 0.044751 | 0.043536 | 1.869511 down | 1.174049 down | 1.592362 up   | NAV1       |
| 233873_x_ | 1.95E-05 | 1.95E-06 | 2.326627 up   | 2.513751 up   | 1.080427 up   | MTPAP      |
| 233881_s_ | 0.002477 | 0.001387 | 1.912138 down | 2.022971 down | 1.057963 down | TOLLIP     |
| 233888_s_ | 1.36E-04 | 2.73E-05 | 3.456995 down | 2.017772 down | 1.713274 up   | SRGAP1     |
|           |          |          |               |               |               | LOC100133  |
| 233891_at | 0.007105 | 0.005435 | 1.492 up      | 1.354386 down | 2.020744 down | 790        |
| 233894_x_ | 3.23E-04 | 8.82E-05 | 2.461199 up   | 1.000235 up   | 2.460622 down | EMID2      |
| 233895_at | 6.08E-04 | 2.07E-04 | 1.886913 up   | 1.307316 up   | 1.44335 down  | ANKRD24    |
| 233901_at | 0.010466 | 0.008673 | 1.113798 up   | 1.143619 down | 1.273761 down |            |
| 233903_s_ | 3.59E-04 | 1.01E-04 | 1.823756 up   | 1.869802 up   | 1.025248 up   | SGEF       |
| 233904_at | 0.003941 | 0.00256  | 1.123836 up   | 1.148456 down | 1.290676 down |            |
| 233911_s_ | 0.00878  | 0.007038 | 1.527211 up   | 1.096324 down | 1.674318 down | PPM1H      |
| 233915_at | 0.004832 | 0.003341 | 1.17119 up    | 1.113872 down | 1.304556 down | C5orf36    |
| 233916_at | 0.013378 | 0.011582 | 1.173859 down | 1.186606 down | 1.010859 down | KIAA1486   |
| 233922_at | 0.017284 | 0.015536 | 1.254672 up   | 1.086323 down | 1.362979 down |            |
| 233923_at | 0.001049 | 4.33E-04 | 1.097821 up   | 1.324224 down | 1.453761 down | FLJ32810   |
| 233938_at | 7.46E-04 | 2.73E-04 | 1.214918 up   | 1.536043 down | 1.866167 down | C11orf86   |
| 233939_at | 1.92E-04 | 4.35E-05 | 2.05583 up    | 1.242205 down | 2.553762 down | REXO1      |
|           |          |          |               |               |               |            |
| 233941_at | 0.022436 | 0.020849 | 1.406515 up   | 1.62308 down  | 2.282886 down | C14orf166B |
| 233947_s_ | 2.44E-08 | 1.53E-10 | 19.58895 down | 1.032435 down | 18.97355 up   | LOC255480  |
| 233948_at | 0.018062 | 0.01633  | 1.21614 up    | 1.128524 down | 1.372443 down | LOC255480  |
| 233949_s_ | 0.034776 | 0.033483 | 1.582736 up   | 1.028123 down | 1.627247 down | MYH7B      |
| 233950_at | 5.52E-04 | 1.80E-04 | 1.638643 up   | 1.349287 up   | 1.214451 down | CADPS      |
| 233955_x_ | 0.001908 | 9.72E-04 | 1.052161 up   | 1.715893 down | 1.805396 down | CXXC5      |
| 233959_at | 0.005131 | 0.00361  | 1.140815 up   | 1.505751 up   | 1.319891 up   | LOC221442  |
|           |          |          |               |               |               | H2BFXP /// |
| 233963_at | 0.006148 | 0.004535 | 1.421104 up   | 1.177136 down | 1.672833 down | LOC644328  |

|           |          |          |               |               |               |           |
|-----------|----------|----------|---------------|---------------|---------------|-----------|
| 233964_at | 0.011302 | 0.009506 | 1.796297 up   | 1.206791 up   | 1.48849 down  |           |
| 233965_at | 0.008416 | 0.00668  | 1.360326 down | 1.075884 up   | 1.463553 up   | LOC255480 |
| 233967_at | 0.004861 | 0.00337  | 1.288655 up   | 1.031505 down | 1.329254 down |           |
| 233976_at | 2.99E-04 | 7.91E-05 | 2.072231 up   | 2.71126 up    | 1.308377 up   |           |
| 233979_s_ | 0.001279 | 5.68E-04 | 1.864435 up   | 1.048768 up   | 1.777738 down | ESPN      |
| 233980_s_ | 0.0011   | 4.62E-04 | 1.096438 up   | 1.323923 down | 1.451599 down | VWF       |
| 233982_x_ | 0.001942 | 9.96E-04 | 1.164619 up   | 1.346908 down | 1.568634 down | STYXL1    |
| 233985_x_ | 1.37E-04 | 2.77E-05 | 2.435577 up   | 1.589077 up   | 1.532699 down | PPP1R9A   |
| 233988_x_ | 0.005996 | 0.004388 | 2.012401 up   | 1.574898 down | 3.169326 down | SCUBE1    |
| 233989_at | 0.018567 | 0.016845 | 1.227716 up   | 1.031239 up   | 1.190525 down |           |
| 233997_at | 2.51E-04 | 6.29E-05 | 1.620115 up   | 1.124115 down | 1.821195 down |           |
| 234000_s_ | 1.80E-05 | 1.75E-06 | 2.574195 up   | 1.777263 up   | 1.448404 down | PTPLAD1   |
| 234002_at | 0.016898 | 0.015145 | 1.359918 up   | 1.080235 down | 1.469031 down | C20orf135 |
| 234003_at | 0.007017 | 0.005357 | 1.808712 up   | 1.111348 down | 2.010108 down | ENOX2     |
| 234010_at | 0.013823 | 0.012032 | 2.113321 up   | 1.023999 up   | 2.063793 down |           |
| 234016_at | 0.007334 | 0.005654 | 1.446951 up   | 1.211932 up   | 1.193922 down | LOC90499  |
| 234019_at | 7.13E-04 | 2.57E-04 | 1.092519 up   | 1.212177 down | 1.324326 down |           |
| 234021_at | 5.63E-04 | 1.86E-04 | 2.139128 up   | 1.189113 down | 2.543664 down | EML2      |
| 234023_s_ | 0.003688 | 0.002351 | 2.300571 up   | 1.922868 up   | 1.196427 down | CENPJ     |
| 234026_at | 0.001089 | 4.56E-04 | 1.42674 up    | 1.40974 down  | 2.011332 down | EML2      |
| 234030_at | 0.004863 | 0.003372 | 1.263037 up   | 1.194666 down | 1.508908 down |           |
| 234034_at | 9.85E-06 | 7.43E-07 | 2.934976 up   | 3.562826 up   | 1.21392 up    |           |
| 234037_s_ | 0.007194 | 0.005521 | 1.566052 up   | 1.118184 down | 1.751134 down |           |
| 234059_at | 0.003086 | 0.00186  | 1.248231 up   | 1.258964 up   | 1.008599 up   |           |
| 234062_at | 0.048621 | 0.047449 | 1.435031 up   | 1.072887 up   | 1.337542 down |           |
| 234079_at | 4.02E-04 | 1.18E-04 | 1.706399 down | 1.191582 down | 1.432045 up   |           |
| 234092_s_ | 0.003706 | 0.002365 | 1.857344 down | 1.22437 down  | 1.51698 up    | TM6SF2    |
| 234102_at | 0.024834 | 0.023274 | 1.46229 up    | 1.109324 up   | 1.318181 down | RASL11B   |
| 234103_at | 8.75E-04 | 3.38E-04 | 4.143868 up   | 3.997022 up   | 1.036739 down | KCNT2     |
| 234104_at | 2.41E-04 | 5.91E-05 | 3.470609 down | 1.042307 down | 3.329739 up   |           |
| 234110_at | 9.29E-04 | 3.67E-04 | 1.412804 down | 1.079511 down | 1.308744 up   |           |
| 234111_at | 0.009072 | 0.007317 | 2.603916 down | 1.672087 down | 1.557285 up   |           |
| 234116_at | 2.81E-04 | 7.29E-05 | 1.757799 up   | 1.06907 up    | 1.644231 down | GJD4      |
| 234119_at | 0.002037 | 0.001063 | 1.286382 up   | 1.078177 down | 1.386948 down |           |

|           |          |          |               |               |               |           |
|-----------|----------|----------|---------------|---------------|---------------|-----------|
| 234122_at | 0.013858 | 0.012069 | 1.286906 up   | 1.088225 up   | 1.182573 down |           |
| 234128_at | 0.008121 | 0.0064   | 1.290141 up   | 1.37946 down  | 1.779697 down |           |
| 234129_at | 8.10E-04 | 3.06E-04 | 1.137649 up   | 1.237684 down | 1.40805 down  | ARHGEF12  |
| 234130_at | 0.019414 | 0.017712 | 1.392173 up   | 1.252676 down | 1.743941 down | LDB3      |
| 234131_at | 0.00123  | 5.38E-04 | 1.367382 up   | 1.041204 up   | 1.313271 down |           |
| 234133_s_ | 3.71E-04 | 1.06E-04 | 1.964338 up   | 1.284741 up   | 1.528976 down | LOC728543 |
| 234142_at | 0.012826 | 0.011029 | 1.319699 up   | 1.383197 down | 1.825404 down |           |
| 234144_at | 0.001756 | 8.70E-04 | 1.062208 down | 1.469051 down | 1.383017 down |           |
| 234149_at | 0.003076 | 0.001851 | 1.248082 down | 1.178934 up   | 1.471407 up   |           |
| 234158_at | 0.041072 | 0.039825 | 1.409543 up   | 1.056676 down | 1.48943 down  |           |
| 234169_at | 0.003014 | 0.001803 | 1.406584 up   | 1.68163 down  | 2.365354 down |           |
| 234175_at | 0.00275  | 0.001594 | 1.732942 up   | 1.20066 down  | 2.080674 down |           |
| 234189_at | 0.038702 | 0.037447 | 1.240679 up   | 1.12181 down  | 1.391806 down |           |
| 234195_at | 7.10E-04 | 2.55E-04 | 1.808592 up   | 1.122354 down | 2.029881 down | TNFRSF10C |
| 234198_at | 0.003788 | 0.002434 | 1.476847 up   | 1.277494 up   | 1.156051 down | KCNIP3    |
| 234200_at | 9.79E-04 | 3.94E-04 | 1.487293 up   | 1.12445 down  | 1.672386 down |           |
| 234201_x_ | 0.004535 | 0.003084 | 1.4435 up     | 1.20272 up    | 1.200197 down |           |
| 234218_at | 0.018766 | 0.017049 | 1.019341 up   | 1.146544 up   | 1.12479 up    |           |
| 234233_s_ | 0.004177 | 0.002759 | 1.540542 down | 1.154167 down | 1.334766 up   |           |
| 234238_at | 0.006842 | 0.005184 | 1.237373 up   | 1.097537 down | 1.358062 down | MAP1LC3B2 |
| 234265_at | 0.009852 | 0.008074 | 1.471574 up   | 1.197904 down | 1.762804 down | PPP1R12C  |
| 234268_at | 0.001403 | 6.43E-04 | 2.200391 up   | 2.299365 up   | 1.04498 up    | SLC2A13   |
| 234269_at | 0.018082 | 0.01635  | 1.045616 up   | 1.372022 up   | 1.312166 up   |           |
| 234271_at | 0.003861 | 0.002494 | 1.480959 up   | 1.559079 down | 2.308932 down | OTOP2     |
| 234272_at | 0.024427 | 0.022852 | 1.219137 up   | 1.026426 down | 1.251354 down |           |
| 234274_at | 0.031252 | 0.029896 | 1.516984 up   | 1.111641 down | 1.686341 down |           |
| 234275_at | 0.005859 | 0.004259 | 1.529287 up   | 1.28702 up    | 1.188239 down |           |
| 234276_at | 0.003072 | 0.001848 | 1.429222 up   | 1.81453 up    | 1.269593 up   |           |
|           |          |          |               |               |               | REG3A /// |
| 234280_at | 0.010289 | 0.008492 | 1.565895 up   | 1.669723 down | 2.614611 down | REG3G     |
| 234282_at | 0.01281  | 0.011009 | 1.374979 down | 1.343102 down | 1.023734 up   |           |
| 234283_at | 0.001902 | 9.68E-04 | 1.679805 up   | 1.313312 down | 2.206108 down | C22orf28  |
| 234286_at | 0.003143 | 0.001909 | 1.311371 up   | 1.480576 down | 1.941584 down | PPP1R12C  |

|           |          |          |          |      |          |      |          |      |              |
|-----------|----------|----------|----------|------|----------|------|----------|------|--------------|
| 234287_at | 0.011631 | 0.009832 | 1.26421  | down | 1.197278 | up   | 1.51361  | up   |              |
| 234291_s_ | 0.02824  | 0.026785 | 1.560959 | up   | 1.112972 | down | 1.737304 | down | SLC6A20      |
| 234293_x_ | 0.002634 | 0.001503 | 1.749963 | up   | 1.11422  | down | 1.949844 | down |              |
| 234294_x_ | 0.003273 | 0.002013 | 2.856754 | up   | 1.598769 | up   | 1.786846 | down | GATAD2A      |
| 234299_s_ | 3.67E-04 | 1.04E-04 | 3.270258 | down | 2.060219 | down | 1.587336 | up   | NIN          |
| 234303_s_ | 0.00224  | 0.001211 | 1.656071 | down | 2.138386 | down | 1.29124  | down | GPR85        |
| 234306_s_ | 0.001356 | 6.15E-04 | 1.386535 | up   | 1.111823 | down | 1.541582 | down | SLAMF7       |
| 234307_s_ | 7.23E-04 | 2.62E-04 | 2.628376 | up   | 5.31528  | up   | 2.022268 | up   | KIF26A       |
| 234317_s_ | 7.98E-07 | 2.15E-08 | 9.73357  | up   | 9.837707 | up   | 1.010699 | up   | STOX2        |
| 234327_at | 0.006535 | 0.004902 | 1.548189 | up   | 1.108748 | down | 1.716552 | down |              |
| 234337_at | 0.002999 | 0.001791 | 1.893285 | up   | 1.212475 | down | 2.295561 | down | TTLL9        |
| 234340_at | 2.13E-04 | 5.02E-05 | 2.19489  | down | 1.161389 | down | 1.889884 | up   |              |
| 234341_x_ | 8.64E-05 | 1.47E-05 | 1.991805 | up   | 1.965798 | up   | 1.01323  | down | LOC91548     |
| 234342_at | 6.35E-04 | 2.19E-04 | 1.364836 | up   | 1.492568 | down | 2.03711  | down |              |
| 234345_at | 0.009816 | 0.008038 | 1.266089 | up   | 1.102784 | down | 1.396223 | down |              |
|           |          |          |          |      |          |      |          |      | IGL@ ///     |
|           |          |          |          |      |          |      |          |      | IGLC1 ///    |
|           |          |          |          |      |          |      |          |      | IGLV3-12 /// |
| 234350_at | 0.011288 | 0.009494 | 1.500234 | up   | 1.427853 | down | 2.142114 | down | IGLV3-21     |
| 234351_x_ | 0.004143 | 0.002729 | 2.08791  | down | 1.358051 | down | 1.537432 | up   | TRPS1        |
| 234354_x_ | 0.008406 | 0.00667  | 1.404478 | down | 1.520588 | down | 1.082671 | down | ERBB2        |
| 234360_at | 0.011928 | 0.010125 | 1.289821 | down | 1.129468 | up   | 1.456812 | up   |              |
| 234365_at | 0.007165 | 0.005496 | 1.717576 | up   | 1.183498 | up   | 1.451271 | down |              |
| 234373_x_ | 0.002042 | 0.001066 | 1.497332 | up   | 1.334331 | down | 1.997936 | down | IGHE         |
| 234375_x_ | 0.002028 | 0.001057 | 1.237775 | down | 1.232961 | up   | 1.526128 | up   |              |
| 234379_at | 0.002625 | 0.001495 | 1.66031  | up   | 1.235699 | down | 2.051644 | down | FLT4         |
|           |          |          |          |      |          |      |          |      | LOC728649    |
|           |          |          |          |      |          |      |          |      | ///          |
| 234380_x_ | 4.87E-04 | 1.52E-04 | 1.692409 | up   | 1.609208 | down | 2.723438 | down | LOC728701    |
| 234381_at | 0.007202 | 0.00553  | 1.377341 | up   | 1.262213 | down | 1.738497 | down | IGLV4-3      |
| 234382_x_ | 0.006819 | 0.005162 | 1.348925 | up   | 1.314026 | up   | 1.026559 | down |              |
| 234400_at | 0.011071 | 0.00927  | 1.751092 | up   | 1.249624 | down | 2.188207 | down |              |
| 234402_at | 0.002542 | 0.001435 | 1.122603 | up   | 1.422626 | down | 1.597044 | down | TRD@         |



|           |          |          |               |               |               |           |
|-----------|----------|----------|---------------|---------------|---------------|-----------|
| 234406_at | 0.017392 | 0.015643 | 1.455639 up   | 1.166867 down | 1.698537 down | RGMA      |
| 234408_at | 0.012387 | 0.010589 | 1.260259 up   | 1.214848 down | 1.531024 down | IL17F     |
| 234414_at | 0.038294 | 0.037033 | 1.325503 up   | 1.065693 down | 1.412579 down | FAM22F    |
| 234417_at | 0.002979 | 0.001775 | 1.10563 up    | 1.332576 down | 1.473336 down |           |
| 234424_at | 0.00143  | 6.60E-04 | 1.263847 up   | 1.310283 down | 1.655997 down |           |
| 234425_at | 0.010292 | 0.008495 | 1.944653 up   | 1.233268 up   | 1.57683 down  |           |
| 234427_at | 0.002938 | 0.001743 | 1.222454 up   | 1.030389 down | 1.259602 down | TRAJ17    |
| 234429_at | 0.008287 | 0.006562 | 1.219571 up   | 1.250327 down | 1.524862 down | C9orf130  |
| 234442_at | 0.001939 | 9.94E-04 | 1.249023 down | 1.188718 up   | 1.484736 up   |           |
| 234450_at | 0.005192 | 0.003664 | 1.009611 down | 1.297474 up   | 1.309944 up   | PROKR2    |
| 234458_at | 0.008203 | 0.006482 | 1.502453 up   | 1.014161 up   | 1.481474 down | ANPEP     |
| 234465_at | 1.78E-04 | 3.96E-05 | 1.557592 up   | 2.545613 up   | 1.634326 up   | EME1      |
| 234466_at | 0.001224 | 5.35E-04 | 1.888904 up   | 1.110794 down | 2.098183 down |           |
| 234468_at | 0.031933 | 0.030592 | 1.422902 up   | 1.020329 down | 1.451828 down |           |
|           |          |          |               |               |               | hCG_16511 |
| 234470_at | 0.01276  | 0.010958 | 1.572357 up   | 1.159274 up   | 1.356329 down | 60        |
| 234472_at | 5.42E-05 | 7.84E-06 | 3.019666 up   | 2.609559 up   | 1.157156 down | GALNT13   |
|           |          |          |               |               |               | RP11-     |
| 234473_at | 0.014954 | 0.013183 | 1.1972 up     | 1.178802 down | 1.411261 down | 408E5.4   |
| 234478_at | 0.00101  | 4.11E-04 | 1.6277 up     | 1.68186 down  | 2.737565 down | LOC440863 |
| 234487_at | 0.009174 | 0.00742  | 1.41611 up    | 1.199768 up   | 1.180319 down |           |
| 234491_s_ | 0.001674 | 8.17E-04 | 1.21192 down  | 2.948641 up   | 3.573518 up   | SAV1      |
| 234495_at | 0.00169  | 8.27E-04 | 2.35373 up    | 1.972993 down | 4.643892 down | KLK15     |
| 234496_x_ | 0.001658 | 8.07E-04 | 2.077778 up   | 1.152833 down | 2.395331 down | NYX       |
| 234504_at | 0.005087 | 0.00357  | 1.198794 up   | 1.321996 down | 1.584801 down | SPAG4L    |
| 234508_at | 0.003374 | 0.002097 | 1.176136 up   | 1.531057 up   | 1.301768 up   |           |
| 234511_at | 0.032355 | 0.031023 | 1.318516 up   | 1.039499 up   | 1.268415 down | ANKRD60   |
| 234512_x_ | 0.021868 | 0.020247 | 1.043746 up   | 1.310065 up   | 1.255157 up   | RPL7AP36  |
| 234536_at | 0.002074 | 0.001089 | 1.773208 up   | 1.83409 down  | 3.252223 down | SARDH     |
| 234540_at | 0.011895 | 0.010094 | 1.370235 up   | 1.080221 up   | 1.268477 down | GCNT7     |
| 234549_at | 0.004152 | 0.002736 | 1.434559 up   | 1.105768 up   | 1.297343 down |           |
| 234552_at | 0.006377 | 0.004751 | 1.665242 up   | 1.375362 up   | 1.210766 down |           |
| 234555_at | 0.005038 | 0.003525 | 1.434718 up   | 1.102451 up   | 1.30139 down  |           |
| 234562_x_ | 4.95E-04 | 1.55E-04 | 1.808276 up   | 3.923208 up   | 2.169585 up   | LOC728678 |

|           |          |          |               |               |               |              |
|-----------|----------|----------|---------------|---------------|---------------|--------------|
| 234568_at | 0.015998 | 0.014225 | 1.091631 up   | 1.361367 up   | 1.247094 up   | SCAMP5       |
| 234570_at | 0.014434 | 0.012651 | 1.296741 up   | 1.063297 down | 1.378821 down | ZNF71        |
| 234573_at | 0.015118 | 0.013343 | 1.421404 up   | 1.035311 up   | 1.372924 down |              |
| 234584_s_ | 0.005271 | 0.003735 | 1.270923 down | 1.494108 up   | 1.898897 up   | ATE1         |
| 234586_at | 0.001239 | 5.43E-04 | 1.721606 up   | 1.056073 up   | 1.630195 down | SARDH        |
| 234589_at | 0.005711 | 0.004123 | 1.315214 down | 1.160323 down | 1.133489 up   | TMEM106A     |
| 234596_at | 0.005266 | 0.003731 | 1.201693 up   | 1.240888 down | 1.491166 down |              |
| 234598_at | 0.007105 | 0.005436 | 1.55729 up    | 1.041896 up   | 1.494669 down |              |
| 234649_at | 0.001922 | 9.82E-04 | 3.113458 up   | 3.031373 up   | 1.027078 down |              |
| 234650_at | 3.26E-04 | 8.93E-05 | 3.747973 up   | 3.618704 up   | 1.035723 down |              |
| 234651_at | 0.012764 | 0.010963 | 1.184698 up   | 1.164571 down | 1.379664 down |              |
| 234655_at | 0.01636  | 0.014592 | 1.088482 up   | 1.08641 down  | 1.182538 down |              |
| 234669_x_ | 0.011442 | 0.009643 | 2.009145 up   | 1.588847 down | 3.192223 down | C11orf30     |
| 234672_s_ | 1.69E-05 | 1.60E-06 | 4.988933 up   | 4.851366 up   | 1.028356 down | TMEM48       |
| 234676_s_ | 1.19E-05 | 9.74E-07 | 1.308859 up   | 1.169918 down | 1.531258 down | N6AMT1       |
| 234690_at | 0.003014 | 0.001803 | 1.221392 down | 1.078725 down | 1.132255 up   |              |
| 234693_at | 0.001823 | 9.15E-04 | 1.262243 up   | 1.012911 up   | 1.246153 down |              |
| 234694_at | 0.004563 | 0.003109 | 1.559573 up   | 1.672324 down | 2.608112 down | CNTROB       |
| 234711_s_ | 0.007822 | 0.006122 | 1.785954 up   | 1.112957 down | 1.98769 down  | BCORL1       |
| 234713_x_ | 0.001215 | 5.30E-04 | 1.570805 up   | 1.350412 down | 2.121234 down |              |
|           |          |          |               |               |               | GOLGA2LY1    |
|           |          |          |               |               |               | ///          |
| 234715_at | 0.009587 | 0.007813 | 1.501889 up   | 1.266849 down | 1.902666 down | GOLGA2LY2    |
|           |          |          |               |               |               | LOC100132    |
| 234716_at | 0.00955  | 0.007777 | 1.641914 up   | 1.204154 down | 1.977117 down | 739 /// ZIC1 |
| 234718_at | 0.010714 | 0.008922 | 1.025565 down | 1.338374 down | 1.305011 down | ANO2         |
| 234723_x_ | 2.45E-04 | 6.05E-05 | 2.091368 up   | 5.175328 up   | 2.474614 up   |              |
| 234724_x_ | 4.61E-04 | 1.41E-04 | 2.377441 up   | 1.179854 up   | 2.01503 down  | PCDHB18      |
| 234726_s_ | 0.002801 | 0.001633 | 3.04274 down  | 1.707871 down | 1.781598 up   | TMEM168      |
| 234733_s_ | 1.04E-05 | 7.99E-07 | 1.662124 up   | 2.037051 up   | 1.225571 up   | FANCM        |
| 234737_at | 0.013825 | 0.012035 | 1.271208 up   | 1.232053 up   | 1.03178 down  | NT5DC3       |
| 234740_at | 4.08E-04 | 1.20E-04 | 1.264294 up   | 1.194468 down | 1.510158 down | CDC14B       |

|           |          |          |               |               |               |                     |
|-----------|----------|----------|---------------|---------------|---------------|---------------------|
| 234741_at | 0.017171 | 0.015416 | 1.358986 up   | 1.092501 down | 1.484694 down | ATP2B2              |
| 234745_at | 0.011671 | 0.00987  | 1.446564 up   | 1.21863 up    | 1.18704 down  |                     |
| 234749_s_ | 0.008647 | 0.006907 | 2.308833 up   | 1.477291 up   | 1.562883 down | WDR51A              |
| 234750_at | 0.018813 | 0.017105 | 1.34929 up    | 1.080633 down | 1.458087 down | CACNG8              |
| 234753_x_ | 0.013052 | 0.011248 | 1.733188 up   | 1.002507 down | 1.737533 down |                     |
| 234756_at | 0.003391 | 0.002112 | 1.963238 up   | 1.125175 up   | 1.74483 down  | CACNG8<br>LOC100129 |
| 234757_at | 0.001915 | 9.77E-04 | 1.101071 down | 1.17509 up    | 1.293857 up   | 884                 |
| 234762_x_ | 0.001356 | 6.15E-04 | 1.726357 up   | 2.449071 up   | 1.418636 up   | NLN                 |
| 234765_at | 0.003746 | 0.002401 | 1.397568 up   | 1.048891 up   | 1.332425 down |                     |
|           |          |          |               |               |               | DKFZp547J2          |
| 234769_at | 0.017834 | 0.016094 | 1.217677 up   | 1.063806 down | 1.295372 down | 22                  |
| 234775_at | 0.014124 | 0.012334 | 1.370731 down | 1.08158 up    | 1.482555 up   | OR51B5              |
| 234782_at | 0.002285 | 0.001246 | 1.344645 up   | 1.476968 down | 1.985997 down | KLHL31              |
| 234788_x_ | 0.003769 | 0.002419 | 1.244801 up   | 2.255069 up   | 1.81159 up    |                     |
| 234790_at | 6.24E-04 | 2.13E-04 | 1.278063 down | 1.071989 up   | 1.37007 up    |                     |
| 234795_at | 0.008887 | 0.007138 | 1.363684 up   | 1.291019 down | 1.760542 down |                     |
| 234799_at | 6.94E-04 | 2.47E-04 | 1.467142 down | 2.18104 down  | 1.486591 down | ADARB1              |
| 234810_at | 0.010639 | 0.008849 | 1.252248 up   | 1.174003 down | 1.470143 down | ZFP1                |
| 234842_at | 0.021168 | 0.019524 | 1.211773 up   | 1.27667 down  | 1.547035 down |                     |
|           |          |          |               |               |               | DKFZp761P0          |
| 234845_at | 0.00342  | 0.002136 | 1.699803 up   | 1.079094 up   | 1.575213 down | 212                 |
|           |          |          |               |               |               | DKFZp761P0          |
| 234846_at | 0.001043 | 4.30E-04 | 2.665024 up   | 1.088666 up   | 2.447971 down | 212                 |
| 234855_at | 0.005863 | 0.004264 | 1.553194 up   | 1.164439 down | 1.808599 down | ORF1                |
| 234863_x_ | 0.001227 | 5.36E-04 | 3.166986 up   | 4.920734 up   | 1.553759 up   | FBXO5               |
| 234864_s_ | 0.006571 | 0.004933 | 1.173692 up   | 1.158883 down | 1.360171 down | TRPM6               |
|           |          |          |               |               |               | NCRNA0017           |
| 234866_s_ | 0.001258 | 5.56E-04 | 1.063952 up   | 1.163438 down | 1.237842 down | 1                   |
| 234872_at | 0.009921 | 0.008143 | 1.10609 up    | 1.152394 down | 1.274651 down |                     |
| 234880_x_ | 0.005412 | 0.003858 | 1.918648 down | 3.484728 down | 1.816242 down | KRTAP1-3            |
| 234881_at | 8.92E-04 | 3.48E-04 | 1.716515 up   | 1.629019 down | 2.796234 down |                     |
| 234882_at | 4.89E-05 | 6.85E-06 | 1.773655 up   | 1.469403 down | 2.606215 down |                     |
| 234887_at | 0.015946 | 0.014173 | 1.358299 up   | 1.135911 down | 1.542907 down |                     |

|           |          |          |               |               |               |           |
|-----------|----------|----------|---------------|---------------|---------------|-----------|
| 234891_at | 0.011582 | 0.009783 | 1.299812 up   | 1.271985 down | 1.653341 down |           |
| 234899_at | 0.001823 | 9.14E-04 | 1.51961 up    | 1.248994 up   | 1.216667 down | H2BFM     |
| 234908_s_ | 0.02207  | 0.02046  | 1.531923 up   | 1.039503 up   | 1.473707 down | DSCAML1   |
| 234911_at | 0.001576 | 7.53E-04 | 1.430146 up   | 1.148451 down | 1.642453 down |           |
| 234916_at | 0.011591 | 0.009793 | 1.367841 up   | 1.221077 down | 1.67024 down  | DBH       |
| 234918_at | 0.001542 | 7.30E-04 | 1.958639 up   | 2.032361 down | 3.980663 down | GLTSCR2   |
| 234919_s_ | 0.013019 | 0.011212 | 1.498634 up   | 1.114848 up   | 1.344251 down | SNTG1     |
| 234922_s_ | 2.64E-04 | 6.71E-05 | 1.331489 up   | 1.21183 down  | 1.613538 down | NHSL1     |
| 234925_at | 0.002604 | 0.001481 | 1.017123 down | 1.347261 down | 1.32458 down  | LOC732275 |
| 234926_s_ | 3.62E-05 | 4.53E-06 | 1.895225 down | 2.292068 down | 1.209391 down | C20orf43  |
| 234928_x_ | 0.009933 | 0.008157 | 1.840379 up   | 1.477652 down | 2.71944 down  | RUNX3     |
| 234929_s_ | 0.024433 | 0.022858 | 1.701393 down | 1.103907 up   | 1.87818 up    | SPATA7    |
| 234930_at | 0.00859  | 0.00685  | 1.231642 up   | 1.104757 down | 1.360665 down |           |
| 234935_at | 0.001337 | 6.04E-04 | 1.514528 up   | 1.303944 down | 1.974859 down | NDOR1     |
| 234946_at | 5.61E-04 | 1.84E-04 | 1.714996 up   | 1.058638 down | 1.815559 down | ENTPD6    |
| 234947_s_ | 0.003078 | 0.001854 | 2.928469 down | 1.825832 down | 1.60391 up    | C10orf84  |
| 234950_s_ | 0.012458 | 0.010661 | 1.314711 up   | 1.058355 down | 1.391431 down | RFWD2     |
| 234951_s_ | 0.002887 | 0.001702 | 6.536275 down | 5.94556 down  | 1.099354 up   | COL12A1   |
| 234952_s_ | 8.64E-04 | 3.32E-04 | 1.630355 up   | 1.043819 down | 1.701795 down | PHRF1     |
| 234956_at | 0.037978 | 0.036711 | 1.275482 up   | 1.047641 up   | 1.21748 down  | LOC93444  |
| 234958_at | 0.008377 | 0.006644 | 1.301233 up   | 1.446015 down | 1.881602 down |           |
| 234965_at | 0.003958 | 0.002574 | 1.068186 up   | 1.329627 down | 1.420289 down |           |
| 234966_at | 0.003314 | 0.002048 | 1.534133 up   | 1.280064 down | 1.963788 down | KLK15     |
| 234970_at | 1.04E-04 | 1.90E-05 | 2.858114 up   | 2.980866 up   | 1.042948 up   | TC2N      |
| 234977_at | 1.60E-06 | 5.71E-08 | 8.064041 down | 2.099536 down | 3.840868 up   | ZADH2     |
| 234979_at | 3.13E-06 | 1.48E-07 | 2.211843 down | 1.655874 down | 1.335755 up   | BCDIN3D   |
| 234981_x_ | 0.001812 | 9.06E-04 | 1.426091 up   | 1.900874 up   | 1.332926 up   | CMBL      |
| 234983_at | 0.004731 | 0.003255 | 1.897879 up   | 2.08524 up    | 1.098721 up   |           |
| 234986_at | 0.003223 | 0.001972 | 4.075634 down | 2.282169 down | 1.78586 up    |           |
| 234994_at | 5.75E-05 | 8.53E-06 | 4.742189 down | 9.539619 down | 2.011649 down | TMEM200A  |
| 234999_at | 0.004225 | 0.002798 | 1.294732 up   | 1.21252 down  | 1.569888 down | C19orf47  |
| 235000_at | 0.002377 | 0.001312 | 4.07855 down  | 2.084435 down | 1.95667 up    |           |
|           |          |          |               |               |               | CDKN2AIPN |
| 235006_at | 0.001025 | 4.19E-04 | 2.036279 up   | 2.428794 up   | 1.192761 up   | L         |

|           |          |          |          |      |          |      |          |      |           |
|-----------|----------|----------|----------|------|----------|------|----------|------|-----------|
| 235007_at | 0.02831  | 0.026862 | 2.554994 | down | 1.5416   | down | 1.657365 | up   | BBS7      |
| 235010_at | 1.95E-06 | 7.53E-08 | 4.424234 | down | 2.419743 | down | 1.82839  | up   | LOC729013 |
| 235011_at | 0.008379 | 0.006646 | 1.422302 | down | 1.908924 | down | 1.342137 | down | MAP3K2    |
| 235014_at | 0.012087 | 0.010289 | 1.439529 | up   | 2.149641 | up   | 1.493294 | up   | LOC147727 |
| 235015_at | 2.62E-04 | 6.62E-05 | 1.725413 | down | 1.766054 | down | 1.023555 | down |           |
| 235016_at | 2.34E-06 | 9.77E-08 | 12.20494 | down | 10.62409 | down | 1.148799 | up   | REEP3     |
| 235020_at | 7.42E-06 | 5.07E-07 | 6.540259 | up   | 4.866498 | up   | 1.343936 | down | TAF4B     |
| 235024_at | 2.83E-07 | 4.81E-09 | 5.240747 | up   | 3.910654 | up   | 1.34012  | down | PHF17     |
| 235025_at | 2.09E-04 | 4.90E-05 | 1.842602 | up   | 2.813733 | up   | 1.527043 | up   | WDR89     |
| 235028_at | 0.004218 | 0.002793 | 2.827916 | up   | 11.75897 | up   | 4.158176 | up   |           |
| 235029_at | 0.001337 | 6.04E-04 | 1.15873  | up   | 2.184405 | up   | 1.885172 | up   | GIN54     |
| 235030_at | 0.002711 | 0.001561 | 3.247239 | down | 1.853029 | up   | 6.017229 | up   | FAM55C    |
| 235031_at | 2.67E-04 | 6.79E-05 | 2.182949 | down | 1.510025 | down | 1.445637 | up   |           |
| 235036_at | 0.002257 | 0.001224 | 3.756357 | down | 2.232571 | down | 1.682525 | up   | LIX1L     |
| 235039_x_ | 4.61E-04 | 1.41E-04 | 2.376182 | up   | 2.348485 | up   | 1.011794 | down | LIN9      |
| 235043_at | 7.87E-04 | 2.95E-04 | 2.650139 | down | 2.404996 | down | 1.101931 | up   | FAM122A   |
| 235044_at | 1.68E-05 | 1.59E-06 | 9.643958 | up   | 22.74822 | up   | 2.358805 | up   | CYYR1     |
| 235046_at | 2.38E-06 | 1.01E-07 | 24.31267 | down | 2.905457 | down | 8.367931 | up   |           |
| 235047_x_ | 0.003342 | 0.002071 | 1.690941 | up   | 1.577815 | down | 2.667991 | down | NACC1     |
| 235048_at | 8.26E-09 | 3.24E-11 | 26.59267 | up   | 33.92878 | up   | 1.27587  | up   | FAM169A   |
| 235054_at | 0.005553 | 0.00398  | 2.141799 | down | 1.390589 | down | 1.54021  | up   | NUDT16    |
| 235055_x_ | 9.98E-04 | 4.05E-04 | 1.880523 | up   | 1.416202 | down | 2.663201 | down | MUC4      |
| 235056_at | 7.59E-04 | 2.80E-04 | 2.43154  | down | 3.416698 | down | 1.405158 | down | ETV6      |
| 235070_at | 0.002866 | 0.001685 | 1.497078 | up   | 1.275383 | up   | 1.173826 | down | A2BP1     |
| 235072_s_ | 9.94E-05 | 1.79E-05 | 3.330945 | down | 2.291064 | down | 1.453886 | up   |           |
| 235076_at | 0.00116  | 4.97E-04 | 4.089413 | down | 3.326117 | down | 1.229486 | up   | CALCOCO2  |
| 235078_at | 0.001234 | 5.40E-04 | 4.424779 | down | 3.030575 | down | 1.460046 | up   |           |
| 235085_at | 3.06E-05 | 3.63E-06 | 6.370849 | up   | 2.252708 | up   | 2.828085 | down | PRAGMIN   |
| 235086_at | 6.89E-06 | 4.49E-07 | 21.67226 | down | 52.43004 | down | 2.419223 | down | THBS1     |
| 235087_at | 0.026638 | 0.025145 | 1.289085 | up   | 1.113299 | down | 1.435136 | down | UNKL      |
| 235091_at | 0.002185 | 0.001167 | 1.302143 | up   | 1.262652 | down | 1.644154 | down | PDE12     |
| 235095_at | 0.009762 | 0.007983 | 1.845263 | up   | 1.23449  | up   | 1.494757 | down | CCDC64B   |
| 235099_at | 0.001697 | 8.32E-04 | 3.692509 | up   | 2.466441 | up   | 1.4971   | down | CMTM8     |
| 235100_at | 0.018554 | 0.016832 | 1.638836 | up   | 1.034243 | down | 1.694954 | down |           |

|           |          |          |          |      |          |      |          |      |           |
|-----------|----------|----------|----------|------|----------|------|----------|------|-----------|
| 235103_at | 3.67E-04 | 1.05E-04 | 1.703206 | down | 2.596393 | up   | 4.422193 | up   | MAN2A1    |
| 235106_at | 7.03E-06 | 4.66E-07 | 3.810054 | down | 3.607584 | down | 1.056124 | up   | MAML2     |
| 235111_at | 0.006114 | 0.004503 | 1.422472 | down | 1.109081 | up   | 1.577636 | up   |           |
| 235112_at | 6.32E-06 | 3.96E-07 | 8.281469 | up   | 15.39037 | up   | 1.858411 | up   |           |
| 235114_x_ | 6.11E-04 | 2.08E-04 | 3.243781 | down | 1.268835 | down | 2.556504 | up   | HOOK3     |
| 235120_at | 0.00424  | 0.002811 | 1.743663 | down | 1.158327 | down | 1.505328 | up   | SEC22C    |
| 235122_at | 0.00156  | 7.43E-04 | 3.061859 | down | 3.759164 | down | 1.227739 | down | HIVEP3    |
| 235124_at | 0.002383 | 0.001316 | 1.894532 | down | 1.129833 | up   | 2.140506 | up   | LOC645212 |
| 235126_at | 0.001172 | 5.03E-04 | 3.520938 | up   | 3.985212 | up   | 1.131861 | up   | LQK1      |
| 235128_at | 0.002632 | 0.001501 | 1.464991 | up   | 1.192562 | down | 1.747093 | down | SYNPO     |
| 235129_at | 2.06E-04 | 4.77E-05 | 2.298197 | up   | 1.629507 | up   | 1.410364 | down | PPP1R1A   |
| 235131_at | 6.38E-05 | 9.84E-06 | 6.734583 | down | 1.945154 | down | 3.462237 | up   | RHOJ      |
| 235138_at | 0.007514 | 0.005823 | 4.144553 | up   | 7.127305 | up   | 1.71968  | up   |           |
| 235141_at | 3.34E-04 | 9.20E-05 | 7.381698 | up   | 8.315364 | up   | 1.126484 | up   | MARVELD2  |
| 235147_at | 0.004292 | 0.002862 | 2.648107 | down | 6.326697 | down | 2.389139 | down | FLJ32063  |
| 235148_at | 4.15E-05 | 5.48E-06 | 4.296456 | up   | 3.926832 | up   | 1.094128 | down | KRTCAP3   |
| 235152_at | 3.28E-05 | 3.99E-06 | 3.973341 | down | 2.606078 | down | 1.524644 | up   |           |
| 235154_at | 2.03E-04 | 4.68E-05 | 1.716554 | up   | 1.603476 | up   | 1.070521 | down | TAF3      |
| 235155_at | 0.009834 | 0.008056 | 2.739893 | down | 1.320791 | down | 2.074434 | up   | BDH2      |
| 235156_at | 0.001174 | 5.06E-04 | 1.728538 | up   | 2.030057 | up   | 1.174436 | up   |           |
| 235157_at | 5.25E-04 | 1.68E-04 | 2.338331 | down | 1.05045  | down | 2.226029 | up   |           |
| 235158_at | 0.023009 | 0.021426 | 2.046401 | up   | 2.031374 | up   | 1.007397 | down | TMEM209   |
| 235159_at | 2.68E-04 | 6.83E-05 | 1.872249 | down | 1.870619 | up   | 3.502264 | up   |           |
| 235164_at | 1.40E-05 | 1.23E-06 | 5.79333  | down | 6.463374 | down | 1.115658 | down | ZNF25     |
| 235165_at | 2.02E-06 | 7.96E-08 | 17.02691 | up   | 20.64607 | up   | 1.212555 | up   | PAR6B     |
| 235168_at | 0.006113 | 0.004502 | 2.129951 | down | 2.193977 | down | 1.03006  | down | PIGM      |
| 235170_at | 7.34E-06 | 4.98E-07 | 3.73924  | up   | 7.569933 | up   | 2.024458 | up   | ZNF92     |
|           |          |          |          |      |          |      |          |      | hCG_18069 |
| 235173_at | 8.01E-08 | 8.30E-10 | 4.051134 | down | 13.40941 | down | 3.310038 | down | 64        |
| 235176_at | 8.70E-05 | 1.49E-05 | 1.865615 | up   | 1.421225 | up   | 1.312681 | down | ZFP82     |
| 235177_at | 5.98E-06 | 3.65E-07 | 4.297237 | up   | 6.164018 | up   | 1.434414 | up   | FAM119A   |
| 235178_x_ | 0.010545 | 0.008753 | 1.070147 | down | 1.368773 | up   | 1.464787 | up   | ESCO2     |
| 235181_at | 0.003781 | 0.002429 | 1.737834 | up   | 1.319954 | up   | 1.316587 | down | C2orf60   |
| 235186_at | 7.29E-04 | 2.65E-04 | 2.445838 | up   | 1.831487 | down | 4.479521 | down | LOC388692 |

|           |          |          |          |      |          |      |          |      |                    |
|-----------|----------|----------|----------|------|----------|------|----------|------|--------------------|
| 235192_at | 0.00286  | 0.00168  | 1.673279 | down | 1.602493 | down | 1.044172 | up   | TP53RK             |
| 235193_at | 0.001366 | 6.21E-04 | 2.826158 | down | 2.26992  | down | 1.245048 | up   |                    |
| 235195_at | 0.011185 | 0.009393 | 1.51847  | down | 1.060652 | down | 1.431638 | up   | FBXW2              |
| 235197_s_ | 0.004846 | 0.003354 | 2.006433 | down | 3.146298 | down | 1.568106 | down | OSTM1              |
| 235198_at | 0.004742 | 0.003264 | 2.48157  | down | 3.203178 | down | 1.290787 | down | OSTM1              |
| 235199_at | 3.22E-04 | 8.78E-05 | 8.020696 | up   | 6.660032 | up   | 1.204303 | down | RNF125             |
| 235200_at | 0.015949 | 0.014177 | 1.629876 | up   | 1.065079 | down | 1.735947 | down | ZNF561             |
| 235202_x_ | 1.38E-04 | 2.81E-05 | 5.18302  | down | 2.814153 | down | 1.841769 | up   | IKIP               |
| 235207_at | 1.35E-04 | 2.70E-05 | 1.87426  | up   | 2.247031 | up   | 1.198889 |      |                    |
| 235212_at | 0.030437 | 0.02905  | 1.415248 | up   | 1.284112 | down | 1.817336 | down | C14orf102          |
| 235215_at | 0.00125  | 5.51E-04 | 4.507032 | down | 3.368183 | down | 1.33812  | up   | ERCC4              |
| 235220_at | 0.006007 | 0.0044   | 1.453641 | down | 1.112635 | down | 1.306485 | up   |                    |
| 235221_at | 1.44E-05 | 1.29E-06 | 4.644787 | down | 1.938804 | down | 2.395696 | up   | CBLN3              |
| 235227_at | 5.48E-05 | 7.99E-06 | 9.791962 | down | 6.504529 | down | 1.505407 | up   |                    |
| 235233_s_ | 0.025184 | 0.023639 | 1.589842 | up   | 1.200368 | up   | 1.324462 | down | GMEB1<br>LOC100131 |
| 235236_at | 6.24E-05 | 9.53E-06 | 12.53664 | down | 3.923129 | down | 3.195572 | up   | 897                |
| 235239_at | 0.015141 | 0.013368 | 1.5578   | up   | 1.006167 | up   | 1.548251 | down | QSOX2              |
| 235245_at | 1.65E-05 | 1.54E-06 | 2.295903 | up   | 2.366971 | up   | 1.030954 | up   | TMEM92             |
| 235249_at | 0.005738 | 0.004149 | 2.045423 | up   | 1.223943 | up   | 1.671175 | down | RDH13              |
| 235252_at | 7.34E-04 | 2.68E-04 | 1.701629 | up   | 3.870702 | up   | 2.274704 | up   | KSR1               |
| 235254_at | 0.022673 | 0.021085 | 1.389691 | up   | 1.132432 | up   | 1.227174 | down | MAP3K2             |
| 235258_at | 1.44E-04 | 2.95E-05 | 2.944606 | up   | 3.611845 | up   | 1.226597 | up   | DCP2               |
| 235260_s_ | 0.002968 | 0.001766 | 1.541354 | down | 1.055659 | down | 1.460087 | up   | PACRGL             |
| 235264_at | 0.001008 | 4.10E-04 | 6.780386 | down | 3.385852 | down | 2.002564 | up   | HCFC2              |
| 235266_at | 0.006694 | 0.005049 | 1.683802 | up   | 2.107601 | up   | 1.251692 | up   | ATAD2              |
| 235267_at | 2.37E-04 | 5.80E-05 | 5.064573 | down | 2.292155 | down | 2.209525 | up   |                    |
| 235269_at | 0.00115  | 4.91E-04 | 2.69235  | up   | 1.796008 | up   | 1.499075 | down | FAM83F             |
| 235271_s_ | 0.022897 | 0.021318 | 1.924679 | up   | 1.745053 | up   | 1.102934 | down | ZNF397             |
| 235275_at | 2.23E-04 | 5.33E-05 | 1.752884 | up   | 1.027326 | down | 1.800783 | down | BMP8B              |
| 235279_at | 1.24E-05 | 1.02E-06 | 5.090397 | down | 6.829131 | down | 1.341572 | down |                    |
| 235285_at | 0.005814 | 0.004218 | 1.691362 | up   | 1.359323 | up   | 1.244268 | down |                    |
| 235286_at | 5.98E-05 | 9.02E-06 | 5.755258 | down | 2.391088 | down | 2.406962 | up   |                    |
| 235288_at | 0.003383 | 0.002104 | 1.034313 | up   | 1.721574 | up   | 1.664461 | up   |                    |

|           |          |          |          |      |          |      |          |      |           |
|-----------|----------|----------|----------|------|----------|------|----------|------|-----------|
| 235289_at | 4.59E-05 | 6.28E-06 | 5.106788 | down | 2.555117 | down | 1.998651 | up   | EIF5A2    |
| 235291_s_ | 6.34E-05 | 9.72E-06 | 5.547791 | down | 3.229065 | down | 1.71808  | up   | FLJ32255  |
| 235292_at | 6.36E-05 | 9.78E-06 | 2.787206 | down | 3.273657 | down | 1.17453  | down | FLJ32255  |
| 235293_at | 1.01E-04 | 1.83E-05 | 2.006959 | up   | 1.25445  | down | 2.517631 | down |           |
| 235296_at | 4.91E-06 | 2.80E-07 | 10.24391 | down | 4.898593 | down | 2.091194 | up   | EIF5A2    |
| 235299_at | 1.74E-05 | 1.67E-06 | 7.037388 | down | 5.438397 | down | 1.294019 | up   | SLC41A2   |
| 235301_at | 1.79E-05 | 1.73E-06 | 6.484412 | up   | 8.585664 | up   | 1.324047 | up   | KIAA1324L |
| 235303_at | 2.97E-04 | 7.86E-05 | 1.619037 | down | 1.212115 | down | 1.335712 | up   | RG9MTD3   |
| 235306_at | 0.015898 | 0.014127 | 1.111608 | down | 1.119239 | up   | 1.244155 | up   | GIMAP8    |
| 235308_at | 0.002114 | 0.001116 | 10.00711 | down | 8.369642 | down | 1.195644 | up   | ZBTB20    |
| 235309_at | 0.003556 | 0.002245 | 1.838443 | up   | 2.643275 | up   | 1.43778  | up   | RPS15A    |
| 235311_at | 5.91E-06 | 3.60E-07 | 7.945259 | down | 4.906739 | down | 1.619255 | up   | FKBP14    |
| 235316_at | 6.32E-04 | 2.17E-04 | 1.833469 | up   | 1.833127 | up   | 1.000187 | down | NAT8L     |
| 235318_at | 7.00E-07 | 1.77E-08 | 31.76066 | down | 41.27182 | down | 1.299463 | down | FBN1      |
|           |          |          |          |      |          |      |          |      | LOC100131 |
| 235322_at | 0.005176 | 0.003649 | 1.446423 | down | 1.007339 | down | 1.435884 | up   | 141       |
| 235323_at | 0.006219 | 0.004599 | 1.458725 | down | 1.563431 | down | 1.07178  | down |           |
| 235324_at | 1.18E-04 | 2.26E-05 | 1.924014 | up   | 2.373148 | up   | 1.233436 | up   | SFRS3     |
| 235327_x_ | 0.001114 | 4.70E-04 | 1.134476 | up   | 2.132162 | up   | 1.879424 | up   | UBXN2A    |
| 235329_at | 0.001944 | 9.97E-04 | 2.218661 | up   | 1.095153 | down | 2.429773 | down | NOXO1     |
| 235330_at | 0.016828 | 0.015074 | 1.752449 | down | 1.162508 | up   | 2.037237 | up   | CCDC117   |
| 235331_x_ | 2.18E-05 | 2.26E-06 | 7.001358 | down | 5.725317 | down | 1.222877 | up   | PCGF5     |
| 235333_at | 8.59E-04 | 3.30E-04 | 8.979461 | up   | 5.330547 | up   | 1.684529 | down | B4GALT6   |
|           |          |          |          |      |          |      |          |      | ST6GALNAC |
| 235334_at | 1.72E-04 | 3.79E-05 | 5.428721 | up   | 9.078345 | up   | 1.672281 | up   | 3         |
| 235335_at | 1.03E-04 | 1.87E-05 | 2.117796 | down | 1.18007  | down | 1.794635 | up   | ABCA9     |
| 235339_at | 0.002788 | 0.001624 | 1.932942 | down | 1.201134 | up   | 2.321721 | up   | SETDB2    |
| 235340_at | 0.00105  | 4.34E-04 | 1.887474 | down | 1.52561  | down | 1.237193 | up   | GANC      |
| 235341_at | 8.20E-04 | 3.11E-04 | 3.566138 | down | 2.298135 | down | 1.551753 | up   | DNAJC3    |
| 235343_at | 1.14E-05 | 9.10E-07 | 28.43866 | up   | 31.604   | up   | 1.111304 | up   | VASH2     |
| 235345_at | 0.001887 | 9.57E-04 | 1.729475 | down | 1.084371 | down | 1.594912 | up   | RUFY2     |
| 235346_at | 0.042168 | 0.040917 | 1.539264 | up   | 1.255581 | up   | 1.225937 | down | FUNDC1    |
| 235347_at | 2.21E-04 | 5.27E-05 | 5.009924 | down | 4.612672 | down | 1.086122 | up   | LRCH3     |
| 235349_at | 1.68E-04 | 3.66E-05 | 5.871802 | down | 2.919175 | down | 2.01146  | up   | FAM82A1   |



|           |          |          |          |      |          |      |          |      |           |
|-----------|----------|----------|----------|------|----------|------|----------|------|-----------|
| 235352_at | 1.24E-04 | 2.40E-05 | 12.83176 | down | 8.194124 | down | 1.565971 | up   |           |
| 235354_s_ | 0.004427 | 0.002983 | 2.057615 | down | 1.13994  | down | 1.805021 | up   | RSRC1     |
| 235358_at | 0.001022 | 4.18E-04 | 2.107381 | up   | 1.998689 | up   | 1.054382 | down | LOC728485 |
| 235363_at | 9.19E-05 | 1.60E-05 | 6.378367 | up   | 9.273422 | up   | 1.453887 | up   |           |
| 235365_at | 0.024684 | 0.023124 | 1.803257 | down | 1.123786 | down | 1.604627 | up   | DFNB59    |
| 235368_at | 0.001024 | 4.18E-04 | 20.95669 | down | 3.932792 | down | 5.328705 | up   | ADAMTS5   |
| 235371_at | 2.60E-05 | 2.87E-06 | 4.358793 | down | 10.71853 | down | 2.45906  | down | GLT8D4    |
| 235375_x_ | 0.008769 | 0.007027 | 1.638088 | up   | 1.109127 | down | 1.816847 | down | TTC9B     |
| 235378_at | 0.00329  | 0.002028 | 1.748615 | down | 2.494315 | down | 1.426452 | down |           |
| 235380_at | 0.032735 | 0.031413 | 1.183407 | up   | 1.012846 | down | 1.19861  | down |           |
| 235383_at | 0.022857 | 0.021273 | 1.69927  | up   | 1.365191 | down | 2.319828 | down | MYO7B     |
| 235384_at | 2.38E-05 | 2.55E-06 | 4.885903 | down | 4.707982 | down | 1.037791 | up   | NUDT19    |
| 235387_at | 0.001846 | 9.29E-04 | 2.891351 | up   | 2.630113 | up   | 1.099326 | down | GSTCD     |
| 235391_at | 0.00127  | 5.63E-04 | 2.072514 | down | 1.229071 | down | 1.686245 | up   | FAM92A1   |
| 235392_at | 0.005863 | 0.004264 | 2.598637 | down | 1.109043 | down | 2.343135 | up   | IRS1      |
| 235396_at | 2.60E-05 | 2.86E-06 | 2.088773 | down | 2.718741 | down | 1.301597 | down | C22orf25  |
| 235402_at | 0.013177 | 0.011379 | 1.389793 | up   | 1.134327 | down | 1.576479 | down | C11orf66  |
| 235404_at | 0.0072   | 0.005528 | 1.531566 | down | 1.573953 | down | 1.027675 | down | ARID5B    |
| 235405_at | 0.0039   | 0.002525 | 2.722041 | down | 1.72097  | down | 1.581691 | up   | GSTA4     |
| 235407_at | 0.00841  | 0.006674 | 1.919094 | down | 1.725402 | down | 1.112259 | up   |           |
| 235409_at | 0.012081 | 0.010281 | 2.51782  | up   | 3.049146 | up   | 1.211026 | up   | MGA       |
| 235410_at | 3.57E-04 | 1.01E-04 | 3.837871 | down | 2.795816 | down | 1.372719 | up   | NPHP3     |
| 235413_at | 0.003728 | 0.002384 | 2.545652 | down | 2.29146  | down | 1.11093  | up   | GGCX      |
| 235417_at | 1.24E-05 | 1.02E-06 | 4.693619 | down | 17.90646 | down | 3.815064 | down | SPOCD1    |
| 235420_at | 0.003204 | 0.001956 | 1.733568 | up   | 2.314125 | up   | 1.334891 | up   | HAPLN4    |
| 235422_at | 0.002219 | 0.001193 | 1.102415 | up   | 2.204796 | up   | 1.99997  | up   |           |
| 235423_at | 3.88E-05 | 5.00E-06 | 2.249332 | up   | 3.006911 | up   | 1.336802 | up   |           |
| 235424_at | 0.005442 | 0.003884 | 3.42658  | down | 2.738    | down | 1.25149  | up   |           |
| 235425_at | 9.58E-04 | 3.82E-04 | 4.678433 | up   | 7.868754 | up   | 1.681921 | up   | SGOL2     |
| 235427_at | 6.11E-06 | 3.77E-07 | 6.919062 | down | 3.670024 | down | 1.885291 | up   |           |
| 235431_s_ | 0.004785 | 0.003298 | 1.684148 | down | 1.809396 | down | 1.074368 | down | PELI3     |
| 235432_at | 4.23E-04 | 1.26E-04 | 6.070048 | down | 1.368892 | down | 4.434279 | up   | NPHP3     |
| 235433_at | 0.002549 | 0.00144  | 1.604881 | down | 3.631913 | down | 2.263041 | down | APOOL     |
| 235434_at | 0.013843 | 0.012052 | 1.26828  | up   | 2.026602 | up   | 1.597914 | up   |           |

|           |          |          |          |      |          |      |          |      |            |
|-----------|----------|----------|----------|------|----------|------|----------|------|------------|
| 235438_at | 2.92E-05 | 3.38E-06 | 18.82521 | down | 1.337456 | down | 14.07539 | up   |            |
| 235439_at | 2.44E-05 | 2.63E-06 | 2.209565 | down | 4.158191 | down | 1.881905 | down | RBMS2      |
| 235440_at | 0.024866 | 0.02331  | 1.776902 | down | 1.703858 | down | 1.04287  | up   | SPTY2D1    |
| 235450_at | 0.009331 | 0.007568 | 2.295192 | down | 1.308765 | down | 1.753708 | up   | FBXL4      |
| 235451_at | 0.001953 | 0.001004 | 2.074421 | down | 1.682871 | down | 1.232668 | up   | SMAD5      |
| 235452_at | 0.028588 | 0.027154 | 2.330176 | down | 1.433554 | down | 1.625454 | up   |            |
| 235453_at | 9.72E-04 | 3.90E-04 | 2.010994 | down | 1.387258 | down | 1.449618 | up   | TOR1AIP2   |
| 235455_at | 0.00377  | 0.00242  | 1.441059 | up   | 1.411821 | down | 2.034516 | down | FAM131C    |
| 235457_at | 7.09E-04 | 2.55E-04 | 5.700449 | down | 7.170795 | down | 1.257935 | down | MAML2      |
| 235459_at | 1.51E-04 | 3.15E-05 | 3.36474  | down | 4.344    | down | 1.291036 | down |            |
| 235460_at | 0.013459 | 0.011661 | 1.779164 | up   | 1.048982 | down | 1.866311 | down | SNX22      |
| 235465_at | 0.031513 | 0.030156 | 2.340301 | up   | 2.056646 | up   | 1.137921 | down | FAM123A    |
| 235466_s_ | 0.00114  | 4.85E-04 | 2.05003  | up   | 1.717643 | up   | 1.193514 | down | DISP1      |
|           |          |          |          |      |          |      |          |      | hCG_17760  |
| 235468_at | 0.001914 | 9.76E-04 | 2.729806 | up   | 2.382091 | up   | 1.145971 | down | 07         |
| 235471_at | 5.37E-07 | 1.23E-08 | 8.396813 | down | 4.676235 | down | 1.795636 | up   | C10orf72   |
| 235474_at | 0.001539 | 7.28E-04 | 2.081715 | up   | 1.303177 | up   | 1.597416 | down |            |
| 235477_at | 0.006219 | 0.004599 | 1.267827 | up   | 1.452086 | down | 1.840994 | down |            |
| 235478_at | 5.40E-04 | 1.75E-04 | 3.230544 | down | 1.554526 | down | 2.078154 | up   | DCLRE1C    |
| 235479_at | 8.91E-05 | 1.53E-05 | 1.353563 | down | 2.641821 | down | 1.951754 | down | CPEB2      |
| 235482_at | 0.001043 | 4.30E-04 | 1.488031 | up   | 2.507538 | up   | 1.685139 | up   | LOC400960  |
| 235483_at | 0.001382 | 6.31E-04 | 2.168938 | up   | 1.52911  | up   | 1.418432 | down |            |
| 235484_at | 0.012406 | 0.010608 | 1.473367 | up   | 1.970259 | up   | 1.337249 | up   | PTAR1      |
| 235485_at | 0.001687 | 8.25E-04 | 1.531967 | up   | 1.241136 | down | 1.901378 | down | WDR44      |
| 235486_at | 2.50E-06 | 1.08E-07 | 4.583757 | down | 4.684888 | down | 1.022063 | down | C11orf41   |
| 235487_at | 0.003033 | 0.001819 | 1.067661 | down | 1.395939 | down | 1.307474 | down |            |
| 235489_at | 6.91E-08 | 6.60E-10 | 34.29459 | down | 9.676422 | down | 3.544141 | up   | RHOJ       |
| 235491_at | 0.004585 | 0.00313  | 1.339358 | up   | 1.312299 | down | 1.757638 | down | ZBTB10     |
| 235492_at | 3.01E-05 | 3.53E-06 | 1.907372 | down | 4.288137 | down | 2.248192 | down | RNF217     |
| 235496_at | 2.27E-04 | 5.47E-05 | 1.516683 | down | 5.78559  | down | 3.814635 | down | HRCT1      |
| 235497_at | 0.006877 | 0.00522  | 2.220576 | down | 1.67412  | down | 1.326414 | up   | LOC643837  |
| 235499_at | 0.002759 | 0.001602 | 1.565443 | up   | 1.401075 | down | 2.193302 | down | tcag7.1196 |
| 235500_at | 0.010065 | 0.008281 | 1.01075  | up   | 2.111669 | up   | 2.089211 | up   | HNRNPC     |
| 235510_at | 0.017834 | 0.016092 | 1.760083 | up   | 1.148111 | down | 2.02077  | down | USHBP1     |

|           |          |          |          |      |          |      |          |      |            |
|-----------|----------|----------|----------|------|----------|------|----------|------|------------|
| 235512_at | 0.002723 | 0.001571 | 2.859405 | down | 1.681004 | down | 1.701011 | up   | CDKL1      |
| 235516_at | 0.024471 | 0.022904 | 1.769383 | down | 1.246822 | down | 1.419115 | up   | SEPSECS    |
| 235518_at | 1.00E-05 | 7.58E-07 | 12.534   | down | 4.022771 | down | 3.115763 | up   | SLC8A1     |
| 235520_at | 0.00221  | 0.001186 | 1.655472 | up   | 3.312988 | up   | 2.001234 | up   | ZNF280C    |
| 235523_at | 0.009183 | 0.007428 | 1.108076 | up   | 1.591811 | up   | 1.436554 | up   | C17orf68   |
| 235524_at | 0.023557 | 0.021971 | 1.179943 | up   | 1.119997 | up   | 1.053524 | down | GARNL1     |
|           |          |          |          |      |          |      |          |      | DLGAP1 /// |
| 235527_at | 2.35E-04 | 5.74E-05 | 1.946792 | up   | 1.98145  | up   | 1.017803 | up   | LOC284214  |
| 235531_at | 1.23E-04 | 2.37E-05 | 2.46855  | down | 1.239672 | down | 1.991294 | up   |            |
| 235532_at | 6.33E-04 | 2.18E-04 | 3.682214 | down | 2.273685 | down | 1.619491 | up   | PIGM       |
| 235534_at | 3.08E-04 | 8.25E-05 | 2.99119  | down | 3.34101  | down | 1.11695  | down |            |
|           |          |          |          |      |          |      |          |      | FRG1 ///   |
|           |          |          |          |      |          |      |          |      | FRG1B ///  |
|           |          |          |          |      |          |      |          |      | LOC100134  |
|           |          |          |          |      |          |      |          |      | 091 ///    |
| 235535_x_ | 4.86E-04 | 1.52E-04 | 3.667103 | down | 1.802376 | down | 2.034593 | up   | LOC642236  |
| 235538_at | 0.001916 | 9.78E-04 | 1.55594  | up   | 3.761475 | up   | 2.417494 | up   |            |
| 235539_at | 0.002757 | 0.001601 | 1.49053  | up   | 1.411684 | up   | 1.055852 | down | NUMA1      |
| 235540_at | 0.021066 | 0.01942  | 1.43104  | down | 1.292245 | up   | 1.849254 | up   | GNRH1      |
| 235545_at | 0.007101 | 0.005431 | 2.31936  | up   | 3.739996 | up   | 1.612512 | up   | DEPDC1     |
| 235546_at | 0.001239 | 5.43E-04 | 1.231704 | up   | 1.660535 | up   | 1.348161 | up   | SPINT1     |
| 235548_at | 2.66E-04 | 6.77E-05 | 2.329292 | down | 11.57782 | down | 4.970531 | down | APCDD1L    |
| 235553_at | 0.003143 | 0.00191  | 1.596398 | up   | 1.853487 | up   | 1.161043 | up   | GAPVD1     |
| 235554_x_ | 8.75E-04 | 3.38E-04 | 1.977848 | down | 1.105968 | up   | 2.187437 | up   | PACRGL     |
| 235558_at | 5.58E-04 | 1.83E-04 | 1.777326 | down | 2.226697 | down | 1.252835 | down | RBMS2      |
| 235560_at | 0.002005 | 0.001039 | 2.440809 | up   | 2.191657 | up   | 1.113682 | down |            |
| 235561_at | 0.003048 | 0.001829 | 1.878681 | down | 1.285502 | down | 1.461437 | up   |            |
| 235566_at | 0.002769 | 0.00161  | 3.715653 | down | 2.440257 | down | 1.522649 | up   | TMF1       |
| 235568_at | 0.021393 | 0.019756 | 1.149962 | up   | 1.10616  | down | 1.272043 | down | C19orf59   |
| 235570_at | 1.29E-04 | 2.55E-05 | 15.26963 | down | 10.6111  | down | 1.439024 | up   |            |
| 235580_at | 9.86E-04 | 3.99E-04 | 1.917008 | up   | 2.246121 | up   | 1.17168  | up   | ZNF141     |
| 235588_at | 0.007044 | 0.00538  | 1.476294 | up   | 2.861758 | up   | 1.938474 | up   | ESCO2      |
| 235590_at | 0.005659 | 0.004078 | 1.5592   | down | 1.199195 | down | 1.300206 | up   | FAM178A    |

|           |          |          |          |      |          |      |          |      |           |
|-----------|----------|----------|----------|------|----------|------|----------|------|-----------|
| 235591_at | 1.84E-07 | 2.77E-09 | 24.68847 | down | 1.27436  | up   | 31.46199 | up   | SSTR1     |
| 235593_at | 0.006107 | 0.004494 | 3.067302 | down | 1.795974 | down | 1.707877 | up   | ZEB2      |
| 235594_at | 0.001623 | 7.83E-04 | 1.58152  | down | 1.069372 | down | 1.478925 | up   | SCYE1     |
| 235596_at | 0.019466 | 0.017765 | 1.368253 | up   | 1.229986 | up   | 1.112413 | down |           |
|           |          |          |          |      |          |      |          |      | RGPD1 /// |
| 235597_s_ | 0.005375 | 0.003825 | 1.816284 | up   | 1.20468  | up   | 1.50769  | down | RGPD2     |
| 235600_at | 0.009122 | 0.007367 | 1.476339 | up   | 1.032983 | up   | 1.4292   | down |           |
| 235604_x_ | 8.98E-05 | 1.55E-05 | 1.574914 | up   | 2.279246 | up   | 1.44722  | up   | ZNF493    |
| 235605_at | 0.01235  | 0.010553 | 1.623442 | up   | 1.100005 | down | 1.785795 | down | CASZ1     |
| 235606_at | 7.96E-04 | 2.99E-04 | 2.687447 | down | 1.85238  | down | 1.450808 | up   | LOC344595 |
| 235607_at | 2.45E-04 | 6.06E-05 | 1.546662 | up   | 3.364637 | up   | 2.175418 | up   |           |
| 235614_at | 0.024553 | 0.022989 | 1.205165 | up   | 1.598064 | down | 1.92593  | down | TMEM151A  |
| 235615_at | 0.002249 | 0.001218 | 2.423657 | up   | 1.637917 | up   | 1.47972  | down | PGGT1B    |
| 235620_x_ | 0.002488 | 0.001395 | 3.139106 | down | 1.166533 | down | 2.690971 | up   | ZMYM5     |
| 235623_at | 0.012262 | 0.010468 | 1.719115 | up   | 1.745505 | up   | 1.015351 | up   | ELP2      |
| 235624_at | 0.002028 | 0.001057 | 1.276031 | up   | 1.386561 | down | 1.769295 | down | HDLBP     |
| 235625_at | 0.009035 | 0.007282 | 3.049057 | down | 1.551571 | down | 1.965141 | up   | VPS41     |
| 235628_x_ | 2.16E-04 | 5.10E-05 | 3.440553 | down | 1.807242 | down | 1.903758 | up   |           |
| 235629_at | 0.016498 | 0.014732 | 2.75124  | down | 11.02612 | down | 4.007691 | down |           |
| 235630_at | 1.41E-04 | 2.89E-05 | 2.383901 | down | 1.829894 | down | 1.302753 | up   |           |
| 235631_at | 1.96E-05 | 1.96E-06 | 12.4155  | down | 13.20259 | down | 1.063396 | down | DDR2      |
| 235632_at | 7.96E-04 | 2.98E-04 | 1.394866 | up   | 1.288088 | down | 1.796711 | down |           |
| 235634_at | 0.01526  | 0.013485 | 1.418767 | up   | 2.53933  | up   | 1.789815 | up   | PURG      |
| 235643_at | 0.011722 | 0.009919 | 3.553201 | down | 3.03829  | down | 1.169474 | up   | SAMD9L    |
| 235644_at | 6.48E-05 | 1.01E-05 | 4.816446 | up   | 4.492721 | up   | 1.072056 | down | CCDC138   |
| 235645_at | 0.001816 | 9.10E-04 | 2.29104  | up   | 3.403619 | up   | 1.485622 | up   | ESCO1     |
| 235653_s_ | 0.004504 | 0.003055 | 2.36262  | down | 1.004472 | up   | 2.373186 | up   | THAP6     |
| 235655_at | 8.77E-04 | 3.39E-04 | 1.976652 | down | 1.483493 | down | 1.332431 | up   |           |
| 235658_at | 0.006647 | 0.005005 | 2.324574 | down | 1.961275 | down | 1.185236 | up   |           |
| 235660_at | 0.016806 | 0.015049 | 1.219091 | down | 1.477684 | down | 1.21212  | down |           |
| 235661_at | 0.016231 | 0.014461 | 1.471787 | down | 1.340233 | down | 1.098158 | up   |           |
| 235663_at | 0.025517 | 0.023992 | 1.522244 | up   | 1.084432 | down | 1.650769 | down |           |
| 235665_at | 0.002063 | 0.001081 | 1.300924 | up   | 1.114046 | up   | 1.167747 | down | PTOV1     |
| 235666_at | 0.039183 | 0.03794  | 3.431846 | down | 2.874278 | down | 1.193986 | up   |           |

|           |          |          |          |      |          |      |          |      |           |
|-----------|----------|----------|----------|------|----------|------|----------|------|-----------|
| 235667_at | 0.002643 | 0.001509 | 1.957291 | down | 1.226797 | down | 1.595449 | up   | LOC643783 |
| 235668_at | 0.019114 | 0.017403 | 1.490161 | down | 1.141791 | up   | 1.701452 | up   | PRDM1     |
| 235671_at | 0.007021 | 0.00536  | 1.641722 | up   | 1.565642 | down | 2.570348 | down |           |
| 235675_at | 0.008451 | 0.006716 | 3.429732 | down | 1.704739 | down | 2.011881 | up   | DHFRL1    |
| 235679_at | 1.84E-04 | 4.14E-05 | 2.102757 | up   | 2.524097 | up   | 1.200375 | up   |           |
| 235685_at | 0.002894 | 0.001707 | 3.390876 | down | 3.551951 | down | 1.047503 | down |           |
| 235688_s_ | 0.00195  | 0.001002 | 2.307043 | up   | 1.42764  | up   | 1.615984 | down | TRAF4     |
| 235689_at | 0.003156 | 0.00192  | 1.367094 | down | 2.300676 | down | 1.682895 | down | MTFMT     |
| 235692_at | 7.10E-04 | 2.55E-04 | 2.471892 | down | 2.024331 | down | 1.221091 | up   | SH3KBP1   |
| 235693_at | 0.005558 | 0.003985 | 3.116436 | up   | 7.654719 | up   | 2.456242 | up   |           |
| 235696_at | 6.22E-04 | 2.13E-04 | 10.33561 | up   | 3.526797 | up   | 2.930593 | down |           |
| 235702_at | 0.005834 | 0.004236 | 2.117237 | down | 1.347805 | down | 1.570877 | up   |           |
| 235710_at | 0.001875 | 9.49E-04 | 1.117213 | up   | 1.414625 | down | 1.580437 | down | VPS53     |
| 235715_at | 0.013829 | 0.012039 | 1.2953   | up   | 1.000656 | up   | 1.294451 | down | FLJ44653  |
| 235717_at | 6.08E-04 | 2.07E-04 | 2.25385  | down | 1.601947 | down | 1.406945 | up   | ZNF229    |
| 235718_at | 0.005923 | 0.004323 | 1.615918 | up   | 1.252072 | down | 2.023246 | down | SRL       |
| 235720_at | 0.002177 | 0.001162 | 2.516916 | up   | 1.493499 | up   | 1.685248 | down | CRIP3     |
| 235724_at | 0.006552 | 0.004916 | 1.537204 | up   | 1.100821 | down | 1.692186 | down |           |
| 235728_at | 1.14E-05 | 9.04E-07 | 5.101441 | down | 4.720857 | down | 1.080618 | up   | ZFP3      |
| 235733_at | 1.41E-05 | 1.25E-06 | 5.041287 | down | 12.67287 | down | 2.513815 | down |           |
| 235734_at | 0.00125  | 5.51E-04 | 1.503945 | up   | 1.660528 | down | 2.497342 | down | PACSIN3   |
| 235740_at | 0.019254 | 0.017547 | 1.143271 | up   | 1.290323 | up   | 1.128624 | up   |           |
| 235741_at | 0.002825 | 0.001652 | 1.75839  | up   | 1.359868 | down | 2.391178 | down | PPIA      |
| 235746_s_ | 8.53E-06 | 6.15E-07 | 16.89588 | down | 2.65292  | down | 6.368787 | up   | PLA2R1    |
| 235747_at | 0.003216 | 0.001967 | 3.228872 | down | 3.150331 | down | 1.024931 | up   | SLC25A16  |
| 235753_at | 5.82E-04 | 1.94E-04 | 1.244253 | down | 3.683177 | down | 2.960151 | down | HOXA7     |
| 235754_at | 8.42E-06 | 6.05E-07 | 3.456209 | down | 3.468725 | down | 1.003621 | down | HFE       |
| 235766_x_ | 1.08E-04 | 1.99E-05 | 4.882114 | down | 5.377159 | down | 1.1014   | down |           |
| 235770_at | 2.59E-04 | 6.53E-05 | 2.723505 | down | 1.0903   | down | 2.49794  | up   | MASP1     |
| 235772_at | 9.75E-05 | 1.74E-05 | 2.116333 | down | 1.67577  | down | 1.262902 | up   |           |
| 235773_at | 8.62E-06 | 6.23E-07 | 4.762963 | up   | 3.917013 | up   | 1.215968 | down | ZIK1      |
| 235775_at | 0.027231 | 0.025745 | 1.313442 | down | 3.051051 | up   | 4.007378 | up   | TMTC2     |
| 235778_s_ | 7.17E-04 | 2.59E-04 | 1.135744 | down | 1.763331 | down | 1.552579 | down | ANKRD44   |
| 235781_at | 0.022203 | 0.020595 | 1.041895 | up   | 1.250439 | up   | 1.200159 | up   | CACNA1B   |

|           |          |          |               |               |               |          | LOC100131 |
|-----------|----------|----------|---------------|---------------|---------------|----------|-----------|
| 235790_at | 4.70E-04 | 1.45E-04 | 1.505223 up   | 1.040147 down | 1.565654 down | 081      |           |
| 235791_x_ | 0.00161  | 7.75E-04 | 3.177241 up   | 3.754593 up   | 1.181715 up   | CHD1     |           |
| 235792_x_ | 4.70E-04 | 1.45E-04 | 1.647156 up   | 1.936368 up   | 1.175583 up   | PIK3C2A  |           |
| 235797_x_ | 0.002418 | 0.001341 | 1.302846 up   | 1.317221 down | 1.716136 down | HMCN2    |           |
| 235799_at | 9.46E-04 | 3.76E-04 | 1.830127 up   | 1.426882 up   | 1.282606 down | NSL1     |           |
| 235802_at | 0.005456 | 0.003898 | 1.346988 up   | 1.436305 down | 1.934685 down | PLD4     |           |
| 235804_at | 0.016538 | 0.014774 | 2.075186 up   | 1.277592 up   | 1.624294 down |          |           |
| 235805_at | 0.031784 | 0.030436 | 1.617106 down | 1.120815 up   | 1.812477 up   |          |           |
| 235808_at | 7.41E-04 | 2.71E-04 | 1.714562 down | 1.013737 down | 1.691327 up   |          |           |
| 235809_at | 0.026935 | 0.025448 | 1.300499 down | 1.060866 down | 1.225885 up   | LIN54    |           |
| 235810_at | 0.003065 | 0.001843 | 1.073802 down | 1.79464 up    | 1.927088 up   | ZNF182   |           |
| 235812_at | 4.59E-04 | 1.40E-04 | 1.947822 down | 2.274611 down | 1.167772 down | TMEM188  |           |
| 235816_s_ | 0.021103 | 0.019458 | 1.553081 up   | 1.077716 down | 1.67378 down  | RGL4     |           |
| 235817_at | 0.006239 | 0.004619 | 1.574536 up   | 1.198412 down | 1.886942 down | TMEM184A |           |
| 235824_at | 0.005039 | 0.003526 | 1.456906 up   | 1.176198 up   | 1.238657 down |          |           |
| 235826_at | 0.024605 | 0.023041 | 1.282266 up   | 1.187425 up   | 1.079872 down |          |           |
| 235836_at | 3.03E-07 | 5.41E-09 | 6.179904 down | 15.87731 down | 2.569184 down | MXRA7    |           |
| 235839_at | 4.83E-04 | 1.50E-04 | 1.279114 up   | 1.517805 down | 1.941446 down | C22orf34 |           |
| 235843_at | 0.001441 | 6.67E-04 | 1.207218 down | 1.515052 down | 1.254995 down |          |           |
| 235844_at | 0.011135 | 0.009339 | 1.928096 down | 1.592996 down | 1.210358 up   | PHTF1    |           |
| 235845_at | 1.84E-04 | 4.12E-05 | 10.53912 up   | 7.797851 up   | 1.351542 down | SP5      |           |
| 235846_at | 0.001568 | 7.48E-04 | 2.826298 up   | 3.314438 up   | 1.172714 up   |          |           |
| 235852_at | 1.55E-04 | 3.26E-05 | 2.225264 up   | 2.114475 up   | 1.052395 down | STON2    |           |
| 235855_at | 0.009906 | 0.008129 | 1.590194 up   | 1.162556 up   | 1.367842 down | COX15    |           |
| 235857_at | 5.71E-09 | 2.02E-11 | 3.226529 down | 6.293273 down | 1.950478 down | KCTD11   |           |
| 235858_at | 0.02824  | 0.026786 | 1.334366 up   | 1.067352 down | 1.424238 down | CREBBP   |           |
| 235863_at | 4.86E-04 | 1.51E-04 | 2.724169 up   | 1.625916 down | 4.42927 down  | JSRP1    |           |
| 235866_at | 1.43E-04 | 2.93E-05 | 2.315238 down | 1.70534 down  | 1.35764 up    | C9orf85  |           |
| 235871_at | 0.010614 | 0.008822 | 1.403723 up   | 1.059305 up   | 1.325135 down | LIPH     |           |
| 235873_at | 0.012085 | 0.010286 | 1.242917 up   | 1.029084 up   | 1.207789 down |          |           |
| 235881_at | 0.010885 | 0.009091 | 1.188559 up   | 1.111577 down | 1.321175 down | FMNL2    |           |
| 235882_at | 3.62E-06 | 1.81E-07 | 2.958012 down | 4.677846 down | 1.581415 down | VPS53    |           |
| 235886_at | 0.031824 | 0.030476 | 1.464271 up   | 1.204913 down | 1.764318 down |          |           |

|           |          |          |               |               |               |           |
|-----------|----------|----------|---------------|---------------|---------------|-----------|
| 235887_at | 0.007572 | 0.005883 | 1.467866 down | 1.881512 down | 1.2818 down   |           |
| 235889_at | 2.40E-05 | 2.57E-06 | 3.147087 down | 2.511745 down | 1.252948 up   |           |
|           |          |          |               |               |               | LOC100128 |
| 235891_at | 0.002054 | 0.001074 | 6.009722 down | 3.697036 down | 1.625551 up   | 178       |
| 235897_at | 9.99E-05 | 1.80E-05 | 2.125099 down | 2.57992 down  | 1.214024 down | COPZ2     |
| 235901_at | 0.010784 | 0.008986 | 2.01841 down  | 1.585055 down | 1.2734 up     |           |
| 235903_at | 0.00462  | 0.003162 | 2.067367 up   | 1.570597 up   | 1.316294 down | ANKS6     |
| 235904_at | 0.001884 | 9.55E-04 | 1.755387 up   | 2.865521 up   | 1.632416 up   | UGT3A1    |
| 235911_at | 0.035468 | 0.034184 | 2.060659 down | 2.246916 down | 1.090387 down |           |
| 235920_at | 0.005478 | 0.003917 | 2.043116 up   | 1.020776 up   | 2.001532 down |           |
| 235921_at | 0.02566  | 0.024142 | 1.628565 up   | 1.184669 up   | 1.374701 down |           |
| 235923_at | 0.002096 | 0.001104 | 1.210506 down | 1.514748 down | 1.251335 down | VTI1A     |
| 235927_at | 0.004932 | 0.003432 | 3.651083 up   | 5.407752 up   | 1.481136 up   | XPO1      |
| 235930_at | 5.52E-04 | 1.81E-04 | 1.266817 up   | 1.96036 up    | 1.547469 up   |           |
| 235932_x_ | 0.01973  | 0.018045 | 1.458759 up   | 1.30859 down  | 1.908919 down | HMCN2     |
| 235937_at | 0.001803 | 9.00E-04 | 1.963309 up   | 1.807695 up   | 1.086085 down |           |
| 235938_at | 1.16E-05 | 9.32E-07 | 4.784718 down | 2.04246 down  | 2.342625 up   |           |
| 235940_at | 0.003267 | 0.002007 | 9.953584 down | 6.513622 down | 1.528118 up   | C9orf64   |
|           |          |          |               |               |               | LOC159110 |
|           |          |          |               |               |               | ///       |
|           |          |          |               |               |               | LOC401629 |
|           |          |          |               |               |               | ///       |
| 235941_s_ | 0.003373 | 0.002095 | 1.2622 up     | 1.1945 down   | 1.507698 down | LOC401630 |
| 235944_at | 0.012395 | 0.010597 | 4.060132 down | 5.591906 down | 1.377272 down | HMCN1     |
| 235949_at | 0.025371 | 0.023837 | 1.475132 down | 1.153083 up   | 1.700949 up   |           |
| 235951_s_ | 0.007627 | 0.005935 | 1.61197 up    | 1.175012 down | 1.894085 down | ZNF688    |
| 235954_at | 7.00E-05 | 1.12E-05 | 1.514981 up   | 1.424683 up   | 1.063381 down |           |
| 235955_at | 4.89E-05 | 6.84E-06 | 3.534251 up   | 2.205271 up   | 1.602638 down | MARVELD2  |
| 235956_at | 0.003233 | 0.001981 | 3.49281 down  | 2.199969 down | 1.587663 up   | KIAA1377  |
| 235957_at | 1.75E-04 | 3.88E-05 | 4.182422 up   | 4.102883 up   | 1.019386 down | GRIP1     |
| 235958_at | 0.007792 | 0.006094 | 1.664319 up   | 1.071721 down | 1.783685 down | PLA2G4F   |
| 235960_at | 2.90E-04 | 7.60E-05 | 1.344657 up   | 2.114027 up   | 1.572168 up   |           |
| 235961_at | 0.00468  | 0.003214 | 1.391368 down | 1.111876 down | 1.251371 up   | GPR161    |
| 235962_at | 0.002438 | 0.001356 | 2.561729 down | 2.60472 down  | 1.016782 down |           |

|           |          |          |          |      |          |      |          |      |           |
|-----------|----------|----------|----------|------|----------|------|----------|------|-----------|
| 235964_x_ | 0.010354 | 0.008559 | 2.041352 | down | 1.423766 | up   | 2.906407 | up   |           |
| 235966_at | 2.62E-05 | 2.89E-06 | 1.733918 | up   | 1.075874 | down | 1.865477 | down | DAB2IP    |
| 235969_at | 0.001097 | 4.60E-04 | 2.146308 | down | 1.416848 | down | 1.514847 | up   | FLJ33996  |
| 235970_at | 0.028576 | 0.027141 | 1.827011 | up   | 3.603925 | up   | 1.97258  | up   | LCORL     |
| 235986_at | 0.018631 | 0.016911 | 1.173099 | up   | 1.083534 | down | 1.271093 | down |           |
| 235989_at | 1.73E-04 | 3.82E-05 | 2.028504 | down | 1.548263 | down | 1.310181 | up   |           |
|           |          |          |          |      |          |      |          |      | LOC100130 |
| 235990_at | 8.31E-04 | 3.16E-04 | 1.96362  | down | 1.502425 | down | 1.306967 | up   | 987       |
| 235995_at | 0.012247 | 0.010453 | 1.3028   | up   | 1.017068 | down | 1.325037 | down | PUM2      |
| 235996_at | 2.08E-04 | 4.84E-05 | 4.166904 | down | 1.081943 | down | 3.851317 | up   | RASSF8    |
| 235997_at | 3.84E-04 | 1.11E-04 | 1.713977 | up   | 1.486403 | up   | 1.153104 | down | ZNF74     |
| 235998_at | 1.14E-04 | 2.16E-05 | 2.036227 | up   | 1.089965 | down | 2.219416 | down | RHPN1     |
| 235999_at | 2.60E-04 | 6.56E-05 | 2.193764 | up   | 2.571695 | up   | 1.172275 | up   |           |
| 236000_s_ | 0.002584 | 0.001467 | 3.523232 | up   | 3.930029 | up   | 1.115461 | up   |           |
| 236003_x_ | 0.005293 | 0.003754 | 1.006356 | down | 1.421605 | down | 1.412627 | down |           |
| 236012_at | 0.001818 | 9.11E-04 | 1.514983 | down | 1.758875 | down | 1.160986 | down | PSMF1     |
| 236019_at | 1.76E-04 | 3.90E-05 | 2.735519 | up   | 4.626319 | up   | 1.691204 | up   | RAB12     |
| 236021_at | 4.97E-04 | 1.56E-04 | 1.767615 | down | 1.084406 | down | 1.630031 | up   |           |
| 236022_at | 0.002541 | 0.001434 | 3.039351 | up   | 1.895575 | up   | 1.603392 | down | MYO19     |
| 236027_at | 0.012985 | 0.011181 | 1.715239 | up   | 1.531093 | up   | 1.120271 | down | C10orf78  |
| 236029_at | 4.26E-04 | 1.27E-04 | 5.995296 | up   | 5.247994 | up   | 1.142398 | down | FAT3      |
| 236030_at | 0.002069 | 0.001085 | 2.826593 | up   | 1.700789 | up   | 1.661931 | down | RCOR2     |
| 236032_at | 0.009458 | 0.007687 | 1.181331 | down | 2.264113 | up   | 2.674667 | up   |           |
| 236033_at | 0.002509 | 0.001411 | 1.505632 | up   | 1.033723 | down | 1.556407 | down | ASB12     |
| 236037_at | 0.004766 | 0.003283 | 1.522779 | up   | 1.143753 | up   | 1.331388 | down | LOC202451 |
| 236038_at | 0.001357 | 6.16E-04 | 5.370273 | down | 2.627917 | down | 2.043547 | up   |           |
| 236039_at | 0.008864 | 0.007116 | 1.48093  | up   | 1.261536 | down | 1.868247 | down | LYPD5     |
| 236040_at | 0.009286 | 0.007525 | 1.44061  | up   | 1.132975 | down | 1.632174 | down | XAGE3     |
|           |          |          |          |      |          |      |          |      | LOC100130 |
| 236042_at | 0.013356 | 0.011558 | 2.349659 | down | 1.763733 | down | 1.332208 | up   | 219       |
| 236044_at | 1.23E-04 | 2.38E-05 | 2.527032 | down | 12.4417  | down | 4.923442 | down | PPAPDC1A  |
| 236045_x_ | 0.003366 | 0.00209  | 1.794561 | up   | 1.381787 | up   | 1.298725 | down |           |
| 236046_at | 0.001886 | 9.57E-04 | 2.856267 | down | 2.330324 | down | 1.225695 | up   | FLJ44896  |
| 236050_at | 0.008439 | 0.006703 | 1.670754 | up   | 1.204717 | up   | 1.386843 | down | C11orf35  |



|           |          |          |               |               |               |           |
|-----------|----------|----------|---------------|---------------|---------------|-----------|
| 236052_at | 0.010614 | 0.008823 | 1.144325 up   | 1.273387 down | 1.457169 down | TRNP1     |
| 236058_at | 6.17E-04 | 2.11E-04 | 3.497836 up   | 2.114564 up   | 1.654164 down | C1orf172  |
| 236059_at | 0.00408  | 0.002675 | 1.077929 up   | 1.595781 up   | 1.480414 up   | UNQ565    |
| 236063_at | 0.009297 | 0.007537 | 1.279153 up   | 1.047746 up   | 1.220863 down |           |
| 236076_at | 0.002385 | 0.001318 | 2.118622 down | 1.551748 down | 1.365313 up   | LOC257396 |
| 236077_at | 0.009264 | 0.007507 | 2.863379 down | 1.762396 down | 1.624709 up   | GANC      |
| 236078_at | 0.001543 | 7.30E-04 | 1.992242 down | 2.349349 down | 1.179249 down | KIAA1609  |
| 236082_at | 0.00865  | 0.006911 | 1.373758 up   | 1.380801 down | 1.896886 down | PHLDB3    |
| 236084_at | 0.001818 | 9.11E-04 | 1.410658 up   | 1.012321 down | 1.428039 down |           |
| 236087_at | 6.46E-05 | 9.99E-06 | 1.89174 up    | 1.301683 down | 2.462445 down | ABLIM2    |
| 236088_at | 7.87E-04 | 2.95E-04 | 3.385966 down | 1.107396 up   | 3.749606 up   | NTNG1     |
| 236090_at | 5.30E-04 | 1.71E-04 | 1.957627 up   | 2.525563 up   | 1.290114 up   |           |
| 236091_at | 0.003226 | 0.001975 | 1.396142 up   | 1.880209 down | 2.625038 down | HMGB2     |
|           |          |          |               |               |               | hCG_16438 |
| 236098_at | 0.008927 | 0.007177 | 1.337271 up   | 1.176167 down | 1.572854 down | 08        |
| 236108_at | 0.002884 | 0.001699 | 1.725373 down | 2.721783 down | 1.577504 down | KIAA1632  |
| 236113_at | 0.00238  | 0.001315 | 1.618242 up   | 1.226275 up   | 1.31964 down  |           |
| 236115_at | 1.70E-04 | 3.72E-05 | 4.563333 down | 3.139118 down | 1.453699 up   | HTR7P     |
| 236126_at | 3.09E-10 | 3.53E-13 | 19.59507 up   | 25.23095 up   | 1.287617 up   | ACVR2B    |
| 236128_at | 0.001654 | 8.04E-04 | 2.507951 up   | 4.429737 up   | 1.766277 up   | ZNF91     |
| 236129_at | 1.74E-05 | 1.68E-06 | 14.08289 down | 26.32634 down | 1.869386 down | GALNT5    |
| 236139_at | 0.008253 | 0.006527 | 1.594125 up   | 1.10493 up    | 1.442738 down |           |
| 236144_at | 0.001445 | 6.69E-04 | 5.290475 down | 1.022435 up   | 5.409168 up   | CPXM2     |
| 236149_at | 4.53E-04 | 1.38E-04 | 2.160335 up   | 2.880156 up   | 1.333199 up   |           |
| 236155_at | 0.002638 | 0.001506 | 1.456128 down | 1.265451 up   | 1.842658 up   | ZCCHC6    |
| 236162_at | 0.001652 | 8.02E-04 | 1.221859 up   | 1.082226 down | 1.322327 down |           |
| 236163_at | 0.001116 | 4.71E-04 | 2.38949 up    | 2.449653 up   | 1.025178 up   | LIX1      |
| 236166_at | 0.002843 | 0.001666 | 2.201092 down | 1.703032 down | 1.292455 up   | LOC285147 |
| 236170_x_ | 0.034954 | 0.033662 | 1.729802 down | 1.481499 down | 1.167603 up   | HERPUD2   |
| 236173_s_ | 0.020223 | 0.018552 | 1.246443 up   | 1.071101 down | 1.335066 down | LRIG1     |
| 236177_s_ | 0.004289 | 0.002859 | 1.30018 up    | 1.248759 down | 1.623611 down |           |
| 236179_at | 5.02E-05 | 7.12E-06 | 16.55107 down | 22.09391 down | 1.334894 down | CDH11     |
| 236184_at | 8.60E-04 | 3.30E-04 | 1.804836 down | 1.101377 down | 1.638709 up   |           |
| 236196_at | 0.002148 | 0.001142 | 1.563542 up   | 2.536622 up   | 1.622356 up   |           |

|           |          |          |          |      |          |      |          |      |                     |
|-----------|----------|----------|----------|------|----------|------|----------|------|---------------------|
| 236207_at | 0.003608 | 0.002285 | 3.274072 | down | 2.04446  | down | 1.601436 | up   | SSFA2               |
| 236208_at | 0.00488  | 0.003388 | 1.932857 | down | 1.167618 | down | 1.655385 | up   | MOCS2               |
| 236210_at | 0.003102 | 0.001872 | 2.275343 | up   | 2.215346 | up   | 1.027082 | down |                     |
| 236212_at | 3.88E-04 | 1.12E-04 | 1.347    | up   | 1.166347 | down | 1.571069 | down |                     |
| 236214_at | 0.004822 | 0.003332 | 1.886403 | up   | 1.670897 | up   | 1.128977 | down | FAM71F1             |
| 236216_at | 0.004659 | 0.003196 | 2.238183 | up   | 3.49543  | up   | 1.561727 | up   |                     |
| 236217_at | 1.47E-05 | 1.32E-06 | 1.824388 | down | 3.599793 | down | 1.973151 | down | SLC31A1             |
| 236220_at | 7.34E-04 | 2.67E-04 | 1.453212 | up   | 1.336244 | up   | 1.087535 | down |                     |
| 236222_at | 0.033107 | 0.031788 | 1.838091 | up   | 1.213211 | up   | 1.515063 | down | C3orf15             |
| 236229_at | 0.009744 | 0.007964 | 2.464436 | down | 2.472812 | down | 1.003399 | down |                     |
| 236231_at | 1.37E-04 | 2.78E-05 | 1.863361 | down | 1.174316 | down | 1.586763 | up   | ZNF271              |
| 236233_at | 4.78E-04 | 1.48E-04 | 2.912932 | down | 3.344608 | down | 1.148193 | down | TRIM32              |
| 236235_at | 5.14E-04 | 1.63E-04 | 2.850072 | down | 2.268499 | down | 1.256369 | up   | ITCH                |
| 236236_at | 5.46E-09 | 1.82E-11 | 16.54853 | up   | 14.46605 | up   | 1.143956 | down |                     |
| 236242_at | 3.45E-04 | 9.61E-05 | 1.821178 | down | 1.412107 | down | 1.289689 | up   |                     |
| 236248_x_ | 0.012662 | 0.010862 | 1.497169 | down | 1.602444 | down | 1.070316 | down | TADA2B              |
| 236249_at | 6.09E-04 | 2.07E-04 | 3.636818 | down | 5.266611 | down | 1.448137 | down | IKIP                |
| 236253_at | 0.006762 | 0.005111 | 1.182847 | down | 1.057527 | up   | 1.250893 | up   |                     |
| 236255_at | 1.13E-04 | 2.13E-05 | 3.04426  | up   | 1.939933 | up   | 1.56926  | down | PLEKHG4B            |
| 236257_at | 0.001338 | 6.05E-04 | 1.801805 | up   | 1.3622   | down | 2.454419 | down | CD2AP               |
| 236258_at | 0.004166 | 0.002749 | 1.539171 | up   | 1.631565 | down | 2.511257 | down | C20orf151           |
| 236263_at | 7.40E-04 | 2.70E-04 | 1.448033 | up   | 1.061653 | down | 1.537309 | down | SHH                 |
| 236264_at | 0.046018 | 0.044811 | 1.357794 | up   | 1.669374 | up   | 1.229475 | up   | LPHN3               |
| 236265_at | 3.80E-05 | 4.83E-06 | 4.533256 | up   | 6.55517  | up   | 1.446018 | up   | SP4                 |
| 236269_at | 0.002841 | 0.001664 | 1.790014 | up   | 1.321975 | down | 2.366353 | down | ZNF628              |
| 236270_at | 6.38E-06 | 4.01E-07 | 7.839279 | down | 3.433533 | down | 2.283152 | up   | NFATC4<br>LOC100131 |
| 236271_at | 0.010905 | 0.009113 | 1.32004  | up   | 1.415763 | down | 1.868863 | down | 721                 |
| 236279_at | 7.82E-07 | 2.08E-08 | 3.888589 | up   | 3.782128 | up   | 1.028148 | down |                     |
| 236281_x_ | 7.41E-04 | 2.71E-04 | 1.536022 | up   | 1.907599 | down | 2.930114 | down | HTR7                |
| 236286_at | 0.001558 | 7.41E-04 | 1.815766 | up   | 1.247153 | up   | 1.455929 | down | PROCA1              |
| 236292_at | 2.56E-04 | 6.42E-05 | 2.560161 | up   | 2.234134 | up   | 1.14593  | down | RNF130              |
| 236297_at | 0.005198 | 0.00367  | 2.375635 | up   | 1.318201 | down | 3.131565 | down |                     |
| 236302_at | 4.30E-06 | 2.32E-07 | 10.00712 | up   | 11.85974 | up   | 1.18513  | up   | PPM1E               |

|           |          |          |          |      |          |      |          |      |           |
|-----------|----------|----------|----------|------|----------|------|----------|------|-----------|
| 236310_at | 0.004038 | 0.002639 | 2.063754 | down | 1.179083 | down | 1.750305 | up   |           |
| 236312_at | 3.73E-06 | 1.89E-07 | 4.383843 | up   | 5.327752 | up   | 1.215316 | up   |           |
| 236313_at | 3.53E-04 | 9.92E-05 | 3.802132 | down | 18.88477 | down | 4.966889 | down | CDKN2B    |
| 236318_x_ | 0.004174 | 0.002757 | 1.580616 | up   | 1.319412 | down | 2.085482 | down |           |
| 236325_at | 0.004314 | 0.002885 | 1.46368  | down | 1.155706 | down | 1.266481 | up   | KIAA1377  |
| 236326_at | 0.00137  | 6.23E-04 | 1.335314 | down | 1.077307 | up   | 1.438543 | up   | HDAC7     |
| 236337_at | 2.11E-04 | 4.96E-05 | 2.470034 | up   | 2.494145 | up   | 1.009761 | up   | SYCP2L    |
| 236339_at | 0.016806 | 0.01505  | 1.233217 | up   | 1.108415 | down | 1.366916 | down | PPM1L     |
| 236341_at | 0.018151 | 0.016425 | 1.333471 | up   | 1.119808 | down | 1.493232 | down | CTLA4     |
| 236344_at | 9.94E-05 | 1.79E-05 | 2.83521  | down | 16.80501 | down | 5.927255 | down | PDE1C     |
| 236347_at | 7.23E-05 | 1.17E-05 | 2.138169 | down | 3.076785 | down | 1.438981 | down | MMAA      |
| 236348_at | 0.002316 | 0.001267 | 1.561038 | up   | 1.289276 | down | 2.012608 | down | TMEM176B  |
| 236351_at | 3.22E-05 | 3.90E-06 | 3.607409 | up   | 2.550371 | up   | 1.414465 | down | LOC389023 |
| 236358_at | 0.009291 | 0.007531 | 1.566946 | down | 1.389364 | down | 1.127815 | up   |           |
| 236361_at | 3.69E-04 | 1.05E-04 | 7.923263 | down | 3.894331 | down | 2.034563 | up   | GALNTL2   |
| 236362_at | 0.001034 | 4.24E-04 | 1.90664  | up   | 1.12872  | down | 2.152063 | down |           |
| 236364_at | 3.73E-05 | 4.71E-06 | 5.523377 | down | 2.047391 | down | 2.697763 | up   |           |
| 236369_at | 0.01054  | 0.008747 | 1.683687 | down | 1.483821 | down | 1.134697 | up   |           |
| 236376_at | 0.007362 | 0.00568  | 1.311902 | up   | 1.336892 | up   | 1.019049 | up   | RIMKLA    |
| 236379_at | 0.003445 | 0.002157 | 2.2707   | up   | 3.520864 | up   | 1.550563 | up   |           |
| 236380_at | 0.008739 | 0.006999 | 1.471645 | down | 1.582709 | down | 1.075469 | down |           |
| 236406_at | 0.003756 | 0.002409 | 1.415054 | up   | 1.156804 | down | 1.63694  | down | ZNF324B   |
| 236410_x_ | 0.022778 | 0.021193 | 1.1084   | down | 1.210358 | up   | 1.341561 | up   |           |
| 236411_at | 0.013075 | 0.011274 | 1.734381 | up   | 1.077862 | up   | 1.609093 | down |           |
| 236420_s_ | 6.81E-05 | 1.08E-05 | 5.072911 | down | 2.364835 | up   | 11.9966  | up   | ANO4      |
| 236433_at | 0.019604 | 0.01791  | 1.537173 | down | 1.235528 | down | 1.244142 | up   |           |
| 236441_at | 0.035881 | 0.034598 | 1.327967 | up   | 1.00204  | down | 1.330676 | down |           |
| 236449_at | 0.016117 | 0.014346 | 2.158025 | down | 1.686501 | down | 1.279587 | up   |           |
| 236451_at | 0.002199 | 0.001177 | 1.450169 | up   | 1.478212 | up   | 1.019338 | up   |           |
| 236452_at | 0.003424 | 0.002139 | 1.37367  | up   | 1.09022  | up   | 1.259994 | down |           |
| 236456_at | 3.82E-04 | 1.10E-04 | 2.929013 | up   | 1.662244 | up   | 1.762083 | down | PTPN5     |
| 236457_at | 0.006692 | 0.005047 | 1.531319 | up   | 1.081815 | down | 1.656604 | down |           |
| 236465_at | 0.017768 | 0.01603  | 1.087557 | up   | 2.958293 | up   | 2.720126 | up   | RNF175    |
| 236470_at | 0.00295  | 0.001753 | 1.469456 | down | 1.13515  | up   | 1.668053 | up   |           |

|           |          |          |               |               |               |          |
|-----------|----------|----------|---------------|---------------|---------------|----------|
| 236477_at | 0.002864 | 0.001683 | 1.5924 up     | 1.756584 up   | 1.103105 up   | PRPF40A  |
| 236479_at | 0.015339 | 0.013566 | 1.810235 up   | 1.052022 up   | 1.720719 down |          |
| 236481_at | 0.006409 | 0.004784 | 1.162208 down | 1.383557 up   | 1.607981 up   | FAH      |
| 236483_at | 8.70E-04 | 3.35E-04 | 1.843913 down | 2.156353 down | 1.169444 down |          |
| 236487_at | 2.41E-04 | 5.93E-05 | 2.557862 down | 1.210538 up   | 3.096388 up   | SCLT1    |
| 236488_s_ | 0.012139 | 0.010341 | 3.619205 down | 2.313515 down | 1.564375 up   |          |
| 236492_at | 0.004509 | 0.00306  | 1.913683 up   | 3.18711 up    | 1.665433 up   | PPP2R2A  |
| 236496_at | 2.14E-05 | 2.20E-06 | 1.558715 up   | 1.992676 down | 3.106013 down | DEGS2    |
| 236499_at | 0.006111 | 0.004498 | 1.6956 up     | 1.293985 down | 2.194081 down | C1orf86  |
| 236500_at | 0.004068 | 0.002665 | 2.117813 down | 1.030108 up   | 2.181575 up   |          |
| 236501_at | 1.37E-04 | 2.77E-05 | 4.052714 up   | 5.36798 up    | 1.32454 up    | SALL4    |
| 236503_at | 0.004593 | 0.003137 | 1.958751 down | 1.368546 down | 1.431264 up   |          |
| 236506_at | 0.004483 | 0.003035 | 1.940988 down | 1.912796 down | 1.014739 up   |          |
| 236507_at | 8.31E-04 | 3.16E-04 | 1.78598 down  | 1.445146 down | 1.235847 up   | ZDHHC3   |
| 236513_at | 0.028597 | 0.027165 | 1.093138 up   | 1.555052 down | 1.699886 down |          |
| 236516_at | 0.006336 | 0.004712 | 1.53597 up    | 1.133824 down | 1.74152 down  |          |
| 236518_at | 0.001972 | 0.001016 | 1.988261 up   | 1.799604 up   | 1.104832 down | KIAA1984 |
| 236519_at | 0.001126 | 4.77E-04 | 7.663007 up   | 7.35862 up    | 1.041365 down | C9orf135 |
| 236527_at | 0.003134 | 0.001901 | 2.198419 down | 2.079014 down | 1.057434 up   |          |
| 236529_at | 0.004922 | 0.003423 | 2.465716 up   | 1.508724 down | 3.720085 down | SRCRB4D  |
| 236531_at | 4.27E-04 | 1.28E-04 | 1.722988 down | 1.789545 down | 1.038629 down |          |
| 236540_at | 0.010827 | 0.009033 | 1.24532 down  | 1.210022 up   | 1.506866 up   |          |
| 236541_at | 0.020604 | 0.018943 | 1.097488 up   | 1.362764 down | 1.495617 down | ARSA     |
| 236557_at | 0.001126 | 4.77E-04 | 3.129284 down | 1.940236 down | 1.612837 up   | ZBTB38   |
| 236562_at | 7.71E-05 | 1.27E-05 | 3.089986 down | 2.489043 down | 1.241436 up   | ZNF439   |
| 236565_s_ | 1.41E-04 | 2.89E-05 | 8.041672 down | 13.38948 down | 1.665012 down | LARP6    |
| 236570_at | 0.003952 | 0.002569 | 2.004176 up   | 1.167757 down | 2.340391 down | ZNF366   |
| 236571_at | 0.009156 | 0.007401 | 3.815759 up   | 1.943896 up   | 1.962944 down |          |
| 236579_at | 0.01489  | 0.01311  | 1.465811 up   | 1.055203 down | 1.546727 down |          |
| 236583_at | 0.014242 | 0.012454 | 1.359041 down | 1.041628 up   | 1.415614 up   |          |
| 236585_at | 2.69E-04 | 6.88E-05 | 1.006045 up   | 1.681064 down | 1.691226 down |          |
| 236598_at | 0.001495 | 7.00E-04 | 1.783026 up   | 1.671271 up   | 1.066868 down |          |
| 236603_at | 6.45E-04 | 2.23E-04 | 1.709447 down | 1.645074 down | 1.039131 up   |          |
| 236604_at | 0.003437 | 0.002151 | 1.494568 up   | 1.461181 down | 2.183835 down | BAHCC1   |

|           |          |          |               |               |               |           | LOC100129 |
|-----------|----------|----------|---------------|---------------|---------------|-----------|-----------|
| 236609_at | 0.008802 | 0.007056 | 1.151209 up   | 1.456061 up   | 1.26481 up    | 592       |           |
| 236615_at | 8.98E-04 | 3.50E-04 | 3.010687 down | 2.14007 down  | 1.406818 up   |           |           |
| 236619_at | 9.86E-04 | 3.98E-04 | 1.880585 up   | 2.000288 up   | 1.063652 up   |           |           |
| 236620_at | 0.003828 | 0.002466 | 6.070427 up   | 11.30047 up   | 1.861561 up   | RIF1      |           |
| 236622_at | 8.71E-04 | 3.36E-04 | 2.387614 down | 2.007349 down | 1.189436 up   | PIGM      |           |
| 236625_at | 0.001728 | 8.51E-04 | 1.166848 up   | 1.452561 down | 1.694917 down |           |           |
| 236630_at | 9.50E-04 | 3.78E-04 | 1.669485 up   | 1.259904 up   | 1.325089 down | AQP2      |           |
| 236633_at | 0.043079 | 0.041839 | 1.323912 up   | 1.006112 up   | 1.31587 down  |           |           |
| 236634_at | 3.03E-05 | 3.58E-06 | 3.884921 down | 3.382428 down | 1.14856 up    | C8orf48   |           |
| 236635_at | 0.007527 | 0.005839 | 1.711136 up   | 1.863659 up   | 1.089136 up   | ZNF667    |           |
| 236636_at | 4.21E-05 | 5.61E-06 | 2.001117 up   | 1.494729 up   | 1.338783 down |           |           |
| 236640_at | 1.09E-06 | 3.29E-08 | 10.79545 down | 17.8539 down  | 1.653835 down | LOC399959 |           |
| 236641_at | 0.005292 | 0.003753 | 4.184256 up   | 6.491868 up   | 1.551499 up   | KIF14     |           |
| 236643_s_ | 0.026853 | 0.025364 | 1.669558 up   | 1.056306 down | 1.763563 down |           |           |
| 236648_at | 0.002354 | 0.001294 | 1.872279 down | 1.117068 down | 1.676065 up   |           |           |
| 236653_at | 0.015499 | 0.013725 | 1.499095 up   | 1.064599 down | 1.595935 down | LOC148189 |           |
| 236655_at | 7.59E-04 | 2.80E-04 | 3.29427 up    | 2.658361 up   | 1.239211 down | TPD52     |           |
|           |          |          |               |               |               | LOC100130 |           |
| 236656_s_ | 1.28E-04 | 2.51E-05 | 2.846359 down | 5.325891 down | 1.871124 down | 506       |           |
|           |          |          |               |               |               | LOC100130 |           |
| 236657_at | 2.80E-04 | 7.25E-05 | 3.290361 down | 3.625699 down | 1.101915 down | 506       |           |
| 236658_at | 0.008969 | 0.007217 | 1.207426 up   | 1.215503 down | 1.46763 down  |           |           |
| 236661_at | 0.005038 | 0.003525 | 1.700712 up   | 1.218289 down | 2.071959 down | IQCF6     |           |
| 236663_at | 0.003944 | 0.002563 | 1.426962 down | 1.113156 down | 1.281906 up   |           |           |
| 236668_at | 0.001753 | 8.68E-04 | 1.517896 down | 1.307215 up   | 1.984216 up   |           |           |
| 236671_at | 0.002203 | 0.00118  | 1.155562 down | 1.564819 down | 1.354163 down |           |           |
| 236675_at | 0.004183 | 0.002765 | 2.304808 down | 2.255141 down | 1.022024 up   | RPA1      |           |
| 236679_x_ | 0.001232 | 5.39E-04 | 1.744259 down | 1.387538 down | 1.257089 up   |           |           |
| 236682_at | 0.035589 | 0.034306 | 1.397141 up   | 1.227287 down | 1.714693 down |           |           |
| 236687_at | 0.019666 | 0.017974 | 1.356611 up   | 1.081921 down | 1.467745 down |           |           |
| 236689_at | 0.004529 | 0.003078 | 1.330557 up   | 1.655044 down | 2.20213 down  | RNF151    |           |
| 236702_at | 3.45E-04 | 9.62E-05 | 1.529472 up   | 1.506847 down | 2.304681 down | C20orf43  |           |
| 236718_at | 0.004178 | 0.002761 | 2.470516 down | 2.561896 down | 1.036989 down | MYO10     |           |

|           |          |          |               |               |               |           |
|-----------|----------|----------|---------------|---------------|---------------|-----------|
| 236725_at | 5.01E-05 | 7.10E-06 | 2.225062 up   | 2.954198 up   | 1.327693 up   | WWC1      |
| 236733_at | 0.008225 | 0.006502 | 1.243297 up   | 1.026286 down | 1.275978 down |           |
| 236736_at | 0.003054 | 0.001833 | 1.684787 up   | 1.411307 down | 2.377752 down |           |
| 236737_at | 0.001066 | 4.43E-04 | 1.577619 up   | 1.157504 down | 1.826101 down | C17orf56  |
| 236744_at | 0.014916 | 0.013141 | 1.646525 up   | 1.358216 down | 2.236337 down | PHPT1     |
| 236745_at | 0.034494 | 0.033191 | 1.623224 up   | 1.036206 up   | 1.566507 down | CCDC78    |
| 236746_at | 4.00E-05 | 5.24E-06 | 1.356005 up   | 1.647047 down | 2.233405 down | GALNT1    |
| 236747_at | 0.005738 | 0.004149 | 1.517338 up   | 1.012467 down | 1.536254 down |           |
| 236749_at | 0.003888 | 0.002515 | 1.862321 up   | 1.11027 down  | 2.067679 down | MNT       |
| 236750_at | 3.73E-04 | 1.07E-04 | 2.189874 up   | 1.531937 up   | 1.429481 down |           |
| 236752_at | 0.002851 | 0.001673 | 2.860056 up   | 4.394198 up   | 1.536403 up   |           |
| 236753_at | 0.00248  | 0.001388 | 1.865486 up   | 1.14804 up    | 1.624932 down | LOC154822 |
| 236756_at | 6.83E-04 | 2.42E-04 | 2.86235 up    | 2.615642 up   | 1.09432 down  | LOC389857 |
|           |          |          |               |               |               | LOC100129 |
| 236758_at | 0.004941 | 0.00344  | 1.293347 up   | 1.113642 down | 1.440325 down | 407       |
| 236759_at | 0.010089 | 0.008303 | 1.460911 up   | 1.105428 up   | 1.321579 down |           |
| 236760_at | 2.84E-04 | 7.39E-05 | 1.675505 down | 1.105314 down | 1.515864 up   | AMMECR1   |
| 236769_at | 0.010644 | 0.008856 | 4.620316 down | 1.650007 down | 2.80018 up    | LOC158402 |
| 236775_s_ | 0.01554  | 0.013768 | 1.37163 up    | 1.044502 down | 1.432671 down |           |
| 236776_at | 0.001334 | 6.01E-04 | 1.234285 up   | 1.379617 down | 1.702841 down |           |
| 236787_at | 0.001122 | 4.75E-04 | 3.424795 down | 1.516635 down | 2.258153 up   |           |
| 236788_at | 0.017197 | 0.015444 | 1.293933 up   | 1.245181 down | 1.61118 down  |           |
| 236794_at | 0.006508 | 0.004875 | 1.222379 up   | 1.452213 up   | 1.188022 up   |           |
| 236797_at | 0.001271 | 5.64E-04 | 1.555468 up   | 1.169301 up   | 1.330254 down |           |
| 236798_at | 0.003227 | 0.001975 | 2.184414 up   | 3.46774 up    | 1.587492 up   |           |
| 236801_at | 6.47E-05 | 1.00E-05 | 1.658805 up   | 1.09854 down  | 1.822263 down |           |
| 236815_at | 2.42E-04 | 5.97E-05 | 1.52266 up    | 1.490896 up   | 1.021305 down |           |
| 236817_at | 0.005114 | 0.003595 | 1.214443 up   | 1.765937 up   | 1.454112 up   | ADAT2     |
| 236820_at | 0.004483 | 0.003034 | 1.266899 up   | 1.428059 down | 1.809207 down |           |
| 236828_at | 0.039047 | 0.037798 | 1.78085 down  | 1.526756 down | 1.166427 up   |           |
| 236831_at | 0.001542 | 7.30E-04 | 4.037251 down | 4.203435 down | 1.041163 down | CCDC50    |
| 236833_at | 0.00823  | 0.006508 | 1.474888 up   | 1.084195 up   | 1.360353 down | TTC16     |
| 236834_at | 6.26E-04 | 2.15E-04 | 3.251904 down | 2.630284 down | 1.236332 up   | SCFD2     |
| 236836_at | 0.001713 | 8.42E-04 | 3.343296 up   | 4.097445 up   | 1.22557 up    |           |

|           |          |          |          |      |          |      |          |      |           |
|-----------|----------|----------|----------|------|----------|------|----------|------|-----------|
| 236837_x_ | 0.029229 | 0.027824 | 2.249521 | down | 1.146004 | down | 1.962927 | up   | LOC650794 |
| 236844_at | 0.004293 | 0.002866 | 1.703482 | up   | 1.329317 | up   | 1.281472 | down | DHX30     |
| 236845_at | 0.002187 | 0.001169 | 1.763509 | up   | 1.481277 | down | 2.612244 | down | TRIM62    |
| 236849_at | 0.00279  | 0.001626 | 2.840166 | down | 2.314802 | down | 1.226959 | up   | VTI1A     |
| 236853_at | 3.55E-04 | 1.00E-04 | 3.216106 | down | 1.138002 | down | 2.826098 | up   | C13orf16  |
| 236856_x_ | 0.010343 | 0.008547 | 2.500898 | down | 1.624167 | down | 1.539804 | up   |           |
| 236857_at | 0.023822 | 0.022242 | 1.691649 | up   | 1.082732 | up   | 1.56239  | down |           |
| 236860_at | 0.016568 | 0.014812 | 1.002843 | up   | 1.155606 | down | 1.158891 | down | NPY6R     |
| 236868_at | 0.011119 | 0.009323 | 1.262147 | up   | 1.223665 | down | 1.544445 | down |           |
| 236871_s_ | 0.011934 | 0.010134 | 1.336046 | up   | 1.009623 | up   | 1.323311 | down | IQCF3     |
| 236880_at | 0.002275 | 0.001239 | 1.67843  | up   | 1.35232  | up   | 1.241148 | down | RAD52     |
| 236881_at | 9.20E-06 | 6.79E-07 | 1.538303 | up   | 1.208439 | down | 1.858946 | down |           |
| 236885_at | 5.56E-04 | 1.82E-04 | 3.228191 | up   | 1.263466 | up   | 2.555028 | down | MEX3A     |
| 236887_at | 0.012221 | 0.010426 | 1.698631 | down | 1.046159 | up   | 1.777038 | up   | KIN       |
| 236894_at | 1.00E-04 | 1.82E-05 | 33.74304 | up   | 24.27596 | up   | 1.389978 | down | L1TD1     |
| 236897_at | 7.43E-04 | 2.72E-04 | 2.018124 | down | 1.084461 | up   | 2.188576 | up   |           |
| 236901_at | 3.65E-06 | 1.84E-07 | 7.908736 | down | 8.911349 | down | 1.126773 | down |           |
| 236905_at | 5.79E-04 | 1.93E-04 | 1.360788 | up   | 1.372253 | up   | 1.008426 | up   | LOC731139 |
| 236906_x_ | 0.001057 | 4.38E-04 | 2.283345 | down | 1.543474 | down | 1.479355 | up   | IPO5      |
| 236907_at | 7.51E-05 | 1.23E-05 | 6.530685 | up   | 5.799498 | up   | 1.126078 | down |           |
| 236917_at | 0.001295 | 5.78E-04 | 2.475457 | down | 1.232312 | down | 2.008791 | up   | LRRC34    |
| 236921_at | 0.005021 | 0.003511 | 1.723397 | up   | 1.492424 | up   | 1.154764 | down |           |
| 236923_x_ | 0.00799  | 0.006276 | 1.212586 | up   | 1.286065 | up   | 1.060597 | up   |           |
| 236925_at | 0.010279 | 0.008482 | 1.389847 | up   | 1.059003 | down | 1.471852 | down | LOC728288 |
| 236936_at | 0.027109 | 0.025624 | 1.51333  | down | 1.318215 | down | 1.148014 | up   |           |
| 236952_at | 0.008667 | 0.006929 | 1.363304 | up   | 1.122641 | up   | 1.214373 | down |           |
| 236958_at | 0.003143 | 0.001908 | 1.937231 | up   | 2.18501  | up   | 1.127904 | up   |           |
| 236961_at | 0.011501 | 0.009699 | 1.990178 | down | 1.379863 | up   | 2.746173 | up   |           |
| 236964_at | 0.018585 | 0.016863 | 1.224966 | up   | 1.13526  | down | 1.390655 | down |           |
| 236966_at | 0.001235 | 5.41E-04 | 2.87671  | up   | 3.422506 | up   | 1.189729 | up   | ARMC8     |
| 236978_at | 0.003275 | 0.002015 | 2.987346 | up   | 5.627272 | up   | 1.883703 | up   |           |
| 236981_at | 0.025967 | 0.024462 | 1.134342 | up   | 1.076106 | down | 1.220672 | down | C17orf99  |
| 236987_at | 0.007919 | 0.006208 | 1.744211 | down | 2.34391  | down | 1.343823 | down |           |
| 236991_at | 0.005126 | 0.003605 | 1.32668  | down | 1.204587 | up   | 1.5981   | up   |           |

|           |          |          |               |               |               |           |
|-----------|----------|----------|---------------|---------------|---------------|-----------|
| 236992_at | 0.00176  | 8.72E-04 | 1.213144 up   | 1.27286 down  | 1.544161 down |           |
| 236993_at | 0.004357 | 0.002925 | 1.396099 up   | 1.038511 up   | 1.344327 down |           |
| 236994_at | 0.00312  | 0.001888 | 2.848856 down | 1.368219 down | 2.082164 up   | FBXL4     |
| 236996_at | 0.0133   | 0.011501 | 1.995712 down | 2.036962 down | 1.020669 down |           |
| 237003_at | 0.009479 | 0.007706 | 1.172487 up   | 1.164766 down | 1.365673 down | BEST3     |
| 237004_at | 0.015469 | 0.013695 | 1.271669 up   | 1.020445 up   | 1.246191 down |           |
| 237005_at | 6.54E-06 | 4.16E-07 | 4.322243 up   | 3.799671 up   | 1.137531 down | LOC442075 |
| 237013_at | 0.022137 | 0.02053  | 1.265539 up   | 1.267223 down | 1.60372 down  |           |
| 237014_at | 8.94E-04 | 3.48E-04 | 1.463483 up   | 1.125048 down | 1.646488 down | MYBL1     |
| 237026_at | 0.010157 | 0.008368 | 1.690457 up   | 1.013883 down | 1.713927 down |           |
| 237027_at | 0.009263 | 0.007505 | 1.366045 up   | 1.0248 down   | 1.399922 down |           |
| 237029_at | 0.001902 | 9.68E-04 | 1.284576 up   | 1.272321 down | 1.634393 down | HGD       |
| 237030_at | 0.019711 | 0.018025 | 1.072598 down | 1.558945 up   | 1.67212 up    | ACPP      |
| 237032_x_ | 0.023526 | 0.021941 | 1.724036 down | 1.987799 down | 1.152992 down | LOC283567 |
| 237035_at | 1.33E-04 | 2.65E-05 | 1.704748 up   | 1.459107 up   | 1.16835 down  |           |
| 237036_at | 0.009086 | 0.007332 | 1.328402 up   | 1.092316 up   | 1.216134 down | FBXO10    |
| 237046_x_ | 0.01071  | 0.008917 | 1.663803 up   | 1.533466 down | 2.551384 down | IL34      |
| 237080_at | 0.00821  | 0.006489 | 1.214962 up   | 1.161407 down | 1.411065 down |           |
| 237088_at | 0.02424  | 0.022664 | 1.267494 down | 1.025214 up   | 1.299453 up   |           |
| 237092_at | 0.001017 | 4.15E-04 | 1.992768 up   | 1.336692 down | 2.663716 down |           |
| 237100_at | 0.004612 | 0.003155 | 1.000407 up   | 1.18845 up    | 1.187967 up   |           |
| 237103_at | 0.005733 | 0.004144 | 1.479152 up   | 1.418109 down | 2.097598 down |           |
| 237109_at | 0.002441 | 0.001359 | 1.460707 up   | 1.467131 down | 2.143049 down | TOM1L2    |
| 237140_x_ | 0.007392 | 0.005707 | 1.40865 up    | 1.00505 up    | 1.401572 down |           |
| 237141_x_ | 0.025521 | 0.023999 | 1.381551 up   | 1.081725 up   | 1.277174 down | AGTPBP1   |
| 237143_at | 0.001414 | 6.51E-04 | 1.405221 down | 1.271038 down | 1.10557 up    |           |
| 237144_at | 0.014308 | 0.012515 | 1.327381 up   | 1.220441 down | 1.619989 down | LTBP3     |
| 237159_x_ | 0.003139 | 0.001904 | 2.184406 up   | 1.163698 down | 2.541989 down | AP1S3     |
| 237163_x_ | 0.013319 | 0.011522 | 1.250696 up   | 1.146105 down | 1.433429 down | LOC390705 |
| 237168_at | 0.001161 | 4.97E-04 | 1.134232 up   | 1.164273 down | 1.320555 down |           |
| 237170_at | 0.004873 | 0.003381 | 1.385098 up   | 1.009027 down | 1.397601 down |           |
| 237171_at | 6.94E-04 | 2.48E-04 | 1.233527 up   | 1.477368 down | 1.822372 down |           |
| 237174_at | 0.005018 | 0.003509 | 1.306296 up   | 1.48618 down  | 1.941391 down |           |
| 237175_at | 0.012454 | 0.010657 | 1.443666 down | 1.505583 down | 1.042889 down |           |



|           |          |          |          |      |          |      |          |      |          |
|-----------|----------|----------|----------|------|----------|------|----------|------|----------|
| 237183_at | 0.030109 | 0.028713 | 3.449365 | down | 3.141419 | down | 1.098028 | up   | GALNT5   |
| 237184_at | 0.010175 | 0.008383 | 1.146664 | up   | 1.276403 | down | 1.463605 | down |          |
| 237187_at | 6.34E-04 | 2.19E-04 | 2.026401 | up   | 1.716309 | up   | 1.180674 | down |          |
| 237188_x_ | 4.19E-04 | 1.25E-04 | 1.543193 | down | 1.483138 | up   | 2.288768 | up   | SPAG4L   |
| 237192_at | 2.42E-04 | 5.95E-05 | 11.5037  | up   | 11.02041 | up   | 1.043854 | down |          |
| 237193_s_ | 1.46E-04 | 3.00E-05 | 16.15927 | up   | 16.20216 | up   | 1.002654 | up   |          |
| 237197_at | 0.018125 | 0.016397 | 1.411908 | up   | 1.110196 | down | 1.567494 | down |          |
| 237203_at | 0.004174 | 0.002757 | 1.536091 | up   | 1.356528 | up   | 1.132369 | down |          |
| 237209_s_ | 0.007873 | 0.006166 | 1.498341 | up   | 2.26254  | up   | 1.510031 | up   | NFRKB    |
| 237217_at | 0.010731 | 0.008936 | 2.617581 | down | 3.425085 | down | 1.308492 | down | ADAMTSL1 |
| 237224_at | 0.006034 | 0.004425 | 1.312733 | up   | 1.050702 | down | 1.379292 | down |          |
| 237227_at | 0.003363 | 0.002089 | 1.439758 | up   | 1.288807 | down | 1.85557  | down | NEK10    |
| 237228_at | 0.002661 | 0.001524 | 1.403506 | up   | 1.58719  | down | 2.22763  | down | ZDHHC1   |
| 237244_at | 0.001543 | 7.31E-04 | 1.38954  | up   | 1.027174 | up   | 1.352779 | down |          |
| 237246_at | 0.015365 | 0.013592 | 1.372558 | up   | 1.956737 | up   | 1.425614 | up   |          |
| 237251_at | 0.009148 | 0.007392 | 1.839299 | up   | 1.251293 | down | 2.301502 | down | C1orf92  |
| 237254_at | 0.004447 | 0.003001 | 1.58784  | up   | 1.264821 | down | 2.008334 | down | SLC5A11  |
| 237257_at | 0.004665 | 0.0032   | 1.689745 | down | 1.425559 | up   | 2.408831 | up   | RAB4B    |
| 237269_at | 0.010564 | 0.008772 | 1.233911 | up   | 1.088013 | down | 1.342511 | down |          |
| 237270_at | 0.016334 | 0.014565 | 1.654343 | down | 1.187675 | down | 1.392926 | up   |          |
| 237275_at | 0.001141 | 4.86E-04 | 16.43243 | up   | 13.42984 | up   | 1.223576 | down |          |
| 237279_at | 0.002231 | 0.001204 | 1.087996 | up   | 1.460728 | down | 1.589266 | down |          |
| 237283_at | 0.012037 | 0.010238 | 1.581323 | up   | 1.063242 | down | 1.681328 | down |          |
| 237284_at | 0.008727 | 0.006986 | 1.337431 | up   | 1.46609  | down | 1.960794 | down | DNAJB8   |
| 237285_at | 9.69E-04 | 3.89E-04 | 1.32006  | up   | 1.281203 | down | 1.691264 | down | SORBS2   |
| 237286_at | 0.006648 | 0.005005 | 1.390241 | up   | 1.138261 | down | 1.582457 | down | INTS9    |
| 237287_at | 0.001838 | 9.24E-04 | 1.764025 | up   | 1.305894 | down | 2.30363  | down | WDR34    |
| 237293_at | 0.002173 | 0.001158 | 2.34176  | down | 1.189505 | down | 1.968684 | up   |          |
| 237295_at | 0.022701 | 0.021112 | 1.310047 | up   | 1.066342 | down | 1.396957 | down |          |
| 237298_at | 0.024702 | 0.023144 | 1.214374 | up   | 1.00757  | down | 1.223567 | down | FLJ26850 |
| 237303_at | 0.019385 | 0.017684 | 1.414697 | up   | 1.000597 | up   | 1.413853 | down |          |
| 237313_at | 0.028753 | 0.027329 | 1.498166 | up   | 1.057257 | down | 1.583947 | down |          |
| 237315_at | 2.91E-04 | 7.65E-05 | 1.61489  | down | 1.090146 | down | 1.481352 | up   |          |
| 237318_at | 0.011153 | 0.009362 | 1.277865 | up   | 1.301028 | down | 1.662538 | down |          |

|           |          |          |               |               |               |           |
|-----------|----------|----------|---------------|---------------|---------------|-----------|
| 237323_at | 0.001682 | 8.22E-04 | 1.197771 up   | 1.261296 down | 1.510743 down | HKDC1     |
| 237324_s_ | 2.18E-04 | 5.17E-05 | 1.636113 up   | 2.094124 down | 3.426225 down | HKDC1     |
| 237333_at | 3.56E-05 | 4.43E-06 | 3.785305 up   | 13.80838 up   | 3.647891 up   | RBBP4     |
| 237334_at | 0.024299 | 0.022723 | 1.471768 up   | 1.023959 up   | 1.437331 down |           |
| 237336_at | 2.49E-05 | 2.70E-06 | 4.699618 up   | 4.109154 up   | 1.143695 down | ADD2      |
| 237338_at | 6.89E-04 | 2.45E-04 | 1.039734 up   | 2.305272 down | 2.396869 down | B3GNT8    |
| 237349_at | 0.011939 | 0.01014  | 1.223505 up   | 1.104484 down | 1.351342 down | TSHR      |
| 237357_at | 0.00578  | 0.004188 | 1.260863 up   | 1.289679 down | 1.626109 down |           |
| 237363_at | 0.016549 | 0.014787 | 1.167573 up   | 1.001971 up   | 1.165276 down | C9orf68   |
| 237370_at | 8.56E-04 | 3.28E-04 | 1.957118 up   | 1.224563 down | 2.396614 down |           |
| 237372_at | 0.005254 | 0.00372  | 4.040333 down | 2.429737 down | 1.662868 up   |           |
| 237373_at | 0.001165 | 5.00E-04 | 1.231609 up   | 1.323985 down | 1.630632 down | RAB20     |
| 237382_at | 0.011854 | 0.010054 | 1.279089 up   | 1.10461 down  | 1.412895 down | GLT25D2   |
| 237390_at | 0.003939 | 0.002558 | 1.197891 up   | 1.02487 up    | 1.168822 down |           |
| 237396_at | 0.010429 | 0.008632 | 1.403135 up   | 1.481191 down | 2.07831 down  |           |
| 237400_at | 0.001102 | 4.63E-04 | 4.088769 down | 2.770272 down | 1.475945 up   |           |
| 237411_at | 1.55E-05 | 1.42E-06 | 5.058252 down | 9.516831 down | 1.881447 down | ADAMTS6   |
| 237414_at | 9.32E-04 | 3.69E-04 | 1.610285 up   | 1.007953 up   | 1.597579 down | F7        |
| 237426_at | 1.97E-04 | 4.51E-05 | 1.873522 down | 1.449839 down | 1.292228 up   | SP100     |
| 237427_at | 0.014922 | 0.013147 | 1.305694 up   | 1.006748 up   | 1.296942 down |           |
| 237435_at | 2.24E-05 | 2.35E-06 | 20.65862 down | 13.15729 down | 1.570128 up   |           |
| 237440_at | 0.005096 | 0.003578 | 1.314982 up   | 1.010642 up   | 1.301135 down |           |
| 237449_at | 8.86E-08 | 9.80E-10 | 6.65289 up    | 6.913977 up   | 1.039244 up   | SP8       |
| 237450_at | 0.02207  | 0.020462 | 1.702308 up   | 1.084675 down | 1.846451 down | LOC389332 |
| 237454_at | 0.002927 | 0.001731 | 1.700098 up   | 1.243781 down | 2.114549 down |           |
| 237457_at | 0.011712 | 0.009909 | 1.299829 up   | 1.383694 down | 1.798566 down | EIF3B     |
| 237460_x_ | 0.015434 | 0.013659 | 1.342559 down | 1.492593 down | 1.111752 down | C14orf182 |
| 237463_at | 0.019385 | 0.017683 | 1.692977 up   | 1.54643 down  | 2.61807 down  | ZFPM1     |
| 237466_s_ | 0.030916 | 0.029552 | 1.464593 up   | 3.451676 down | 5.055302 down | HHIP      |
| 237469_at | 0.007661 | 0.005965 | 1.47563 up    | 1.685448 up   | 1.142189 up   | TOP2A     |
| 237475_x_ | 0.002834 | 0.001659 | 1.557022 up   | 2.669357 up   | 1.7144 up     | CCDC152   |
| 237477_at | 0.004498 | 0.003049 | 1.1265 up     | 1.083506 down | 1.22057 down  | PDCL2     |
| 237480_at | 5.50E-04 | 1.80E-04 | 2.141122 down | 1.195435 down | 1.791082 up   |           |
| 237484_at | 0.006225 | 0.004605 | 1.371554 up   | 1.011179 up   | 1.356391 down | C12orf69  |

|           |          |          |               |               |               |                      |
|-----------|----------|----------|---------------|---------------|---------------|----------------------|
| 237491_at | 0.004232 | 0.002805 | 2.231408 up   | 3.384344 up   | 1.516685 up   |                      |
| 237492_at | 9.19E-04 | 3.62E-04 | 1.339881 up   | 1.27205 up    | 1.053325 down |                      |
| 237510_at | 0.004324 | 0.002893 | 1.51798 up    | 1.387168 up   | 1.094302 down | MYNN                 |
| 237519_at | 2.44E-04 | 6.01E-05 | 1.500387 up   | 1.179673 down | 1.769965 down |                      |
| 237523_at | 6.06E-04 | 2.06E-04 | 1.604875 up   | 1.130383 up   | 1.419762 down |                      |
| 237524_at | 0.005821 | 0.004224 | 1.207807 up   | 1.358766 down | 1.641127 down |                      |
| 237529_at | 0.00968  | 0.007903 | 1.443204 up   | 1.084457 up   | 1.330808 down |                      |
| 237533_at | 0.019548 | 0.017851 | 1.649239 up   | 1.011574 down | 1.668328 down |                      |
| 237534_at | 0.002295 | 0.001252 | 2.451732 up   | 1.801295 down | 4.416293 down |                      |
| 237535_x_ | 4.79E-04 | 1.49E-04 | 1.785566 up   | 1.110611 up   | 1.607733 down | NRXN1                |
| 237542_at | 0.014786 | 0.013009 | 1.344652 up   | 1.242837 down | 1.671184 down |                      |
| 237549_at | 0.009179 | 0.007424 | 1.129665 up   | 1.116458 down | 1.261224 down |                      |
| 237550_at | 3.83E-04 | 1.11E-04 | 1.478602 up   | 1.223013 down | 1.80835 down  |                      |
| 237553_at | 0.008469 | 0.006735 | 1.524278 down | 1.383246 down | 1.101957 up   |                      |
| 237559_at | 9.30E-04 | 3.68E-04 | 1.053062 up   | 1.809076 down | 1.90507 down  | GPR55                |
| 237564_at | 0.002449 | 0.001364 | 1.354412 up   | 1.124359 down | 1.522845 down | LOC440731            |
| 237568_at | 0.001954 | 0.001005 | 1.591445 up   | 1.205549 down | 1.918564 down |                      |
| 237570_x_ | 0.004417 | 0.002972 | 1.660212 up   | 1.228581 down | 2.039706 down |                      |
| 237574_at | 0.002773 | 0.001613 | 1.082602 up   | 1.382701 down | 1.496915 down |                      |
| 237583_at | 7.81E-04 | 2.91E-04 | 1.842262 up   | 1.322766 up   | 1.392735 down |                      |
| 237585_at | 0.030834 | 0.029459 | 2.250794 up   | 1.206294 up   | 1.865876 down | C4orf47<br>NCRNA0017 |
| 237591_at | 0.024097 | 0.022518 | 1.497632 up   | 2.246449 up   | 1.500001 up   | 3                    |
| 237596_at | 0.009566 | 0.007794 | 1.098611 down | 1.222118 down | 1.112421 down |                      |
| 237604_at | 0.008972 | 0.007222 | 1.701889 up   | 1.097925 up   | 1.550096 down | LOC415056            |
| 237609_at | 0.010024 | 0.008243 | 1.088921 down | 1.186083 up   | 1.29155 up    |                      |
| 237619_at | 0.013046 | 0.01124  | 1.091766 up   | 1.179682 up   | 1.080527 up   | C6orf146             |
| 237623_at | 0.00278  | 0.001618 | 1.876506 down | 1.058882 down | 1.772158 up   | CST3                 |
| 237627_at | 0.016819 | 0.015064 | 1.417769 down | 1.808455 down | 1.275564 down |                      |
| 237629_at | 0.004108 | 0.002698 | 1.381915 up   | 1.108565 up   | 1.246581 down |                      |
| 237641_at | 0.003621 | 0.002296 | 1.687999 up   | 1.309936 down | 2.21117 down  |                      |
| 237643_at | 0.033464 | 0.032149 | 1.592351 up   | 1.044476 up   | 1.524545 down |                      |
| 237644_at | 0.009488 | 0.007715 | 1.22133 down  | 1.042549 up   | 1.273296 up   |                      |
| 237646_x_ | 0.007268 | 0.005592 | 2.048983 up   | 1.64932 down  | 3.379427 down | PLEKHG5              |

|           |          |          |               |               |               |           |
|-----------|----------|----------|---------------|---------------|---------------|-----------|
| 237647_at | 0.017634 | 0.015892 | 1.423905 up   | 1.088591 down | 1.55005 down  | GHRL      |
| 237653_at | 0.003789 | 0.002435 | 1.333711 down | 1.030821 up   | 1.374817 up   |           |
| 237656_at | 0.041475 | 0.040229 | 1.183868 up   | 1.132053 down | 1.3402 down   | WWC2      |
| 237663_at | 7.87E-04 | 2.95E-04 | 1.259793 down | 1.167332 up   | 1.470596 up   |           |
| 237676_at | 0.004261 | 0.002832 | 1.394387 up   | 1.175679 up   | 1.186027 down |           |
| 237681_at | 0.007654 | 0.005958 | 1.149169 down | 1.204766 up   | 1.384479 up   |           |
| 237697_at | 0.006113 | 0.004502 | 1.396609 up   | 1.426088 down | 1.991688 down |           |
| 237704_at | 0.014382 | 0.012598 | 1.506594 up   | 1.083941 down | 1.633058 down |           |
| 237705_at | 0.017256 | 0.015508 | 1.115066 up   | 1.094126 down | 1.220023 down |           |
| 237712_at | 0.011443 | 0.009645 | 1.280711 up   | 1.215282 down | 1.556426 down |           |
| 237713_at | 0.010977 | 0.009181 | 1.059902 down | 1.301771 down | 1.228199 down |           |
| 237715_at | 7.43E-04 | 2.72E-04 | 1.90774 up    | 1.295637 down | 2.471738 down | AKNA      |
| 237723_at | 0.001088 | 4.55E-04 | 1.350197 down | 1.141862 down | 1.182452 up   |           |
| 237727_at | 0.001953 | 0.001004 | 1.81089 up    | 1.730123 up   | 1.046683 down |           |
| 237739_at | 0.001419 | 6.53E-04 | 1.494765 up   | 1.229679 down | 1.838081 down |           |
| 237743_at | 2.75E-04 | 7.08E-05 | 1.047461 down | 1.44145 down  | 1.376138 down |           |
| 237745_at | 0.003996 | 0.002603 | 2.165598 down | 1.335982 down | 1.620978 up   | LOC641467 |
| 237750_at | 0.043986 | 0.042751 | 1.16234 down  | 1.078029 up   | 1.253036 up   | XPNPEP3   |
| 237759_at | 0.009767 | 0.007989 | 1.123865 up   | 1.281548 down | 1.440288 down | CD48      |
| 237765_at | 5.59E-04 | 1.83E-04 | 1.809931 up   | 1.136206 down | 2.056454 down | C14orf68  |
| 237779_at | 0.003828 | 0.002466 | 1.156541 up   | 1.385502 up   | 1.197971 up   |           |
| 237785_at | 0.017836 | 0.016098 | 1.150352 up   | 1.142437 down | 1.314205 down | ASB14     |
| 237786_at | 0.0012   | 5.21E-04 | 1.389708 up   | 1.707962 up   | 1.229008 up   | MAGI2     |
| 237789_at | 0.005031 | 0.003519 | 1.397792 up   | 1.341837 down | 1.875609 down |           |
|           |          |          |               |               |               | LOC100127 |
| 237790_at | 1.92E-04 | 4.34E-05 | 1.916558 down | 1.016608 down | 1.885248 up   | 971       |
| 237800_at | 0.003746 | 0.0024   | 1.114071 up   | 1.13351 down  | 1.26281 down  |           |
| 237802_at | 0.010308 | 0.008513 | 2.843528 up   | 2.349924 up   | 1.210051 down | XKR4      |
| 237805_at | 0.015157 | 0.013384 | 1.193947 up   | 1.102522 down | 1.316353 down | LOC729296 |
| 237809_at | 0.005919 | 0.004319 | 1.261515 down | 1.175743 up   | 1.483218 up   |           |
| 237810_at | 9.25E-08 | 1.05E-09 | 132.5002 up   | 117.4512 up   | 1.128129 down | CLDN6     |
| 237812_at | 0.009689 | 0.007911 | 1.241431 up   | 1.012629 up   | 1.225949 down |           |
|           |          |          |               |               |               | PCBP2 /// |
| 237813_at | 0.020539 | 0.01887  | 1.681777 up   | 1.205345 up   | 1.395265 down | PCBP2P2   |

|           |          |          |               |               |               |            |
|-----------|----------|----------|---------------|---------------|---------------|------------|
| 237824_at | 0.003066 | 0.001844 | 1.32368 up    | 1.017834 up   | 1.300488 down |            |
| 237839_at | 0.028374 | 0.026925 | 2.317441 up   | 1.789416 up   | 1.295083 down |            |
| 237851_at | 0.001172 | 5.04E-04 | 1.68558 up    | 1.651219 down | 2.783262 down |            |
| 237853_x_ | 8.83E-04 | 3.43E-04 | 1.778753 down | 1.001583 down | 1.775942 up   | KRTAP10-12 |
| 237855_at | 0.001305 | 5.84E-04 | 2.083167 up   | 1.008525 down | 2.100926 down | ZNF777     |
| 237857_at | 0.01657  | 0.014814 | 1.289702 up   | 1.146638 up   | 1.124768 down |            |
| 237860_at | 1.46E-05 | 1.31E-06 | 3.271645 down | 2.556541 down | 1.279716 up   |            |
| 237861_at | 0.012258 | 0.010462 | 1.159972 up   | 1.356583 down | 1.573598 down | LOC729556  |
| 237867_s_ | 6.85E-04 | 2.43E-04 | 2.363559 down | 1.102386 down | 2.14404 up    | PID1       |
| 237868_x_ | 0.004248 | 0.002821 | 1.5877 up     | 2.371532 up   | 1.49369 up    |            |
| 237880_at | 0.018781 | 0.01707  | 1.277818 up   | 1.093082 down | 1.396761 down | LOC729285  |
| 237882_at | 0.008467 | 0.006733 | 2.018926 up   | 1.347658 down | 2.720821 down |            |
| 237885_at | 0.007537 | 0.005849 | 1.565216 up   | 1.336269 up   | 1.171334 down |            |
| 237894_at | 0.006073 | 0.004463 | 1.302686 up   | 1.210257 down | 1.576585 down | C3orf22    |
| 237895_at | 0.00169  | 8.27E-04 | 2.03955 up    | 3.705445 up   | 1.816795 up   |            |
| 237896_at | 0.002633 | 0.001502 | 4.314635 up   | 3.758392 up   | 1.148 down    | NODAL      |
| 237911_at | 4.76E-05 | 6.58E-06 | 46.81883 up   | 32.84932 up   | 1.42526 down  |            |
| 237916_at | 0.007041 | 0.005378 | 1.226342 up   | 1.292076 down | 1.584526 down |            |
| 237922_at | 0.017156 | 0.015399 | 1.47553 up    | 1.023053 down | 1.509546 down |            |
| 237923_at | 0.009488 | 0.007716 | 1.023633 down | 1.444205 down | 1.410863 down |            |
| 237926_s_ | 0.004669 | 0.003204 | 1.423575 up   | 1.468199 down | 2.090092 down |            |
| 237931_at | 0.001133 | 4.81E-04 | 1.792252 up   | 1.3301 down   | 2.383873 down |            |
| 237941_at | 7.23E-04 | 2.62E-04 | 1.7865 up     | 1.024704 up   | 1.743431 down |            |
|           |          |          |               |               |               | LOC100129  |
| 237943_at | 0.003104 | 0.001874 | 1.259379 up   | 1.665436 up   | 1.322427 up   | 701        |
| 237944_at | 0.024615 | 0.023051 | 1.283741 up   | 1.208462 down | 1.551352 down | LRRFIP1    |
| 237955_at | 0.010306 | 0.008511 | 1.284216 up   | 1.010634 up   | 1.270703 down | LOC133874  |
| 237959_at | 0.045533 | 0.044324 | 1.319316 up   | 1.112941 down | 1.468321 down |            |
| 237975_at | 0.002221 | 0.001195 | 1.284982 up   | 1.419433 down | 1.823947 down |            |
| 237977_at | 0.007953 | 0.006244 | 1.433442 up   | 1.162041 down | 1.665719 down |            |
| 237986_at | 0.009083 | 0.007328 | 1.428432 up   | 1.317976 down | 1.882639 down |            |
| 237991_at | 0.026885 | 0.025396 | 1.016874 up   | 1.121129 down | 1.140046 down |            |
| 237993_at | 0.009078 | 0.007323 | 2.127826 up   | 1.391379 down | 2.960611 down | CHCHD5     |

|           |          |          |               |               |               |                      |
|-----------|----------|----------|---------------|---------------|---------------|----------------------|
| 238001_at | 0.004293 | 0.002864 | 1.841508 up   | 1.84181 up    | 1.000164 up   | KCTD6                |
| 238004_at | 5.54E-05 | 8.09E-06 | 2.032624 up   | 1.258782 up   | 1.614754 down | PGBD2                |
| 238006_at | 0.00207  | 0.001086 | 1.726805 up   | 1.246284 down | 2.15209 down  | SIN3A                |
| 238013_at | 0.002358 | 0.001297 | 4.710304 down | 3.543886 down | 1.329135 up   | PLEKHA2<br>LOC100129 |
| 238016_s_ | 0.008268 | 0.006541 | 1.198065 up   | 1.501367 down | 1.798736 down | 105                  |
| 238019_at | 0.003483 | 0.002188 | 1.630834 up   | 1.205432 down | 1.96586 down  | LSDP5                |
| 238020_at | 0.001196 | 5.19E-04 | 2.733501 down | 1.388677 down | 1.968422 up   | PSMC2<br>hCG_18154   |
| 238021_s_ | 0.002163 | 0.001152 | 3.556656 down | 2.882605 down | 1.233834 up   | 91<br>hCG_18154      |
| 238022_at | 1.28E-05 | 1.08E-06 | 2.858874 down | 4.672786 down | 1.634485 down | 91                   |
| 238025_at | 5.71E-05 | 8.44E-06 | 5.059929 down | 5.20884 down  | 1.029429 down | MLKL                 |
| 238026_at | 0.004765 | 0.003283 | 2.016408 down | 1.917782 down | 1.051427 up   | RPL35A<br>LOC100128  |
| 238028_at | 3.46E-04 | 9.64E-05 | 2.223032 up   | 1.086319 down | 2.414923 down | 918                  |
| 238035_at | 2.02E-04 | 4.66E-05 | 2.856172 up   | 3.413696 up   | 1.1952 up     | SP3                  |
| 238038_at | 3.80E-05 | 4.81E-06 | 1.366069 up   | 2.008298 down | 2.743473 down |                      |
| 238039_at | 0.013803 | 0.012014 | 1.697952 down | 1.097423 down | 1.547217 up   | LOC728769            |
| 238041_at | 0.001178 | 5.08E-04 | 3.448755 down | 1.663102 down | 2.073688 up   |                      |
| 238043_at | 0.002601 | 0.001479 | 1.559375 up   | 2.064309 up   | 1.323806 up   | LOC729446            |
| 238044_at | 0.004063 | 0.00266  | 1.606646 up   | 1.318624 down | 2.118561 down |                      |
| 238045_at | 0.008374 | 0.006642 | 2.39863 down  | 1.524513 down | 1.573375 up   | TMEM65               |
| 238046_x_ | 0.017172 | 0.015417 | 1.684178 up   | 1.429652 down | 2.407788 down | PWWP2B               |
| 238050_at | 6.04E-04 | 2.05E-04 | 2.519464 down | 1.63939 down  | 1.53683 up    | ANTXR2               |
| 238051_x_ | 0.003668 | 0.002334 | 2.171008 up   | 1.504582 down | 3.26646 down  | PWWP2B               |
| 238058_at | 2.62E-06 | 1.15E-07 | 8.60391 down  | 10.90819 down | 1.267818 down | LOC150381            |
| 238059_at | 0.025385 | 0.023852 | 1.642759 up   | 1.15365 down  | 1.895168 down |                      |
| 238060_s_ | 3.53E-04 | 9.94E-05 | 1.320525 up   | 1.203436 down | 1.589168 down | B4GALNT4             |
| 238066_at | 5.80E-05 | 8.66E-06 | 4.063918 up   | 4.102346 up   | 1.009456 up   | RBP7                 |
| 238067_at | 1.97E-08 | 1.06E-10 | 25.45065 down | 12.20916 down | 2.084554 up   | TBC1D8B              |
| 238069_at | 0.002232 | 0.001205 | 1.410825 up   | 2.081883 up   | 1.47565 up    |                      |
| 238075_at | 0.001478 | 6.89E-04 | 1.809039 up   | 4.625792 up   | 2.557044 up   | CHEK1                |
| 238076_at | 0.007991 | 0.006278 | 1.141932 down | 1.794998 up   | 2.049767 up   | GATAD2B              |

|           |          |          |               |               |               |           |
|-----------|----------|----------|---------------|---------------|---------------|-----------|
| 238077_at | 2.87E-04 | 7.50E-05 | 1.717563 up   | 1.705072 up   | 1.007326 down | KCTD6     |
| 238078_at | 0.001192 | 5.16E-04 | 2.976999 down | 2.251186 down | 1.322414 up   | SEC22A    |
| 238079_at | 0.0209   | 0.01925  | 1.392449 up   | 1.126336 up   | 1.236264 down | TPM3      |
| 238080_at | 0.002213 | 0.001188 | 2.550871 up   | 1.421173 up   | 1.794905 down | B4GALNT4  |
| 238081_at | 0.011079 | 0.009278 | 3.159841 down | 1.295226 down | 2.439606 up   | C4orf12   |
| 238083_at | 0.002395 | 0.001325 | 1.093507 up   | 1.528875 down | 1.671834 down | PARP10    |
| 238085_at | 5.81E-04 | 1.94E-04 | 2.013981 up   | 1.295917 up   | 1.554097 down |           |
|           |          |          |               |               |               | LOC100129 |
| 238093_at | 0.002255 | 0.001223 | 1.537256 up   | 1.23355 down  | 1.896281 down | 722       |
| 238095_at | 0.02054  | 0.018874 | 1.347693 up   | 1.108559 up   | 1.215716 down | GATA5     |
| 238096_at | 0.004263 | 0.002836 | 2.079807 down | 1.35564 down  | 1.534188 up   | LOC284023 |
|           |          |          |               |               |               | LOC100134 |
| 238097_at | 0.017039 | 0.015282 | 1.315422 up   | 1.398889 down | 1.84013 down  | 226       |
| 238101_at | 6.26E-04 | 2.15E-04 | 1.171556 up   | 1.429827 down | 1.675121 down | BEND4     |
| 238105_x_ | 0.004065 | 0.002662 | 1.145808 up   | 1.52085 down  | 1.742601 down | WNT7B     |
| 238110_at | 9.79E-04 | 3.94E-04 | 1.458622 up   | 1.202684 down | 1.754262 down | SAPS2     |
| 238112_at | 0.010488 | 0.008697 | 1.620148 up   | 1.196124 down | 1.937898 down | LOC283177 |
| 238114_at | 0.034022 | 0.032709 | 2.554261 up   | 2.090386 up   | 1.221909 down | PCMTD1    |
| 238122_at | 0.002715 | 0.001565 | 1.925439 up   | 3.511014 up   | 1.823487 up   | RBM12B    |
| 238125_at | 0.003034 | 0.00182  | 1.743442 up   | 1.291191 down | 2.251117 down | ADAMTS16  |
| 238126_at | 0.004626 | 0.003167 | 1.73851 down  | 1.093641 down | 1.589654 up   |           |
| 238133_at | 0.008679 | 0.006941 | 1.707604 down | 1.304955 up   | 2.228346 up   |           |
| 238134_at | 0.01827  | 0.016549 | 1.47786 up    | 1.20516 up    | 1.226277 down |           |
| 238144_s_ | 0.004272 | 0.002844 | 1.264898 up   | 1.147865 down | 1.451933 down |           |
| 238151_at | 3.59E-04 | 1.01E-04 | 5.063 down    | 2.832663 down | 1.787364 up   |           |
| 238153_at | 0.001805 | 9.01E-04 | 1.395349 up   | 1.176891 down | 1.642173 down | PDE6B     |
| 238156_at | 4.10E-06 | 2.18E-07 | 4.412931 up   | 7.542114 up   | 1.709094 up   |           |
|           |          |          |               |               |               | LOC100129 |
| 238165_at | 0.001325 | 5.96E-04 | 1.643357 down | 1.034506 down | 1.588543 up   | 282       |
| 238166_s_ | 0.003033 | 0.001818 | 1.539268 down | 1.389319 down | 1.10793 up    | C17orf51  |
| 238167_at | 7.71E-04 | 2.86E-04 | 1.613579 up   | 1.438713 down | 2.321477 down | C17orf51  |
| 238173_at | 9.51E-05 | 1.68E-05 | 1.598086 up   | 1.290927 down | 2.063012 down | TCEA2     |
| 238175_at | 0.0021   | 0.001107 | 1.301754 up   | 1.16961 up    | 1.112981 down |           |
| 238177_at | 0.009454 | 0.007681 | 1.479994 up   | 1.002956 down | 1.484369 down | SLC6A19   |

|           |          |          |          |      |          |      |          |      |           |
|-----------|----------|----------|----------|------|----------|------|----------|------|-----------|
| 238178_at | 0.001114 | 4.70E-04 | 6.489096 | down | 1.601094 | down | 4.052915 | up   |           |
| 238180_at | 0.010283 | 0.008486 | 1.022414 | up   | 1.686963 | down | 1.724773 | down |           |
| 238186_at | 1.01E-04 | 1.82E-05 | 1.664342 | up   | 1.009505 | down | 1.680161 | down |           |
| 238196_at | 0.010957 | 0.009161 | 1.28987  | up   | 1.365858 | down | 1.761779 | down | LOC285095 |
| 238197_at | 0.001679 | 8.21E-04 | 1.818871 | up   | 1.292863 | up   | 1.406856 | down | GATA5     |
| 238215_at | 0.007165 | 0.005495 | 1.364154 | up   | 1.170164 | up   | 1.16578  | down | SLC6A18   |
| 238220_at | 0.020793 | 0.019139 | 1.533002 | up   | 1.391007 | up   | 1.102081 | down | KDM6A     |
| 238227_at | 0.007614 | 0.005922 | 1.204685 | up   | 1.581129 | up   | 1.312483 | up   | GARNL3    |
| 238238_at | 0.001097 | 4.60E-04 | 1.276953 | up   | 1.305224 | down | 1.666709 | down |           |
| 238240_at | 0.006494 | 0.004862 | 1.493583 | up   | 1.147115 | up   | 1.302034 | down |           |
| 238242_at | 9.58E-04 | 3.82E-04 | 1.916524 | up   | 1.443665 | down | 2.766819 | down |           |
| 238247_at | 0.010434 | 0.008637 | 1.414001 | up   | 1.117907 | down | 1.580721 | down |           |
| 238252_at | 6.56E-04 | 2.29E-04 | 2.211812 | up   | 2.232777 | up   | 1.009479 | up   |           |
| 238259_at | 0.0035   | 0.0022   | 1.368226 | up   | 1.297395 | up   | 1.054594 | down | ADSSL1    |
| 238260_at | 0.00568  | 0.004097 | 1.386676 | up   | 1.065327 | down | 1.477263 | down |           |
| 238263_at | 0.002282 | 0.001243 | 2.45592  | up   | 1.521046 | up   | 1.614626 | down | LOC285965 |
| 238265_x_ | 0.002532 | 0.001428 | 1.430581 | up   | 1.123103 | down | 1.60669  | down |           |
| 238267_s_ | 0.004564 | 0.003111 | 2.424493 | up   | 1.739827 | down | 4.218197 | down |           |
| 238270_x_ | 0.003412 | 0.002128 | 1.208826 | down | 1.258014 | up   | 1.520719 | up   |           |
| 238285_at | 0.004496 | 0.003046 | 1.244604 | down | 1.185279 | up   | 1.475203 | up   | SOX5      |
| 238286_at | 0.010477 | 0.008686 | 1.348214 | up   | 1.216072 | up   | 1.108663 | down | SPG7      |
| 238296_at | 0.001633 | 7.90E-04 | 1.771801 | up   | 1.445184 | up   | 1.226003 | down | GLIPR1L1  |
| 238300_s_ | 0.006053 | 0.004443 | 1.578319 | up   | 1.046996 | down | 1.652493 | down | DAZAP2    |
|           |          |          |          |      |          |      |          |      | LOC100133 |
| 238308_at | 0.005591 | 0.004016 | 1.523143 | up   | 1.110972 | up   | 1.371001 | down | 236       |
| 238312_s_ | 0.015304 | 0.013532 | 1.329841 | up   | 1.115964 | down | 1.484055 | down | B4GALT3   |
| 238313_at | 0.011127 | 0.009332 | 1.739175 | up   | 1.046977 | down | 1.820875 | down |           |
| 238318_at | 0.00627  | 0.004653 | 1.351696 | down | 1.017667 | down | 1.32823  | up   |           |
| 238319_at | 0.022732 | 0.021146 | 1.275983 | up   | 1.015024 | up   | 1.257096 | down | LOC644090 |
| 238325_s_ | 0.006121 | 0.00451  | 2.207551 | up   | 1.167151 | down | 2.576544 | down | ODF3B     |
| 238326_at | 0.004472 | 0.003026 | 2.748503 | up   | 2.565459 | down | 7.051172 | down | ODF3B     |
| 238332_at | 6.37E-04 | 2.20E-04 | 19.07475 | down | 2.598386 | down | 7.341001 | up   | ANKRD29   |
| 238334_at | 3.49E-04 | 9.79E-05 | 1.252449 | up   | 1.796681 | down | 2.250251 | down | MTG1      |
| 238337_s_ | 0.002599 | 0.001477 | 1.9624   | down | 1.200087 | up   | 2.35505  | up   | DNAJC21   |



|           |          |          |          |      |          |      |          |      |           |
|-----------|----------|----------|----------|------|----------|------|----------|------|-----------|
| 238338_at | 0.007031 | 0.005369 | 1.356531 | down | 1.013847 | down | 1.338003 | up   |           |
| 238344_at | 0.006043 | 0.004434 | 1.551095 | up   | 1.273983 | down | 1.976069 | down |           |
| 238345_at | 0.004186 | 0.002768 | 2.507556 | up   | 1.17489  | down | 2.946103 | down | SLC38A10  |
| 238346_s_ | 0.004248 | 0.002821 | 2.949891 | up   | 3.997193 | up   | 1.355031 | up   | TGS1      |
| 238350_at | 0.001156 | 4.94E-04 | 2.505656 | up   | 2.204104 | up   | 1.136814 | down | UBN2      |
| 238351_x_ | 0.011776 | 0.009973 | 2.071743 | up   | 1.168026 | down | 2.419848 | down |           |
| 238359_at | 0.003125 | 0.001893 | 1.716861 | up   | 1.12674  | down | 1.934457 | down |           |
| 238362_at | 0.015797 | 0.01402  | 1.127578 | down | 1.080469 | up   | 1.218313 | up   |           |
| 238363_at | 8.18E-05 | 1.37E-05 | 2.870256 | down | 1.1691   | down | 2.4551   | up   |           |
| 238366_at | 0.02667  | 0.025184 | 1.542198 | up   | 1.059266 | down | 1.633598 | down | C1orf228  |
| 238374_at | 0.002541 | 0.001434 | 1.406921 | up   | 1.100743 | down | 1.548658 | down | H1FNT     |
| 238381_x_ | 0.015886 | 0.01411  | 1.351499 | up   | 1.134887 | down | 1.533799 | down |           |
| 238388_x_ | 0.004159 | 0.002743 | 1.804255 | up   | 1.337471 | down | 2.413139 | down |           |
| 238391_at | 0.007203 | 0.005531 | 1.068861 | down | 1.108857 | down | 1.037419 | down |           |
| 238400_at | 0.013621 | 0.011828 | 1.422502 | up   | 1.282685 | down | 1.824621 | down | FLJ35220  |
| 238404_x_ | 0.005448 | 0.003891 | 1.712105 | up   | 1.572866 | down | 2.692911 | down | SEZ6L2    |
| 238405_at | 0.015222 | 0.01345  | 1.68243  | up   | 1.241866 | down | 2.089352 | down |           |
| 238406_x_ | 0.002865 | 0.001683 | 1.892062 | up   | 1.537802 | down | 2.909616 | down | SEZ6L2    |
| 238415_at | 0.011261 | 0.009468 | 1.444712 | up   | 1.243459 | down | 1.796439 | down |           |
| 238417_at | 7.60E-04 | 2.81E-04 | 2.77206  | up   | 1.255259 | up   | 2.208357 | down | PGM2L1    |
| 238419_at | 0.010148 | 0.008356 | 2.113993 | down | 2.983586 | down | 1.411351 | down | PHLDB2    |
| 238425_at | 0.00836  | 0.006629 | 1.805274 | down | 1.476867 | down | 1.222367 | up   |           |
| 238430_x_ | 0.002215 | 0.00119  | 6.274488 | down | 4.458884 | down | 1.407188 | up   | SLFN5     |
| 238432_at | 5.06E-04 | 1.60E-04 | 2.33448  | down | 1.759021 | down | 1.327147 | up   | FLJ35776  |
| 238440_at | 5.40E-04 | 1.75E-04 | 2.352978 | up   | 2.482917 | up   | 1.055223 | up   | CLYBL     |
| 238441_at | 0.048692 | 0.047525 | 1.009978 | up   | 2.457444 | up   | 2.433166 | up   | PRKAA2    |
| 238443_at | 1.95E-04 | 4.45E-05 | 4.290413 | up   | 5.723996 | up   | 1.334136 | up   |           |
| 238444_at | 0.014907 | 0.013131 | 1.364507 | up   | 1.522096 | up   | 1.115492 | up   | ZNF618    |
| 238445_x_ | 0.006344 | 0.004719 | 1.634963 | up   | 2.108554 | down | 3.447407 | down | MGAT5B    |
| 238447_at | 7.29E-04 | 2.65E-04 | 10.69479 | down | 14.08848 | down | 1.317322 | down | RBMS3     |
| 238449_at | 0.011854 | 0.010052 | 1.905181 | up   | 4.751947 | up   | 2.494223 | up   | LOC595101 |
| 238451_at | 3.48E-04 | 9.73E-05 | 2.258444 | up   | 1.848147 | up   | 1.222005 | down | MPP7      |
| 238453_at | 5.37E-07 | 1.22E-08 | 16.97309 | up   | 17.43723 | up   | 1.027346 | up   | FGFBP3    |
| 238455_at | 0.005925 | 0.004325 | 3.036446 | up   | 1.272016 | up   | 2.387113 | down |           |

|           |          |          |          |      |          |      |          |      |           |
|-----------|----------|----------|----------|------|----------|------|----------|------|-----------|
| 238456_at | 0.004433 | 0.002988 | 2.017898 | down | 1.016906 | down | 1.984351 | up   |           |
| 238458_at | 0.014735 | 0.012958 | 3.769583 | down | 1.786048 | down | 2.110572 | up   | EFHA2     |
| 238461_at | 8.67E-04 | 3.33E-04 | 2.247864 | down | 1.481657 | up   | 3.330563 | up   | EIF4E3    |
| 238462_at | 2.72E-04 | 6.98E-05 | 6.708613 | down | 10.51397 | down | 1.567234 | down | UBASH3B   |
| 238463_at | 4.13E-04 | 1.22E-04 | 3.243067 | down | 1.482751 | down | 2.187195 | up   |           |
| 238468_at | 0.005571 | 0.003998 | 1.244303 | up   | 2.241519 | up   | 1.801426 | up   | TNRC6B    |
| 238469_at | 2.71E-04 | 6.94E-05 | 4.31944  | down | 3.22224  | down | 1.340509 | up   | OGFRL1    |
| 238472_at | 0.015657 | 0.013879 | 1.681717 | down | 1.116214 | up   | 1.877155 | up   | FBXO9     |
|           |          |          |          |      |          |      |          |      | LOC100216 |
| 238473_at | 0.007512 | 0.005821 | 1.294165 | up   | 1.256891 | down | 1.626625 | down | 545       |
| 238476_at | 0.009877 | 0.008101 | 6.095824 | down | 2.061425 | down | 2.957093 | up   | C5orf41   |
| 238477_at | 0.001927 | 9.86E-04 | 2.245058 | down | 2.571831 | down | 1.145552 | down |           |
| 238480_at | 8.95E-04 | 3.49E-04 | 8.62171  | down | 2.64963  | down | 3.253929 | up   | TTC39C    |
| 238486_at | 0.004293 | 0.002865 | 1.447269 | down | 1.330855 | up   | 1.926105 | up   | FRS2      |
| 238489_at | 0.00578  | 0.004188 | 1.297597 | up   | 1.782286 | up   | 1.373528 | up   | PRKAA2    |
| 238492_at | 0.005519 | 0.00395  | 1.530386 | up   | 1.857132 | up   | 1.213505 | up   |           |
| 238494_at | 0.003275 | 0.002014 | 1.799398 | down | 1.747795 | down | 1.029525 | up   | TRAF3IP1  |
| 238501_at | 0.035925 | 0.034644 | 1.582566 | down | 1.7612   | up   | 2.787215 | up   |           |
| 238505_at | 0.006455 | 0.004826 | 1.879293 | down | 1.428145 | down | 1.315898 | up   | ADPRH     |
| 238506_at | 4.07E-05 | 5.36E-06 | 3.195777 | down | 1.694616 | down | 1.885842 | up   | LRRCS8    |
| 238507_at | 7.53E-04 | 2.77E-04 | 2.197665 | down | 1.074654 | down | 2.044999 | up   |           |
| 238508_at | 0.004433 | 0.002989 | 2.100451 | up   | 2.391435 | up   | 1.138534 | up   | DBF4B     |
| 238509_at | 0.016925 | 0.015174 | 1.343423 | up   | 1.418642 | down | 1.905837 | down | CUL1      |
| 238511_at | 0.002065 | 0.001082 | 2.18149  | up   | 2.608654 | up   | 1.195813 | up   | LOC440288 |
| 238516_at | 0.002236 | 0.001207 | 2.670014 | down | 1.426    | down | 1.872381 | up   | BMPR2     |
| 238519_at | 6.07E-04 | 2.06E-04 | 3.079911 | up   | 2.078234 | up   | 1.481985 | down | RSC1A1    |
| 238520_at | 3.74E-04 | 1.07E-04 | 3.133007 | down | 1.797914 | up   | 5.632876 | up   | TRERF1    |
| 238521_at | 1.57E-04 | 3.35E-05 | 1.601665 | up   | 1.851443 | up   | 1.155949 | up   |           |
| 238522_at | 0.003844 | 0.00248  | 1.290823 | down | 1.443838 | down | 1.118541 | down | USP54     |
| 238523_at | 0.003662 | 0.002328 | 1.536361 | down | 1.948123 | down | 1.268011 | down | KLHL36    |
| 238526_at | 6.36E-04 | 2.20E-04 | 3.317034 | up   | 3.224212 | up   | 1.028789 | down | RAB3IP    |
| 238529_at | 1.44E-06 | 4.86E-08 | 1.973244 | up   | 1.944978 | up   | 1.014533 | down | LOC730631 |
| 238530_at | 0.012821 | 0.011023 | 2.229459 | down | 1.48384  | down | 1.502493 | up   | NNT       |
| 238540_at | 0.002497 | 0.001401 | 1.861119 | down | 1.211648 | down | 1.536022 | up   | LOC401320 |

|           |          |          |               |               |               |          |
|-----------|----------|----------|---------------|---------------|---------------|----------|
| 238541_at | 1.71E-04 | 3.77E-05 | 2.634925 up   | 2.103727 up   | 1.252504 down | C21orf58 |
| 238542_at | 1.42E-05 | 1.25E-06 | 5.251869 down | 36.90348 down | 7.026734 down | ULBP2    |
| 238546_at | 2.67E-04 | 6.82E-05 | 6.139615 down | 2.409315 down | 2.548282 up   | SLC8A1   |
| 238547_at | 8.02E-04 | 3.02E-04 | 1.677617 up   | 1.747129 up   | 1.041435 up   | HEXIM2   |
| 238548_at | 0.009827 | 0.008048 | 1.551414 down | 1.217758 down | 1.273992 up   |          |
| 238551_at | 3.40E-04 | 9.41E-05 | 2.445945 down | 3.348977 down | 1.369196 down | FUT11    |
| 238552_at | 0.00587  | 0.004272 | 1.268909 down | 1.080904 up   | 1.371568 up   |          |
| 238561_s_ | 0.004377 | 0.002941 | 2.753388 down | 1.316738 down | 2.091068 up   | UTP23    |
| 238562_at | 9.04E-04 | 3.53E-04 | 3.201101 down | 1.241657 down | 2.578088 up   | UTP23    |
| 238566_at | 0.018485 | 0.016762 | 2.156269 up   | 1.549919 up   | 1.391214 down |          |
| 238569_at | 5.01E-06 | 2.88E-07 | 2.477039 down | 2.939551 down | 1.18672 down  | GABBR1   |
| 238573_at | 0.00563  | 0.00405  | 1.183524 down | 1.699557 down | 1.436014 down |          |
| 238574_at | 7.62E-07 | 2.02E-08 | 3.154638 down | 5.034335 down | 1.595852 down | MCART1   |
| 238583_at | 9.08E-07 | 2.55E-08 | 4.758764 down | 5.775253 down | 1.213604 down | MSRB3    |
| 238585_at | 0.006848 | 0.005191 | 2.911924 down | 1.238828 down | 2.350549 up   | GTDC1    |
| 238597_at | 6.15E-04 | 2.10E-04 | 2.512863 down | 1.598174 down | 1.572334 up   | ANKRD13C |
| 238600_at | 0.011811 | 0.010009 | 1.48828 up    | 1.001168 down | 1.490018 down | JAKMIP1  |
| 238604_at | 8.95E-04 | 3.49E-04 | 7.20278 down  | 3.894663 down | 1.849398 up   |          |
| 238606_at | 0.004025 | 0.002628 | 1.317165 down | 1.963318 down | 1.490564 down | ZNF747   |
| 238607_at | 0.002455 | 0.00137  | 2.273829 up   | 2.036696 up   | 1.11643 down  | ZNF296   |
| 238611_at | 0.004841 | 0.00335  | 1.575282 up   | 2.120921 up   | 1.346375 up   |          |
| 238613_at | 9.31E-08 | 1.07E-09 | 8.449072 down | 4.888079 down | 1.728506 up   | ZAK      |
| 238614_x_ | 0.003836 | 0.002472 | 1.070846 up   | 1.84331 up    | 1.721358 up   | ZNF430   |
| 238615_at | 0.002407 | 0.001333 | 2.137391 down | 1.437082 down | 1.487313 up   | ERLIN2   |
| 238617_at | 0.004154 | 0.002738 | 12.55861 down | 4.324033 down | 2.904374 up   |          |
| 238622_at | 0.001642 | 7.96E-04 | 3.090839 down | 1.126846 down | 2.742911 up   | RAP2B    |
| 238629_x_ | 0.005941 | 0.00434  | 1.644472 up   | 1.167123 down | 1.919302 down |          |
| 238630_at | 0.009078 | 0.007323 | 1.91066 down  | 1.105935 down | 1.727642 up   | OPA3     |
| 238633_at | 0.001144 | 4.88E-04 | 2.064923 up   | 1.617996 up   | 1.276223 down | EPC1     |
| 238636_at | 0.012318 | 0.010524 | 2.020922 down | 1.812448 down | 1.115023 up   | CACNA1C  |
| 238638_at | 0.002107 | 0.001112 | 2.14062 up    | 1.004429 up   | 2.131181 down | SLC37A2  |
| 238645_at | 0.021875 | 0.020256 | 1.635105 up   | 1.215575 down | 1.987593 down |          |
| 238646_at | 0.00334  | 0.002068 | 2.215016 up   | 1.991691 up   | 1.112129 down |          |
| 238647_at | 0.002425 | 0.001346 | 4.489183 down | 4.004396 down | 1.121064 up   | C14orf28 |

|           |          |          |               |               |               |             |
|-----------|----------|----------|---------------|---------------|---------------|-------------|
| 238648_at | 0.014713 | 0.012935 | 1.432222 up   | 1.076355 down | 1.541579 down | FLJ42291    |
| 238649_at | 9.05E-04 | 3.54E-04 | 1.704114 down | 1.1431 up     | 1.947973 up   | PITPNC1     |
| 238650_x_ | 0.001164 | 4.99E-04 | 1.844294 up   | 1.50471 up    | 1.225681 down | WDR89       |
| 238651_at | 0.001231 | 5.38E-04 | 3.414955 up   | 4.634334 up   | 1.35707 up    |             |
| 238656_at | 4.28E-04 | 1.28E-04 | 1.463533 down | 1.429585 up   | 2.092245 up   |             |
| 238658_at | 0.003007 | 0.001798 | 2.008497 down | 3.245302 down | 1.615786 down |             |
| 238666_at | 0.022314 | 0.020717 | 1.406991 up   | 2.754313 up   | 1.957591 up   |             |
| 238669_at | 1.92E-07 | 2.97E-09 | 16.73748 down | 1.227147 down | 13.63935 up   | PTGS1       |
| 238670_at | 2.59E-04 | 6.54E-05 | 2.182719 up   | 1.381366 up   | 1.580117 down |             |
| 238672_at | 0.014541 | 0.012765 | 1.825077 down | 1.175204 up   | 2.144838 up   |             |
| 238677_at | 0.002277 | 0.00124  | 2.131192 up   | 2.171331 up   | 1.018834 up   | WDR36       |
| 238682_at | 2.28E-04 | 5.49E-05 | 2.037869 down | 1.750861 down | 1.163924 up   | CCDC96      |
| 238683_at | 9.74E-04 | 3.91E-04 | 1.101582 down | 1.766499 down | 1.603603 down | ZNF524      |
| 238684_at | 4.17E-04 | 1.24E-04 | 2.479018 down | 1.18102 down  | 2.099049 up   |             |
| 238693_at | 0.007942 | 0.006231 | 2.585884 down | 1.64154 down  | 1.575279 up   | PHC3        |
| 238695_s_ | 2.24E-04 | 5.39E-05 | 2.834699 up   | 2.504232 up   | 1.131963 down | RAB39B      |
|           |          |          |               |               |               | NCRNA0008   |
| 238697_at | 1.60E-04 | 3.44E-05 | 2.685236 up   | 2.743542 up   | 1.021714 up   | 6           |
| 238701_x_ | 0.024702 | 0.023145 | 1.289728 down | 1.877482 up   | 2.42144 up    | C11orf92    |
|           |          |          |               |               |               | C3orf57 /// |
|           |          |          |               |               |               | LOC100129   |
| 238702_at | 0.026008 | 0.024505 | 1.514131 up   | 1.111921 up   | 1.361726 down | 285         |
|           |          |          |               |               |               | C21orf70    |
|           |          |          |               |               |               | ///         |
| 238703_at | 3.71E-04 | 1.06E-04 | 1.483622 up   | 1.615046 down | 2.396117 down | LOC729535   |
| 238704_at | 0.007798 | 0.006101 | 2.625975 up   | 2.087746 up   | 1.257804 down |             |
| 238707_at | 0.020221 | 0.018549 | 1.244886 down | 1.1284 down   | 1.103232 up   |             |
| 238711_s_ | 0.006572 | 0.004934 | 2.572043 down | 2.237901 down | 1.149311 up   | ZNF148      |
| 238714_at | 0.001495 | 7.00E-04 | 2.320072 up   | 4.098712 up   | 1.766631 up   |             |
| 238715_at | 0.004794 | 0.003306 | 1.389334 up   | 1.080294 down | 1.500889 down | LOC646014   |
| 238718_at | 0.0259   | 0.024392 | 1.344688 up   | 1.077751 up   | 1.247679 down |             |
| 238725_at | 1.07E-04 | 1.98E-05 | 3.629865 down | 1.845404 down | 1.966975 up   | IRF1        |
| 238726_at | 0.027013 | 0.025524 | 2.259363 down | 1.393106 down | 1.621817 up   |             |
| 238729_x_ | 0.001082 | 4.51E-04 | 1.060313 up   | 1.892376 up   | 1.784733 up   |             |

|           |          |          |          |      |          |      |          |      |           |
|-----------|----------|----------|----------|------|----------|------|----------|------|-----------|
| 238733_at | 7.39E-04 | 2.70E-04 | 3.92273  | down | 2.198732 | down | 1.784087 | up   |           |
| 238736_at | 2.47E-04 | 6.12E-05 | 5.137934 | down | 2.414185 | up   | 12.40393 | up   | REV3L     |
| 238738_at | 0.010827 | 0.009034 | 1.375396 | up   | 3.056845 | up   | 2.22252  | up   | PSMD7     |
| 238740_at | 0.003286 | 0.002024 | 1.553527 | up   | 1.161579 | up   | 1.337427 | down | AARSD1    |
| 238742_x_ | 6.28E-04 | 2.16E-04 | 1.969052 | up   | 1.719367 | up   | 1.145219 | down |           |
| 238743_at | 0.010497 | 0.008705 | 2.504036 | down | 1.498497 | down | 1.671032 | up   |           |
| 238744_at | 0.019453 | 0.017752 | 1.367916 | up   | 1.638081 | up   | 1.197502 | up   |           |
| 238746_at | 0.004806 | 0.003318 | 2.261104 | down | 1.307561 | down | 1.729254 | up   | PXMP4     |
| 238750_at | 1.10E-04 | 2.05E-05 | 1.036489 | up   | 2.311304 | down | 2.395641 | down |           |
| 238752_at | 0.025984 | 0.024481 | 2.090086 | up   | 1.332957 | up   | 1.568007 | down |           |
| 238753_at | 0.001576 | 7.54E-04 | 1.076499 | up   | 1.832704 | down | 1.972905 | down | FREQ      |
| 238754_at | 0.003314 | 0.002049 | 1.298325 | up   | 1.578924 | down | 2.049957 | down |           |
| 238757_at | 0.002024 | 0.001053 | 1.556693 | up   | 1.473941 | up   | 1.056144 | down | DBF4B     |
| 238759_at | 4.03E-04 | 1.18E-04 | 2.200835 | up   | 3.054584 | up   | 1.38792  | up   | CCDC88A   |
| 238766_at | 0.003662 | 0.002329 | 1.174493 | up   | 2.215302 | up   | 1.886178 | up   |           |
| 238768_at | 0.003711 | 0.00237  | 2.851295 | down | 1.56203  | down | 1.825378 | up   | C2orf68   |
| 238770_at | 0.022137 | 0.020531 | 1.229998 | up   | 1.100246 | down | 1.353301 | down | C8orf79   |
| 238772_at | 0.001922 | 9.83E-04 | 1.367744 | up   | 1.161637 | down | 1.588821 | down | ZNF207    |
| 238776_x_ | 0.018403 | 0.016677 | 1.283072 | up   | 1.067099 | down | 1.369165 | down | OBSL1     |
| 238778_at | 3.11E-04 | 8.38E-05 | 4.366644 | up   | 3.365542 | up   | 1.297456 | down | MPP7      |
| 238781_at | 0.011202 | 0.009411 | 1.246408 | up   | 2.470859 | up   | 1.982384 | up   |           |
| 238782_at | 0.00122  | 5.32E-04 | 1.959785 | down | 1.308402 | down | 1.497846 | up   |           |
| 238784_at | 0.00487  | 0.003378 | 1.309193 | down | 1.956701 | up   | 2.561699 | up   | DPY19L2   |
| 238788_at | 0.004535 | 0.003084 | 1.625048 | up   | 1.431174 | up   | 1.135465 | down | LOC494150 |
| 238789_at | 0.004223 | 0.002797 | 1.38157  | up   | 1.912141 | up   | 1.384035 | up   | KANK1     |
| 238790_at | 0.011145 | 0.009353 | 1.68379  | down | 1.508582 | down | 1.116141 | up   | LOC374443 |
| 238791_at | 4.70E-05 | 6.48E-06 | 2.215418 | up   | 2.181668 | up   | 1.01547  | down | ZNF100    |
| 238797_at | 0.016425 | 0.014654 | 1.763618 | up   | 1.430094 | up   | 1.233218 | down | TRIM11    |
| 238807_at | 0.005375 | 0.003825 | 1.63698  | up   | 2.035219 | up   | 1.243277 | up   | GAPDHL7   |
| 238811_at | 7.84E-05 | 1.30E-05 | 2.293482 | down | 1.772834 | down | 1.293681 | up   | ATP11B    |
| 238812_at | 0.00347  | 0.002177 | 1.90302  | up   | 2.834468 | up   | 1.489458 | up   |           |
| 238818_at | 0.00112  | 4.73E-04 | 1.997327 | down | 1.541047 | down | 1.296084 | up   | KIAA1429  |
| 238822_at | 0.002282 | 0.001243 | 1.397975 | up   | 1.760582 | up   | 1.259381 | up   |           |
| 238823_at | 1.49E-04 | 3.10E-05 | 1.770377 | down | 1.884747 | down | 1.064602 | down | FMNL3     |

|           |          |          |               |               |               |                   |
|-----------|----------|----------|---------------|---------------|---------------|-------------------|
| 238824_at | 0.02831  | 0.026861 | 2.397541 down | 1.465337 down | 1.63617 up    |                   |
| 238833_at | 0.00158  | 7.55E-04 | 1.69803 up    | 2.119611 up   | 1.248276 up   | LOC729088         |
| 238834_at | 0.014067 | 0.012276 | 1.3468 up     | 1.013412 up   | 1.328977 down | MYLK3             |
| 238836_at | 0.004242 | 0.002814 | 1.991148 up   | 1.684183 up   | 1.182263 down |                   |
| 238837_at | 0.008659 | 0.00692  | 1.592388 up   | 1.050433 up   | 1.515936 down | PHF8              |
| 238839_at | 0.00132  | 5.93E-04 | 1.597612 up   | 1.18602 up    | 1.347036 down | OTX1              |
| 238842_at | 0.006536 | 0.004902 | 1.768666 up   | 1.717608 up   | 1.029726 down |                   |
| 238844_s_ | 0.008093 | 0.006372 | 2.060219 down | 1.643634 down | 1.253454 up   | NPHP1             |
| 238849_at | 0.001172 | 5.03E-04 | 1.536856 up   | 1.207272 down | 1.855403 down | ACY1              |
| 238852_at | 2.18E-05 | 2.26E-06 | 36.68827 down | 6.426932 down | 5.70852 up    |                   |
| 238853_at | 2.31E-04 | 5.61E-05 | 2.977909 up   | 1.954589 up   | 1.523547 down | RAB3IP            |
| 238855_at | 0.009724 | 0.007943 | 1.425077 up   | 1.124405 down | 1.602364 down | AHNAK             |
| 238860_at | 8.06E-07 | 2.19E-08 | 4.150894 up   | 4.70033 up    | 1.132366 up   | C6orf130          |
| 238863_x_ | 0.002757 | 0.0016   | 1.115293 up   | 2.107004 up   | 1.889194 up   |                   |
| 238866_at | 0.004861 | 0.003369 | 1.594691 up   | 2.066516 down | 3.295455 down | C19orf68          |
| 238868_at | 2.23E-04 | 5.32E-05 | 3.721104 down | 4.623309 down | 1.242456 down | UACA<br>LOC100128 |
| 238872_at | 0.010292 | 0.008495 | 1.116441 up   | 1.444403 down | 1.61259 down  | 239               |
| 238874_at | 0.003827 | 0.002464 | 1.11875 down  | 1.235748 down | 1.104579 down | FLJ43663          |
| 238887_at | 0.003667 | 0.002333 | 1.59622 up    | 1.384768 up   | 1.152698 down |                   |
| 238889_at | 1.13E-04 | 2.12E-05 | 1.064744 down | 2.985761 down | 2.804207 down | AGBL5             |
| 238891_at | 7.41E-04 | 2.71E-04 | 2.244955 down | 1.343923 down | 1.67045 up    |                   |
| 238897_at | 0.037593 | 0.036319 | 1.109923 down | 1.02294 up    | 1.135384 up   | LRRC28            |
| 238901_at | 0.009797 | 0.008019 | 1.325928 down | 1.386989 down | 1.046051 down |                   |
| 238903_at | 0.007061 | 0.005395 | 1.971675 up   | 1.734026 up   | 1.137051 down | UBXN2B            |
| 238905_at | 5.80E-05 | 8.65E-06 | 6.803269 down | 2.104888 down | 3.23213 up    | RHOJ              |
| 238906_s_ | 9.37E-05 | 1.65E-05 | 14.60755 down | 2.729376 down | 5.351972 up   | RHOJ              |
| 238907_at | 0.01788  | 0.016143 | 1.862485 down | 1.028711 up   | 1.915958 up   | ZNF780A           |
| 238912_x_ | 9.24E-04 | 3.64E-04 | 1.216342 up   | 2.001848 up   | 1.645793 up   | C9orf85           |
| 238913_at | 0.008449 | 0.006713 | 2.199916 up   | 3.387642 up   | 1.539896 up   |                   |
| 238916_at | 0.003986 | 0.002594 | 1.888098 up   | 1.740166 down | 3.285604 down | LOC400027         |
| 238921_at | 0.013197 | 0.011402 | 1.531829 down | 1.236869 down | 1.238473 up   | LOC644794         |
| 238926_at | 0.013234 | 0.011439 | 1.065584 down | 1.286309 down | 1.207141 down |                   |
| 238929_at | 8.87E-04 | 3.45E-04 | 1.354286 down | 1.736561 down | 1.282271 down | SFRS2B            |

|           |          |          |               |               |               |           |
|-----------|----------|----------|---------------|---------------|---------------|-----------|
| 238930_at | 3.07E-04 | 8.20E-05 | 1.569659 up   | 1.276313 down | 2.003376 down | FLJ40125  |
| 238932_at | 0.003004 | 0.001795 | 3.922301 down | 1.440965 down | 2.721997 up   |           |
| 238933_at | 1.98E-04 | 4.52E-05 | 2.584892 down | 1.353434 down | 1.909876 up   | IRS1      |
| 238935_at | 5.25E-04 | 1.68E-04 | 5.004891 down | 4.683572 down | 1.068606 up   | RPS27L    |
| 238936_at | 6.34E-04 | 2.18E-04 | 2.07895 up    | 1.026758 down | 2.134578 down |           |
| 238941_at | 0.001908 | 9.72E-04 | 1.424376 up   | 1.134619 down | 1.616124 down | TRIM50    |
| 238943_at | 0.010333 | 0.008538 | 1.681269 up   | 1.136429 down | 1.910642 down | FIBCD1    |
| 238947_at | 0.006149 | 0.004537 | 1.726718 up   | 1.497906 down | 2.586461 down | MFSD3     |
| 238948_at | 0.004708 | 0.003235 | 1.716954 down | 1.13278 down  | 1.5157 up     | TM9SF1    |
| 238951_at | 0.039679 | 0.038437 | 1.429474 up   | 2.079277 up   | 1.454575 up   |           |
| 238953_at | 5.61E-05 | 8.22E-06 | 2.368164 down | 3.298463 down | 1.392836 down |           |
| 238954_at | 0.013352 | 0.011554 | 1.489254 down | 1.020177 down | 1.4598 up     |           |
| 238955_at | 0.003939 | 0.002559 | 1.920355 down | 1.129207 down | 1.700623 up   | RFTN2     |
| 238956_at | 4.96E-07 | 1.08E-08 | 9.477031 up   | 10.31317 up   | 1.088228 up   |           |
| 238958_at | 0.010502 | 0.008712 | 1.341873 down | 1.225748 down | 1.094738 up   | UBE2E1    |
| 238963_at | 4.97E-04 | 1.56E-04 | 3.512307 down | 1.771555 down | 1.982612 up   |           |
| 238964_at | 3.69E-04 | 1.05E-04 | 6.114929 up   | 5.644347 up   | 1.083372 down | FIGN      |
| 238966_at | 0.007388 | 0.005704 | 1.426173 up   | 1.16232 up    | 1.227005 down | BRUNOL4   |
| 238969_at | 7.70E-05 | 1.27E-05 | 12.00806 down | 4.542996 down | 2.643203 up   | C3orf55   |
| 238974_at | 7.61E-04 | 2.81E-04 | 1.616408 up   | 1.640438 up   | 1.014866 up   | C2orf69   |
| 238977_at | 4.09E-04 | 1.21E-04 | 2.311038 up   | 2.937853 up   | 1.271227 up   | MCM6      |
| 238983_at | 1.21E-06 | 3.84E-08 | 6.136588 up   | 5.842803 up   | 1.050281 down | NSUN7     |
| 238984_at | 0.030228 | 0.028836 | 1.330485 up   | 1.135654 down | 1.510971 down | REG4      |
| 238989_at | 0.001402 | 6.43E-04 | 3.022275 down | 1.46607 down  | 2.061481 up   | C1GALT1C1 |
| 238991_at | 0.014238 | 0.012448 | 1.445113 up   | 1.120287 down | 1.618941 down |           |
| 239000_at | 0.002614 | 0.001488 | 1.527024 up   | 1.601933 down | 2.446191 down | BRD4      |
| 239001_at | 3.83E-04 | 1.11E-04 | 1.243455 up   | 3.185554 up   | 2.561858 up   | MGST1     |
| 239002_at | 0.006753 | 0.005103 | 2.305975 up   | 2.529208 up   | 1.096806 up   | ASPM      |
| 239007_at | 8.05E-04 | 3.03E-04 | 2.833643 up   | 3.486837 up   | 1.230514 up   | ZNF616    |
| 239010_at | 0.001612 | 7.77E-04 | 1.835396 down | 2.961879 down | 1.613755 down | FLJ39632  |
| 239011_at | 0.020531 | 0.018861 | 1.671888 up   | 1.637089 down | 2.73703 down  |           |
| 239016_at | 0.028547 | 0.027109 | 1.491378 down | 1.238493 down | 1.204188 up   |           |
| 239019_at | 0.001273 | 5.65E-04 | 1.837414 down | 1.881739 down | 1.024124 down | KLF12     |
| 239024_at | 0.003089 | 0.001862 | 3.859227 down | 1.935073 down | 1.994357 up   | ZNF148    |

|           |          |          |               |               |               |           |
|-----------|----------|----------|---------------|---------------|---------------|-----------|
| 239030_at | 0.007366 | 0.005684 | 1.190115 up   | 1.339962 down | 1.594709 down |           |
| 239033_at | 6.07E-06 | 3.74E-07 | 8.301149 up   | 15.69297 up   | 1.890457 up   |           |
| 239036_at | 7.87E-05 | 1.31E-05 | 2.082884 up   | 1.037781 down | 2.161577 down |           |
| 239039_at | 3.38E-04 | 9.34E-05 | 1.992106 down | 1.166296 down | 1.708063 up   |           |
| 239043_at | 0.020197 | 0.018525 | 2.976073 down | 1.303824 down | 2.282573 up   | ZNF404    |
| 239048_at | 0.004608 | 0.003151 | 1.364623 up   | 1.047729 down | 1.429755 down |           |
| 239051_at | 0.006552 | 0.004917 | 1.487516 down | 1.353505 down | 1.09901 up    | FLJ31813  |
| 239053_at | 0.047733 | 0.046552 | 1.424045 down | 1.113286 up   | 1.58537 up    | CIAO1     |
| 239056_at | 0.002781 | 0.001619 | 1.960043 down | 1.351233 down | 1.450558 up   | SEC22C    |
| 239058_at | 2.21E-06 | 9.09E-08 | 2.605552 down | 23.45397 down | 9.001536 down |           |
| 239064_at | 0.00668  | 0.005034 | 1.727956 down | 1.371866 down | 1.259566 up   |           |
| 239067_s_ | 0.013157 | 0.011359 | 1.451092 up   | 1.262436 down | 1.831912 down | PANX2     |
| 239071_at | 0.003288 | 0.002026 | 1.839284 up   | 2.27706 up    | 1.238014 up   | RBBP4     |
| 239073_at | 0.016137 | 0.014371 | 1.272064 up   | 1.196349 down | 1.521833 down | ANKFY1    |
| 239074_at | 0.010062 | 0.008278 | 1.351313 down | 1.074393 up   | 1.451842 up   | LOC400581 |
|           |          |          |               |               |               | CSGALNACT |
| 239077_at | 3.13E-04 | 8.44E-05 | 3.82063 down  | 2.300337 down | 1.6609 up     | 2         |
| 239081_at | 0.002372 | 0.001308 | 1.854102 down | 1.005842 down | 1.843334 up   |           |
| 239082_at | 6.50E-06 | 4.11E-07 | 18.51076 up   | 16.27964 up   | 1.137049 down |           |
| 239083_at | 5.36E-06 | 3.15E-07 | 2.354151 up   | 2.098749 up   | 1.121692 down | ZNF786    |
| 239084_at | 1.13E-04 | 2.13E-05 | 2.526535 down | 3.758531 down | 1.487623 down | SNAP29    |
| 239089_at | 0.003116 | 0.001885 | 1.494396 down | 1.300123 down | 1.149427 up   |           |
| 239098_at | 0.021318 | 0.019674 | 1.255475 down | 1.015074 down | 1.236831 up   | KCNRG     |
| 239099_at | 9.46E-04 | 3.76E-04 | 1.255552 down | 1.107791 down | 1.133383 up   | GRINL1A   |
| 239101_at | 0.013057 | 0.011253 | 1.773013 down | 1.541429 down | 1.15024 up    | ITCH      |
| 239105_at | 0.012838 | 0.01104  | 1.020334 up   | 1.555332 down | 1.586958 down |           |
| 239111_at | 0.002199 | 0.001177 | 1.818615 up   | 1.055285 down | 1.919156 down | PRDM8     |
| 239112_at | 0.010458 | 0.008663 | 1.350719 up   | 1.288236 down | 1.740045 down |           |
| 239120_at | 0.001852 | 9.33E-04 | 1.124594 up   | 1.468277 down | 1.651215 down | C1orf126  |
| 239124_at | 0.001062 | 4.40E-04 | 1.035117 up   | 1.778988 up   | 1.718635 up   |           |
| 239125_at | 0.002436 | 0.001354 | 2.012331 up   | 1.251704 down | 2.518842 down |           |
| 239127_at | 2.23E-04 | 5.33E-05 | 1.793872 up   | 1.605452 up   | 1.117363 down |           |
| 239130_at | 0.001913 | 9.75E-04 | 1.667137 up   | 1.801906 up   | 1.080839 up   |           |
| 239132_at | 0.001476 | 6.88E-04 | 1.293613 up   | 1.878939 up   | 1.452474 up   | NOS1      |



|           |          |          |          |      |          |      |          |      |           |
|-----------|----------|----------|----------|------|----------|------|----------|------|-----------|
| 239135_at | 1.30E-05 | 1.11E-06 | 5.001187 | down | 3.844722 | down | 1.300793 | up   | CPPED1    |
| 239137_x_ | 0.001251 | 5.51E-04 | 1.431906 | up   | 1.200452 | up   | 1.192805 | down | C6orf223  |
| 239139_at | 0.002848 | 0.00167  | 1.767905 | up   | 1.239405 | down | 2.19115  | down | CPNE9     |
|           |          |          |          |      |          |      |          |      | LOC100126 |
| 239141_at | 0.02525  | 0.023709 | 1.667547 | up   | 1.056355 | down | 1.761521 | down | 784       |
| 239143_x_ | 5.25E-05 | 7.51E-06 | 4.042967 | up   | 6.375714 | up   | 1.576989 | up   | RNF138    |
| 239144_at | 0.008261 | 0.006535 | 1.780846 | up   | 1.31303  | up   | 1.356288 | down | B3GAT2    |
| 239145_at | 0.025116 | 0.023561 | 1.776949 | up   | 1.009024 | down | 1.792984 | down | ZNF414    |
| 239146_at | 7.80E-04 | 2.91E-04 | 1.963254 | down | 1.374397 | down | 1.428447 | up   | CLDND1    |
| 239148_at | 1.29E-06 | 4.18E-08 | 9.135533 | up   | 5.790694 | up   | 1.577623 | down | MARVELD3  |
| 239153_at | 9.32E-04 | 3.69E-04 | 11.92298 | down | 6.082333 | down | 1.960264 | up   | HOTAIR    |
| 239155_at | 3.41E-08 | 2.71E-10 | 12.99526 | up   | 13.87717 | up   | 1.067864 | up   | CXADRP1   |
| 239161_at | 0.014994 | 0.013222 | 1.95948  | down | 1.263507 | down | 1.550827 | up   | FDX1      |
| 239162_at | 0.013383 | 0.011589 | 1.465456 | up   | 2.017332 | up   | 1.37659  | up   |           |
| 239167_at | 0.006968 | 0.00531  | 1.709306 | up   | 1.586983 | up   | 1.07708  | down |           |
| 239169_at | 4.86E-04 | 1.51E-04 | 2.731835 | up   | 3.350915 | up   | 1.226617 | up   | RDM1      |
| 239170_at | 0.005328 | 0.003784 | 2.05975  | down | 1.549011 | down | 1.329719 | up   |           |
| 239184_at | 7.46E-04 | 2.73E-04 | 1.445576 | up   | 1.495965 | up   | 1.034858 | up   |           |
| 239193_at | 0.005913 | 0.004313 | 1.788024 | up   | 2.909628 | up   | 1.627287 | up   | FUBP3     |
| 239201_at | 0.001098 | 4.61E-04 | 3.275518 | down | 3.045448 | down | 1.075546 | up   | PFTK2     |
| 239208_s_ | 0.001202 | 5.22E-04 | 2.079819 | up   | 3.072463 | up   | 1.477274 | up   | C21orf57  |
| 239209_at | 1.28E-04 | 2.50E-05 | 2.243258 | up   | 2.074401 | up   | 1.081401 | down |           |
| 239217_x_ | 3.11E-05 | 3.71E-06 | 2.246497 | down | 2.082432 | down | 1.078785 | up   | ABCC3     |
| 239218_at | 6.26E-05 | 9.58E-06 | 3.764967 | down | 36.32613 | down | 9.648459 | down | PDE1C     |
| 239226_at | 0.010153 | 0.008362 | 1.69124  | up   | 1.324209 | up   | 1.27717  | down | RTKN      |
| 239231_at | 3.22E-05 | 3.89E-06 | 5.392856 | up   | 5.588194 | up   | 1.036222 | up   |           |
| 239232_at | 0.009358 | 0.007592 | 1.622097 | up   | 1.34129  | up   | 1.209356 | down | MSI2      |
| 239233_at | 1.40E-04 | 2.84E-05 | 2.623909 | up   | 2.940815 | up   | 1.120776 | up   | CCDC88A   |
| 239236_at | 7.40E-05 | 1.20E-05 | 3.782768 | down | 2.635177 | down | 1.435489 | up   |           |
| 239238_at | 0.003939 | 0.002558 | 5.070148 | up   | 5.34862  | up   | 1.054924 | up   |           |
| 239241_at | 0.011874 | 0.010071 | 1.185727 | up   | 1.353995 | down | 1.605468 | down | LOC727869 |
| 239243_at | 0.005944 | 0.004342 | 1.234514 | up   | 6.919805 | up   | 5.605287 | up   | ZNF638    |
| 239249_at | 0.006525 | 0.004892 | 1.498107 | up   | 1.203377 | down | 1.802787 | down |           |
| 239252_at | 0.001651 | 8.02E-04 | 1.829701 | down | 1.026905 | up   | 1.878928 | up   |           |

|           |          |          |               |               |               |           |
|-----------|----------|----------|---------------|---------------|---------------|-----------|
| 239253_at | 3.03E-05 | 3.57E-06 | 3.063424 up   | 4.371749 up   | 1.427079 up   |           |
| 239254_at | 0.006858 | 0.0052   | 1.625126 up   | 1.131794 down | 1.839308 down | CCDC40    |
| 239258_at | 0.014903 | 0.013127 | 1.293231 down | 2.193625 up   | 2.836863 up   |           |
| 239264_at | 0.014775 | 0.012998 | 3.001325 up   | 3.914345 up   | 1.304206 up   |           |
| 239266_at | 1.05E-04 | 1.92E-05 | 2.142742 up   | 2.693834 up   | 1.257191 up   |           |
| 239269_at | 0.002912 | 0.00172  | 1.949624 down | 1.539996 down | 1.265992 up   |           |
| 239273_s_ | 0.006303 | 0.004684 | 1.675353 up   | 1.005763 down | 1.685008 down | MMP28     |
| 239277_at | 0.001106 | 4.65E-04 | 2.152149 down | 2.46359 down  | 1.144712 down |           |
| 239278_at | 0.002928 | 0.001733 | 2.527029 down | 1.214651 down | 2.080457 up   |           |
| 239286_at | 4.37E-06 | 2.37E-07 | 9.850883 down | 19.37687 down | 1.967019 down | CDH11     |
| 239295_at | 3.26E-04 | 8.93E-05 | 2.702036 up   | 3.058853 up   | 1.132055 up   | SRrp35    |
| 239297_at | 9.47E-04 | 3.77E-04 | 3.459696 down | 1.083944 down | 3.191768 up   | C8orf79   |
| 239304_at | 0.008052 | 0.006331 | 1.251086 up   | 1.350583 down | 1.689696 down | MFSD4     |
| 239306_at | 0.010891 | 0.009098 | 1.165915 up   | 1.198288 down | 1.397102 down |           |
| 239307_at | 0.003621 | 0.002296 | 2.267197 down | 1.23764 down  | 1.831871 up   |           |
| 239309_at | 4.26E-04 | 1.27E-04 | 1.014228 down | 1.696639 down | 1.672838 down | DLX6      |
| 239310_at | 0.006633 | 0.004989 | 1.012504 down | 1.555097 up   | 1.574541 up   |           |
| 239312_at | 0.015782 | 0.014006 | 1.300183 up   | 1.106714 down | 1.43893 down  |           |
| 239313_at | 2.51E-04 | 6.27E-05 | 2.882767 down | 1.038791 up   | 2.994592 up   | LOC401320 |
| 239317_at | 0.009562 | 0.007788 | 1.136452 up   | 1.006635 up   | 1.128961 down |           |
| 239319_at | 0.001042 | 4.29E-04 | 2.407926 up   | 1.927473 up   | 1.249265 down | LOC728342 |
| 239323_at | 0.00287  | 0.001688 | 1.537241 up   | 1.185817 down | 1.822886 down |           |
| 239327_at | 0.001077 | 4.49E-04 | 1.410575 up   | 1.142324 down | 1.611334 down |           |
| 239330_at | 0.002967 | 0.001765 | 1.350089 up   | 1.378511 up   | 1.021052 up   |           |
| 239331_at | 0.005442 | 0.003884 | 6.495829 down | 4.699647 down | 1.382195 up   |           |
| 239334_at | 4.92E-04 | 1.54E-04 | 2.173719 up   | 1.081661 up   | 2.009613 down | FAM62B    |
| 239335_at | 5.06E-04 | 1.60E-04 | 1.762864 up   | 1.163744 down | 2.051522 down | ZNF710    |
| 239336_at | 2.01E-06 | 7.91E-08 | 22.307 down   | 22.67298 down | 1.016407 down | THBS1     |
| 239339_at | 0.001151 | 4.91E-04 | 2.497282 up   | 1.803933 up   | 1.384355 down |           |
| 239342_at | 0.02867  | 0.027238 | 1.755293 down | 1.517722 down | 1.156531 up   | DGKZ      |
| 239343_at | 9.50E-04 | 3.78E-04 | 2.300179 down | 1.637365 down | 1.404805 up   | LOC728705 |
| 239344_at | 0.015972 | 0.014199 | 1.388218 up   | 1.052534 up   | 1.31893 down  |           |
| 239345_at | 0.00347  | 0.002176 | 1.389243 up   | 1.518741 up   | 1.093215 up   | SLC19A3   |
| 239350_at | 1.08E-06 | 3.23E-08 | 3.125757 up   | 2.908546 up   | 1.07468 down  | MARVELD3  |

|           |          |          |               |               |               |           |
|-----------|----------|----------|---------------|---------------|---------------|-----------|
| 239355_at | 8.83E-04 | 3.43E-04 | 1.544172 up   | 2.041625 up   | 1.322149 up   |           |
|           |          |          |               |               |               | LOC100129 |
| 239356_at | 4.79E-04 | 1.49E-04 | 1.238331 up   | 1.442303 down | 1.786048 down | 122       |
| 239363_at | 0.008104 | 0.006385 | 1.63613 down  | 2.372683 down | 1.45018 down  |           |
| 239364_at | 0.001009 | 4.10E-04 | 1.28584 down  | 2.562657 down | 1.992983 down |           |
| 239367_at | 1.45E-07 | 1.95E-09 | 6.247404 down | 11.46969 down | 1.835913 down | BDNF      |
| 239368_at | 0.009943 | 0.008167 | 1.386187 up   | 1.834106 down | 2.542414 down |           |
| 239370_at | 2.53E-05 | 2.76E-06 | 7.867895 down | 28.38922 down | 3.608236 down |           |
| 239384_at | 0.017397 | 0.015648 | 1.004552 up   | 1.83568 up    | 1.827362 up   | FLJ44342  |
| 239389_at | 0.017915 | 0.016177 | 1.201317 up   | 1.161567 down | 1.39541 down  |           |
| 239393_at | 0.002947 | 0.001749 | 2.306016 up   | 3.088064 up   | 1.339134 up   |           |
| 239396_at | 9.07E-04 | 3.55E-04 | 1.842237 down | 1.013418 up   | 1.866955 up   |           |
| 239399_at | 0.013693 | 0.011902 | 1.125803 up   | 1.16492 down  | 1.31147 down  |           |
| 239405_at | 0.014164 | 0.012376 | 1.180614 up   | 1.372758 up   | 1.162749 up   |           |
| 239410_at | 0.01224  | 0.010444 | 2.235965 up   | 1.738 up      | 1.286516 down |           |
| 239413_at | 7.47E-05 | 1.22E-05 | 2.774464 up   | 4.144716 up   | 1.49388 up    | CEP152    |
| 239416_at | 0.029818 | 0.028419 | 1.222673 up   | 1.128802 down | 1.380155 down | FBXL6     |
| 239419_at | 0.002515 | 0.001415 | 1.110136 up   | 1.293029 down | 1.435438 down | PTPRA     |
| 239422_at | 4.65E-04 | 1.43E-04 | 2.393888 up   | 1.020523 up   | 2.345746 down | GPC2      |
| 239423_at | 0.001924 | 9.84E-04 | 2.201099 down | 1.72908 down  | 1.272988 up   |           |
| 239428_at | 0.015731 | 0.013955 | 1.300979 up   | 1.359773 down | 1.769035 down | RAB1A     |
| 239430_at | 0.008163 | 0.006444 | 1.305185 up   | 1.035388 up   | 1.260576 down | IGFL1     |
| 239431_at | 0.001033 | 4.23E-04 | 3.829775 down | 3.499591 down | 1.09435 up    | TICAM2    |
| 239433_at | 2.57E-04 | 6.47E-05 | 1.175642 down | 2.118755 down | 1.802211 down | LRR8E     |
| 239435_x_ | 2.02E-04 | 4.66E-05 | 2.142073 down | 2.447163 down | 1.142427 down | SHROOM1   |
| 239438_at | 0.044292 | 0.043065 | 1.380899 up   | 1.108516 up   | 1.245718 down | RAPGEF6   |
| 239446_x_ | 0.001398 | 6.41E-04 | 1.955272 up   | 1.788914 down | 3.497815 down | DCBLD2    |
| 239451_at | 0.00374  | 0.002394 | 2.398915 up   | 2.793975 up   | 1.164683 up   |           |
| 239457_at | 0.009748 | 0.007968 | 1.651872 up   | 1.179387 up   | 1.400619 down | ATP8B3    |
| 239458_at | 0.022194 | 0.020585 | 1.159201 down | 1.130697 up   | 1.310705 up   | ALS2CR12  |
| 239466_at | 4.16E-04 | 1.23E-04 | 2.101317 down | 1.942362 down | 1.081836 up   | LOC344595 |
| 239468_at | 4.95E-04 | 1.55E-04 | 23.97084 down | 3.095032 down | 7.744941 up   | MKX       |
| 239475_at | 0.005643 | 0.004065 | 1.432736 up   | 1.151824 down | 1.650259 down | ACPL2     |
| 239481_at | 0.002574 | 0.001459 | 1.731624 up   | 1.403321 up   | 1.233947 down | FAM133A   |

|           |          |          |               |               |               |           |
|-----------|----------|----------|---------------|---------------|---------------|-----------|
| 239482_x_ | 6.47E-06 | 4.08E-07 | 5.367858 up   | 8.359955 up   | 1.55741 up    | ZNF708    |
| 239483_at | 0.005381 | 0.00383  | 1.53829 down  | 1.132654 down | 1.358129 up   | FLJ37035  |
| 239495_at | 3.99E-05 | 5.20E-06 | 1.376867 up   | 1.110882 down | 1.529536 down |           |
| 239502_at | 0.01045  | 0.008655 | 1.396137 up   | 1.292019 down | 1.803835 down |           |
| 239503_at | 4.13E-04 | 1.22E-04 | 1.264489 up   | 5.236855 up   | 4.141479 up   |           |
| 239508_x_ | 0.011514 | 0.009714 | 1.510253 up   | 1.170488 down | 1.767732 down | CCDC108   |
| 239509_at | 0.002584 | 0.001466 | 1.218696 up   | 1.258868 up   | 1.032963 up   | FLJ16779  |
| 239515_at | 0.033227 | 0.031912 | 1.644734 down | 1.347215 down | 1.220841 up   |           |
| 239517_at | 0.008258 | 0.006531 | 1.578716 up   | 1.219054 up   | 1.295034 down | ITGB6     |
| 239522_at | 0.007009 | 0.005348 | 1.411619 up   | 1.329563 down | 1.876836 down | IL12RB1   |
| 239523_at | 0.003588 | 0.00227  | 2.195873 up   | 1.325513 down | 2.910659 down | TUSC5     |
| 239527_at | 0.007945 | 0.006236 | 1.222304 down | 1.099482 down | 1.111709 up   | RAB3GAP1  |
| 239528_at | 0.020325 | 0.018653 | 1.267896 up   | 1.165698 down | 1.477983 down | PROM2     |
| 239531_at | 0.046831 | 0.045628 | 1.088244 down | 1.262945 up   | 1.374392 up   |           |
| 239533_at | 0.004494 | 0.003044 | 1.58556 down  | 1.277852 down | 1.240801 up   | GPR155    |
| 239536_at | 3.17E-04 | 8.58E-05 | 1.908121 down | 1.471749 down | 1.296499 up   |           |
| 239538_at | 8.51E-04 | 3.25E-04 | 1.689062 up   | 2.117204 up   | 1.25348 up    | ZRANB3    |
| 239544_at | 0.002923 | 0.001728 | 1.279769 down | 1.754507 up   | 2.245363 up   |           |
| 239548_at | 0.046288 | 0.045082 | 1.467082 down | 1.660234 down | 1.131657 down | NEGR1     |
| 239552_at | 7.86E-06 | 5.50E-07 | 6.950887 up   | 6.64493 up    | 1.046044 down | VWDE      |
| 239553_at | 3.19E-04 | 8.68E-05 | 1.175829 down | 1.739263 down | 1.47918 down  | FLJ35379  |
| 239555_at | 0.011745 | 0.009944 | 1.490732 up   | 1.033236 down | 1.540278 down |           |
| 239559_at | 0.002143 | 0.001138 | 2.236423 up   | 2.4678 up     | 1.103459 up   |           |
| 239568_at | 4.02E-04 | 1.18E-04 | 1.510628 down | 1.131571 up   | 1.709383 up   | PLEKHH2   |
| 239573_at | 0.025153 | 0.023604 | 1.157035 up   | 1.168465 down | 1.351954 down |           |
| 239576_at | 0.01124  | 0.009446 | 1.641675 up   | 1.205427 up   | 1.361904 down | MTUS1     |
| 239582_at | 1.54E-04 | 3.24E-05 | 2.381769 down | 1.609527 down | 1.479794 up   | PML       |
|           |          |          |               |               |               | FAM95B1   |
|           |          |          |               |               |               | ///       |
|           |          |          |               |               |               | LOC100132 |
|           |          |          |               |               |               | 340 ///   |
|           |          |          |               |               |               | LOC644587 |
|           |          |          |               |               |               | ///       |
| 239590_x_ | 1.04E-04 | 1.89E-05 | 1.63461 up    | 1.089774 down | 1.781356 down | LOC90499  |

|           |          |          |               |               |               |           |
|-----------|----------|----------|---------------|---------------|---------------|-----------|
| 239594_at | 0.00809  | 0.006369 | 1.181117 up   | 1.24891 down  | 1.475109 down | LOC145837 |
| 239596_at | 0.00843  | 0.006692 | 1.226597 down | 1.558874 down | 1.270894 down | SLC30A7   |
| 239597_at | 7.89E-04 | 2.96E-04 | 5.191587 up   | 8.98152 up    | 1.730014 up   |           |
| 239603_x_ | 0.001173 | 5.04E-04 | 1.004484 up   | 1.671114 up   | 1.663655 up   |           |
| 239606_at | 0.00318  | 0.001939 | 1.442192 up   | 1.683825 up   | 1.167546 up   |           |
| 239613_at | 0.015508 | 0.013735 | 1.380952 up   | 1.305509 down | 1.802845 down |           |
| 239615_at | 0.002077 | 0.001091 | 1.115268 up   | 1.666815 down | 1.858945 down | SLC22A5   |
| 239616_at | 0.010844 | 0.00905  | 1.154798 down | 1.200738 up   | 1.386609 up   | REXO2     |
| 239617_at | 0.008394 | 0.006659 | 1.53143 up    | 1.029155 up   | 1.488046 down | GHRLOS    |
| 239620_at | 0.006785 | 0.005132 | 1.553499 up   | 1.121954 up   | 1.384637 down | TTC23L    |
| 239623_at | 0.006766 | 0.005116 | 1.277758 down | 1.588497 down | 1.24319 down  | FLJ44606  |
| 239627_at | 0.002776 | 0.001615 | 1.441673 up   | 1.200479 down | 1.730698 down | TMED9     |
| 239628_at | 3.41E-04 | 9.44E-05 | 1.64566 up    | 1.124244 up   | 1.463793 down |           |
| 239629_at | 5.07E-04 | 1.61E-04 | 7.946329 down | 3.035075 down | 2.618166 up   | CFLAR     |
| 239634_at | 0.001923 | 9.83E-04 | 1.397053 up   | 1.115062 down | 1.557802 down |           |
| 239638_at | 0.004248 | 0.00282  | 4.421624 down | 2.38714 down  | 1.852268 up   |           |
| 239641_at | 1.23E-04 | 2.38E-05 | 1.829542 down | 2.785296 down | 1.522401 down |           |
| 239643_at | 0.00625  | 0.004632 | 1.441147 up   | 1.575633 down | 2.270719 down |           |
| 239648_at | 0.004275 | 0.002847 | 1.932682 down | 2.010612 down | 1.040322 down | DCUN1D3   |
| 239659_at | 0.009157 | 0.007402 | 1.445186 up   | 1.088129 up   | 1.328139 down |           |
| 239660_at | 0.004    | 0.002606 | 2.079324 up   | 2.468583 up   | 1.187205 up   | C20orf74  |
| 239661_at | 0.004535 | 0.003084 | 1.698495 up   | 1.312091 up   | 1.294495 down |           |
|           |          |          |               |               |               | LOC100129 |
| 239662_x_ | 0.002221 | 0.001195 | 1.962216 up   | 1.519786 down | 2.982149 down | 701       |
| 239663_x_ | 0.029251 | 0.027846 | 1.874439 up   | 1.136813 up   | 1.648853 down | LARP1     |
| 239666_at | 2.91E-05 | 3.36E-06 | 2.422505 up   | 1.030371 down | 2.496079 down | PYGO2     |
| 239670_at | 0.006167 | 0.004552 | 2.263435 up   | 1.358128 up   | 1.666585 down |           |
| 239672_at | 9.56E-04 | 3.81E-04 | 7.457308 down | 1.687819 down | 4.41831 up    |           |
| 239677_at | 0.006198 | 0.004581 | 1.146825 down | 1.270522 up   | 1.457066 up   |           |
| 239678_at | 0.003865 | 0.002498 | 1.096642 down | 1.425426 up   | 1.563182 up   |           |
| 239681_at | 0.031349 | 0.02999  | 1.338866 up   | 1.273509 down | 1.705058 down | C17orf56  |
| 239686_at | 0.007301 | 0.005623 | 1.171709 up   | 1.157966 down | 1.356799 down |           |
| 239688_at | 0.003004 | 0.001794 | 1.516692 up   | 1.87026 up    | 1.233118 up   | SMC1A     |
| 239689_at | 0.005082 | 0.003567 | 1.302442 up   | 1.400294 down | 1.8238 down   |           |

|           |          |          |               |               |               |                                   |
|-----------|----------|----------|---------------|---------------|---------------|-----------------------------------|
| 239700_at | 0.001106 | 4.65E-04 | 1.438263 up   | 1.452555 down | 2.089156 down | ZNF710                            |
| 239706_x_ | 9.01E-04 | 3.52E-04 | 1.958615 down | 1.075613 down | 1.820929 up   |                                   |
| 239709_at | 0.012391 | 0.010593 | 1.242087 down | 1.522928 up   | 1.891609 up   |                                   |
| 239710_at | 7.16E-04 | 2.58E-04 | 8.175001 up   | 9.872414 up   | 1.207635 up   | FIGN                              |
| 239715_at | 0.039113 | 0.037868 | 1.183131 up   | 1.754533 up   | 1.482958 up   |                                   |
| 239718_at | 5.90E-06 | 3.59E-07 | 3.486411 down | 1.489079 down | 2.34132 up    |                                   |
| 239719_at | 3.06E-05 | 3.63E-06 | 9.641616 down | 2.798498 down | 3.445283 up   | CD109                             |
| 239720_at | 0.008596 | 0.006858 | 1.385595 up   | 1.217745 up   | 1.137837 down | GLP-1                             |
| 239726_at | 0.001252 | 5.52E-04 | 3.837842 up   | 3.305039 up   | 1.161209 down |                                   |
| 239727_at | 0.00371  | 0.002369 | 1.50612 up    | 1.221327 down | 1.839465 down | DIO3OS                            |
| 239728_at | 0.00619  | 0.004573 | 1.054093 up   | 1.491905 up   | 1.415345 up   |                                   |
| 239733_at | 0.006794 | 0.00514  | 1.426186 up   | 1.339885 up   | 1.064409 down | DYDC2                             |
| 239735_at | 0.007091 | 0.005422 | 2.371855 up   | 3.727912 up   | 1.571728 up   |                                   |
| 239741_at | 1.64E-04 | 3.54E-05 | 4.132828 down | 2.331132 down | 1.772884 up   | LOC283658                         |
| 239744_at | 0.002714 | 0.001564 | 1.064988 up   | 1.25906 up    | 1.18223 up    |                                   |
| 239748_x_ | 0.002515 | 0.001416 | 1.492958 up   | 1.980047 up   | 1.326258 up   | OCIAD1                            |
| 239749_at | 0.002315 | 0.001267 | 1.41314 down  | 1.471856 down | 1.04155 down  | FAF1                              |
| 239752_at | 3.71E-09 | 1.11E-11 | 73.81802 up   | 63.18239 up   | 1.168333 down |                                   |
| 239756_at | 0.002671 | 0.001532 | 1.193545 up   | 1.19602 down  | 1.427504 down |                                   |
| 239761_at | 0.001362 | 6.19E-04 | 1.082325 up   | 1.990517 down | 2.154387 down | GCNT1                             |
| 239762_at | 0.001537 | 7.26E-04 | 2.484328 down | 1.872538 down | 1.326717 up   | LOC286437<br>LOC100129<br>965 /// |
| 239763_at | 0.008219 | 0.006497 | 1.894628 down | 1.040627 up   | 1.971602 up   | PRDM11                            |
| 239767_at | 0.0379   | 0.036634 | 1.147066 down | 1.085528 down | 1.056689 up   |                                   |
| 239768_x_ | 2.56E-04 | 6.42E-05 | 3.107741 down | 1.625996 down | 1.911285 up   |                                   |
| 239769_at | 0.005904 | 0.004305 | 2.100989 down | 2.267706 down | 1.079352 down | CDH11                             |
| 239772_x_ | 0.002196 | 0.001175 | 1.916407 up   | 1.340889 down | 2.569689 down | DHX30<br>LOC100131                |
| 239775_at | 2.63E-04 | 6.68E-05 | 2.853113 down | 2.592227 down | 1.100642 up   | 512                               |
| 239777_at | 0.004173 | 0.002756 | 1.221399 up   | 1.807187 down | 2.207297 down | C14orf182                         |
| 239779_at | 0.016609 | 0.014853 | 1.550593 up   | 1.025826 down | 1.590639 down |                                   |
| 239783_at | 0.00649  | 0.004857 | 1.147714 down | 1.239918 up   | 1.423071 up   |                                   |
| 239786_at | 0.008158 | 0.006437 | 1.748819 down | 1.228672 down | 1.423341 up   |                                   |

|           |          |          |               |               |               |            |
|-----------|----------|----------|---------------|---------------|---------------|------------|
| 239789_at | 0.017035 | 0.015278 | 1.459547 up   | 1.038982 up   | 1.404786 down | C11orf49   |
| 239790_s_ | 7.56E-04 | 2.78E-04 | 1.974517 up   | 1.853544 up   | 1.065266 down |            |
| 239792_at | 2.81E-04 | 7.29E-05 | 1.970261 up   | 2.172094 up   | 1.10244 up    | LOC440288  |
| 239793_at | 0.004441 | 0.002996 | 1.673509 down | 1.17706 down  | 1.42177 up    |            |
| 239796_x_ | 0.002025 | 0.001054 | 1.819424 down | 1.290181 down | 1.410208 up   | TIRAP      |
| 239800_at | 0.00451  | 0.003061 | 1.69722 up    | 1.113018 up   | 1.52488 down  |            |
| 239810_at | 2.45E-04 | 6.07E-05 | 1.384013 up   | 1.527417 down | 2.113965 down | VASH1      |
| 239814_at | 0.001751 | 8.67E-04 | 2.287986 down | 1.076574 down | 2.125249 up   |            |
| 239816_at | 0.002312 | 0.001264 | 1.361344 up   | 1.048421 up   | 1.298471 down |            |
| 239821_at | 0.006903 | 0.005243 | 1.344471 down | 1.201527 down | 1.118969 up   | FLJ30064   |
| 239825_at | 0.001042 | 4.29E-04 | 1.175794 down | 1.433911 down | 1.219525 down |            |
| 239830_at | 0.003086 | 0.00186  | 1.870946 down | 1.195483 up   | 2.236683 up   |            |
| 239835_at | 0.002147 | 0.001141 | 6.914228 up   | 3.168706 up   | 2.182035 down | KBTBD8     |
| 239836_at | 0.009155 | 0.0074   | 1.367285 up   | 1.109634 up   | 1.232195 down | ECHDC2     |
| 239837_at | 0.021094 | 0.019448 | 1.824502 up   | 1.028941 up   | 1.773185 down | ADAM11     |
| 239840_at | 0.022871 | 0.021291 | 1.345568 down | 1.035412 down | 1.299548 up   |            |
| 239844_x_ | 0.001173 | 5.04E-04 | 1.659203 up   | 1.119212 down | 1.857 down    | C1orf228   |
| 239845_at | 0.022746 | 0.02116  | 1.296251 down | 1.623387 down | 1.252372 down |            |
| 239846_at | 0.016304 | 0.014533 | 1.5739 down   | 1.536581 down | 1.024287 up   | MTHFD1     |
| 239849_at | 0.005566 | 0.003993 | 1.085473 up   | 1.115526 down | 1.210874 down |            |
| 239850_at | 0.014464 | 0.012682 | 1.265479 up   | 1.061712 up   | 1.191923 down |            |
| 239853_at | 4.20E-04 | 1.25E-04 | 1.874949 up   | 1.459941 up   | 1.284264 down | KLC3       |
| 239862_at | 0.001921 | 9.81E-04 | 1.699019 up   | 1.64292 up    | 1.034146 down |            |
| 239865_at | 0.009111 | 0.007356 | 1.313298 up   | 1.179551 down | 1.549102 down |            |
| 239866_at | 0.003006 | 0.001797 | 2.876584 down | 2.267839 down | 1.268425 up   |            |
|           |          |          |               |               |               | SPATS1 /// |
| 239870_at | 0.017768 | 0.016028 | 1.27299 down  | 1.113974 up   | 1.418078 up   | TMEM151B   |
| 239881_at | 0.006809 | 0.005153 | 1.311323 down | 1.268812 down | 1.033505 up   |            |
| 239886_at | 5.71E-04 | 1.89E-04 | 2.673163 up   | 2.112324 up   | 1.265508 down |            |
| 239890_s_ | 0.004857 | 0.003365 | 1.524952 down | 1.163184 down | 1.311015 up   | SERP2      |
| 239891_x_ | 0.001756 | 8.70E-04 | 2.489472 down | 2.339439 down | 1.064132 up   | RAB12      |
| 239897_at | 0.001554 | 7.38E-04 | 1.531264 up   | 1.7782 up     | 1.161263 up   | BCLAF1     |
| 239903_at | 0.013651 | 0.011858 | 6.022025 down | 2.340446 down | 2.573025 up   |            |
| 239907_at | 0.001625 | 7.85E-04 | 4.045062 up   | 3.542386 up   | 1.141903 down |            |

|           |          |          |          |      |          |      |          |      |            |
|-----------|----------|----------|----------|------|----------|------|----------|------|------------|
| 239909_at | 8.01E-04 | 3.02E-04 | 2.404969 | down | 4.510129 | down | 1.875338 | down | ADAMTSL1   |
| 239913_at | 2.84E-04 | 7.40E-05 | 2.828531 | up   | 2.703346 | up   | 1.046307 | down | SLC10A4    |
| 239919_at | 4.54E-06 | 2.50E-07 | 11.17338 | down | 1.033267 | up   | 11.54509 | up   | LOC255480  |
| 239920_at | 9.96E-04 | 4.04E-04 | 1.86563  | up   | 1.647828 | down | 3.074239 | down | UBTF       |
| 239925_at | 8.90E-04 | 3.47E-04 | 1.692353 | up   | 1.118621 | down | 1.893102 | down |            |
| 239931_at | 0.016487 | 0.014719 | 1.472653 | up   | 1.021853 | up   | 1.441159 | down |            |
| 239933_x_ | 0.005198 | 0.003669 | 1.893875 | up   | 1.521316 | down | 2.881182 | down | C14orf45   |
| 239942_at | 5.85E-05 | 8.75E-06 | 3.154505 | down | 1.34434  | down | 2.346509 | up   |            |
| 239947_at | 0.005898 | 0.0043   | 1.649145 | up   | 1.191028 | down | 1.964178 | down |            |
| 239949_at | 0.00109  | 4.56E-04 | 1.344631 | down | 1.47749  | up   | 1.986679 | up   | THNSL2     |
| 239951_at | 0.001518 | 7.14E-04 | 3.418359 | down | 1.451223 | down | 2.355503 | up   |            |
| 239952_at | 8.80E-04 | 3.41E-04 | 2.471235 | down | 1.317712 | down | 1.875399 | up   | ZEB1       |
| 239956_at | 1.29E-04 | 2.54E-05 | 1.42762  | down | 1.111512 | down | 1.284394 | up   |            |
| 239960_x_ | 0.010583 | 0.00879  | 1.784964 | down | 1.443106 | down | 1.23689  | up   | LYRM7      |
| 239961_at | 1.47E-04 | 3.04E-05 | 1.334497 | up   | 1.602486 | down | 2.138512 | down |            |
| 239970_at | 0.024851 | 0.023293 | 1.500695 | up   | 1.020536 | up   | 1.470498 | down |            |
| 239975_at | 7.82E-04 | 2.92E-04 | 7.738699 | up   | 8.837526 | up   | 1.141991 | up   | HLA-DPB2   |
| 239980_at | 0.002681 | 0.00154  | 1.296413 | up   | 1.050389 | up   | 1.234223 | down | C22orf28   |
| 239988_at | 6.75E-04 | 2.38E-04 | 1.487883 | up   | 1.733434 | up   | 1.165034 | up   |            |
| 239993_at | 0.001398 | 6.40E-04 | 1.397671 | up   | 1.050885 | down | 1.468792 | down |            |
| 239994_at | 9.13E-04 | 3.58E-04 | 3.318477 | up   | 2.504006 | up   | 1.325267 | down |            |
| 239995_at | 0.008058 | 0.00634  | 1.993717 | down | 1.212831 | down | 1.643854 | up   |            |
| 239996_x_ | 0.003352 | 0.002079 | 2.144886 | up   | 1.573188 | down | 3.374308 | down | ATP2A2     |
|           |          |          |          |      |          |      |          |      | FAM93B /// |
|           |          |          |          |      |          |      |          |      | LOC389634  |
|           |          |          |          |      |          |      |          |      | ///        |
| 240002_at | 0.010044 | 0.00826  | 1.655906 | up   | 1.009954 | down | 1.672388 | down | OR7E140P   |
| 240004_at | 4.78E-04 | 1.48E-04 | 1.515692 | up   | 1.557571 | up   | 1.02763  | up   |            |
| 240008_at | 0.006647 | 0.005004 | 2.775233 | up   | 3.627122 | up   | 1.306962 | up   |            |
| 240009_at | 0.037336 | 0.036062 | 1.432014 | up   | 1.097803 | up   | 1.304436 | down |            |
| 240011_at | 0.02059  | 0.018924 | 1.731436 | down | 1.34855  | down | 1.283925 | up   | TTBK2      |
| 240015_at | 0.001655 | 8.05E-04 | 1.380447 | up   | 1.511154 | up   | 1.094685 | up   |            |
| 240026_x_ | 0.004857 | 0.003365 | 1.101856 | up   | 1.148347 | up   | 1.042193 | up   |            |



|           |          |          |          |      |          |      |          |      |           |
|-----------|----------|----------|----------|------|----------|------|----------|------|-----------|
| 240030_at | 0.021178 | 0.019536 | 1.375483 | down | 1.005915 | up   | 1.38362  | up   | COMMD6    |
| 240031_at | 0.00339  | 0.002111 | 1.442477 | up   | 1.184876 | up   | 1.217407 | down | MSRA      |
| 240035_at | 0.017282 | 0.015532 | 1.366885 | up   | 1.089237 | up   | 1.254902 | down |           |
| 240036_at | 0.001368 | 6.23E-04 | 1.404857 | up   | 1.013018 | down | 1.423145 | down | SEC14L1   |
| 240044_x_ | 0.002542 | 0.001436 | 1.33417  | up   | 2.529417 | up   | 1.895873 | up   | TNRC6B    |
| 240045_at | 0.001584 | 7.58E-04 | 1.21213  | up   | 1.397889 | down | 1.694423 | down |           |
| 240051_at | 0.001856 | 9.36E-04 | 1.616251 | up   | 2.137167 | down | 3.454198 | down | TPD52L3   |
| 240053_x_ | 0.022121 | 0.020513 | 1.066054 | up   | 1.148791 | down | 1.224673 | down |           |
| 240054_at | 7.83E-04 | 2.93E-04 | 1.578717 | down | 1.007348 | up   | 1.590318 | up   |           |
| 240057_at | 0.001244 | 5.47E-04 | 1.324449 | up   | 1.124469 | down | 1.489302 | down |           |
|           |          |          |          |      |          |      |          |      | LOC100129 |
| 240058_at | 0.029373 | 0.027969 | 1.200926 | up   | 1.06773  | down | 1.282264 | down | 597       |
| 240060_at | 0.0045   | 0.003051 | 1.433939 | up   | 1.296192 | down | 1.858659 | down |           |
| 240069_at | 0.047542 | 0.046355 | 1.658223 | up   | 1.099245 | up   | 1.508511 | down |           |
| 240077_at | 0.001634 | 7.91E-04 | 1.298668 | up   | 1.333232 | down | 1.731426 | down |           |
| 240079_at | 0.030392 | 0.029003 | 1.323697 | up   | 1.219562 | down | 1.61433  | down | ZNF81     |
| 240081_at | 0.01269  | 0.01089  | 1.596516 | up   | 1.22819  | up   | 1.299893 | down |           |
| 240085_at | 0.003436 | 0.00215  | 1.199436 | up   | 1.120534 | down | 1.344009 | down |           |
| 240095_at | 6.12E-05 | 9.28E-06 | 3.952603 | down | 2.410582 | down | 1.639688 | up   |           |
| 240096_at | 0.007675 | 0.00598  | 1.478616 | up   | 1.058695 | down | 1.565404 | down |           |
| 240098_at | 0.010545 | 0.008753 | 1.875288 | up   | 1.003547 | up   | 1.86866  | down | RIF1      |
| 240099_at | 0.001473 | 6.86E-04 | 1.81501  | up   | 1.289647 | up   | 1.407369 | down |           |
| 240103_at | 0.010066 | 0.008283 | 1.186993 | up   | 1.043213 | down | 1.238286 | down |           |
| 240104_at | 0.004497 | 0.003048 | 2.259564 | up   | 1.373399 | up   | 1.645235 | down |           |
| 240105_at | 0.002876 | 0.001694 | 3.807009 | up   | 4.861052 | up   | 1.276869 | up   |           |
| 240108_at | 0.006221 | 0.004602 | 1.485453 | up   | 2.322745 | up   | 1.563661 | up   |           |
| 240110_at | 0.004155 | 0.002739 | 1.043977 | up   | 1.321846 | up   | 1.266164 | up   | HMGCS2    |
| 240112_at | 0.007165 | 0.005494 | 1.241535 | up   | 1.001516 | down | 1.243418 | down |           |
| 240115_at | 0.013779 | 0.011992 | 1.701635 | down | 1.564623 | down | 1.087569 | up   |           |
| 240116_at | 8.48E-04 | 3.24E-04 | 1.563609 | up   | 1.438048 | down | 2.248545 | down |           |
| 240117_at | 3.35E-07 | 6.27E-09 | 4.372483 | up   | 3.578711 | up   | 1.221804 | down | FBN3      |
| 240121_x_ | 0.003563 | 0.00225  | 2.020583 | down | 1.66353  | down | 1.214635 | up   |           |
| 240127_at | 0.004285 | 0.002855 | 1.363666 | up   | 1.134969 | down | 1.54772  | down |           |
| 240134_at | 9.08E-04 | 3.55E-04 | 1.514616 | down | 1.147482 | up   | 1.737994 | up   |           |

|           |          |          |               |               |               |            |
|-----------|----------|----------|---------------|---------------|---------------|------------|
| 240143_at | 0.005895 | 0.004296 | 1.697303 up   | 1.285168 up   | 1.320685 down |            |
| 240144_at | 0.005896 | 0.004298 | 1.428904 up   | 1.059743 up   | 1.348349 down | DNASE1     |
| 240147_at | 0.001064 | 4.41E-04 | 2.295527 up   | 1.324615 down | 3.04069 down  | C7orf50    |
|           |          |          |               |               |               | ZNF273 /// |
|           |          |          |               |               |               | ZNF493 /// |
| 240155_x_ | 0.004785 | 0.003298 | 1.771816 up   | 3.560264 up   | 2.009387 up   | ZNF738     |
| 240163_at | 0.001807 | 9.03E-04 | 1.217237 up   | 1.348005 down | 1.640841 down | RORA       |
| 240170_at | 0.009537 | 0.007763 | 1.892687 up   | 2.820598 up   | 1.490261 up   |            |
| 240171_at | 5.20E-04 | 1.67E-04 | 1.246623 up   | 1.255208 down | 1.56477 down  |            |
| 240172_at | 0.002368 | 0.001305 | 2.924339 down | 1.419088 down | 2.060718 up   | ERGIC2     |
| 240180_at | 0.006398 | 0.004775 | 1.489831 up   | 2.068045 up   | 1.388107 up   |            |
| 240183_at | 0.003657 | 0.002323 | 1.331504 up   | 1.296264 down | 1.72598 down  |            |
| 240184_at | 0.012867 | 0.011069 | 1.202296 up   | 1.42998 up    | 1.189375 up   |            |
| 240187_at | 0.016548 | 0.014786 | 1.728486 down | 1.97716 down  | 1.143868 down | PPP1R3C    |
| 240188_at | 6.47E-05 | 1.00E-05 | 2.368202 down | 1.181628 up   | 2.798334 up   |            |
| 240189_at | 6.57E-04 | 2.30E-04 | 2.548096 up   | 2.08918 up    | 1.219664 down | ACOXL      |
| 240192_at | 0.002937 | 0.001741 | 1.171747 up   | 1.073498 down | 1.257868 down | FLJ45983   |
| 240193_at | 0.044521 | 0.043295 | 1.567593 up   | 1.071407 down | 1.67953 down  |            |
| 240197_at | 1.58E-04 | 3.38E-05 | 1.40703 up    | 1.318513 up   | 1.067134 down | SYN2       |
| 240202_x_ | 0.002515 | 0.001416 | 1.335095 up   | 1.260464 up   | 1.059209 down | PFKP       |
| 240203_at | 0.002173 | 0.001158 | 1.092363 up   | 1.253379 down | 1.369145 down |            |
| 240205_x_ | 0.007165 | 0.005495 | 1.633309 up   | 2.229465 up   | 1.364999 up   |            |
| 240210_at | 0.003572 | 0.002257 | 1.82937 up    | 1.298503 down | 2.375442 down | ATAD3C     |
| 240214_at | 9.92E-04 | 4.02E-04 | 3.276563 down | 3.146864 down | 1.041215 up   |            |
| 240219_at | 0.003017 | 0.001805 | 2.050246 down | 1.398395 down | 1.466143 up   |            |
| 240220_at | 2.35E-04 | 5.74E-05 | 1.112044 up   | 1.327899 down | 1.476682 down |            |
| 240221_at | 0.011125 | 0.009329 | 1.228842 down | 1.887175 up   | 2.31904 up    | CSNK1A1    |
| 240223_at | 0.004562 | 0.003108 | 1.309618 up   | 1.371312 down | 1.795895 down | SLC2A9     |
| 240231_at | 2.51E-05 | 2.72E-06 | 4.382176 up   | 8.986768 up   | 2.050755 up   |            |
| 240241_at | 0.009566 | 0.007794 | 1.649798 up   | 1.21608 down  | 2.006286 down |            |
| 240242_at | 0.003158 | 0.001922 | 1.319309 up   | 1.056195 up   | 1.249115 down |            |
| 240251_at | 0.010454 | 0.008659 | 1.221489 up   | 1.04774 down  | 1.279803 down | IFT80      |
| 240261_at | 6.69E-06 | 4.30E-07 | 2.258109 up   | 3.096434 up   | 1.371251 up   | TOM1L1     |
| 240263_at | 0.004717 | 0.003242 | 4.077367 up   | 3.35867 up    | 1.213983 down |            |

|           |          |          |               |               |               |           |
|-----------|----------|----------|---------------|---------------|---------------|-----------|
| 240264_at | 0.001919 | 9.80E-04 | 1.435036 up   | 1.031095 down | 1.479659 down |           |
| 240267_at | 3.90E-04 | 1.13E-04 | 2.781701 up   | 2.943198 up   | 1.058057 up   |           |
| 240270_x_ | 0.005478 | 0.003917 | 1.634858 down | 1.070279 up   | 1.749754 up   |           |
| 240277_at | 0.007338 | 0.005658 | 2.303564 down | 3.119086 down | 1.354026 down |           |
| 240279_at | 9.73E-04 | 3.91E-04 | 2.254715 up   | 1.767653 up   | 1.275542 down |           |
| 240280_at | 1.33E-04 | 2.67E-05 | 1.013438 down | 1.729069 down | 1.706142 down | UFSP1     |
| 240284_x_ | 0.002436 | 0.001354 | 1.54701 up    | 1.18033 down  | 1.825982 down | EMG1      |
| 240301_at | 4.19E-05 | 5.56E-06 | 4.718876 up   | 3.496204 up   | 1.349714 down | DPPA2     |
| 240302_at | 0.005427 | 0.003869 | 1.604628 up   | 1.072931 down | 1.721655 down |           |
| 240303_at | 0.001762 | 8.74E-04 | 1.385503 up   | 1.197801 down | 1.659557 down | TMC5      |
| 240304_s_ | 1.10E-06 | 3.36E-08 | 3.872768 up   | 3.764624 up   | 1.028727 down | TMC5      |
| 240305_at | 0.007498 | 0.005808 | 1.642185 up   | 1.050263 down | 1.724727 down |           |
| 240307_at | 0.003225 | 0.001974 | 3.482196 up   | 5.078324 up   | 1.458368 up   |           |
| 240310_at | 0.006989 | 0.00533  | 2.106255 down | 2.321865 down | 1.102367 down | TOR1AIP1  |
| 240312_at | 2.49E-04 | 6.19E-05 | 1.945229 up   | 2.105059 up   | 1.082166 up   | LOC389895 |
| 240318_at | 0.010442 | 0.008647 | 1.864478 up   | 1.388134 up   | 1.343154 down | AFMID     |
|           |          |          |               |               |               | LOC100131 |
| 240320_at | 0.003533 | 0.002226 | 1.169731 up   | 1.296266 up   | 1.108175 up   | 781       |
| 240325_x_ | 0.005883 | 0.004284 | 1.594734 up   | 1.005065 down | 1.602811 down | LOC442142 |
| 240328_at | 0.011143 | 0.009349 | 1.514029 up   | 1.249221 up   | 1.211978 down |           |
|           |          |          |               |               |               | LOC100131 |
| 240329_at | 0.006169 | 0.004554 | 1.275271 down | 1.083551 down | 1.176937 up   | 904       |
| 240334_at | 0.035847 | 0.034563 | 1.257347 up   | 1.119674 down | 1.407819 down |           |
| 240349_at | 0.005048 | 0.003535 | 1.326726 up   | 1.791579 up   | 1.350376 up   | PRKAA2    |
| 240350_at | 0.003477 | 0.002183 | 1.347871 up   | 1.088058 down | 1.466562 down |           |
| 240352_at | 0.002554 | 0.001444 | 1.343746 up   | 1.204131 down | 1.618046 down |           |
| 240353_s_ | 0.00511  | 0.00359  | 1.288043 up   | 1.127128 down | 1.451788 down | C12orf54  |
| 240361_at | 0.008166 | 0.006448 | 1.252735 up   | 1.140942 down | 1.429298 down |           |
| 240364_at | 8.90E-04 | 3.47E-04 | 1.207735 up   | 1.052491 down | 1.27113 down  |           |
|           |          |          |               |               |               | LOC100129 |
| 240366_at | 0.013678 | 0.011887 | 1.187117 up   | 1.050037 up   | 1.130548 down | 562       |
| 240368_at | 0.004373 | 0.002938 | 2.156722 up   | 1.797013 up   | 1.200171 down |           |
| 240373_at | 0.013462 | 0.011664 | 1.698078 up   | 1.075899 down | 1.82696 down  | C19orf29  |

|           |          |          |               |               |               |  |              |
|-----------|----------|----------|---------------|---------------|---------------|--|--------------|
|           |          |          |               |               |               |  | LOC339047    |
|           |          |          |               |               |               |  | /// NPIP /// |
| 240376_s_ | 3.48E-04 | 9.72E-05 | 2.043121 up   | 1.309508 down | 2.675484 down |  | PKD1P1       |
|           |          |          |               |               |               |  | LOC100131    |
| 240382_at | 5.70E-05 | 8.43E-06 | 2.732929 up   | 2.438694 down | 6.664777 down |  | 914          |
| 240387_at | 0.025656 | 0.024137 | 1.491949 up   | 1.205554 down | 1.798626 down |  | UBASH3B      |
| 240391_at | 2.84E-04 | 7.41E-05 | 2.223707 down | 1.621913 down | 1.37104 up    |  | NDUFB2       |
| 240396_at | 0.01612  | 0.01435  | 1.511303 up   | 1.205666 down | 1.822127 down |  | IL20RA       |
| 240397_x_ | 2.34E-06 | 9.85E-08 | 7.492556 down | 1.138285 down | 6.582324 up   |  |              |
| 240400_at | 0.003382 | 0.002102 | 1.774205 down | 1.160508 down | 1.528818 up   |  |              |
| 240402_at | 0.002127 | 0.001126 | 1.817209 down | 2.265561 down | 1.246726 down |  | KIRREL3      |
| 240404_at | 0.005099 | 0.003581 | 1.171379 up   | 1.291055 down | 1.512314 down |  |              |
| 240414_at | 0.011087 | 0.009287 | 1.22414 down  | 1.016336 up   | 1.244138 up   |  |              |
| 240418_at | 0.012813 | 0.011014 | 1.254684 down | 1.249605 down | 1.004064 up   |  |              |
| 240419_at | 4.00E-05 | 5.25E-06 | 6.646305 up   | 5.961807 up   | 1.114814 down |  | SLC6A15      |
| 240421_x_ | 7.09E-05 | 1.14E-05 | 1.124587 down | 1.803328 up   | 2.027999 up   |  |              |
| 240429_at | 0.00223  | 0.001203 | 1.485668 down | 1.081273 down | 1.373999 up   |  | ZNF546       |
| 240432_x_ | 0.004094 | 0.002686 | 3.204679 down | 3.240293 down | 1.011113 down |  |              |
| 240436_at | 0.0017   | 8.34E-04 | 2.79725 down  | 1.388771 down | 2.014191 up   |  | LOC650794    |
| 240441_at | 0.014504 | 0.012723 | 1.445183 up   | 1.220099 down | 1.763267 down |  |              |
| 240447_at | 0.048327 | 0.047149 | 1.161872 up   | 1.014034 down | 1.178178 down |  |              |
| 240455_at | 0.002906 | 0.001716 | 1.644342 up   | 1.078762 up   | 1.524286 down |  |              |
| 240467_at | 0.001258 | 5.56E-04 | 3.453742 down | 1.699882 down | 2.031754 up   |  |              |
| 240468_at | 0.003698 | 0.00236  | 1.329323 up   | 1.29549 down  | 1.722124 down |  |              |
| 240471_at | 0.001426 | 6.57E-04 | 1.300574 up   | 1.157244 up   | 1.123855 down |  |              |
| 240478_at | 8.79E-04 | 3.40E-04 | 2.155683 up   | 2.557831 up   | 1.186553 up   |  |              |
| 240496_at | 0.003642 | 0.002312 | 1.735683 up   | 1.030128 up   | 1.68492 down  |  |              |
| 240507_at | 0.027042 | 0.025557 | 1.361728 down | 1.170272 down | 1.1636 up     |  |              |
| 240512_x_ | 0.014109 | 0.012318 | 1.343929 down | 1.138462 down | 1.180478 up   |  | KCTD4        |
| 240514_at | 0.002834 | 0.001658 | 1.246309 up   | 1.284143 down | 1.600438 down |  | PGA3         |
| 240517_at | 0.004466 | 0.003021 | 2.70868 up    | 1.54087 up    | 1.757891 down |  | CBS          |
| 240521_at | 0.010388 | 0.008591 | 1.712572 up   | 1.091711 up   | 1.568705 down |  |              |
| 240526_at | 0.004918 | 0.003419 | 1.20446 up    | 1.006634 down | 1.21245 down  |  |              |
| 240531_at | 5.10E-04 | 1.62E-04 | 1.381295 up   | 1.424834 down | 1.968115 down |  |              |

|           |          |          |               |               |               |           |
|-----------|----------|----------|---------------|---------------|---------------|-----------|
| 240541_at | 9.75E-04 | 3.92E-04 | 1.459231 up   | 1.549877 down | 2.261629 down |           |
| 240545_at | 0.002974 | 0.001771 | 3.182112 up   | 2.119133 up   | 1.50161 down  | LOC286382 |
| 240549_at | 2.25E-04 | 5.42E-05 | 3.594748 down | 2.153382 down | 1.66935 up    |           |
| 240570_at | 0.002141 | 0.001137 | 1.66361 up    | 1.449888 up   | 1.147406 down | INADL     |
| 240571_at | 0.00863  | 0.00689  | 1.319593 up   | 1.37384 down  | 1.81291 down  |           |
| 240574_at | 0.00753  | 0.005843 | 1.337389 down | 1.270474 up   | 1.699117 up   |           |
| 240577_at | 0.005598 | 0.004023 | 1.230001 up   | 1.277368 down | 1.571164 down | LOC643749 |
| 240590_at | 0.002022 | 0.001051 | 1.347387 up   | 1.145933 down | 1.544014 down | LOC348761 |
| 240594_at | 0.009816 | 0.008038 | 3.649993 up   | 6.398978 up   | 1.753148 up   |           |
| 240595_at | 0.004018 | 0.002623 | 1.751526 up   | 1.097904 down | 1.923008 down |           |
| 240596_at | 0.002818 | 0.001646 | 1.291294 down | 1.148696 down | 1.124139 up   |           |
| 240606_at | 0.0026   | 0.001478 | 1.523531 up   | 1.30056 up    | 1.171442 down |           |
| 240607_at | 0.007196 | 0.005524 | 1.175761 down | 1.220589 up   | 1.435121 up   | MIAT      |
| 240613_at | 0.002747 | 0.001591 | 1.162278 down | 1.348229 down | 1.159989 down | JAK1      |
| 240614_at | 0.002928 | 0.001733 | 1.422464 up   | 1.104532 down | 1.571156 down | KCNC2     |
|           |          |          |               |               |               | LOC100131 |
| 240616_at | 0.002938 | 0.001743 | 3.712607 up   | 2.351976 up   | 1.578506 down | 110       |
| 240617_at | 0.001309 | 5.86E-04 | 1.658927 up   | 1.684586 down | 2.794604 down |           |
| 240622_at | 0.011282 | 0.009488 | 1.262715 up   | 1.025146 down | 1.294467 down |           |
|           |          |          |               |               |               | LOC100134 |
| 240624_x_ | 0.002149 | 0.001143 | 1.702578 up   | 1.129375 down | 1.922848 down | 685       |
| 240636_at | 0.003143 | 0.001909 | 2.883374 up   | 3.445025 up   | 1.194789 up   |           |
| 240638_at | 0.030868 | 0.029496 | 1.290731 up   | 1.206856 down | 1.557727 down |           |
| 240640_at | 0.016034 | 0.01426  | 1.266949 up   | 1.0508 up     | 1.2057 down   |           |
| 240644_at | 0.004067 | 0.002664 | 1.182103 up   | 1.265161 down | 1.495551 down |           |
| 240645_at | 0.006032 | 0.004423 | 1.166759 up   | 1.095188 down | 1.27782 down  |           |
| 240664_at | 0.002117 | 0.001119 | 1.863698 up   | 1.377142 down | 2.566575 down |           |
| 240672_at | 0.013514 | 0.01172  | 1.659171 up   | 1.052388 down | 1.746091 down |           |
| 240674_at | 0.004531 | 0.00308  | 1.27739 up    | 1.151494 up   | 1.109333 down | JARID2    |
| 240681_at | 3.49E-08 | 2.84E-10 | 12.32432 up   | 13.55459 up   | 1.099825 up   |           |
| 240686_x_ | 0.001799 | 8.98E-04 | 2.482064 up   | 1.428628 down | 3.545947 down | TFRC      |
| 240690_at | 0.001466 | 6.82E-04 | 7.005145 up   | 5.070846 up   | 1.381455 down |           |
| 240692_at | 0.018516 | 0.016792 | 1.394087 up   | 1.061207 down | 1.479415 down | MGC34796  |
| 240698_s_ | 1.23E-04 | 2.39E-05 | 2.139386 up   | 2.185201 up   | 1.021415 up   |           |

|           |          |          |          |      |          |      |          |      |           |
|-----------|----------|----------|----------|------|----------|------|----------|------|-----------|
| 240700_at | 0.00319  | 0.001945 | 1.656876 | down | 1.531701 | down | 1.081723 | up   | TOR1AIP2  |
| 240715_at | 4.18E-07 | 8.49E-09 | 15.38139 | down | 1.110064 | down | 13.85632 | up   | TBX5      |
| 240716_at | 0.013735 | 0.011946 | 1.601595 | up   | 1.067103 | up   | 1.500881 | down | TTC23     |
| 240720_at | 0.00413  | 0.002718 | 1.511351 | up   | 1.018632 | up   | 1.483707 | down |           |
| 240721_at | 0.010784 | 0.008989 | 2.419265 | down | 1.850758 | down | 1.307175 | up   |           |
| 240735_at | 0.014995 | 0.013225 | 1.36027  | up   | 1.105562 | down | 1.503862 | down | CDC42BPA  |
| 240737_at | 0.028766 | 0.027343 | 1.317879 | up   | 1.040487 | up   | 1.266599 | down |           |
| 240748_at | 0.028507 | 0.027065 | 1.278342 | up   | 1.051332 | up   | 1.215927 | down |           |
| 240752_at | 0.020491 | 0.018819 | 1.416373 | up   | 1.156153 | down | 1.637544 | down | PCGF2     |
| 240760_at | 0.001392 | 6.37E-04 | 1.544109 | up   | 1.624765 | down | 2.508814 | down | CDRT15    |
| 240765_at | 2.21E-04 | 5.26E-05 | 3.153272 | up   | 2.164613 | up   | 1.456737 | down |           |
|           |          |          |          |      |          |      |          |      | RP11-     |
| 240767_x_ | 0.02453  | 0.022963 | 1.163034 | up   | 1.245853 | down | 1.448969 | down | 470P4.2   |
| 240778_at | 0.006913 | 0.005253 | 1.536581 | up   | 1.296699 | up   | 1.184994 | down | GINS4     |
| 240780_at | 0.001334 | 6.01E-04 | 1.166154 | up   | 1.185859 | down | 1.382894 | down |           |
| 240786_at | 0.004299 | 0.00287  | 1.404254 | up   | 1.138542 | down | 1.598801 | down | NOTCH4    |
| 240796_at | 0.006401 | 0.004778 | 1.716567 | up   | 1.07433  | down | 1.844159 | down |           |
| 240800_x_ | 0.004591 | 0.003134 | 1.10311  | up   | 1.399621 | up   | 1.268795 | up   |           |
| 240813_at | 0.001172 | 5.03E-04 | 1.742371 | up   | 1.520503 | down | 2.64928  | down |           |
| 240816_at | 0.009924 | 0.008147 | 1.407699 | up   | 1.042197 | up   | 1.350704 | down |           |
| 240819_at | 8.63E-04 | 3.31E-04 | 1.368712 | up   | 1.081795 | down | 1.480666 | down |           |
| 240823_at | 0.005111 | 0.003592 | 1.28368  | up   | 1.144661 | down | 1.469378 | down |           |
| 240826_at | 0.001696 | 8.31E-04 | 1.526296 | down | 1.194457 | down | 1.277816 | up   |           |
| 240827_at | 0.005138 | 0.003617 | 1.420359 | up   | 1.105352 | up   | 1.284983 | down | FLJ45983  |
| 240834_at | 0.002046 | 0.00107  | 1.327905 | down | 1.63756  | down | 1.233191 | down | FAM105B   |
| 240838_s_ | 0.002509 | 0.001411 | 1.253102 | down | 1.145044 | up   | 1.434856 | up   | LOC145837 |
| 240842_at | 0.019994 | 0.018323 | 1.278647 | up   | 1.12102  | up   | 1.140611 | down |           |
| 240843_at | 0.006444 | 0.004816 | 1.148387 | down | 1.586709 | up   | 1.822155 | up   |           |
| 240848_at | 0.005683 | 0.0041   | 1.150924 | up   | 1.133171 | down | 1.304194 | down |           |
| 240849_at | 0.004919 | 0.00342  | 1.922228 | up   | 1.038414 | down | 1.996069 | down |           |
| 240853_at | 0.009352 | 0.007586 | 1.681085 | up   | 1.156127 | down | 1.943547 | down |           |
| 240862_at | 0.035262 | 0.033974 | 1.289523 | up   | 1.245171 | up   | 1.035619 | down | RASGRP4   |
| 240873_x_ | 0.003727 | 0.002382 | 2.8823   | down | 3.50577  | down | 1.21631  | down | DAB2      |
| 240882_at | 0.023808 | 0.022224 | 1.387912 | up   | 1.175825 | down | 1.631942 | down |           |

|           |          |          |               |               |               |           |
|-----------|----------|----------|---------------|---------------|---------------|-----------|
| 240886_at | 0.004673 | 0.003208 | 1.688515 up   | 1.354826 down | 2.287643 down | CASR      |
| 240887_at | 0.007515 | 0.005825 | 1.449827 up   | 1.220908 up   | 1.187499 down |           |
| 240889_at | 0.009933 | 0.008158 | 1.443296 up   | 1.370972 down | 1.978718 down | CDRT15L2  |
| 240891_at | 0.027397 | 0.025912 | 1.705094 up   | 1.249334 up   | 1.364802 down | FSTL1     |
| 240897_at | 6.60E-04 | 2.31E-04 | 1.39602 up    | 1.266496 down | 1.768055 down |           |
| 240899_at | 0.002228 | 0.001201 | 1.723181 down | 1.375578 down | 1.252696 up   |           |
| 240900_at | 0.002058 | 0.001077 | 1.377707 up   | 1.252369 down | 1.725398 down | C7orf50   |
| 240901_at | 0.012563 | 0.010765 | 1.25706 up    | 1.077147 down | 1.354039 down |           |
| 240910_at | 7.28E-04 | 2.65E-04 | 1.682109 down | 1.131712 up   | 1.903663 up   |           |
| 240913_at | 0.001886 | 9.56E-04 | 1.429385 up   | 1.21896 up    | 1.172627 down | FGFR2     |
| 240915_at | 4.63E-04 | 1.42E-04 | 1.099338 up   | 1.140997 down | 1.254342 down | IGHG1     |
| 240916_x_ | 0.024006 | 0.022424 | 1.360494 up   | 1.043428 down | 1.419577 down |           |
| 240919_at | 0.001822 | 9.14E-04 | 1.645199 up   | 1.022739 down | 1.682609 down |           |
| 240931_s_ | 0.005131 | 0.003611 | 1.356547 up   | 1.069537 up   | 1.26835 down  | LOC728613 |
| 240938_at | 0.005208 | 0.003679 | 1.126762 up   | 1.169167 down | 1.317373 down |           |
| 240939_x_ | 0.024439 | 0.02287  | 1.059137 up   | 1.574823 up   | 1.486893 up   |           |
| 240941_at | 0.005716 | 0.004128 | 1.056486 up   | 1.364358 down | 1.441425 down | ITSN2     |
| 240944_at | 0.001284 | 5.71E-04 | 1.958898 up   | 1.984992 up   | 1.013321 up   |           |
| 240945_at | 0.011745 | 0.009943 | 1.309034 up   | 1.244416 down | 1.628982 down |           |
| 240947_at | 0.005349 | 0.003801 | 1.595618 down | 1.167665 down | 1.366503 up   | ANO6      |
| 240948_at | 7.26E-04 | 2.63E-04 | 1.298231 down | 1.686562 down | 1.299123 down |           |
| 240949_x_ | 0.009891 | 0.008115 | 1.337437 up   | 1.003798 up   | 1.332377 down |           |
| 240951_at | 4.76E-04 | 1.47E-04 | 1.170322 down | 1.168409 down | 1.001638 up   | RORA      |
| 240957_at | 0.030897 | 0.029529 | 1.25686 up    | 1.06 up       | 1.185717 down |           |
|           |          |          |               |               |               | LOC100131 |
| 240963_x_ | 0.019837 | 0.018155 | 1.264983 up   | 1.154432 down | 1.460337 down | 347       |
| 240967_at | 0.001595 | 7.66E-04 | 1.217915 up   | 1.084622 down | 1.320976 down | KRTAP19-3 |
| 240968_at | 0.004349 | 0.002916 | 1.286741 down | 1.007824 up   | 1.296809 up   |           |
| 240974_at | 0.004483 | 0.003034 | 1.154838 up   | 1.237324 down | 1.428909 down |           |
|           |          |          |               |               |               | hCG_17760 |
| 240975_x_ | 0.00846  | 0.006726 | 1.328596 up   | 1.186818 down | 1.576801 down | 07        |
| 240981_at | 0.013378 | 0.011583 | 1.400461 up   | 1.036067 down | 1.450972 down |           |
| 240984_at | 0.001502 | 7.05E-04 | 1.686703 up   | 1.063385 down | 1.793615 down |           |
| 240986_at | 0.00145  | 6.72E-04 | 1.451199 up   | 1.149378 up   | 1.262594 down |           |

|           |          |          |               |               |               |           |
|-----------|----------|----------|---------------|---------------|---------------|-----------|
| 240988_x_ | 8.24E-04 | 3.12E-04 | 1.771529 up   | 1.014421 up   | 1.746345 down |           |
| 240993_at | 0.00185  | 9.31E-04 | 1.838254 up   | 1.3348 up     | 1.377176 down |           |
| 240996_at | 4.97E-05 | 7.00E-06 | 1.675966 up   | 1.145407 up   | 1.463205 down |           |
| 241000_at | 0.008634 | 0.006893 | 1.335956 up   | 1.059478 up   | 1.260957 down |           |
| 241002_at | 2.80E-05 | 3.20E-06 | 4.166902 up   | 4.627258 up   | 1.110479 up   |           |
| 241010_x_ | 0.001672 | 8.16E-04 | 1.356901 up   | 1.637998 down | 2.222601 down |           |
| 241012_at | 0.009109 | 0.007355 | 1.063981 down | 1.242403 down | 1.167693 down |           |
| 241014_at | 0.002715 | 0.001564 | 1.472597 down | 2.736835 down | 1.858508 down | LOC339400 |
| 241021_at | 0.002576 | 0.00146  | 1.737567 up   | 1.206356 up   | 1.440344 down |           |
| 241031_at | 0.036849 | 0.035579 | 1.099892 down | 1.096914 up   | 1.206487 up   | FAM148A   |
| 241032_at | 0.04138  | 0.040133 | 1.189194 up   | 1.050055 down | 1.248719 down | ANKRD40   |
| 241037_at | 0.008435 | 0.006698 | 1.333986 up   | 1.044696 down | 1.393609 down |           |
| 241043_at | 0.038668 | 0.037412 | 1.271368 up   | 1.078794 up   | 1.178509 down |           |
| 241045_at | 0.006515 | 0.004882 | 1.481694 up   | 1.169341 down | 1.732606 down | JMJD5     |
| 241046_at | 0.002205 | 0.001181 | 1.448577 up   | 1.077063 down | 1.560209 down |           |
| 241048_at | 2.08E-06 | 8.36E-08 | 2.288027 up   | 2.344241 up   | 1.024568 up   |           |
| 241059_at | 0.011141 | 0.009347 | 1.300064 up   | 1.237873 down | 1.609313 down |           |
| 241060_x_ | 0.020219 | 0.018546 | 1.321098 down | 1.203025 up   | 1.589313 up   |           |
| 241071_at | 0.010184 | 0.008391 | 1.219238 up   | 1.243735 down | 1.516409 down |           |
| 241100_at | 0.0121   | 0.010303 | 1.251928 down | 1.457508 down | 1.164211 down |           |
| 241101_at | 0.045409 | 0.044197 | 1.090998 up   | 1.153135 down | 1.258068 down |           |
| 241102_at | 0.001999 | 0.001034 | 1.318778 up   | 1.59071 up    | 1.2062 up     |           |
| 241104_at | 0.005428 | 0.003871 | 1.641783 up   | 1.259916 down | 2.068507 down |           |
| 241109_at | 0.003576 | 0.002261 | 1.029927 up   | 1.12978 down  | 1.16359 down  |           |
| 241115_at | 0.02349  | 0.021902 | 1.267757 up   | 1.080916 down | 1.370338 down |           |
| 241118_at | 0.006111 | 0.004498 | 1.055437 up   | 1.181193 down | 1.246675 down |           |
| 241119_at | 0.00303  | 0.001816 | 1.054216 down | 1.208229 up   | 1.273734 up   |           |
| 241123_at | 0.042584 | 0.041337 | 1.398262 up   | 1.091683 up   | 1.280831 down |           |
| 241125_at | 0.01174  | 0.009937 | 1.128023 up   | 1.408399 down | 1.588706 down |           |
| 241128_at | 0.011148 | 0.009355 | 1.324977 up   | 1.039252 down | 1.376984 down |           |
| 241142_at | 0.026581 | 0.025084 | 1.185333 up   | 1.036699 down | 1.228833 down |           |
| 241143_at | 0.014667 | 0.012889 | 1.533614 up   | 1.048528 down | 1.608037 down |           |
| 241148_at | 0.005803 | 0.004209 | 1.087194 up   | 1.476151 down | 1.604862 down | ACTG2     |
| 241149_at | 0.007509 | 0.005817 | 1.922283 up   | 1.220624 down | 2.346385 down |           |



|           |          |          |               |               |               |           |
|-----------|----------|----------|---------------|---------------|---------------|-----------|
| 241152_at | 0.004454 | 0.003009 | 1.234317 up   | 1.326011 down | 1.636717 down |           |
| 241154_x_ | 0.011631 | 0.009832 | 1.431229 up   | 1.034199 down | 1.480176 down |           |
| 241156_at | 0.009834 | 0.008056 | 1.264159 up   | 1.118831 up   | 1.129893 down |           |
| 241162_at | 0.004293 | 0.002865 | 1.100246 up   | 1.214605 down | 1.336364 down |           |
|           |          |          |               |               |               | LOC100129 |
| 241180_at | 0.010153 | 0.008363 | 1.150208 up   | 1.080778 down | 1.243119 down | 112       |
| 241181_x_ | 0.003962 | 0.002576 | 1.460282 up   | 1.287181 down | 1.879646 down |           |
| 241187_at | 0.002099 | 0.001106 | 1.721784 up   | 1.144319 up   | 1.504636 down |           |
| 241195_at | 0.002185 | 0.001167 | 1.165552 up   | 1.16621 down  | 1.359278 down |           |
| 241198_s_ | 5.65E-06 | 3.39E-07 | 5.303502 down | 3.382967 down | 1.567707 up   | C11orf70  |
| 241199_x_ | 5.68E-05 | 8.39E-06 | 3.667564 up   | 2.810859 up   | 1.304784 down | DPPA4     |
| 241200_x_ | 0.017462 | 0.015715 | 1.142943 up   | 1.156988 down | 1.322371 down |           |
| 241204_at | 5.52E-04 | 1.80E-04 | 1.297973 down | 1.010032 up   | 1.310995 up   |           |
| 241211_at | 0.003994 | 0.002601 | 1.384764 up   | 1.648793 down | 2.283189 down |           |
| 241223_x_ | 0.01318  | 0.011382 | 1.686104 up   | 1.879484 up   | 1.11469 up    |           |
| 241227_at | 0.001998 | 0.001034 | 1.717441 up   | 1.516066 down | 2.603755 down |           |
| 241230_at | 9.19E-04 | 3.61E-04 | 1.381934 up   | 1.266429 down | 1.750122 down |           |
| 241235_at | 0.003452 | 0.002163 | 1.17151 up    | 1.077862 down | 1.262726 down |           |
| 241254_at | 0.007148 | 0.005479 | 1.306474 down | 1.194262 down | 1.093959 up   |           |
|           |          |          |               |               |               | LOC100131 |
| 241256_at | 5.07E-04 | 1.61E-04 | 1.416126 up   | 1.155802 down | 1.63676 down  | 283       |
| 241261_x_ | 0.001342 | 6.07E-04 | 1.554509 up   | 1.620099 down | 2.518459 down |           |
| 241264_at | 0.00103  | 4.21E-04 | 1.00958 up    | 1.270691 down | 1.282864 down |           |
| 241269_at | 0.013531 | 0.011737 | 1.373016 down | 1.130583 down | 1.214433 up   |           |
| 241276_at | 0.009527 | 0.00775  | 1.492366 up   | 1.222454 up   | 1.220795 down |           |
| 241285_at | 0.005784 | 0.004192 | 1.243018 up   | 1.211258 down | 1.505616 down |           |
| 241288_at | 0.003228 | 0.001977 | 1.102343 up   | 1.232448 down | 1.35858 down  |           |
| 241297_at | 0.016683 | 0.014925 | 1.134865 down | 1.072126 down | 1.058518 up   |           |
| 241300_at | 0.001038 | 4.27E-04 | 2.315661 down | 1.791012 down | 1.292935 up   |           |
| 241309_at | 0.008414 | 0.006678 | 1.258631 up   | 1.043672 up   | 1.205963 down |           |
| 241322_at | 0.002131 | 0.001129 | 2.025431 up   | 1.206201 down | 2.443077 down |           |
| 241327_at | 0.020823 | 0.019174 | 1.348501 up   | 1.019402 down | 1.374664 down |           |
| 241337_at | 0.004601 | 0.003144 | 1.91504 down  | 1.595442 down | 1.200319 up   |           |
| 241342_at | 0.003465 | 0.002172 | 2.832286 down | 1.202638 down | 2.355061 up   | TMEM65    |

|           |          |          |               |               |               |           |
|-----------|----------|----------|---------------|---------------|---------------|-----------|
| 241343_at | 0.002262 | 0.001229 | 1.124923 up   | 2.486148 up   | 2.21006 up    | RNASEH1   |
| 241346_at | 0.001485 | 6.93E-04 | 2.444813 up   | 1.684114 down | 4.117343 down | ARHGAP30  |
| 241350_at | 0.001797 | 8.96E-04 | 1.165584 down | 2.37675 down  | 2.039106 down | FBXL22    |
| 241355_at | 0.003597 | 0.002276 | 3.820153 down | 2.114438 down | 1.806699 up   | HR        |
| 241358_at | 0.013979 | 0.012192 | 1.509415 up   | 1.035522 down | 1.563033 down | WFIKKN2   |
| 241359_at | 3.43E-05 | 4.23E-06 | 9.036724 down | 4.088628 down | 2.21021 up    |           |
| 241364_at | 0.010387 | 0.008589 | 3.215788 down | 2.097745 down | 1.532974 up   | TMEM57    |
| 241370_at | 0.002095 | 0.001103 | 3.299585 down | 1.34975 up    | 4.453614 up   | LOC286052 |
| 241373_at | 5.62E-04 | 1.85E-04 | 1.217675 down | 1.592771 down | 1.308043 down |           |
|           |          |          |               |               |               | LOC100130 |
| 241376_at | 0.005961 | 0.004358 | 1.594302 down | 1.071381 up   | 1.708105 up   | 097       |
| 241377_s_ | 0.004893 | 0.003398 | 1.413341 up   | 1.178548 down | 1.66569 down  | MIB2      |
| 241378_at | 0.001485 | 6.93E-04 | 1.842835 up   | 1.281369 down | 2.36135 down  | MIB2      |
| 241380_at | 0.001666 | 8.11E-04 | 1.346991 up   | 1.260444 down | 1.697807 down | FLJ41603  |
| 241384_x_ | 0.010873 | 0.009079 | 1.624746 down | 1.124847 down | 1.444415 up   | GK5       |
| 241385_at | 0.001784 | 8.88E-04 | 1.215321 up   | 2.496315 up   | 2.054038 up   | LARP7     |
| 241387_at | 0.004386 | 0.002949 | 2.833024 up   | 3.221808 up   | 1.137233 up   |           |
| 241388_at | 0.003556 | 0.002244 | 1.212011 up   | 2.685734 up   | 2.215933 up   |           |
| 241389_at | 3.91E-05 | 5.05E-06 | 1.972422 up   | 1.168014 down | 2.303817 down | CHRN2     |
| 241392_at | 0.009245 | 0.007488 | 1.840071 down | 1.964866 down | 1.067821 down | TMEM39A   |
| 241393_at | 2.44E-04 | 6.03E-05 | 2.554165 down | 2.496765 down | 1.02299 up    | IPP       |
| 241394_at | 5.96E-04 | 2.01E-04 | 1.269207 up   | 1.026294 up   | 1.23669 down  | LOC284120 |
| 241396_at | 4.81E-04 | 1.49E-04 | 2.103526 up   | 1.749115 up   | 1.202623 down | NEDD4L    |
| 241401_at | 0.001993 | 0.00103  | 2.011371 down | 1.074196 up   | 2.160606 up   | C4orf12   |
| 241407_at | 4.89E-05 | 6.85E-06 | 1.894199 up   | 2.287523 up   | 1.207647 up   |           |
| 241408_at | 0.009609 | 0.007833 | 1.02862 down  | 1.46148 up    | 1.503307 up   | CRIPAK    |
| 241418_at | 0.003601 | 0.002279 | 1.933218 down | 1.338499 down | 1.444319 up   | LOC344887 |
| 241424_at | 0.003114 | 0.001882 | 1.331364 up   | 1.244499 down | 1.656881 down |           |
| 241427_x_ | 0.003275 | 0.002015 | 1.856365 up   | 1.526695 down | 2.834103 down |           |
| 241428_x_ | 4.33E-04 | 1.30E-04 | 1.632834 down | 1.91109 down  | 1.170413 down | TCEA2     |
| 241434_at | 0.004247 | 0.002819 | 2.853689 down | 2.809089 down | 1.015877 up   |           |
| 241437_s_ | 0.002147 | 0.001141 | 1.752921 up   | 1.269265 up   | 1.381051 down | EP400NL   |
| 241439_at | 0.011847 | 0.010045 | 1.518598 up   | 1.172957 up   | 1.294675 down |           |
| 241442_at | 0.002908 | 0.001717 | 1.782851 down | 2.016474 down | 1.131039 down |           |

|           |          |          |               |               |               |           |
|-----------|----------|----------|---------------|---------------|---------------|-----------|
| 241451_s_ | 7.98E-04 | 3.00E-04 | 1.550979 up   | 1.298703 down | 2.014261 down |           |
| 241454_at | 0.027847 | 0.026376 | 1.286799 down | 1.010585 down | 1.27332 up    |           |
| 241464_s_ | 3.82E-05 | 4.88E-06 | 3.269262 down | 1.834085 down | 1.782503 up   |           |
| 241466_at | 1.95E-04 | 4.45E-05 | 1.698251 up   | 2.137943 up   | 1.258909 up   |           |
| 241475_at | 0.038194 | 0.036933 | 1.457603 up   | 1.115389 down | 1.625795 down | BREA2     |
| 241477_at | 0.019813 | 0.018128 | 1.644338 up   | 1.034812 down | 1.70158 down  | NEIL1     |
| 241478_at | 0.033942 | 0.03263  | 1.525017 up   | 1.403508 down | 2.140373 down | MICALL2   |
| 241484_x_ | 0.003613 | 0.002289 | 5.518787 down | 3.40744 down  | 1.619629 up   |           |
| 241492_at | 0.001816 | 9.09E-04 | 1.308344 up   | 1.06127 down  | 1.388507 down |           |
| 241493_at | 0.004045 | 0.002644 | 1.458733 up   | 1.04116 down  | 1.518775 down |           |
| 241507_x_ | 0.00258  | 0.001463 | 1.159826 up   | 1.310502 down | 1.519954 down |           |
| 241509_at | 2.00E-04 | 4.61E-05 | 2.511462 up   | 3.815284 up   | 1.519149 up   |           |
| 241510_at | 0.00686  | 0.005202 | 1.502566 up   | 1.75356 up    | 1.167043 up   | LOC440981 |
| 241511_at | 0.01169  | 0.009888 | 1.16255 up    | 1.217176 down | 1.415028 down |           |
| 241512_at | 0.006218 | 0.004597 | 1.46609 up    | 1.185208 up   | 1.23699 down  | SPATC1    |
| 241514_at | 0.02003  | 0.018357 | 1.240496 up   | 1.007725 up   | 1.230987 down |           |
| 241515_at | 0.003331 | 0.002062 | 1.465968 up   | 1.059282 down | 1.552873 down |           |
| 241520_x_ | 0.001392 | 6.37E-04 | 2.035154 up   | 1.051943 down | 2.140865 down |           |
| 241525_at | 0.03247  | 0.031139 | 1.169091 up   | 1.405124 down | 1.642718 down | LOC200772 |
| 241529_at | 0.006072 | 0.004462 | 1.395693 up   | 1.219328 up   | 1.144641 down |           |
| 241531_at | 0.010224 | 0.008429 | 1.316672 up   | 1.051204 down | 1.38409 down  |           |
| 241534_at | 0.008528 | 0.006791 | 1.37157 down  | 1.260545 up   | 1.728926 up   |           |
| 241535_at | 0.004413 | 0.002969 | 3.306148 up   | 4.597151 up   | 1.390486 up   |           |
| 241540_at | 0.011475 | 0.009675 | 1.525427 up   | 1.202918 up   | 1.268105 down |           |
| 241546_at | 0.006243 | 0.004625 | 1.442175 up   | 1.134034 up   | 1.271721 down | SPATA5    |
| 241547_at | 0.034101 | 0.032794 | 1.22838 up    | 1.025417 down | 1.259602 down |           |
| 241563_at | 6.73E-05 | 1.06E-05 | 1.313121 up   | 1.435776 down | 1.885348 down |           |
| 241574_s_ | 2.89E-04 | 7.58E-05 | 3.027287 up   | 3.038672 up   | 1.003761 up   | IGF2BP1   |
| 241576_at | 0.039603 | 0.038357 | 1.038528 up   | 1.135701 down | 1.179457 down |           |
| 241590_at | 0.002877 | 0.001694 | 1.568535 up   | 1.219598 up   | 1.286108 down |           |
| 241595_at | 0.003209 | 0.00196  | 2.337625 up   | 2.604337 up   | 1.114095 up   |           |
| 241596_at | 8.85E-05 | 1.52E-05 | 3.548502 up   | 4.142823 up   | 1.167485 up   | NUDT10    |
| 241599_at | 9.99E-04 | 4.06E-04 | 1.054599 up   | 1.952594 down | 2.059205 down | LSM11     |
| 241600_at | 0.003659 | 0.002326 | 3.027762 up   | 2.233646 up   | 1.355525 down |           |

|           |          |          |               |               |               |           |
|-----------|----------|----------|---------------|---------------|---------------|-----------|
| 241601_at | 0.006456 | 0.004827 | 1.512001 up   | 1.91428 up    | 1.266057 up   | WIPF3     |
| 241607_at | 4.90E-07 | 1.06E-08 | 4.67929 down  | 3.654643 down | 1.280369 up   | LOC730102 |
| 241612_at | 1.95E-04 | 4.42E-05 | 4.494265 up   | 3.443374 up   | 1.305192 down | FOXD3     |
| 241614_at | 0.00766  | 0.005964 | 1.41716 down  | 1.079601 down | 1.31267 up    |           |
| 241618_at | 0.004067 | 0.002664 | 2.007145 up   | 1.883121 down | 3.779698 down |           |
| 241627_x_ | 0.006126 | 0.004516 | 1.581895 down | 1.346183 up   | 2.12952 up    | FLJ10357  |
| 241629_at | 0.003642 | 0.002312 | 1.828282 up   | 1.647115 down | 3.01139 down  |           |
| 241631_at | 0.001655 | 8.05E-04 | 1.132417 down | 1.311125 up   | 1.484741 up   |           |
| 241633_x_ | 0.003898 | 0.002523 | 1.131899 up   | 1.400341 down | 1.585044 down |           |
| 241637_at | 0.006174 | 0.004559 | 1.387126 up   | 1.008007 down | 1.398232 down |           |
| 241644_at | 0.027033 | 0.025548 | 1.213129 up   | 1.213923 down | 1.472644 down | BOLA2     |
| 241646_s_ | 0.003094 | 0.001866 | 1.314711 up   | 1.230269 down | 1.617448 down | BCAP29    |
| 241650_x_ | 0.015452 | 0.013676 | 1.645673 up   | 1.037514 up   | 1.586169 down | HMCN2     |
| 241664_x_ | 0.018655 | 0.016933 | 1.242532 up   | 1.185692 down | 1.47326 down  |           |
| 241666_at | 0.004804 | 0.003315 | 2.463342 down | 1.080462 down | 2.279897 up   | C3orf23   |
| 241667_x_ | 0.011886 | 0.010084 | 1.790531 up   | 1.011055 up   | 1.770953 down |           |
| 241669_x_ | 0.00154  | 7.29E-04 | 2.332798 up   | 1.685153 down | 3.93112 down  | PRKD2     |
| 241670_x_ | 0.00297  | 0.001768 | 2.054617 up   | 1.756023 down | 3.607953 down | LOC729177 |
| 241671_x_ | 0.001486 | 6.94E-04 | 2.132952 up   | 1.920613 down | 4.096575 down | FLJ22536  |
| 241673_x_ | 0.004458 | 0.003014 | 1.058664 up   | 1.175667 down | 1.244636 down |           |
| 241677_x_ | 0.005611 | 0.004033 | 1.496254 up   | 1.161526 down | 1.737938 down |           |
| 241682_at | 2.12E-06 | 8.53E-08 | 7.558282 up   | 8.308378 up   | 1.099242 up   | KLHL23    |
| 241686_x_ | 0.002757 | 0.0016   | 1.211926 up   | 1.580062 up   | 1.303761 up   |           |
| 241691_at | 0.011336 | 0.009539 | 1.51357 up    | 1.147664 down | 1.737069 down | SCARF2    |
| 241698_at | 0.011118 | 0.009321 | 2.715369 down | 1.544229 down | 1.758398 up   | RFTN2     |
| 241701_at | 0.014326 | 0.012534 | 2.936236 down | 1.536897 down | 1.910497 up   | ARHGAP21  |
| 241702_at | 0.008737 | 0.006995 | 1.407668 up   | 1.848668 up   | 1.313284 up   |           |
| 241703_at | 0.002256 | 0.001224 | 1.800595 up   | 1.631872 up   | 1.103392 down | RUNDC3B   |
| 241704_x_ | 6.91E-04 | 2.46E-04 | 1.496303 up   | 1.89575 up    | 1.266956 up   | ZNF320    |
| 241708_at | 0.007479 | 0.005789 | 1.744791 down | 2.737752 down | 1.5691 down   | DOCK1     |
| 241709_s_ | 0.015836 | 0.014061 | 1.095161 up   | 1.709624 down | 1.872313 down | DOCK1     |
| 241716_at | 0.002251 | 0.00122  | 2.987165 up   | 4.183358 up   | 1.400444 up   | HSPD1     |
| 241720_at | 0.005462 | 0.003903 | 1.549811 up   | 1.754291 up   | 1.131939 up   | ZNF326    |
| 241724_x_ | 2.00E-04 | 4.60E-05 | 1.466355 up   | 1.992647 up   | 1.358912 up   |           |

|           |          |          |          |      |          |      |          |      |           |
|-----------|----------|----------|----------|------|----------|------|----------|------|-----------|
| 241726_at | 1.01E-04 | 1.83E-05 | 1.052847 | down | 3.126476 | down | 2.969543 | down |           |
| 241737_x_ | 3.74E-04 | 1.07E-04 | 2.172771 | up   | 2.131741 | up   | 1.019247 | down |           |
| 241738_at | 0.002023 | 0.001052 | 1.579629 | down | 1.638014 | down | 1.036961 | down | ZNF250    |
| 241739_at | 0.002436 | 0.001354 | 1.681321 | down | 1.2149   | down | 1.383917 | up   | OGFOD1    |
| 241745_at | 0.00686  | 0.005203 | 5.246568 | down | 3.159745 | down | 1.66044  | up   |           |
| 241749_at | 1.70E-04 | 3.74E-05 | 2.940931 | up   | 2.859929 | up   | 1.028323 | down | MURC      |
| 241752_at | 1.30E-04 | 2.58E-05 | 5.160757 | down | 2.185371 | down | 2.361501 | up   | SLC8A1    |
| 241756_at | 9.36E-04 | 3.71E-04 | 3.027365 | down | 1.000114 | down | 3.027022 | up   |           |
| 241758_at | 0.006622 | 0.004978 | 1.218615 | down | 1.095175 | down | 1.112713 | up   |           |
| 241761_at | 0.00148  | 6.90E-04 | 1.551611 | up   | 1.483433 | up   | 1.04596  | down |           |
| 241767_at | 0.008582 | 0.006843 | 1.576386 | up   | 1.062853 | down | 1.675466 | down |           |
| 241774_at | 0.00169  | 8.28E-04 | 2.563928 | down | 1.19444  | up   | 3.062459 | up   |           |
| 241776_at | 9.41E-04 | 3.73E-04 | 3.839071 | up   | 3.680652 | up   | 1.043041 | down |           |
| 241780_at | 3.09E-04 | 8.28E-05 | 3.986584 | down | 7.477796 | down | 1.875741 | down |           |
| 241781_at | 0.002262 | 0.001228 | 2.648515 | down | 1.091635 | down | 2.426192 | up   | C9orf41   |
| 241789_at | 1.66E-04 | 3.61E-05 | 10.12334 | down | 5.783639 | down | 1.750341 | up   |           |
| 241792_x_ | 6.81E-05 | 1.08E-05 | 1.779789 | up   | 2.047384 | up   | 1.150352 | up   |           |
| 241793_at | 0.02287  | 0.021288 | 1.328569 | down | 1.040329 | up   | 1.382149 | up   | ZMYND17   |
| 241795_at | 0.005303 | 0.003762 | 1.870192 | up   | 1.254463 | down | 2.346086 | down | RHEB      |
| 241798_at | 0.007523 | 0.005834 | 2.29441  | up   | 2.619494 | up   | 1.141685 | up   |           |
| 241799_x_ | 0.001865 | 9.42E-04 | 2.624966 | up   | 1.172947 | down | 3.078946 | down |           |
| 241800_x_ | 0.020938 | 0.019293 | 1.318063 | up   | 1.15371  | down | 1.520663 | down |           |
| 241801_at | 0.00293  | 0.001735 | 1.432247 | up   | 2.504512 | up   | 1.74866  | up   | PGAP1     |
| 241804_at | 0.004289 | 0.002859 | 1.724139 | down | 1.227541 | up   | 2.116452 | up   |           |
| 241809_at | 0.001567 | 7.47E-04 | 2.180406 | down | 2.080667 | down | 1.047936 | up   | C1orf183  |
| 241816_at | 1.24E-04 | 2.41E-05 | 2.796879 | up   | 3.511208 | up   | 1.255402 | up   | C14orf106 |
| 241820_at | 6.10E-04 | 2.08E-04 | 2.56134  | up   | 5.484181 | up   | 2.141138 | up   | RIF1      |
| 241826_x_ | 3.37E-04 | 9.30E-05 | 2.665982 | up   | 2.782652 | up   | 1.043762 | up   | ZNF738    |
| 241834_at | 6.77E-05 | 1.07E-05 | 3.542953 | up   | 4.051704 | up   | 1.143595 | up   | IPW       |
| 241837_at | 9.92E-04 | 4.02E-04 | 3.221601 | down | 1.146967 | down | 2.808799 | up   |           |
| 241843_at | 1.56E-04 | 3.30E-05 | 4.634361 | up   | 5.270253 | up   | 1.137212 | up   | SNORA28   |
| 241863_x_ | 0.008962 | 0.00721  | 1.536676 | down | 1.364848 | up   | 2.097328 | up   |           |
| 241864_x_ | 3.67E-04 | 1.05E-04 | 5.544682 | down | 3.565319 | down | 1.555171 | up   |           |
| 241866_at | 7.47E-04 | 2.74E-04 | 3.261523 | down | 2.159754 | down | 1.510137 | up   | SLC16A7   |

|           |          |          |          |      |          |      |          |      |          |
|-----------|----------|----------|----------|------|----------|------|----------|------|----------|
| 241869_at | 0.006423 | 0.004798 | 4.176448 | down | 2.307355 | down | 1.810059 | up   | APOL6    |
| 241874_at | 7.98E-04 | 3.00E-04 | 4.92876  | down | 3.182213 | down | 1.548847 | up   | C5orf53  |
| 241876_at | 0.007353 | 0.005671 | 1.516909 | down | 1.006353 | up   | 1.526546 | up   | MDM4     |
| 241877_at | 0.017966 | 0.016227 | 1.282102 | down | 1.068767 | up   | 1.370268 | up   |          |
| 241894_at | 3.02E-04 | 8.05E-05 | 1.823868 | up   | 1.325654 | down | 2.417817 | down | VMO1     |
| 241902_at | 3.21E-05 | 3.87E-06 | 22.28057 | down | 1.672547 | down | 13.32134 | up   | MKX      |
| 241912_at | 5.39E-04 | 1.74E-04 | 4.248544 | up   | 5.739729 | up   | 1.350987 | up   | ZNF814   |
| 241916_at | 0.021508 | 0.019883 | 1.019015 | down | 1.698078 | up   | 1.730367 | up   |          |
| 241921_x_ | 0.002818 | 0.001647 | 2.089448 | up   | 1.292256 | down | 2.700102 | down |          |
| 241922_at | 0.012685 | 0.010885 | 1.581448 | down | 1.328934 | down | 1.190012 | up   | LMO4     |
| 241925_x_ | 1.18E-05 | 9.61E-07 | 12.6193  | down | 3.958276 | down | 3.188079 | up   |          |
| 241927_x_ | 0.004454 | 0.00301  | 1.261298 | up   | 1.292758 | down | 1.630553 | down |          |
| 241931_at | 0.006378 | 0.004753 | 1.404122 | down | 1.421043 | down | 1.012051 | down | XG       |
| 241935_at | 0.018379 | 0.016653 | 1.450509 | up   | 1.372683 | down | 1.991089 | down | SHROOM1  |
| 241936_x_ | 0.011008 | 0.009211 | 1.392788 | down | 1.69349  | up   | 2.358674 | up   |          |
| 241943_at | 0.02068  | 0.01902  | 1.254947 | up   | 1.074354 | down | 1.348257 | down | CCDC58   |
| 241944_x_ | 0.021246 | 0.0196   | 1.703603 | up   | 1.847941 | down | 3.148157 | down |          |
| 241945_at | 0.005392 | 0.003839 | 1.217031 | down | 1.121044 | up   | 1.364345 | up   |          |
| 241946_at | 0.001566 | 7.47E-04 | 2.62575  | down | 1.916198 | down | 1.370292 | up   | ZDHHC21  |
| 241950_at | 0.012863 | 0.011064 | 1.536955 | up   | 1.106329 | up   | 1.389239 | down |          |
| 241952_at | 0.004082 | 0.002677 | 1.639169 | up   | 1.353712 | down | 2.218963 | down | SLC16A11 |
| 241954_at | 0.018781 | 0.01707  | 1.31041  | up   | 2.348761 | up   | 1.792386 | up   | FDFT1    |
| 241957_x_ | 3.37E-05 | 4.14E-06 | 1.442119 | down | 3.193867 | down | 2.214704 | down | LIN7B    |
| 241966_at | 6.75E-04 | 2.38E-04 | 1.621894 | down | 2.416477 | down | 1.489911 | down | MYO5A    |
| 241968_at | 0.00103  | 4.21E-04 | 1.7518   | up   | 3.267992 | up   | 1.865505 | up   |          |
| 241969_at | 7.42E-05 | 1.21E-05 | 2.68252  | down | 4.138543 | down | 1.542782 | down | ARID5B   |
| 241973_x_ | 0.00241  | 0.001335 | 1.050711 | up   | 1.785375 | up   | 1.699207 | up   | DPP7     |
| 241976_at | 0.004275 | 0.002847 | 1.559469 | down | 1.076333 | down | 1.448873 | up   | TCEA3    |
| 241983_at | 0.002633 | 0.001502 | 1.322595 | up   | 1.341024 | up   | 1.013934 | up   | PTPN2    |
| 241986_at | 0.001672 | 8.16E-04 | 6.849464 | down | 2.546278 | down | 2.68999  | up   | BMPER    |
| 241989_at | 5.32E-06 | 3.10E-07 | 2.618334 | down | 1.451288 | down | 1.804145 | up   | GRK4     |
| 241990_at | 0.001267 | 5.61E-04 | 2.364804 | up   | 1.011909 | up   | 2.336973 | down | RHOV     |
| 241991_at | 0.001326 | 5.96E-04 | 2.724607 | down | 1.048757 | down | 2.597939 | up   |          |
| 241992_at | 1.38E-04 | 2.81E-05 | 1.746068 | down | 1.608935 | down | 1.085233 | up   | DRAM     |

|           |          |          |               |               |               |           |
|-----------|----------|----------|---------------|---------------|---------------|-----------|
| 241997_at | 0.002596 | 0.001475 | 1.726841 up   | 2.091115 up   | 1.210948 up   |           |
| 241999_at | 0.005564 | 0.003991 | 1.391103 up   | 1.105393 down | 1.537715 down | SFXN5     |
| 242004_x_ | 3.13E-04 | 8.42E-05 | 1.188672 down | 1.88847 down  | 1.588722 down |           |
| 242005_at | 0.017315 | 0.015569 | 1.219113 down | 1.613124 down | 1.323195 down |           |
| 242008_at | 1.58E-04 | 3.37E-05 | 8.981979 up   | 13.77832 up   | 1.533995 up   |           |
| 242010_at | 0.007    | 0.005339 | 1.580959 up   | 1.120699 down | 1.771779 down | LOC728475 |
| 242017_at | 0.003509 | 0.002207 | 1.668228 down | 1.145032 up   | 1.910174 up   |           |
| 242022_at | 0.001852 | 9.34E-04 | 1.89607 up    | 3.294845 up   | 1.737723 up   |           |
| 242023_at | 0.019414 | 0.017713 | 2.326943 down | 2.137202 down | 1.08878 up    | ABHD4     |
| 242025_at | 0.001373 | 6.25E-04 | 1.872631 up   | 1.769092 up   | 1.058527 down |           |
| 242031_at | 3.80E-05 | 4.82E-06 | 1.277389 up   | 1.219697 up   | 1.047301 down |           |
| 242032_at | 0.005039 | 0.003528 | 1.380236 down | 1.130674 up   | 1.560596 up   | KIDINS220 |
| 242034_at | 0.003119 | 0.001887 | 1.482482 down | 1.249324 down | 1.186628 up   | FBXL17    |
| 242037_at | 5.61E-05 | 8.22E-06 | 5.042701 down | 4.153768 down | 1.214007 up   | ASPH      |
| 242038_at | 0.033618 | 0.032306 | 1.177544 up   | 1.036026 up   | 1.136597 down | LRRRC8B   |
| 242039_at | 0.005659 | 0.004078 | 1.697606 up   | 1.344647 down | 2.282682 down | ARAP1     |
| 242040_at | 0.007498 | 0.005808 | 1.50686 up    | 1.108627 down | 1.670546 down | GCNT7     |
| 242044_at | 0.017251 | 0.0155   | 1.467071 up   | 1.416577 up   | 1.035645 down |           |
| 242045_at | 1.15E-05 | 9.15E-07 | 2.086311 up   | 2.480393 up   | 1.18889 up    | ANKRD18A  |
| 242050_at | 0.004178 | 0.00276  | 1.214258 up   | 1.216782 down | 1.477487 down | LRRRC7    |
| 242051_at | 9.87E-04 | 3.99E-04 | 5.631927 down | 2.272412 down | 2.478391 up   |           |
| 242056_at | 0.002467 | 0.00138  | 1.559127 up   | 3.245373 up   | 2.081532 up   | TRIM45    |
| 242060_x_ | 3.69E-04 | 1.05E-04 | 1.785058 down | 1.002334 up   | 1.789224 up   | PHF11     |
| 242062_at | 1.31E-04 | 2.61E-05 | 2.326469 down | 1.874649 down | 1.241016 up   | SAMD8     |
| 242069_at | 0.001172 | 5.04E-04 | 1.739804 up   | 2.428108 up   | 1.395622 up   | CBX5      |
| 242070_at | 1.08E-04 | 1.99E-05 | 5.903409 up   | 5.762258 up   | 1.024496 down | LOC728485 |
| 242071_x_ | 0.001334 | 6.01E-04 | 1.78062 up    | 1.368649 down | 2.437044 down | ITGA8     |
| 242077_x_ | 0.007552 | 0.005864 | 1.174253 up   | 1.473407 up   | 1.25476 up    | C6orf150  |
| 242091_at | 0.001134 | 4.82E-04 | 1.310803 down | 1.108022 up   | 1.452398 up   | ZNF720    |
| 242093_at | 0.001566 | 7.47E-04 | 3.686125 up   | 7.599569 up   | 2.061669 up   | SYTL5     |
| 242098_at | 0.008436 | 0.006699 | 1.482073 up   | 1.24615 up    | 1.189322 down | LOC202451 |
| 242100_at | 1.61E-06 | 5.75E-08 | 2.632505 down | 20.13075 down | 7.646994 down | CHSY3     |
| 242101_at | 0.012427 | 0.01063  | 1.16126 up    | 1.043754 down | 1.21207 down  |           |
| 242105_at | 0.012926 | 0.011124 | 1.227421 up   | 1.179649 down | 1.447926 down | CCNE1     |

|           |          |          |          |      |          |      |          |      |            |
|-----------|----------|----------|----------|------|----------|------|----------|------|------------|
| 242107_x_ | 0.027438 | 0.025956 | 2.857147 | down | 1.64257  | down | 1.739437 | up   |            |
| 242111_at | 2.53E-04 | 6.35E-05 | 2.199198 | up   | 3.028868 | up   | 1.37726  | up   | METTL3     |
| 242113_at | 0.007969 | 0.006258 | 1.088334 | down | 1.380336 | up   | 1.502267 | up   |            |
| 242115_at | 0.014094 | 0.012303 | 1.124663 | down | 1.099466 | down | 1.022917 | up   |            |
| 242119_at | 0.004382 | 0.002945 | 1.343569 | up   | 1.04099  | up   | 1.290665 | down | PROX1      |
| 242120_at | 6.92E-05 | 1.10E-05 | 1.719758 | up   | 1.730115 | up   | 1.006022 | up   |            |
| 242123_at | 0.004886 | 0.003392 | 1.319607 | down | 2.211515 | down | 1.67589  | down | PAQR7      |
| 242128_at | 1.38E-10 | 8.28E-14 | 175.1722 | up   | 163.422  | up   | 1.071901 | down | OTX2       |
| 242133_s_ | 3.14E-04 | 8.50E-05 | 5.675966 | down | 2.492657 | down | 2.277074 | up   |            |
| 242134_at | 0.018042 | 0.016306 | 4.270149 | down | 2.571235 | down | 1.660739 | up   |            |
| 242137_at | 1.52E-04 | 3.20E-05 | 5.345092 | down | 3.000645 | down | 1.781314 | up   |            |
| 242138_at | 0.001557 | 7.40E-04 | 1.049904 | up   | 6.769637 | down | 7.107468 | down | DLX1       |
| 242141_at | 2.91E-04 | 7.63E-05 | 2.20163  | up   | 1.636133 | up   | 1.34563  | down | HDAC2      |
| 242145_at | 0.012289 | 0.010496 | 1.542184 | up   | 1.217761 | up   | 1.266409 | down |            |
| 242148_at | 0.00897  | 0.007218 | 1.238958 | up   | 1.390998 | down | 1.723388 | down | BCL6B      |
| 242152_at | 0.011943 | 0.010143 | 1.30126  | up   | 1.0565   | down | 1.374781 | down |            |
| 242154_x_ | 0.005149 | 0.003625 | 1.461458 | up   | 1.354757 | up   | 1.07876  | down | PPIL5      |
| 242156_at | 0.004177 | 0.002759 | 1.579662 | up   | 1.889715 | up   | 1.196278 | up   |            |
| 242161_at | 0.00209  | 0.0011   | 1.167092 | up   | 1.060667 | up   | 1.100337 | down |            |
| 242167_at | 5.79E-04 | 1.93E-04 | 1.874057 | up   | 2.368228 | up   | 1.263691 | up   |            |
| 242169_at | 0.012341 | 0.010545 | 1.305255 | down | 1.002572 | up   | 1.308612 | up   | BHMT2      |
| 242172_at | 2.74E-04 | 7.05E-05 | 6.09513  | down | 1.046018 | down | 5.826985 | up   | MEIS1      |
| 242177_at | 0.03048  | 0.029095 | 1.302251 | up   | 1.060023 | down | 1.380415 | down |            |
| 242180_at | 0.005223 | 0.003691 | 1.251841 | up   | 1.329462 | down | 1.664274 | down | TSPAN16    |
| 242184_s_ | 0.034606 | 0.033306 | 1.542219 | up   | 1.088915 | up   | 1.416289 | down | SFRS12     |
| 242187_s_ | 0.02033  | 0.018659 | 1.757295 | up   | 1.112453 | down | 1.954908 | down | TNRC18     |
|           |          |          |          |      |          |      |          |      | NBPF10 /// |
| 242191_at | 0.001111 | 4.68E-04 | 6.979023 | down | 1.192475 | down | 5.852555 | up   | NBPF11     |
| 242192_at | 0.016917 | 0.015164 | 1.391565 | up   | 1.080049 | down | 1.502958 | down |            |
| 242203_at | 0.009762 | 0.007985 | 1.293969 | up   | 1.26408  | down | 1.63568  | down |            |
| 242213_at | 2.72E-04 | 7.00E-05 | 2.149832 | down | 1.618028 | down | 1.328674 | up   |            |
| 242215_at | 4.15E-04 | 1.23E-04 | 1.352235 | up   | 1.109133 | down | 1.499809 | down | GRIK4      |
| 242224_at | 0.036132 | 0.034856 | 1.196034 | up   | 2.010109 | up   | 1.680646 | up   | GPATCH2    |
| 242230_at | 1.36E-05 | 1.19E-06 | 5.559099 | down | 2.697609 | down | 2.06075  | up   | ATXN1      |



|           |          |          |               |               |               |           |
|-----------|----------|----------|---------------|---------------|---------------|-----------|
| 242235_x_ | 2.28E-04 | 5.52E-05 | 1.04374 up    | 2.179843 up   | 2.088492 up   |           |
| 242246_x_ | 0.023158 | 0.021576 | 1.296543 up   | 1.65574 down  | 2.146738 down |           |
| 242247_at | 3.46E-04 | 9.65E-05 | 2.051838 down | 1.076468 down | 1.906085 up   | METT5D1   |
| 242251_at | 5.88E-05 | 8.84E-06 | 2.13042 up    | 2.122553 up   | 1.003707 down | SPATA5    |
| 242258_at | 0.048976 | 0.047815 | 1.766682 down | 1.802772 down | 1.020428 down |           |
| 242260_at | 1.19E-04 | 2.27E-05 | 8.202058 up   | 14.39998 up   | 1.755655 up   | MATR3     |
| 242261_at | 0.001033 | 4.23E-04 | 2.234079 up   | 2.765489 up   | 1.237866 up   |           |
| 242263_at | 1.60E-05 | 1.47E-06 | 5.967803 down | 2.671542 down | 2.233842 up   | TMED5     |
| 242268_at | 0.00218  | 0.001164 | 1.444599 up   | 1.889569 up   | 1.308023 up   | CUGBP2    |
| 242270_at | 5.57E-05 | 8.14E-06 | 1.684302 up   | 1.717088 up   | 1.019466 up   |           |
| 242278_at | 0.006871 | 0.005214 | 1.102532 down | 1.150839 up   | 1.268837 up   |           |
| 242283_at | 1.35E-05 | 1.17E-06 | 2.816807 up   | 5.069582 up   | 1.799762 up   | DNAH14    |
| 242292_at | 0.00312  | 0.001889 | 1.807253 up   | 1.620761 up   | 1.115064 down | CXorf50B  |
| 242294_at | 0.005633 | 0.004054 | 1.713282 up   | 1.605463 up   | 1.067158 down | FBXO45    |
| 242310_at | 2.67E-05 | 2.99E-06 | 10.33275 up   | 13.78384 up   | 1.333995 up   |           |
| 242313_at | 0.001038 | 4.26E-04 | 2.767091 down | 1.248912 down | 2.215601 up   | LOC728730 |
| 242314_at | 0.025689 | 0.024173 | 1.427651 up   | 1.047511 down | 1.49548 down  | TNRC6C    |
| 242315_at | 0.003226 | 0.001975 | 1.218217 down | 1.020762 down | 1.19344 up    |           |
| 242319_at | 0.046303 | 0.045099 | 1.124446 down | 1.007664 up   | 1.133064 up   | DGKG      |
| 242324_x_ | 6.68E-05 | 1.05E-05 | 11.46515 down | 4.398875 down | 2.606383 up   | CCBE1     |
| 242327_x_ | 1.57E-04 | 3.33E-05 | 1.707983 up   | 1.088866 up   | 1.568589 down |           |
| 242338_at | 0.013369 | 0.011571 | 1.045286 down | 1.947799 up   | 2.036008 up   | TMEM64    |
| 242342_at | 0.014085 | 0.012293 | 1.27866 down  | 1.177132 up   | 1.505152 up   |           |
| 242344_at | 5.62E-04 | 1.85E-04 | 2.10948 up    | 1.947436 up   | 1.083209 down | GABRB2    |
| 242346_x_ | 3.56E-05 | 4.42E-06 | 20.31559 up   | 25.13384 up   | 1.23717 up    |           |
| 242347_at | 6.52E-04 | 2.27E-04 | 1.002007 down | 1.547488 up   | 1.550595 up   |           |
| 242349_at | 0.013369 | 0.011572 | 1.205873 up   | 2.714895 up   | 2.251394 up   | HECTD1    |
| 242354_at | 0.002098 | 0.001105 | 1.676416 up   | 1.548652 up   | 1.082501 down |           |
| 242358_at | 0.00104  | 4.28E-04 | 3.97975 down  | 1.402055 down | 2.838513 up   |           |
|           |          |          |               |               |               | LOC100131 |
| 242364_x_ | 0.003656 | 0.002323 | 1.643192 up   | 1.692079 up   | 1.029751 up   | 096       |
| 242369_x_ | 0.01082  | 0.009026 | 1.335048 up   | 2.414362 up   | 1.808447 up   |           |
| 242371_x_ | 3.27E-04 | 8.97E-05 | 1.150281 down | 1.512394 up   | 1.739677 up   |           |
| 242377_x_ | 0.00369  | 0.002354 | 1.243698 up   | 1.761819 up   | 1.416597 up   | THUMPD3   |

|           |          |          |               |               |               |                      |
|-----------|----------|----------|---------------|---------------|---------------|----------------------|
| 242378_at | 0.007293 | 0.005616 | 1.334313 up   | 1.266495 down | 1.689901 down | MYADML2              |
| 242379_at | 0.004247 | 0.002818 | 1.513599 up   | 1.754812 up   | 1.159364 up   |                      |
| 242380_at | 6.03E-04 | 2.04E-04 | 1.481412 down | 1.040036 up   | 1.540723 up   |                      |
| 242387_at | 7.28E-06 | 4.90E-07 | 4.740658 up   | 5.18373 up    | 1.093462 up   | C8orf42              |
| 242389_at | 6.73E-05 | 1.06E-05 | 2.520129 up   | 3.034611 up   | 1.204149 up   |                      |
| 242398_x_ | 0.001731 | 8.54E-04 | 1.478206 up   | 1.461315 up   | 1.011559 down |                      |
| 242400_at | 0.006065 | 0.004455 | 1.535056 down | 1.073046 up   | 1.647185 up   | ZFP90                |
| 242402_x_ | 0.001903 | 9.69E-04 | 1.9552 up     | 1.076205 down | 2.104196 down |                      |
| 242404_at | 0.005335 | 0.003789 | 1.498111 down | 1.143986 down | 1.309554 up   |                      |
| 242413_at | 0.008051 | 0.006329 | 1.177945 down | 1.195771 up   | 1.408552 up   |                      |
| 242414_at | 6.04E-05 | 9.14E-06 | 1.16565 up    | 12.466 up     | 10.69447 up   | QPRT                 |
| 242415_at | 0.003305 | 0.00204  | 1.963917 up   | 1.486224 down | 2.918819 down | LOC642031            |
| 242417_at | 2.03E-04 | 4.69E-05 | 2.386718 up   | 1.799796 up   | 1.326105 down | LOC283278            |
| 242418_at | 5.85E-04 | 1.95E-04 | 2.340677 down | 1.552917 down | 1.507277 up   | C2orf27A             |
| 242422_at | 0.010093 | 0.008307 | 1.642425 up   | 3.606388 up   | 2.19577 up    | G3BP1                |
| 242424_at | 0.041926 | 0.040676 | 1.125117 down | 1.747963 up   | 1.966662 up   |                      |
| 242429_at | 5.56E-04 | 1.82E-04 | 2.248177 up   | 5.436377 up   | 2.418126 up   | ZNF567               |
| 242434_at | 0.001569 | 7.49E-04 | 2.633329 up   | 2.478562 up   | 1.062442 down |                      |
| 242435_at | 0.007558 | 0.00587  | 1.497803 up   | 1.42108 down  | 2.128499 down | PDE4A                |
| 242446_at | 0.027412 | 0.025928 | 1.245879 up   | 1.034141 down | 1.288414 down | C6orf163             |
| 242447_at | 0.009969 | 0.008191 | 5.544189 down | 2.781954 down | 1.992912 up   | C3orf70              |
| 242448_at | 0.006742 | 0.005093 | 1.159353 up   | 3.144044 up   | 2.711895 up   |                      |
| 242452_at | 0.004092 | 0.002685 | 1.868635 up   | 1.270823 up   | 1.470413 down |                      |
| 242456_at | 4.18E-04 | 1.24E-04 | 1.432758 up   | 1.7983 up     | 1.255132 up   | MRE11A               |
| 242458_at | 0.001157 | 4.95E-04 | 3.493819 down | 1.144329 down | 3.05316 up    | RALGPS2<br>LOC100131 |
| 242462_at | 6.68E-04 | 2.34E-04 | 2.459472 up   | 2.521577 up   | 1.025252 up   | 741                  |
| 242463_x_ | 0.001189 | 5.14E-04 | 2.360127 up   | 2.199159 up   | 1.073195 down | ZNF600               |
| 242464_at | 0.003672 | 0.002338 | 1.351905 down | 1.009508 up   | 1.364759 up   |                      |
| 242470_at | 9.37E-04 | 3.72E-04 | 2.179474 down | 1.253682 down | 1.738458 up   | EID2B                |
| 242478_at | 0.011421 | 0.009621 | 1.344076 down | 1.028256 up   | 1.382054 up   | GSTA1                |
| 242484_at | 0.035387 | 0.0341   | 1.285654 up   | 1.052884 down | 1.353644 down | TTC9B                |
| 242492_at | 0.006568 | 0.00493  | 1.864258 up   | 1.988572 up   | 1.066683 up   | CLNS1A               |
| 242497_at | 7.26E-04 | 2.63E-04 | 1.738833 up   | 1.024253 up   | 1.697659 down | TRAFD1               |

|           |          |          |               |               |               |                   |
|-----------|----------|----------|---------------|---------------|---------------|-------------------|
| 242498_x_ | 0.003066 | 0.001844 | 3.610613 up   | 1.953569 up   | 1.848213 down |                   |
| 242503_at | 0.023384 | 0.021797 | 2.076156 up   | 1.01744 down  | 2.112364 down | CHST13            |
| 242515_x_ | 8.45E-05 | 1.43E-05 | 3.648162 down | 2.281161 down | 1.599256 up   | C11orf17          |
| 242517_at | 3.72E-05 | 4.69E-06 | 6.140012 up   | 4.141371 up   | 1.482604 down | KISS1R            |
| 242522_at | 0.004202 | 0.002781 | 1.250906 up   | 1.072725 up   | 1.166102 down |                   |
| 242534_at | 0.015018 | 0.013249 | 1.450537 up   | 1.025738 down | 1.487871 down | EVI5L             |
| 242538_at | 0.015221 | 0.013448 | 1.618202 down | 1.488223 down | 1.087338 up   | TFDP1             |
| 242545_at | 2.03E-04 | 4.70E-05 | 2.144523 down | 1.484478 down | 1.444631 up   | TTLL11            |
| 242546_at | 9.52E-07 | 2.73E-08 | 1.278279 down | 9.383654 down | 7.340849 down | FLJ39632          |
| 242550_at | 0.0013   | 5.81E-04 | 2.207408 up   | 3.270856 up   | 1.481763 up   | EIF3B             |
| 242551_at | 0.005982 | 0.004376 | 1.549231 up   | 1.091538 up   | 1.41931 down  |                   |
| 242553_at | 0.009671 | 0.007894 | 1.260452 up   | 1.433962 down | 1.80744 down  | ABCC3             |
| 242558_at | 0.02732  | 0.025836 | 3.970985 up   | 3.434189 up   | 1.156309 down |                   |
| 242560_at | 1.17E-04 | 2.23E-05 | 10.32948 up   | 11.34601 up   | 1.098411 up   | FANCD2            |
| 242564_at | 1.40E-05 | 1.24E-06 | 2.177875 down | 1.201655 down | 1.812397 up   | ZNF814            |
| 242565_x_ | 0.002649 | 0.001514 | 2.346134 up   | 3.929125 up   | 1.674723 up   | C21orf57          |
| 242567_at | 5.23E-04 | 1.68E-04 | 1.420466 up   | 1.220998 down | 1.734386 down | ABTB1             |
| 242569_at | 4.35E-05 | 5.84E-06 | 3.366908 down | 1.930227 down | 1.744307 up   | STAM2             |
| 242574_at | 0.010302 | 0.008506 | 1.367189 down | 1.16036 up    | 1.586431 up   | FKBP15            |
| 242584_at | 2.68E-05 | 3.01E-06 | 2.98301 up    | 6.152213 up   | 2.062417 up   | FAM161A           |
| 242587_at | 3.94E-06 | 2.04E-07 | 5.113082 down | 1.327288 down | 3.852278 up   | SLC9A9            |
| 242589_x_ | 0.010803 | 0.009009 | 1.447 up      | 1.044025 down | 1.510704 down |                   |
| 242590_at | 0.003734 | 0.00239  | 2.029761 down | 1.175396 down | 1.726874 up   |                   |
| 242592_at | 0.002623 | 0.001494 | 1.847503 up   | 2.180009 up   | 1.179976 up   | GPR137C           |
| 242596_at | 0.015942 | 0.014167 | 1.527254 up   | 1.12019 down  | 1.710814 down |                   |
| 242602_x_ | 3.10E-04 | 8.33E-05 | 2.288229 up   | 2.438444 up   | 1.065647 up   | ZNF254            |
| 242605_at | 0.002036 | 0.001062 | 4.573851 down | 1.377112 down | 3.321336 up   |                   |
| 242609_x_ | 0.002237 | 0.001209 | 1.186199 down | 1.470133 up   | 1.743869 up   |                   |
| 242610_x_ | 0.016498 | 0.014733 | 1.878442 down | 1.087868 down | 1.726718 up   |                   |
| 242630_at | 8.68E-04 | 3.34E-04 | 1.599615 up   | 1.679614 up   | 1.050011 up   |                   |
| 242632_at | 0.016609 | 0.014852 | 1.237845 up   | 1.275412 down | 1.578762 down | FGD2<br>LOC100128 |
| 242633_x_ | 0.001249 | 5.49E-04 | 1.613973 up   | 2.041665 up   | 1.264993 up   | 510               |
| 242634_at | 0.044759 | 0.043547 | 1.220423 down | 1.151863 up   | 1.40576 up    | GATAD1            |

|           |          |          |          |      |          |      |          |      |           |
|-----------|----------|----------|----------|------|----------|------|----------|------|-----------|
| 242636_at | 0.004605 | 0.003149 | 1.701436 | down | 1.321215 | down | 1.287781 | up   |           |
| 242637_at | 0.014107 | 0.012315 | 1.160772 | up   | 1.790891 | up   | 1.542845 | up   |           |
| 242644_at | 6.35E-04 | 2.19E-04 | 1.40806  | up   | 1.207715 | down | 1.700536 | down | TMC8      |
| 242648_at | 0.004424 | 0.002979 | 3.051098 | down | 1.97971  | down | 1.541185 | up   | KLHL8     |
| 242655_at | 6.94E-04 | 2.47E-04 | 2.23795  | up   | 2.076754 | up   | 1.077619 | down |           |
| 242657_at | 5.15E-04 | 1.64E-04 | 2.29956  | down | 1.431877 | down | 1.605976 | up   |           |
| 242658_at | 0.013191 | 0.011394 | 1.623773 | up   | 1.283526 | down | 2.084155 | down |           |
| 242659_at | 0.00129  | 5.75E-04 | 1.256065 | up   | 1.528921 | down | 1.920424 | down |           |
| 242675_x_ | 0.006765 | 0.005114 | 1.545398 | up   | 1.302037 | up   | 1.186908 | down |           |
| 242692_at | 0.003576 | 0.00226  | 1.298408 | up   | 1.154736 | up   | 1.12442  | down |           |
| 242696_at | 1.99E-04 | 4.55E-05 | 1.542862 | up   | 1.779436 | up   | 1.153334 | up   |           |
| 242697_at | 0.016292 | 0.014519 | 1.30006  | down | 1.082333 | down | 1.201164 | up   | ZNF540    |
| 242702_at | 0.002568 | 0.001454 | 3.27736  | down | 1.99968  | down | 1.638942 | up   | MMAA      |
| 242713_at | 0.016493 | 0.014725 | 1.249558 | up   | 1.116442 | down | 1.395059 | down |           |
| 242716_at | 0.002778 | 0.001617 | 1.102231 | down | 1.443153 | down | 1.309303 | down | SLC30A1   |
| 242722_at | 2.25E-05 | 2.37E-06 | 9.498739 | down | 22.20137 | down | 2.337297 | down | LMO7      |
| 242733_at | 0.001633 | 7.90E-04 | 1.249182 | up   | 1.489729 | up   | 1.192563 | up   |           |
| 242735_x_ | 0.007133 | 0.005464 | 1.10336  | up   | 1.461665 | up   | 1.324741 | up   | ELF2      |
| 242736_at | 0.004159 | 0.002743 | 2.163402 | up   | 1.854734 | up   | 1.166422 | down |           |
| 242738_s_ | 0.007401 | 0.005715 | 2.451473 | down | 4.047834 | down | 1.651185 | down | ZFH3      |
| 242741_x_ | 0.044624 | 0.043403 | 1.225266 | up   | 1.171243 | up   | 1.046125 | down |           |
| 242744_s_ | 0.013627 | 0.011834 | 1.173948 | up   | 1.177988 | down | 1.382897 | down | CASR      |
| 242750_at | 0.001977 | 0.001019 | 3.691167 | down | 3.556753 | down | 1.037791 | up   | MMAA      |
| 242760_x_ | 2.62E-05 | 2.90E-06 | 3.030686 | down | 2.200502 | down | 1.377271 | up   | PIGB      |
| 242770_at | 3.21E-04 | 8.72E-05 | 3.981382 | down | 2.522646 | down | 1.578256 | up   | LOC642236 |
| 242772_x_ | 0.033219 | 0.031903 | 1.033595 | down | 1.839254 | up   | 1.901044 | up   |           |
| 242774_at | 0.003326 | 0.002057 | 3.002131 | up   | 3.290806 | up   | 1.096157 | up   | SYNE2     |
| 242782_x_ | 0.006229 | 0.004609 | 1.455228 | up   | 1.090062 | down | 1.586289 | down | TMEM198   |
| 242785_at | 0.003723 | 0.00238  | 1.669725 | up   | 1.095027 | up   | 1.524826 | down | EML6      |
| 242786_at | 8.98E-05 | 1.55E-05 | 11.75231 | down | 2.109016 | down | 5.572413 | up   |           |
| 242792_at | 0.006458 | 0.004829 | 1.075205 | up   | 1.208436 | down | 1.299317 | down |           |
| 242793_at | 0.007802 | 0.006105 | 1.606937 | up   | 1.30975  | down | 2.104686 | down |           |
| 242794_at | 2.95E-04 | 7.78E-05 | 1.13308  | up   | 5.145274 | up   | 4.540962 | up   | MAML3     |
| 242805_at | 0.005744 | 0.004156 | 1.233481 | up   | 1.136752 | up   | 1.085092 | down |           |

|           |          |          |               |               |               |           |
|-----------|----------|----------|---------------|---------------|---------------|-----------|
| 242810_x_ | 0.004058 | 0.002655 | 2.079848 up   | 1.253456 down | 2.606998 down |           |
| 242813_at | 0.002804 | 0.001636 | 1.161911 up   | 1.431963 up   | 1.23242 up    |           |
| 242814_at | 8.46E-08 | 9.07E-10 | 6.136531 up   | 9.559897 up   | 1.557867 up   | SERPINB9  |
| 242816_at | 0.007165 | 0.005494 | 1.497318 up   | 1.241788 down | 1.859351 down |           |
| 242818_x_ | 0.013028 | 0.011223 | 1.835203 down | 1.78489 down  | 1.028189 up   |           |
| 242826_at | 0.02615  | 0.024653 | 2.009072 down | 1.555373 down | 1.291698 up   |           |
| 242827_x_ | 0.00771  | 0.006012 | 1.369273 up   | 2.379123 up   | 1.737509 up   |           |
| 242828_at | 2.44E-04 | 6.01E-05 | 10.02475 up   | 9.65511 up    | 1.038285 down | FIGN      |
| 242832_at | 0.006301 | 0.004683 | 1.464618 up   | 1.03083 down  | 1.509772 down | PER1      |
| 242836_at | 0.003356 | 0.002083 | 2.027893 up   | 3.234568 up   | 1.595039 up   |           |
| 242839_at | 5.27E-05 | 7.57E-06 | 2.778308 up   | 2.974694 up   | 1.070685 up   |           |
| 242845_at | 1.25E-04 | 2.44E-05 | 3.417493 down | 1.107538 up   | 3.785004 up   |           |
| 242846_at | 0.001492 | 6.98E-04 | 1.941832 up   | 1.255431 up   | 1.546745 down |           |
| 242848_x_ | 0.001989 | 0.001028 | 1.499447 up   | 1.100016 down | 1.649415 down |           |
| 242855_at | 0.00988  | 0.008103 | 1.289828 up   | 1.26353 down  | 1.629736 down | KCP       |
| 242862_x_ | 0.001484 | 6.93E-04 | 1.274847 up   | 2.247396 up   | 1.762874 up   |           |
| 242869_at | 0.041867 | 0.040616 | 1.480746 up   | 1.076701 down | 1.59432 down  |           |
| 242871_at | 6.93E-04 | 2.47E-04 | 1.160081 up   | 4.089858 up   | 3.525494 up   | PAQR5     |
| 242874_at | 1.29E-06 | 4.17E-08 | 1.766023 up   | 1.989443 up   | 1.12651 up    |           |
| 242881_x_ | 1.24E-04 | 2.42E-05 | 1.606273 down | 7.407849 down | 4.611825 down |           |
| 242884_at | 0.042711 | 0.041468 | 1.215721 up   | 1.259284 down | 1.530939 down | LOC440570 |
| 242888_at | 1.27E-04 | 2.49E-05 | 3.968242 down | 3.924001 down | 1.011275 up   |           |
| 242889_x_ | 0.019475 | 0.017777 | 1.200185 up   | 1.455993 up   | 1.21314 up    | LOC645431 |
| 242890_at | 4.54E-06 | 2.51E-07 | 16.23196 up   | 20.89697 up   | 1.287396 up   |           |
| 242892_at | 0.007725 | 0.006028 | 1.006879 up   | 1.187278 up   | 1.179167 up   |           |
| 242902_at | 0.004011 | 0.002617 | 1.279007 up   | 1.315837 down | 1.682965 down | CYMP      |
| 242907_at | 0.021946 | 0.020332 | 2.704601 down | 2.085402 down | 1.296921 up   |           |
| 242917_at | 0.005355 | 0.003807 | 1.81398 up    | 1.711728 up   | 1.059736 down | RASGEF1A  |
| 242918_at | 1.04E-04 | 1.91E-05 | 3.545927 up   | 4.354769 up   | 1.228104 up   | NASP      |
| 242919_at | 1.40E-05 | 1.22E-06 | 4.749719 up   | 8.511782 up   | 1.79206 up    | ZNF253    |
| 242923_at | 7.98E-05 | 1.33E-05 | 6.98631 up    | 8.037056 up   | 1.150401 up   | ZNF678    |
| 242927_at | 0.00227  | 0.001234 | 1.672277 down | 1.270113 down | 1.316637 up   | DCLRE1C   |
| 242928_at | 0.004282 | 0.002853 | 1.575764 down | 1.132856 down | 1.390965 up   |           |
| 242934_at | 0.022332 | 0.020742 | 2.229808 down | 1.207504 down | 1.846626 up   |           |

|           |          |          |          |      |          |      |          |      |           |
|-----------|----------|----------|----------|------|----------|------|----------|------|-----------|
| 242935_at | 0.006339 | 0.004715 | 2.595569 | down | 1.472048 | down | 1.763236 | up   | SBF2      |
| 242940_x_ | 0.00238  | 0.001314 | 1.223557 | up   | 1.658914 | down | 2.029777 | down | DLX6      |
| 242941_x_ | 0.007252 | 0.005577 | 1.764161 | up   | 1.10643  | up   | 1.594463 | down | TBX1      |
| 242954_at | 0.01312  | 0.011321 | 1.450177 | up   | 1.060719 | down | 1.538231 | down |           |
| 242956_at | 0.00417  | 0.002752 | 1.34216  | up   | 1.815792 | up   | 1.352888 | up   | IDH1      |
| 242959_at | 0.002062 | 0.00108  | 1.052636 | up   | 1.338153 | up   | 1.271239 | up   |           |
| 242962_at | 0.020801 | 0.019149 | 1.315877 | up   | 1.01651  | up   | 1.294505 | down |           |
| 242963_at | 2.63E-06 | 1.16E-07 | 4.082653 | down | 8.189443 | down | 2.005912 | down | SGMS2     |
| 242967_at | 0.002709 | 0.00156  | 1.256166 | up   | 1.293999 | up   | 1.030118 | up   |           |
| 242973_at | 0.010797 | 0.009001 | 2.552121 | down | 1.819371 | down | 1.402749 | up   | CACNA1C   |
| 242978_x_ | 1.13E-04 | 2.12E-05 | 1.077986 | up   | 1.979298 | up   | 1.836107 | up   |           |
| 242979_at | 0.002174 | 0.00116  | 5.700224 | down | 2.569669 | down | 2.218272 | up   | IRS1      |
| 242981_at | 0.002966 | 0.001764 | 2.953224 | down | 1.851206 | down | 1.595298 | up   |           |
| 242984_at | 1.79E-04 | 3.99E-05 | 2.711839 | down | 1.901249 | down | 1.426346 | up   | MKLN1     |
| 242986_at | 0.00751  | 0.005819 | 2.213556 | down | 1.165162 | down | 1.899785 | up   |           |
| 242987_x_ | 0.002319 | 0.00127  | 1.842853 | up   | 1.080482 | down | 1.991169 | down |           |
| 242993_at | 0.018098 | 0.016368 | 1.466985 | down | 1.075938 | down | 1.363447 | up   |           |
| 243000_at | 3.98E-04 | 1.16E-04 | 2.764479 | up   | 2.471207 | up   | 1.118676 | down | CDK6      |
| 243002_at | 0.033209 | 0.031891 | 1.721487 | up   | 1.076677 | down | 1.853485 | down |           |
| 243011_at | 0.001277 | 5.67E-04 | 1.927361 | down | 1.082653 | down | 1.78022  | up   | FAM55C    |
| 243016_at | 0.001356 | 6.16E-04 | 2.392888 | down | 1.549812 | up   | 3.708526 | up   |           |
| 243018_at | 0.002341 | 0.001285 | 2.739742 | up   | 2.058446 | up   | 1.330976 | down |           |
| 243021_at | 0.034602 | 0.0333   | 1.65455  | up   | 1.193219 | up   | 1.386627 | down | LOC730496 |
| 243023_at | 7.56E-04 | 2.78E-04 | 2.04636  | up   | 2.996152 | up   | 1.464138 | up   |           |
| 243026_x_ | 0.019202 | 0.017496 | 1.451341 | down | 1.465462 | up   | 2.126886 | up   | XIAP      |
| 243037_at | 2.11E-04 | 4.95E-05 | 3.463345 | up   | 4.665976 | up   | 1.347246 | up   |           |
| 243038_at | 0.028887 | 0.027464 | 2.191495 | down | 1.332244 | down | 1.644966 | up   | RBM43     |
| 243041_s_ | 1.56E-04 | 3.30E-05 | 7.049594 | down | 8.014318 | down | 1.136848 | down |           |
| 243042_at | 0.005053 | 0.00354  | 3.427965 | down | 2.102316 | down | 1.630566 | up   | FAM73A    |
| 243043_at | 0.005149 | 0.003626 | 1.198739 | down | 1.158274 | down | 1.034936 | up   |           |
| 243044_at | 0.019107 | 0.017396 | 1.368603 | up   | 1.08049  | down | 1.478762 | down |           |
| 243046_at | 0.021904 | 0.020286 | 1.283509 | up   | 3.046362 | up   | 2.373464 | up   |           |
| 243050_at | 0.002753 | 0.001597 | 1.636193 | down | 1.056724 | down | 1.548363 | up   |           |
| 243051_at | 0.005508 | 0.003941 | 1.340362 | up   | 1.475254 | up   | 1.100638 | up   | CNIH4     |

|           |          |          |          |      |          |      |          |      |           |
|-----------|----------|----------|----------|------|----------|------|----------|------|-----------|
| 243052_at | 0.001168 | 5.01E-04 | 1.727206 | down | 1.02849  | up   | 1.776413 | up   | MOBKL2C   |
| 243057_at | 0.011808 | 0.010004 | 1.182933 | up   | 1.018267 | down | 1.204541 | down |           |
| 243060_at | 0.01214  | 0.010344 | 1.156415 | up   | 1.284088 | down | 1.484938 | down |           |
| 243061_at | 0.003211 | 0.001961 | 1.283333 | up   | 1.174665 | up   | 1.09251  | down | C14orf23  |
| 243062_at | 0.026614 | 0.025121 | 1.747554 | up   | 1.213548 | down | 2.12074  | down | FLCN      |
| 243064_at | 0.026029 | 0.024529 | 1.252197 | up   | 1.040222 | down | 1.302563 | down |           |
| 243071_at | 0.001742 | 8.61E-04 | 2.068112 | up   | 2.81048  | up   | 1.358959 | up   |           |
| 243076_x_ | 0.030368 | 0.028978 | 1.202997 | up   | 1.132628 | down | 1.362548 | down | GLI4      |
| 243080_at | 0.013455 | 0.011657 | 1.190749 | up   | 1.064687 | up   | 1.118403 | down | HECW2     |
| 243087_at | 1.88E-04 | 4.25E-05 | 1.729564 | down | 1.18668  | down | 1.457481 | up   | WDR63     |
| 243092_at | 0.003792 | 0.002438 | 1.877556 | down | 1.124202 | up   | 2.110752 | up   |           |
| 243093_at | 9.04E-04 | 3.54E-04 | 3.396141 | down | 1.517508 | down | 2.237972 | up   | C2orf49   |
| 243099_at | 0.002218 | 0.001192 | 1.381201 | up   | 1.484118 | down | 2.049865 | down | NFAM1     |
| 243117_at | 0.002115 | 0.001118 | 1.886037 | up   | 1.145056 | down | 2.159617 | down |           |
| 243118_at | 5.61E-04 | 1.84E-04 | 2.271275 | down | 1.811971 | down | 1.253483 | up   | C6orf182  |
| 243119_at | 0.020915 | 0.019268 | 2.20957  | up   | 1.089014 | down | 2.406253 | down |           |
| 243122_at | 0.007197 | 0.005525 | 1.242106 | up   | 1.165771 | up   | 1.06548  | down |           |
| 243125_x_ | 0.005187 | 0.003659 | 1.23627  | down | 1.139859 | down | 1.084582 | up   |           |
| 243126_x_ | 0.005909 | 0.004309 | 1.053533 | up   | 1.101737 | down | 1.160716 | down |           |
| 243131_x_ | 0.006864 | 0.005206 | 1.611459 | up   | 1.138056 | up   | 1.415975 | down |           |
| 243134_at | 0.013645 | 0.011852 | 1.6124   | up   | 4.283581 | up   | 2.65665  | up   |           |
| 243135_x_ | 0.001244 | 5.46E-04 | 2.147973 | up   | 1.201594 | down | 2.580992 | down |           |
| 243136_at | 0.013035 | 0.011229 | 1.674602 | up   | 1.198833 | up   | 1.396861 | down |           |
| 243140_at | 8.63E-04 | 3.31E-04 | 1.435306 | down | 4.211184 | down | 2.933998 | down | ACTA2     |
| 243141_at | 2.18E-06 | 8.89E-08 | 4.111423 | down | 4.670249 | down | 1.13592  | down | SGMS2     |
| 243147_x_ | 0.004121 | 0.00271  | 1.683929 | up   | 1.170719 | up   | 1.438372 | down |           |
| 243153_at | 0.002377 | 0.001312 | 1.426338 | up   | 1.089679 | up   | 1.308952 | down | CDK5RAP2  |
| 243156_at | 0.006543 | 0.004909 | 1.434091 | up   | 1.013152 | up   | 1.415474 | down |           |
| 243161_x_ | 5.46E-09 | 1.80E-11 | 110.884  | up   | 97.7145  | up   | 1.134775 | down | ZFP42     |
| 243163_at | 0.002519 | 0.001419 | 1.475931 | down | 1.126258 | down | 1.310473 | up   |           |
|           |          |          |          |      |          |      |          |      | LOC100134 |
| 243171_at | 0.002072 | 0.001088 | 1.392534 | up   | 1.711213 | down | 2.382923 | down | 625       |
| 243173_at | 0.004658 | 0.003194 | 1.978636 | up   | 1.596495 | up   | 1.239363 | down | CABP7     |
| 243174_at | 0.001217 | 5.31E-04 | 2.250297 | up   | 2.264439 | up   | 1.006285 | up   |           |

|           |          |          |          |      |          |      |          |      |             |
|-----------|----------|----------|----------|------|----------|------|----------|------|-------------|
| 243175_at | 0.01687  | 0.015117 | 1.361503 | down | 1.216523 | down | 1.119176 | up   | UTS2D       |
|           |          |          |          |      |          |      |          |      | LOC100130   |
| 243179_at | 1.90E-04 | 4.30E-05 | 5.581505 | down | 1.736505 | down | 3.214218 | up   | 360         |
| 243186_at | 0.005734 | 0.004145 | 1.611009 | up   | 1.203543 | down | 1.938917 | down |             |
| 243192_at | 0.005763 | 0.004173 | 1.229515 | down | 1.008067 | down | 1.219676 | up   |             |
| 243199_at | 0.006754 | 0.005104 | 1.347692 | up   | 1.336362 | down | 1.801005 | down |             |
| 243214_at | 0.026834 | 0.025345 | 1.49086  | up   | 1.153723 | down | 1.720039 | down | ZBTB46      |
| 243216_x  | 0.001981 | 0.001023 | 1.284884 | up   | 1.875284 | up   | 1.459497 | up   |             |
| 243222_at | 0.00935  | 0.007584 | 1.295472 | down | 1.283842 | down | 1.009059 | up   |             |
| 243224_at | 0.005394 | 0.003842 | 1.259286 | down | 1.284451 | up   | 1.617492 | up   |             |
| 243225_at | 3.77E-04 | 1.08E-04 | 1.687608 | up   | 2.055255 | up   | 1.217851 | up   | LOC283481   |
| 243227_at | 0.026211 | 0.024715 | 1.490547 | up   | 1.017593 | down | 1.51677  | down |             |
| 243233_at | 0.006149 | 0.004537 | 1.8489   | up   | 1.852584 | up   | 1.001992 | up   |             |
| 243239_at | 0.025475 | 0.023943 | 1.382568 | up   | 1.207762 | down | 1.669813 | down | SAMM50      |
| 243243_at | 0.048079 | 0.046899 | 1.031921 | down | 1.212209 | up   | 1.250904 | up   | GPC3        |
| 243254_at | 0.001645 | 7.99E-04 | 1.109319 | down | 1.185665 | down | 1.068822 | down | HIVEP2      |
| 243256_at | 1.19E-04 | 2.28E-05 | 4.548272 | down | 1.526299 | down | 2.979935 | up   | MKNK1       |
| 243260_x  | 0.013218 | 0.011422 | 1.83849  | up   | 1.04003  | down | 1.912085 | down | C8orf5      |
| 243263_at | 0.004456 | 0.003012 | 1.44642  | up   | 1.790053 | down | 2.589168 | down | C17orf55    |
|           |          |          |          |      |          |      |          |      | C8orf44 /// |
| 243264_s  | 0.008566 | 0.006824 | 1.762077 | down | 1.234633 | down | 1.427207 | up   | SGK3        |
| 243265_at | 0.004958 | 0.003454 | 1.453472 | up   | 1.087611 | up   | 1.33639  | down | GAD2        |
| 243267_x  | 0.024026 | 0.022444 | 2.110683 | up   | 1.041741 | up   | 2.026111 | down |             |
| 243271_at | 2.11E-04 | 4.94E-05 | 3.013999 | down | 1.777313 | down | 1.695818 | up   |             |
| 243273_at | 0.004925 | 0.003426 | 1.210765 | up   | 1.396825 | down | 1.691226 | down |             |
| 243276_at | 0.003205 | 0.001956 | 1.320434 | up   | 1.347665 | down | 1.779503 | down | ALS2CL      |
| 243277_x  | 0.025799 | 0.024288 | 1.161674 | up   | 1.085757 | down | 1.261296 | down | EVI1        |
| 243280_at | 0.002984 | 0.001779 | 1.487333 | up   | 2.270449 | up   | 1.526523 | up   |             |
| 243285_at | 0.001638 | 7.93E-04 | 1.81666  | up   | 1.736068 | down | 3.153845 | down | LOC283335   |
| 243287_s  | 0.002213 | 0.001188 | 1.087408 | down | 2.330748 | down | 2.143398 | down | OSTM1       |
| 243288_at | 0.011209 | 0.009419 | 1.585036 | up   | 1.106602 | down | 1.754004 | down | SMYD2       |
| 243290_at | 0.002579 | 0.001463 | 1.987087 | up   | 1.160729 | down | 2.30647  | down |             |
| 243292_at | 0.015194 | 0.01342  | 1.632746 | up   | 1.129812 | down | 1.844696 | down | FAM132A     |
| 243295_at | 8.45E-04 | 3.23E-04 | 1.652946 | up   | 2.49739  | up   | 1.510873 | up   | RBM27       |



|           |          |          |               |               |               |           |
|-----------|----------|----------|---------------|---------------|---------------|-----------|
| 243297_at | 0.005866 | 0.004267 | 2.052373 up   | 1.903295 down | 3.906272 down |           |
| 243307_at | 7.78E-05 | 1.29E-05 | 1.19614 down  | 1.04245 down  | 1.147431 up   |           |
| 243309_at | 0.003939 | 0.002558 | 1.603469 down | 2.540348 down | 1.584282 down | FLJ27352  |
| 243324_x_ | 0.001168 | 5.01E-04 | 1.7288 down   | 1.249512 down | 1.383581 up   | TNPO1     |
| 243330_at | 0.018806 | 0.017097 | 1.26791 up    | 1.098619 down | 1.392951 down |           |
| 243339_at | 0.005907 | 0.004307 | 1.448122 up   | 1.287069 up   | 1.125132 down |           |
| 243342_at | 0.018574 | 0.016852 | 1.523458 up   | 1.298941 down | 1.978883 down |           |
| 243346_at | 0.026934 | 0.025446 | 1.170011 up   | 1.010927 up   | 1.157365 down | LMOD3     |
| 243347_at | 0.029936 | 0.028538 | 1.712894 up   | 1.301353 up   | 1.316241 down |           |
| 243349_at | 0.004127 | 0.002715 | 1.376725 up   | 1.024932 up   | 1.343236 down | KIAA1324  |
| 243356_at | 2.39E-05 | 2.56E-06 | 2.881229 up   | 3.585655 up   | 1.244488 up   | FAM7A3    |
| 243357_at | 1.70E-07 | 2.51E-09 | 9.739033 down | 8.271133 down | 1.177473 up   | NEGR1     |
| 243359_at | 0.008993 | 0.007241 | 1.301468 up   | 1.038548 down | 1.351636 down |           |
| 243365_s_ | 0.003383 | 0.002104 | 1.873329 up   | 1.145731 down | 2.14633 down  | AUTS2     |
| 243366_s_ | 2.06E-07 | 3.29E-09 | 16.28124 down | 2.905894 down | 5.602833 up   |           |
| 243367_at | 2.80E-05 | 3.19E-06 | 6.287122 down | 1.856349 down | 3.386822 up   |           |
| 243374_x_ | 0.001834 | 9.21E-04 | 1.753044 up   | 1.151625 down | 2.018849 down |           |
| 243392_at | 0.014891 | 0.013111 | 1.492246 up   | 1.080641 down | 1.612582 down | USP49     |
| 243395_at | 0.003387 | 0.002108 | 1.056974 down | 1.937016 up   | 2.047375 up   |           |
| 243403_x_ | 0.00129  | 5.75E-04 | 1.746892 down | 1.085989 down | 1.608573 up   | CPM       |
| 243404_at | 0.02841  | 0.026962 | 1.127245 up   | 1.545736 up   | 1.371252 up   |           |
| 243409_at | 5.87E-05 | 8.81E-06 | 2.469324 down | 1.615503 down | 1.528517 up   | FOX1      |
| 243416_at | 4.23E-07 | 8.78E-09 | 5.249481 up   | 6.659014 up   | 1.268509 up   |           |
| 243417_at | 9.28E-05 | 1.62E-05 | 3.323452 down | 1.068373 down | 3.11076 up    |           |
| 243426_at | 0.00367  | 0.002336 | 2.234345 down | 1.724355 down | 1.295757 up   | LOC339290 |
| 243430_at | 0.00101  | 4.11E-04 | 1.596957 up   | 1.307447 up   | 1.221431 down | SEZ6      |
| 243431_at | 5.41E-04 | 1.76E-04 | 3.598067 down | 1.006508 up   | 3.621482 up   |           |
| 243432_at | 0.017009 | 0.015254 | 1.274699 up   | 1.26445 up    | 1.008105 down | LOC642891 |
| 243438_at | 0.003911 | 0.002536 | 1.566415 down | 2.137041 down | 1.364288 down | PDE7B     |
| 243439_at | 5.76E-04 | 1.91E-04 | 1.532037 up   | 2.640754 up   | 1.723688 up   | ZNF418    |
| 243441_at | 0.017291 | 0.015544 | 1.35132 down  | 1.393748 down | 1.031398 down |           |
| 243442_x_ | 5.50E-04 | 1.79E-04 | 1.257558 up   | 1.735145 up   | 1.379774 up   |           |
| 243453_at | 8.27E-05 | 1.40E-05 | 1.908083 down | 1.966323 down | 1.030523 down |           |
| 243454_at | 0.006057 | 0.004446 | 1.371165 up   | 1.847799 up   | 1.347612 up   |           |

|           |          |          |               |               |               |          |
|-----------|----------|----------|---------------|---------------|---------------|----------|
| 243458_at | 0.001347 | 6.10E-04 | 1.659027 up   | 1.185583 down | 1.966914 down |          |
| 243462_s_ | 0.002122 | 0.001123 | 3.176373 up   | 5.179519 up   | 1.63064 up    |          |
| 243467_at | 0.009312 | 0.007551 | 1.277374 down | 1.188241 up   | 1.517828 up   |          |
| 243481_at | 5.74E-06 | 3.46E-07 | 11.26306 down | 1.884494 down | 5.976703 up   | RHOJ     |
| 243486_at | 0.001411 | 6.48E-04 | 1.322443 up   | 1.035458 down | 1.369334 down |          |
| 243489_at | 0.001076 | 4.48E-04 | 2.260468 up   | 3.428966 up   | 1.516928 up   |          |
| 243490_at | 0.01624  | 0.01447  | 1.373687 up   | 1.056784 up   | 1.299875 down |          |
| 243497_at | 0.014772 | 0.012994 | 1.345357 up   | 1.326969 down | 1.785246 down |          |
| 243501_at | 0.00706  | 0.005394 | 1.936754 down | 1.996243 down | 1.030716 down |          |
| 243509_at | 3.02E-04 | 8.05E-05 | 2.590006 up   | 3.094545 up   | 1.194802 up   |          |
| 243512_x_ | 0.012261 | 0.010466 | 1.36767 up    | 1.816987 up   | 1.328527 up   |          |
| 243517_at | 0.015352 | 0.01358  | 1.369249 up   | 1.173803 up   | 1.166507 down |          |
| 243518_at | 7.47E-04 | 2.74E-04 | 1.633181 up   | 1.736628 down | 2.836227 down |          |
| 243519_at | 0.023378 | 0.021791 | 1.593478 up   | 1.130845 down | 1.801976 down | UBE3C    |
| 243521_at | 0.002719 | 0.001568 | 3.389699 down | 2.571842 down | 1.318004 up   |          |
| 243522_at | 0.002175 | 0.001161 | 1.348051 up   | 1.048511 up   | 1.285681 down |          |
| 243523_at | 0.009734 | 0.007954 | 1.530549 up   | 1.502087 down | 2.299018 down | UNQ6487  |
| 243544_at | 0.001815 | 9.08E-04 | 1.076323 down | 1.055914 up   | 1.136504 up   | ADH1B    |
| 243550_at | 0.001204 | 5.23E-04 | 1.679032 down | 1.435742 down | 1.169453 up   | ZDHHC21  |
| 243552_at | 6.11E-05 | 9.28E-06 | 3.868231 up   | 7.470442 up   | 1.93123 up    | MBTD1    |
| 243557_at | 0.019694 | 0.018004 | 1.112071 down | 1.351598 up   | 1.503073 up   |          |
| 243564_at | 1.35E-04 | 2.71E-05 | 1.250806 down | 2.536044 down | 2.027527 down | PDE1C    |
| 243565_at | 0.001932 | 9.90E-04 | 1.662666 up   | 1.806608 up   | 1.086573 up   | CCDC150  |
| 243567_at | 0.004851 | 0.003359 | 1.991152 up   | 1.474153 down | 2.935261 down |          |
| 243574_at | 0.005912 | 0.004312 | 1.300762 up   | 1.140164 down | 1.483082 down |          |
| 243579_at | 0.012802 | 0.011001 | 1.477228 up   | 1.101564 up   | 1.341027 down | MSI2     |
| 243582_at | 6.94E-04 | 2.48E-04 | 1.007787 up   | 3.368689 down | 3.39492 down  | SH3RF2   |
| 243587_x_ | 0.001909 | 9.73E-04 | 1.398708 down | 1.281379 down | 1.091565 up   |          |
| 243590_at | 2.13E-04 | 5.01E-05 | 1.462949 down | 1.596601 down | 1.091359 down |          |
| 243593_s_ | 6.11E-06 | 3.78E-07 | 2.388297 up   | 1.999263 up   | 1.194589 down |          |
| 243600_at | 0.004082 | 0.002677 | 1.375281 up   | 1.432253 down | 1.969751 down | C19orf20 |
| 243606_at | 8.83E-05 | 1.51E-05 | 4.35123 down  | 2.138716 down | 2.034506 up   | FAM55C   |
| 243607_at | 0.033059 | 0.031738 | 1.236357 down | 1.035183 up   | 1.279855 up   |          |
| 243610_at | 1.85E-06 | 6.99E-08 | 52.94727 up   | 71.15627 up   | 1.343908 up   | C9orf135 |

|           |          |          |               |               |               |                                                                            |
|-----------|----------|----------|---------------|---------------|---------------|----------------------------------------------------------------------------|
| 243612_at | 0.001617 | 7.80E-04 | 1.608552 up   | 3.098281 up   | 1.926131 up   | NSD1                                                                       |
| 243614_s_ | 0.004509 | 0.00306  | 2.439541 up   | 1.000219 down | 2.440074 down | PRODH2                                                                     |
| 243616_at | 0.001499 | 7.03E-04 | 1.221597 up   | 1.189531 down | 1.453128 down |                                                                            |
| 243617_at | 2.51E-04 | 6.27E-05 | 2.290743 up   | 1.301444 up   | 1.760155 down | ZNF827                                                                     |
| 243618_s_ | 6.64E-05 | 1.04E-05 | 2.733164 up   | 2.567054 up   | 1.064708 down | ZNF827                                                                     |
| 243619_at | 0.00556  | 0.003988 | 1.797813 down | 1.352714 down | 1.329042 up   | FGFR1OP2                                                                   |
| 243621_at | 0.034254 | 0.032951 | 1.354255 up   | 1.075866 up   | 1.258758 down | SPACA3                                                                     |
| 243626_at | 0.001908 | 9.72E-04 | 1.072426 up   | 1.540347 up   | 1.43632 up    |                                                                            |
| 243630_at | 0.001705 | 8.37E-04 | 1.226173 down | 1.568 up      | 1.922639 up   | NDUFB1                                                                     |
| 243633_at | 0.002503 | 0.001406 | 1.439358 up   | 1.710692 down | 2.462298 down |                                                                            |
| 243634_at | 8.23E-06 | 5.83E-07 | 4.404141 down | 3.590492 down | 1.226612 up   |                                                                            |
| 243639_at | 0.003076 | 0.001851 | 1.434243 up   | 1.224004 up   | 1.171764 down |                                                                            |
| 243640_x_ | 0.003239 | 0.001984 | 1.857786 up   | 1.262249 up   | 1.471806 down |                                                                            |
| 243645_at | 6.03E-04 | 2.04E-04 | 1.547503 down | 3.717856 down | 2.402488 down | NFASC<br>CPEB3 ///<br>LOC100130                                            |
| 243651_at | 0.008673 | 0.006935 | 1.665831 up   | 1.959013 down | 3.263385 down | 772                                                                        |
| 243654_at | 0.015148 | 0.013375 | 1.16738 up    | 1.226385 down | 1.431657 down |                                                                            |
| 243655_x_ | 0.009885 | 0.008109 | 1.246676 up   | 1.023959 up   | 1.217506 down |                                                                            |
| 243660_at | 0.024437 | 0.022865 | 1.009166 up   | 1.337719 up   | 1.325568 up   | CHD9                                                                       |
| 243663_at | 0.006952 | 0.005293 | 1.325977 down | 1.02081 up    | 1.353571 up   |                                                                            |
| 243672_at | 6.41E-07 | 1.54E-08 | 22.37134 up   | 22.5746 up    | 1.009086 up   | SALL3<br>LOC100130<br>623 ///<br>LOC100240<br>735 ///<br>RP11-<br>160N1.10 |
| 243674_at | 0.006224 | 0.004604 | 1.42178 up    | 1.147603 down | 1.63164 down  |                                                                            |
| 243680_at | 0.006858 | 0.0052   | 2.048197 down | 1.357707 down | 1.50857 up    |                                                                            |
| 243686_at | 0.022249 | 0.020647 | 1.088767 up   | 1.267621 up   | 1.164272 up   |                                                                            |
| 243688_at | 0.003095 | 0.001867 | 1.401199 up   | 1.679651 down | 2.353526 down | MGC45800                                                                   |
| 243690_at | 1.02E-05 | 7.80E-07 | 3.214301 down | 3.394295 down | 1.055998 down | TRIOBP                                                                     |
| 243692_at | 0.021458 | 0.019827 | 1.291938 up   | 1.003975 up   | 1.286824 down | GATA4                                                                      |
| 243702_at | 0.00389  | 0.002517 | 2.26199 down  | 2.347108 down | 1.03763 down  |                                                                            |

|           |          |          |               |               |               |           |
|-----------|----------|----------|---------------|---------------|---------------|-----------|
| 243708_at | 0.00553  | 0.003959 | 1.645617 up   | 1.120425 down | 1.843789 down | TMEM132E  |
| 243711_at | 6.22E-04 | 2.13E-04 | 2.62189 down  | 4.311482 down | 1.644418 down | DDAH1     |
| 243716_at | 0.026652 | 0.025162 | 1.099193 up   | 1.163196 down | 1.278577 down | FLJ43663  |
| 243717_at | 0.009656 | 0.007879 | 1.355982 up   | 1.21808 up    | 1.113212 down | EPHA10    |
| 243722_at | 0.004509 | 0.00306  | 1.73578 up    | 1.086619 down | 1.886131 down | PYDC1     |
| 243726_at | 0.00312  | 0.001889 | 1.332295 up   | 1.080766 down | 1.439899 down |           |
| 243729_at | 1.54E-04 | 3.24E-05 | 1.645594 up   | 1.74599 up    | 1.061009 up   |           |
| 243731_at | 0.020797 | 0.019144 | 1.667308 up   | 1.464716 down | 2.442133 down |           |
| 243738_at | 0.001087 | 4.54E-04 | 1.834789 up   | 1.08109 down  | 1.983572 down | NMNAT3    |
| 243742_at | 0.005871 | 0.004274 | 1.02882 down  | 1.237286 up   | 1.272945 up   |           |
| 243744_at | 0.010285 | 0.008488 | 1.335861 up   | 1.293842 down | 1.728393 down | LOC348751 |
| 243745_at | 5.48E-05 | 7.97E-06 | 3.414305 up   | 6.129074 up   | 1.795116 up   |           |
| 243747_at | 0.003681 | 0.002345 | 3.570813 down | 1.703382 down | 2.096308 up   | ZNF599    |
| 243749_s_ | 0.01263  | 0.010831 | 1.643803 up   | 1.155669 down | 1.899691 down |           |
| 243750_x_ | 0.001086 | 4.54E-04 | 1.909015 up   | 1.065528 down | 2.034108 down | C21orf70  |
| 243758_at | 0.021318 | 0.019675 | 1.468234 up   | 1.00948 down  | 1.482152 down | CCDC37    |
| 243759_at | 0.003934 | 0.002554 | 2.440867 up   | 3.890949 up   | 1.594085 up   | SFRS15    |
| 243760_at | 0.00151  | 7.09E-04 | 1.415934 up   | 1.020985 up   | 1.38683 down  | LOC650794 |
| 243766_s_ | 0.006871 | 0.005213 | 2.159863 up   | 1.205857 down | 2.604486 down | TEAD2     |
| 243770_at | 0.002227 | 0.001199 | 1.973881 up   | 1.411068 up   | 1.398855 down | ZNF483    |
| 243774_at | 0.011098 | 0.009301 | 2.15542 up    | 1.098745 down | 2.368257 down | MUC20     |
| 243776_at | 0.002515 | 0.001416 | 1.030867 up   | 1.32085 down  | 1.36162 down  |           |
| 243779_at | 0.017761 | 0.016017 | 1.318745 up   | 1.514136 up   | 1.148164 up   | GALNT13   |
| 243782_at | 0.002989 | 0.001783 | 1.287134 down | 1.011409 up   | 1.301819 up   |           |
| 243792_x_ | 0.007381 | 0.005698 | 1.262394 down | 2.442684 up   | 3.083629 up   | PTPN13    |
| 243793_at | 0.011014 | 0.009218 | 1.365551 up   | 1.077088 down | 1.470819 down | AHDC1     |
| 243803_at | 0.009933 | 0.008158 | 1.324662 up   | 1.118908 down | 1.482175 down | LOC643037 |
| 243805_at | 3.50E-05 | 4.33E-06 | 15.50169 down | 4.201104 down | 3.689909 up   | CCBE1     |
| 243811_at | 0.001114 | 4.70E-04 | 1.875787 up   | 1.348829 up   | 1.390678 down |           |
| 243813_at | 1.99E-05 | 1.99E-06 | 43.95378 down | 17.14363 down | 2.563854 up   |           |
| 243816_at | 0.002227 | 0.0012   | 3.943459 down | 2.963802 down | 1.330541 up   | ZNF70     |
| 243818_at | 0.001409 | 6.47E-04 | 1.909002 up   | 1.52497 down  | 2.91117 down  | SFTA1P    |
| 243820_at | 0.02078  | 0.019124 | 1.711421 up   | 1.046824 down | 1.791556 down | LOC401463 |
| 243823_at | 0.004117 | 0.002706 | 1.478627 up   | 1.141682 down | 1.688123 down |           |

|           |          |          |               |               |               |           |
|-----------|----------|----------|---------------|---------------|---------------|-----------|
| 243833_at | 0.004626 | 0.003167 | 1.534487 up   | 1.325931 down | 2.034624 down | UNC5A     |
| 243834_at | 0.00304  | 0.001824 | 1.97425 up    | 2.212474 up   | 1.120665 up   | TNRC6A    |
| 243849_at | 0.003286 | 0.002023 | 1.805996 up   | 1.134806 down | 2.049455 down | TMEM37    |
| 243850_at | 0.004234 | 0.002807 | 1.370657 up   | 1.173723 down | 1.608772 down |           |
| 243855_at | 0.001097 | 4.60E-04 | 1.569437 up   | 1.763321 up   | 1.123537 up   |           |
| 243863_at | 0.004782 | 0.003296 | 1.396127 down | 1.332701 down | 1.047592 up   | ZCWPW2    |
| 243864_at | 3.43E-07 | 6.46E-09 | 14.21311 down | 42.52625 down | 2.992044 down | CCDC80    |
| 243869_at | 8.70E-04 | 3.35E-04 | 2.013562 up   | 1.166441 up   | 1.726244 down |           |
| 243882_at | 0.003297 | 0.002033 | 1.235753 up   | 1.084449 down | 1.340112 down |           |
| 243889_at | 0.025755 | 0.02424  | 1.354417 up   | 1.338514 down | 1.812906 down |           |
| 243894_at | 8.55E-04 | 3.27E-04 | 2.117949 down | 3.132875 down | 1.479202 down | SLC41A2   |
| 243899_at | 0.001783 | 8.88E-04 | 1.893071 up   | 1.806536 up   | 1.047901 down | ARL17P1   |
| 243904_at | 0.003601 | 0.002279 | 3.75676 down  | 2.44811 down  | 1.534555 up   |           |
| 243905_at | 0.004794 | 0.003306 | 1.31195 up    | 1.173715 down | 1.539856 down | LOC387895 |
| 243906_at | 0.004007 | 0.002612 | 1.709508 up   | 1.260112 down | 2.154172 down |           |
| 243909_x_ | 0.003621 | 0.002296 | 2.030367 down | 1.038195 down | 1.955671 up   | GUSBL2    |
| 243911_at | 0.001369 | 6.23E-04 | 1.827665 down | 1.220618 down | 1.497328 up   |           |
| 243912_x_ | 0.005013 | 0.003503 | 1.398133 up   | 1.034737 up   | 1.351197 down | APOBEC3F  |
| 243916_x_ | 0.01604  | 0.014268 | 1.52882 down  | 2.241485 up   | 3.426827 up   | UBLCP1    |
|           |          |          |               |               |               | LOC100127 |
|           |          |          |               |               |               | 980 ///   |
|           |          |          |               |               |               | LOC100131 |
| 243924_at | 4.89E-05 | 6.83E-06 | 3.492225 up   | 4.0564 up     | 1.161552 up   | 741       |
| 243929_at | 0.001104 | 4.64E-04 | 1.562397 up   | 1.297524 up   | 1.204137 down |           |
| 243931_at | 9.96E-05 | 1.79E-05 | 2.401018 down | 2.064406 down | 1.163055 up   |           |
| 243934_at | 0.001562 | 7.44E-04 | 1.316182 down | 1.001247 down | 1.314542 up   | ODF3B     |
| 243935_at | 0.007736 | 0.00604  | 1.28513 up    | 1.16843 up    | 1.099878 down | FRAS1     |
| 243944_at | 0.015712 | 0.013935 | 1.31743 up    | 1.020393 down | 1.344297 down |           |
| 243952_at | 0.023356 | 0.021768 | 1.632152 down | 1.362389 down | 1.198007 up   | psiTPTE22 |
| 243956_at | 0.034034 | 0.032726 | 1.400711 up   | 1.281471 down | 1.79497 down  | SUSD3     |
|           |          |          |               |               |               | LOC100128 |
|           |          |          |               |               |               | 108 ///   |
| 243957_at | 0.006756 | 0.005105 | 2.324454 down | 1.001473 down | 2.321034 up   | LOC400464 |
| 243959_at | 0.020531 | 0.018859 | 1.216398 down | 1.07807 up    | 1.311362 up   |           |

|           |          |          |               |               |               |           |
|-----------|----------|----------|---------------|---------------|---------------|-----------|
| 243965_at | 0.010784 | 0.008989 | 1.384275 up   | 1.15693 down  | 1.60151 down  |           |
| 243967_at | 2.58E-04 | 6.50E-05 | 2.256884 down | 1.101696 down | 2.048555 up   | AFF3      |
|           |          |          |               |               |               | LOC100130 |
| 243970_at | 0.00401  | 0.002616 | 1.057748 down | 1.261716 down | 1.192832 down | 642       |
| 243973_at | 0.005628 | 0.004048 | 1.460818 up   | 1.49643 up    | 1.024378 up   |           |
| 243976_at | 0.005893 | 0.004294 | 2.076899 down | 1.346572 down | 1.54236 up    |           |
| 243980_at | 0.001832 | 9.20E-04 | 1.246549 up   | 1.283891 down | 1.600433 down | ZNF594    |
| 243987_at | 0.026901 | 0.025413 | 1.39842 up    | 1.086334 down | 1.519151 down |           |
| 243989_at | 0.036295 | 0.035019 | 1.029189 down | 1.3308 down   | 1.293057 down |           |
| 243990_at | 0.009566 | 0.007792 | 1.483588 down | 1.303817 down | 1.13788 up    |           |
| 243992_at | 0.00397  | 0.002582 | 2.635094 up   | 4.289342 up   | 1.627776 up   |           |
| 243996_at | 0.005653 | 0.004073 | 1.466494 up   | 1.235221 up   | 1.187232 down |           |
| 243999_at | 0.001076 | 4.48E-04 | 6.451035 down | 3.382786 down | 1.907018 up   | SLFN5     |
| 244003_at | 0.047403 | 0.046211 | 1.223729 up   | 1.053443 up   | 1.161647 down |           |
| 244007_at | 9.19E-05 | 1.60E-05 | 5.31924 up    | 6.206011 up   | 1.16671 up    | ZNF462    |
| 244012_x_ | 0.007009 | 0.005348 | 1.455521 up   | 1.193113 up   | 1.219936 down |           |
| 244017_at | 0.002951 | 0.001754 | 1.483142 up   | 1.259986 down | 1.868739 down |           |
| 244023_at | 0.004445 | 0.002999 | 1.43899 up    | 1.2673 up     | 1.135477 down | SYK       |
| 244024_at | 0.003035 | 0.00182  | 1.865746 up   | 1.092752 up   | 1.707382 down | ZNF182    |
| 244027_at | 0.012991 | 0.011187 | 1.5772 up     | 1.301516 up   | 1.211817 down |           |
| 244038_at | 1.80E-04 | 4.03E-05 | 2.251682 up   | 2.207629 up   | 1.019955 down | WDR89     |
| 244041_at | 0.005618 | 0.004039 | 1.366337 up   | 1.114622 down | 1.52295 down  | STX6      |
| 244050_at | 1.03E-05 | 7.93E-07 | 14.44258 down | 4.723513 down | 3.057593 up   | PTPLAD2   |
| 244052_at | 9.98E-05 | 1.80E-05 | 2.611864 up   | 2.056781 up   | 1.26988 down  | CBR4      |
| 244056_at | 0.024859 | 0.023302 | 1.377249 up   | 1.208619 down | 1.66457 down  | SFTA2     |
| 244057_s_ | 1.10E-04 | 2.06E-05 | 1.949313 down | 2.403125 down | 1.232806 down | C10orf72  |
| 244058_at | 6.54E-05 | 1.02E-05 | 3.739884 down | 2.093598 down | 1.786343 up   | C10orf72  |
| 244065_at | 0.025506 | 0.023978 | 1.817525 up   | 1.135327 down | 2.063485 down | LOC643827 |
| 244069_at | 0.003519 | 0.002215 | 1.198675 up   | 1.342675 down | 1.609431 down |           |
| 244070_at | 0.002608 | 0.001483 | 1.302519 down | 1.789859 down | 1.374153 down | SYNE1     |
| 244071_at | 8.11E-04 | 3.07E-04 | 2.387201 up   | 1.434566 up   | 1.664058 down | FBLL1     |
| 244075_at | 8.05E-04 | 3.03E-04 | 3.679426 down | 1.071731 down | 3.433163 up   |           |
| 244081_at | 0.02537  | 0.023835 | 1.332257 up   | 1.004061 up   | 1.326868 down |           |
| 244085_at | 2.60E-04 | 6.58E-05 | 1.515092 up   | 1.508583 down | 2.285642 down | ZNF653    |

|           |          |          |               |               |               |           |
|-----------|----------|----------|---------------|---------------|---------------|-----------|
| 244090_at | 7.52E-04 | 2.76E-04 | 1.199387 up   | 1.996109 down | 2.394108 down |           |
| 244091_at | 0.002654 | 0.001518 | 1.673679 down | 2.805183 down | 1.676058 down |           |
| 244092_at | 0.003421 | 0.002136 | 1.294449 up   | 1.354542 up   | 1.046424 up   | ZRANB3    |
| 244095_at | 0.011374 | 0.009577 | 1.447357 up   | 1.103352 down | 1.596945 down |           |
| 244104_at | 0.001974 | 0.001017 | 1.703025 up   | 1.34493 down  | 2.290448 down | MGAT3     |
| 244110_at | 0.001233 | 5.40E-04 | 1.804752 up   | 2.413313 up   | 1.337199 up   | MLL       |
| 244115_at | 0.01377  | 0.011982 | 2.951644 down | 1.554644 down | 1.898597 up   | FAM126A   |
| 244121_at | 0.006219 | 0.004599 | 1.37364 down  | 1.095508 down | 1.253884 up   | UBR3      |
| 244124_at | 0.026185 | 0.024688 | 1.395299 up   | 1.1842 down   | 1.652312 down | RAB37     |
| 244126_at | 2.42E-04 | 5.97E-05 | 1.599333 down | 1.843509 down | 1.152674 down | PEX11G    |
| 244128_x_ | 2.47E-04 | 6.14E-05 | 3.498272 down | 1.293306 down | 2.704908 up   | GLIS1     |
| 244132_x_ | 0.002157 | 0.001148 | 2.355875 up   | 4.280517 up   | 1.816955 up   | ZNF518A   |
| 244133_at | 0.003071 | 0.001847 | 1.640917 up   | 2.312871 up   | 1.409499 up   | USP49     |
| 244138_at | 0.008137 | 0.006416 | 1.170806 up   | 1.117365 down | 1.308219 down | LOC728904 |
| 244146_at | 1.18E-04 | 2.25E-05 | 1.480486 down | 1.067482 up   | 1.580391 up   | DTWD1     |
| 244147_at | 0.014136 | 0.012348 | 1.337575 up   | 1.122341 up   | 1.191773 down |           |
| 244157_x_ | 0.002407 | 0.001333 | 1.404583 up   | 1.315089 up   | 1.068052 down |           |
| 244158_at | 0.002528 | 0.001425 | 1.208301 down | 1.275515 up   | 1.541205 up   |           |
| 244160_at | 0.002381 | 0.001315 | 1.705705 up   | 1.513344 up   | 1.12711 down  |           |
| 244163_at | 9.37E-04 | 3.72E-04 | 2.076679 down | 2.553111 up   | 5.301991 up   | SEMA3A    |
| 244164_at | 0.018978 | 0.017271 | 1.316165 up   | 1.332901 down | 1.754318 down |           |
| 244166_at | 0.001972 | 0.001017 | 1.2564 down   | 1.558305 down | 1.240294 down | APLN      |
| 244170_at | 3.18E-04 | 8.62E-05 | 1.754386 up   | 1.375529 up   | 1.275427 down |           |
| 244171_at | 2.52E-04 | 6.30E-05 | 2.124208 down | 1.204088 up   | 2.557733 up   | MKLN1     |
| 244180_at | 0.001174 | 5.05E-04 | 1.670516 up   | 1.697534 down | 2.835758 down | ZNF793    |
| 244182_at | 0.013082 | 0.01128  | 1.650709 up   | 1.343558 down | 2.217823 down |           |
| 244189_at | 3.01E-05 | 3.55E-06 | 2.949783 up   | 4.66577 up    | 1.581734 up   | LOC284900 |
| 244191_at | 0.003383 | 0.002103 | 1.996222 up   | 1.080868 up   | 1.84687 down  | RPLP1     |
| 244192_x_ | 0.001833 | 9.21E-04 | 1.230456 up   | 1.207769 down | 1.486106 down | SSNA1     |
| 244193_at | 0.012144 | 0.01035  | 1.462767 up   | 1.737522 down | 2.54159 down  | DNAJC22   |
| 244195_at | 0.007583 | 0.005895 | 1.323894 up   | 1.018755 up   | 1.299521 down |           |
| 244197_x_ | 0.002856 | 0.001677 | 1.880675 up   | 3.532367 up   | 1.878244 up   |           |
| 244206_at | 0.009654 | 0.007877 | 1.246477 up   | 1.049786 down | 1.308534 down | ANUBL1    |
| 244208_at | 2.12E-04 | 4.97E-05 | 1.611344 up   | 1.019315 down | 1.642467 down |           |

|           |          |          |               |               |               |           |
|-----------|----------|----------|---------------|---------------|---------------|-----------|
| 244212_at | 0.003004 | 0.001795 | 1.280179 up   | 1.201165 down | 1.537707 down |           |
| 244213_at | 0.00987  | 0.008094 | 1.270551 up   | 1.142933 down | 1.452155 down |           |
| 244214_at | 0.014522 | 0.012744 | 1.387071 down | 1.11191 down  | 1.247467 up   | PEL13     |
| 244215_at | 0.011869 | 0.010067 | 1.156874 up   | 1.405691 down | 1.626208 down |           |
| 244219_at | 0.009361 | 0.007595 | 1.561067 up   | 2.191736 up   | 1.403998 up   |           |
| 244223_at | 0.015125 | 0.01335  | 1.170101 up   | 1.129587 down | 1.321732 down |           |
| 244224_x_ | 2.93E-04 | 7.71E-05 | 1.461243 down | 1.077737 up   | 1.574835 up   | LYNX1     |
| 244227_at | 6.65E-06 | 4.27E-07 | 9.25381 up    | 7.459488 up   | 1.240542 down | SYT6      |
| 244229_at | 0.040606 | 0.039364 | 1.112605 up   | 1.160554 down | 1.291238 down | PARVG     |
| 244231_at | 0.010773 | 0.008976 | 1.144507 down | 2.19803 down  | 1.920504 down | LOC149684 |
| 244238_at | 0.008907 | 0.007158 | 1.417432 up   | 1.033808 up   | 1.371078 down |           |
| 244241_x_ | 0.001073 | 4.46E-04 | 2.896582 down | 1.317956 down | 2.197784 up   |           |
| 244243_at | 0.00511  | 0.003591 | 1.080574 down | 1.239299 up   | 1.339154 up   |           |
| 244244_at | 0.002542 | 0.001435 | 1.286045 up   | 1.011345 down | 1.300635 down |           |
| 244245_at | 0.017642 | 0.0159   | 1.526908 up   | 1.326004 down | 2.024686 down | ANKRD9    |
| 244261_at | 6.07E-06 | 3.72E-07 | 2.609222 up   | 3.314678 up   | 1.27037 up    | IL28RA    |
| 244264_at | 6.54E-04 | 2.28E-04 | 4.000204 up   | 3.908202 up   | 1.023541 down | KLRG2     |
| 244265_at | 0.003397 | 0.002117 | 2.596346 up   | 2.355684 up   | 1.102162 down |           |
| 244271_at | 0.026135 | 0.024637 | 1.628695 down | 1.192382 up   | 1.942026 up   |           |
| 244279_at | 9.93E-04 | 4.02E-04 | 2.172607 up   | 1.236442 down | 2.686302 down | SOBP      |
| 244281_at | 0.00137  | 6.23E-04 | 2.398423 up   | 1.237129 down | 2.967159 down | REXO1     |
| 244287_at | 0.00188  | 9.52E-04 | 1.113953 down | 2.412444 up   | 2.687348 up   | SFRS12    |
| 244288_s_ | 1.76E-04 | 3.89E-05 | 1.193556 up   | 1.131503 down | 1.350512 down |           |
| 244291_x_ | 0.007736 | 0.00604  | 1.255872 down | 1.095587 down | 1.1463 up     |           |
| 244294_at | 4.97E-04 | 1.56E-04 | 2.344272 down | 1.550561 down | 1.511886 up   | GTF2H5    |
| 244309_at | 0.001155 | 4.94E-04 | 1.202398 up   | 1.159457 down | 1.394129 down |           |
| 244317_at | 6.47E-06 | 4.08E-07 | 3.529394 up   | 6.471272 up   | 1.833536 up   | KIAA1324L |
| 244324_at | 0.001568 | 7.48E-04 | 2.816967 up   | 3.631021 up   | 1.288982 up   | C18orf54  |
| 244327_at | 0.011055 | 0.009254 | 1.342444 up   | 1.104169 up   | 1.215796 down |           |
| 244339_at | 0.004494 | 0.003045 | 1.687799 down | 1.097948 down | 1.537231 up   |           |
| 244344_at | 0.032148 | 0.030809 | 1.269357 up   | 1.61873 down  | 2.054746 down | WNK4      |
| 244363_at | 0.019281 | 0.017577 | 1.407392 up   | 1.001118 up   | 1.405821 down | ROS1      |
| 244364_at | 0.004421 | 0.002976 | 1.767894 up   | 1.55995 up    | 1.133301 down | MYO3A     |
| 244367_at | 0.045575 | 0.044367 | 1.110059 up   | 1.084418 down | 1.203768 down |           |



|           |          |          |               |               |               |           |
|-----------|----------|----------|---------------|---------------|---------------|-----------|
| 244374_at | 0.011033 | 0.009234 | 1.555939 up   | 1.088498 down | 1.693637 down | PLAC2     |
| 244377_at | 0.002097 | 0.001105 | 1.269142 down | 1.686847 down | 1.329125 down | SLC1A4    |
| 244397_at | 2.12E-04 | 4.98E-05 | 2.653666 down | 2.489147 down | 1.066095 up   |           |
| 244400_at | 3.39E-04 | 9.37E-05 | 1.448018 up   | 1.362582 down | 1.973043 down | VPS33A    |
| 244402_at | 0.003288 | 0.002026 | 1.048458 up   | 1.296765 down | 1.359603 down |           |
|           |          |          |               |               |               | ZNF20 /// |
| 244406_at | 2.85E-05 | 3.27E-06 | 2.618803 up   | 1.815241 up   | 1.442675 down | ZNF625    |
| 244415_at | 0.008058 | 0.00634  | 1.353326 up   | 1.041876 up   | 1.298932 down |           |
| 244416_at | 0.002853 | 0.001674 | 1.103357 down | 1.579517 down | 1.431556 down | TTC17     |
| 244420_at | 0.002191 | 0.001171 | 1.041858 down | 4.560945 up   | 4.751856 up   |           |
| 244427_at | 0.015801 | 0.014024 | 1.750418 up   | 1.9878 up     | 1.135614 up   | KIF23     |
| 244429_at | 7.82E-04 | 2.92E-04 | 2.426983 up   | 1.093492 up   | 2.21948 down  |           |
| 244450_at | 0.044825 | 0.043618 | 1.071124 down | 1.698216 up   | 1.819 up      |           |
| 244452_at | 0.009137 | 0.007382 | 1.474209 down | 1.507358 down | 1.022485 down | C2orf30   |
| 244461_at | 0.013777 | 0.011988 | 2.782754 up   | 1.289608 up   | 2.15783 down  | CYTSB     |
| 244462_at | 0.004763 | 0.00328  | 1.795245 down | 1.067228 up   | 1.915935 up   | ZNF224    |
| 244471_x_ | 0.026488 | 0.024993 | 1.335613 up   | 1.001262 up   | 1.33393 down  | PANX2     |
| 244472_at | 4.24E-04 | 1.27E-04 | 2.729575 up   | 1.755827 up   | 1.554581 down | LOC388630 |
| 244477_at | 0.011973 | 0.010174 | 1.751657 up   | 1.461452 down | 2.559962 down | SLC12A3   |
| 244480_at | 0.003295 | 0.002032 | 1.327066 up   | 1.344977 up   | 1.013496 up   |           |
| 244494_at | 0.004844 | 0.003353 | 1.501478 up   | 1.24484 down  | 1.8691 down   | ZDHHC1    |
| 244498_x_ | 0.00118  | 5.09E-04 | 2.364794 down | 1.639605 down | 1.442295 up   | LOC440296 |
| 244499_at | 0.001412 | 6.49E-04 | 1.976745 up   | 1.04153 down  | 2.058839 down | ZFC3H1    |
| 244504_x_ | 0.009142 | 0.007387 | 1.34655 up    | 1.442616 down | 1.942554 down | ARF1      |
| 244511_at | 0.010921 | 0.009126 | 2.083739 down | 1.654868 down | 1.259157 up   |           |
| 244515_at | 0.001392 | 6.37E-04 | 1.612366 up   | 1.931063 up   | 1.197659 up   | PSMD7     |
| 244519_at | 0.010837 | 0.009043 | 2.097449 down | 2.457026 down | 1.171435 down | ASXL1     |
| 244522_at | 0.033909 | 0.032597 | 1.352661 up   | 1.035835 down | 1.401133 down | SYVN1     |
| 244523_at | 6.18E-06 | 3.85E-07 | 1.534569 up   | 1.878138 up   | 1.223887 up   | MMD       |
| 244525_at | 0.001625 | 7.85E-04 | 1.246122 down | 1.133218 up   | 1.412127 up   |           |
| 244528_at | 0.006042 | 0.004433 | 1.096051 up   | 1.312962 down | 1.439073 down | ARMC8     |
| 244530_at | 0.012469 | 0.010674 | 1.318635 up   | 1.200419 down | 1.582915 down |           |
| 244532_x_ | 0.031023 | 0.029663 | 1.541011 down | 1.251172 down | 1.231654 up   |           |
| 244533_at | 0.010848 | 0.009055 | 1.049935 down | 2.473398 down | 2.355763 down |           |

|           |          |          |               |               |               |           |
|-----------|----------|----------|---------------|---------------|---------------|-----------|
| 244536_at | 0.010796 | 0.008999 | 1.347814 up   | 1.812394 up   | 1.344691 up   |           |
| 244540_at | 0.034704 | 0.033402 | 1.213494 up   | 1.289186 down | 1.56442 down  | LOC727933 |
| 244541_x_ | 0.006658 | 0.005015 | 1.354508 up   | 1.22526 down  | 1.659624 down |           |
|           |          |          |               |               |               | LOC100286 |
| 244543_s_ | 8.01E-04 | 3.01E-04 | 1.275544 up   | 1.312063 down | 1.673593 down | 844       |
| 244545_at | 0.007952 | 0.006243 | 1.388234 up   | 1.095946 up   | 1.266699 down |           |
| 244546_at | 3.82E-04 | 1.10E-04 | 3.007801 up   | 4.302689 up   | 1.43051 up    | CYCS      |
| 244552_at | 0.003052 | 0.001832 | 2.759707 up   | 3.439088 up   | 1.246179 up   | ZNF788    |
| 244561_at | 1.89E-04 | 4.26E-05 | 2.174366 down | 2.847245 down | 1.30946 down  |           |
| 244563_at | 0.004993 | 0.003486 | 2.36778 up    | 2.799325 up   | 1.182257 up   | QSER1     |
| 244566_at | 0.001406 | 6.45E-04 | 1.800287 up   | 1.741639 down | 3.135449 down |           |
|           |          |          |               |               |               | LOC100130 |
| 244570_at | 0.004739 | 0.003261 | 1.568954 down | 1.188969 down | 1.319592 up   | 360       |
| 244572_at | 0.003698 | 0.002359 | 1.202655 down | 1.904618 down | 1.583678 down | KY        |
| 244583_at | 4.43E-04 | 1.34E-04 | 1.260551 up   | 1.112901 down | 1.402869 down |           |
| 244584_at | 0.002757 | 0.0016   | 1.273009 down | 2.045062 down | 1.606479 down | C11orf41  |
| 244590_at | 0.013069 | 0.011267 | 1.871423 up   | 1.036493 up   | 1.805533 down |           |
| 244591_x_ | 0.014364 | 0.01258  | 1.693259 up   | 1.197236 down | 2.02723 down  | RNF207    |
| 244595_at | 0.02596  | 0.024453 | 1.284994 up   | 1.016363 up   | 1.264305 down |           |
| 244611_at | 0.003472 | 0.002179 | 1.053571 up   | 1.318556 up   | 1.251511 up   | MED13     |
| 244615_x_ | 0.003306 | 0.002042 | 1.606993 up   | 1.009189 down | 1.621759 down | TARSL2    |
| 244617_at | 0.003024 | 0.001811 | 1.289766 up   | 1.797595 down | 2.318477 down | GPR26     |
| 244618_at | 0.008088 | 0.006367 | 1.136977 down | 1.198436 up   | 1.362594 up   |           |
| 244623_at | 7.85E-04 | 2.94E-04 | 2.701951 down | 7.899553 down | 2.923648 down | KCNQ5     |
| 244625_at | 0.003998 | 0.002605 | 3.854968 up   | 4.978495 up   | 1.291449 up   |           |
| 244627_at | 0.002417 | 0.001339 | 1.148314 up   | 1.686238 up   | 1.468447 up   | DAK       |
|           |          |          |               |               |               | LOC100134 |
| 244630_at | 0.002678 | 0.001537 | 1.794677 up   | 1.135161 down | 2.037248 down | 081       |
| 244637_at | 0.004531 | 0.00308  | 1.442526 up   | 1.026592 up   | 1.40516 down  |           |
| 244640_at | 9.74E-04 | 3.92E-04 | 4.260036 up   | 6.027103 up   | 1.414801 up   | ZNF850P   |
| 244641_at | 0.003499 | 0.002199 | 1.725261 down | 1.942085 down | 1.125676 down | C7orf30   |
| 244646_at | 2.85E-04 | 7.43E-05 | 2.765096 up   | 2.230241 up   | 1.239819 down |           |
| 244650_at | 0.011348 | 0.00955  | 1.091527 up   | 1.461994 up   | 1.339403 up   | FAM105A   |
| 244654_at | 0.001505 | 7.06E-04 | 1.622807 up   | 1.457867 up   | 1.113138 down | MYO1G     |

|           |          |          |               |               |               |              |
|-----------|----------|----------|---------------|---------------|---------------|--------------|
| 244656_at | 0.008201 | 0.00648  | 1.954188 up   | 1.260167 down | 2.462604 down | RASL10B      |
| 244661_at | 8.20E-05 | 1.38E-05 | 4.470865 down | 4.120461 down | 1.08504 up    |              |
| 244664_at | 2.12E-04 | 4.99E-05 | 2.024011 up   | 2.500144 up   | 1.235242 up   |              |
|           |          |          |               |               |               | SNHG5 ///    |
|           |          |          |               |               |               | SNORD50A     |
|           |          |          |               |               |               | ///          |
| 244669_at | 2.74E-04 | 7.06E-05 | 3.086433 up   | 5.86484 up    | 1.900199 up   | SNORD50B     |
| 244680_at | 0.038658 | 0.037398 | 1.72654 down  | 1.628949 down | 1.059911 up   | GLRB         |
| 244682_at | 0.014271 | 0.012482 | 1.30309 up    | 1.043502 down | 1.359777 down | CAMSAP1      |
| 244686_at | 0.015519 | 0.013748 | 1.54478 up    | 1.028072 up   | 1.502599 down | TCOF1        |
| 244689_at | 0.012026 | 0.010227 | 1.529834 down | 1.874336 down | 1.225189 down | PPARA        |
| 244690_at | 4.30E-04 | 1.29E-04 | 1.247166 up   | 1.168998 down | 1.457935 down |              |
| 244692_at | 0.009874 | 0.008098 | 1.516764 up   | 1.033556 up   | 1.467519 down | CYP4F22      |
| 244694_at | 0.004256 | 0.002828 | 3.022022 up   | 1.777574 up   | 1.700082 down | IGLON5       |
| 244697_at | 0.002365 | 0.001303 | 1.360783 up   | 1.078583 down | 1.467717 down |              |
| 244707_at | 0.007738 | 0.006043 | 1.484501 up   | 1.916309 down | 2.844762 down |              |
|           |          |          |               |               |               | FLJ33996 /// |
|           |          |          |               |               |               | LOC100127    |
| 244708_at | 2.96E-04 | 7.81E-05 | 2.128168 down | 1.000724 down | 2.126627 up   | 971          |
| 244709_at | 9.60E-04 | 3.84E-04 | 1.602099 up   | 1.191014 down | 1.908122 down | FAM123C      |
| 244711_at | 0.001029 | 4.21E-04 | 1.778161 up   | 1.571688 up   | 1.13137 down  |              |
| 244712_at | 0.013978 | 0.012191 | 1.878331 up   | 1.157853 down | 2.174831 down | MEX3D        |
| 244715_at | 5.52E-04 | 1.80E-04 | 1.348191 up   | 1.597592 down | 2.15386 down  |              |
| 244716_x_ | 0.002536 | 0.001431 | 1.686856 up   | 1.418087 up   | 1.189529 down | TMIGD2       |
| 244725_at | 0.002845 | 0.001668 | 1.842484 up   | 1.077091 down | 1.984523 down | DMRTA1       |
| 244727_at | 0.005406 | 0.003851 | 1.493071 up   | 1.01331 down  | 1.512944 down | KCNQ1OT1     |
|           |          |          |               |               |               | LOC100129    |
| 244730_x_ | 0.022258 | 0.020658 | 1.265358 down | 1.497202 down | 1.183223 down | 195          |
| 244737_at | 0.013747 | 0.011959 | 1.42425 down  | 1.022434 up   | 1.456202 up   |              |
| 244738_at | 4.89E-04 | 1.53E-04 | 2.082083 up   | 2.105058 up   | 1.011035 up   | BRWD3        |
| 244743_x_ | 1.18E-06 | 3.69E-08 | 6.142685 up   | 9.288954 up   | 1.512198 up   | ZNF138       |
| 244746_at | 0.023896 | 0.022317 | 1.375778 up   | 1.268838 down | 1.745639 down | SEMA6D       |
| 244747_at | 0.010602 | 0.008808 | 1.242957 up   | 1.054091 up   | 1.179174 down | NPNT         |

|           |          |          |          |      |          |      |          |      |           |
|-----------|----------|----------|----------|------|----------|------|----------|------|-----------|
| 244752_at | 1.70E-04 | 3.73E-05 | 2.162523 | down | 1.008642 | down | 2.143996 | up   | ZNF438    |
| 244755_at | 0.019762 | 0.018075 | 1.136091 | down | 1.162191 | up   | 1.320354 | up   | XPR1      |
| 244758_at | 7.51E-06 | 5.16E-07 | 3.353803 | up   | 2.677512 | up   | 1.252582 | down | SCAND3    |
| 244764_at | 1.94E-06 | 7.46E-08 | 2.00694  | down | 4.080593 | down | 2.033241 | down |           |
|           |          |          |          |      |          |      |          |      | LOC440354 |
|           |          |          |          |      |          |      |          |      | ///       |
|           |          |          |          |      |          |      |          |      | LOC595101 |
|           |          |          |          |      |          |      |          |      | ///       |
|           |          |          |          |      |          |      |          |      | LOC641298 |
|           |          |          |          |      |          |      |          |      | ///       |
|           |          |          |          |      |          |      |          |      | LOC728423 |
|           |          |          |          |      |          |      |          |      | ///       |
|           |          |          |          |      |          |      |          |      | LOC729513 |
|           |          |          |          |      |          |      |          |      | /// SMG1  |
| 244766_at | 0.006294 | 0.004675 | 2.385897 | up   | 4.13186  | up   | 1.731785 | up   |           |
| 244769_at | 2.21E-06 | 9.09E-08 | 1.838769 | down | 1.189572 | down | 1.54574  | up   |           |
| 244777_at | 5.46E-05 | 7.93E-06 | 3.501722 | up   | 3.726497 | up   | 1.06419  | up   | DCP2      |
| 244780_at | 0.012757 | 0.010955 | 1.215888 | up   | 1.17705  | up   | 1.032996 | down | SGPP2     |
| 244786_at | 0.005411 | 0.003857 | 1.216938 | down | 1.58174  | up   | 1.92488  | up   | SNHG10    |
| 244788_at | 1.48E-04 | 3.08E-05 | 3.211643 | down | 1.565656 | down | 2.051309 | up   |           |
| 244796_at | 7.43E-04 | 2.72E-04 | 1.195358 | up   | 1.364614 | down | 1.631203 | down |           |
| 244800_x_ | 0.016489 | 0.014721 | 1.364603 | up   | 1.036362 | up   | 1.316724 | down |           |
| 244803_at | 0.020636 | 0.018975 | 1.174155 | down | 2.40322  | up   | 2.821751 | up   |           |
| 244805_at | 0.003864 | 0.002497 | 1.585134 | up   | 1.108018 | up   | 1.430604 | down |           |
| 244809_at | 0.017108 | 0.015352 | 1.616234 | up   | 1.121352 | down | 1.812368 | down |           |
| 244811_at | 4.86E-04 | 1.51E-04 | 2.60964  | up   | 5.017869 | up   | 1.922821 | up   | PHIP      |
| 244813_at | 0.001639 | 7.94E-04 | 1.596769 | up   | 2.570447 | up   | 1.60978  | up   |           |
| 244816_at | 0.027932 | 0.026465 | 1.03168  | down | 1.286466 | up   | 1.327221 | up   |           |
| 244824_at | 0.00484  | 0.003347 | 1.235702 | up   | 1.125857 | down | 1.391224 | down |           |
| 244825_at | 0.001671 | 8.15E-04 | 1.229631 | up   | 1.442796 | down | 1.774106 | down | SHROOM4   |
| 244826_at | 0.036329 | 0.035058 | 1.163292 | down | 2.242412 | up   | 2.60858  | up   |           |
| 244834_at | 0.001258 | 5.56E-04 | 1.153707 | down | 1.808835 | down | 1.567846 | down | C1orf134  |
| 244835_at | 2.81E-05 | 3.22E-06 | 2.147226 | down | 1.251711 | down | 1.715433 | up   | C16orf52  |
| 244838_at | 0.003836 | 0.002473 | 1.488346 | up   | 1.261261 | up   | 1.180046 | down |           |
| 244840_x_ | 0.003657 | 0.002323 | 2.169089 | up   | 1.276667 | up   | 1.699025 | down | DOCK4     |

|           |          |          |               |               |               |           |
|-----------|----------|----------|---------------|---------------|---------------|-----------|
| 244842_x_ | 0.001108 | 4.66E-04 | 1.012898 up   | 1.718237 up   | 1.696358 up   |           |
| 244844_at | 0.009895 | 0.008119 | 1.146794 up   | 1.283569 up   | 1.119268 up   | MRS2      |
| 244848_at | 0.001077 | 4.49E-04 | 1.740638 down | 1.267947 down | 1.3728 up     | CHD1L     |
| 244849_at | 0.005877 | 0.004279 | 1.956038 down | 1.317808 up   | 2.577681 up   | SEMA3A    |
| 244852_at | 2.57E-06 | 1.12E-07 | 5.84535 down  | 1.172826 down | 4.983986 up   | DSEL      |
| 244856_at | 0.026591 | 0.025096 | 1.218658 up   | 1.066963 down | 1.300262 down |           |
| 244857_at | 0.003271 | 0.002011 | 1.522126 up   | 1.193482 down | 1.81663 down  | HBEGF     |
| 244863_at | 0.001553 | 7.38E-04 | 1.322092 up   | 1.230772 down | 1.627194 down |           |
| 244865_at | 0.004795 | 0.003307 | 1.98725 up    | 1.040363 down | 2.06746 down  | HAX1      |
| 244866_at | 0.007251 | 0.005575 | 1.187033 up   | 1.311927 down | 1.5573 down   |           |
| 244867_at | 0.006122 | 0.004511 | 2.76331 up    | 3.374925 up   | 1.221335 up   |           |
| 244872_at | 3.06E-05 | 3.64E-06 | 3.323403 up   | 8.152044 up   | 2.452921 up   | RBBP4     |
| 244874_at | 9.82E-04 | 3.96E-04 | 1.292643 up   | 1.438645 down | 1.859654 down |           |
|           |          |          |               |               |               | NCRNA0010 |
| 244875_at | 0.013019 | 0.011213 | 1.503703 up   | 1.028203 down | 1.546112 down | 5         |
| 244882_at | 0.002698 | 0.001552 | 2.071586 up   | 1.791796 down | 3.711859 down | TNRC18    |
| 244884_at | 0.002141 | 0.001137 | 1.910264 up   | 1.036091 up   | 1.843722 down |           |
| 244889_at | 0.030027 | 0.028629 | 1.348007 up   | 1.266311 down | 1.706995 down | LOC388210 |
| 1552257_a | 0.003181 | 0.00194  | 2.853581 up   | 1.58818 up    | 1.796761 down | TTLL12    |
| 1552274_a | 2.03E-06 | 8.07E-08 | 17.37453 down | 6.972955 down | 2.491703 up   | PXK       |
| 1552275_s | 1.99E-07 | 3.11E-09 | 26.02621 down | 7.845937 down | 3.317158 up   | PXK       |
| 1552283_s | 1.98E-05 | 1.98E-06 | 2.492992 up   | 2.10224 up    | 1.185874 down | ZDHHC11   |
| 1552295_a | 4.45E-04 | 1.35E-04 | 4.056328 down | 4.63209 down  | 1.141941 down | SLC39A13  |
| 1552296_a | 0.006251 | 0.004633 | 1.332715 up   | 1.169969 up   | 1.139103 down | BEST4     |
| 1552301_a | 0.002618 | 0.00149  | 1.55801 down  | 1.901372 down | 1.220385 down | CORO6     |
| 1552303_a | 0.00708  | 0.005412 | 1.536815 down | 1.592776 down | 1.036413 down | TMEM106A  |
| 1552307_a | 4.10E-05 | 5.42E-06 | 5.202686 down | 1.749671 down | 2.973523 up   | TTC39C    |
| 1552309_a | 4.79E-06 | 2.71E-07 | 12.14616 down | 18.12459 down | 1.492208 down | NEXN      |
| 1552310_a | 0.004515 | 0.003066 | 2.595306 down | 2.093186 down | 1.239883 up   | C15orf40  |
| 1552312_a | 0.001835 | 9.22E-04 | 2.819389 down | 1.937028 down | 1.455523 up   | MFAP3     |
| 1552314_a | 0.002831 | 0.001657 | 1.629512 up   | 1.492351 up   | 1.091909 down | EYA3      |
| 1552319_a | 0.015295 | 0.013522 | 1.602104 up   | 1.182701 up   | 1.354615 down | KLK8      |
| 1552323_s | 0.013098 | 0.011296 | 1.357637 down | 1.128564 up   | 1.53218 up    | FAM122C   |
| 1552325_a | 0.002773 | 0.001613 | 1.260906 up   | 1.031076 down | 1.30009 down  | CCDC11    |

|           |          |          |          |      |          |      |          |      |          |
|-----------|----------|----------|----------|------|----------|------|----------|------|----------|
| 1552329_a | 0.020546 | 0.01888  | 2.10863  | down | 1.428938 | up   | 3.013101 | up   | RBBP6    |
| 1552330_a | 0.001615 | 7.78E-04 | 2.309827 | down | 1.756757 | down | 1.314824 | up   | MGC16385 |
| 1552334_a | 0.003281 | 0.00202  | 2.838755 | down | 1.694048 | down | 1.675723 | up   | TRIOBP   |
| 1555044_a | 0.009979 | 0.008202 | 1.374534 | up   | 1.037608 | up   | 1.324714 | down | KBTBD5   |
| 1557411_s | 1.52E-06 | 5.27E-08 | 14.89261 | down | 8.663263 | down | 1.719054 | up   | SLC25A43 |
| 1552360_a | 3.67E-04 | 1.04E-04 | 2.851719 | down | 1.69192  | down | 1.685493 | up   | TIRAP    |
| 1552375_a | 0.001335 | 6.02E-04 | 2.161998 | down | 1.851932 | down | 1.167429 | up   | ZNF333   |
| 1552378_s | 0.015844 | 0.01407  | 2.592449 | down | 1.600743 | down | 1.619529 | up   | RDH10    |
| 1552381_a | 4.55E-05 | 6.21E-06 | 3.166398 | up   | 2.666372 | up   | 1.187531 | down | SRrp35   |
| 1552383_a | 0.001314 | 5.90E-04 | 2.164465 | up   | 1.668681 | up   | 1.297111 | down | FAM71A   |
| 1552384_a | 0.001853 | 9.34E-04 | 1.385562 | up   | 1.078959 | down | 1.494964 | down | FAM71A   |
| 1552388_a | 0.002481 | 0.001389 | 1.606063 | up   | 1.06775  | down | 1.714873 | down | FLJ30901 |
| 1552391_a | 0.004654 | 0.00319  | 1.322674 | up   | 1.229872 | down | 1.62672  | down | C1orf65  |
| 1552400_a | 0.00289  | 0.001704 | 1.251119 | up   | 1.330797 | up   | 1.063685 | up   | C15orf27 |
| 1552414_a | 0.029204 | 0.027794 | 1.248315 | up   | 1.103444 | up   | 1.13129  | down | WFDC9    |
| 1552439_s | 0.012936 | 0.011135 | 1.1791   | up   | 1.04688  | down | 1.234377 | down | MEGF11   |
| 1552440_a | 0.001586 | 7.59E-04 | 1.37273  | up   | 1.331    | down | 1.827103 | down | GPR182   |
| 1552481_s | 4.38E-06 | 2.38E-07 | 3.390414 | down | 2.482102 | down | 1.365945 | up   | MAN1A2   |
| 1552485_a | 0.001727 | 8.51E-04 | 3.11956  | down | 4.037434 | down | 1.294232 | down | LACTB    |
| 1552486_s | 0.017879 | 0.016142 | 1.830782 | down | 2.217718 | down | 1.21135  | down | LACTB    |
| 1552496_a | 1.85E-05 | 1.80E-06 | 6.06459  | up   | 5.155787 | up   | 1.176268 | down | COBL     |
| 1552502_s | 4.35E-05 | 5.85E-06 | 1.373815 | down | 2.107917 | down | 1.534353 | down | RHBDL2   |
| 1552504_a | 7.73E-04 | 2.87E-04 | 1.998722 | up   | 1.141014 | up   | 1.751706 | down | BRSK1    |
| 1552507_a | 0.006588 | 0.004949 | 2.637821 | down | 8.300007 | down | 3.14654  | down | KCNE4    |
| 1552508_a | 0.00453  | 0.003078 | 2.48655  | down | 8.197515 | down | 3.296742 | down | KCNE4    |
| 1552515_a | 0.001563 | 7.45E-04 | 1.167831 | down | 1.253585 | down | 1.07343  | down | HIPK1    |
| 1552520_a | 0.001217 | 5.31E-04 | 2.234042 | up   | 2.591277 | up   | 1.159905 | up   | TMEM74   |
| 1552521_a | 0.001121 | 4.74E-04 | 2.095391 | up   | 2.057217 | up   | 1.018556 | down | TMEM74   |
| 1552523_a | 0.002051 | 0.001073 | 1.427548 | up   | 1.464967 | up   | 1.026212 | up   | TIGD4    |
| 1552535_a | 0.00106  | 4.39E-04 | 1.54912  | up   | 1.641353 | up   | 1.059539 | up   | CLDN19   |
| 1552548_a | 0.009617 | 0.007842 | 1.229583 | up   | 1.16876  | down | 1.437087 | down | BSND     |
| 1552557_a | 0.007231 | 0.005555 | 1.765001 | up   | 1.545069 | up   | 1.142344 | down | ZDHC15   |
| 1552563_a | 0.005426 | 0.003869 | 1.496971 | up   | 1.287    | up   | 1.163148 | down | C8orf6   |
| 1552564_a | 0.008166 | 0.006447 | 1.194847 | up   | 1.14887  | down | 1.372723 | down | NUDT9P1  |

|           |          |          |          |      |          |      |          |      |            |
|-----------|----------|----------|----------|------|----------|------|----------|------|------------|
| 1552568_a | 0.005633 | 0.004053 | 1.052204 | up   | 1.176649 | down | 1.238075 | down | RTP3       |
| 1552575_a | 7.74E-05 | 1.28E-05 | 2.431026 | up   | 2.45146  | up   | 1.008405 | up   | C6orf141   |
| 1552576_a | 0.009838 | 0.008061 | 1.287217 | up   | 1.088983 | up   | 1.182036 | down | ALMS1P     |
| 1552580_a | 2.86E-04 | 7.47E-05 | 3.201085 | up   | 2.007854 | up   | 1.594282 | down | TRIML2     |
| 1552607_a | 0.003023 | 0.00181  | 1.447027 | down | 1.233089 | down | 1.173497 | up   | CXorf52    |
| 1552610_a | 1.70E-04 | 3.74E-05 | 7.523002 | down | 4.720856 | down | 1.593567 | up   | JAK1       |
| 1552611_a | 5.87E-05 | 8.80E-06 | 6.029536 | down | 3.664748 | down | 1.64528  | up   | JAK1       |
| 1560814_a | 5.18E-05 | 7.41E-06 | 4.459212 | down | 2.168648 | down | 2.056218 | up   | C15orf57   |
| 1552615_a | 0.007008 | 0.005347 | 1.4191   | up   | 1.075609 | up   | 1.319346 | down | ACACB      |
| 1552620_a | 0.009885 | 0.008109 | 1.210109 | down | 1.245666 | up   | 1.507392 | up   | SPRR4      |
| 1552633_a | 3.33E-04 | 9.17E-05 | 1.86273  | up   | 1.586122 | up   | 1.174393 | down | ZNF101     |
| 1552634_a | 9.66E-05 | 1.72E-05 | 3.225776 | up   | 2.976377 | up   | 1.083793 | down | ZNF101     |
| 1552643_a | 0.032262 | 0.030927 | 1.280019 | down | 1.968055 | down | 1.53752  | down | ZNF626     |
| 1552646_a | 0.004723 | 0.003248 | 1.271295 | down | 1.181222 | down | 1.076253 | up   | IL11RA     |
| 1552658_a | 3.21E-05 | 3.89E-06 | 9.36055  | down | 7.91569  | down | 1.182531 | up   | NAV3       |
| 1552666_a | 0.026669 | 0.02518  | 1.243911 | up   | 1.005353 | up   | 1.237288 | down | LRRC7      |
| 1552678_a | 1.26E-05 | 1.06E-06 | 2.564962 | up   | 6.8739   | up   | 2.679923 | up   | USP28      |
| 1554579_a | 0.002683 | 0.001541 | 1.33867  | up   | 1.378788 | up   | 1.029968 | up   | MYO18B     |
| 1552680_a | 0.003351 | 0.002077 | 1.720149 | up   | 3.065048 | up   | 1.78185  | up   | CASC5      |
| 1561405_s | 7.07E-04 | 2.54E-04 | 1.188777 | up   | 1.204751 | down | 1.432179 | down | CATSPER2   |
| 1552690_a | 0.00443  | 0.002985 | 1.328877 | down | 1.112935 | up   | 1.478954 | up   | CACNA2D4   |
| 1552691_a | 4.15E-04 | 1.23E-04 | 1.346176 | up   | 1.33062  | up   | 1.01169  | down | ARL11      |
| 1552701_a | 4.06E-04 | 1.19E-04 | 12.58855 | down | 2.645923 | down | 4.757715 | up   | CARD16     |
|           |          |          |          |      |          |      |          |      | CARD16 /// |
| 1552703_s | 1.68E-06 | 6.11E-08 | 19.00855 | down | 1.656757 | down | 11.47335 | up   | CASP1      |
| 1552705_a | 0.02138  | 0.019742 | 1.556555 | down | 1.132487 | down | 1.374457 | up   | DUSP19     |
| 1552712_a | 0.016544 | 0.01478  | 1.415585 | up   | 1.141679 | down | 1.616143 | down | NMNAT2     |
| 1552716_a | 4.42E-04 | 1.33E-04 | 2.421439 | down | 1.6936   | down | 1.429758 | up   | SPEF2      |
| 1552718_a | 0.002581 | 0.001465 | 1.749178 | down | 2.251775 | down | 1.287333 | down | DTD1       |
| 1552721_a | 0.001213 | 5.29E-04 | 10.12026 | down | 6.548708 | down | 1.545383 | up   | FGF1       |
| 1552730_a | 0.017049 | 0.015294 | 1.372244 | up   | 1.023099 | down | 1.403942 | down | DHH        |
| 1552731_a | 0.003512 | 0.002209 | 1.321467 | up   | 1.178115 | up   | 1.12168  | down | ABRA       |
| 1552733_a | 8.99E-04 | 3.51E-04 | 5.435509 | down | 2.513342 | down | 2.162662 | up   | KLHDC1     |
| 1552736_a | 0.019838 | 0.018156 | 1.131849 | down | 2.182746 | up   | 2.470538 | up   | NETO1      |

|           |          |          |          |      |          |      |          |      |          |
|-----------|----------|----------|----------|------|----------|------|----------|------|----------|
| 1552739_s | 1.12E-04 | 2.11E-05 | 3.611035 | down | 1.967476 | down | 1.835364 | up   | ST7L     |
| 1552740_a | 2.56E-04 | 6.43E-05 | 2.260441 | up   | 1.670041 | up   | 1.353524 | down | C2orf15  |
| 1552742_a | 0.005962 | 0.004358 | 1.618232 | up   | 1.348522 | up   | 1.200004 | down | KCNH8    |
| 1552751_a | 0.001322 | 5.94E-04 | 1.545539 | up   | 1.243141 | up   | 1.243254 | down | CIB3     |
| 1563646_a | 0.018442 | 0.01672  | 1.544112 | down | 1.257429 | up   | 1.941611 | up   | TMEM67   |
| 1552766_a | 0.001816 | 9.09E-04 | 2.230611 | up   | 1.801916 | up   | 1.237911 | down | HS6ST2   |
| 1552767_a | 8.78E-07 | 2.45E-08 | 10.62876 | up   | 17.21562 | up   | 1.61972  | up   | HS6ST2   |
| 1552771_a | 0.004081 | 0.002676 | 1.382003 | up   | 1.057636 | up   | 1.306691 | down | LIN9     |
| 1552774_a | 0.014107 | 0.012314 | 1.538933 | down | 1.08181  | up   | 1.664833 | up   | SLC25A27 |
| 1552787_a | 7.07E-04 | 2.54E-04 | 2.119059 | up   | 2.999984 | up   | 1.415715 | up   | HELB     |
| 1552788_a | 7.37E-04 | 2.69E-04 | 1.333863 | up   | 2.343905 | up   | 1.757231 | up   | HELB     |
| 1552789_a | 1.29E-05 | 1.09E-06 | 4.064698 | down | 2.73818  | down | 1.484453 | up   | SEC62    |
| 1552790_a | 4.86E-05 | 6.78E-06 | 4.4285   | down | 3.091791 | down | 1.432342 | up   | SEC62    |
| 1552793_a | 0.00165  | 8.02E-04 | 1.99976  | down | 1.356498 | down | 1.474207 | up   | C8orf31  |
| 1552794_a | 0.01002  | 0.008239 | 1.439873 | down | 1.271358 | down | 1.132548 | up   | ZNF547   |
| 1552798_a | 3.82E-05 | 4.86E-06 | 2.633652 | down | 4.529512 | down | 1.719859 | down | TLR4     |
| 1552807_a | 0.001537 | 7.27E-04 | 1.347916 | up   | 1.135389 | down | 1.530408 | down | SIGLEC10 |
| 1552813_a | 0.008012 | 0.006296 | 1.128424 | down | 1.320815 | up   | 1.490439 | up   | KLF14    |
| 1552828_a | 0.006377 | 0.00475  | 1.640926 | down | 1.129133 | down | 1.453261 | up   | SNX18    |
| 1567214_a | 3.76E-05 | 4.76E-06 | 3.548514 | up   | 4.152451 | up   | 1.170194 | up   | PNN      |
| 1552836_a | 0.002152 | 0.001145 | 1.835579 | down | 1.004852 | down | 1.826717 | up   | ZNF619   |
| 1552843_a | 0.004796 | 0.003309 | 1.517871 | up   | 1.028393 | down | 1.560968 | down | SLC26A1  |
| 1552863_a | 0.002453 | 0.001368 | 1.434392 | down | 1.18619  | up   | 1.701461 | up   | CACNG6   |
| 1552882_a | 9.40E-04 | 3.73E-04 | 1.179123 | up   | 1.739411 | down | 2.05098  | down | FAM123B  |
| 1552890_a | 0.033542 | 0.032229 | 1.17916  | up   | 1.204819 | down | 1.420674 | down | CABP4    |
| 1552895_a | 0.020063 | 0.01839  | 1.277741 | down | 1.067026 | up   | 1.363383 | up   | C21orf99 |
| 1552897_a | 2.63E-05 | 2.91E-06 | 11.34481 | up   | 10.10297 | up   | 1.122918 | down | KCNG3    |
| 1552903_a | 0.003297 | 0.002033 | 1.006608 | down | 1.314851 | down | 1.30622  | down | B4GALNT2 |
| 1552930_a | 0.013903 | 0.012112 | 1.036696 | down | 1.287218 | up   | 1.334453 | up   | MMEL1    |
| 1552931_a | 0.001202 | 5.22E-04 | 2.770838 | down | 3.675535 | down | 1.326507 | down | PDE8A    |
| 1552932_a | 0.001237 | 5.42E-04 | 1.282762 | up   | 1.238097 | down | 1.588184 | down | NLRP6    |
| 1552933_a | 0.003517 | 0.002213 | 1.288037 | down | 1.014402 | down | 1.26975  | up   | C1orf62  |
| 1552935_a | 5.01E-04 | 1.58E-04 | 2.011994 | down | 1.141866 | down | 1.762022 | up   | ZCCHC5   |
| 1552938_a | 0.006377 | 0.004751 | 3.217911 | up   | 2.343345 | up   | 1.373213 | down | ZIC5     |



|           |          |          |               |               |               |          |
|-----------|----------|----------|---------------|---------------|---------------|----------|
| 1552946_a | 6.64E-05 | 1.04E-05 | 5.701232 up   | 4.614357 up   | 1.235542 down | ZNF114   |
| 1552947_x | 1.33E-04 | 2.65E-05 | 4.389094 up   | 3.969235 up   | 1.105778 down | ZNF114   |
| 1552948_a | 2.97E-04 | 7.84E-05 | 1.711899 up   | 1.314754 down | 2.250726 down | CCDC27   |
| 1552950_a | 0.005226 | 0.003695 | 1.1791 up     | 1.225747 down | 1.445278 down | C15orf26 |
| 1552957_a | 0.029561 | 0.02816  | 1.216866 up   | 1.103505 down | 1.342818 down | DNAH6    |
| 1552961_a | 0.010477 | 0.008685 | 1.476244 up   | 1.142672 down | 1.686863 down |          |
| 1552965_a | 0.003948 | 0.002565 | 1.372913 up   | 1.29309 up    | 1.061731 down | B3GNT7   |
| 1552970_s | 1.95E-04 | 4.45E-05 | 1.717492 down | 1.369018 down | 1.254543 up   | ZMYM6    |
| 1552973_a | 0.008938 | 0.007187 | 1.394649 up   | 1.222598 up   | 1.140726 down | WNT9B    |
| 1552975_x | 0.008592 | 0.006853 | 1.223369 up   | 1.187964 down | 1.453319 down |          |
| 1552999_a | 0.015823 | 0.014047 | 1.207263 up   | 1.131436 down | 1.36594 down  | WFDC10B  |
| 1553034_a | 0.001977 | 0.00102  | 2.085593 down | 1.835886 down | 1.136015 up   | SDCCAG8  |
| 1553039_a | 0.001869 | 9.45E-04 | 1.286325 down | 1.140333 up   | 1.466839 up   | ASB10    |
| 1564537_a | 0.007228 | 0.005552 | 1.348309 up   | 1.169846 down | 1.577314 down | ASB10    |
| 1553055_a | 7.29E-05 | 1.18E-05 | 7.807262 down | 4.663403 down | 1.674156 up   | SLFN5    |
| 1553064_a | 0.002599 | 0.001477 | 1.455469 up   | 1.352088 down | 1.967922 down | H1FOO    |
| 1553074_a | 0.006699 | 0.005054 | 1.375818 up   | 1.074606 up   | 1.280299 down | ASB11    |
| 1553094_a | 0.012806 | 0.011005 | 1.703484 up   | 1.271928 down | 2.166708 down | TAC4     |
| 1553530_a | 7.26E-04 | 2.63E-04 | 4.128743 down | 3.881089 down | 1.06381 up    | ITGB1    |
| 1553099_a | 0.003134 | 0.0019   | 2.258421 up   | 2.094554 up   | 1.078235 down | TIGD1    |
| 1553105_s | 3.24E-08 | 2.50E-10 | 36.13475 up   | 35.52931 up   | 1.017041 down | DSG2     |
| 1553106_a | 2.03E-06 | 8.06E-08 | 6.806819 down | 6.140857 down | 1.108448 up   | C5orf24  |
| 1553108_a | 5.43E-06 | 3.20E-07 | 3.734179 down | 4.019662 down | 1.076452 down | C5orf24  |
| 1553111_a | 8.05E-04 | 3.04E-04 | 1.844409 down | 1.682114 up   | 3.102506 up   | KBTBD6   |
| 1553114_a | 0.006531 | 0.004898 | 1.066559 down | 1.279164 up   | 1.364304 up   | PTK6     |
| 1553117_a | 0.001465 | 6.81E-04 | 3.283185 down | 3.736668 down | 1.138123 down | STK38    |
| 1553125_x | 0.012359 | 0.01056  | 1.628699 up   | 1.000083 down | 1.628834 down | WDR62    |
| 1553129_a | 1.59E-04 | 3.41E-05 | 2.838688 down | 1.022196 up   | 2.901695 up   | SVEP1    |
| 1553131_a | 7.39E-04 | 2.69E-04 | 1.442819 up   | 1.649941 up   | 1.143554 up   | GATA4    |
| 1553132_a | 4.99E-04 | 1.57E-04 | 2.946754 up   | 2.82248 up    | 1.04403 down  | TC2N     |
| 1553139_s | 0.01107  | 0.009269 | 2.506499 down | 3.016982 down | 1.203664 down | PLXNA3   |
| 1553141_a | 2.18E-05 | 2.26E-06 | 3.387112 down | 2.715669 down | 1.247248 up   | C13orf31 |
| 1553142_a | 0.001048 | 4.33E-04 | 4.260135 down | 2.515302 down | 1.693687 up   | C13orf31 |
| 1553145_a | 0.012085 | 0.010287 | 1.069591 up   | 2.119195 up   | 1.981314 up   | FLJ39653 |

|           |          |          |          |      |          |      |          |      |          |
|-----------|----------|----------|----------|------|----------|------|----------|------|----------|
| 1553148_a | 0.007378 | 0.005695 | 3.213968 | down | 1.2261   | down | 2.621292 | up   | SNX13    |
| 1553157_a | 0.01032  | 0.008526 | 1.75192  | up   | 1.209422 | up   | 1.44856  | down | LHX4     |
| 1553158_a | 0.001856 | 9.36E-04 | 2.500001 | down | 1.64189  | down | 1.522636 | up   | C3orf34  |
| 1553167_a | 0.00104  | 4.28E-04 | 2.129636 | down | 1.584377 | down | 1.344147 | up   | SEPSECS  |
| 1553169_a | 0.019168 | 0.01746  | 2.616955 | up   | 1.511732 | up   | 1.731098 | down | LRRN4    |
| 1553177_a | 0.007792 | 0.006096 | 1.182984 | down | 1.130654 | down | 1.046283 | up   | SH2D1B   |
| 1553179_a | 2.15E-09 | 5.62E-12 | 19.23157 | up   | 18.84881 | up   | 1.020307 | down | ADAMTS19 |
| 1553180_a | 2.95E-04 | 7.76E-05 | 6.205763 | up   | 6.816806 | up   | 1.098464 | up   | ADAMTS19 |
| 1553183_a | 0.013222 | 0.011426 | 1.177946 | up   | 1.099733 | up   | 1.07112  | down | UMODL1   |
| 1553185_a | 2.29E-04 | 5.54E-05 | 8.868935 | up   | 19.78593 | up   | 2.230925 | up   | RASEF    |
| 1553186_x | 3.40E-04 | 9.41E-05 | 7.616952 | up   | 16.84703 | up   | 2.21178  | up   | RASEF    |
| 1553192_a | 0.002967 | 0.001766 | 1.651799 | down | 1.124925 | down | 1.468364 | up   | ZNF441   |
| 1553194_a | 4.50E-06 | 2.47E-07 | 8.745512 | down | 4.117033 | down | 2.124227 | up   | NEGR1    |
| 1553202_a | 2.05E-05 | 2.08E-06 | 1.802005 | up   | 1.58728  | up   | 1.135279 | down | STOX1    |
| 1553209_a | 0.005566 | 0.003994 | 1.753231 | up   | 1.328175 | up   | 1.320031 | down | RNFT2    |
| 1553216_a | 0.020433 | 0.018762 | 1.598113 | down | 1.677807 | down | 1.049868 | down | ZNF41    |
| 1553220_a | 4.46E-06 | 2.44E-07 | 2.685526 | up   | 3.341864 | up   | 1.244399 | up   | FAM117B  |
| 1553221_a | 7.18E-04 | 2.59E-04 | 1.606709 | down | 1.88186  | down | 1.171251 | down | ZNF583   |
| 1553225_s | 0.001389 | 6.35E-04 | 1.676315 | down | 1.515566 | up   | 2.540564 | up   | ZNF75D   |
| 1553227_s | 0.002245 | 0.001215 | 2.644976 | up   | 2.983718 | up   | 1.12807  | up   | BRWD1    |
| 1553252_a | 7.83E-04 | 2.93E-04 | 3.559604 | up   | 4.251425 | up   | 1.194353 | up   | BRWD3    |
| 1553266_a | 0.011735 | 0.009931 | 1.150322 | up   | 1.025252 | up   | 1.12199  | down | CNOT6L   |
| 1553268_a | 0.02149  | 0.019861 | 1.300976 | up   | 1.697493 | up   | 1.304784 | up   | RHBDL3   |
| 1553292_s | 4.91E-04 | 1.54E-04 | 4.586431 | up   | 5.503697 | up   | 1.199996 | up   | FLJ25006 |
| 1553347_s | 0.019555 | 0.01786  | 1.150316 | up   | 1.262566 | up   | 1.097581 | up   | KCNA6    |
| 1553348_a | 0.003935 | 0.002554 | 2.530705 | down | 1.943519 | down | 1.302126 | up   | NFX1     |
| 1553349_a | 0.004613 | 0.003156 | 4.160556 | up   | 4.814905 | up   | 1.157274 | up   | ARID2    |
| 1553354_a | 3.95E-04 | 1.15E-04 | 1.720066 | down | 1.097041 | down | 1.567914 | up   | FLJ31958 |
| 1553359_a | 0.025414 | 0.02388  | 1.0119   | up   | 1.507747 | up   | 1.490016 | up   | FBXL18   |
| 1553365_a | 0.003556 | 0.002245 | 1.305563 | up   | 1.226814 | up   | 1.06419  | down | DEPDC4   |
| 1553367_a | 0.003424 | 0.002139 | 1.704661 | up   | 1.415265 | up   | 1.204481 | down | COX6B2   |
| 1553372_a | 0.00225  | 0.001219 | 1.855892 | up   | 1.130203 | up   | 1.642088 | down | FLJ23865 |
| 1553375_a | 0.003976 | 0.002587 | 1.1734   | down | 1.459803 | down | 1.24408  | down | BTBD9    |
| 1553396_a | 0.004272 | 0.002844 | 2.655464 | up   | 1.960688 | up   | 1.354353 | down | CCDC13   |

|           |          |          |               |               |               |           |
|-----------|----------|----------|---------------|---------------|---------------|-----------|
| 1553399_a | 3.49E-04 | 9.78E-05 | 2.397037 up   | 1.018511 up   | 2.353473 down | C17orf69  |
| 1553402_a | 0.001351 | 6.12E-04 | 2.284274 down | 1.93033 down  | 1.183359 up   | HFE       |
| 1553411_s | 1.16E-05 | 9.38E-07 | 9.204088 up   | 10.60145 up   | 1.151819 up   | SALL3     |
| 1553429_a | 0.005375 | 0.003825 | 1.400638 up   | 1.014068 down | 1.420342 down | FLJ31713  |
| 1553438_a | 0.019725 | 0.018039 | 1.285531 down | 1.241076 up   | 1.595441 up   | C11orf72  |
| 1553453_a | 0.010399 | 0.008602 | 1.2255 down   | 1.075629 up   | 1.318184 up   | ASB14     |
| 1562211_a | 0.006272 | 0.004655 | 1.645648 down | 1.07521 down  | 1.530538 up   | ZNF491    |
| 1553459_a | 0.001237 | 5.42E-04 | 2.207144 up   | 2.825023 up   | 1.279945 up   | CCDC150   |
| 1553466_a | 0.016453 | 0.014682 | 1.350122 down | 1.171615 down | 1.15236 up    | CXorf59   |
| 1553479_a | 0.006218 | 0.004598 | 1.117303 up   | 1.367849 up   | 1.224242 up   | TMEM145   |
| 1553485_a | 0.003555 | 0.002244 | 1.369508 down | 1.036566 up   | 1.419585 up   | CCDC140   |
| 1553492_a | 0.003246 | 0.00199  | 1.340518 up   | 1.00774 up    | 1.330223 down | PAX1      |
| 1553494_a | 0.004133 | 0.002721 | 1.286663 up   | 1.223564 up   | 1.05157 down  | TDH       |
| 1555565_s | 0.012624 | 0.010824 | 2.59383 down  | 2.388084 down | 1.086155 up   | TAPBP     |
|           |          |          |               |               |               | PALM2 /// |
|           |          |          |               |               |               | PALM2-    |
| 1553502_a | 0.009827 | 0.008049 | 1.227664 up   | 1.134765 down | 1.39311 down  | AKAP2     |
| 1553528_a | 3.60E-05 | 4.49E-06 | 2.7308 up     | 4.354442 up   | 1.594566 up   | TAF5      |
| 1553536_a | 0.00108  | 4.51E-04 | 1.950829 down | 1.240345 down | 1.572812 up   | MBNL2     |
| 1553539_a | 0.001644 | 7.98E-04 | 1.479041 up   | 1.04383 down  | 1.543867 down | KRT74     |
| 1553541_a | 0.004314 | 0.002884 | 1.338625 up   | 1.342693 up   | 1.003039 up   | LMX1A     |
| 1553559_a | 0.00506  | 0.003547 | 1.546533 down | 1.312842 down | 1.178004 up   | TMEM171   |
| 1553565_s | 7.22E-04 | 2.61E-04 | 4.925597 down | 6.387396 down | 1.296776 down | DDAH1     |
| 1553574_a | 0.002759 | 0.001603 | 1.434745 down | 1.284052 down | 1.117357 up   | IFNE      |
| 1553583_a | 0.01655  | 0.014791 | 1.459534 up   | 1.225669 up   | 1.190806 down | THRSP     |
|           |          |          |               |               |               | FAM27E1   |
|           |          |          |               |               |               | ///       |
|           |          |          |               |               |               | FAM27E2   |
|           |          |          |               |               |               | ///       |
| 1553590_a | 0.002901 | 0.001712 | 1.611599 up   | 1.047148 up   | 1.539037 down | FAM27E3   |
| 1553600_a | 0.025778 | 0.024266 | 1.369988 up   | 1.060133 down | 1.45237 down  | TMIE      |
| 1553603_s | 2.58E-04 | 6.49E-05 | 2.517074 up   | 3.085789 up   | 1.225943 up   | ATL2      |
| 1553612_a | 0.01082  | 0.009026 | 1.562587 down | 1.057447 down | 1.477698 up   | ZNF354B   |
| 1553613_s | 0.001533 | 7.24E-04 | 5.866896 down | 8.24614 down  | 1.405537 down | FOXC1     |

|           |          |          |               |               |               |            |
|-----------|----------|----------|---------------|---------------|---------------|------------|
| 1553618_a | 0.011997 | 0.010199 | 1.175613 up   | 1.074006 down | 1.262615 down | LOC653192  |
| 1553639_a | 0.011963 | 0.010164 | 1.296194 up   | 1.510146 up   | 1.165062 up   | /// TRIM43 |
| 1553642_a | 0.005114 | 0.003595 | 1.363995 up   | 1.275339 up   | 1.069516 down | PPARGC1B   |
| 1553646_a | 0.01433  | 0.012541 | 1.89841 down  | 1.390563 down | 1.36521 up    | C9orf163   |
| 1553647_a | 0.025757 | 0.024244 | 1.39085 down  | 1.228961 down | 1.131729 up   | HDX        |
| 1553660_a | 8.45E-04 | 3.22E-04 | 1.749701 up   | 1.463038 up   | 1.195937 down | CDYL2      |
| 1553672_a | 0.001245 | 5.47E-04 | 2.044718 down | 4.355696 down | 2.130219 down | HUS1B      |
| 1553677_a | 1.23E-04 | 2.37E-05 | 2.16626 down  | 1.841944 down | 1.176073 up   | ENAH       |
| 1553678_a | 8.92E-04 | 3.48E-04 | 3.588375 down | 3.884278 down | 1.082462 down | TIPRL      |
| 1553686_a | 0.009943 | 0.008167 | 1.339482 up   | 1.270457 down | 1.701753 down | ITGB1      |
| 1553693_s | 0.017662 | 0.015922 | 1.729136 up   | 2.353234 up   | 1.360931 up   | C18orf25   |
| 1553696_s | 4.09E-04 | 1.21E-04 | 1.723616 up   | 2.117792 up   | 1.228692 up   | CBR4       |
| 1553705_a | 0.001387 | 6.34E-04 | 1.888341 up   | 2.165215 up   | 1.146622 up   | ZNF569     |
| 1553709_a | 7.51E-05 | 1.23E-05 | 2.830571 up   | 2.410273 up   | 1.174378 down | CHRM3      |
| 1553711_a | 0.01433  | 0.012542 | 1.244301 down | 1.181761 up   | 1.470467 up   | PRPF38A    |
| 1553715_s | 0.017464 | 0.015718 | 1.868279 up   | 1.272658 up   | 1.468014 down | C4orf39    |
| 1553722_s | 0.01889  | 0.017184 | 1.27032 up    | 1.211423 up   | 1.048618 down | C16orf14   |
| 1553728_a | 1.57E-04 | 3.32E-05 | 1.572993 down | 1.528201 up   | 2.403851 up   | RNF152     |
| 1553730_x | 0.003888 | 0.002515 | 1.314598 down | 1.340775 up   | 1.762579 up   | LRRC43     |
| 1563919_a | 0.003216 | 0.001966 | 1.358575 up   | 1.285848 down | 1.746921 down | LRRC43     |
| 1553732_s | 4.19E-04 | 1.25E-04 | 1.897616 down | 2.525673 down | 1.330972 down | CCDC123    |
| 1553741_a | 0.002584 | 0.001467 | 1.862289 up   | 1.258862 up   | 1.479343 down | CCDC123    |
| 1553743_a | 0.020823 | 0.019174 | 4.327728 down | 1.99674 down  | 2.167398 up   | C1orf211   |
| 1553752_a | 0.003151 | 0.001915 | 1.755636 up   | 1.037636 up   | 1.691957 down | FAM119A    |
| 1553768_a | 5.35E-04 | 1.73E-04 | 3.506631 down | 4.311255 down | 1.229458 down | C20orf165  |
| 1553781_a | 0.00187  | 9.46E-04 | 1.413235 down | 1.092222 down | 1.293908 up   | DCBLD1     |
| 1560091_a | 0.001802 | 8.99E-04 | 2.430051 up   | 2.082225 up   | 1.167045 down | ZC3HAV1L   |
| 1562309_s | 7.58E-06 | 5.22E-07 | 7.18525 up    | 7.37157 up    | 1.025931 up   | PHF21B     |
| 1553789_a | 0.02357  | 0.021984 | 1.007908 down | 1.383736 up   | 1.394678 up   | PHF21B     |
| 1553799_a | 0.007    | 0.00534  | 1.561563 up   | 1.223374 up   | 1.276439 down | C21orf58   |
| 1553815_a | 0.028536 | 0.027097 | 1.761411 down | 1.471829 down | 1.19675 up    | C15orf33   |
| 1569470_a | 0.020063 | 0.018391 | 1.564667 up   | 1.29116 up    | 1.21183 down  | TCEANC     |
| 1553823_a | 0.001127 | 4.78E-04 | 1.551005 up   | 1.458549 up   | 1.063389 down | FRMD5      |
|           |          |          |               |               |               | RTP1       |

|           |          |          |               |               |               | MAGEA2 /// |
|-----------|----------|----------|---------------|---------------|---------------|------------|
| 1553830_s | 0.001619 | 7.81E-04 | 1.41304 up    | 1.099809 up   | 1.284805 down | MAGEA2B    |
| 1553845_x | 0.002135 | 0.001132 | 1.272263 up   | 1.246974 up   | 1.02028 down  | C10orf67   |
| 1553864_a | 0.025011 | 0.023453 | 1.260191 up   | 1.042863 down | 1.314207 down | GPR26      |
| 1553868_a | 0.002035 | 0.001062 | 1.217787 down | 1.049338 up   | 1.27787 up    | C5orf36    |
| 1553872_a | 0.014993 | 0.01322  | 1.414168 up   | 1.133704 up   | 1.247388 down | C17orf103  |
| 1553874_a | 8.87E-05 | 1.53E-05 | 23.36134 up   | 19.11913 up   | 1.221883 down | ZSCAN10    |
| 1553875_s | 1.35E-04 | 2.71E-05 | 6.294813 up   | 7.821994 up   | 1.242609 up   | ZSCAN10    |
| 1553882_a | 0.002252 | 0.001221 | 1.137444 up   | 1.160652 down | 1.320176 down |            |
| 1554953_a | 0.00149  | 6.97E-04 | 1.884181 up   | 1.021946 down | 1.925531 down | C21orf90   |
| 1553906_s | 0.006911 | 0.00525  | 1.282398 down | 1.444234 up   | 1.852083 up   | FGD2       |
| 1553917_a | 0.008158 | 0.006438 | 1.202938 down | 1.149454 up   | 1.382722 up   | PIKFYVE    |
| 1553918_a | 0.001591 | 7.63E-04 | 1.676988 up   | 1.744305 up   | 1.040142 up   | C21orf129  |
| 1553919_a | 0.013909 | 0.012119 | 1.311465 down | 1.010503 down | 1.297833 up   | C9orf62    |
| 1553927_a | 0.002904 | 0.001714 | 1.371479 up   | 1.043507 down | 1.431148 down | C7orf33    |
| 1553928_a | 0.002732 | 0.001579 | 2.076246 down | 2.340253 down | 1.127156 down | ELMOD2     |
| 1553930_a | 0.00267  | 0.001531 | 1.027623 up   | 1.179467 up   | 1.147763 up   | TAAR1      |
| 1553938_a | 0.0075   | 0.00581  | 1.306698 up   | 1.073736 down | 1.403049 down | STK32A     |
| 1553940_a | 0.031842 | 0.030495 | 2.182171 down | 1.486755 down | 1.467741 up   | LRRC28     |
| 1553954_a | 4.59E-04 | 1.40E-04 | 3.048458 down | 2.489689 down | 1.224433 up   | ALG14      |
| 1553959_a | 1.16E-04 | 2.21E-05 | 1.055013 down | 2.362665 down | 2.239465 down | B3GALT6    |
| 1553960_a | 1.22E-04 | 2.36E-05 | 11.73622 down | 3.308989 down | 3.546769 up   | SNX21      |
| 1553961_s | 1.40E-05 | 1.23E-06 | 5.151704 down | 3.214322 down | 1.602734 up   | SNX21      |
| 1553971_a | 0.00236  | 0.001298 | 1.397011 down | 1.433228 up   | 2.002236 up   | GATS       |
|           |          |          |               |               |               | RP11-      |
| 1553976_a | 0.006527 | 0.004895 | 1.299646 up   | 1.420698 down | 1.846405 down | 529I10.4   |
| 1553979_a | 9.89E-07 | 2.91E-08 | 5.409616 up   | 5.717415 up   | 1.056899 up   |            |
| 1553982_a | 6.61E-05 | 1.03E-05 | 2.603391 down | 2.28046 down  | 1.141608 up   | RAB7B      |
| 1553986_a | 0.00549  | 0.003927 | 1.553603 up   | 2.381361 up   | 1.532798 up   | RASEF      |
| 1553987_a | 0.001564 | 7.46E-04 | 1.350765 up   | 2.887691 up   | 2.137819 up   | C12orf47   |
| 1553994_a | 1.01E-06 | 2.99E-08 | 20.37145 down | 30.58455 down | 1.501344 down | NT5E       |
| 1553995_a | 1.27E-07 | 1.61E-09 | 37.1553 down  | 32.07019 down | 1.158562 up   | NT5E       |
| 1554001_a | 0.001631 | 7.89E-04 | 2.263028 up   | 1.680087 up   | 1.34697 down  | TRIM37     |

|           |          |          |          |      |          |      |          |      |           |
|-----------|----------|----------|----------|------|----------|------|----------|------|-----------|
| 1554004_a | 0.002449 | 0.001365 | 2.026236 | down | 2.327831 | down | 1.148845 | down | RGNEF     |
| 1554006_a | 5.99E-04 | 2.02E-04 | 1.785233 | up   | 1.972925 | up   | 1.105136 | up   | LLGL2     |
| 1554007_a | 1.82E-06 | 6.77E-08 | 25.98079 | up   | 60.91571 | up   | 2.344645 | up   |           |
| 1554008_a | 0.002282 | 0.001244 | 2.426571 | down | 2.019822 | down | 1.201379 | up   | OSMR      |
| 1554010_a | 0.004266 | 0.002838 | 2.040362 | down | 2.769514 | down | 1.357364 | down | NDST1     |
| 1554018_a | 1.25E-05 | 1.05E-06 | 40.3981  | down | 5.277878 | down | 7.654231 | up   | GPNUMB    |
| 1554019_s | 0.00443  | 0.002986 | 1.743453 | down | 1.052858 | down | 1.655925 | up   | C6orf182  |
| 1554020_a | 7.13E-06 | 4.77E-07 | 10.01427 | up   | 6.990922 | up   | 1.432467 | down | BICD1     |
| 1554029_a | 0.021494 | 0.019866 | 4.556365 | down | 1.418718 | down | 3.211608 | up   | TTC37     |
| 1554030_a | 0.015295 | 0.013522 | 1.774447 | down | 1.511814 | down | 1.173721 | up   | ARSB      |
| 1554041_a | 0.00521  | 0.003681 | 1.53941  | up   | 1.123247 | up   | 1.3705   | down | C20orf141 |
| 1554043_a | 3.23E-04 | 8.81E-05 | 2.630536 | up   | 2.989071 | up   | 1.136297 | up   |           |
| 1554050_a | 9.25E-04 | 3.65E-04 | 2.003251 | up   | 2.368421 | up   | 1.182289 | up   | SMPDL3B   |
| 1556283_s | 9.58E-05 | 1.69E-05 | 3.232343 | down | 6.493659 | down | 2.008964 | down | FGFR10P2  |
| 1554062_a | 6.48E-05 | 1.01E-05 | 14.01792 | down | 16.27875 | down | 1.161282 | down | XG        |
| 1554076_s | 2.98E-04 | 7.89E-05 | 1.921338 | down | 1.749681 | down | 1.098108 | up   | TMEM136   |
| 1554078_s | 0.001172 | 5.04E-04 | 1.207694 | up   | 1.467218 | up   | 1.214892 | up   | DNAJA3    |
| 1554079_a | 0.001438 | 6.65E-04 | 2.05884  | up   | 1.719913 | down | 3.541025 | down | GALNTL4   |
|           |          |          |          |      |          |      |          |      | SBDS ///  |
| 1554089_s | 0.017243 | 0.015489 | 3.087829 | down | 2.595135 | down | 1.189853 | up   | SBDSP     |
| 1554097_a | 1.29E-07 | 1.66E-09 | 8.695923 | down | 7.766063 | down | 1.119734 | up   | LOC554202 |
| 1554101_a | 0.004565 | 0.003112 | 1.244986 | up   | 2.317422 | up   | 1.861405 | up   | TMTC4     |
| 1554102_a | 6.69E-04 | 2.35E-04 | 1.251944 | up   | 2.379127 | up   | 1.900347 | up   | TMTC4     |
| 1554105_a | 0.008888 | 0.00714  | 1.942279 | down | 1.000342 | up   | 1.942943 | up   | TMEM185A  |
| 1554108_a | 8.70E-04 | 3.35E-04 | 1.60871  | down | 1.007957 | down | 1.59601  | up   |           |
| 1554113_a | 6.50E-04 | 2.26E-04 | 1.492023 | up   | 1.754985 | up   | 1.176245 | up   | SLC4A8    |
| 1554116_s | 5.78E-04 | 1.92E-04 | 1.289773 | up   | 1.477682 | up   | 1.145691 | up   | PARP11    |
| 1554119_a | 0.001153 | 4.93E-04 | 1.298261 | up   | 1.11707  | down | 1.450248 | down | C16orf57  |
| 1554125_a | 0.001966 | 0.001012 | 1.388617 | up   | 1.708449 | up   | 1.230324 | up   | NLGN4Y    |
| 1554126_a | 2.26E-04 | 5.43E-05 | 2.538707 | down | 4.67974  | down | 1.843355 | down | MSRB3     |
| 1554127_s | 8.44E-08 | 8.97E-10 | 16.29425 | down | 26.73343 | down | 1.640667 | down | MSRB3     |
| 1554129_a | 0.007874 | 0.006167 | 1.30297  | up   | 1.384578 | up   | 1.062632 | up   | ADIG      |
| 1554141_s | 0.001434 | 6.62E-04 | 2.259181 | down | 1.544998 | down | 1.462255 | up   | WDR78     |
| 1554145_a | 0.00186  | 9.39E-04 | 1.698633 | down | 1.176278 | up   | 1.998064 | up   | KLRAQ1    |

|           |          |          |          |      |          |      |          |      |            |
|-----------|----------|----------|----------|------|----------|------|----------|------|------------|
| 1554148_a | 0.036802 | 0.035532 | 1.888923 | down | 1.657656 | down | 1.139514 | up   | SLC33A1    |
| 1554149_a | 0.008374 | 0.006641 | 1.57451  | up   | 1.282589 | up   | 1.227603 | down | CLDND1     |
| 1554159_a | 0.012448 | 0.010651 | 2.525318 | down | 1.569094 | down | 1.609412 | up   | ZMYND11    |
| 1554161_a | 0.001683 | 8.23E-04 | 1.780027 | down | 1.253942 | up   | 2.232051 | up   | SLC25A27   |
| 1554163_a | 1.11E-08 | 4.83E-11 | 11.51762 | down | 1.246553 | down | 9.239575 | up   | TWIST2     |
| 1554168_a | 0.001816 | 9.10E-04 | 3.318041 | down | 2.15836  | down | 1.537298 | up   | SH3KBP1    |
|           |          |          |          |      |          |      |          |      | TRIM73 /// |
| 1554183_s | 0.032812 | 0.031492 | 1.155678 | up   | 1.055393 | up   | 1.095022 | down | TRIM74     |
| 1554193_s | 0.0019   | 9.67E-04 | 2.013893 | down | 1.394869 | down | 1.443787 | up   | MANEA      |
| 1554196_a | 0.00362  | 0.002294 | 1.412381 | up   | 1.047522 | down | 1.479499 | down | IZUMO1     |
| 1554201_a | 0.019073 | 0.017363 | 1.435552 | up   | 1.280563 | up   | 1.121032 | down | CABP4      |
|           |          |          |          |      |          |      |          |      | NCRNA0011  |
| 1554203_a | 0.006036 | 0.004427 | 1.334614 | up   | 1.263512 | down | 1.686301 | down | 0          |
| 1554217_a | 0.00505  | 0.003537 | 2.556032 | down | 1.259152 | down | 2.029964 | up   | CCDC132    |
| 1554222_a | 0.009198 | 0.007442 | 1.369484 | up   | 1.19791  | up   | 1.143228 | down | MGC45922   |
| 1554239_s | 1.22E-06 | 3.91E-08 | 6.96572  | down | 3.609104 | down | 1.930041 | up   | ZADH2      |
| 1554242_a | 1.78E-05 | 1.72E-06 | 11.97727 | up   | 11.89372 | up   | 1.007025 | down | COCH       |
| 1554246_a | 4.01E-05 | 5.26E-06 | 2.104605 | up   | 2.073085 | up   | 1.015205 | down | C1orf210   |
| 1554248_a | 1.25E-05 | 1.04E-06 | 2.706036 | up   | 3.096013 | up   | 1.144114 | up   | ZNF638     |
| 1554249_a | 0.001335 | 6.02E-04 | 1.21985  | up   | 3.803077 | up   | 3.117658 | up   | ZNF638     |
| 1554250_s | 0.002773 | 0.001612 | 1.970526 | down | 1.336347 | up   | 2.633306 | up   | TRIM73     |
| 1554273_a | 0.001427 | 6.58E-04 | 3.214628 | down | 1.242256 | down | 2.587733 | up   | ERAP2      |
| 1554300_a | 0.003194 | 0.001948 | 1.722608 | up   | 1.607059 | up   | 1.071901 | down | SVOPL      |
| 1554303_a | 0.001149 | 4.90E-04 | 1.40017  | down | 1.071232 | down | 1.307066 | up   | HNMT       |
| 1554309_a | 9.11E-05 | 1.58E-05 | 1.933751 | up   | 2.290773 | up   | 1.184627 | up   | EIF4G3     |
| 1554314_a | 3.53E-04 | 9.92E-05 | 1.262294 | up   | 1.645404 | up   | 1.303503 | up   | C6orf141   |
| 1554316_a | 0.005524 | 0.003954 | 1.257835 | down | 1.439729 | up   | 1.810941 | up   | PGLS       |
| 1554329_x | 0.004907 | 0.00341  | 1.24228  | up   | 1.240444 | up   | 1.00148  | down | STXBP4     |
| 1554337_a | 0.004573 | 0.003119 | 1.307023 | up   | 1.132164 | down | 1.479765 | down | FARP2      |
| 1554339_a | 0.007919 | 0.006208 | 2.872789 | down | 1.437954 | down | 1.997831 | up   | COG3       |
| 1554340_a | 3.61E-07 | 6.91E-09 | 17.34069 | up   | 13.93024 | up   | 1.244823 | down | C1orf187   |
| 1554341_a | 0.014375 | 0.01259  | 1.552928 | down | 1.088782 | down | 1.426298 | up   | HELQ       |
| 1554351_a | 0.020305 | 0.018633 | 2.155362 | down | 1.592529 | down | 1.353421 | up   | TIPRL      |
| 1554352_s | 2.58E-08 | 1.69E-10 | 4.27868  | down | 3.490179 | down | 1.22592  | up   | DENND4A    |

|           |          |          |          |      |          |      |          |      |           |
|-----------|----------|----------|----------|------|----------|------|----------|------|-----------|
| 1554360_a | 0.006015 | 0.004408 | 1.873152 | down | 1.722653 | down | 1.087365 | up   | FCHSD2    |
| 1554362_a | 0.012141 | 0.010346 | 1.040647 | down | 1.138802 | up   | 1.185091 | up   | BTG4      |
| 1554376_s | 1.01E-04 | 1.84E-05 | 2.792135 | up   | 1.105276 | up   | 2.526187 | down | PTPLA     |
| 1554378_a | 5.60E-04 | 1.84E-04 | 1.405432 | down | 4.221351 | down | 3.003598 | down | PDE1C     |
| 1554383_a | 0.003539 | 0.00223  | 4.228346 | down | 2.353153 | down | 1.796885 | up   | TRAM2     |
| 1554386_a | 0.030784 | 0.029406 | 1.382848 | up   | 1.015236 | up   | 1.362096 | down | CST9      |
| 1554396_a | 0.002866 | 0.001685 | 1.631069 | down | 1.087479 | down | 1.499862 | up   | UEVLD     |
| 1554397_s | 5.06E-04 | 1.60E-04 | 5.22859  | down | 3.143574 | down | 1.663263 | up   | UEVLD     |
| 1555213_a | 0.001931 | 9.89E-04 | 1.377046 | up   | 1.186816 | down | 1.6343   | down | CLEC7A    |
|           |          |          |          |      |          |      |          |      | RUNDC2B   |
|           |          |          |          |      |          |      |          |      | ///       |
| 1554413_s | 0.016702 | 0.014945 | 1.33674  | up   | 1.061519 | up   | 1.259271 | down | RUNDC2C   |
| 1554415_a | 2.11E-05 | 2.16E-06 | 2.697497 | up   | 2.029222 | up   | 1.329326 | down | TAF5L     |
| 1555745_a | 0.003742 | 0.002397 | 1.327857 | up   | 1.027971 | up   | 1.291726 | down | LYZ       |
| 1554443_s | 0.036132 | 0.034855 | 1.406012 | down | 1.085121 | down | 1.295719 | up   | BEST1     |
| 1554452_a | 0.020981 | 0.019338 | 2.251074 | up   | 2.756056 | up   | 1.22433  | up   | C7orf68   |
| 1554464_a | 2.50E-04 | 6.24E-05 | 4.747958 | down | 2.312012 | down | 2.053604 | up   | CRTAP     |
| 1554470_s | 0.00149  | 6.97E-04 | 1.390561 | up   | 3.962865 | up   | 2.849833 | up   | ZBTB44    |
| 1554471_a | 0.002541 | 0.001434 | 2.279446 | down | 1.764518 | down | 1.291823 | up   | ANKRD13C  |
| 1554474_a | 8.42E-08 | 8.91E-10 | 96.00475 | down | 7.008087 | down | 13.69914 | up   | MOXD1     |
| 1554476_x | 6.56E-04 | 2.29E-04 | 1.585483 | up   | 1.233195 | up   | 1.28567  | down | ZNF808    |
| 1554481_a | 0.004003 | 0.002609 | 1.827169 | up   | 1.352294 | up   | 1.351163 | down | EPB41     |
| 1554482_a | 0.012289 | 0.010496 | 2.343948 | down | 2.487056 | down | 1.061054 | down | SAR1B     |
| 1554483_a | 0.001569 | 7.49E-04 | 1.001892 | up   | 1.638113 | up   | 1.63502  | up   | TMEM37    |
| 1554485_s | 0.001411 | 6.49E-04 | 2.371153 | up   | 1.782988 | up   | 1.329876 | down | TMEM37    |
| 1554489_a | 0.003022 | 0.001809 | 1.7607   | up   | 2.935965 | up   | 1.667499 | up   | CEP70     |
| 1554506_x | 0.011955 | 0.010156 | 1.298749 | up   | 1.428644 | up   | 1.100016 | up   | NAALAD2   |
| 1554509_a | 0.006258 | 0.004639 | 2.708072 | down | 1.953784 | down | 1.386065 | up   | C10orf97  |
| 1554512_a | 0.001739 | 8.59E-04 | 1.63082  | down | 1.526748 | down | 1.068166 | up   | CCDC123   |
| 1554513_s | 5.23E-04 | 1.68E-04 | 3.062236 | down | 1.600408 | down | 1.913409 | up   | CCDC123   |
| 1554517_x | 0.010214 | 0.008419 | 1.330733 | up   | 1.600683 | up   | 1.202858 | up   | LOC203274 |
| 1554520_a | 9.98E-04 | 4.05E-04 | 1.97994  | down | 1.244093 | down | 1.591472 | up   | LOC283861 |
| 1554534_a | 0.002776 | 0.001615 | 1.346283 | down | 1.085067 | up   | 1.460807 | up   | DPYD      |
| 1554538_a | 0.002092 | 0.001101 | 1.451038 | up   | 1.044261 | down | 1.515262 | down | RHOF      |



|           |          |          |               |               |               |           |
|-----------|----------|----------|---------------|---------------|---------------|-----------|
| 1554555_a | 4.94E-05 | 6.95E-06 | 3.193016 up   | 2.204897 up   | 1.448148 down | SETD6     |
| 1554556_a | 0.005747 | 0.004159 | 1.288016 down | 1.336022 down | 1.037271 down | ATP11B    |
| 1554557_a | 0.001434 | 6.62E-04 | 2.066565 down | 2.34862 down  | 1.136485 down | ATP11B    |
| 1554564_a | 0.003801 | 0.002446 | 1.366068 up   | 1.31709 down  | 1.799235 down | UNQ1887   |
| 1554565_x | 0.00826  | 0.006534 | 1.414402 up   | 1.279959 up   | 1.105038 down | UNQ1887   |
| 1554566_a | 0.001739 | 8.59E-04 | 1.404342 down | 1.149381 up   | 1.614123 up   | KCTD17    |
| 1554572_a | 3.99E-05 | 5.21E-06 | 3.232326 up   | 4.504324 up   | 1.393524 up   | SUV39H2   |
| 1554574_a | 0.007471 | 0.005782 | 5.380561 down | 4.083396 down | 1.317668 up   | CYB5R3    |
| 1554576_a | 4.13E-04 | 1.22E-04 | 3.411304 up   | 3.968949 up   | 1.16347 up    | ETV4      |
| 1554578_a | 0.001082 | 4.52E-04 | 1.542946 down | 1.142868 down | 1.350065 up   | ZNF70     |
| 1554582_a | 0.003341 | 0.002069 | 1.828423 down | 1.444869 down | 1.26546 up    | C12orf72  |
| 1554597_a | 9.41E-04 | 3.74E-04 | 2.748966 up   | 2.682195 up   | 1.024894 down |           |
| 1554599_x | 4.43E-04 | 1.34E-04 | 2.793325 up   | 2.292194 up   | 1.218625 down |           |
| 1554600_s | 7.00E-06 | 4.64E-07 | 9.090729 down | 10.13429 down | 1.114795 down | LMNA      |
| 1554608_a | 9.96E-04 | 4.04E-04 | 1.686511 down | 1.026251 down | 1.643371 up   | TGOLN2    |
| 1554612_a | 0.011849 | 0.010048 | 1.114336 up   | 1.292204 down | 1.439949 down | KIAA0226  |
| 1554613_a | 0.001669 | 8.13E-04 | 1.406145 up   | 1.193153 up   | 1.178512 down | KIAA0226  |
| 1554614_a | 2.30E-04 | 5.57E-05 | 3.270874 up   | 7.874983 up   | 2.407609 up   | PTBP2     |
| 1554619_a | 0.001258 | 5.56E-04 | 1.313143 down | 1.133285 down | 1.158706 up   | MBLAC2    |
| 1554631_a | 0.001889 | 9.58E-04 | 1.630103 down | 1.047769 up   | 1.707972 up   | ATM       |
| 1554635_a | 0.022884 | 0.021303 | 1.239434 down | 1.005943 up   | 1.2468 up     | NPAS3     |
| 1554641_a | 0.005851 | 0.004252 | 1.271478 up   | 1.29759 up    | 1.020537 up   | TET3      |
| 1554642_a | 0.008803 | 0.007058 | 1.370759 down | 1.209862 up   | 1.658429 up   | RNF32     |
| 1554646_a | 0.004956 | 0.003453 | 1.58634 up    | 2.080521 up   | 1.311523 up   | OSBPL1A   |
| 1554649_a | 6.58E-04 | 2.30E-04 | 1.205774 down | 1.270662 up   | 1.532132 up   |           |
| 1554655_a | 0.014534 | 0.012758 | 1.790828 up   | 1.128534 up   | 1.586862 down | RPRML     |
| 1554663_a | 0.00866  | 0.006922 | 1.16538 up    | 1.109258 down | 1.292707 down | NUMA1     |
|           |          |          |               |               |               | LOC100130 |
| 1554666_a | 0.020962 | 0.019317 | 1.353239 down | 1.066653 down | 1.268679 up   | 950       |
| 1554676_a | 0.022796 | 0.021211 | 1.22549 up    | 1.065245 down | 1.305447 down | SRGN      |
| 1554677_s | 0.002966 | 0.001764 | 1.44792 up    | 1.217214 up   | 1.189536 down | CMTM4     |
| 1554678_s | 1.70E-04 | 3.73E-05 | 2.617078 up   | 3.290266 up   | 1.257229 up   | HNRPD     |
| 1554679_a | 0.006987 | 0.005327 | 3.742302 up   | 6.281961 up   | 1.678636 up   | LAPTM4B   |
| 1554681_a | 0.002273 | 0.001237 | 1.630951 up   | 1.592271 down | 2.596915 down | MGC50722  |

|           |          |          |               |               |               |            |
|-----------|----------|----------|---------------|---------------|---------------|------------|
| 1554683_a | 0.009928 | 0.008151 | 1.37028 up    | 1.026876 up   | 1.334416 down | MGC50722   |
| 1554685_a | 6.52E-05 | 1.01E-05 | 11.07395 down | 7.365137 down | 1.503563 up   | KIAA1199   |
| 1554689_a | 0.002245 | 0.001215 | 3.732215 up   | 7.498229 up   | 2.009057 up   | NLGN4X     |
| 1554694_a | 0.025221 | 0.023678 | 1.273836 up   | 1.127474 down | 1.436217 down | CCNY       |
| 1554700_a | 0.012061 | 0.010261 | 1.223875 up   | 1.04831 down  | 1.283001 down | CDH7       |
| 1554703_a | 0.002164 | 0.001153 | 2.174695 up   | 3.062596 up   | 1.408288 up   | ARHGEF10   |
| 1554704_a | 8.65E-06 | 6.26E-07 | 2.516815 down | 1.163635 down | 2.162891 up   | ATP8B3     |
| 1554707_a | 0.007562 | 0.005874 | 1.607533 up   | 1.041084 up   | 1.544096 down | C9orf68    |
| 1554711_a | 0.001485 | 6.94E-04 | 1.363634 up   | 1.0368 up     | 1.315233 down | CALHM3     |
| 1554719_a | 0.002819 | 0.001648 | 1.137639 up   | 1.392792 down | 1.584495 down | NDUFA10    |
| 1554723_x | 0.006156 | 0.004543 | 1.018701 down | 1.177621 down | 1.156002 down |            |
| 1554739_a | 0.00204  | 0.001065 | 1.040614 up   | 1.346566 down | 1.401255 down | IPP        |
| 1554740_a | 5.64E-05 | 8.29E-06 | 3.506563 down | 2.694526 down | 1.301365 up   | IPP        |
|           |          |          |               |               |               | FGF7 ///   |
|           |          |          |               |               |               | KGFLP1 /// |
| 1554741_s | 0.003606 | 0.002283 | 31.84311 down | 10.92632 down | 2.914349 up   | KGFLP2     |
| 1554751_a | 5.42E-05 | 7.84E-06 | 1.136698 down | 1.657929 down | 1.458548 down |            |
| 1554758_a | 0.004236 | 0.002808 | 2.271272 down | 2.109493 down | 1.076691 up   | CD99L2     |
| 1554765_a | 0.01431  | 0.012519 | 1.16862 up    | 1.011211 down | 1.181722 down | C11orf64   |
| 1554768_a | 0.005045 | 0.003533 | 4.982236 up   | 7.384583 up   | 1.482182 up   | MAD2L1     |
| 1554774_a | 0.002429 | 0.001349 | 2.021543 down | 1.979395 down | 1.021293 up   | MINA       |
| 1554776_a | 2.28E-06 | 9.42E-08 | 20.23026 up   | 24.81804 up   | 1.226778 up   | ZFP42      |
| 1554777_a | 3.41E-07 | 6.40E-09 | 26.76946 up   | 23.80247 up   | 1.124651 down | ZFP42      |
| 1554780_a | 0.022834 | 0.021248 | 1.601801 down | 1.037533 down | 1.543855 up   | PHTF2      |
| 1554790_a | 0.038224 | 0.036964 | 1.199019 down | 1.25096 up    | 1.499925 up   | ZSCAN20    |
| 1554795_a | 2.44E-04 | 6.03E-05 | 2.124188 down | 8.149284 down | 3.836424 down | FBLIM1     |
| 1554797_a | 0.009806 | 0.008027 | 1.246482 down | 1.047889 down | 1.189517 up   | SYT16      |
| 1554804_a | 5.72E-05 | 8.46E-06 | 2.034545 up   | 2.283654 up   | 1.122439 up   | CLDN19     |
| 1554806_a | 8.21E-04 | 3.11E-04 | 4.715962 down | 3.403618 down | 1.385574 up   | FBXO8      |
| 1554807_a | 5.66E-05 | 8.33E-06 | 2.316552 down | 2.670326 down | 1.152716 down | SPIRE1     |
| 1554827_a | 2.67E-04 | 6.82E-05 | 1.453002 down | 1.651165 down | 1.136382 down | ADCY7      |
| 1554831_x | 9.25E-04 | 3.65E-04 | 1.138753 down | 1.604219 down | 1.408751 down | ALS2CR11   |
| 1554835_a | 0.011874 | 0.010073 | 1.058651 down | 1.716904 up   | 1.817601 up   | B3GNT5     |
| 1554839_a | 0.005442 | 0.003884 | 1.440862 down | 1.185206 up   | 1.707717 up   | CIDEC      |

|           |          |          |               |               |               |          |
|-----------|----------|----------|---------------|---------------|---------------|----------|
| 1554841_a | 0.005642 | 0.004063 | 1.296048 up   | 1.418546 up   | 1.094517 up   | MTHFD2L  |
| 1554842_a | 0.007436 | 0.005748 | 1.437048 up   | 1.197413 up   | 1.200127 down | SLC12A1  |
| 1554847_a | 0.025417 | 0.023884 | 1.347151 up   | 1.170271 down | 1.576532 down | ATP6V1B1 |
| 1554867_a | 6.34E-07 | 1.52E-08 | 7.111449 down | 7.375459 down | 1.037125 down | PRR16    |
| 1554885_a | 0.001314 | 5.89E-04 | 1.827927 down | 2.620616 up   | 4.790296 up   | PRIM2    |
| 1554887_a | 4.50E-04 | 1.37E-04 | 3.756507 up   | 3.599896 up   | 1.043504 down |          |
| 1555716_a | 4.19E-06 | 2.24E-07 | 16.23383 up   | 14.76908 up   | 1.099177 down | CXADR    |
| 1554890_a | 0.012931 | 0.01113  | 1.780971 up   | 2.415041 up   | 1.356025 up   | TIA1     |
| 1554909_a | 0.018849 | 0.017143 | 1.313609 down | 1.413838 down | 1.0763 down   | CCDC36   |
| 1554918_a | 4.07E-04 | 1.20E-04 | 4.248062 down | 1.215661 down | 3.494446 up   | ABCC4    |
| 1554923_a | 0.004232 | 0.002805 | 1.535322 up   | 1.330907 up   | 1.15359 down  | ANKS6    |
| 1554933_a | 1.07E-04 | 1.97E-05 | 2.755935 up   | 2.284607 up   | 1.206306 down | PSIP1    |
| 1554938_a | 0.021737 | 0.020109 | 1.798688 up   | 1.372852 up   | 1.310184 down | ACOT11   |
| 1554946_a | 0.006643 | 0.004999 | 1.333144 up   | 1.009443 down | 1.345732 down |          |
| 1554952_s | 0.005823 | 0.004226 | 1.904676 up   | 1.518445 up   | 1.25436 down  | NLRP12   |
| 1554960_a | 0.001252 | 5.52E-04 | 1.215221 down | 2.408109 down | 1.981622 down | C1orf110 |
| 1554963_a | 5.59E-04 | 1.83E-04 | 1.384587 up   | 1.369403 up   | 1.011088 down |          |
| 1554964_x | 4.65E-04 | 1.43E-04 | 1.297938 up   | 1.204336 up   | 1.077721 down |          |
| 1554966_a | 1.12E-04 | 2.10E-05 | 10.31232 down | 9.974846 down | 1.033833 up   | FILIP1L  |
| 1554986_a | 0.004731 | 0.003255 | 3.367641 down | 3.225135 down | 1.044186 up   | SNX19    |
| 1554992_a | 0.010069 | 0.008285 | 1.470372 up   | 1.23581 up    | 1.189804 down | RASGRF1  |
| 1554997_a | 0.011056 | 0.009256 | 3.050719 down | 3.801834 down | 1.246209 down | PTGS2    |
| 1555014_x | 0.018216 | 0.016492 | 1.530193 up   | 1.360925 up   | 1.124377 down |          |
| 1555037_a | 0.010767 | 0.008971 | 1.593328 up   | 2.747788 up   | 1.724559 up   | IDH1     |
| 1555039_a | 0.001396 | 6.39E-04 | 3.444299 down | 1.049194 down | 3.282806 up   | ABCC4    |
| 1555041_a | 0.001823 | 9.15E-04 | 2.134853 down | 1.883584 down | 1.1334 up     | NAGA     |
| 1555049_a | 0.009535 | 0.007759 | 1.355355 up   | 1.134745 up   | 1.194414 down | C21orf29 |
| 1555052_a | 0.007726 | 0.006031 | 1.794296 up   | 1.188174 up   | 1.510129 down | SYT9     |
| 1555058_a | 0.002231 | 0.001204 | 2.682291 down | 3.317292 down | 1.236738 down | LPGAT1   |
| 1555063_a | 0.003908 | 0.002532 | 1.441544 up   | 1.157596 down | 1.668725 down | USP6     |
| 1555065_x | 0.003535 | 0.002228 | 1.237766 up   | 1.051031 up   | 1.177669 down | USP6     |
| 1555078_a | 0.010405 | 0.008608 | 1.176791 up   | 1.130225 down | 1.330039 down | ZNF843   |
| 1555079_a | 0.011542 | 0.009741 | 1.025385 down | 1.102863 down | 1.07556 down  | C9orf68  |
| 1555082_a | 2.11E-04 | 4.96E-05 | 2.190774 down | 1.491174 down | 1.469161 up   | NEK11    |

|           |          |          |               |               |               |                       |
|-----------|----------|----------|---------------|---------------|---------------|-----------------------|
| 1555084_a | 0.005262 | 0.003727 | 1.535484 up   | 1.054236 up   | 1.456489 down |                       |
| 1555097_a | 5.42E-07 | 1.26E-08 | 31.48272 down | 4.42864 down  | 7.108891 up   | PTGFR                 |
| 1555112_a | 4.70E-06 | 2.62E-07 | 3.111771 up   | 3.680381 up   | 1.182729 up   | C1orf114              |
| 1555113_a | 0.001949 | 0.001001 | 1.349323 down | 1.012013 up   | 1.365533 up   | PARD3B                |
| 1555114_a | 8.82E-04 | 3.42E-04 | 1.379319 up   | 1.169681 up   | 1.179227 down | ATP6V0A2<br>LOC100129 |
| 1555124_a | 0.034554 | 0.033252 | 1.288563 up   | 1.015559 up   | 1.268822 down | 726                   |
| 1557119_a | 5.61E-04 | 1.84E-04 | 2.576012 down | 2.752064 down | 1.068343 down | ZNF575                |
| 1555131_a | 0.004041 | 0.002641 | 1.463848 down | 1.258972 up   | 1.842944 up   | PER3                  |
| 1555132_a | 0.005553 | 0.003979 | 1.373839 up   | 1.005758 up   | 1.365974 down |                       |
| 1555136_a | 0.004863 | 0.003372 | 2.65057 up    | 3.522156 up   | 1.328829 up   | FGD6                  |
| 1555137_a | 6.90E-04 | 2.45E-04 | 3.883996 up   | 4.342976 up   | 1.118172 up   | FGD6                  |
| 1555140_a | 0.003257 | 0.001998 | 1.848514 down | 1.801574 down | 1.026055 up   | BCL2L2                |
| 1555145_a | 0.006967 | 0.005309 | 1.449145 down | 1.081934 down | 1.339402 up   | C1orf96               |
| 1555168_a | 0.003786 | 0.002432 | 2.027696 up   | 1.332488 up   | 1.521737 down | CALN1                 |
| 1555171_a | 0.023709 | 0.022123 | 1.338195 up   | 1.110147 down | 1.485594 down | ST3GAL3               |
| 1555175_a | 0.001133 | 4.81E-04 | 2.250299 down | 1.928229 down | 1.167029 up   | PBLD                  |
| 1555181_a | 0.002295 | 0.001252 | 1.392625 down | 1.47668 up    | 2.056461 up   | ST3GAL3<br>hCG_20201  |
| 1555188_a | 0.015764 | 0.013989 | 1.235437 up   | 1.172032 down | 1.447971 down | 70                    |
| 1555193_a | 0.019546 | 0.017848 | 2.120982 down | 1.392753 up   | 2.954005 up   | ZNF277                |
| 1555195_a | 0.008457 | 0.006722 | 1.268052 up   | 1.230288 down | 1.560069 down | FBXO36                |
| 1555196_a | 0.001249 | 5.50E-04 | 1.429476 up   | 1.154747 down | 1.650683 down |                       |
| 1558612_a | 0.016396 | 0.014626 | 1.193398 up   | 1.123255 down | 1.34049 down  | ATP1A4                |
| 1555216_a | 2.57E-04 | 6.46E-05 | 3.818767 down | 1.620294 down | 2.356835 up   | LOC645722             |
| 1555224_a | 0.002078 | 0.001093 | 1.204473 up   | 1.245434 down | 1.500091 down | LOC554201             |
| 1555229_a | 9.18E-06 | 6.75E-07 | 210.0307 down | 15.87246 down | 13.23239 up   | C1S                   |
| 1555233_a | 1.21E-05 | 9.90E-07 | 24.11836 down | 3.772697 down | 6.39287 up    | RHOJ                  |
| 1555234_a | 2.57E-05 | 2.82E-06 | 4.459079 down | 1.123038 down | 3.970552 up   | RHOJ                  |
| 1555238_a | 0.004326 | 0.002894 | 1.213836 up   | 1.373258 up   | 1.131337 up   | PTH2                  |
| 1555240_s | 0.001148 | 4.89E-04 | 7.263941 down | 4.199622 down | 1.729666 up   | GNG12                 |
| 1555247_a | 5.82E-04 | 1.94E-04 | 3.543603 down | 4.843793 up   | 17.16448 up   | RAPGEF6               |
| 1555269_a | 0.005754 | 0.004164 | 1.428025 up   | 1.029409 down | 1.470022 down | ANO1                  |
| 1555278_a | 0.002208 | 0.001184 | 2.511628 up   | 2.166992 up   | 1.159039 down | CKAP5                 |

|           |          |          |               |               |               |            |
|-----------|----------|----------|---------------|---------------|---------------|------------|
| 1555279_a | 0.004418 | 0.002973 | 1.788015 up   | 1.493148 up   | 1.19748 down  | ARMC8      |
| 1555300_a | 5.94E-04 | 2.00E-04 | 1.239322 up   | 1.553624 up   | 1.253609 up   | MED12L     |
| 1555303_a | 0.001317 | 5.91E-04 | 1.906317 up   | 1.911275 up   | 1.002601 up   |            |
| 1555310_a | 2.50E-04 | 6.23E-05 | 2.817778 up   | 2.881156 up   | 1.022492 up   | PAK6       |
| 1555311_a | 0.006685 | 0.00504  | 1.516857 down | 1.258977 down | 1.204833 up   |            |
| 1555323_a | 0.005716 | 0.004127 | 1.502844 up   | 1.306823 up   | 1.149998 down | ABCB9      |
| 1555326_a | 1.61E-04 | 3.46E-05 | 15.56356 down | 11.77451 down | 1.321802 up   | ADAM9      |
| 1555345_a | 3.95E-04 | 1.15E-04 | 2.911738 down | 1.008028 up   | 2.935114 up   | SLC38A4    |
| 1555355_a | 4.40E-04 | 1.33E-04 | 3.248078 down | 3.822598 down | 1.17688 down  | ETS1       |
| 1555370_a | 1.10E-04 | 2.04E-05 | 6.415369 up   | 5.764621 up   | 1.112886 down | CAMTA1     |
| 1555372_a | 0.004508 | 0.003059 | 2.393761 up   | 4.733584 up   | 1.977467 up   | BCL2L11    |
| 1555379_a | 0.021874 | 0.020254 | 1.287398 up   | 1.329391 down | 1.711455 down | FAM159A    |
| 1555388_s | 6.49E-05 | 1.01E-05 | 1.196996 up   | 3.86392 down  | 4.625096 down | SNX25      |
| 1555399_a | 2.12E-04 | 4.98E-05 | 2.583255 up   | 1.708984 up   | 1.511574 down | DUSP16     |
| 1555405_a | 0.015375 | 0.013602 | 1.266343 up   | 1.000076 up   | 1.266247 down | UBE3C      |
|           |          |          |               |               |               | LOC100131  |
| 1555410_a | 0.001039 | 4.27E-04 | 1.398916 up   | 1.096133 down | 1.533397 down | 642        |
| 1555412_a | 0.00442  | 0.002975 | 1.404195 up   | 1.216243 up   | 1.154535 down | FBXL21     |
| 1555419_a | 0.00108  | 4.50E-04 | 3.522469 down | 2.058783 down | 1.710947 up   | ASAH1      |
| 1555420_a | 7.73E-04 | 2.87E-04 | 1.818959 down | 2.706126 down | 1.487733 down | KLF7       |
| 1555427_s | 0.013955 | 0.012168 | 2.285615 up   | 1.108033 up   | 2.062768 down | SYNCRIP    |
| 1555444_a | 0.019868 | 0.018188 | 1.292936 up   | 1.079708 up   | 1.197487 down | PPP1R12B   |
| 1555450_a | 0.002059 | 0.001078 | 1.324621 up   | 3.155724 up   | 2.38236 up    | NARG1L     |
| 1555464_a | 0.004802 | 0.003313 | 1.522905 down | 1.031903 down | 1.475822 up   | IFIH1      |
| 1555471_a | 0.002948 | 0.00175  | 7.317686 down | 5.115535 down | 1.430483 up   | FMN2       |
| 1555480_a | 0.003341 | 0.00207  | 1.834701 down | 5.381105 down | 2.93296 down  | FBLIM1     |
| 1555483_x | 0.003268 | 0.002008 | 1.449242 down | 3.312954 down | 2.285991 down | FBLIM1     |
| 1555486_a | 0.001999 | 0.001035 | 1.076859 down | 2.119941 down | 1.968635 down | FLJ14213   |
|           |          |          |               |               |               | ACTR3B /// |
|           |          |          |               |               |               | LOC100133  |
| 1555487_a | 1.34E-06 | 4.42E-08 | 3.017534 up   | 3.622048 up   | 1.200334 up   | 409        |
| 1555495_a | 1.68E-05 | 1.60E-06 | 2.817862 up   | 2.722796 up   | 1.034915 down | SDCCAG10   |
| 1555501_s | 4.86E-04 | 1.52E-04 | 2.900529 down | 1.374482 down | 2.110271 up   | RSRC1      |
| 1555536_a | 4.95E-04 | 1.55E-04 | 2.492606 down | 1.634713 down | 1.524798 up   | ANTXR2     |

|           |          |          |               |               |               |          |
|-----------|----------|----------|---------------|---------------|---------------|----------|
| 1555557_a | 0.001597 | 7.67E-04 | 1.14633 up    | 1.316846 down | 1.509539 down | TNK2     |
| 1555559_s | 0.010905 | 0.009112 | 2.218051 down | 1.140502 down | 1.944802 up   | USP25    |
| 1555564_a | 0.004128 | 0.002716 | 1.733266 down | 2.898811 down | 1.672456 down | CFI      |
| 1555572_a | 0.031895 | 0.030553 | 1.063894 up   | 1.09909 down  | 1.169316 down | CA6      |
| 1555579_s | 5.27E-04 | 1.69E-04 | 7.065636 down | 8.498548 down | 1.2028 down   | PTPRM    |
| 1555580_a | 0.009748 | 0.00797  | 1.569783 up   | 1.077511 up   | 1.456861 down |          |
| 1555594_a | 9.69E-04 | 3.89E-04 | 5.602742 down | 6.105093 down | 1.089662 down | MBNL1    |
| 1555595_a | 1.06E-04 | 1.95E-05 | 2.452462 down | 1.948992 down | 1.258323 up   | SCRN3    |
| 1555600_s | 0.001245 | 5.47E-04 | 2.194725 down | 1.288931 down | 1.702749 up   | APOL4    |
| 1555609_a | 0.00201  | 0.001044 | 7.543236 down | 4.650832 down | 1.621911 up   | ZMAT3    |
| 1555614_a | 0.009544 | 0.007771 | 1.49233 down  | 1.240918 down | 1.202601 up   | SUGT1P   |
| 1555620_a | 7.60E-04 | 2.80E-04 | 1.582797 down | 1.105237 up   | 1.749364 up   | PTGIR    |
| 1555632_a | 0.001714 | 8.43E-04 | 1.3597 down   | 1.009498 down | 1.346907 up   | PIK3IP1  |
| 1555665_a | 0.002563 | 0.001451 | 1.322681 up   | 1.316642 down | 1.741497 down |          |
| 1555666_a | 0.011716 | 0.009913 | 1.174813 up   | 1.04209 up    | 1.127362 down | PTPRS    |
| 1555673_a | 0.001077 | 4.49E-04 | 2.326071 down | 27.15786 down | 11.67542 down | KRTAP2-4 |
| 1555679_a | 6.17E-05 | 9.40E-06 | 2.812747 up   | 4.029565 up   | 1.432608 up   | RTN4IP1  |
| 1555692_a | 0.005984 | 0.004378 | 1.34426 up    | 1.048978 up   | 1.281495 down |          |
| 1555695_a | 0.006209 | 0.004589 | 1.377118 down | 1.037943 down | 1.326776 up   | CLRN1    |
| 1555710_a | 0.01792  | 0.016183 | 1.130357 up   | 1.086879 down | 1.228561 down | IGH@     |
| 1555726_a | 0.002358 | 0.001297 | 1.146814 up   | 1.130752 down | 1.296762 down | GAF3A    |
| 1555746_a | 6.92E-04 | 2.46E-04 | 1.626515 up   | 1.366954 down | 2.223371 down | CD79B    |
| 1555748_x | 0.029406 | 0.028004 | 1.515226 up   | 1.067023 down | 1.616781 down | CD79B    |
| 1555753_x | 0.00231  | 0.001263 | 2.410273 up   | 1.037979 up   | 2.322083 down |          |
| 1555760_a | 5.17E-07 | 1.15E-08 | 2.537842 up   | 3.446225 up   | 1.357935 up   | RBM15    |
| 1555761_x | 2.45E-05 | 2.64E-06 | 1.815502 up   | 1.835921 up   | 1.011247 up   | RBM15    |
| 1555762_s | 8.45E-04 | 3.22E-04 | 2.093226 up   | 2.27848 up    | 1.088502 up   | RBM15    |
| 1555765_a | 1.78E-04 | 3.95E-05 | 2.992213 up   | 2.683672 up   | 1.11497 down  | GNG4     |
| 1555766_a | 0.001153 | 4.93E-04 | 1.822475 down | 1.325798 up   | 2.416234 up   | GNG2     |
| 1555772_a | 3.46E-04 | 9.64E-05 | 11.61792 up   | 11.82745 up   | 1.018035 up   | CDC25A   |
| 1555777_a | 0.006127 | 0.004517 | 1.34953 down  | 1.800242 down | 1.333977 down | POSTN    |
| 1555778_a | 9.65E-06 | 7.25E-07 | 50.07543 down | 131.5951 down | 2.627937 down | POSTN    |
| 1555785_a | 0.002199 | 0.001177 | 2.269417 down | 1.36349 down  | 1.664417 up   | XRN1     |
| 1555788_a | 0.002462 | 0.001375 | 2.163207 down | 3.703356 down | 1.711974 down | TRIB3    |

|           |          |          |               |               |               |           |
|-----------|----------|----------|---------------|---------------|---------------|-----------|
| 1555793_a | 0.007727 | 0.006032 | 1.4054 up     | 1.623096 up   | 1.154899 up   | ZFP82     |
| 1555797_a | 4.49E-04 | 1.36E-04 | 3.037349 down | 4.459053 down | 1.468074 down | ARPC5     |
| 1555801_s | 6.13E-04 | 2.09E-04 | 1.533554 up   | 1.107441 up   | 1.384772 down | ZNF385B   |
| 1555819_s | 0.002225 | 0.001219 | 1.852417 down | 1.152055 up   | 2.134085 up   | SAMD14    |
| 1555820_a | 0.011222 | 0.00943  | 1.040411 down | 1.322202 up   | 1.375634 up   | MKS1      |
|           |          |          |               |               |               | FAM138A   |
|           |          |          |               |               |               | ///       |
|           |          |          |               |               |               | FAM138B   |
|           |          |          |               |               |               | ///       |
|           |          |          |               |               |               | FAM138C   |
|           |          |          |               |               |               | ///       |
|           |          |          |               |               |               | FAM138E   |
|           |          |          |               |               |               | ///       |
| 1555822_a | 0.00374  | 0.002395 | 1.313126 up   | 1.143612 up   | 1.148227 down | FAM138F   |
| 1555823_a | 0.001455 | 6.75E-04 | 1.913963 down | 1.031653 up   | 1.974546 up   | PACS2     |
| 1555824_a | 7.46E-04 | 2.73E-04 | 2.127856 down | 1.822209 down | 1.167734 up   | PACS2     |
| 1555826_a | 0.028053 | 0.026588 | 3.70781 up    | 1.636044 up   | 2.266326 down | EPR1      |
| 1555830_s | 0.010983 | 0.009187 | 3.840787 down | 2.094353 down | 1.833878 up   | FAM62B    |
| 1555831_s | 0.003833 | 0.00247  | 2.909331 down | 2.781472 down | 1.045968 up   | LRRC41    |
| 1555832_s | 0.002467 | 0.001379 | 1.786597 down | 3.266112 down | 1.828119 down | KLF6      |
| 1555834_a | 0.001864 | 9.41E-04 | 2.125796 up   | 2.824445 up   | 1.328653 up   | UCHL1     |
| 1555844_s | 0.003506 | 0.002204 | 2.18182 up    | 2.17055 up    | 1.005192 down | HNRNPM    |
| 1555845_a | 0.003854 | 0.002488 | 1.742989 up   | 3.495336 up   | 2.00537 up    |           |
| 1555846_a | 5.51E-05 | 8.03E-06 | 1.990143 up   | 2.482966 up   | 1.247632 up   |           |
| 1555847_a | 0.002257 | 0.001225 | 2.506403 down | 3.570553 down | 1.424573 down | LOC284454 |
| 1555848_a | 0.0019   | 9.67E-04 | 2.51182 down  | 2.030683 down | 1.236934 up   |           |
| 1555851_s | 0.002353 | 0.001293 | 1.399583 up   | 1.561448 up   | 1.115652 up   | SEPW1     |
| 1555852_a | 3.83E-05 | 4.88E-06 | 4.084449 down | 1.363402 down | 2.995777 up   |           |
| 1555854_a | 1.58E-04 | 3.37E-05 | 13.06985 down | 1.523367 down | 8.579577 up   |           |
| 1555856_s | 0.001064 | 4.41E-04 | 1.846489 up   | 1.169727 down | 2.159888 down |           |
| 1555864_s | 7.76E-04 | 2.89E-04 | 2.276909 up   | 1.746938 up   | 1.303372 down | PDHA1     |
| 1555870_a | 8.63E-04 | 3.31E-04 | 2.066378 down | 1.866845 down | 1.106882 up   | RNF207    |
| 1555875_a | 2.65E-05 | 2.94E-06 | 4.063818 down | 1.684577 down | 2.412367 up   | SRGAP1    |
| 1555881_s | 4.09E-04 | 1.20E-04 | 1.687082 down | 1.379958 down | 1.22256 up    | LZTS2     |

|           |          |          |          |      |          |      |          |      |           |
|-----------|----------|----------|----------|------|----------|------|----------|------|-----------|
| 1555889_a | 1.45E-04 | 2.99E-05 | 2.614709 | down | 2.502257 | down | 1.04494  | up   | CRTAP     |
| 1555894_s | 4.87E-04 | 1.52E-04 | 5.40025  | down | 1.892868 | down | 2.852946 | up   | MTSS1L    |
| 1555896_a | 0.044218 | 0.042984 | 1.691843 | down | 1.947461 | down | 1.151088 | down | ADAM15    |
| 1555897_a | 0.002551 | 0.001442 | 1.8197   | down | 2.035    | down | 1.118316 | down | KDM1      |
| 1555898_a | 0.004311 | 0.002881 | 1.340318 | down | 1.001751 | up   | 1.342665 | up   | LOC400986 |
| 1555905_a | 0.027556 | 0.026081 | 1.604234 | down | 1.163442 | up   | 1.866433 | up   | C3orf23   |
|           |          |          |          |      |          |      |          |      | hCG_20144 |
| 1555907_a | 8.06E-05 | 1.35E-05 | 4.92328  | down | 5.025337 | down | 1.020729 | down | 17        |
| 1555908_a | 0.001664 | 8.10E-04 | 1.400141 | down | 1.580746 | down | 1.12899  | down | FAM120A   |
| 1555913_a | 0.002077 | 0.001092 | 1.806757 | up   | 2.186561 | up   | 1.210213 | up   | GON4L     |
| 1555920_a | 0.006647 | 0.005004 | 1.191661 | up   | 3.018701 | up   | 2.533187 | up   | CBX3      |
| 1555922_a | 2.66E-04 | 6.77E-05 | 1.516067 | up   | 2.260193 | up   | 1.490827 | up   | C10orf114 |
| 1555923_a | 1.68E-04 | 3.67E-05 | 1.148101 | up   | 2.563998 | up   | 2.233252 | up   | C10orf114 |
| 1555935_s | 0.001629 | 7.87E-04 | 1.897986 | up   | 3.463604 | up   | 1.824884 | up   | HUNK      |
| 1555942_a | 0.002856 | 0.001677 | 1.788411 | up   | 1.459062 | up   | 1.225726 | down | LOC642587 |
| 1555945_s | 0.002232 | 0.001204 | 3.81035  | down | 2.206875 | down | 1.726582 | up   | FAM120A   |
| 1555948_s | 0.003248 | 0.001992 | 5.10326  | down | 2.166196 | down | 2.355862 | up   | FAM120A   |
| 1555950_a | 1.60E-04 | 3.43E-05 | 2.658461 | down | 3.302578 | up   | 8.779775 | up   | CD55      |
| 1557123_a | 0.004211 | 0.002788 | 1.027639 | down | 1.478823 | down | 1.43905  | down | CHADL     |
| 1555958_a | 0.024656 | 0.023093 | 1.047904 | up   | 1.209437 | up   | 1.154149 | up   | CRTAC1    |
| 1555962_a | 2.24E-05 | 2.35E-06 | 8.057505 | up   | 5.84174  | up   | 1.379299 | down | B3GNT7    |
| 1555963_x | 8.13E-06 | 5.73E-07 | 9.87717  | up   | 8.284193 | up   | 1.192291 | down | B3GNT7    |
| 1555968_a | 0.003448 | 0.002159 | 3.250022 | down | 1.6132   | down | 2.014643 | up   |           |
| 1555970_a | 0.001341 | 6.06E-04 | 2.632071 | down | 1.256071 | down | 2.09548  | up   |           |
| 1555972_s | 0.001631 | 7.88E-04 | 2.689916 | down | 1.475158 | down | 1.823477 | up   | FBXO28    |
| 1555973_a | 0.005375 | 0.003824 | 1.956476 | down | 1.099125 | down | 1.78003  | up   |           |
| 1555974_a | 0.003468 | 0.002175 | 2.380801 | down | 1.271768 | down | 1.872041 | up   |           |
| 1555982_a | 0.005252 | 0.003717 | 3.1631   | down | 1.260265 | down | 2.509868 | up   | ZFYVE16   |
| 1555988_a | 0.00592  | 0.00432  | 1.227728 | up   | 1.194665 | down | 1.466723 | down | LOC126536 |
| 1555996_s | 0.002319 | 0.00127  | 1.519518 | down | 4.508984 | up   | 6.851482 | up   | EIF4A2    |
| 1556000_s | 0.025299 | 0.02376  | 1.163671 | down | 1.361277 | down | 1.169812 | down | BTBD7     |
| 1556001_a | 0.002823 | 0.00165  | 1.382239 | down | 1.102851 | up   | 1.524404 | up   | LOC284939 |
| 1556007_s | 0.013487 | 0.011691 | 1.178941 | down | 2.931795 | up   | 3.456413 | up   |           |
| 1556012_a | 8.39E-04 | 3.20E-04 | 3.966453 | up   | 3.974232 | up   | 1.001961 | up   | KLHDC7A   |



|           |          |          |               |               |               |           |
|-----------|----------|----------|---------------|---------------|---------------|-----------|
| 1556014_a | 8.58E-04 | 3.29E-04 | 1.532126 up   | 1.213997 up   | 1.262051 down | MESP2     |
| 1556021_a | 0.049081 | 0.047925 | 1.480823 down | 1.238204 up   | 1.833561 up   |           |
| 1556029_s | 0.008912 | 0.007164 | 1.454142 up   | 1.677732 down | 2.43966 down  | NMNAT2    |
| 1556033_a | 1.16E-04 | 2.21E-05 | 1.550507 up   | 2.913918 up   | 1.879332 up   | FLJ39739  |
| 1556037_s | 0.025576 | 0.024054 | 3.63721 up    | 1.750516 down | 6.366994 down | HHIP      |
| 1556042_s | 0.001365 | 6.20E-04 | 1.229866 down | 1.3909 up     | 1.71062 up    | LOC338799 |
| 1556051_a | 7.97E-04 | 2.99E-04 | 2.712539 up   | 1.166271 up   | 2.325822 down | BICD1     |
| 1556064_a | 0.008971 | 0.00722  | 1.907124 down | 1.737864 down | 1.097395 up   | LOC284926 |
| 1556069_s | 0.001893 | 9.61E-04 | 1.180496 up   | 2.06513 up    | 1.749374 up   | HIF3A     |
| 1556072_a | 0.004772 | 0.003288 | 1.404373 up   | 1.148173 down | 1.612463 down | C22orf37  |
| 1556088_a | 0.010198 | 0.008405 | 1.450349 up   | 2.016154 up   | 1.390117 up   | RPAIN     |
| 1556092_s | 0.043921 | 0.042681 | 1.192553 up   | 1.147287 down | 1.368201 down |           |
| 1556128_a | 0.041243 | 0.039996 | 1.137689 down | 1.67606 up    | 1.906836 up   | RASGRF2   |
| 1556136_a | 0.018149 | 0.016423 | 1.528803 down | 1.149862 down | 1.329553 up   | MYLK4     |
| 1556138_a | 1.27E-08 | 6.08E-11 | 5.769051 down | 7.463609 down | 1.293733 down |           |
| 1563745_a | 0.003942 | 0.002561 | 1.432646 down | 1.28512 down  | 1.114796 up   | LOC283050 |
| 1556144_a | 0.020726 | 0.019068 | 1.128628 down | 1.112766 up   | 1.255898 up   | DHX30     |
|           |          |          |               |               |               | LOC100131 |
| 1556145_a | 0.004794 | 0.003306 | 1.424413 up   | 1.175895 down | 1.67496 down  | 170       |
| 1556151_a | 0.003942 | 0.002561 | 2.970957 down | 2.845982 down | 1.043913 up   | ITFG1     |
| 1556163_a | 3.68E-04 | 1.05E-04 | 1.564456 up   | 1.461611 up   | 1.070364 down | IGSF3     |
| 1556180_a | 4.10E-04 | 1.21E-04 | 2.949454 down | 1.433285 down | 2.057829 up   | LOC729678 |
| 1556190_s | 4.41E-04 | 1.33E-04 | 1.54864 down  | 5.18946 down  | 3.350978 down | PRNP      |
| 1556195_a | 0.00109  | 4.56E-04 | 1.666902 up   | 1.998139 up   | 1.198714 up   |           |
| 1556216_s | 0.01748  | 0.015734 | 1.999733 down | 1.947292 down | 1.02693 up    |           |
| 1556221_a | 0.011119 | 0.009322 | 1.435136 up   | 1.089735 down | 1.563918 down |           |
| 1556228_a | 0.00354  | 0.002232 | 2.711466 down | 2.471824 down | 1.096949 up   | VCPIP1    |
| 1556231_a | 0.00371  | 0.002368 | 1.214819 up   | 1.169595 down | 1.420847 down |           |
| 1556235_a | 0.005556 | 0.003983 | 1.753345 down | 1.436248 down | 1.220781 up   |           |
| 1556247_a | 0.001993 | 0.00103  | 1.537091 up   | 1.057211 up   | 1.453911 down |           |
| 1556265_a | 0.002885 | 0.0017   | 1.600367 down | 1.032898 up   | 1.653015 up   | LOC400831 |
| 1556267_a | 8.37E-04 | 3.19E-04 | 1.78481 up    | 1.576743 up   | 1.13196 down  | C12orf28  |
| 1556300_s | 6.38E-05 | 9.86E-06 | 35.25854 down | 1.086189 down | 32.46079 up   | SIM1      |

|           |          |          |               |               |               |  |             |
|-----------|----------|----------|---------------|---------------|---------------|--|-------------|
|           |          |          |               |               |               |  | C1orf86 /// |
|           |          |          |               |               |               |  | LOC100128   |
| 1556309_s | 0.004127 | 0.002715 | 1.771433 up   | 1.310182 up   | 1.352052 down |  | 003         |
|           |          |          |               |               |               |  | CCBL2 ///   |
|           |          |          |               |               |               |  | LOC100131   |
|           |          |          |               |               |               |  | 735 ///     |
| 1556336_a | 0.002136 | 0.001133 | 1.36471 up    | 2.399843 up   | 1.758501 up   |  | RBMX        |
| 1556344_a | 8.07E-04 | 3.05E-04 | 1.879202 up   | 2.297424 up   | 1.222553 up   |  | LOC150051   |
| 1556362_a | 0.002804 | 0.001636 | 1.142426 down | 1.26818 up    | 1.448801 up   |  |             |
| 1556385_a | 0.001012 | 4.12E-04 | 2.437652 down | 1.635565 down | 1.490404 up   |  |             |
| 1556401_a | 0.005887 | 0.004289 | 1.244603 up   | 1.060858 down | 1.320347 down |  |             |
| 1556417_a | 0.001214 | 5.30E-04 | 1.529868 up   | 1.264805 up   | 1.209568 down |  |             |
| 1556427_s | 1.35E-05 | 1.17E-06 | 45.60644 down | 2.707186 down | 16.84643 up   |  | LRRN4CL     |
| 1556429_a | 1.85E-04 | 4.18E-05 | 3.140376 up   | 3.764025 up   | 1.198591 up   |  | WDR67       |
| 1556442_x | 0.001942 | 9.97E-04 | 1.134269 up   | 1.874467 up   | 1.652577 up   |  |             |
| 1556444_a | 0.013352 | 0.011553 | 1.322322 down | 1.470119 up   | 1.94397 up    |  |             |
| 1556465_a | 4.40E-05 | 5.92E-06 | 1.126281 down | 1.996009 down | 1.772213 down |  |             |
| 1556477_a | 0.016143 | 0.014377 | 1.272651 up   | 1.065713 down | 1.356281 down |  | LOC283485   |
| 1556488_s | 5.15E-04 | 1.64E-04 | 2.058414 up   | 1.822182 up   | 1.129643 down |  | C3orf15     |
| 1556498_a | 0.007334 | 0.005653 | 1.334133 down | 1.243659 down | 1.072748 up   |  | RPL5        |
| 1556499_s | 1.79E-04 | 3.99E-05 | 5.288807 down | 5.715471 down | 1.080673 down |  | COL1A1      |
| 1556541_s | 9.13E-04 | 3.58E-04 | 1.298997 down | 1.13098 down  | 1.148558 up   |  |             |
|           |          |          |               |               |               |  | LOC100129   |
| 1556555_a | 9.54E-05 | 1.68E-05 | 2.889132 down | 1.897665 down | 1.522467 up   |  | 461         |
| 1556568_a | 0.003077 | 0.001852 | 2.21133 up    | 3.307761 up   | 1.495825 up   |  |             |
| 1556579_s | 5.09E-05 | 7.24E-06 | 2.029475 up   | 5.010233 up   | 2.468734 up   |  | IGSF10      |
| 1556582_a | 0.001893 | 9.61E-04 | 1.381776 down | 2.145207 down | 1.5525 down   |  | PVR         |
| 1556584_a | 9.12E-04 | 3.57E-04 | 1.541742 up   | 1.408018 up   | 1.094973 down |  |             |
| 1556586_x | 0.00366  | 0.002327 | 1.34313 up    | 1.319825 up   | 1.017658 down |  |             |
| 1556588_a | 0.006461 | 0.004832 | 2.167194 down | 1.668622 down | 1.298792 up   |  | C15orf37    |
| 1556589_a | 0.002936 | 0.00174  | 1.338257 down | 1.021405 up   | 1.366903 up   |  |             |
| 1556592_a | 0.026762 | 0.025274 | 1.154858 up   | 1.013429 up   | 1.139555 down |  |             |
| 1556595_a | 0.006431 | 0.004805 | 2.0175 up     | 1.621947 up   | 1.243876 down |  |             |
| 1556601_a | 0.017542 | 0.015797 | 1.00628 up    | 1.73339 up    | 1.722573 up   |  | SPATA13     |

|           |          |          |               |               |               |           |
|-----------|----------|----------|---------------|---------------|---------------|-----------|
| 1556607_a | 0.024492 | 0.022926 | 1.71333 up    | 1.069387 up   | 1.60216 down  | EHD4      |
| 1556609_a | 0.019894 | 0.018217 | 1.123724 up   | 1.083817 down | 1.217911 down | LOC401098 |
|           |          |          |               |               |               | LOC100129 |
| 1556616_a | 0.003913 | 0.002537 | 1.380299 up   | 1.151899 down | 1.589965 down | 637       |
| 1556630_a | 7.37E-04 | 2.69E-04 | 1.080513 down | 1.550184 down | 1.434674 down | CASC2     |
| 1564372_s | 0.01284  | 0.011043 | 1.315881 down | 1.159483 down | 1.134886 up   | CASC2     |
| 1556636_a | 1.91E-04 | 4.31E-05 | 1.172737 up   | 1.258638 down | 1.47605 down  |           |
| 1556639_a | 0.001395 | 6.39E-04 | 1.20564 up    | 1.349749 up   | 1.119529 up   | LOC439914 |
| 1556650_a | 0.010434 | 0.008639 | 1.053303 up   | 1.281092 up   | 1.216262 up   |           |
| 1556654_a | 0.036662 | 0.035391 | 1.344868 up   | 1.039315 up   | 1.293995 down |           |
| 1556662_a | 0.003572 | 0.002258 | 1.383902 up   | 1.089622 down | 1.507931 down |           |
| 1556676_a | 0.004544 | 0.003093 | 1.252986 up   | 1.204065 down | 1.508676 down |           |
| 1556677_a | 0.015377 | 0.013606 | 1.303114 down | 1.038686 up   | 1.353526 up   |           |
| 1556678_a | 0.00263  | 0.0015   | 2.598409 down | 1.338024 down | 1.941975 up   |           |
| 1556683_x | 0.001679 | 8.21E-04 | 1.345381 up   | 1.396792 up   | 1.038213 up   |           |
| 1556689_a | 0.001821 | 9.13E-04 | 1.387392 up   | 1.453969 up   | 1.047987 up   | WNT4      |
| 1556694_a | 0.003065 | 0.001843 | 1.148115 up   | 1.510929 up   | 1.316008 up   |           |
| 1556695_a | 9.96E-05 | 1.79E-05 | 5.856519 down | 2.443012 down | 2.397253 up   | FLJ42709  |
| 1556696_s | 0.001852 | 9.33E-04 | 4.826239 down | 2.957752 down | 1.631726 up   | FLJ42709  |
| 1556742_a | 0.003143 | 0.001909 | 1.22627 down  | 1.066869 up   | 1.308269 up   | LOC728411 |
| 1556744_a | 0.008804 | 0.007059 | 1.39246 down  | 2.396131 up   | 3.336517 up   |           |
| 1556747_a | 0.006468 | 0.004839 | 1.338908 down | 1.130456 up   | 1.513577 up   |           |
| 1556750_a | 3.14E-04 | 8.46E-05 | 2.724351 down | 1.975151 down | 1.379312 up   | LOC153577 |
| 1556763_a | 0.007406 | 0.00572  | 1.350348 up   | 1.013628 up   | 1.332193 down |           |
| 1556771_a | 8.90E-04 | 3.47E-04 | 1.248047 down | 1.285208 up   | 1.604 up      | LOC415056 |
| 1556773_a | 0.007076 | 0.005407 | 1.221611 down | 1.380703 down | 1.130231 down |           |
| 1556776_a | 0.033293 | 0.031978 | 1.320744 up   | 1.135792 up   | 1.16284 down  |           |
| 1556777_a | 0.002964 | 0.001763 | 1.623166 up   | 1.113262 down | 1.807009 down |           |
| 1556778_a | 0.016978 | 0.015224 | 1.271768 up   | 1.096682 down | 1.394726 down |           |
| 1556779_s | 0.00714  | 0.005471 | 1.315478 up   | 1.083924 down | 1.425878 down |           |
| 1556786_a | 0.005197 | 0.003669 | 1.510207 down | 1.180104 down | 1.279724 up   | PDE5A     |
| 1563805_a | 0.00127  | 5.63E-04 | 1.234606 up   | 1.625233 down | 2.006522 down | FAM83C    |
| 1556801_a | 0.00227  | 0.001234 | 1.43046 up    | 1.082557 down | 1.548555 down | LOC400794 |
| 1556818_a | 0.001076 | 4.48E-04 | 2.541503 up   | 3.165965 up   | 1.245706 up   |           |

|           |          |          |               |               |               |           |
|-----------|----------|----------|---------------|---------------|---------------|-----------|
| 1556826_s | 2.45E-05 | 2.65E-06 | 3.745481 up   | 2.764047 up   | 1.355072 down | C1orf187  |
| 1556827_a | 1.61E-04 | 3.46E-05 | 1.694443 down | 2.2389 down   | 1.321319 down | LOC339929 |
| 1556837_a | 0.005628 | 0.004048 | 1.488859 up   | 1.061231 down | 1.580023 down |           |
| 1556841_a | 0.001418 | 6.53E-04 | 2.901183 down | 3.530553 down | 1.216936 down | ALDH1L2   |
| 1556842_a | 0.00942  | 0.00765  | 1.243942 up   | 1.292658 down | 1.607992 down | LOC286087 |
| 1556850_a | 0.014246 | 0.012458 | 1.302344 down | 1.060253 up   | 1.380814 up   | CEP290    |
| 1556851_a | 0.004272 | 0.002843 | 1.296863 up   | 1.158094 down | 1.501888 down |           |
| 1564621_a | 0.001604 | 7.71E-04 | 1.402985 down | 1.032844 down | 1.358371 up   | MEI1      |
| 1556885_a | 0.003751 | 0.002405 | 1.287077 down | 1.167174 down | 1.102729 up   | LAYN      |
| 1556886_a | 0.022966 | 0.021385 | 2.025776 down | 1.836323 down | 1.10317 up    | LAYN      |
| 1556894_a | 0.009214 | 0.007459 | 1.599308 up   | 1.587261 down | 2.53852 down  | NT5DC2    |
| 1556898_a | 0.016866 | 0.015113 | 1.117497 up   | 1.056175 down | 1.180273 down | LOC200830 |
| 1556911_a | 2.93E-06 | 1.34E-07 | 8.406472 up   | 7.194163 up   | 1.168513 down |           |
| 1556917_a | 0.009842 | 0.008065 | 1.242652 up   | 1.258612 down | 1.564016 down |           |
| 1556925_a | 5.94E-04 | 2.00E-04 | 1.41928 up    | 1.5052 up     | 1.060538 up   | SMC3      |
| 1556936_a | 0.003918 | 0.002541 | 2.123425 down | 1.238956 down | 1.713883 up   |           |
| 1556941_a | 0.001295 | 5.78E-04 | 1.261629 up   | 1.116805 down | 1.408993 down | LOC283484 |
| 1556944_a | 0.018842 | 0.017134 | 1.175237 up   | 1.05638 down  | 1.241497 down |           |
| 1556952_a | 8.79E-04 | 3.40E-04 | 1.435204 down | 1.029644 up   | 1.47775 up    |           |
| 1556954_a | 0.002394 | 0.001324 | 1.22808 up    | 1.400882 down | 1.720395 down | LOC283854 |
| 1556962_a | 0.01996  | 0.018286 | 1.399907 up   | 1.142573 up   | 1.225223 down |           |
| 1556963_a | 0.013134 | 0.011335 | 1.25878 up    | 1.038042 down | 1.306666 down |           |
| 1556964_s | 0.003148 | 0.001913 | 1.180618 up   | 1.254696 down | 1.481316 down |           |
| 1556972_a | 0.007943 | 0.006234 | 1.305168 down | 1.119737 down | 1.165602 up   |           |
| 1556978_a | 0.007323 | 0.005643 | 1.327535 up   | 1.574962 up   | 1.18638 up    | TAF8      |
| 1556980_a | 0.010048 | 0.008265 | 1.230001 up   | 1.155198 up   | 1.064753 down |           |
| 1556985_a | 0.008142 | 0.006421 | 1.332908 up   | 1.068344 down | 1.424003 down |           |
| 1556987_s | 0.004183 | 0.002765 | 1.63971 down  | 1.072652 up   | 1.758837 up   | OR2H1     |
| 1557007_a | 0.001654 | 8.04E-04 | 1.602419 up   | 1.113143 up   | 1.439545 down |           |
| 1557008_a | 0.001106 | 4.65E-04 | 2.582037 up   | 1.140867 up   | 2.263224 down | LOC340107 |
| 1557014_a | 3.53E-04 | 9.95E-05 | 1.602522 up   | 1.599436 up   | 1.001929 down | C9orf122  |
| 1557021_s | 0.001607 | 7.73E-04 | 1.833868 up   | 1.529799 up   | 1.198764 down |           |
| 1557024_a | 0.001576 | 7.53E-04 | 1.302041 up   | 1.537402 down | 2.001761 down |           |
| 1557031_a | 3.46E-04 | 9.64E-05 | 1.423224 up   | 1.002588 up   | 1.41955 down  | RNF212    |

|           |          |          |               |               |               |                    |
|-----------|----------|----------|---------------|---------------|---------------|--------------------|
| 1557036_a | 2.00E-04 | 4.61E-05 | 1.809189 down | 1.293821 down | 1.398331 up   | ZBTB1<br>LOC100127 |
| 1557044_a | 0.002588 | 0.001469 | 1.263226 up   | 1.356154 up   | 1.073564 up   | 980                |
| 1557047_a | 5.29E-04 | 1.70E-04 | 1.723627 up   | 2.013293 up   | 1.168056 up   | YEATS2             |
| 1557049_a | 2.87E-06 | 1.30E-07 | 8.830444 down | 7.633037 down | 1.156872 up   | LOC149478          |
| 1557052_a | 0.001277 | 5.67E-04 | 1.270871 up   | 1.084778 down | 1.378614 down |                    |
| 1557055_s | 0.00118  | 5.09E-04 | 1.22466 up    | 1.228005 down | 1.503889 down | LOC643837          |
| 1557064_s | 2.87E-06 | 1.30E-07 | 2.696252 down | 1.74882 down  | 1.541755 up   | HGSNAT             |
| 1557068_a | 0.005538 | 0.003965 | 1.26201 up    | 1.025713 up   | 1.230373 down | KRT37              |
| 1557078_a | 4.95E-04 | 1.55E-04 | 4.173248 down | 5.811921 down | 1.392661 down | SLFN5              |
| 1557080_s | 4.02E-06 | 2.11E-07 | 30.61873 down | 167.8145 down | 5.480779 down | ITGBL1             |
| 1557081_a | 0.002568 | 0.001454 | 4.97769 up    | 7.090212 up   | 1.424398 up   | RBM25              |
| 1557089_a | 9.10E-05 | 1.58E-05 | 2.62782 up    | 1.784433 up   | 1.472636 down | KIF5C              |
| 1557091_a | 2.07E-04 | 4.81E-05 | 2.011809 down | 1.276867 up   | 2.568813 up   | MAMSTR             |
| 1557105_a | 0.001411 | 6.48E-04 | 1.154027 down | 1.393844 up   | 1.608534 up   | ZNF397OS           |
| 1557114_a | 0.009867 | 0.00809  | 1.627035 down | 1.105773 down | 1.4714 up     | LOC284385          |
| 1557116_a | 0.017863 | 0.016124 | 2.872753 down | 1.965346 down | 1.461704 up   | APOL6              |
| 1557122_s | 0.002553 | 0.001444 | 1.547408 up   | 1.865447 up   | 1.20553 up    | GABRB2<br>RP1-     |
| 1557133_a | 8.17E-04 | 3.09E-04 | 1.510033 up   | 1.256253 up   | 1.202013 down | 177G6.2            |
| 1557137_a | 2.96E-04 | 7.81E-05 | 3.637932 down | 2.629701 down | 1.383402 up   | TMEM17             |
| 1557143_a | 4.01E-04 | 1.17E-04 | 2.826867 down | 1.152535 up   | 3.258064 up   | CSMD2              |
| 1557149_a | 0.004337 | 0.002904 | 1.334576 down | 1.22755 up    | 1.638258 up   |                    |
| 1557151_a | 0.009838 | 0.008061 | 1.316234 up   | 1.050236 down | 1.382356 down | TRIM31             |
| 1557167_a | 1.48E-04 | 3.09E-05 | 2.848806 down | 1.567539 down | 1.817375 up   | HCG11              |
| 1557169_x | 8.77E-04 | 3.39E-04 | 2.892159 down | 1.446771 down | 1.999044 up   | HCG11              |
| 1557170_a | 0.020394 | 0.018724 | 1.271304 up   | 1.597816 up   | 1.256832 up   | NEK8               |
| 1557172_x | 7.30E-04 | 2.65E-04 | 1.315685 up   | 2.071554 up   | 1.574506 up   | NEK8               |
| 1557185_a | 0.003178 | 0.001937 | 1.685836 up   | 1.206597 up   | 1.397181 down | TPCN1              |
| 1557218_s | 0.019523 | 0.017824 | 1.326167 up   | 1.405921 up   | 1.060139 up   | FANCB              |
| 1557236_a | 7.64E-06 | 5.27E-07 | 5.679915 down | 1.597769 down | 3.554904 up   | APOL6              |
| 1557241_a | 0.00235  | 0.00129  | 2.707533 down | 1.338501 down | 2.022811 up   |                    |
| 1557242_a | 2.58E-04 | 6.50E-05 | 3.60902 down  | 1.524434 down | 2.36745 up    |                    |
| 1557244_a | 0.012792 | 0.010991 | 1.327472 down | 1.114043 down | 1.191581 up   |                    |

|           |          |          |          |      |          |      |          |      |           |
|-----------|----------|----------|----------|------|----------|------|----------|------|-----------|
| 1557258_a | 0.01262  | 0.01082  | 1.169897 | down | 1.578565 | up   | 1.846758 | up   | BCL10     |
|           |          |          |          |      |          |      |          |      | WHAMML1   |
|           |          |          |          |      |          |      |          |      | ///       |
| 1557261_a | 1.81E-04 | 4.06E-05 | 2.940211 | down | 1.929127 | down | 1.524115 | up   | WHAMML2   |
| 1557276_a | 0.001541 | 7.29E-04 | 1.034199 | up   | 1.40428  | up   | 1.357842 | up   |           |
| 1557279_a | 0.047001 | 0.045797 | 1.292071 | down | 1.009357 | up   | 1.304161 | up   |           |
| 1557280_s | 0.005428 | 0.003871 | 1.257584 | down | 1.142989 | down | 1.100259 | up   |           |
| 1557286_a | 8.21E-05 | 1.38E-05 | 5.881526 | down | 9.581533 | down | 1.62909  | down |           |
| 1557289_s | 3.81E-05 | 4.85E-06 | 2.014115 | down | 1.163947 | down | 1.730418 | up   | GTF2IRD2  |
| 1557293_a | 0.037462 | 0.036186 | 1.848021 | down | 1.791049 | up   | 3.309896 | up   | LOC440993 |
| 1557295_a | 0.004177 | 0.00276  | 1.430866 | down | 1.556744 | down | 1.087973 | down |           |
| 1557300_s | 0.003618 | 0.002293 | 1.888068 | up   | 3.642233 | up   | 1.92908  | up   |           |
| 1557302_a | 1.04E-04 | 1.91E-05 | 6.939317 | down | 6.652816 | down | 1.043065 | up   |           |
| 1557312_a | 6.57E-04 | 2.30E-04 | 1.191903 | down | 1.652178 | down | 1.386168 | down | C12orf61  |
| 1557315_a | 0.001126 | 4.77E-04 | 2.649805 | down | 1.820329 | down | 1.455673 | up   |           |
| 1557322_a | 0.039316 | 0.038073 | 1.943019 | down | 1.743627 | down | 1.114354 | up   | ZNF230    |
| 1557334_a | 0.002193 | 0.001173 | 1.263624 | up   | 1.310181 | down | 1.655576 | down | FERMT1    |
| 1557336_a | 0.005341 | 0.003794 | 1.412242 | down | 1.224999 | down | 1.152851 | up   |           |
| 1557348_a | 0.003115 | 0.001884 | 2.48228  | up   | 3.069258 | up   | 1.236467 | up   |           |
| 1557350_a | 6.89E-04 | 2.45E-04 | 1.94793  | up   | 2.508025 | up   | 1.287534 | up   | G3BP1     |
| 1557353_a | 1.69E-04 | 3.70E-05 | 1.820373 | down | 2.533181 | down | 1.391572 | down |           |
| 1557360_a | 2.67E-04 | 6.81E-05 | 2.532729 | up   | 4.908875 | up   | 1.938176 | up   | LRPPRC    |
| 1557369_a | 3.98E-04 | 1.16E-04 | 2.999338 | up   | 3.788991 | up   | 1.263276 | up   | LOC285401 |
| 1557384_a | 0.005154 | 0.00363  | 2.368977 | up   | 3.186151 | up   | 1.344948 | up   | ZNF131    |
| 1557385_a | 3.45E-04 | 9.59E-05 | 3.840231 | up   | 5.024982 | up   | 1.30851  | up   | FAM161A   |
| 1557415_s | 0.024033 | 0.022455 | 1.658854 | down | 1.124604 | down | 1.475057 | up   | LETM2     |
| 1557422_a | 0.007575 | 0.005886 | 1.672595 | up   | 2.644892 | up   | 1.58131  | up   |           |
| 1557434_a | 0.002129 | 0.001127 | 1.187939 | up   | 1.138661 | up   | 1.043277 | down |           |
| 1557443_s | 0.025727 | 0.024212 | 1.177745 | up   | 1.03255  | down | 1.216081 | down |           |
| 1557472_a | 0.002797 | 0.001631 | 1.187067 | up   | 1.094788 | down | 1.299587 | down | FLJ30838  |
| 1557507_a | 0.00118  | 5.09E-04 | 1.969638 | down | 1.972477 | down | 1.001442 | down |           |
| 1557527_a | 0.001171 | 5.03E-04 | 4.544675 | down | 1.523827 | down | 2.982409 | up   |           |
| 1557531_a | 0.008439 | 0.006702 | 1.085811 | up   | 1.182922 | down | 1.28443  | down | C10orf55  |
| 1557544_a | 0.032901 | 0.031581 | 1.23296  | down | 1.035835 | down | 1.190305 | up   | CCDC147   |

|           |          |          |          |      |          |      |          |      |           |
|-----------|----------|----------|----------|------|----------|------|----------|------|-----------|
| 1562415_a | 4.92E-05 | 6.90E-06 | 4.10319  | down | 8.357532 | down | 2.036838 | down | SPOCD1    |
| 1557550_a | 0.003267 | 0.002006 | 1.404533 | up   | 1.036319 | up   | 1.355309 | down | LOC148145 |
| 1557576_a | 0.013916 | 0.012128 | 1.110888 | down | 1.188587 | up   | 1.320387 | up   | PAQR3     |
| 1557593_a | 0.002733 | 0.001579 | 1.119036 | up   | 1.272675 | up   | 1.137296 | up   | SPAG17    |
| 1557605_a | 0.004262 | 0.002834 | 1.1222   | down | 1.207178 | up   | 1.354695 | up   | LOC401312 |
| 1557609_s | 0.002517 | 0.001418 | 1.527873 | down | 1.43838  | down | 1.062218 | up   | TBC1D12   |
| 1557616_a | 2.21E-04 | 5.26E-05 | 1.879363 | up   | 1.969209 | up   | 1.047806 | up   | ZNF496    |
| 1557618_a | 0.002954 | 0.001756 | 1.001265 | down | 1.205126 | down | 1.203604 | down | LOC285768 |
| 1557628_s | 0.017589 | 0.015848 | 1.257891 | down | 1.400621 | down | 1.113468 | down | LOC283745 |
| 1557684_a | 1.30E-04 | 2.58E-05 | 2.249233 | up   | 2.560593 | up   | 1.13843  | up   | ZNF286A   |
| 1557690_x | 0.001245 | 5.47E-04 | 1.697815 | down | 1.223743 | up   | 2.07769  | up   |           |
| 1557693_a | 0.016026 | 0.014251 | 1.330223 | up   | 1.124876 | down | 1.496336 | down |           |
| 1557700_a | 0.002237 | 0.001209 | 1.373201 | down | 1.194881 | up   | 1.640811 | up   | POLH      |
| 1557701_s | 0.001418 | 6.52E-04 | 3.035637 | down | 2.79657  | down | 1.085486 | up   | POLH      |
| 1557702_a | 0.003875 | 0.002506 | 1.200729 | up   | 1.258691 | down | 1.511348 | down |           |
| 1557710_a | 0.002274 | 0.001238 | 1.135376 | up   | 1.390827 | down | 1.579112 | down |           |
| 1557712_x | 4.07E-04 | 1.20E-04 | 1.072172 | up   | 2.01987  | up   | 1.883906 | up   |           |
| 1557719_a | 0.003286 | 0.002024 | 1.37741  | up   | 2.208745 | up   | 1.60355  | up   | PIKFYVE   |
|           |          |          |          |      |          |      |          |      | LOC100131 |
| 1557729_a | 0.001455 | 6.75E-04 | 1.666393 | down | 1.102866 | up   | 1.837808 | up   | 848       |
| 1557737_s | 0.003671 | 0.002337 | 1.554288 | up   | 3.012157 | up   | 1.937966 | up   | NKTR      |
| 1557740_a | 2.65E-05 | 2.95E-06 | 3.384766 | down | 1.412949 | down | 2.395533 | up   |           |
|           |          |          |          |      |          |      |          |      | LOC100128 |
| 1557741_a | 0.019673 | 0.017981 | 1.158869 | up   | 1.015547 | down | 1.176886 | down | 176       |
| 1557749_a | 0.002942 | 0.001746 | 2.328126 | down | 1.336686 | down | 1.741715 | up   | EHBP1L1   |
| 1557751_a | 0.002171 | 0.001157 | 1.618504 | up   | 2.558781 | up   | 1.580954 | up   |           |
| 1557787_a | 0.017245 | 0.015492 | 1.209679 | up   | 1.071376 | down | 1.296021 | down |           |
| 1557795_s | 0.004393 | 0.002953 | 1.528144 | up   | 1.718798 | up   | 1.124762 | up   | NTRK3     |
| 1557801_x | 1.76E-04 | 3.89E-05 | 1.383223 | down | 1.22055  | up   | 1.688292 | up   | C11orf31  |
| 1557803_a | 8.23E-05 | 1.39E-05 | 4.127288 | up   | 3.458735 | up   | 1.193294 | down |           |
| 1557804_a | 0.022598 | 0.021012 | 1.228668 | up   | 2.347537 | up   | 1.910636 | up   |           |
|           |          |          |          |      |          |      |          |      | LOC100132 |
| 1557807_a | 0.013046 | 0.011241 | 1.4264   | up   | 1.00943  | down | 1.439851 | down | 987       |
| 1557809_a | 4.44E-04 | 1.34E-04 | 1.746312 | up   | 1.686227 | up   | 1.035633 | down |           |

|           |          |          |               |               |               |           |
|-----------|----------|----------|---------------|---------------|---------------|-----------|
| 1557816_a | 3.65E-04 | 1.04E-04 | 1.554195 up   | 1.573071 up   | 1.012145 up   |           |
|           |          |          |               |               |               | LOC100131 |
| 1557817_a | 0.00131  | 5.87E-04 | 1.655327 up   | 1.504542 up   | 1.10022 down  | 941       |
| 1557820_a | 0.033851 | 0.032539 | 1.81126 up    | 1.734453 up   | 1.044283 down | AFG3L2    |
| 1557822_a | 0.015377 | 0.013606 | 1.201409 up   | 1.108357 down | 1.33159 down  | LOC401134 |
| 1557852_a | 0.020651 | 0.018992 | 2.276897 down | 1.082225 down | 2.103903 up   |           |
| 1557867_s | 0.002105 | 0.00111  | 1.360772 down | 1.001841 down | 1.358272 up   | C9orf117  |
| 1557905_s | 1.55E-04 | 3.27E-05 | 16.06484 down | 7.582674 down | 2.118626 up   | CD44      |
| 1557918_s | 0.004075 | 0.00267  | 4.637711 up   | 4.47455 up    | 1.036464 down | SLC16A1   |
| 1557938_s | 1.68E-04 | 3.67E-05 | 9.741673 down | 15.62469 down | 1.603902 down | PTRF      |
| 1557948_a | 0.025633 | 0.024112 | 1.849012 down | 1.050787 up   | 1.942917 up   | PHLDB3    |
| 1557953_a | 7.20E-04 | 2.60E-04 | 2.962047 down | 3.946588 down | 1.332385 down | ZKSCAN1   |
| 1557954_a | 1.08E-06 | 3.26E-08 | 2.211376 up   | 3.323984 up   | 1.50313 up    | CXorf15   |
| 1557985_s | 6.19E-05 | 9.44E-06 | 3.162218 up   | 3.198432 up   | 1.011452 up   | CEP78     |
| 1557987_a | 0.001658 | 8.07E-04 | 3.494417 up   | 6.952312 up   | 1.989548 up   | LOC641298 |
| 1557994_a | 0.001821 | 9.13E-04 | 1.584836 up   | 1.44004 up    | 1.10055 down  | TTN       |
| 1558014_s | 0.008842 | 0.007097 | 1.729477 down | 1.929418 up   | 3.336886 up   | FAR1      |
| 1558019_a | 0.001493 | 6.99E-04 | 2.482302 down | 1.315835 up   | 3.266298 up   |           |
| 1558044_s | 0.011546 | 0.009746 | 1.716845 down | 1.629216 down | 1.053786 up   | EXOSC6    |
| 1558045_a | 0.002072 | 0.001087 | 1.392295 up   | 2.450841 up   | 1.760288 up   | LOC441528 |
| 1558052_a | 0.005895 | 0.004296 | 1.402416 up   | 1.151279 up   | 1.218137 down | TMED4     |
| 1558080_s | 0.00197  | 0.001014 | 3.173223 down | 2.061011 down | 1.539644 up   | DNAJC3    |
| 1558097_a | 4.53E-05 | 6.17E-06 | 3.218604 up   | 2.084846 up   | 1.543809 down | C22orf30  |
| 1558107_a | 0.005351 | 0.003803 | 1.634798 down | 1.43454 down  | 1.139597 up   | LOC283788 |
| 1558109_x | 0.001561 | 7.43E-04 | 1.929032 down | 1.478334 down | 1.30487 up    | LOC283788 |
| 1558116_x | 0.003265 | 0.002004 | 2.542942 down | 2.118726 down | 1.200223 up   | RECK      |
| 1558118_a | 0.003915 | 0.002539 | 1.590054 up   | 1.044352 down | 1.660576 down | DGCR5     |
| 1558124_a | 6.23E-05 | 9.52E-06 | 1.174596 up   | 1.367315 up   | 1.164073 up   | NUDCD2    |
| 1558136_s | 0.002123 | 0.001123 | 2.106033 up   | 2.393327 up   | 1.136415 up   | TAF11     |
| 1558143_a | 4.26E-04 | 1.27E-04 | 1.674373 up   | 3.593222 up   | 2.146011 up   | BCL2L11   |
| 1558148_x | 0.019054 | 0.017344 | 1.277771 up   | 1.223937 down | 1.563911 down | FLJ90757  |
|           |          |          |               |               |               | LOC100131 |
| 1558152_a | 5.05E-04 | 1.60E-04 | 3.425612 down | 6.34164 down  | 1.851243 down | 262       |
| 1558154_a | 0.002072 | 0.001087 | 1.764547 up   | 1.18358 up    | 1.490855 down |           |



|           |          |          |               |               |               |  |              |
|-----------|----------|----------|---------------|---------------|---------------|--|--------------|
|           |          |          |               |               |               |  | IGL@ ///     |
|           |          |          |               |               |               |  | IGLV7-43 /// |
| 1558176_a | 0.009813 | 0.008034 | 1.343476 up   | 1.110452 up   | 1.209846 down |  | IGLV7-46     |
| 1558177_a | 0.009064 | 0.007309 | 1.051795 down | 1.212902 up   | 1.275725 up   |  | C14orf83     |
| 1558183_a | 0.023183 | 0.021602 | 1.119815 up   | 1.209489 down | 1.354404 down |  | ZNF17        |
| 1558184_s | 0.029453 | 0.02805  | 1.544647 down | 1.356239 down | 1.138919 up   |  | ZNF17        |
| 1558193_a | 0.019707 | 0.018021 | 1.419026 up   | 1.057577 down | 1.500729 down |  |              |
| 1558202_a | 0.007544 | 0.005856 | 1.535616 down | 1.111676 down | 1.381352 up   |  | LOC145783    |
| 1558552_s | 7.60E-04 | 2.81E-04 | 2.206228 down | 1.663596 down | 1.32618 up    |  | C3orf55      |
| 1558256_a | 0.002866 | 0.001684 | 2.003985 down | 2.220635 down | 1.10811 down  |  | LOC148189    |
| 1558279_a | 2.28E-05 | 2.41E-06 | 6.463304 down | 3.255559 down | 1.985313 up   |  | KDSR         |
| 1558280_s | 0.021662 | 0.020033 | 2.575555 down | 1.374299 up   | 3.539582 up   |  | ARHGAP29     |
| 1558281_a | 0.002836 | 0.00166  | 1.439535 up   | 1.29483 down  | 1.863952 down |  | TMEM184A     |
| 1558301_a | 0.00549  | 0.003927 | 1.193285 down | 1.237028 down | 1.036658 down |  | EFCAB5       |
| 1558304_s | 0.001618 | 7.80E-04 | 1.632152 up   | 2.19288 up    | 1.343551 up   |  | TSEN54       |
| 1560292_a | 0.00225  | 0.00122  | 2.133683 down | 1.330121 down | 1.604127 up   |  | TMCO4        |
| 1558322_a | 4.19E-06 | 2.24E-07 | 3.27104 up    | 2.615954 up   | 1.25042 down  |  | PAQR9        |
| 1558324_a | 0.042056 | 0.040806 | 1.30347 up    | 1.033674 down | 1.347363 down |  | TMEM72       |
| 1558330_x | 7.67E-04 | 2.84E-04 | 2.32512 up    | 1.938873 up   | 1.199212 down |  | NFKBIL2      |
| 1558368_s | 1.64E-04 | 3.55E-05 | 2.910358 up   | 3.087617 up   | 1.060906 up   |  | C1orf187     |
| 1558369_a | 0.006564 | 0.004927 | 1.9727 up     | 4.628536 up   | 2.346295 up   |  | MPHOSPH9     |
| 1558390_a | 0.001611 | 7.76E-04 | 1.46074 up    | 1.258338 down | 1.838104 down |  | ZNF599       |
| 1558400_x | 0.006373 | 0.004746 | 1.408956 up   | 1.02629 up    | 1.372863 down |  | ANKRD24      |
| 1558401_a | 0.016105 | 0.014334 | 2.046674 down | 1.018743 down | 2.009019 up   |  |              |
| 1558402_a | 0.012782 | 0.01098  | 1.222764 up   | 1.137312 down | 1.390664 down |  |              |
| 1558418_a | 0.005456 | 0.003897 | 1.483325 up   | 1.555956 up   | 1.048966 up   |  |              |
| 1558421_a | 0.002818 | 0.001646 | 1.783043 up   | 1.034897 up   | 1.722918 down |  | C14orf180    |
| 1558459_s | 0.007874 | 0.006167 | 1.759658 down | 1.041758 up   | 1.833138 up   |  | LOC401320    |
| 1558487_a | 1.71E-04 | 3.76E-05 | 3.504278 down | 4.337187 down | 1.237684 down |  | TMED4        |
| 1558489_a | 0.006612 | 0.004969 | 1.191373 up   | 1.030524 down | 1.227739 down |  |              |
| 1558496_a | 0.00624  | 0.004621 | 1.149713 down | 1.009797 up   | 1.160976 up   |  |              |
| 1558501_a | 1.28E-04 | 2.53E-05 | 2.481815 down | 1.011053 up   | 2.509248 up   |  | DNM3         |

|           |          |          |               |               |               |                      |
|-----------|----------|----------|---------------|---------------|---------------|----------------------|
| 1558504_a | 0.01272  | 0.010918 | 1.023636 up   | 1.61196 up    | 1.57474 up    |                      |
| 1558507_a | 0.011243 | 0.00945  | 1.662071 down | 1.580406 down | 1.051674 up   | C1orf53              |
| 1558508_a | 3.98E-05 | 5.19E-06 | 4.107365 down | 8.338998 down | 2.030255 down | C1orf53              |
| 1558511_s | 0.004699 | 0.003229 | 2.504799 down | 2.66956 down  | 1.065778 down | FAM62B               |
| 1558515_a | 0.002671 | 0.001532 | 2.332306 up   | 3.995259 up   | 1.713008 up   |                      |
| 1558517_s | 3.46E-05 | 4.26E-06 | 2.151422 down | 1.528586 down | 1.40746 up    | LRRRC8C              |
| 1558523_a | 0.002204 | 0.001181 | 2.001835 up   | 1.610399 up   | 1.243068 down | FAM184A<br>LOC100132 |
| 1558527_a | 0.01025  | 0.008454 | 1.684358 down | 1.885088 down | 1.119173 down | 707                  |
| 1558530_a | 0.005077 | 0.003562 | 1.397419 up   | 1.350834 down | 1.887682 down | LRTM2                |
| 1558568_a | 0.024481 | 0.022914 | 1.65069 down  | 1.21273 down  | 1.361136 up   |                      |
| 1558607_a | 0.02532  | 0.023783 | 1.344191 up   | 1.020434 up   | 1.317273 down | PAPPA                |
| 1558620_a | 0.012505 | 0.010708 | 1.945024 down | 1.773092 down | 1.096968 up   | ZNF621               |
| 1558630_a | 0.012857 | 0.011059 | 1.472889 up   | 1.264739 up   | 1.16458 down  |                      |
| 1558636_s | 2.65E-05 | 2.94E-06 | 6.585625 down | 1.432625 down | 4.596893 up   | ADAMTS5              |
| 1558641_a | 0.00658  | 0.004941 | 1.200475 down | 1.26182 up    | 1.514784 up   | LOC202051            |
| 1558643_s | 8.76E-04 | 3.39E-04 | 1.947341 up   | 6.777193 down | 13.1975 down  | EDIL3                |
| 1558654_a | 0.008371 | 0.006638 | 1.498681 up   | 1.321189 down | 1.98004 down  | PPM1H                |
| 1558685_a | 0.004841 | 0.003349 | 2.067609 down | 1.342798 down | 1.539777 up   | LOC158960            |
| 1558688_a | 1.12E-04 | 2.10E-05 | 3.371436 down | 2.346729 down | 1.436653 up   | LOC441461            |
| 1558692_a | 7.95E-04 | 2.98E-04 | 11.37698 down | 5.278889 down | 2.155185 up   | C1orf85              |
| 1558695_a | 0.003939 | 0.002557 | 1.445211 up   | 2.728656 up   | 1.888067 up   |                      |
| 1558714_a | 0.012201 | 0.010406 | 1.492006 up   | 3.30628 up    | 2.215996 up   |                      |
| 1558719_s | 0.002472 | 0.001383 | 2.070597 up   | 2.346994 up   | 1.133487 up   | LOC441383            |
| 1558722_a | 0.006005 | 0.004398 | 2.538372 down | 1.317157 down | 1.92716 up    | ///<br>ZNF252        |
| 1558733_a | 3.67E-04 | 1.05E-04 | 6.025873 down | 3.780526 down | 1.593925 up   | ZBTB38               |
| 1558757_a | 0.0135   | 0.011704 | 1.337292 up   | 1.15501 up    | 1.157819 down |                      |
| 1558758_s | 0.005183 | 0.003655 | 1.475947 down | 1.200734 up   | 1.772221 up   |                      |
| 1558775_s | 0.004309 | 0.00288  | 3.105258 down | 1.156033 down | 2.686132 up   | NSMAF                |
| 1558778_s | 0.029814 | 0.028413 | 1.5185 up     | 1.005356 up   | 1.510411 down | MKL2                 |
| 1558783_a | 4.50E-04 | 1.37E-04 | 3.086274 up   | 5.687553 up   | 1.842854 up   |                      |
| 1558784_a | 0.004404 | 0.002963 | 1.348805 up   | 1.710347 up   | 1.268047 up   |                      |
| 1558794_a | 0.002363 | 0.0013   | 1.335373 down | 2.558782 down | 1.916155 down | LOC728190            |

|           |          |          |          |      |          |      |          |      |           |
|-----------|----------|----------|----------|------|----------|------|----------|------|-----------|
| 1558801_a | 0.002563 | 0.00145  | 2.87423  | down | 1.524076 | down | 1.885884 | up   |           |
| 1558803_a | 7.42E-07 | 1.93E-08 | 5.031522 | down | 2.125051 | down | 2.367718 | up   |           |
| 1558814_s | 0.00401  | 0.002616 | 1.514623 | up   | 1.301118 | up   | 1.164093 | down | TMED5     |
| 1558822_a | 0.02147  | 0.01984  | 1.539161 | up   | 2.389935 | up   | 1.552751 | up   |           |
| 1558828_s | 1.70E-04 | 3.71E-05 | 8.992077 | down | 14.58817 | down | 1.622336 | down | LOC728264 |
| 1558832_a | 0.002448 | 0.001364 | 1.553445 | up   | 1.248865 | up   | 1.243886 | down | FLJ32224  |
| 1558847_a | 0.001033 | 4.23E-04 | 1.816202 | down | 2.709351 | down | 1.491768 | down |           |
| 1558849_a | 2.49E-04 | 6.20E-05 | 1.703283 | down | 1.190751 | up   | 2.028186 | up   | LOC284276 |
| 1558855_a | 0.012743 | 0.010941 | 1.340802 | down | 1.004418 | down | 1.334904 | up   | FARP2     |
| 1558877_a | 0.003545 | 0.002236 | 1.03067  | up   | 1.866989 | up   | 1.811433 | up   |           |
| 1558881_a | 0.00987  | 0.008094 | 1.289591 | down | 1.261365 | down | 1.022378 | up   | LOC145820 |
| 1558888_x | 3.69E-04 | 1.05E-04 | 1.547566 | up   | 1.413921 | up   | 1.094521 | down | ZNF321    |
| 1558903_a | 0.004258 | 0.00283  | 1.208581 | down | 1.014109 | down | 1.191766 | up   | LOC284260 |
| 1558914_a | 0.003854 | 0.002488 | 1.548741 | up   | 1.533267 | up   | 1.010093 | down | PPPDE1    |
| 1558938_a | 6.55E-04 | 2.28E-04 | 1.472109 | down | 1.012586 | up   | 1.490637 | up   |           |
| 1558942_a | 1.71E-04 | 3.77E-05 | 1.280871 | up   | 2.126008 | up   | 1.659814 | up   | ZNF765    |
| 1558947_a | 0.002243 | 0.001213 | 1.316914 | up   | 1.060343 | up   | 1.24197  | down |           |
| 1558954_a | 0.008237 | 0.006513 | 1.053445 | down | 1.282764 | up   | 1.35132  | up   | SNORA78   |
| 1558956_s | 0.012291 | 0.010498 | 2.605622 | down | 1.440669 | up   | 3.75384  | up   | IFT80     |
| 1558960_a | 0.039627 | 0.038382 | 1.262564 | up   | 1.027185 | down | 1.296887 | down | MFGE8     |
| 1558965_a | 0.006283 | 0.004664 | 1.298208 | down | 1.341456 | up   | 1.741488 | up   | PHF21A    |
| 1558969_a | 0.01154  | 0.009739 | 1.645048 | down | 1.079751 | down | 1.523543 | up   | RPL32P3   |
| 1558984_a | 0.016055 | 0.014283 | 1.241561 | down | 1.23238  | up   | 1.530075 | up   | MAP3K11   |
| 1559026_a | 0.01959  | 0.017897 | 1.233377 | up   | 1.088731 | down | 1.342817 | down |           |
| 1559039_a | 2.70E-04 | 6.91E-05 | 2.60409  | up   | 1.909059 | up   | 1.36407  | down | DHX36     |
| 1559051_s | 0.00498  | 0.003475 | 2.251829 | down | 1.270492 | down | 1.772407 | up   | C6orf150  |
| 1559064_a | 0.007664 | 0.005968 | 1.580294 | down | 1.36964  | down | 1.153802 | up   | NUP153    |
| 1560713_a | 9.29E-04 | 3.67E-04 | 1.727096 | down | 1.057558 | up   | 1.826503 | up   | ELFN2     |
| 1559072_a | 2.87E-06 | 1.31E-07 | 7.405541 | down | 1.017558 | up   | 7.535567 | up   | ELFN2     |
| 1559078_a | 5.07E-04 | 1.61E-04 | 3.764606 | up   | 4.735799 | up   | 1.25798  | up   | BCL11A    |
| 1559083_x | 0.001025 | 4.19E-04 | 1.729879 | up   | 1.233601 | down | 2.133982 | down | LOC284600 |
| 1559094_a | 6.35E-04 | 2.19E-04 | 2.902299 | down | 1.33149  | down | 2.179737 | up   | FBXO9     |
| 1559096_x | 6.24E-04 | 2.13E-04 | 3.48499  | down | 1.130052 | down | 3.08392  | up   | FBXO9     |
| 1559119_a | 0.016055 | 0.014282 | 1.299114 | up   | 1.741321 | up   | 1.340391 | up   |           |

|           |          |          |          |      |          |      |          |      |           |
|-----------|----------|----------|----------|------|----------|------|----------|------|-----------|
| 1559129_a | 0.001782 | 8.87E-04 | 1.557564 | down | 1.07429  | down | 1.449854 | up   | LOC158257 |
| 1559133_a | 6.63E-05 | 1.04E-05 | 1.679745 | down | 1.093264 | down | 1.53645  | up   |           |
| 1559149_a | 0.020149 | 0.018475 | 2.226156 | up   | 1.458322 | up   | 1.526519 | down |           |
| 1559166_a | 0.003481 | 0.002186 | 1.302648 | down | 1.245657 | down | 1.045752 | up   |           |
| 1559167_x | 6.85E-04 | 2.43E-04 | 1.256286 | down | 1.771519 | up   | 2.225534 | up   | MPV17L    |
| 1559170_a | 1.09E-05 | 8.47E-07 | 1.05208  | down | 3.811055 | down | 3.6224   | down |           |
| 1559174_a | 0.00416  | 0.002743 | 1.16833  | up   | 1.172202 | down | 1.369518 | down | RAB6A     |
| 1559224_a | 0.003115 | 0.001883 | 1.279089 | down | 1.602703 | up   | 2.049999 | up   | LCE1E     |
| 1559228_a | 9.84E-04 | 3.97E-04 | 1.305831 | up   | 1.467068 | up   | 1.123475 | up   |           |
| 1559237_a | 0.005897 | 0.004299 | 1.227399 | up   | 1.216166 | down | 1.492721 | down |           |
| 1559245_a | 0.002869 | 0.001687 | 1.232327 | up   | 1.392113 | up   | 1.129662 | up   |           |
| 1559265_a | 0.002257 | 0.001224 | 1.086554 | down | 1.809271 | up   | 1.96587  | up   | C10orf140 |
| 1559266_s | 0.001121 | 4.74E-04 | 2.113139 | up   | 4.677374 | up   | 2.213472 | up   | C10orf140 |
|           |          |          |          |      |          |      |          |      | hCG_17718 |
| 1559275_x | 0.001953 | 0.001004 | 1.115069 | up   | 1.097651 | down | 1.223957 | down | 30        |
| 1559280_a | 6.54E-06 | 4.16E-07 | 82.62779 | up   | 139.1852 | up   | 1.684485 | up   |           |
| 1559287_a | 0.003423 | 0.002138 | 1.33644  | down | 1.09414  | down | 1.221453 | up   |           |
| 1559295_a | 0.043472 | 0.042233 | 1.200081 | up   | 1.210454 | down | 1.452643 | down |           |
| 1559296_a | 2.94E-04 | 7.72E-05 | 1.305174 | down | 1.173677 | up   | 1.531853 | up   | LOC730057 |
| 1559322_a | 0.006316 | 0.004695 | 1.605387 | down | 1.803535 | down | 1.123427 | down | LOC727916 |
| 1559324_a | 6.10E-05 | 9.25E-06 | 1.083403 | up   | 1.688386 | down | 1.829202 | down | LOC220594 |
| 1559388_a | 0.005915 | 0.004315 | 1.83589  | down | 1.163731 | down | 1.57759  | up   | LYNX1     |
| 1559393_a | 0.001161 | 4.98E-04 | 2.364453 | down | 3.63395  | down | 1.53691  | down | ALDH1L2   |
| 1559394_a | 0.004171 | 0.002753 | 4.670042 | up   | 3.58748  | up   | 1.301761 | down |           |
| 1559402_a | 0.002238 | 0.00121  | 1.436108 | up   | 1.383991 | up   | 1.037657 | down | C1orf61   |
| 1559410_a | 4.80E-04 | 1.49E-04 | 6.5517   | up   | 10.03083 | up   | 1.531026 | up   |           |
| 1559429_a | 0.01196  | 0.01016  | 1.175984 | up   | 1.094778 | down | 1.287442 | down | C3orf43   |
| 1559436_x | 0.001919 | 9.80E-04 | 1.740847 | up   | 1.935106 | up   | 1.111589 | up   |           |
| 1559438_a | 0.004139 | 0.002726 | 1.374438 | up   | 1.048389 | up   | 1.311    | down | C21orf58  |
| 1559455_a | 0.014998 | 0.013228 | 1.304221 | down | 1.089437 | down | 1.197151 | up   |           |
| 1559477_s | 1.07E-04 | 1.98E-05 | 12.51134 | down | 3.214395 | down | 3.892285 | up   | MEIS1     |
| 1559491_a | 8.29E-04 | 3.15E-04 | 2.046926 | up   | 1.569389 | up   | 1.304282 | down |           |
| 1559495_a | 0.016761 | 0.015005 | 1.427528 | down | 1.210531 | up   | 1.728067 | up   |           |
| 1559506_x | 0.002335 | 0.001281 | 1.130573 | down | 1.554176 | down | 1.37468  | down | FLJ35409  |

|           |          |          |               |               |               |           |
|-----------|----------|----------|---------------|---------------|---------------|-----------|
| 1559510_a | 0.002528 | 0.001426 | 1.162671 up   | 1.355992 up   | 1.166274 up   | BHLHB9    |
| 1559517_a | 7.76E-04 | 2.89E-04 | 3.008543 down | 2.460133 down | 1.222919 up   | SPIRE1    |
| 1559548_a | 2.03E-05 | 2.06E-06 | 3.170538 up   | 3.664266 up   | 1.155724 up   | ACVR2B    |
| 1559567_a | 0.023855 | 0.022276 | 1.360224 up   | 1.139757 up   | 1.193433 down |           |
| 1559585_a | 0.00153  | 7.22E-04 | 1.706919 down | 1.110356 down | 1.537272 up   | DDX60L    |
| 1559600_a | 0.009209 | 0.007453 | 1.382574 down | 1.933068 up   | 2.672609 up   |           |
| 1566722_a | 9.80E-04 | 3.95E-04 | 1.351421 down | 1.469769 down | 1.087573 down | SVEP1     |
| 1559616_x | 0.004535 | 0.003084 | 1.723642 up   | 1.338414 up   | 1.287824 down | ZNF626    |
| 1559617_a | 0.005885 | 0.004287 | 1.339039 up   | 1.209851 down | 1.620038 down | LOC732087 |
| 1559641_a | 0.0137   | 0.01191  | 1.279316 up   | 1.14196 down  | 1.460927 down |           |
| 1559654_s | 0.022928 | 0.021348 | 1.175569 up   | 1.487631 up   | 1.265456 up   |           |
| 1559667_a | 0.003152 | 0.001917 | 2.185098 up   | 1.138718 up   | 1.91891 down  |           |
| 1559672_a | 0.001669 | 8.13E-04 | 1.369397 up   | 1.036583 up   | 1.321068 down | C9orf93   |
| 1559675_a | 9.73E-04 | 3.91E-04 | 1.195994 down | 1.299827 up   | 1.554586 up   |           |
| 1559695_a | 0.013859 | 0.01207  | 1.501124 up   | 1.169482 up   | 1.283581 down |           |
| 1559696_a | 3.99E-05 | 5.20E-06 | 2.506287 up   | 2.513888 up   | 1.003033 up   |           |
| 1559697_a | 4.99E-04 | 1.57E-04 | 2.089781 up   | 2.353974 up   | 1.126421 up   |           |
| 1559701_s | 0.001344 | 6.08E-04 | 1.547073 down | 1.846705 down | 1.193677 down | NDST2     |
| 1559702_a | 0.004642 | 0.00318  | 1.230466 up   | 1.468486 up   | 1.193439 up   |           |
| 1559739_a | 0.016487 | 0.014718 | 1.256794 up   | 1.610843 up   | 1.281708 up   | CHPT1     |
| 1559753_a | 6.26E-04 | 2.14E-04 | 1.532017 up   | 1.073748 up   | 1.426794 down |           |
| 1559776_a | 3.42E-04 | 9.49E-05 | 5.336016 down | 1.863524 down | 2.8634 up     |           |
| 1559807_a | 0.011599 | 0.009801 | 1.210779 up   | 1.352093 up   | 1.116713 up   |           |
| 1559808_a | 3.01E-04 | 8.02E-05 | 1.888958 down | 1.055482 up   | 1.993761 up   |           |
| 1559821_a | 0.008973 | 0.007223 | 1.594638 up   | 1.267443 up   | 1.258153 down |           |
|           |          |          |               |               |               | LOC644215 |
| 1559822_s | 1.25E-05 | 1.05E-06 | 2.691026 down | 3.085515 down | 1.146594 down | /// MTDH  |
| 1559828_a | 7.60E-04 | 2.80E-04 | 1.339392 up   | 1.072545 down | 1.436559 down | FAM170B   |
| 1559840_s | 3.04E-04 | 8.10E-05 | 5.122281 down | 2.382757 down | 2.149729 up   | TBX18     |
| 1559849_a | 0.022007 | 0.020396 | 1.1001 up     | 1.059996 down | 1.166101 down | ZNF605    |
| 1559867_a | 6.85E-04 | 2.43E-04 | 2.396385 down | 1.044961 up   | 2.504129 up   |           |
| 1561114_a | 6.76E-04 | 2.38E-04 | 1.557891 up   | 1.668254 up   | 1.070842 up   | DEPDC4    |
|           |          |          |               |               |               | LOC100129 |
| 1559871_s | 0.043568 | 0.042331 | 1.164013 up   | 1.059677 down | 1.233478 down | 129       |

|           |          |          |          |      |          |      |          |      |                       |
|-----------|----------|----------|----------|------|----------|------|----------|------|-----------------------|
| 1559889_a | 0.003173 | 0.001933 | 1.421005 | down | 1.077499 | down | 1.3188   | up   |                       |
| 1559901_s | 0.005708 | 0.00412  | 1.757764 | down | 1.37232  | down | 1.280871 | up   | C21orf34              |
| 1559926_a | 0.001232 | 5.39E-04 | 1.359882 | up   | 1.528863 | up   | 1.124262 | up   | LOC728353             |
| 1559942_a | 8.19E-04 | 3.10E-04 | 3.868539 | down | 1.623998 | down | 2.382108 | up   | MDFIC                 |
| 1559945_a | 0.003657 | 0.002324 | 1.58524  | down | 1.016186 | up   | 1.610898 | up   | RUVBL2                |
| 1559946_s | 0.014728 | 0.012949 | 1.869474 | up   | 1.21205  | up   | 1.542406 | down | RUVBL2<br>LOC100130   |
| 1559960_x | 7.51E-04 | 2.76E-04 | 1.67123  | up   | 2.941889 | up   | 1.760314 | up   | 958                   |
| 1569868_s | 0.044774 | 0.043563 | 1.435463 | down | 1.293098 | up   | 1.856195 | up   | EME2                  |
| 1559964_a | 0.019993 | 0.018319 | 1.314155 | down | 1.856011 | up   | 2.439086 | up   | FLJ38717<br>LOC100192 |
| 1559965_a | 2.92E-04 | 7.69E-05 | 1.256569 | down | 12.85051 | down | 10.22667 | down | 378<br>LOC100192      |
| 1559966_a | 2.59E-04 | 6.54E-05 | 1.312081 | down | 5.704685 | down | 4.347816 | down | 378                   |
| 1559971_a | 0.007938 | 0.006227 | 1.525578 | up   | 1.201433 | up   | 1.269799 | down | BSDC1                 |
| 1560779_a | 0.022406 | 0.020818 | 1.092342 | down | 1.357116 | down | 1.242392 | down |                       |
| 1559982_s | 0.001611 | 7.76E-04 | 1.645781 | up   | 1.24812  | down | 2.054132 | down | AKR1CL2               |
| 1559987_a | 0.003523 | 0.002218 | 1.741964 | up   | 1.377921 | up   | 1.264197 | down |                       |
| 1559995_a | 0.003133 | 0.0019   | 1.519204 | up   | 1.08958  | up   | 1.394302 | down | SAMD14<br>LOC100131   |
| 1560001_a | 0.001408 | 6.46E-04 | 1.207709 | down | 1.558005 | up   | 1.881616 | up   | 581                   |
| 1560007_a | 0.013291 | 0.011492 | 1.265866 | down | 1.351936 | down | 1.067993 | down | LOC645984             |
| 1560019_a | 0.00125  | 5.50E-04 | 2.585458 | up   | 2.853144 | up   | 1.103536 | up   | MGC11082              |
| 1560047_s | 8.05E-04 | 3.03E-04 | 2.444294 | up   | 1.338742 | up   | 1.825814 | down |                       |
| 1560049_a | 0.012168 | 0.010374 | 2.136944 | up   | 3.040963 | up   | 1.423043 | up   |                       |
| 1560059_a | 0.016917 | 0.015164 | 1.275051 | up   | 1.122998 | down | 1.431879 | down | VPS37C                |
| 1560071_a | 0.010104 | 0.008317 | 1.944081 | down | 1.230238 | down | 1.580248 | up   |                       |
| 1560108_a | 0.018765 | 0.017047 | 1.341968 | up   | 1.128791 | down | 1.514801 | down |                       |
| 1560109_s | 0.022332 | 0.020739 | 1.222326 | up   | 1.112295 | down | 1.359587 | down |                       |
| 1560119_a | 0.00624  | 0.004621 | 1.824386 | up   | 1.472222 | up   | 1.239206 | down | LOC389634             |
| 1560129_a | 0.002919 | 0.001725 | 1.092287 | up   | 1.332567 | up   | 1.219979 | up   |                       |
| 1560130_a | 0.022467 | 0.020884 | 1.19653  | up   | 1.054724 | down | 1.262009 | down | C1orf145              |
| 1560131_a | 0.009485 | 0.007712 | 1.252386 | down | 1.169418 | up   | 1.464562 | up   |                       |
| 1560145_a | 0.015129 | 0.013354 | 1.256927 | up   | 2.687389 | up   | 2.138063 | up   | MKLN1                 |

|           |          |          |               |               |               |            |
|-----------|----------|----------|---------------|---------------|---------------|------------|
| 1560153_a | 0.005718 | 0.00413  | 1.099997 up   | 1.837838 up   | 1.670766 up   | FRAS1      |
| 1560162_a | 0.005887 | 0.004289 | 1.245813 down | 1.037549 up   | 1.292593 up   | FLJ40606   |
| 1561367_a | 0.004654 | 0.00319  | 1.137511 up   | 1.420972 up   | 1.249194 up   |            |
| 1560174_a | 0.007101 | 0.005431 | 1.125272 up   | 1.025039 down | 1.153447 down | SPAG16     |
| 1560177_a | 0.002965 | 0.001764 | 1.855896 up   | 1.680769 up   | 1.104195 down | CCDC66     |
| 1560202_a | 0.022048 | 0.020436 | 1.002114 down | 1.108633 down | 1.106293 down | LOC338739  |
| 1560208_a | 0.002318 | 0.001269 | 2.281515 down | 3.373228 down | 1.478503 down |            |
| 1560224_a | 0.010318 | 0.008524 | 2.138446 down | 1.080306 up   | 2.310175 up   | AHCTF1     |
| 1560259_a | 0.002677 | 0.001536 | 1.283824 up   | 1.788718 up   | 1.393274 up   |            |
| 1560263_a | 0.002933 | 0.001737 | 1.605823 up   | 2.386003 up   | 1.485844 up   |            |
| 1560271_a | 0.001875 | 9.49E-04 | 2.707914 up   | 8.491981 up   | 3.135986 up   |            |
| 1560285_a | 0.019898 | 0.018221 | 1.427422 up   | 1.092999 down | 1.560171 down |            |
| 1560296_a | 0.003432 | 0.002145 | 1.105263 down | 1.79012 up    | 1.978553 up   |            |
|           |          |          |               |               |               | DMRTC1 /// |
| 1560300_a | 0.001226 | 5.36E-04 | 1.115069 up   | 1.540296 up   | 1.381345 up   | DMRTC1B    |
| 1560317_s | 0.011153 | 0.009362 | 1.308165 up   | 1.012979 up   | 1.291404 down | HIP1       |
| 1560327_a | 8.63E-04 | 3.31E-04 | 2.337137 down | 1.180354 down | 1.980031 up   |            |
| 1560371_a | 0.009845 | 0.008068 | 1.419588 down | 1.064939 up   | 1.511774 up   | LOC401321  |
| 1560399_a | 0.010933 | 0.009139 | 1.411464 up   | 1.014715 up   | 1.390996 down | OTUD7A     |
| 1560407_a | 0.018608 | 0.016886 | 1.149993 up   | 1.372155 up   | 1.193186 up   | MARK1      |
| 1560411_a | 0.039937 | 0.0387   | 1.221954 up   | 1.279199 up   | 1.046847 up   |            |
| 1560443_a | 0.021652 | 0.020023 | 1.377257 up   | 2.063525 up   | 1.498287 up   |            |
| 1560445_x | 0.007265 | 0.005589 | 1.521525 up   | 1.685821 up   | 1.107982 up   | ARHGEF1    |
| 1560485_a | 0.020735 | 0.01908  | 1.384257 down | 1.148988 down | 1.204762 up   | HIVEP1     |
| 1560496_a | 0.004462 | 0.003017 | 1.554882 down | 1.200847 up   | 1.867176 up   |            |
| 1560499_a | 0.005971 | 0.004366 | 1.383954 up   | 1.266722 up   | 1.092548 down | C14orf64   |
| 1560512_a | 0.001564 | 7.45E-04 | 1.64882 up    | 1.886024 up   | 1.143863 up   |            |
| 1560536_a | 0.008136 | 0.006414 | 1.382091 up   | 1.140011 up   | 1.212349 down |            |
| 1560556_a | 0.01042  | 0.008622 | 1.33115 up    | 1.776242 up   | 1.334367 up   | PLEKHA8    |
| 1560573_a | 8.63E-04 | 3.31E-04 | 1.036573 down | 1.674538 down | 1.615457 down | LOC387895  |
| 1560576_a | 0.004309 | 0.00288  | 1.345544 up   | 1.186936 down | 1.597075 down |            |
| 1560581_a | 0.012816 | 0.011018 | 1.121685 up   | 1.09026 down  | 1.222928 down |            |
| 1560587_s | 3.48E-04 | 9.73E-05 | 2.414681 down | 2.187035 down | 1.104089 up   | PRDX5      |

|           |          |          |          |      |          |      |          |      |            |
|-----------|----------|----------|----------|------|----------|------|----------|------|------------|
| 1560599_a | 0.00675  | 0.0051   | 2.28364  | down | 1.579653 | down | 1.445659 | up   | CCDC123    |
| 1560604_a | 0.039166 | 0.037922 | 1.229225 | up   | 1.131728 | down | 1.391148 | down |            |
| 1560617_a | 0.03121  | 0.029851 | 1.322409 | up   | 1.165058 | down | 1.540682 | down |            |
| 1560625_s | 0.001437 | 6.64E-04 | 1.13445  | up   | 1.461201 | up   | 1.288027 | up   |            |
| 1560631_a | 0.012009 | 0.01021  | 1.076454 | down | 1.137231 | up   | 1.224177 | up   | CALCOCO2   |
| 1560652_a | 1.54E-07 | 2.17E-09 | 13.41223 | up   | 12.39169 | up   | 1.082357 | down |            |
| 1560656_a | 0.001631 | 7.89E-04 | 1.440703 | down | 1.01512  | up   | 1.462486 | up   |            |
| 1560694_a | 0.008335 | 0.006605 | 1.34742  | down | 1.143719 | down | 1.178104 | up   | SFT2D1     |
| 1560698_a | 0.001832 | 9.20E-04 | 2.665519 | down | 1.233682 | down | 2.16062  | up   | LOC283392  |
| 1560724_a | 0.004745 | 0.003266 | 1.72005  | down | 1.114616 | down | 1.543177 | up   |            |
| 1560738_a | 0.001139 | 4.84E-04 | 2.015798 | up   | 1.967151 | up   | 1.02473  | down |            |
| 1560741_a | 2.15E-05 | 2.22E-06 | 10.30336 | up   | 12.32791 | up   | 1.196494 | up   | SNRPN      |
| 1560746_a | 0.004251 | 0.002824 | 1.25996  | down | 1.106565 | down | 1.138622 | up   | C1orf118   |
| 1560771_a | 0.005519 | 0.00395  | 1.22608  | up   | 1.069739 | up   | 1.14615  | down |            |
| 1560772_a | 0.008468 | 0.006734 | 1.394891 | up   | 1.071678 | up   | 1.301595 | down |            |
| 1560774_a | 0.002696 | 0.00155  | 1.501677 | up   | 2.000983 | up   | 1.332498 | up   |            |
| 1560782_a | 9.94E-05 | 1.79E-05 | 2.256736 | up   | 1.561185 | up   | 1.445528 | down |            |
| 1560784_x | 0.002936 | 0.00174  | 1.632371 | up   | 1.022687 | up   | 1.596159 | down |            |
| 1560787_a | 0.015809 | 0.014032 | 1.219593 | up   | 1.240166 | down | 1.512497 | down | QDPR       |
| 1560792_a | 1.90E-04 | 4.29E-05 | 1.900013 | down | 1.461173 | down | 1.300335 | up   |            |
| 1560806_a | 0.029811 | 0.028409 | 1.404137 | up   | 1.008565 | down | 1.416163 | down | LOC150527  |
| 1560810_a | 0.004454 | 0.003008 | 1.366223 | up   | 1.021307 | down | 1.395332 | down |            |
| 1560821_a | 0.001127 | 4.77E-04 | 1.475119 | down | 3.033364 | down | 2.056352 | down | ARHGAP22   |
| 1560826_a | 0.001411 | 6.48E-04 | 7.803658 | down | 2.939409 | down | 2.654839 | up   |            |
| 1560834_a | 1.45E-05 | 1.30E-06 | 3.309053 | up   | 2.549072 | up   | 1.29814  | down | RMST       |
| 1560844_a | 0.003143 | 0.001908 | 1.316184 | up   | 1.175527 | up   | 1.119655 | down |            |
| 1560855_a | 0.013936 | 0.01215  | 1.26819  | up   | 1.309845 | up   | 1.032846 | up   |            |
| 1560859_a | 0.002818 | 0.001646 | 1.286581 | up   | 1.282823 | up   | 1.002929 | down |            |
| 1560868_s | 0.011187 | 0.009395 | 1.376451 | down | 1.187369 | up   | 1.634356 | up   |            |
| 1560883_s | 0.003103 | 0.001873 | 1.307545 | up   | 1.314589 | up   | 1.005388 | up   |            |
| 1560884_a | 0.005432 | 0.003874 | 1.068637 | up   | 1.21323  | down | 1.296502 | down | SLC17A1    |
| 1560887_a | 0.026669 | 0.025182 | 1.226984 | up   | 1.050505 | down | 1.288953 | down |            |
| 1560897_a | 0.01935  | 0.017646 | 1.251403 | down | 1.003864 | down | 1.246587 | up   | KRTAP10-11 |



|           |          |          |               |               |               |                  |
|-----------|----------|----------|---------------|---------------|---------------|------------------|
| 1560911_a | 0.025058 | 0.023499 | 1.313788 up   | 1.032724 up   | 1.272158 down | LOC100133<br>461 |
| 1560928_a | 0.045949 | 0.044742 | 1.072331 up   | 1.233191 up   | 1.15001 up    | LOC151657        |
| 1560979_a | 0.008345 | 0.006615 | 1.065223 up   | 1.192269 down | 1.270033 down |                  |
| 1560986_a | 0.004038 | 0.002639 | 1.986339 down | 1.228593 up   | 2.440402 up   |                  |
| 1560988_a | 0.00295  | 0.001752 | 1.16556 down  | 1.05069 down  | 1.109328 up   |                  |
| 1560990_a | 0.001987 | 0.001026 | 1.083748 up   | 1.11467 down  | 1.20802 down  |                  |
| 1560995_s | 0.001869 | 9.45E-04 | 1.369621 down | 1.057054 down | 1.295696 up   |                  |
| 1560997_a | 0.0312   | 0.02984  | 1.072393 up   | 1.089933 down | 1.168837 down |                  |
| 1561010_a | 0.00312  | 0.001888 | 1.079696 up   | 1.23107 down  | 1.329181 down | MAOB             |
| 1561019_a | 0.004365 | 0.002932 | 1.064194 down | 1.533419 up   | 1.631856 up   |                  |
| 1561038_a | 0.004023 | 0.002627 | 1.300908 up   | 1.072355 down | 1.395035 down | ZNF81            |
| 1561044_a | 0.006355 | 0.004729 | 1.594725 up   | 1.326816 up   | 1.201919 down |                  |
| 1561045_a | 0.013319 | 0.011522 | 1.140671 up   | 1.110451 down | 1.266659 down |                  |
| 1561087_a | 0.005024 | 0.003513 | 1.212217 down | 1.031171 up   | 1.250002 up   |                  |
| 1561091_a | 0.008996 | 0.007245 | 1.360998 up   | 1.136701 down | 1.547047 down |                  |
| 1561093_a | 0.004289 | 0.00286  | 1.337603 down | 1.322489 up   | 1.768966 up   | SLC22A25         |
| 1561097_a | 0.015131 | 0.013357 | 1.258508 down | 1.104967 up   | 1.390611 up   |                  |
| 1561101_a | 9.91E-04 | 4.01E-04 | 9.968748 up   | 11.45697 up   | 1.149288 up   | LOC153469        |
| 1561113_a | 0.002416 | 0.001339 | 1.18902 up    | 1.218318 up   | 1.02464 up    |                  |
| 1561180_a | 2.75E-05 | 3.12E-06 | 8.833977 down | 2.418596 down | 3.652524 up   |                  |
| 1561181_a | 5.76E-04 | 1.91E-04 | 2.873513 down | 1.676281 down | 1.714219 up   |                  |
| 1561191_a | 0.006379 | 0.004756 | 1.117061 up   | 1.252475 up   | 1.121224 up   |                  |
| 1561195_a | 0.00243  | 0.001349 | 1.99055 up    | 3.896411 up   | 1.957455 up   |                  |
| 1561198_a | 0.00597  | 0.004366 | 1.029399 down | 1.235866 down | 1.200571 down | LOC387790        |
| 1561200_a | 0.005609 | 0.004032 | 1.117951 up   | 1.170914 down | 1.309025 down | VWA3B            |
| 1561249_a | 0.014507 | 0.012727 | 1.229367 up   | 1.188998 down | 1.461715 down |                  |
| 1561254_a | 0.005885 | 0.004286 | 1.366974 down | 1.04377 up    | 1.426807 up   | tcag7.1188       |
| 1561261_a | 0.002213 | 0.001189 | 1.281734 up   | 1.136487 down | 1.456674 down |                  |
| 1561266_a | 0.00204  | 0.001065 | 1.181286 up   | 1.378701 down | 1.62864 down  |                  |
|           |          |          |               |               |               | hCG_20154        |
| 1561294_a | 0.01786  | 0.01612  | 1.227176 up   | 1.067007 up   | 1.150111 down | 35               |
| 1561341_a | 1.22E-04 | 2.36E-05 | 6.20114 up    | 5.846429 up   | 1.060671 down |                  |
| 1561346_a | 0.016626 | 0.01487  | 1.275353 up   | 1.525327 up   | 1.196003 up   |                  |

|           |          |          |          |      |          |      |          |      |           |
|-----------|----------|----------|----------|------|----------|------|----------|------|-----------|
| 1561360_a | 0.009628 | 0.007853 | 1.27686  | down | 1.186549 | down | 1.076113 | up   |           |
| 1561365_a | 0.001206 | 5.24E-04 | 1.685898 | down | 1.454433 | down | 1.159144 | up   | NRP1      |
| 1561384_a | 0.003078 | 0.001854 | 1.097789 | up   | 1.32202  | down | 1.451299 | down | LOC284661 |
| 1561389_a | 0.032005 | 0.030664 | 1.267363 | down | 1.102873 | down | 1.149147 | up   |           |
| 1561394_s | 5.61E-04 | 1.84E-04 | 1.68162  | down | 2.237095 | down | 1.330321 | down | KIAA1755  |
| 1561402_a | 0.002284 | 0.001244 | 1.410096 | up   | 1.004629 | down | 1.416623 | down | LOC339894 |
| 1561418_a | 0.027322 | 0.02584  | 2.866744 | down | 2.312203 | down | 1.239832 | up   |           |
| 1561429_a | 0.021272 | 0.019625 | 1.23153  | up   | 1.144105 | down | 1.409    | down | C3orf15   |
| 1561430_s | 0.002929 | 0.001734 | 1.646581 | up   | 1.328418 | up   | 1.239505 | down | C3orf15   |
| 1561439_a | 0.023774 | 0.022189 | 1.384245 | up   | 1.241478 | up   | 1.114997 | down |           |
| 1561442_a | 0.002303 | 0.001258 | 1.196052 | down | 1.040316 | up   | 1.244273 | up   | LOC283585 |
| 1561449_a | 0.01979  | 0.018105 | 1.330885 | up   | 1.03227  | down | 1.373833 | down | TSPAN18   |
| 1561484_a | 0.001953 | 0.001004 | 1.079889 | up   | 1.216254 | down | 1.313419 | down |           |
| 1561500_a | 0.003513 | 0.00221  | 2.04002  | up   | 1.33032  | down | 2.713879 | down | C16orf84  |
| 1561502_x | 0.009565 | 0.007792 | 1.532068 | up   | 1.084555 | down | 1.661612 | down | C16orf84  |
| 1561531_a | 0.009988 | 0.00821  | 1.27517  | down | 1.19216  | up   | 1.520206 | up   |           |
| 1561532_a | 0.012119 | 0.010322 | 1.250968 | down | 1.032899 | up   | 1.292123 | up   |           |
| 1561534_a | 0.003435 | 0.002148 | 1.67026  | up   | 1.409234 | up   | 1.185226 | down |           |
| 1561535_a | 0.033153 | 0.031834 | 1.181551 | down | 1.007677 | down | 1.172549 | up   |           |
| 1561539_a | 0.00104  | 4.28E-04 | 1.191945 | up   | 1.436863 | down | 1.712663 | down |           |
| 1561565_a | 0.00306  | 0.001838 | 1.147457 | up   | 1.138324 | down | 1.306178 | down |           |
| 1561572_a | 4.28E-04 | 1.28E-04 | 1.377749 | down | 1.194144 | up   | 1.645231 | up   |           |
| 1561577_a | 0.004121 | 0.00271  | 1.229744 | up   | 1.215745 | up   | 1.011515 | down |           |
| 1561595_x | 0.001431 | 6.60E-04 | 1.398991 | up   | 1.492852 | up   | 1.067092 | up   |           |
| 1561616_a | 0.010554 | 0.008763 | 1.043223 | down | 1.608833 | up   | 1.678372 | up   | DNAH6     |
| 1561617_a | 0.010926 | 0.009131 | 1.134451 | up   | 1.210677 | down | 1.373453 | down | DNAH6     |
| 1561642_a | 0.012695 | 0.010894 | 1.316391 | up   | 1.777402 | up   | 1.350208 | up   |           |
| 1561658_a | 0.001415 | 6.51E-04 | 1.221473 | up   | 1.127728 | down | 1.377488 | down |           |
| 1561692_a | 0.013645 | 0.011851 | 1.099677 | up   | 1.08552  | down | 1.193721 | down |           |
| 1561702_a | 0.014493 | 0.012712 | 1.228653 | up   | 1.126306 | up   | 1.090869 | down |           |
| 1561707_a | 0.029936 | 0.028539 | 1.297851 | up   | 1.068774 | down | 1.387109 | down | LOC150185 |
| 1561710_a | 7.10E-04 | 2.56E-04 | 1.107919 | up   | 1.30456  | down | 1.445346 | down | SNX19     |
| 1561718_a | 0.030891 | 0.029522 | 1.09013  | up   | 1.177413 | down | 1.283533 | down |           |
| 1561732_a | 0.012244 | 0.010449 | 1.279104 | up   | 1.045023 | up   | 1.223996 | down |           |

|           |          |          |          |      |          |      |          |      |           |
|-----------|----------|----------|----------|------|----------|------|----------|------|-----------|
| 1561737_a | 0.001535 | 7.25E-04 | 1.485201 | up   | 1.155953 | up   | 1.284828 | down |           |
| 1561749_a | 0.006343 | 0.004718 | 1.512847 | down | 1.064548 | up   | 1.610498 | up   |           |
| 1561778_a | 0.002788 | 0.001624 | 1.349567 | up   | 1.092905 | down | 1.474949 | down |           |
| 1561829_a | 0.002322 | 0.001272 | 2.679561 | up   | 1.805991 | up   | 1.483707 | down |           |
| 1561855_x | 0.025104 | 0.023548 | 1.209789 | up   | 1.034355 | down | 1.251352 | down |           |
| 1561894_a | 0.003555 | 0.002244 | 1.22474  | down | 1.124506 | up   | 1.377228 | up   | LOC653739 |
| 1561899_a | 0.008892 | 0.007144 | 1.472729 | up   | 1.446564 | down | 2.130396 | down | CLECL1    |
| 1567107_s | 0.001556 | 7.39E-04 | 3.704966 | down | 4.635102 | down | 1.251051 | down | TPM4      |
| 1561940_a | 0.002023 | 0.001052 | 1.301104 | up   | 1.08792  | down | 1.415497 | down | POLE      |
| 1563629_a | 4.31E-04 | 1.29E-04 | 2.718088 | down | 1.44837  | down | 1.876654 | up   |           |
| 1561960_a | 0.009457 | 0.007684 | 1.012496 | down | 1.237869 | down | 1.222591 | down | KIAA1920  |
| 1561989_a | 0.008131 | 0.00641  | 1.344688 | down | 1.058681 | up   | 1.423595 | up   |           |
| 1561998_a | 0.006378 | 0.004752 | 1.233834 | up   | 1.064661 | down | 1.313616 | down |           |
| 1562012_a | 0.007251 | 0.005575 | 1.701497 | down | 1.039534 | up   | 1.768764 | up   |           |
| 1562013_a | 0.001994 | 0.001031 | 2.558854 | down | 1.057242 | up   | 2.705327 | up   |           |
| 1562016_a | 0.005407 | 0.003853 | 1.413727 | up   | 1.201286 | up   | 1.176844 | down |           |
|           |          |          |          |      |          |      |          |      | LOC100130 |
|           |          |          |          |      |          |      |          |      | 987 ///   |
| 1562022_s | 1.92E-05 | 1.90E-06 | 2.384335 | down | 1.203729 | up   | 2.870094 | up   | RAD9A     |
| 1562026_a | 0.003211 | 0.001962 | 1.164379 | up   | 1.373989 | up   | 1.180019 | up   | WNK2      |
| 1562033_a | 0.020138 | 0.018464 | 1.018266 | down | 1.509294 | up   | 1.536862 | up   |           |
| 1562038_a | 0.049183 | 0.04803  | 1.180132 | up   | 1.038511 | down | 1.22558  | down |           |
| 1562049_a | 0.022041 | 0.020429 | 1.178712 | up   | 1.074297 | down | 1.266286 | down |           |
| 1562071_a | 0.017545 | 0.015802 | 1.134428 | up   | 1.025785 | down | 1.163679 | down |           |
| 1562095_a | 0.021041 | 0.019397 | 1.149232 | up   | 1.019801 | up   | 1.126919 | down |           |
| 1562098_a | 0.022207 | 0.020602 | 1.469558 | down | 1.32955  | down | 1.105305 | up   |           |
| 1562116_a | 0.004466 | 0.003021 | 1.294599 | up   | 1.344755 | up   | 1.038742 | up   |           |
| 1562157_a | 0.014487 | 0.012706 | 1.170007 | down | 1.061583 | up   | 1.24206  | up   |           |
| 1562169_a | 0.012679 | 0.010878 | 3.731531 | up   | 3.181047 | up   | 1.173051 | down |           |
| 1562193_a | 0.020548 | 0.018884 | 1.445275 | up   | 1.256986 | up   | 1.149794 | down |           |
| 1562209_a | 0.026413 | 0.024916 | 1.150718 | up   | 1.045325 | down | 1.202874 | down | WDR21B    |
| 1562226_a | 4.10E-04 | 1.21E-04 | 5.602206 | up   | 5.474723 | up   | 1.023286 | down | VWDE      |
| 1562229_a | 0.003023 | 0.00181  | 1.417225 | up   | 1.183962 | up   | 1.197019 | down |           |
| 1562234_a | 7.44E-04 | 2.73E-04 | 3.163999 | down | 3.503469 | down | 1.107292 | down | NAV3      |

|           |          |          |          |      |          |      |          |      |           |
|-----------|----------|----------|----------|------|----------|------|----------|------|-----------|
| 1562235_s | 0.002717 | 0.001566 | 1.993806 | up   | 5.697861 | up   | 2.857781 | up   |           |
| 1562240_a | 2.09E-04 | 4.87E-05 | 1.469709 | up   | 1.562546 | down | 2.296489 | down | PLXNA4    |
| 1562250_a | 0.007515 | 0.005825 | 1.132642 | up   | 1.008467 | up   | 1.123132 | down |           |
| 1562256_a | 0.002285 | 0.001245 | 1.335845 | down | 1.224251 | up   | 1.635409 | up   | NLRP1     |
| 1562257_x | 0.005928 | 0.004328 | 1.295209 | down | 1.300496 | up   | 1.684415 | up   | NLRP1     |
| 1562271_x | 0.018405 | 0.016682 | 1.141223 | down | 1.192435 | up   | 1.360834 | up   | ARHGEF7   |
| 1562280_a | 5.81E-04 | 1.94E-04 | 1.990278 | up   | 2.398922 | up   | 1.20532  | up   |           |
| 1562290_a | 0.016092 | 0.014321 | 1.156939 | up   | 1.059952 | down | 1.226299 | down |           |
| 1562316_a | 0.013715 | 0.011926 | 1.317586 | up   | 1.194509 | down | 1.573868 | down |           |
| 1562319_a | 0.033474 | 0.03216  | 1.01701  | up   | 1.205531 | down | 1.226037 | down | FAM169B   |
| 1562323_a | 0.003902 | 0.002528 | 1.255022 | up   | 1.490862 | up   | 1.187917 | up   |           |
| 1562346_a | 0.001537 | 7.26E-04 | 1.170099 | down | 1.001261 | up   | 1.171575 | up   |           |
| 1562348_a | 0.044702 | 0.043486 | 1.475243 | up   | 1.8676   | up   | 1.265962 | up   | LOC400680 |
| 1562368_a | 9.61E-04 | 3.84E-04 | 1.599838 | up   | 1.000062 | down | 1.599937 | down | CARD11    |
| 1562378_s | 0.002381 | 0.001315 | 1.109667 | down | 1.396197 | up   | 1.549314 | up   | PROM2     |
| 1562425_a | 0.009765 | 0.007987 | 1.416239 | up   | 1.199726 | down | 1.699099 | down | FARP1     |
| 1562431_x | 0.019682 | 0.017991 | 1.173812 | up   | 1.022403 | down | 1.200109 | down |           |
| 1562442_a | 6.54E-04 | 2.28E-04 | 1.371301 | up   | 2.171487 | up   | 1.583523 | up   | SSBP1     |
| 1562474_a | 0.001977 | 0.00102  | 3.769539 | down | 1.940483 | down | 1.942578 | up   |           |
| 1562606_a | 5.23E-04 | 1.68E-04 | 1.794325 | down | 1.334414 | down | 1.344654 | up   | LOC440028 |
| 1562543_a | 0.004554 | 0.003102 | 1.195396 | up   | 1.134507 | down | 1.356184 | down |           |
| 1562544_a | 6.31E-04 | 2.17E-04 | 1.086599 | up   | 1.49636  | up   | 1.377104 | up   |           |
| 1562549_a | 0.006972 | 0.005314 | 1.510083 | up   | 1.274763 | up   | 1.184599 | down |           |
| 1562572_a | 0.003987 | 0.002595 | 1.225735 | down | 1.058335 | up   | 1.297238 | up   |           |
| 1562601_a | 0.014258 | 0.012469 | 1.303846 | up   | 1.068056 | down | 1.392581 | down | UNQ6975   |
| 1562603_a | 0.037812 | 0.036544 | 1.185905 | down | 1.376201 | up   | 1.632044 | up   | RFFL      |
| 1562617_a | 0.005846 | 0.004248 | 1.107693 | up   | 1.370644 | up   | 1.237386 | up   | LOC340074 |
| 1562621_a | 0.009792 | 0.008013 | 1.432658 | up   | 1.048685 | up   | 1.366147 | down |           |
| 1562623_a | 0.014823 | 0.013049 | 1.376354 | up   | 1.078561 | up   | 1.276103 | down | LOC146513 |
| 1562624_a | 0.001429 | 6.59E-04 | 1.383134 | up   | 1.169031 | down | 1.616927 | down |           |
| 1562632_a | 1.25E-04 | 2.44E-05 | 1.604941 | up   | 1.054644 | down | 1.692641 | down | LOC285191 |
| 1562637_a | 0.001396 | 6.39E-04 | 1.038883 | up   | 1.145972 | up   | 1.103081 | up   | SAMD12    |
| 1562644_a | 0.021583 | 0.019957 | 1.171408 | up   | 1.040779 | up   | 1.125511 | down | MTHFD2L   |
| 1562645_a | 0.004552 | 0.0031   | 1.187033 | up   | 1.272312 | down | 1.510277 | down | LOC401176 |

|           |          |          |               |               |               |           |
|-----------|----------|----------|---------------|---------------|---------------|-----------|
| 1562648_a | 0.007478 | 0.005788 | 1.175852 up   | 1.644035 up   | 1.398166 up   | CCDC88A   |
| 1562650_a | 0.017429 | 0.015682 | 1.338022 up   | 1.089152 up   | 1.228499 down | FRYL      |
| 1562659_a | 0.011579 | 0.00978  | 1.402579 up   | 1.078934 up   | 1.299968 down | LOC400548 |
| 1562673_a | 0.033204 | 0.031884 | 1.753458 up   | 3.180044 up   | 1.813584 up   |           |
| 1562694_a | 0.012712 | 0.01091  | 1.39482 up    | 1.015898 up   | 1.372992 down | C3orf65   |
| 1562699_a | 0.001279 | 5.69E-04 | 1.334768 down | 1.094634 up   | 1.461082 up   |           |
| 1562723_a | 0.003061 | 0.001839 | 1.379182 up   | 1.022931 down | 1.410808 down |           |
| 1562731_s | 0.01918  | 0.017475 | 1.158883 up   | 1.3769 up     | 1.188126 up   | MDS2      |
| 1562745_a | 0.036324 | 0.035051 | 1.241554 down | 1.126533 up   | 1.398652 up   |           |
| 1562790_a | 0.00496  | 0.003458 | 1.359077 up   | 1.229247 up   | 1.105618 down | NCALD     |
| 1562792_a | 0.006253 | 0.004636 | 1.395586 up   | 1.142641 up   | 1.221369 down | NIPAL1    |
| 1562820_a | 0.017764 | 0.016023 | 1.096047 up   | 1.061751 down | 1.16373 down  |           |
| 1562828_a | 1.48E-04 | 3.06E-05 | 8.250695 up   | 9.075723 up   | 1.099995 up   |           |
| 1562836_a | 0.043311 | 0.042069 | 1.698556 up   | 1.589153 down | 2.699266 down |           |
| 1562849_a | 0.009245 | 0.007488 | 1.565291 up   | 1.145011 up   | 1.367054 down |           |
| 1562894_a | 0.00275  | 0.001594 | 1.256242 down | 1.063085 up   | 1.335492 up   |           |
| 1562896_a | 0.004187 | 0.002769 | 1.690153 down | 1.068477 down | 1.581834 up   | TNRC18    |
| 1562902_a | 0.006167 | 0.004553 | 1.018678 up   | 1.112609 up   | 1.092208 up   |           |
| 1562940_a | 3.66E-04 | 1.04E-04 | 1.620518 down | 1.054821 down | 1.536297 up   |           |
| 1562942_a | 0.007826 | 0.006126 | 1.152061 up   | 1.091162 down | 1.257086 down |           |
| 1562947_x | 0.001537 | 7.26E-04 | 1.321249 up   | 1.203119 up   | 1.098186 down |           |
| 1562950_a | 0.00374  | 0.002395 | 1.05861 down  | 1.379778 up   | 1.460647 up   |           |
| 1562979_a | 0.014696 | 0.012918 | 1.695712 up   | 1.191791 down | 2.020935 down |           |
| 1562988_a | 0.001332 | 6.00E-04 | 1.436494 up   | 1.515019 up   | 1.054665 up   | ZNF397OS  |
| 1562998_a | 0.0042   | 0.002779 | 1.104759 up   | 1.04647 down  | 1.156097 down |           |
| 1563012_x | 0.00339  | 0.00211  | 1.132424 up   | 1.381138 up   | 1.219629 up   |           |
| 1563022_a | 2.74E-04 | 7.07E-05 | 2.31512 up    | 2.241658 up   | 1.032771 down | LOC347475 |
| 1563035_x | 0.001121 | 4.74E-04 | 1.005753 down | 1.331045 down | 1.323431 down | GPD1      |
| 1565000_a | 0.010896 | 0.009103 | 1.141045 up   | 1.37677 up    | 1.206587 up   | TCP11L2   |
| 1563054_a | 0.01439  | 0.012608 | 1.105156 up   | 1.103015 down | 1.219004 down |           |
| 1563071_a | 0.017499 | 0.015754 | 1.448009 up   | 1.188363 up   | 1.21849 down  |           |
| 1563074_a | 0.00626  | 0.004641 | 1.5712 up     | 1.159206 up   | 1.35541 down  | LOC255654 |
| 1563091_a | 0.048346 | 0.04717  | 1.169049 up   | 1.047423 up   | 1.11612 down  |           |
| 1563121_a | 0.011702 | 0.009899 | 1.158099 down | 1.065848 up   | 1.234357 up   |           |

|           |          |          |               |               |               |           |
|-----------|----------|----------|---------------|---------------|---------------|-----------|
| 1563154_a | 0.014233 | 0.012442 | 1.22532 up    | 1.134878 down | 1.390589 down |           |
| 1563226_a | 0.021674 | 0.020046 | 1.467863 up   | 1.221687 down | 1.793269 down | SLC38A10  |
| 1563243_a | 0.011304 | 0.009509 | 1.40369 up    | 1.115937 down | 1.56643 down  |           |
| 1563252_a | 1.08E-04 | 2.01E-05 | 1.367049 up   | 1.181133 down | 1.614666 down | ERBB3     |
| 1563265_a | 0.005101 | 0.003582 | 1.182517 up   | 1.060041 down | 1.253516 down |           |
| 1563271_a | 0.012468 | 0.010672 | 1.339503 down | 1.135925 down | 1.179217 up   |           |
| 1563272_a | 1.17E-04 | 2.23E-05 | 1.987593 down | 1.889447 down | 1.051944 up   | TBC1D8B   |
| 1563315_s | 0.003607 | 0.002284 | 1.561773 up   | 1.620844 up   | 1.037823 up   | ERICH1    |
| 1563321_s | 9.01E-04 | 3.52E-04 | 3.776505 up   | 4.027937 up   | 1.066578 up   | MLLT10    |
| 1563341_a | 6.04E-04 | 2.05E-04 | 1.074203 up   | 1.515413 down | 1.627861 down |           |
| 1563345_a | 0.002643 | 0.00151  | 1.025733 down | 1.385957 up   | 1.421621 up   |           |
| 1563357_a | 1.21E-04 | 2.33E-05 | 14.61393 up   | 21.55131 up   | 1.47471 up    |           |
| 1563373_a | 0.009072 | 0.007317 | 1.280958 up   | 1.216212 down | 1.557915 down | LOC731223 |
| 1563397_a | 3.44E-04 | 9.56E-05 | 1.384268 up   | 1.212485 up   | 1.141679 down |           |
| 1563445_x | 9.20E-05 | 1.61E-05 | 2.941964 down | 1.121717 down | 2.622733 up   | CTSLL3    |
| 1563458_a | 0.002136 | 0.001133 | 2.7176 down   | 1.374558 down | 1.977071 up   | PARVA     |
| 1563469_a | 2.29E-05 | 2.42E-06 | 4.273221 down | 1.161912 down | 3.677749 up   |           |
| 1563473_a | 0.001095 | 4.59E-04 | 1.595289 up   | 1.582425 up   | 1.008129 down |           |
| 1563483_a | 0.012463 | 0.010667 | 1.411836 down | 1.040585 down | 1.356771 up   | FAM91A2   |
| 1563497_a | 0.001193 | 5.17E-04 | 2.91975 up    | 5.451119 up   | 1.866982 up   | USP25     |
| 1563498_s | 0.00406  | 0.002657 | 3.101363 down | 2.180462 down | 1.422342 up   | SLC25A45  |
| 1563502_a | 0.003567 | 0.002253 | 1.339266 up   | 1.063395 up   | 1.259425 down | ZDHHC2    |
| 1563512_a | 0.018823 | 0.017114 | 1.013281 up   | 1.241374 up   | 1.225105 up   | NOS1AP    |
| 1563533_a | 0.022311 | 0.020713 | 1.322668 up   | 1.006687 up   | 1.313882 down | GADL1     |
| 1563569_a | 0.012521 | 0.010725 | 1.283616 up   | 1.077092 down | 1.382572 down |           |
| 1563571_a | 7.60E-04 | 2.81E-04 | 1.719363 up   | 1.196252 up   | 1.437292 down | LOC285463 |
| 1563577_a | 0.009361 | 0.007596 | 1.522015 down | 1.277635 up   | 1.94458 up    |           |
|           |          |          |               |               |               | hCG_20450 |
| 1563606_a | 0.030135 | 0.028742 | 1.237613 up   | 1.281591 down | 1.586114 down | 89        |
| 1563614_a | 0.001431 | 6.61E-04 | 1.185199 up   | 1.417236 up   | 1.195779 up   | MTBP      |
| 1563621_a | 0.00525  | 0.003716 | 1.29767 down  | 1.291858 up   | 1.676405 up   |           |
| 1563671_a | 0.019624 | 0.017931 | 1.225334 down | 1.048142 down | 1.169053 up   | LACE1     |
| 1563674_a | 0.00595  | 0.004348 | 1.332441 down | 1.20883 up    | 1.610694 up   | FCRL2     |
| 1563685_a | 0.0137   | 0.011911 | 1.375814 up   | 1.147125 up   | 1.199359 down | LOC285422 |

|           |          |          |               |               |               |           |
|-----------|----------|----------|---------------|---------------|---------------|-----------|
| 1563691_a | 0.011425 | 0.009626 | 1.578607 up   | 1.006102 down | 1.58824 down  | LOC285300 |
| 1563754_a | 6.19E-05 | 9.43E-06 | 4.287133 down | 1.278486 down | 3.353289 up   | GRIK2     |
| 1563770_a | 2.15E-04 | 5.08E-05 | 1.848407 up   | 1.70408 up    | 1.084695 down | ZBTB8B    |
| 1563781_a | 0.003281 | 0.00202  | 1.448173 down | 1.407067 up   | 2.037675 up   | LOC285949 |
| 1563783_a | 0.046408 | 0.045206 | 1.368638 down | 1.347582 down | 1.015625 up   | ZNF333    |
| 1563796_s | 0.003559 | 0.002247 | 1.95132 up    | 1.801333 up   | 1.083265 down | EARS2     |
| 1563821_a | 0.00101  | 4.11E-04 | 1.206024 up   | 1.277571 up   | 1.059326 up   | LOC170425 |
| 1563903_x | 6.08E-04 | 2.07E-04 | 1.119807 up   | 1.35987 down  | 1.522793 down |           |
| 1563975_a | 2.25E-04 | 5.41E-05 | 1.441341 up   | 1.570544 up   | 1.08964 up    | RNF130    |
|           |          |          |               |               |               | LOC100190 |
| 1563983_a | 0.003223 | 0.001972 | 1.472509 down | 1.053625 down | 1.397565 up   | 939       |
| 1564051_a | 0.021332 | 0.019694 | 1.123972 down | 1.045825 down | 1.074723 up   |           |
| 1564063_a | 0.043557 | 0.042318 | 1.283547 up   | 1.241277 down | 1.593237 down | ATP11B    |
| 1564064_a | 1.22E-04 | 2.35E-05 | 3.125183 down | 2.994319 down | 1.043704 up   | ATP11B    |
| 1564066_a | 0.002075 | 0.00109  | 2.386828 up   | 1.180307 down | 2.81719 down  | TMEM151B  |
| 1564067_x | 0.001009 | 4.10E-04 | 2.999367 up   | 1.092495 down | 3.276793 down | TMEM151B  |
|           |          |          |               |               |               | hCG_18206 |
| 1564109_a | 0.004794 | 0.003306 | 1.330968 down | 1.117578 up   | 1.48746 up    | 79        |
| 1564143_a | 6.43E-04 | 2.23E-04 | 1.156685 down | 1.189994 up   | 1.376449 up   |           |
| 1564154_a | 9.36E-05 | 1.64E-05 | 3.797494 up   | 5.354302 up   | 1.409956 up   |           |
| 1564155_x | 1.10E-04 | 2.05E-05 | 2.919156 up   | 5.000865 up   | 1.71312 up    |           |
| 1564204_a | 0.013908 | 0.012117 | 1.102158 up   | 1.263128 up   | 1.14605 up    | FAM91A2   |
| 1569090_x | 0.001136 | 4.83E-04 | 1.129126 up   | 1.435896 up   | 1.271688 up   | FLJ35390  |
| 1564207_a | 9.07E-04 | 3.55E-04 | 1.728444 down | 1.1837 up     | 2.045959 up   | FLJ35390  |
| 1564208_x | 0.007434 | 0.005745 | 1.289896 down | 1.064757 up   | 1.373425 up   | FLJ35390  |
| 1564211_a | 0.017946 | 0.016208 | 1.333197 up   | 1.094543 down | 1.459241 down | C14orf64  |
| 1564229_a | 0.004671 | 0.003206 | 1.393123 down | 1.115151 down | 1.249269 up   | LOC729173 |
| 1564237_a | 0.00429  | 0.002861 | 1.072076 up   | 1.261072 up   | 1.176289 up   |           |
|           |          |          |               |               |               | LOC100130 |
| 1564240_a | 0.006836 | 0.005178 | 1.454651 down | 1.114224 down | 1.305528 up   | 856       |
| 1564242_a | 0.006888 | 0.005229 | 1.515238 up   | 1.08214 up    | 1.400224 down |           |
| 1564248_a | 4.28E-04 | 1.28E-04 | 2.67579 up    | 2.862946 up   | 1.069944 up   |           |
| 1564276_a | 0.011596 | 0.009797 | 1.012238 up   | 1.266166 down | 1.281662 down | C5orf56   |
| 1564301_a | 0.00294  | 0.001744 | 1.12122 up    | 1.261576 up   | 1.125182 up   | RPAIN     |

|           |          |          |               |               |               |           |
|-----------|----------|----------|---------------|---------------|---------------|-----------|
| 1564319_a | 4.94E-05 | 6.96E-06 | 1.563816 up   | 1.295186 up   | 1.207407 down | FAM71E2   |
| 1564331_a | 3.63E-04 | 1.03E-04 | 1.901153 down | 1.187322 down | 1.601211 up   | ZNF846    |
| 1564336_a | 0.001636 | 7.92E-04 | 1.267342 down | 1.189384 up   | 1.507356 up   |           |
| 1564339_a | 4.81E-04 | 1.49E-04 | 1.595412 up   | 1.499531 up   | 1.06394 down  | CHRM3     |
| 1564356_a | 0.005264 | 0.003729 | 1.29572 down  | 1.006717 up   | 1.304423 up   | ZNF568    |
| 1564413_a | 1.13E-05 | 8.90E-07 | 19.34612 up   | 14.71898 up   | 1.314366 down | FLJ36116  |
| 1564426_x | 0.001949 | 0.001001 | 2.624018 up   | 1.08895 up    | 2.409676 down | LOC389634 |
|           |          |          |               |               |               | LOC100130 |
| 1564444_a | 0.001657 | 8.06E-04 | 1.436042 up   | 1.003376 down | 1.44089 down  | 264       |
|           |          |          |               |               |               | LOC100130 |
| 1564449_a | 0.013562 | 0.011769 | 1.222567 up   | 1.013975 up   | 1.205717 down | 353       |
| 1564451_a | 0.011088 | 0.009289 | 1.35194 up    | 1.224099 up   | 1.104437 down |           |
| 1564520_s | 0.001552 | 7.37E-04 | 2.763646 up   | 1.715813 up   | 1.610692 down | PRMT5     |
| 1564521_x | 1.59E-04 | 3.40E-05 | 2.220252 up   | 1.64881 up    | 1.346578 down | PRMT5     |
| 1564559_a | 0.01174  | 0.009938 | 1.565886 up   | 1.096996 up   | 1.427432 down | LOC728073 |
| 1564573_a | 2.08E-04 | 4.85E-05 | 1.098986 down | 3.006778 down | 2.735957 down | LOC402778 |
| 1564580_a | 0.006631 | 0.004986 | 1.374993 up   | 1.238686 up   | 1.110043 down |           |
| 1564627_a | 0.008738 | 0.006997 | 1.250949 up   | 1.225926 down | 1.53357 down  | DNAJC13   |
| 1564632_a | 0.007459 | 0.00577  | 1.189355 up   | 1.125437 up   | 1.056794 down |           |
| 1564637_a | 0.005232 | 0.0037   | 1.41381 up    | 2.437809 up   | 1.724283 up   | FAM98B    |
| 1564658_a | 0.008791 | 0.007047 | 1.810008 up   | 1.325902 up   | 1.365114 down | C7orf52   |
|           |          |          |               |               |               | LOC100128 |
| 1564691_a | 0.034384 | 0.033308 | 1.292072 down | 1.136867 down | 1.13652 up    | 594       |
| 1564706_s | 0.001941 | 9.95E-04 | 2.381521 up   | 1.628897 up   | 1.462045 down | GLS2      |
| 1564709_a | 0.018523 | 0.0168   | 1.178925 up   | 1.040685 up   | 1.132836 down | LOC286238 |
| 1564746_a | 1.92E-06 | 7.37E-08 | 3.078827 down | 2.688024 down | 1.145387 up   | NHEDC2    |
| 1564749_a | 0.005729 | 0.00414  | 1.378133 up   | 1.297676 up   | 1.062 down    |           |
| 1564789_a | 0.009696 | 0.007918 | 1.200768 up   | 1.0515 down   | 1.262607 down |           |
| 1564796_a | 0.004058 | 0.002655 | 2.411501 down | 2.47159 down  | 1.024918 down | EMP1      |
| 1564807_a | 9.30E-04 | 3.68E-04 | 1.357824 down | 1.037087 up   | 1.408181 up   |           |
| 1564821_a | 0.019775 | 0.018088 | 1.278109 up   | 1.237648 down | 1.581848 down |           |
| 1564838_a | 0.022332 | 0.020742 | 1.19187 down  | 1.010433 up   | 1.204304 up   | LOC151760 |
| 1564868_a | 0.007363 | 0.005681 | 1.705065 up   | 1.420751 up   | 1.200116 down | FAM117B   |
| 1564886_a | 0.004857 | 0.003365 | 1.145046 down | 1.261818 up   | 1.444839 up   |           |



|           |          |          |               |               |               |           |
|-----------|----------|----------|---------------|---------------|---------------|-----------|
| 1564887_a | 0.012141 | 0.010347 | 1.4066 up     | 1.089481 up   | 1.291074 down |           |
| 1564905_a | 0.014566 | 0.012791 | 1.32564 up    | 1.118966 down | 1.483346 down |           |
|           |          |          |               |               |               | MATR3 /// |
| 1564907_s | 0.008637 | 0.006896 | 2.147345 up   | 3.262898 up   | 1.519503 up   | SNHG4     |
| 1565254_s | 0.03263  | 0.031307 | 1.707639 down | 1.344446 down | 1.270144 up   | ELL       |
| 1564964_a | 0.006634 | 0.004991 | 2.296224 up   | 1.939192 up   | 1.184114 down |           |
| 1565105_a | 1.84E-04 | 4.12E-05 | 1.620522 up   | 1.306448 down | 2.117128 down |           |
| 1565149_a | 0.006526 | 0.004894 | 1.435424 down | 1.744199 up   | 2.503665 up   | DYNC2H1   |
| 1565162_s | 5.13E-04 | 1.63E-04 | 1.218918 down | 4.186737 up   | 5.103287 up   | MGST1     |
| 1565424_a | 0.041974 | 0.040725 | 1.230067 up   | 1.062993 down | 1.307552 down | C8orf8    |
| 1565535_x | 0.005673 | 0.004091 | 1.450568 up   | 1.400593 down | 2.031655 down |           |
| 1565598_a | 0.006243 | 0.004625 | 1.071542 up   | 1.500953 up   | 1.400741 up   |           |
| 1565611_a | 0.019826 | 0.018143 | 1.084538 down | 1.299029 up   | 1.408846 up   | DYNLRB1   |
| 1565620_a | 0.004565 | 0.003113 | 1.108781 up   | 2.205597 up   | 1.989209 up   | AGAP4     |
| 1565627_a | 0.004161 | 0.002744 | 1.618147 down | 1.922353 down | 1.187997 down |           |
| 1565628_a | 0.001249 | 5.50E-04 | 1.304785 down | 1.481367 down | 1.135334 down |           |
| 1565639_a | 1.89E-04 | 4.27E-05 | 1.83849 down  | 1.137907 up   | 2.092031 up   |           |
| 1565659_a | 0.006032 | 0.004423 | 1.349907 up   | 1.016265 down | 1.371864 down | FUT6      |
| 1565671_a | 0.006655 | 0.005012 | 1.873898 up   | 1.045583 down | 1.959316 down | LOC391142 |
| 1565672_a | 8.90E-04 | 3.46E-04 | 1.234131 down | 1.182872 up   | 1.459819 up   |           |
| 1565681_s | 6.76E-04 | 2.38E-04 | 2.199873 down | 2.965708 down | 1.348127 down | DIP2C     |
| 1565698_a | 0.008659 | 0.00692  | 1.187195 down | 1.120031 down | 1.059966 up   | HECTD2    |
| 1565722_a | 0.004612 | 0.003155 | 1.22045 up    | 1.34328 down  | 1.639405 down |           |
| 1565740_a | 3.14E-04 | 8.50E-05 | 1.17048 up    | 1.265571 down | 1.481325 down |           |
| 1565752_a | 0.00476  | 0.003277 | 1.315303 down | 1.017568 up   | 1.33841 up    | FGD2      |
| 1565786_x | 0.002008 | 0.001041 | 3.845552 up   | 2.658672 up   | 1.446419 down | FLJ45482  |
| 1565807_a | 0.019678 | 0.017986 | 1.211669 up   | 1.155245 down | 1.399775 down |           |
| 1565811_a | 0.004247 | 0.002818 | 1.420755 up   | 1.832863 up   | 1.290063 up   |           |
| 1565817_a | 0.007496 | 0.005806 | 1.5326 up     | 1.215297 up   | 1.261092 down | IKZF1     |
| 1565818_s | 0.024321 | 0.022744 | 1.513791 up   | 1.010803 up   | 1.497613 down | IKZF1     |
| 1565826_a | 0.001559 | 7.42E-04 | 1.04059 up    | 1.522636 down | 1.584439 down |           |
| 1565836_a | 0.005825 | 0.004228 | 1.220535 up   | 1.381796 up   | 1.132123 up   |           |
| 1565846_a | 0.004172 | 0.002754 | 1.289349 up   | 1.163929 up   | 1.107756 down |           |
| 1565859_a | 0.010415 | 0.008617 | 1.218096 up   | 1.275359 up   | 1.047011 up   | SNORA71A  |

|           |          |          |          |      |          |      |          |      |           |
|-----------|----------|----------|----------|------|----------|------|----------|------|-----------|
| 1565868_a | 9.20E-05 | 1.61E-05 | 2.047961 | down | 1.137322 | down | 1.800686 | up   | CD44      |
| 1565875_a | 0.010616 | 0.008826 | 1.2799   | up   | 1.077595 | up   | 1.187738 | down |           |
| 1565876_x | 0.003387 | 0.002108 | 1.148559 | up   | 1.072348 | down | 1.231654 | down |           |
| 1565903_a | 0.004118 | 0.002706 | 1.416178 | up   | 1.242014 | down | 1.758913 | down |           |
| 1565908_a | 0.009155 | 0.0074   | 1.45043  | up   | 1.046844 | up   | 1.385527 | down | NADSYN1   |
| 1565913_a | 0.013477 | 0.011681 | 1.145742 | down | 1.242526 | up   | 1.423614 | up   |           |
| 1565921_a | 0.026815 | 0.025326 | 1.286276 | up   | 1.021181 | up   | 1.259596 | down |           |
| 1565935_a | 4.56E-04 | 1.39E-04 | 2.709531 | up   | 2.168427 | up   | 1.249538 | down | LOC91431  |
| 1565951_s | 2.30E-04 | 5.58E-05 | 4.164358 | up   | 3.739487 | up   | 1.113618 | down | CHML      |
| 1565975_a | 0.001077 | 4.49E-04 | 1.653935 | up   | 1.442331 | up   | 1.14671  | down |           |
| 1566002_a | 0.012806 | 0.011005 | 1.696124 | up   | 1.009305 | up   | 1.680488 | down |           |
| 1566003_x | 0.001658 | 8.06E-04 | 2.778968 | up   | 1.229667 | up   | 2.259936 | down |           |
| 1566030_a | 0.007845 | 0.006143 | 1.197316 | down | 1.050306 | down | 1.139969 | up   |           |
| 1566082_a | 0.049785 | 0.048629 | 1.124598 | down | 1.08772  | up   | 1.223248 | up   | LOC644215 |
| 1566084_a | 0.002308 | 0.001261 | 2.068908 | down | 1.016301 | down | 2.035723 | up   | LOC644215 |
| 1566097_a | 0.009761 | 0.007982 | 1.0964   | up   | 1.251763 | up   | 1.141703 | up   |           |
| 1566101_a | 0.001251 | 5.51E-04 | 1.076303 | up   | 1.178221 | down | 1.268123 | down | TTLL5     |
| 1566102_a | 0.011145 | 0.009352 | 1.249931 | up   | 1.351758 | up   | 1.081466 | up   | TTLL5     |
| 1566109_a | 0.003058 | 0.001837 | 1.100852 | down | 1.095619 | up   | 1.206114 | up   | MYNN      |
| 1566136_a | 0.008576 | 0.006836 | 1.71856  | down | 1.222017 | down | 1.406331 | up   |           |
| 1566177_a | 0.006431 | 0.004805 | 1.410618 | up   | 1.241147 | up   | 1.136544 | down |           |
| 1566178_x | 0.005436 | 0.003878 | 1.573304 | up   | 1.526109 | up   | 1.030925 | down |           |
| 1566185_a | 0.00868  | 0.006942 | 1.171085 | up   | 1.523529 | up   | 1.300955 | up   |           |
| 1566222_a | 0.026223 | 0.024729 | 1.219011 | down | 1.060047 | down | 1.149959 | up   |           |
| 1566236_a | 0.009933 | 0.008156 | 1.390767 | up   | 1.242454 | up   | 1.119371 | down | DGCR12    |
| 1566251_a | 0.00454  | 0.003088 | 1.04451  | down | 1.11617  | up   | 1.16585  | up   | LOC651250 |
| 1566267_a | 0.011649 | 0.00985  | 1.186441 | up   | 1.087926 | down | 1.29076  | down |           |
| 1566284_a | 9.56E-04 | 3.82E-04 | 1.805844 | down | 1.380936 | up   | 2.493754 | up   |           |
| 1566302_a | 0.001782 | 8.87E-04 | 1.777068 | down | 1.121103 | down | 1.585106 | up   | PPP1R11   |
| 1566339_a | 0.003711 | 0.002371 | 1.18439  | up   | 1.35684  | down | 1.607028 | down | SNORD8    |
| 1566342_a | 0.004533 | 0.003082 | 6.63542  | down | 2.268912 | down | 2.924494 | up   | SOD2      |
| 1566402_a | 0.011096 | 0.009298 | 1.993815 | down | 1.214812 | down | 1.641254 | up   | SNORA68   |
| 1566441_a | 0.011895 | 0.010092 | 1.156136 | up   | 1.1953   | down | 1.38193  | down |           |
| 1566452_a | 0.009921 | 0.008144 | 1.428569 | up   | 1.233864 | up   | 1.157801 | down |           |

|           |          |          |               |               |               |           |
|-----------|----------|----------|---------------|---------------|---------------|-----------|
| 1566456_a | 0.008762 | 0.007021 | 1.553449 up   | 1.088069 up   | 1.427712 down |           |
| 1566463_a | 0.032927 | 0.03161  | 1.217521 up   | 1.106113 down | 1.346715 down |           |
| 1566465_a | 5.62E-04 | 1.85E-04 | 1.581595 up   | 1.331923 up   | 1.187452 down | LOC728987 |
| 1566472_s | 5.94E-04 | 2.00E-04 | 5.687135 down | 3.728488 down | 1.52532 up    | RETSAT    |
| 1566474_a | 0.009506 | 0.007733 | 1.446126 up   | 1.185897 up   | 1.219437 down |           |
| 1566482_a | 0.005093 | 0.003575 | 4.844775 down | 3.502714 down | 1.383149 up   |           |
| 1566507_a | 0.003757 | 0.00241  | 1.424357 down | 1.036637 down | 1.374017 up   | FBXO9     |
| 1566509_s | 2.89E-04 | 7.56E-05 | 2.117816 down | 2.111139 down | 1.003163 up   | FBXO9     |
| 1566527_a | 0.025962 | 0.024456 | 1.364358 up   | 1.050033 down | 1.432621 down |           |
| 1566544_a | 0.005243 | 0.003709 | 1.159827 up   | 1.279569 down | 1.484079 down |           |
| 1566549_a | 0.005131 | 0.00361  | 1.177802 up   | 1.681282 up   | 1.427475 up   |           |
| 1566555_a | 0.009852 | 0.008074 | 1.145463 up   | 1.146271 down | 1.313011 down | FLJ90757  |
| 1566557_a | 1.58E-04 | 3.36E-05 | 4.614754 down | 3.175955 down | 1.453029 up   | FLJ90757  |
| 1566558_x | 7.71E-04 | 2.86E-04 | 2.637835 down | 2.03866 down  | 1.293907 up   | FLJ90757  |
| 1566576_a | 0.018761 | 0.017043 | 1.267374 up   | 1.143495 down | 1.449235 down |           |
| 1566577_a | 0.007416 | 0.005728 | 1.448875 up   | 1.315536 down | 1.906047 down |           |
| 1566727_a | 0.003796 | 0.002441 | 1.221417 down | 1.123297 up   | 1.372014 up   |           |
| 1566734_a | 0.002046 | 0.00107  | 1.144502 up   | 1.432583 up   | 1.251709 up   | LOC283454 |
| 1566749_a | 0.00235  | 0.001291 | 1.092894 up   | 1.048947 down | 1.146388 down |           |
| 1566766_a | 2.06E-04 | 4.78E-05 | 2.335167 up   | 2.190933 up   | 1.065832 down | MACC1     |
| 1566780_a | 0.001599 | 7.68E-04 | 1.111852 down | 1.130875 up   | 1.257366 up   |           |
| 1566783_a | 0.004067 | 0.002664 | 1.038913 up   | 1.258434 up   | 1.211299 up   |           |
| 1566784_a | 0.00462  | 0.003162 | 1.201715 down | 1.248638 up   | 1.500506 up   | LOC728806 |
| 1566786_a | 0.005847 | 0.004248 | 1.237717 up   | 1.176414 down | 1.456068 down |           |
| 1566824_a | 0.008423 | 0.006686 | 1.386055 down | 1.213884 up   | 1.68251 up    |           |
| 1566839_a | 0.007314 | 0.005634 | 1.06571 up    | 1.263655 down | 1.34669 down  | LOC283674 |
| 1566840_a | 0.025011 | 0.023454 | 1.03773 up    | 1.119289 down | 1.16152 down  | LOC283674 |
| 1566860_a | 0.006356 | 0.00473  | 1.034014 up   | 1.208137 down | 1.24923 down  | LOC145663 |
| 1566867_a | 0.013575 | 0.011783 | 1.351217 up   | 1.033883 down | 1.397 down    |           |
| 1566879_a | 0.008719 | 0.006978 | 1.128136 down | 1.225156 up   | 1.382143 up   |           |
| 1566880_a | 0.001941 | 9.95E-04 | 1.35557 down  | 1.097071 up   | 1.487156 up   |           |
| 1566887_x | 0.002834 | 0.001658 | 1.423545 up   | 3.338774 up   | 2.345394 up   |           |
| 1566901_a | 0.00377  | 0.00242  | 2.530231 up   | 4.002382 up   | 1.581825 up   | TGIF1     |
| 1566950_a | 0.033842 | 0.032528 | 1.239285 up   | 1.031156 down | 1.277896 down |           |

|           |          |          |               |               |               |           |
|-----------|----------|----------|---------------|---------------|---------------|-----------|
| 1566957_a | 0.00964  | 0.007863 | 1.880738 up   | 1.05764 up    | 1.77824 down  |           |
| 1566987_s | 0.004432 | 0.002988 | 1.514405 down | 1.505387 down | 1.005991 up   | LOC651250 |
| 1566989_a | 0.003174 | 0.001934 | 1.336974 down | 1.58929 up    | 2.124839 up   | ARID1B    |
| 1566990_x | 4.95E-04 | 1.55E-04 | 1.517167 down | 1.537524 up   | 2.332682 up   | ARID1B    |
| 1566991_a | 0.017826 | 0.016085 | 1.485779 up   | 1.160519 down | 1.724275 down | ARID1B    |
| 1567008_a | 0.028446 | 0.026999 | 1.022615 down | 1.141328 down | 1.116087 down |           |
| 1567031_a | 0.022517 | 0.020933 | 1.114111 down | 1.188638 down | 1.066894 down | ZNF160    |
| 1567036_a | 0.007426 | 0.005738 | 1.52581 up    | 1.17677 down  | 1.795528 down | C20orf181 |
| 1567068_a | 0.002453 | 0.001368 | 1.187618 up   | 1.257527 down | 1.493462 down | OR4D1     |
| 1567076_a | 0.010462 | 0.008668 | 1.207163 up   | 1.131452 down | 1.365846 down |           |
| 1567079_a | 0.001936 | 9.92E-04 | 1.519984 up   | 1.035071 down | 1.573292 down | CLN6      |
| 1567105_a | 0.005177 | 0.00365  | 1.997191 down | 1.525436 down | 1.309259 up   |           |
| 1567167_a | 0.001858 | 9.37E-04 | 1.413757 up   | 1.356248 down | 1.917406 down |           |
| 1567213_a | 0.020512 | 0.018839 | 1.053188 down | 2.475501 up   | 2.607168 up   | PNN       |
| 1567246_a | 0.012029 | 0.010231 | 1.133935 up   | 1.016423 up   | 1.115613 down | OR5H1     |
| 1567252_a | 0.003529 | 0.002222 | 1.439073 up   | 1.012429 up   | 1.421407 down | OR10D3P   |
| 1567257_a | 0.004351 | 0.002919 | 1.665743 down | 1.069871 down | 1.556957 up   | OR1J2     |
| 1567277_a | 0.033327 | 0.032012 | 1.397699 up   | 1.091774 down | 1.525972 down | CTTN      |
| 1567282_a | 4.38E-04 | 1.32E-04 | 1.415465 up   | 1.003184 up   | 1.410972 down | OR1J4     |
| 1567297_a | 0.007396 | 0.00571  | 1.553232 up   | 1.205728 up   | 1.288211 down | OR13C4    |
| 1567375_a | 0.001922 | 9.83E-04 | 1.332747 up   | 1.17389 up    | 1.135325 down |           |
| 1567377_a | 0.001132 | 4.80E-04 | 1.550936 up   | 1.284669 down | 1.992439 down | DNAH1     |
| 1567378_x | 0.005117 | 0.003597 | 1.20798 up    | 1.217182 down | 1.470332 down | DNAH1     |
| 1567387_a | 2.23E-04 | 5.34E-05 | 1.697852 down | 1.338725 down | 1.26826 up    |           |
| 1567440_a | 0.002072 | 0.001088 | 1.378386 down | 1.114372 up   | 1.536035 up   | PSEN1     |
| 1567443_x | 0.007122 | 0.005452 | 1.411535 up   | 1.110517 down | 1.567534 down | PSEN1     |
| 1567457_a | 0.004605 | 0.003148 | 2.222851 down | 1.452455 down | 1.53041 up    | RAC1      |
| 1567540_a | 0.001594 | 7.65E-04 | 1.504175 up   | 1.037772 up   | 1.449427 down | MFGE8     |
| 1567575_a | 0.011061 | 0.009261 | 3.284051 down | 2.406334 down | 1.364753 up   |           |
| 1567590_a | 0.009592 | 0.007818 | 1.234225 up   | 1.259095 down | 1.554006 down |           |
| 1567591_a | 0.001182 | 5.11E-04 | 1.257968 down | 1.073257 up   | 1.350123 up   |           |
| 1567627_a | 0.001533 | 7.24E-04 | 1.747909 up   | 1.058897 up   | 1.650688 down | CD74      |
| 1567687_a | 0.00212  | 0.001121 | 1.044807 up   | 1.58882 down  | 1.660009 down | CECR9     |
| 1567705_a | 0.015503 | 0.01373  | 1.228705 down | 1.063337 down | 1.155518 up   |           |

|           |          |          |               |               |               |           |
|-----------|----------|----------|---------------|---------------|---------------|-----------|
| 1567860_a | 0.007544 | 0.005856 | 1.010253 up   | 1.157921 down | 1.169793 down |           |
| 1567985_a | 1.82E-04 | 4.08E-05 | 1.00551 down  | 1.712444 up   | 1.72188 up    |           |
| 1568248_x | 0.034254 | 0.03295  | 1.487173 up   | 1.365583 down | 2.030858 down | SNORA71B  |
| 1568408_x | 9.69E-04 | 3.88E-04 | 1.004209 down | 1.580843 up   | 1.587496 up   |           |
| 1568513_x | 0.002378 | 0.001312 | 1.821052 up   | 1.860063 up   | 1.021422 up   | IL23A     |
| 1568592_a | 8.29E-05 | 1.40E-05 | 3.407344 down | 2.205618 down | 1.544848 up   | TRIM69    |
| 1568596_a | 4.51E-04 | 1.37E-04 | 2.991804 up   | 3.147962 up   | 1.052195 up   | TROAP     |
| 1568597_a | 0.019321 | 0.017613 | 2.477325 down | 1.6217 down   | 1.52761 up    | LOC646762 |
| 1568604_a | 0.029095 | 0.027681 | 1.909238 up   | 3.455852 up   | 1.810069 up   | CADPS     |
| 1568611_a | 0.002074 | 0.001089 | 2.281607 down | 3.730988 down | 1.635246 down |           |
| 1568616_a | 0.003125 | 0.001894 | 1.36674 up    | 1.109299 down | 1.516123 down |           |
| 1568617_a | 1.58E-04 | 3.37E-05 | 3.068845 up   | 2.877053 up   | 1.066663 down | KIAA1543  |
| 1568618_a | 0.002979 | 0.001775 | 2.985893 up   | 1.606886 down | 4.79799 down  | GALNT1    |
| 1568619_s | 4.23E-05 | 5.64E-06 | 6.850293 down | 8.427236 down | 1.230201 down | ITPRIPL2  |
| 1568689_a | 0.02552  | 0.023996 | 1.334978 up   | 1.117132 down | 1.491347 down | LOC728853 |
| 1568698_a | 0.007447 | 0.005759 | 1.00712 down  | 1.308639 up   | 1.317956 up   | FLJ43080  |
| 1568704_a | 0.00176  | 8.72E-04 | 1.11759 down  | 1.356712 up   | 1.516247 up   | CHERP     |
| 1568719_s | 9.27E-04 | 3.66E-04 | 2.017355 up   | 1.059147 up   | 1.904698 down | SLC22A23  |
| 1568735_a | 0.005175 | 0.003648 | 1.560494 up   | 1.293826 up   | 1.206109 down |           |
| 1568739_a | 0.012527 | 0.010732 | 1.142612 up   | 1.084747 down | 1.239445 down | LOC285692 |
|           |          |          |               |               |               | hCG_16547 |
| 1568746_a | 0.008297 | 0.006572 | 1.311381 up   | 1.026512 up   | 1.277511 down | 03        |
| 1568777_a | 0.033383 | 0.032067 | 1.041031 down | 1.409348 up   | 1.467175 up   | EML5      |
| 1568780_a | 3.82E-05 | 4.87E-06 | 8.721786 up   | 12.89041 up   | 1.477956 up   | LOC649305 |
| 1568791_s | 0.003352 | 0.002079 | 1.368665 up   | 1.058571 up   | 1.292936 down |           |
| 1568820_a | 5.70E-05 | 8.43E-06 | 2.76349 down  | 1.513156 down | 1.82631 up    | BEND6     |
| 1568836_a | 2.19E-05 | 2.28E-06 | 2.582298 down | 1.225444 down | 2.107235 up   | CLK4      |
| 1568846_a | 0.018673 | 0.016955 | 1.226344 up   | 1.040772 down | 1.276345 down |           |
| 1568856_a | 0.004185 | 0.002767 | 1.381151 down | 1.003984 up   | 1.386653 up   | NBR1      |
| 1568873_a | 1.66E-04 | 3.59E-05 | 3.182218 up   | 2.989811 up   | 1.064354 down | ZNF519    |
| 1569796_s | 8.31E-05 | 1.40E-05 | 1.884079 up   | 2.368763 up   | 1.257253 up   | ATRNL1    |
| 1568889_a | 0.009865 | 0.008088 | 1.230951 down | 1.154642 up   | 1.421308 up   | FANCD2    |
| 1568900_a | 0.004026 | 0.002629 | 2.341626 down | 1.36449 down  | 1.716119 up   | ZNF568    |
| 1568908_a | 0.002656 | 0.001519 | 1.209081 up   | 1.016441 down | 1.22896 down  |           |

|           |          |          |               |               |               |           |
|-----------|----------|----------|---------------|---------------|---------------|-----------|
| 1568935_a | 0.017412 | 0.015664 | 1.189649 up   | 1.098978 down | 1.307398 down |           |
| 1568955_a | 1.43E-05 | 1.26E-06 | 2.791689 down | 2.580682 down | 1.081764 up   | SRGAP2P1  |
| 1568957_x | 1.66E-05 | 1.57E-06 | 2.627278 down | 2.565285 down | 1.024166 up   | SRGAP2P1  |
| 1568964_x | 8.13E-04 | 3.07E-04 | 2.276633 up   | 1.059212 down | 2.411436 down | SPN       |
| 1568978_s | 0.025174 | 0.023625 | 1.325658 up   | 1.051458 down | 1.393874 down | C11orf21  |
| 1568983_a | 0.004743 | 0.003265 | 1.828395 up   | 3.270058 up   | 1.788485 up   |           |
| 1568987_a | 9.34E-04 | 3.70E-04 | 2.19155 up    | 2.450348 up   | 1.118089 up   | MGC57346  |
| 1568997_a | 0.002589 | 0.00147  | 2.218268 up   | 2.021239 up   | 1.09748 down  |           |
| 1569003_a | 0.00378  | 0.002428 | 2.847111 down | 5.745941 down | 2.018166 down | TMEM49    |
|           |          |          |               |               |               | LOC727914 |
|           |          |          |               |               |               | ///       |
| 1569013_s | 2.87E-05 | 3.31E-06 | 2.203543 down | 1.715834 down | 1.28424 up    | LOC96610  |
| 1569023_a | 0.002057 | 0.001076 | 30.01837 up   | 25.2358 up    | 1.189515 down |           |
| 1569044_a | 8.79E-04 | 3.40E-04 | 1.696542 up   | 1.076811 up   | 1.575525 down | CDC42BPG  |
| 1569061_a | 0.003606 | 0.002283 | 1.398734 up   | 1.240289 down | 1.734835 down | IQGAP3    |
| 1569064_a | 0.028404 | 0.026955 | 1.183094 up   | 1.066447 down | 1.261707 down | C15orf62  |
| 1569065_s | 0.001535 | 7.25E-04 | 1.422263 up   | 1.067264 up   | 1.332626 down | C15orf62  |
| 1569067_a | 0.007752 | 0.006058 | 1.272326 up   | 1.480632 up   | 1.163721 up   |           |
| 1569073_x | 0.019857 | 0.018176 | 1.794331 up   | 1.21461 up    | 1.477289 down | SMARCA4   |
| 1569078_a | 0.007118 | 0.005449 | 1.221827 up   | 1.122197 down | 1.371131 down | RNF213    |
| 1569091_a | 0.015851 | 0.014076 | 1.250339 up   | 2.136851 up   | 1.709018 up   |           |
| 1569098_s | 0.009086 | 0.007332 | 1.596483 down | 1.392324 up   | 2.222822 up   | TP53BP1   |
| 1569104_a | 0.002185 | 0.001168 | 1.915609 down | 1.620151 down | 1.182365 up   |           |
| 1569108_a | 1.42E-04 | 2.90E-05 | 3.416362 up   | 3.825153 up   | 1.119657 up   | ZNF589    |
|           |          |          |               |               |               | LOC728613 |
| 1568763_s | 6.07E-04 | 2.06E-04 | 1.079653 up   | 2.580654 up   | 2.390264 up   | /// PDCD6 |
| 1569112_a | 0.002449 | 0.001365 | 1.165403 up   | 1.535332 up   | 1.317426 up   | SLC44A5   |
| 1569140_a | 0.006952 | 0.005291 | 1.006397 down | 1.247689 down | 1.239758 down | UBR2      |
| 1569144_a | 0.021806 | 0.02018  | 1.331319 up   | 1.055438 up   | 1.261389 down | C9orf169  |
| 1569156_a | 0.00103  | 4.21E-04 | 2.089608 down | 1.302306 down | 1.604544 up   | ZNF846    |
| 1569157_s | 0.003459 | 0.002168 | 3.752788 down | 2.343475 down | 1.601378 up   | ZNF846    |
| 1569189_a | 8.82E-04 | 3.42E-04 | 2.192858 down | 1.306664 up   | 2.865328 up   | TTC9C     |
| 1569193_a | 0.004225 | 0.002798 | 1.219551 down | 1.38953 down  | 1.139378 down | LOC149134 |
| 1569200_a | 0.001038 | 4.26E-04 | 1.08798 up    | 1.778297 up   | 1.634494 up   |           |

|           |          |          |               |               |               |           |
|-----------|----------|----------|---------------|---------------|---------------|-----------|
| 1569235_a | 0.009399 | 0.007632 | 1.343812 up   | 1.17409 up    | 1.144556 down |           |
| 1569243_a | 0.003267 | 0.002006 | 1.530026 up   | 1.679575 up   | 1.097743 up   |           |
| 1569245_a | 0.01872  | 0.017002 | 1.488134 up   | 1.178849 up   | 1.262362 down | C8orf74   |
| 1569253_a | 1.29E-04 | 2.54E-05 | 1.638816 down | 1.212231 down | 1.351901 up   | INTS4     |
| 1569259_a | 0.017643 | 0.015903 | 1.159648 up   | 1.155502 down | 1.339975 down |           |
| 1569262_x | 0.002307 | 0.00126  | 1.270472 up   | 1.296572 up   | 1.020544 up   | UBE2CBP   |
| 1569263_a | 7.08E-04 | 2.54E-04 | 1.258739 down | 3.713422 down | 2.950113 down |           |
| 1569269_s | 0.006169 | 0.004554 | 3.110447 down | 2.263904 down | 1.37393 up    | SRGAP1    |
| 1569274_a | 0.006689 | 0.005045 | 1.450115 up   | 1.125657 up   | 1.288239 down | C14orf182 |
|           |          |          |               |               |               | hCG_16461 |
| 1569283_a | 0.008606 | 0.006869 | 2.410513 up   | 2.033121 up   | 1.185622 down | 57        |
| 1569290_s | 2.95E-05 | 3.43E-06 | 13.79996 down | 1.554296 down | 8.878593 up   | GRIA3     |
| 1569296_a | 0.004565 | 0.003113 | 1.73188 down  | 1.46929 down  | 1.17872 up    | LOC493754 |
| 1569316_a | 0.001014 | 4.13E-04 | 2.401185 up   | 1.862446 up   | 1.289264 down |           |
| 1569320_a | 0.030034 | 0.028638 | 1.762066 up   | 3.972567 up   | 2.254493 up   | GPBP1L1   |
| 1569335_a | 2.81E-04 | 7.29E-05 | 1.862406 up   | 1.859621 up   | 1.001498 down | STRA6     |
| 1569338_a | 9.32E-05 | 1.63E-05 | 2.332885 down | 1.35689 down  | 1.719288 up   |           |
| 1569341_a | 0.002515 | 0.001416 | 1.456341 up   | 1.043782 down | 1.520102 down |           |
| 1569345_a | 0.005445 | 0.003887 | 1.212824 up   | 1.322685 up   | 1.090583 up   |           |
| 1569348_a | 5.85E-04 | 1.96E-04 | 1.780151 down | 1.030485 up   | 1.834419 up   | psiTPTE22 |
| 1569355_a | 0.006382 | 0.004759 | 1.334391 up   | 1.026503 down | 1.369756 down | KCNIP3    |
| 1569365_a | 0.002572 | 0.001457 | 2.132375 up   | 1.122509 up   | 1.899651 down | KIAA1656  |
| 1569369_a | 0.001827 | 9.17E-04 | 1.645031 down | 1.078315 down | 1.525557 up   | ZFYVE28   |
| 1569392_a | 0.003005 | 0.001796 | 1.391771 up   | 1.436294 up   | 1.03199 up    | GPSN2     |
| 1569396_a | 0.001789 | 8.91E-04 | 1.241049 up   | 1.518299 up   | 1.2234 up     | RAB40C    |
| 1569409_x | 1.28E-04 | 2.52E-05 | 1.32299 up    | 2.569633 up   | 1.942292 up   |           |
| 1569416_a | 5.82E-04 | 1.94E-04 | 1.4568 up     | 1.194067 up   | 1.220032 down |           |
| 1569418_a | 0.030594 | 0.02921  | 1.334047 up   | 1.111774 up   | 1.199927 down |           |
| 1569419_a | 0.007317 | 0.005637 | 1.306819 down | 1.198731 up   | 1.566525 up   |           |
| 1569436_a | 0.017763 | 0.01602  | 1.40205 up    | 1.017527 down | 1.426624 down | LOC400128 |
| 1569443_s | 0.020809 | 0.019158 | 1.410317 up   | 1.187488 down | 1.674734 down |           |
| 1569448_a | 0.002805 | 0.001637 | 1.356772 up   | 1.045303 up   | 1.29797 down  | PGM2L1    |
| 1569449_a | 2.07E-04 | 4.82E-05 | 1.450139 up   | 1.507992 up   | 1.039895 up   |           |
| 1569461_a | 0.019435 | 0.017734 | 1.284193 up   | 1.044036 down | 1.340743 down |           |

|           |          |          |               |               |               |            |
|-----------|----------|----------|---------------|---------------|---------------|------------|
| 1569462_x | 0.008995 | 0.007244 | 1.2573 up     | 1.163904 down | 1.463377 down | KCNT1      |
| 1569472_s | 9.11E-05 | 1.58E-05 | 7.964398 down | 3.308625 down | 2.407163 up   | TTC3       |
| 1569473_s | 0.032853 | 0.031533 | 1.473488 down | 1.059605 down | 1.390601 up   | ZNF783     |
| 1569474_a | 0.024453 | 0.022884 | 1.01062 up    | 1.18809 up    | 1.175605 up   |            |
|           |          |          |               |               |               | DKFZP434L1 |
| 1569476_a | 0.003778 | 0.002426 | 2.504897 up   | 1.703999 up   | 1.47001 down  | 87         |
| 1569482_a | 0.004317 | 0.002887 | 1.495175 up   | 1.257202 up   | 1.189288 down |            |
| 1569484_s | 8.08E-04 | 3.05E-04 | 4.12918 up    | 4.906103 up   | 1.188154 up   | MDN1       |
| 1569487_a | 0.005253 | 0.003718 | 1.401187 down | 1.20965 up    | 1.694945 up   |            |
| 1569494_a | 0.017334 | 0.015589 | 1.065608 up   | 1.065453 down | 1.135355 down |            |
| 1569495_a | 0.008286 | 0.00656  | 1.073438 up   | 1.310657 up   | 1.22099 up    | SCLT1      |
| 1569499_a | 0.004857 | 0.003365 | 1.572229 up   | 1.491551 up   | 1.054089 down |            |
| 1569516_a | 0.001552 | 7.37E-04 | 1.200134 down | 1.198345 up   | 1.438174 up   |            |
| 1569518_a | 0.016702 | 0.014945 | 1.36478 up    | 1.03984 up    | 1.31249 down  |            |
| 1569520_a | 0.032616 | 0.03129  | 1.47982 down  | 1.227432 down | 1.205623 up   |            |
|           |          |          |               |               |               | LOC100132  |
| 1569522_a | 6.97E-04 | 2.49E-04 | 1.383381 down | 1.455676 up   | 2.013755 up   | 767        |
| 1569542_a | 4.74E-04 | 1.47E-04 | 2.483741 up   | 2.703755 up   | 1.088582 up   |            |
| 1569568_a | 0.037989 | 0.036724 | 1.101701 down | 1.116004 down | 1.012983 down |            |
| 1569569_x | 0.006913 | 0.005252 | 1.268249 down | 1.048162 up   | 1.32933 up    |            |
| 1569577_x | 3.97E-05 | 5.16E-06 | 3.755901 down | 1.538554 down | 2.441189 up   |            |
| 1569597_a | 0.00633  | 0.004707 | 1.404116 up   | 1.623111 up   | 1.155966 up   |            |
| 1569601_a | 7.90E-04 | 2.96E-04 | 2.258164 up   | 2.088746 up   | 1.08111 down  |            |
| 1569614_s | 0.017967 | 0.016229 | 1.378793 up   | 1.045292 up   | 1.31905 down  | LCN8       |
| 1569617_a | 0.005243 | 0.00371  | 1.454748 up   | 1.056742 up   | 1.376635 down | OSBP2      |
| 1569630_a | 0.016476 | 0.014706 | 1.270016 up   | 1.148845 up   | 1.105471 down | RUFY2      |
| 1569631_a | 1.68E-04 | 3.67E-05 | 2.217931 down | 1.629771 down | 1.360885 up   | NMNAT1     |
| 1569640_s | 0.011759 | 0.009957 | 1.229081 down | 1.229053 up   | 1.510606 up   | EEPD1      |
| 1569648_a | 1.38E-04 | 2.81E-05 | 1.673685 up   | 1.678086 up   | 1.00263 up    | DACT2      |
| 1569679_a | 0.008099 | 0.006377 | 1.188037 down | 1.305239 up   | 1.550672 up   | CDH22      |
| 1569703_a | 0.002594 | 0.001474 | 1.616393 down | 1.425524 down | 1.133894 up   |            |
| 1569712_a | 0.042481 | 0.041235 | 1.099282 up   | 1.195474 down | 1.314163 down | LOC729725  |
| 1569727_a | 0.017591 | 0.01585  | 1.037122 up   | 1.319121 up   | 1.271905 up   |            |
| 1569739_a | 0.003995 | 0.002602 | 1.289891 down | 1.05414 up    | 1.359726 up   | LOC221946  |



|           |          |          |          |      |          |      |          |      |           |
|-----------|----------|----------|----------|------|----------|------|----------|------|-----------|
| 1569792_a | 7.29E-04 | 2.65E-04 | 2.015343 | down | 1.707463 | down | 1.180314 | up   | C12orf72  |
| 1569847_a | 0.008738 | 0.006996 | 1.667048 | up   | 2.346165 | up   | 1.407377 | up   | CGNL1     |
| 1569871_a | 0.001022 | 4.17E-04 | 1.12767  | down | 1.909957 | up   | 2.153802 | up   | LOC650392 |
| 1569872_a | 0.003354 | 0.002081 | 1.312966 | up   | 1.941896 | up   | 1.479015 | up   | LOC650392 |
| 1569876_a | 0.002107 | 0.001112 | 1.295712 | up   | 1.194419 | down | 1.547623 | down | C17orf57  |
|           |          |          |          |      |          |      |          |      | LOC100132 |
| 1569898_a | 6.01E-04 | 2.03E-04 | 2.901478 | down | 2.535907 | down | 1.144158 | up   | 707       |
| 1569904_x | 0.008727 | 0.006987 | 1.445277 | up   | 1.431613 | down | 2.069076 | down |           |
| 1569927_a | 0.033842 | 0.032529 | 1.789021 | up   | 1.454347 | up   | 1.230119 | down |           |
| 1569931_a | 0.003394 | 0.002114 | 1.151384 | up   | 1.116092 | down | 1.28505  | down |           |
| 1569952_x | 9.09E-06 | 6.65E-07 | 3.37004  | down | 1.101717 | up   | 3.71283  | up   |           |
| 1569956_a | 6.39E-05 | 9.88E-06 | 1.770518 | down | 1.045437 | down | 1.693568 | up   | MYLK      |
| 1569971_a | 0.00975  | 0.007972 | 1.235375 | up   | 1.165579 | up   | 1.059881 | down |           |
| 1570537_a | 0.031085 | 0.029728 | 1.289646 | up   | 1.097146 | down | 1.414931 | down |           |
| 1569991_a | 0.007813 | 0.006114 | 1.037211 | up   | 1.283421 | up   | 1.237377 | up   | KY        |
| 1570007_a | 0.004956 | 0.003452 | 1.491966 | down | 1.196869 | up   | 1.785687 | up   | LRRRC8C   |
| 1570068_a | 0.00445  | 0.003005 | 1.054964 | up   | 1.287707 | up   | 1.220617 | up   |           |
| 1570071_a | 0.040992 | 0.039746 | 1.275419 | down | 1.152029 | down | 1.107107 | up   |           |
| 1570102_a | 0.04458  | 0.043355 | 1.203979 | up   | 1.189514 | down | 1.43215  | down |           |
| 1570124_a | 0.003307 | 0.002043 | 1.473663 | down | 1.075181 | up   | 1.584455 | up   |           |
| 1570145_a | 0.023161 | 0.021581 | 1.14908  | up   | 1.041127 | down | 1.196339 | down | UCHL5     |
| 1570153_a | 3.20E-05 | 3.85E-06 | 7.718997 | up   | 9.200627 | up   | 1.191946 | up   | C13orf38  |
| 1570155_a | 0.040114 | 0.038874 | 1.268852 | down | 2.27559  | down | 1.793424 | down |           |
| 1570185_a | 0.007031 | 0.005369 | 1.063296 | down | 1.35783  | up   | 1.443775 | up   |           |
| 1570186_a | 0.005564 | 0.003992 | 1.21843  | up   | 1.116082 | down | 1.359868 | down | GRASPOS   |
| 1570200_a | 0.001622 | 7.82E-04 | 1.062575 | up   | 1.299047 | up   | 1.222545 | up   | HELB      |
| 1570208_a | 0.004645 | 0.003183 | 1.098654 | down | 1.160075 | down | 1.055906 | down | LOC284260 |
| 1570219_a | 0.007669 | 0.005974 | 1.182376 | down | 1.329794 | up   | 1.572317 | up   | LOXL4     |
| 1570224_a | 0.0052   | 0.003672 | 1.182297 | down | 1.041853 | down | 1.134802 | up   |           |
| 1570229_a | 0.003733 | 0.002389 | 1.271077 | up   | 1.297673 | up   | 1.020924 | up   |           |
| 1570425_s | 0.00749  | 0.005799 | 1.052886 | down | 1.275233 | up   | 1.342675 | up   | LATS1     |
| 1570248_a | 0.006349 | 0.004723 | 1.734259 | up   | 1.22701  | up   | 1.413402 | down |           |
| 1570266_x | 1.13E-04 | 2.12E-05 | 8.314027 | up   | 11.378   | up   | 1.368531 | up   |           |
| 1570267_a | 0.004112 | 0.002702 | 1.319984 | up   | 1.032669 | up   | 1.278226 | down |           |

|           |          |          |               |               |               |          |
|-----------|----------|----------|---------------|---------------|---------------|----------|
| 1570272_a | 0.021762 | 0.020133 | 1.565595 up   | 1.165815 up   | 1.342919 down |          |
| 1570328_s | 0.007249 | 0.005573 | 1.226712 down | 1.176099 up   | 1.442735 up   | C20orf62 |
| 1570331_a | 0.00508  | 0.003565 | 1.008062 up   | 1.260684 up   | 1.250602 up   |          |
| 1570360_s | 0.032179 | 0.030842 | 1.225362 down | 2.624706 up   | 3.216216 up   | DDX3Y    |
| 1570361_a | 0.002353 | 0.001293 | 1.493105 up   | 1.175483 down | 1.75512 down  |          |
| 1570364_a | 0.003973 | 0.002585 | 1.657677 up   | 1.282632 down | 2.12619 down  | ZNF709   |
| 1570366_x | 0.008871 | 0.007124 | 1.514393 up   | 1.025368 up   | 1.476926 down | ZNF709   |
| 1570382_a | 0.00301  | 0.0018   | 1.062385 down | 1.518342 up   | 1.613063 up   |          |
| 1570409_x | 0.002077 | 0.001091 | 1.269984 up   | 1.149841 down | 1.46028 down  |          |
| 1570410_a | 0.001414 | 6.50E-04 | 1.362918 up   | 1.097204 up   | 1.242174 down | CYGB     |
| 1570412_a | 1.29E-04 | 2.56E-05 | 2.638475 up   | 2.254234 up   | 1.170453 down |          |
| 1570423_a | 0.002835 | 0.001659 | 1.295367 down | 1.183013 down | 1.094973 up   |          |
| 1570486_a | 0.016679 | 0.01492  | 1.334065 up   | 1.017303 down | 1.357148 down | SOX6     |
| 1570517_a | 0.013119 | 0.01132  | 1.179294 down | 1.065675 up   | 1.256744 up   | FHL5     |
| 1570534_a | 0.008582 | 0.006842 | 2.063318 up   | 1.499309 up   | 1.376179 down | ZNF483   |
| 1570552_a | 1.65E-05 | 1.54E-06 | 4.143999 down | 1.707997 down | 2.426234 up   | C18orf50 |
| 1570587_a | 0.025978 | 0.024474 | 1.31384 up    | 1.049059 up   | 1.252399 down |          |
| 1570601_a | 0.021453 | 0.019822 | 1.138572 up   | 1.155781 down | 1.31594 down  |          |
| 1570607_a | 0.003258 | 0.001999 | 1.2511 up     | 1.430906 up   | 1.143718 up   |          |
| 1570621_a | 0.012467 | 0.010671 | 1.159338 up   | 1.051169 up   | 1.102903 down |          |
| 1570651_a | 0.00455  | 0.003098 | 1.314313 up   | 1.024727 down | 1.346812 down | CCBL1    |
